# Supplementary material for: Burden of disease scenarios for 204 countries and territories, 2022–2050: a forecasting analysis for the Global Burden of Disease Study 2021
Source: PubMed Central journal article supplement (PMC11121021; doi:10.1016/s0140-6736(24)00685-8), 2024-05-18
Supplement: mmc2.pdf [file mmc2.pdf]

# THE LANCET

## Supplementary appendix 2

This appendix formed part of the original submission and has been peer reviewed. We post it as supplied by the authors.

Supplement to: GBD 2021 Forecasting Collaborators. Burden of disease scenarios for 204 countries and territories, 2022–2050: a forecasting analysis for the Global Burden of Disease Study 2021. *Lancet* 2024; **403**: 2204–56.

## Appendix 2: supplementary results appendix to “Burden of disease scenarios for 204 countries and territories, 2022–2050: a forecasting analysis for the Global Burden of Disease Study 2021”

This supplement provides additional figures and tables containing more detailed results for “Burden of disease scenarios for 204 countries and territories, 2022–2050: a forecasting analysis for the Global Burden of Disease Study 2021”.

These and other results are available to view and download in [GBD Foresight](#), an interactive forecasting visualisation tool.

### Figures

|                                                                                                                                                                                             |      |
|---------------------------------------------------------------------------------------------------------------------------------------------------------------------------------------------|------|
| Supplemental Results Figure S1. Select risk factor Summary Exposure Values (SEVs) by global and GBD super region and scenario, 1990-2050.....                                               | 3    |
| Supplemental Results Figure S2. Global and super-regional healthy life expectancy, 1990–2050 for females (A) and males (B).....                                                             | 11   |
| Supplemental Results Figure S3. Life expectancy and HALE by sex and location, 1990-2050.....                                                                                                | 12   |
| Supplemental Results Figure S4. Age-standardised DALY rates and all age DALY counts and by Level 1 and Level 2 causes, 1990–2050.....                                                       | 245  |
| Supplemental Results Figure S5. Age-standardised death rates and all age death counts and by Level 1 and Level 2 causes, 1990–2050.....                                                     | 478  |
| Supplemental Results Figure S6. Cause level 2 area plots for 4 burden measures for reference scenario by location, 1990-2050.....                                                           | 711  |
| Supplemental Results Figure S7. Leading 20 level 3 causes of DALYs, and percentage change in number of DALYs and all-age and age-standardised DALY rates by location, 2022 and 2050.....    | 944  |
| Supplemental Results Figure S8. Leading 20 level 3 causes of deaths, and percentage change in number of deaths and all-age and age-standardised death rates by location, 2022 and 2050..... | 1177 |
| Supplemental Results Figure S9. Population aging by global and GBD super region, 1990-2050.....                                                                                             | 1410 |
| Supplemental Results Figure S10. All-cause age standardised DALY rates (A) and all age DALY counts (B), for the past and for five future scenarios, 1990–2050.....                          | 1411 |
| Supplemental Results Figure S11. All-cause age standardised death rates (A) and all age death counts (B), for the past and for five future scenarios, 1990–2050.....                        | 1644 |
| Supplemental Results Figure S12. All cause and top NCD causes age standardized DALY rates and all age counts by scenario and location, 1990-2050.....                                       | 1877 |
| Supplemental Results Figure S13. All cause and top NCD causes age standardized death rates and all age counts by scenario and location, 1990-2050.....                                      | 2110 |
| Supplemental Results Figure S14. Decomposition of change in life expectancy by location and level 2 causes plus COVID-19 for reference and alternative scenarios, 2022–2050.....            | 2343 |

## Tables

|                                                                                                                                                                                                                     |      |
|---------------------------------------------------------------------------------------------------------------------------------------------------------------------------------------------------------------------|------|
| Supplemental Results Table S1. Annual change in life expectancy in pre-COVID pandemic years (1990-2019) and post-COVID pandemic years (2022-2050) by global and super region for females, males and both sexes..... | 2547 |
| Supplemental Results Table S2. Life expectancy and healthy life expectancy (HALE) in 2022 and 2050 (reference scenario) by location for both sexes.....                                                             | 2548 |
| Supplemental Results Table S3. Percent decrease in DALY counts by scenario compared to reference in 2050....                                                                                                        | 2560 |
| Supplemental Results Table S4. Cause-specific death counts and age-standardised death rates in 2022 and 2050 by scenario.....                                                                                       | 2570 |

# Global

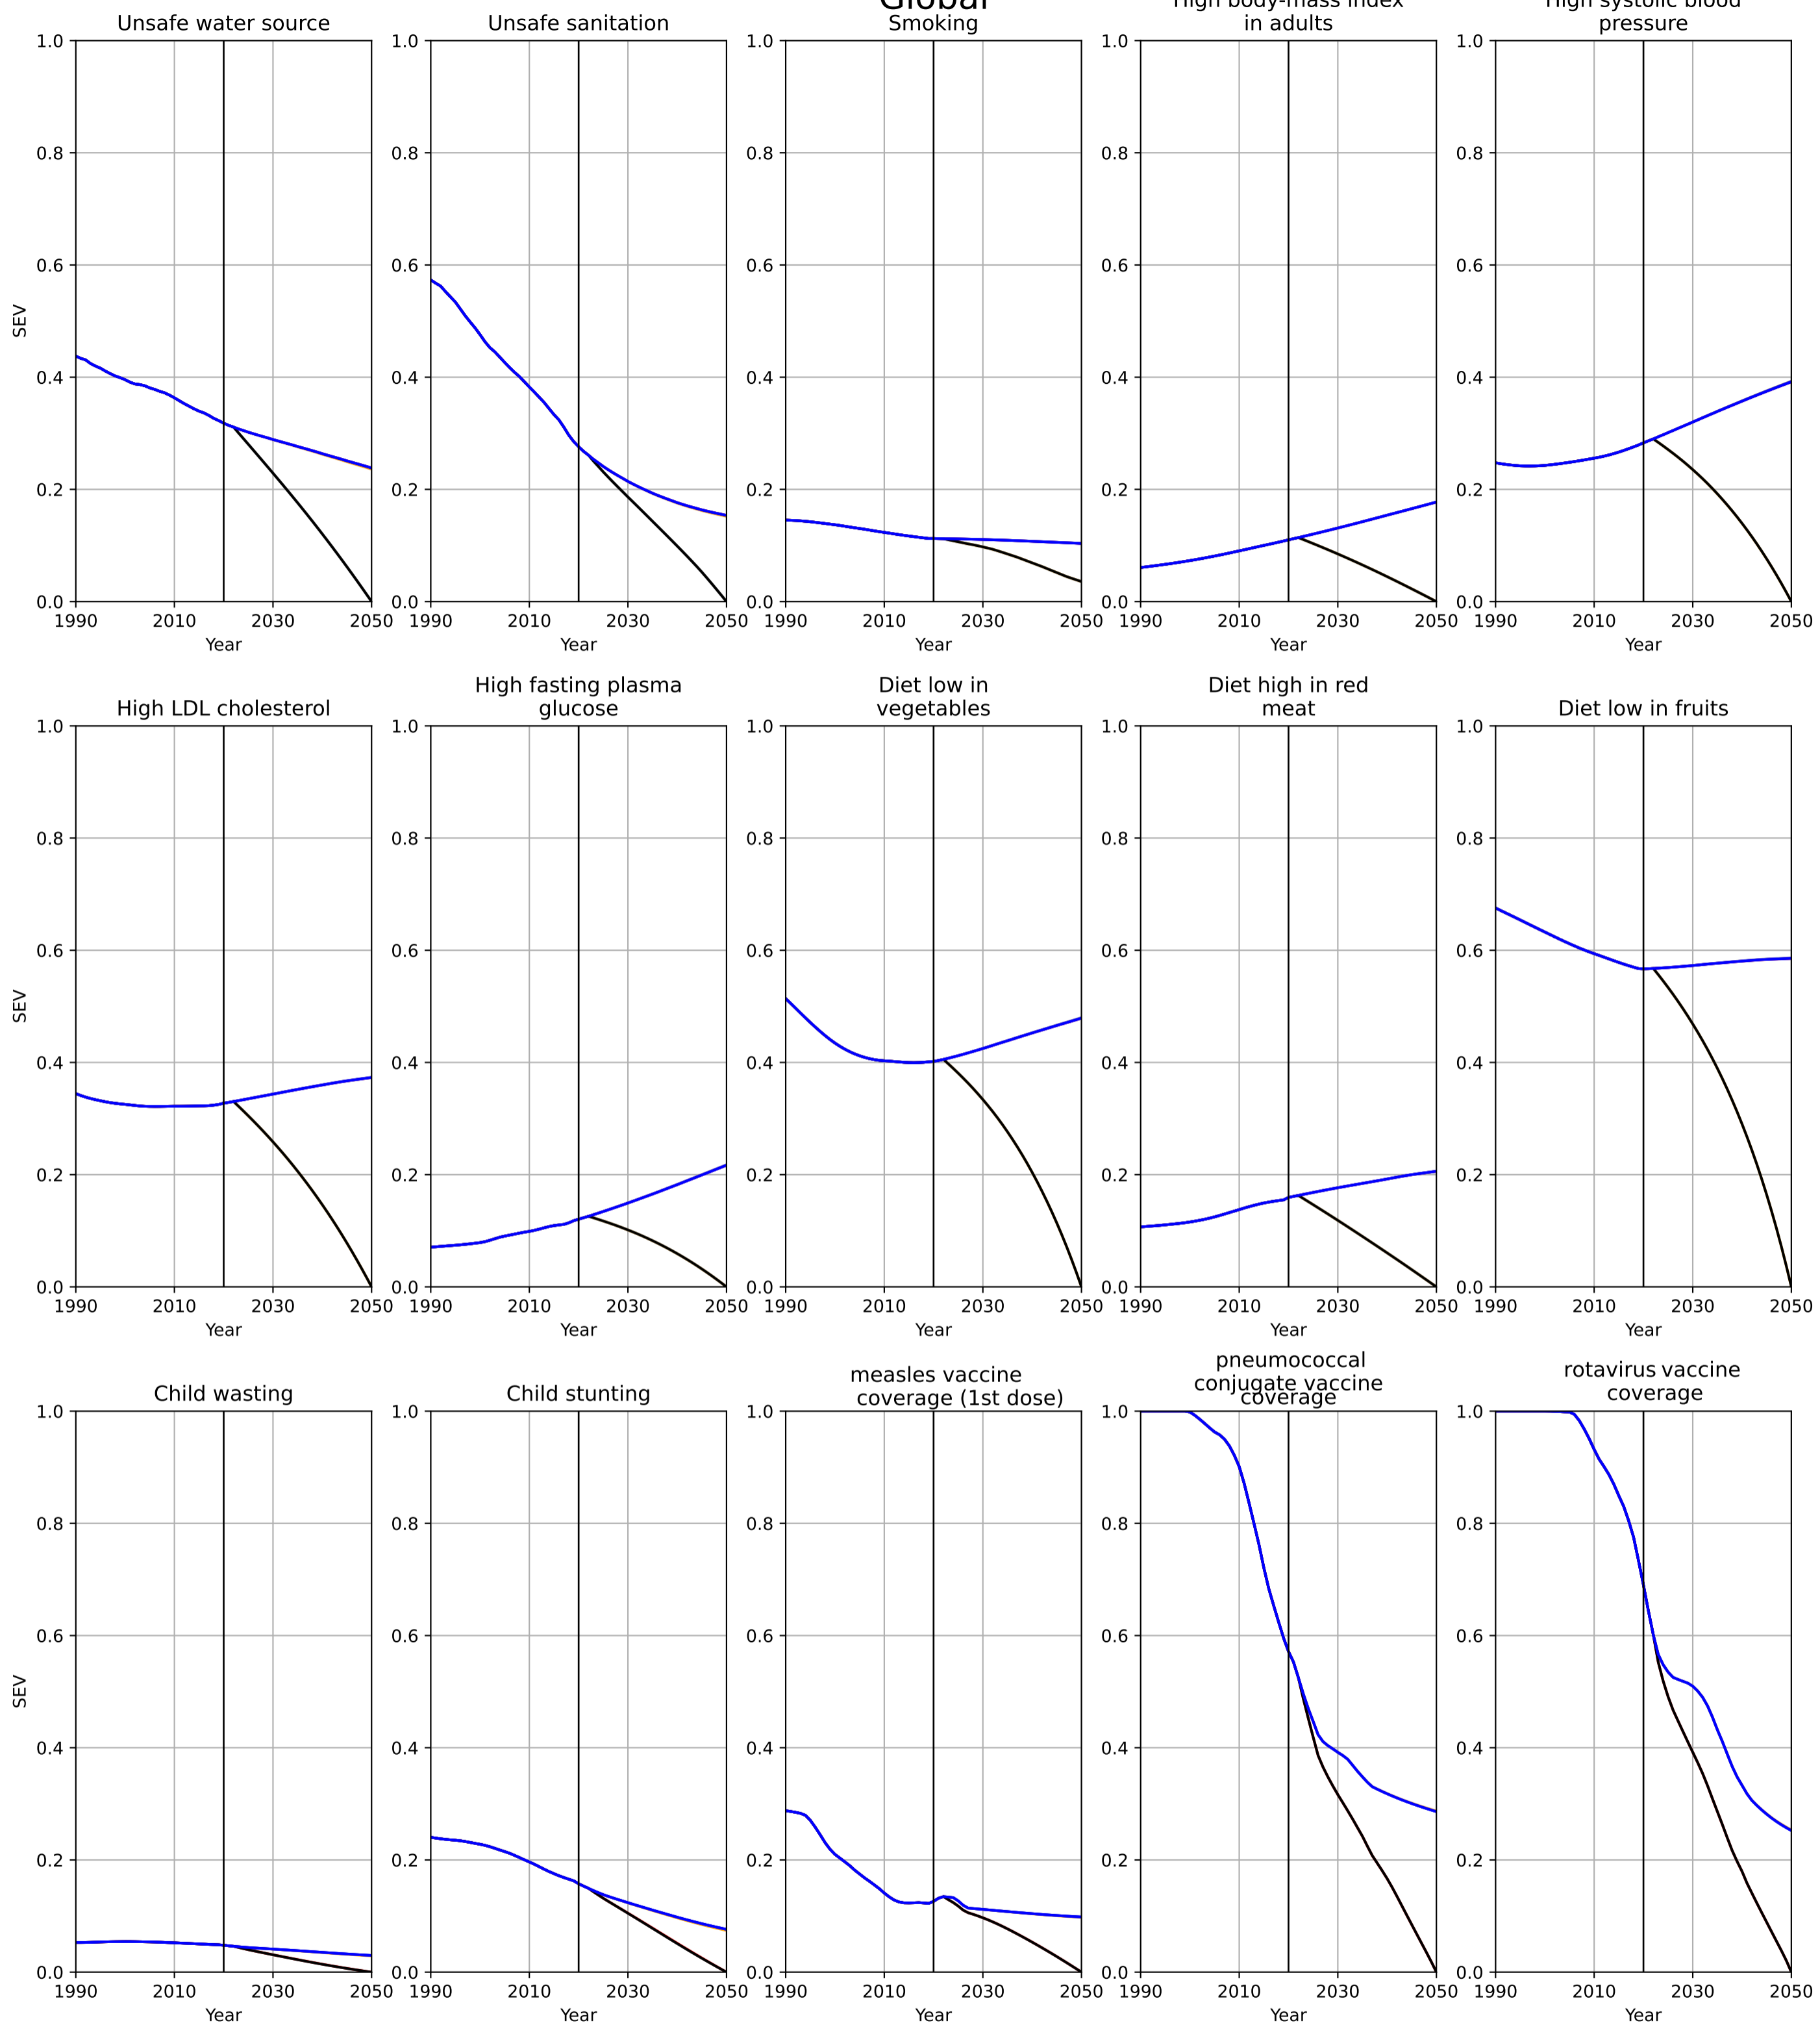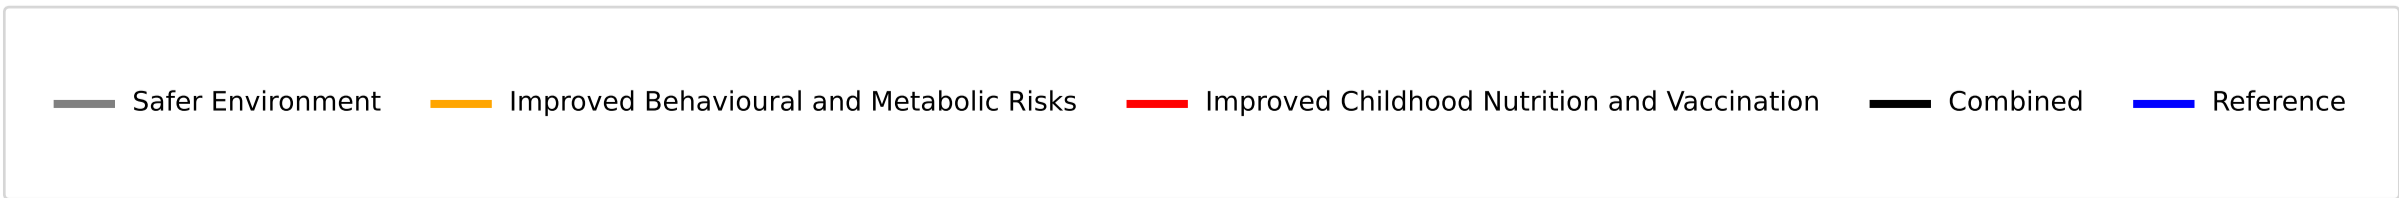

# Central Europe, Eastern Europe, And Central Asia

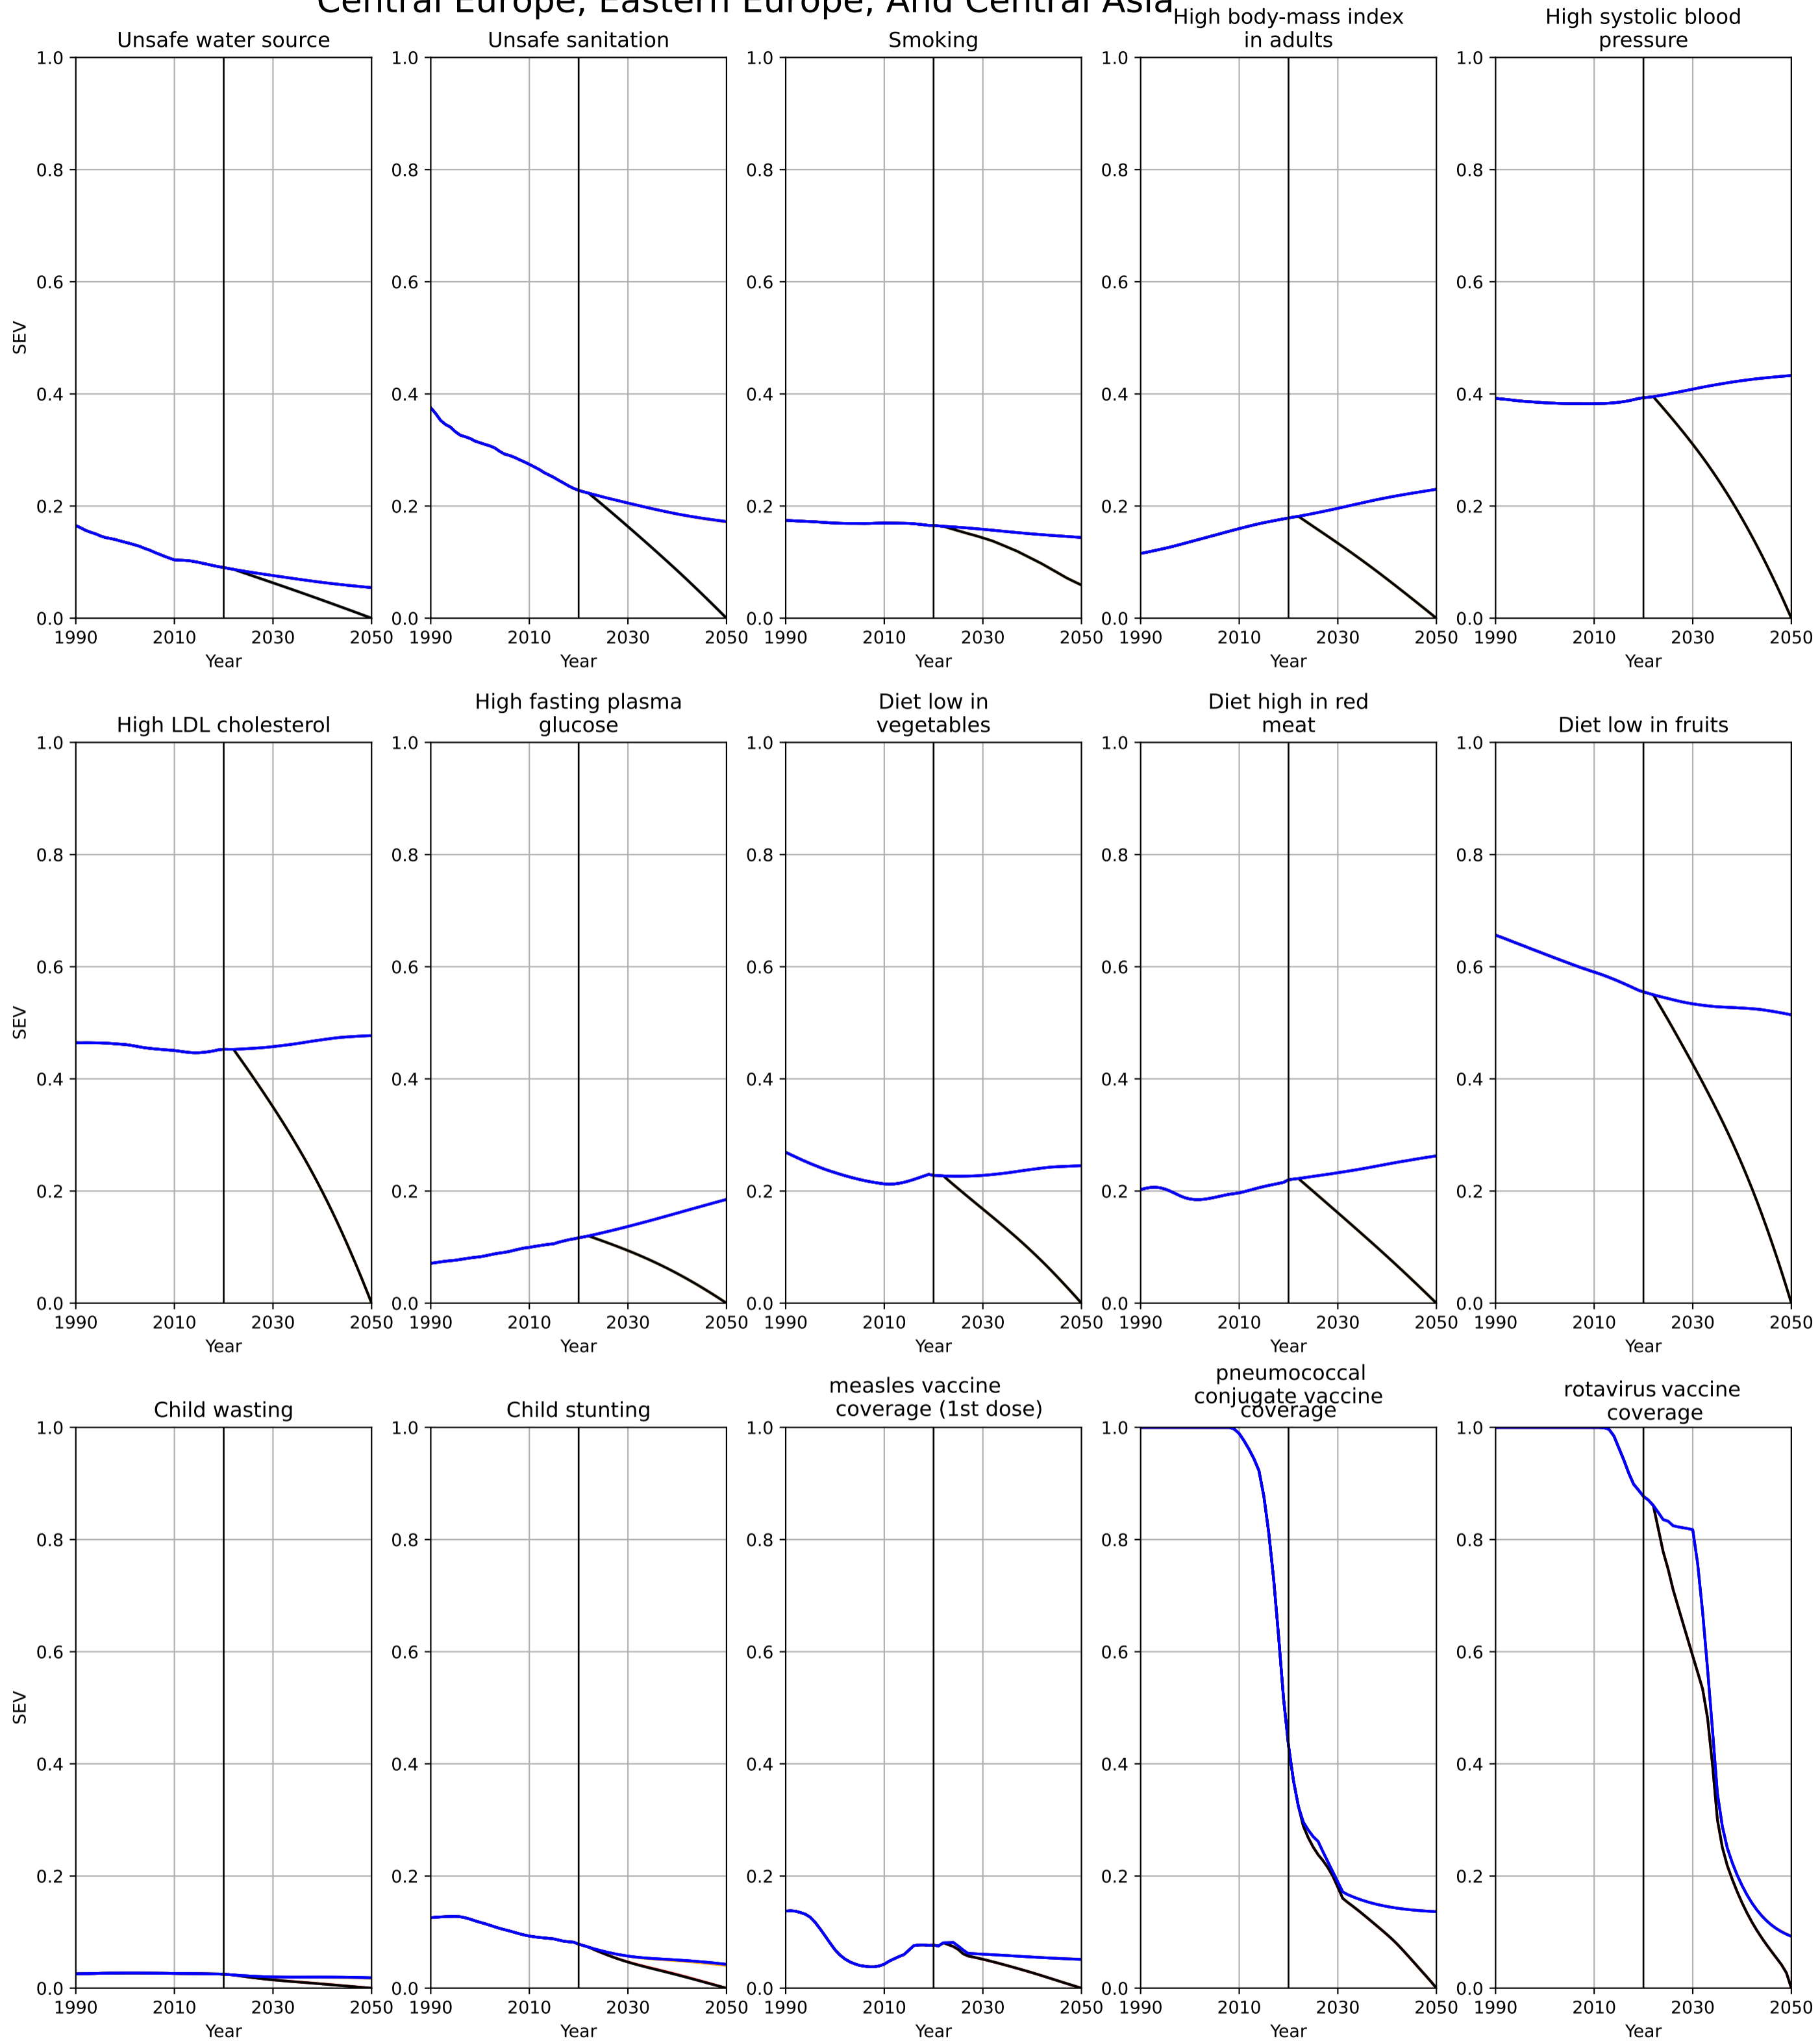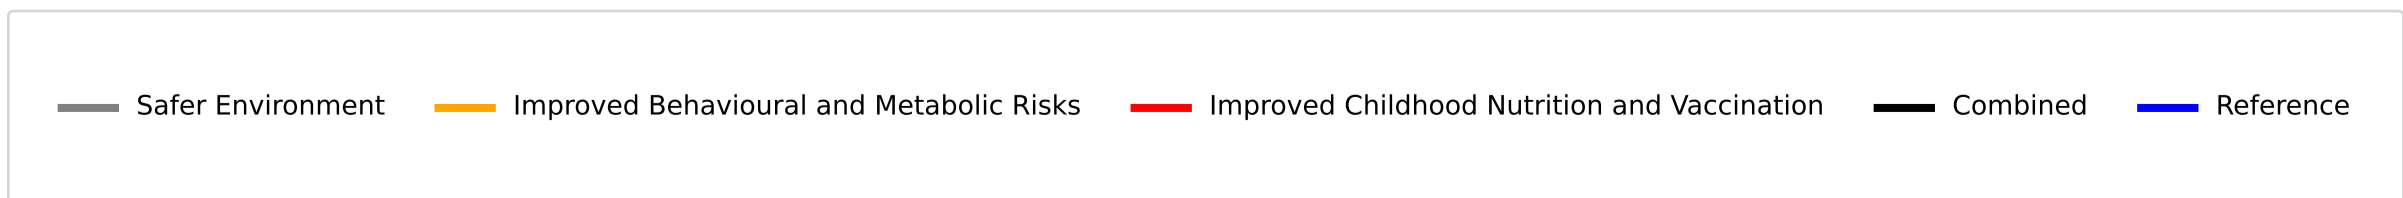

# High Income

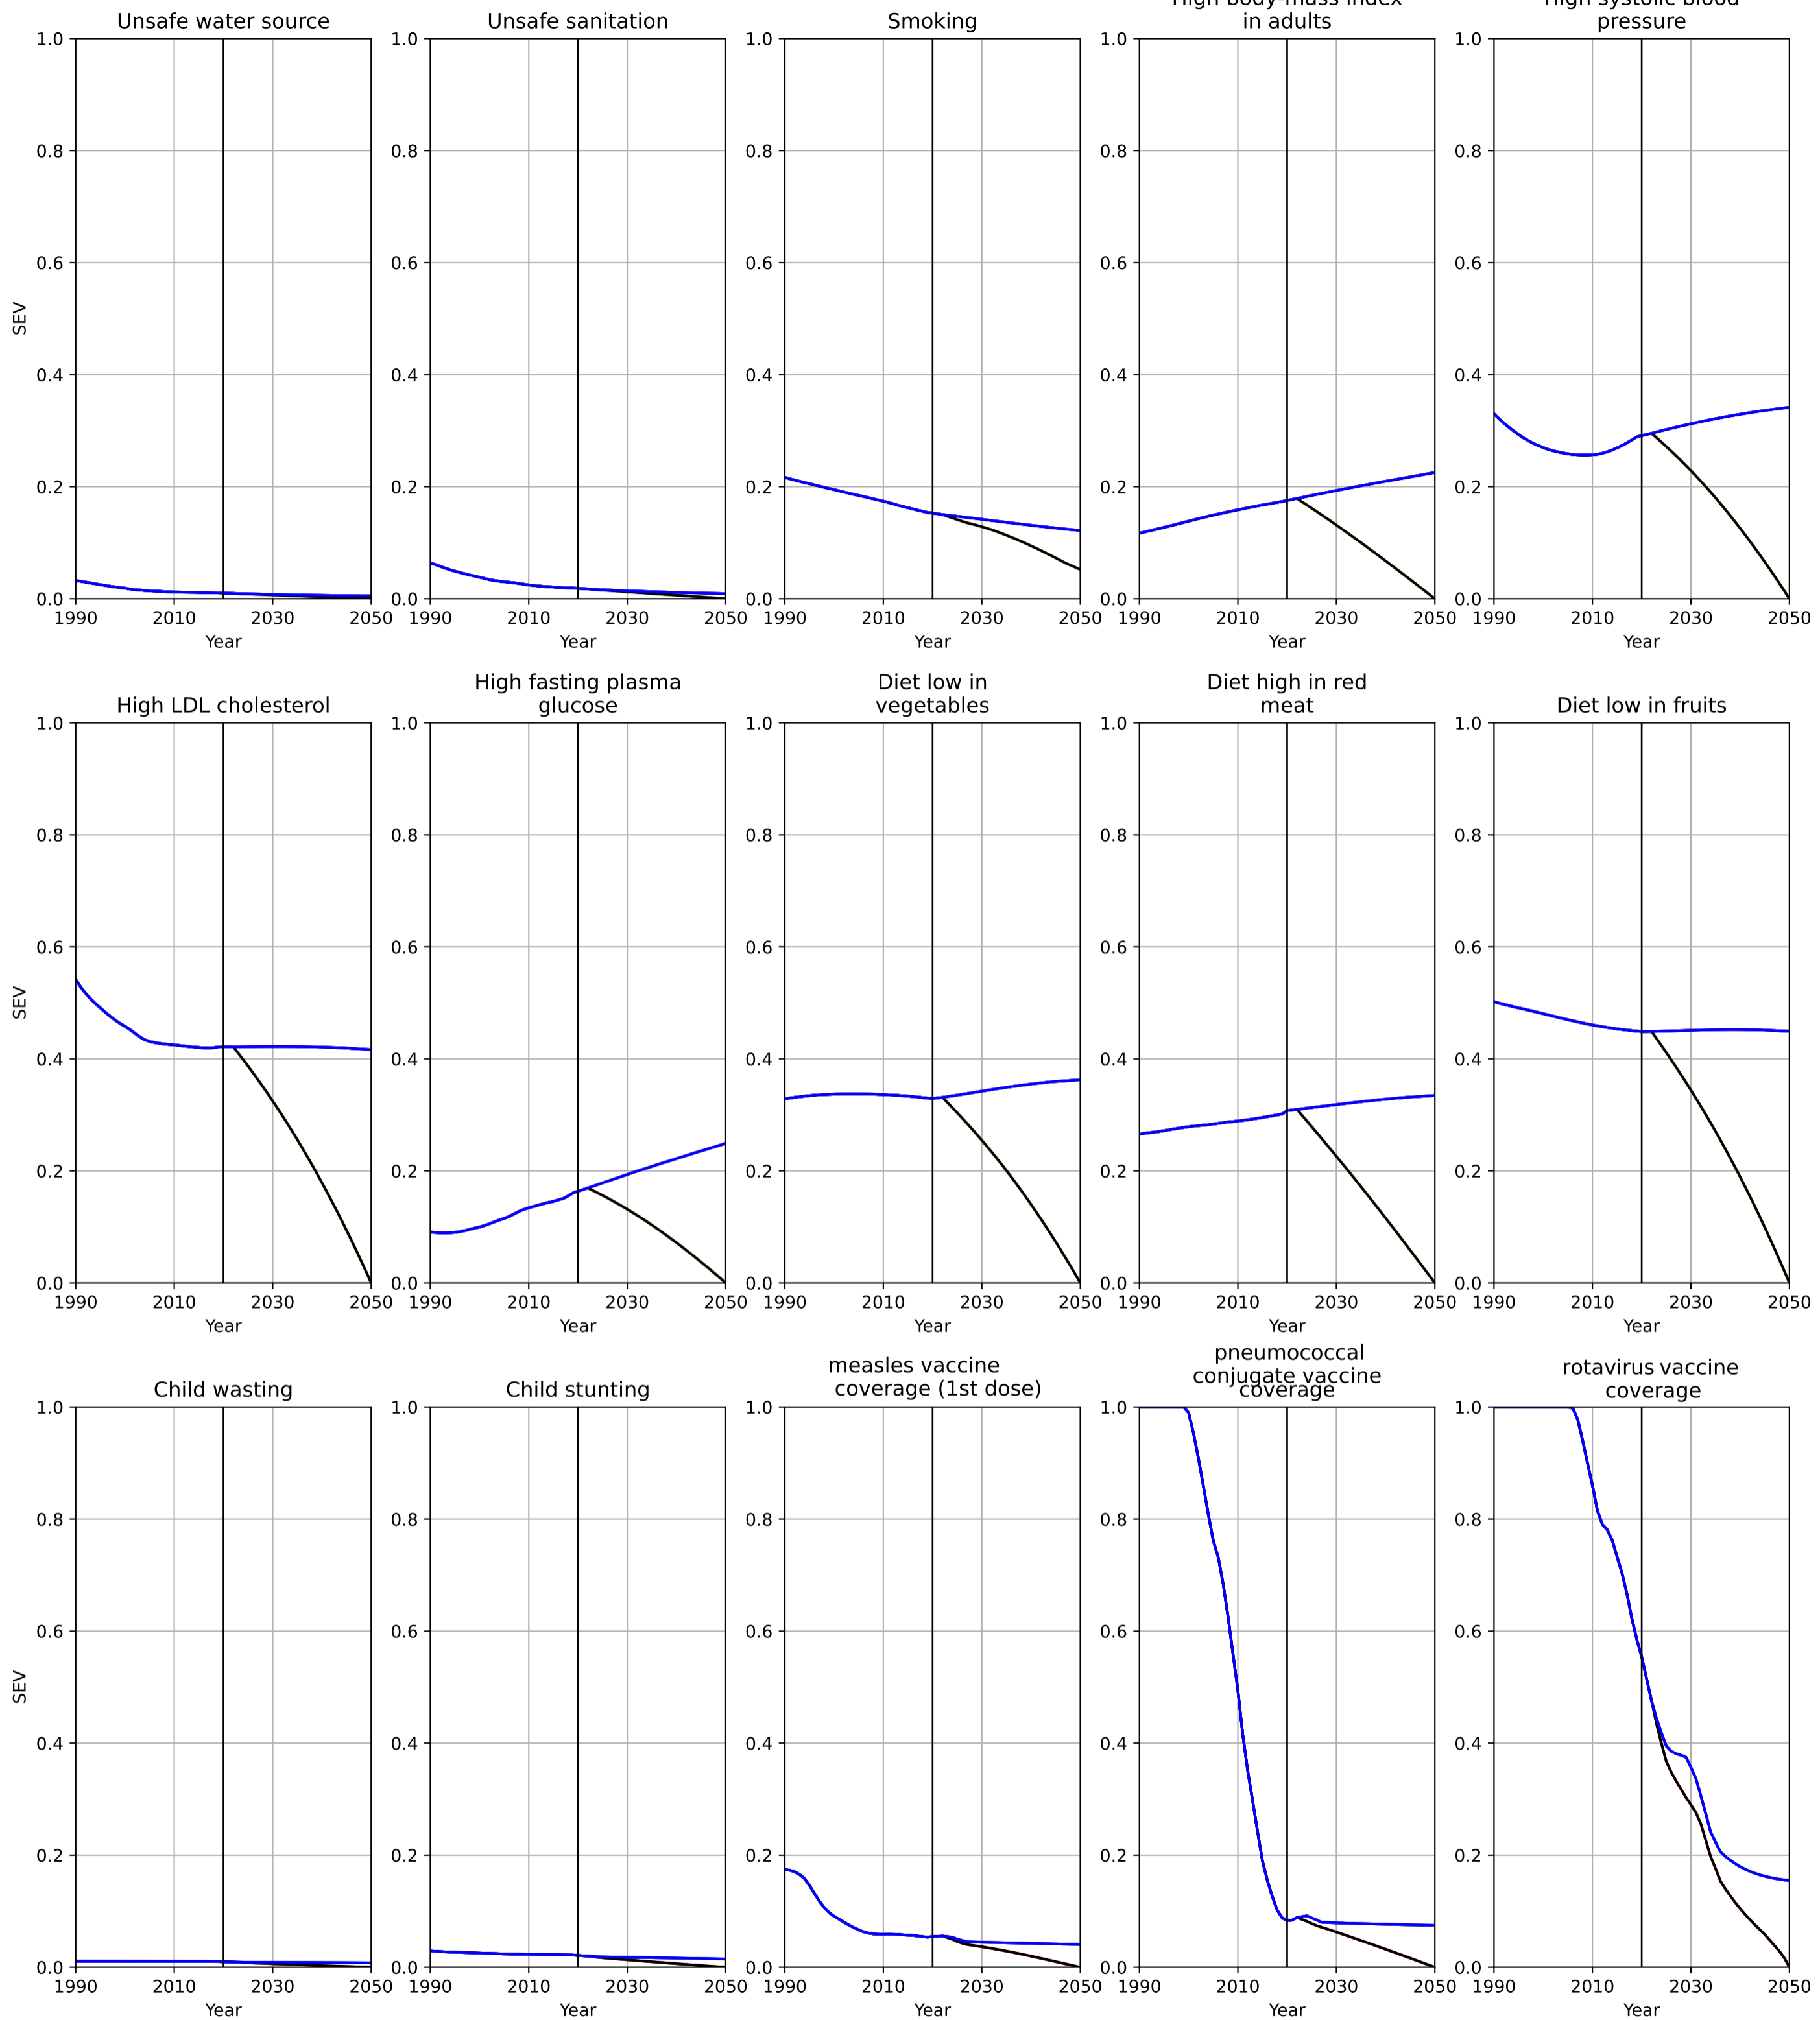

# Latin America And Caribbean

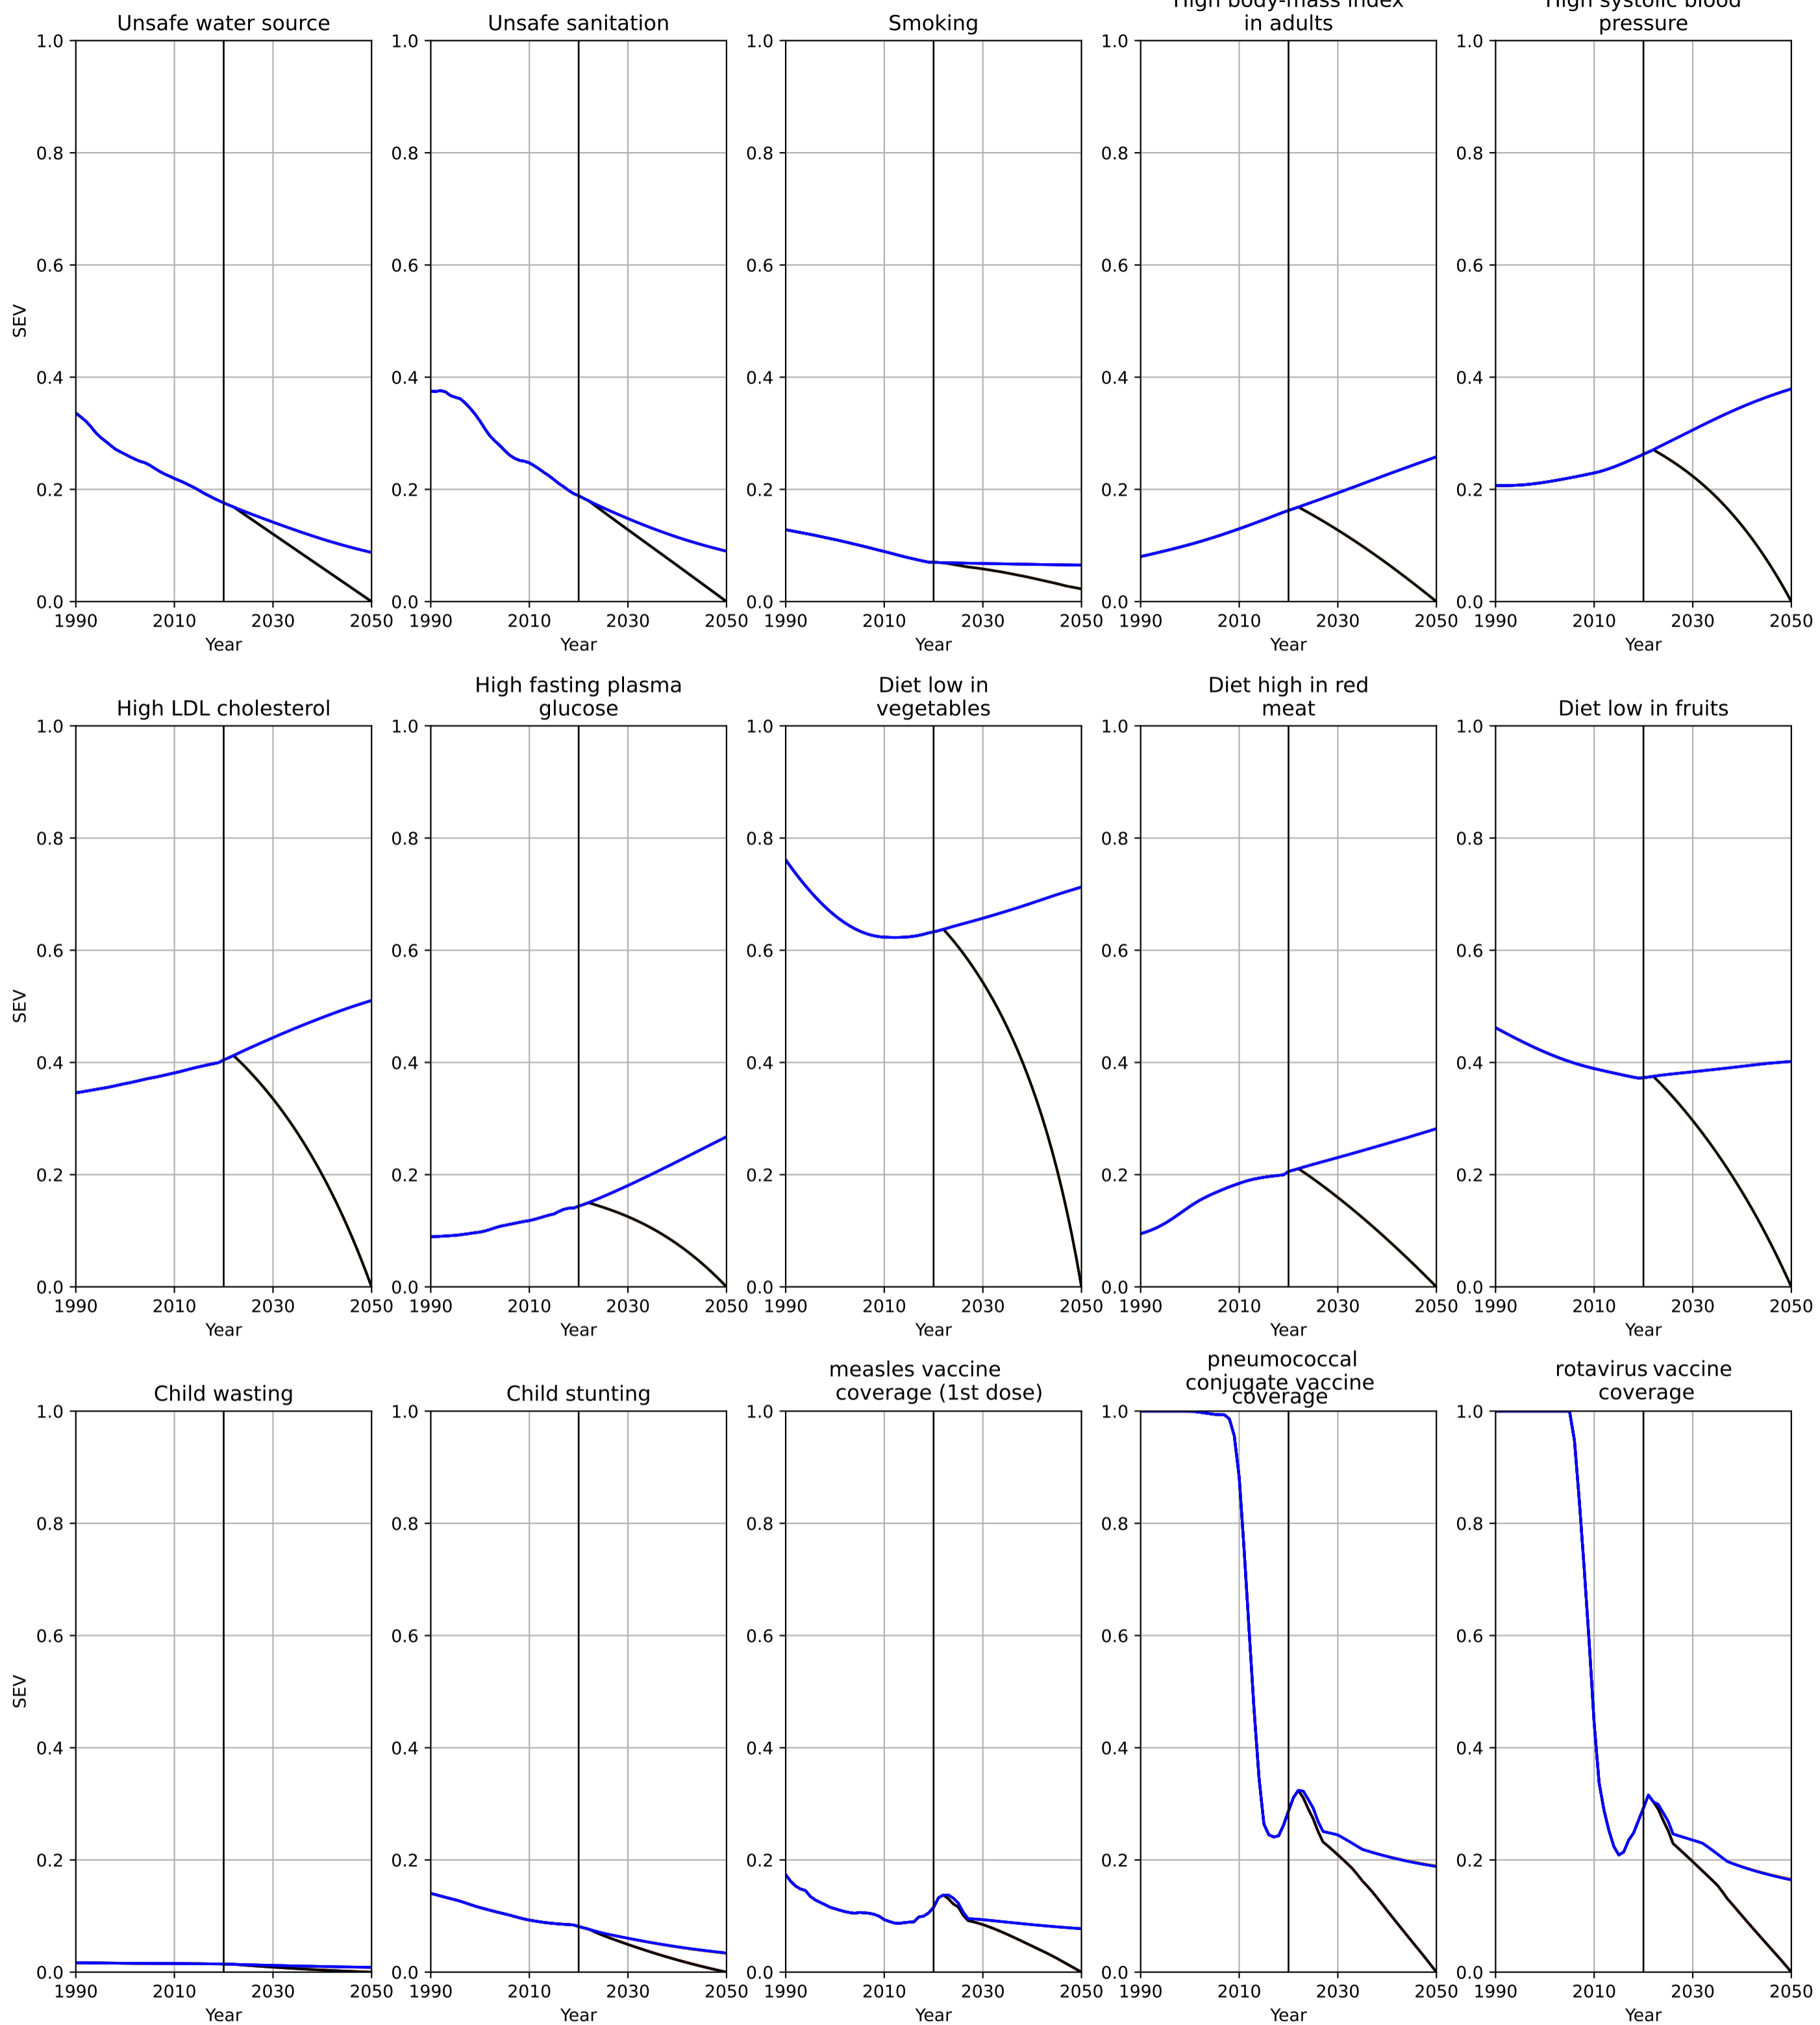

# North Africa And Middle East

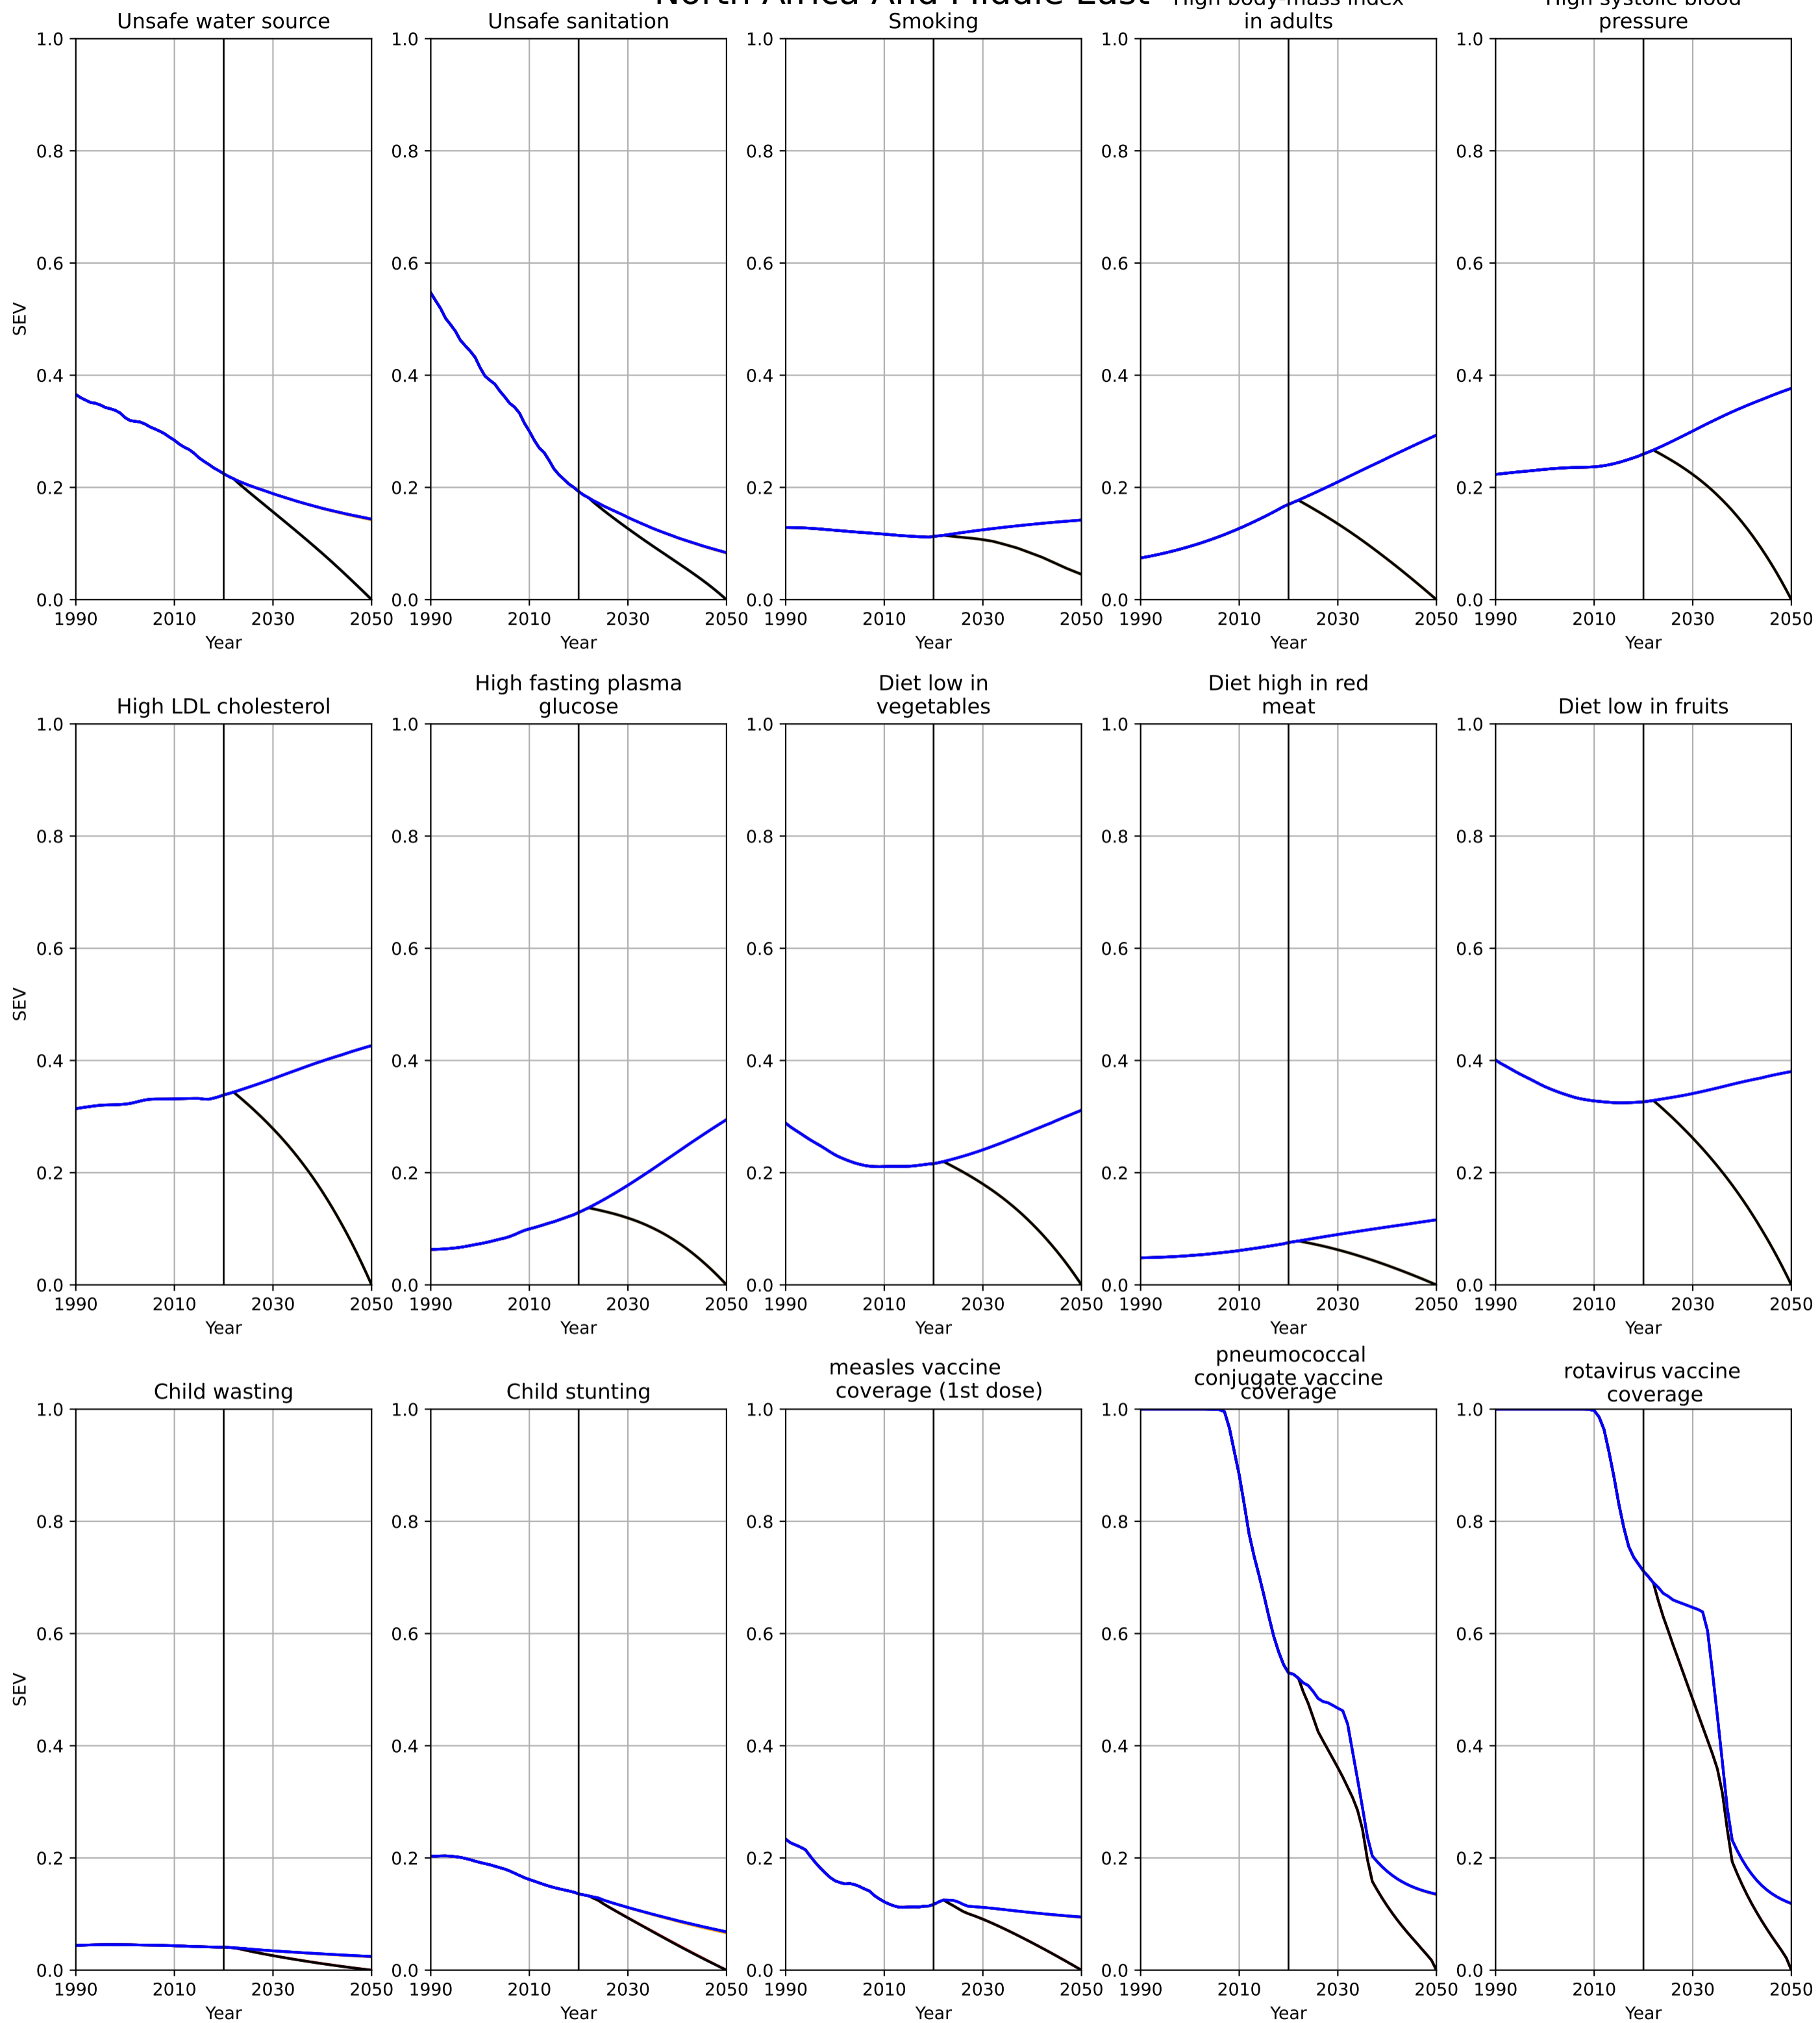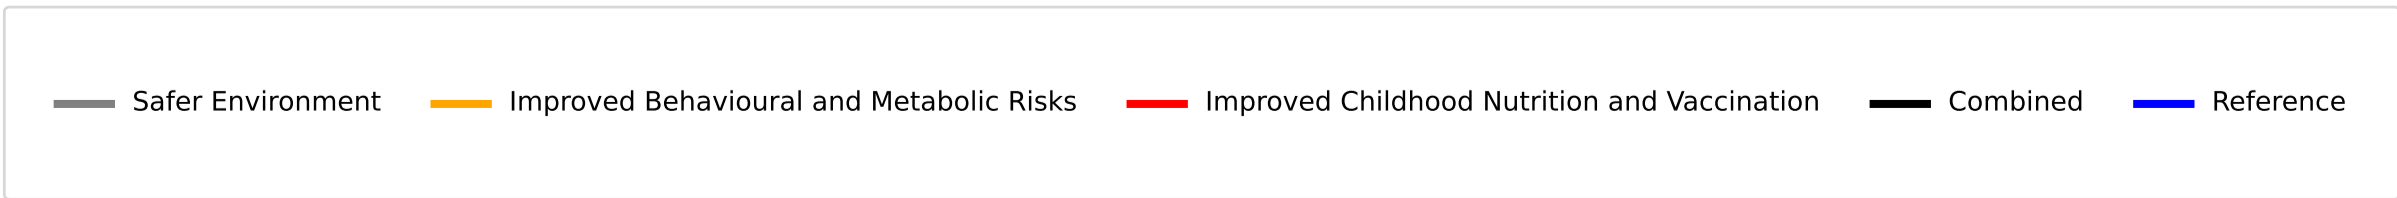



# South Asia

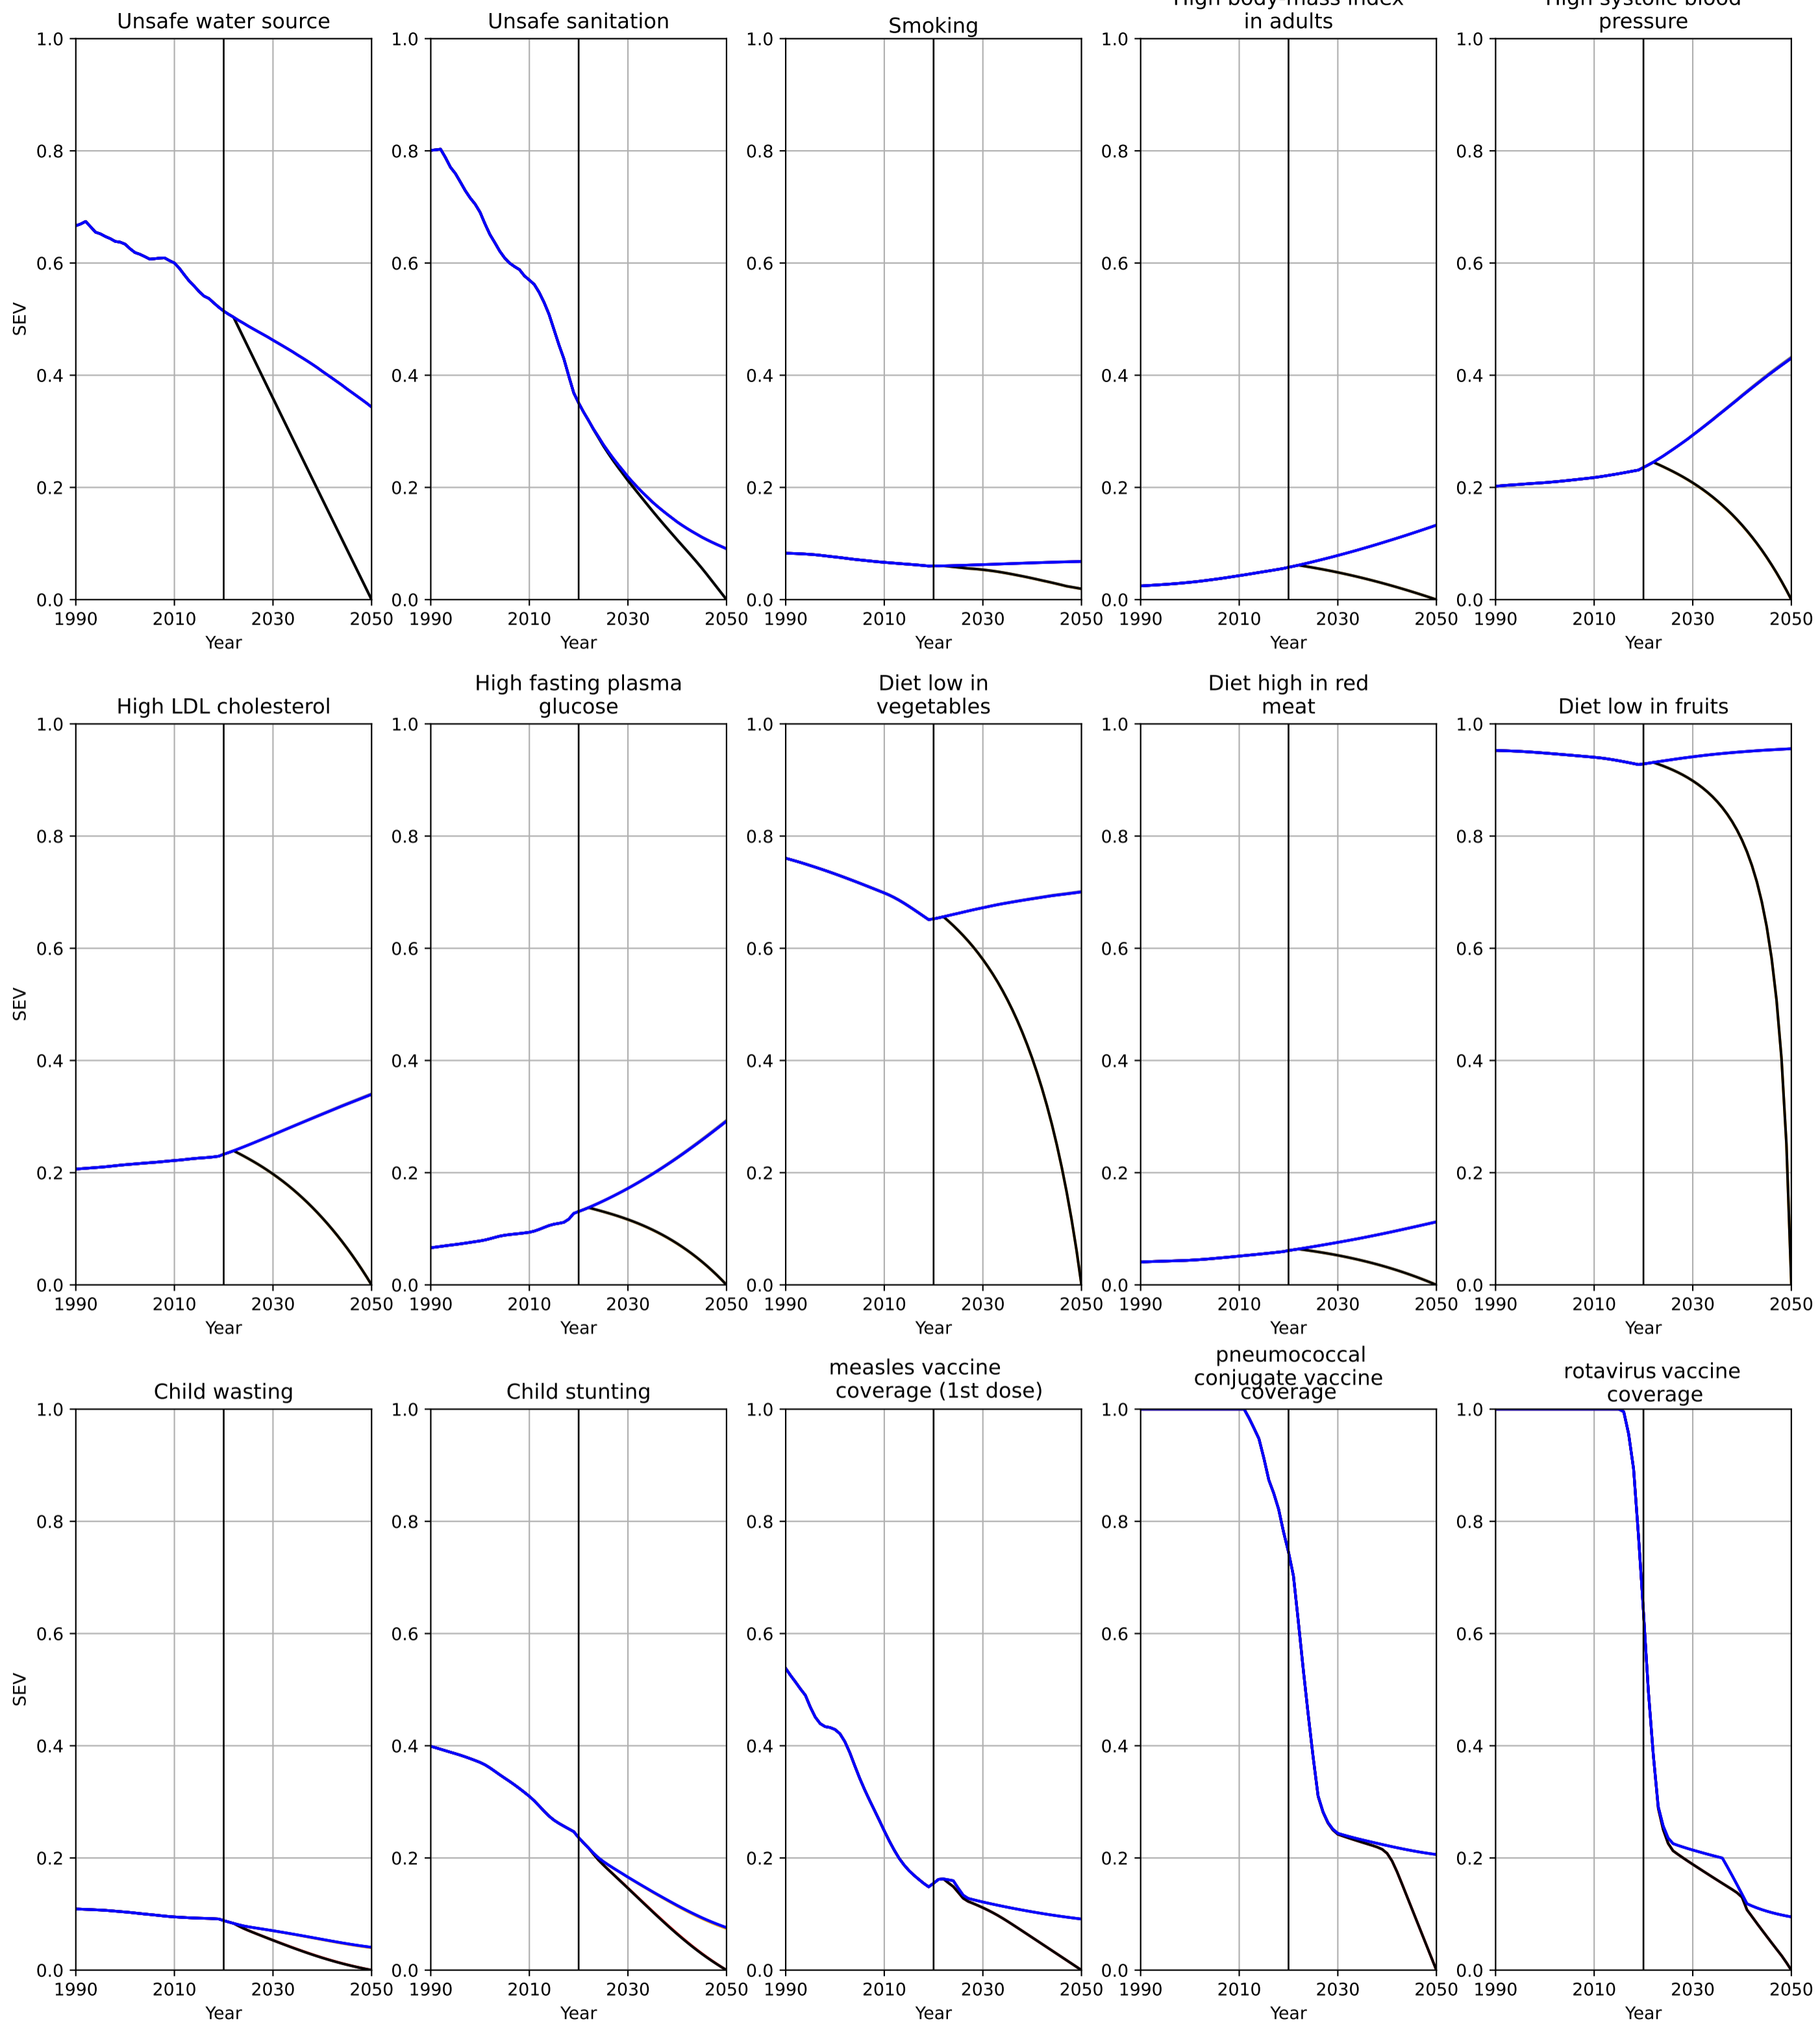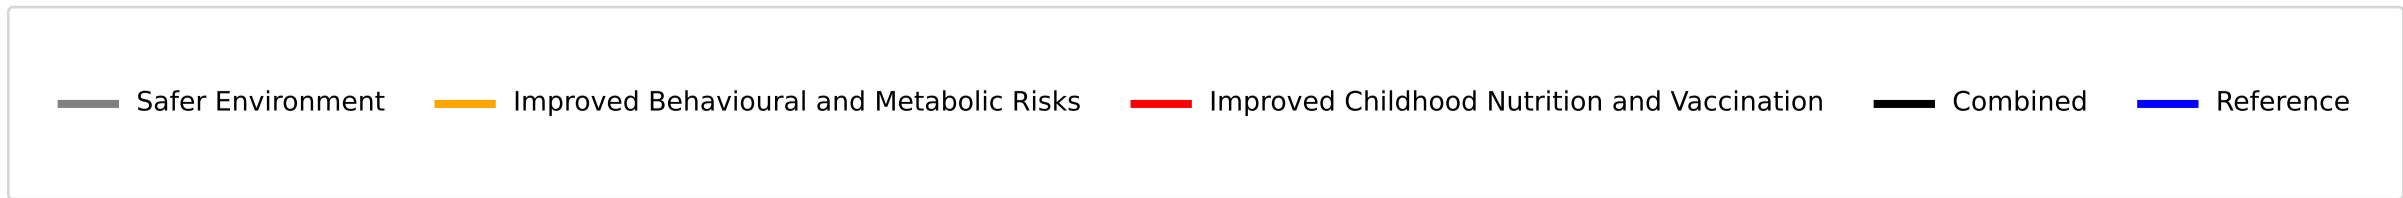

# Southeast Asia, East Asia, And Oceania

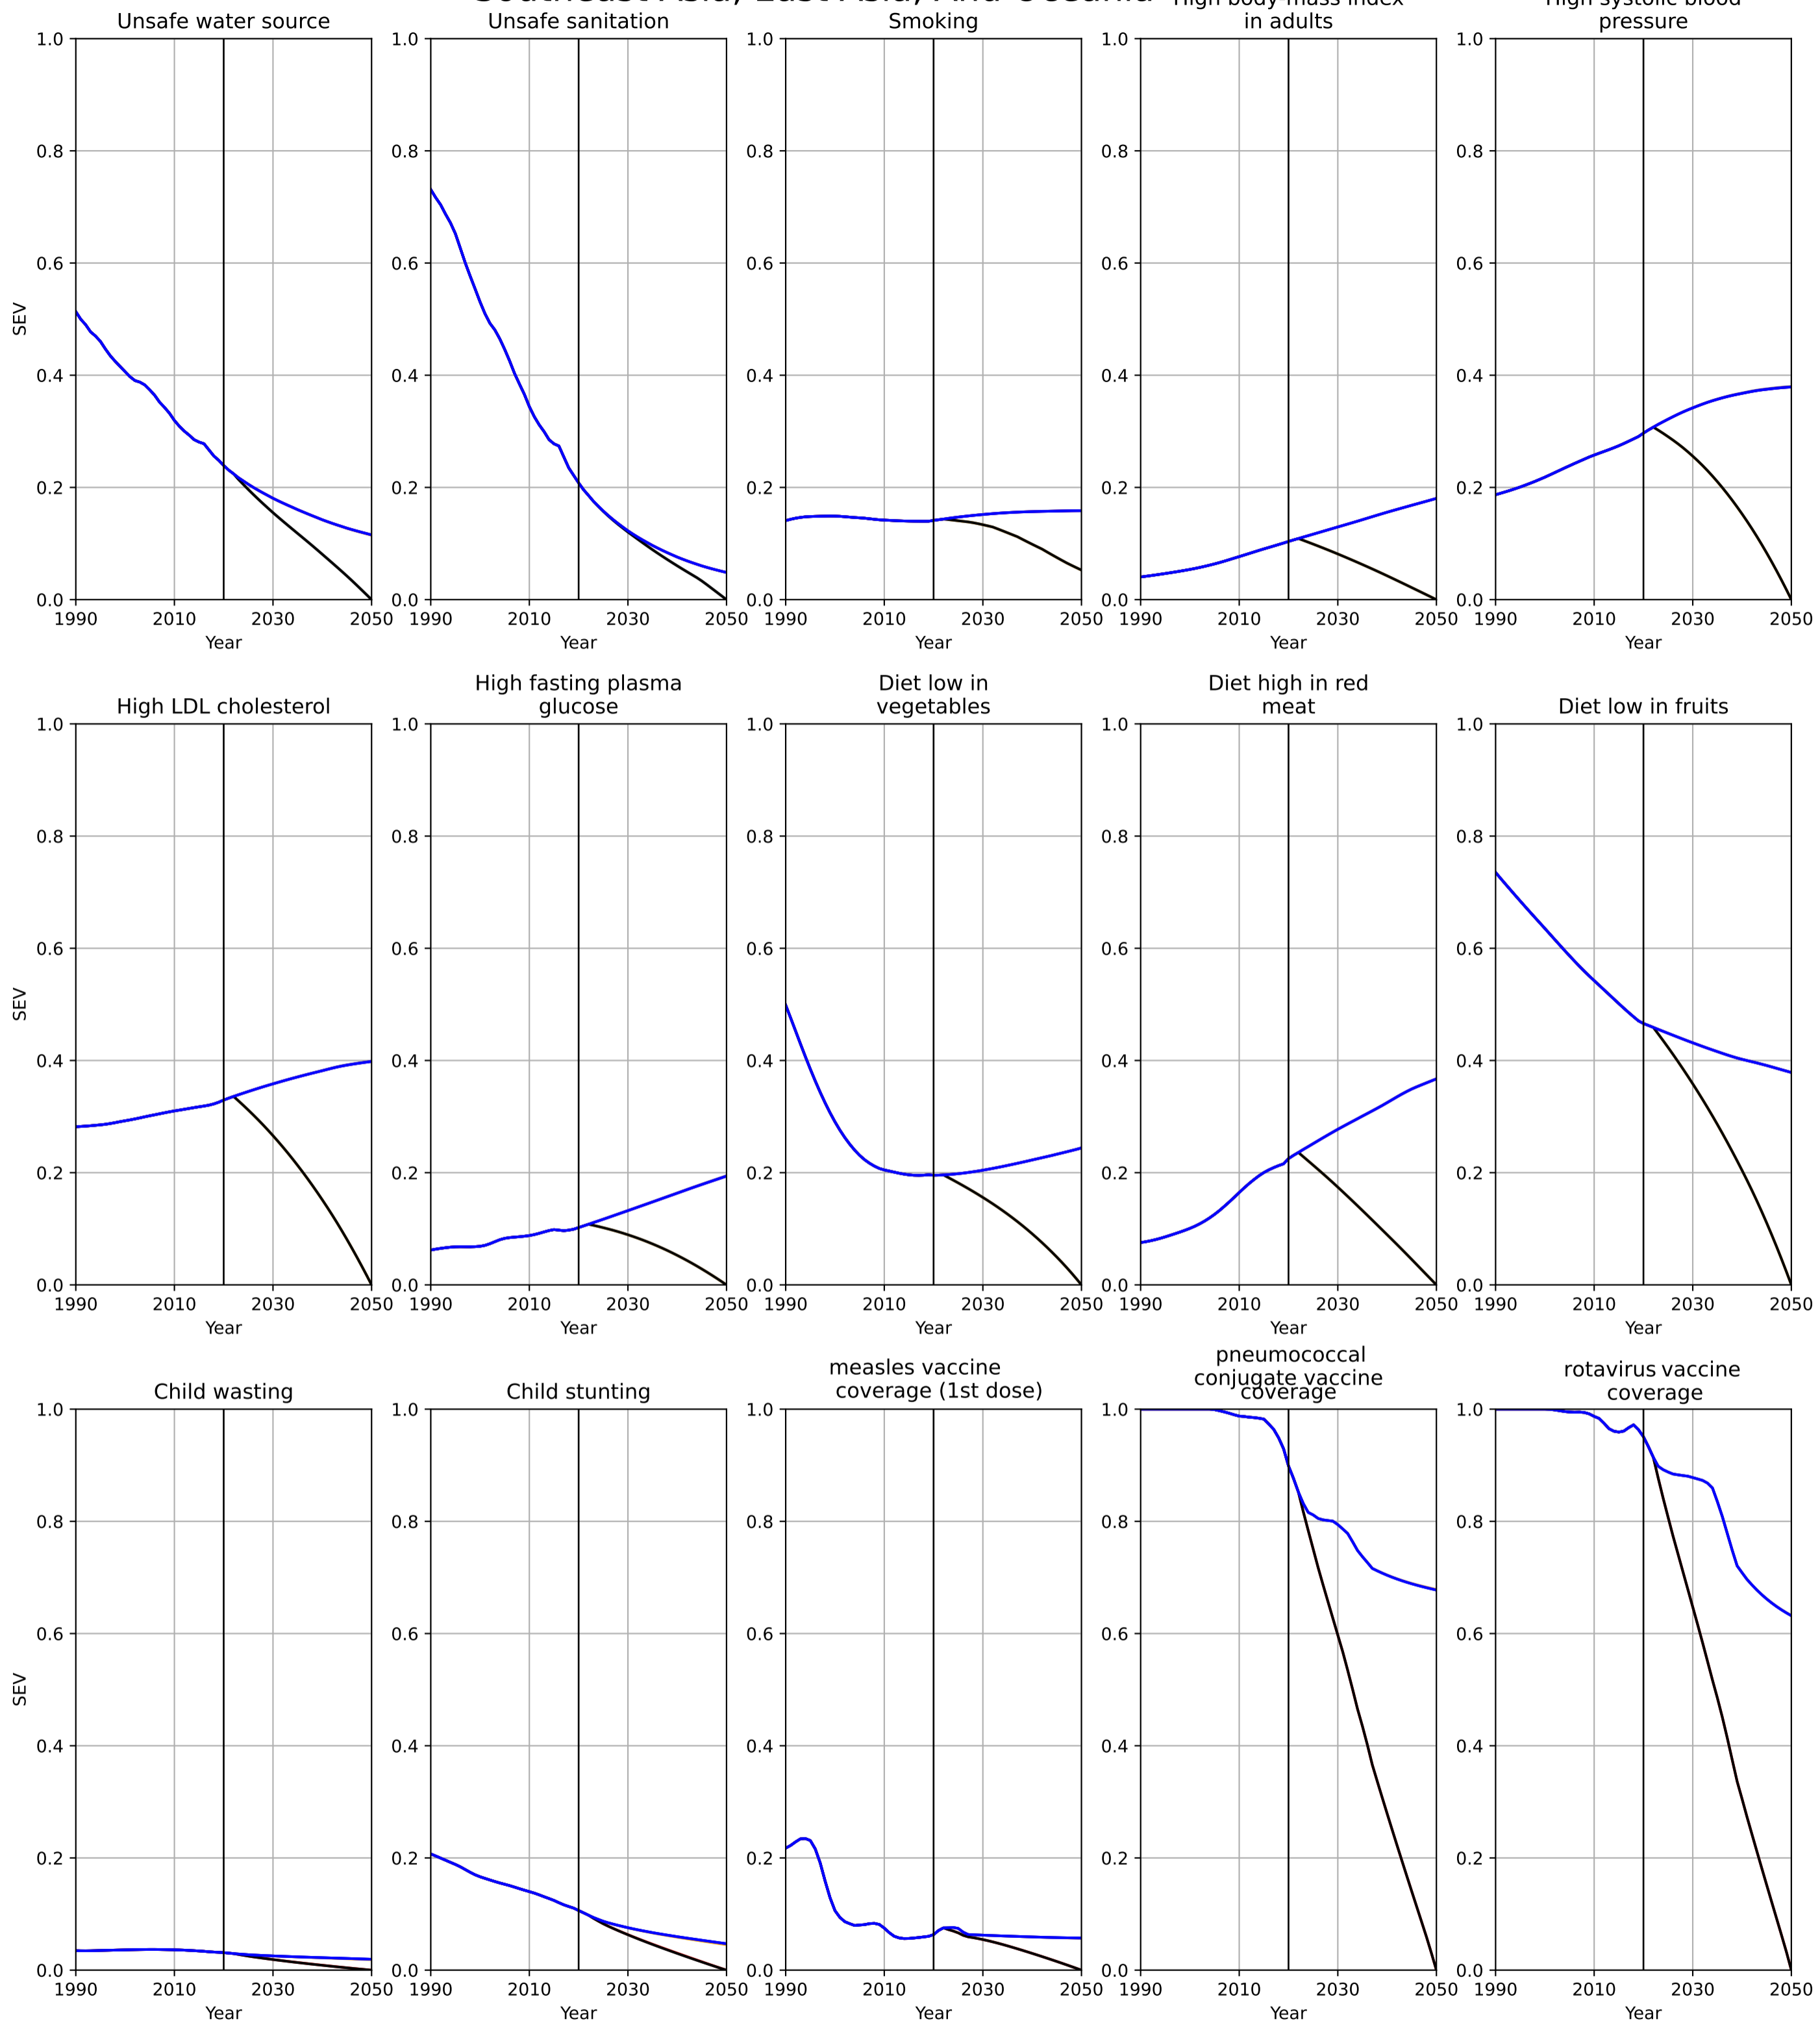

# Sub-Saharan Africa

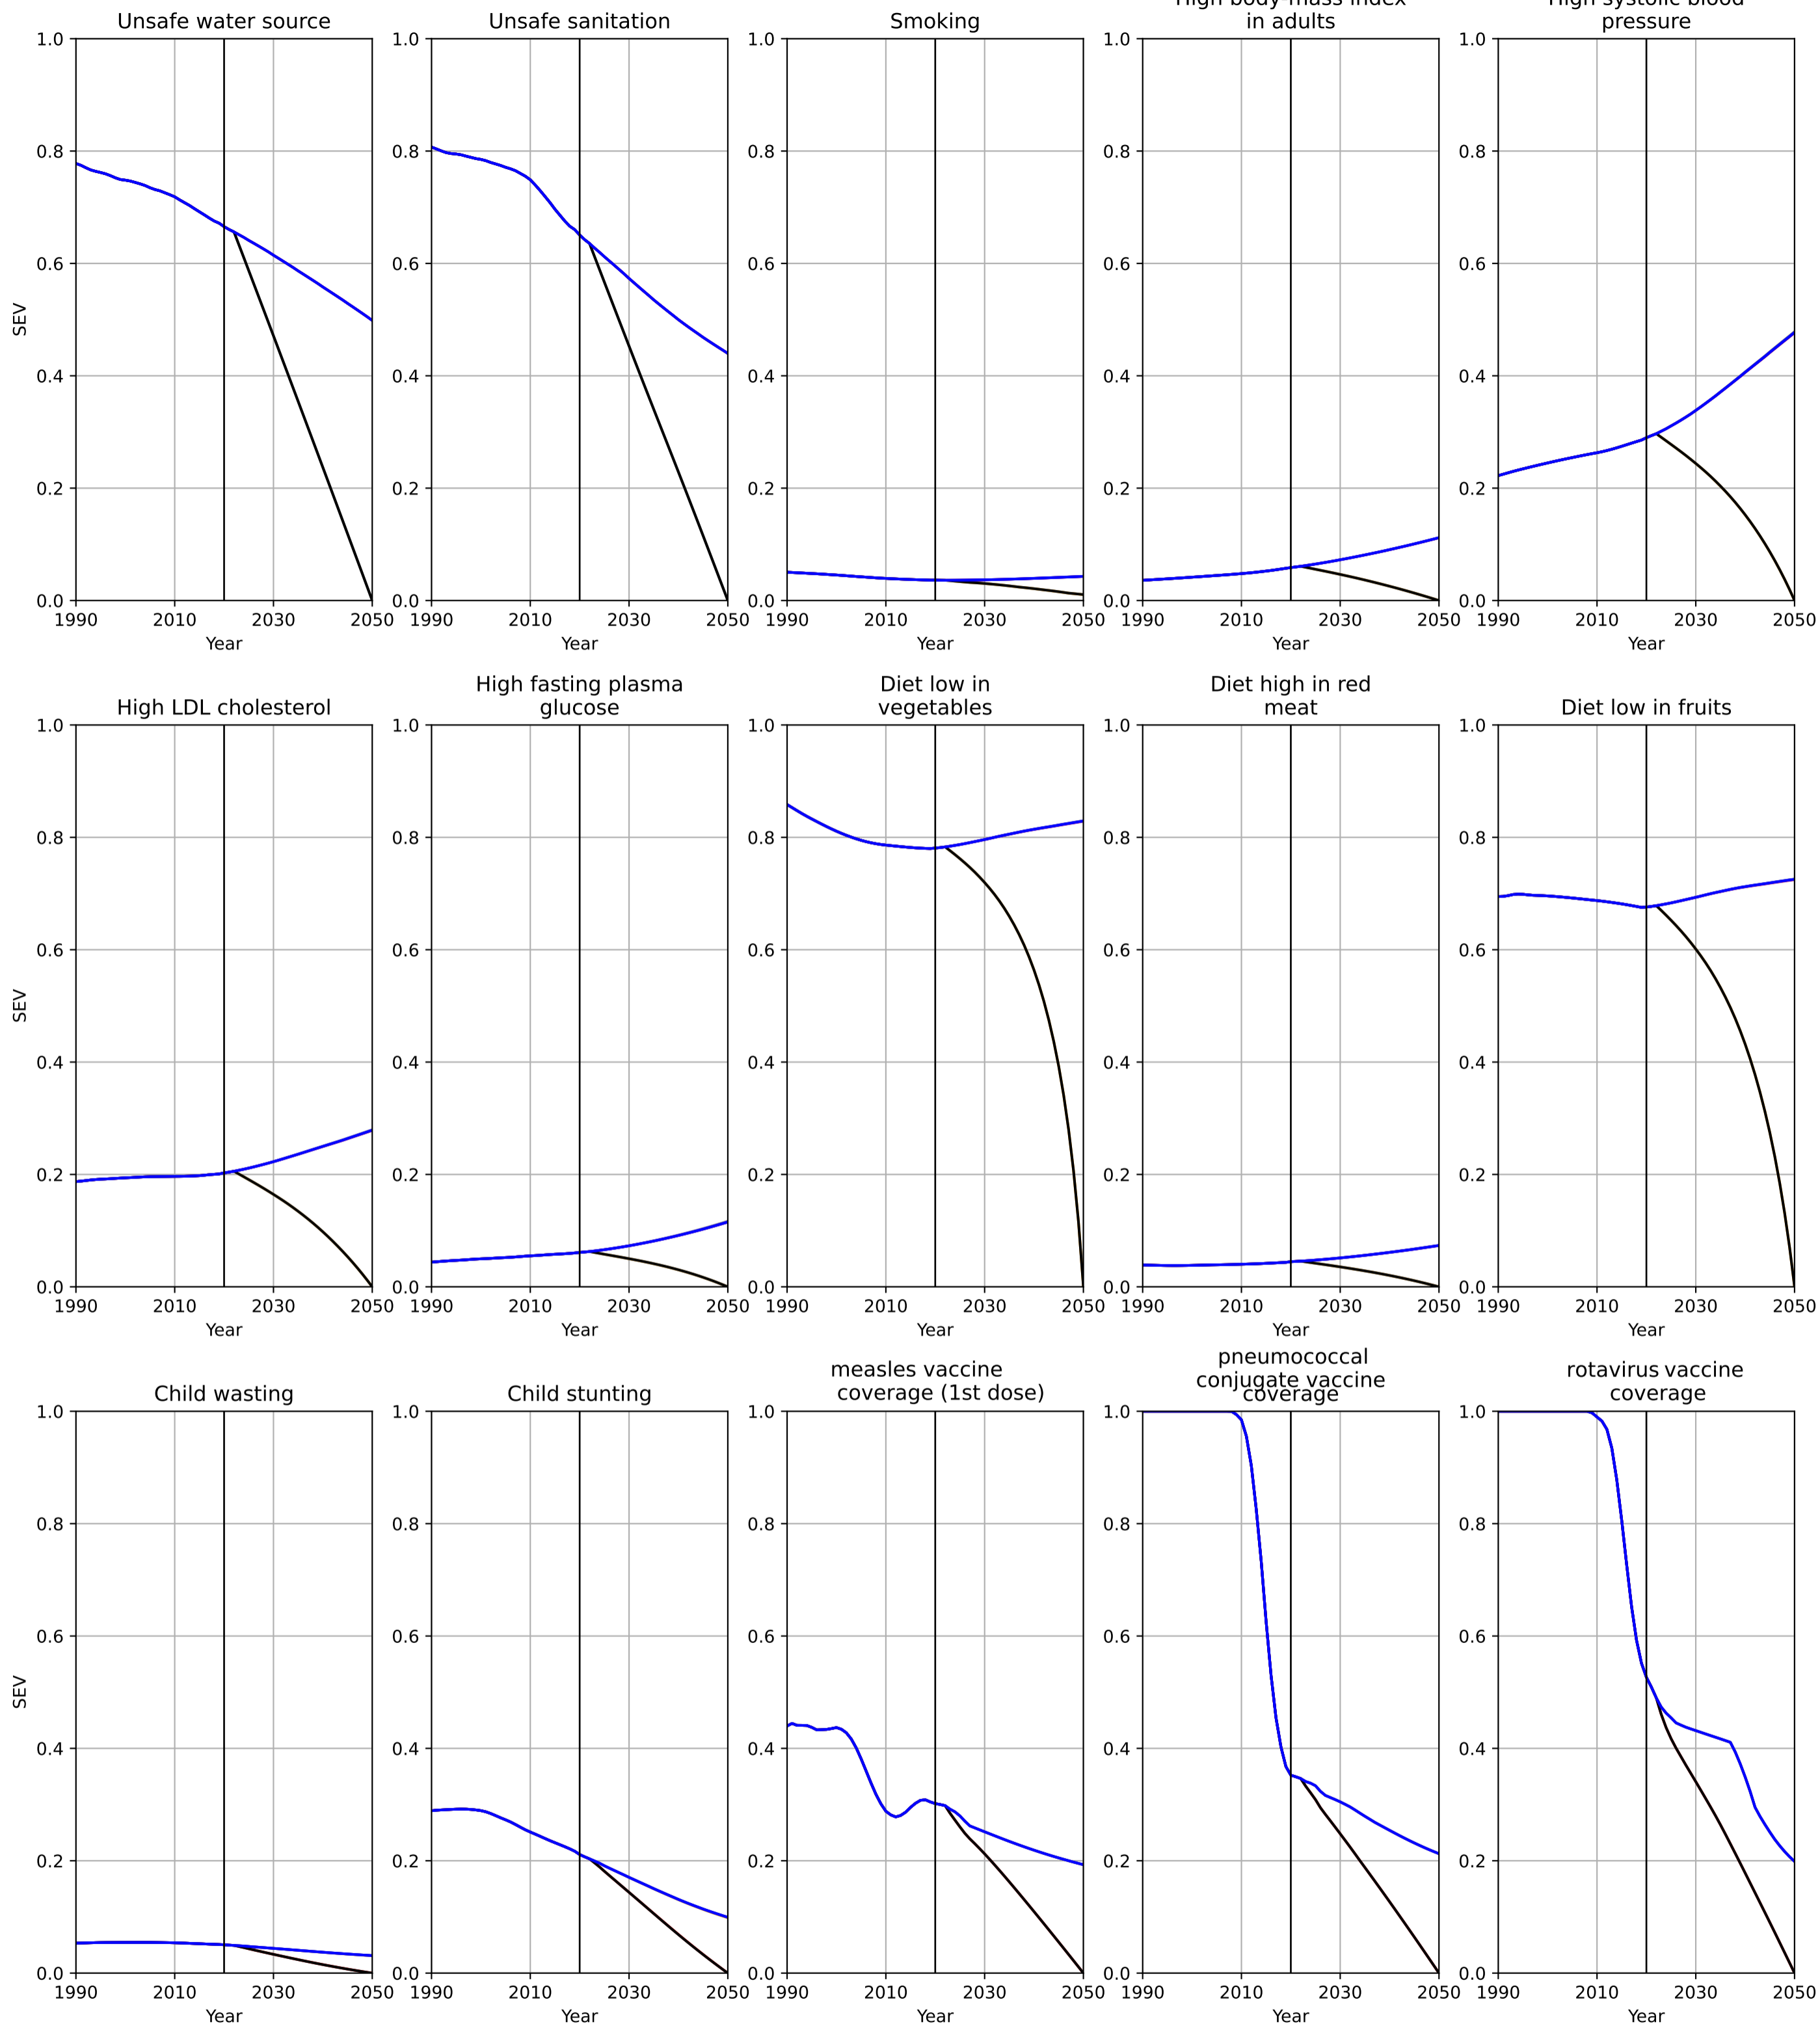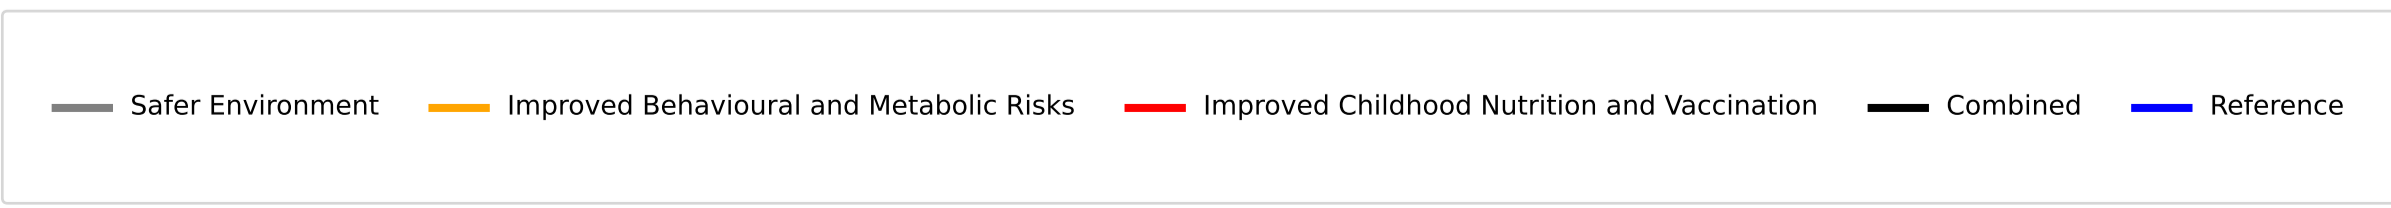

Supplemental Results Figure S2. Global and super-regional healthy life expectancy, 1990–2050 for females (A) and males (B)

A) Females

B) Males

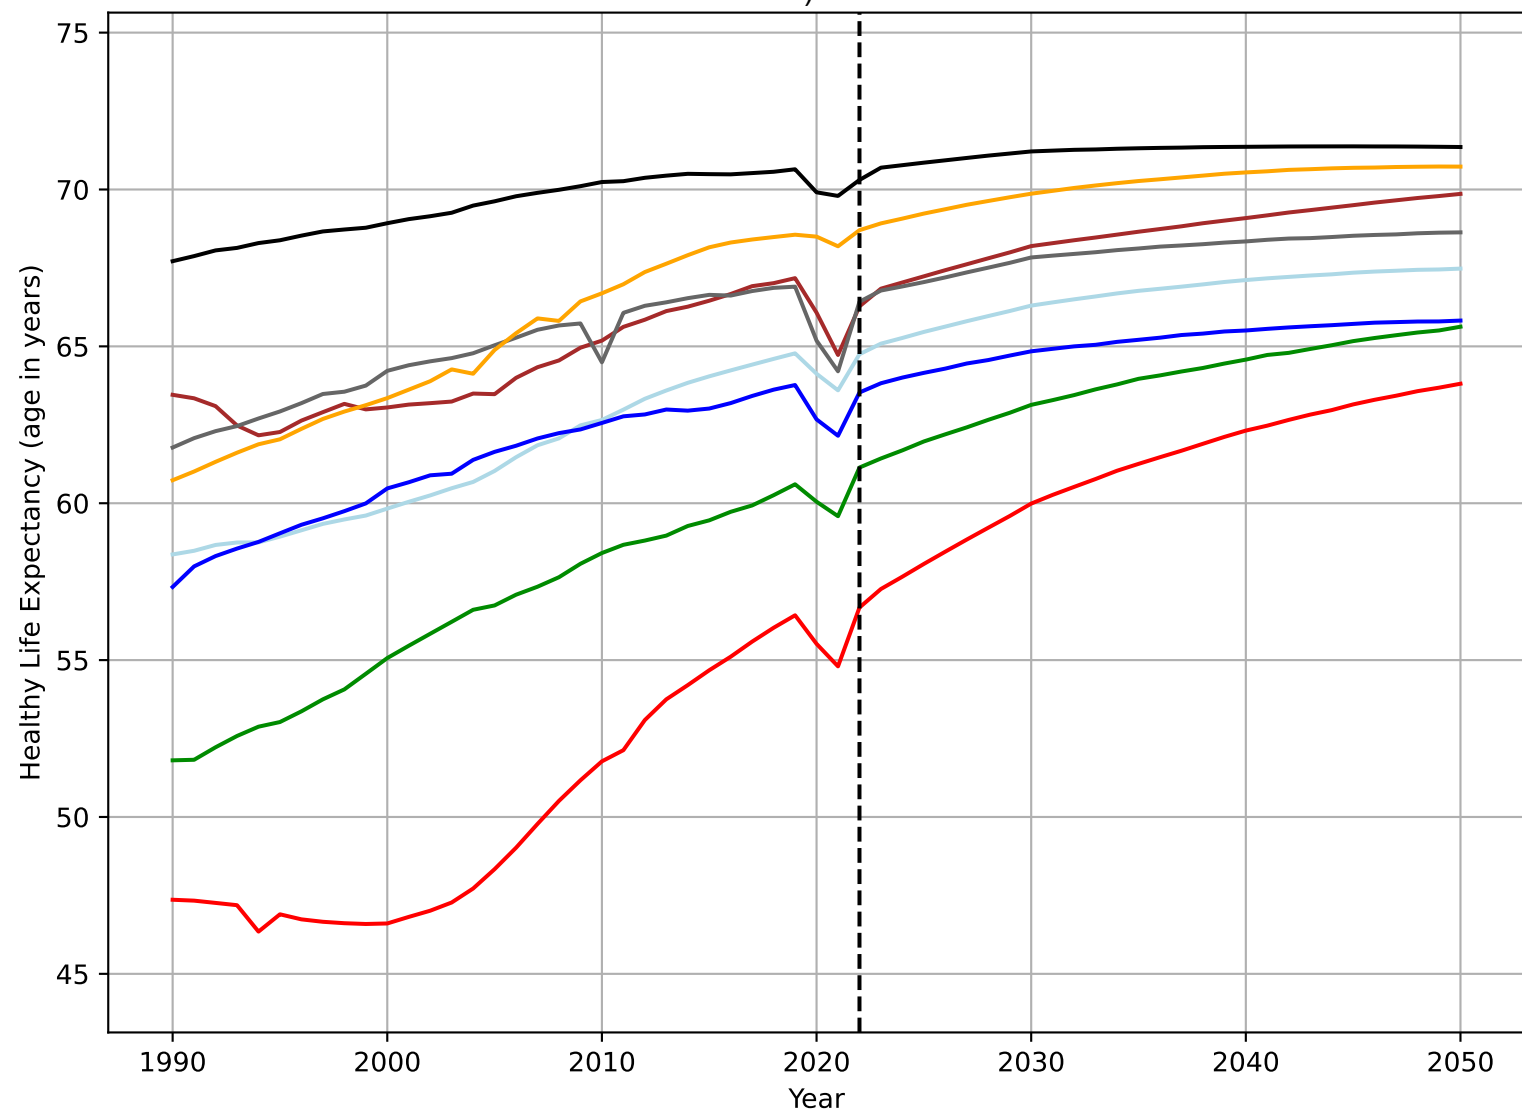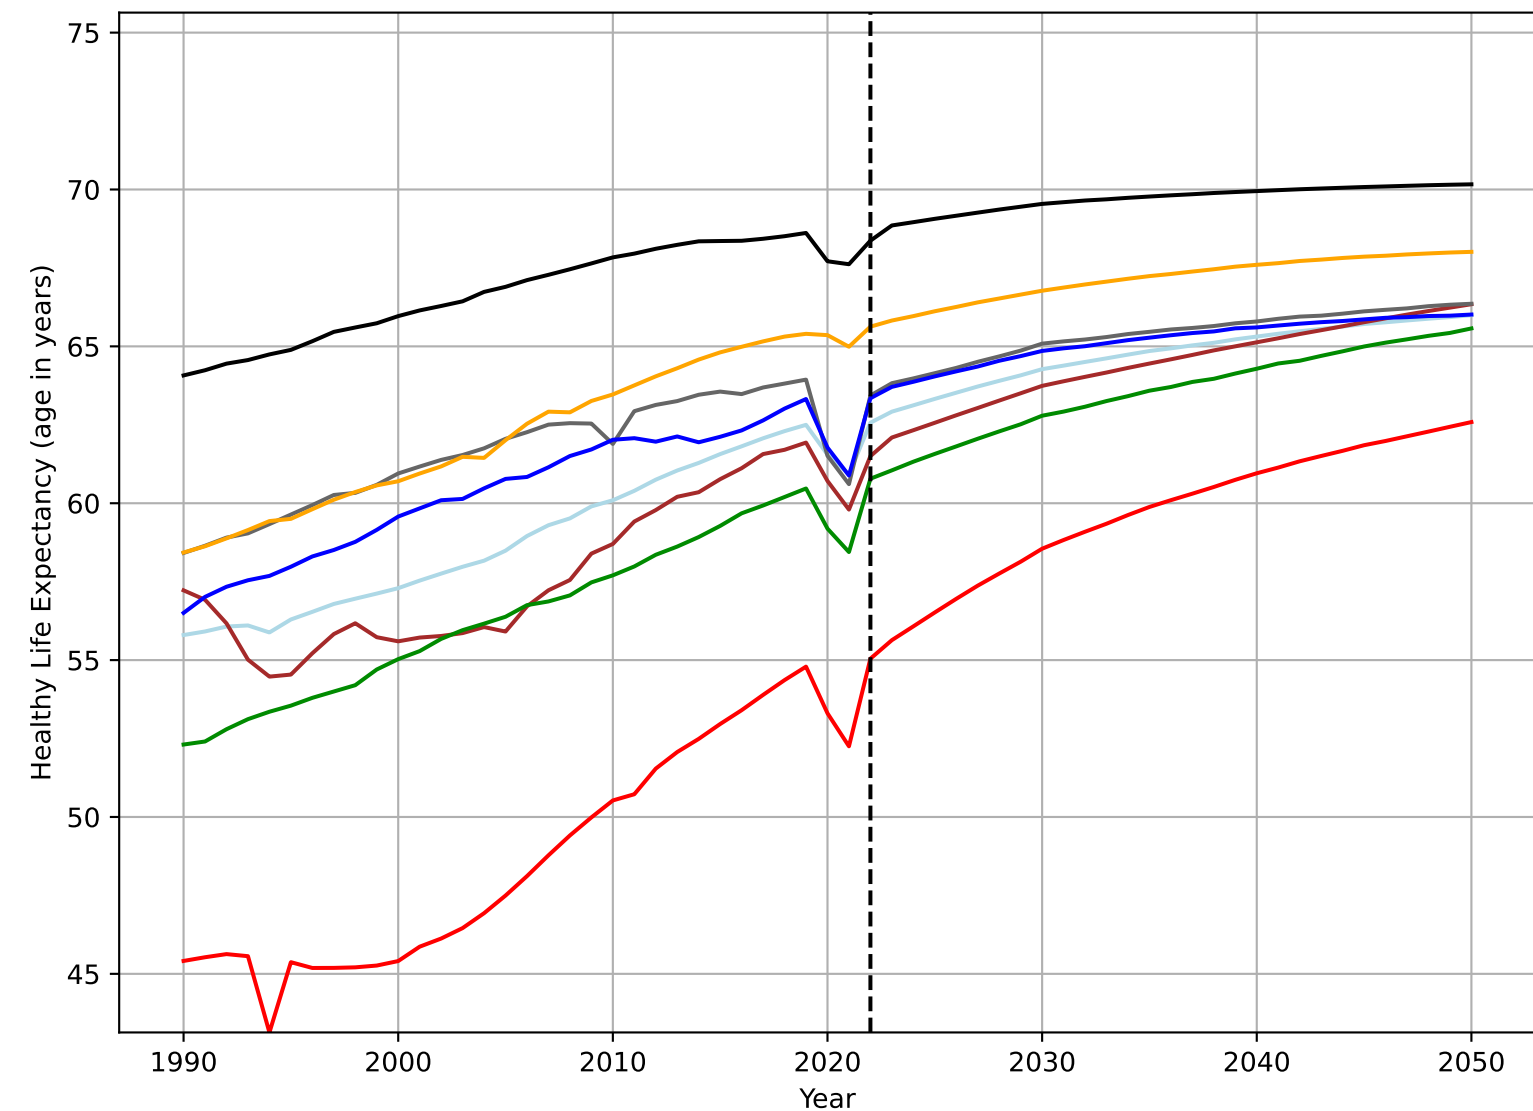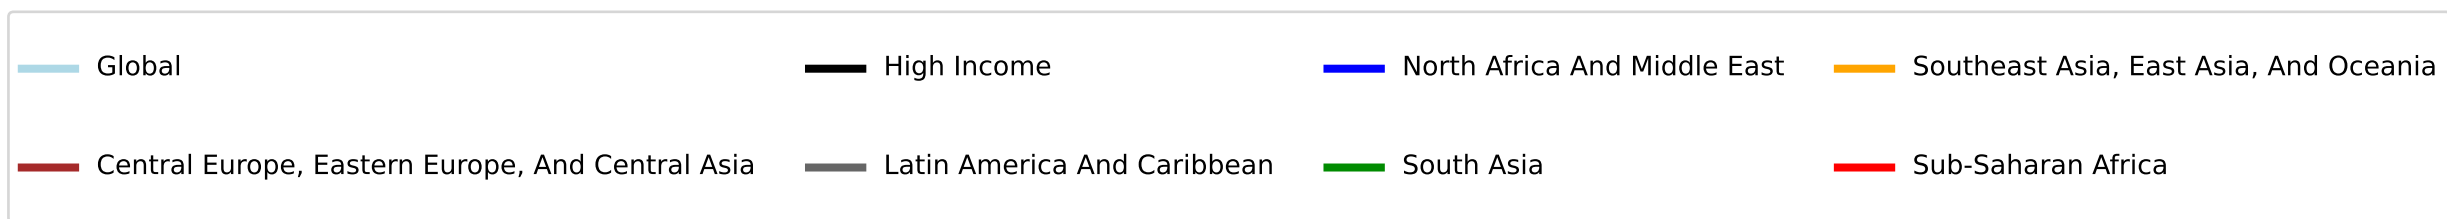

# Armenia

### Life Expectancy

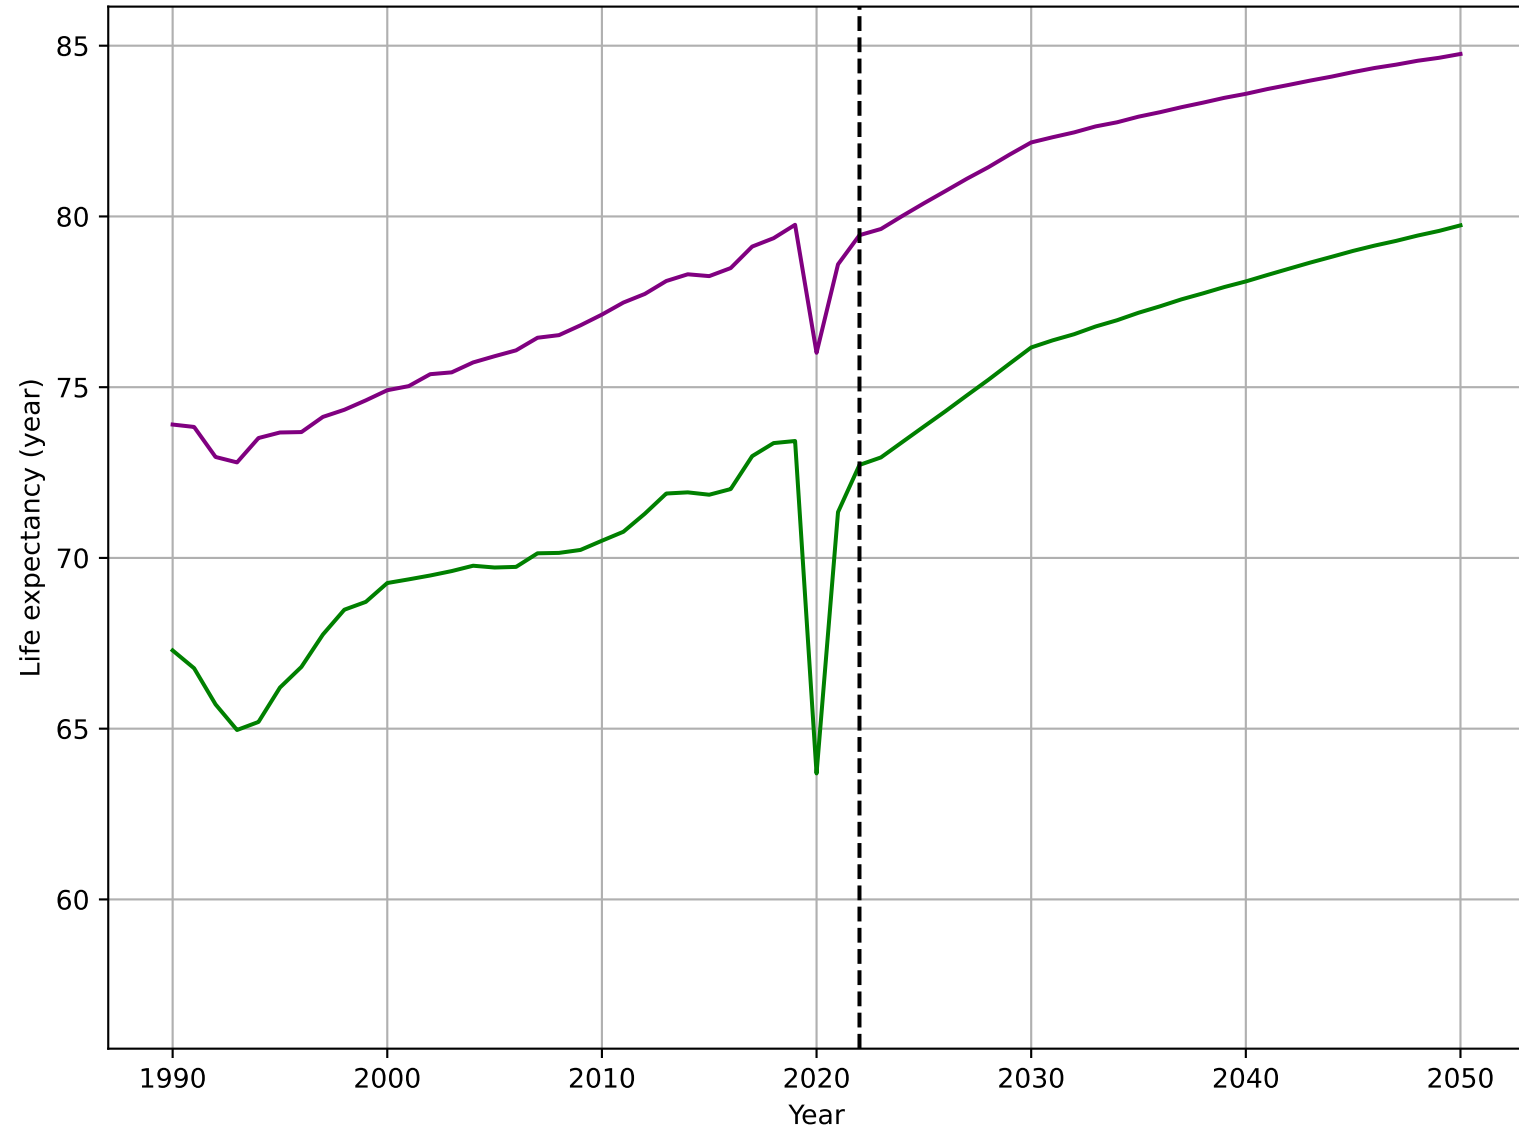

### Healthy Life Expectancy (HALE)

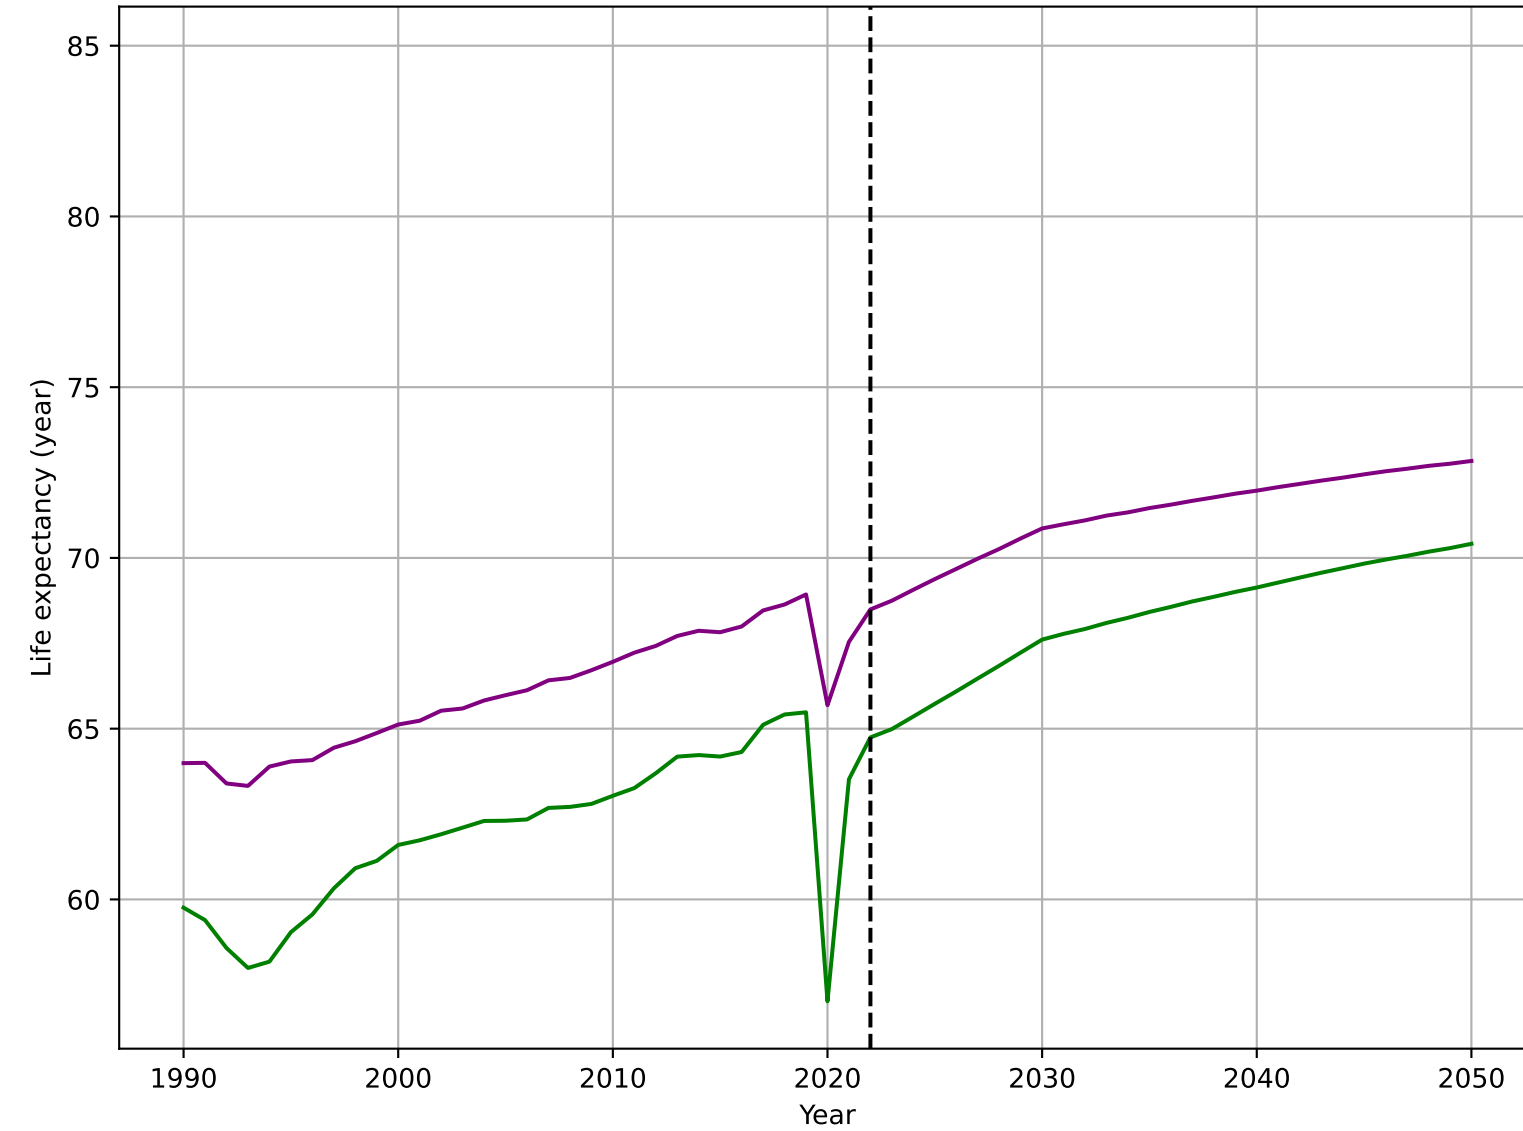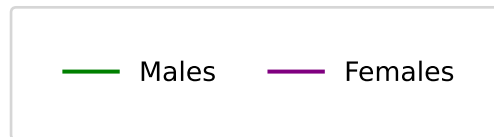

# Azerbaijan

### Life Expectancy

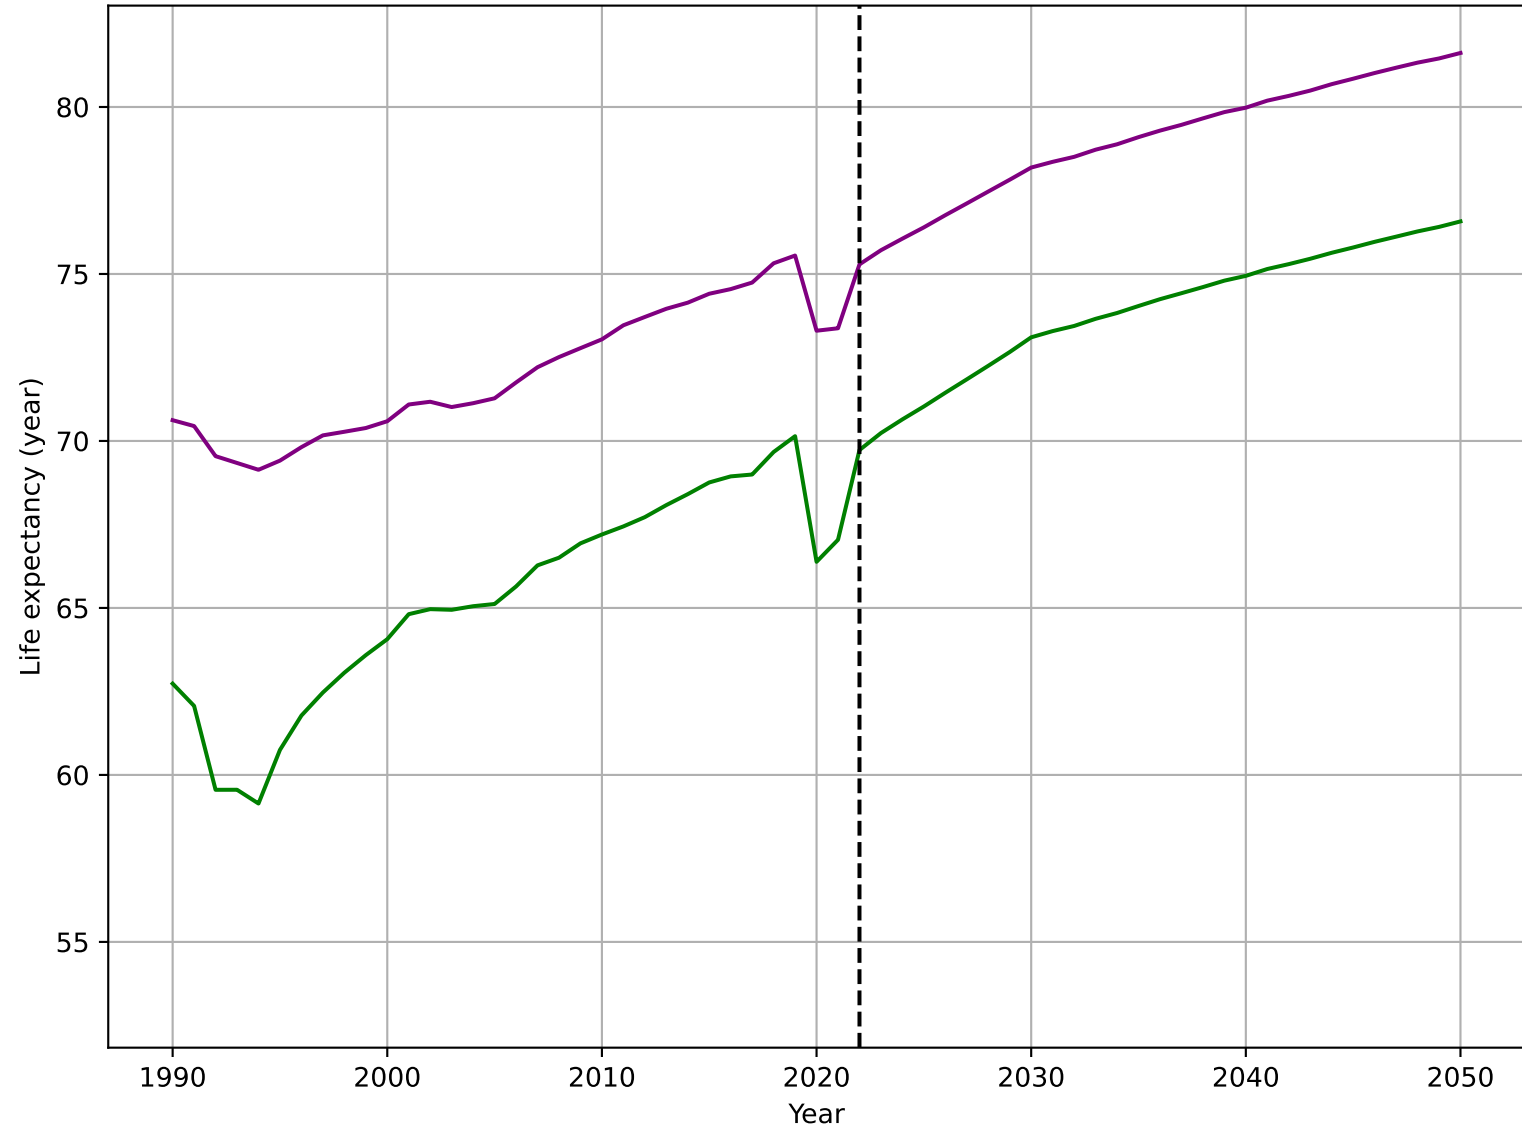

### Healthy Life Expectancy (HALE)

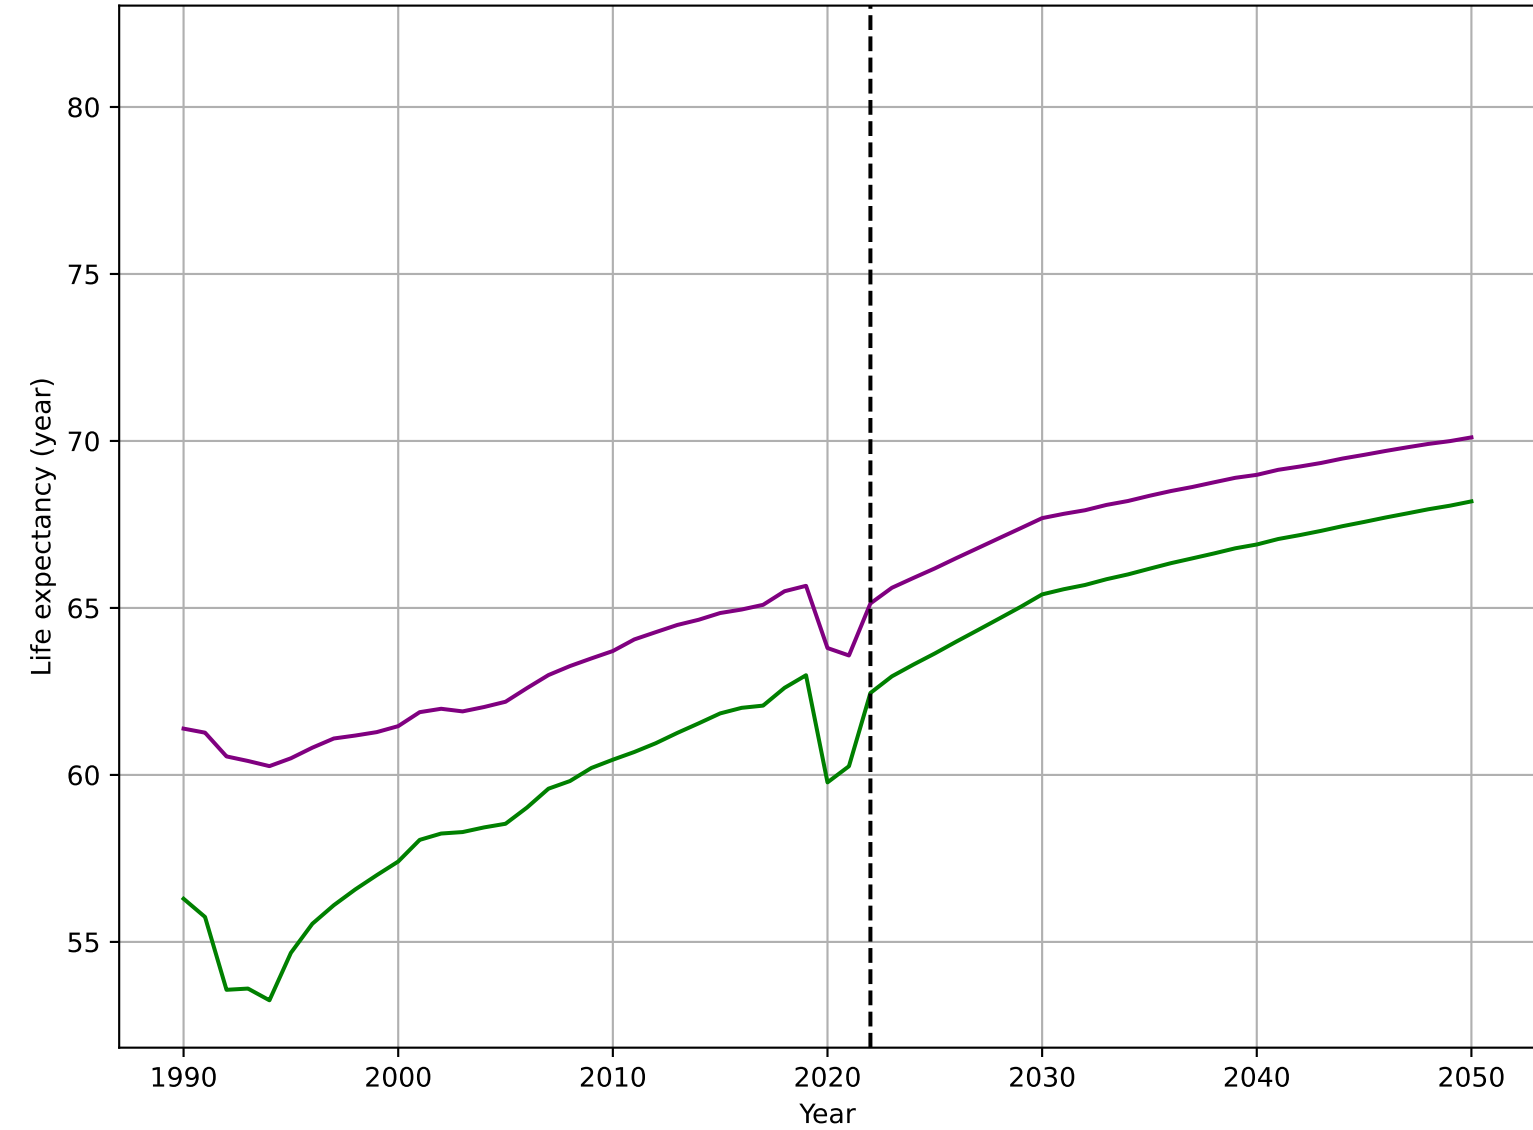

# Georgia

### Life Expectancy

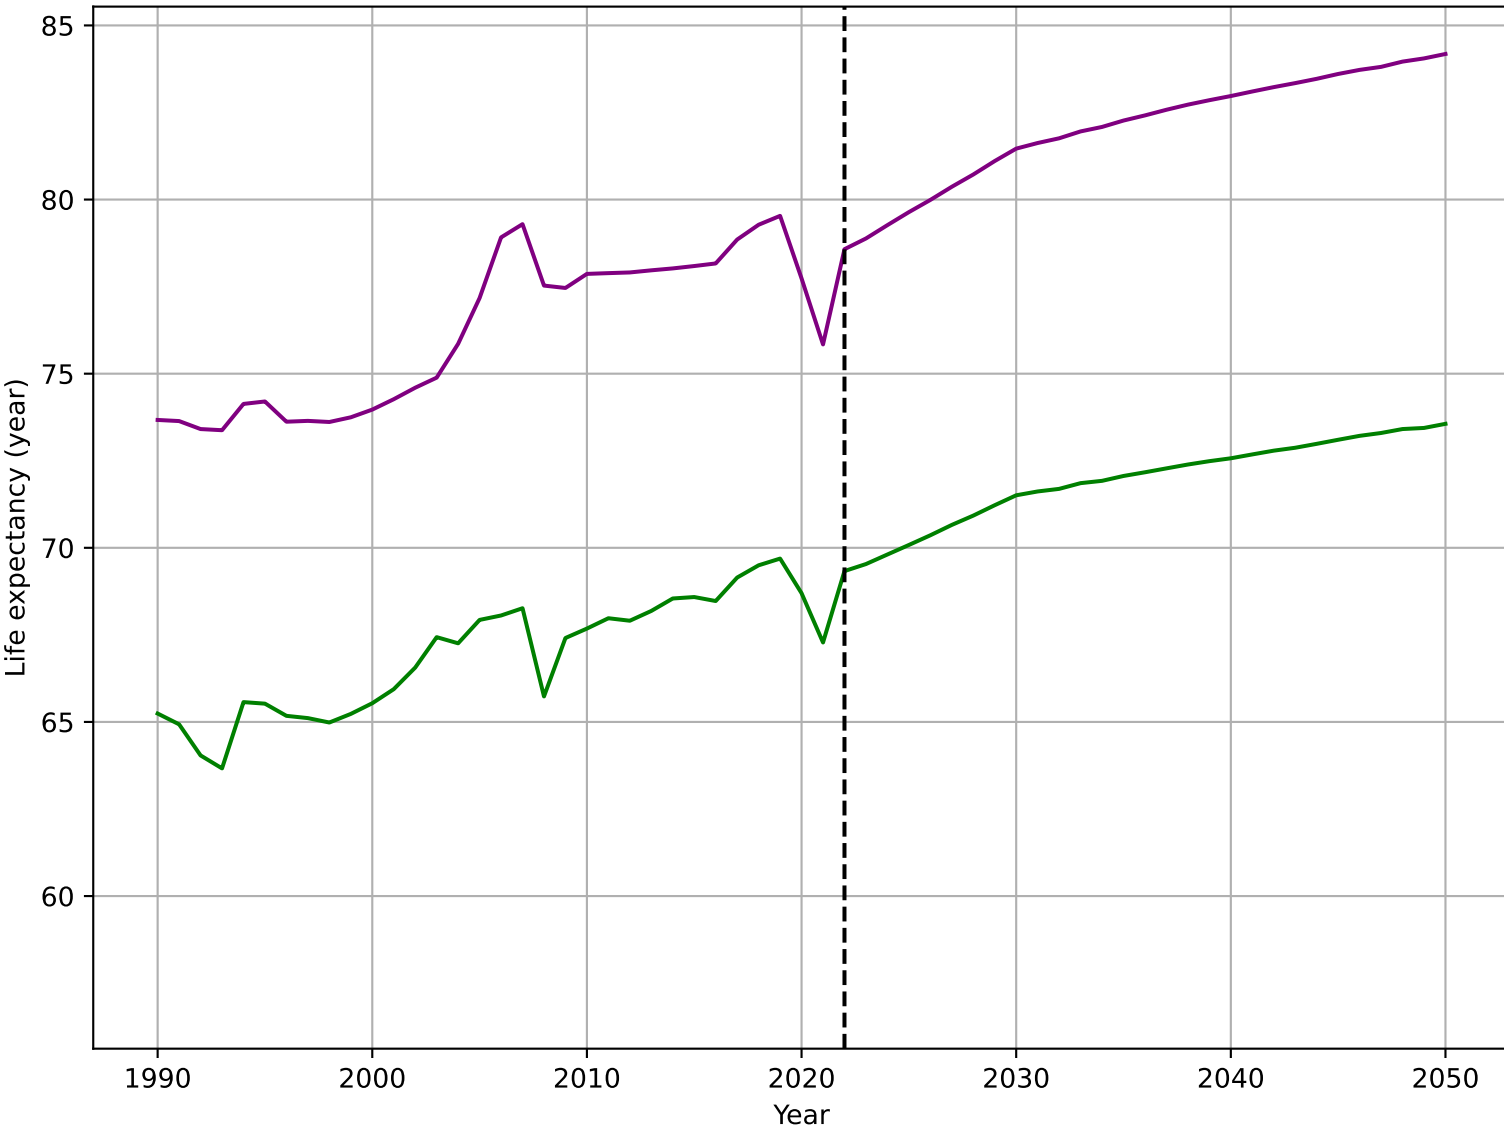

### Healthy Life Expectancy (HALE)

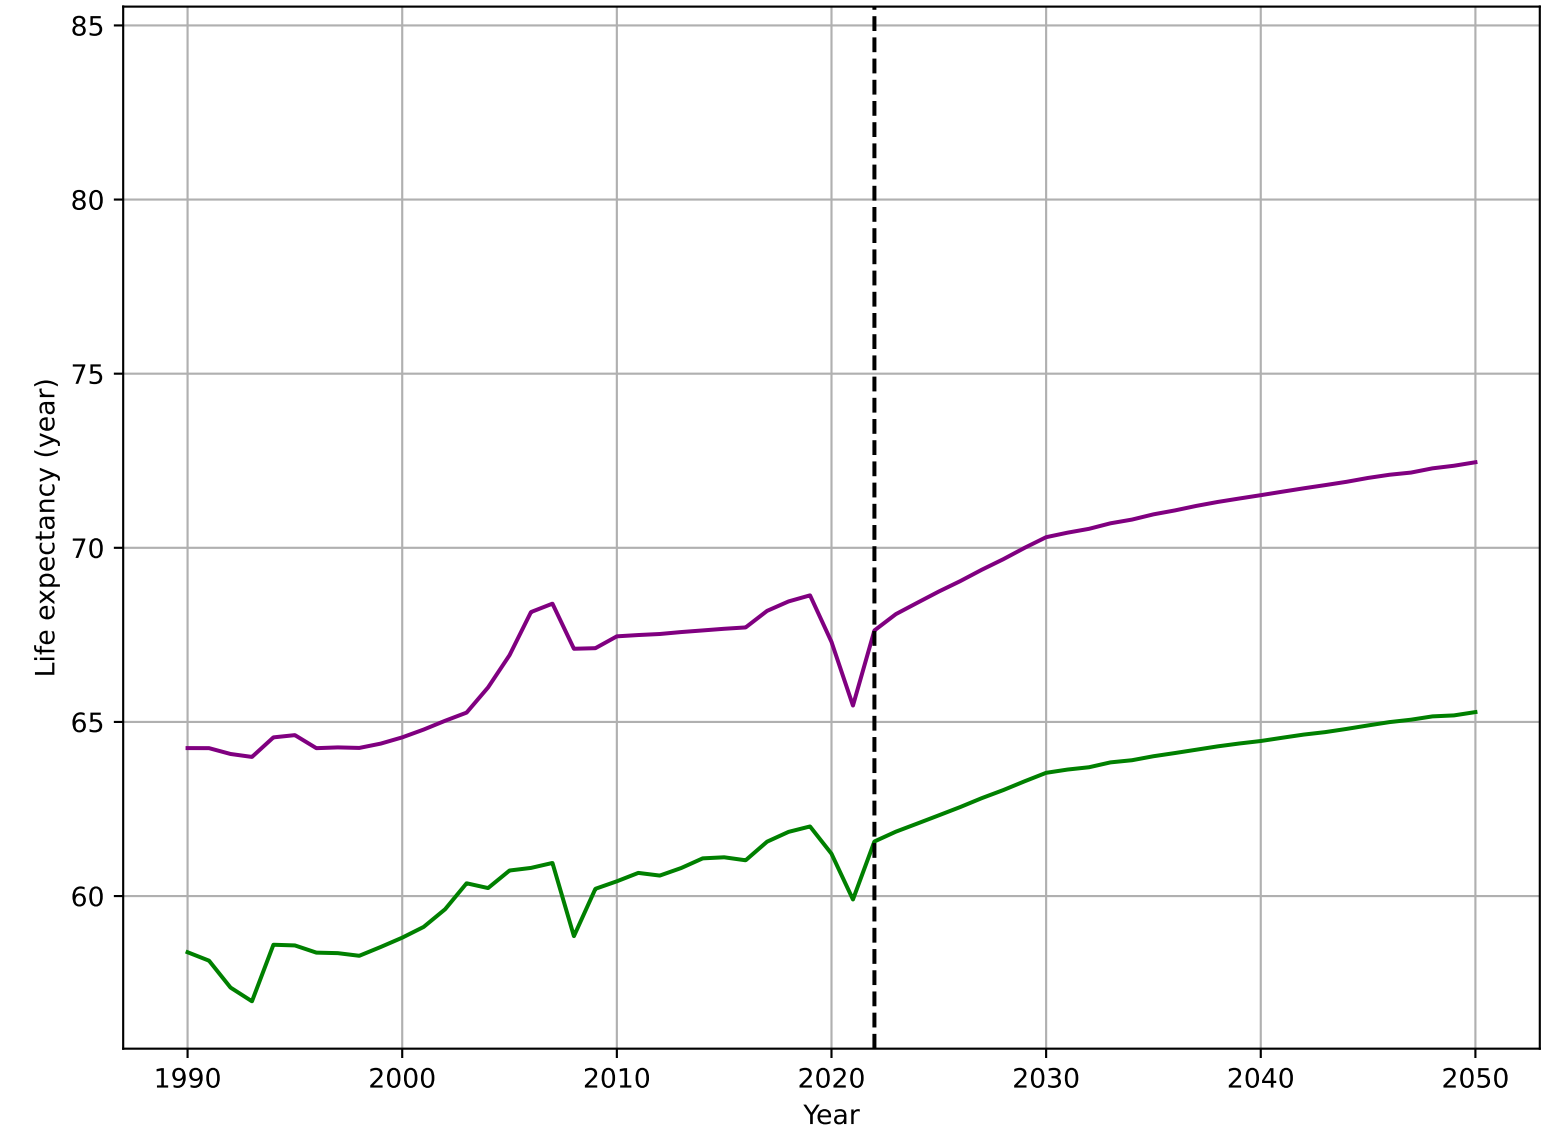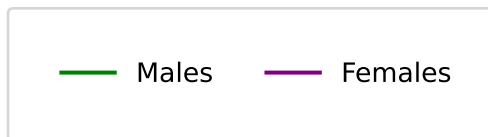

# Kazakhstan

### Life Expectancy

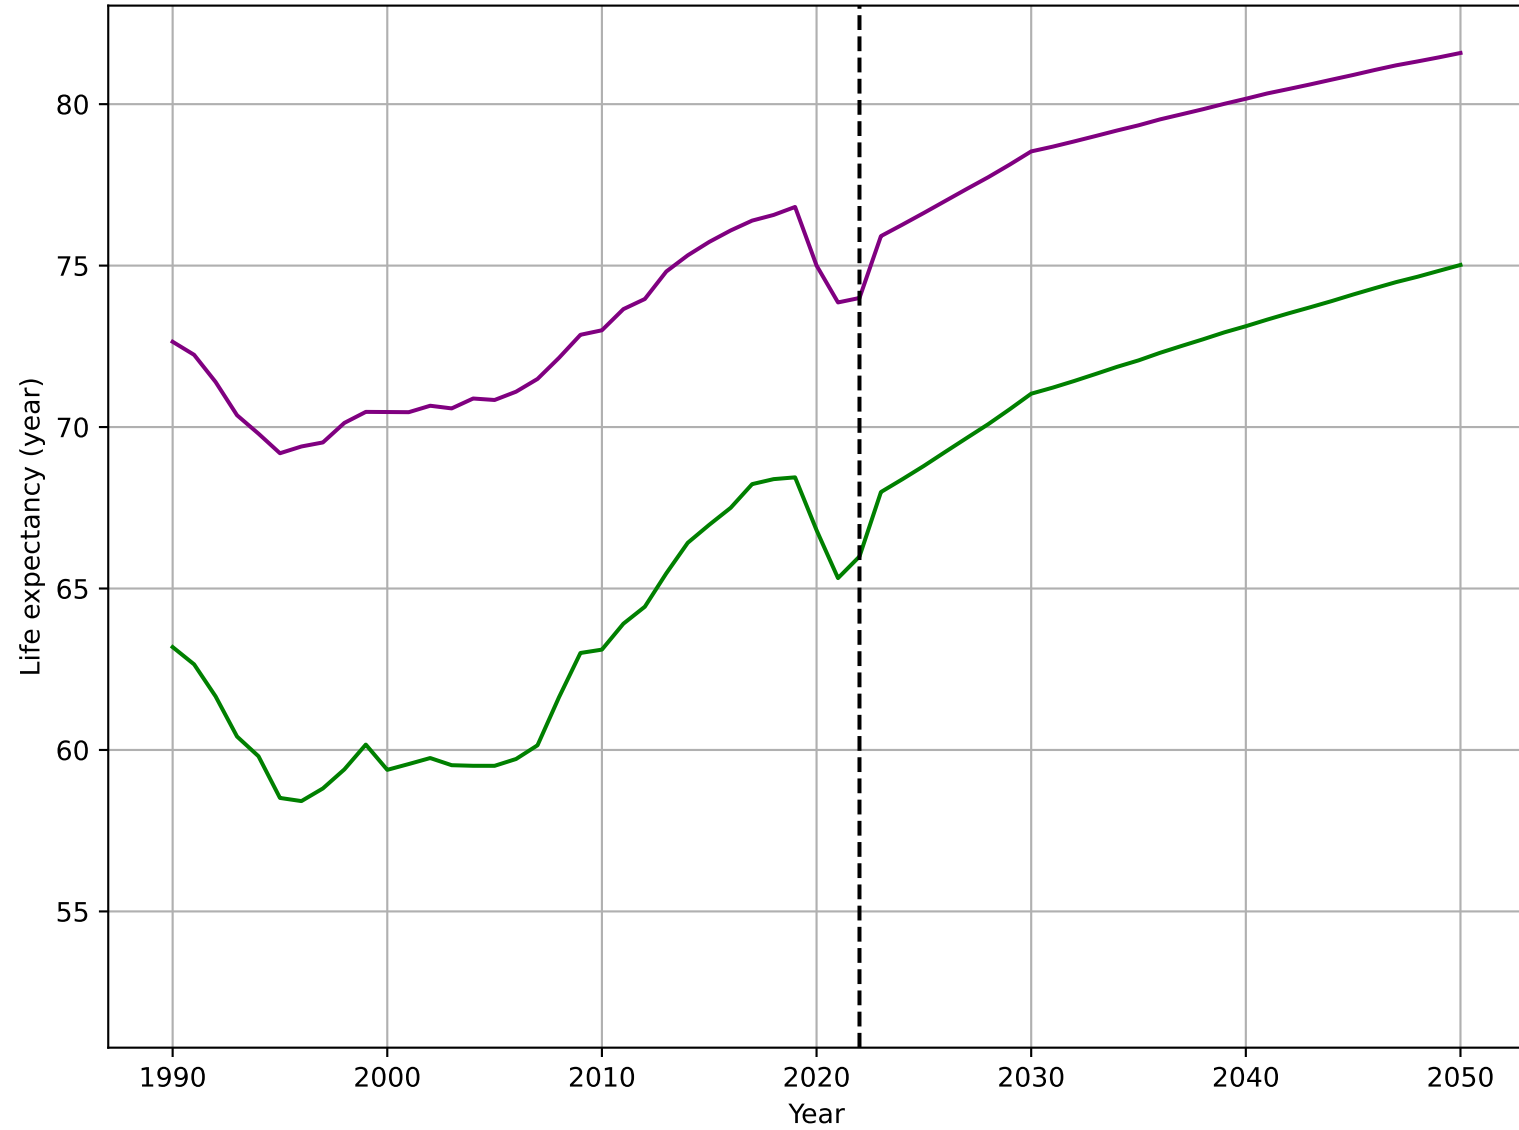

### Healthy Life Expectancy (HALE)

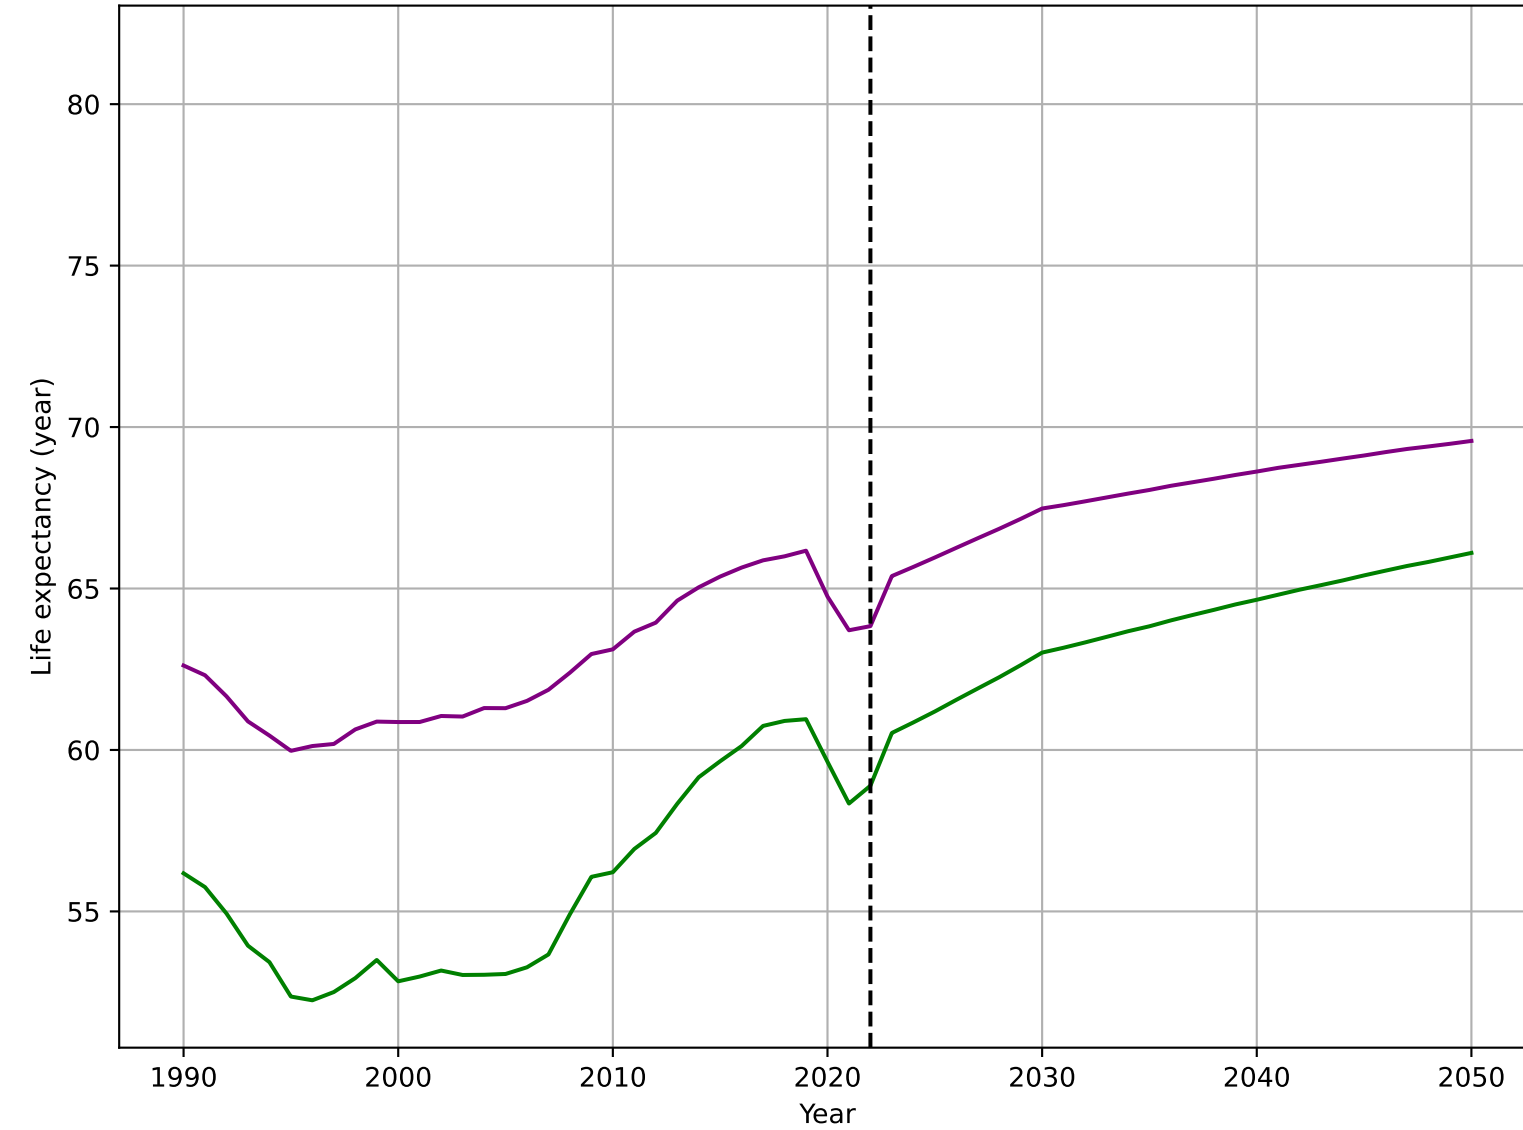



# Kyrgyzstan

### Life Expectancy

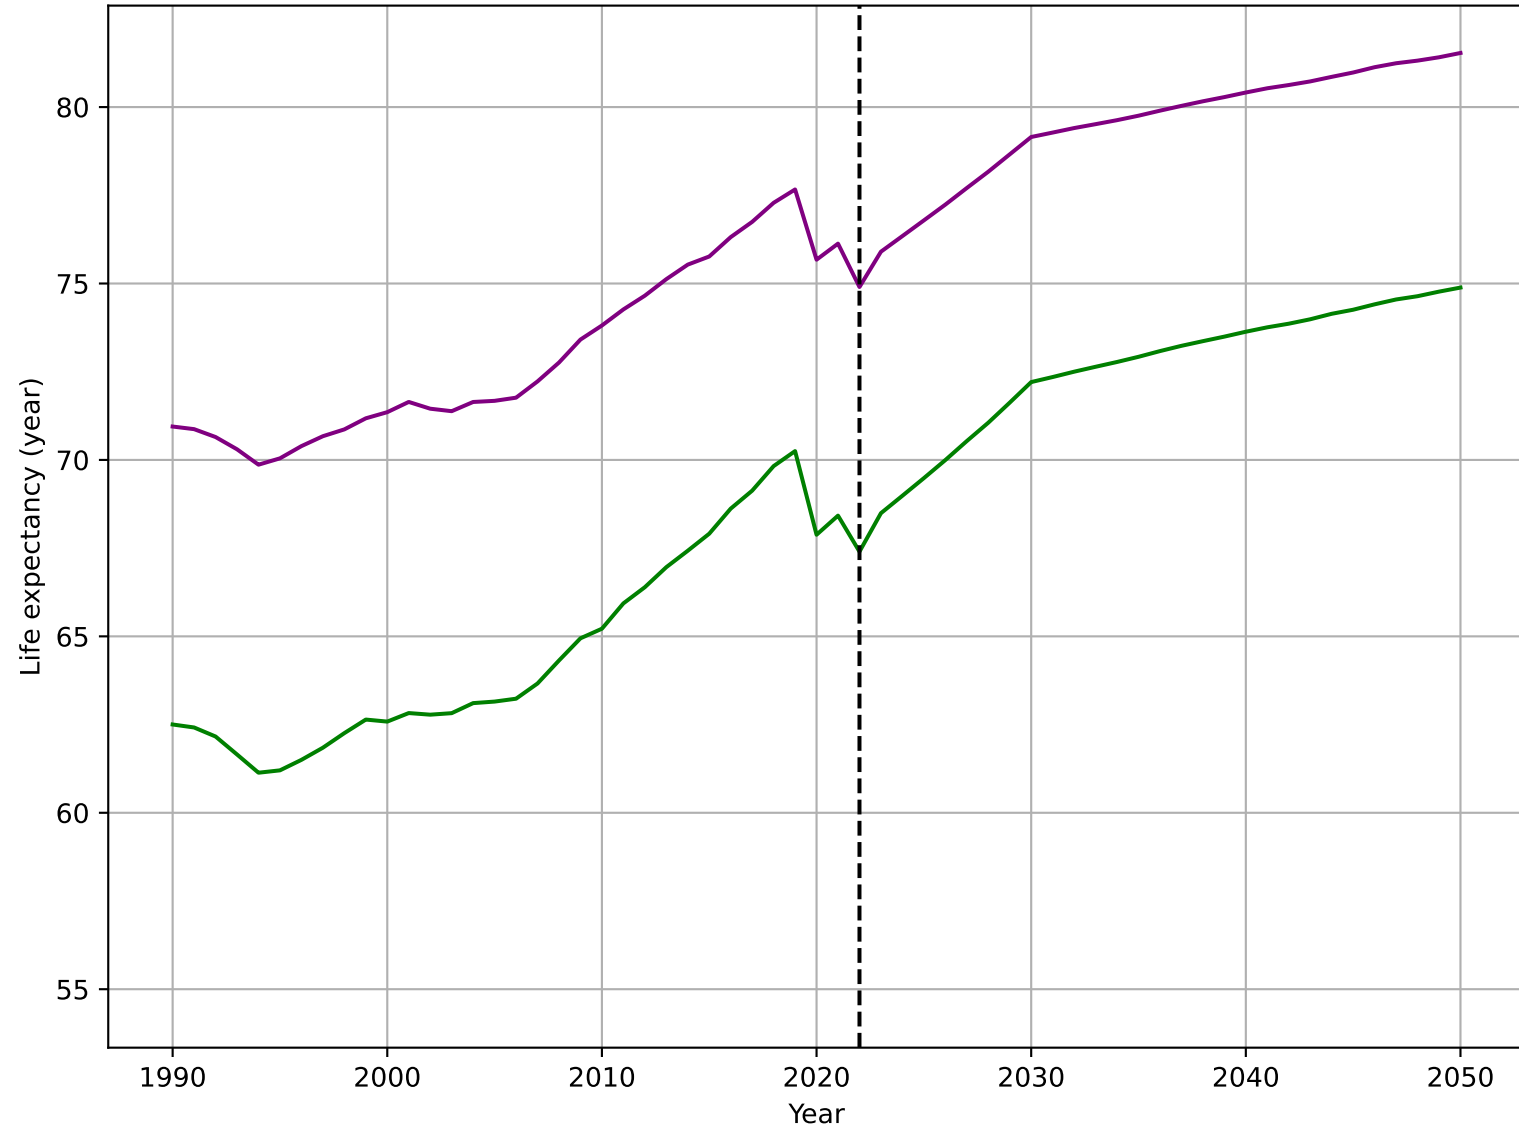

### Healthy Life Expectancy (HALE)

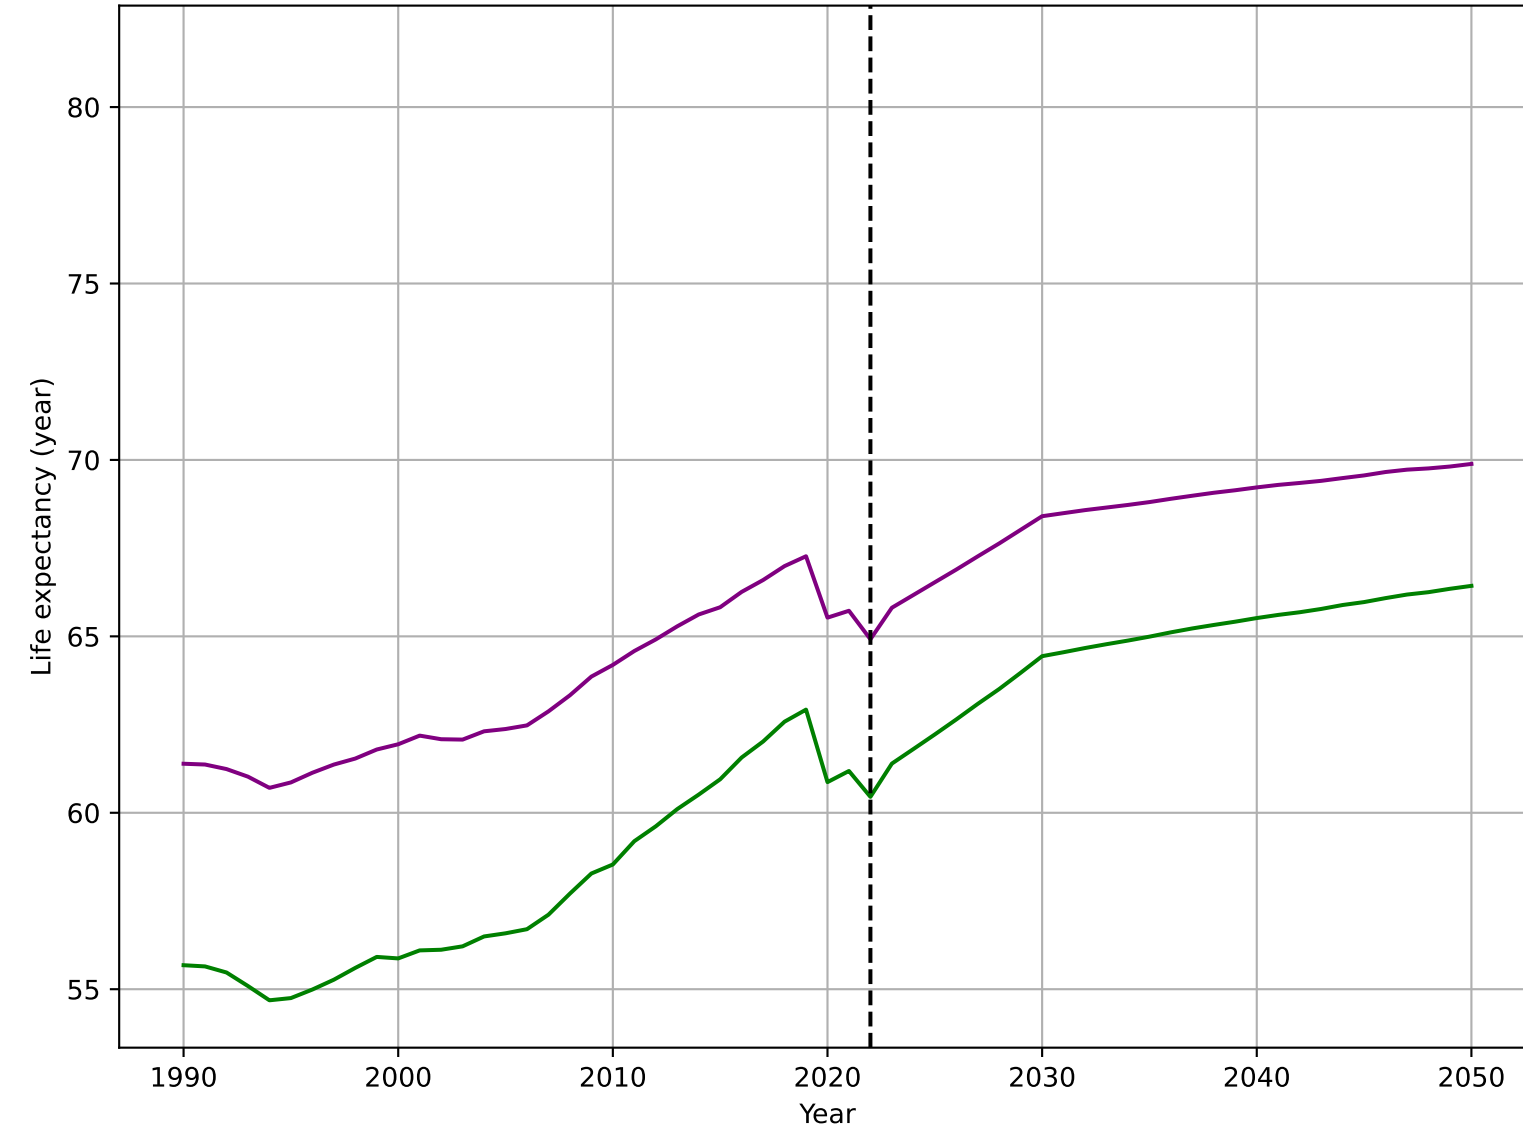

# Mongolia

### Life Expectancy

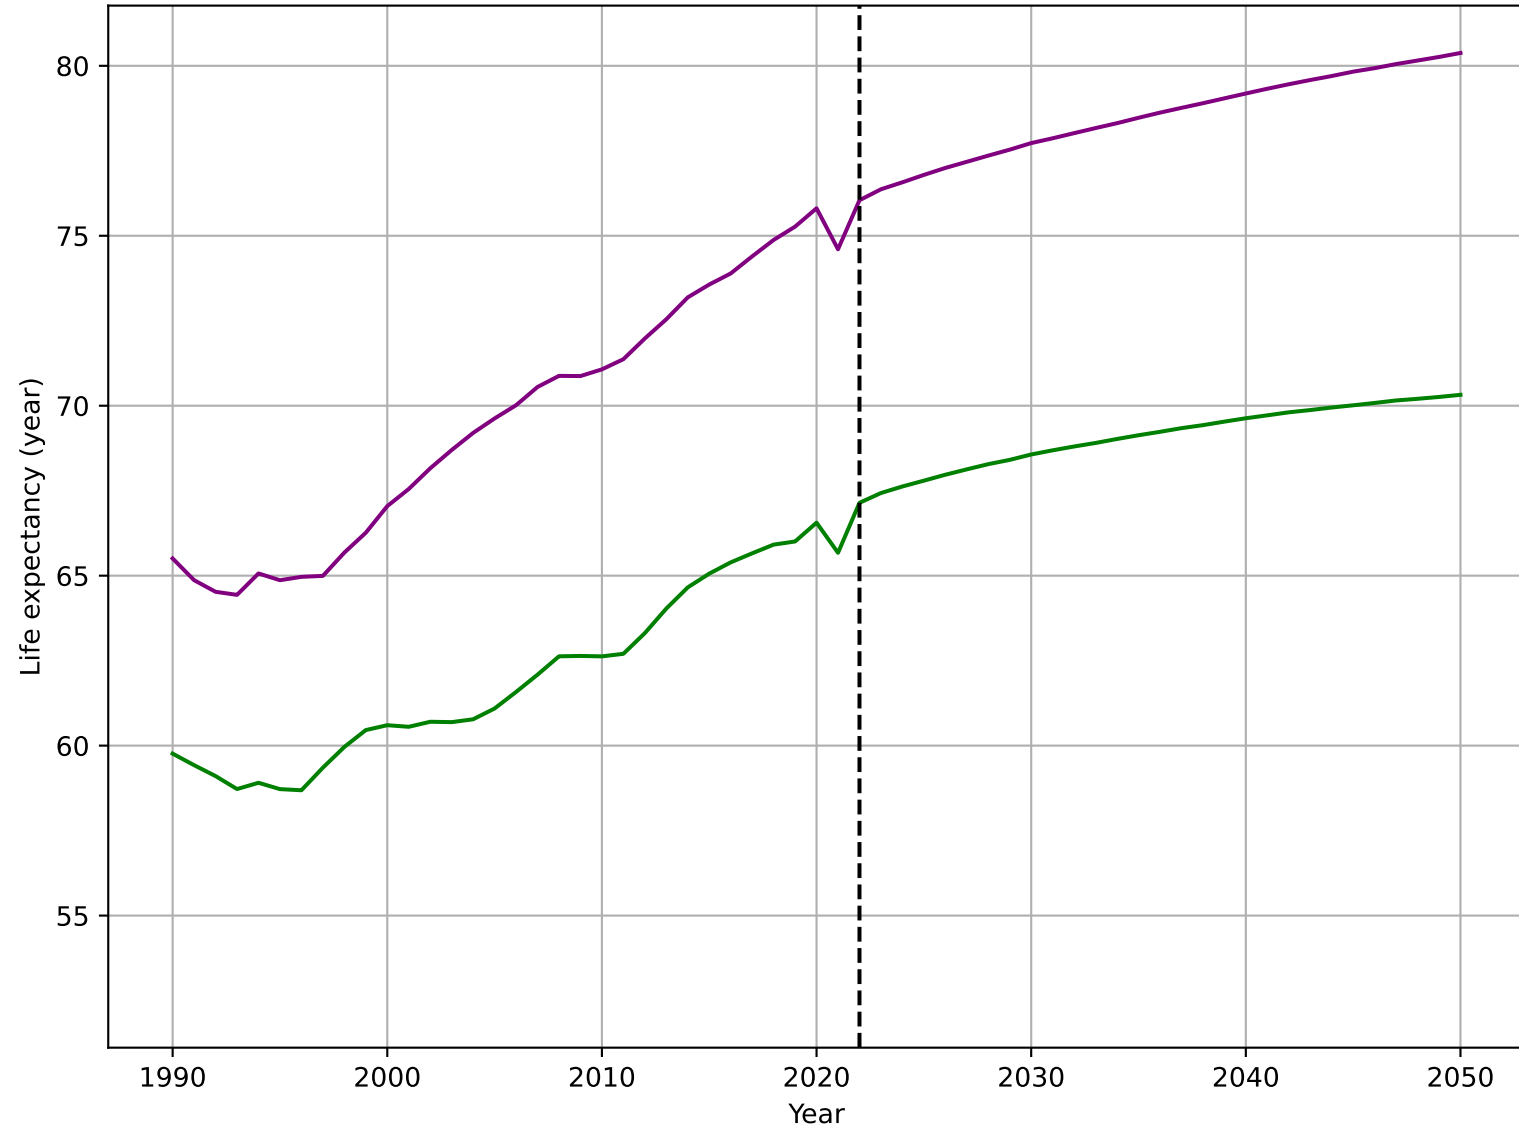

### Healthy Life Expectancy (HALE)

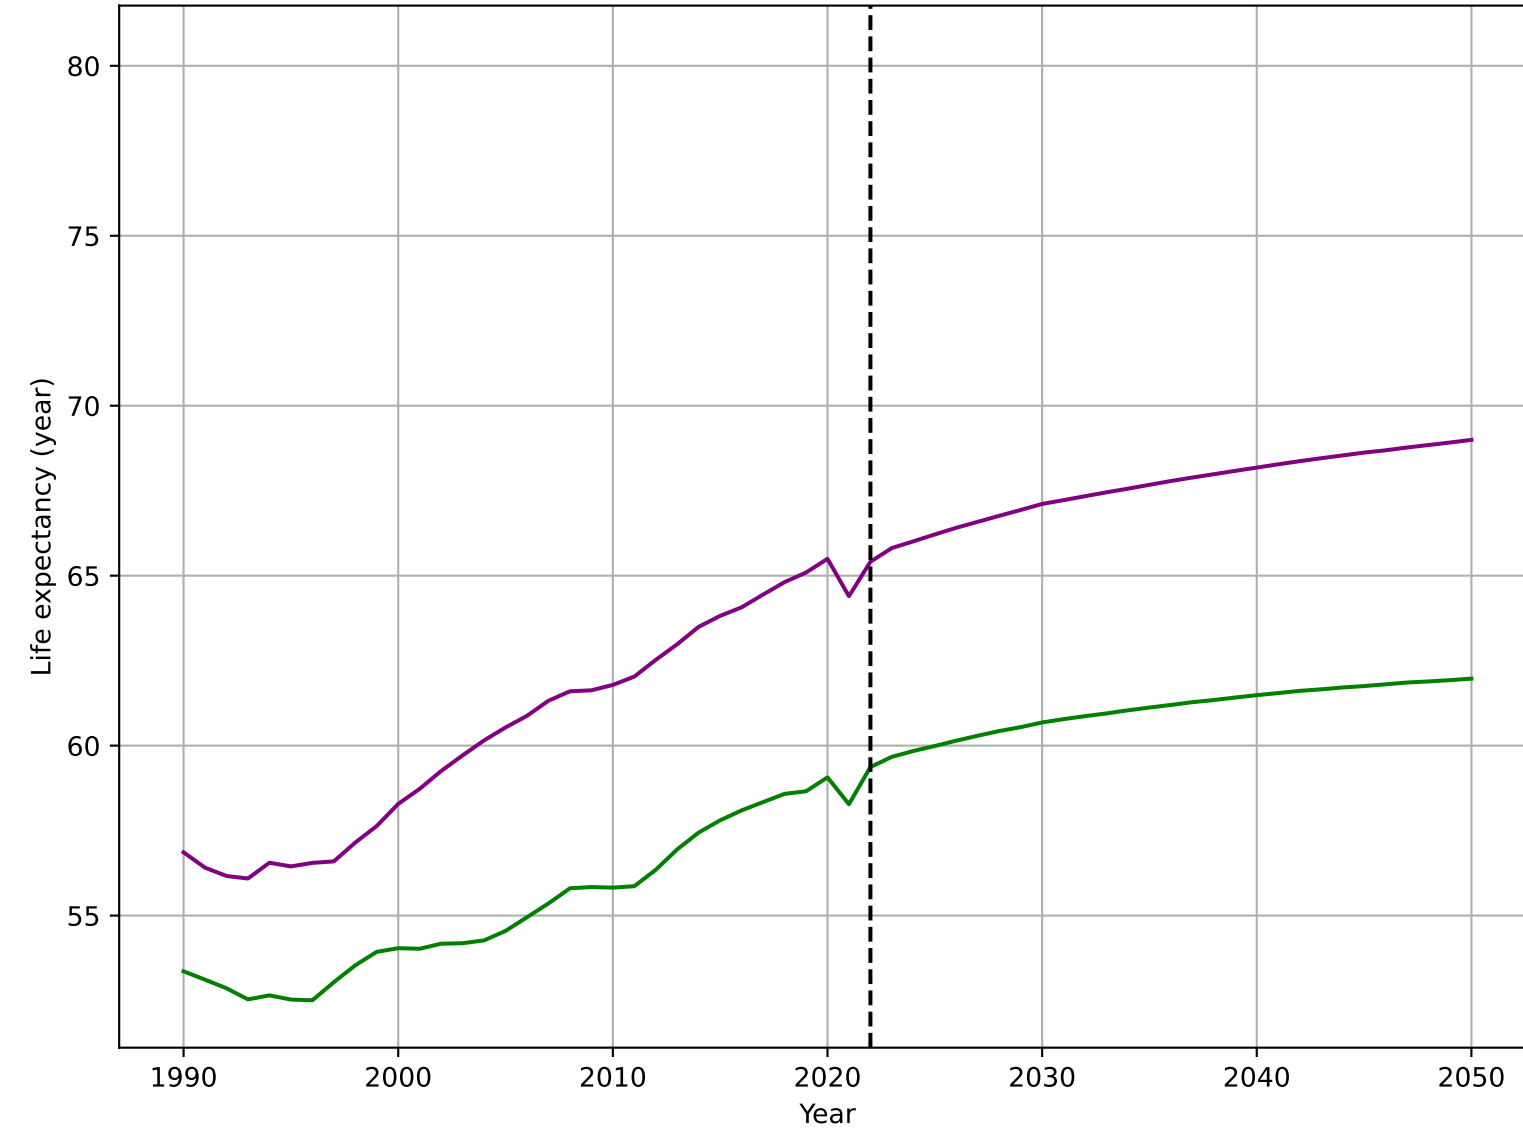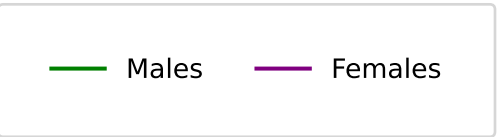

# Tajikistan

### Life Expectancy

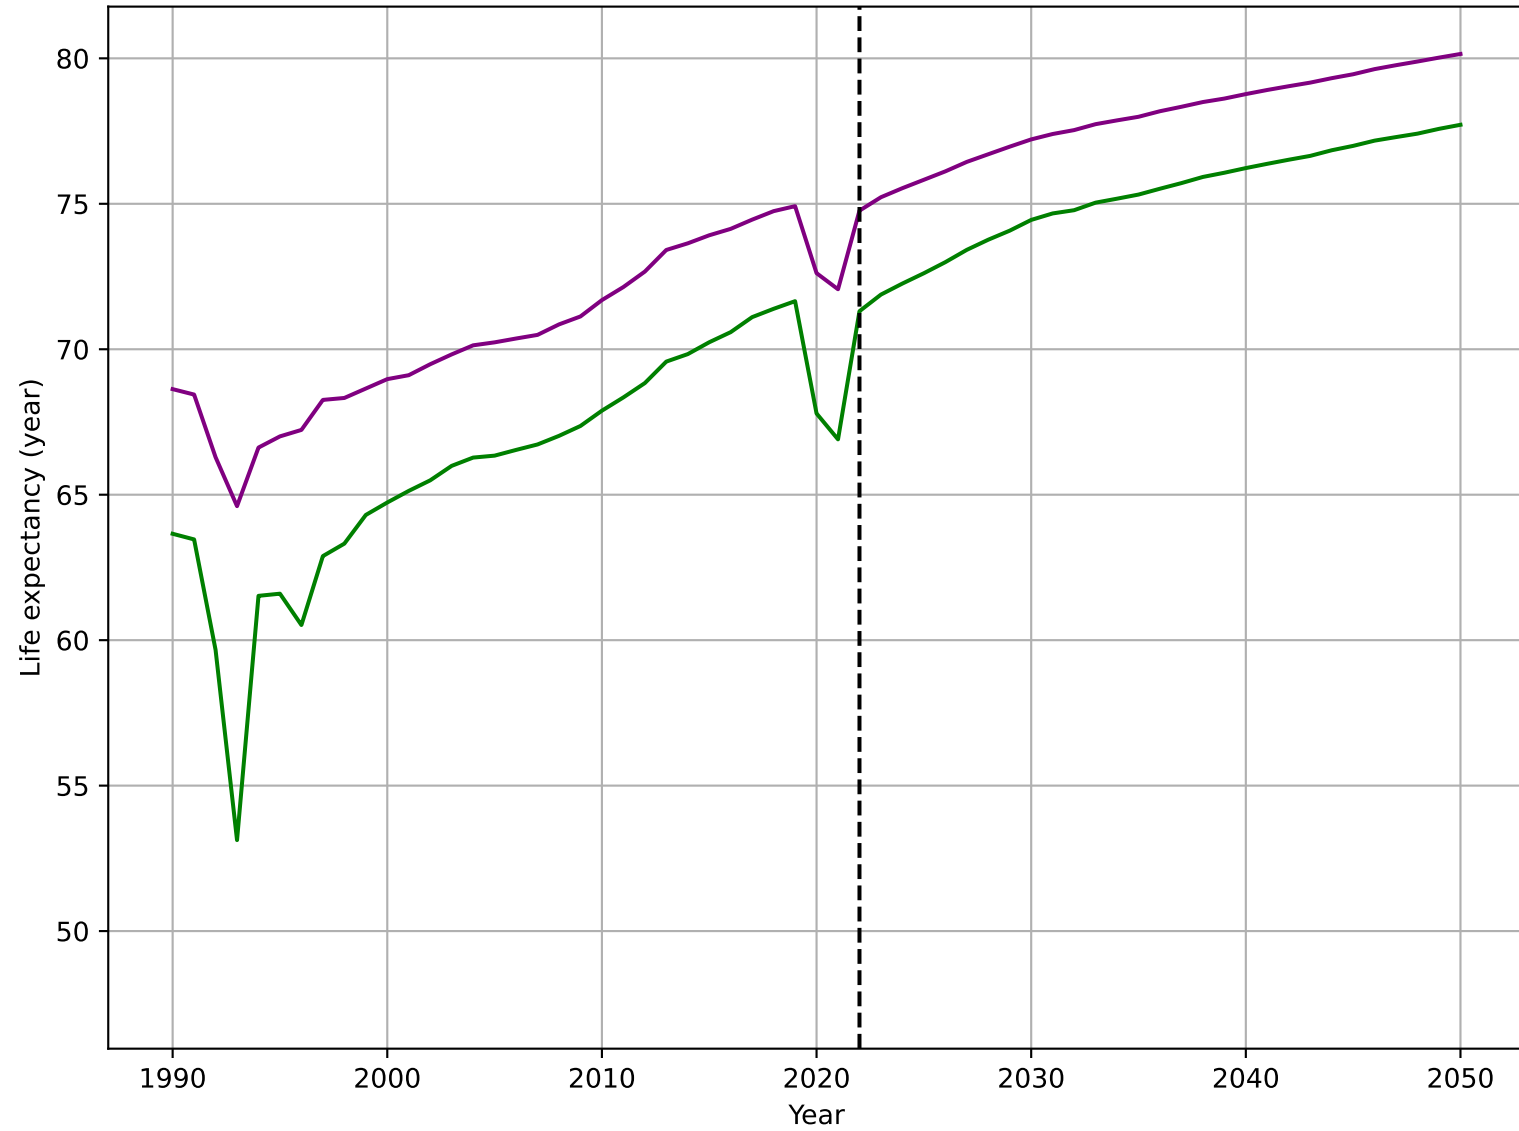

### Healthy Life Expectancy (HALE)

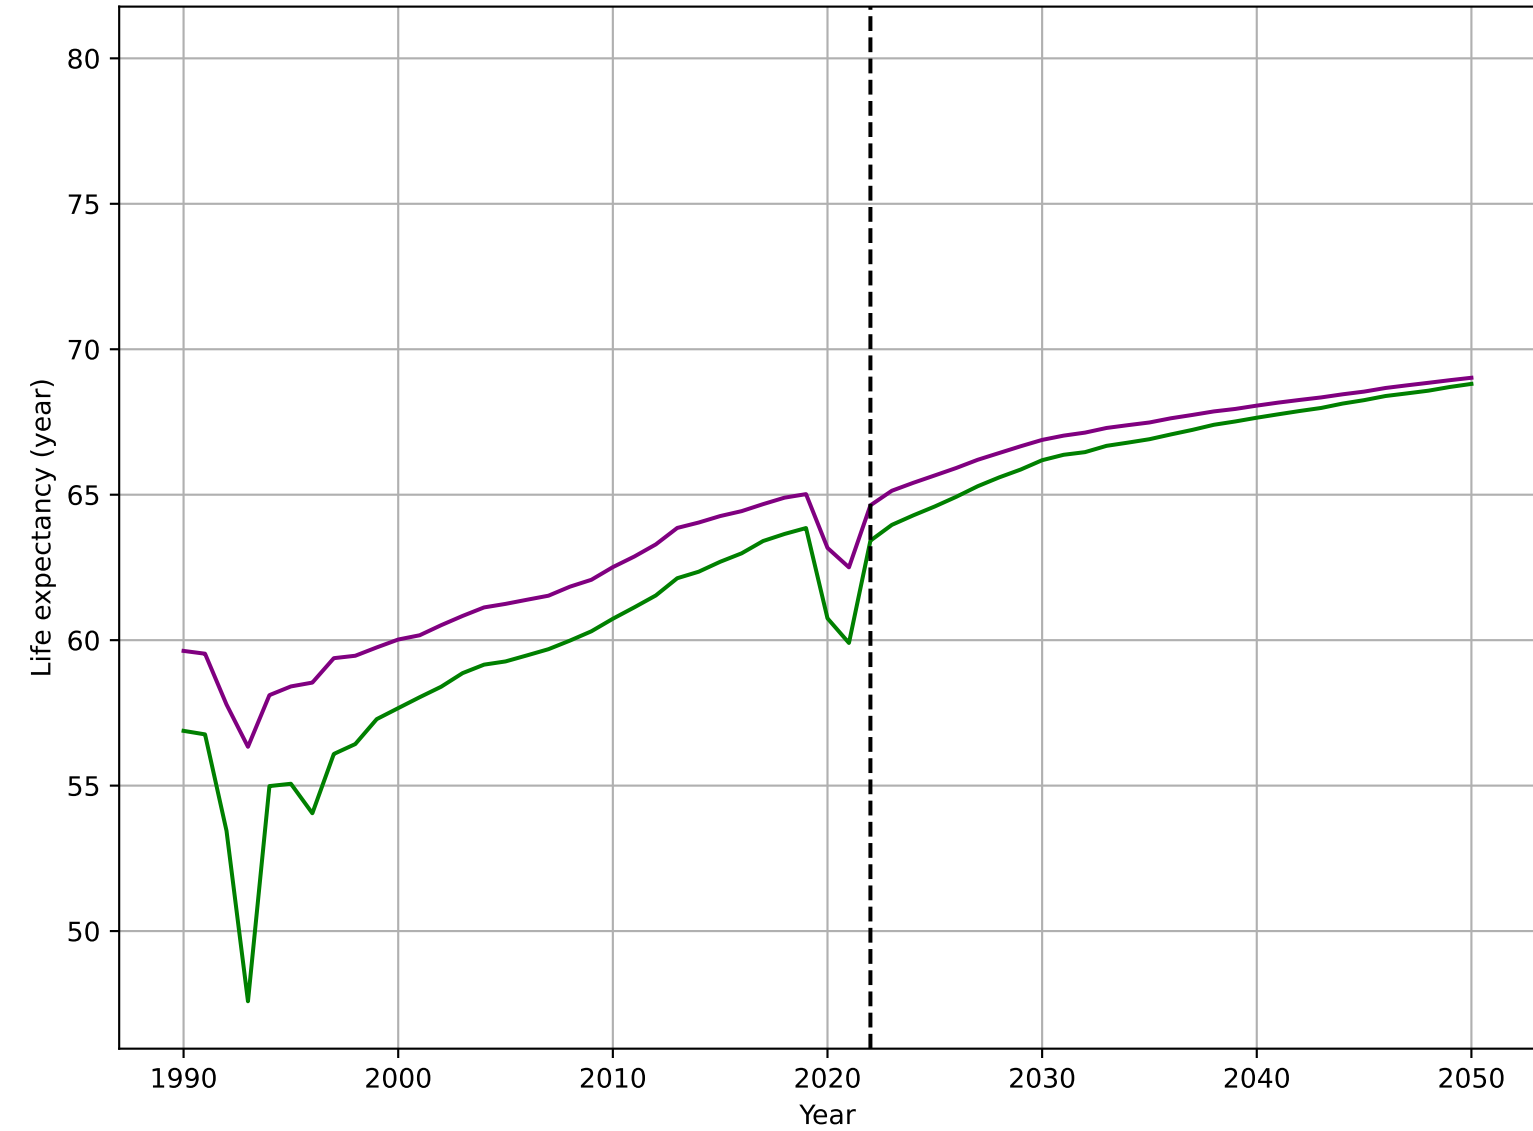

# Turkmenistan

### Life Expectancy

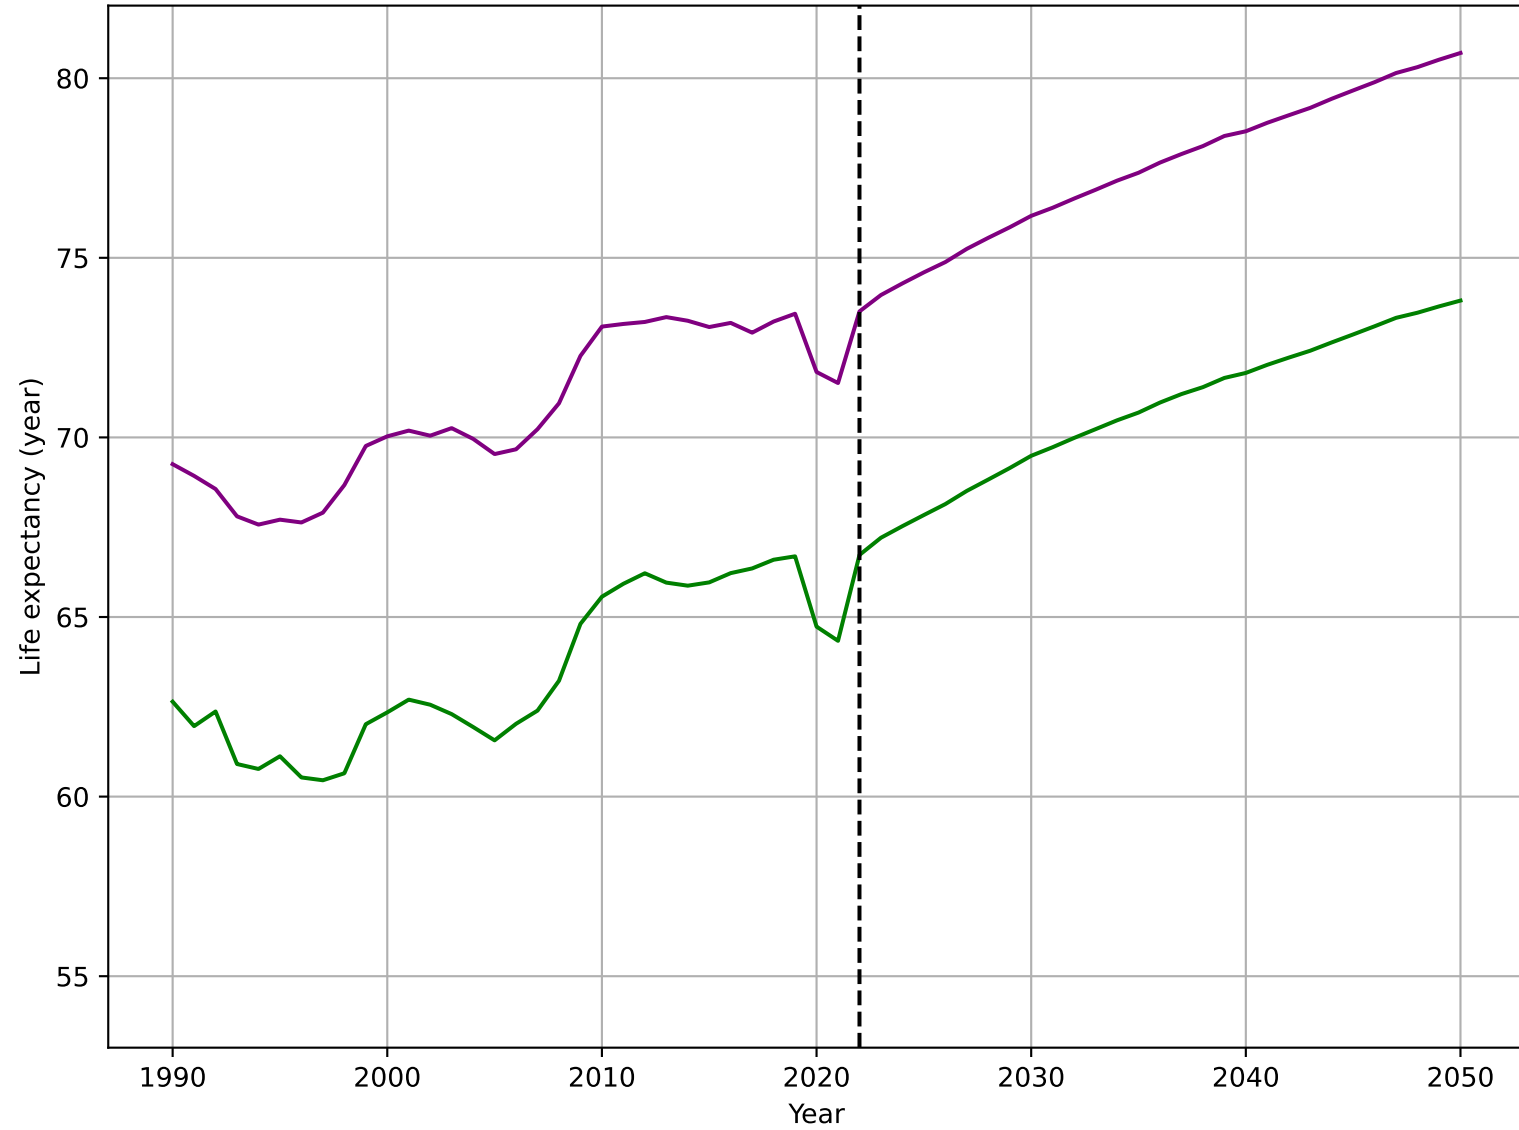

### Healthy Life Expectancy (HALE)

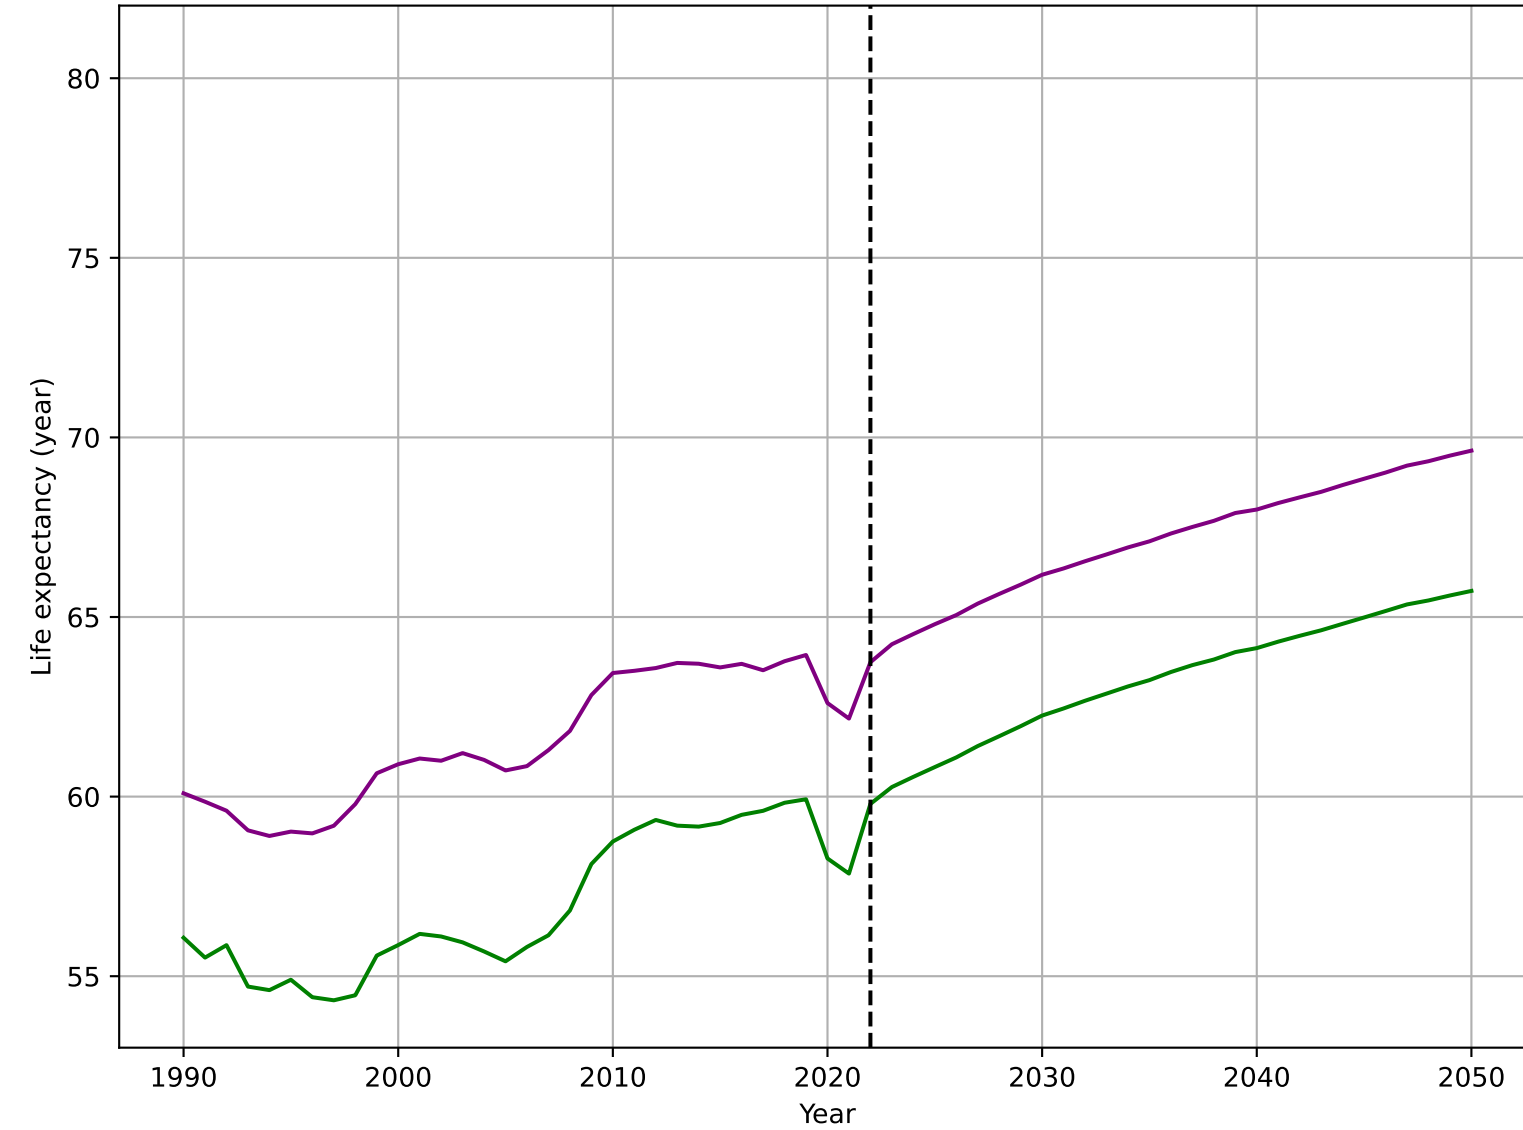

# Uzbekistan

### Life Expectancy

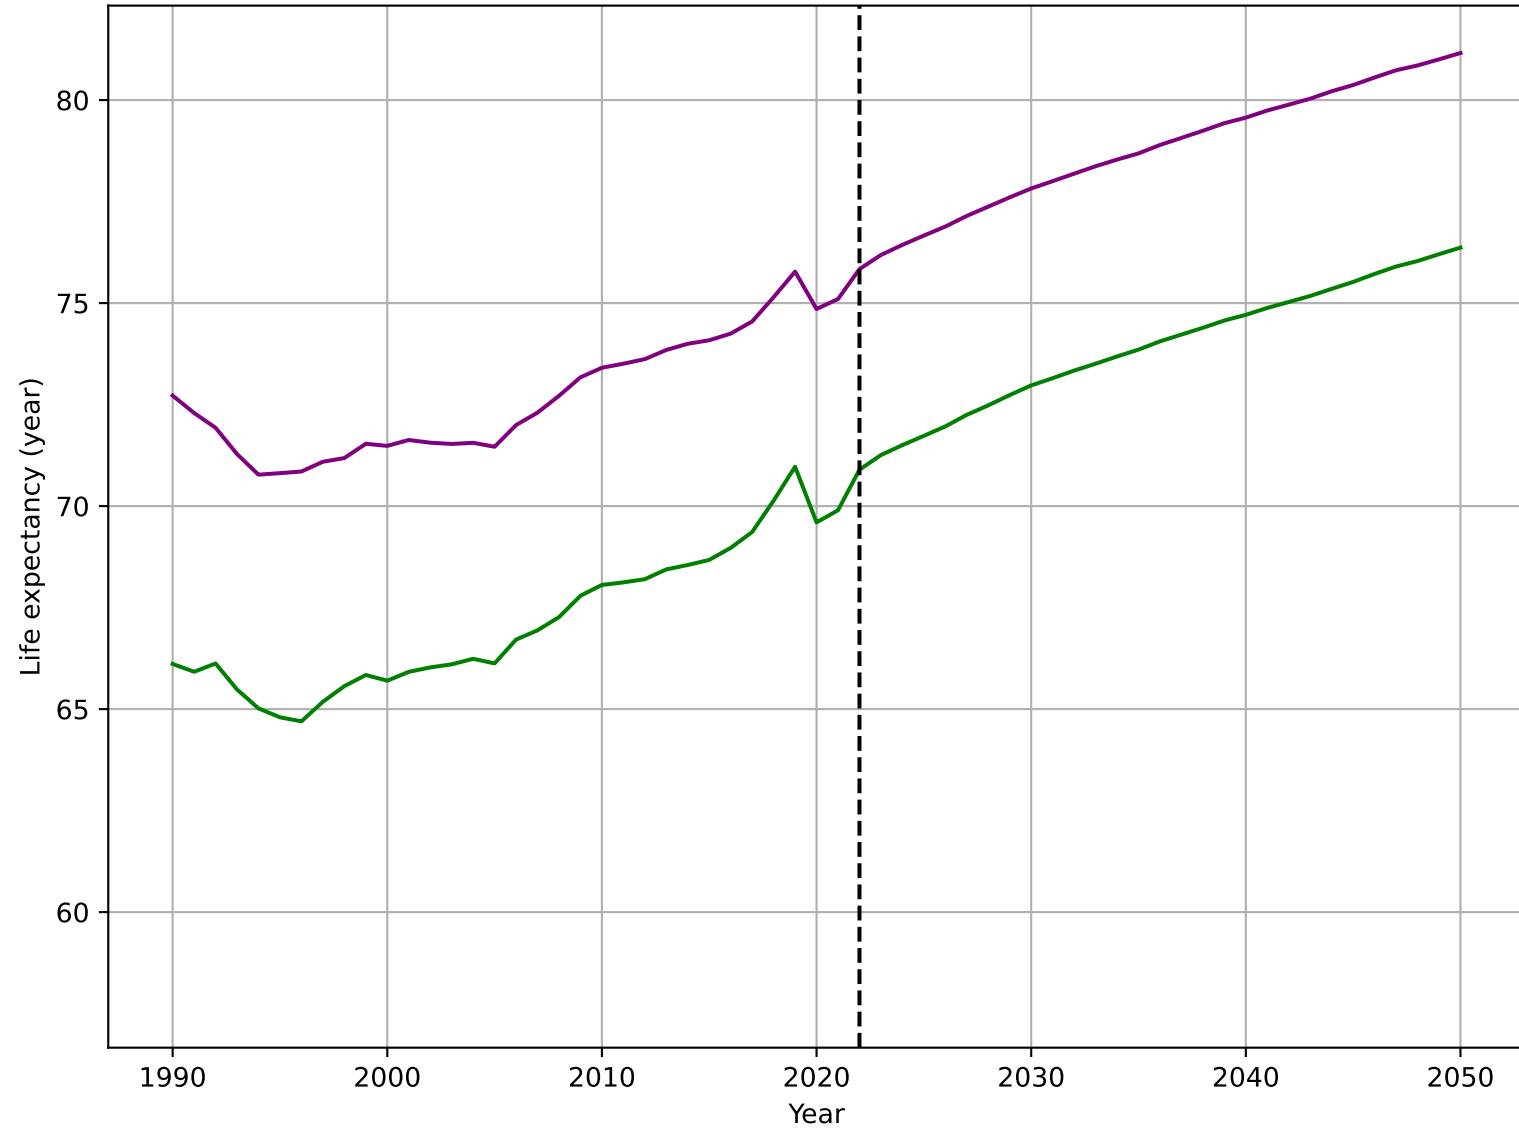

### Healthy Life Expectancy (HALE)

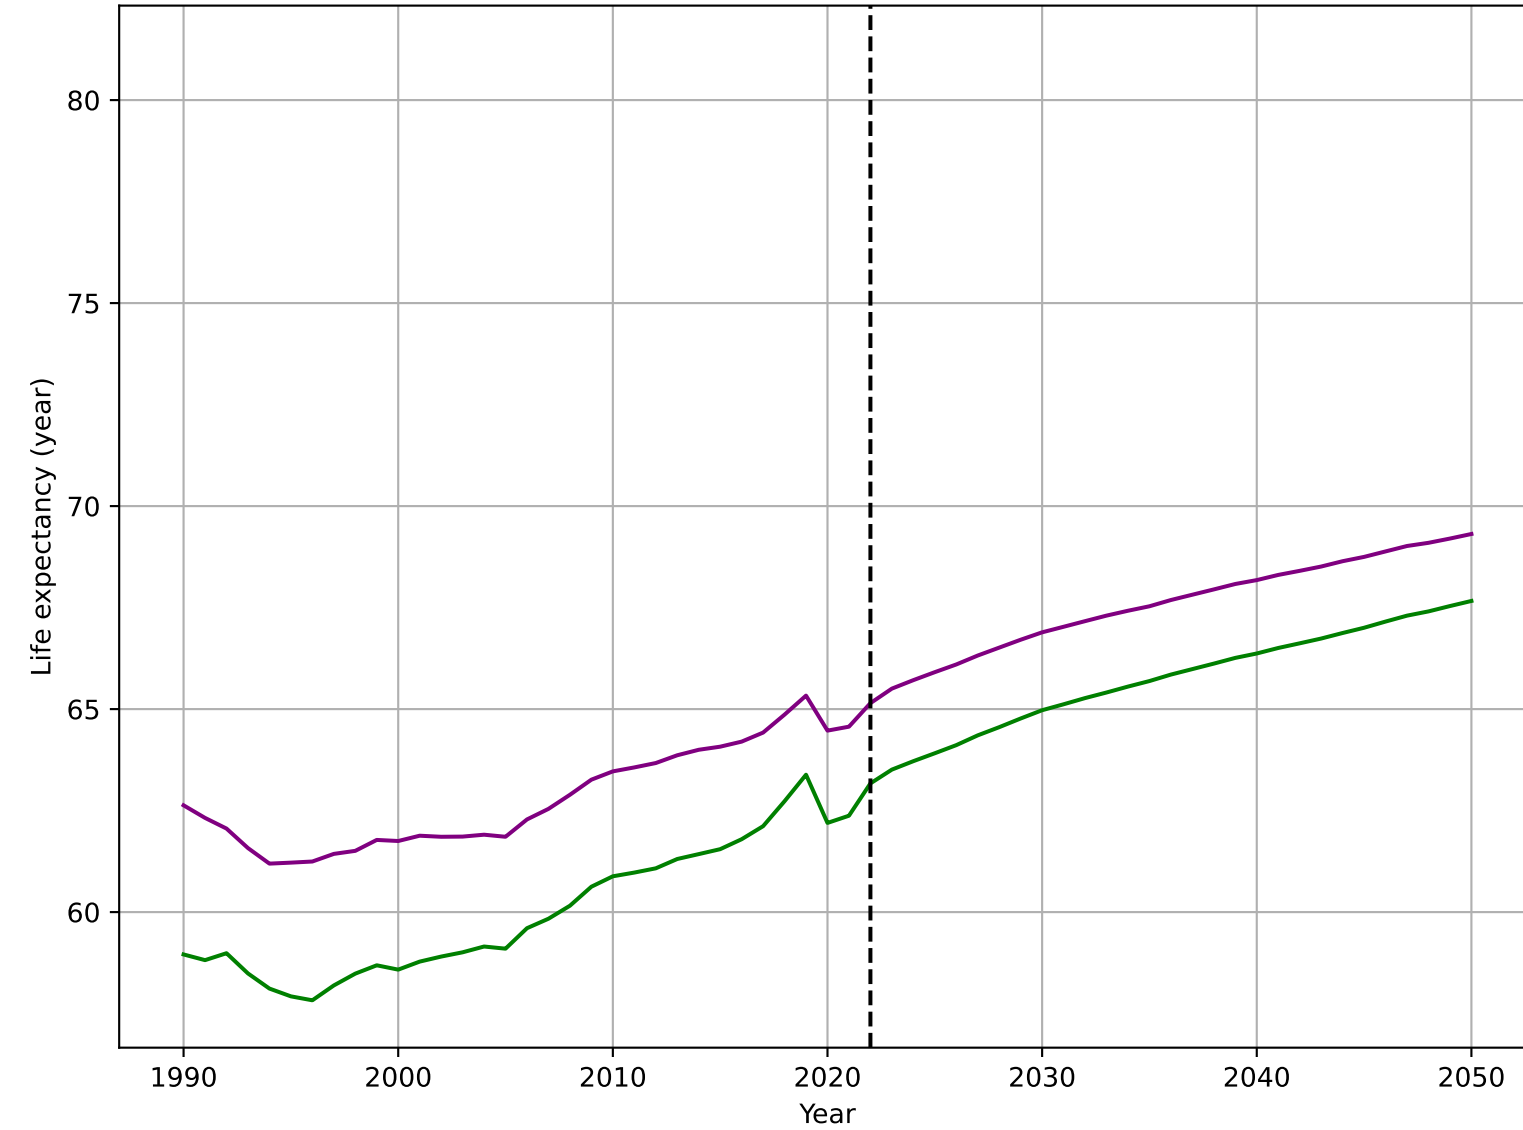

# Albania

### Life Expectancy

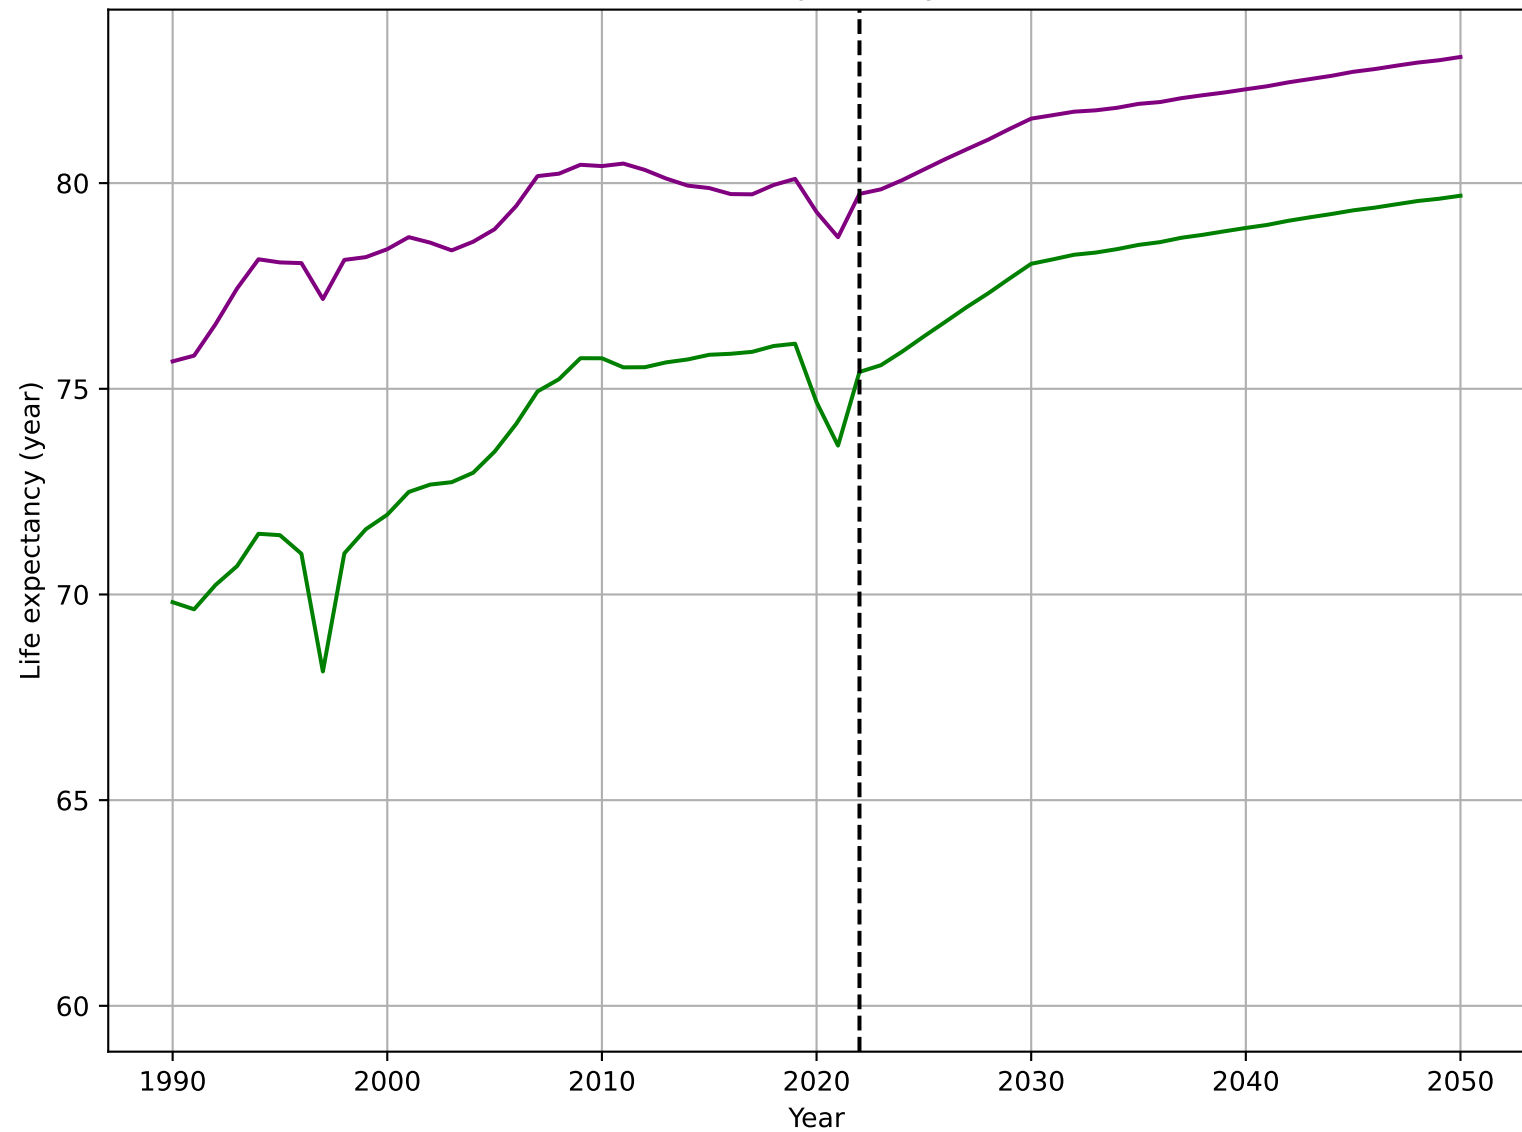

### Healthy Life Expectancy (HALE)

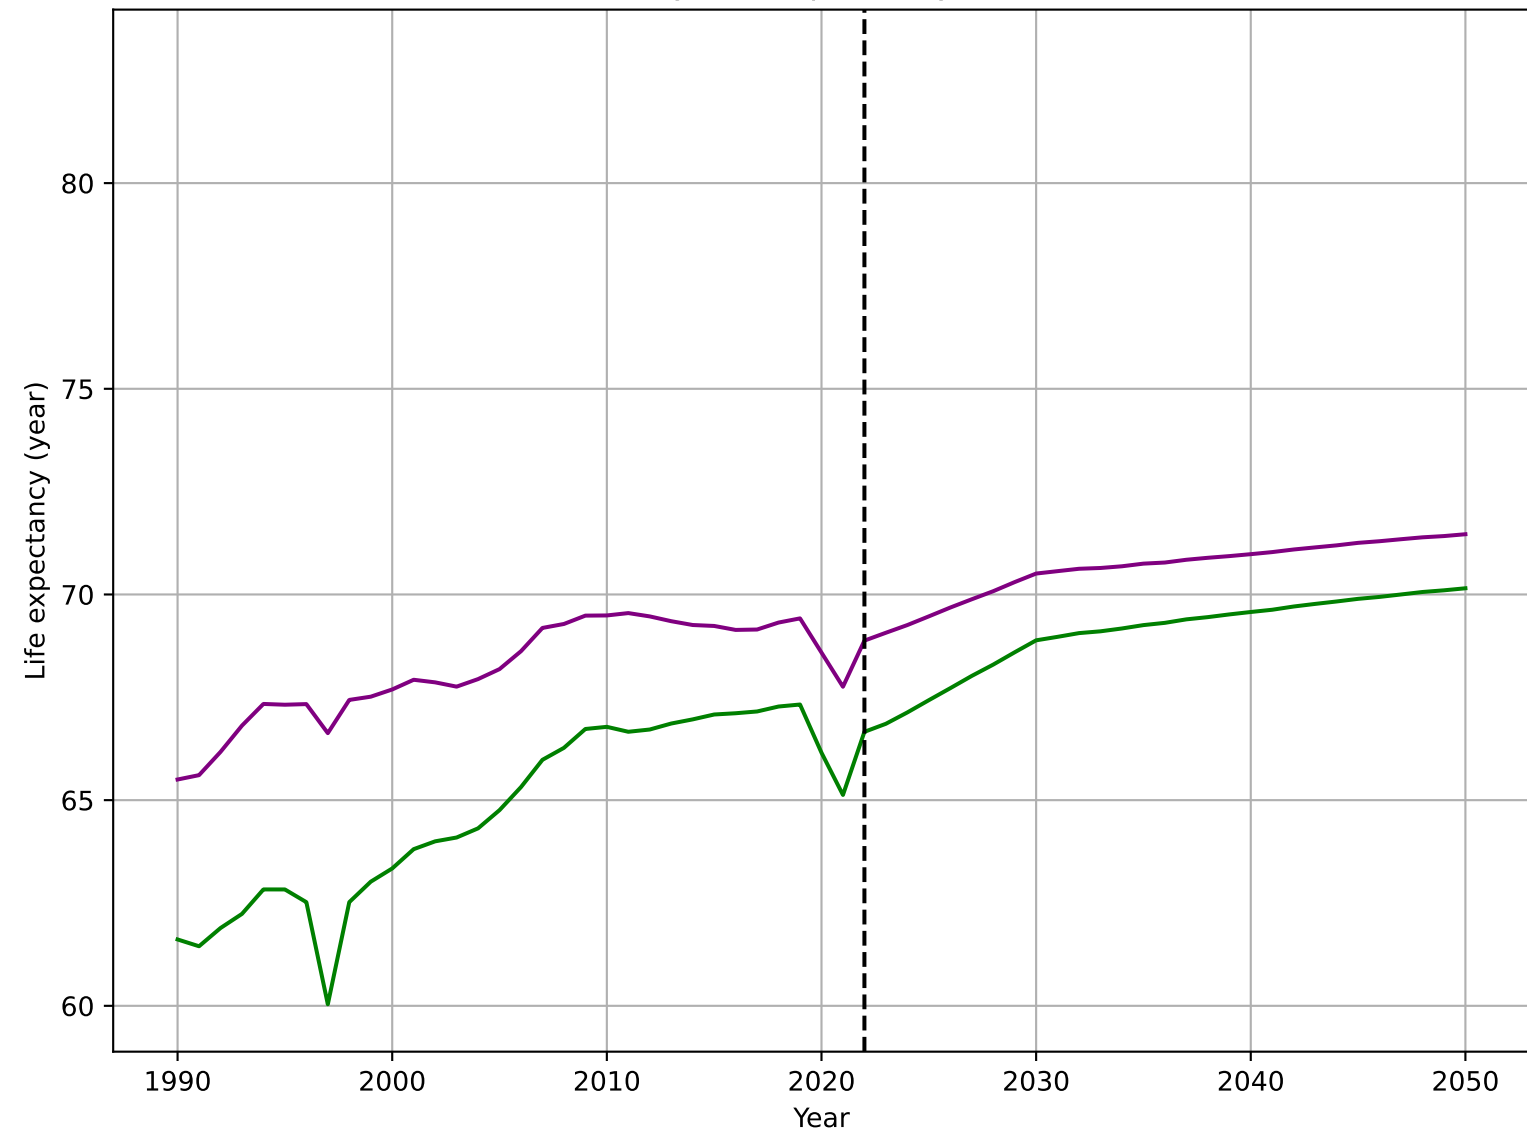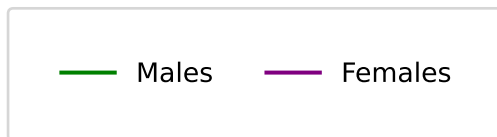

# Bosnia And Herzegovina

### Life Expectancy

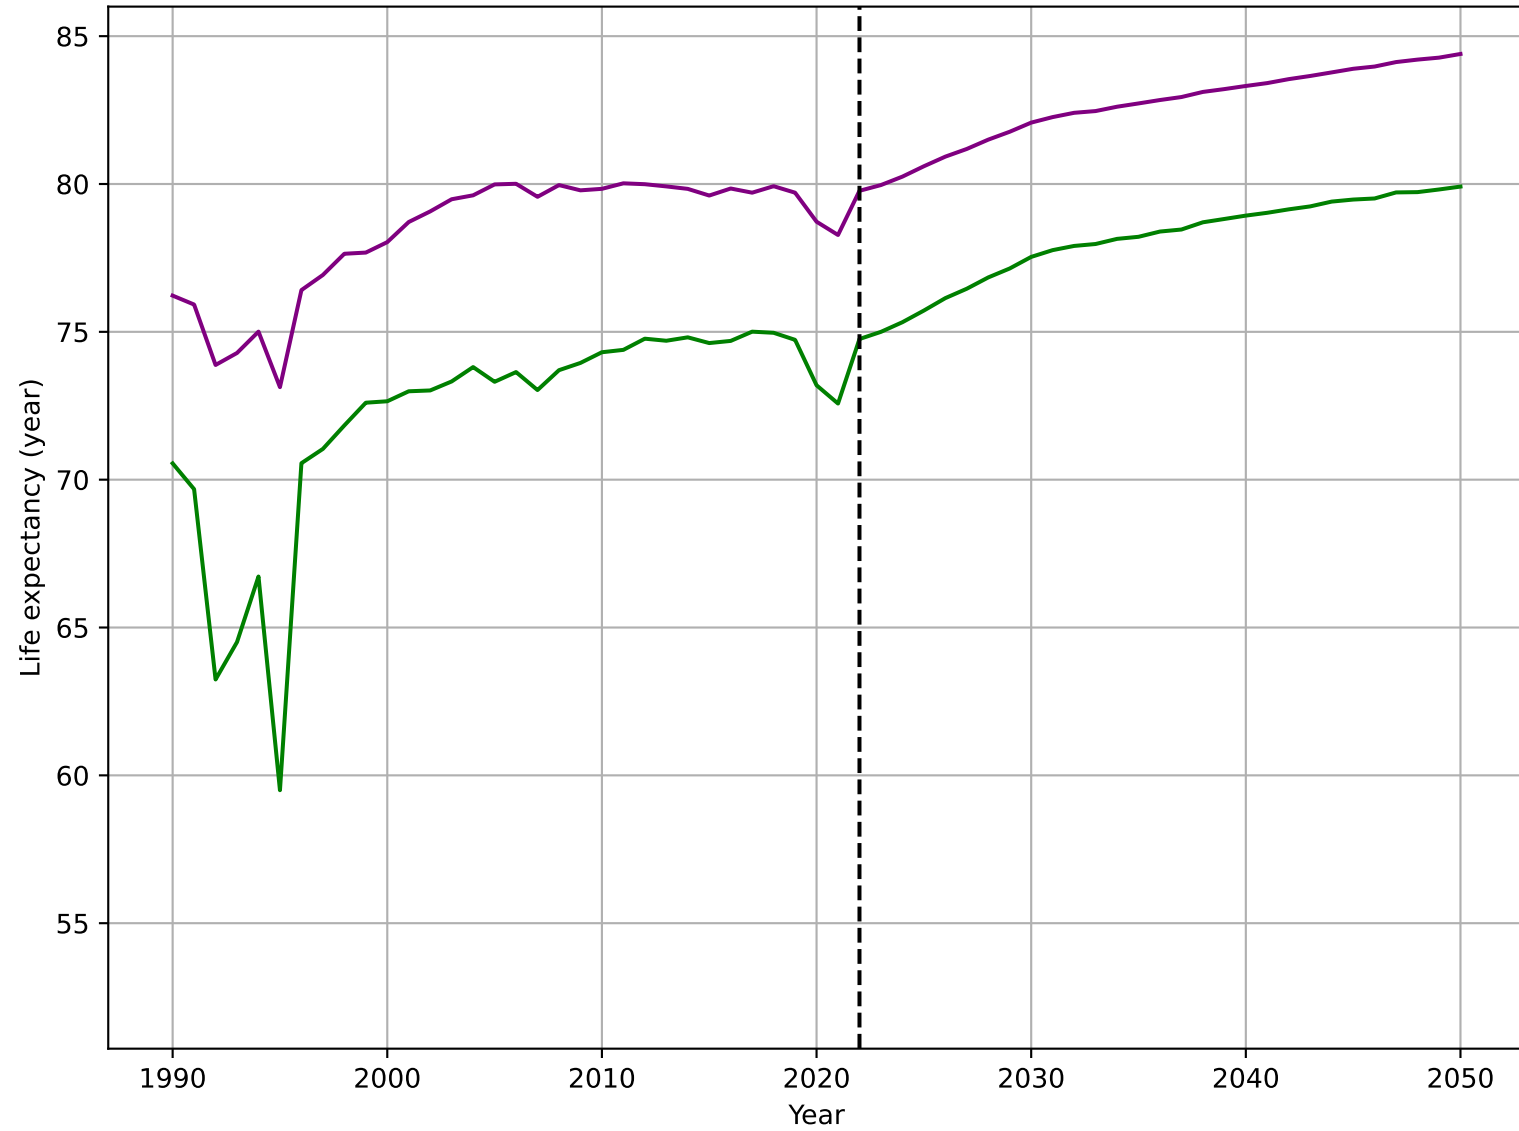

### Healthy Life Expectancy (HALE)

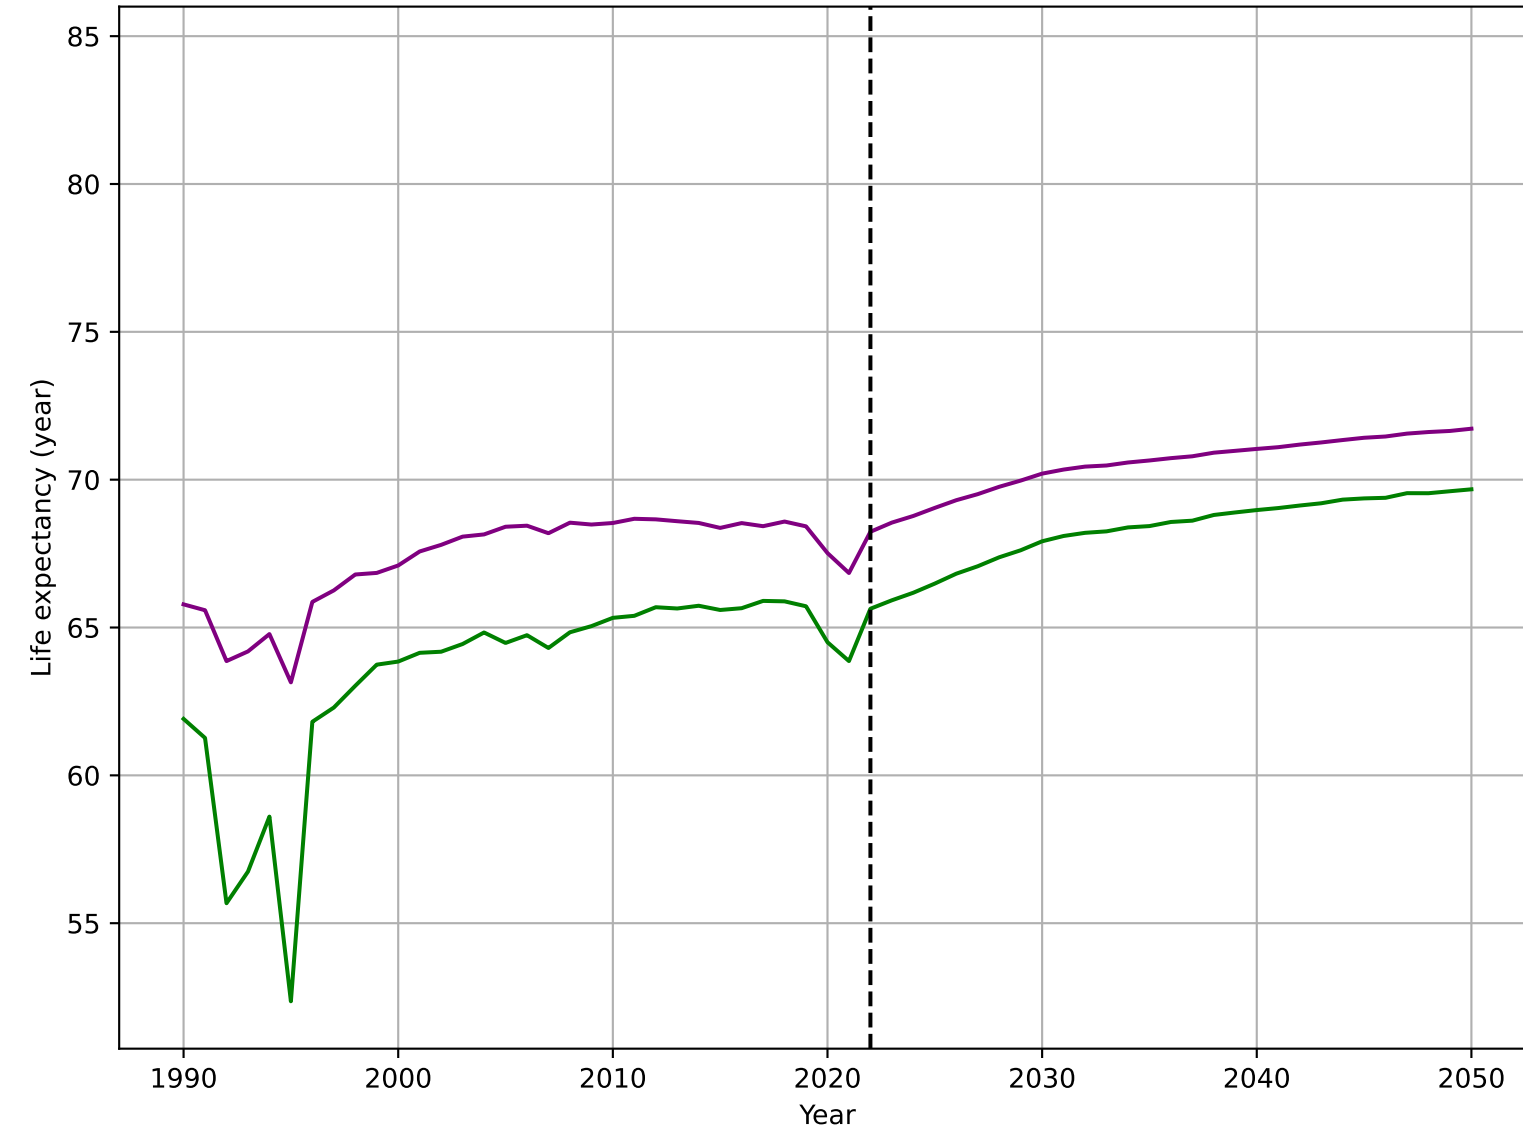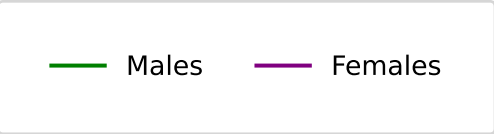

# Bulgaria

### Life Expectancy

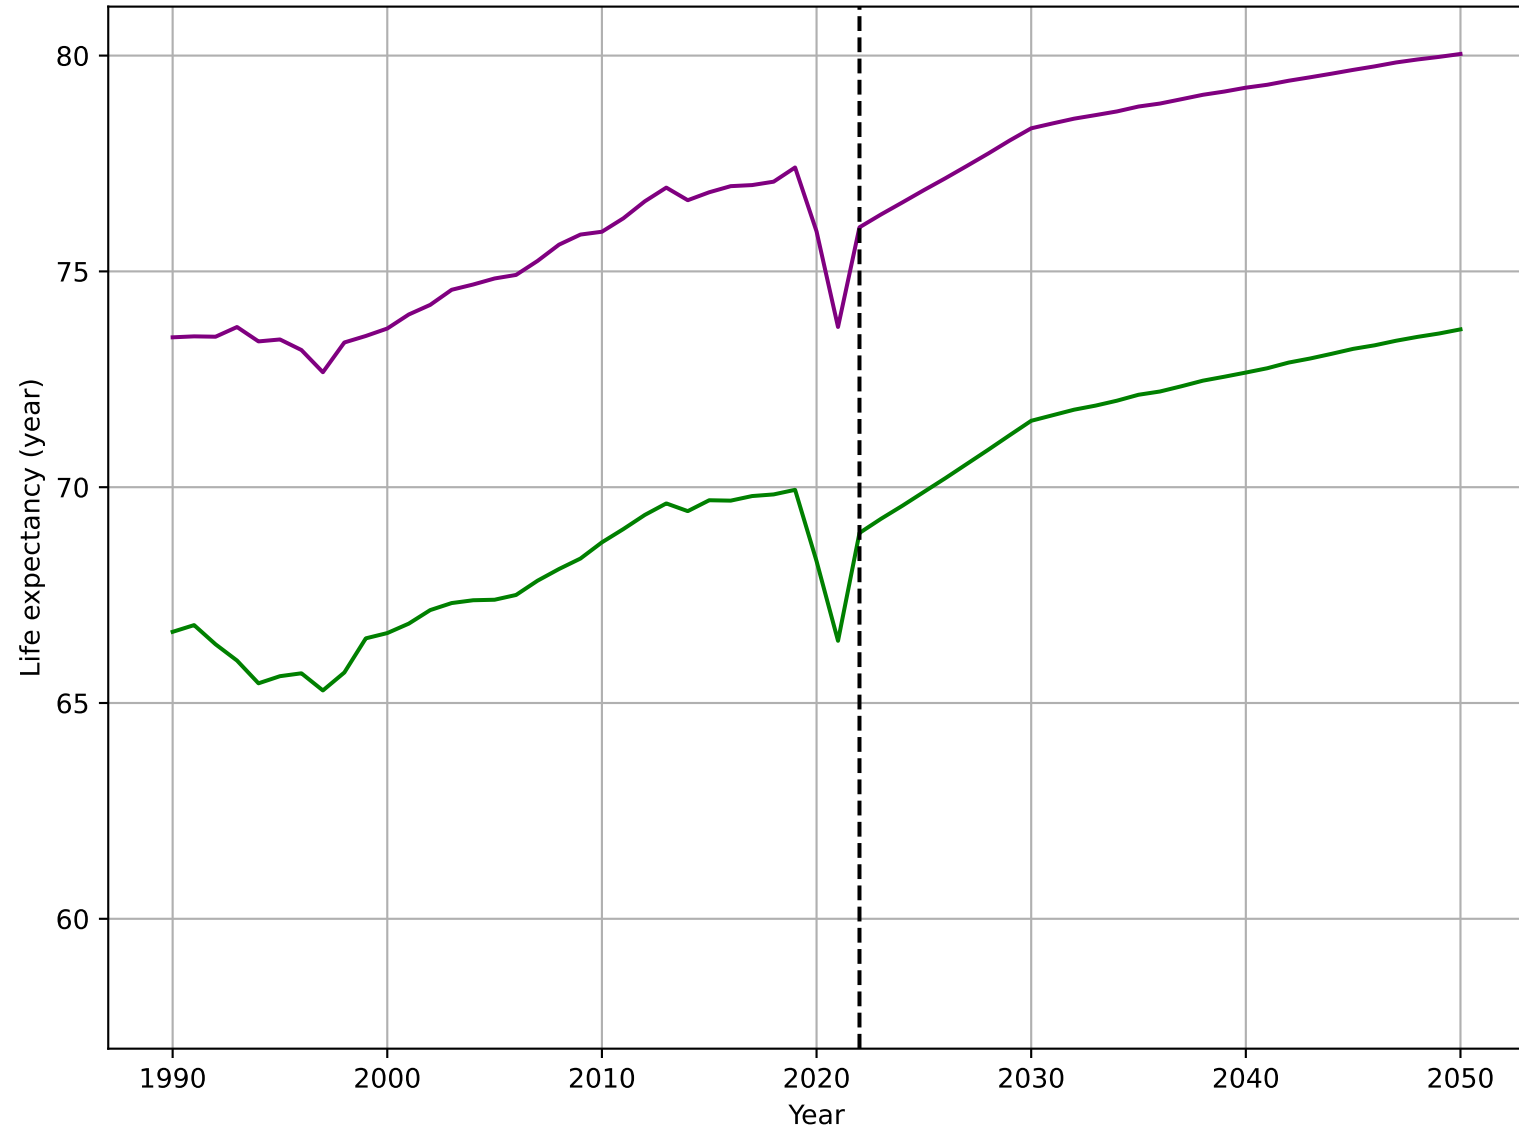

### Healthy Life Expectancy (HALE)

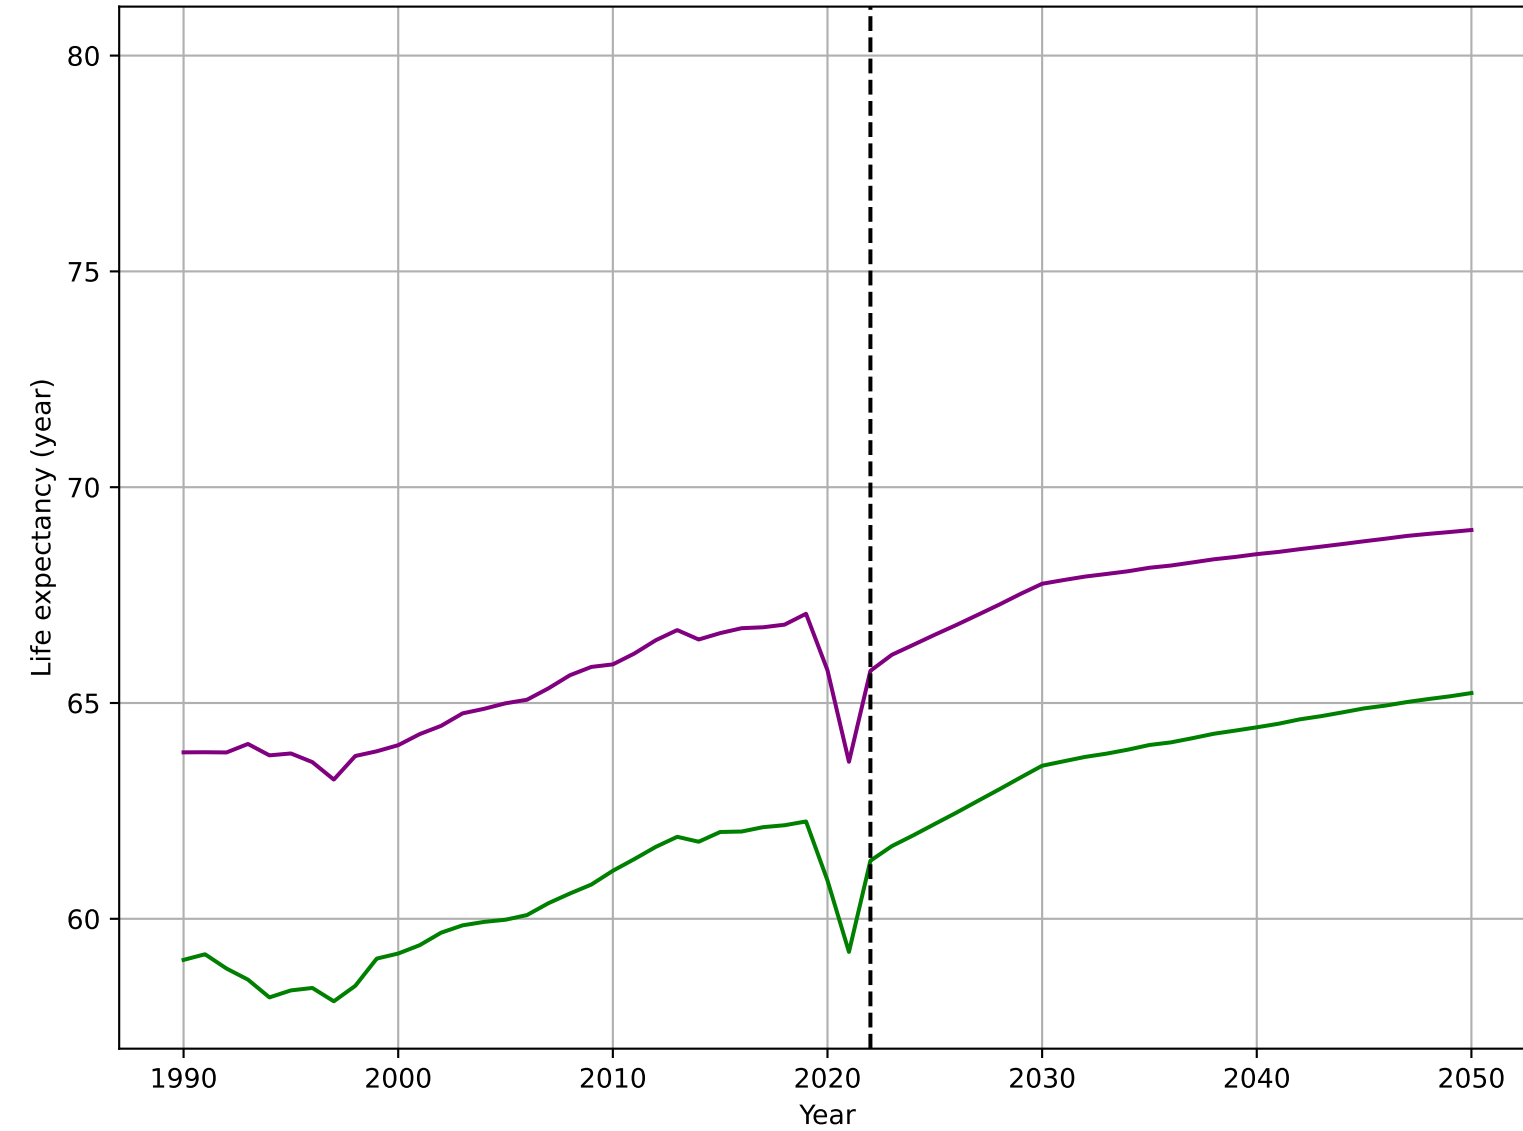



# Croatia

### Life Expectancy

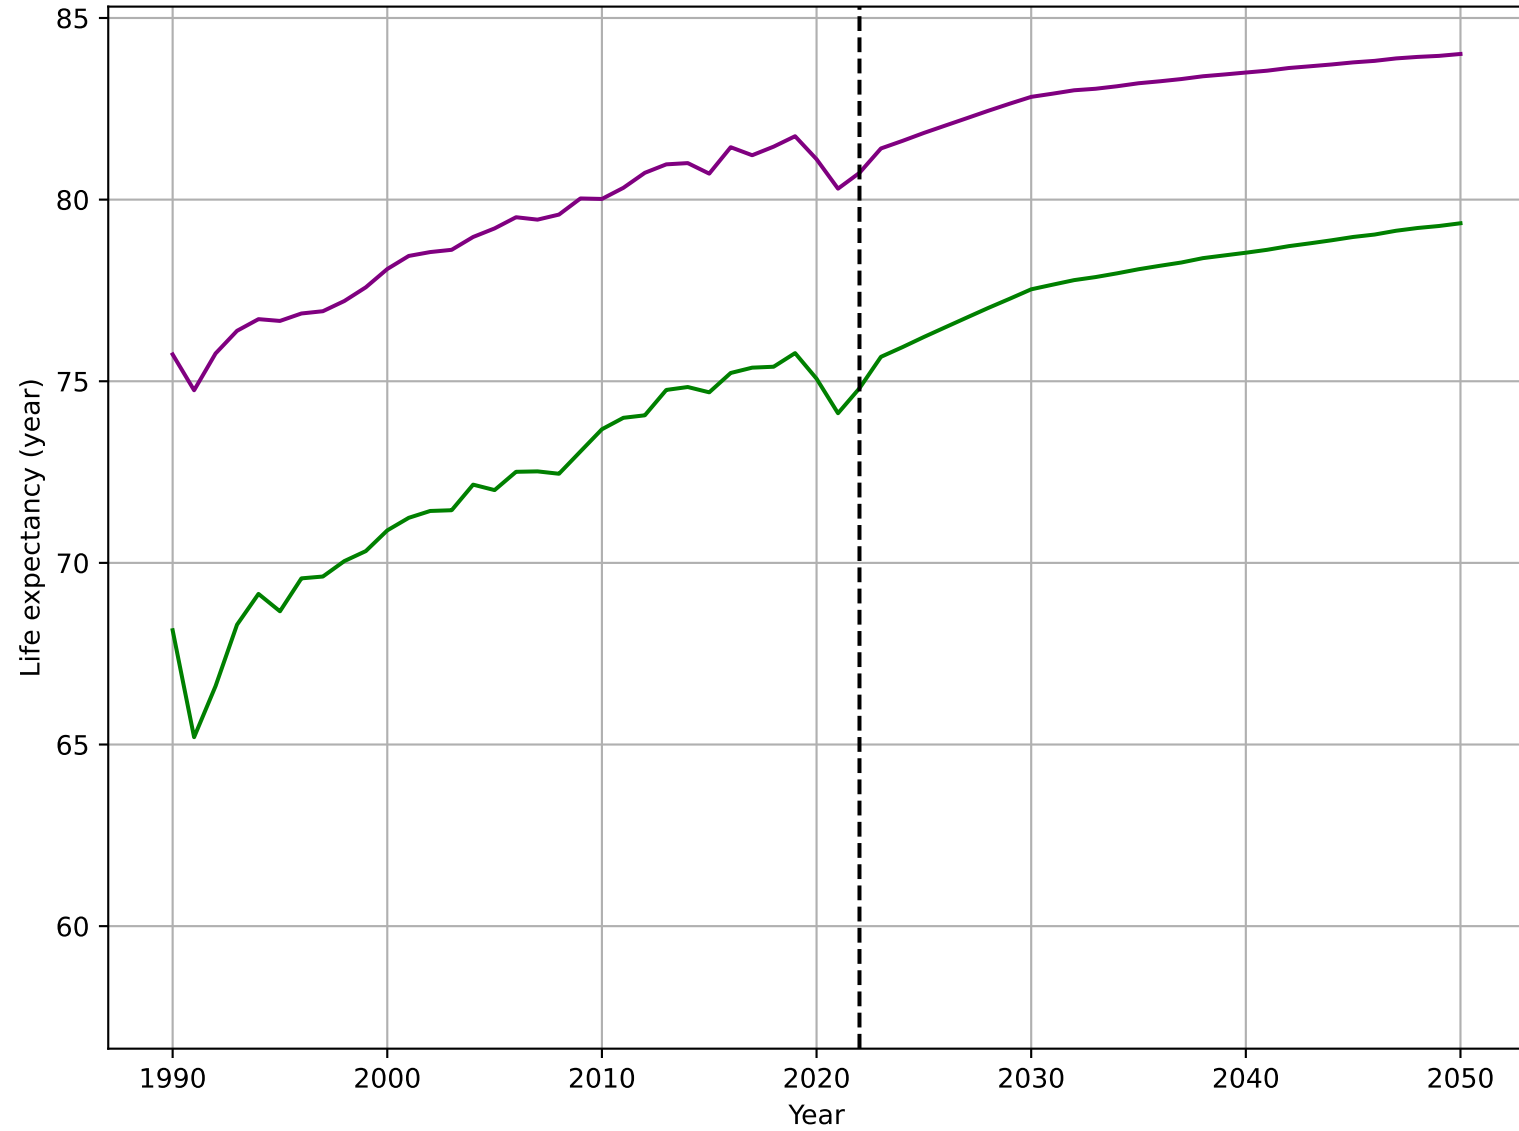

### Healthy Life Expectancy (HALE)

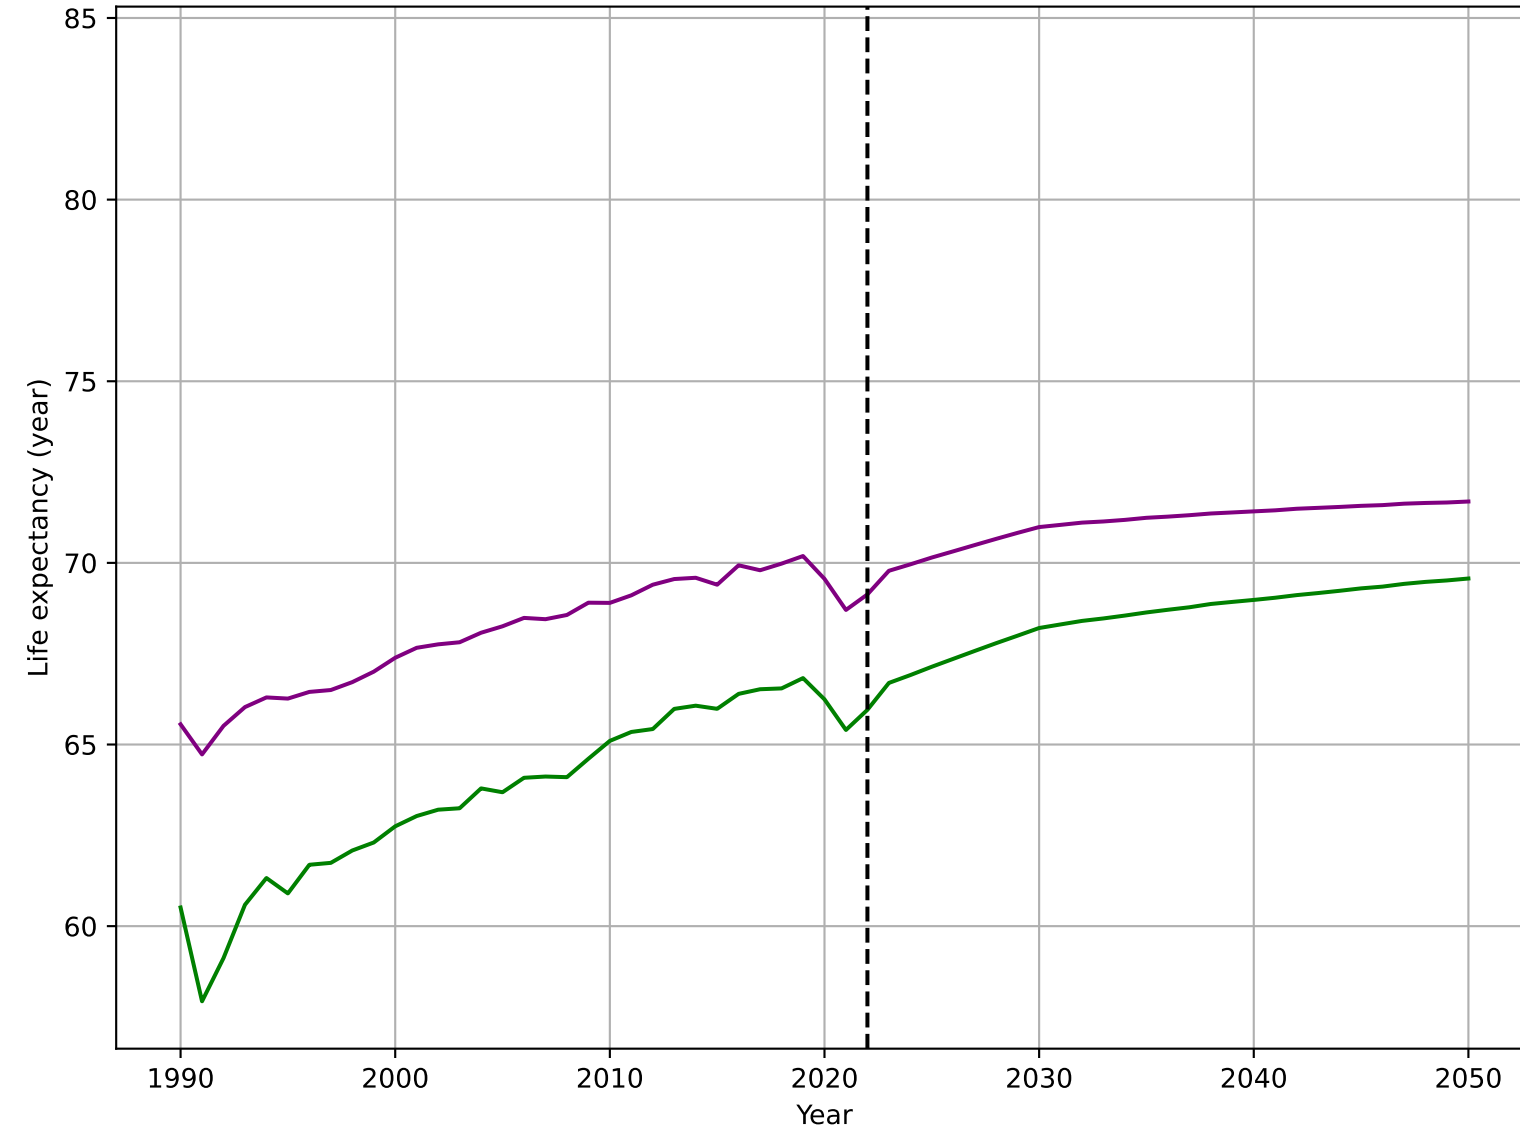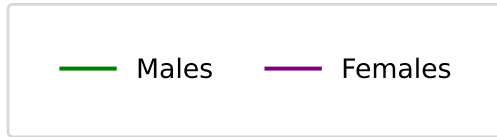

# Czechia

### Life Expectancy

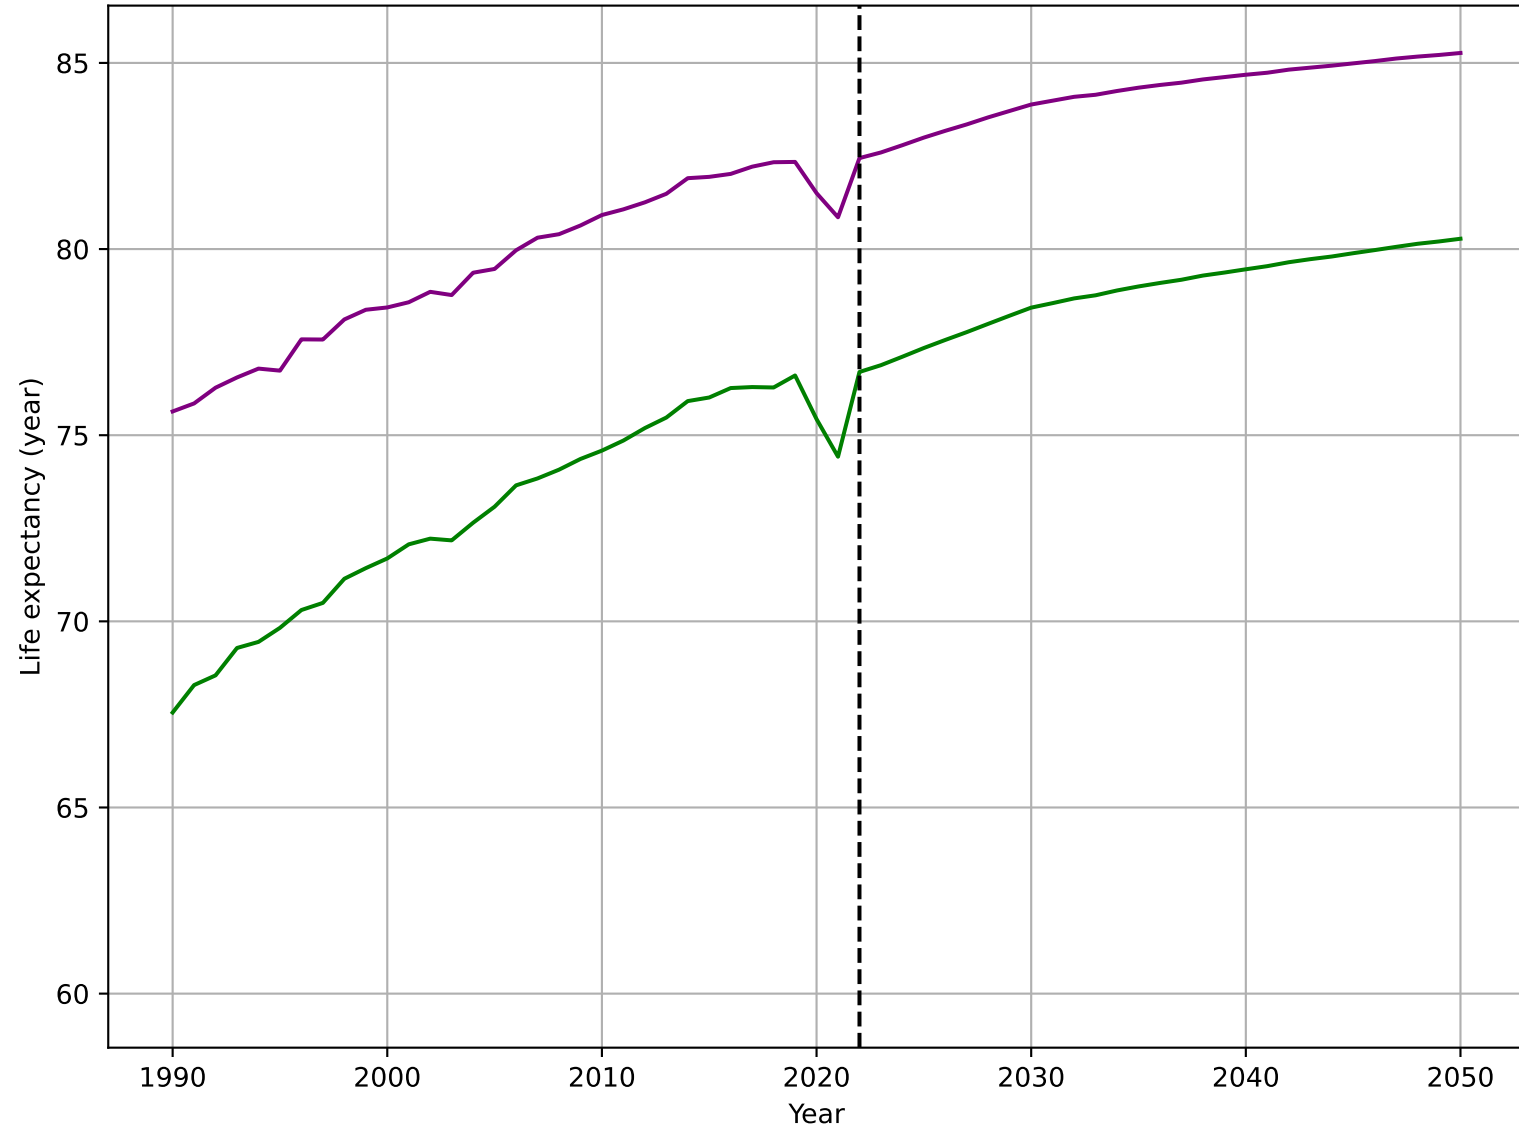

### Healthy Life Expectancy (HALE)

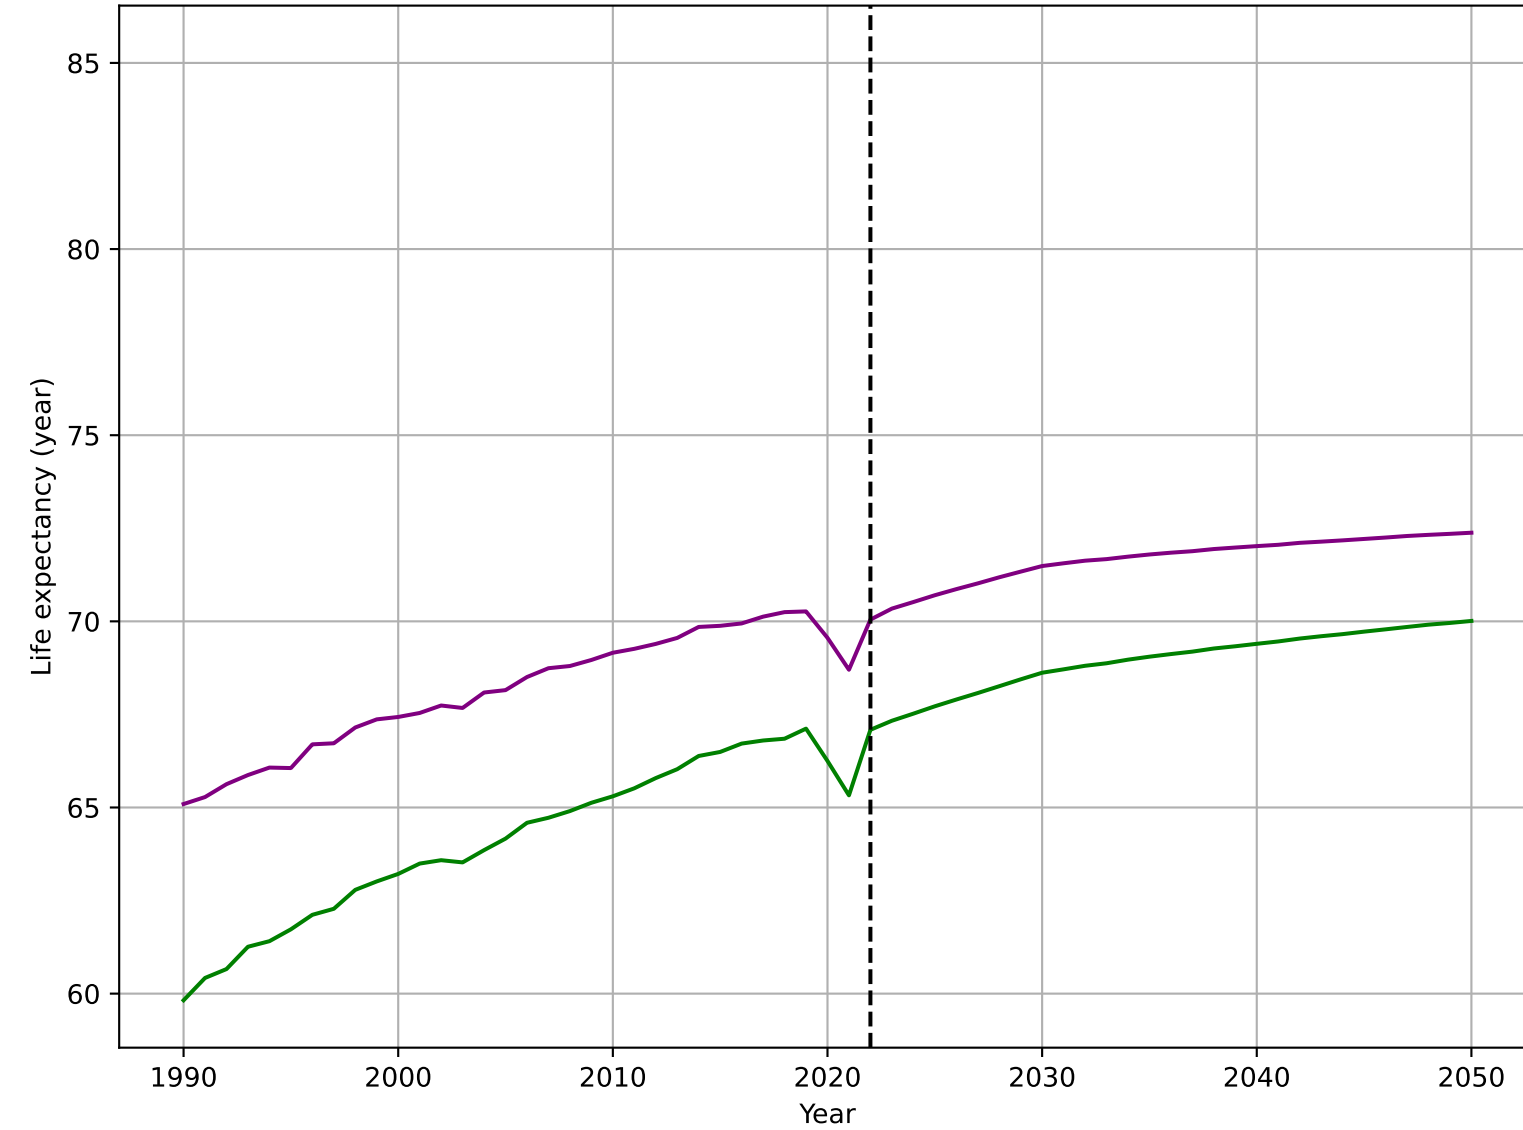

# Hungary

### Life Expectancy

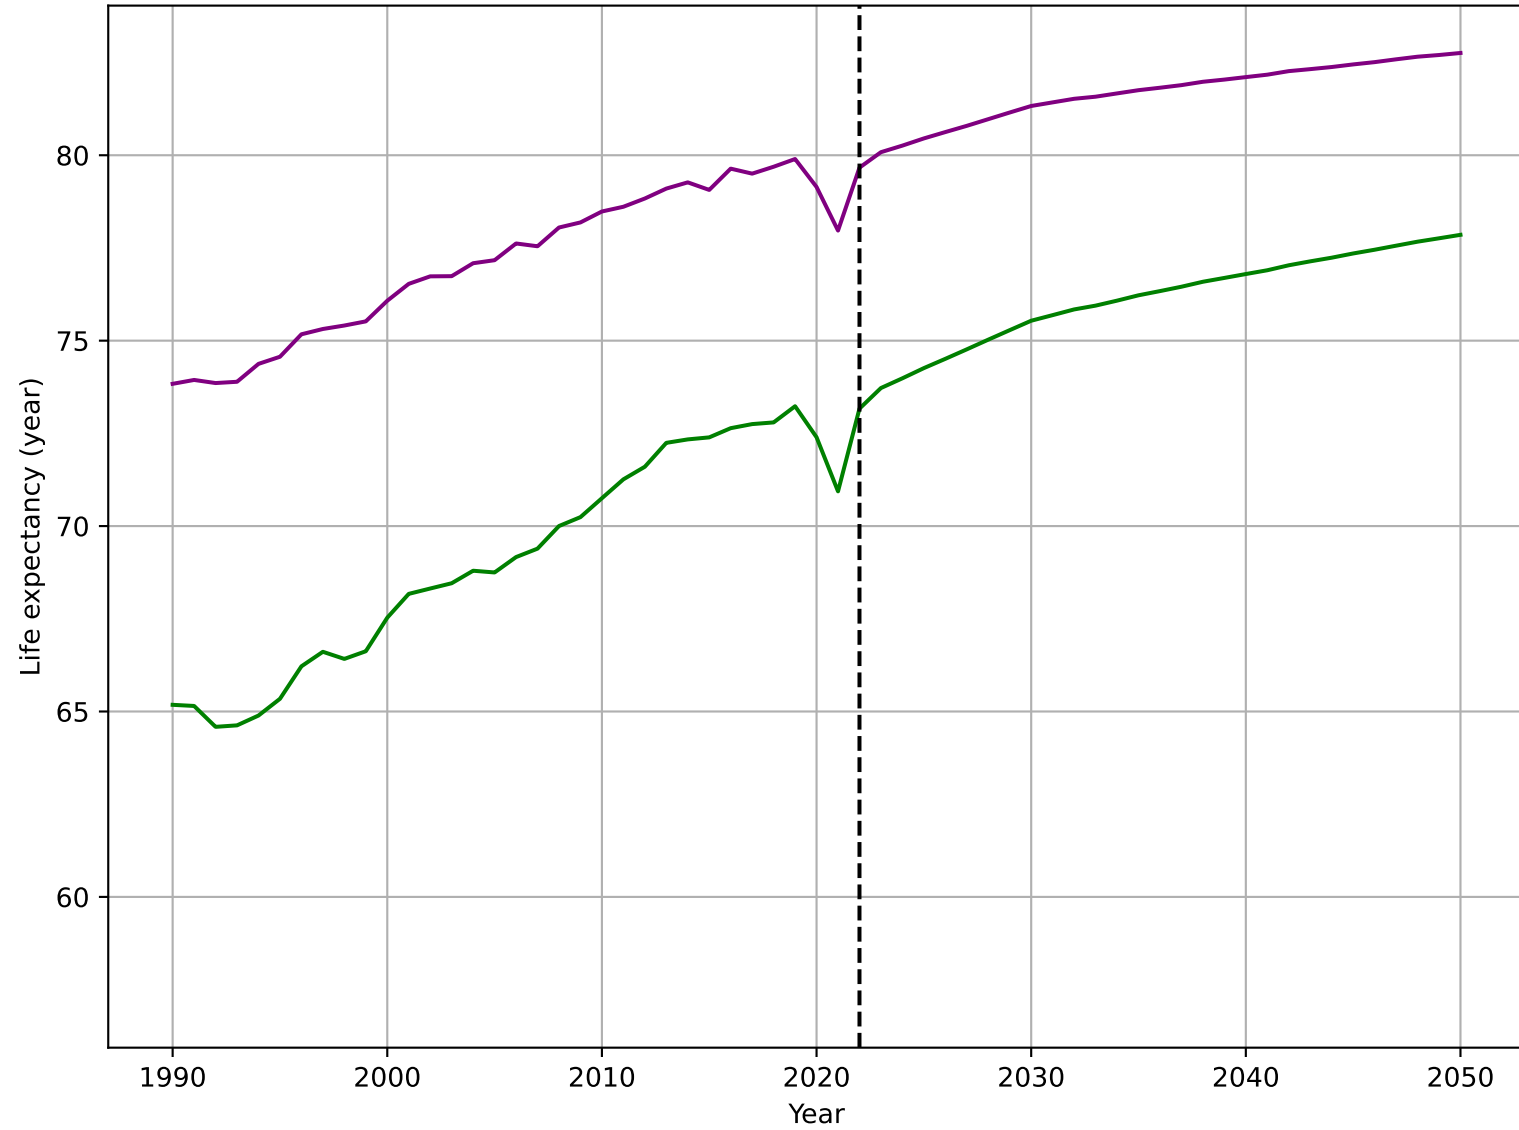

### Healthy Life Expectancy (HALE)

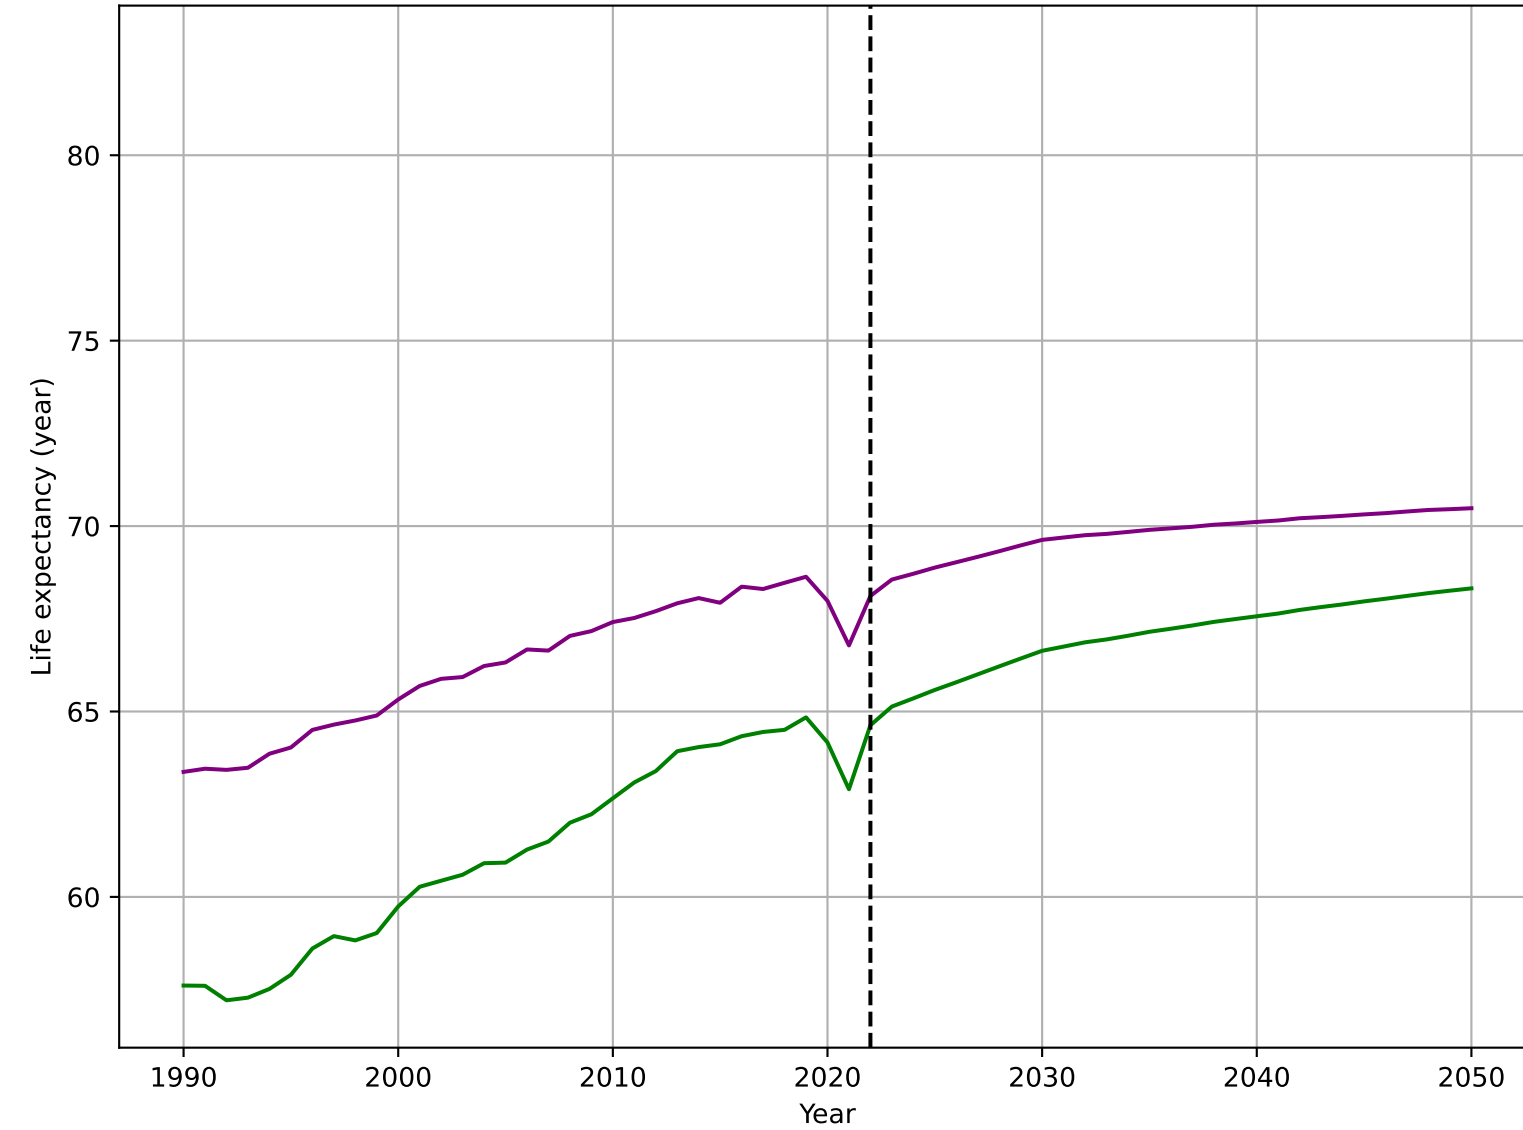

# Montenegro

### Life Expectancy

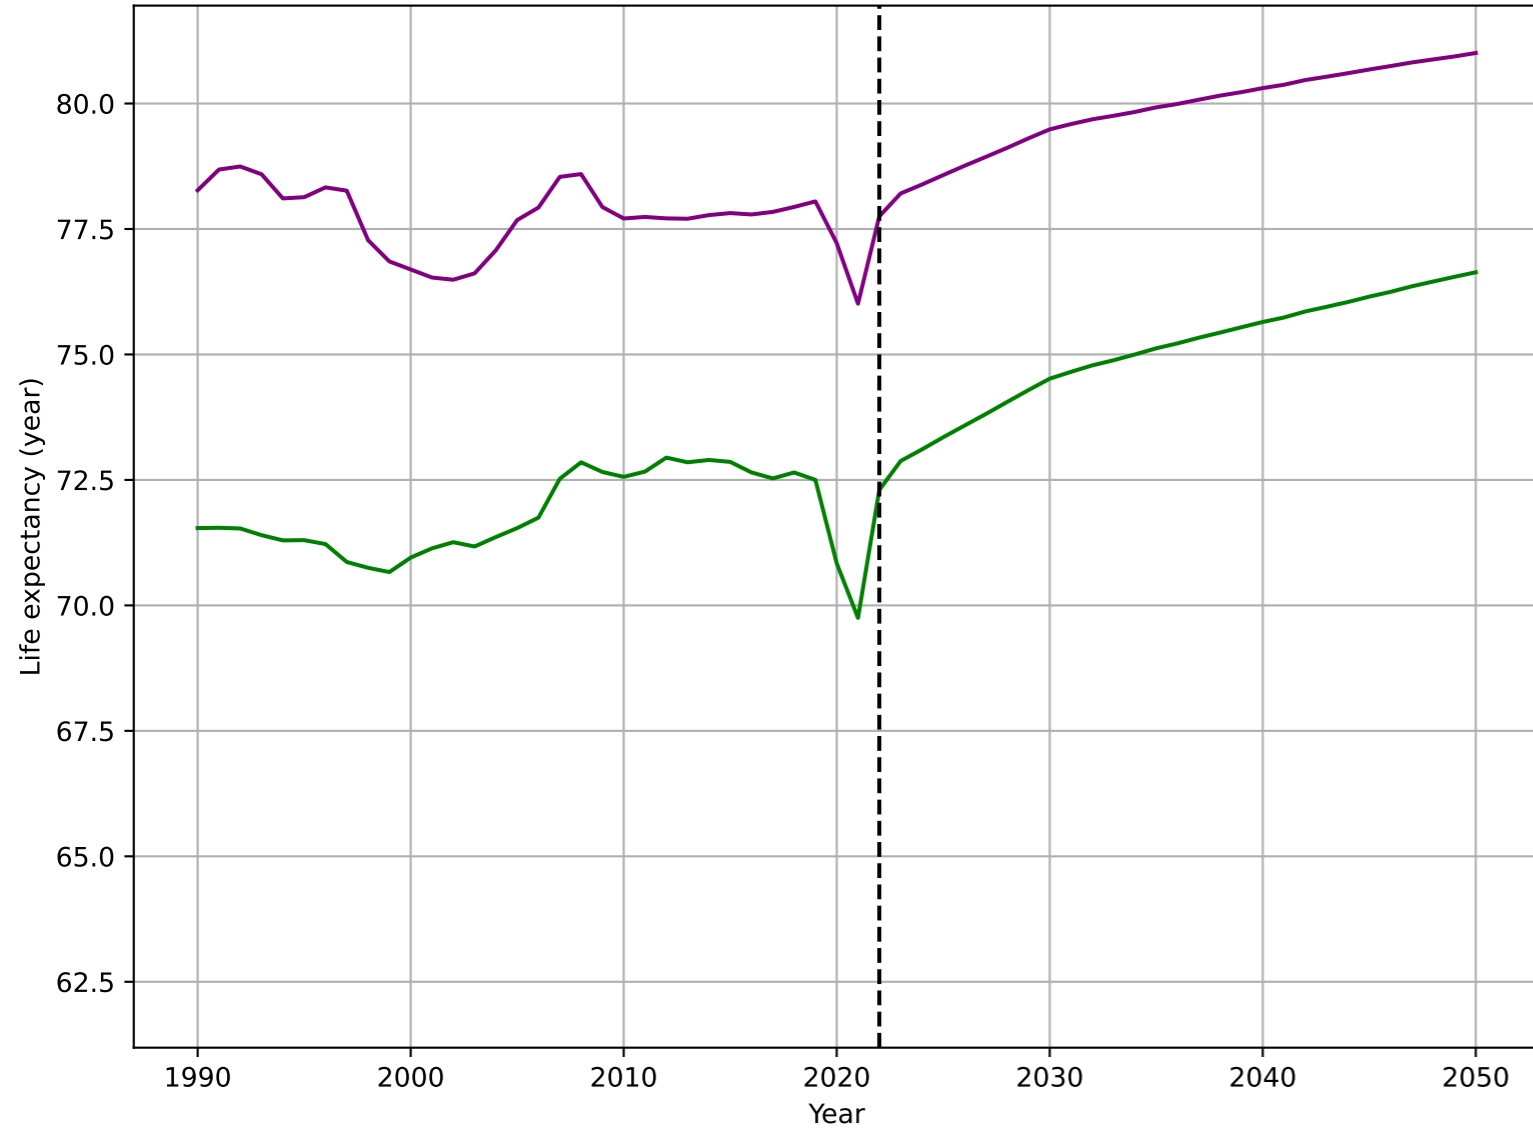

### Healthy Life Expectancy (HALE)

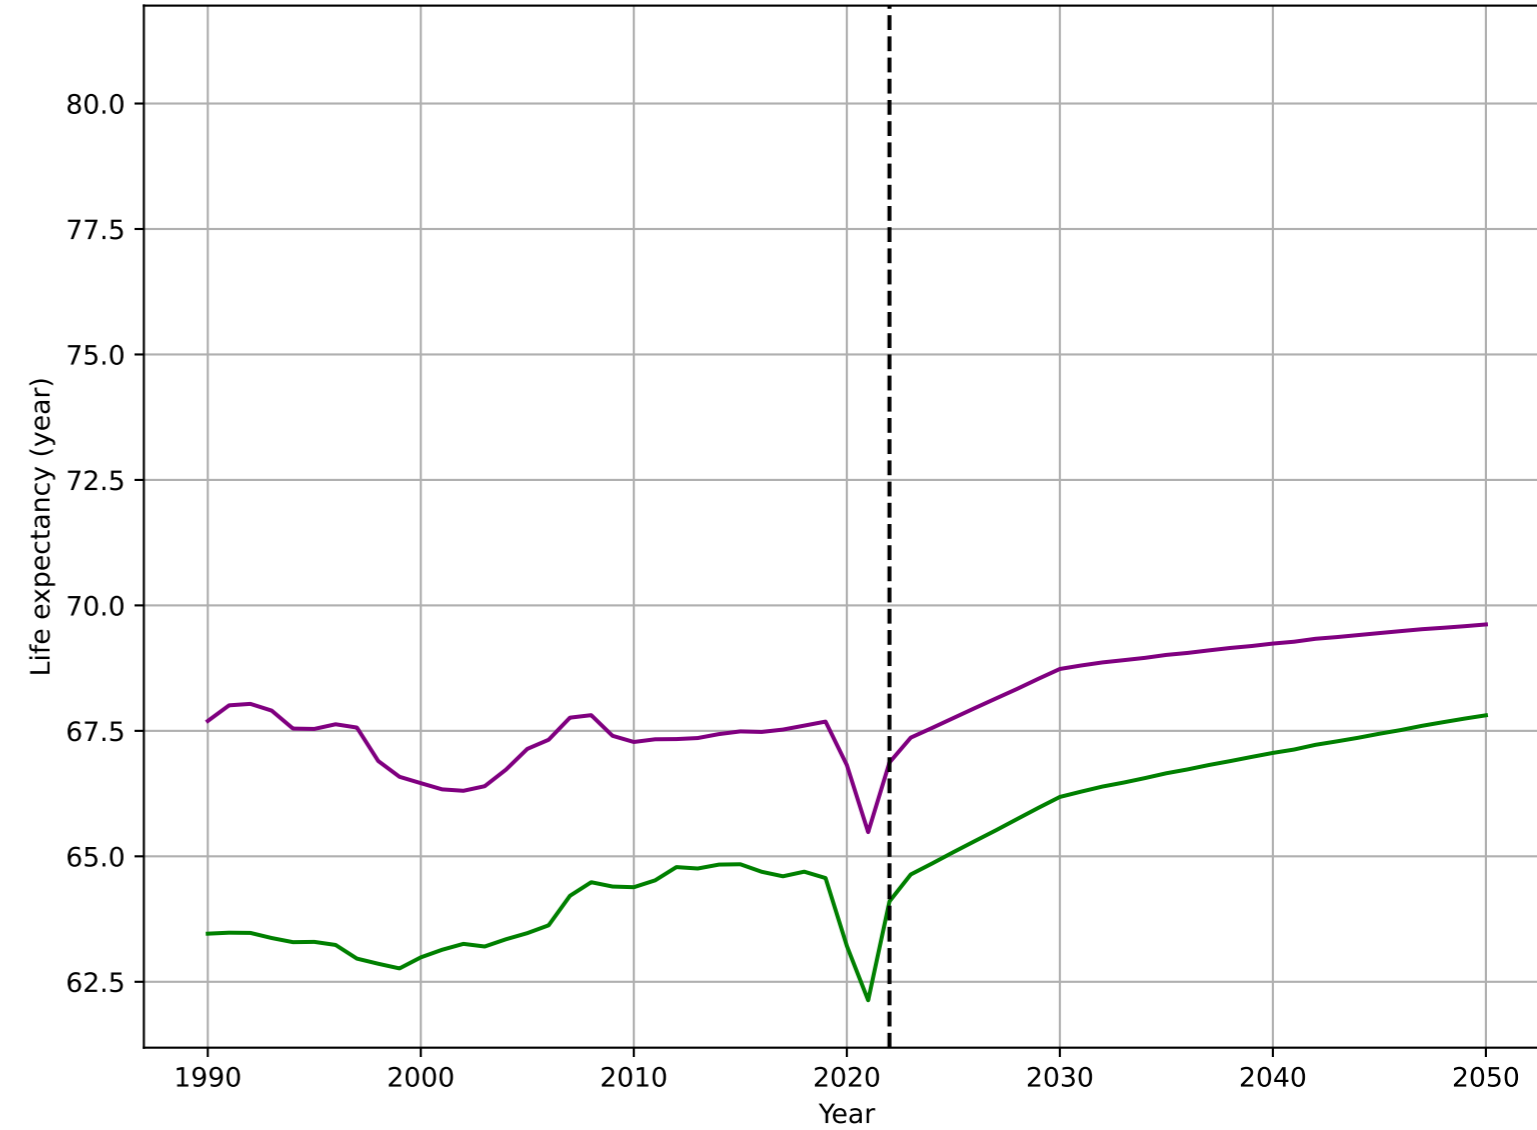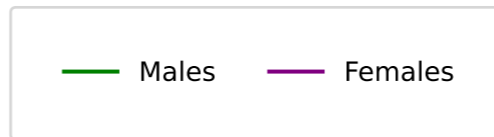

# North Macedonia

## Life Expectancy

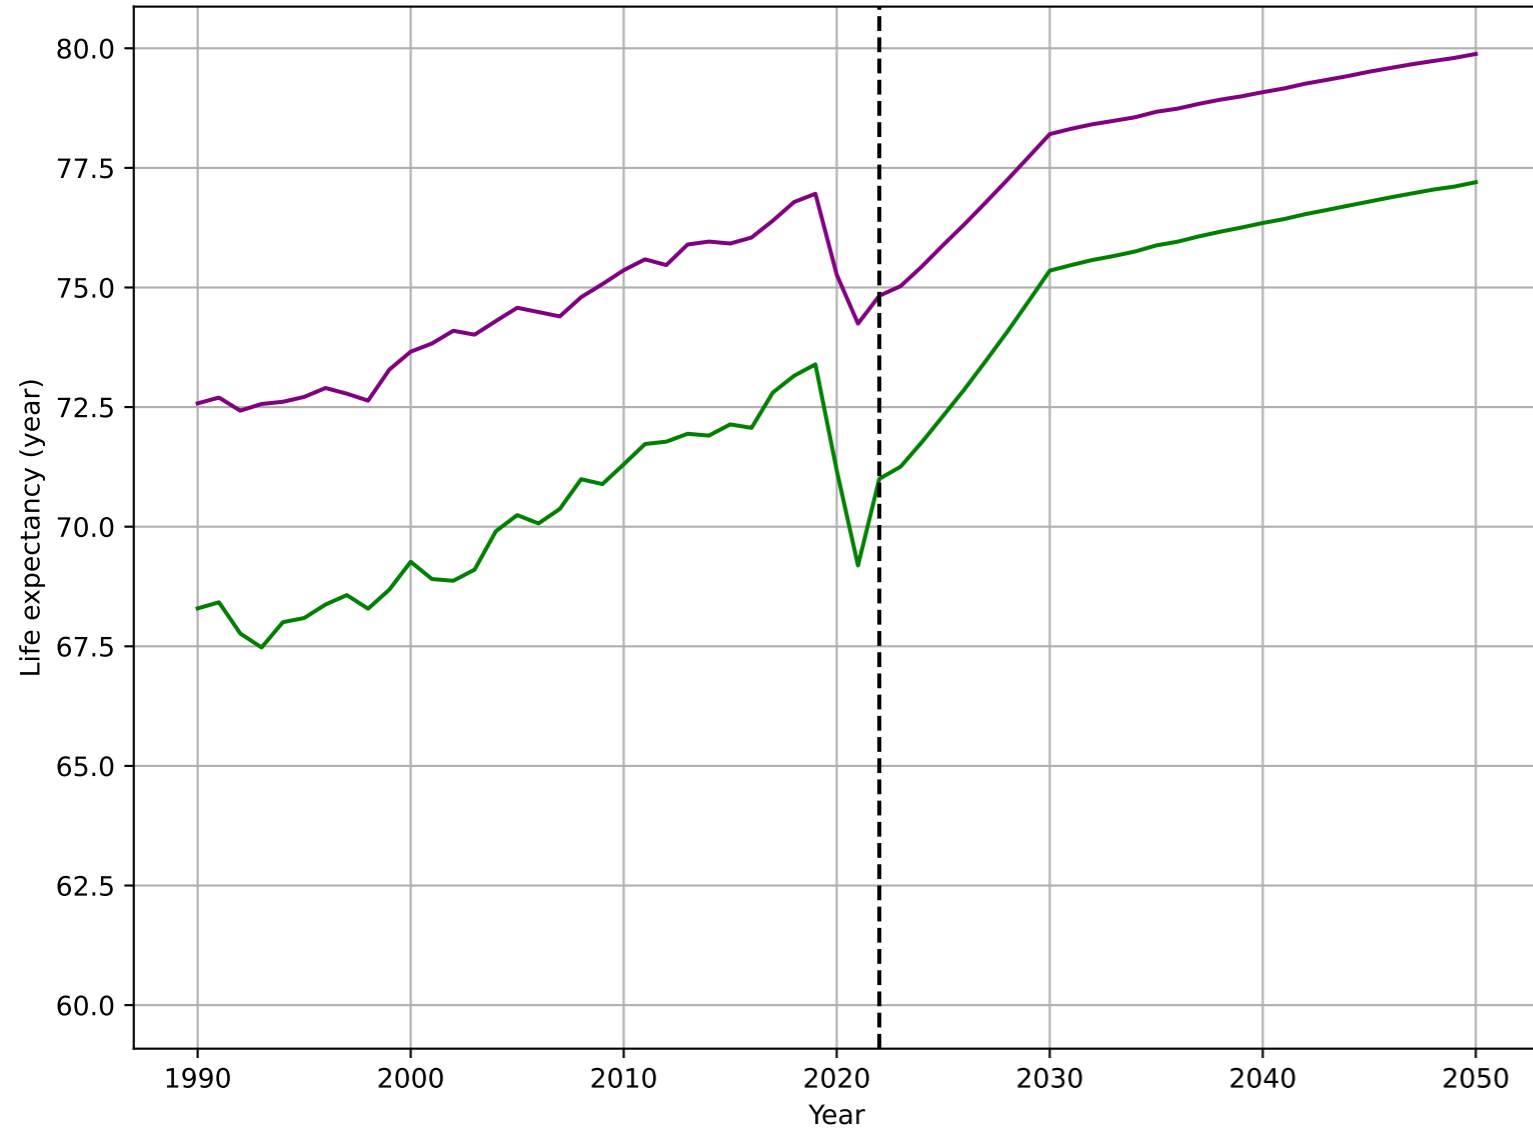

## Healthy Life Expectancy (HALE)

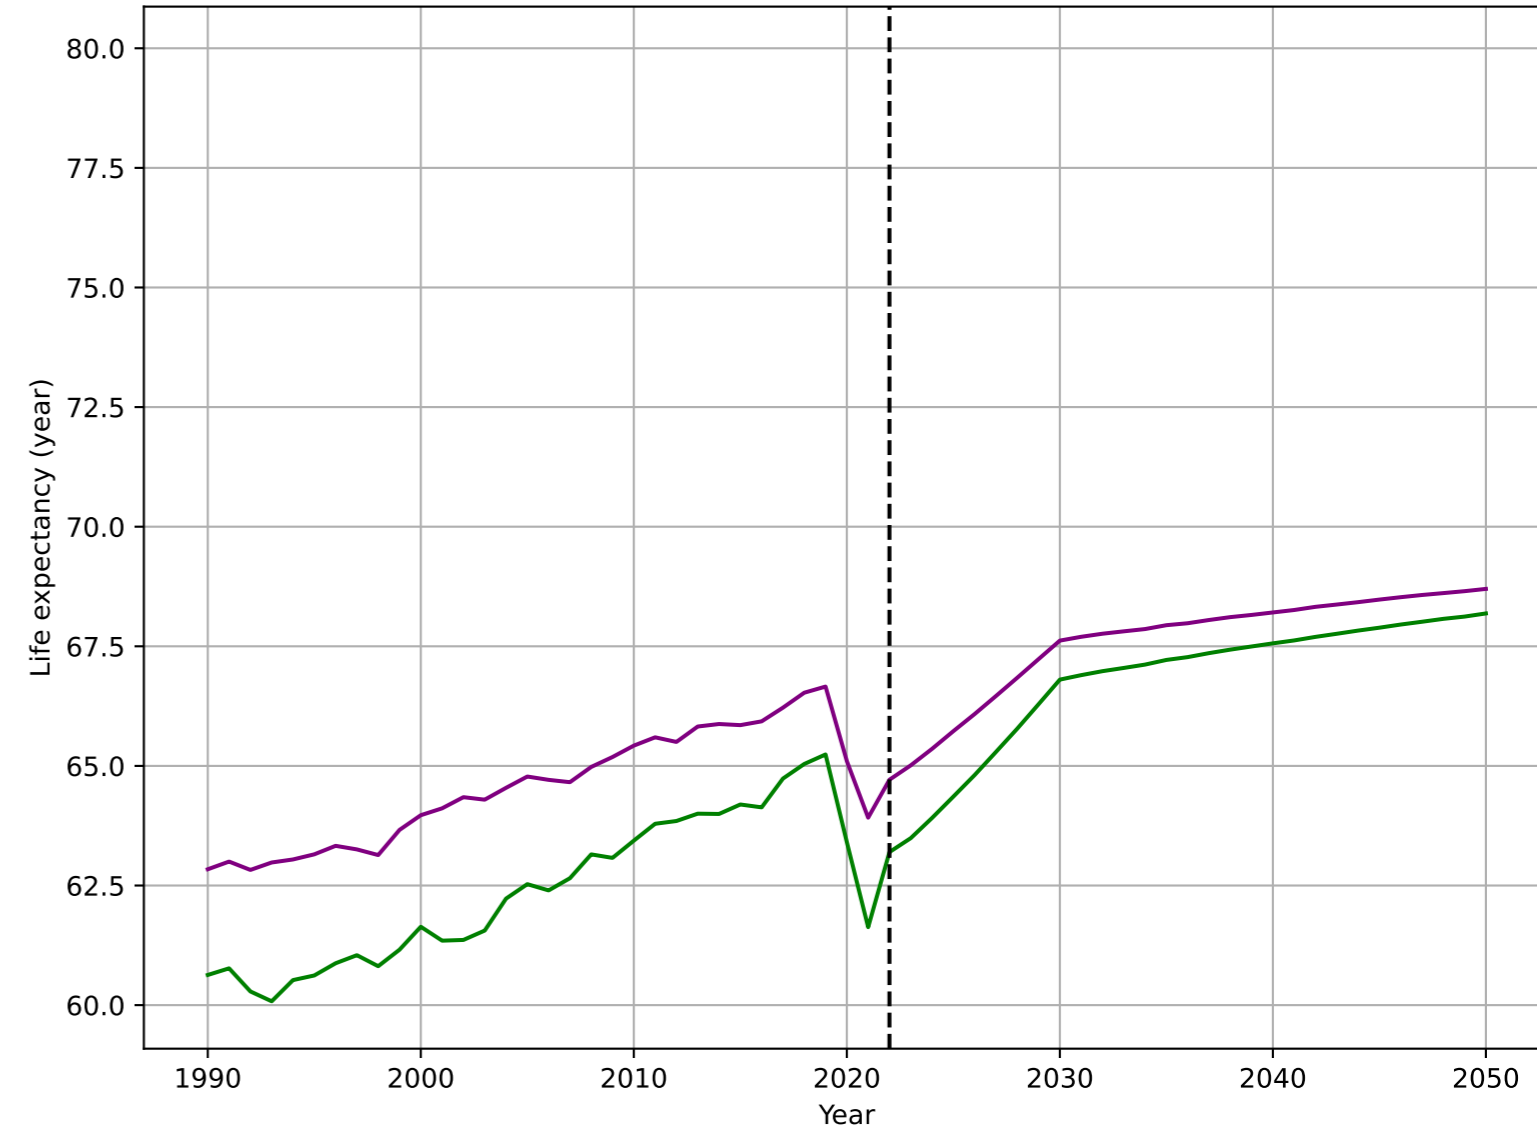

# Poland

### Life Expectancy

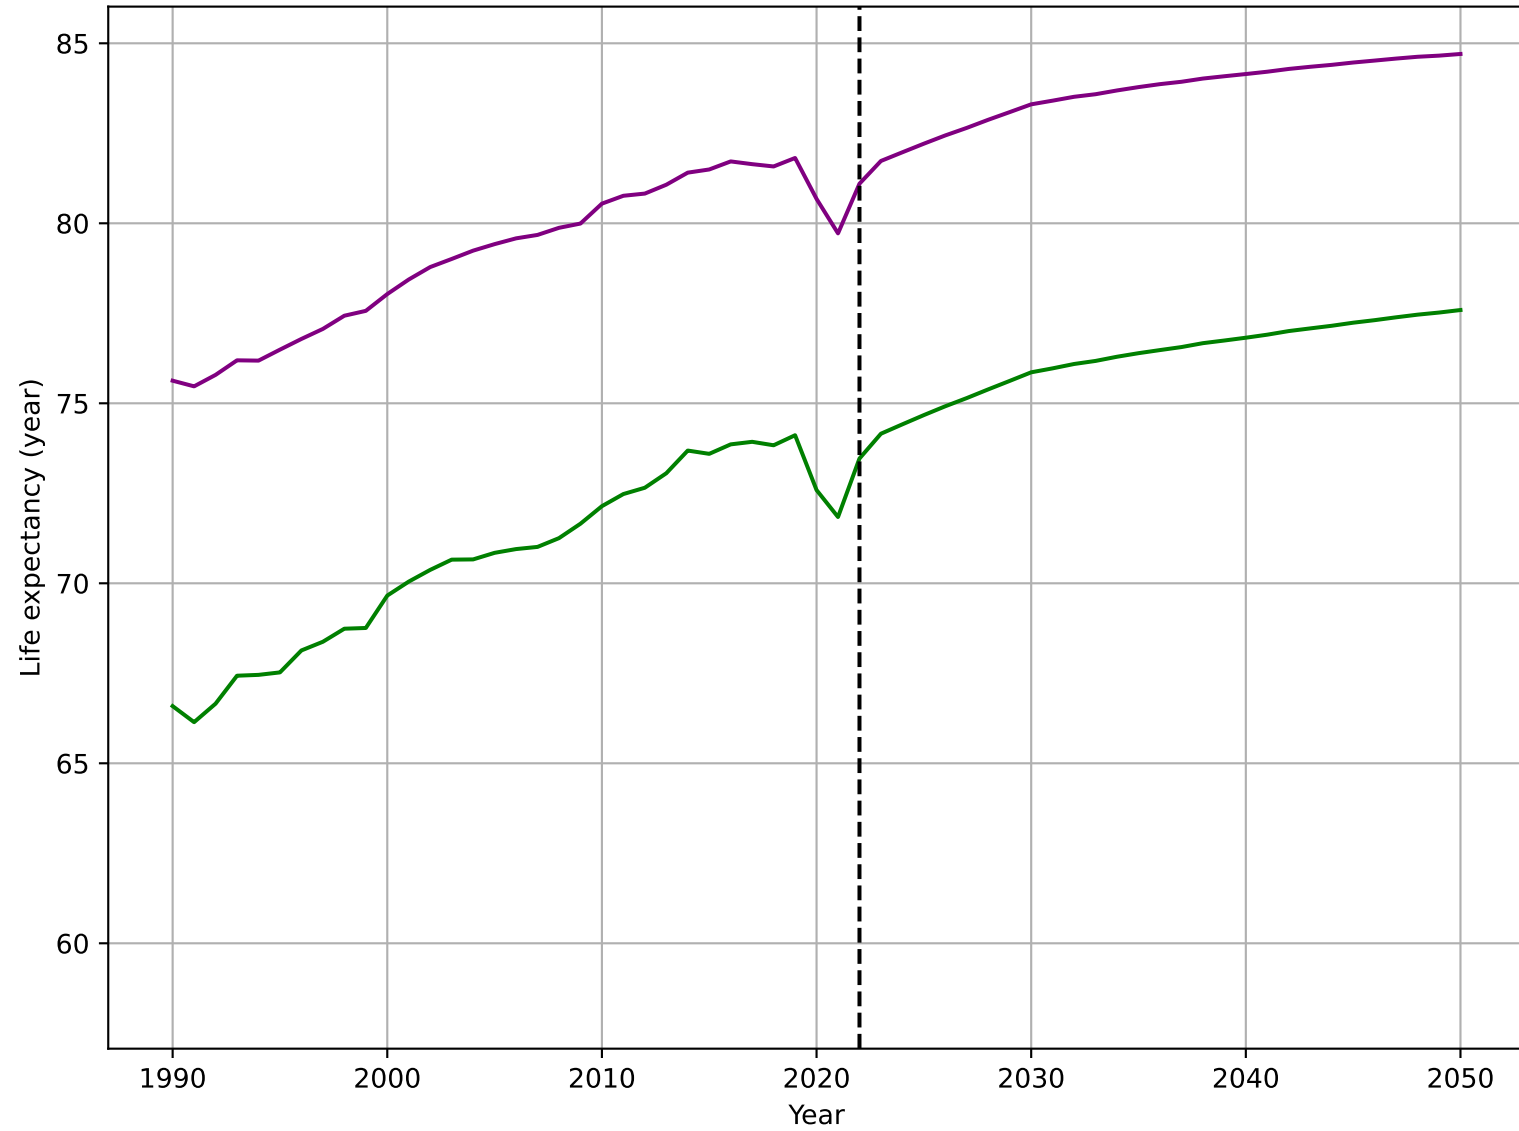

### Healthy Life Expectancy (HALE)

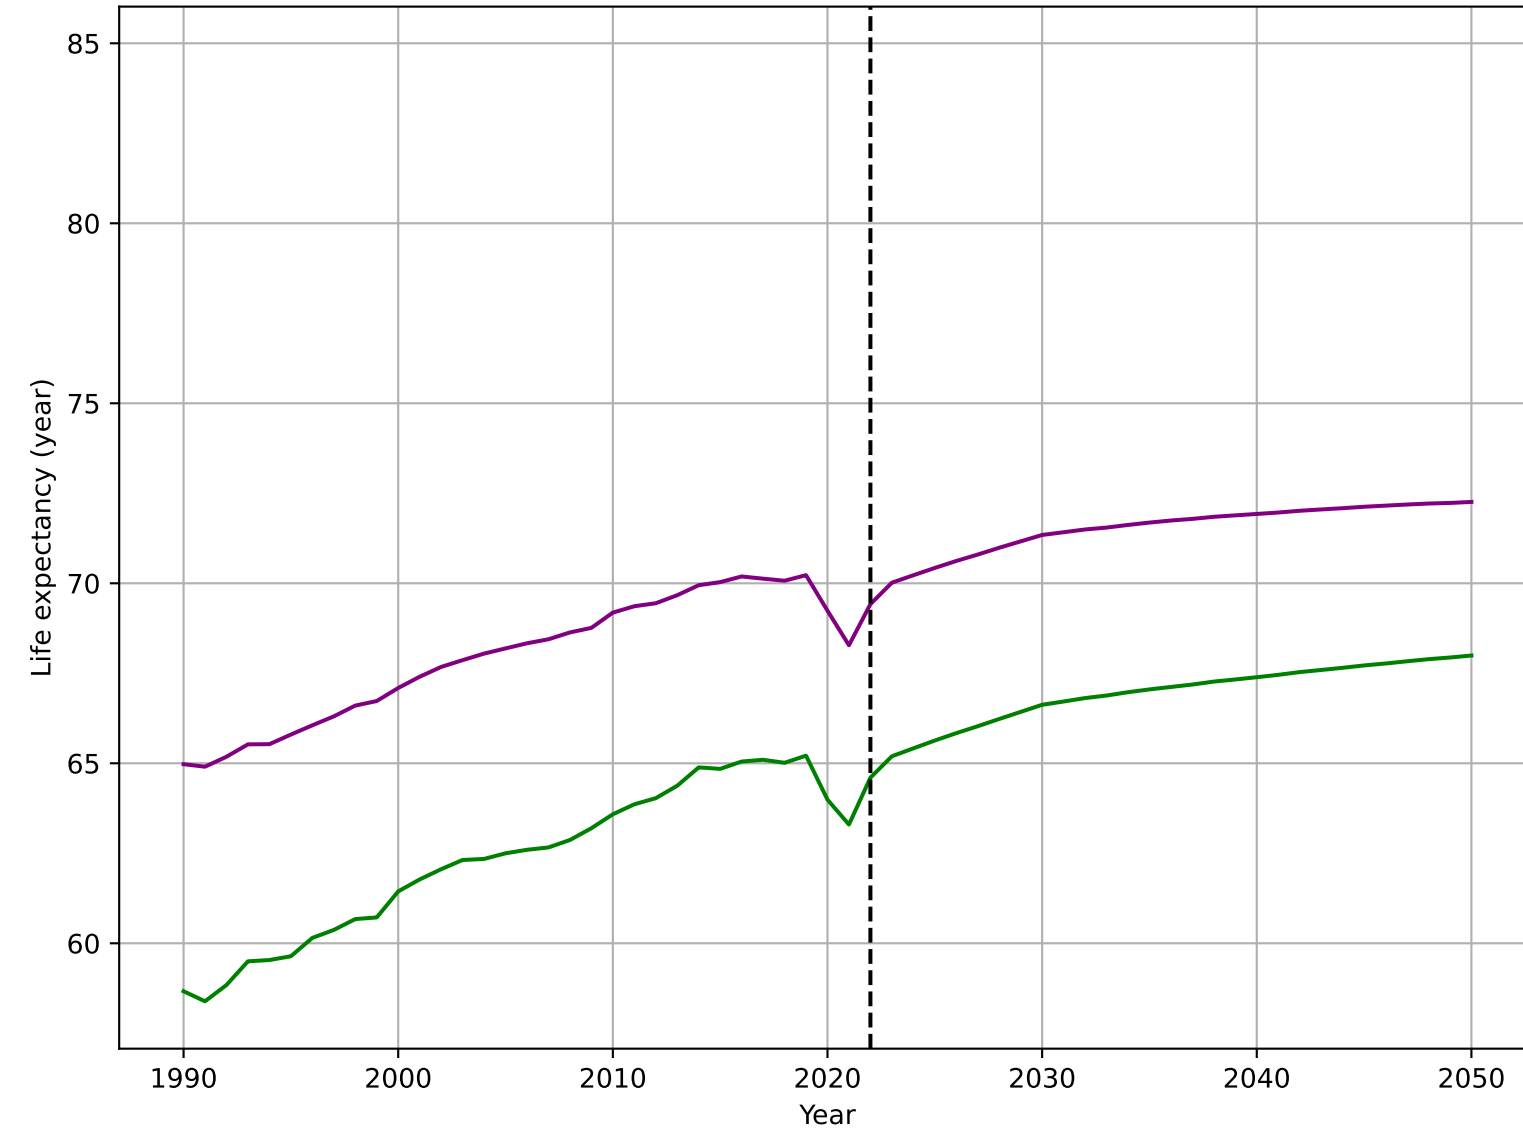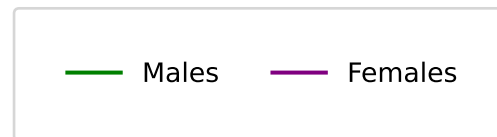

# Romania

### Life Expectancy

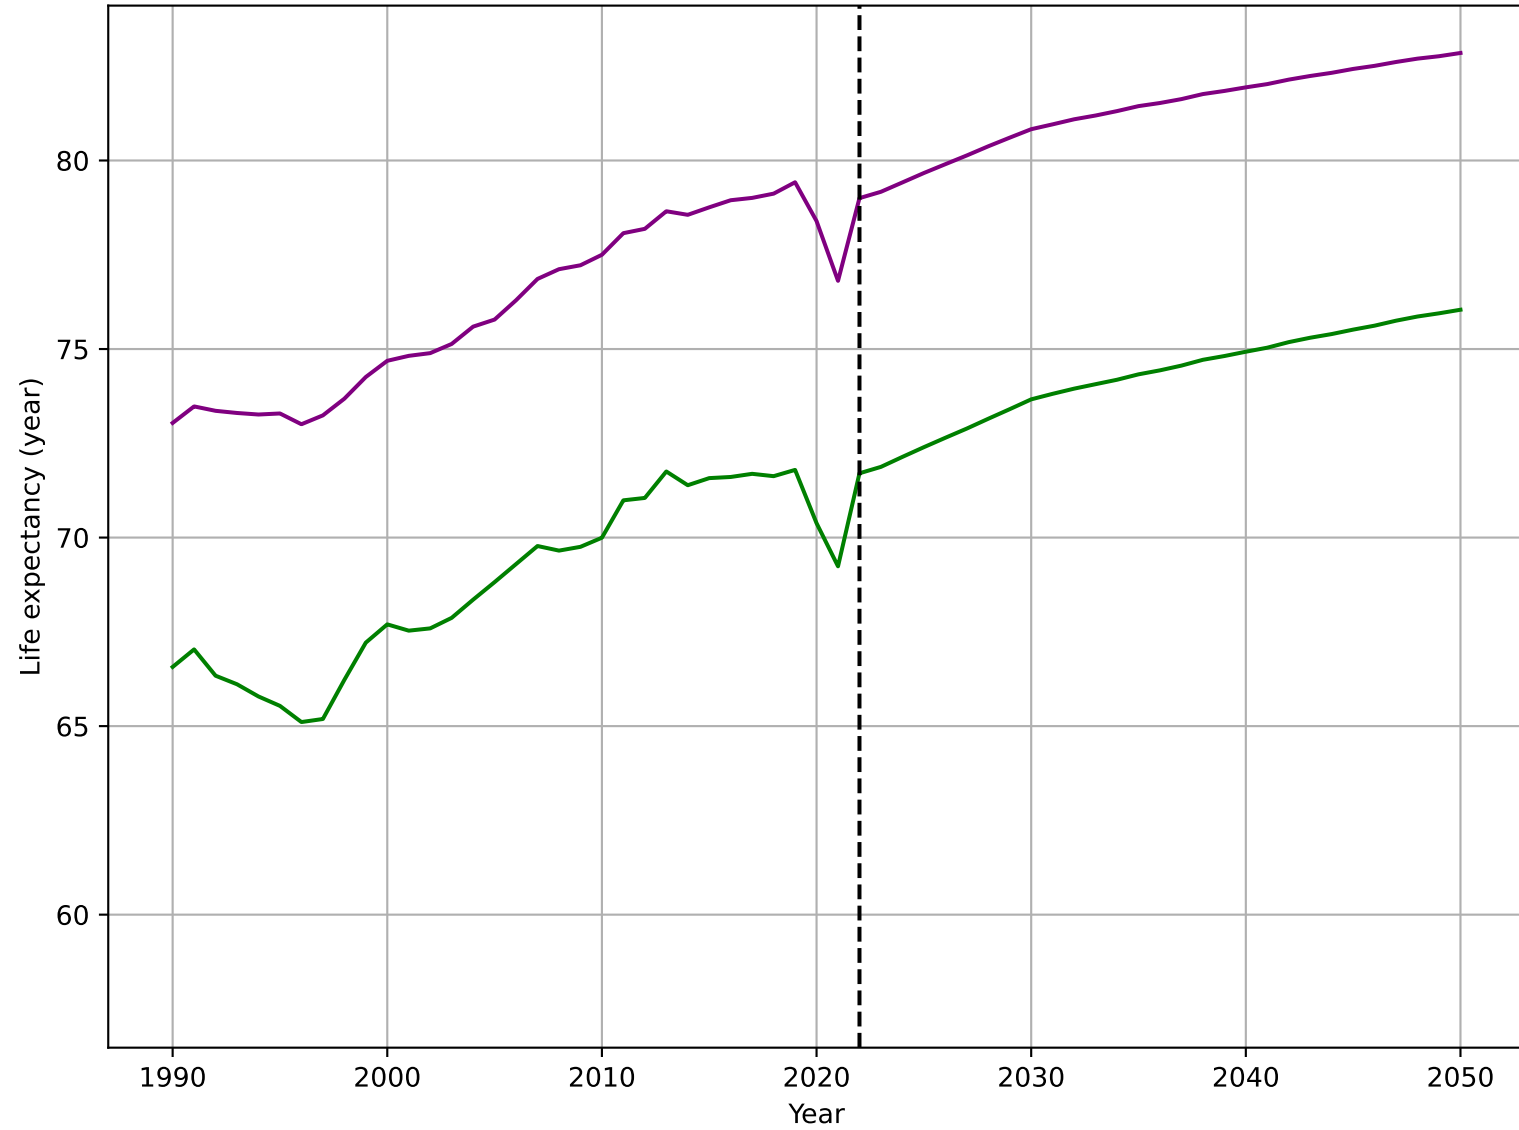

### Healthy Life Expectancy (HALE)

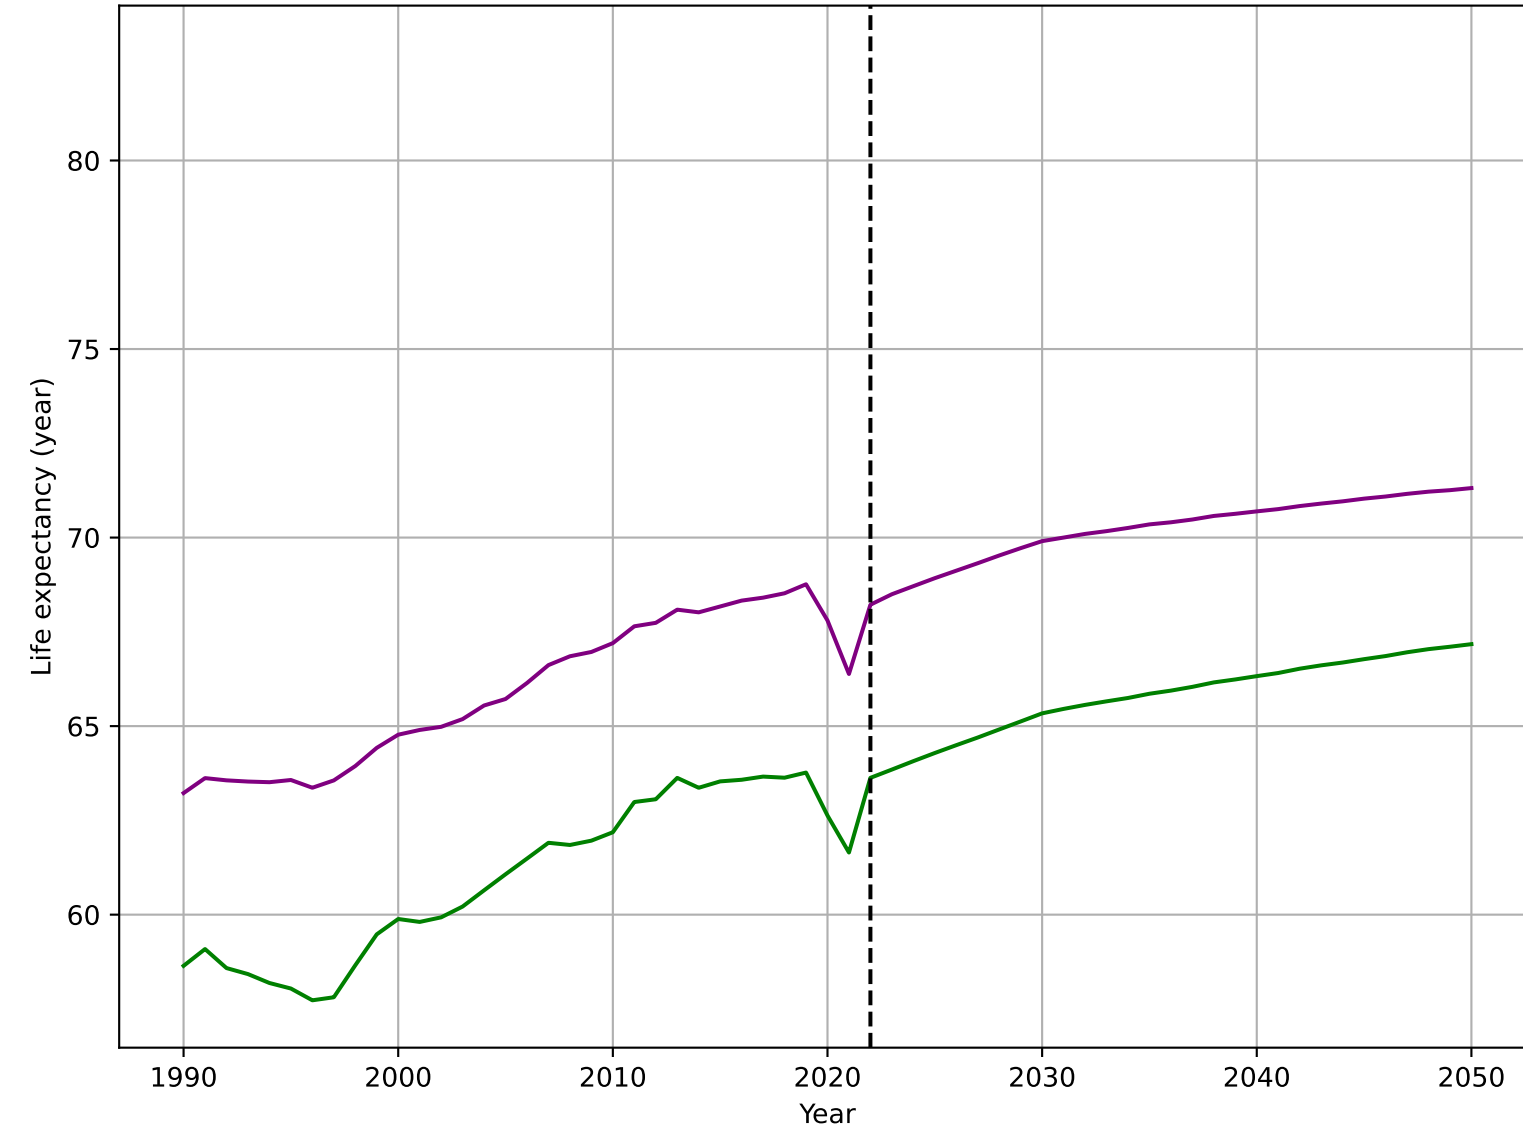

# Serbia

### Life Expectancy

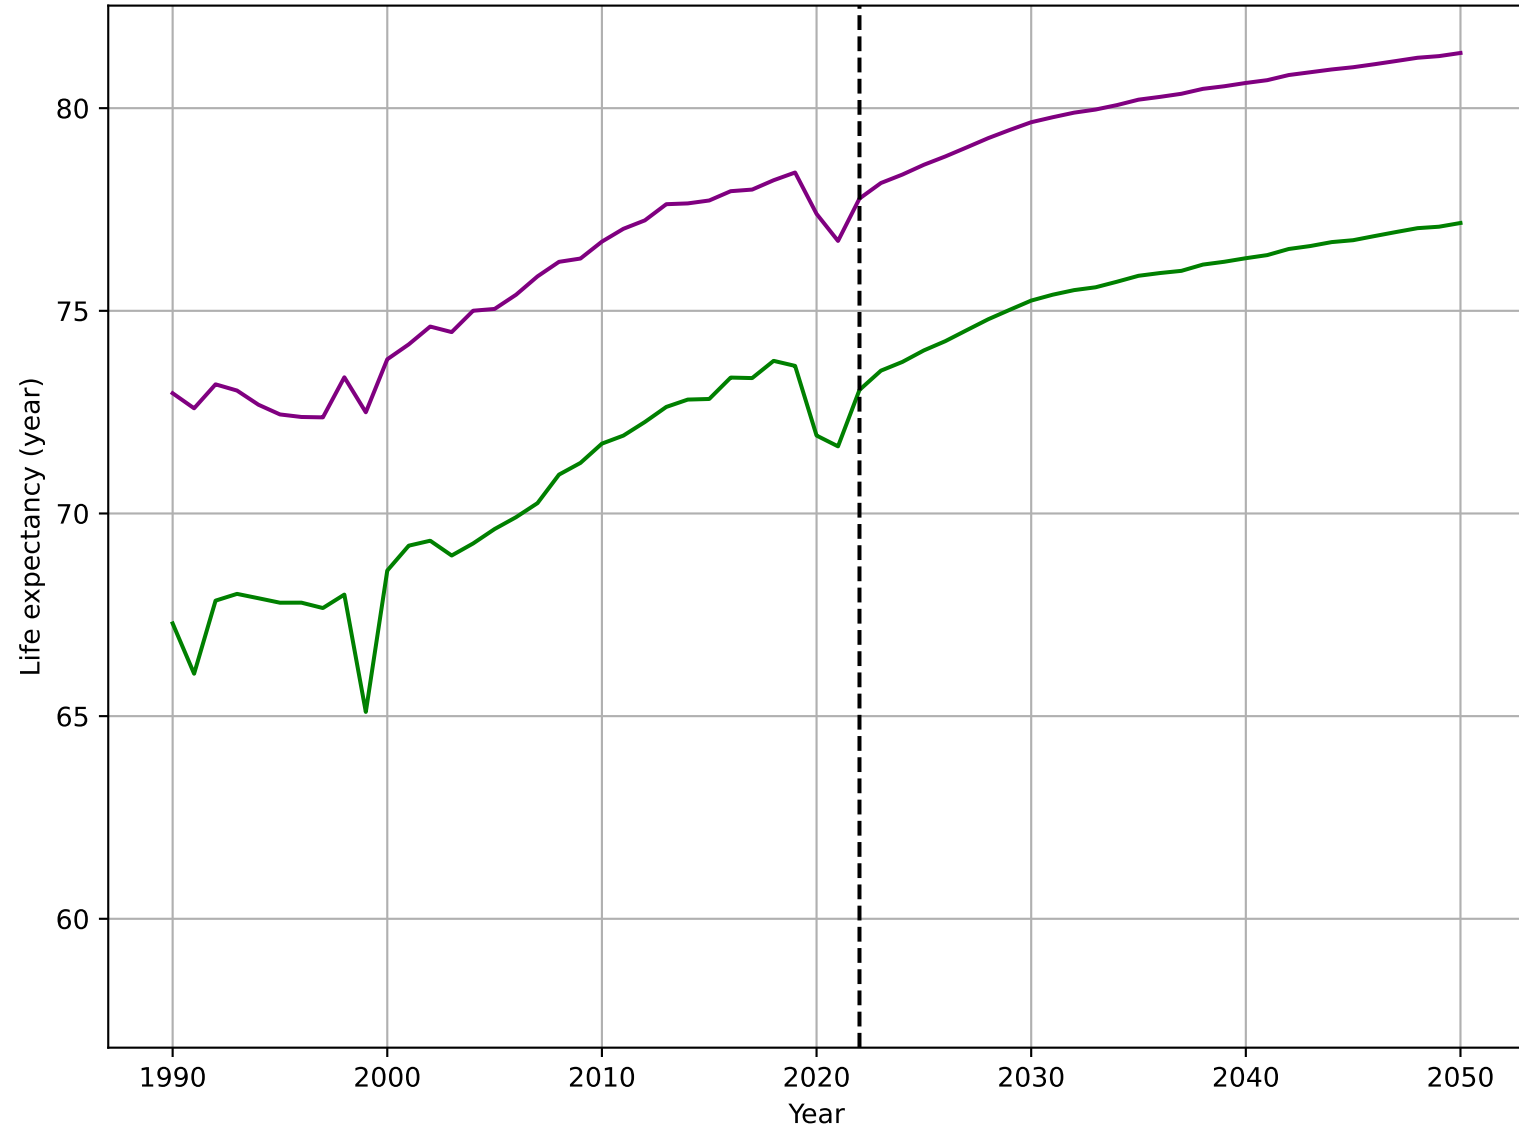

### Healthy Life Expectancy (HALE)

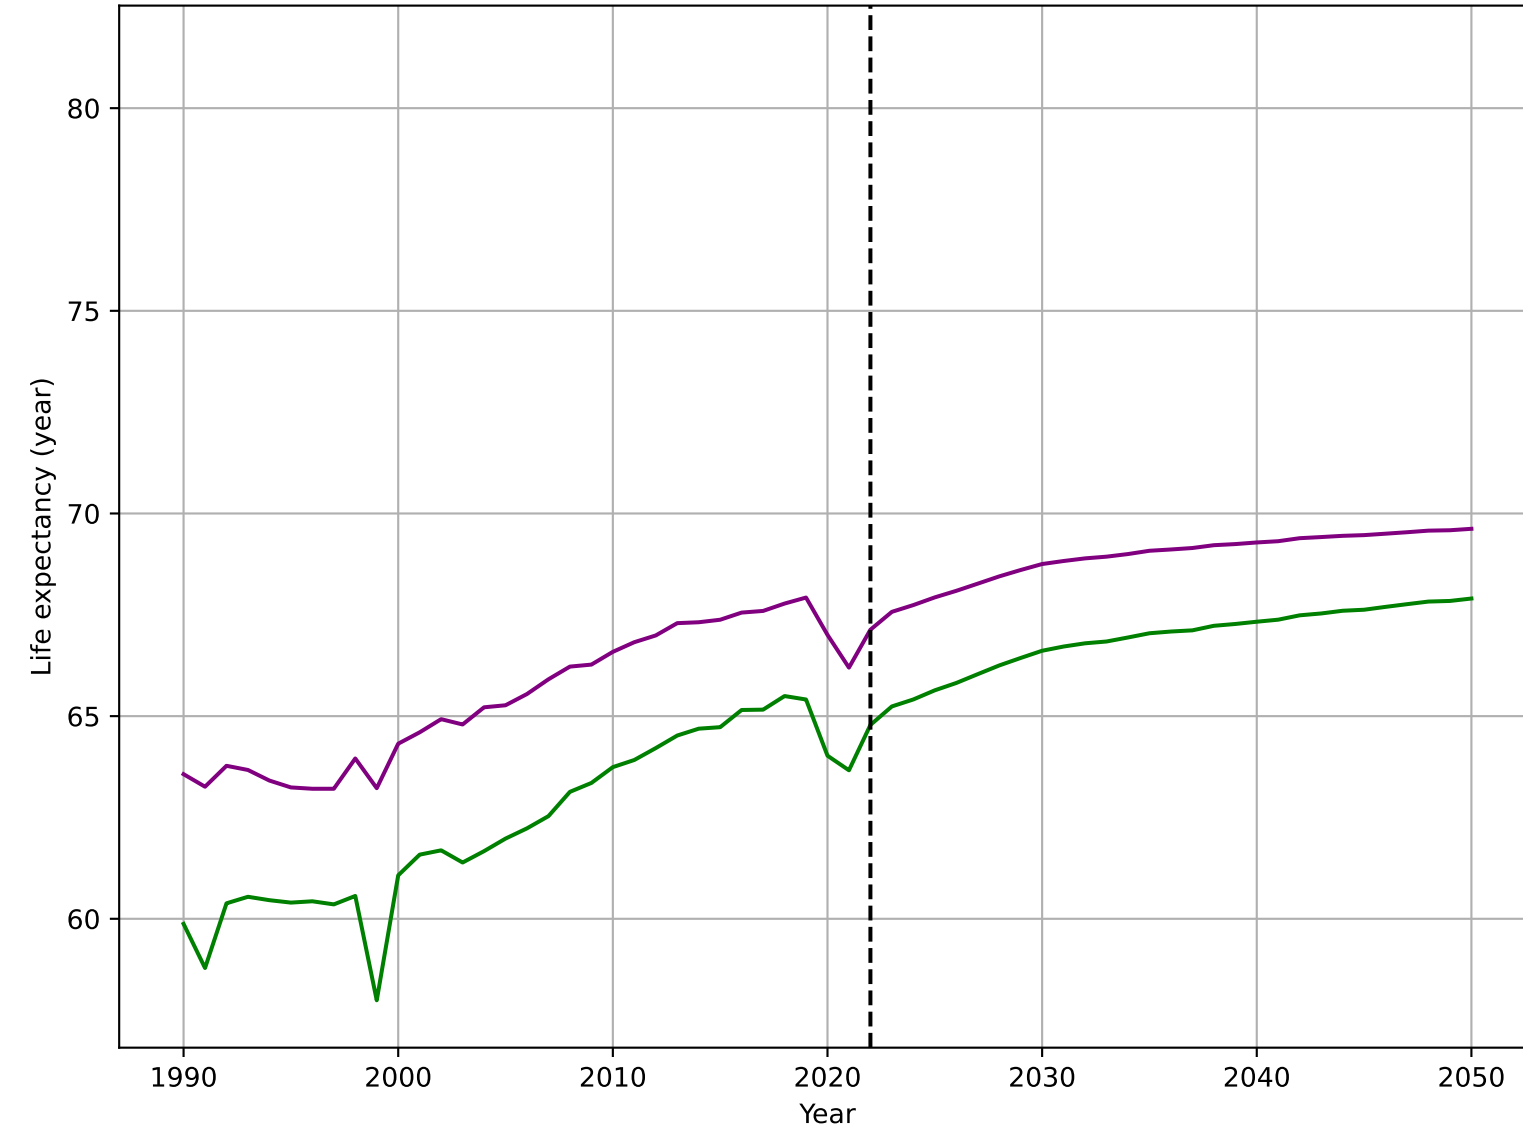



# Slovakia

### Life Expectancy

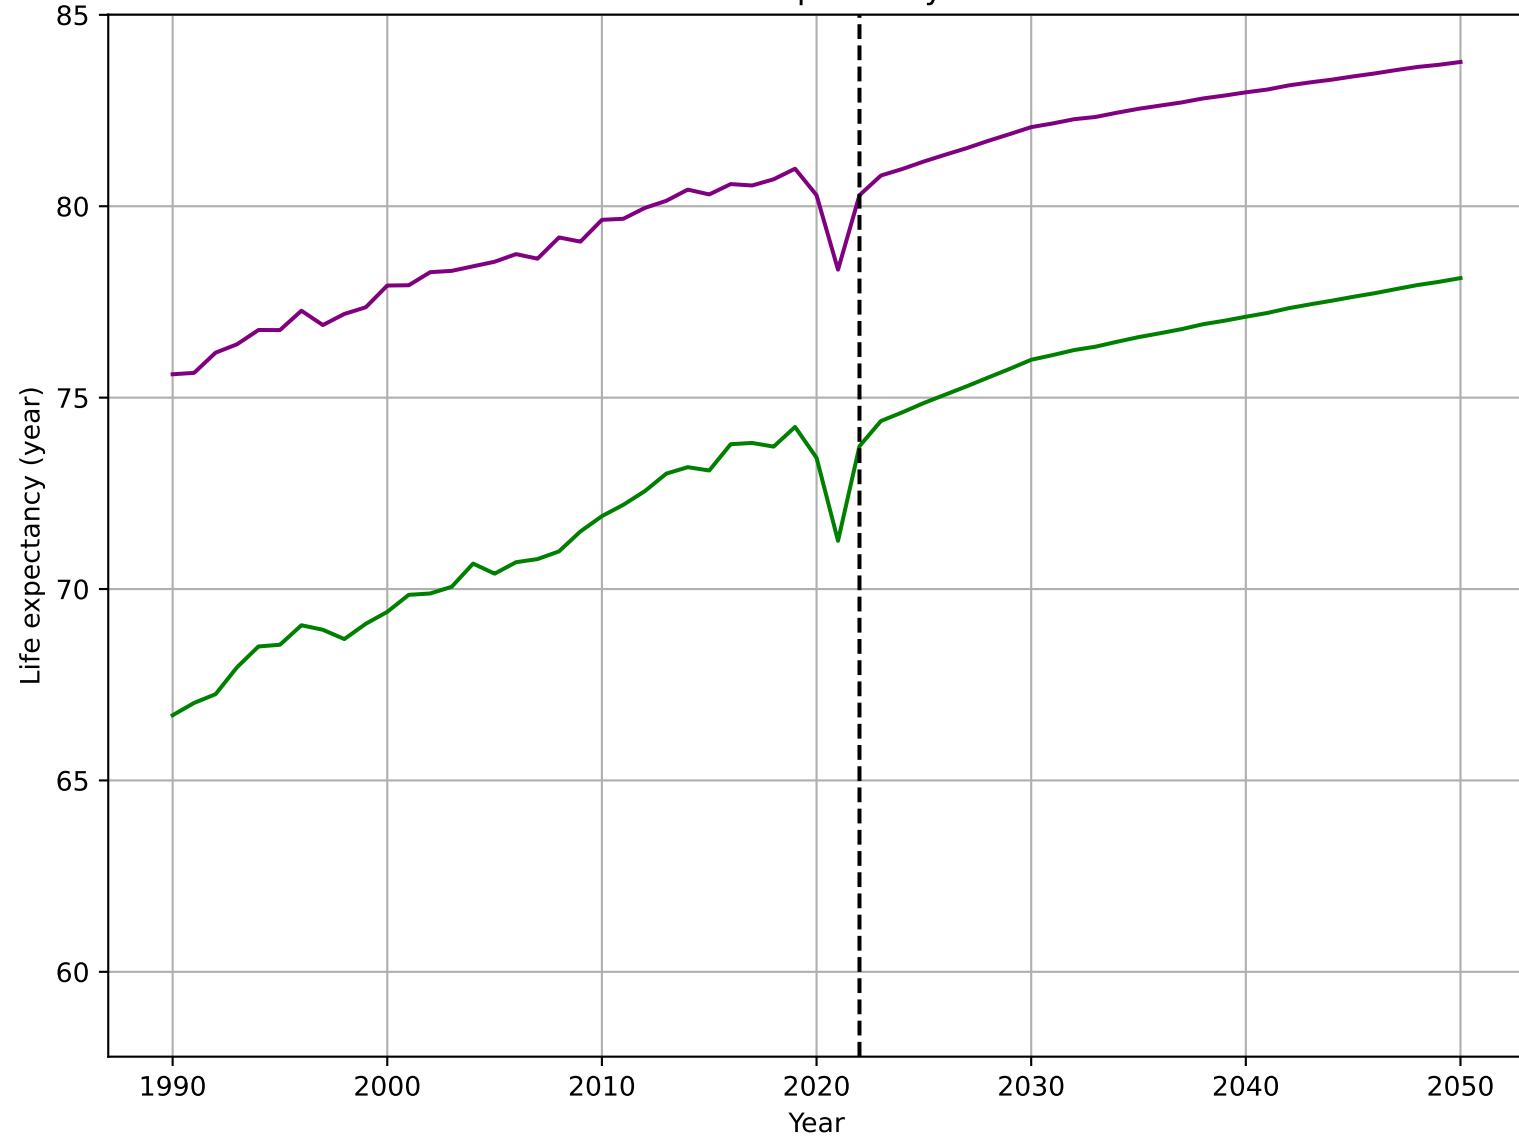

### Healthy Life Expectancy (HALE)

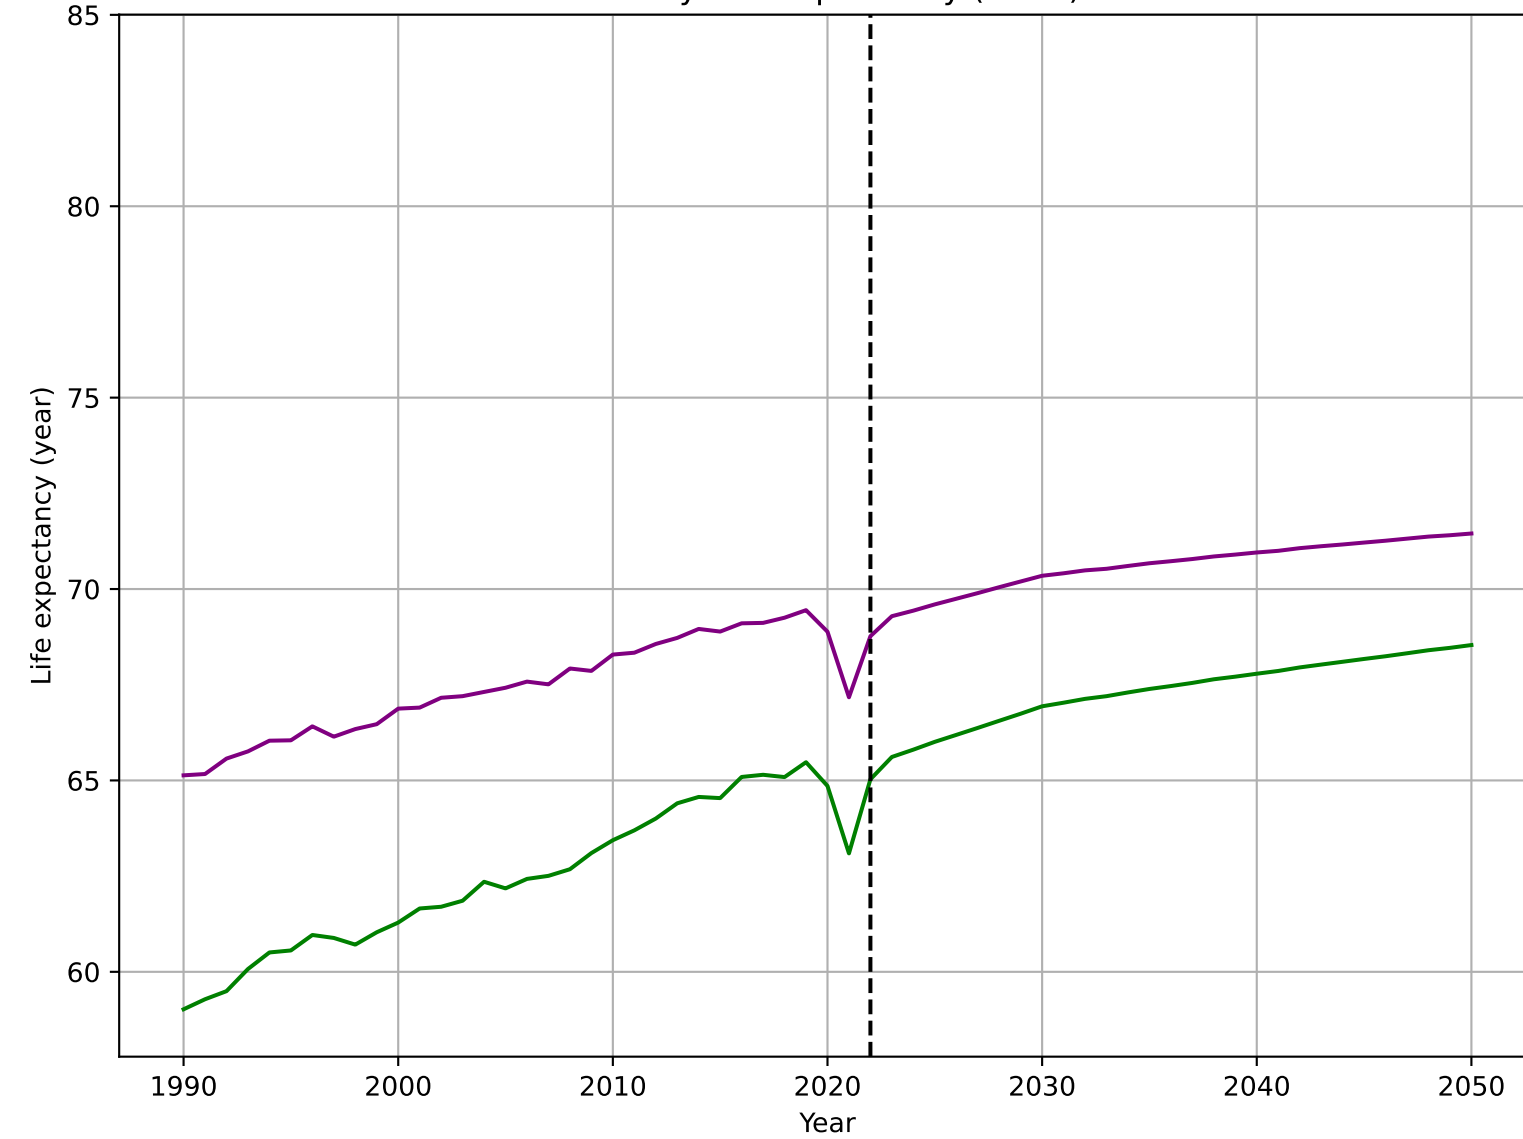

# Slovenia

### Life Expectancy

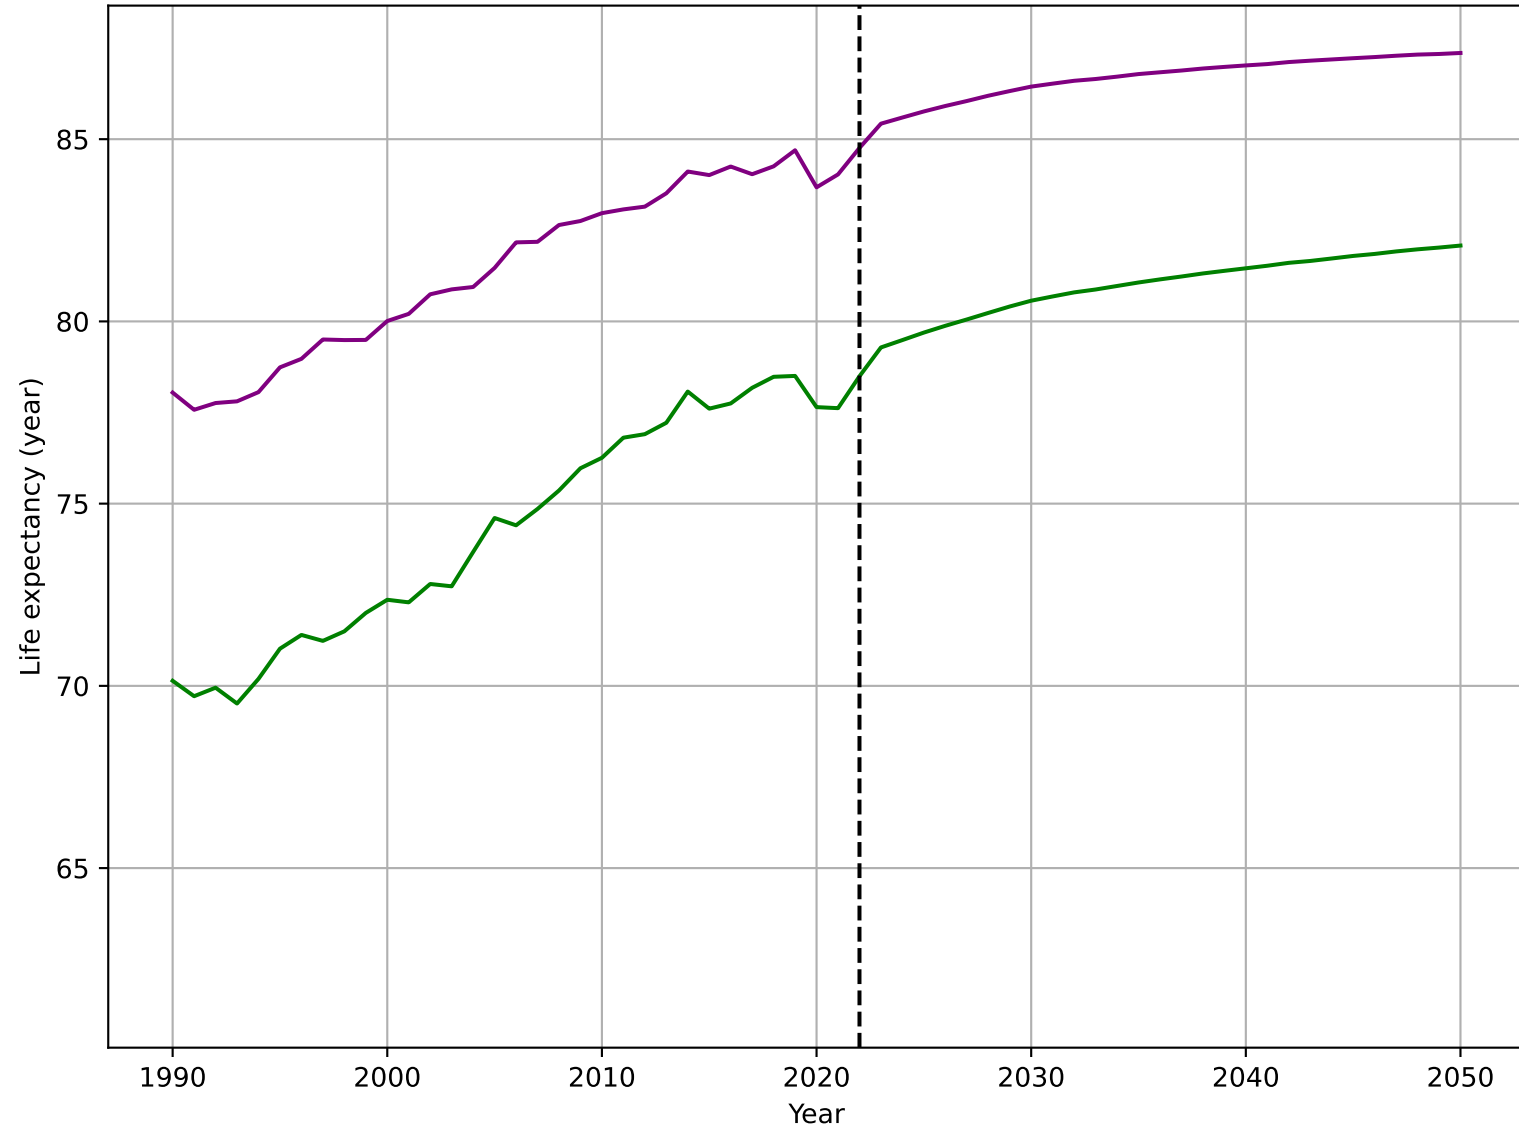

### Healthy Life Expectancy (HALE)

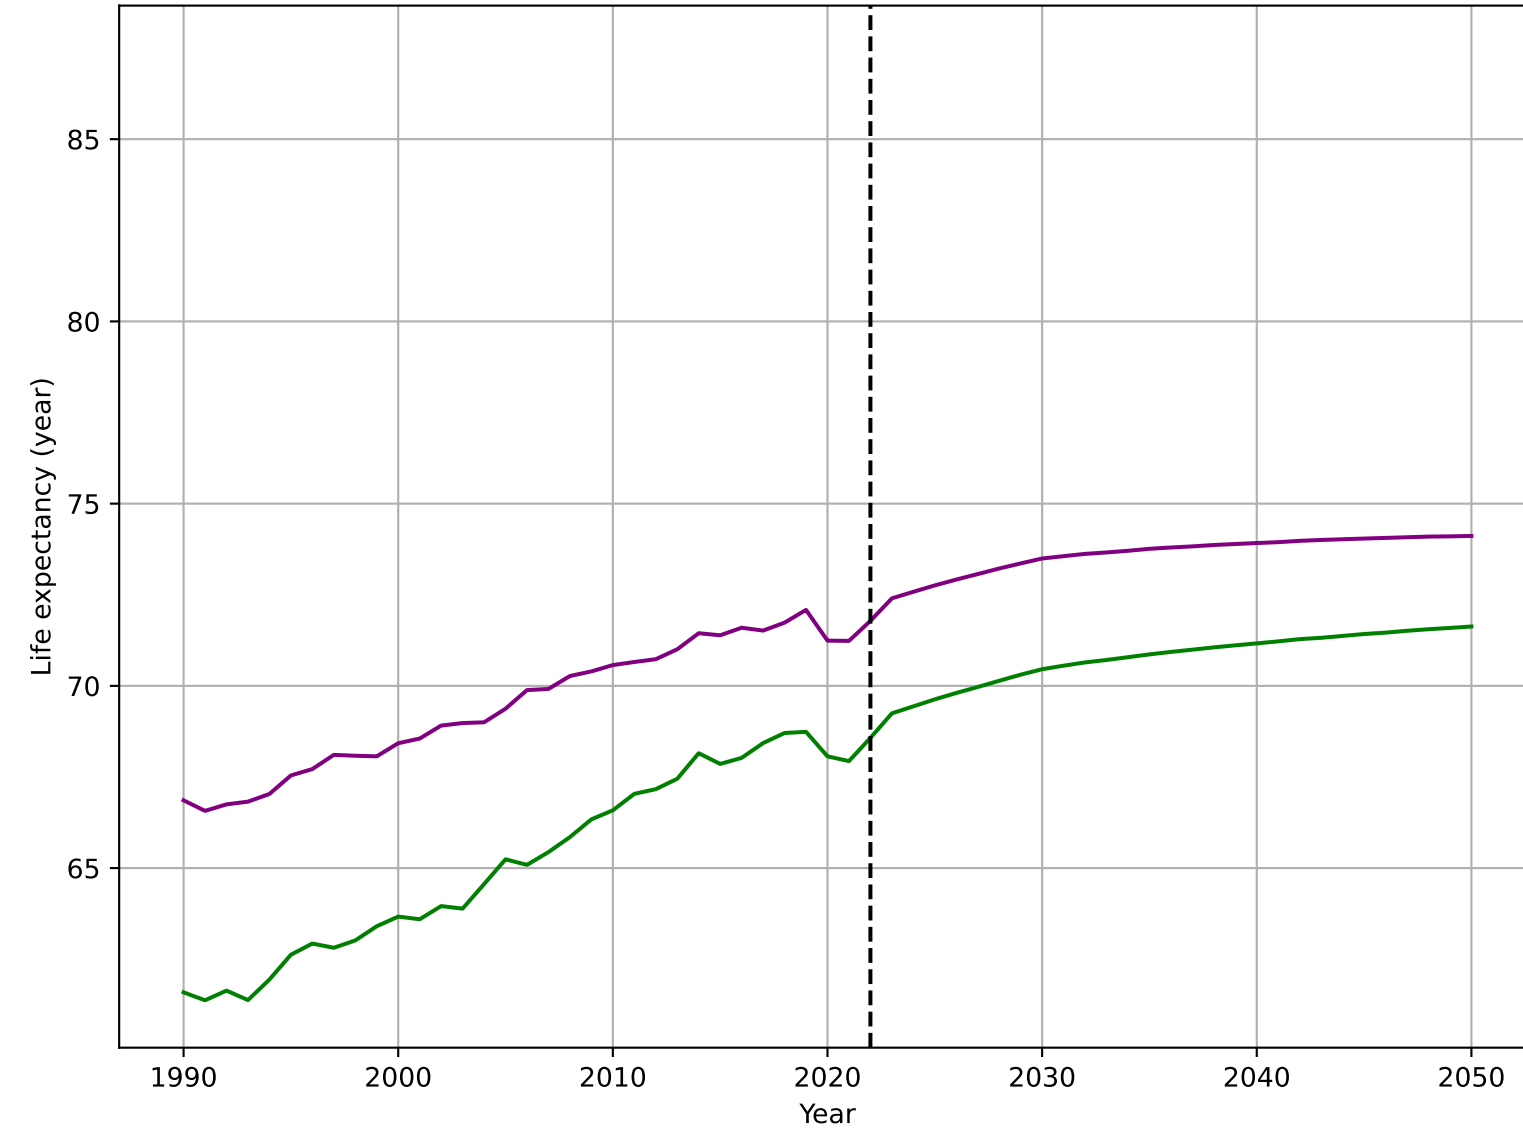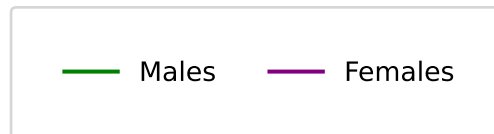

# Belarus

### Life Expectancy

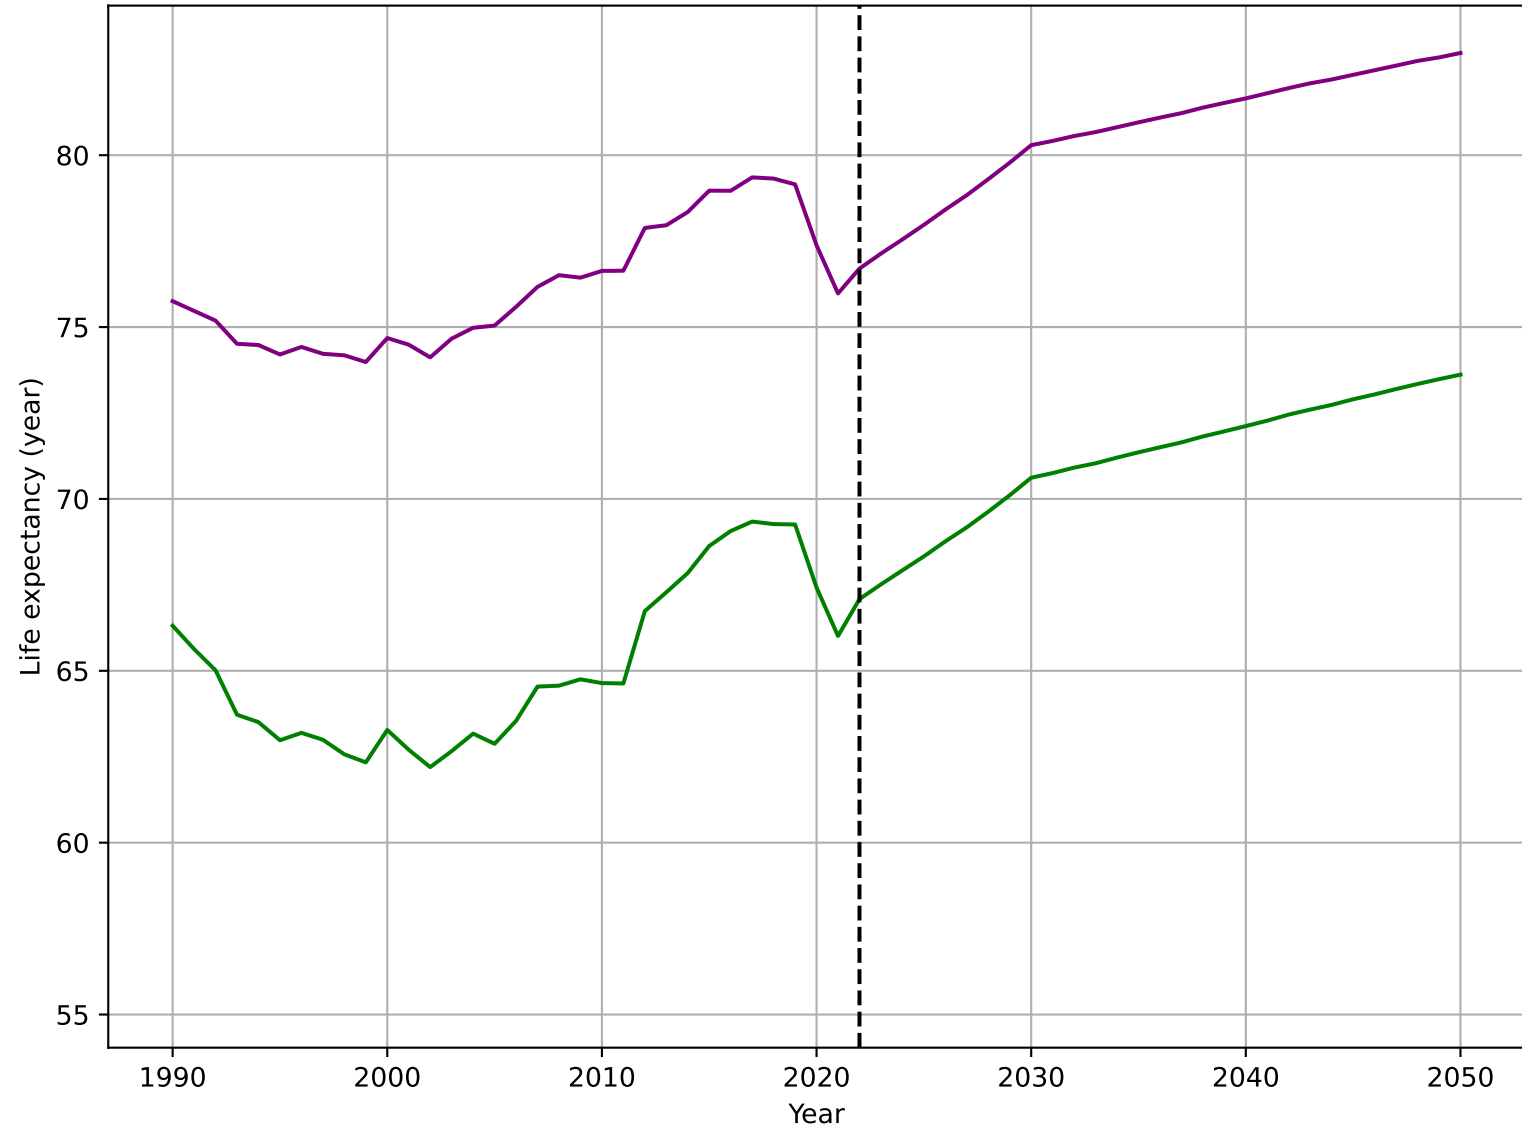

### Healthy Life Expectancy (HALE)

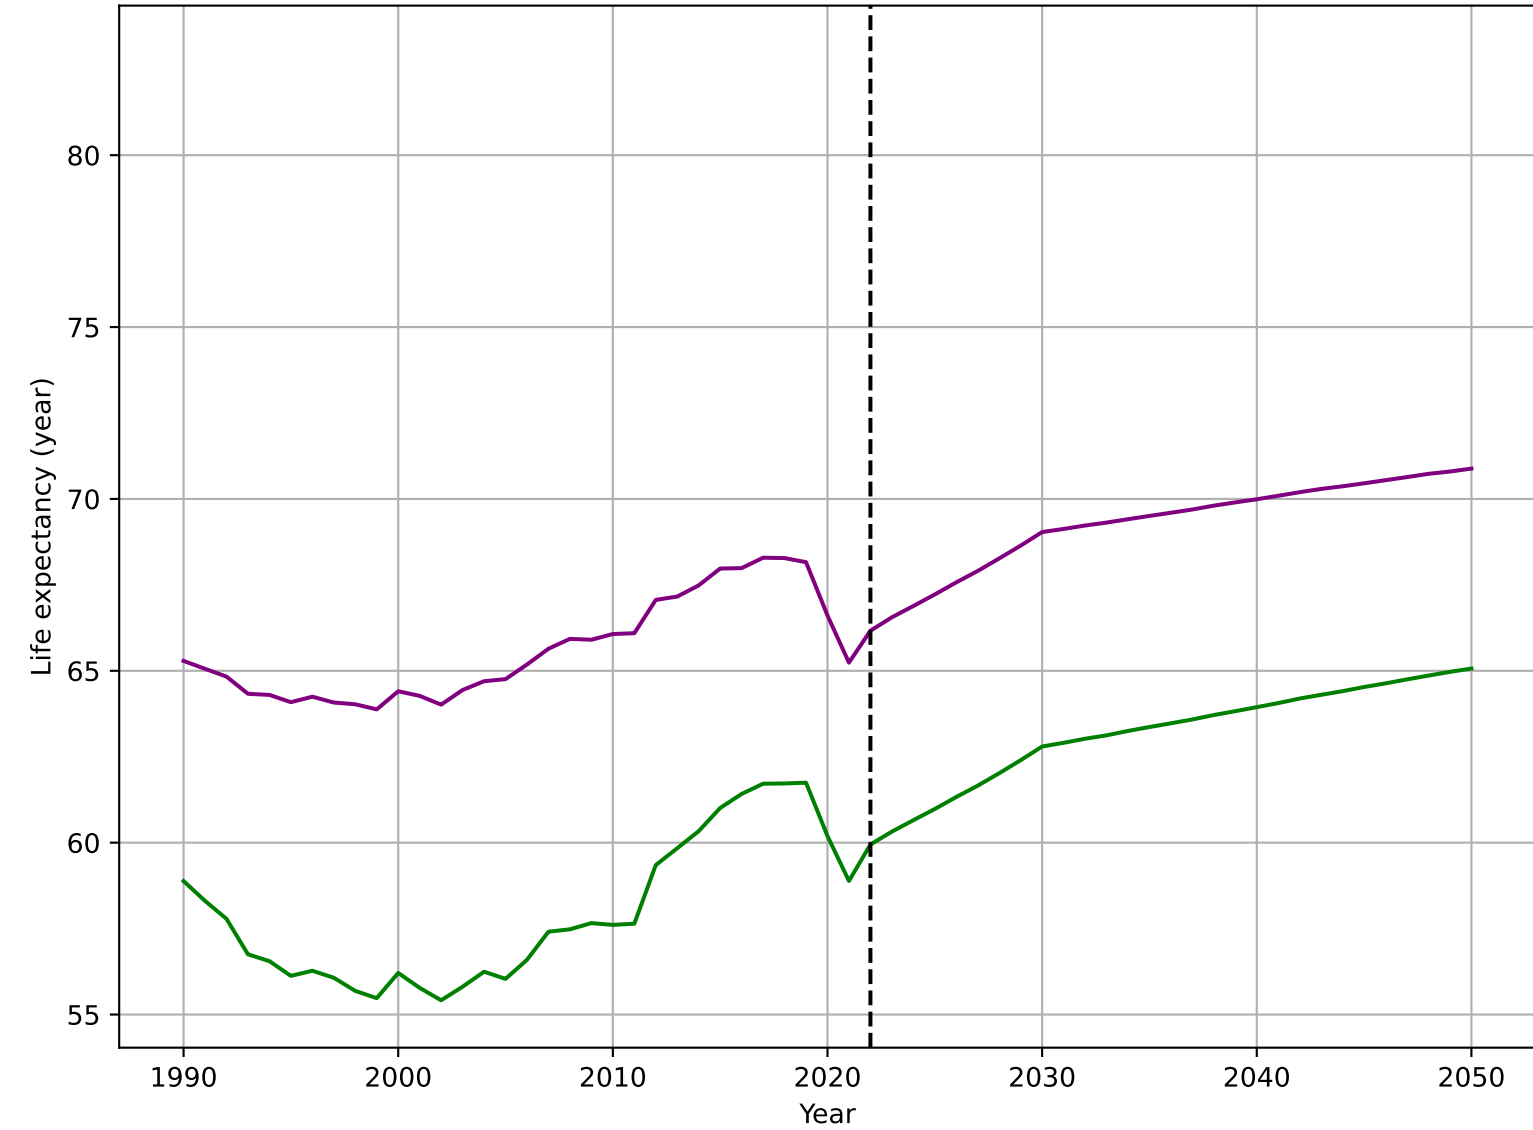

# Estonia

### Life Expectancy

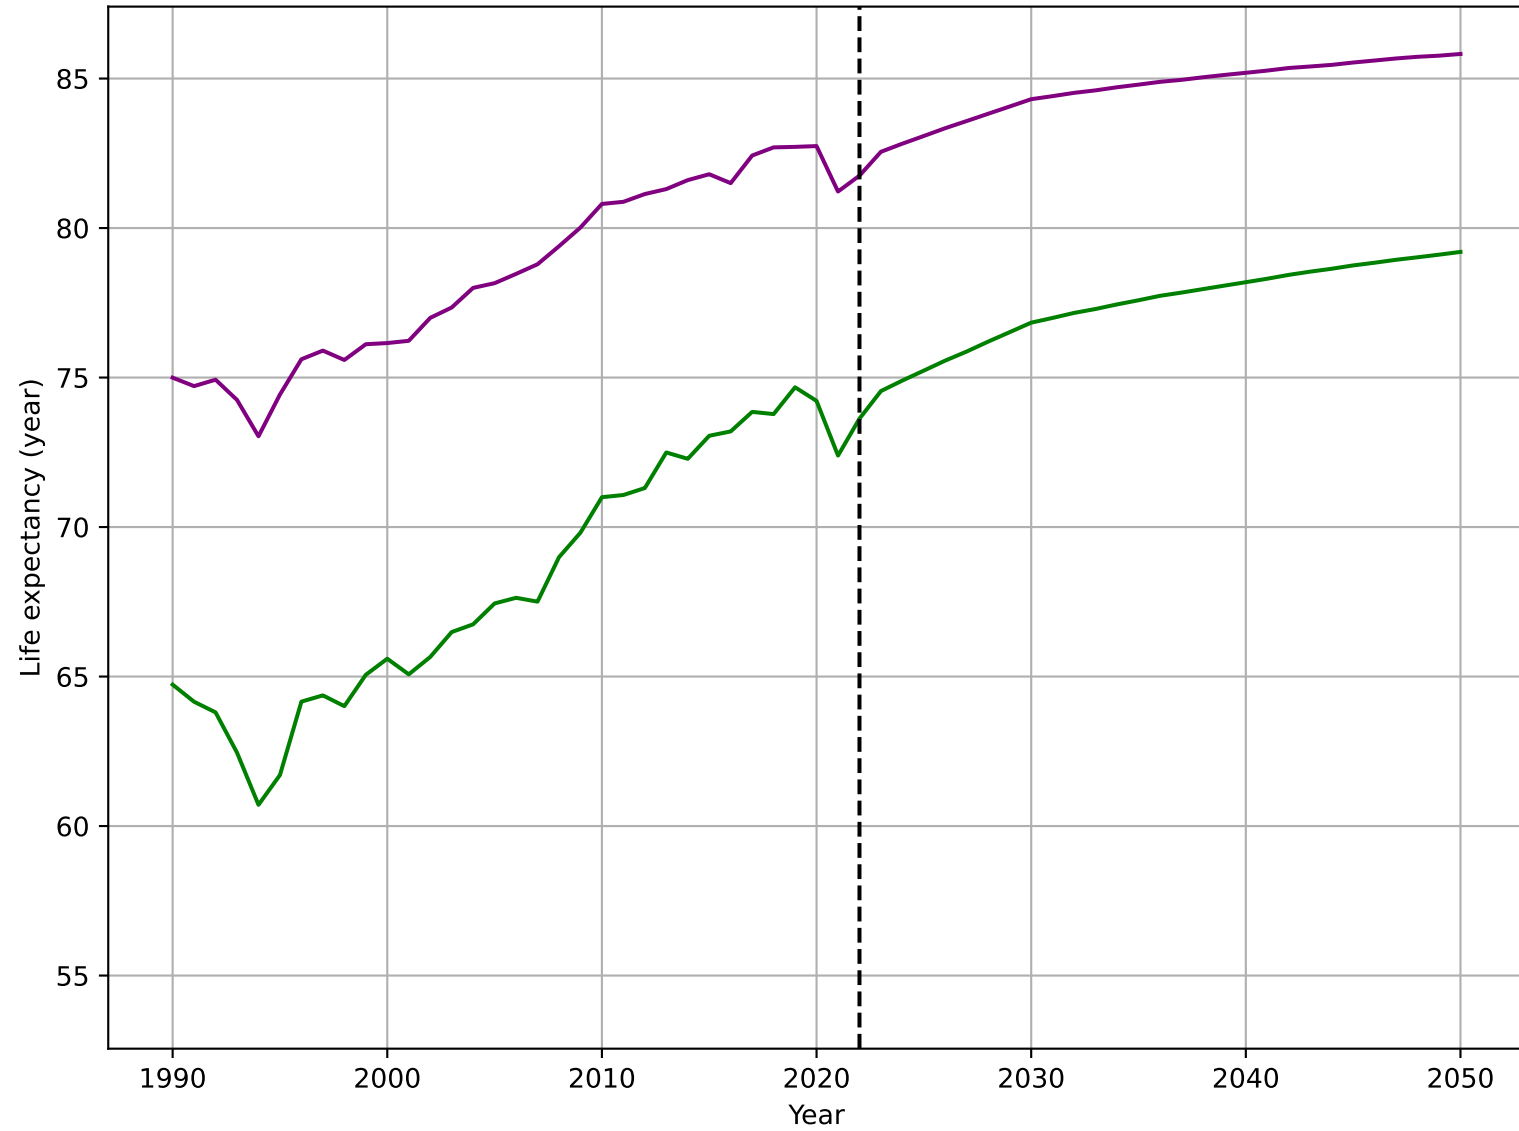

### Healthy Life Expectancy (HALE)

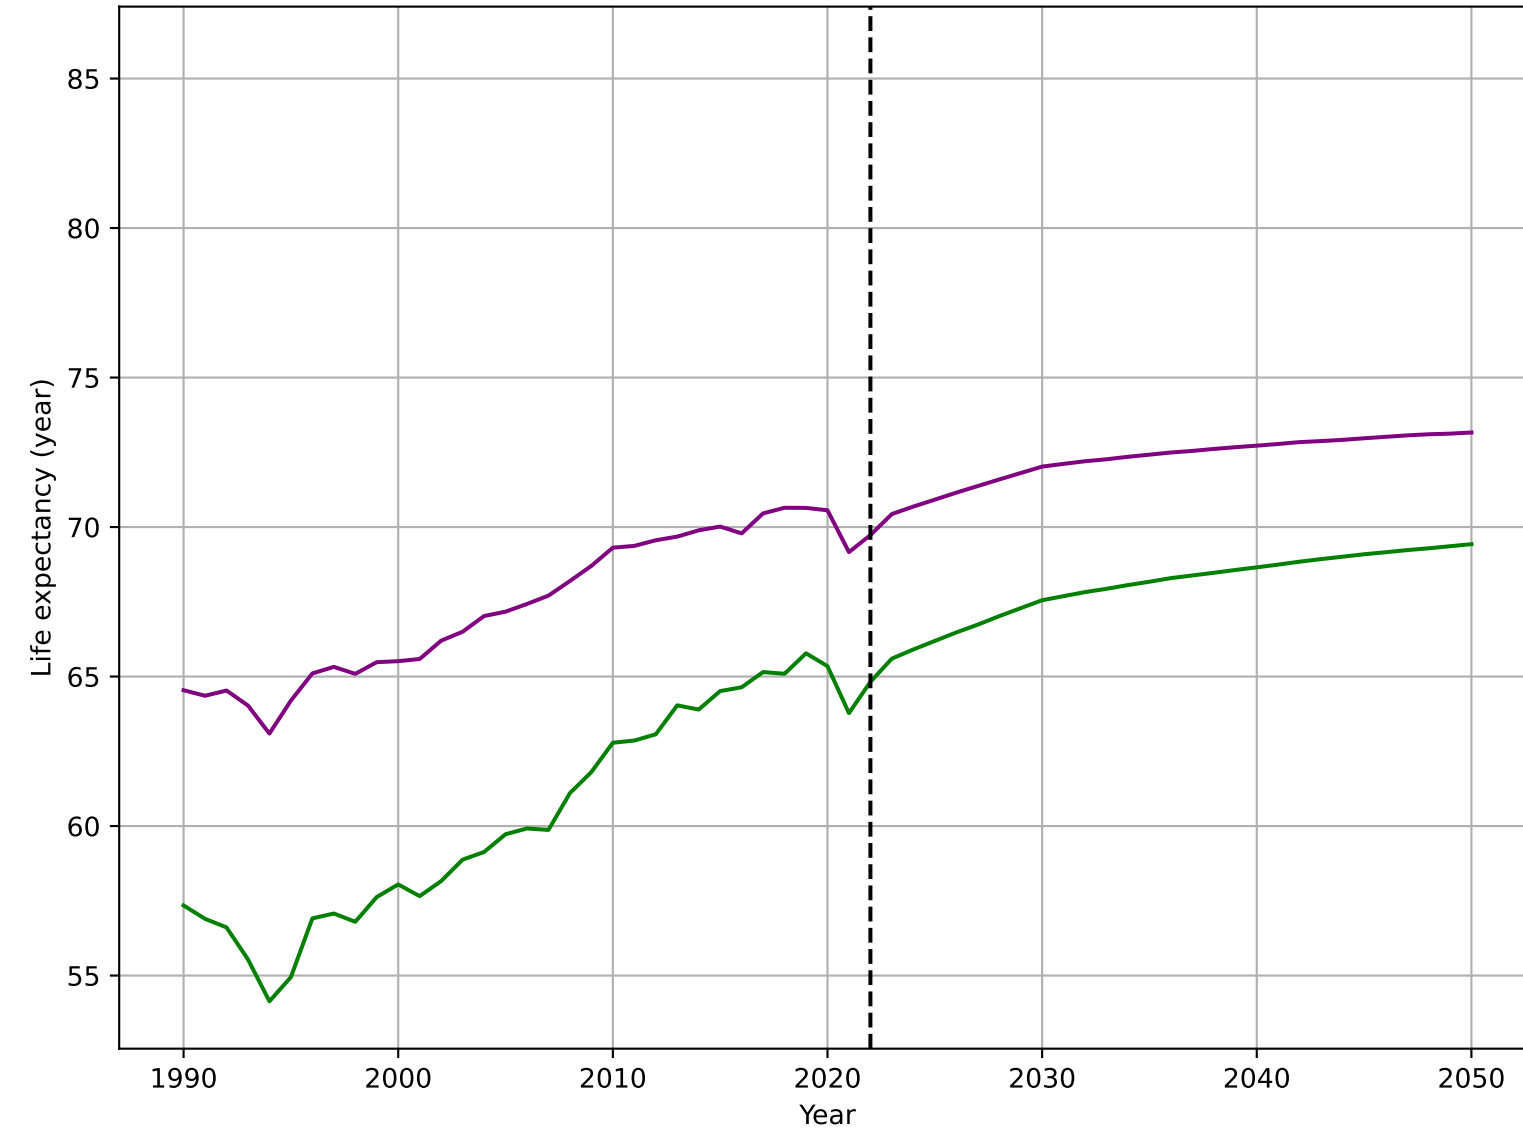

# Latvia

### Life Expectancy

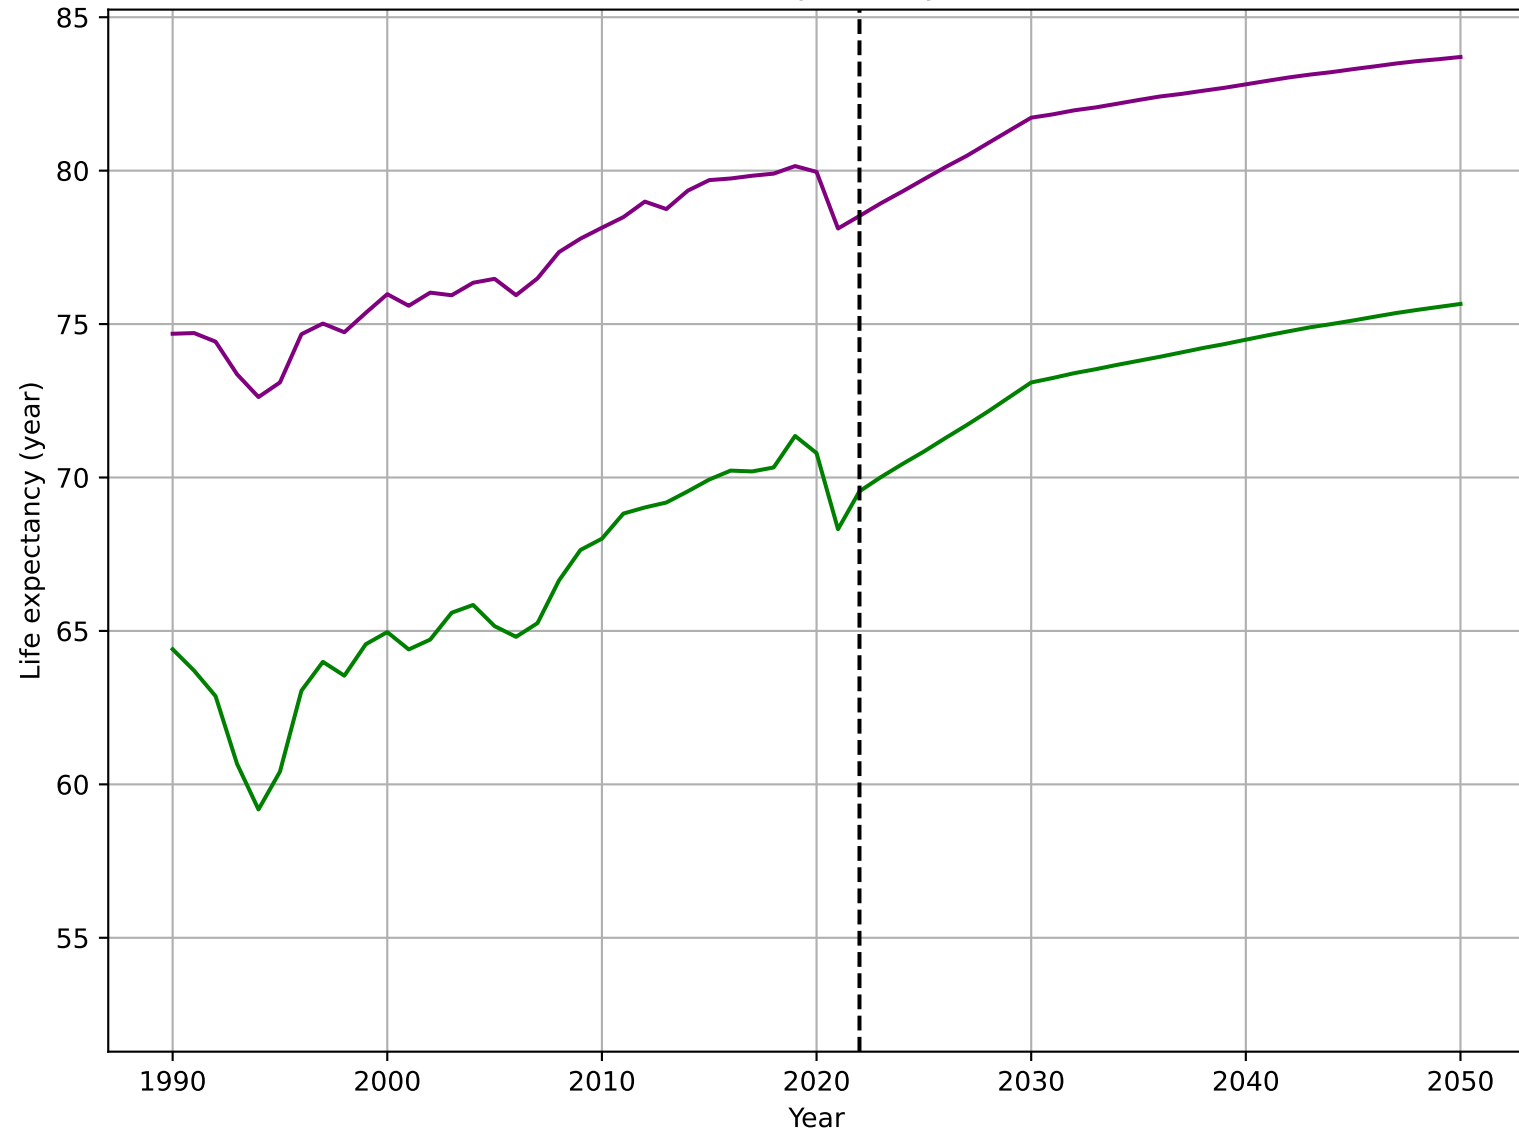

### Healthy Life Expectancy (HALE)

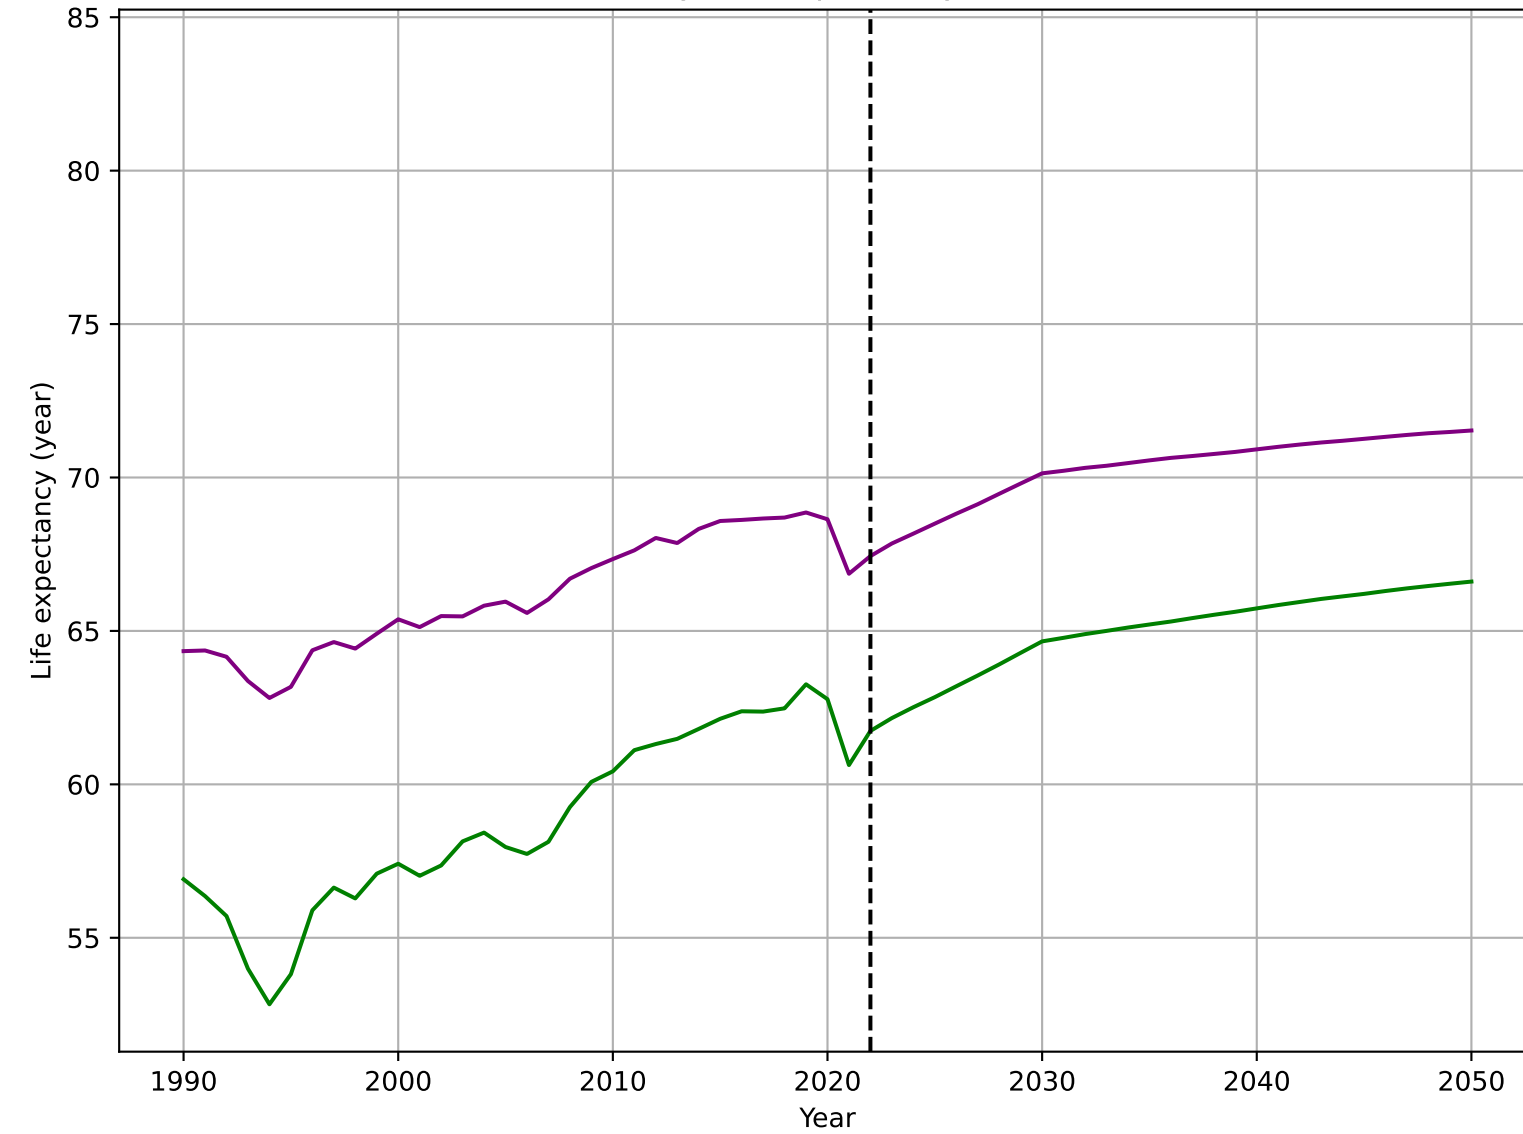

# Lithuania

### Life Expectancy

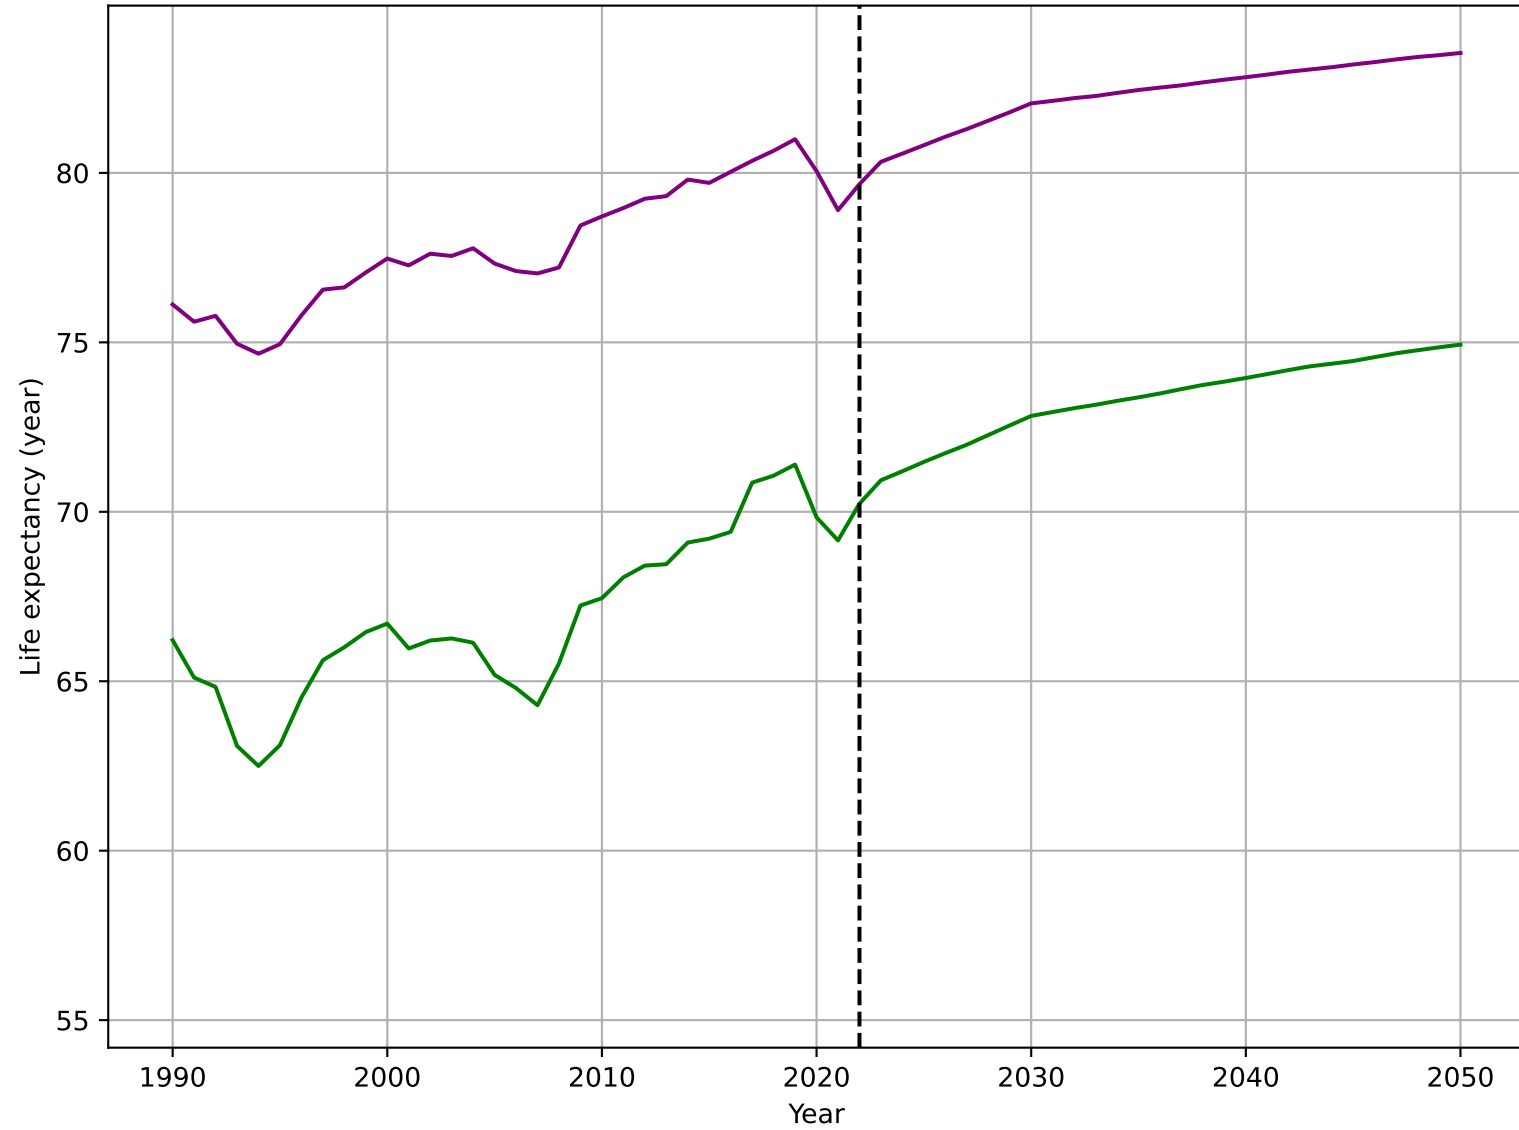

### Healthy Life Expectancy (HALE)

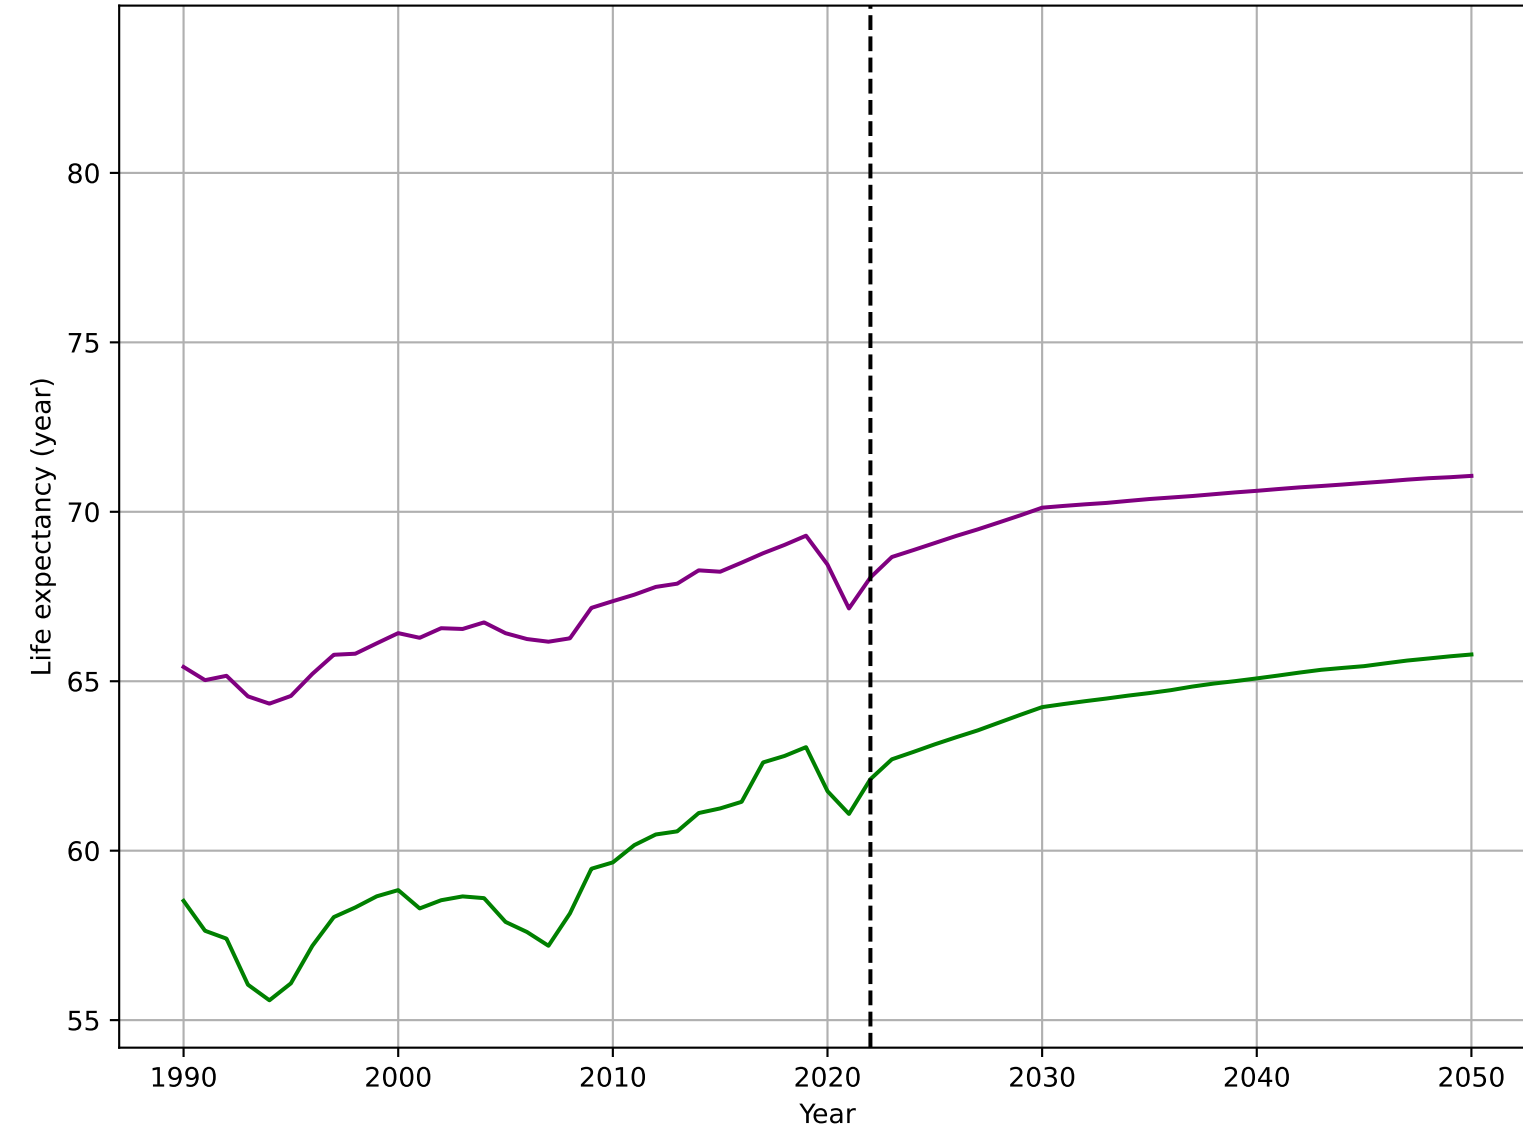

# Moldova

### Life Expectancy

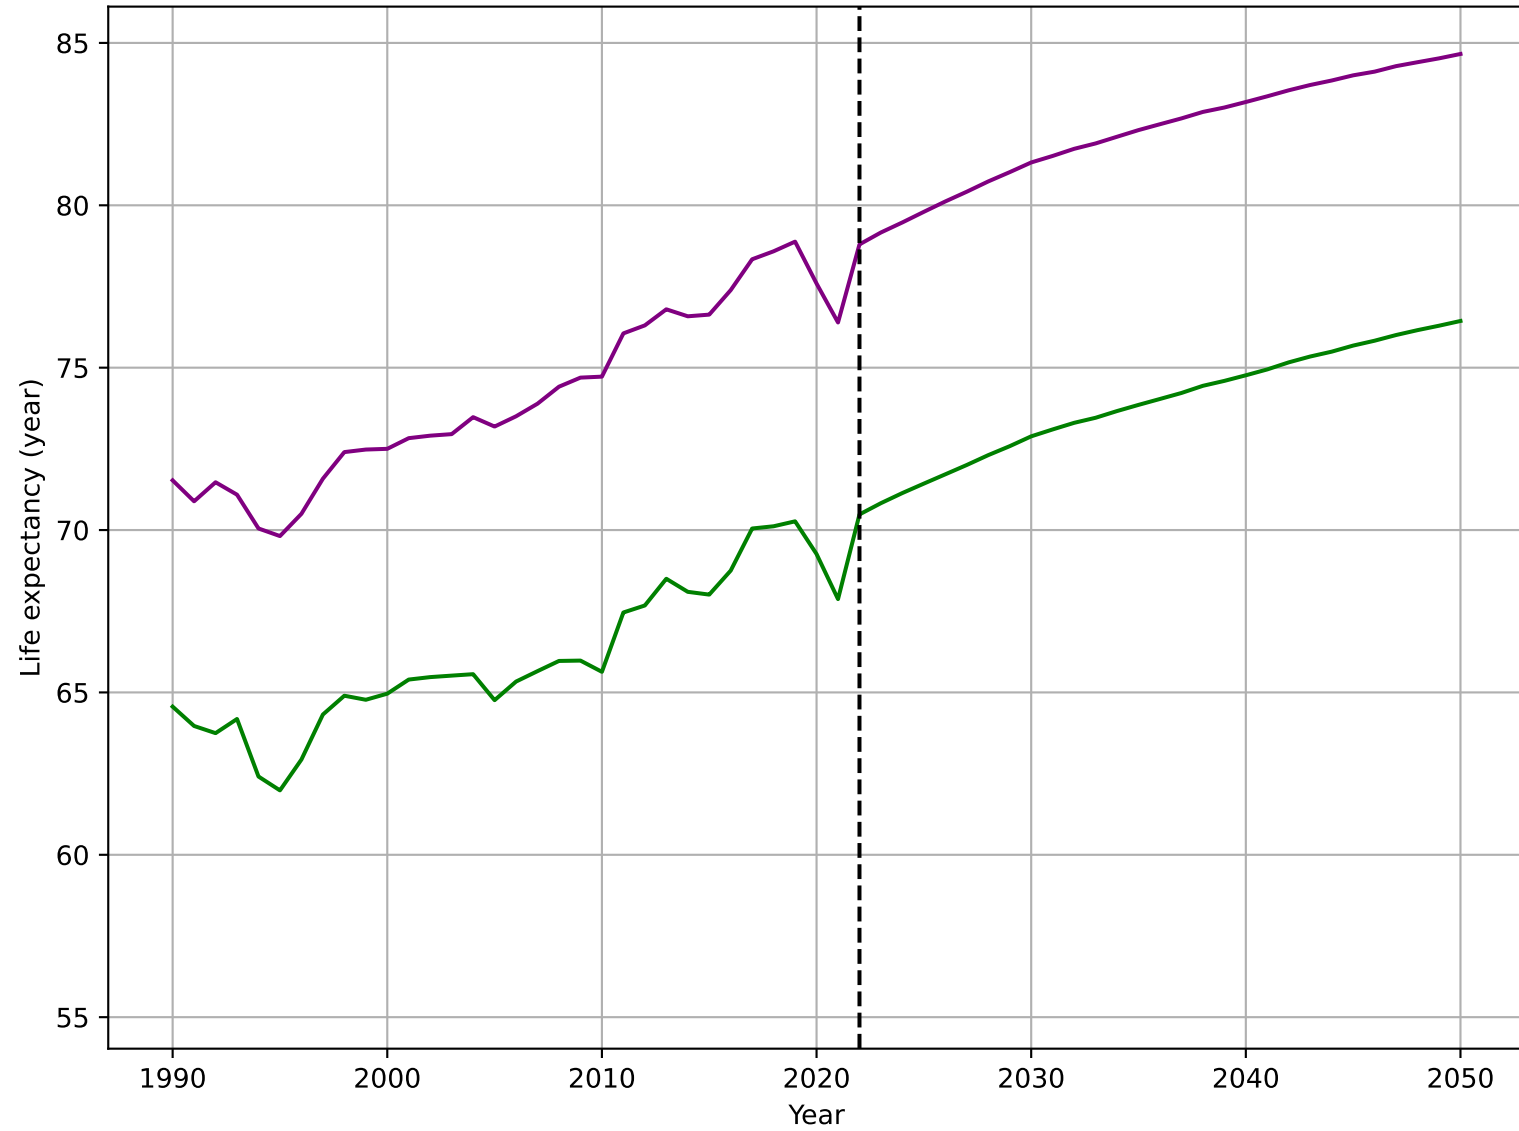

### Healthy Life Expectancy (HALE)

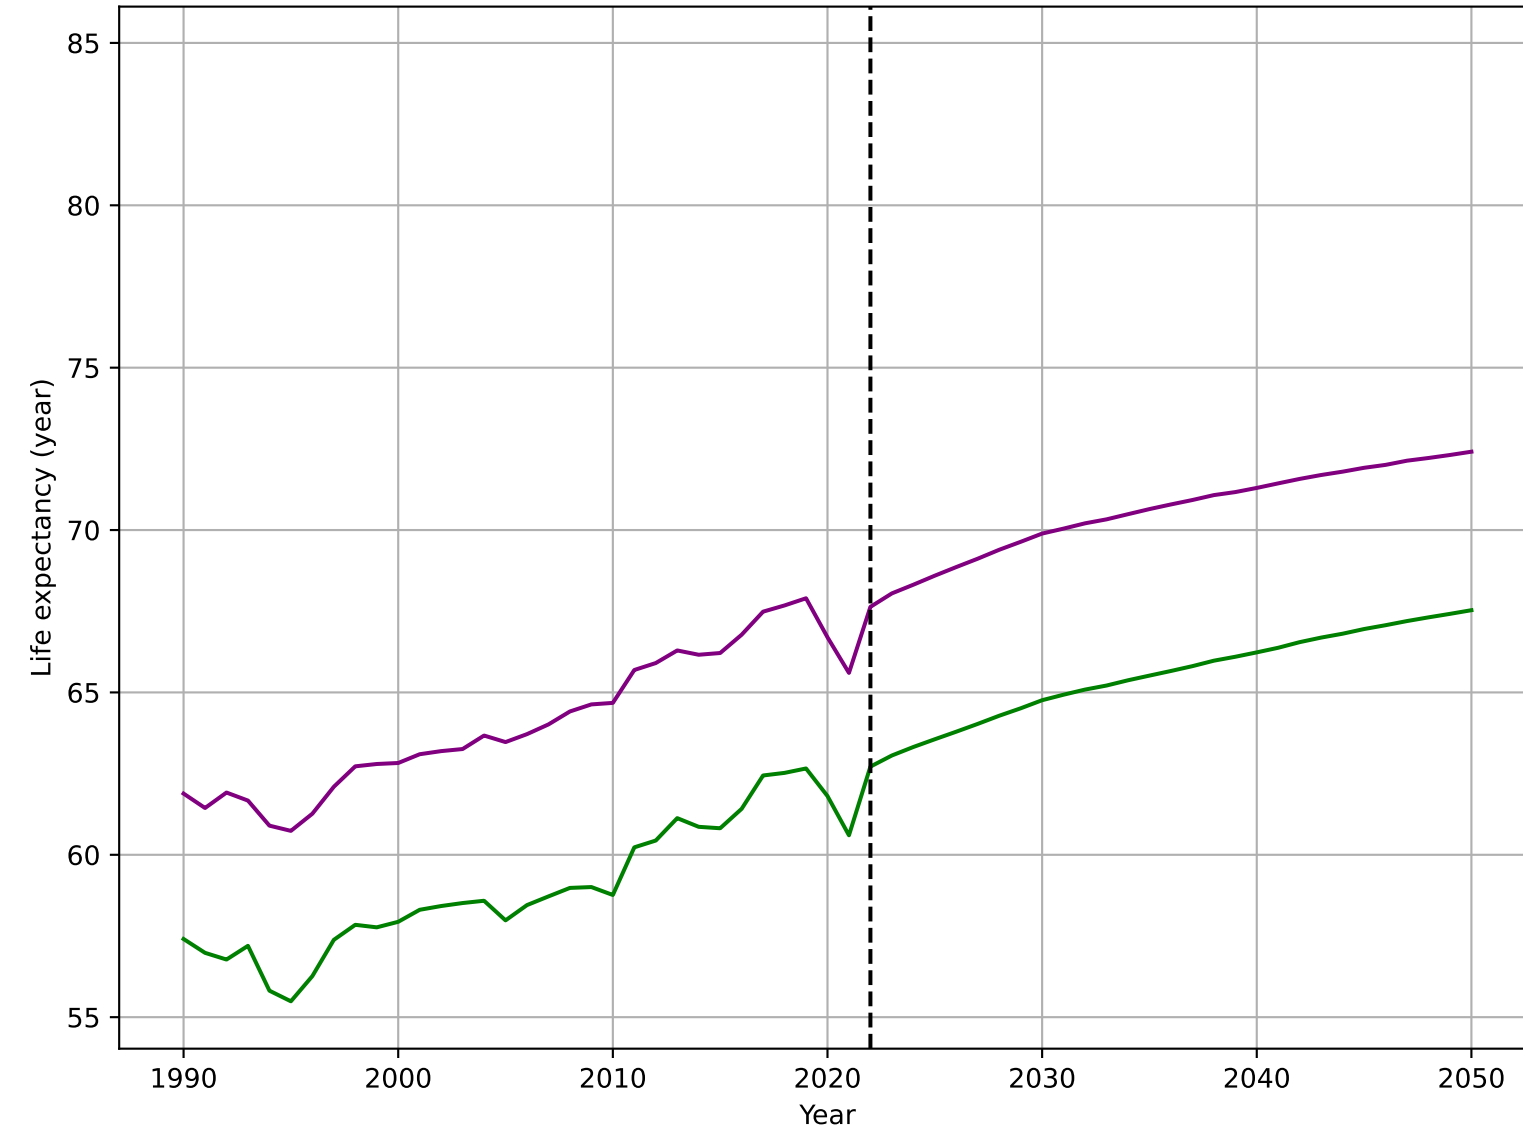

# Russia

### Life Expectancy

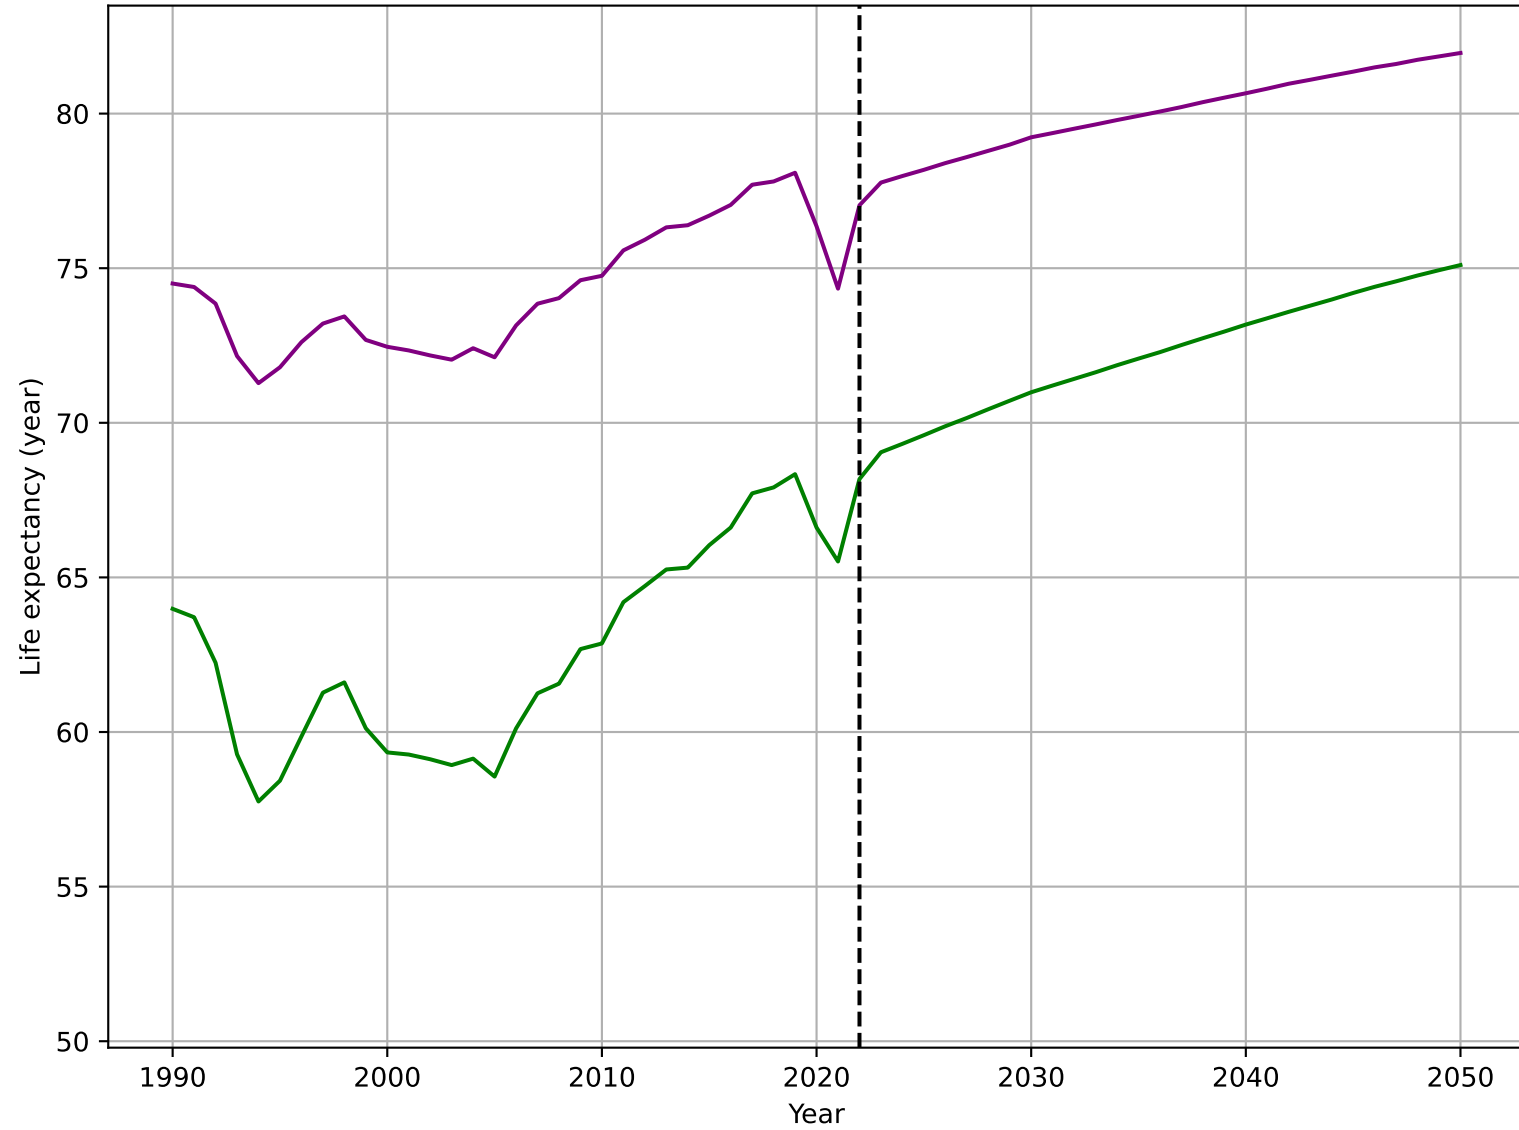

### Healthy Life Expectancy (HALE)

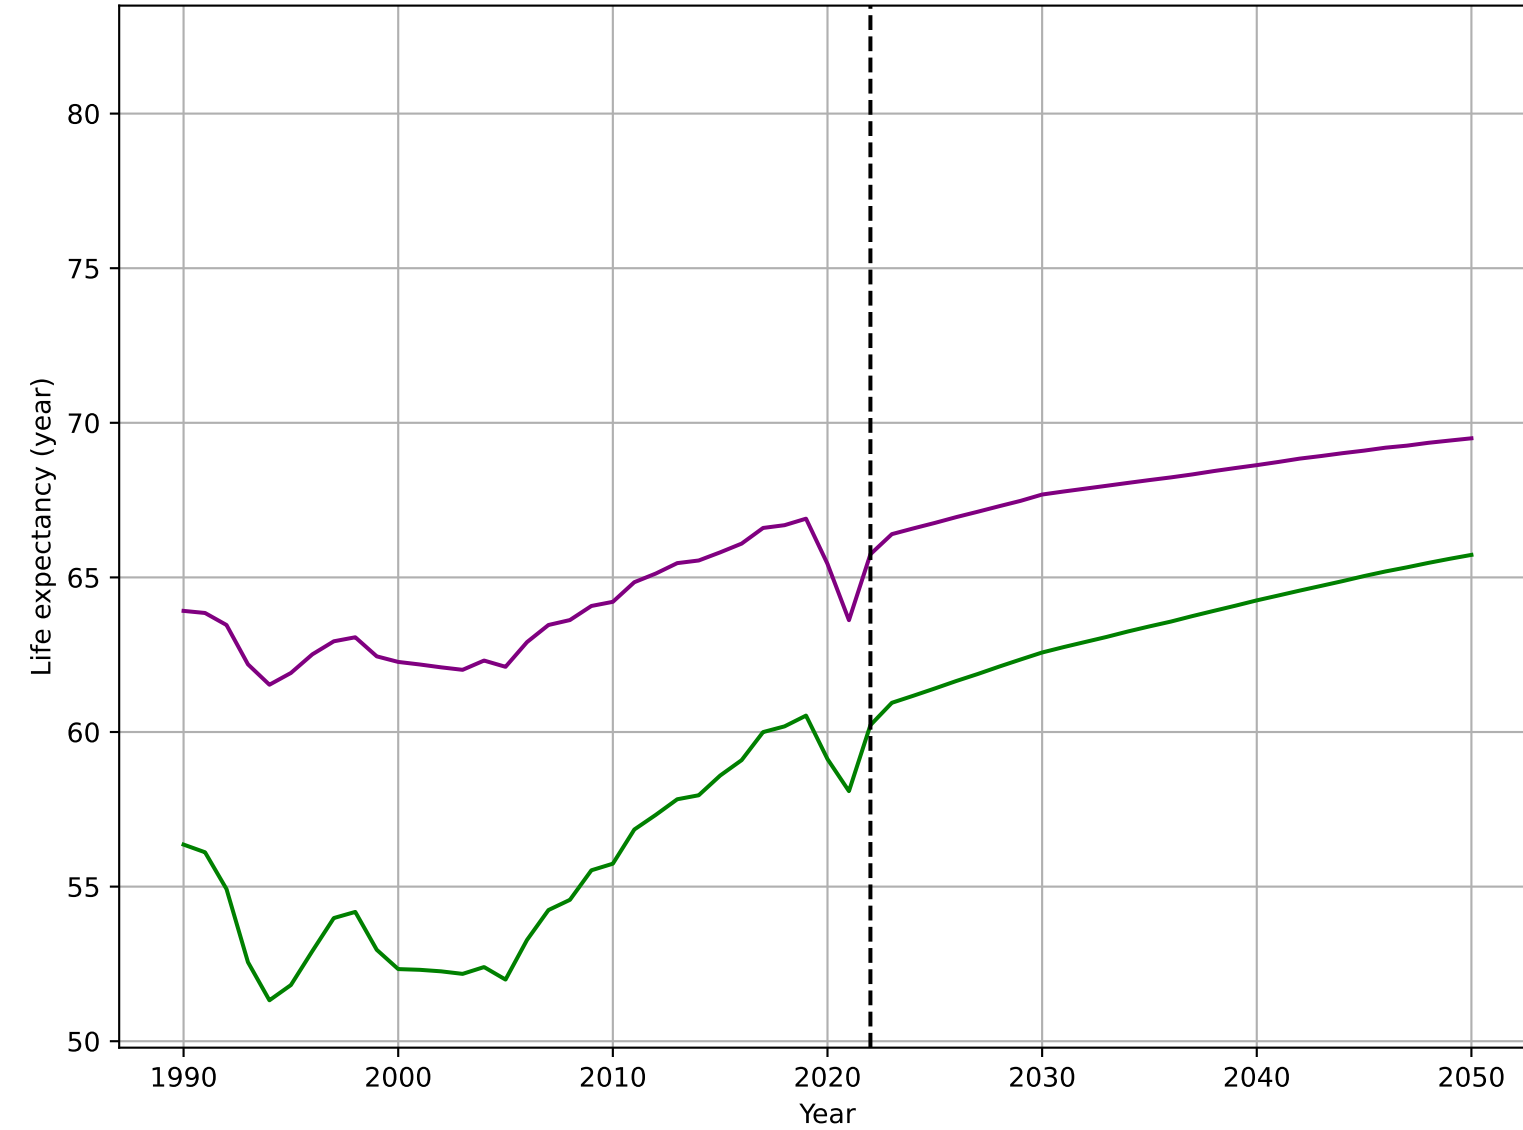



# Ukraine

### Life Expectancy

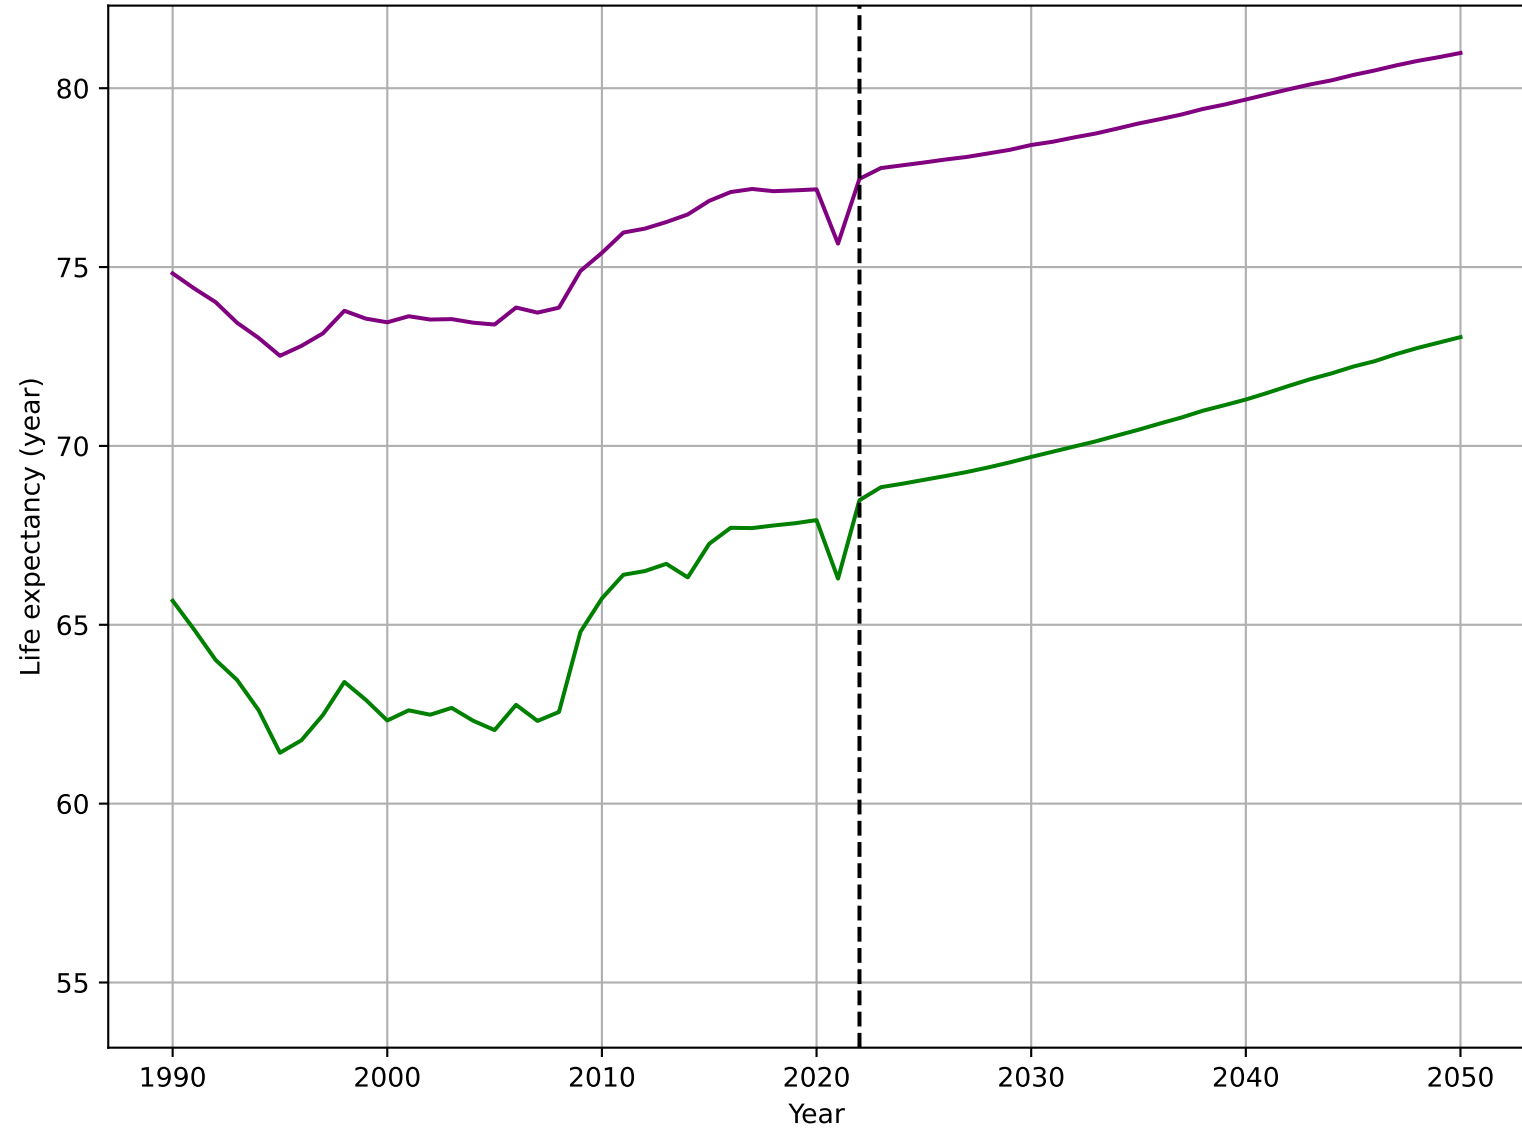

### Healthy Life Expectancy (HALE)

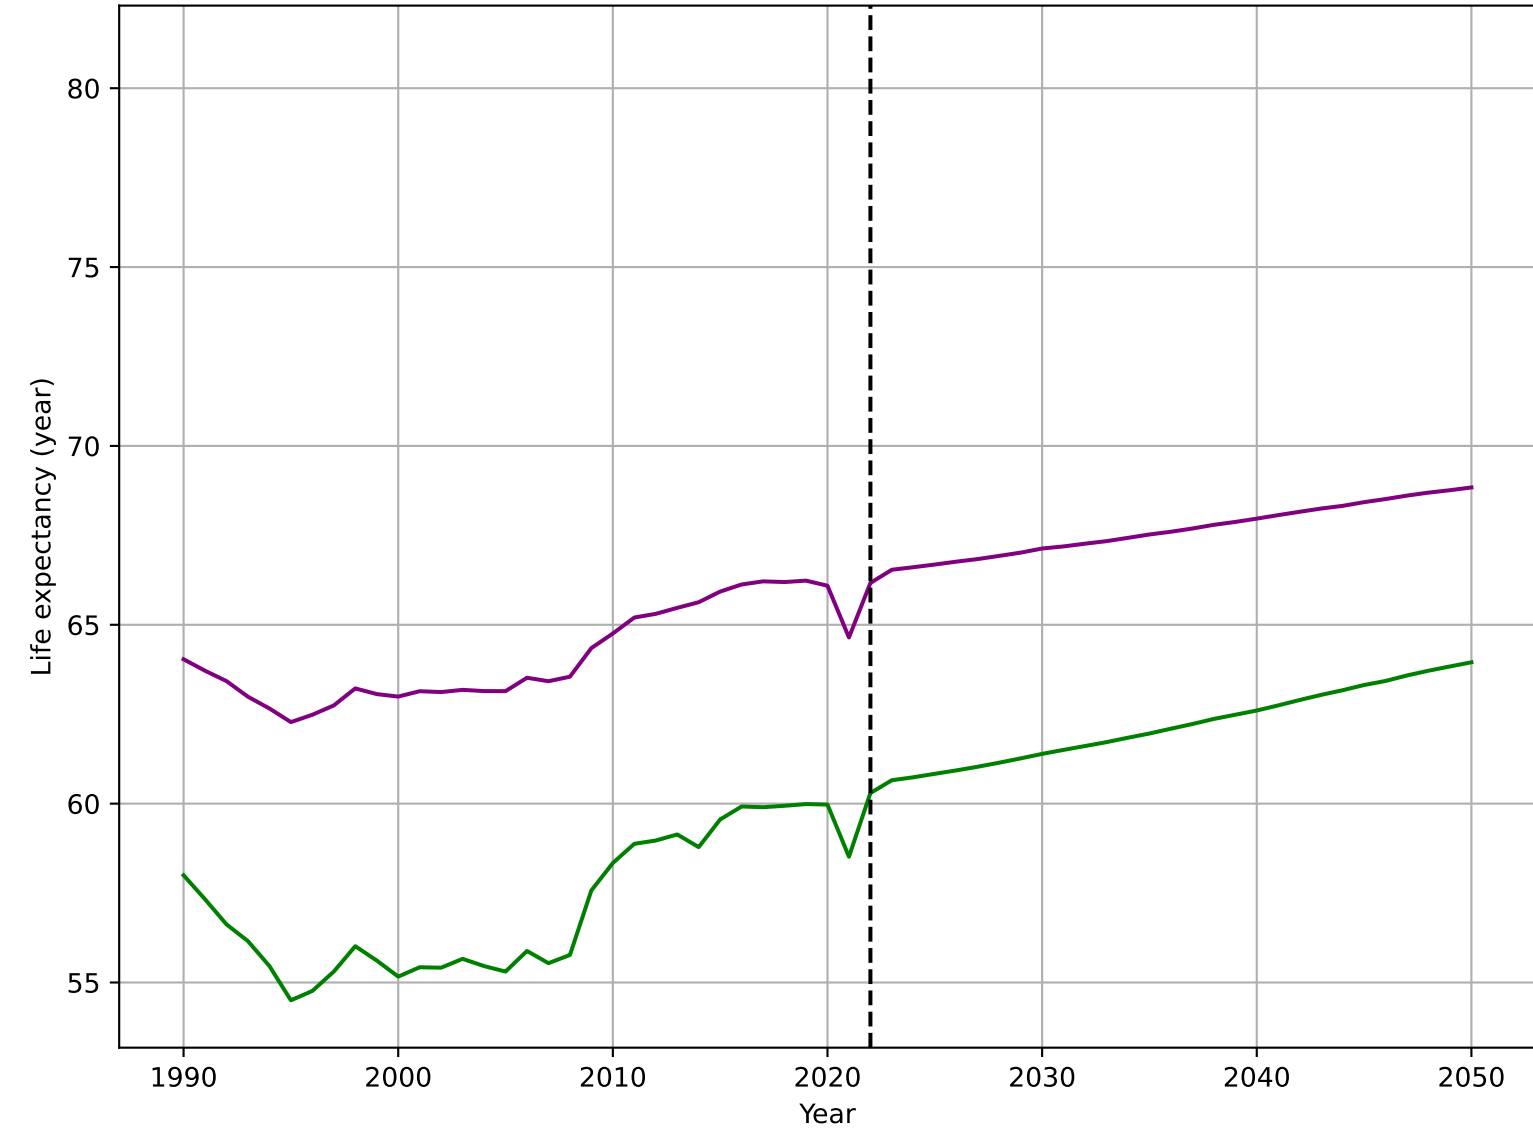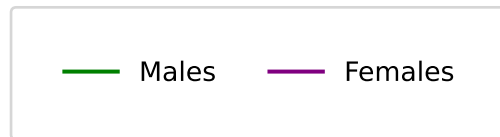

# Australia

### Life Expectancy

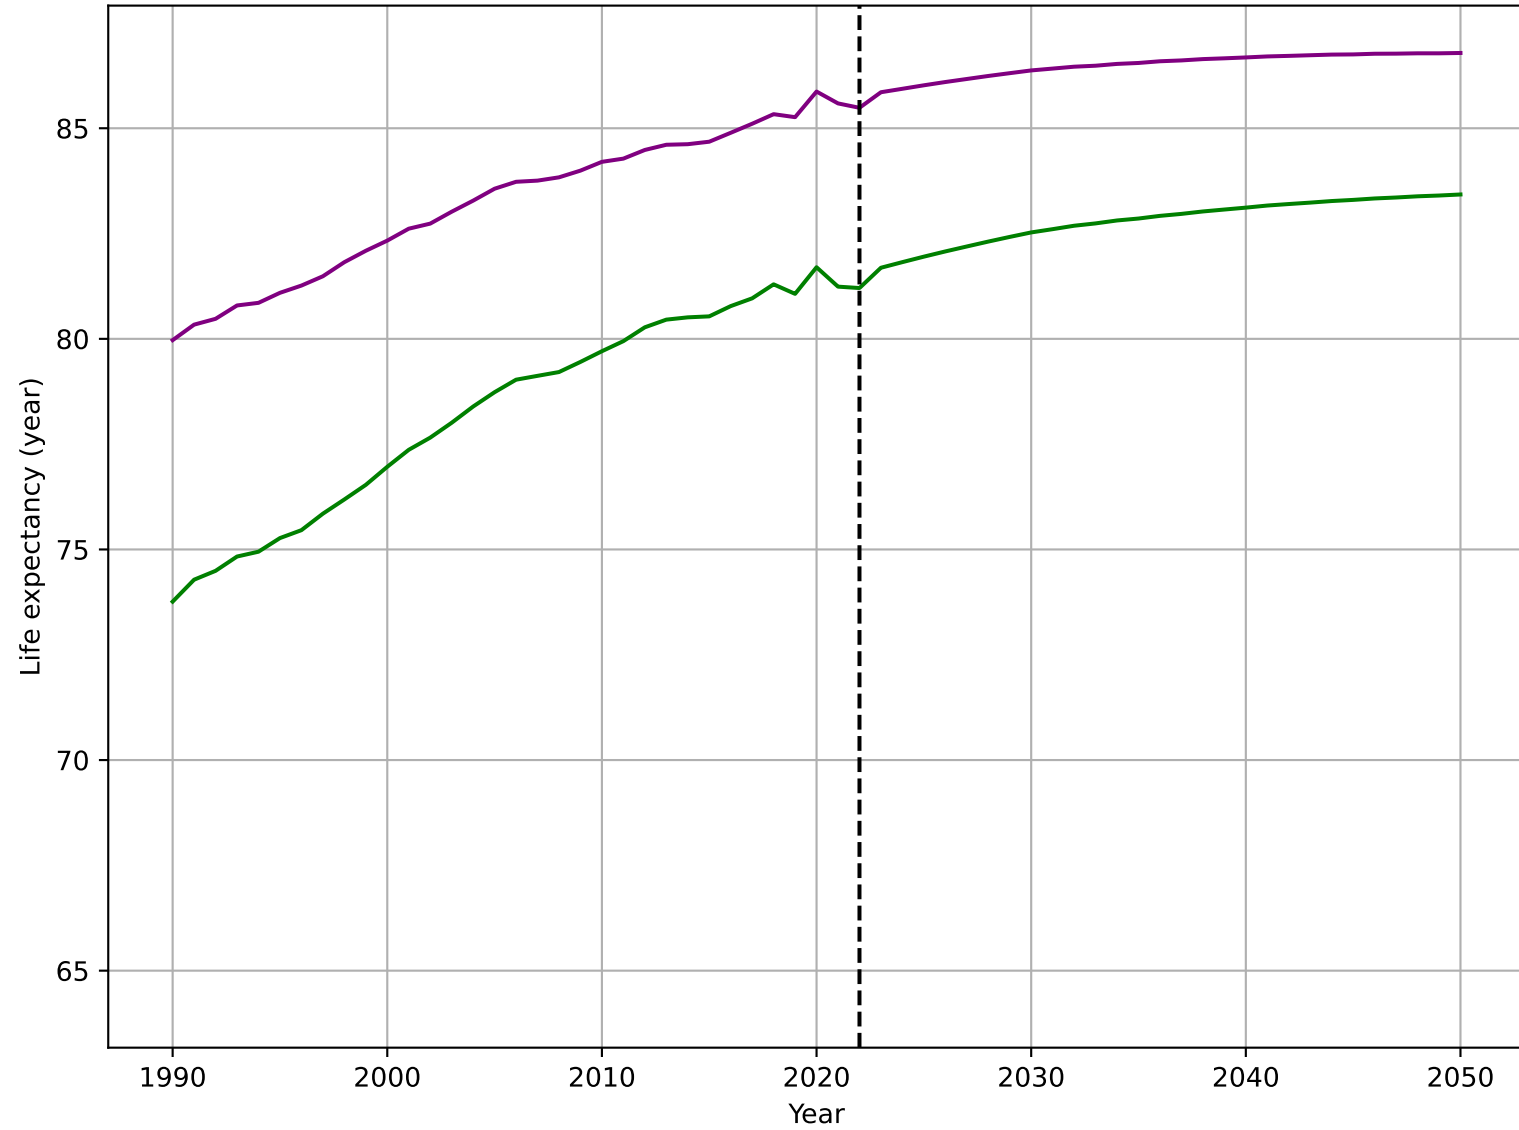

### Healthy Life Expectancy (HALE)

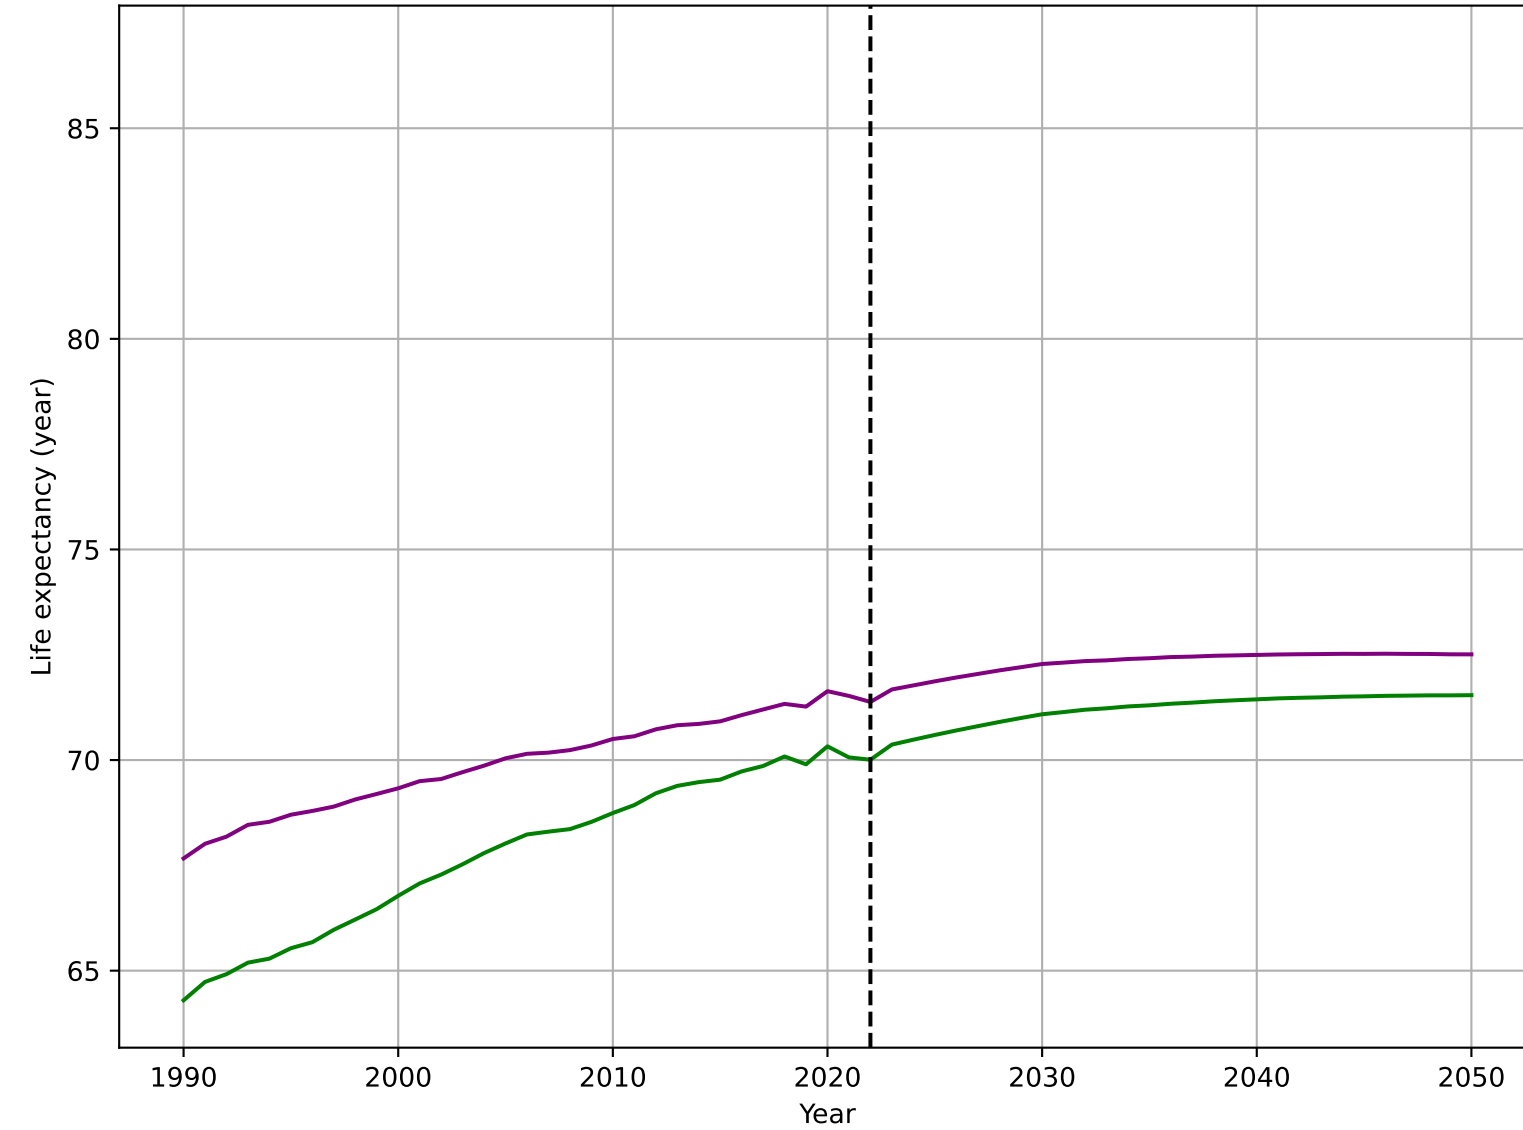

# New Zealand

### Life Expectancy

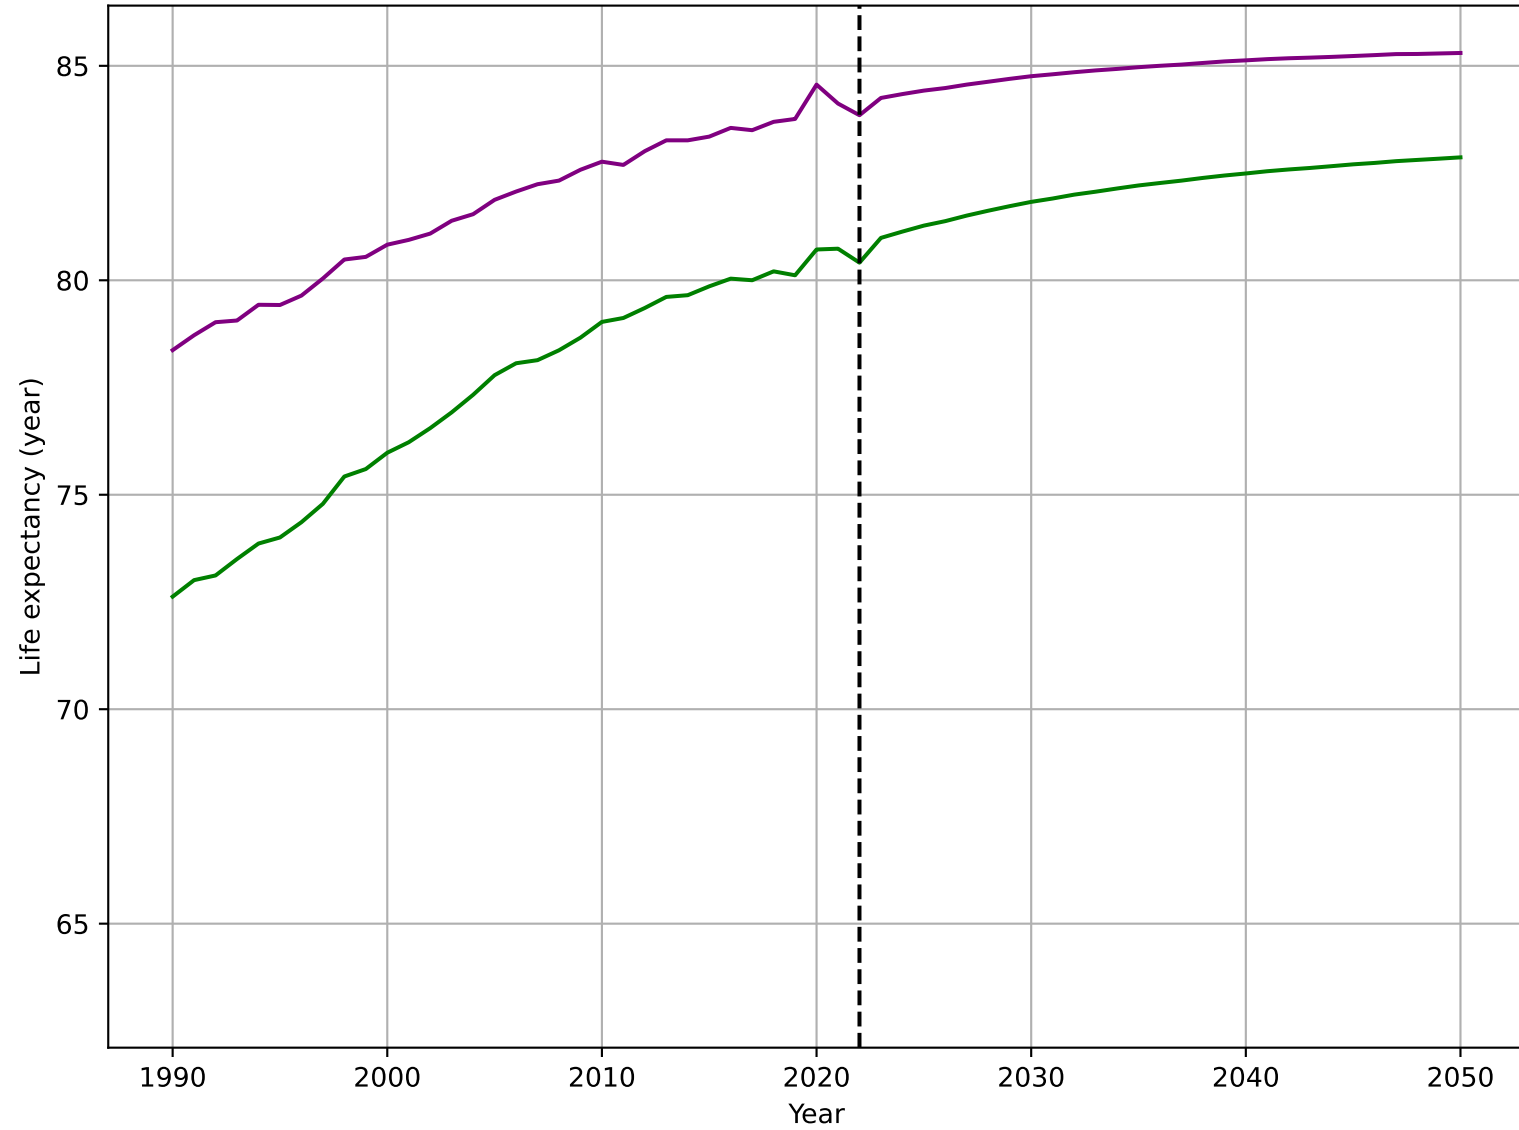

### Healthy Life Expectancy (HALE)

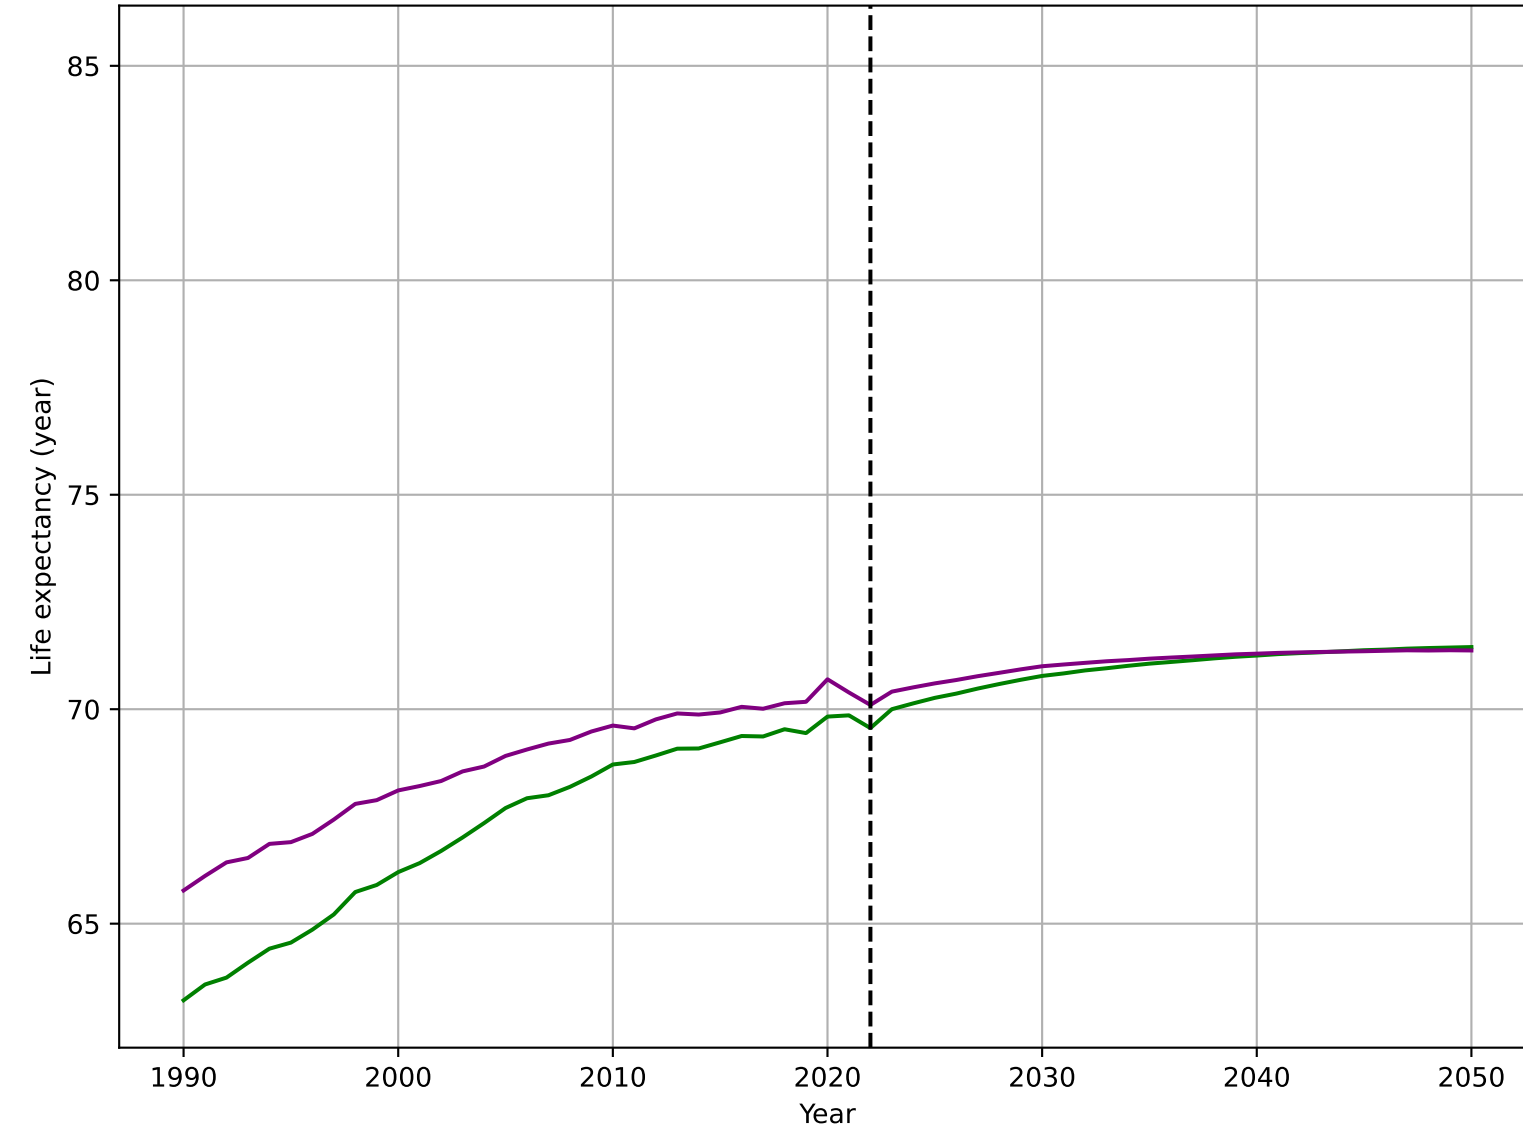

# Brunei

## Life Expectancy

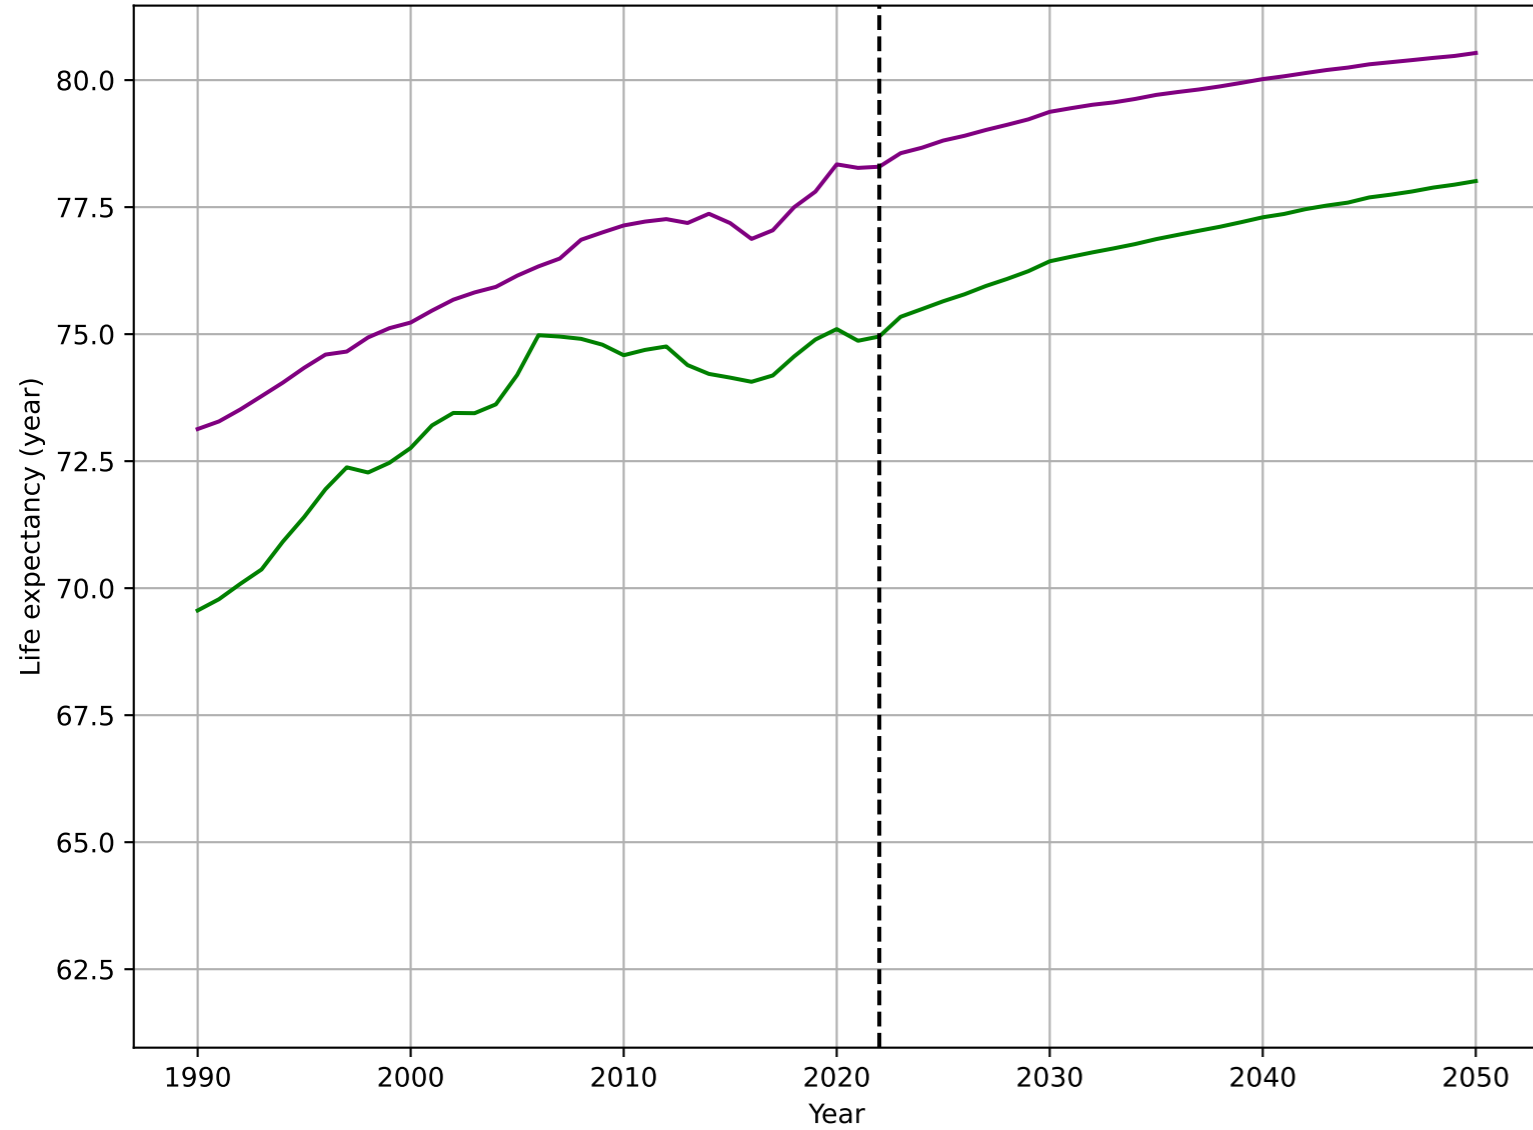

## Healthy Life Expectancy (HALE)

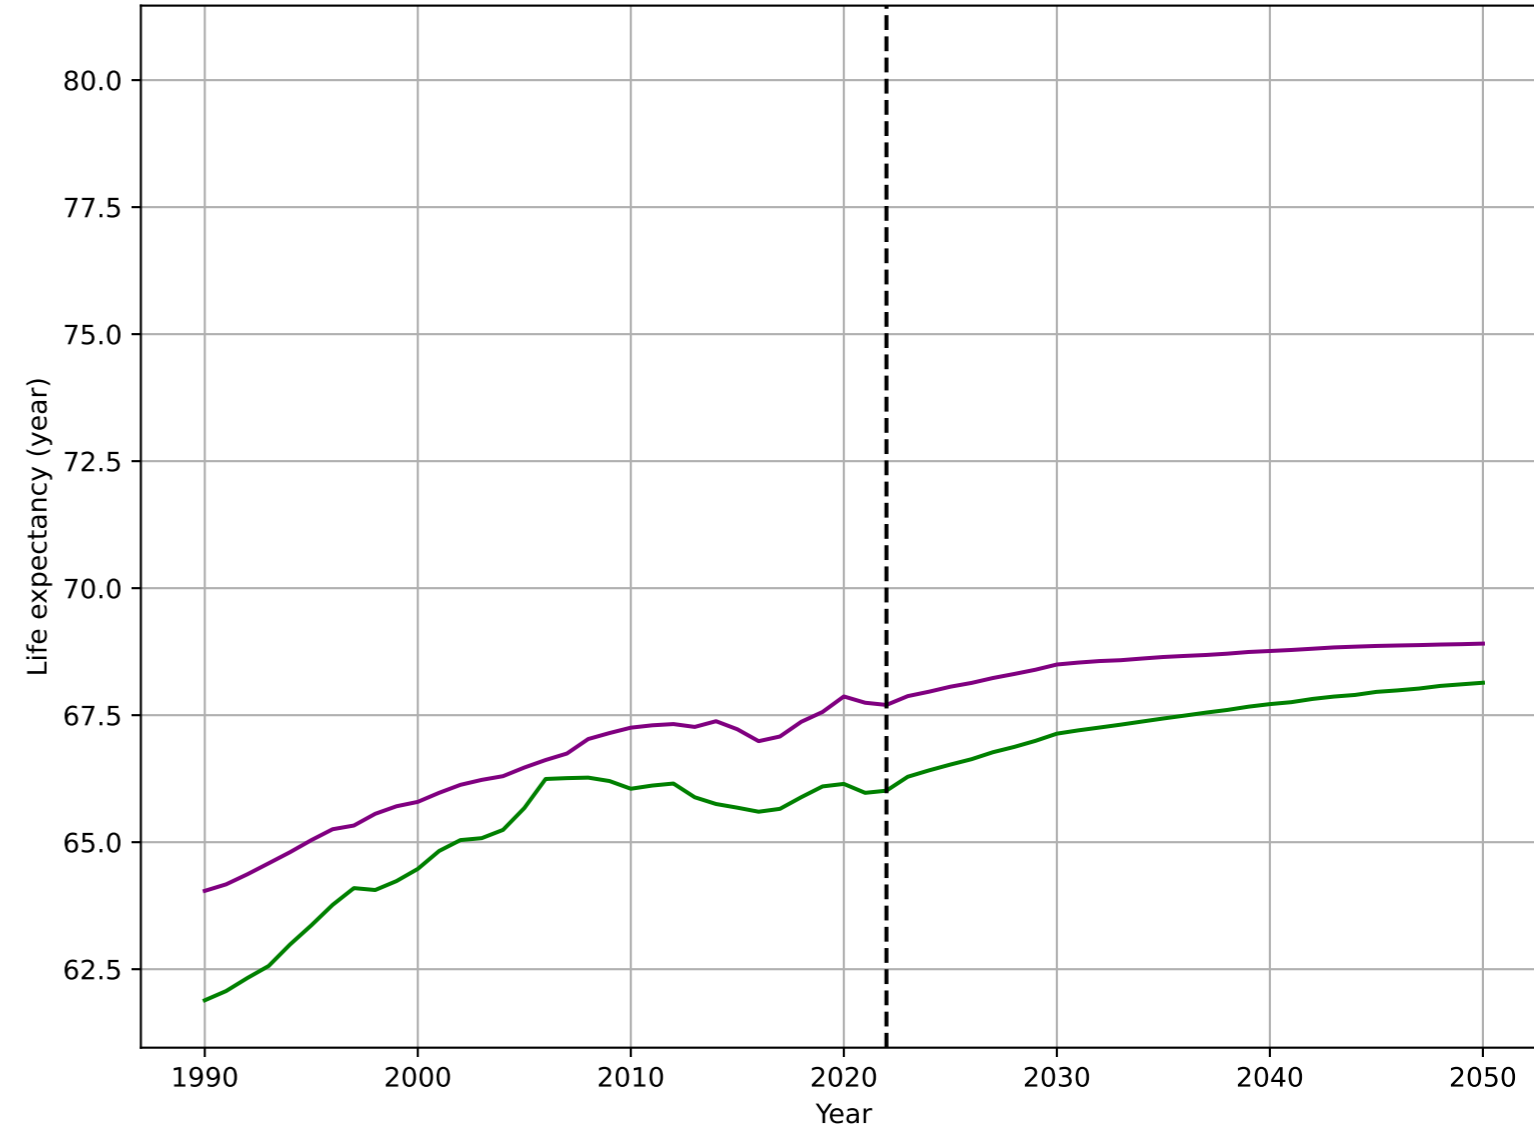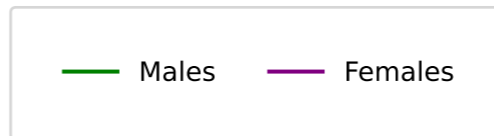

# Japan

### Life Expectancy

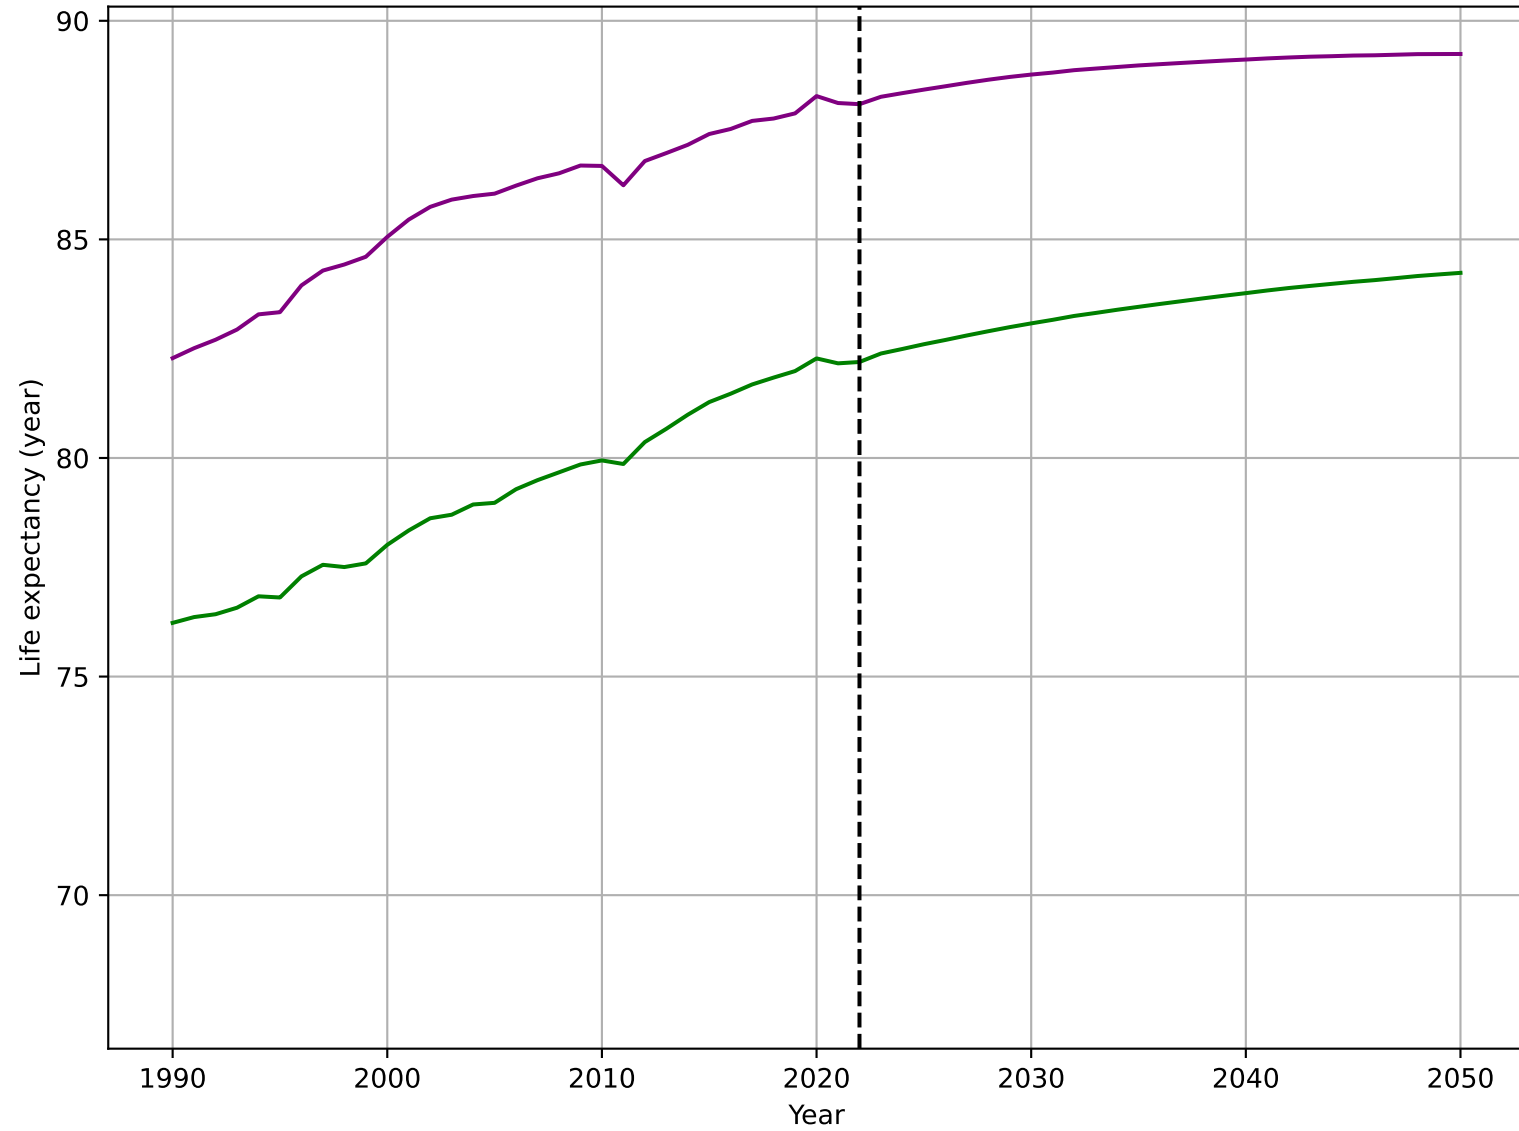

### Healthy Life Expectancy (HALE)

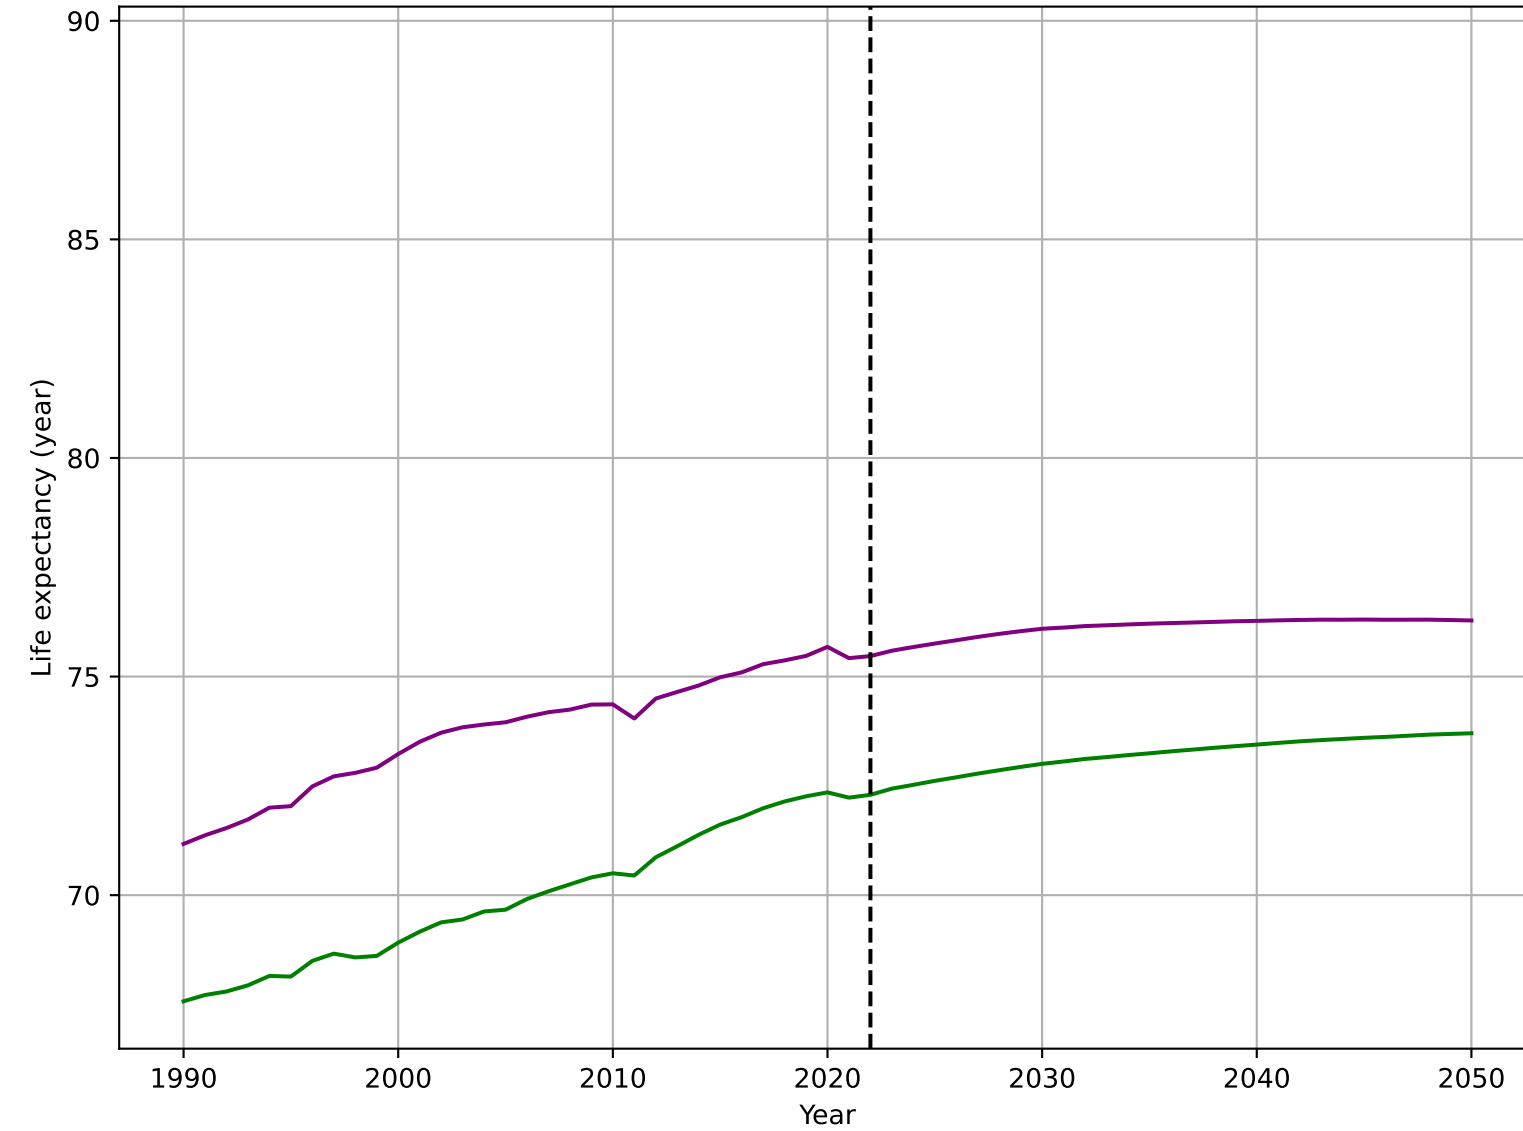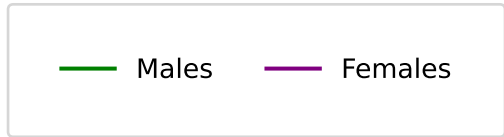

# South Korea

### Life Expectancy

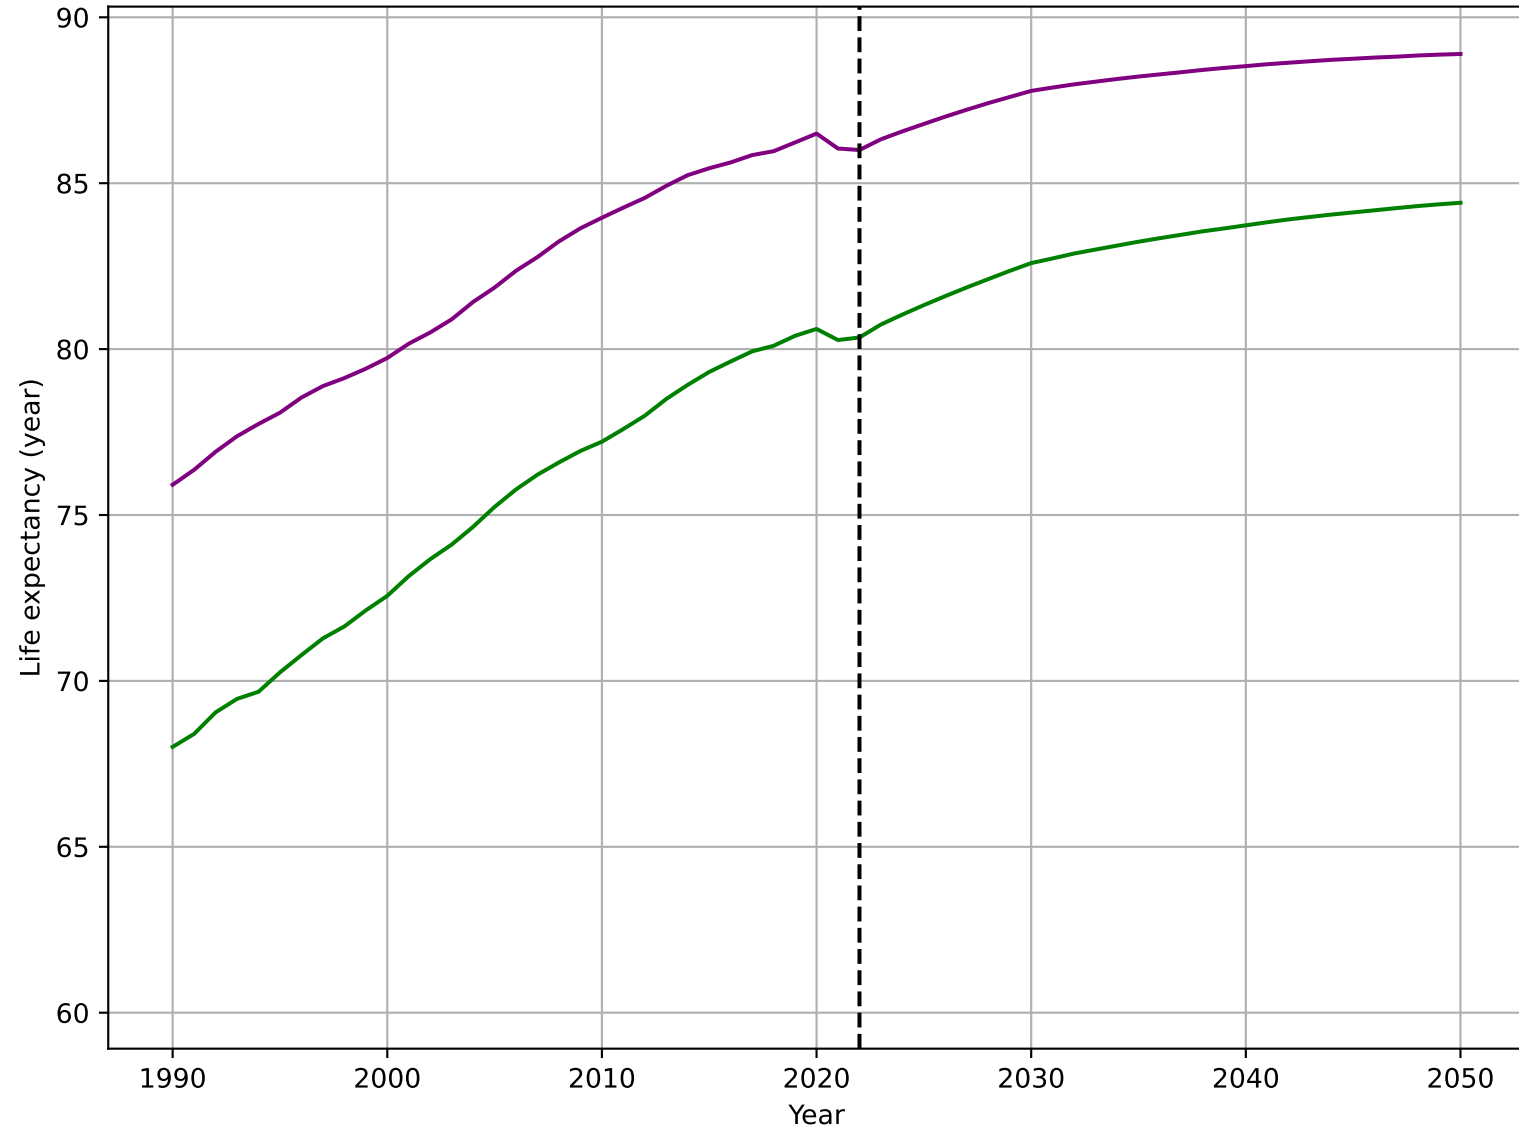

### Healthy Life Expectancy (HALE)

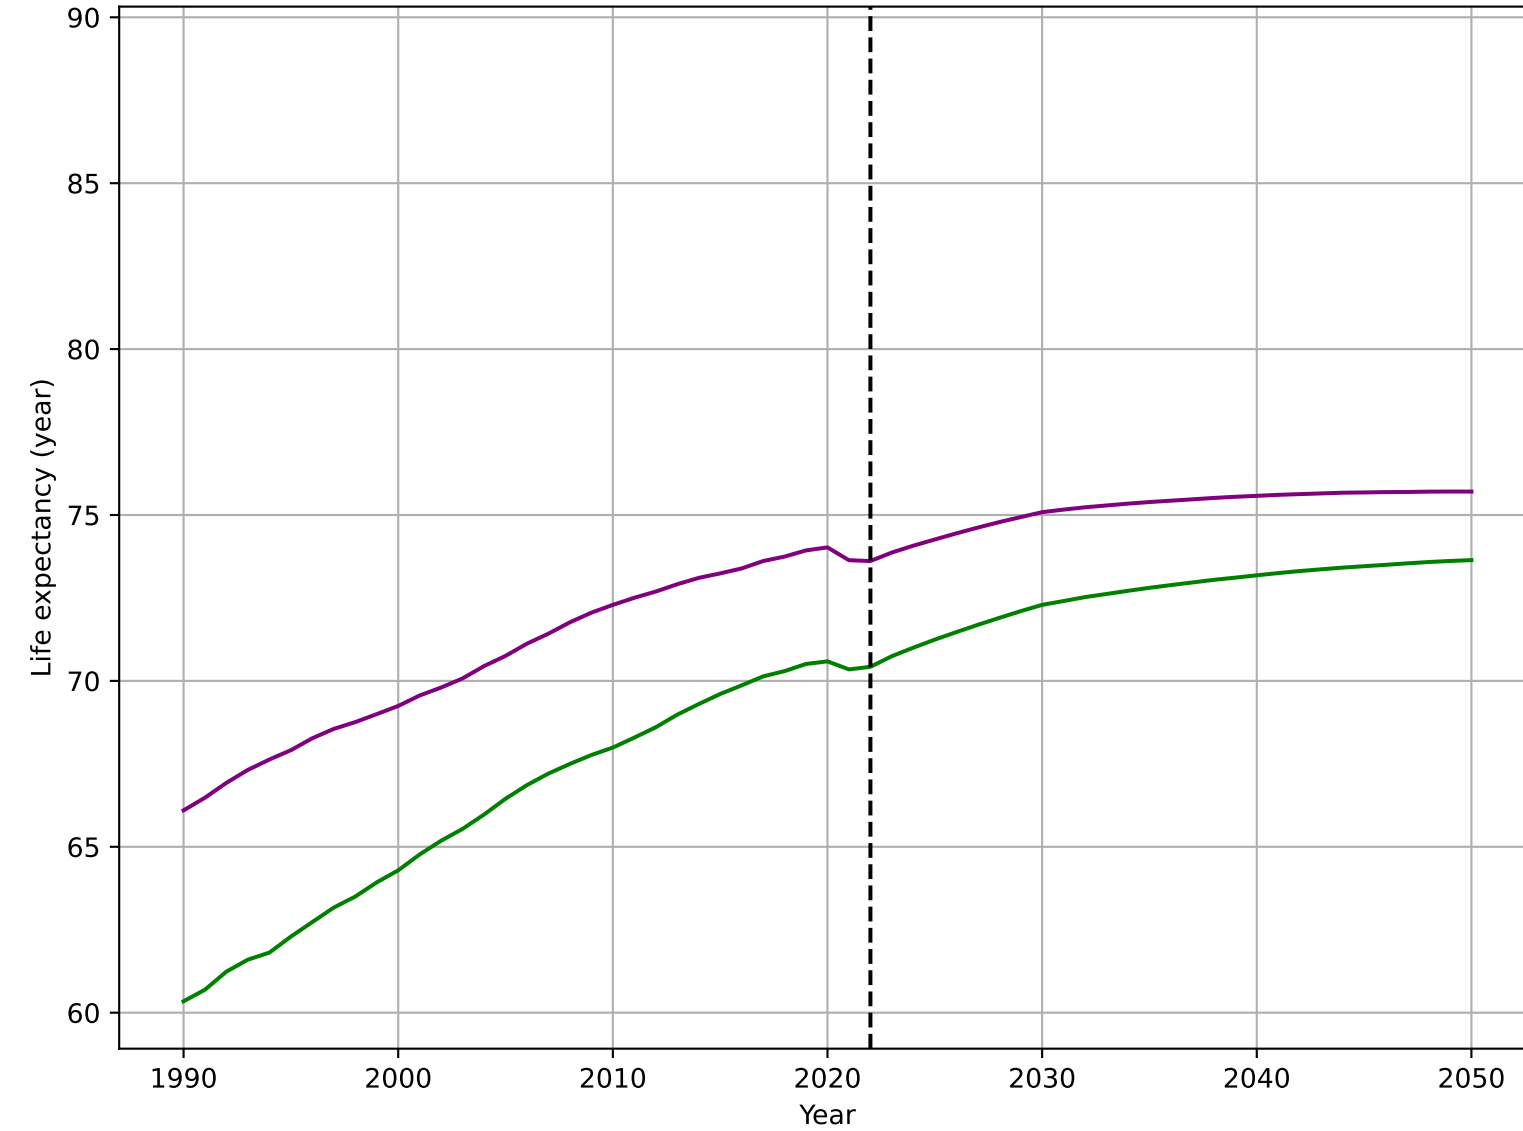

# Singapore

### Life Expectancy

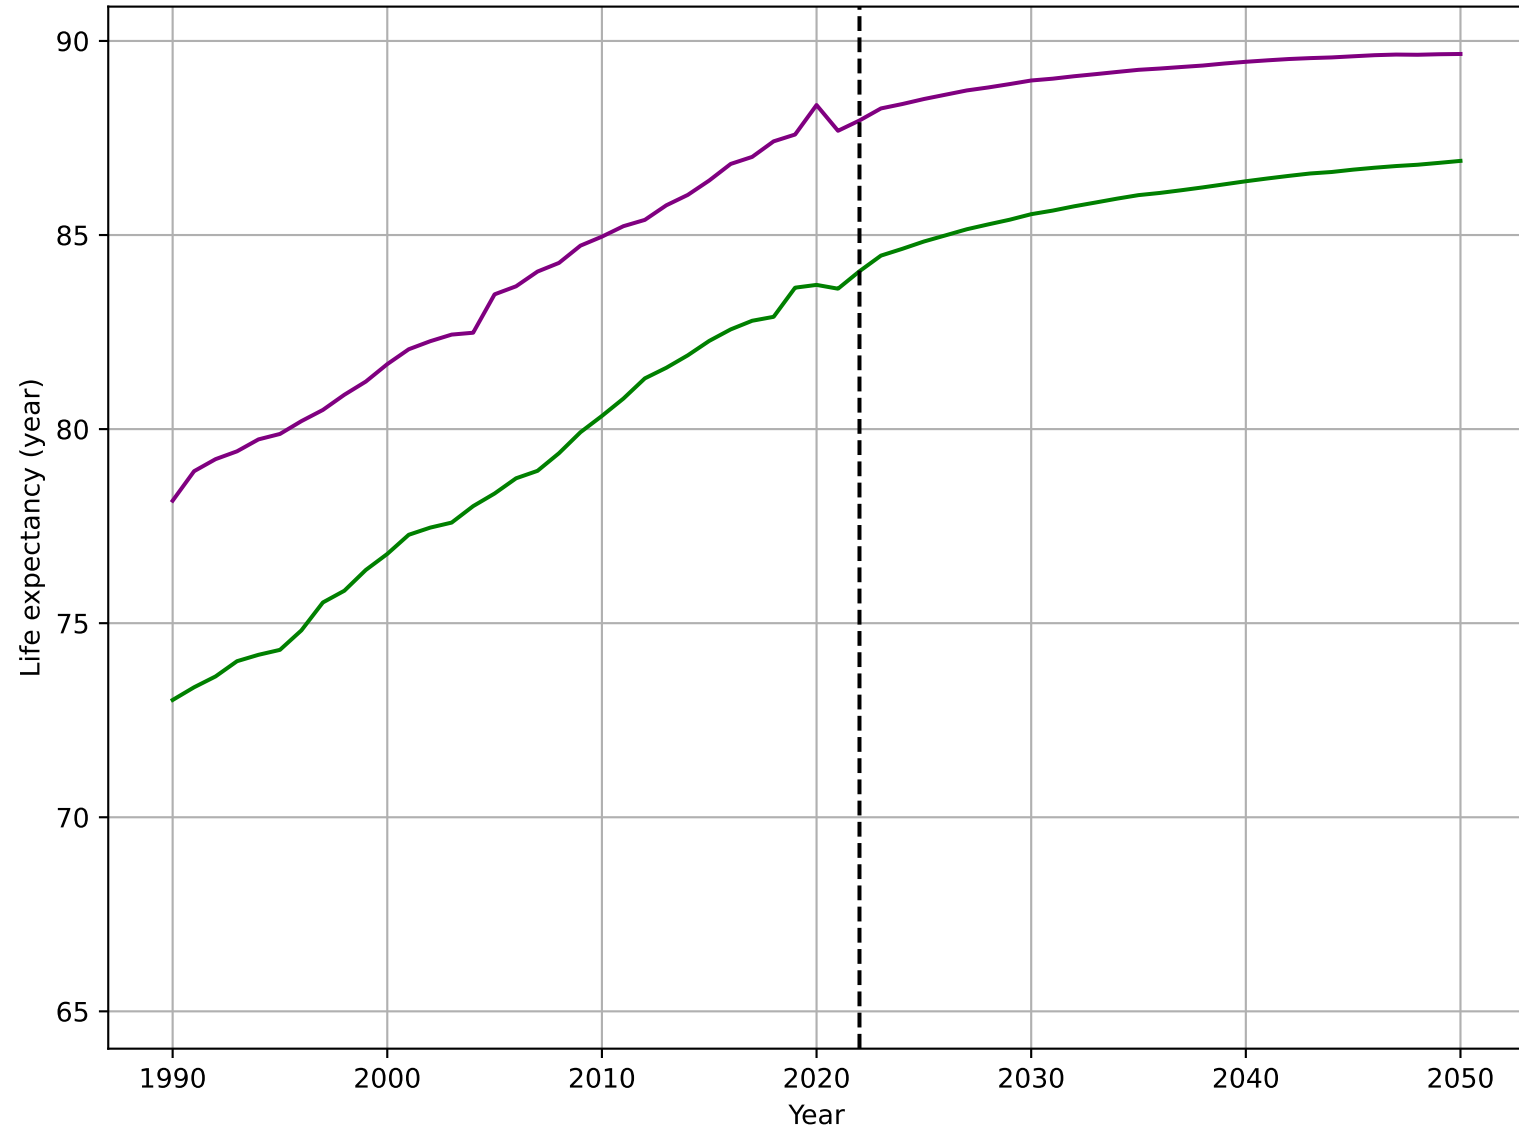

### Healthy Life Expectancy (HALE)

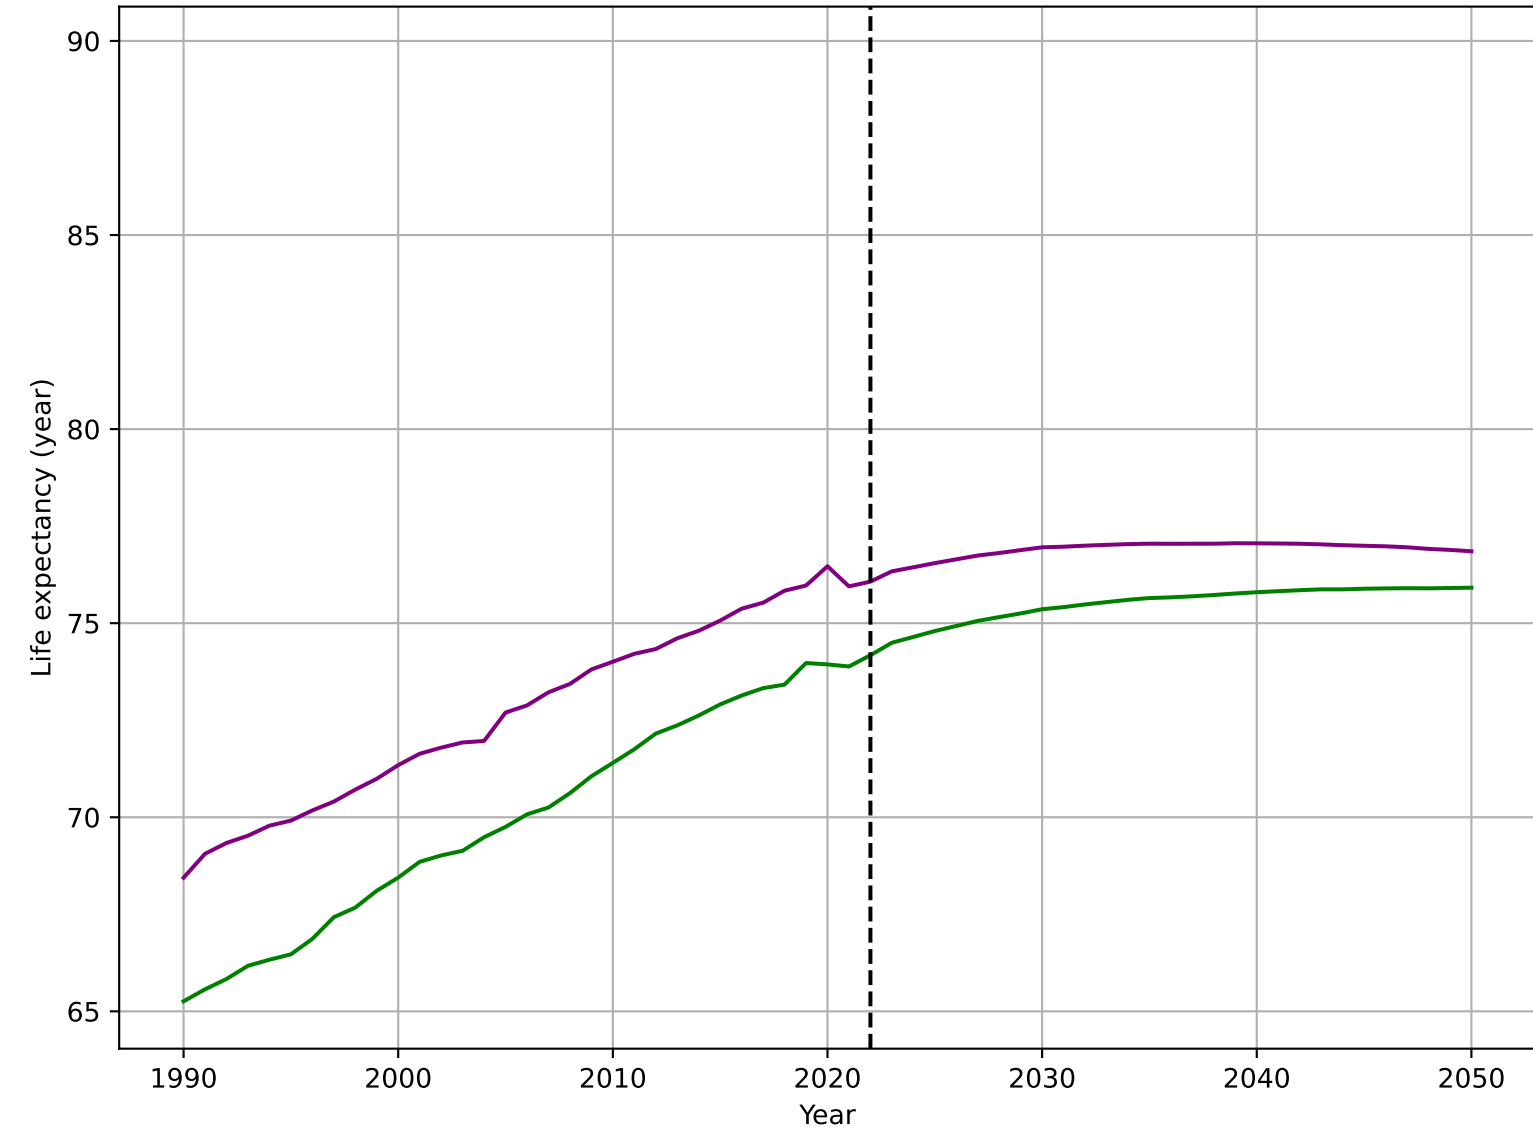

# Canada

### Life Expectancy

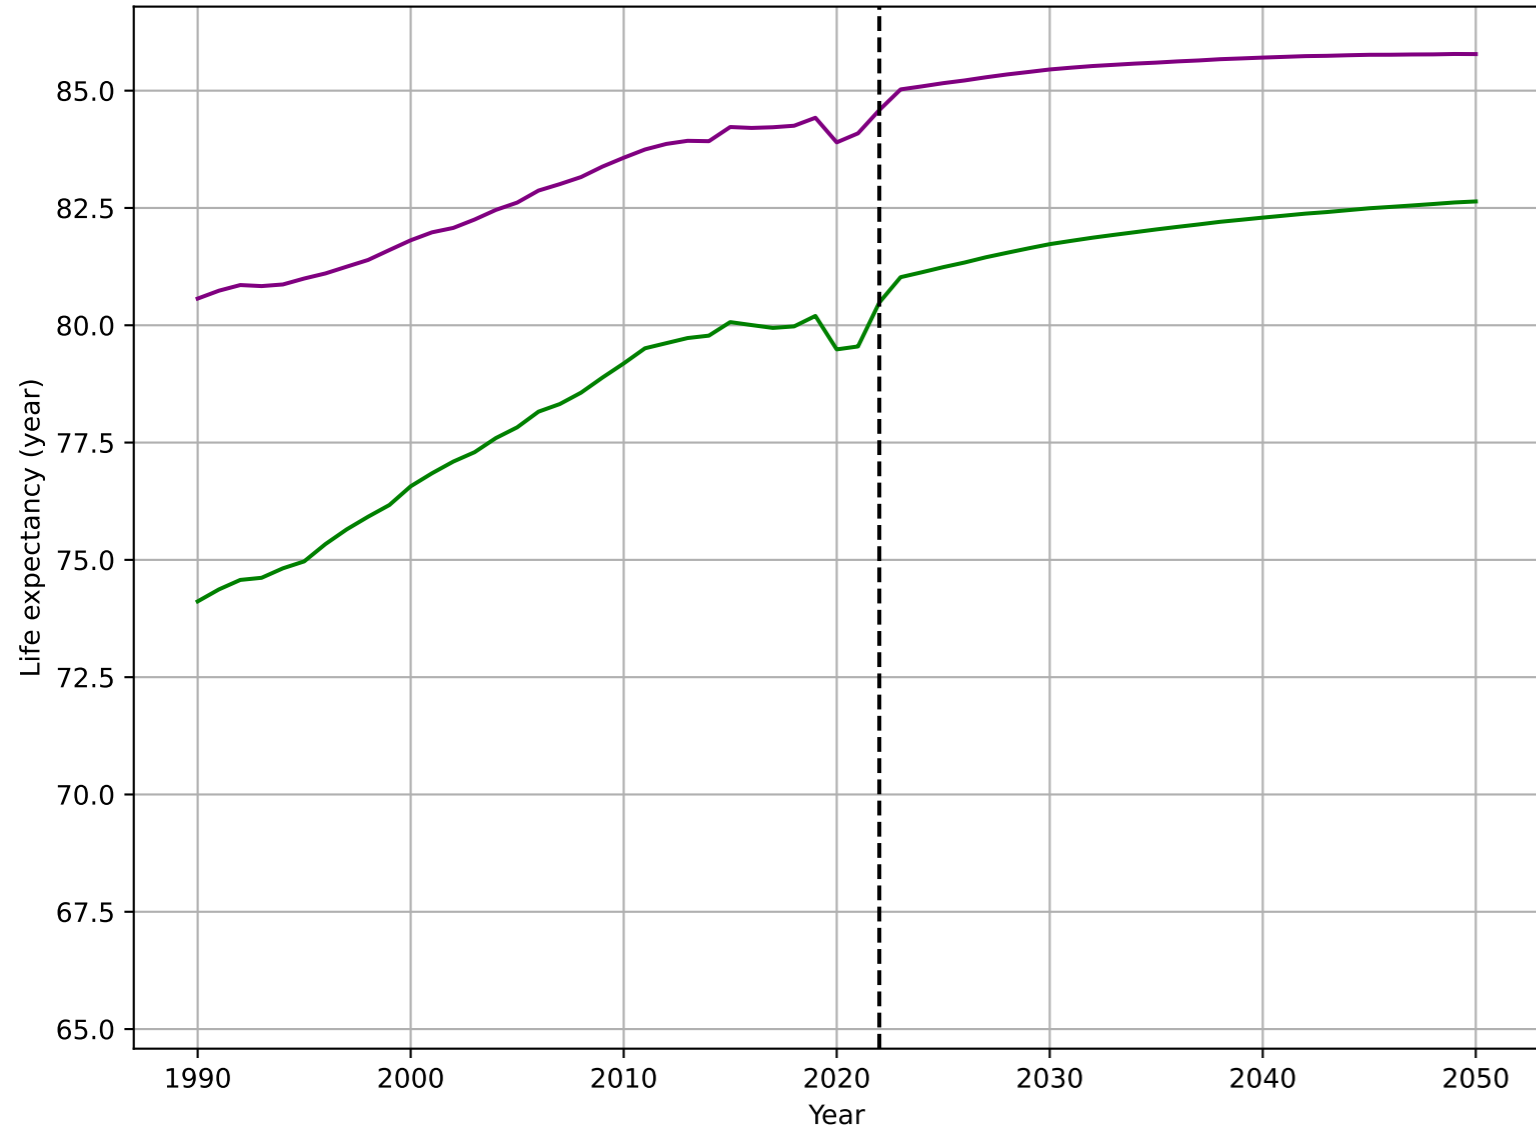

### Healthy Life Expectancy (HALE)

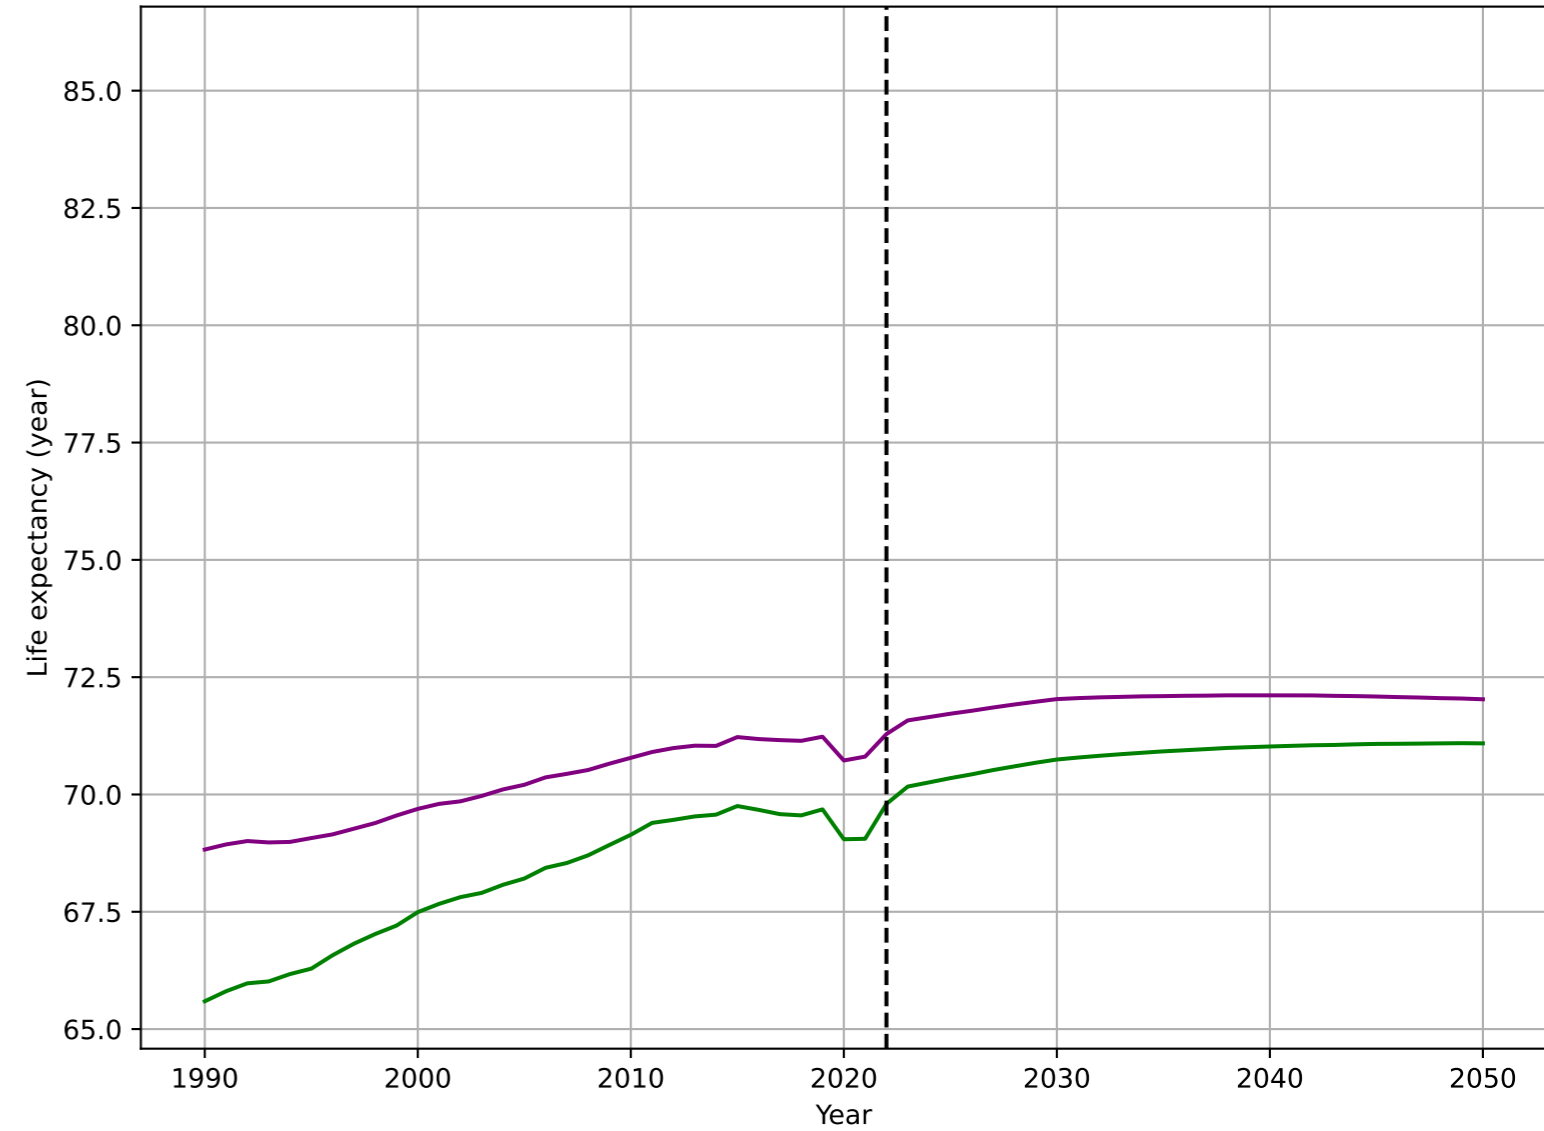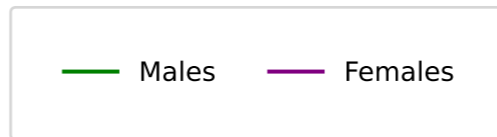



# Greenland

### Life Expectancy

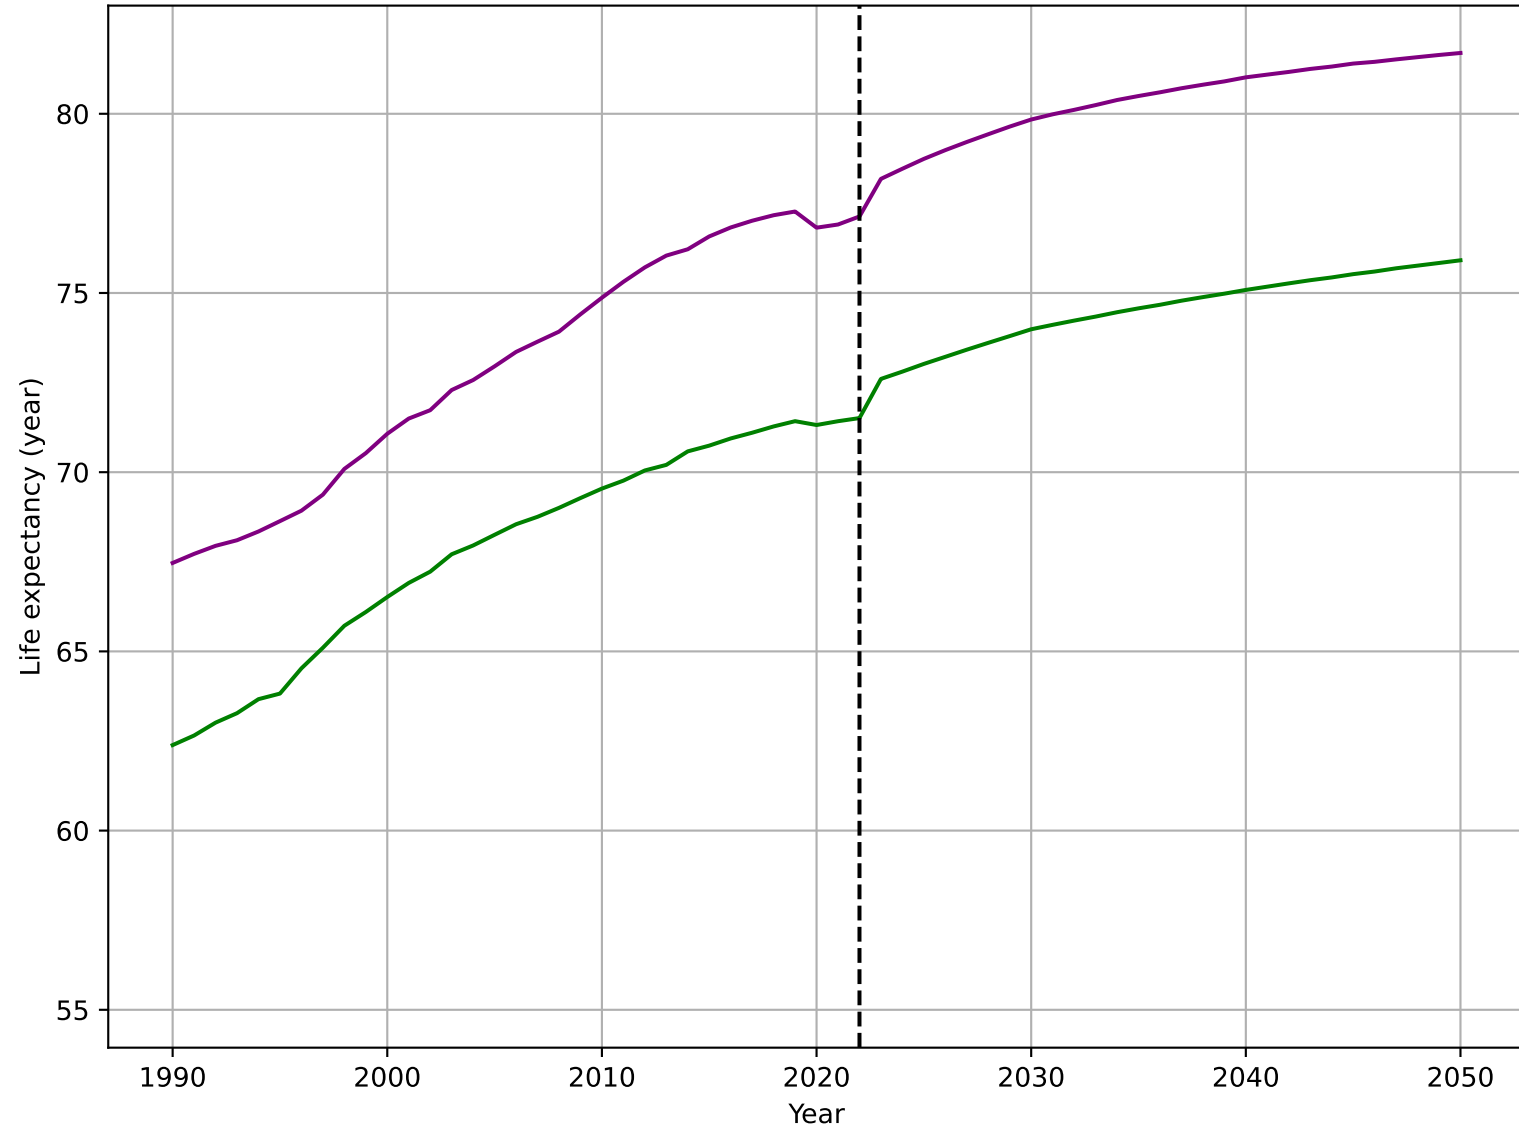

### Healthy Life Expectancy (HALE)

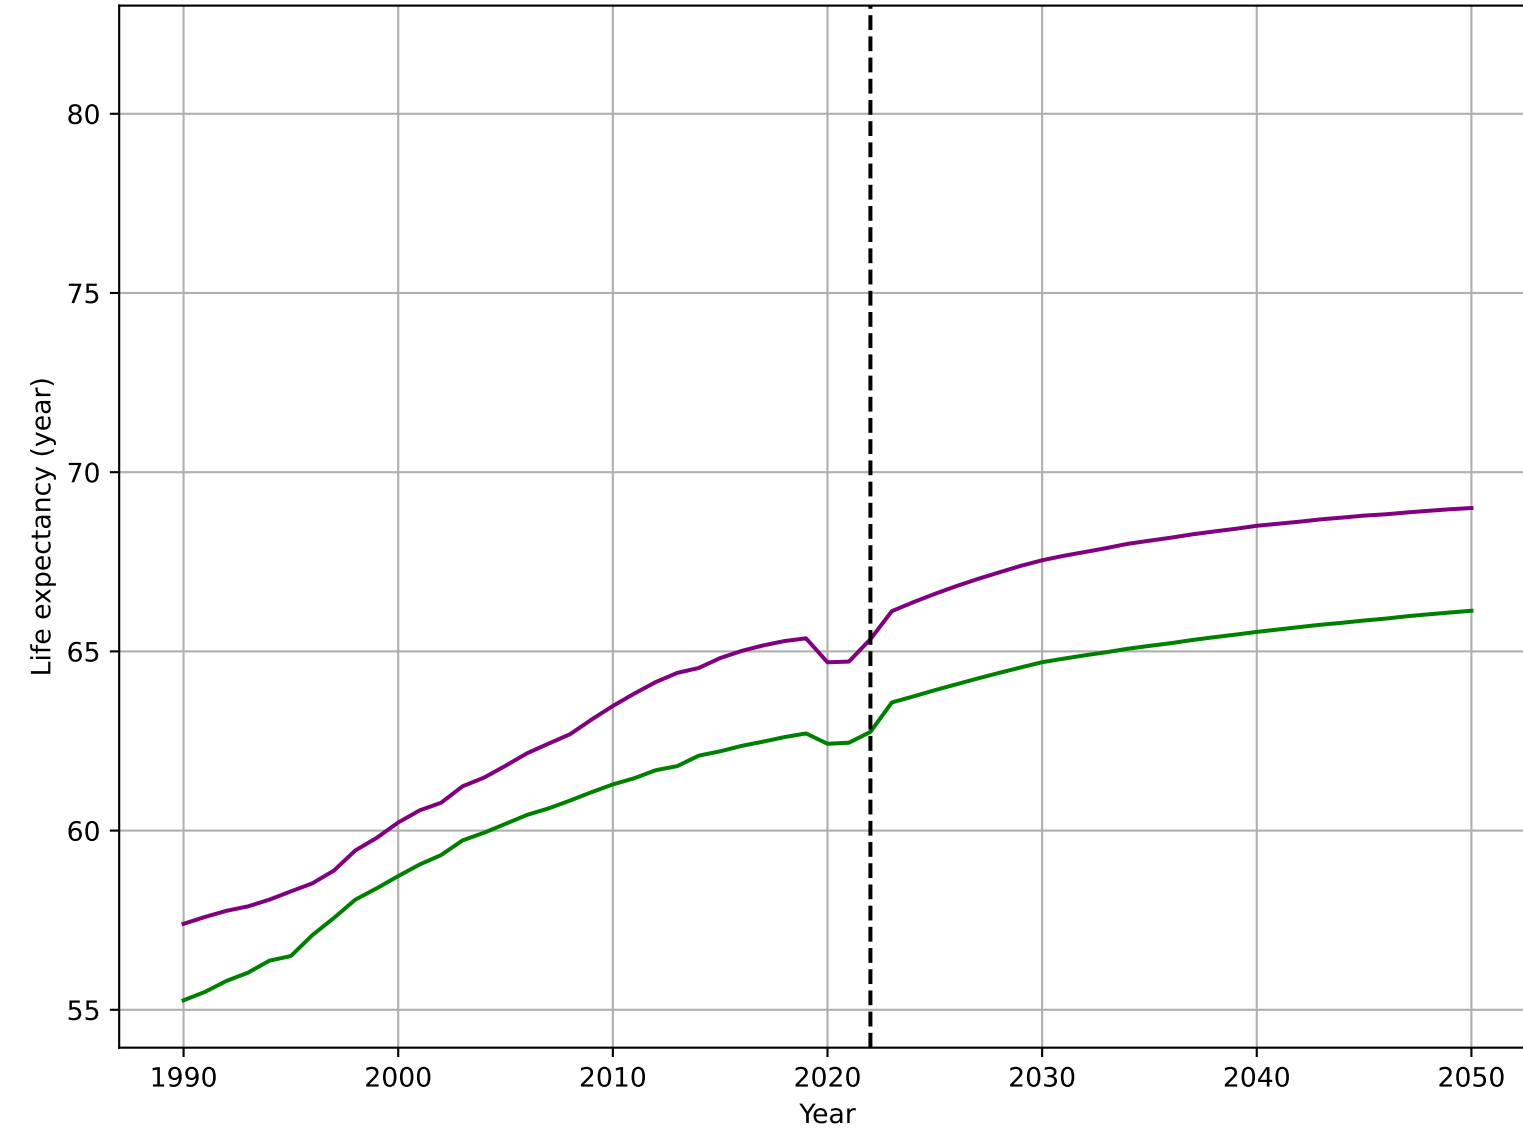

# USA

### Life Expectancy

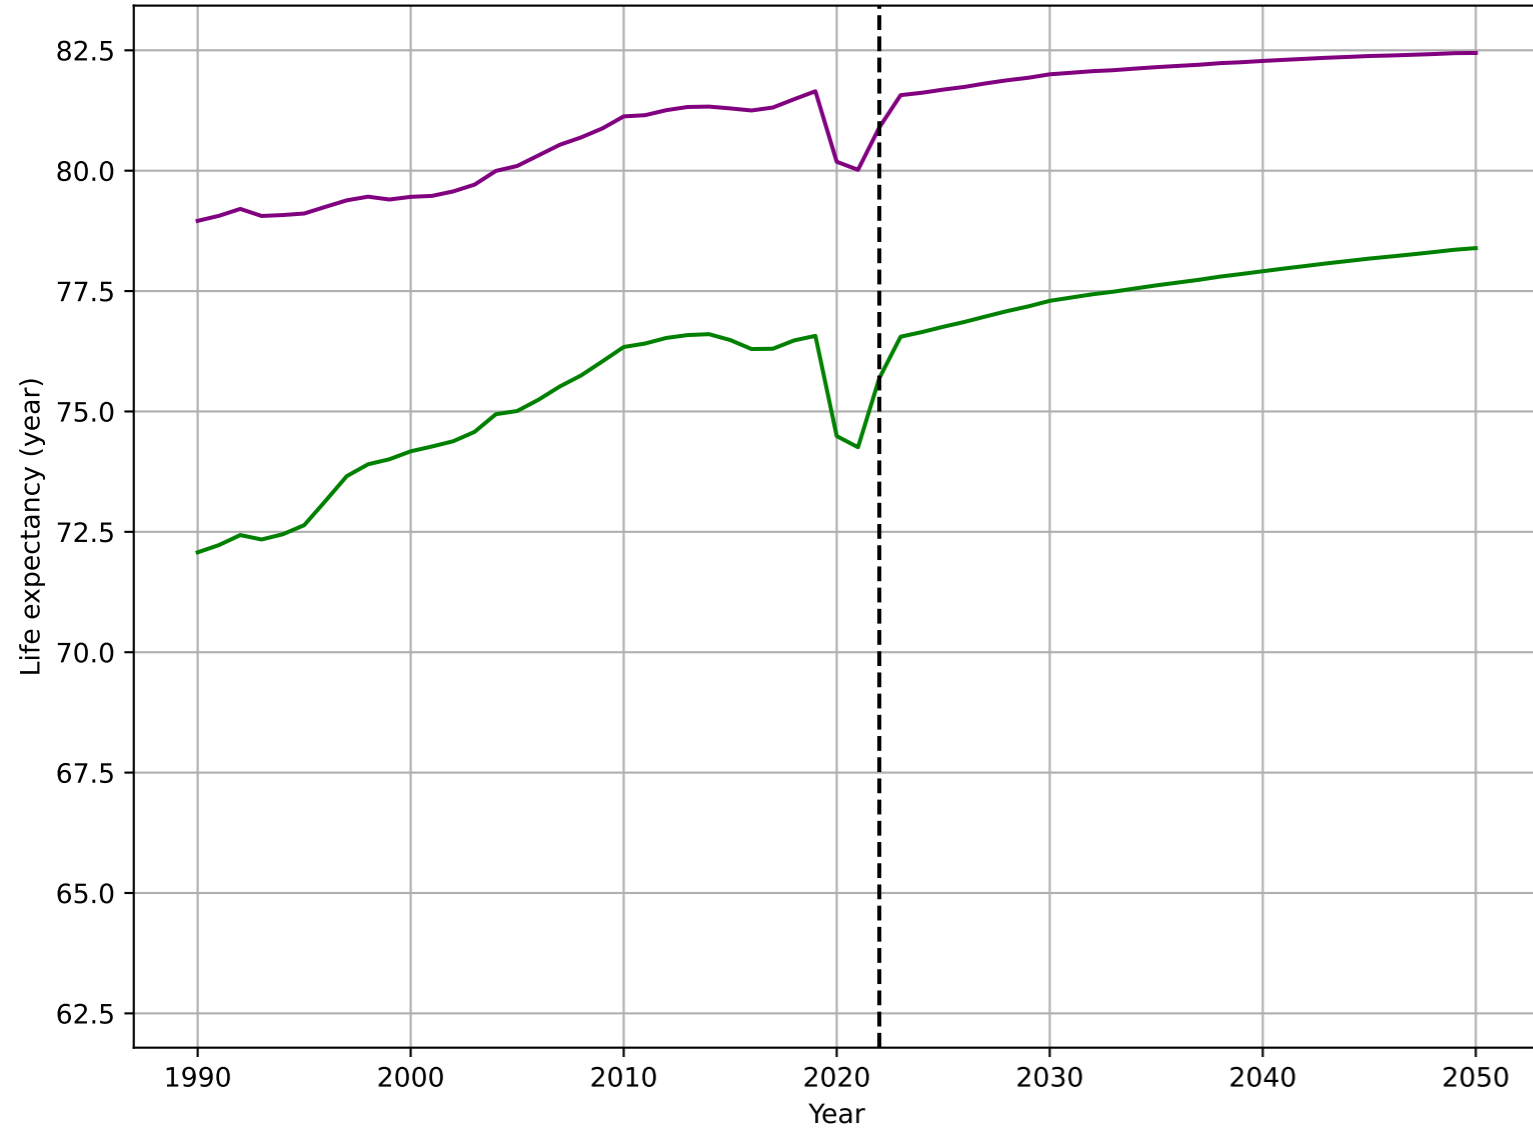

### Healthy Life Expectancy (HALE)

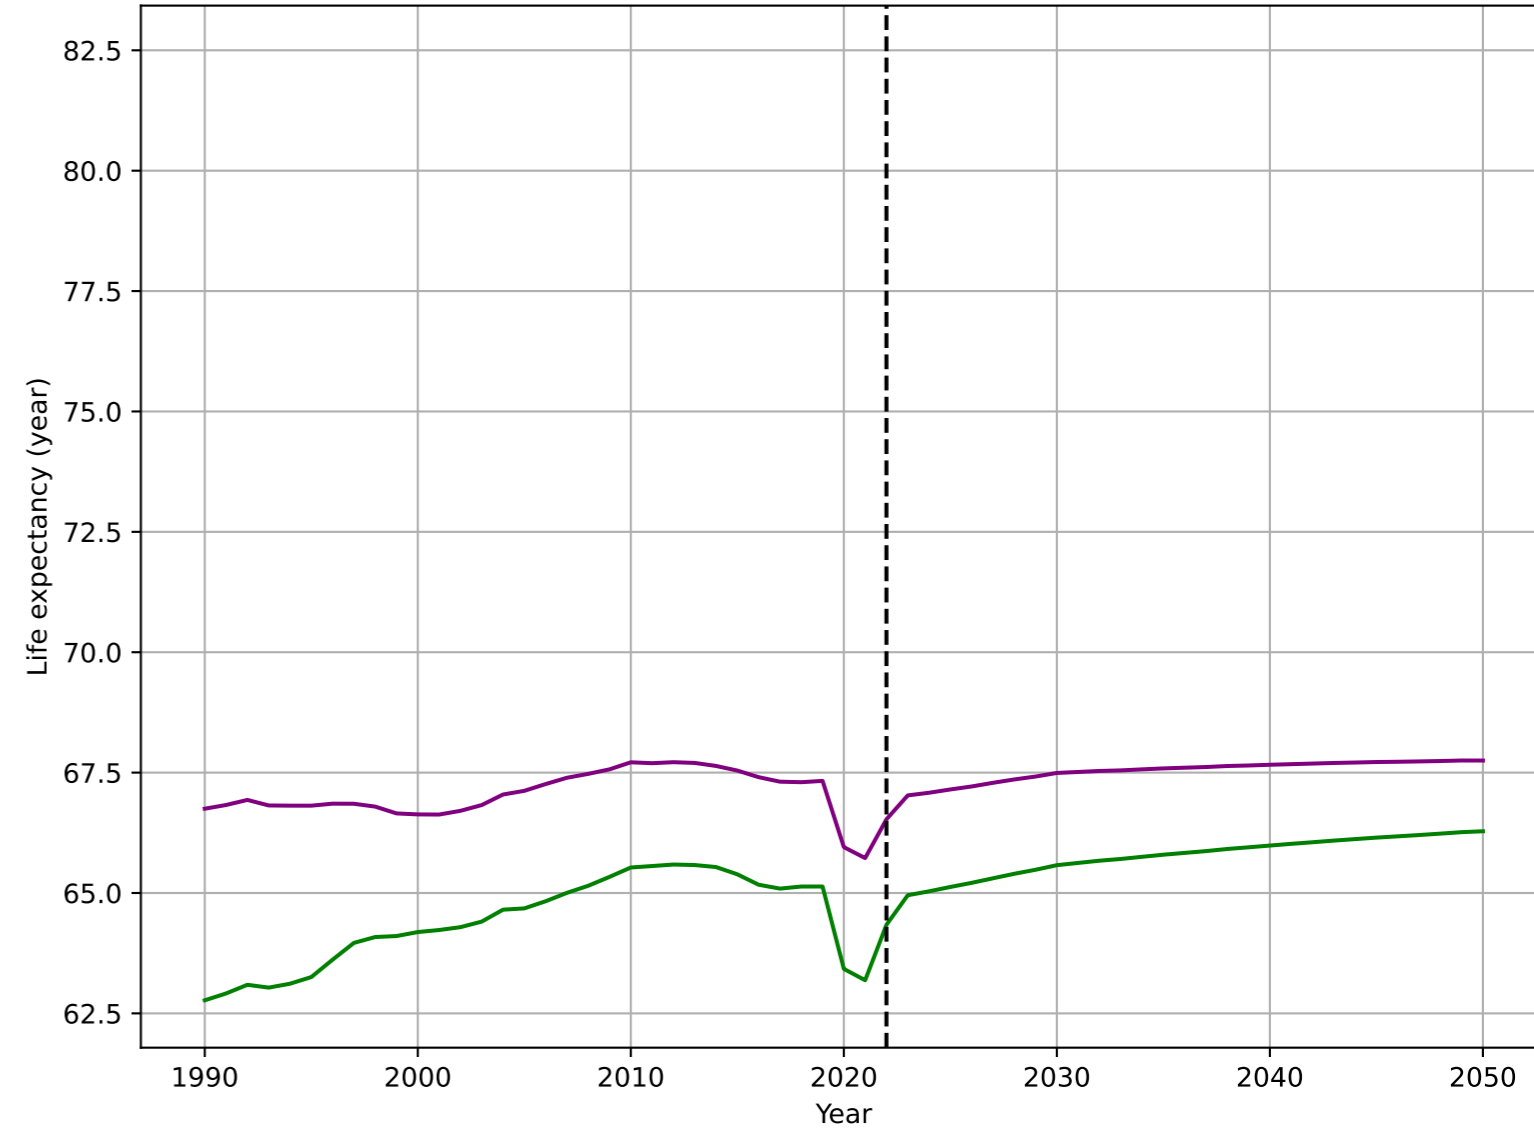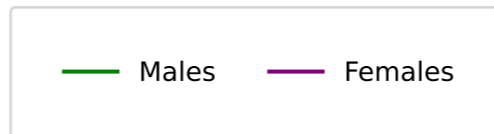

# Argentina

### Life Expectancy

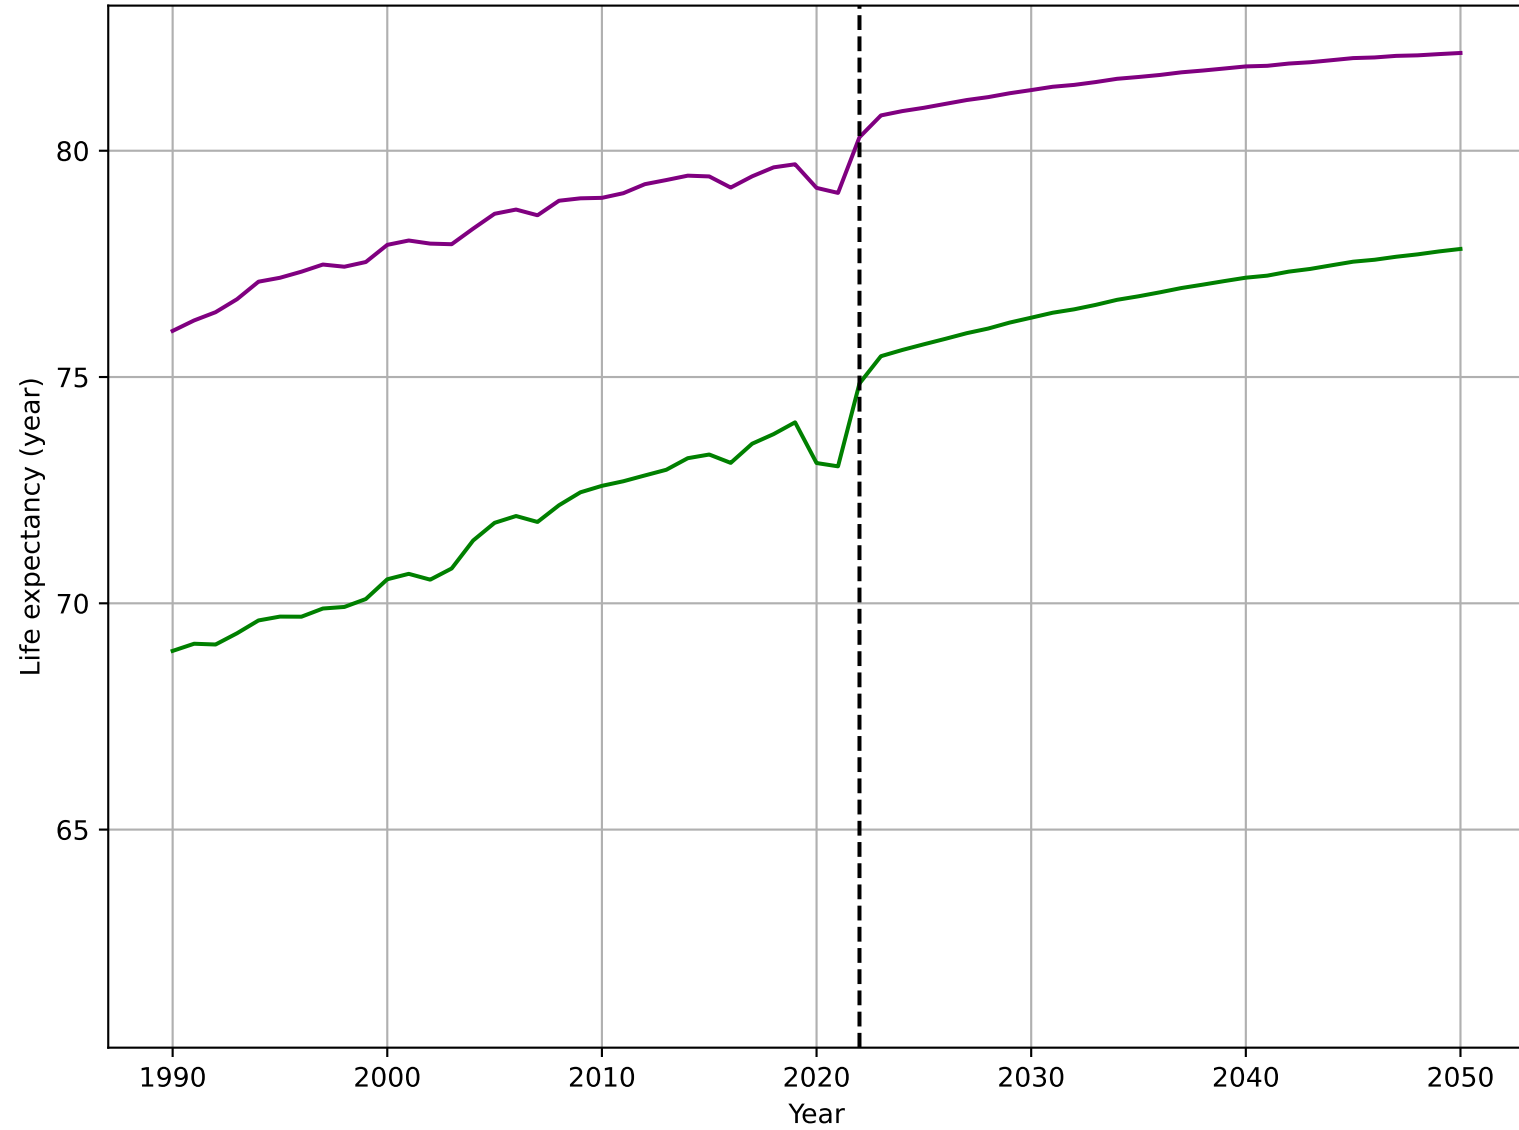

### Healthy Life Expectancy (HALE)

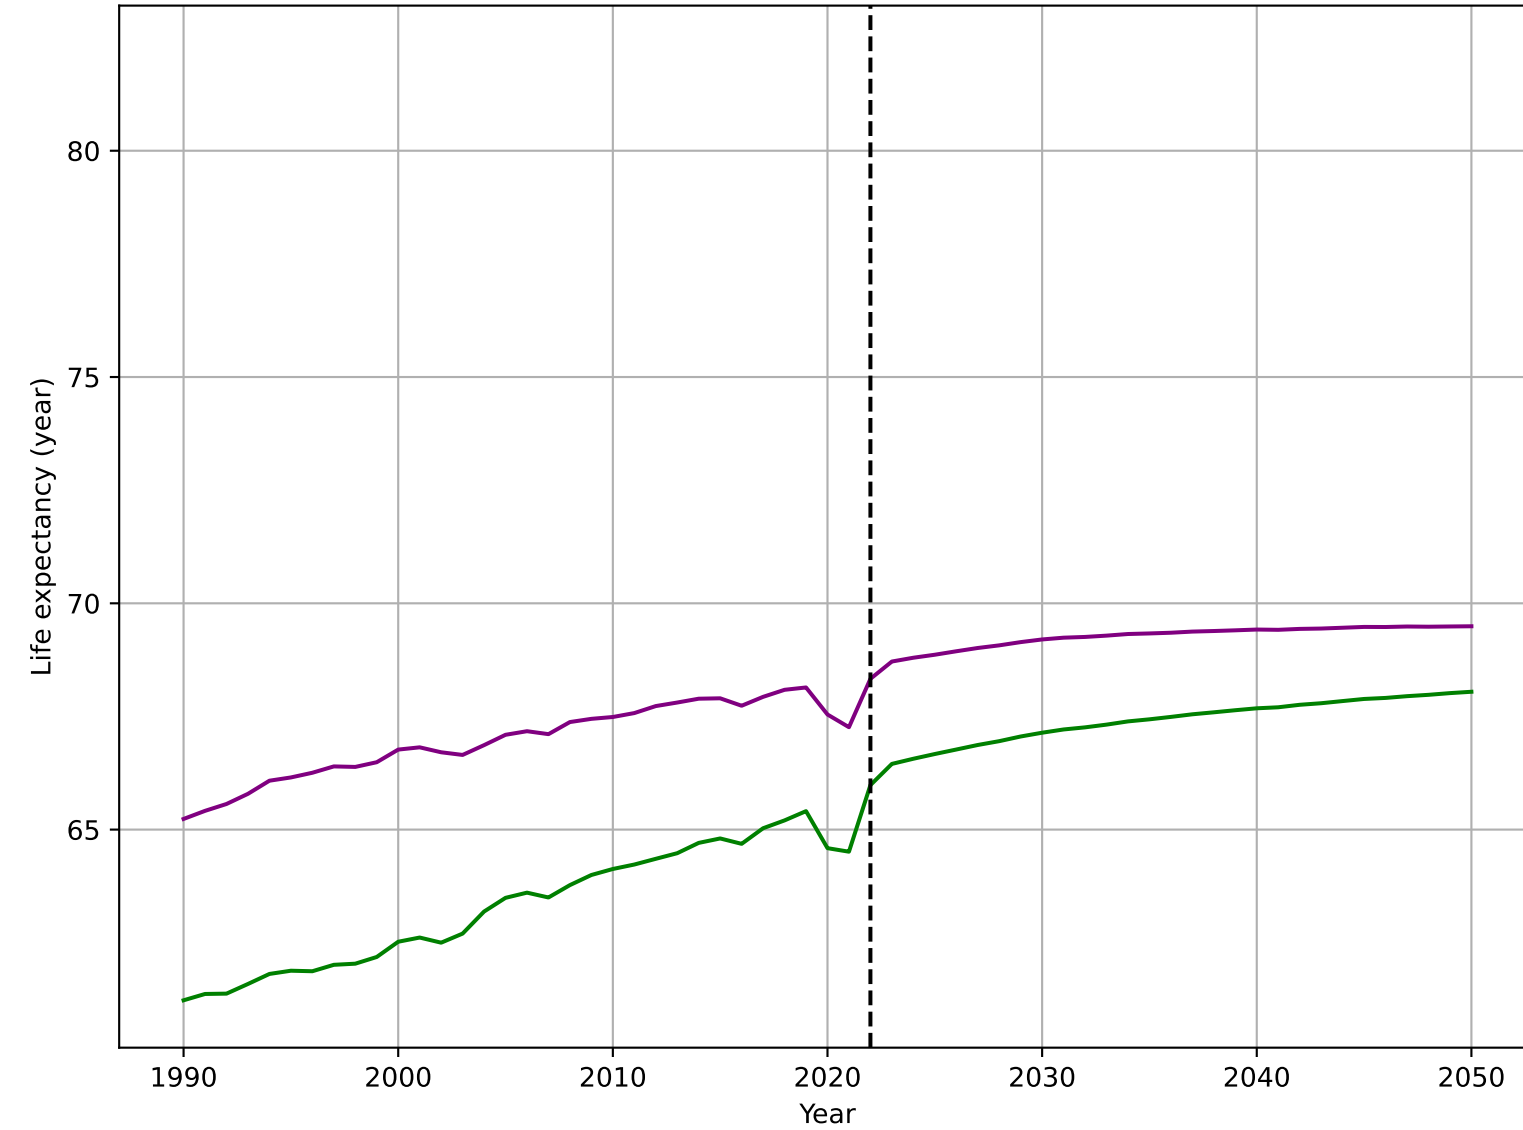

# Chile

### Life Expectancy

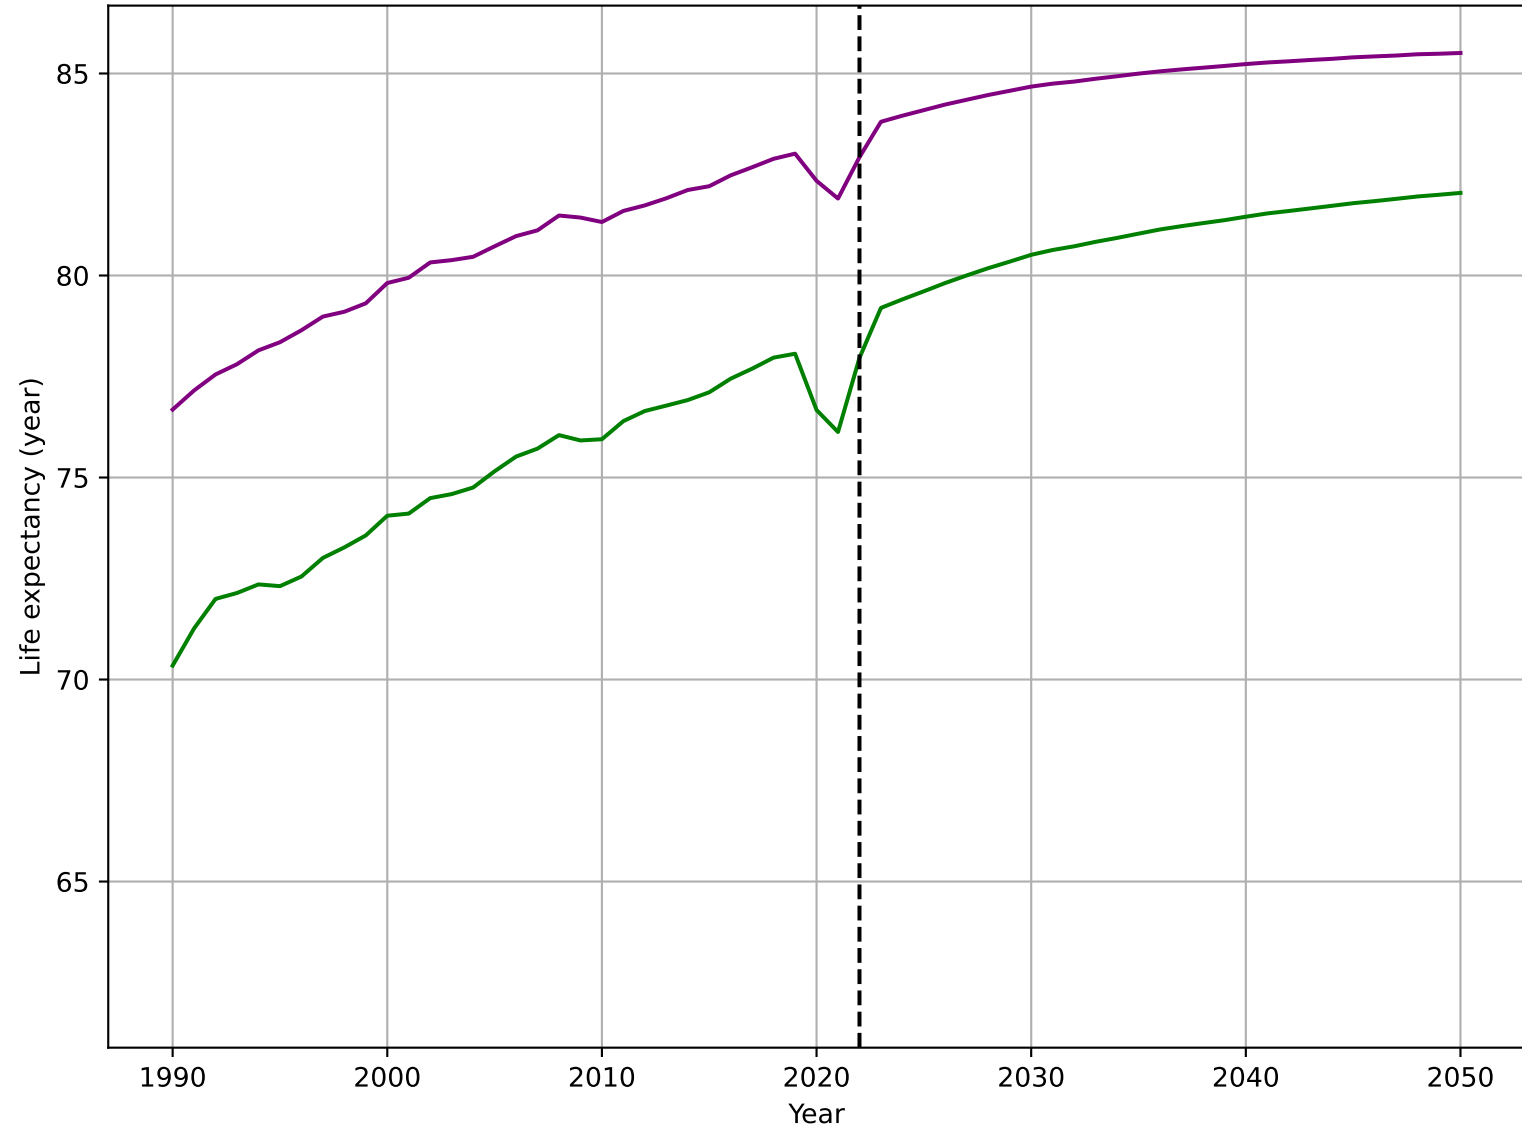

### Healthy Life Expectancy (HALE)

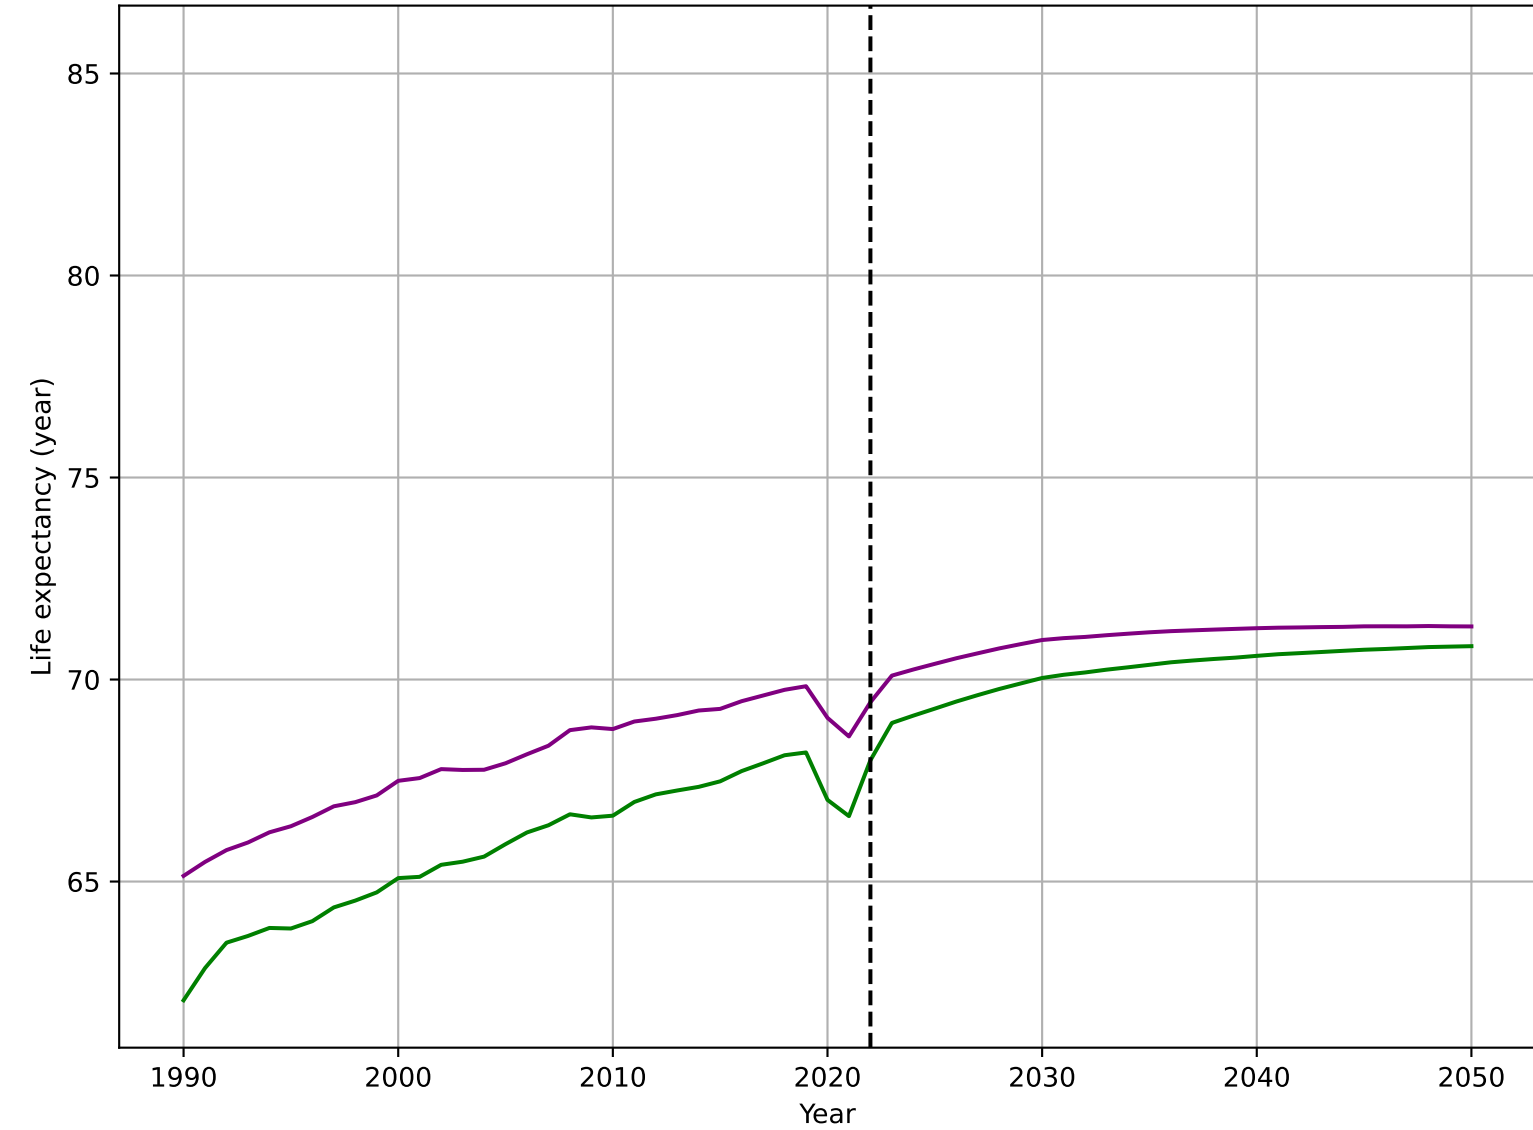

# Uruguay

### Life Expectancy

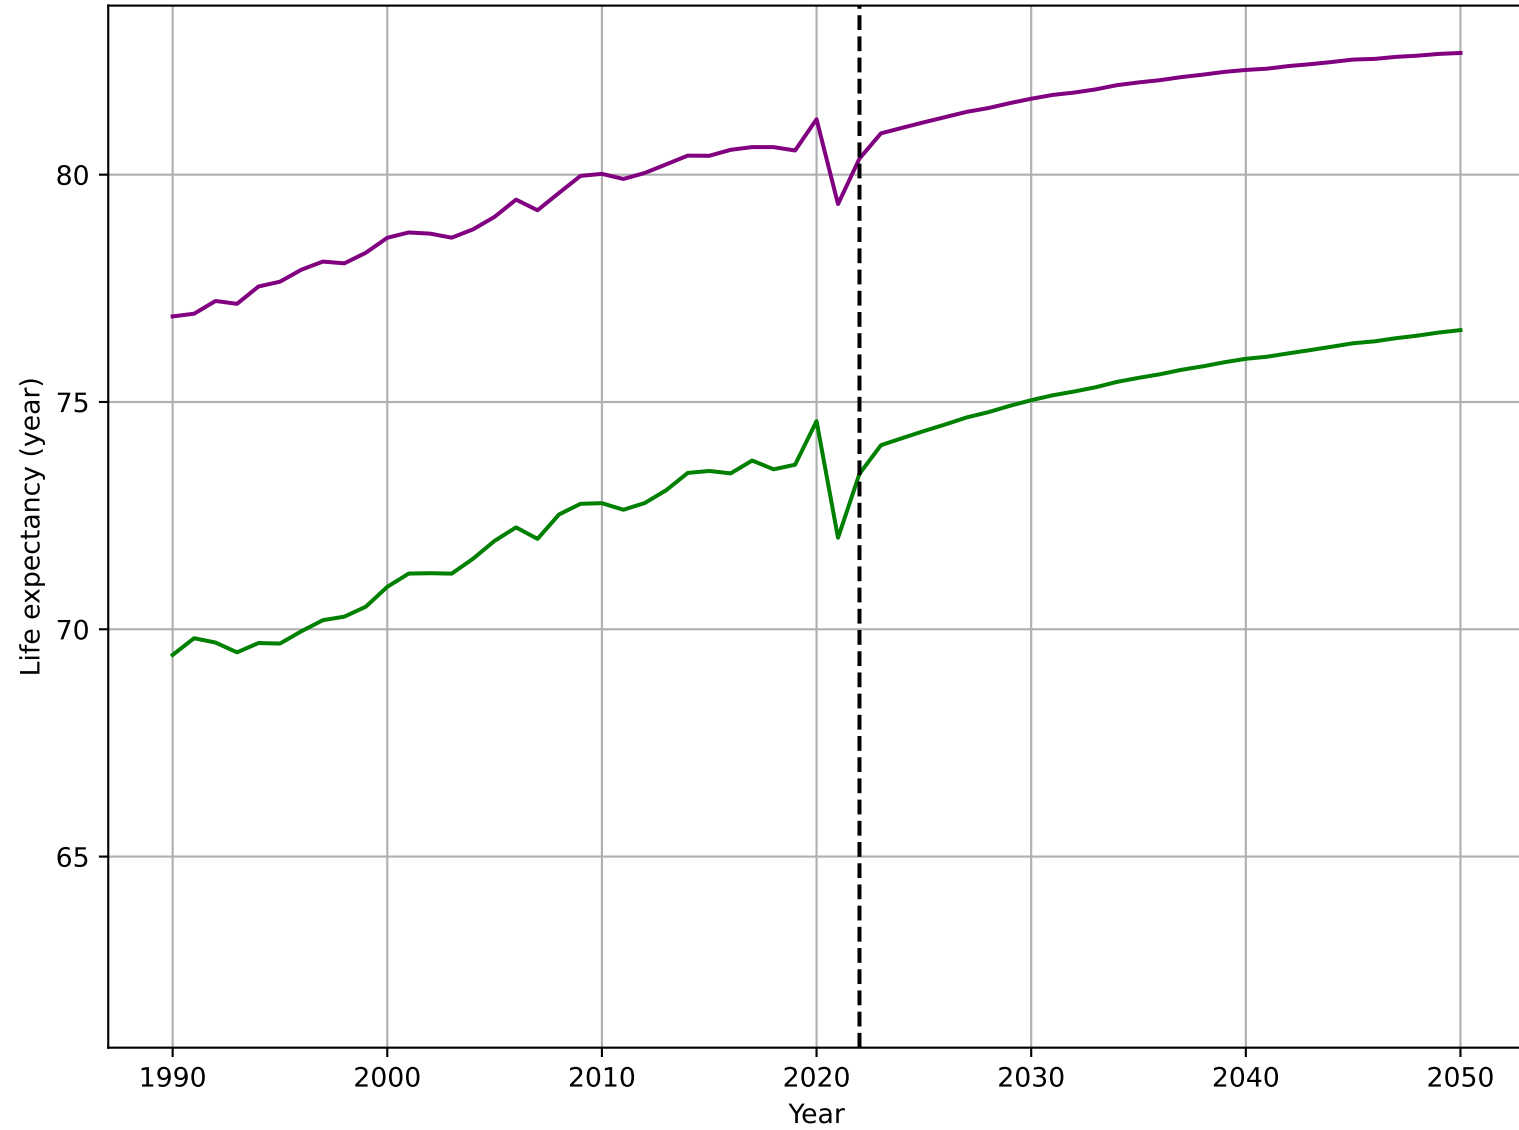

### Healthy Life Expectancy (HALE)

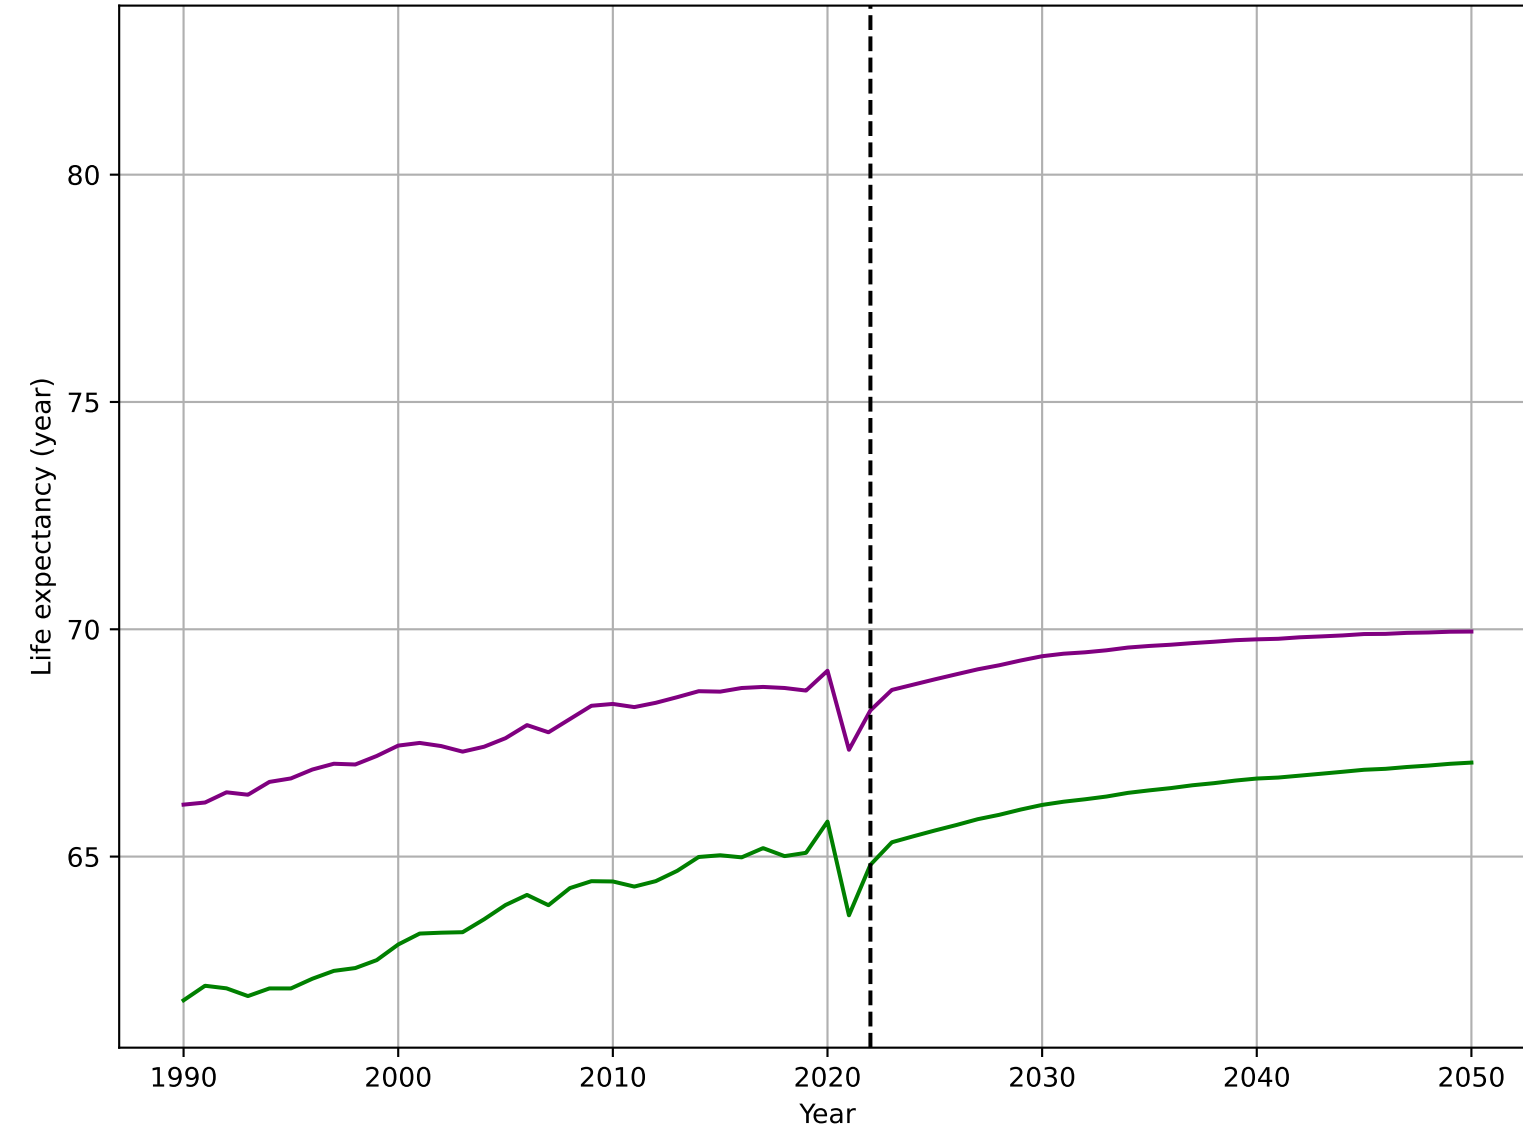

# Andorra

### Life Expectancy

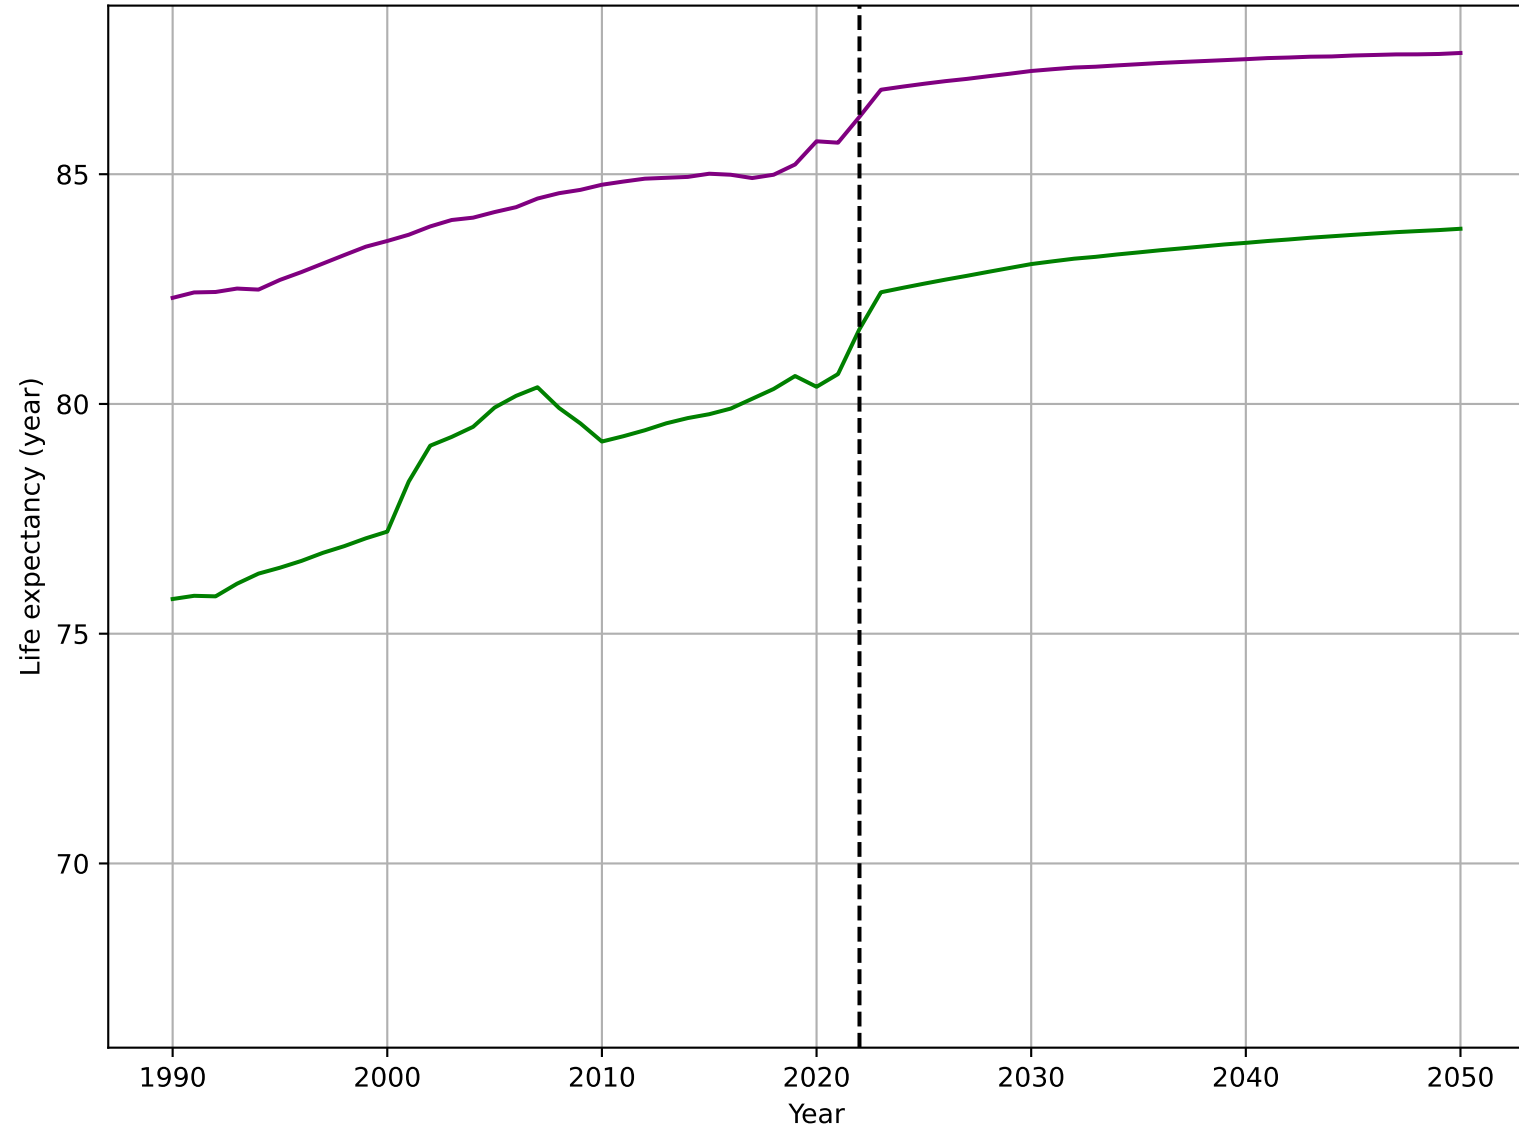

### Healthy Life Expectancy (HALE)

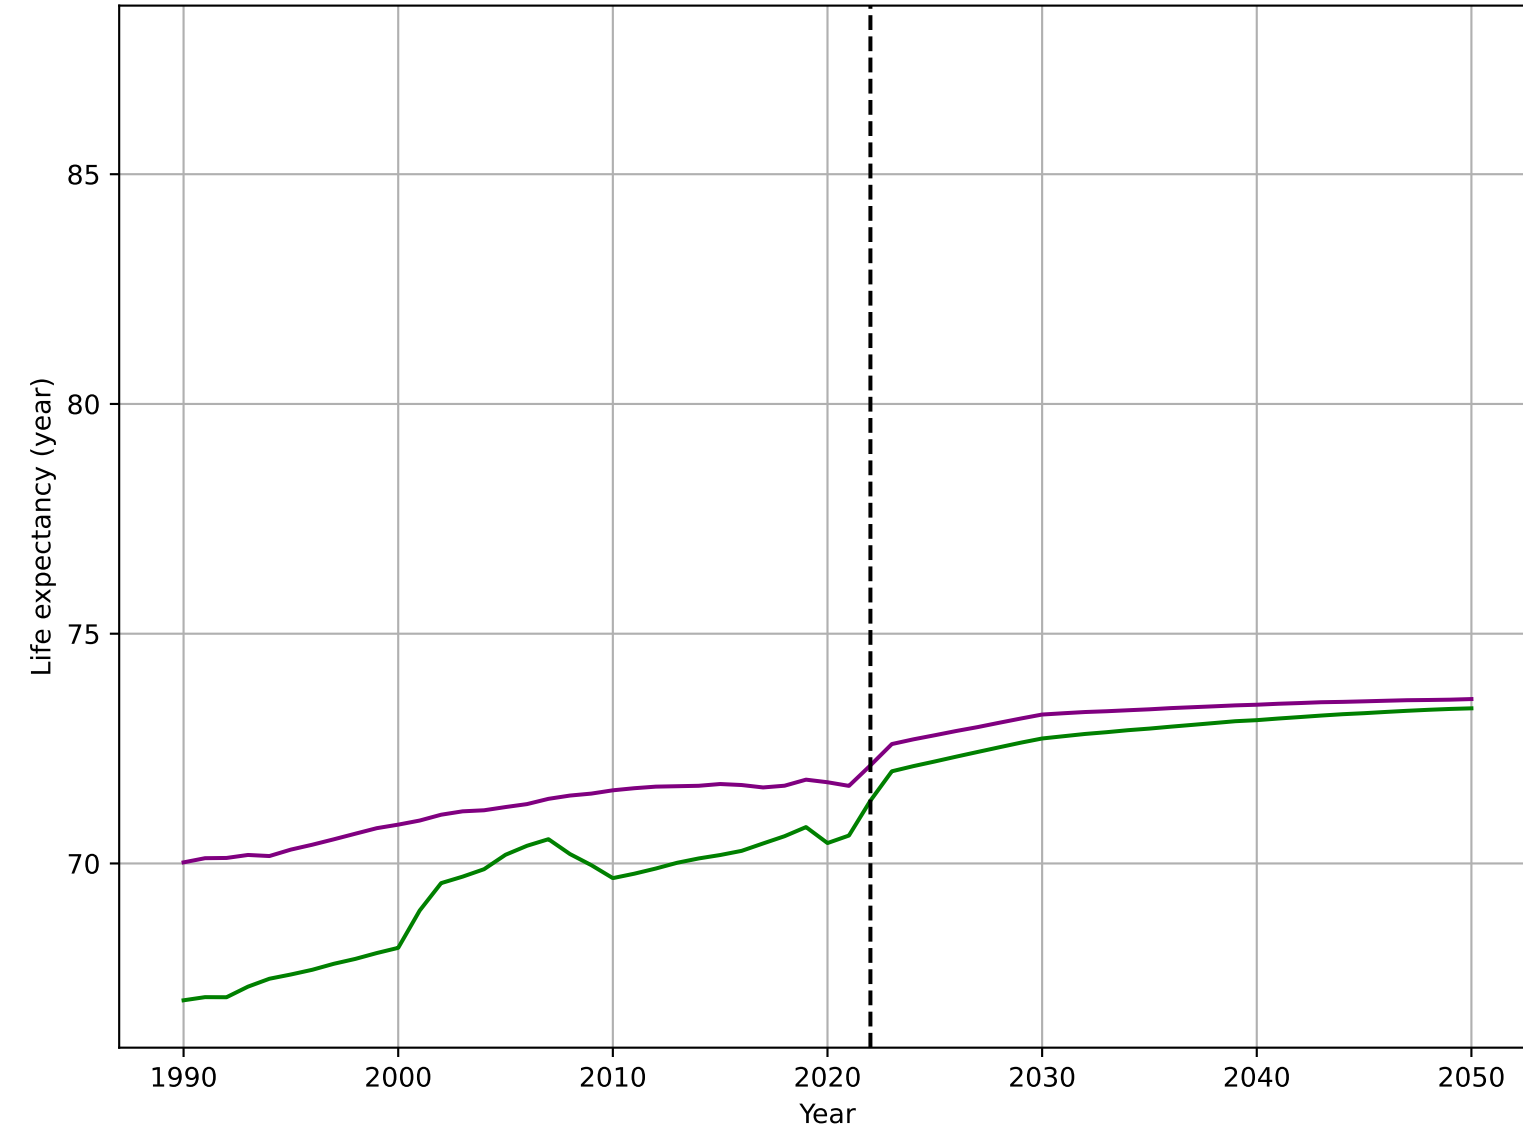

# Austria

### Life Expectancy

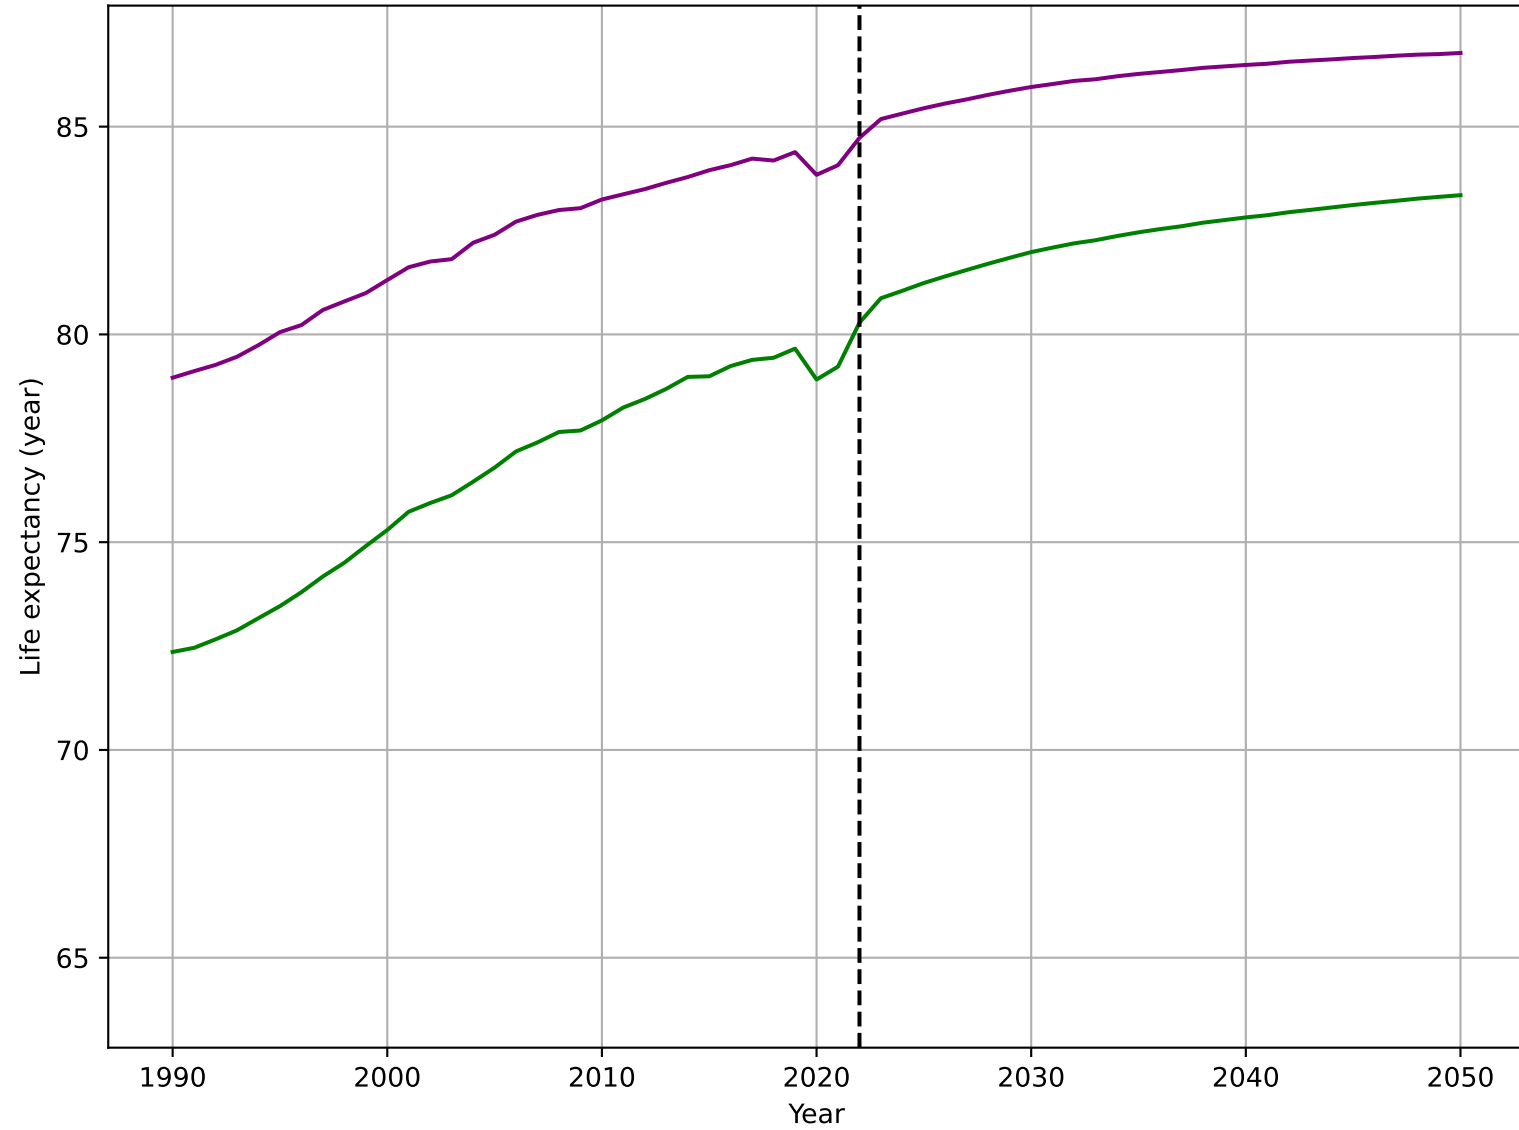

### Healthy Life Expectancy (HALE)

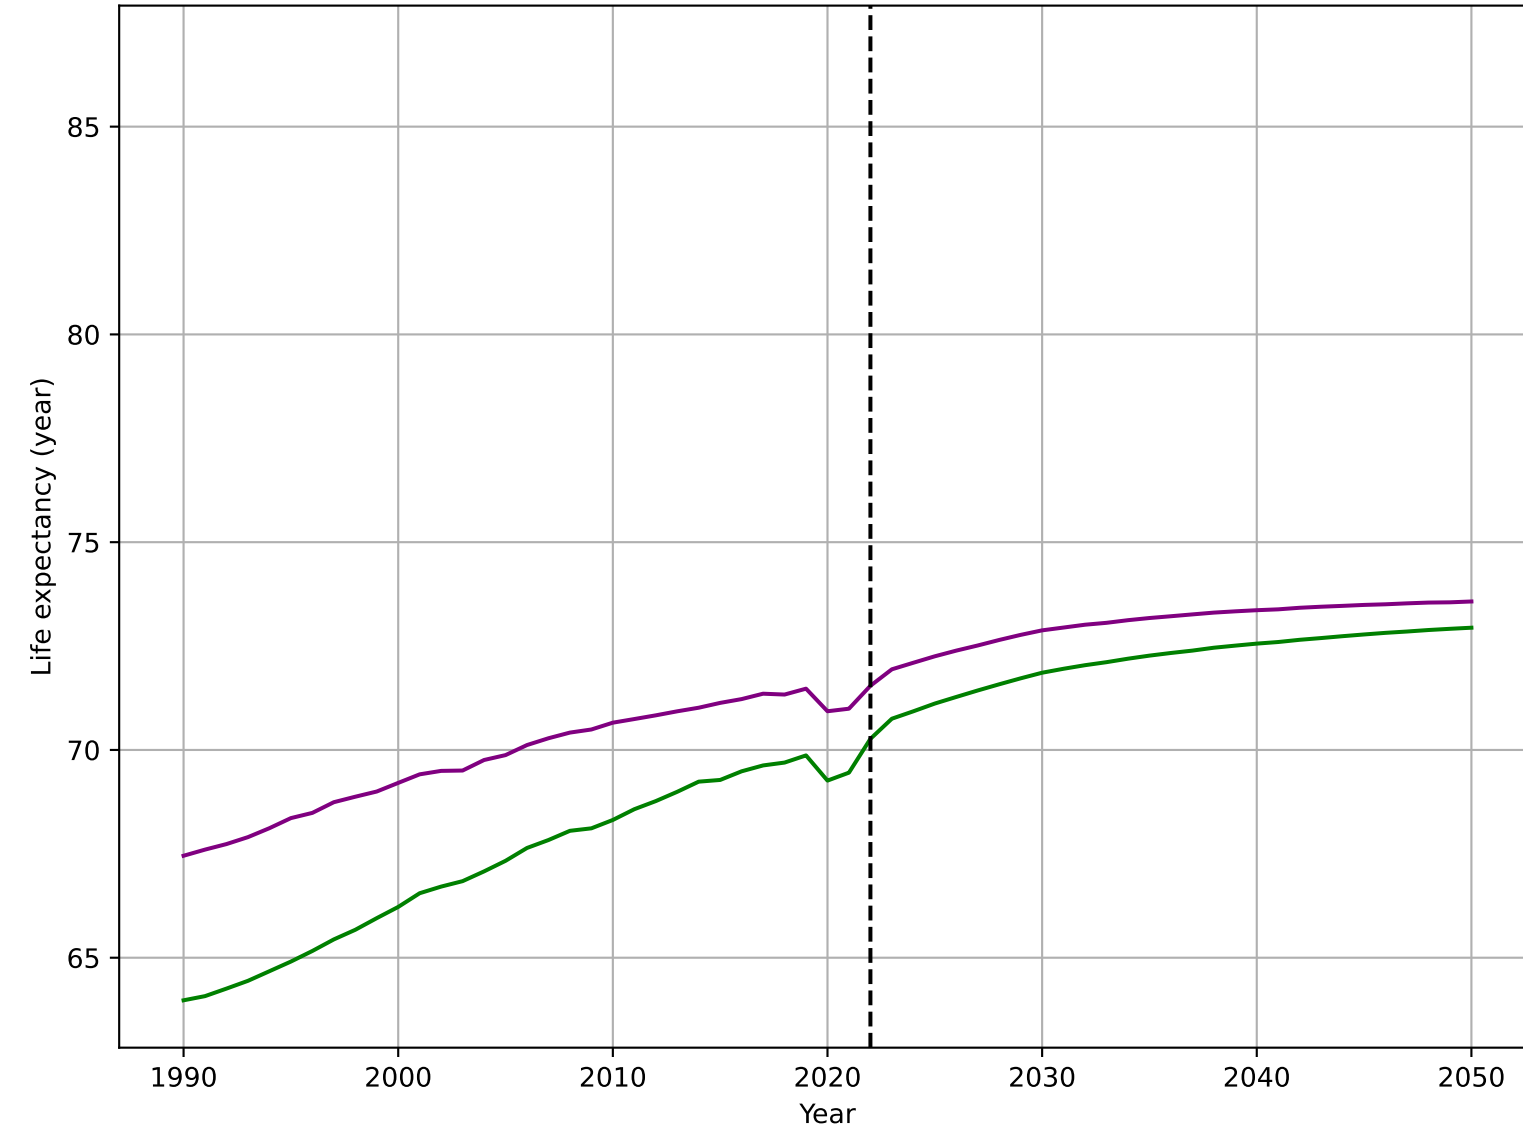

# Belgium

### Life Expectancy

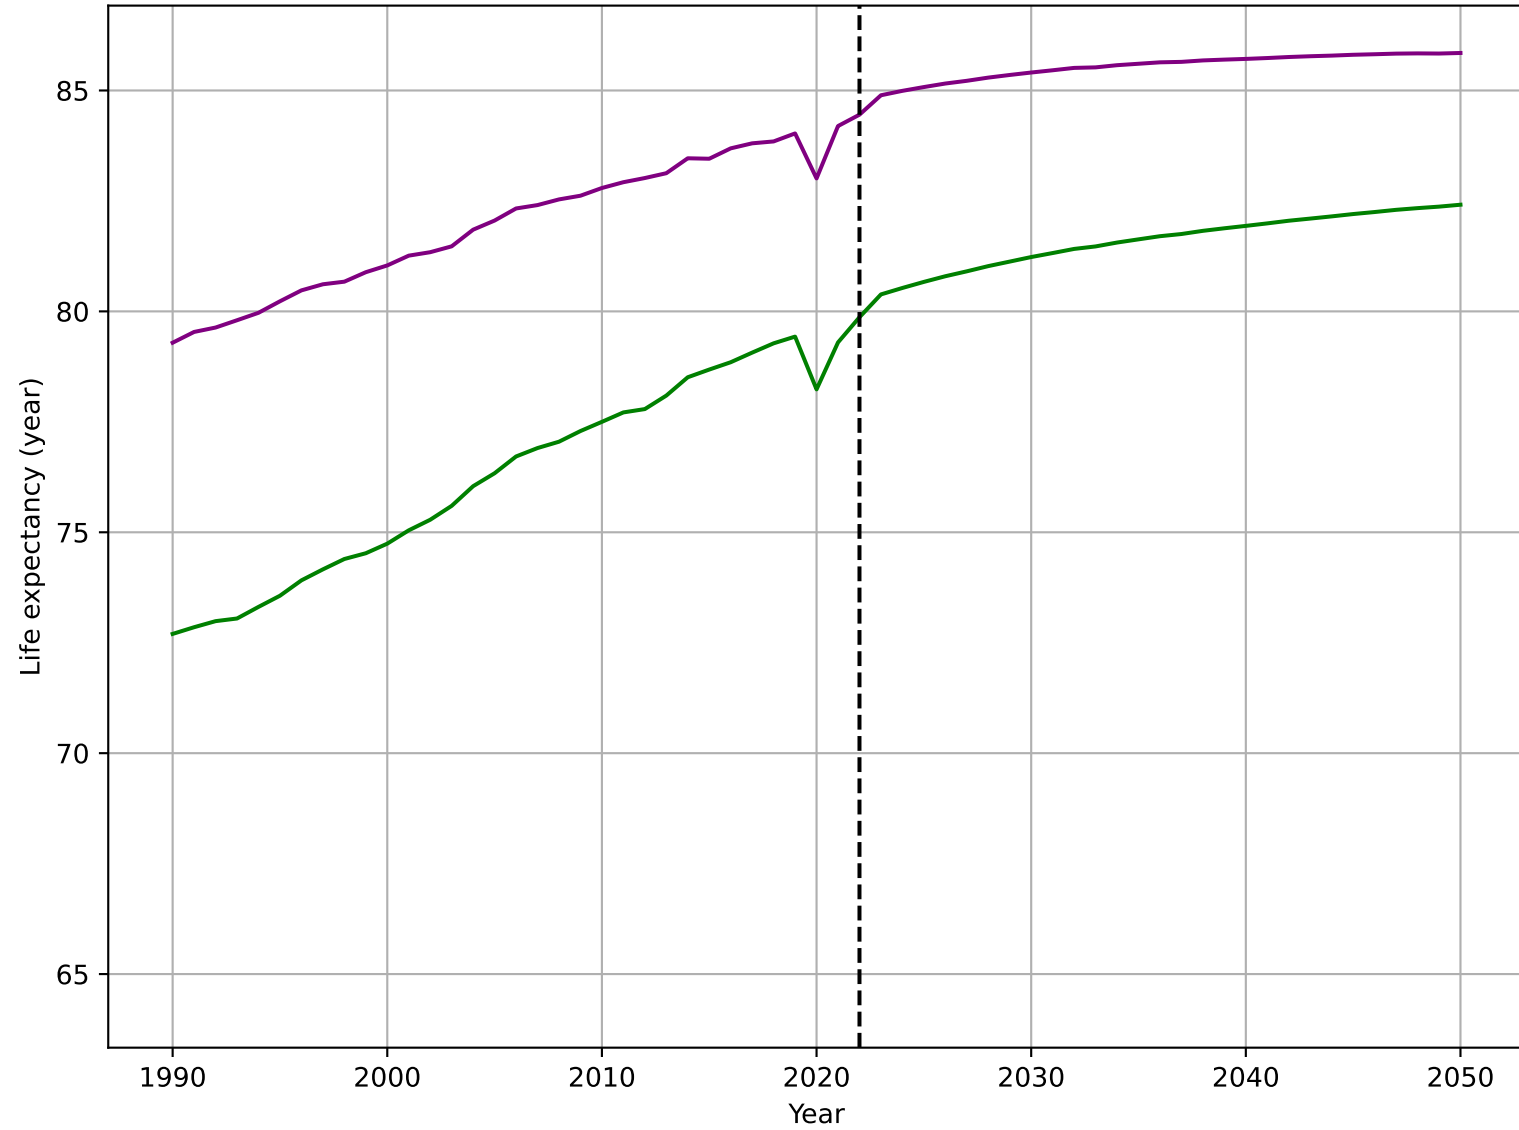

### Healthy Life Expectancy (HALE)

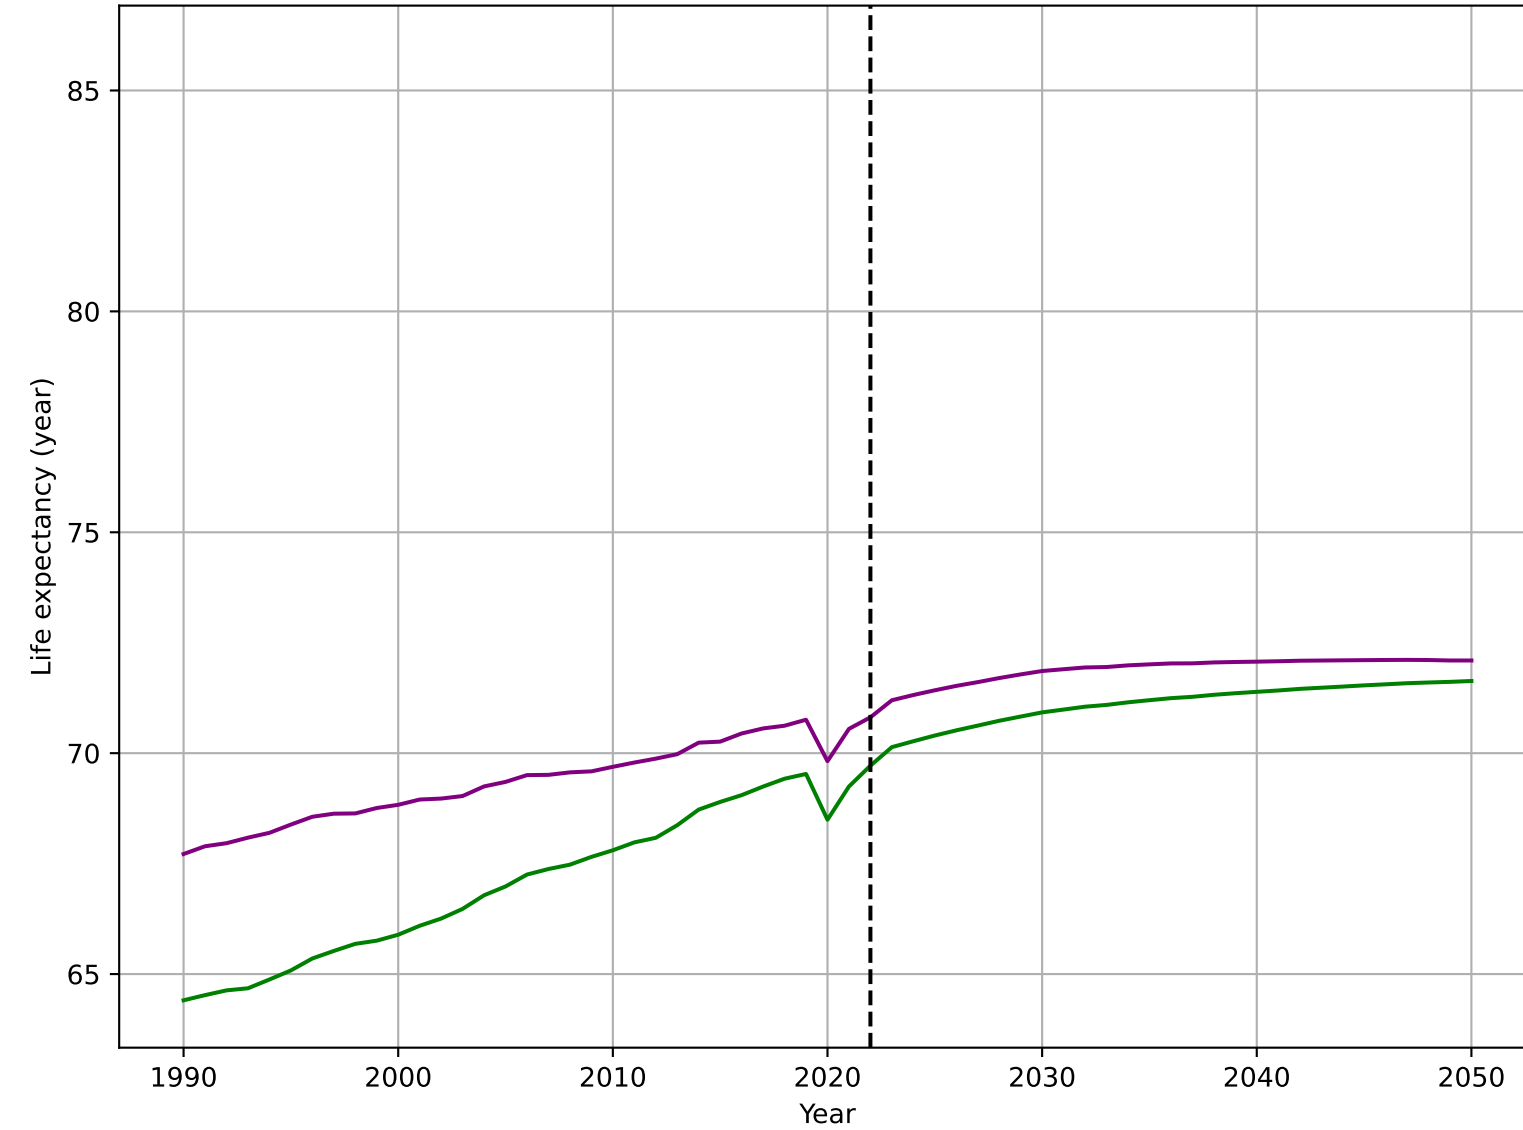



# Cyprus

### Life Expectancy

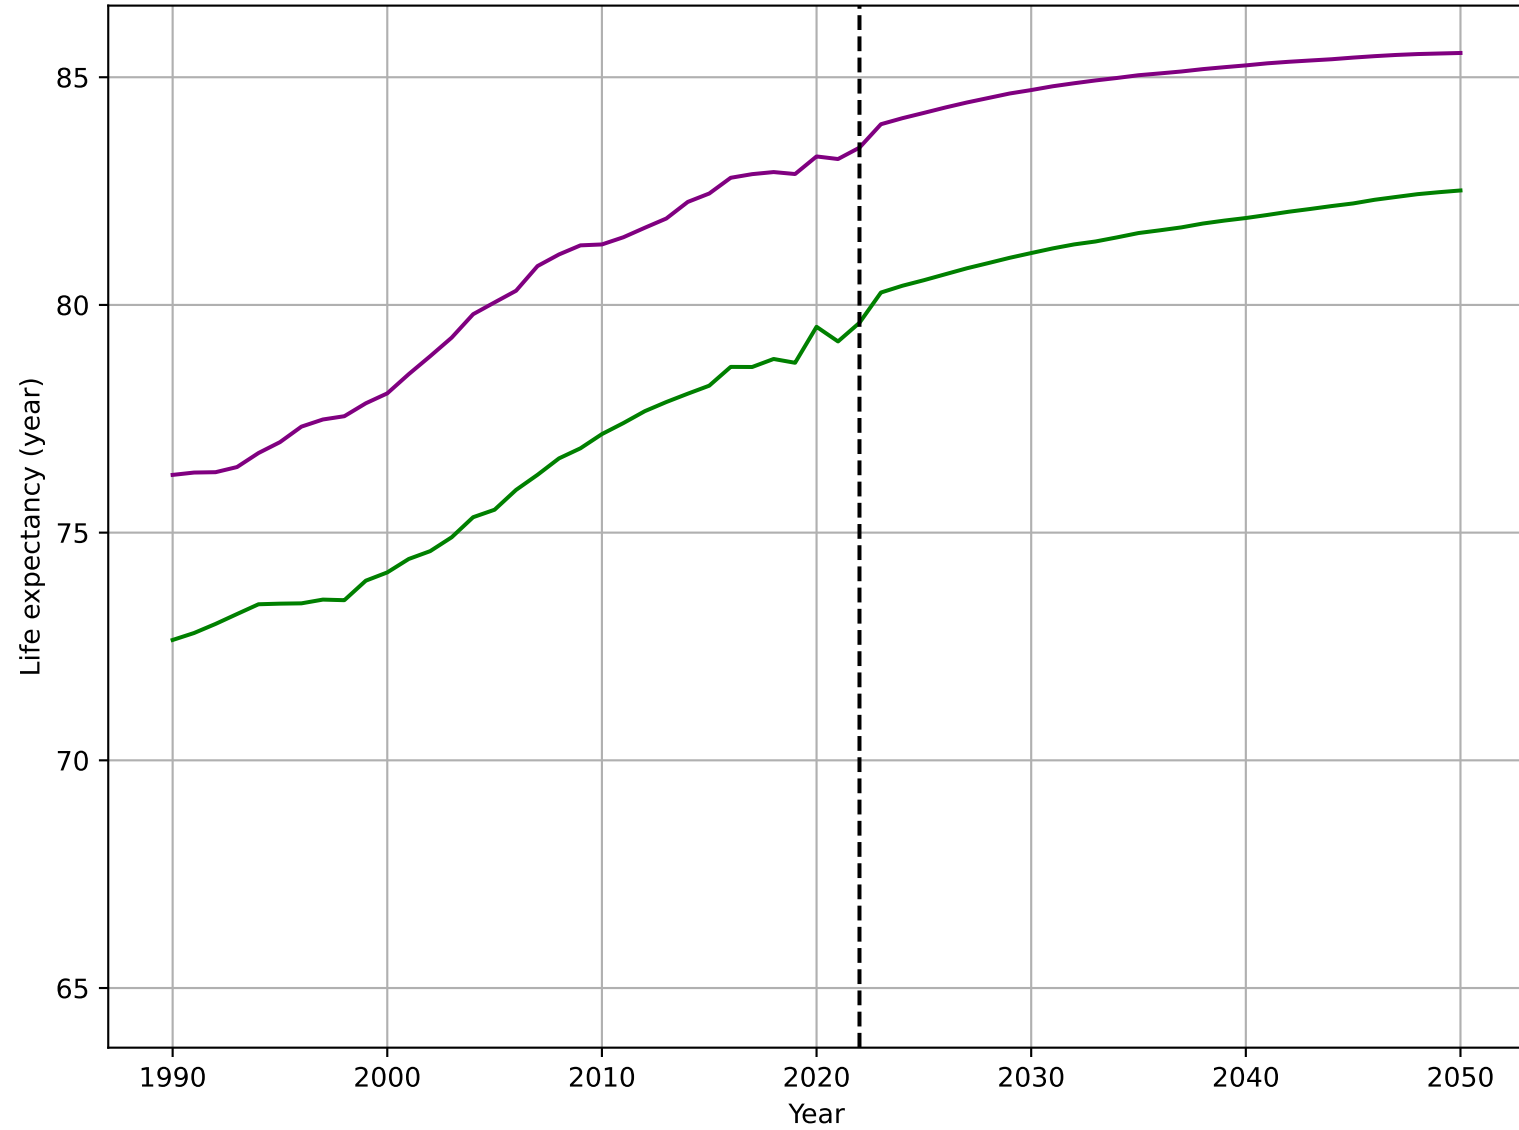

### Healthy Life Expectancy (HALE)

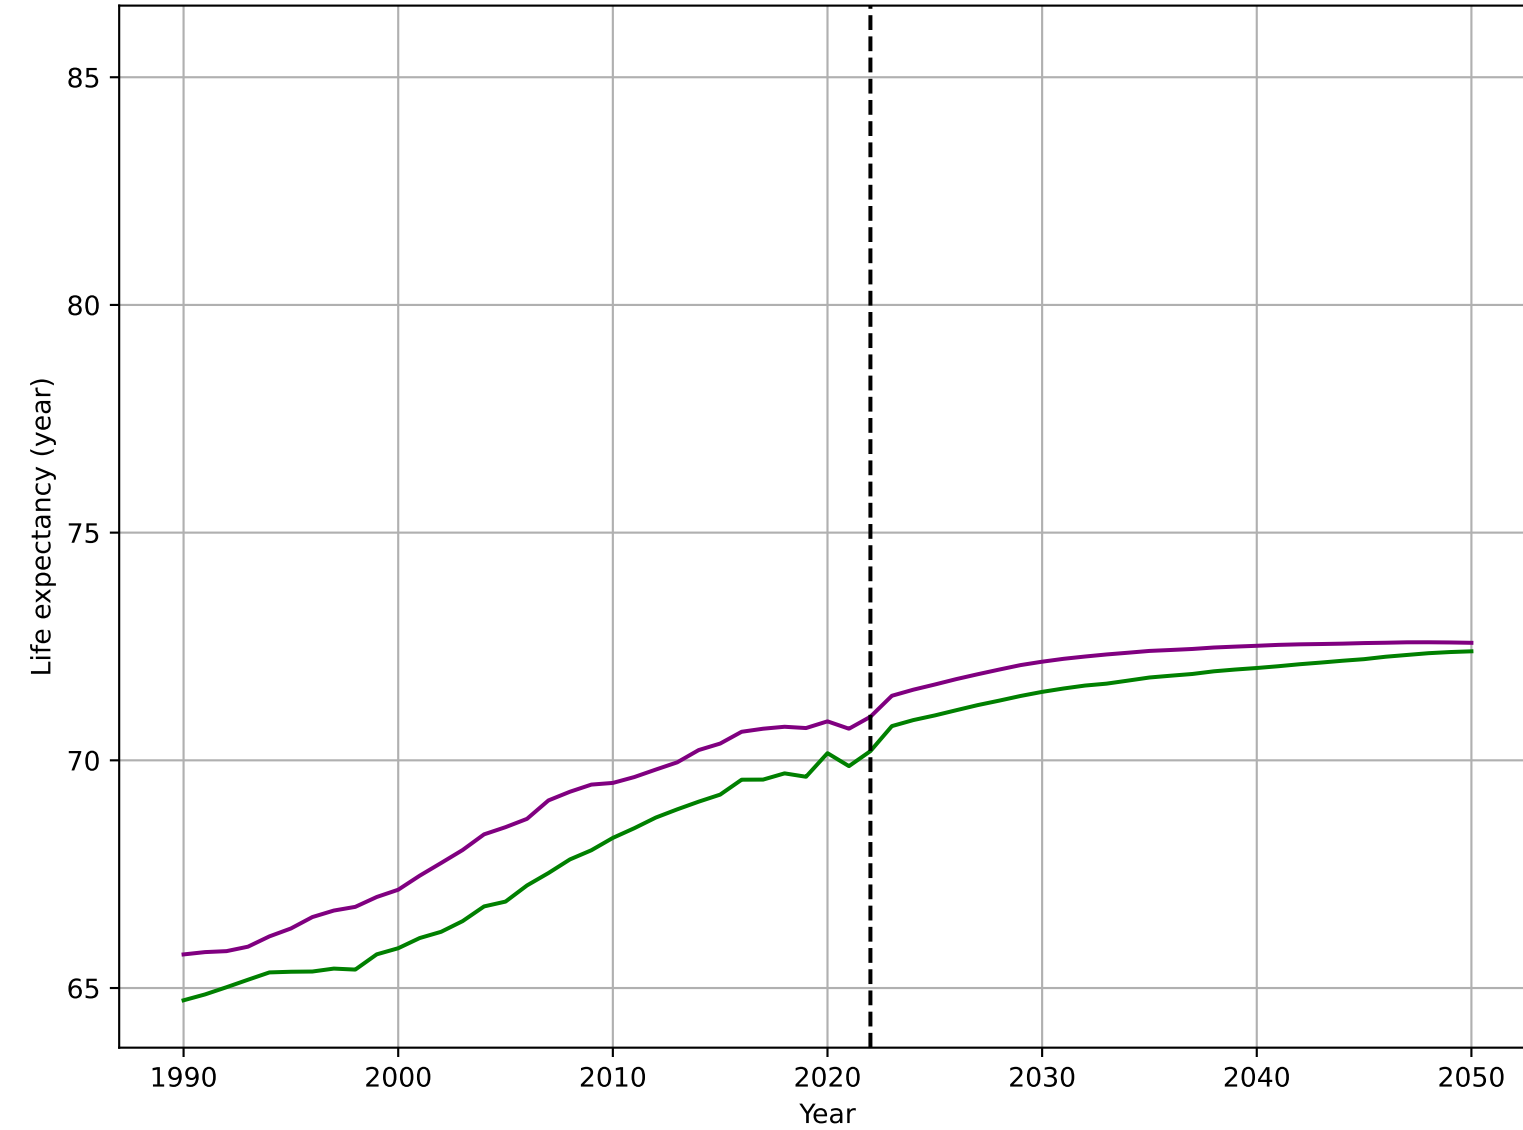

# Denmark

### Life Expectancy

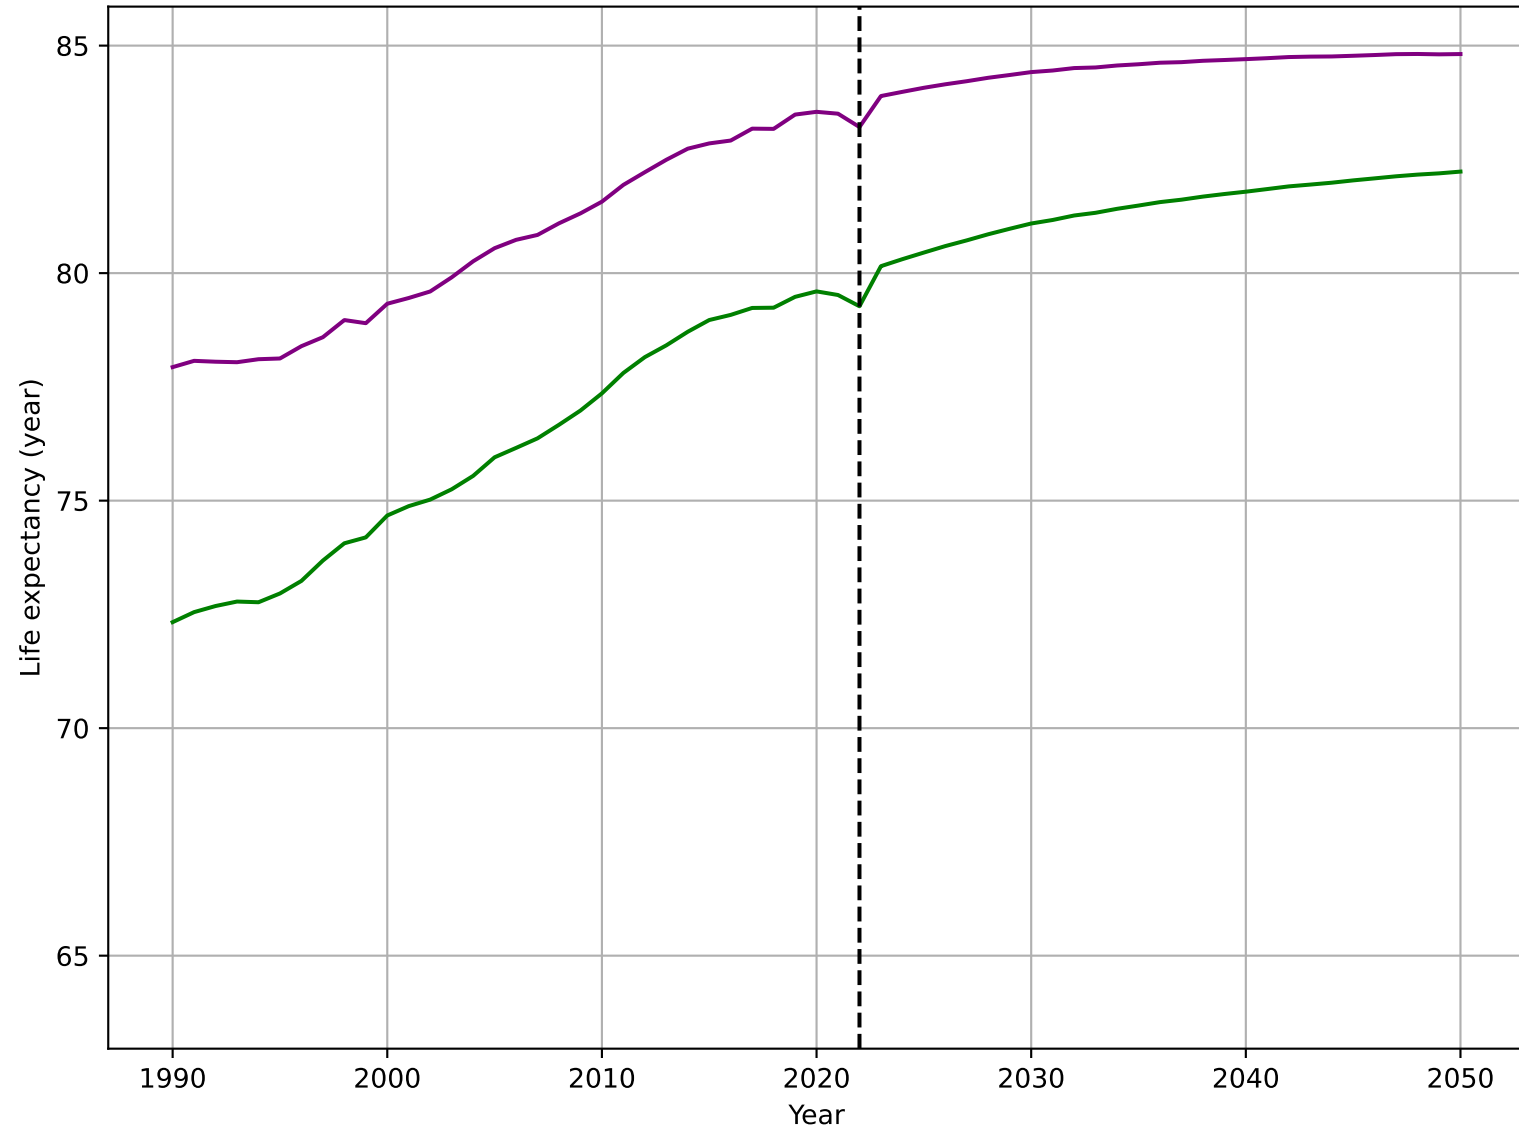

### Healthy Life Expectancy (HALE)

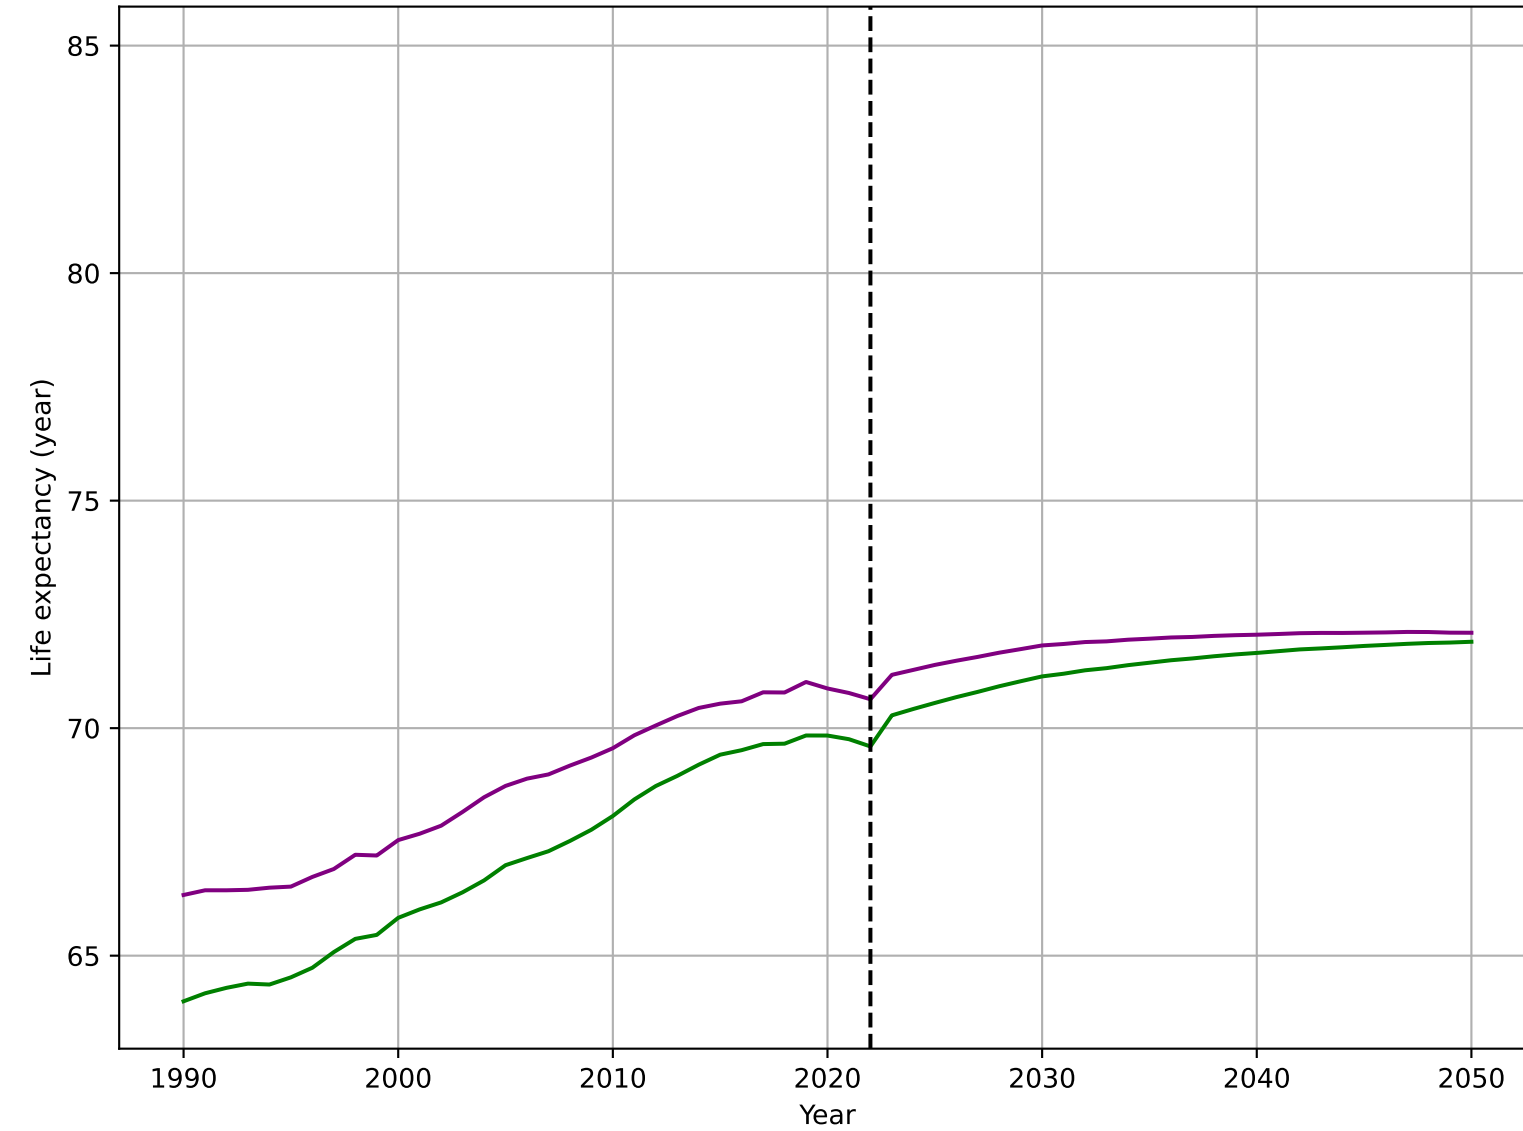

# Finland

### Life Expectancy

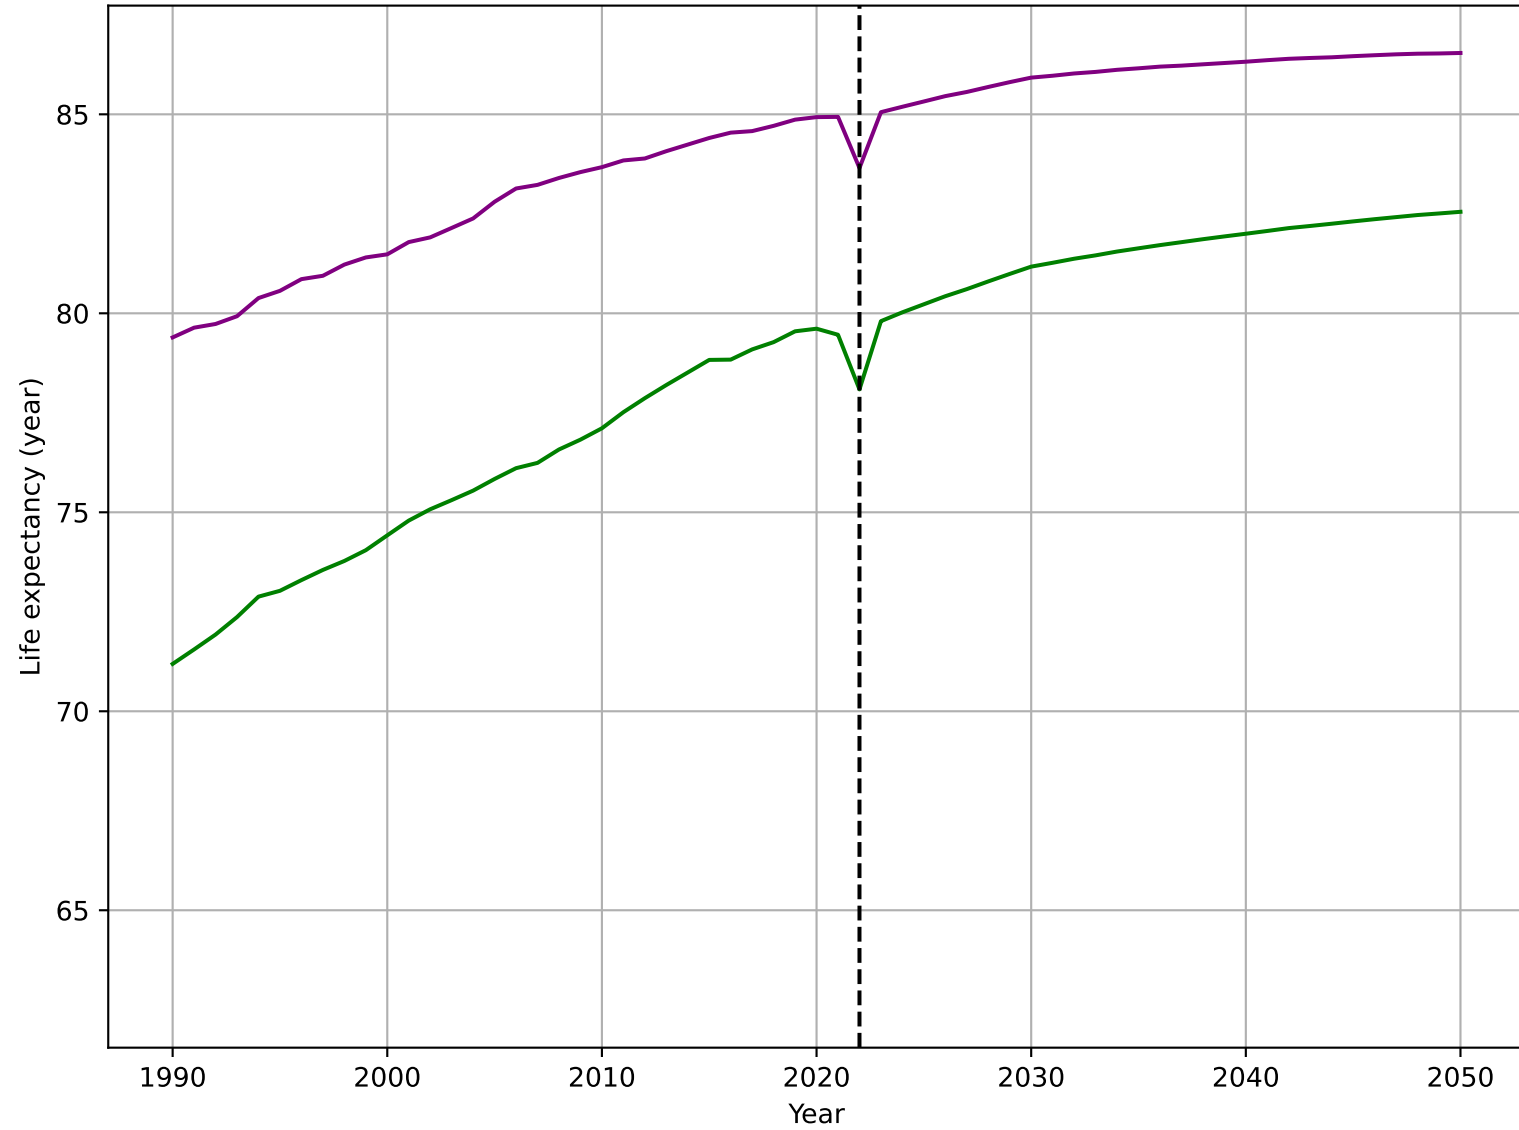

### Healthy Life Expectancy (HALE)

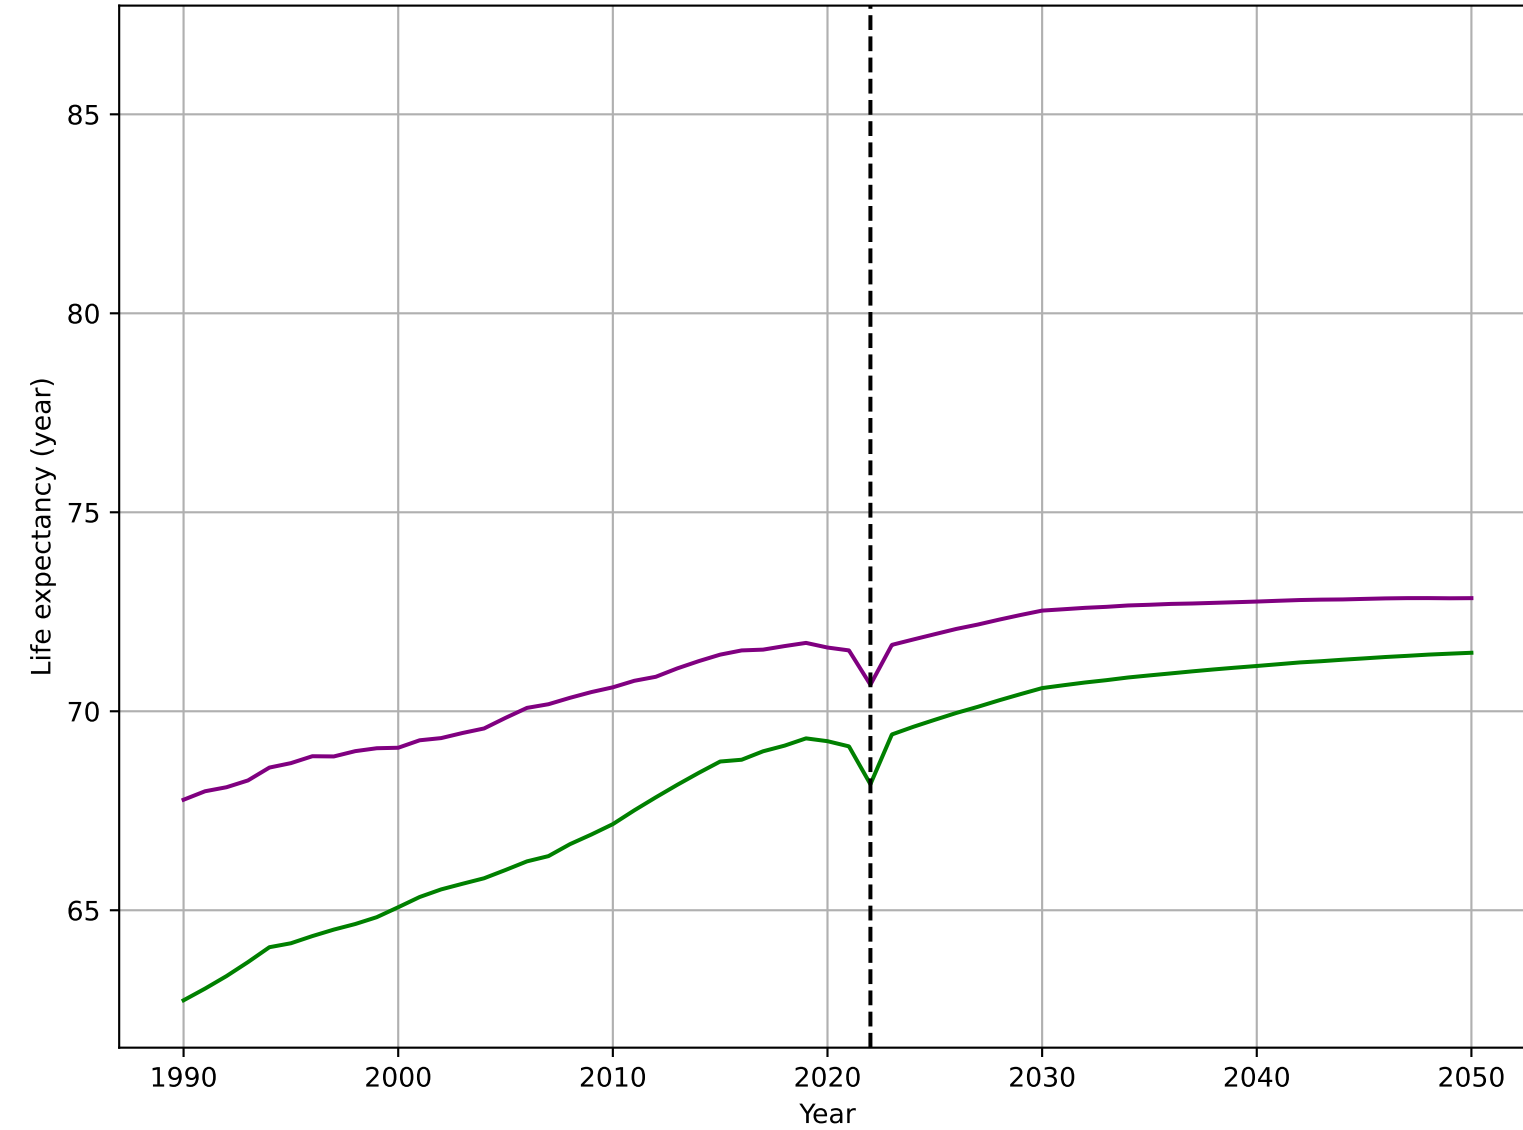

# France

### Life Expectancy

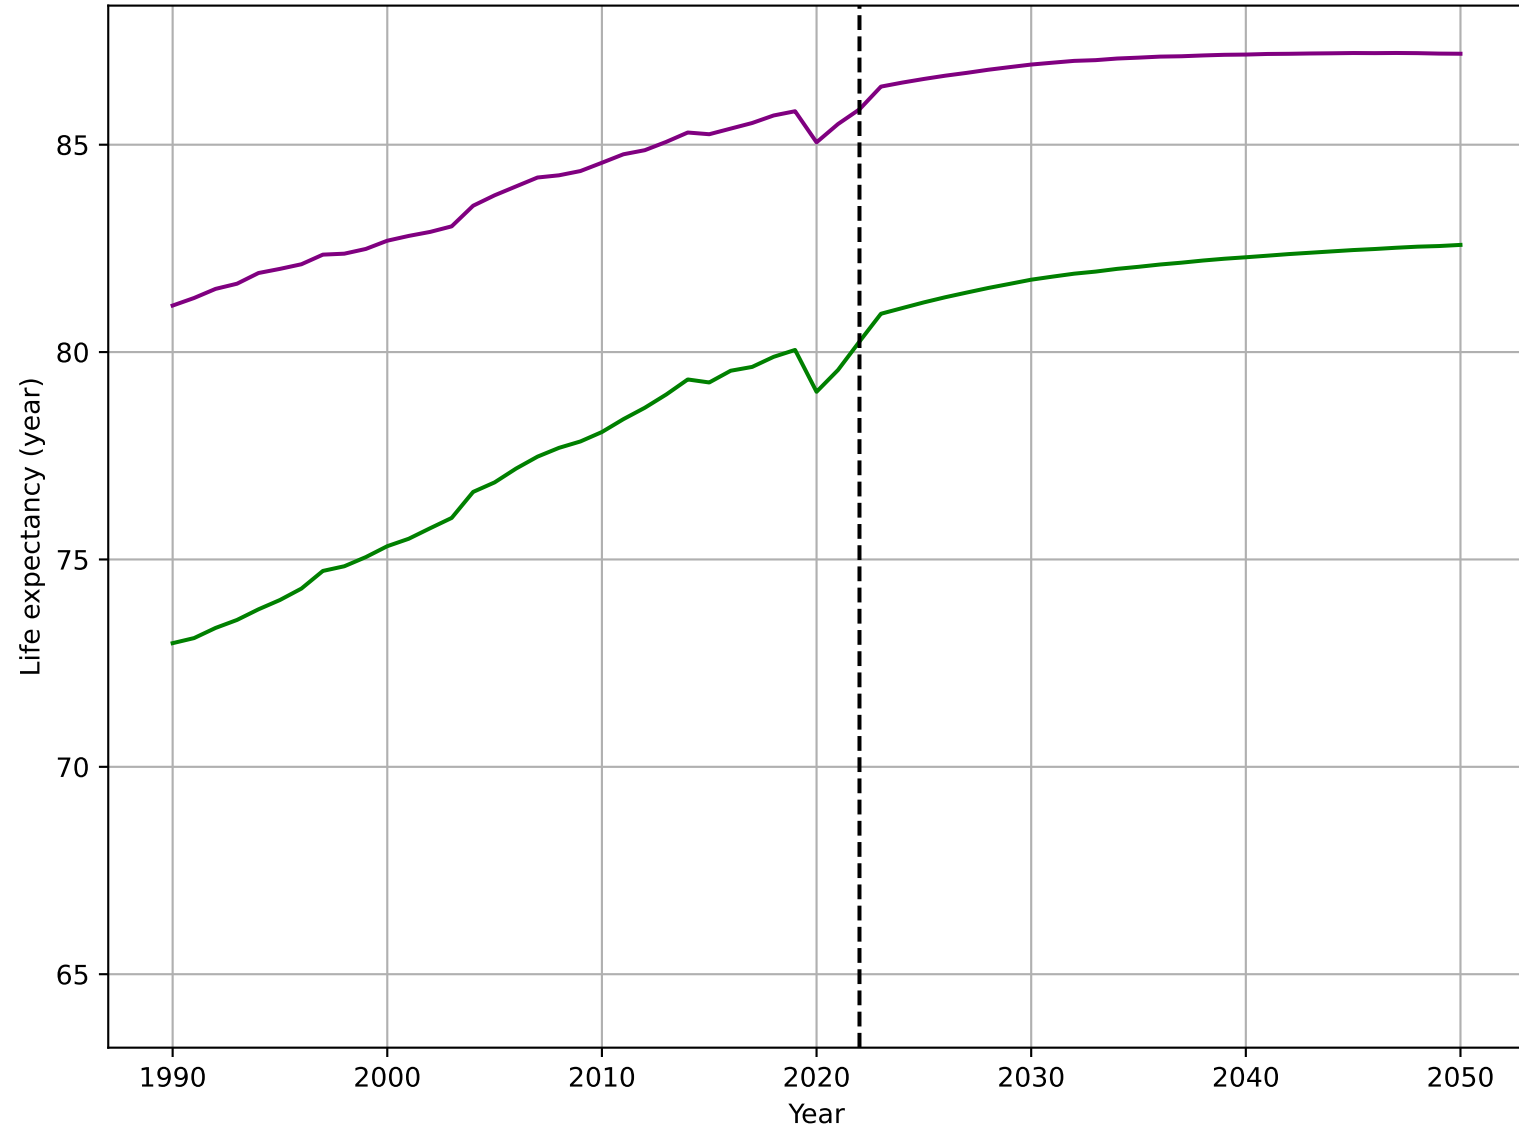

### Healthy Life Expectancy (HALE)

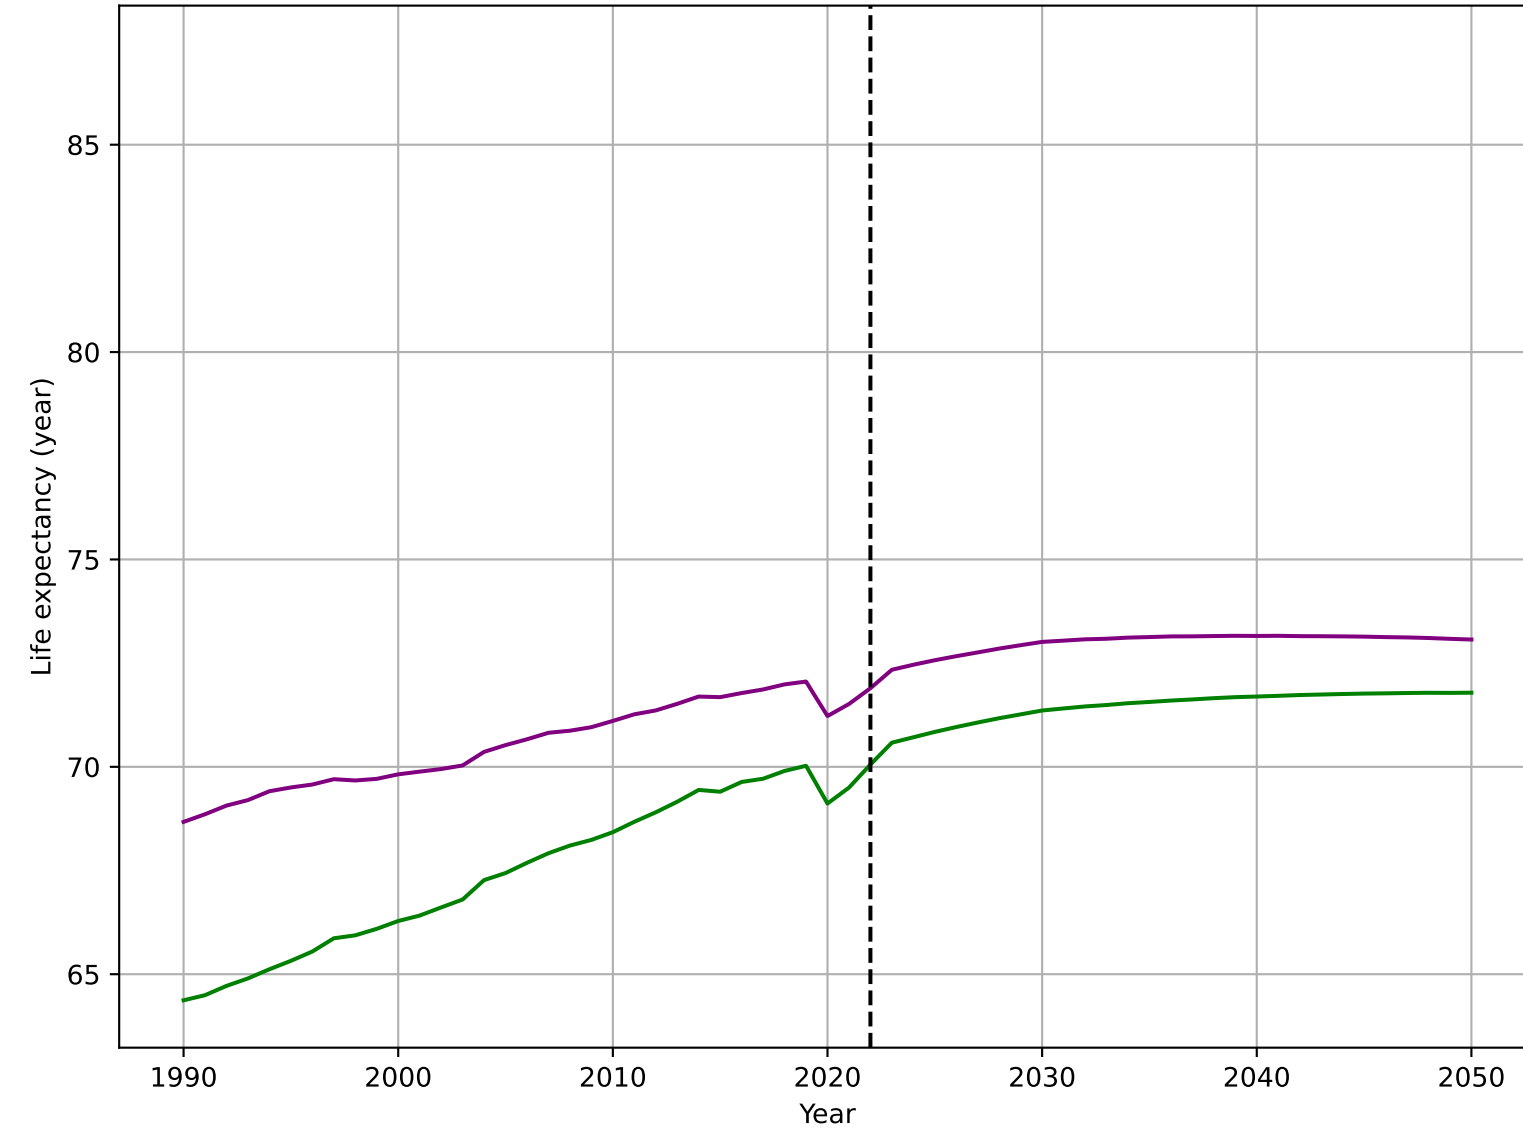

# Germany

### Life Expectancy

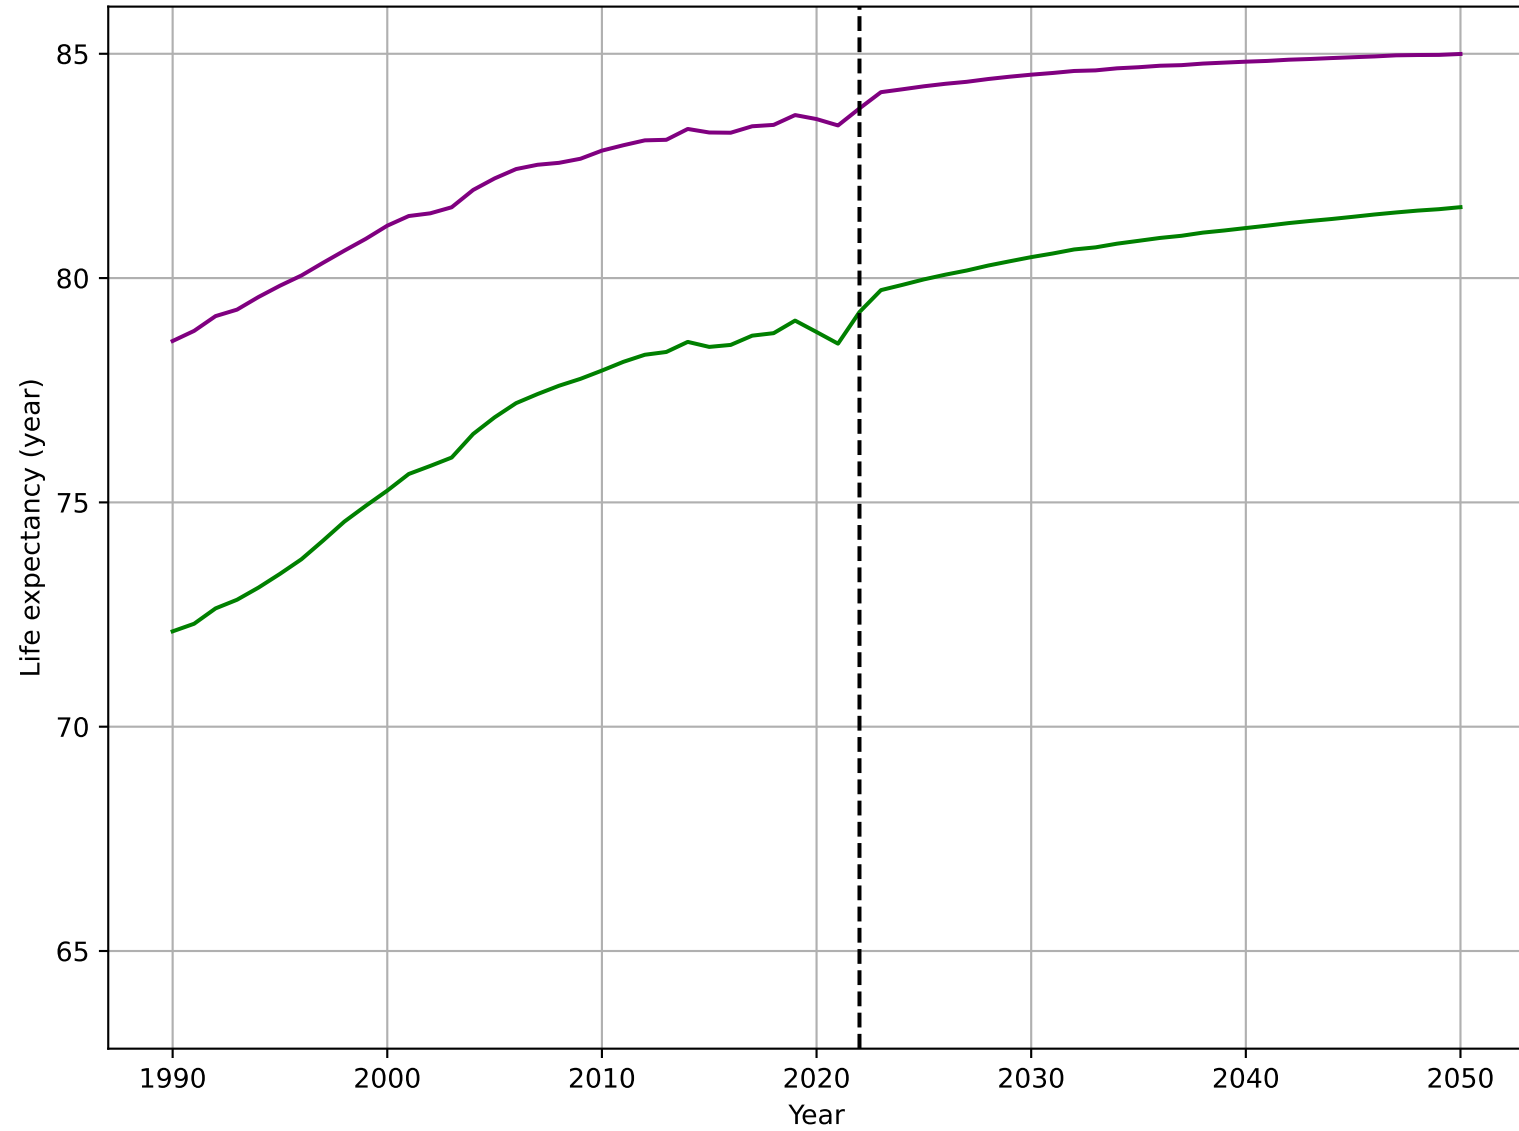

### Healthy Life Expectancy (HALE)

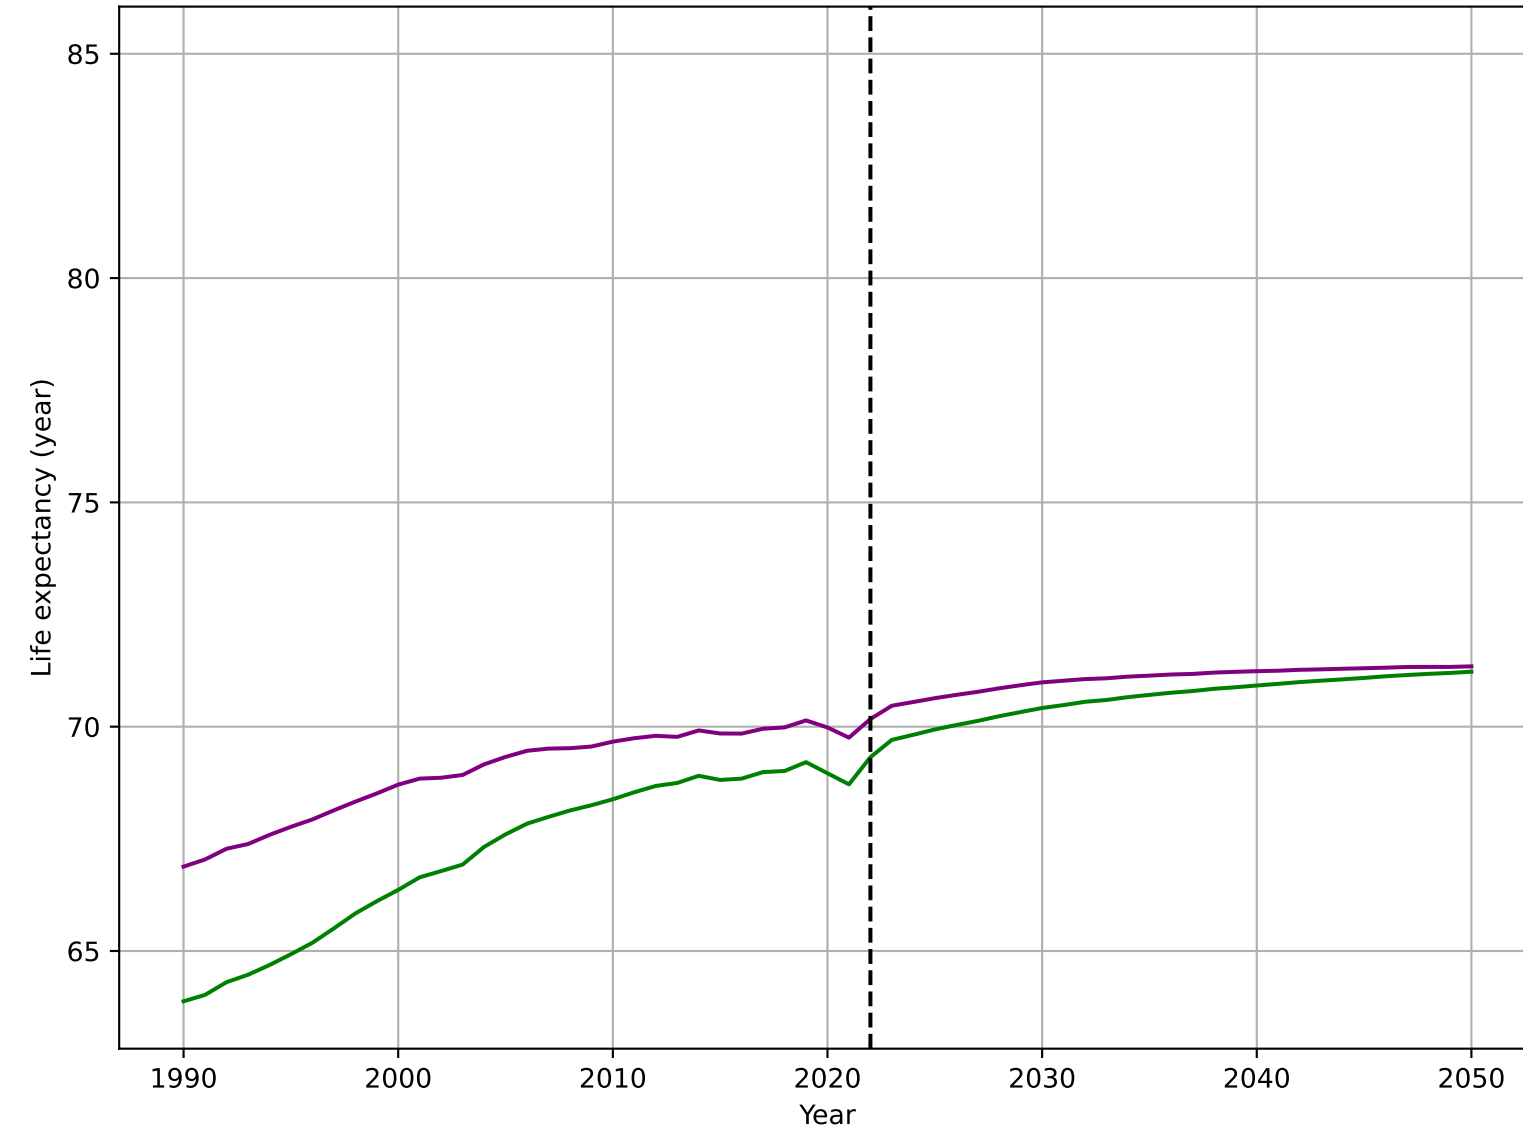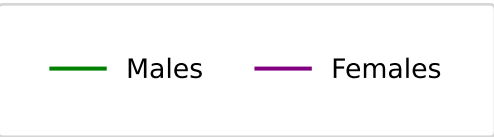

# Greece

### Life Expectancy

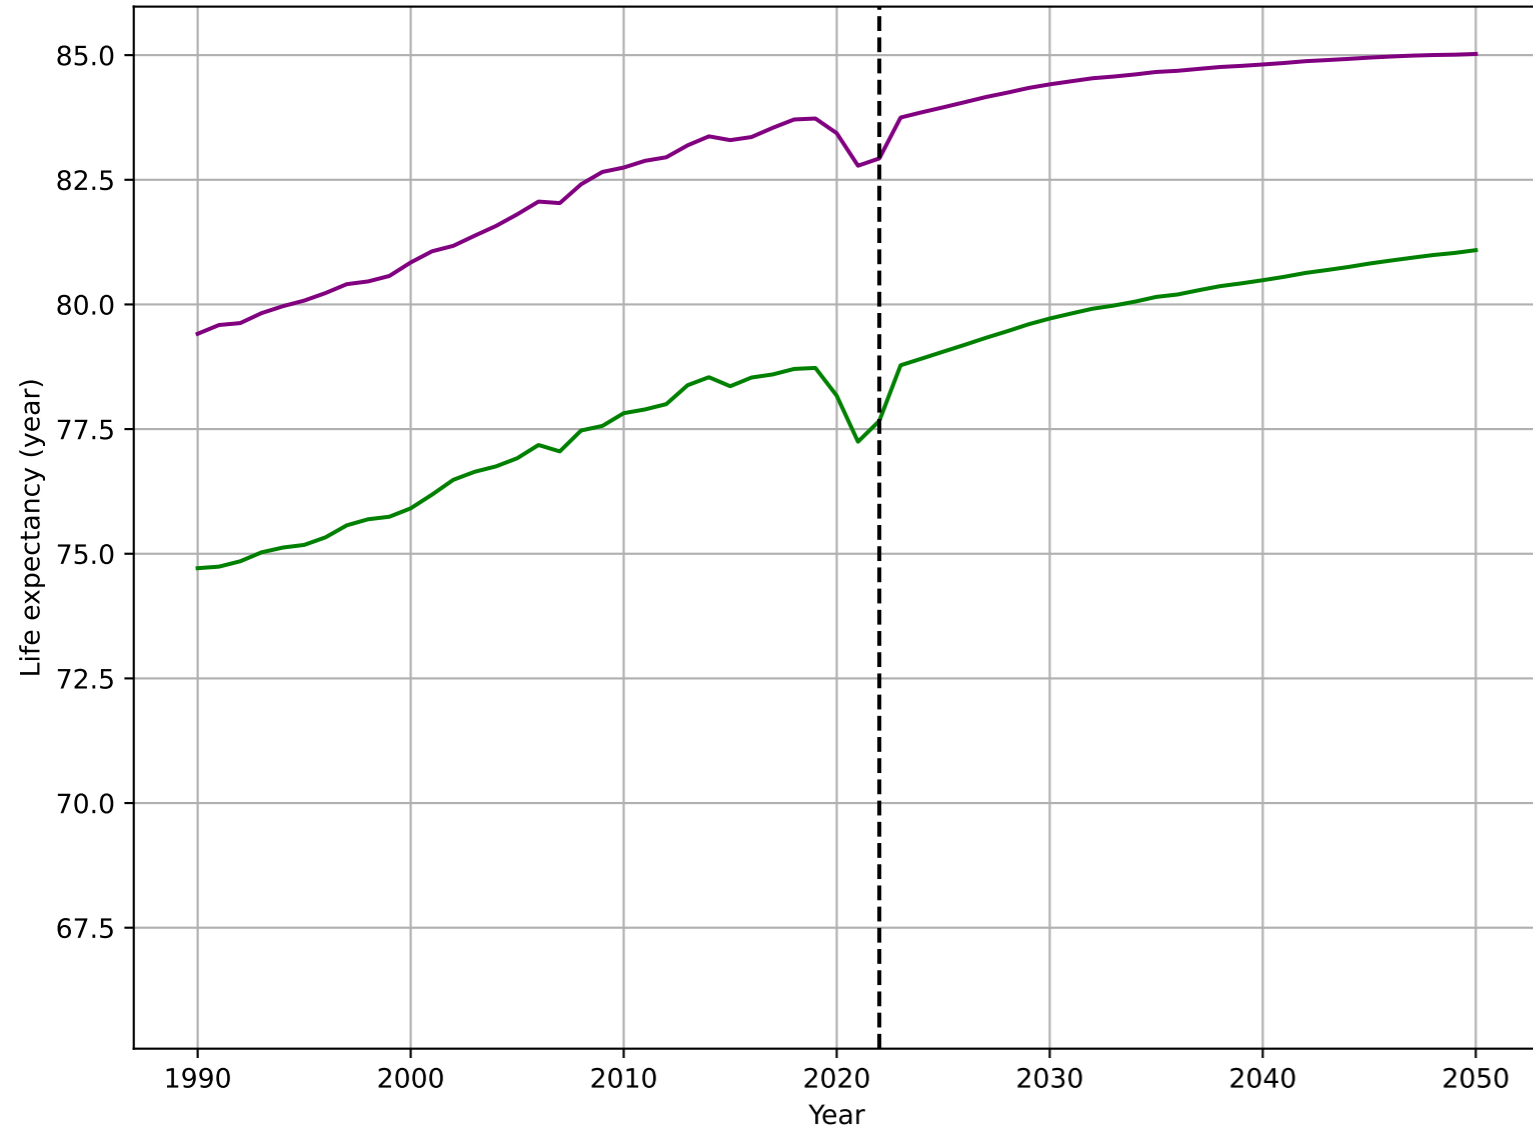

### Healthy Life Expectancy (HALE)

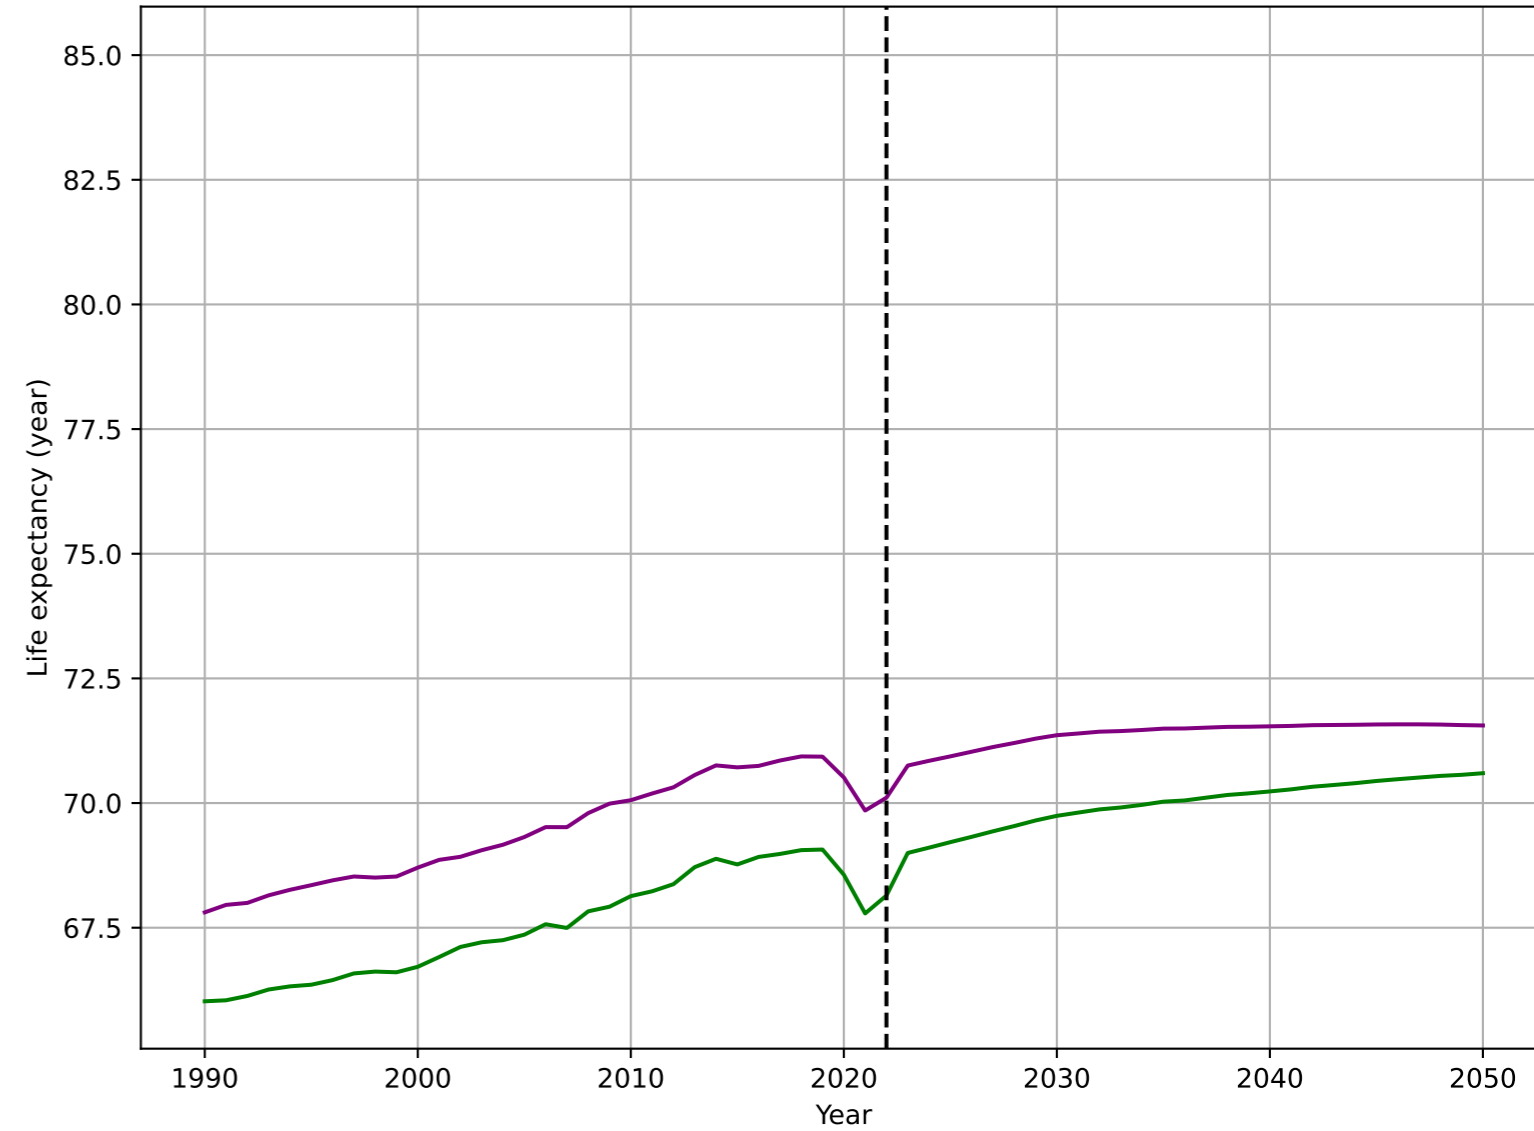

# Iceland

### Life Expectancy

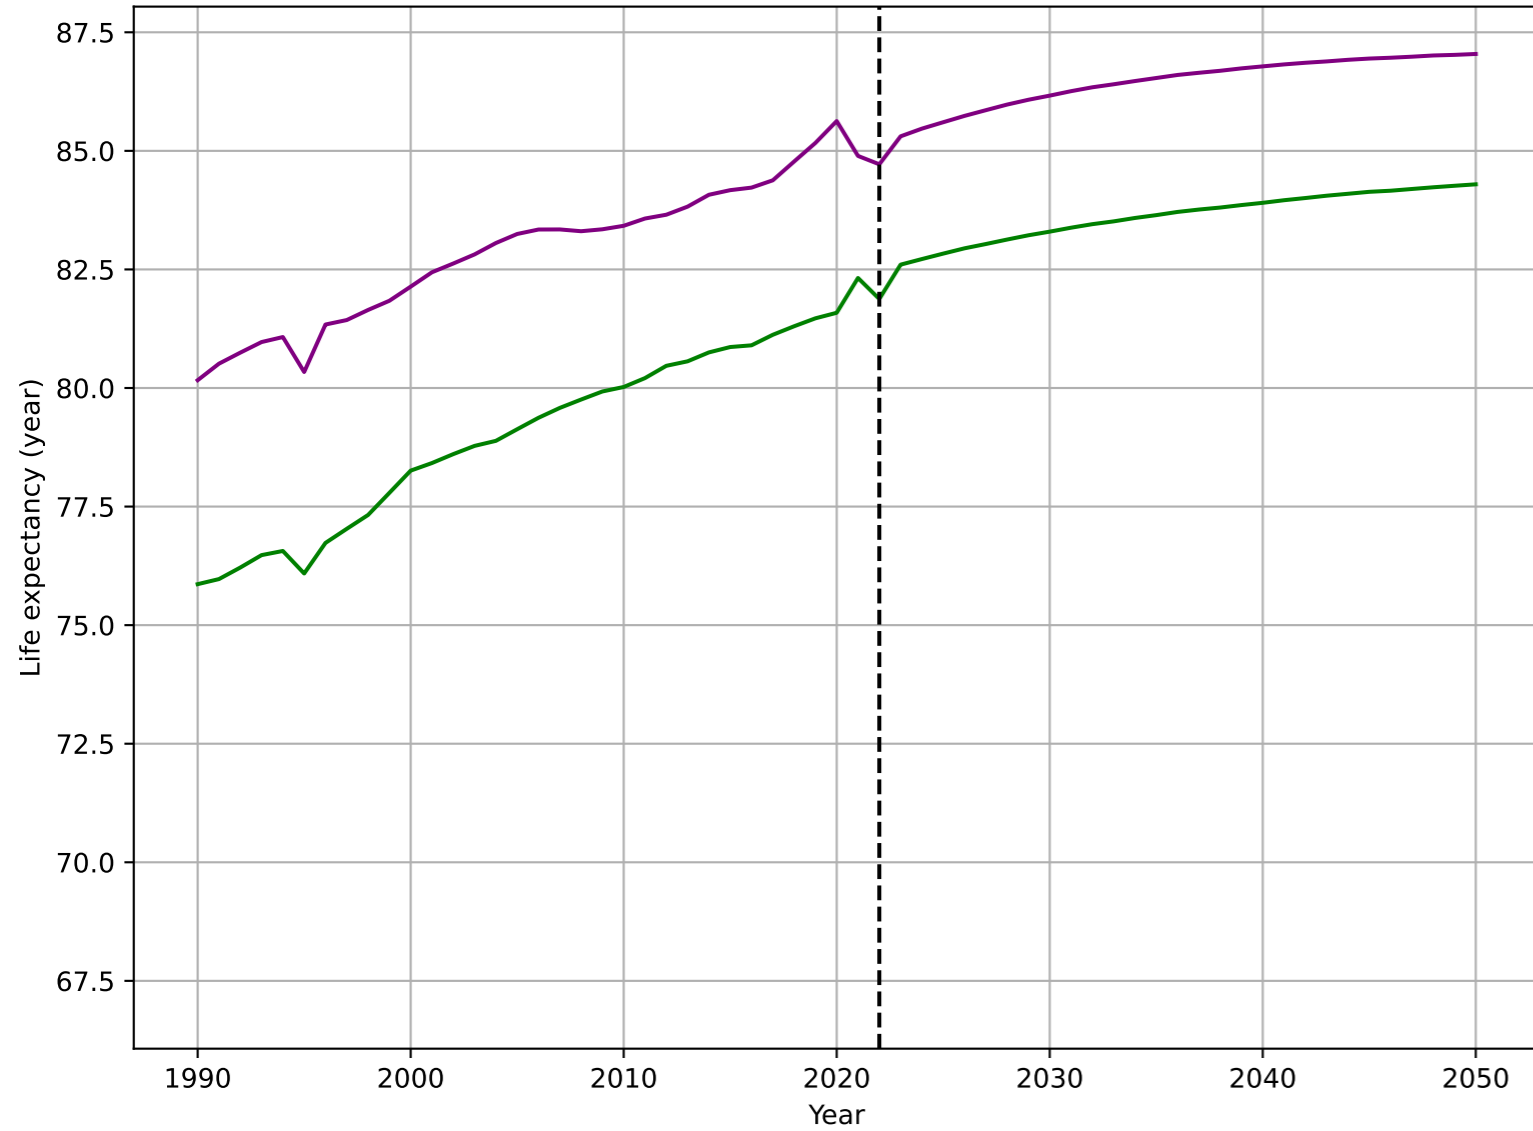

### Healthy Life Expectancy (HALE)

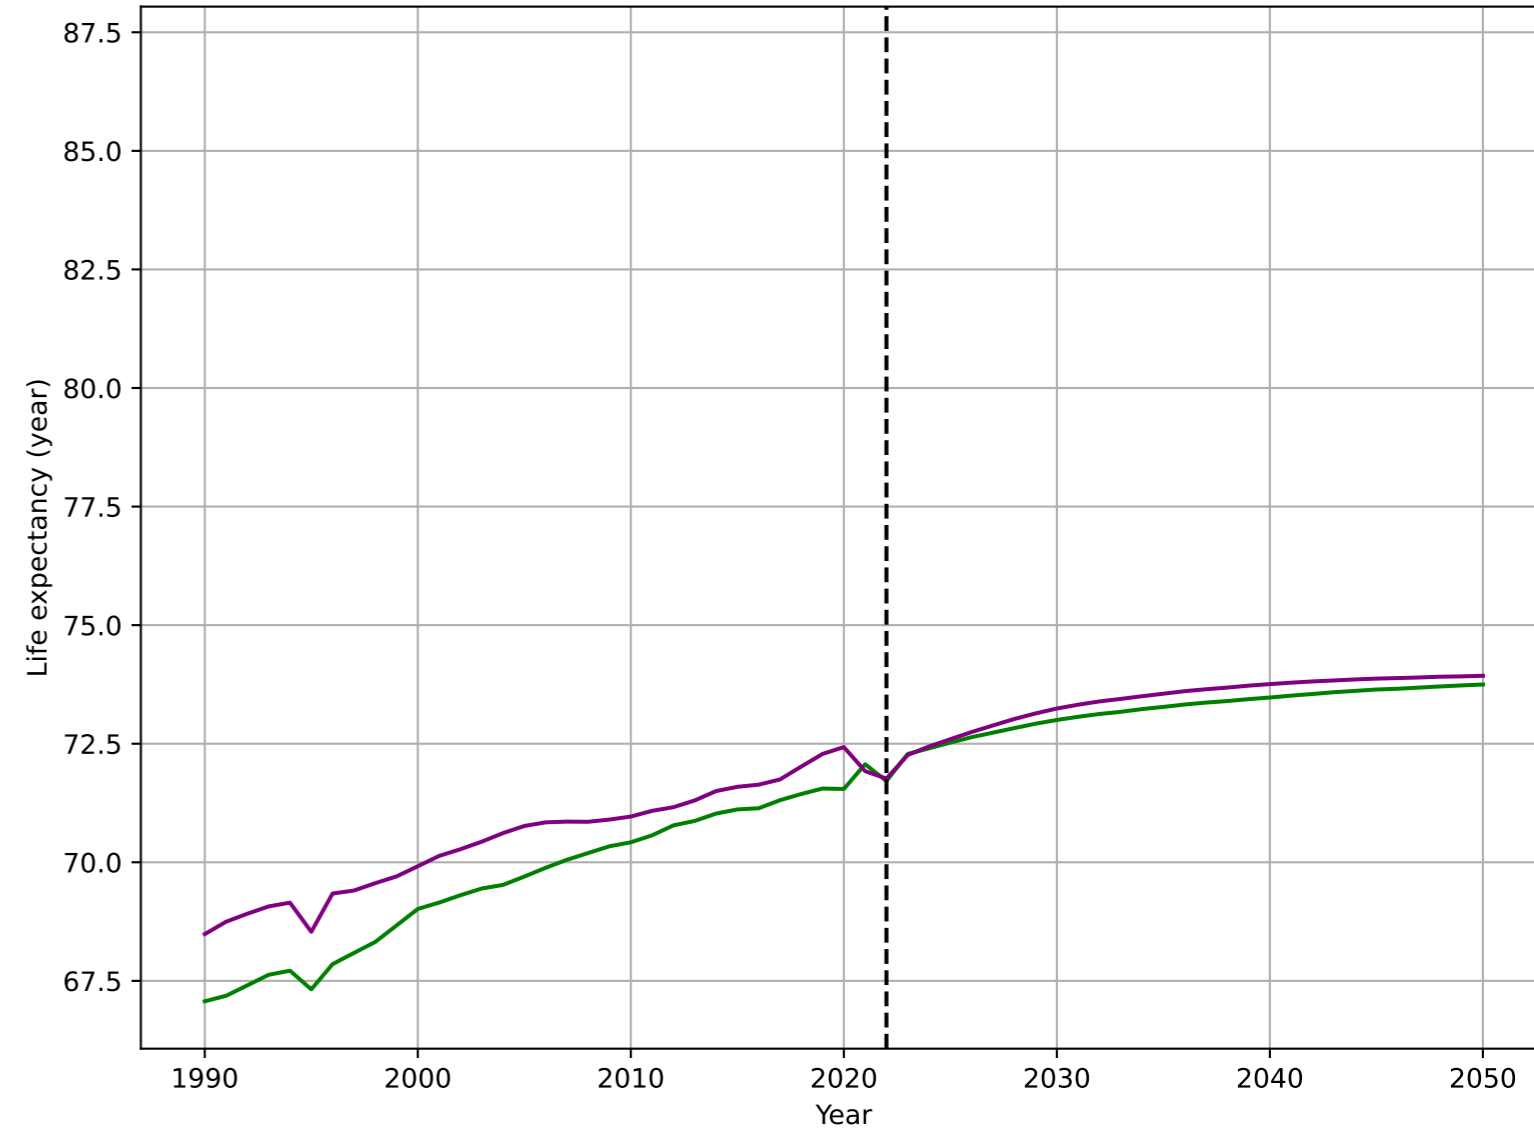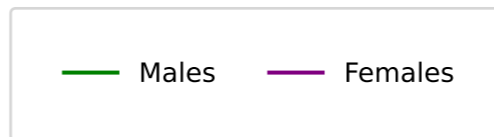

# Ireland

### Life Expectancy

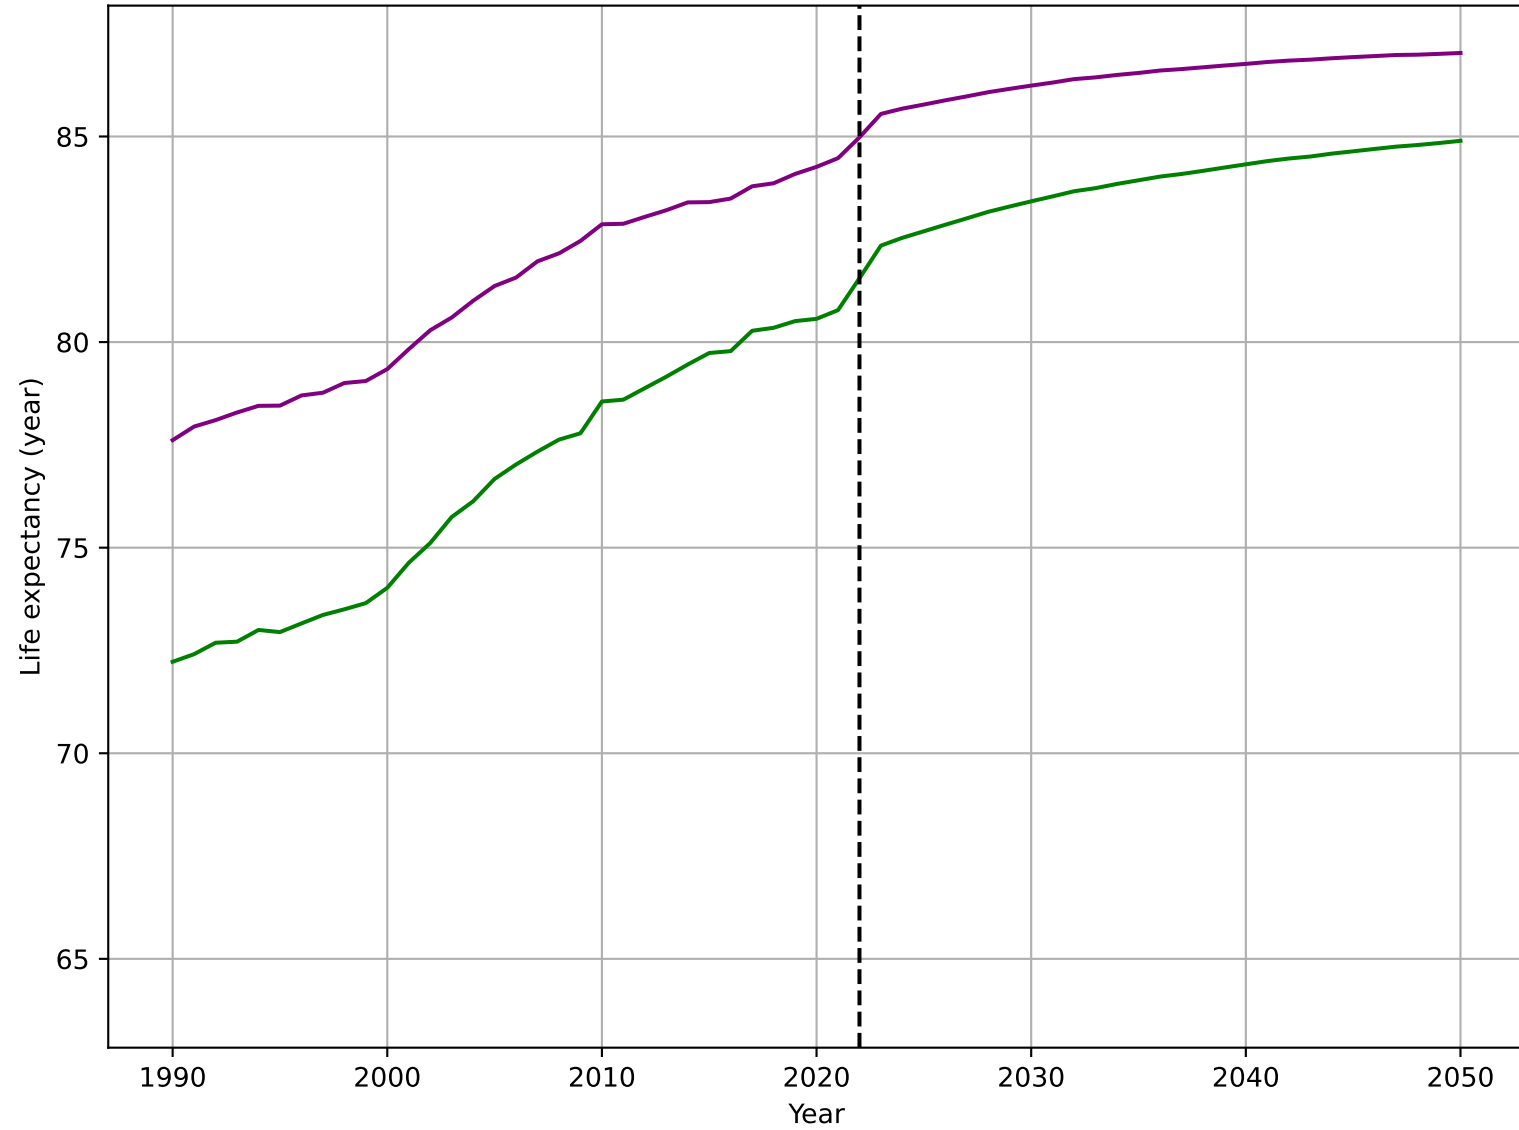

### Healthy Life Expectancy (HALE)

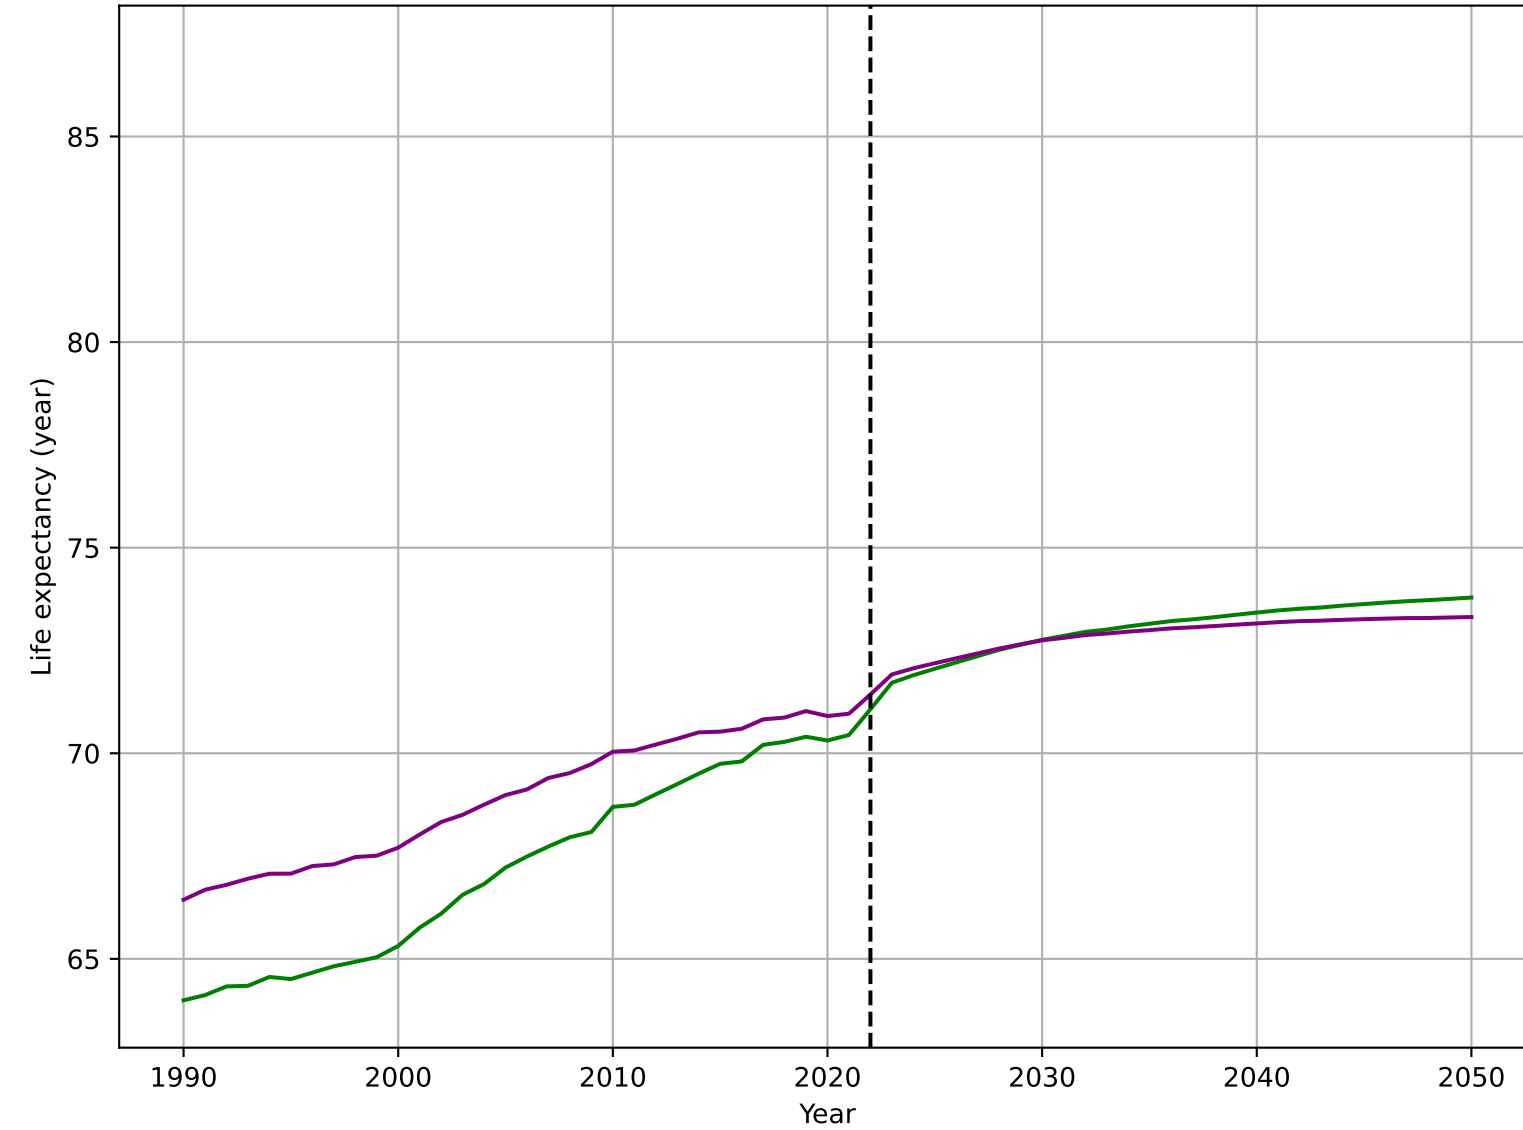



# Israel

### Life Expectancy

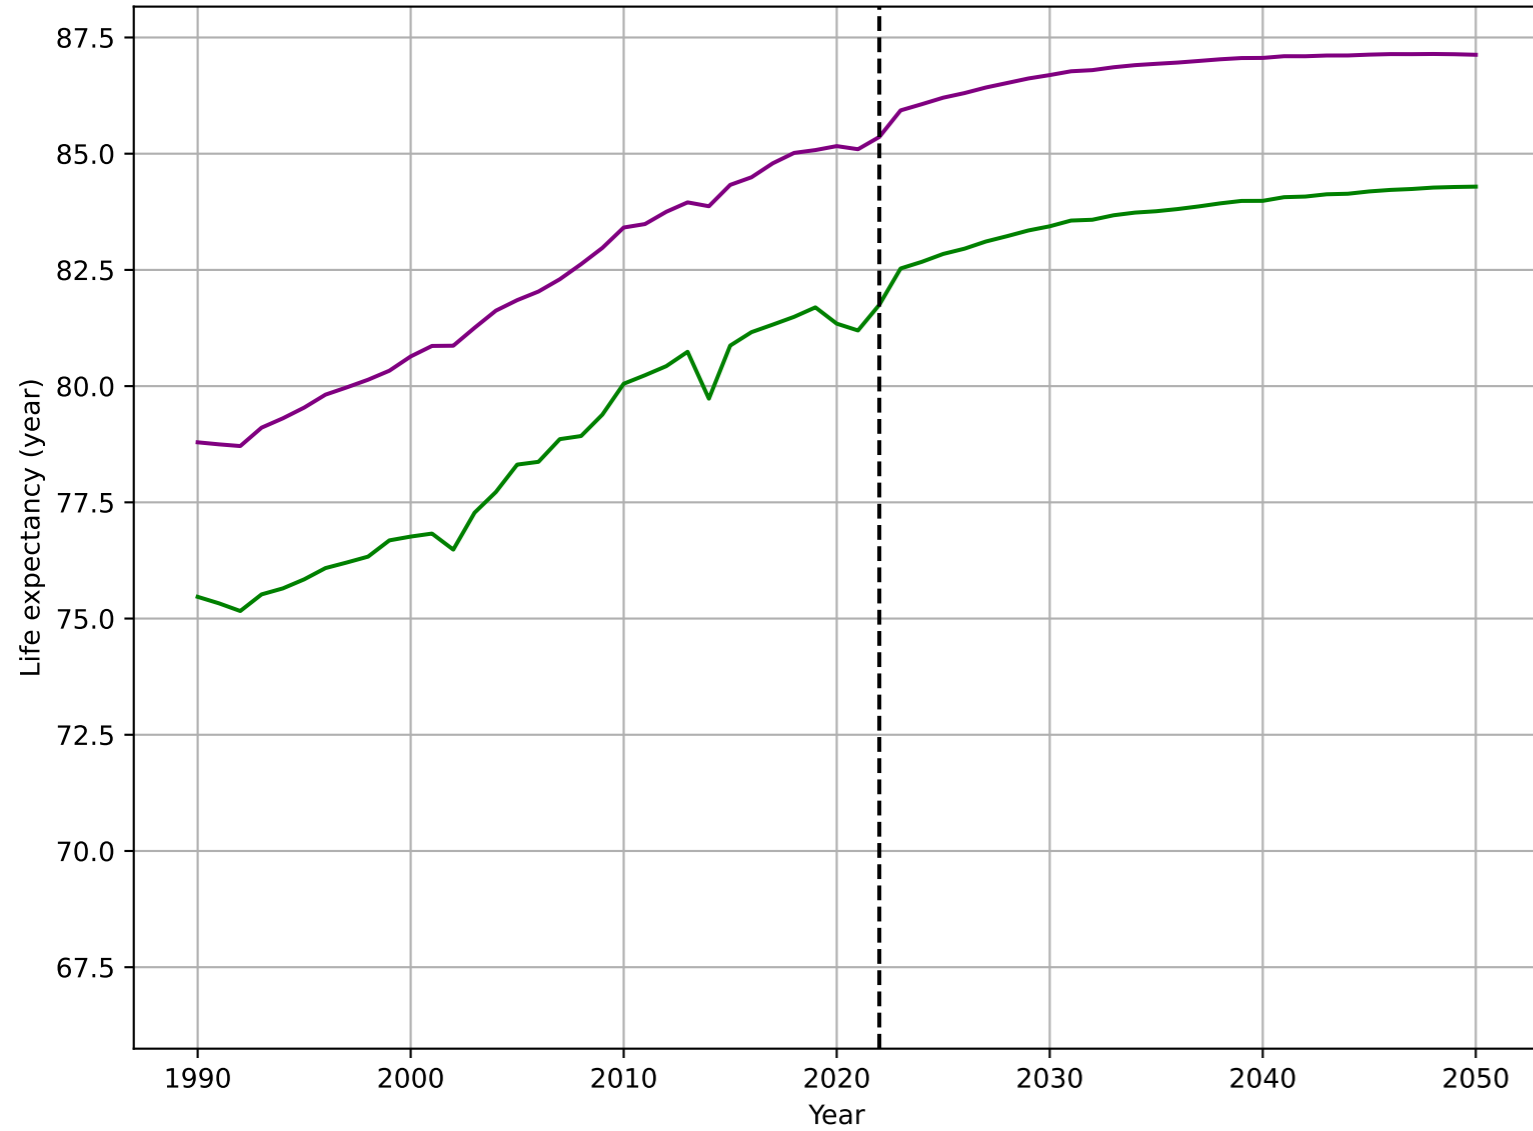

### Healthy Life Expectancy (HALE)

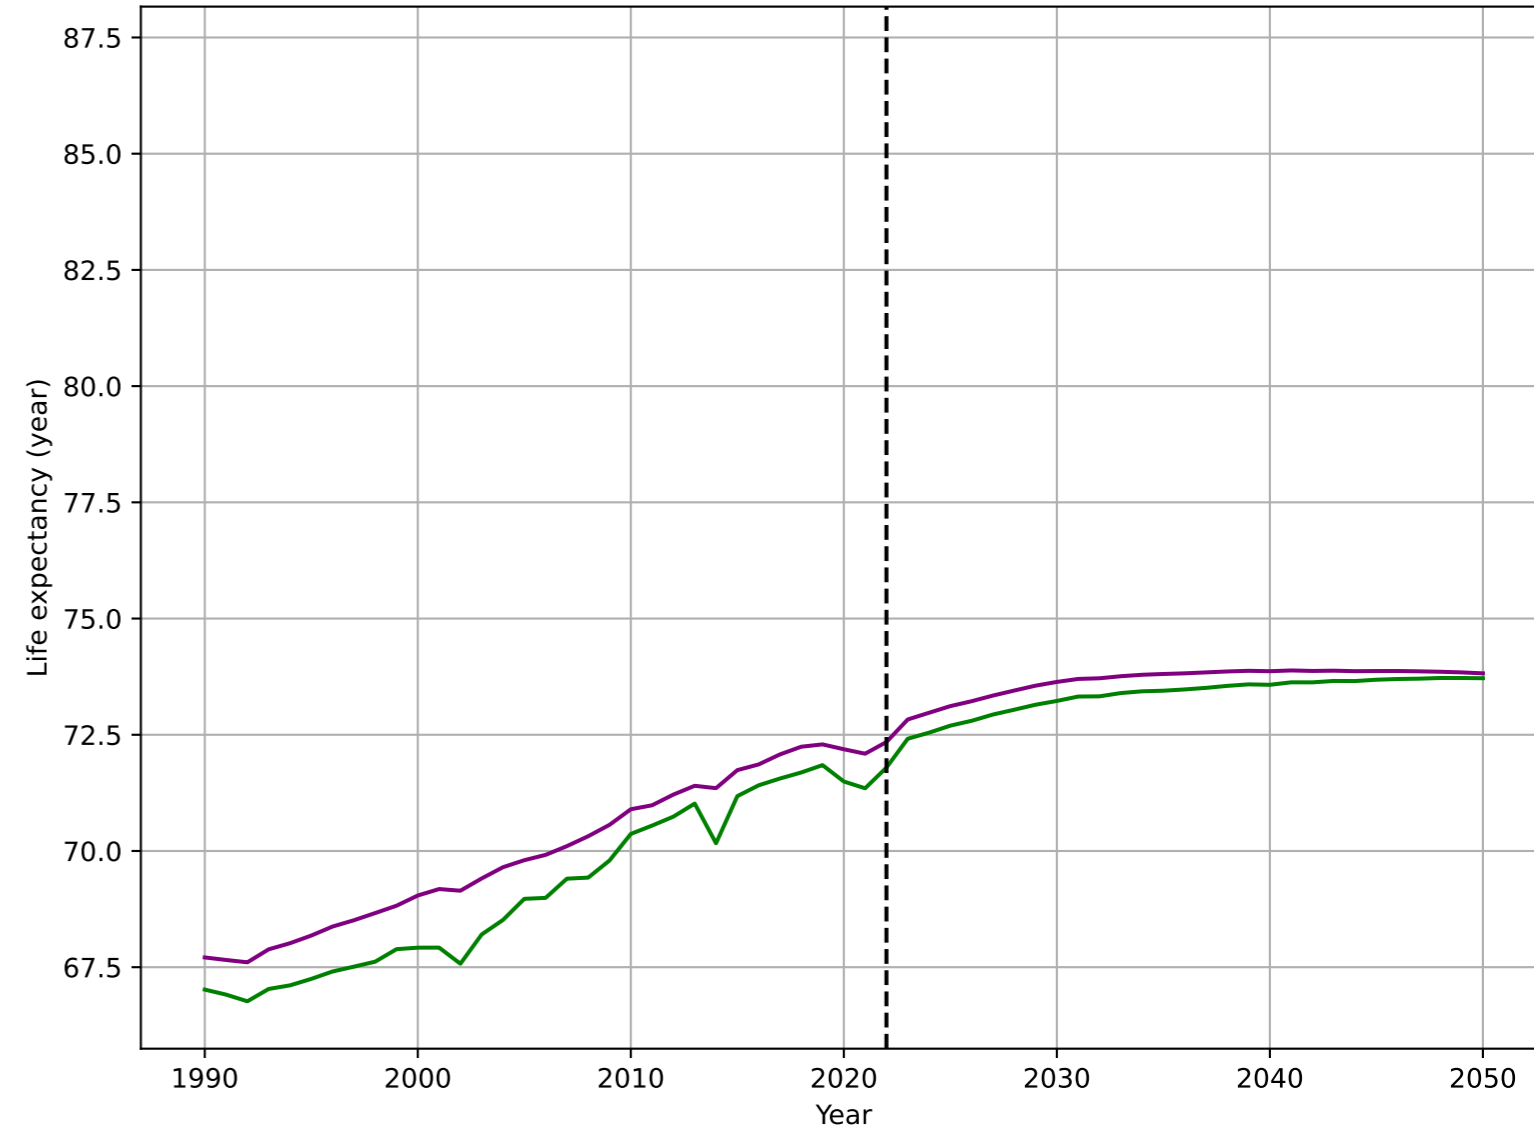

# Italy

### Life Expectancy

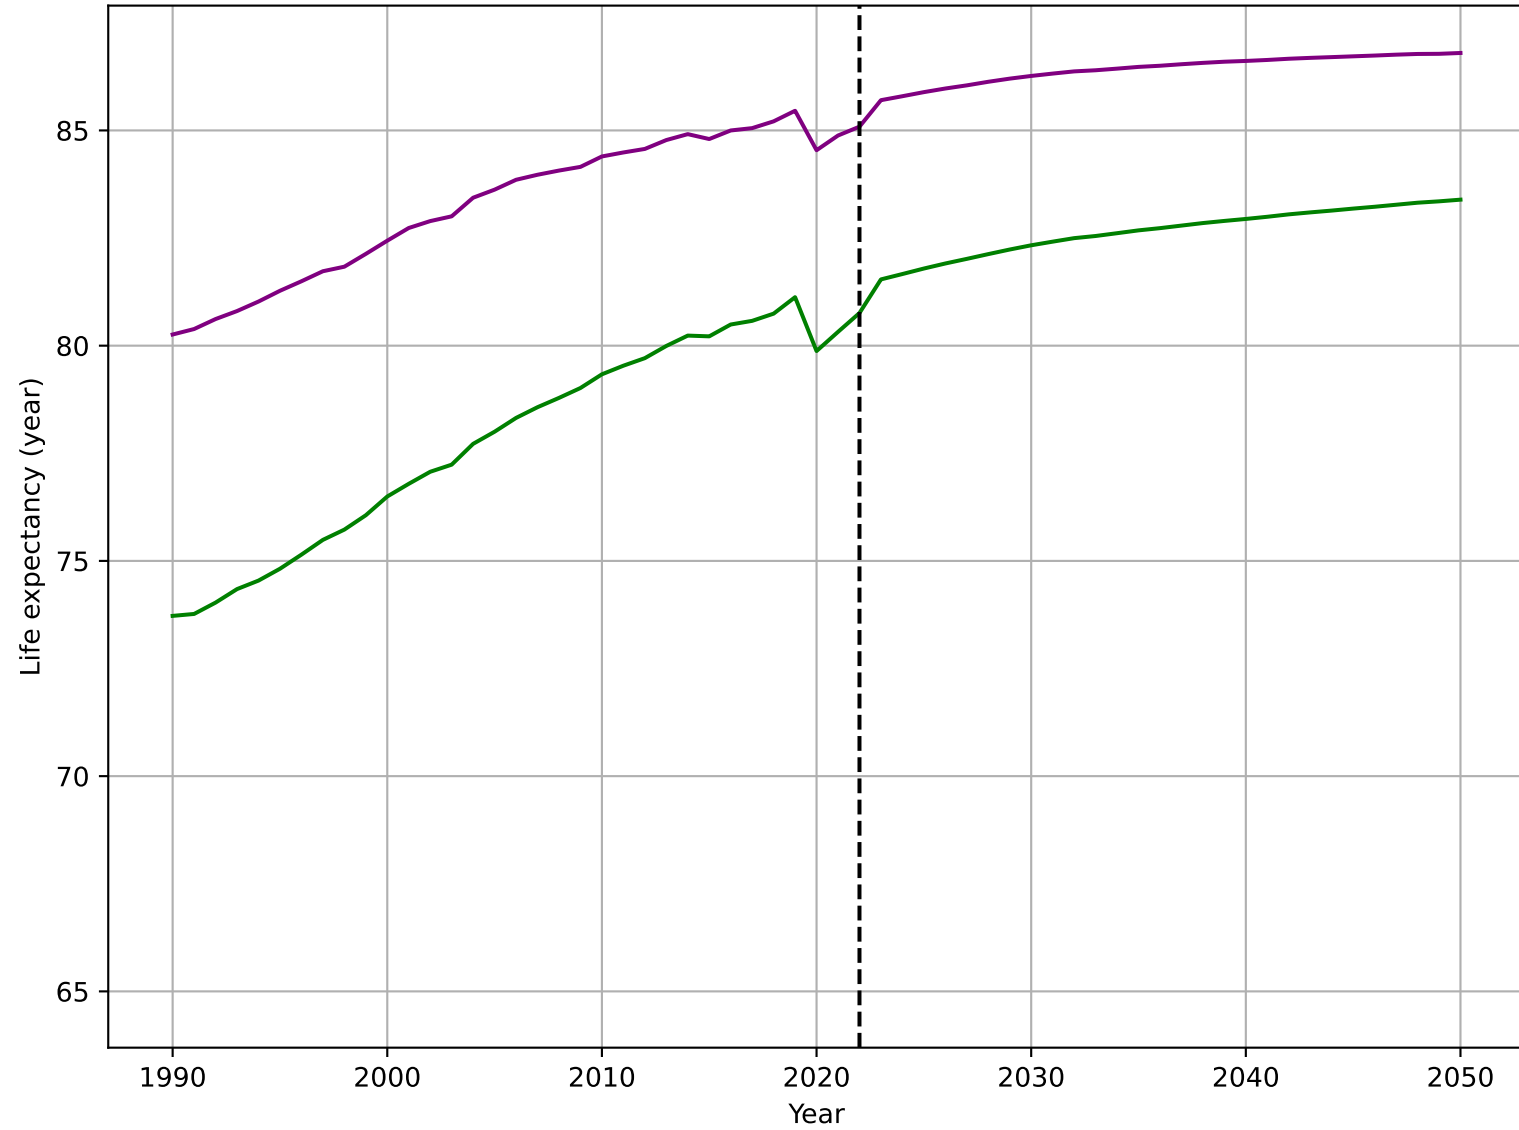

### Healthy Life Expectancy (HALE)

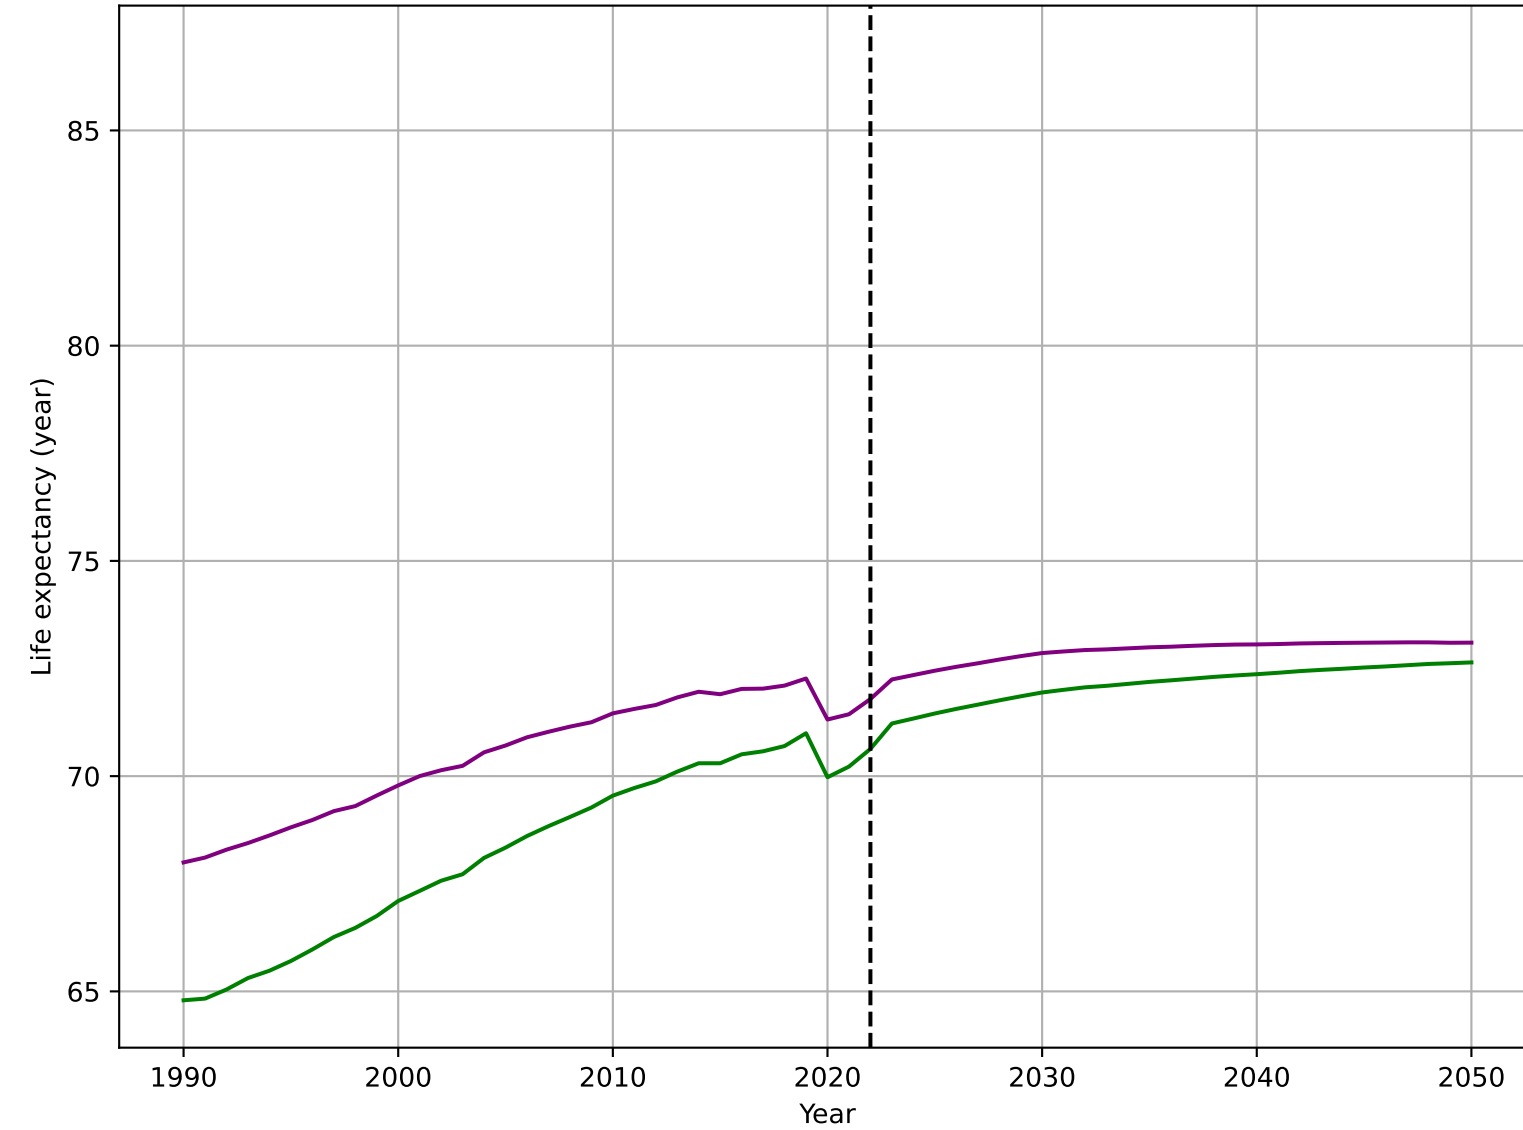

# Luxembourg

### Life Expectancy

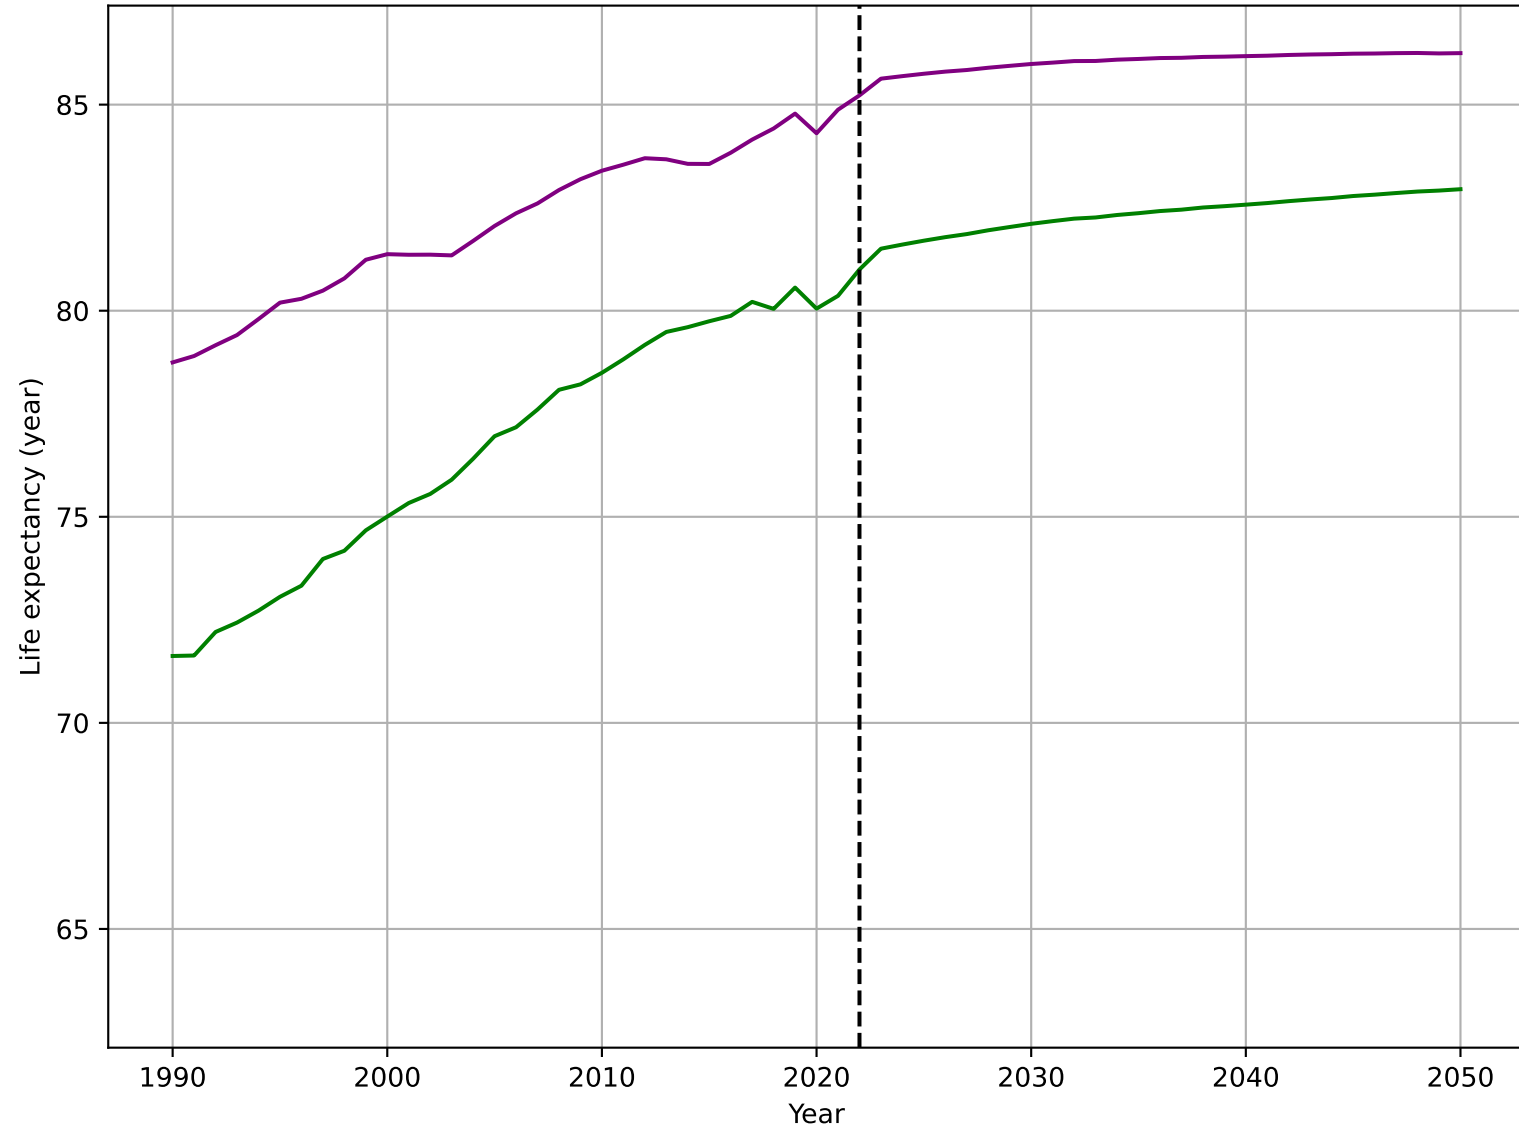

### Healthy Life Expectancy (HALE)

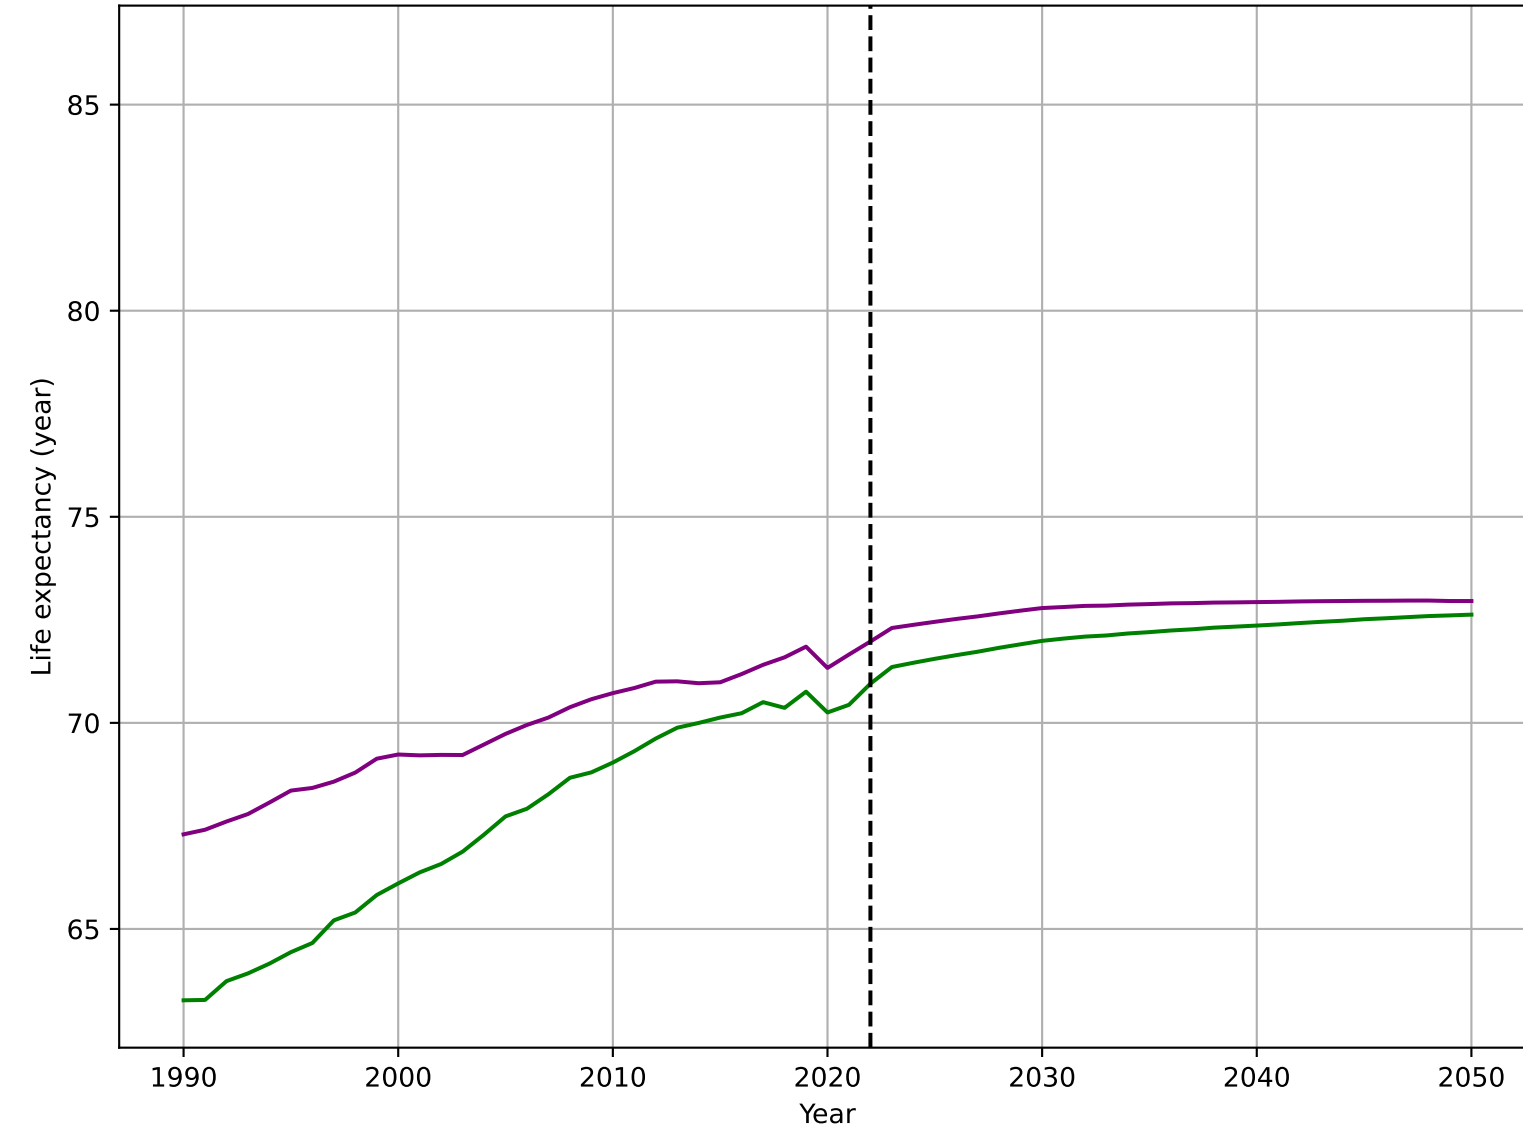

# Malta

### Life Expectancy

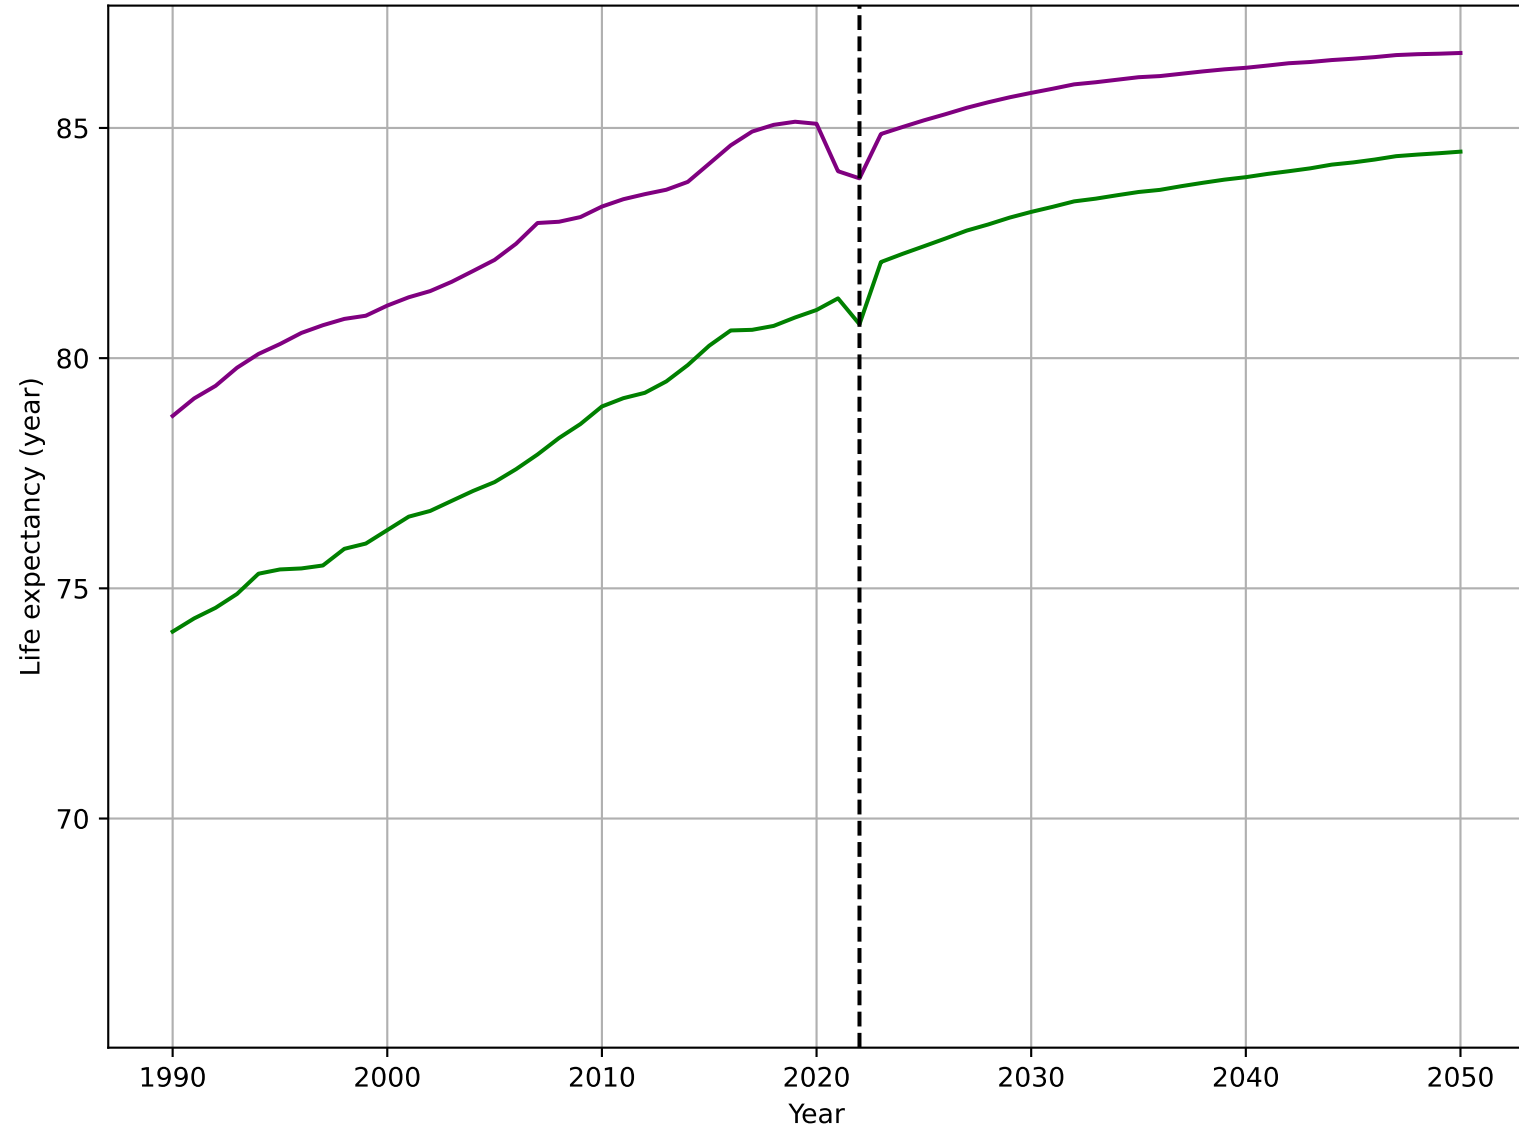

### Healthy Life Expectancy (HALE)

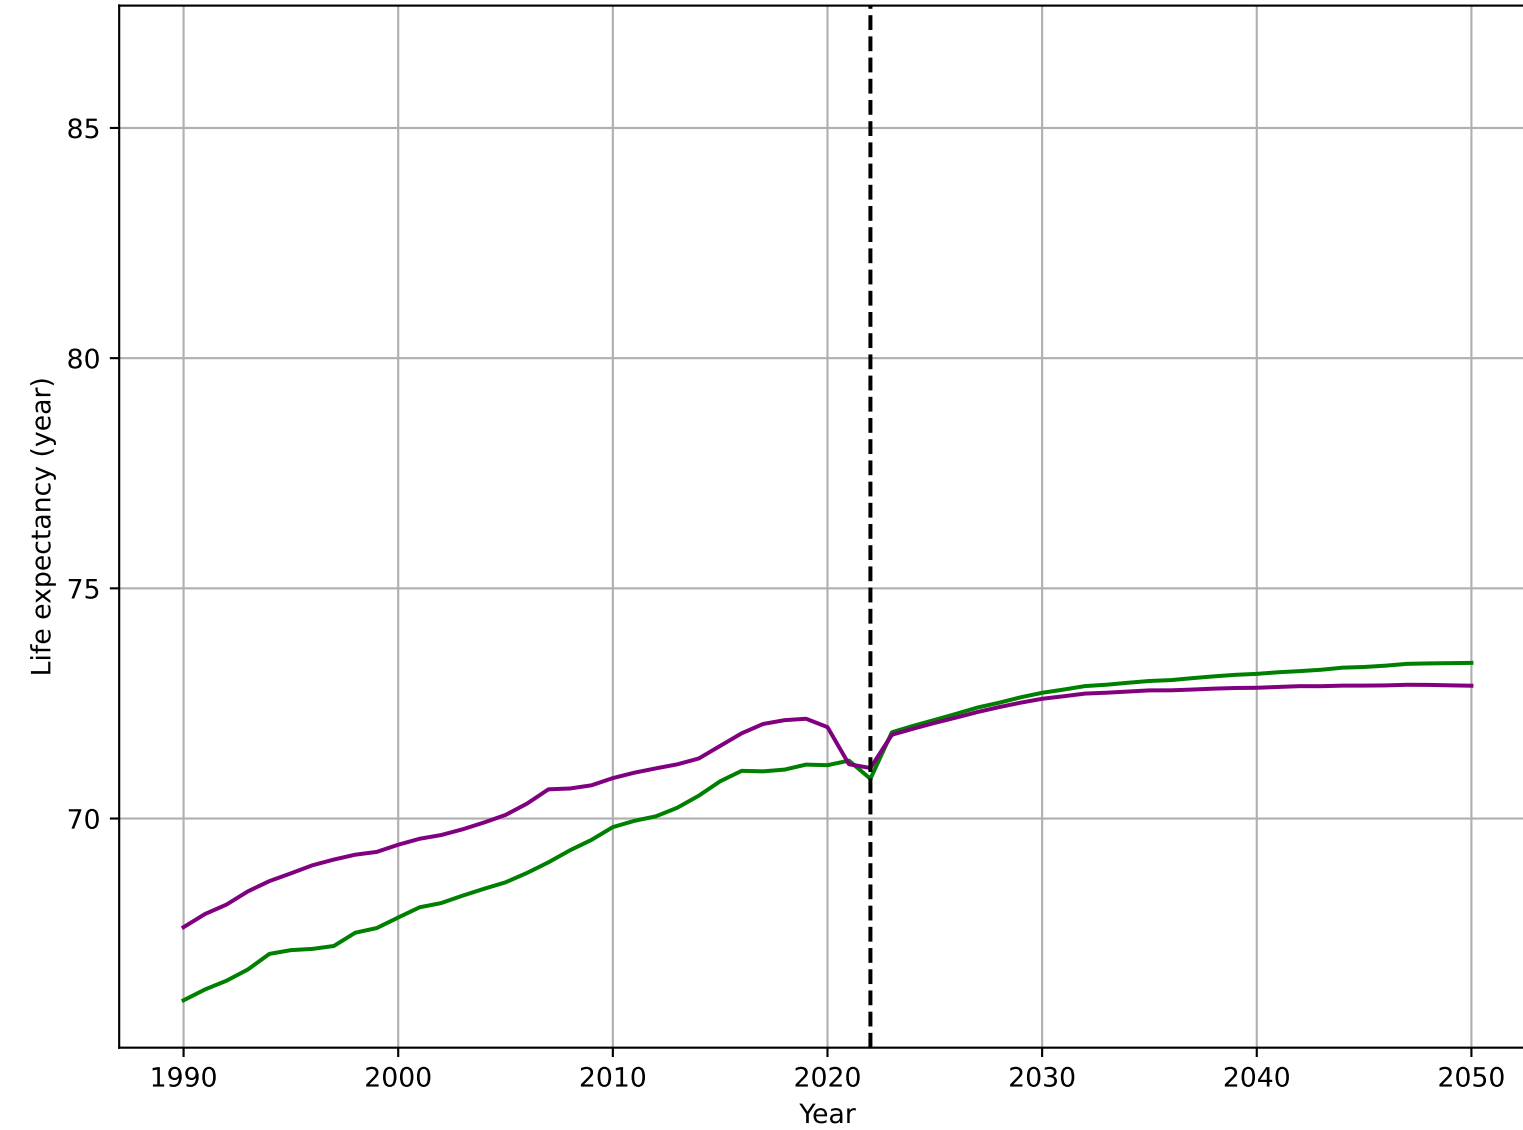

# Monaco

### Life Expectancy

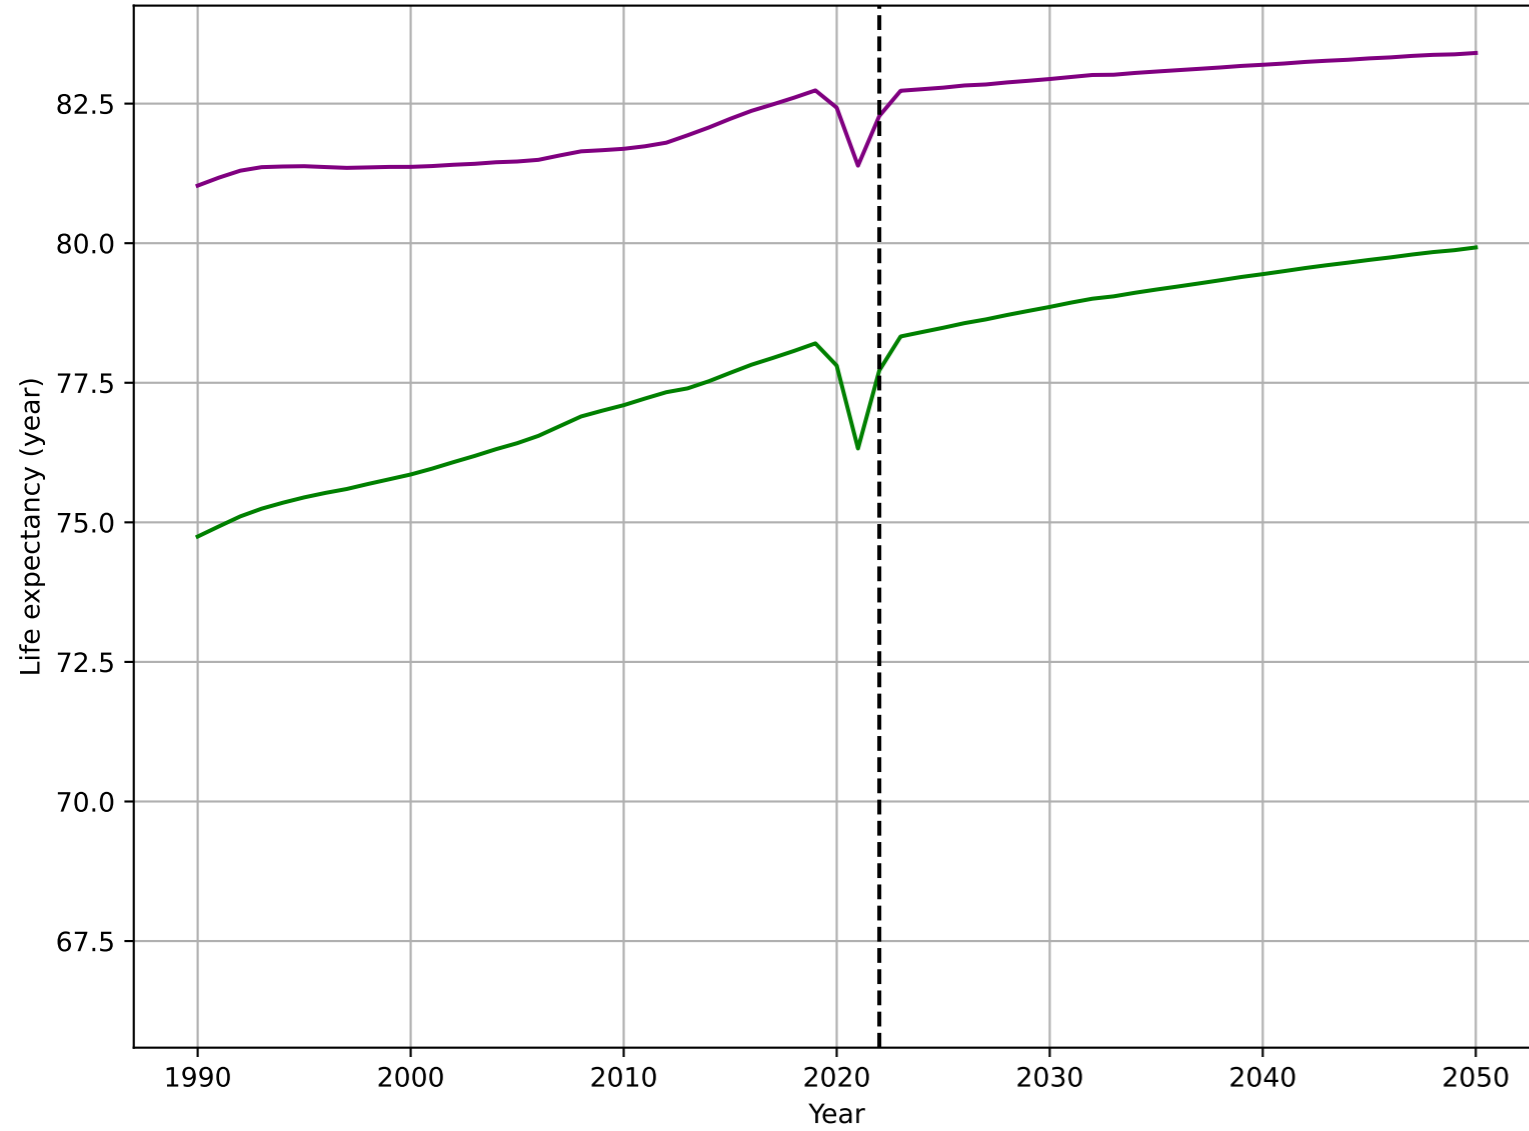

### Healthy Life Expectancy (HALE)

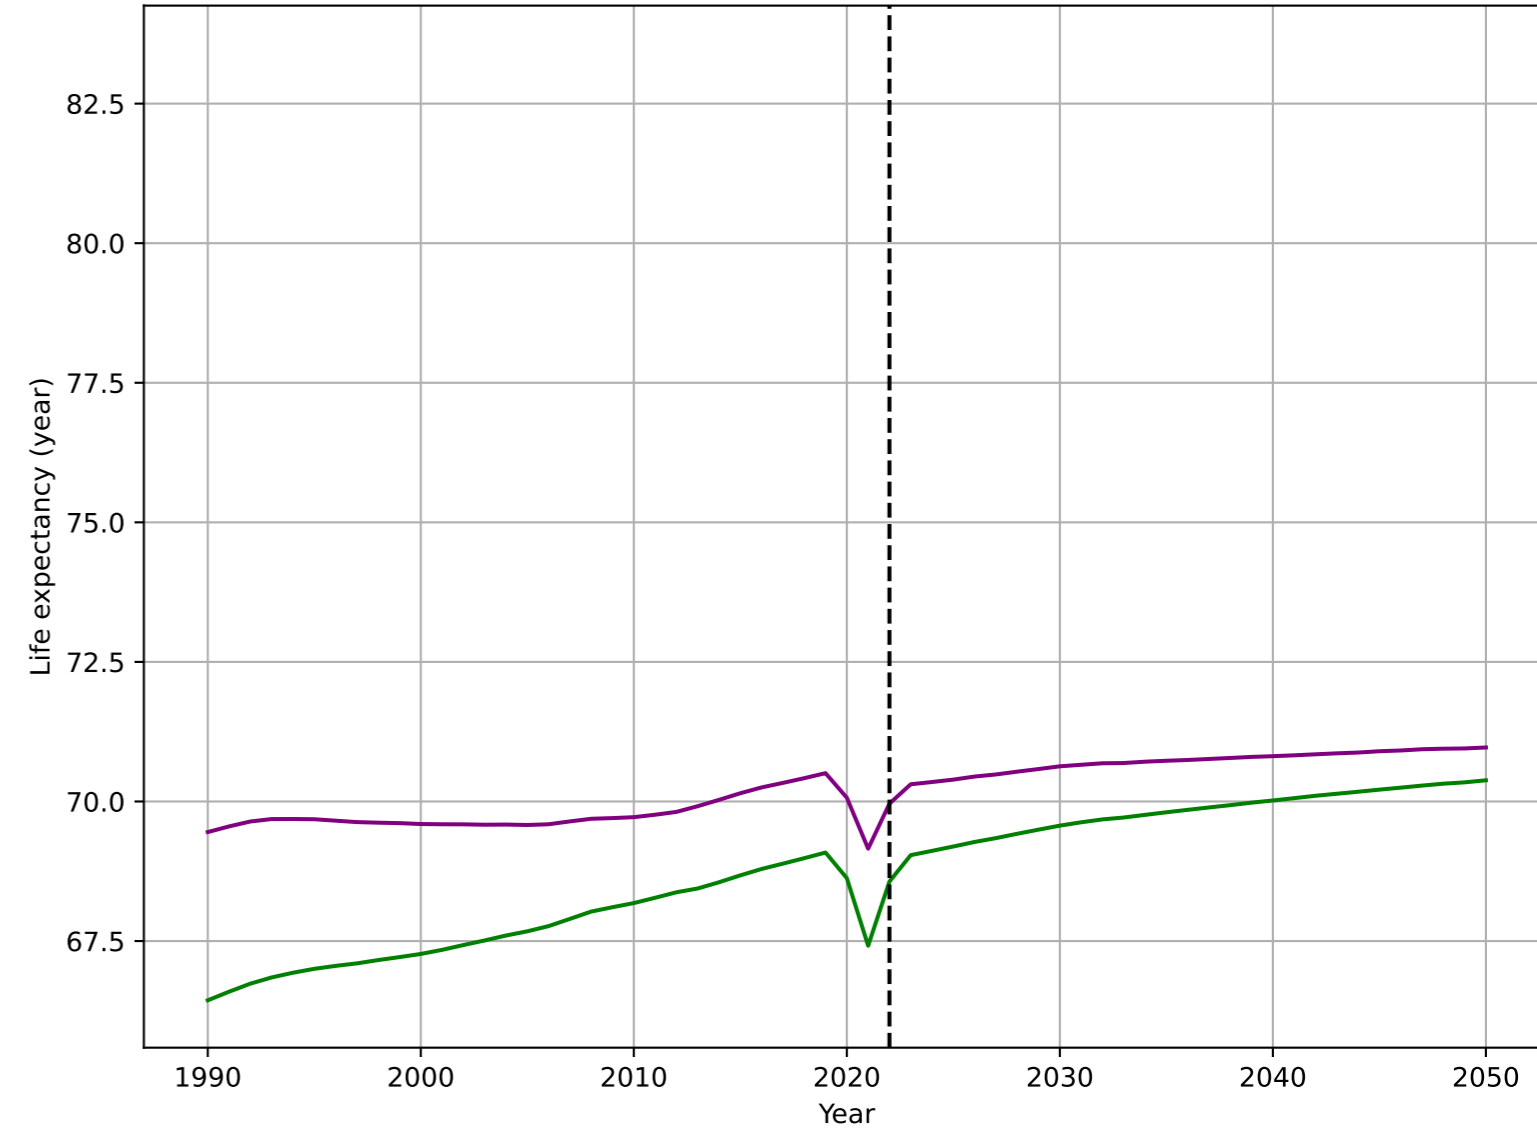

# Netherlands

### Life Expectancy

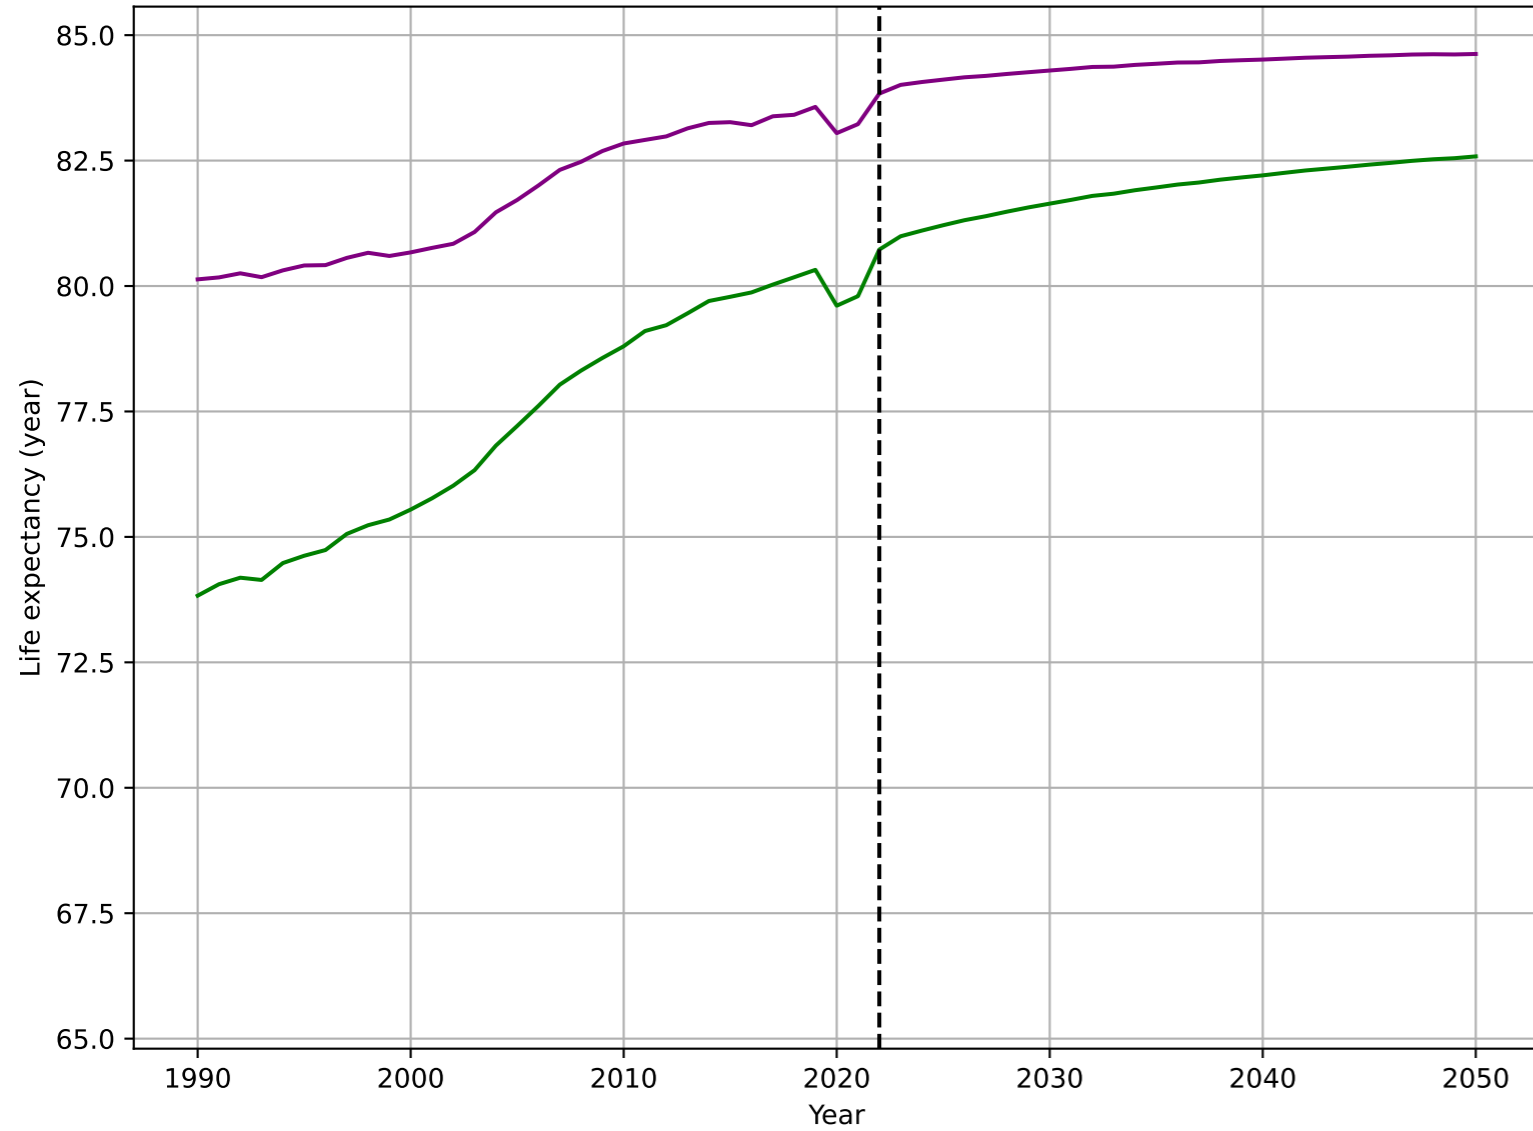

### Healthy Life Expectancy (HALE)

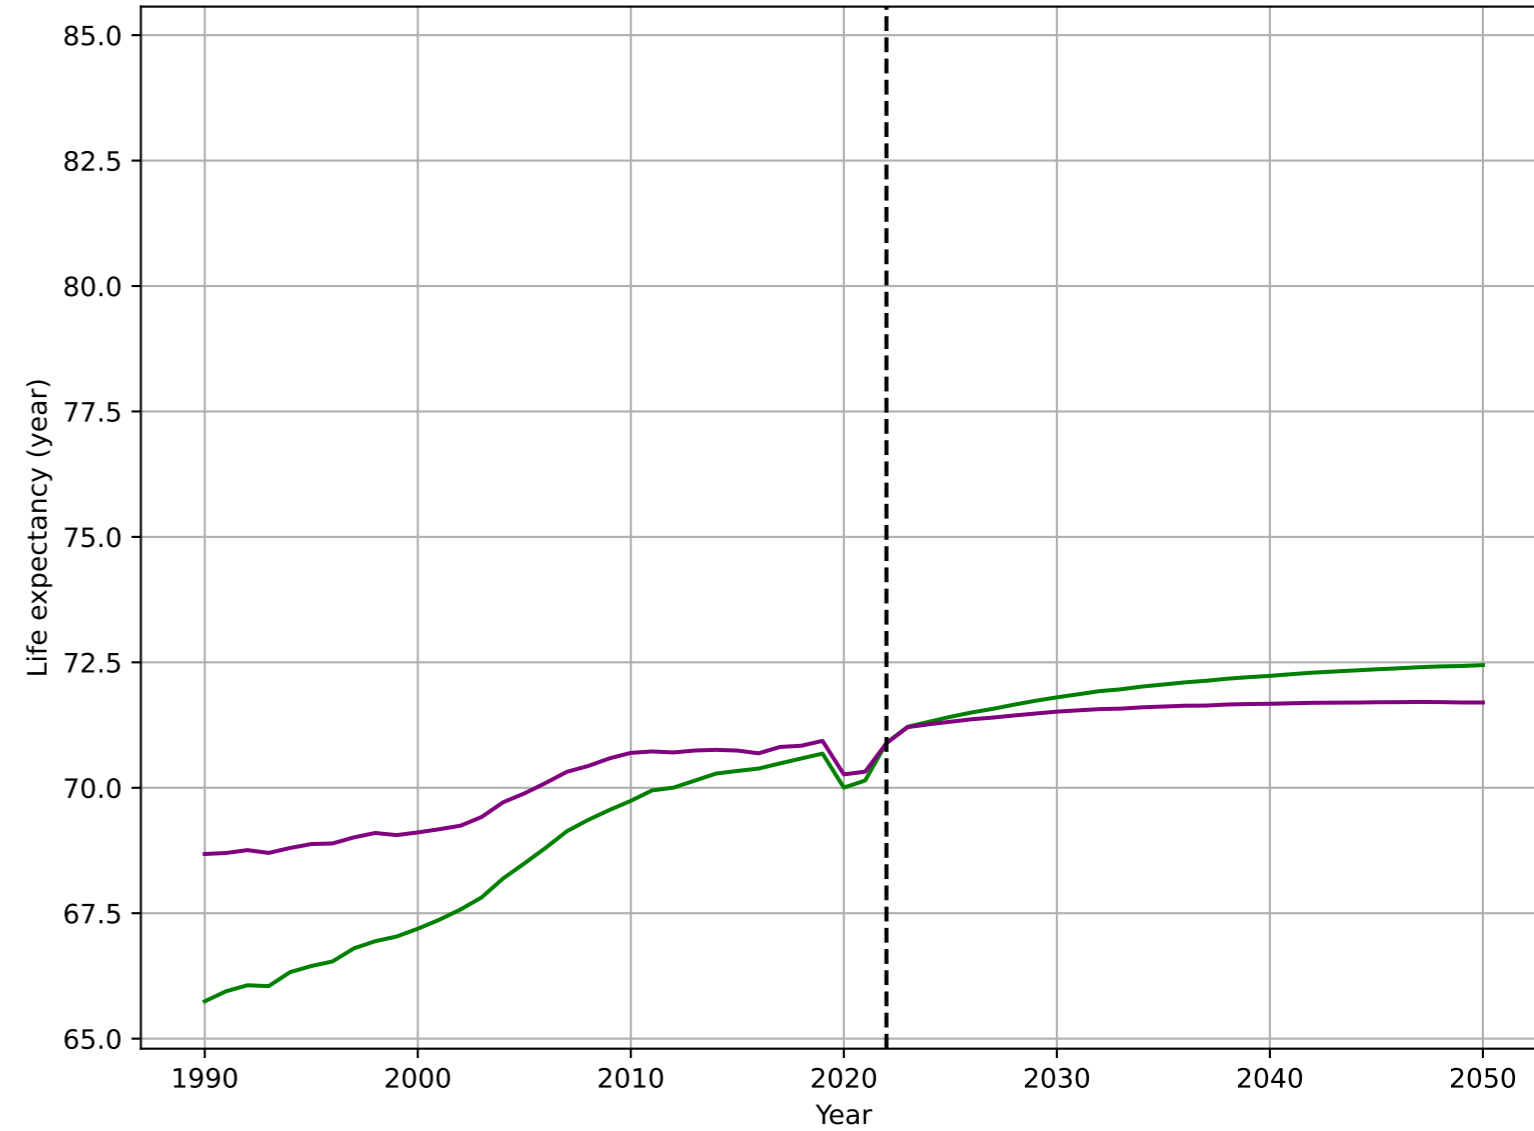

# Norway

### Life Expectancy

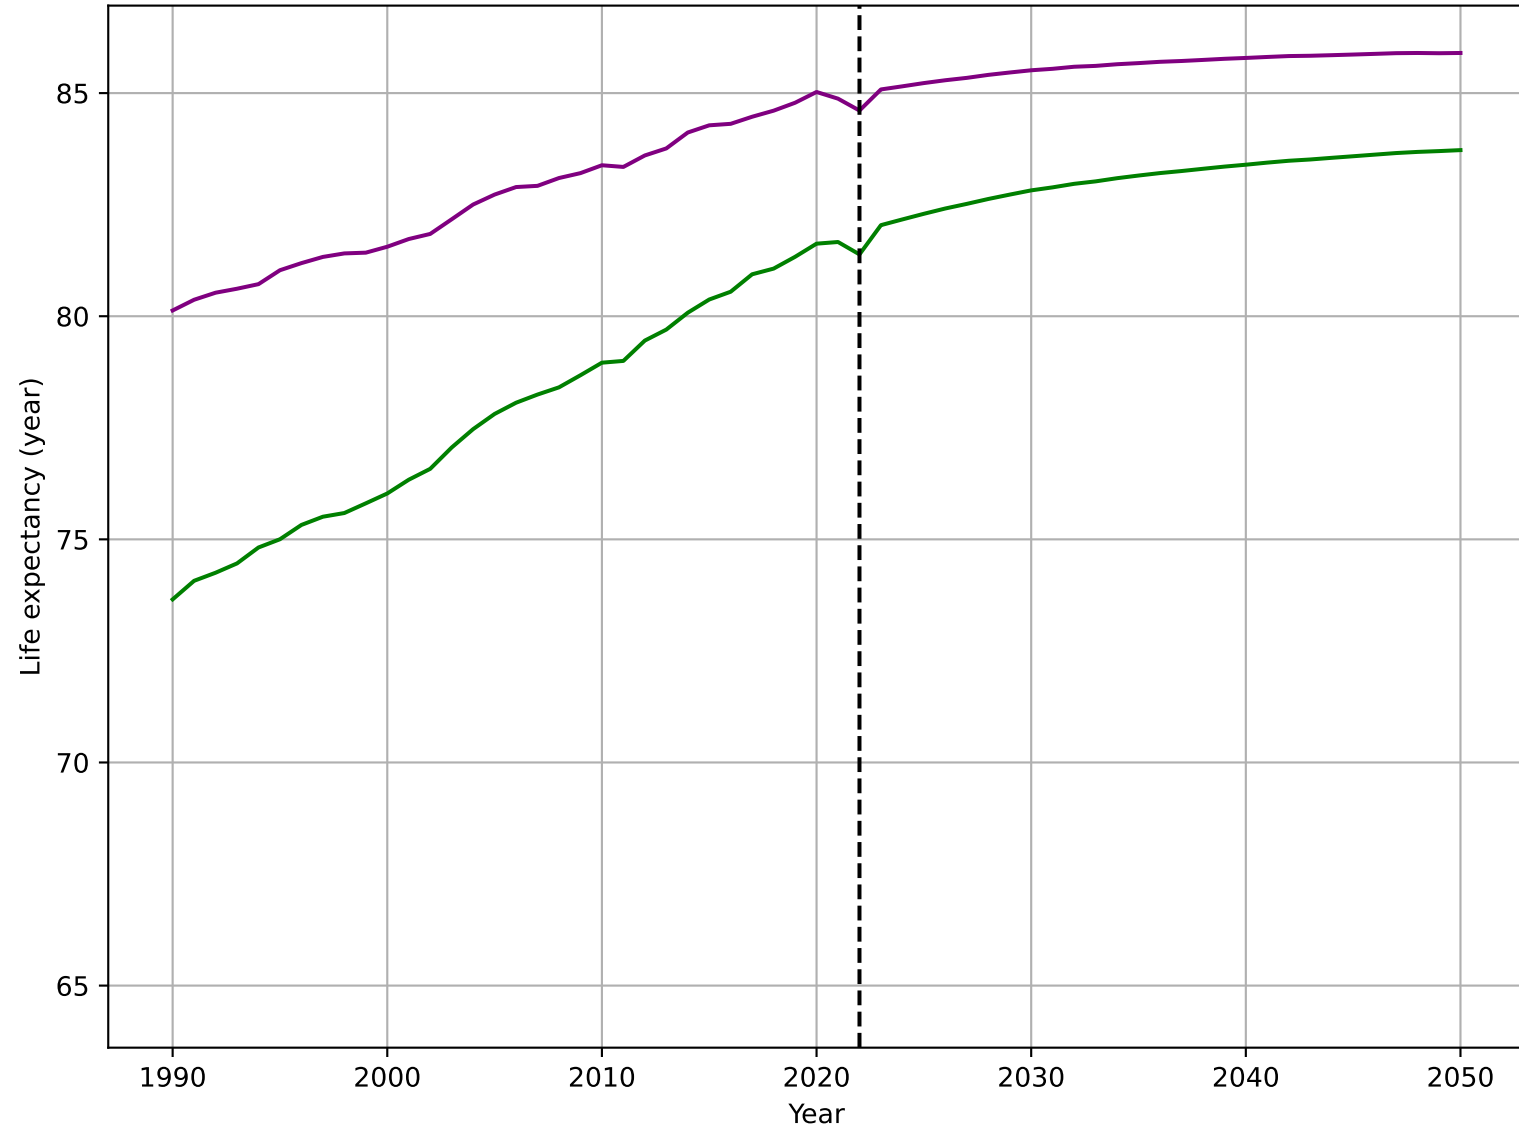

### Healthy Life Expectancy (HALE)

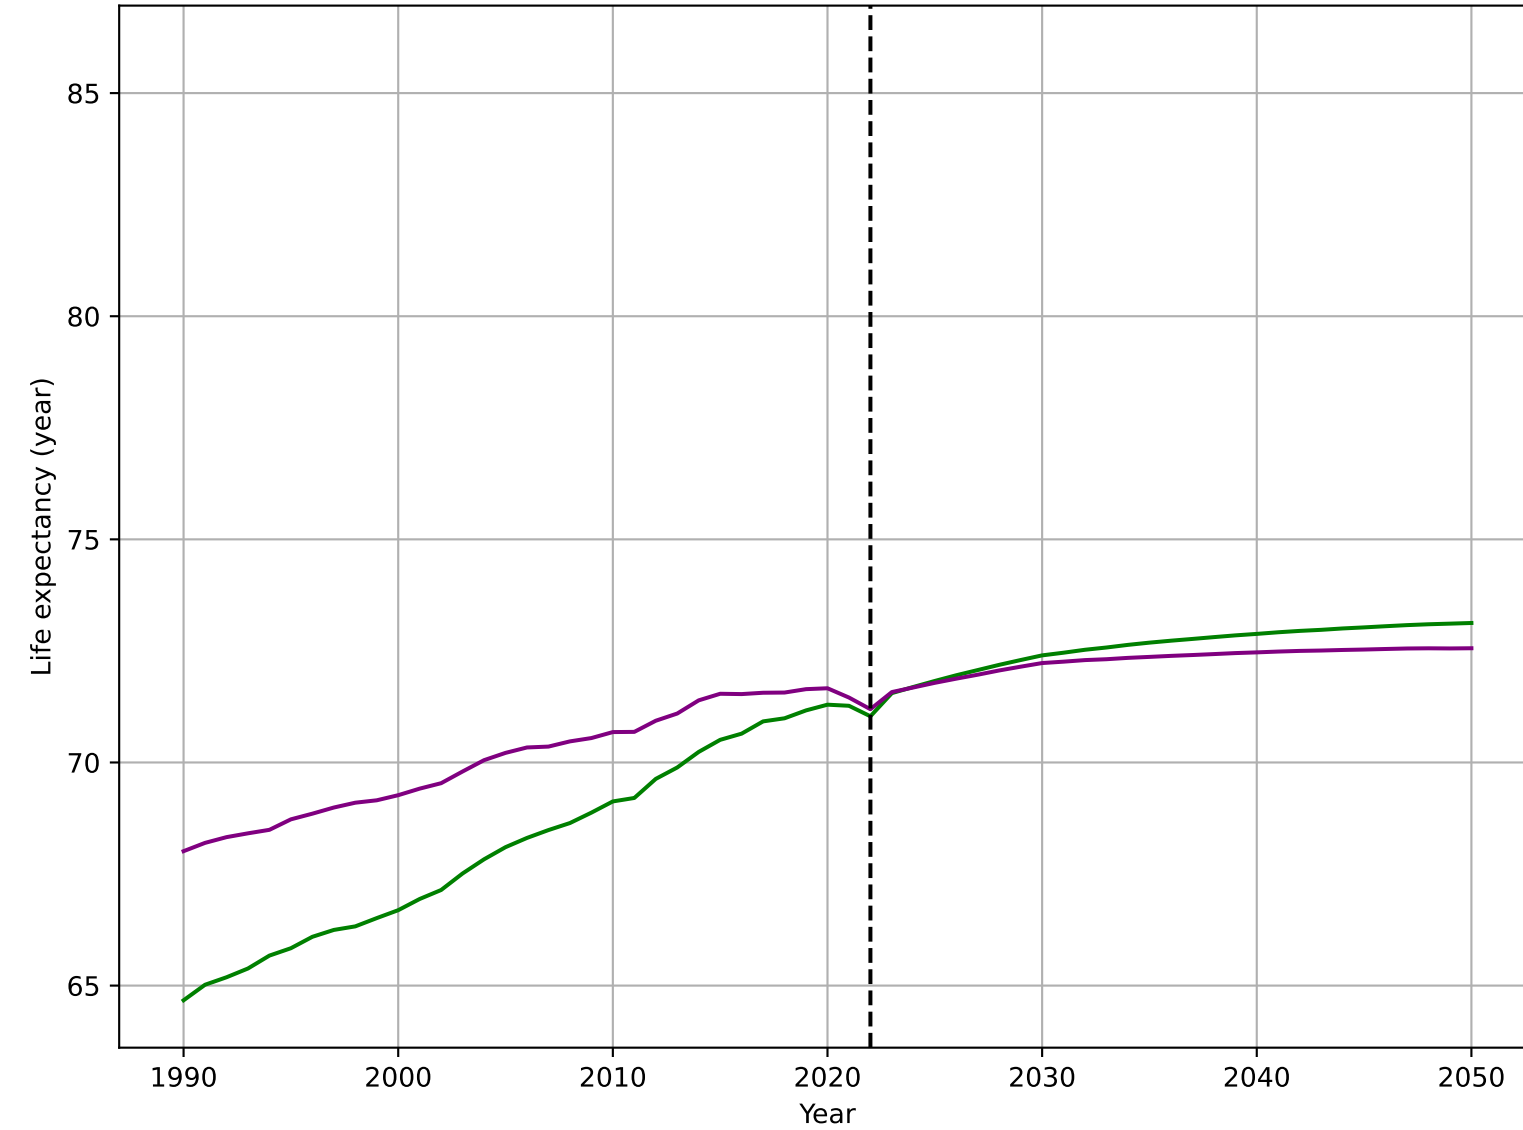

# Portugal

### Life Expectancy

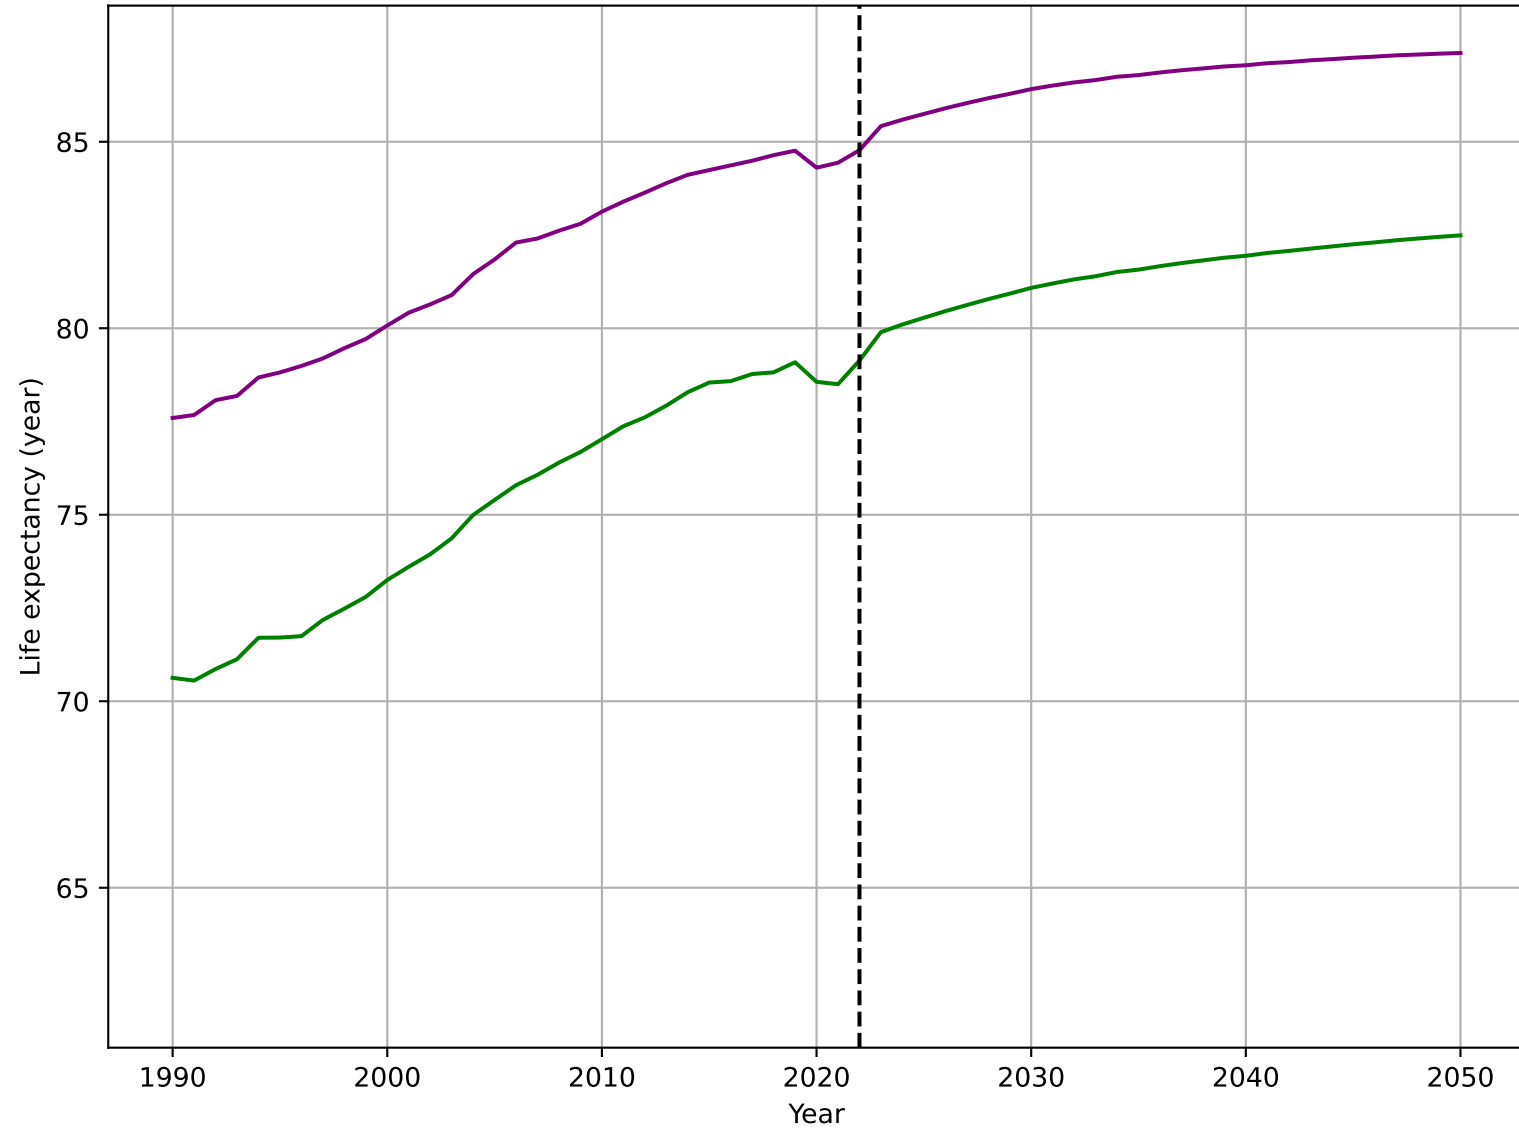

### Healthy Life Expectancy (HALE)

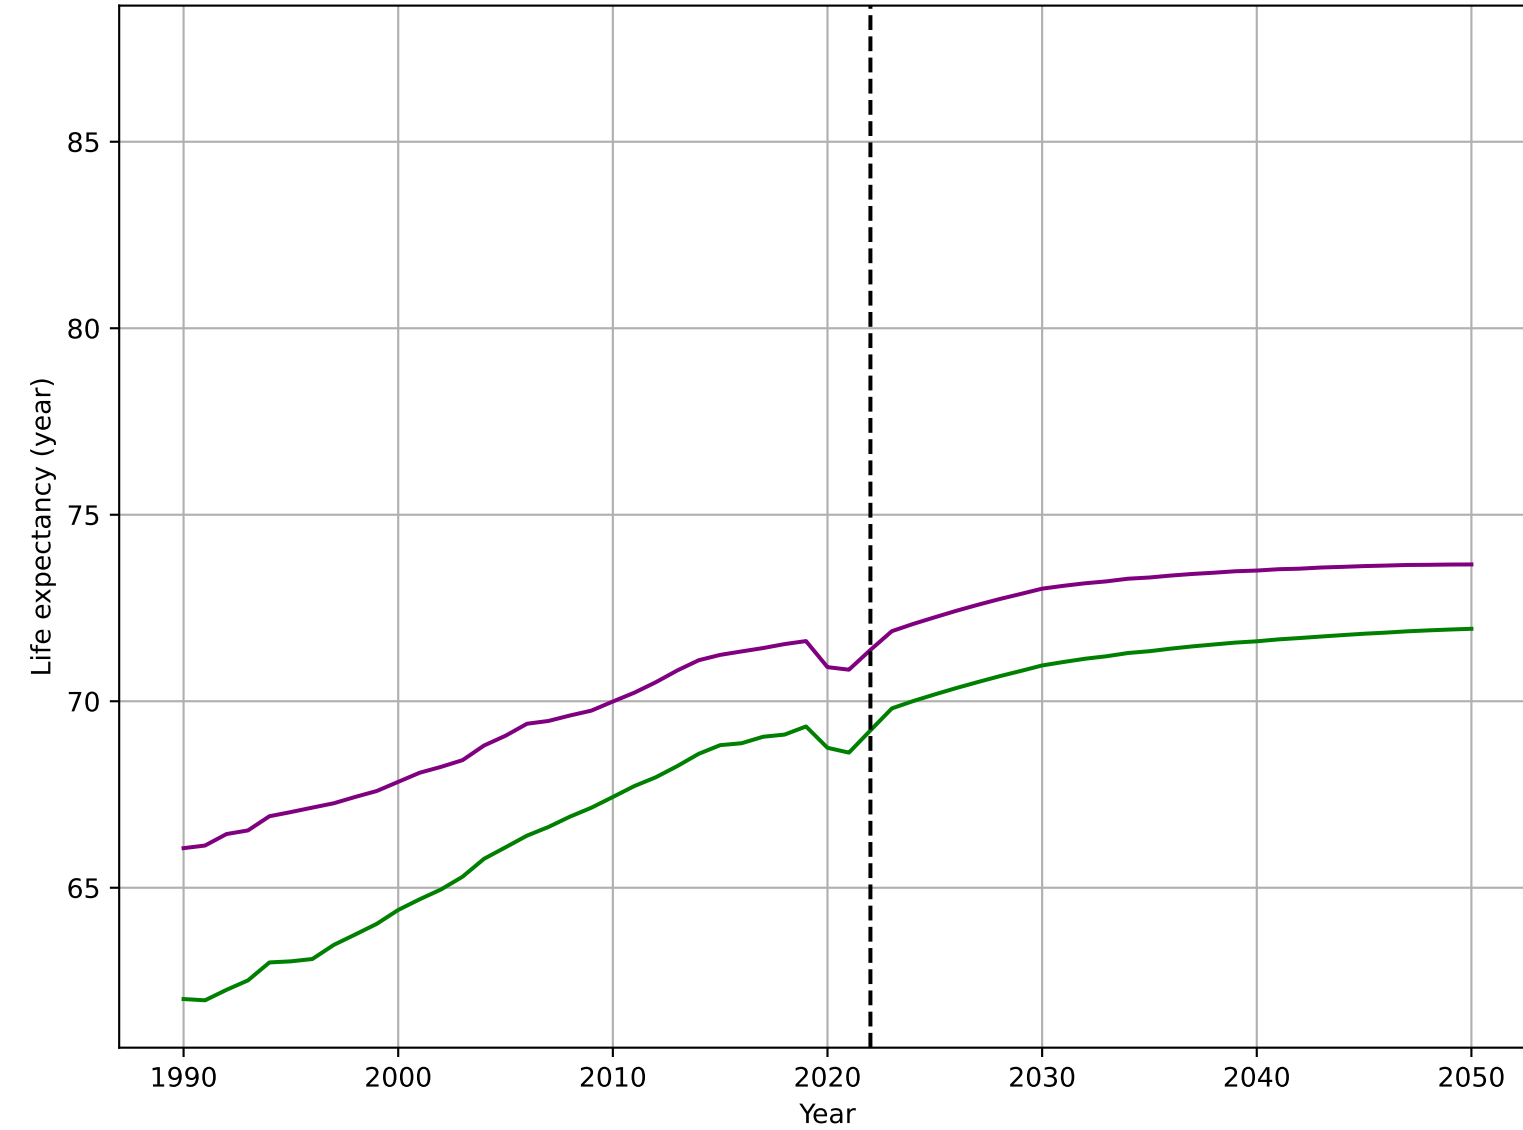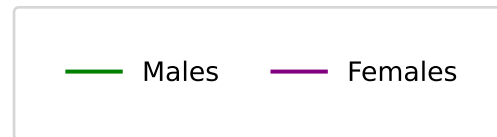



# San Marino

### Life Expectancy

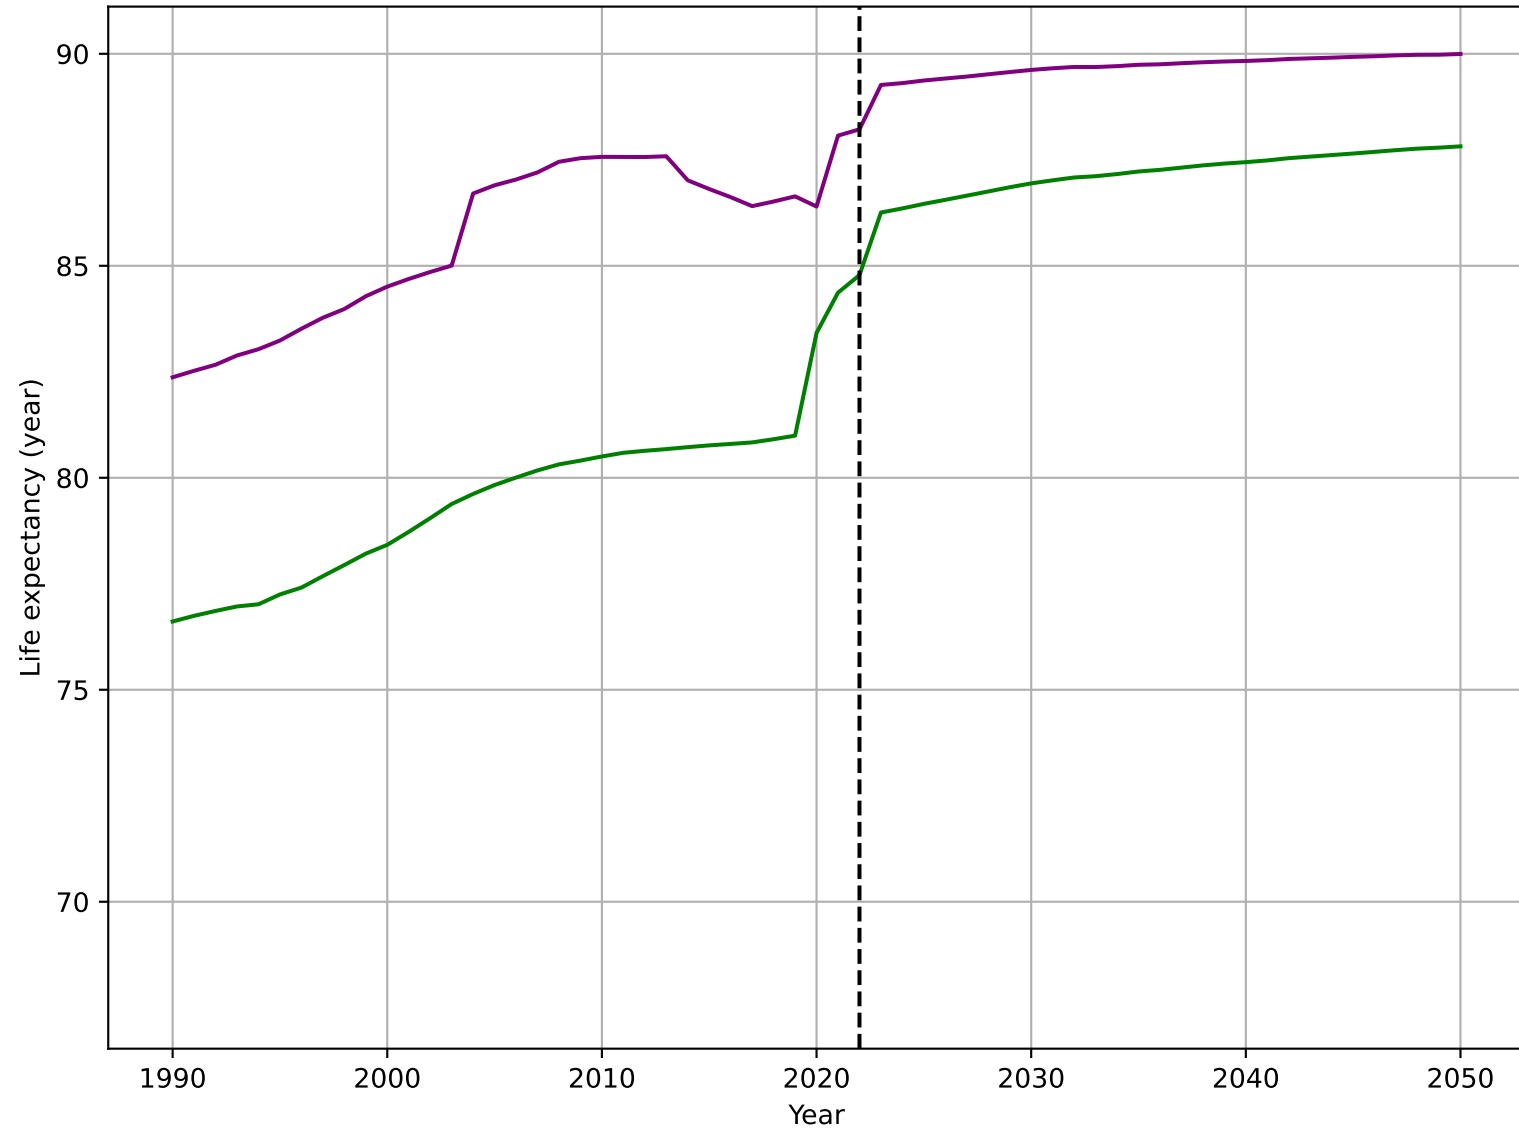

### Healthy Life Expectancy (HALE)

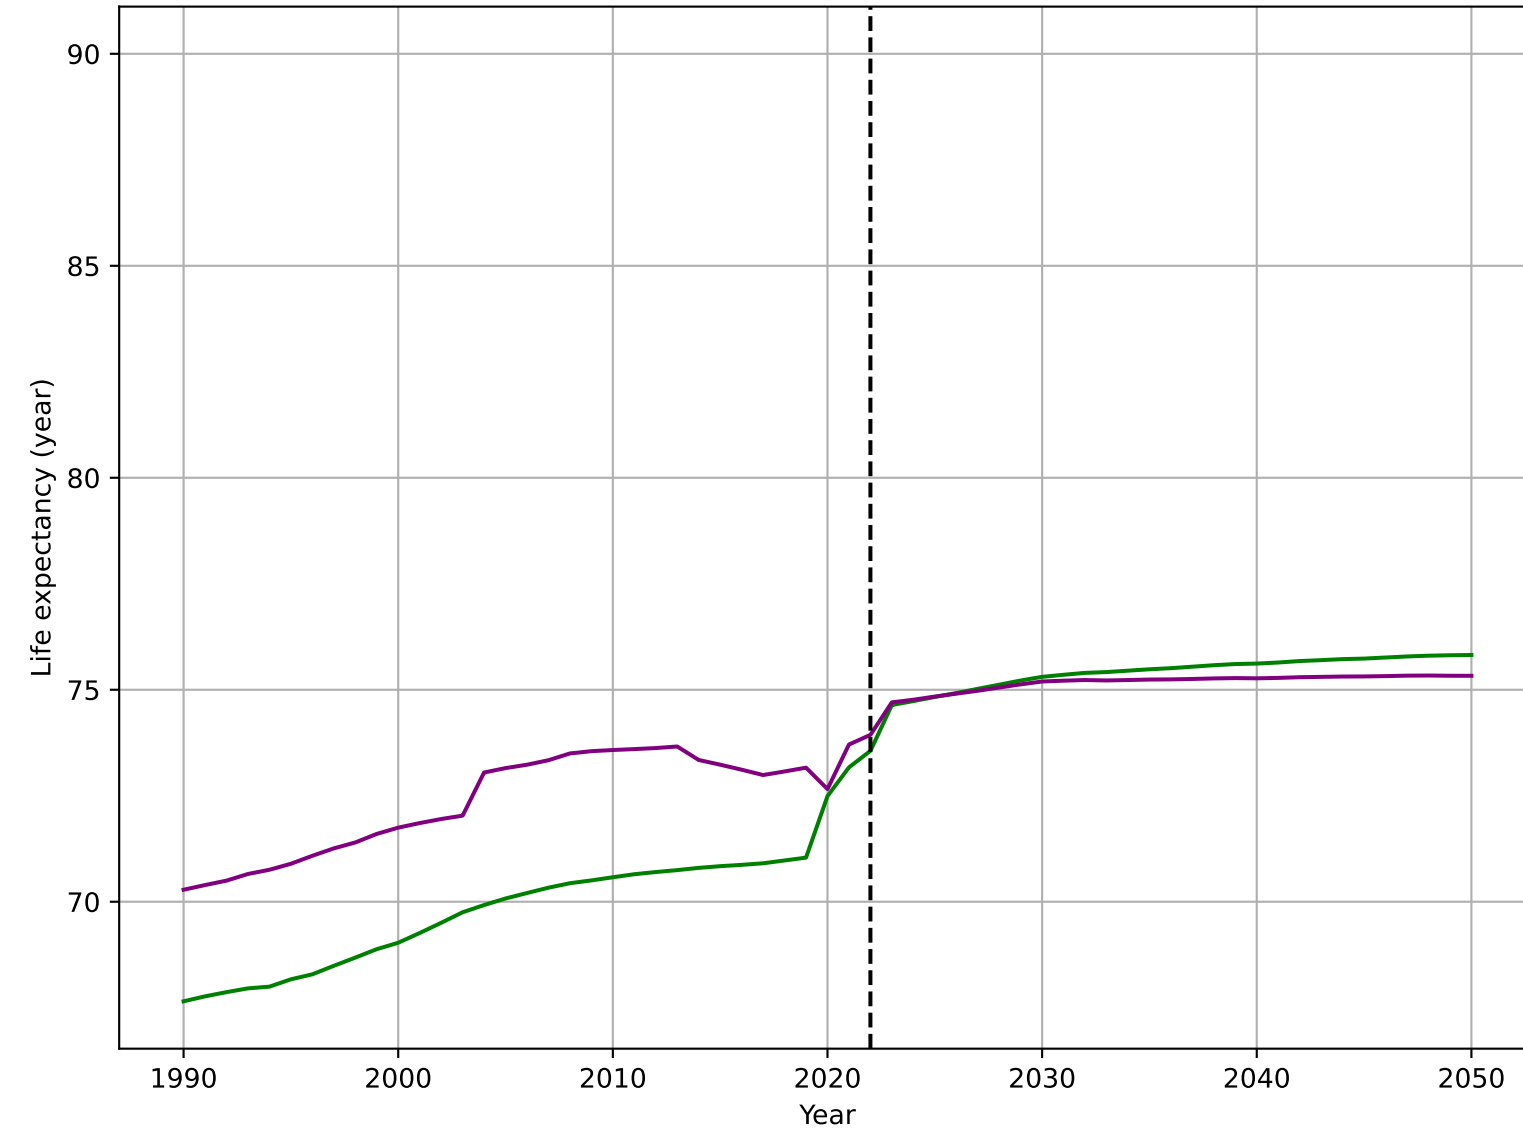

# Spain

### Life Expectancy

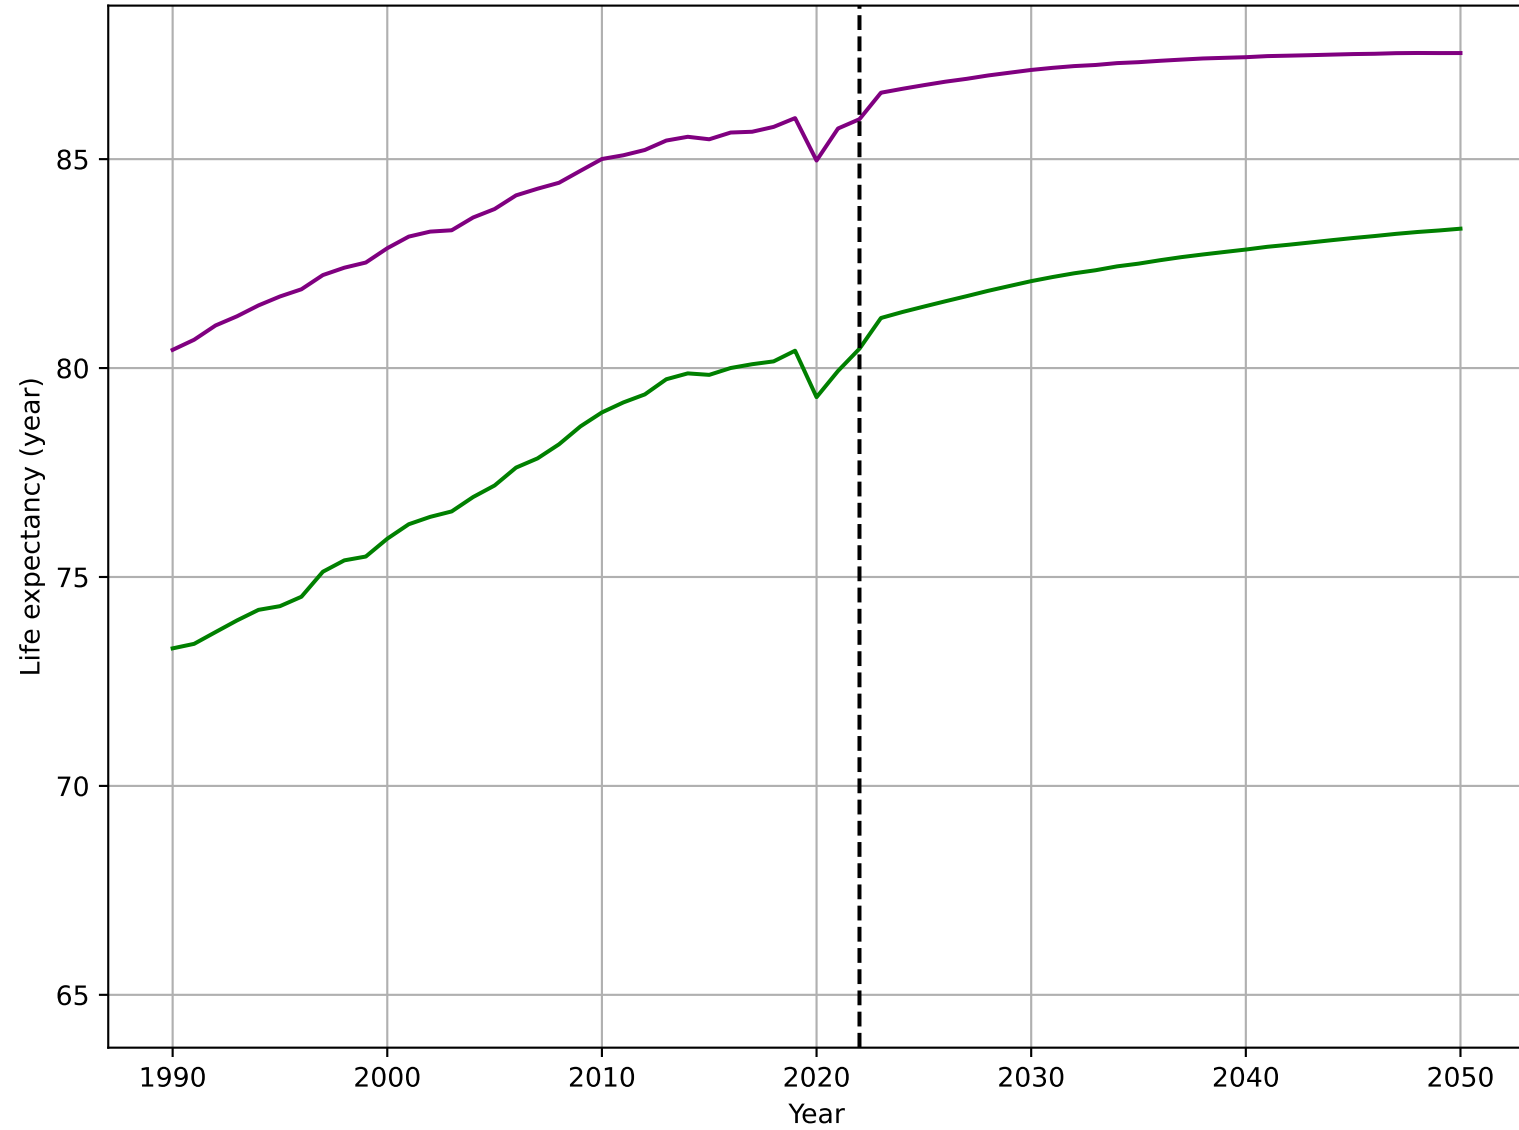

### Healthy Life Expectancy (HALE)

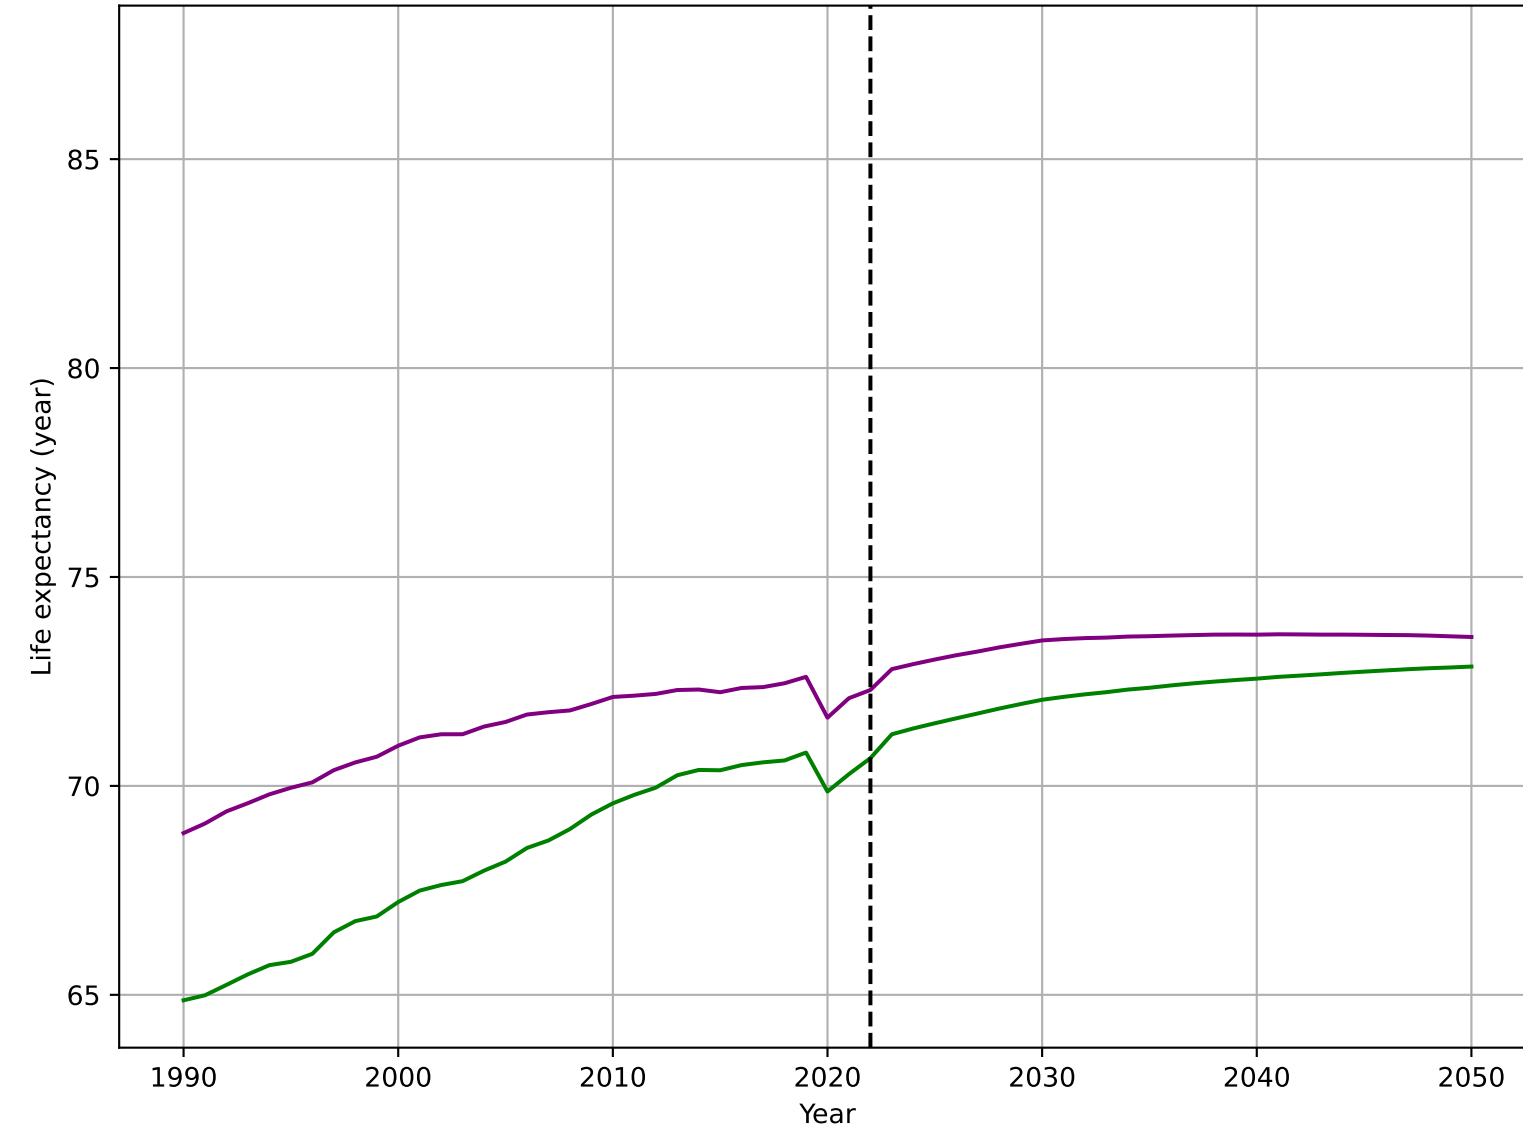

# Sweden

### Life Expectancy

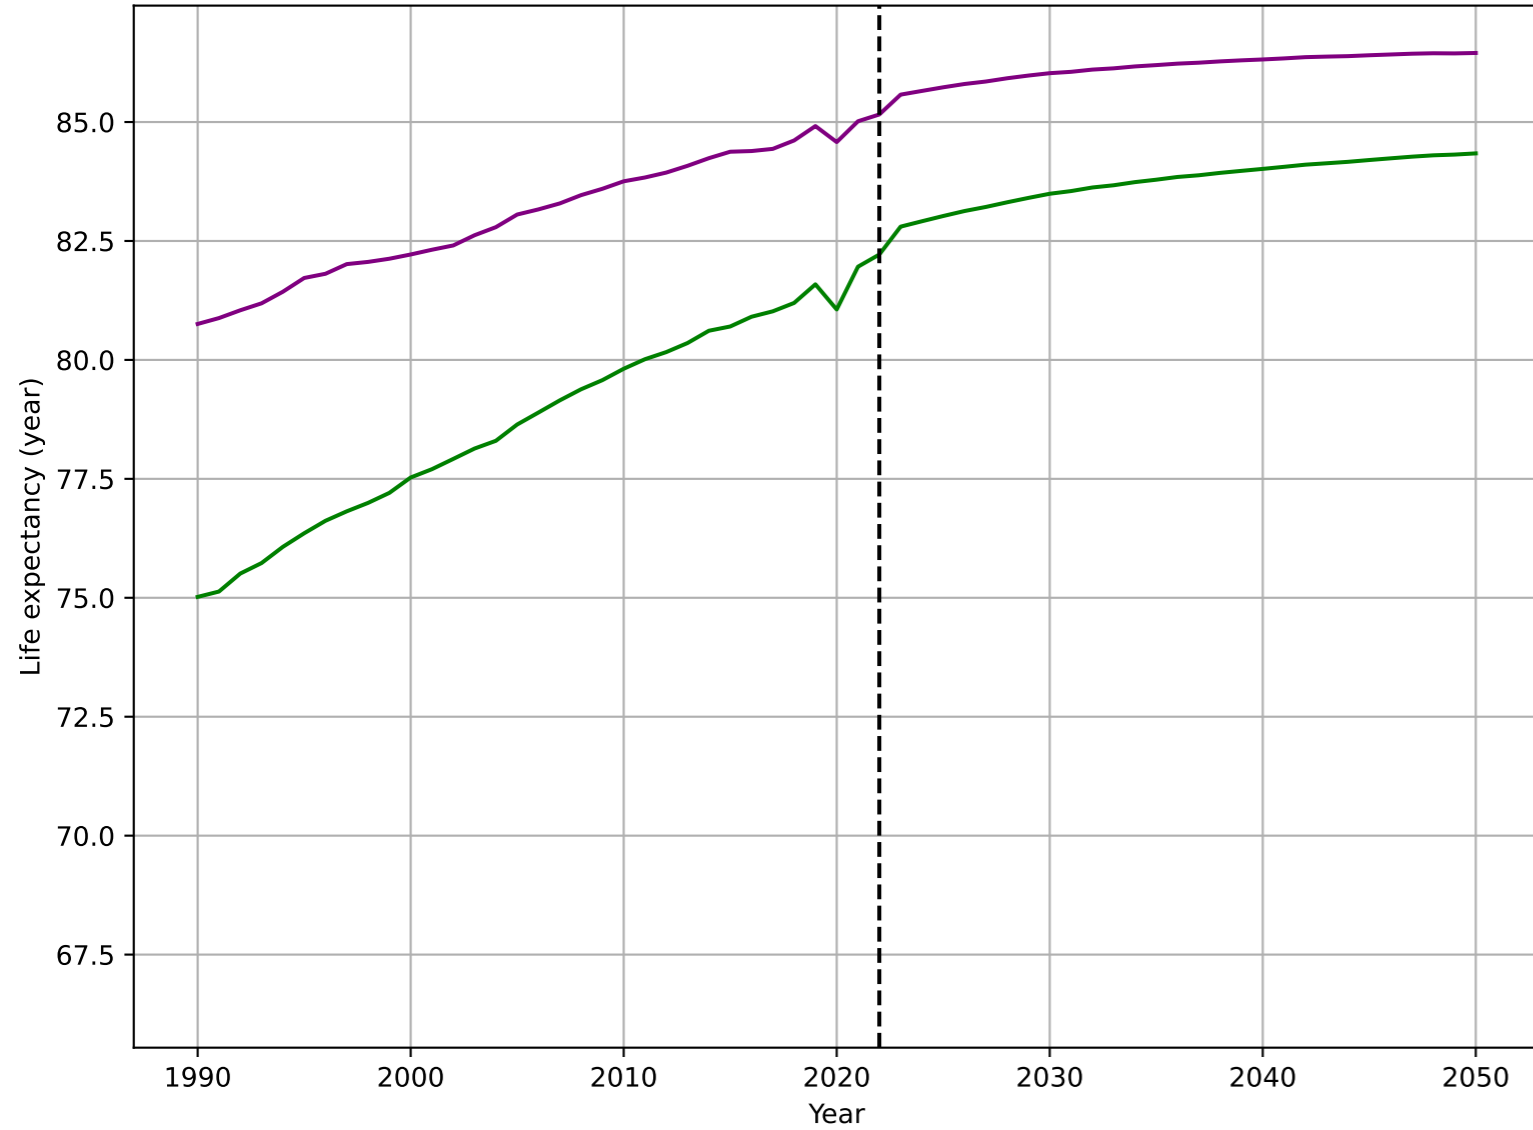

### Healthy Life Expectancy (HALE)

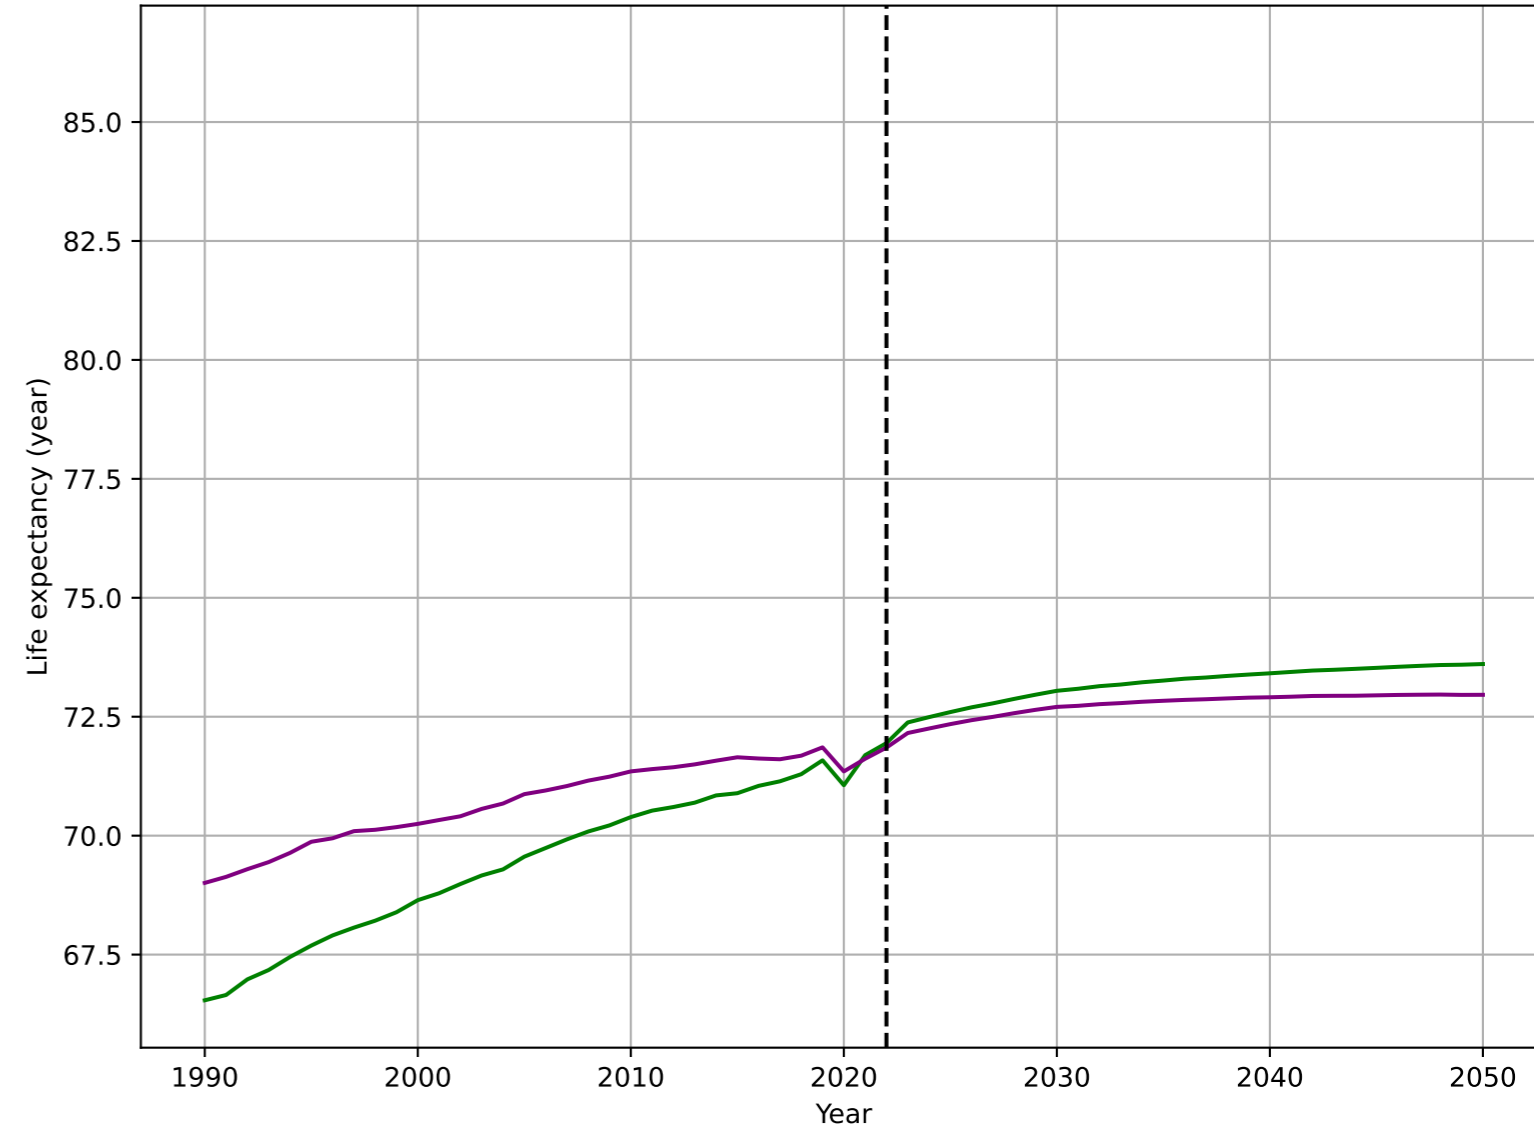

# Switzerland

### Life Expectancy

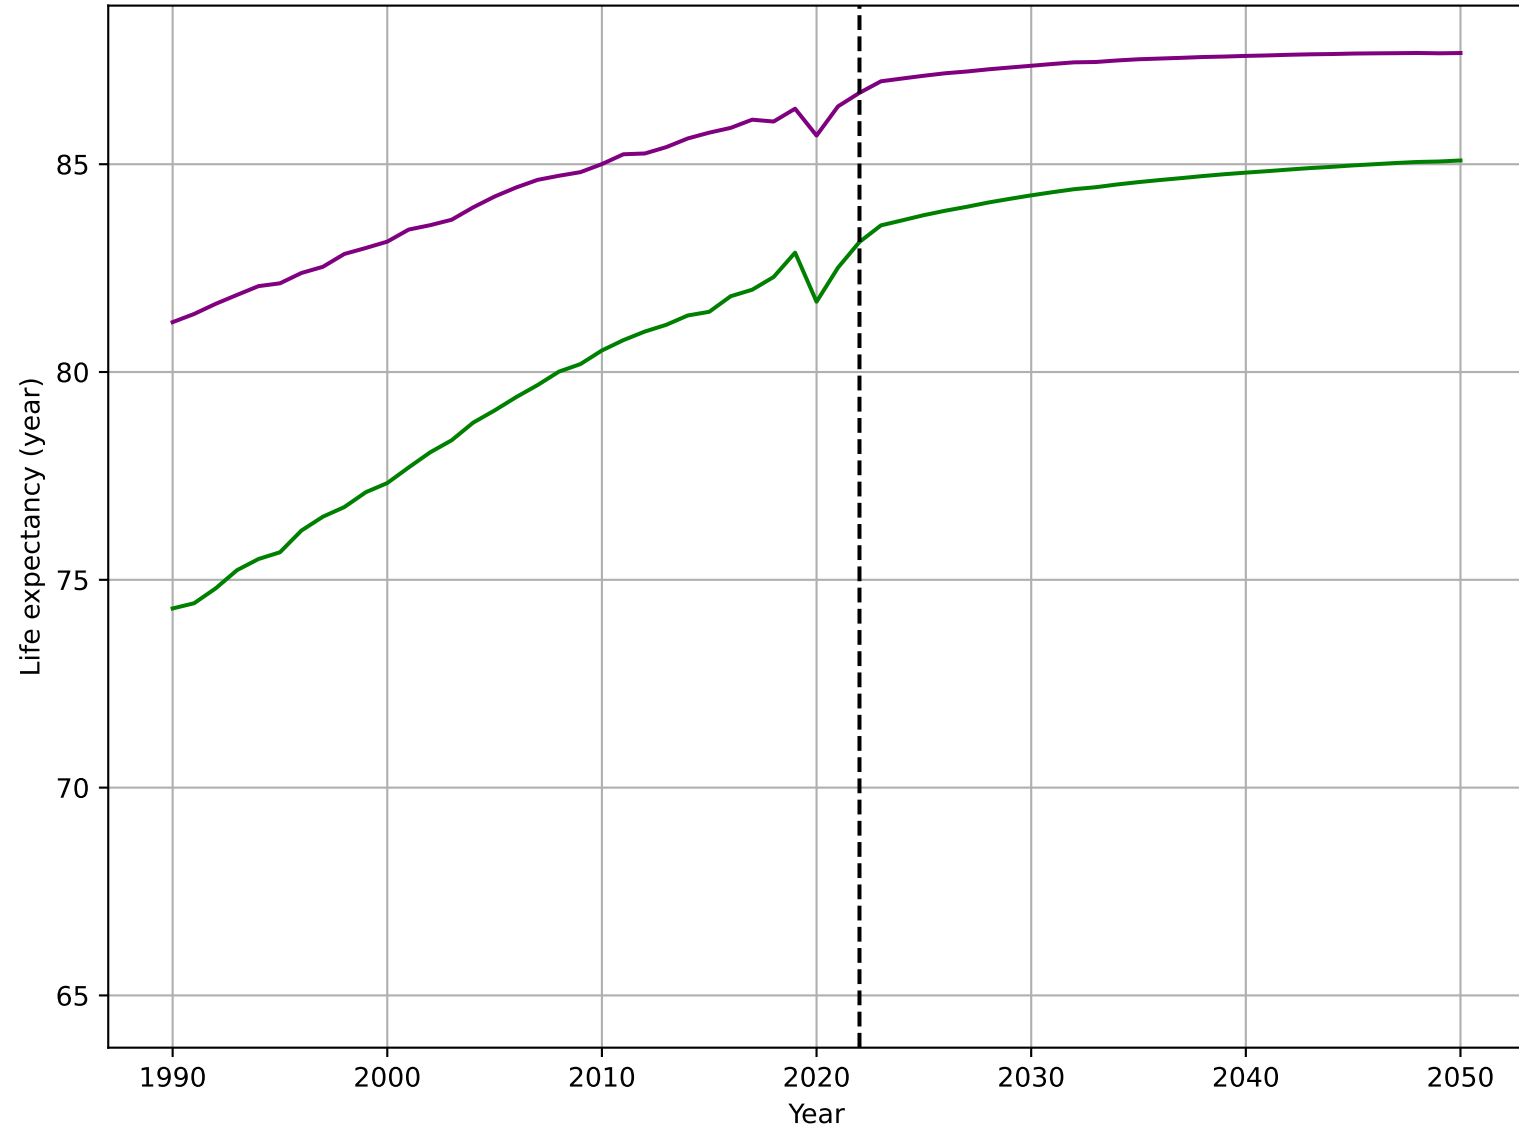

### Healthy Life Expectancy (HALE)

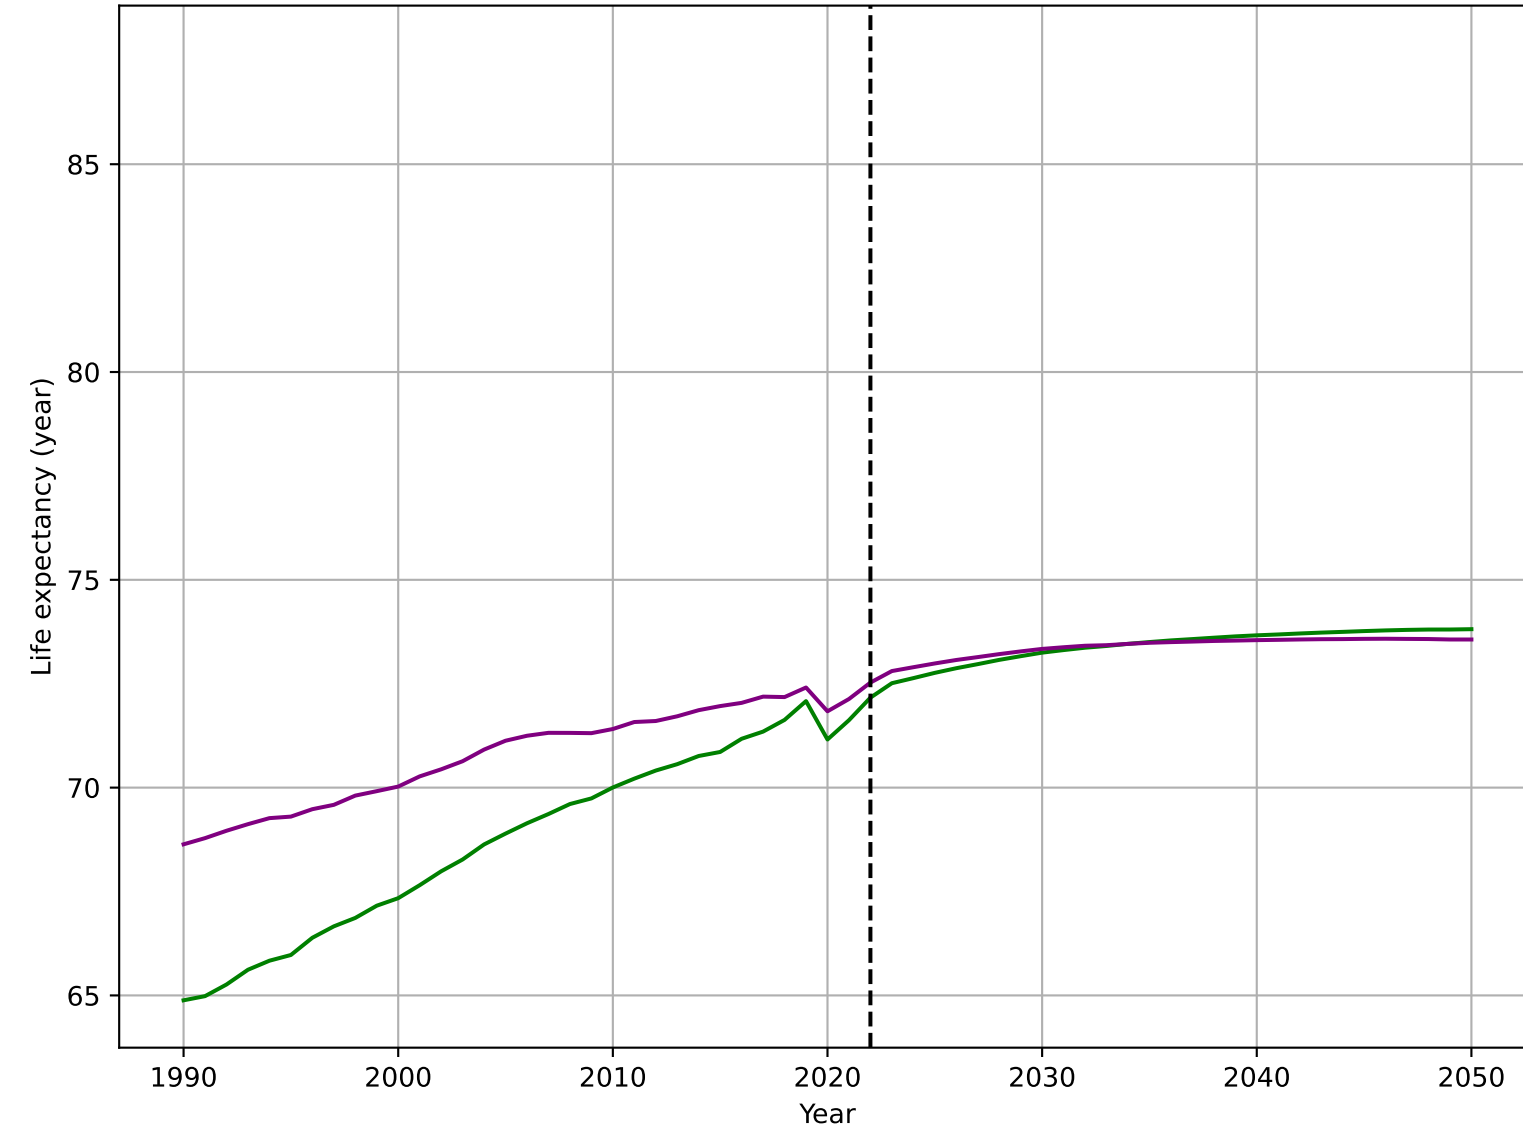

# UK

### Life Expectancy

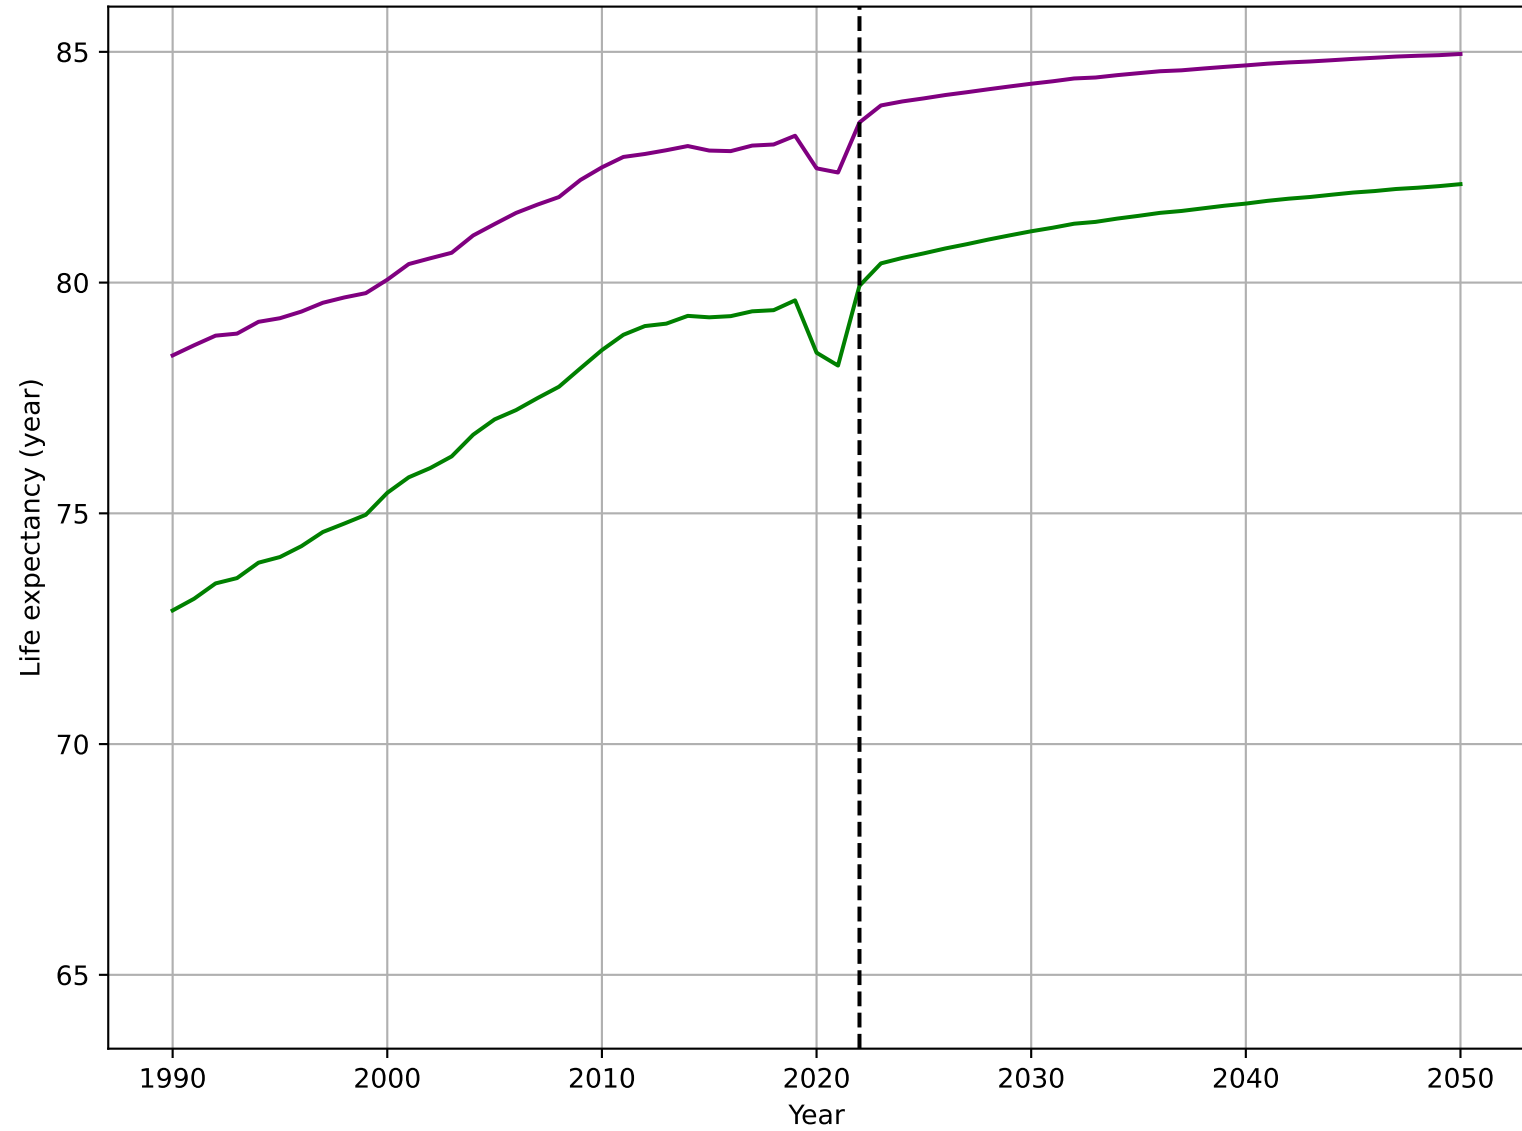

### Healthy Life Expectancy (HALE)

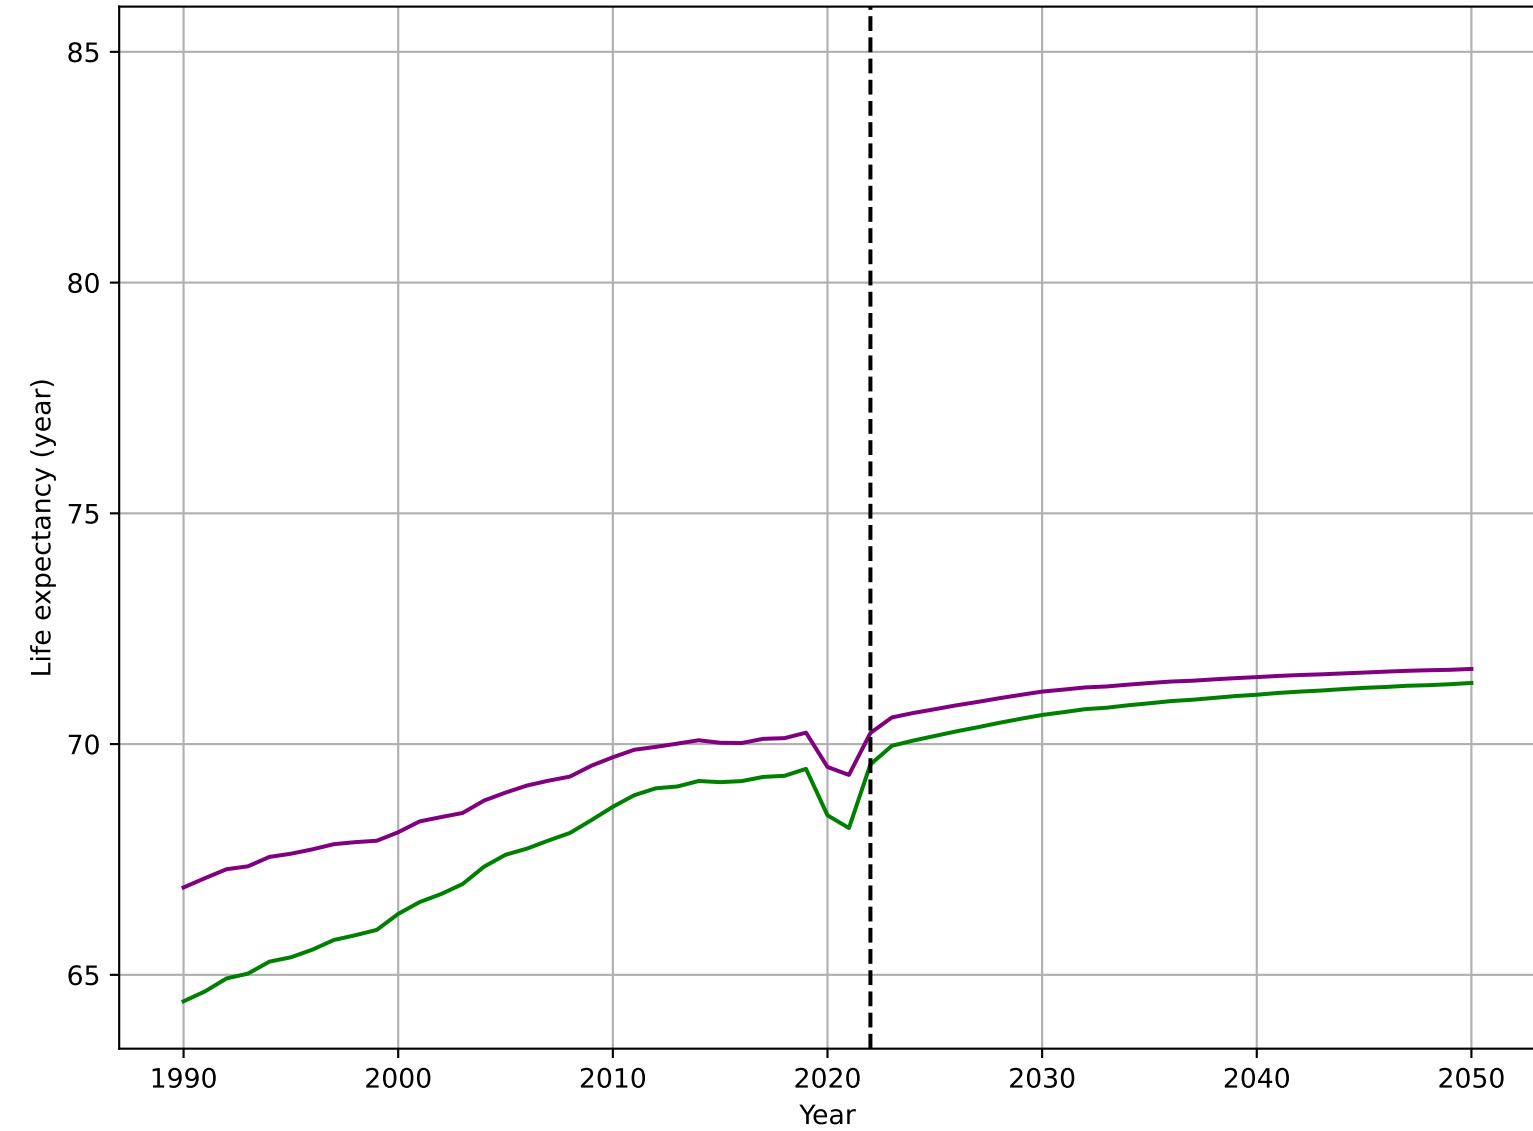

# Bolivia

### Life Expectancy

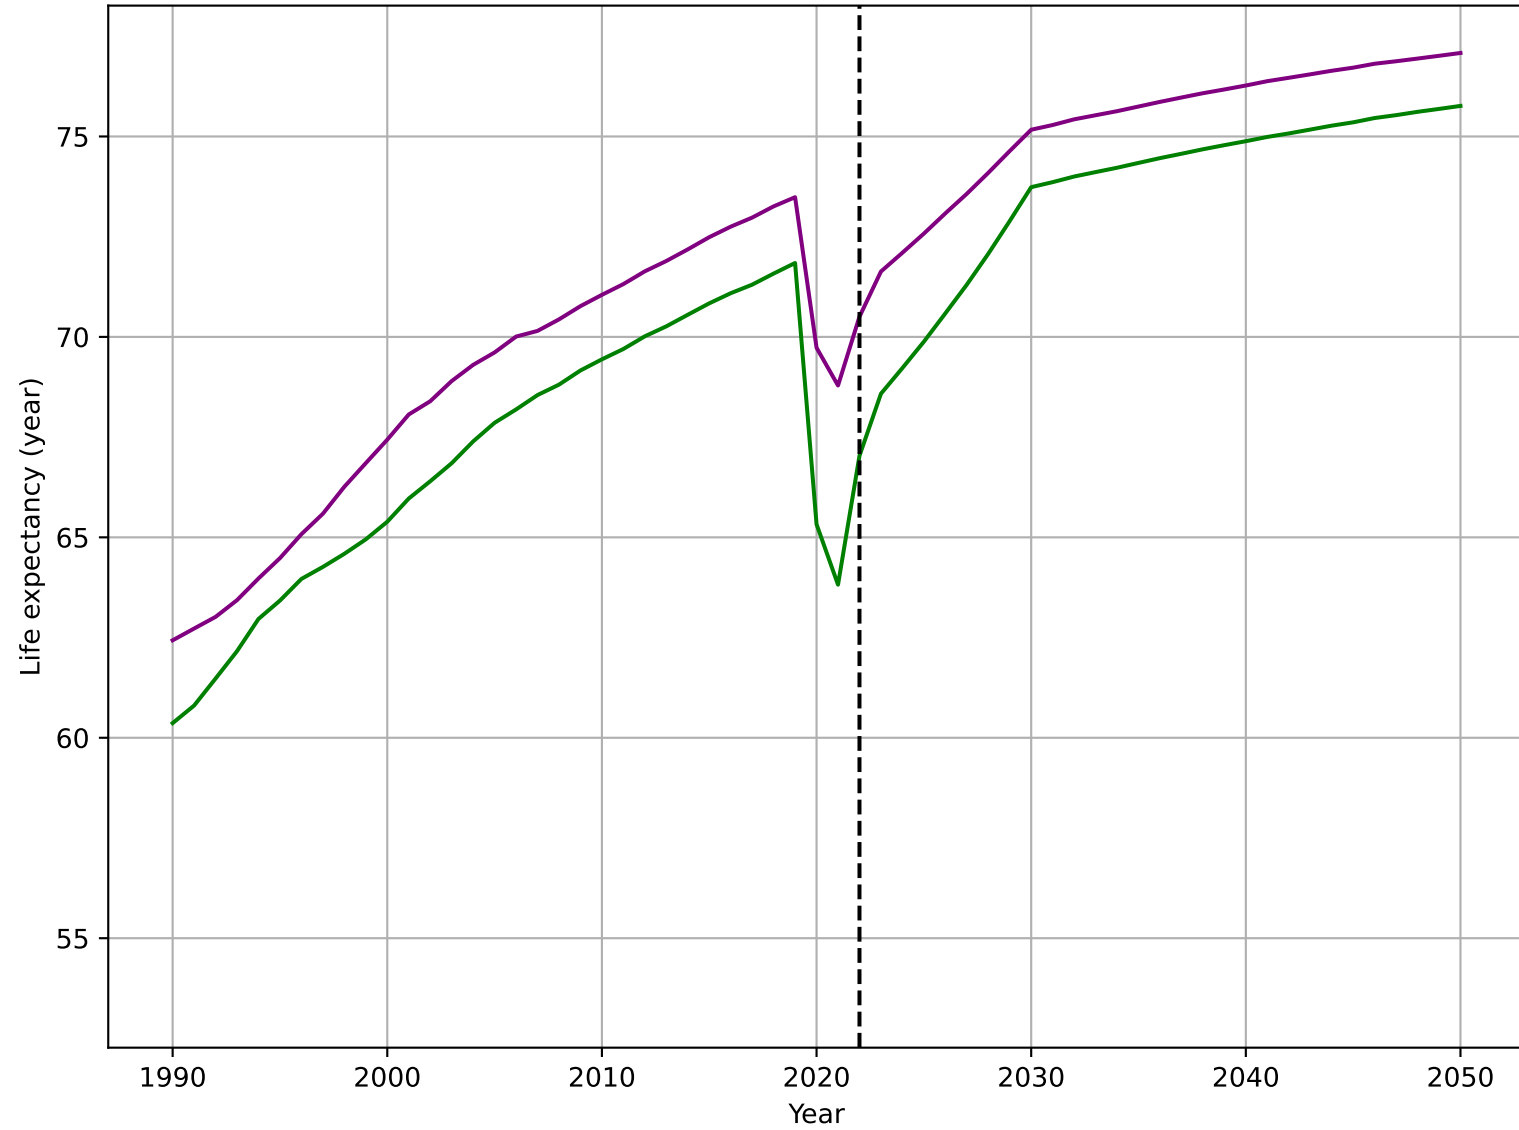

### Healthy Life Expectancy (HALE)

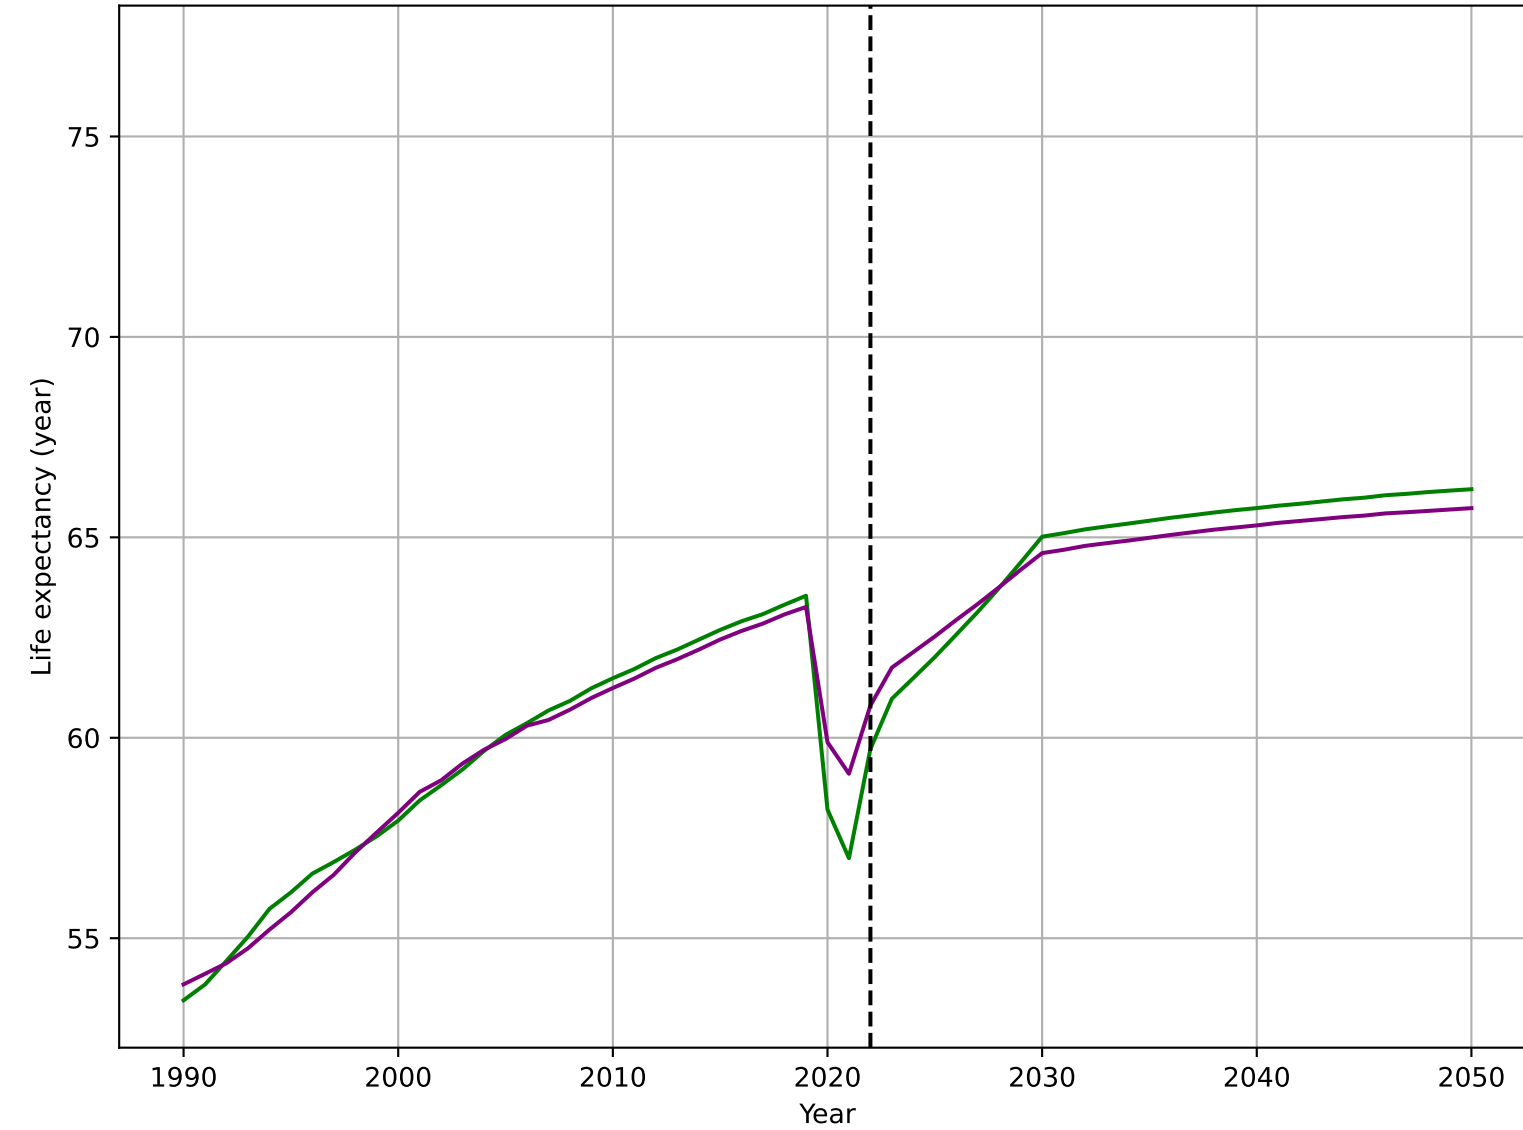

# Ecuador

### Life Expectancy

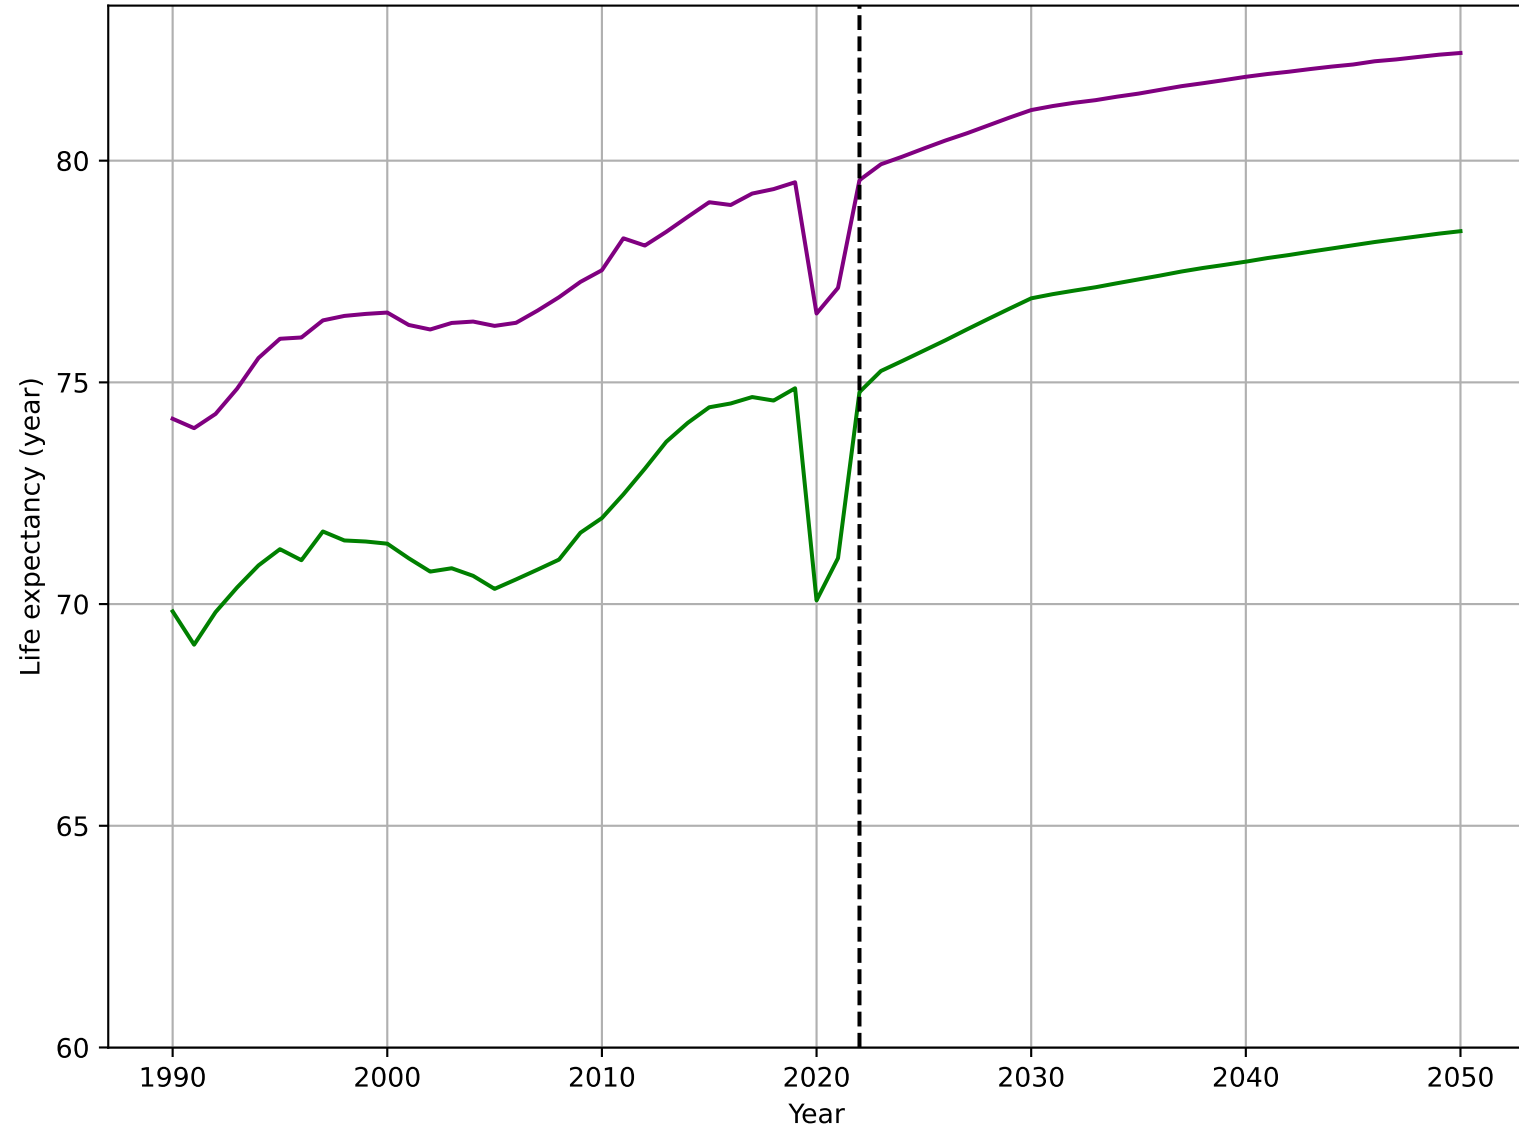

### Healthy Life Expectancy (HALE)

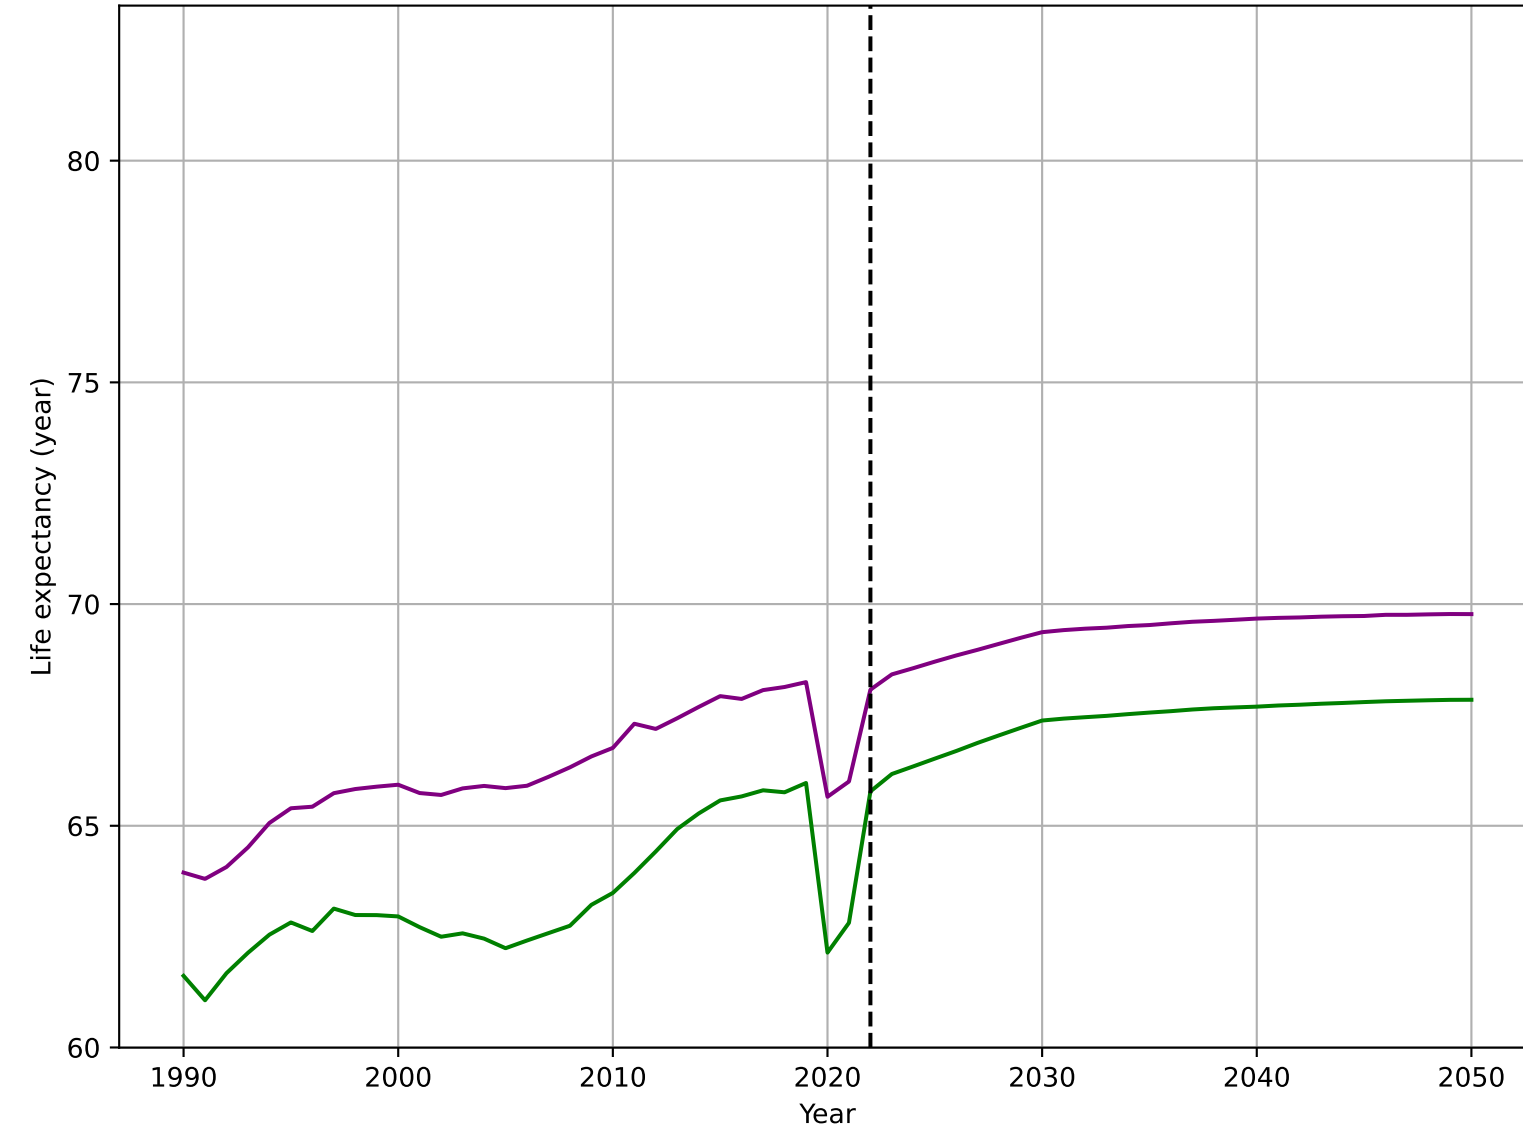

# Peru

### Life Expectancy

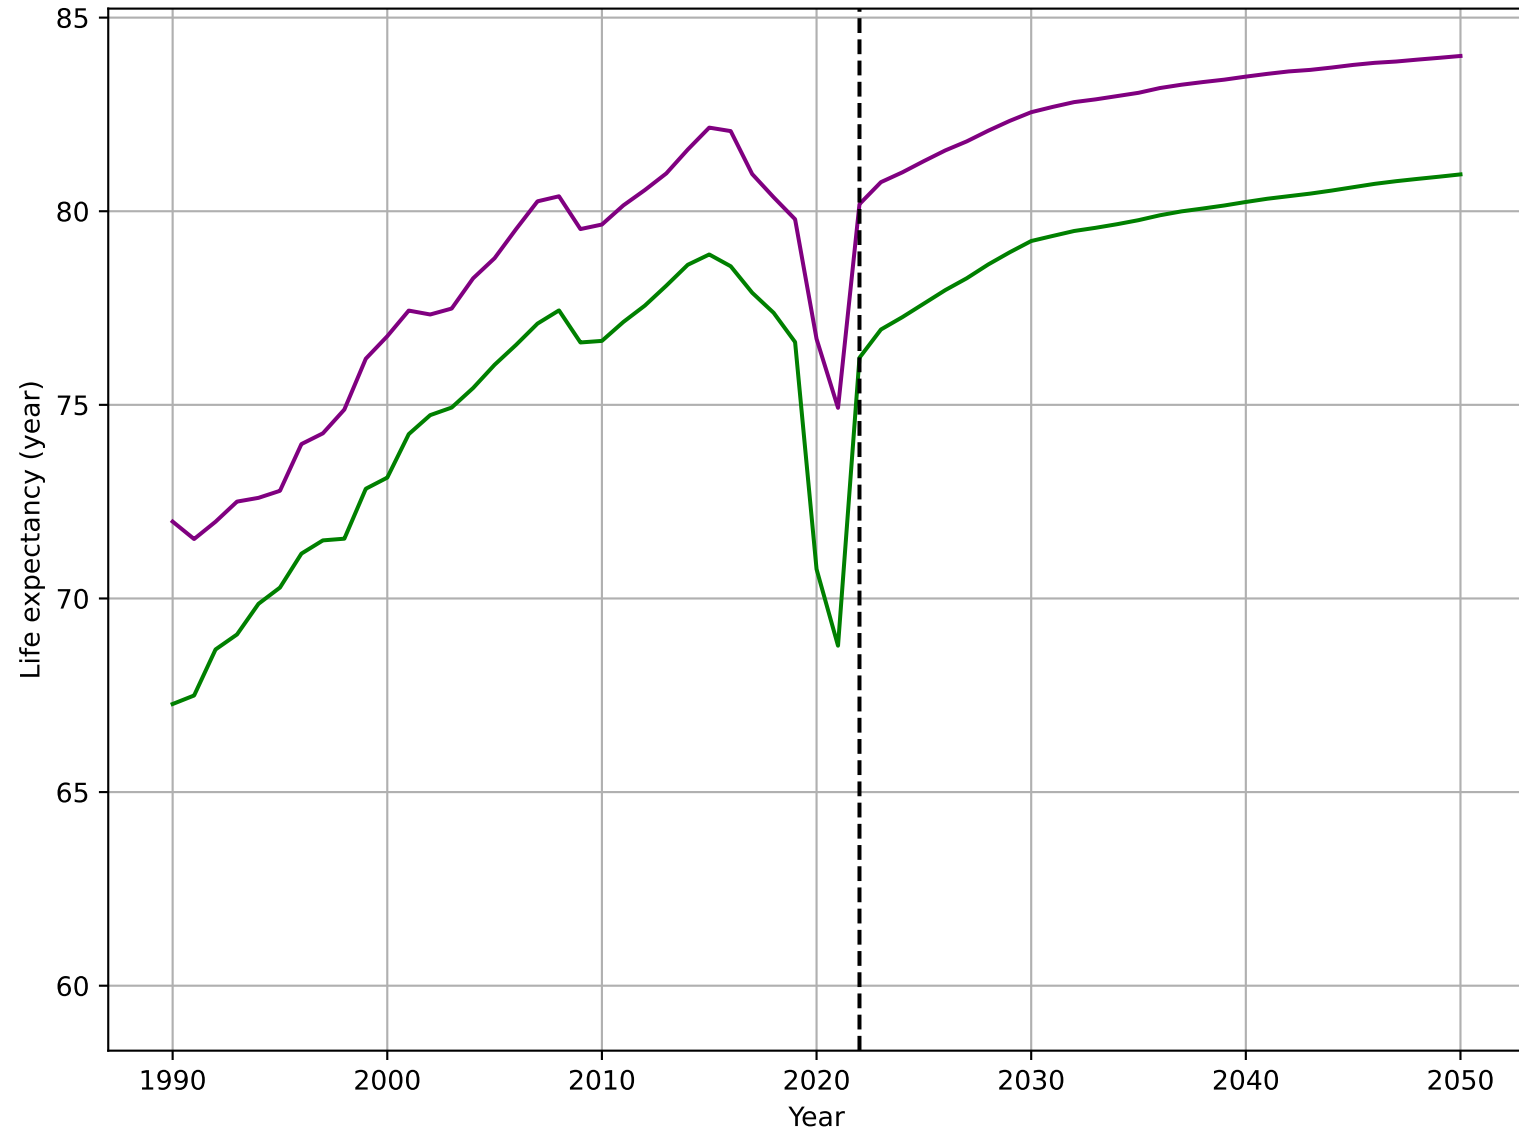

### Healthy Life Expectancy (HALE)

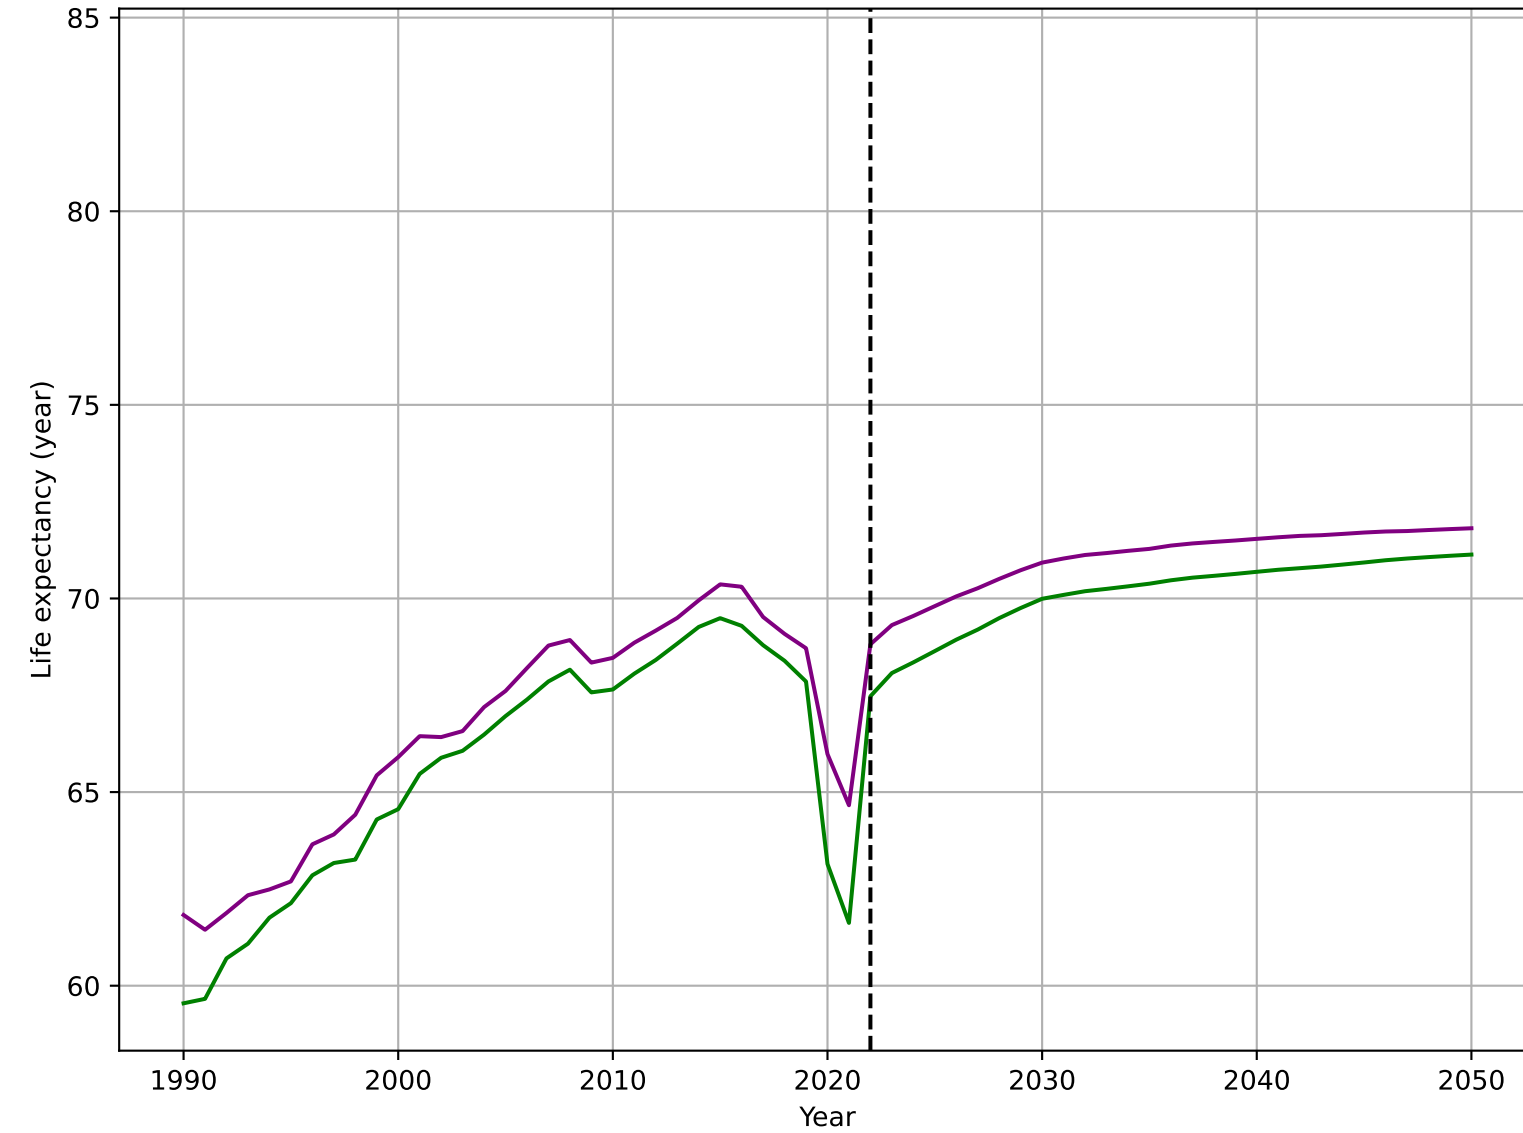



# Antigua And Barbuda

### Life Expectancy

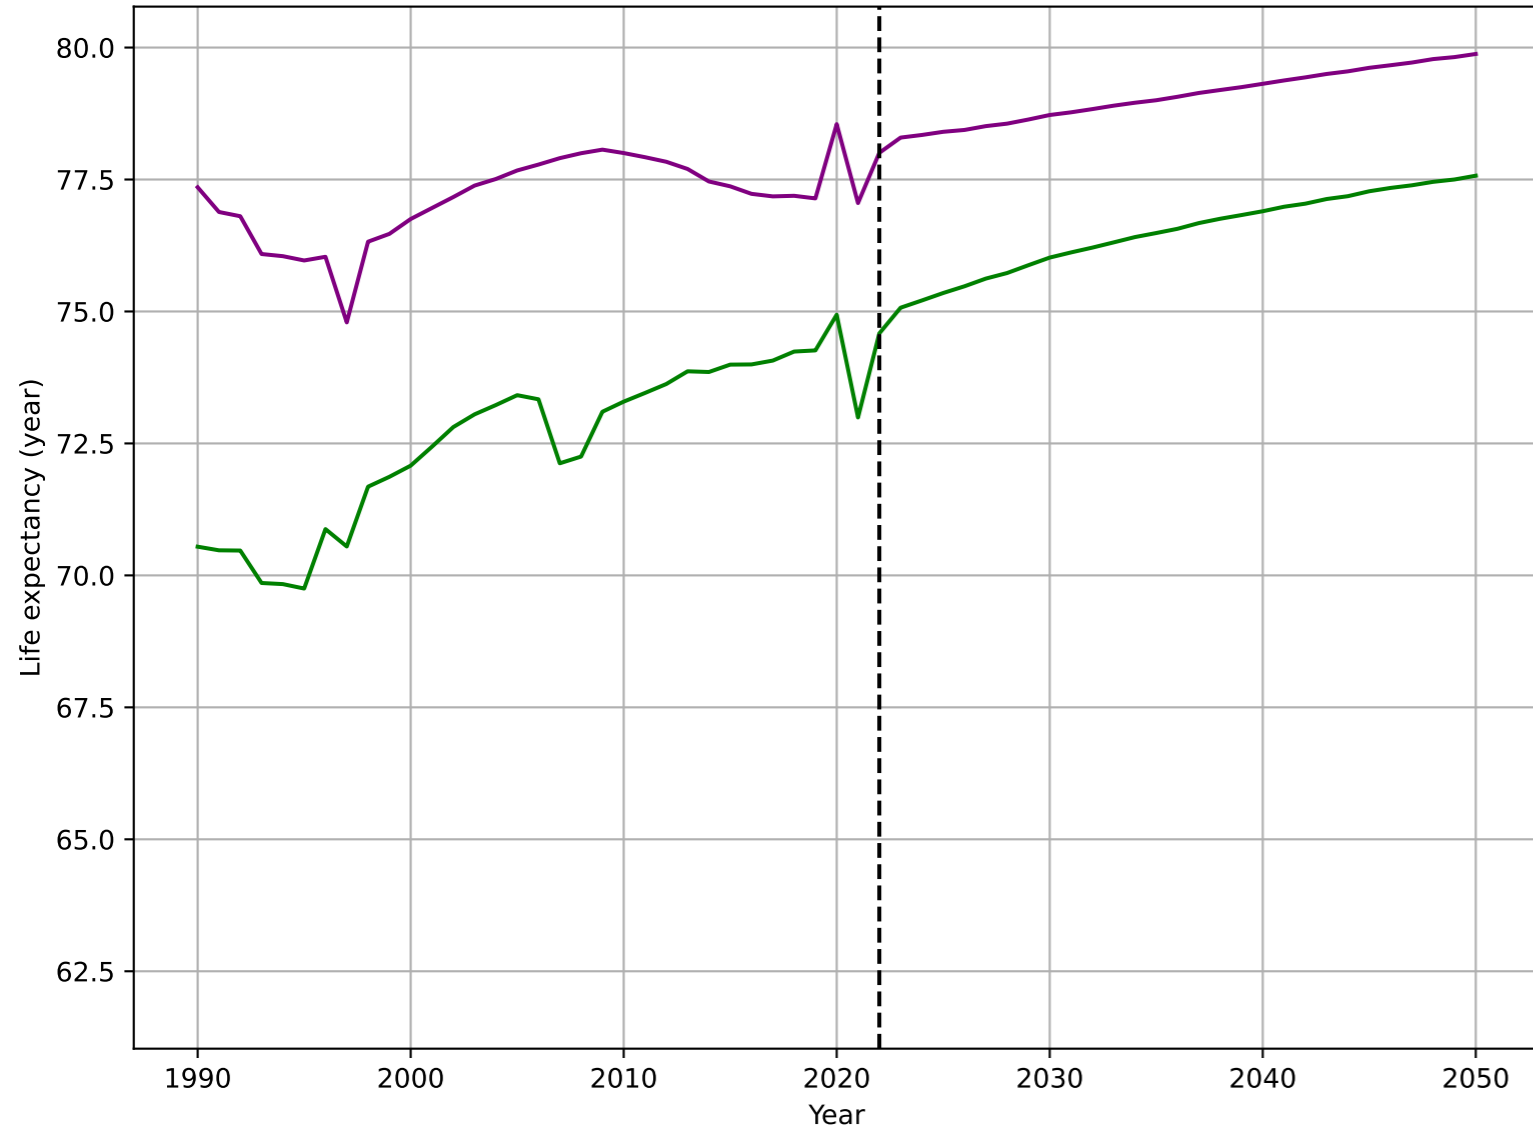

### Healthy Life Expectancy (HALE)

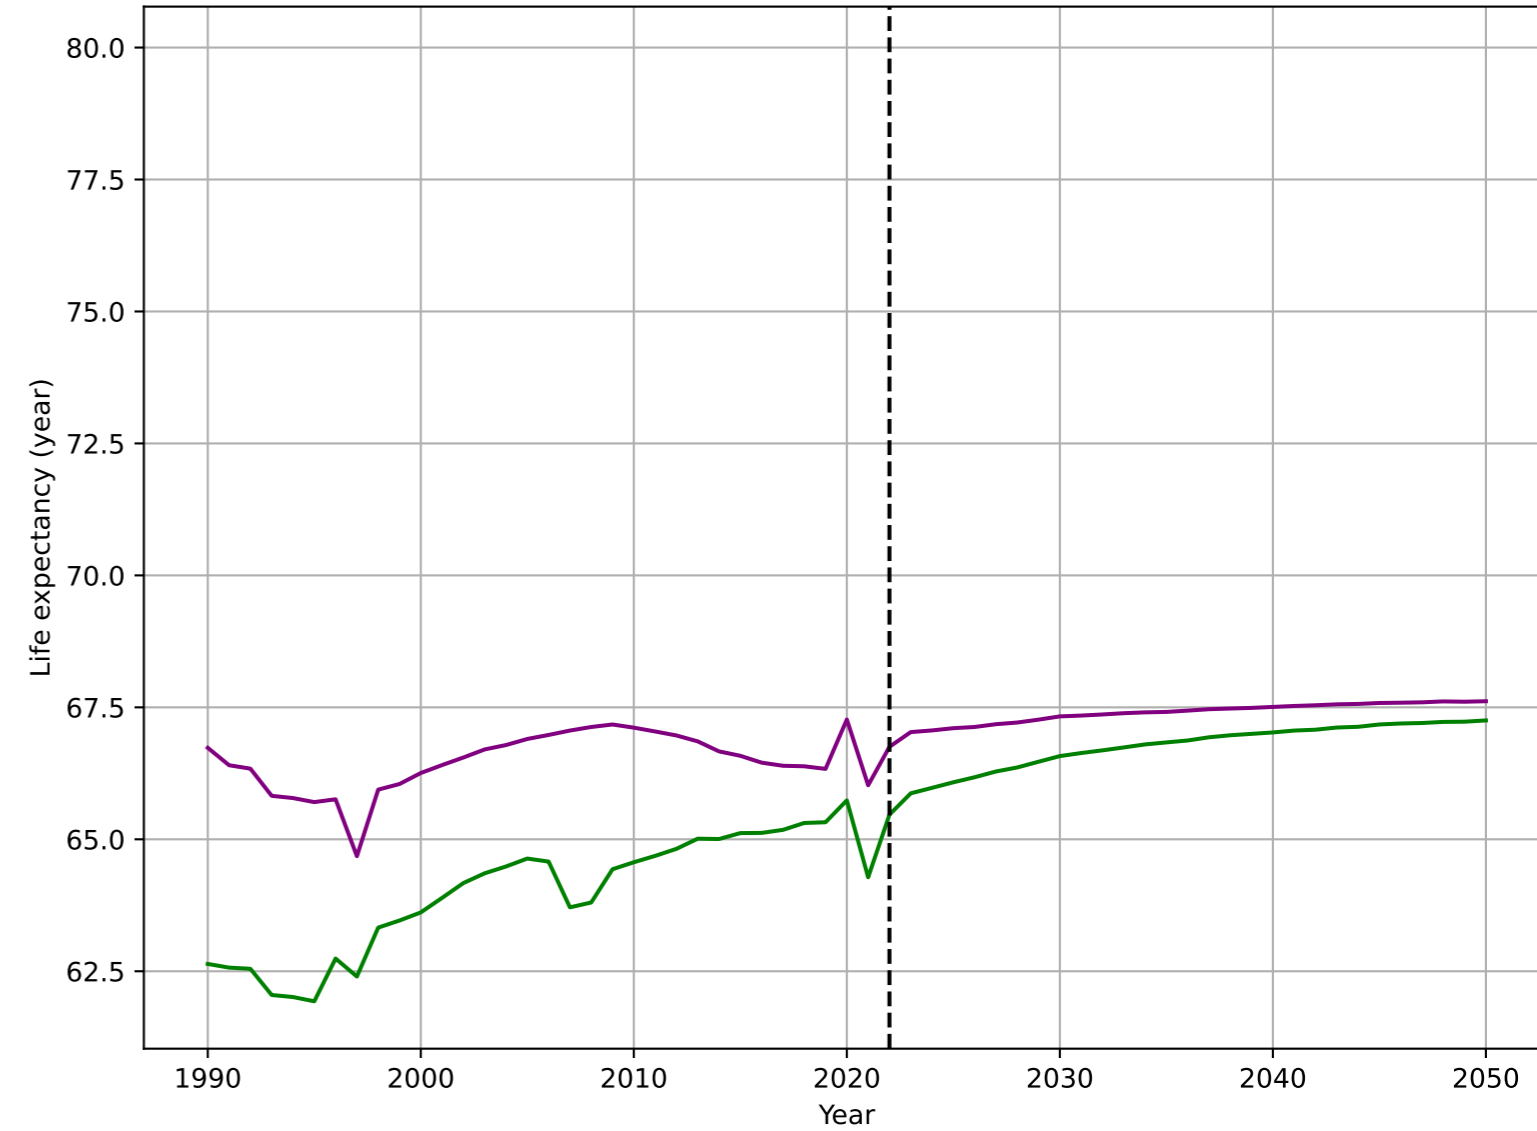

# The Bahamas

### Life Expectancy

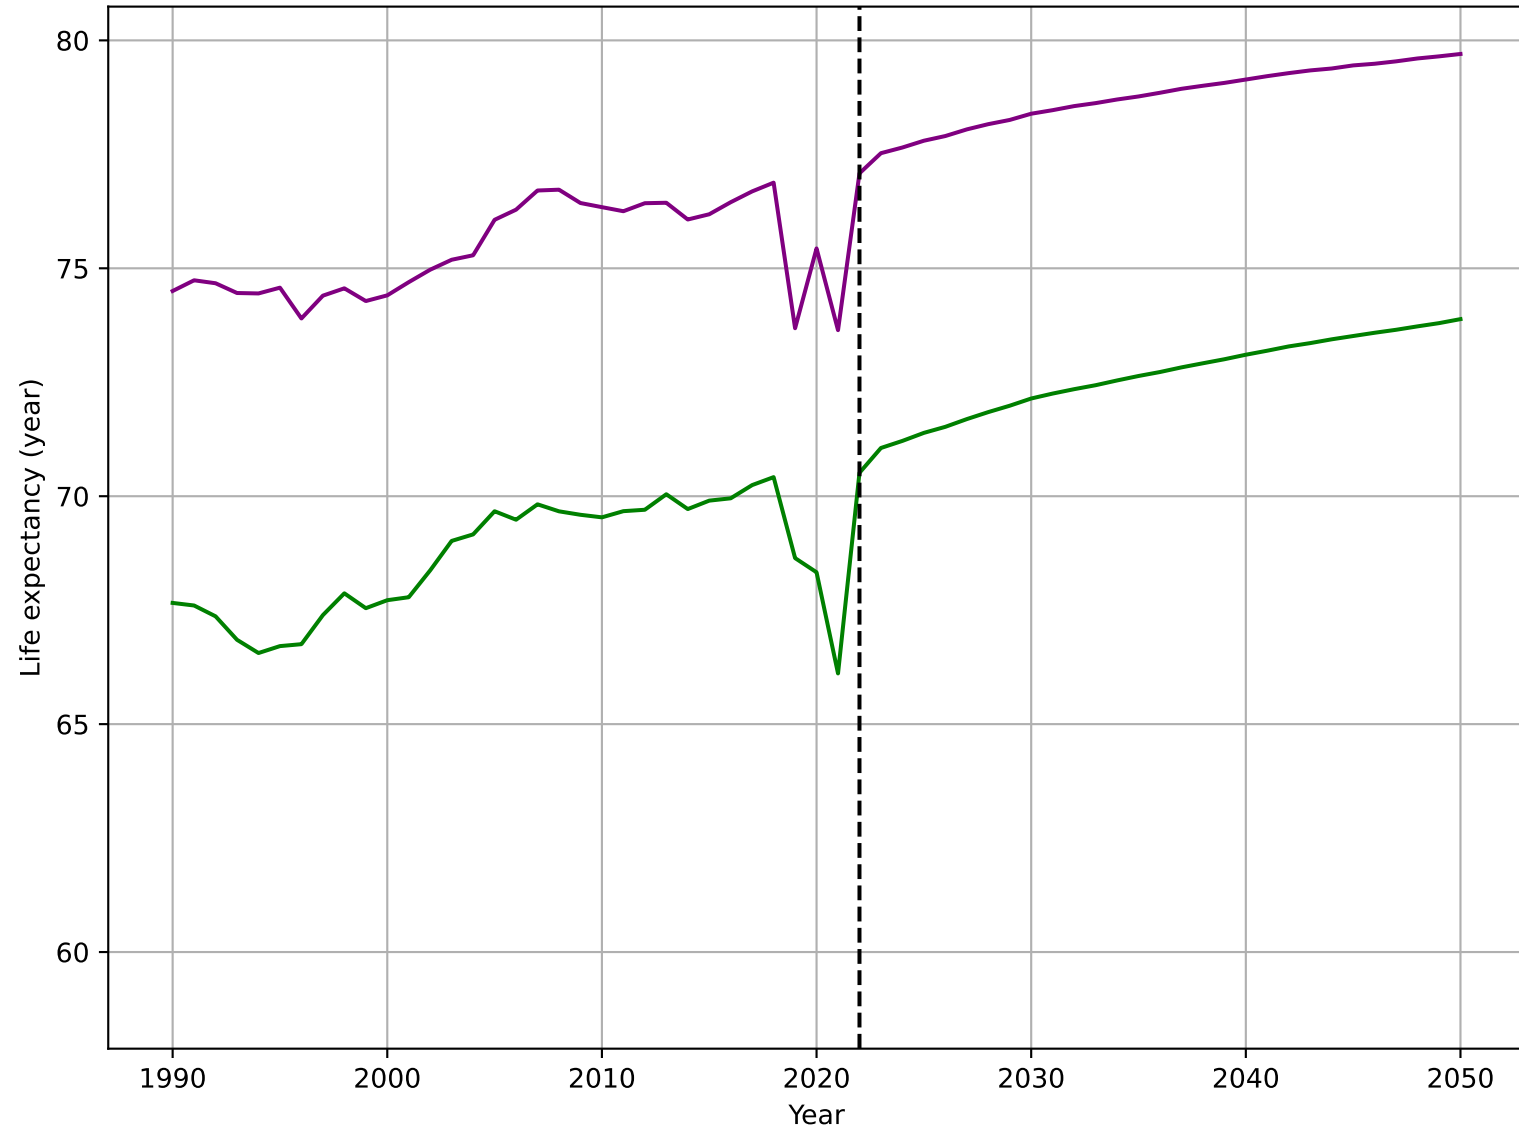

### Healthy Life Expectancy (HALE)

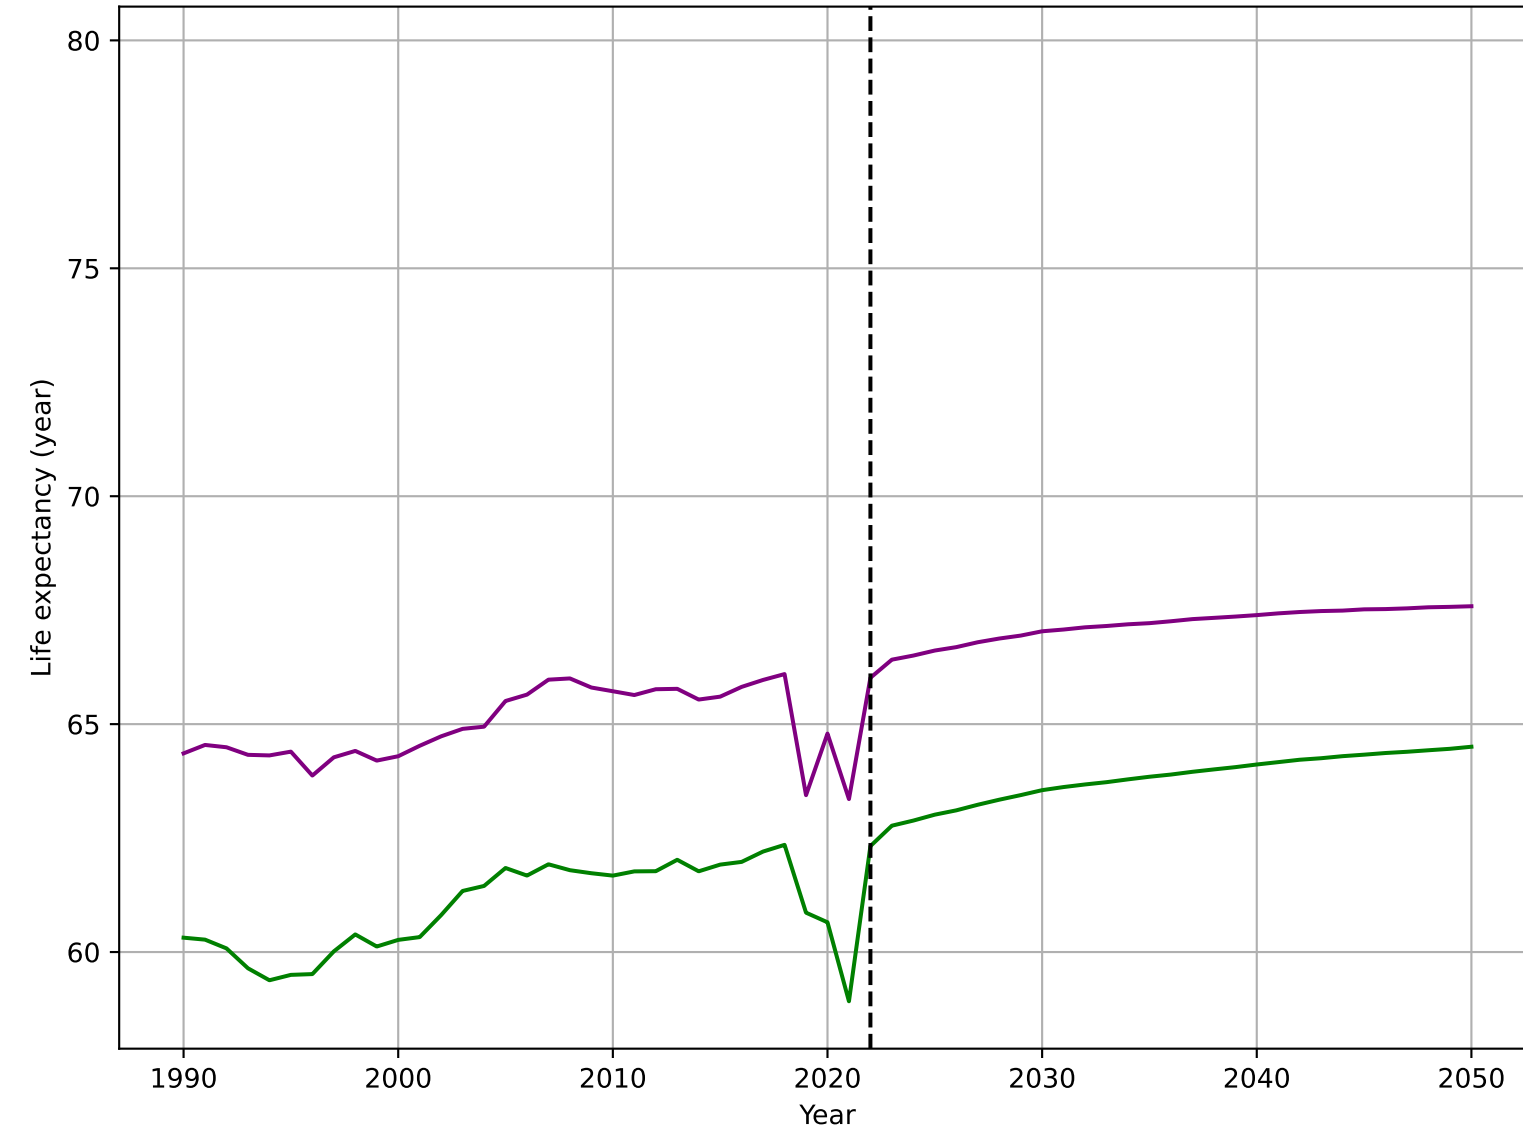

# Barbados

### Life Expectancy

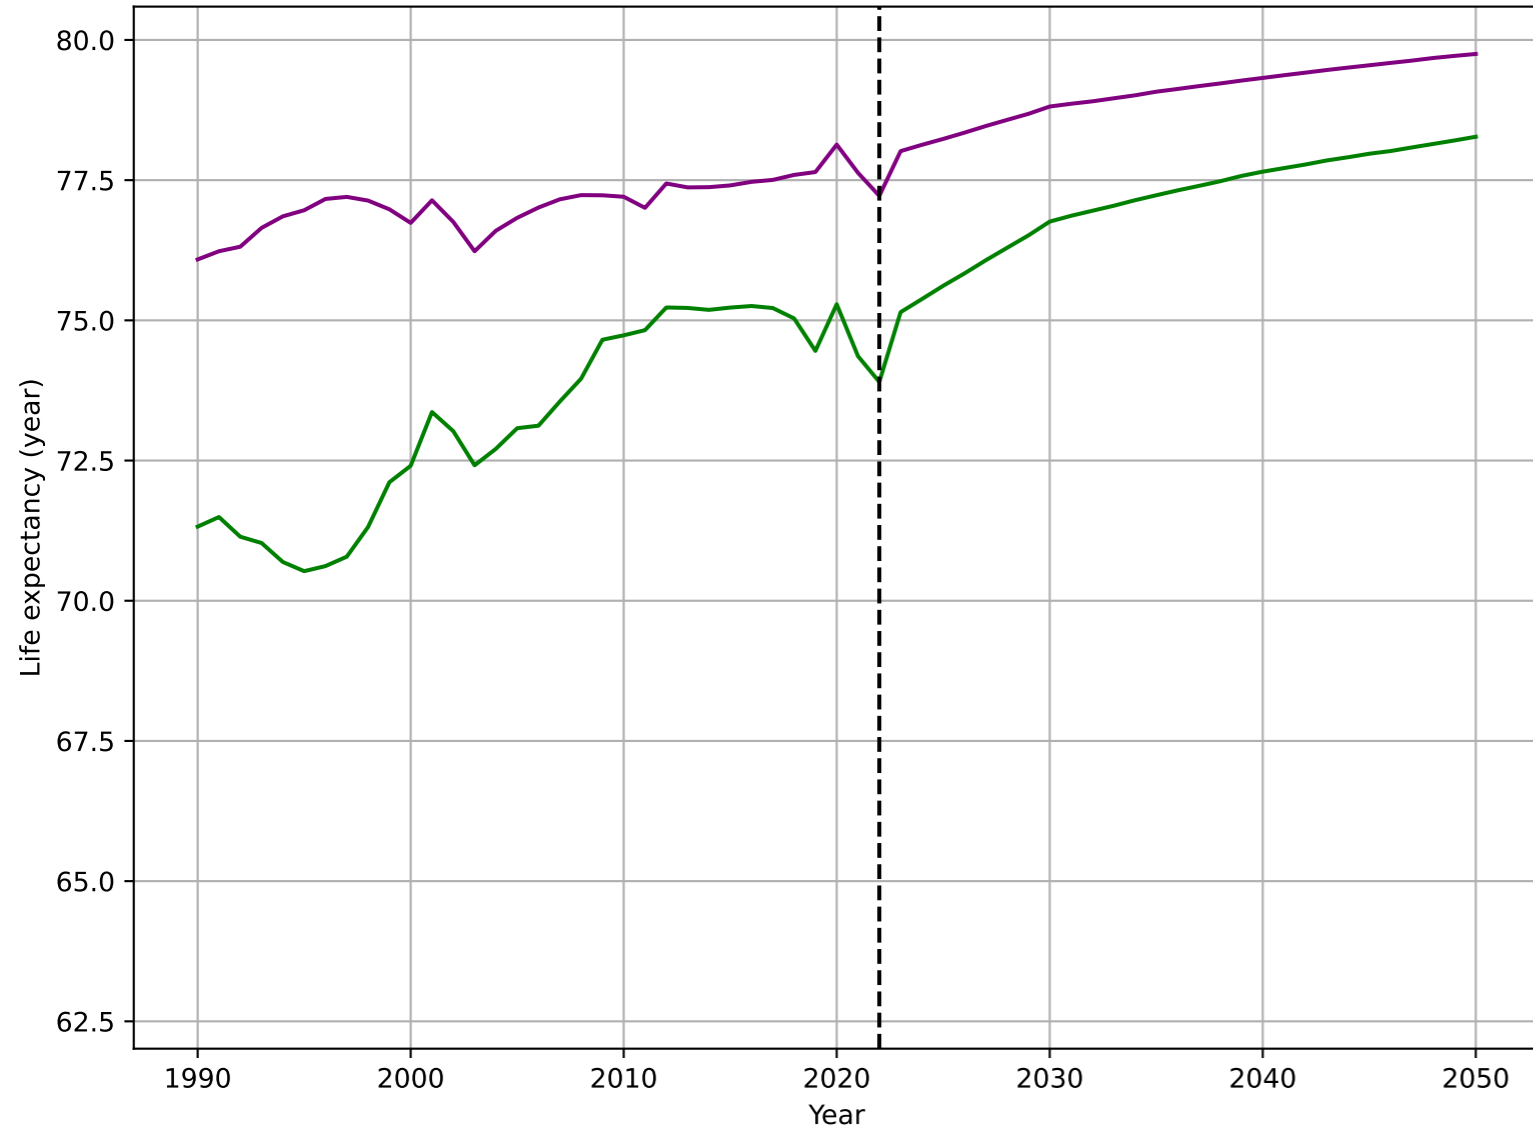

### Healthy Life Expectancy (HALE)

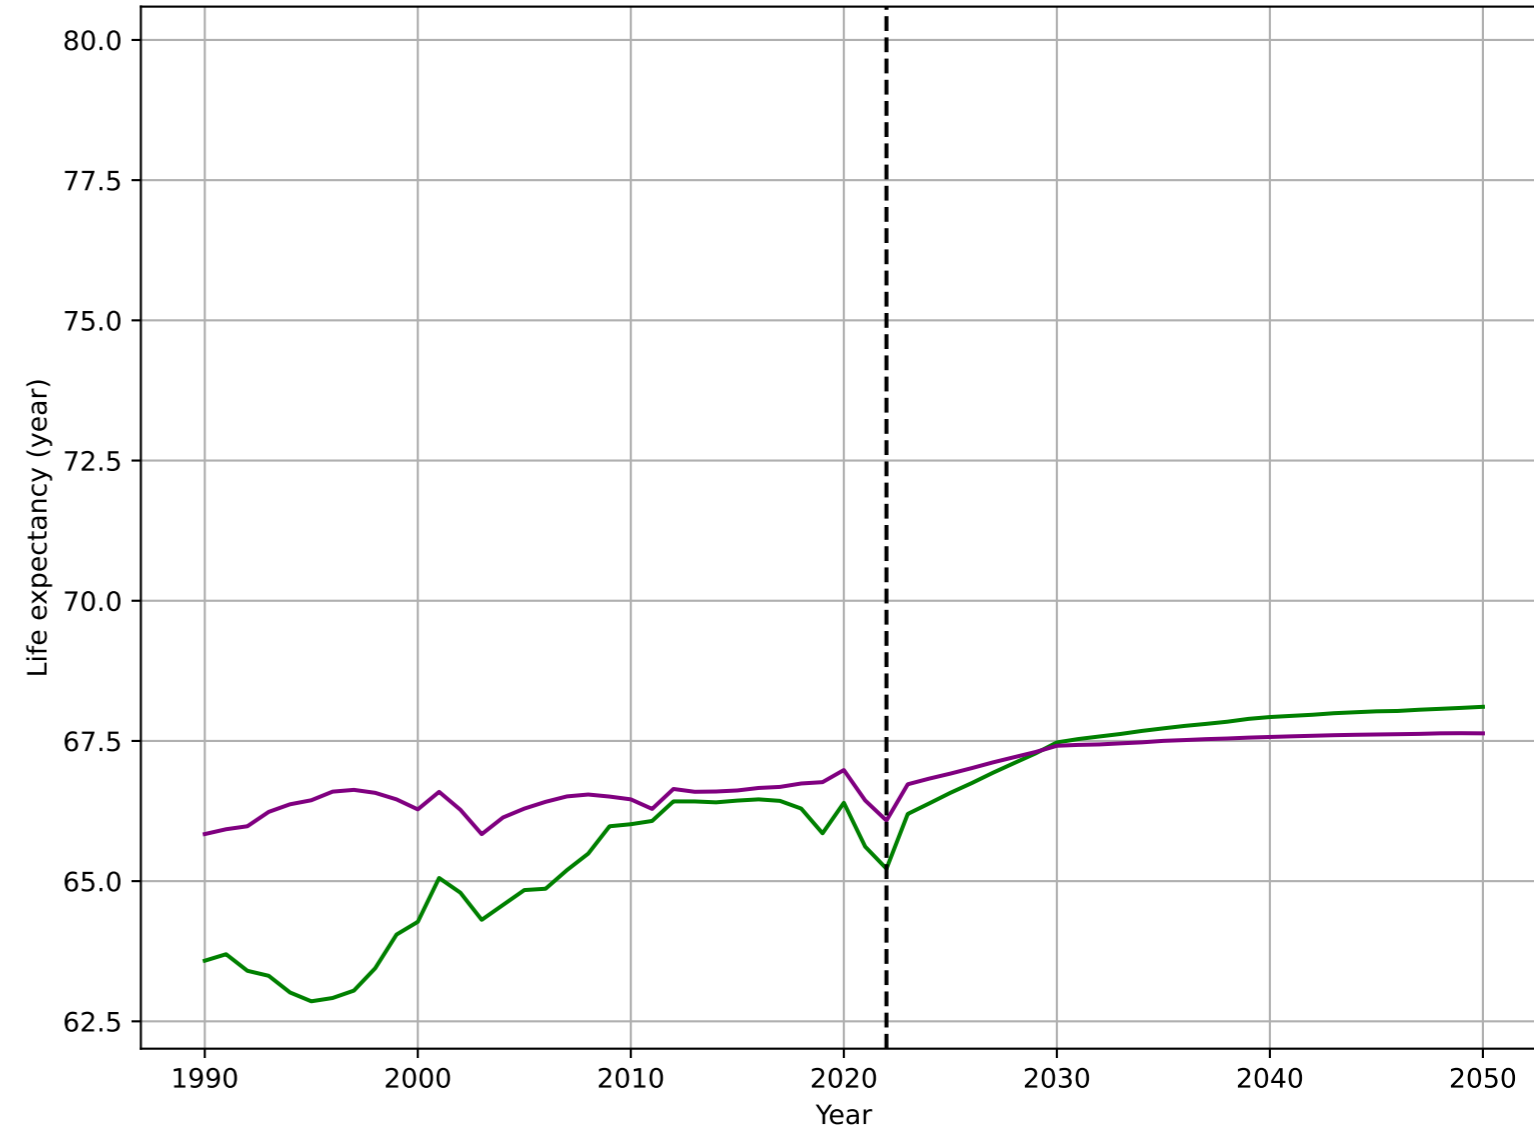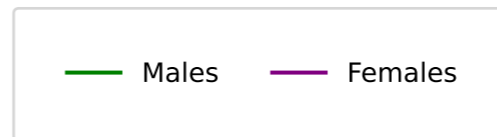

# Belize

### Life Expectancy

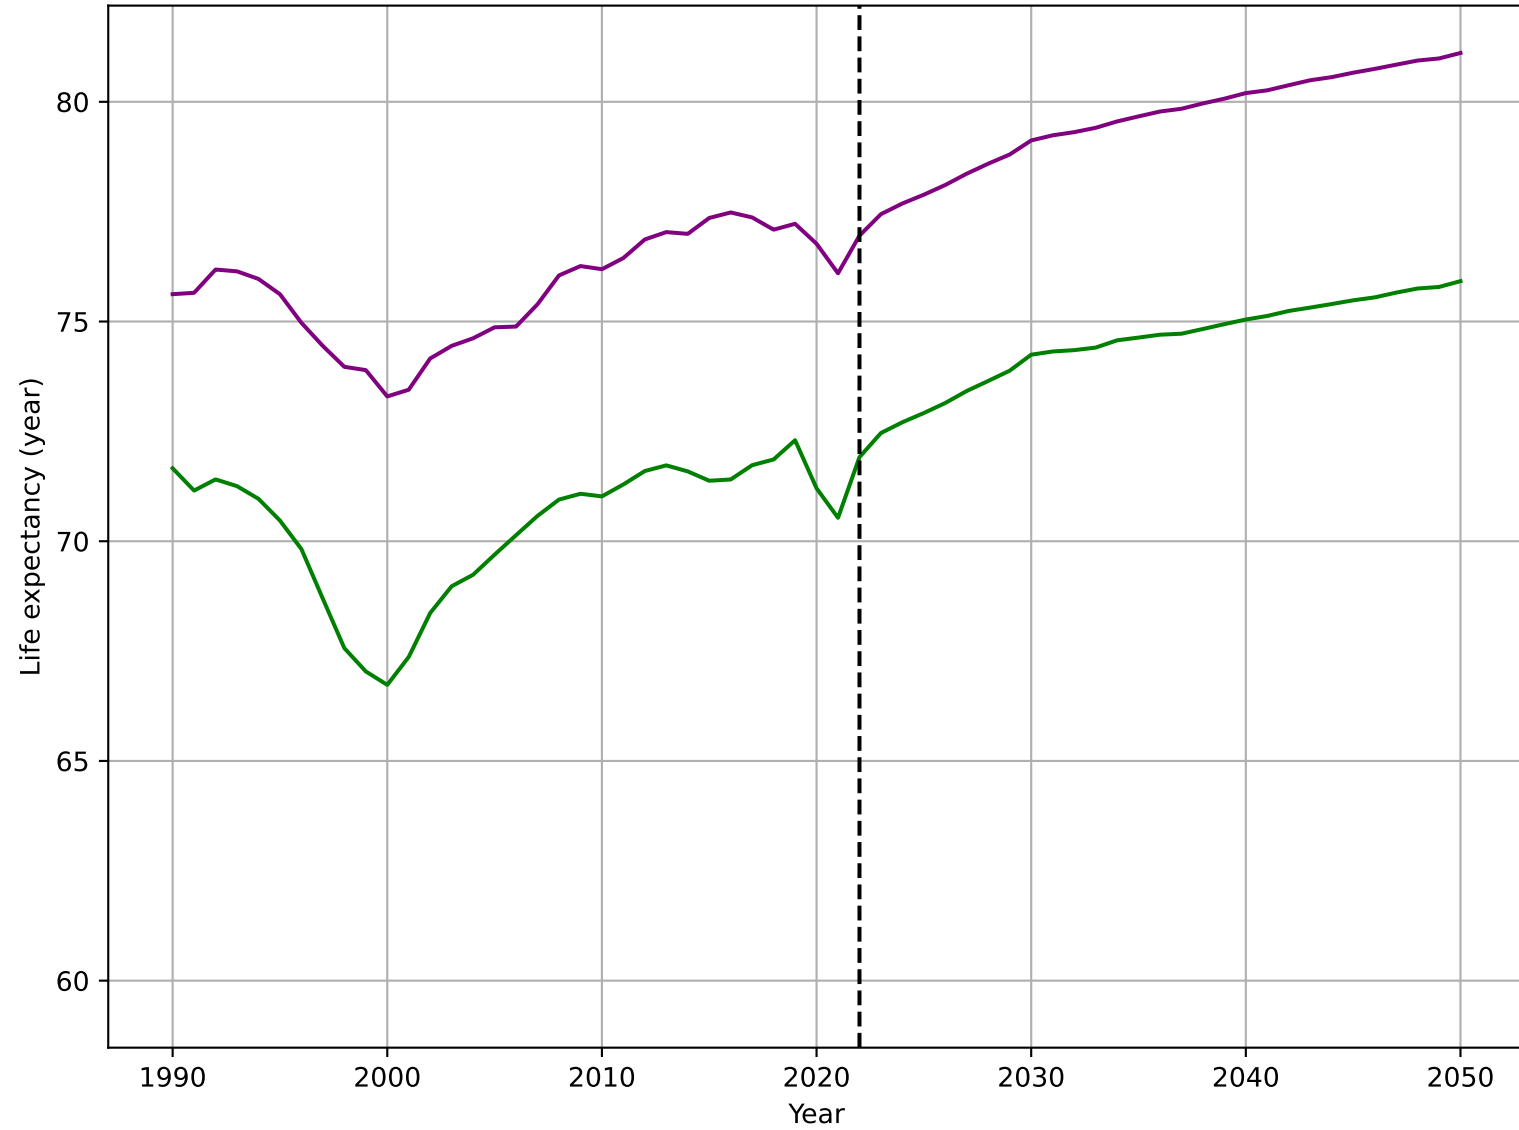

### Healthy Life Expectancy (HALE)

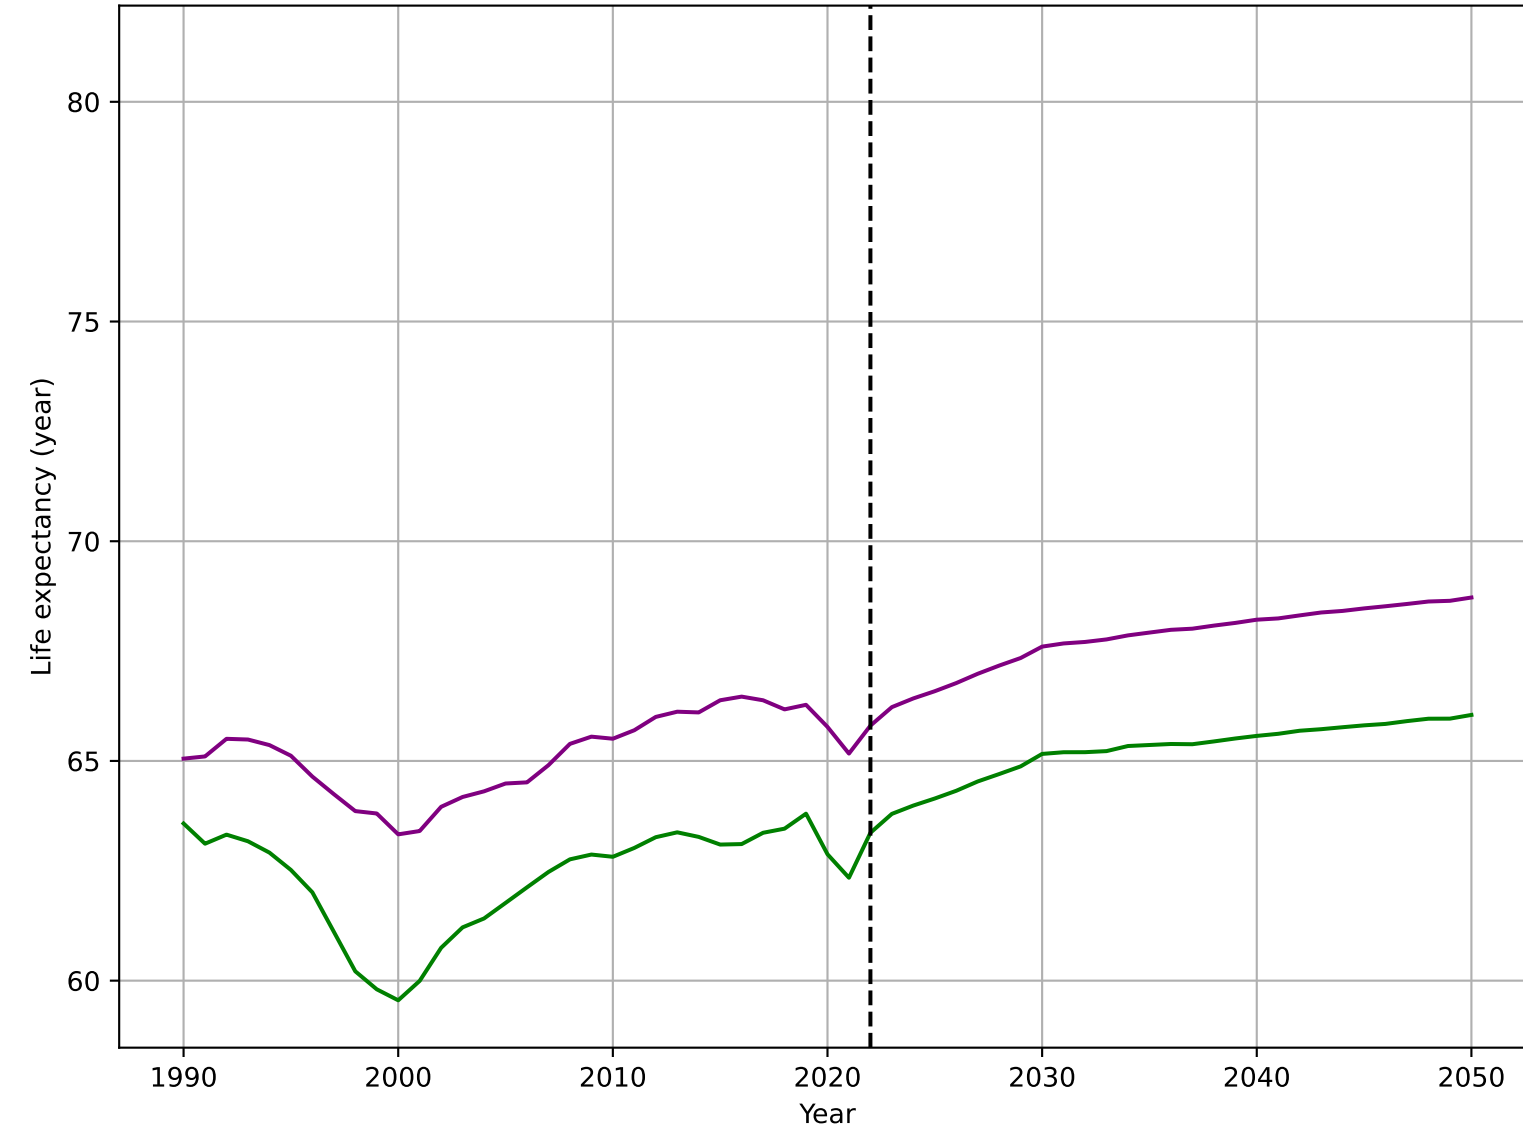

# Bermuda

### Life Expectancy

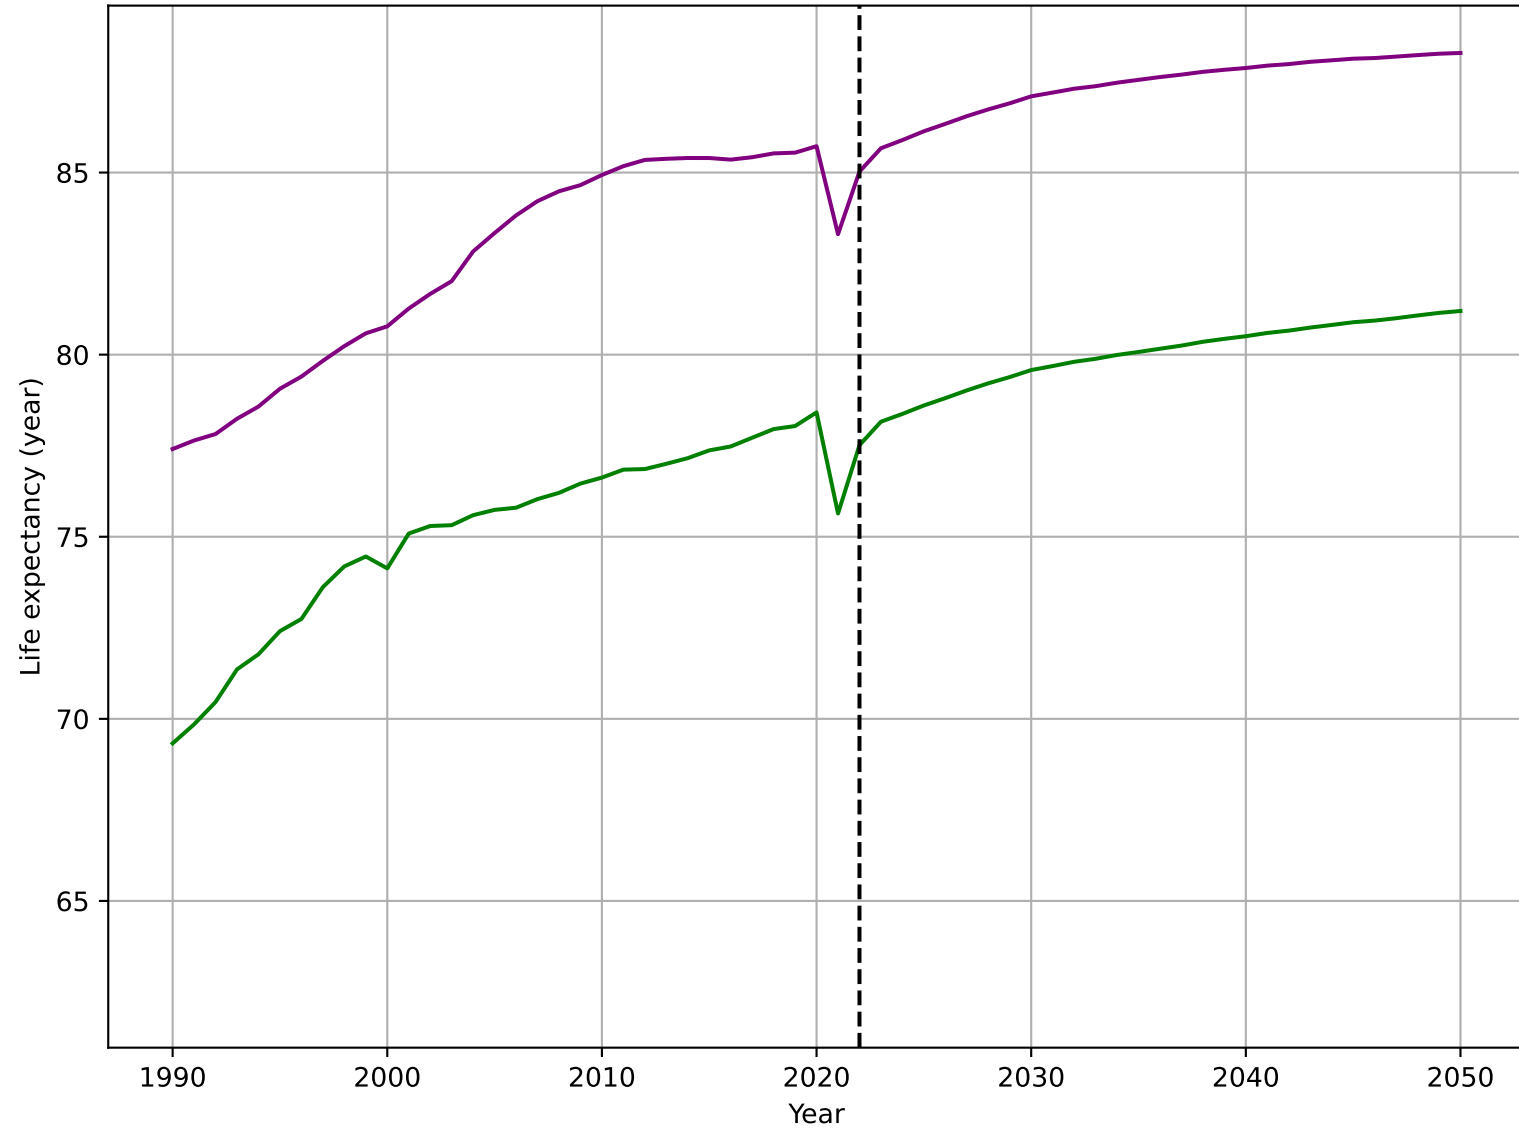

### Healthy Life Expectancy (HALE)

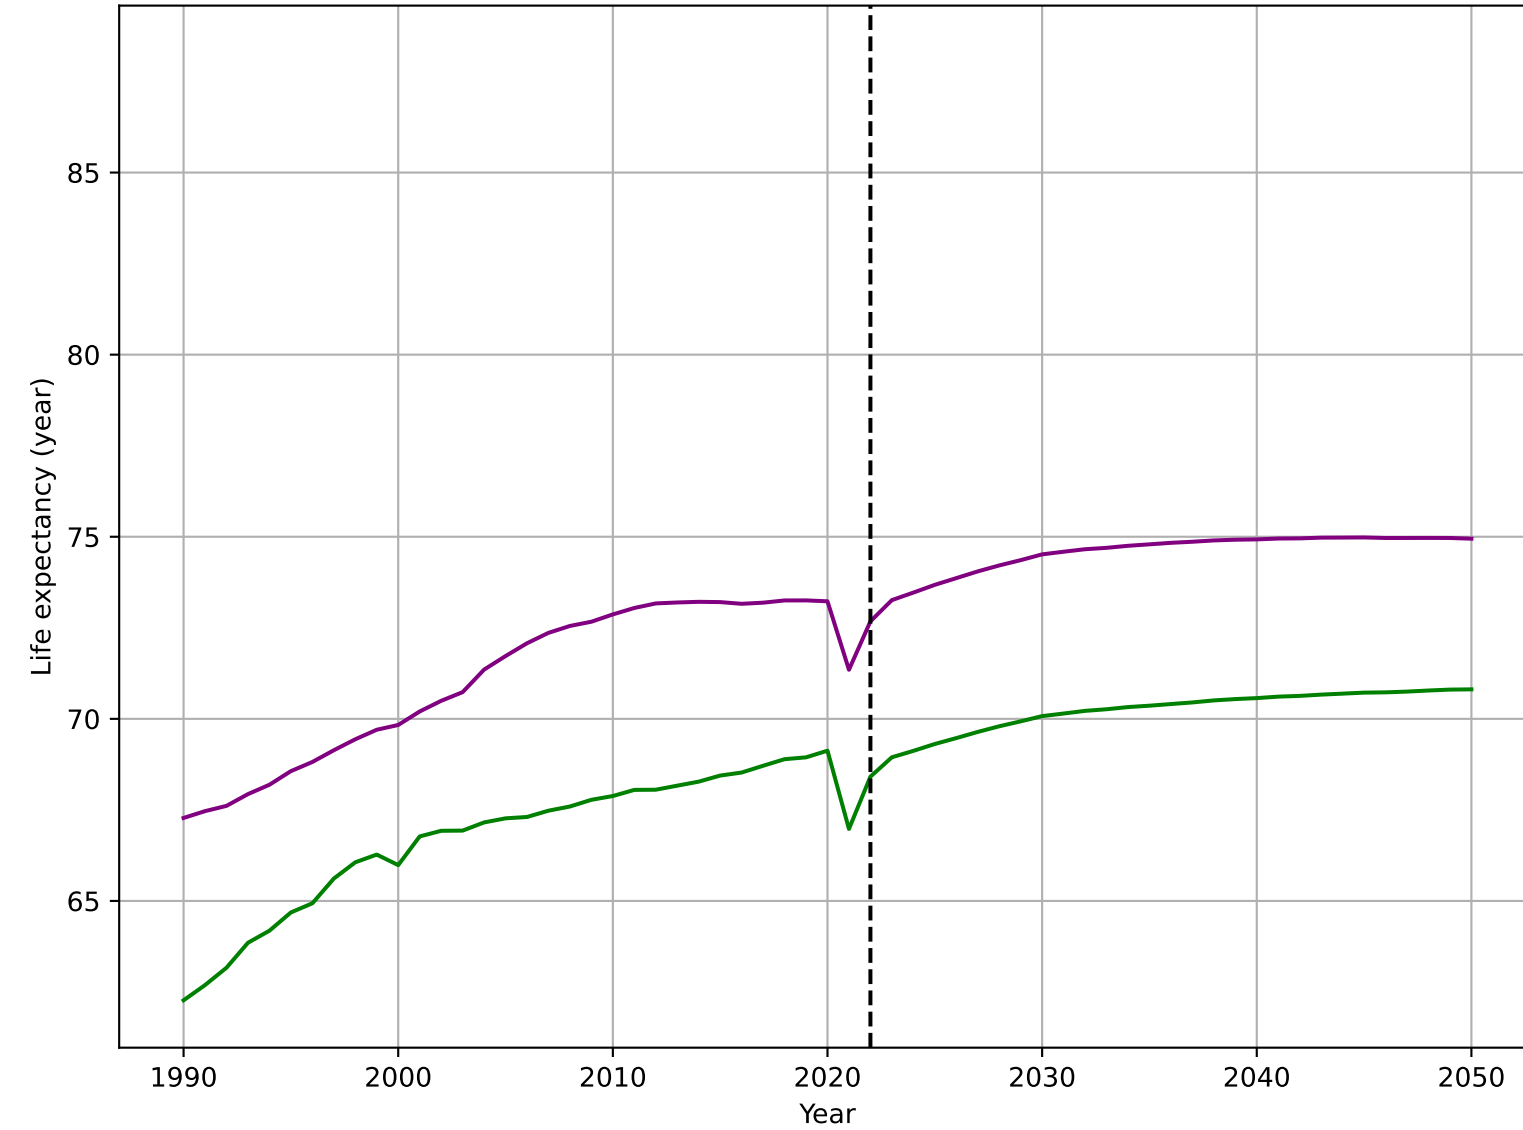

# Cuba

## Life Expectancy

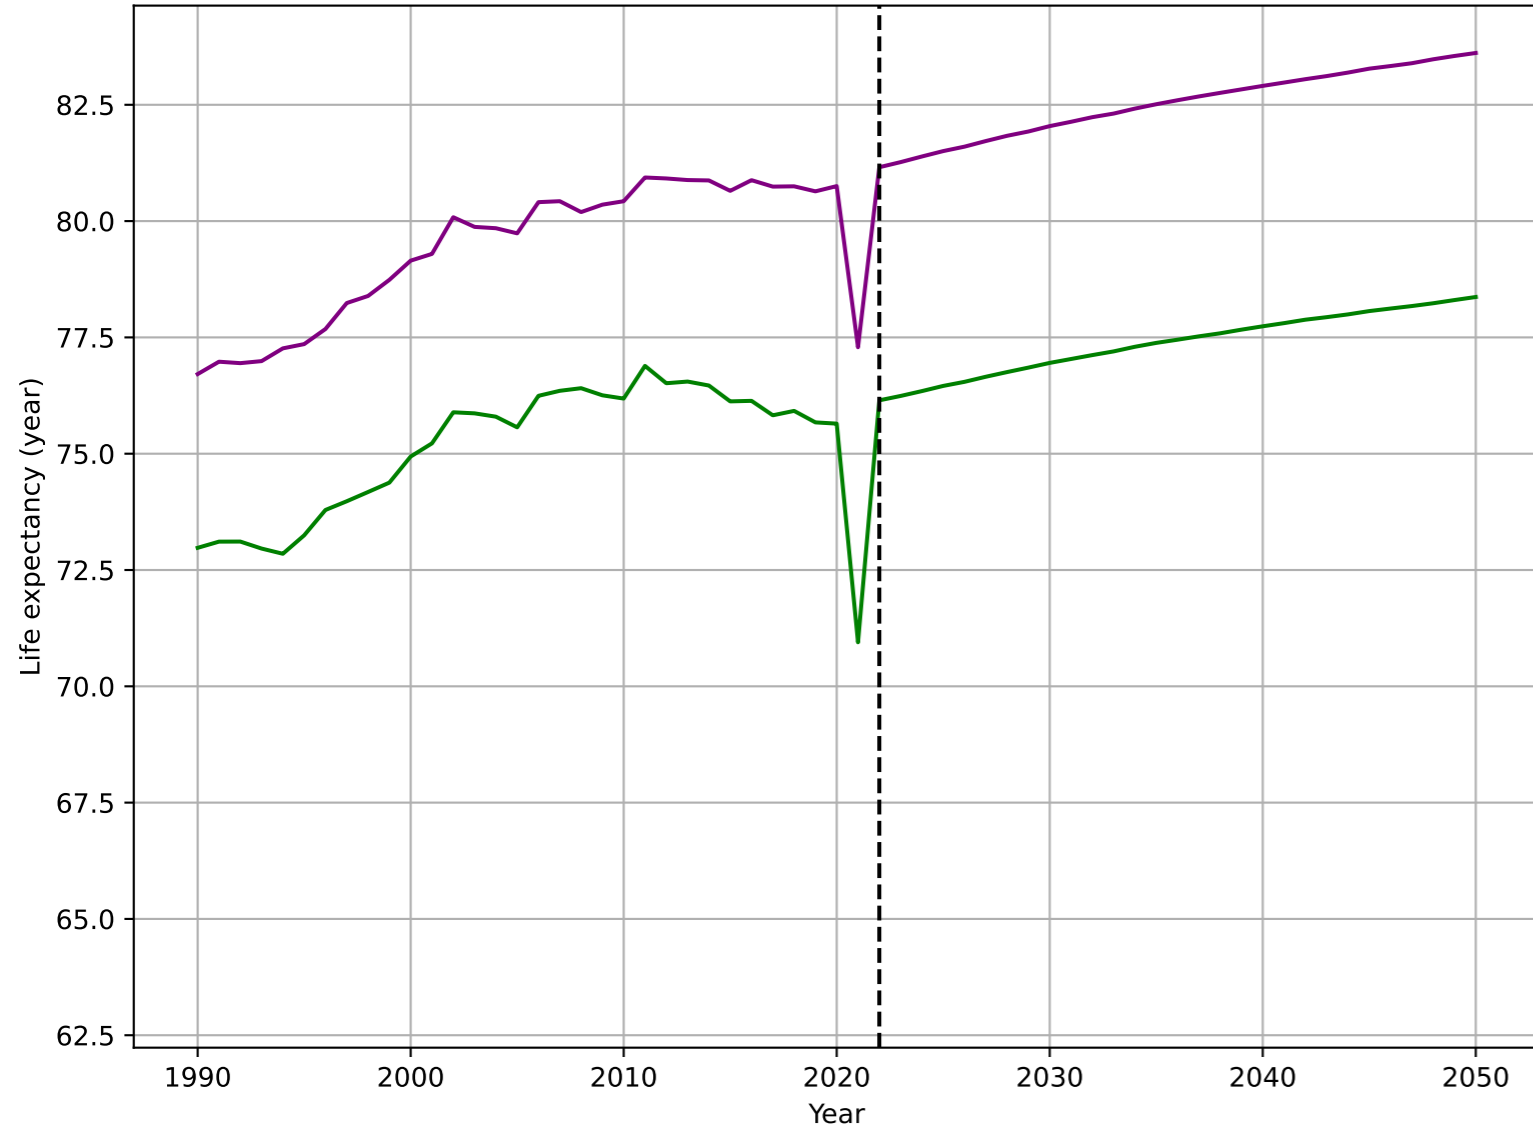

## Healthy Life Expectancy (HALE)

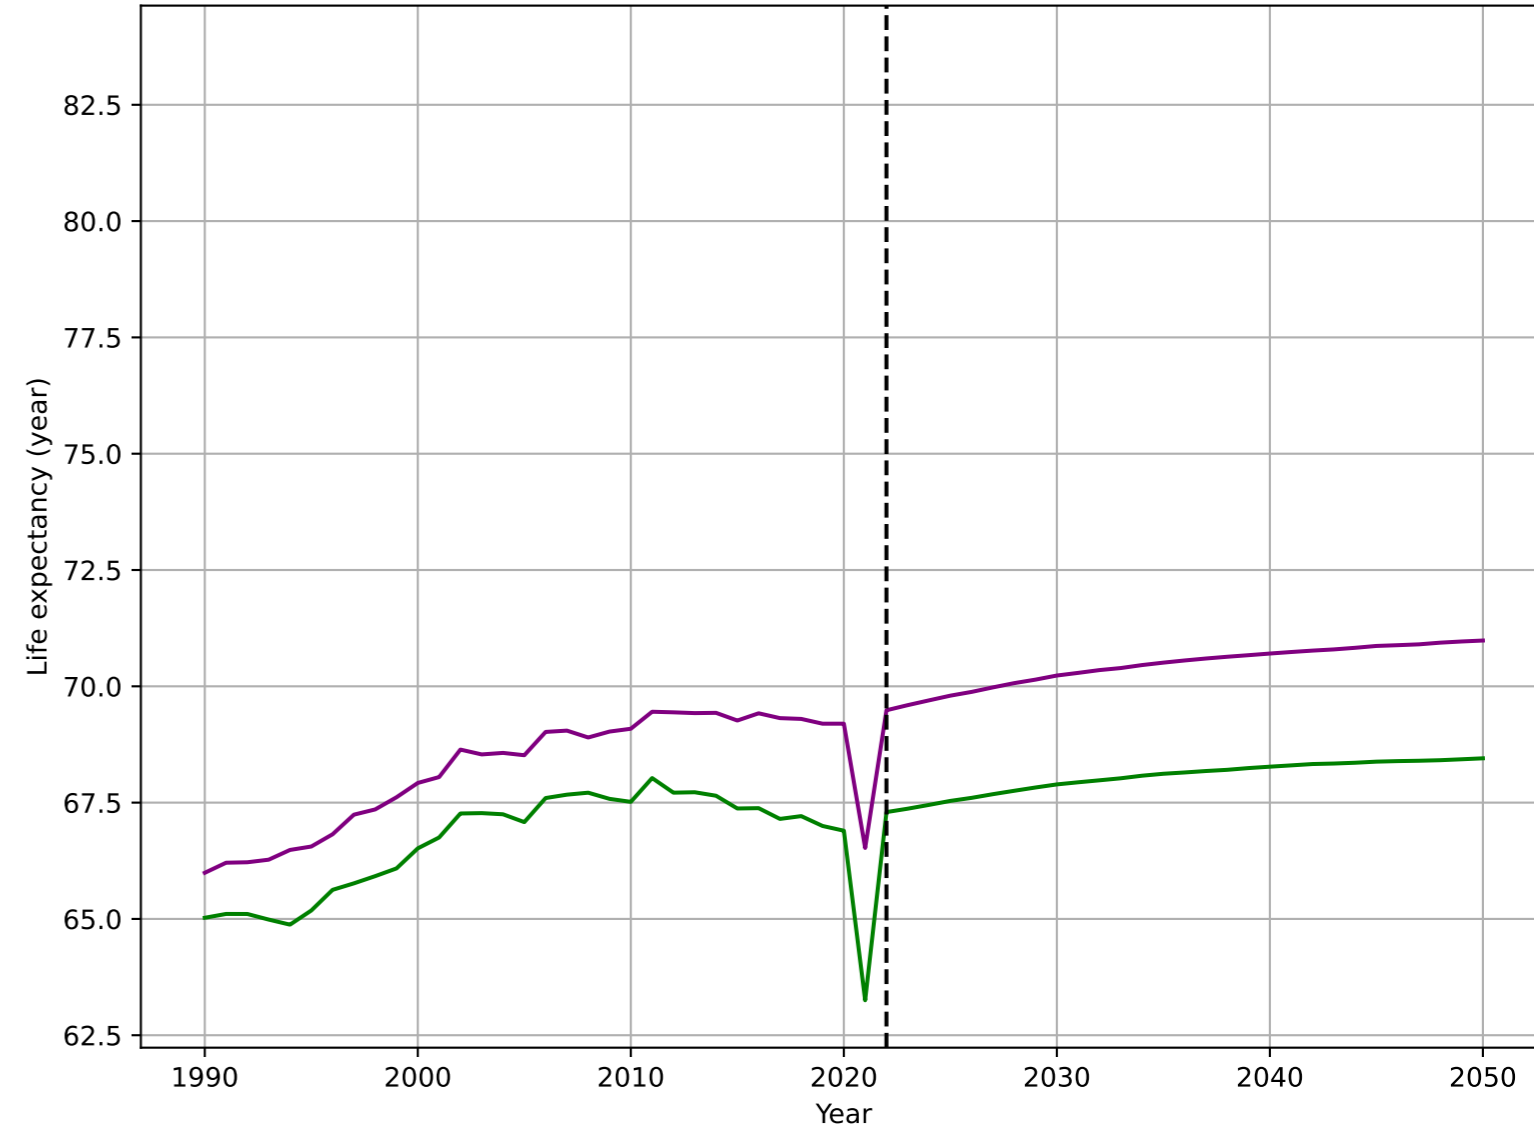

# Dominica

### Life Expectancy

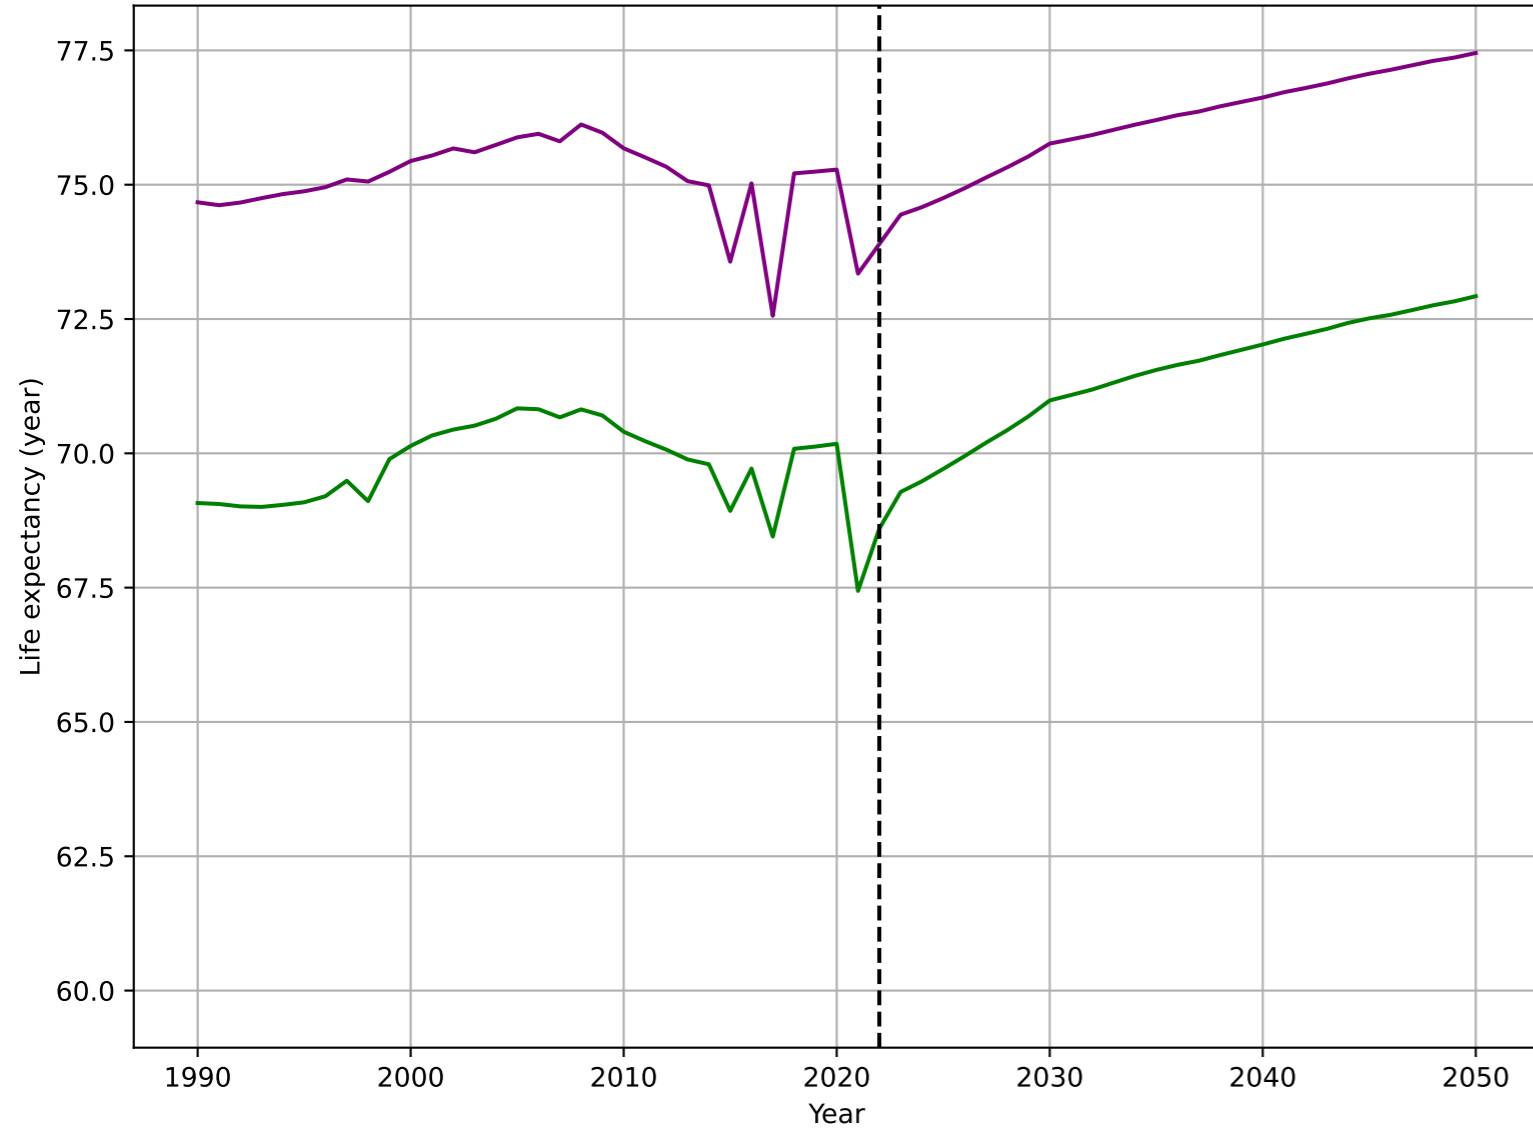

### Healthy Life Expectancy (HALE)

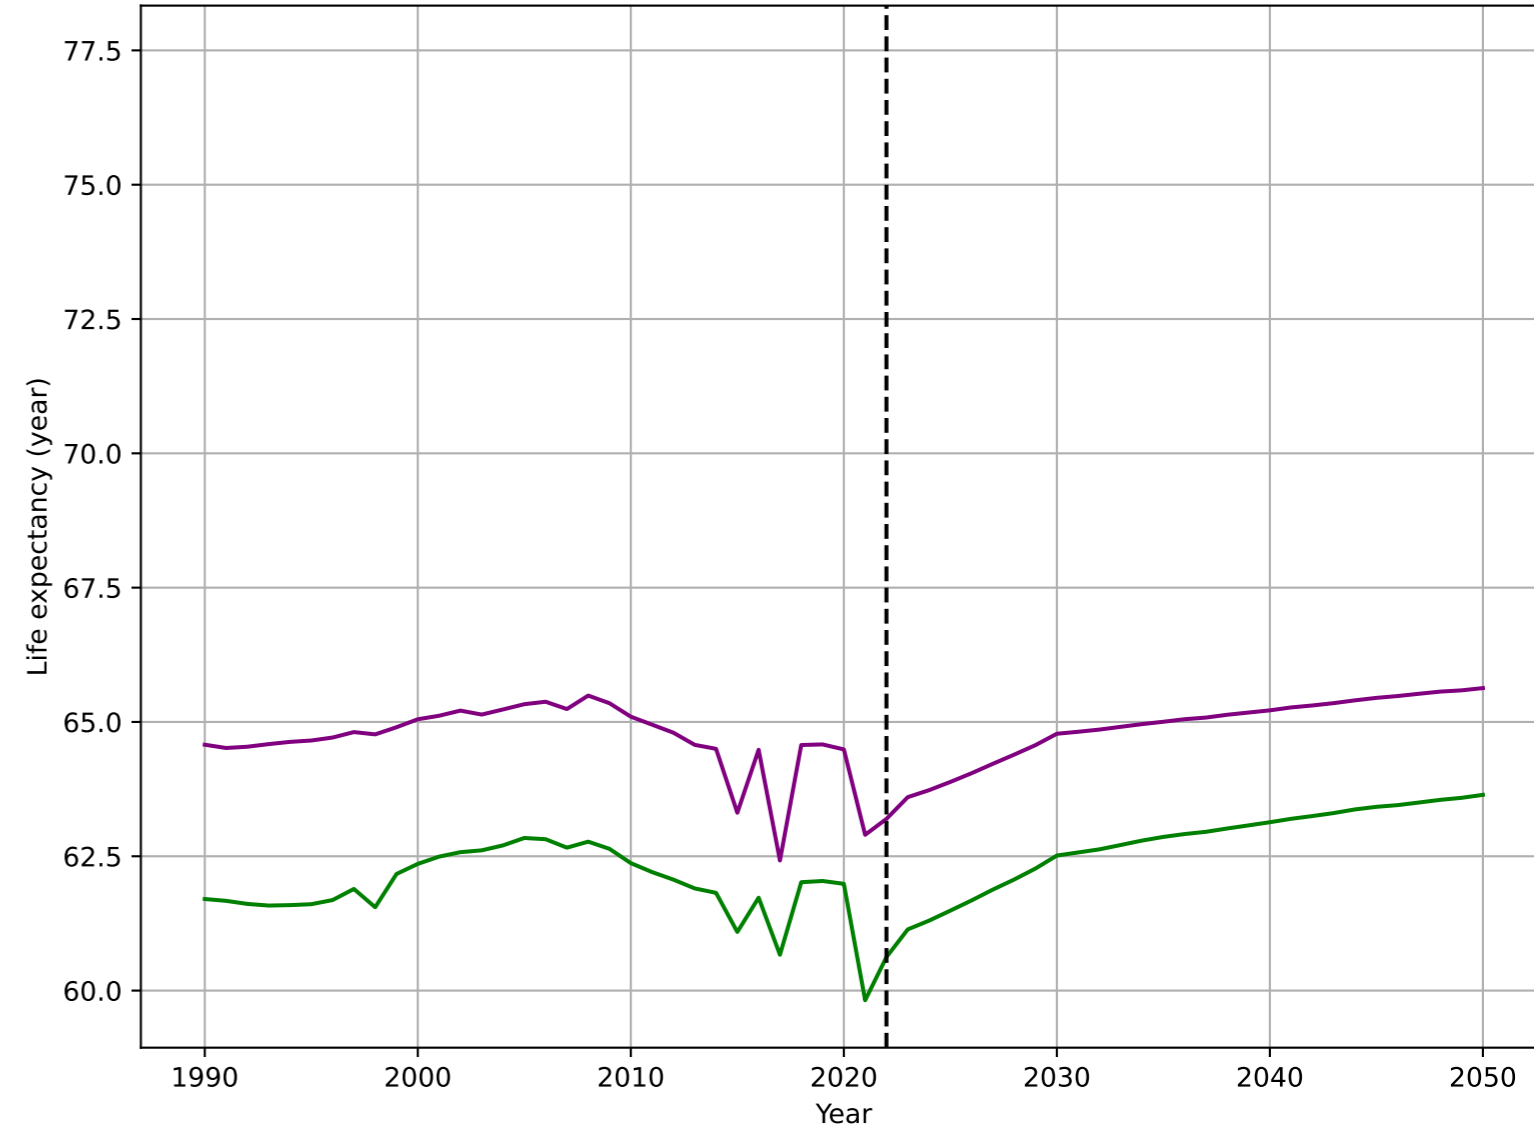

# Dominican Republic

### Life Expectancy

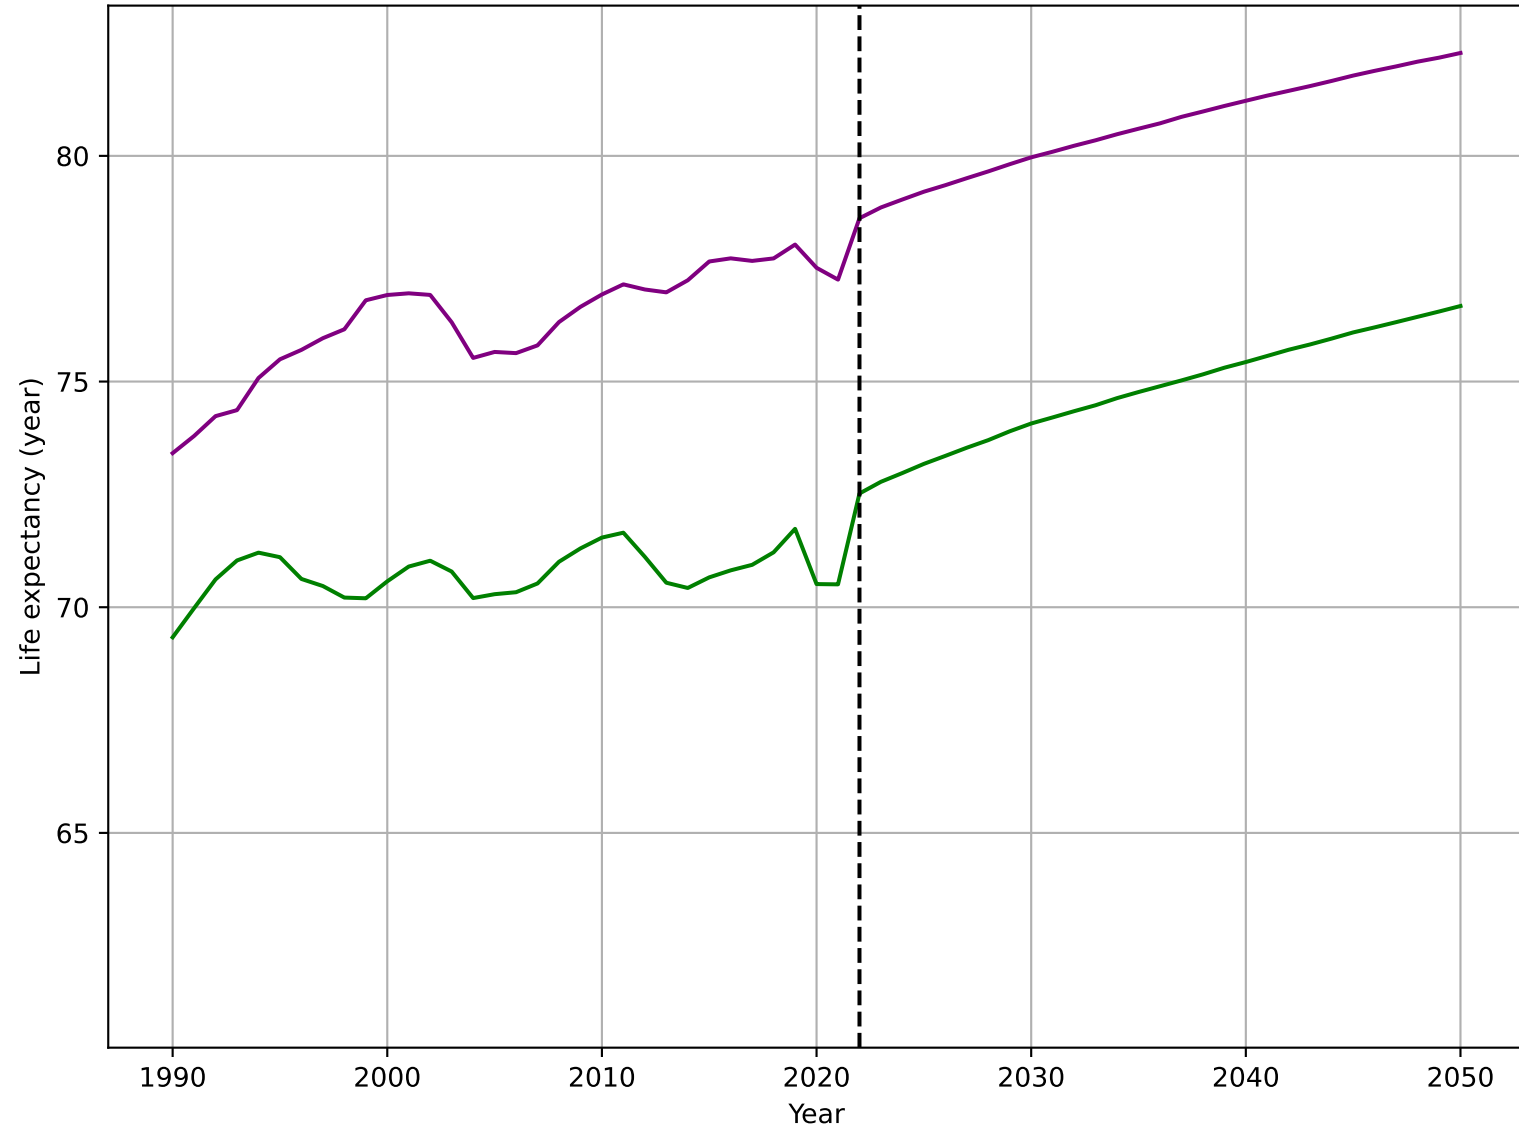

### Healthy Life Expectancy (HALE)

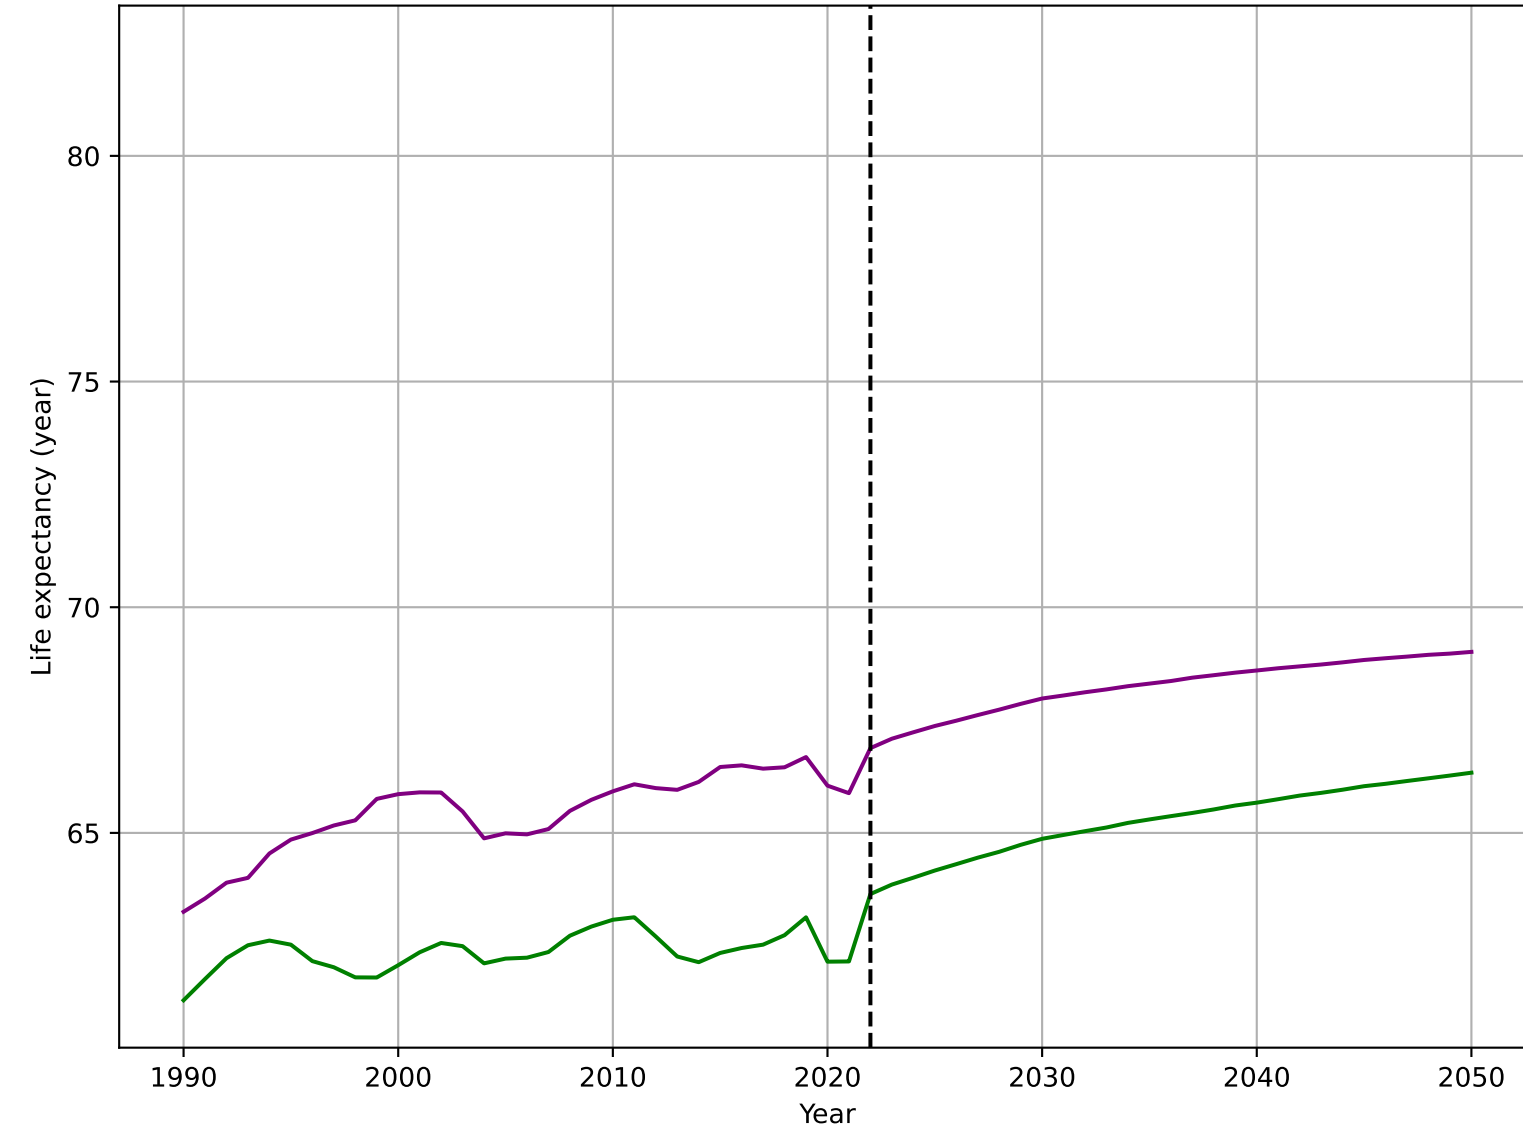



# Grenada

### Life Expectancy

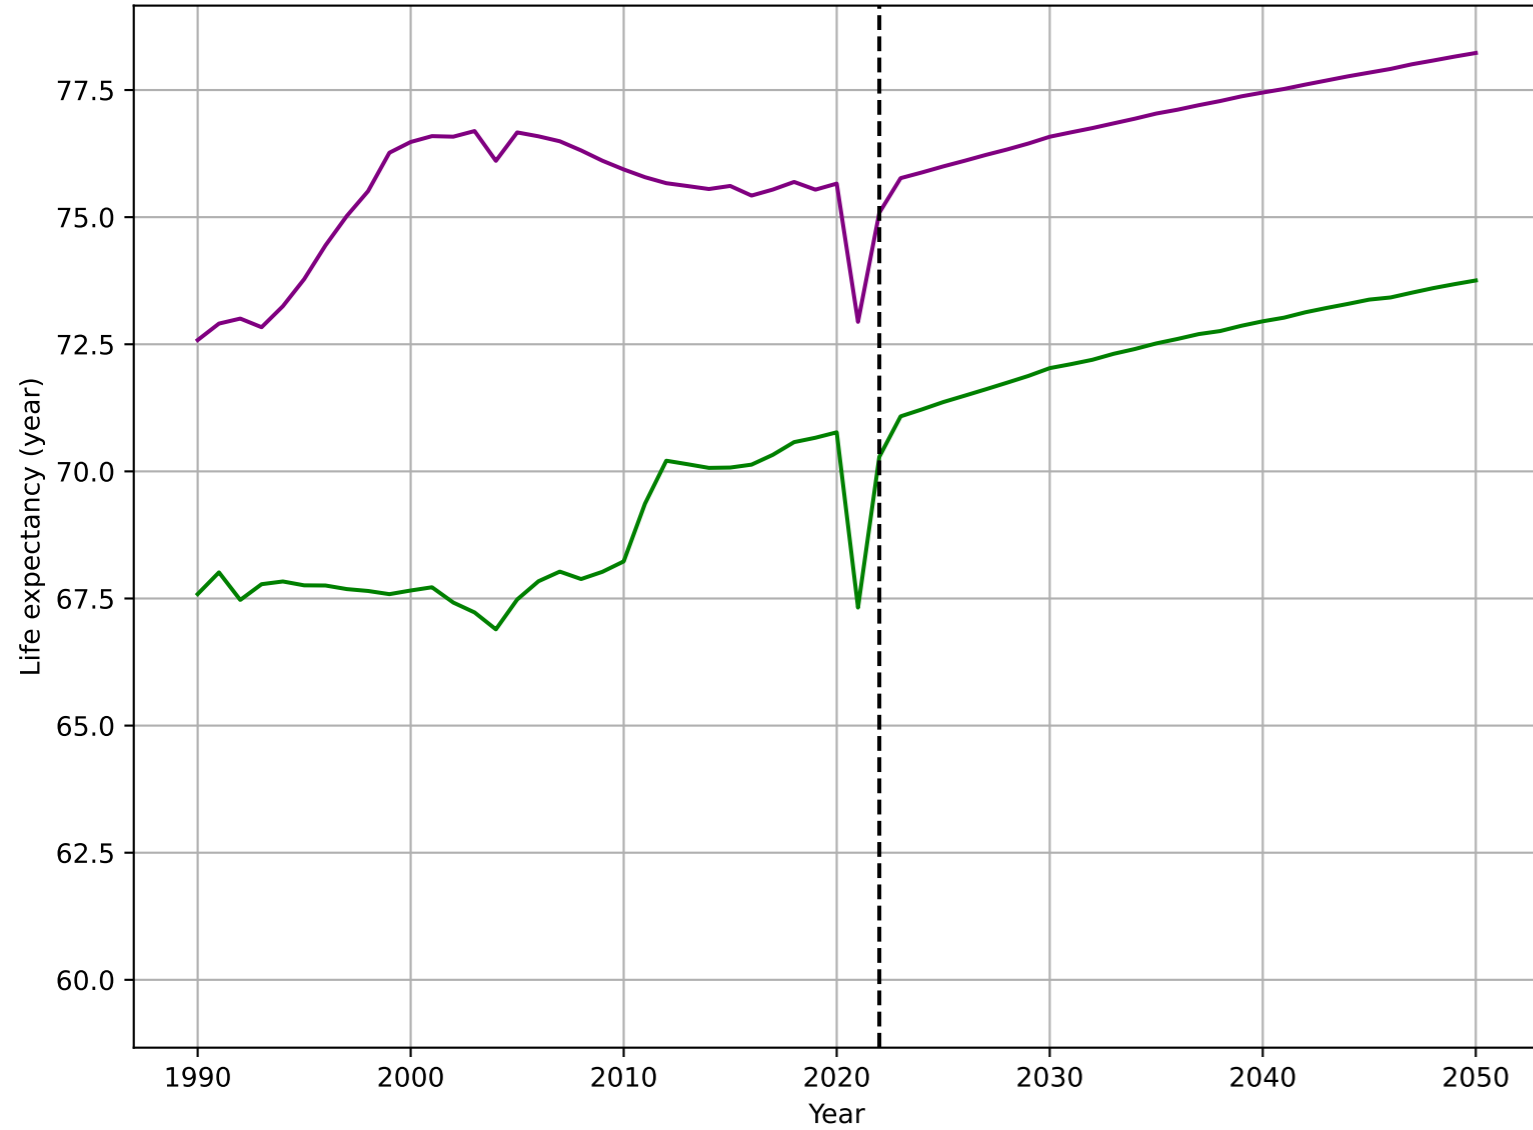

### Healthy Life Expectancy (HALE)

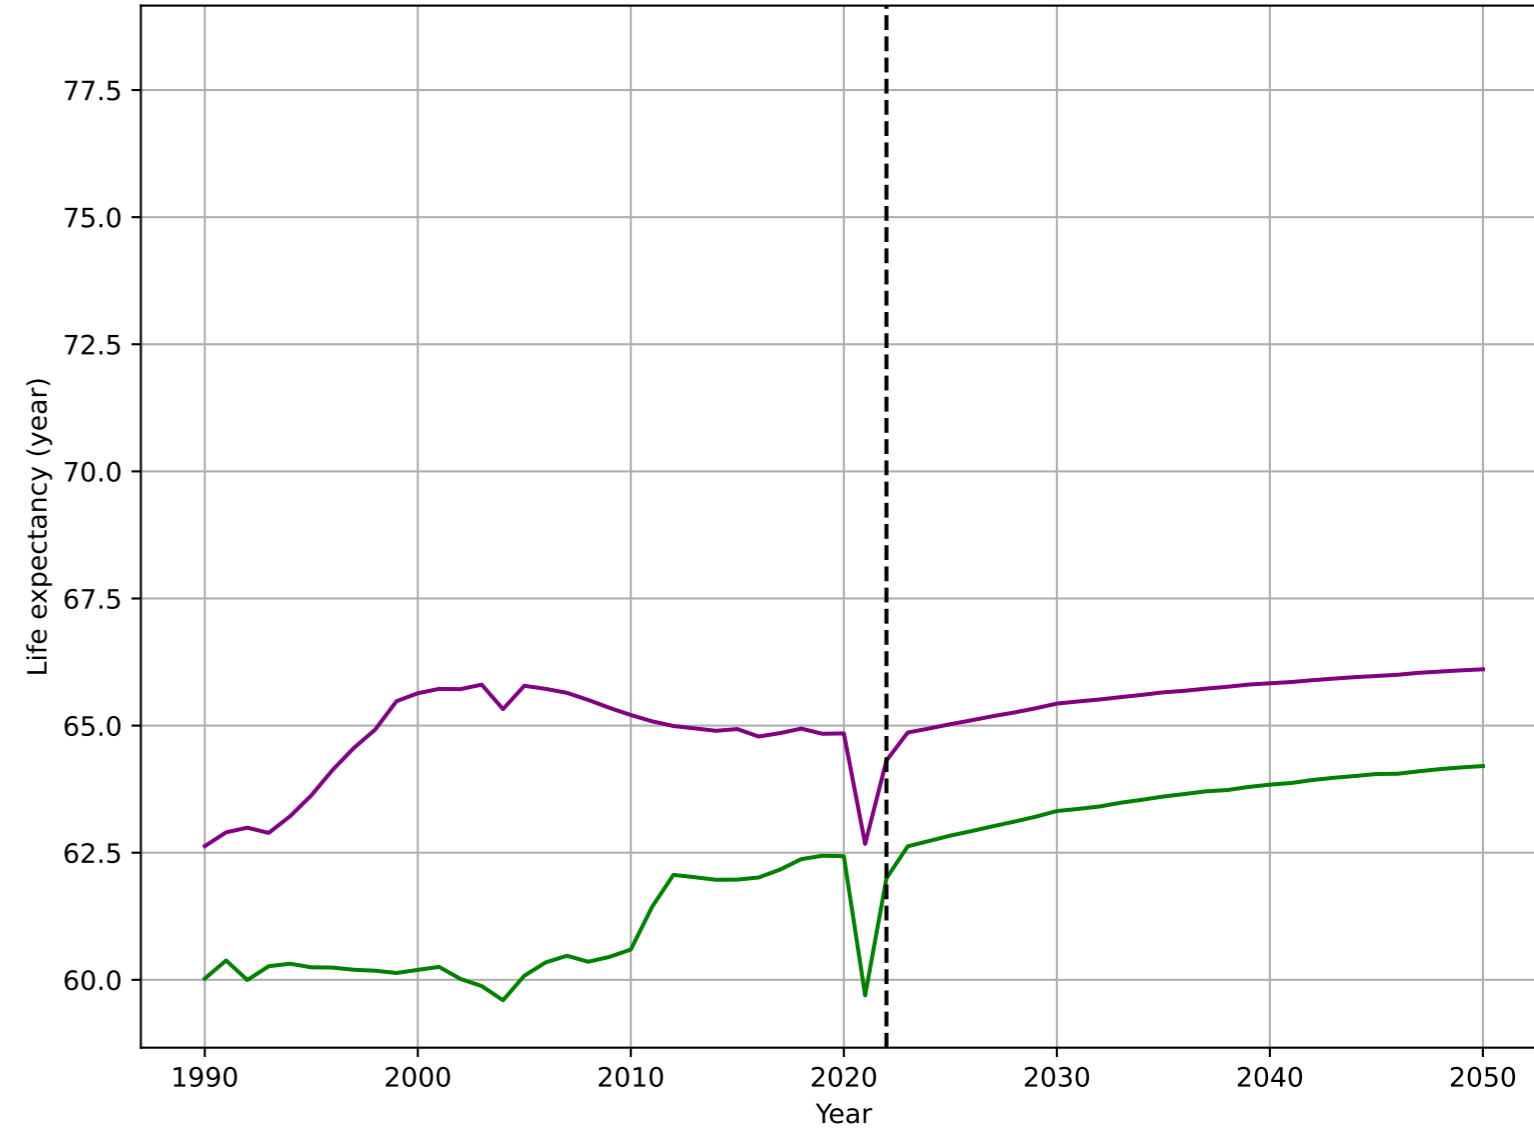

# Guyana

### Life Expectancy

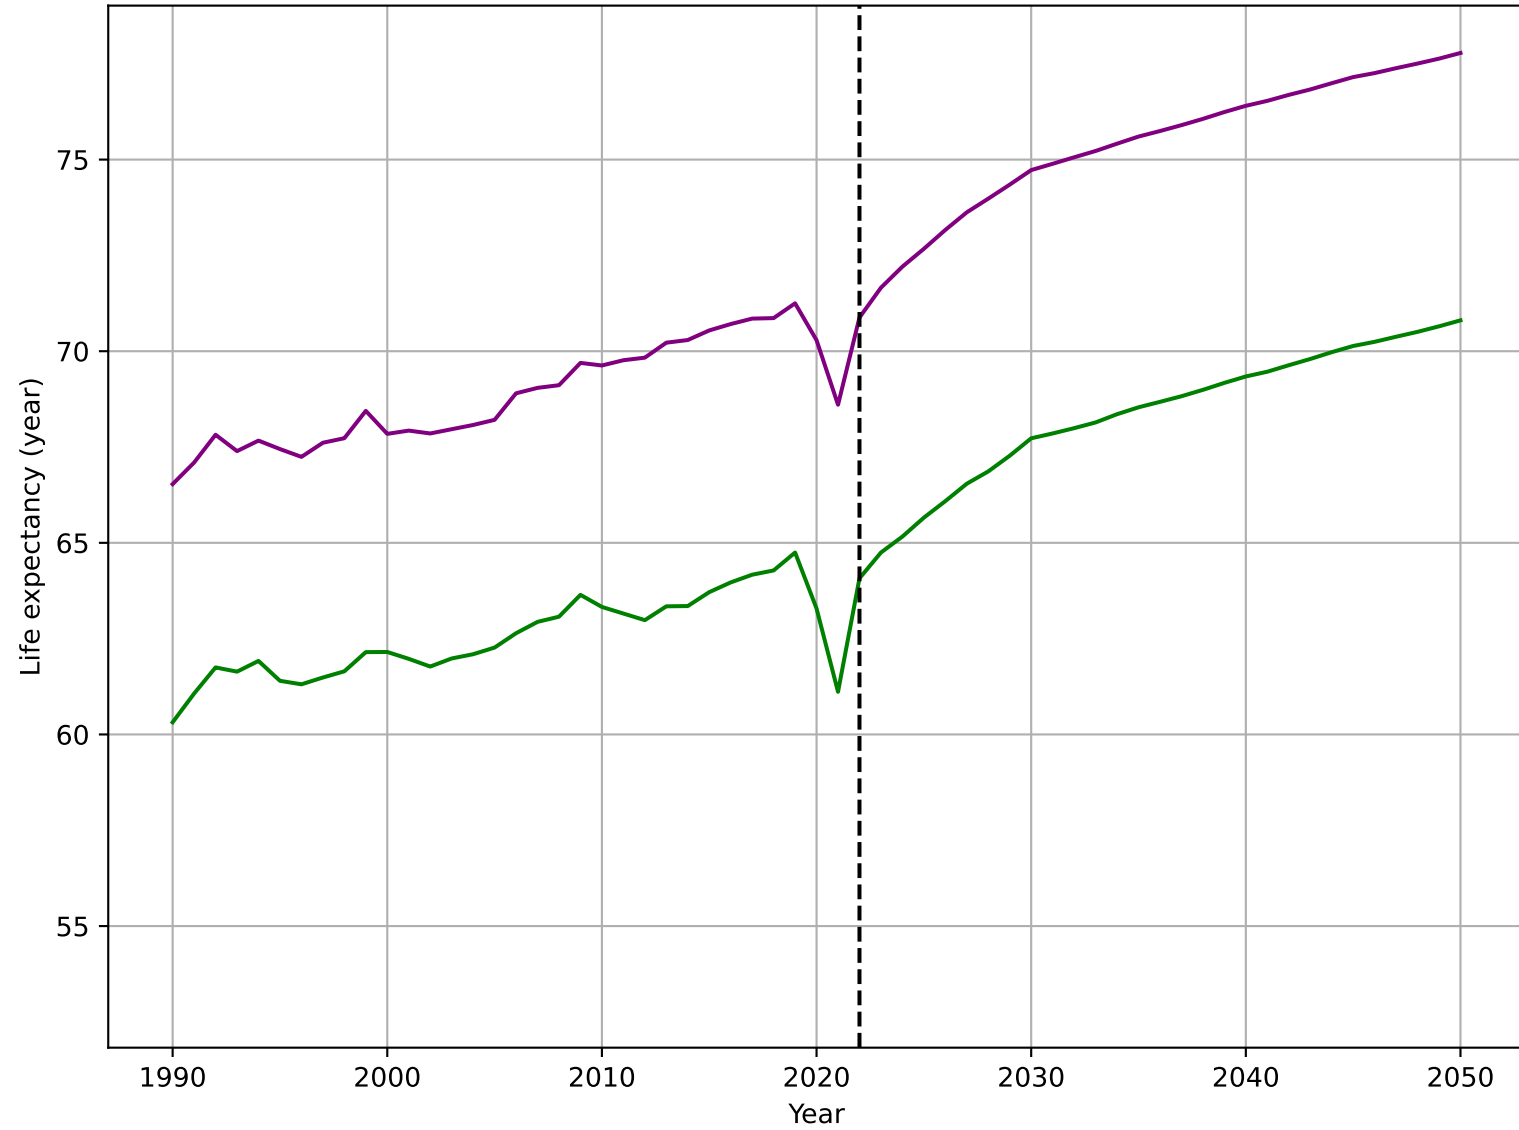

### Healthy Life Expectancy (HALE)

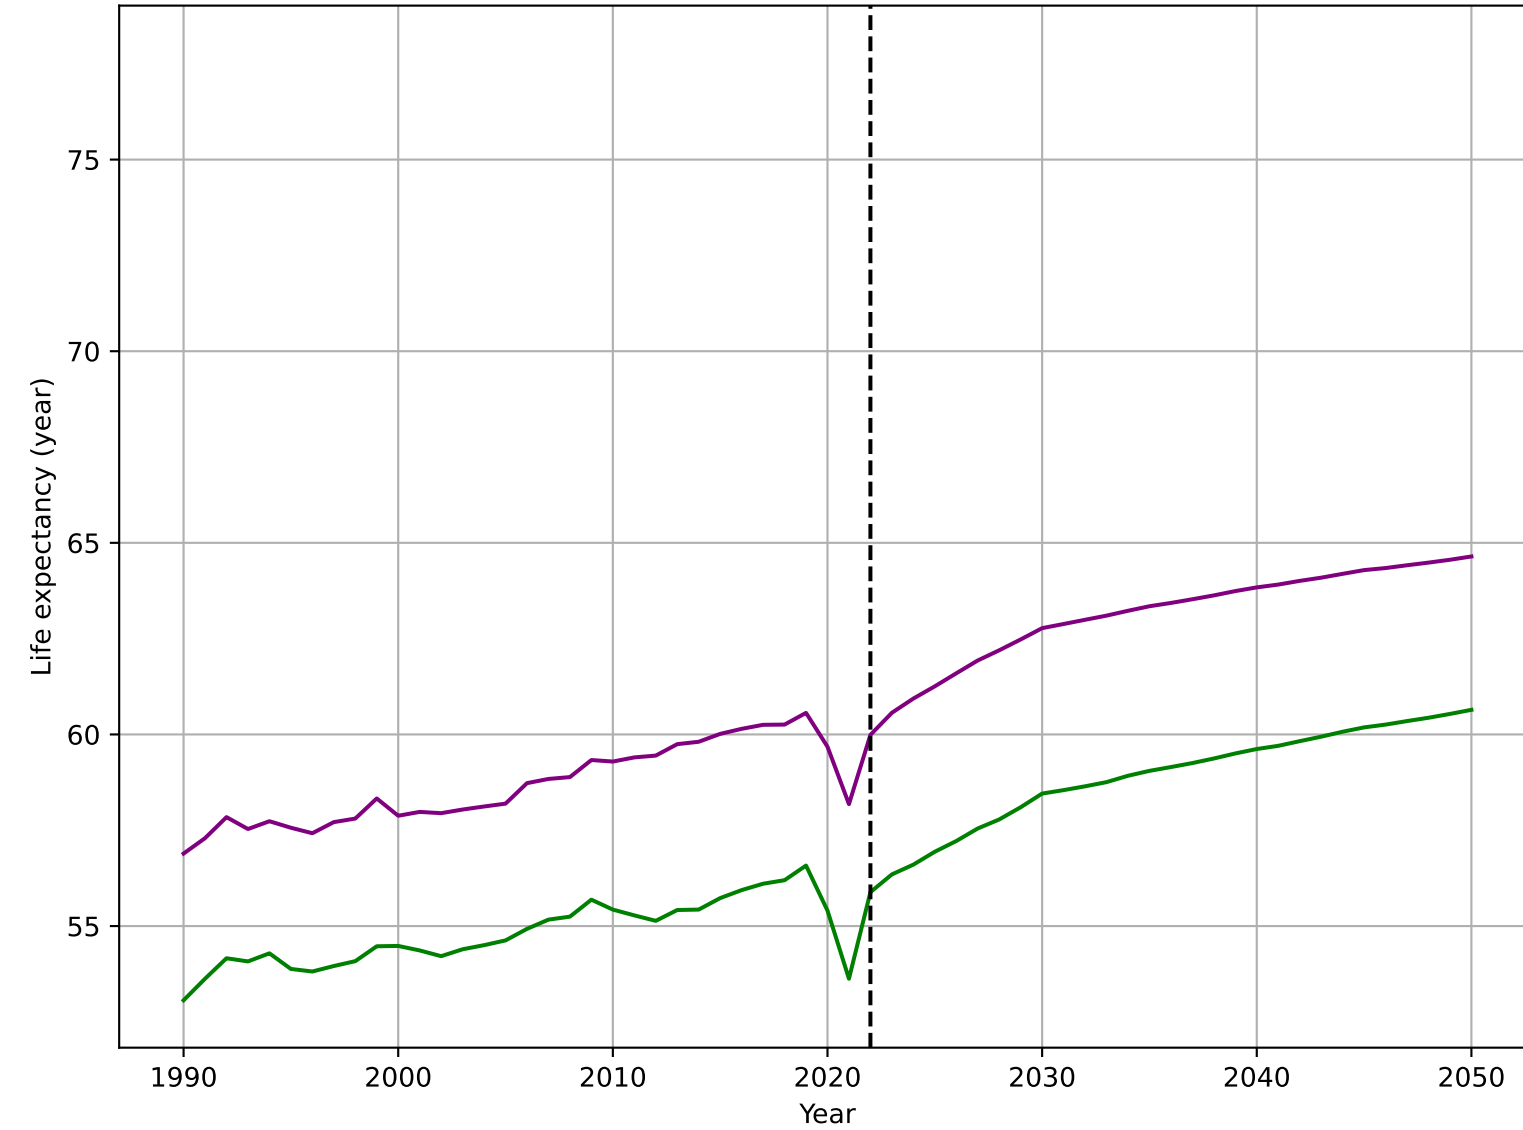

# Haiti

### Life Expectancy

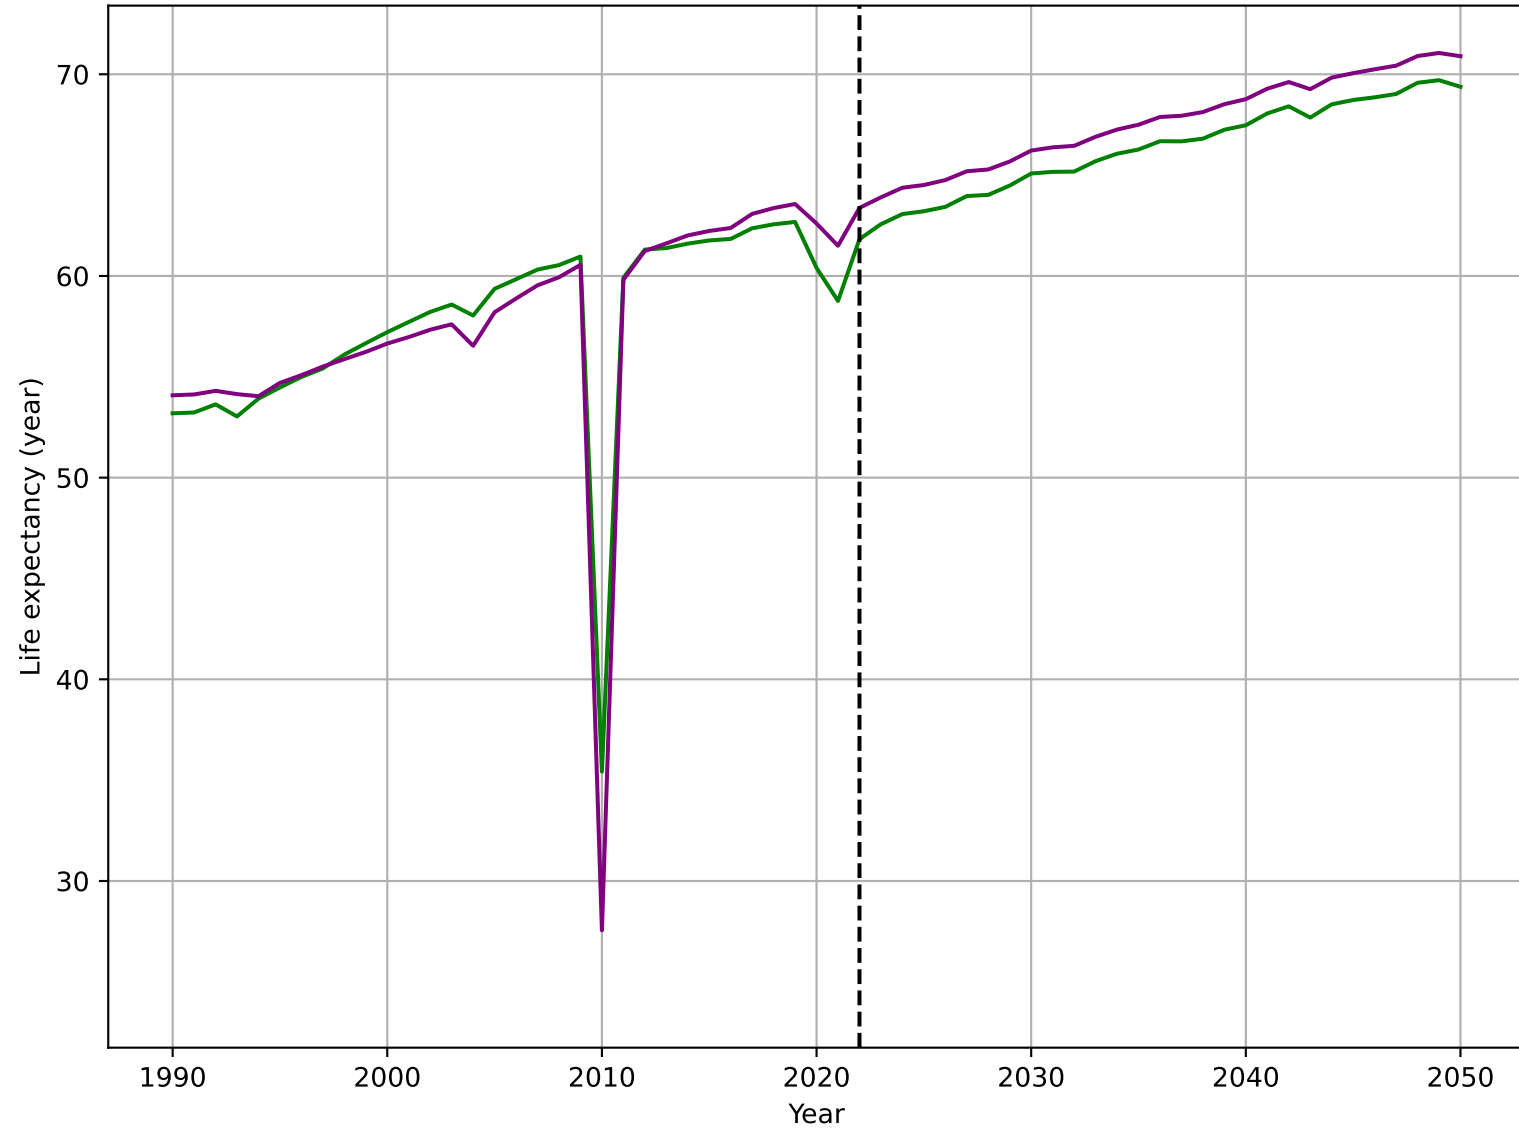

### Healthy Life Expectancy (HALE)

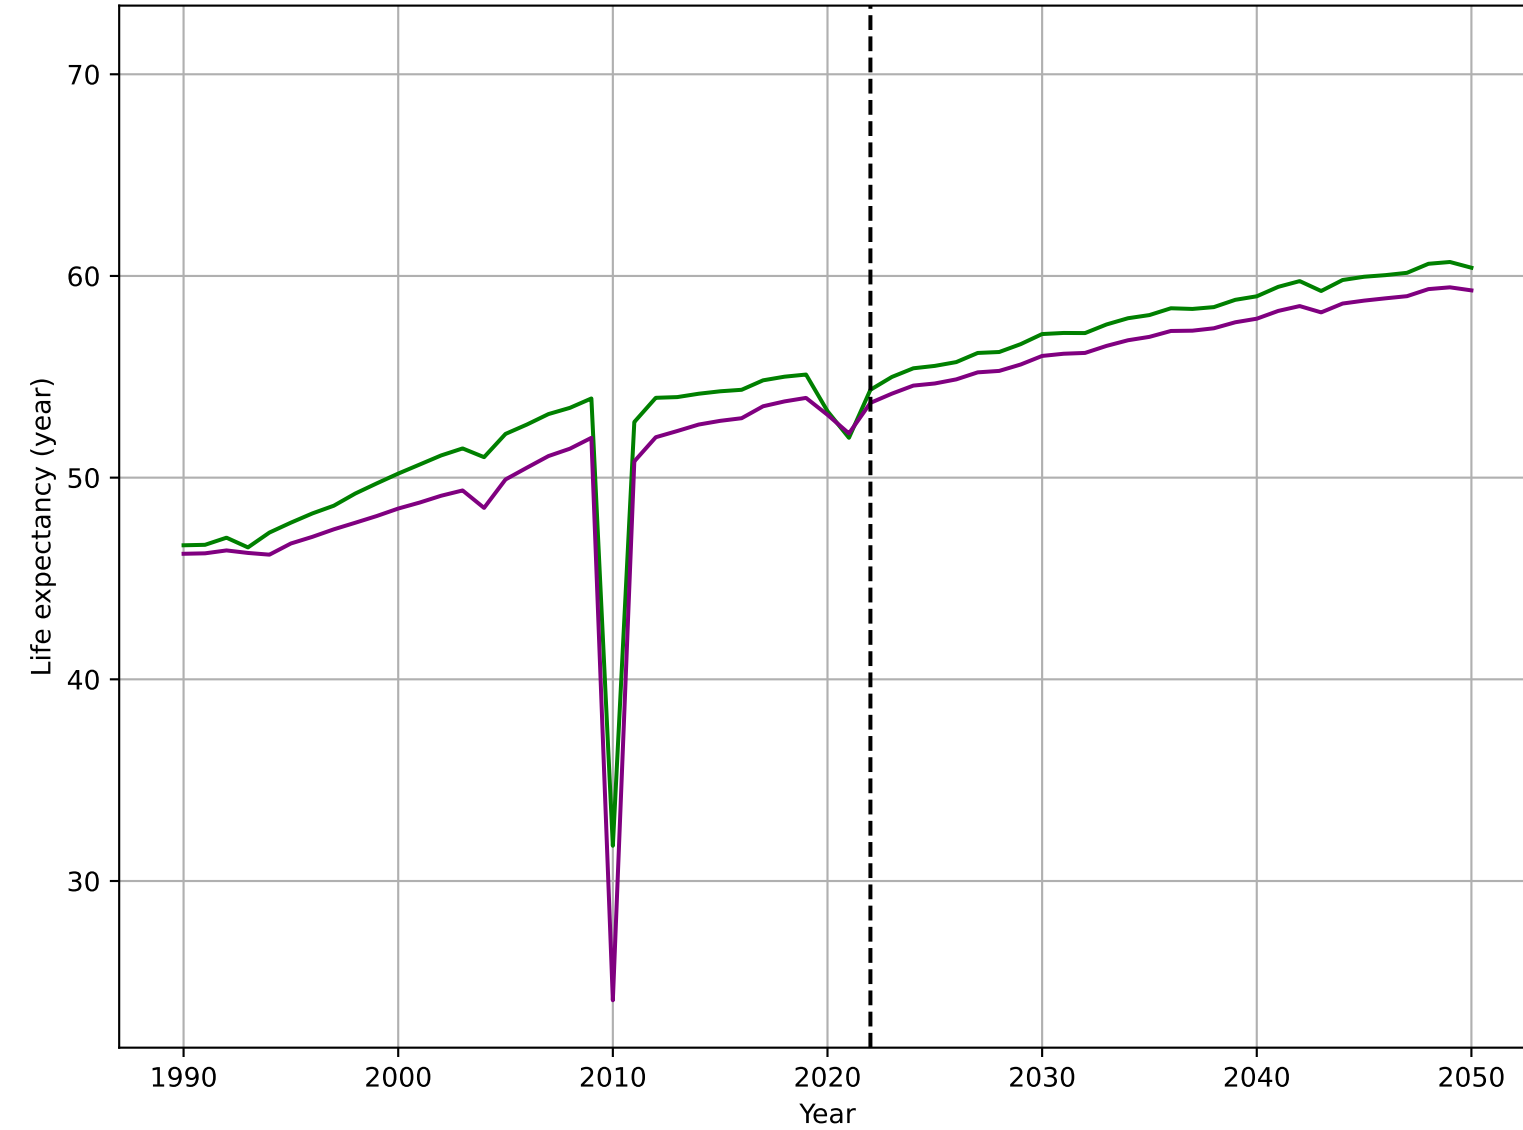

# Jamaica

### Life Expectancy

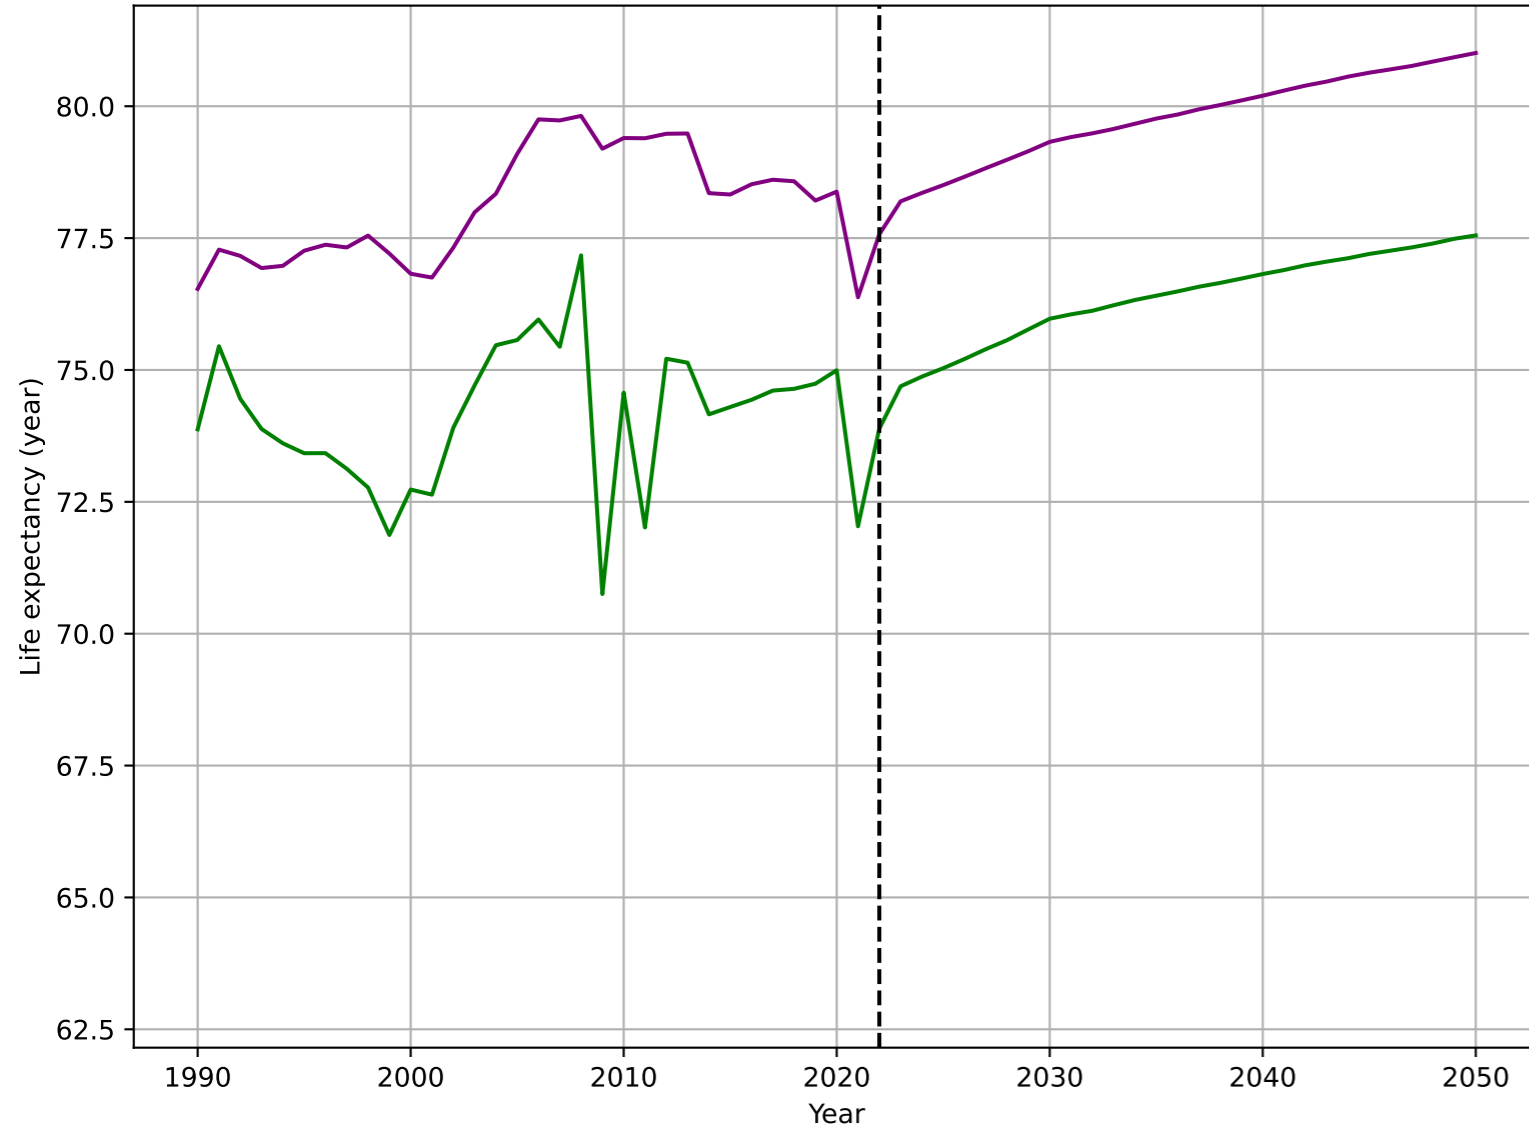

### Healthy Life Expectancy (HALE)

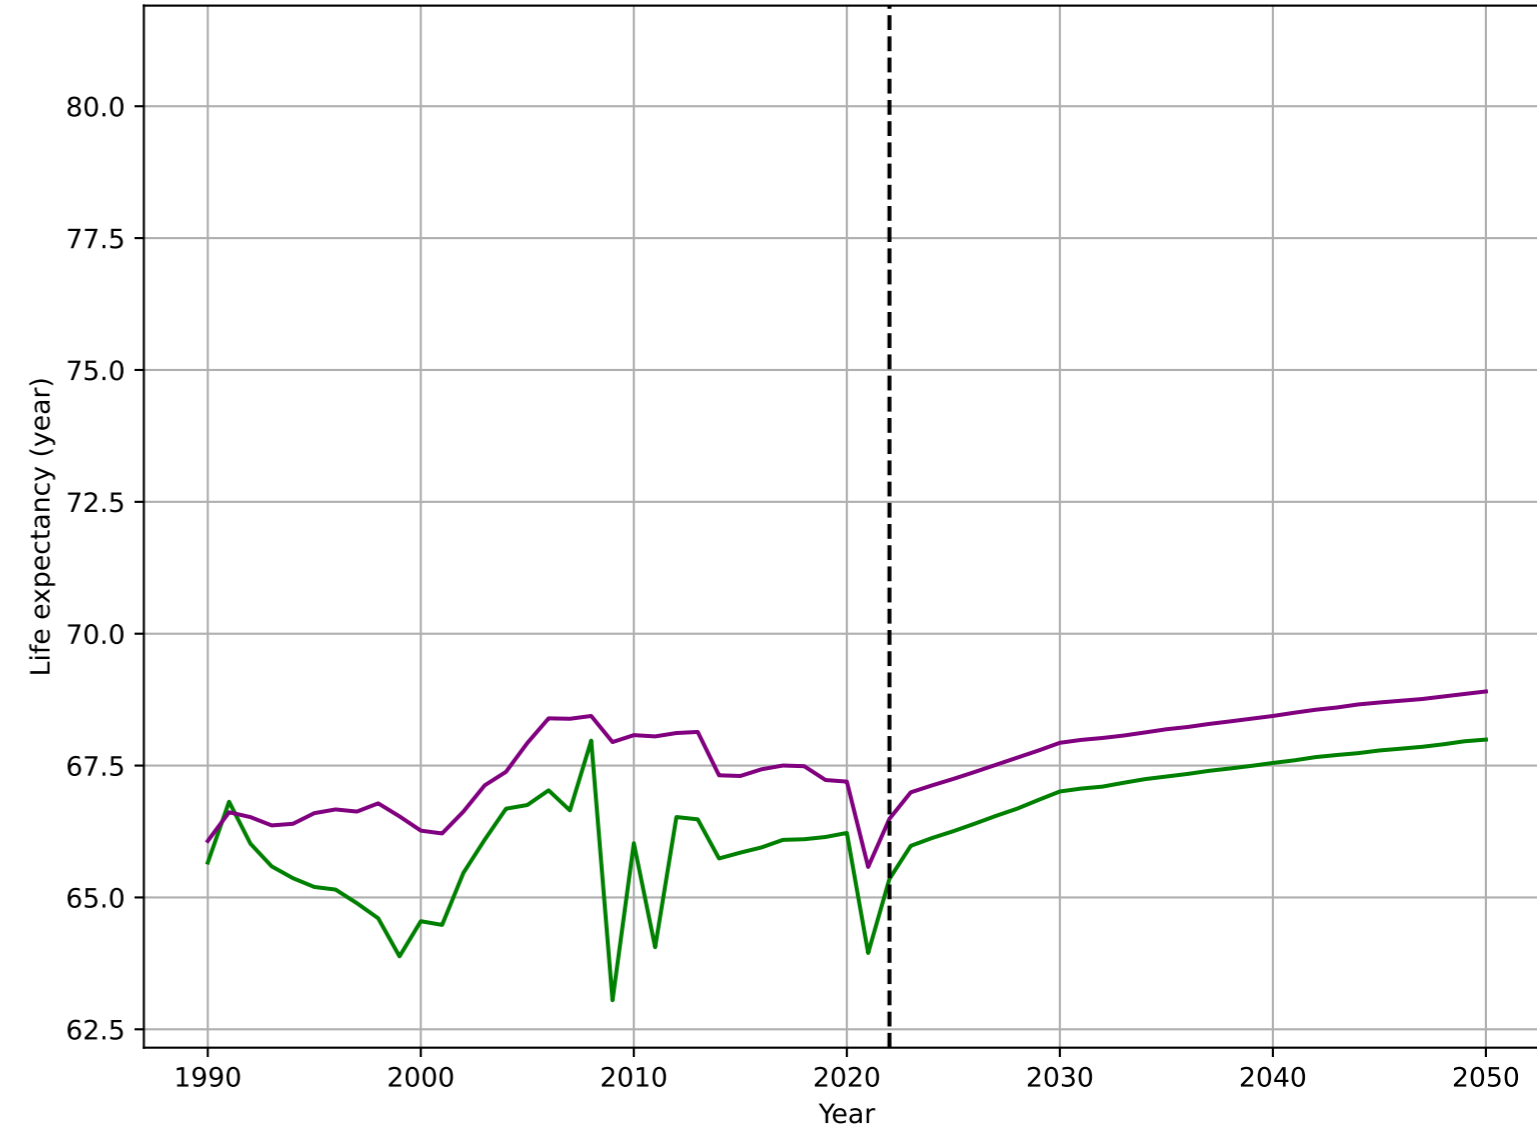

# Puerto Rico

## Life Expectancy

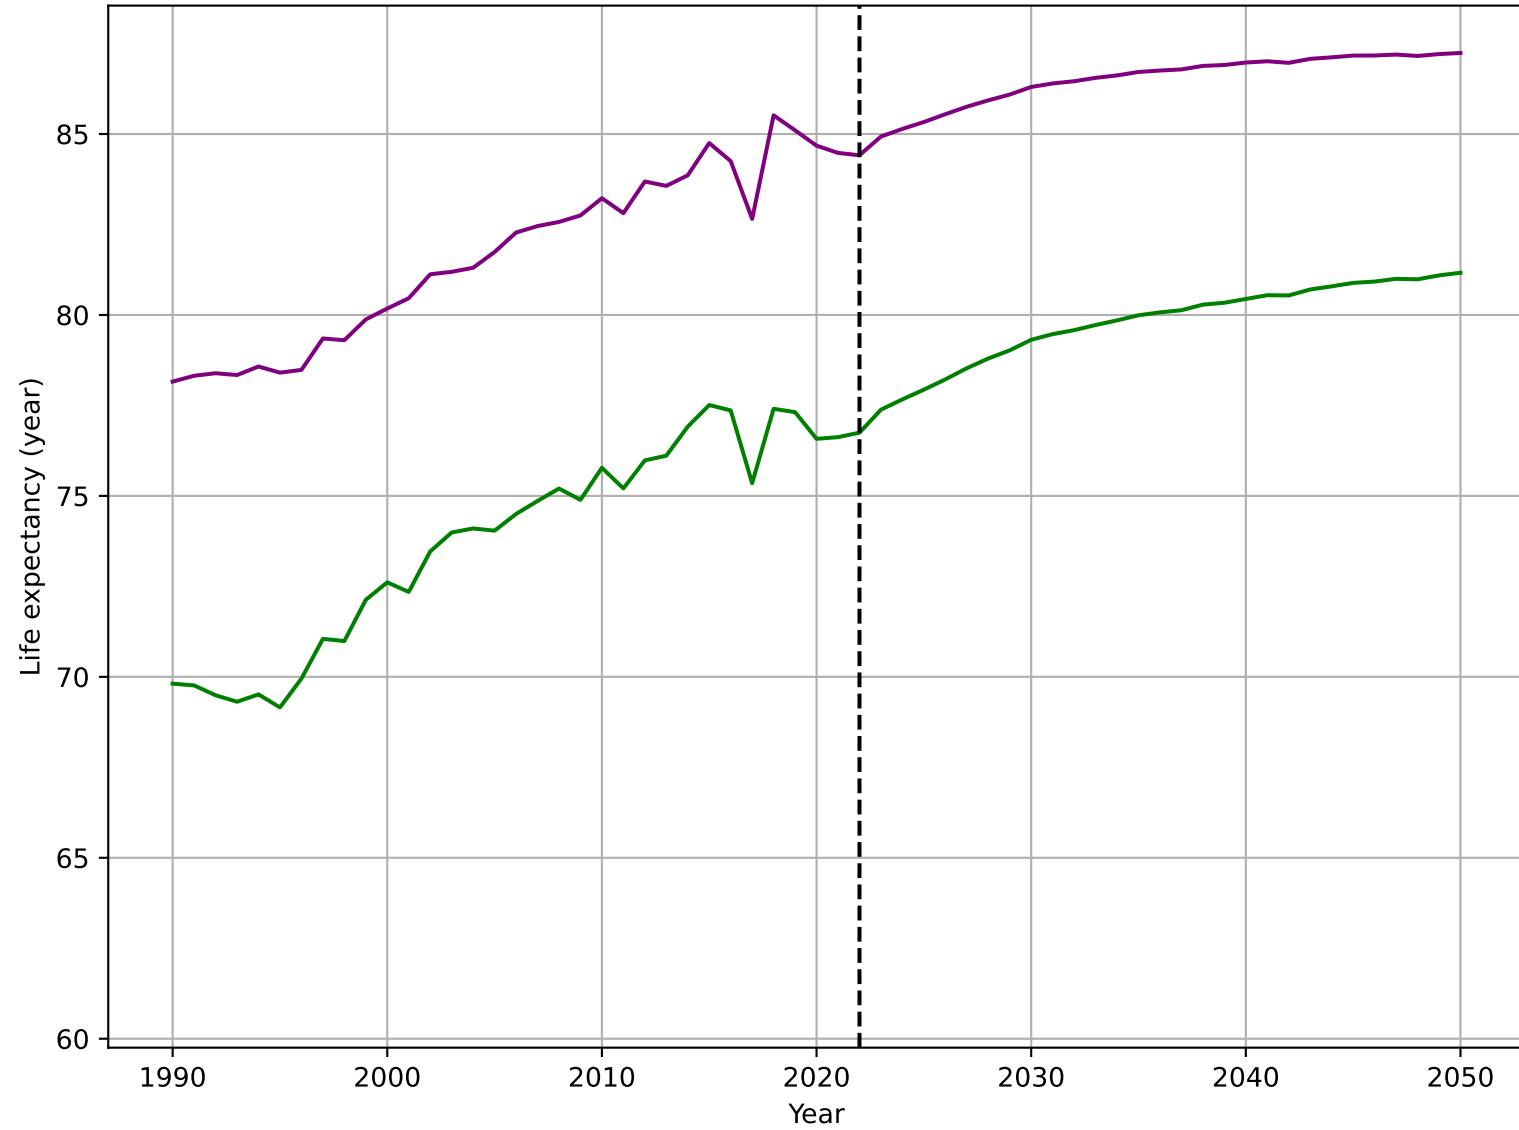

## Healthy Life Expectancy (HALE)

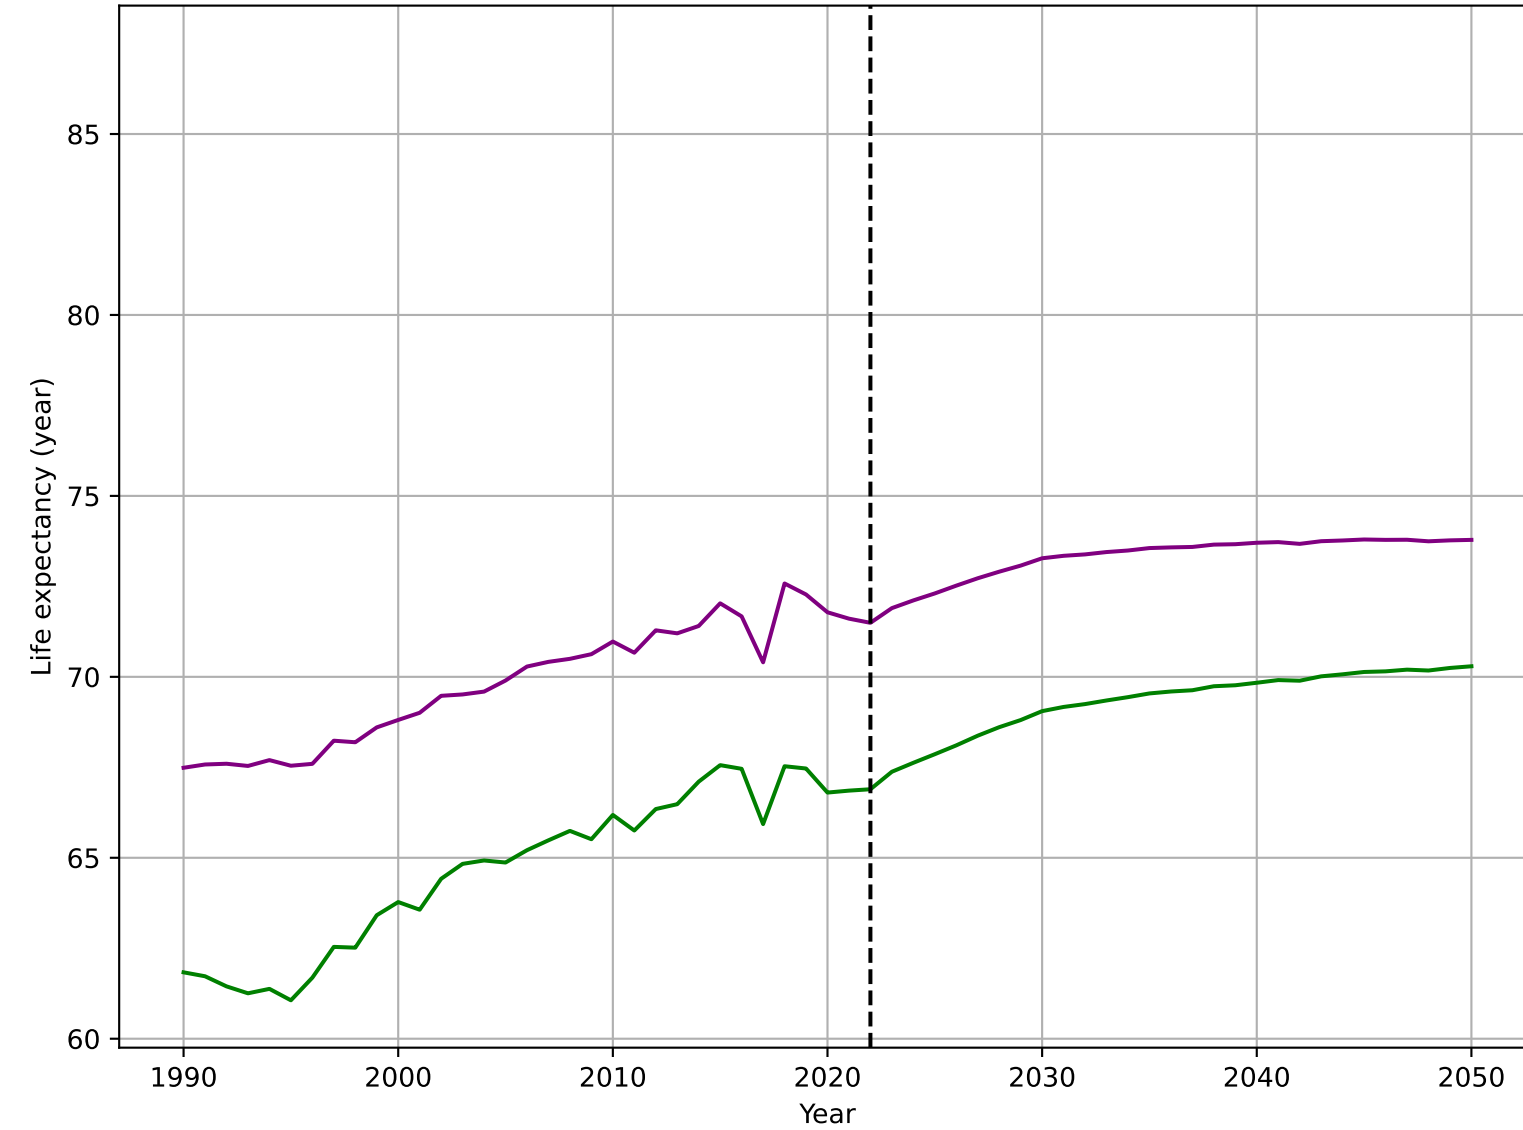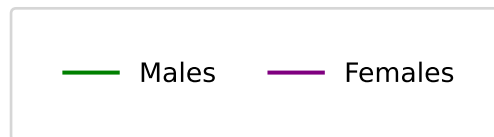

# Saint Kitts And Nevis

### Life Expectancy

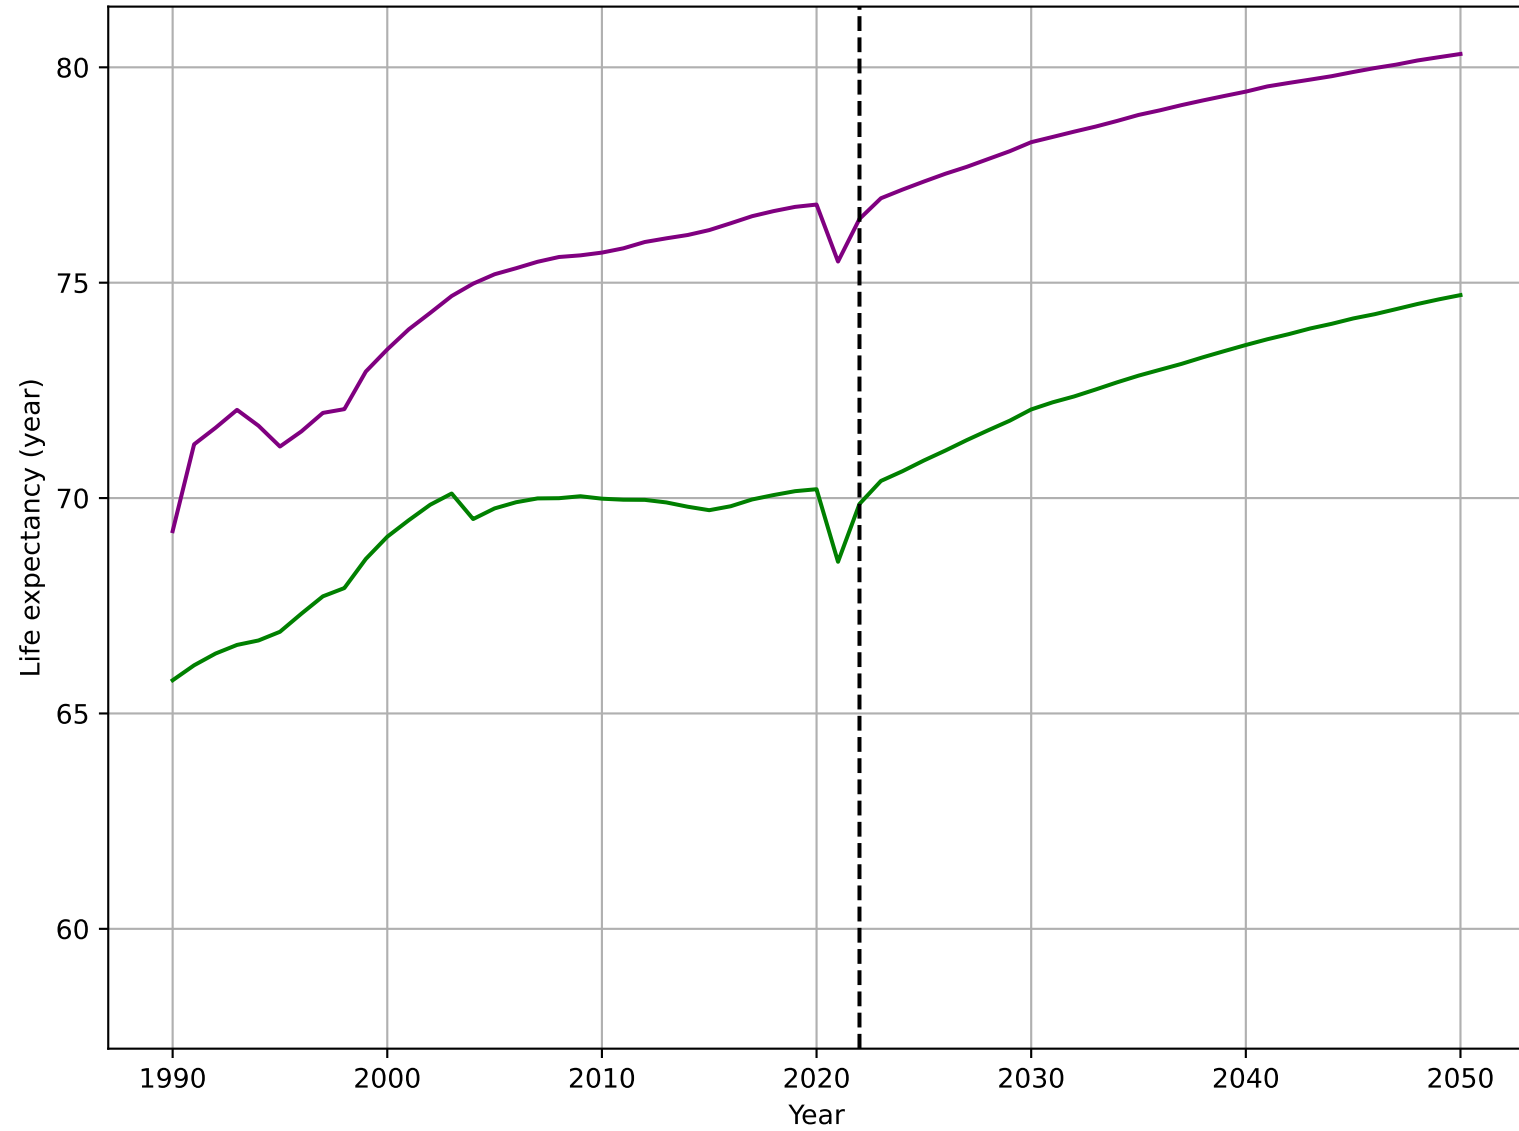

### Healthy Life Expectancy (HALE)

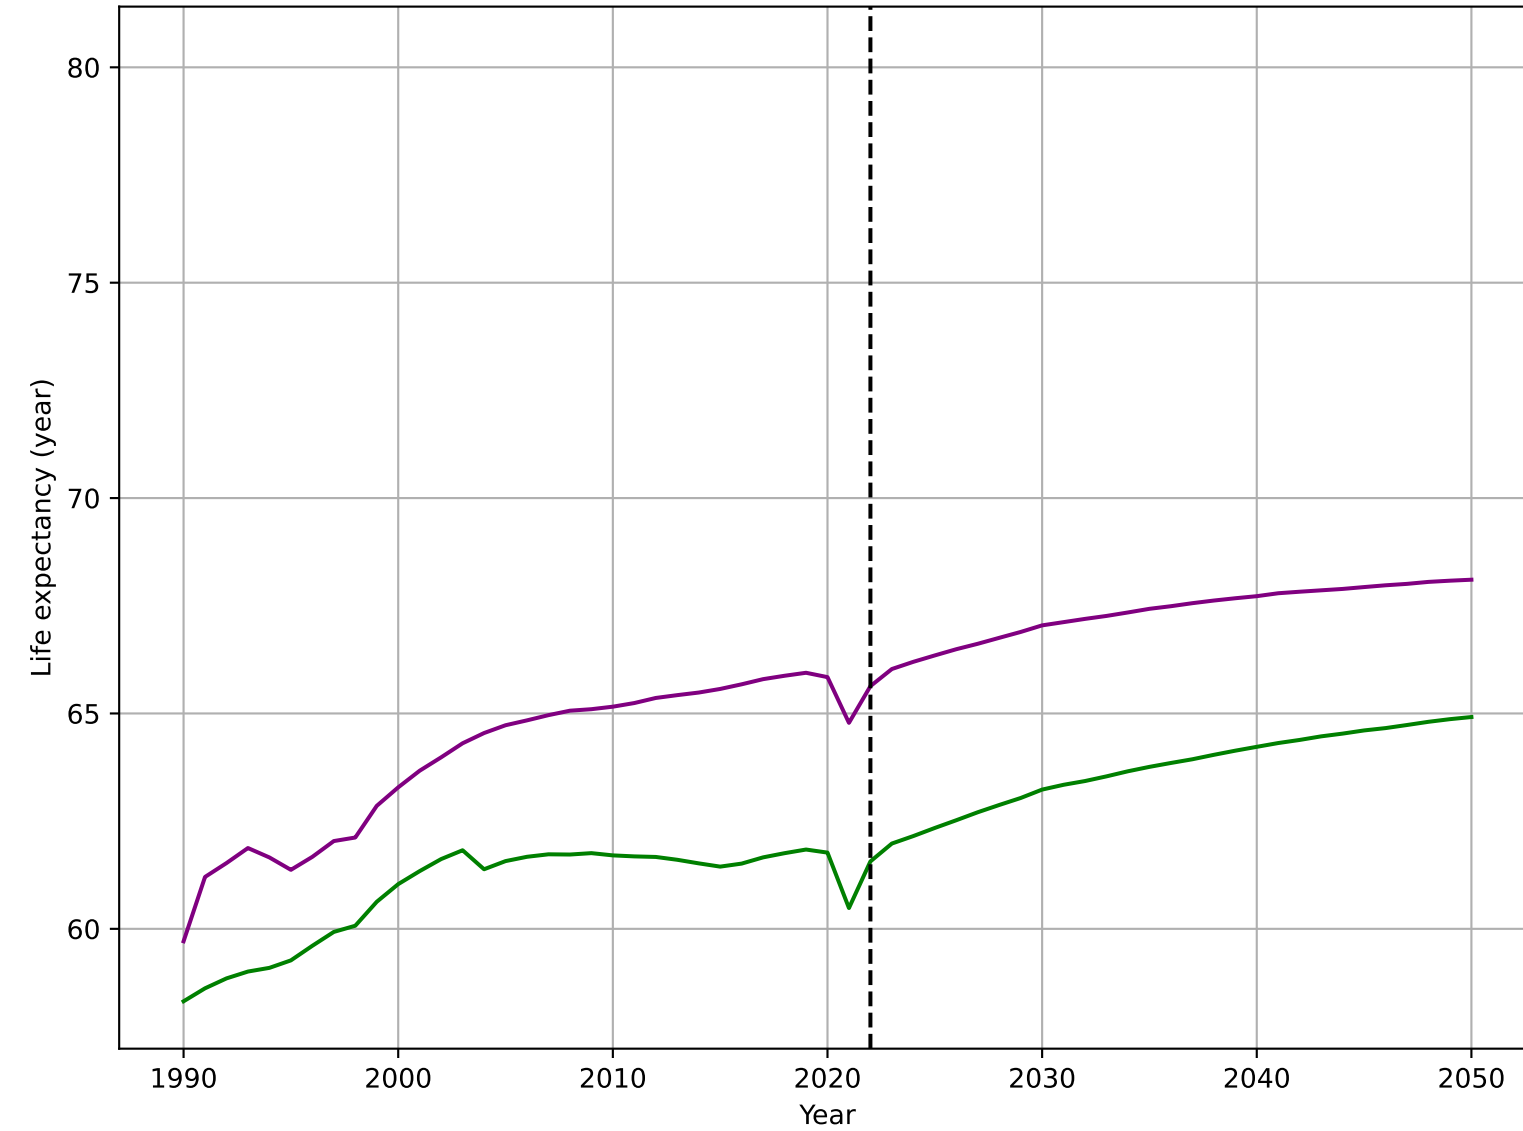

# Saint Lucia

### Life Expectancy

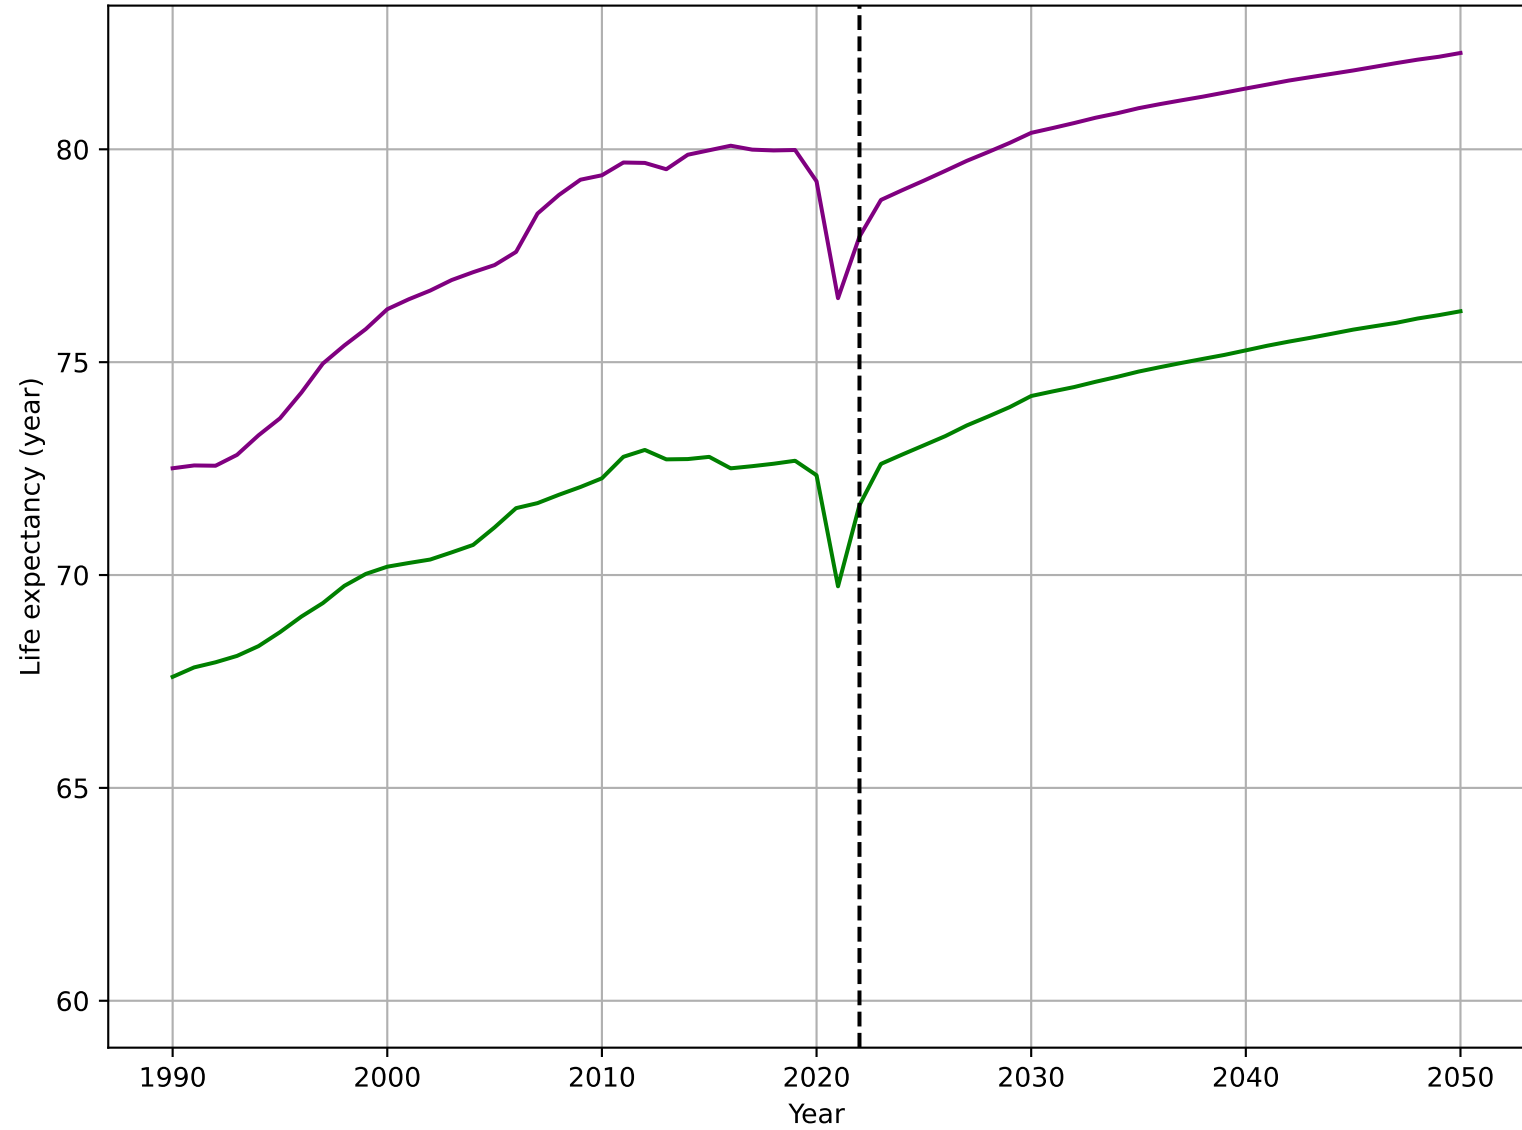

### Healthy Life Expectancy (HALE)

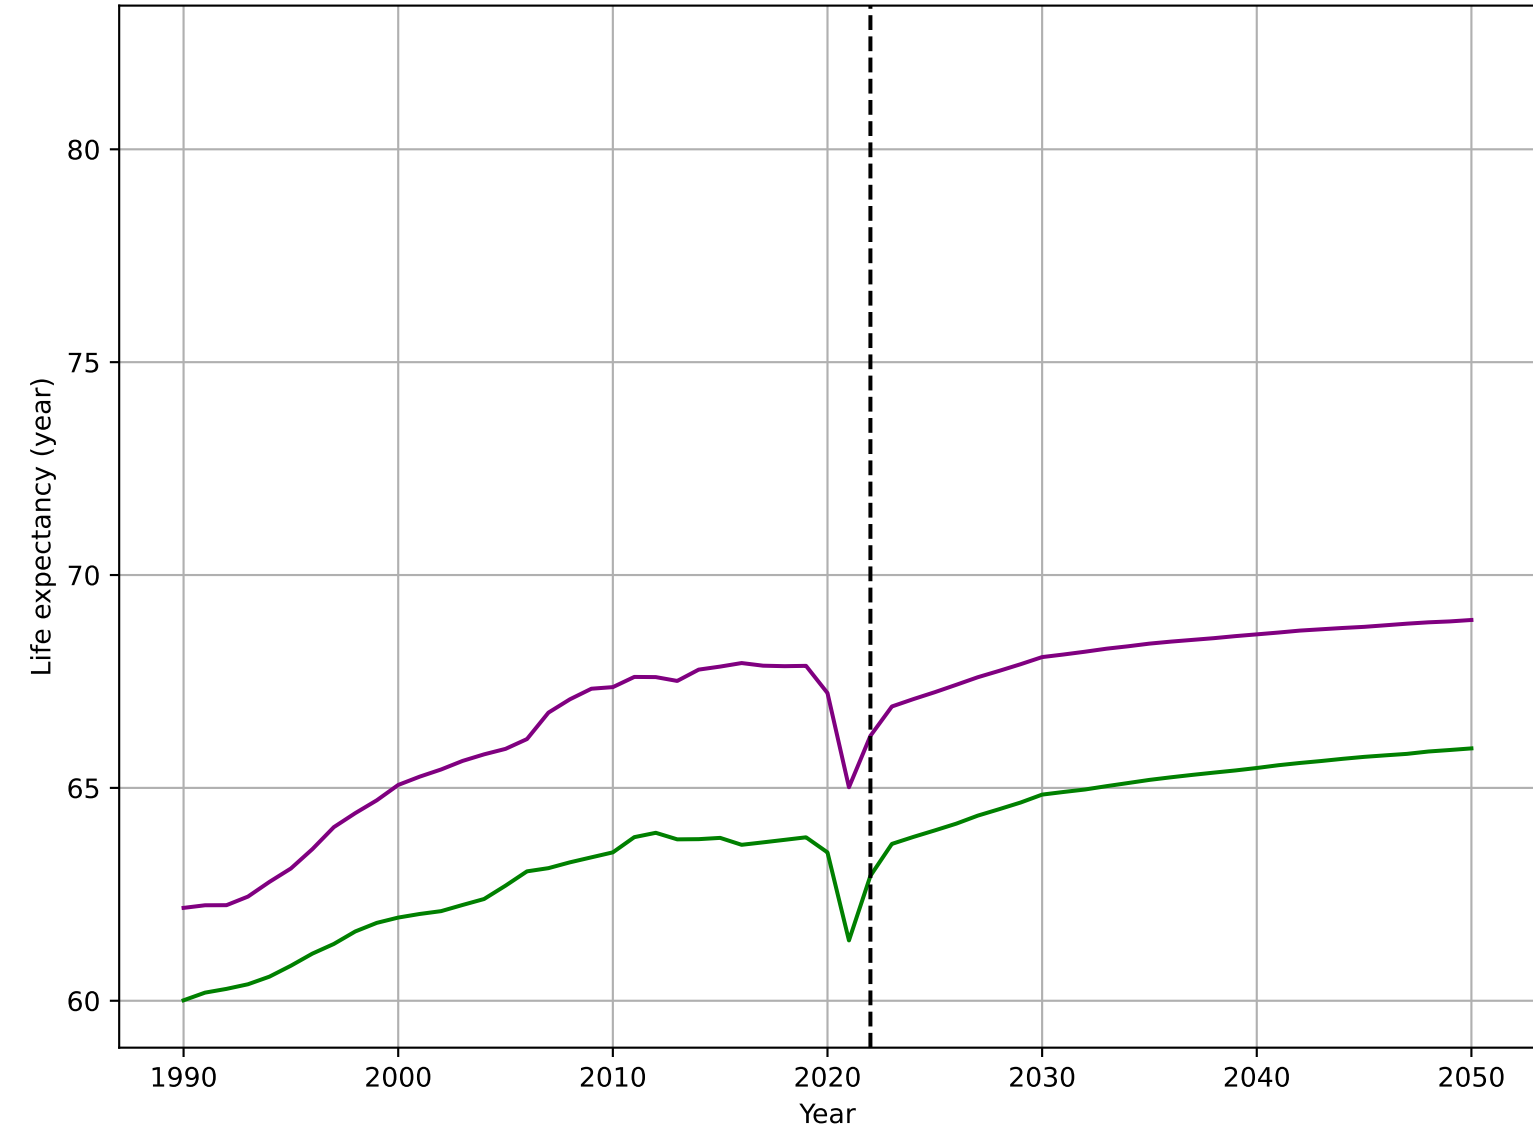

# Saint Vincent And The Grenadines

Life Expectancy

Healthy Life Expectancy (HALE)

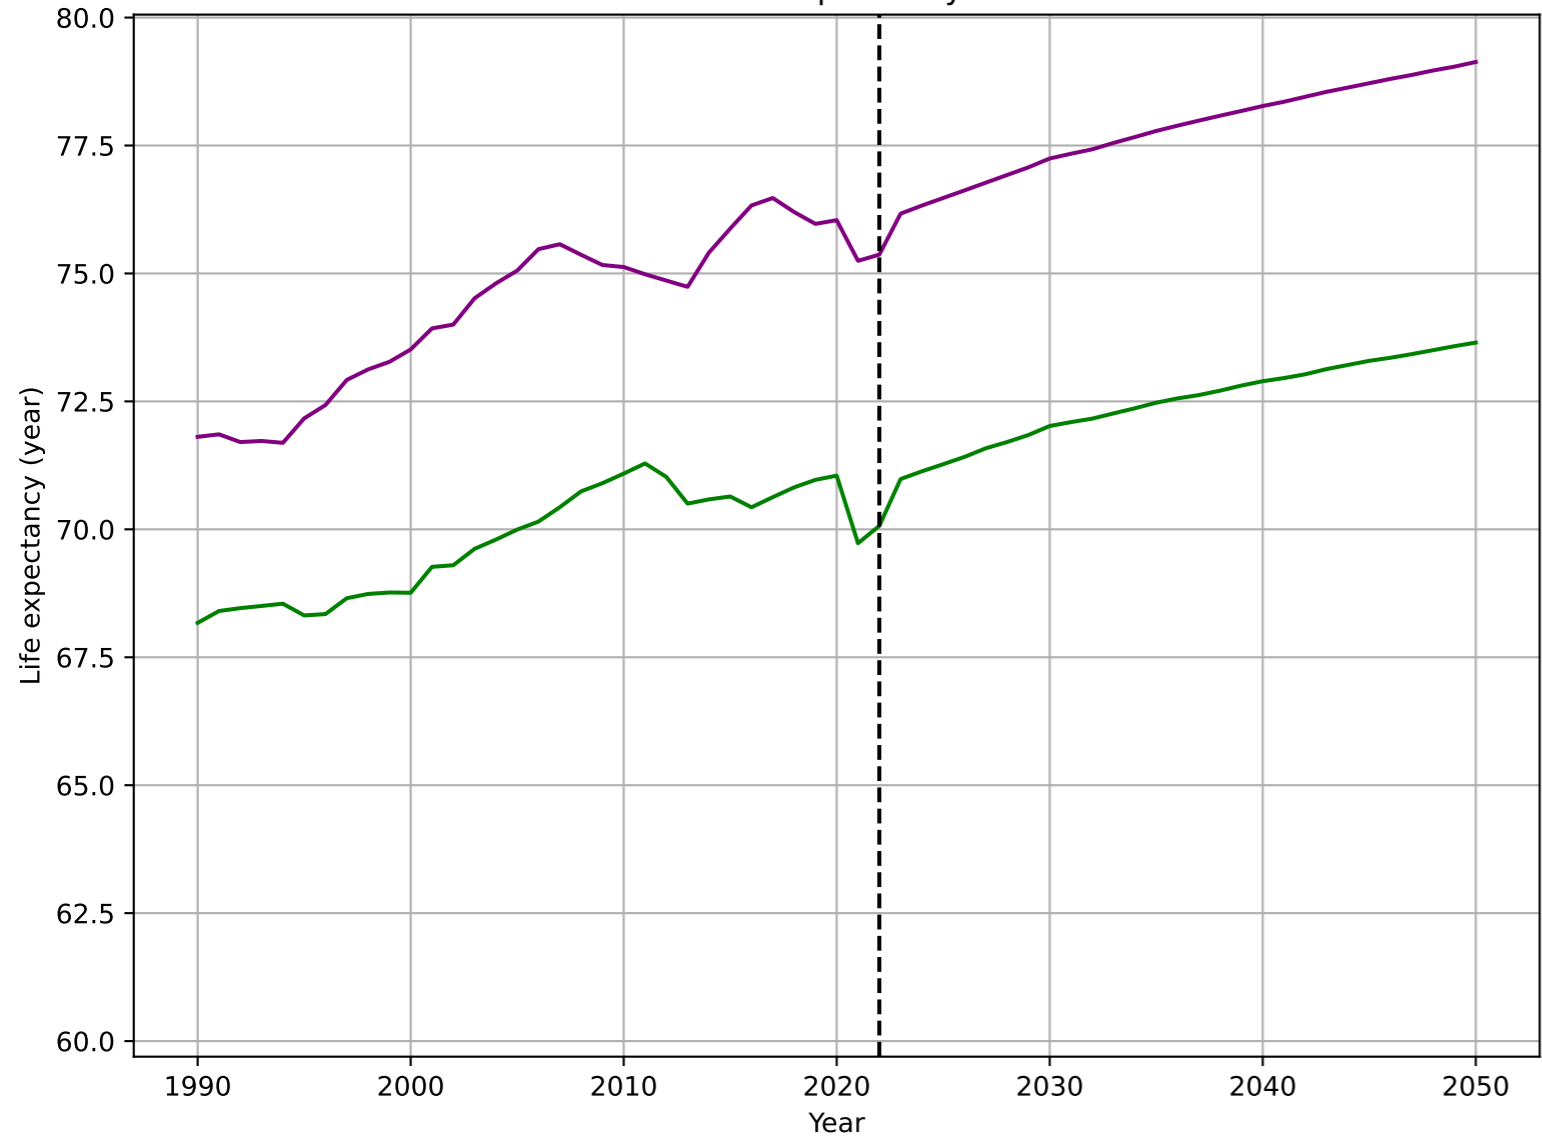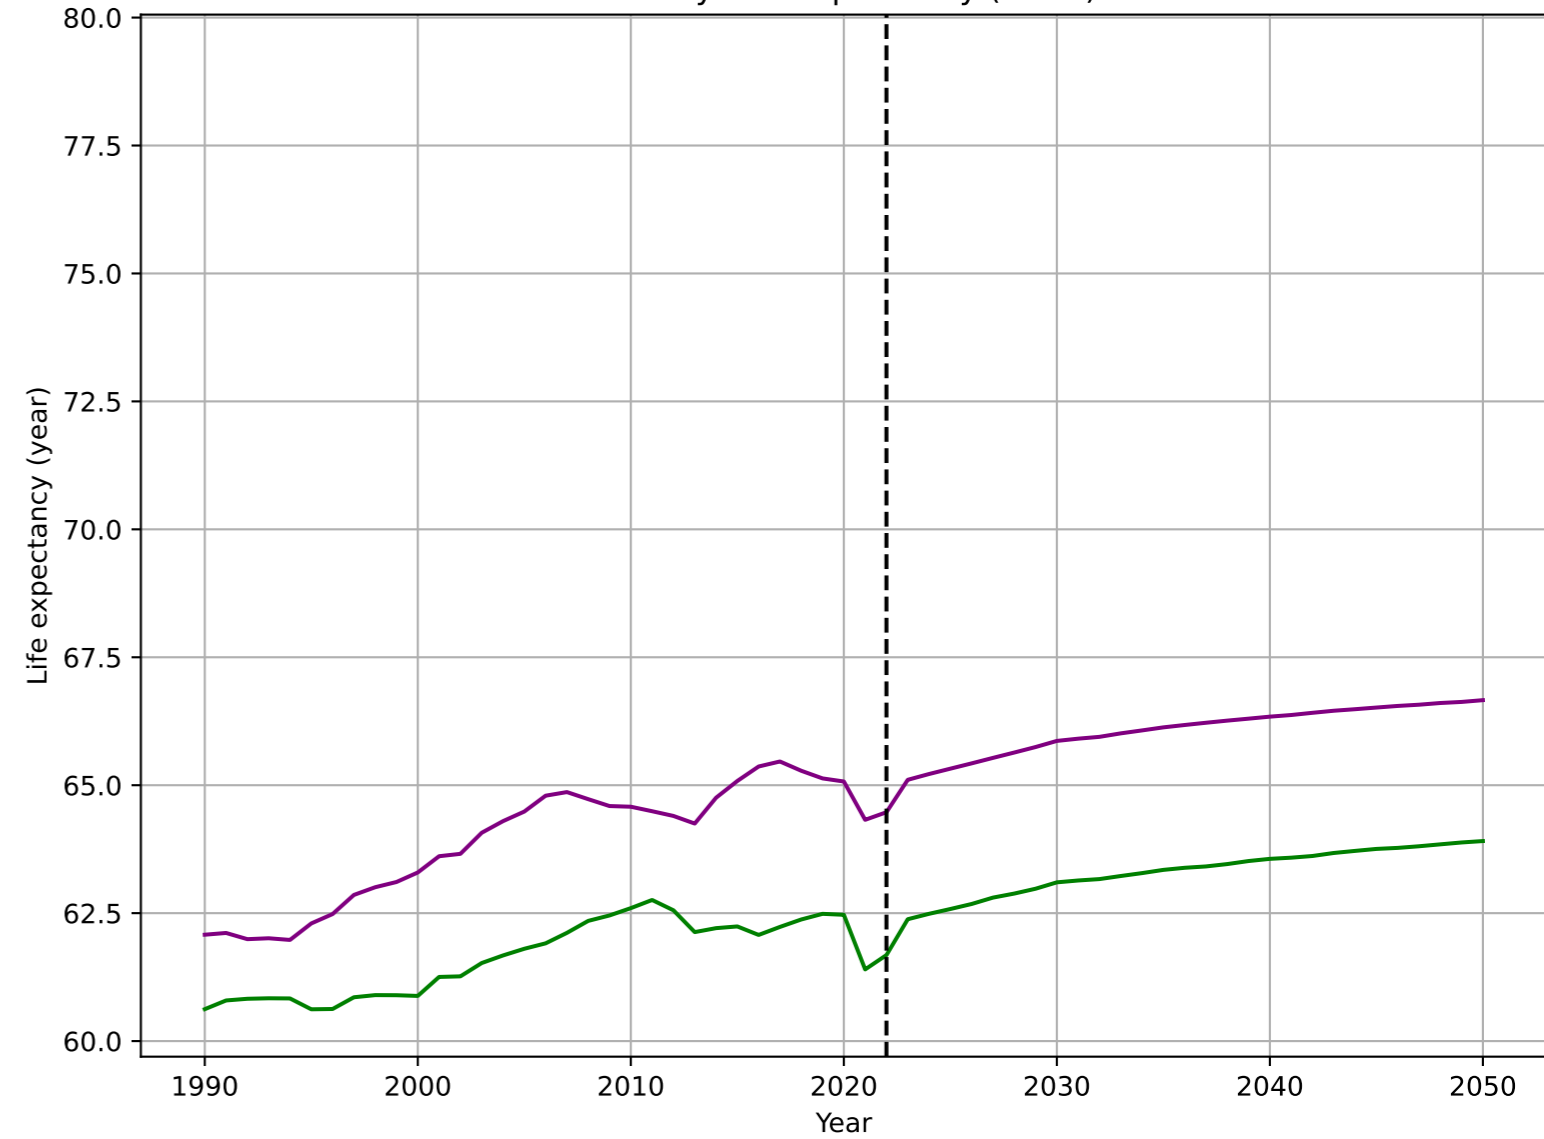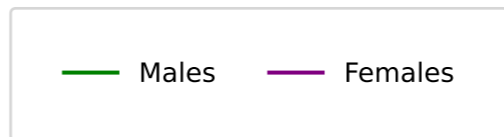



# Suriname

### Life Expectancy

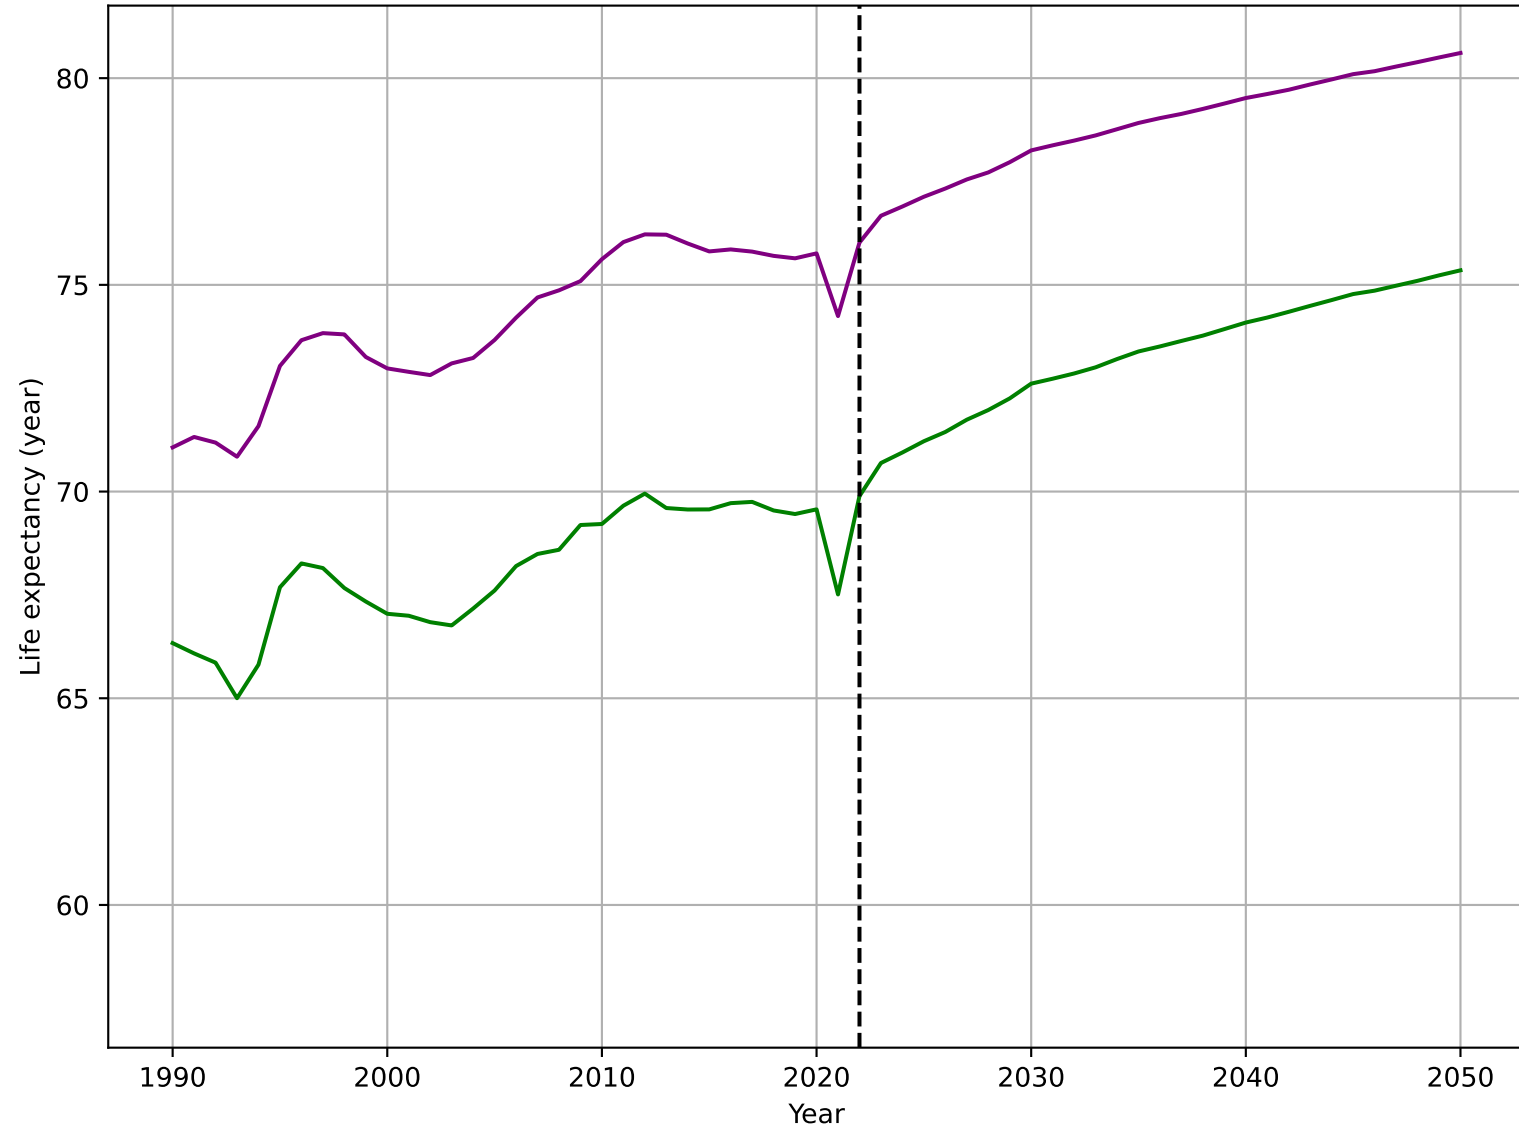

### Healthy Life Expectancy (HALE)

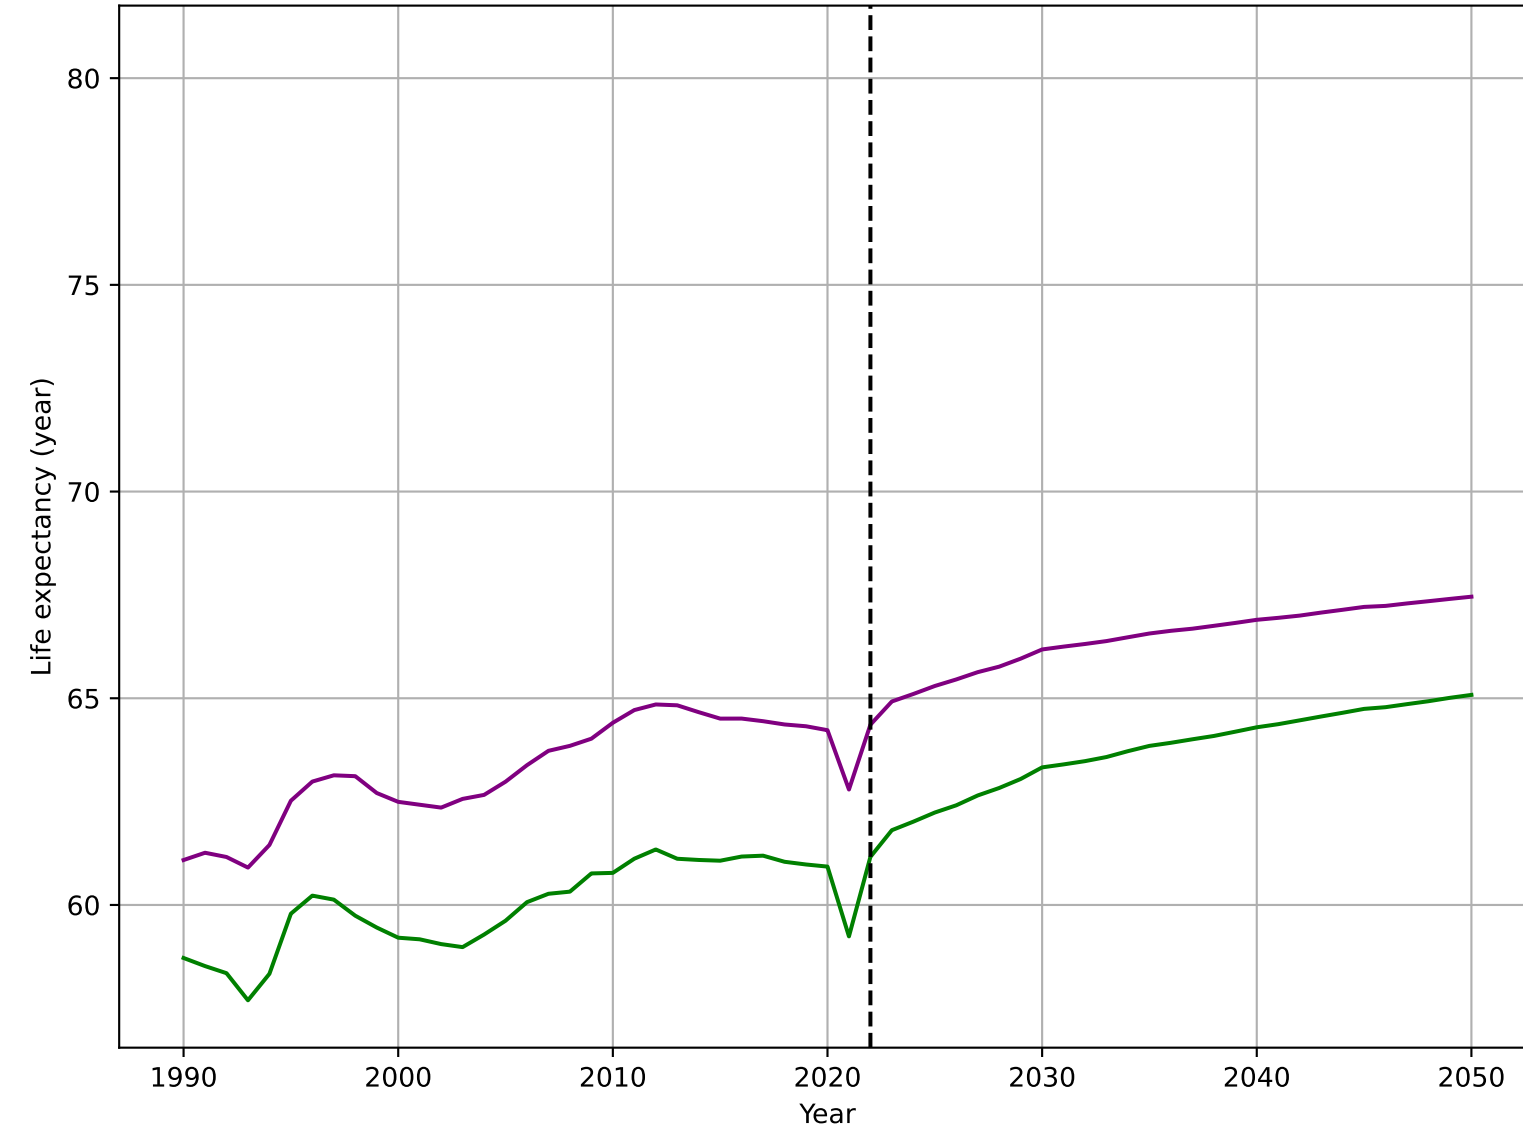

# Trinidad And Tobago

## Life Expectancy

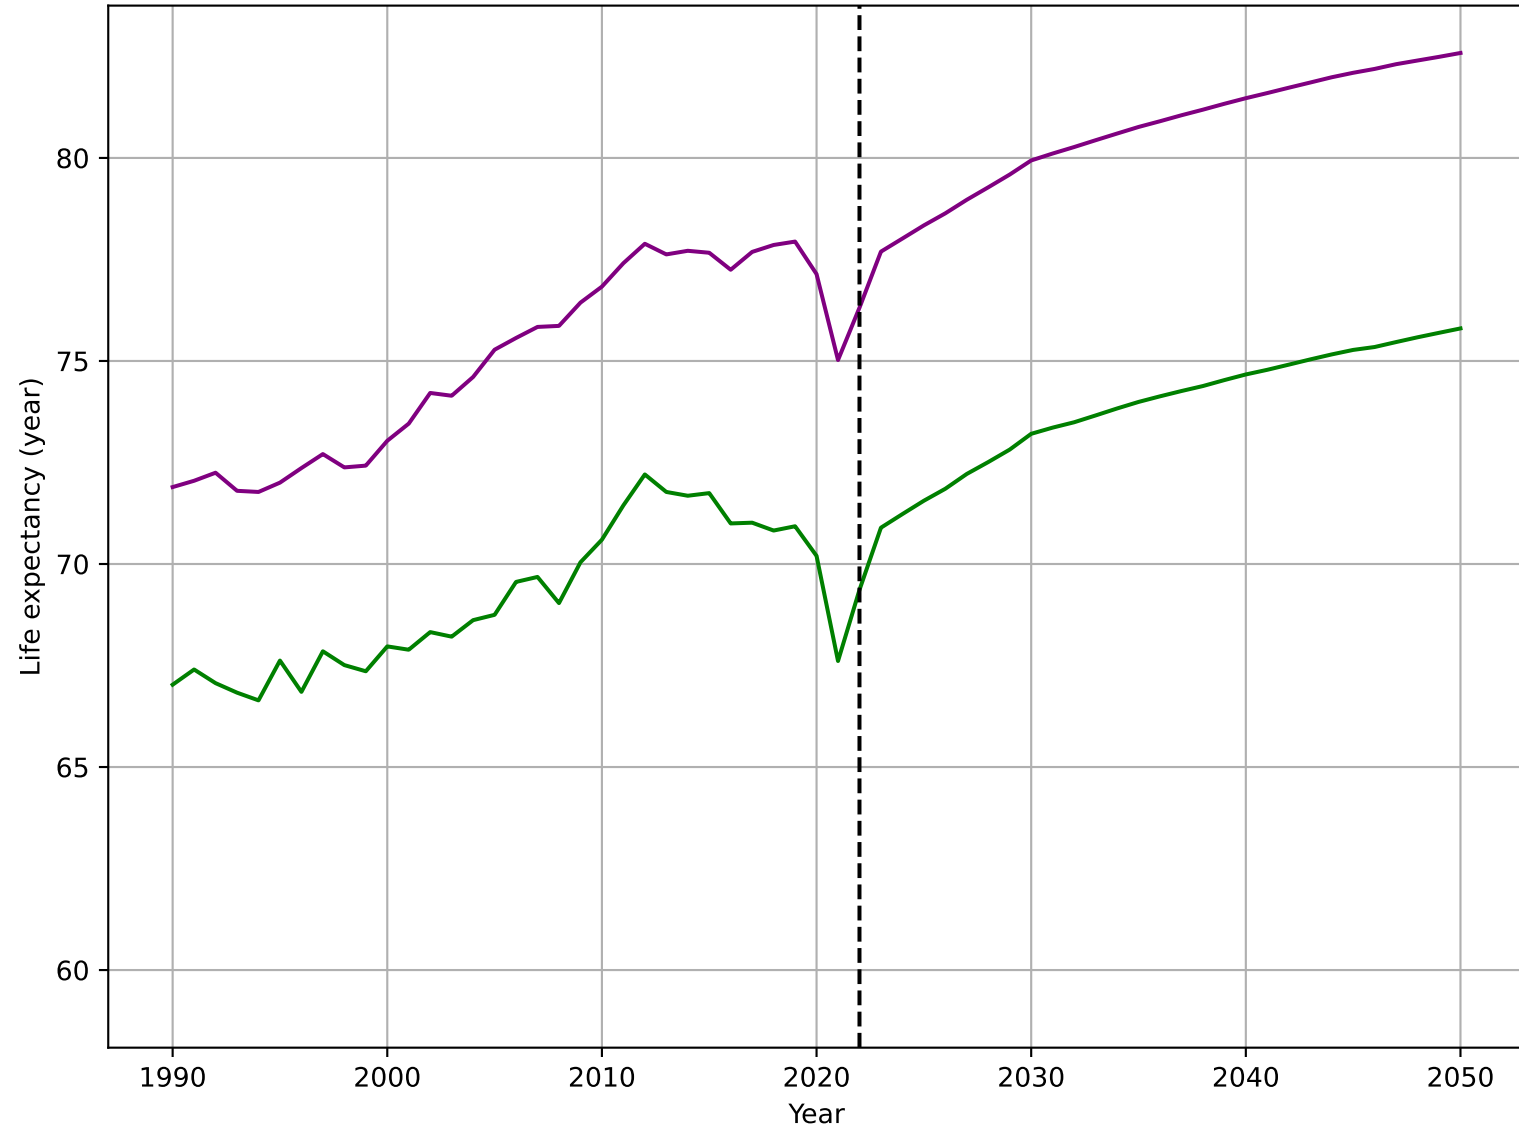

## Healthy Life Expectancy (HALE)

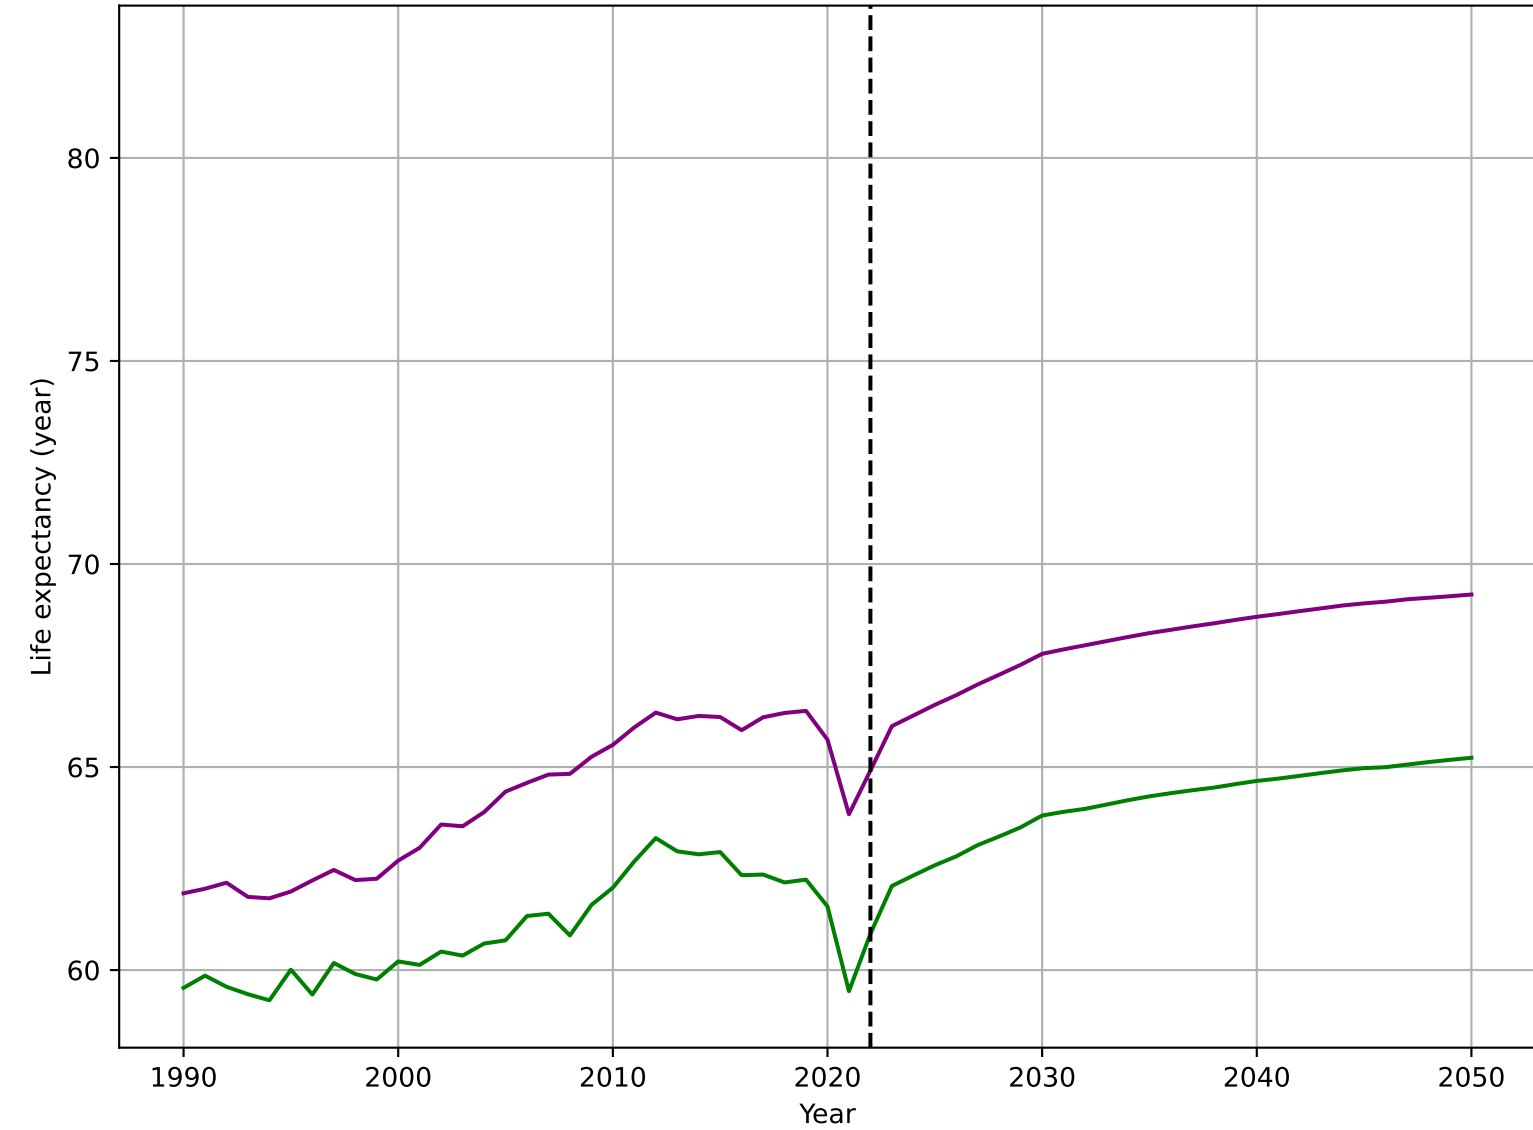

# Virgin Islands

### Life Expectancy

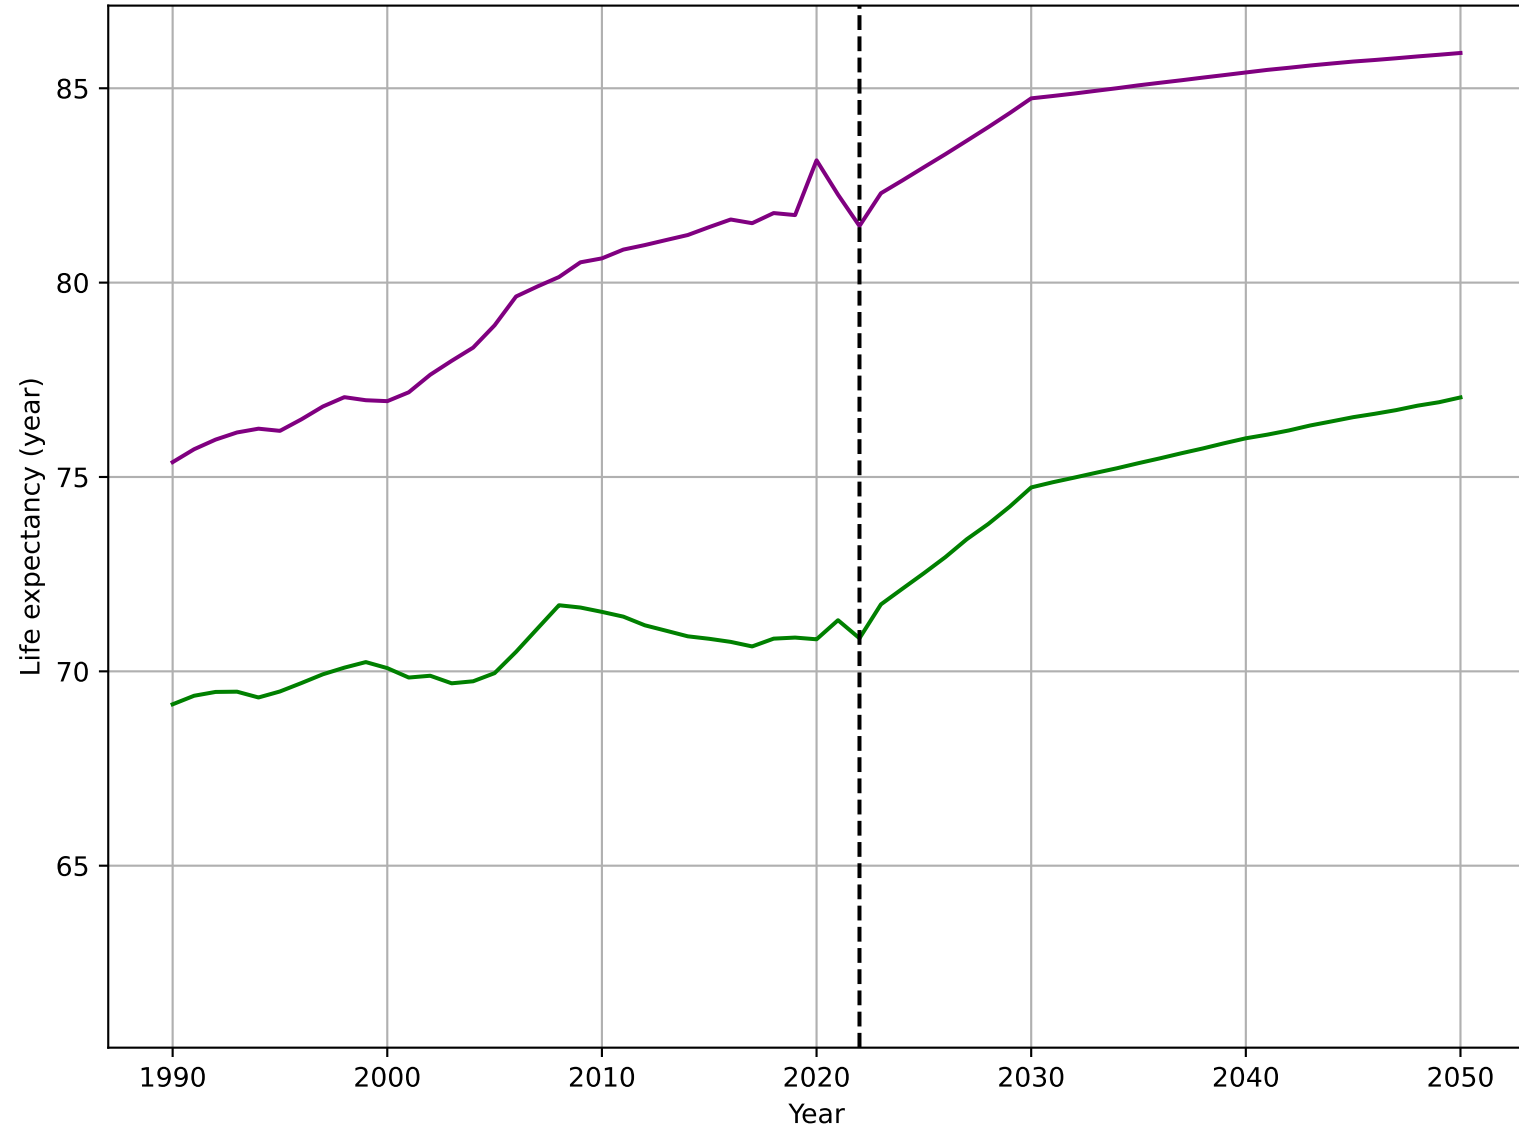

### Healthy Life Expectancy (HALE)

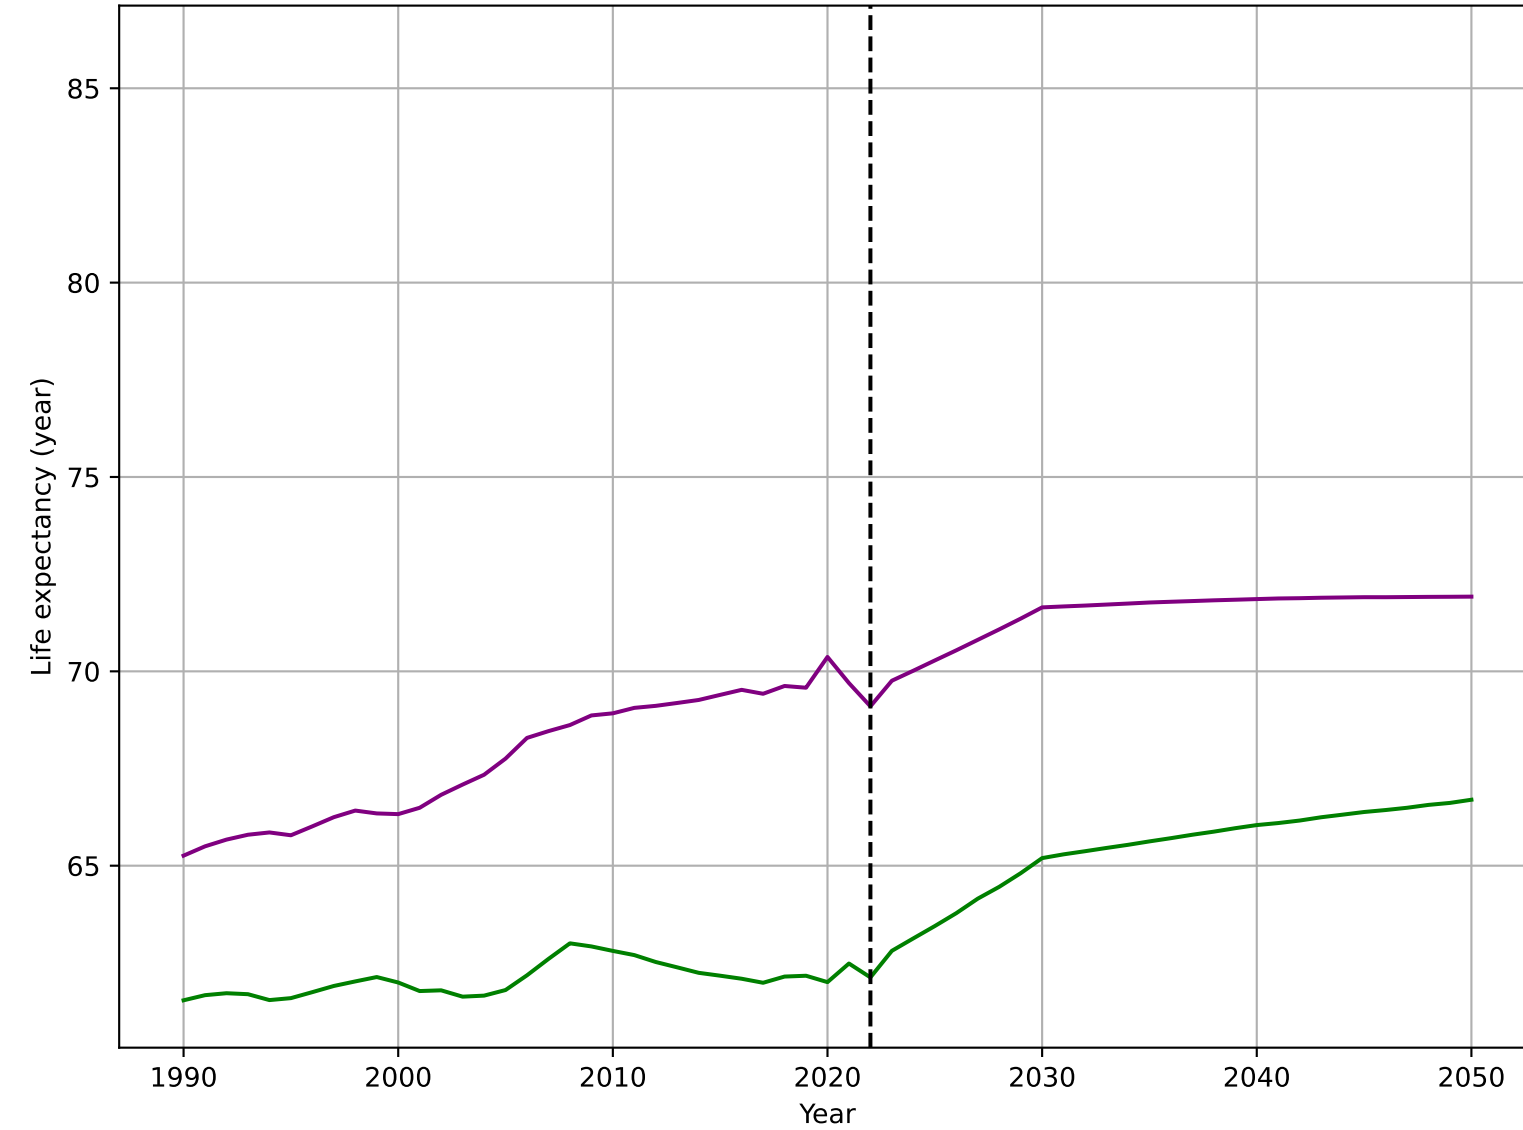

# Colombia

### Life Expectancy

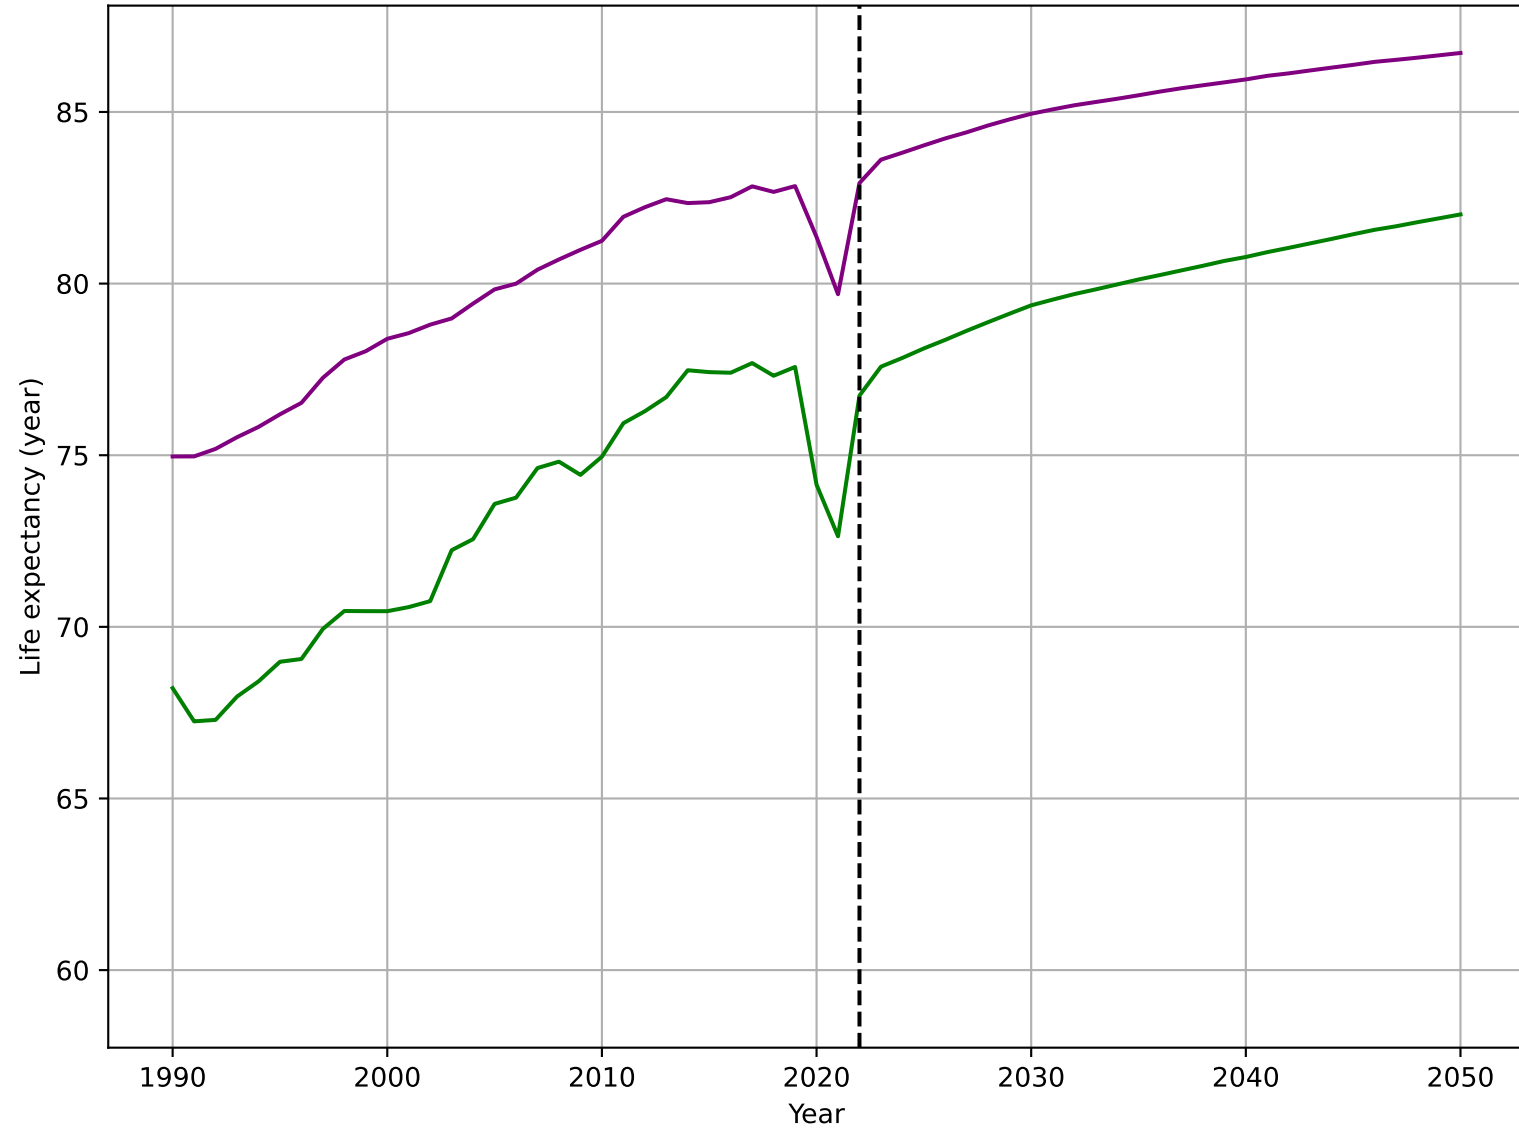

### Healthy Life Expectancy (HALE)

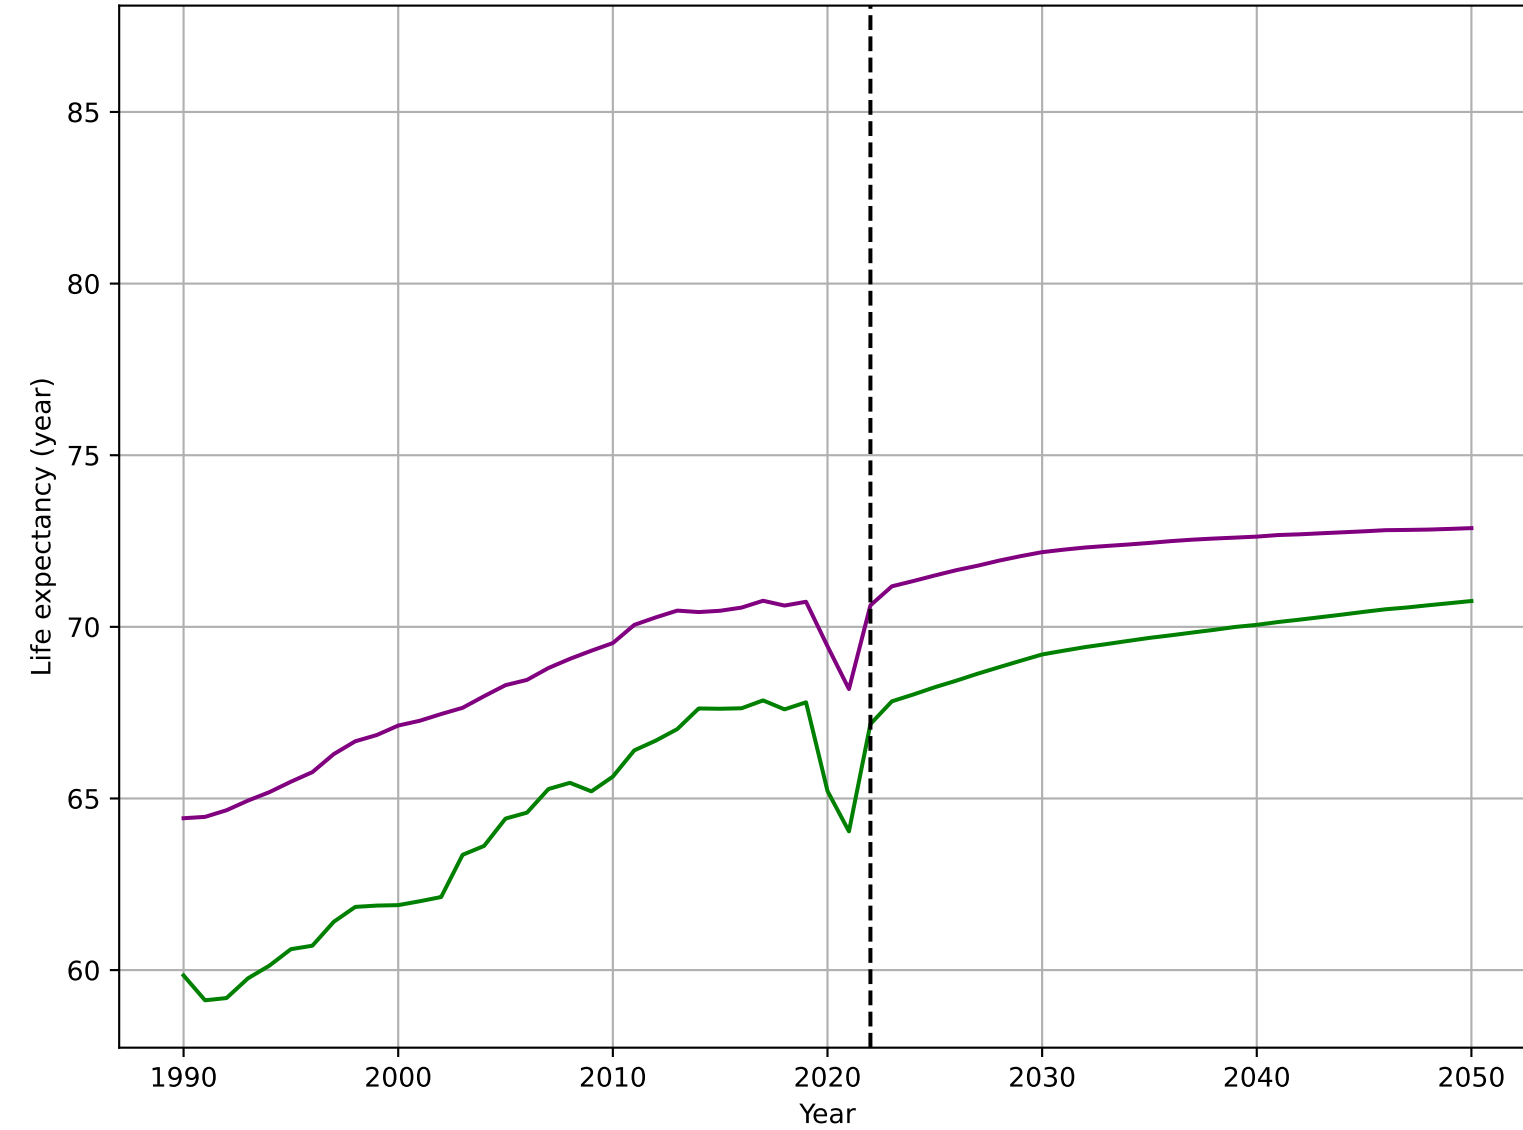

# Costa Rica

## Life Expectancy

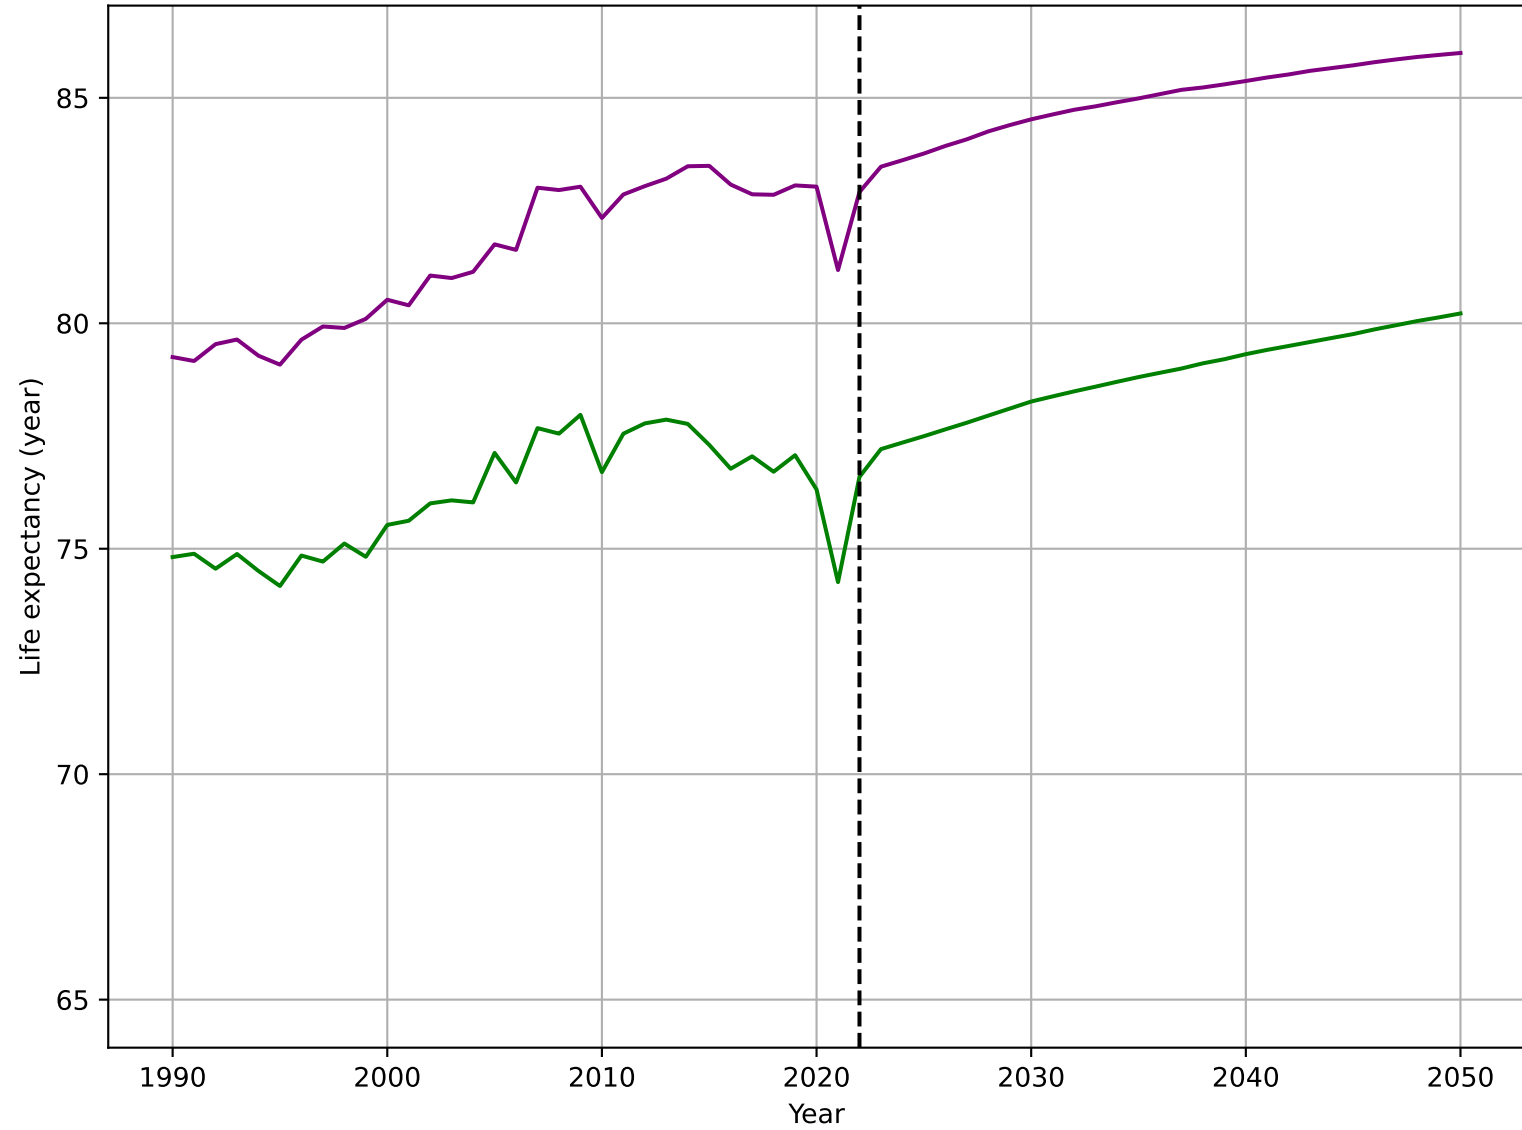

## Healthy Life Expectancy (HALE)

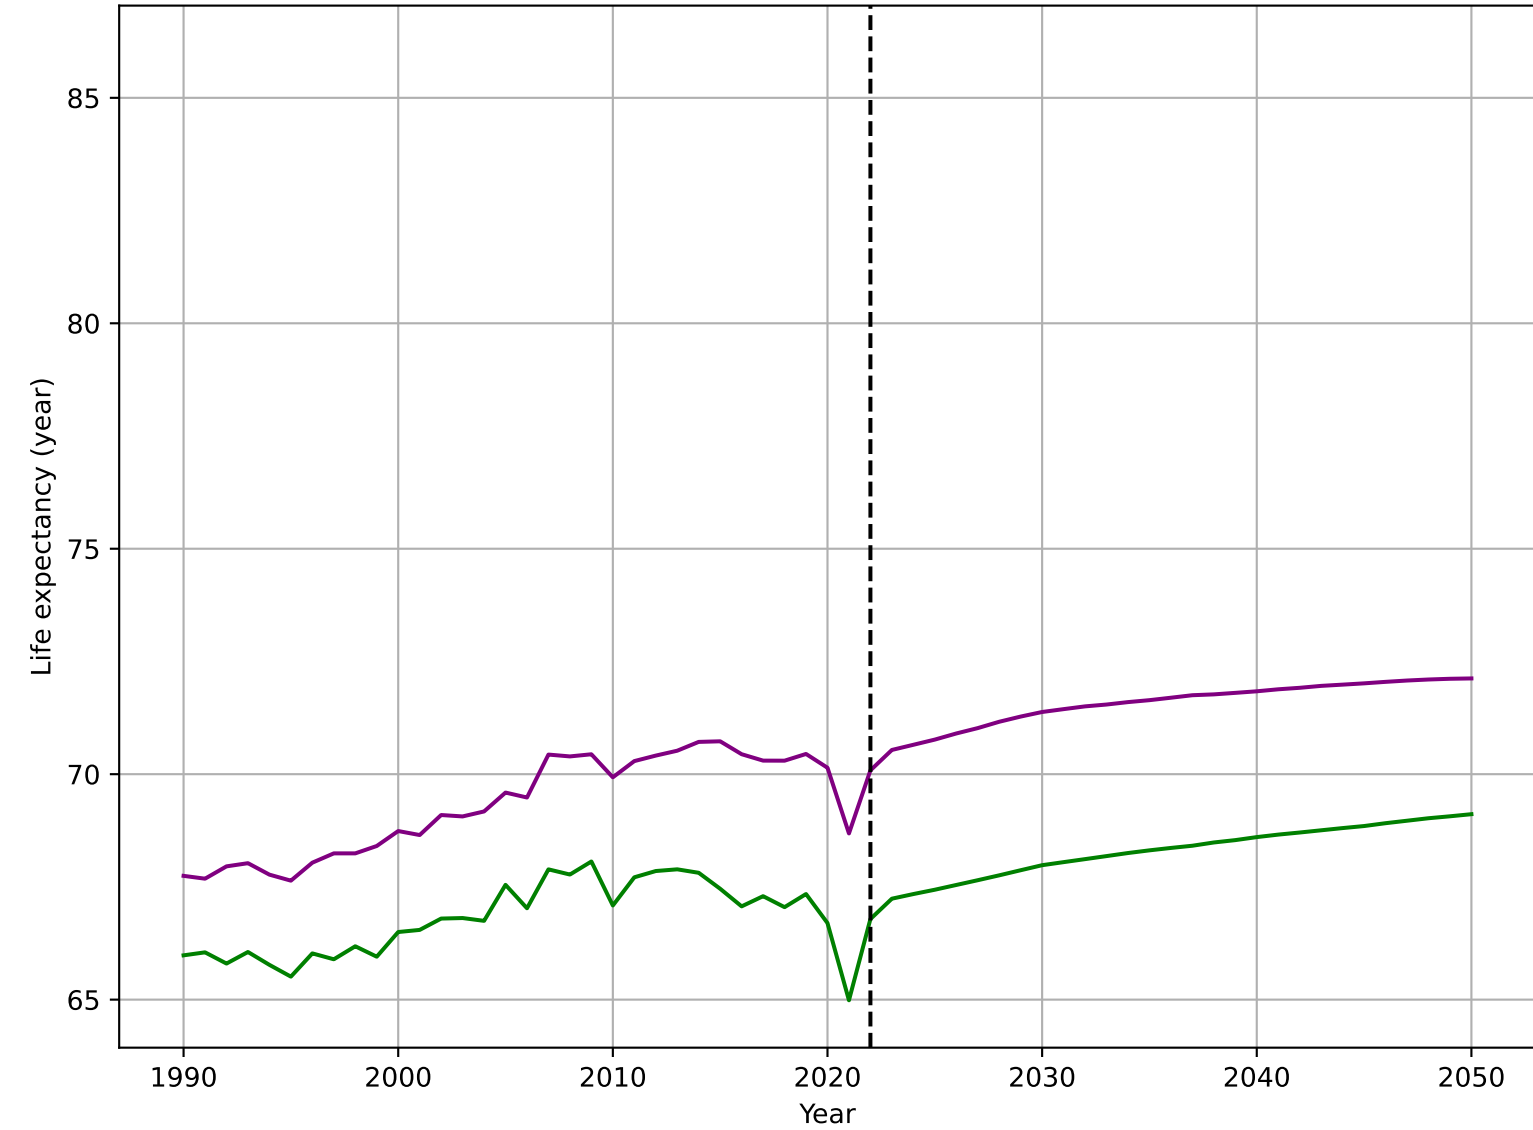

# El Salvador

### Life Expectancy

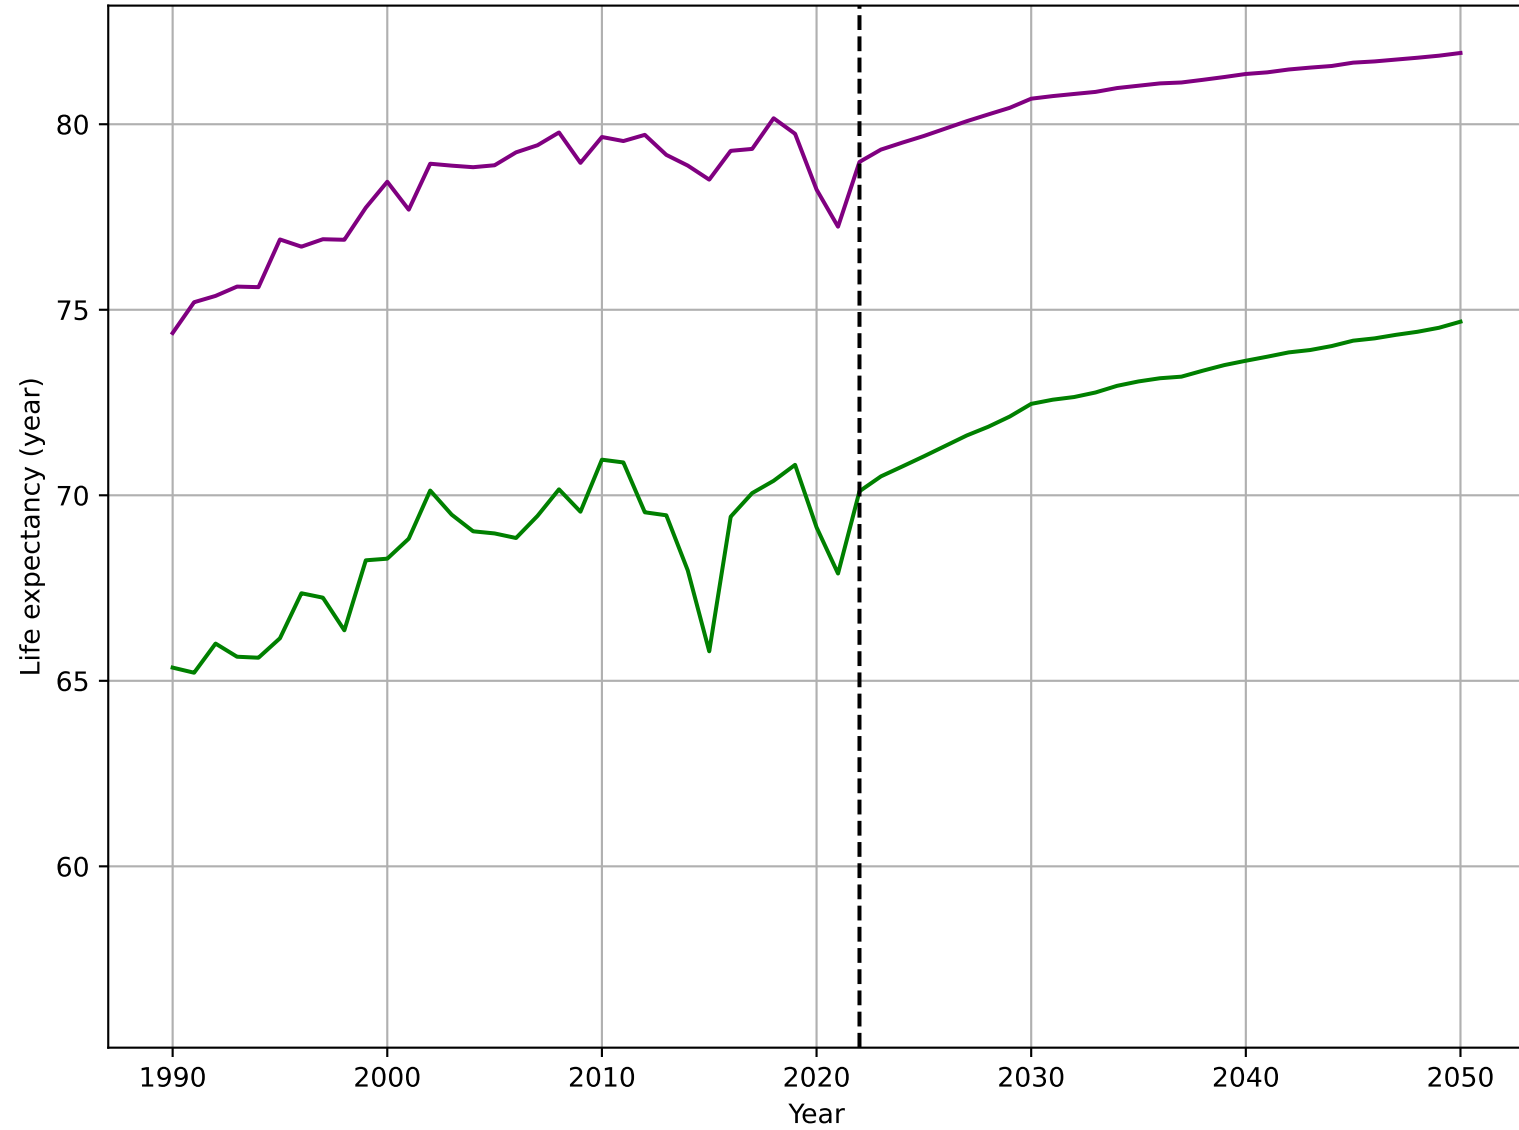

### Healthy Life Expectancy (HALE)

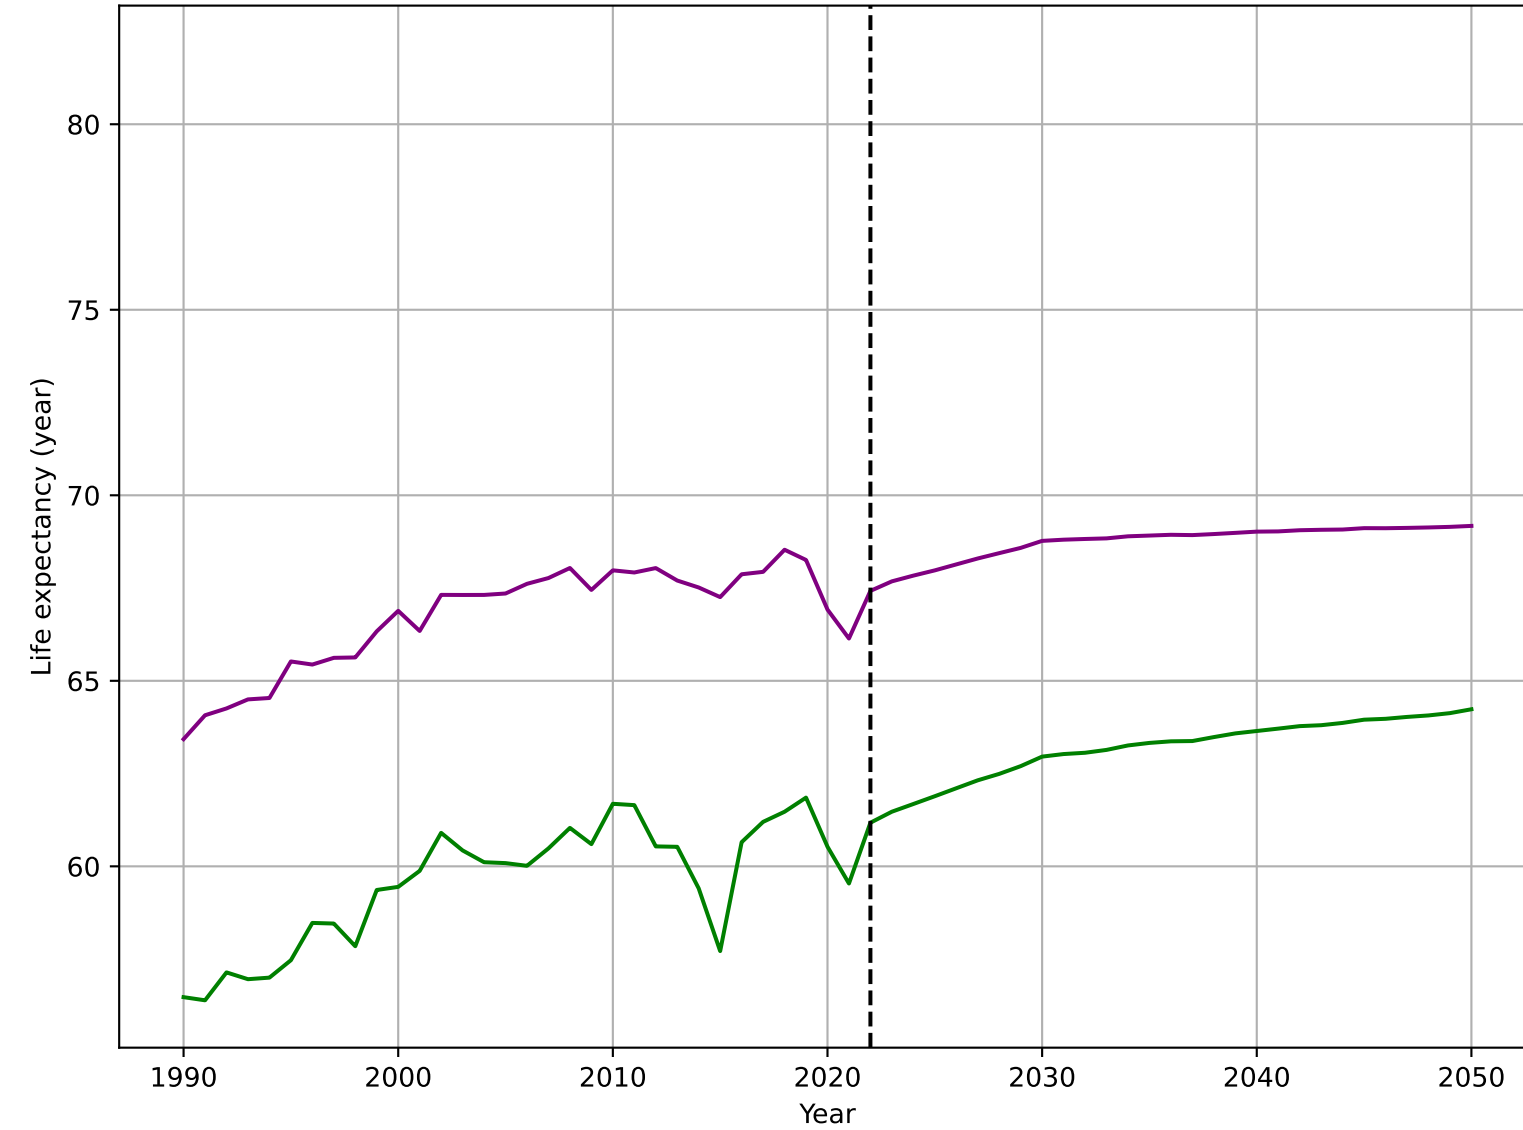

# Guatemala

### Life Expectancy

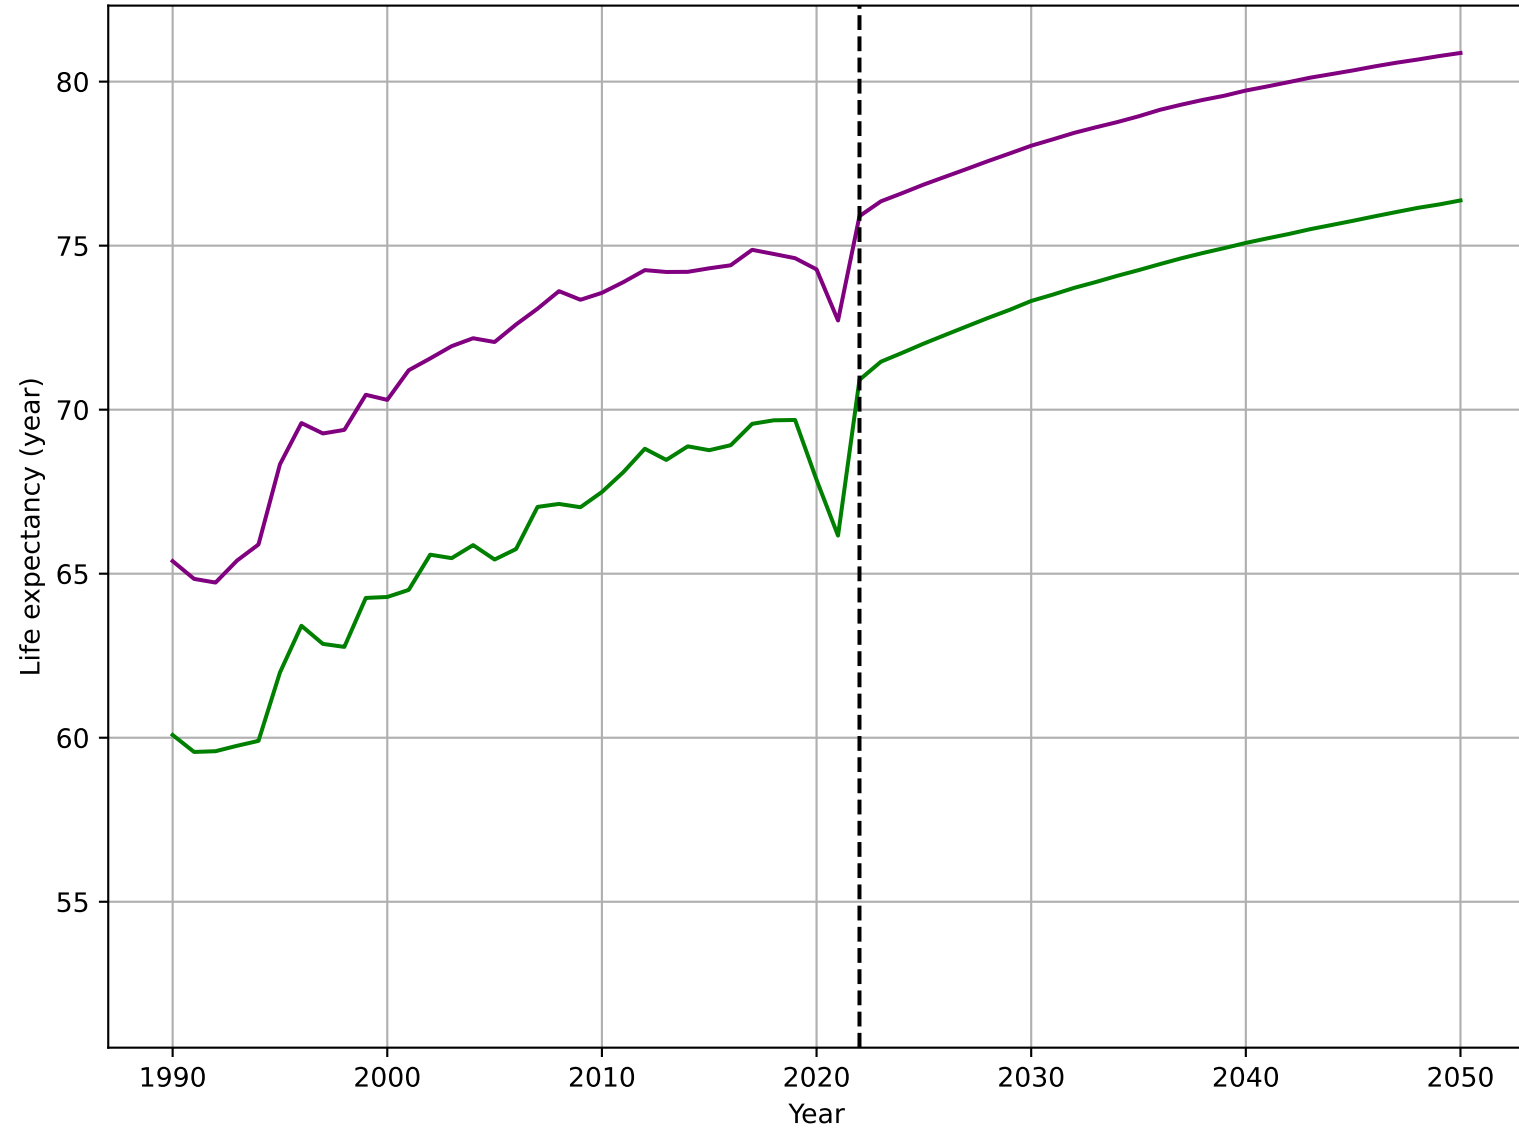

### Healthy Life Expectancy (HALE)

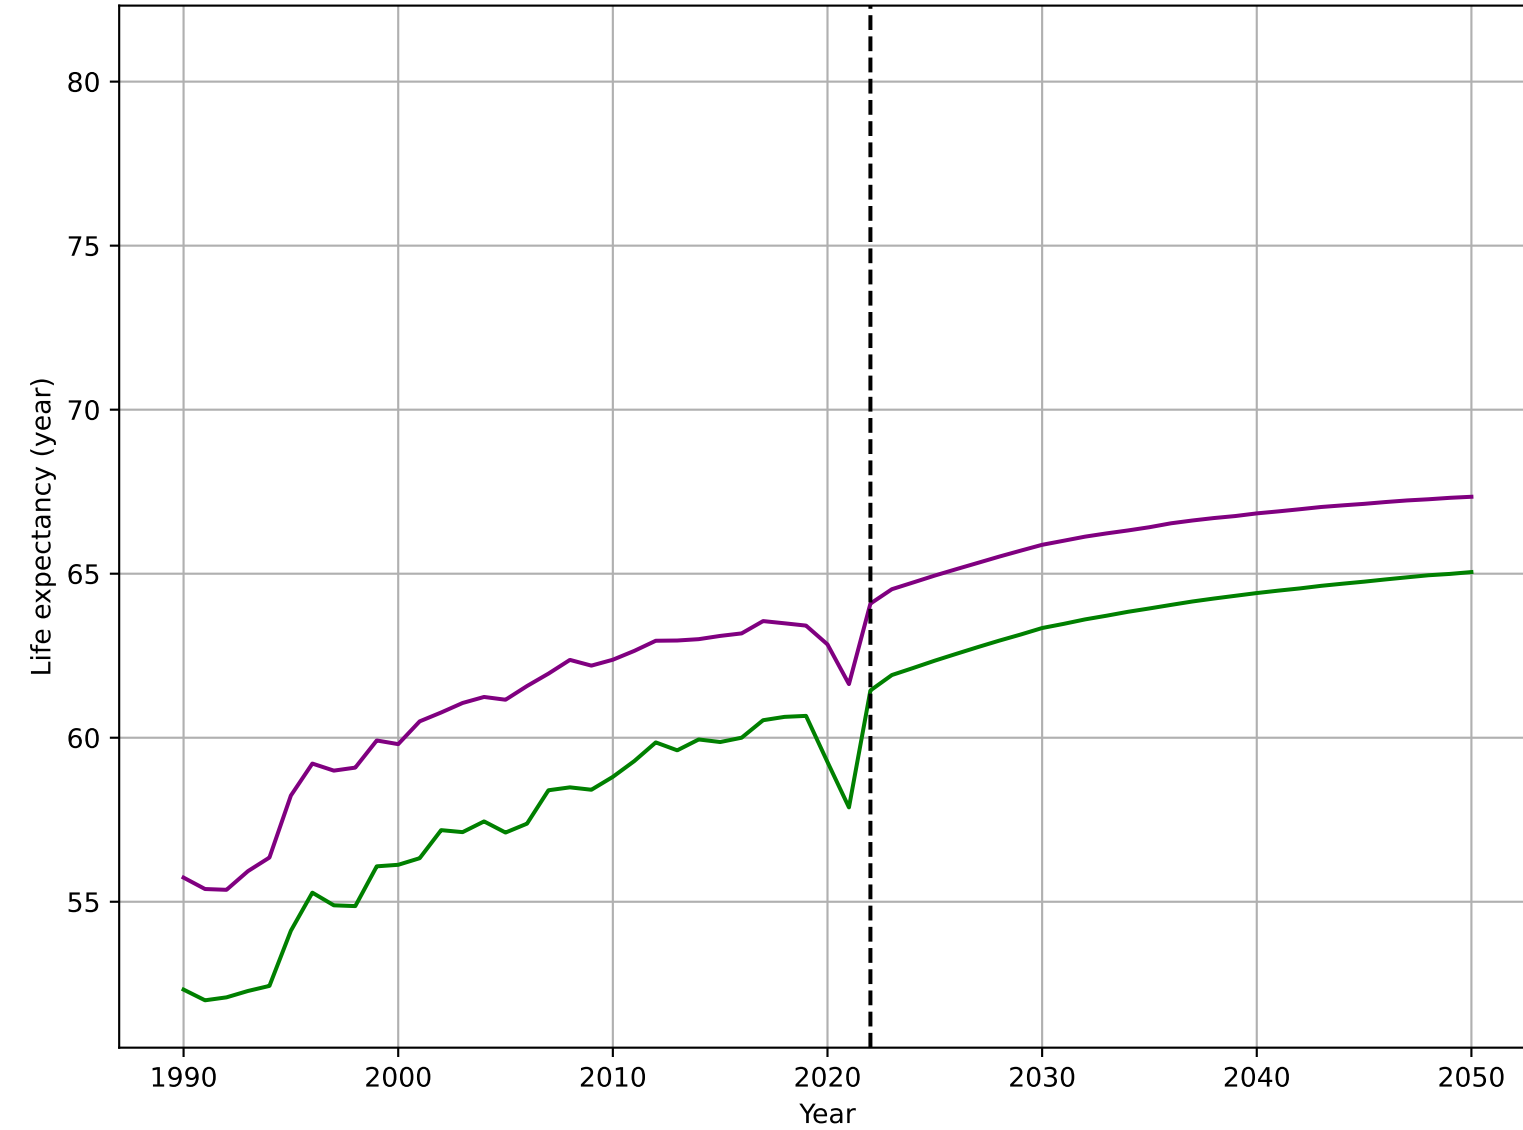

# Honduras

### Life Expectancy

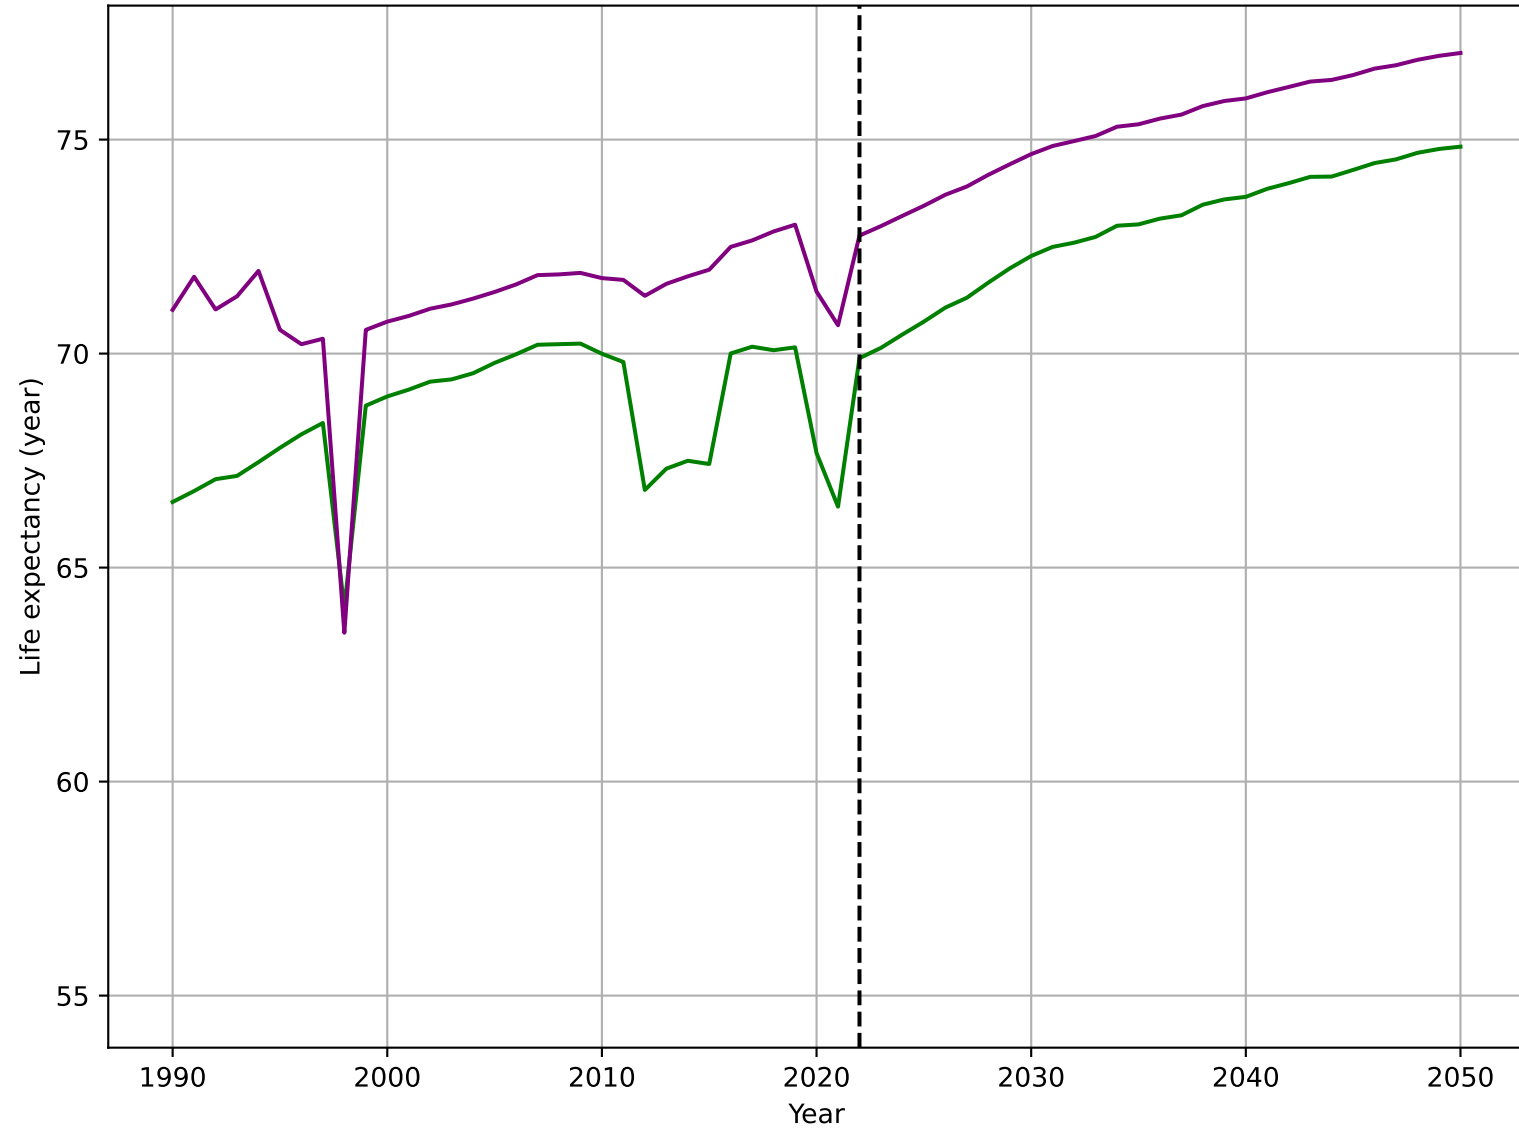

### Healthy Life Expectancy (HALE)

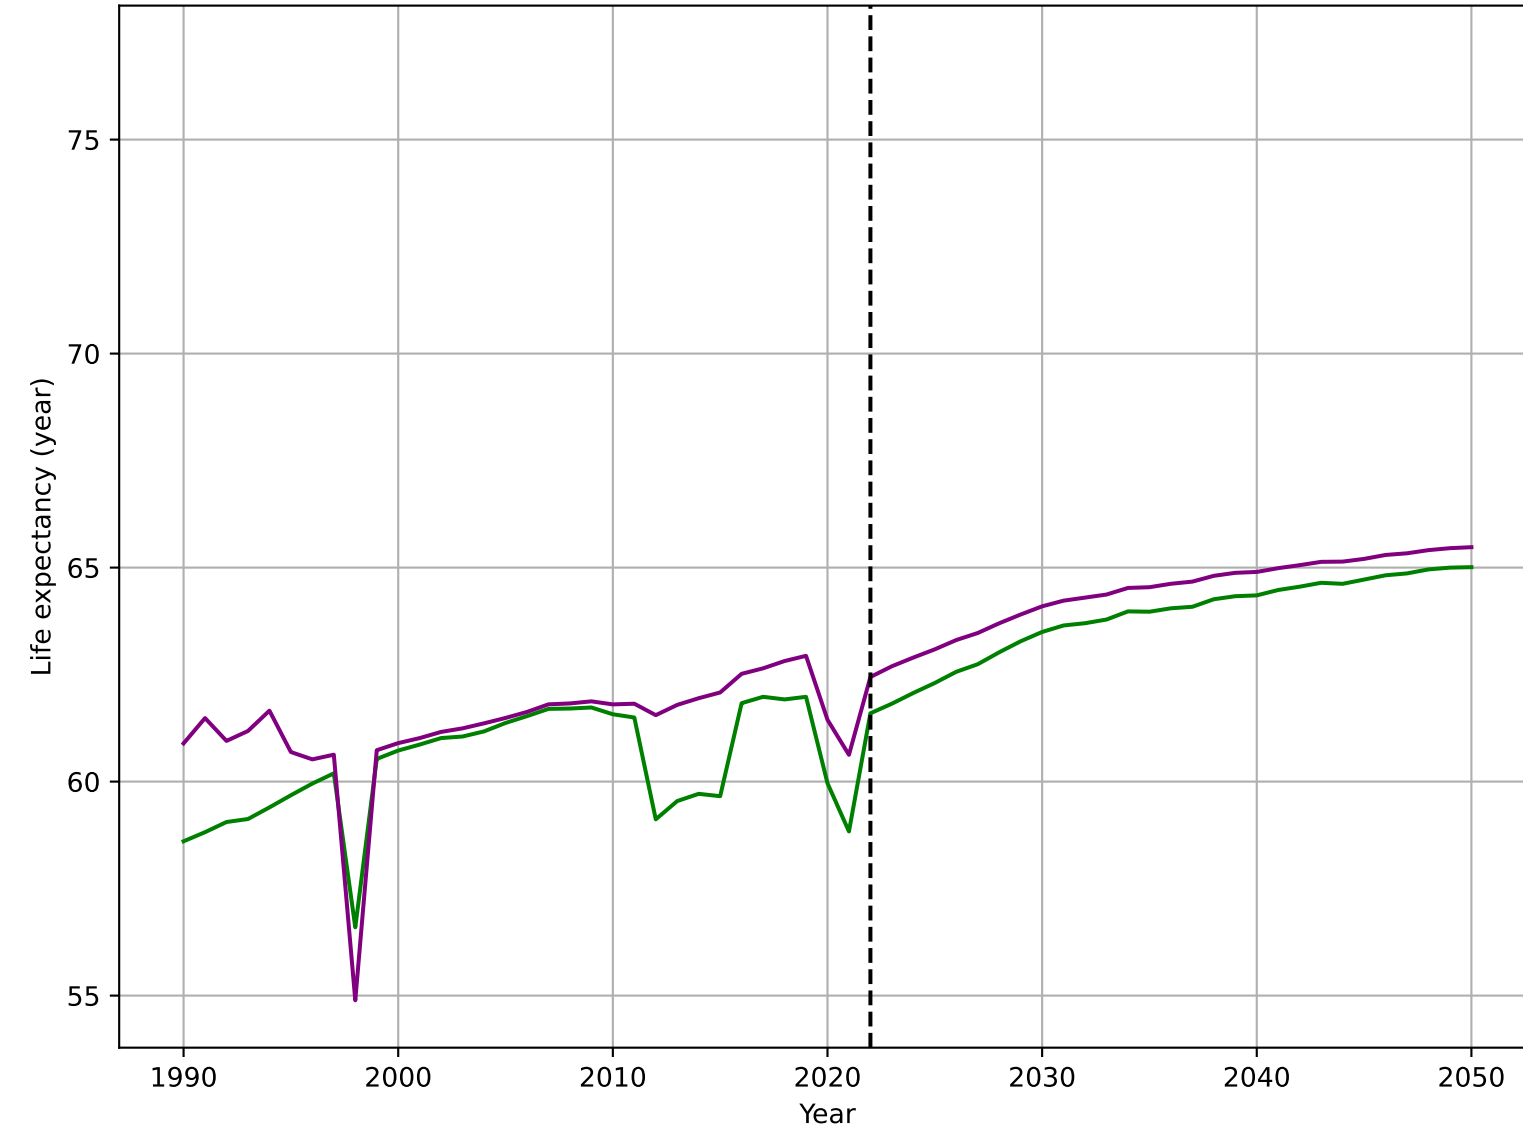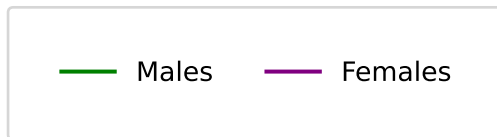



# Mexico

### Life Expectancy

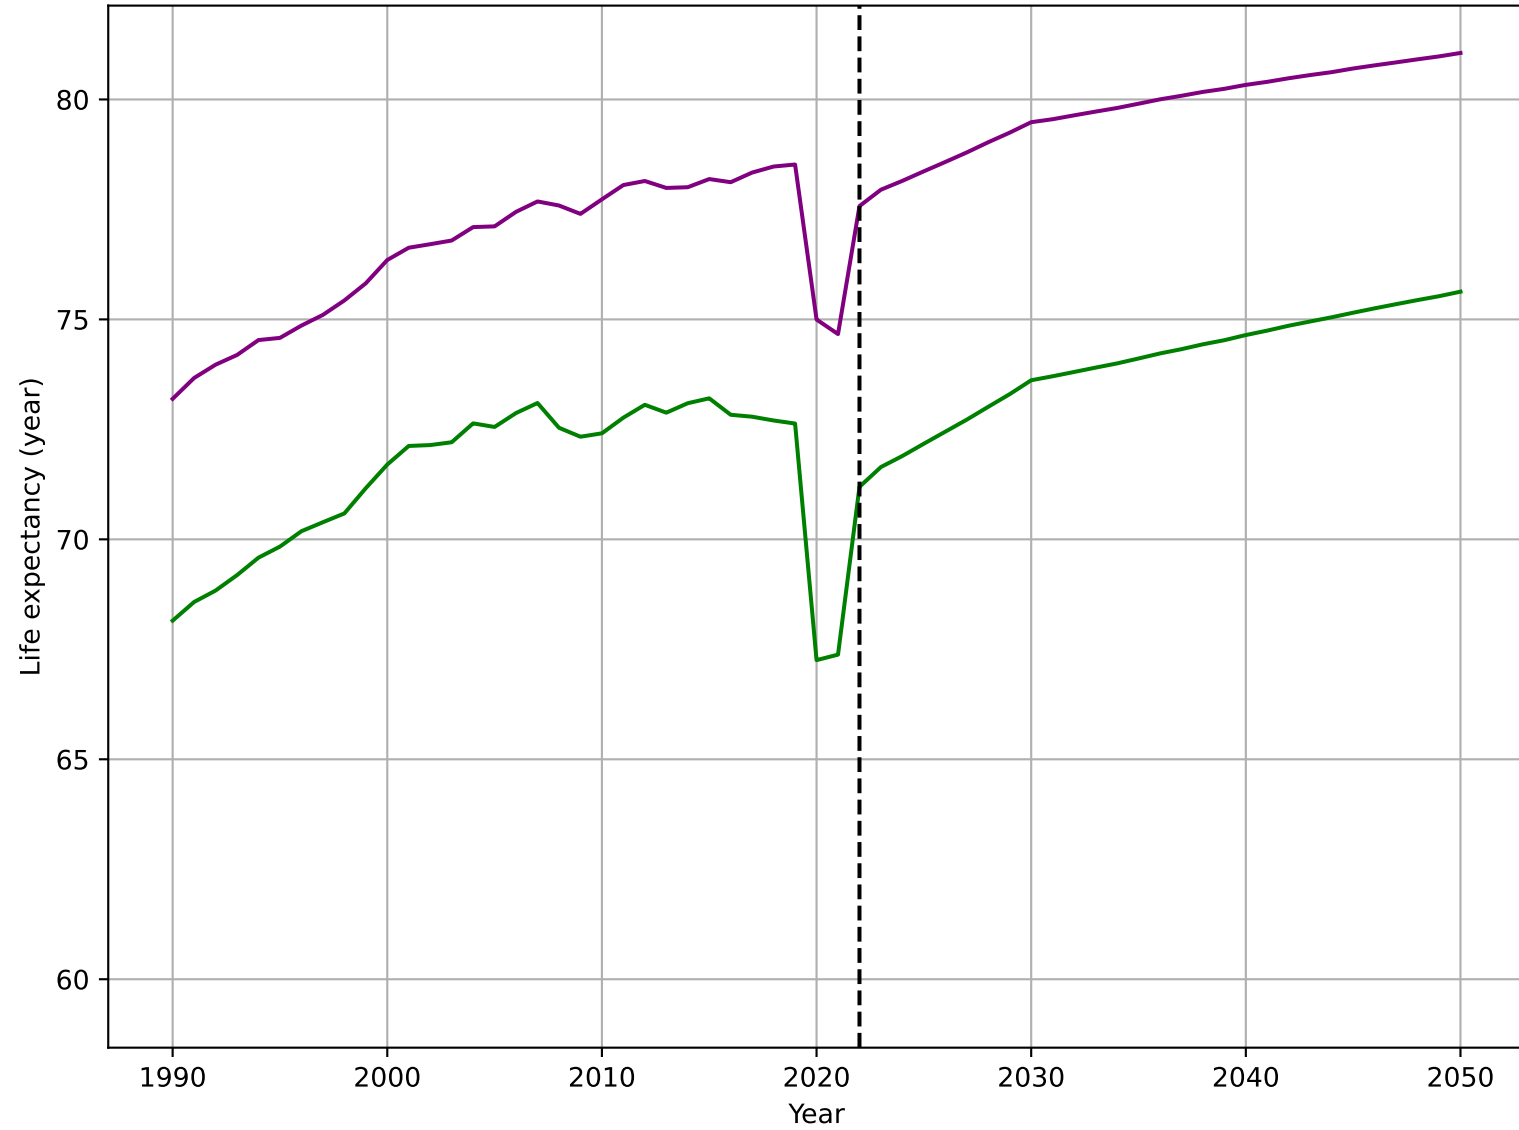

### Healthy Life Expectancy (HALE)

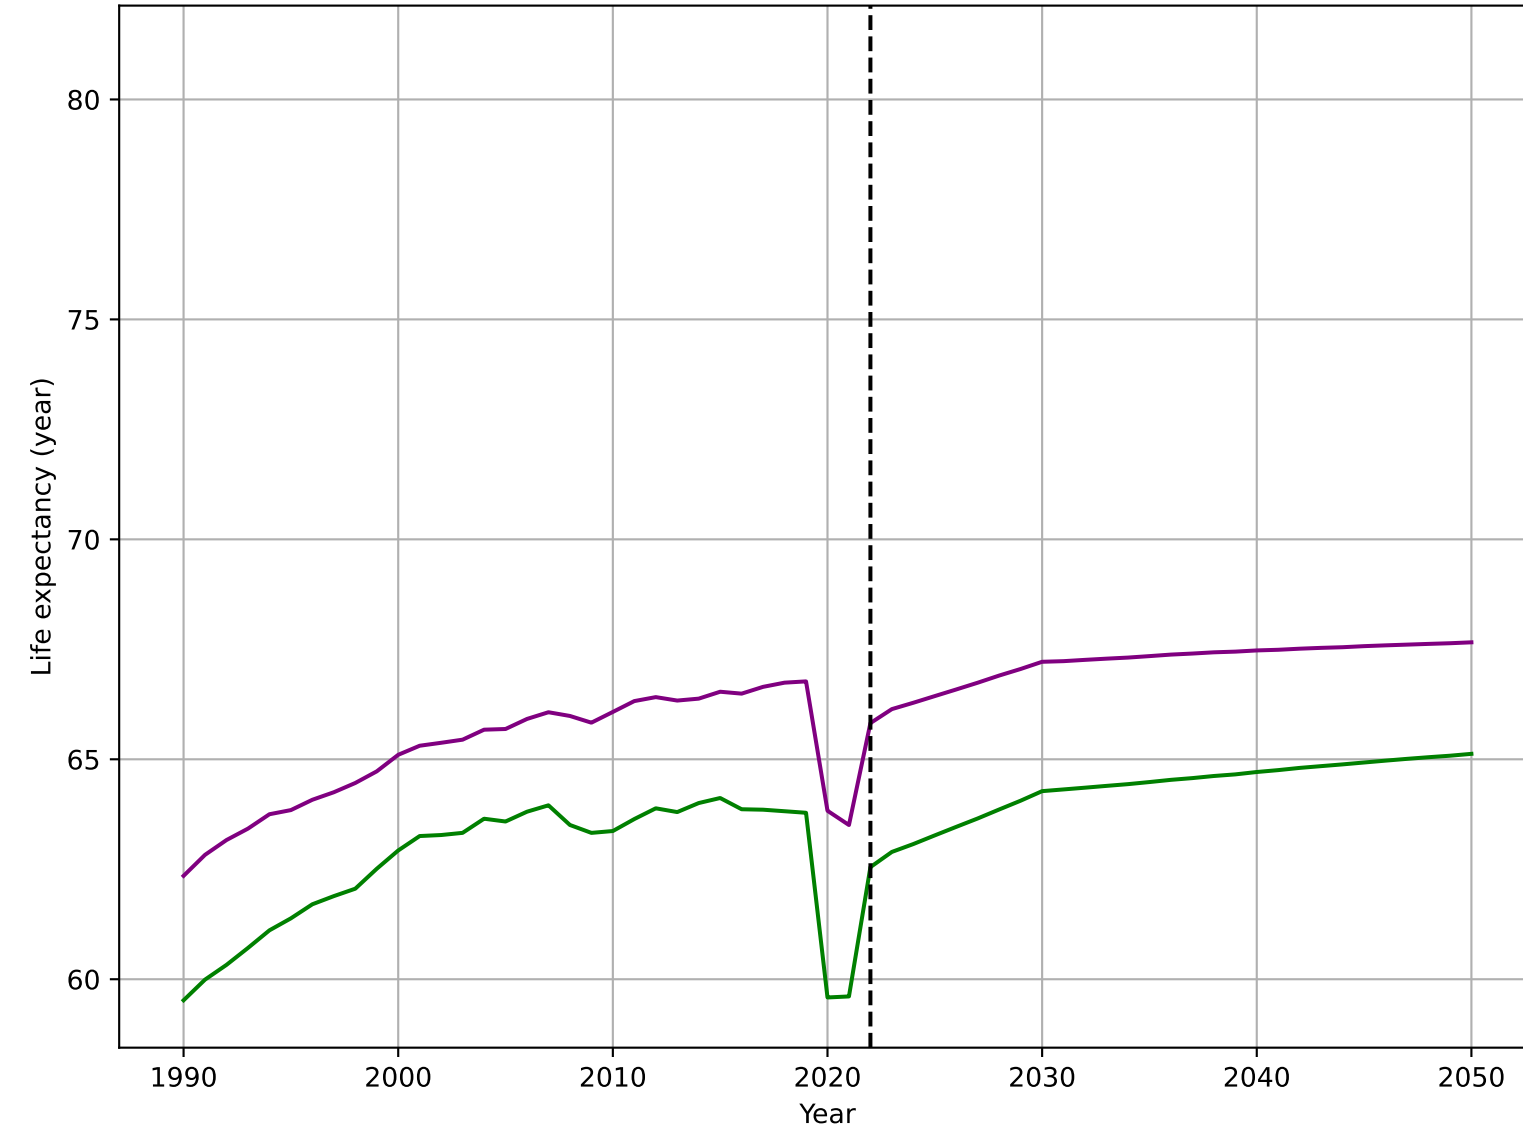

# Nicaragua

### Life Expectancy

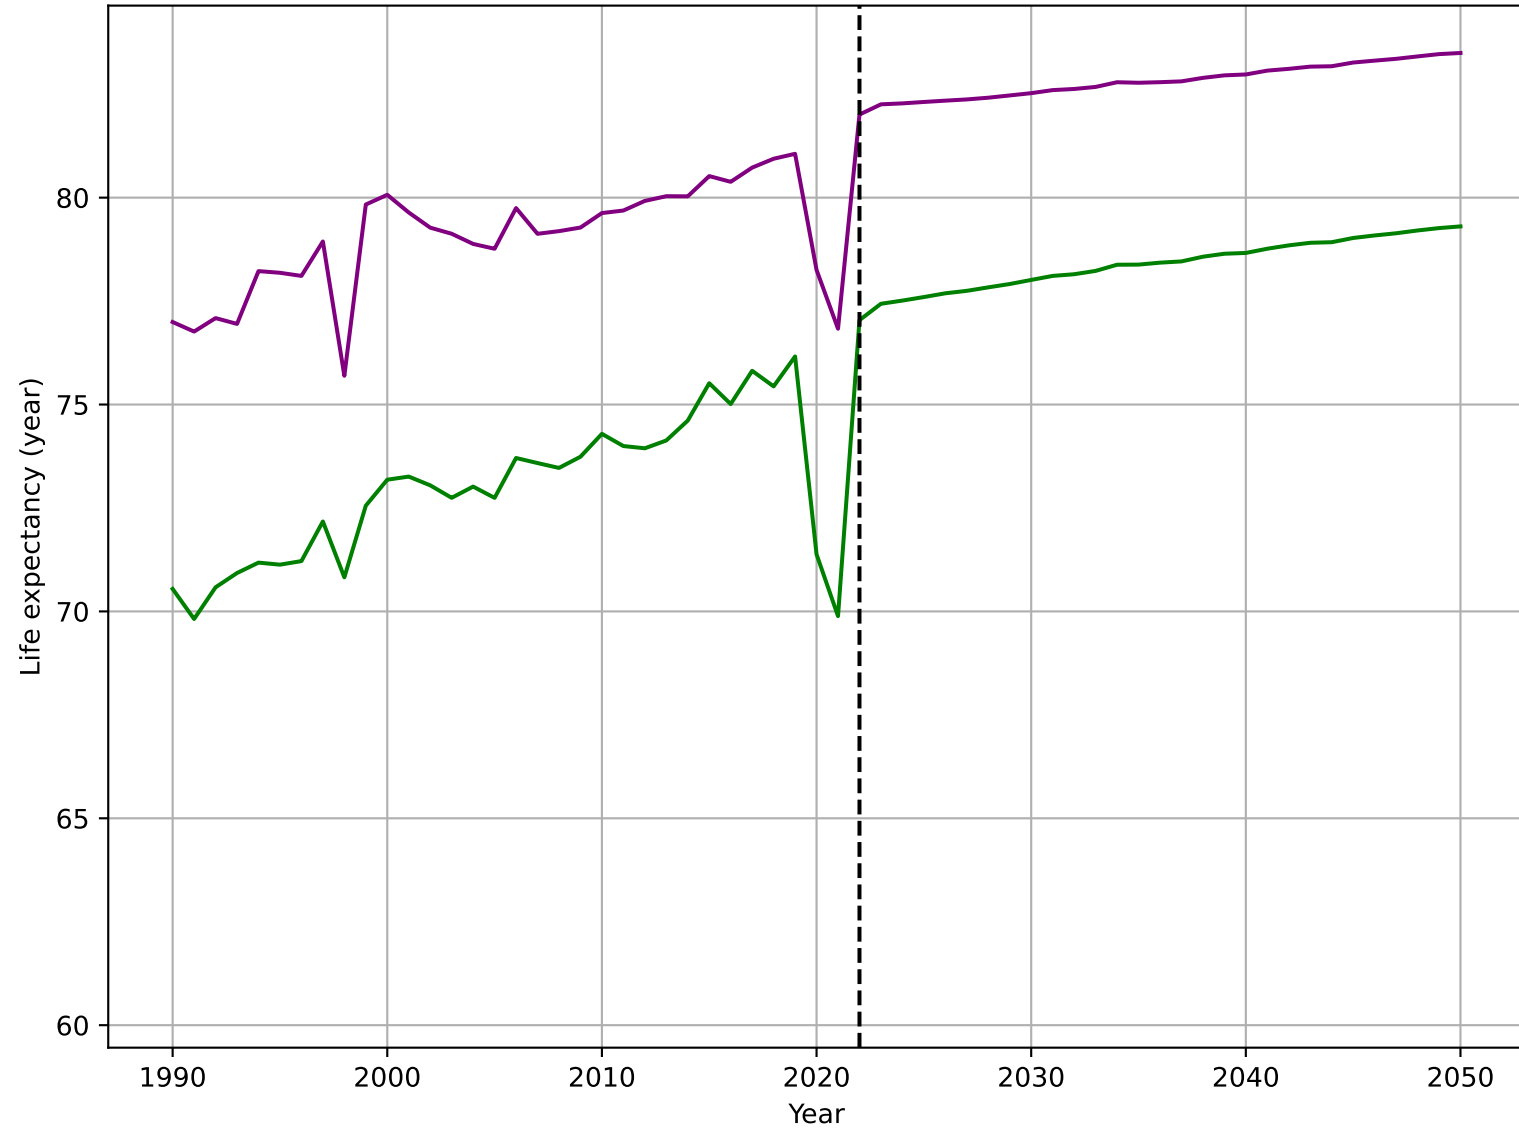

### Healthy Life Expectancy (HALE)

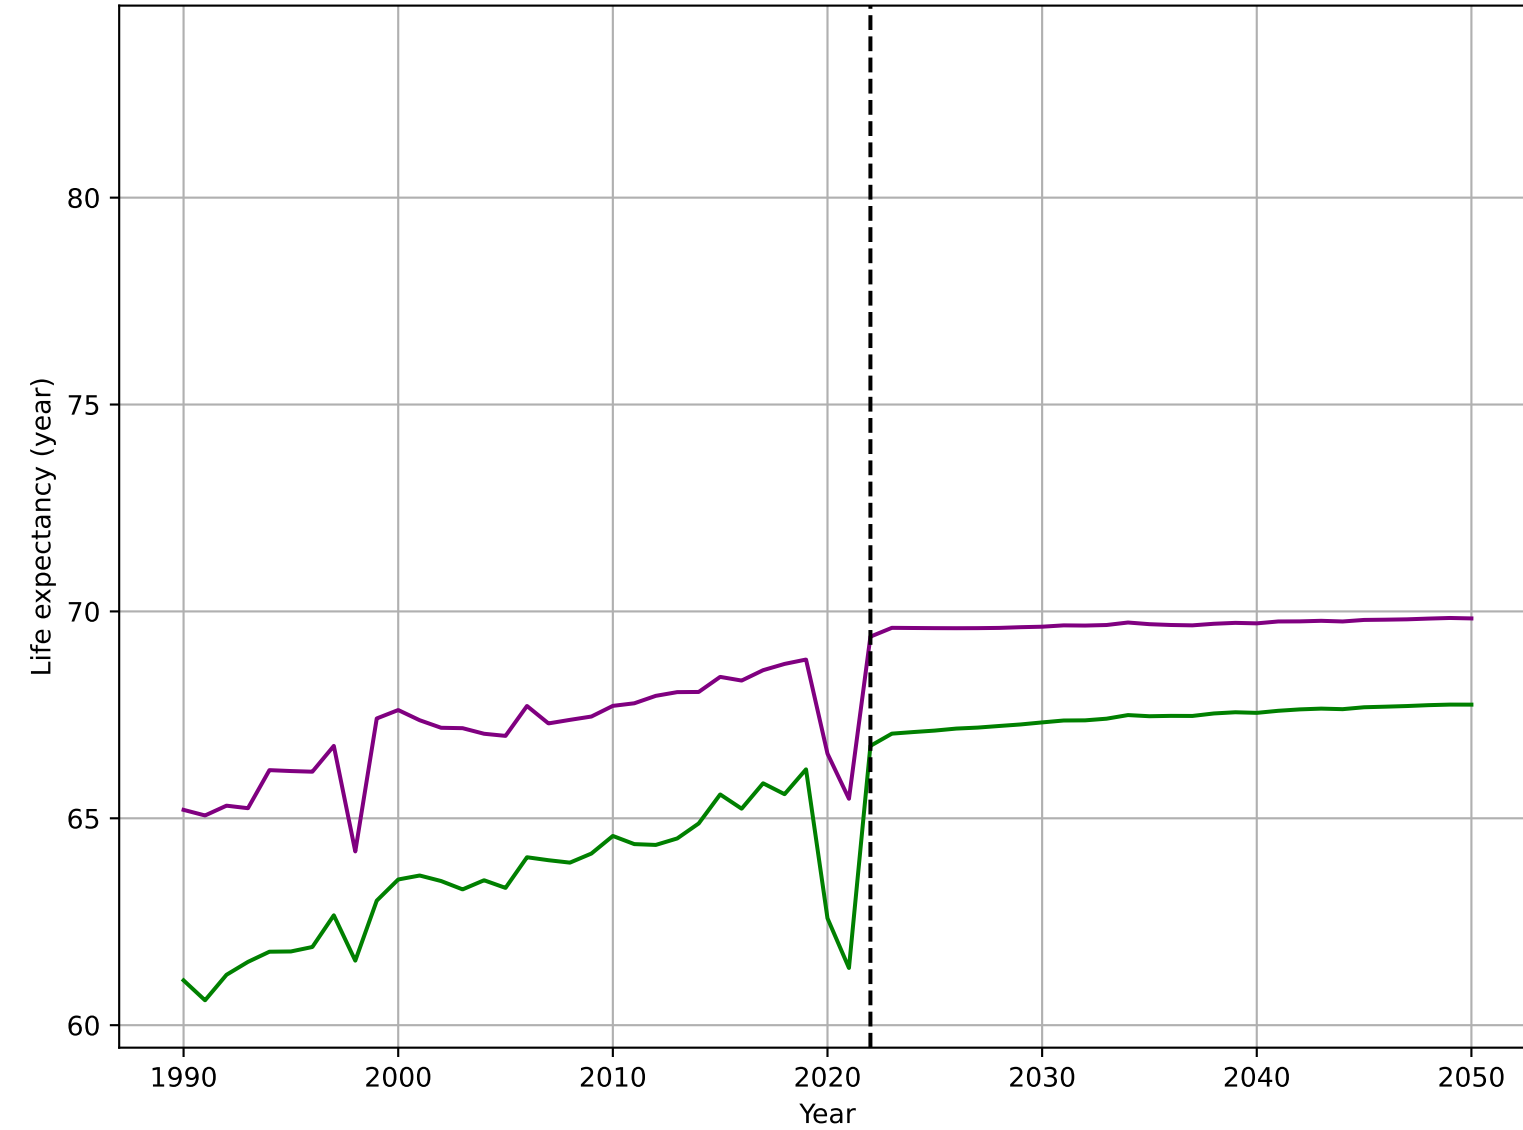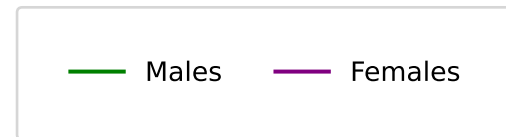

# Panama

### Life Expectancy

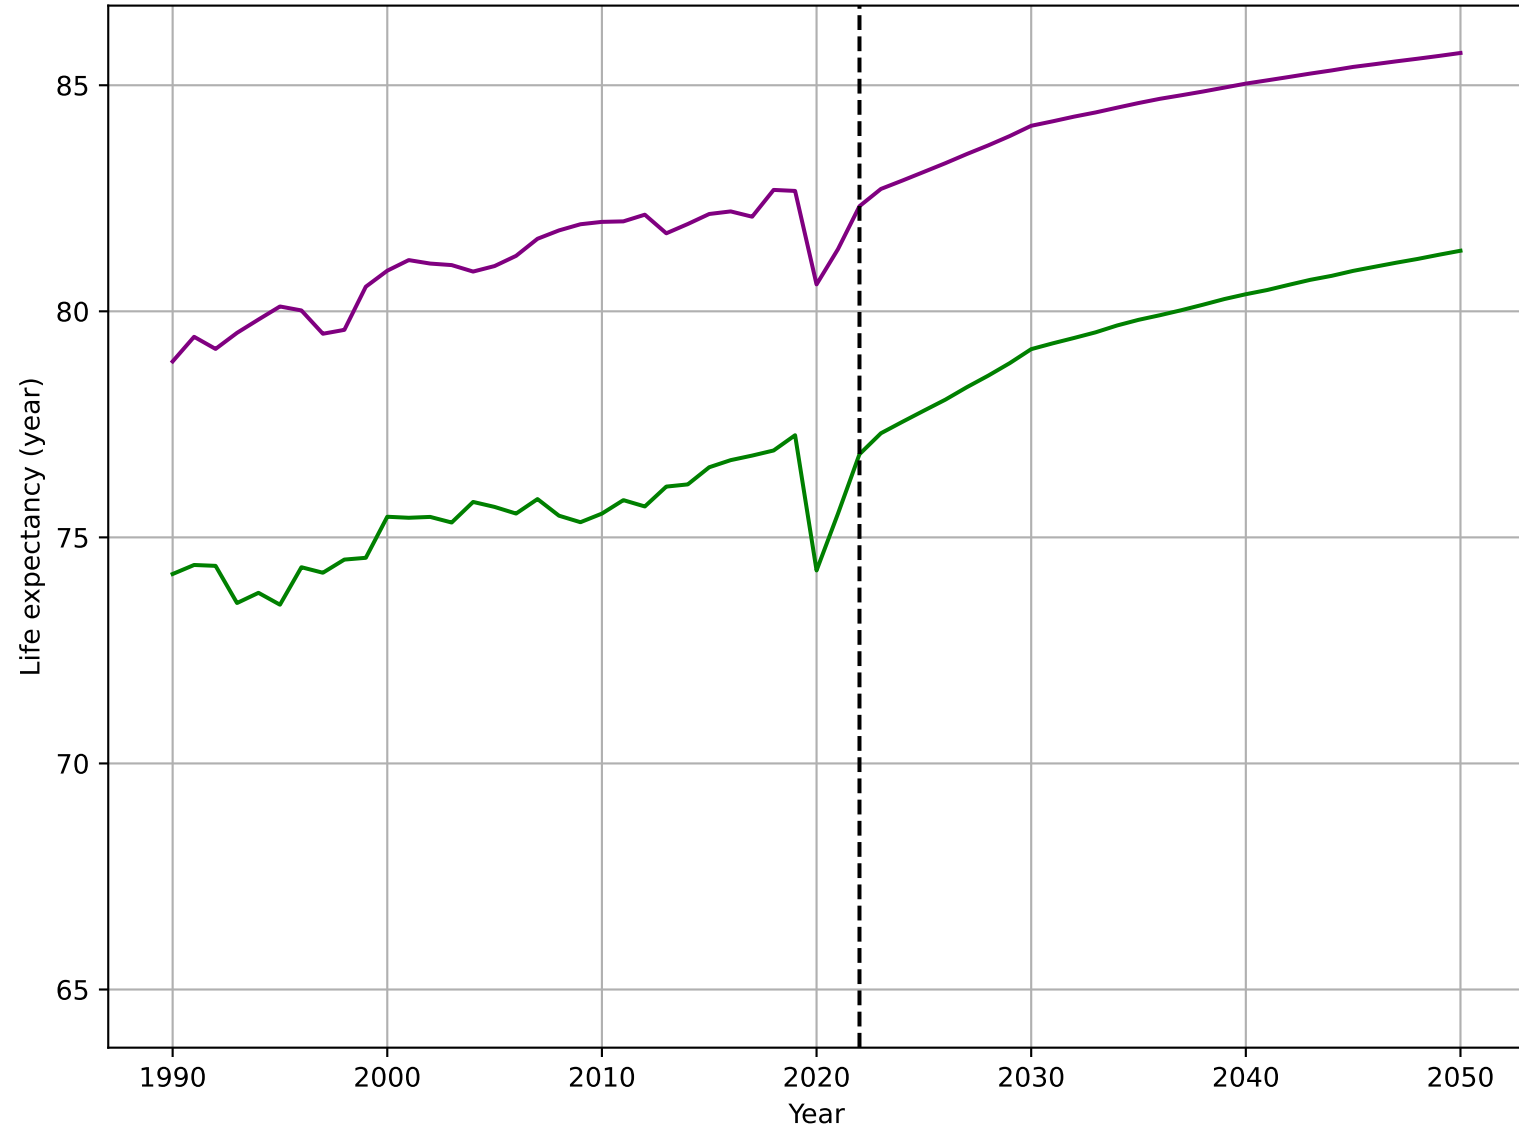

### Healthy Life Expectancy (HALE)

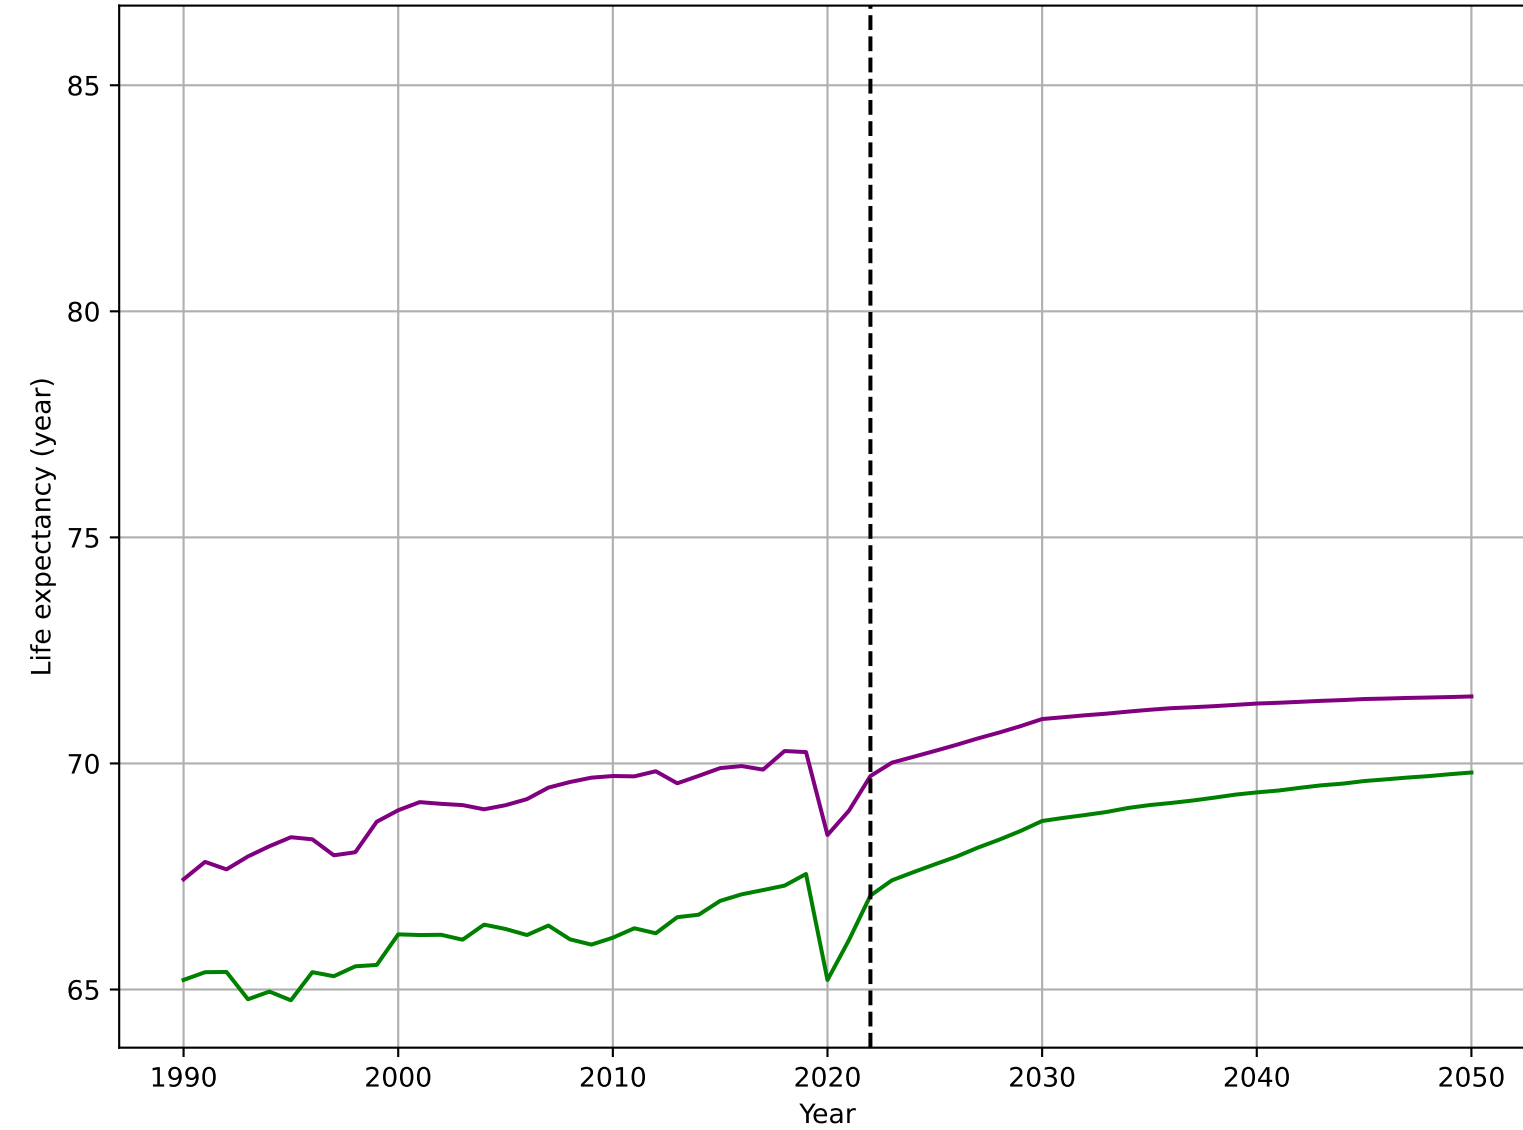

# Venezuela

### Life Expectancy

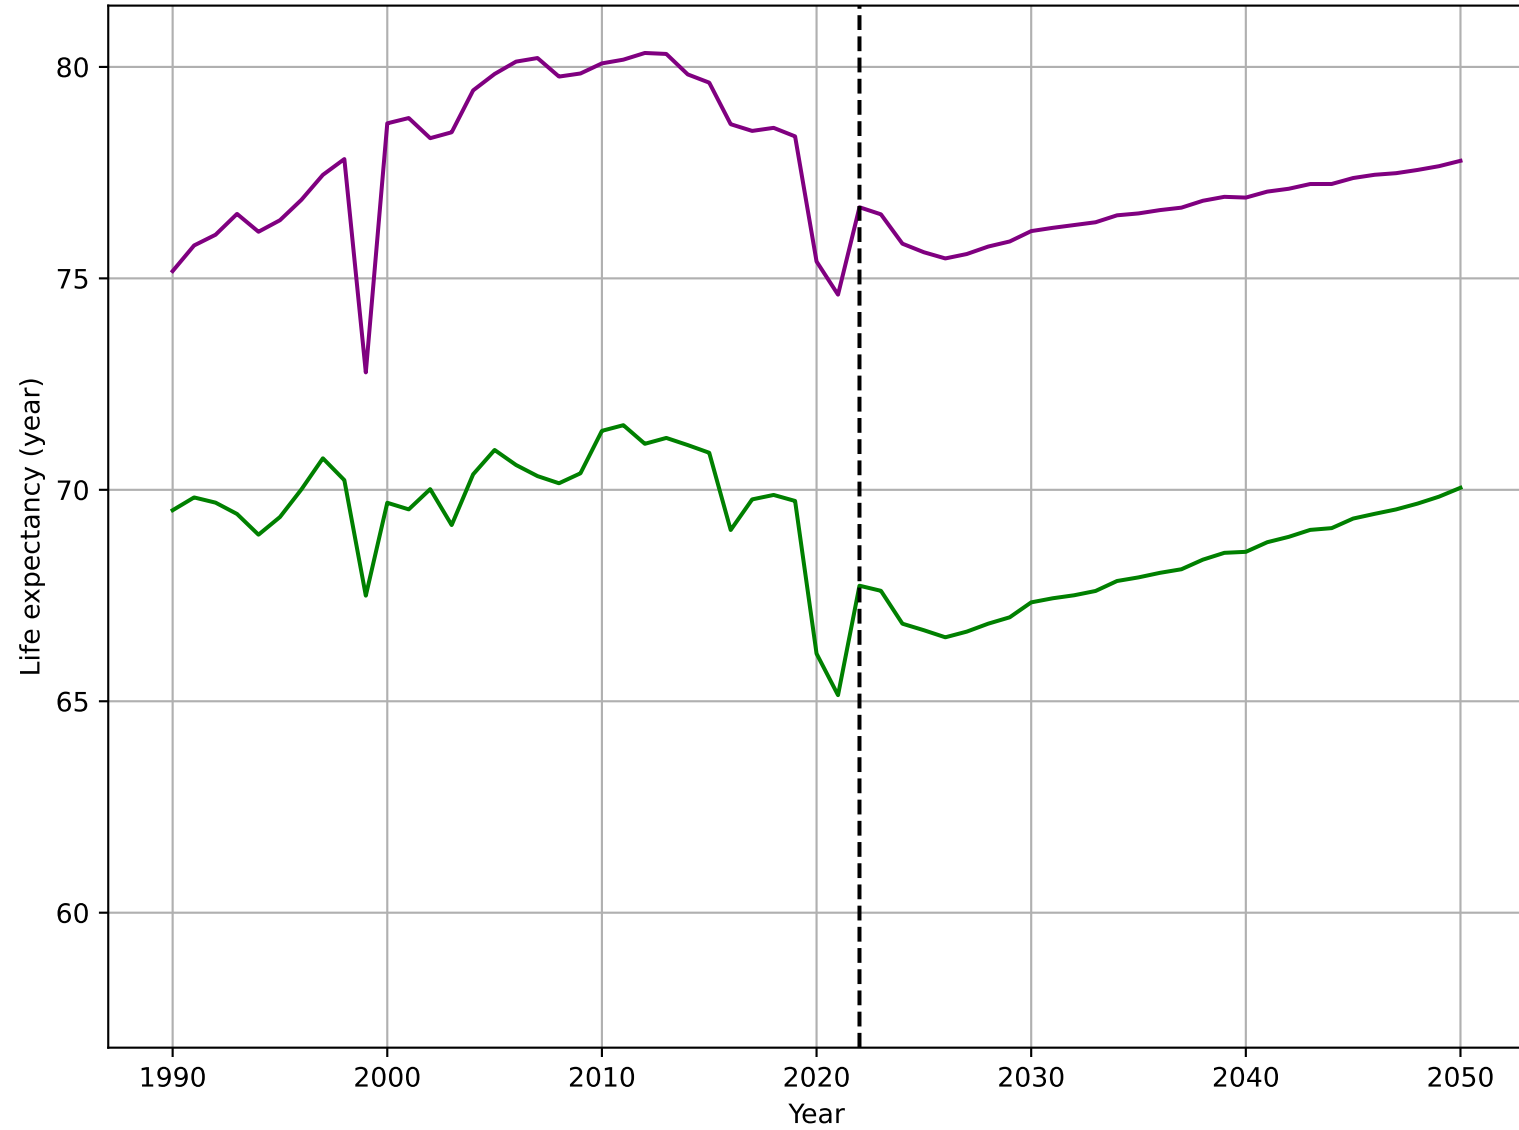

### Healthy Life Expectancy (HALE)

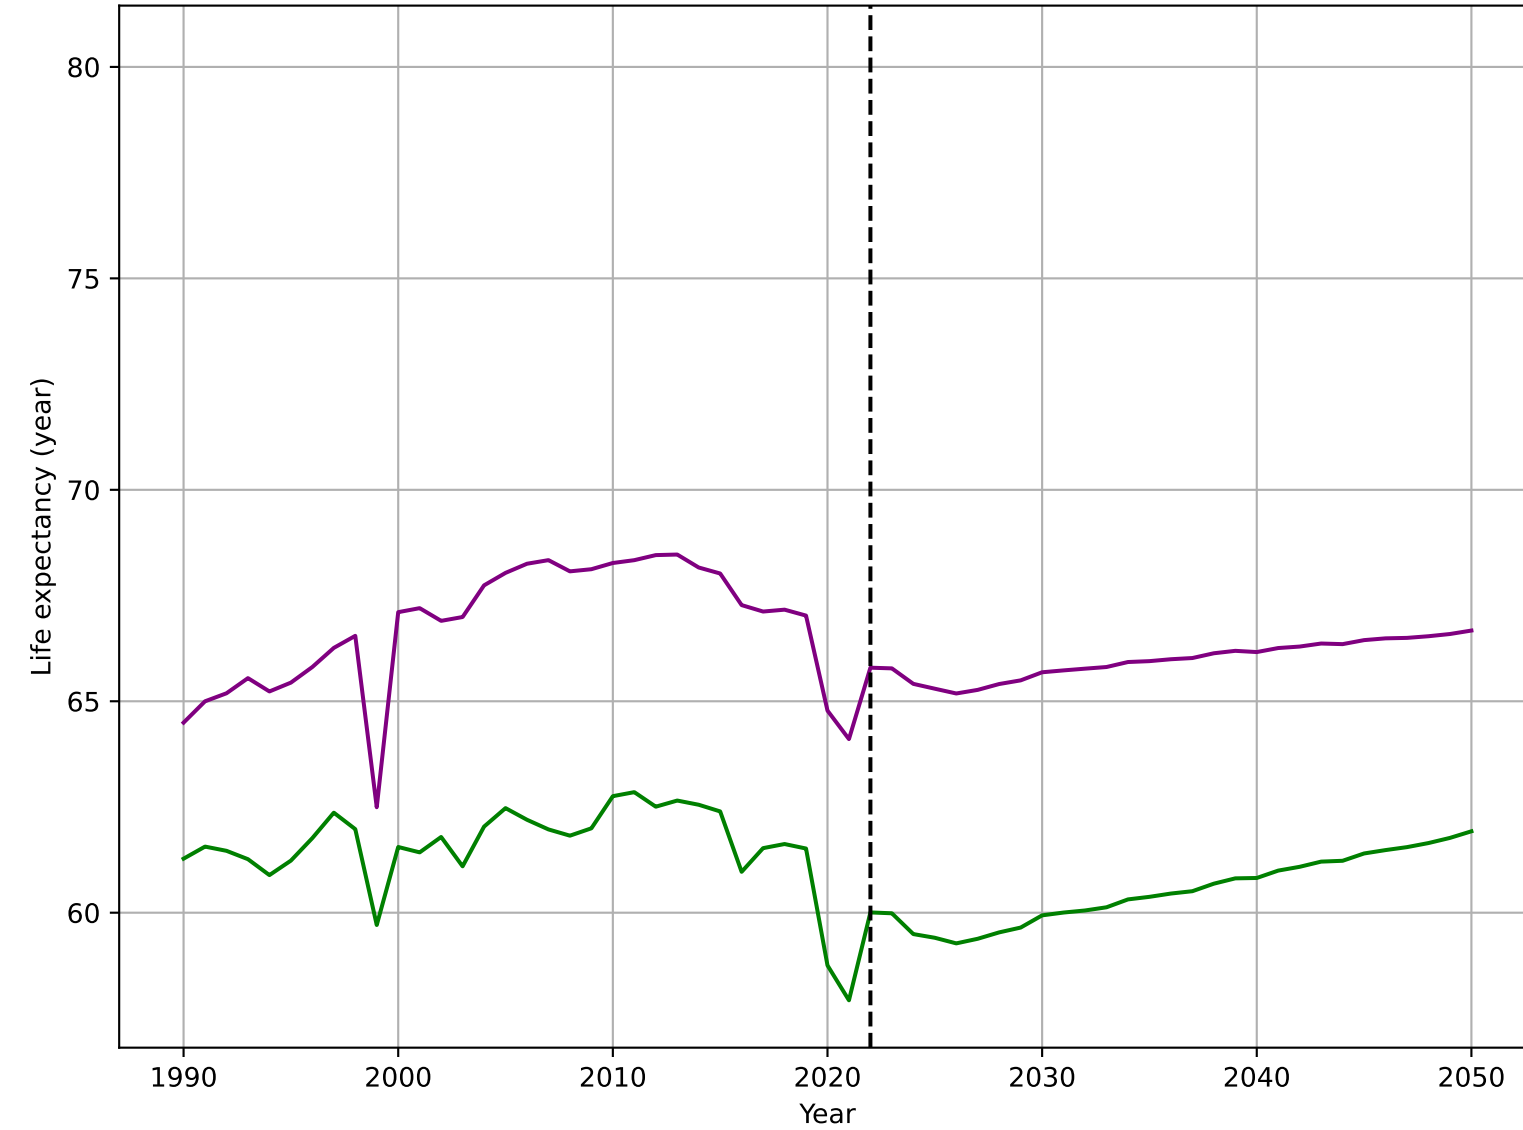

# Brazil

### Life Expectancy

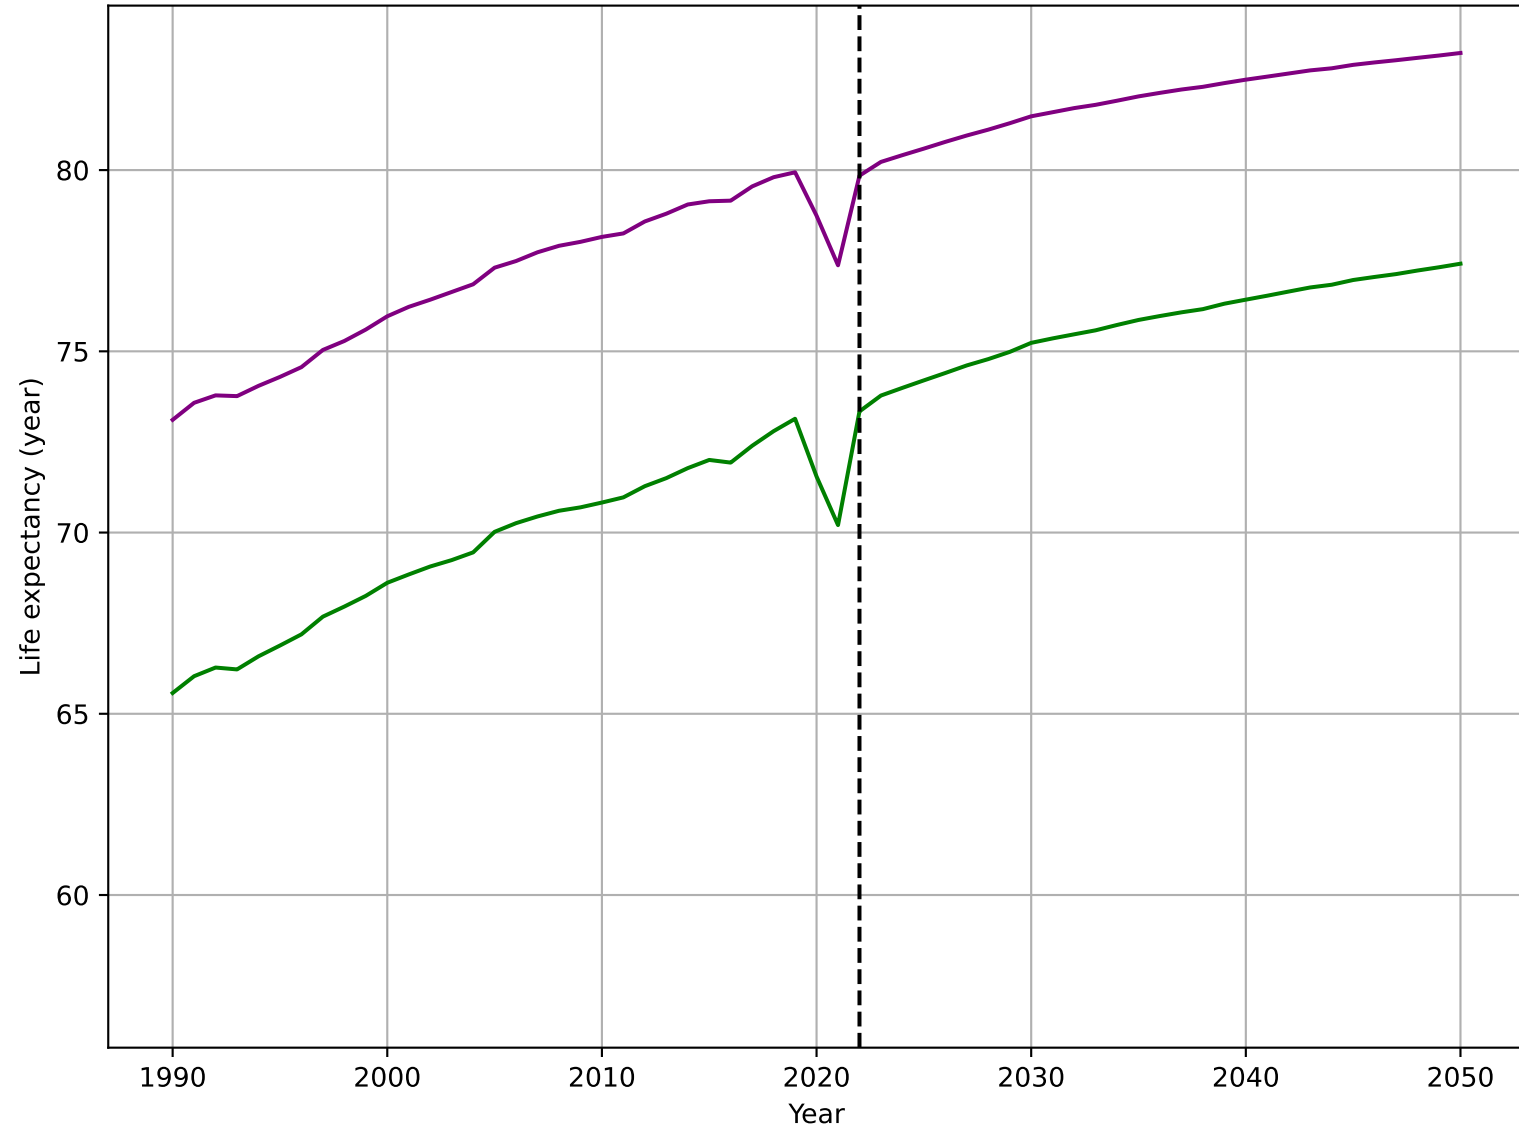

### Healthy Life Expectancy (HALE)

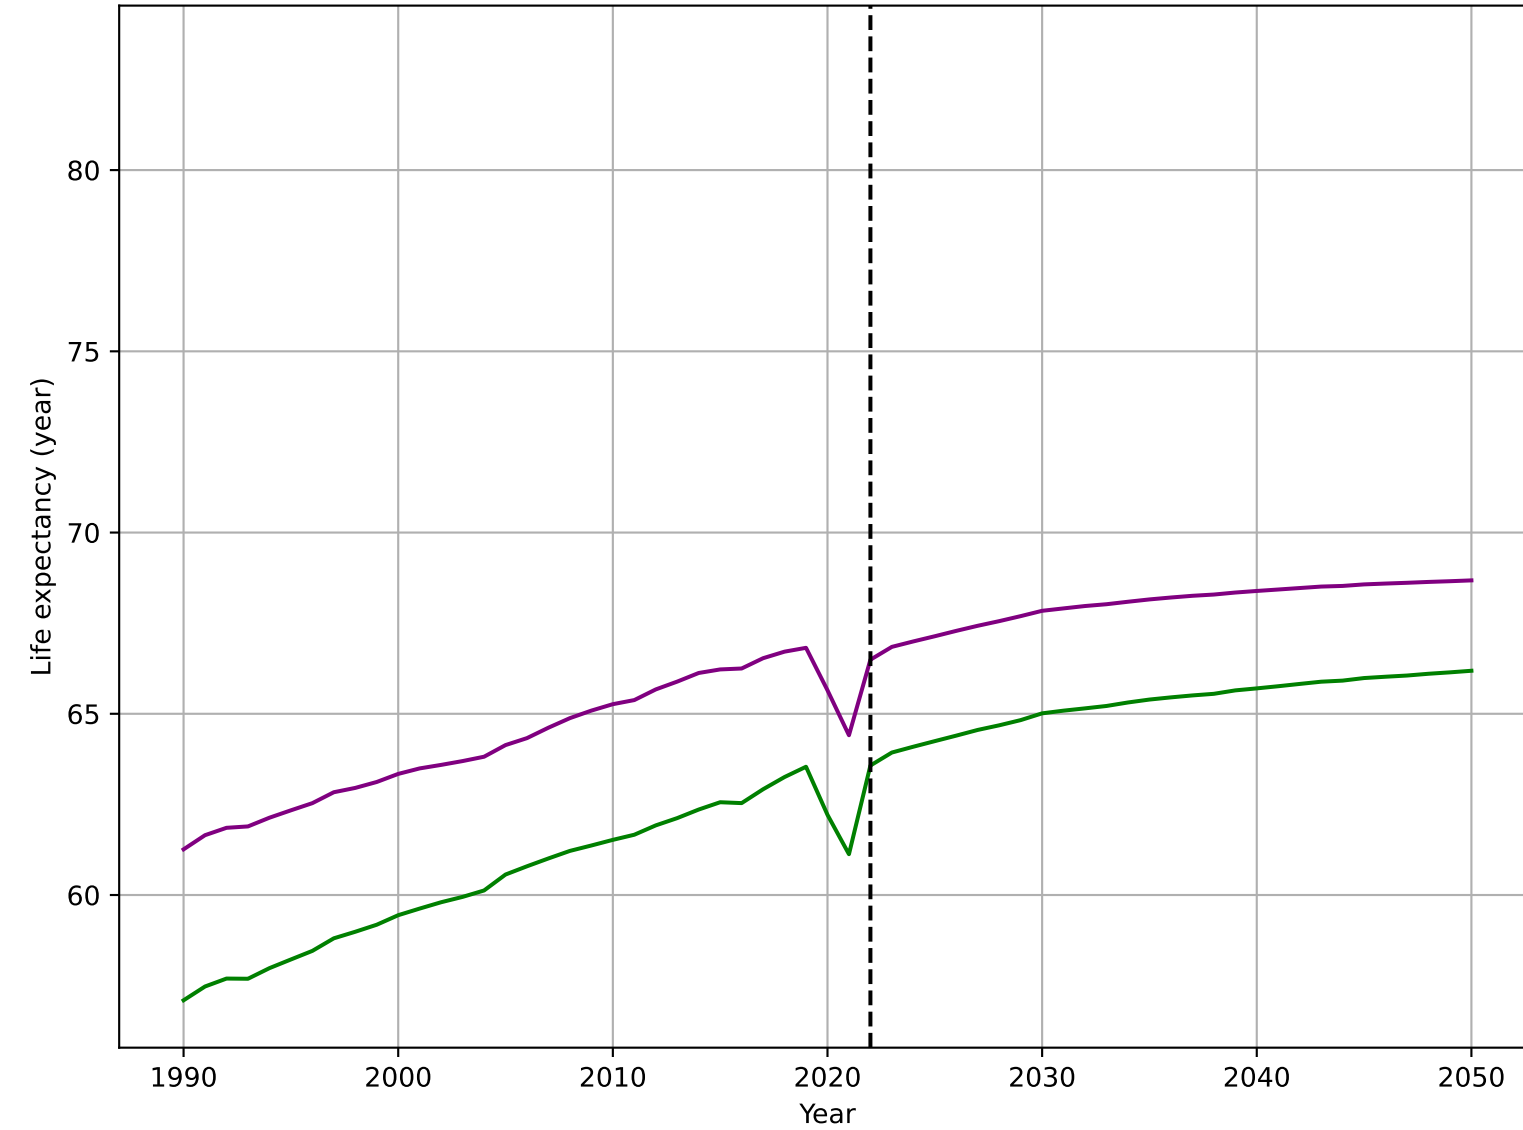

# Paraguay

### Life Expectancy

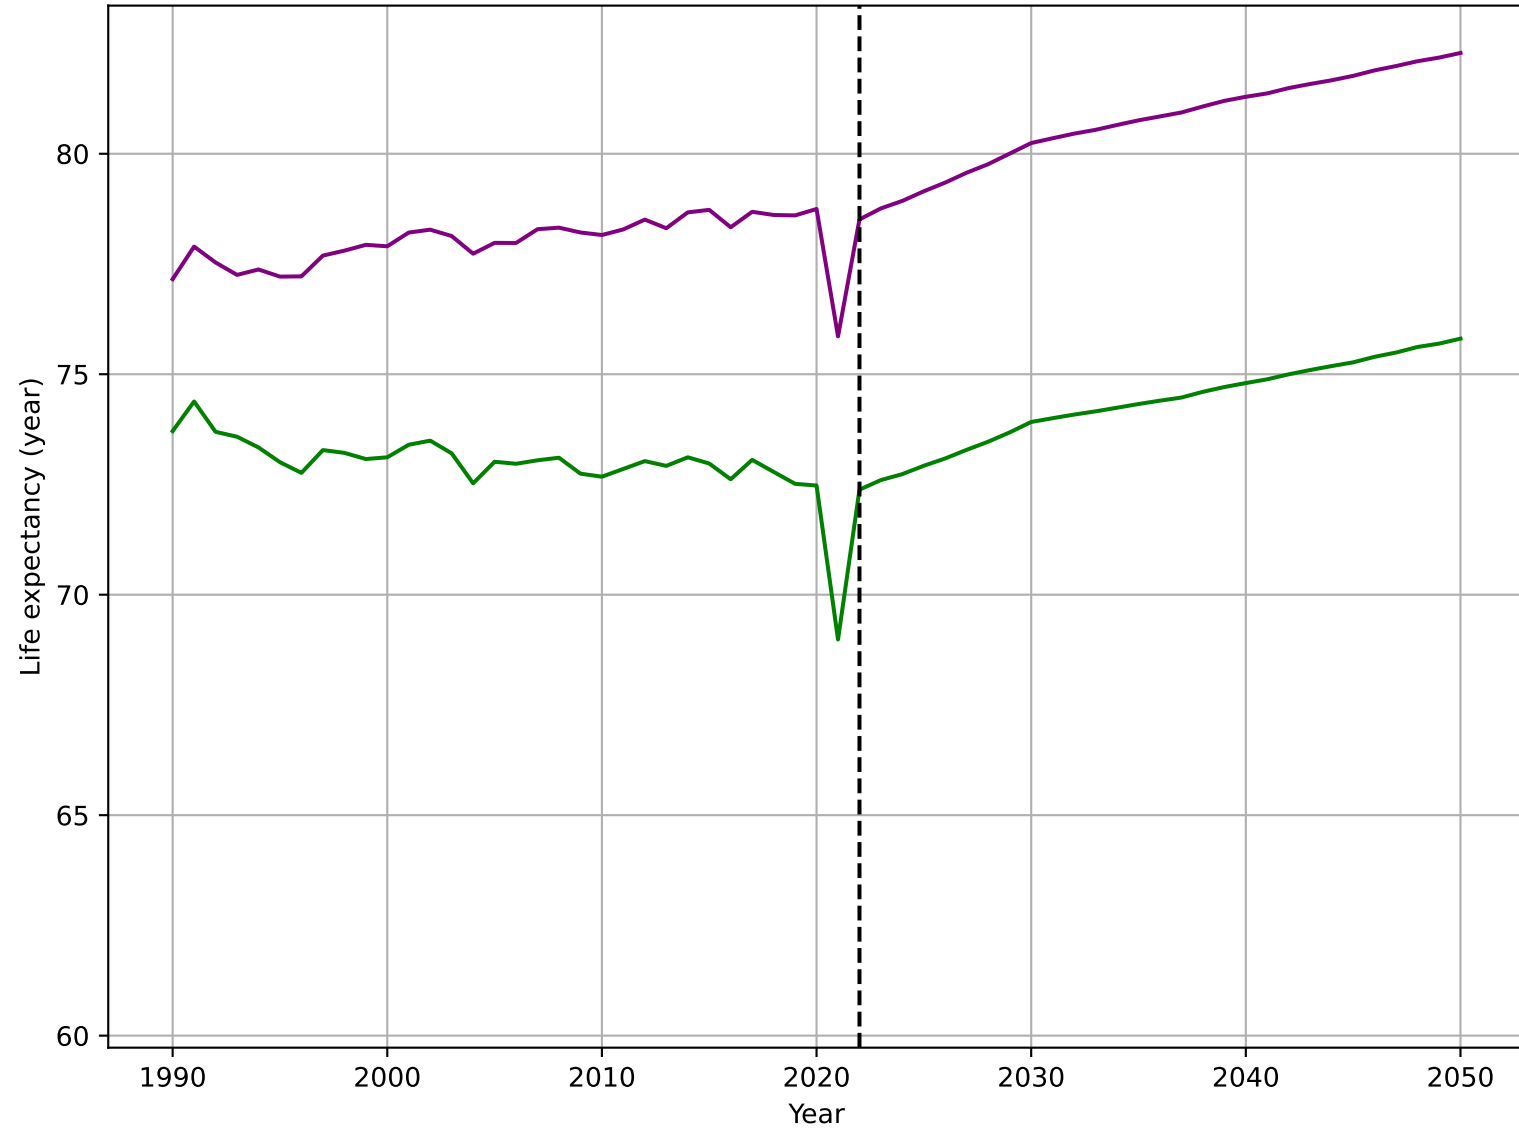

### Healthy Life Expectancy (HALE)

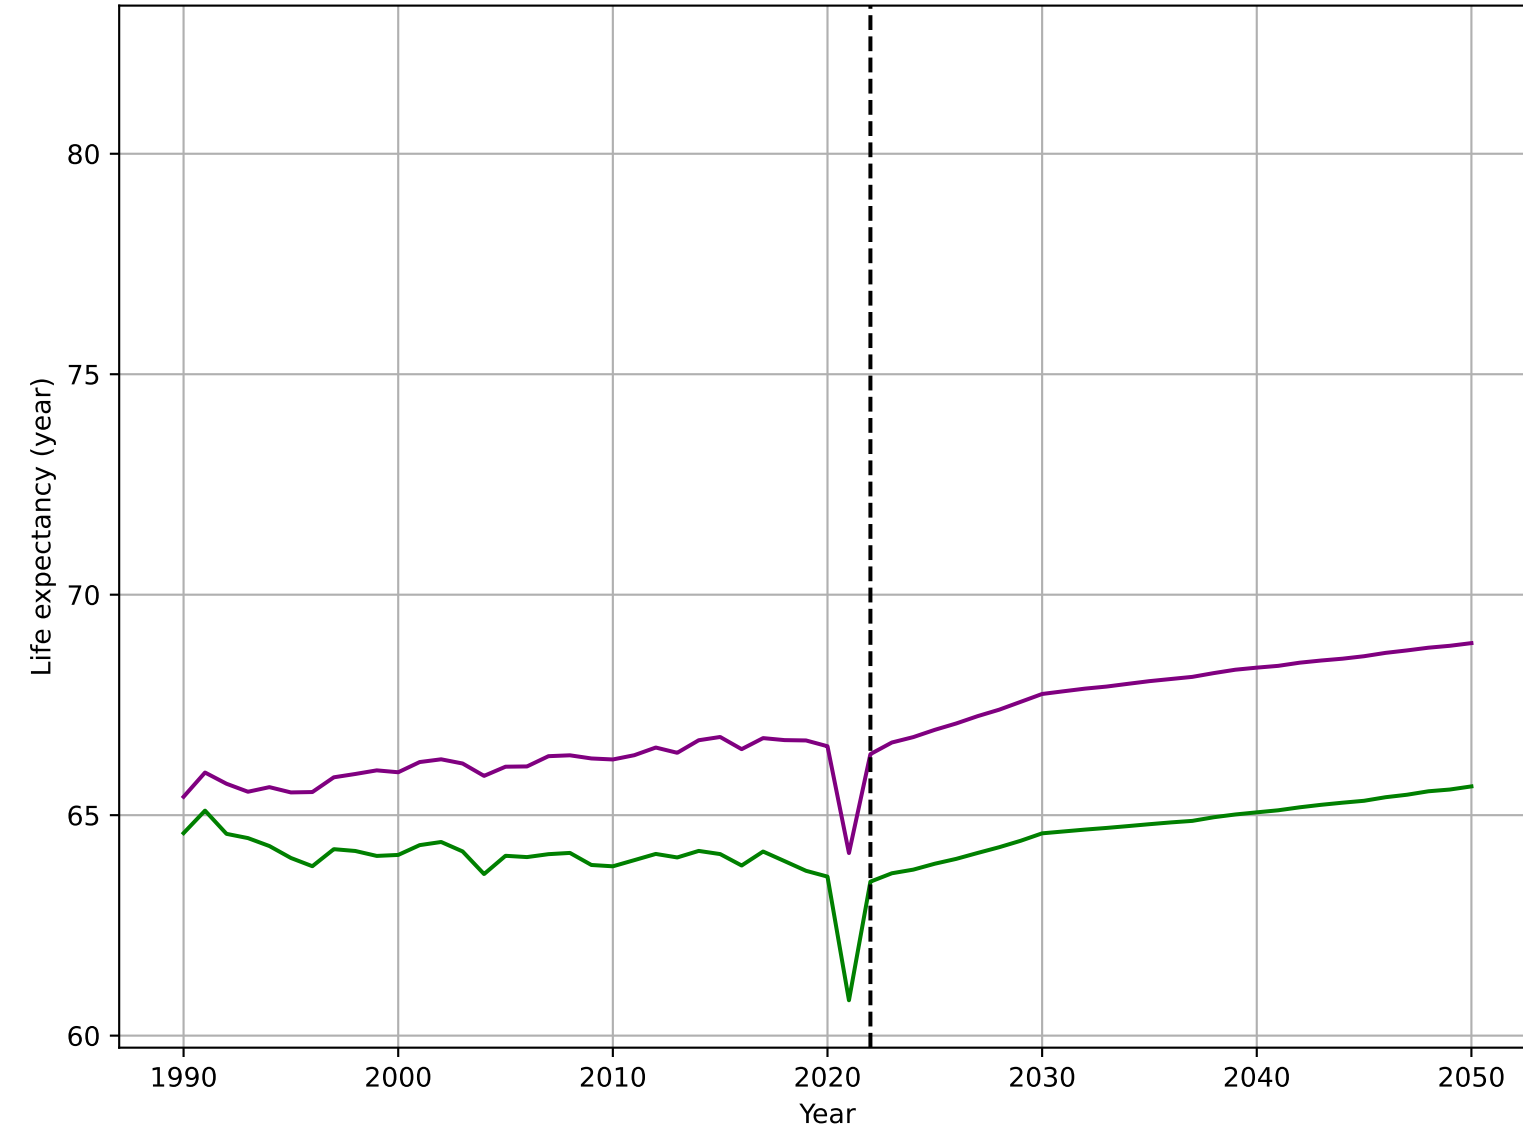

# Afghanistan

### Life Expectancy

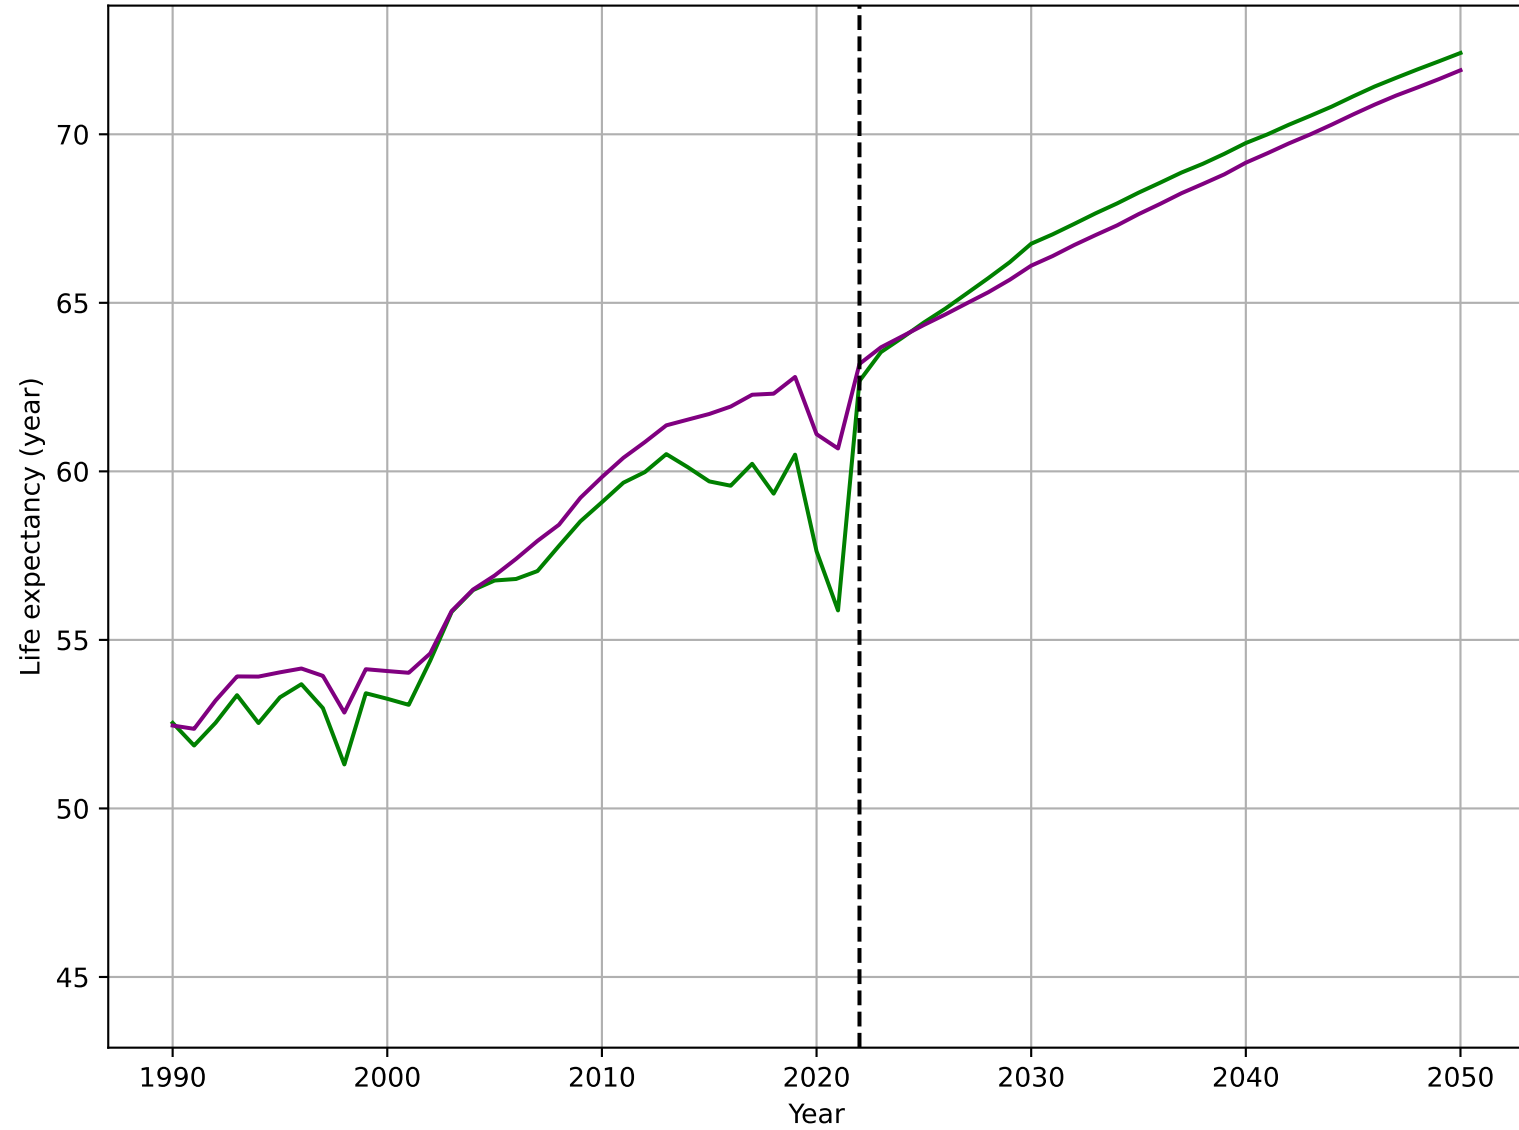

### Healthy Life Expectancy (HALE)

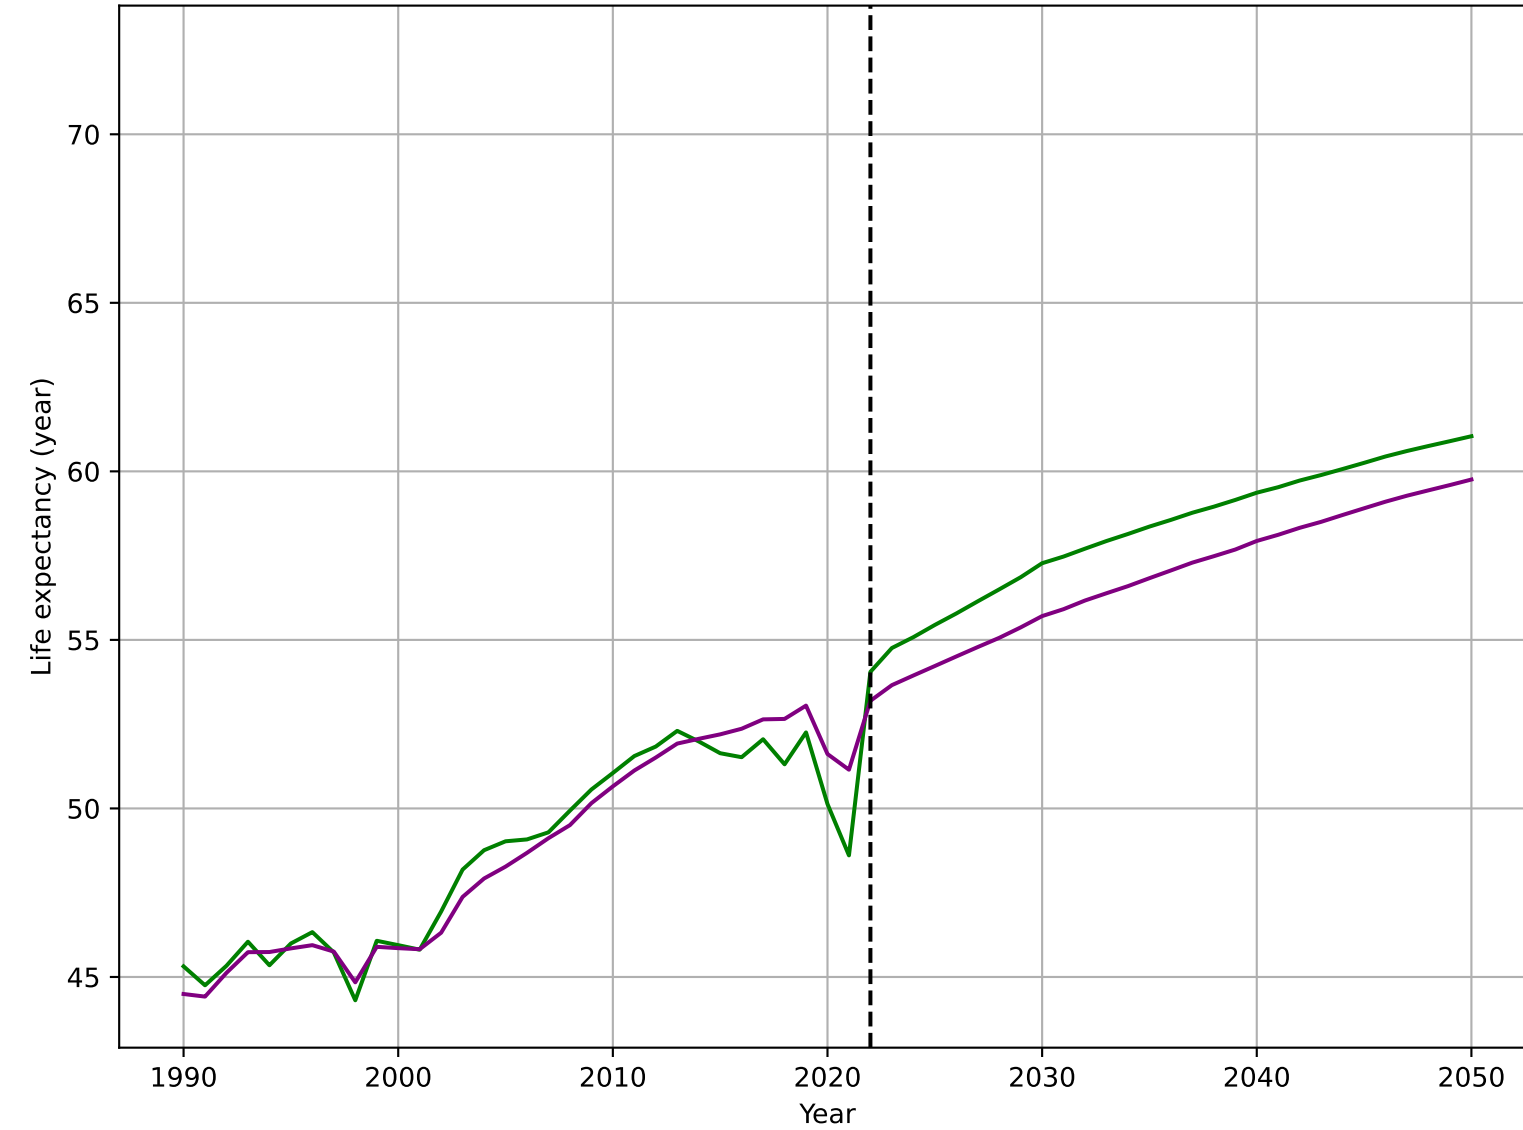

# Algeria

### Life Expectancy

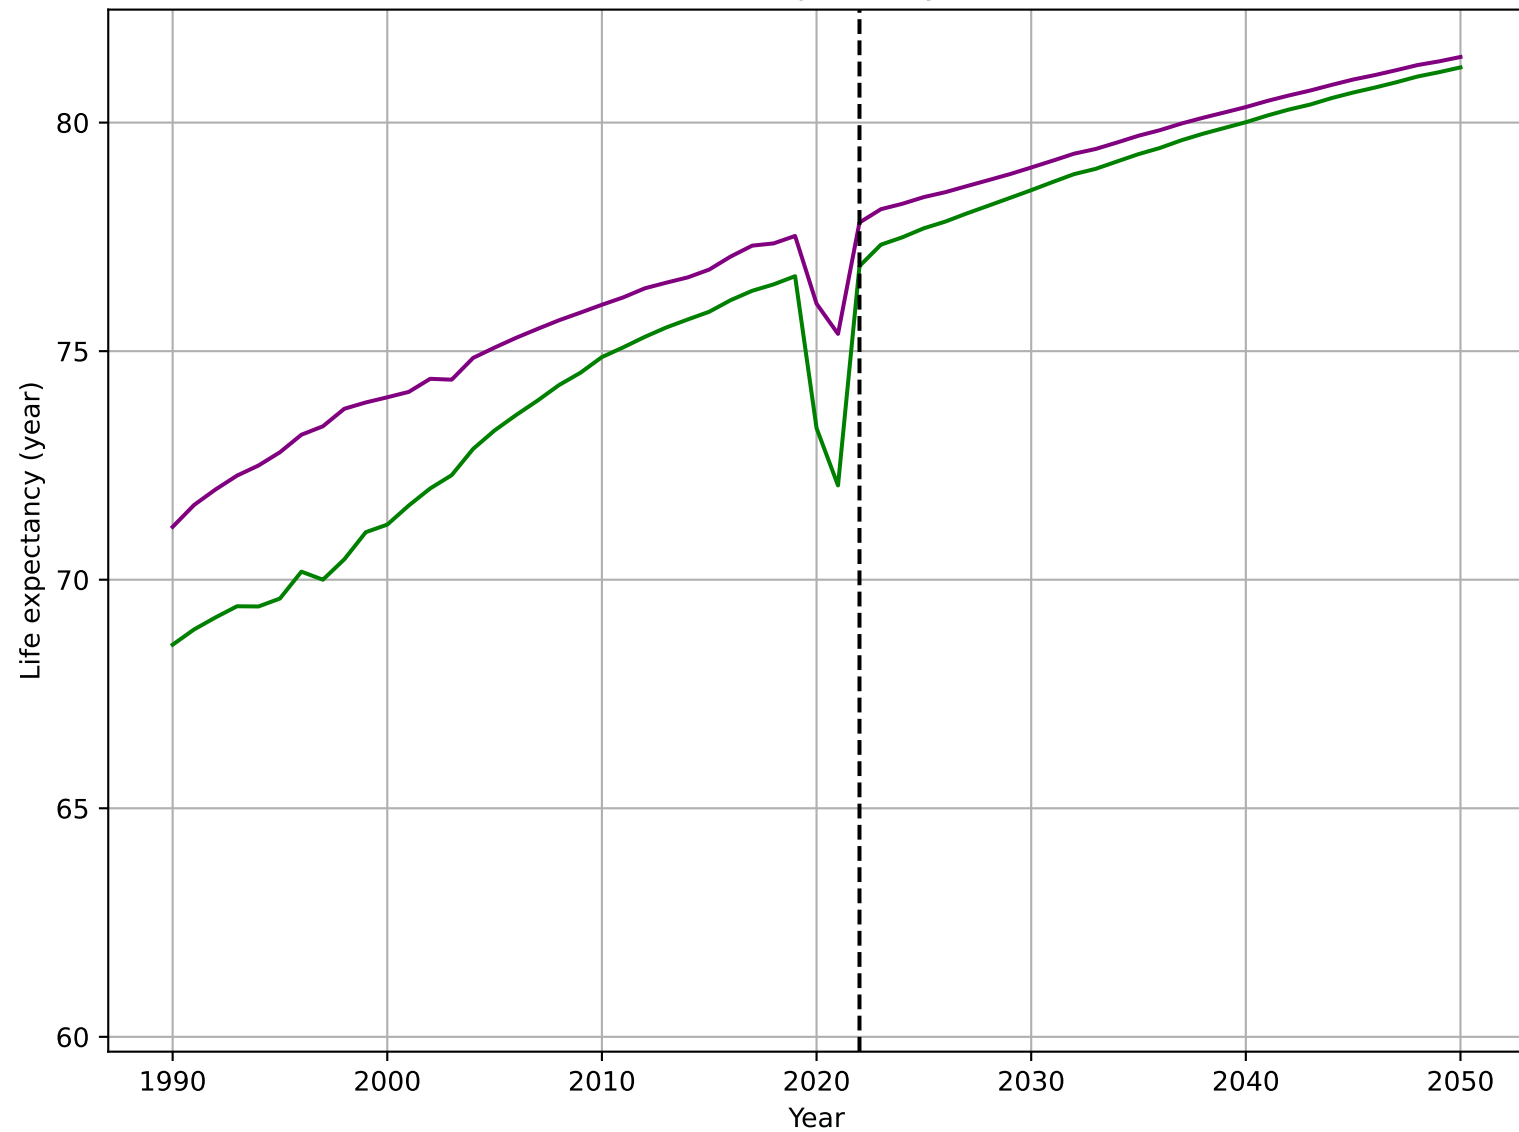

### Healthy Life Expectancy (HALE)

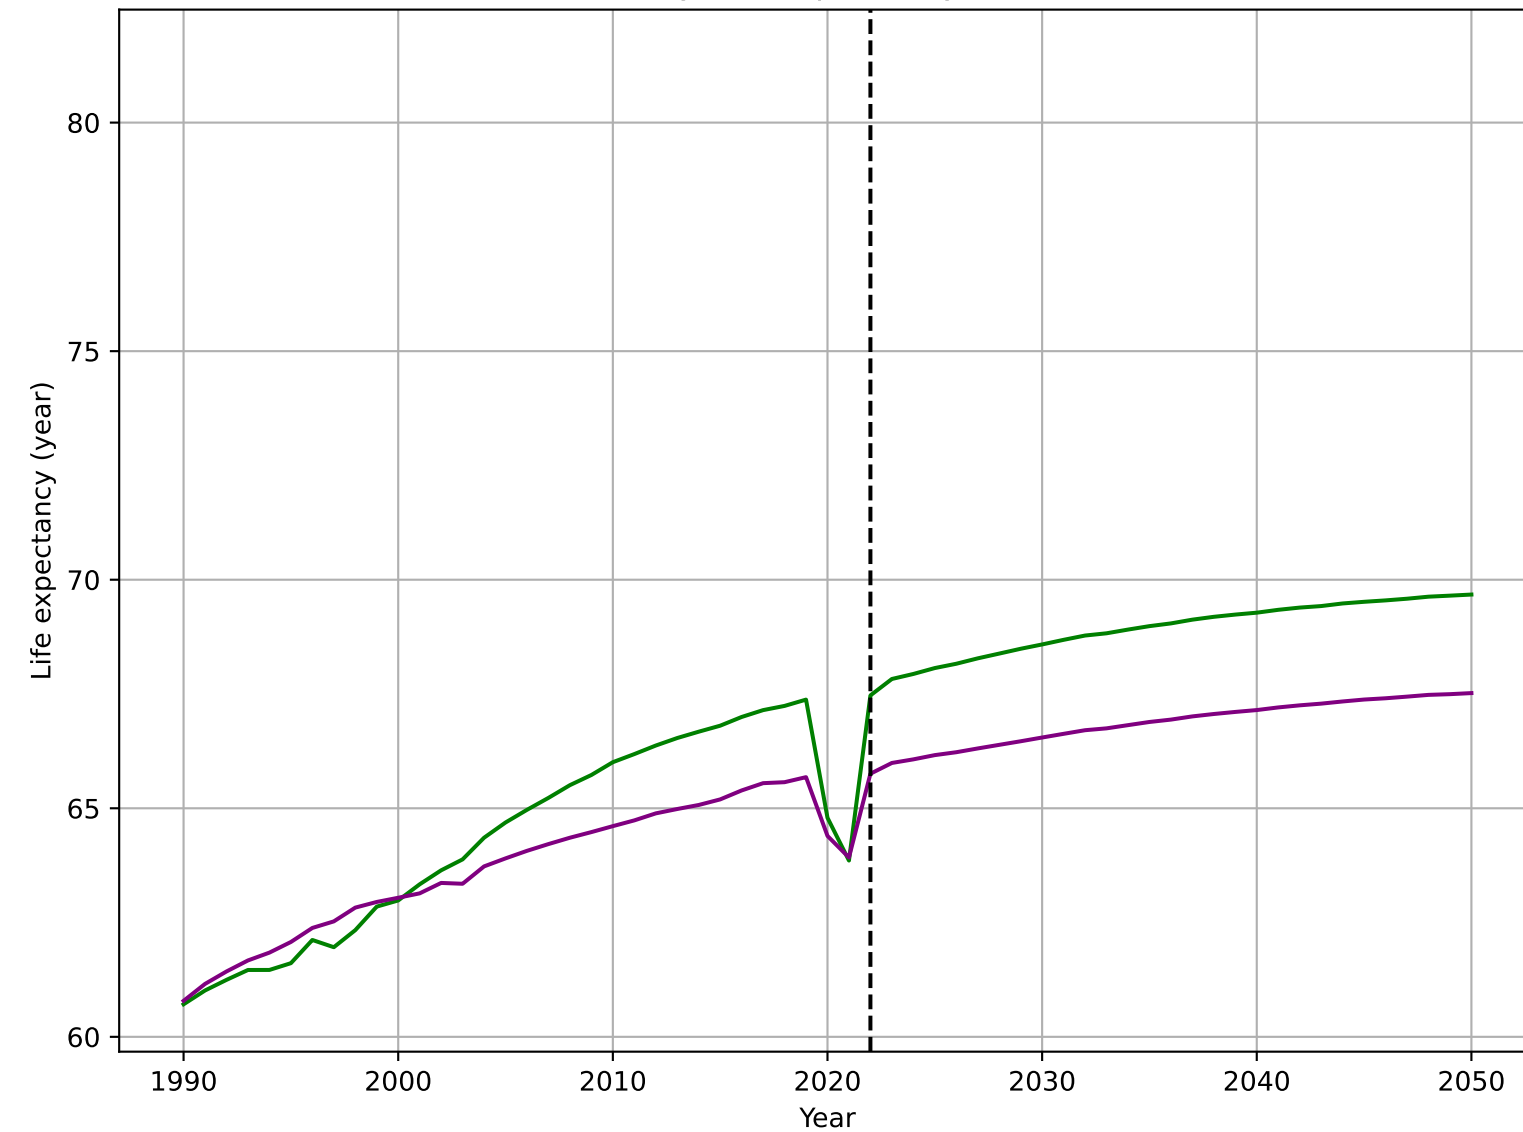



# Bahrain

### Life Expectancy

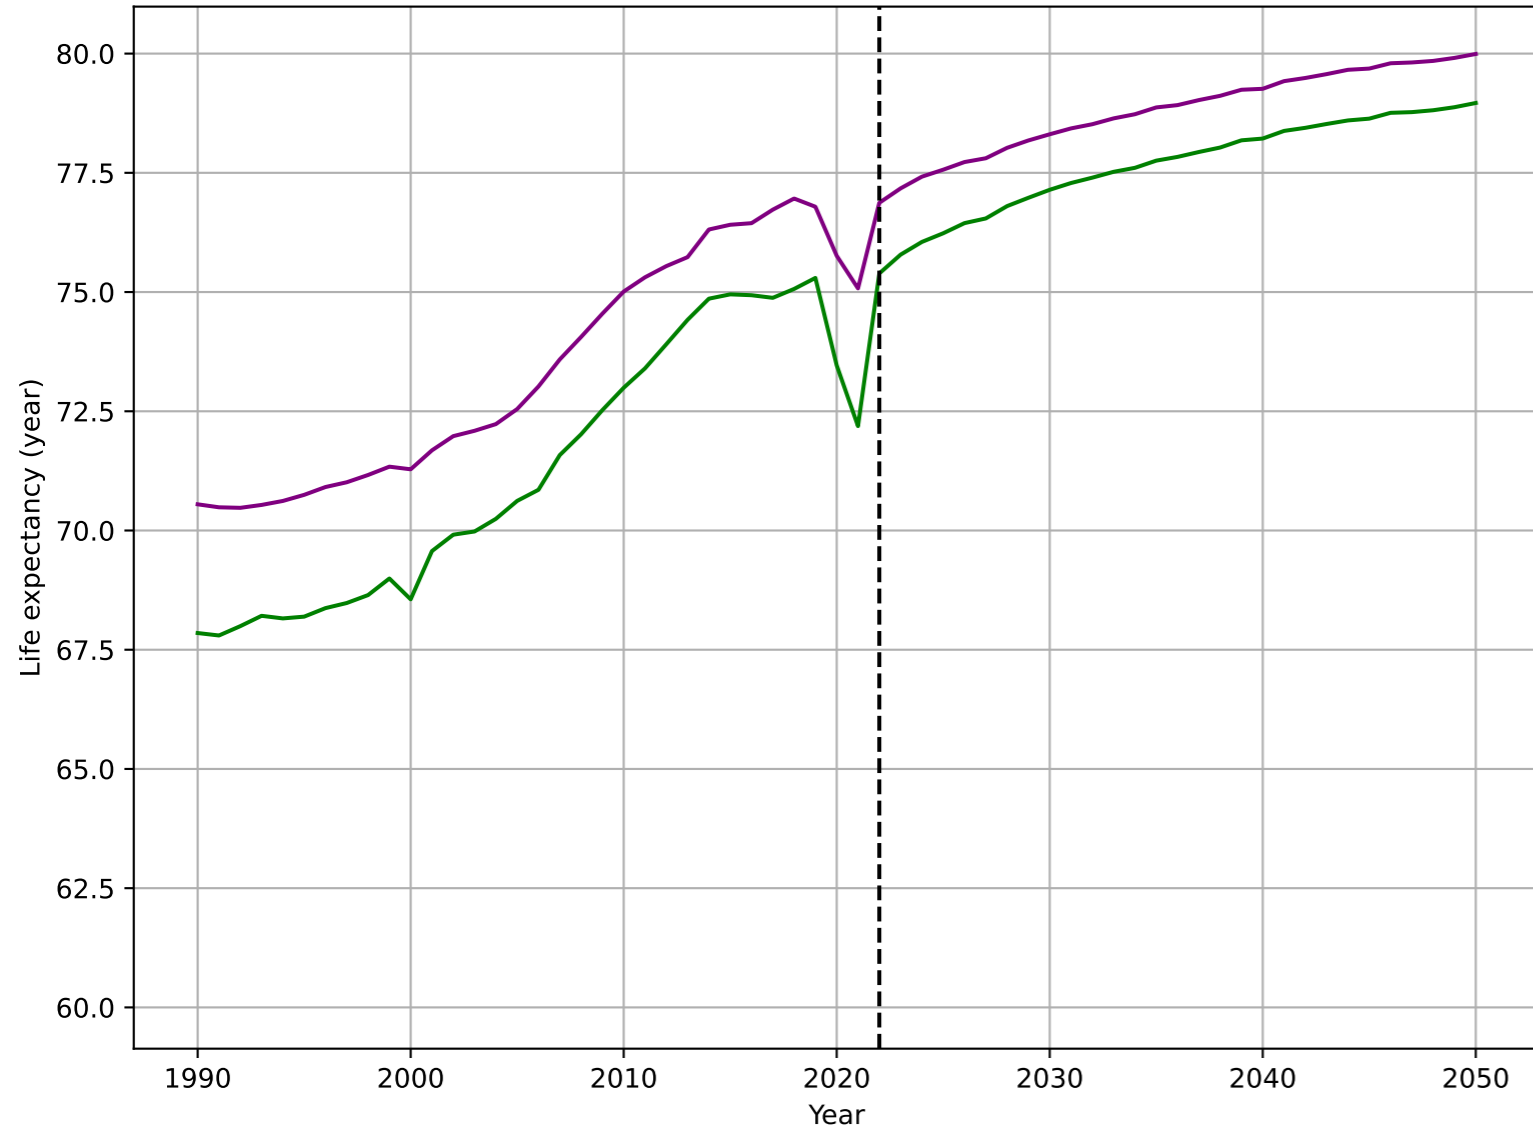

### Healthy Life Expectancy (HALE)

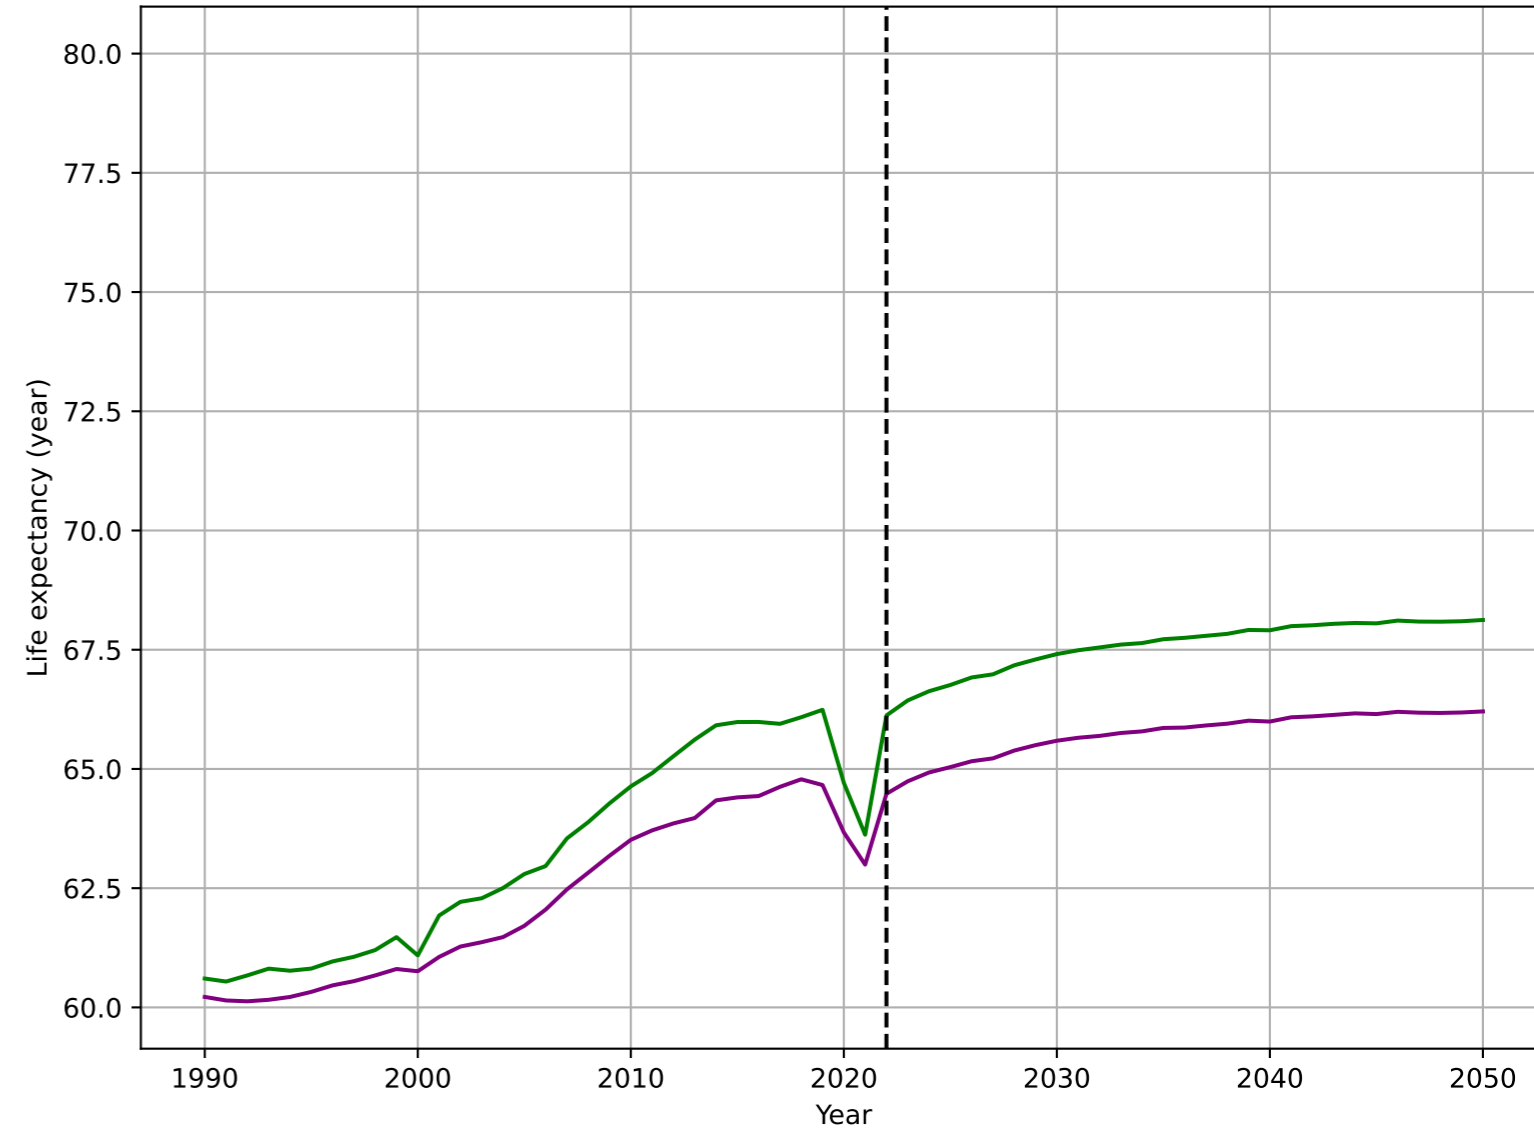

# Egypt

### Life Expectancy

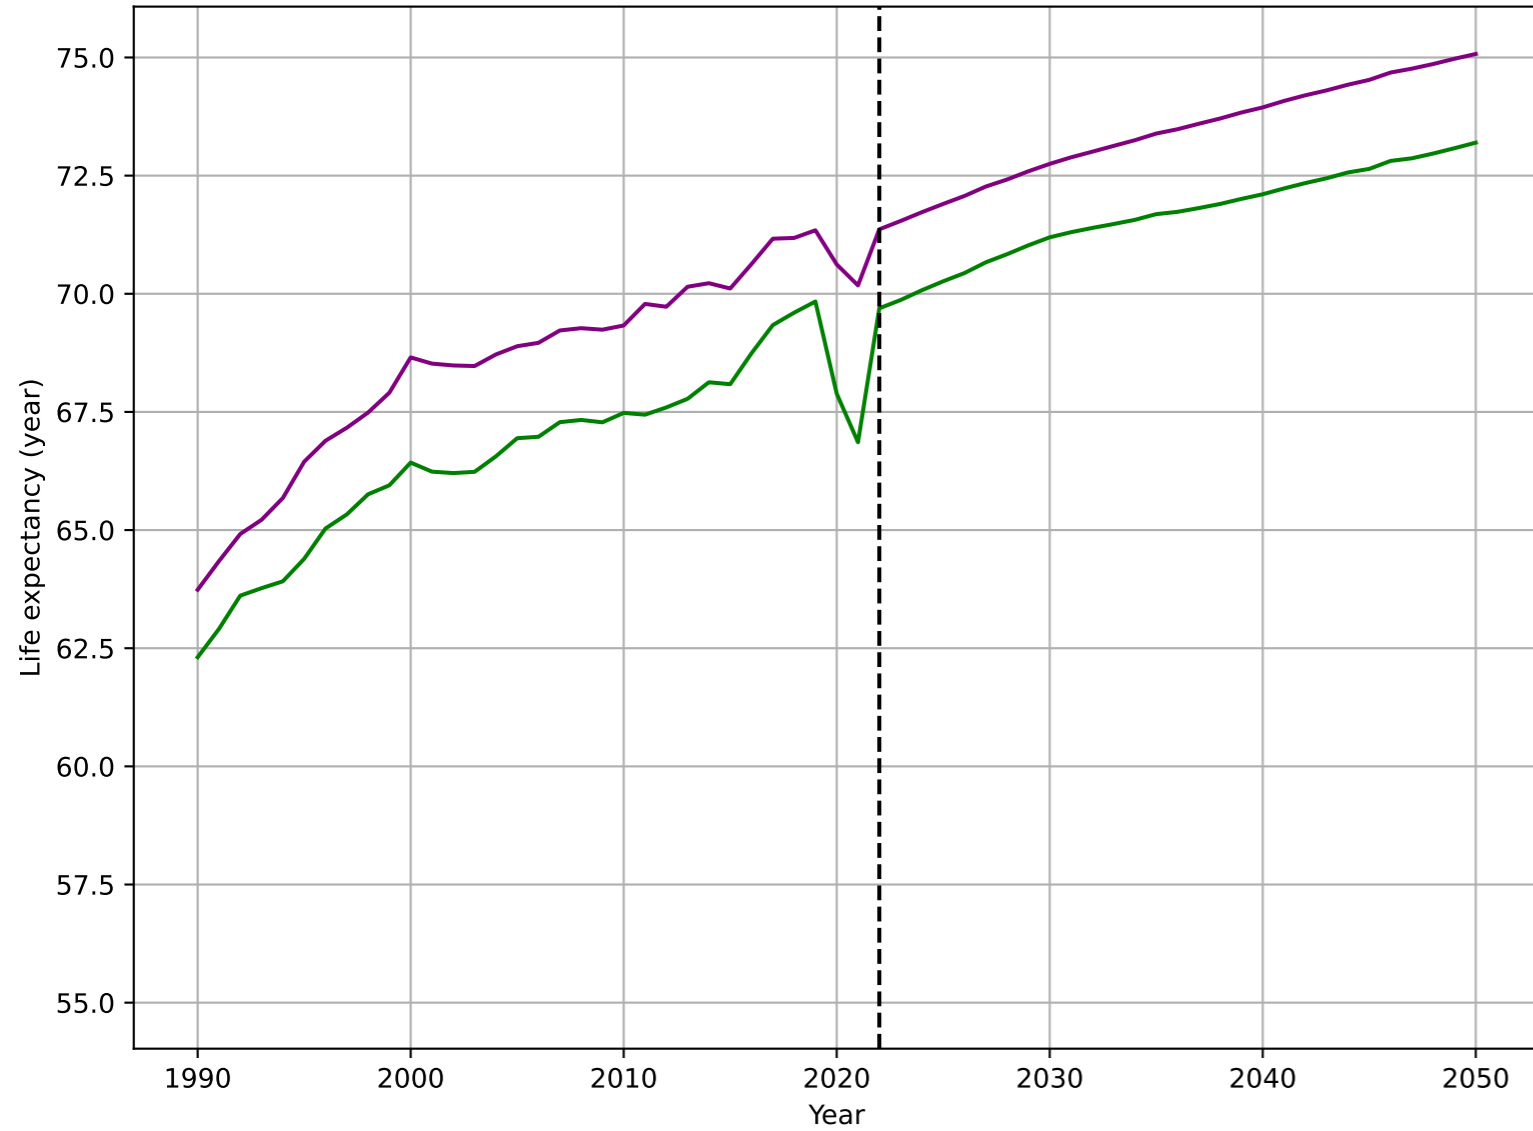

### Healthy Life Expectancy (HALE)

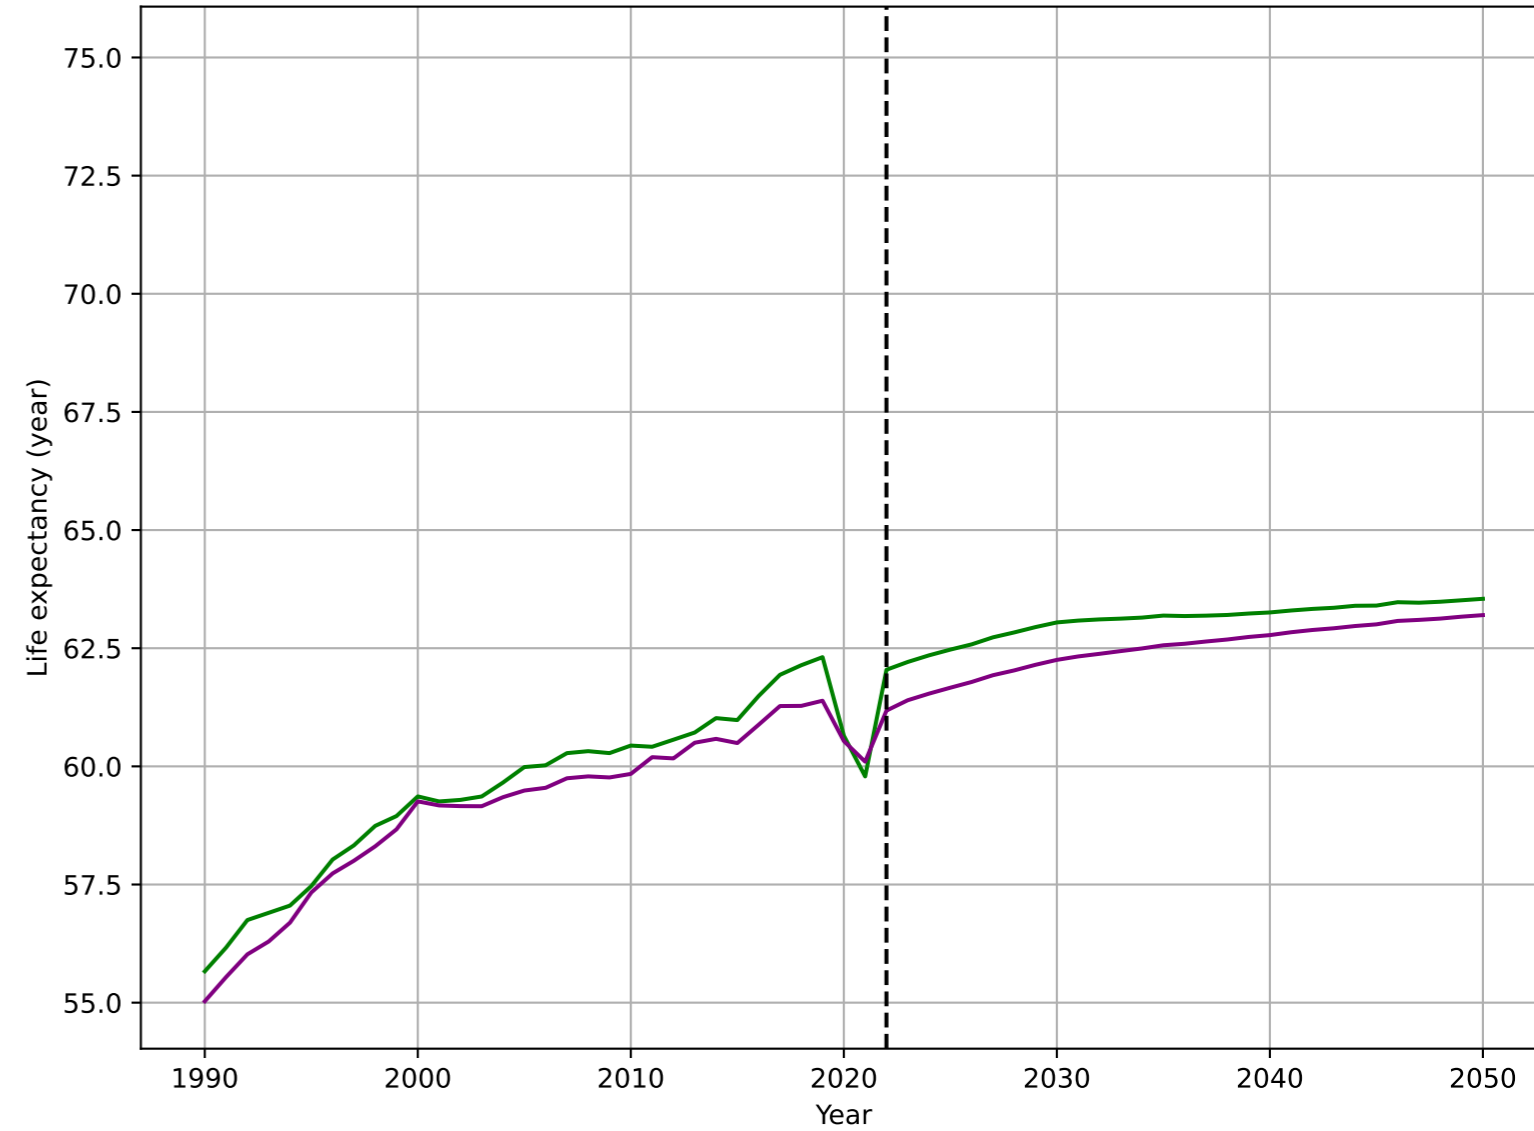

# Iran

### Life Expectancy

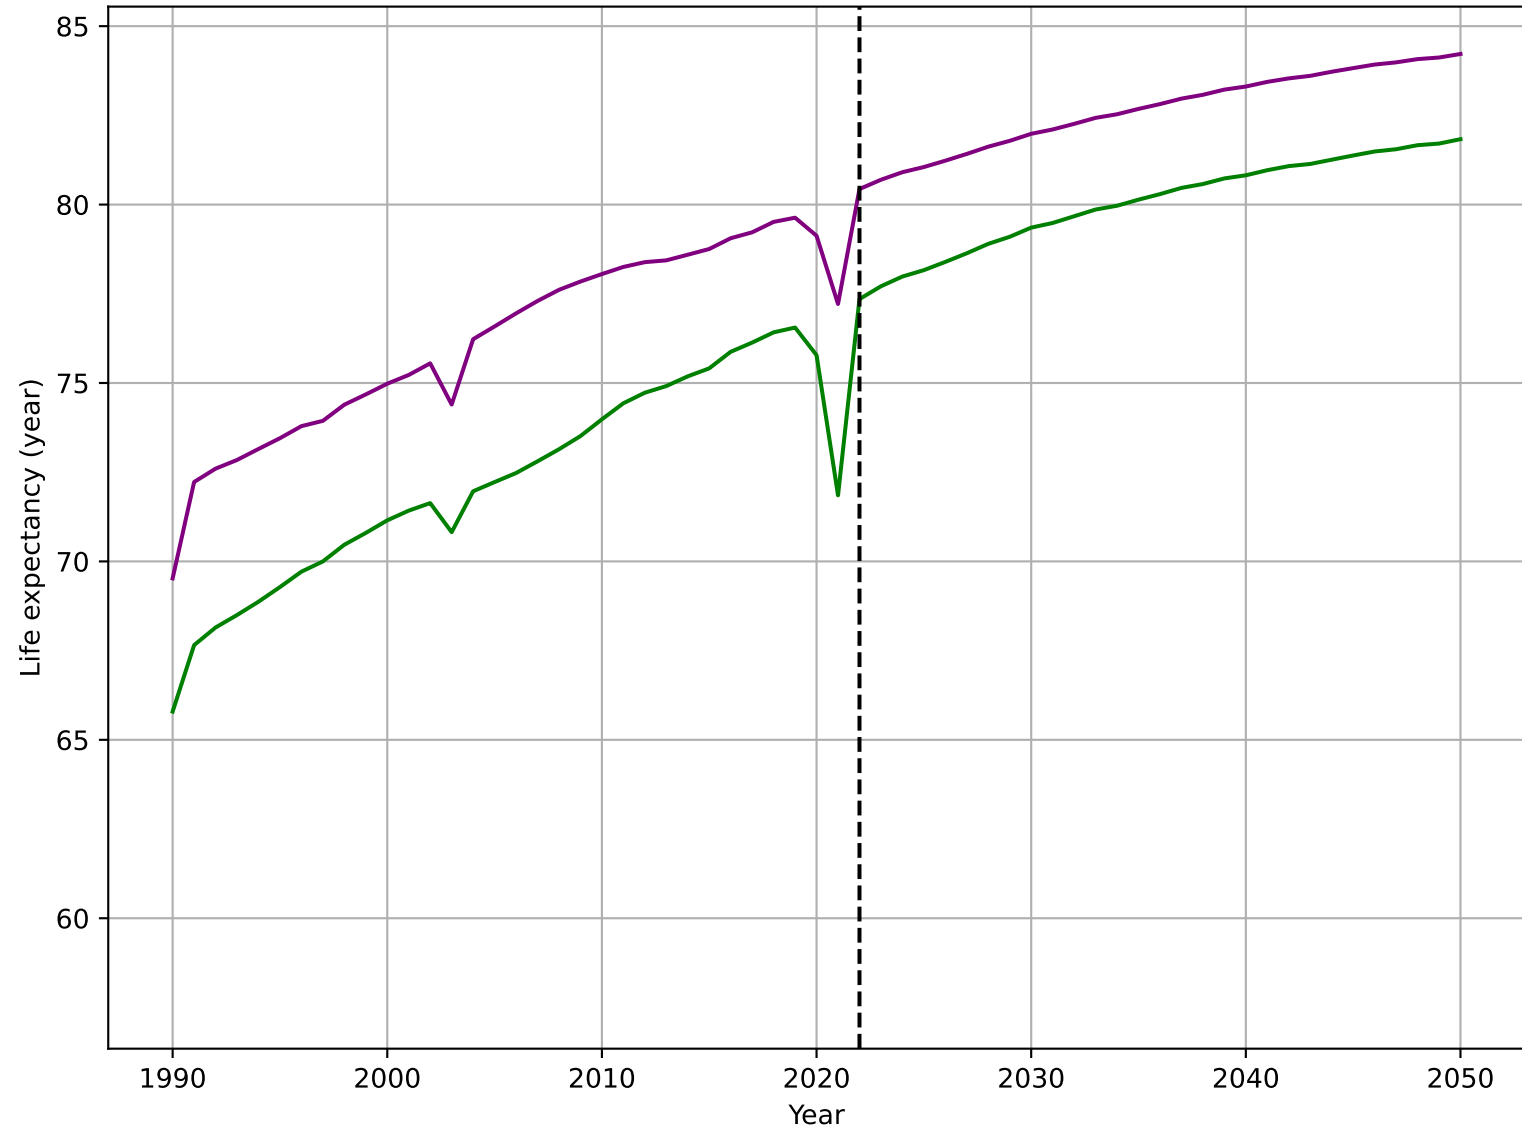

### Healthy Life Expectancy (HALE)

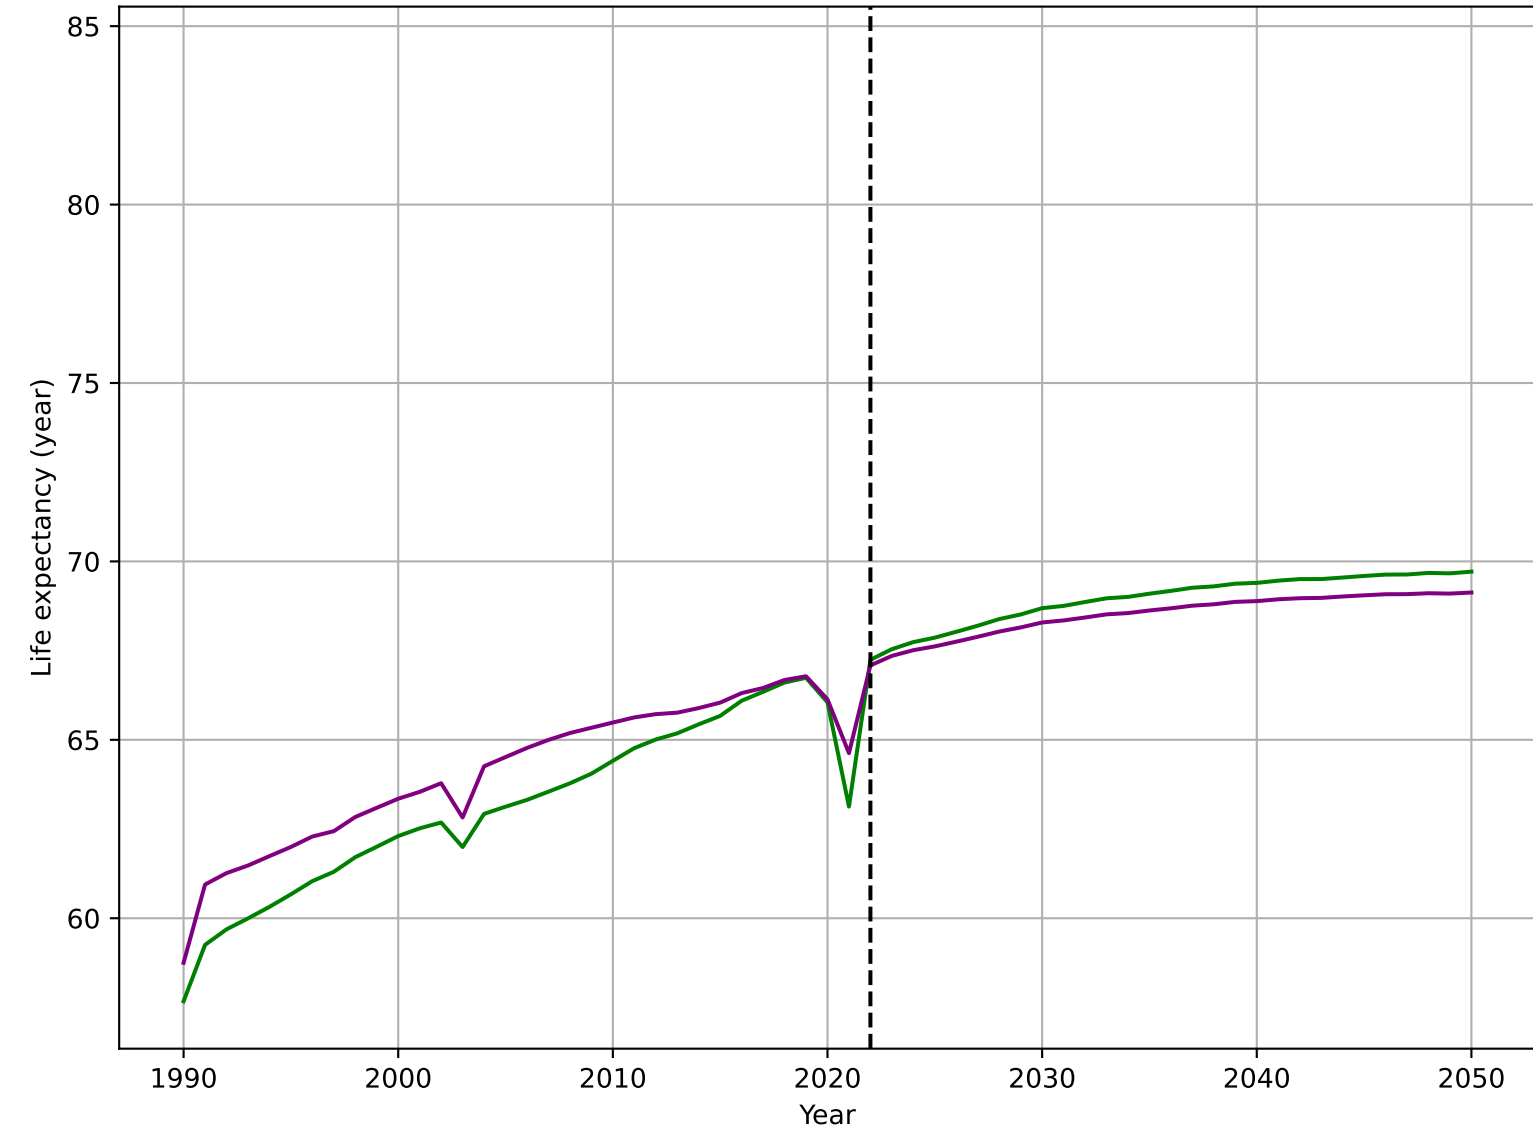

# Iraq

### Life Expectancy

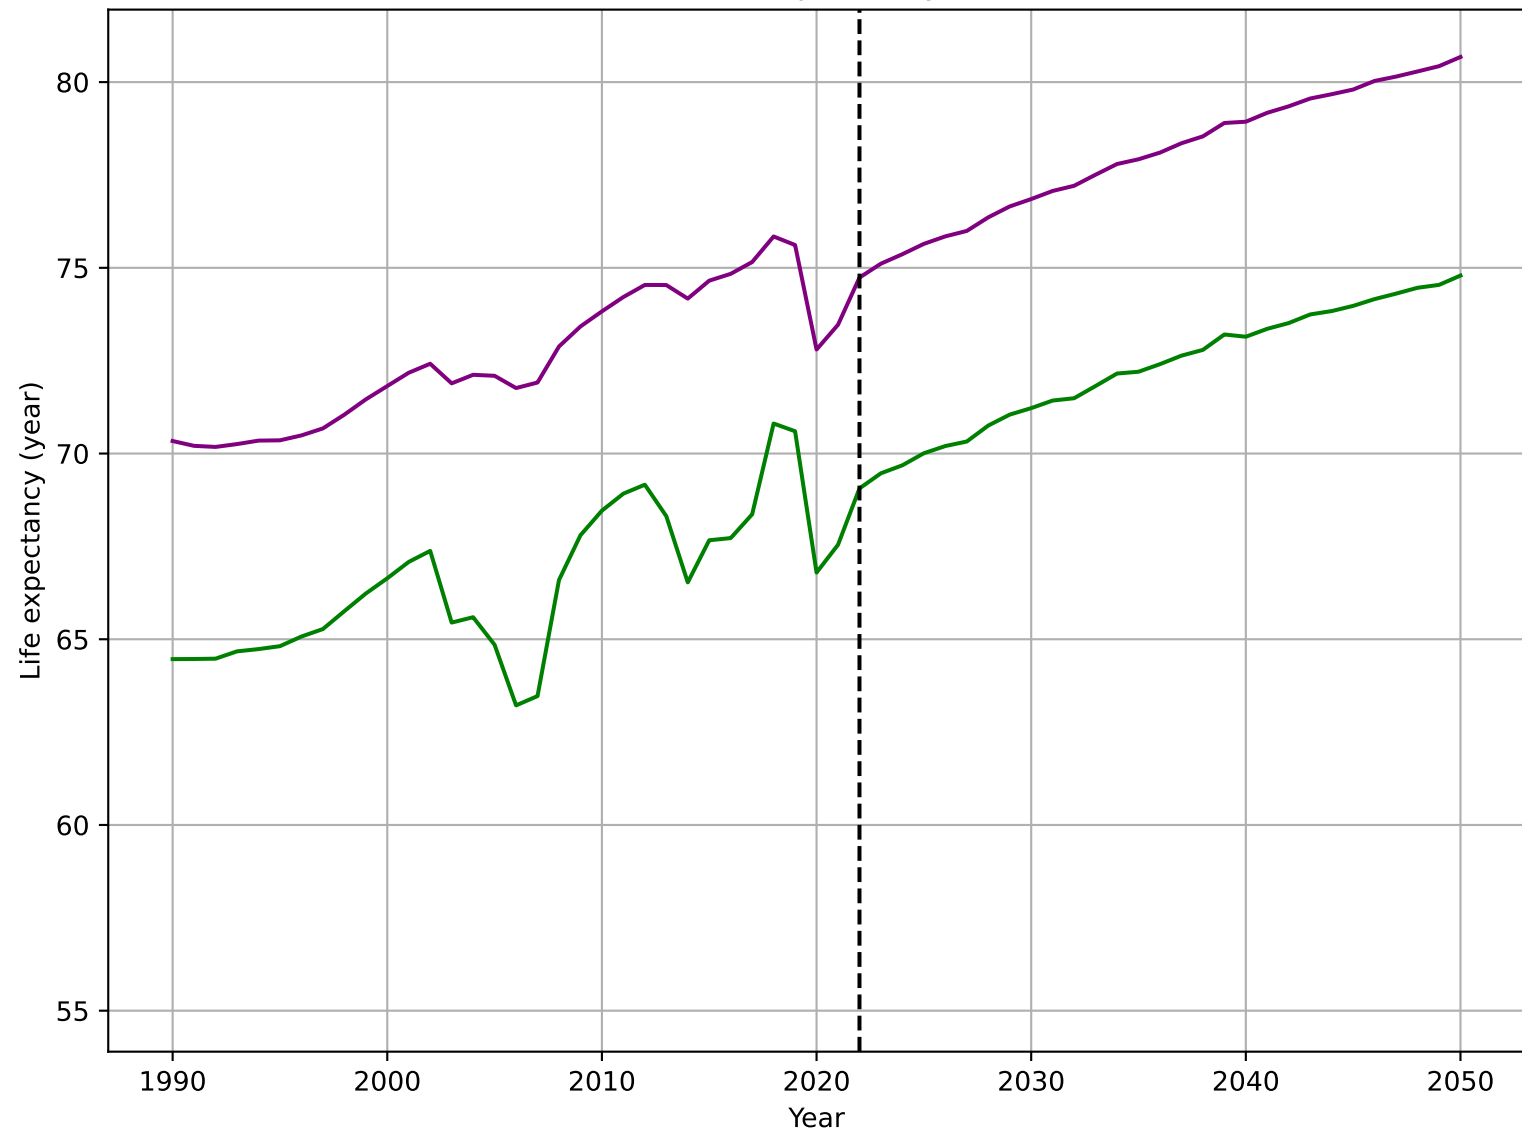

### Healthy Life Expectancy (HALE)

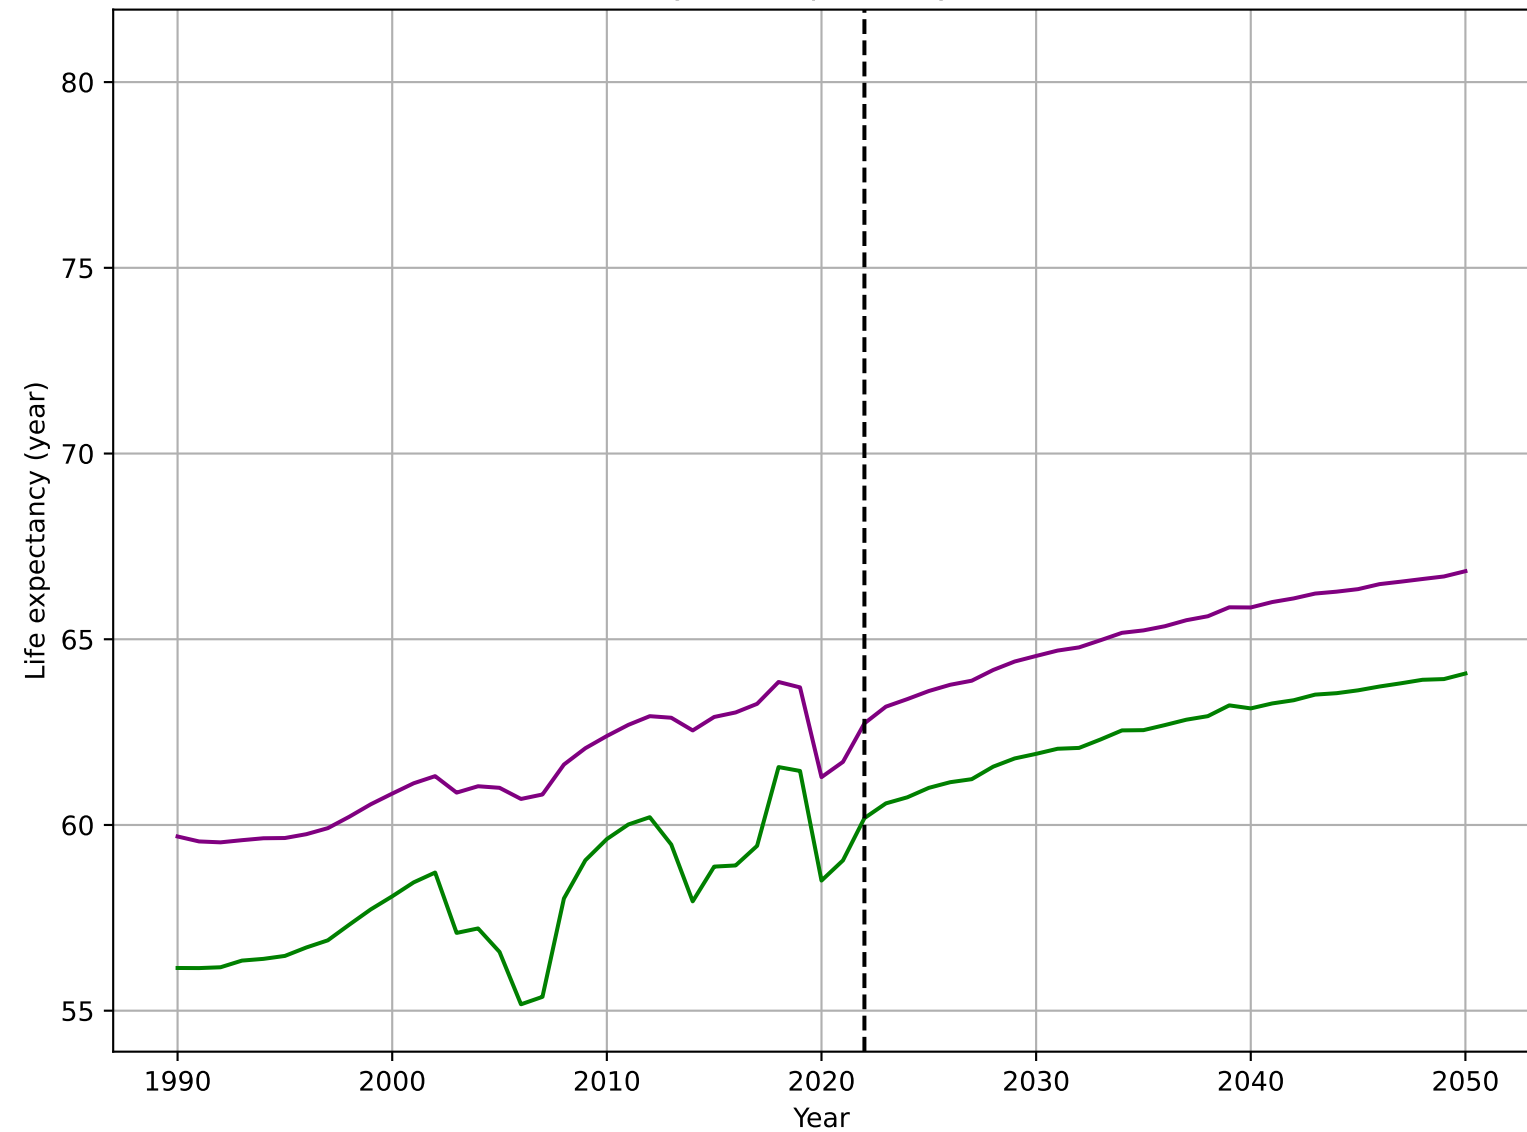

# Jordan

### Life Expectancy

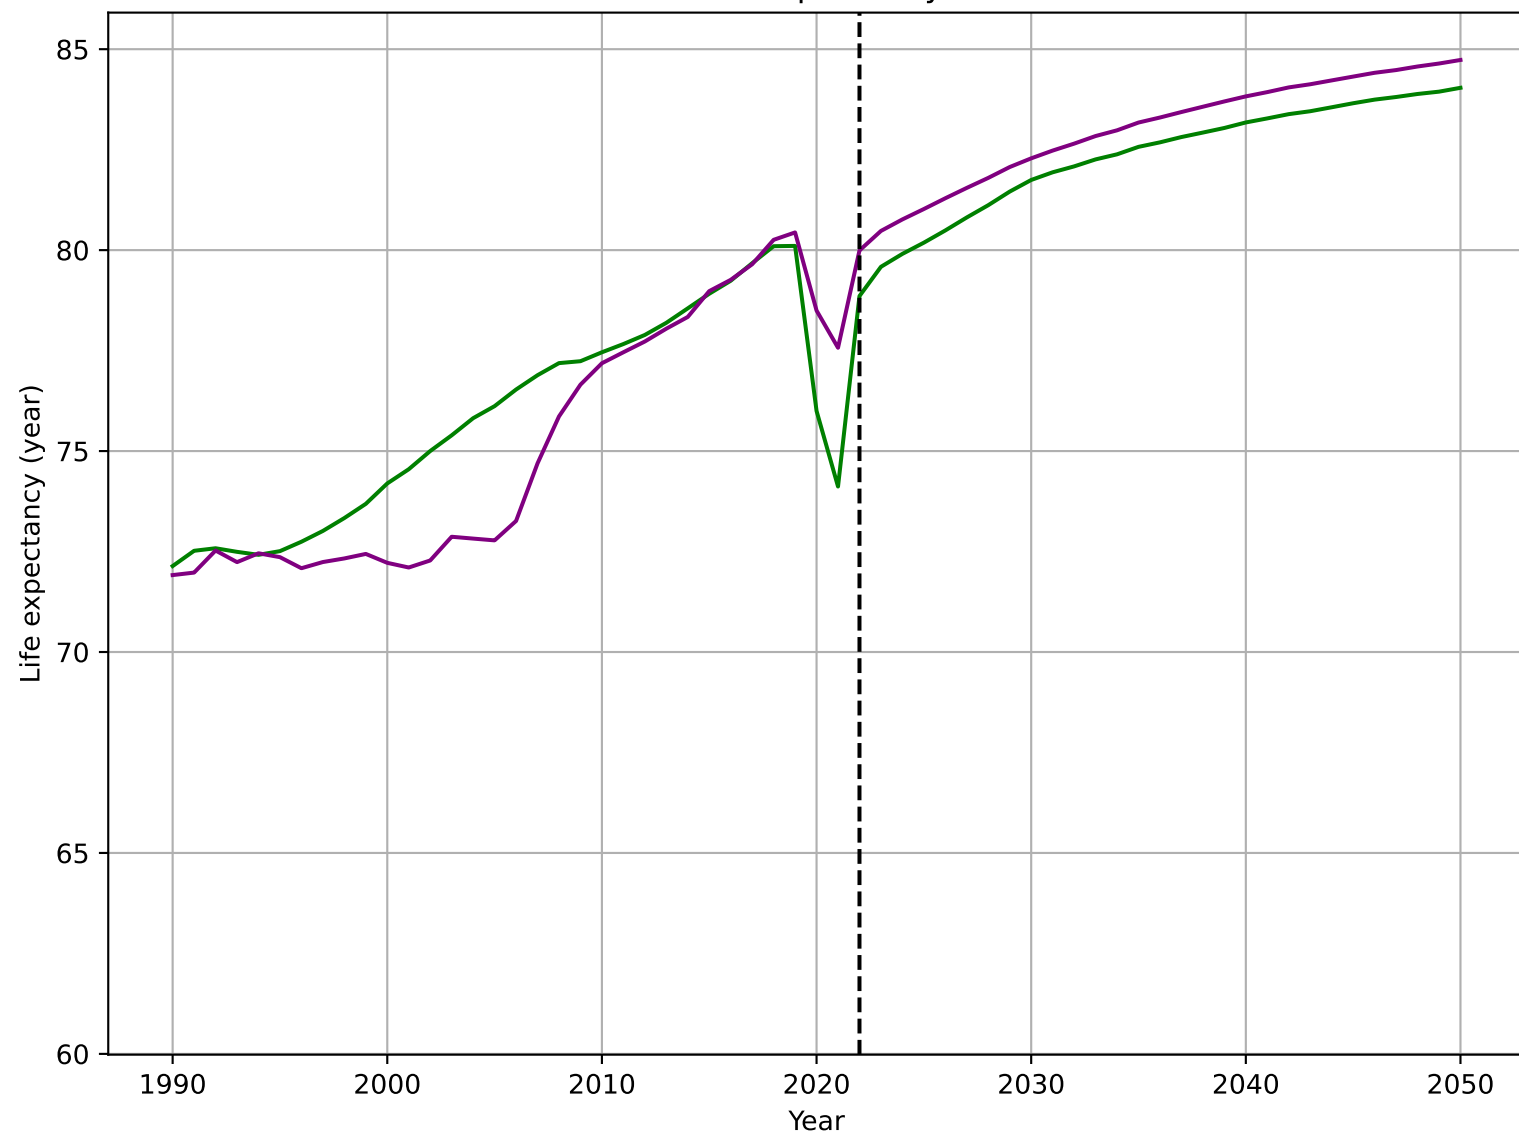

### Healthy Life Expectancy (HALE)

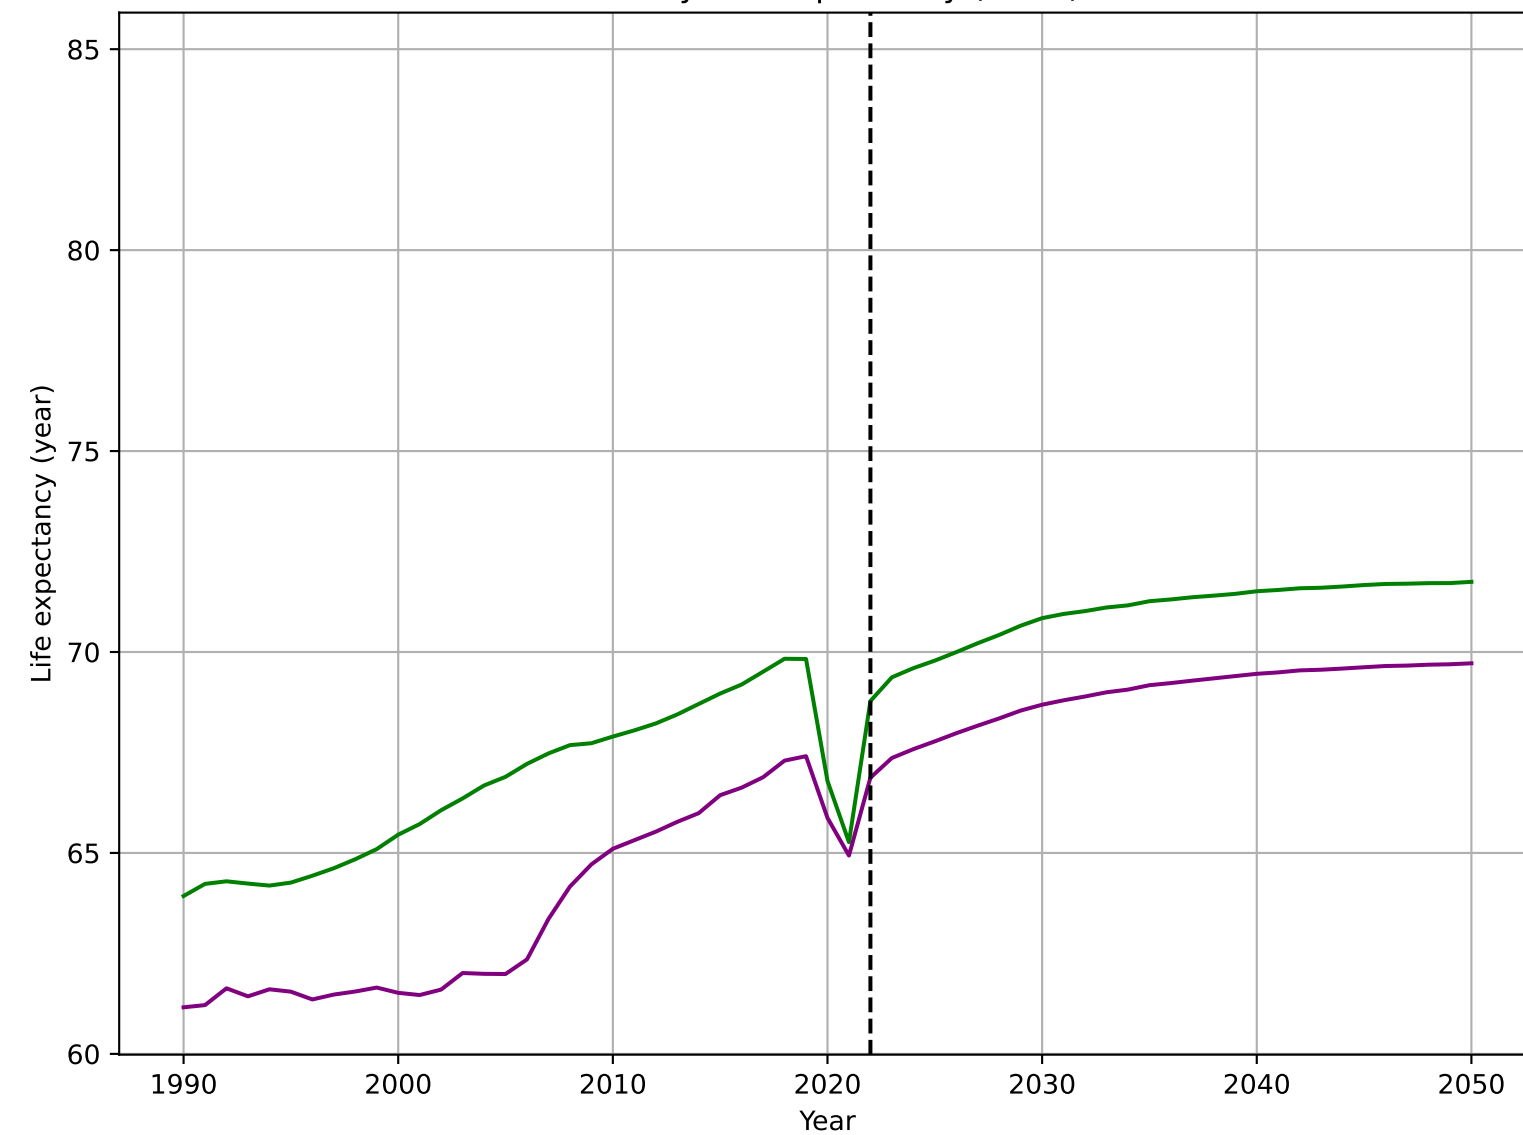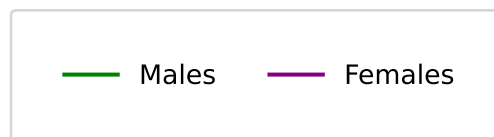

# Kuwait

### Life Expectancy

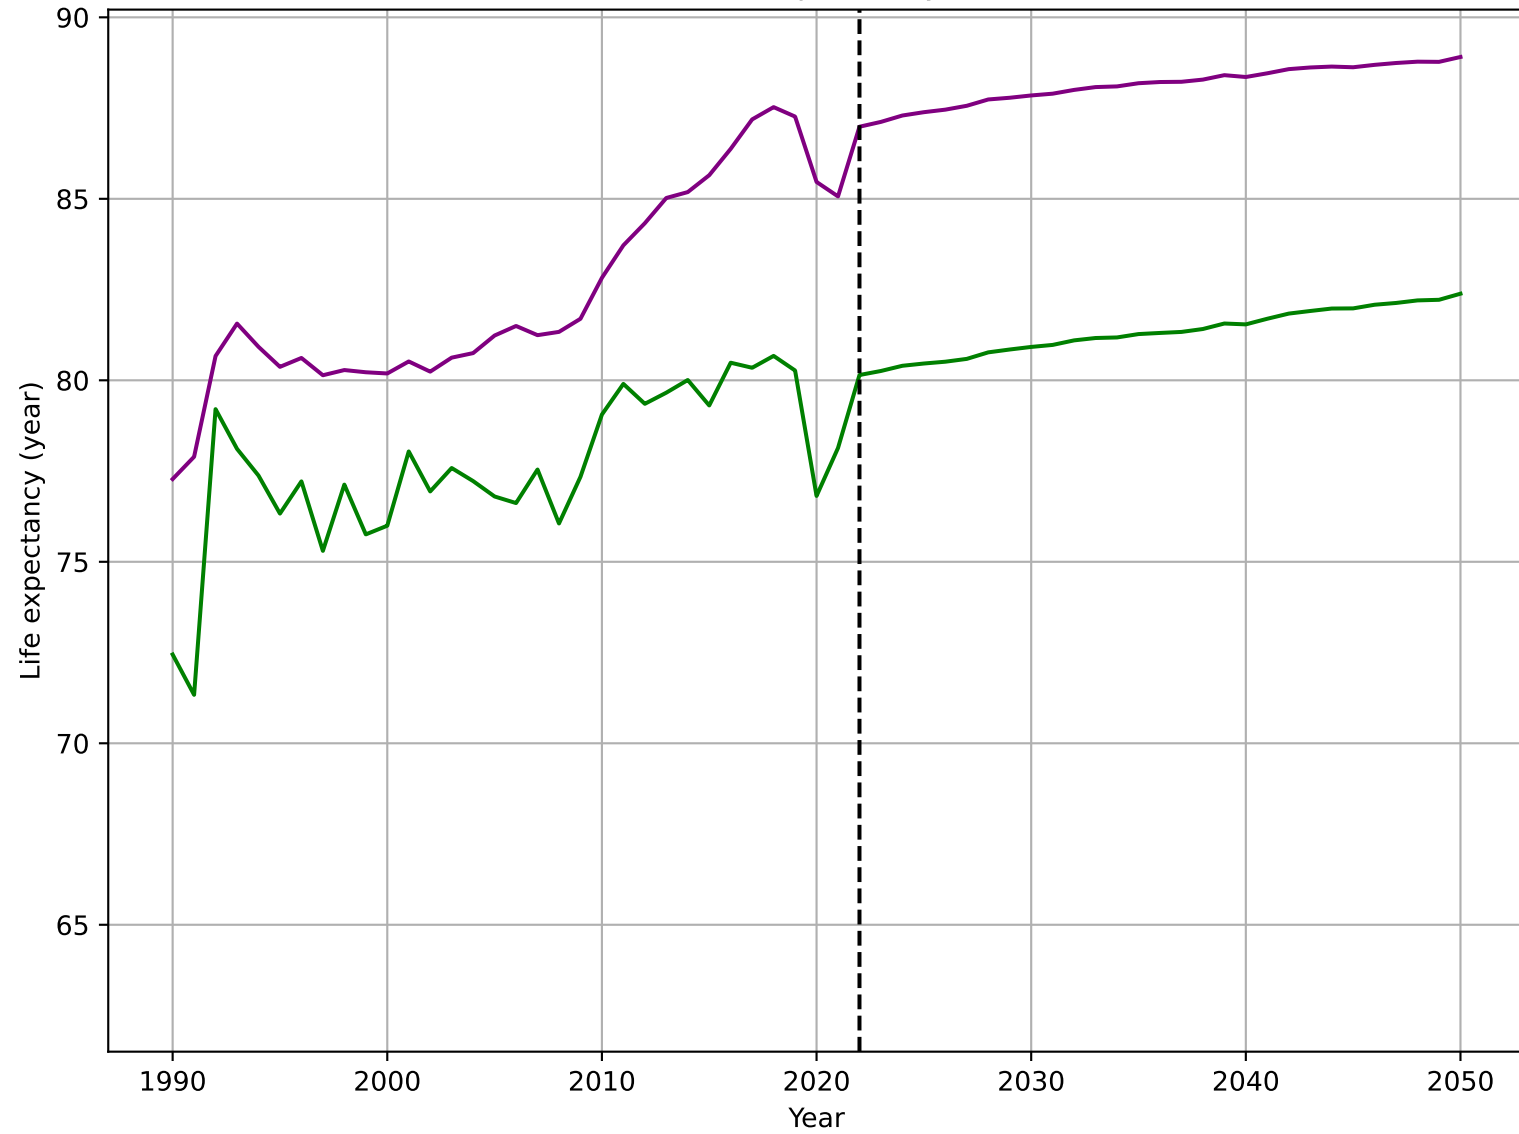

### Healthy Life Expectancy (HALE)

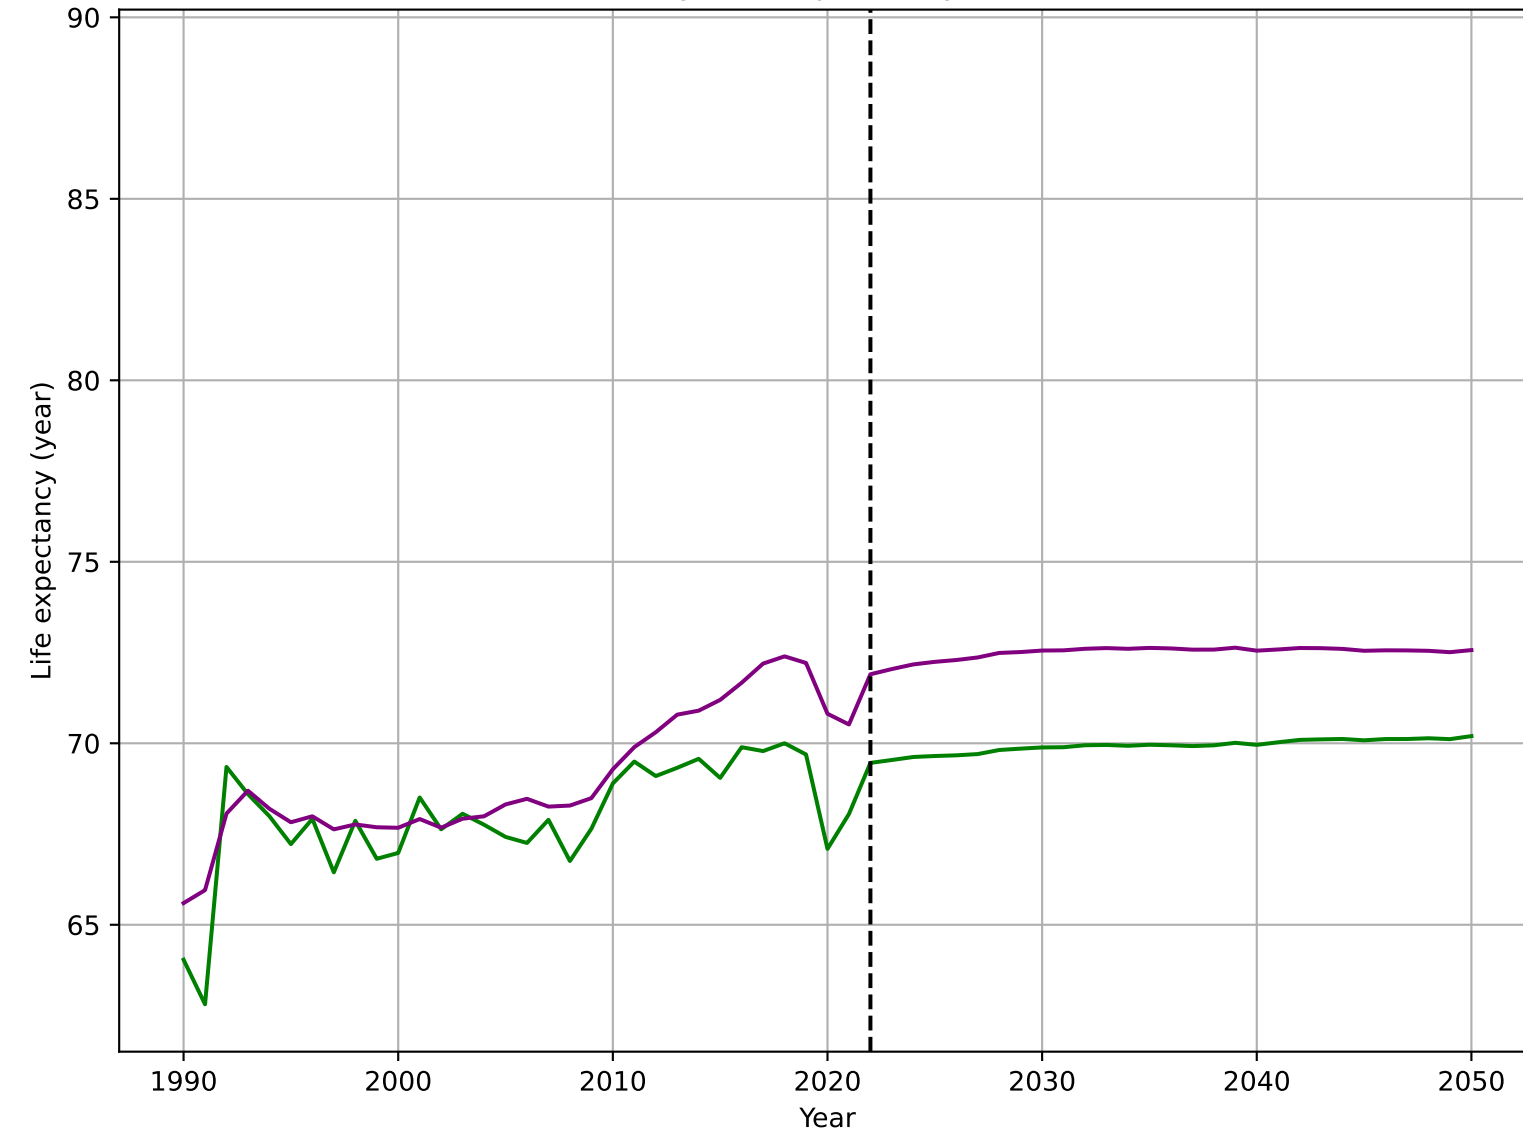

# Lebanon

### Life Expectancy

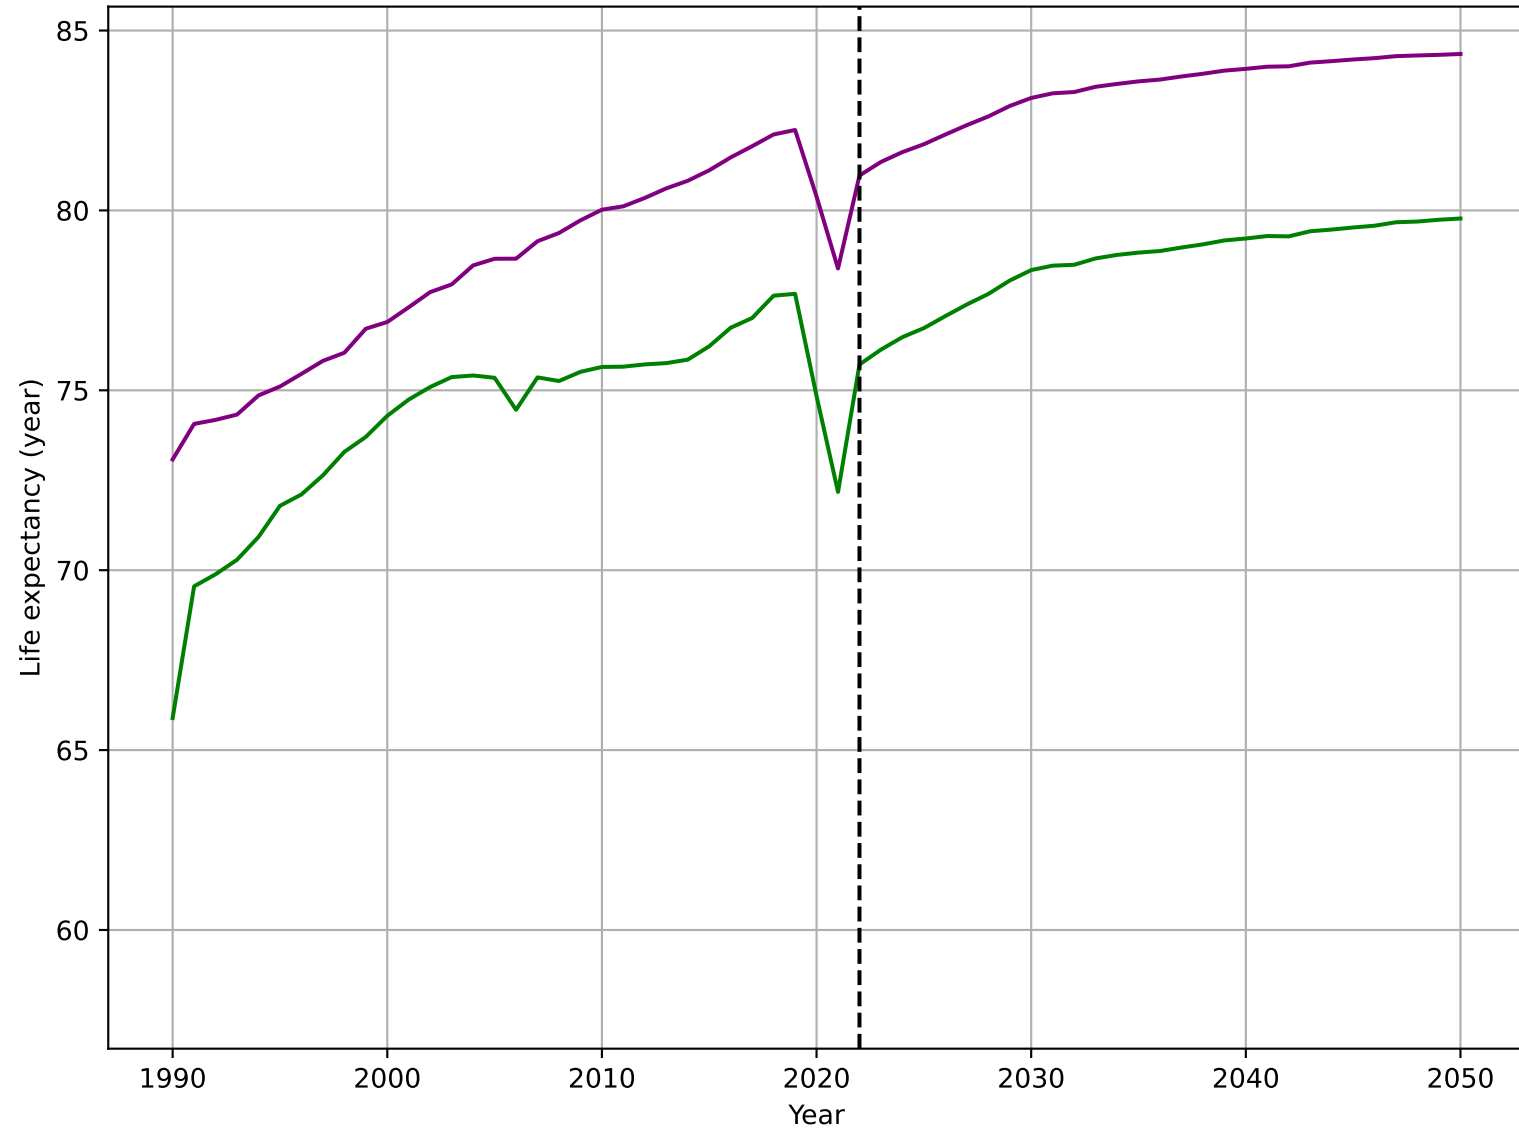

### Healthy Life Expectancy (HALE)

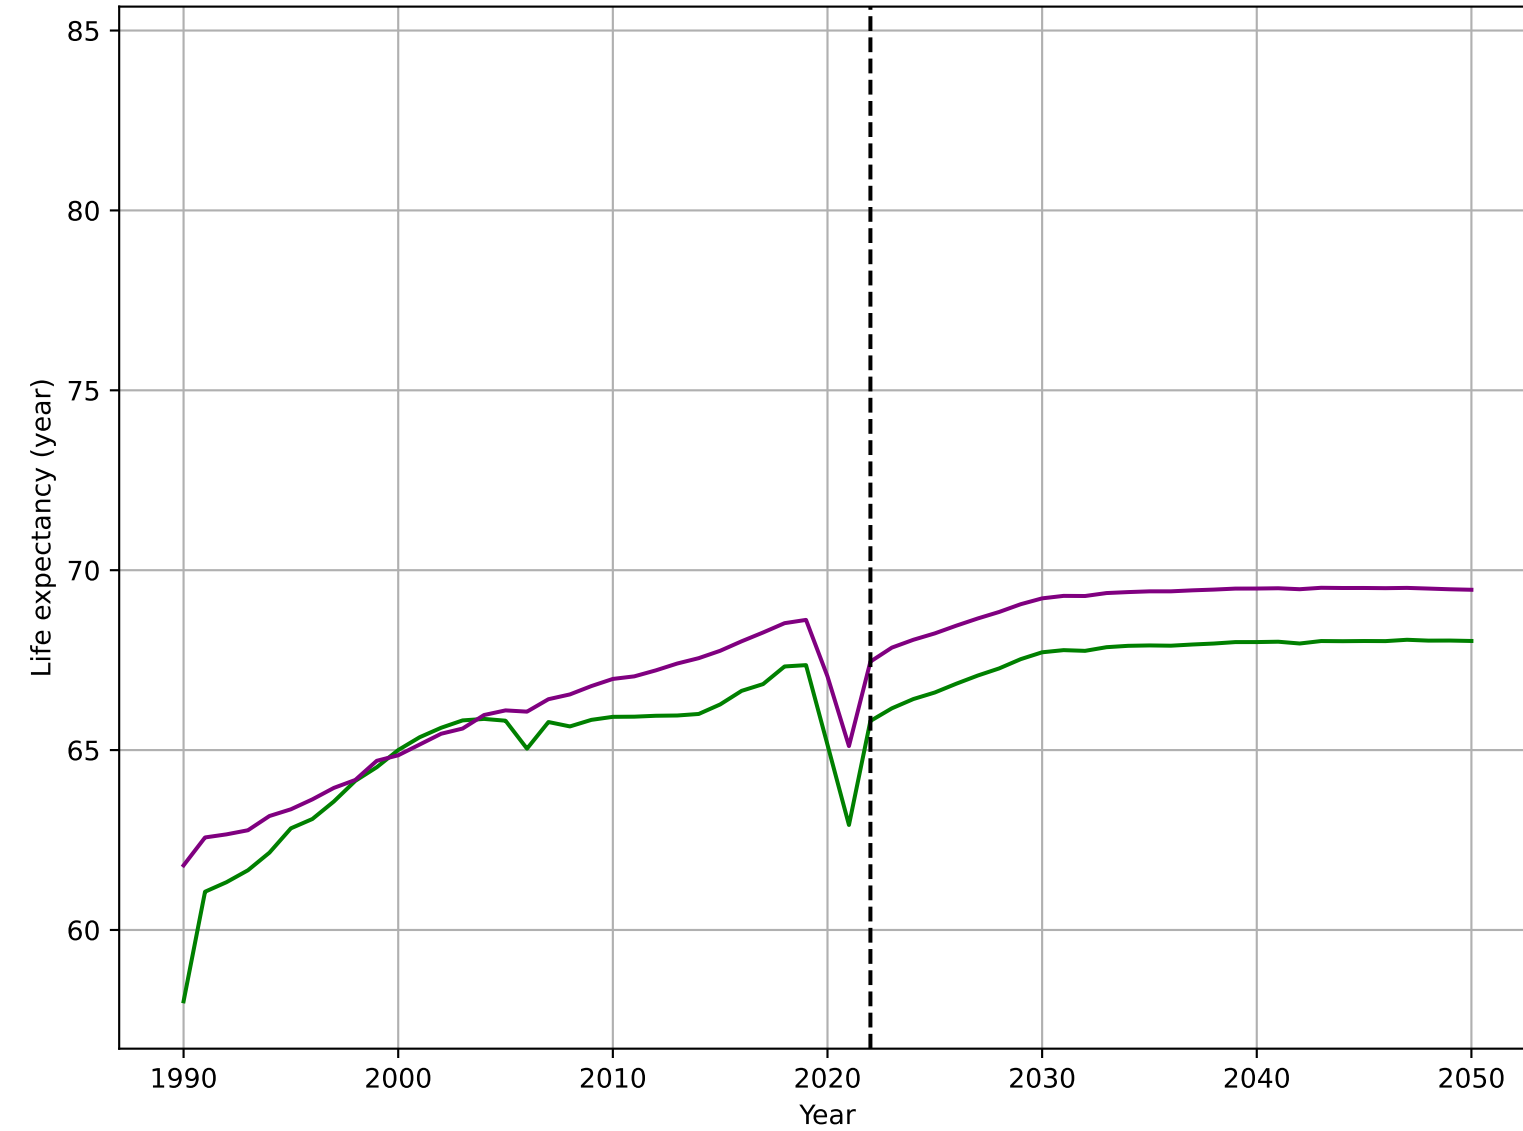

# Libya

### Life Expectancy

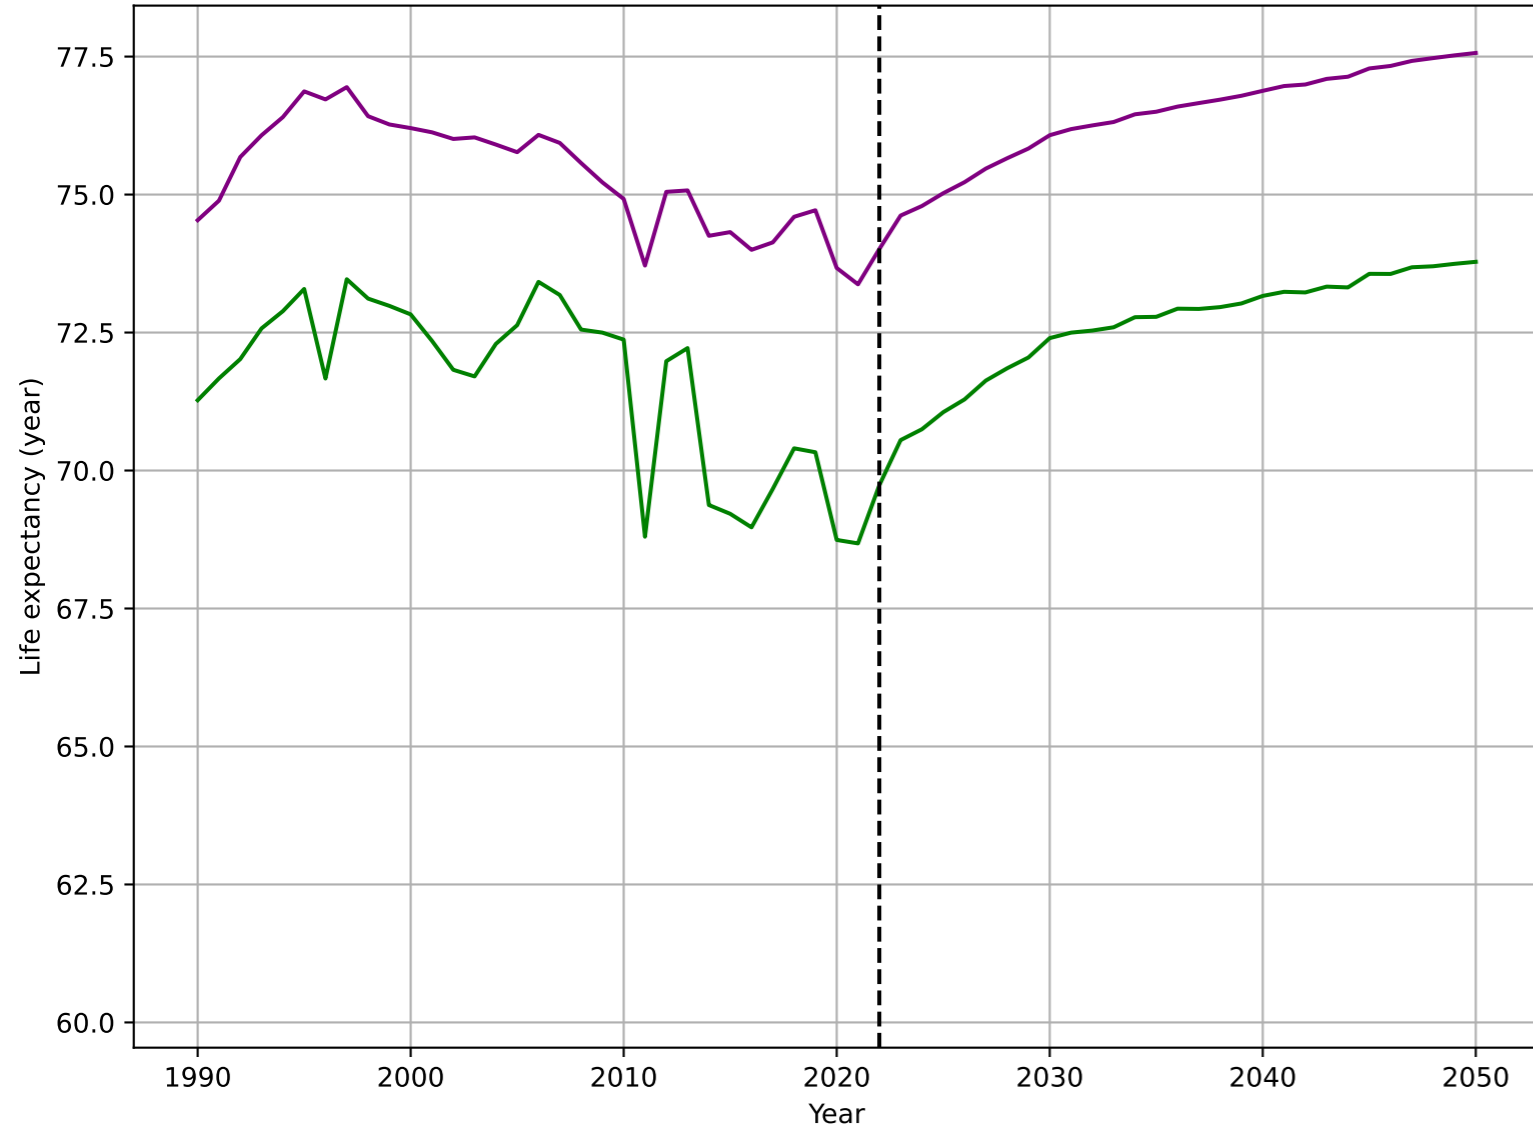

### Healthy Life Expectancy (HALE)

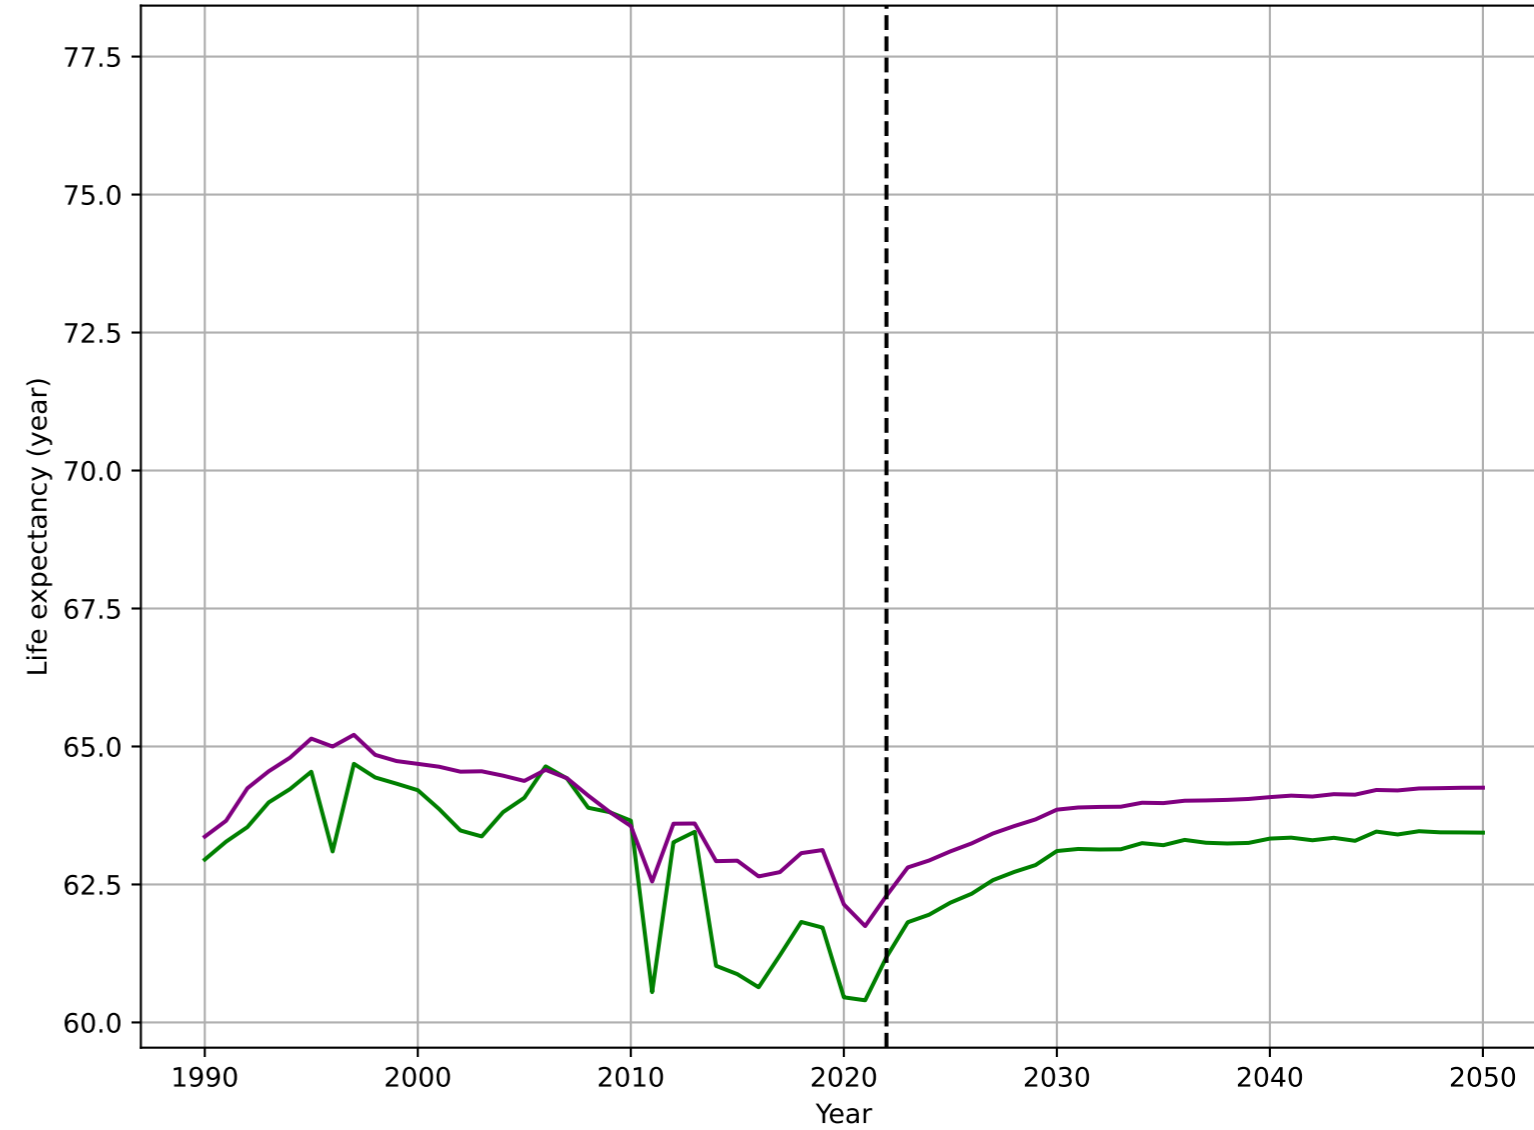



# Morocco

### Life Expectancy

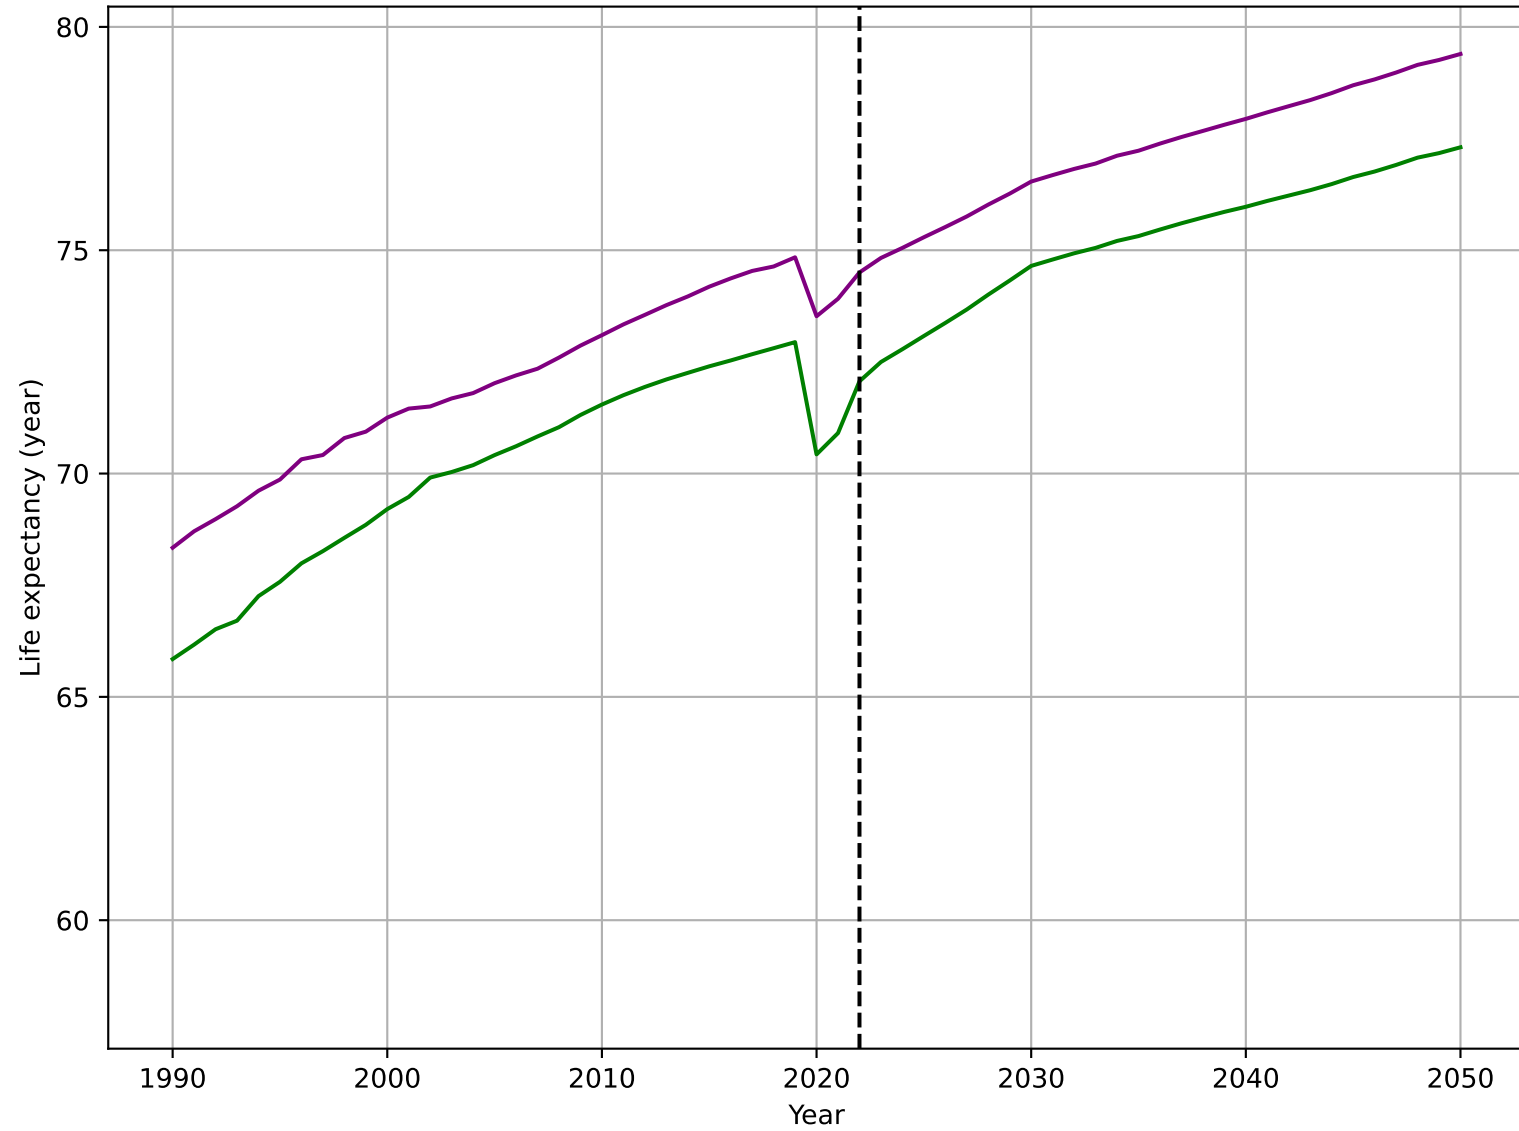

### Healthy Life Expectancy (HALE)

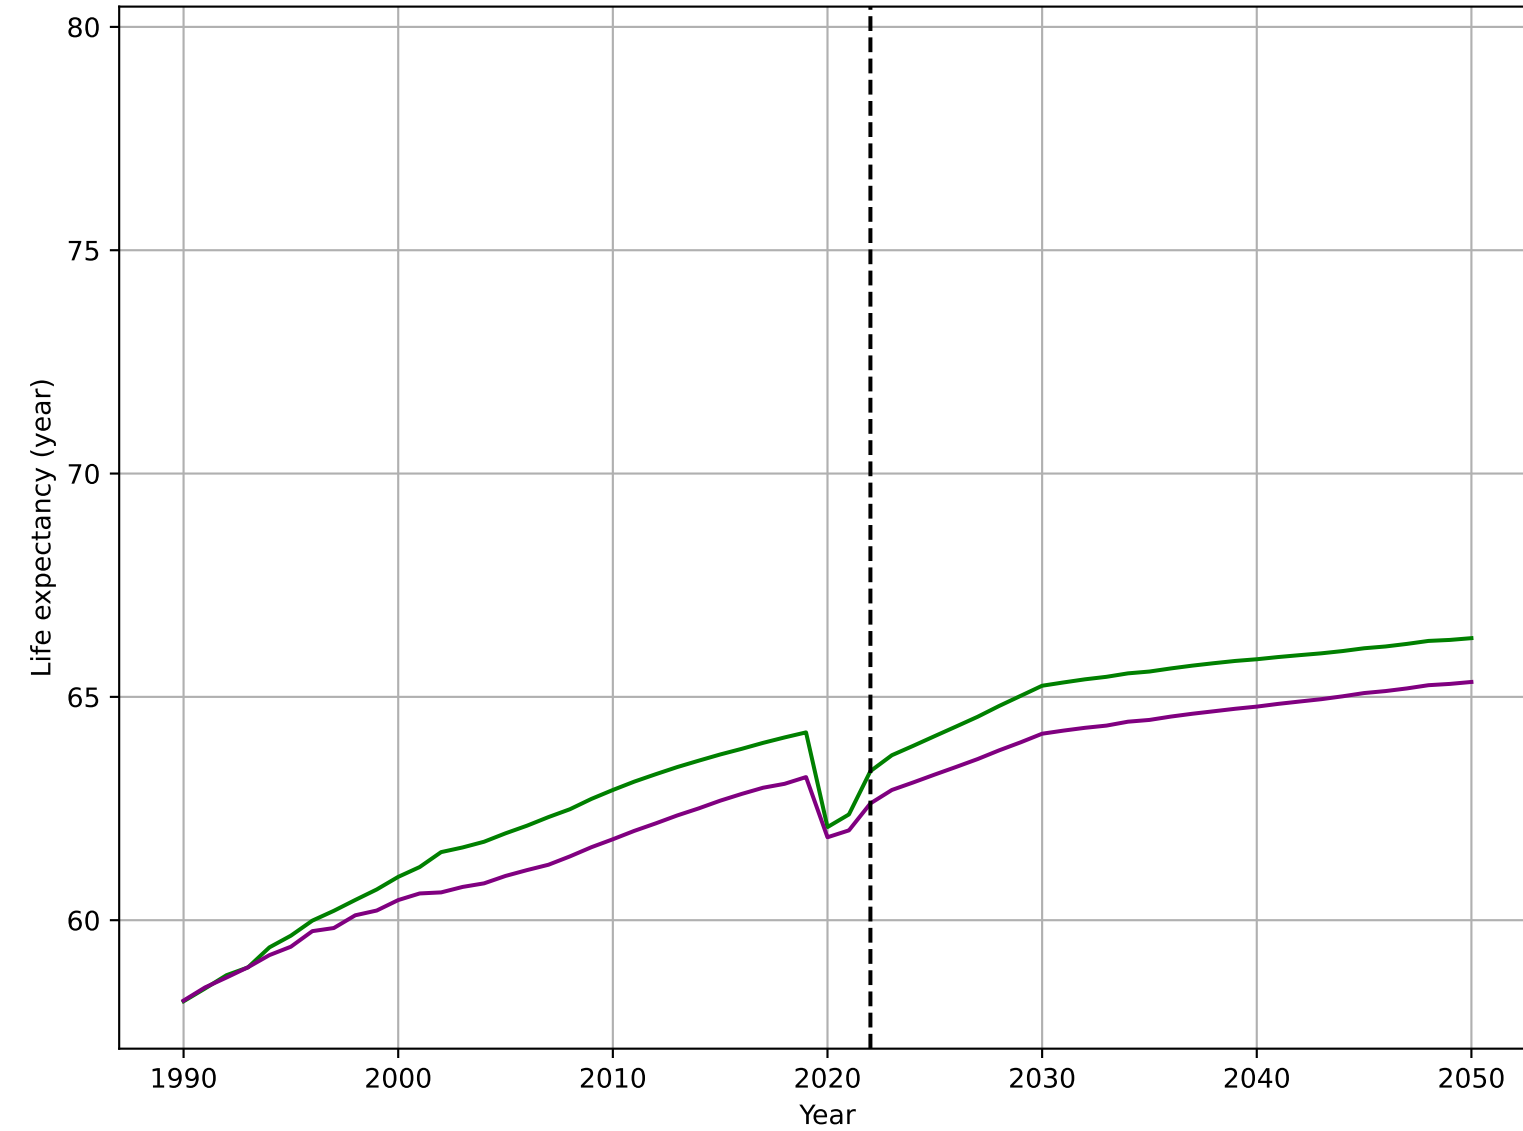

# Oman

### Life Expectancy

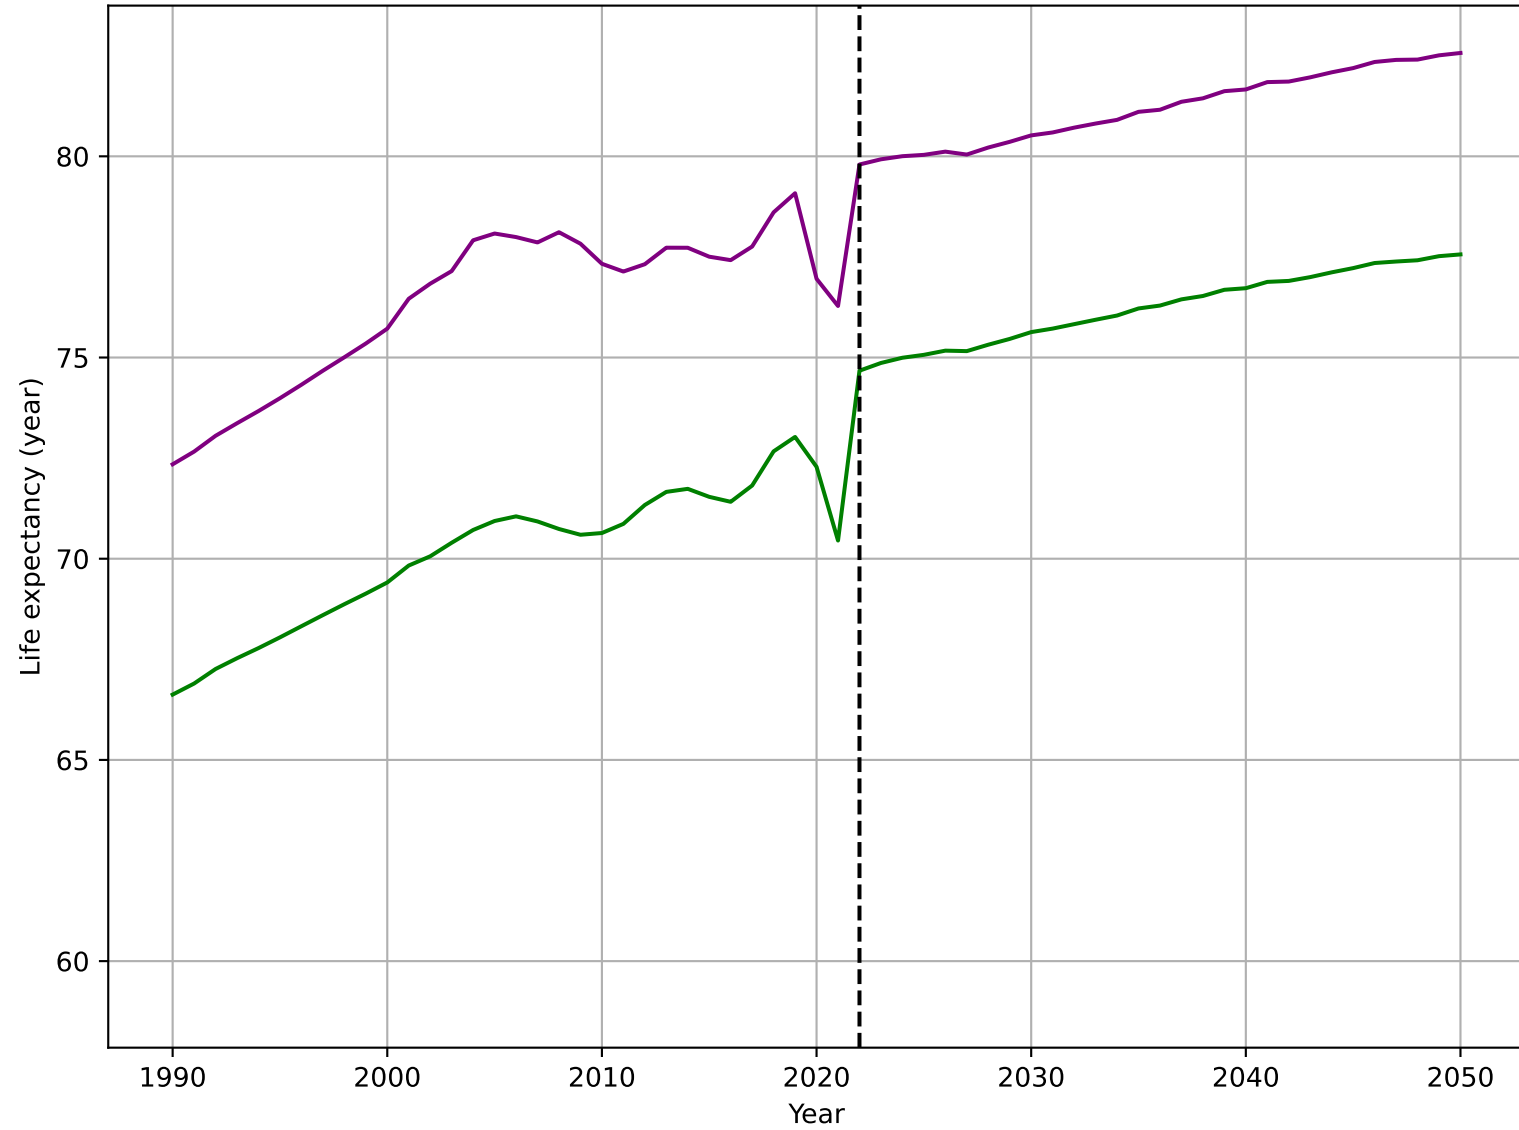

### Healthy Life Expectancy (HALE)

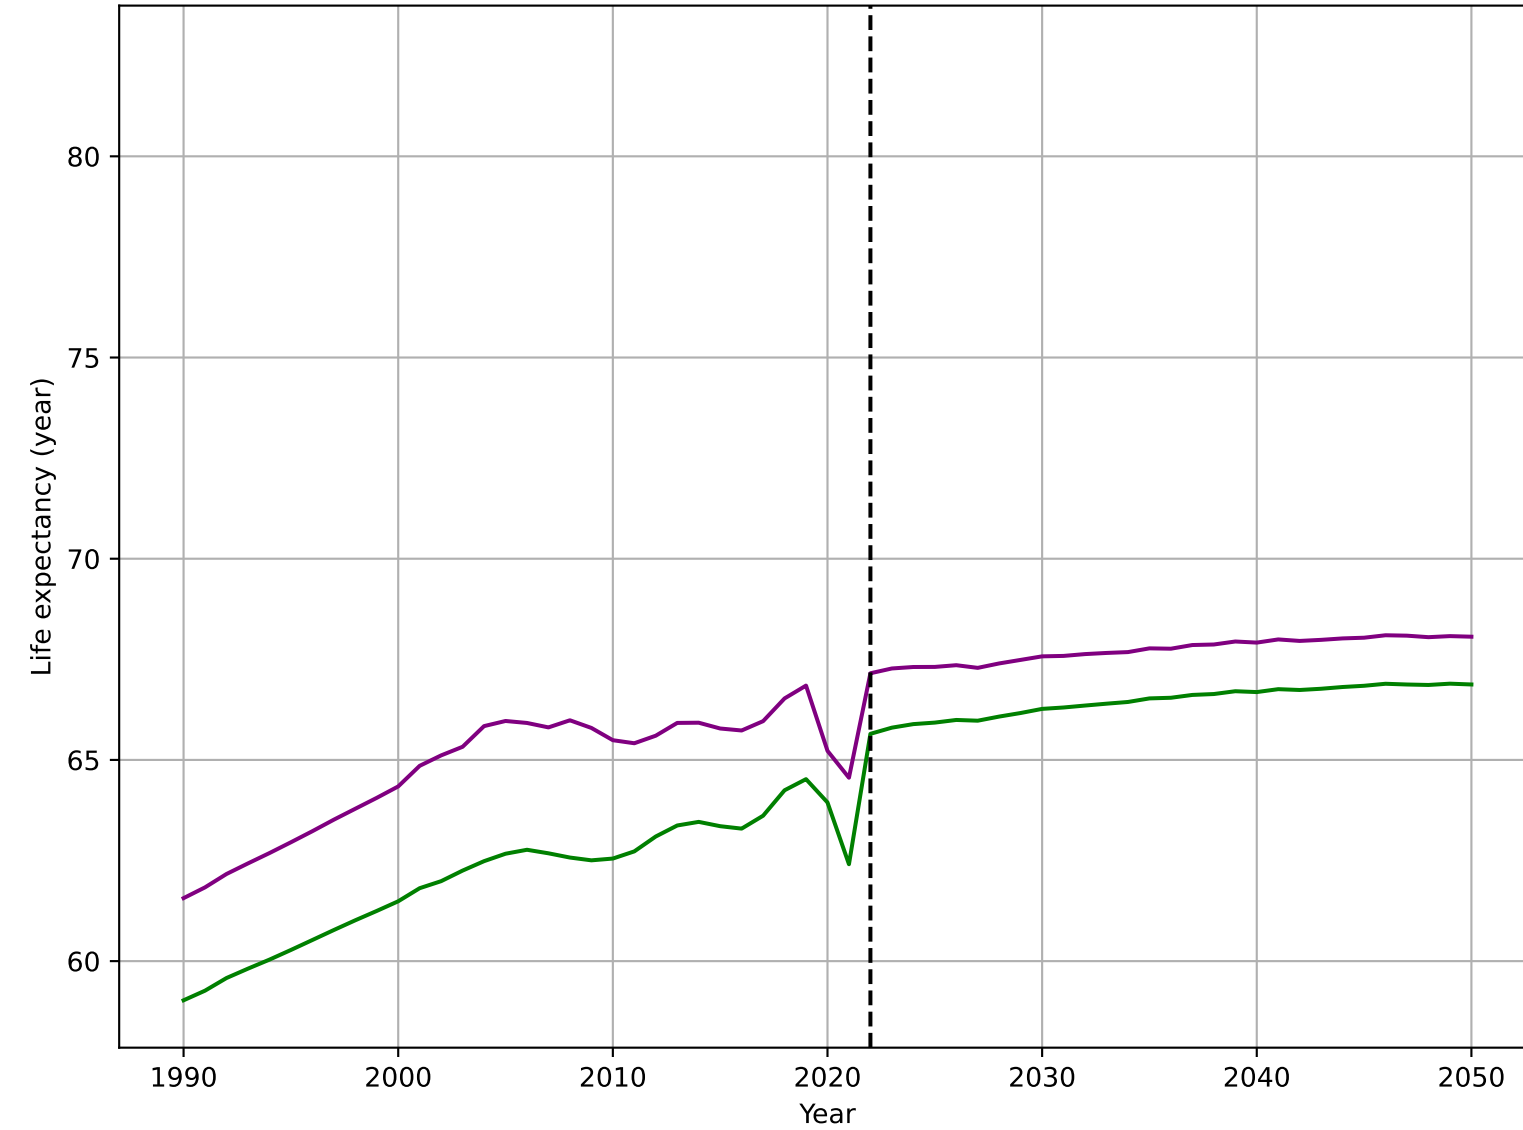

# Palestine

### Life Expectancy

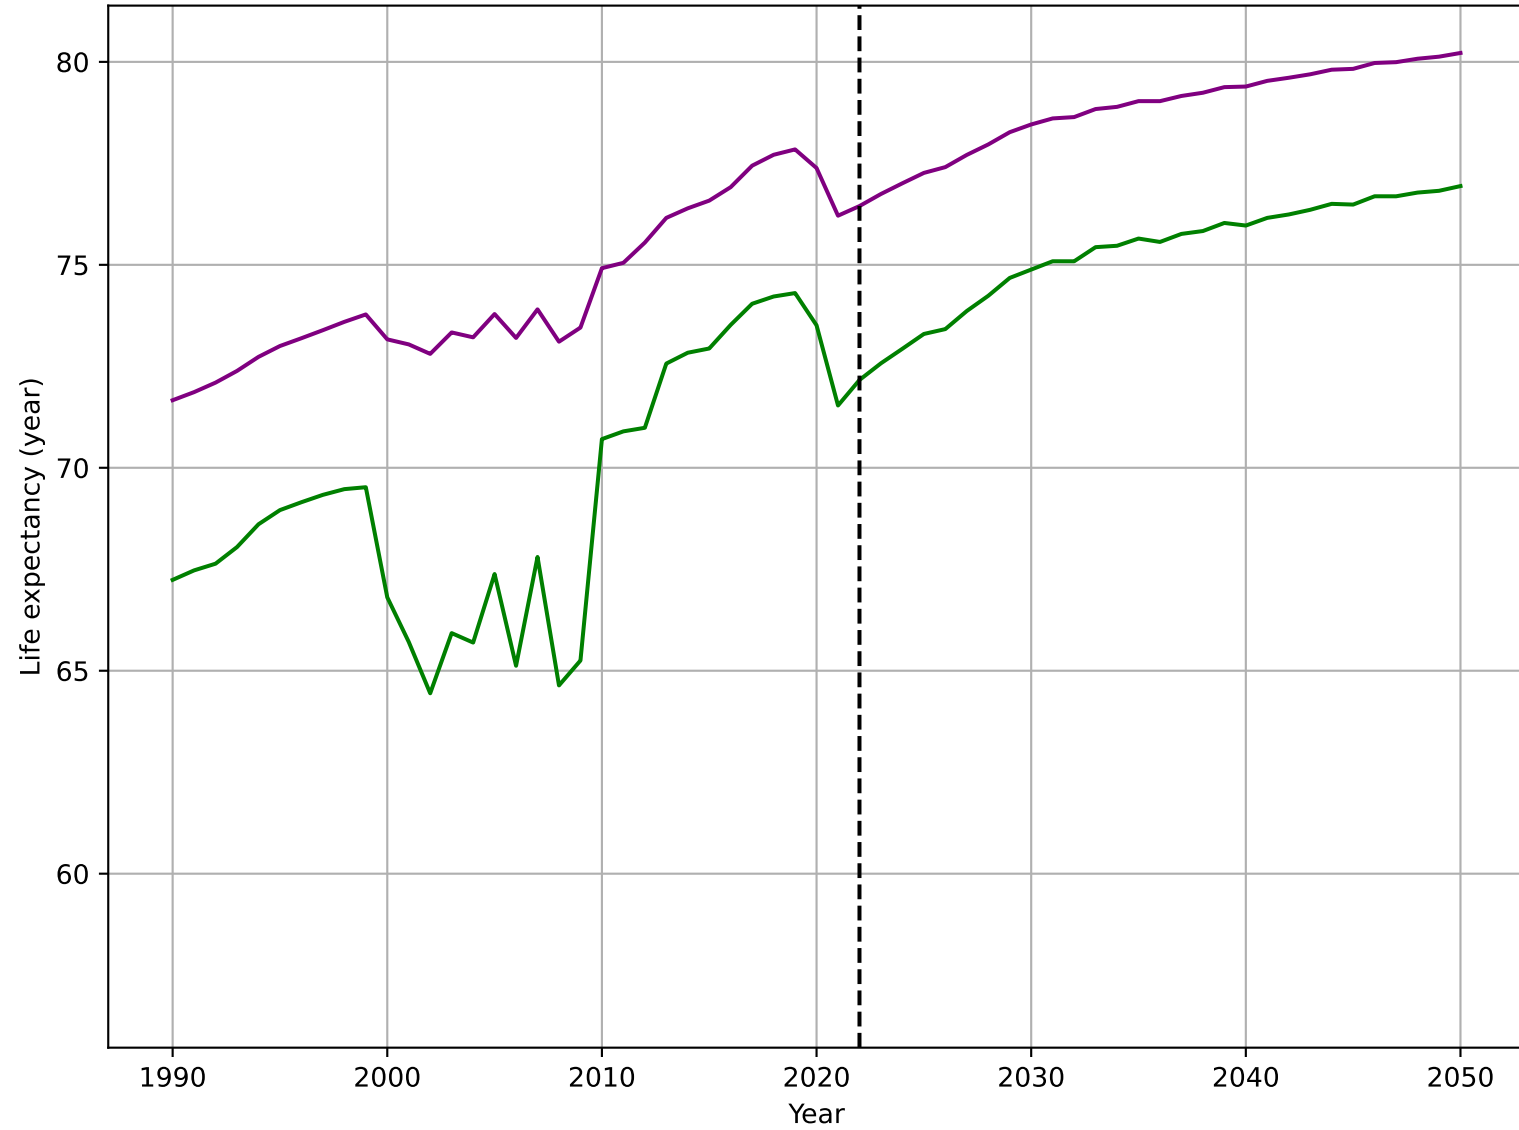

### Healthy Life Expectancy (HALE)

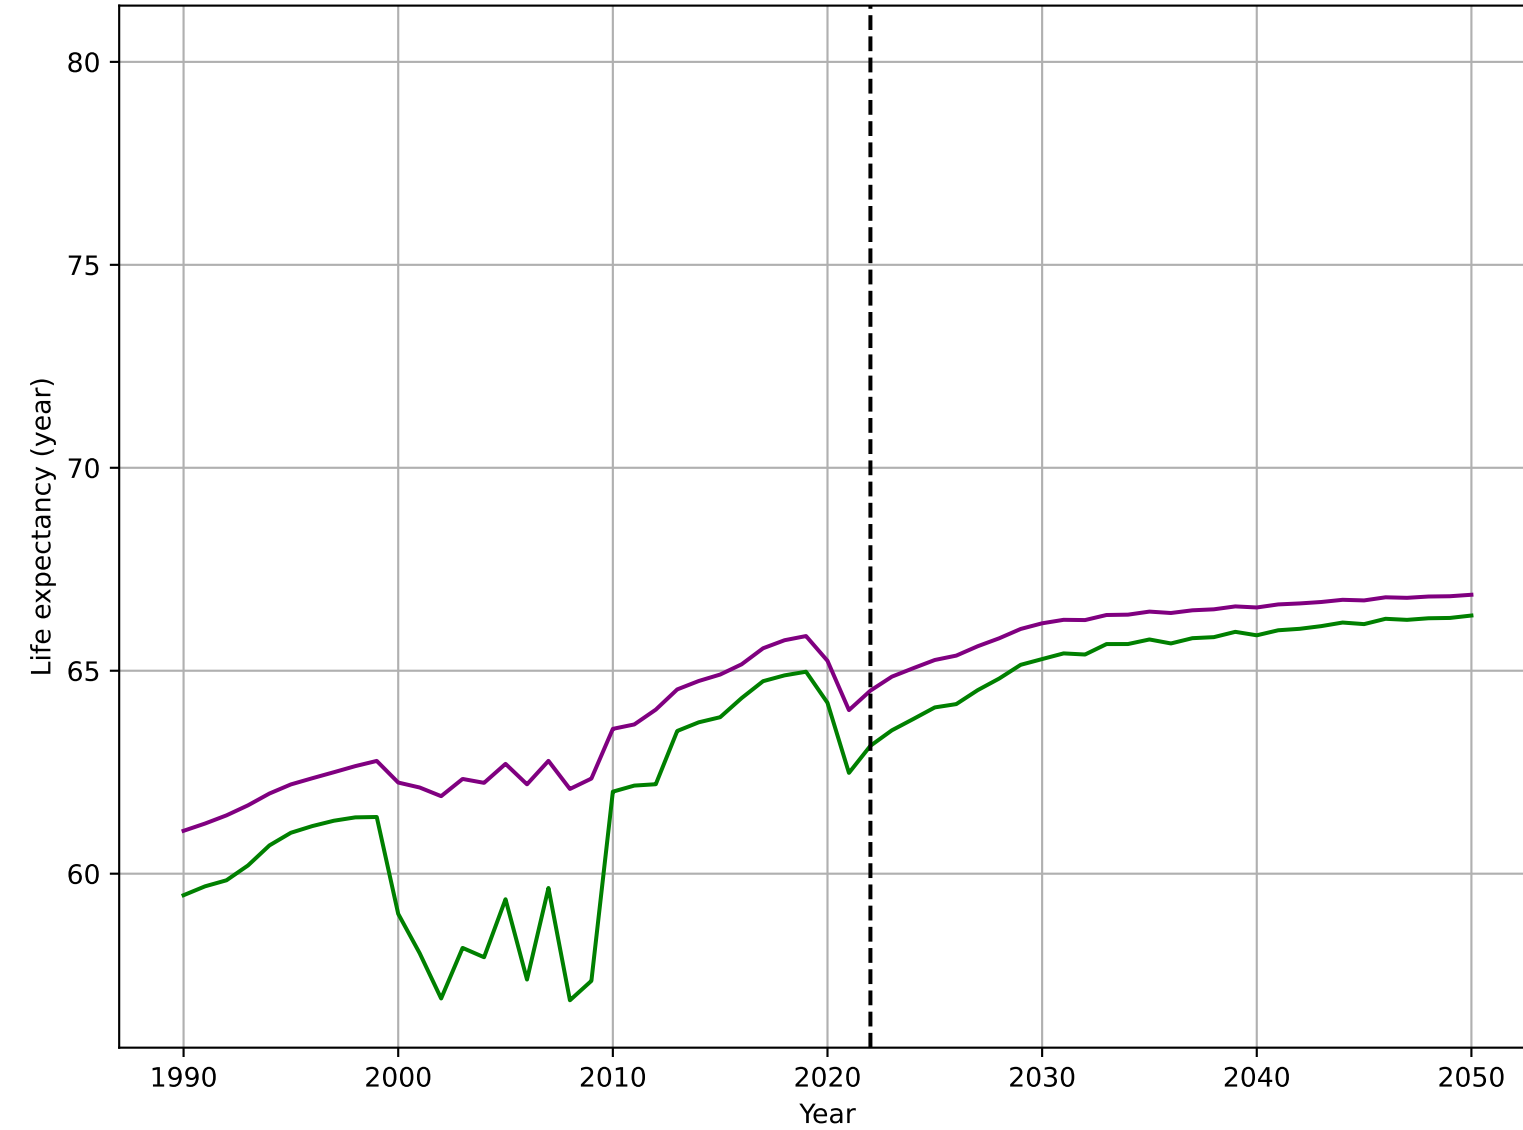

# Qatar

### Life Expectancy

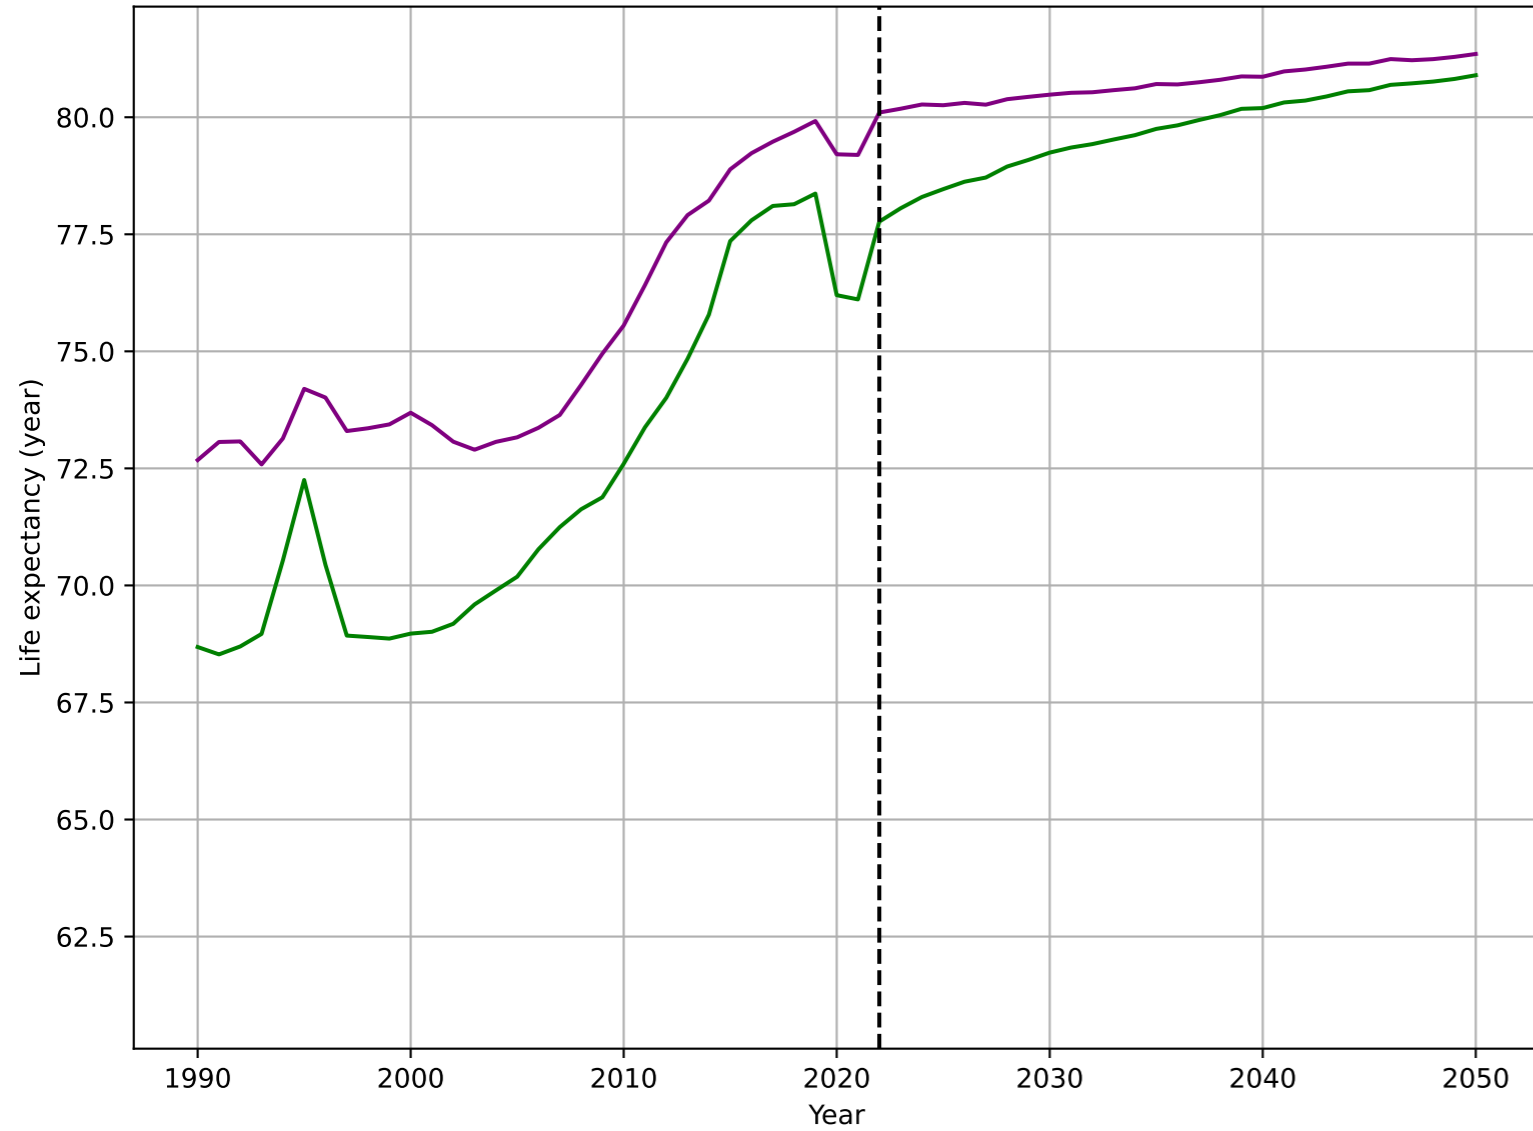

### Healthy Life Expectancy (HALE)

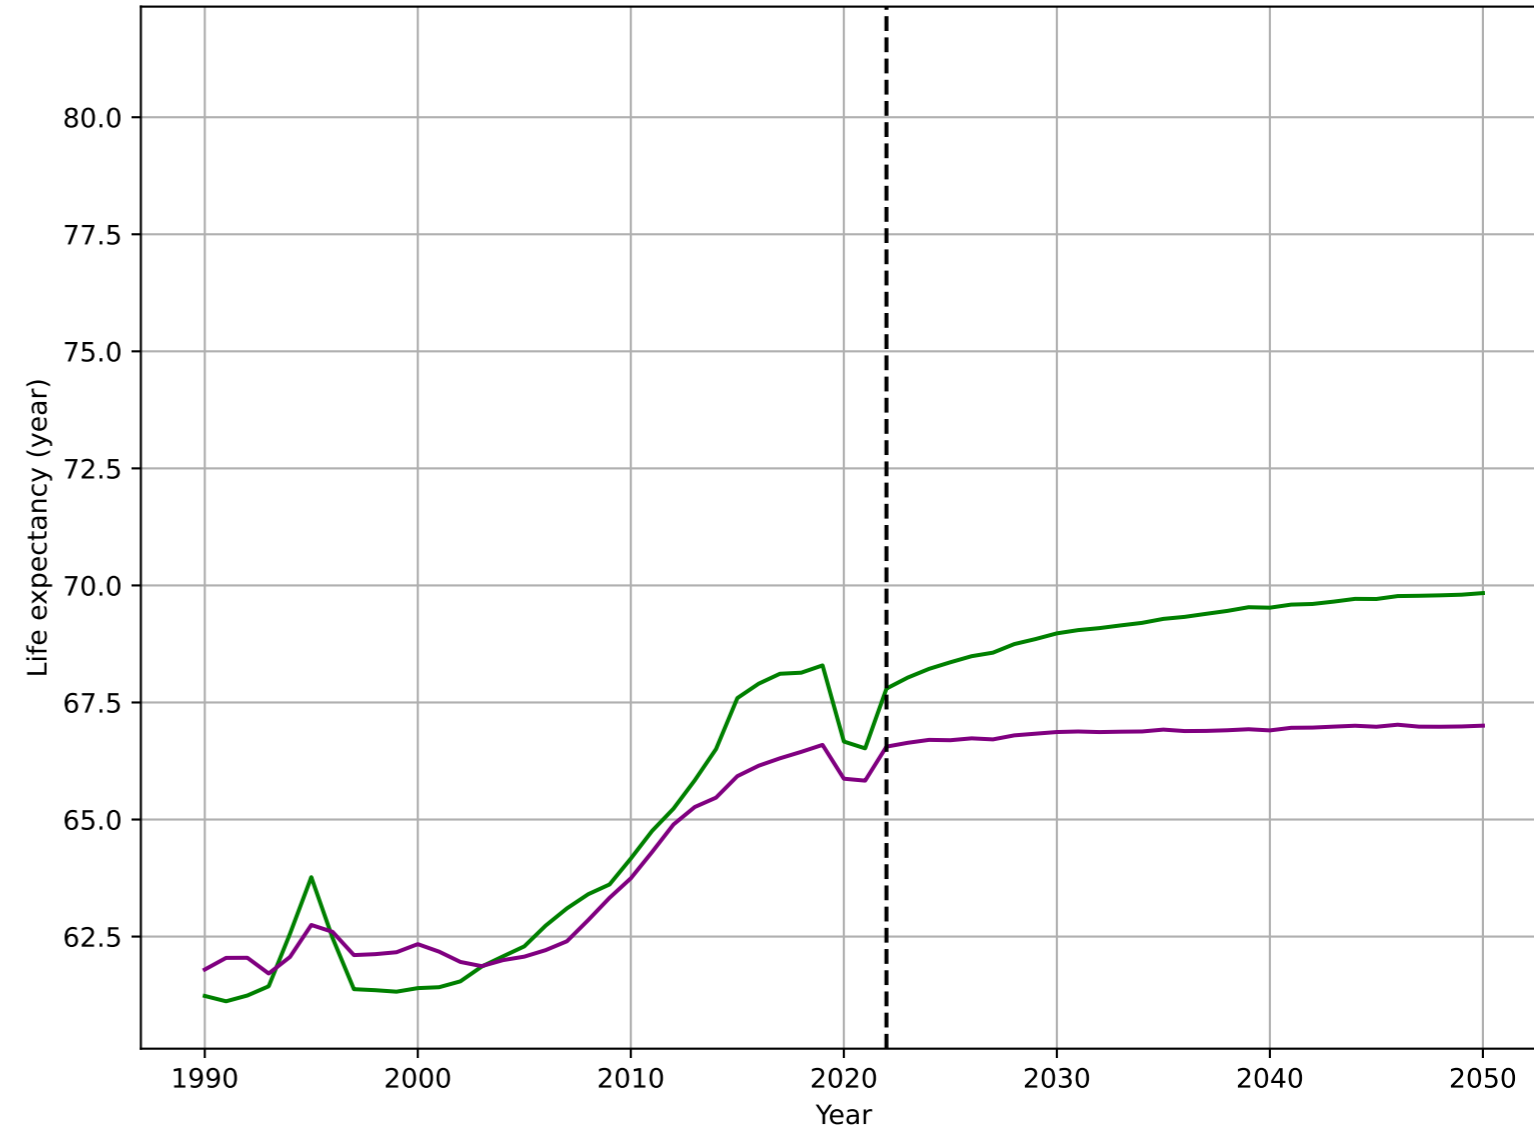

# Saudi Arabia

## Life Expectancy

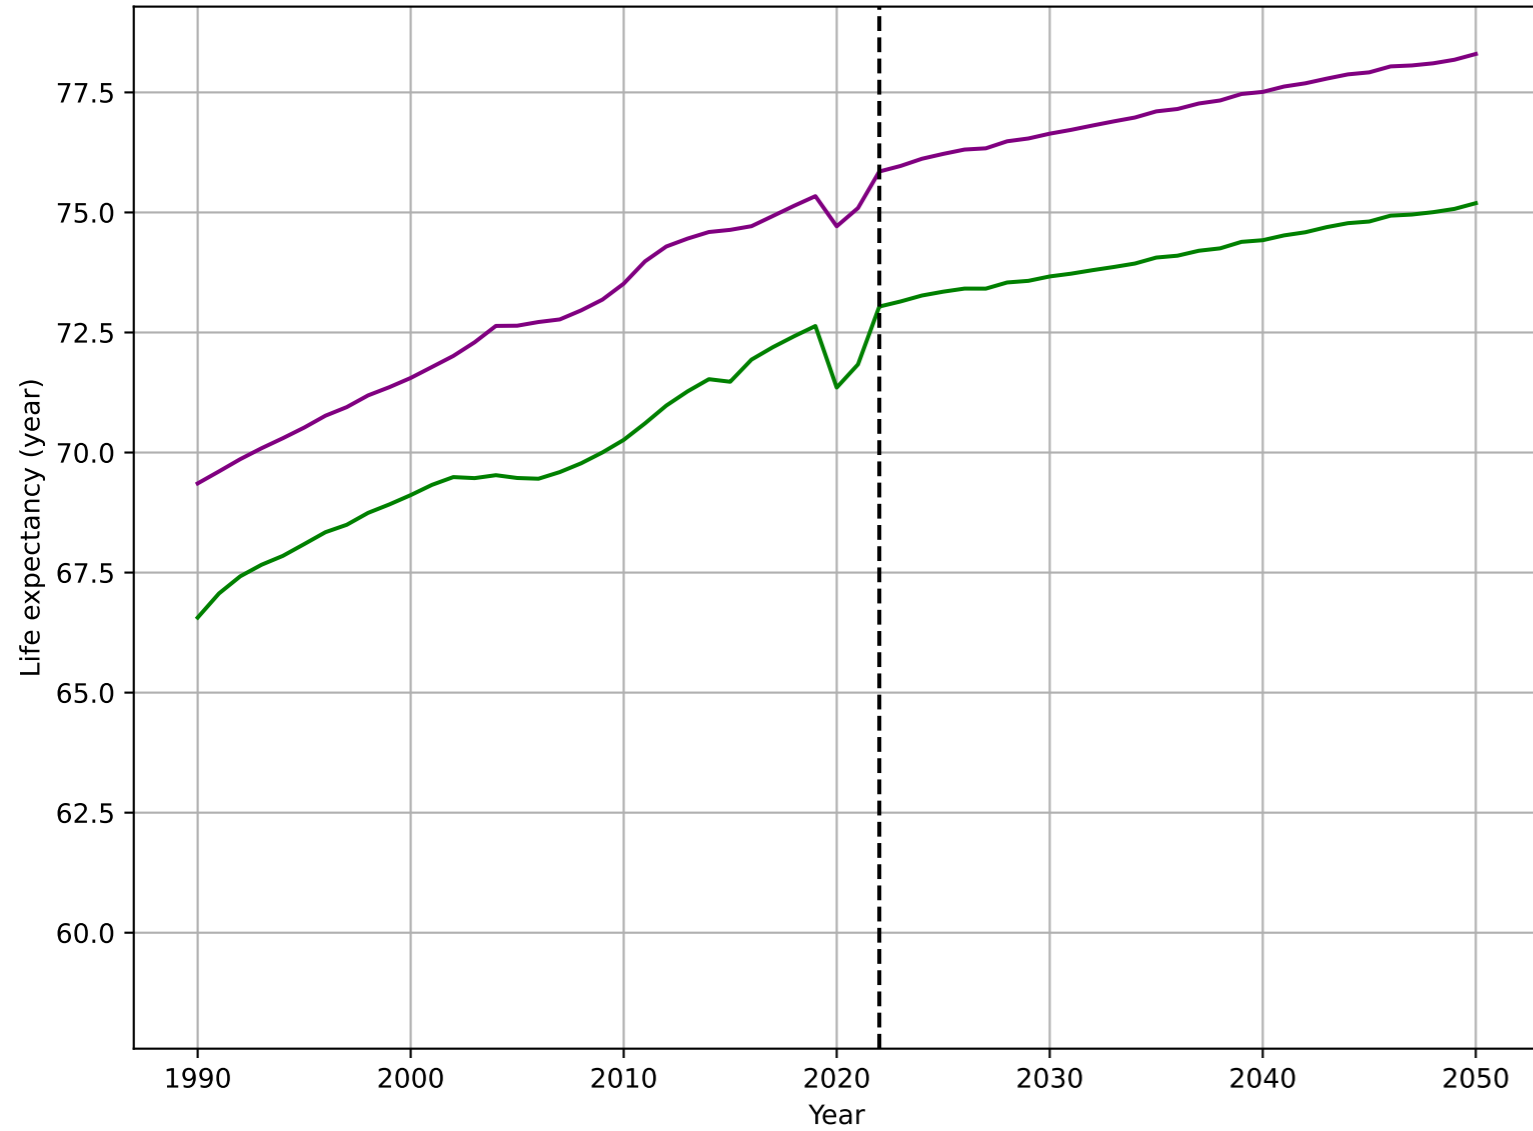

## Healthy Life Expectancy (HALE)

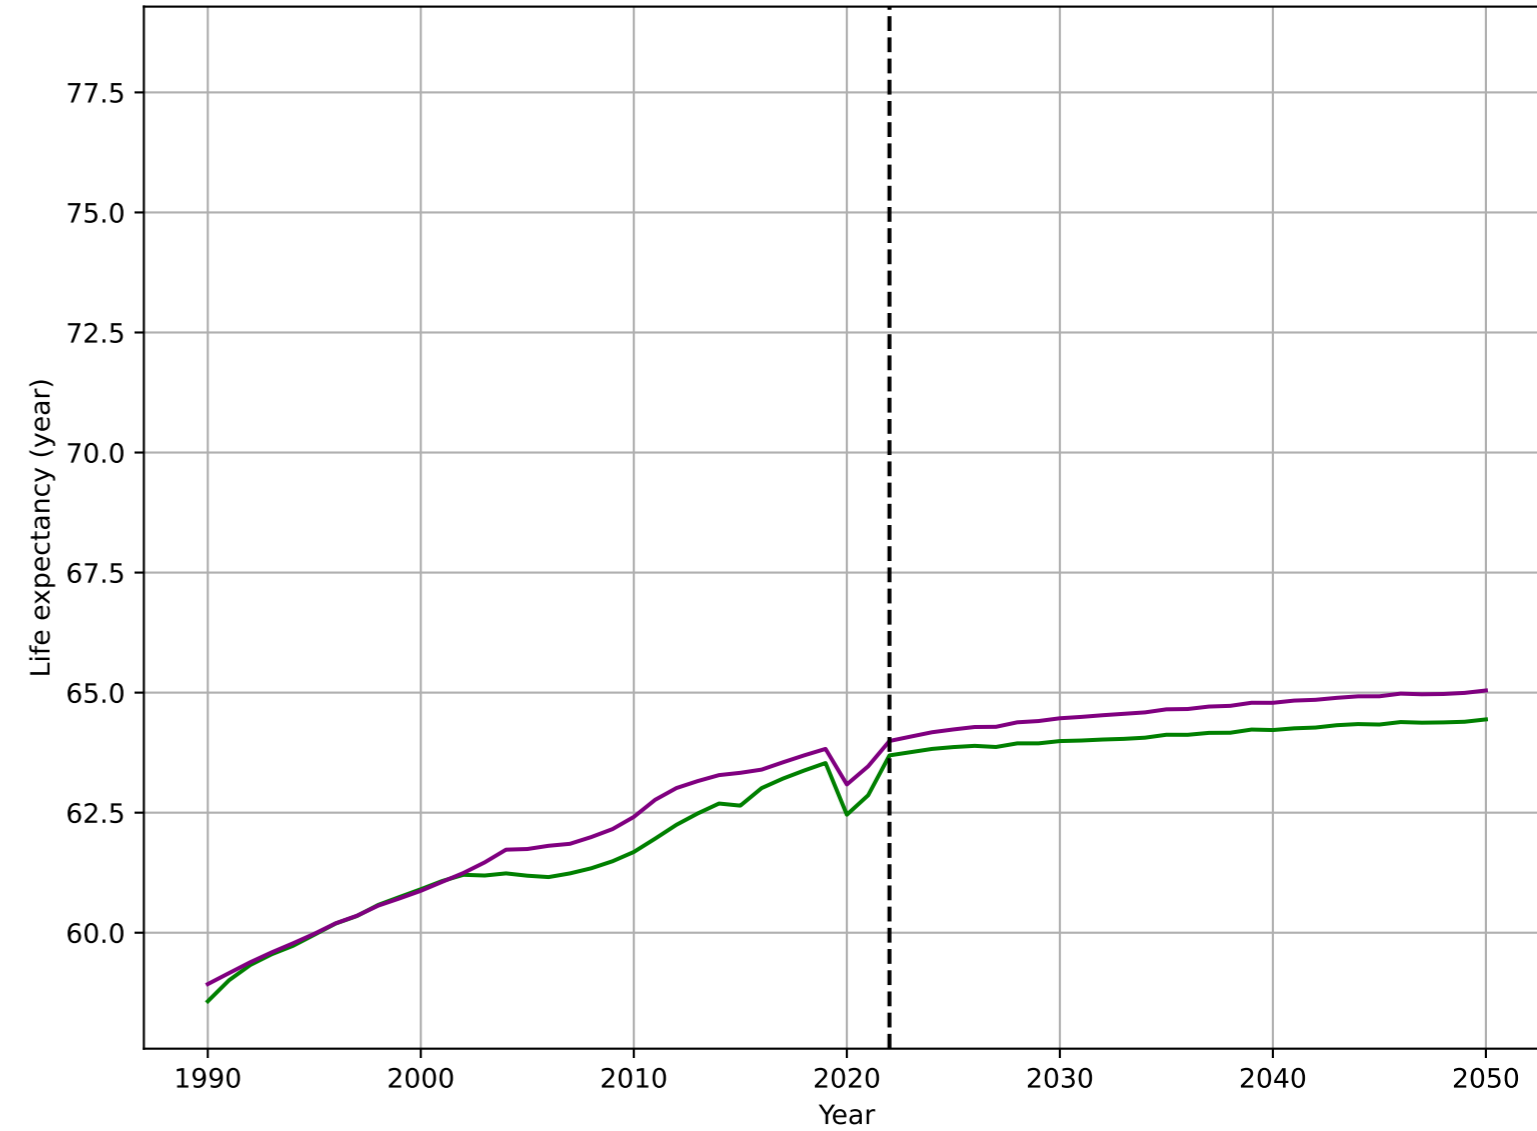

# Sudan

### Life Expectancy

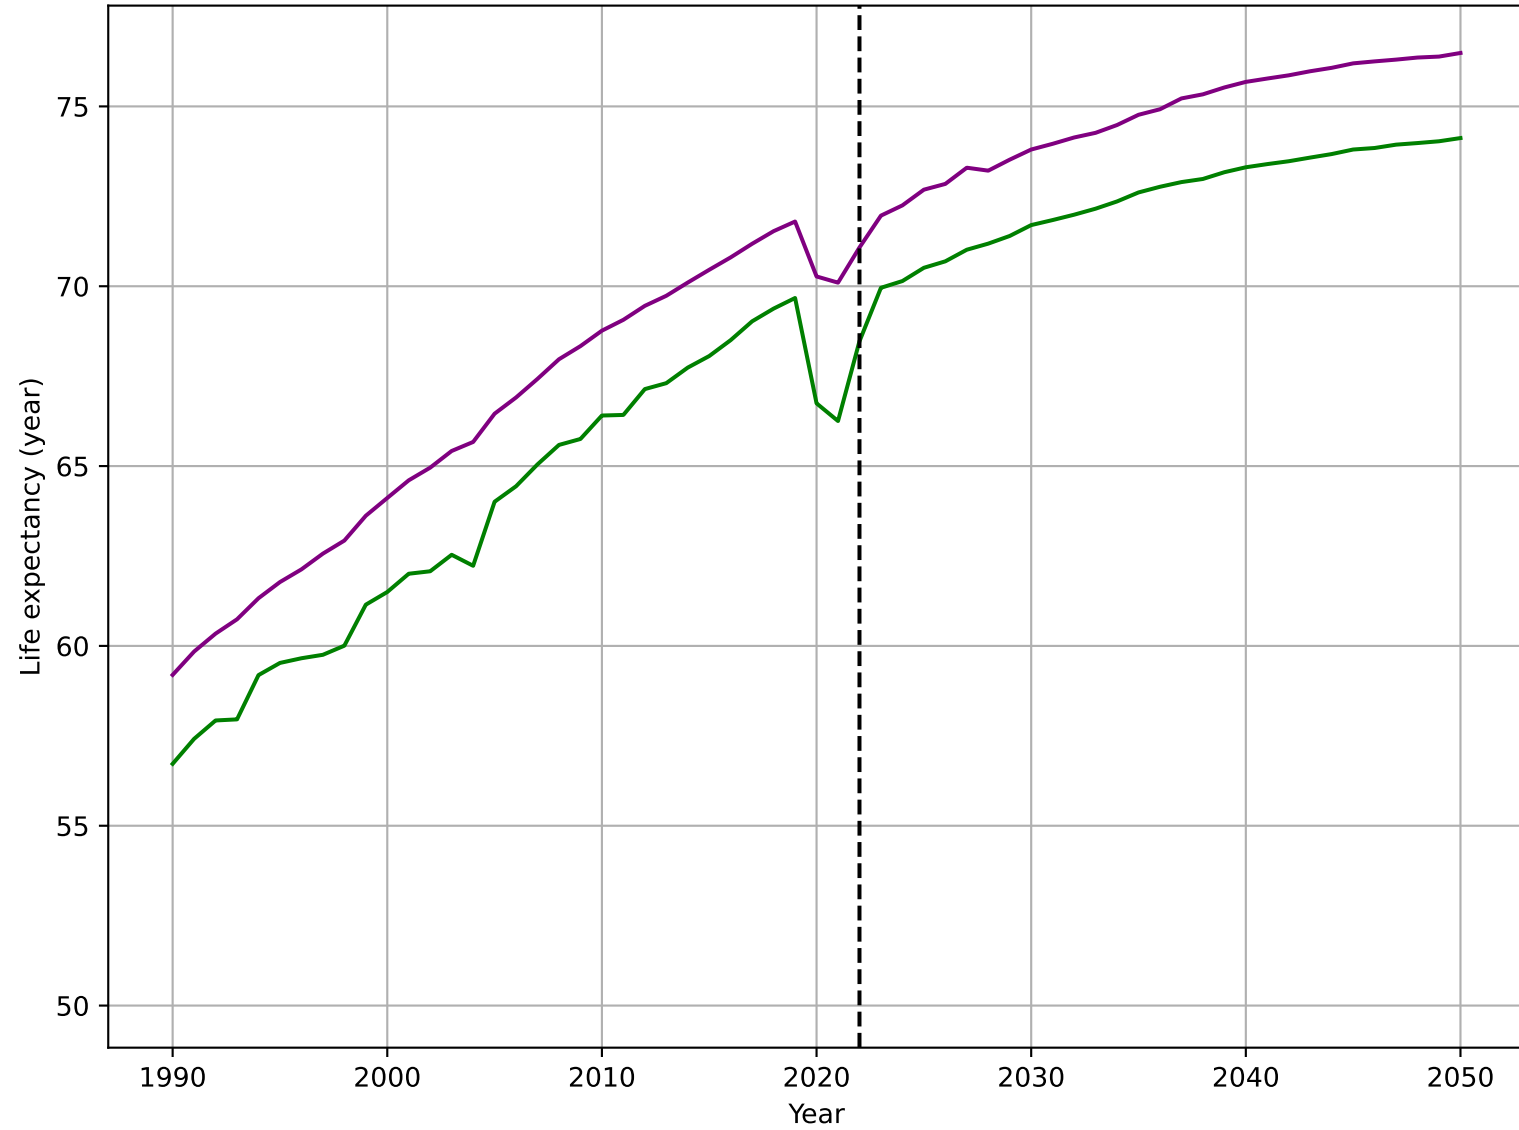

### Healthy Life Expectancy (HALE)

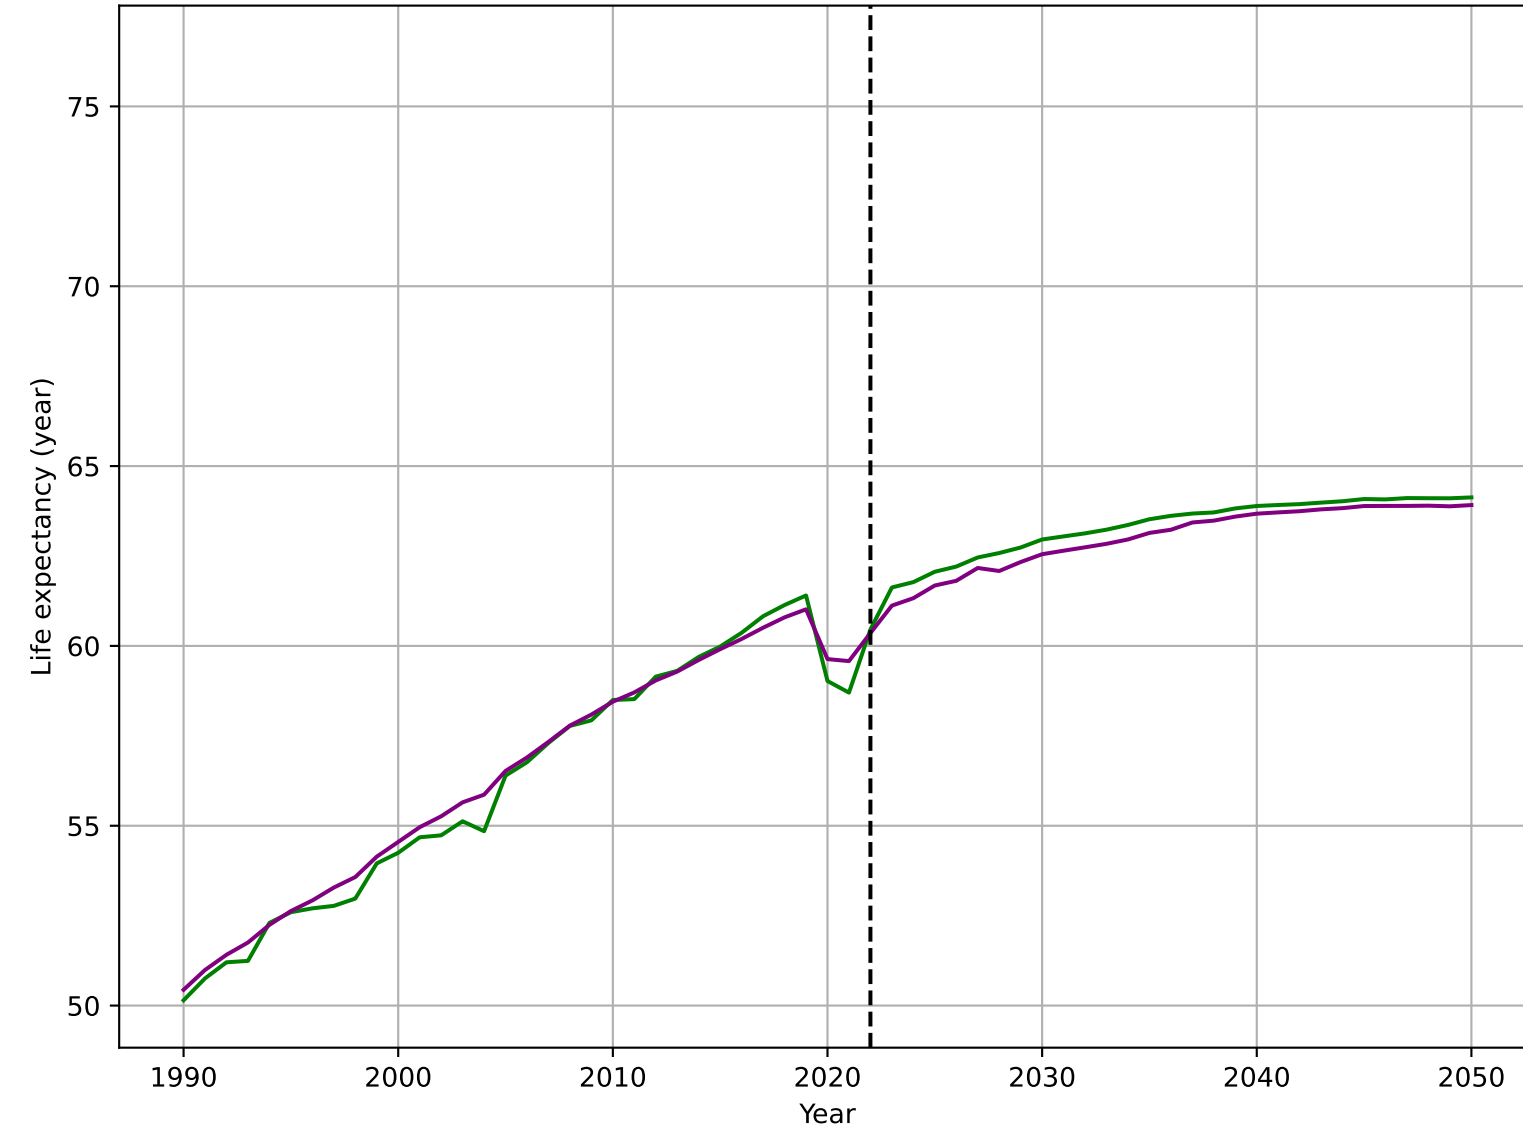

# Syria

### Life Expectancy

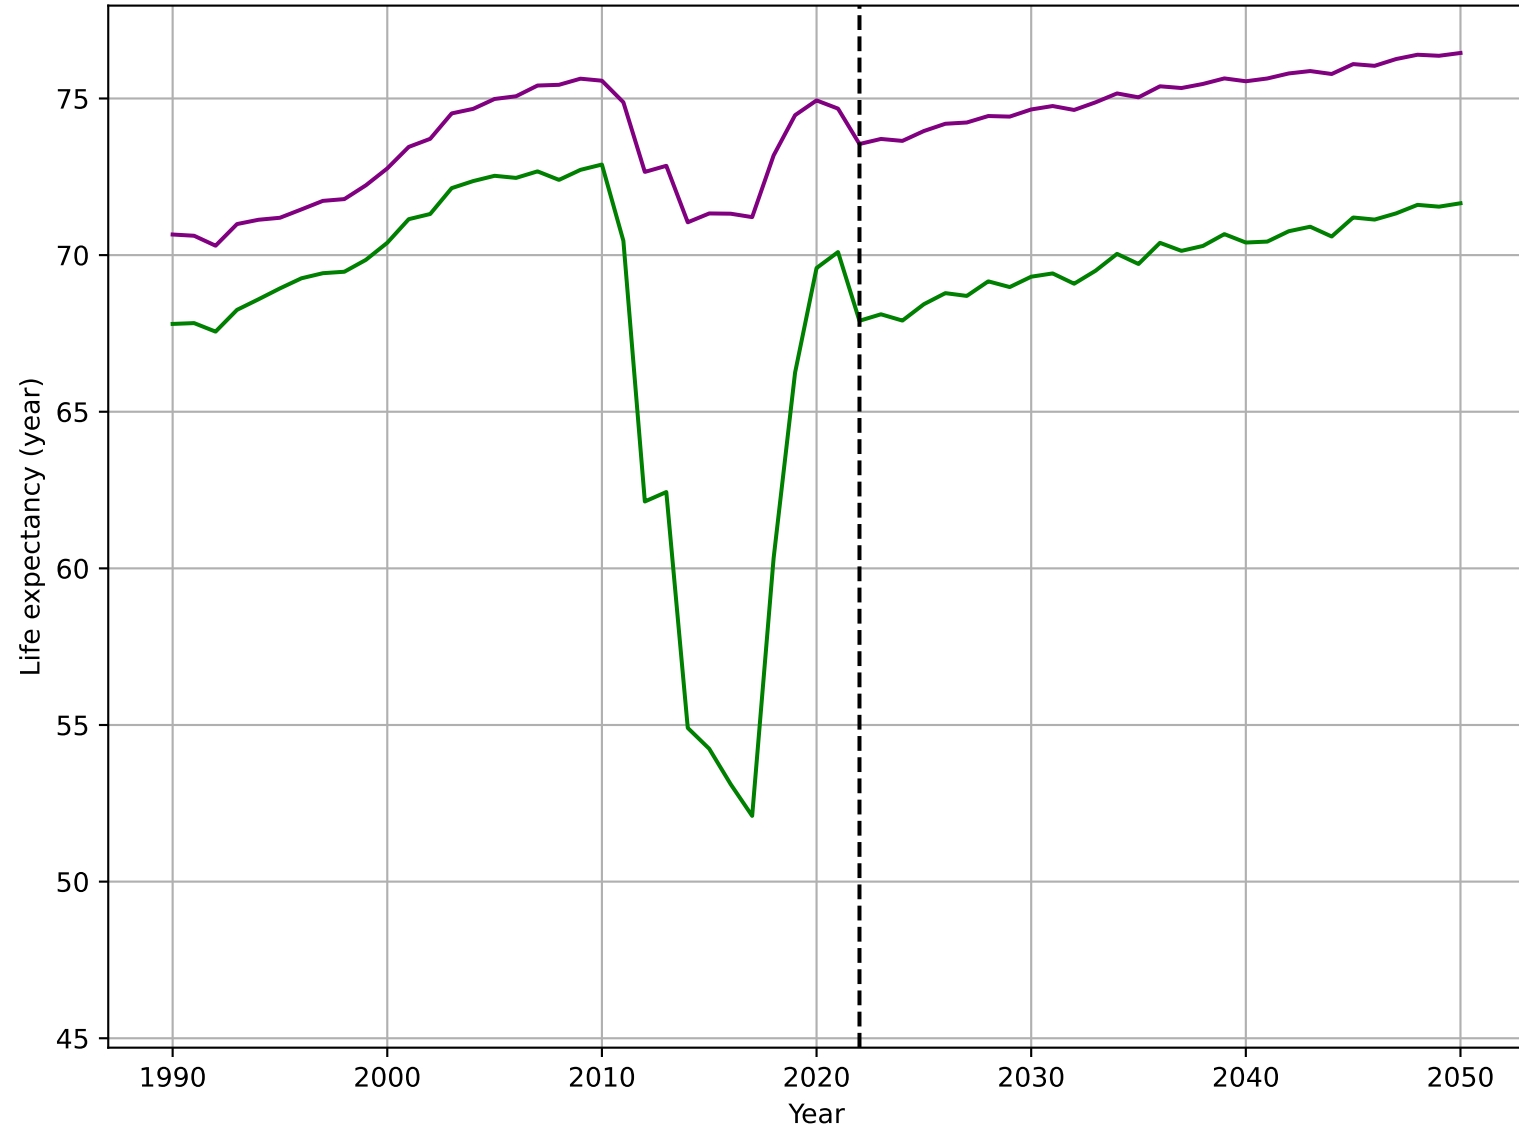

### Healthy Life Expectancy (HALE)

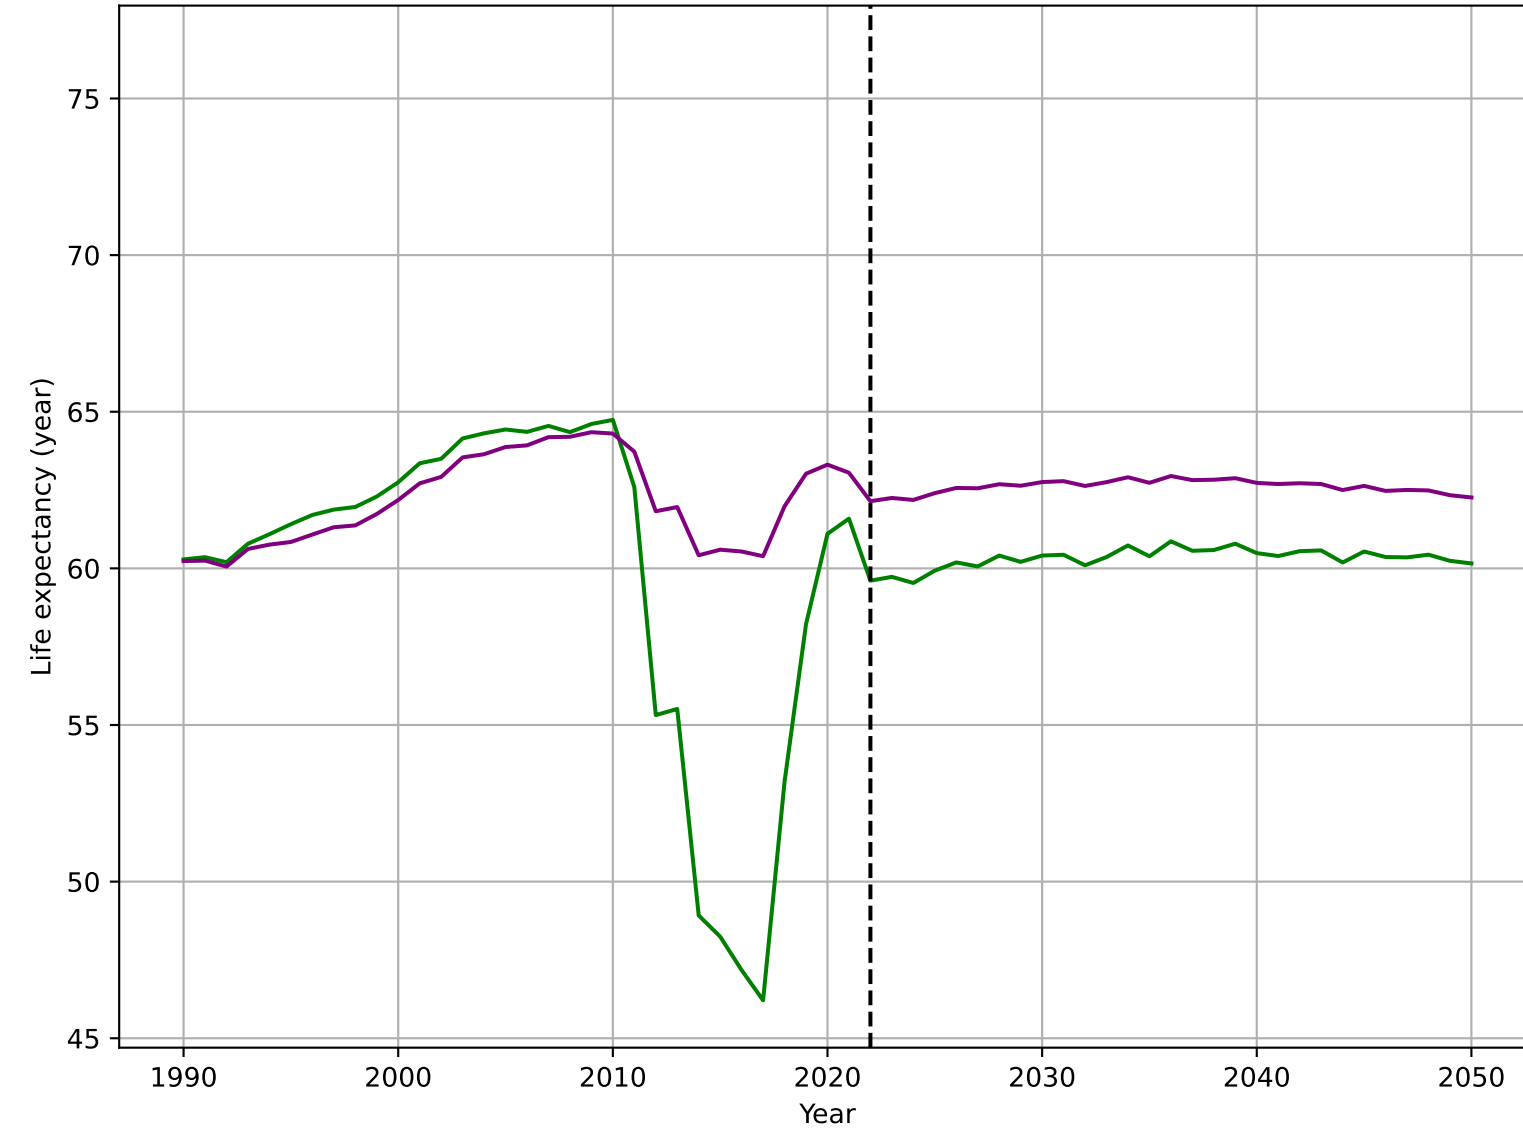

# Tunisia

### Life Expectancy

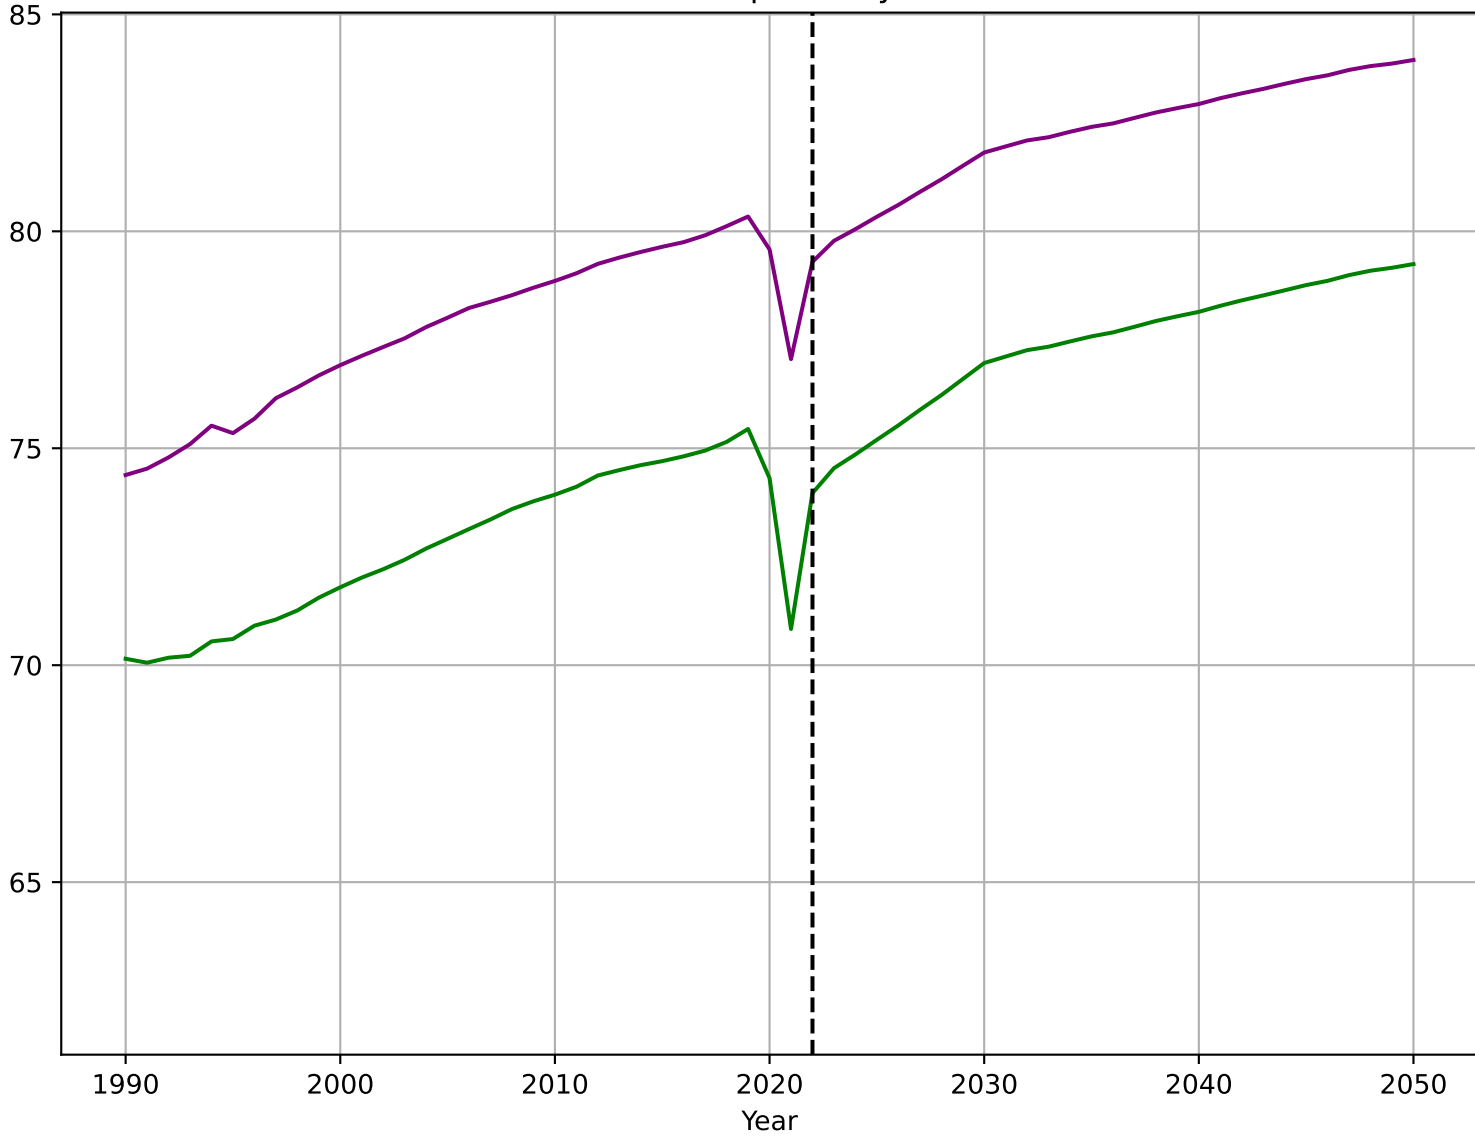

### Healthy Life Expectancy (HALE)

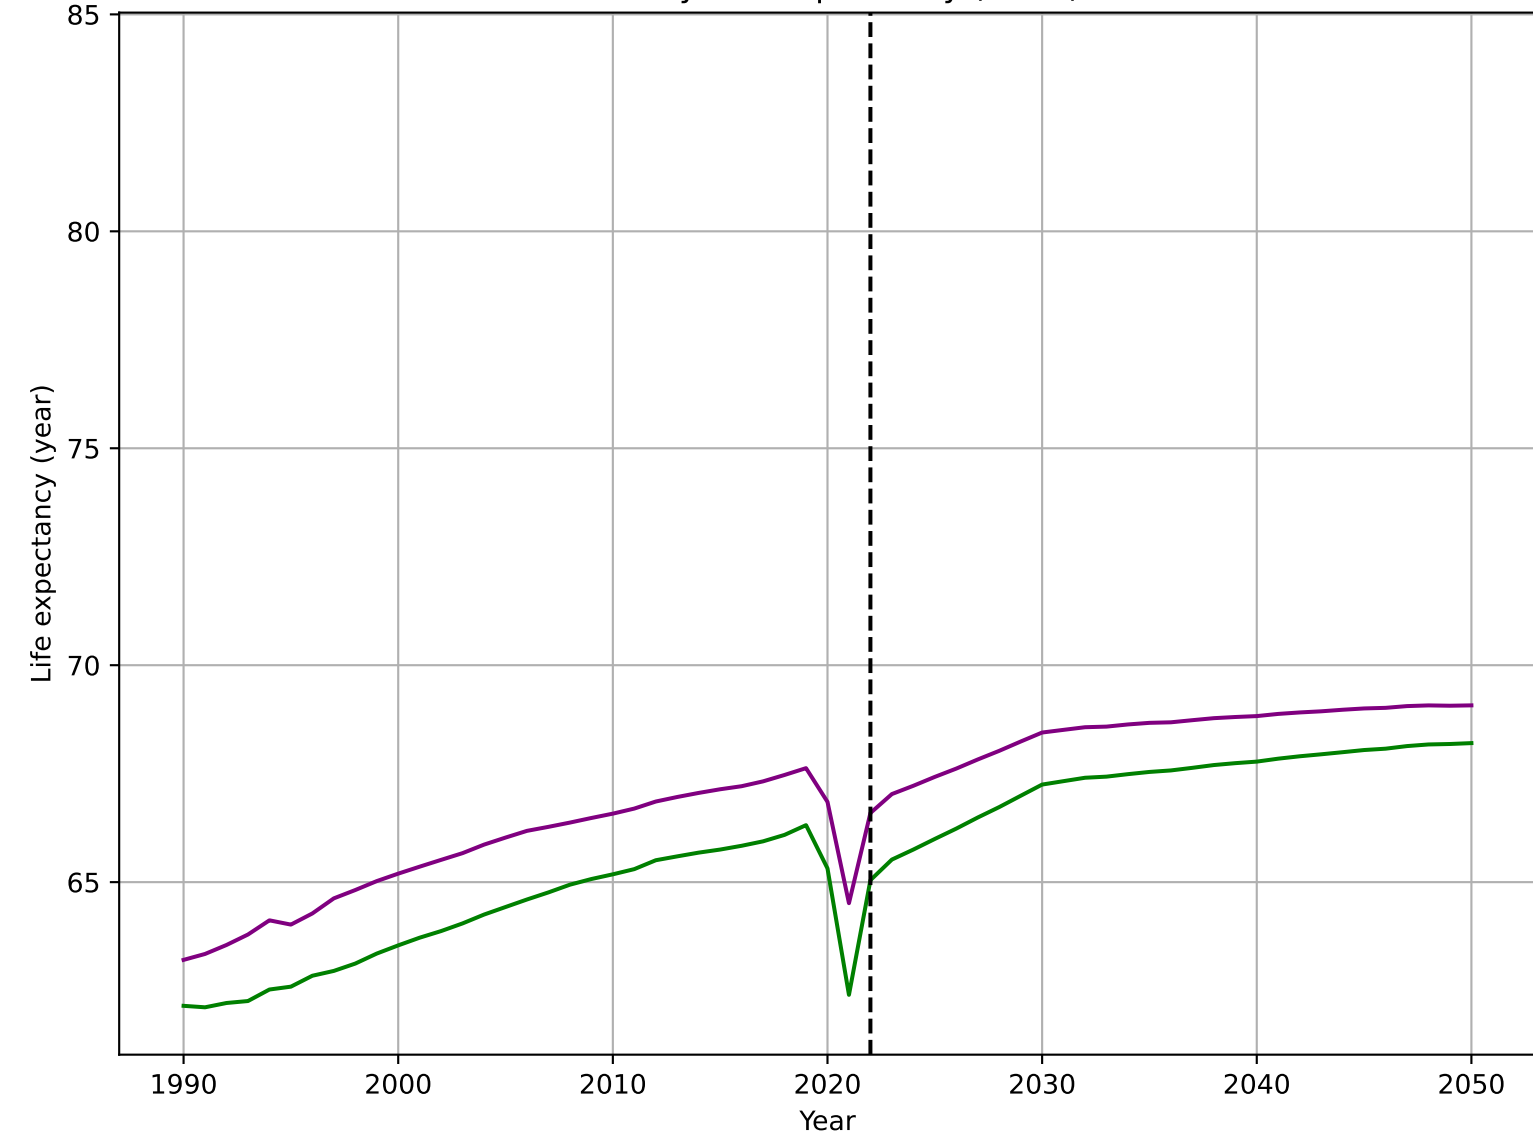



# Türkiye

### Life Expectancy

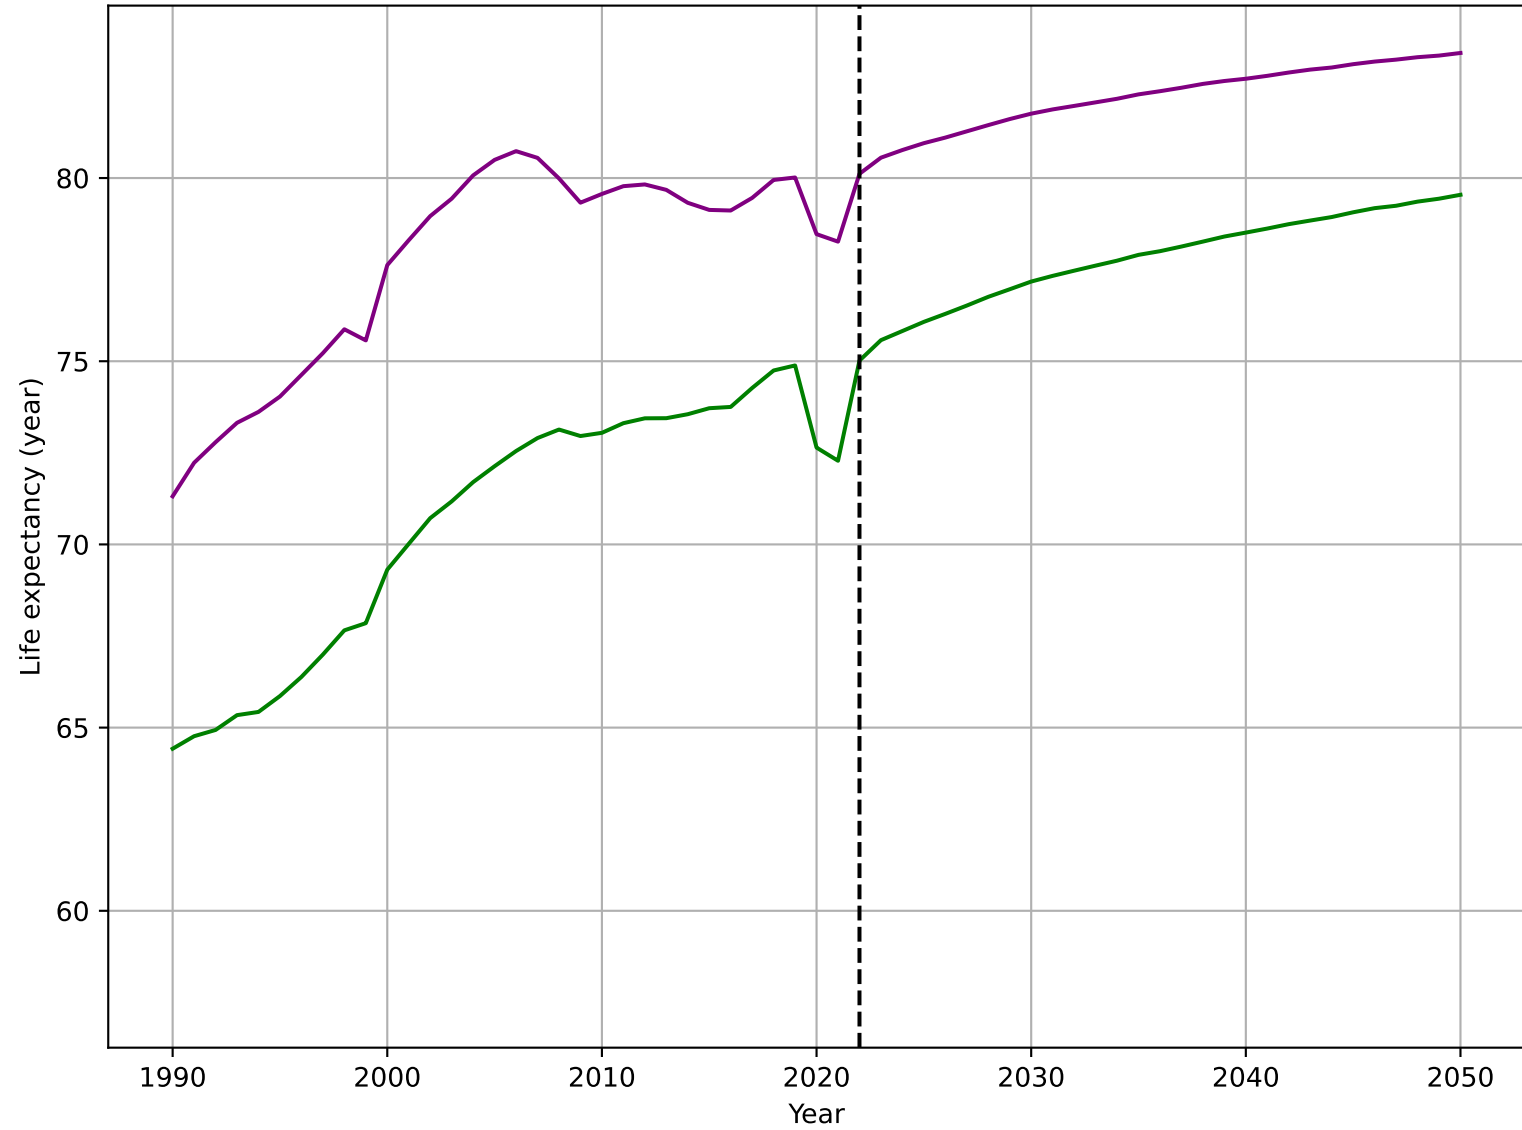

### Healthy Life Expectancy (HALE)

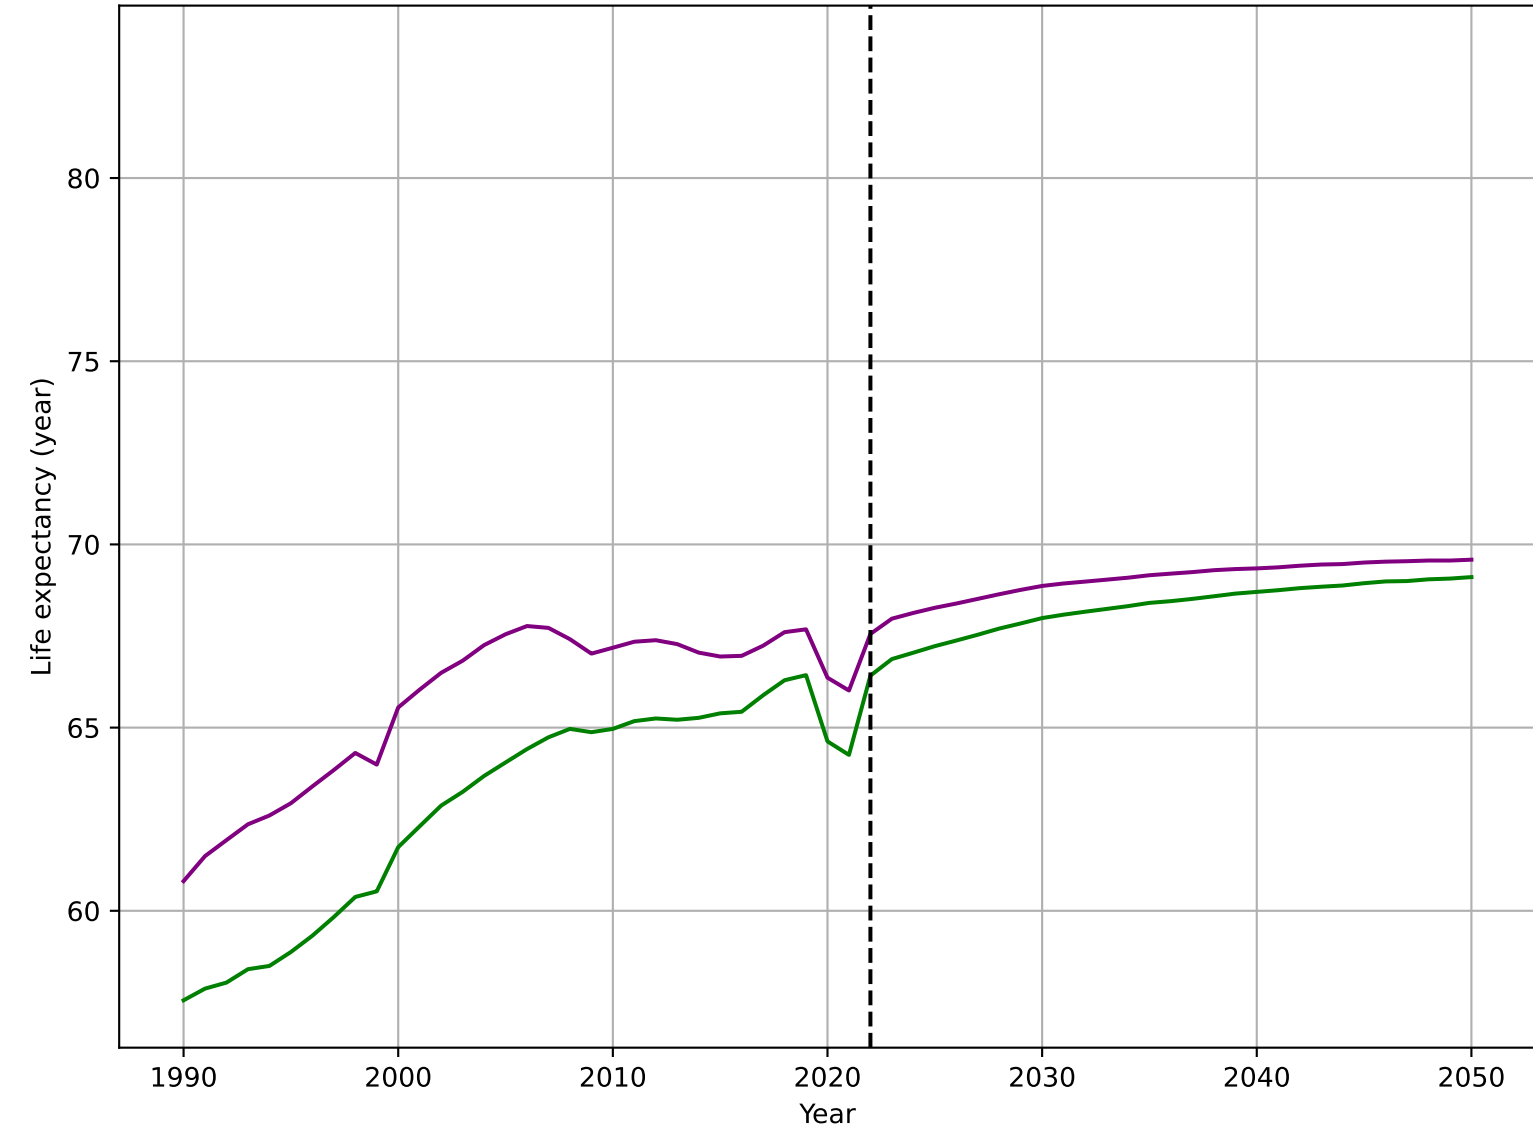

# United Arab Emirates

### Life Expectancy

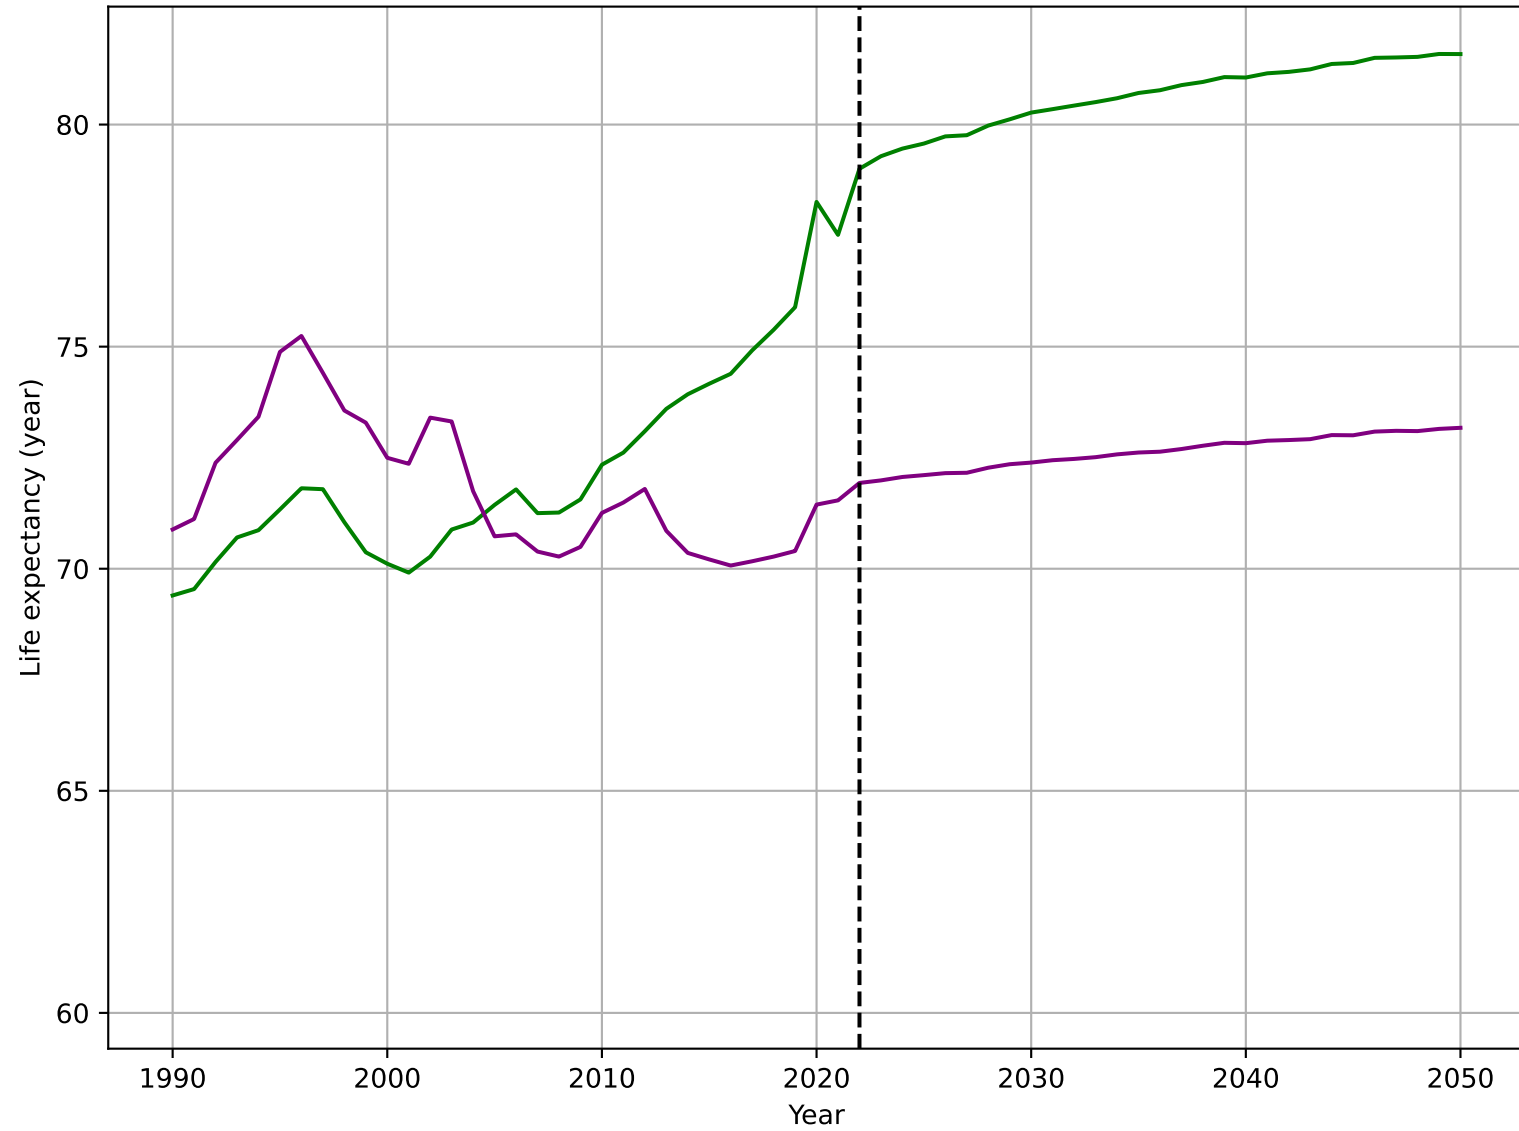

### Healthy Life Expectancy (HALE)

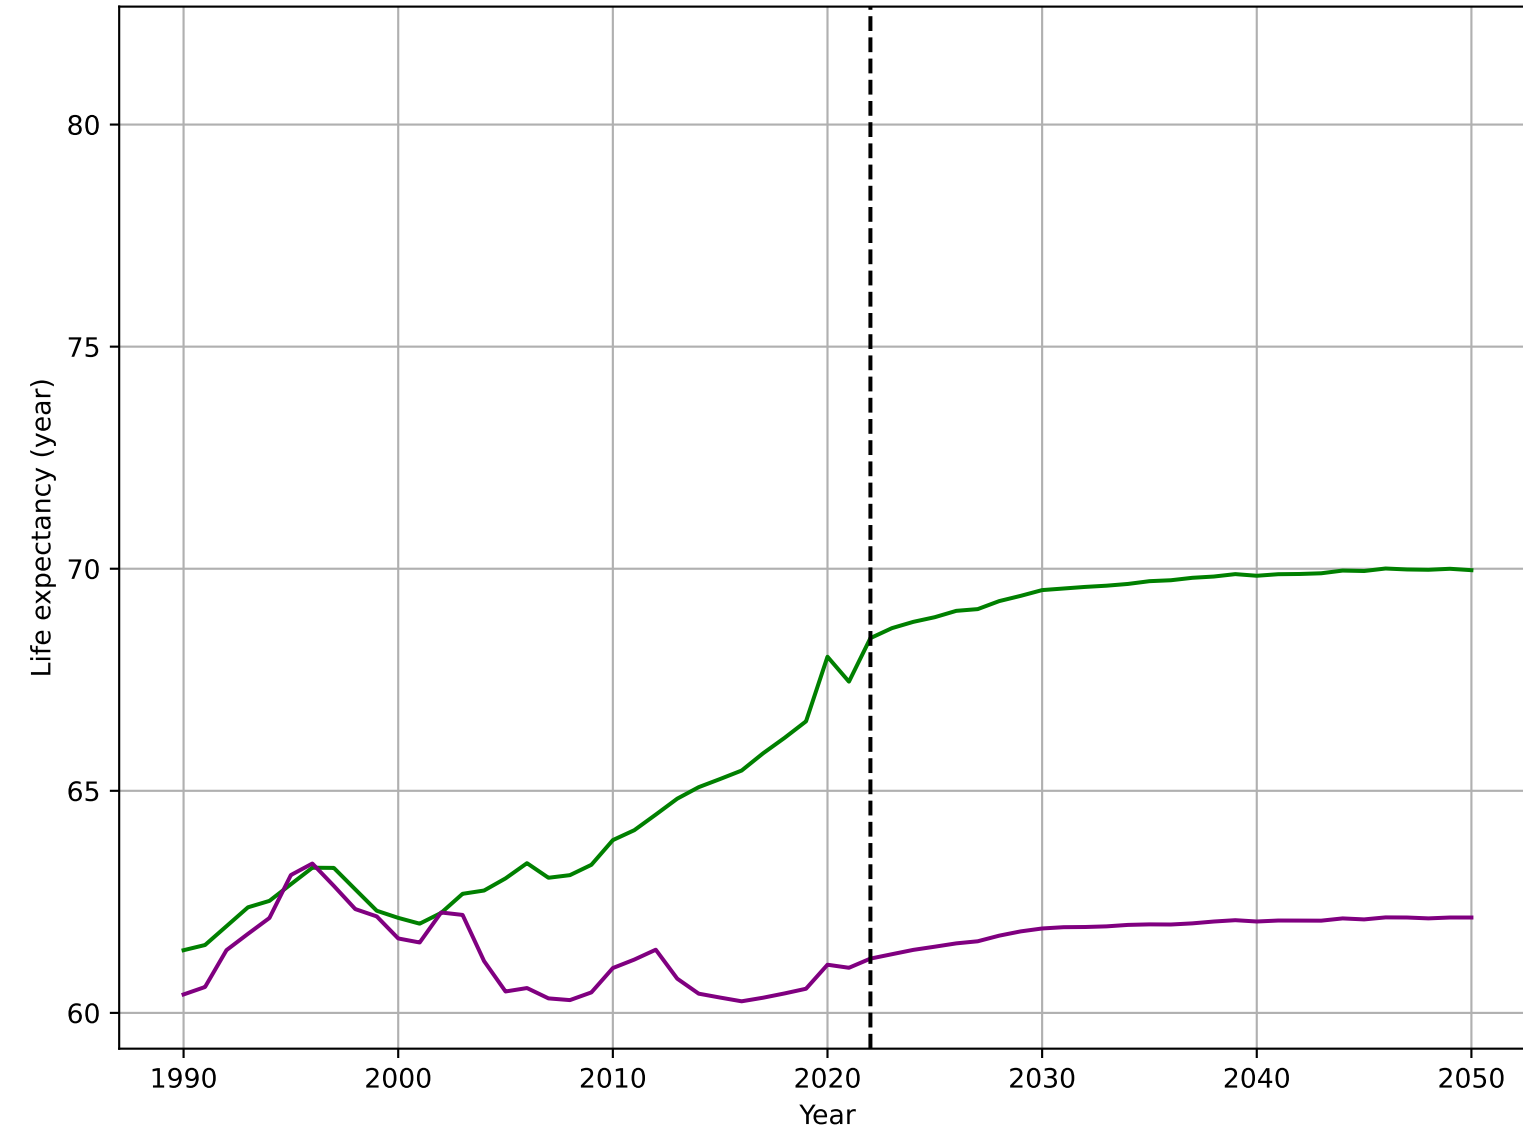

# Yemen

### Life Expectancy

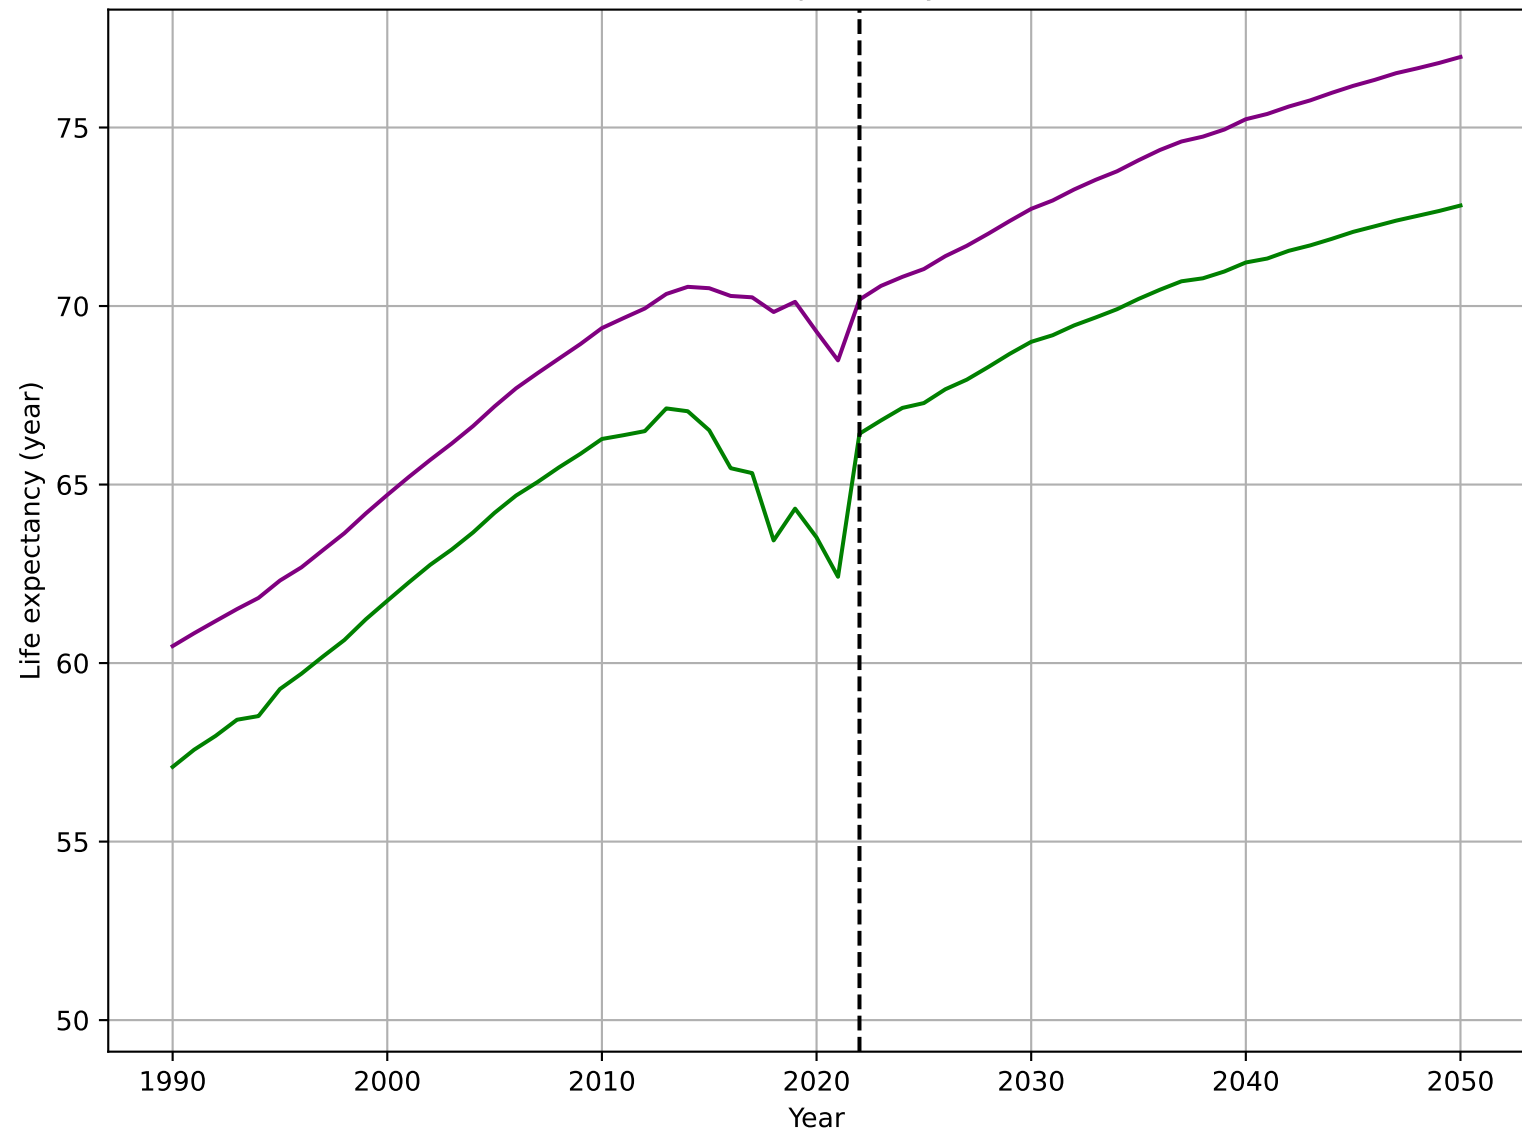

### Healthy Life Expectancy (HALE)

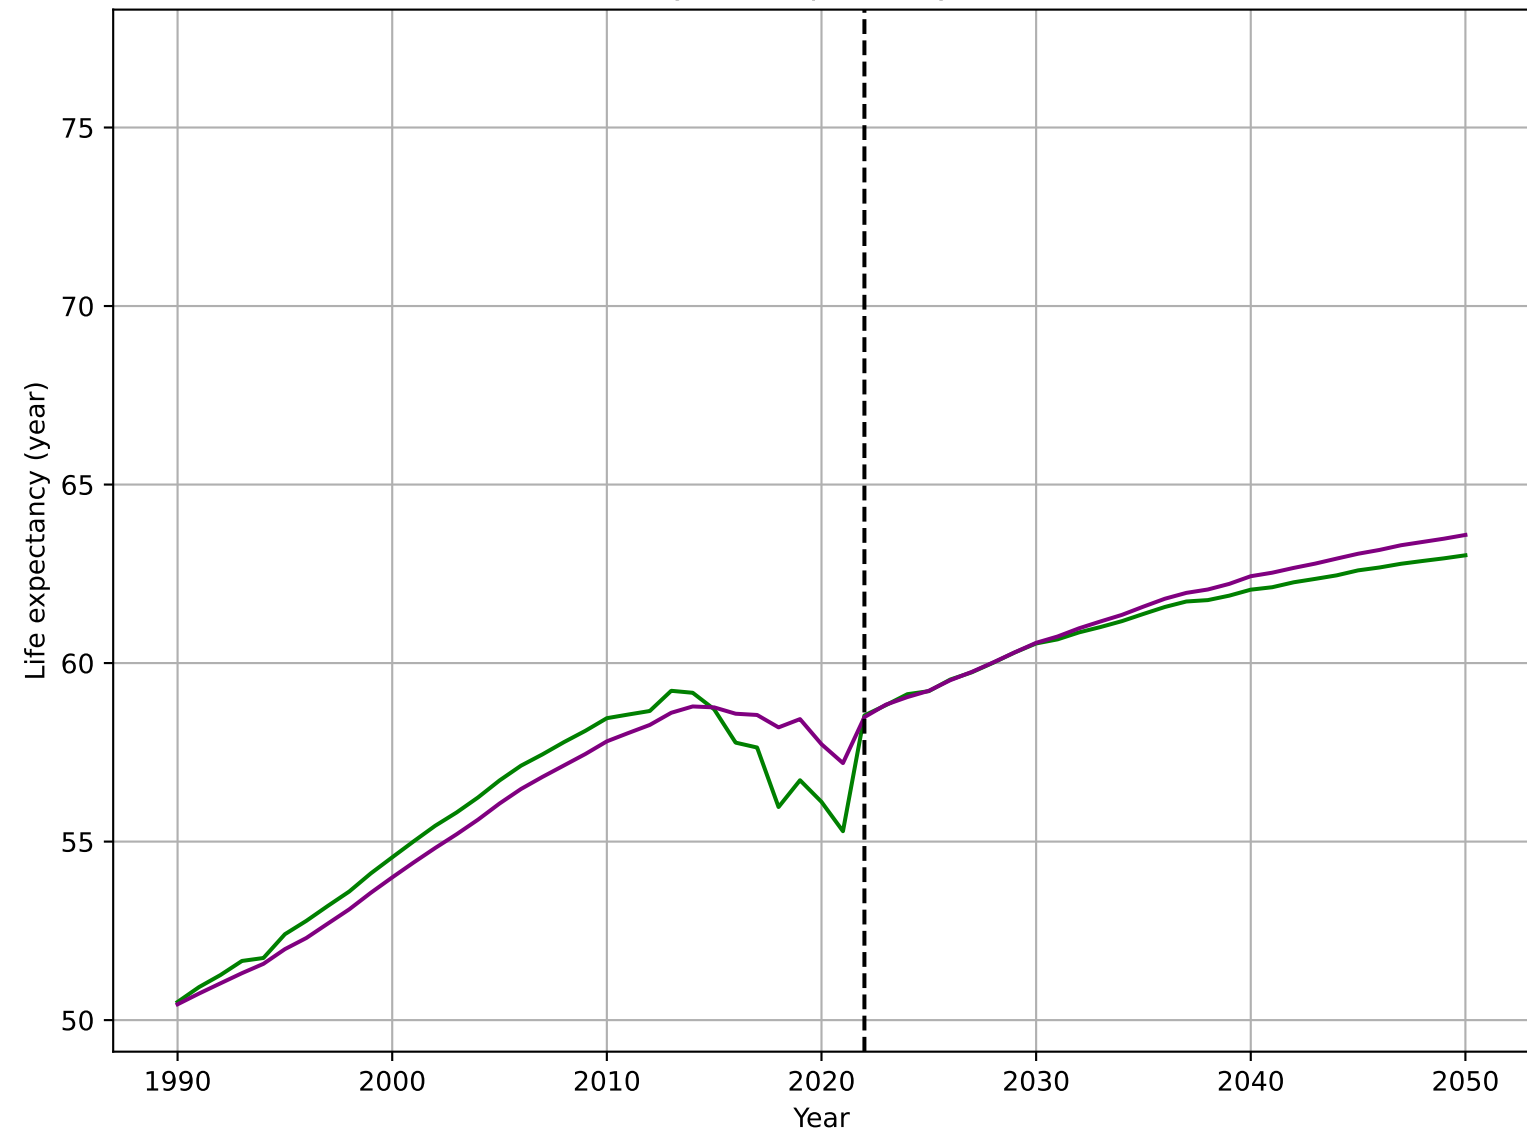

# Bangladesh

### Life Expectancy

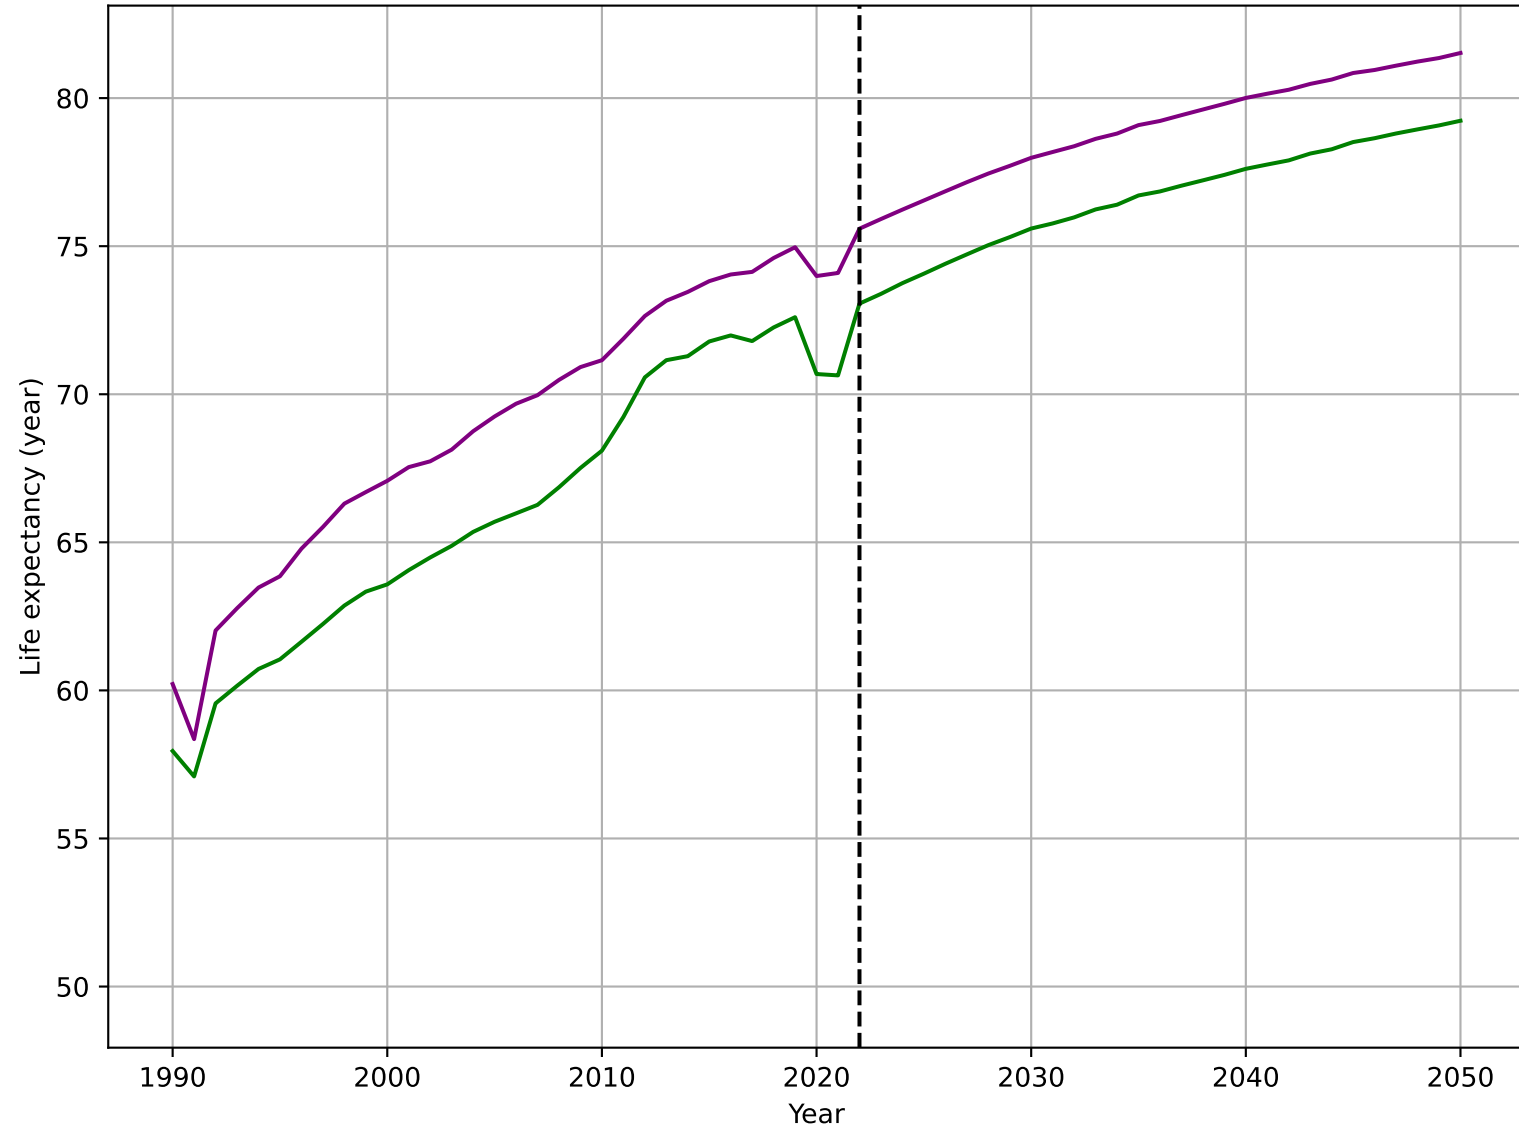

### Healthy Life Expectancy (HALE)

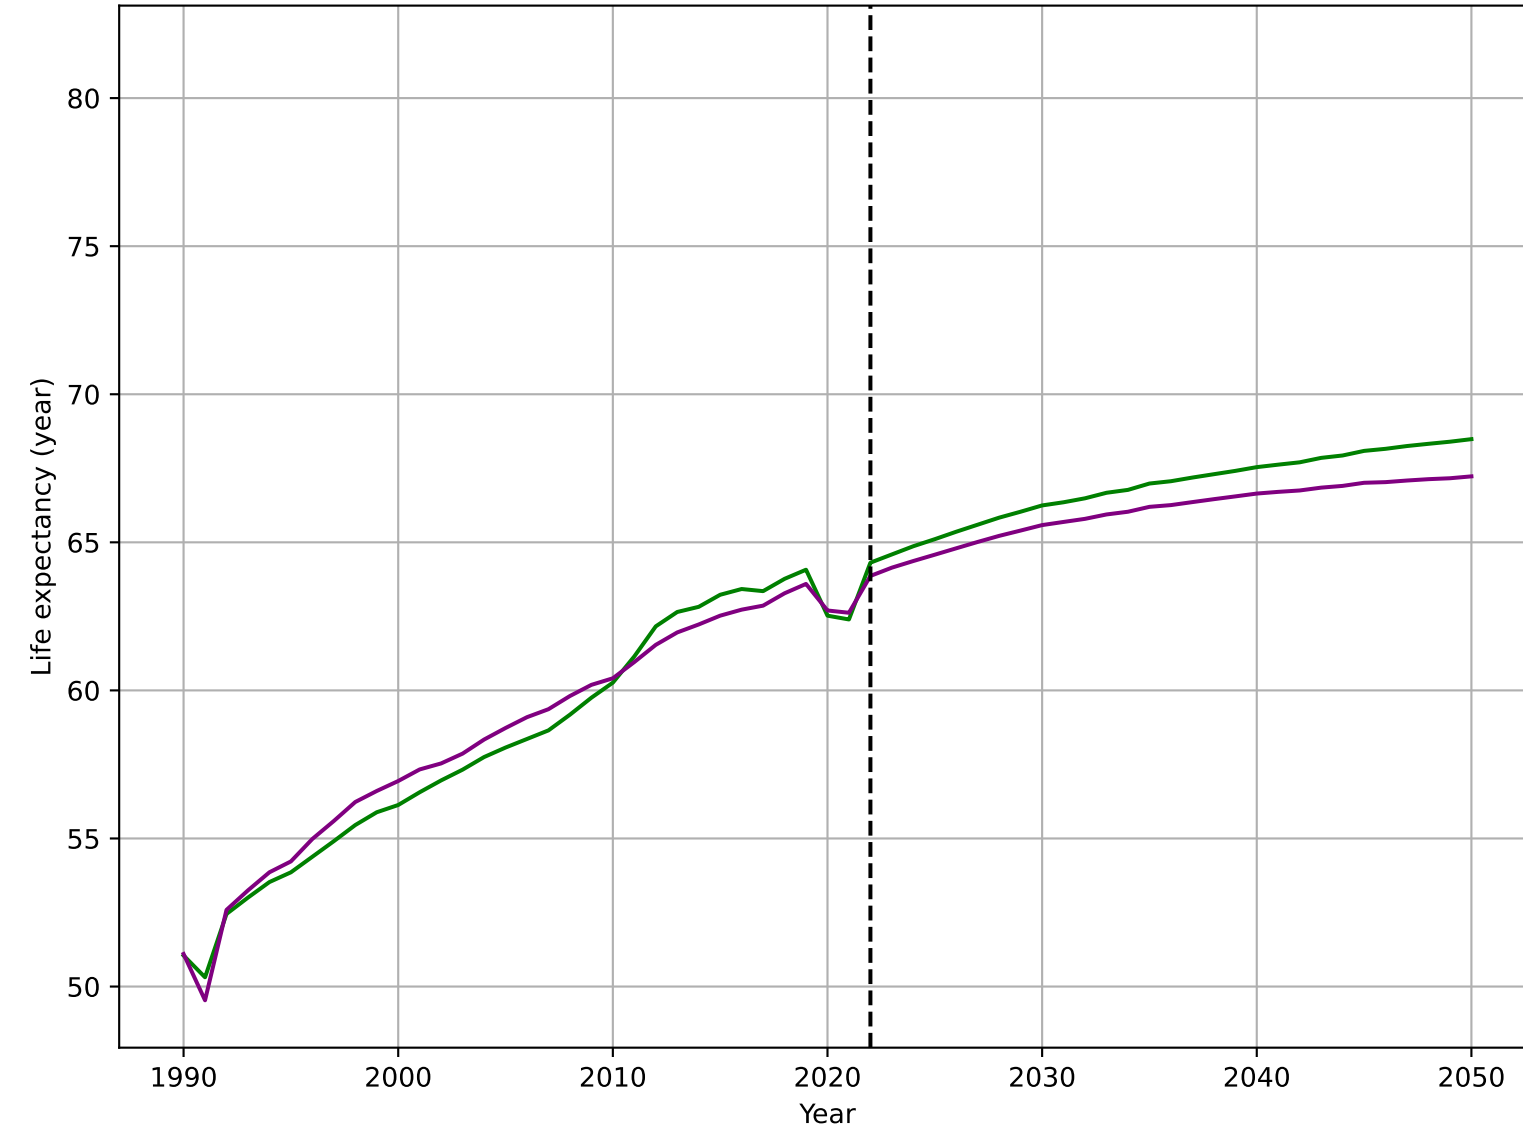

# Bhutan

### Life Expectancy

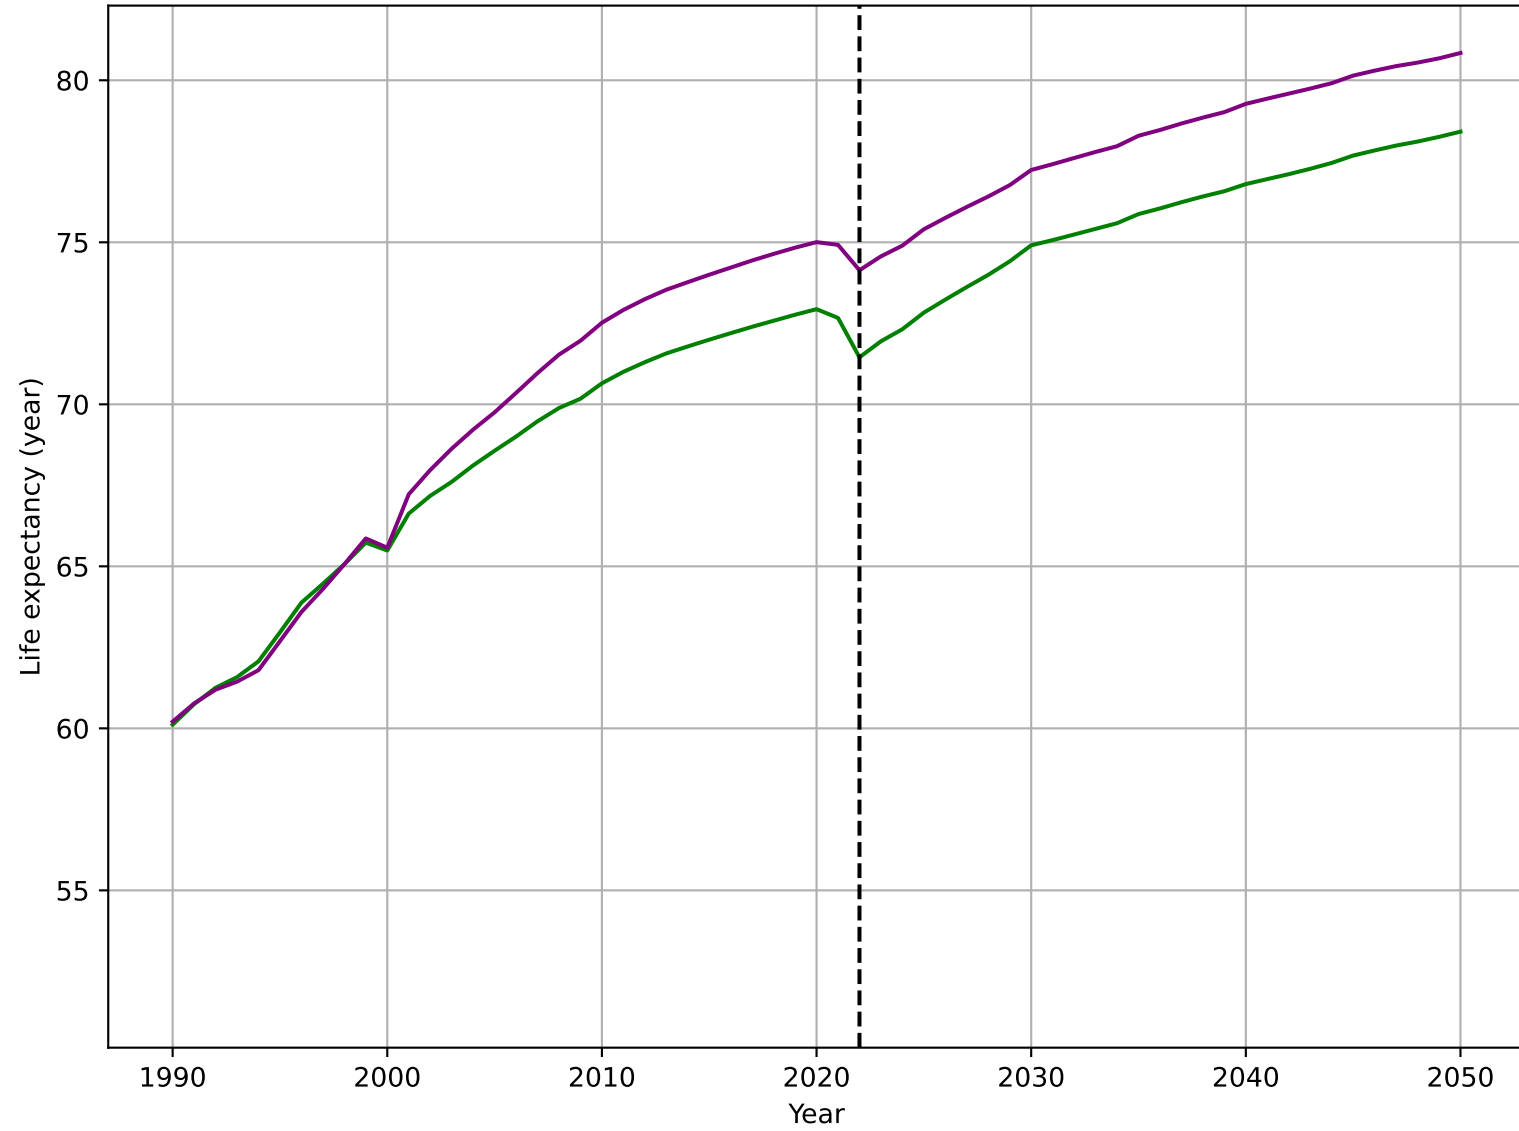

### Healthy Life Expectancy (HALE)

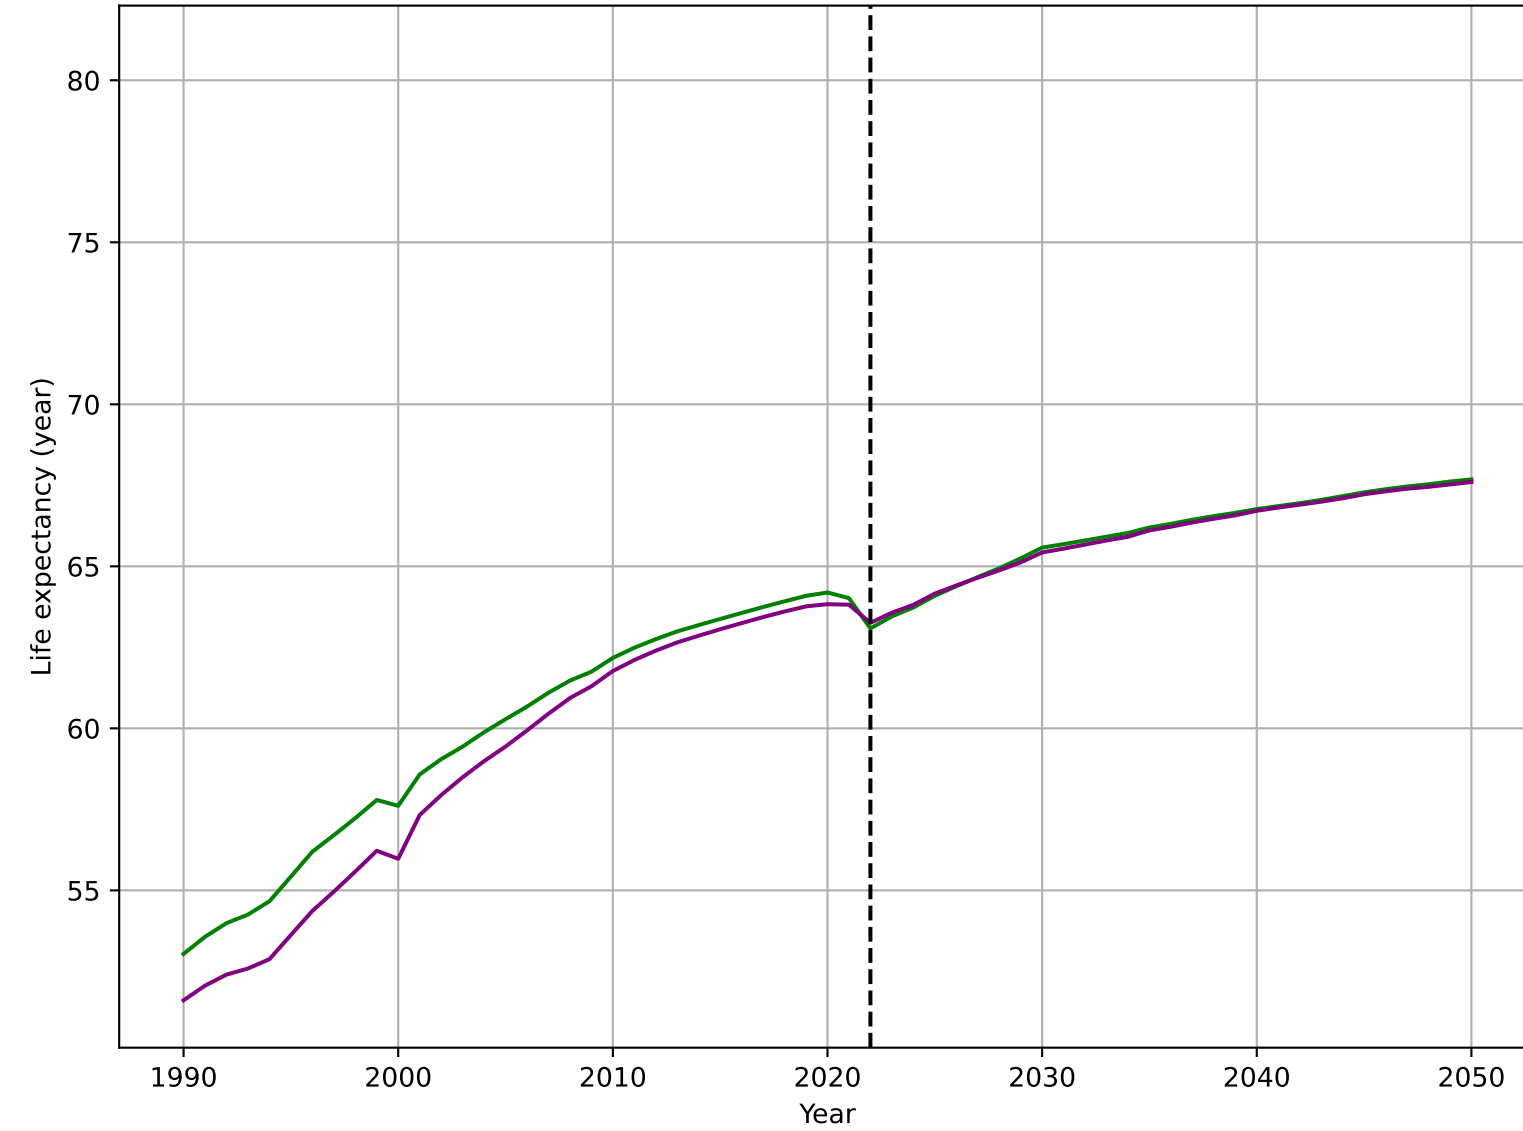

# India

### Life Expectancy

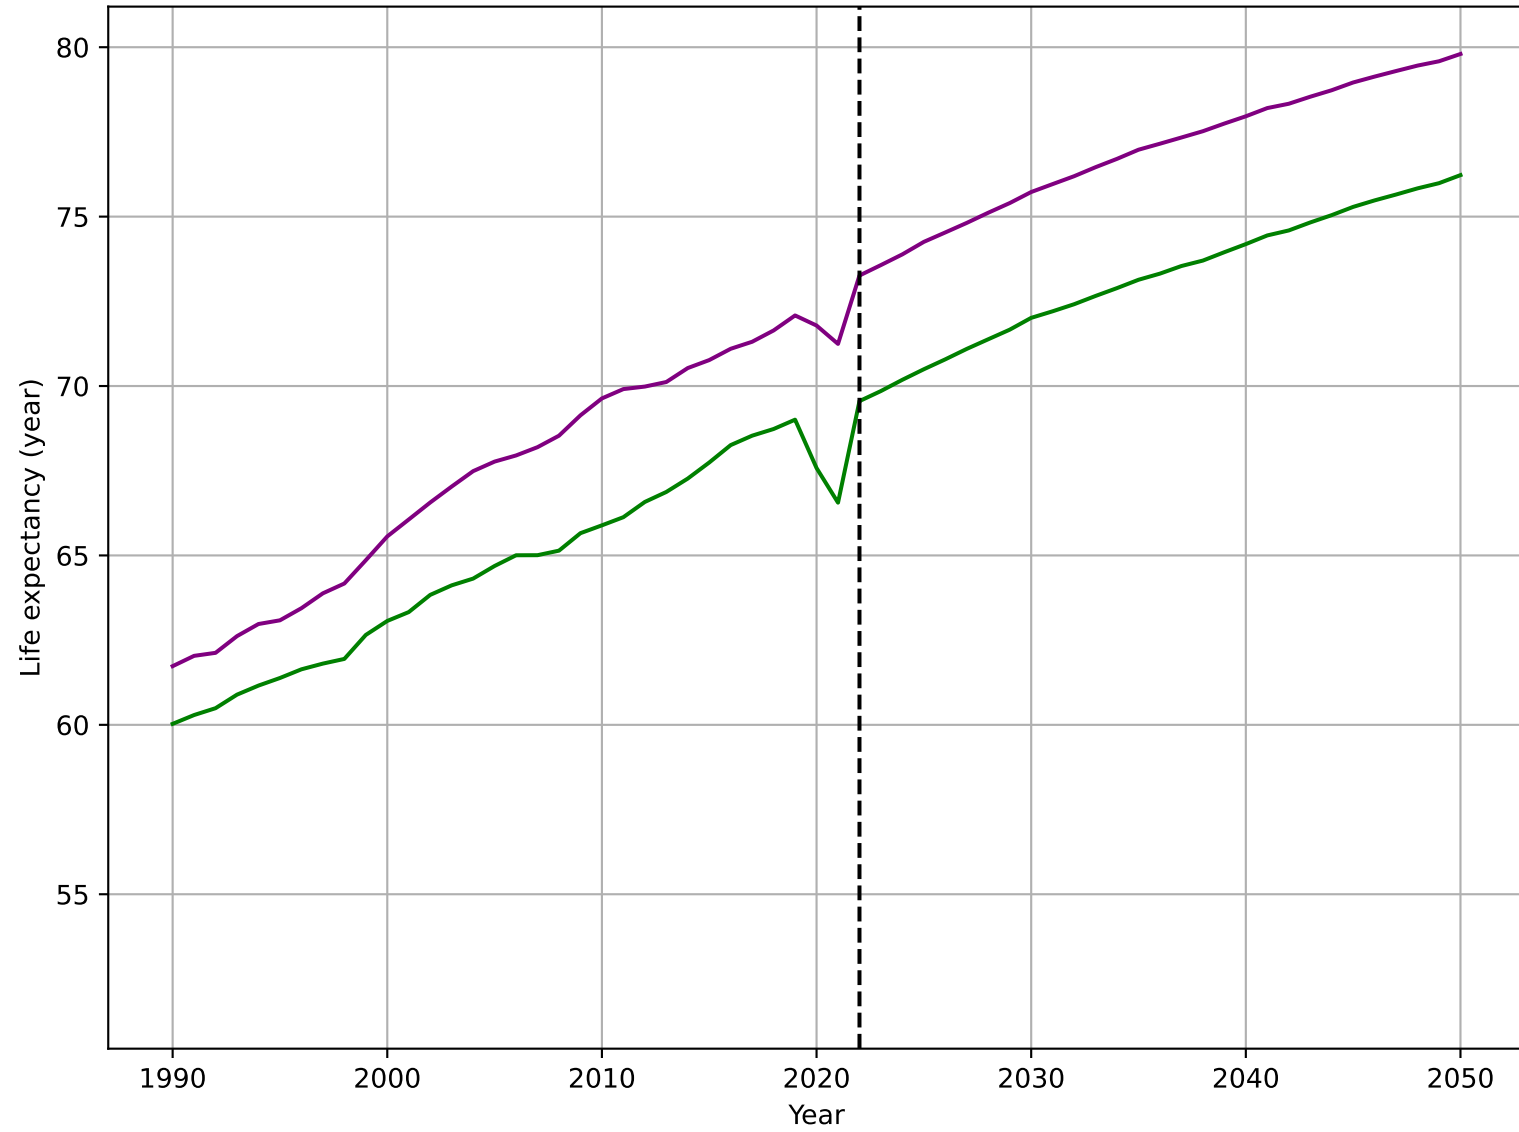

### Healthy Life Expectancy (HALE)

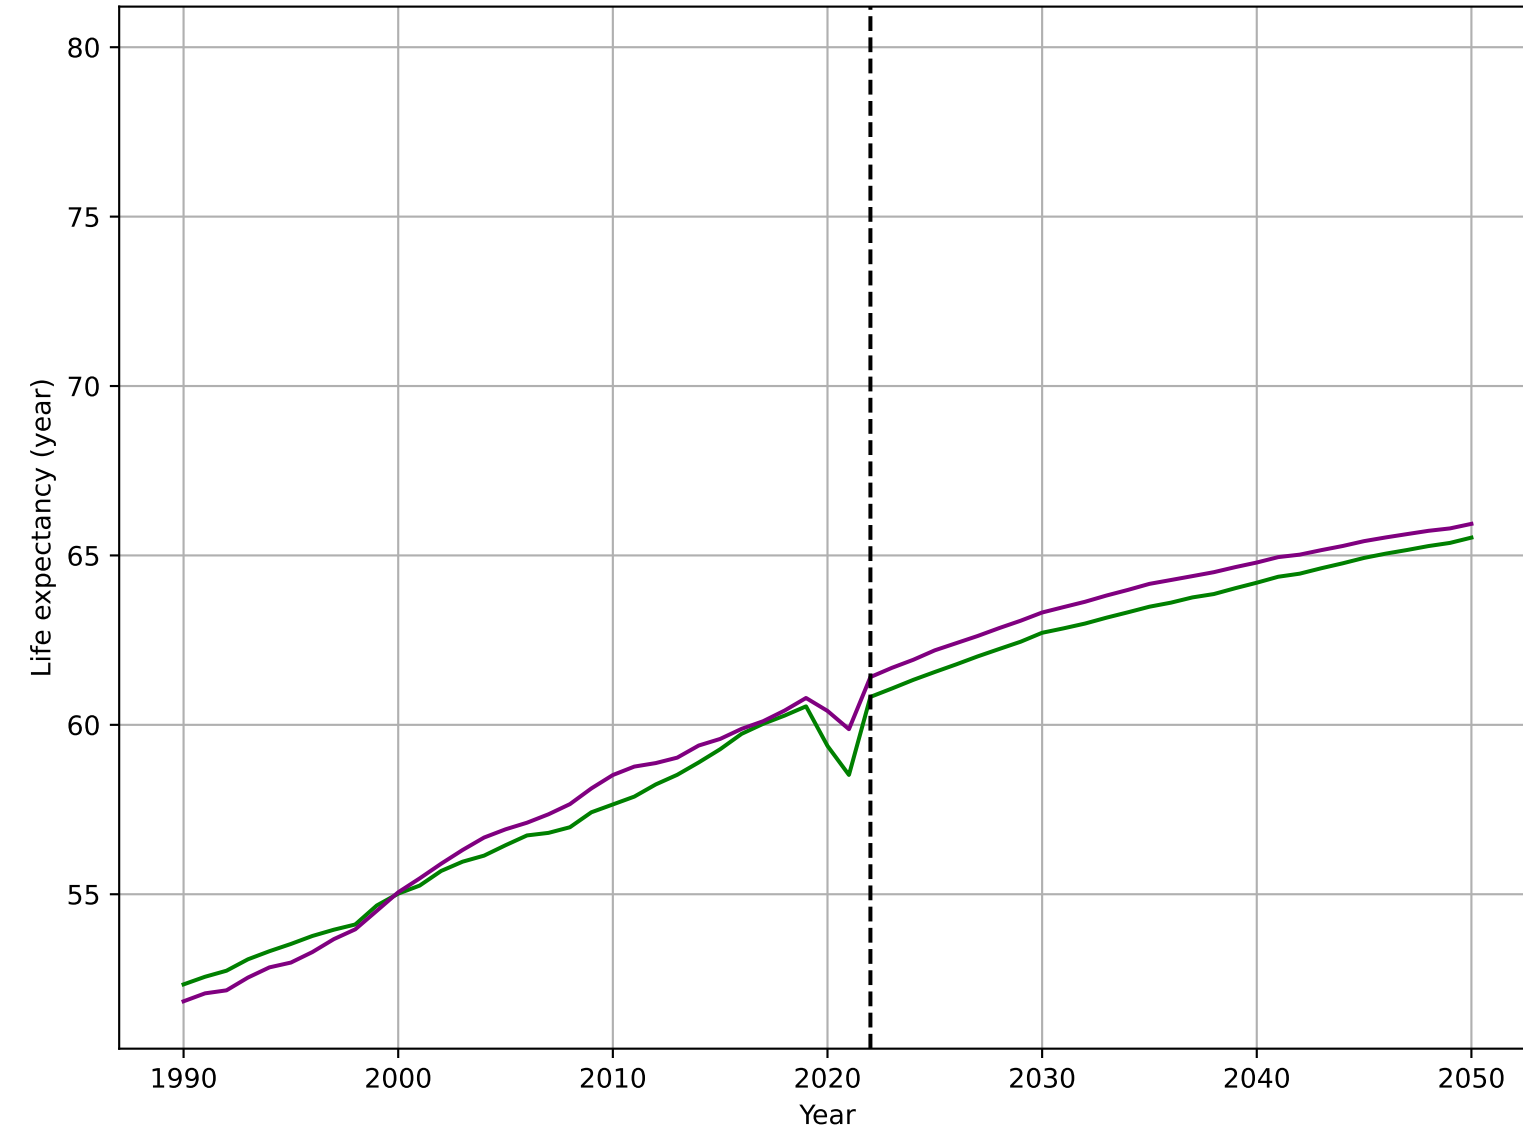

# Nepal

### Life Expectancy

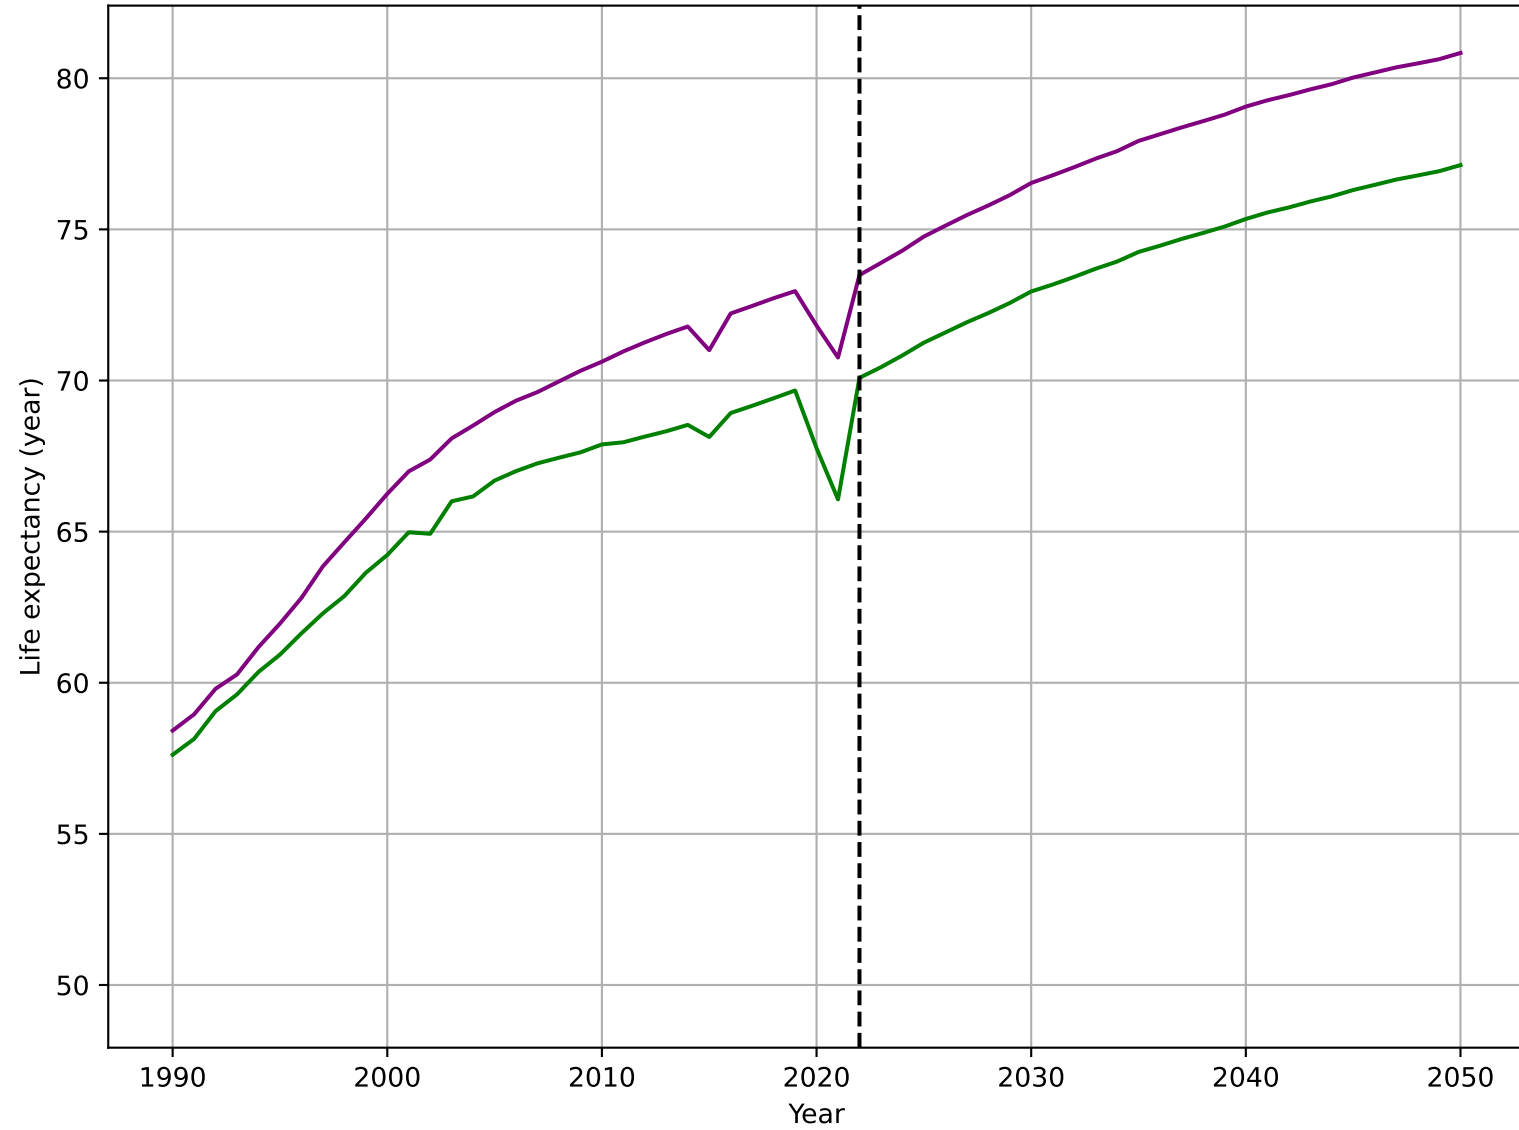

### Healthy Life Expectancy (HALE)

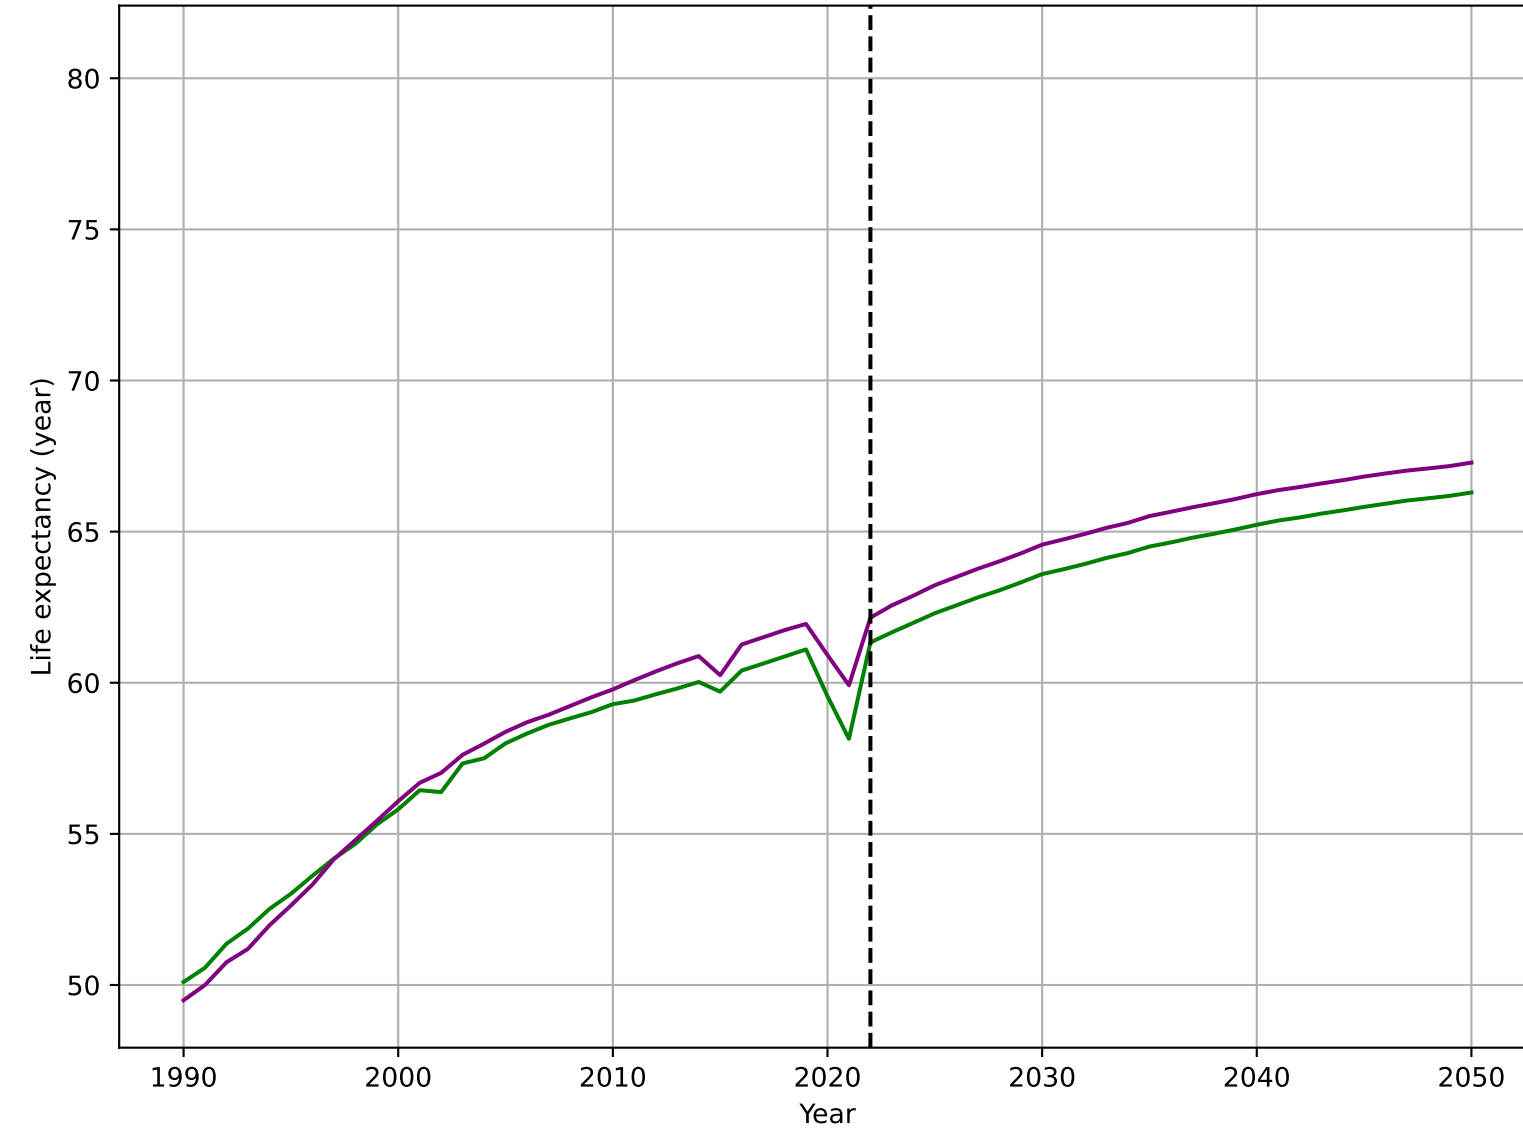

# Pakistan

### Life Expectancy

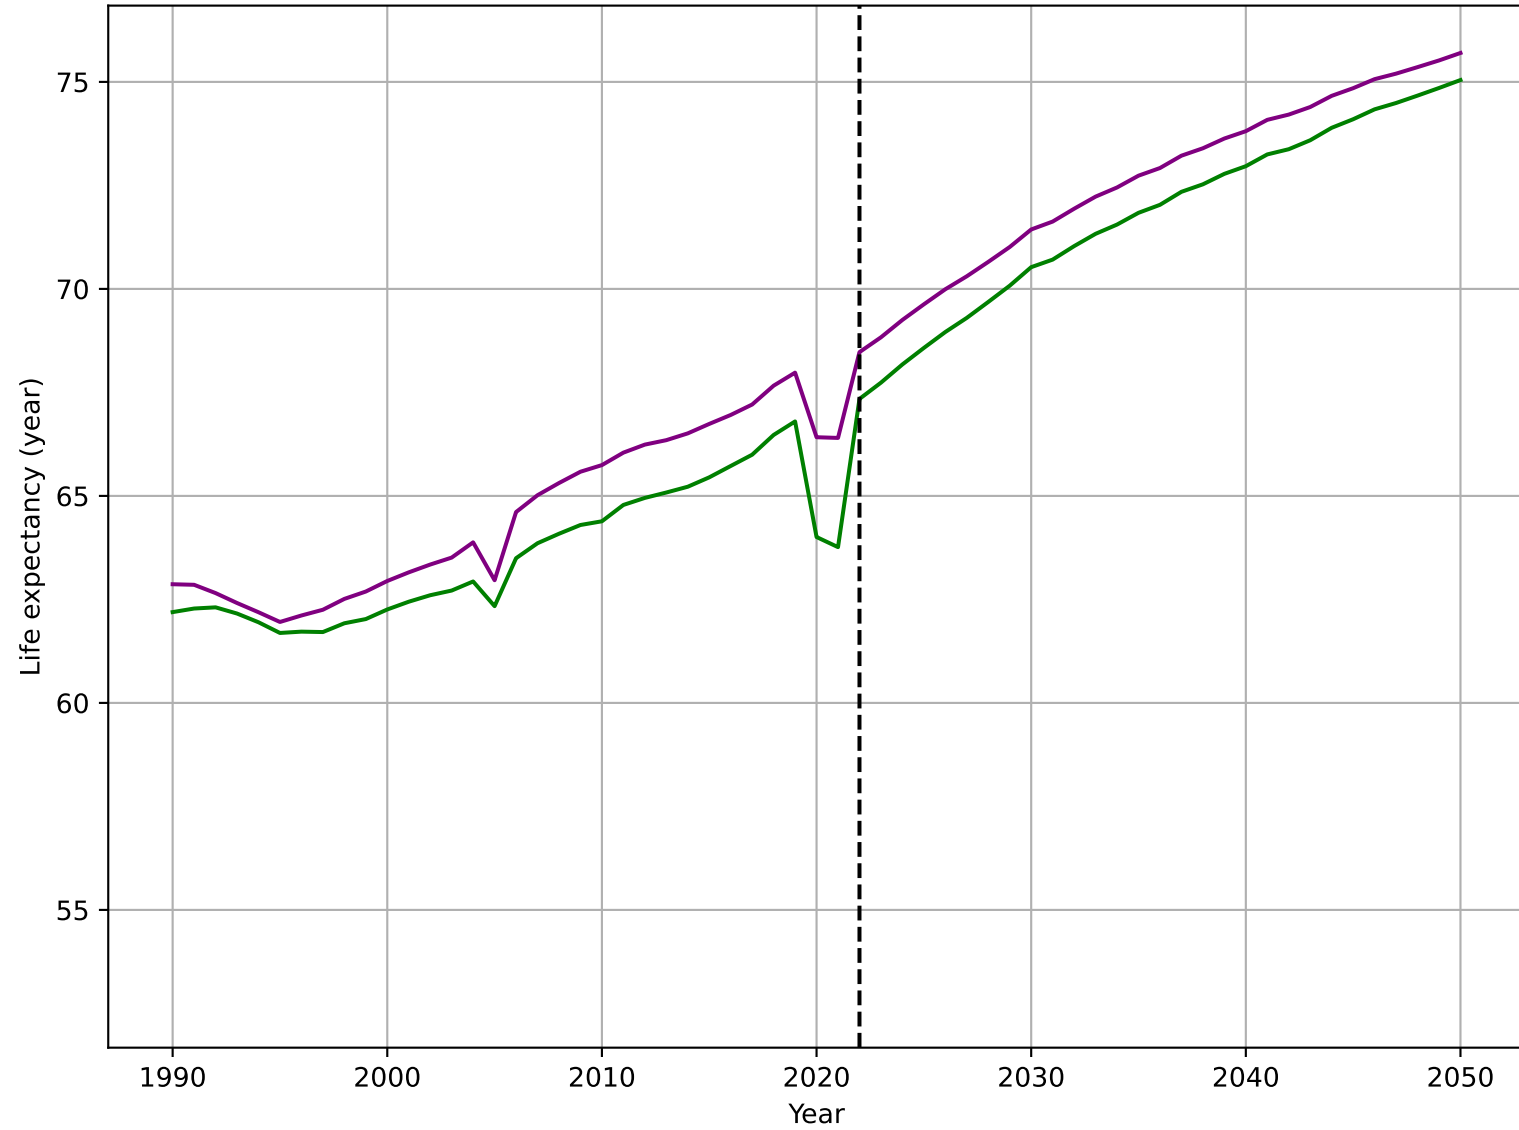

### Healthy Life Expectancy (HALE)

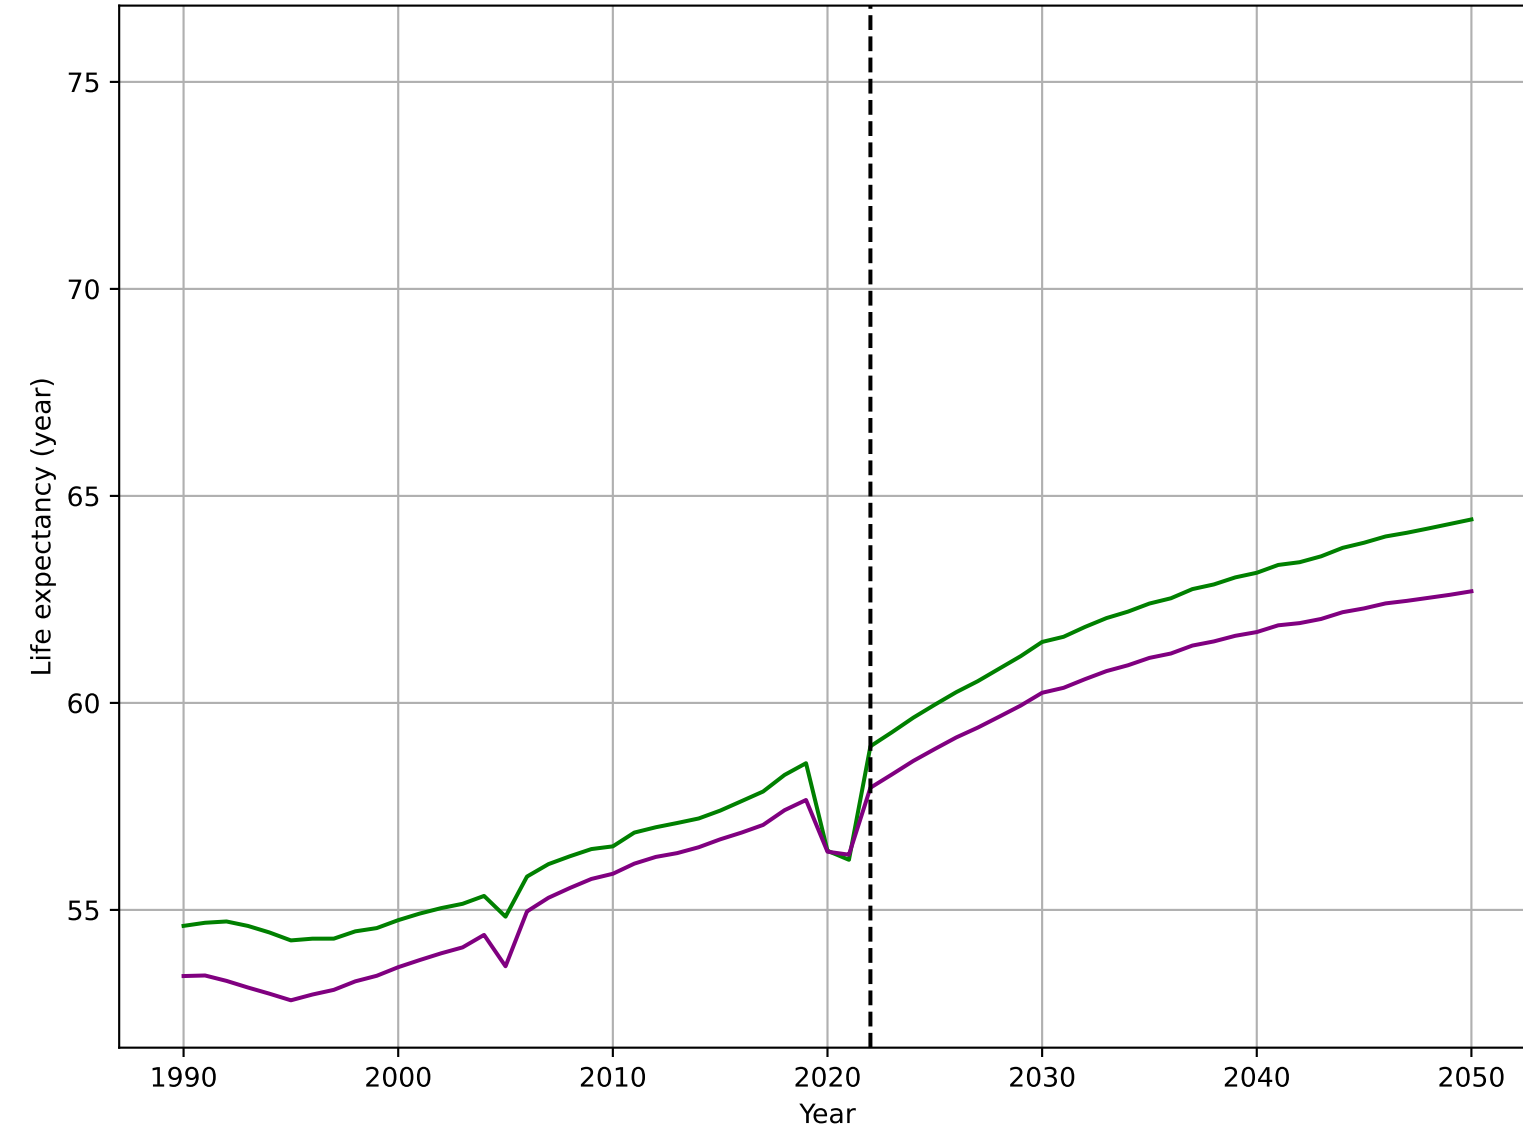



# China

### Life Expectancy

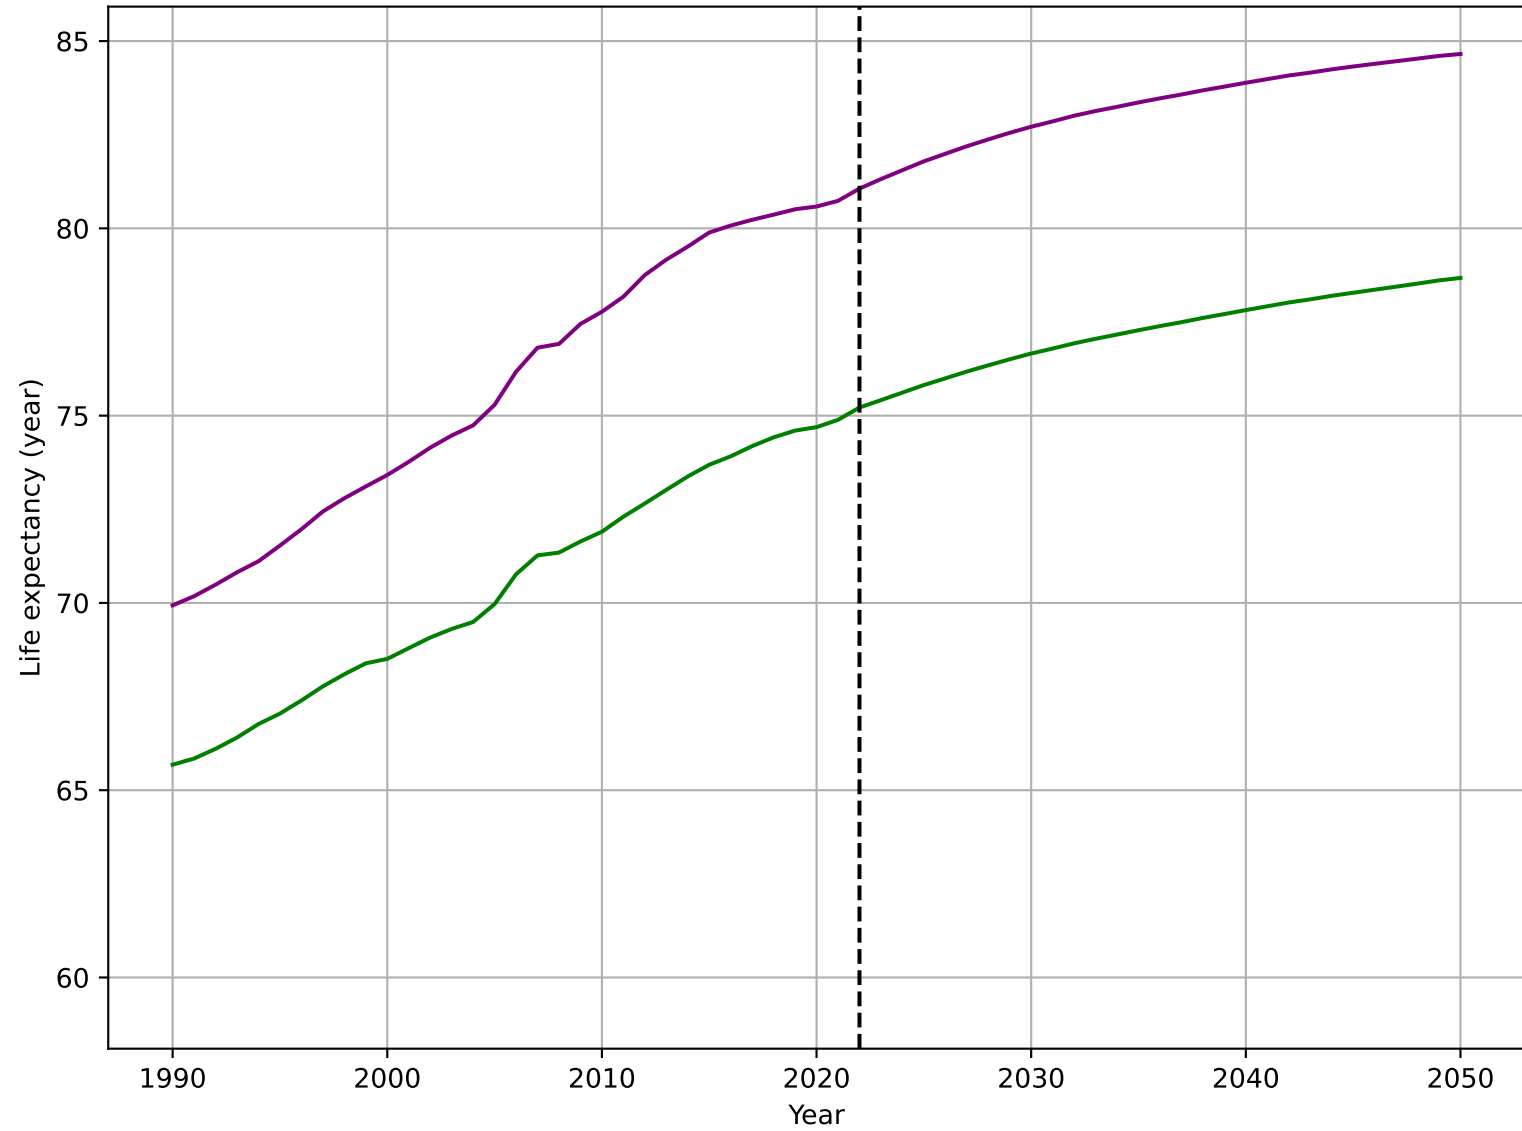

### Healthy Life Expectancy (HALE)

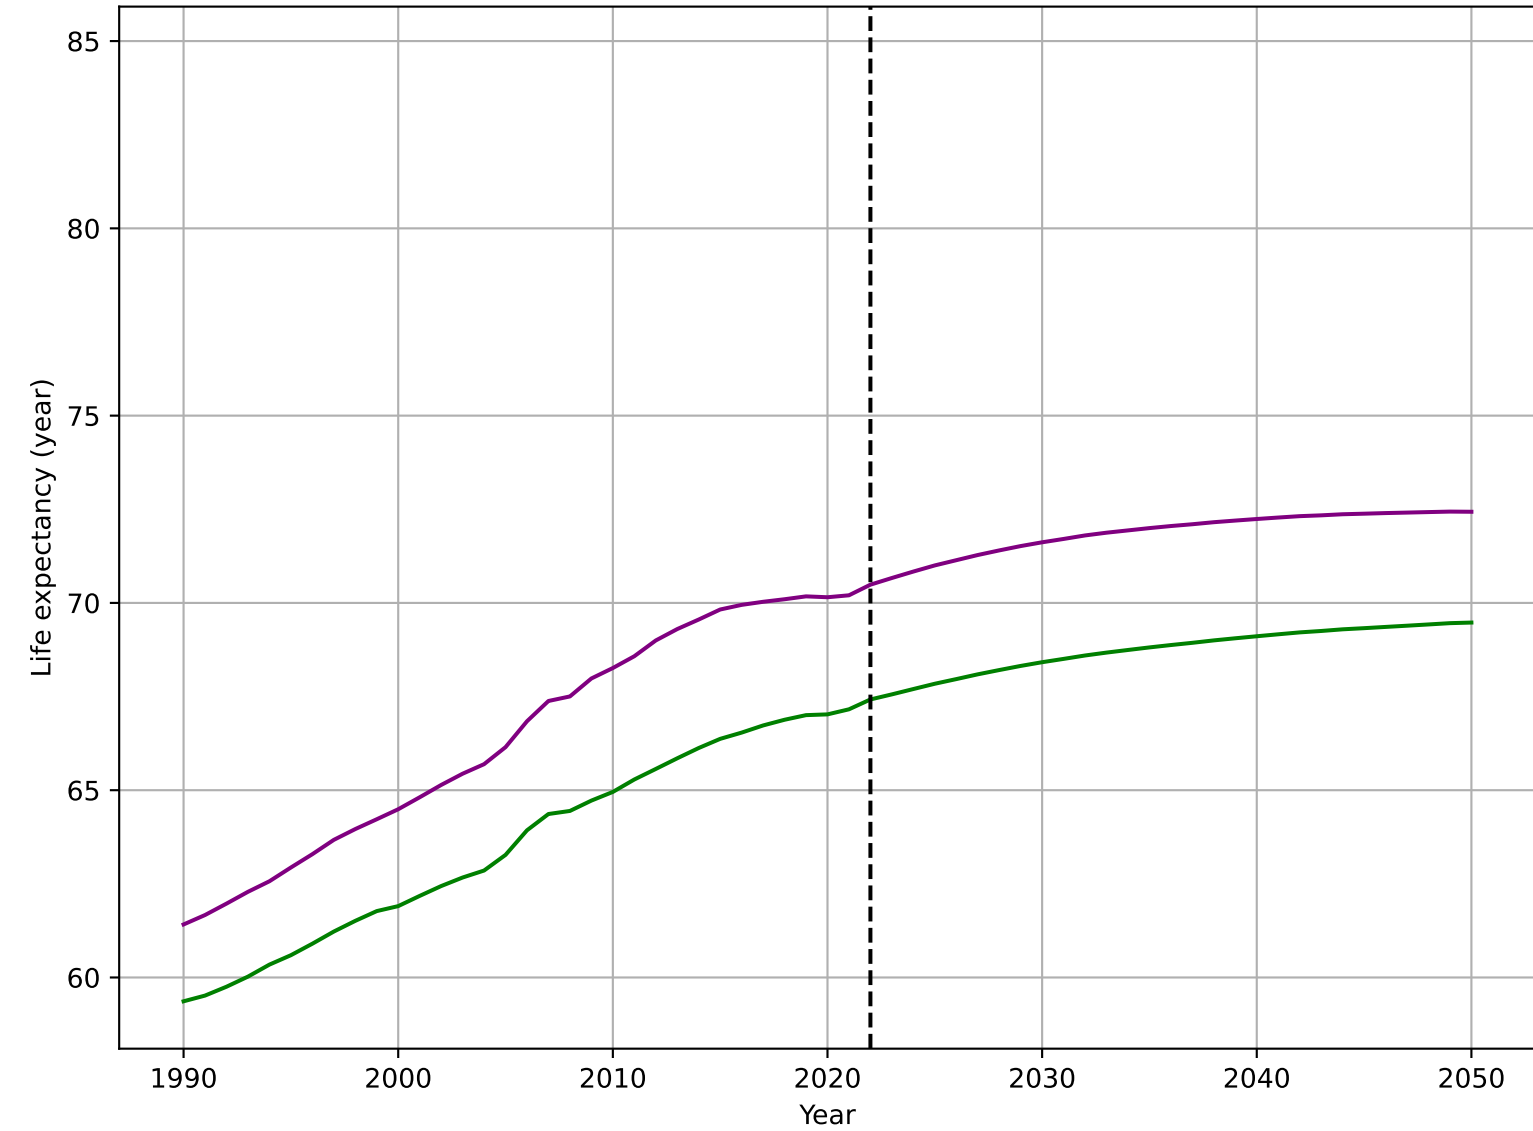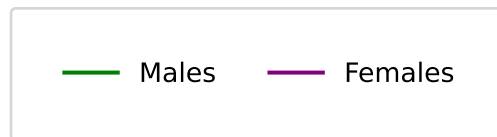

# North Korea

### Life Expectancy

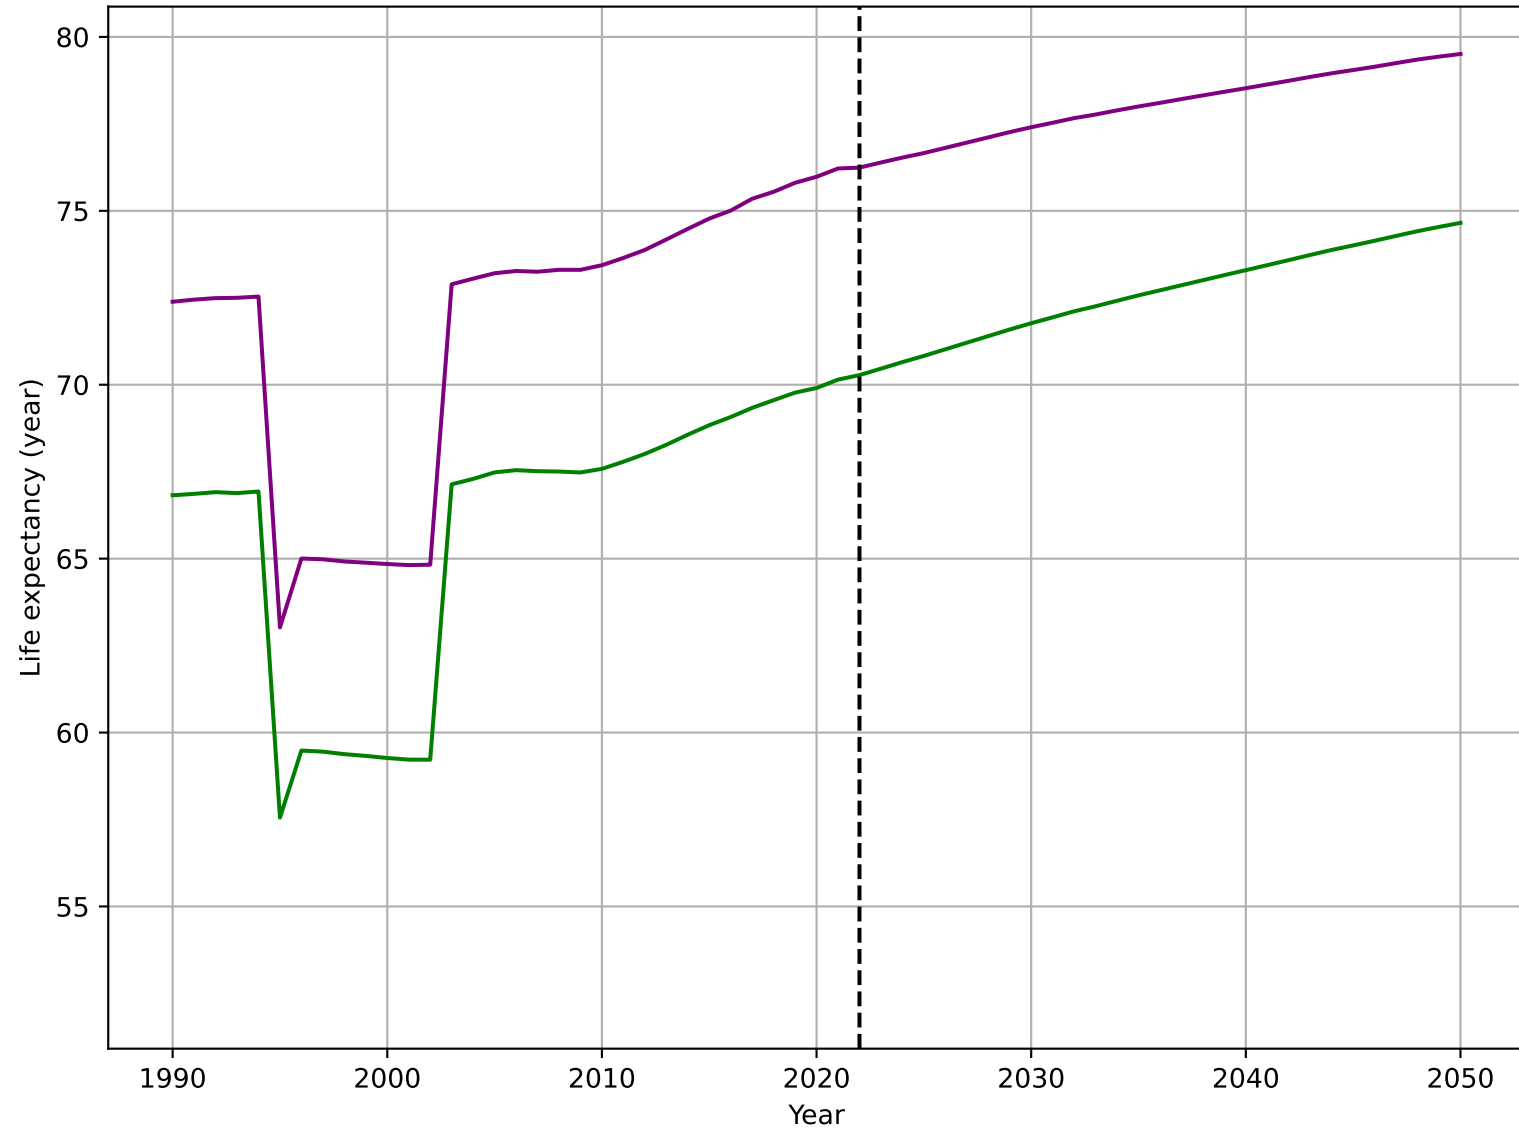

### Healthy Life Expectancy (HALE)

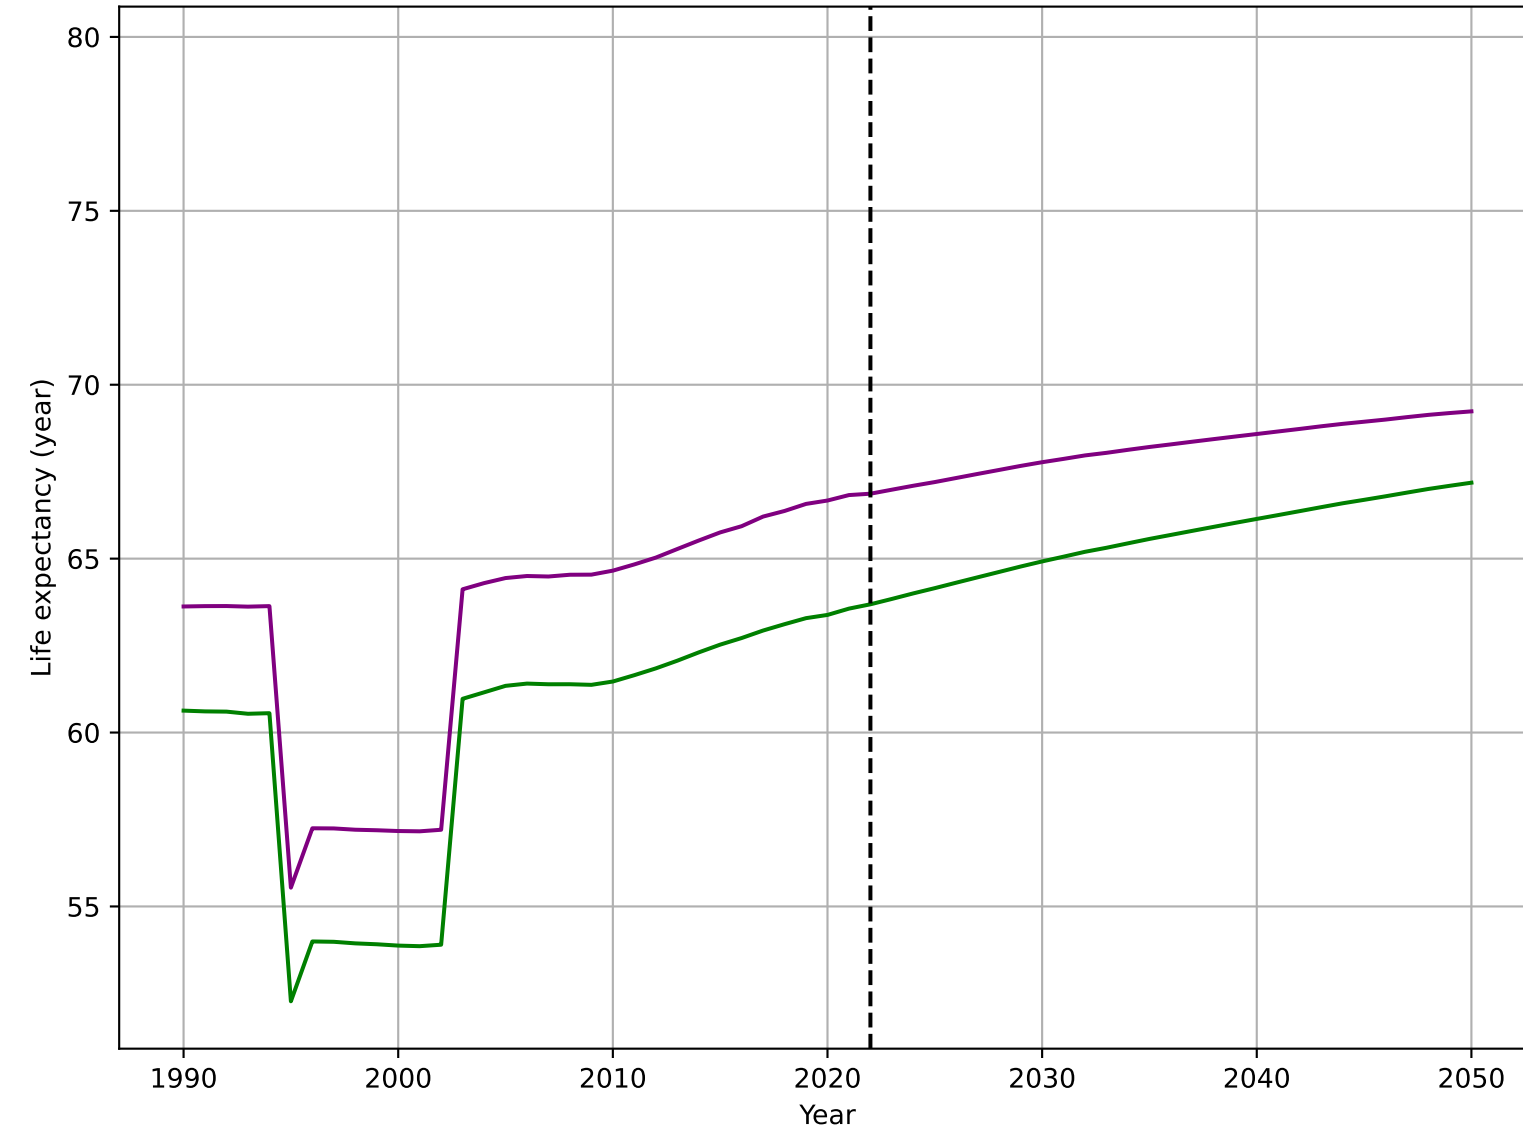

# Taiwan (Province Of China)

### Life Expectancy

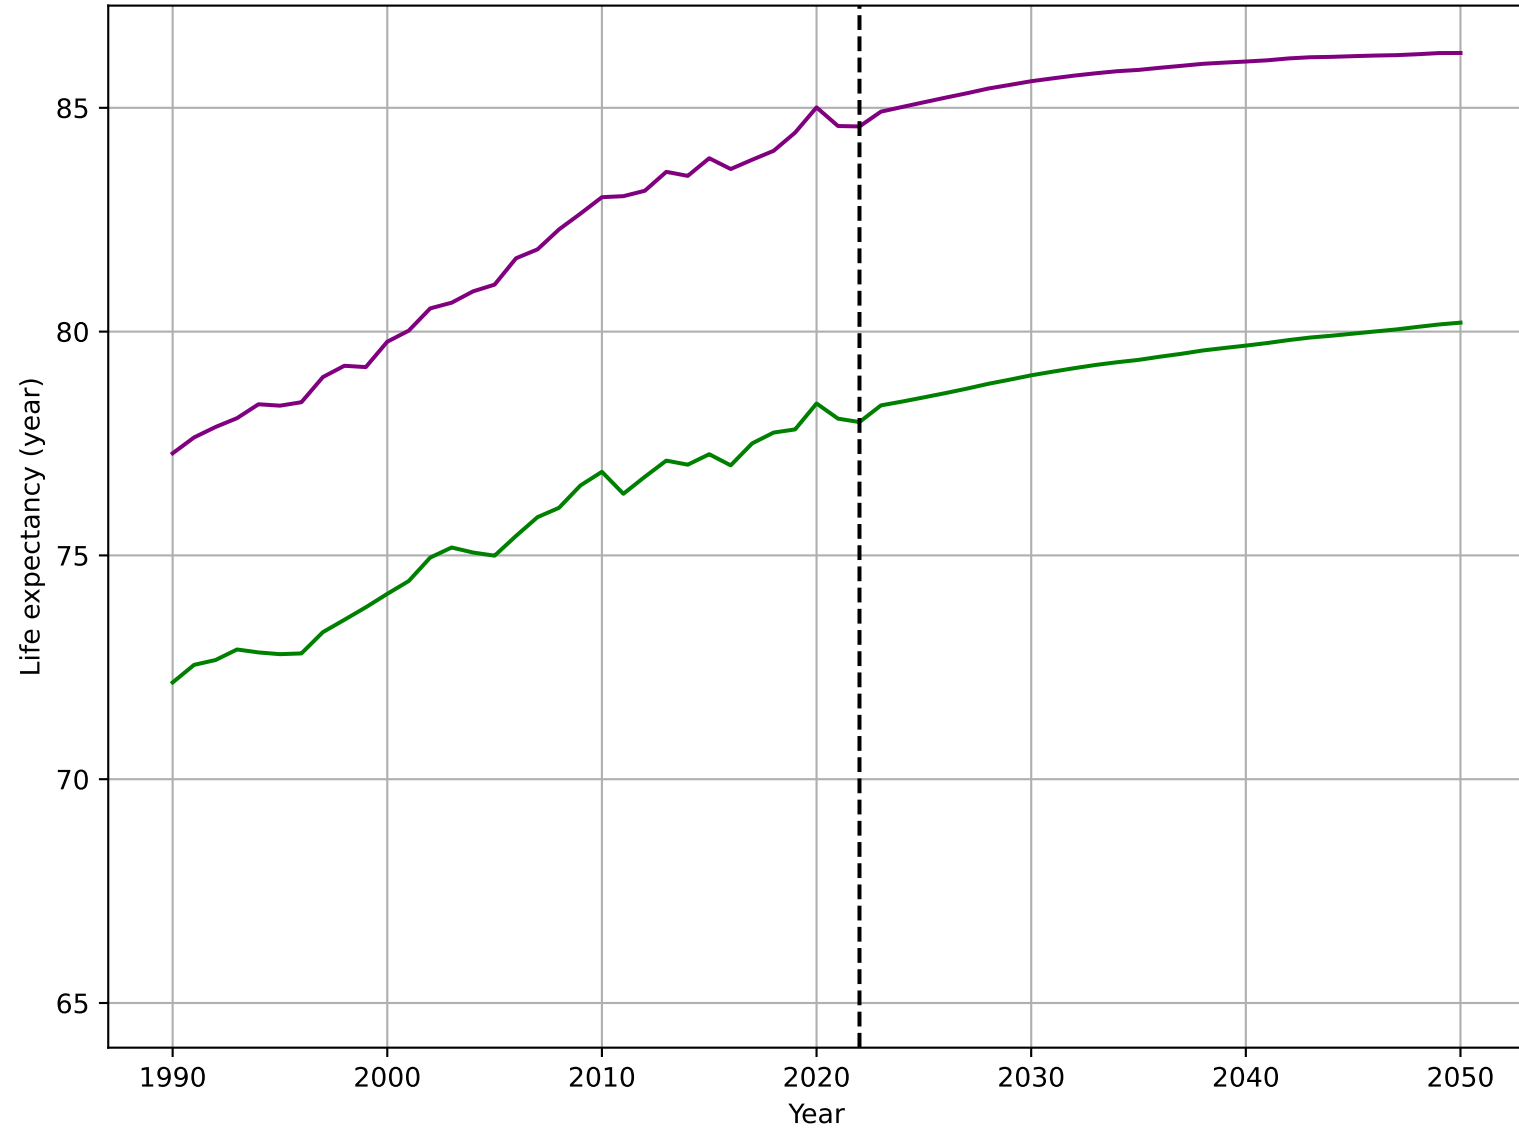

### Healthy Life Expectancy (HALE)

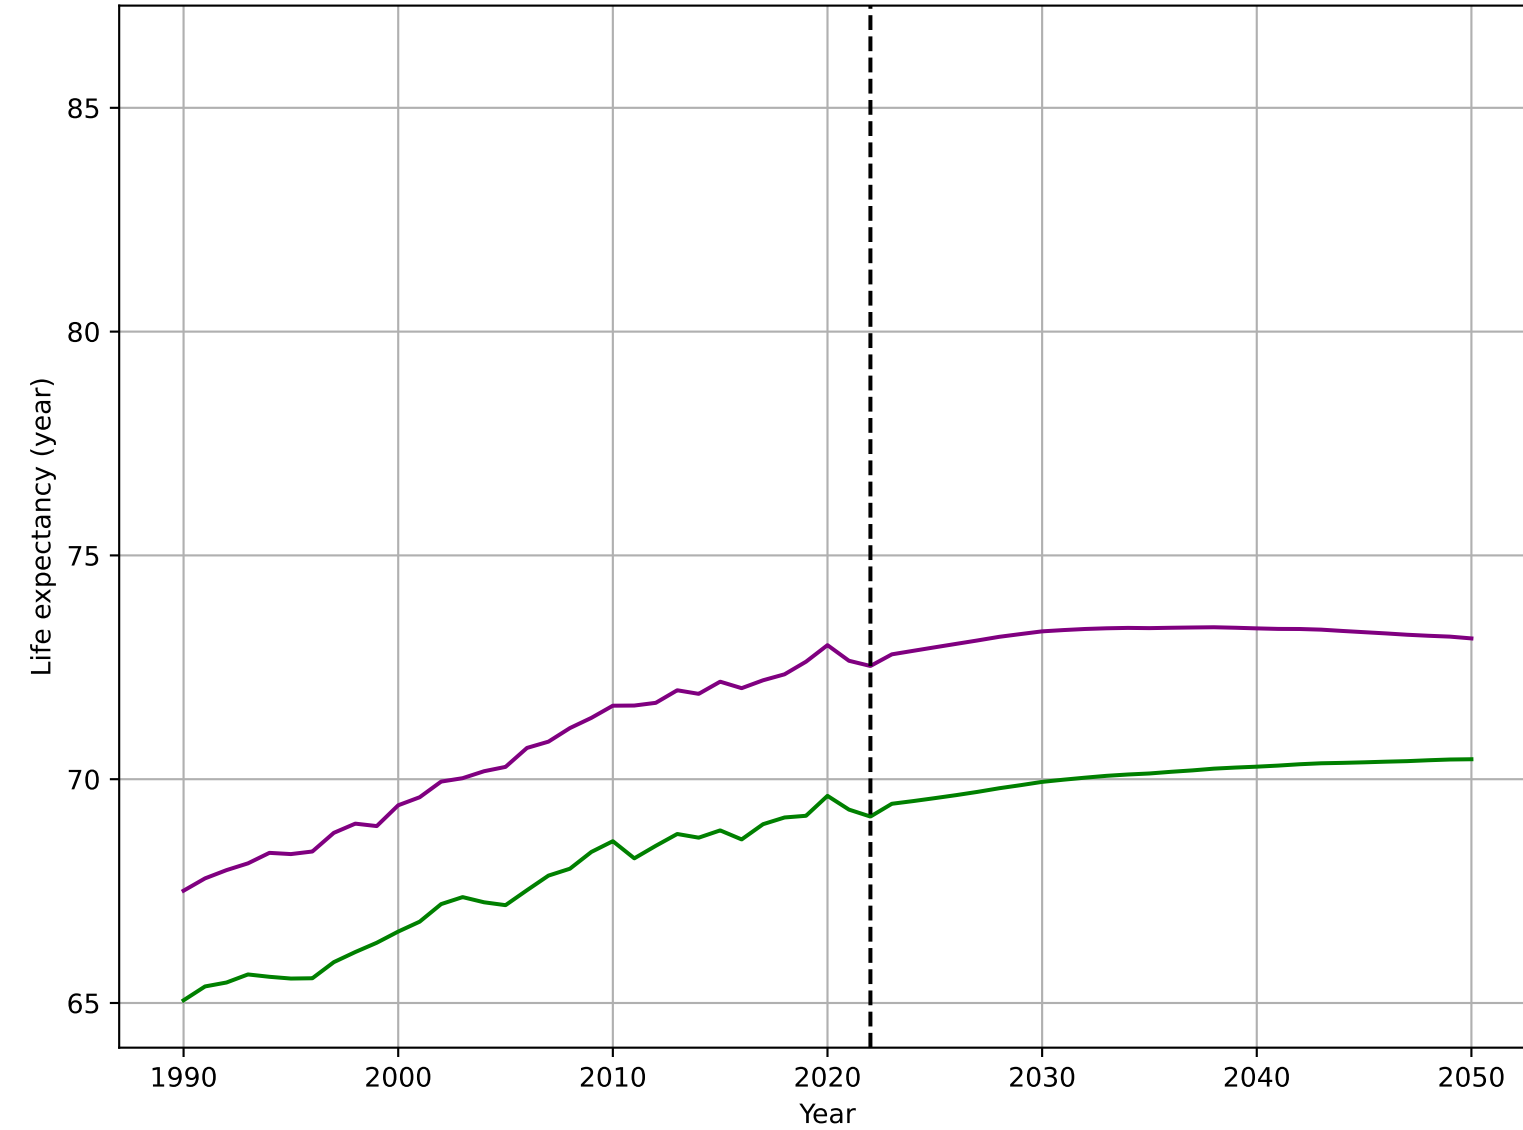

# American Samoa

### Life Expectancy

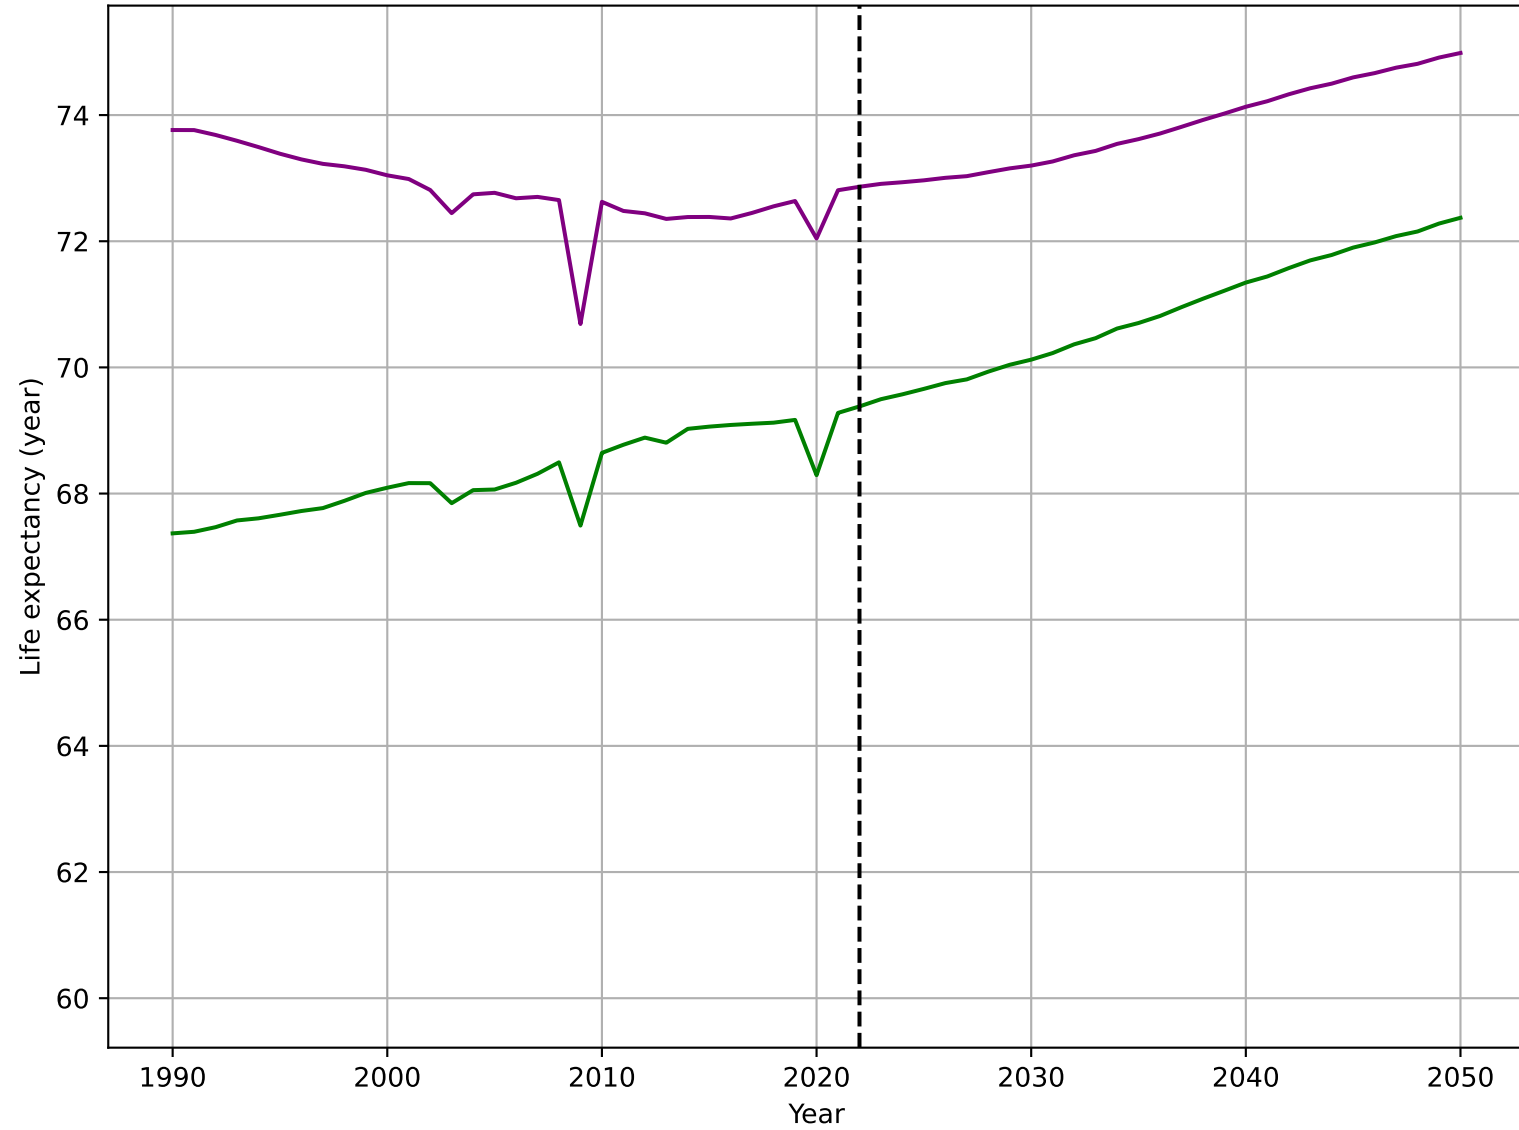

### Healthy Life Expectancy (HALE)

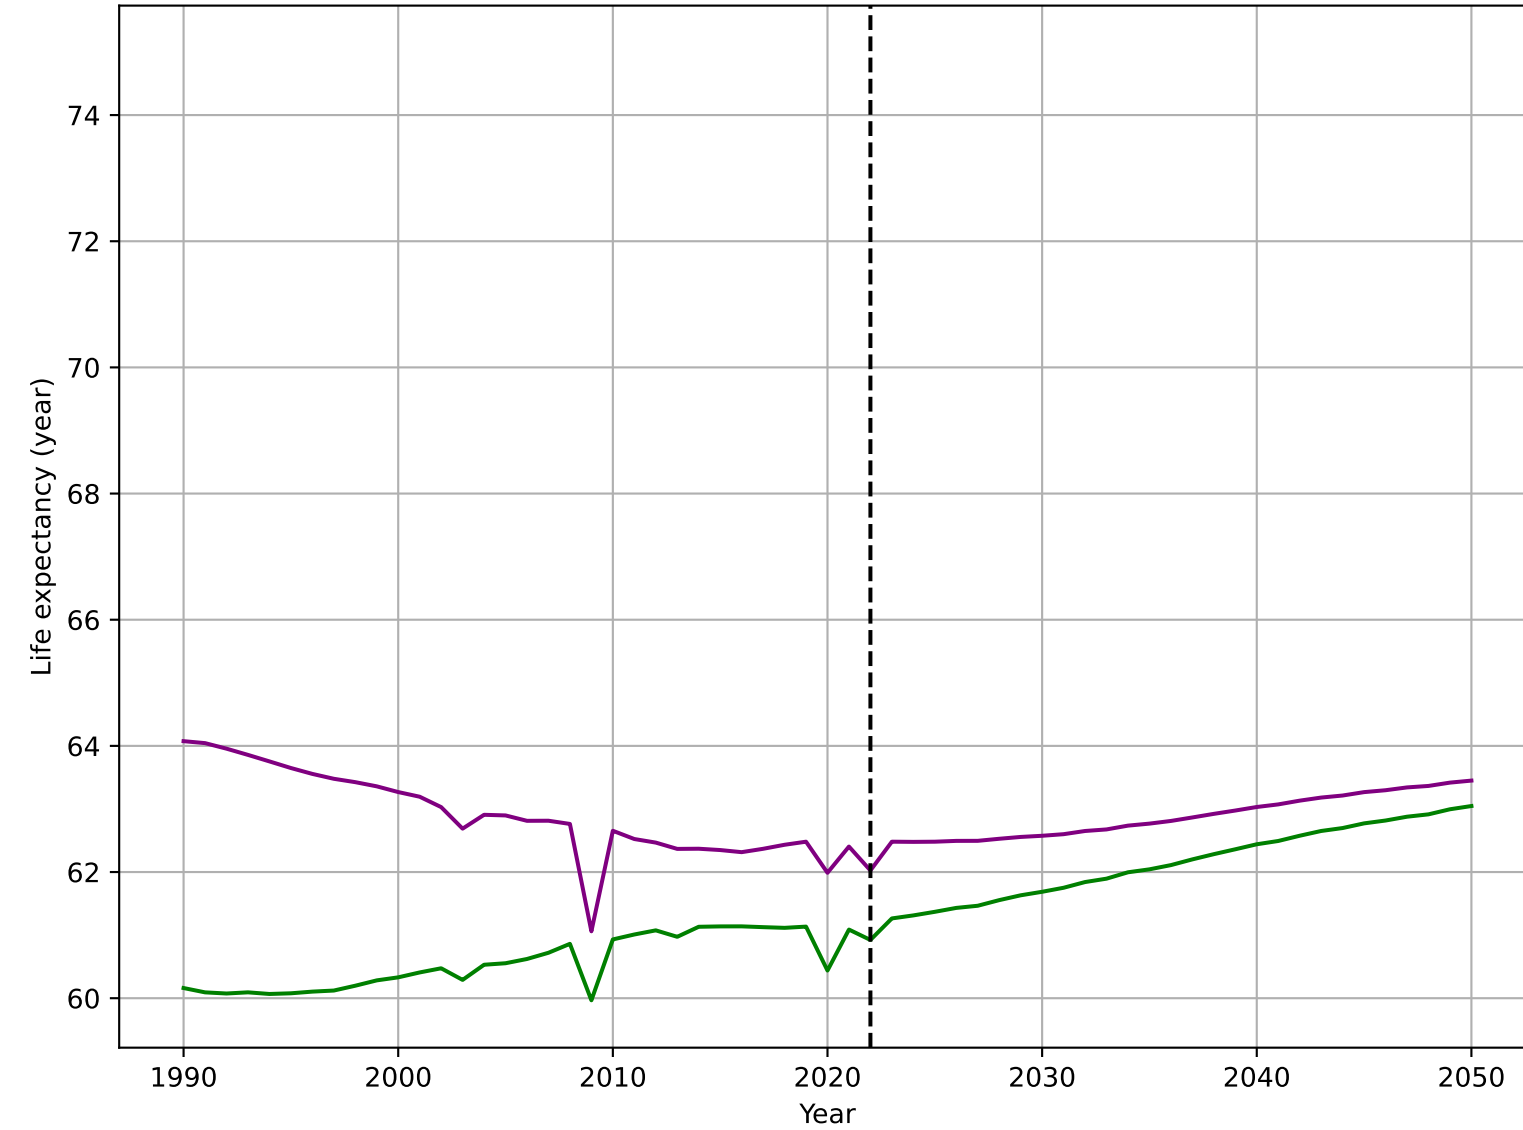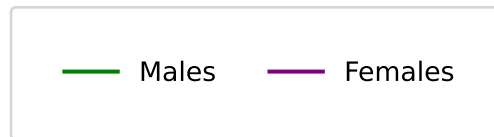

# Cook Islands

## Life Expectancy

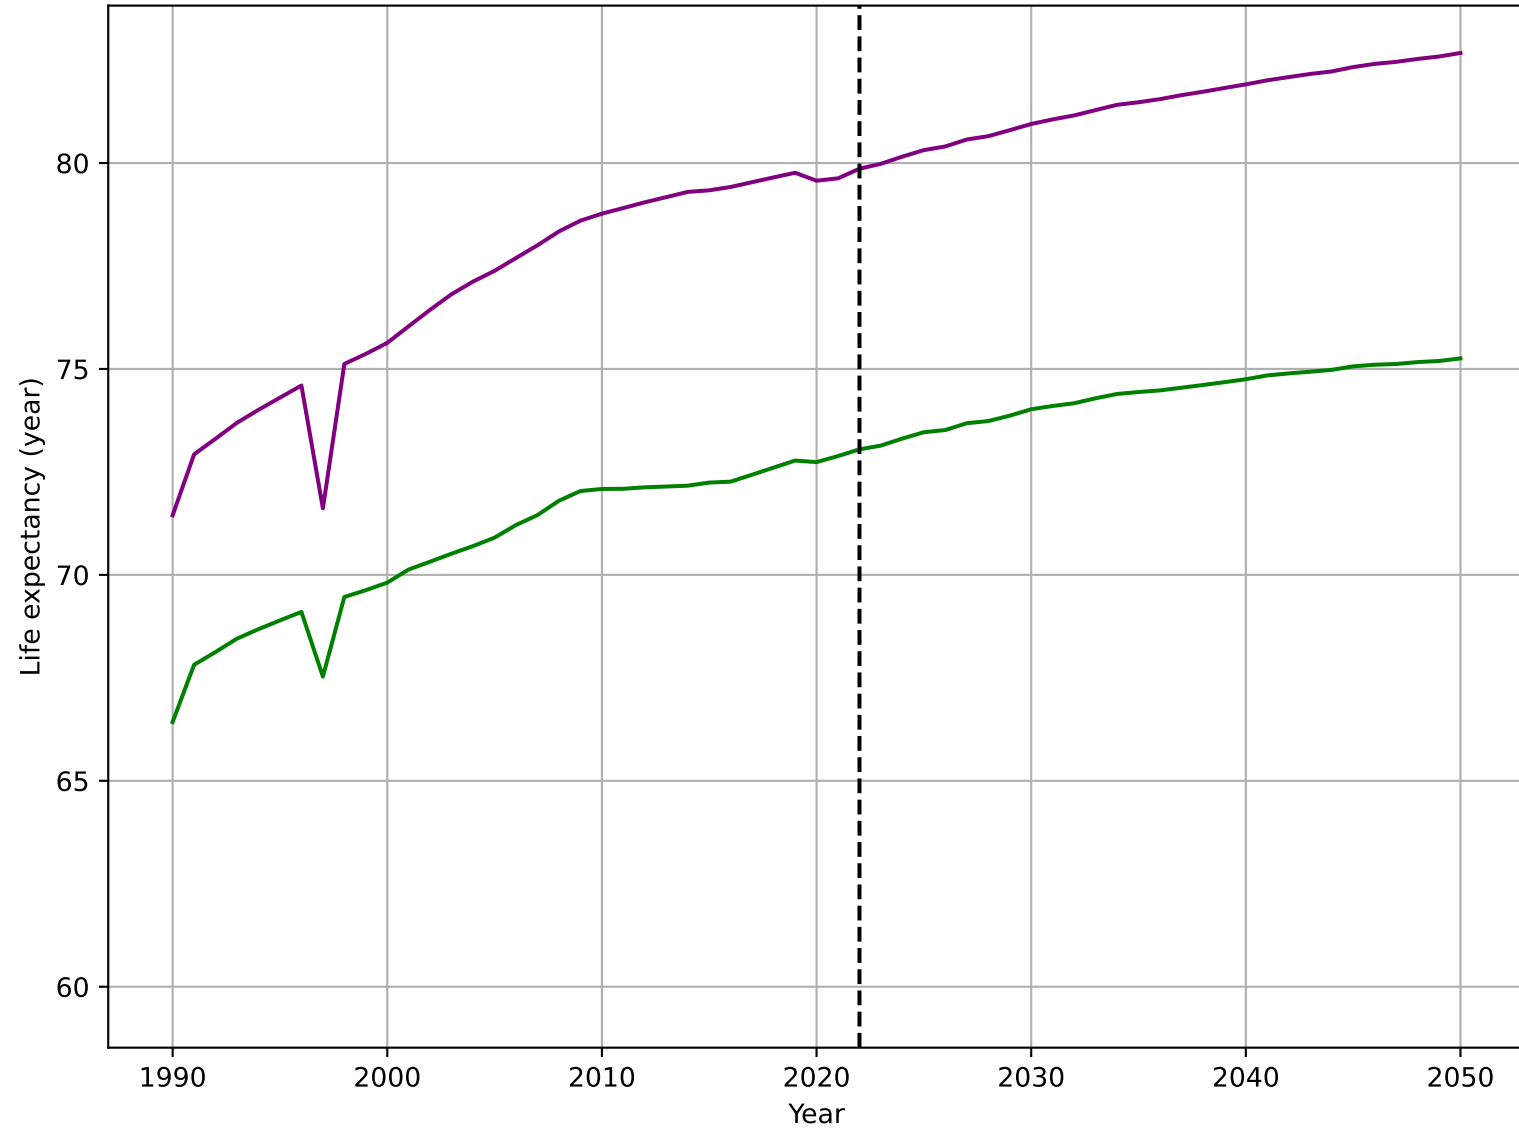

## Healthy Life Expectancy (HALE)

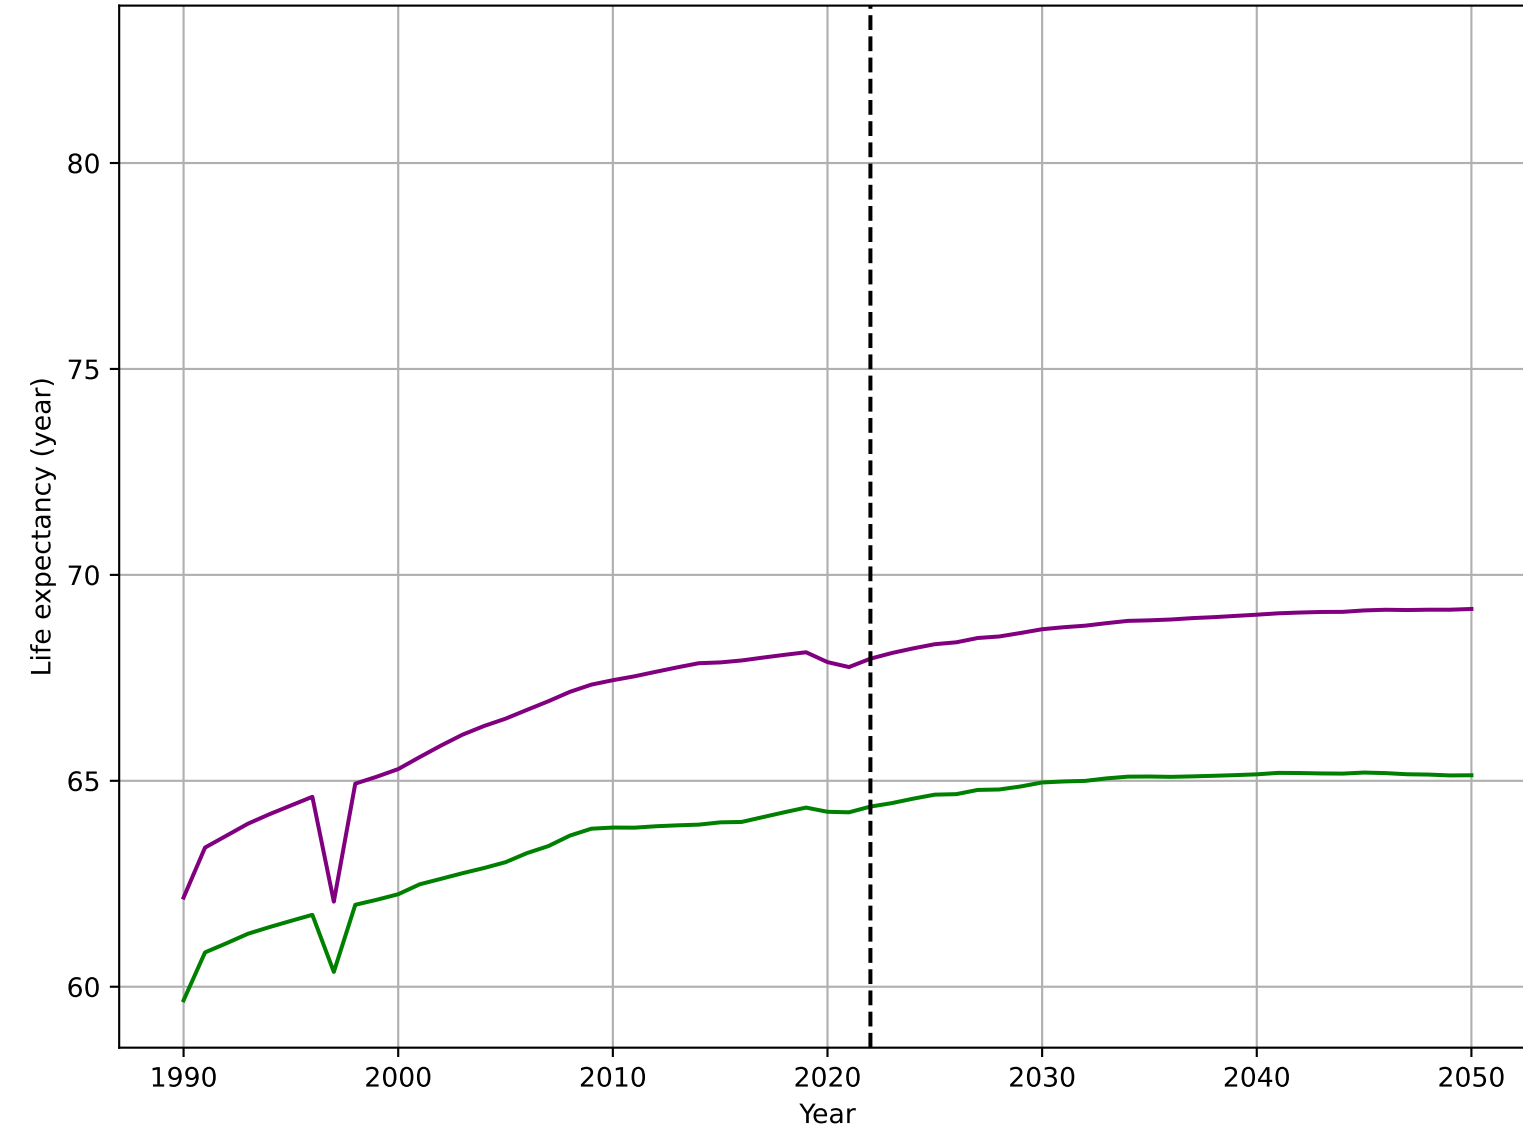

# Fiji

### Life Expectancy

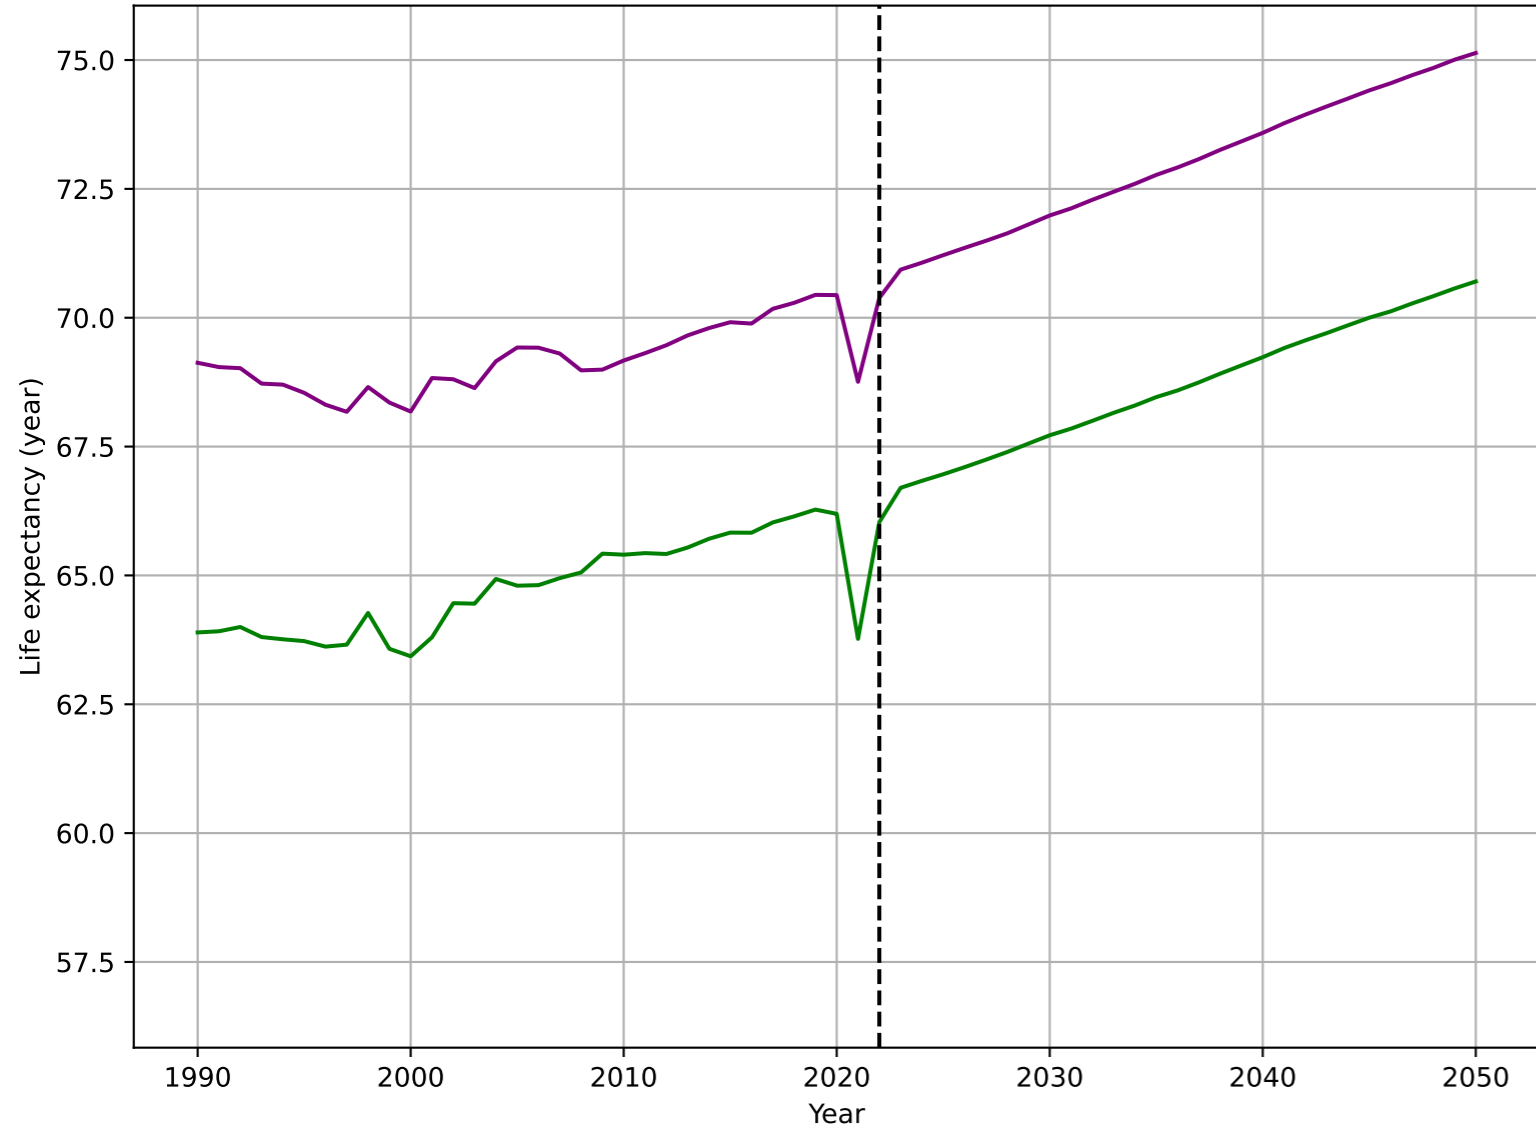

### Healthy Life Expectancy (HALE)

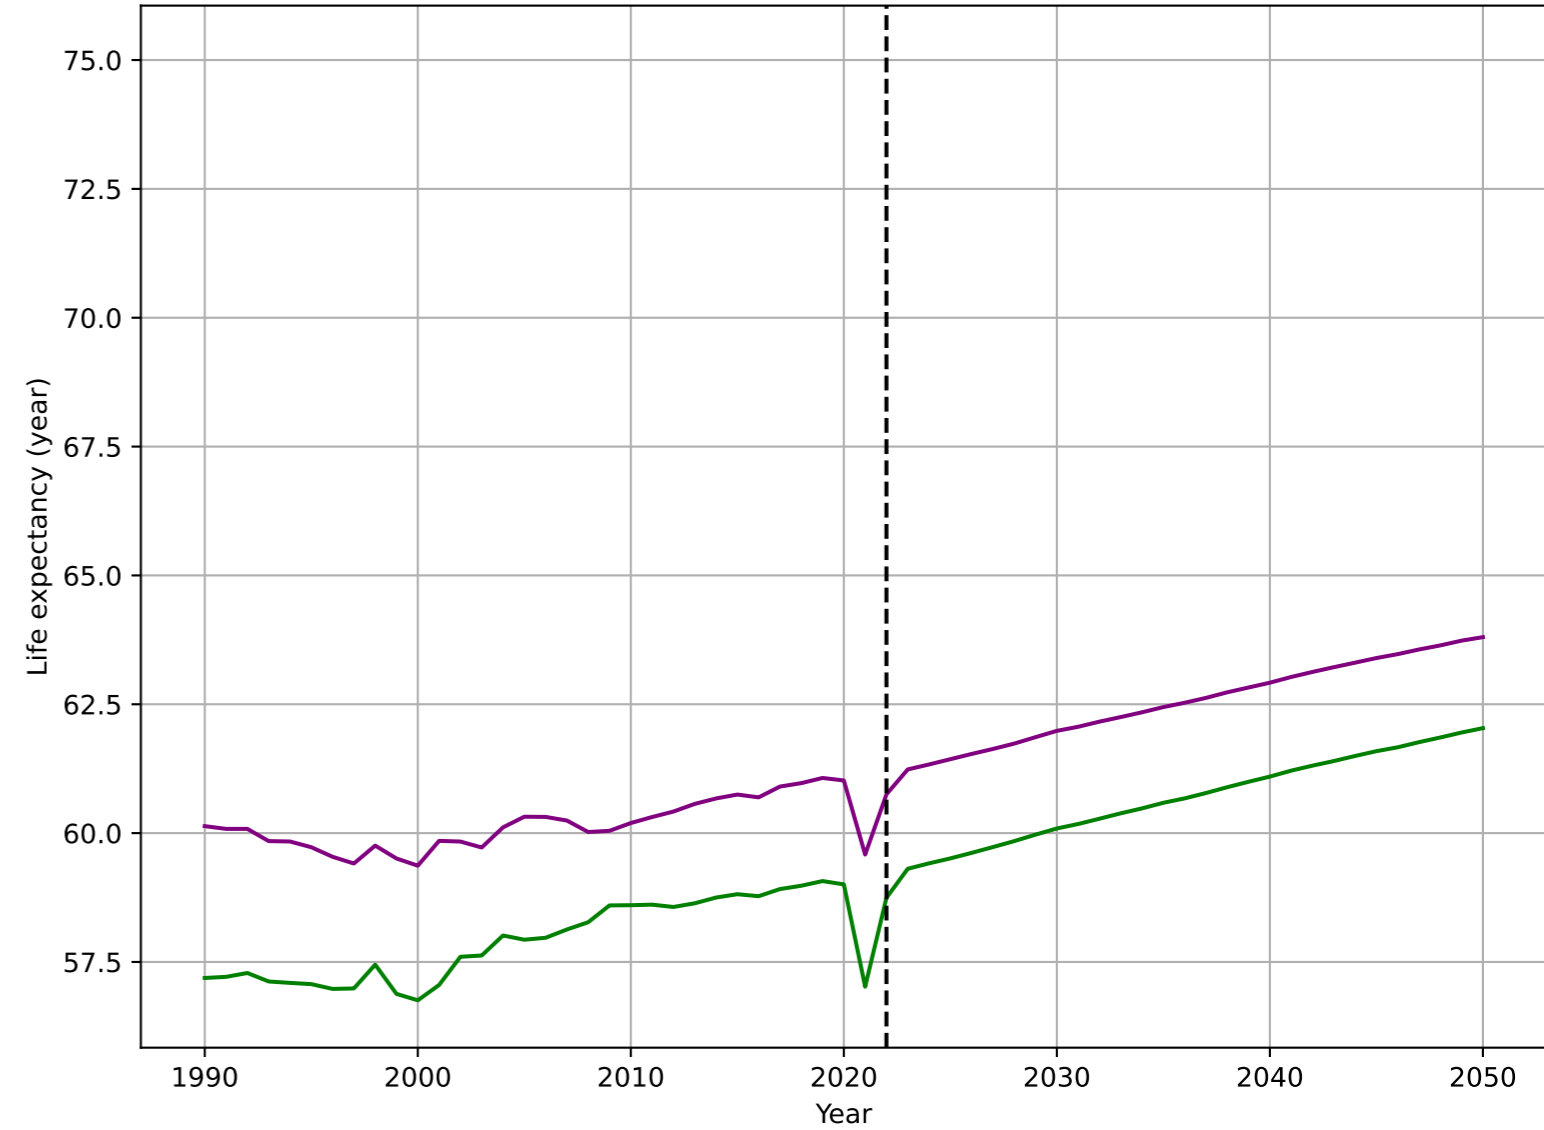

# Guam

### Life Expectancy

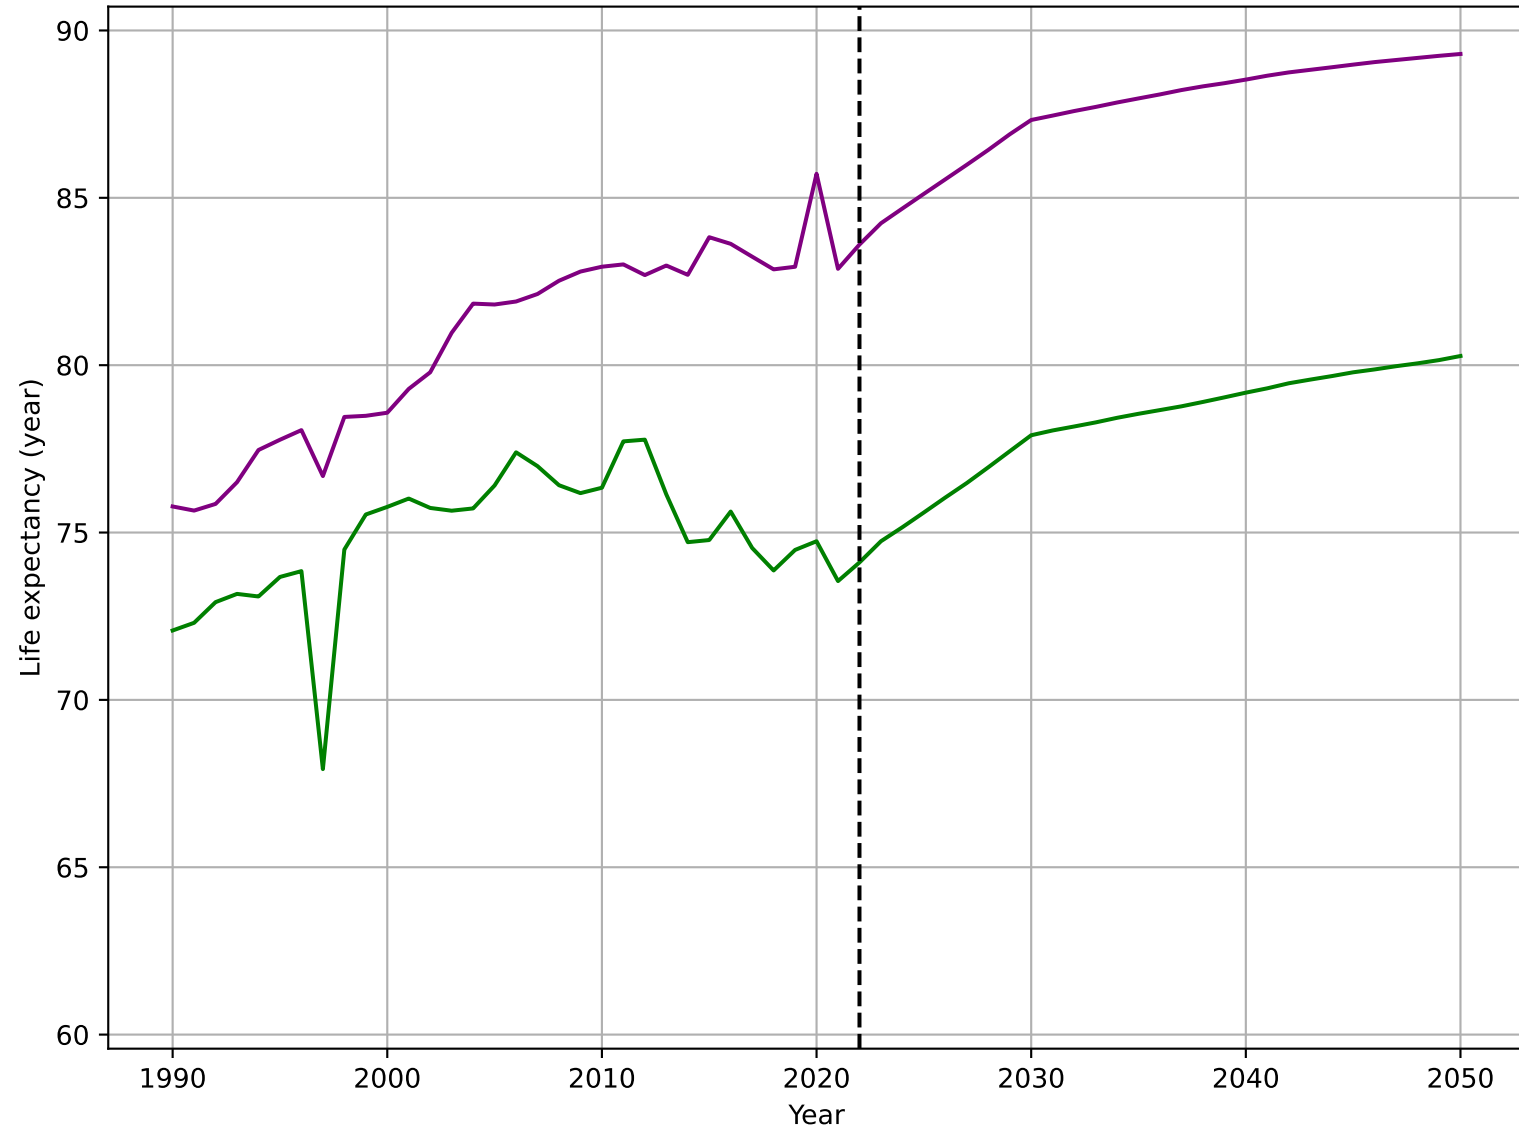

### Healthy Life Expectancy (HALE)

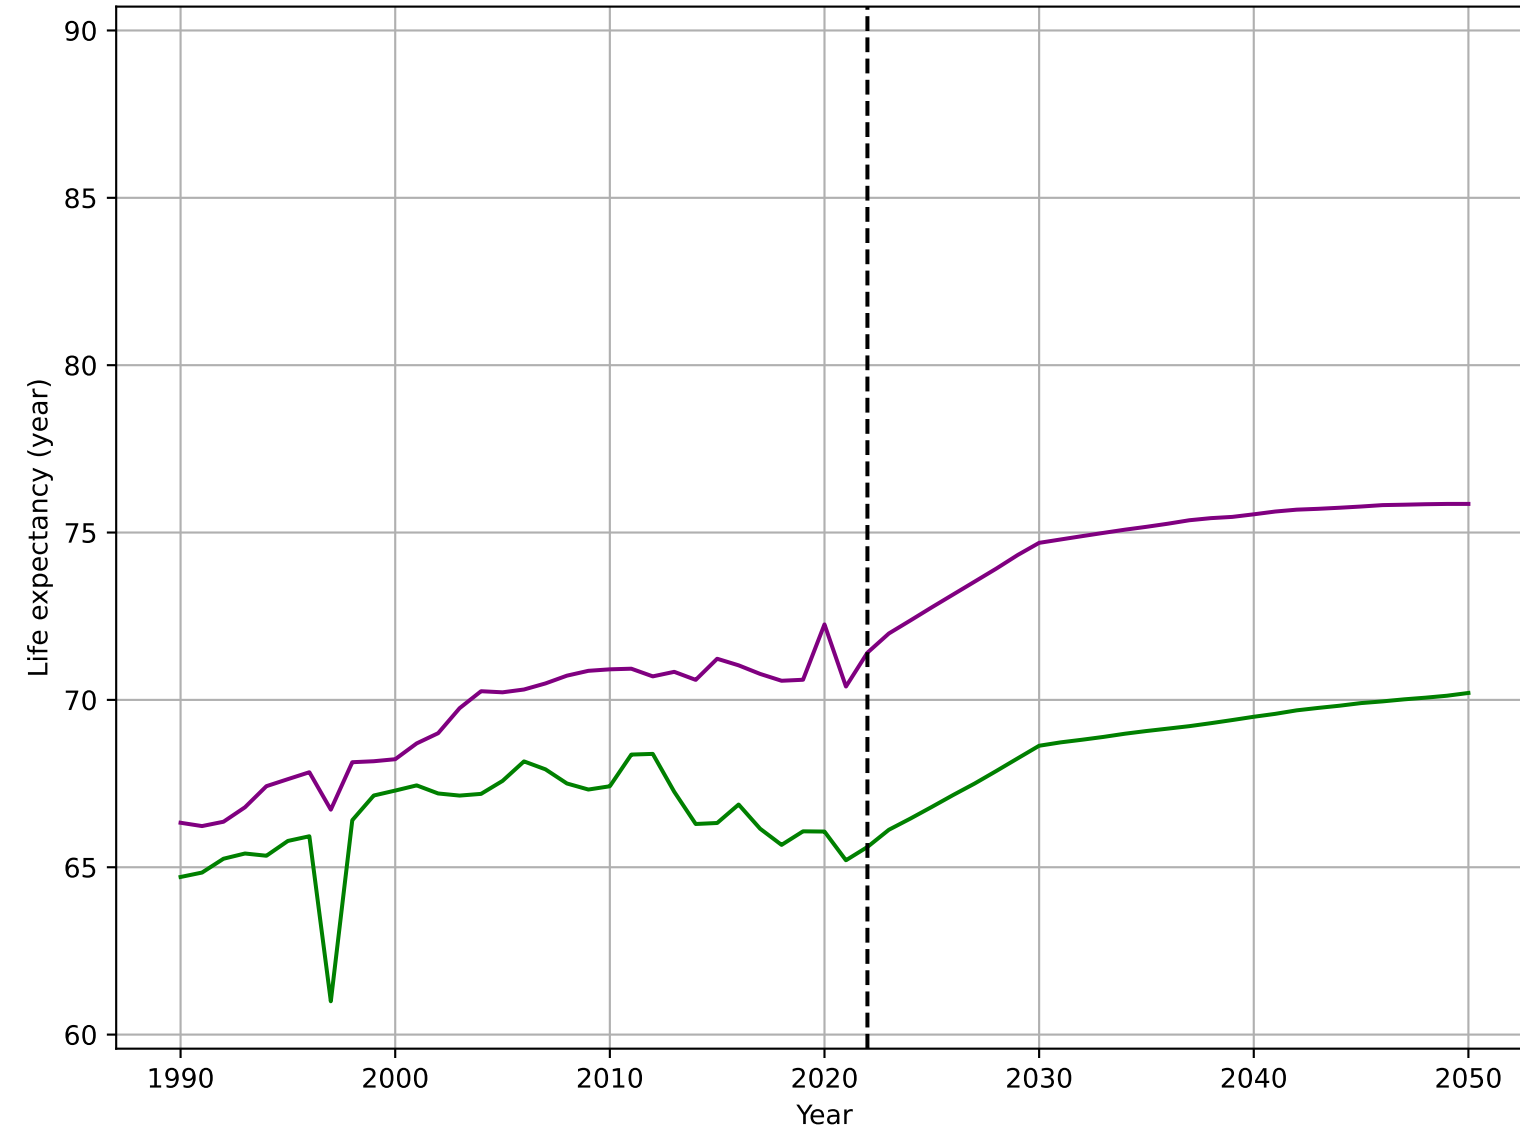

# Kiribati

## Life Expectancy

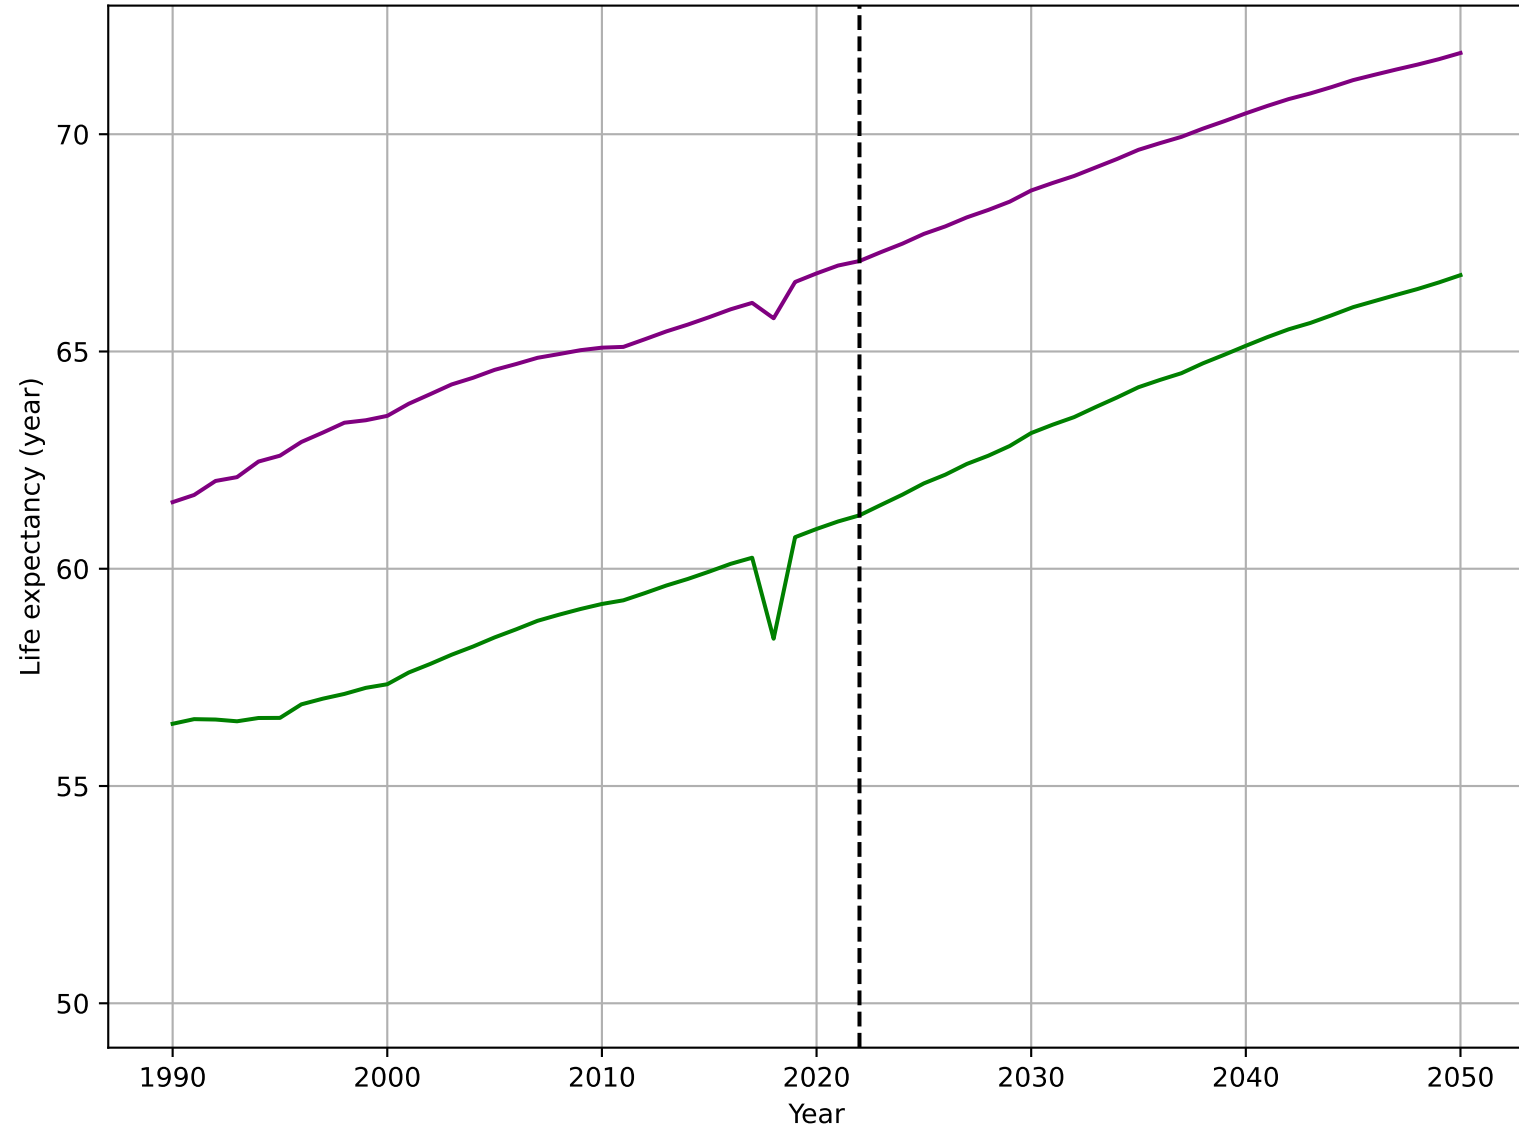

## Healthy Life Expectancy (HALE)

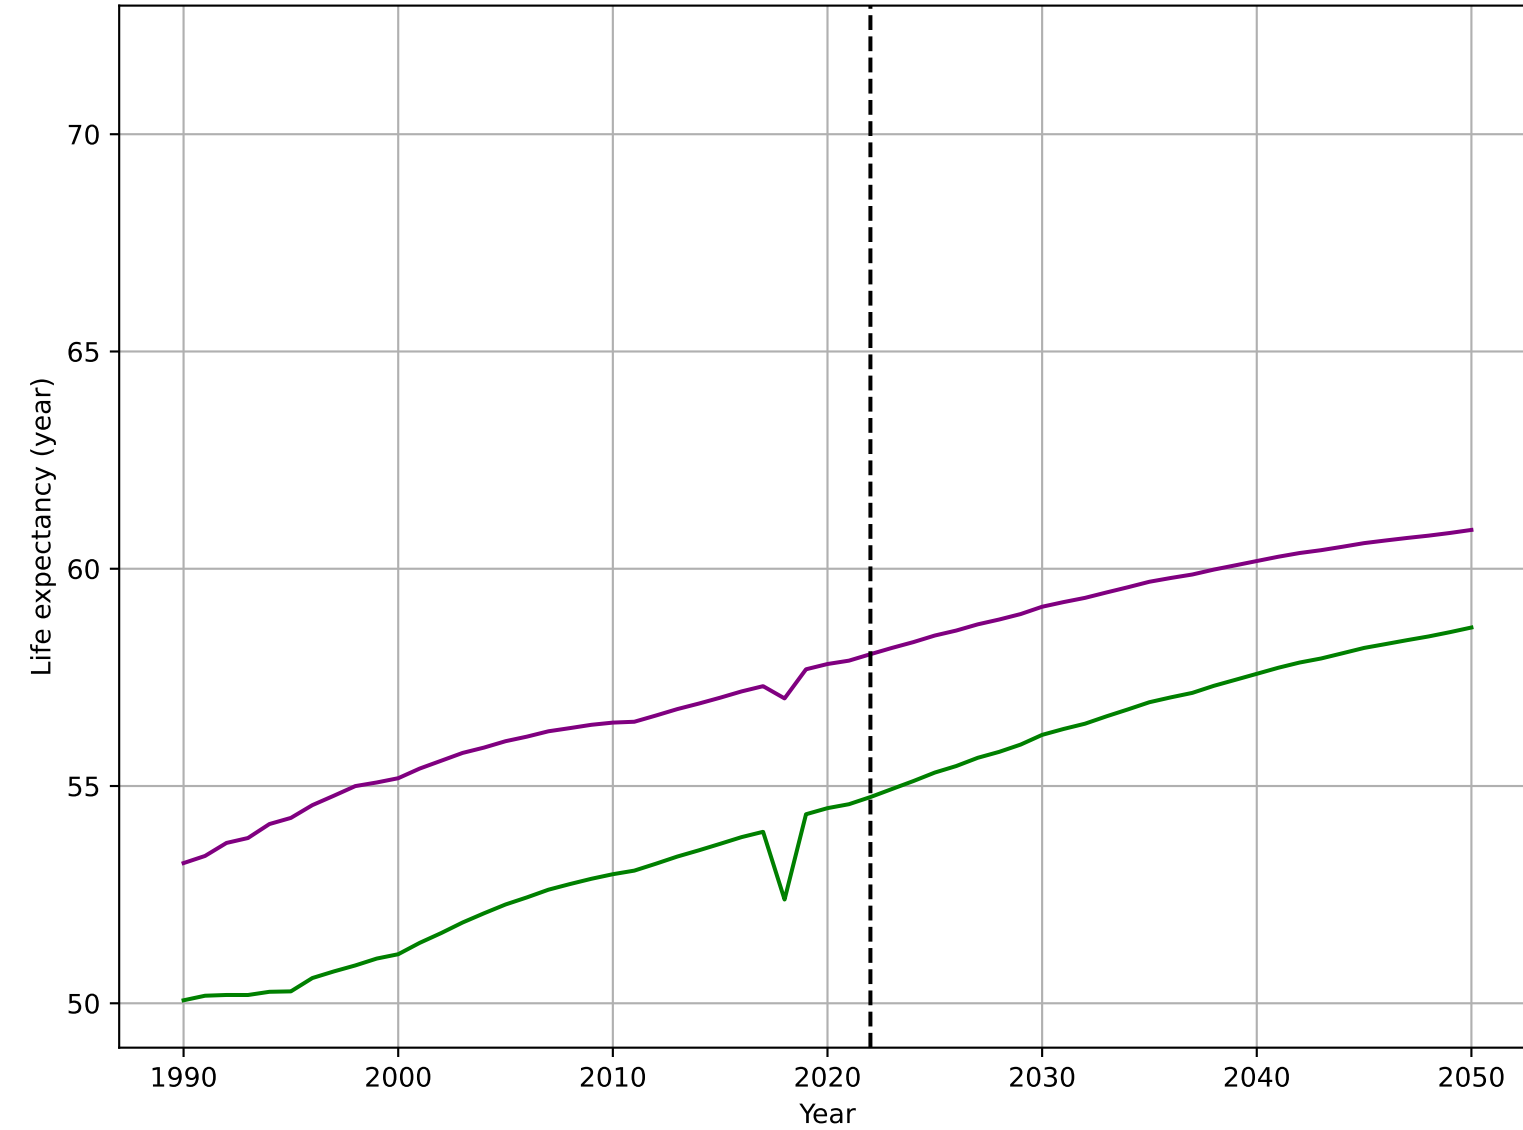



# Marshall Islands

## Life Expectancy

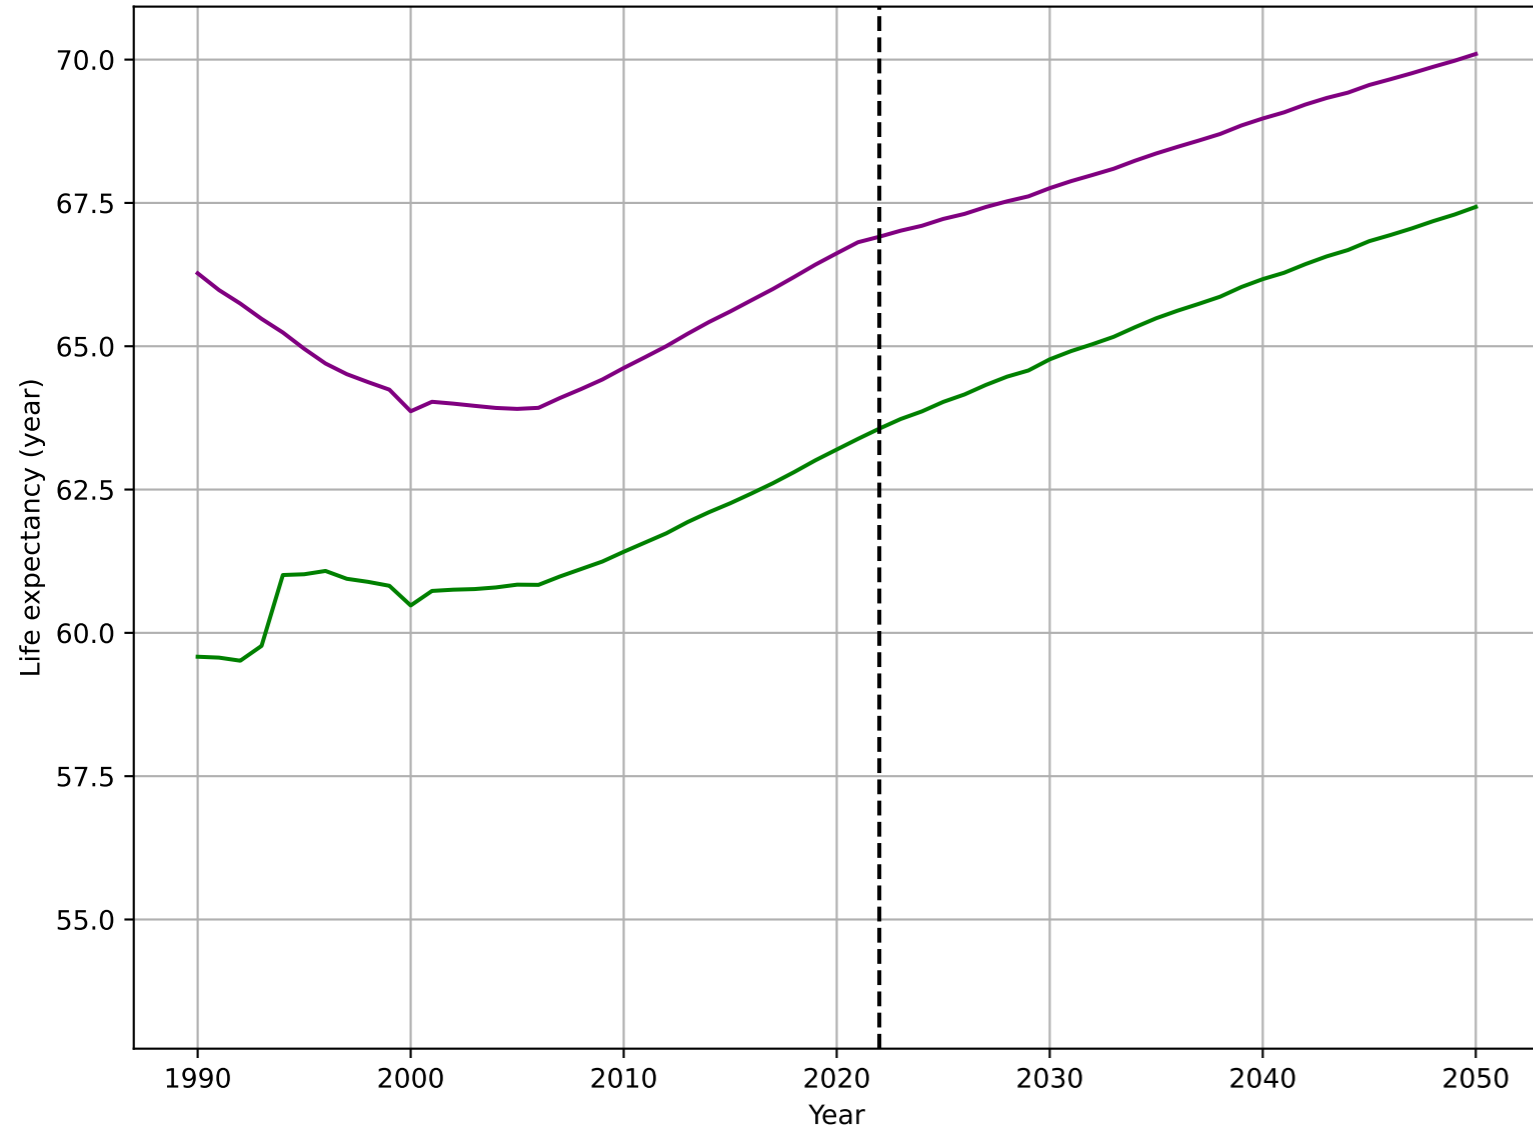

## Healthy Life Expectancy (HALE)

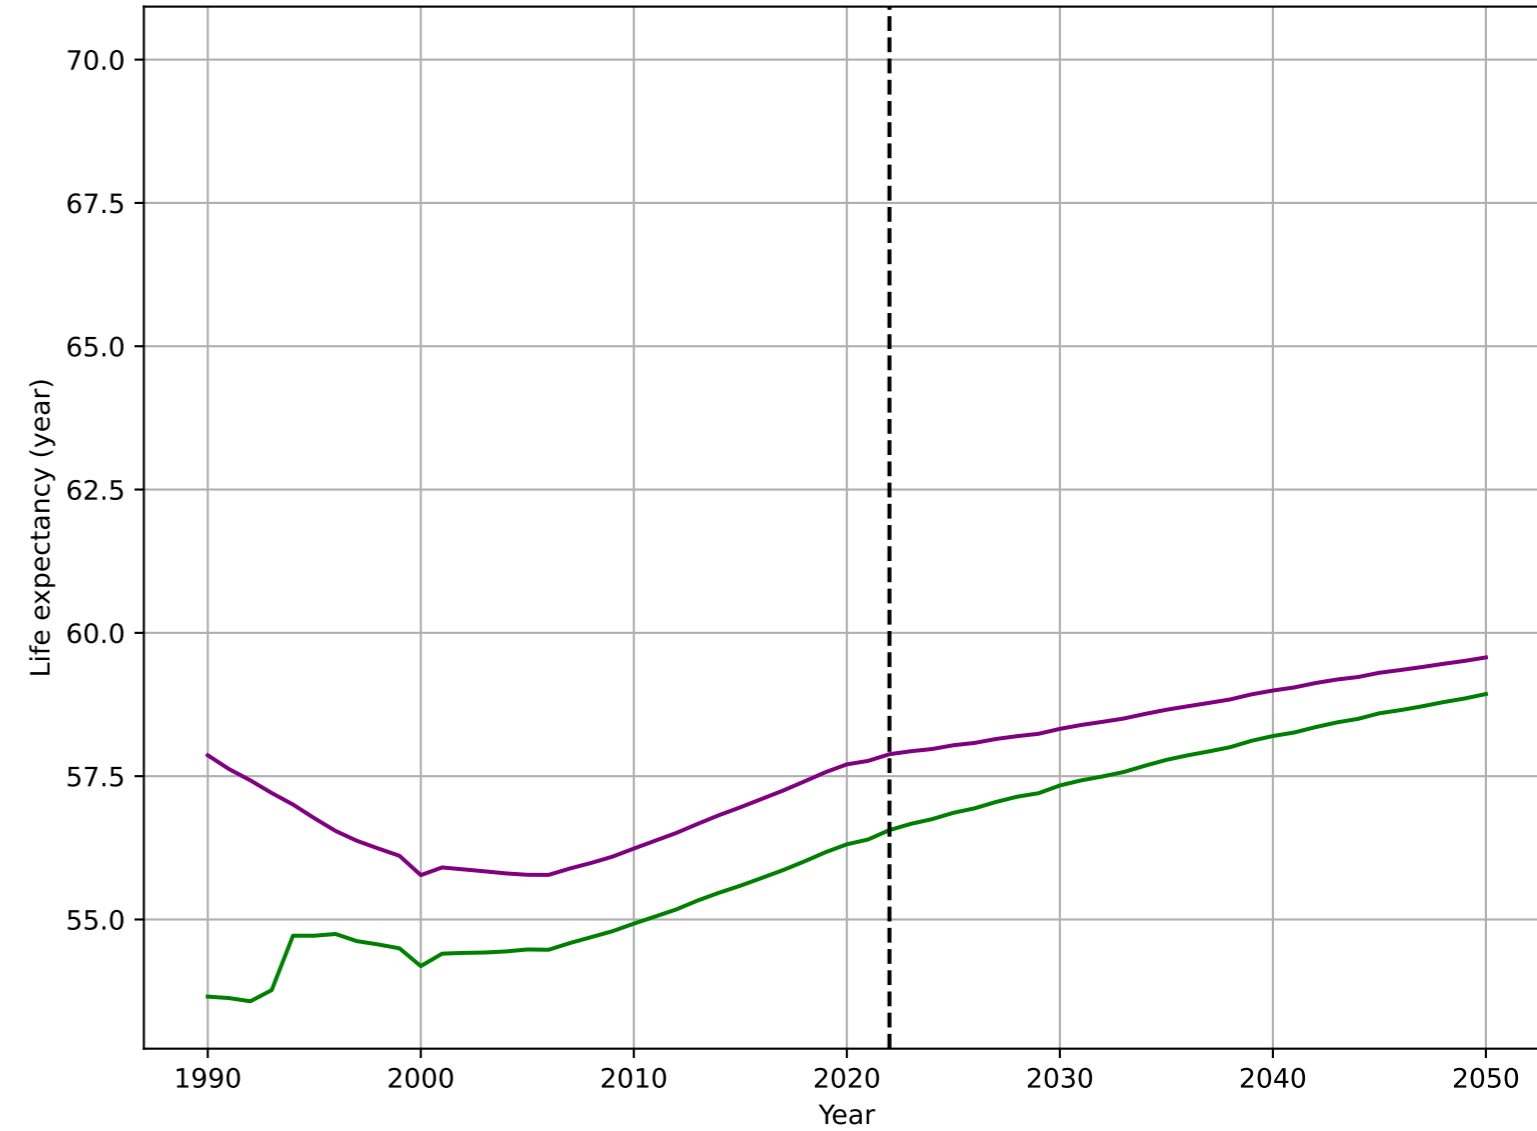

# Federated States Of Micronesia

### Life Expectancy

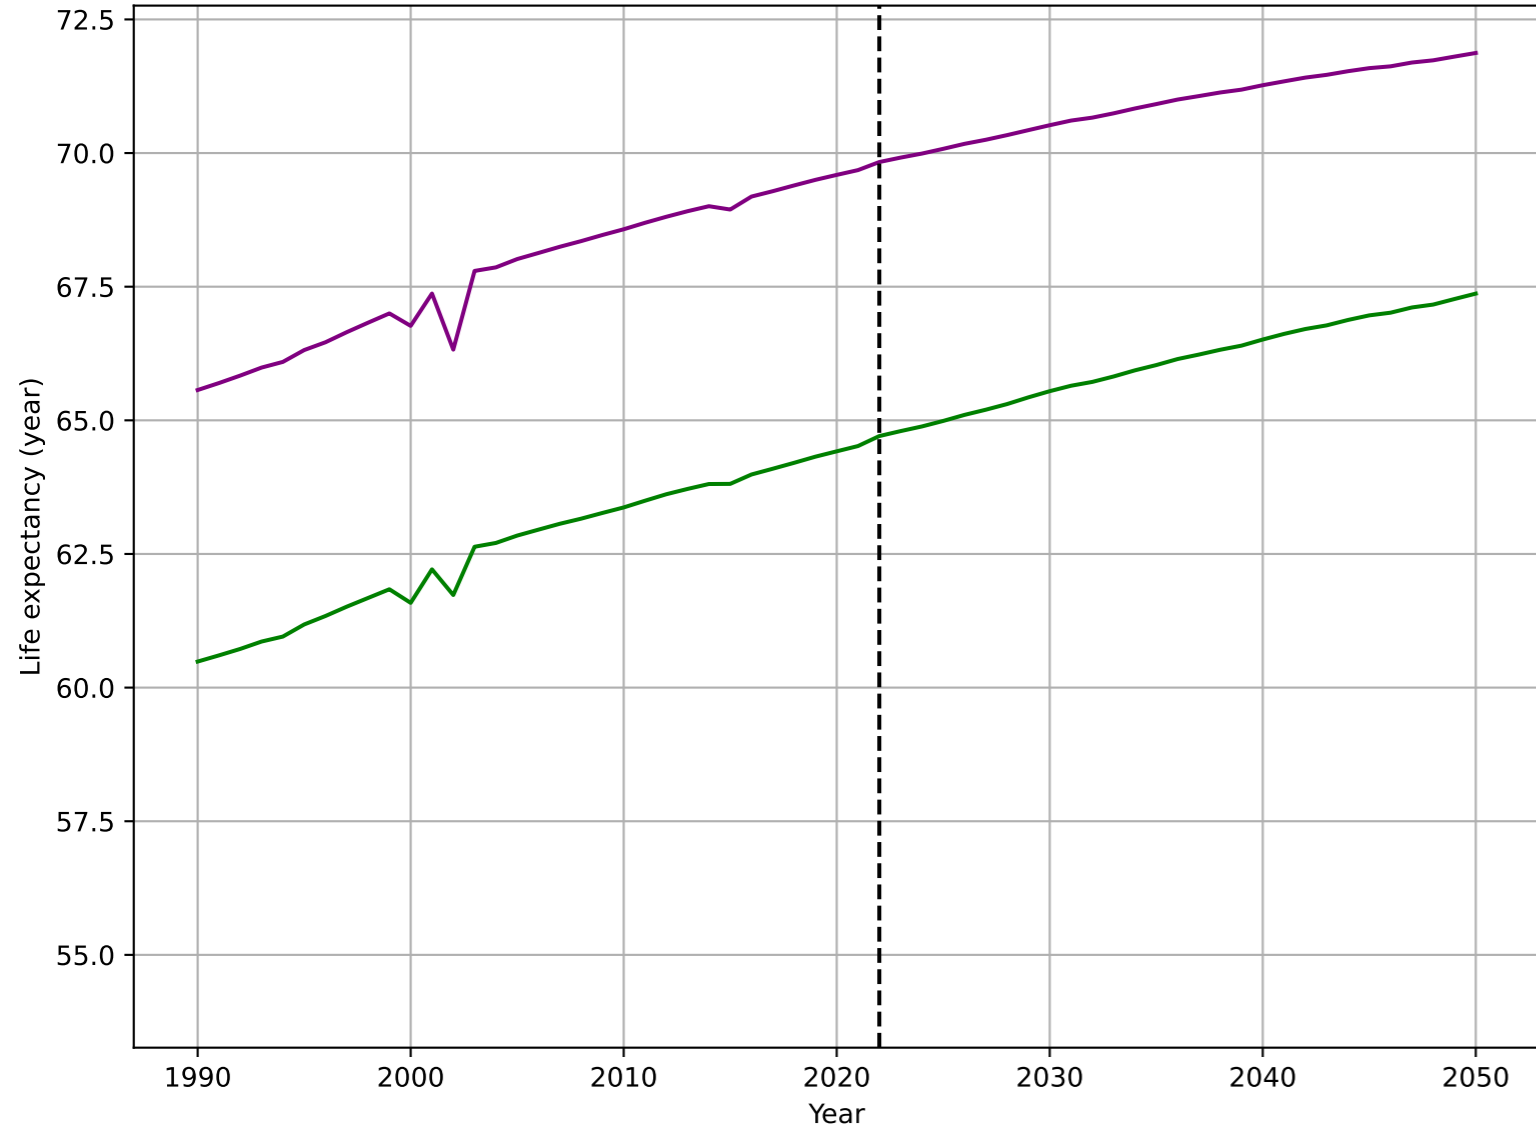

### Healthy Life Expectancy (HALE)

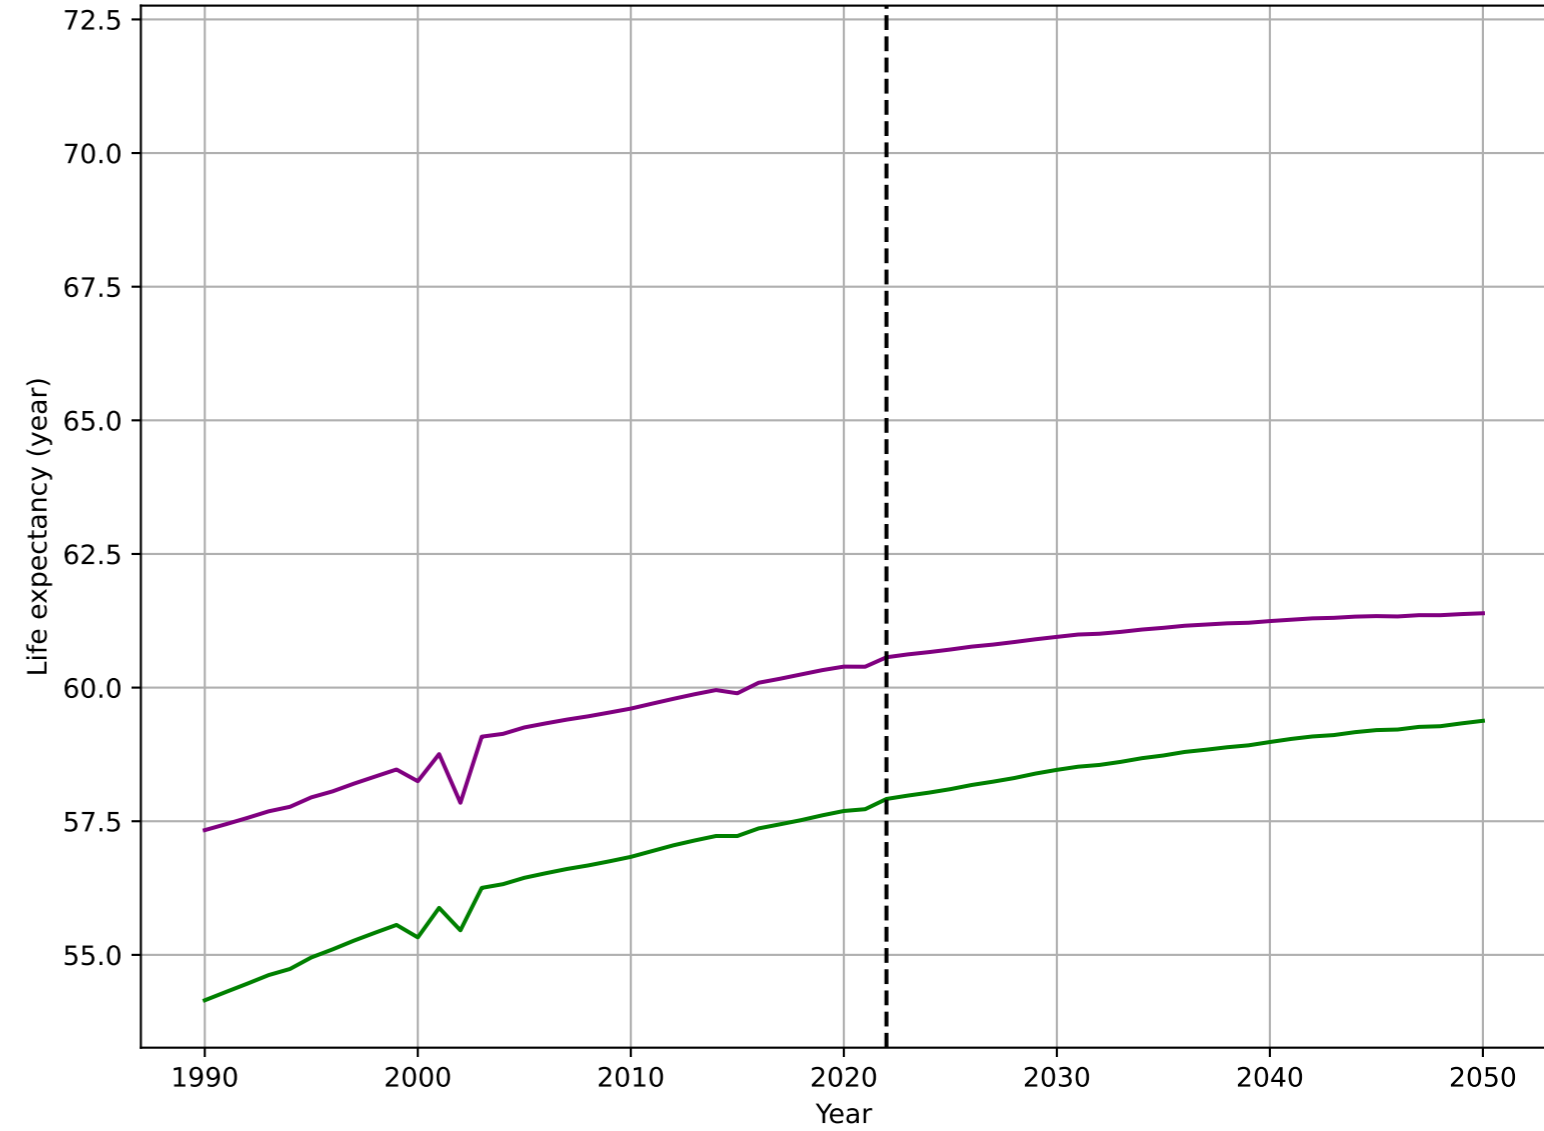

# Nauru

### Life Expectancy

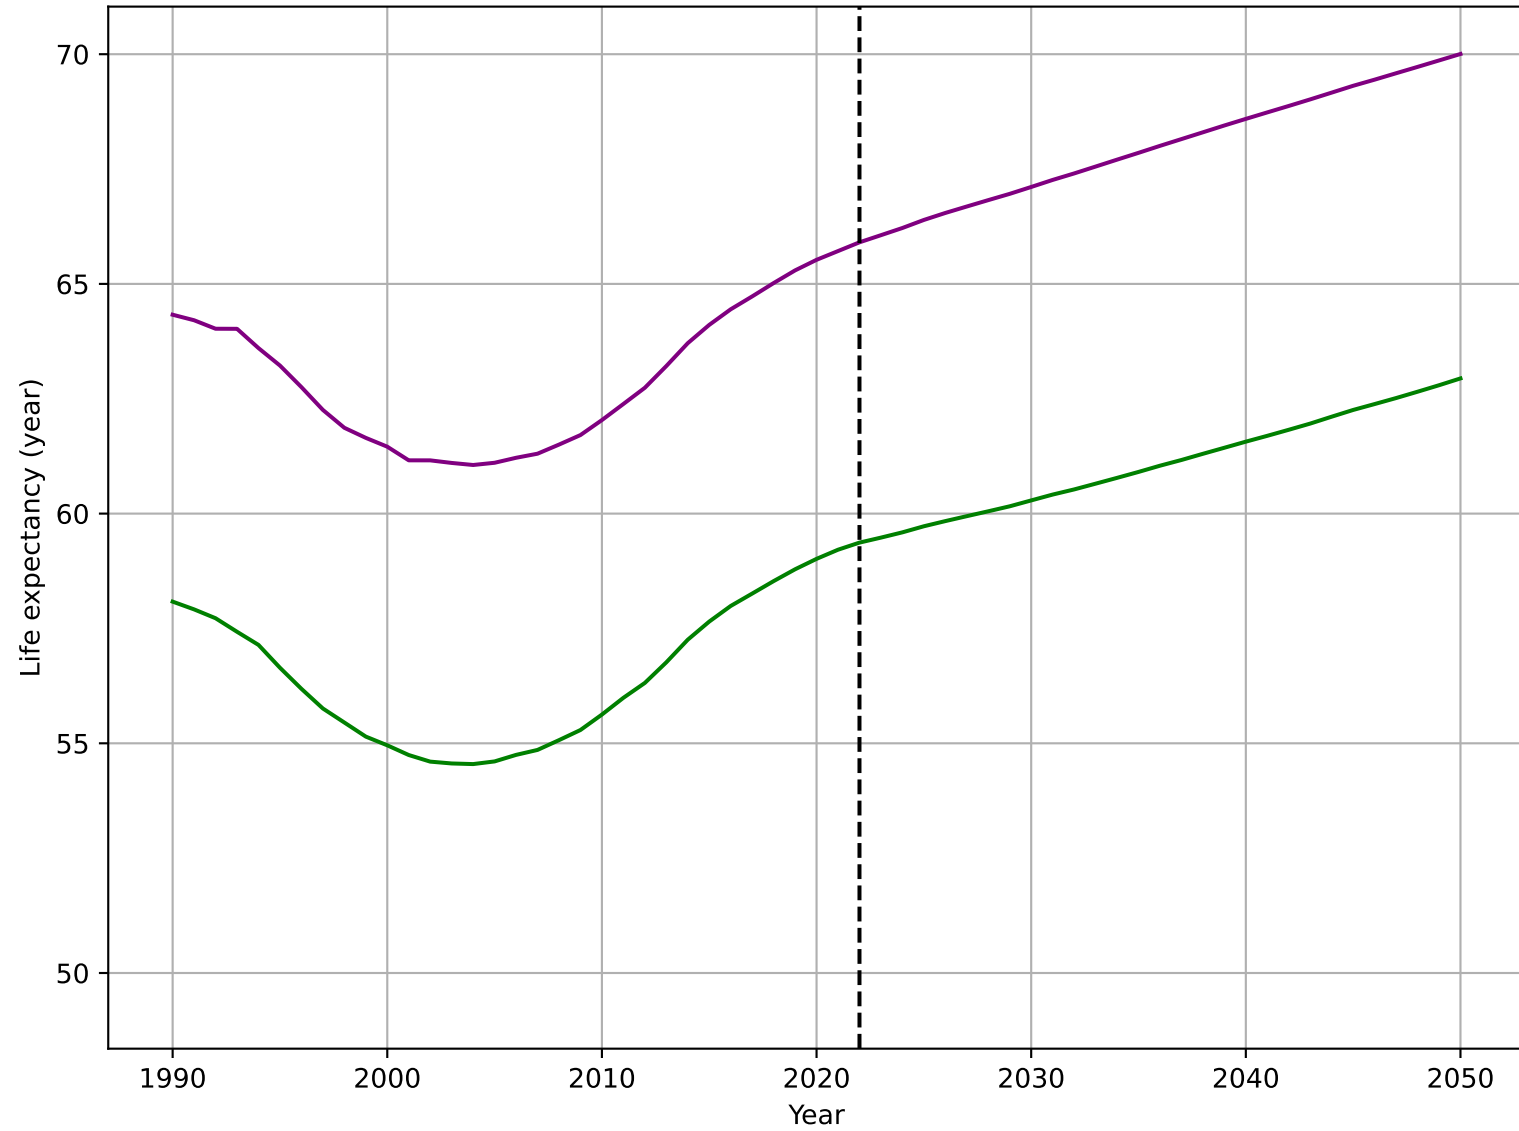

### Healthy Life Expectancy (HALE)

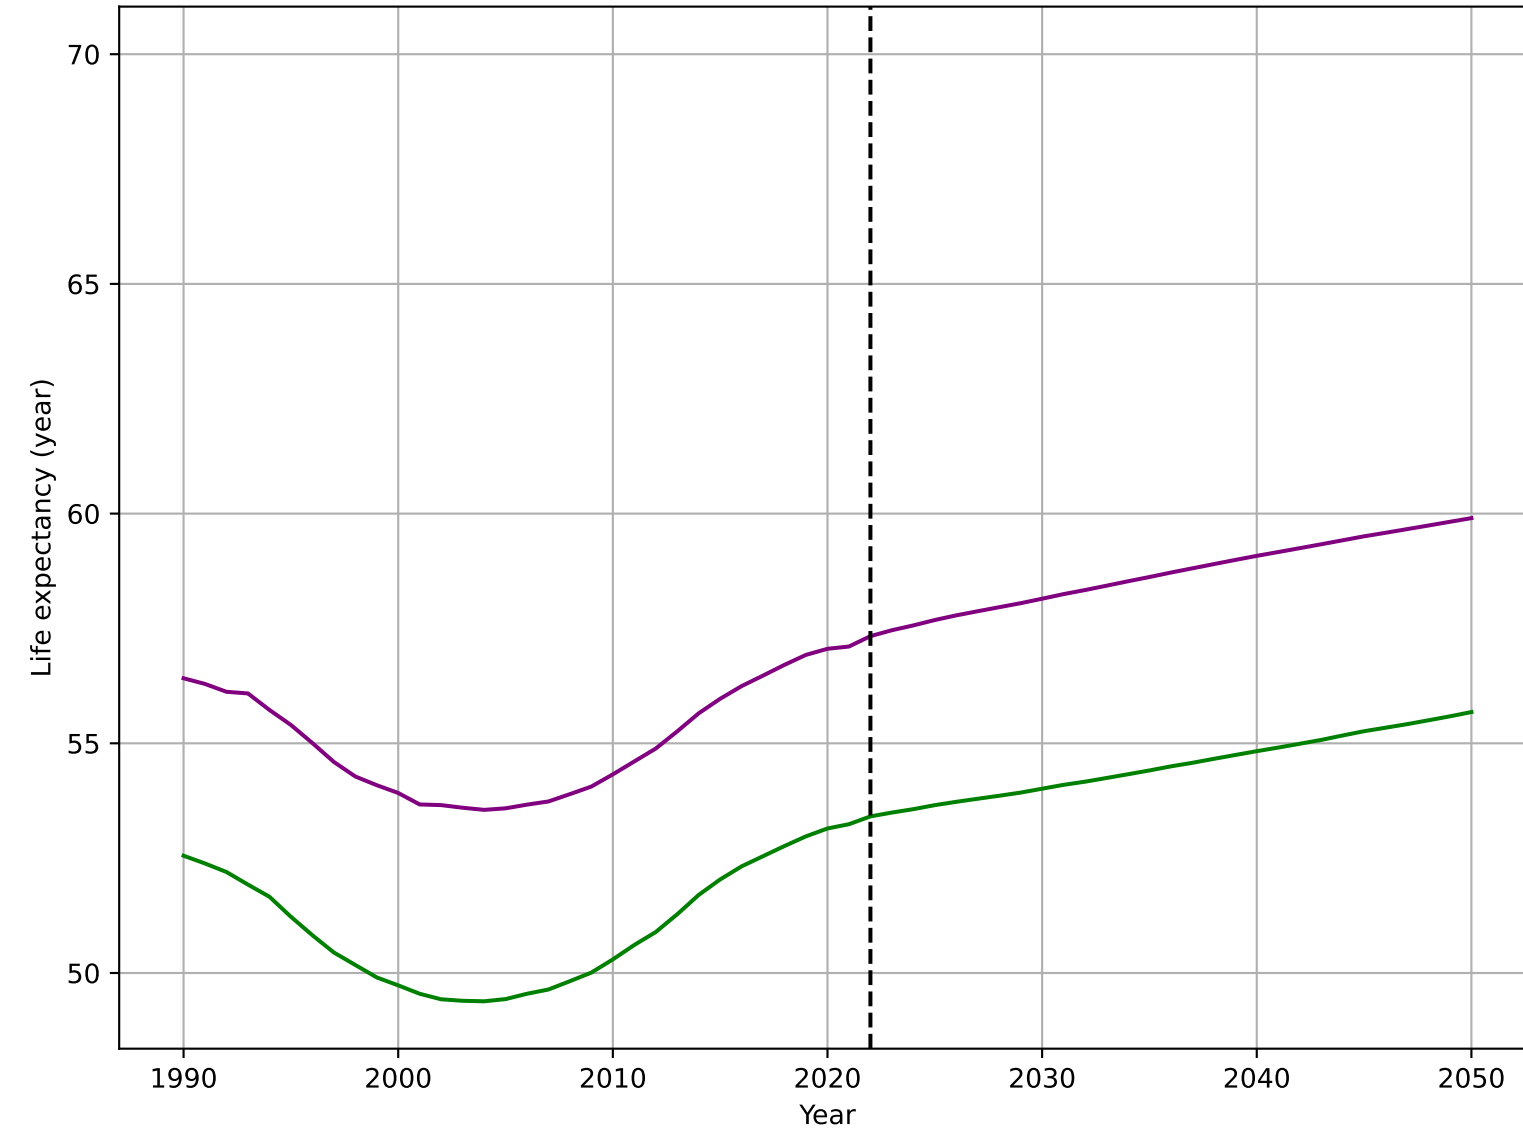

# Niue

### Life Expectancy

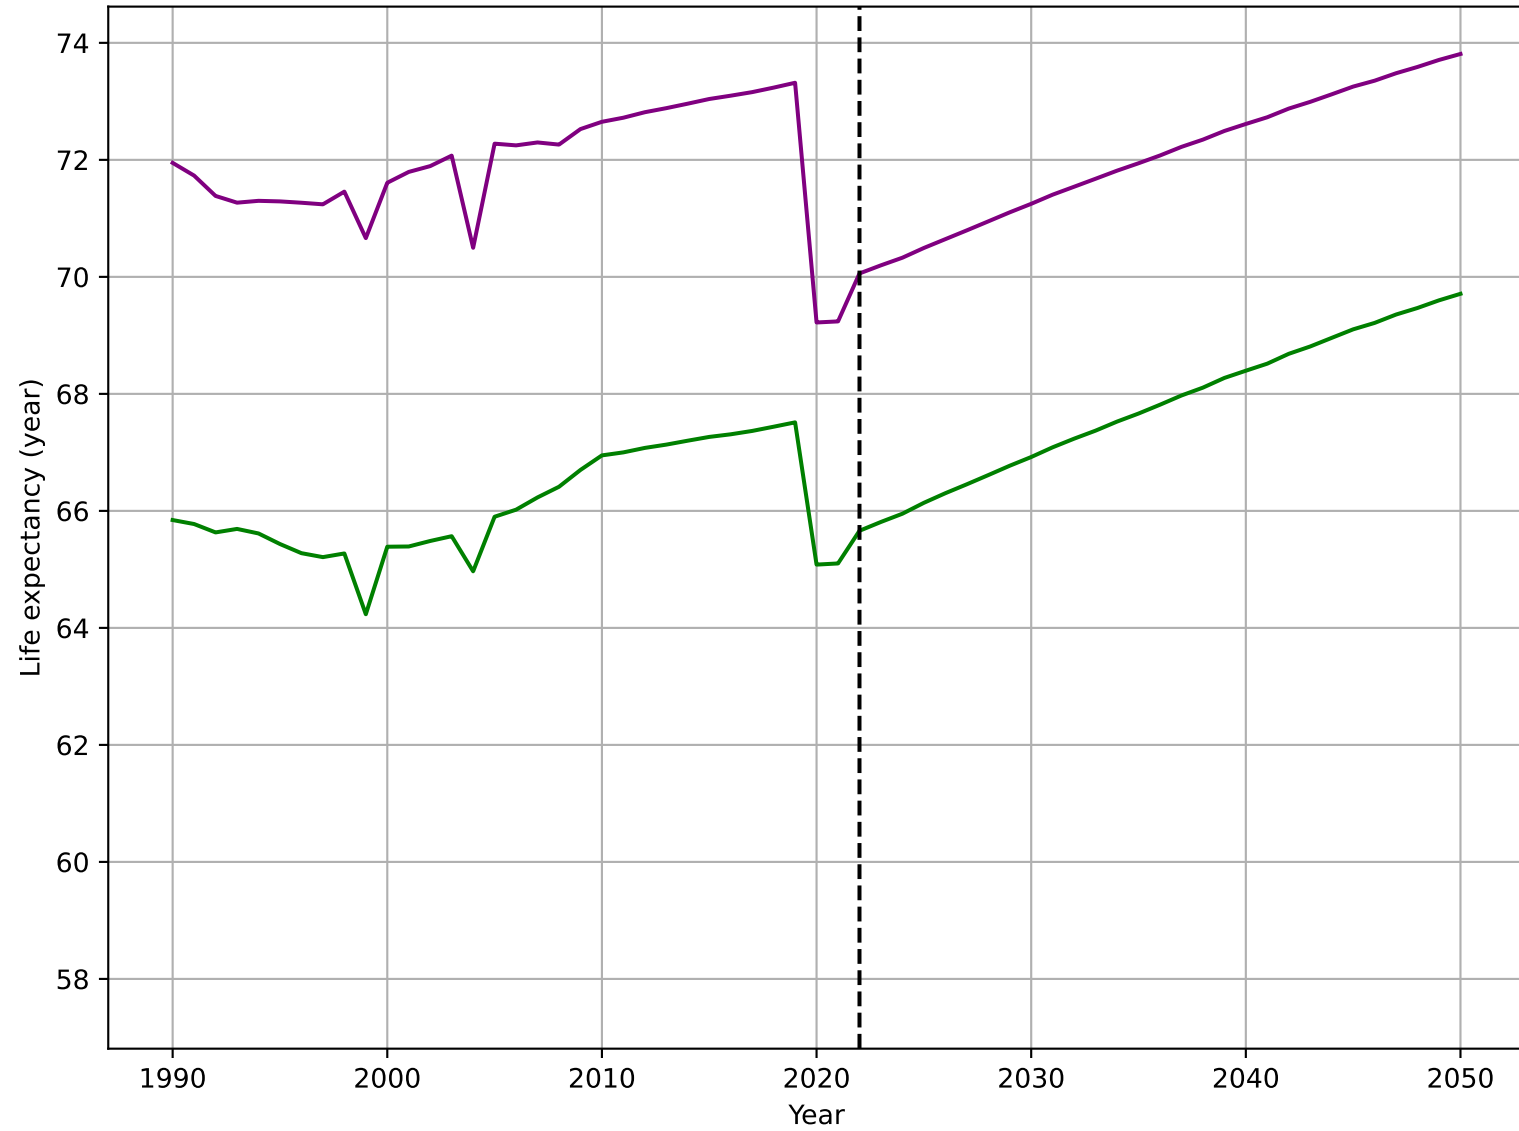

### Healthy Life Expectancy (HALE)

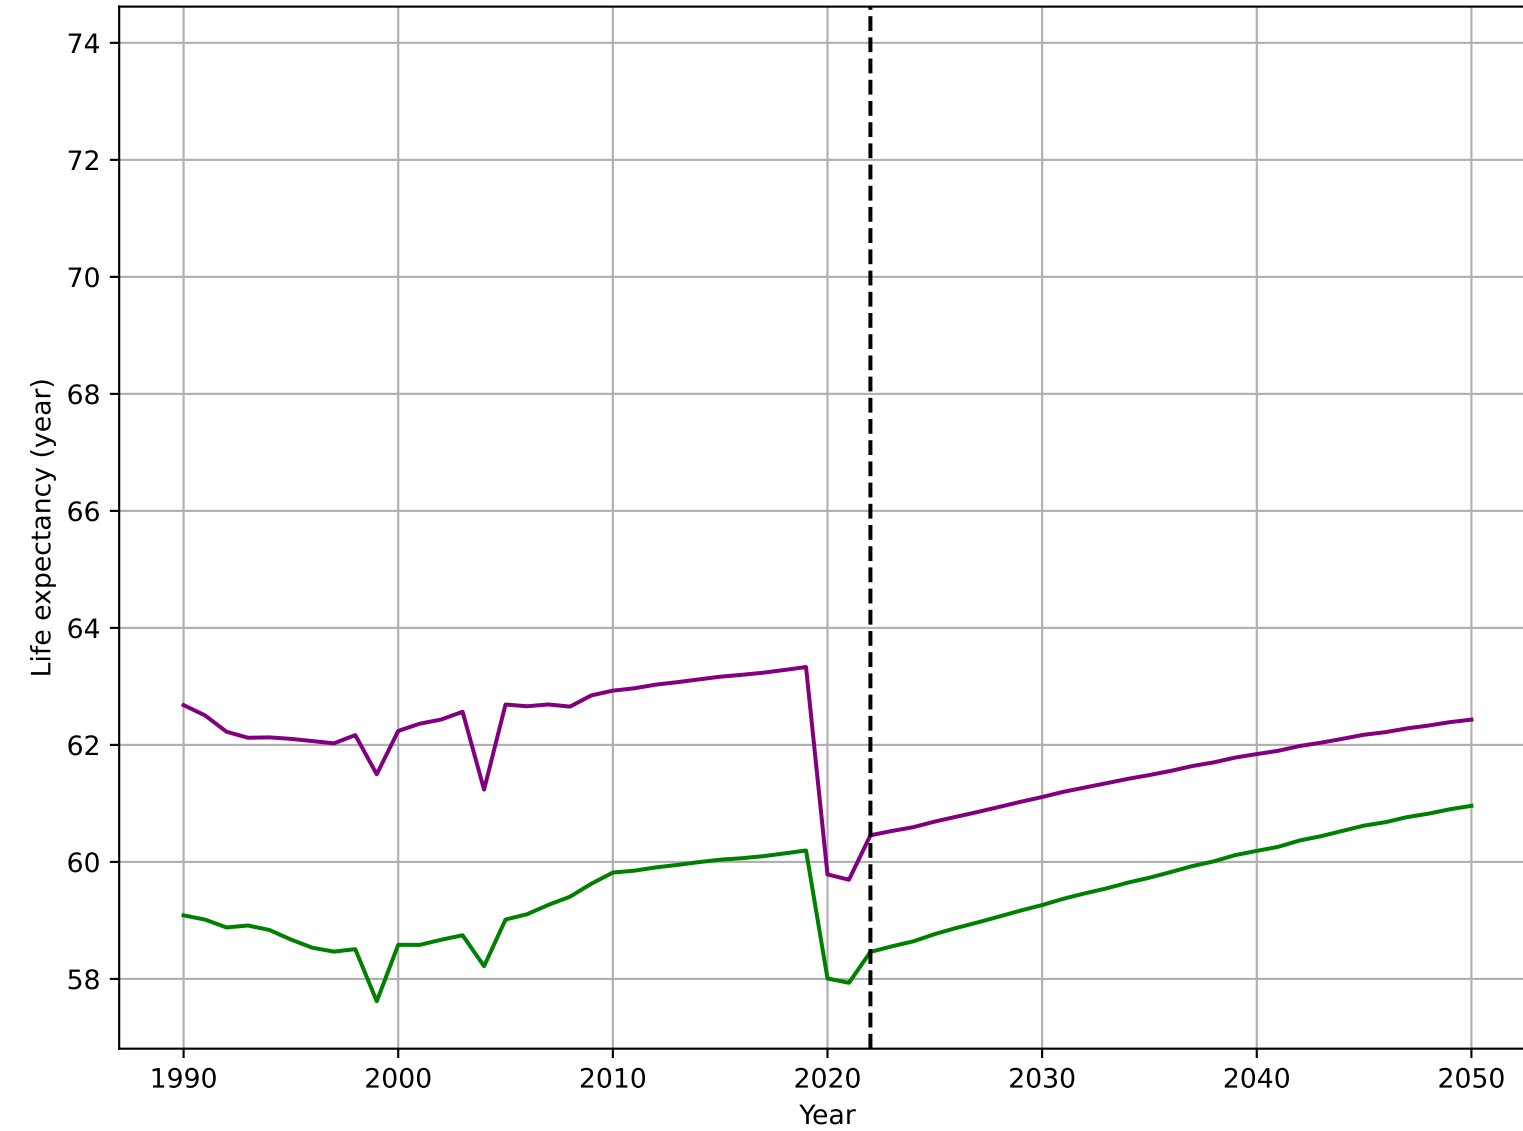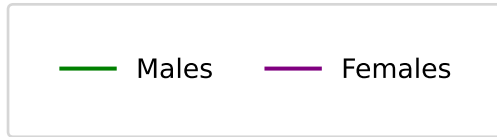

# Northern Mariana Islands

### Life Expectancy

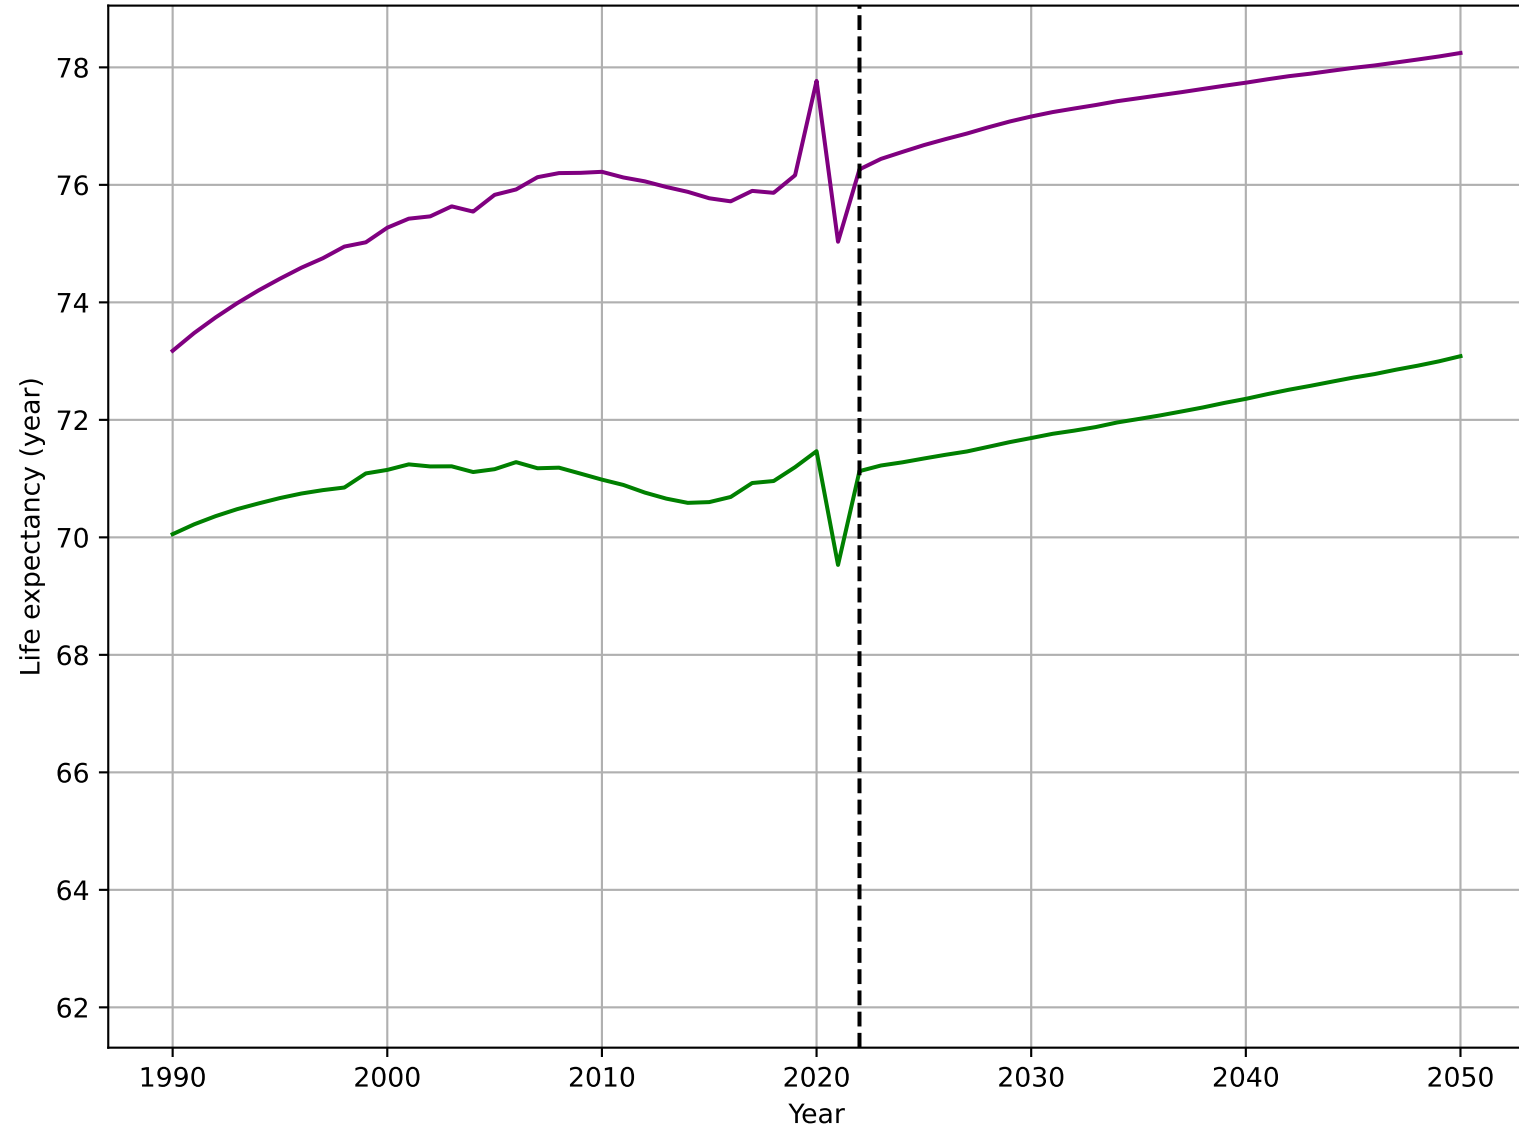

### Healthy Life Expectancy (HALE)

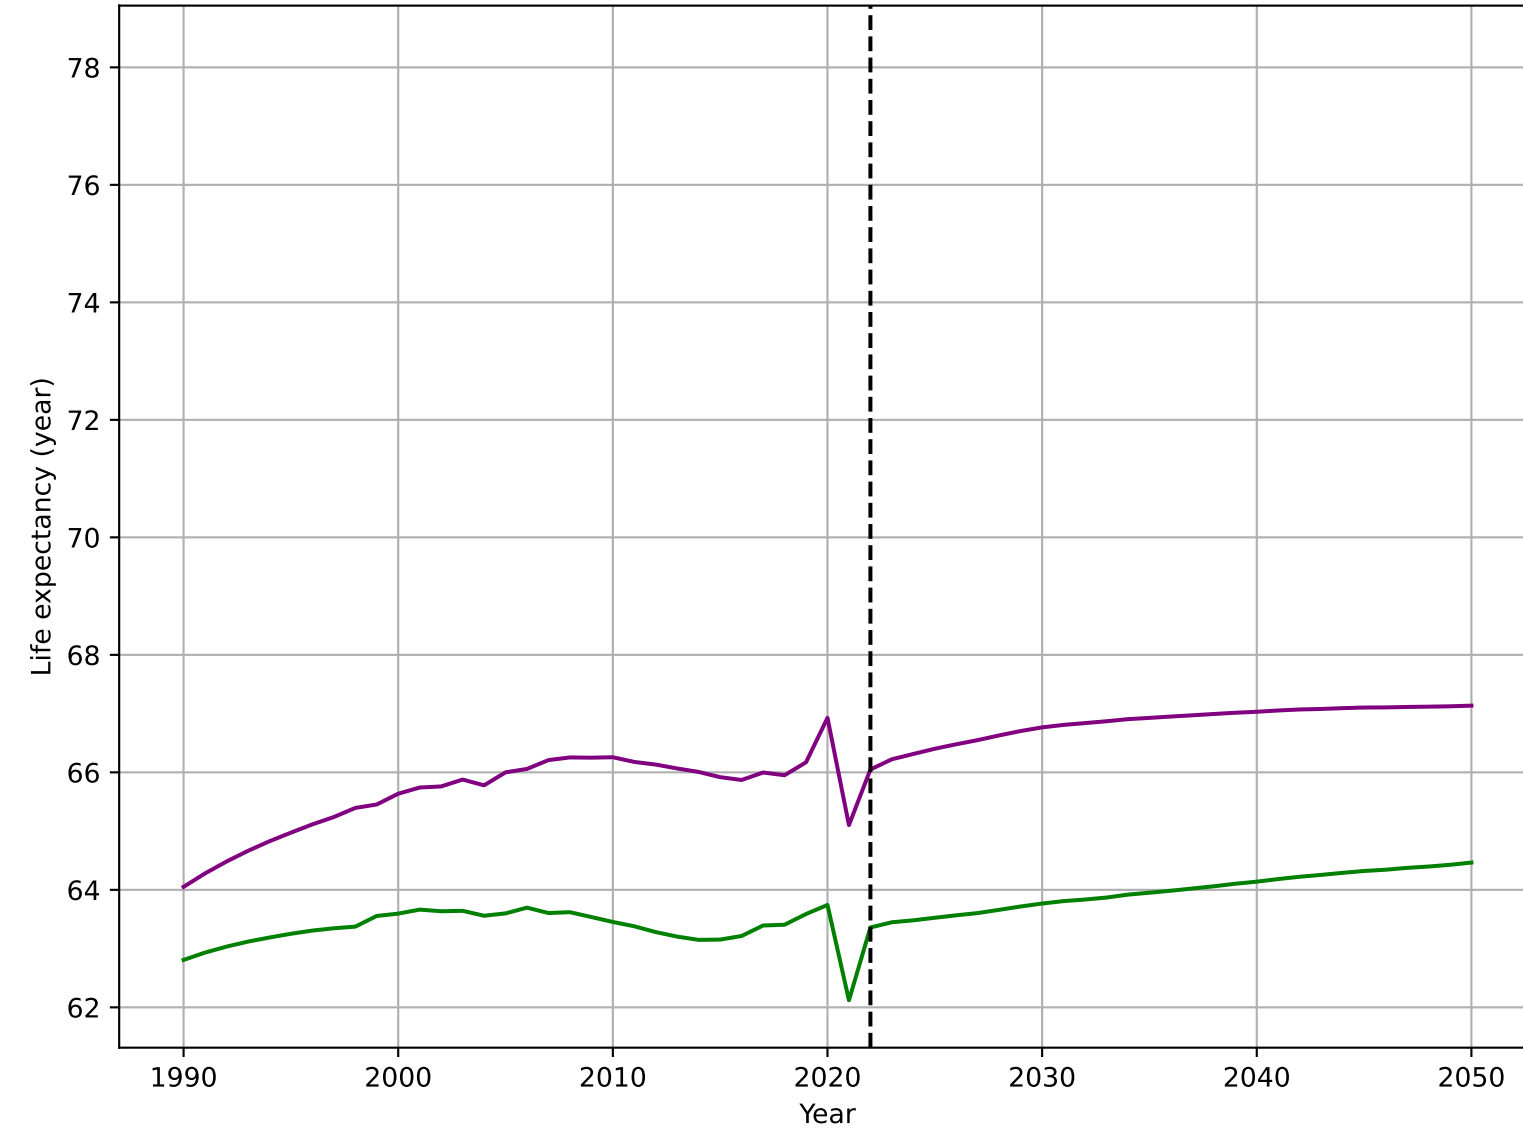

# Palau

### Life Expectancy

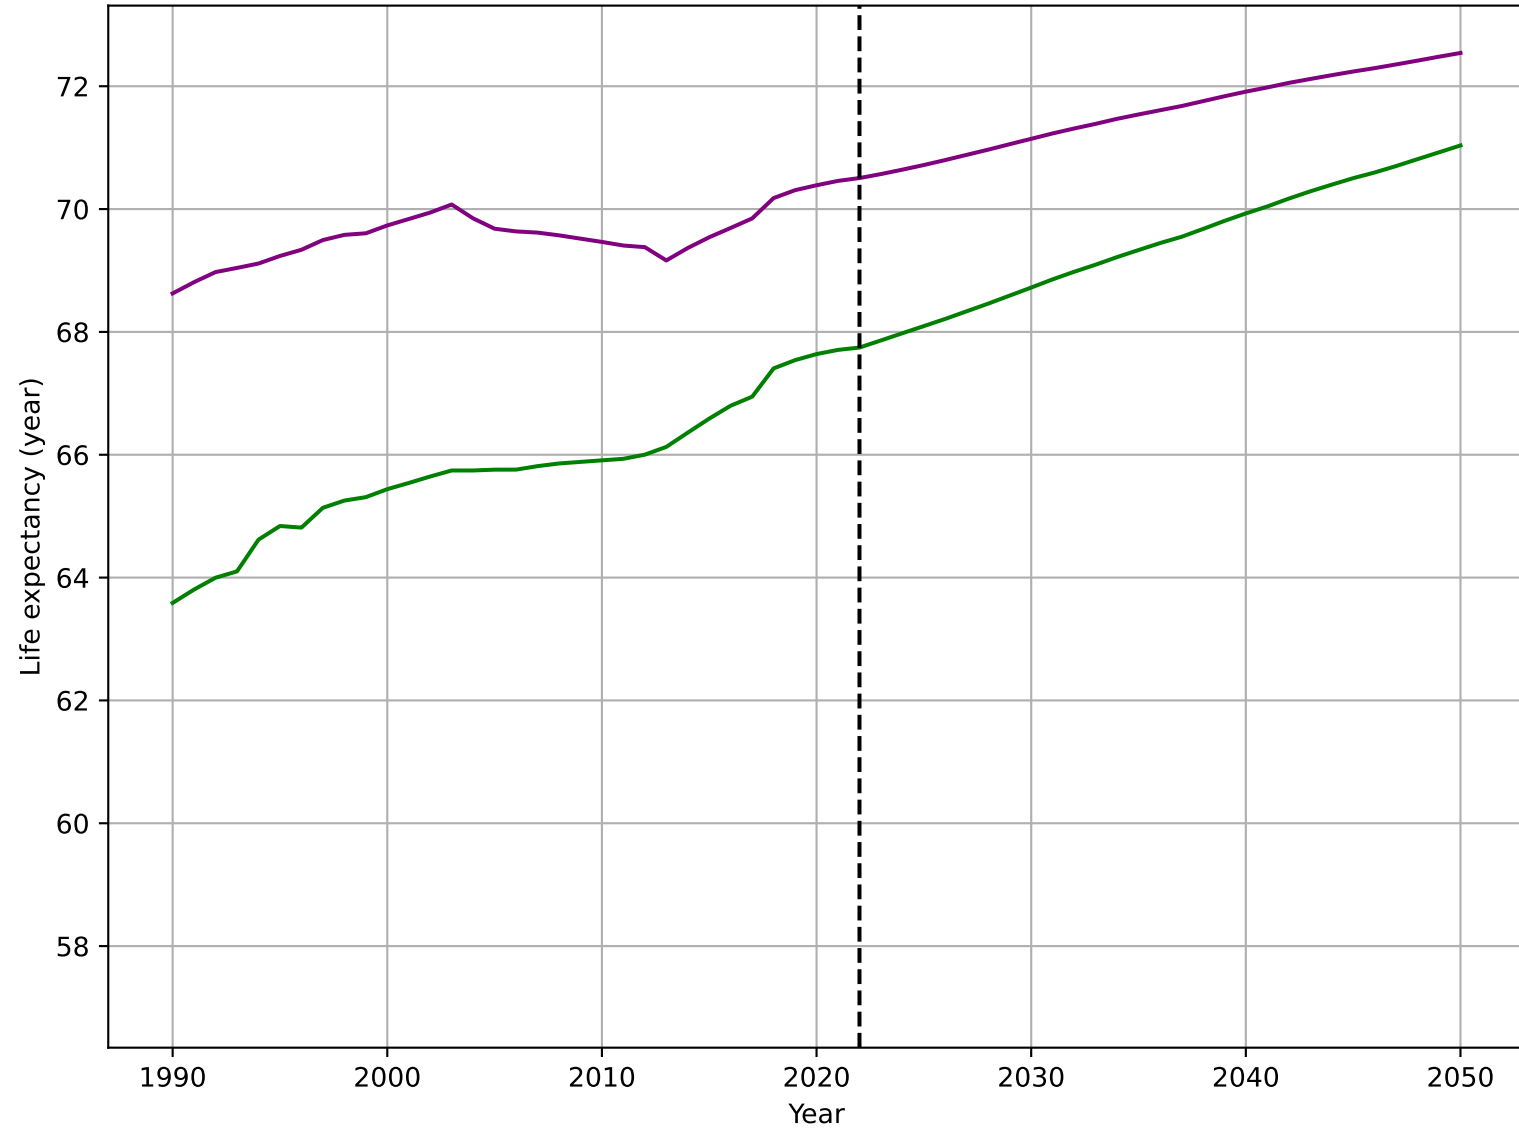

### Healthy Life Expectancy (HALE)

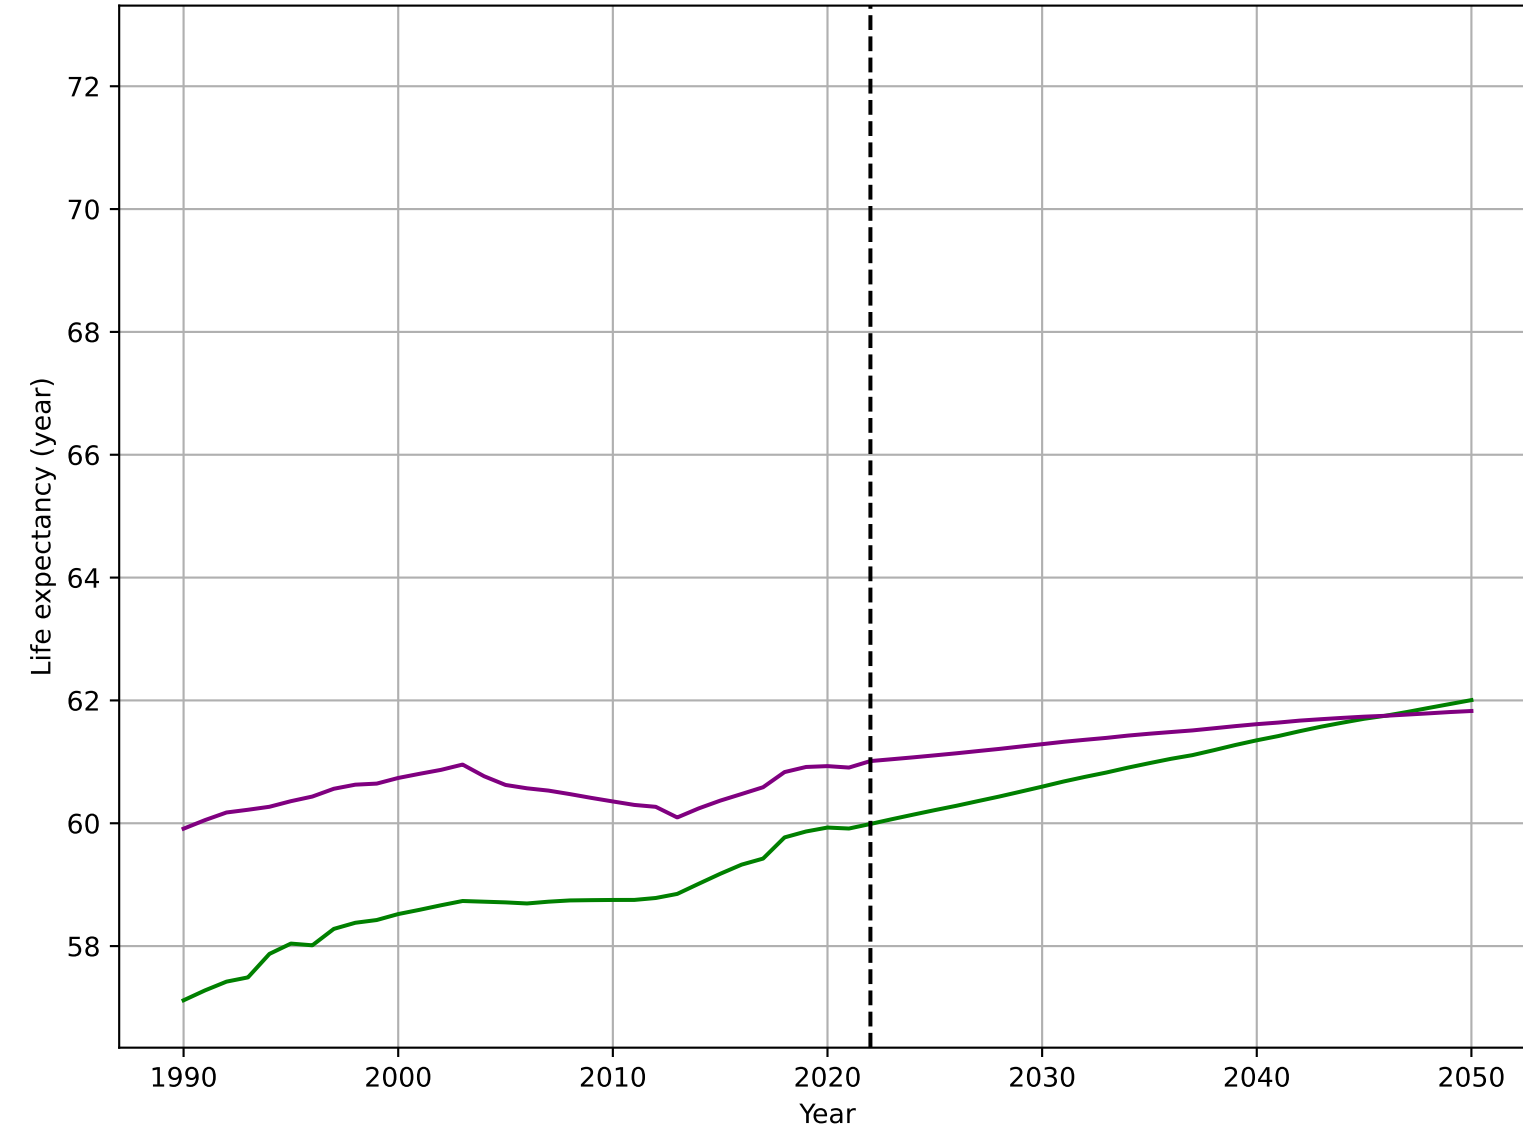

# Papua New Guinea

## Life Expectancy

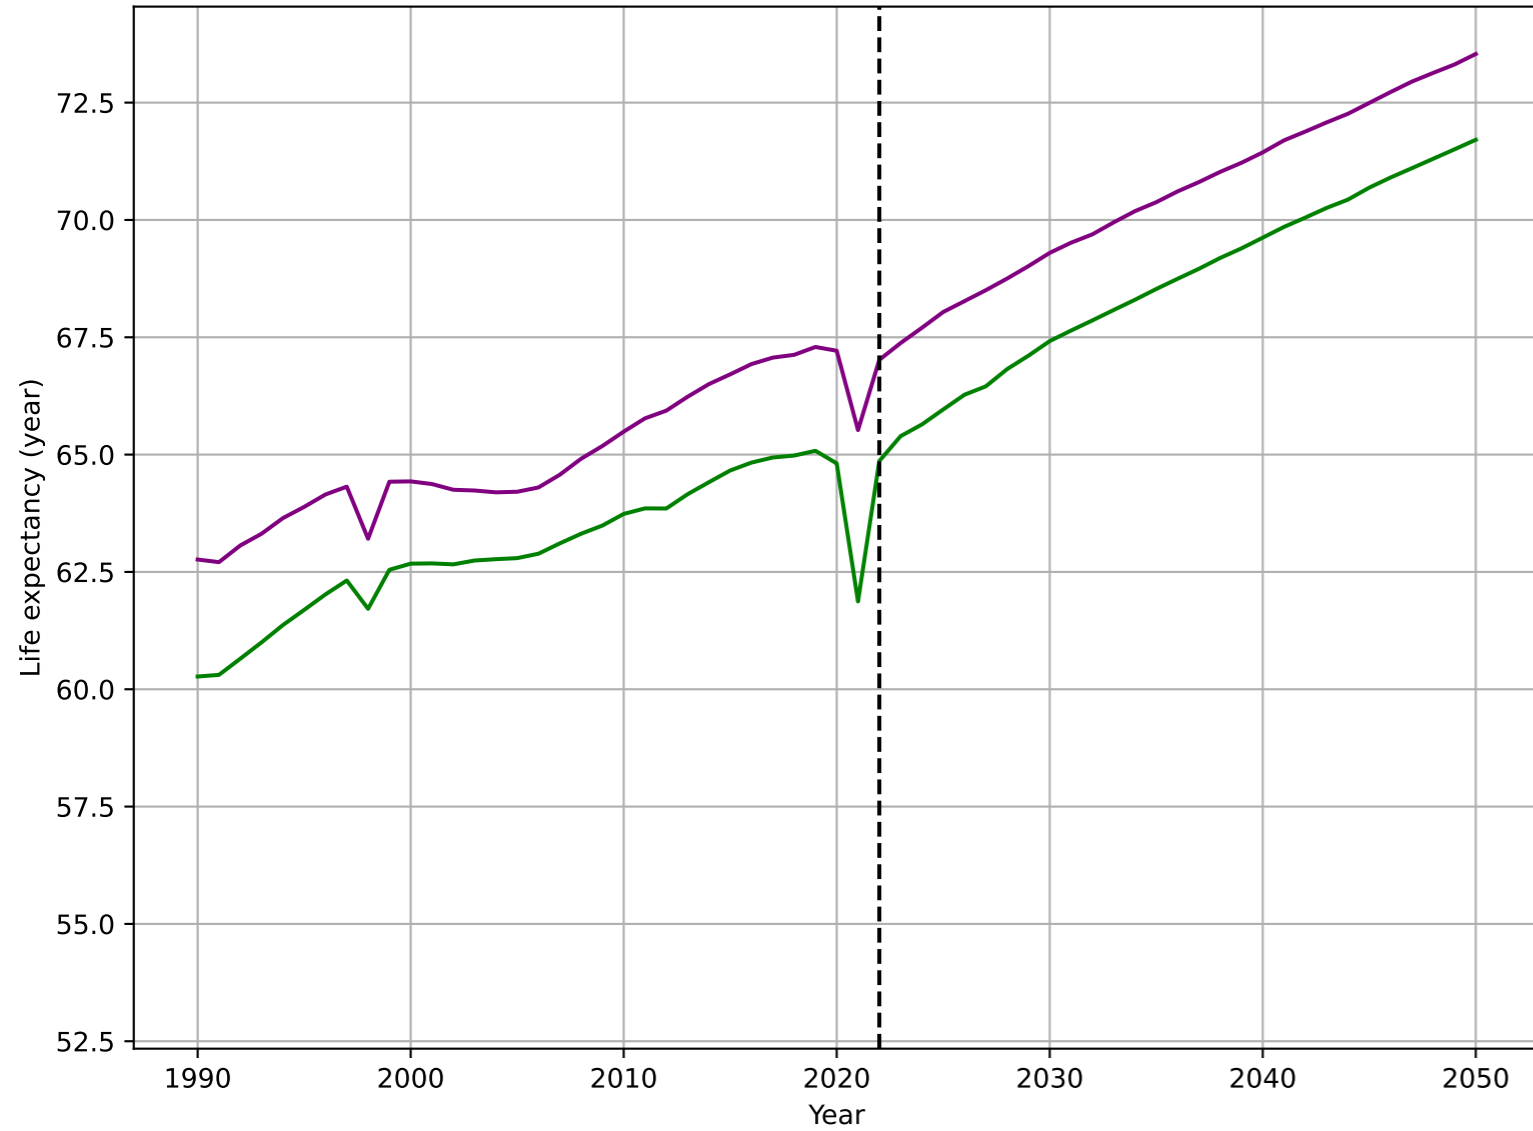

## Healthy Life Expectancy (HALE)

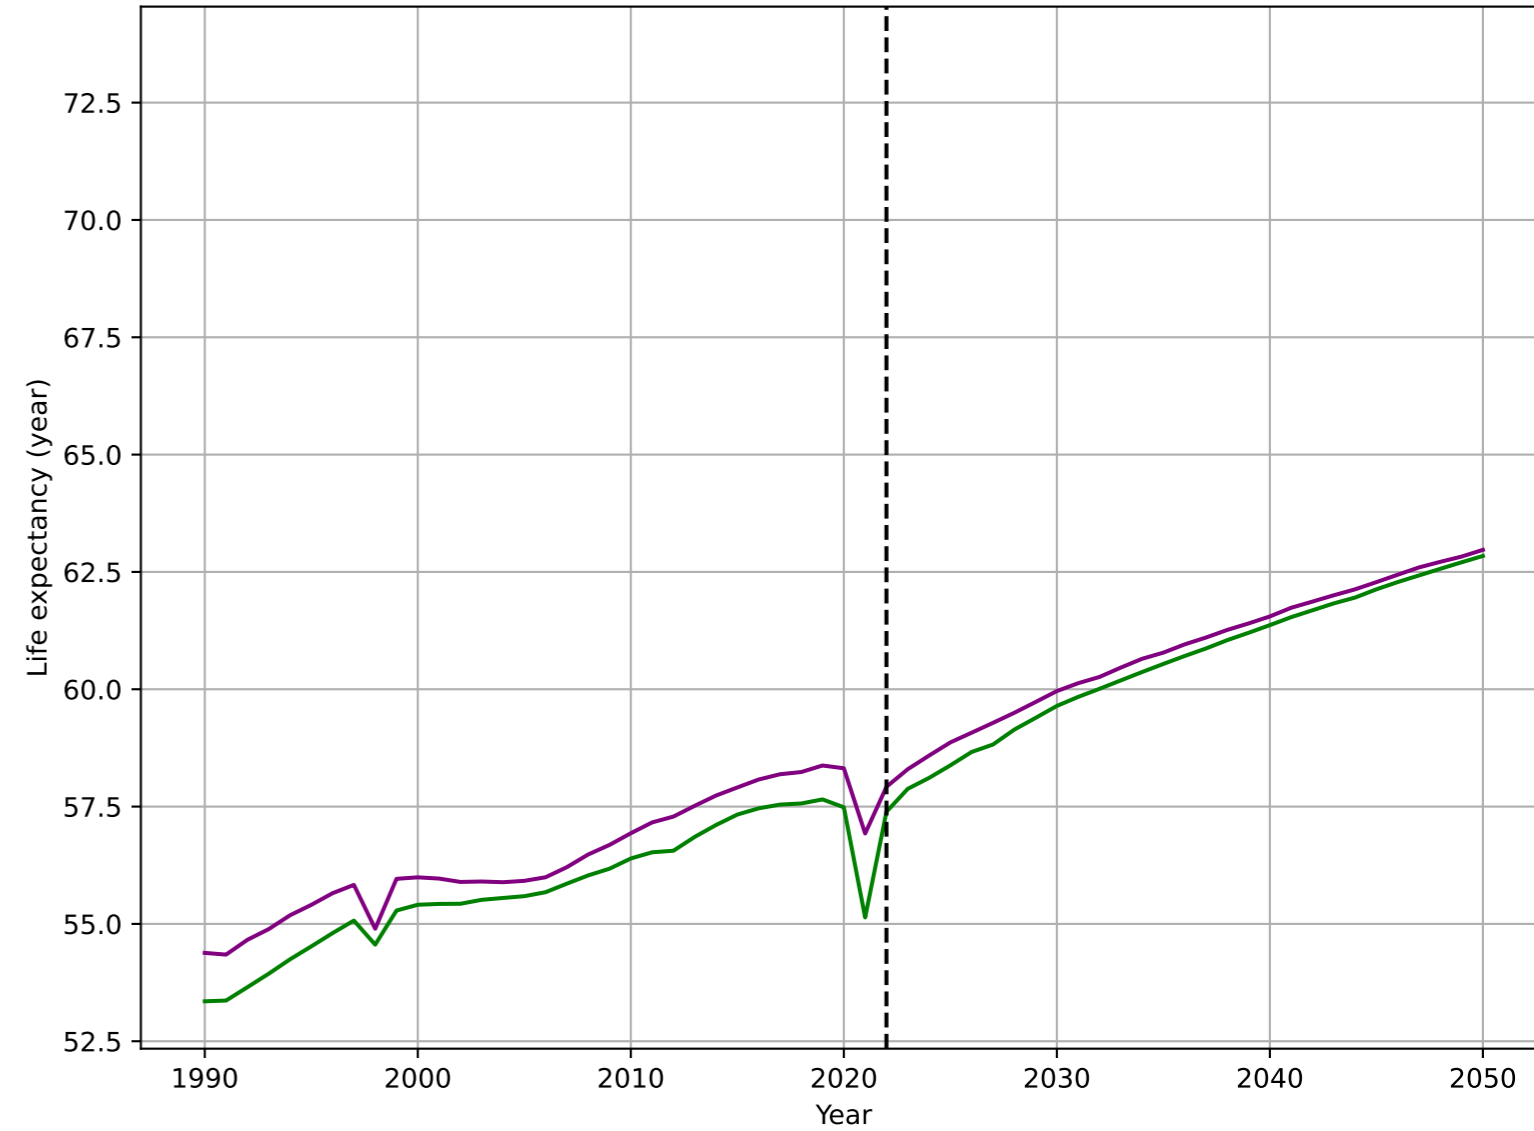

# Samoa

### Life Expectancy

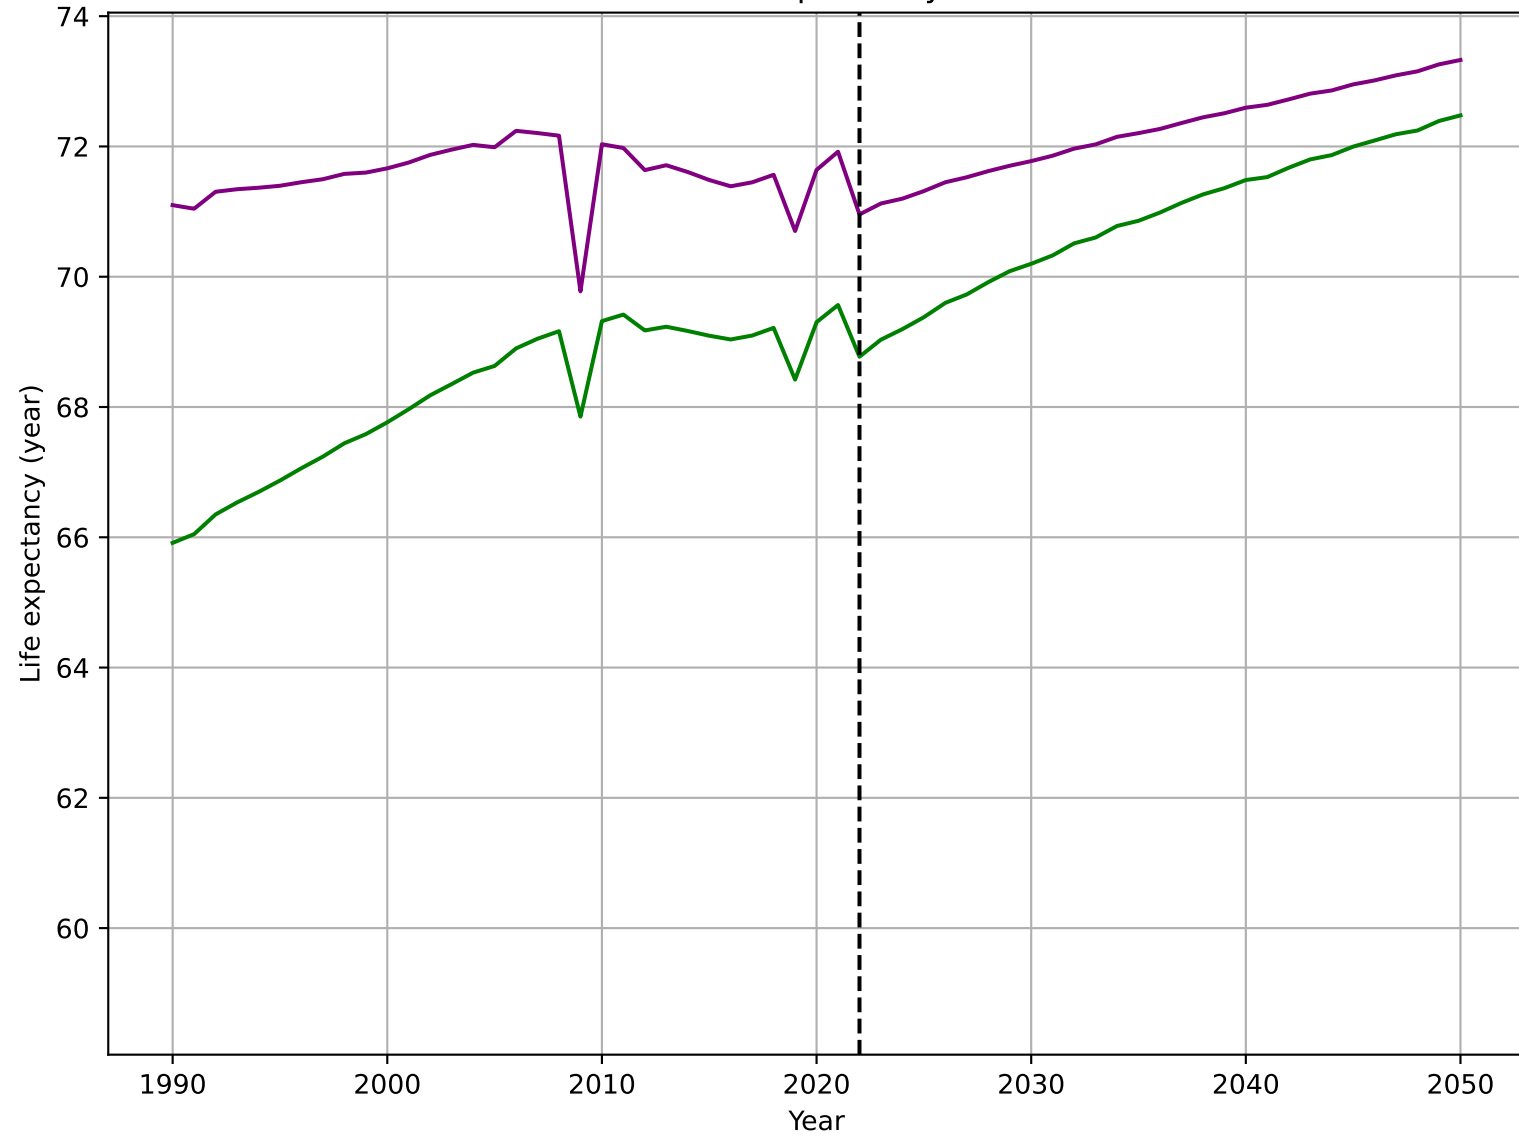

### Healthy Life Expectancy (HALE)

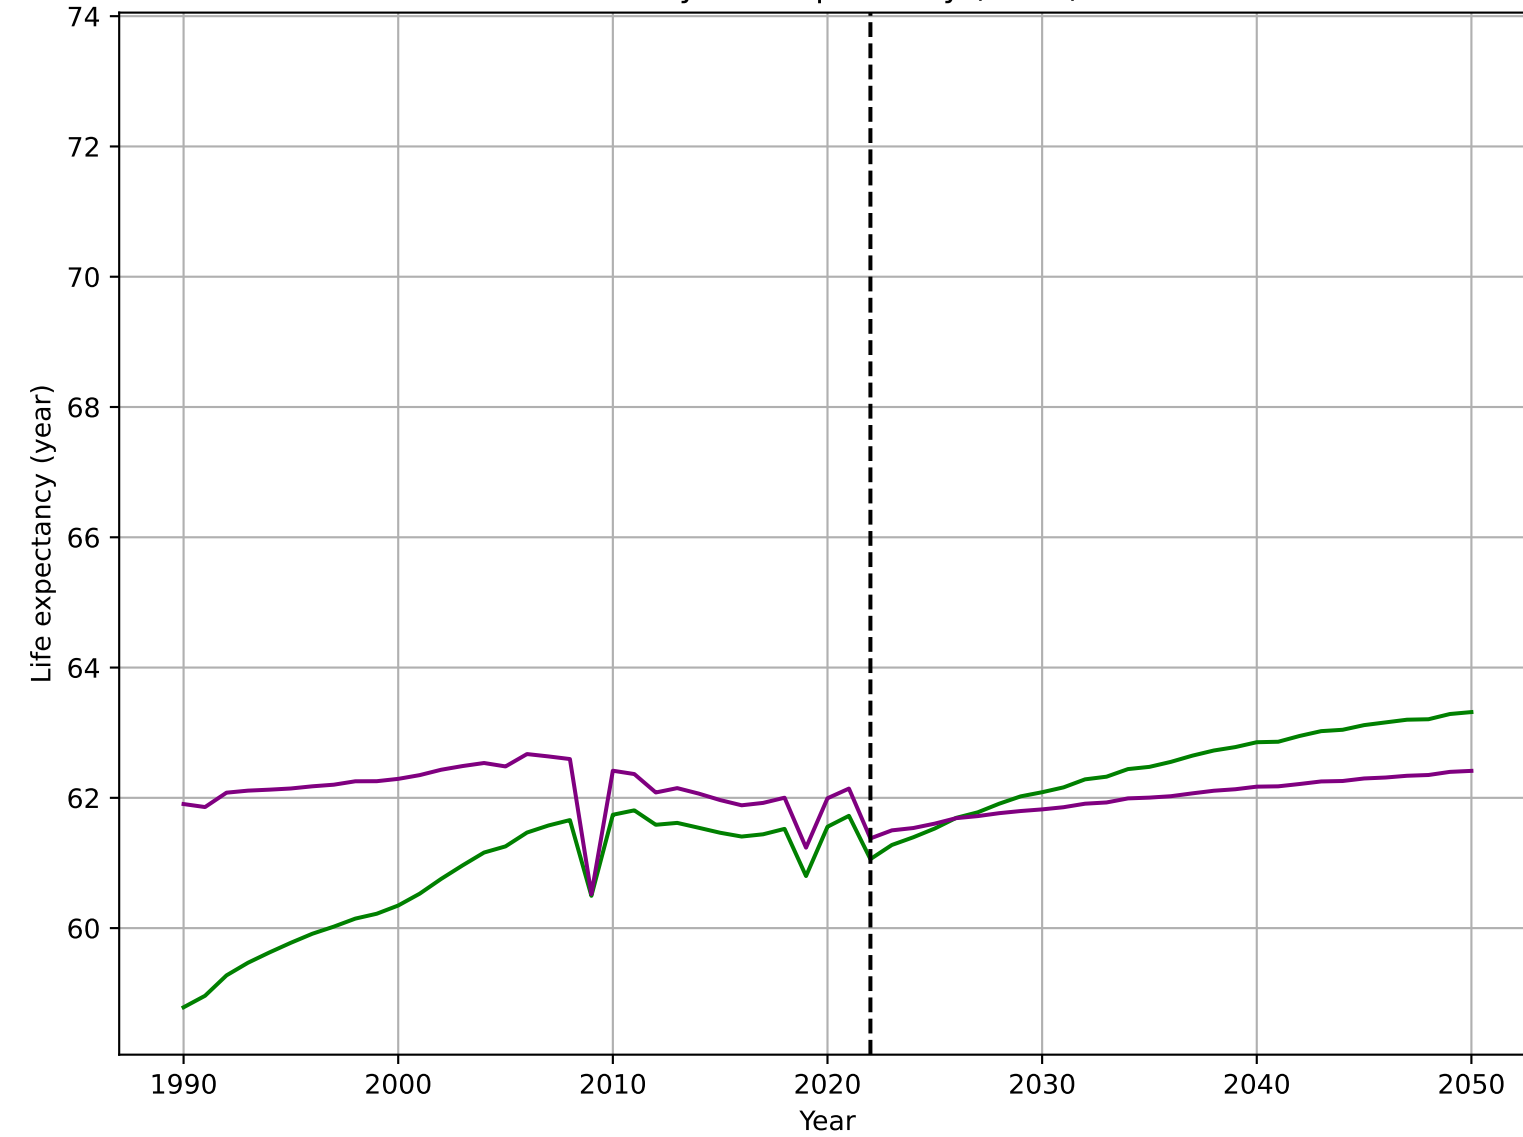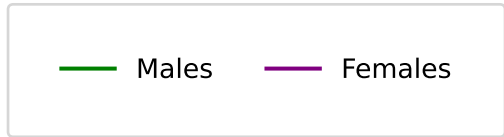



# Solomon Islands

### Life Expectancy

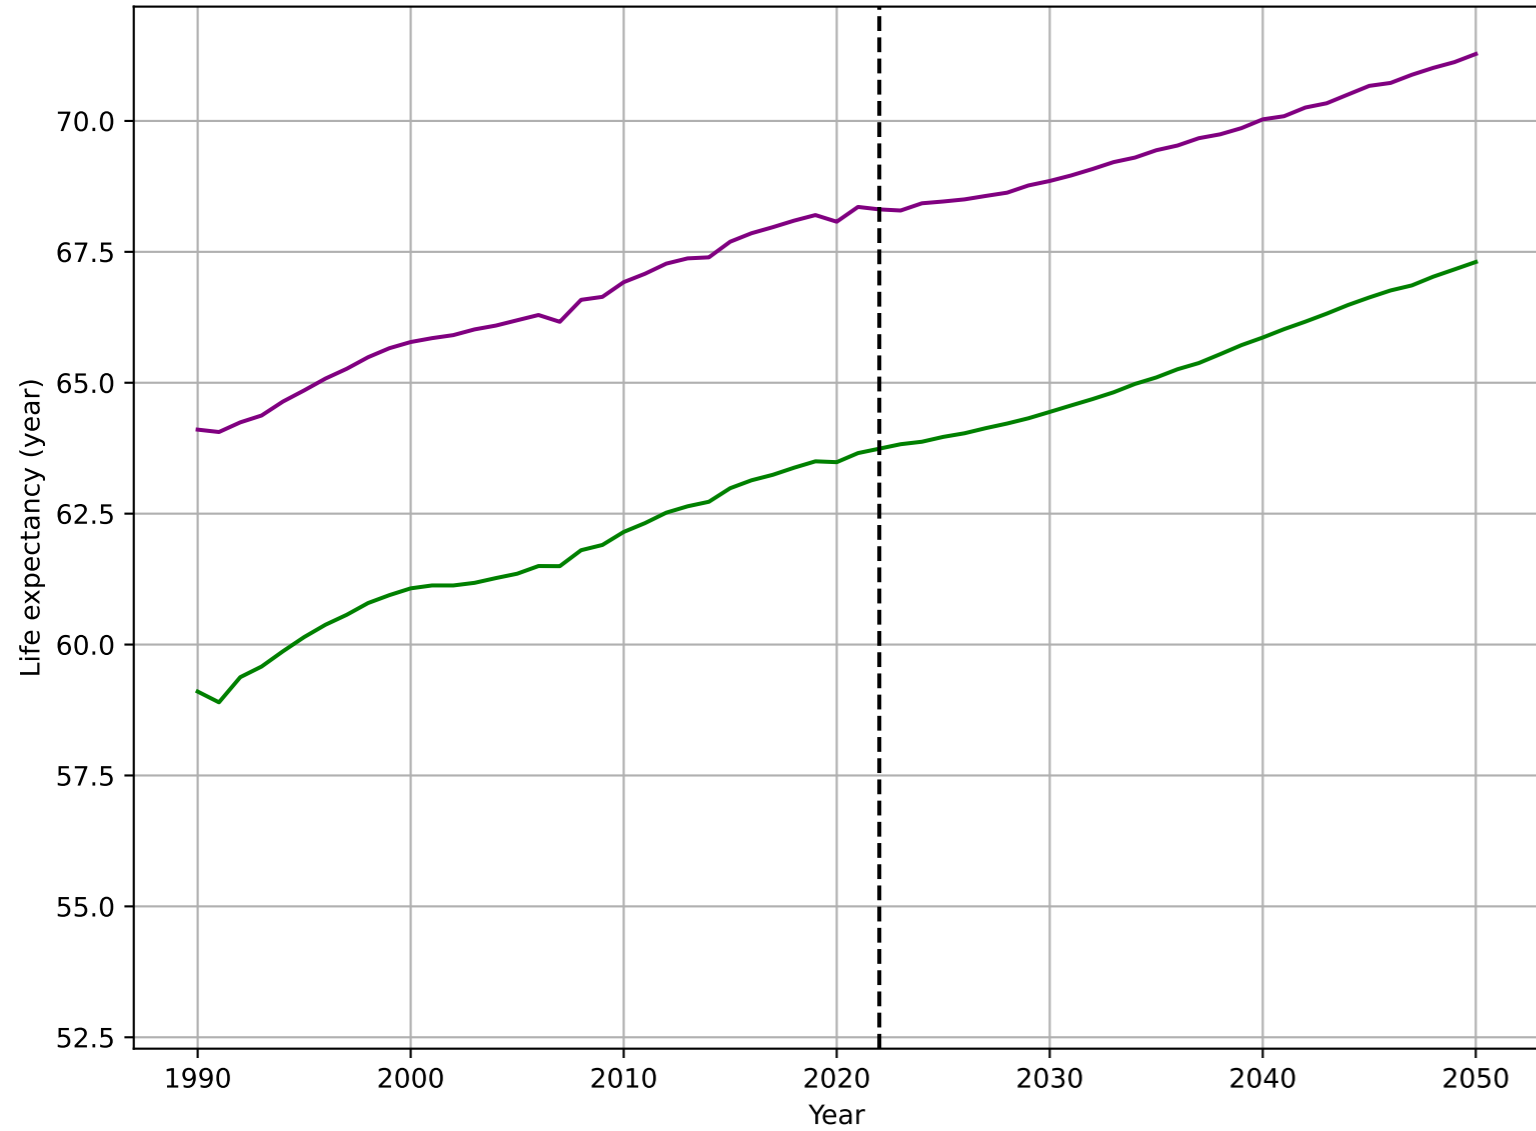

### Healthy Life Expectancy (HALE)

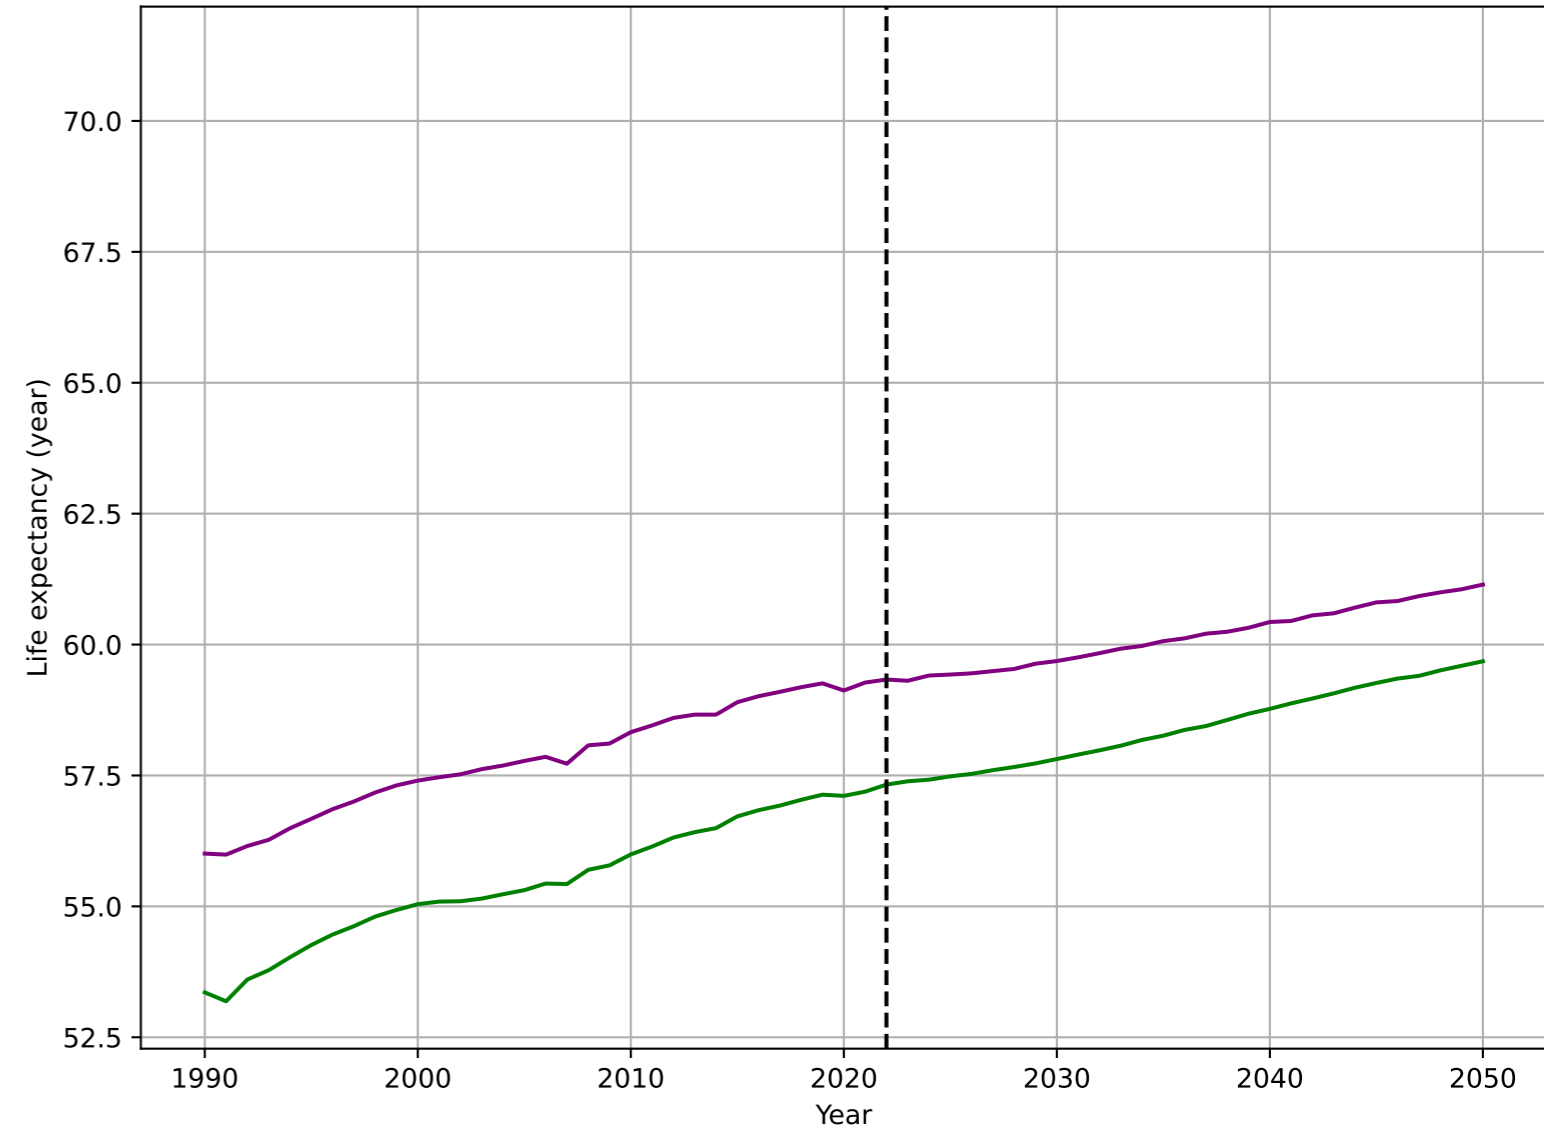

# Tokelau

### Life Expectancy

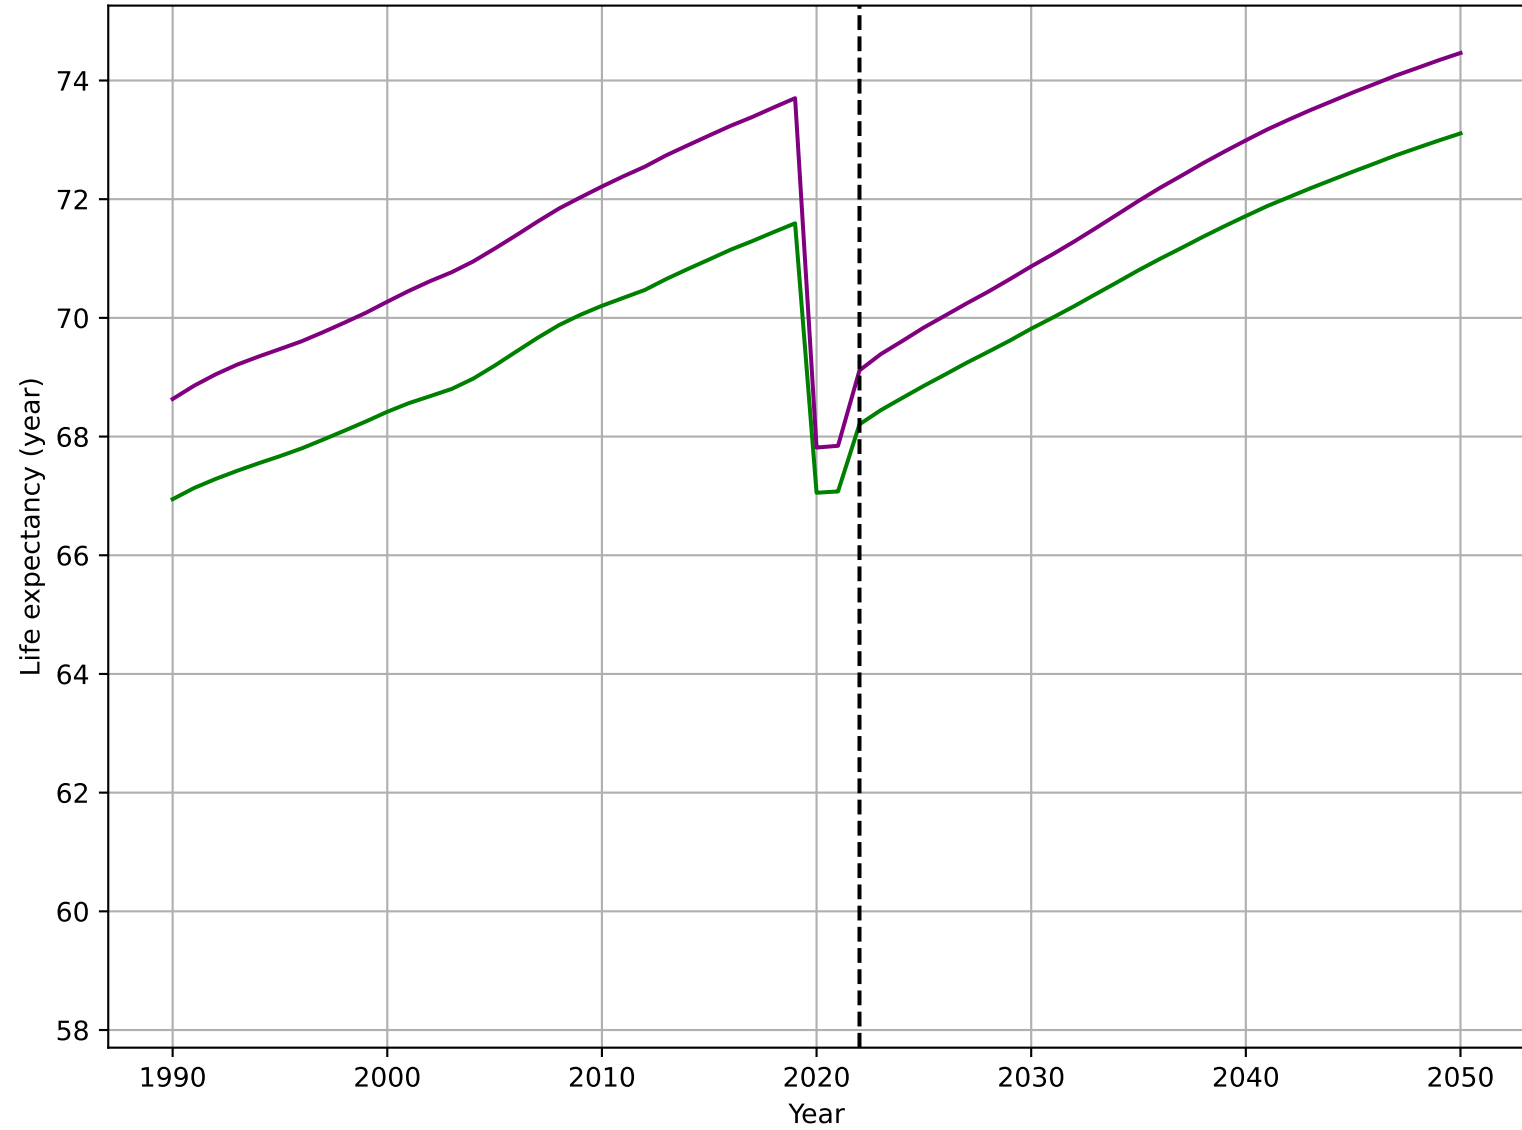

### Healthy Life Expectancy (HALE)

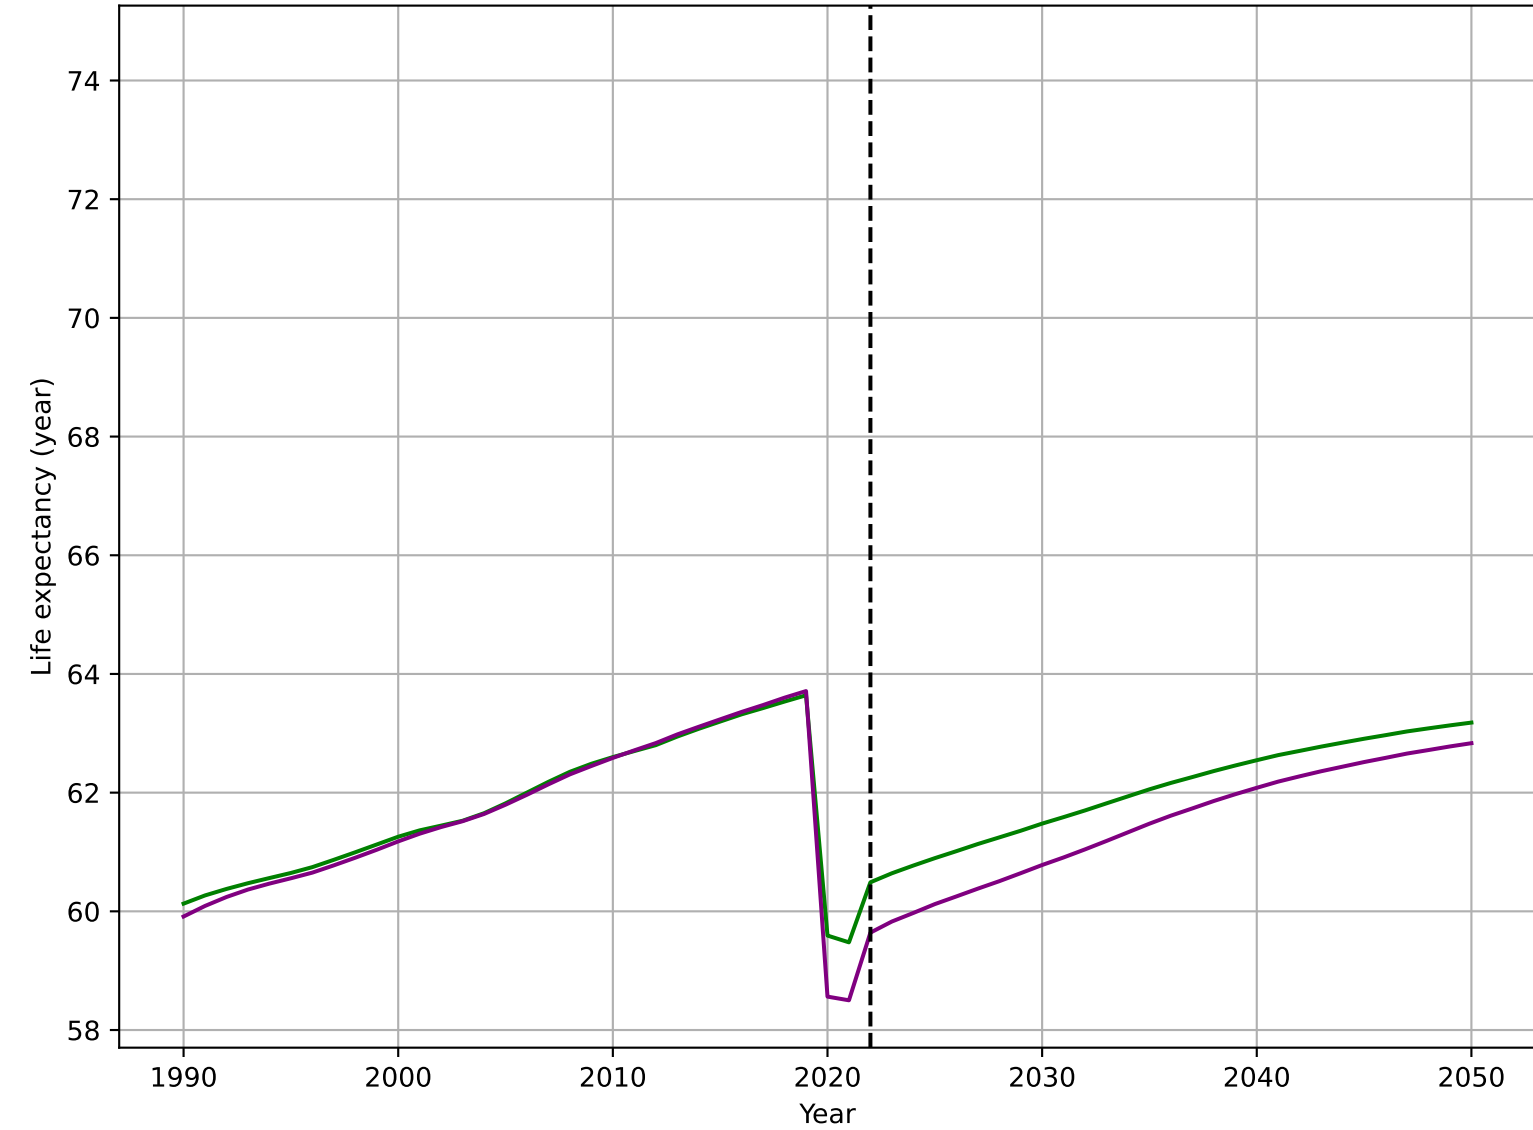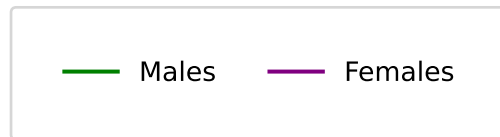

# Tonga

### Life Expectancy

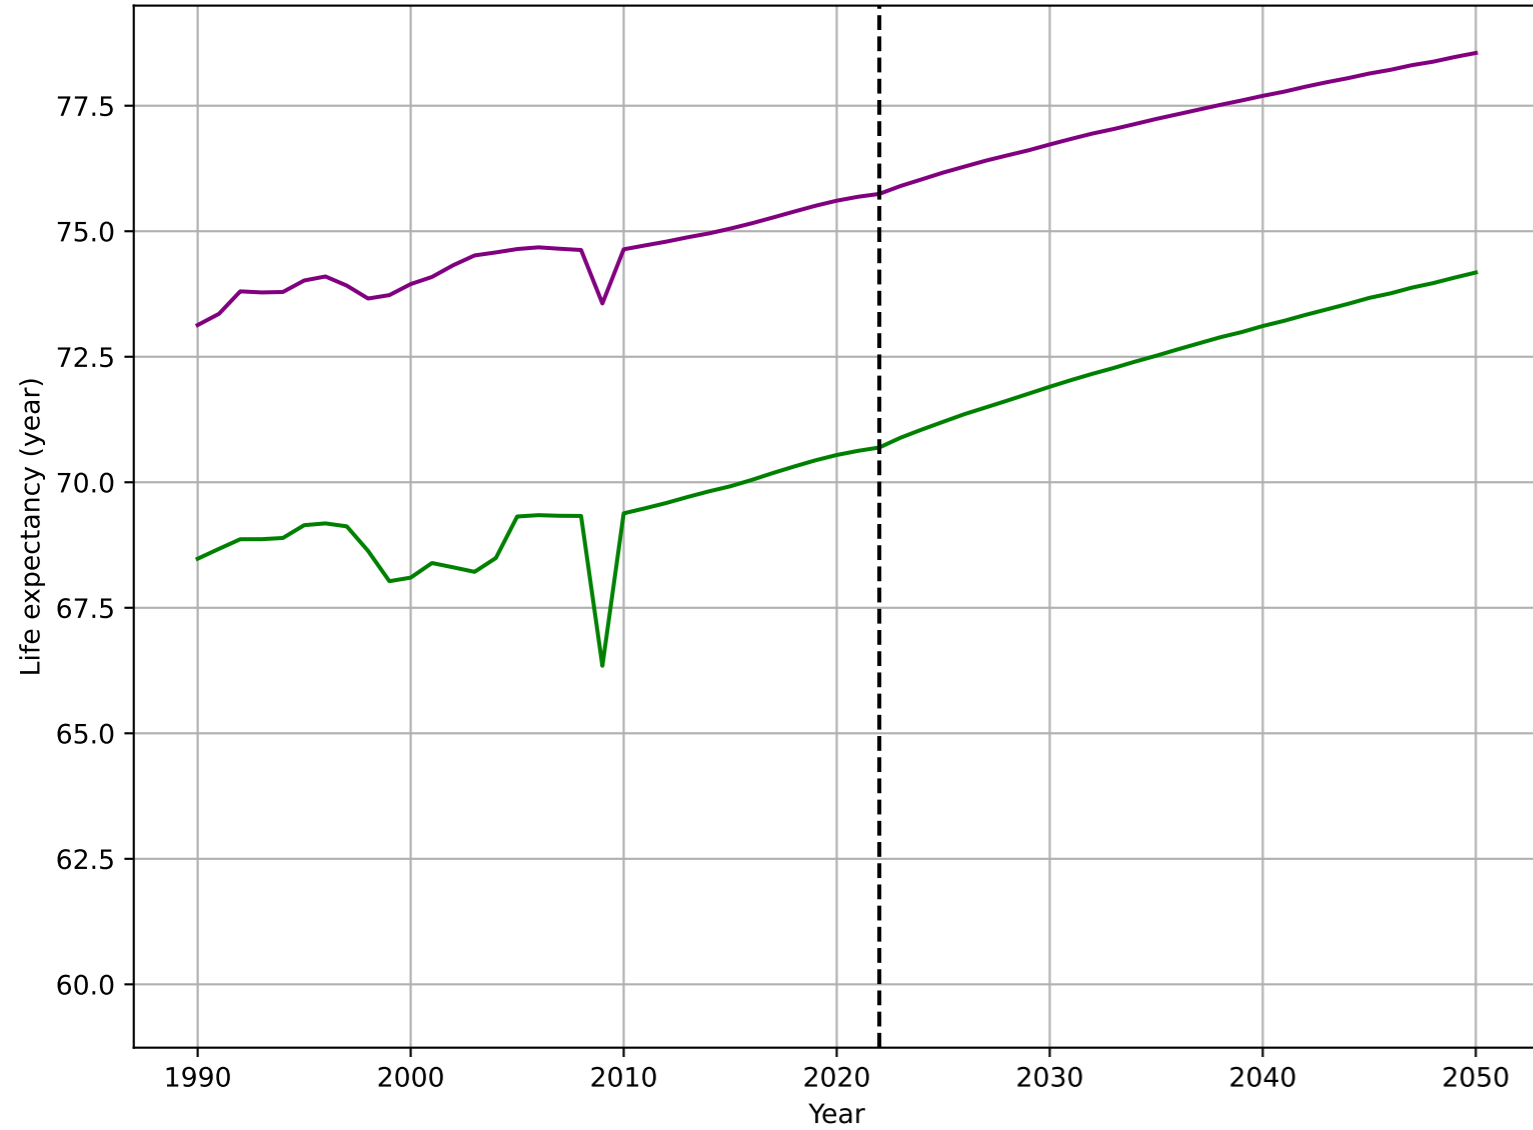

### Healthy Life Expectancy (HALE)

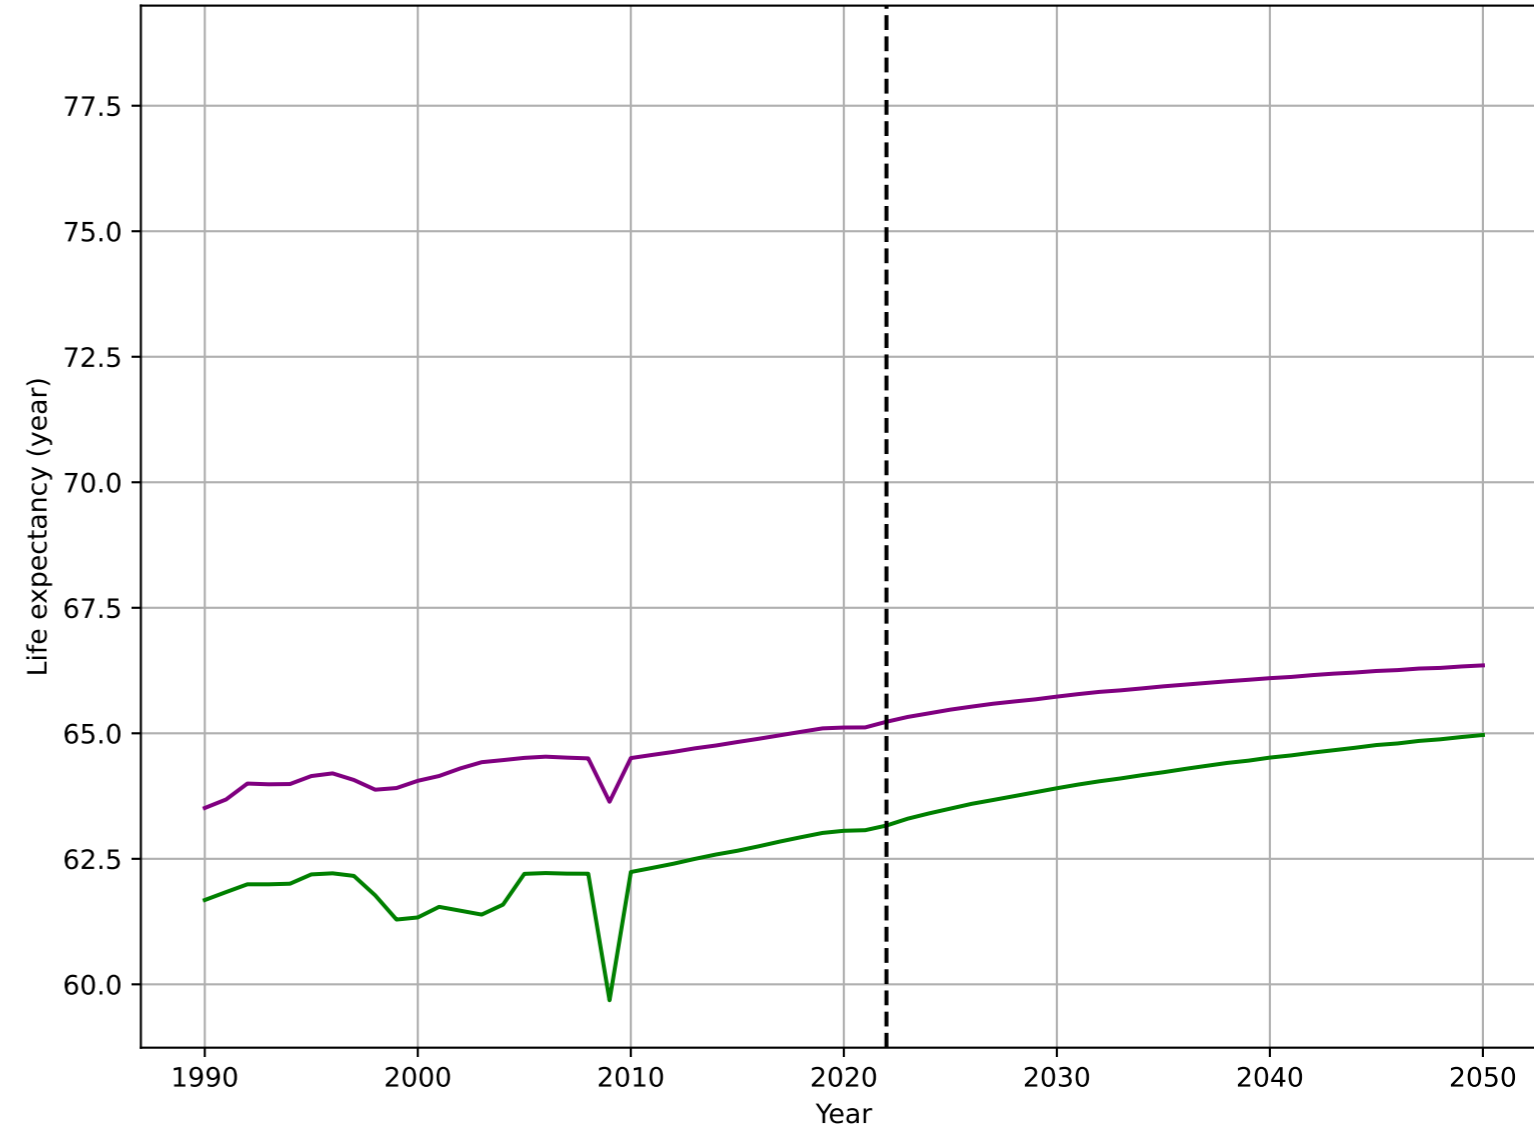

# Tuvalu

### Life Expectancy

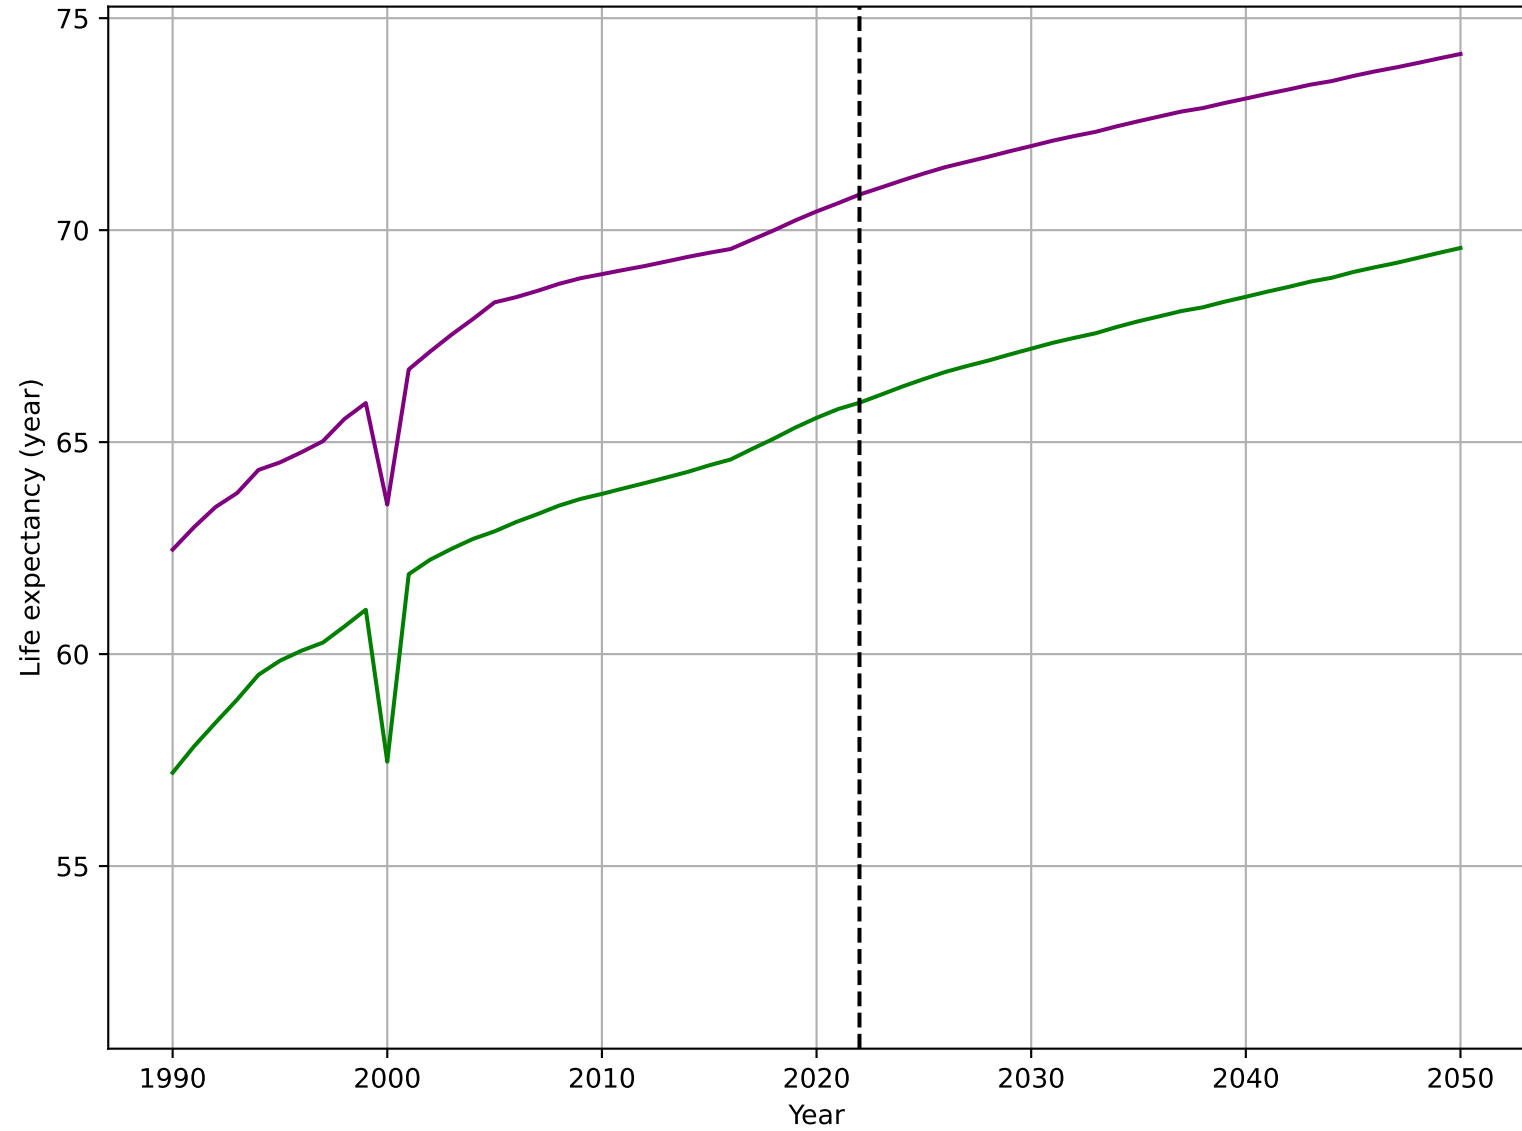

### Healthy Life Expectancy (HALE)

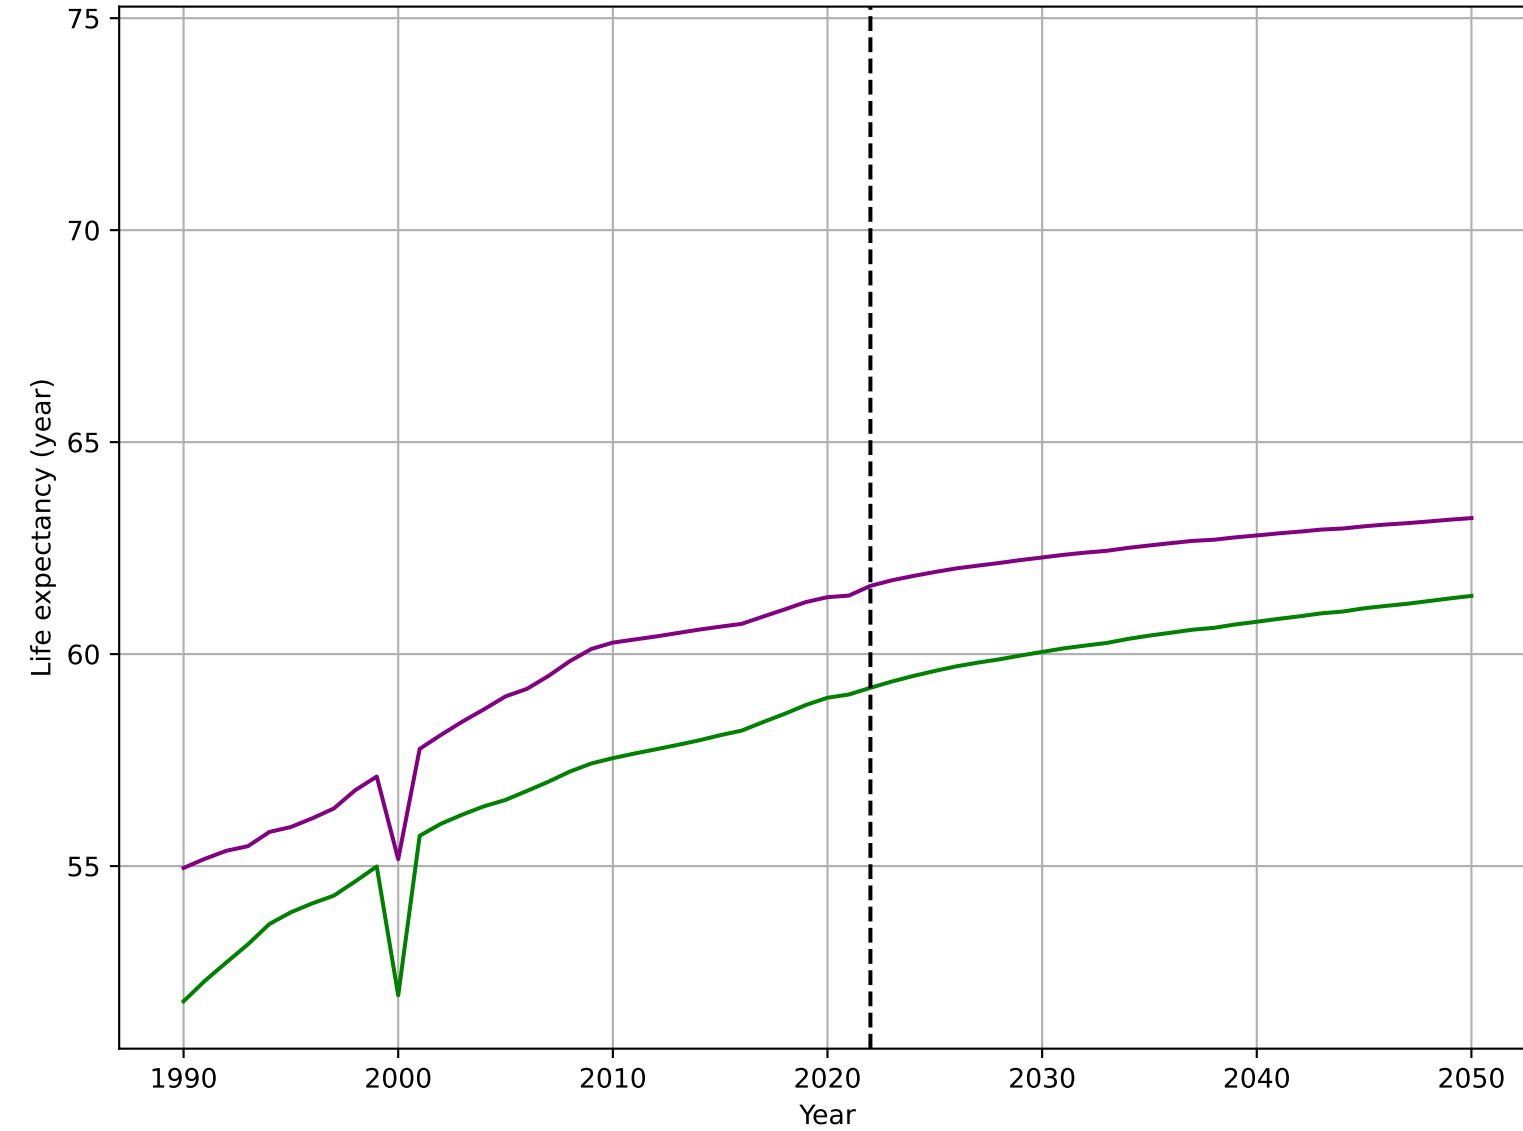

# Vanuatu

### Life Expectancy

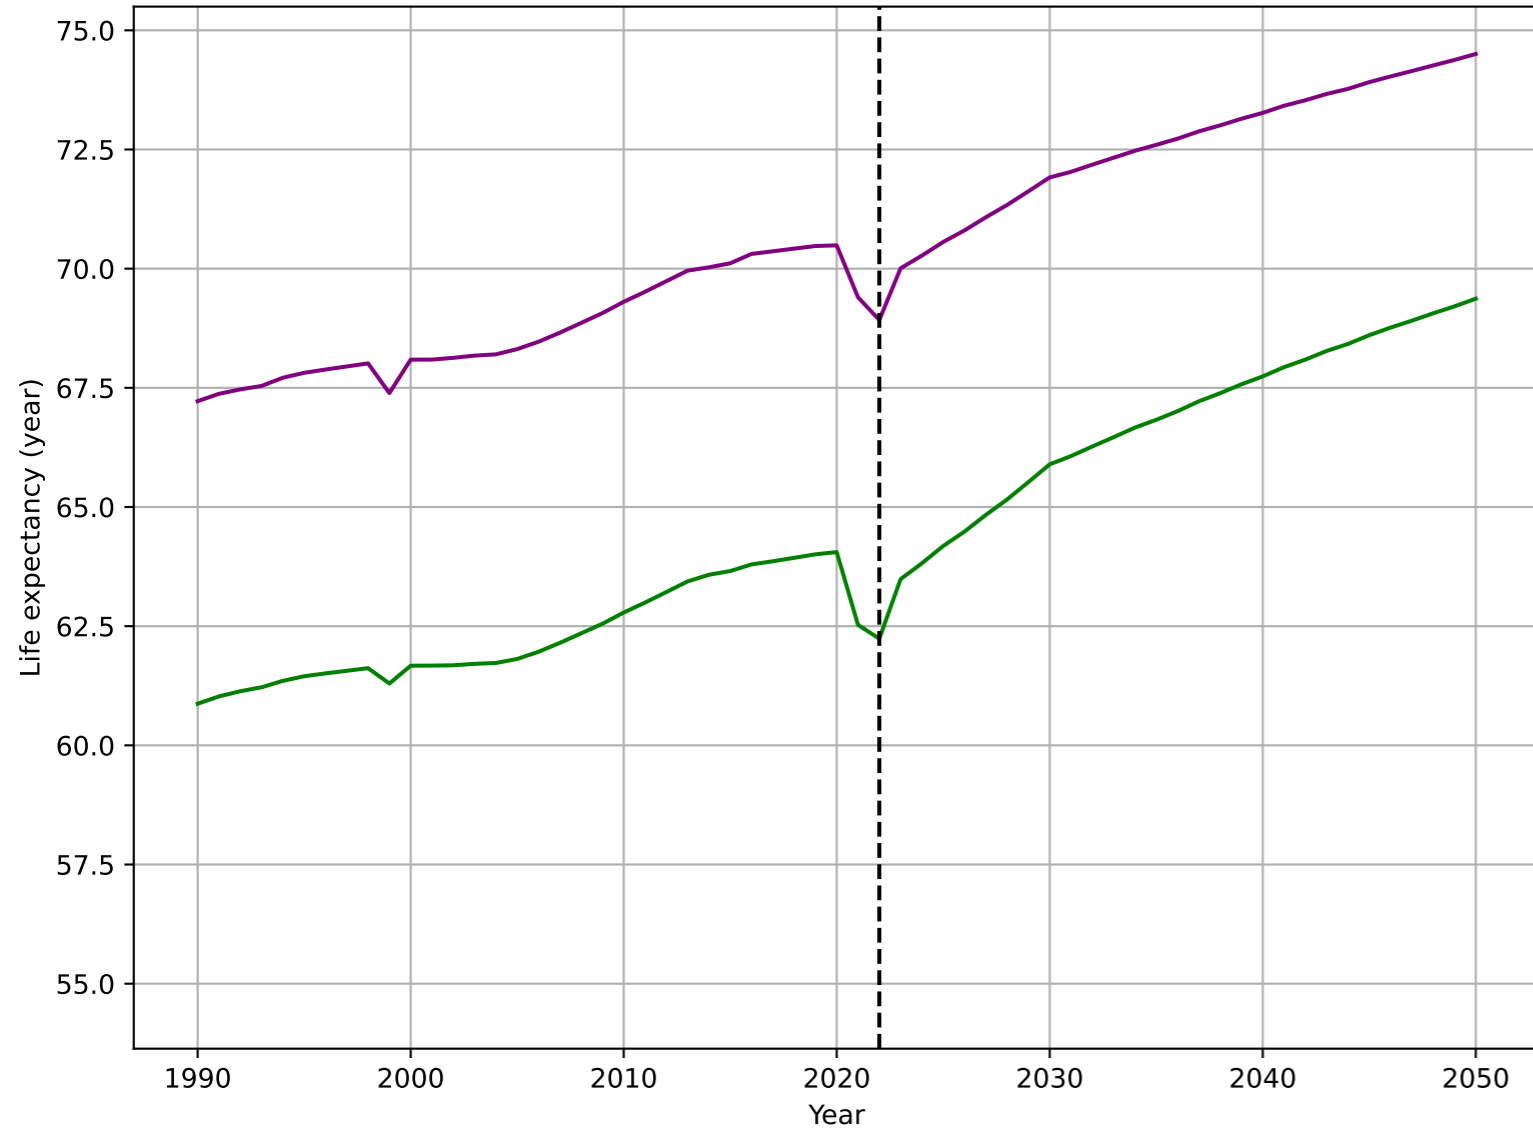

### Healthy Life Expectancy (HALE)

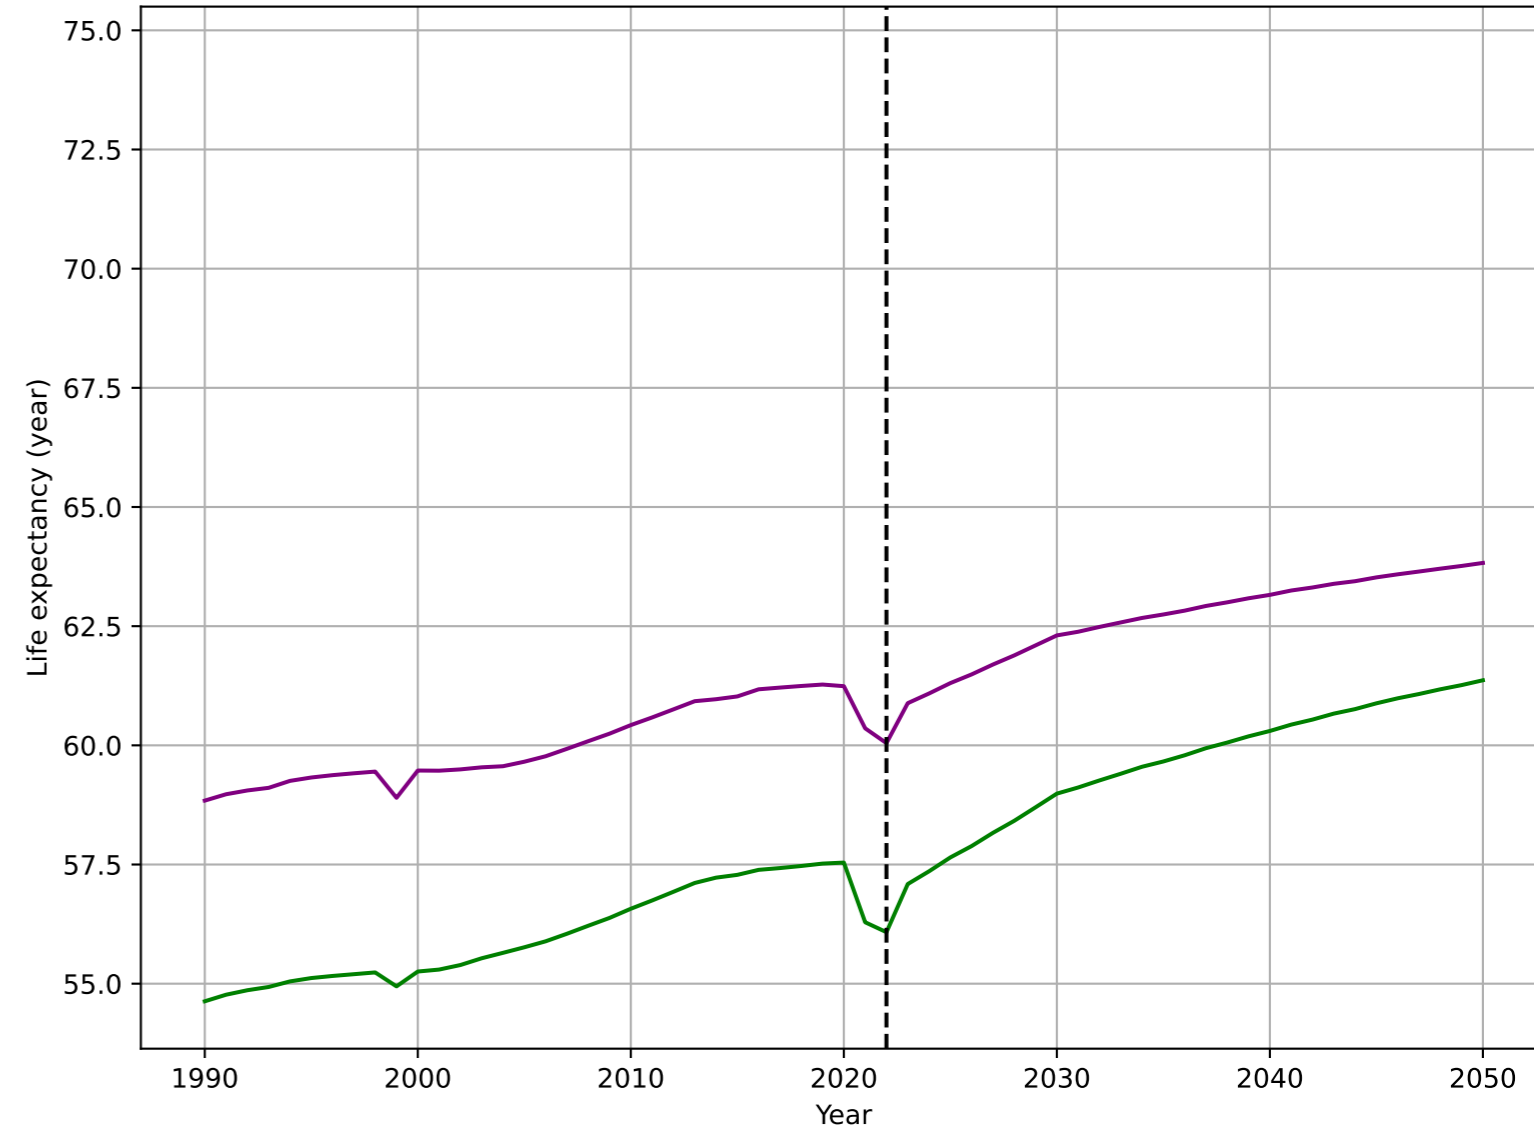

# Cambodia

### Life Expectancy

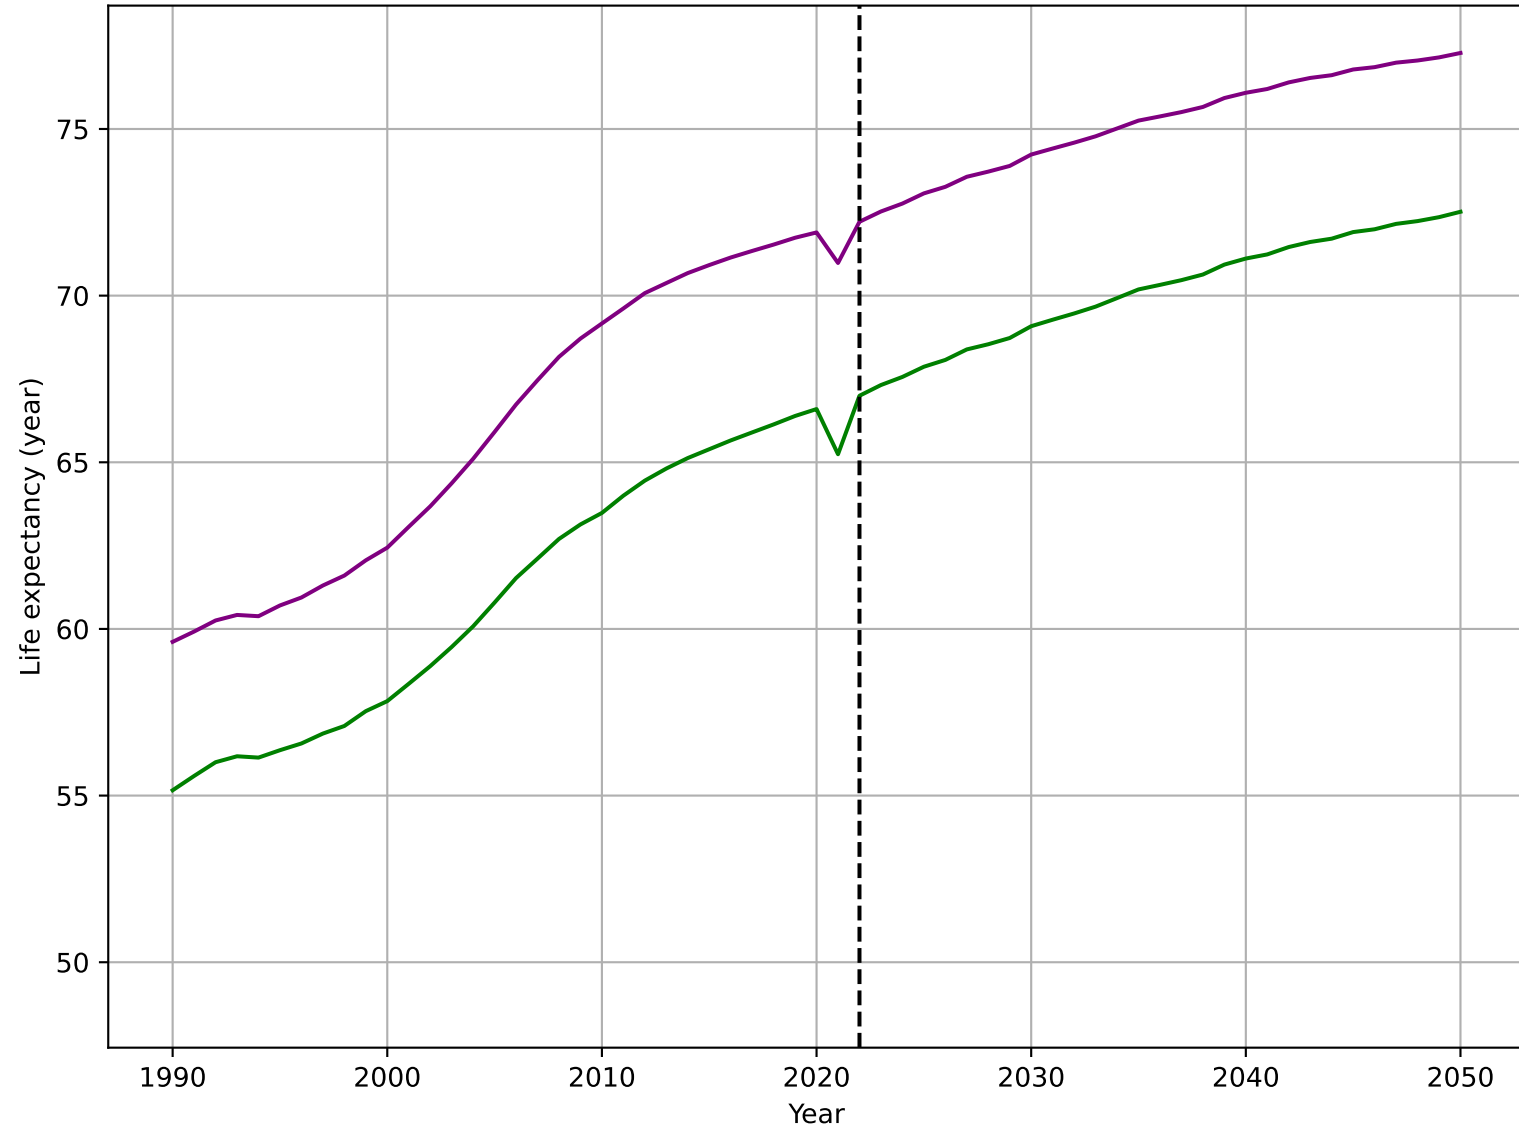

### Healthy Life Expectancy (HALE)

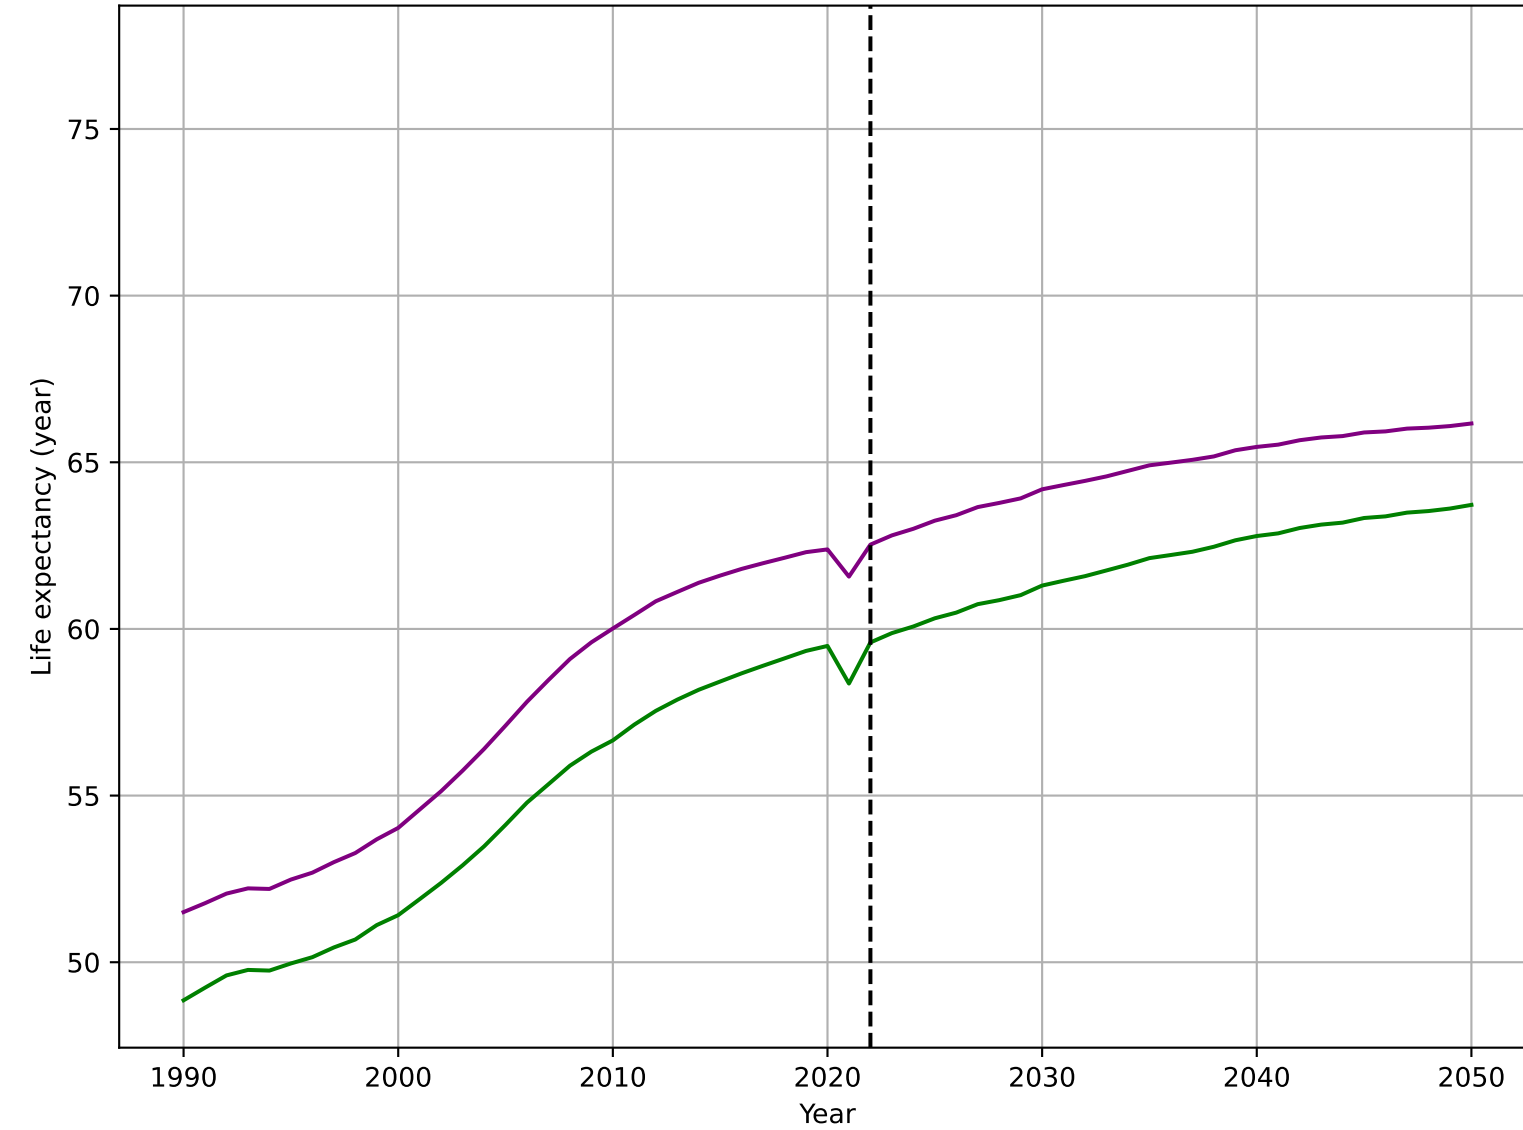

# Indonesia

### Life Expectancy

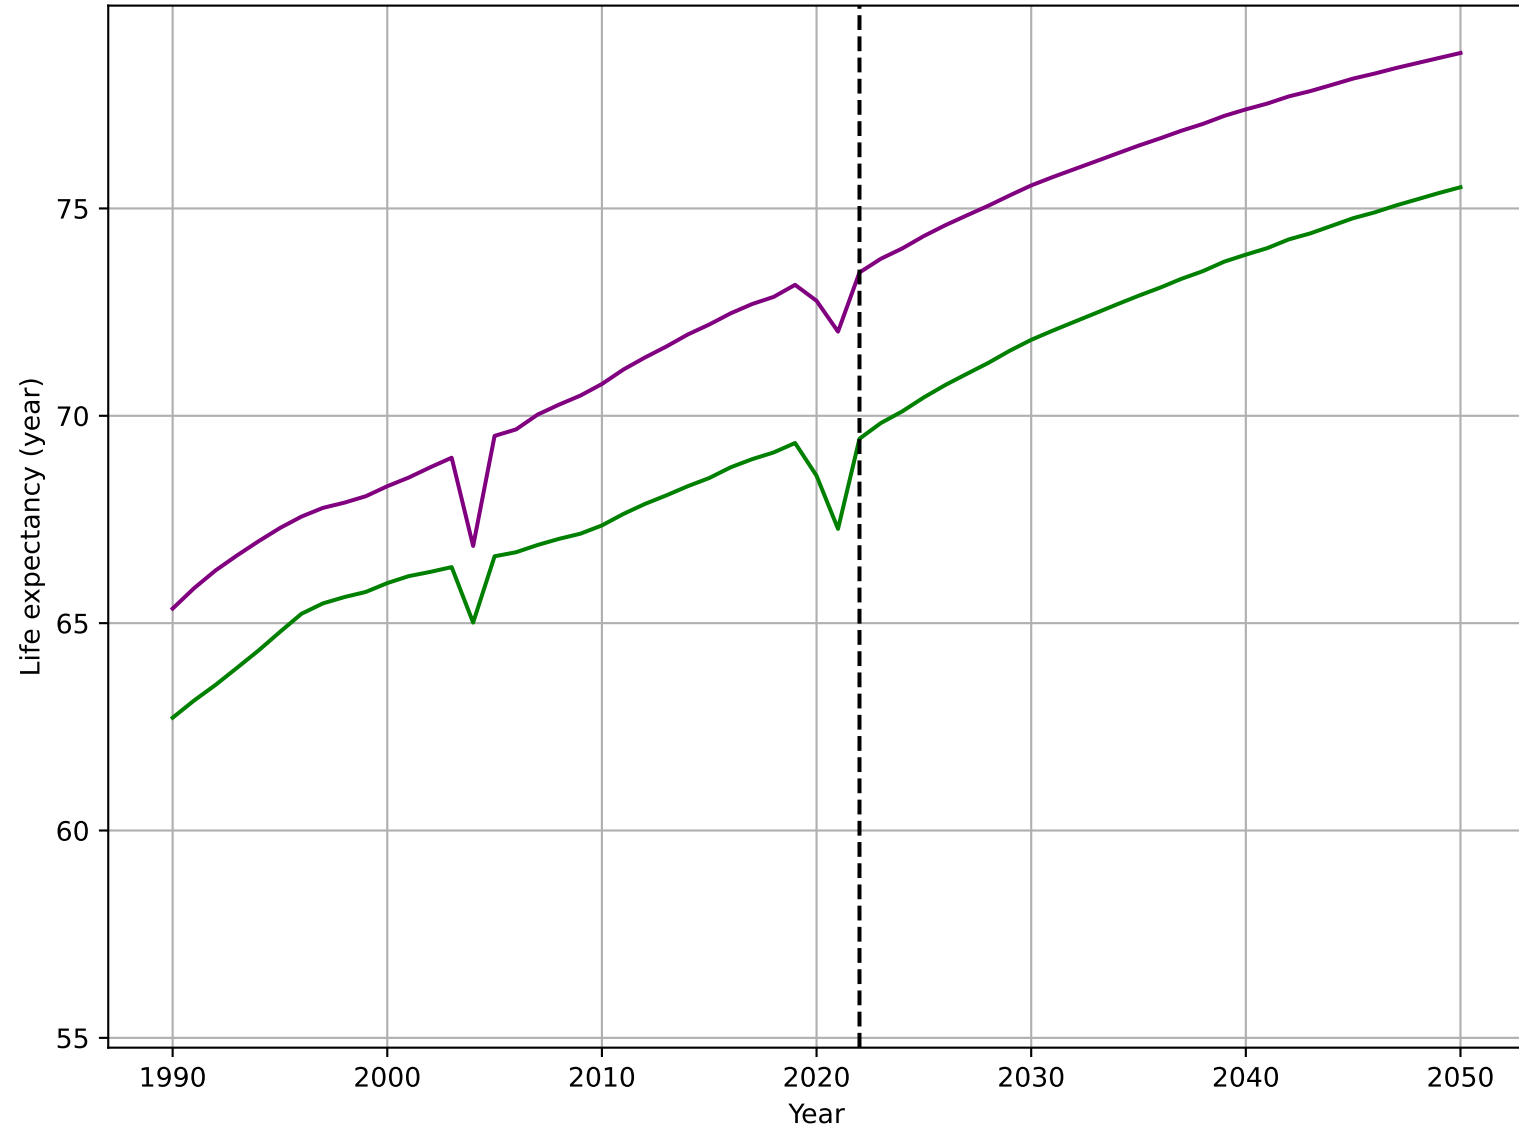

### Healthy Life Expectancy (HALE)

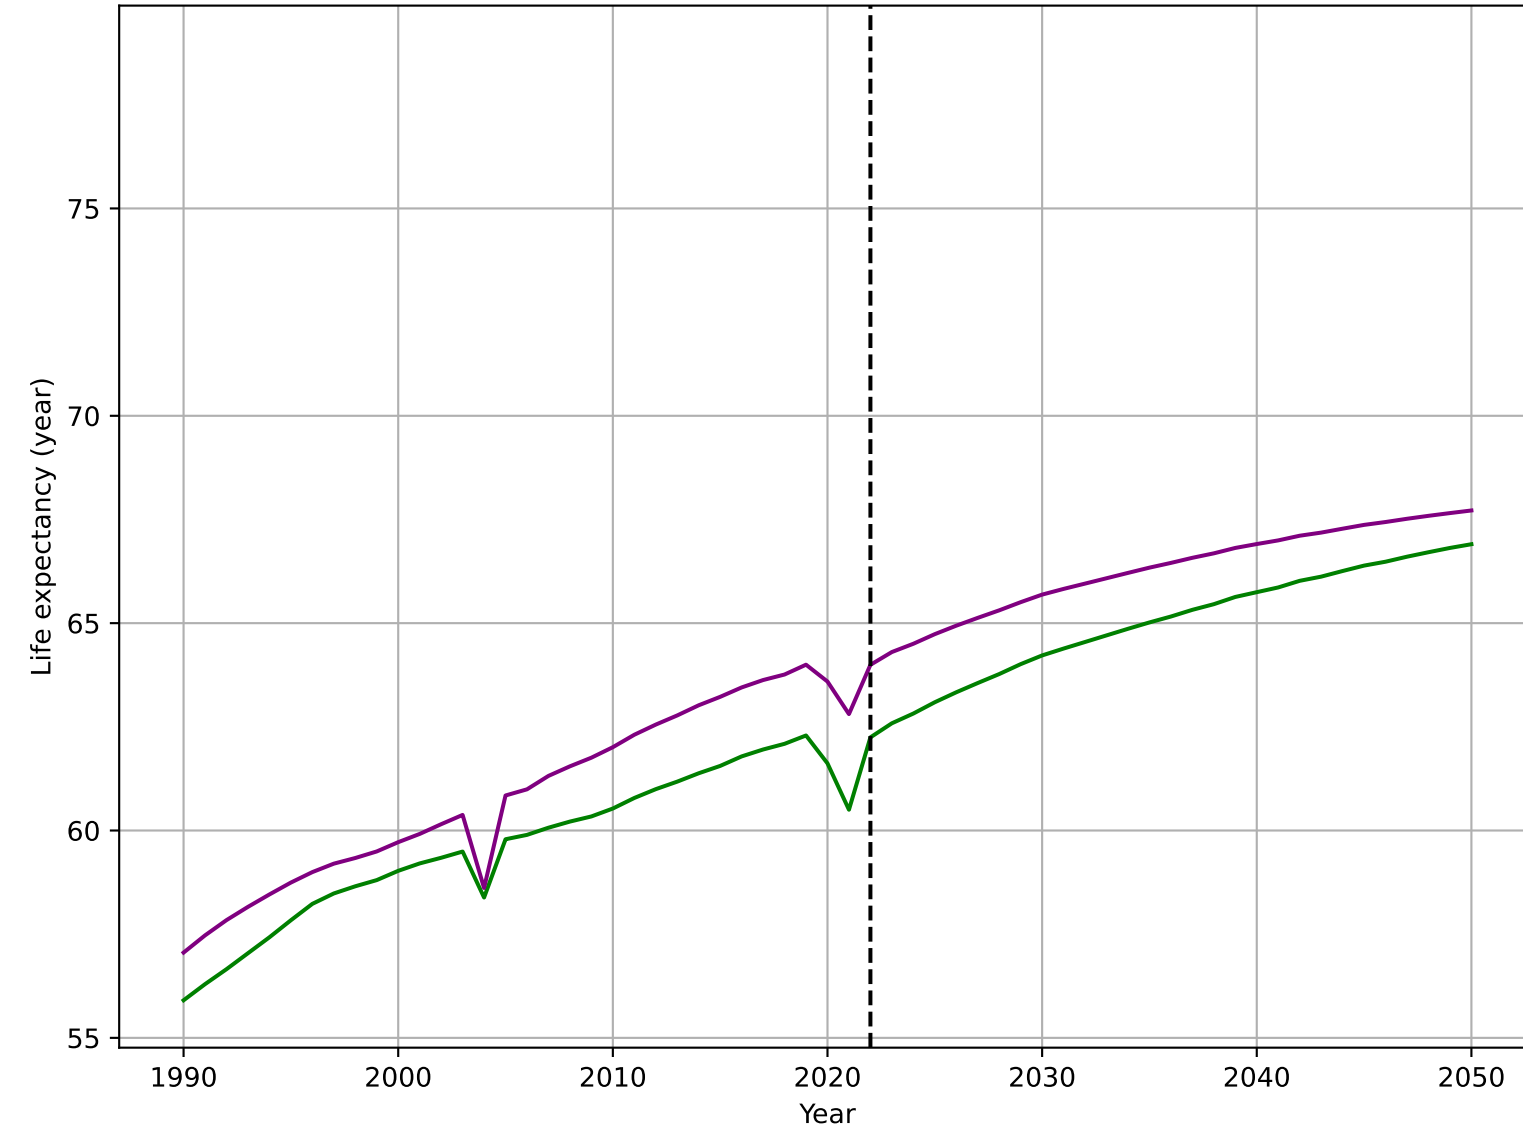

# Laos

### Life Expectancy

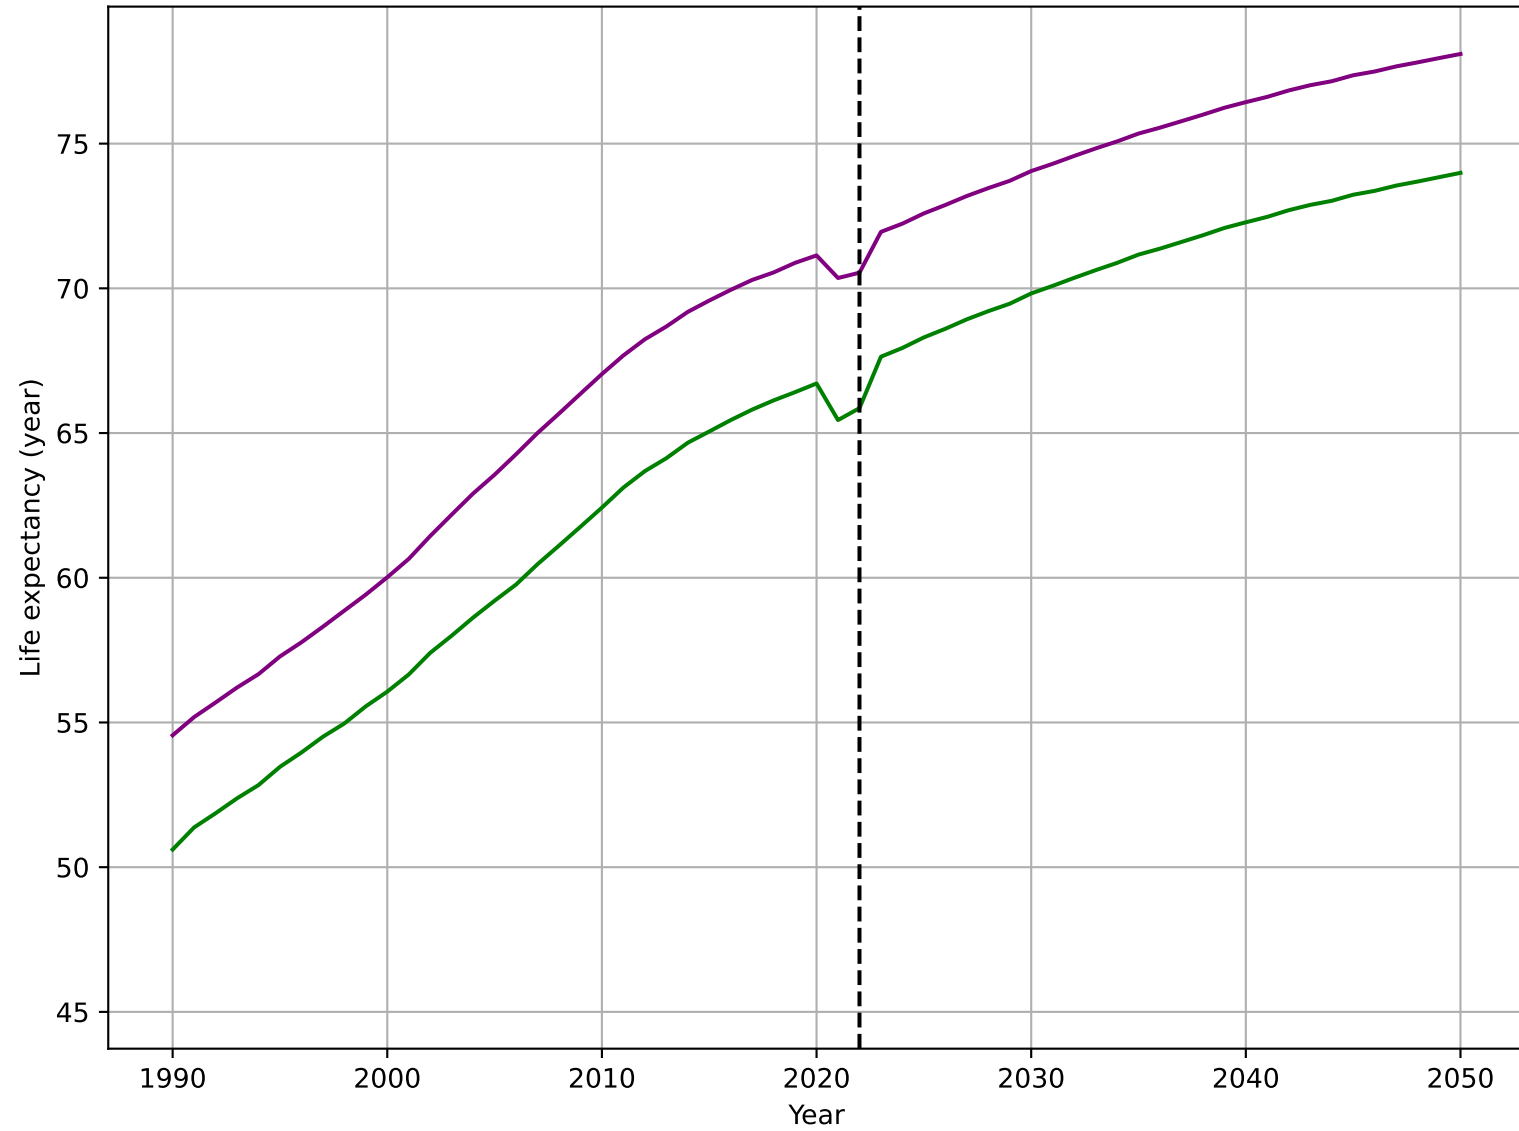

### Healthy Life Expectancy (HALE)

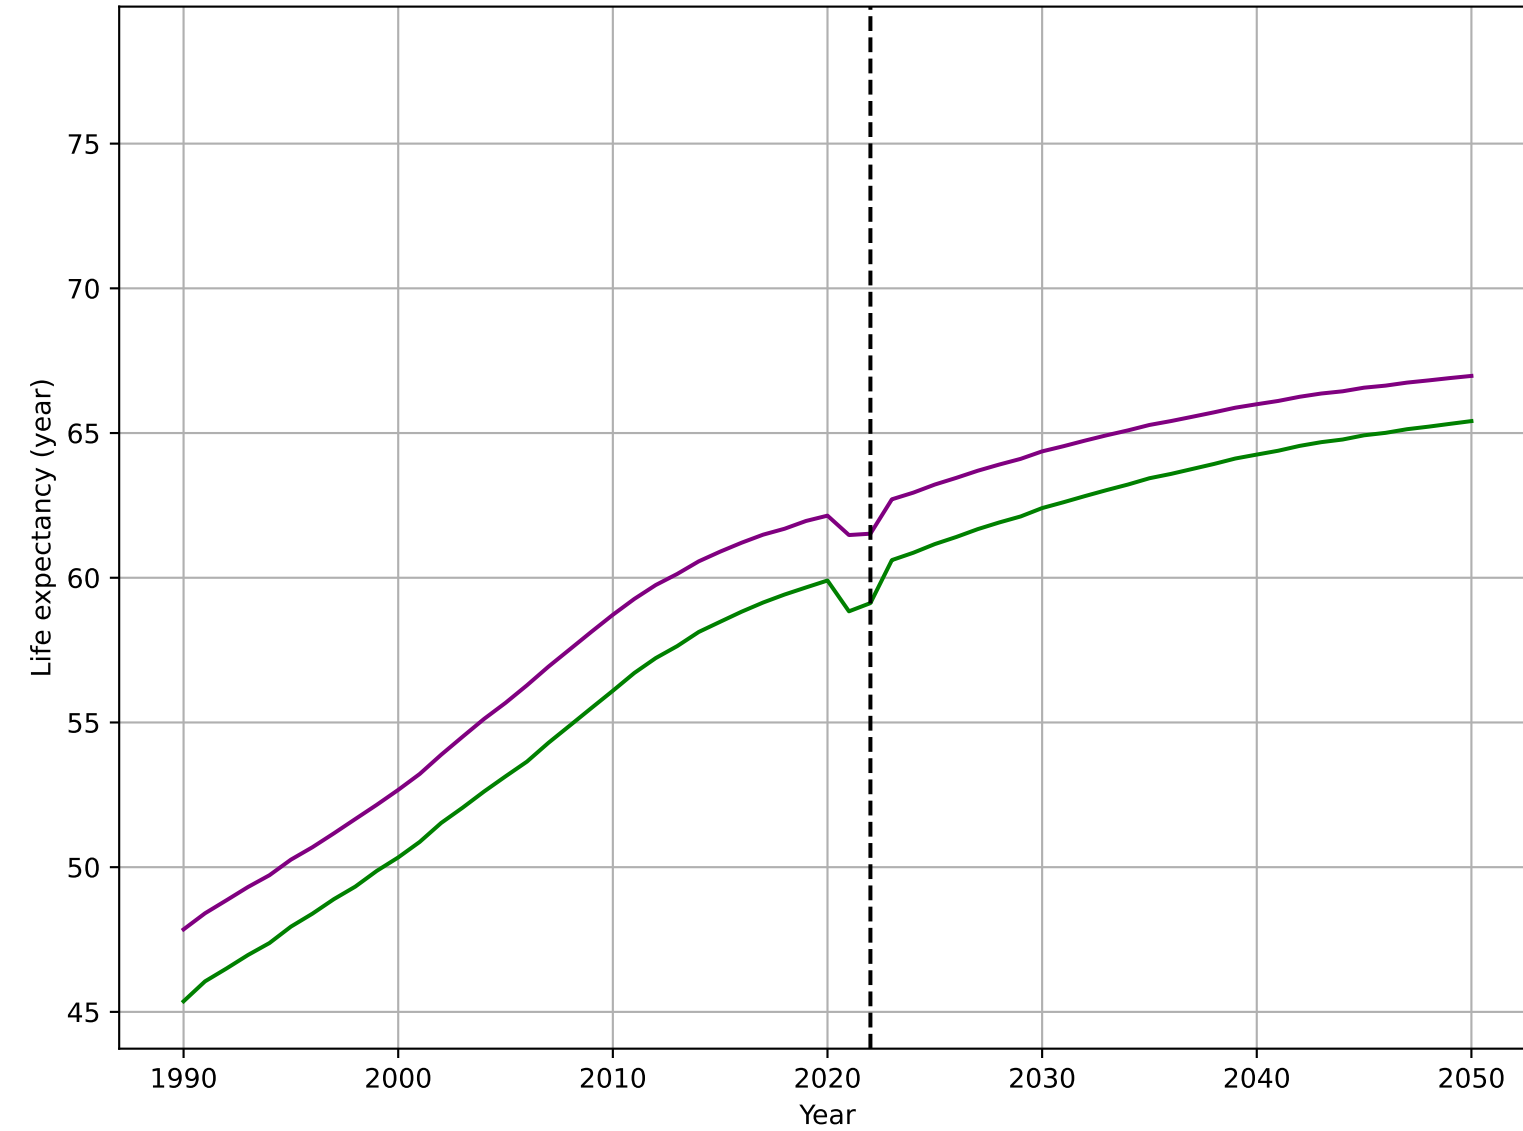



# Malaysia

### Life Expectancy

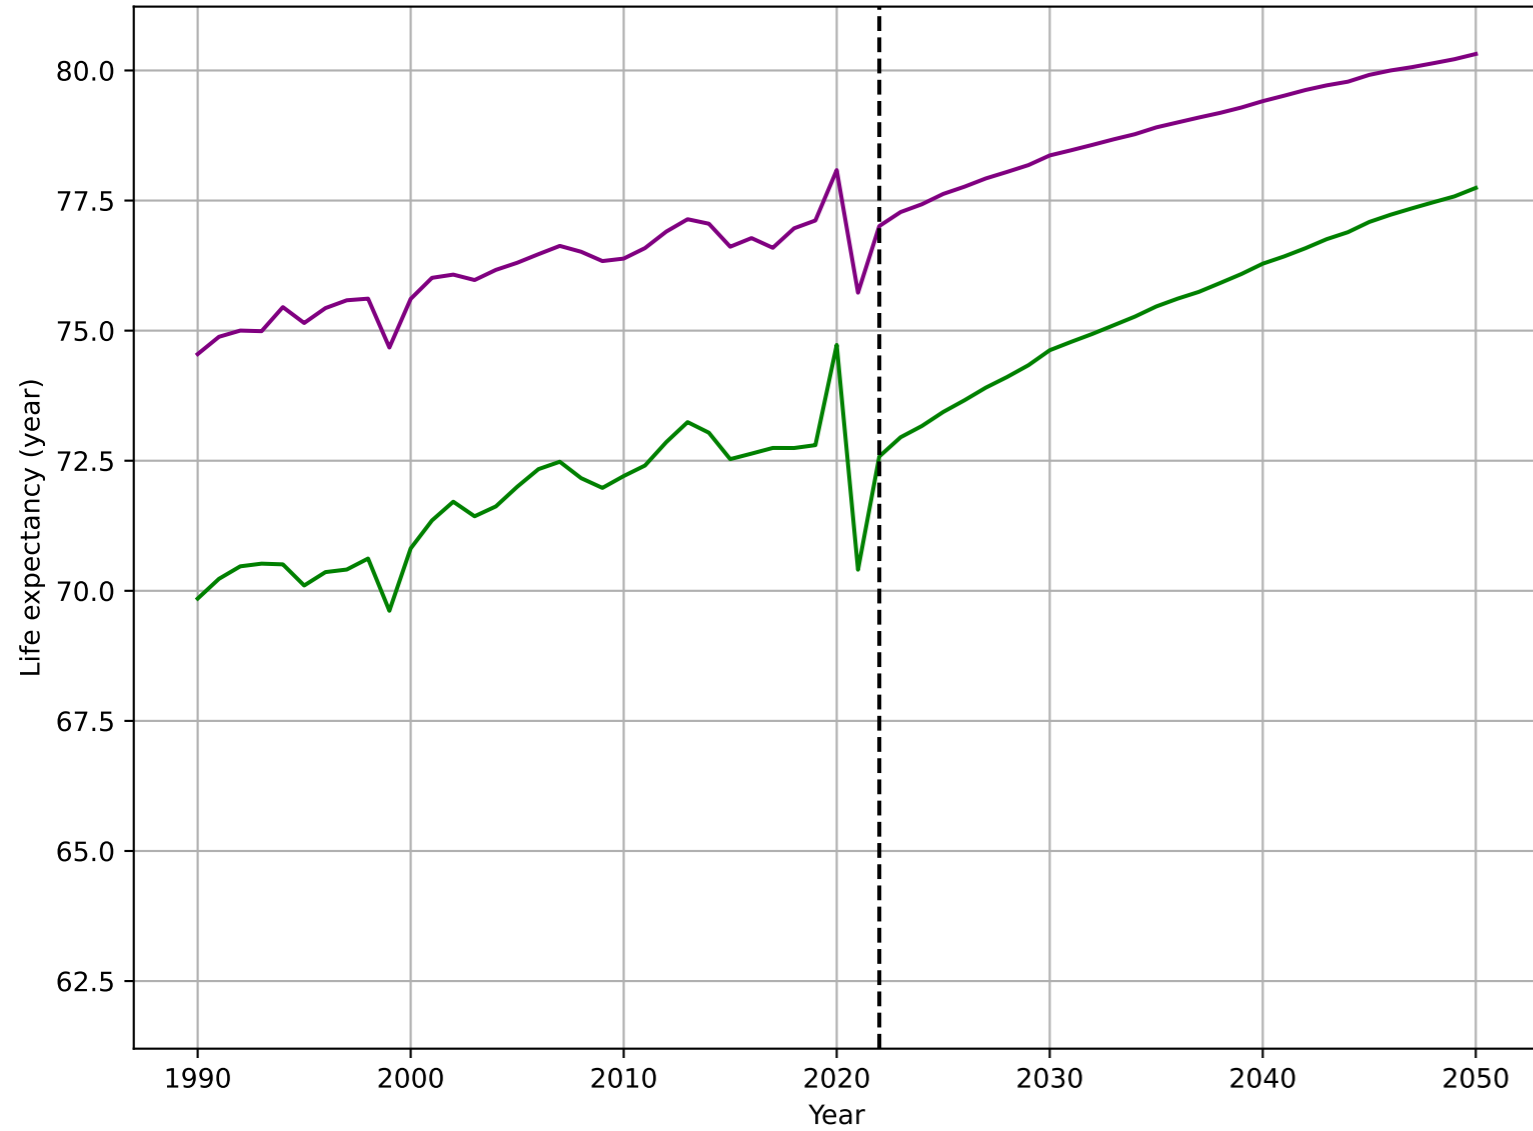

### Healthy Life Expectancy (HALE)

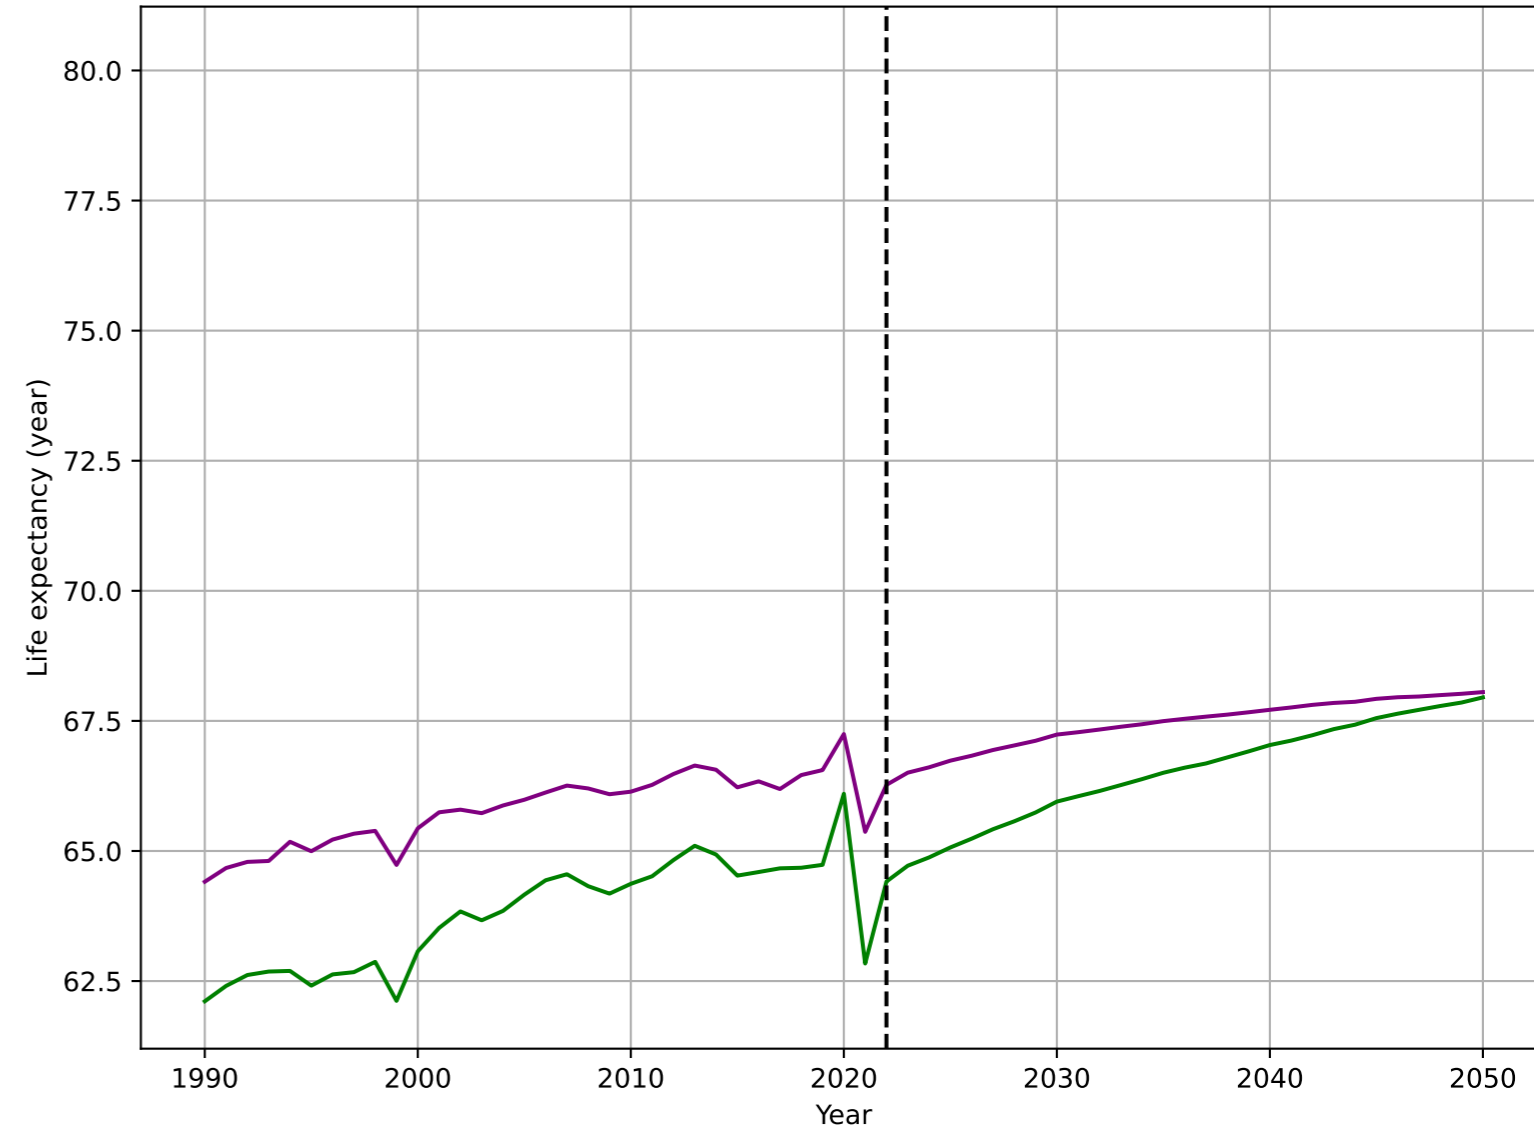

# Maldives

### Life Expectancy

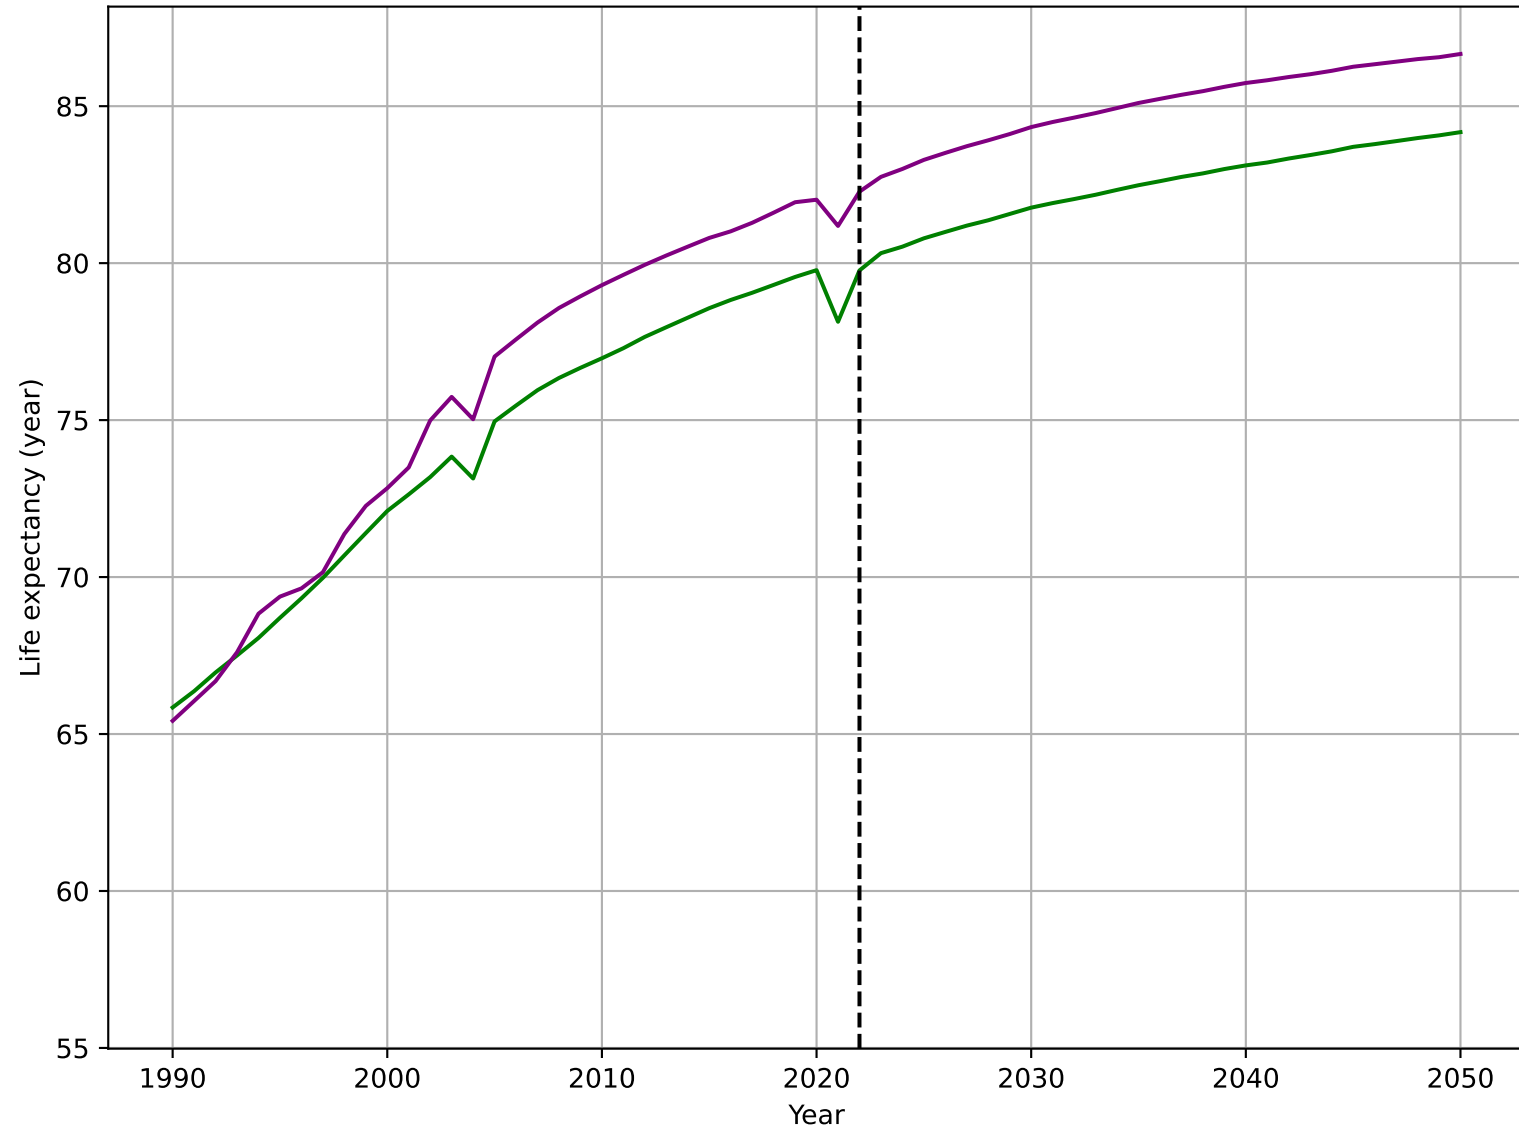

### Healthy Life Expectancy (HALE)

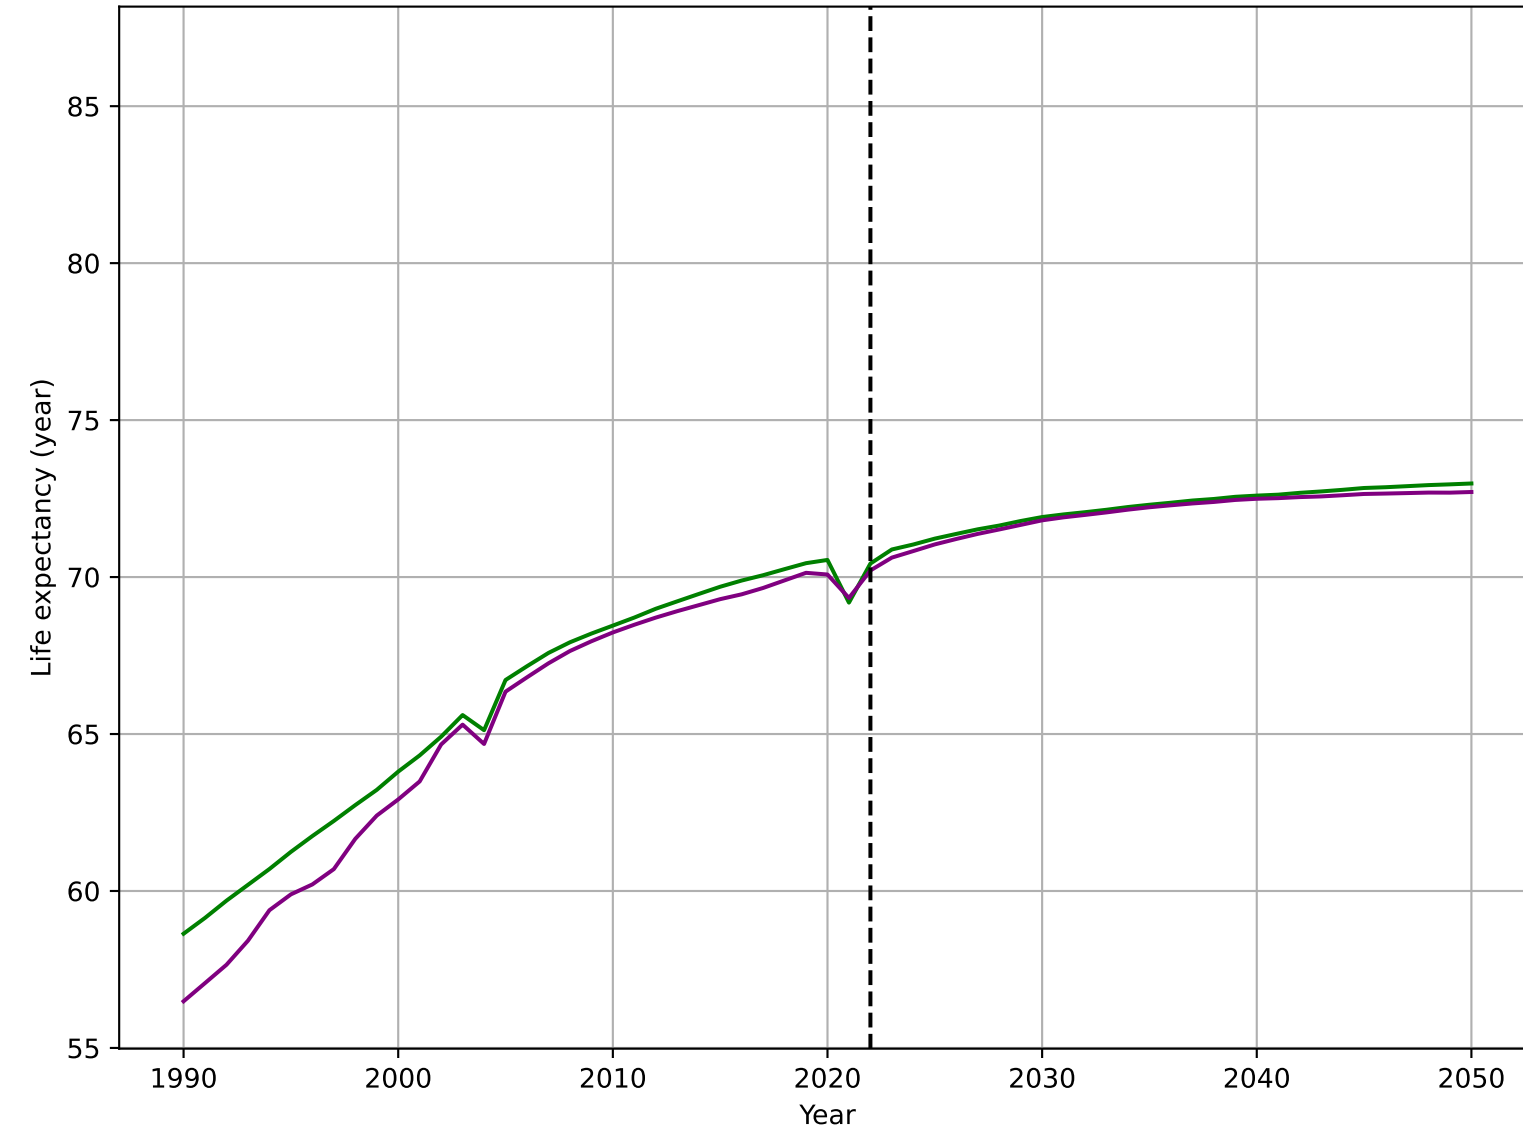

# Mauritius

### Life Expectancy

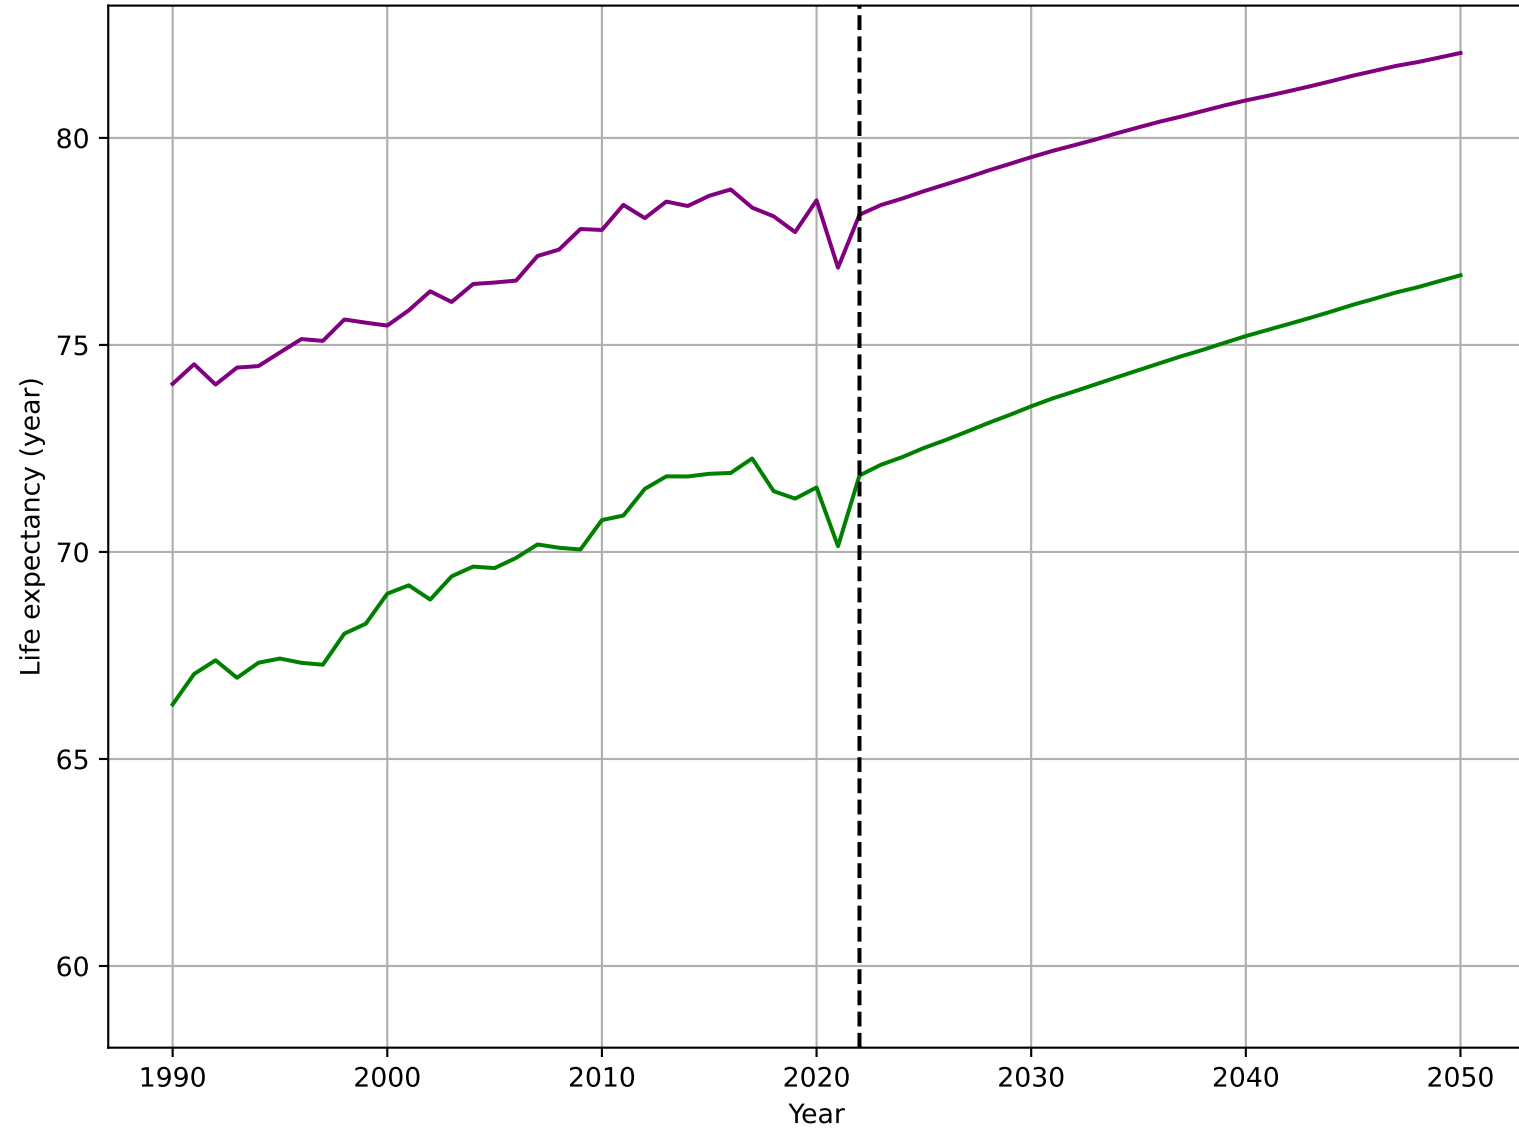

### Healthy Life Expectancy (HALE)

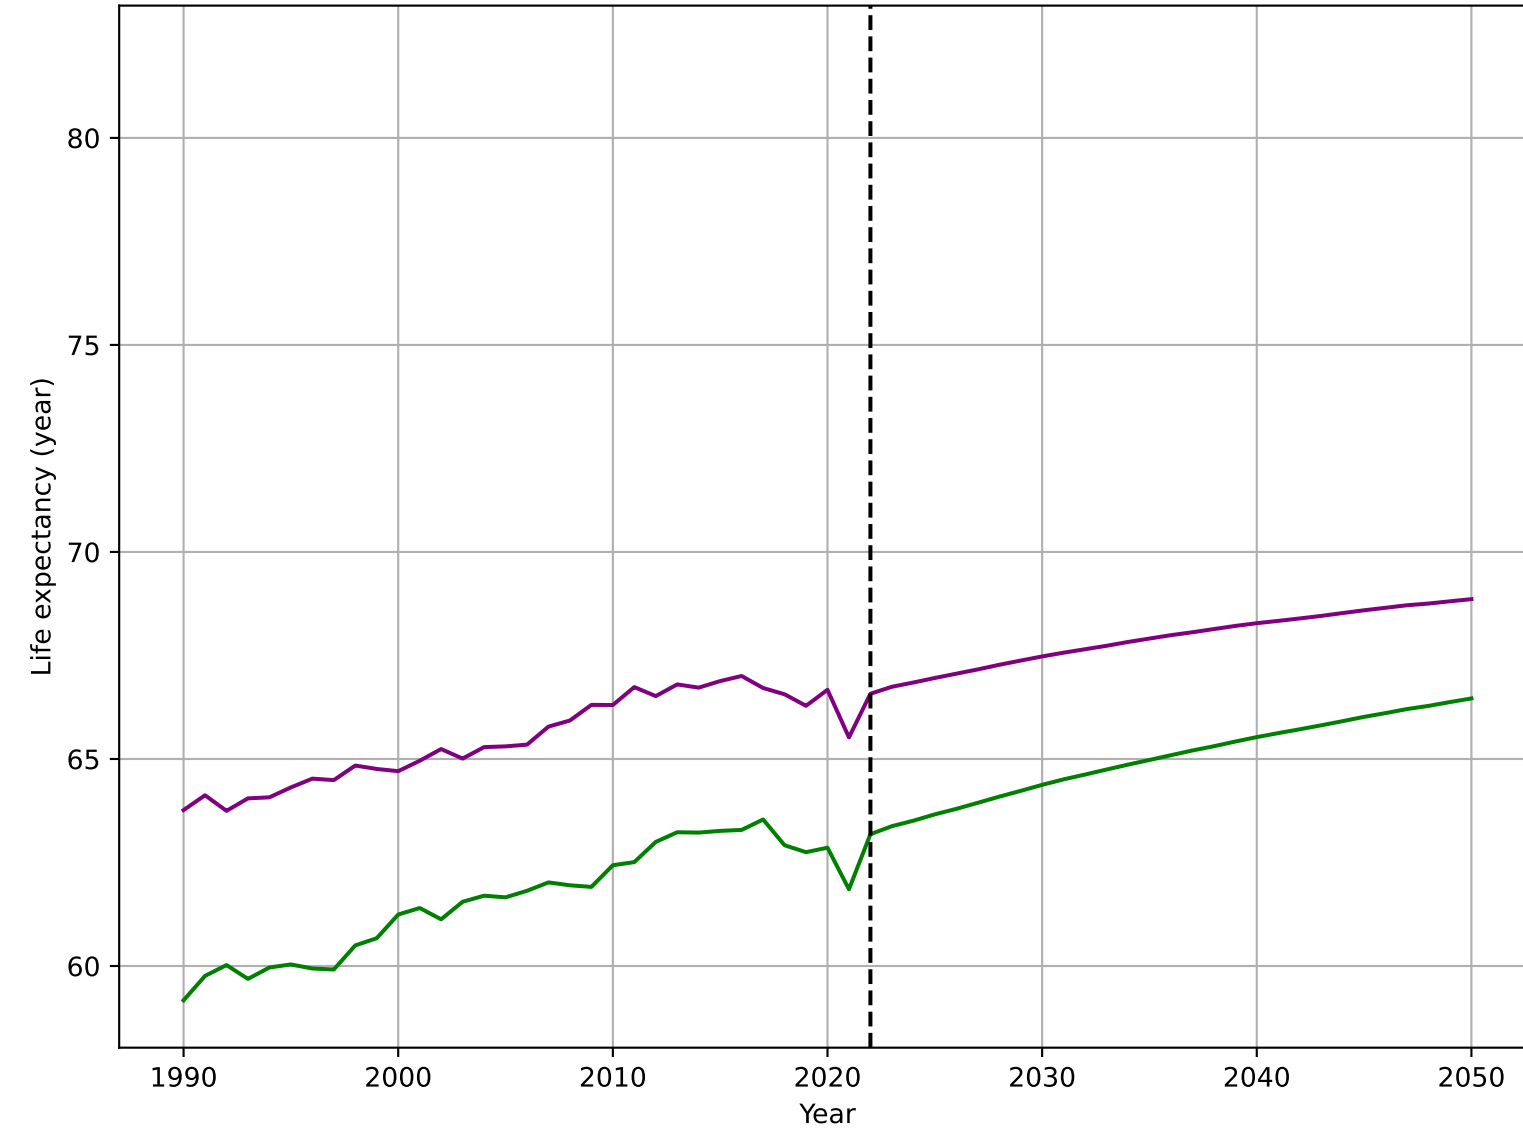

# Myanmar

### Life Expectancy

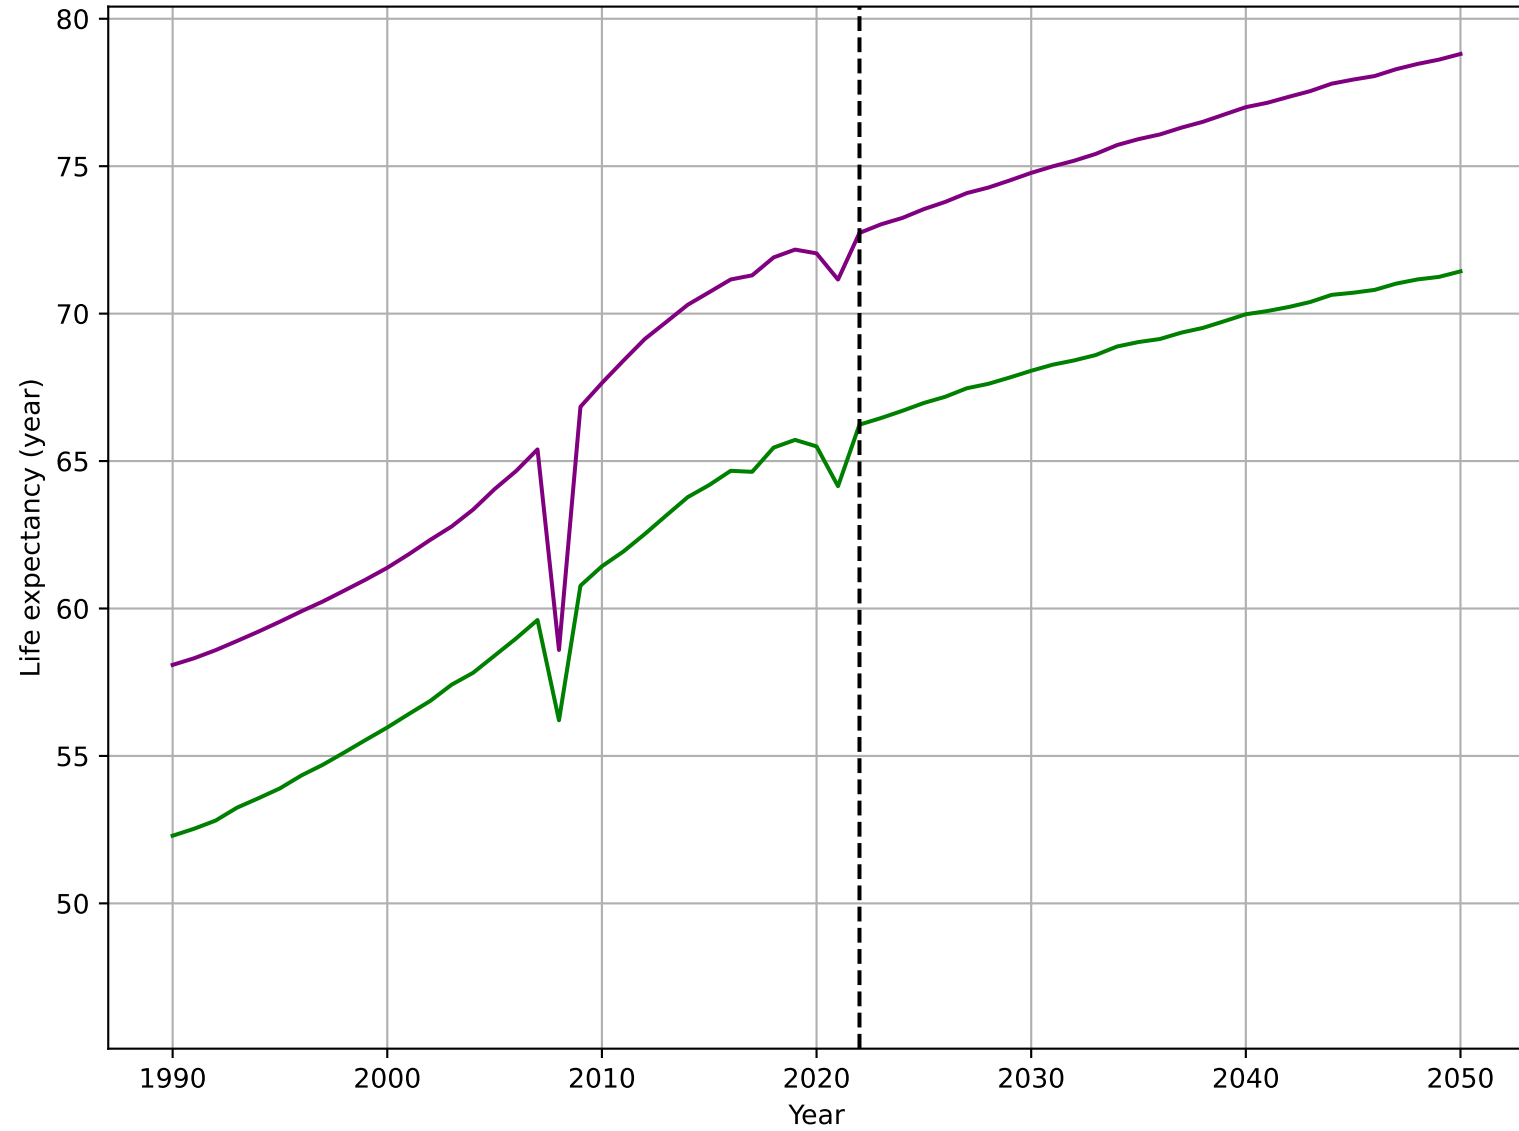

### Healthy Life Expectancy (HALE)

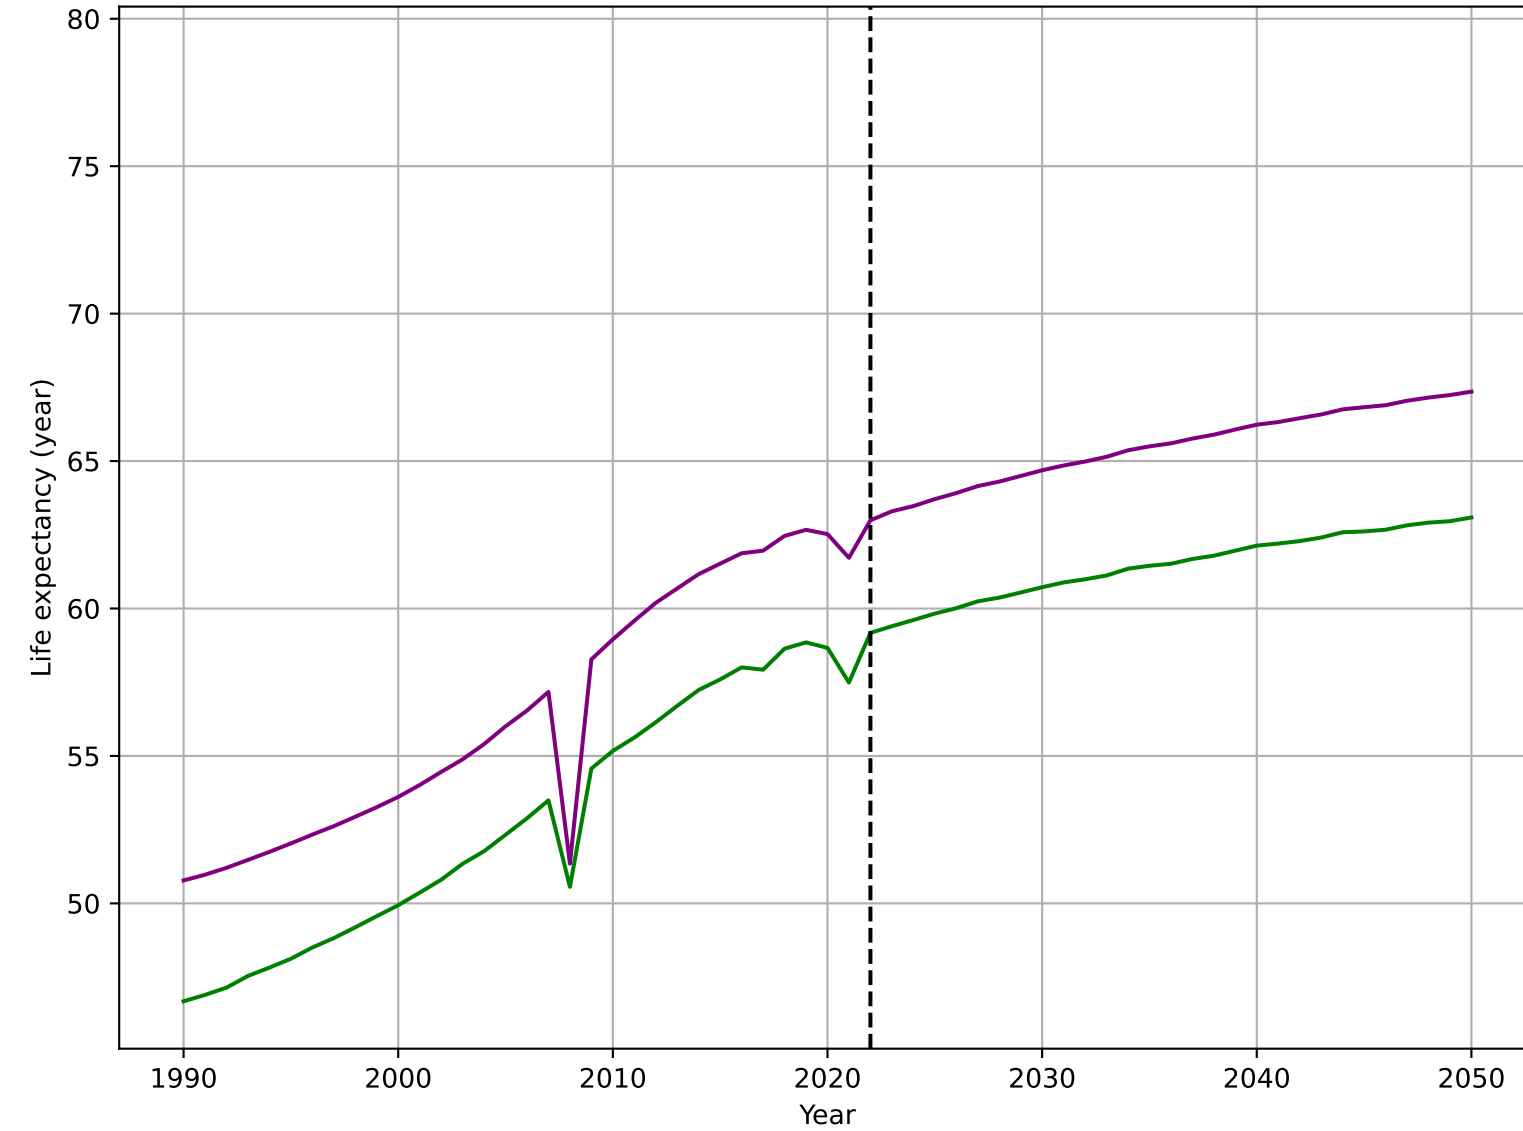

# Philippines

### Life Expectancy

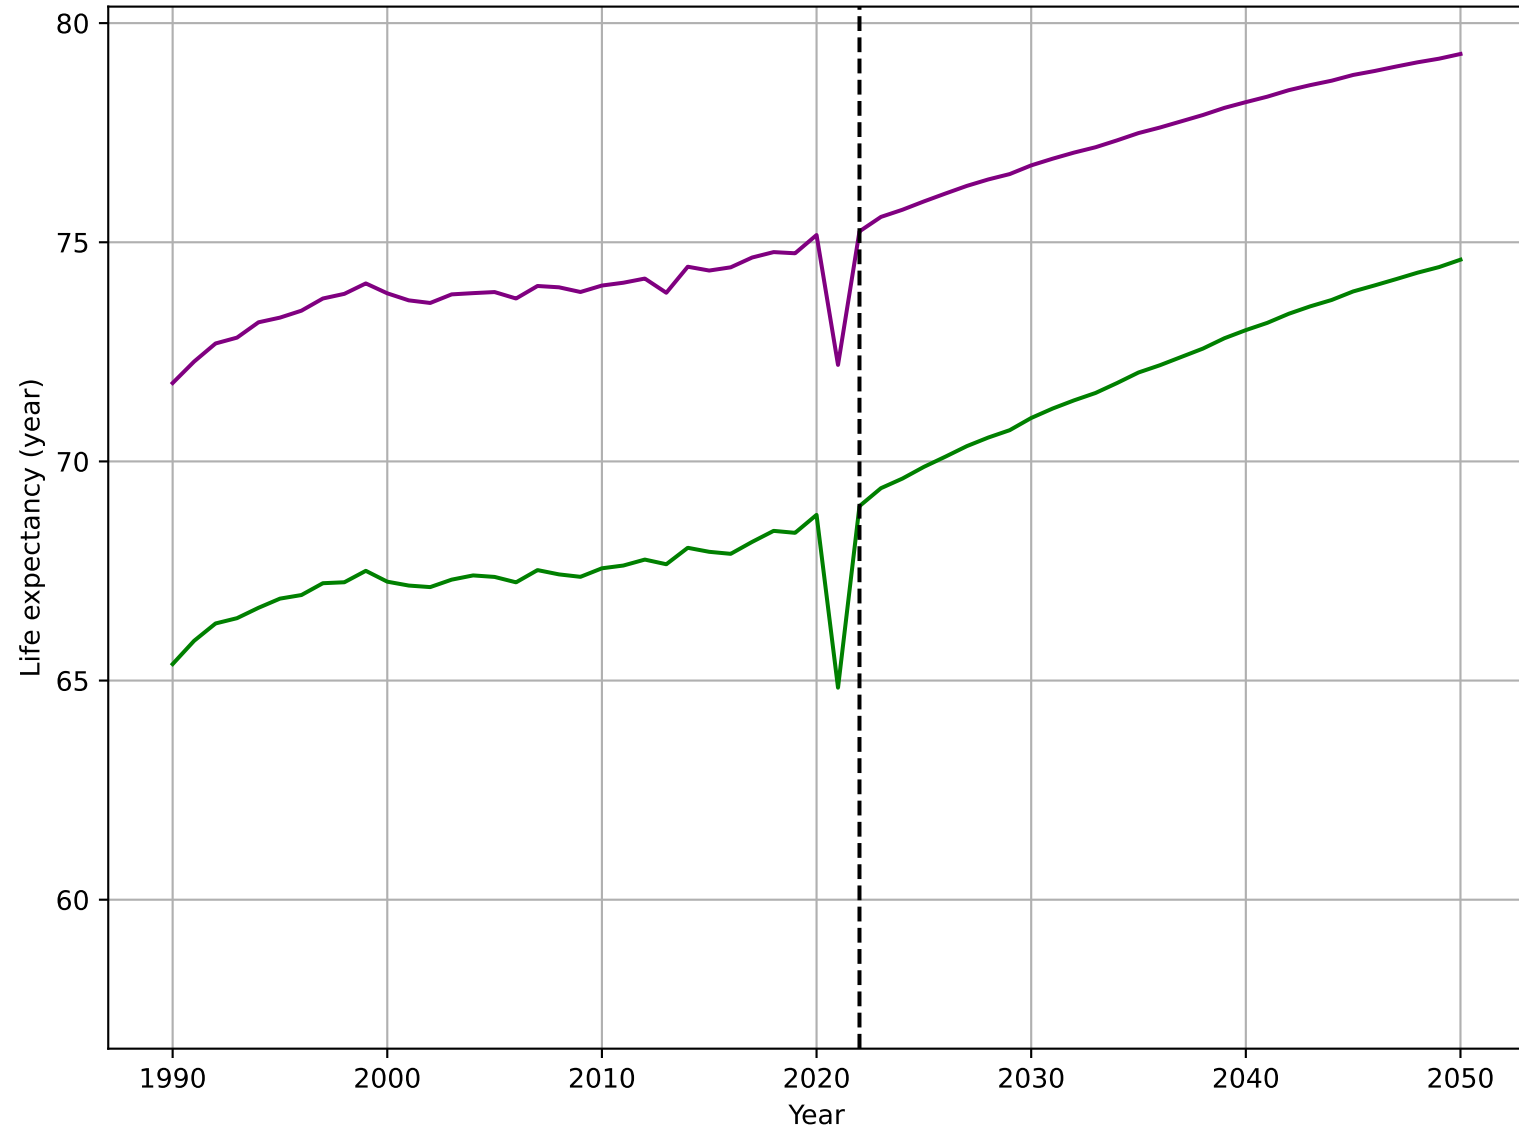

### Healthy Life Expectancy (HALE)

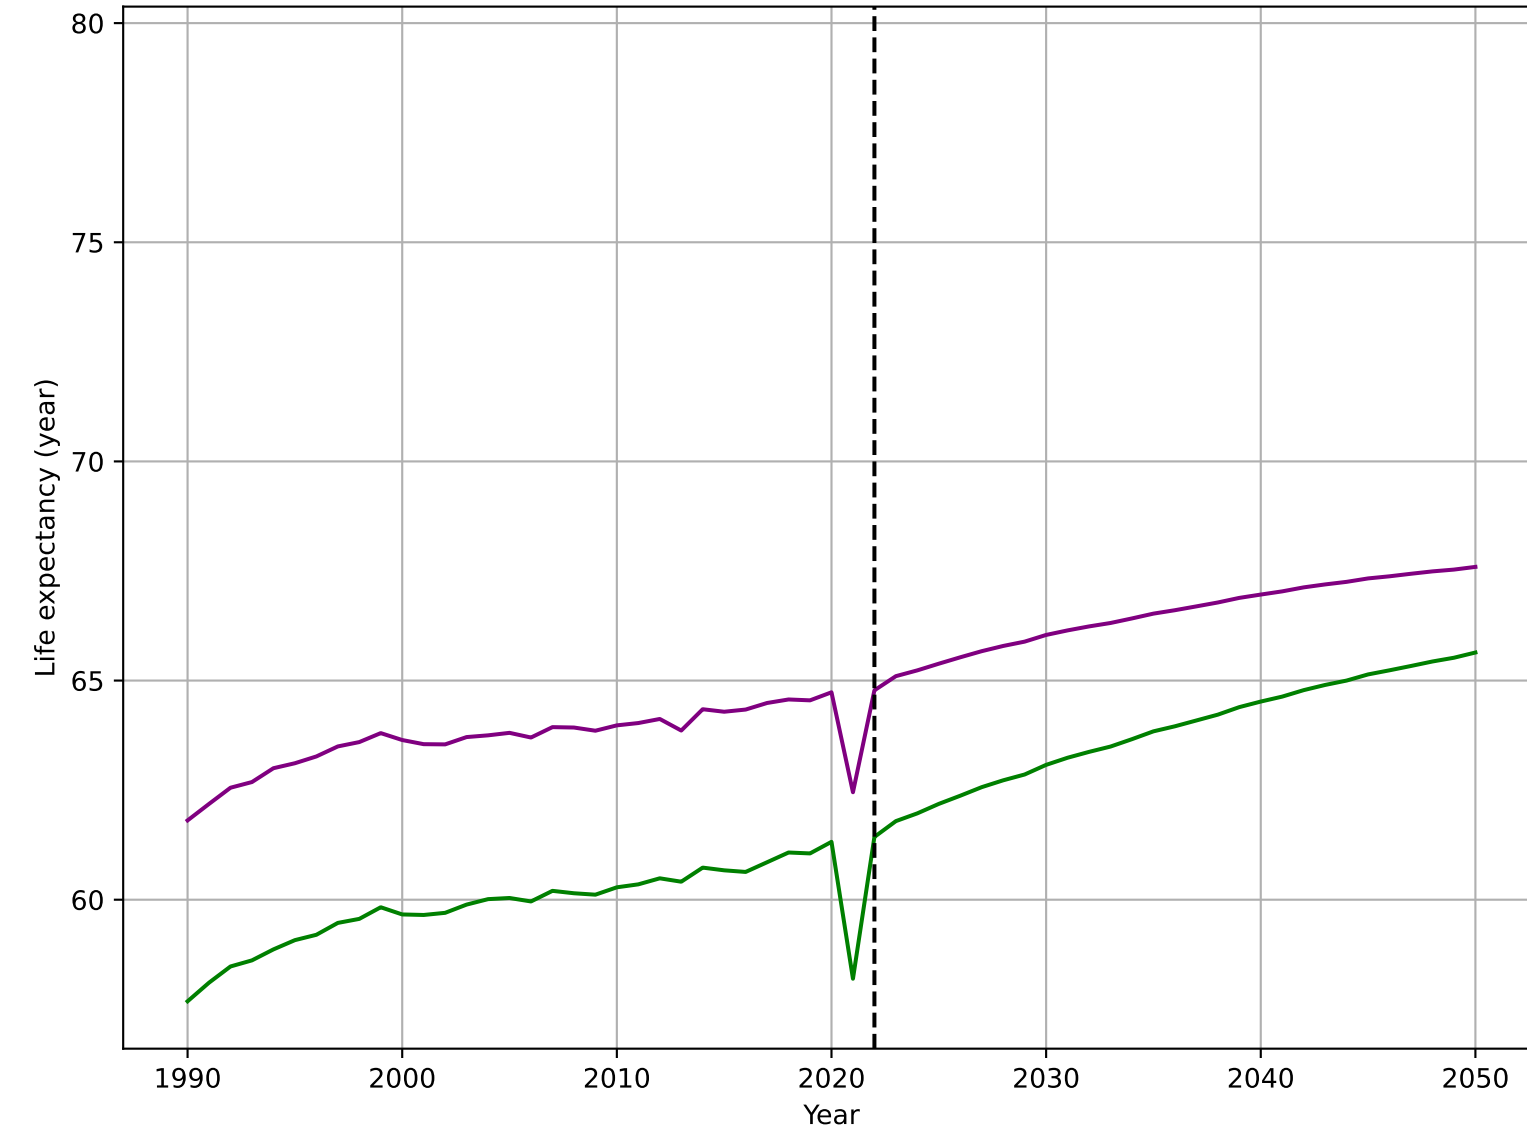

# Seychelles

### Life Expectancy

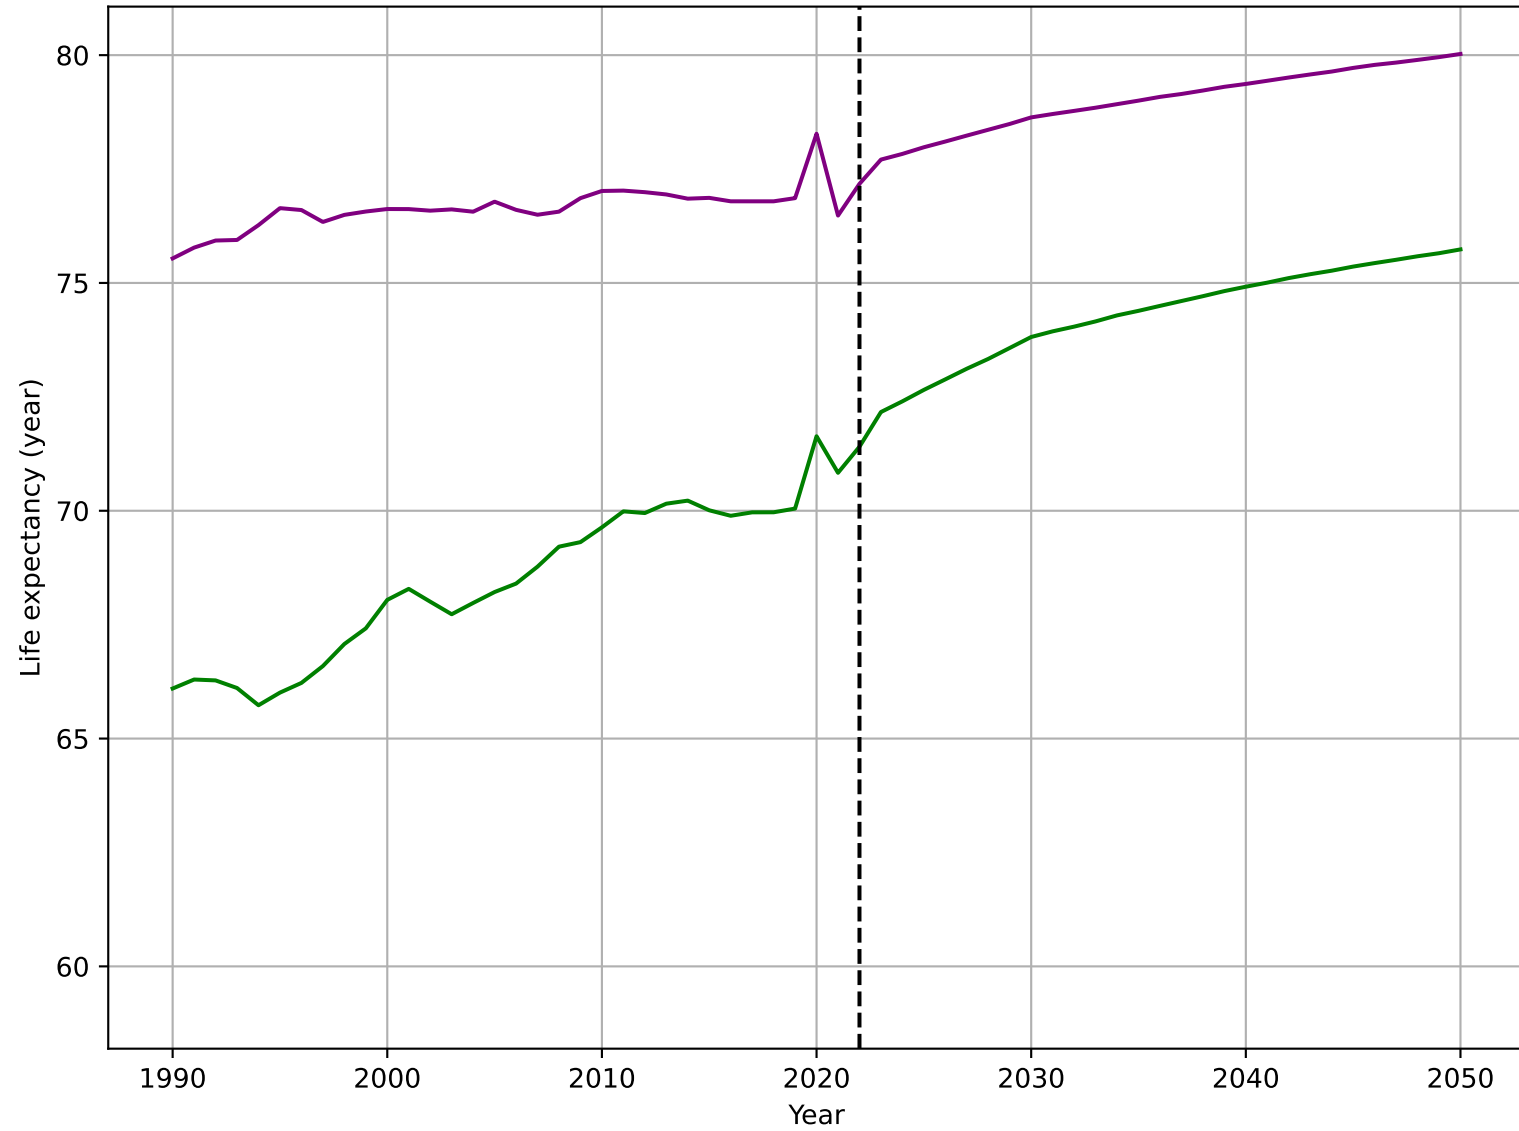

### Healthy Life Expectancy (HALE)

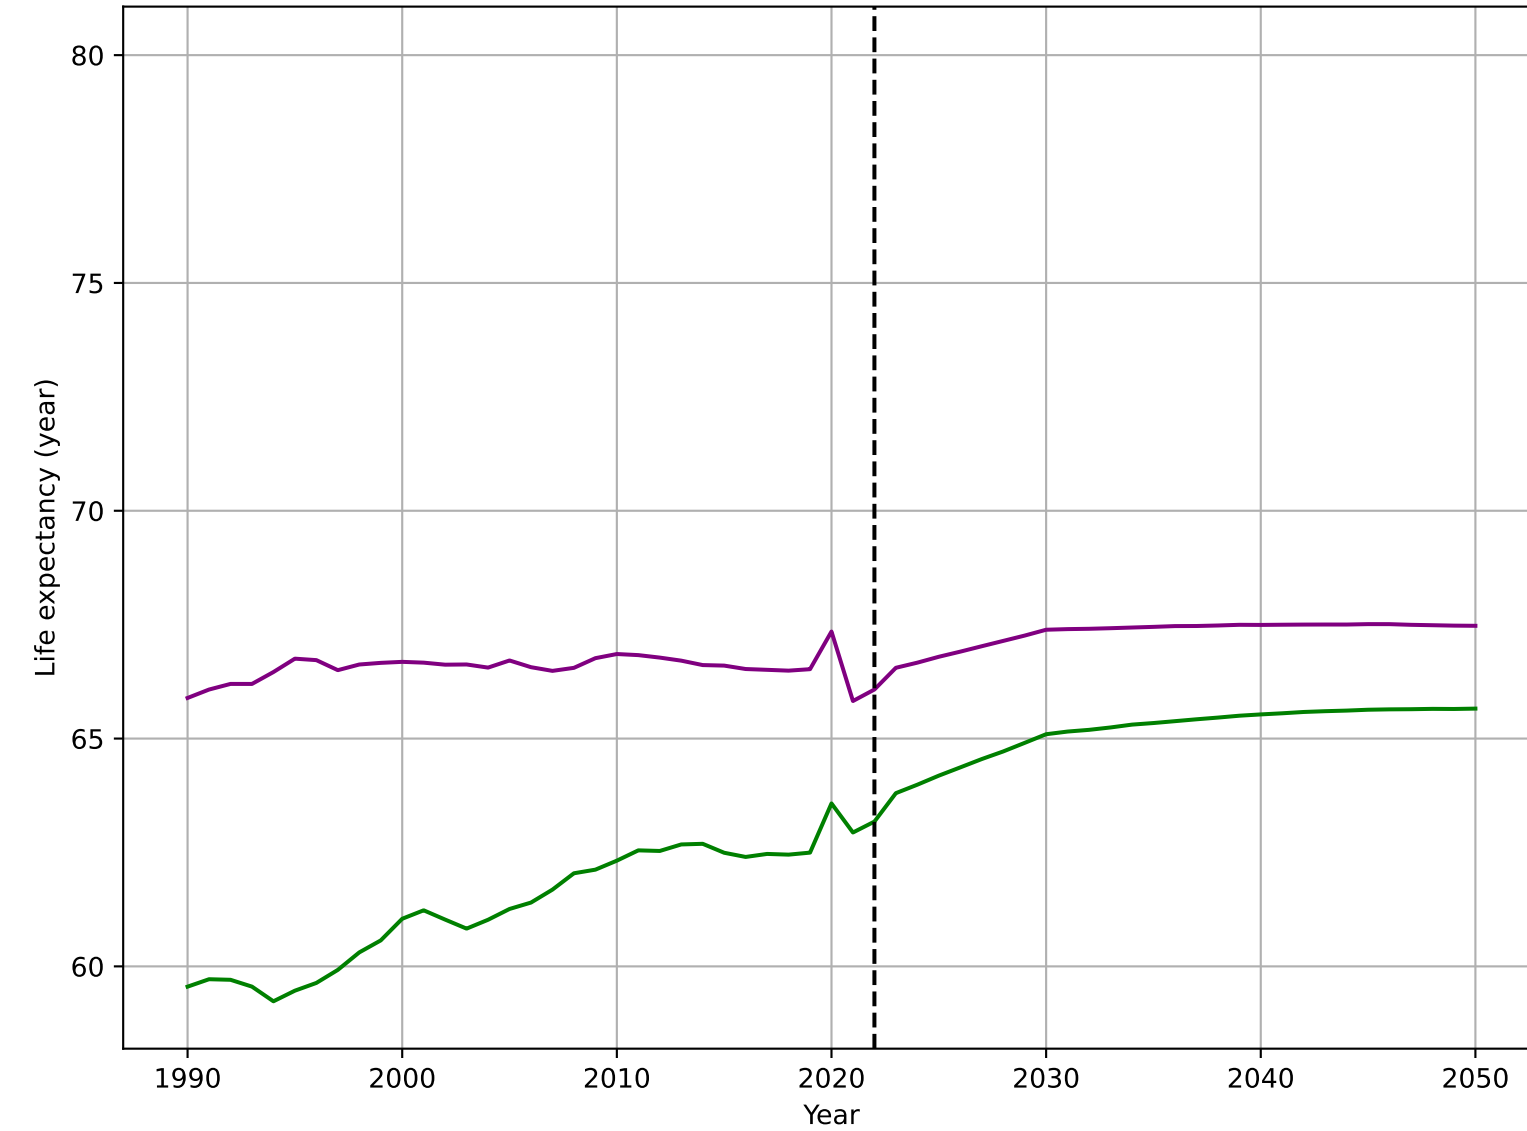

# Sri Lanka

### Life Expectancy

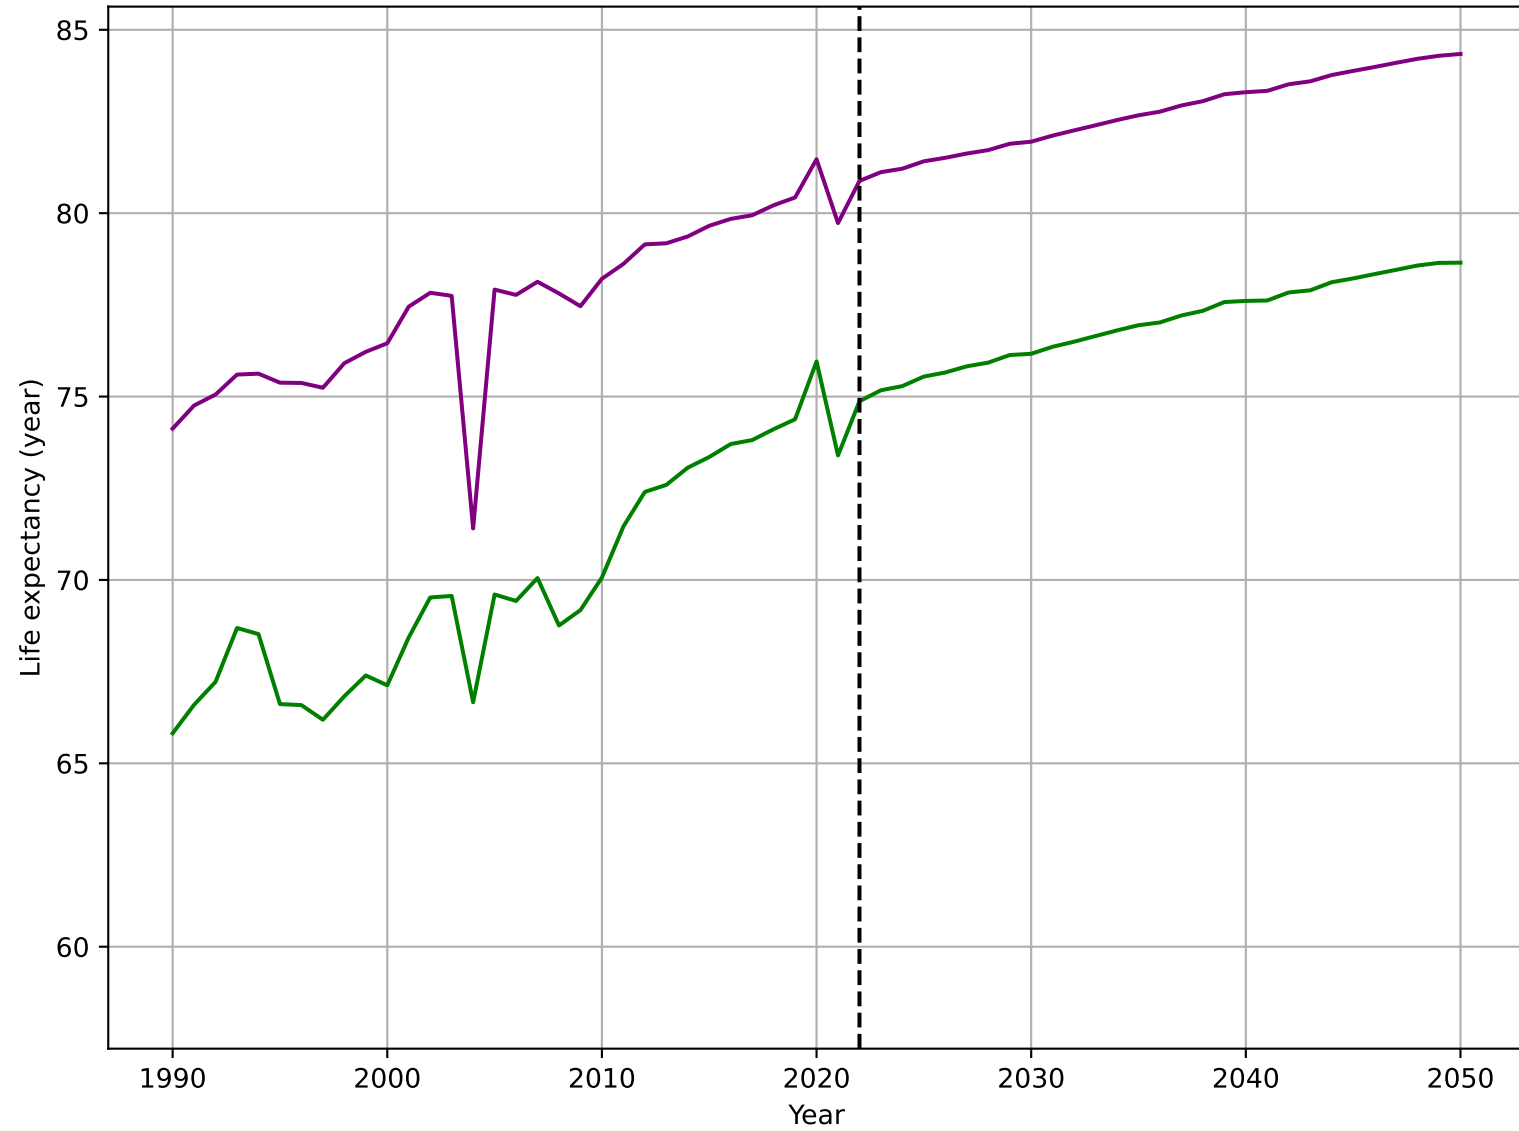

### Healthy Life Expectancy (HALE)

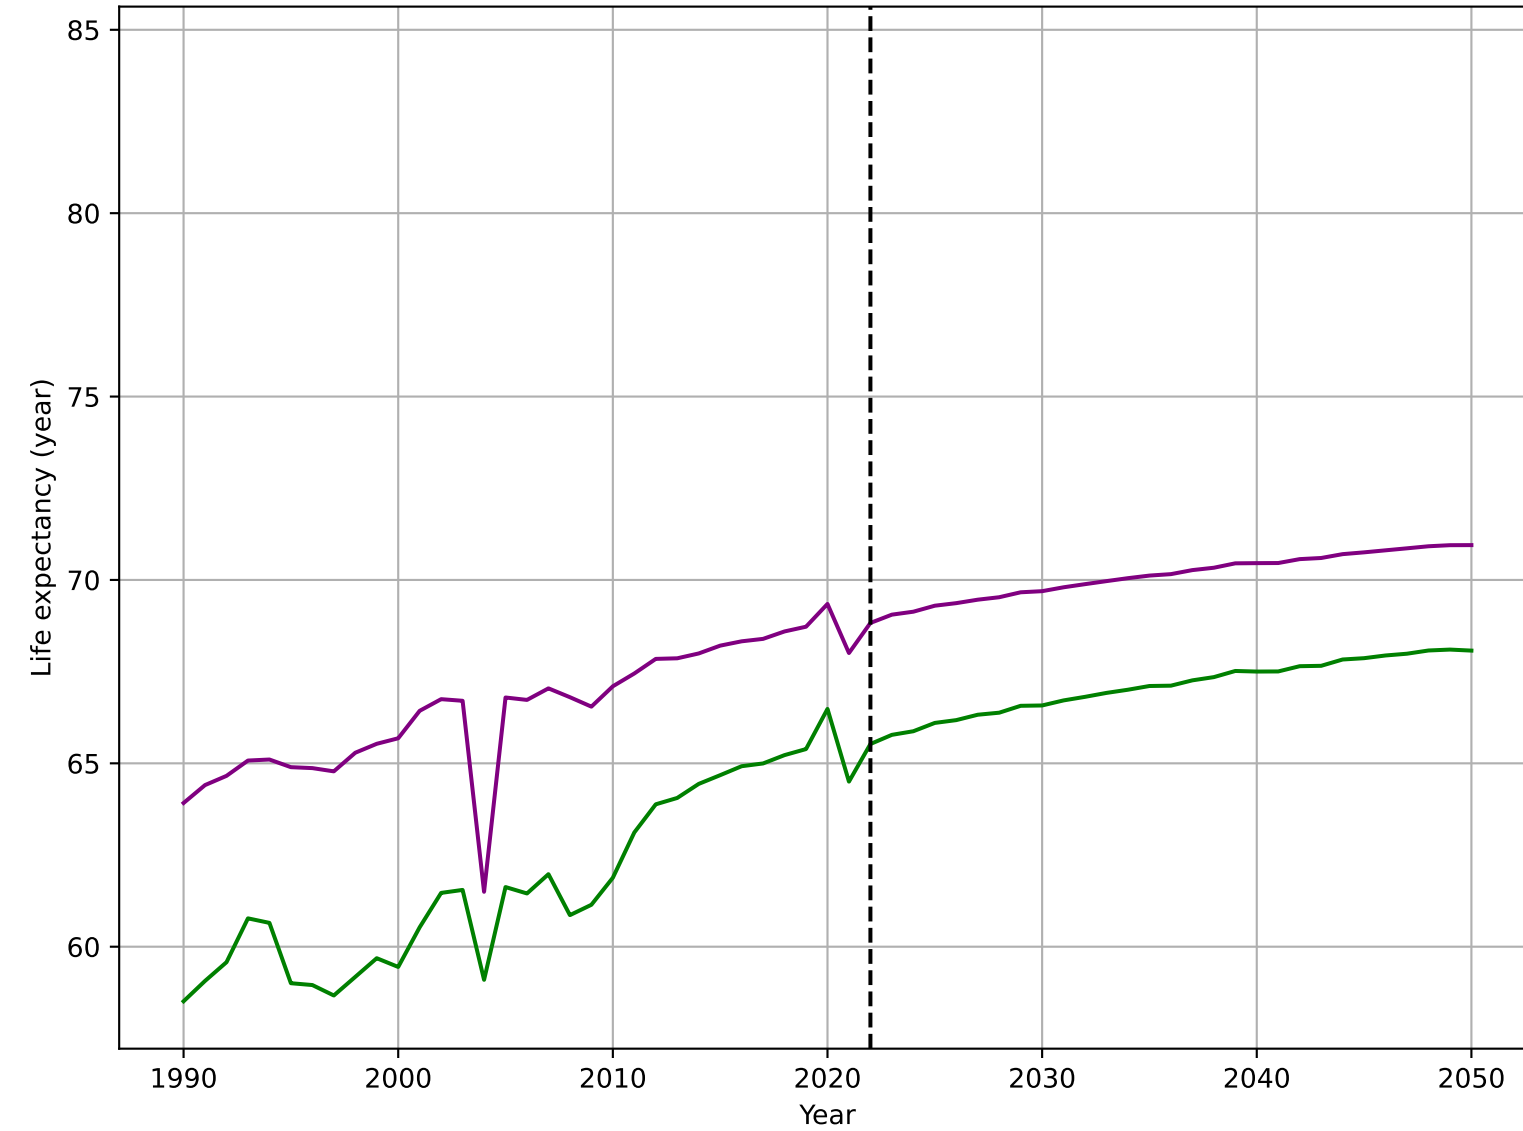

# Thailand

### Life Expectancy

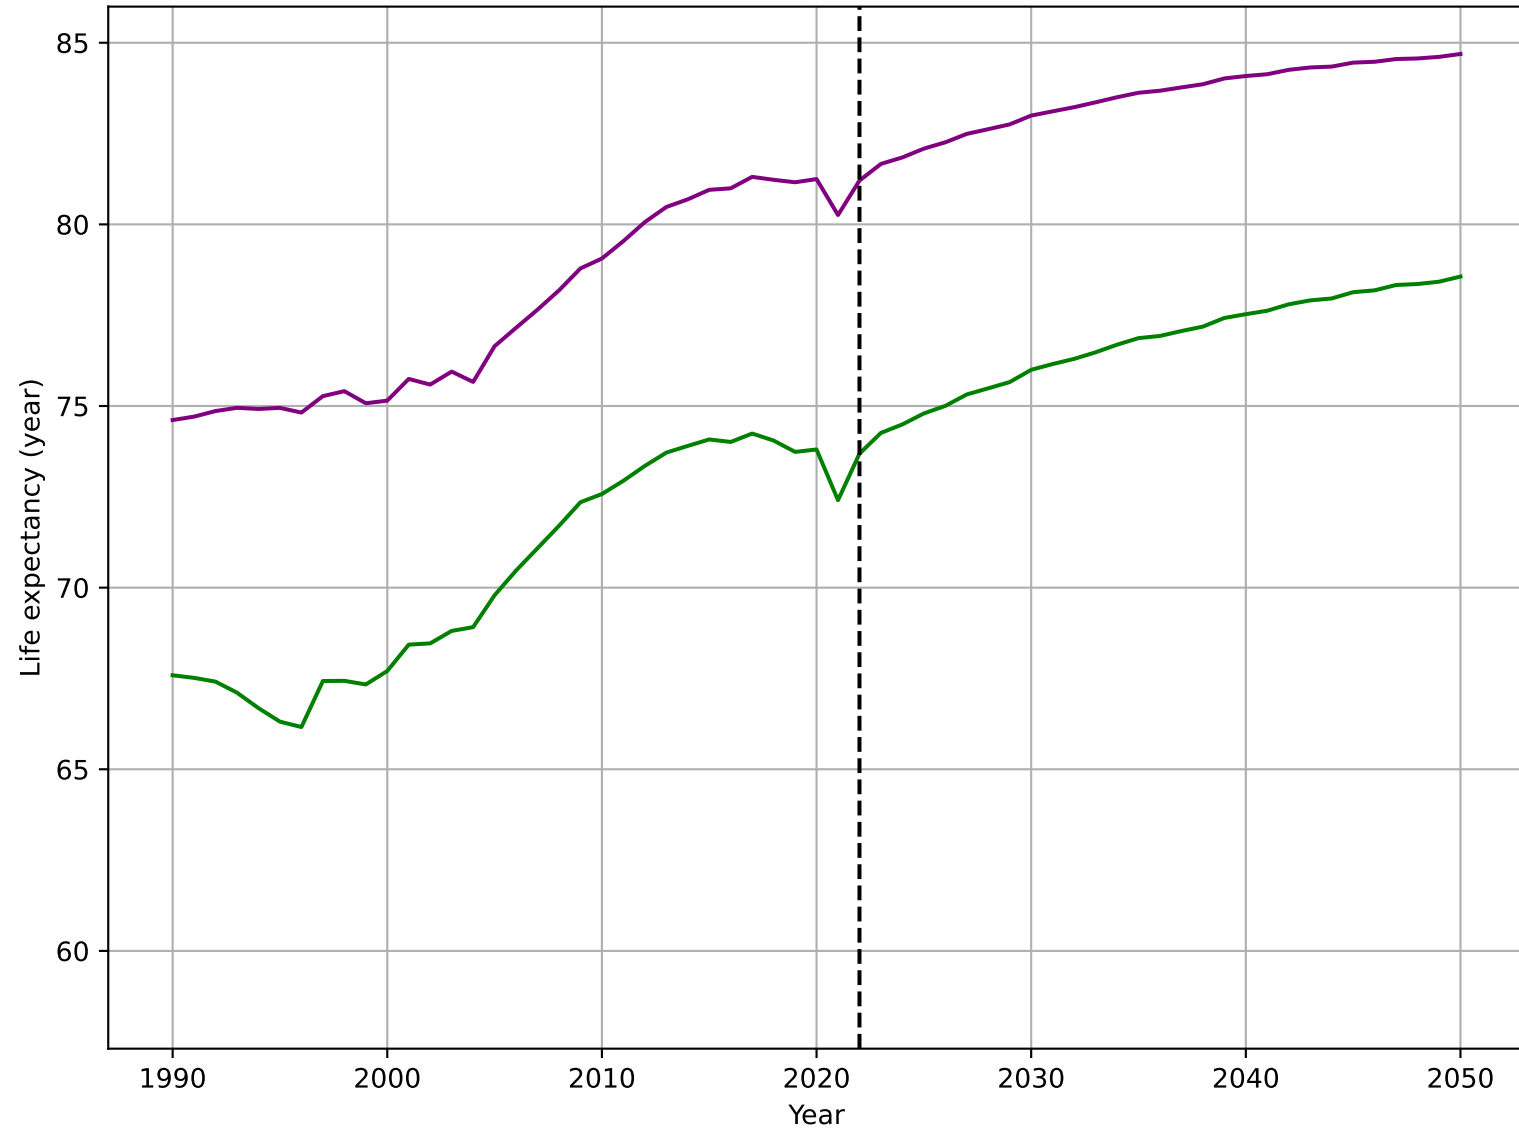

### Healthy Life Expectancy (HALE)

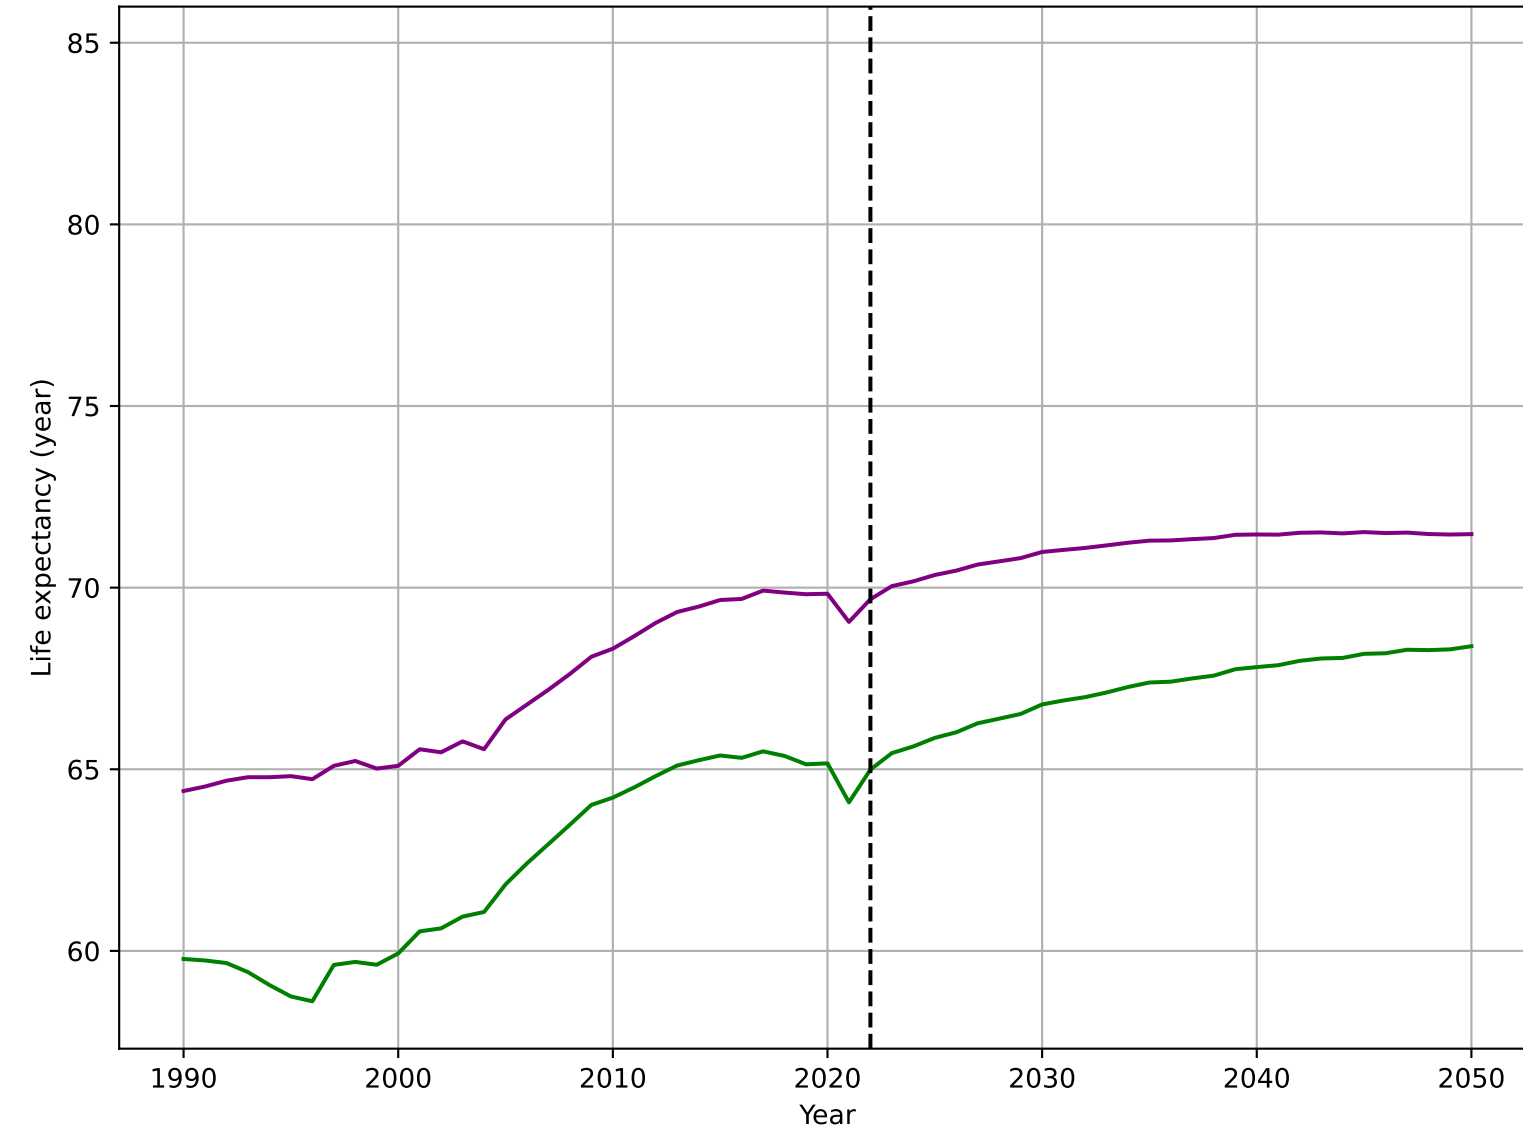



# Timor-Leste

### Life Expectancy

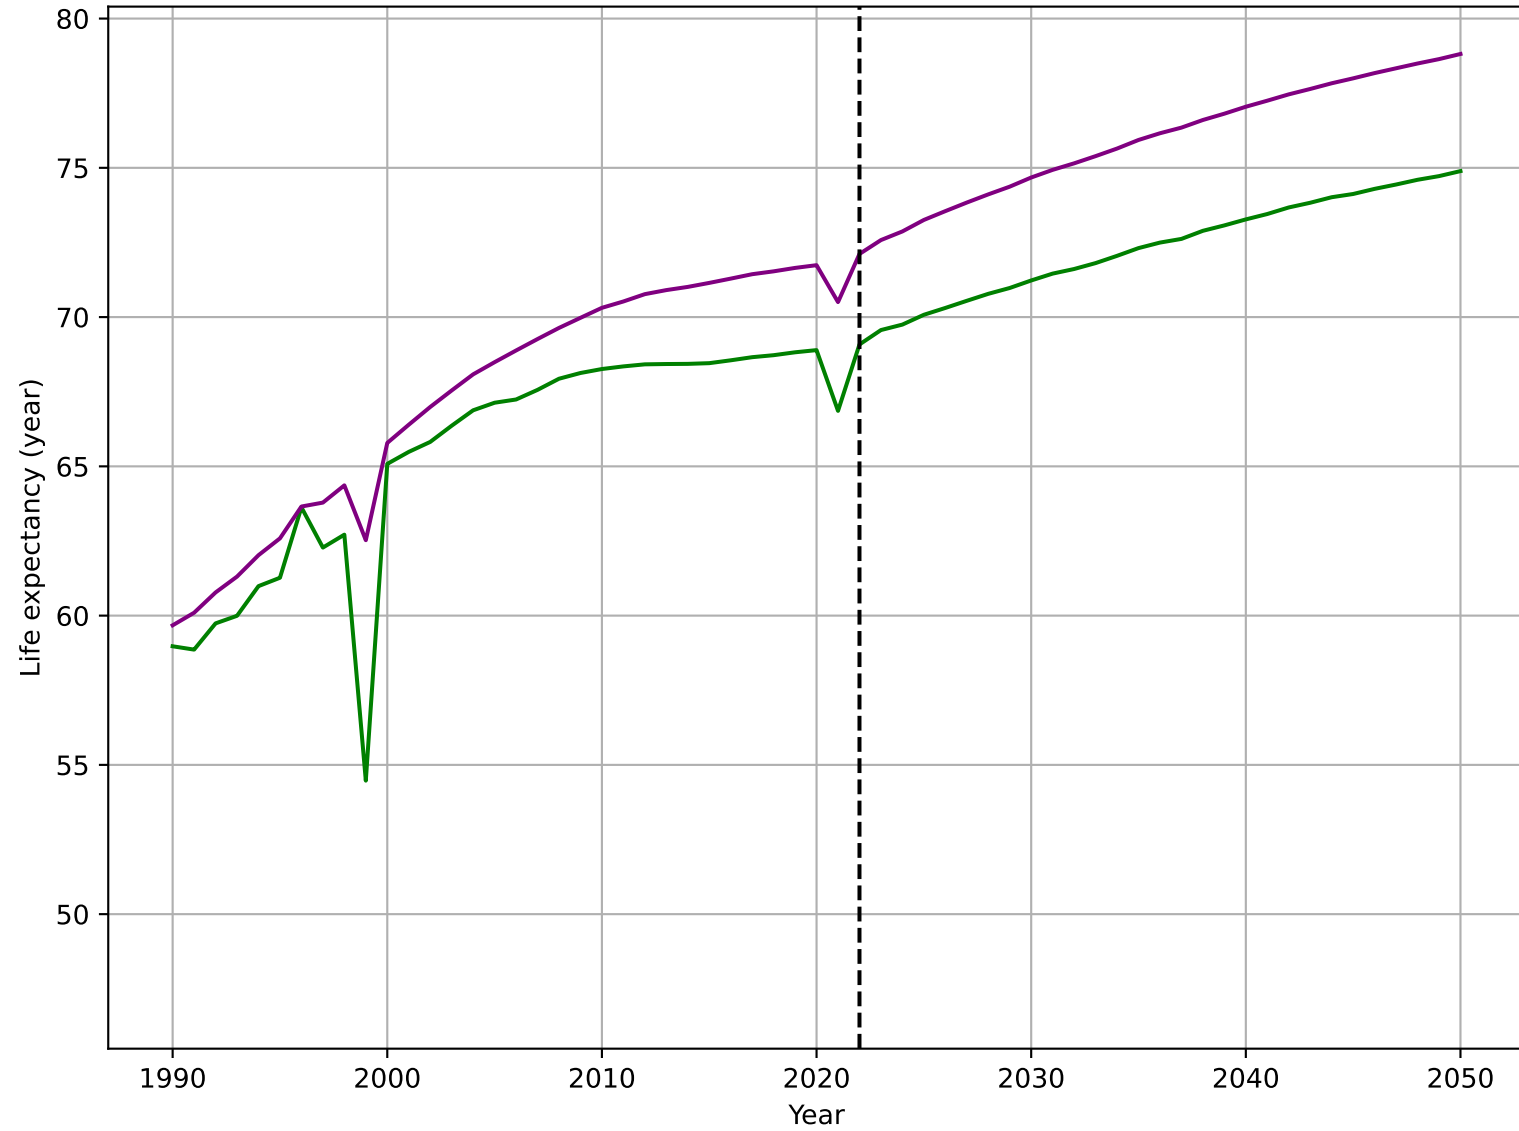

### Healthy Life Expectancy (HALE)

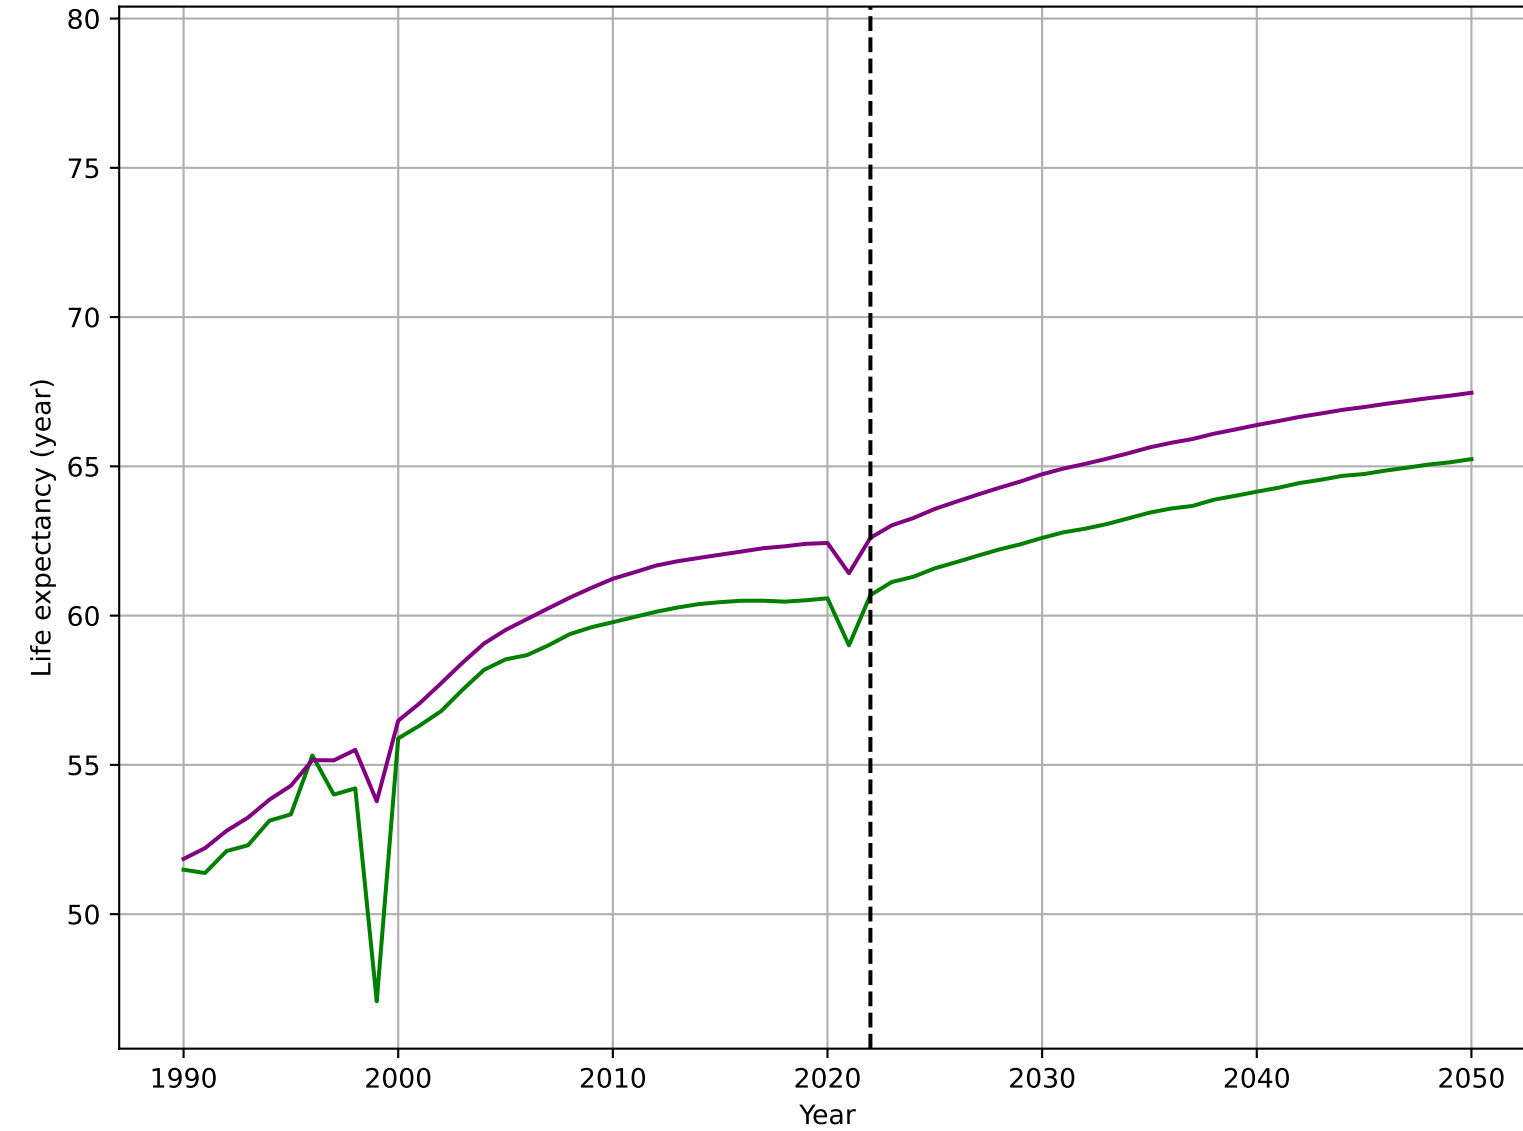

# Viet Nam

### Life Expectancy

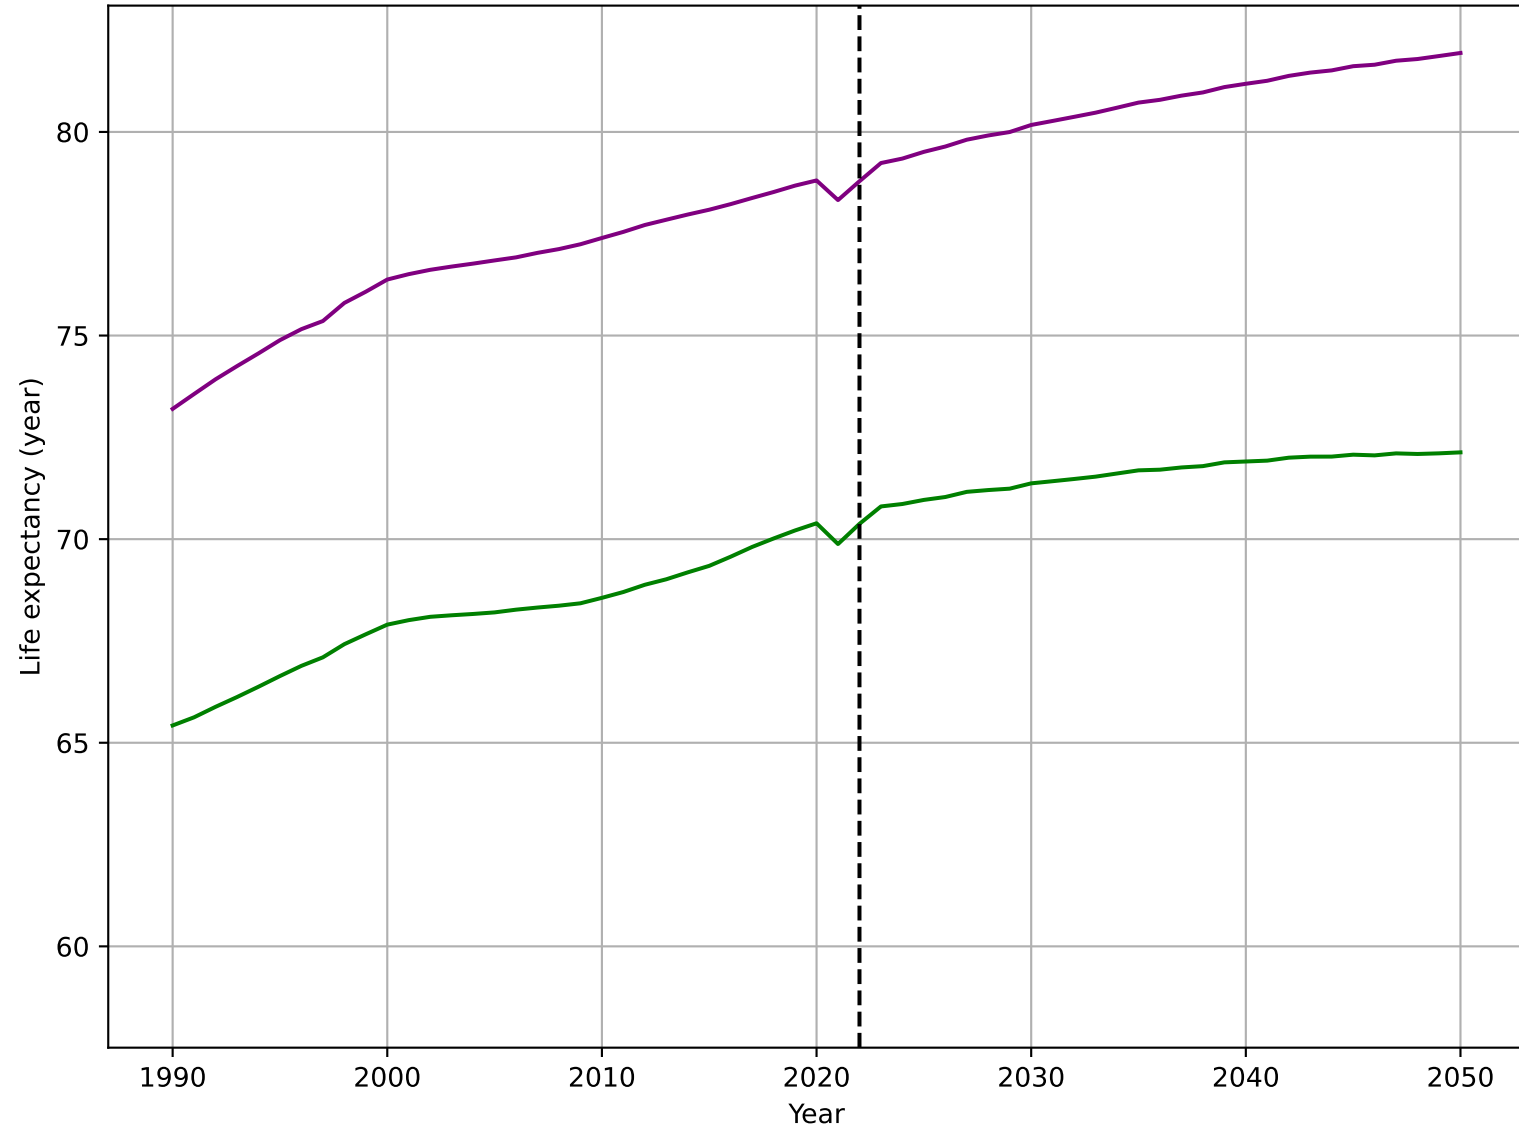

### Healthy Life Expectancy (HALE)

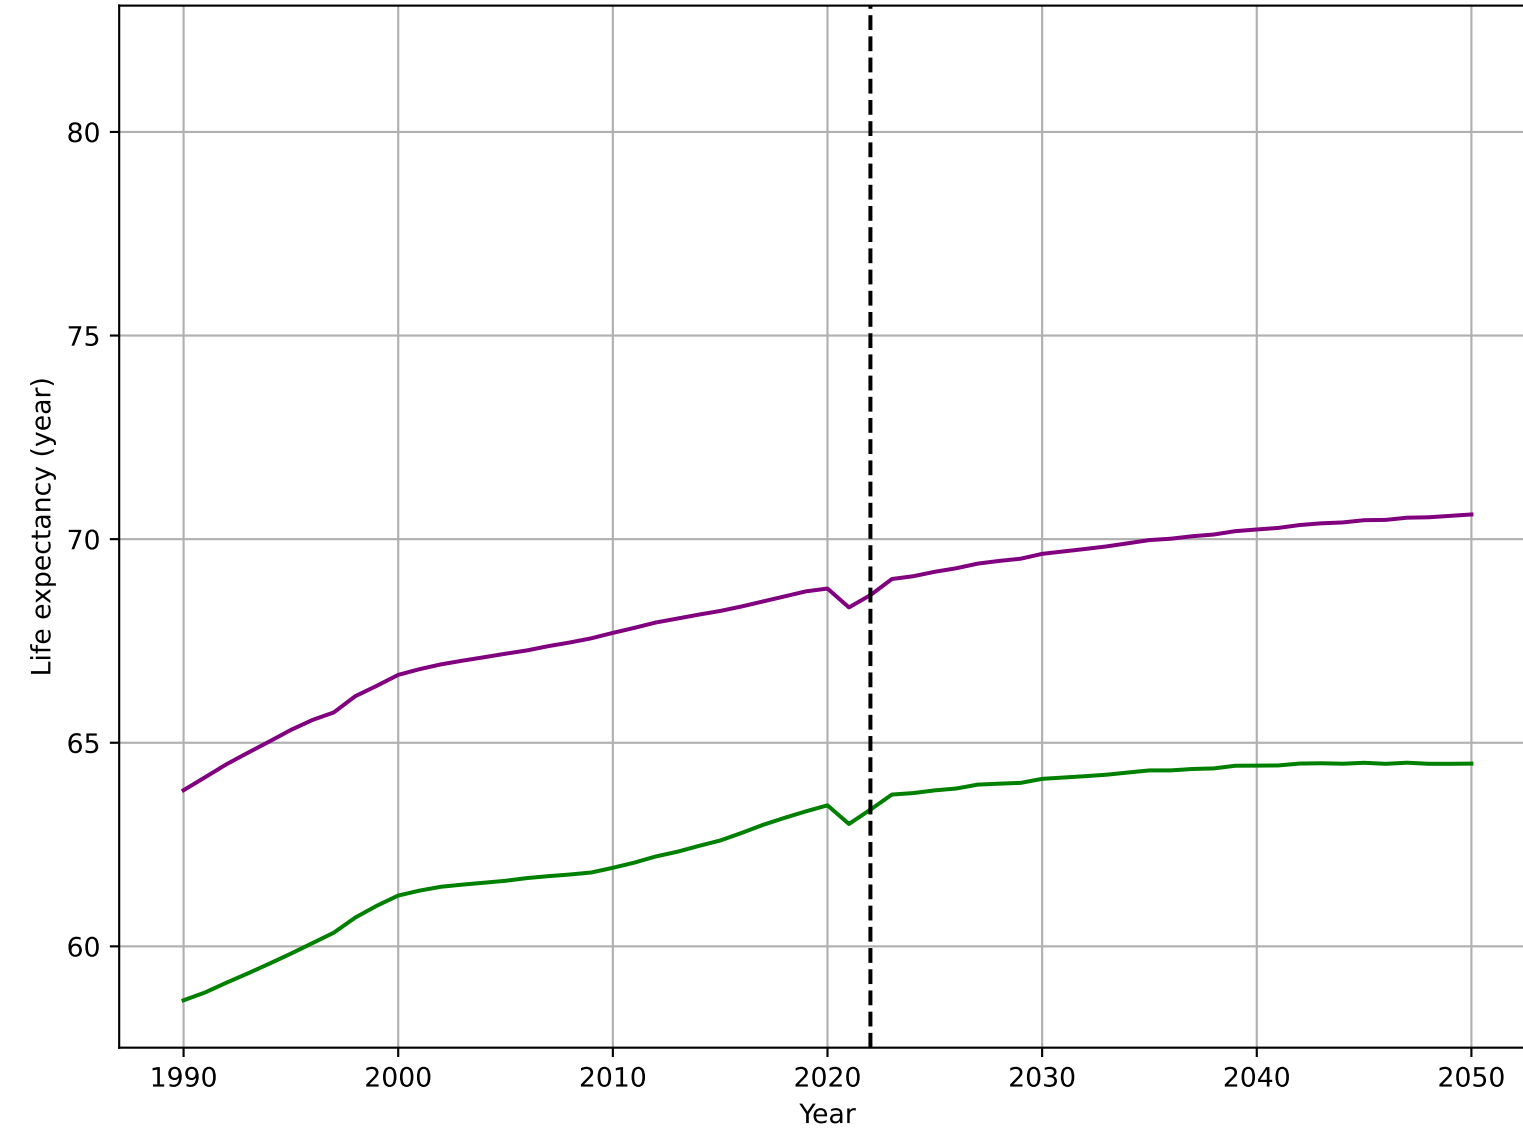

# Angola

### Life Expectancy

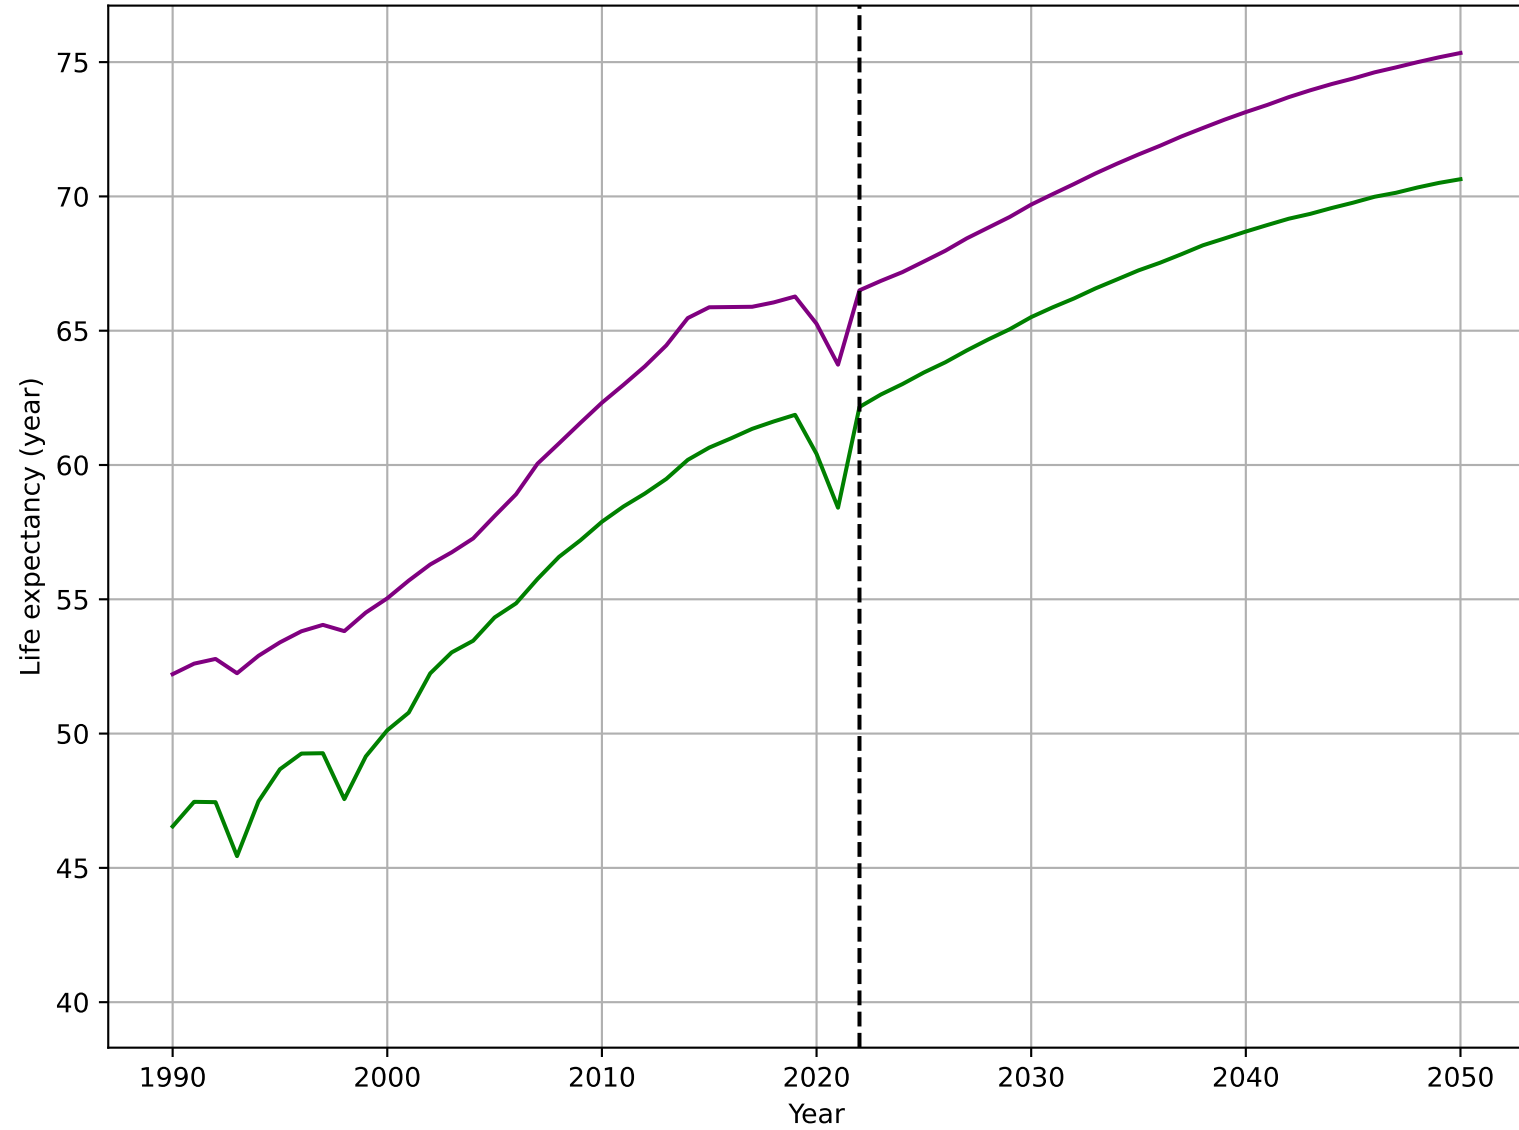

### Healthy Life Expectancy (HALE)

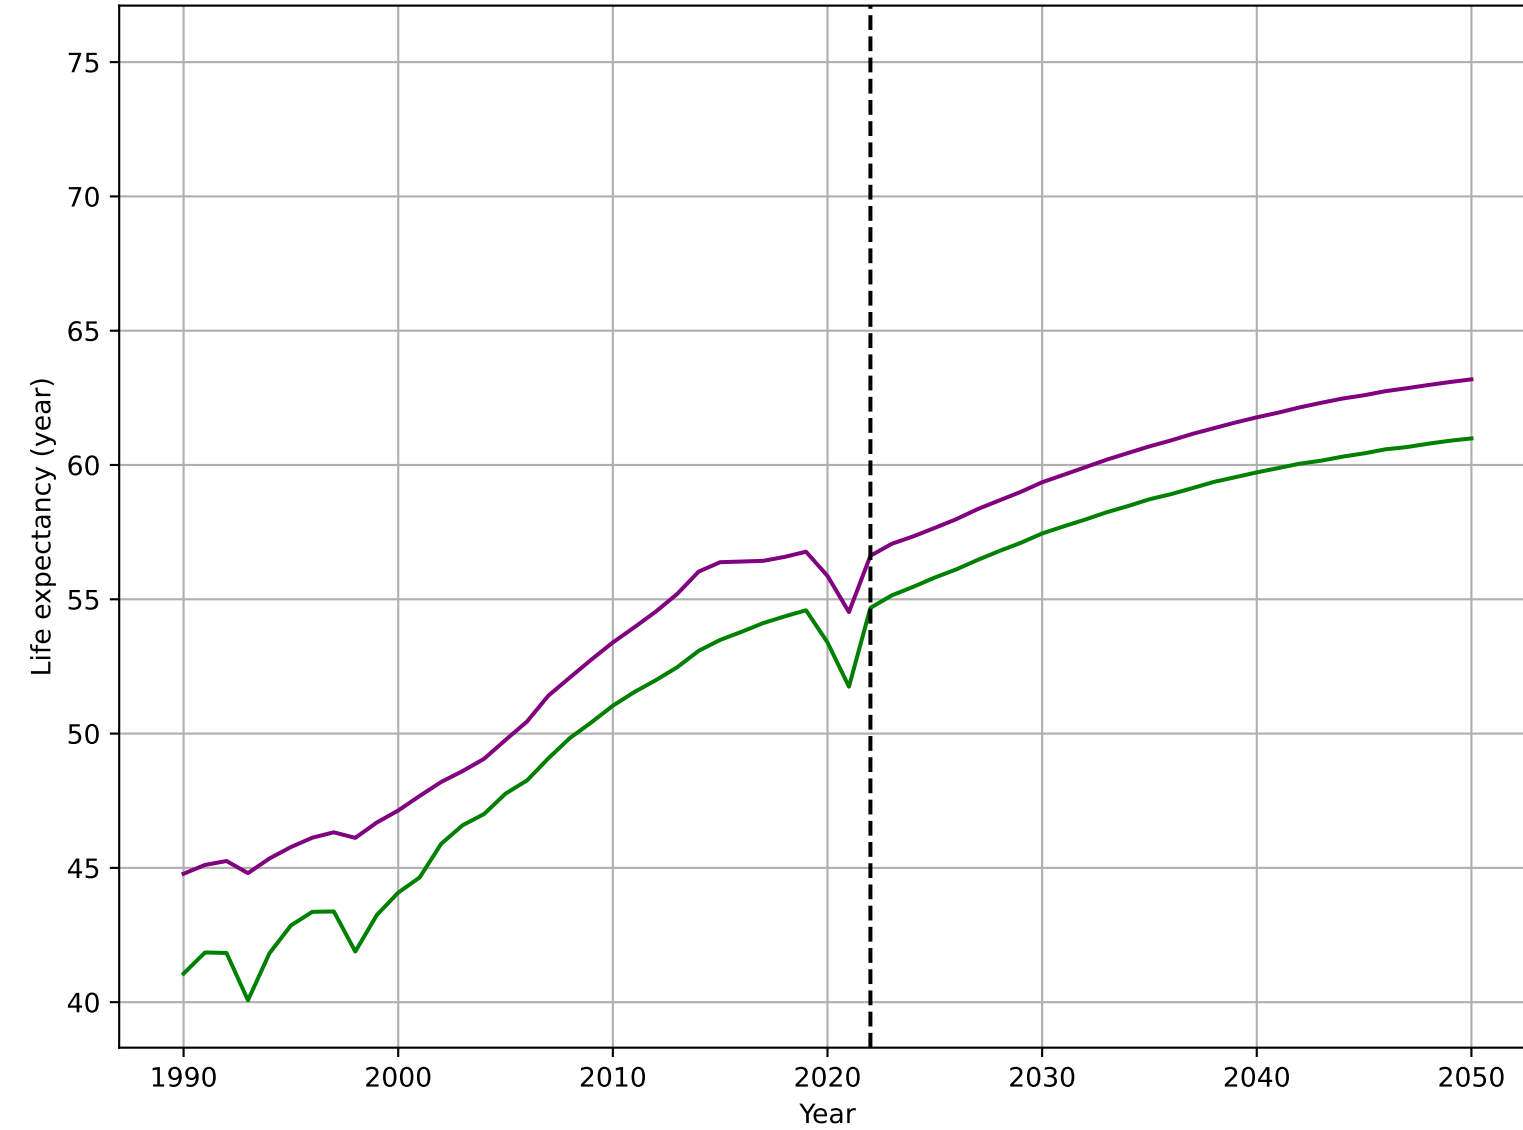

# Central African Republic

### Life Expectancy

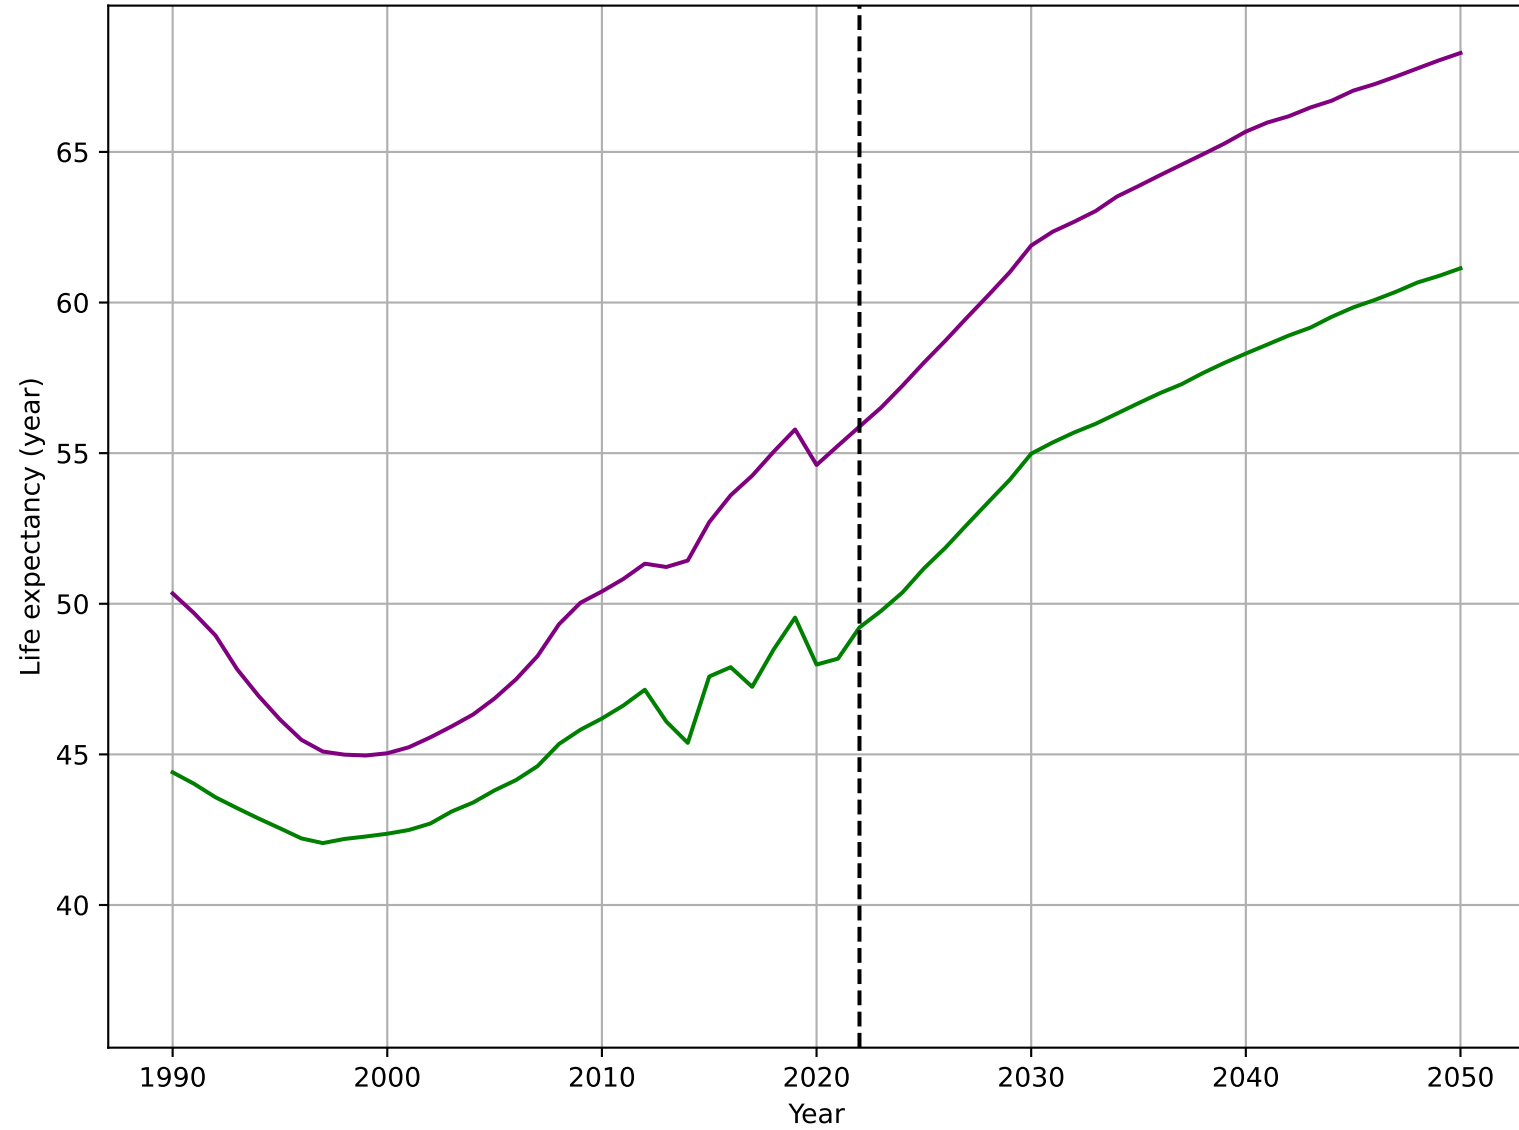

### Healthy Life Expectancy (HALE)

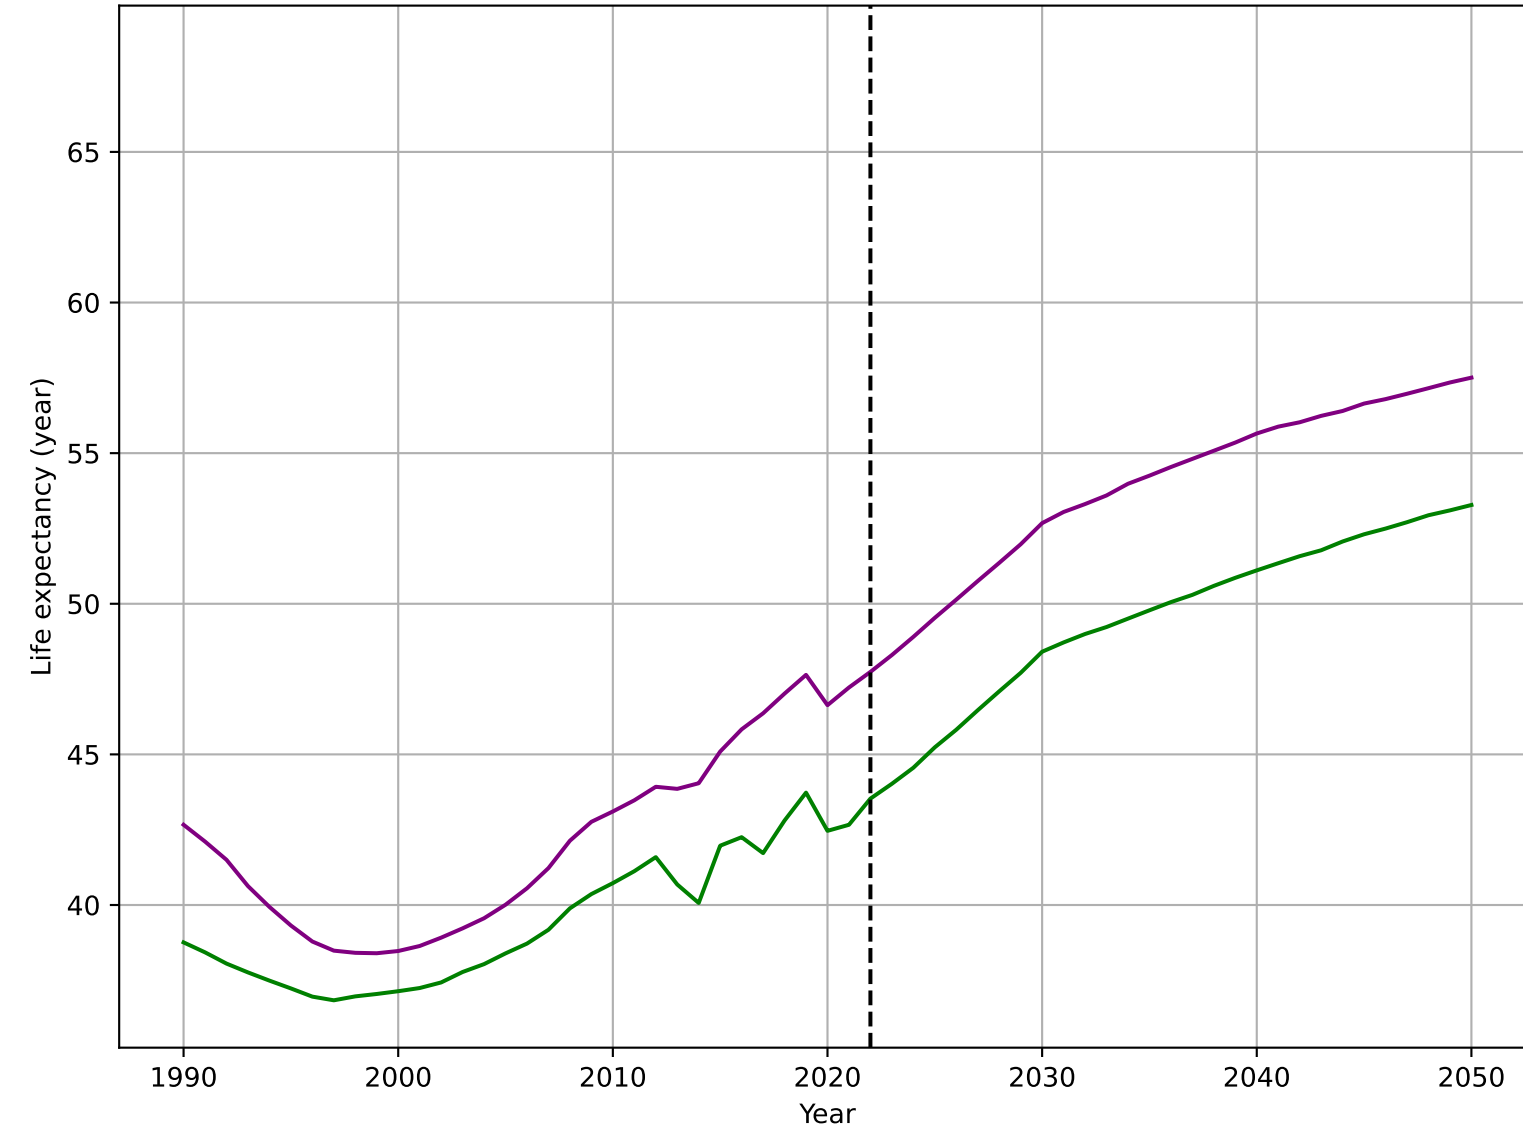

# Congo (Brazzaville)

## Life Expectancy

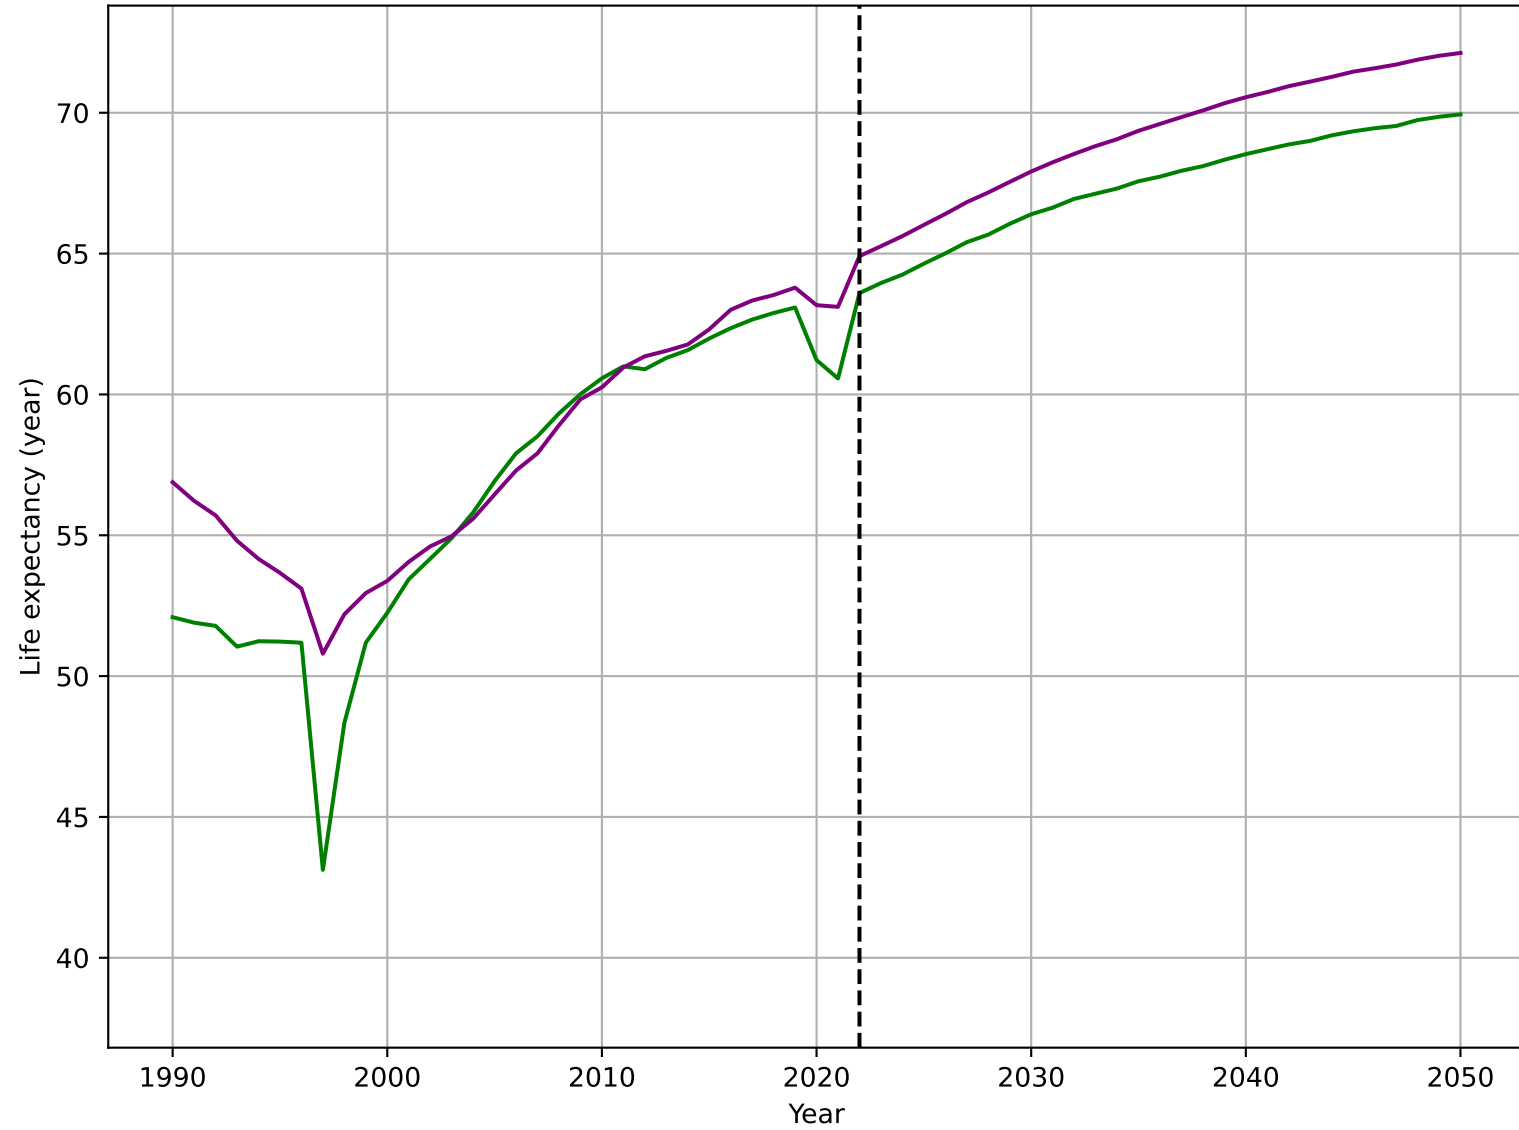

## Healthy Life Expectancy (HALE)

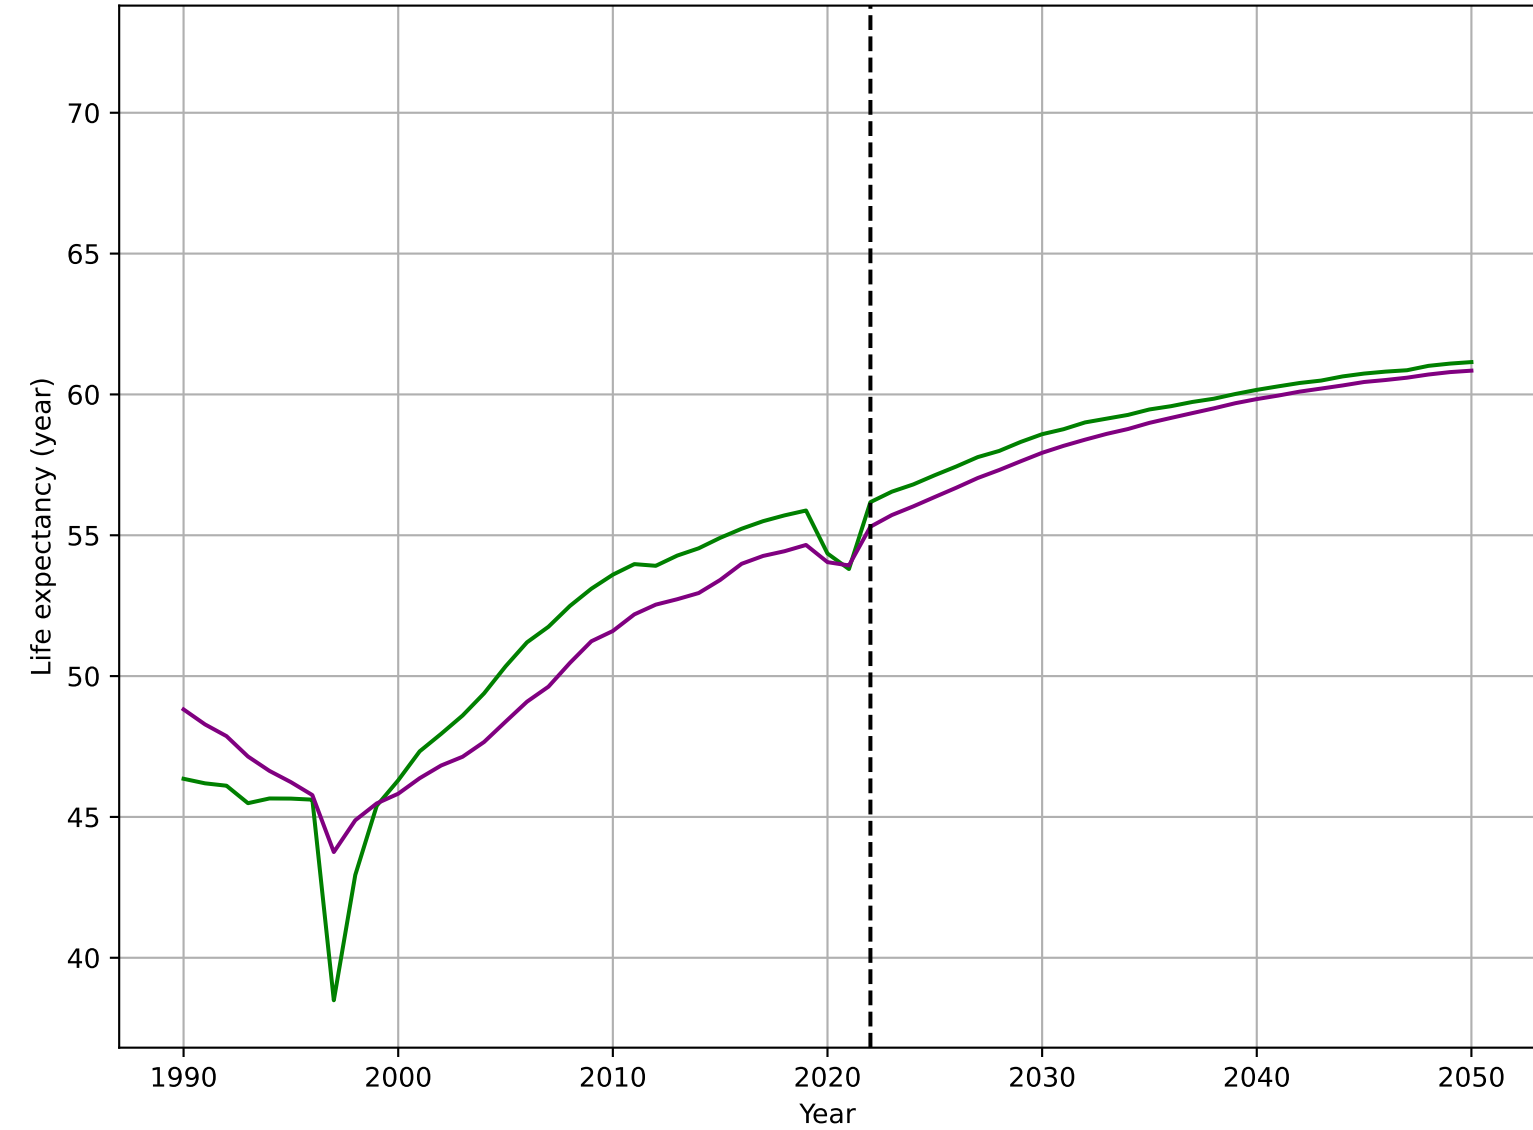

# DR Congo

## Life Expectancy

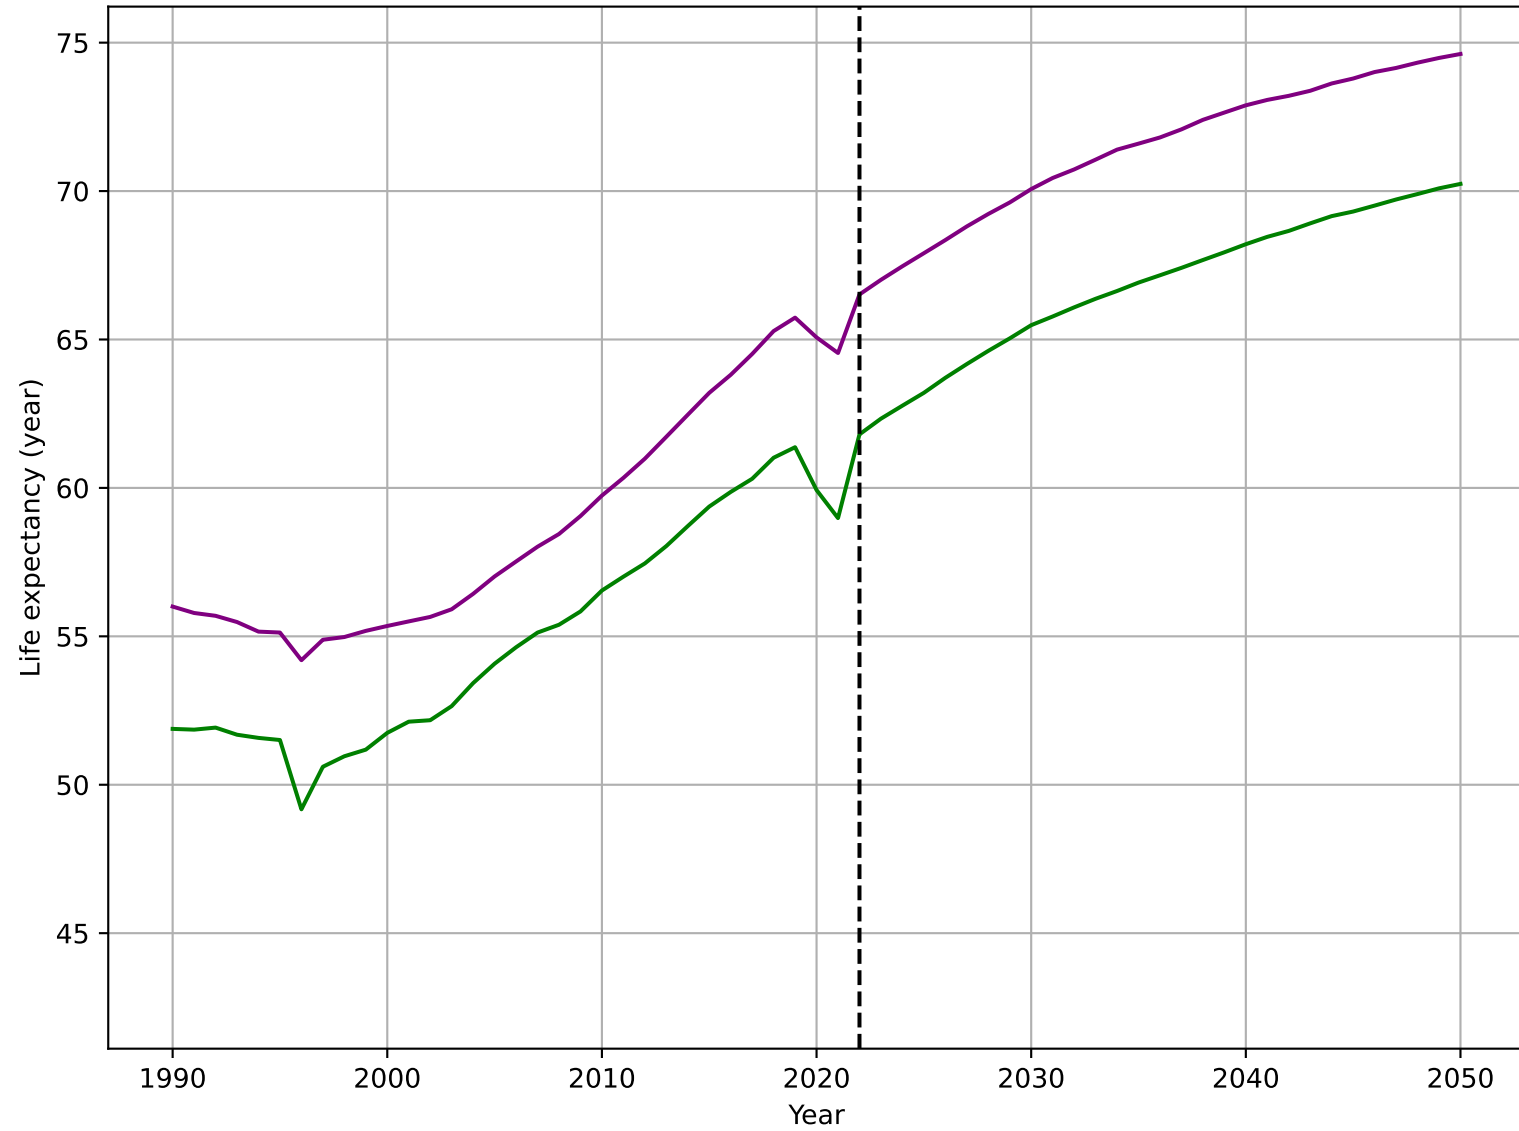

## Healthy Life Expectancy (HALE)

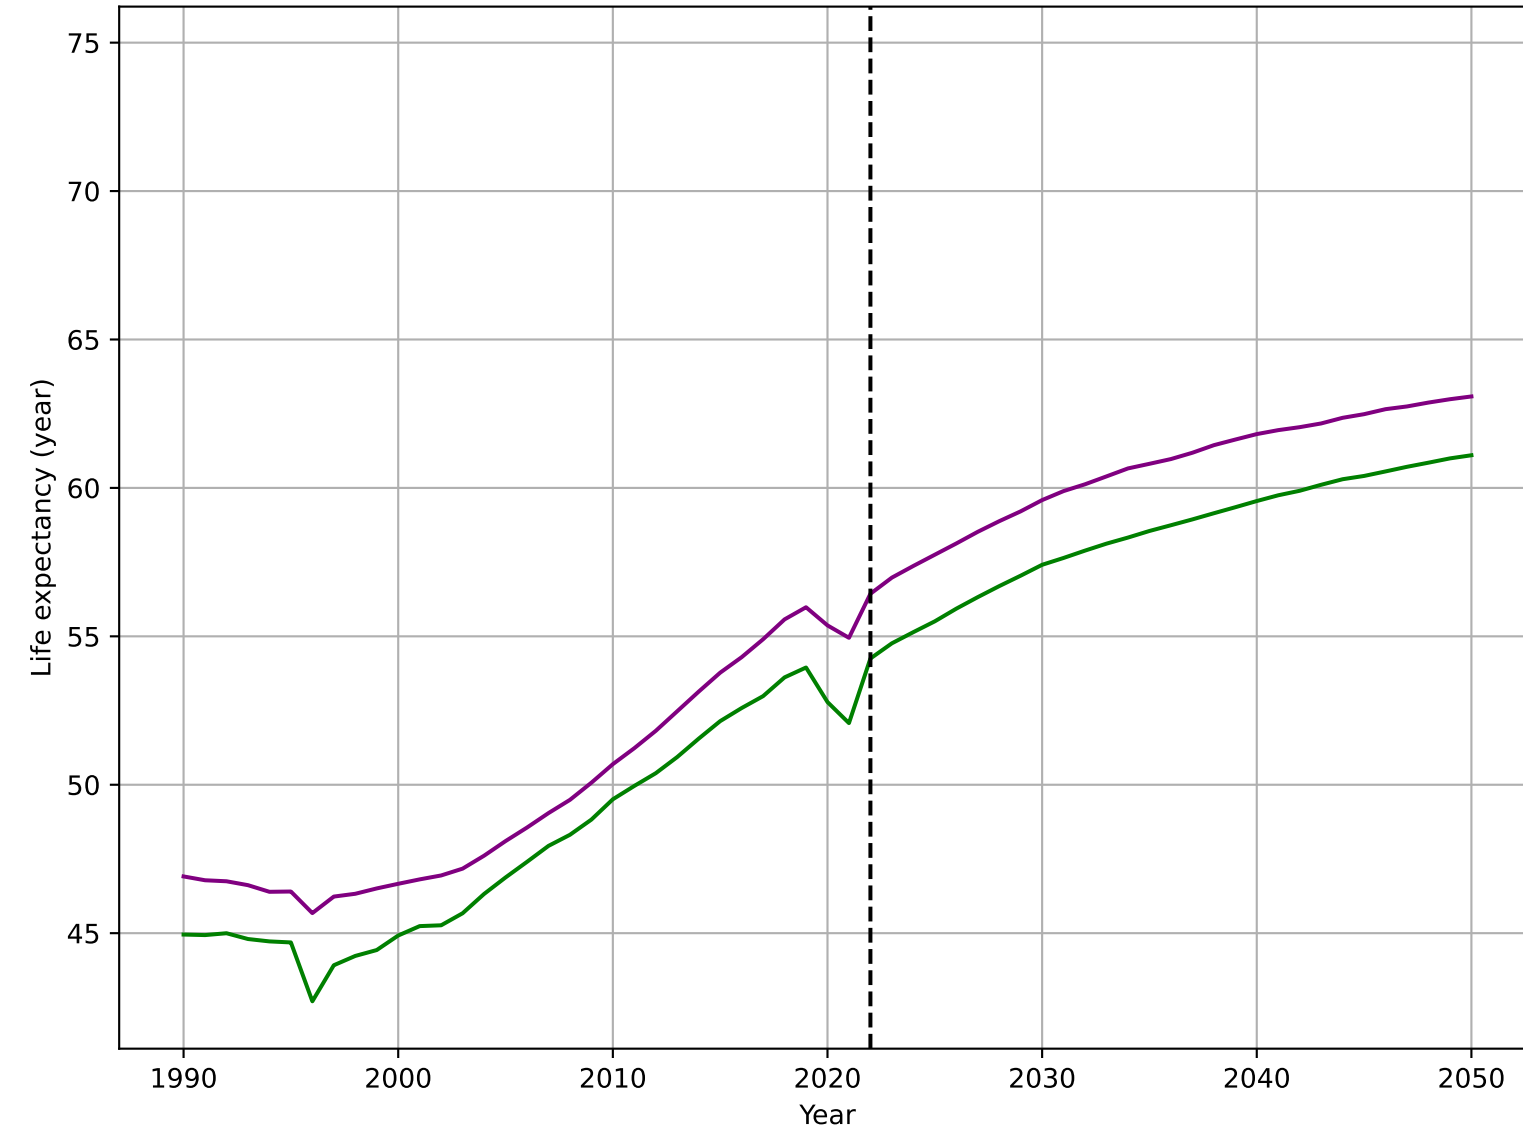

# Equatorial Guinea

### Life Expectancy

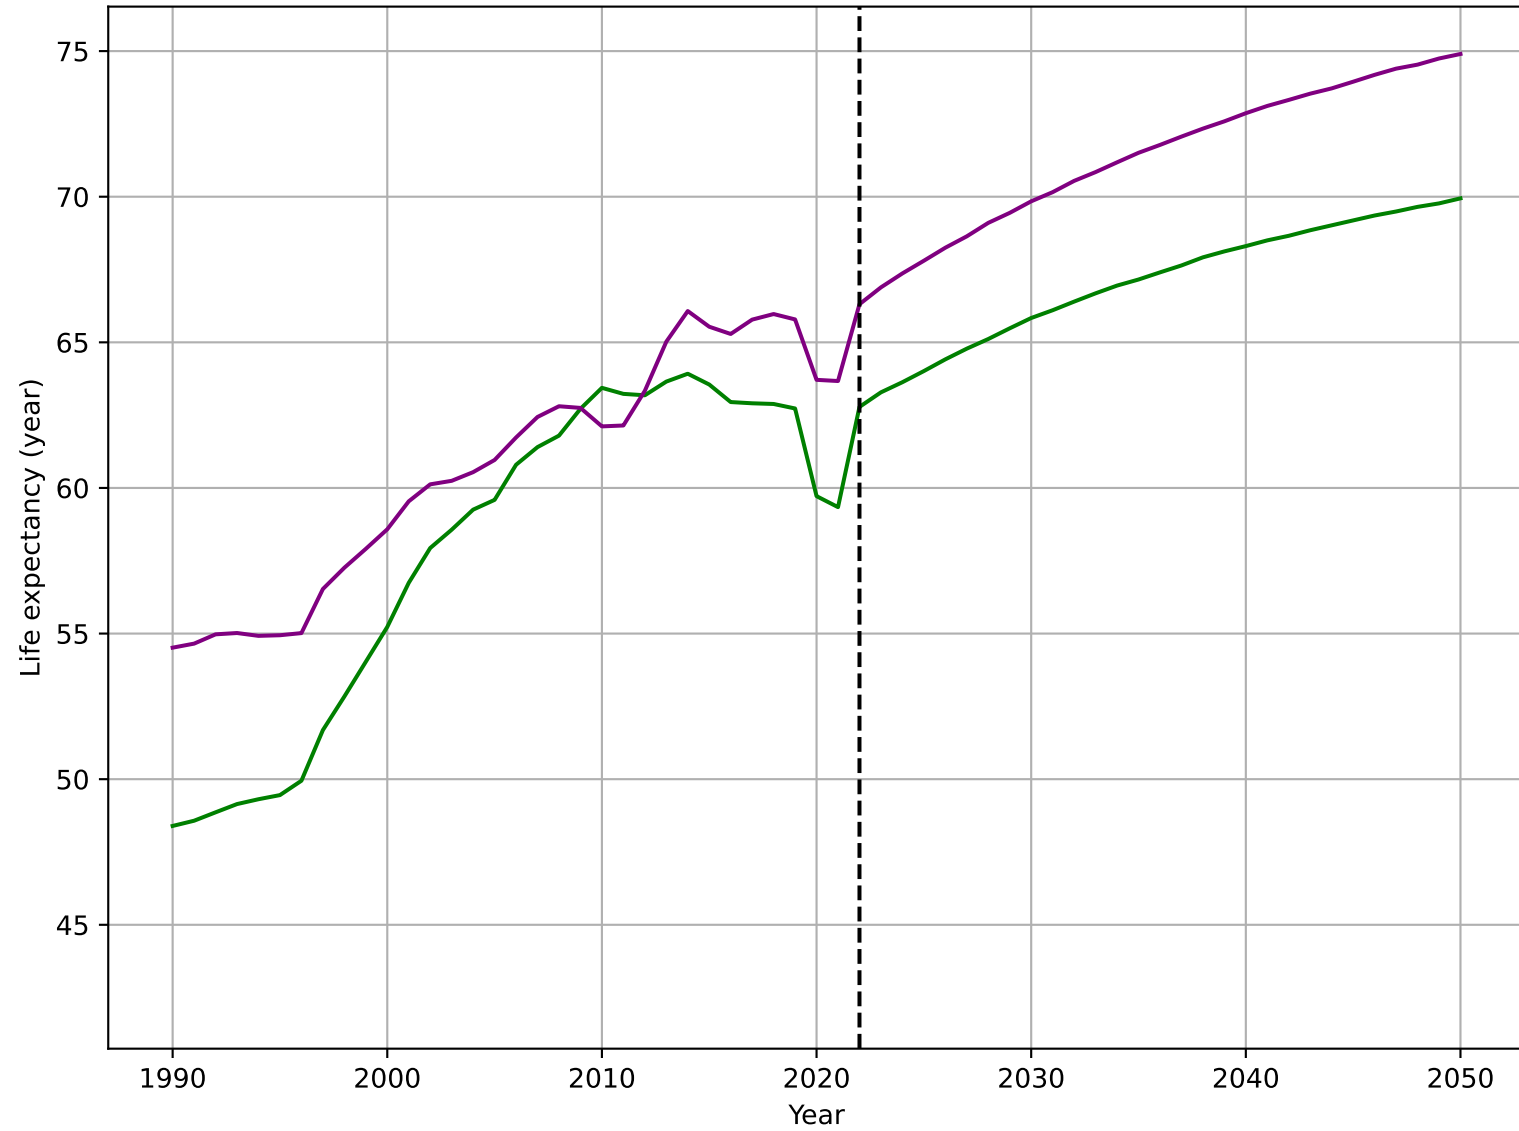

### Healthy Life Expectancy (HALE)

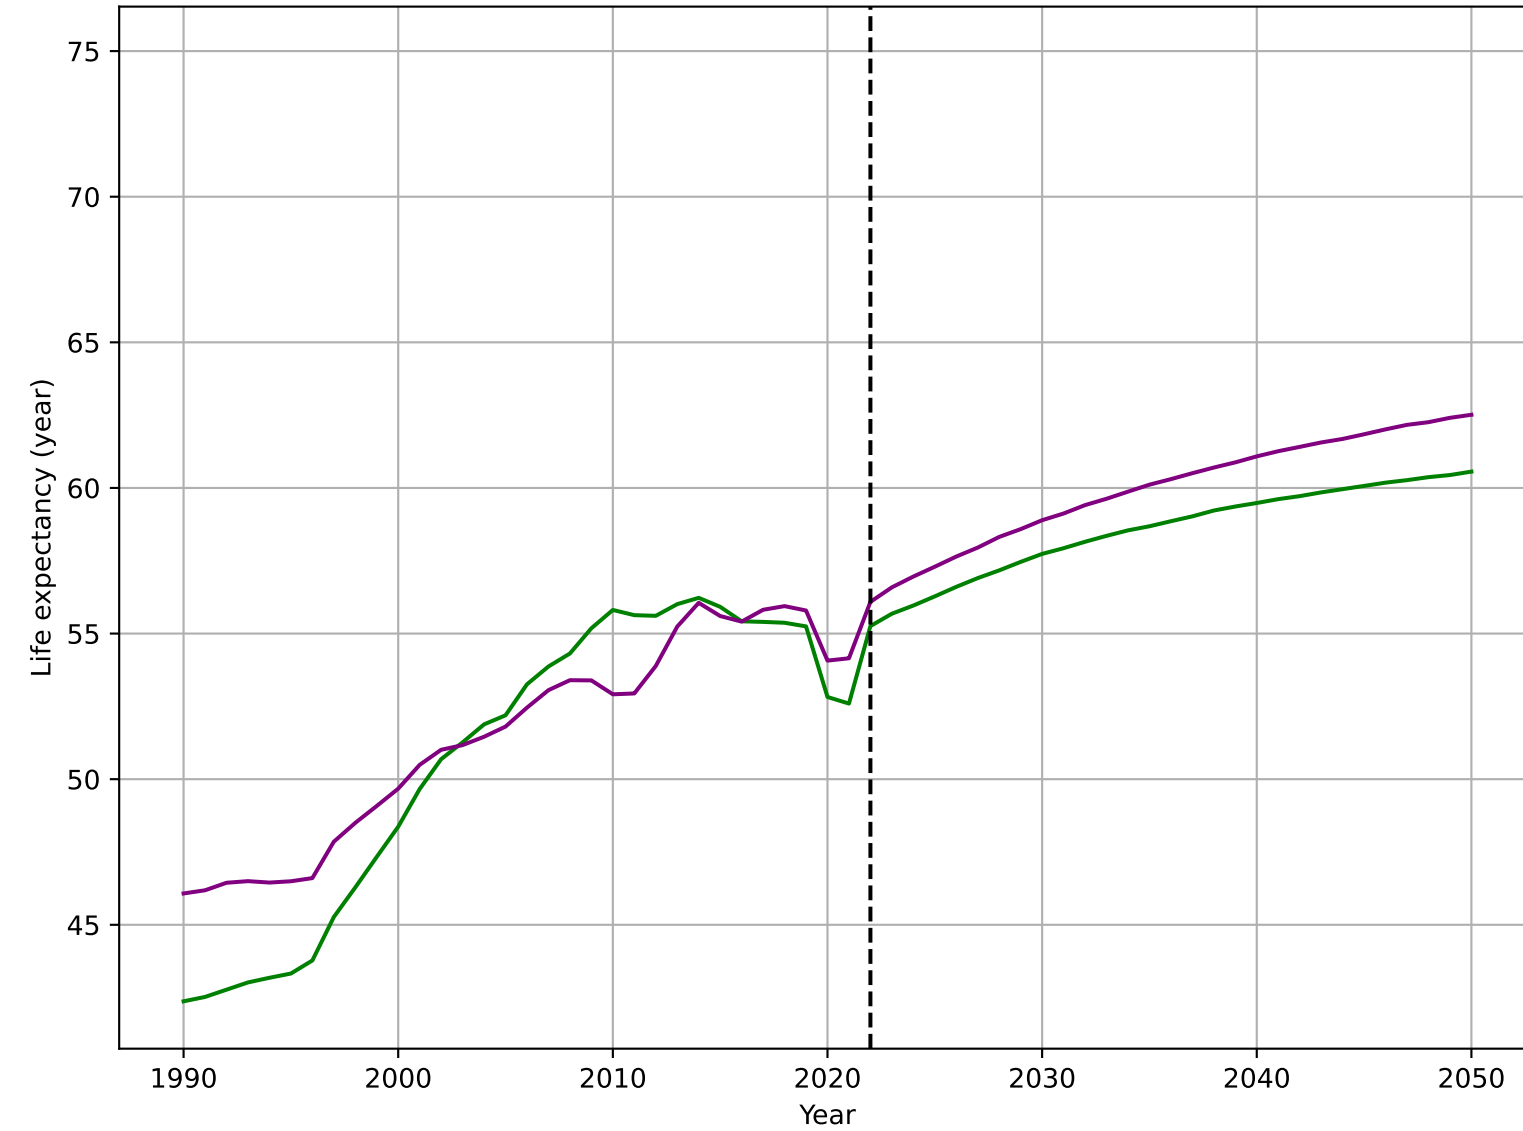

# Gabon

### Life Expectancy

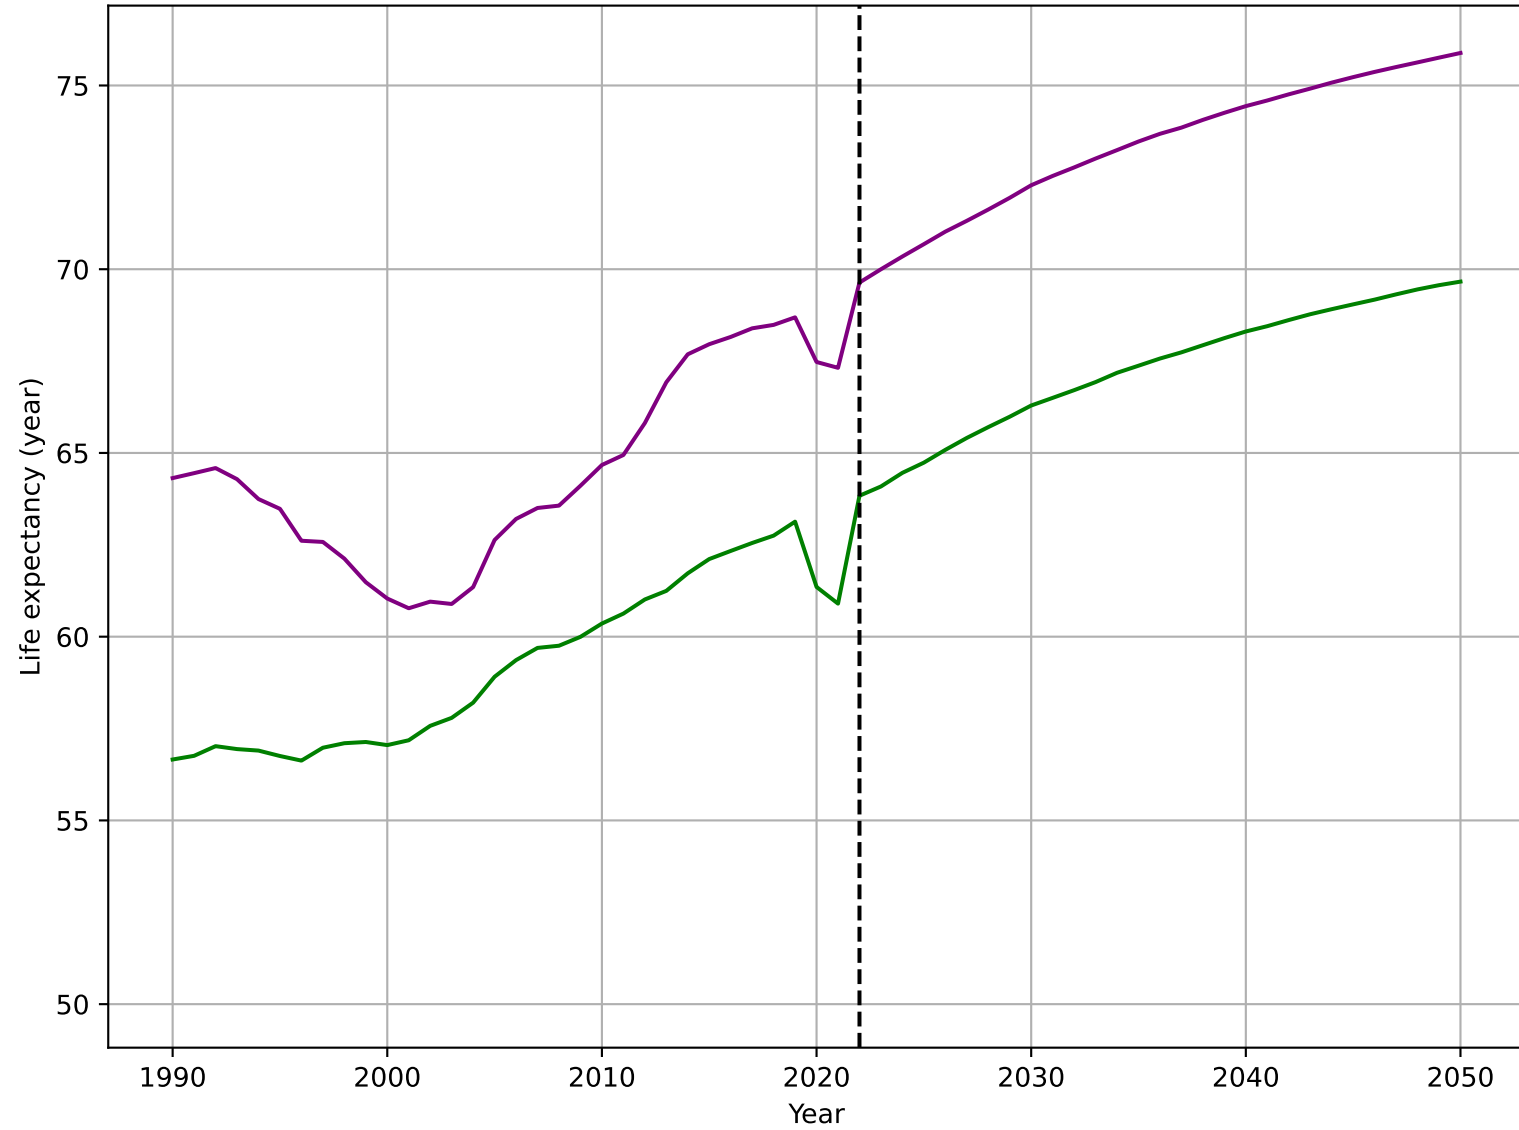

### Healthy Life Expectancy (HALE)

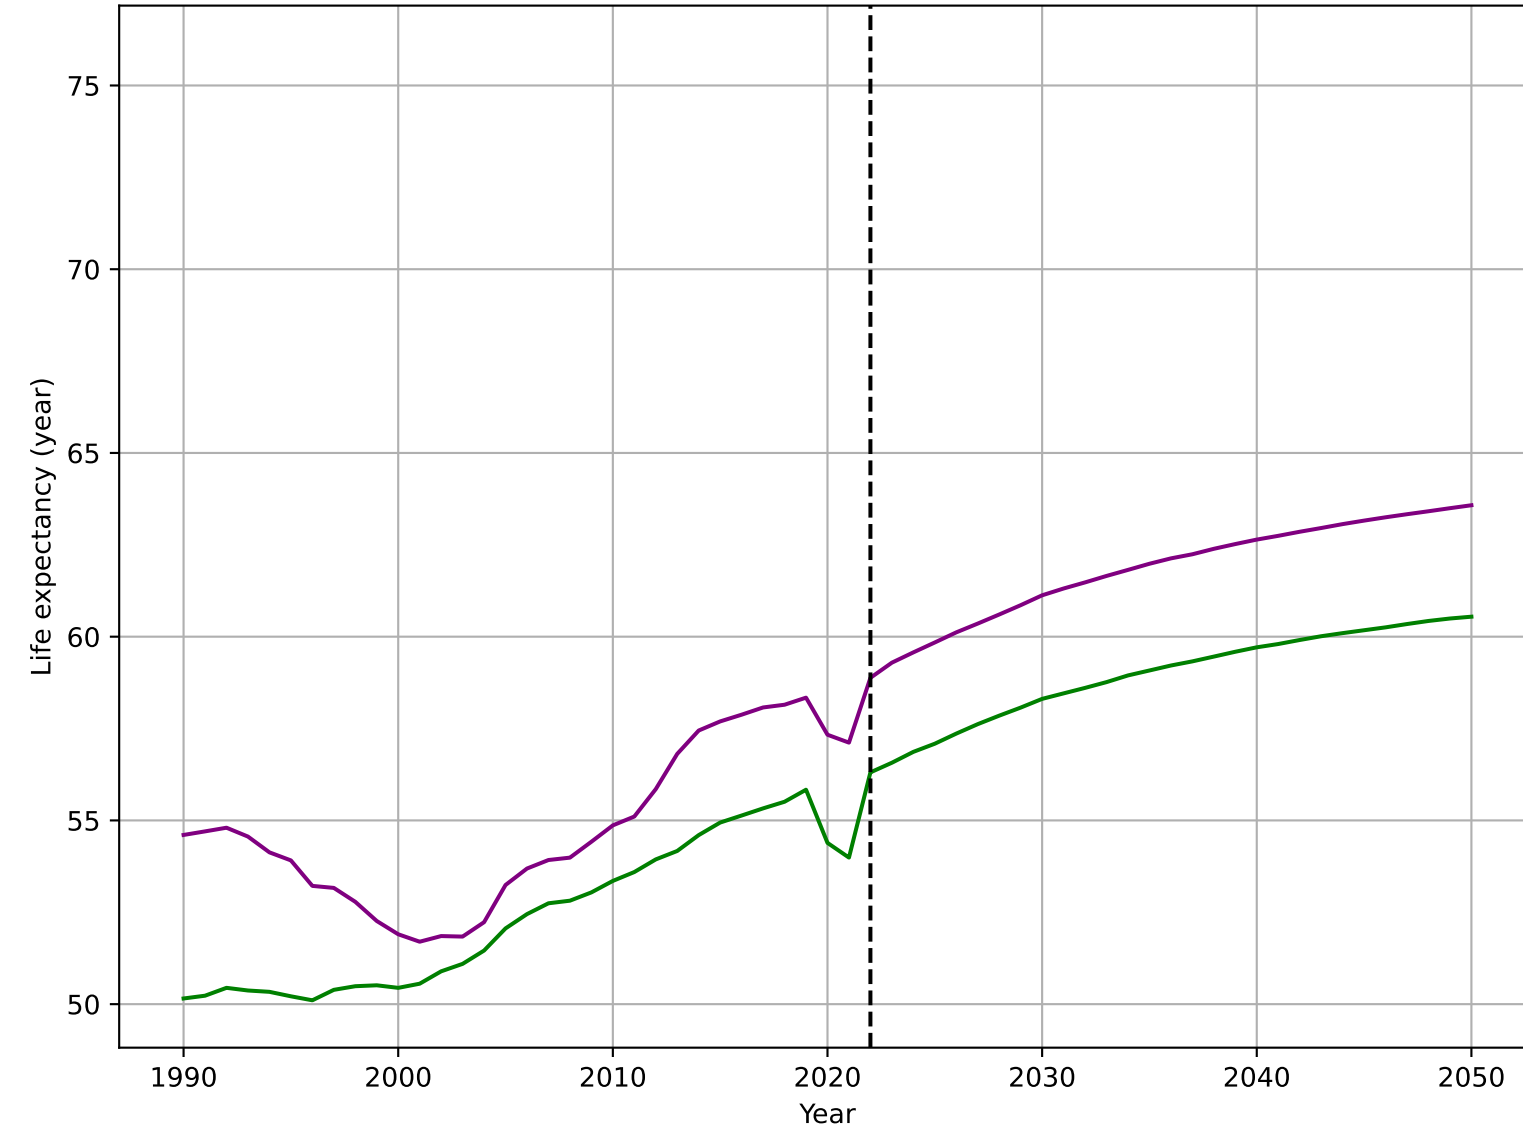



# Burundi

### Life Expectancy

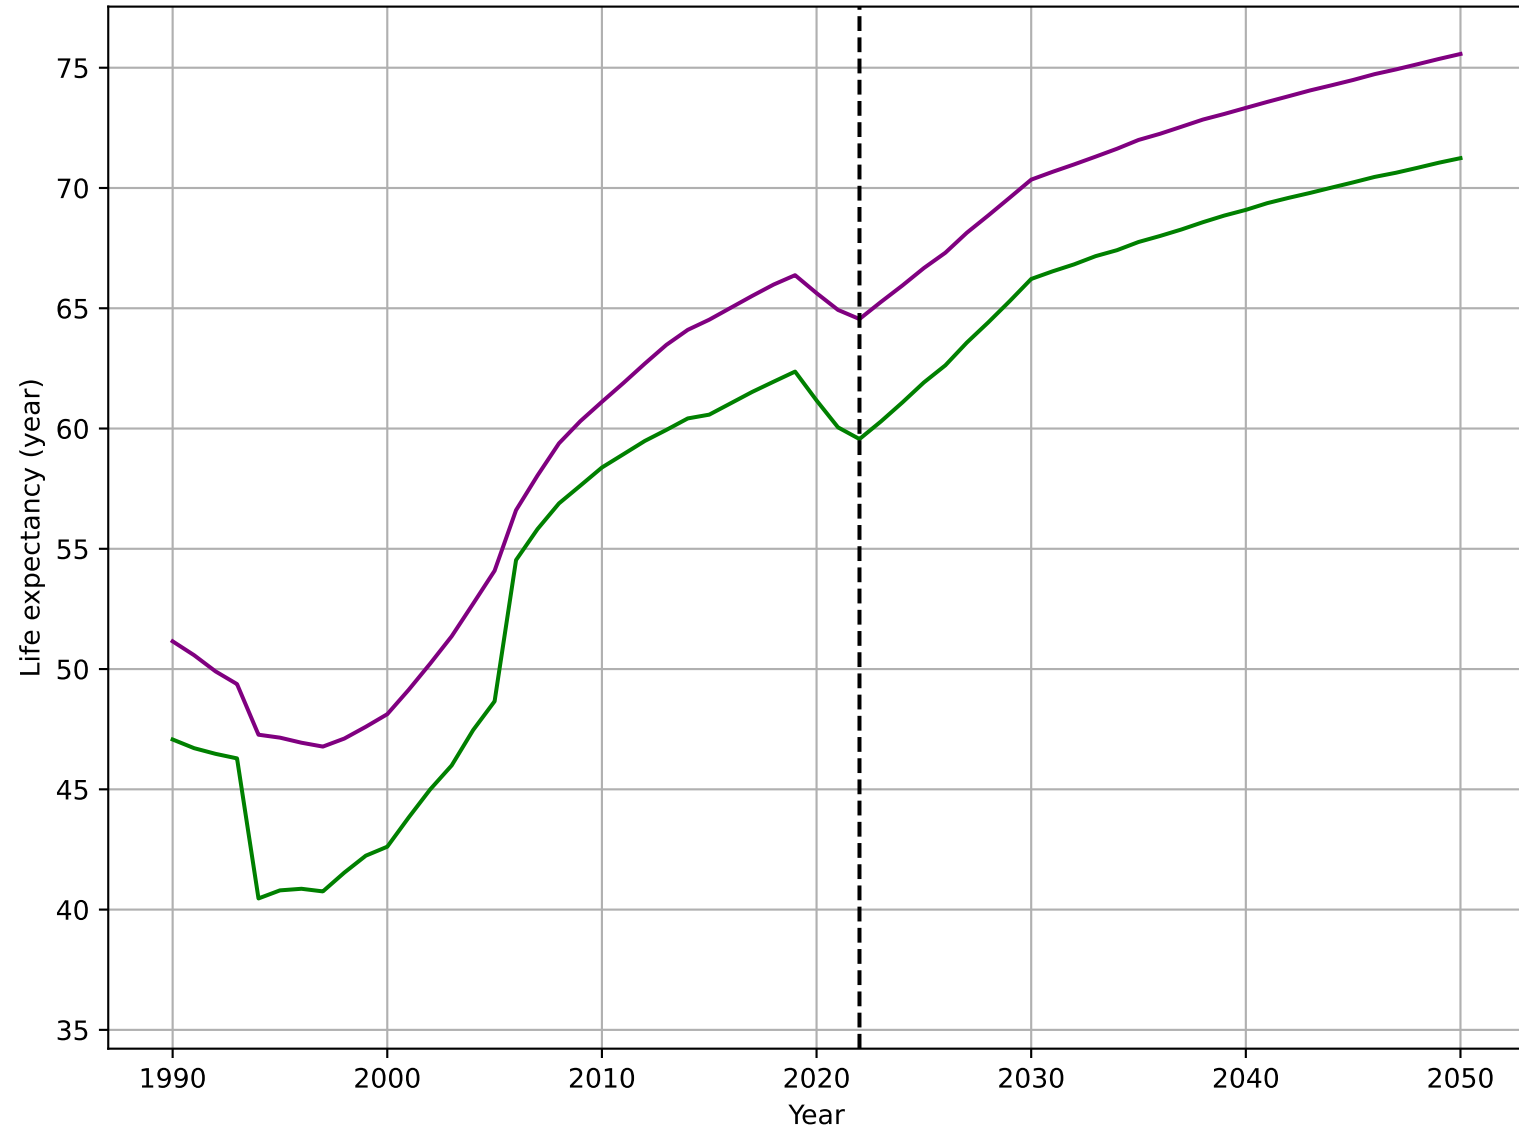

### Healthy Life Expectancy (HALE)

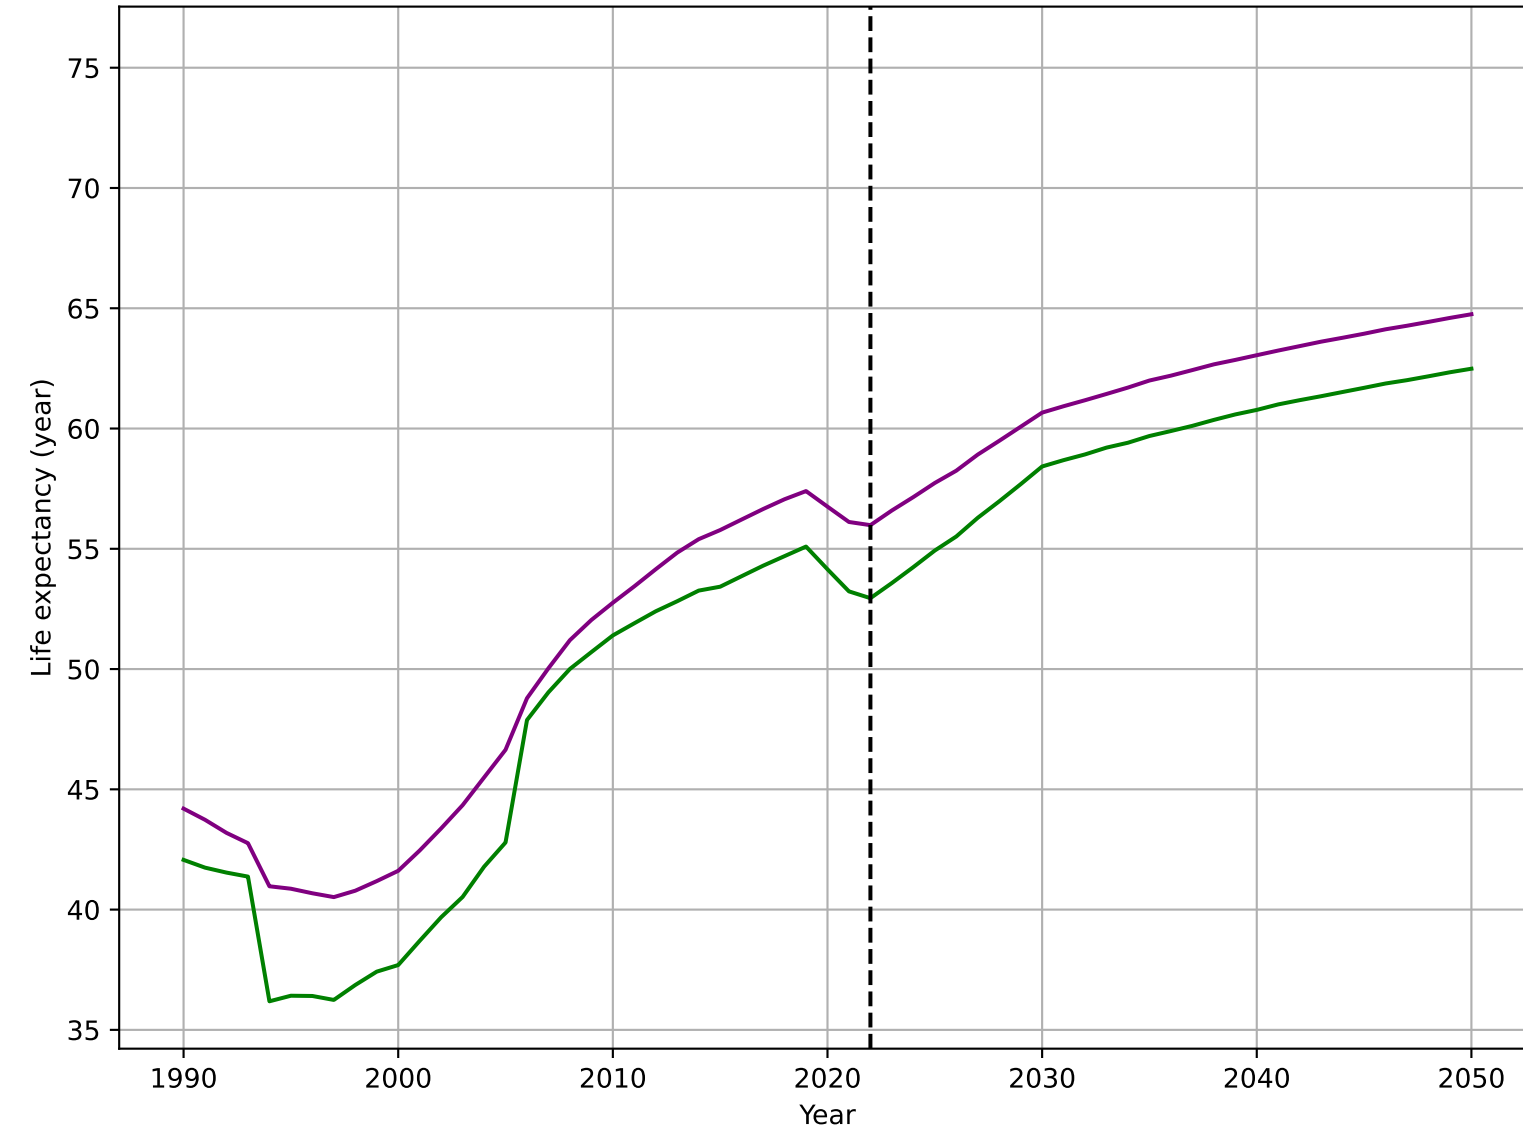

# Comoros

## Life Expectancy

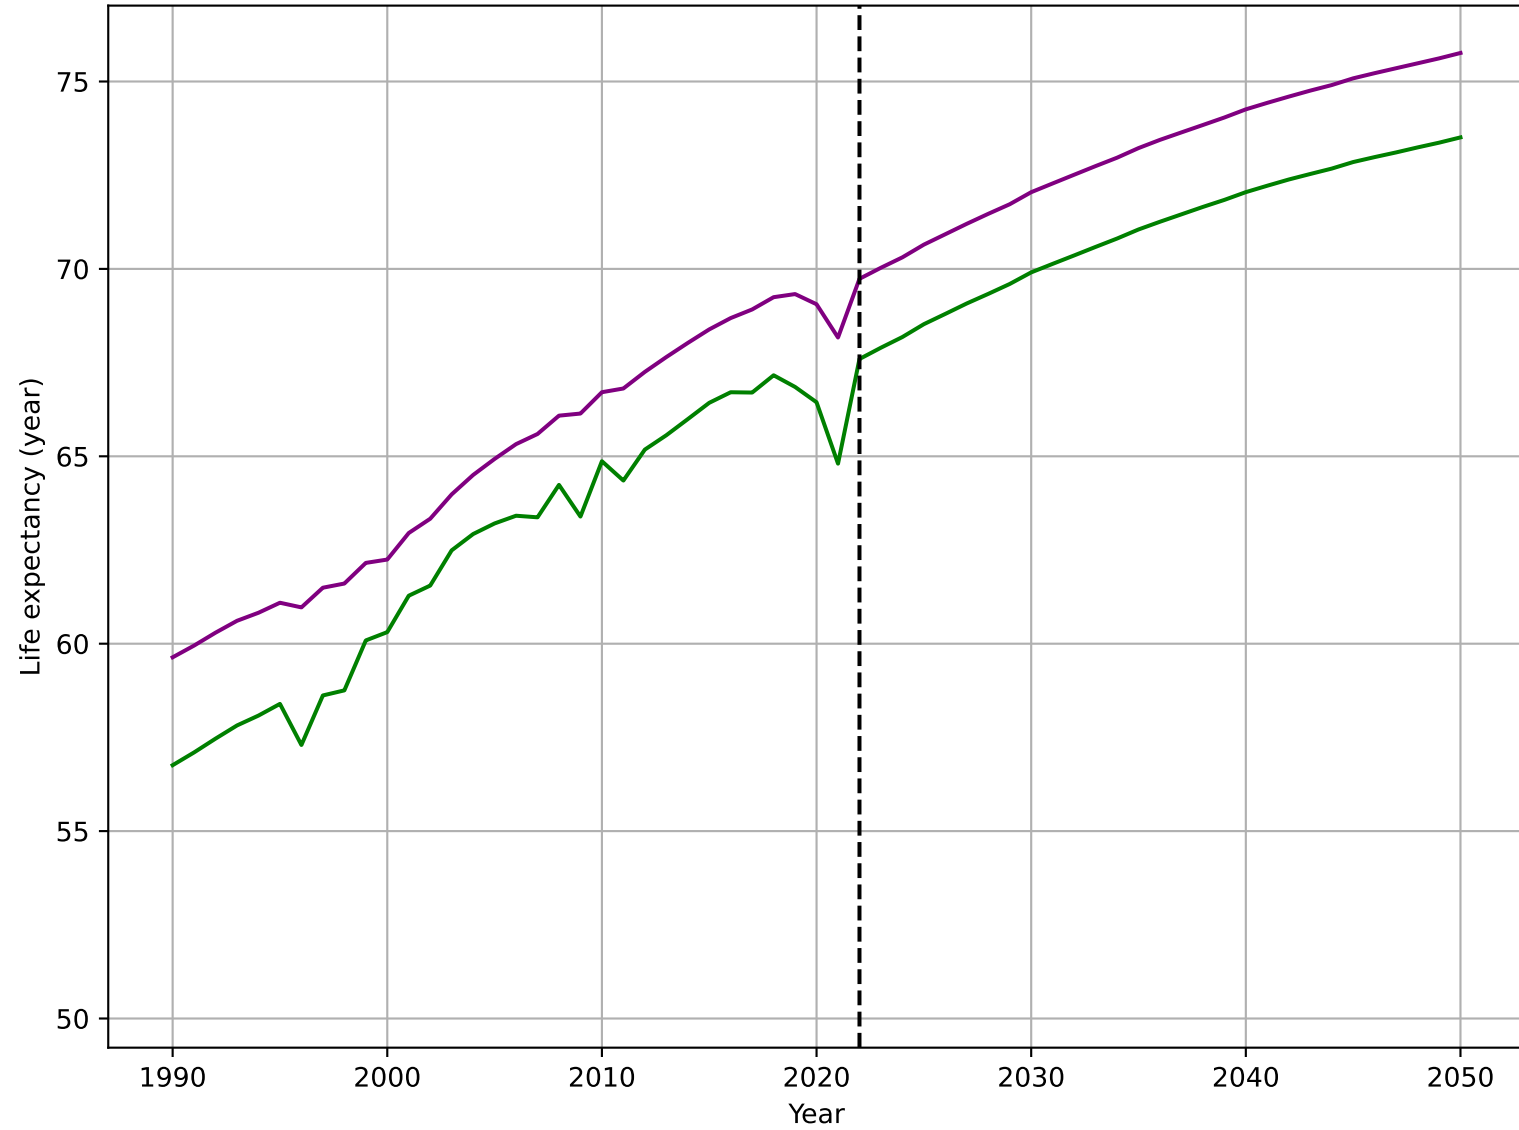

## Healthy Life Expectancy (HALE)

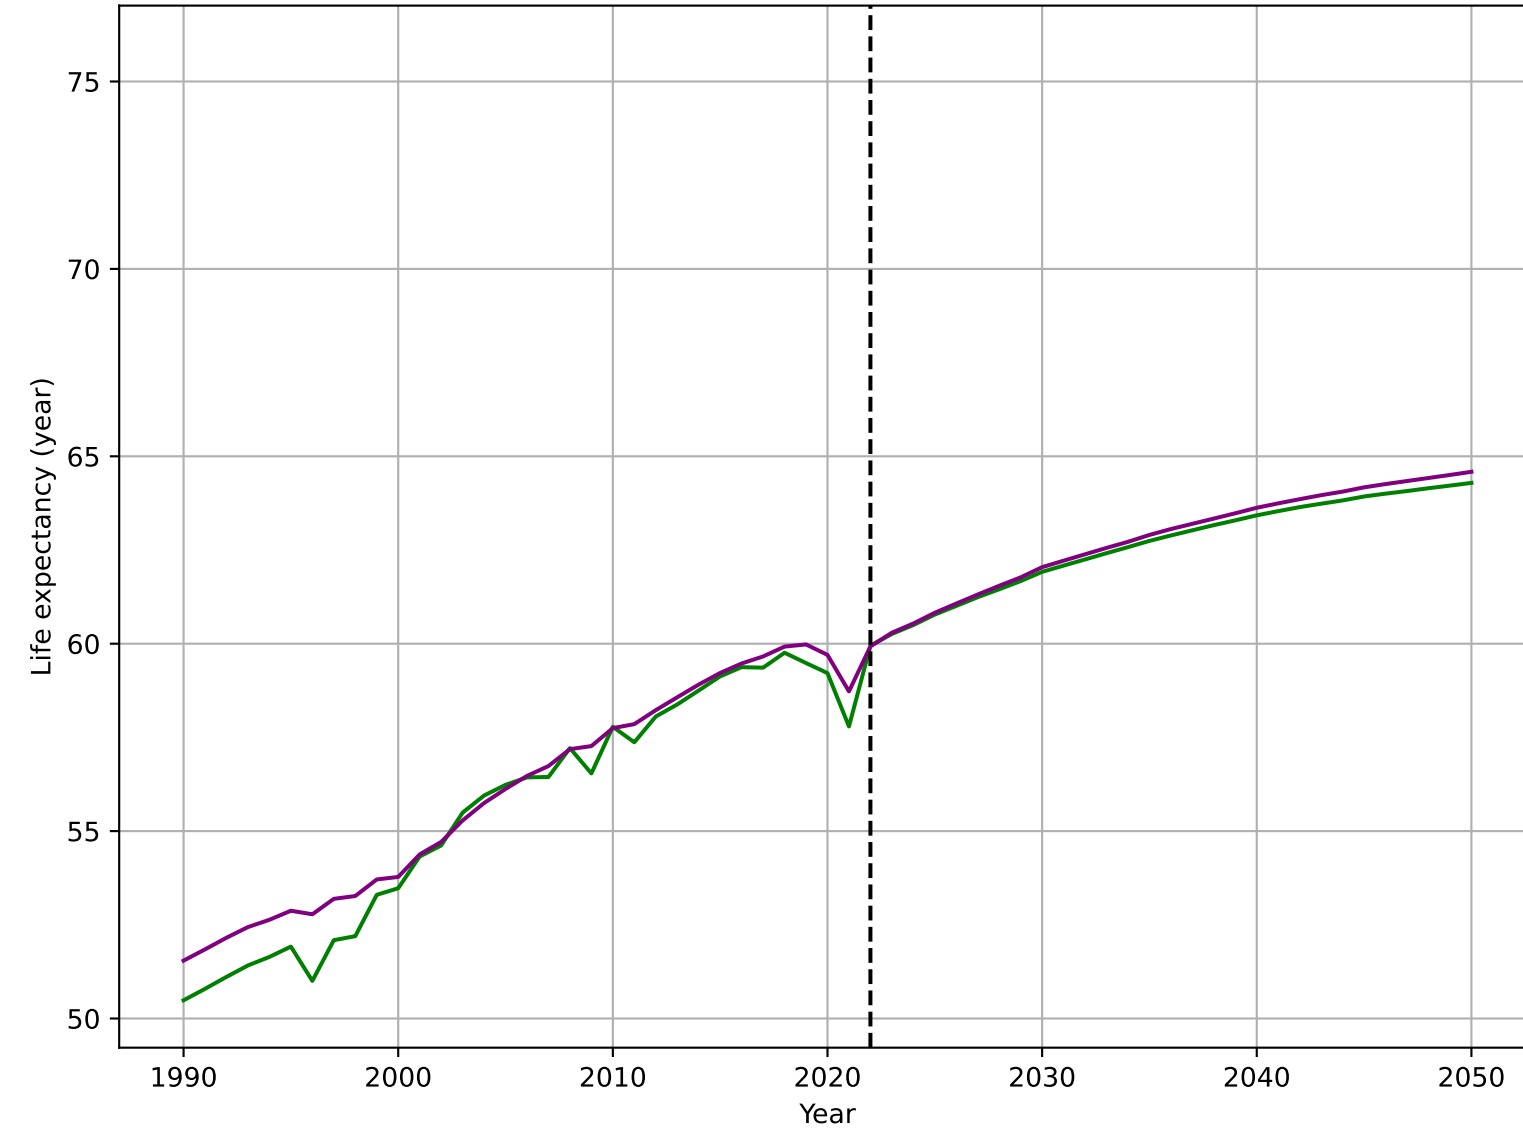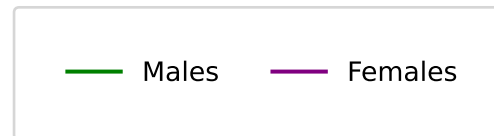

# Djibouti

### Life Expectancy

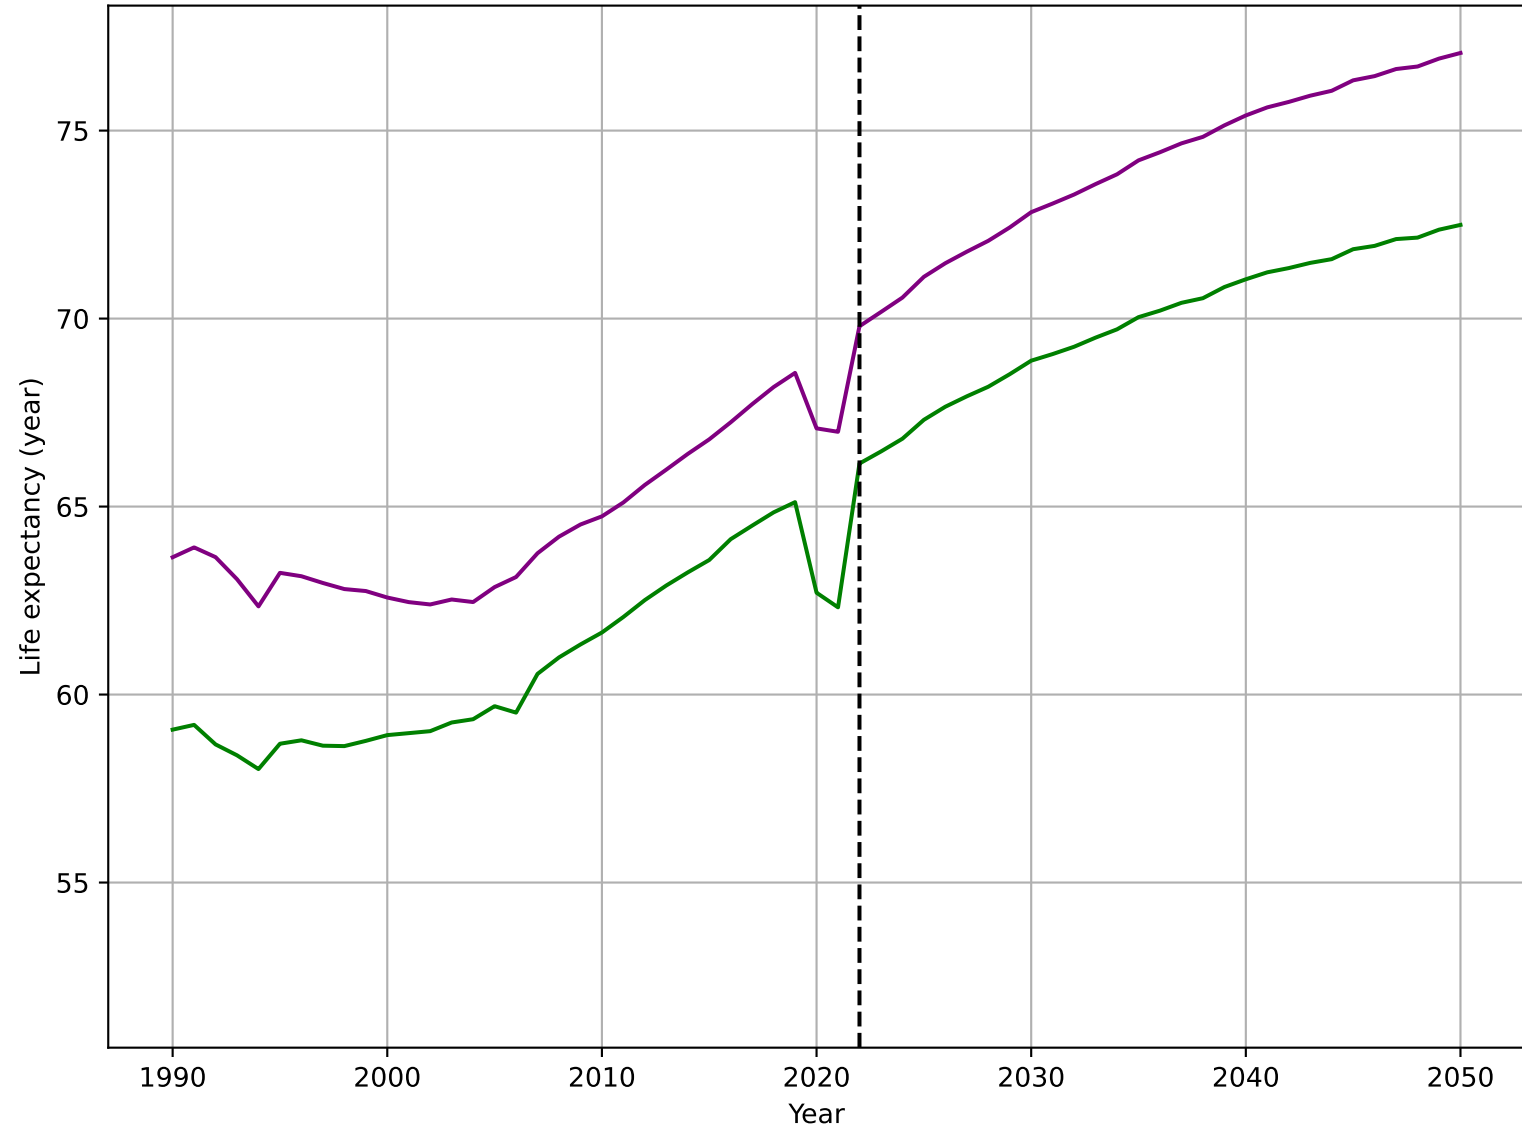

### Healthy Life Expectancy (HALE)

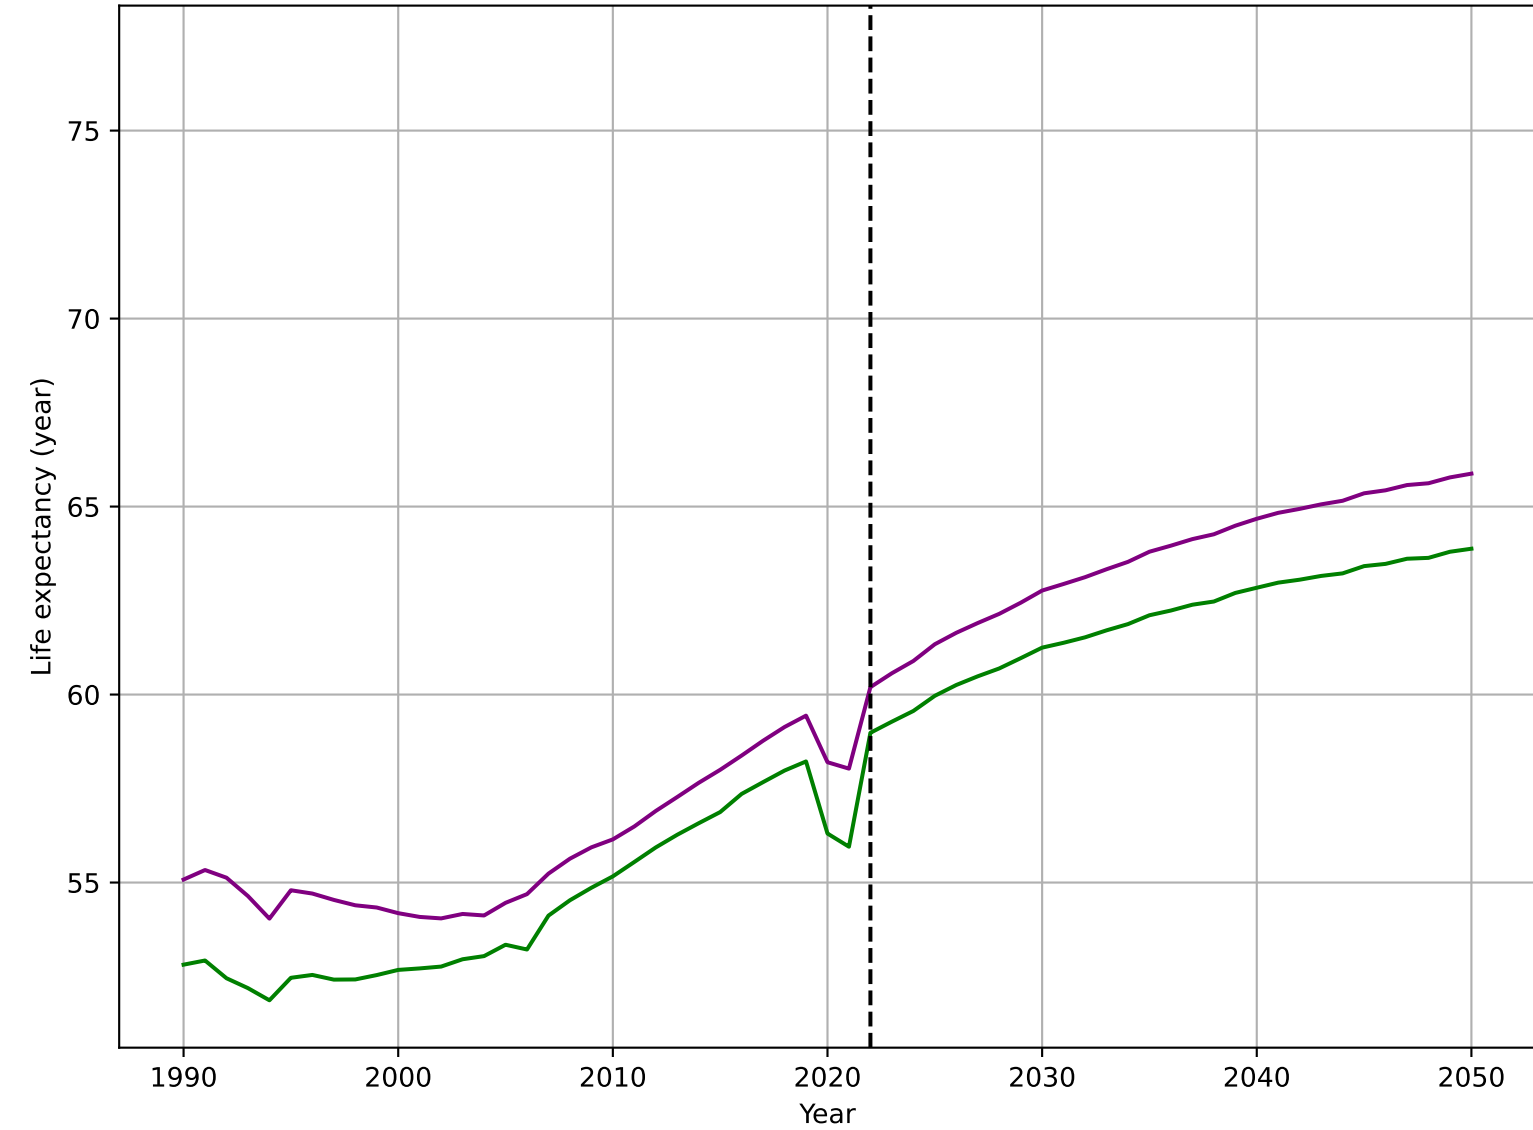

# Eritrea

### Life Expectancy

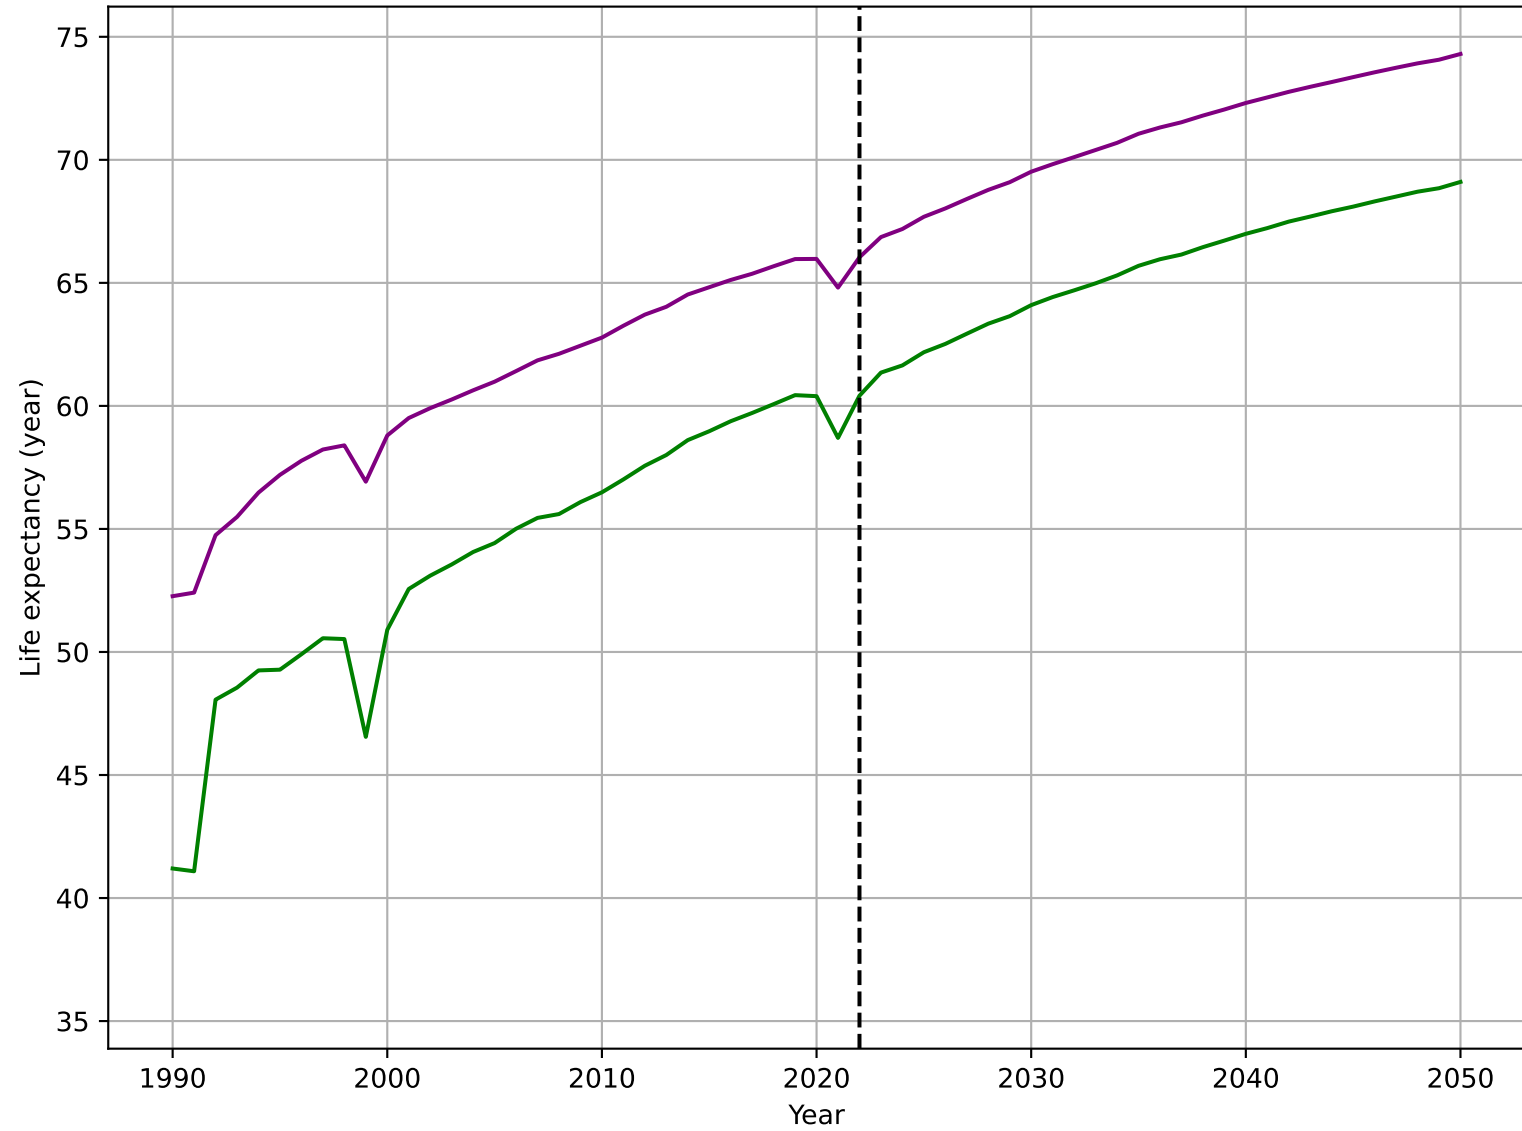

### Healthy Life Expectancy (HALE)

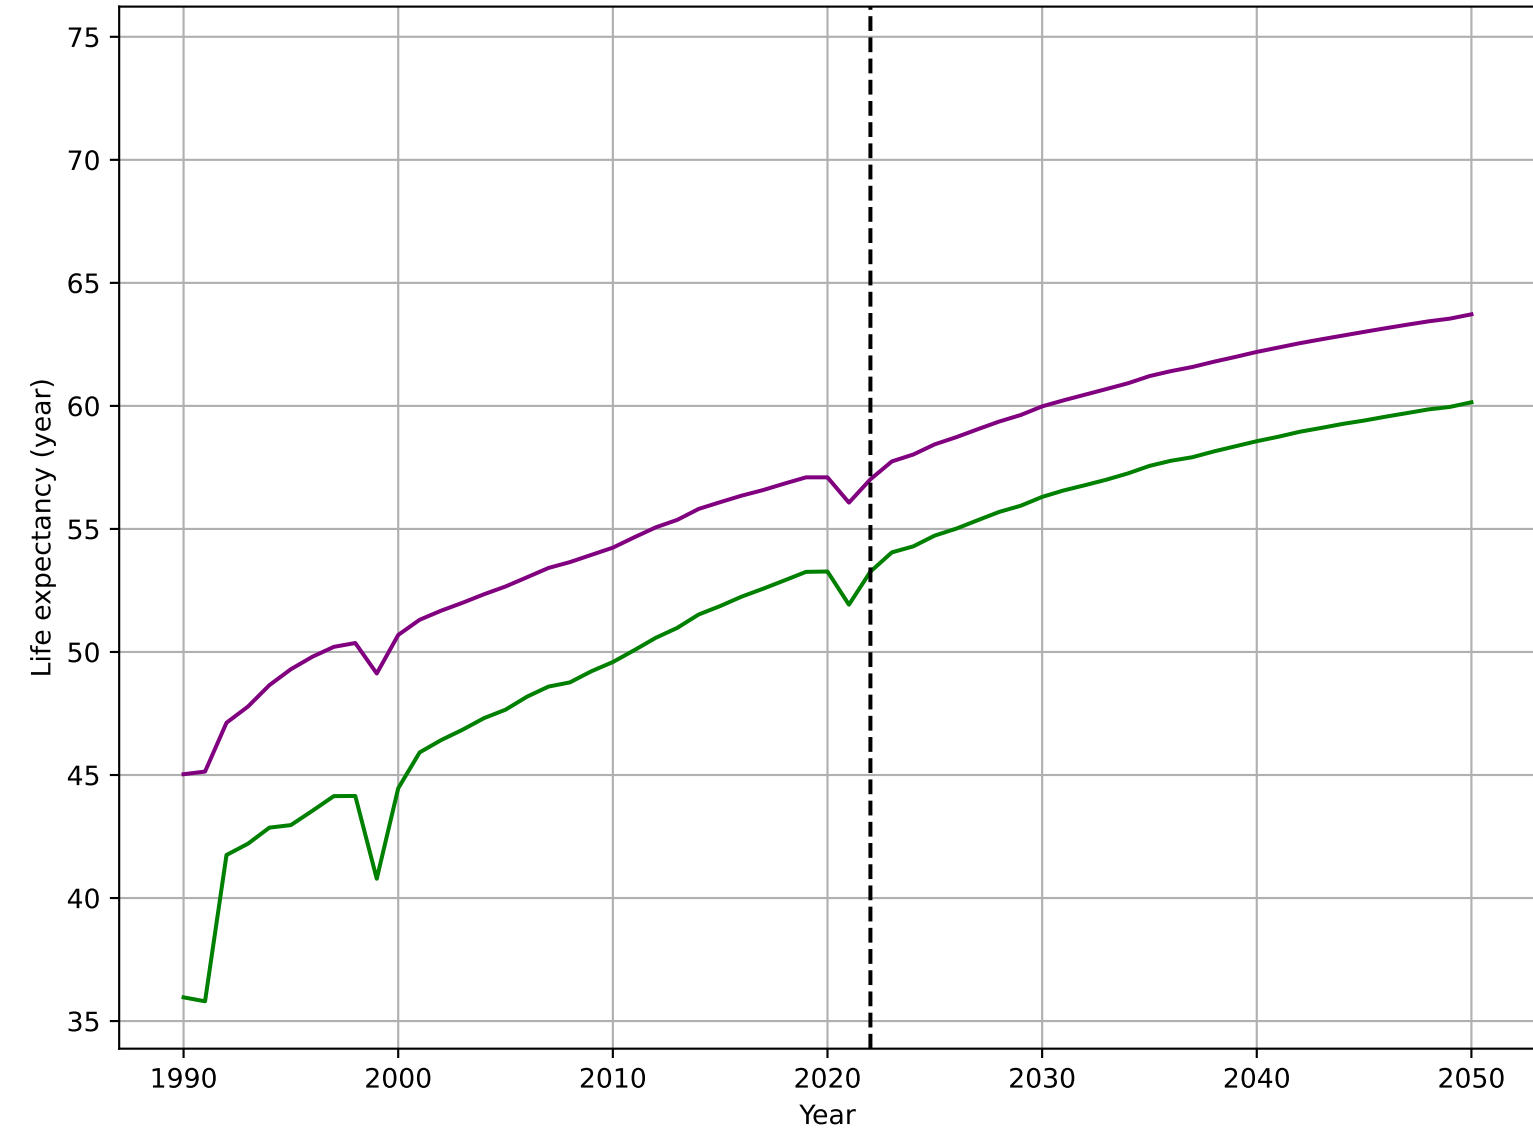

# Ethiopia

### Life Expectancy

### Healthy Life Expectancy (HALE)

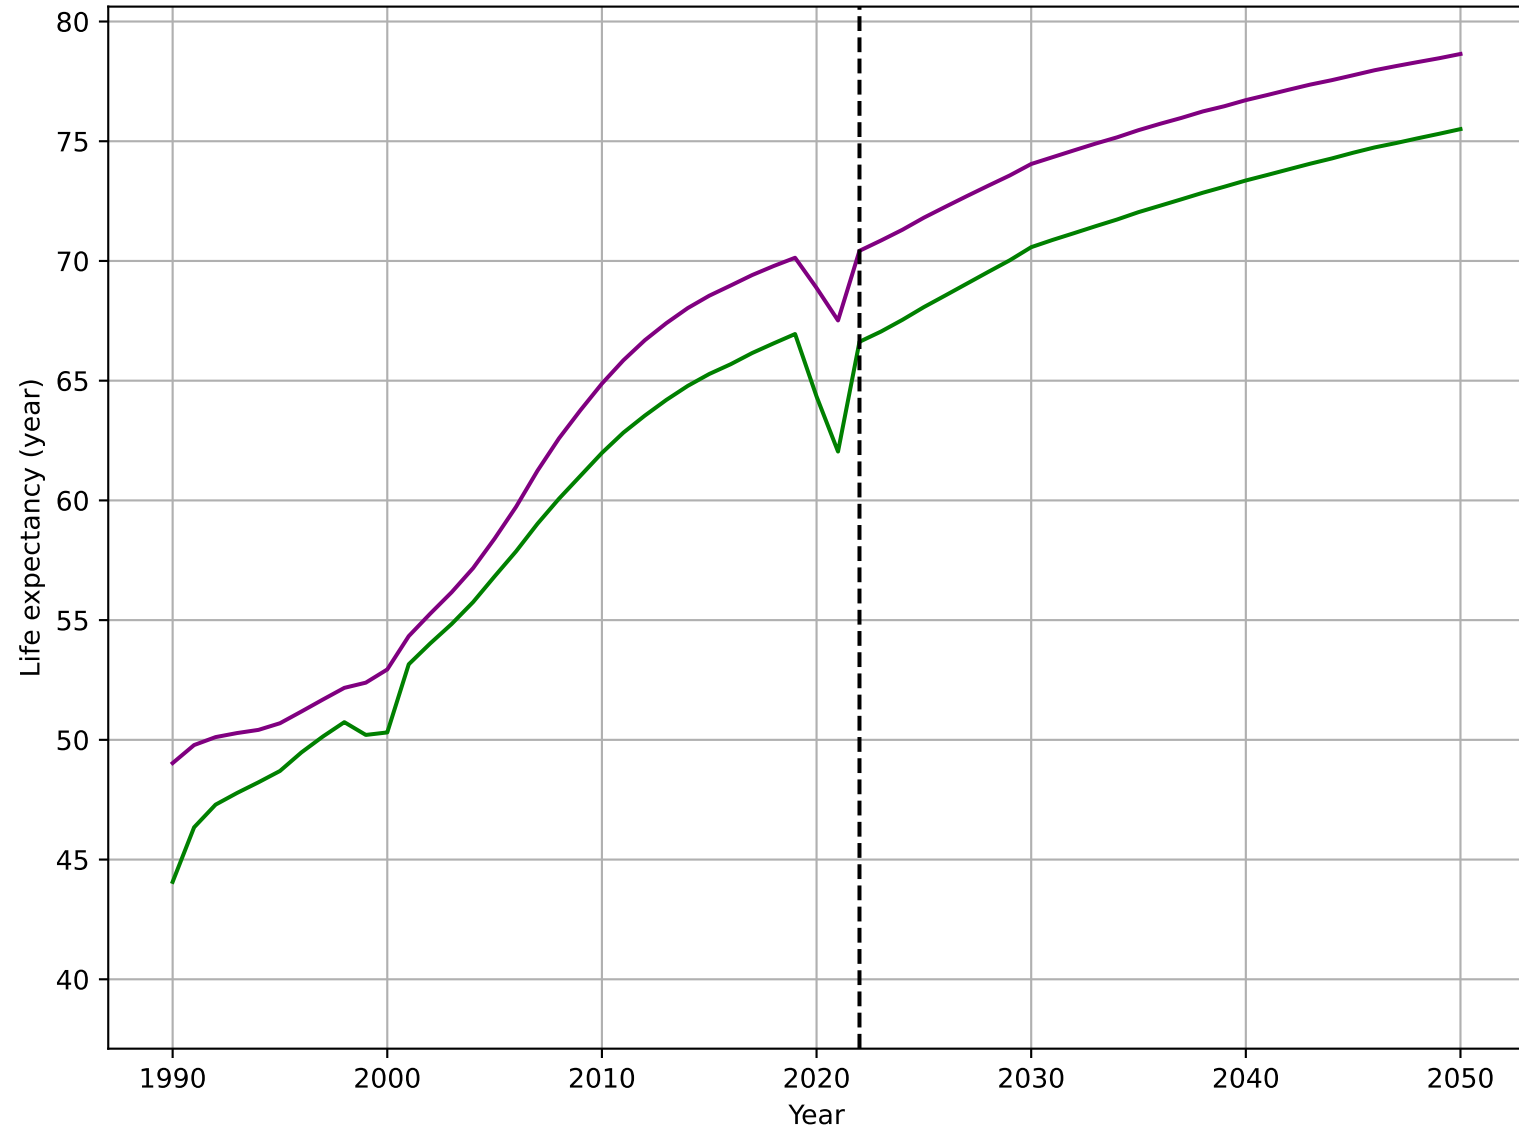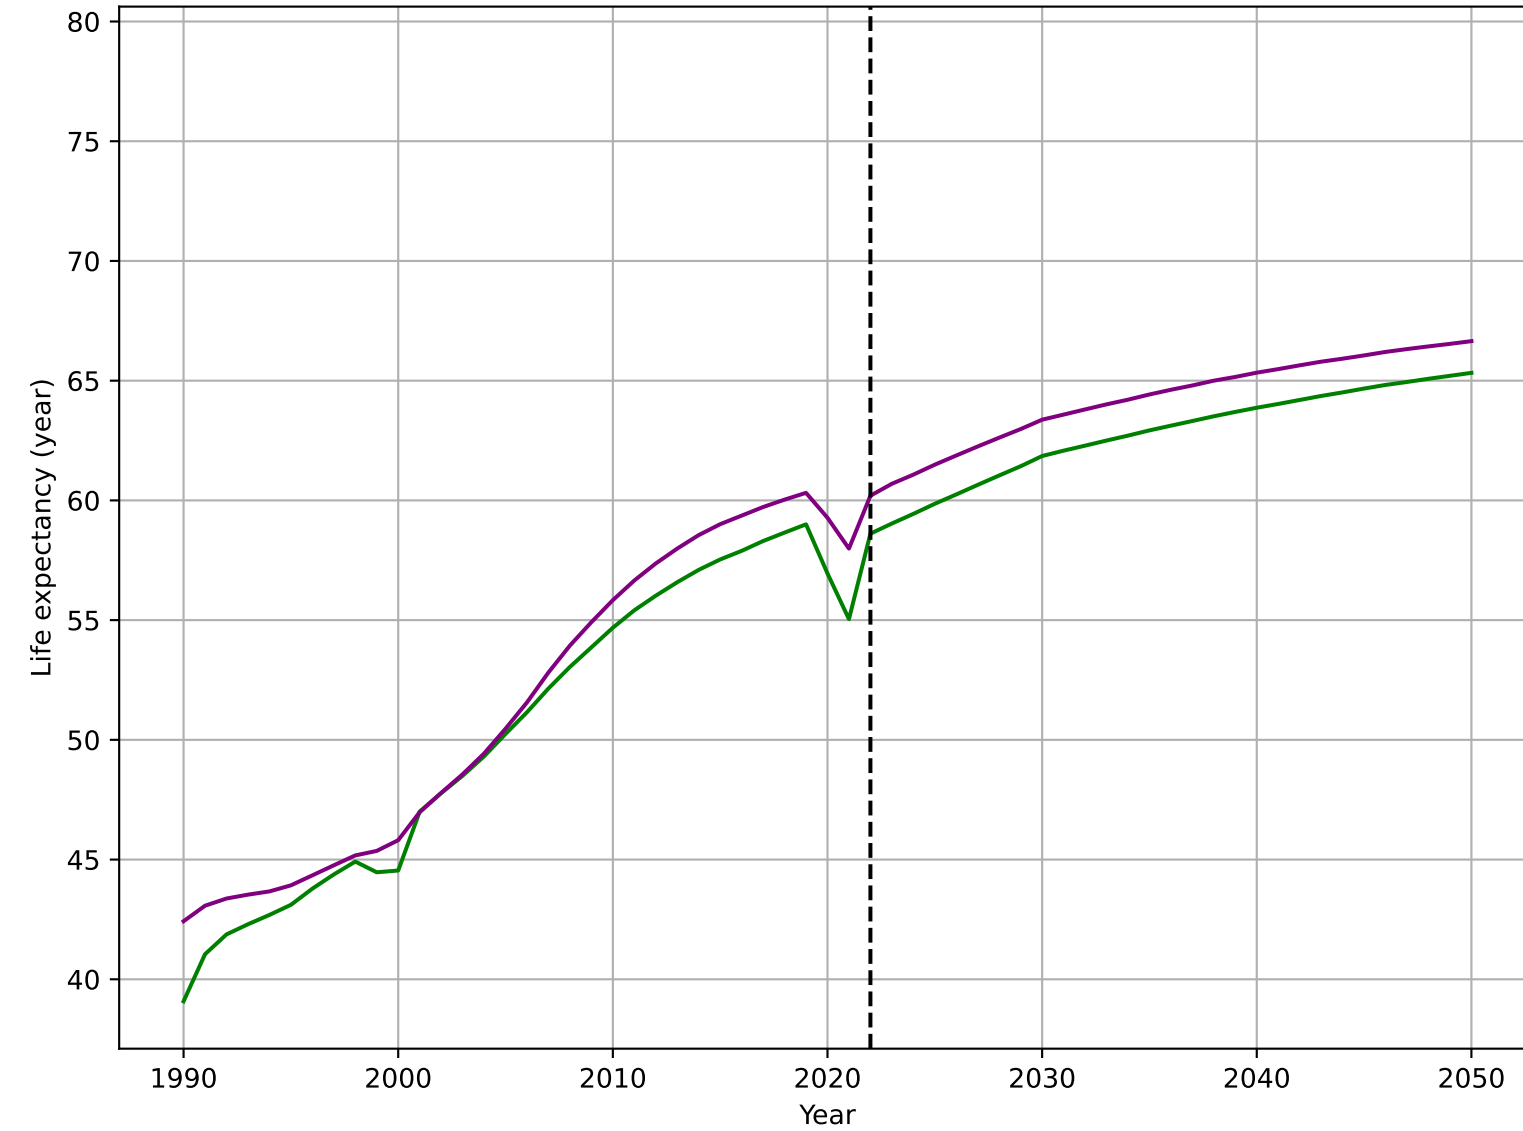

# Kenya

### Life Expectancy

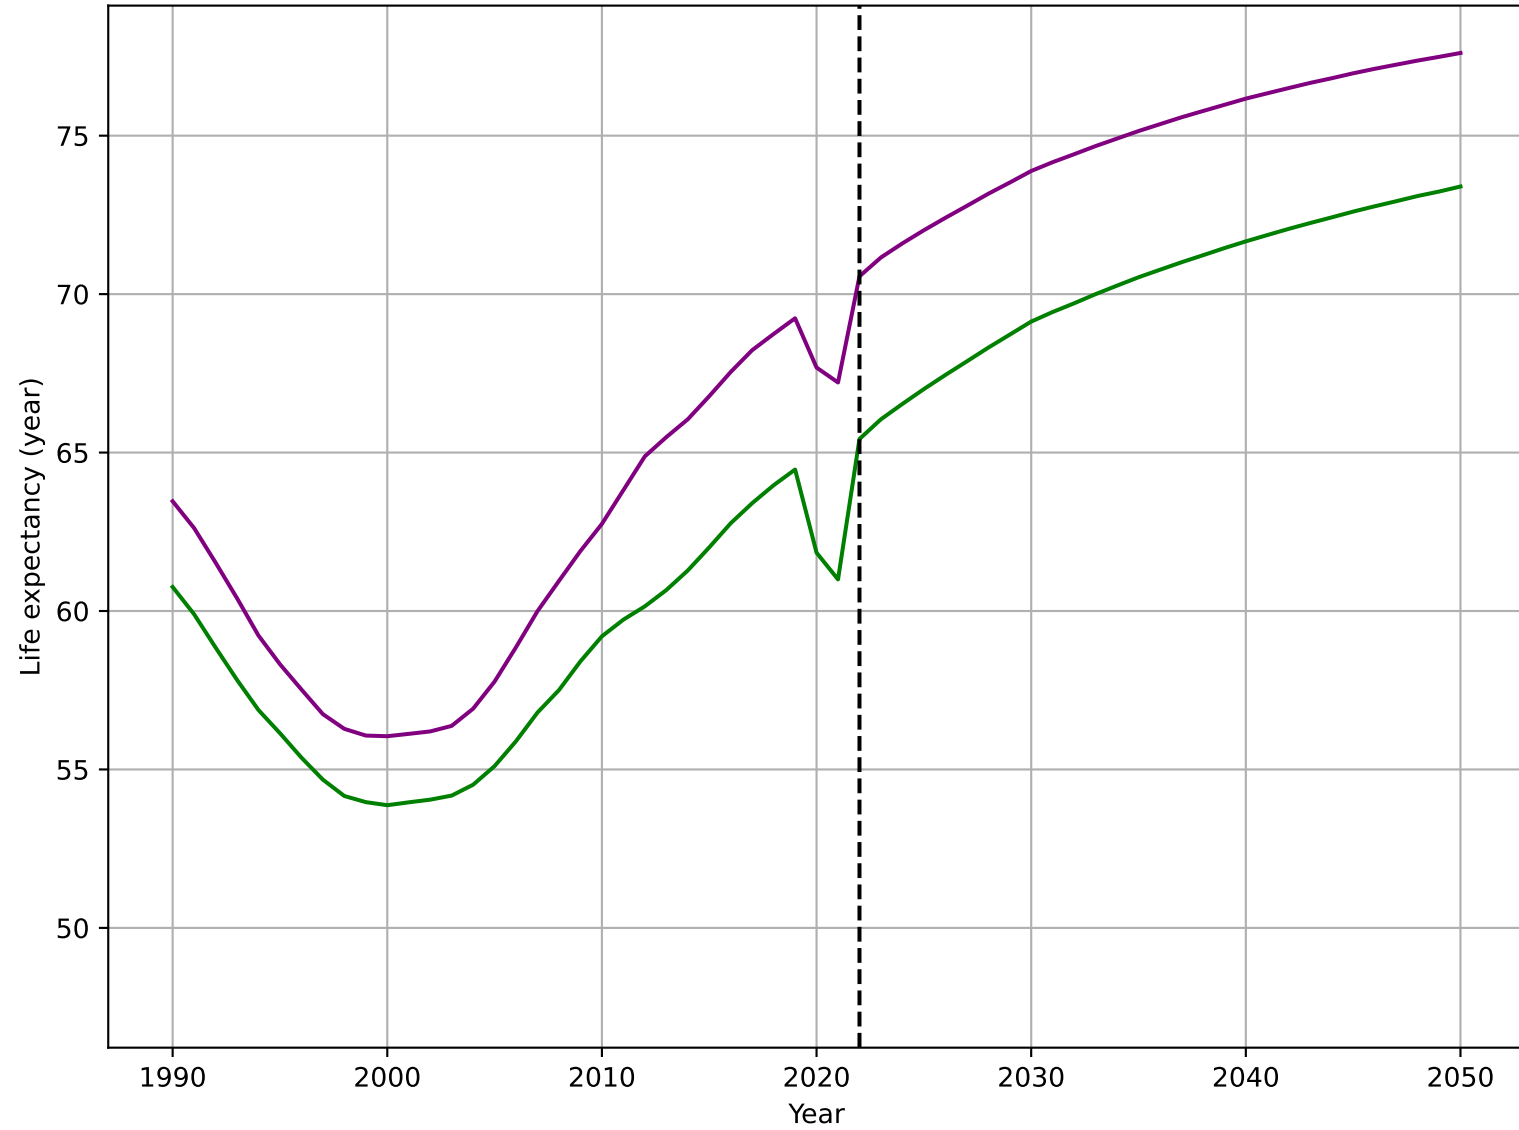

### Healthy Life Expectancy (HALE)

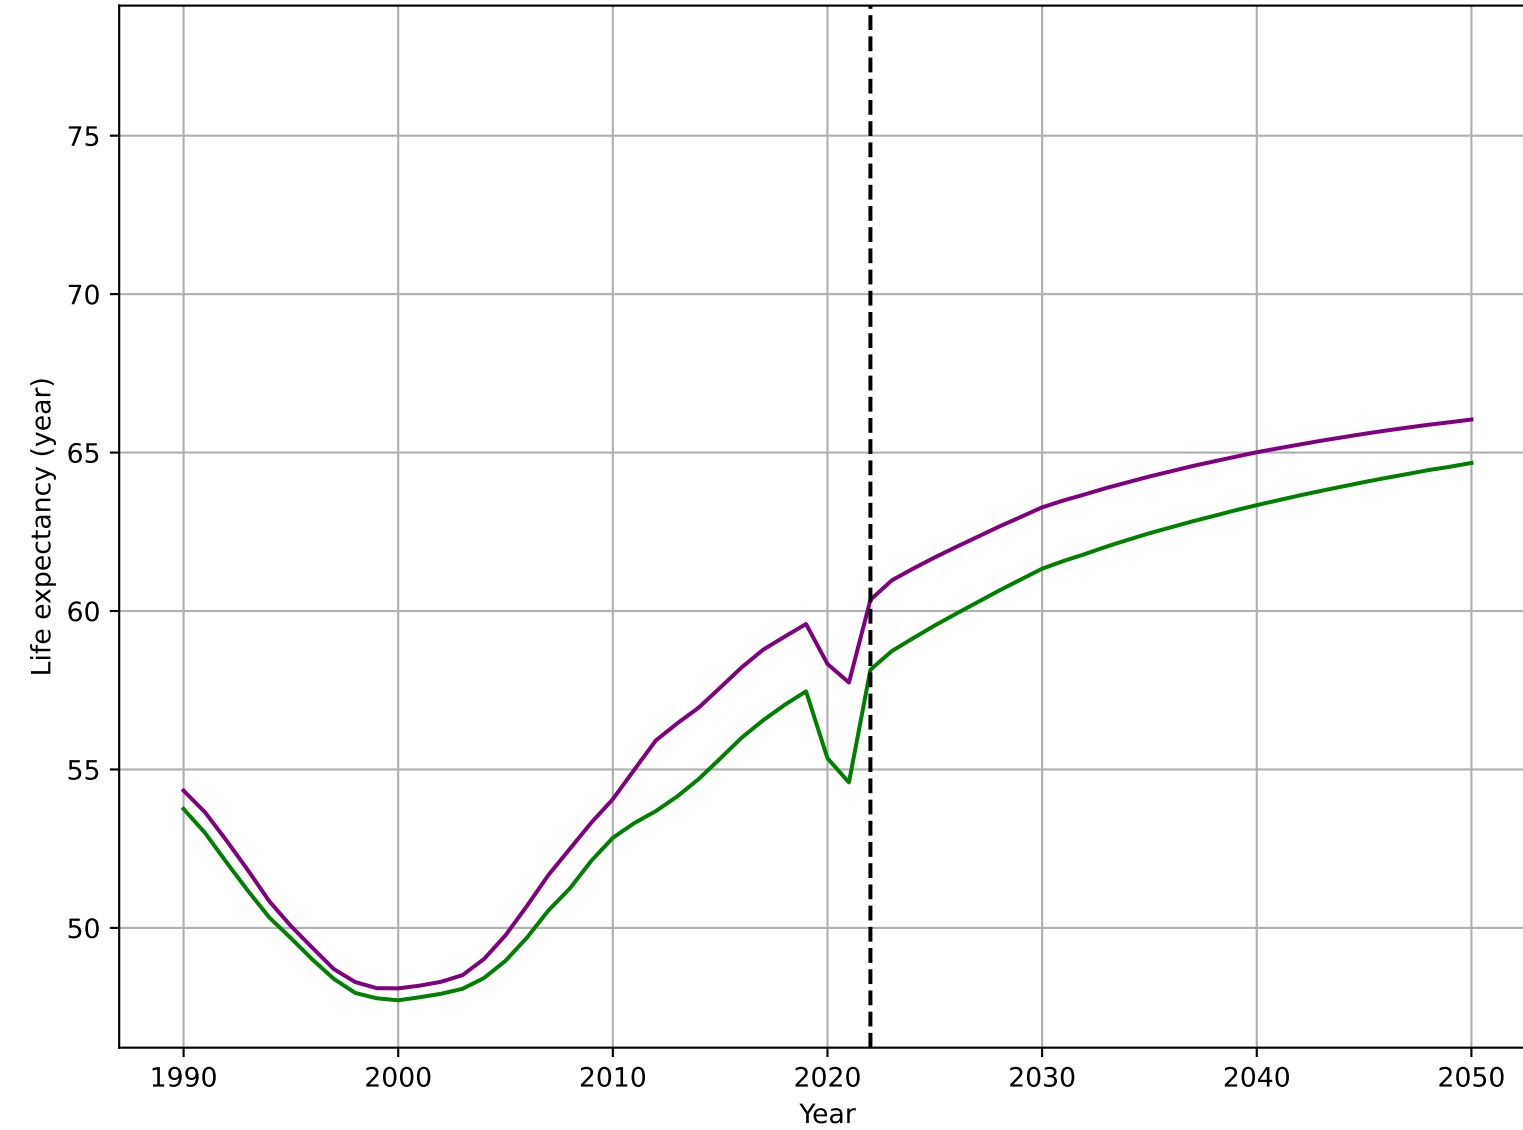

# Madagascar

### Life Expectancy

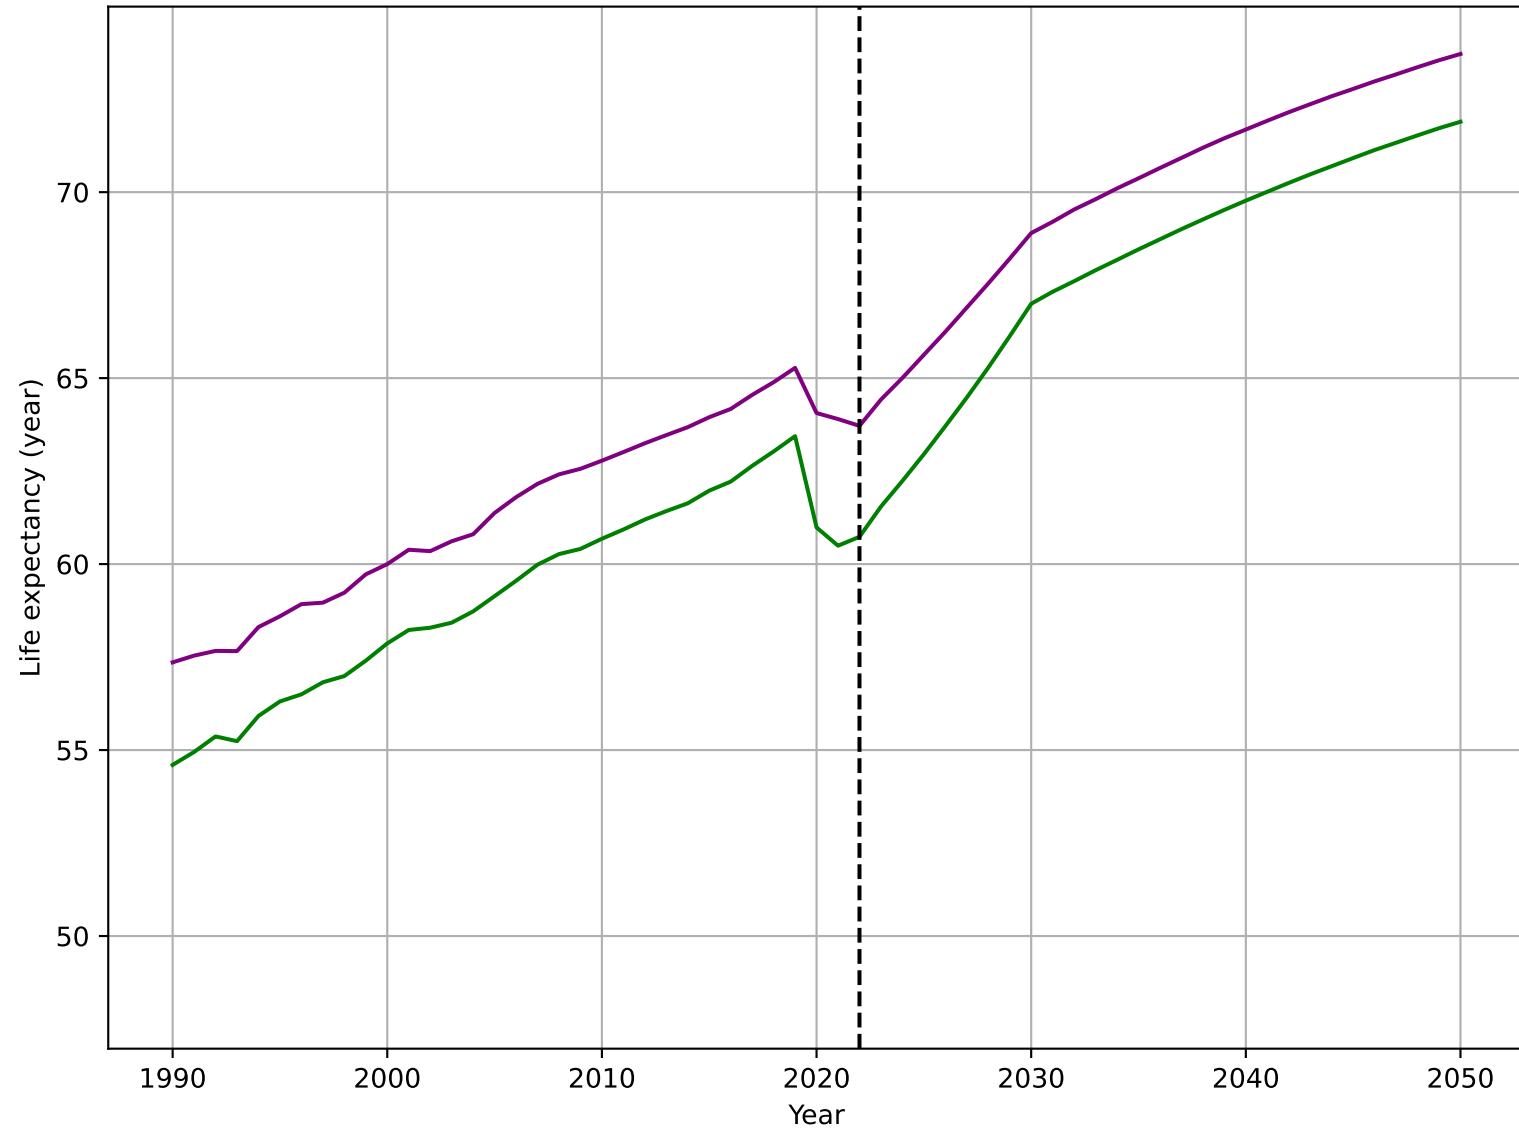

### Healthy Life Expectancy (HALE)

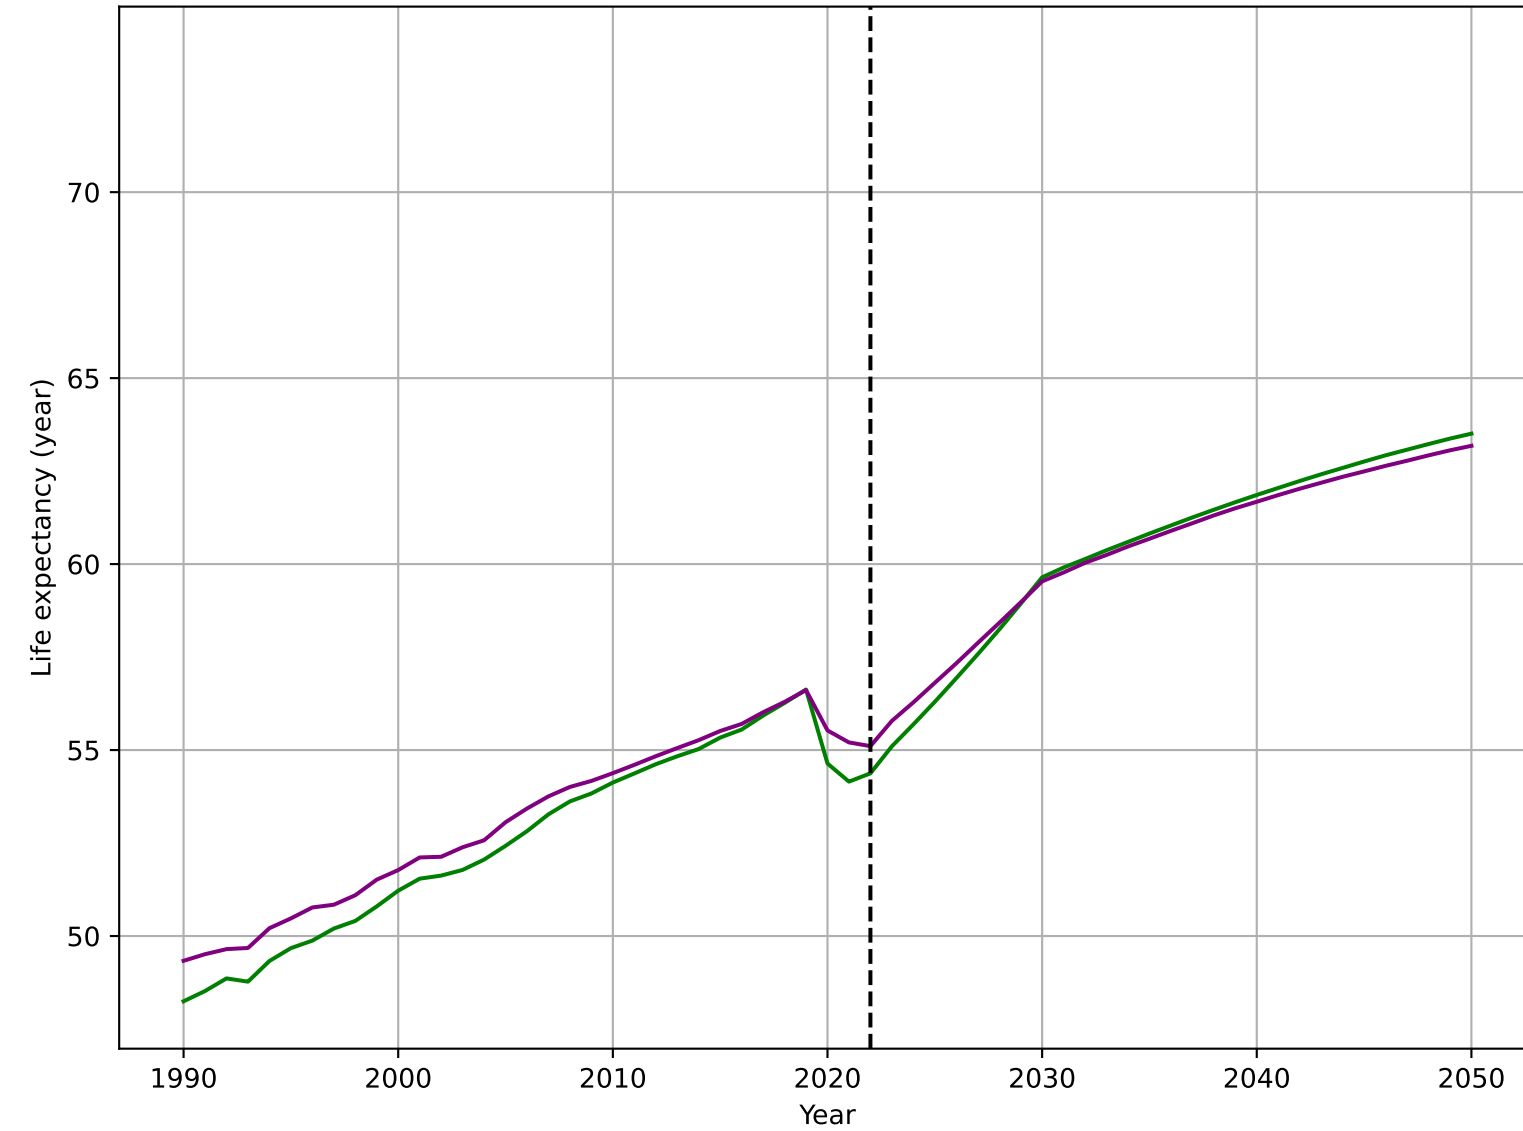

# Malawi

### Life Expectancy

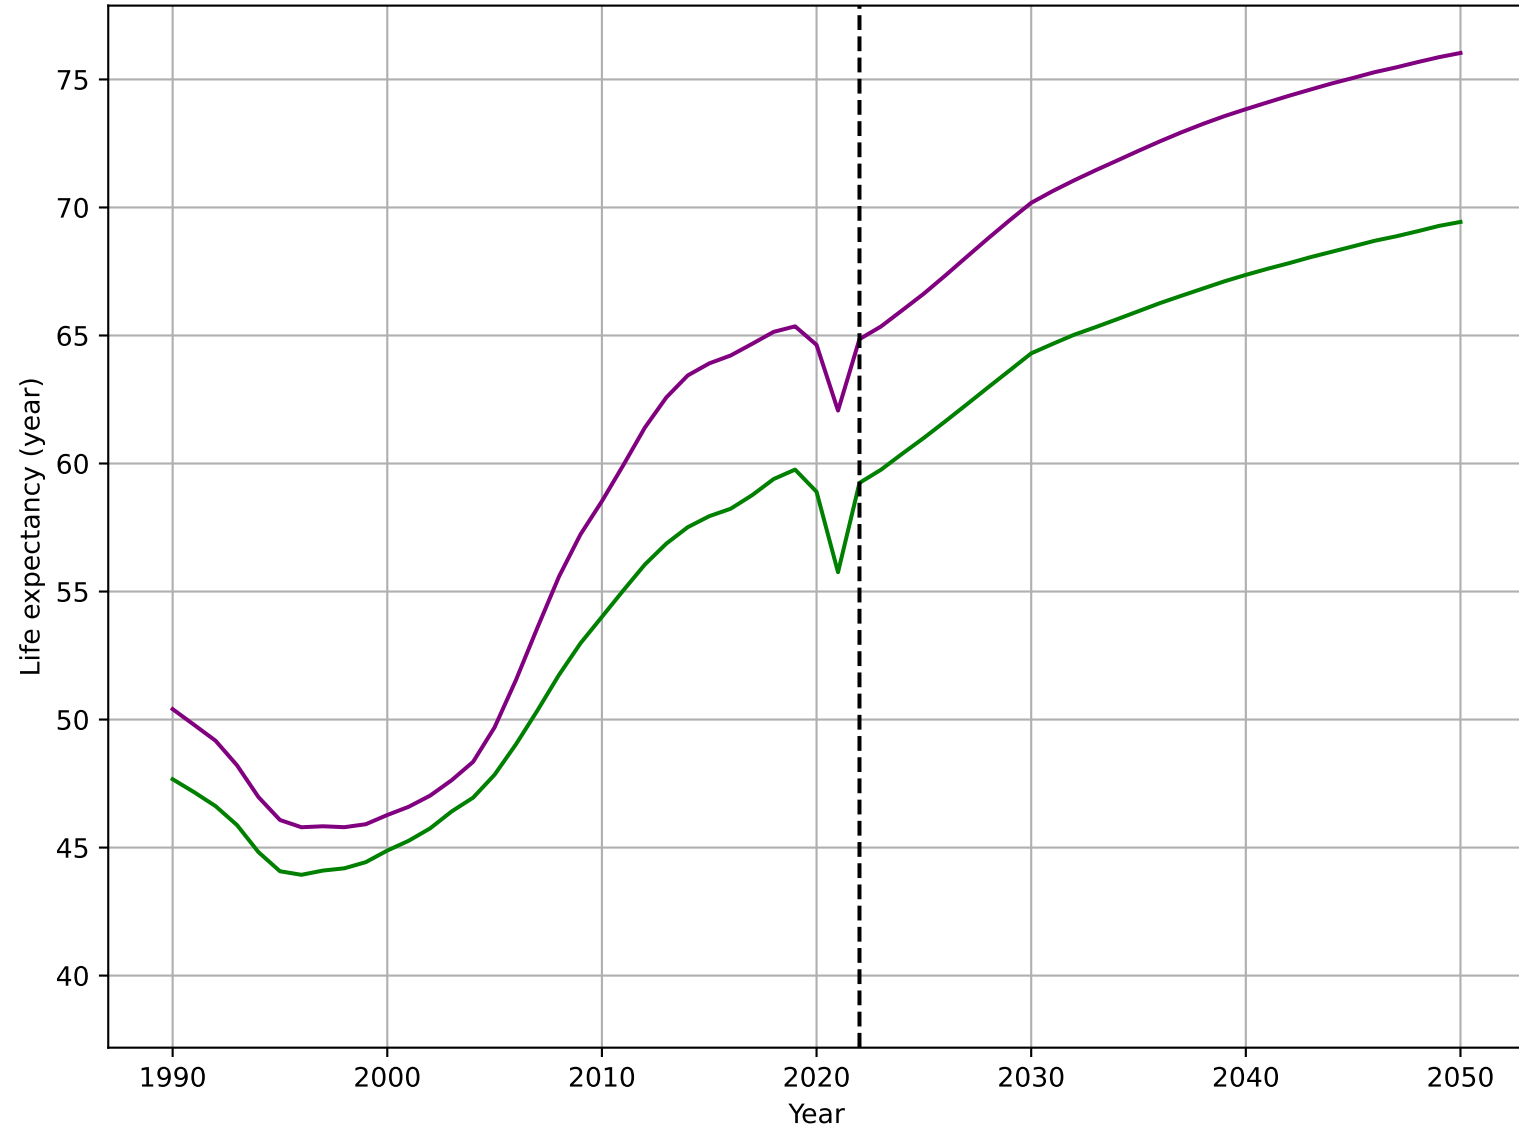

### Healthy Life Expectancy (HALE)

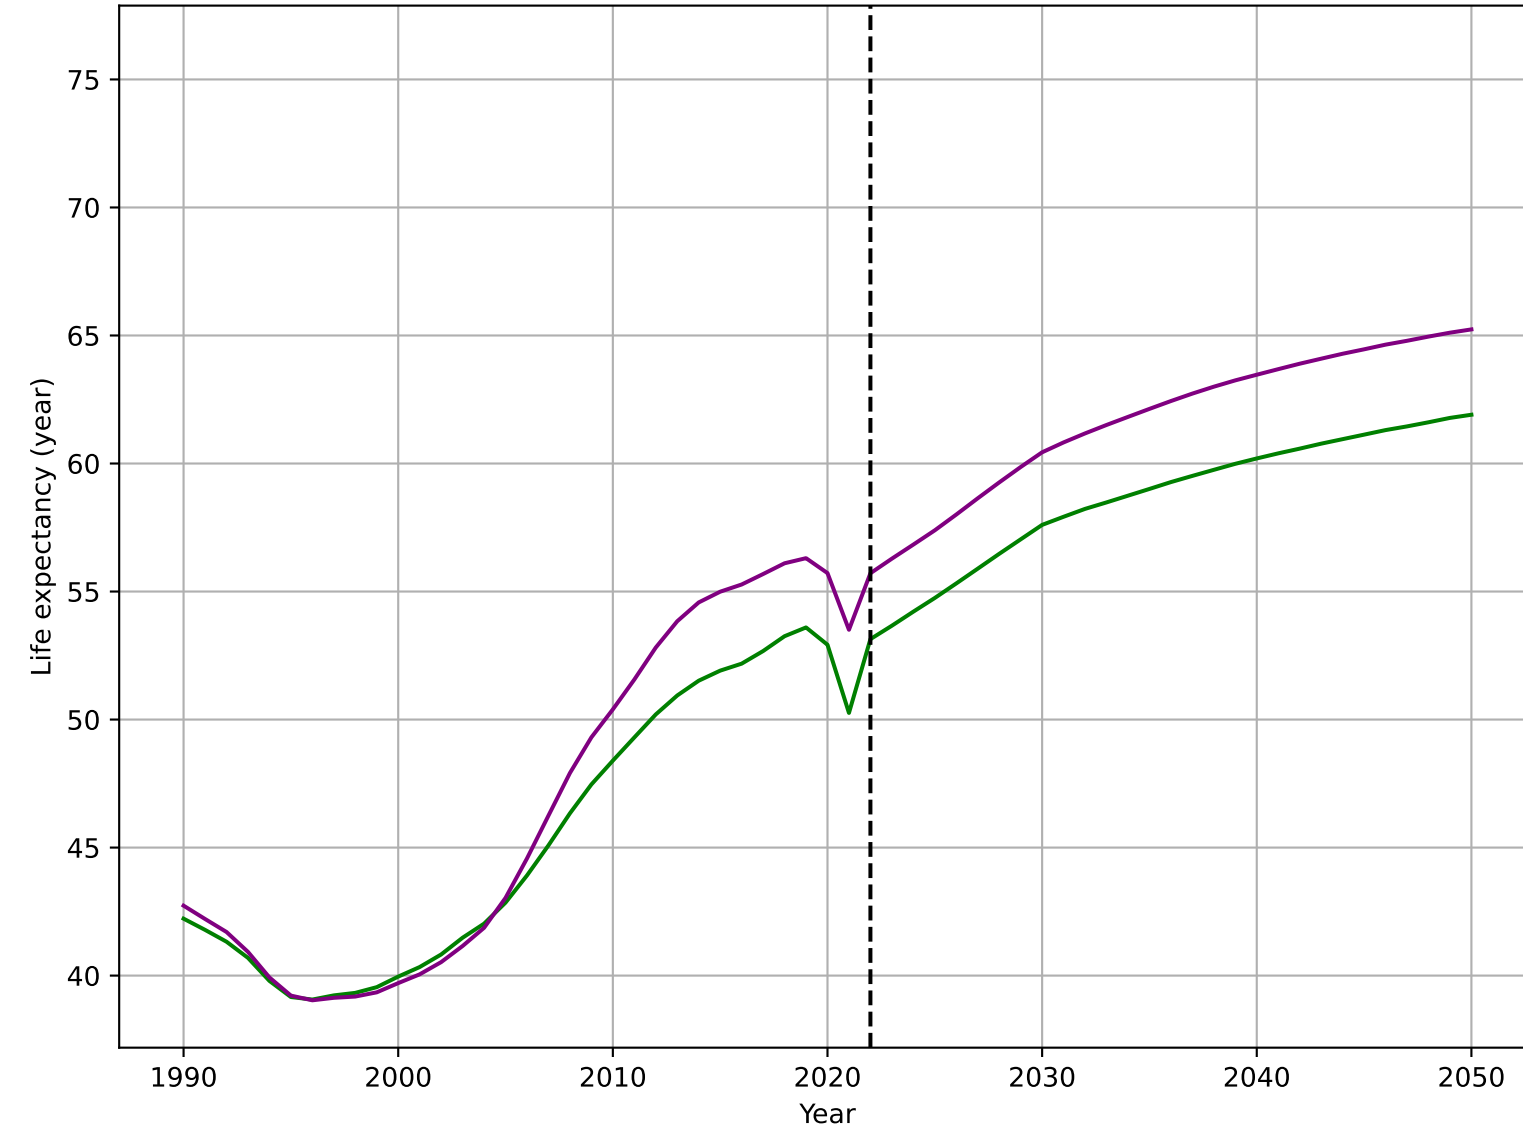



# Mozambique

### Life Expectancy

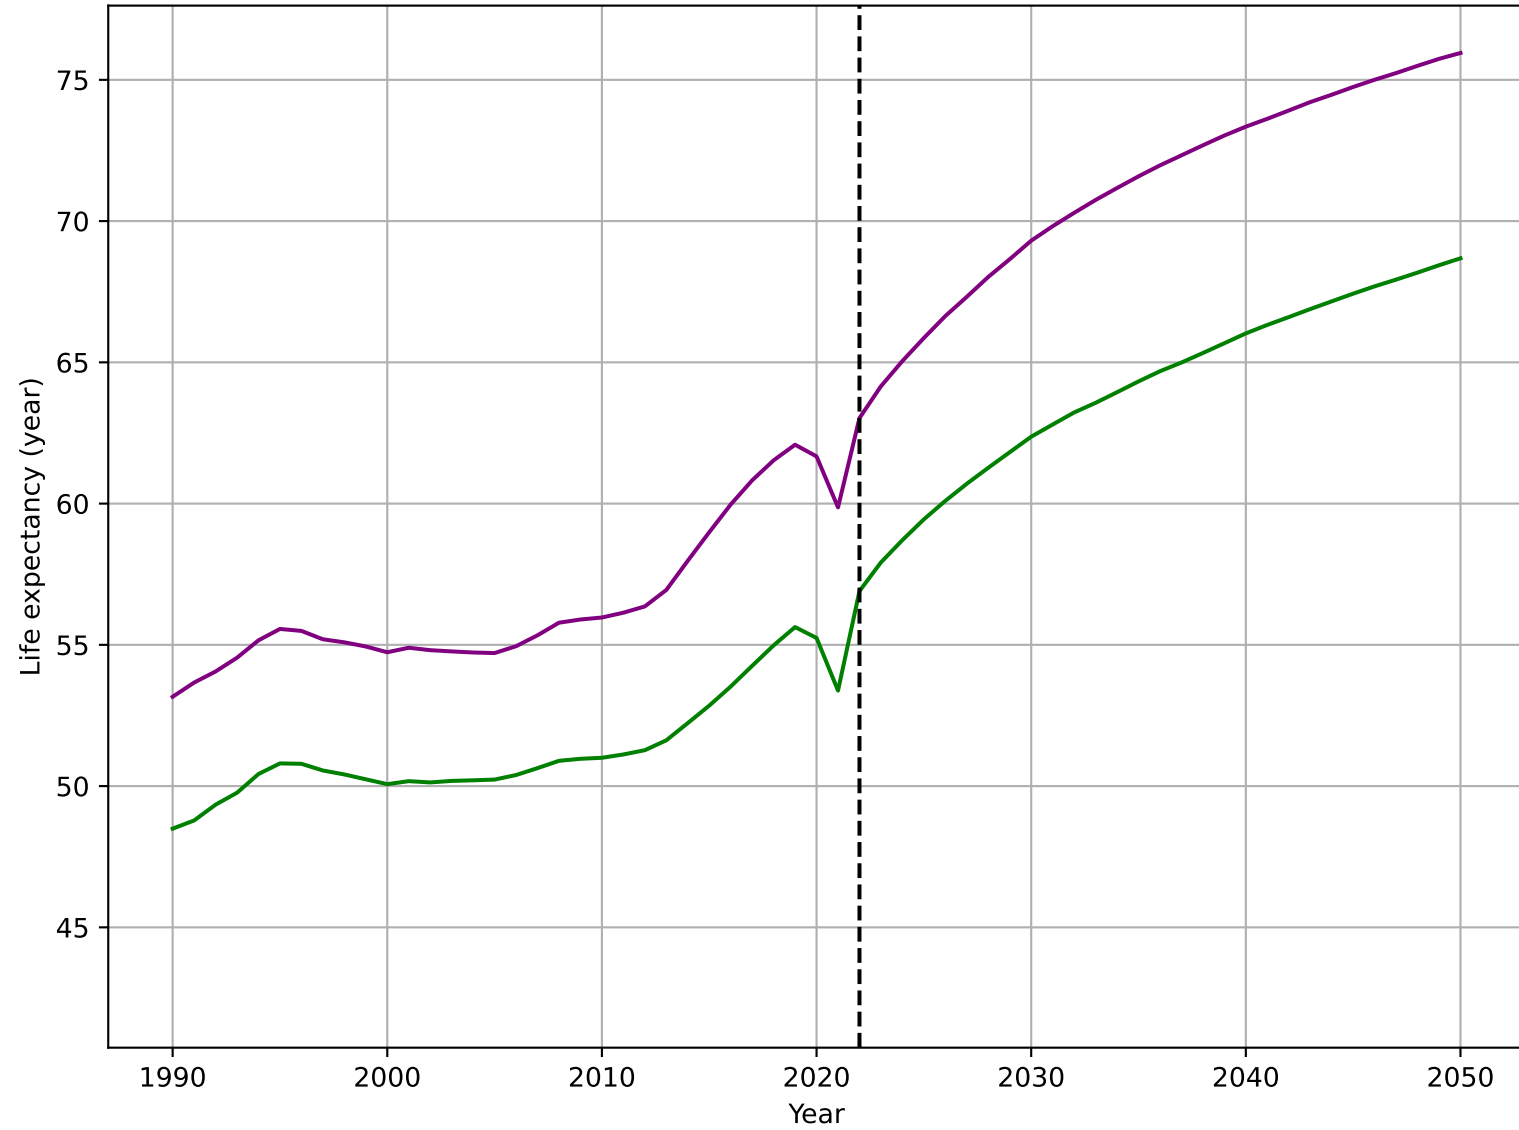

### Healthy Life Expectancy (HALE)

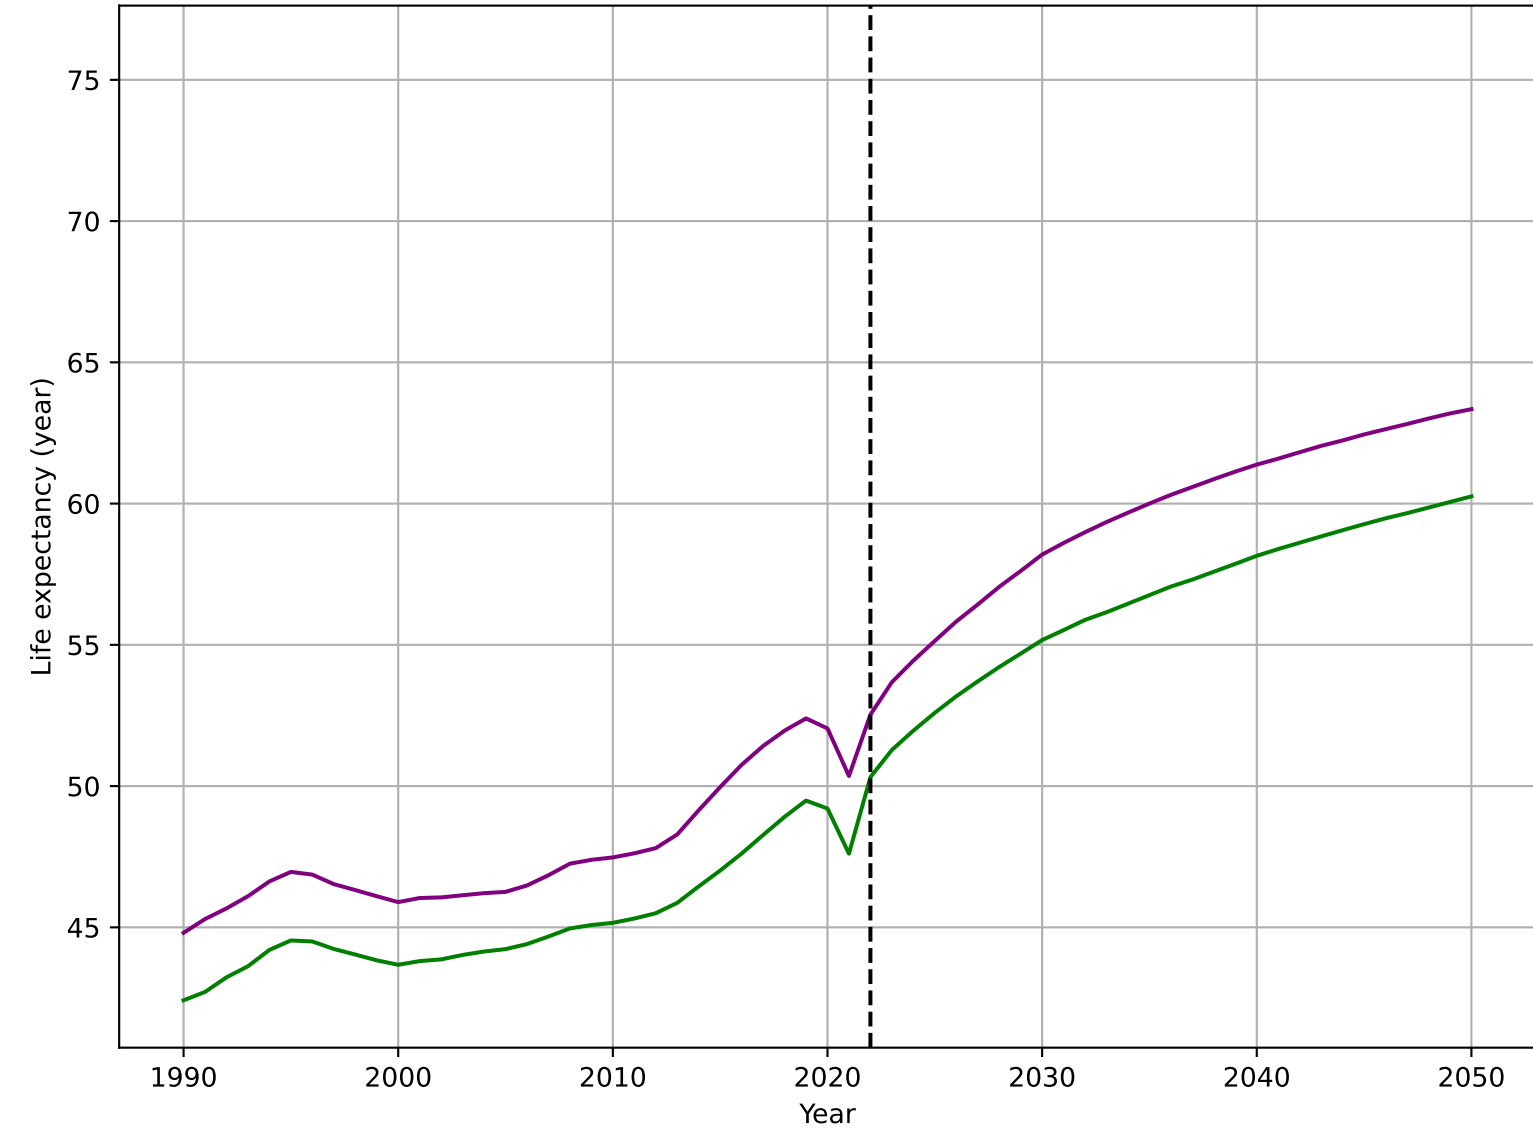

# Rwanda

### Life Expectancy

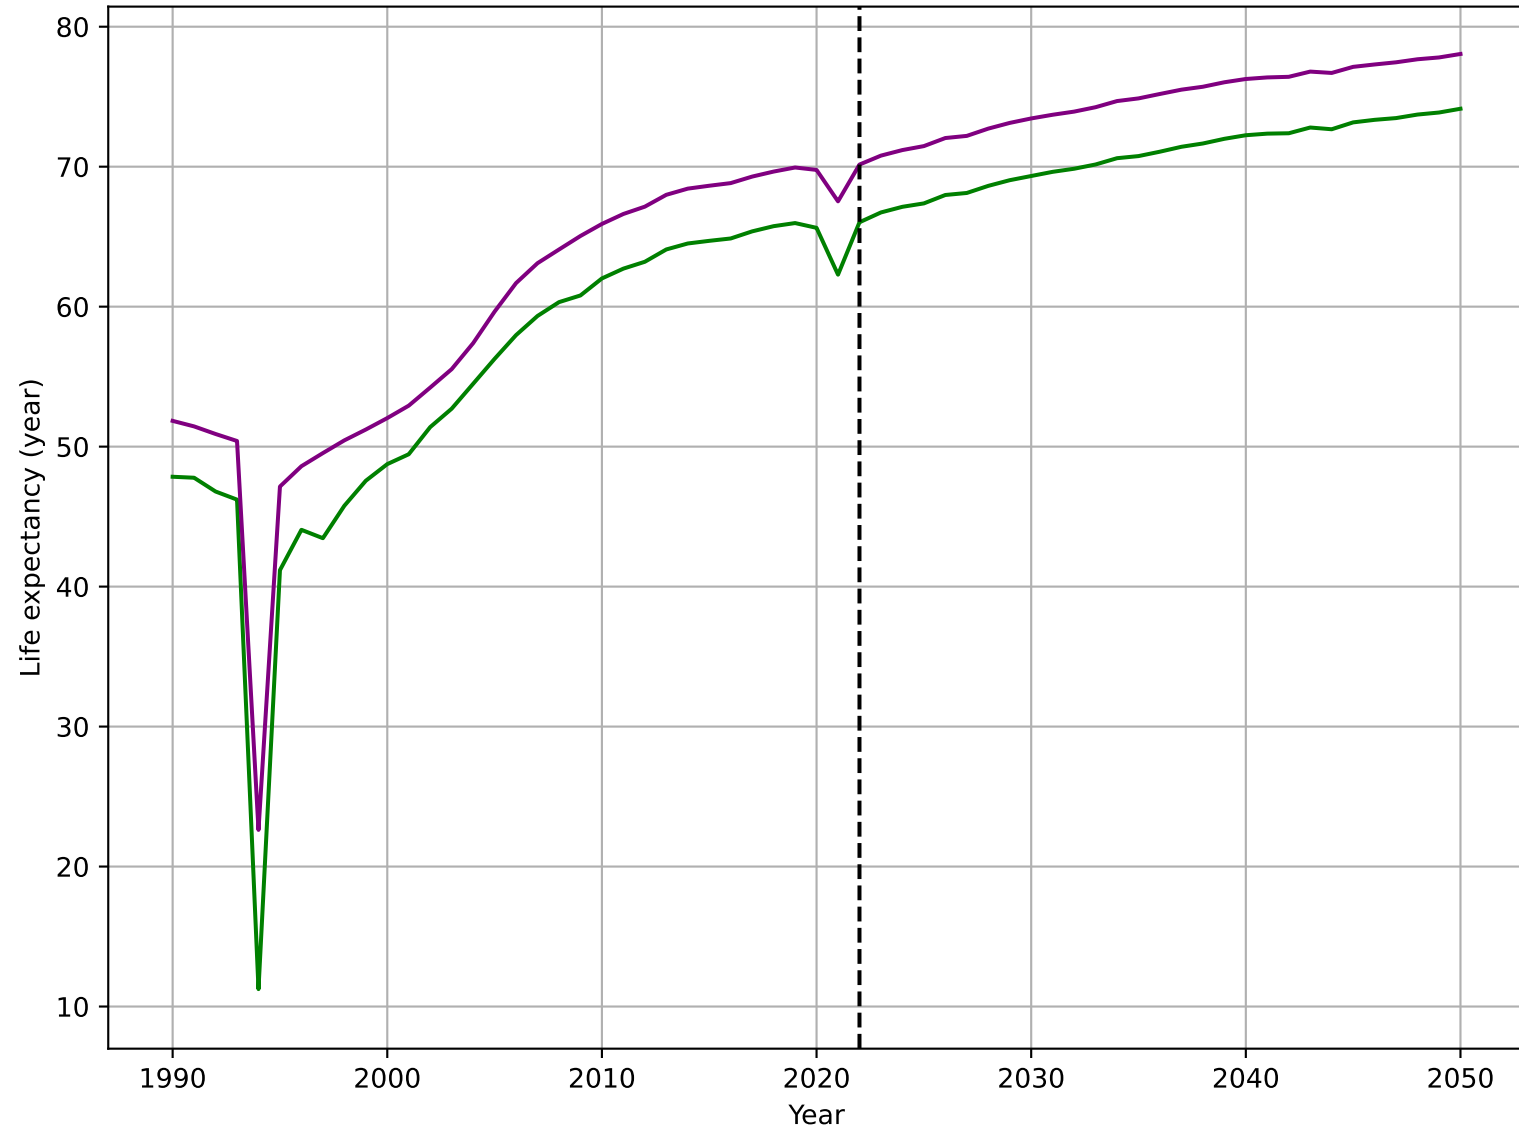

### Healthy Life Expectancy (HALE)

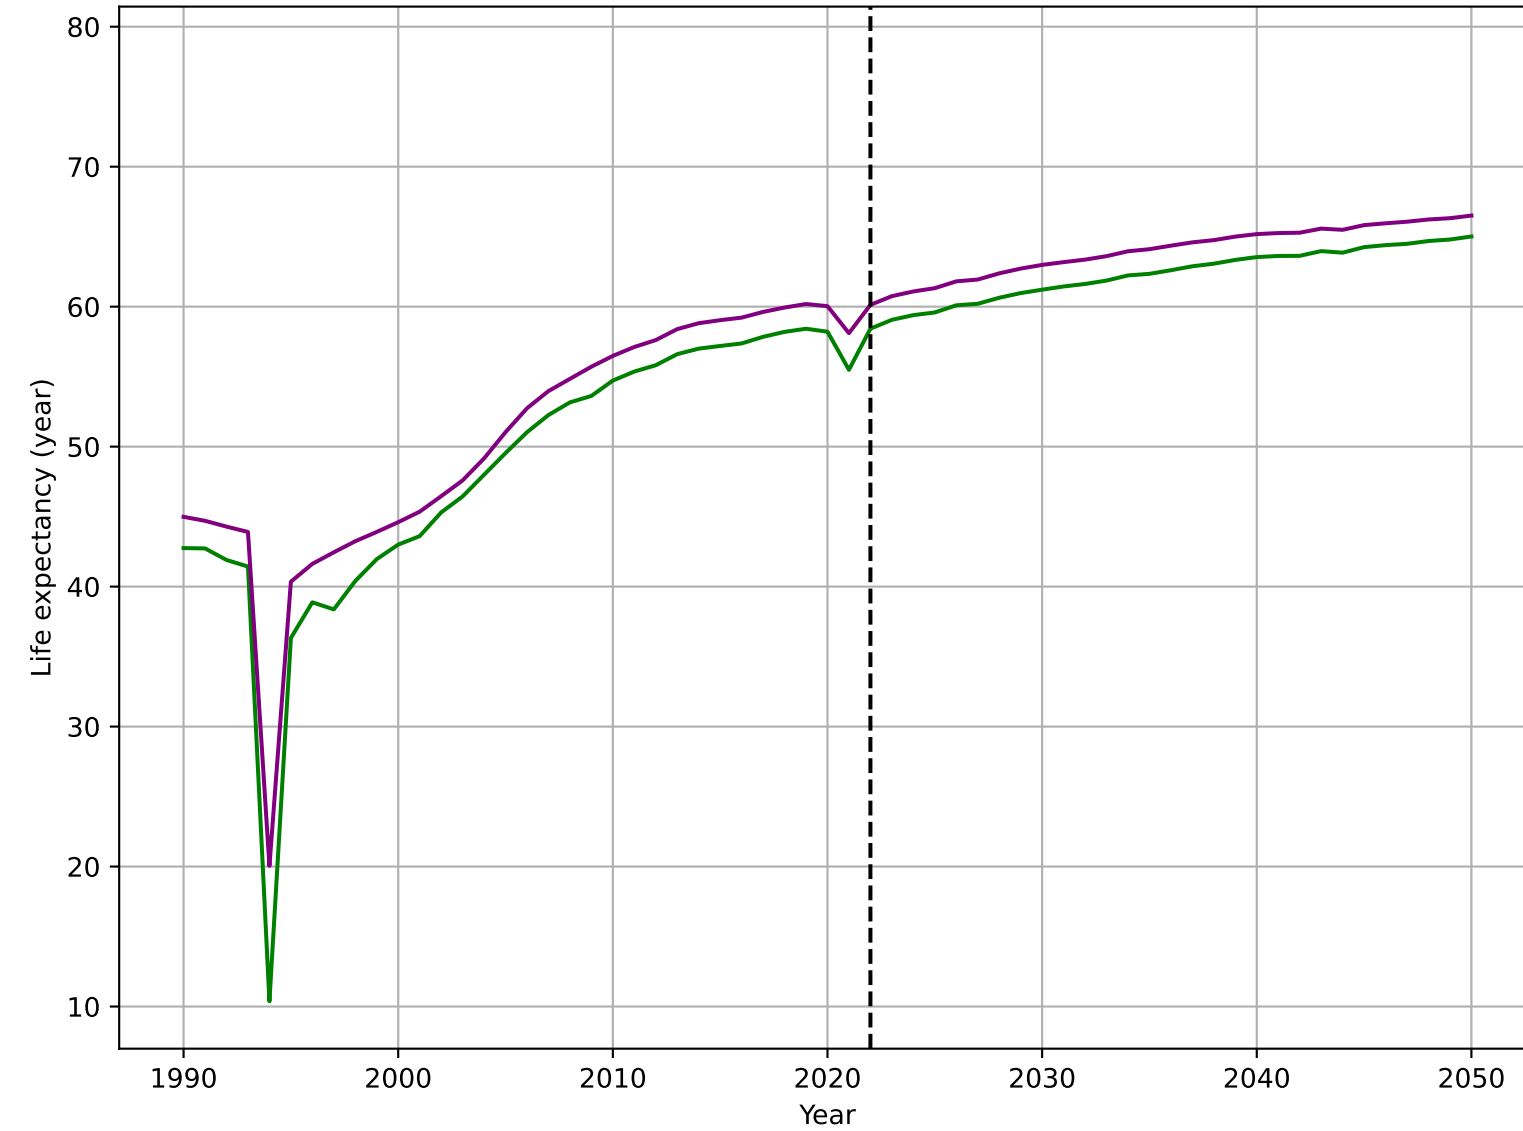

# Somalia

### Life Expectancy

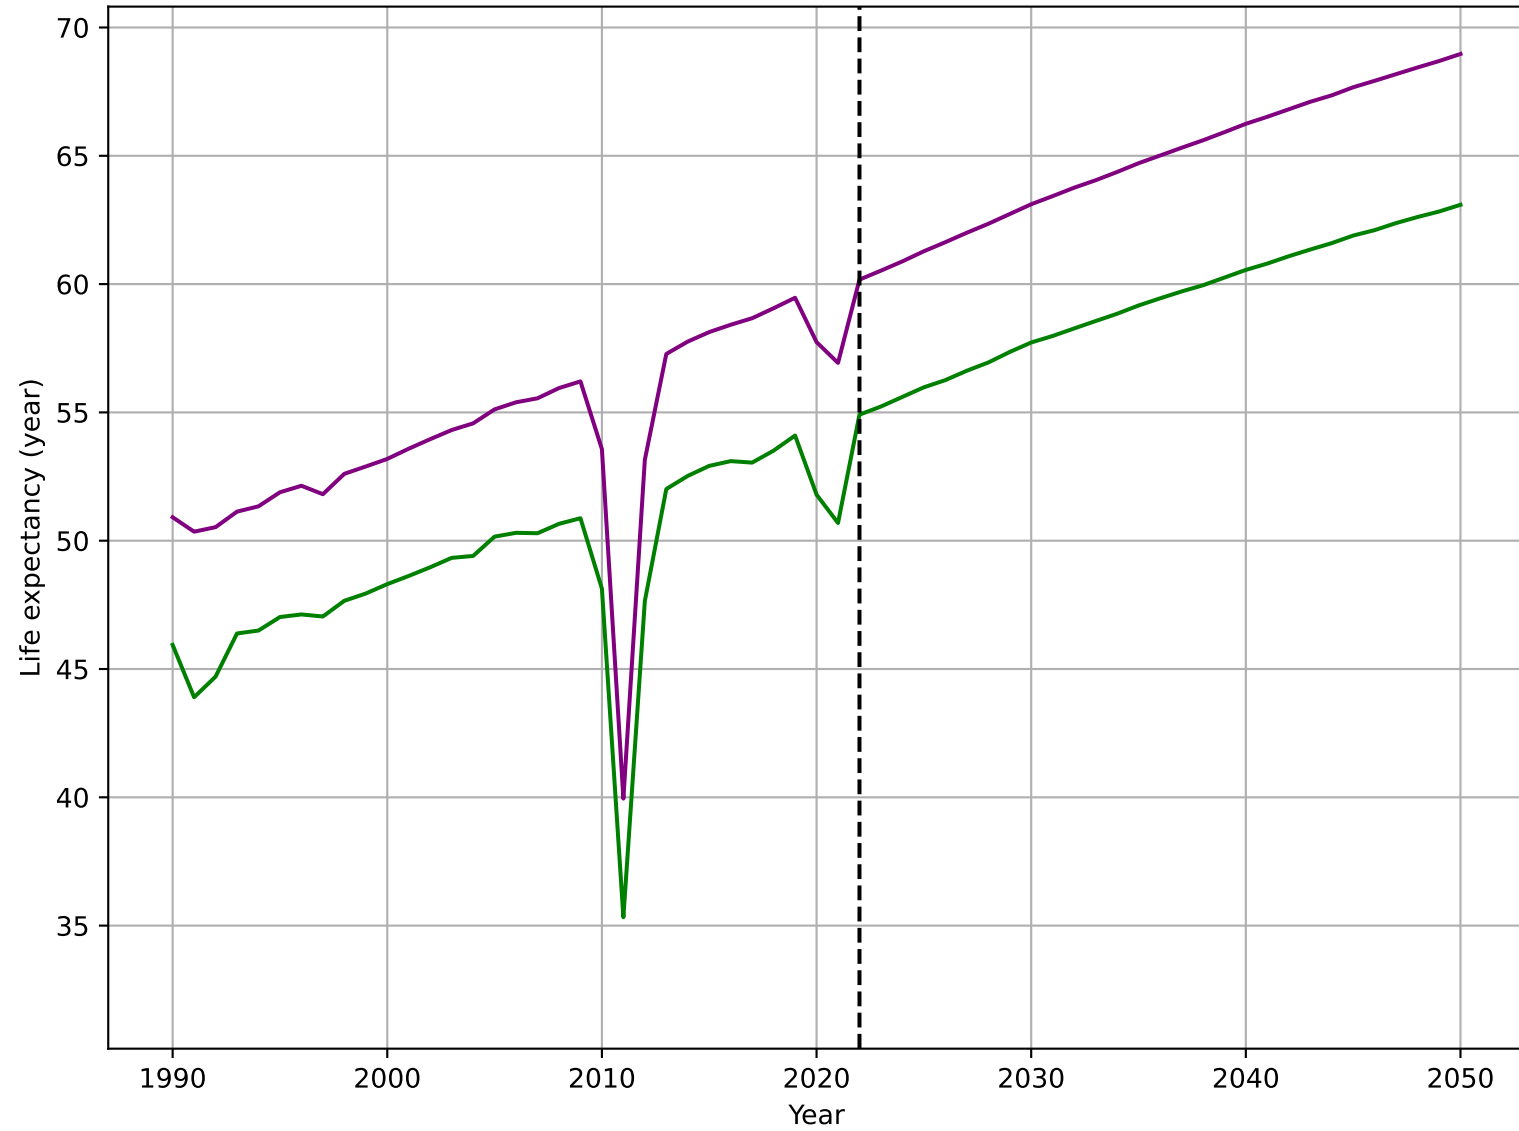

### Healthy Life Expectancy (HALE)

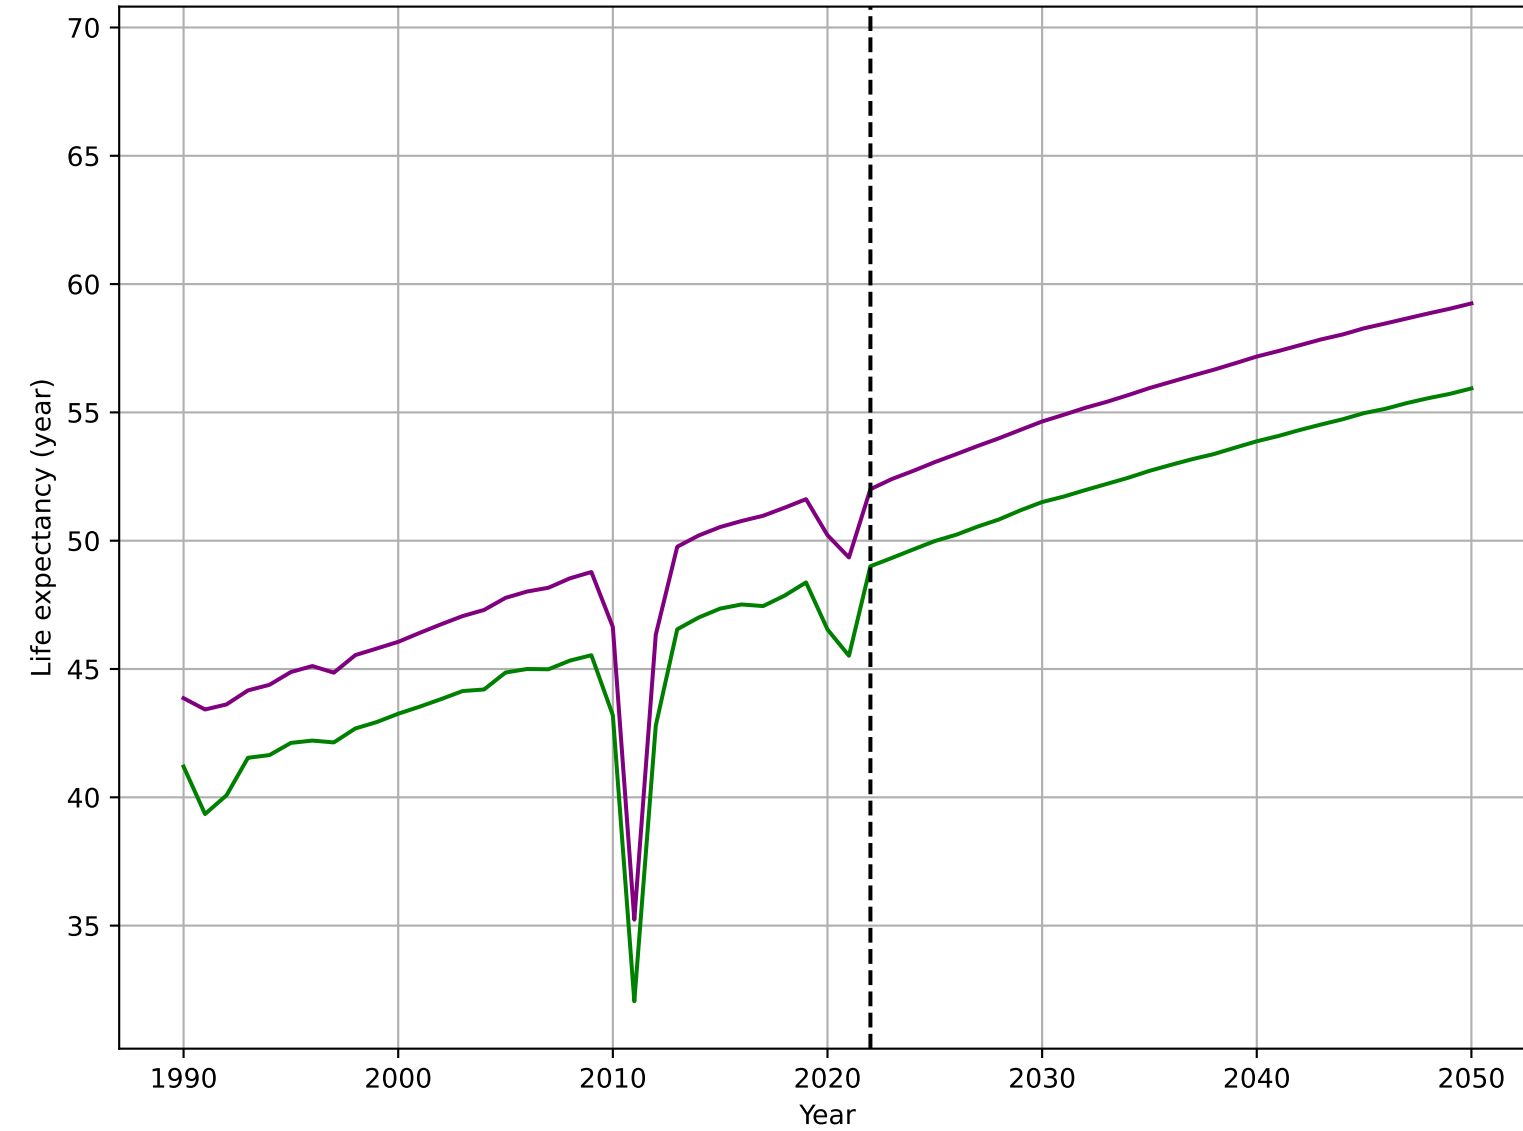

# South Sudan

## Life Expectancy

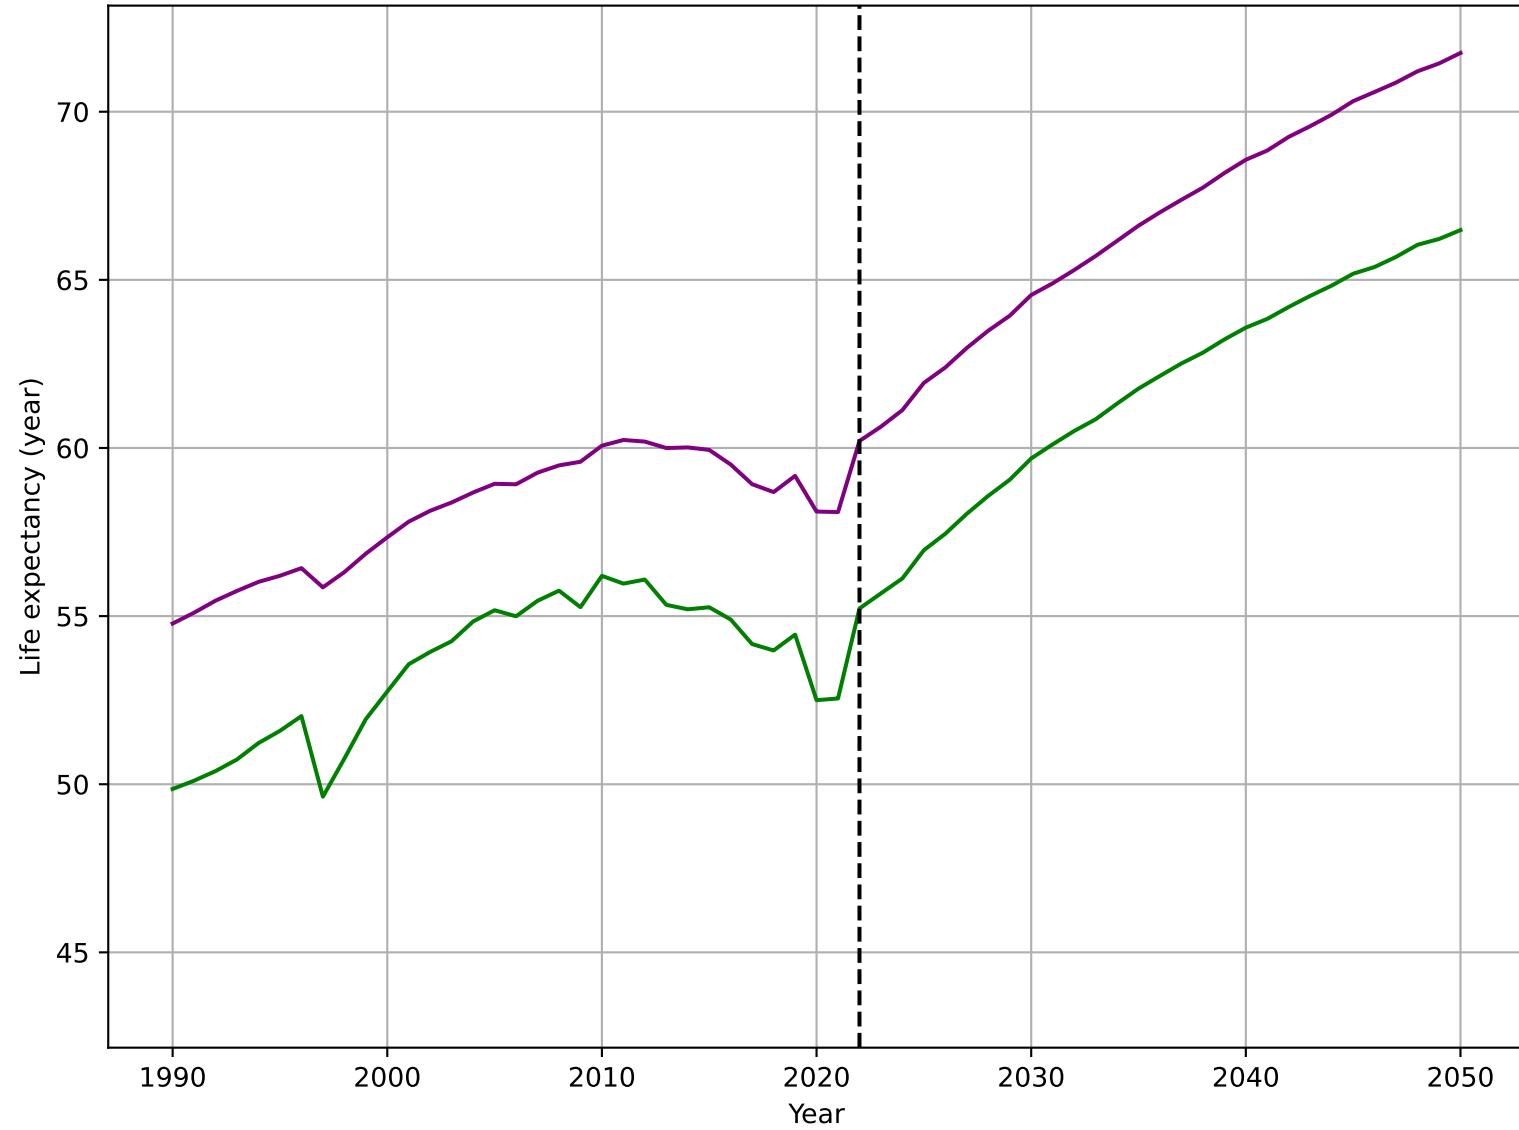

## Healthy Life Expectancy (HALE)

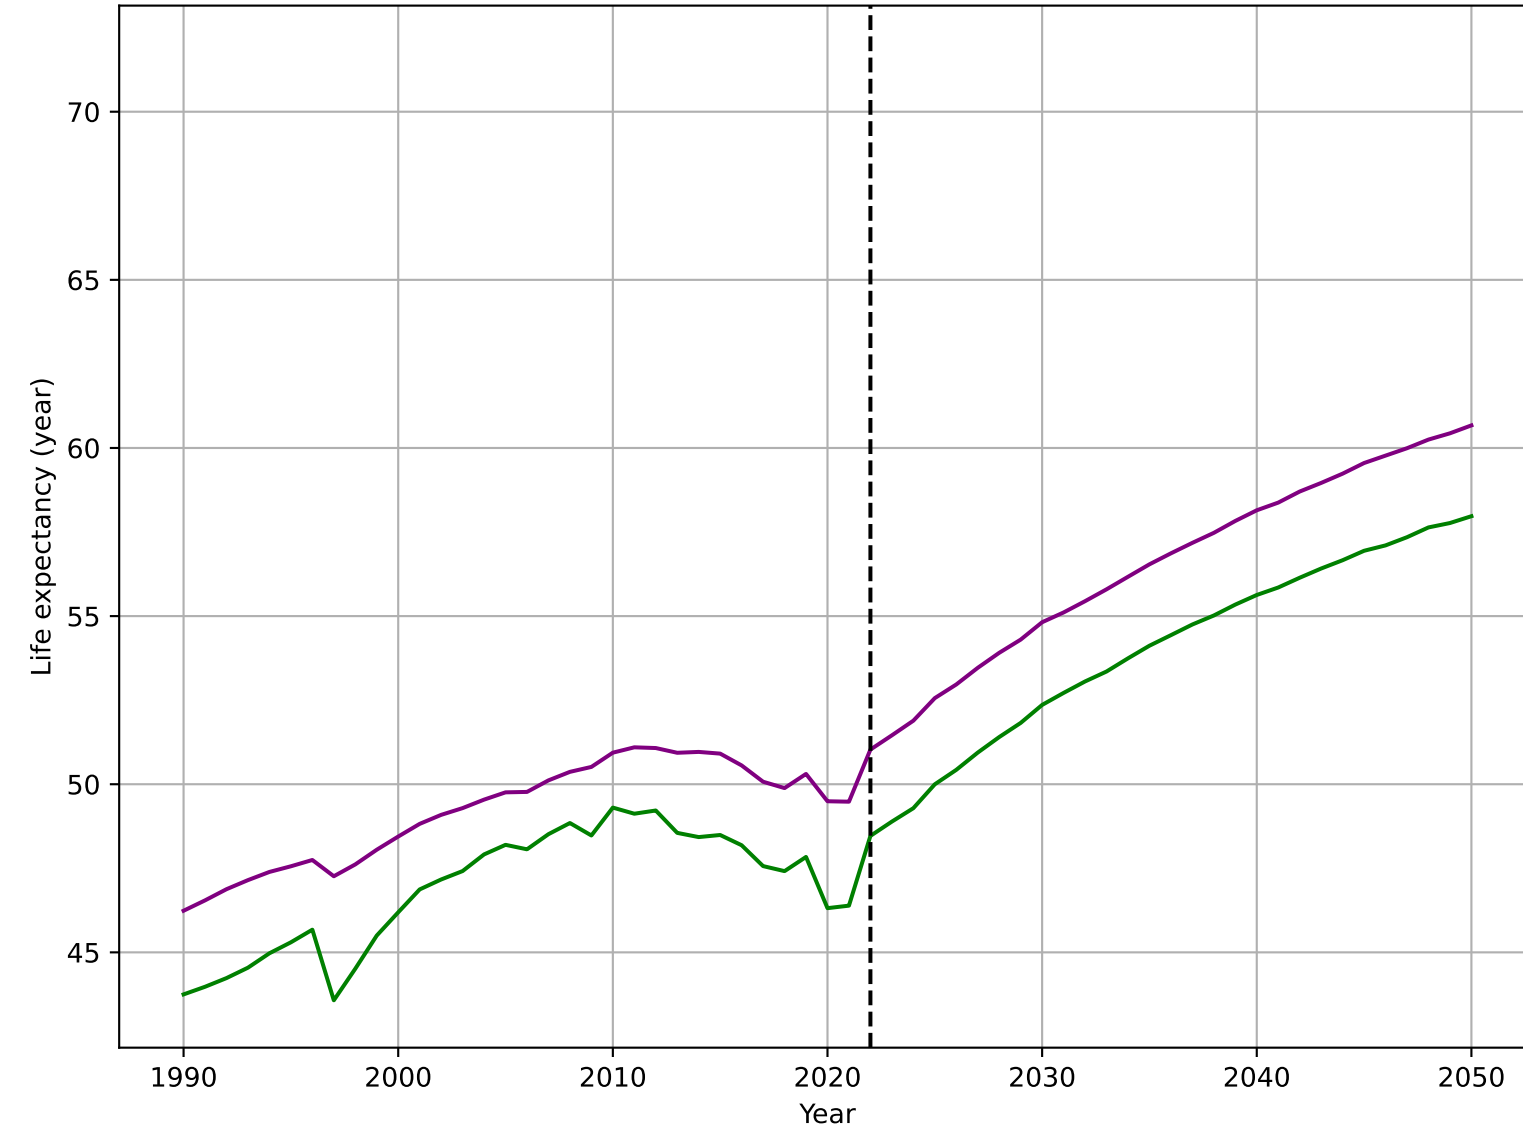

# Uganda

### Life Expectancy

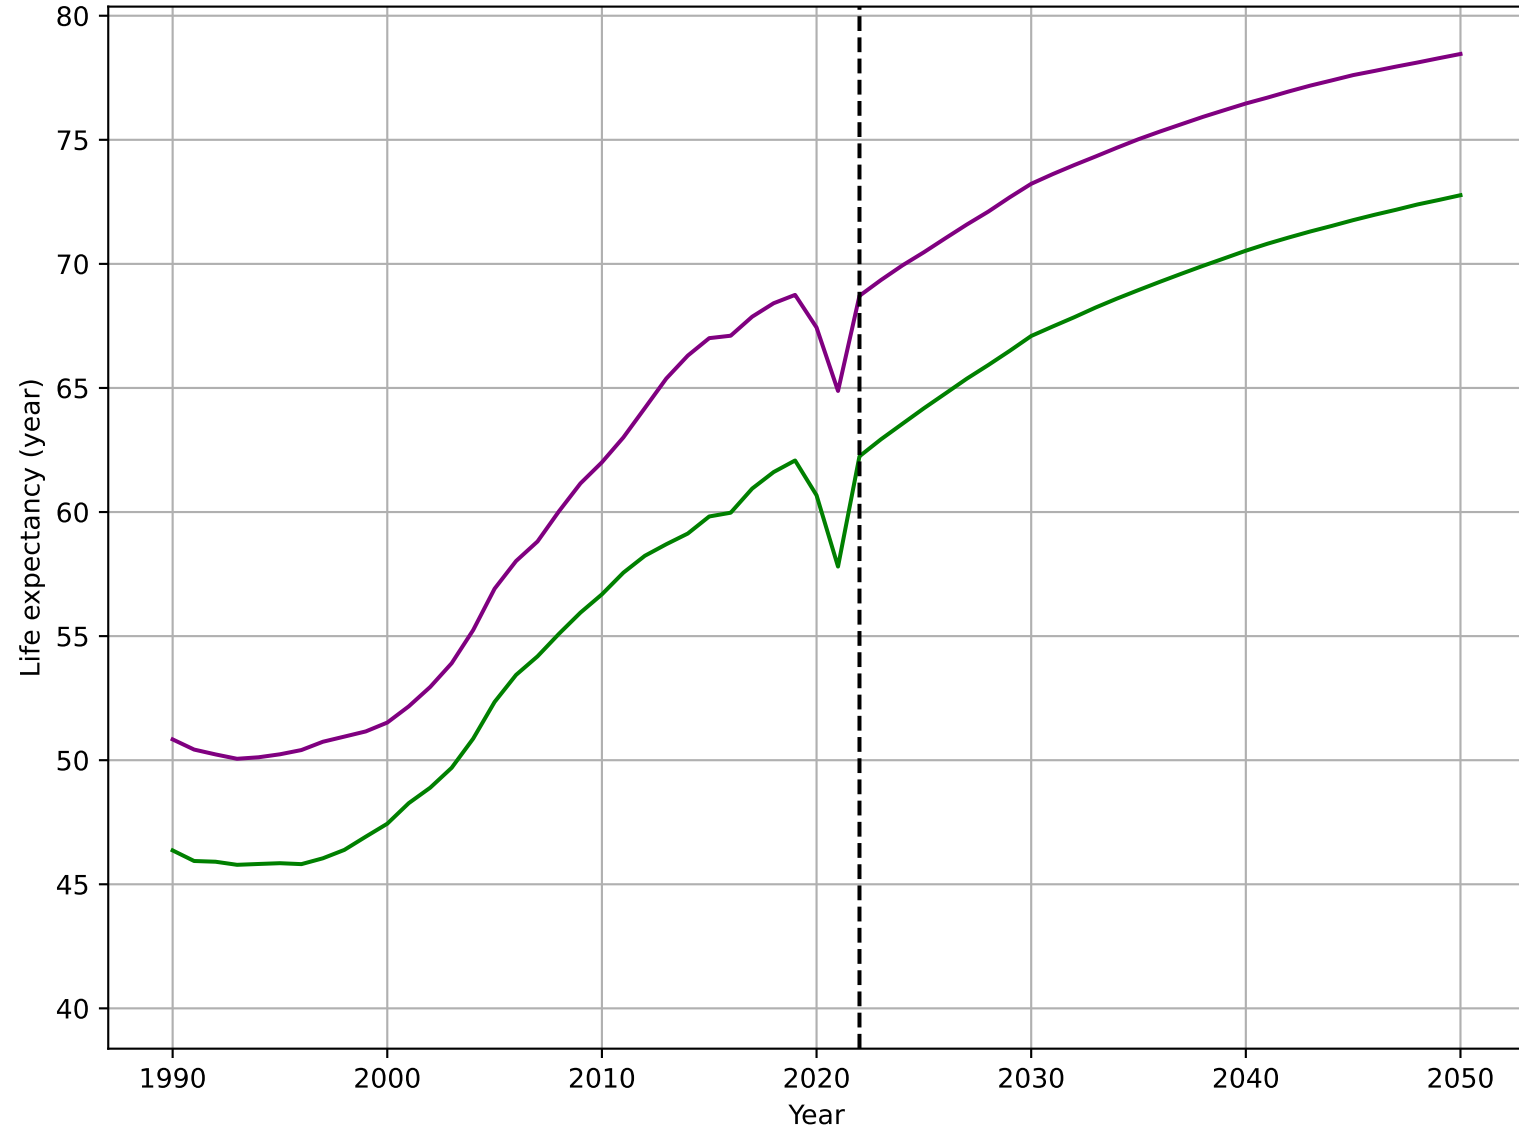

### Healthy Life Expectancy (HALE)

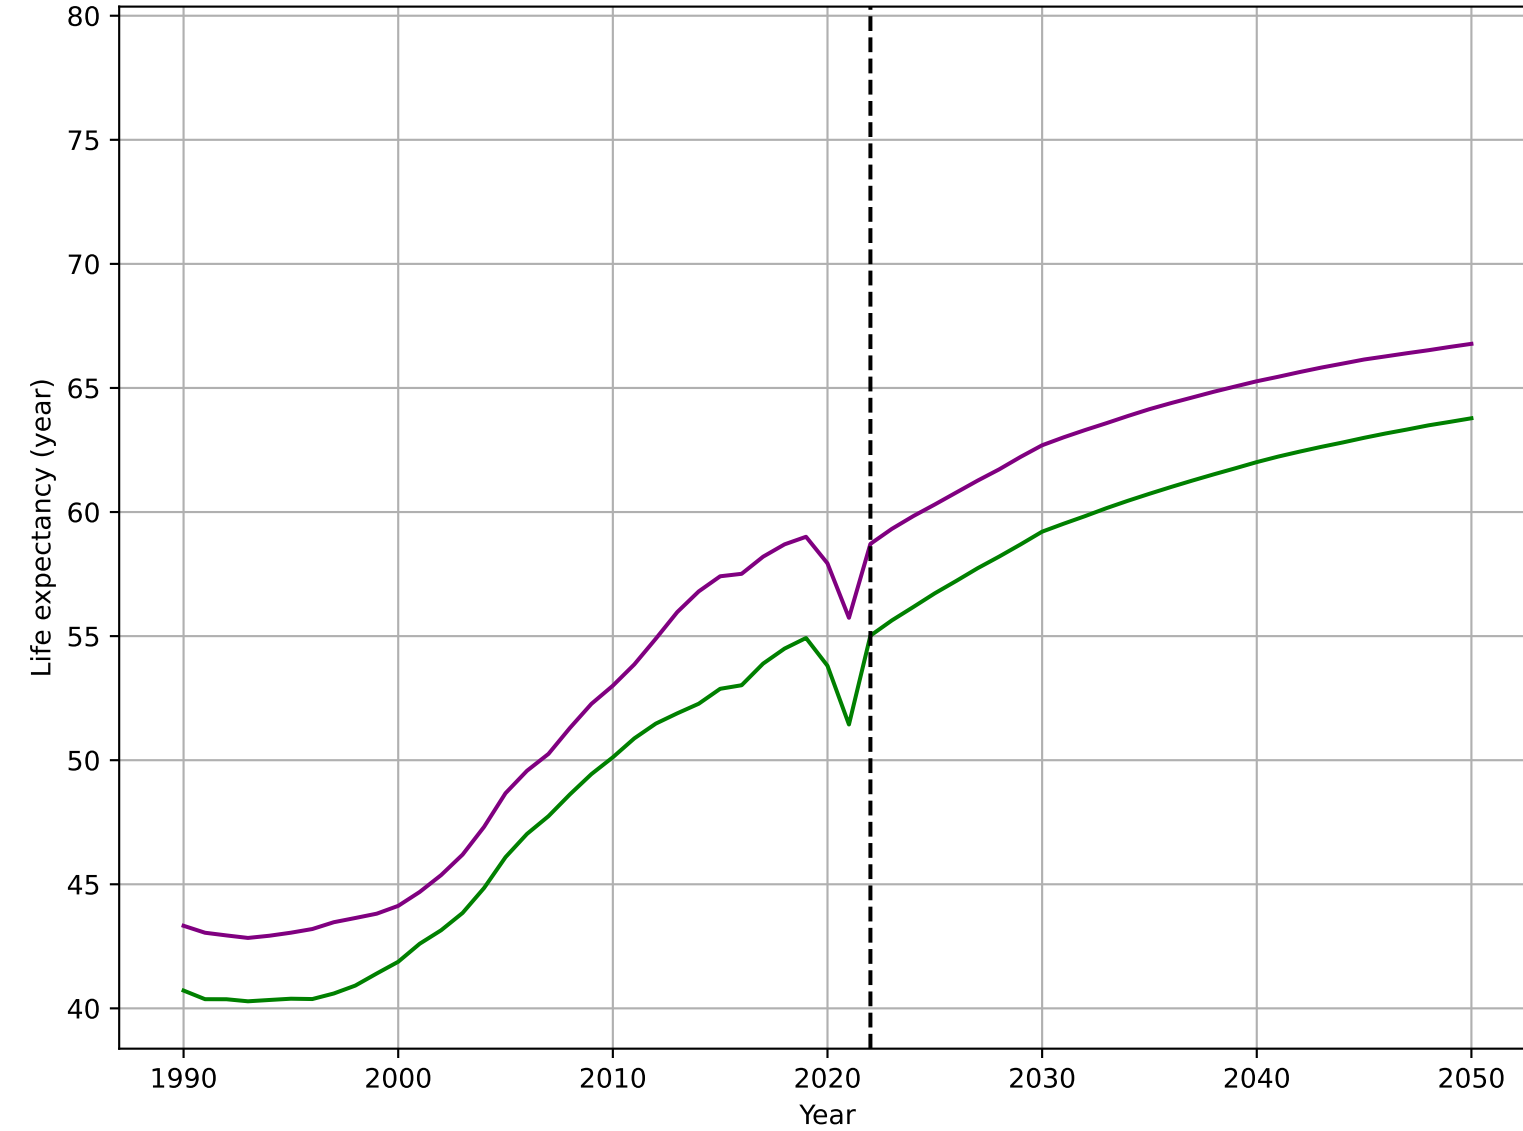

# Tanzania

### Life Expectancy

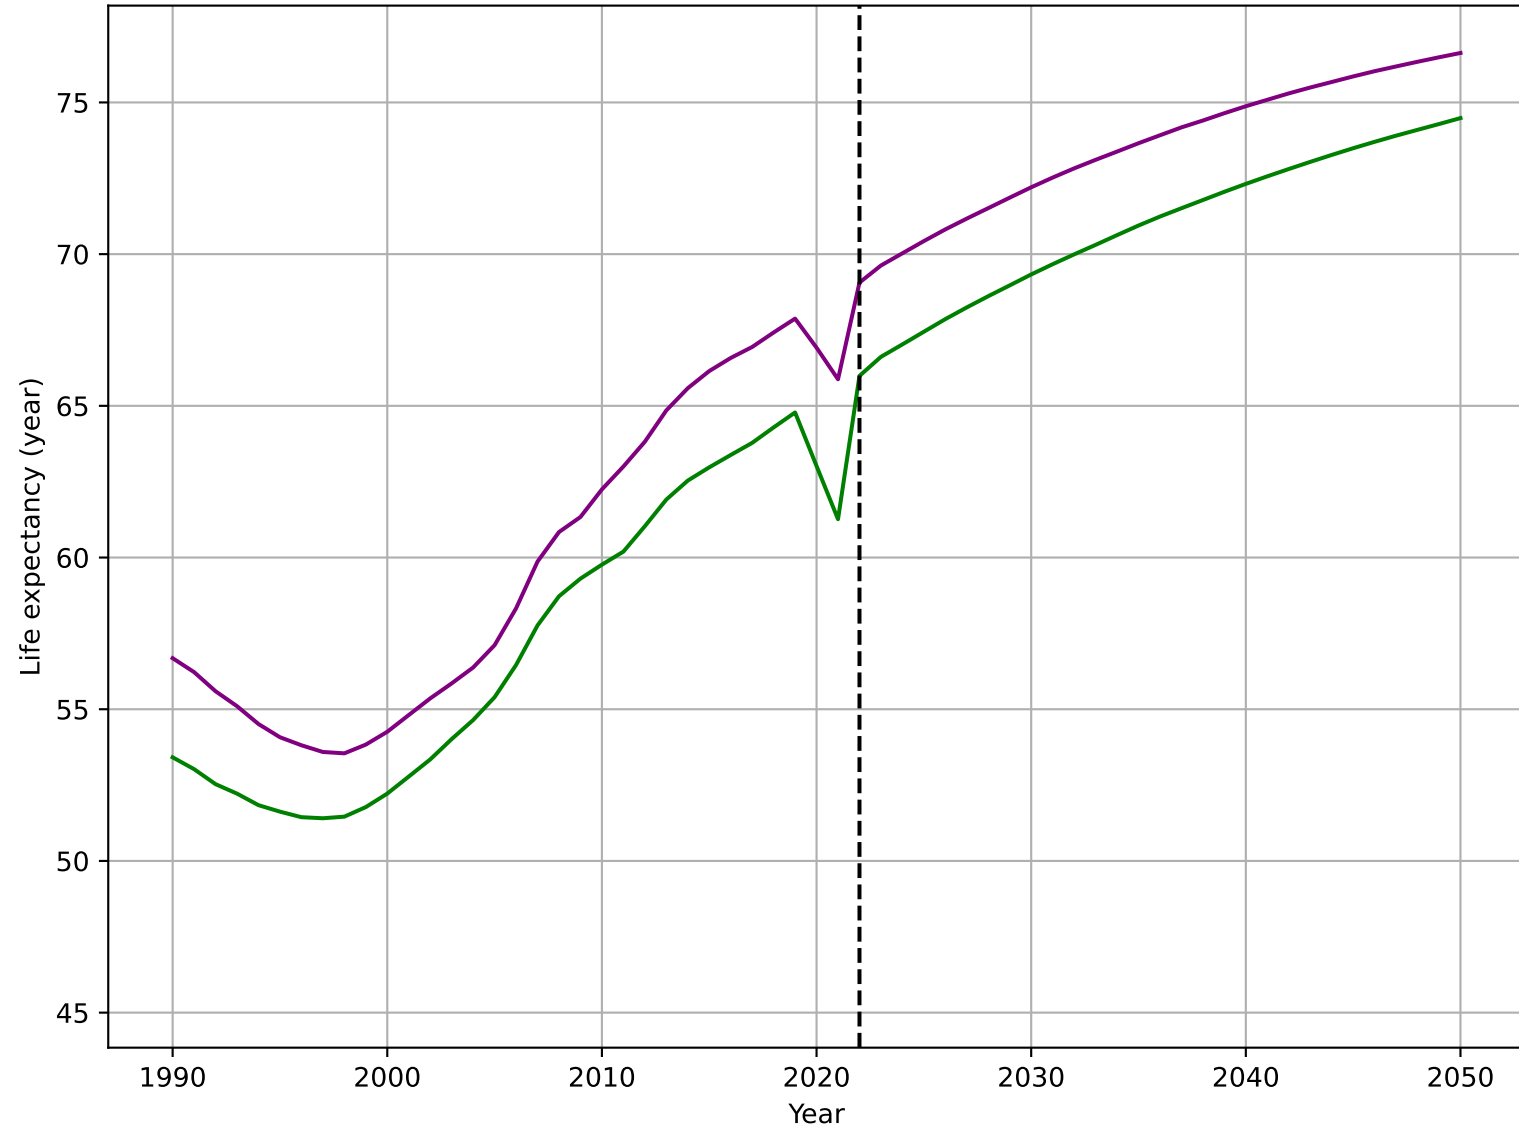

### Healthy Life Expectancy (HALE)

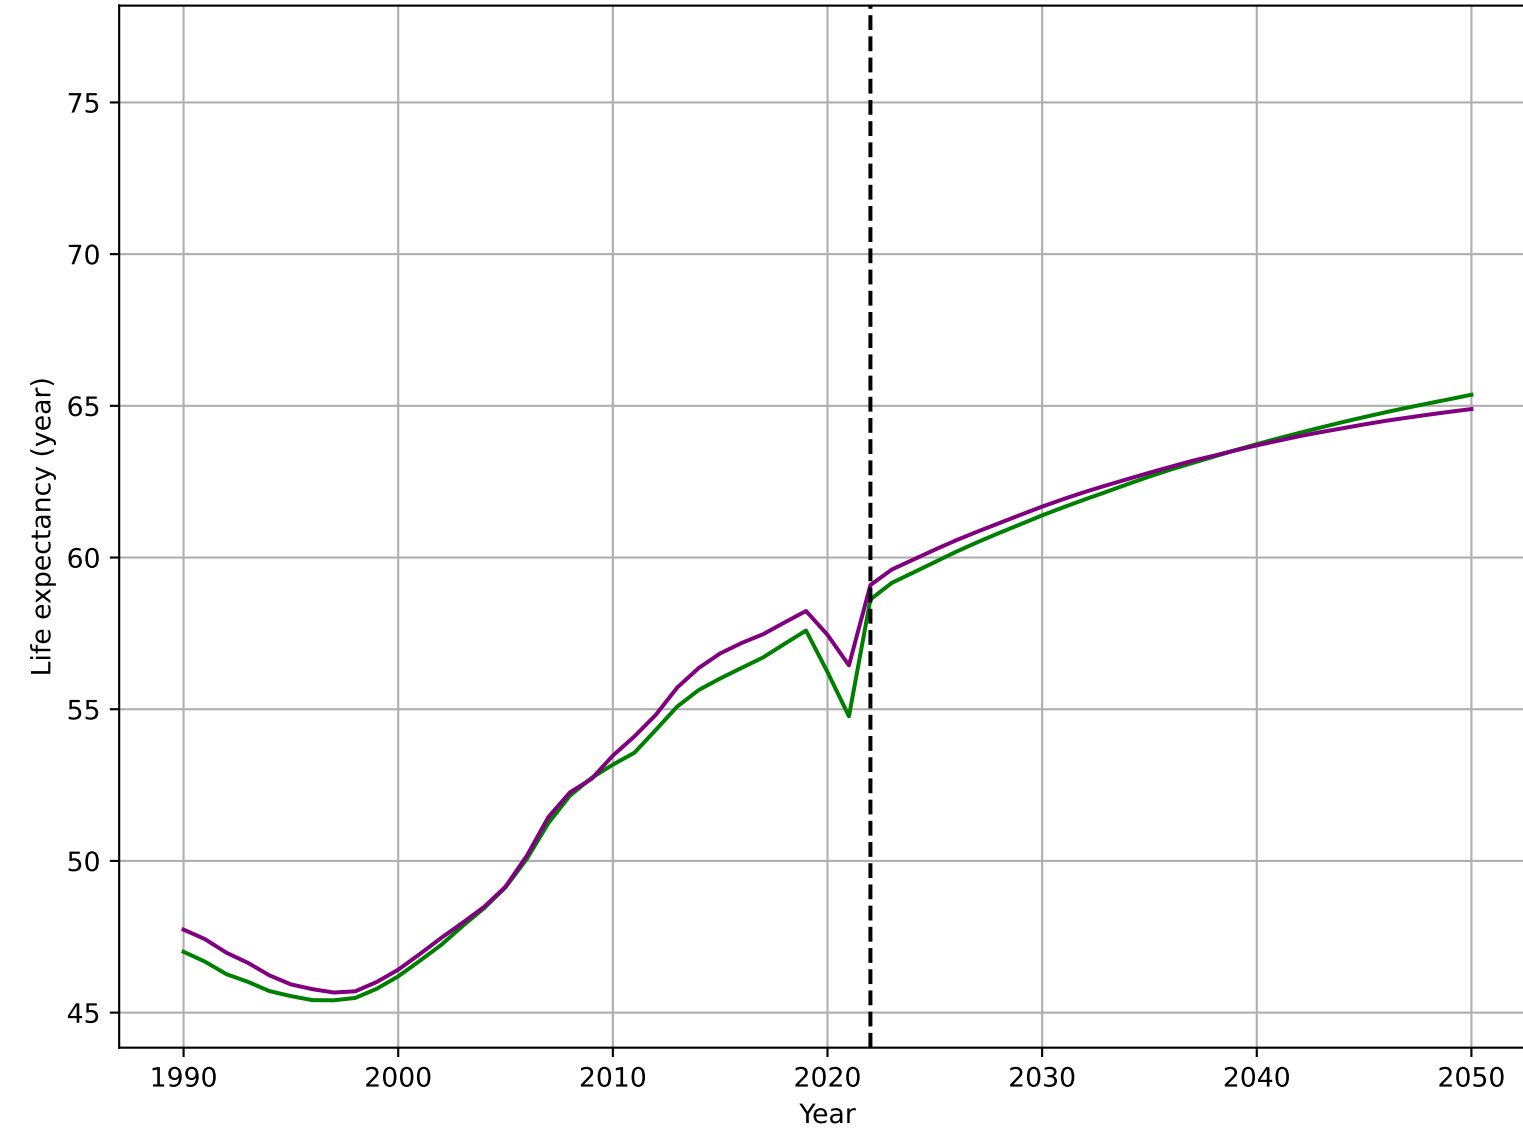

# Zambia

### Life Expectancy

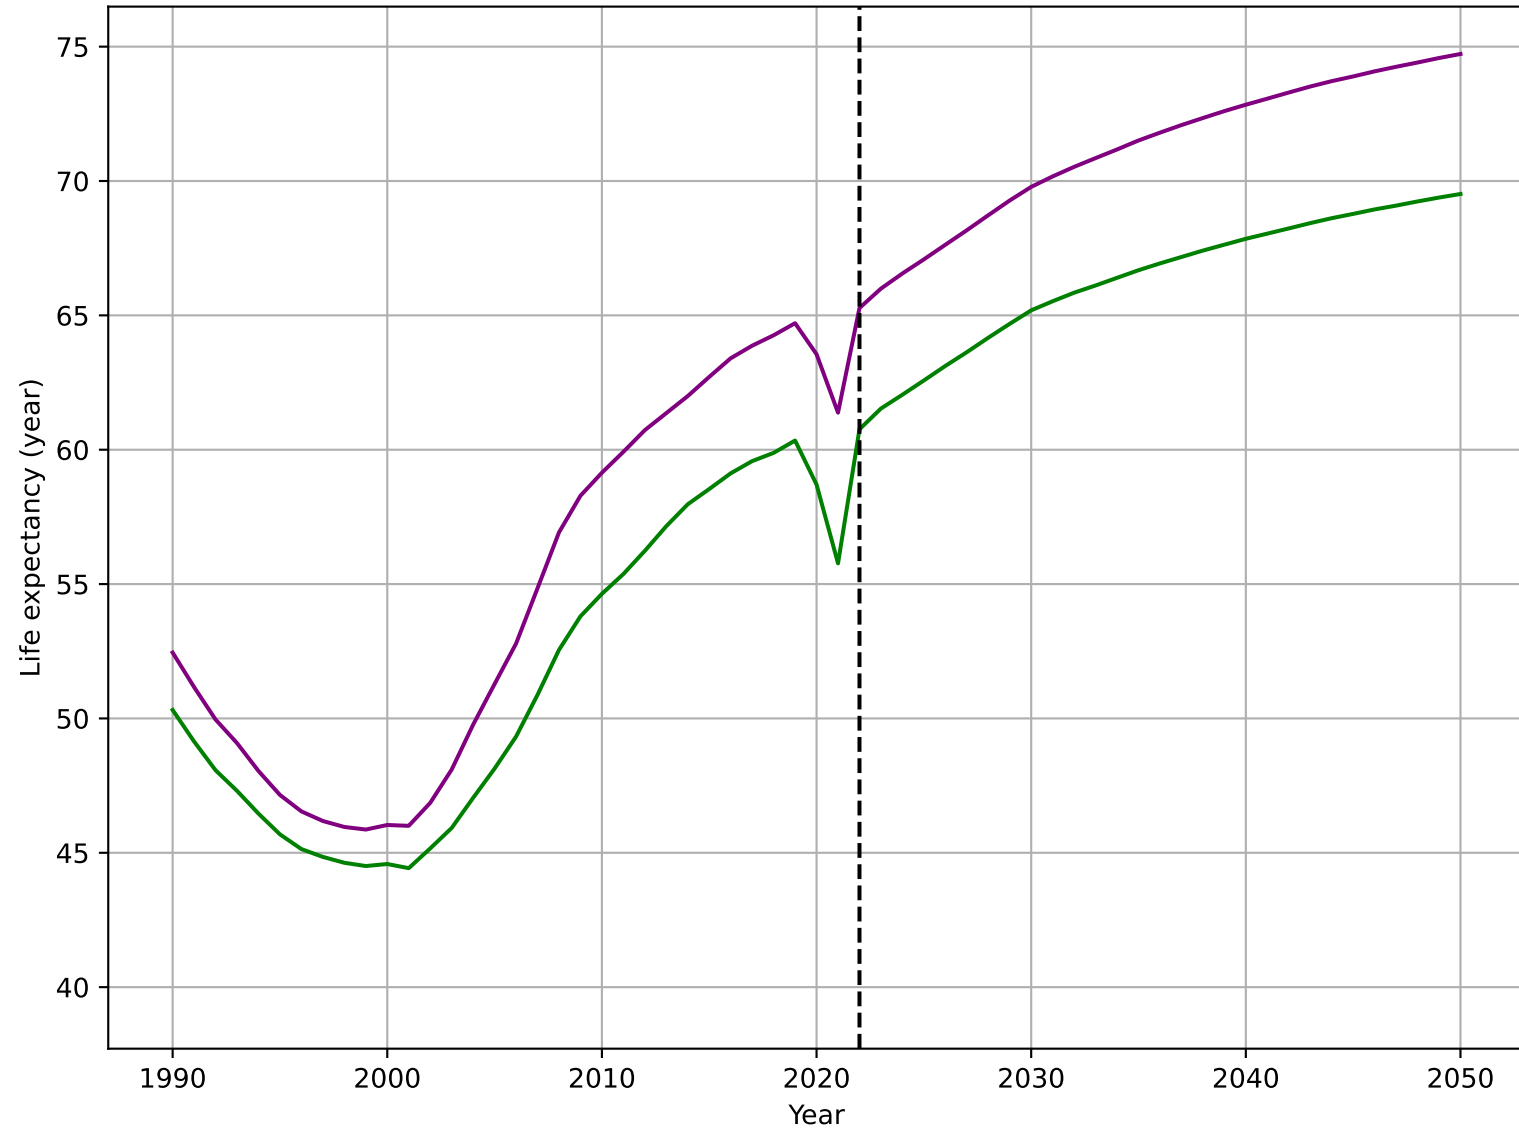

### Healthy Life Expectancy (HALE)

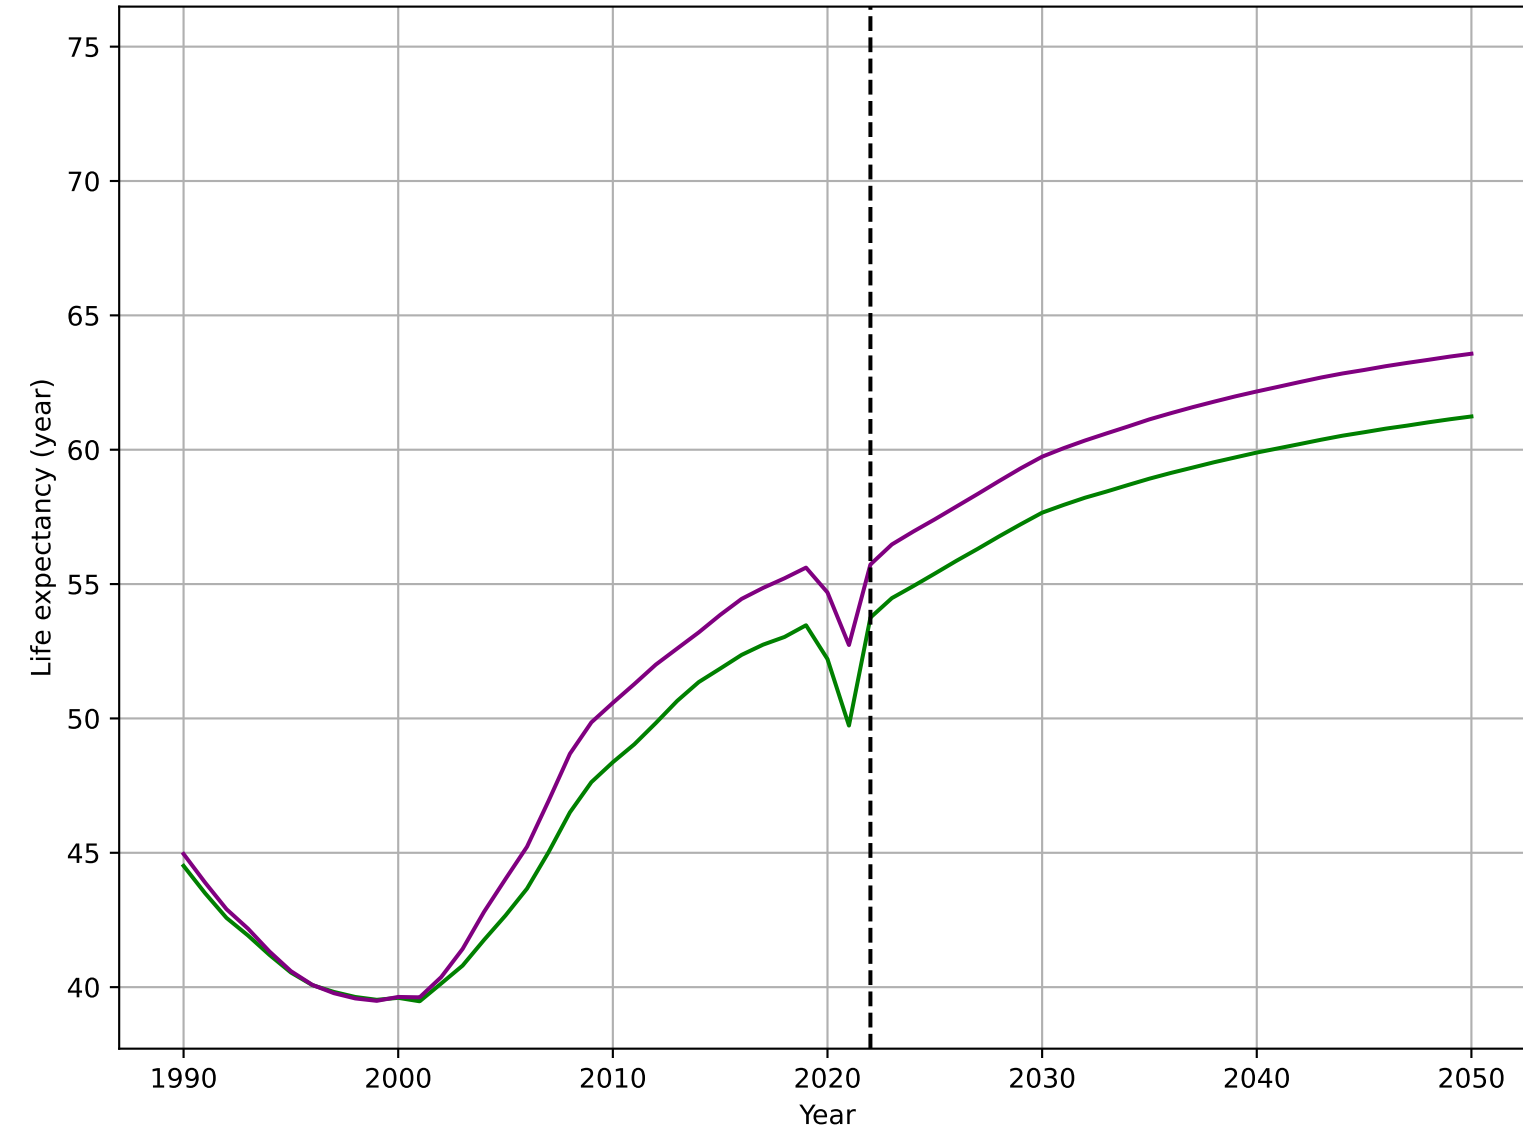

# Botswana

### Life Expectancy

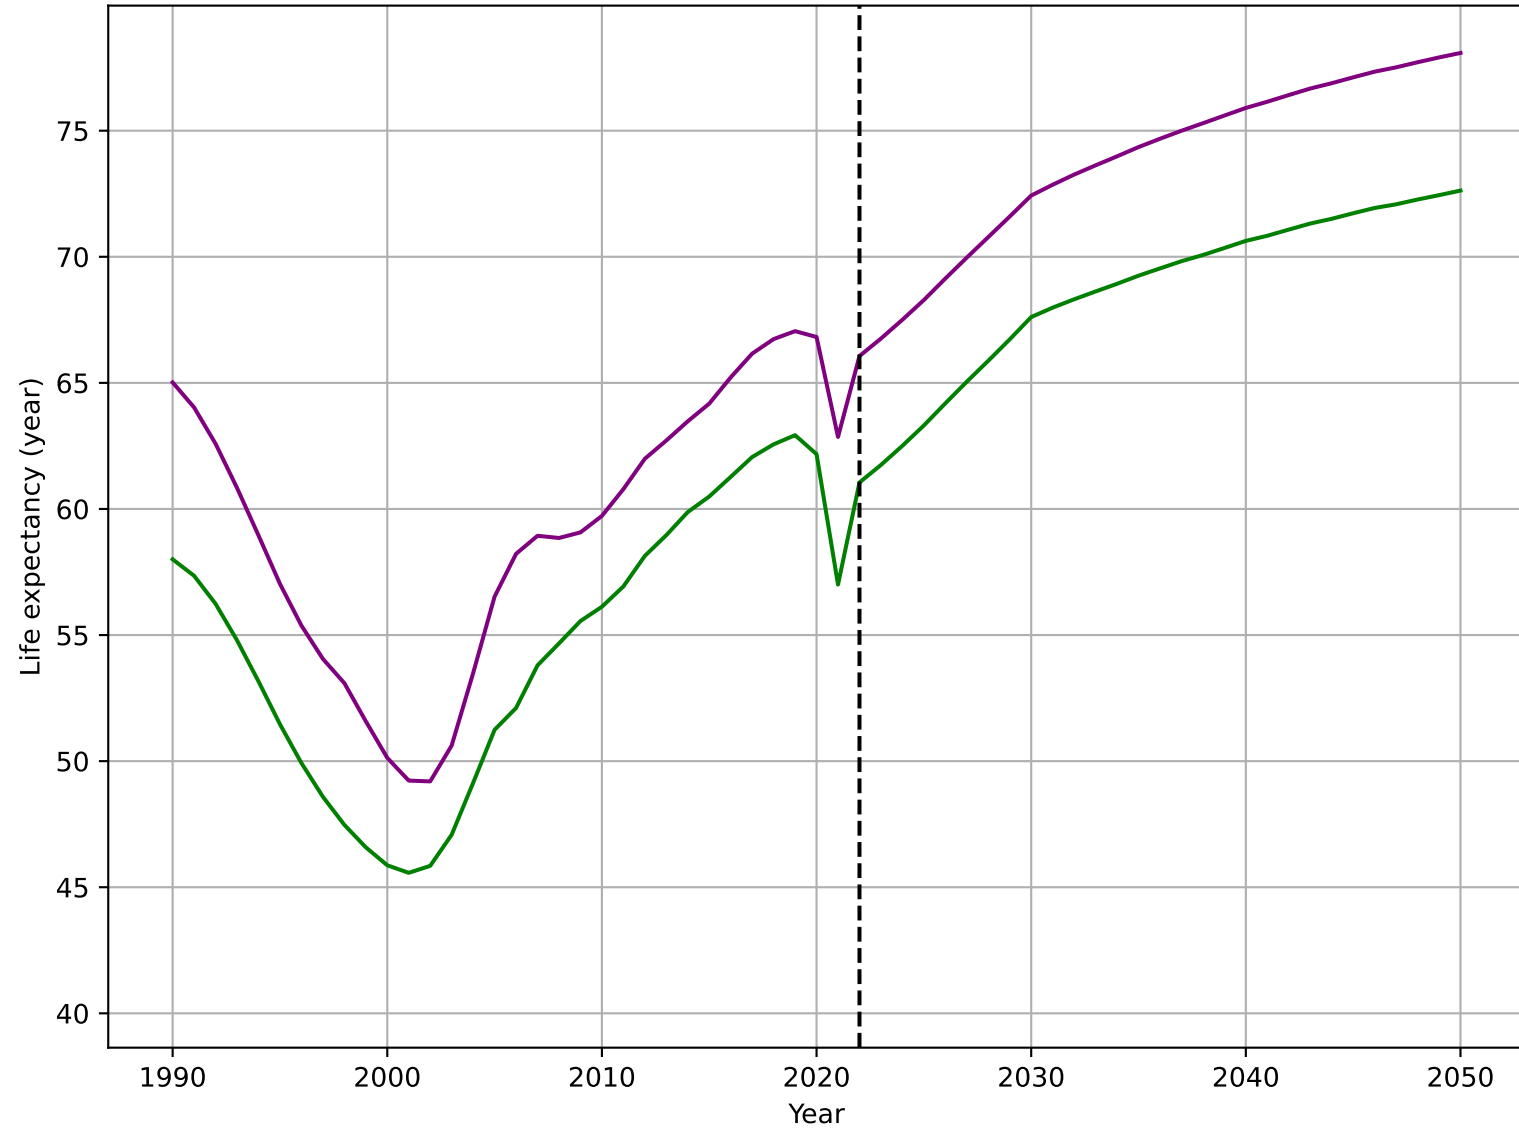

### Healthy Life Expectancy (HALE)

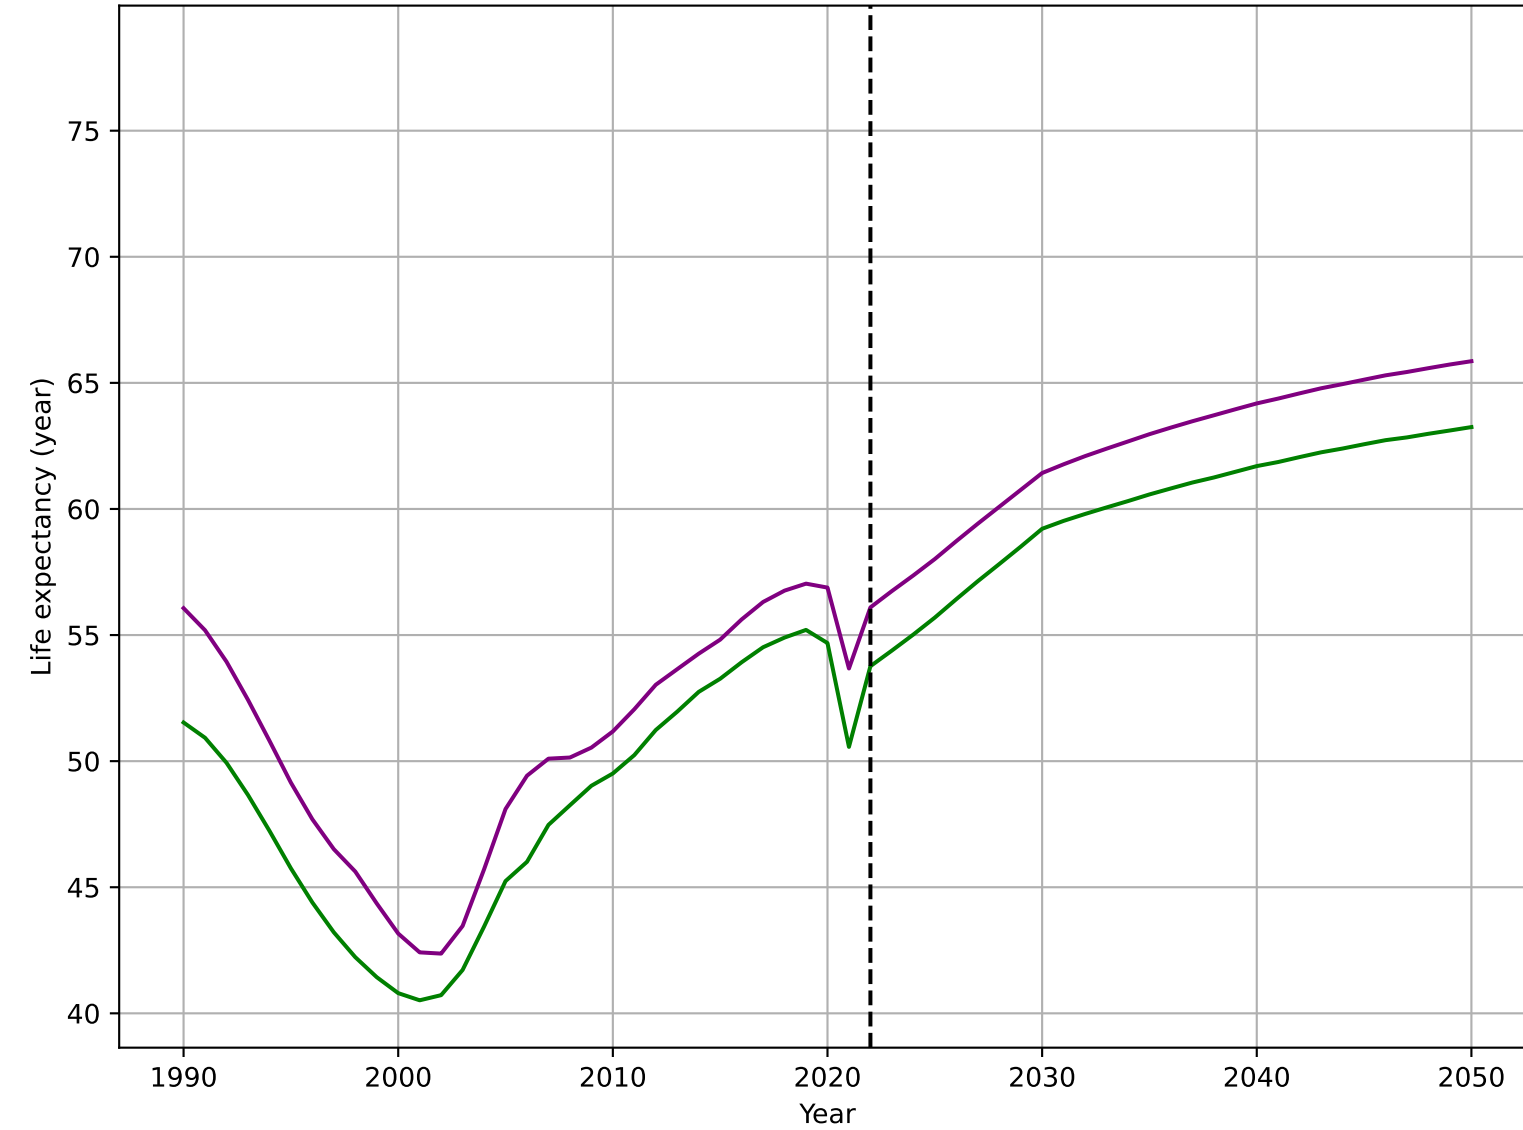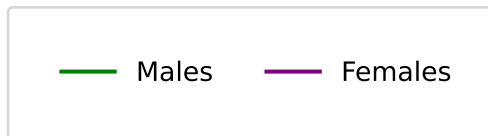



# Eswatini

## Life Expectancy

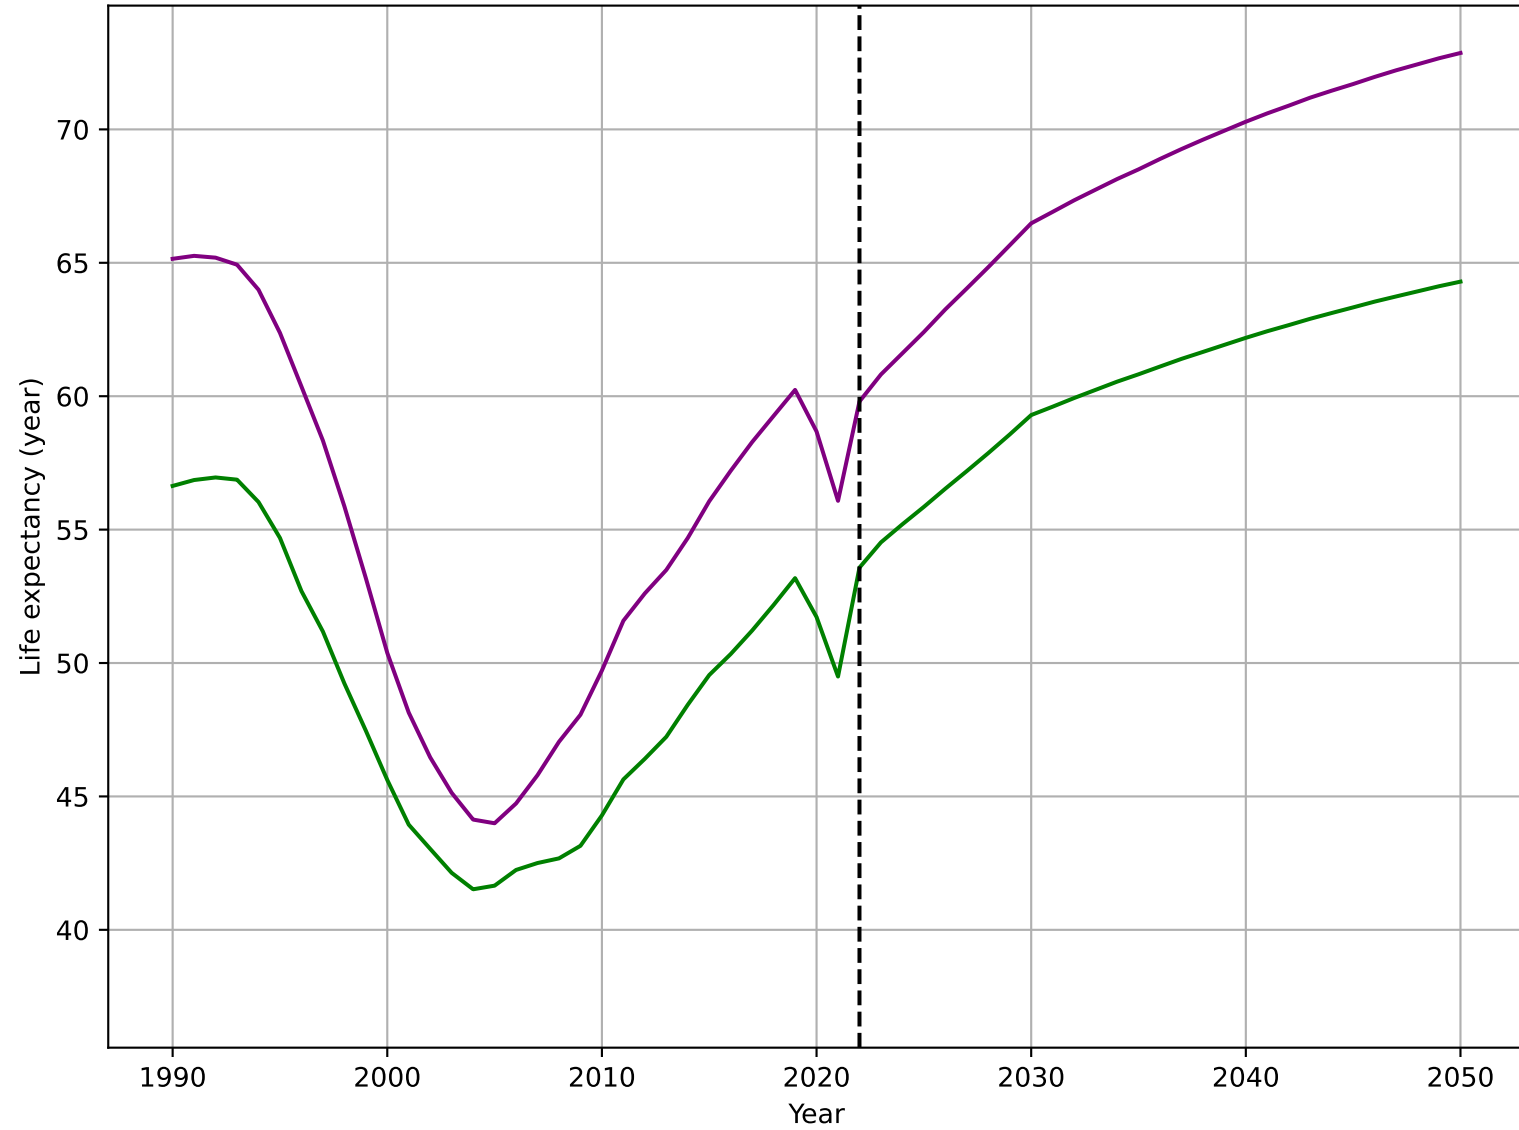

## Healthy Life Expectancy (HALE)

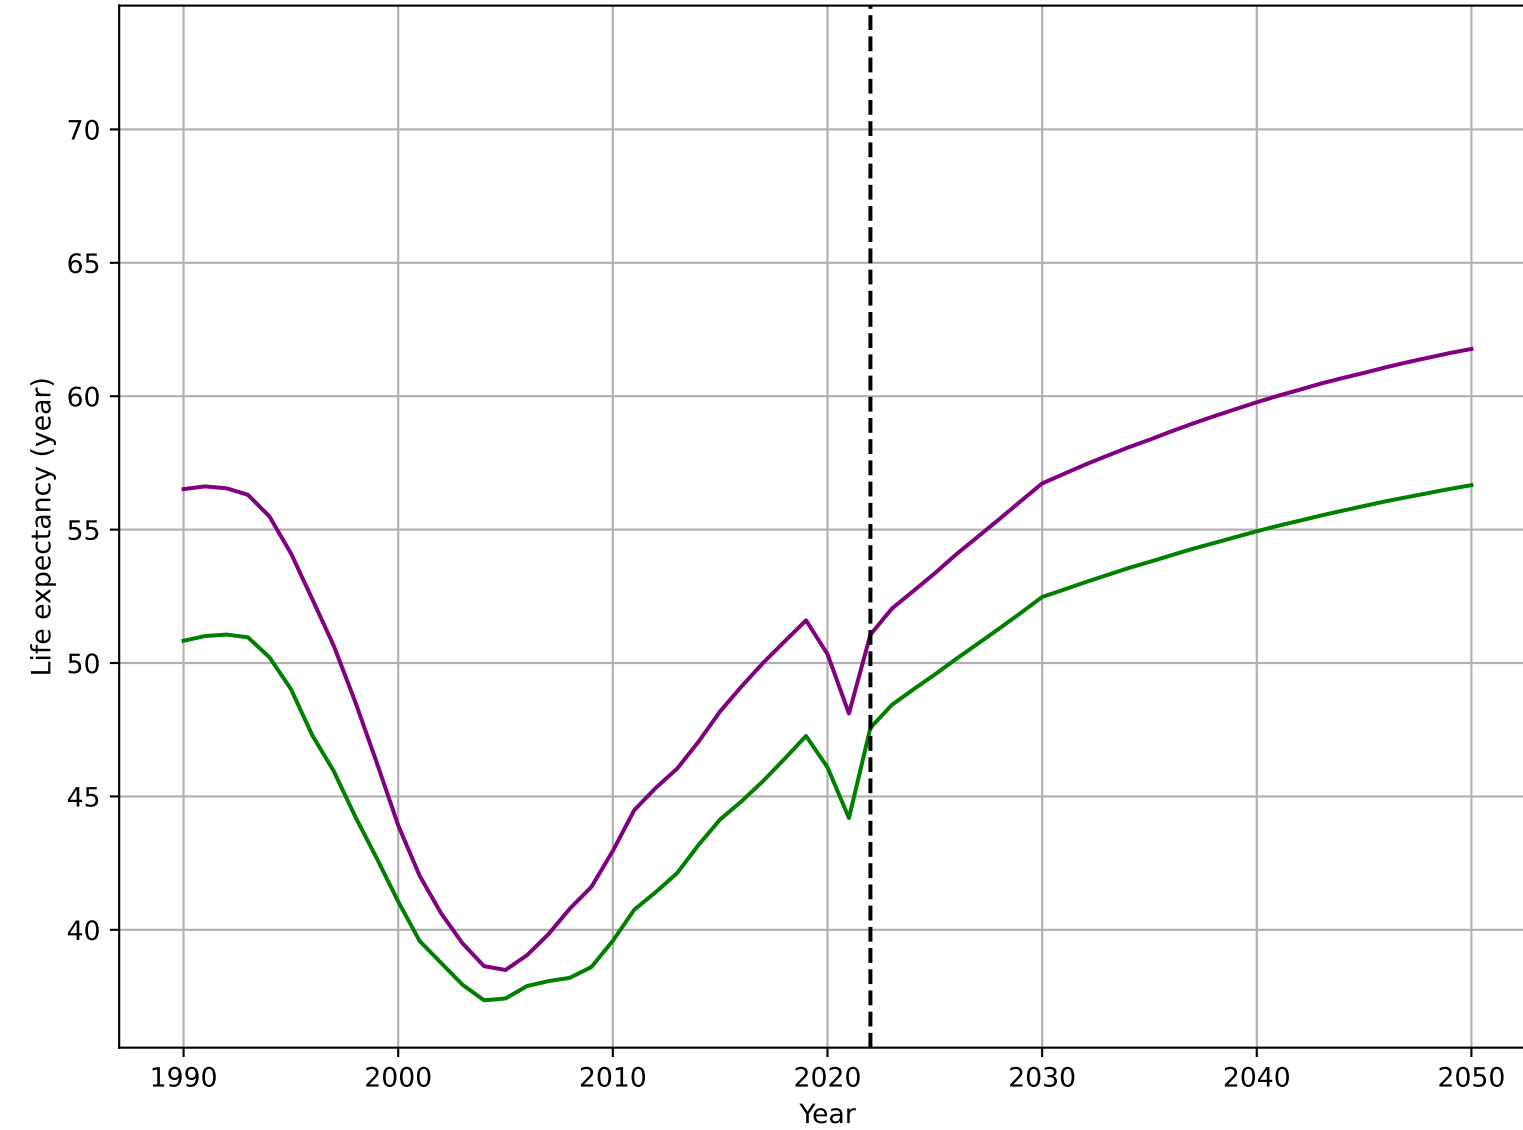

# Lesotho

### Life Expectancy

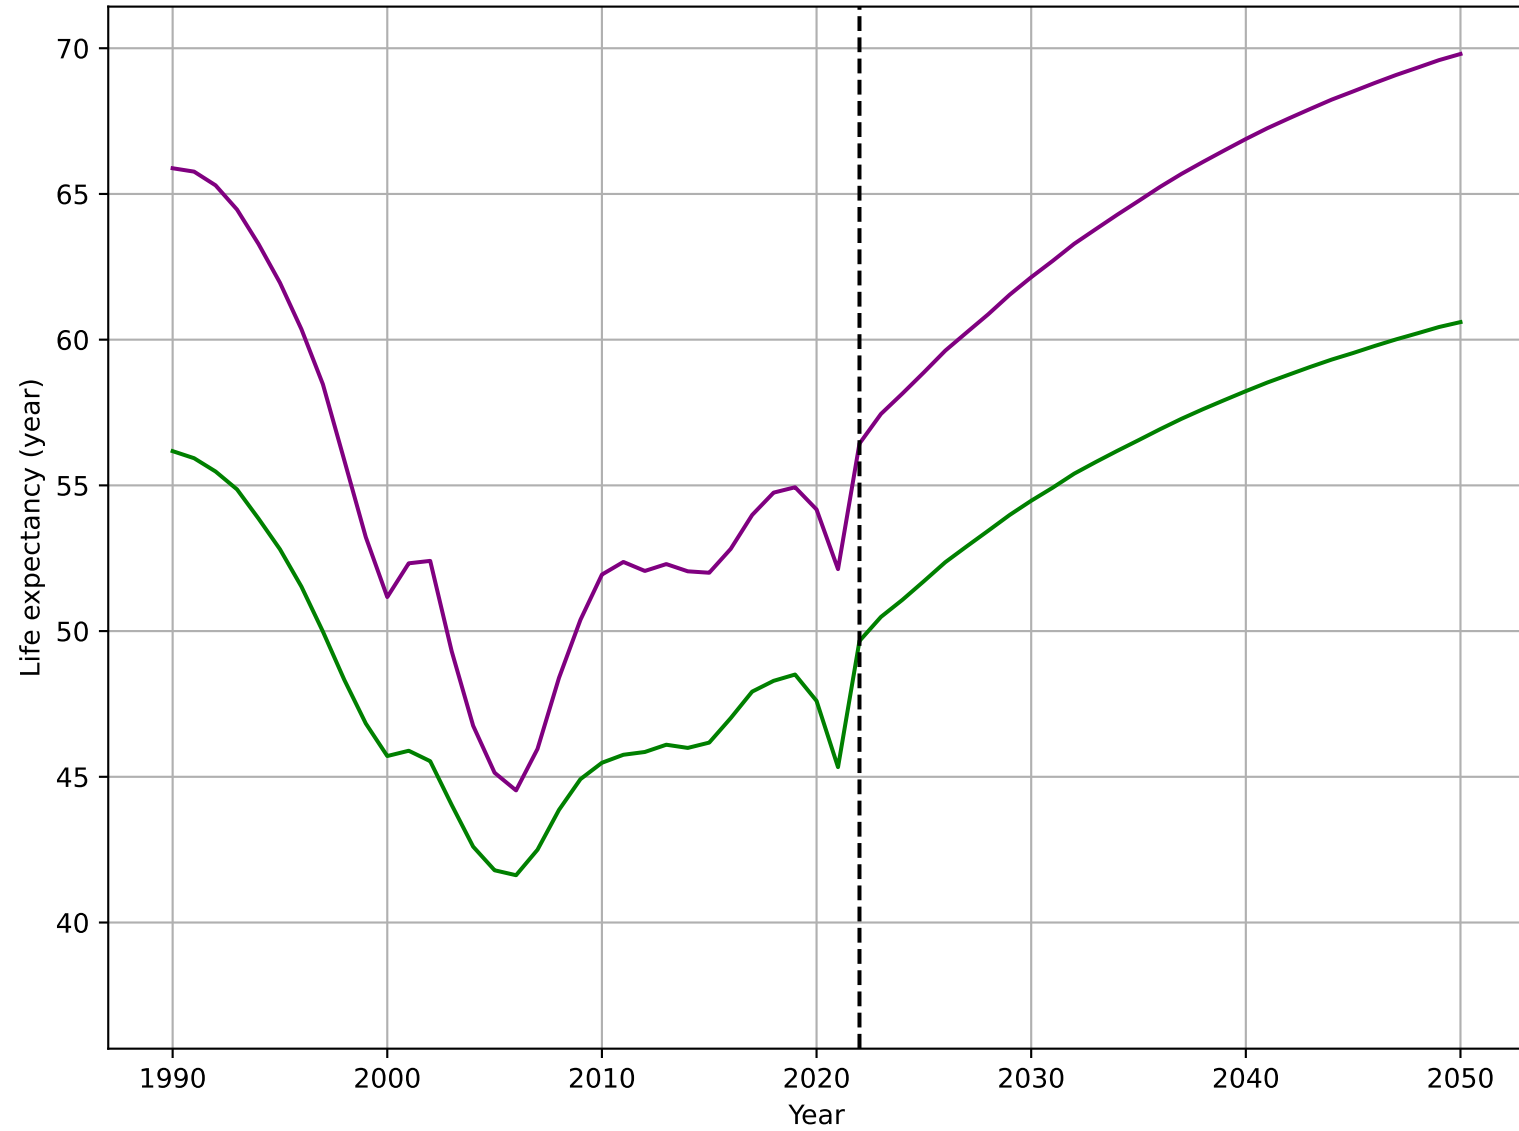

### Healthy Life Expectancy (HALE)

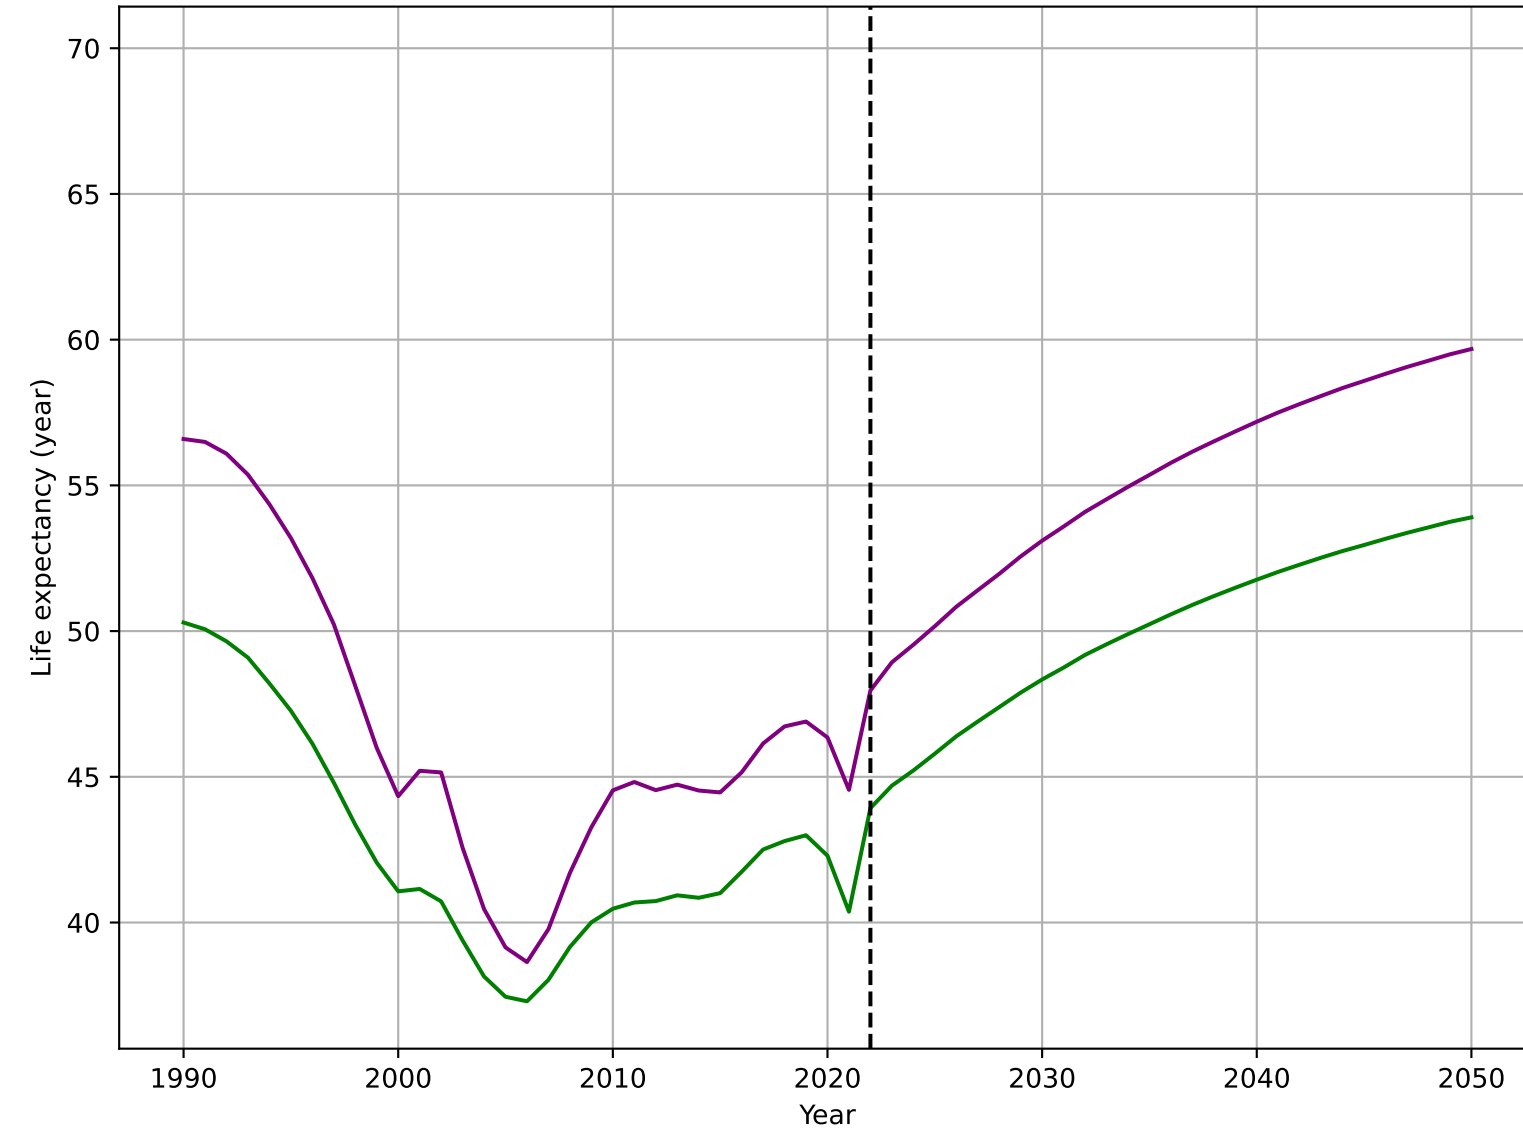

# Namibia

## Life Expectancy

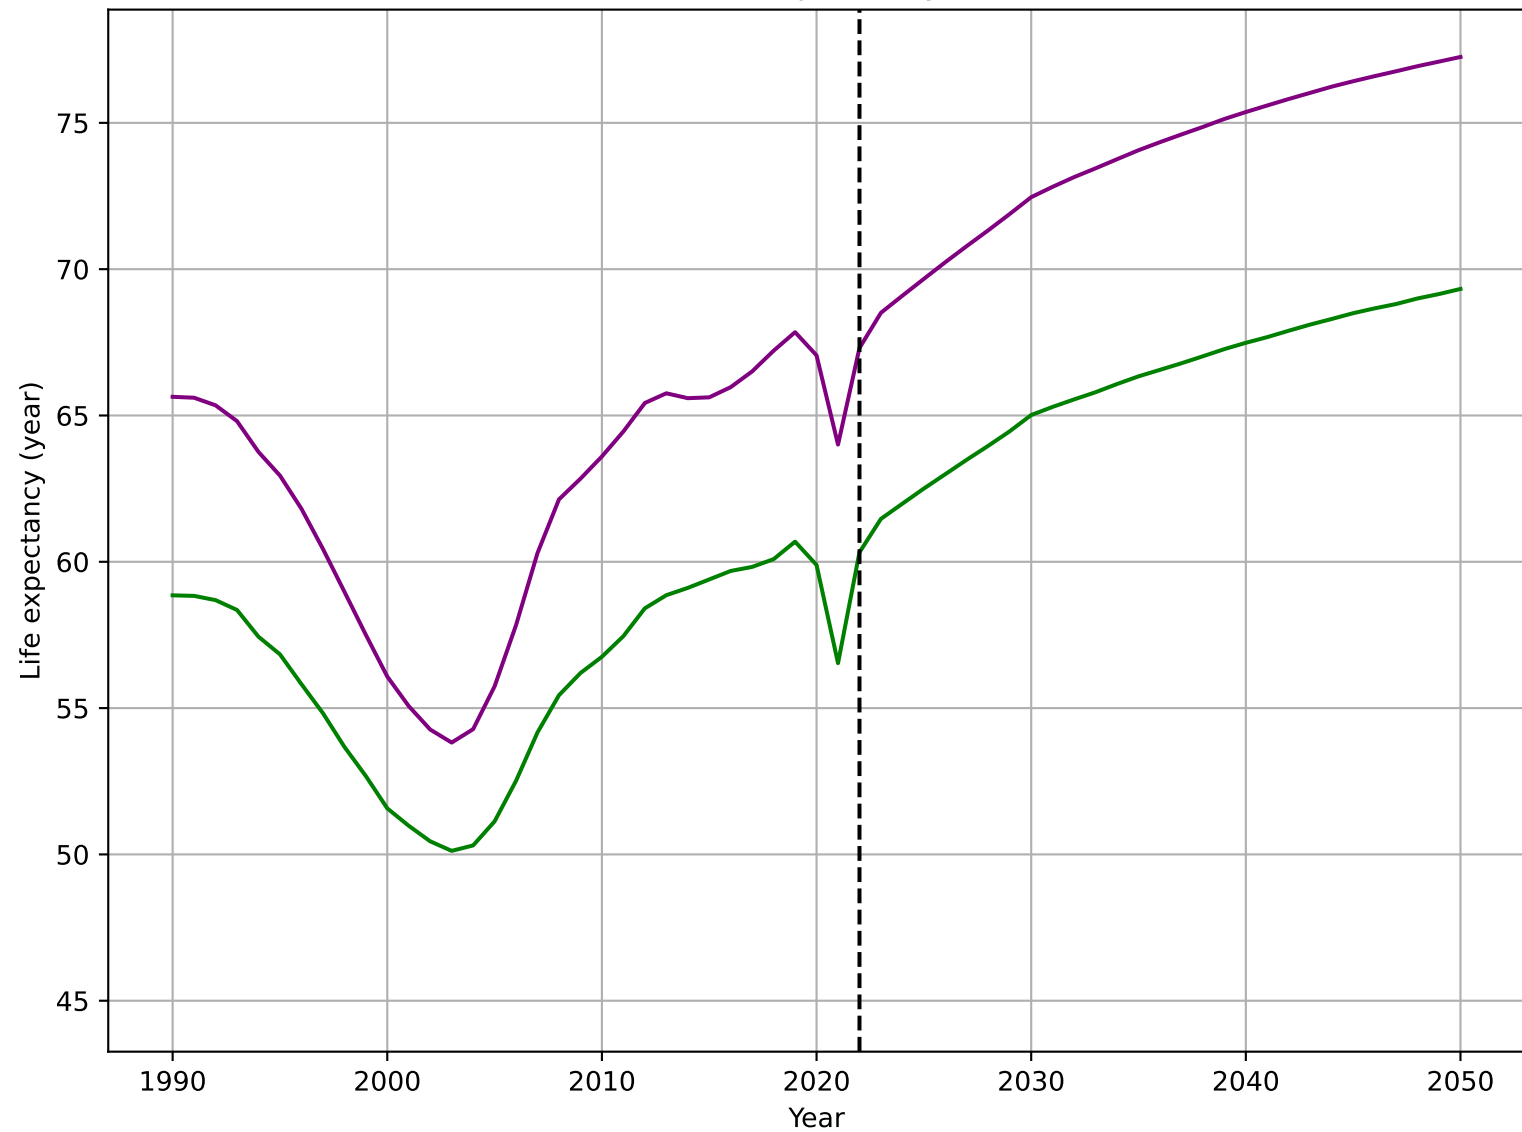

## Healthy Life Expectancy (HALE)

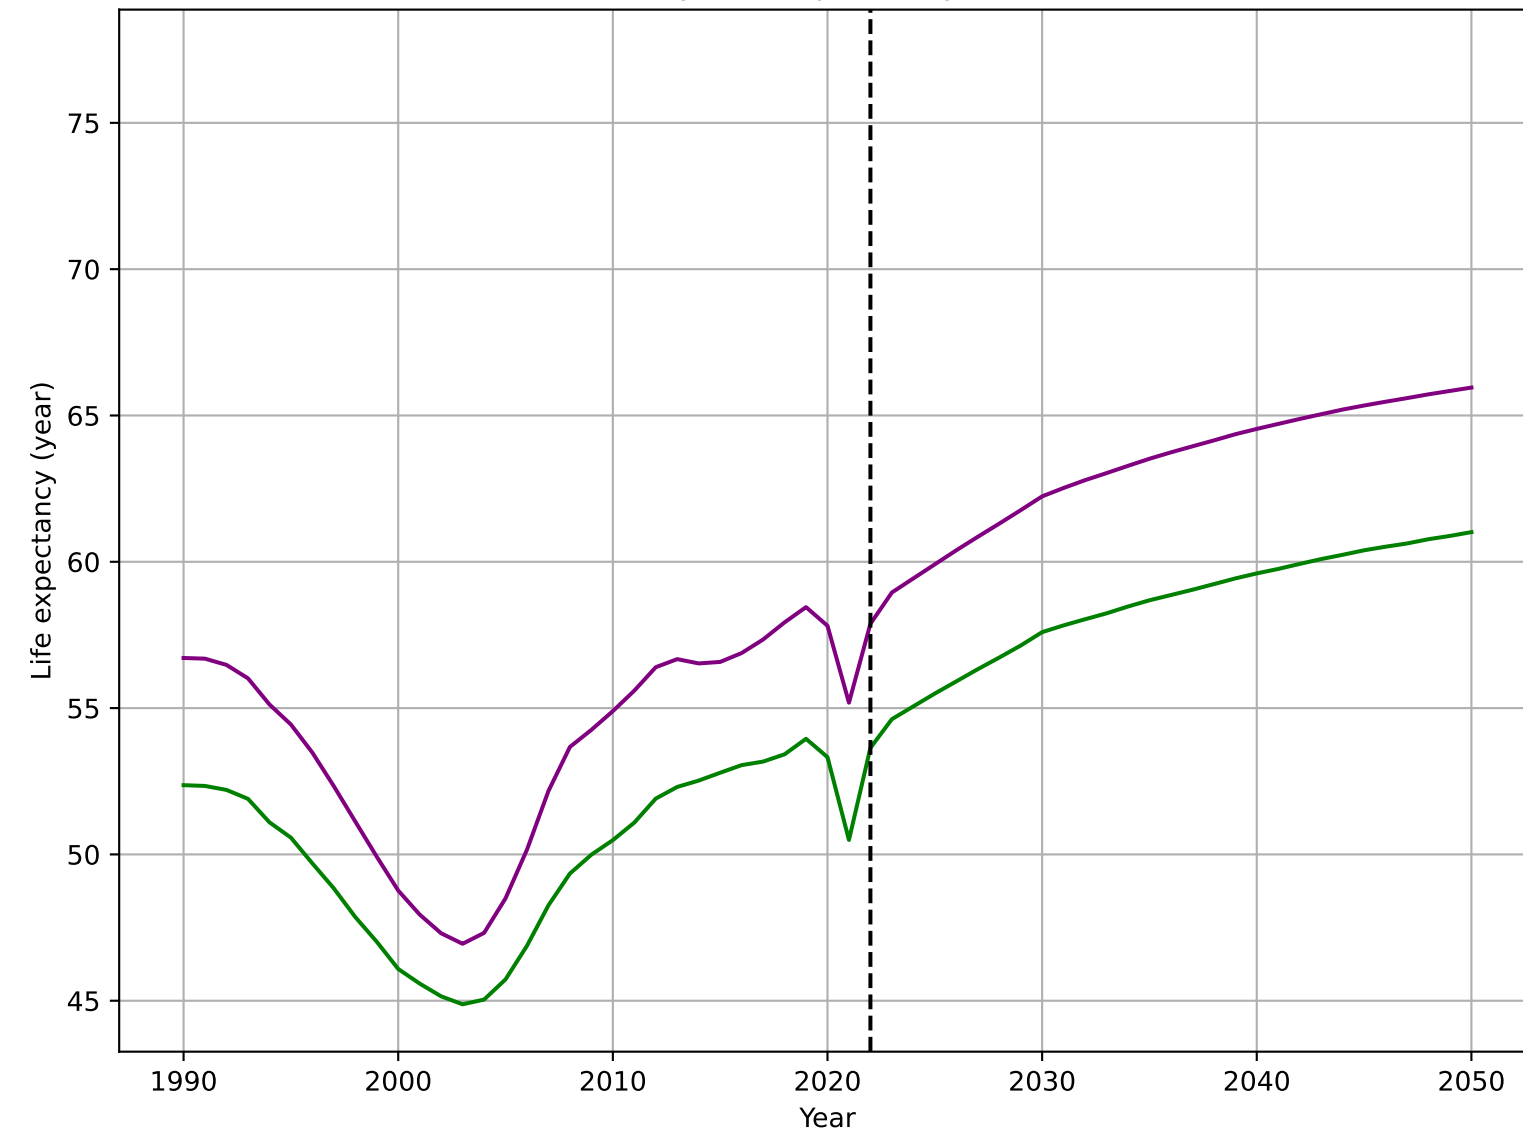

# South Africa

### Life Expectancy

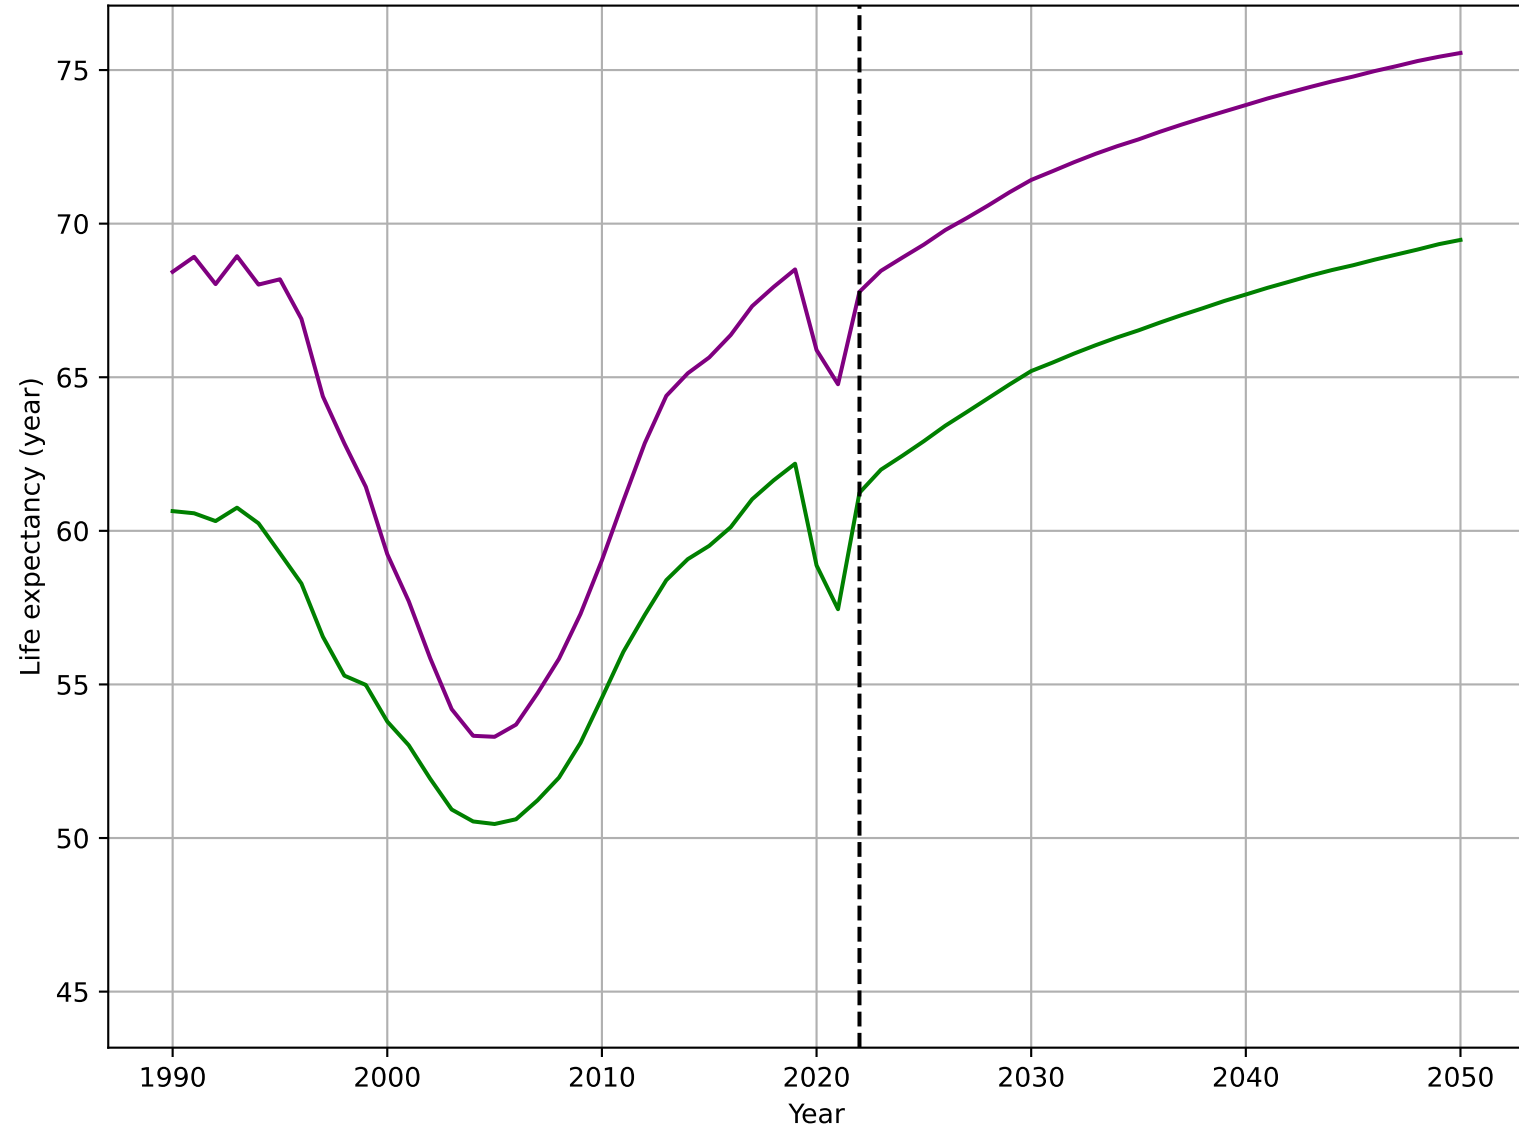

### Healthy Life Expectancy (HALE)

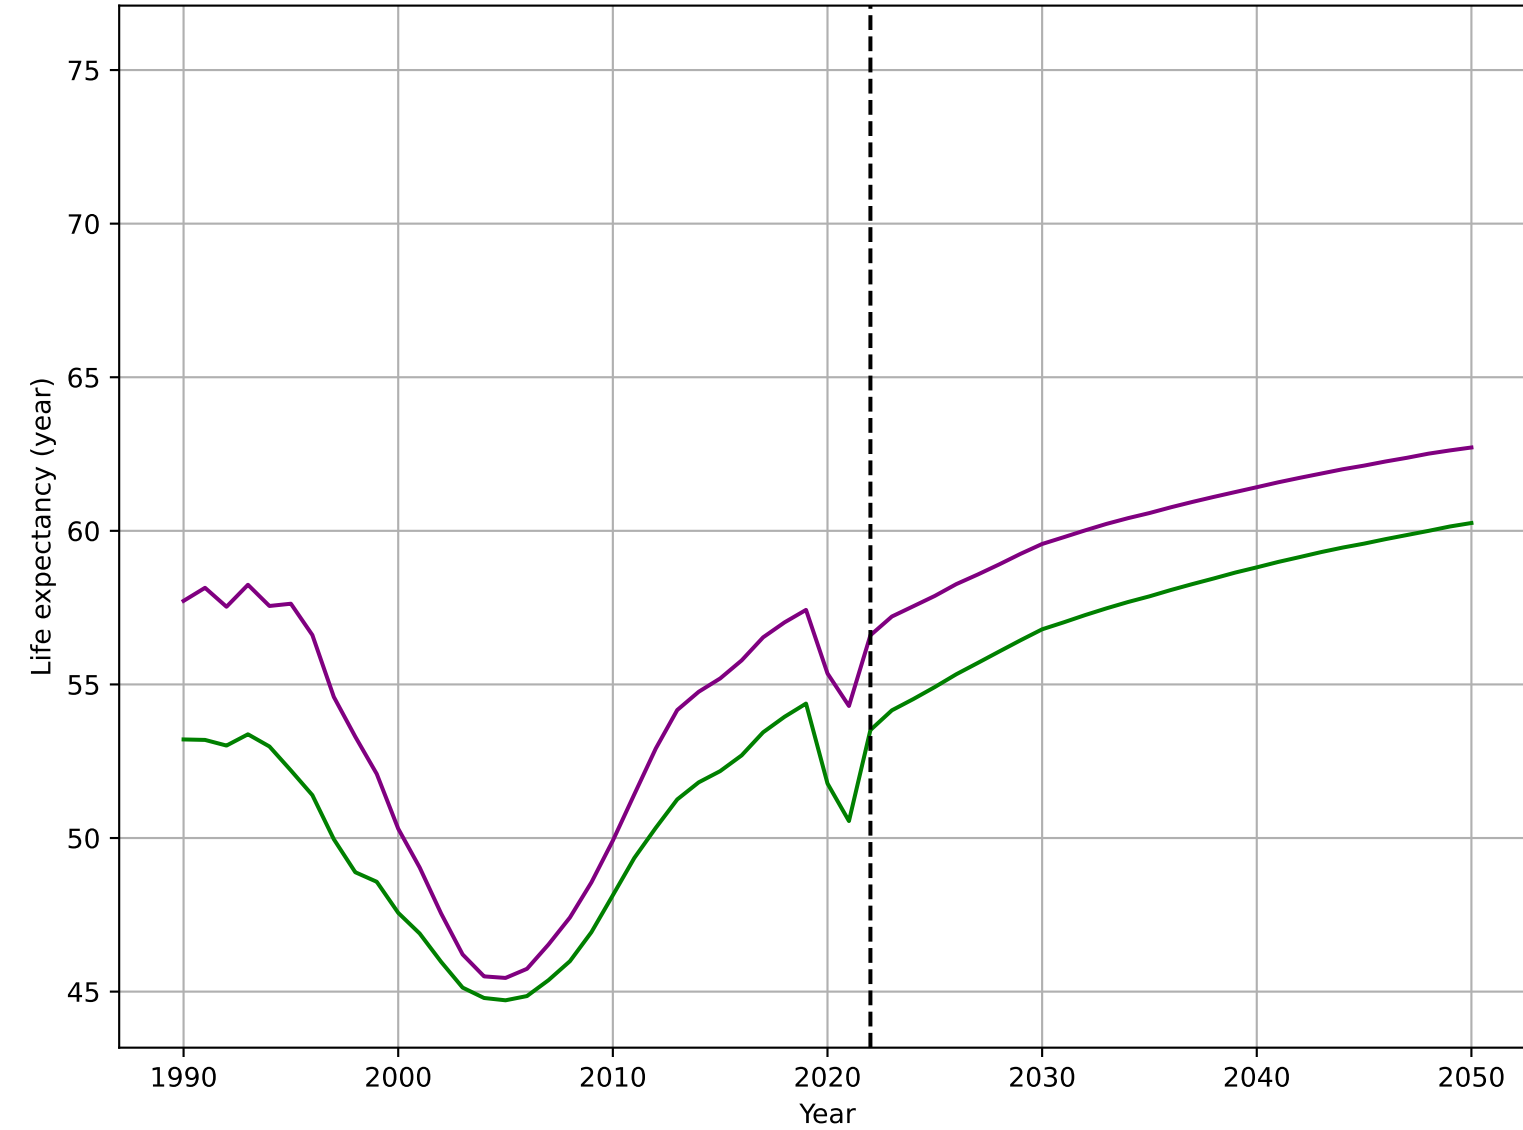

# Zimbabwe

### Life Expectancy

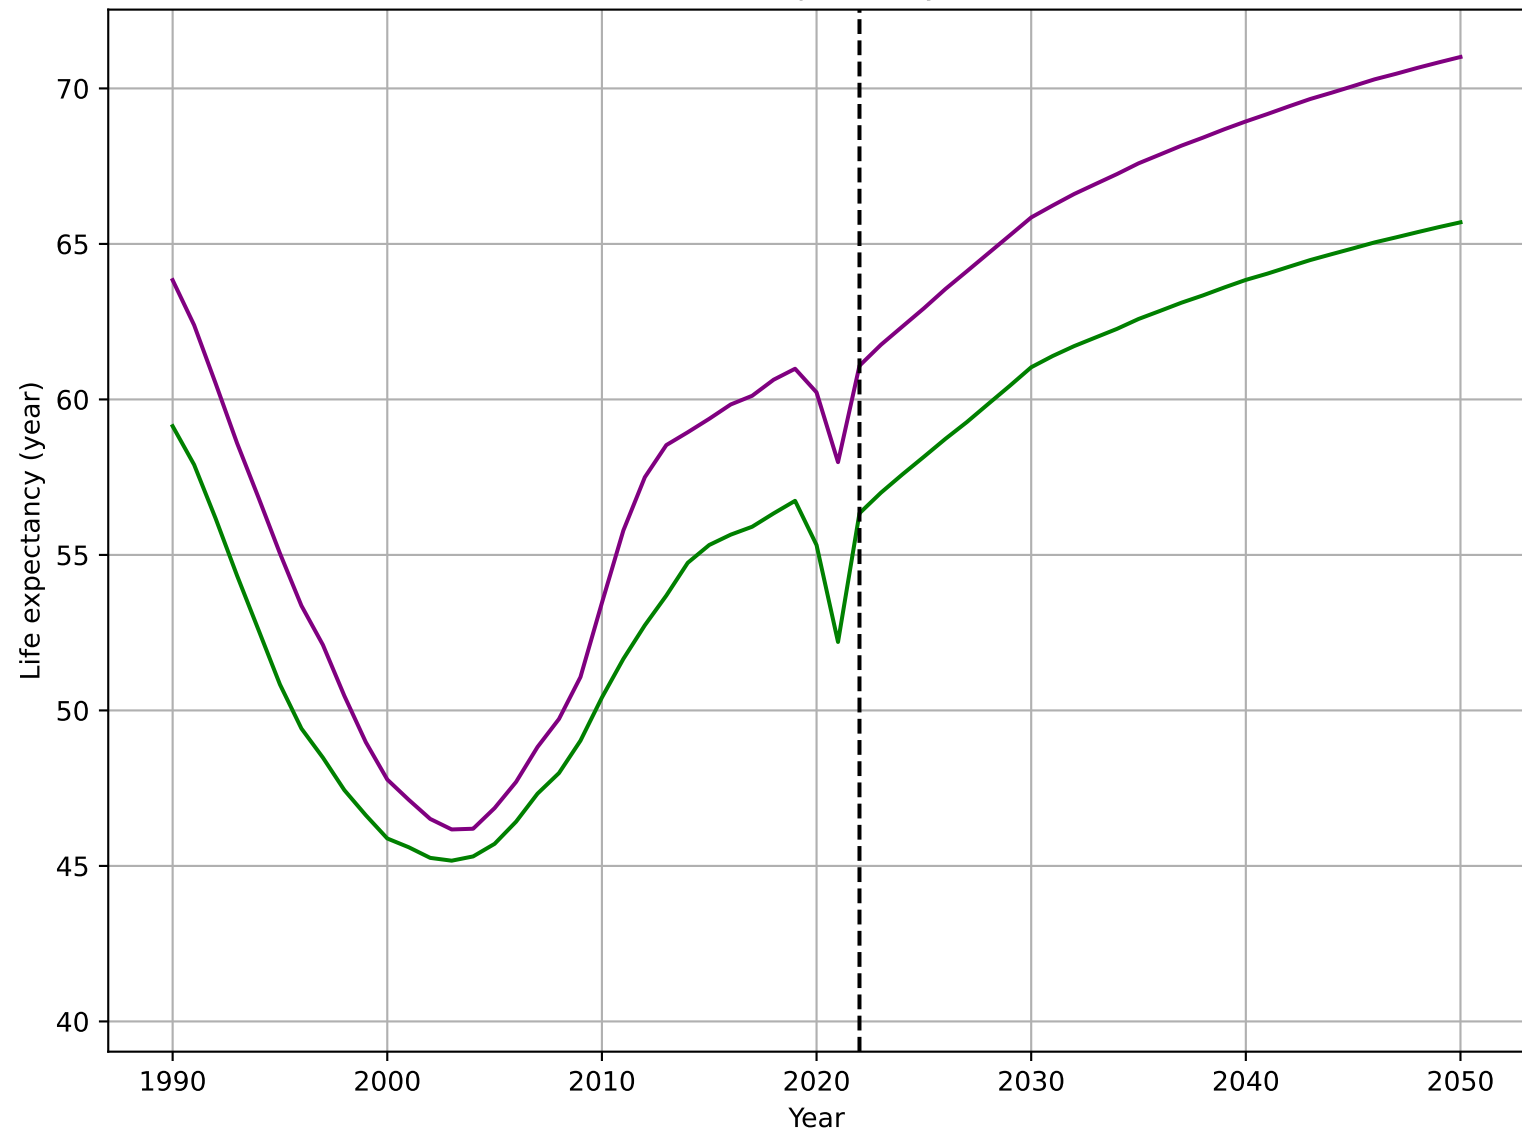

### Healthy Life Expectancy (HALE)

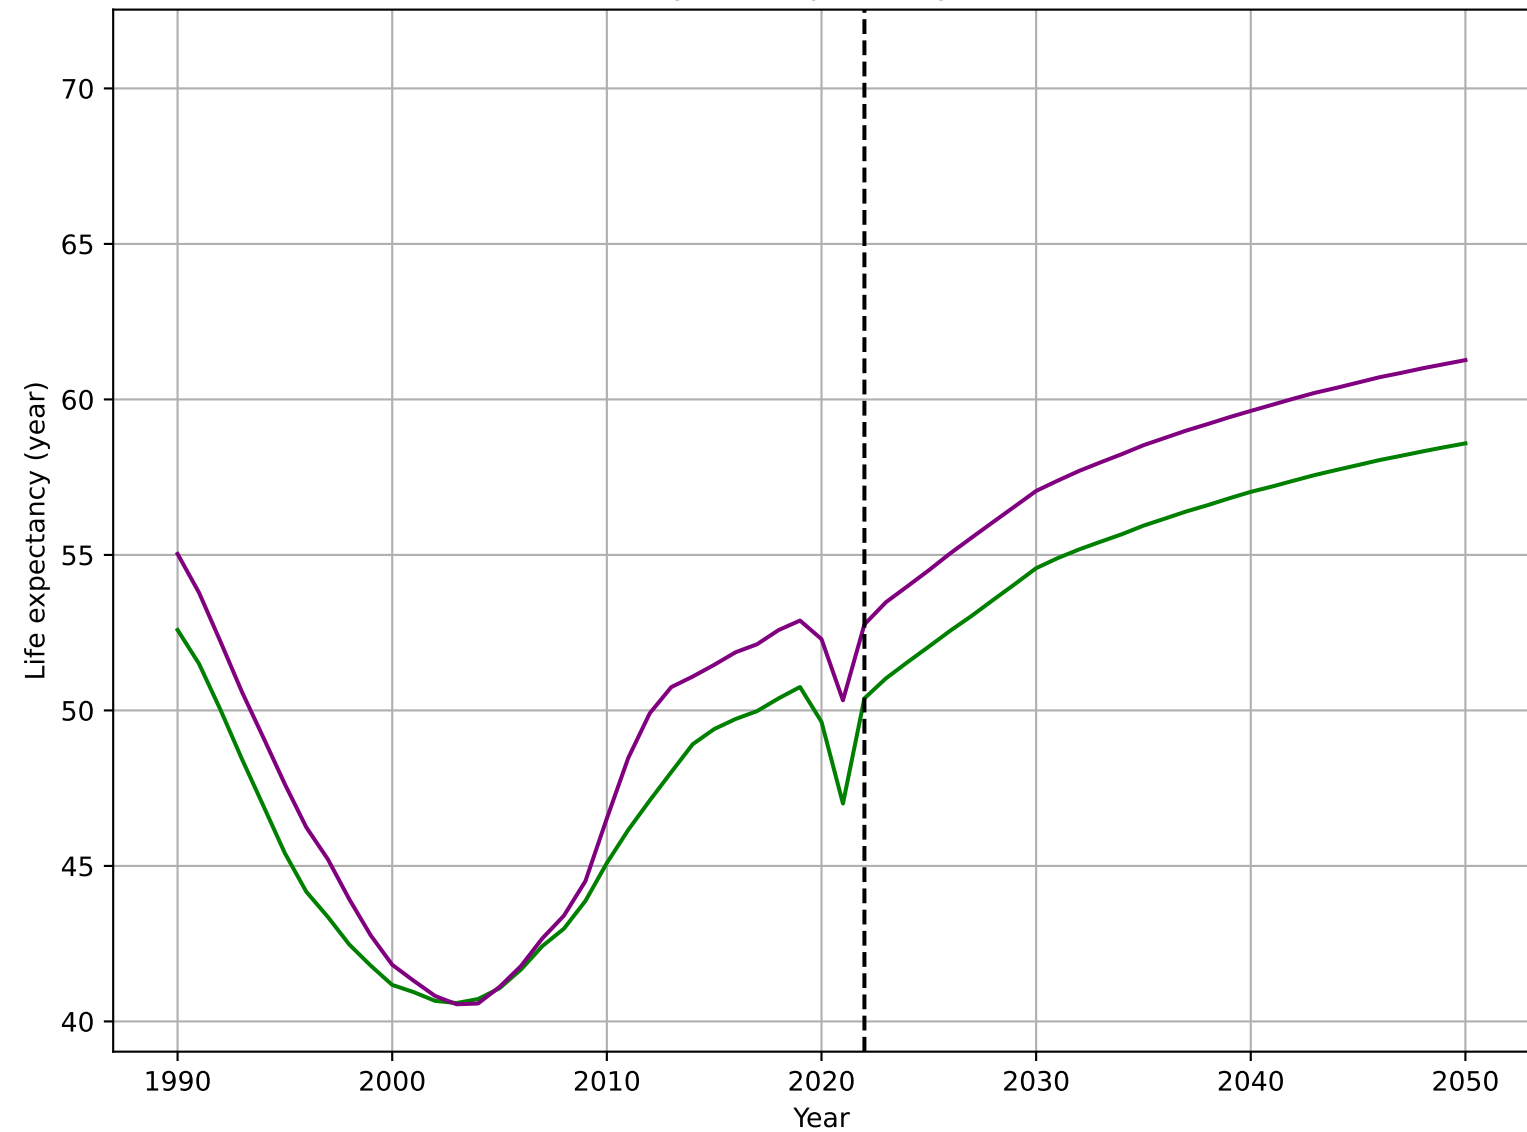

# Benin

### Life Expectancy

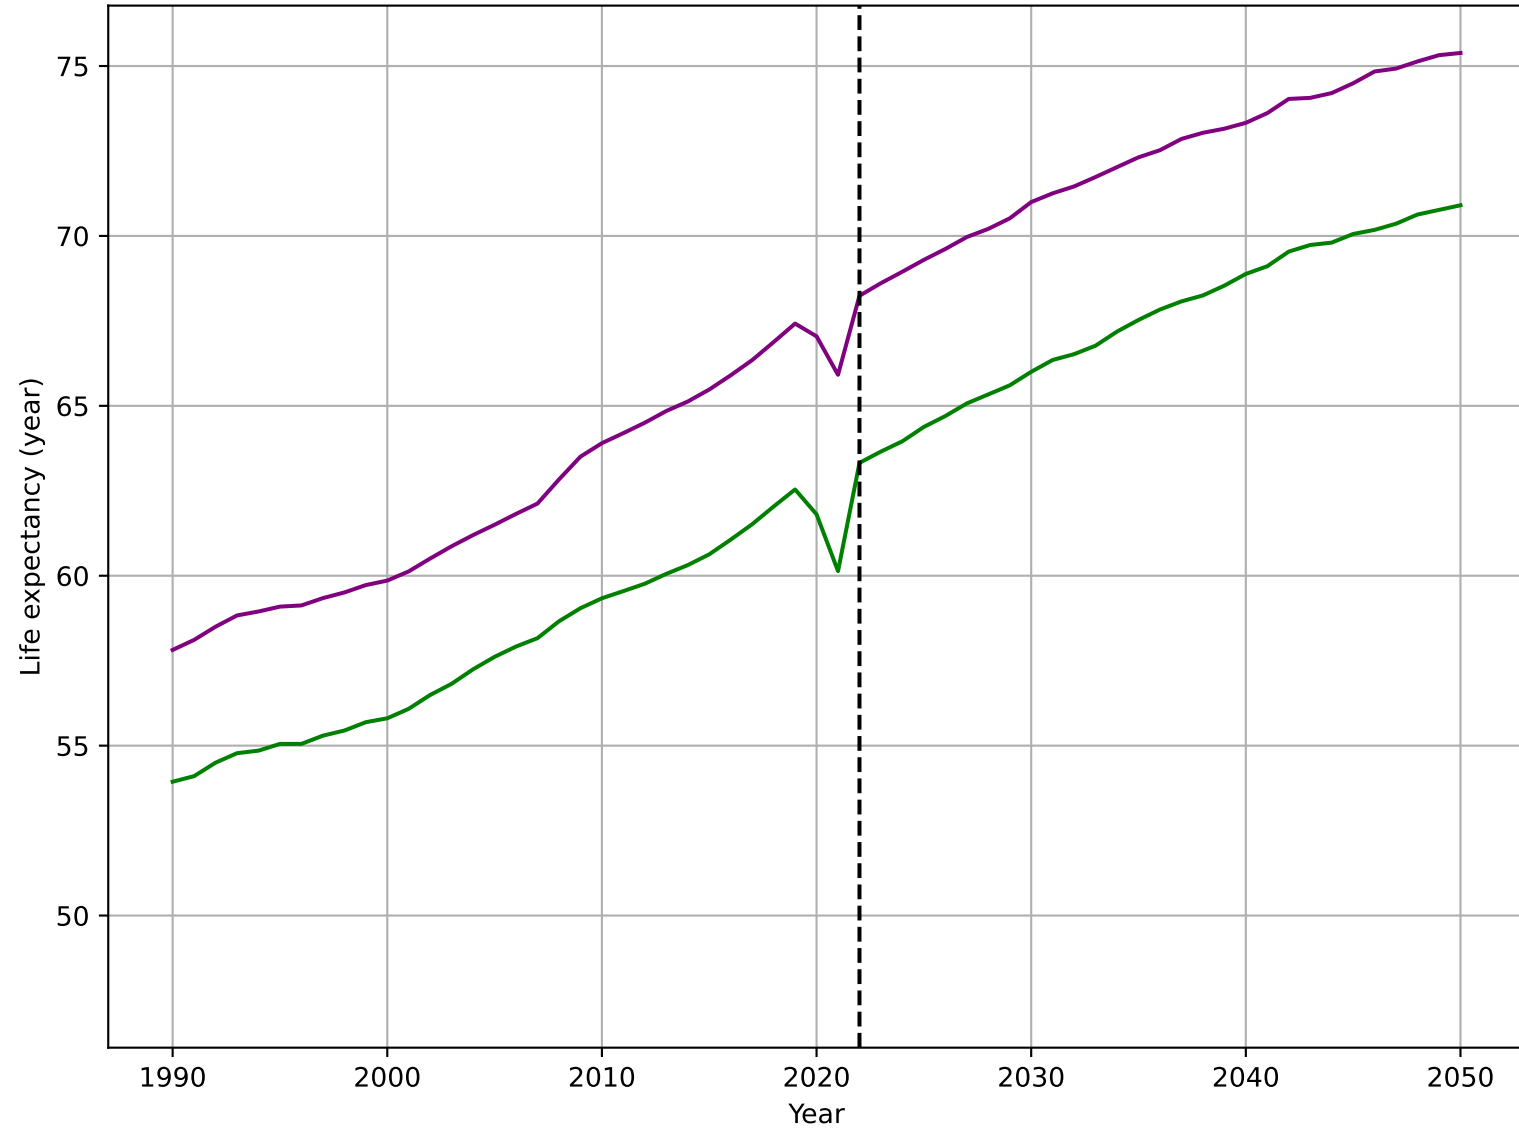

### Healthy Life Expectancy (HALE)

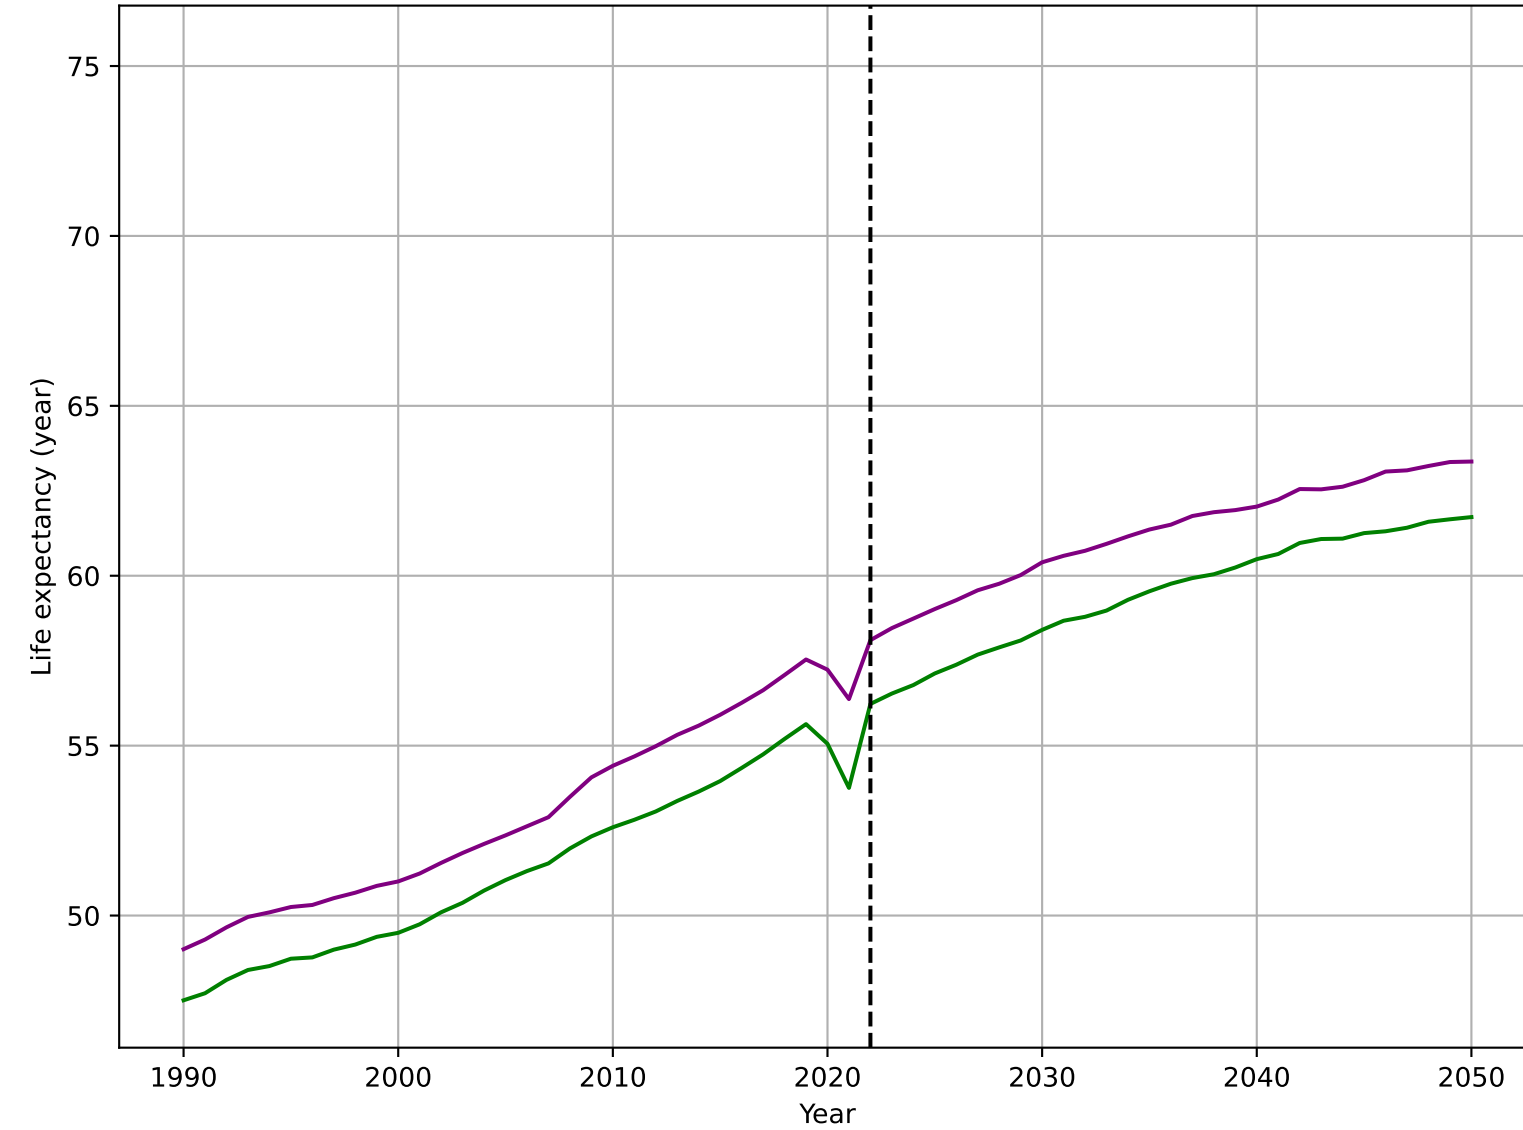

# Burkina Faso

## Life Expectancy

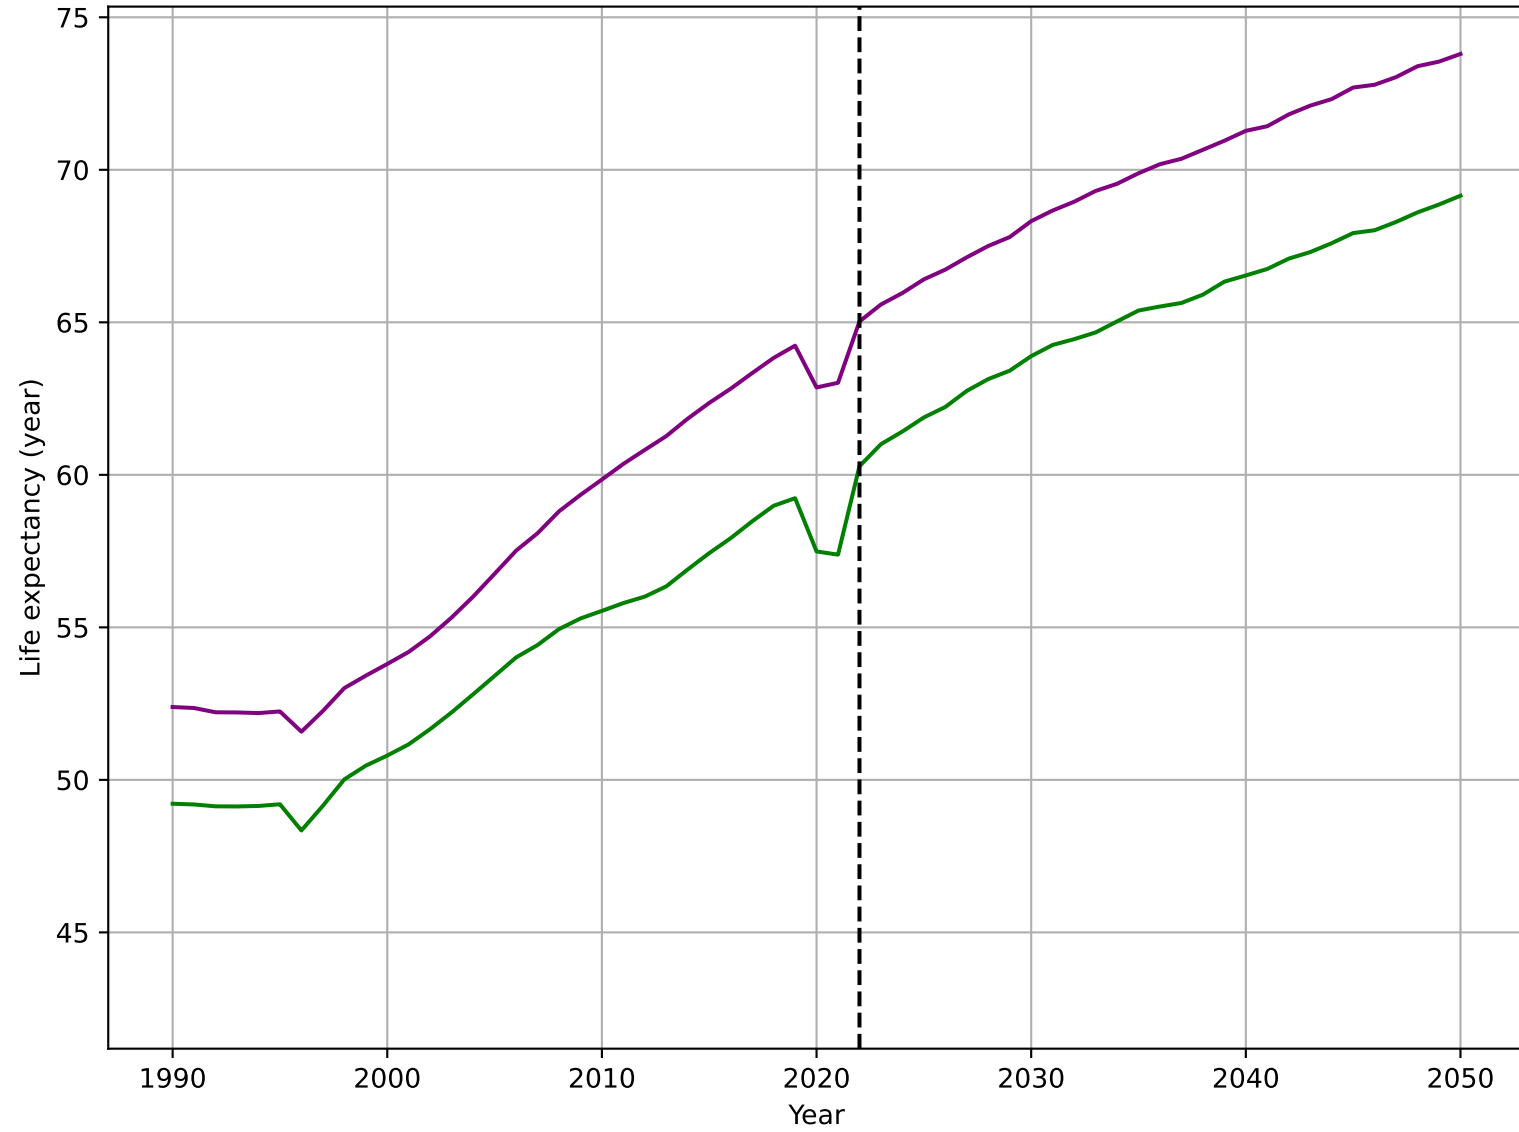

## Healthy Life Expectancy (HALE)

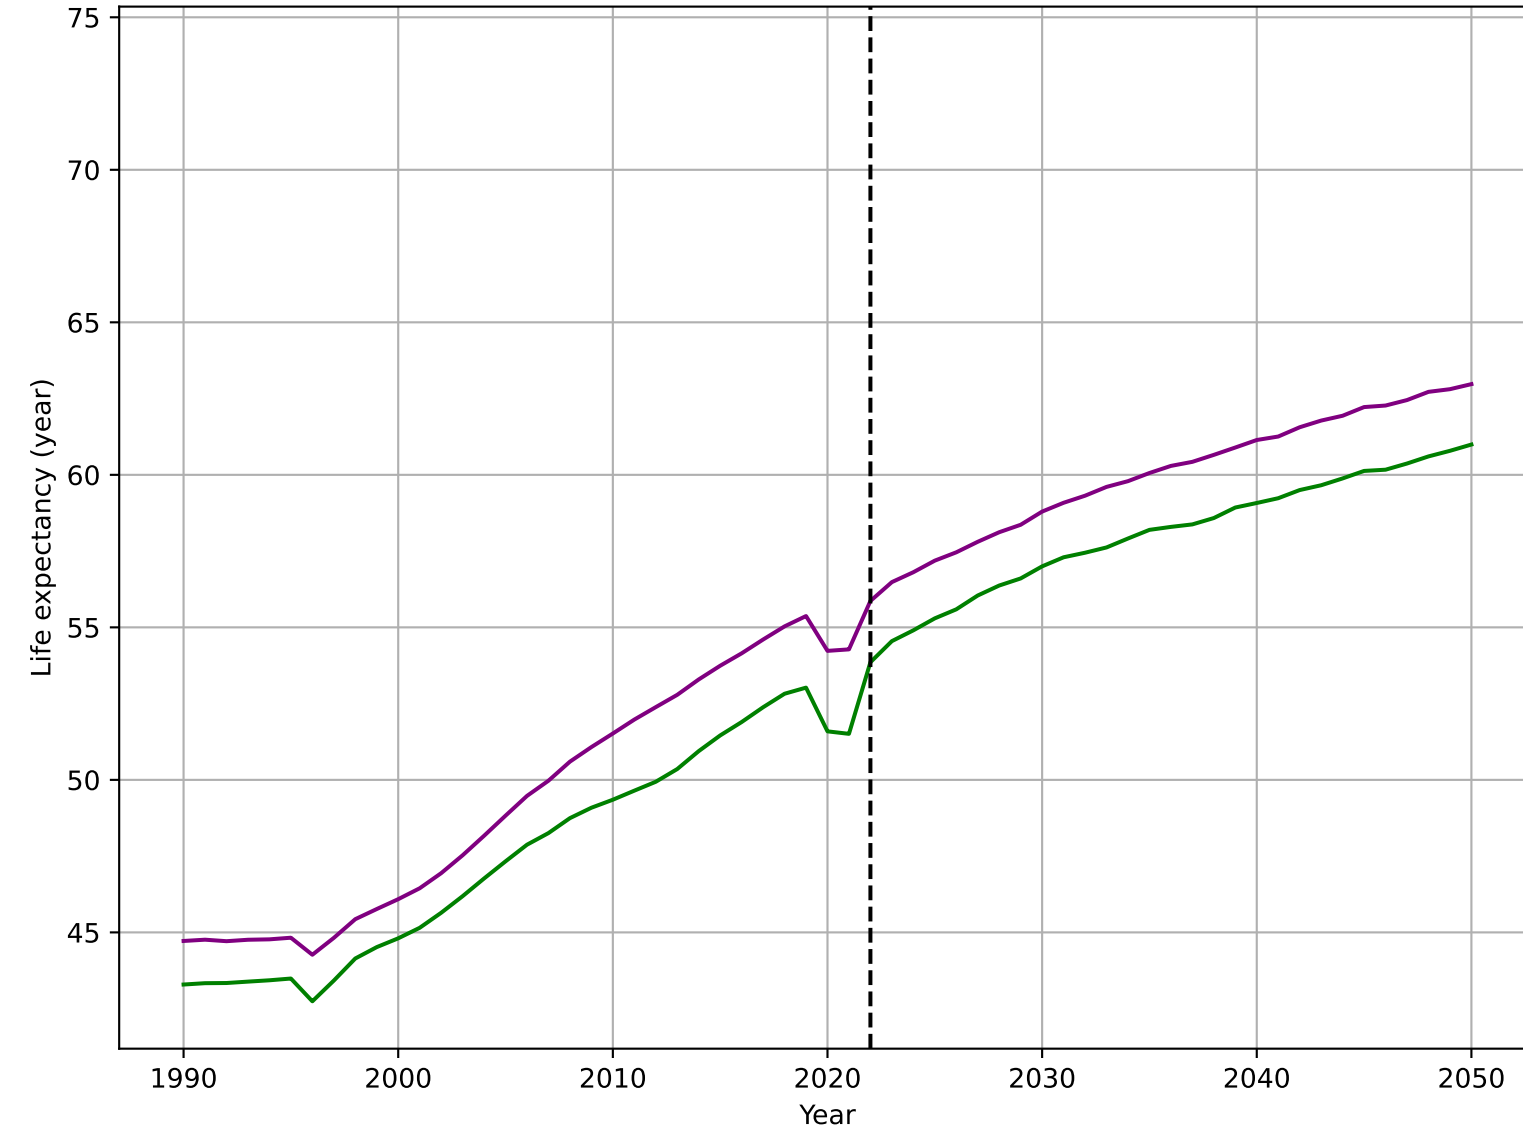

# Cabo Verde

### Life Expectancy

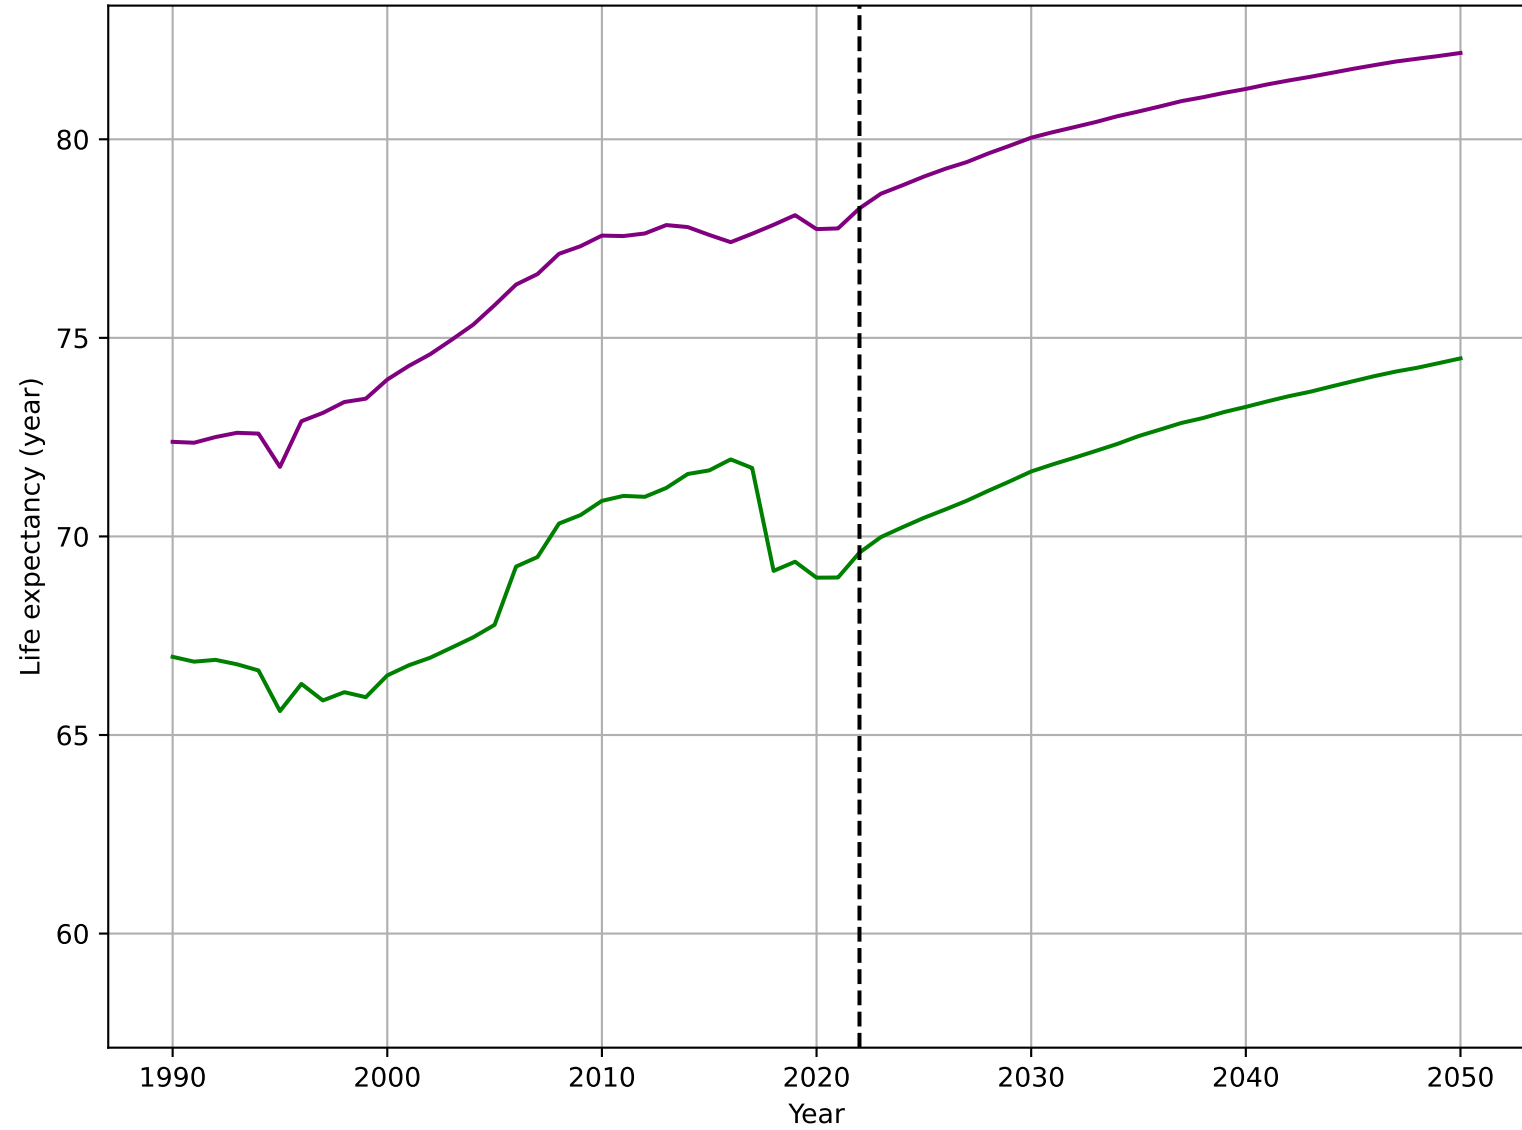

### Healthy Life Expectancy (HALE)

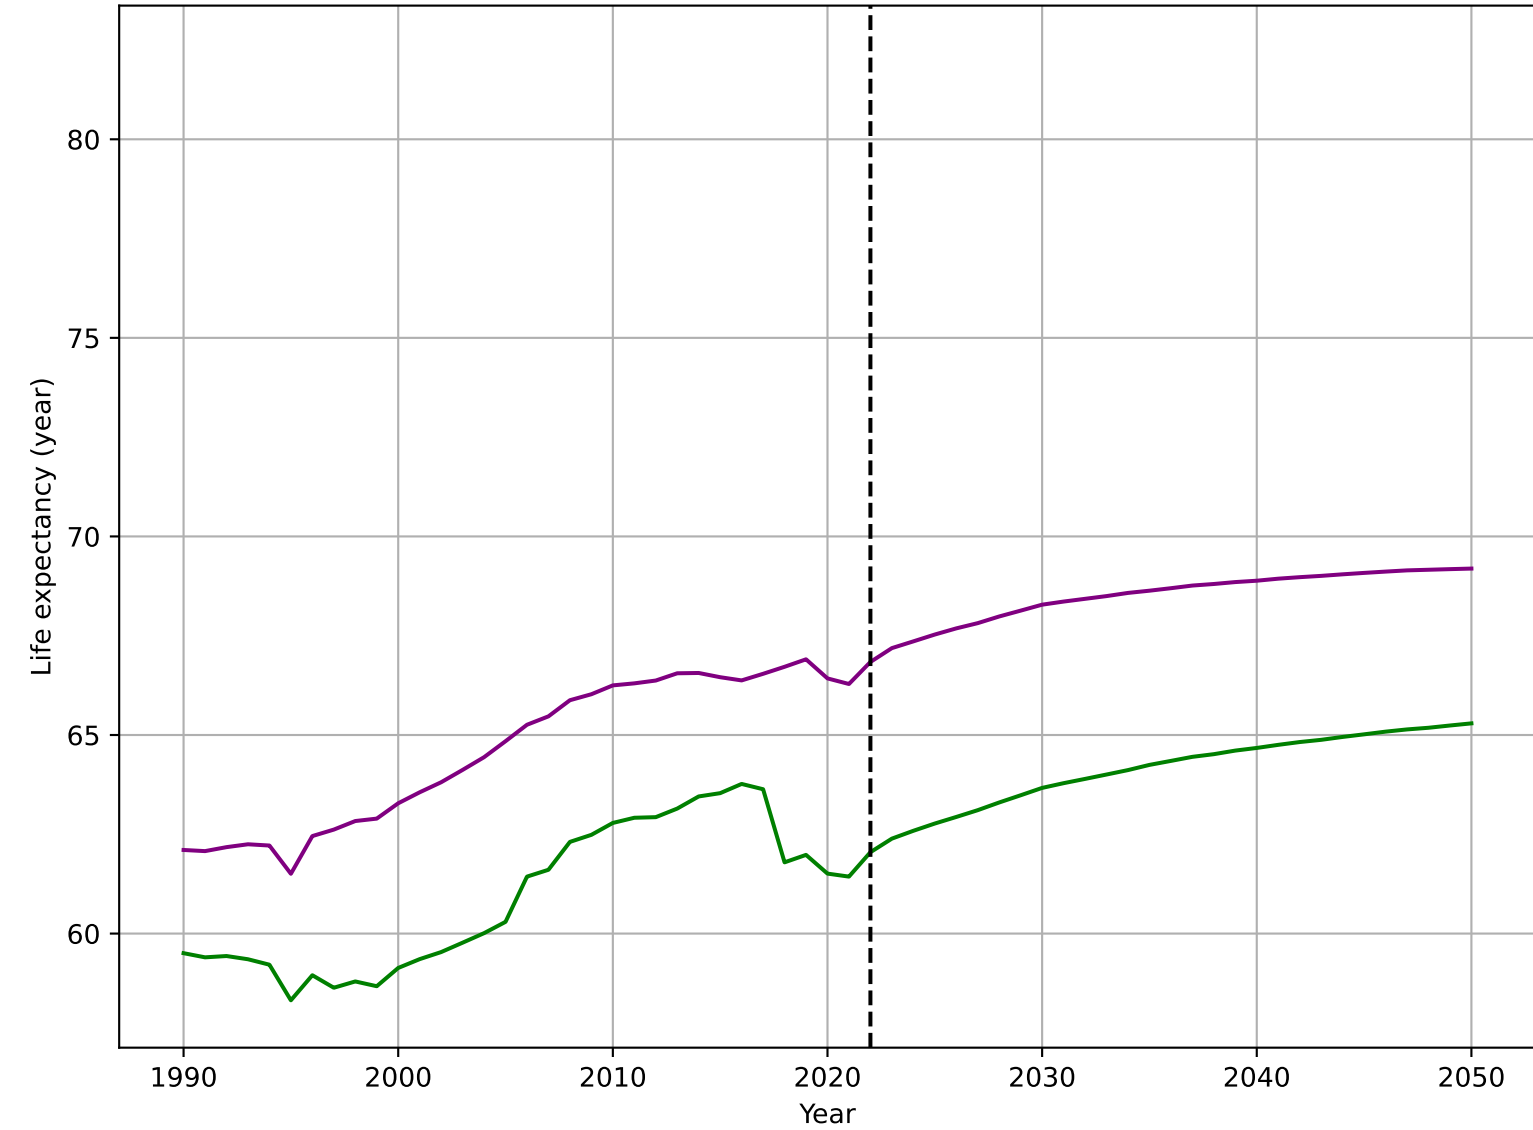



# Cameroon

### Life Expectancy

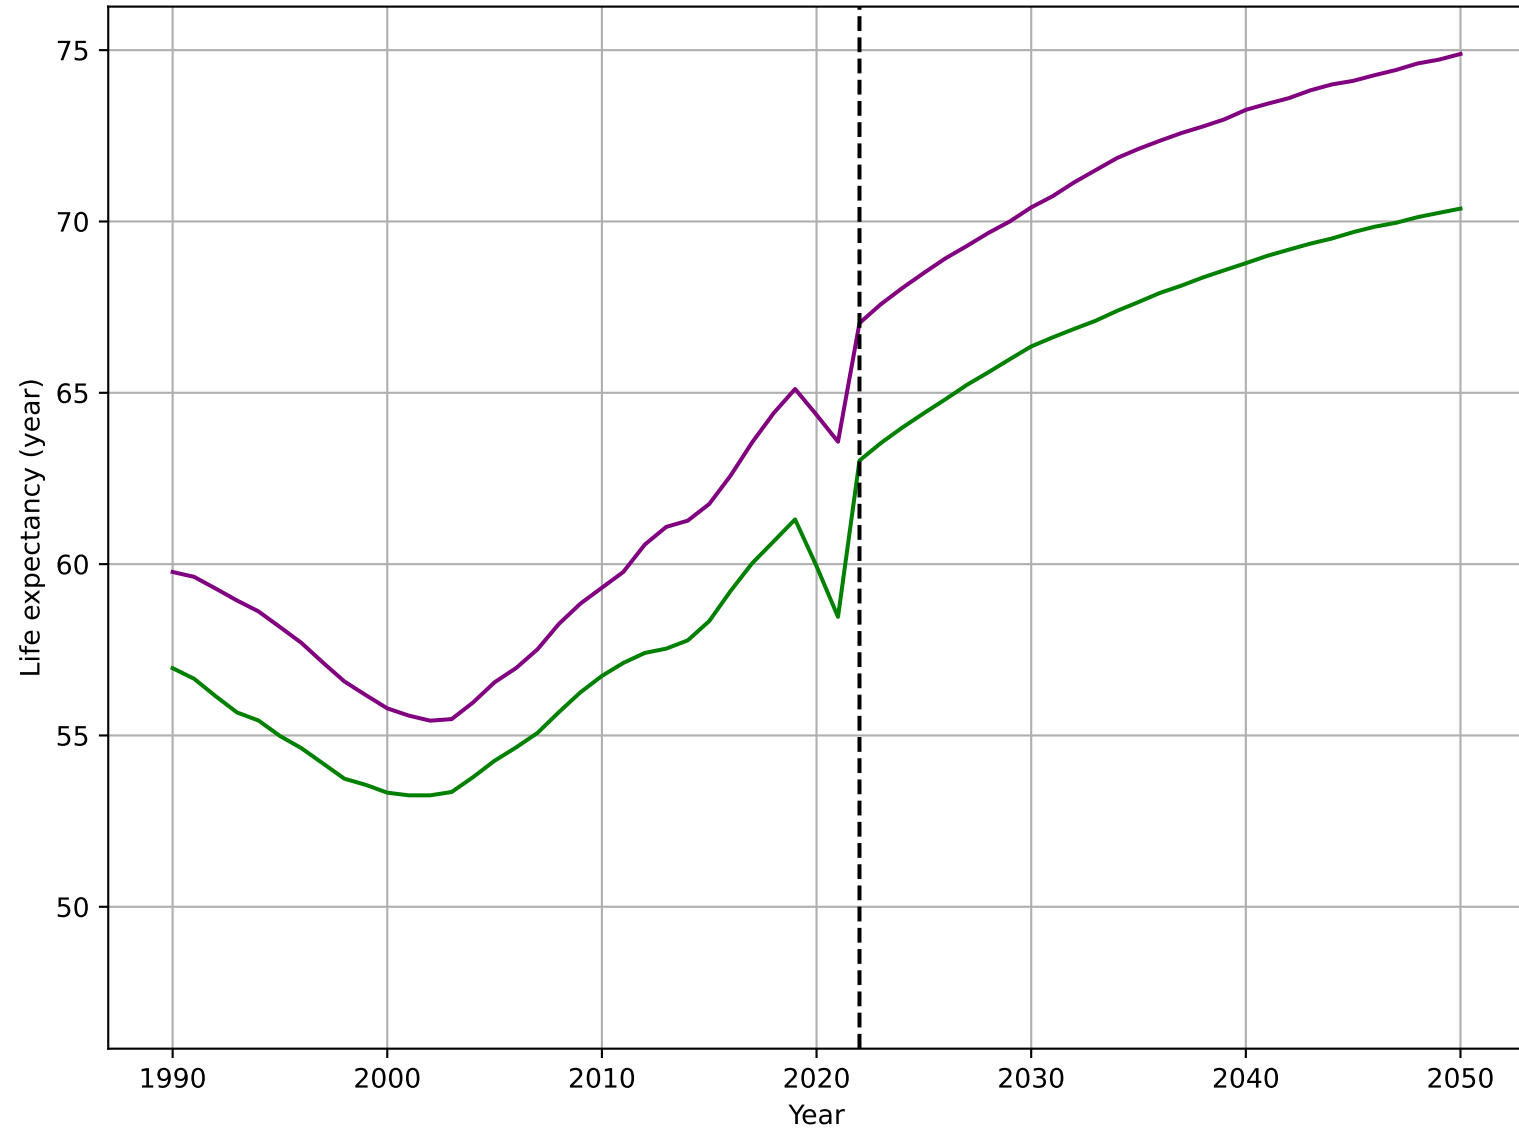

### Healthy Life Expectancy (HALE)

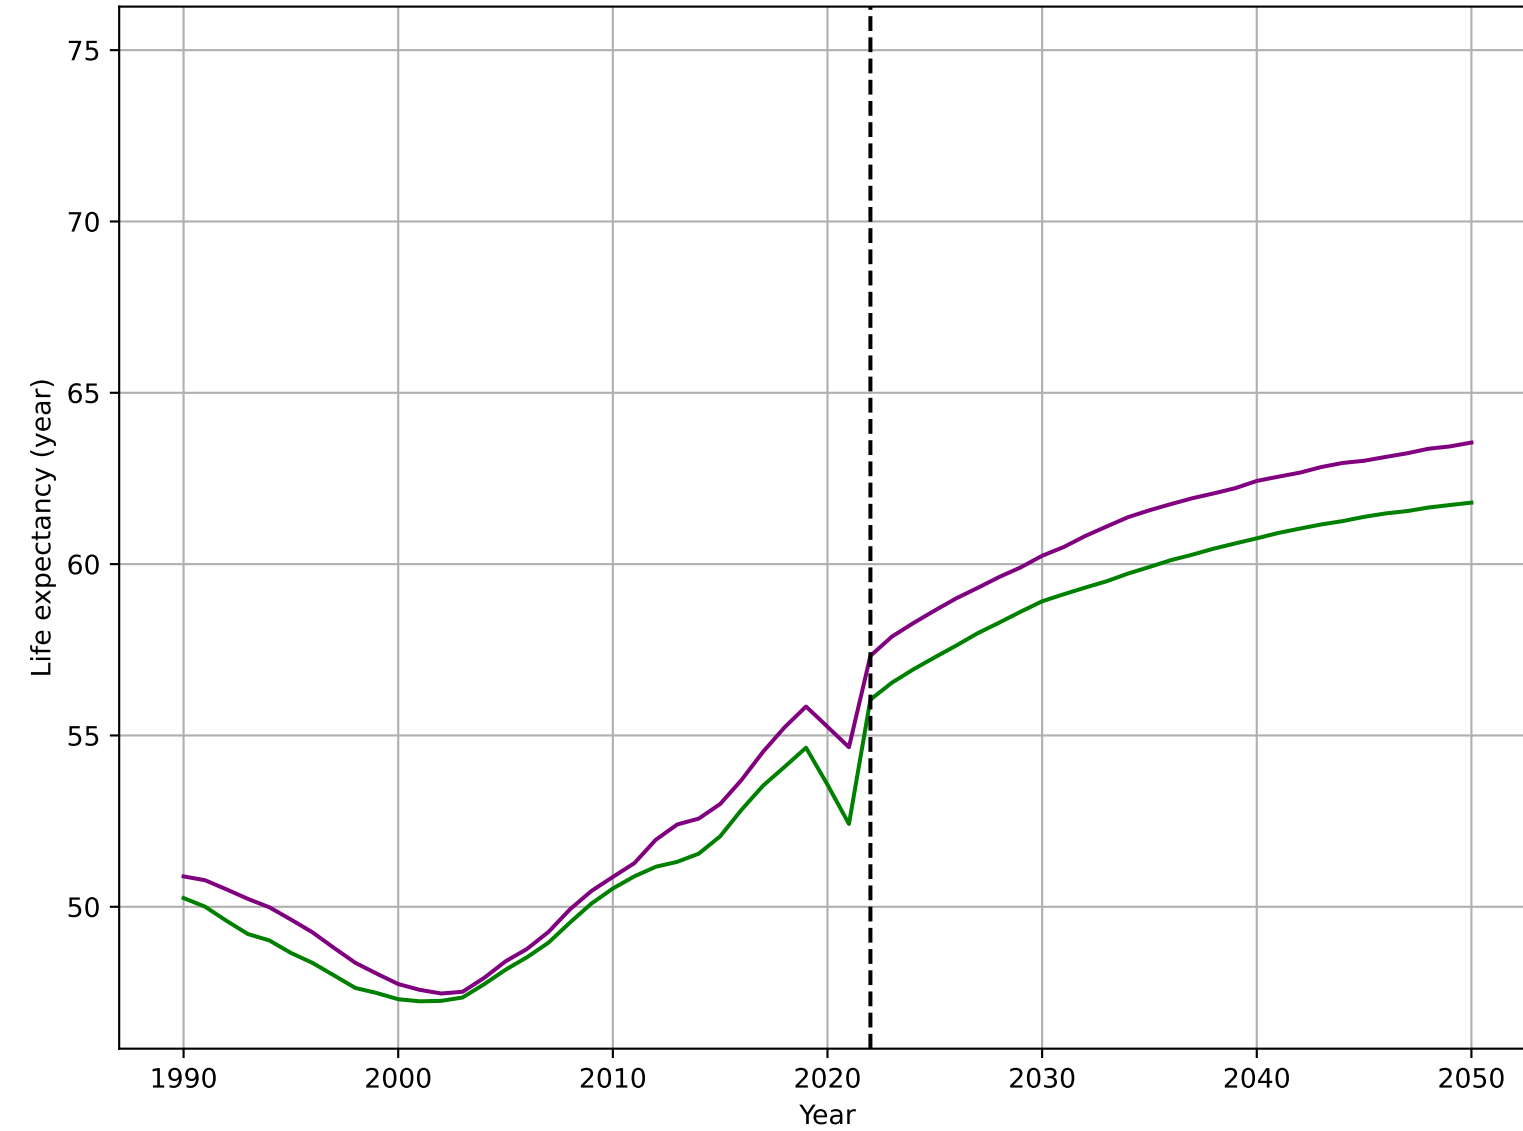

# Chad

## Life Expectancy

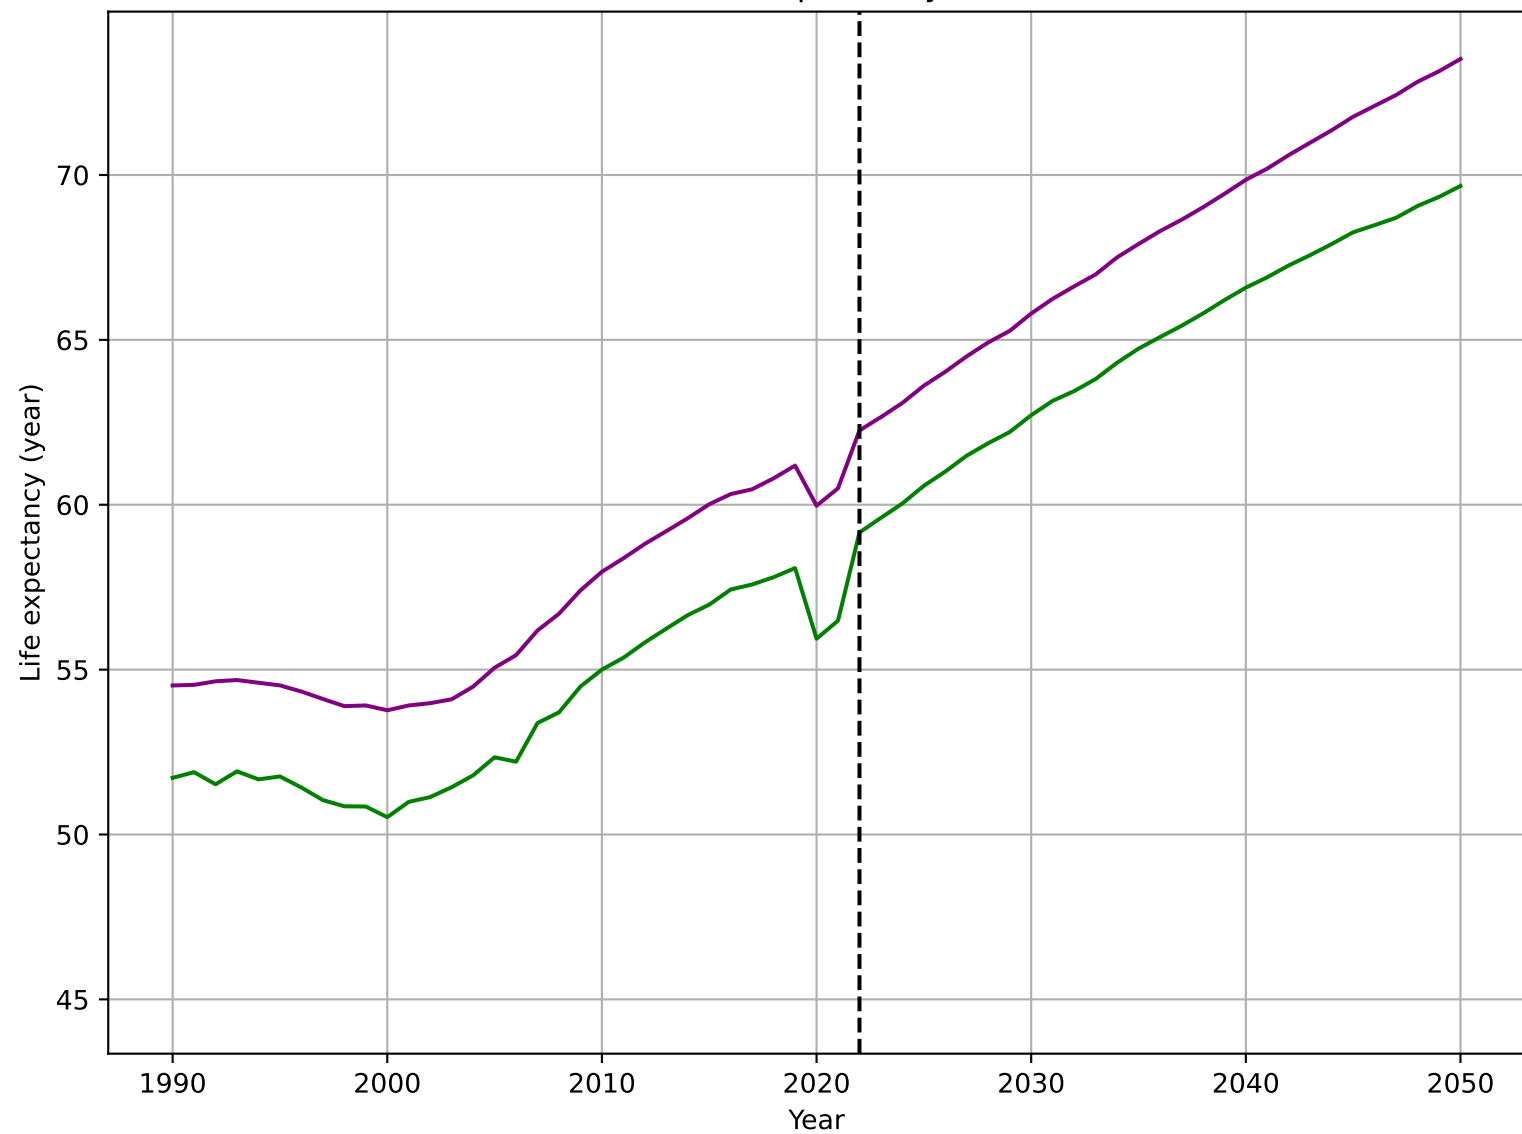

## Healthy Life Expectancy (HALE)

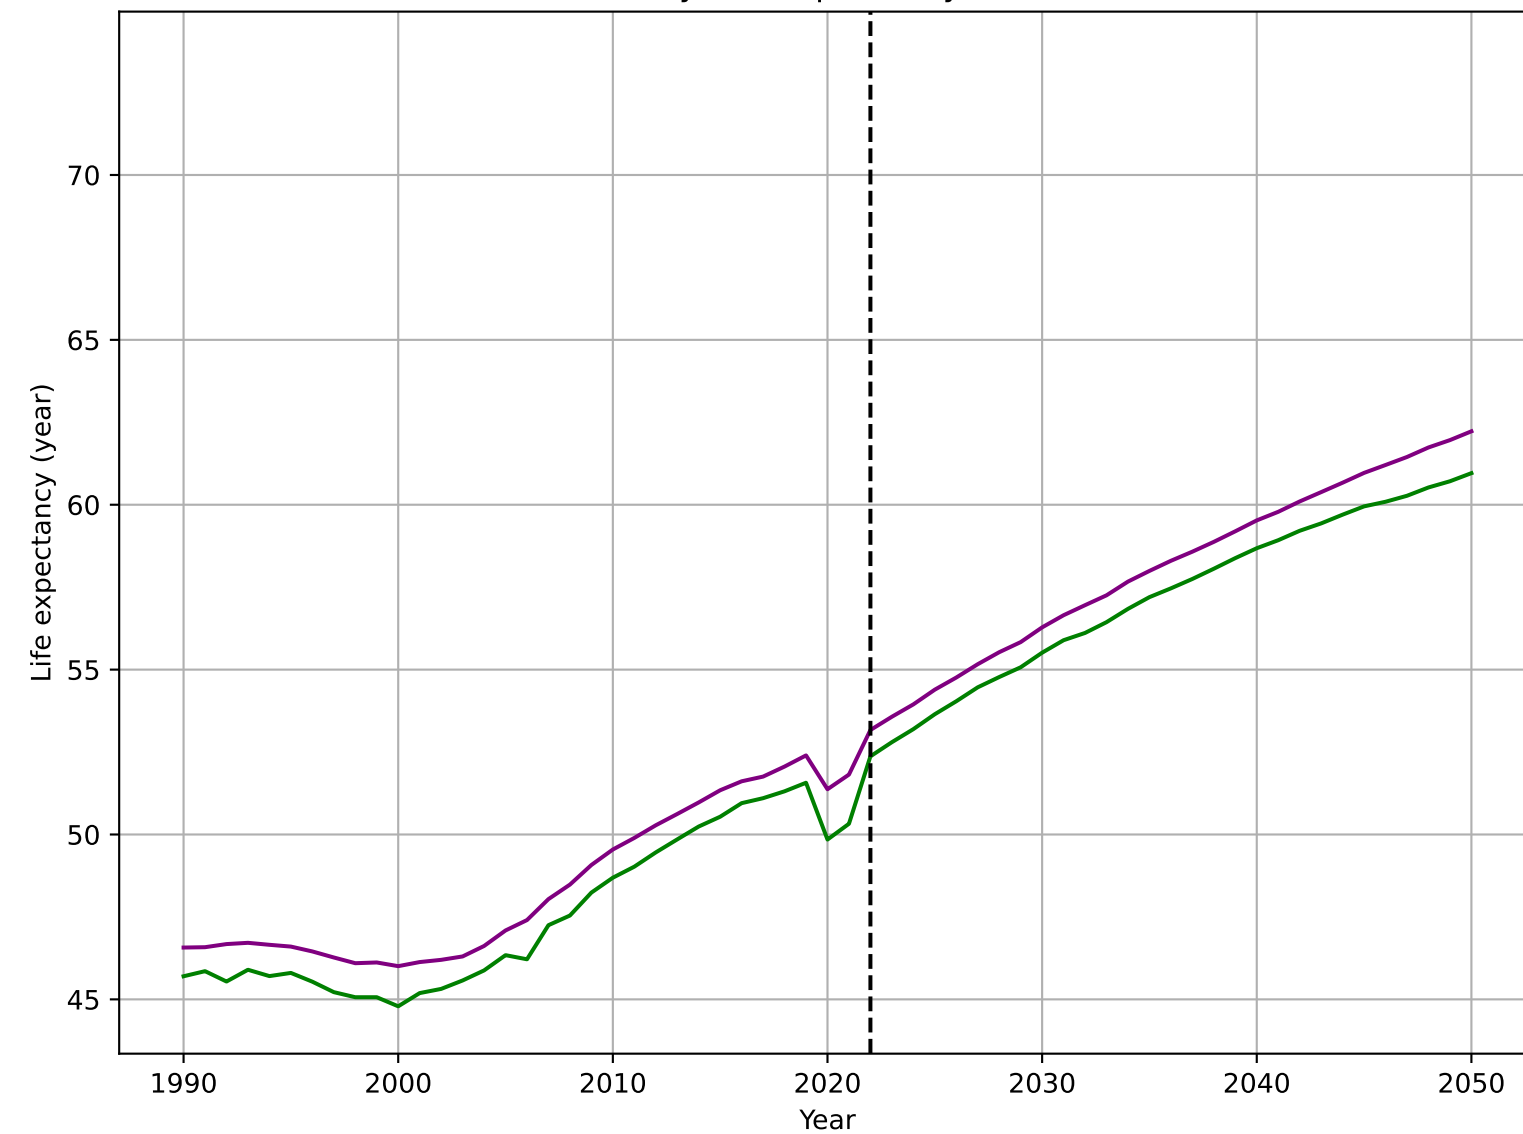

# Côte D'Ivoire

## Life Expectancy

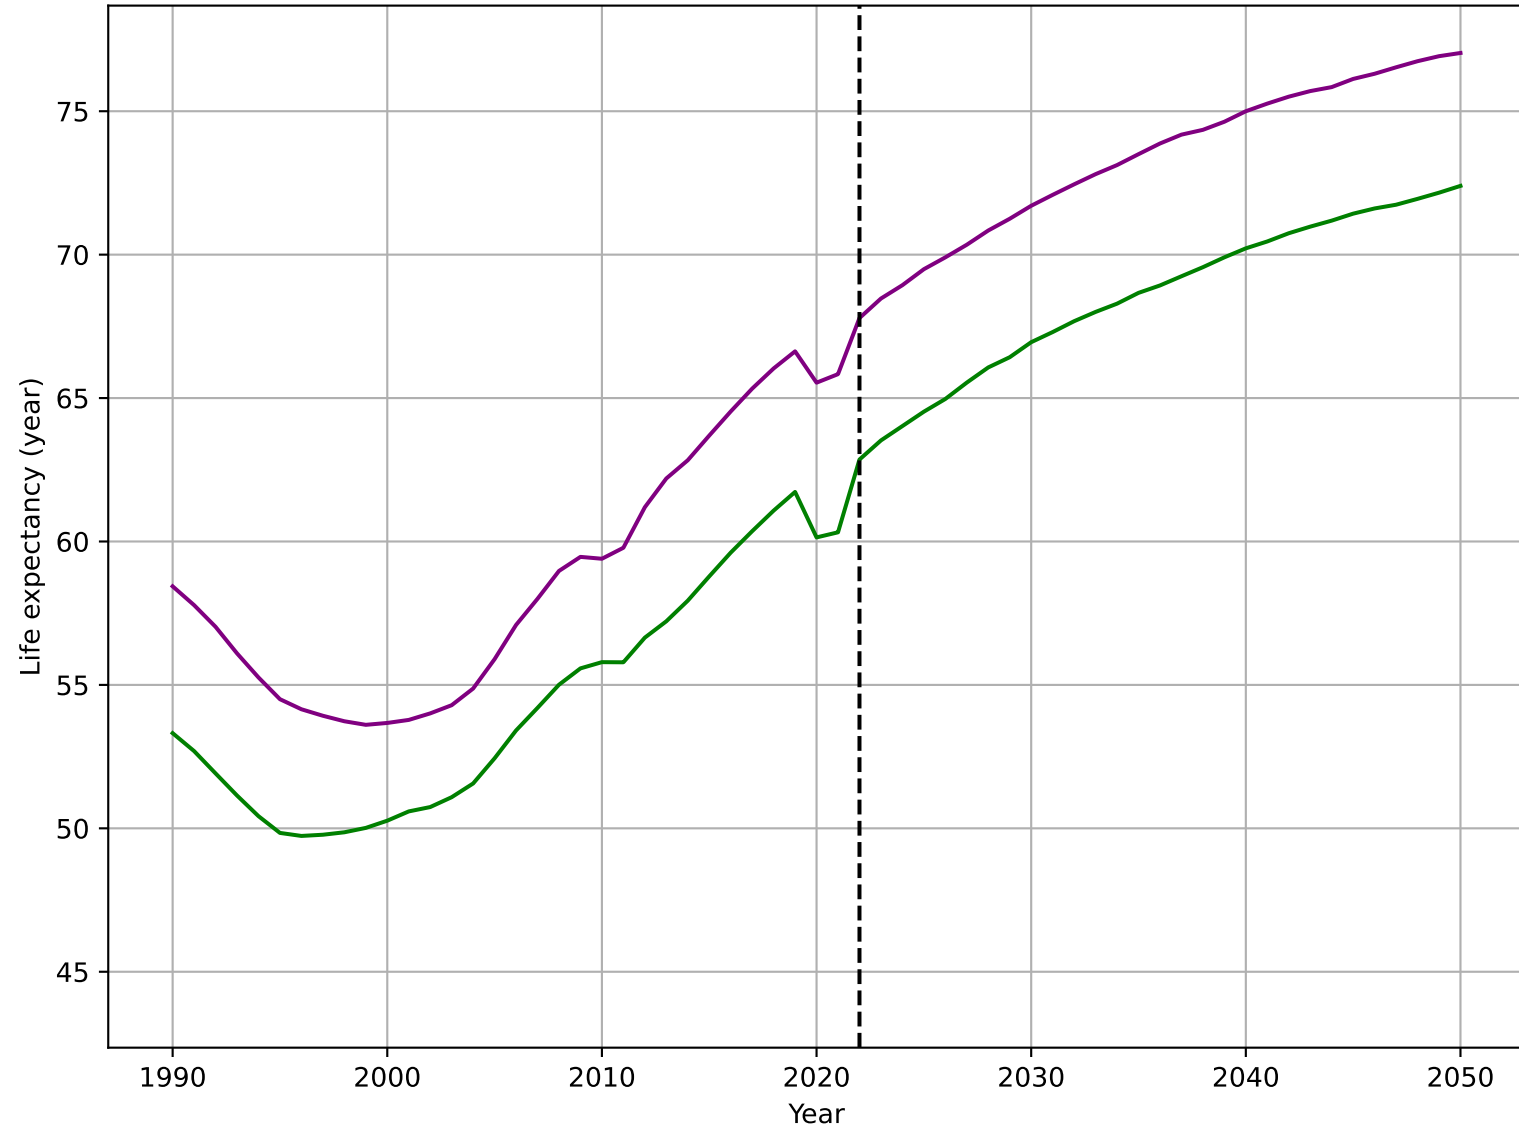

## Healthy Life Expectancy (HALE)

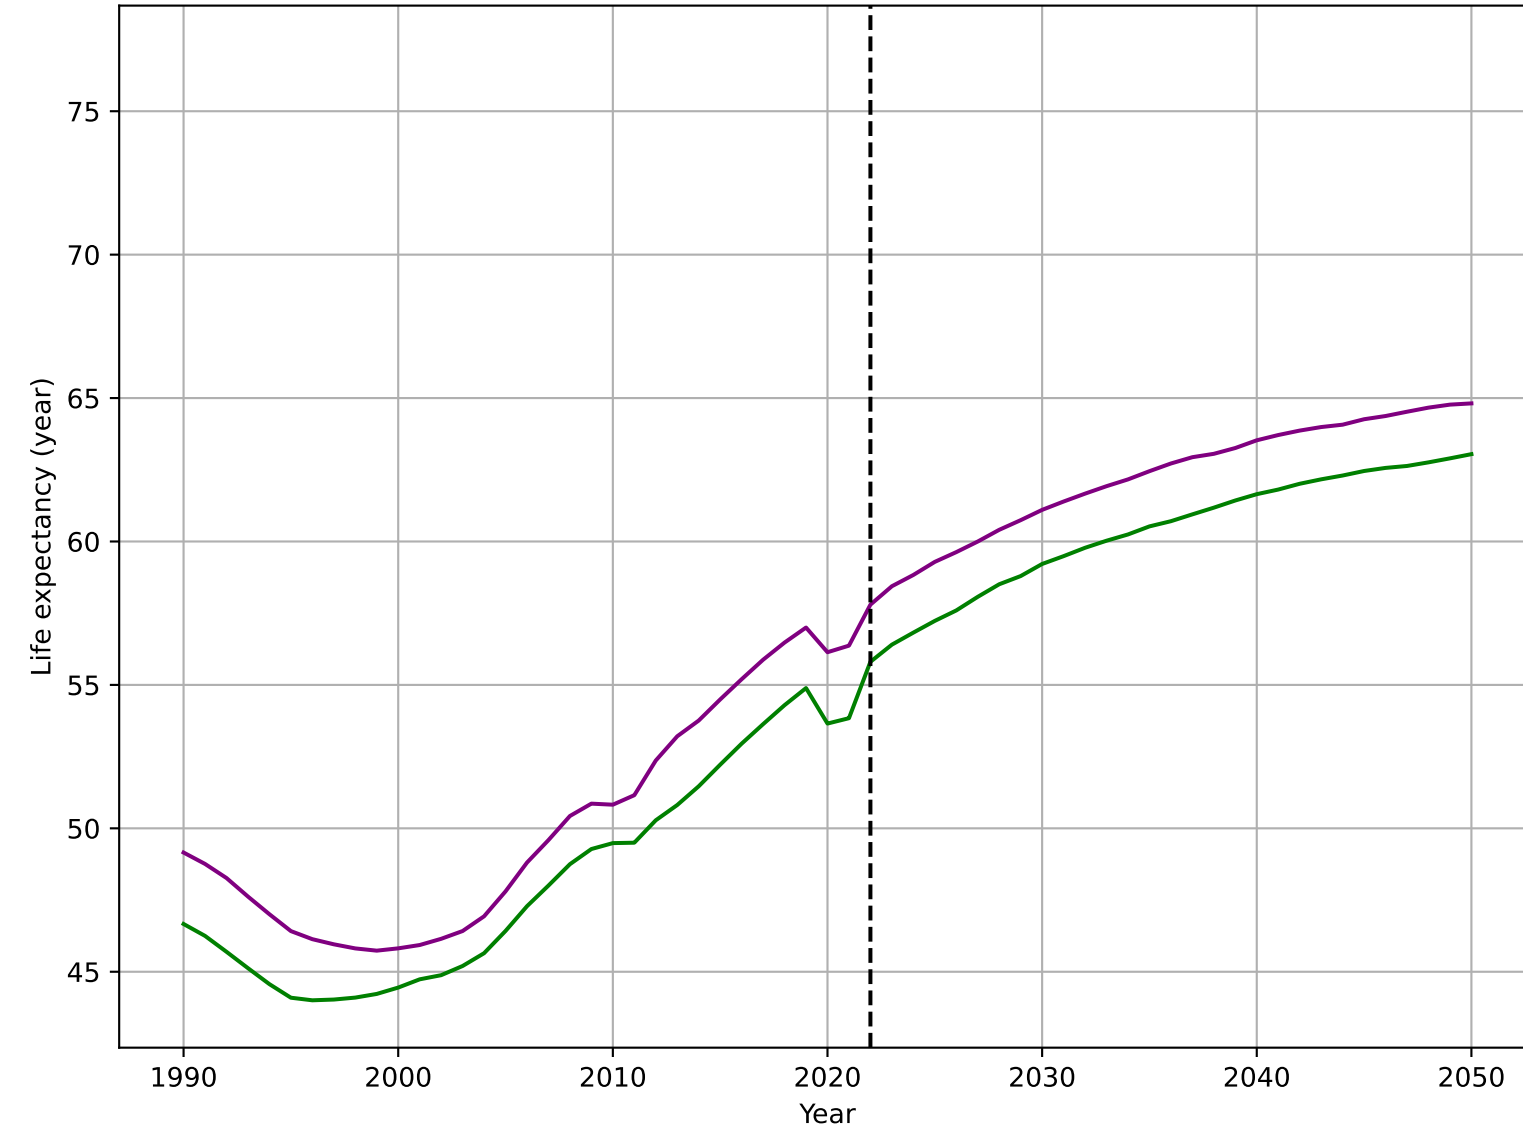

# The Gambia

## Life Expectancy

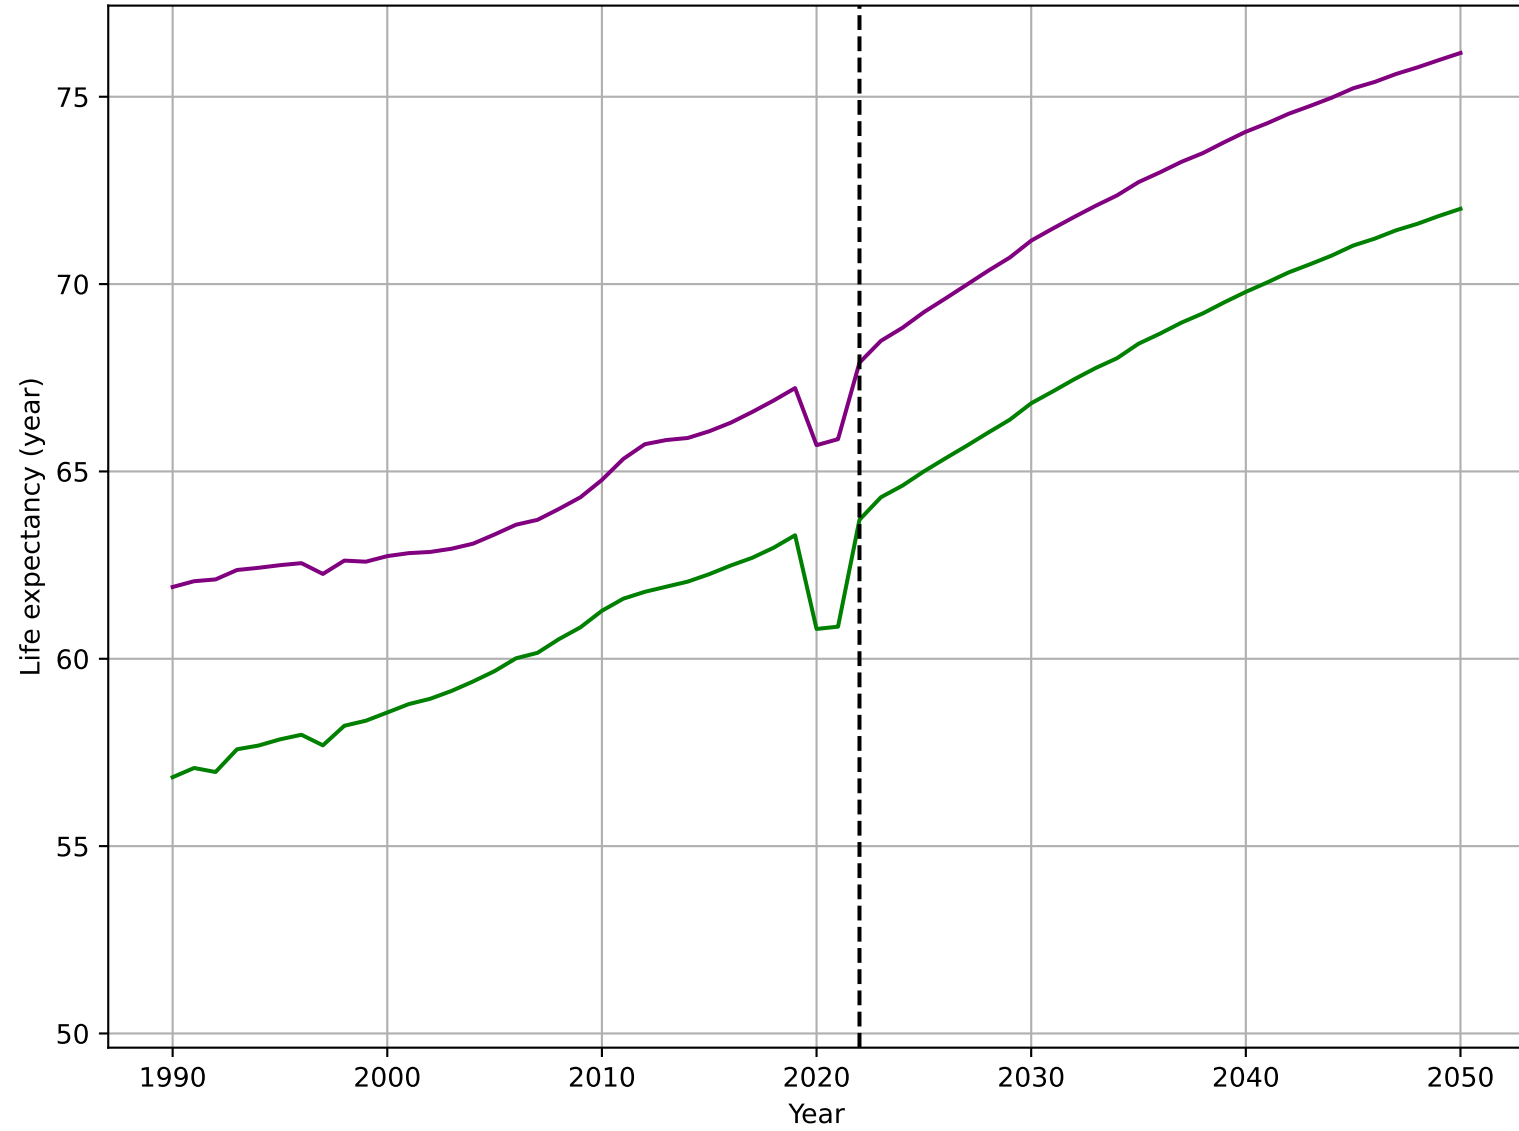

## Healthy Life Expectancy (HALE)

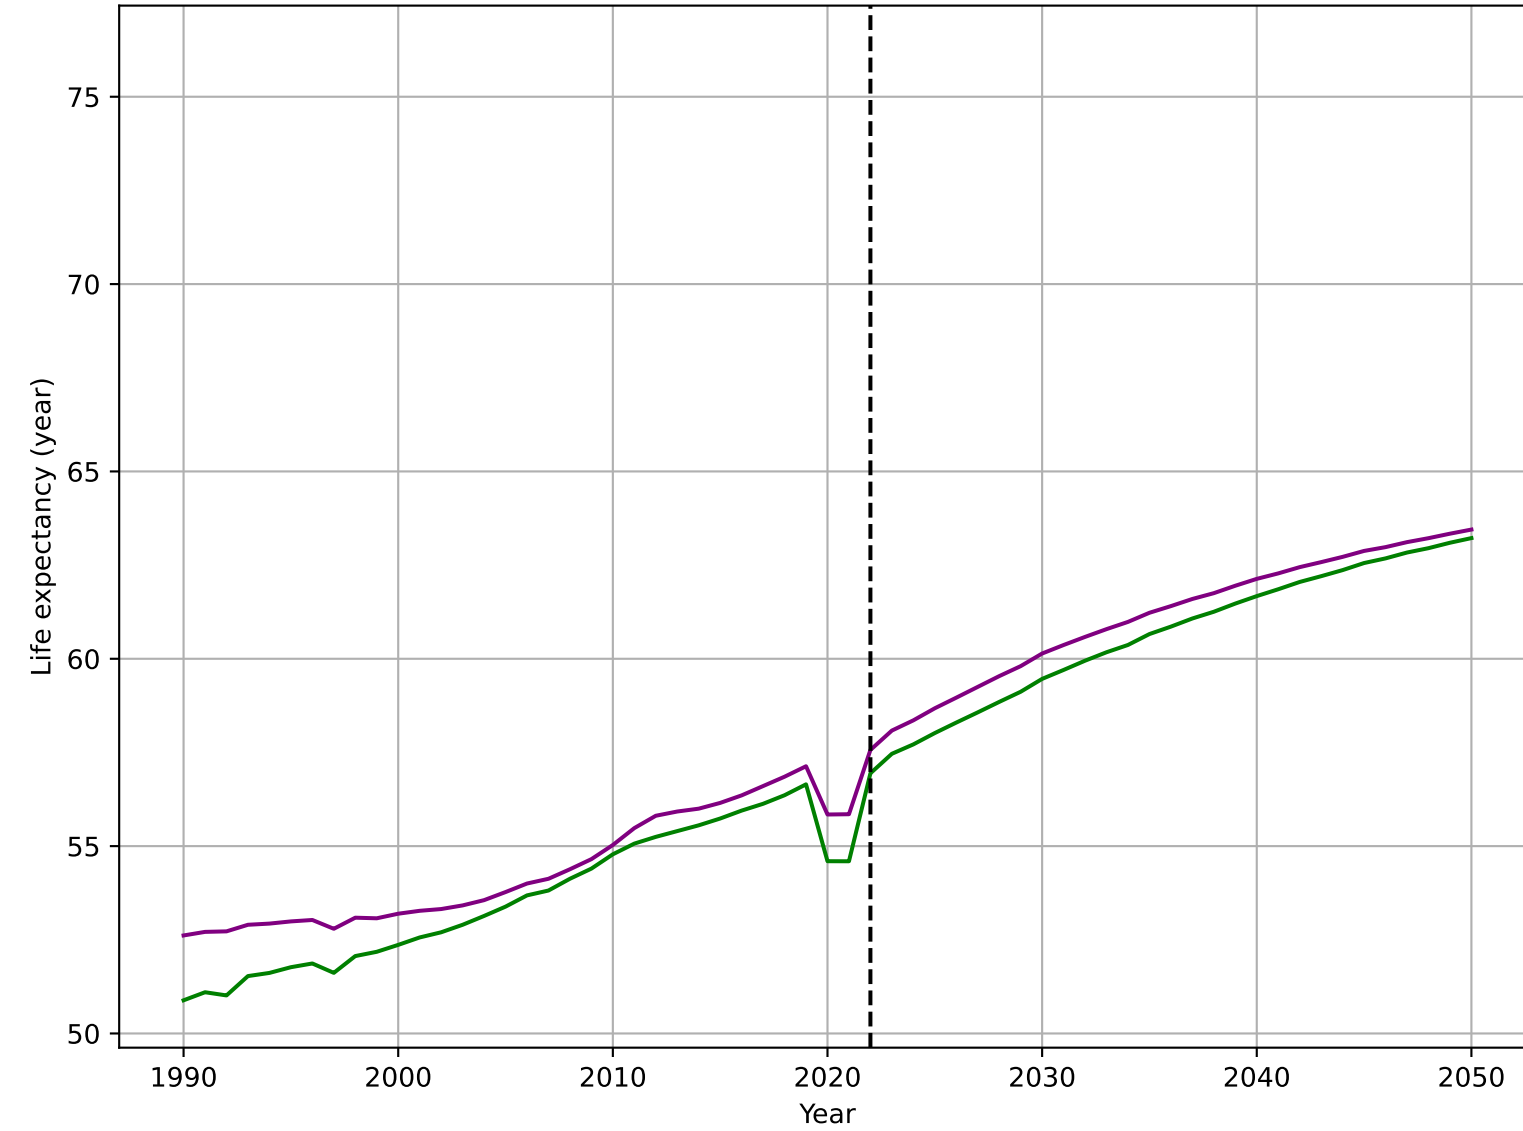

# Ghana

### Life Expectancy

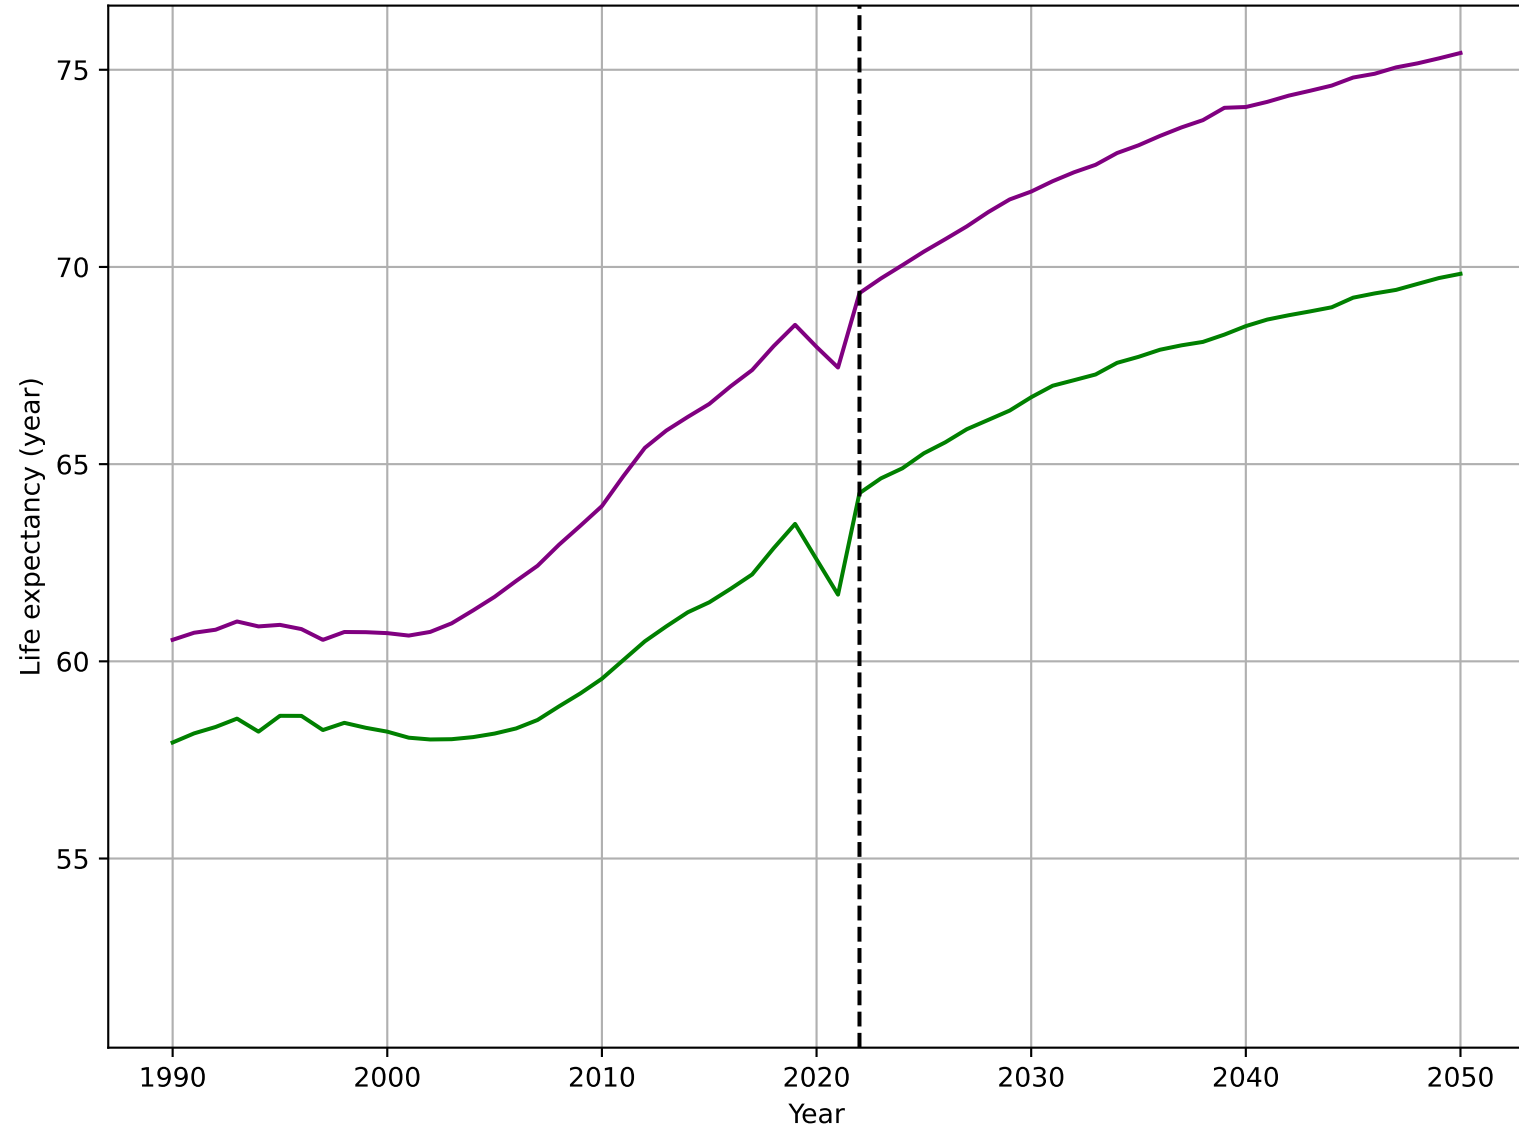

### Healthy Life Expectancy (HALE)

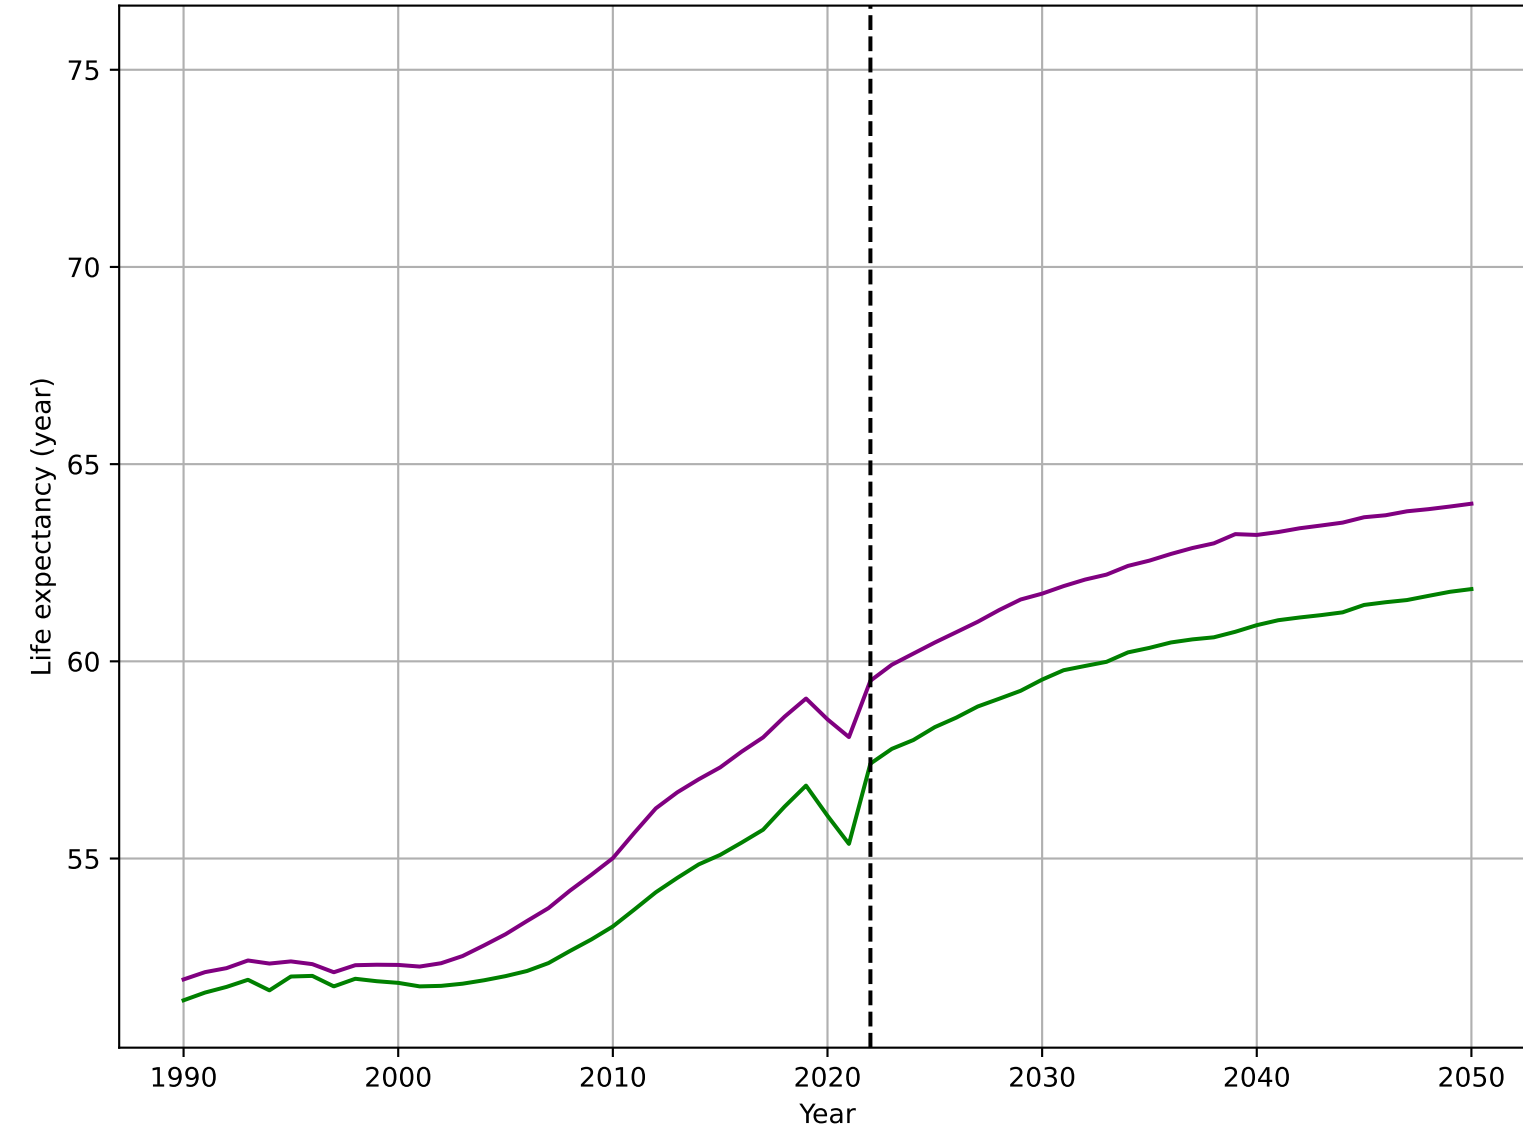

# Guinea

### Life Expectancy

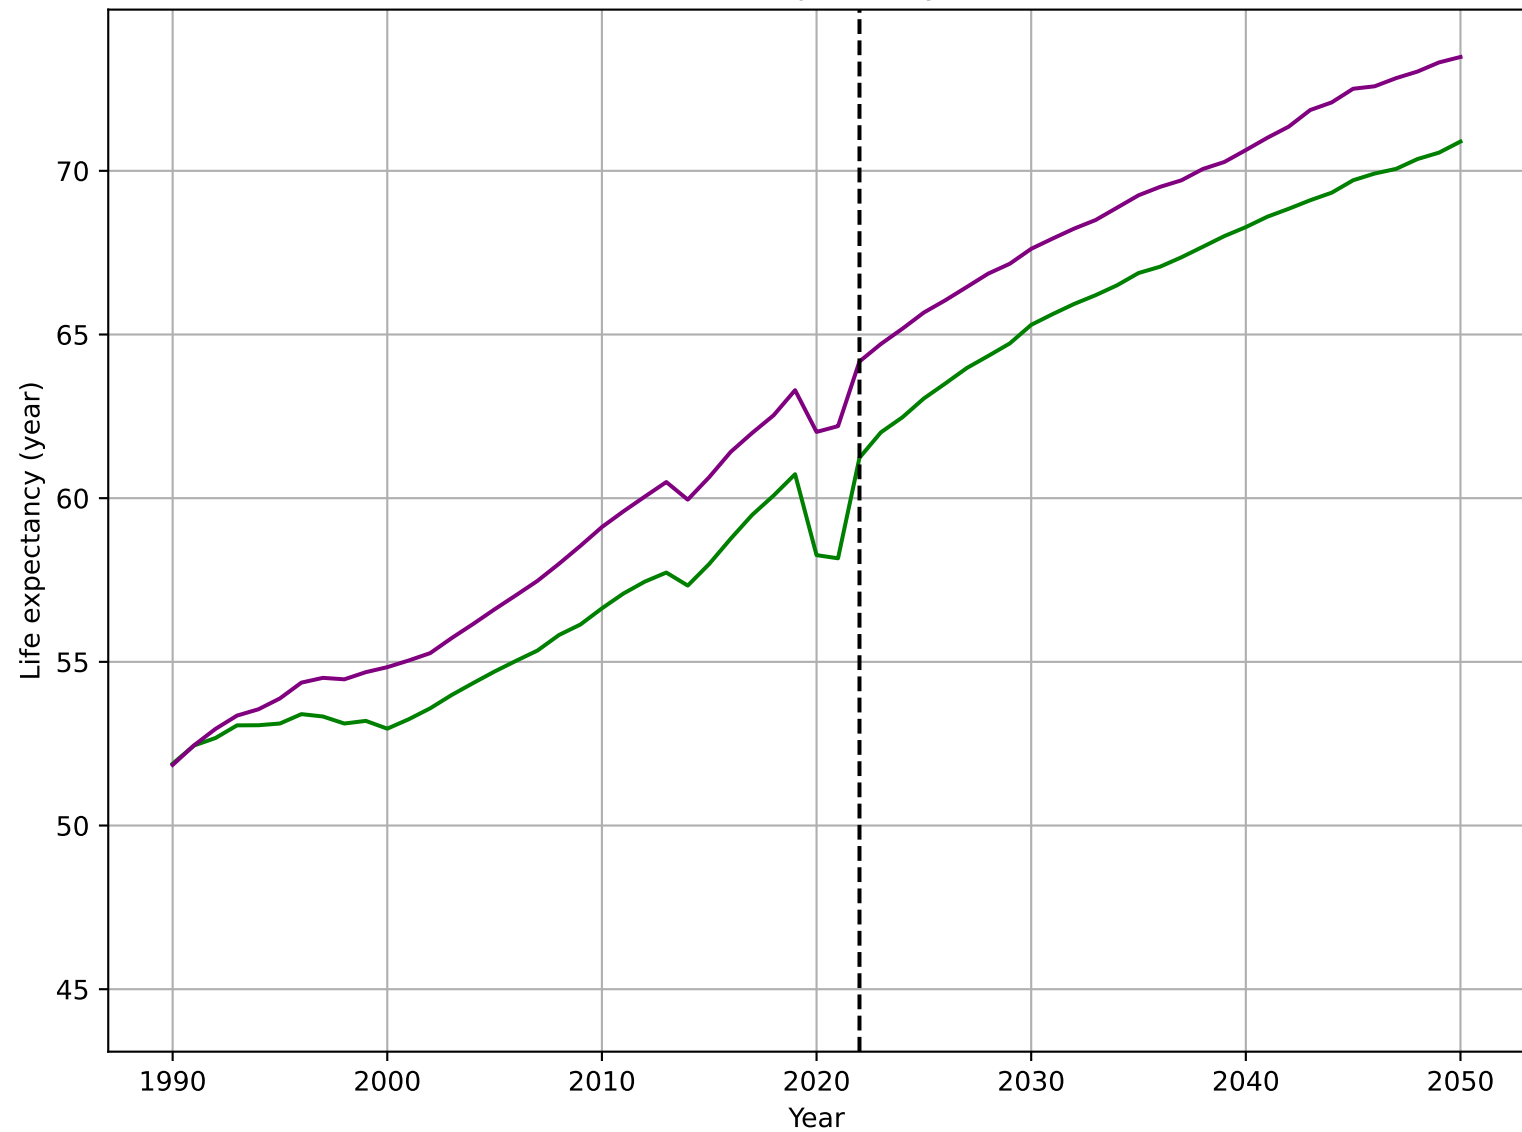

### Healthy Life Expectancy (HALE)

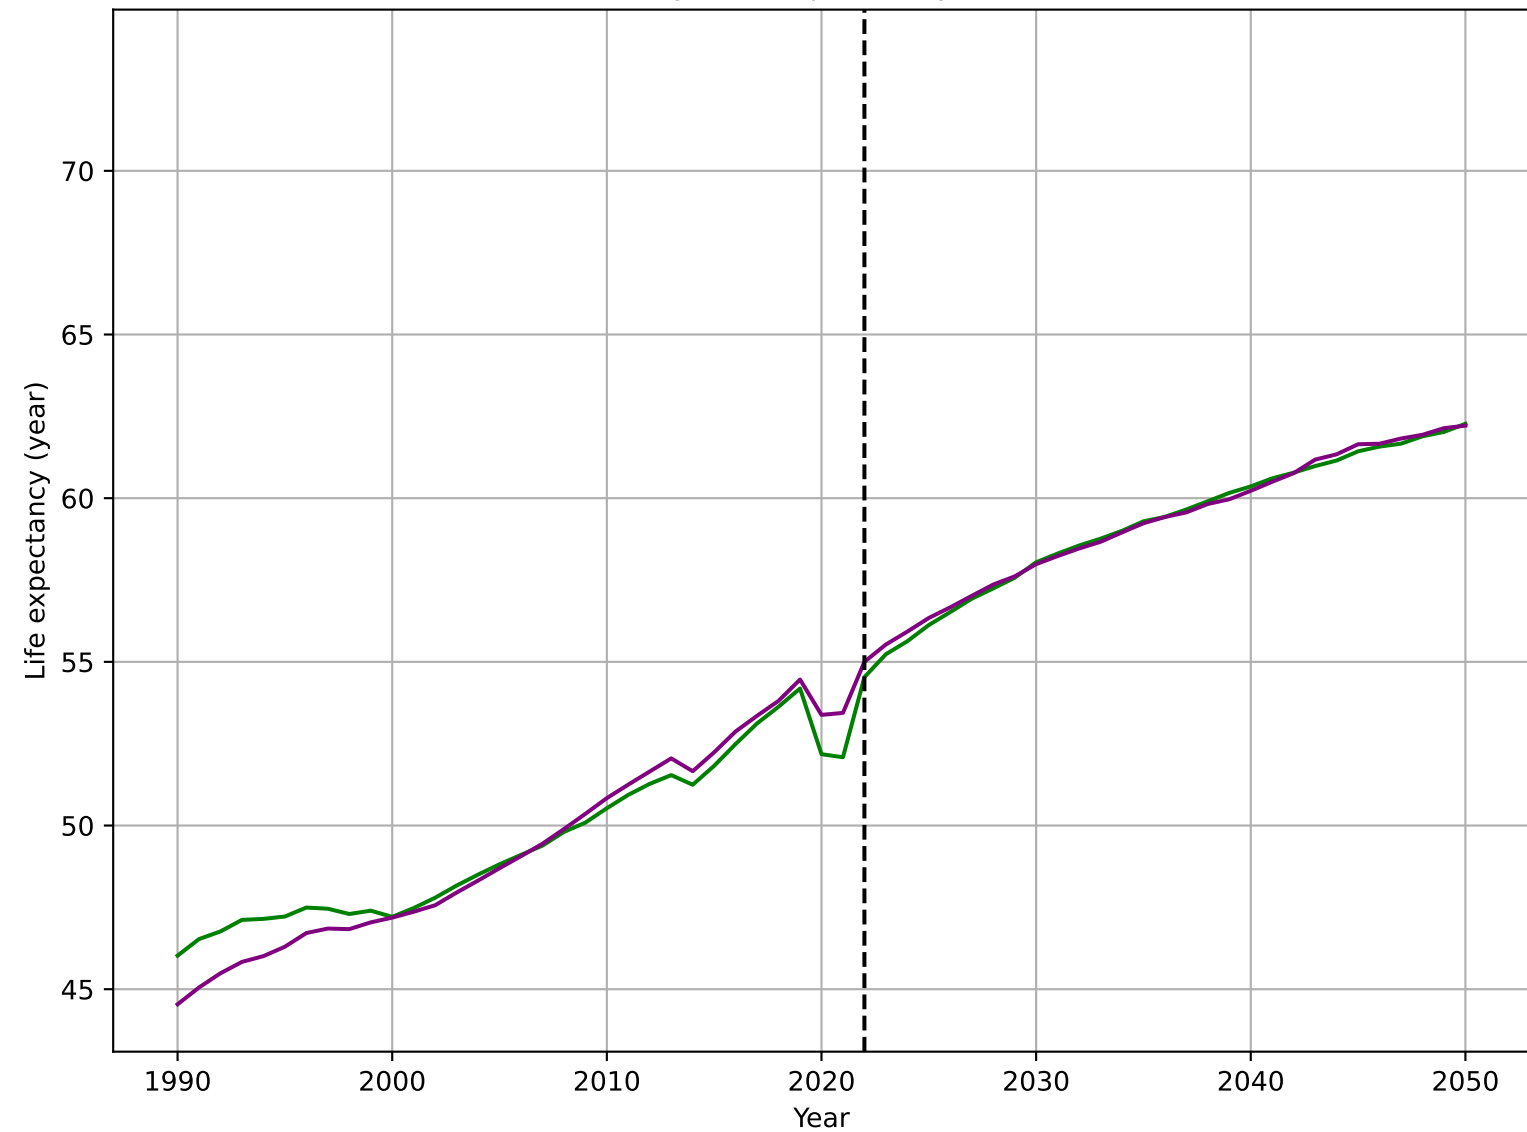

# Guinea-Bissau

## Life Expectancy

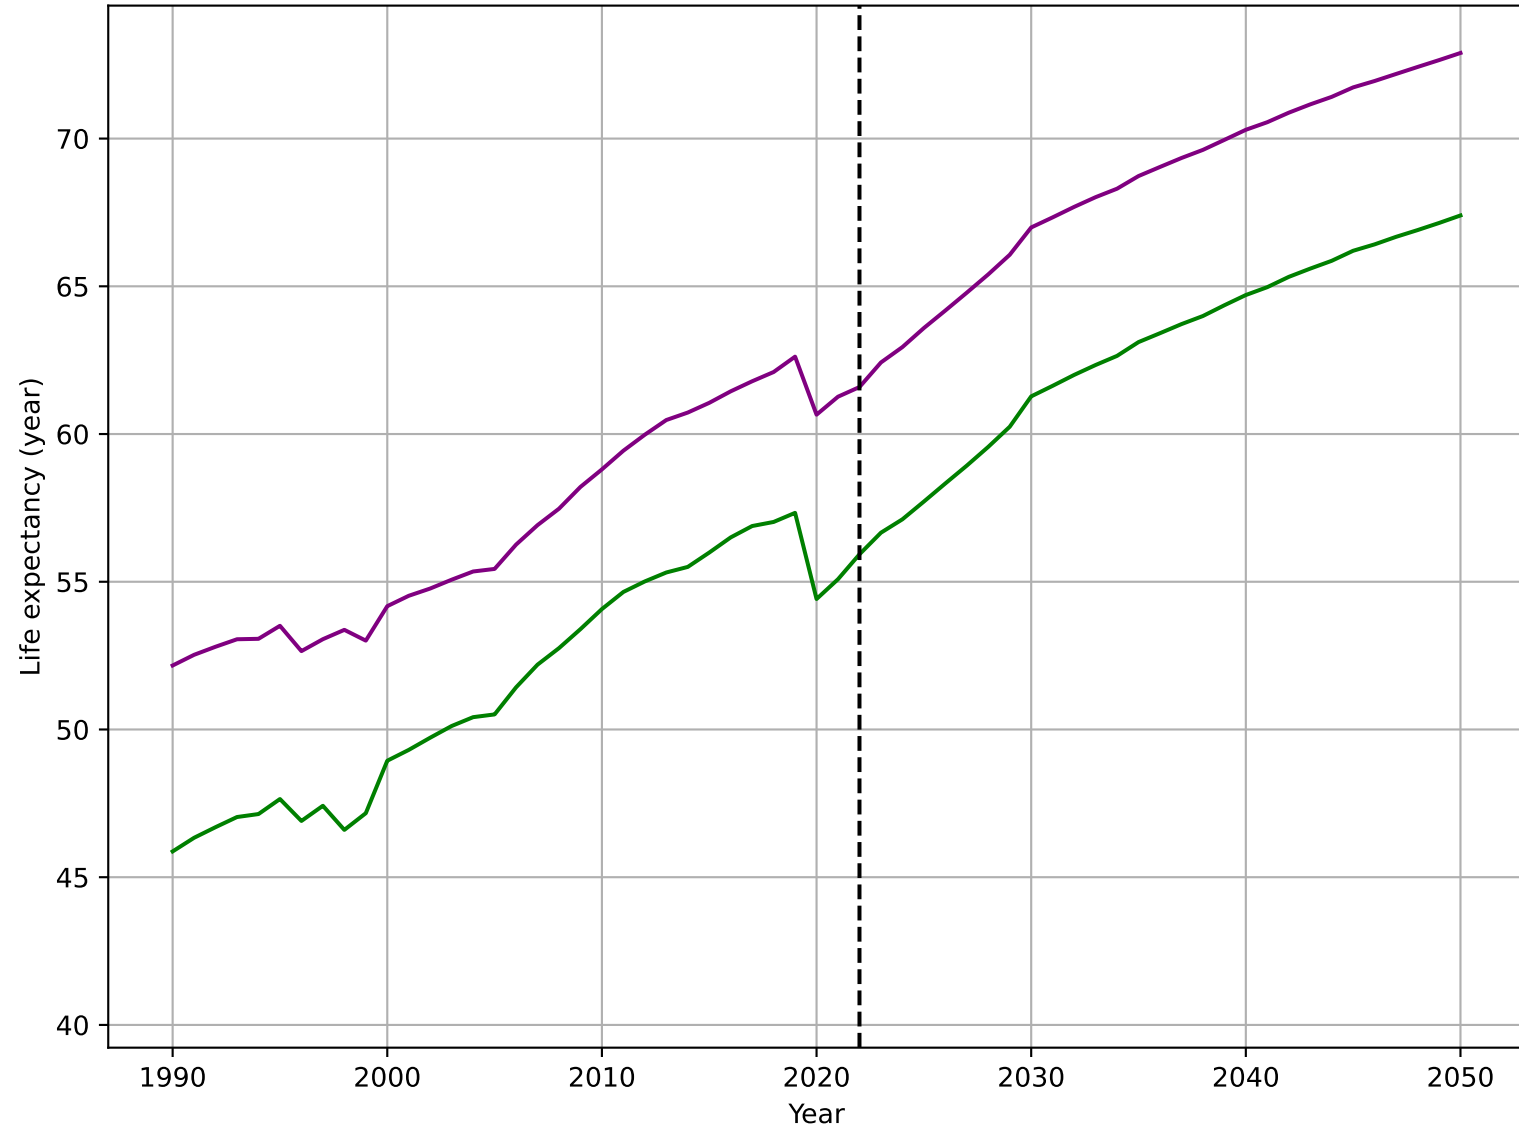

## Healthy Life Expectancy (HALE)

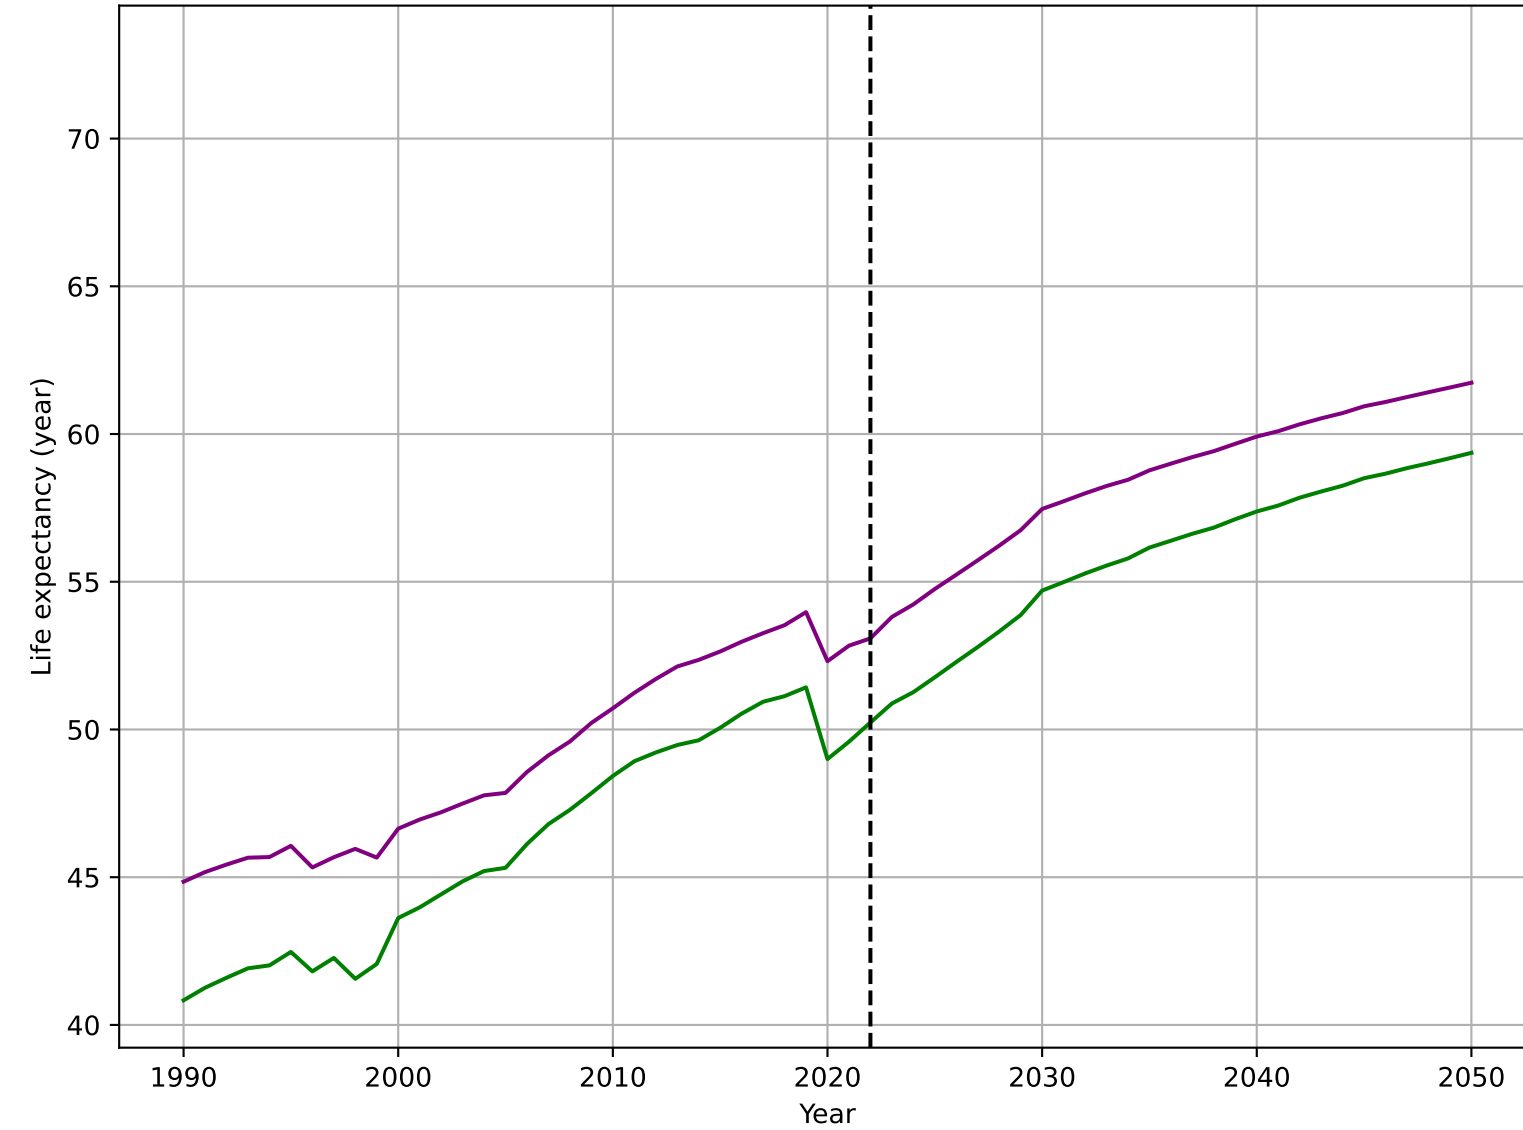

# Liberia

## Life Expectancy

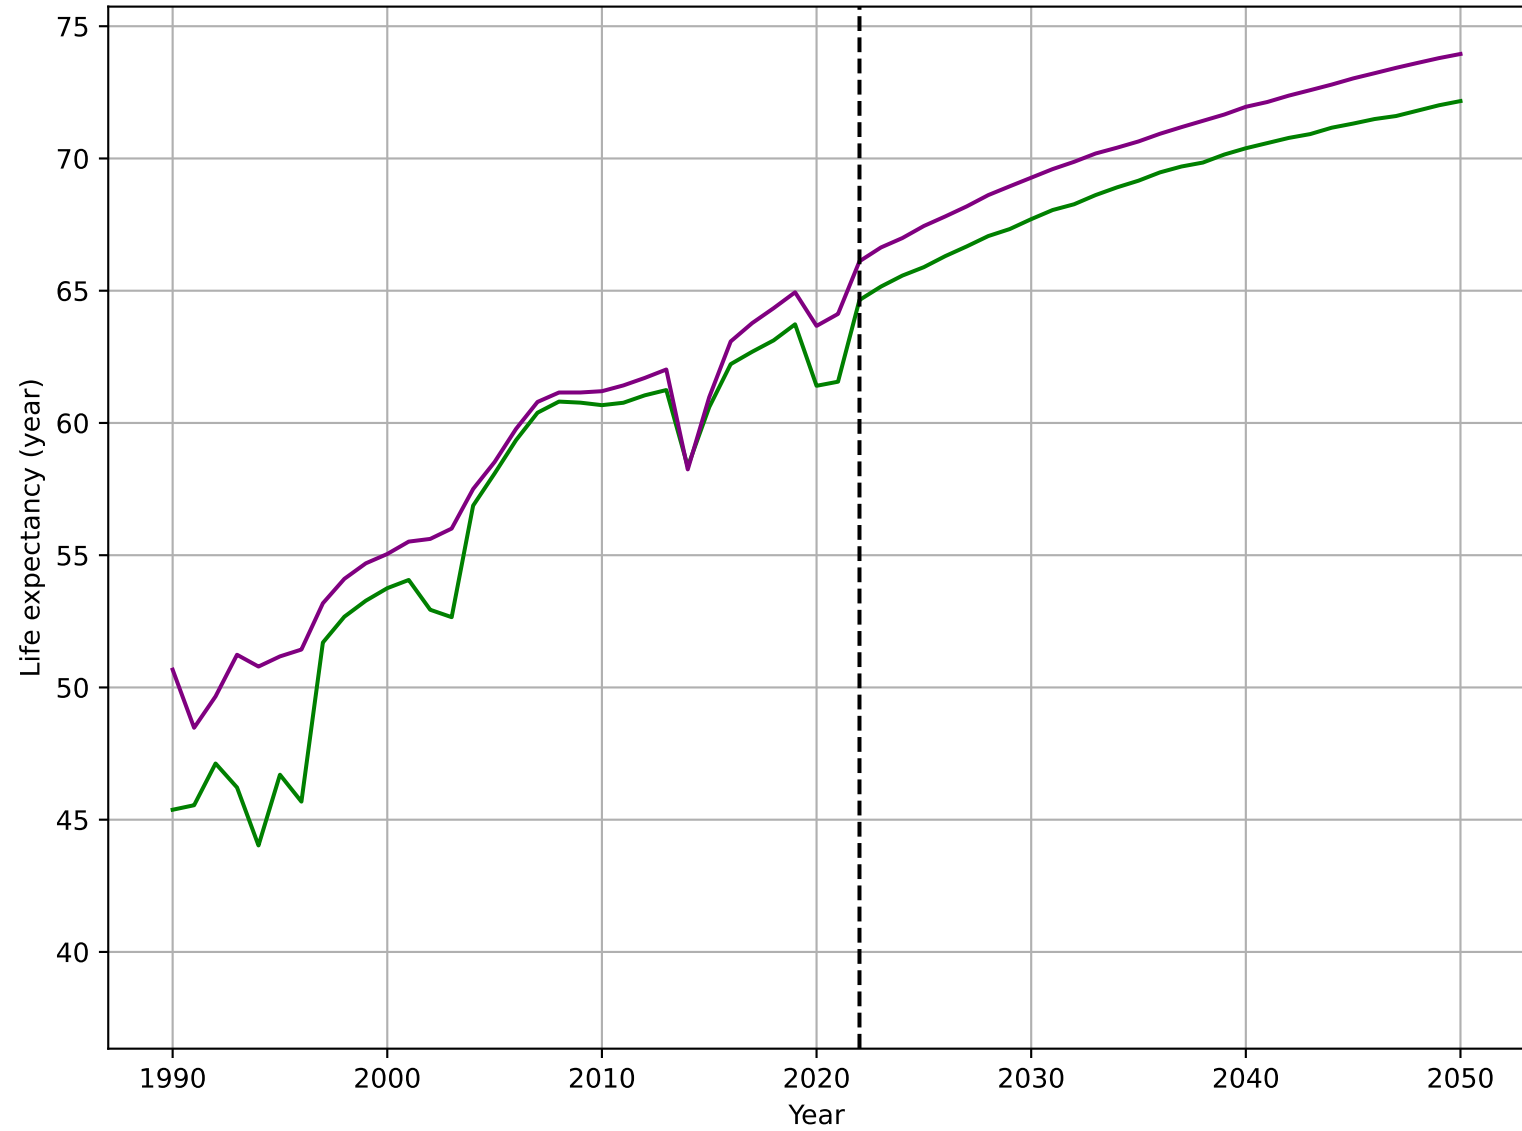

## Healthy Life Expectancy (HALE)

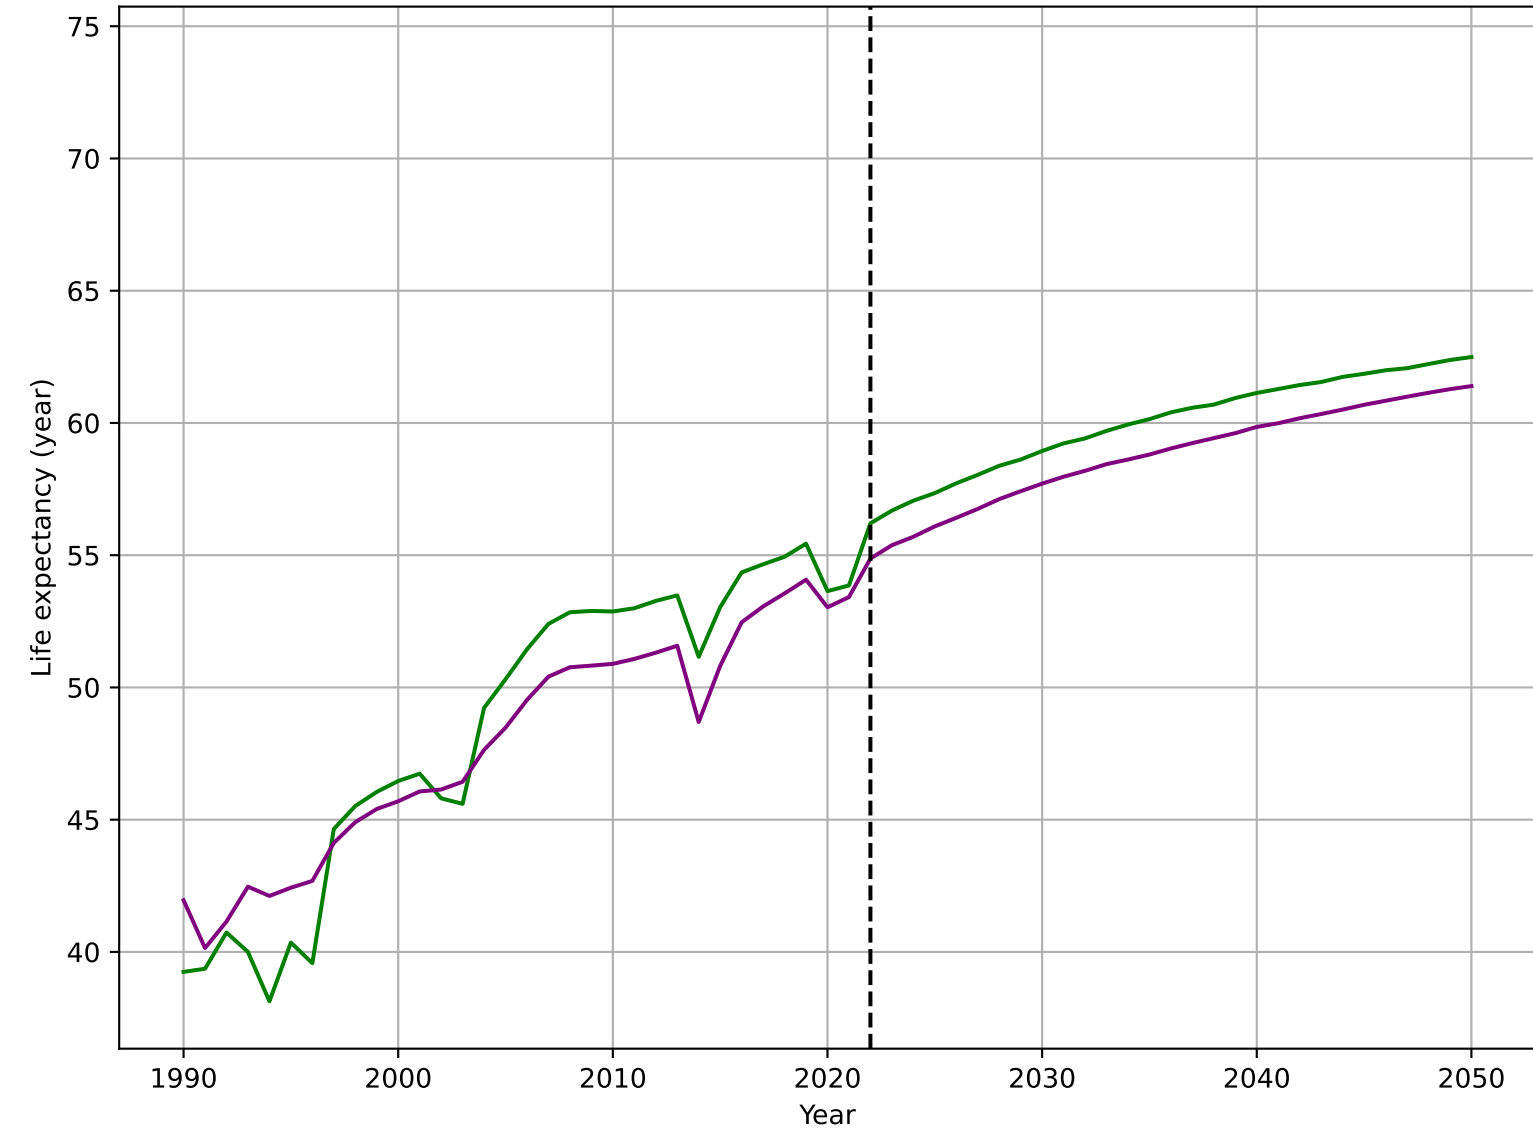



# Mali

### Life Expectancy

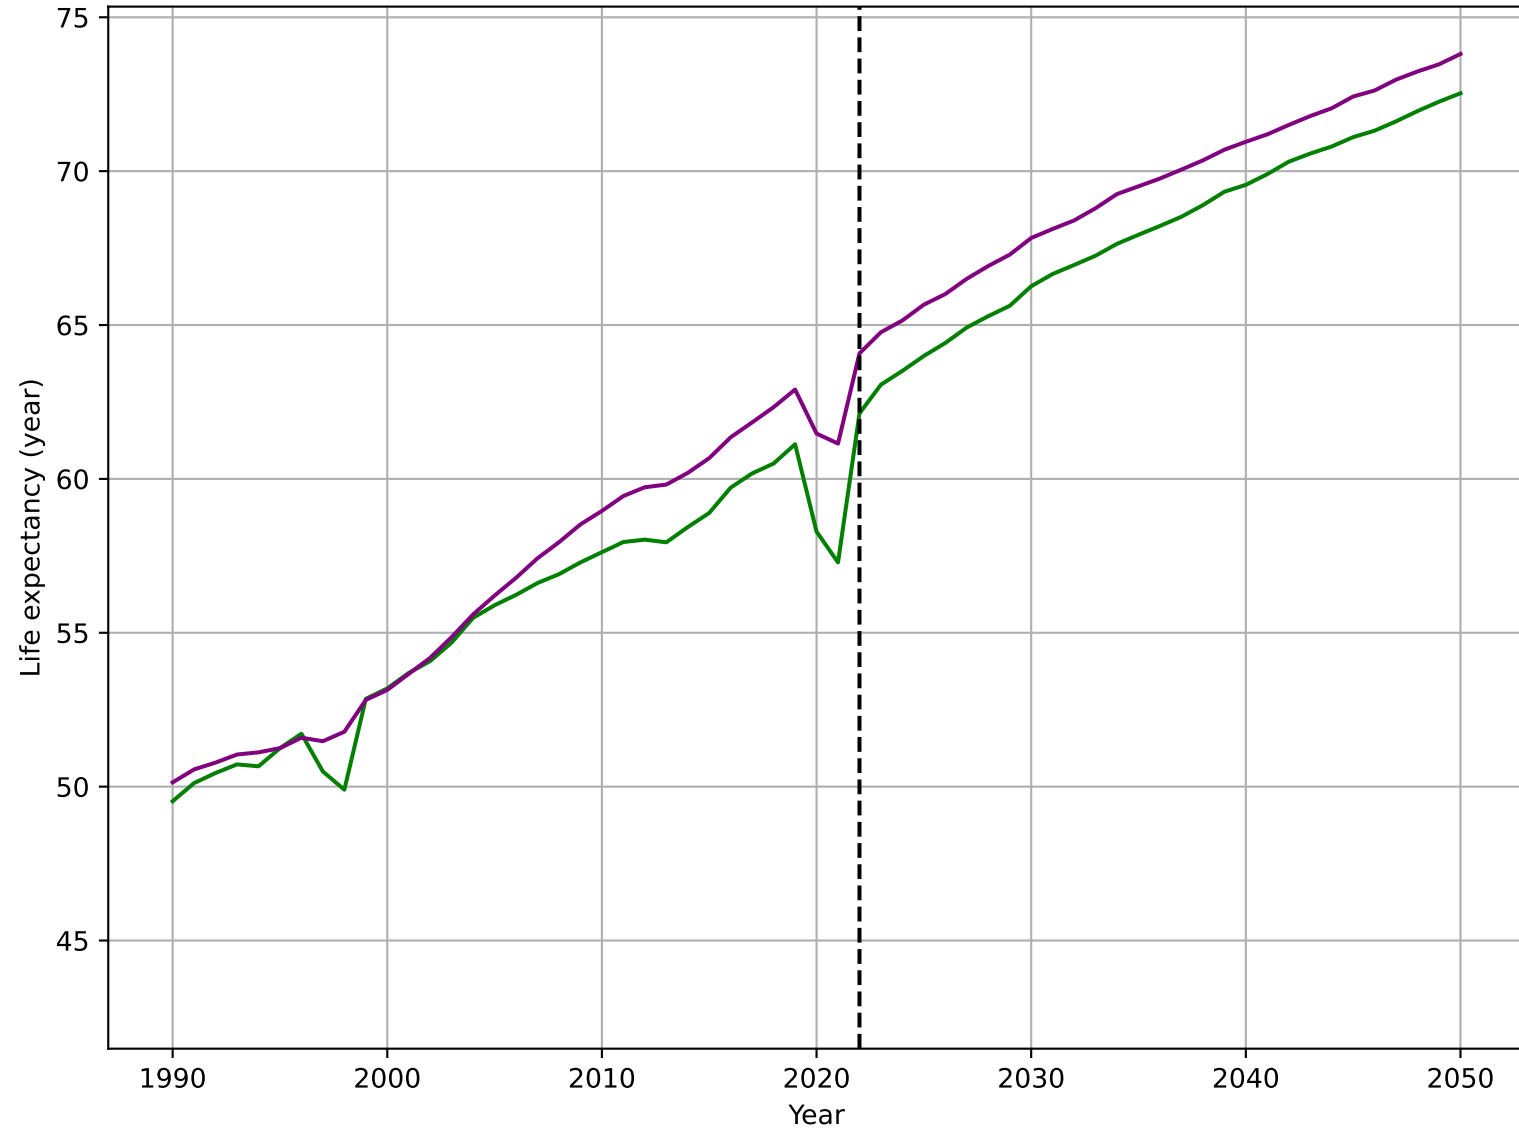

### Healthy Life Expectancy (HALE)

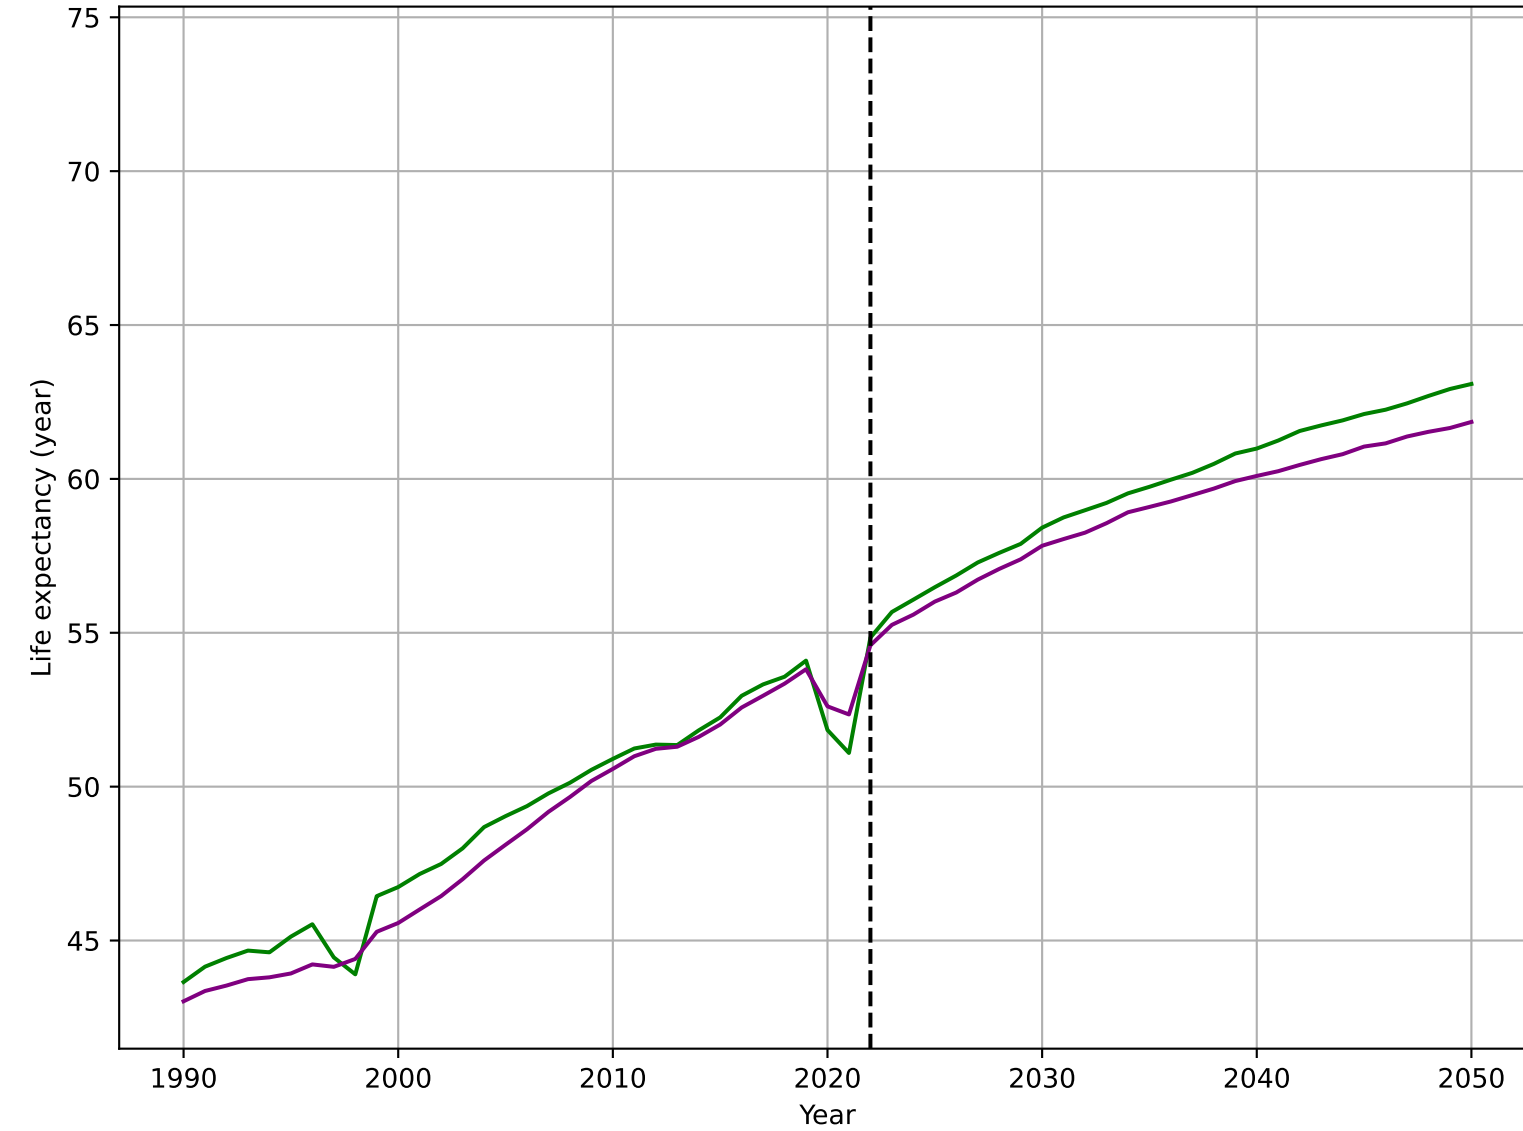

# Mauritania

### Life Expectancy

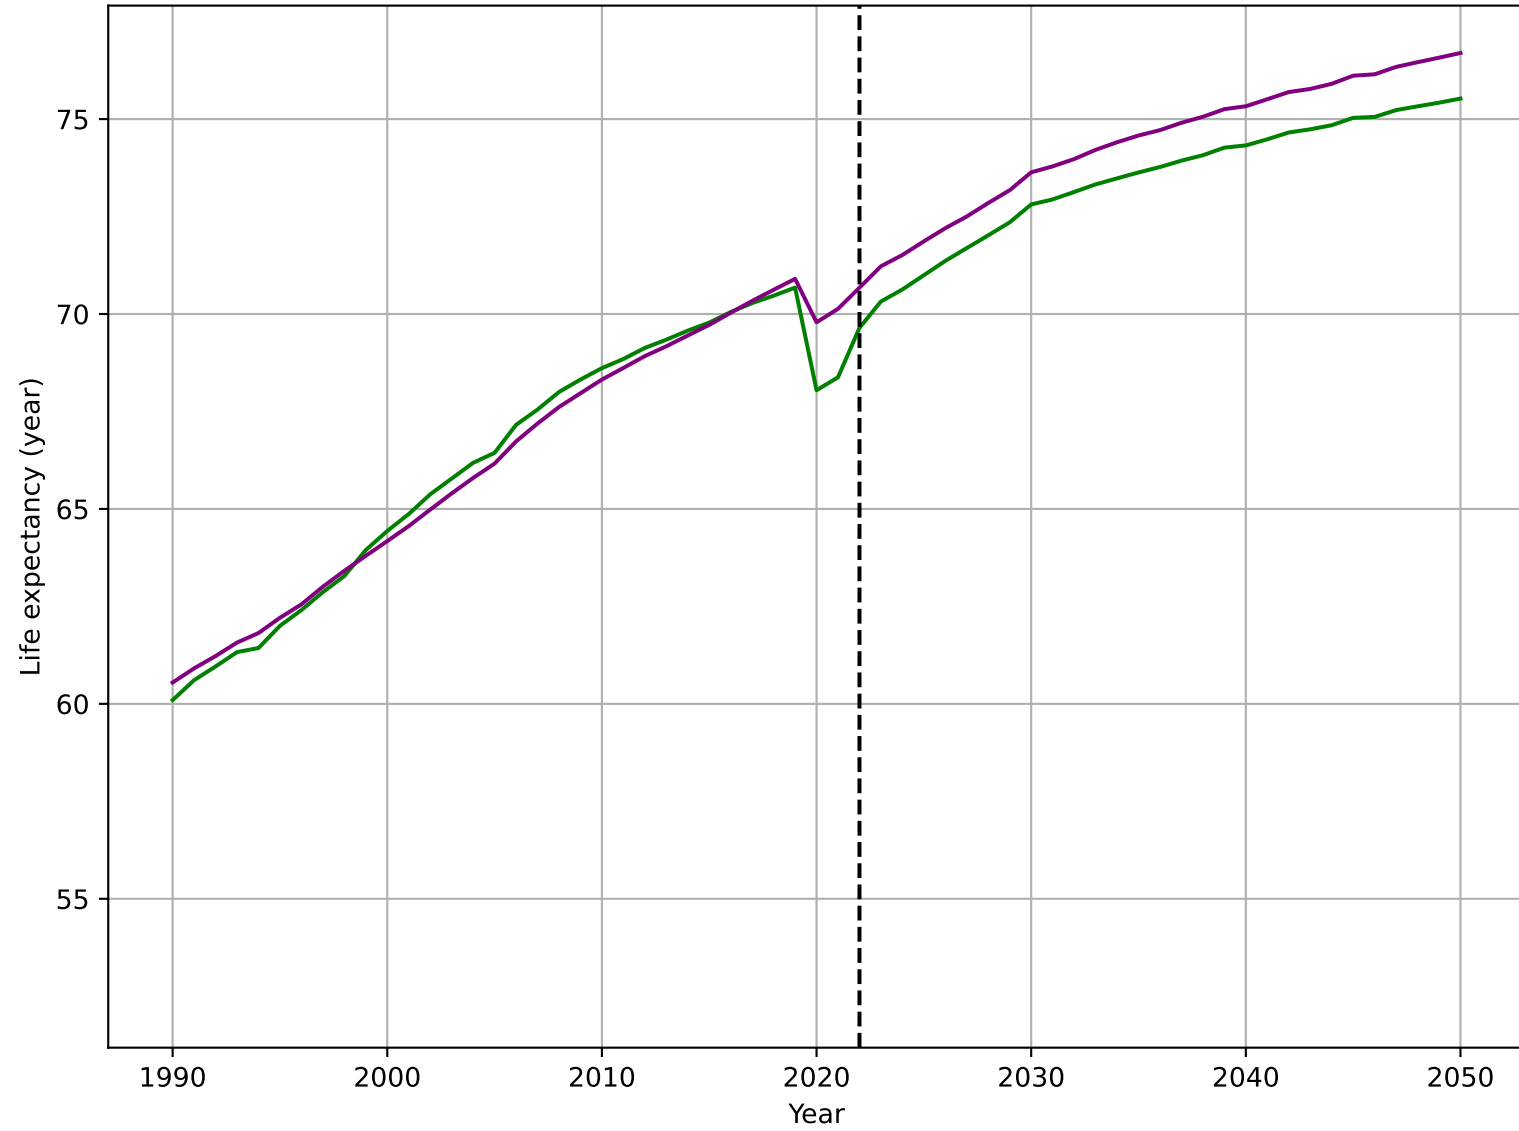

### Healthy Life Expectancy (HALE)

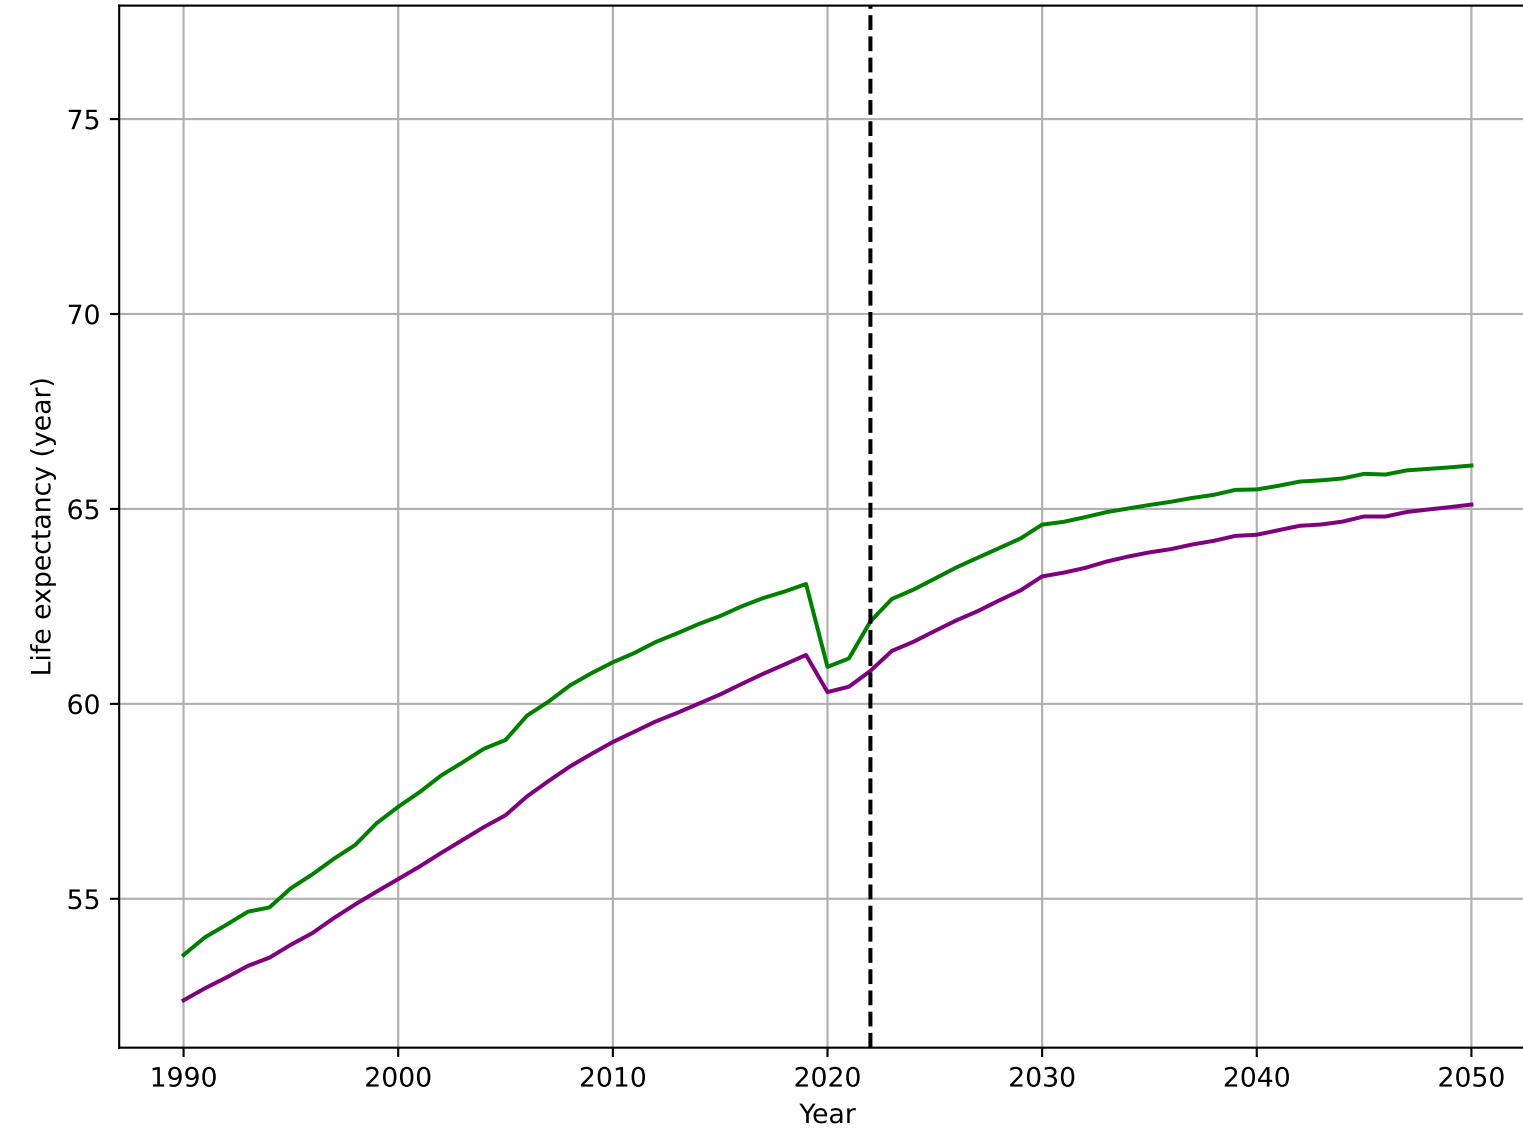

# Niger

### Life Expectancy

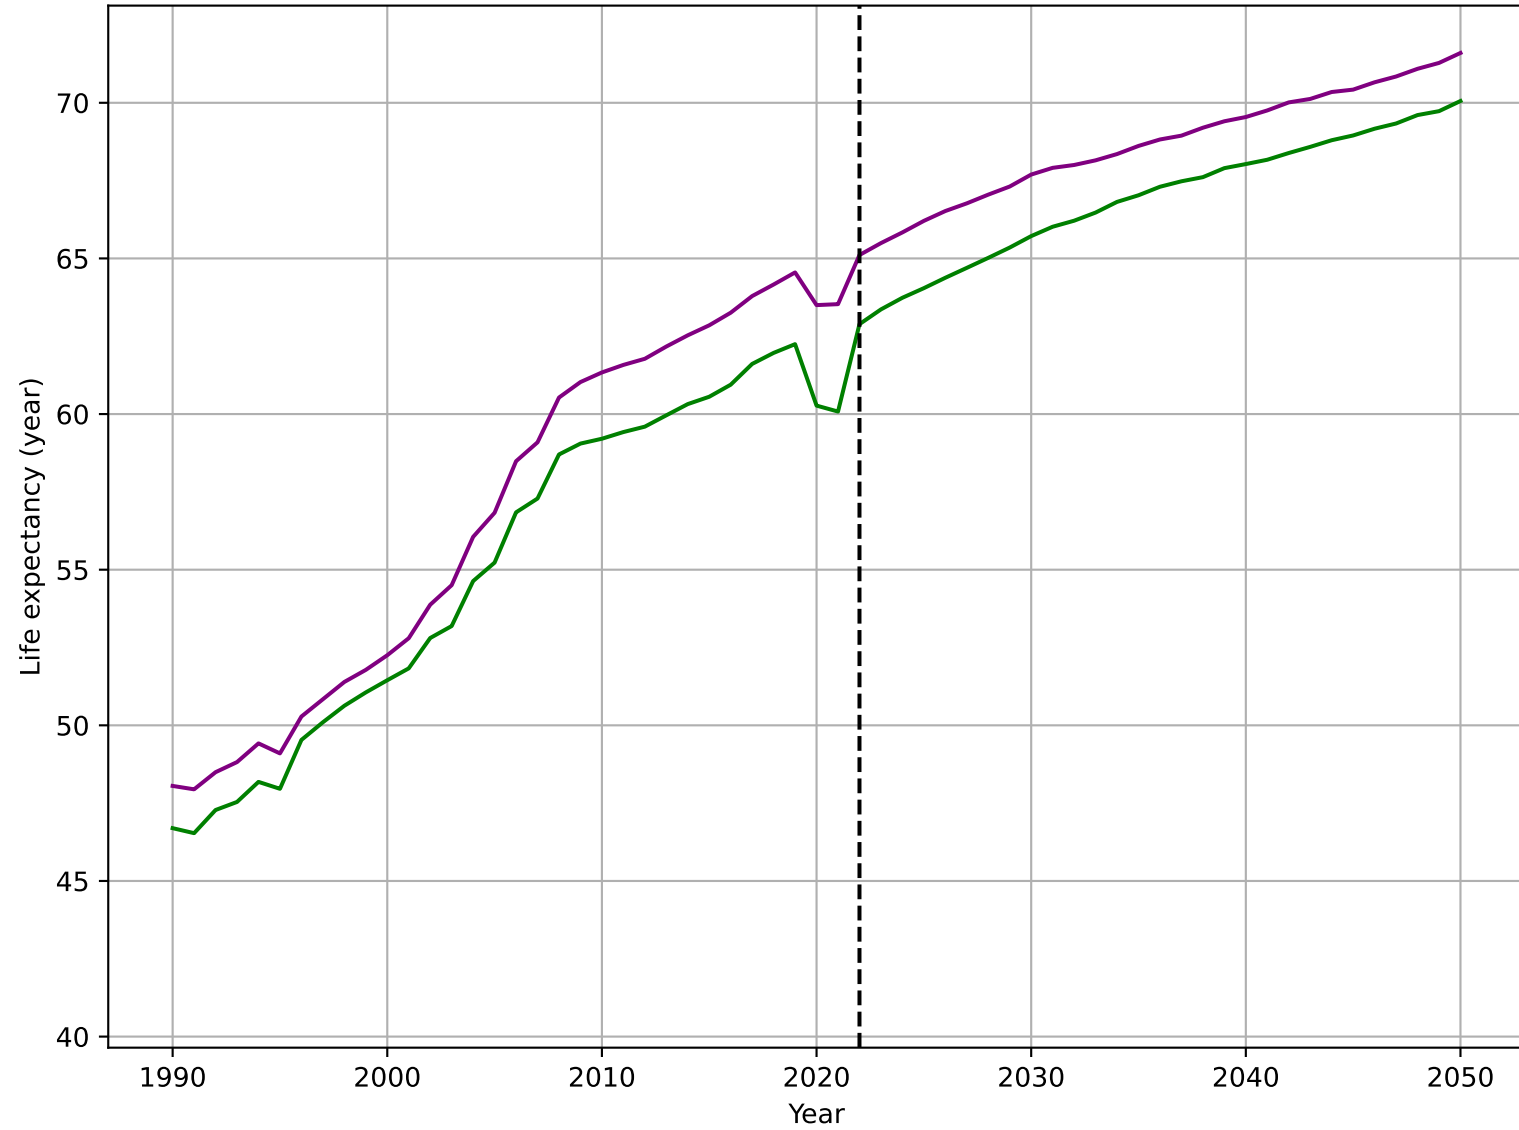

### Healthy Life Expectancy (HALE)

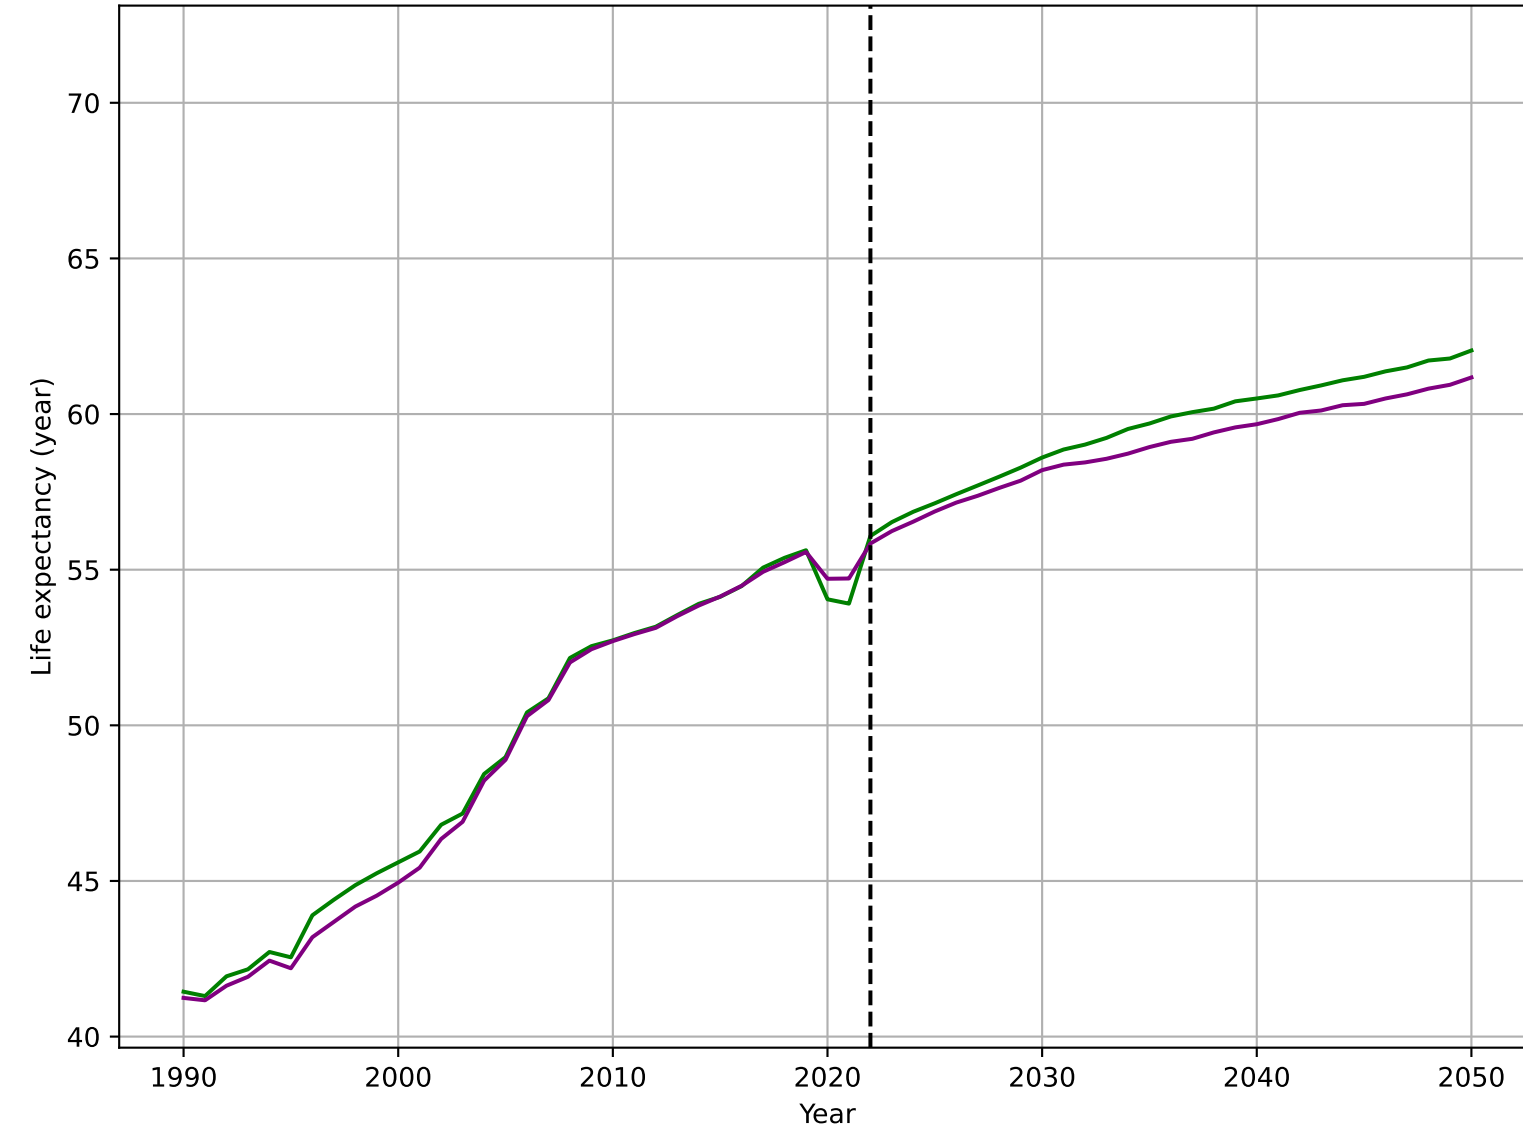

# Nigeria

### Life Expectancy

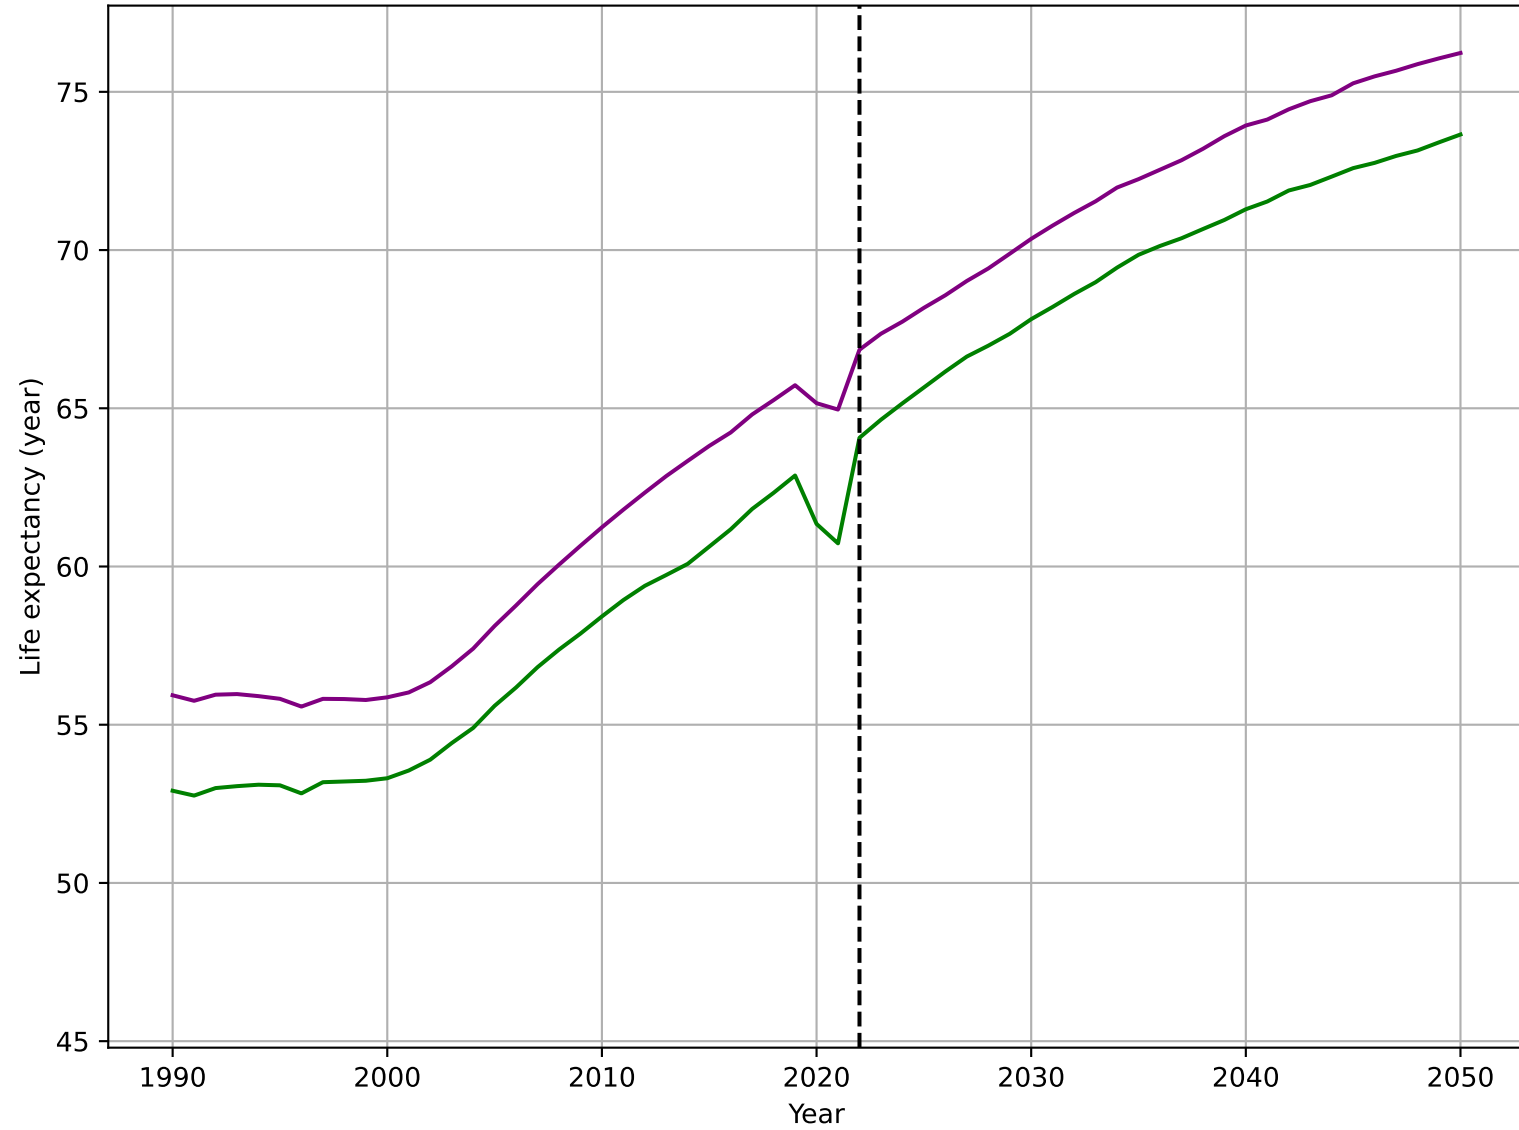

### Healthy Life Expectancy (HALE)

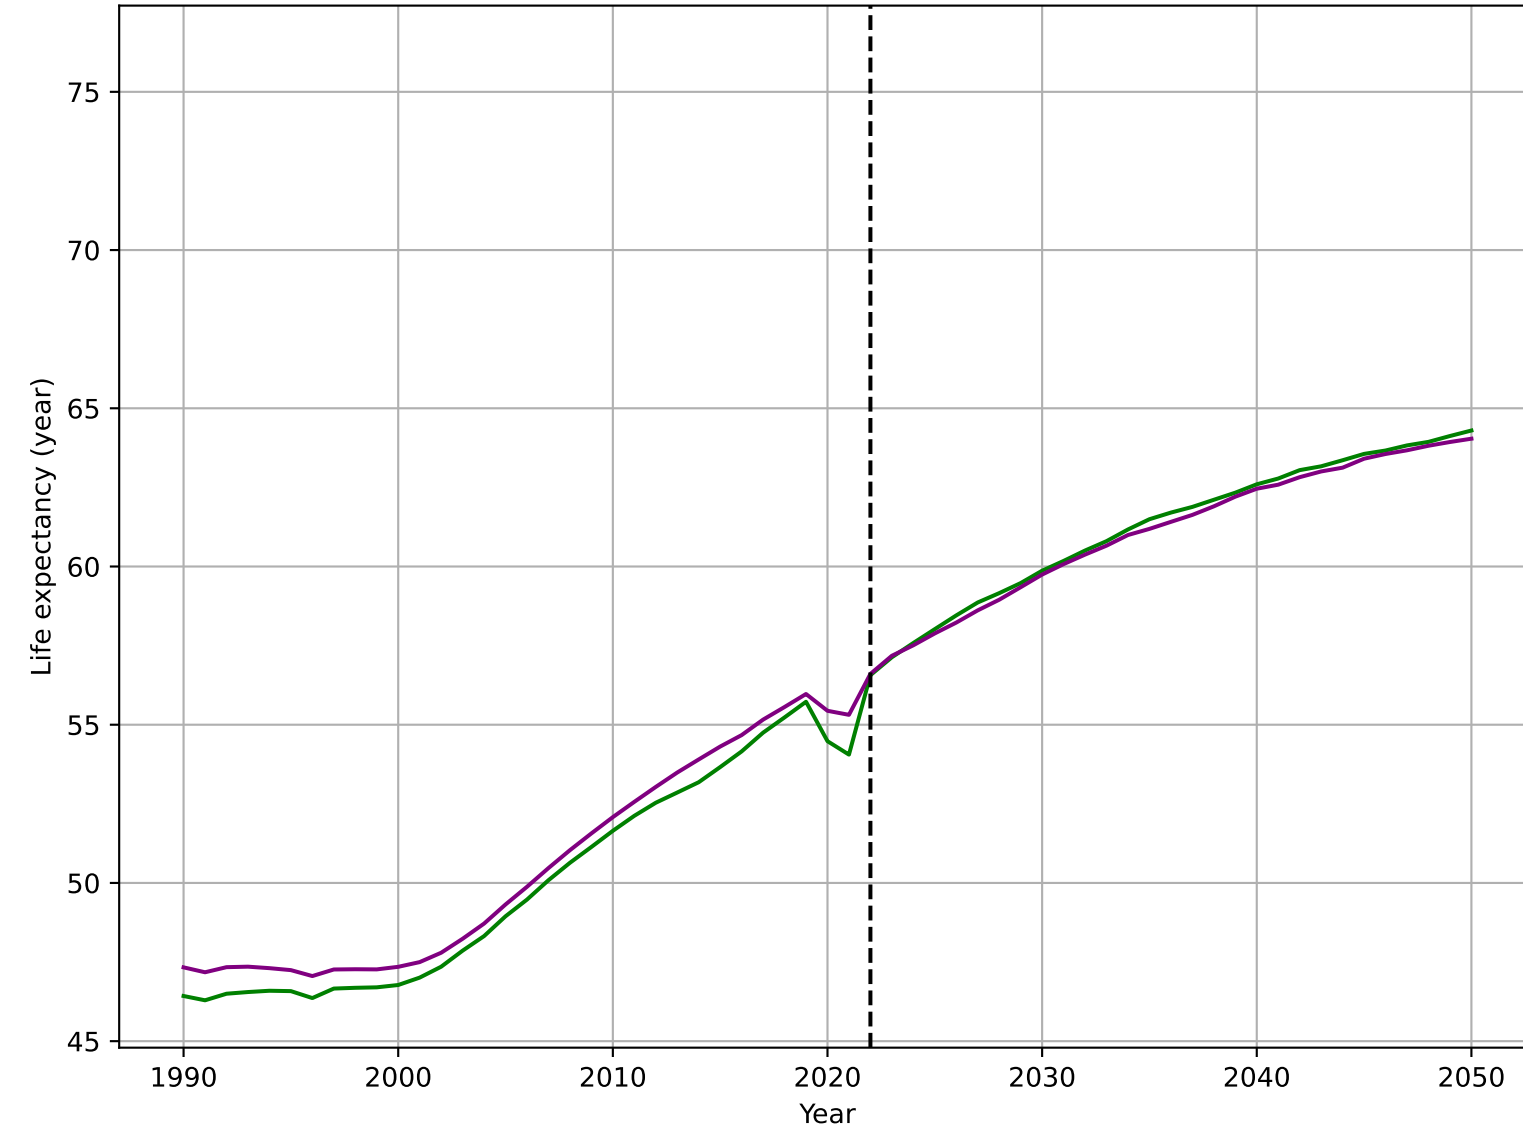

# São Tomé And Príncipe

### Life Expectancy

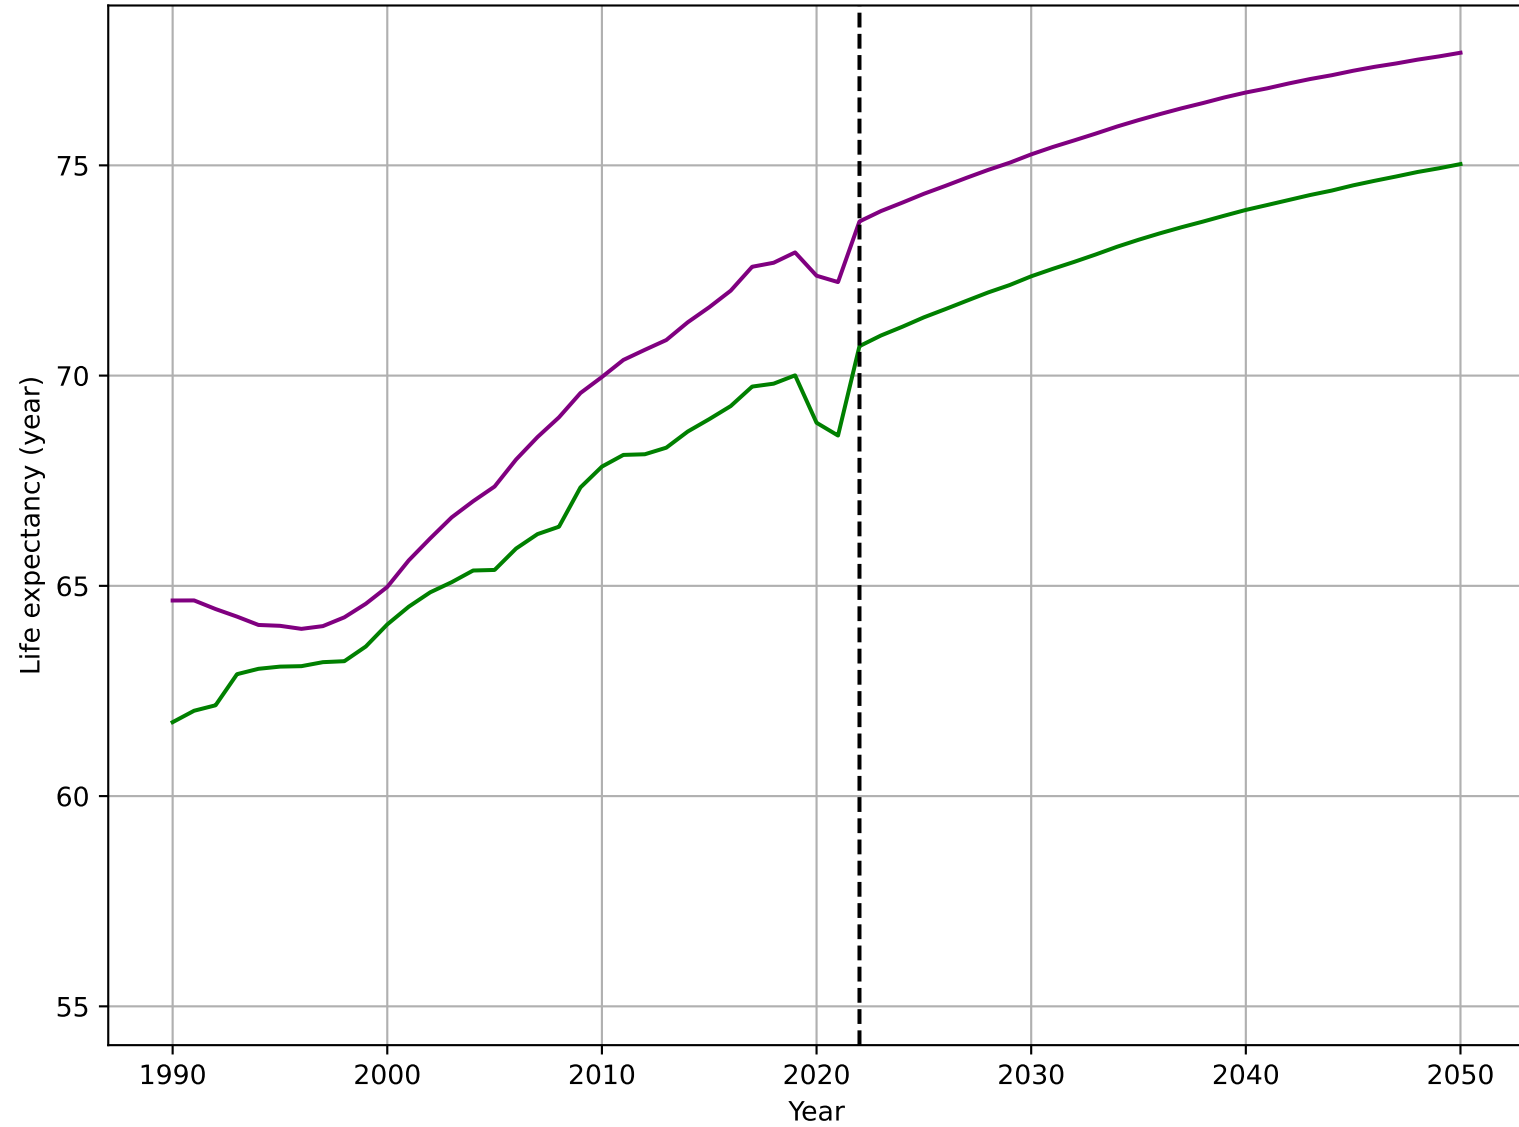

### Healthy Life Expectancy (HALE)

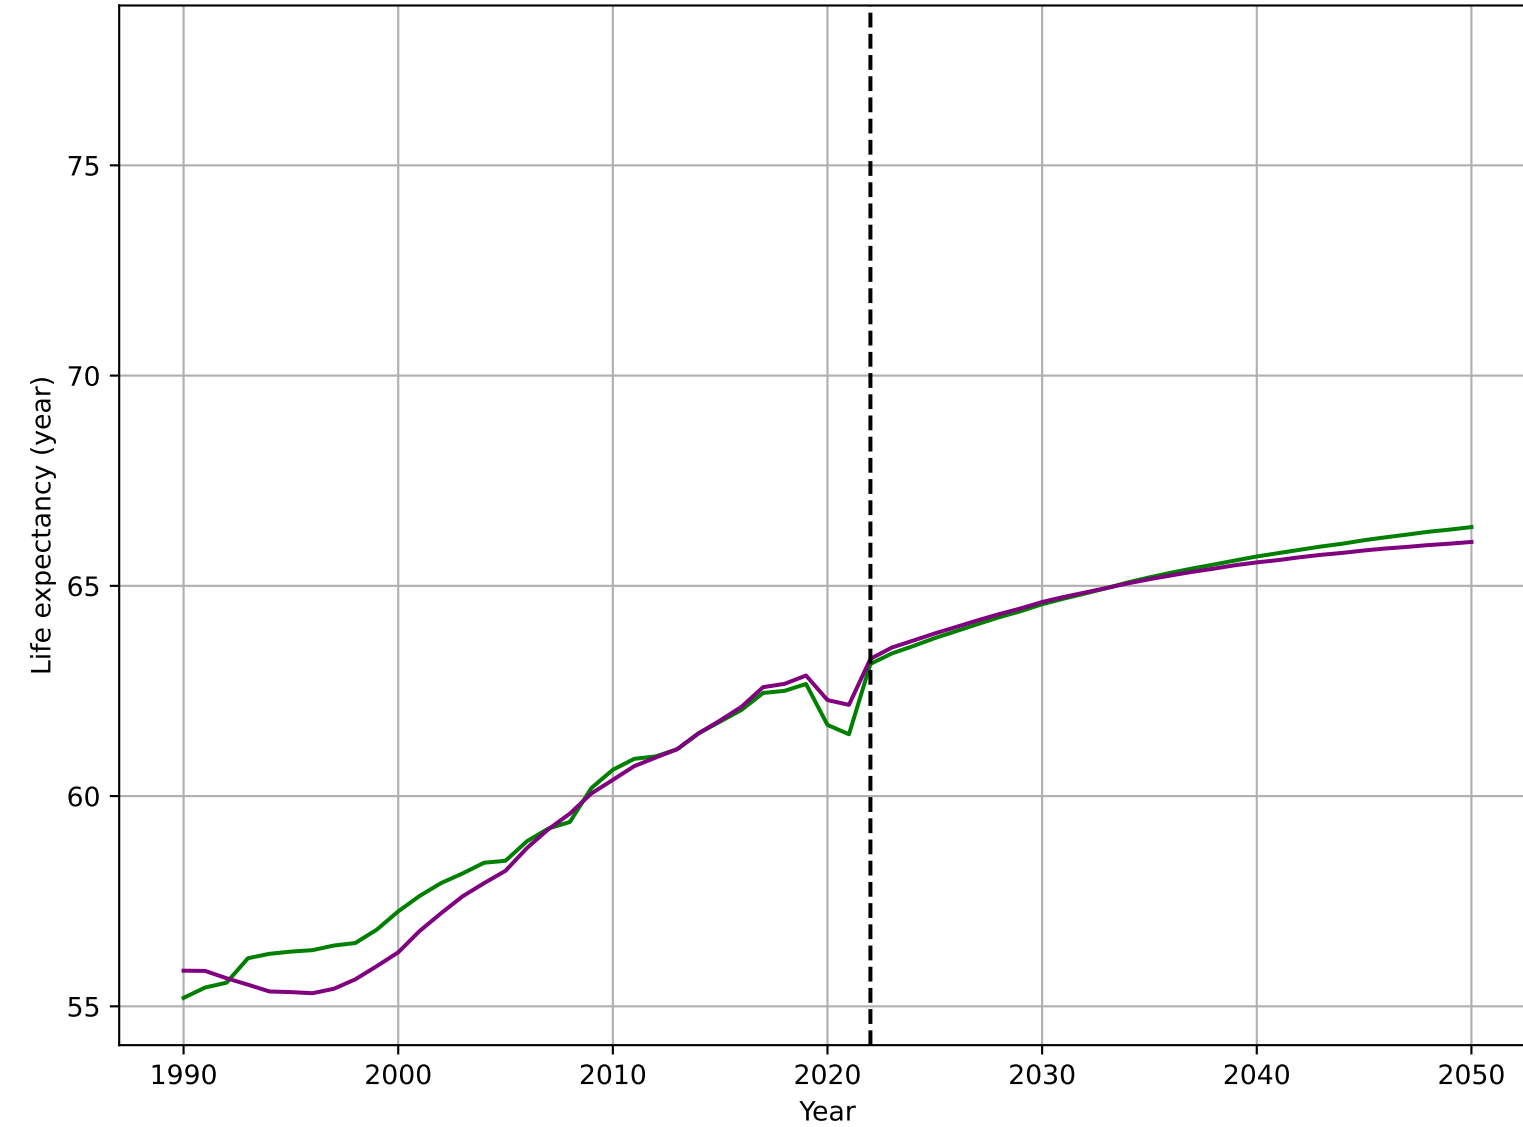

# Senegal

### Life Expectancy

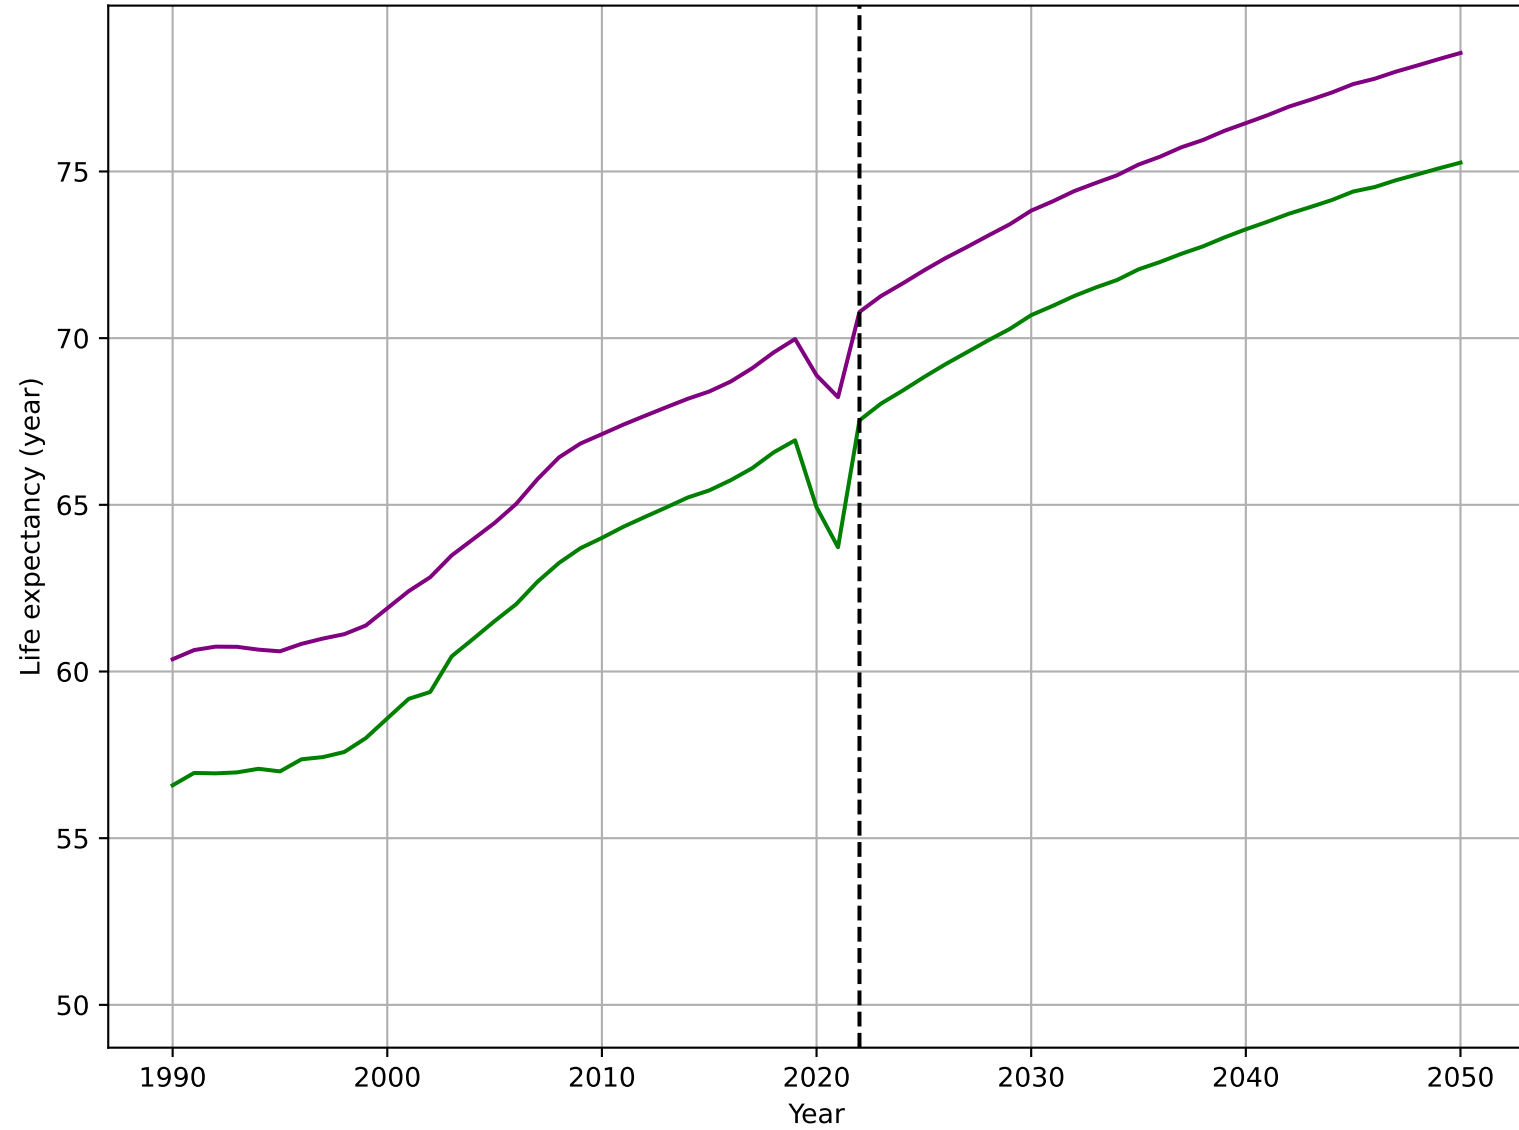

### Healthy Life Expectancy (HALE)

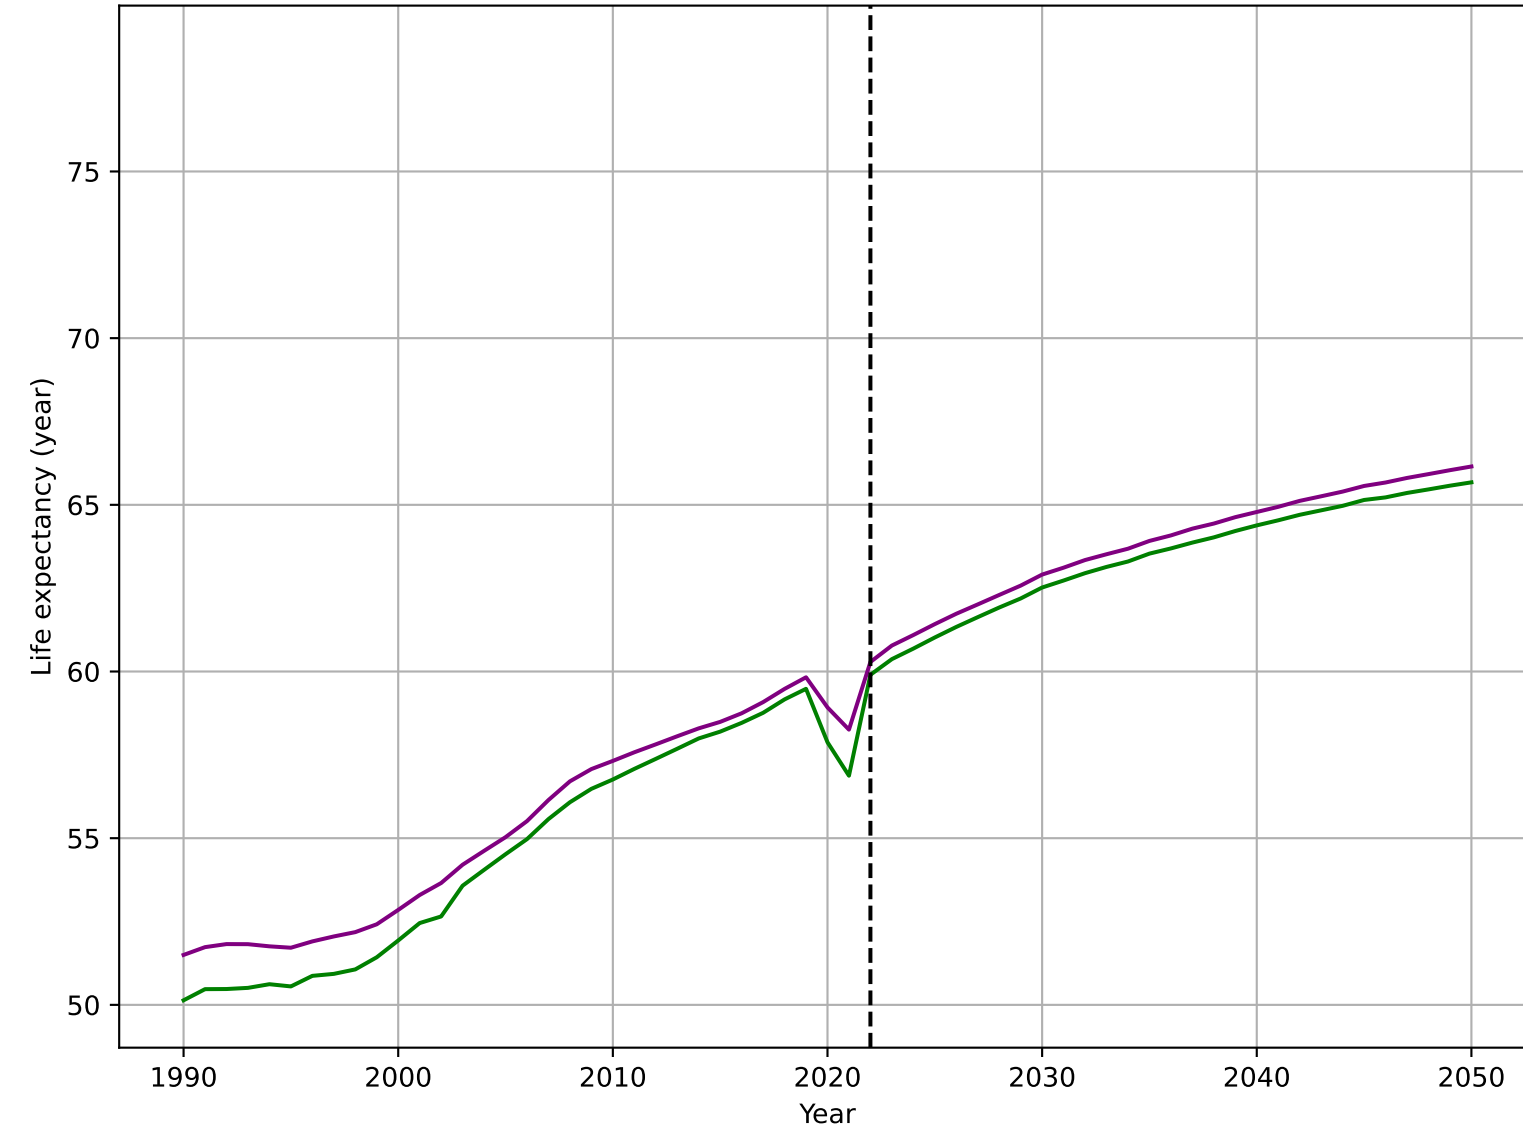

# Sierra Leone

### Life Expectancy

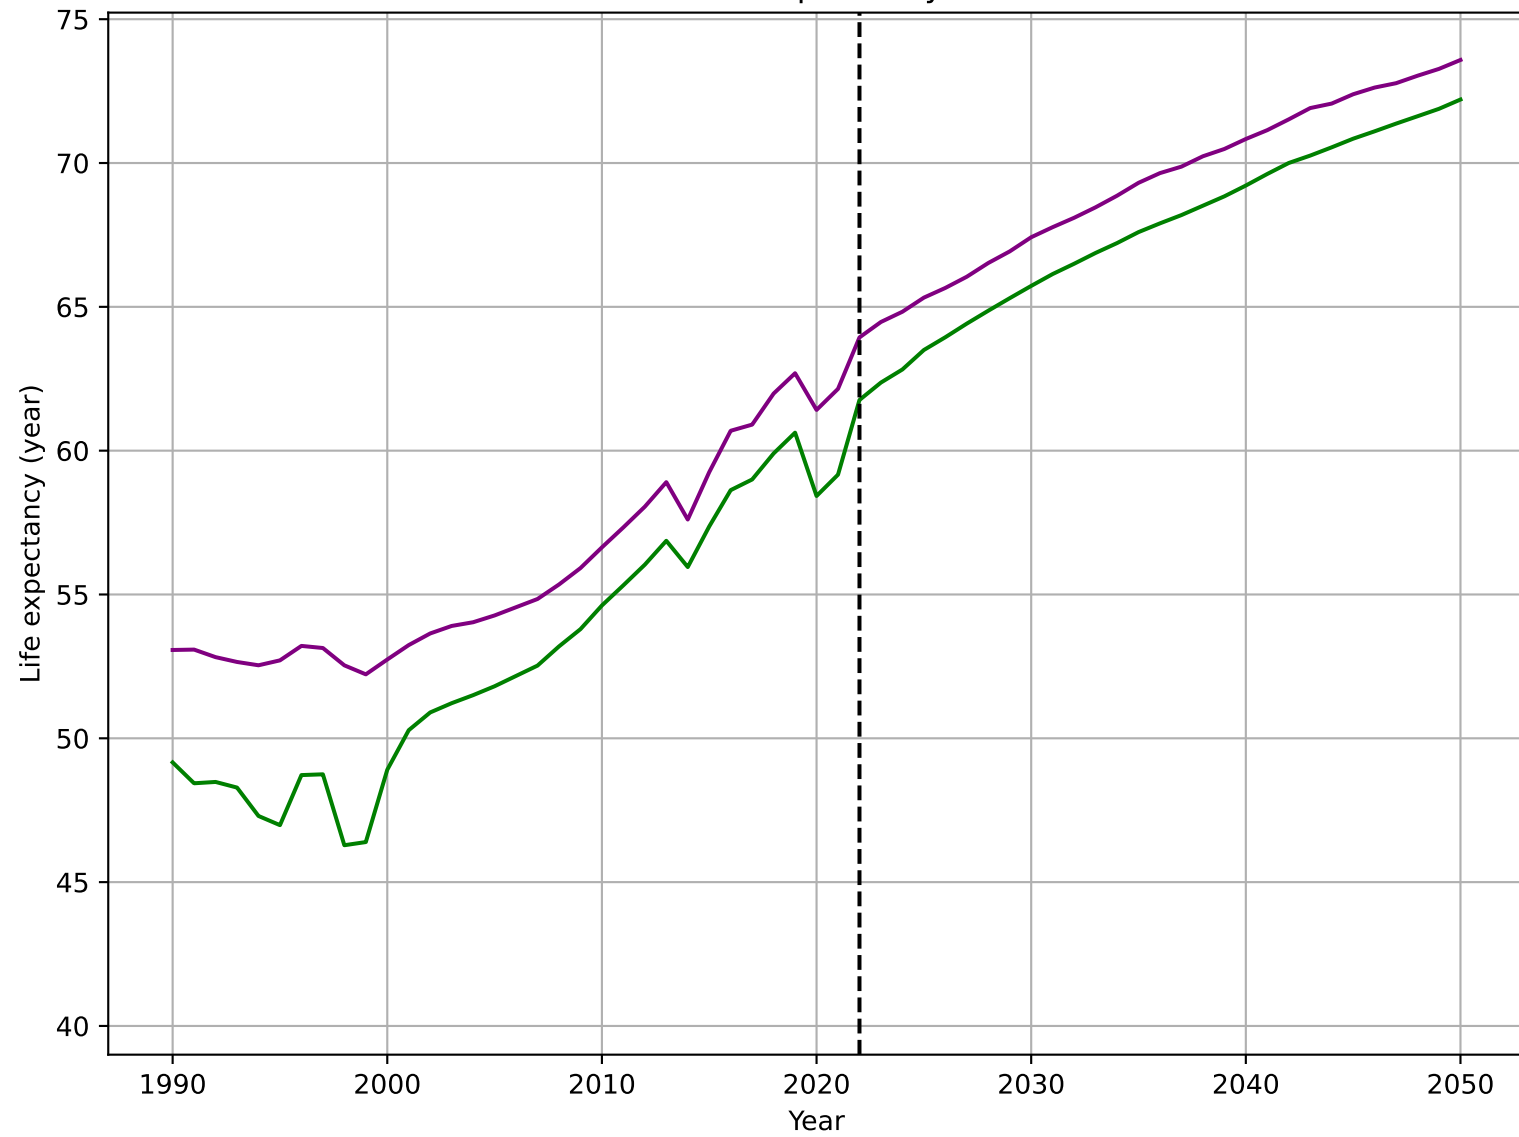

### Healthy Life Expectancy (HALE)

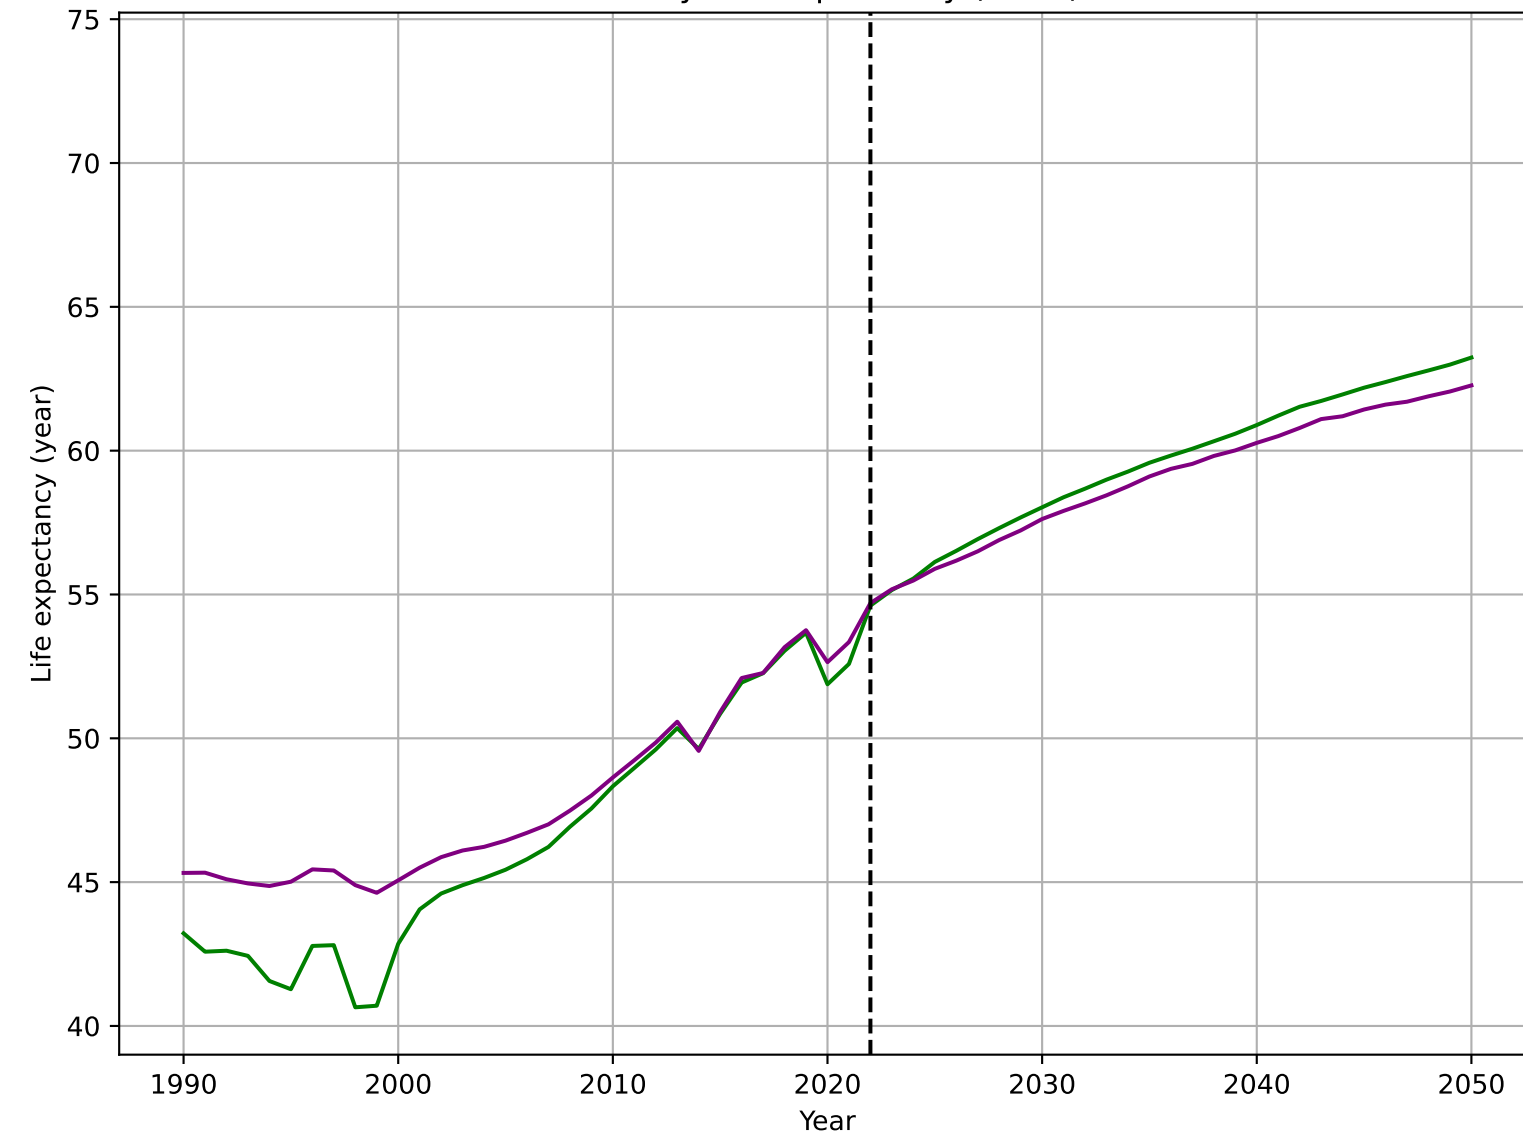

# Togo

### Life Expectancy

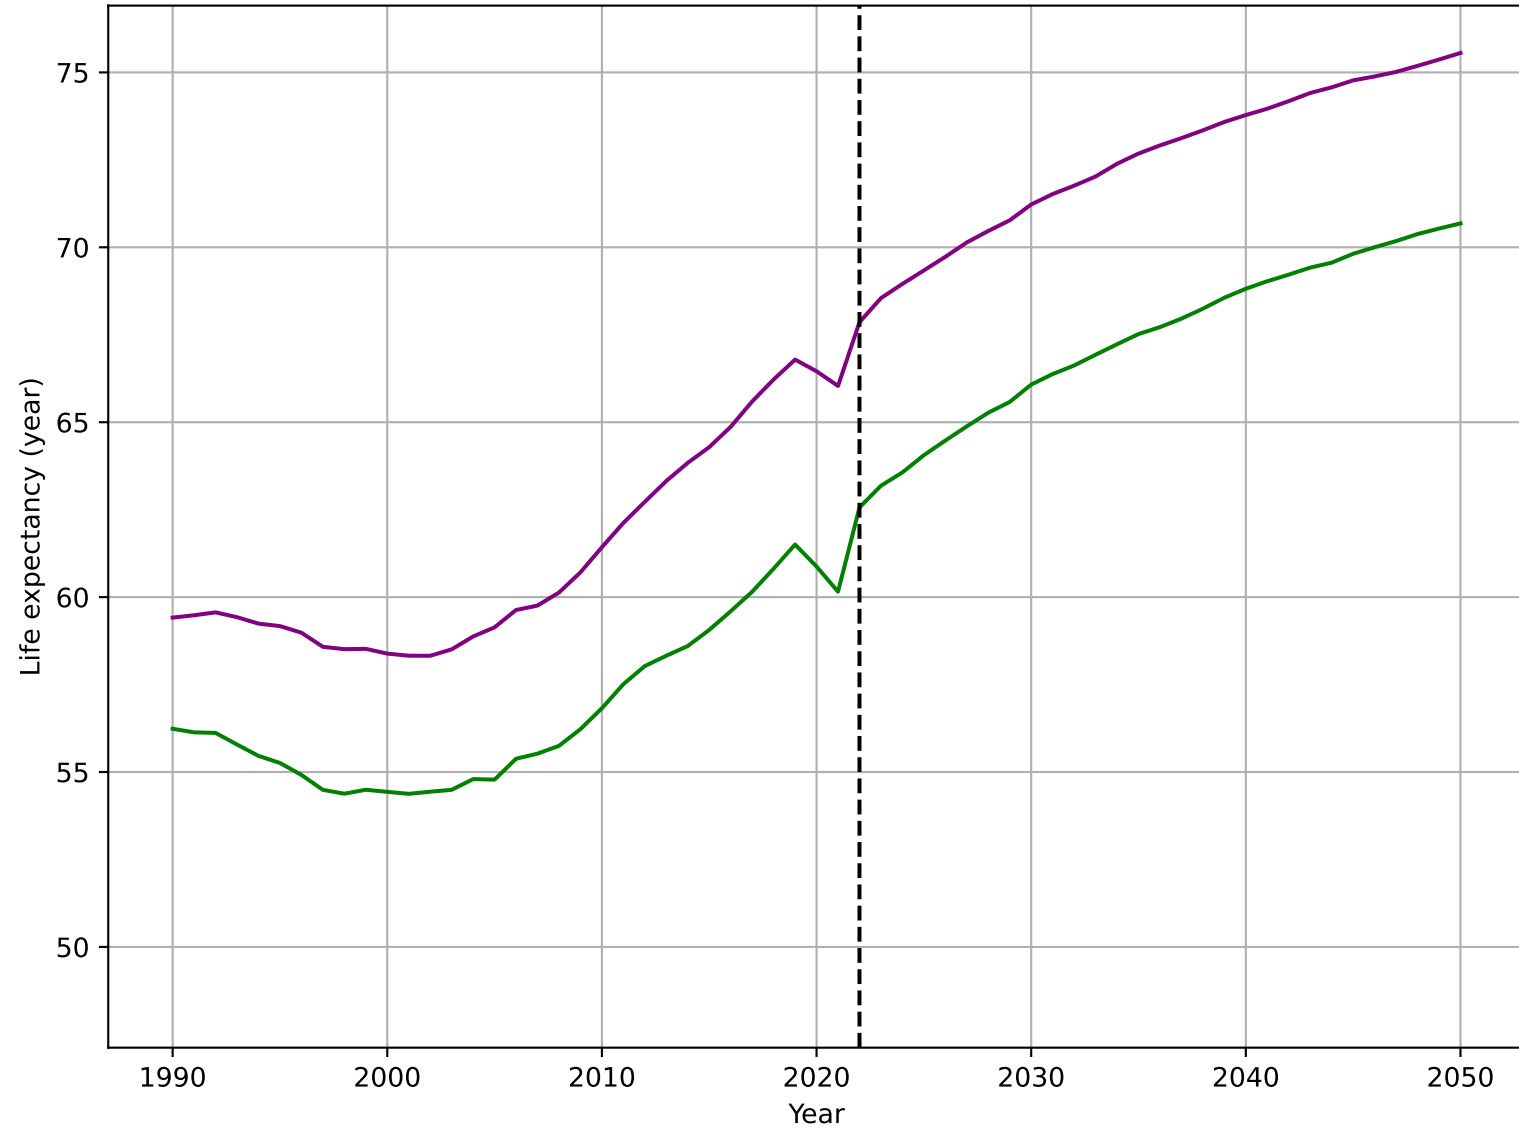

### Healthy Life Expectancy (HALE)

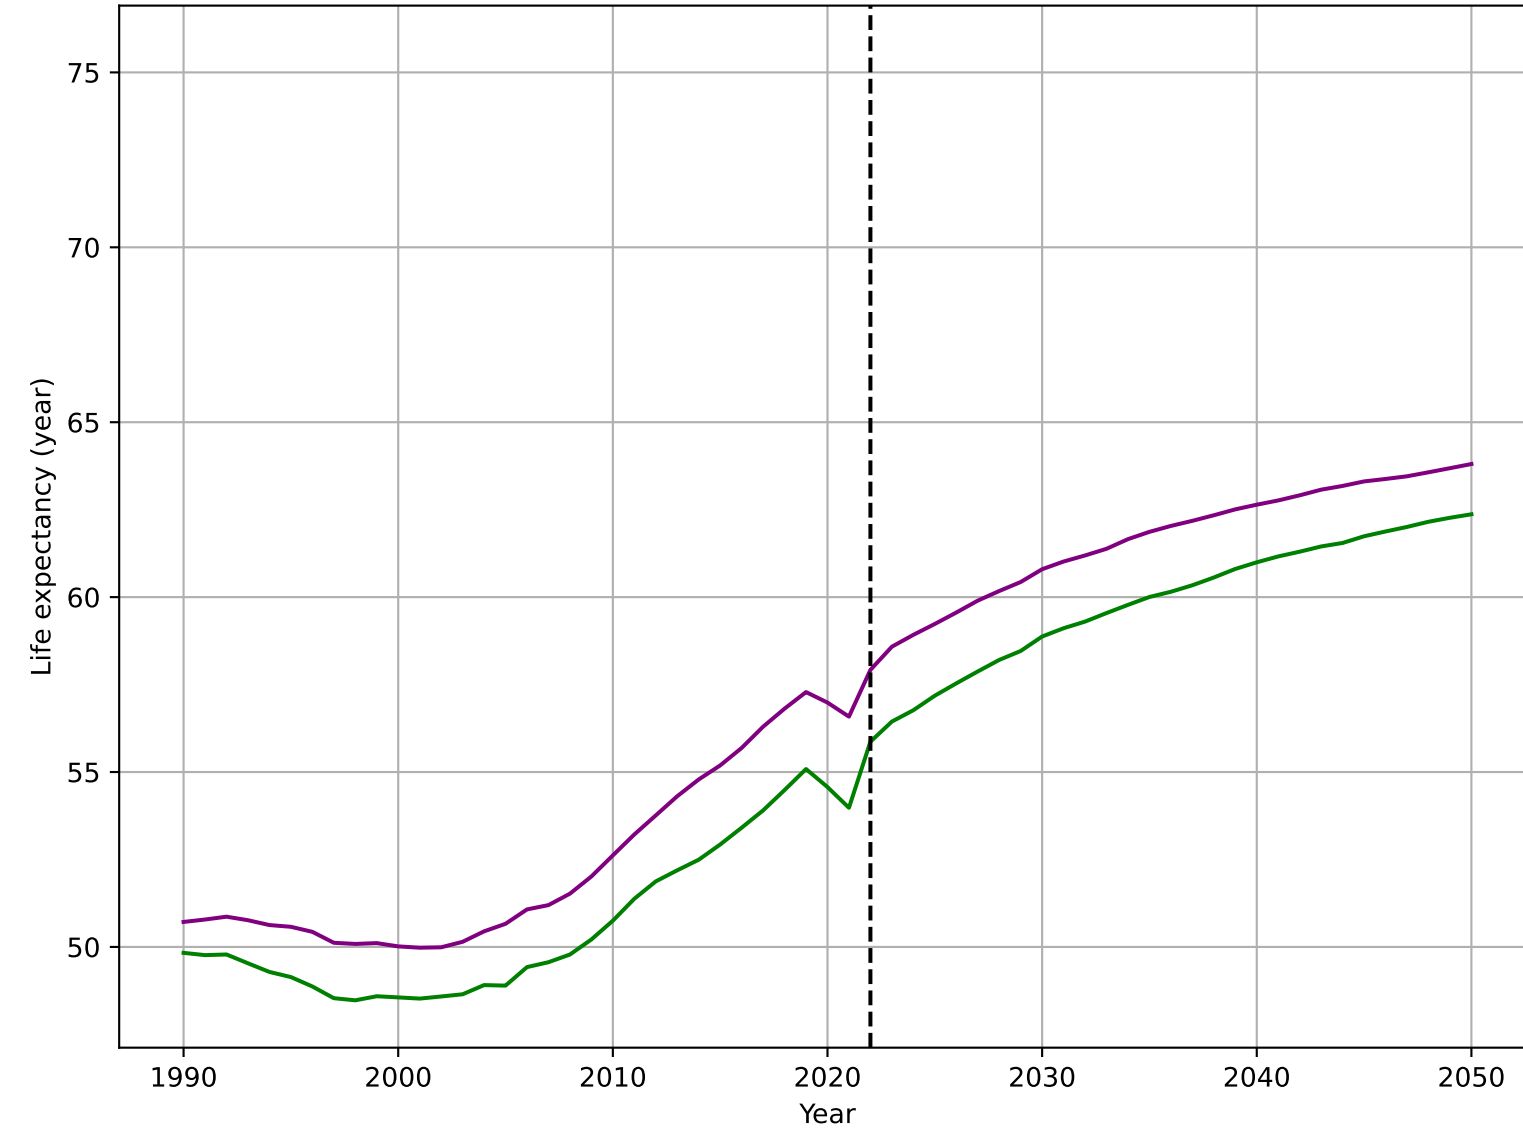



# Global

### Life Expectancy

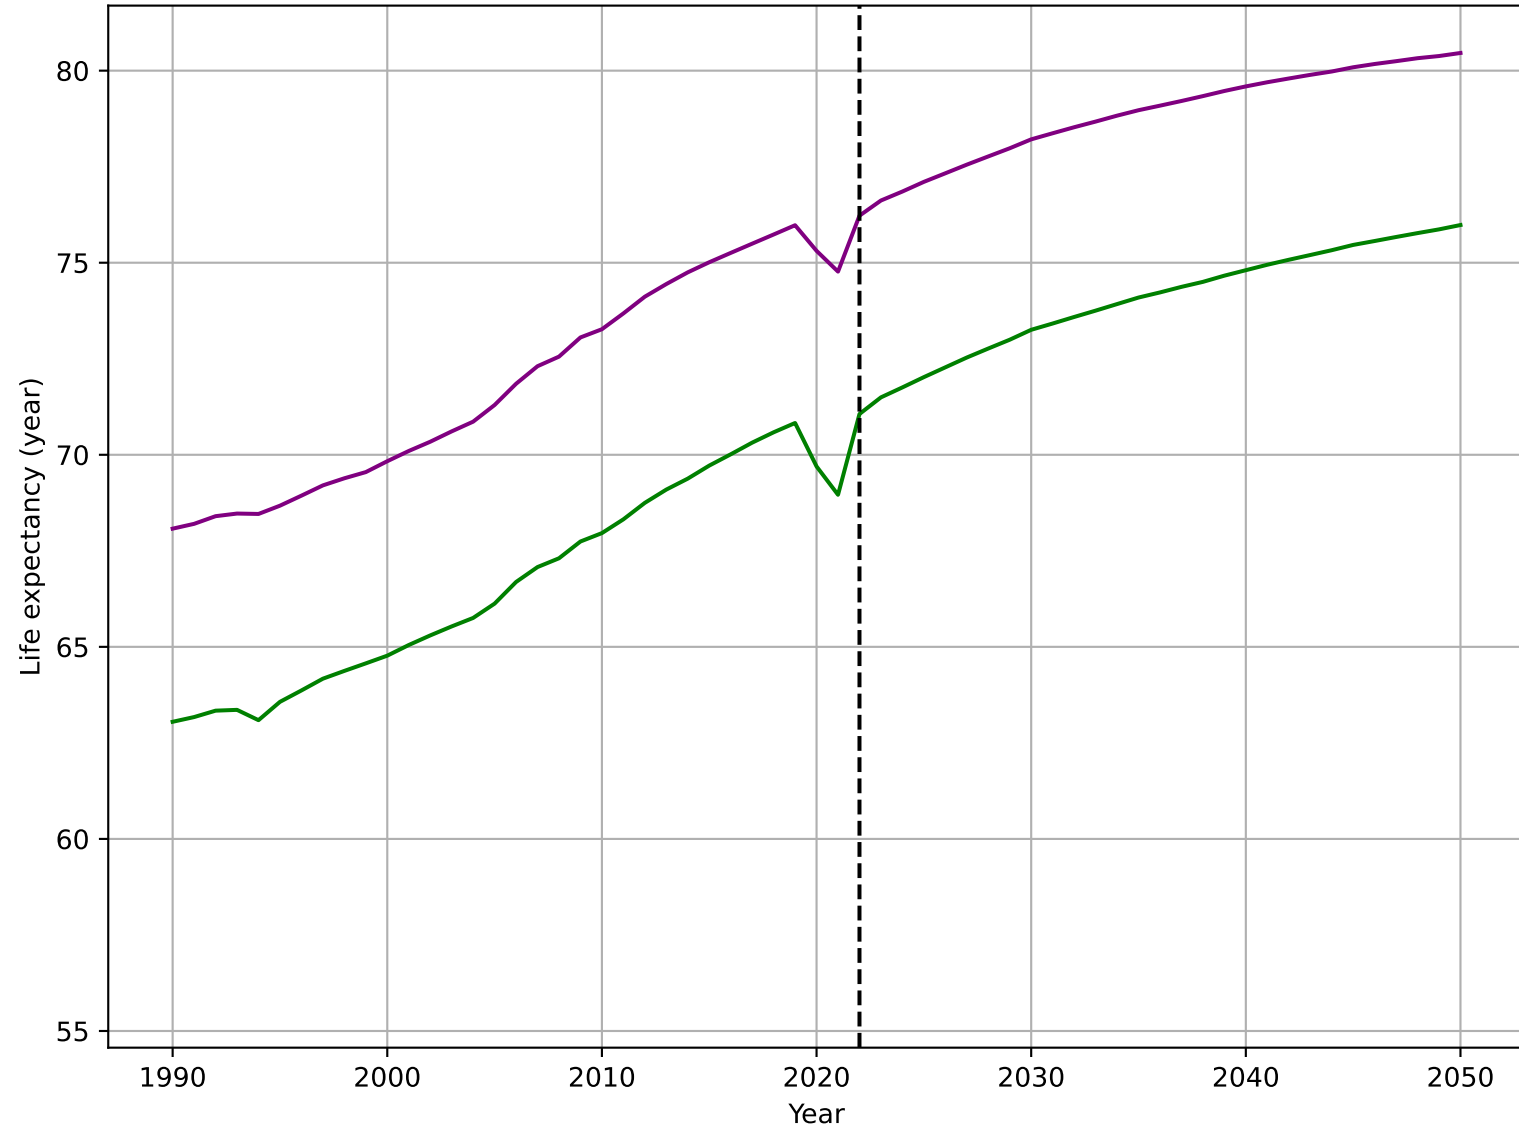

### Healthy Life Expectancy (HALE)

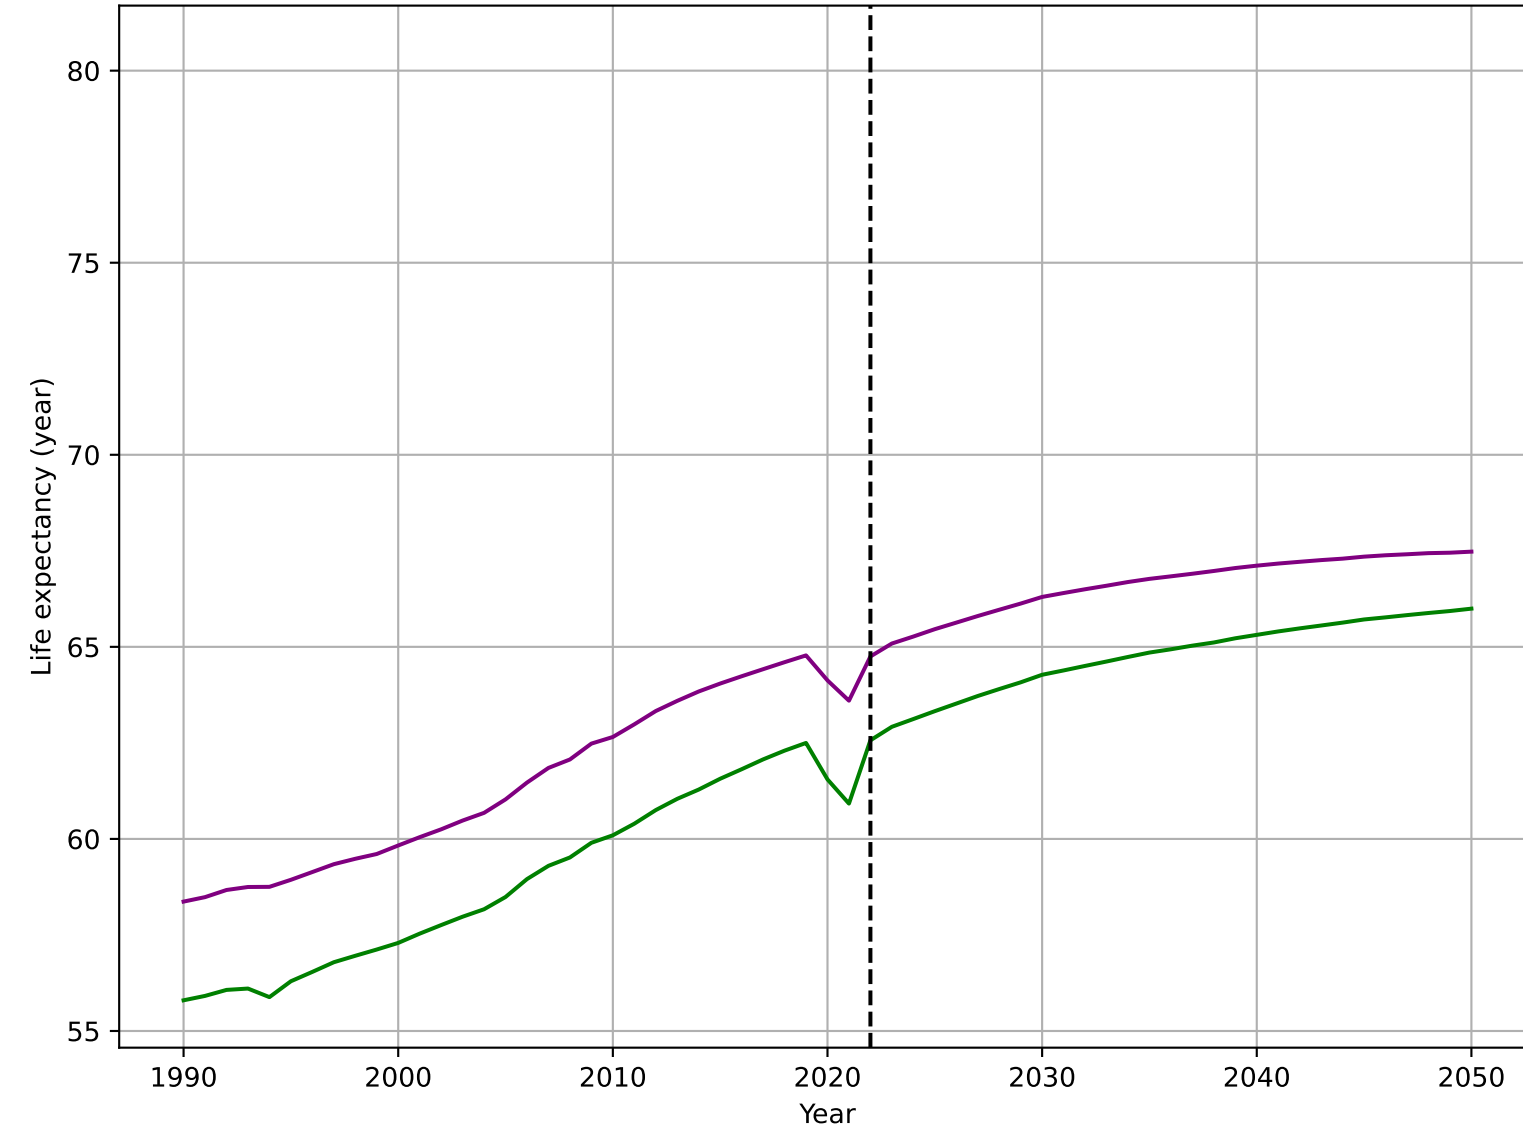

# Central Europe, Eastern Europe, And Central Asia

Life Expectancy

Healthy Life Expectancy (HALE)

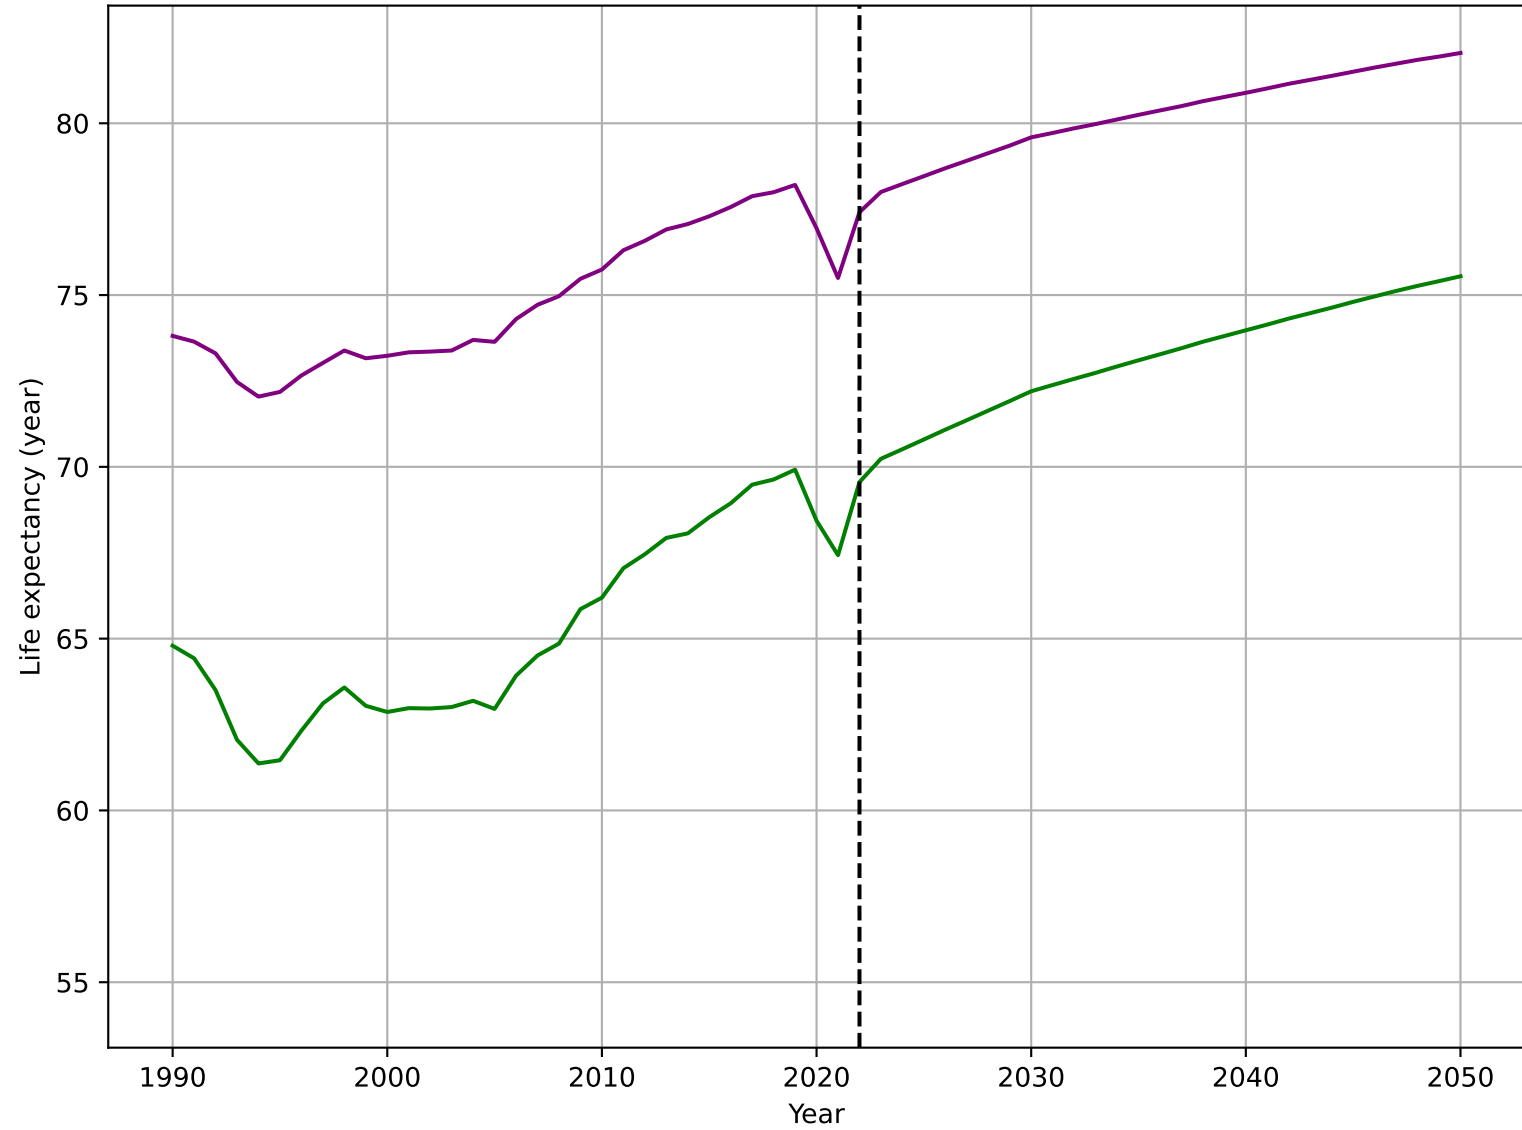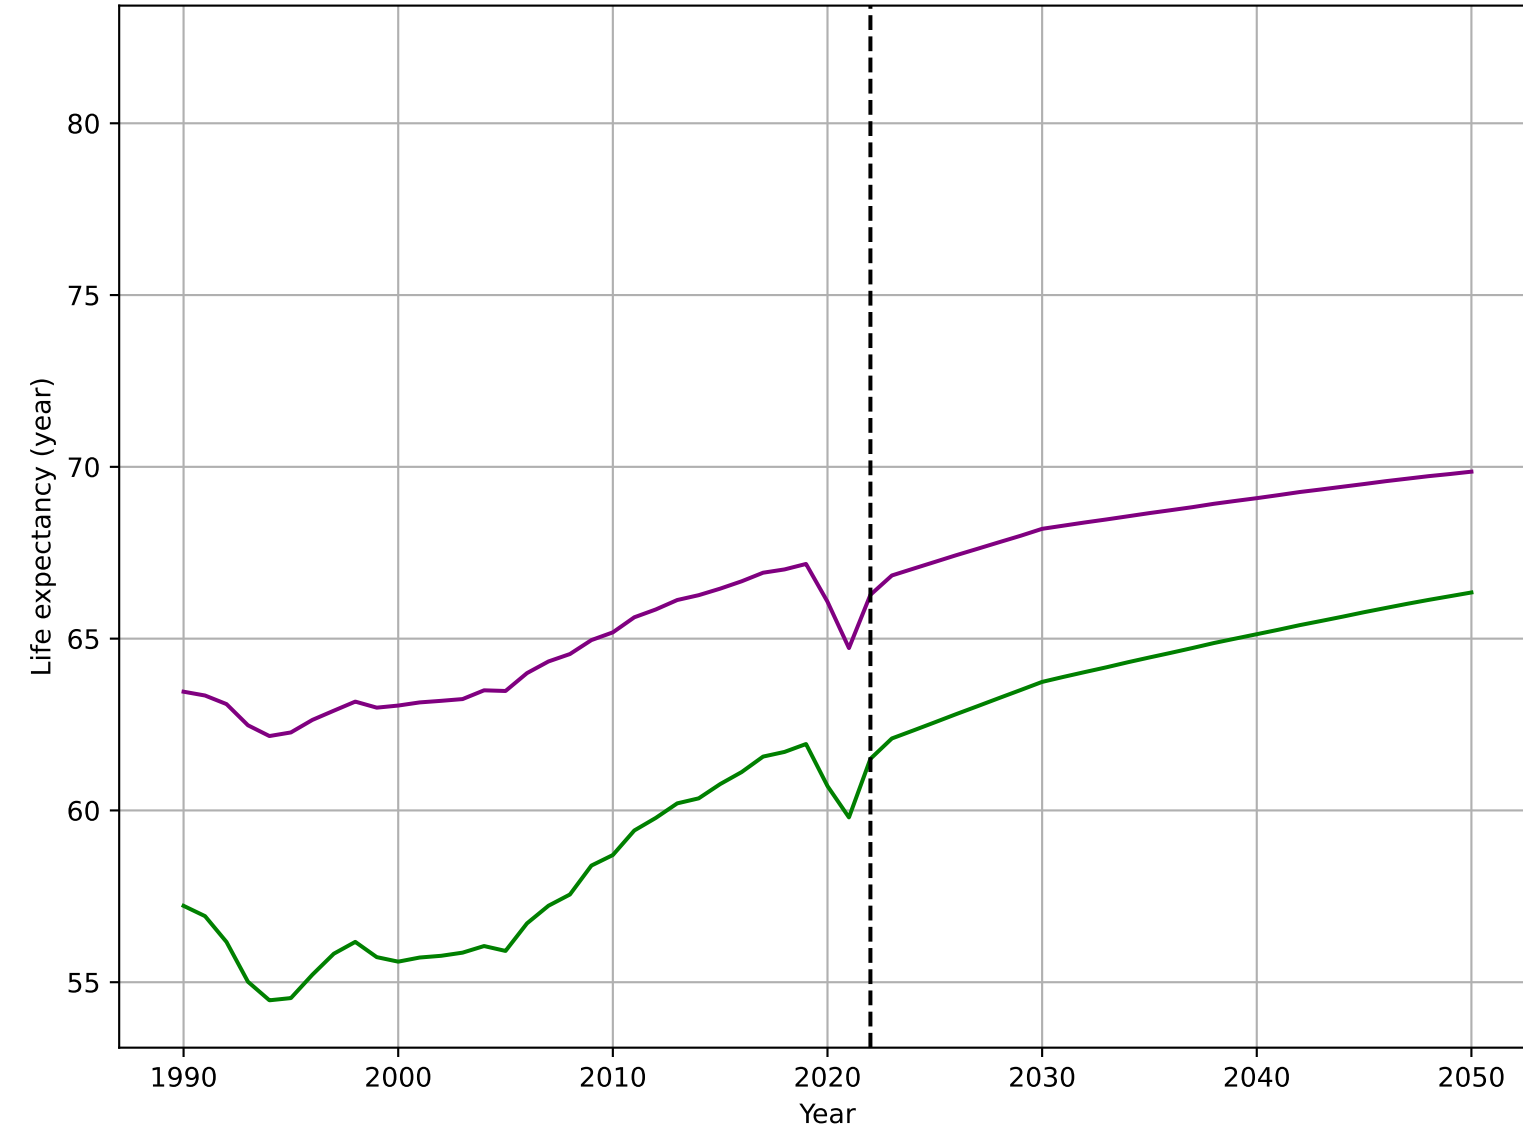

# High Income

### Life Expectancy

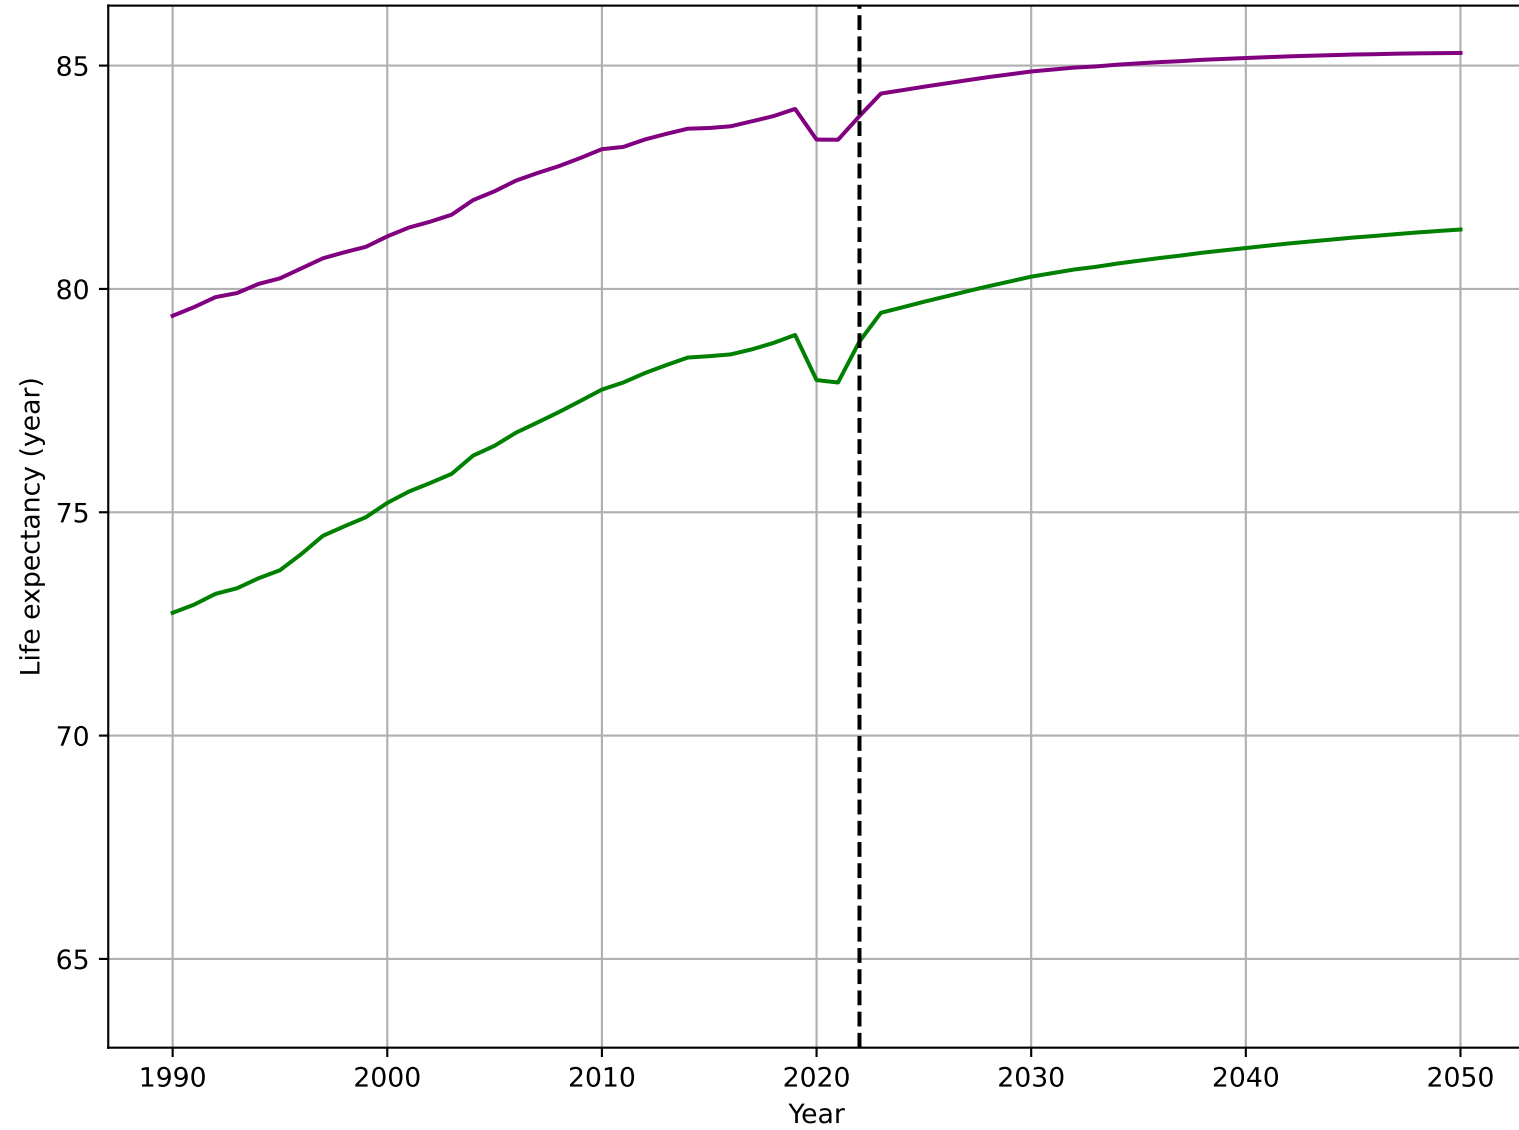

### Healthy Life Expectancy (HALE)

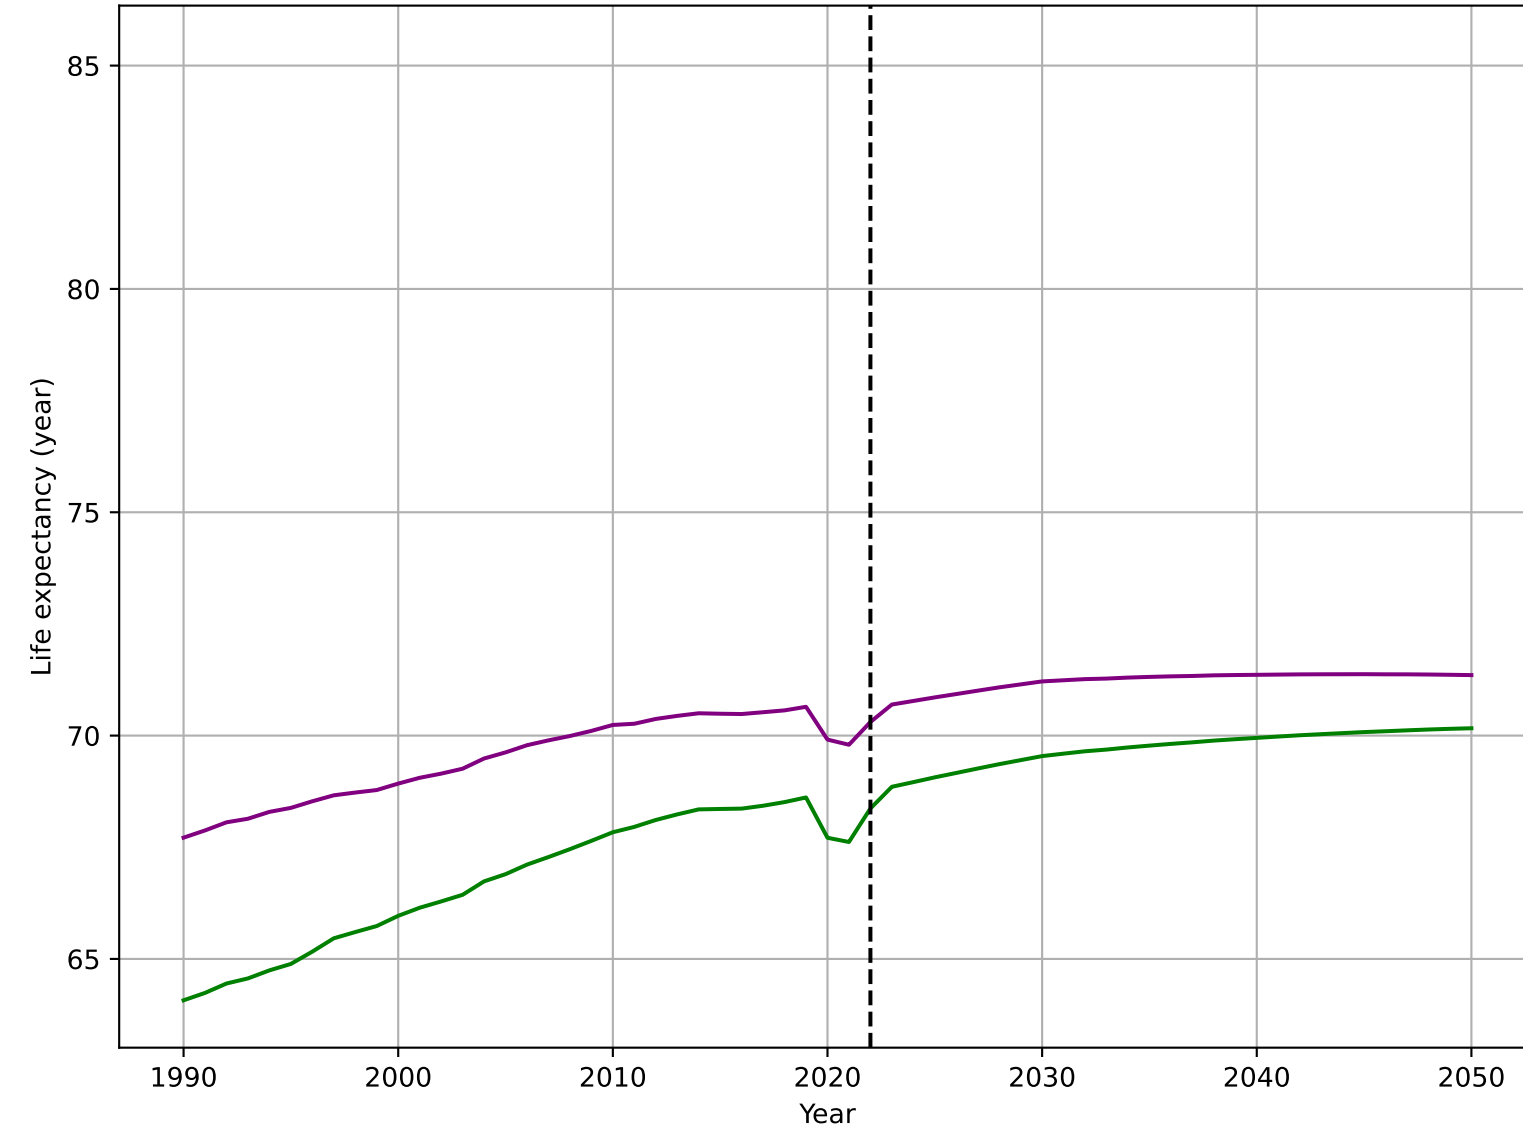

# Latin America And Caribbean

### Life Expectancy

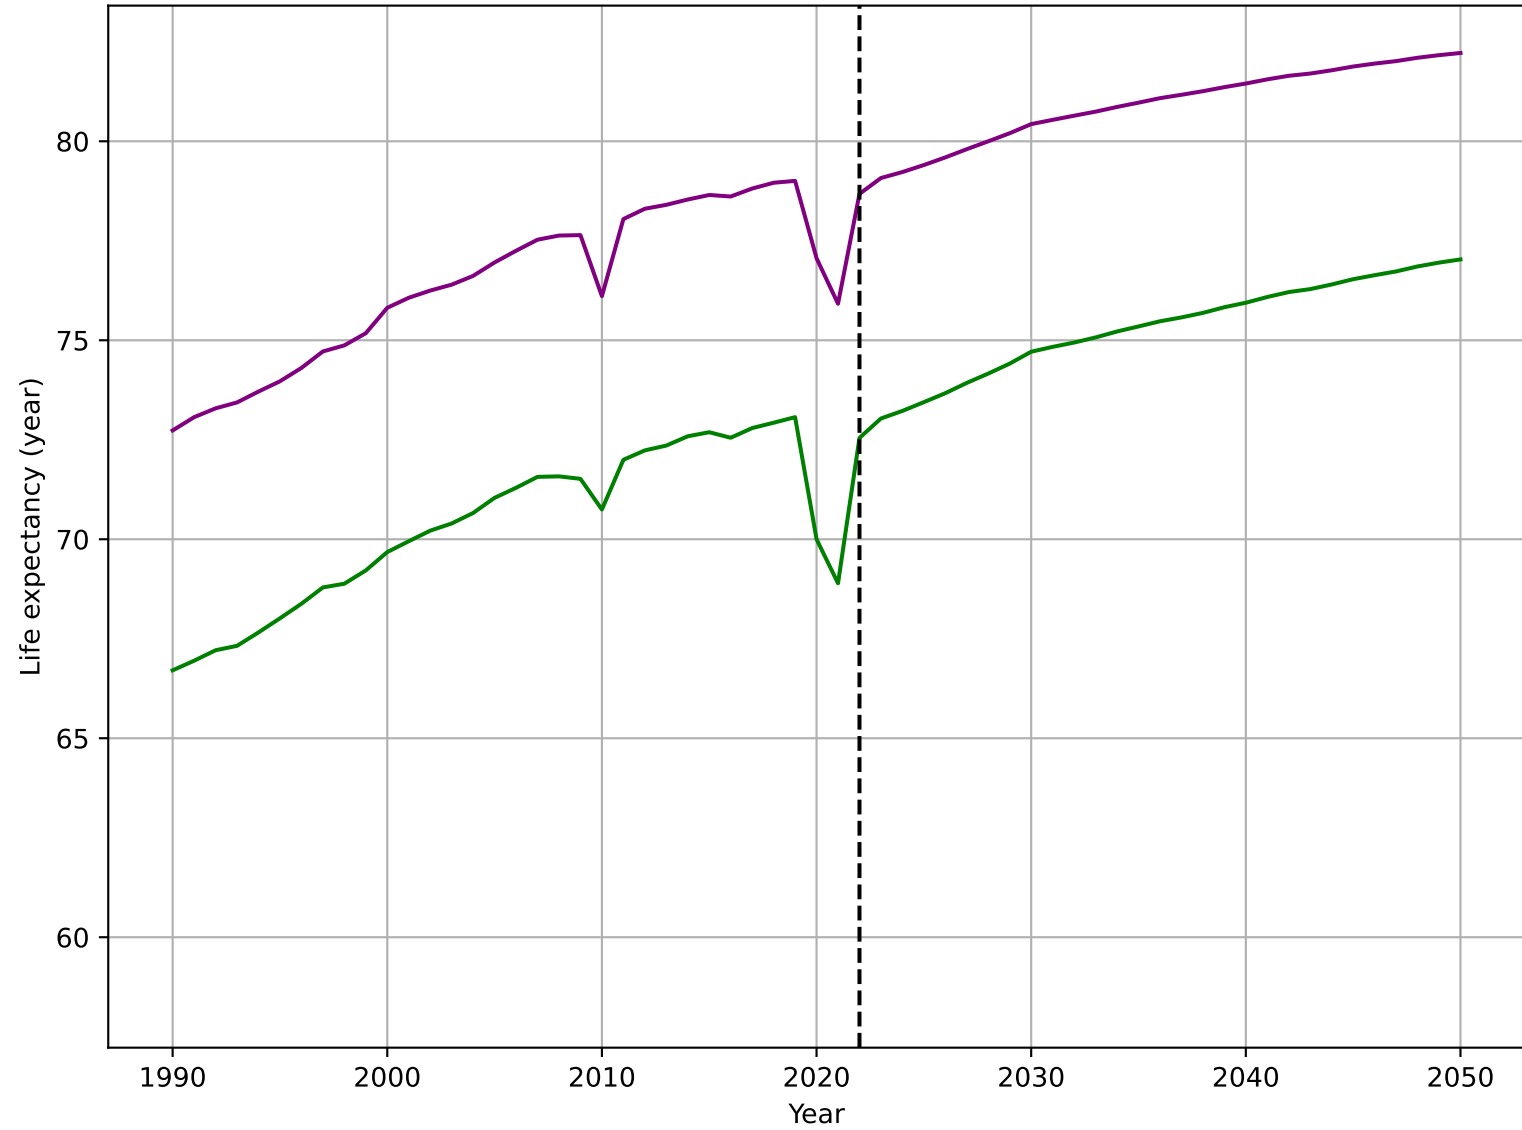

### Healthy Life Expectancy (HALE)

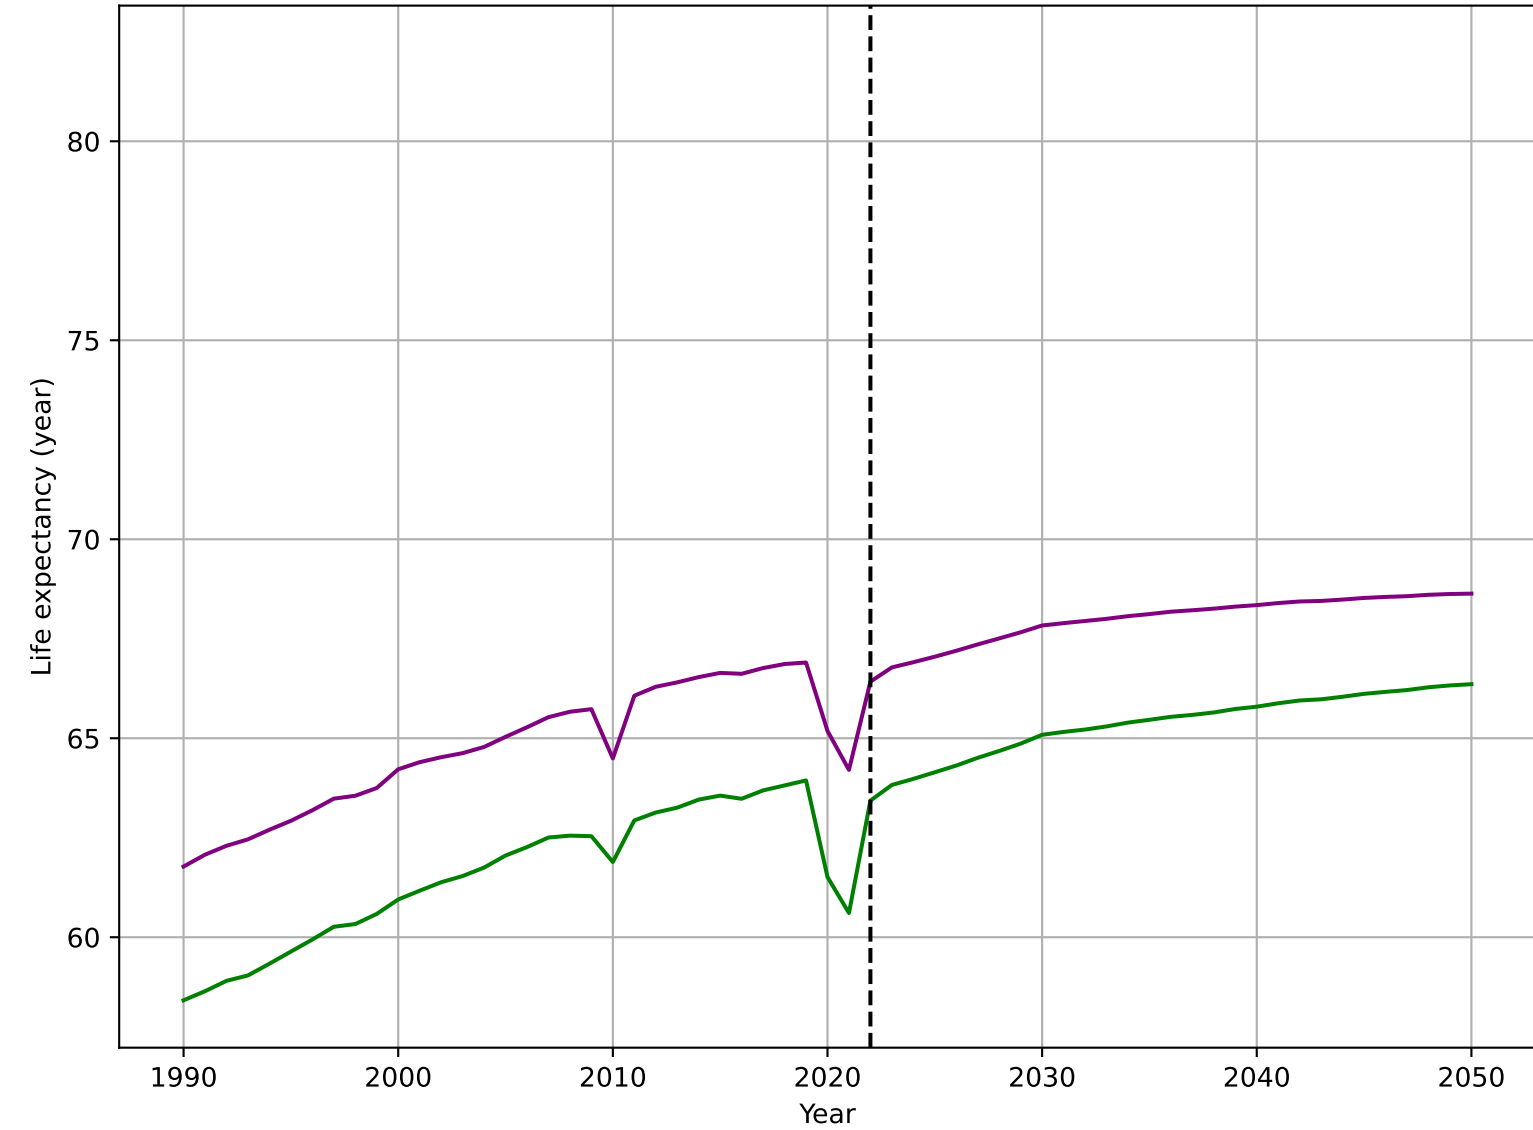

# North Africa And Middle East

### Life Expectancy

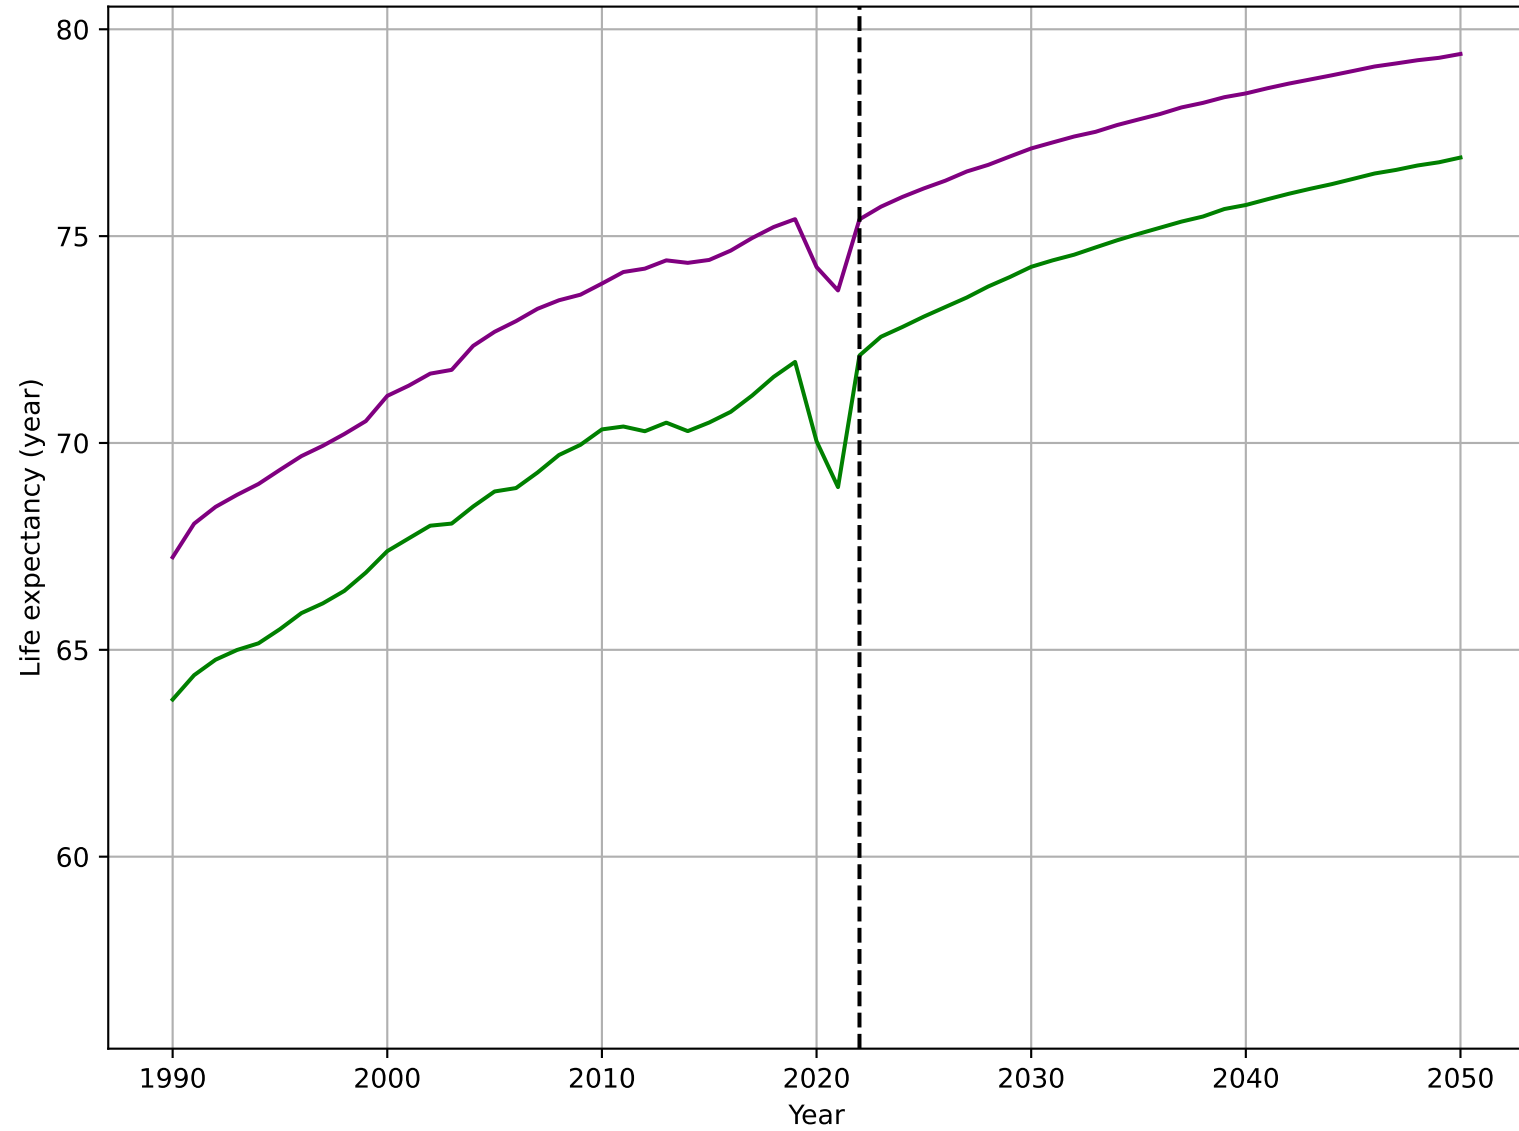

### Healthy Life Expectancy (HALE)

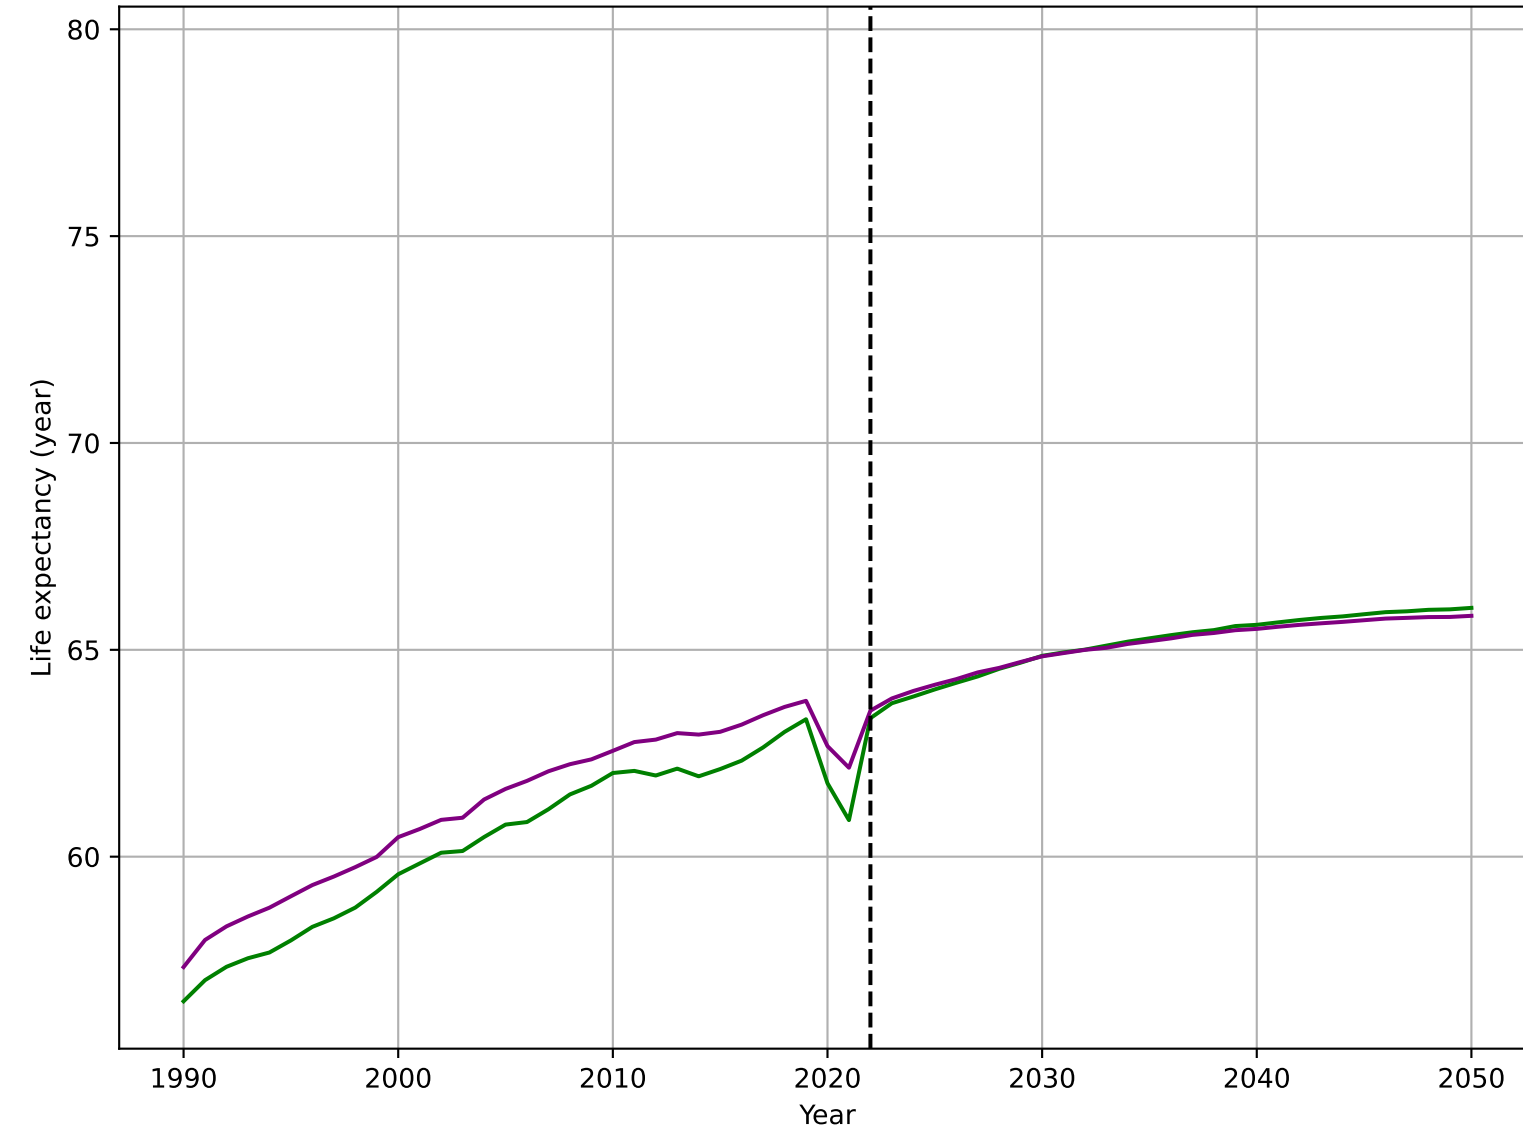

# South Asia

### Life Expectancy

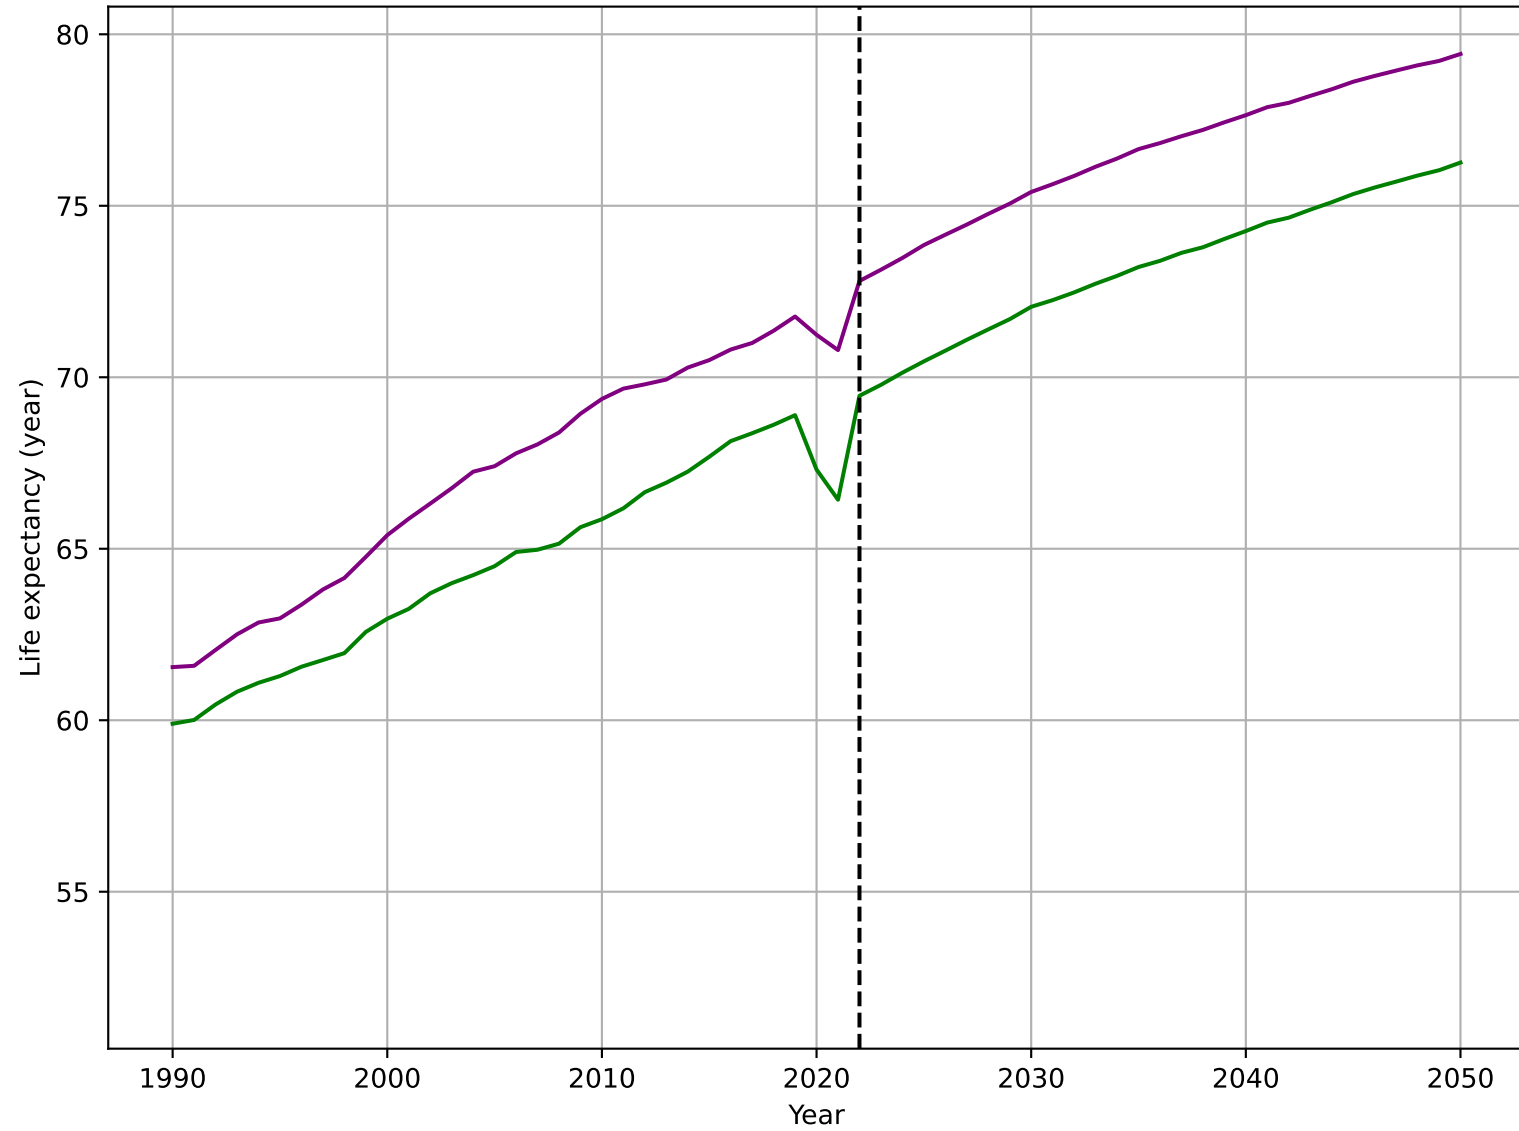

### Healthy Life Expectancy (HALE)

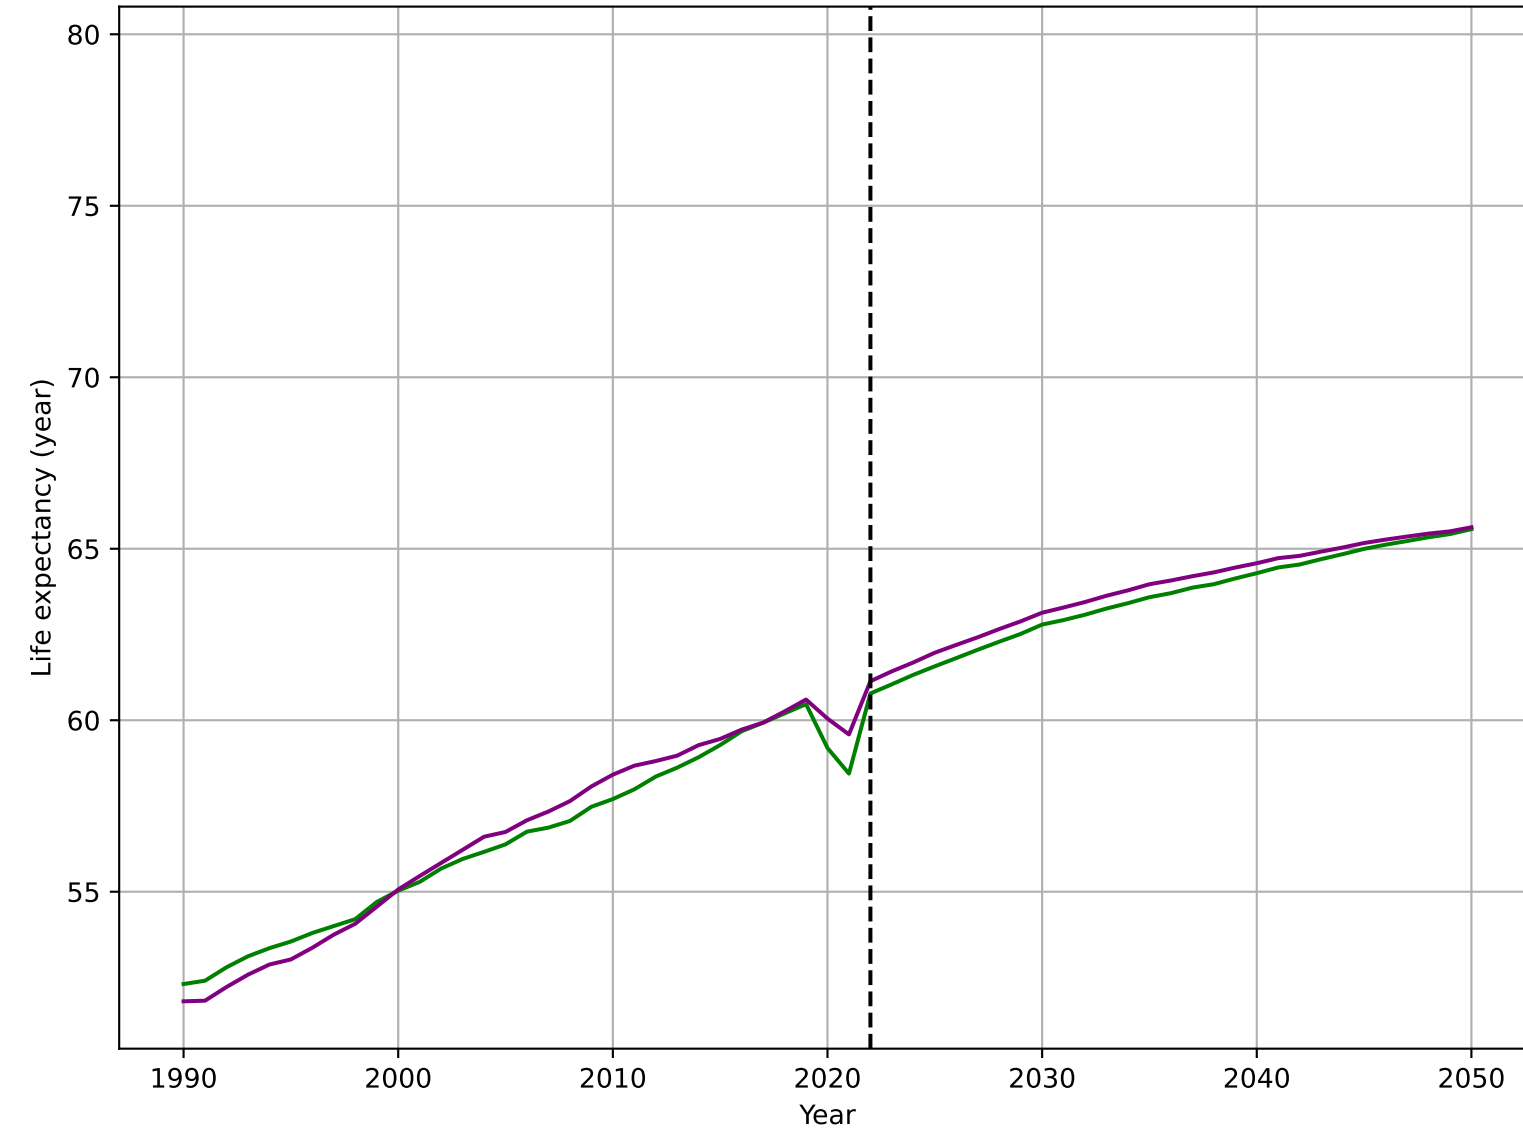

# Southeast Asia, East Asia, And Oceania

Life Expectancy

Healthy Life Expectancy (HALE)

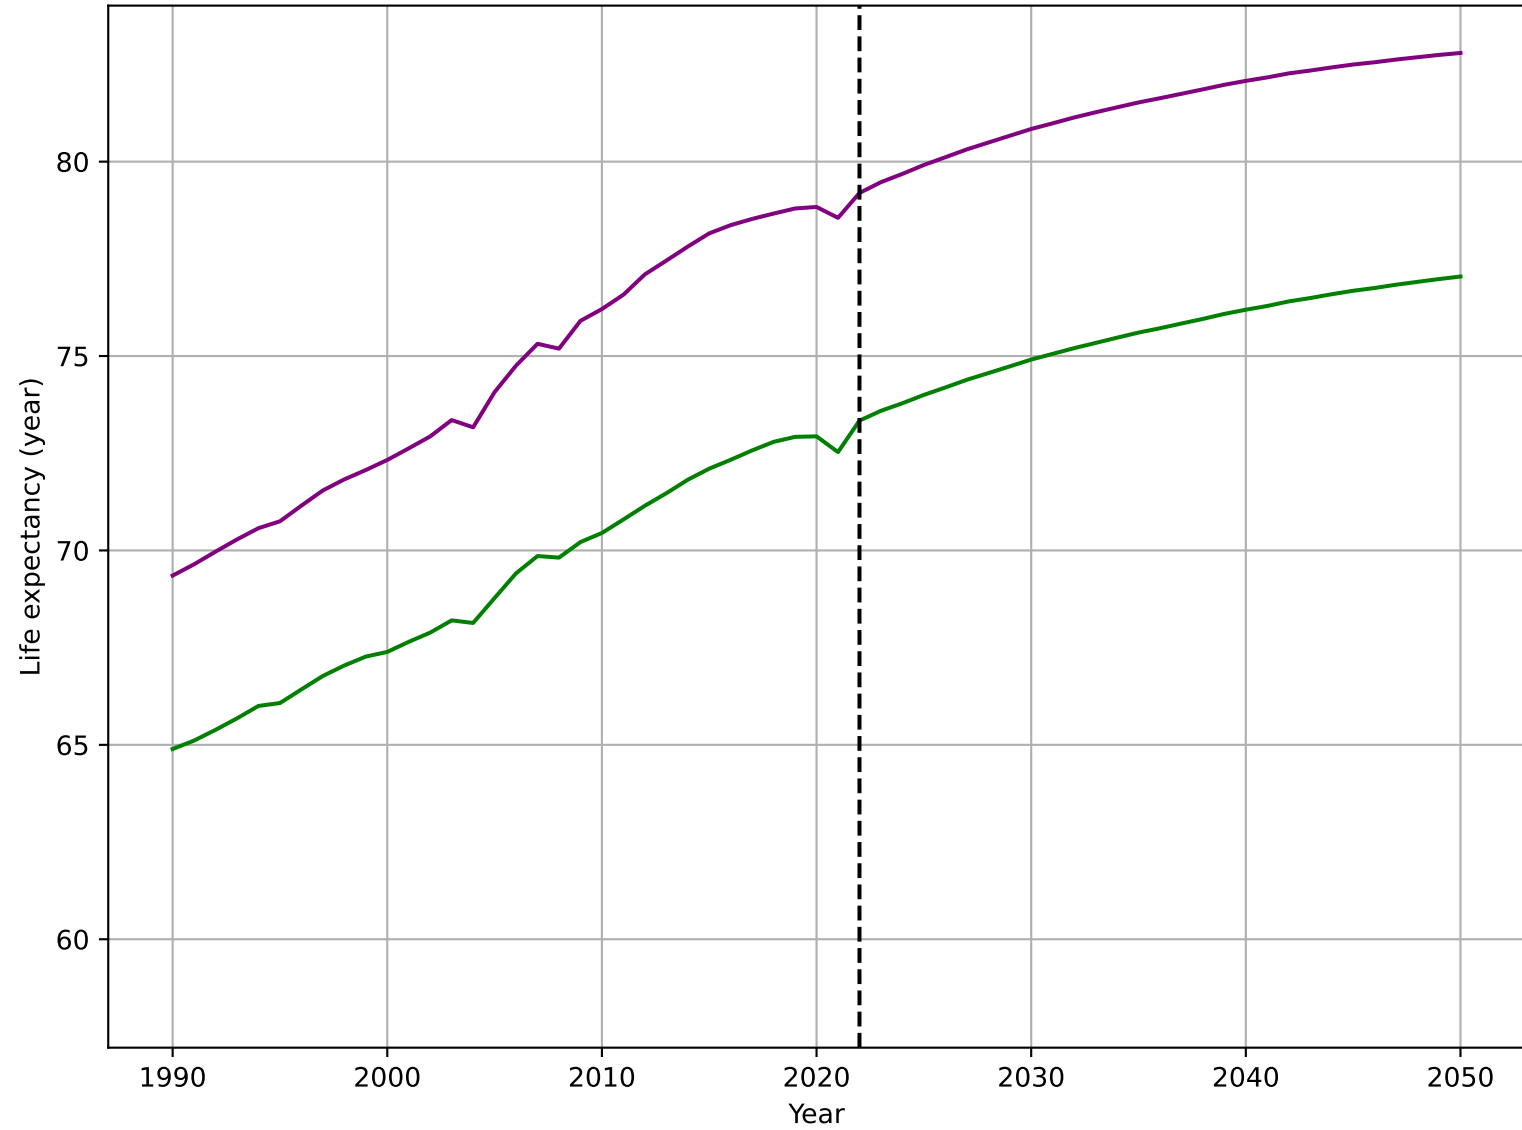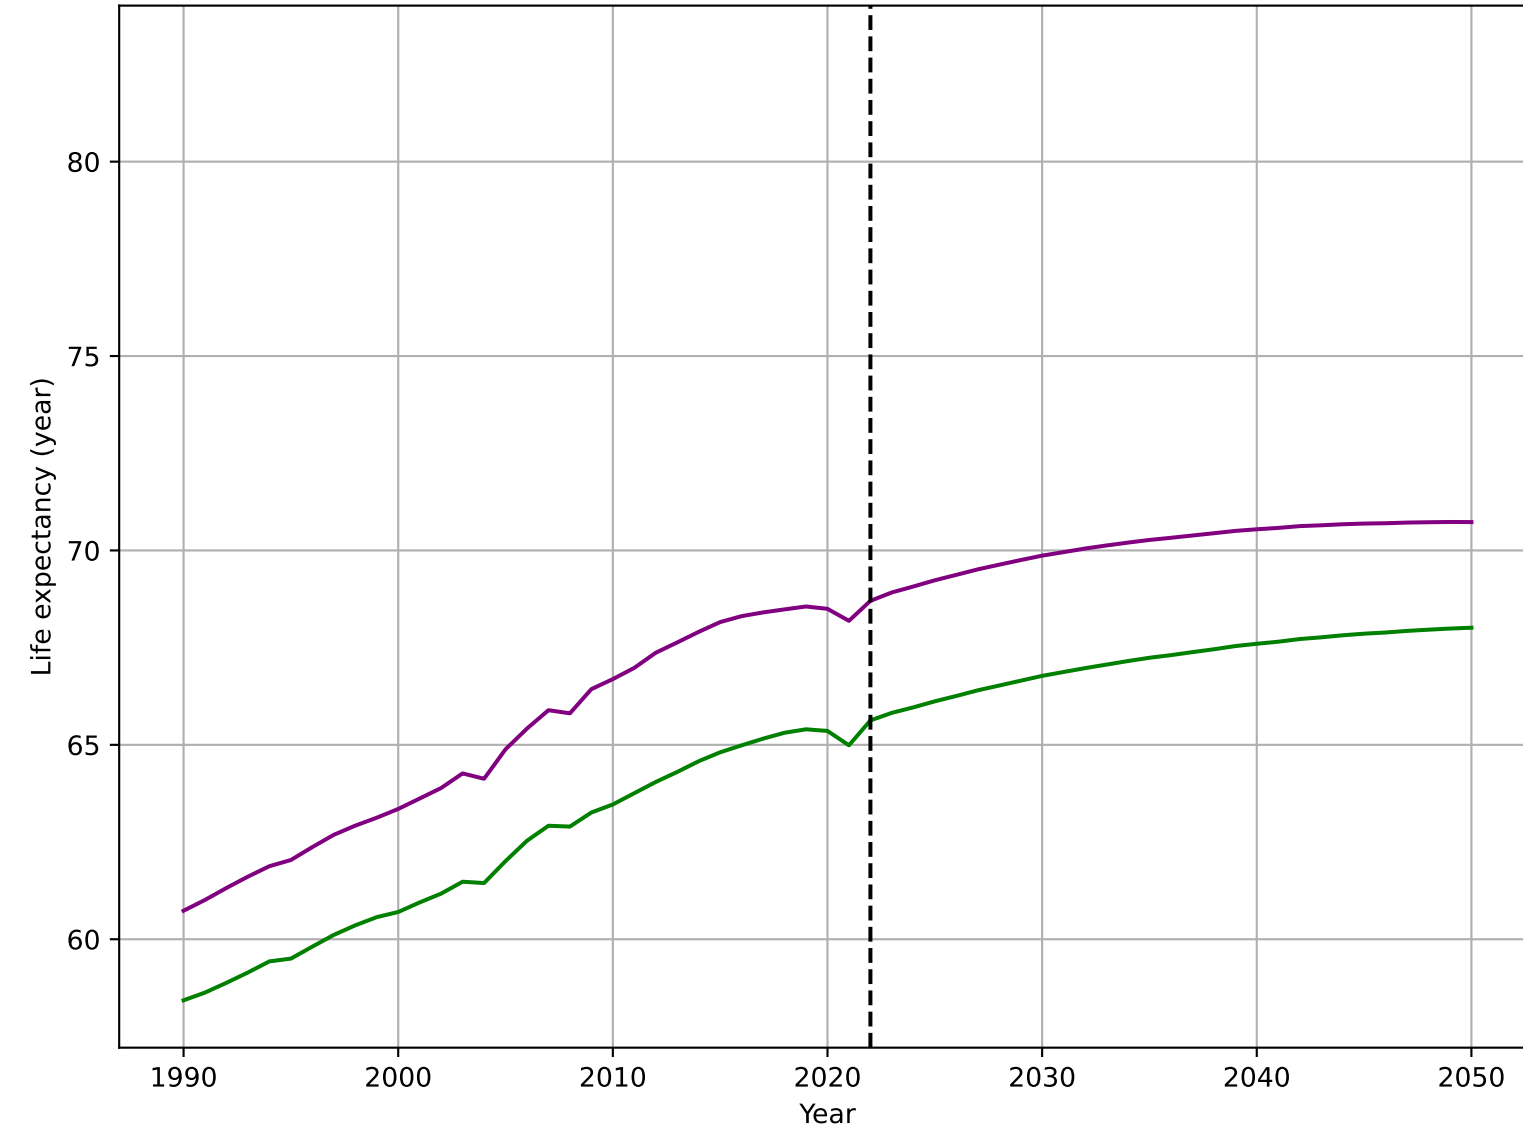

# Sub-Saharan Africa

## Life Expectancy

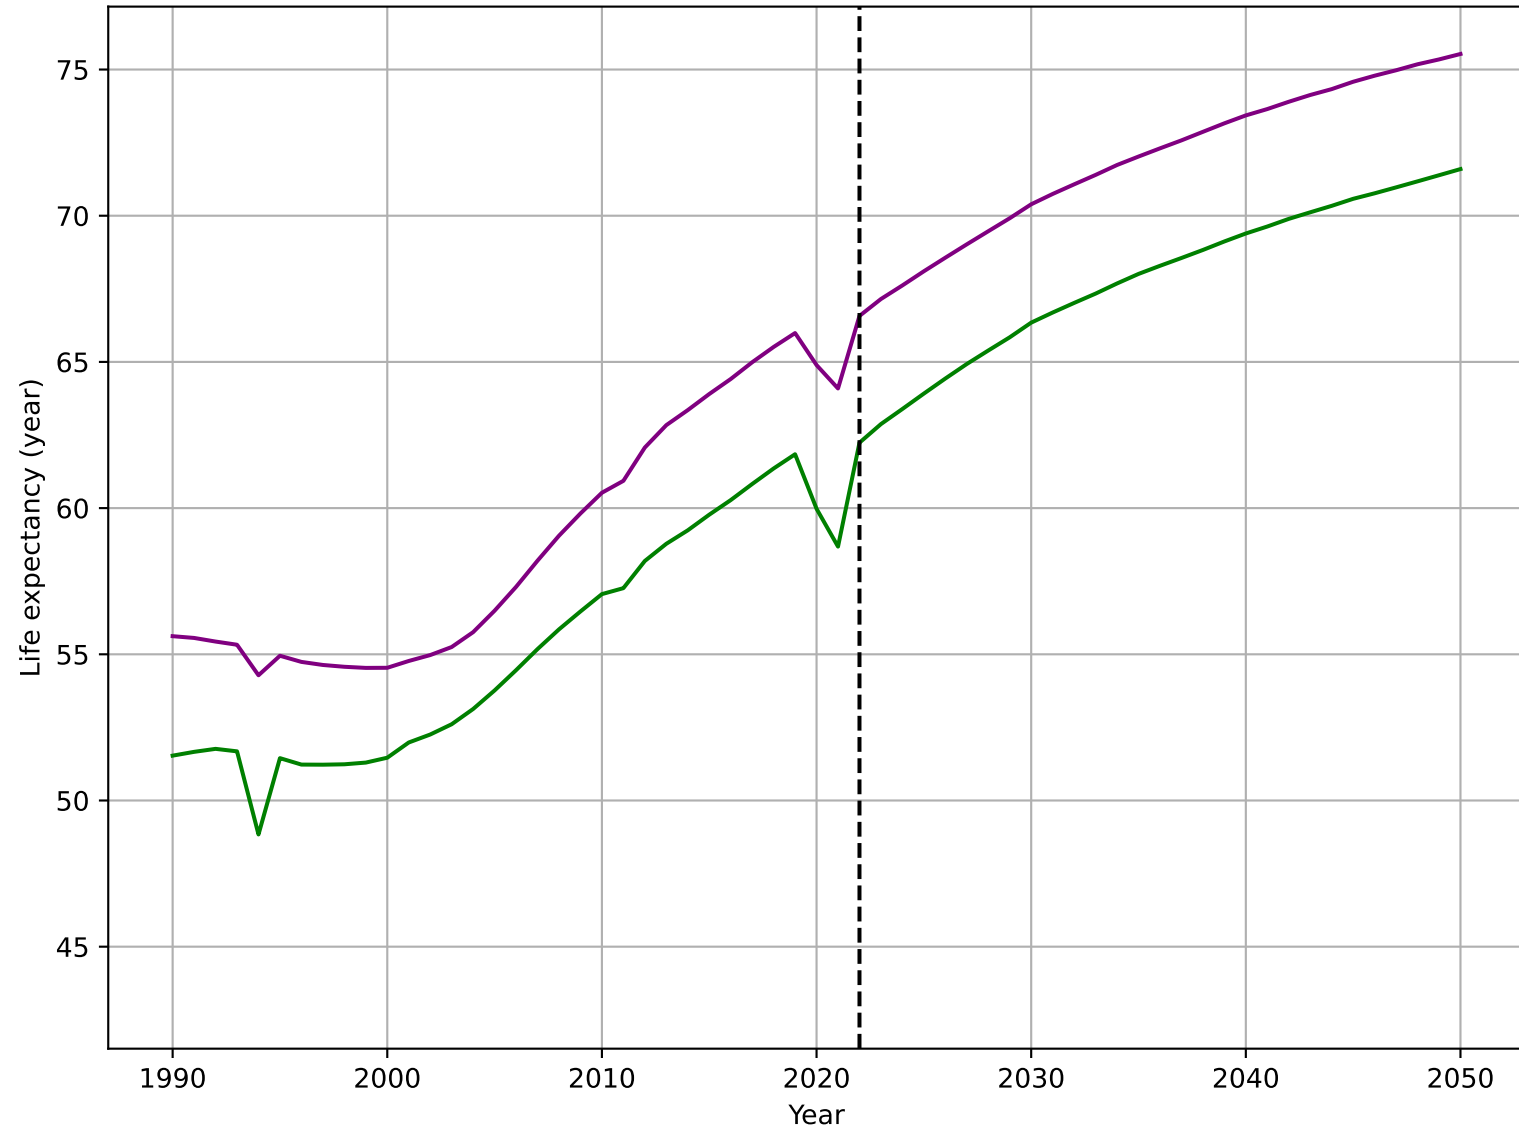

## Healthy Life Expectancy (HALE)

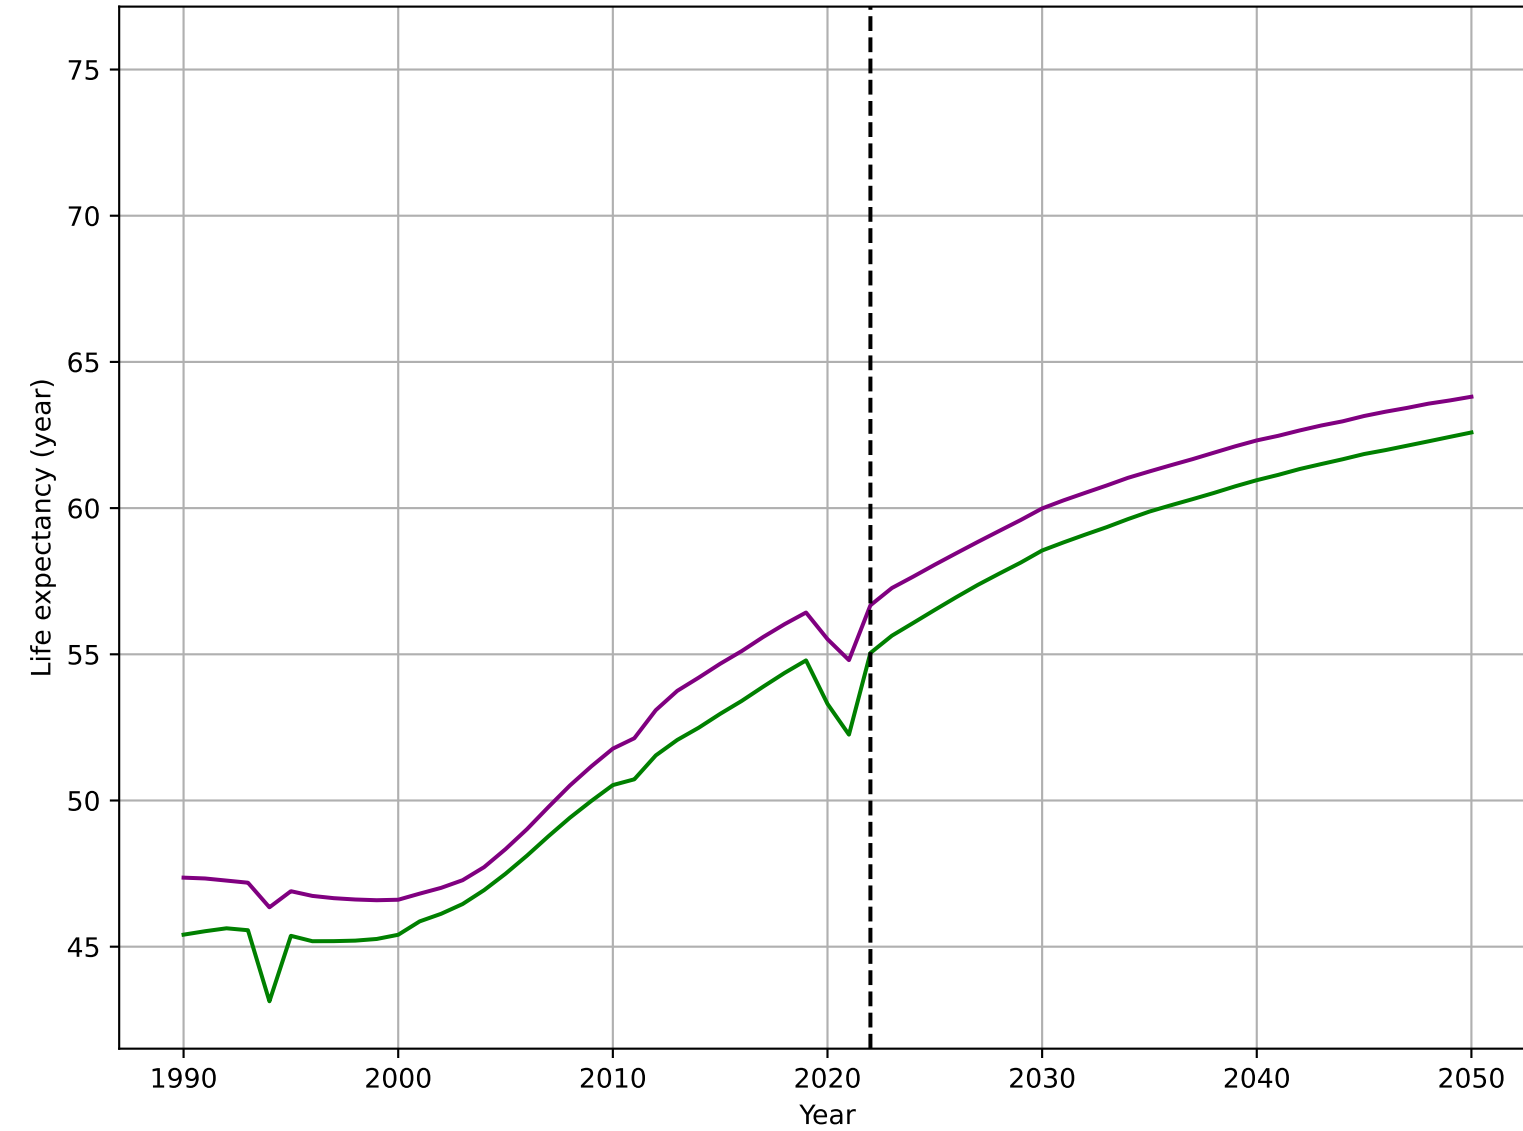



# Central Asia

### Life Expectancy

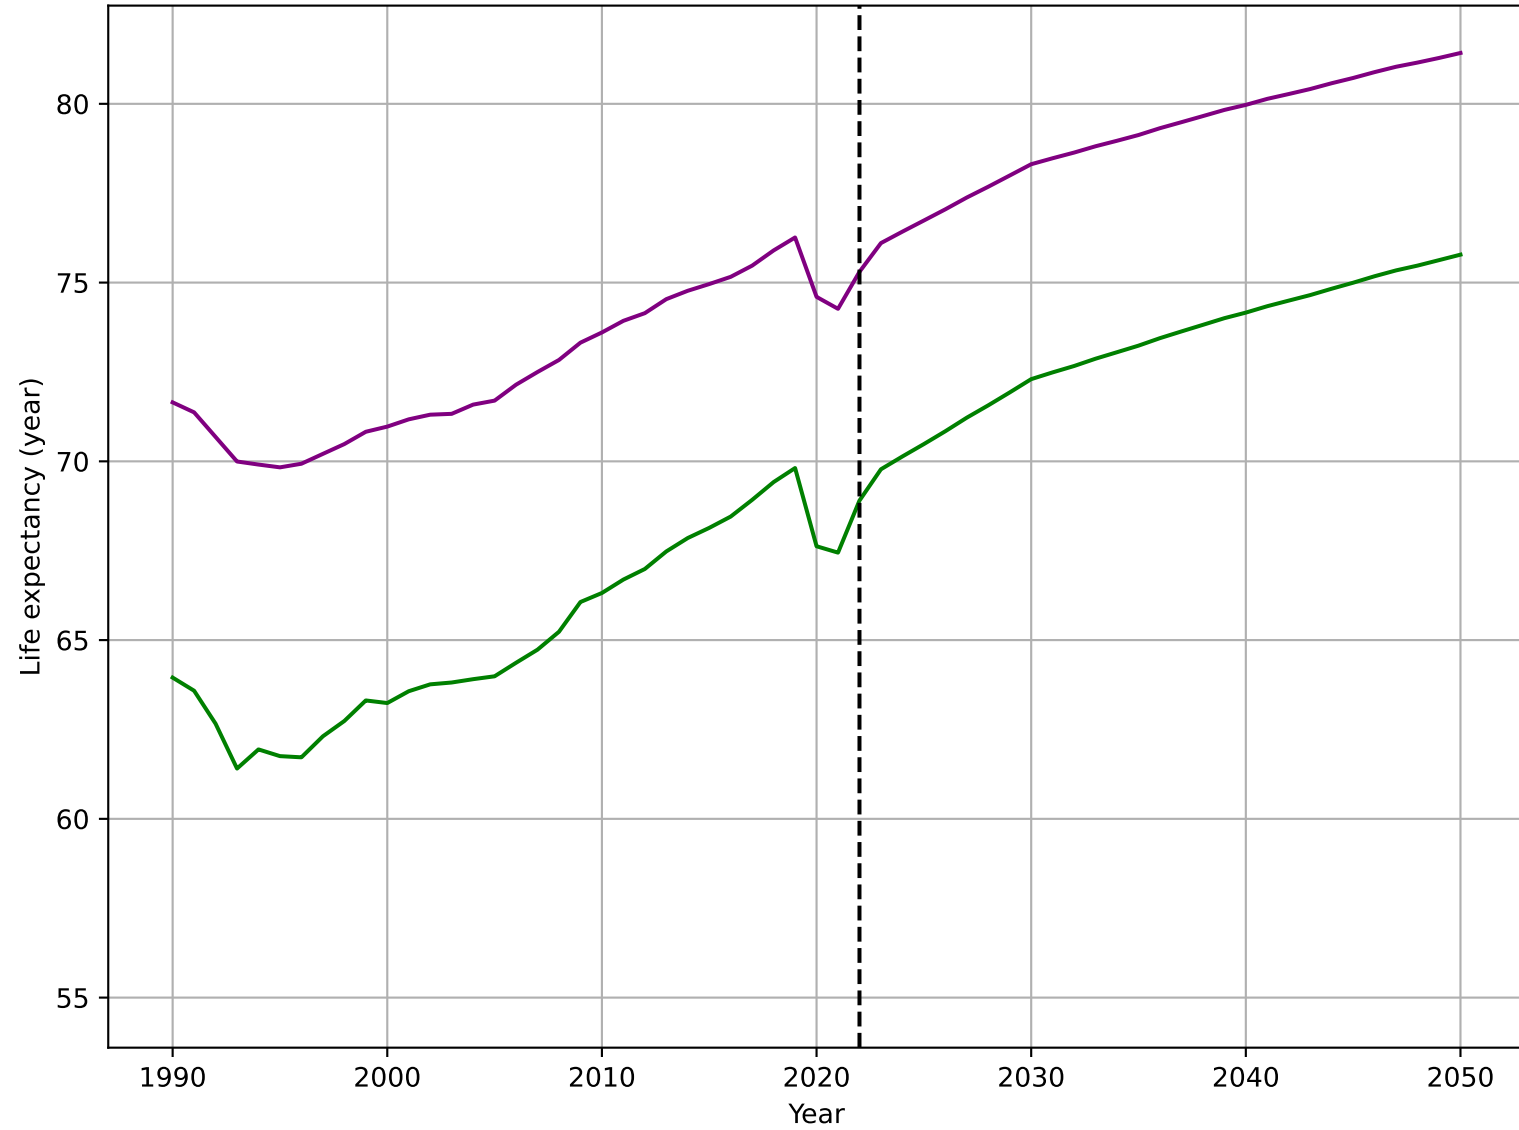

### Healthy Life Expectancy (HALE)

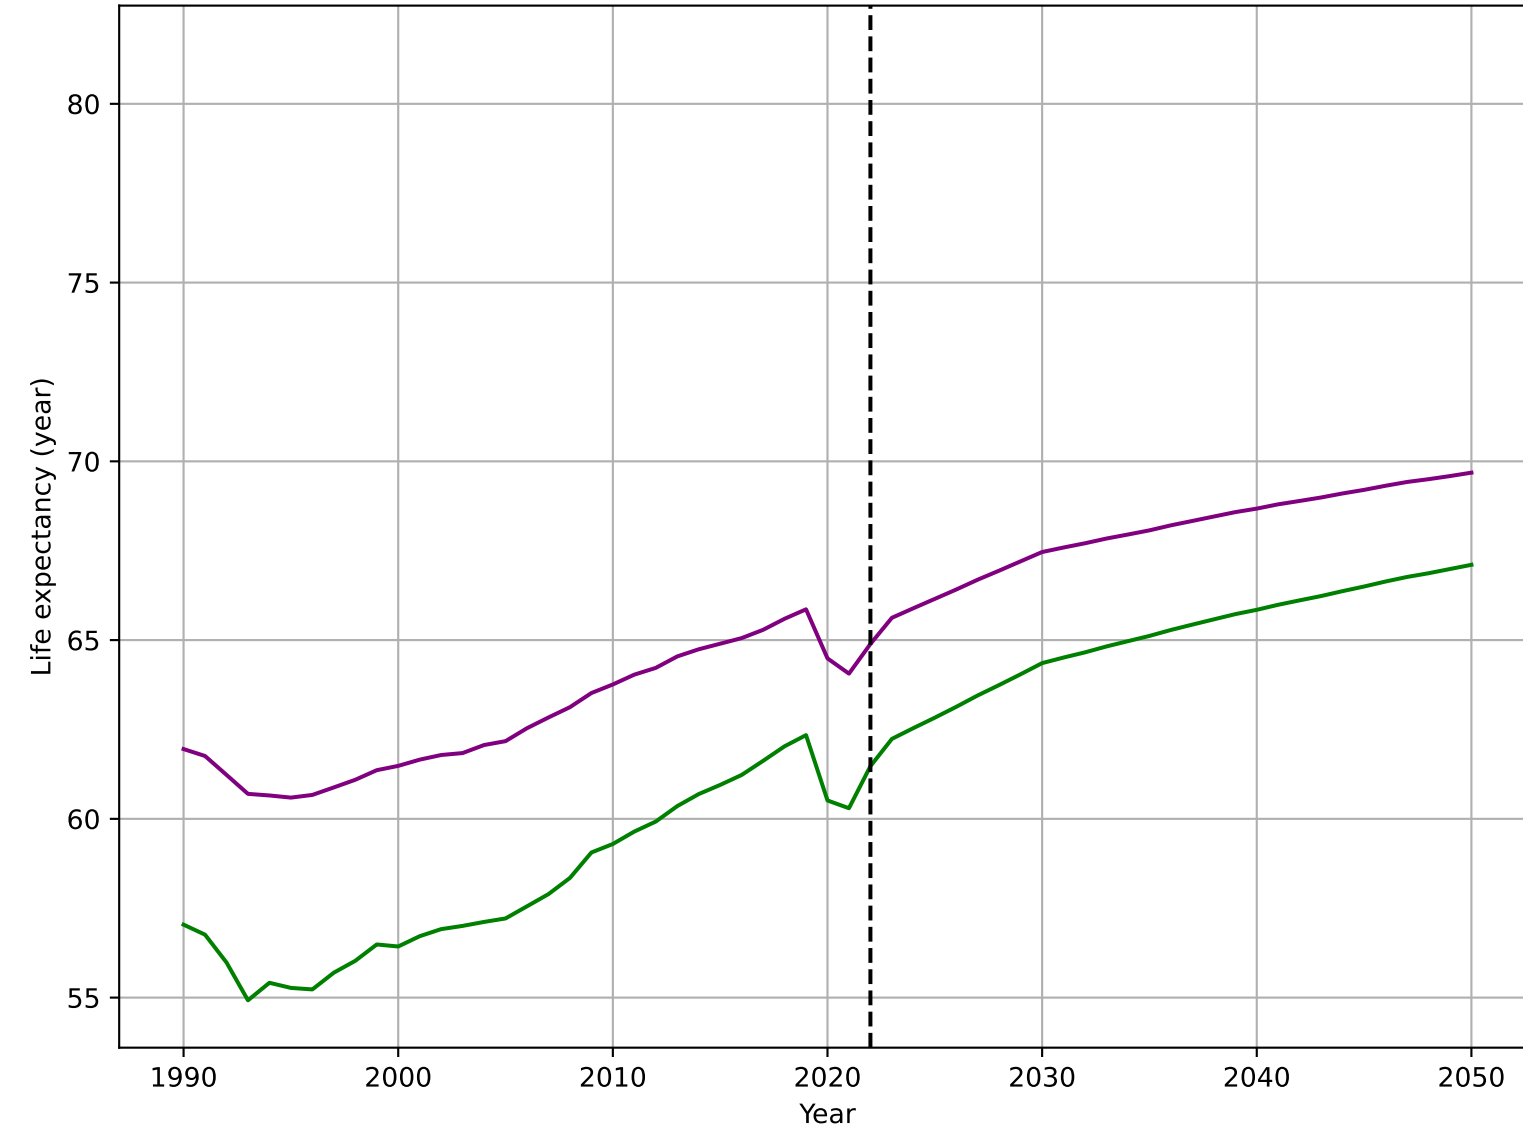

# Central Europe

### Life Expectancy

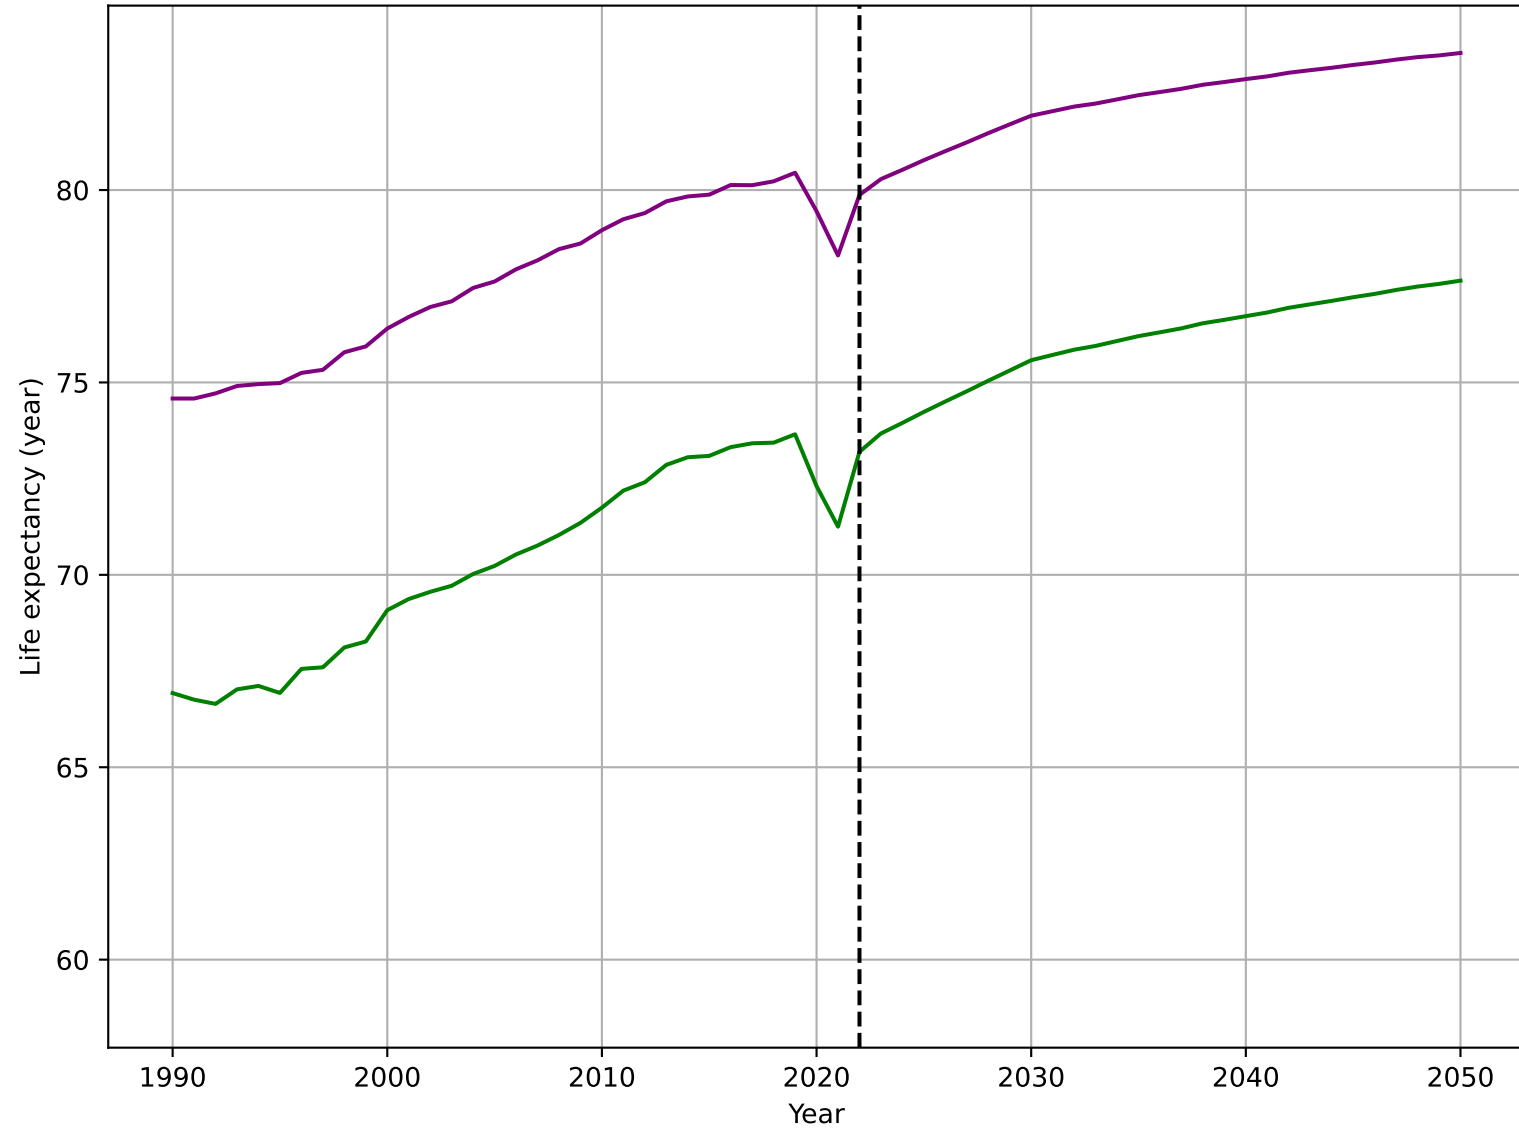

### Healthy Life Expectancy (HALE)

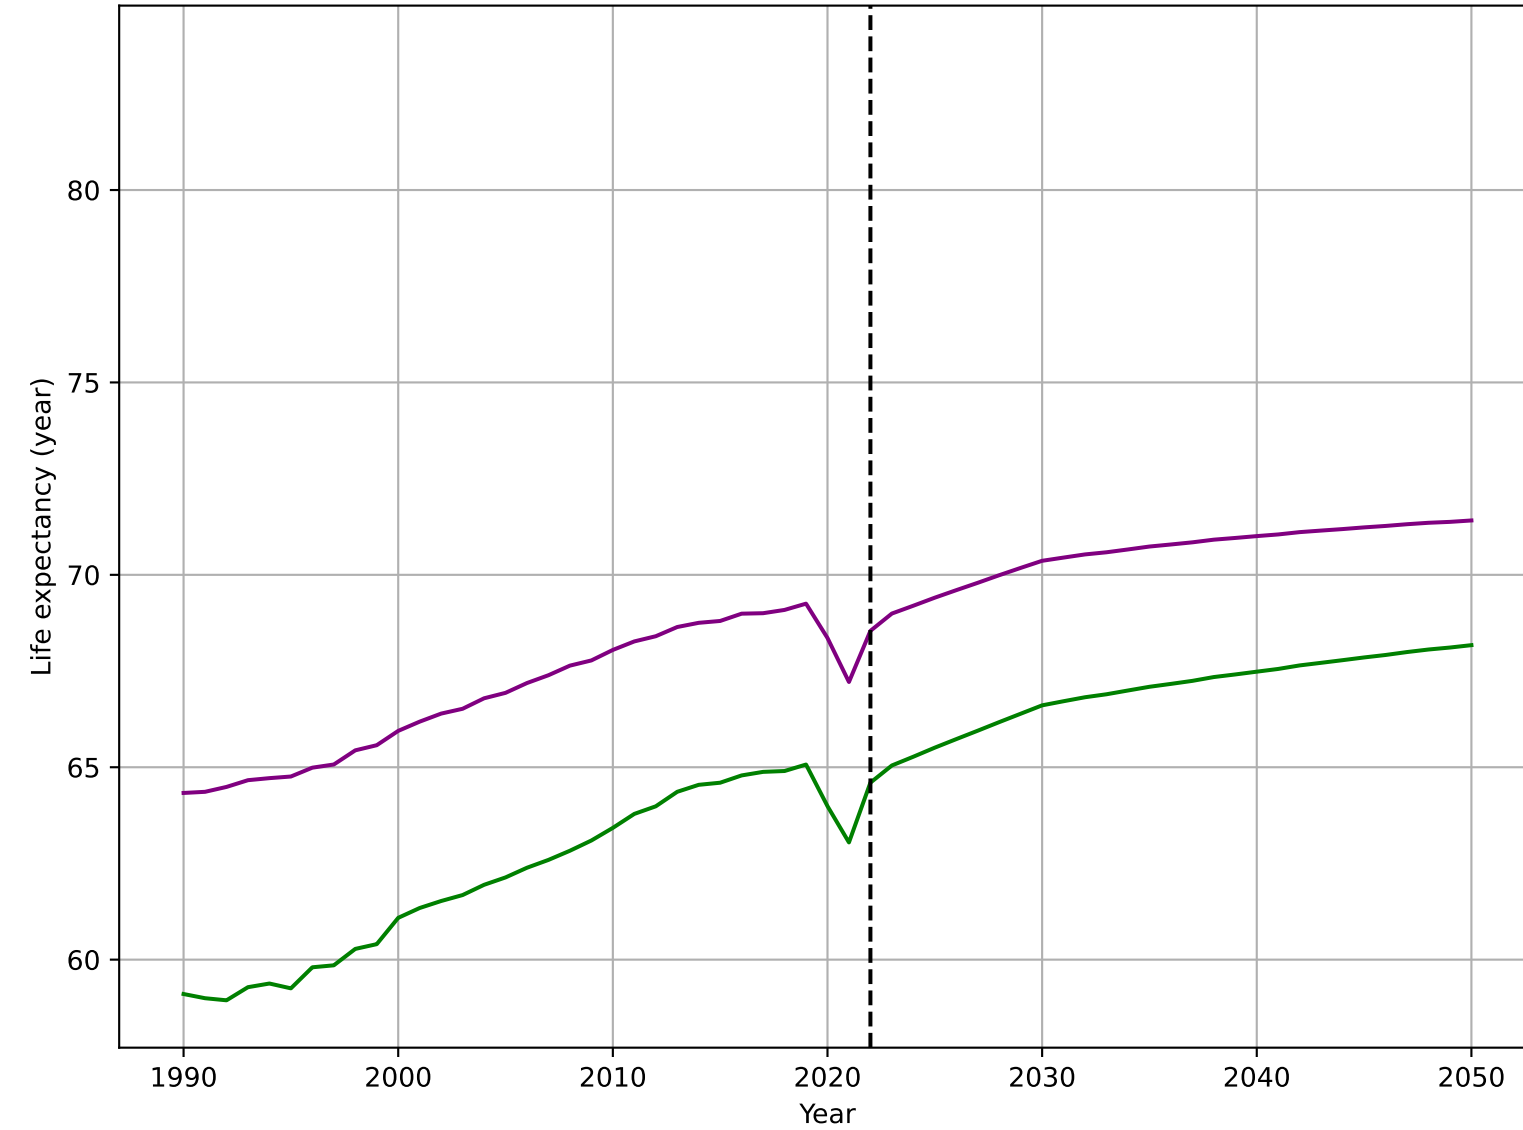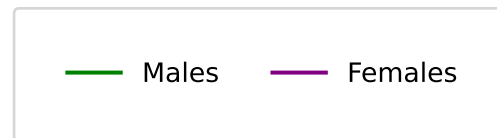

# Eastern Europe

### Life Expectancy

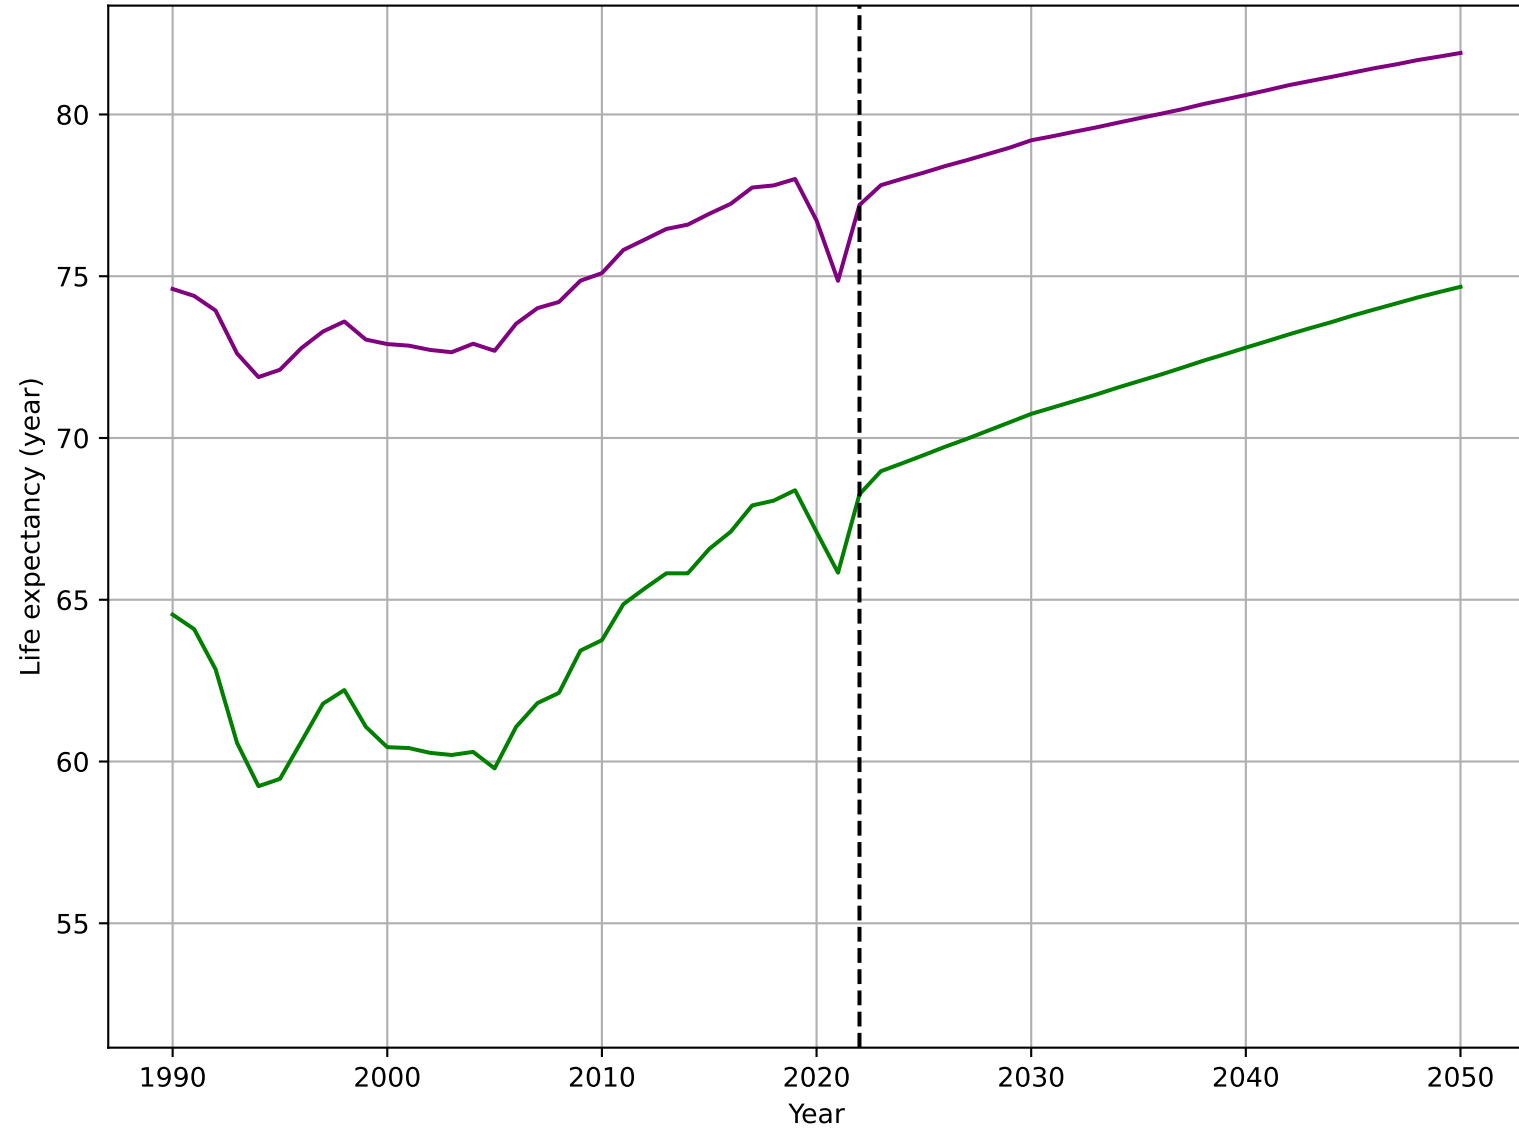

### Healthy Life Expectancy (HALE)

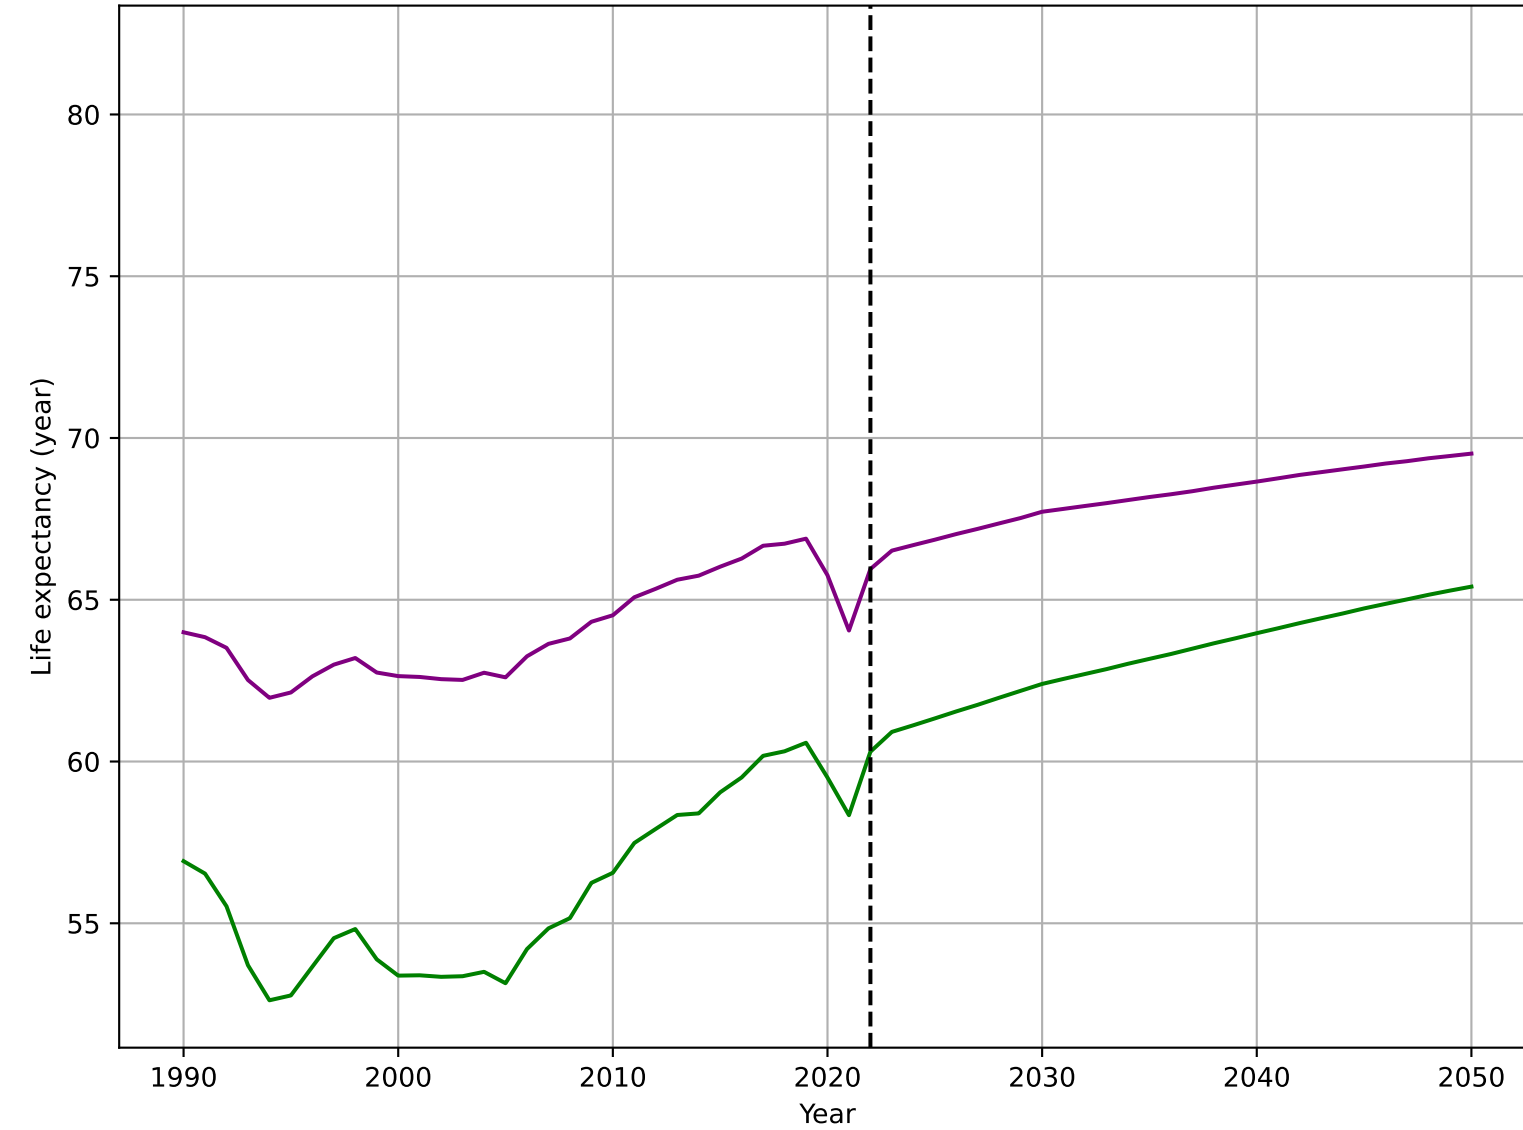

# Australasia

### Life Expectancy

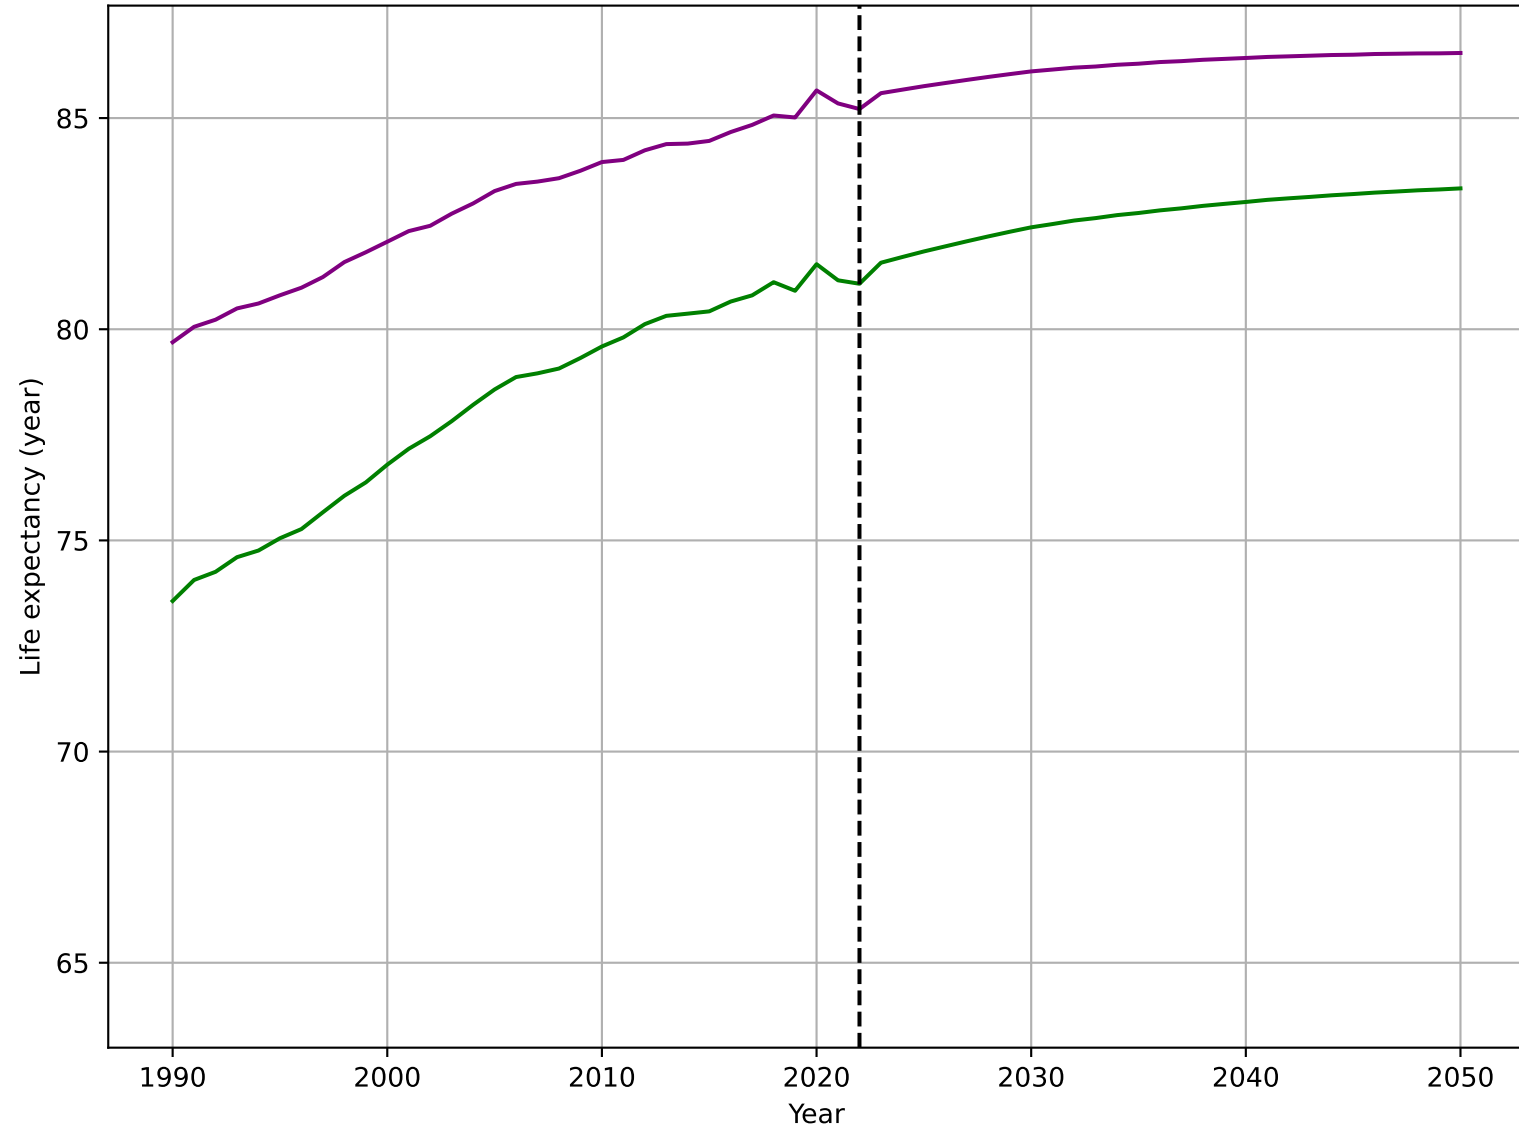

### Healthy Life Expectancy (HALE)

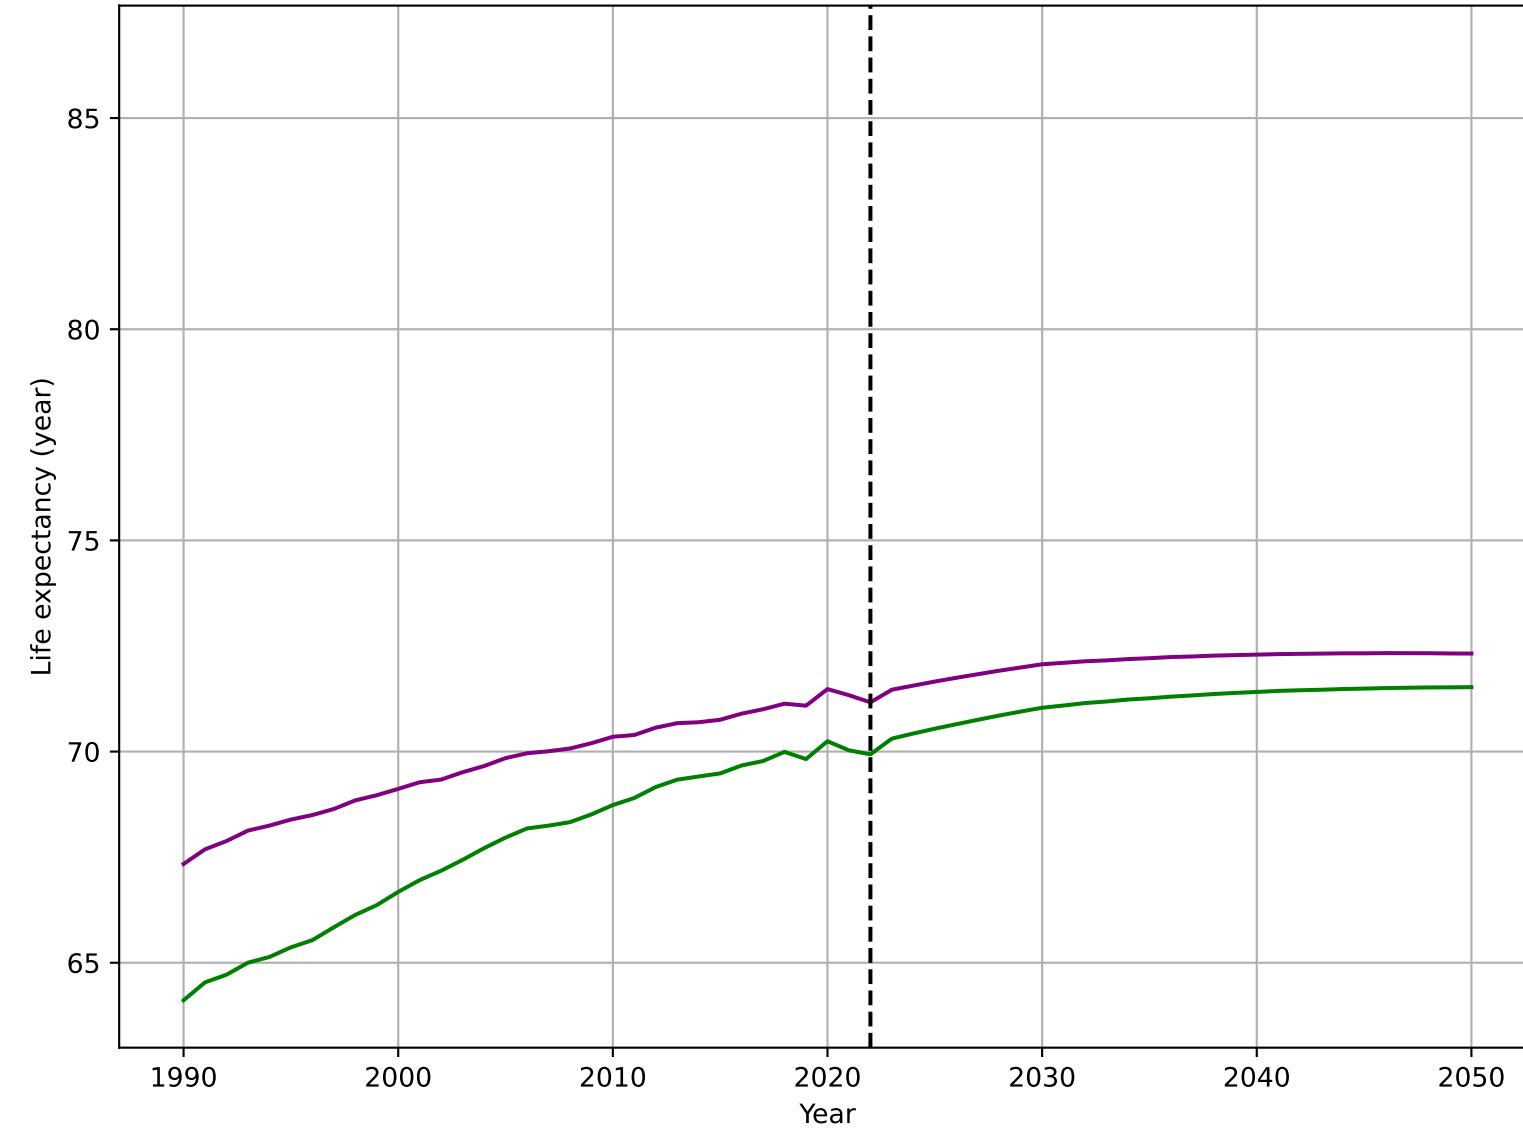

# High-Income Asia Pacific

### Life Expectancy

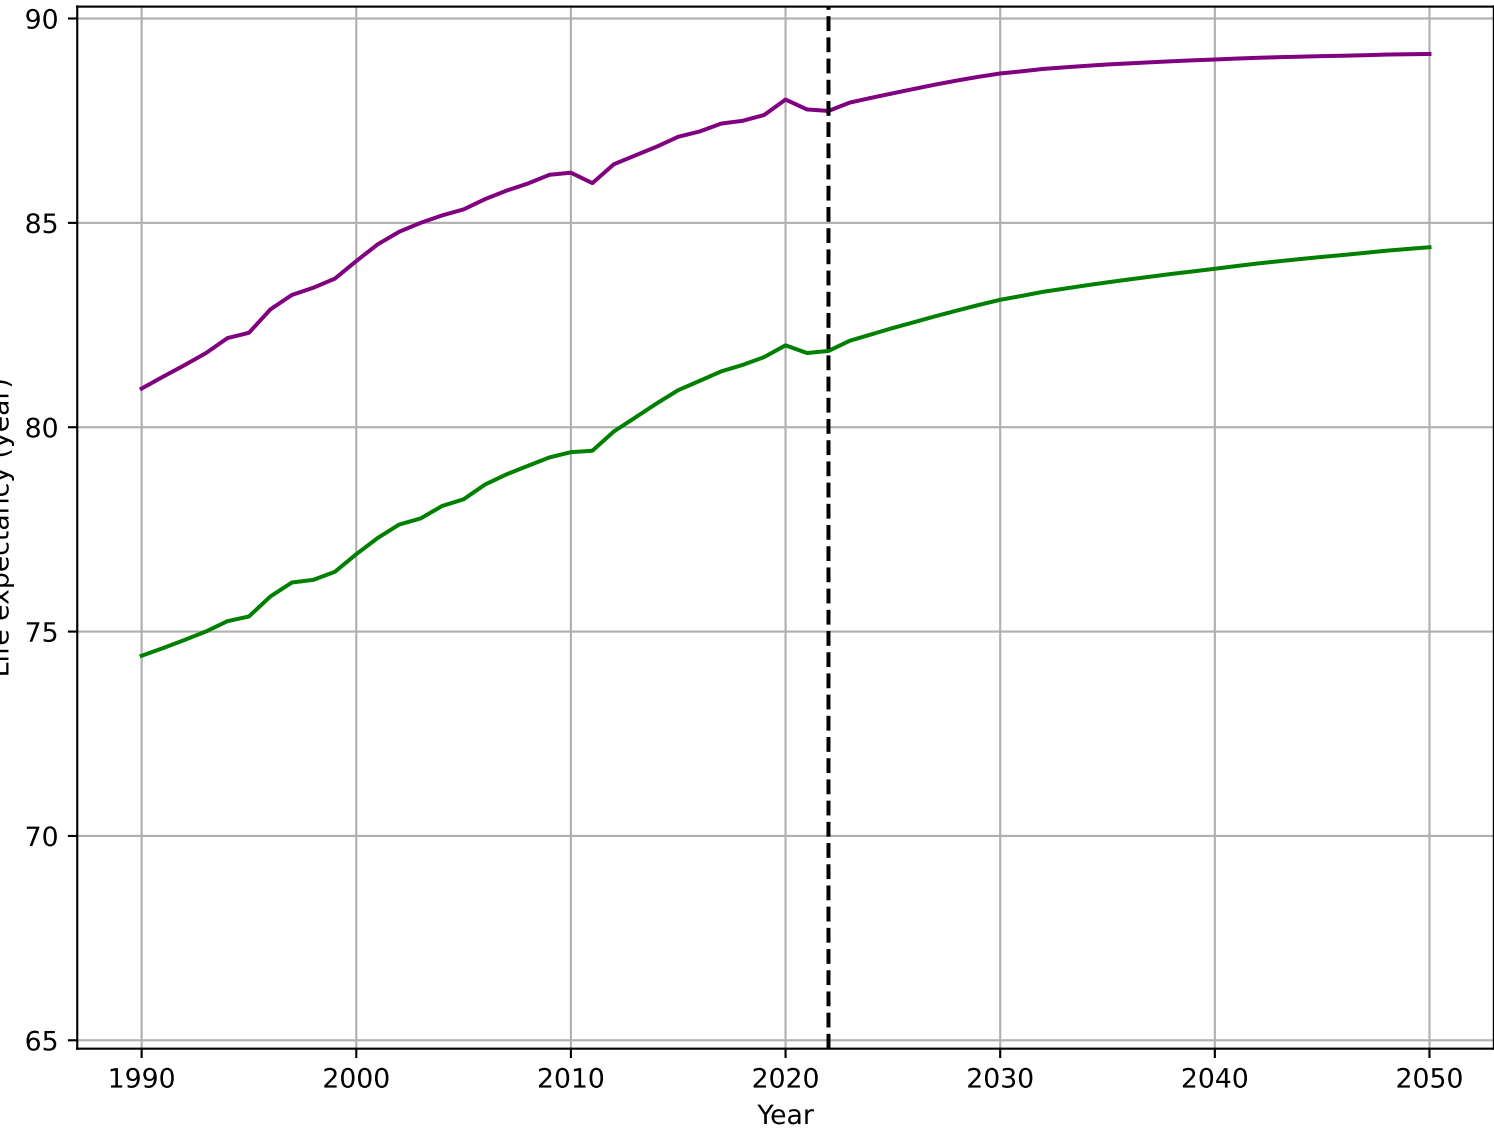

### Healthy Life Expectancy (HALE)

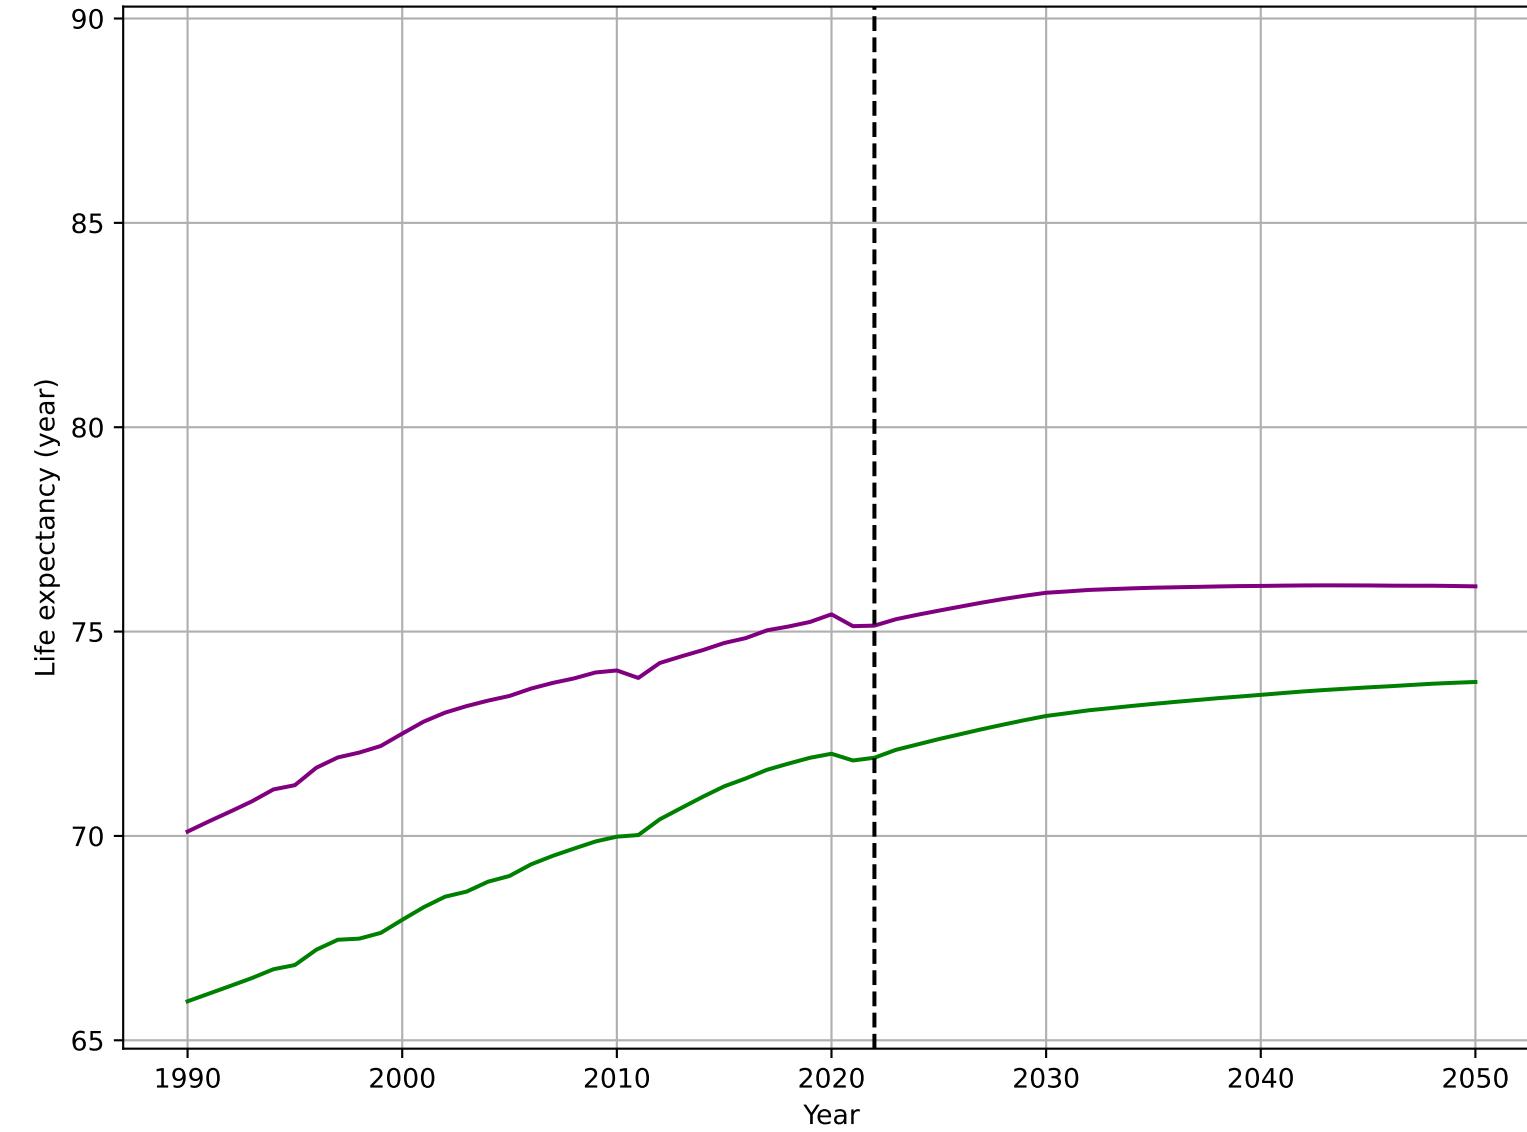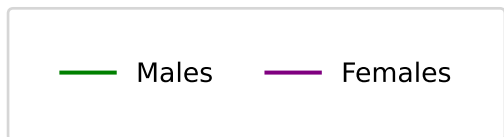

# High-Income North America

### Life Expectancy

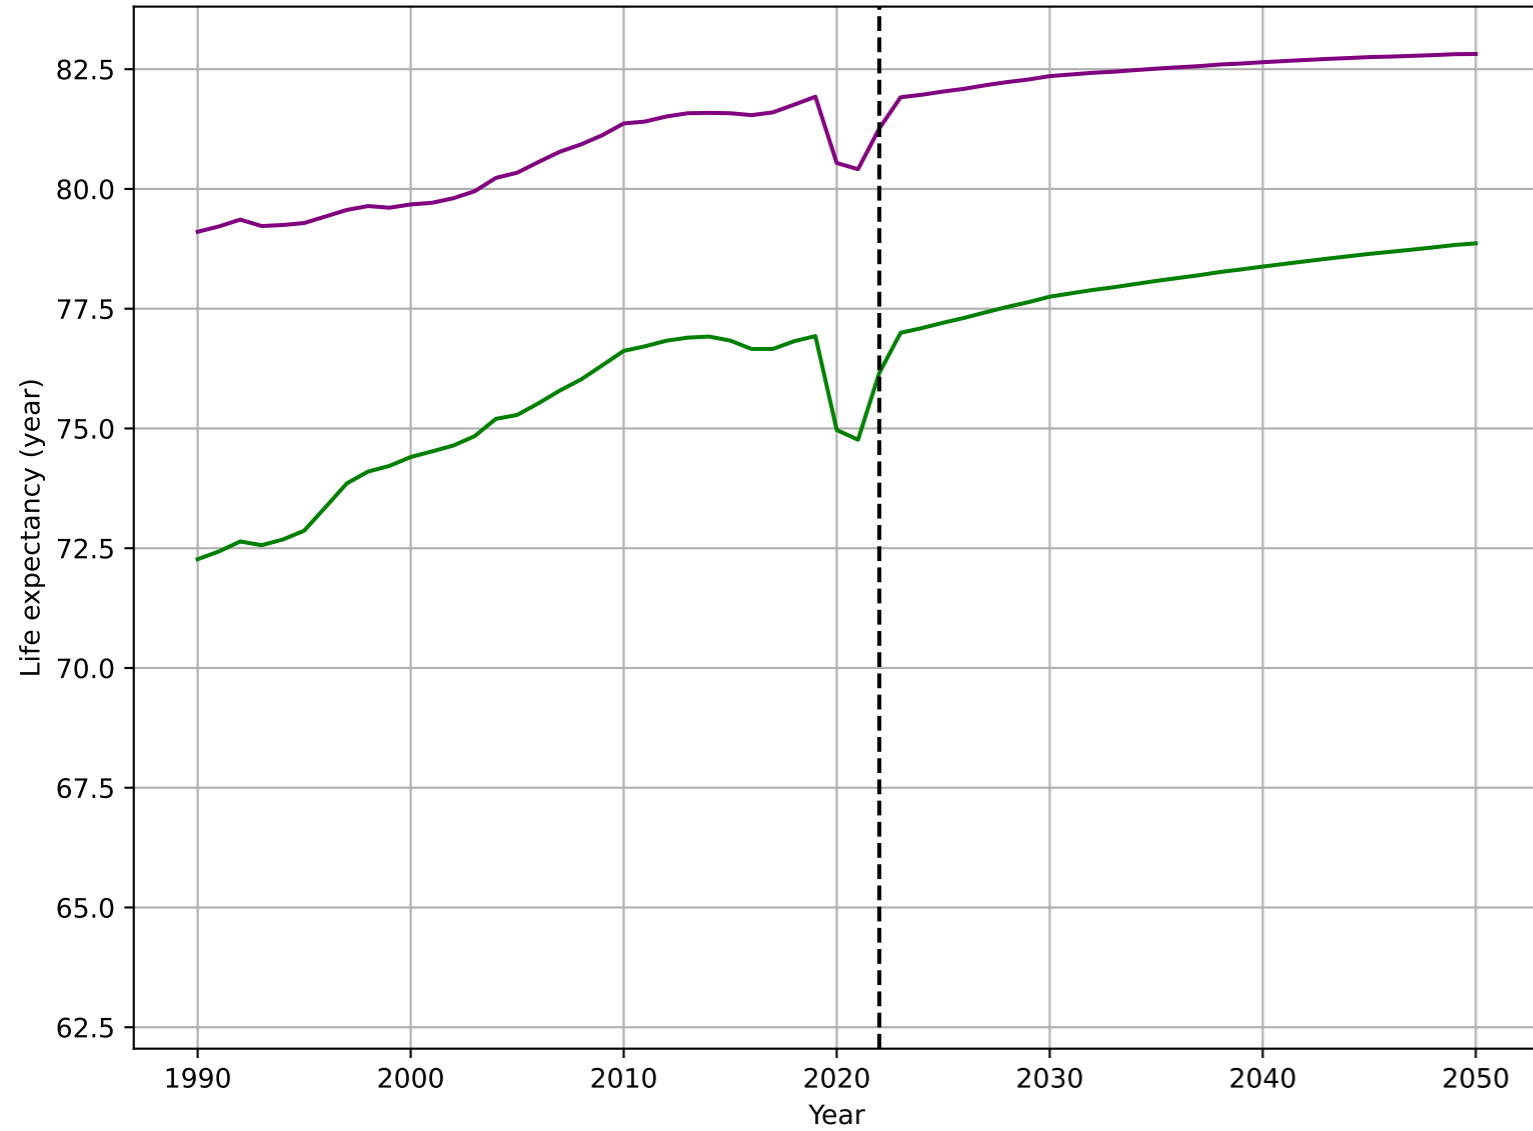

### Healthy Life Expectancy (HALE)

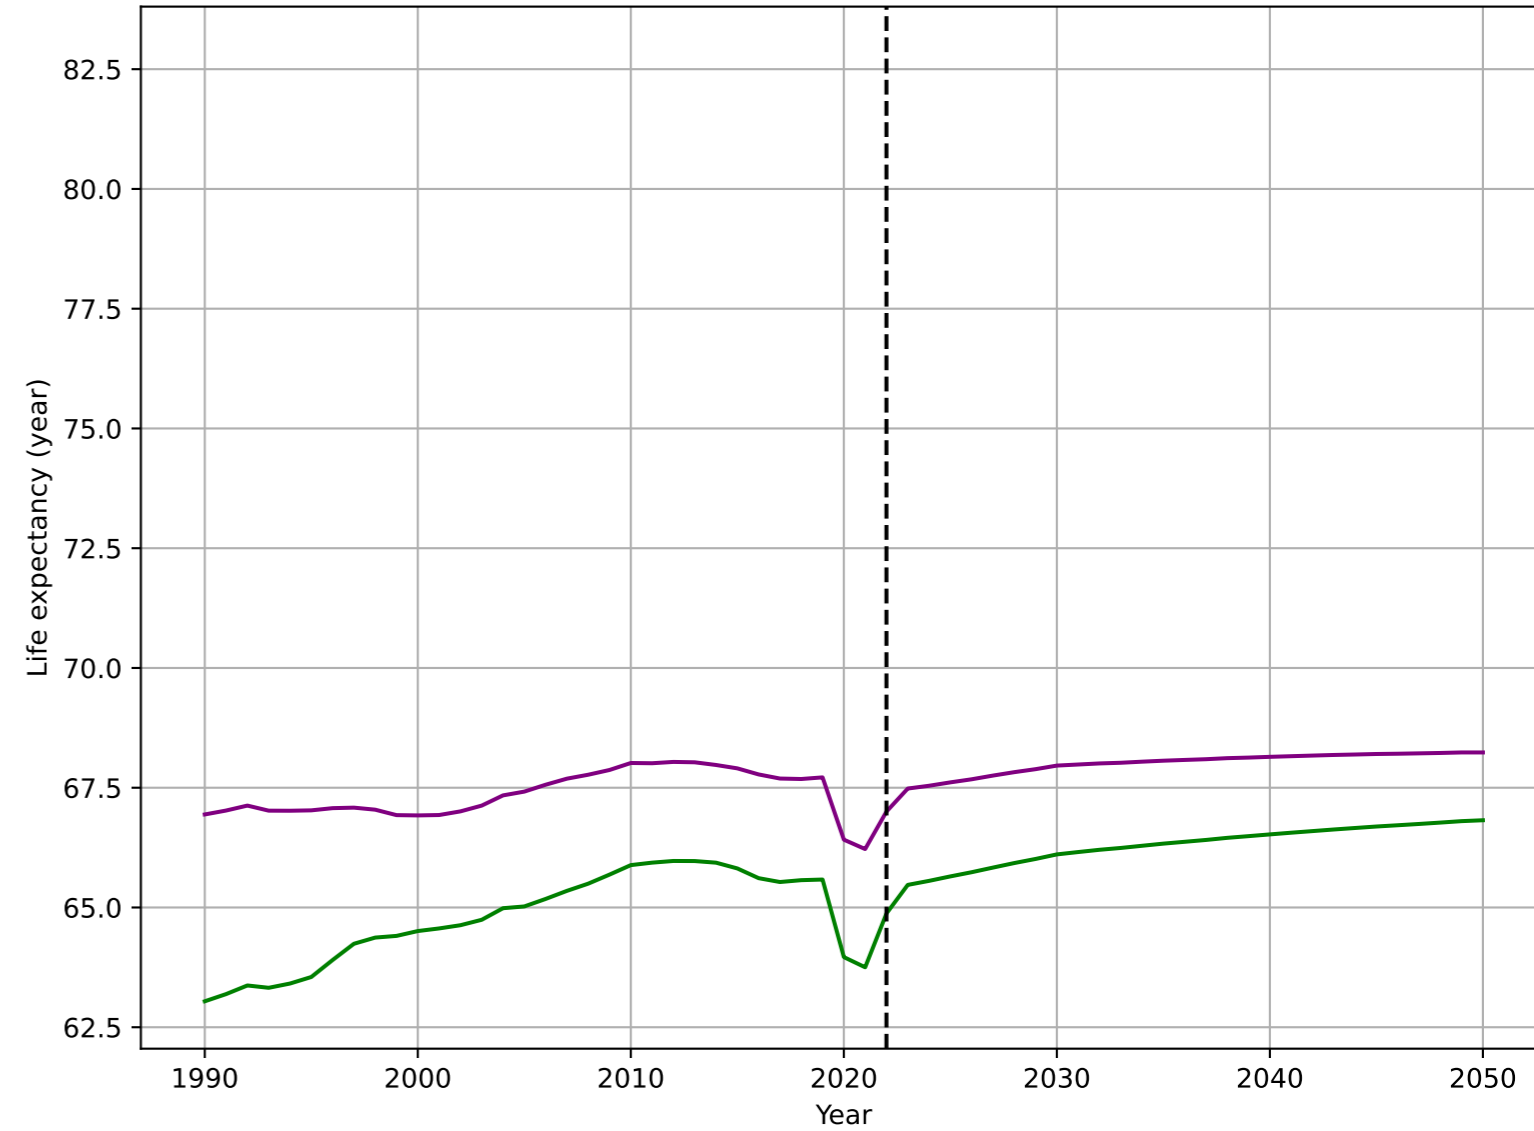

# Southern Latin America

### Life Expectancy

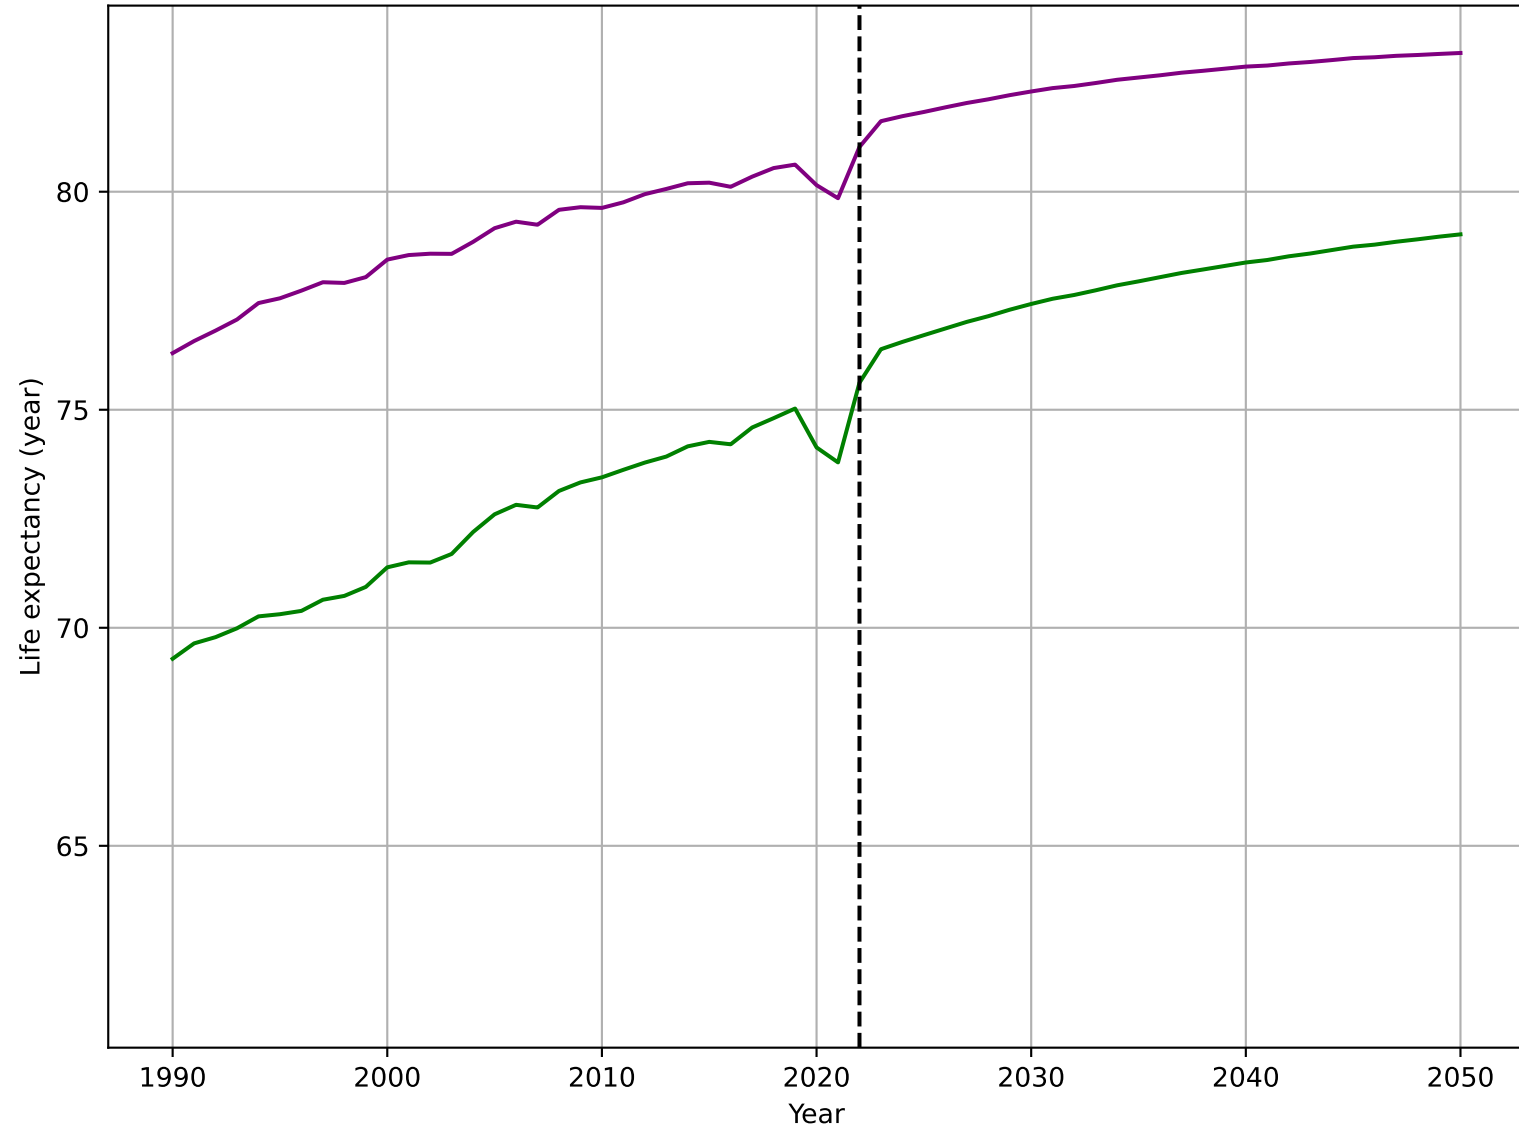

### Healthy Life Expectancy (HALE)

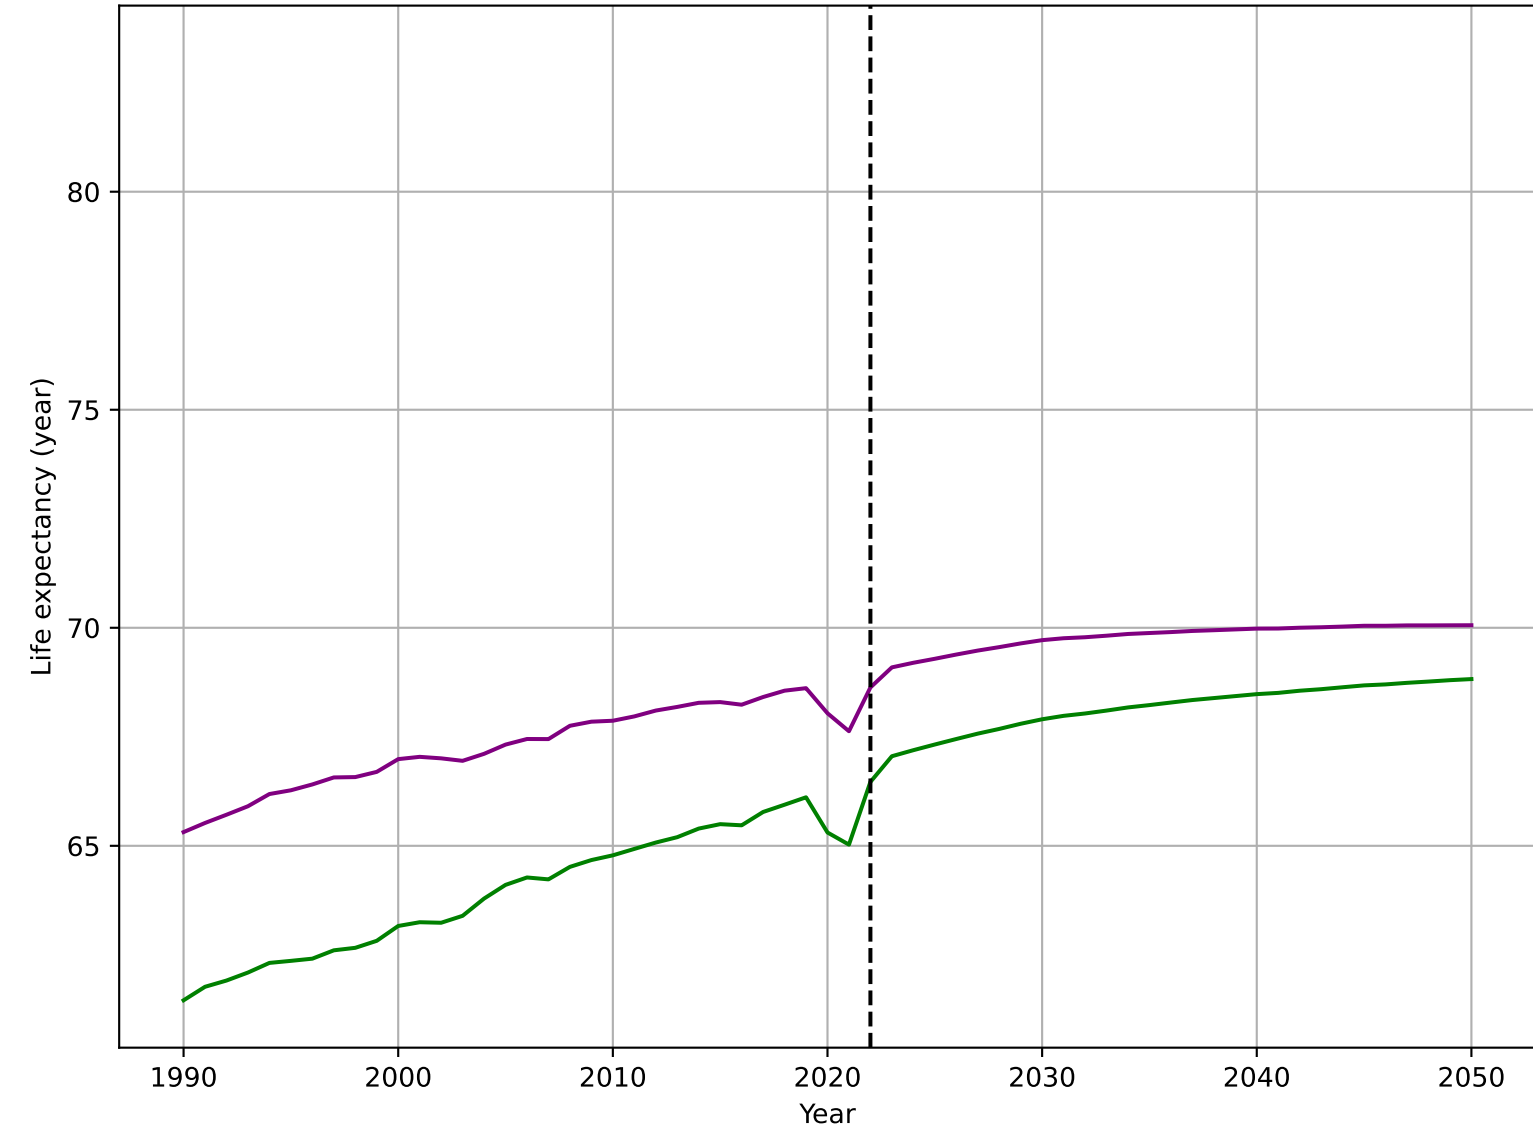

# Western Europe

### Life Expectancy

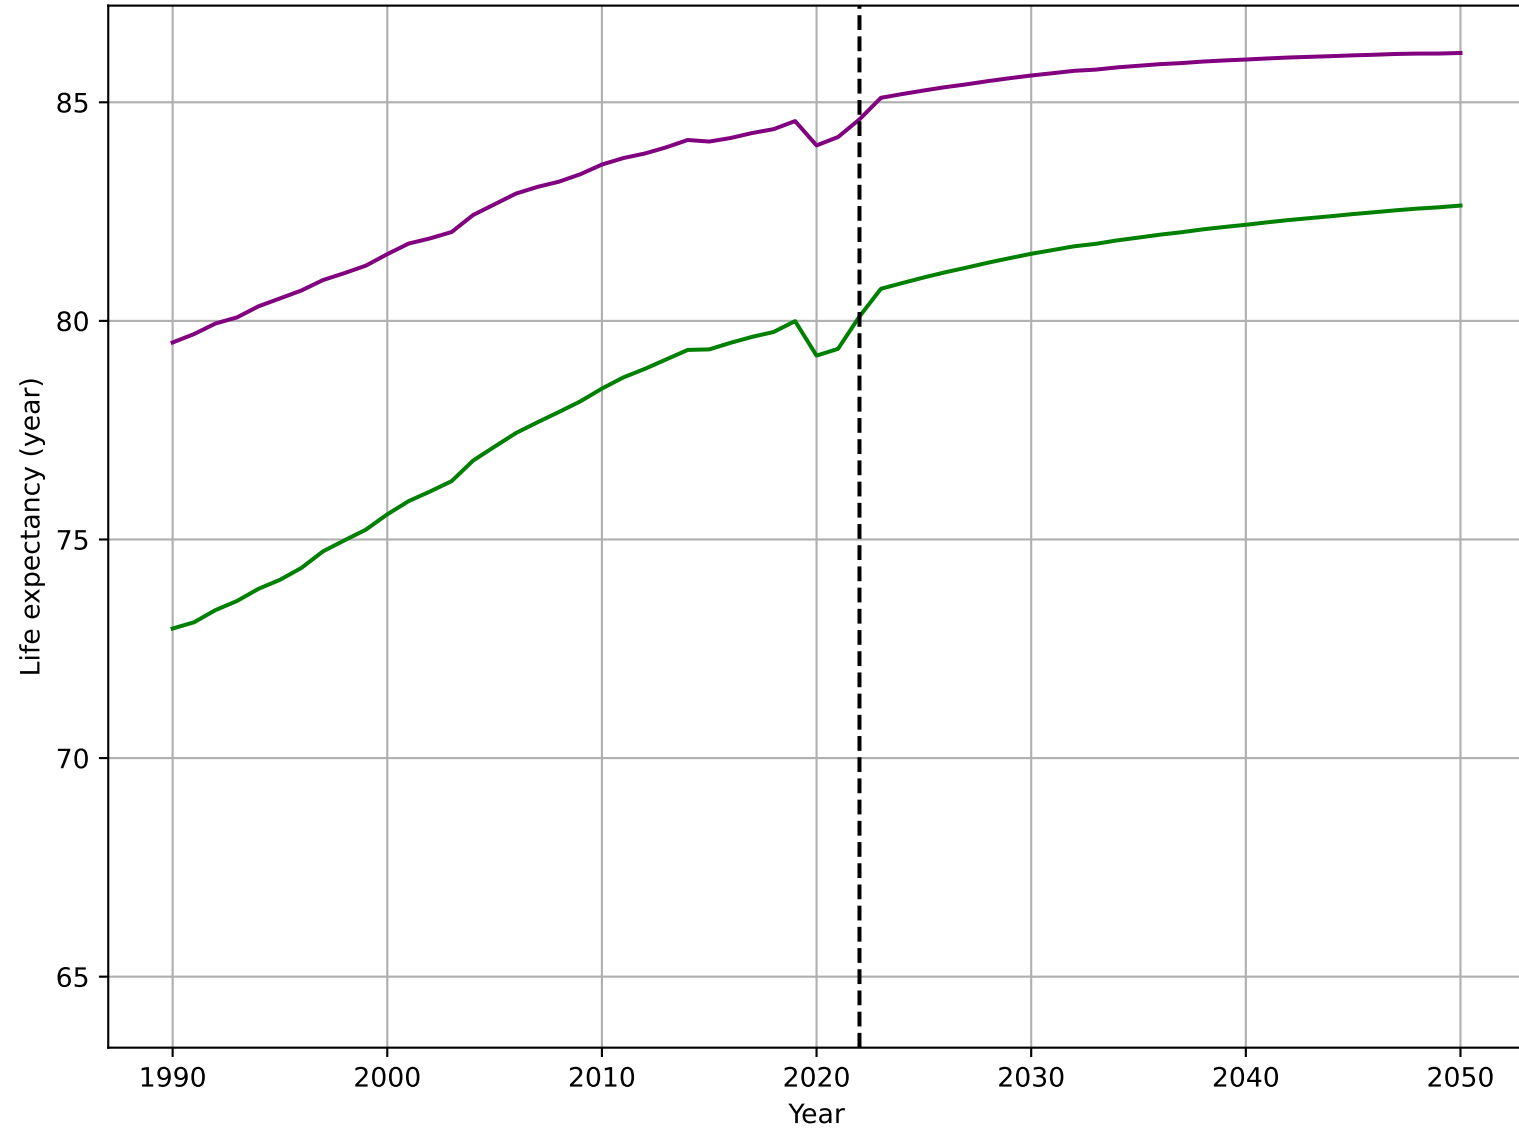

### Healthy Life Expectancy (HALE)

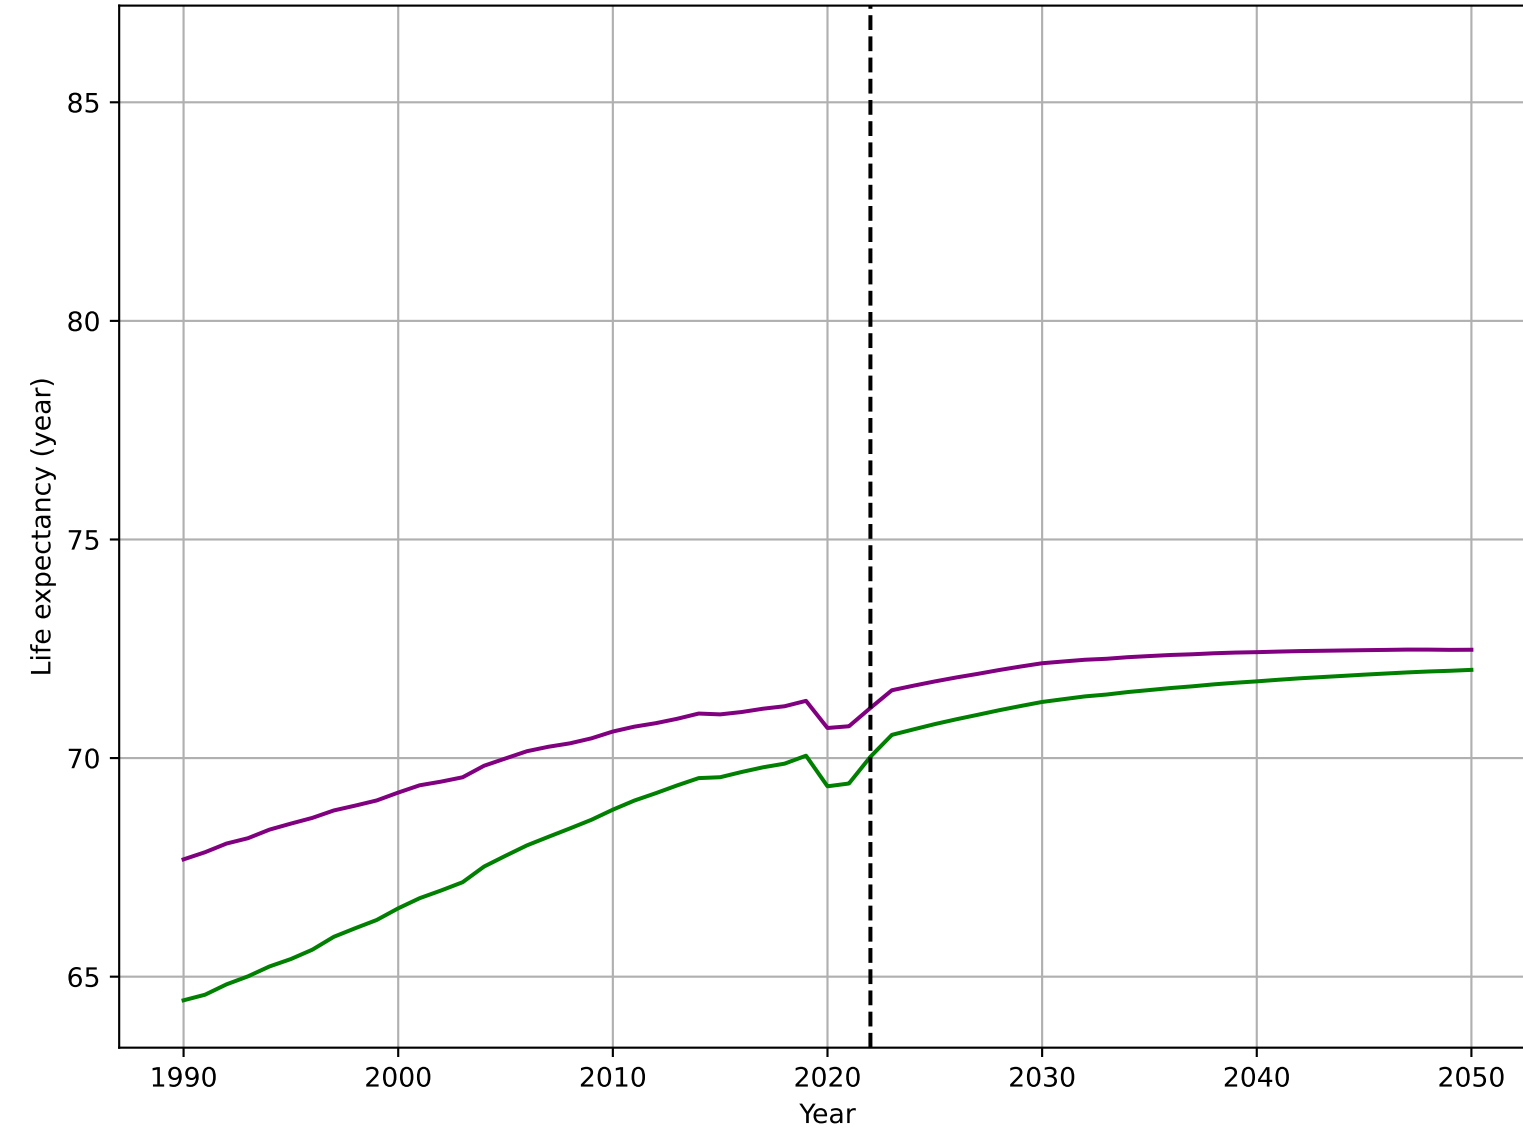



# Andean Latin America

### Life Expectancy

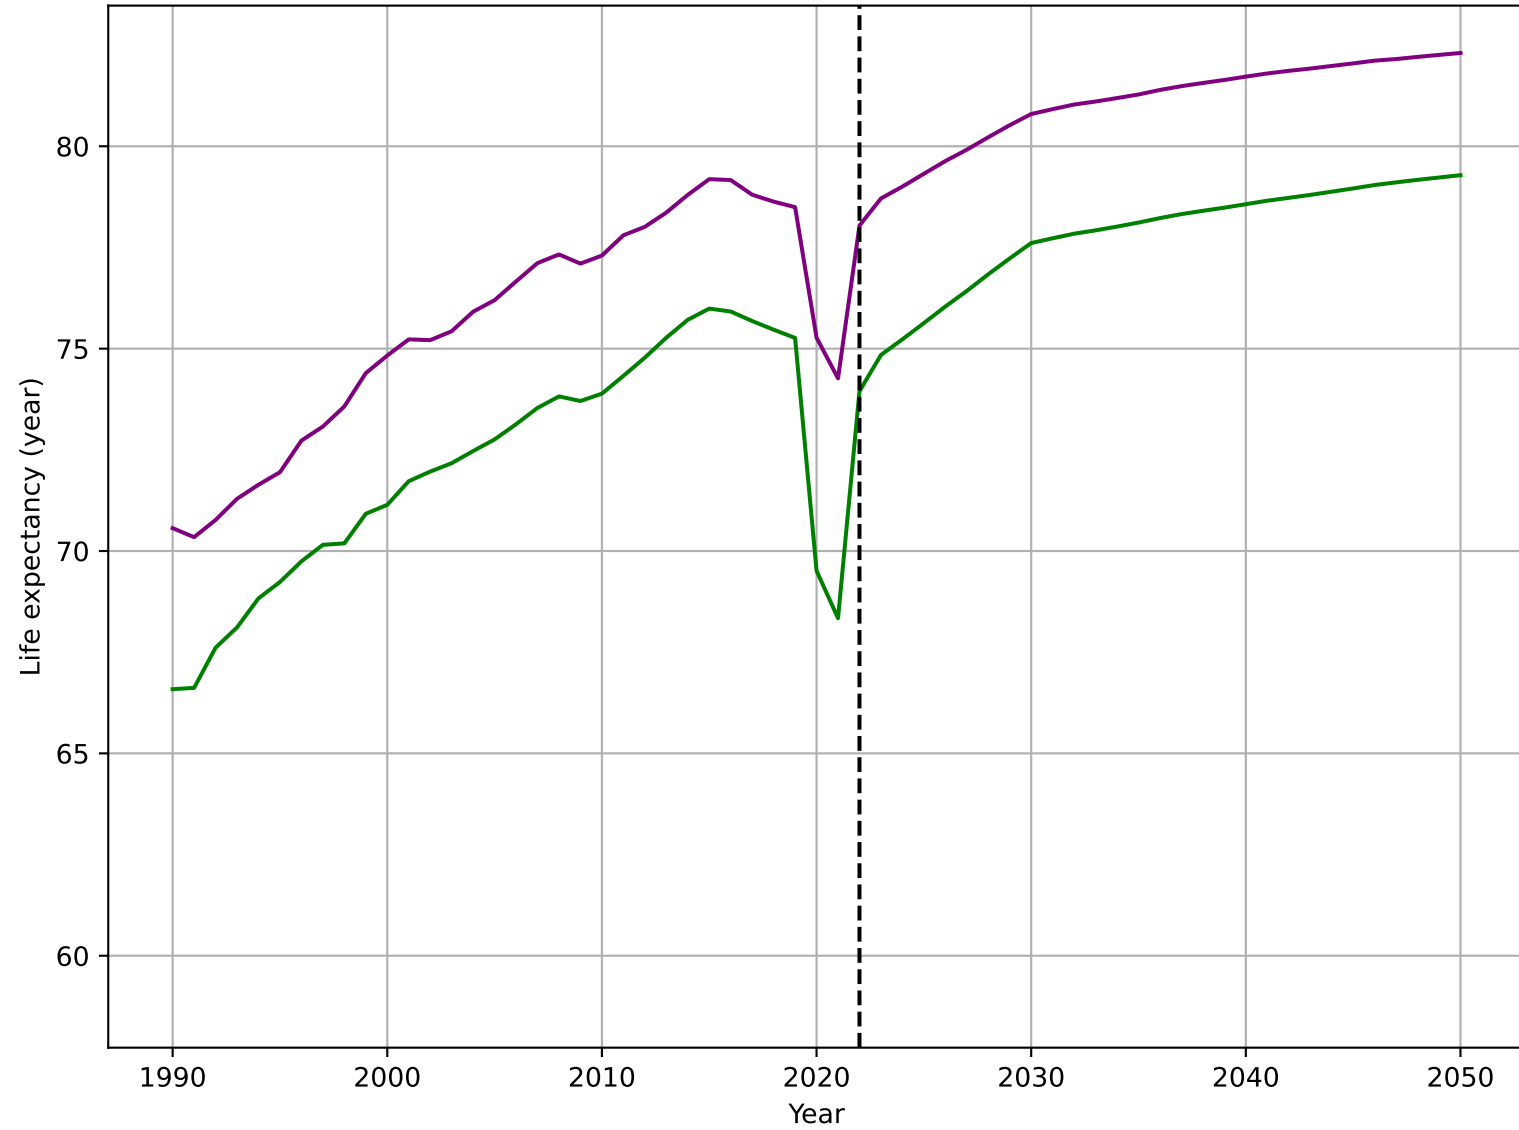

### Healthy Life Expectancy (HALE)

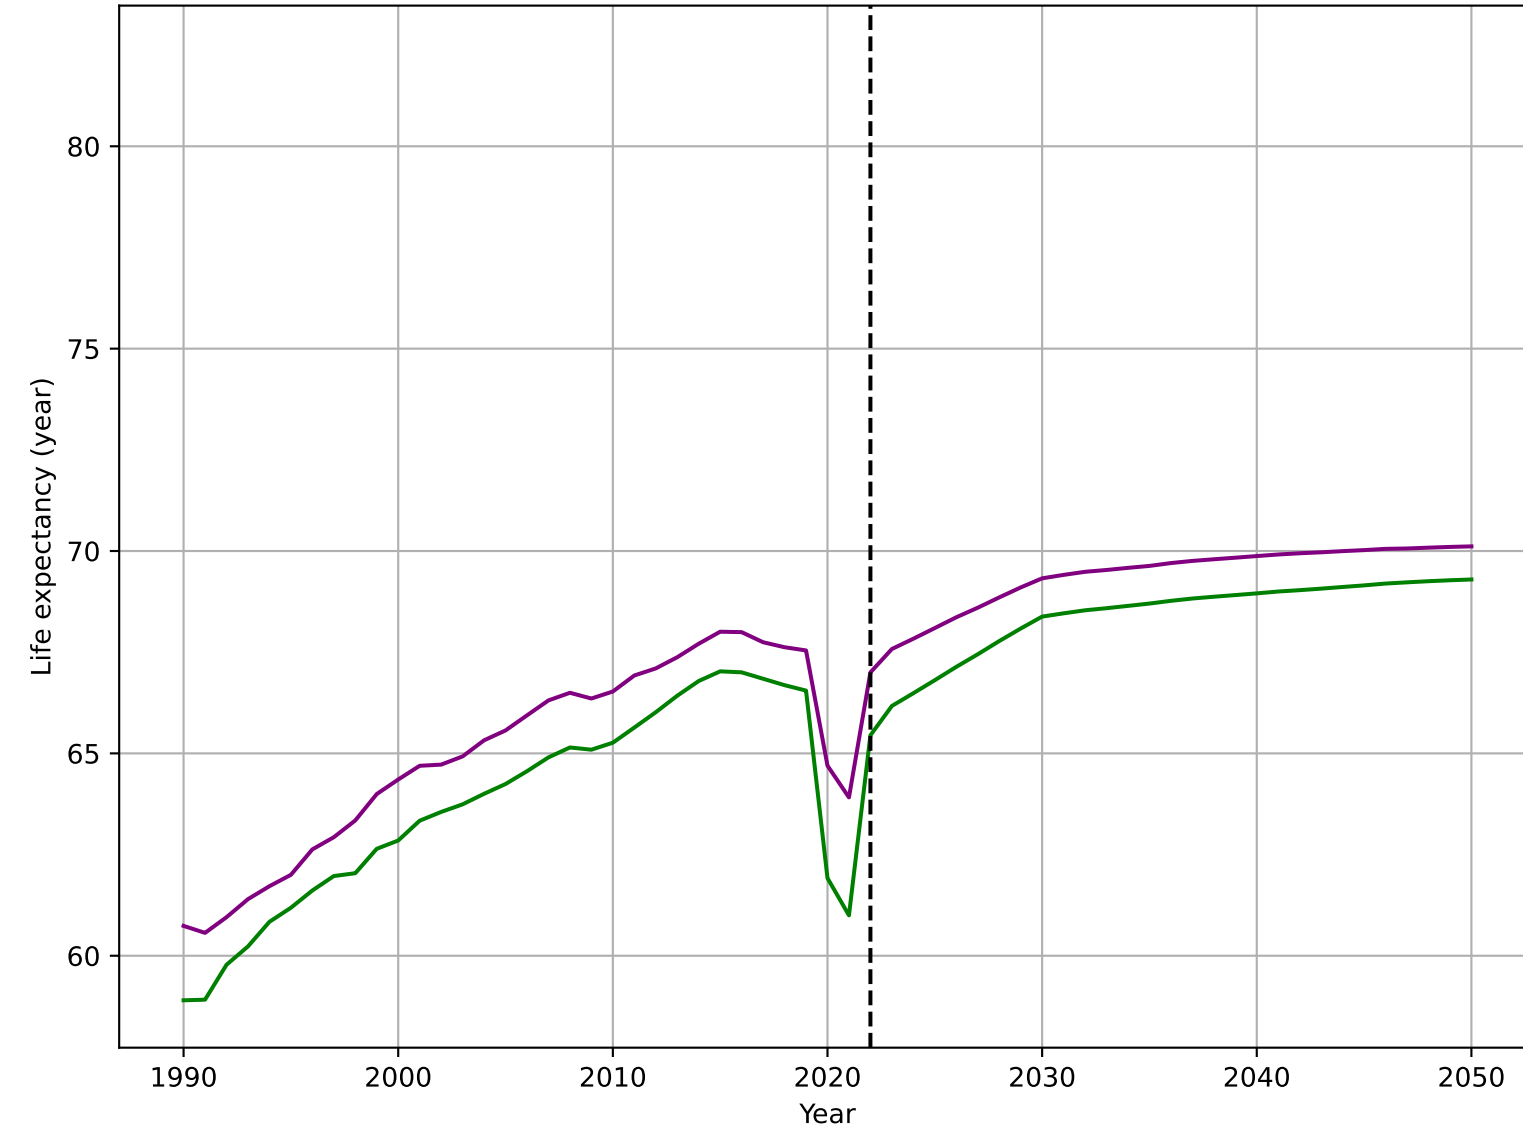

# Caribbean

### Life Expectancy

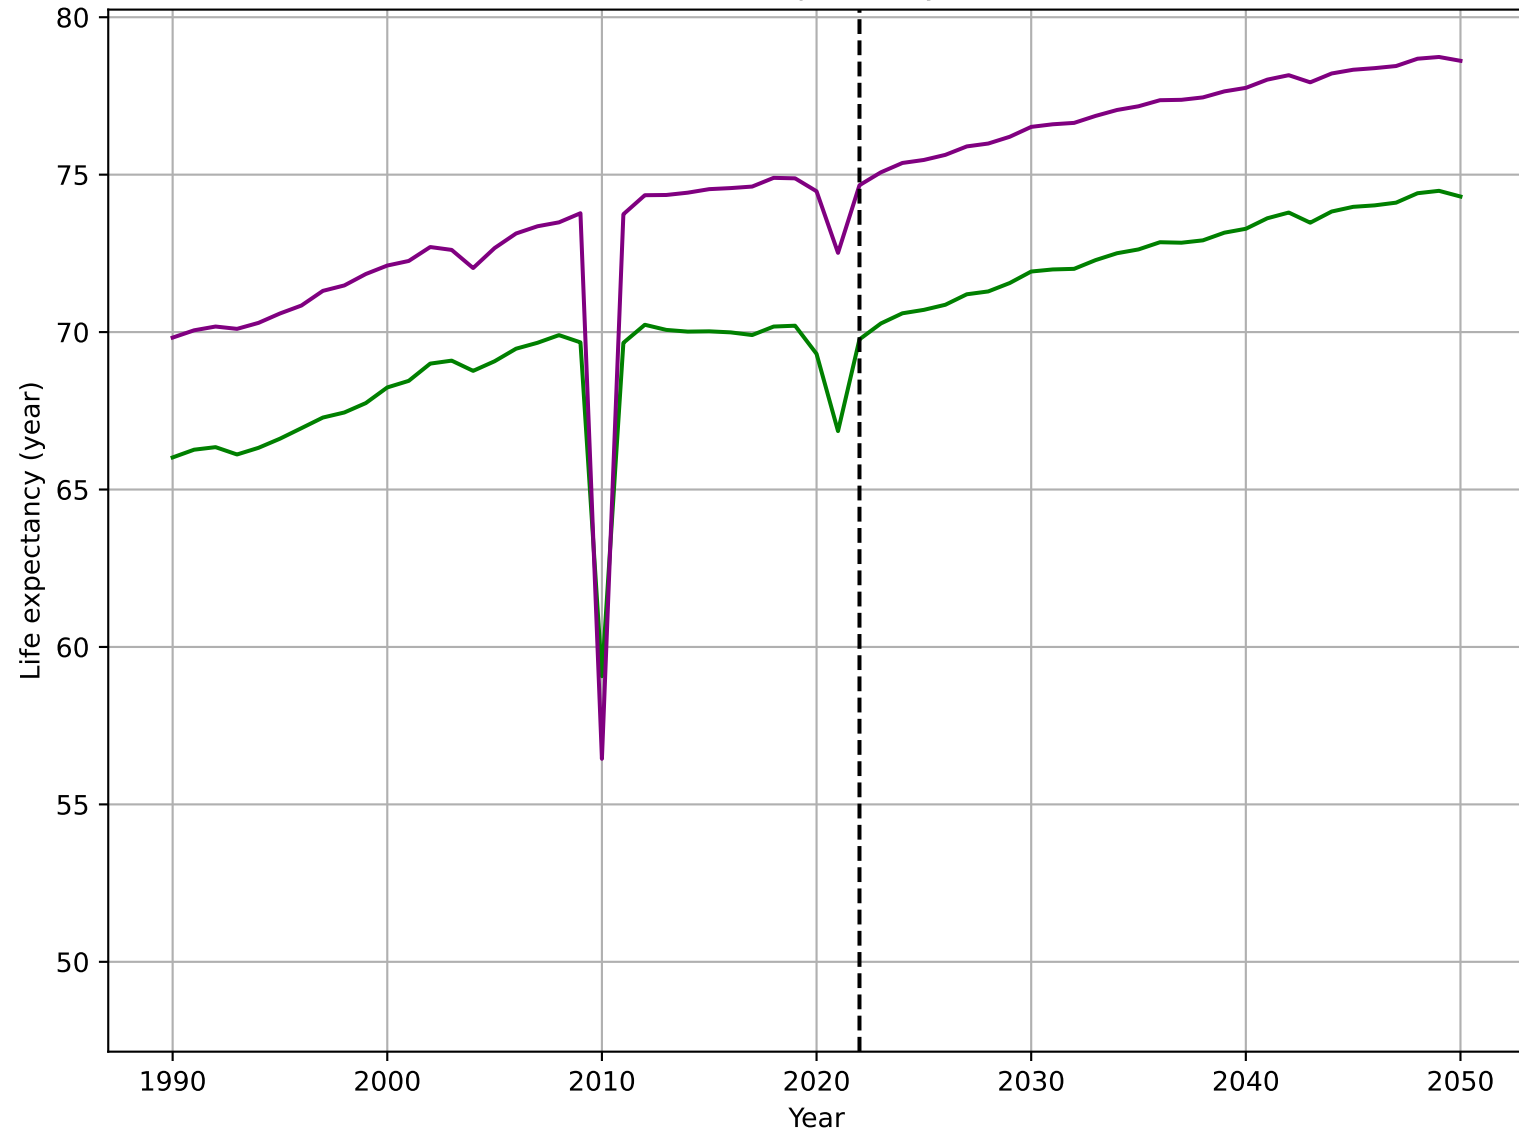

### Healthy Life Expectancy (HALE)

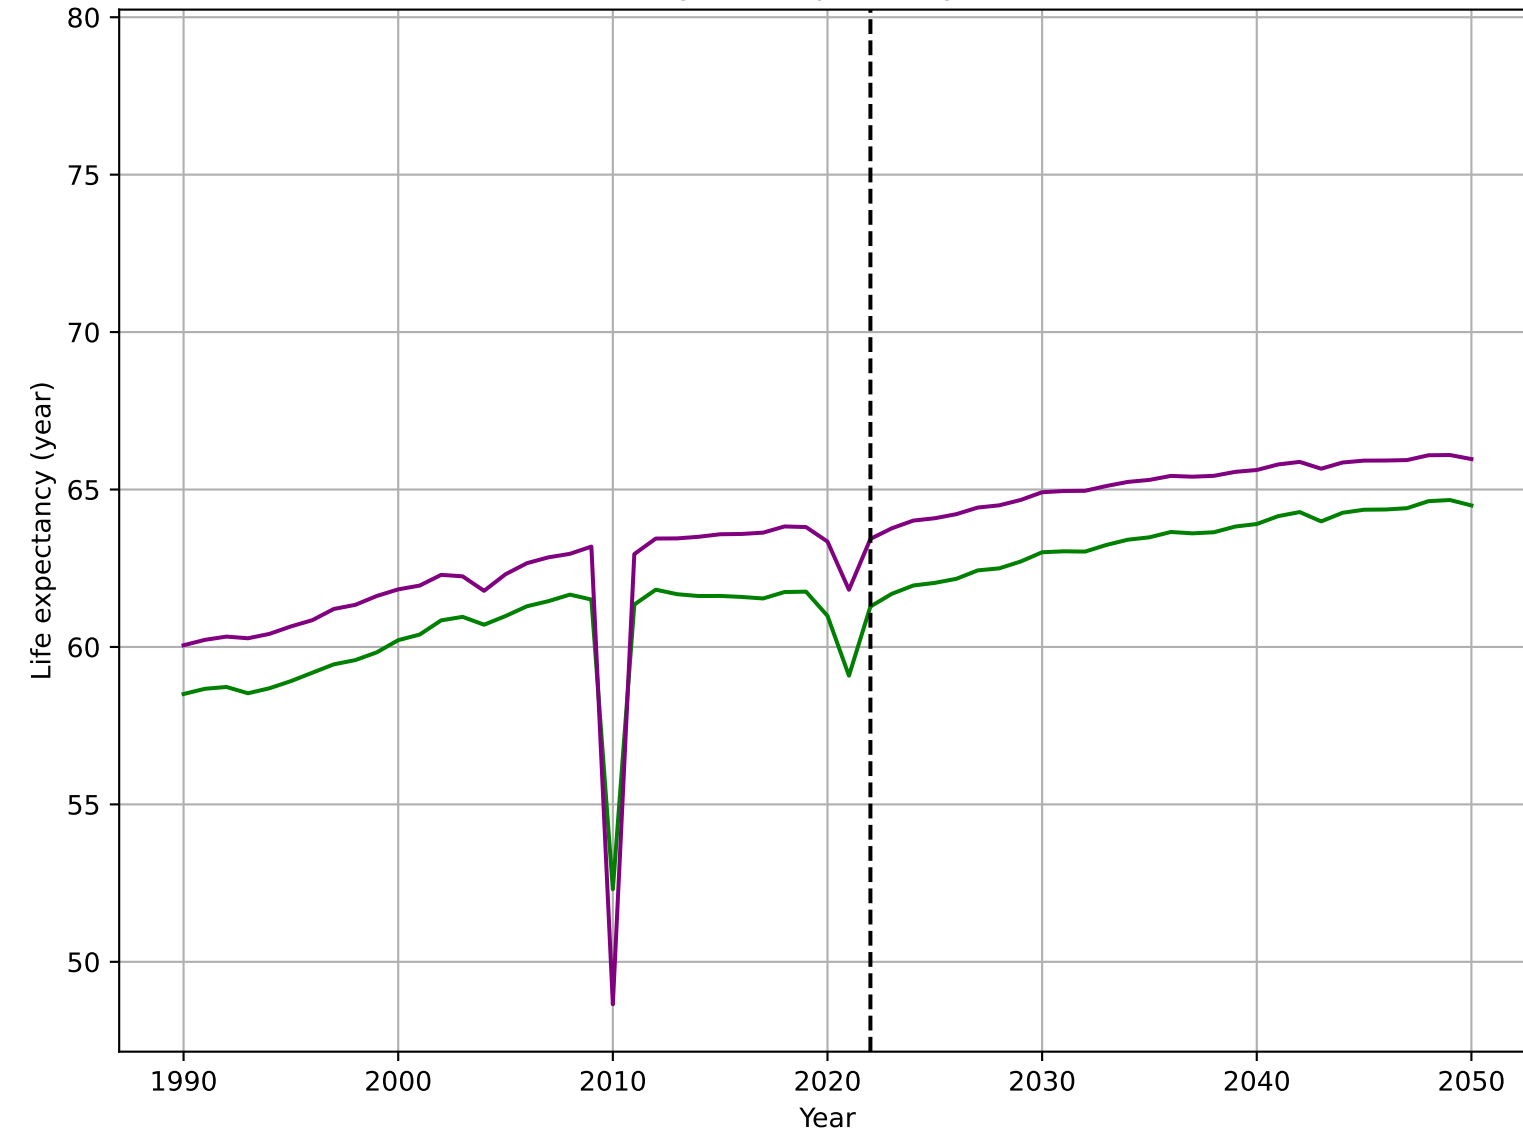

# Central Latin America

### Life Expectancy

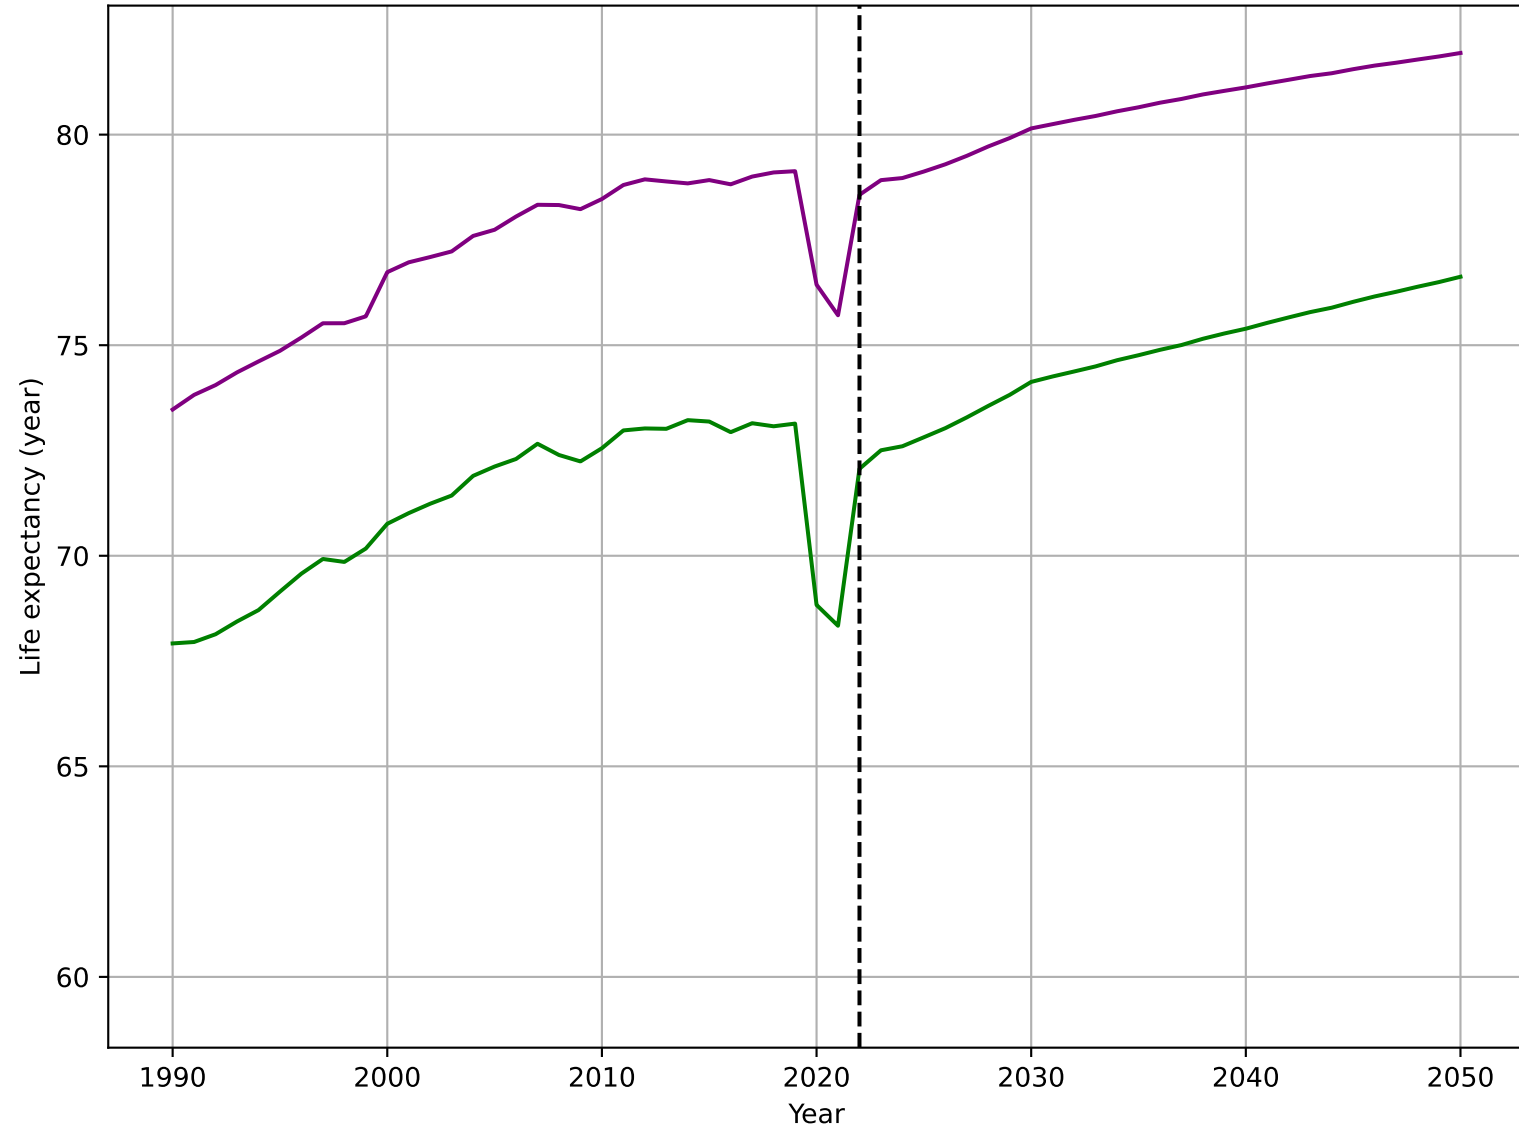

### Healthy Life Expectancy (HALE)

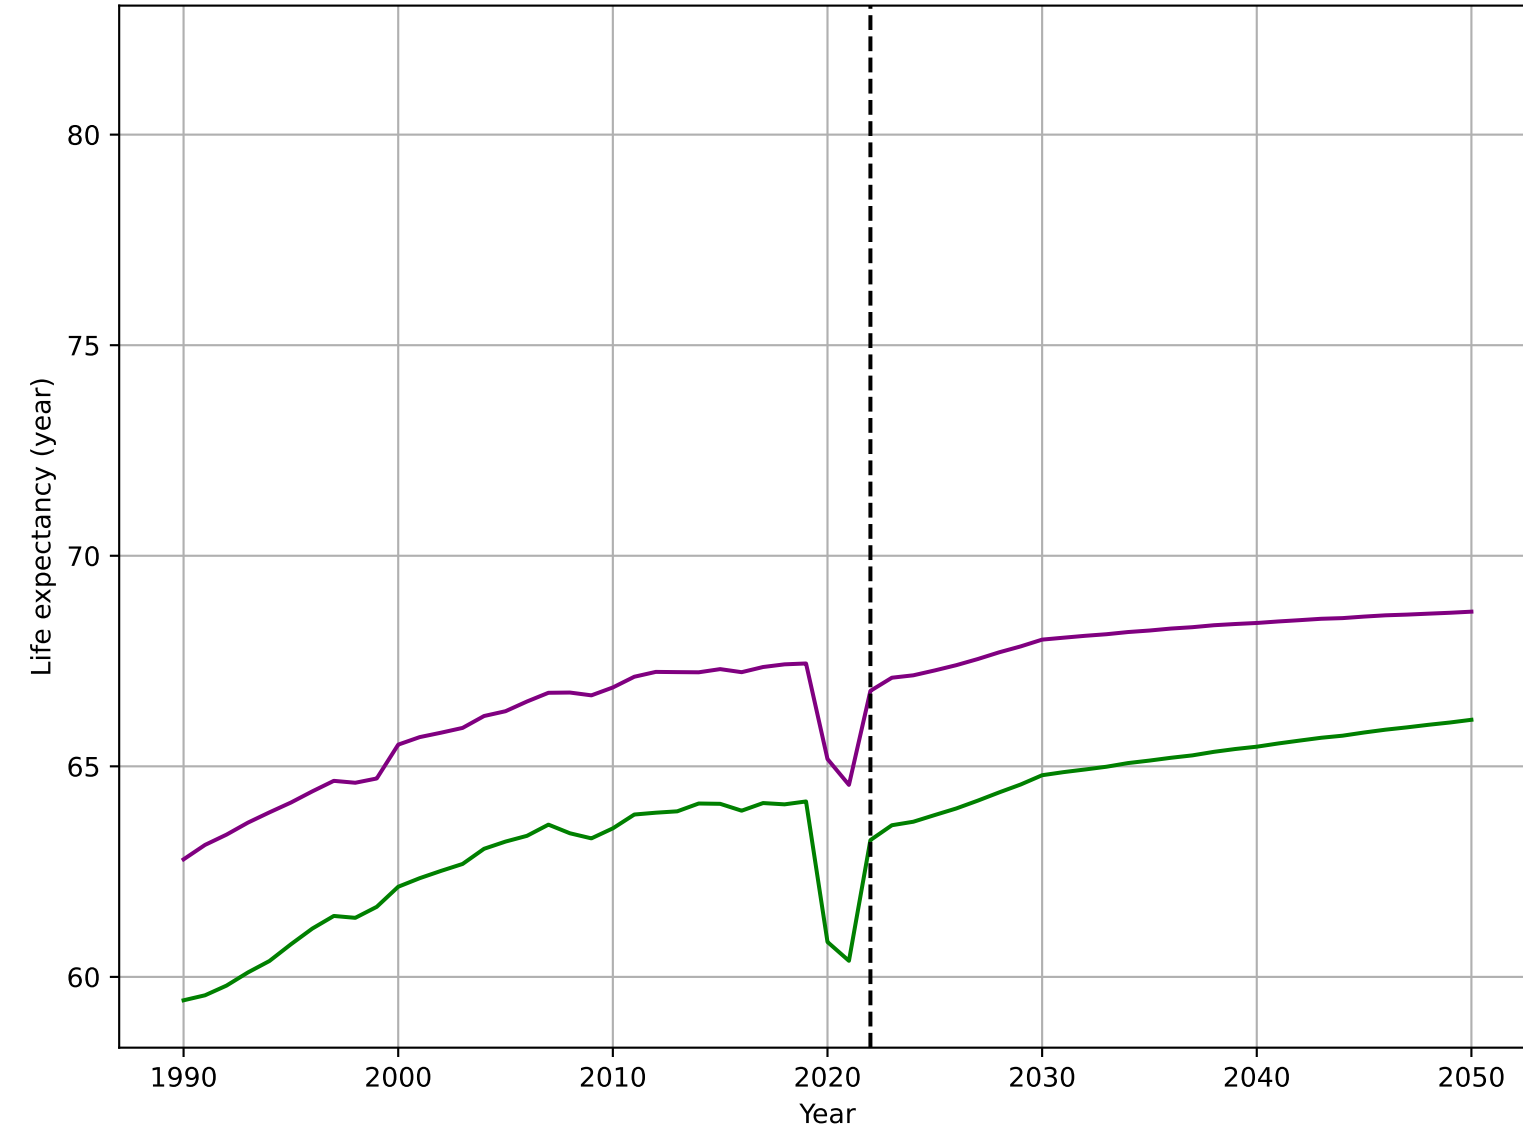

# Tropical Latin America

## Life Expectancy

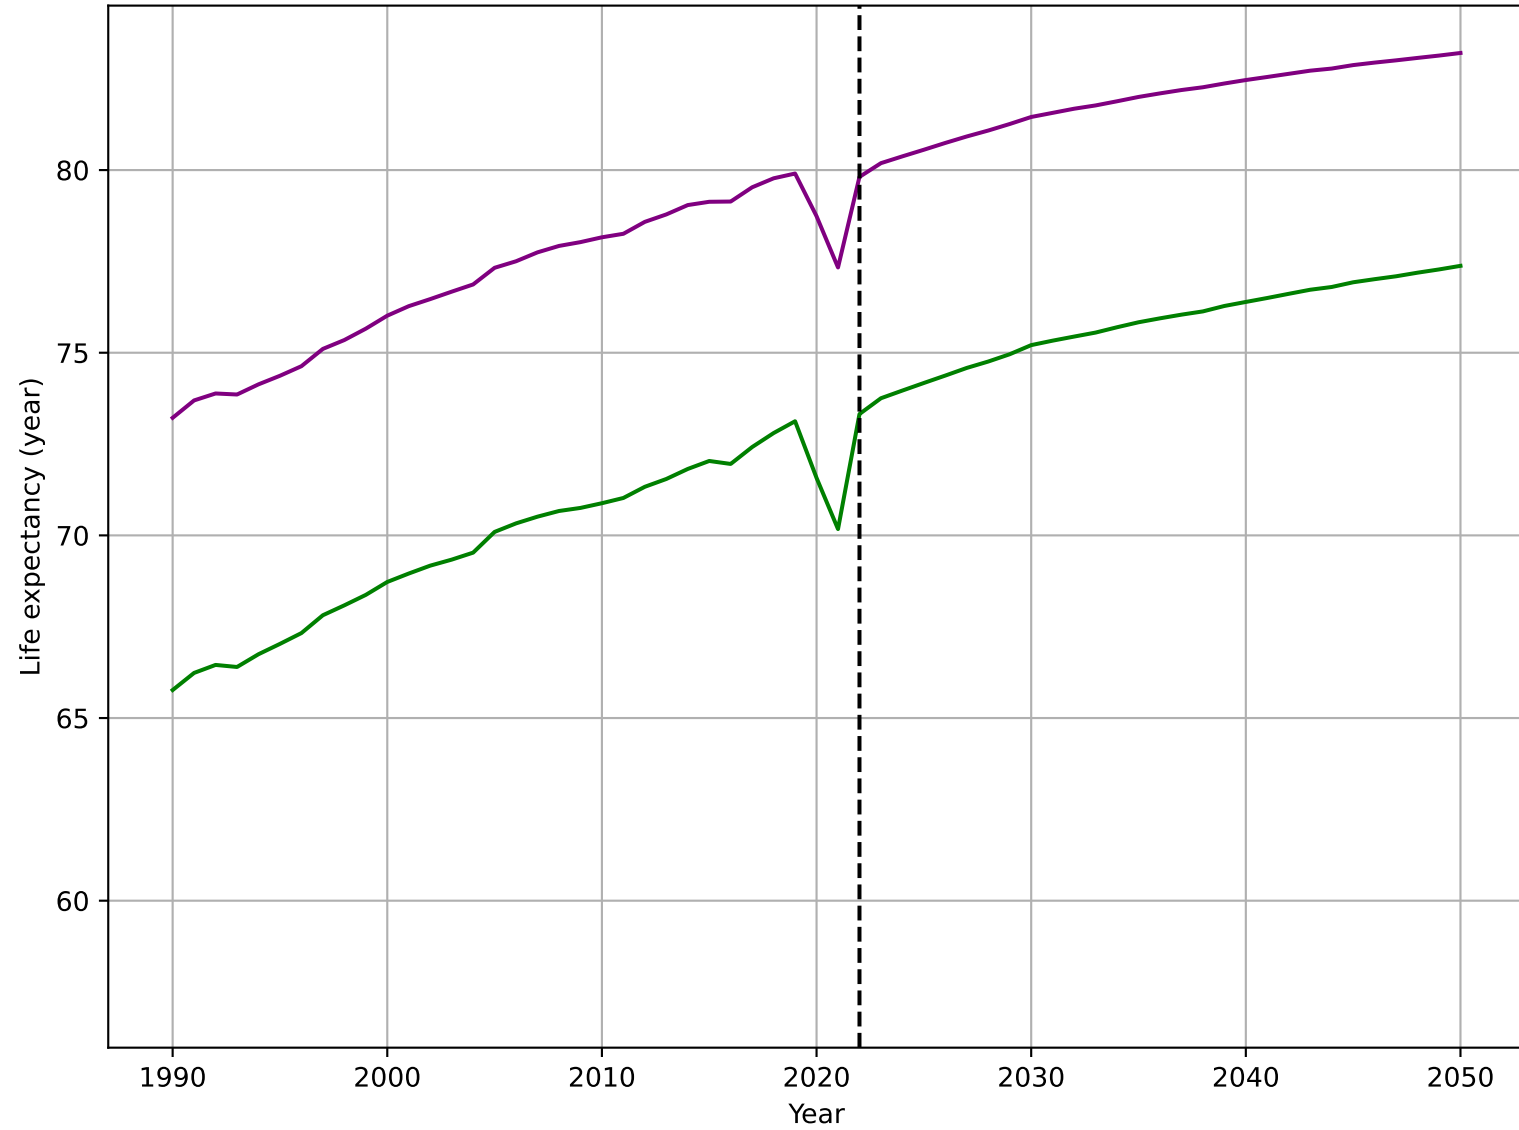

## Healthy Life Expectancy (HALE)

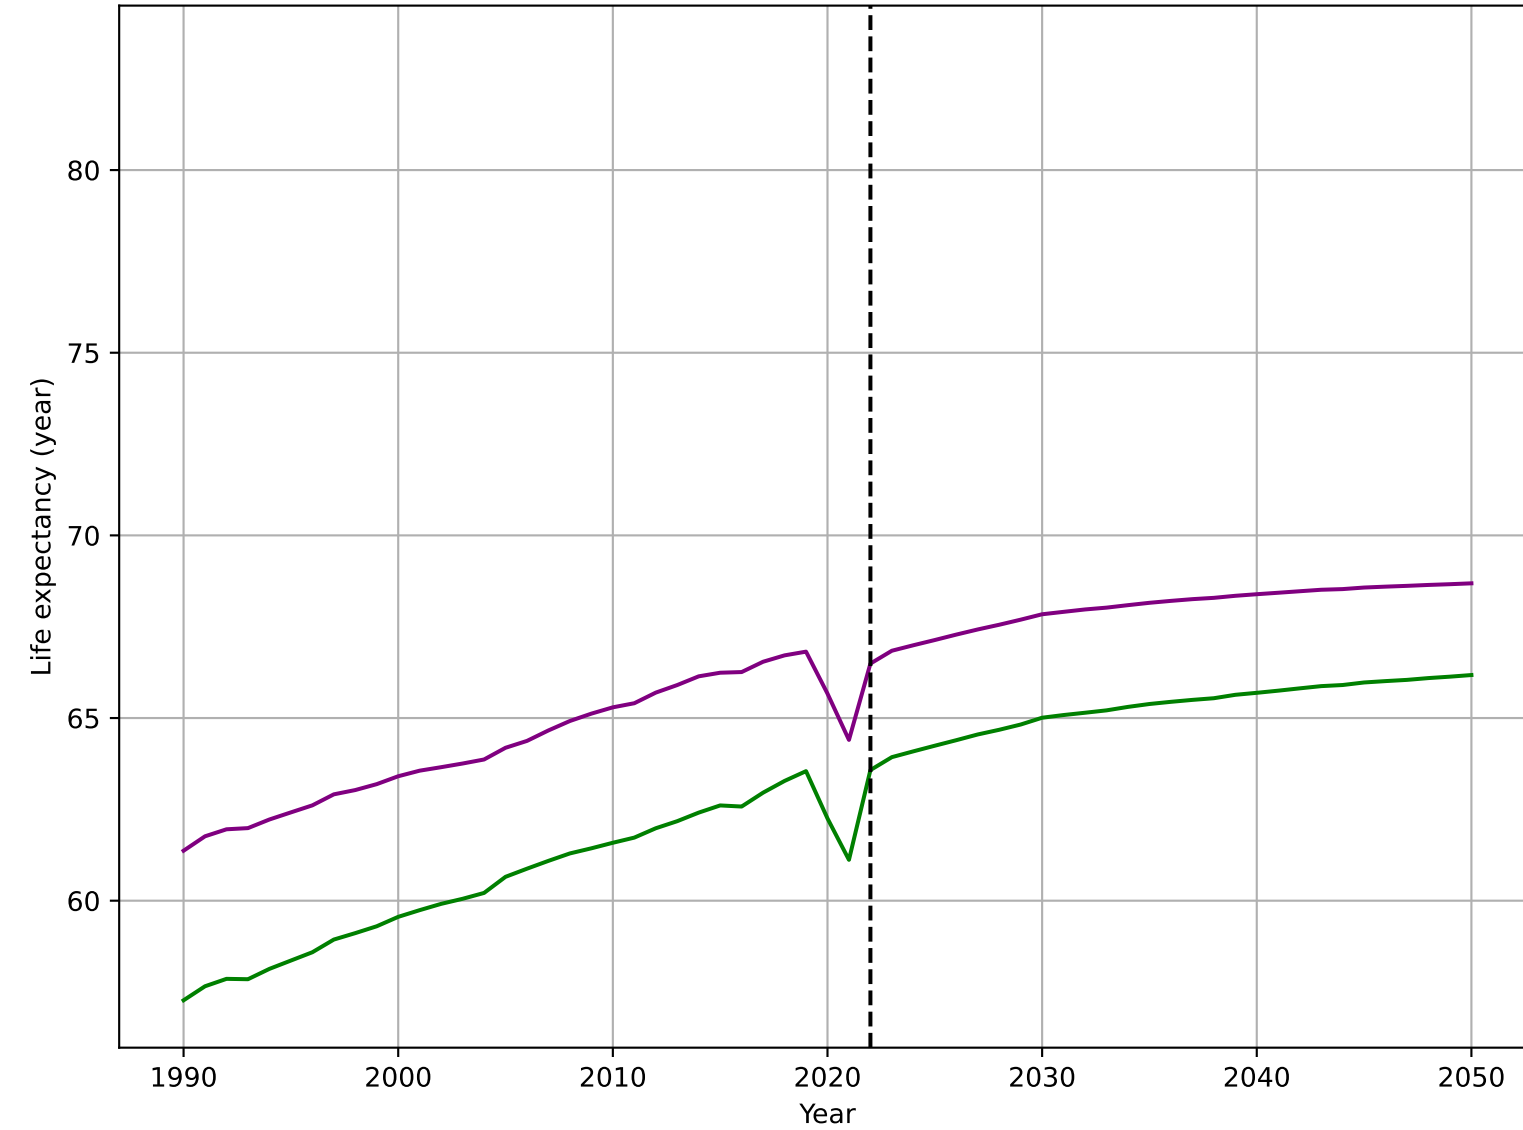

# North Africa And Middle East

### Life Expectancy



### Healthy Life Expectancy (HALE)



# South Asia

### Life Expectancy



### Healthy Life Expectancy (HALE)



# East Asia

### Life Expectancy

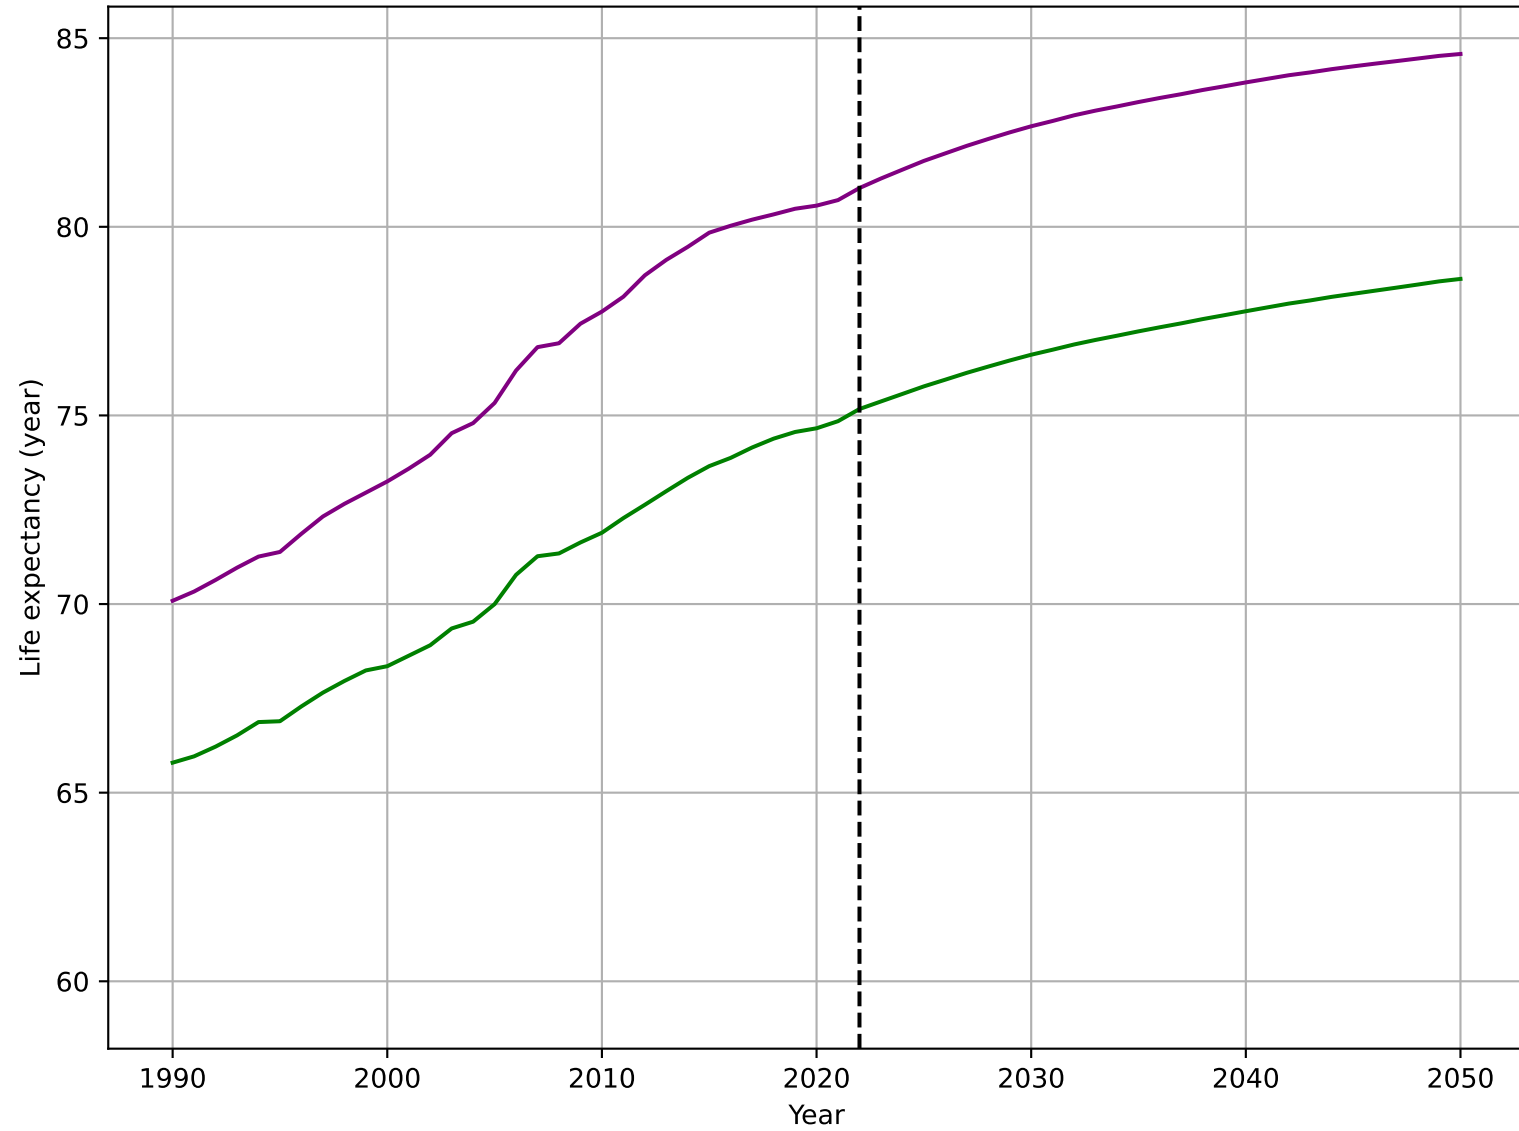

### Healthy Life Expectancy (HALE)

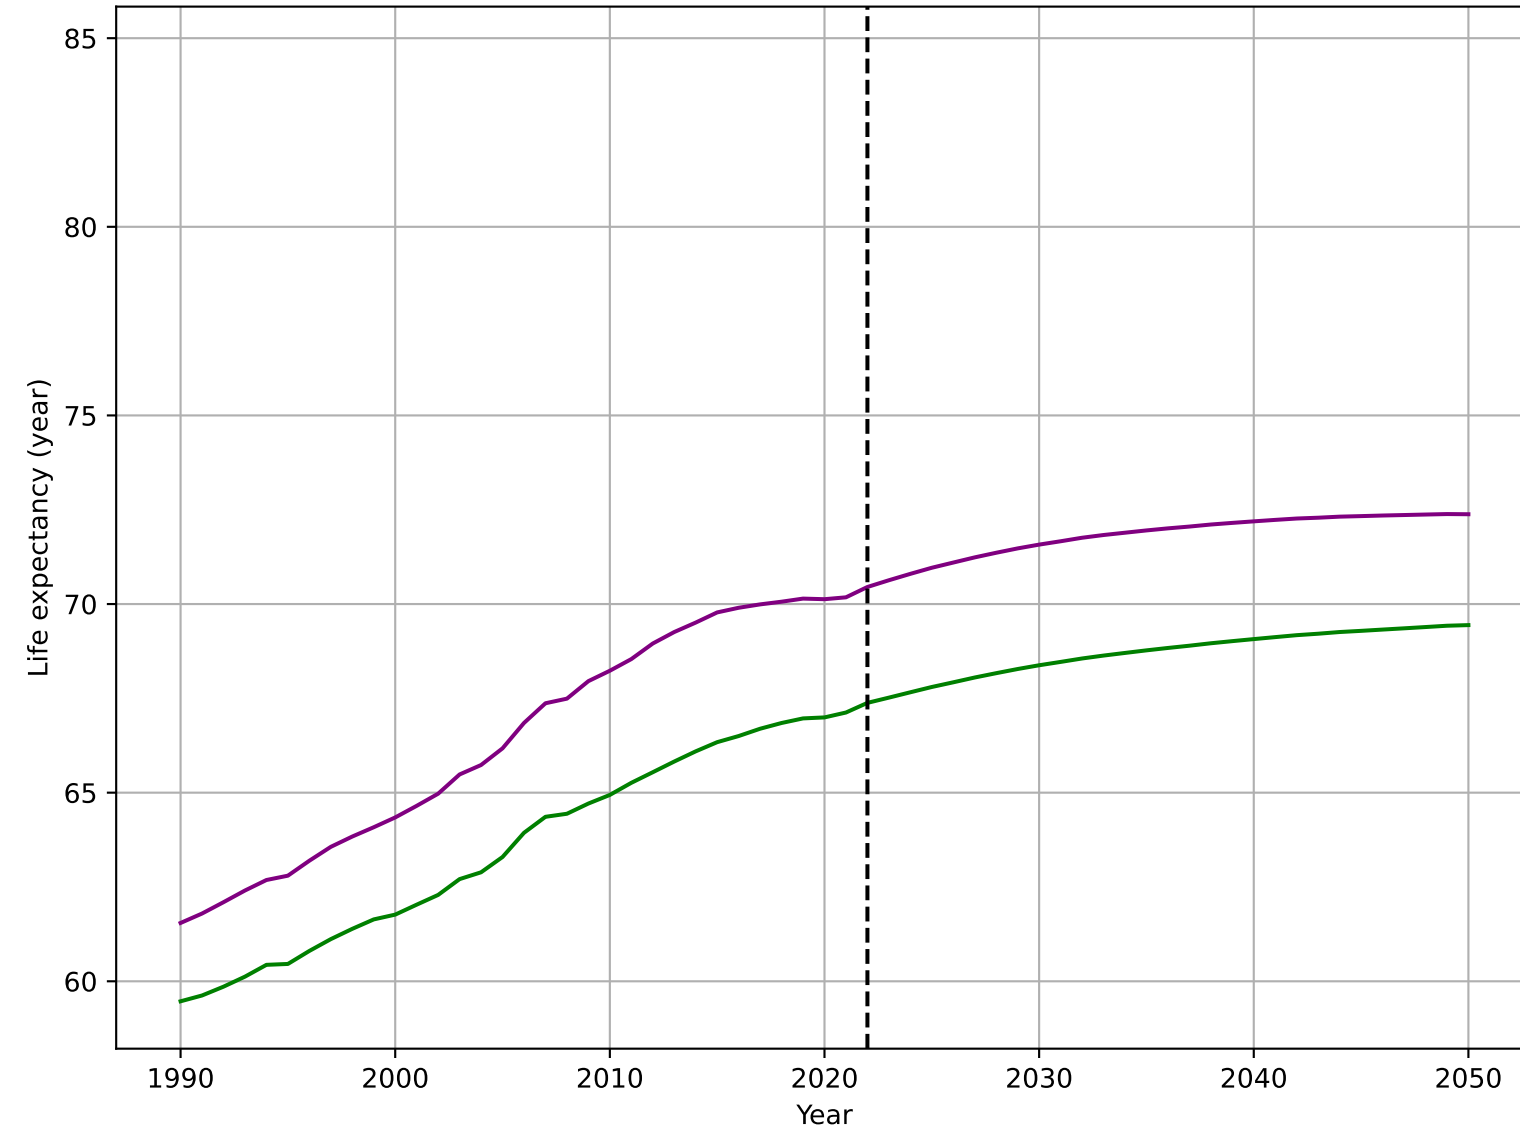

# Oceania

### Life Expectancy

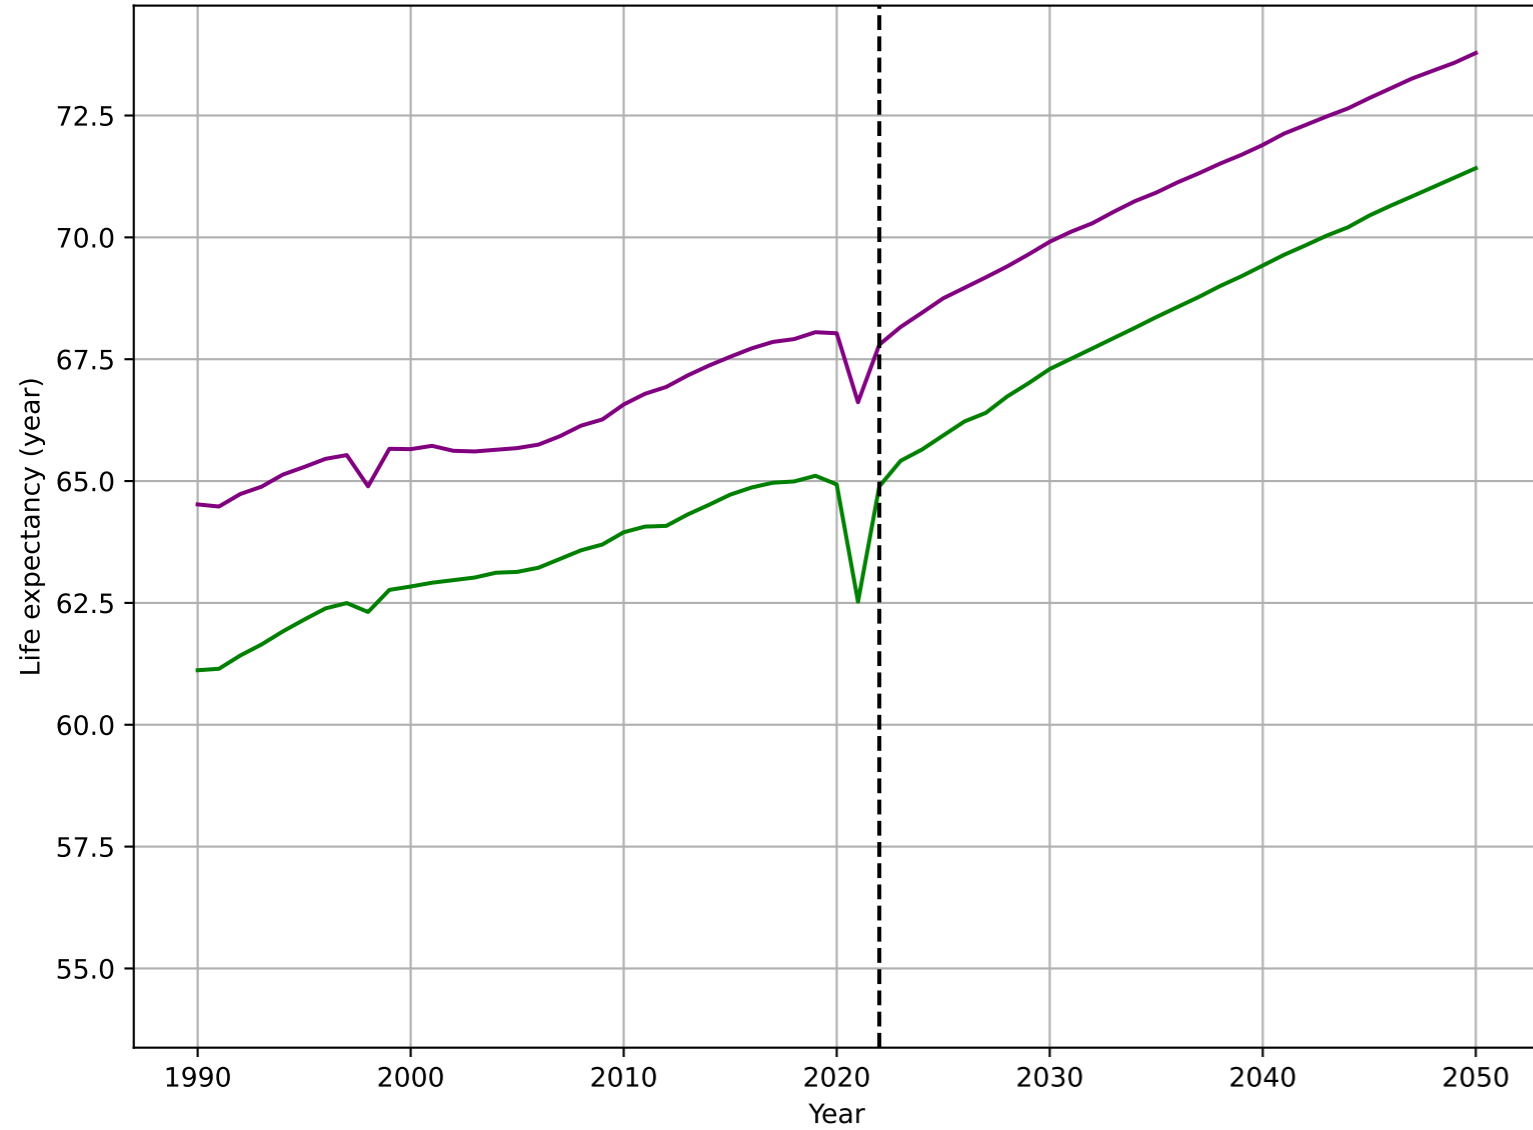

### Healthy Life Expectancy (HALE)

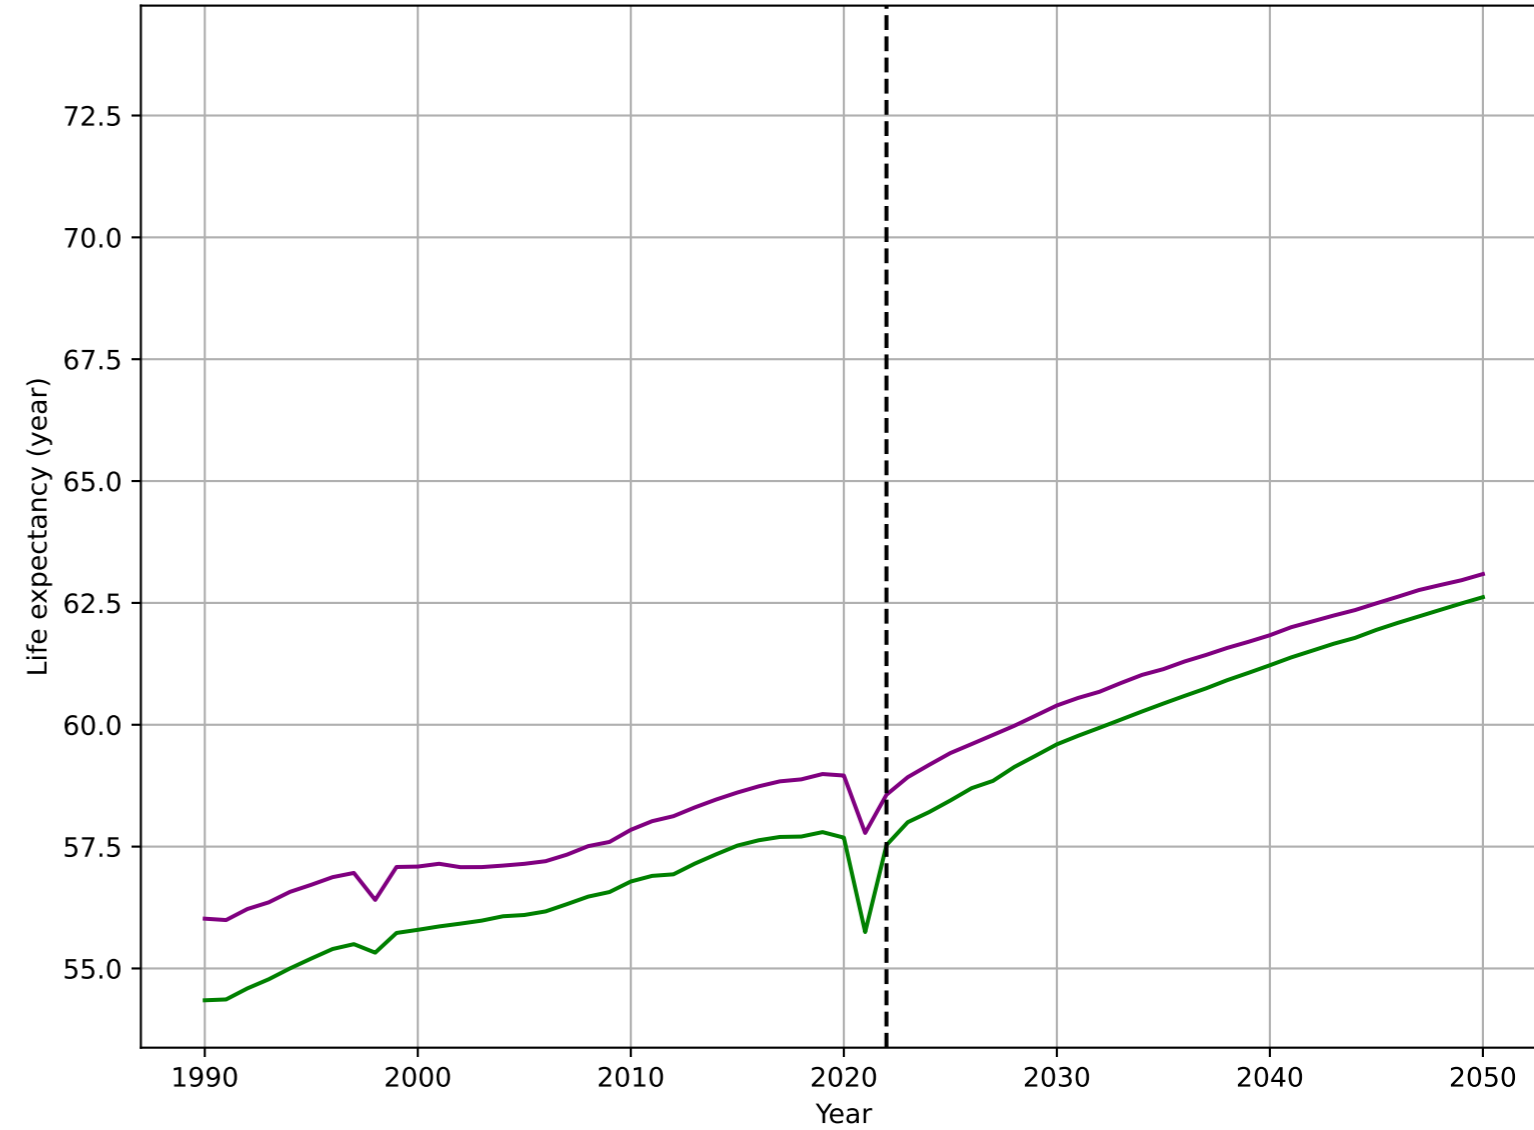



# Southeast Asia

### Life Expectancy

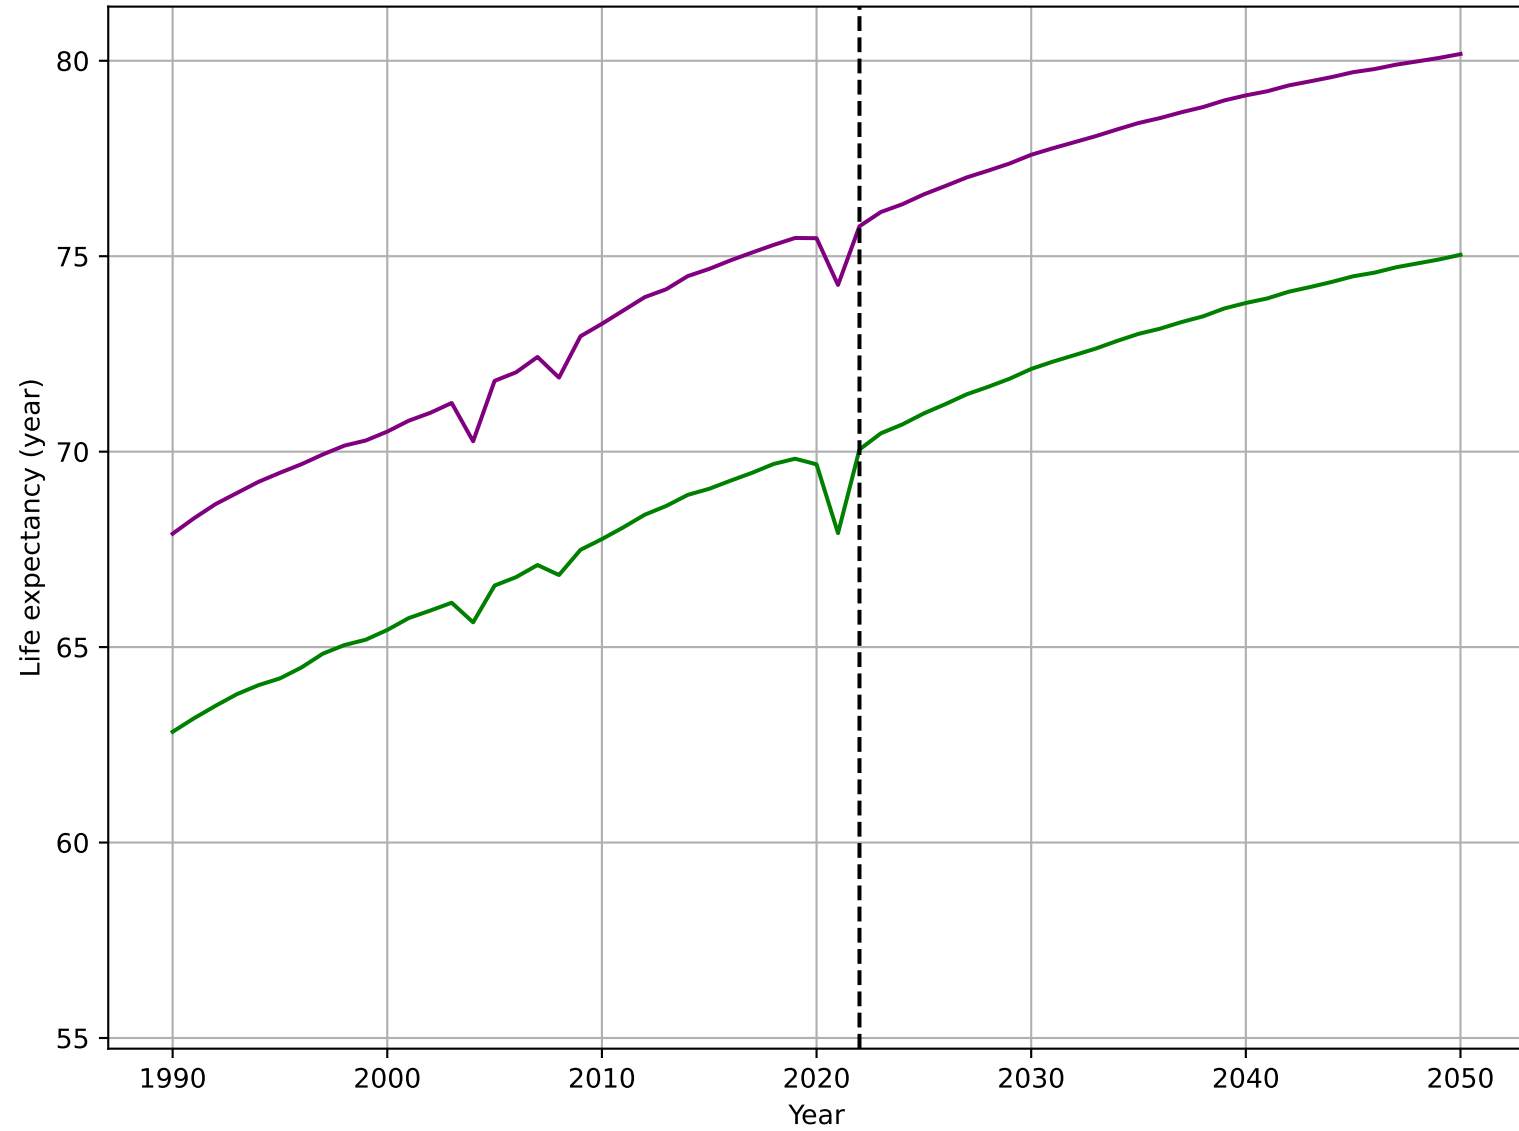

### Healthy Life Expectancy (HALE)

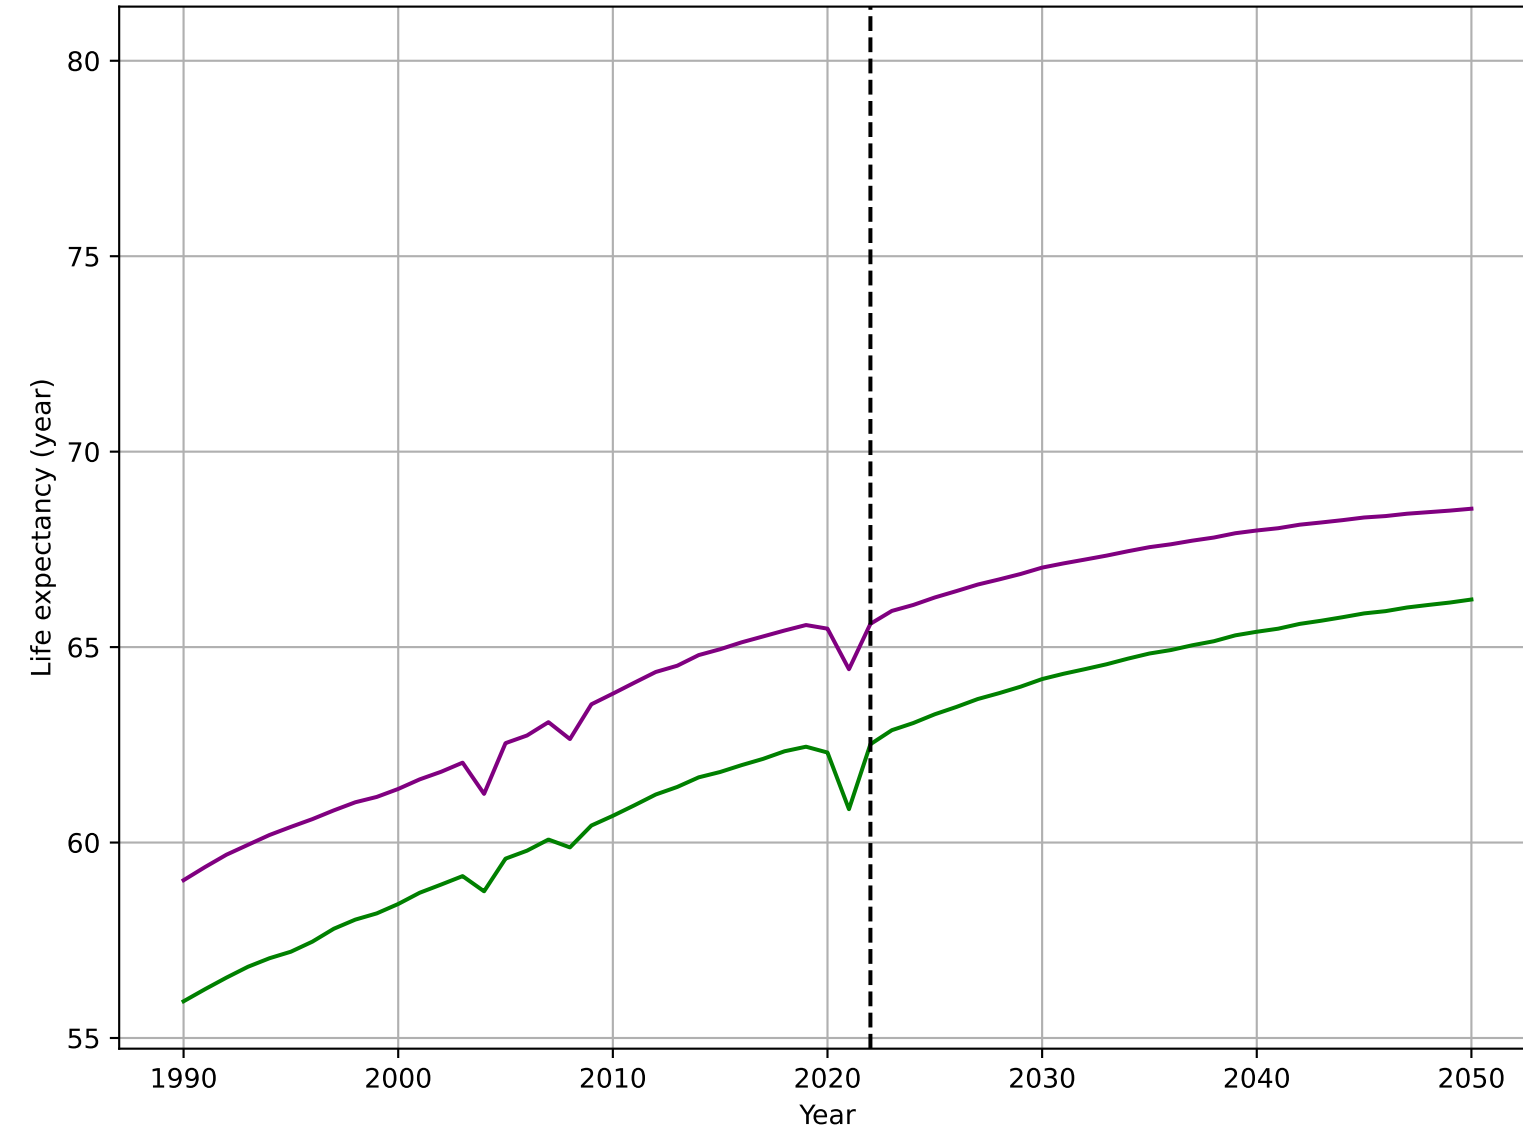

# Central Sub-Saharan Africa

### Life Expectancy

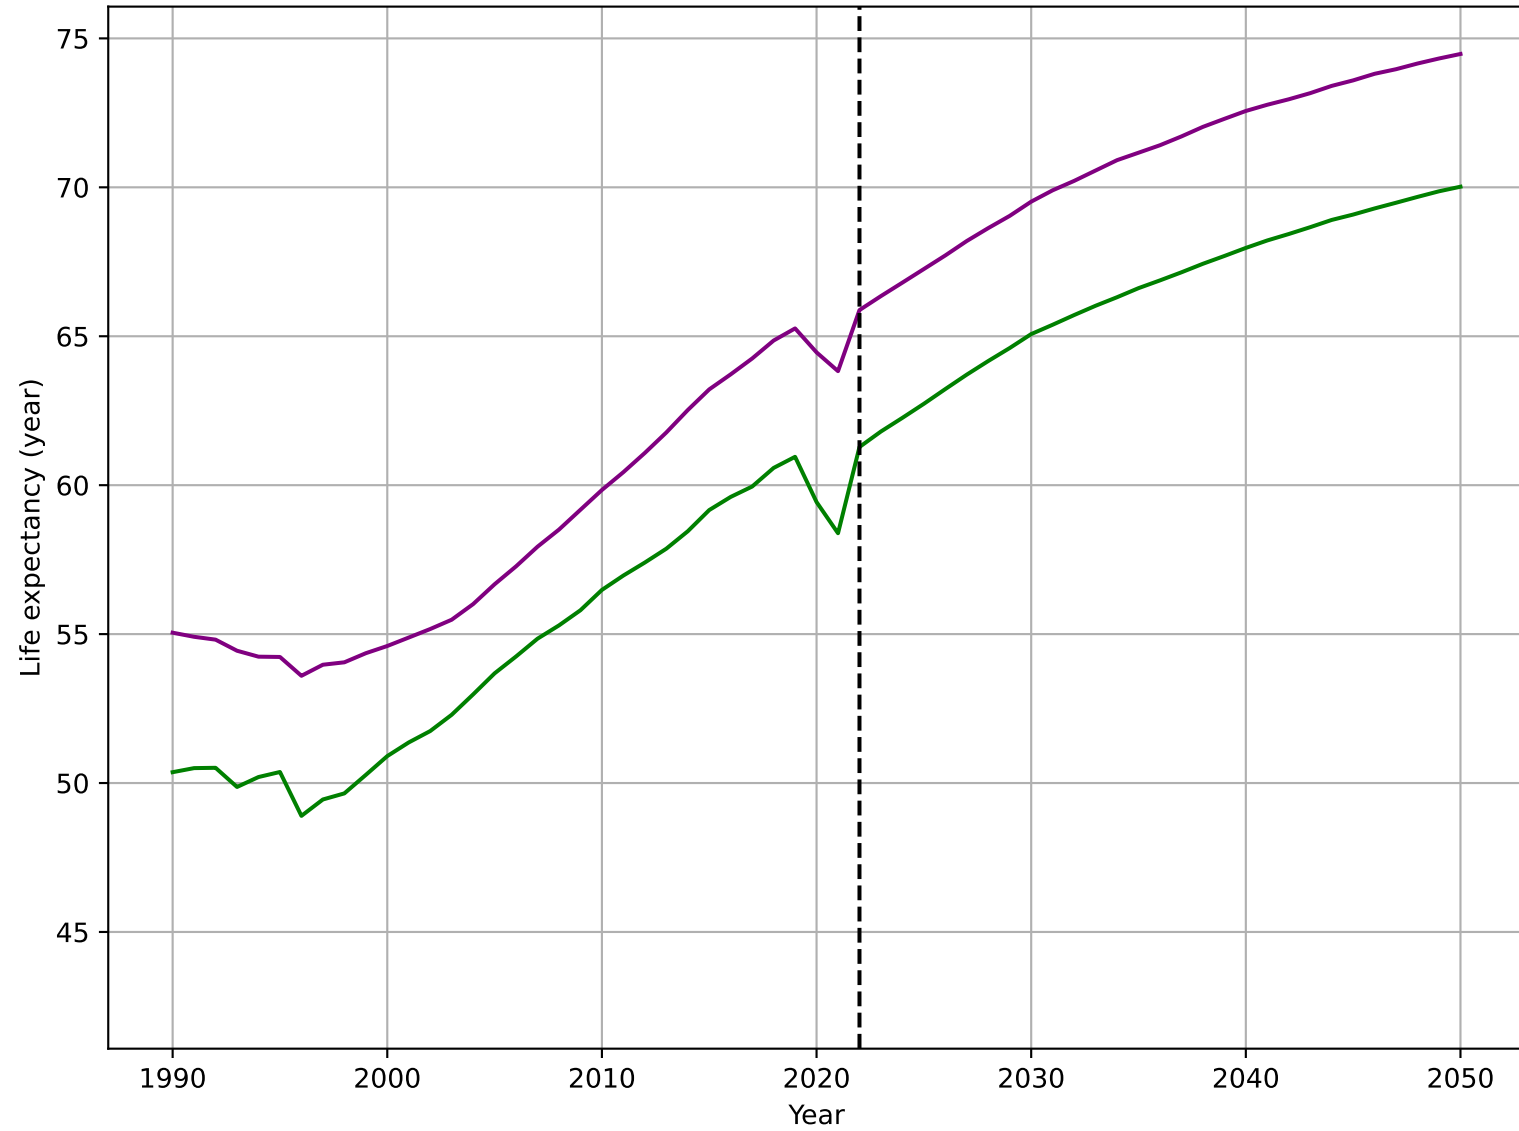

### Healthy Life Expectancy (HALE)

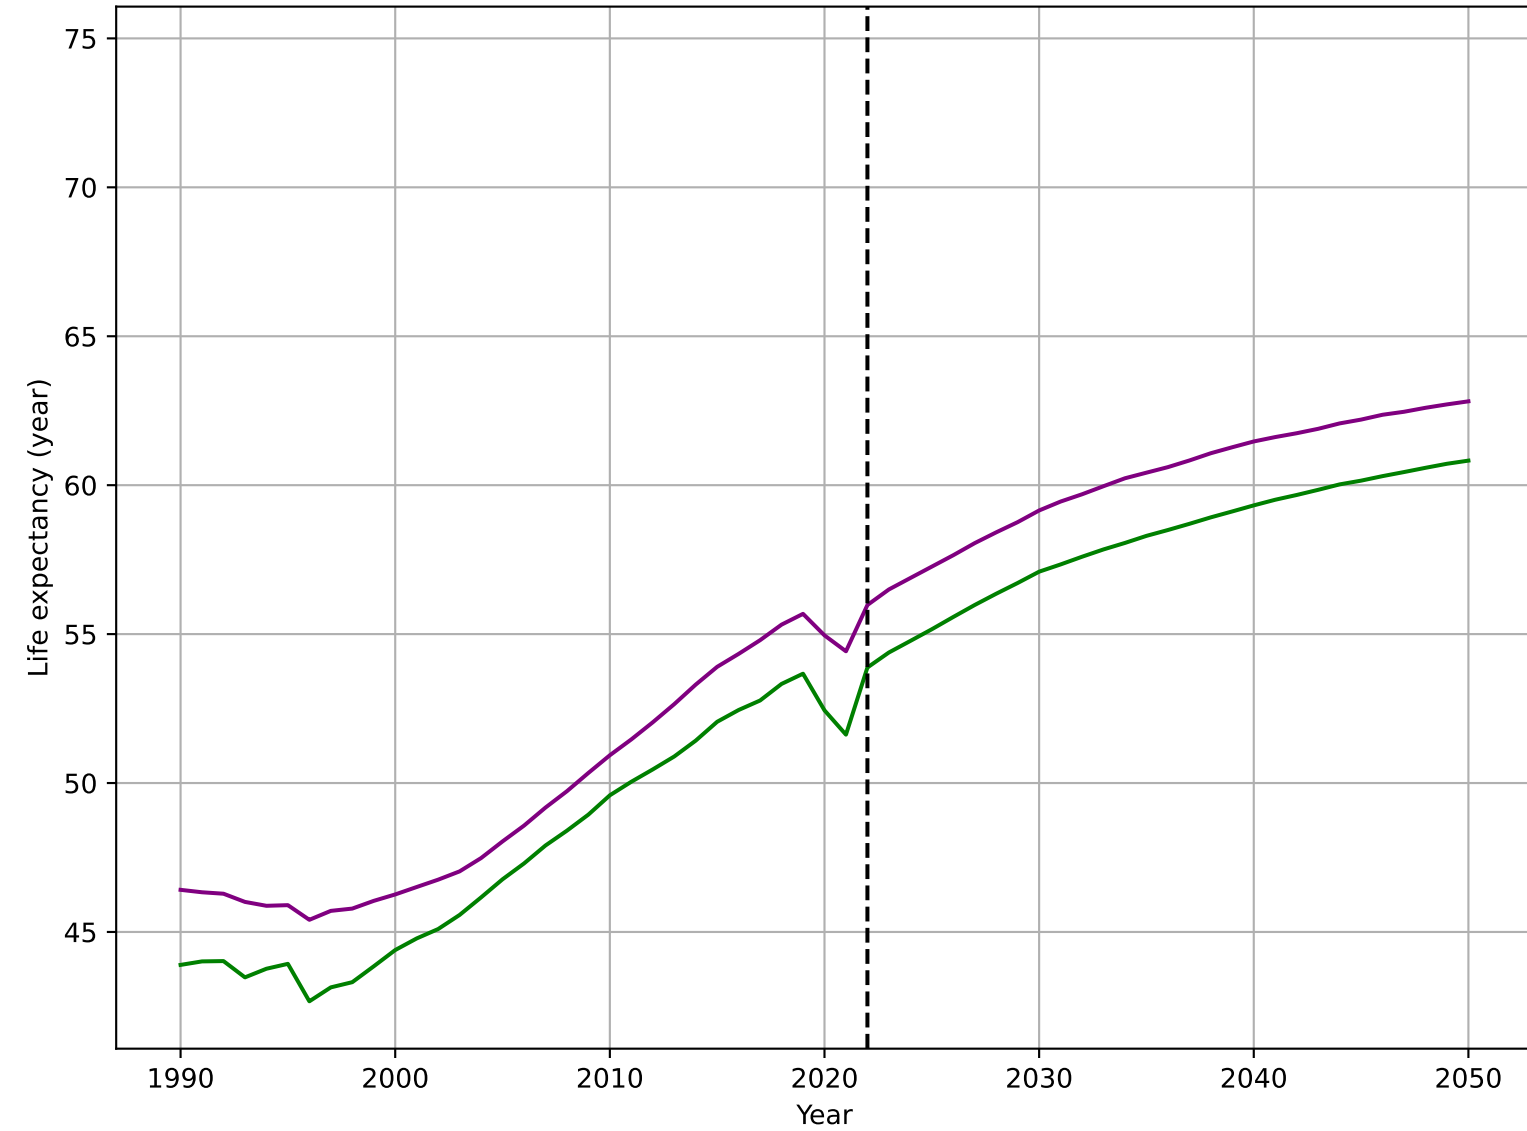

# Eastern Sub-Saharan Africa

### Life Expectancy

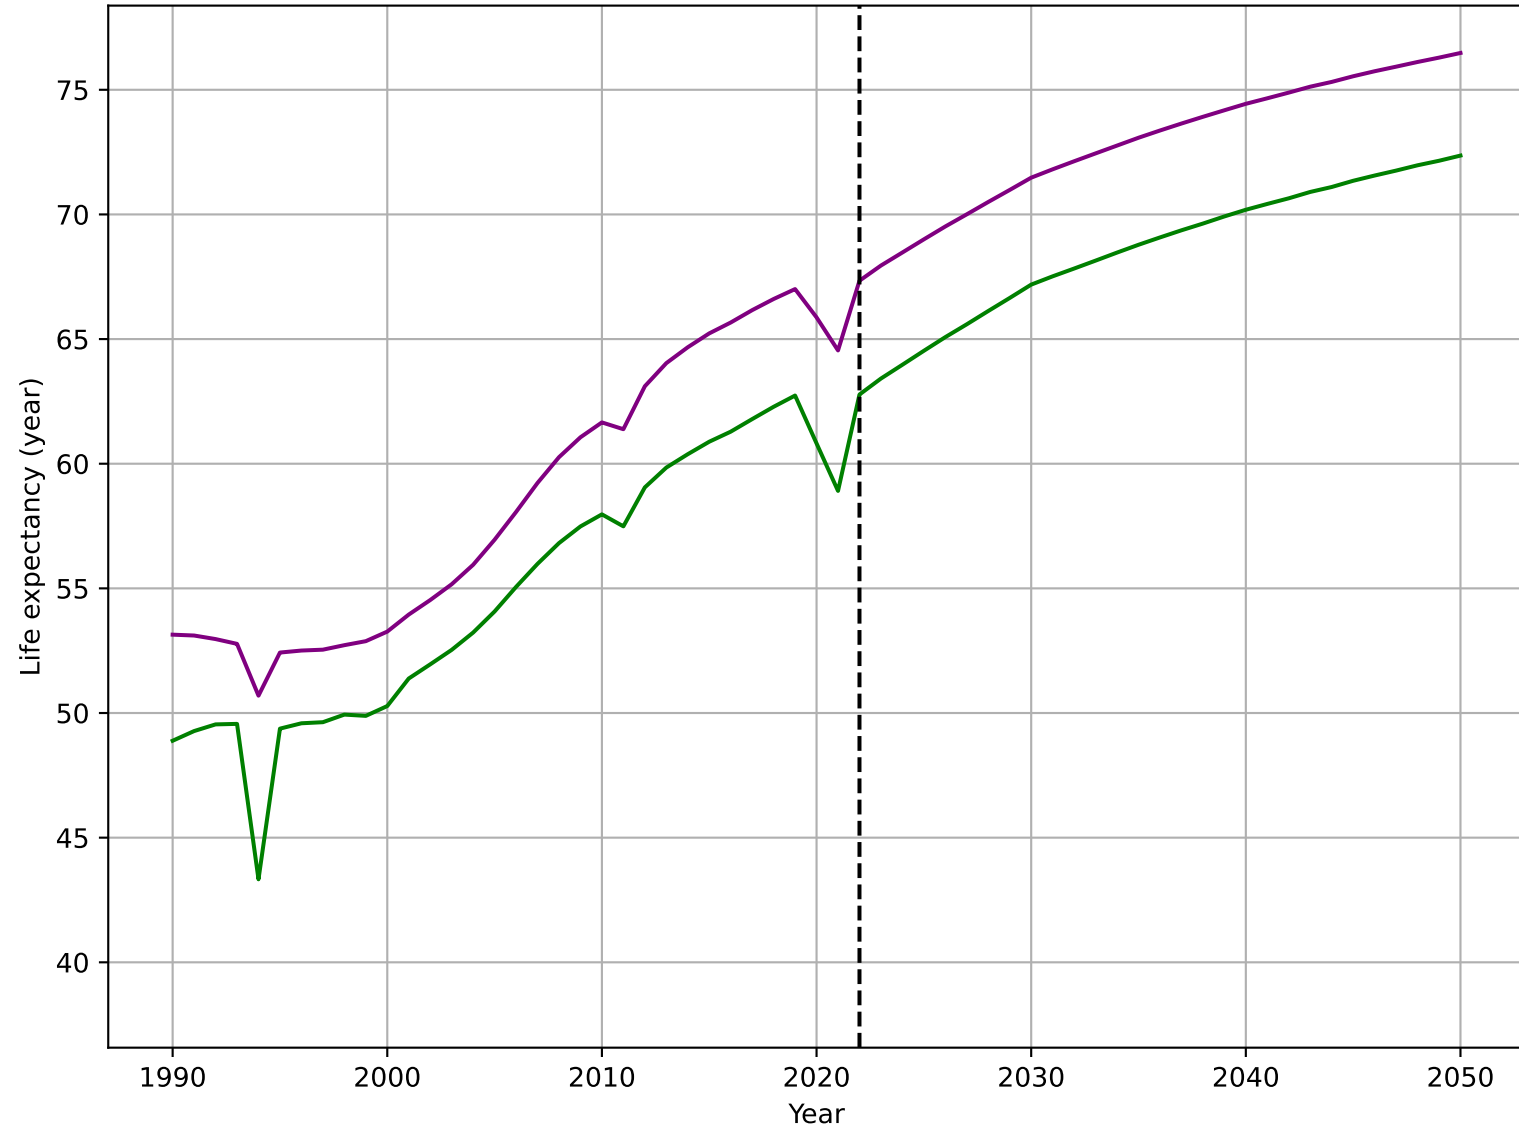

### Healthy Life Expectancy (HALE)

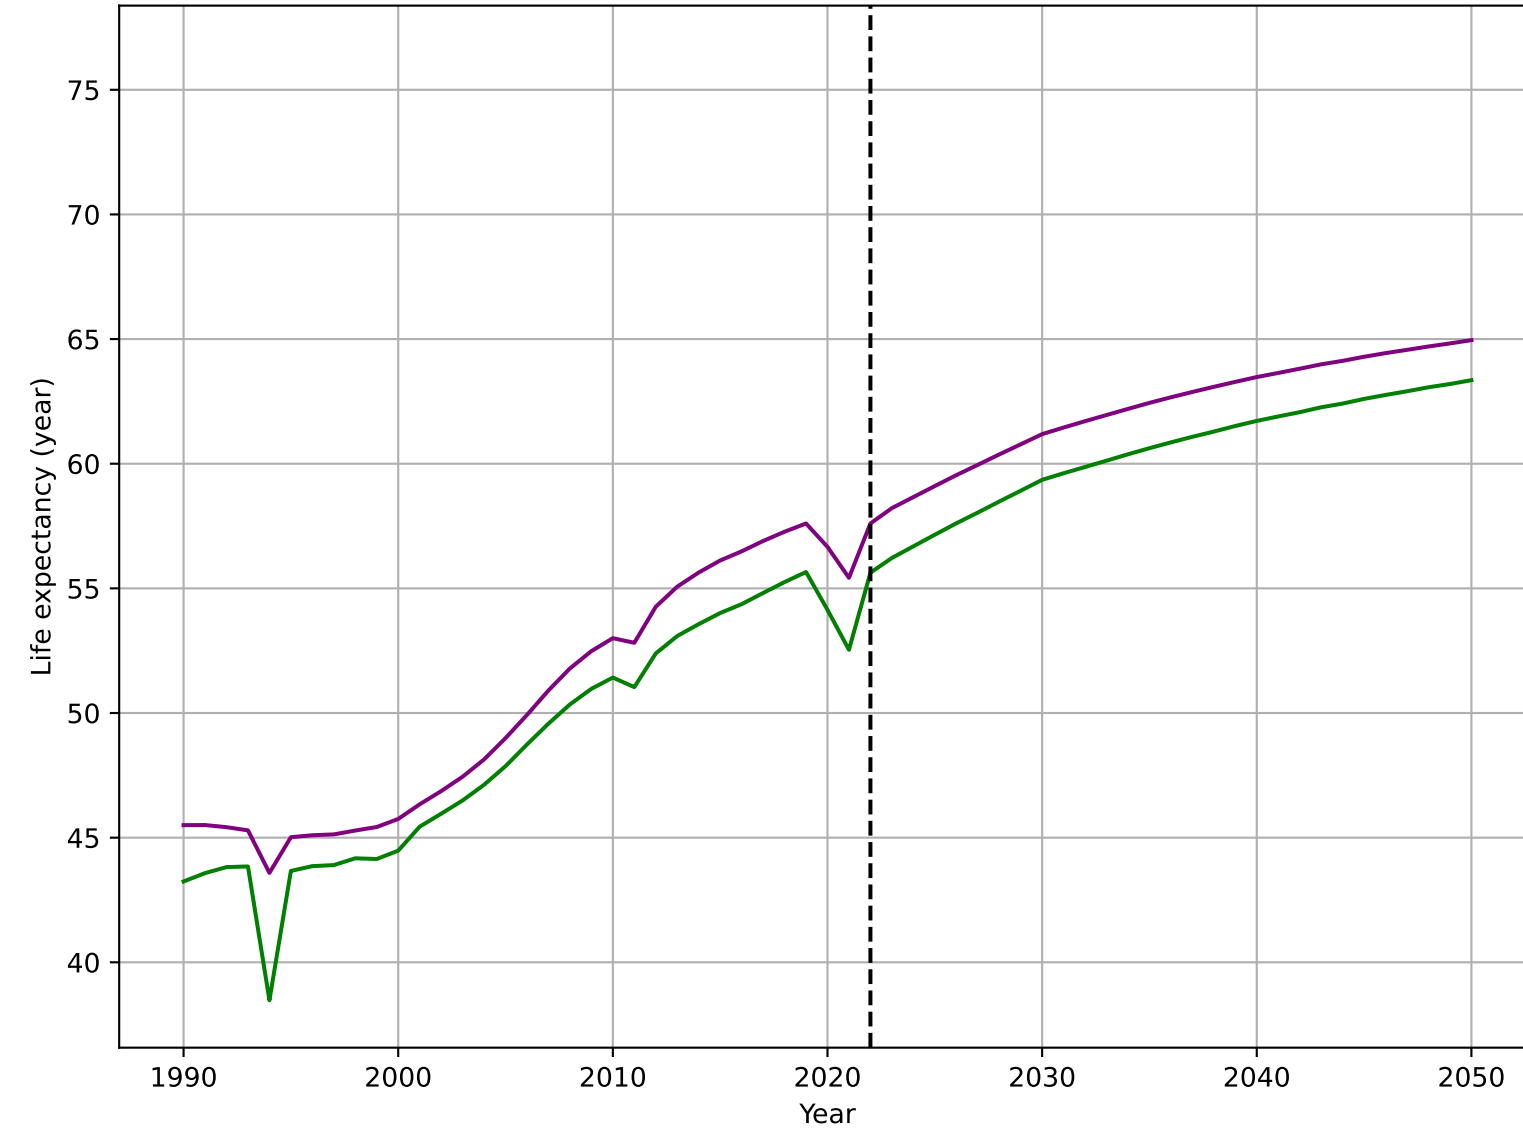

# Southern Sub-Saharan Africa

### Life Expectancy

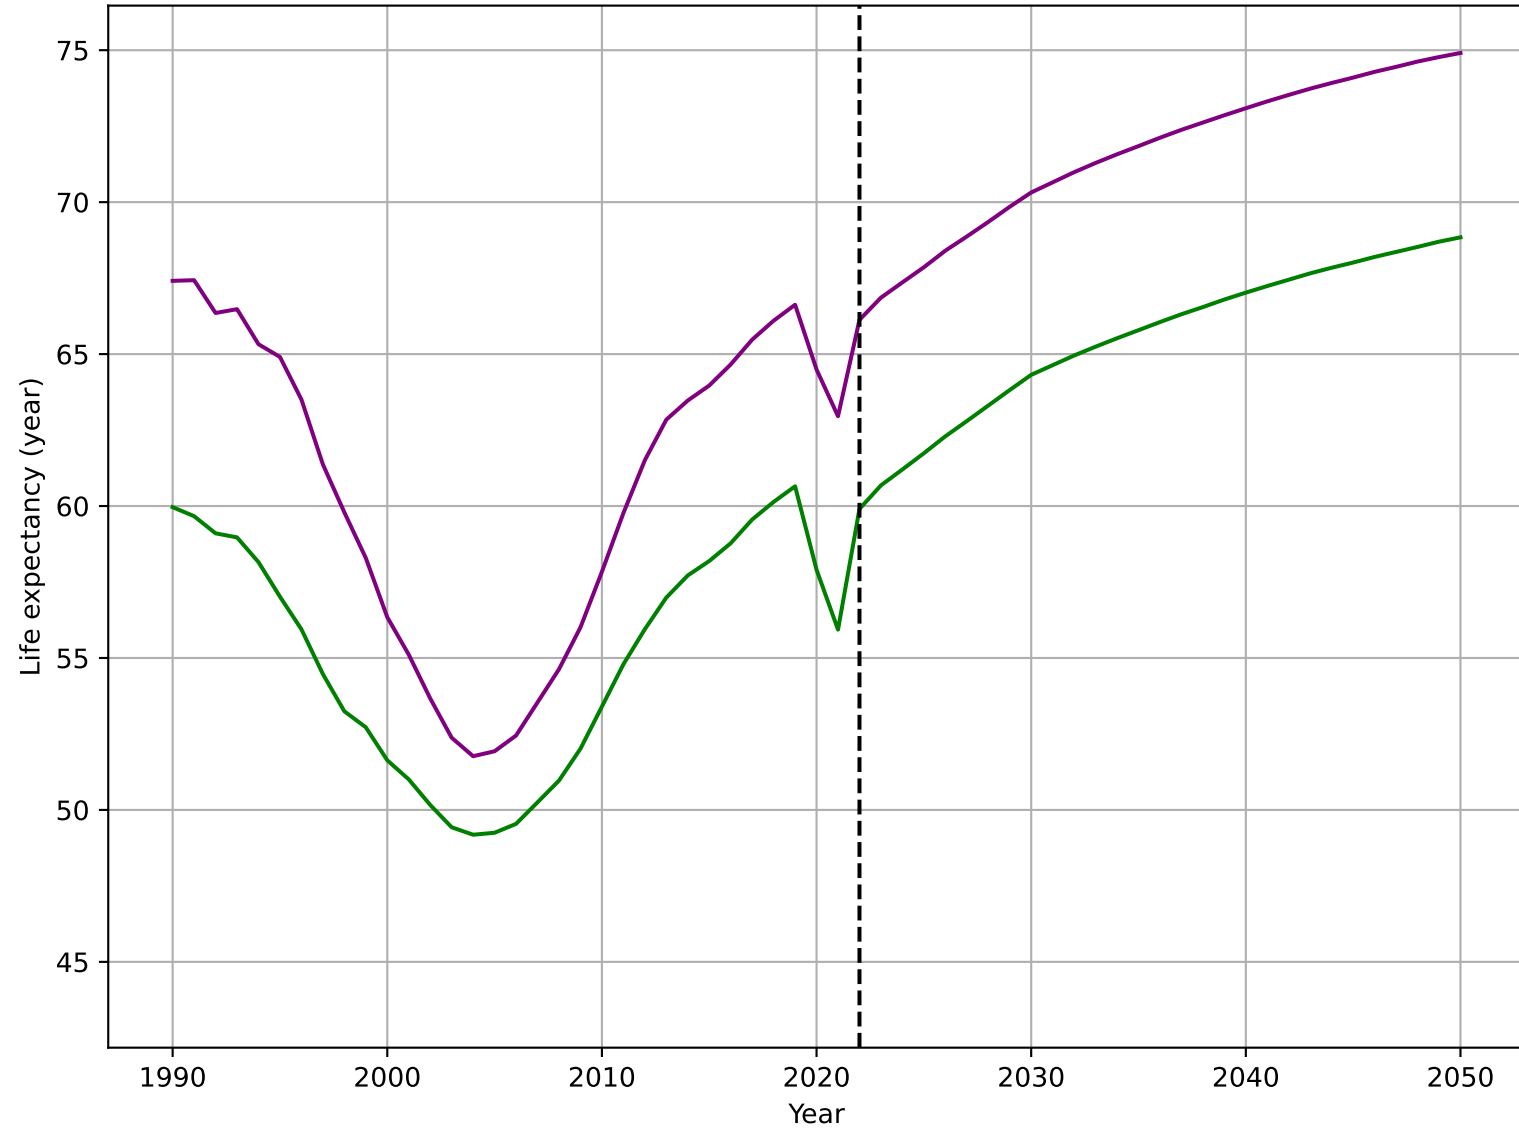

### Healthy Life Expectancy (HALE)

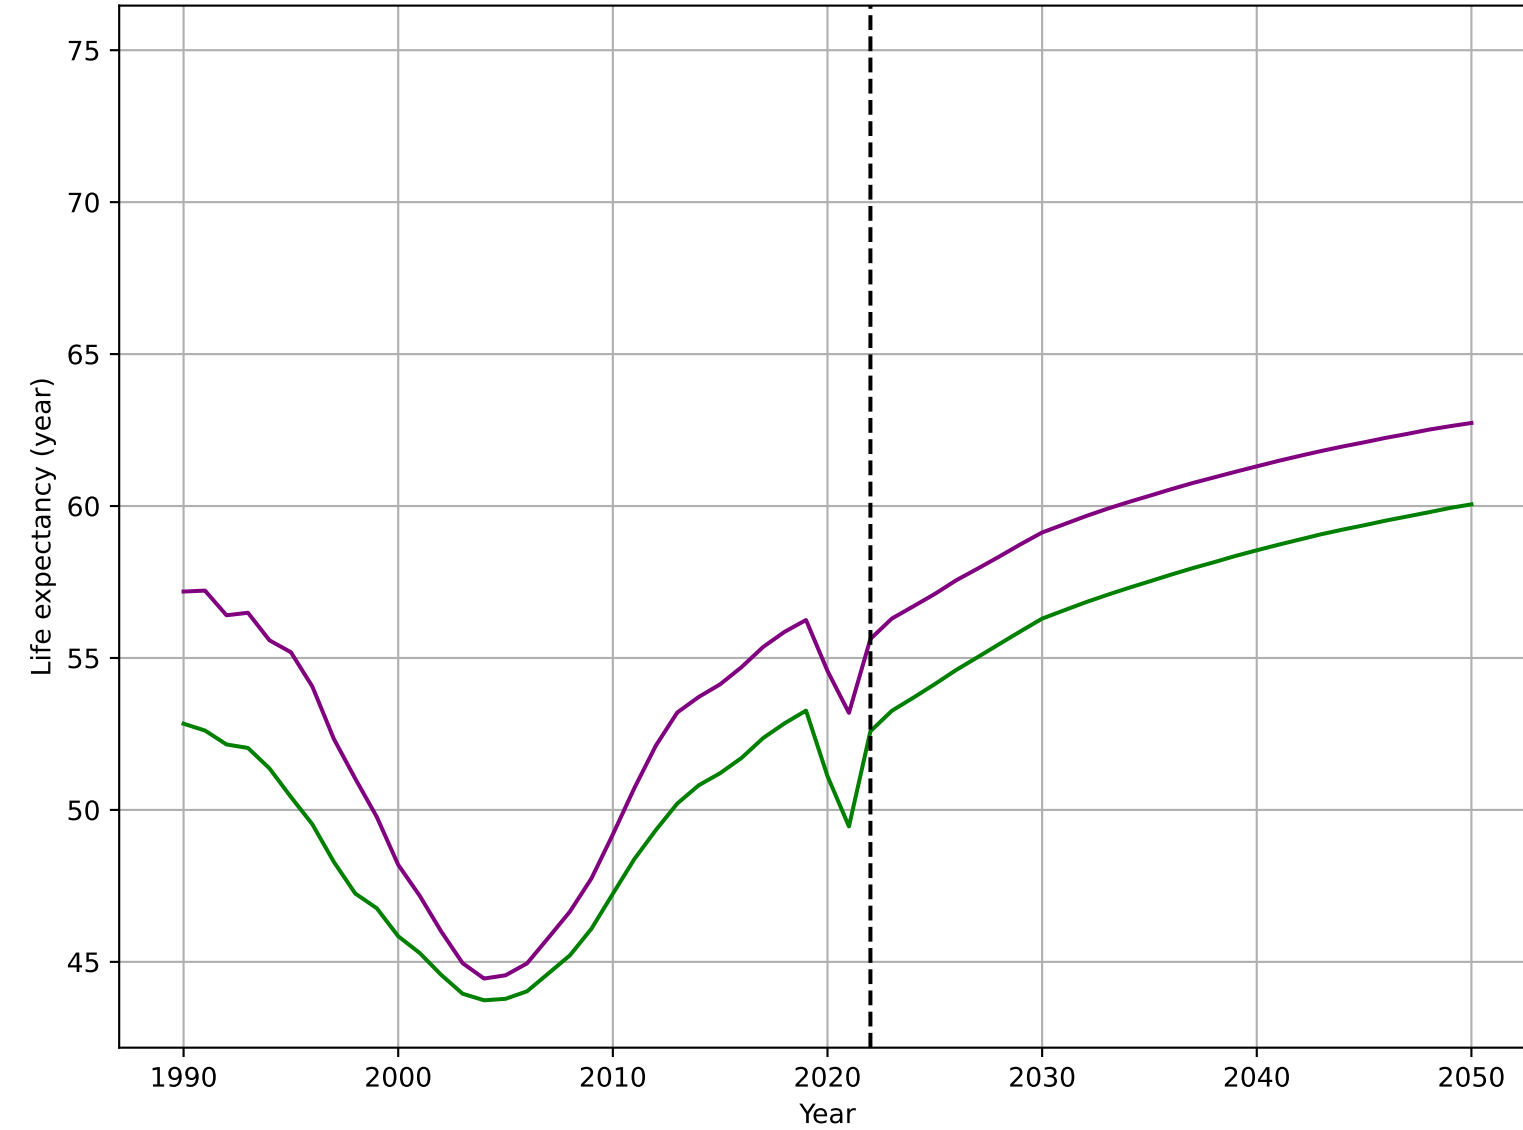

# Western Sub-Saharan Africa

### Life Expectancy

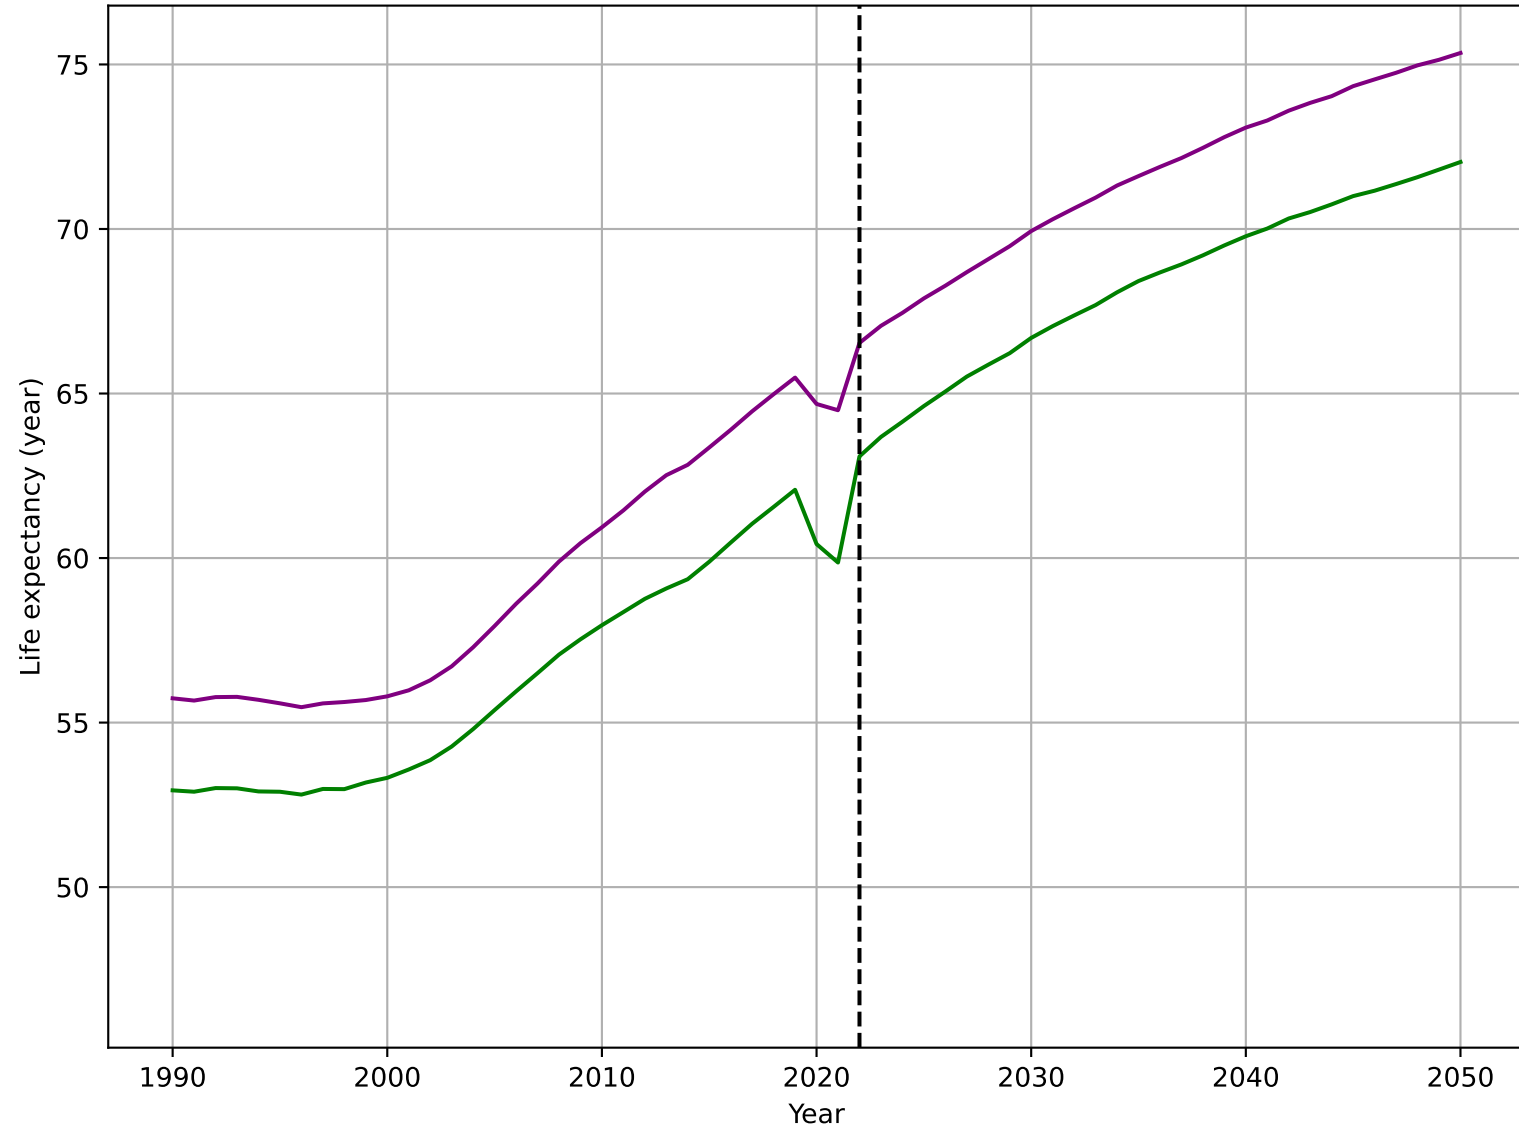

### Healthy Life Expectancy (HALE)

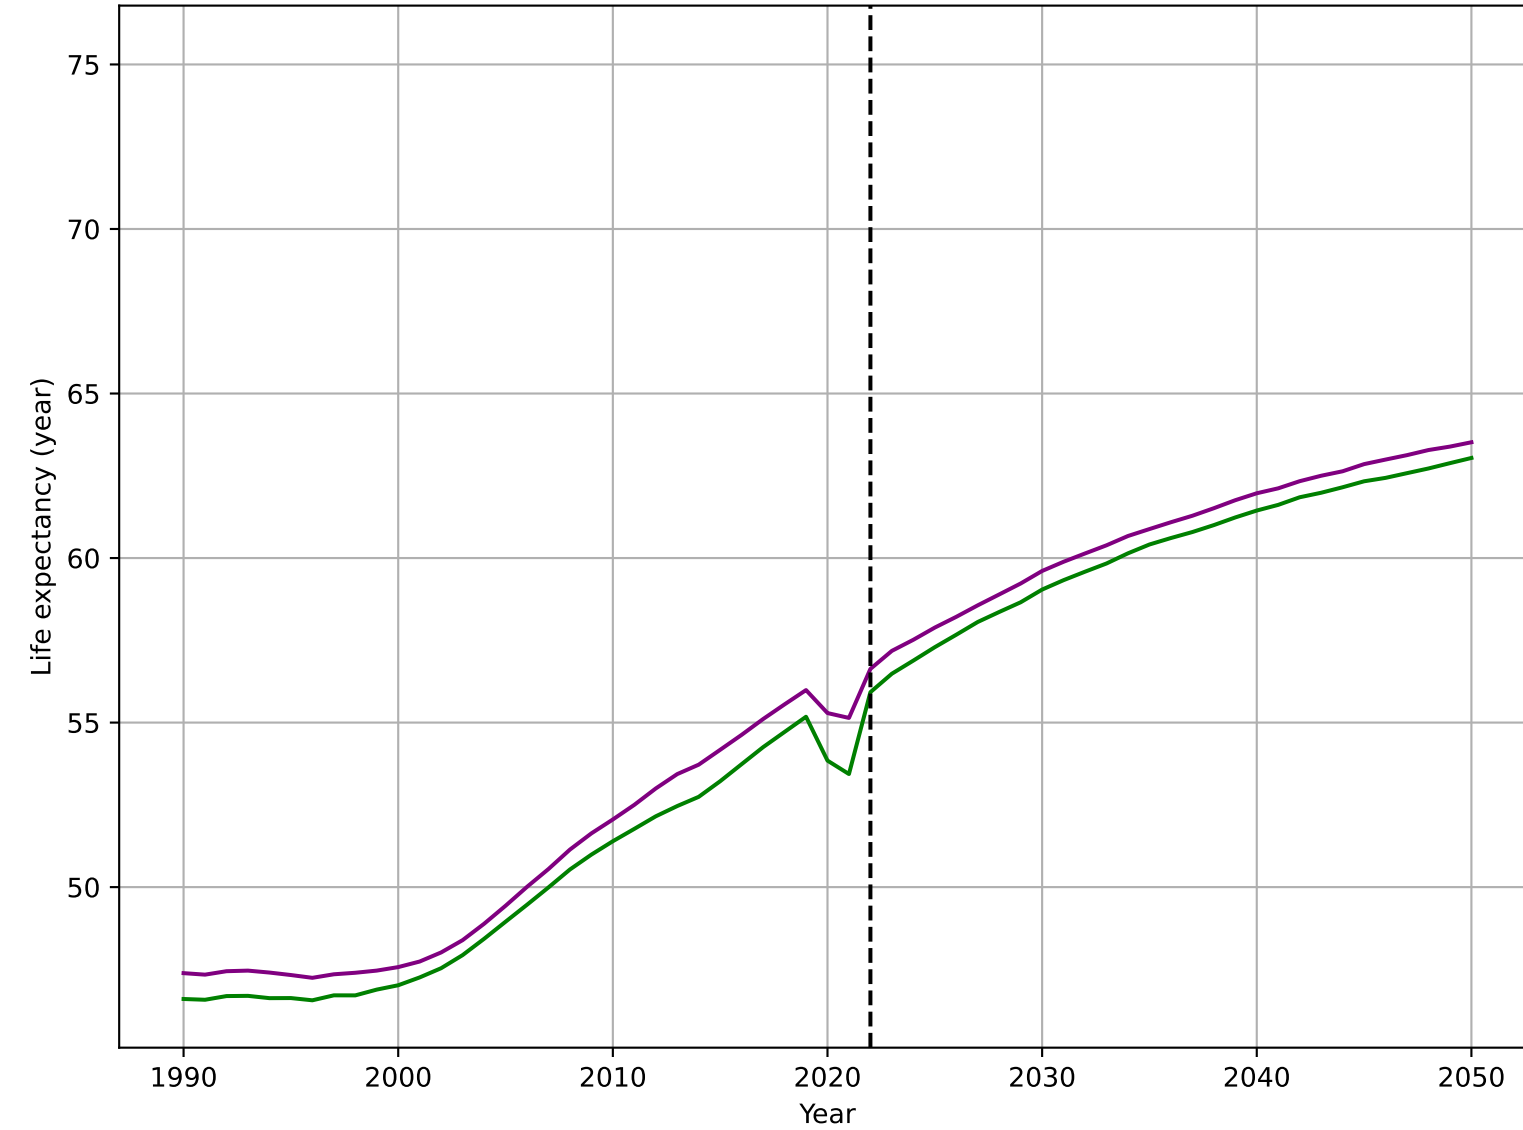

# Armenia

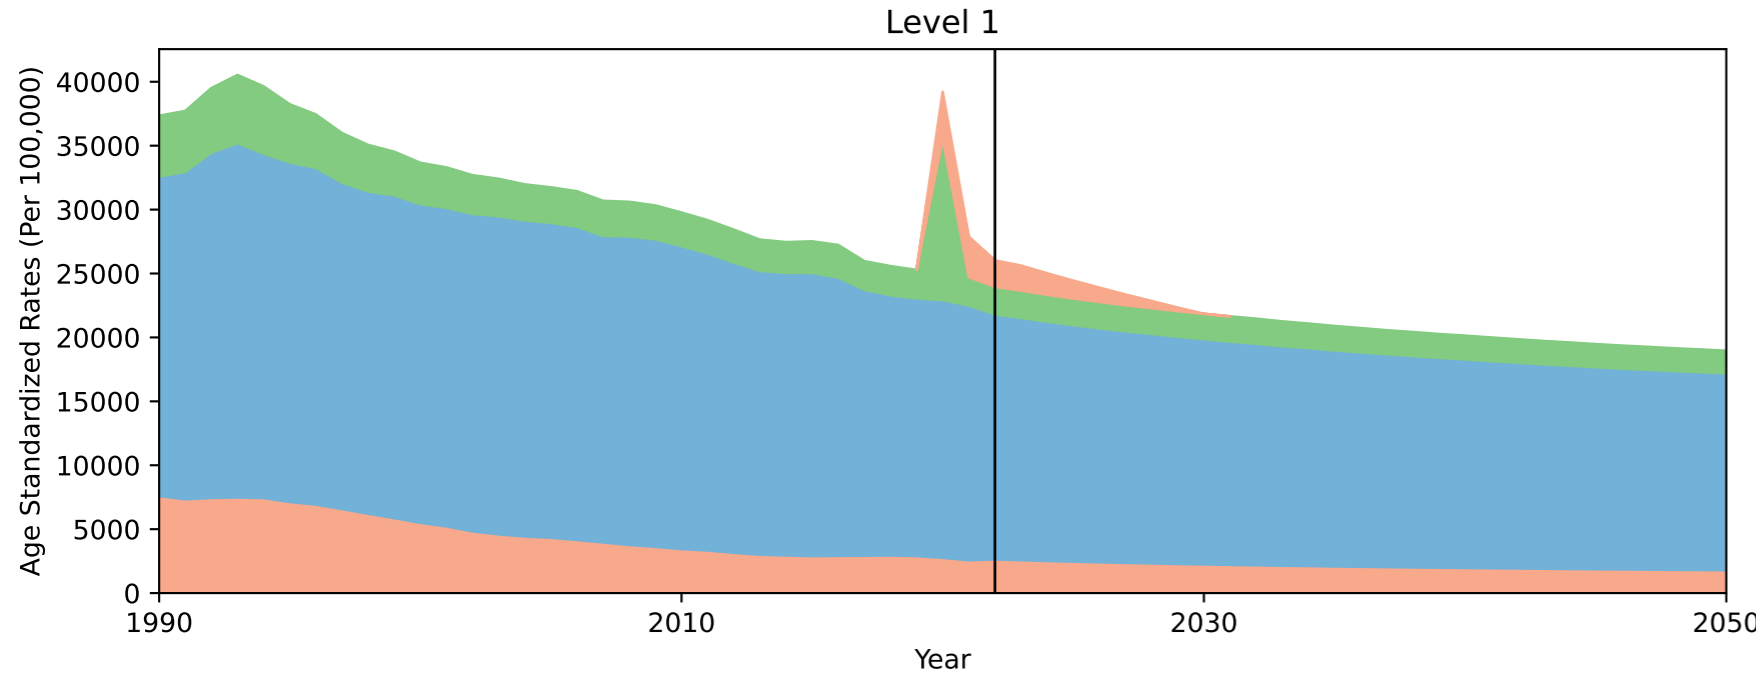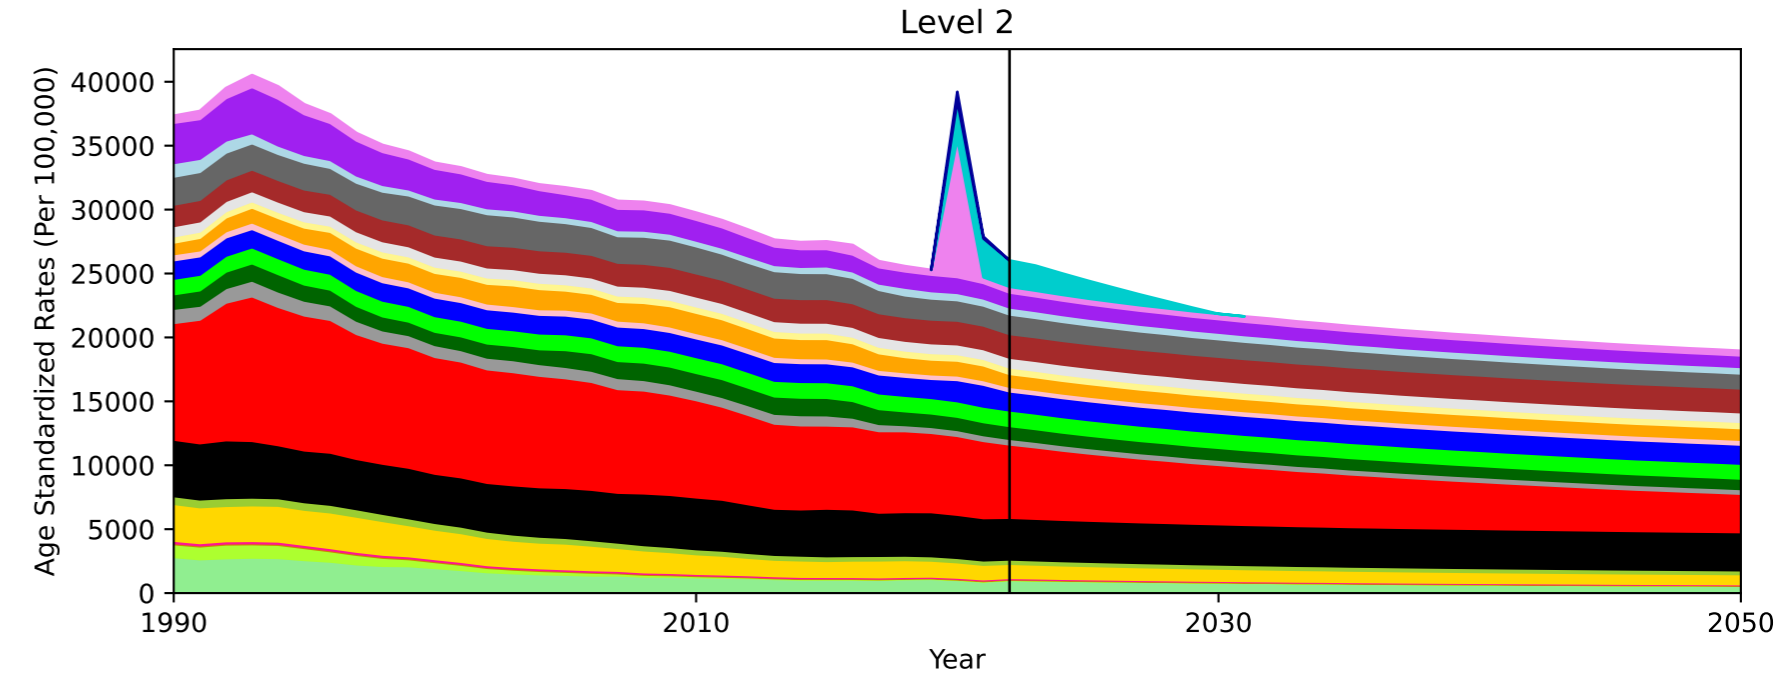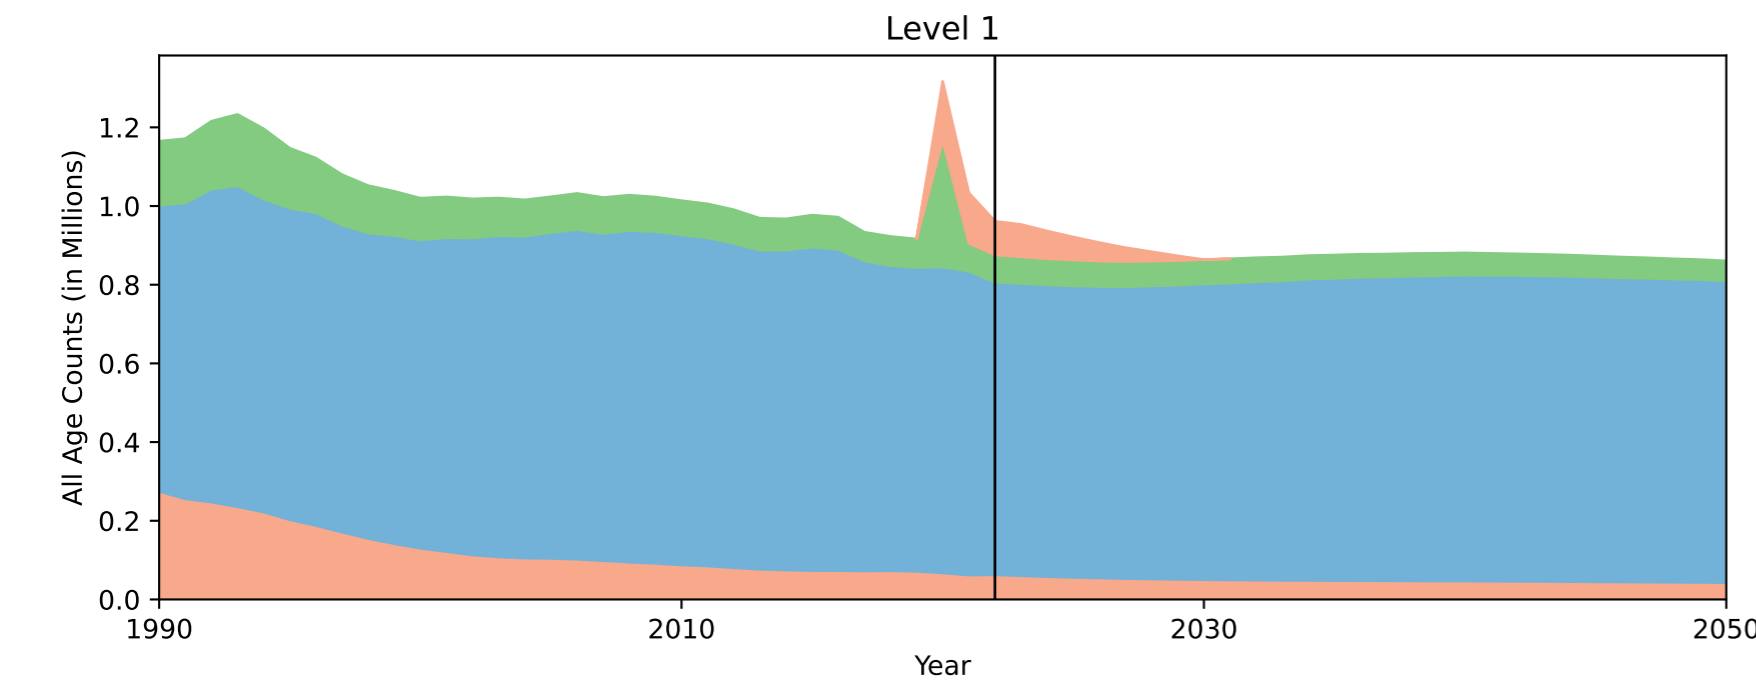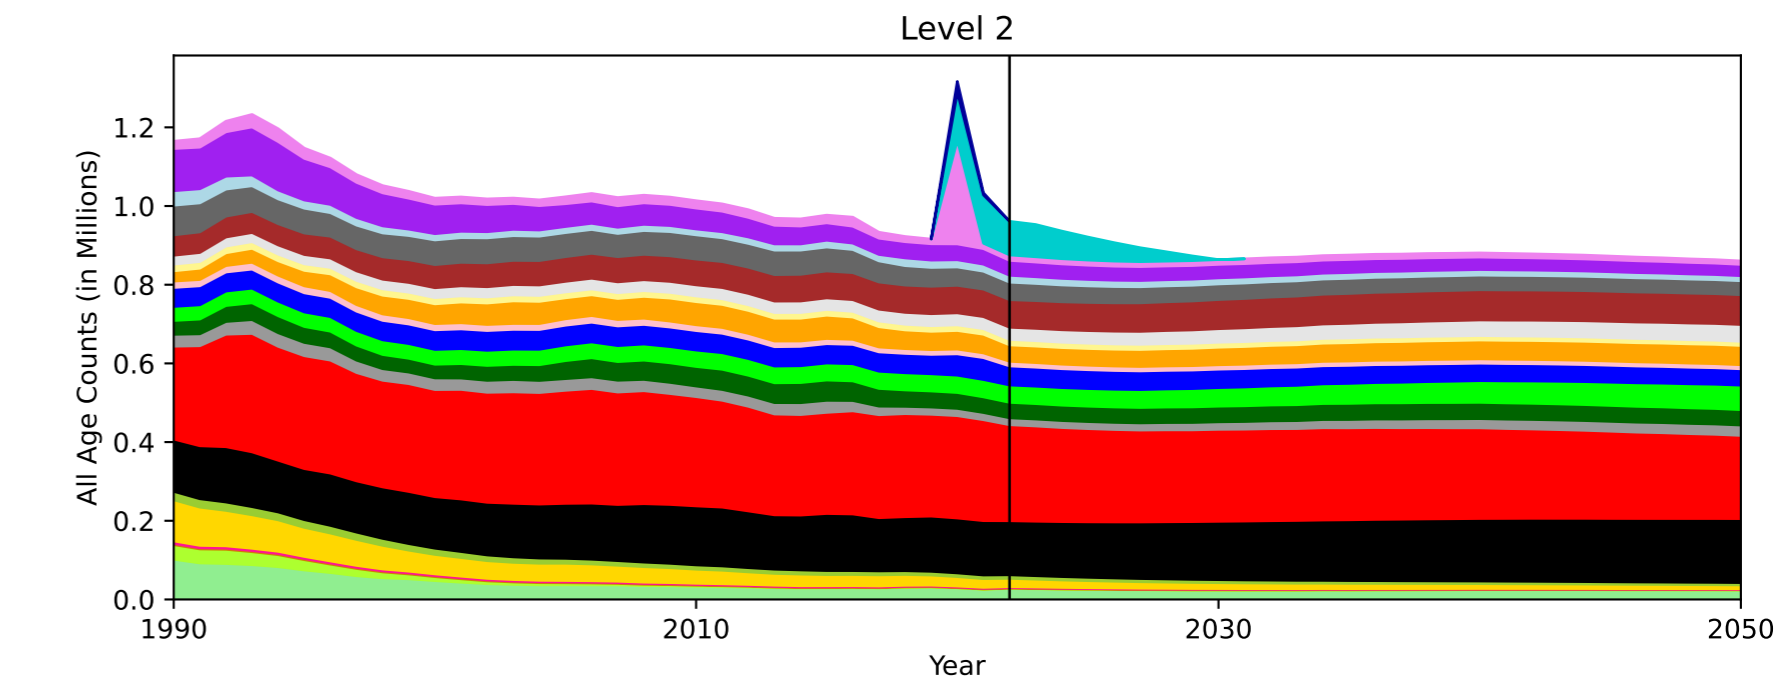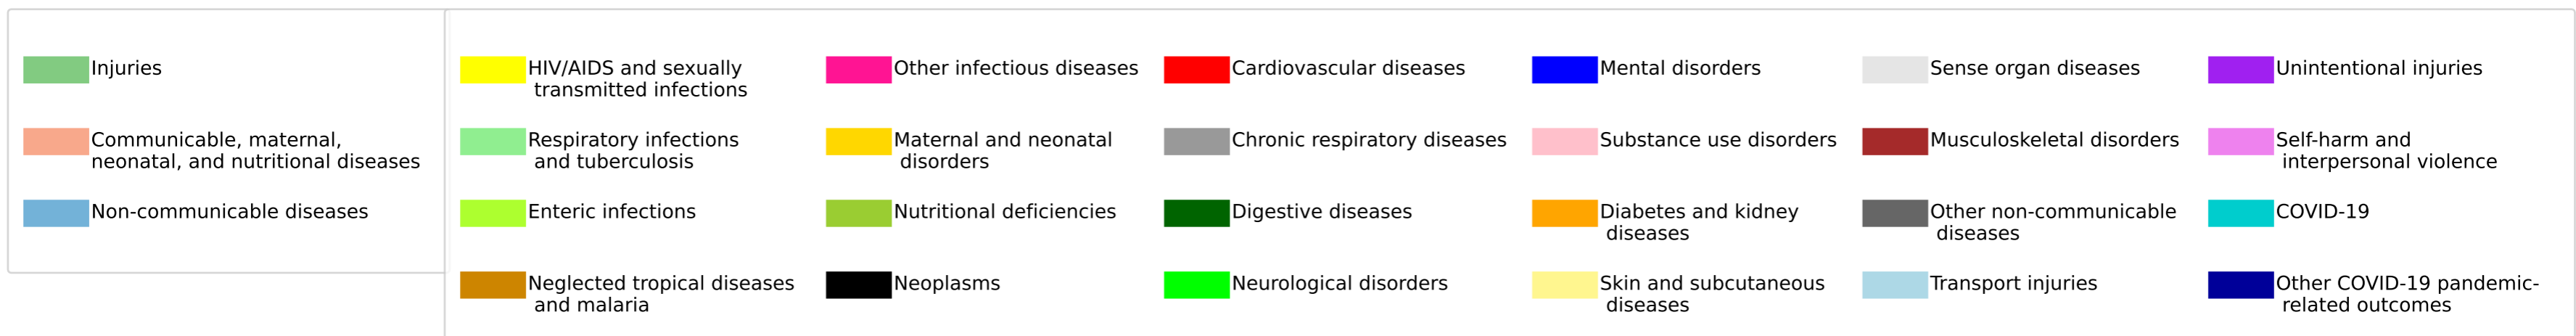

# Azerbaijan

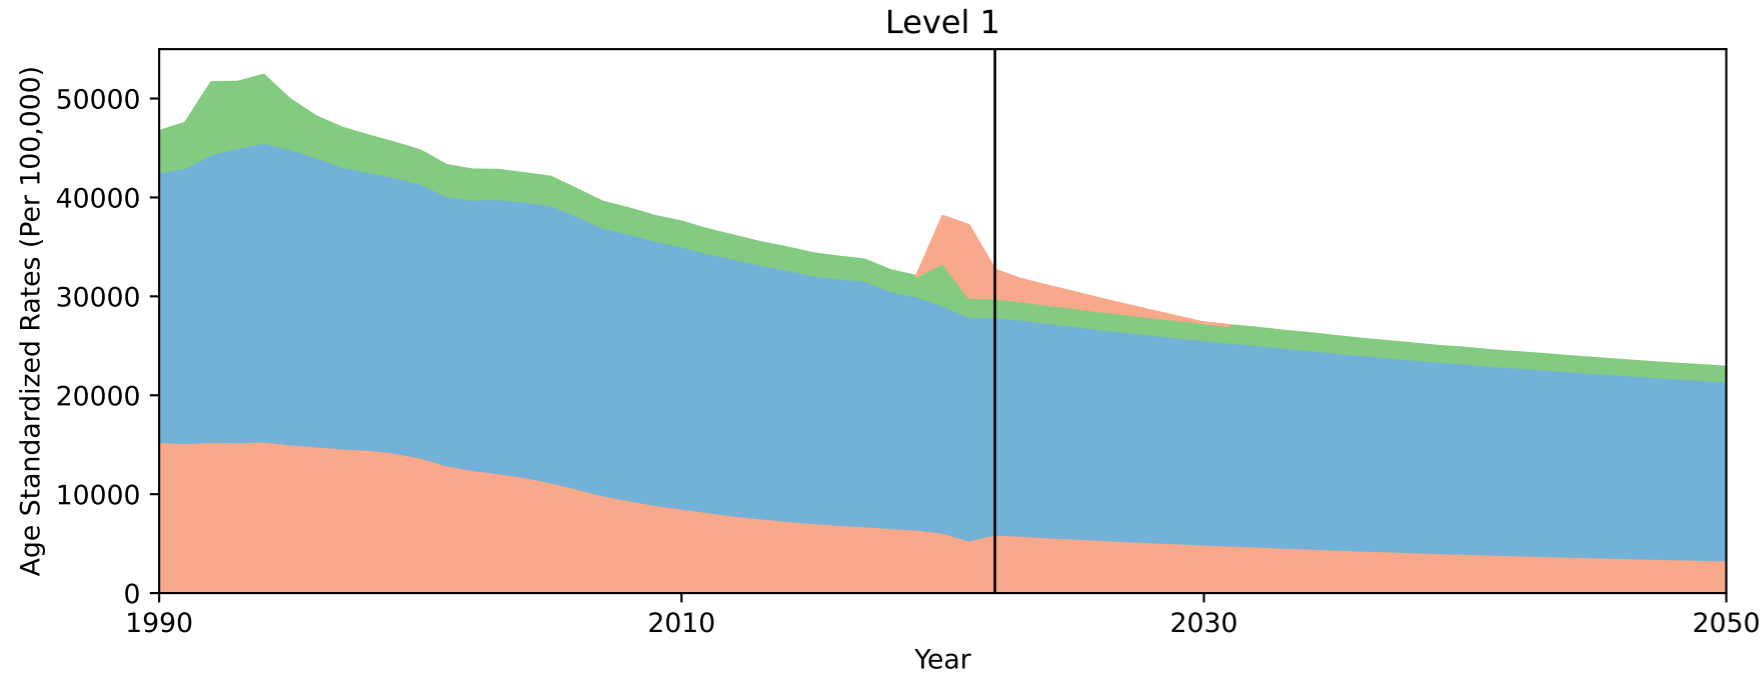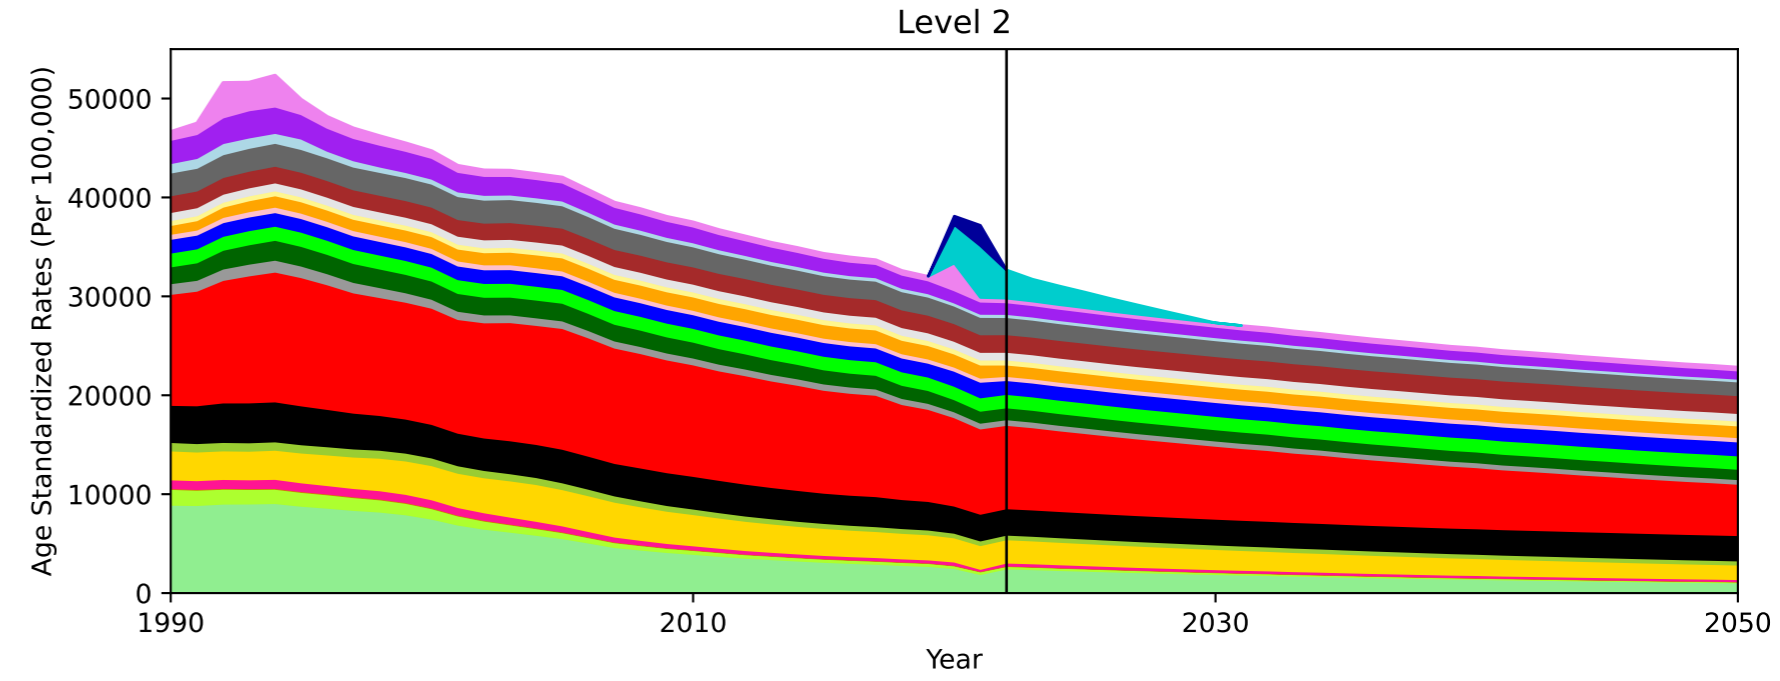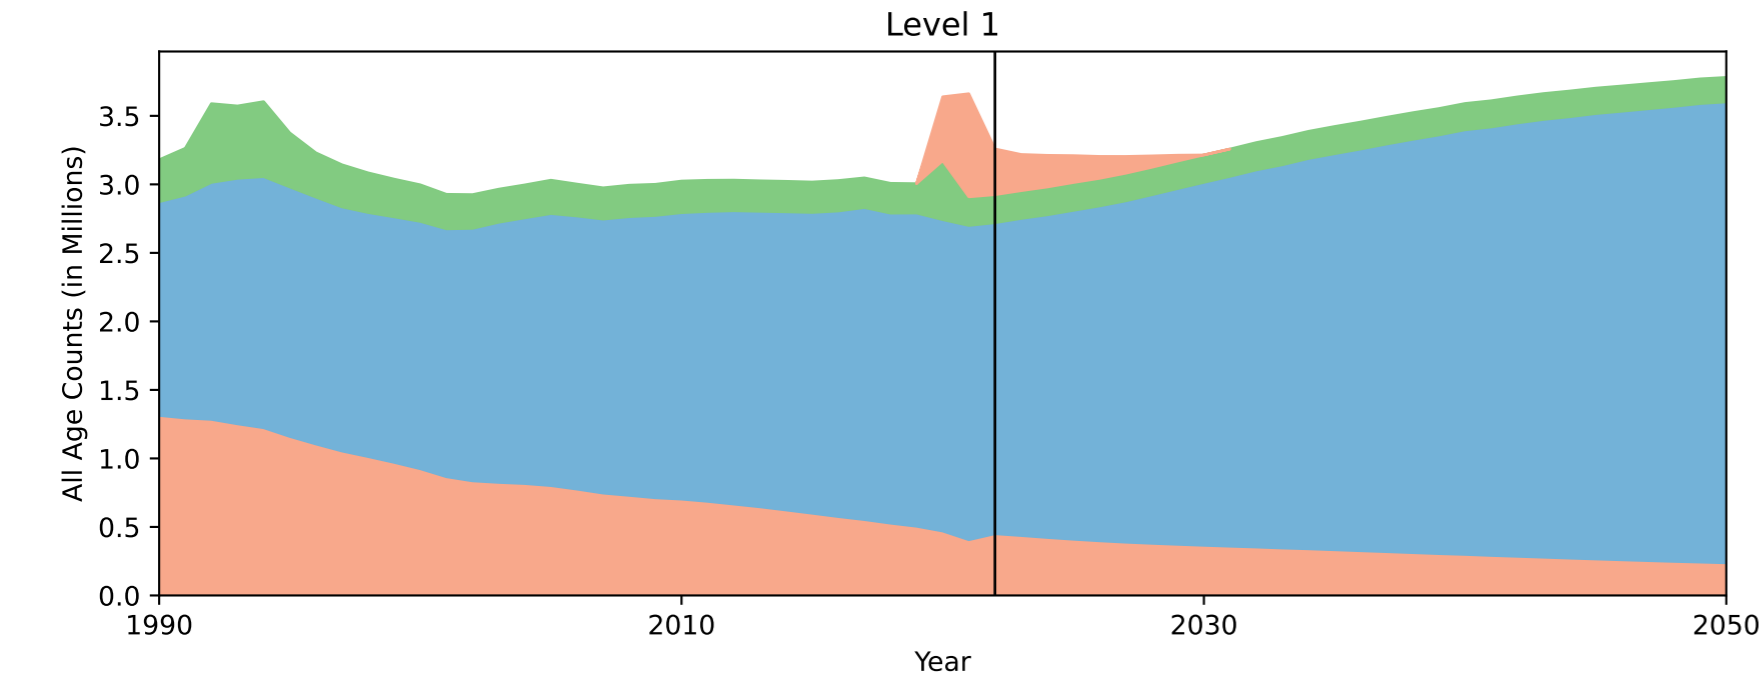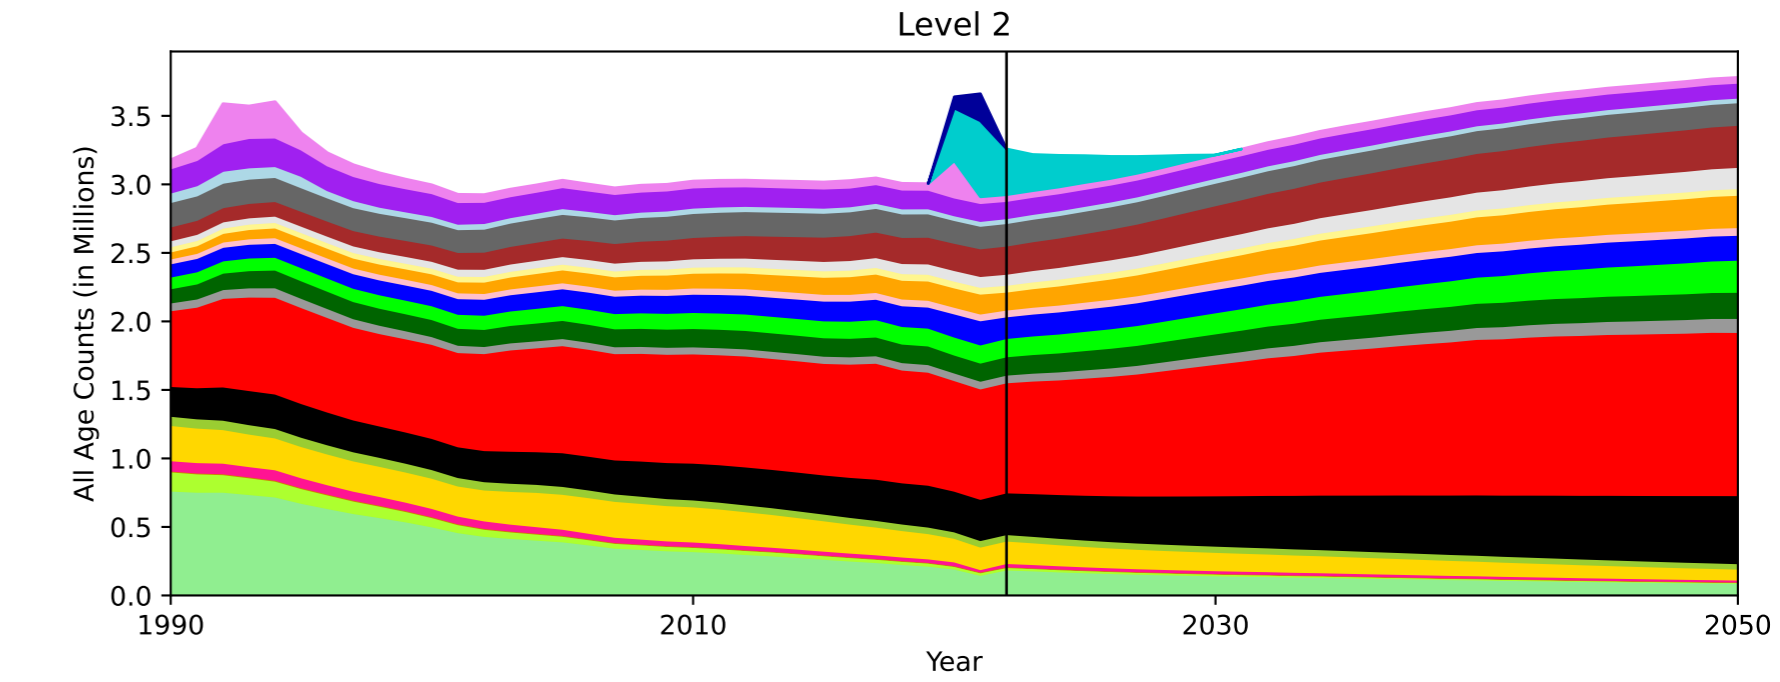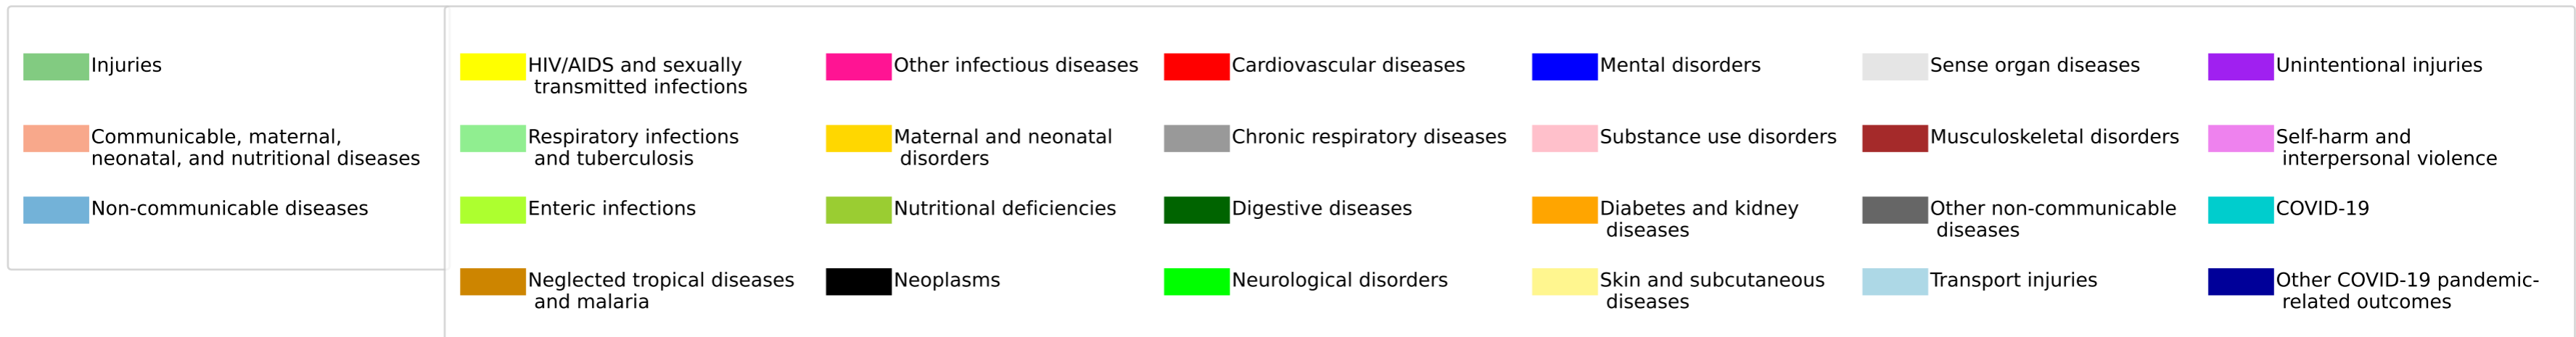

# Georgia

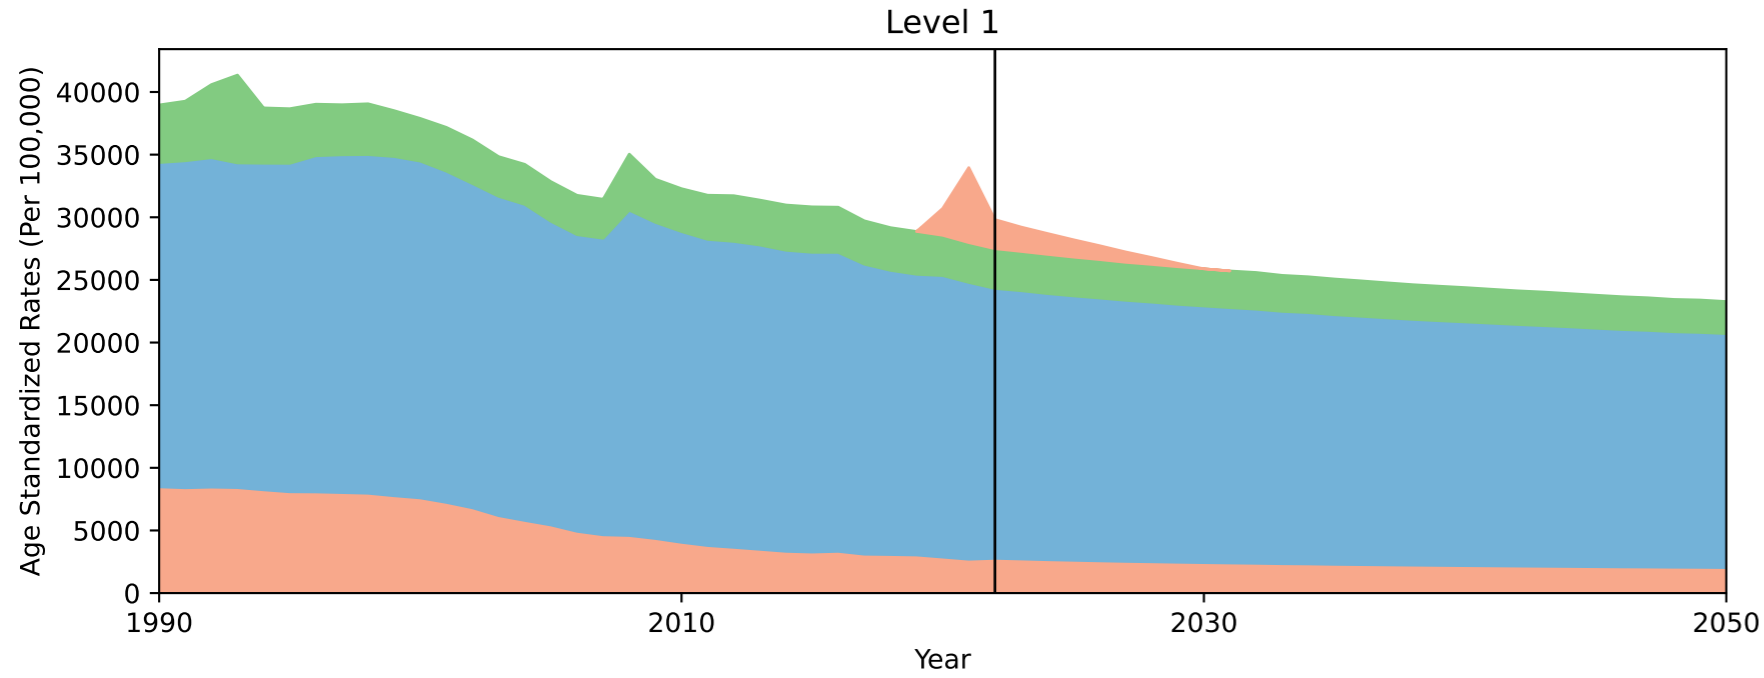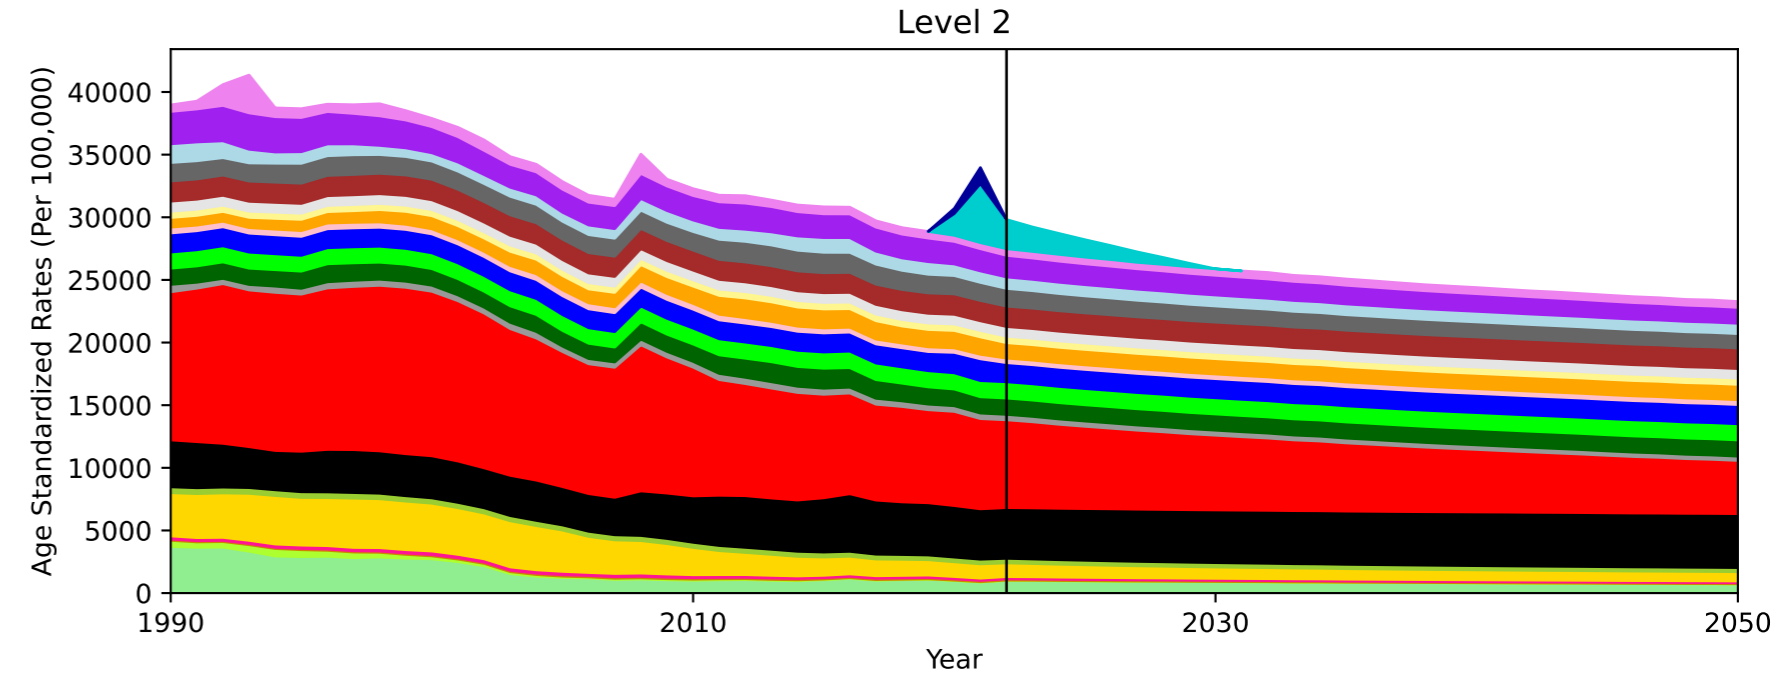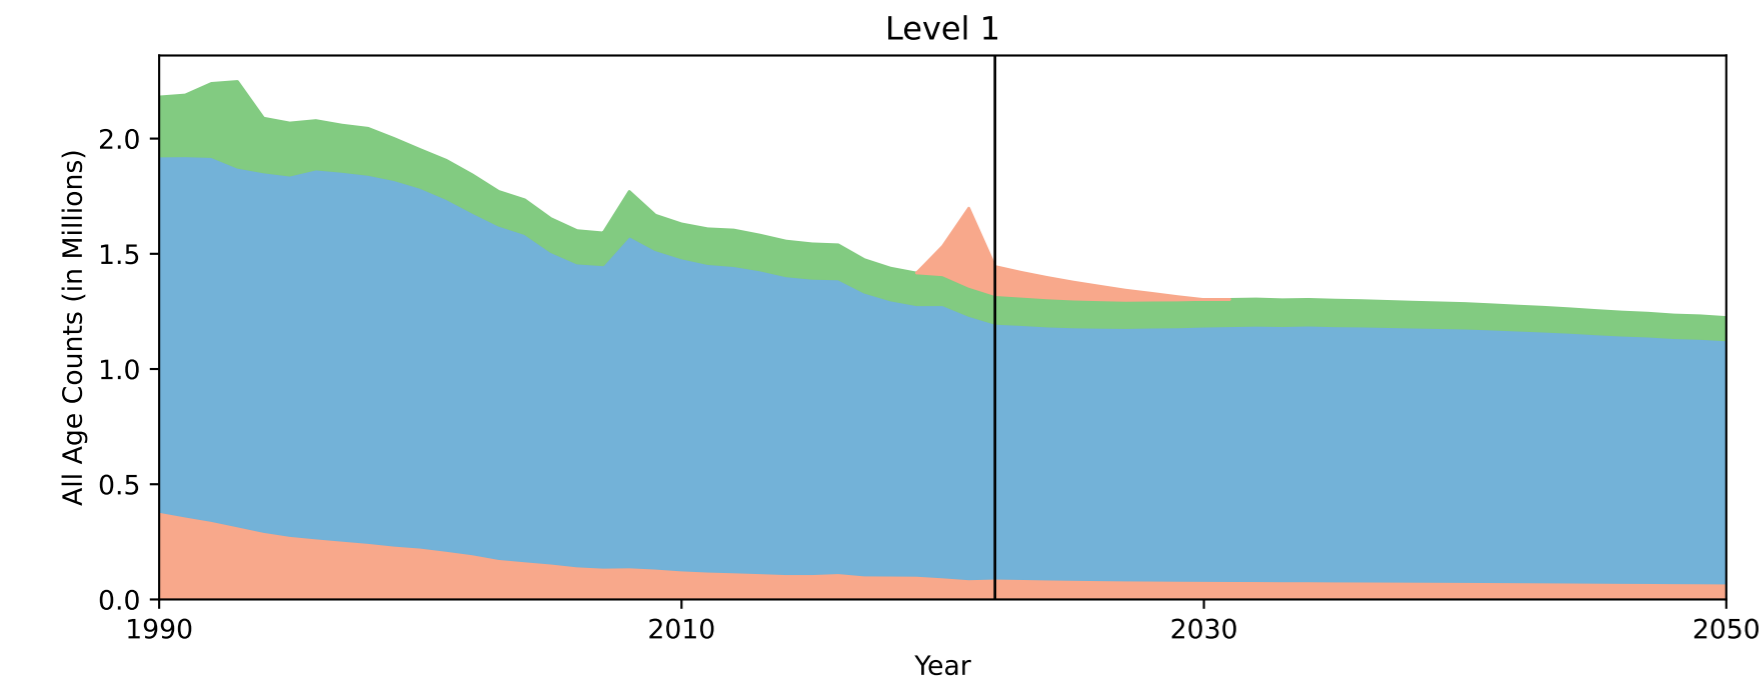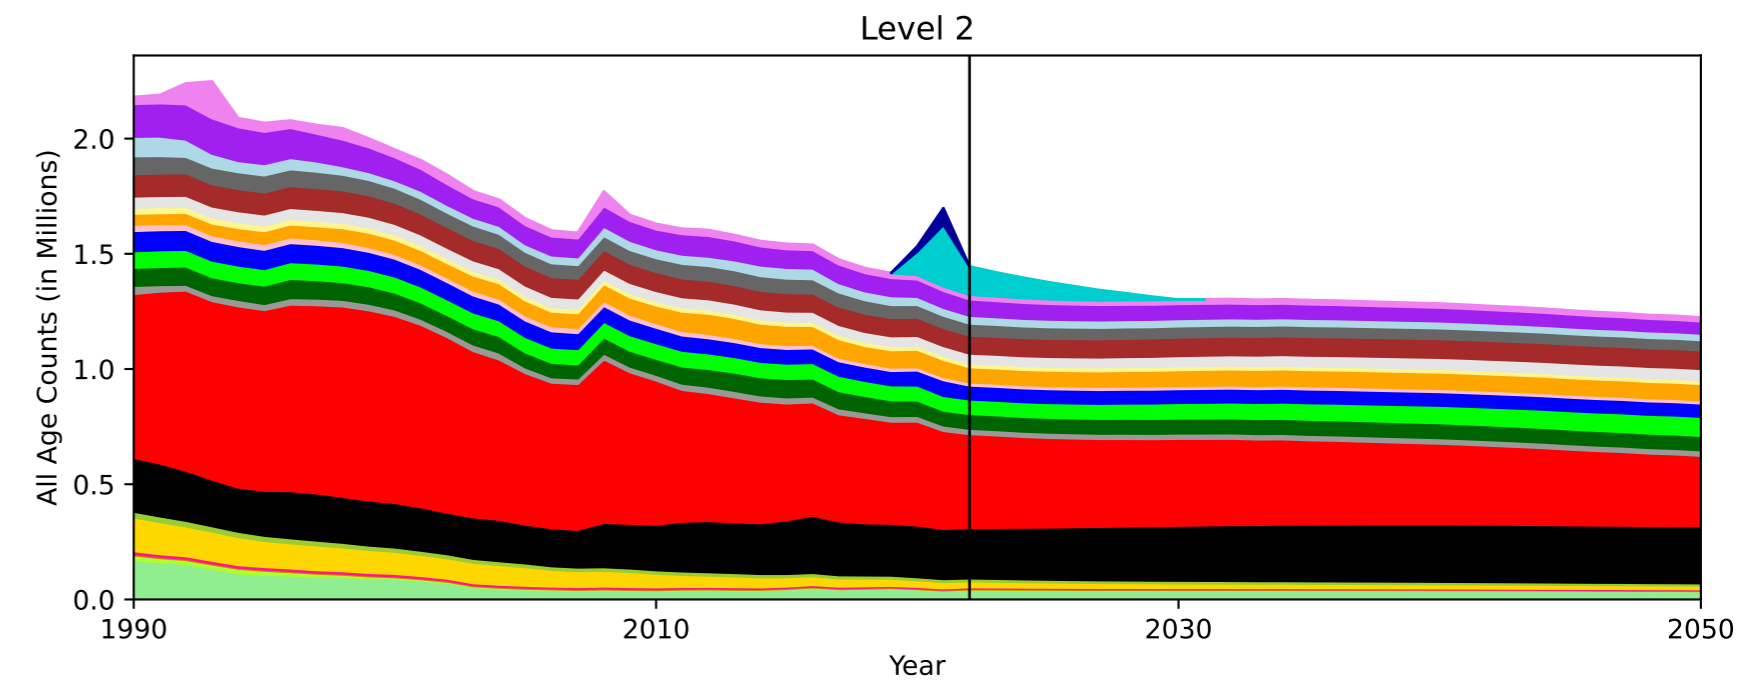



# Kazakhstan

Level 1

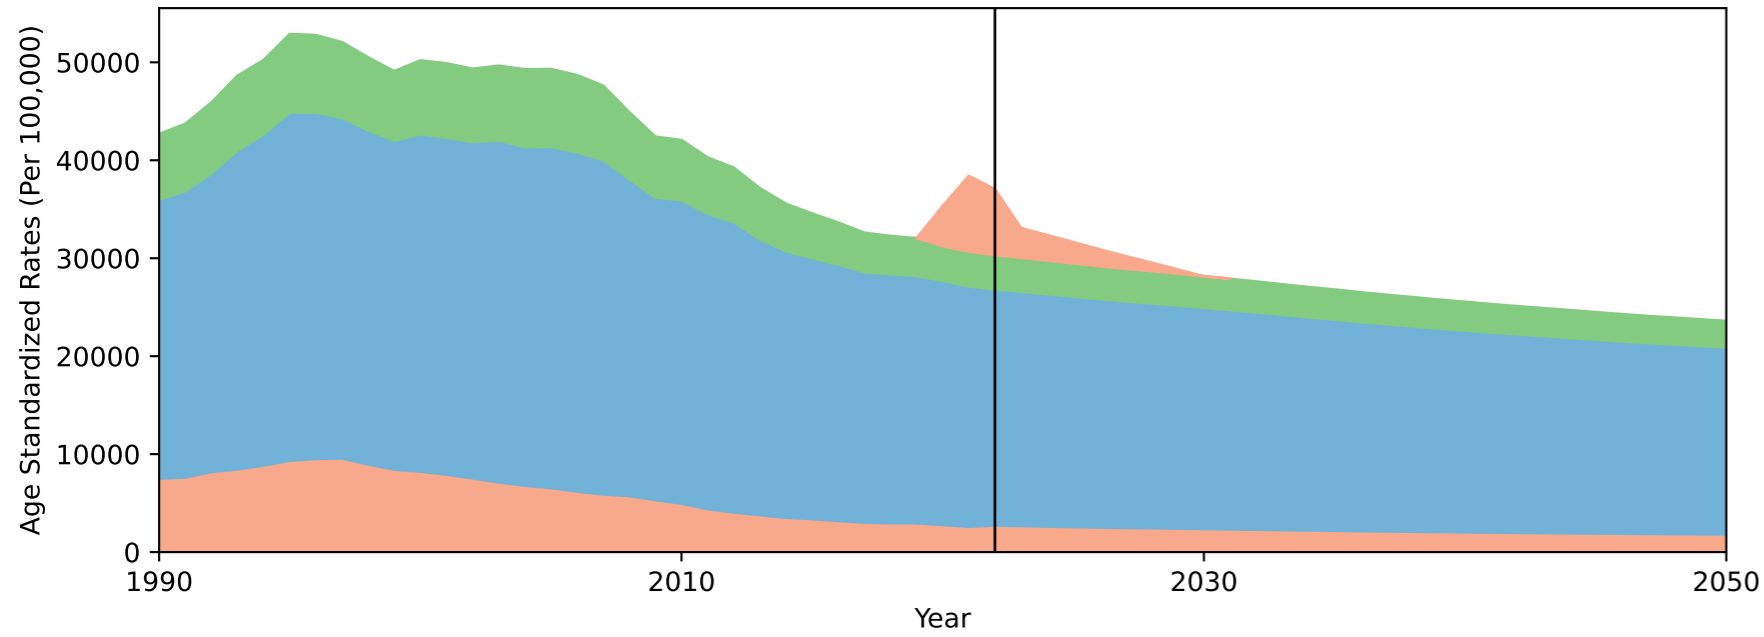

Level 2

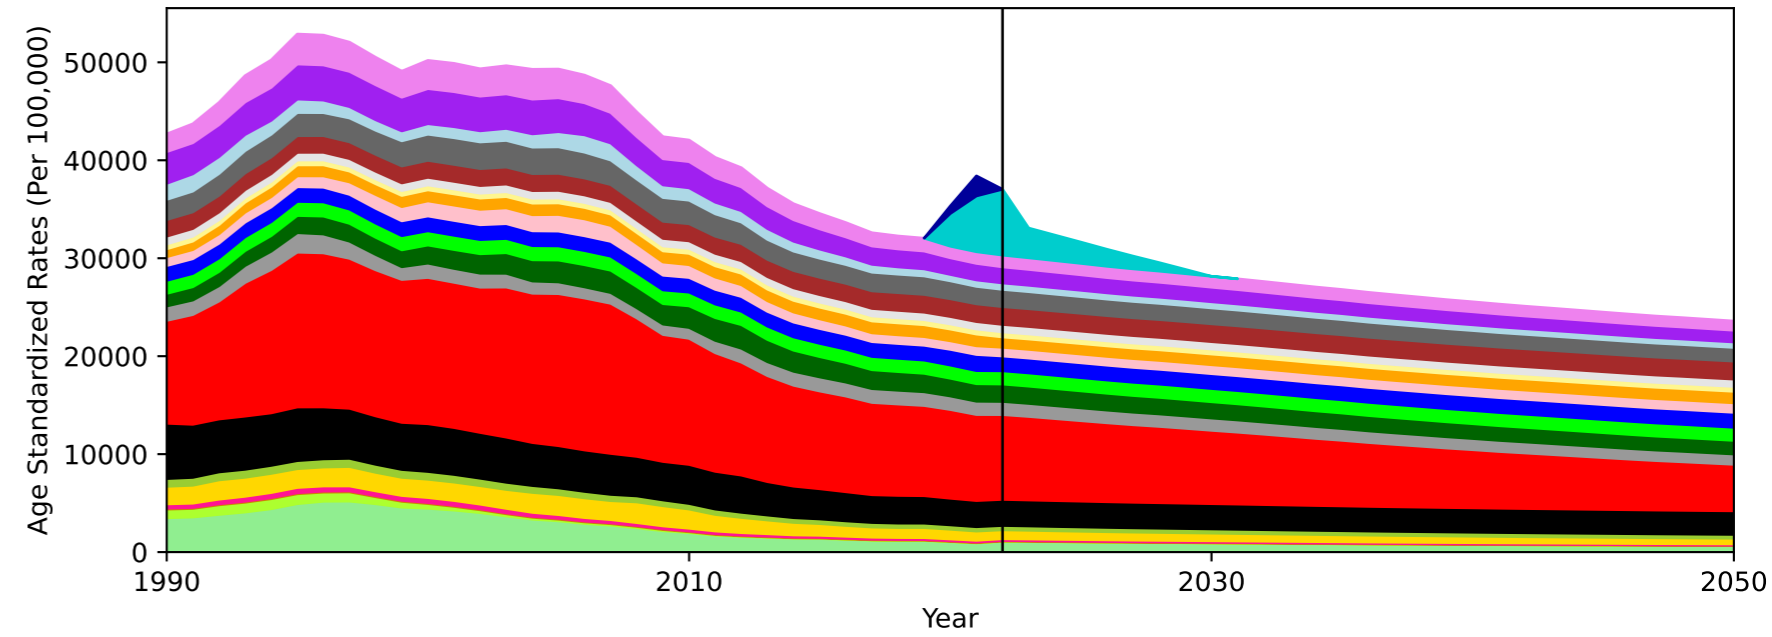

Level 1

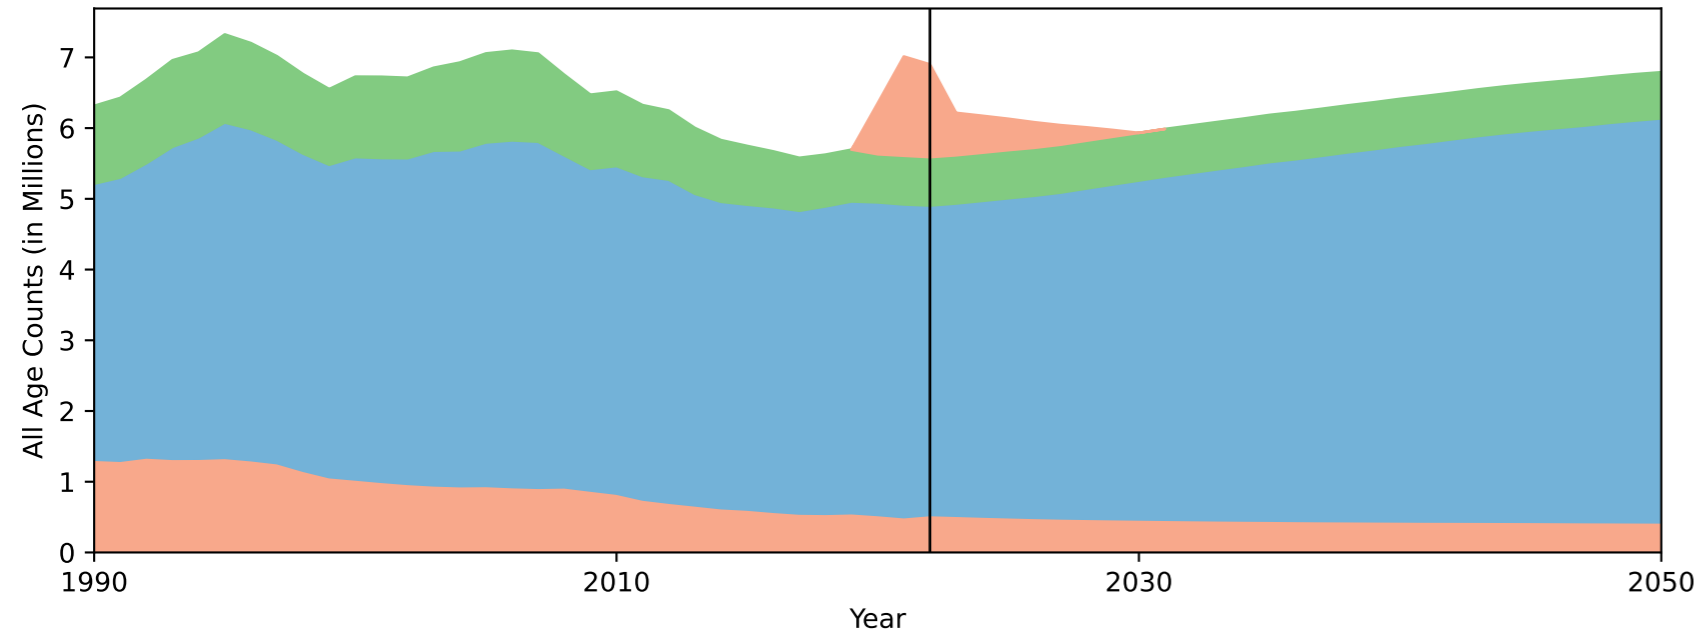

Level 2

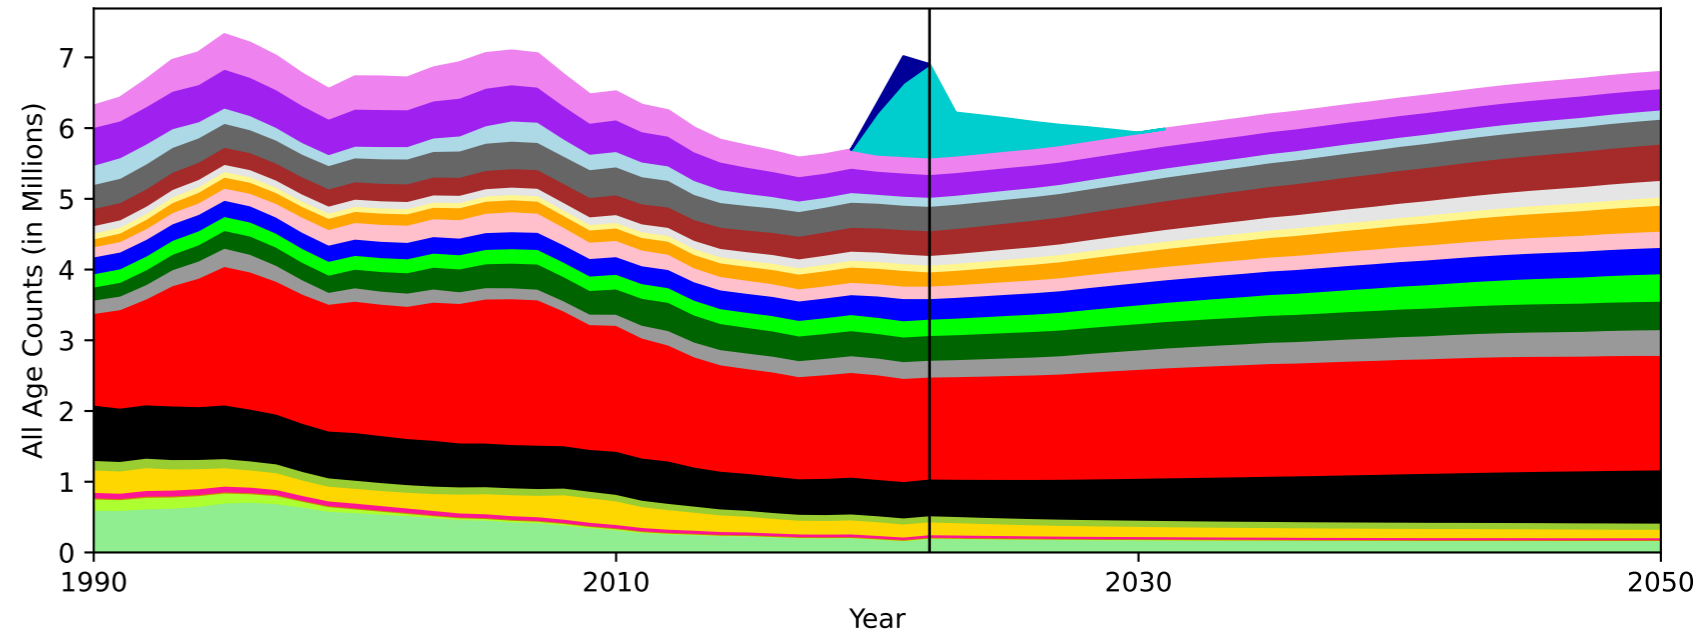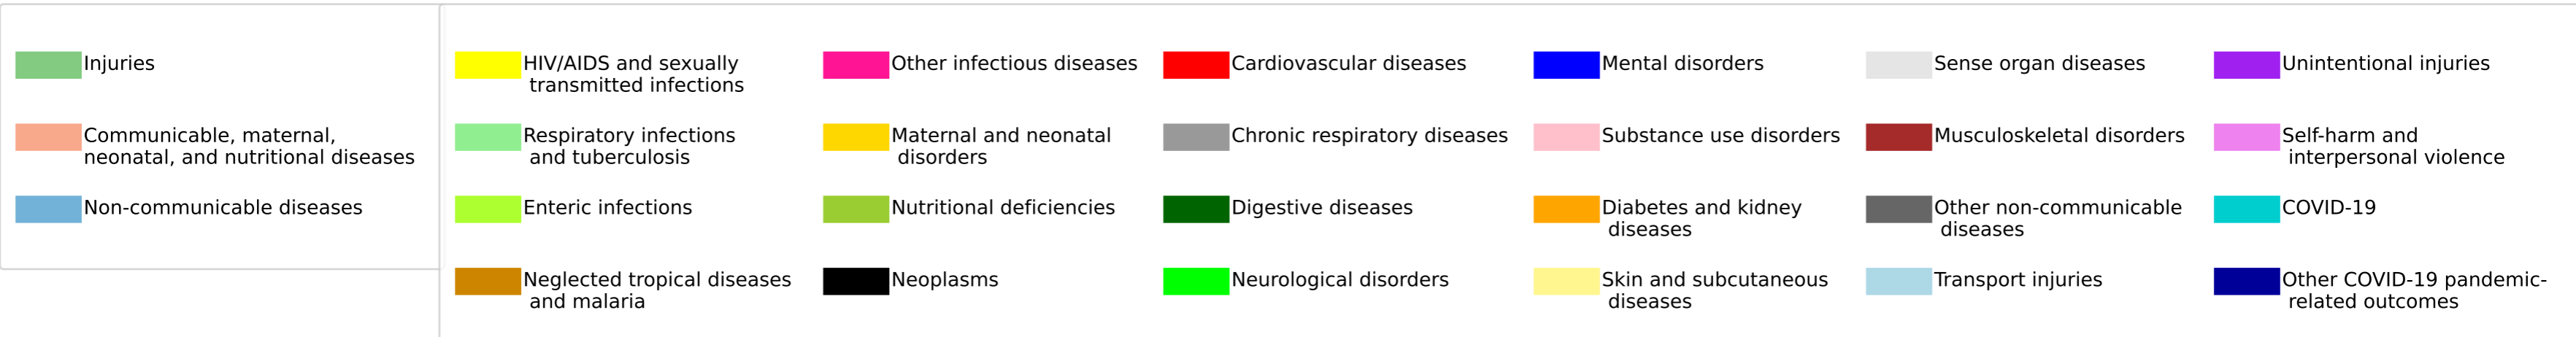

# Kyrgyzstan

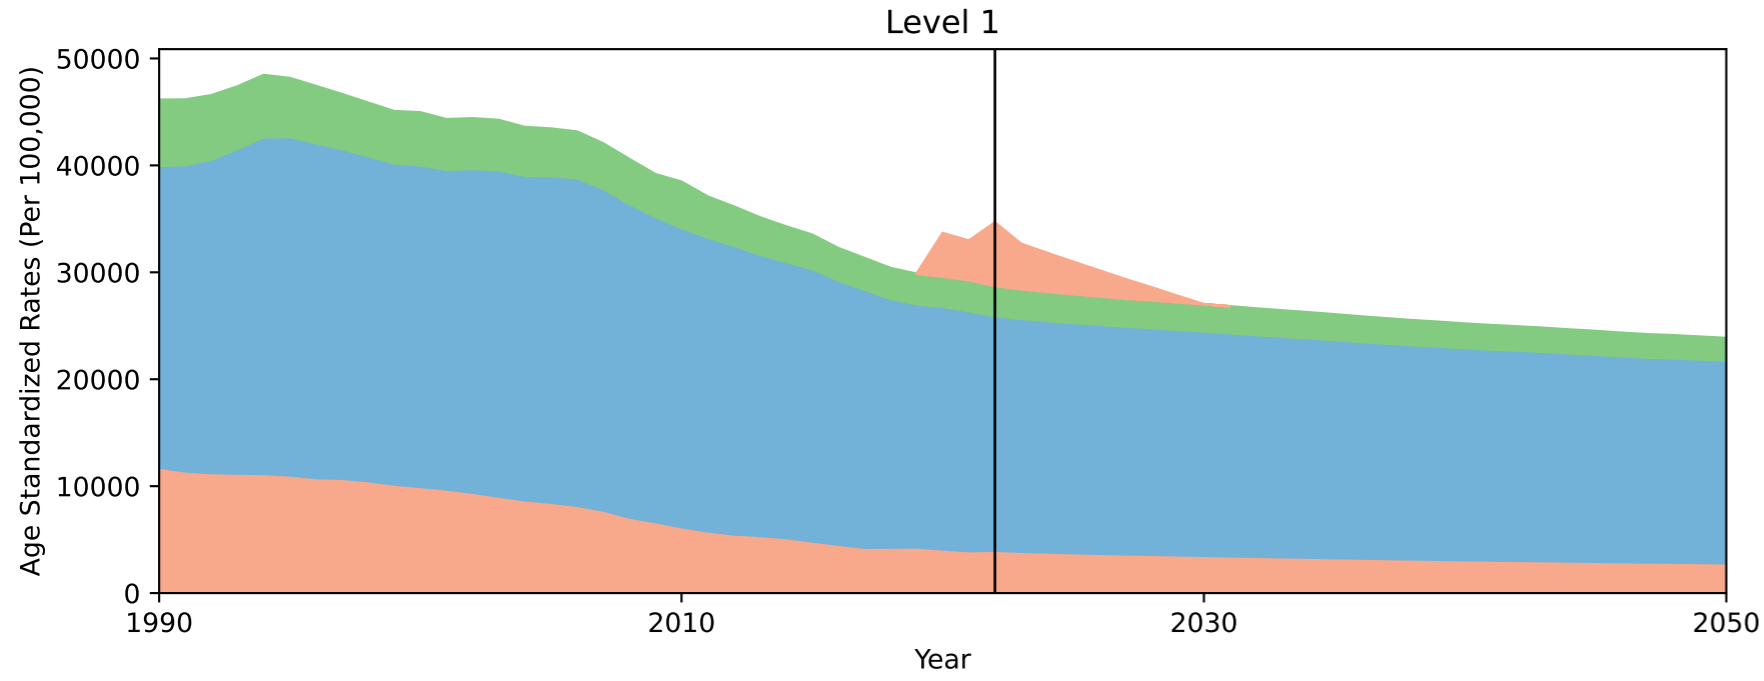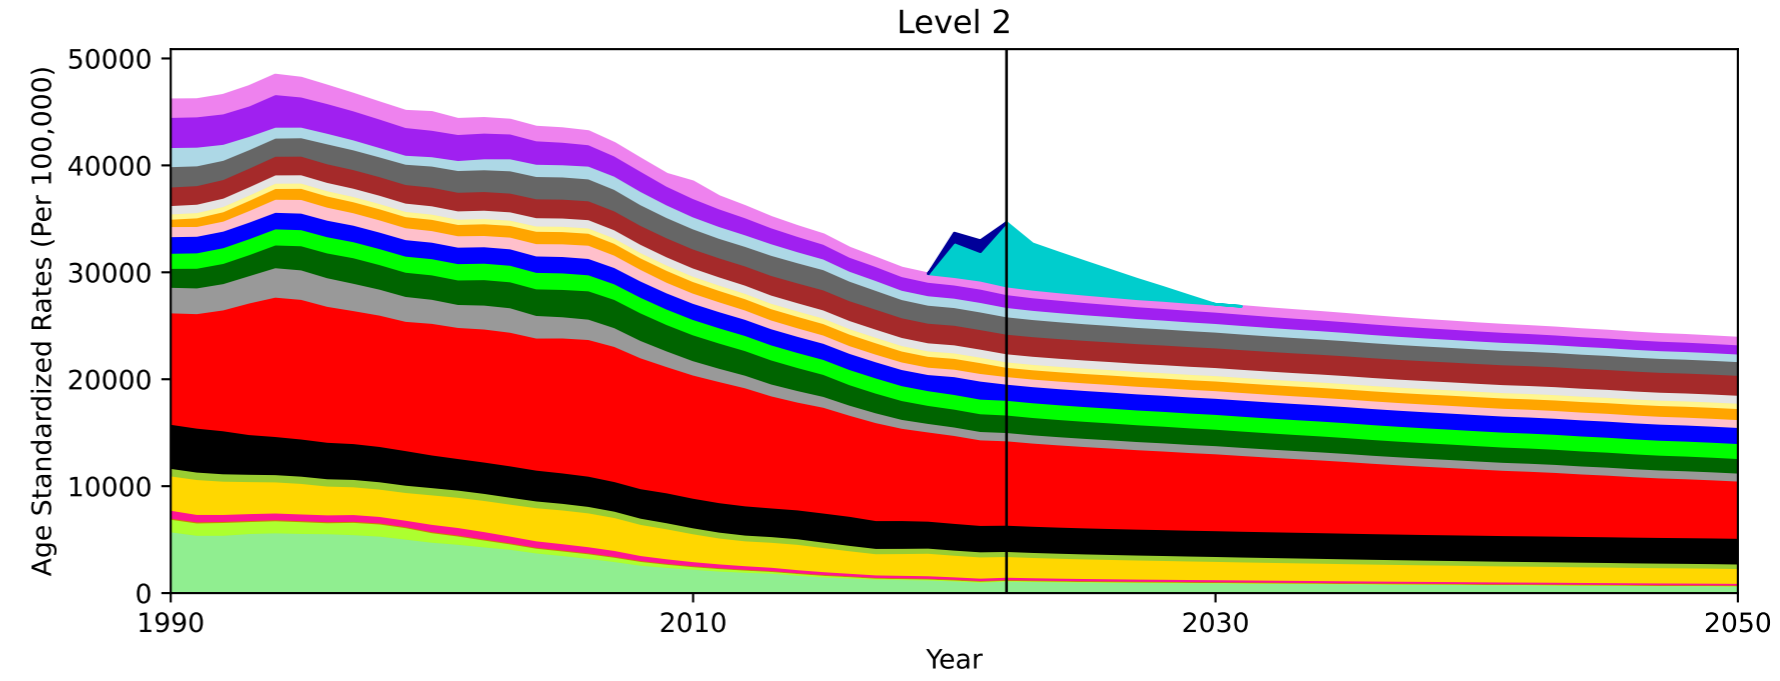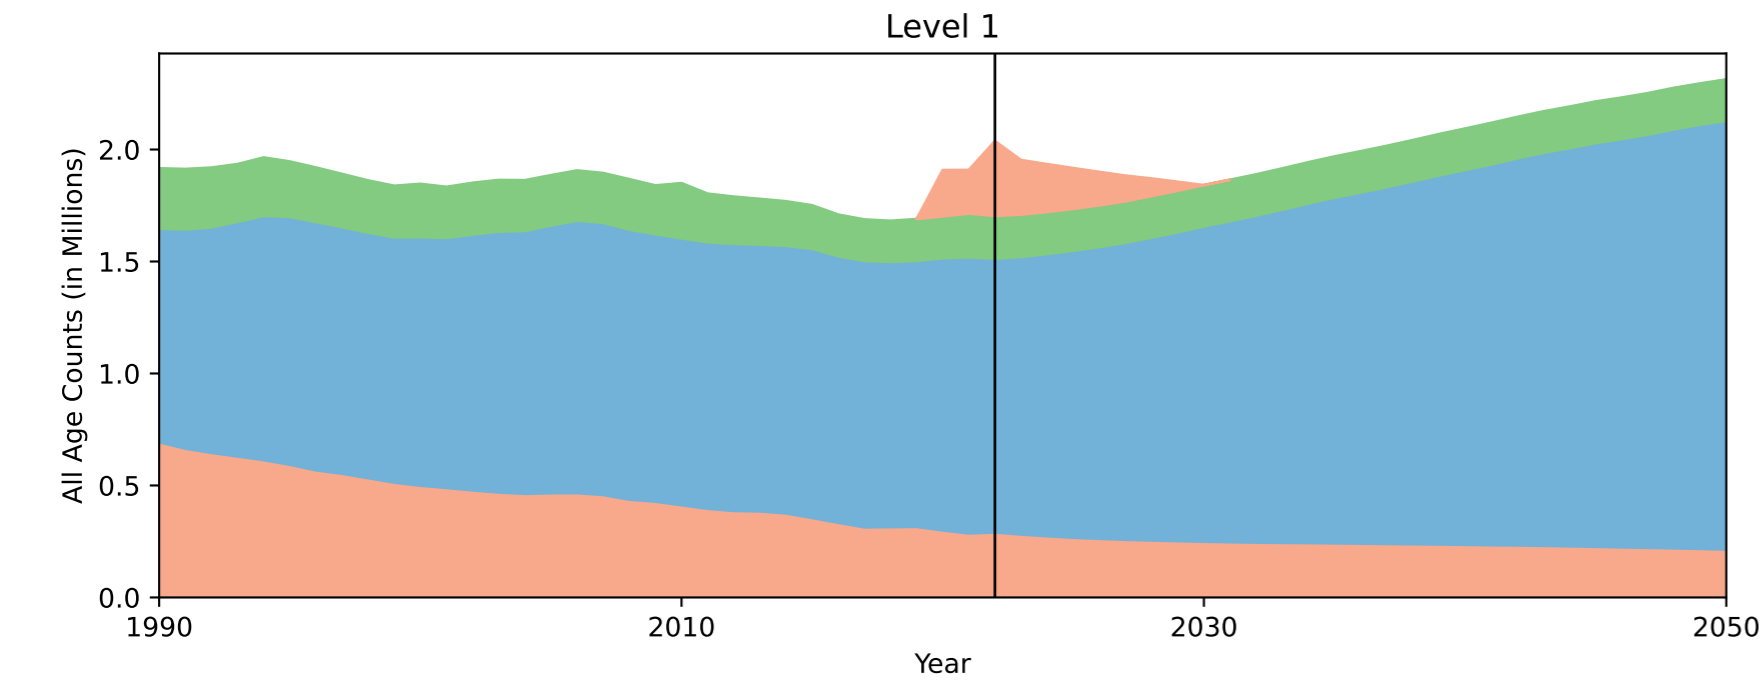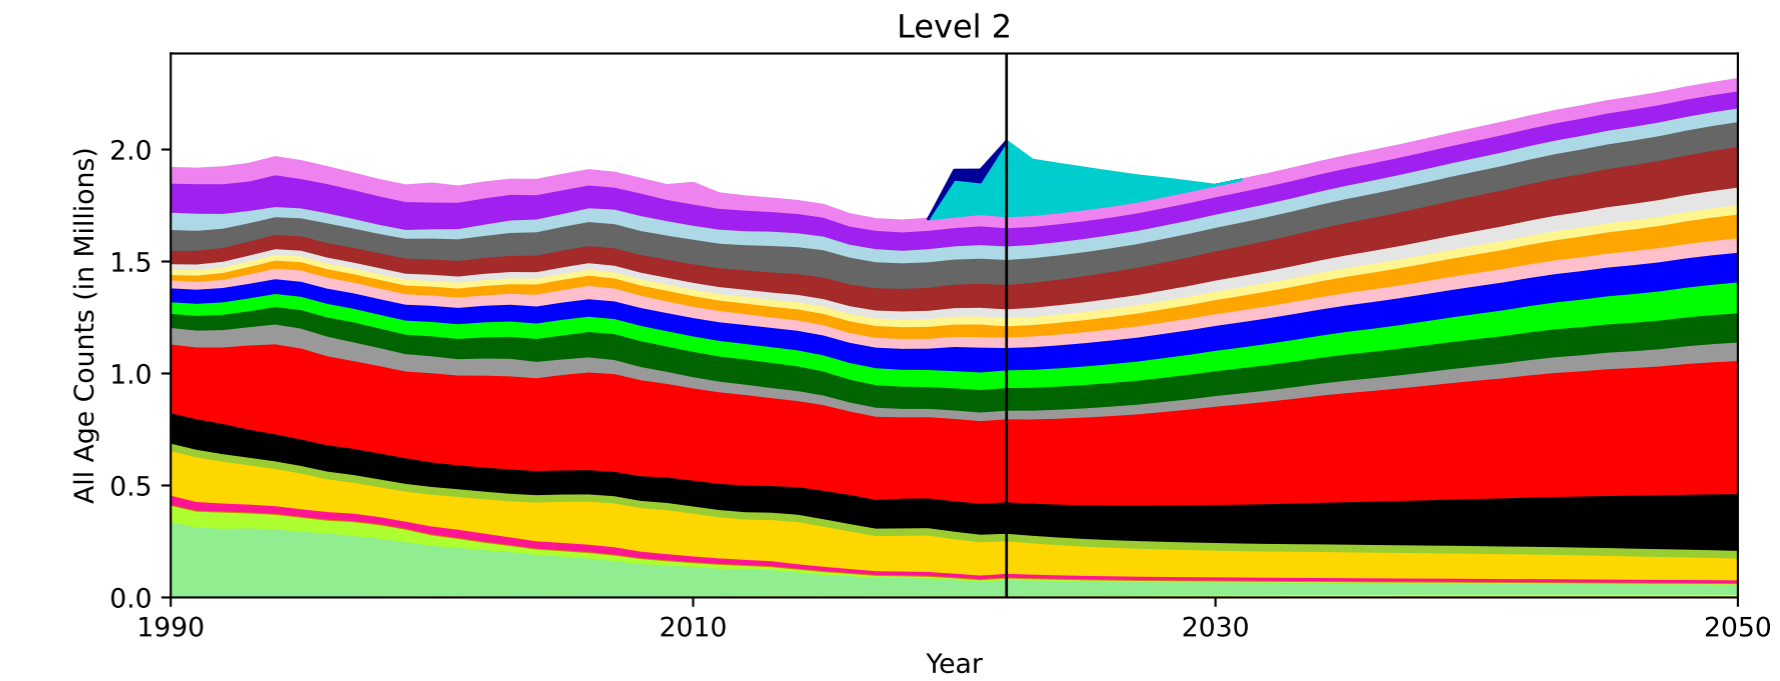

# Mongolia

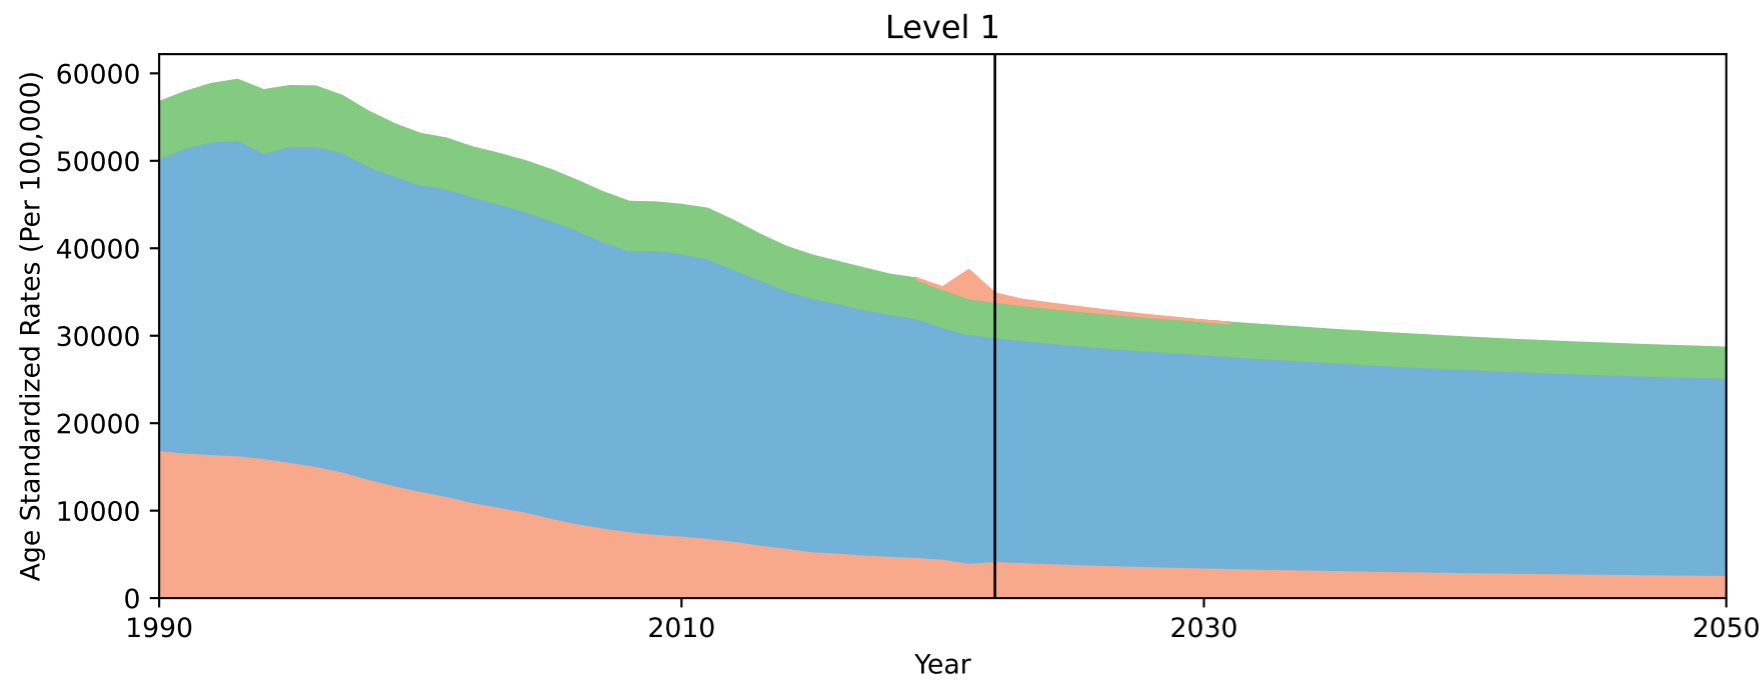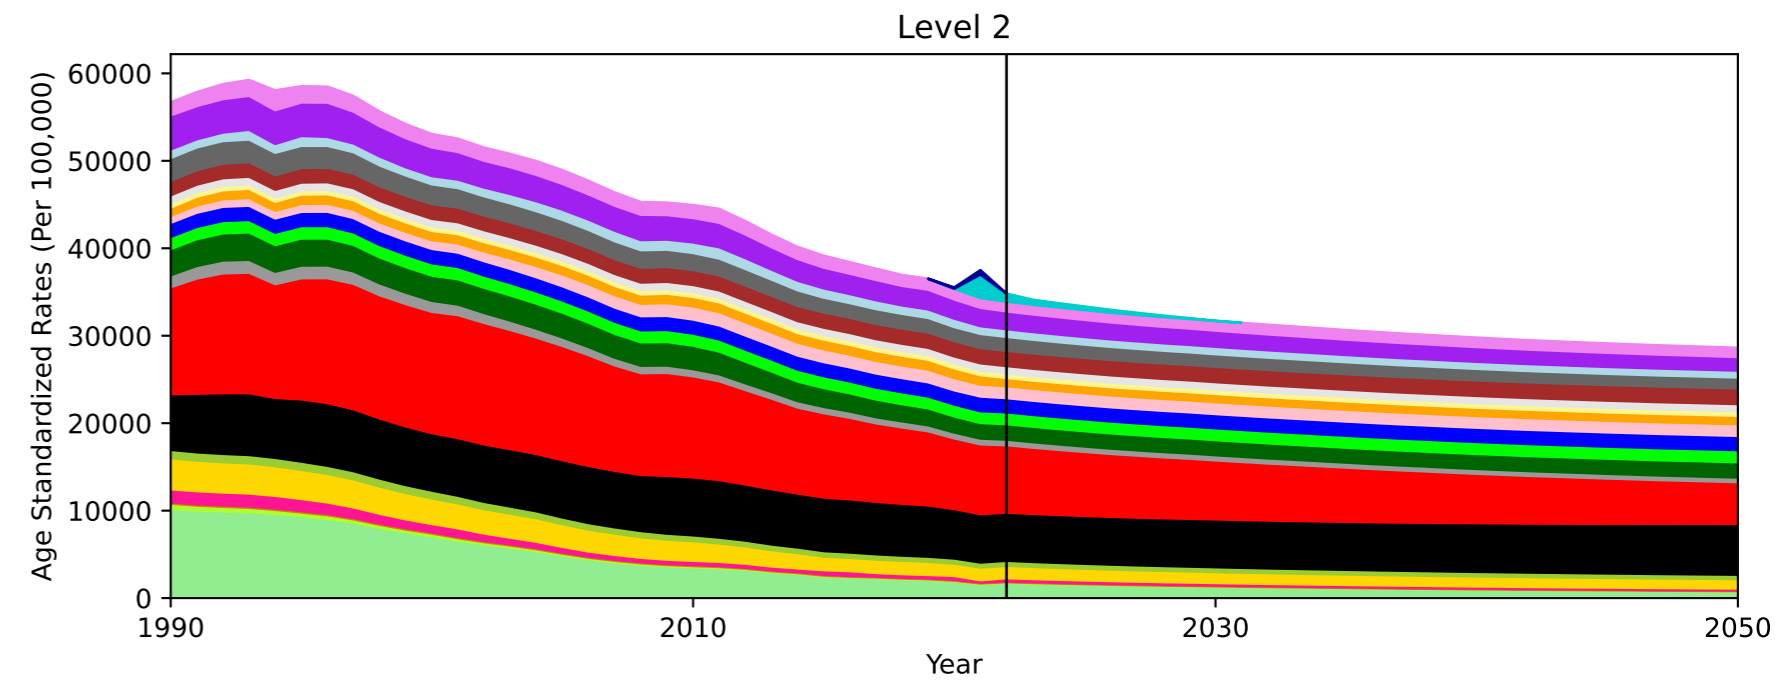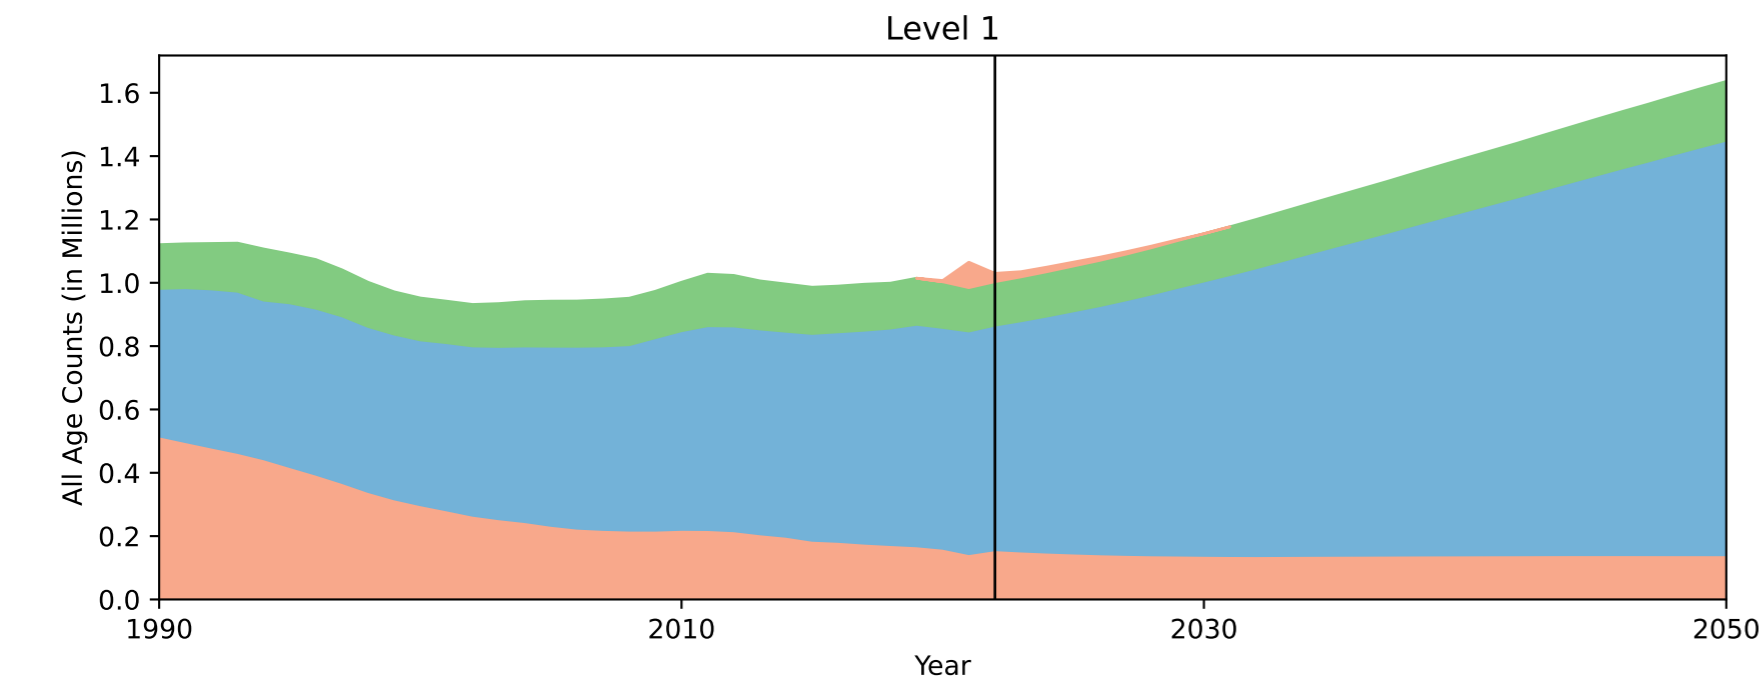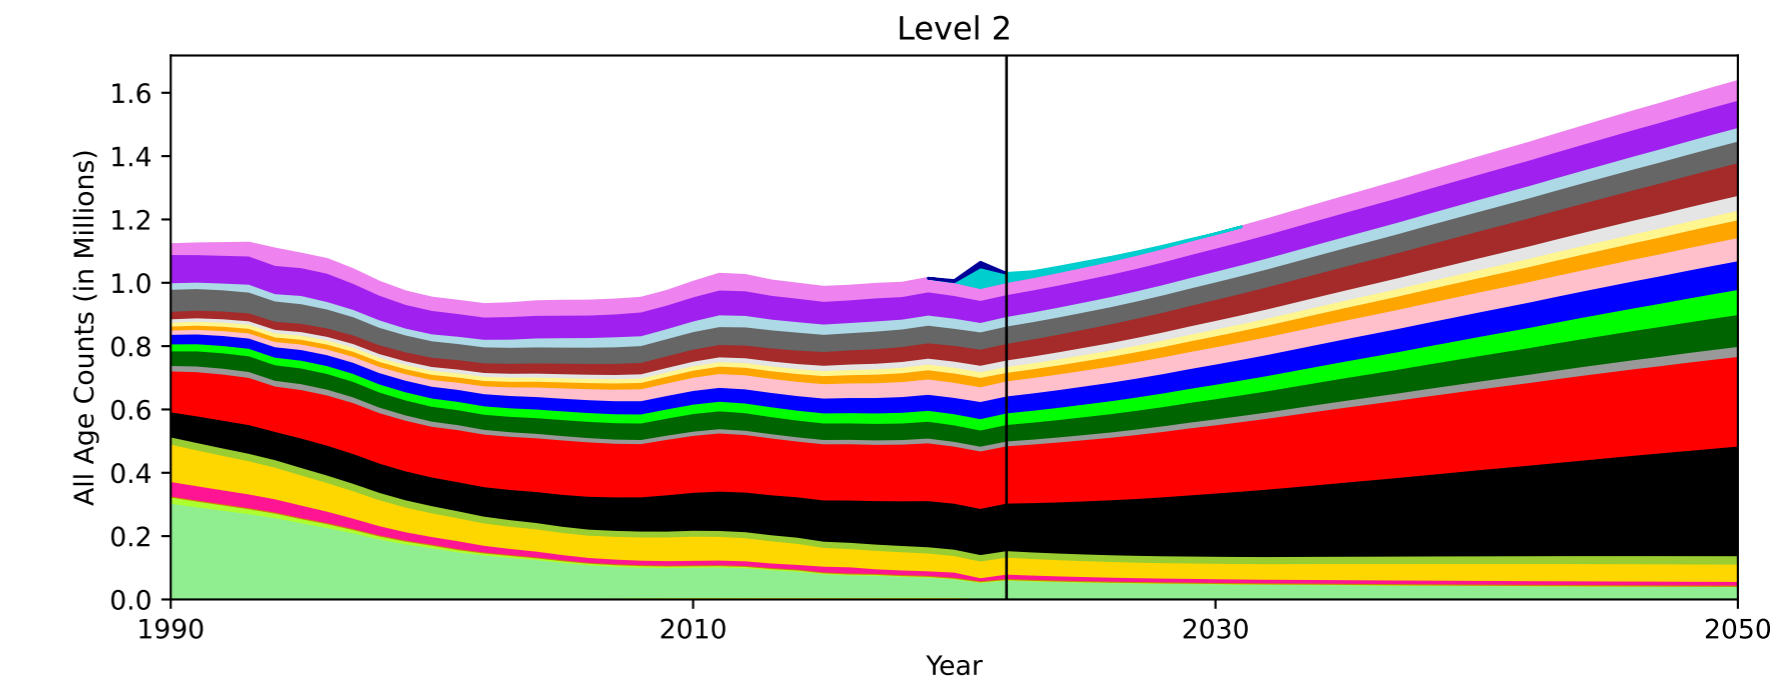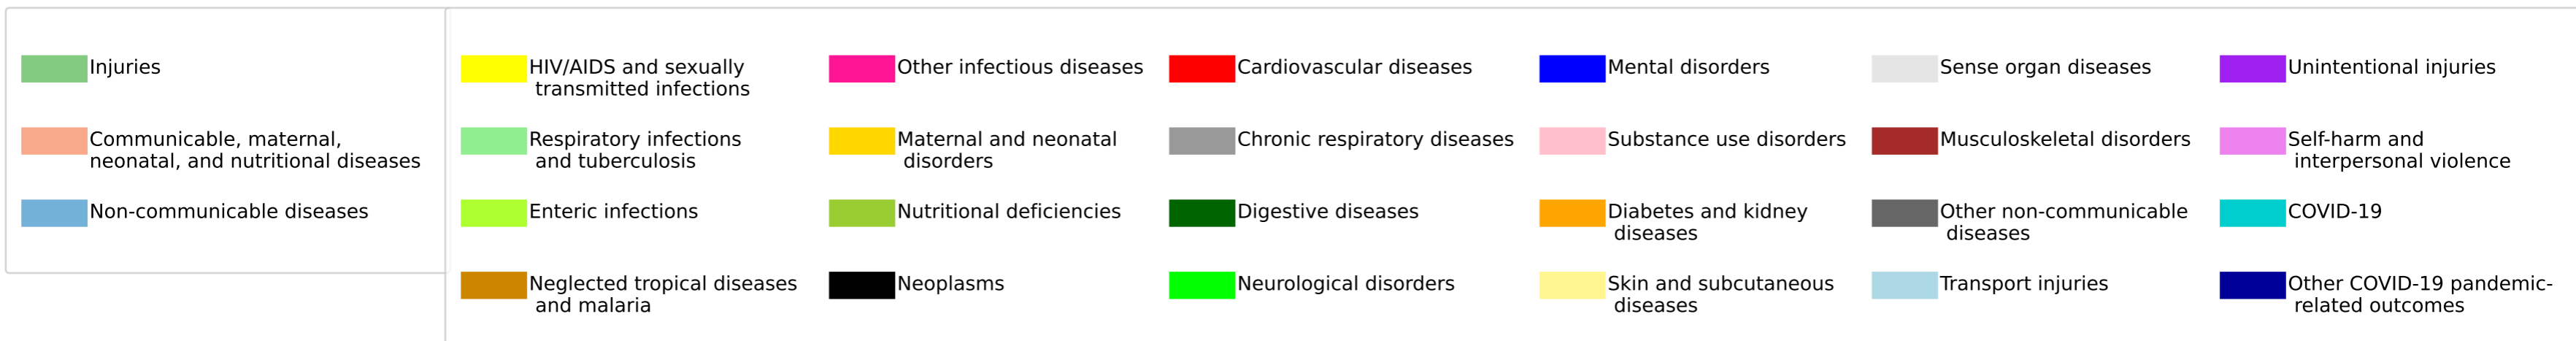

# Tajikistan

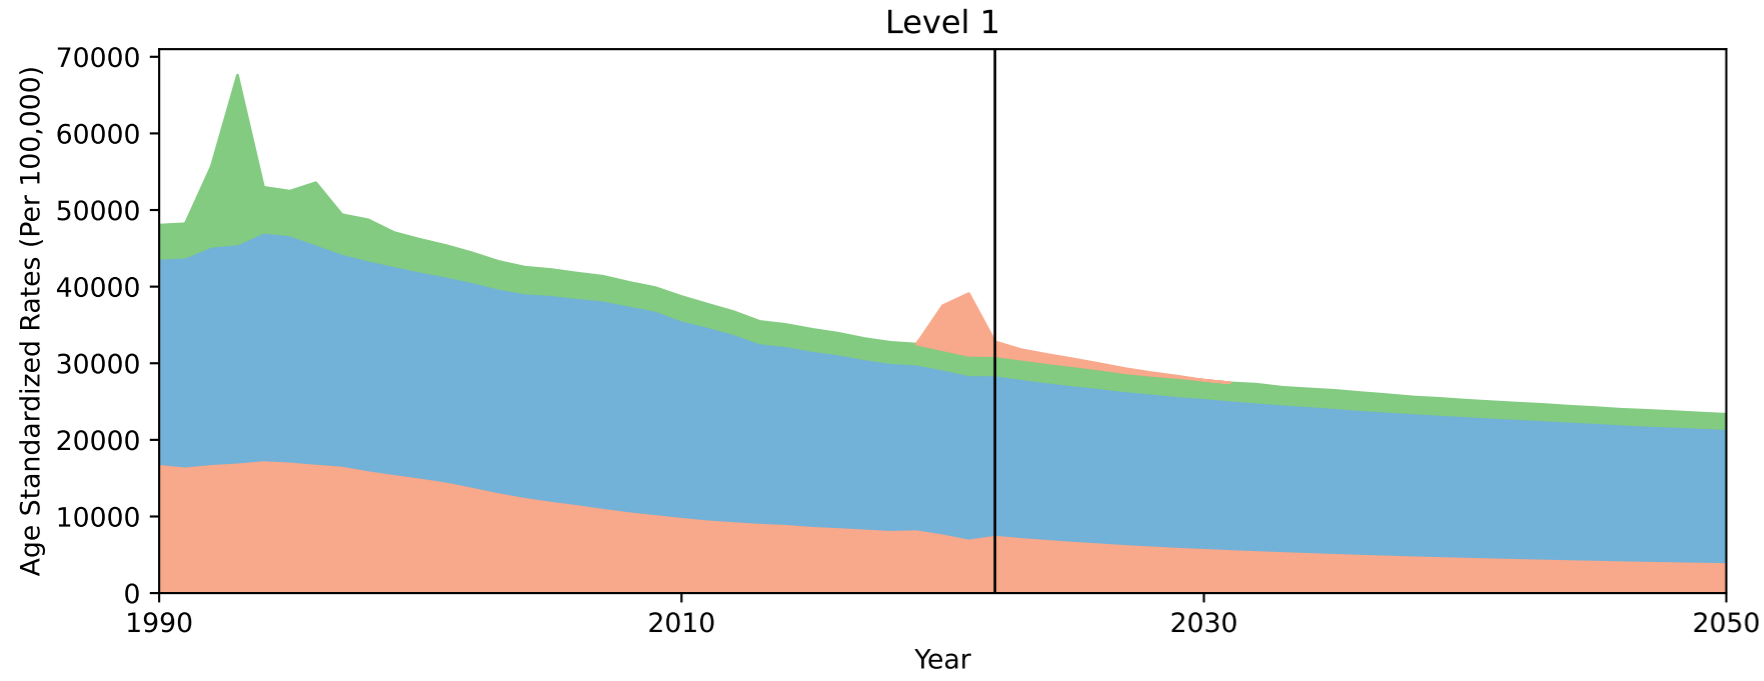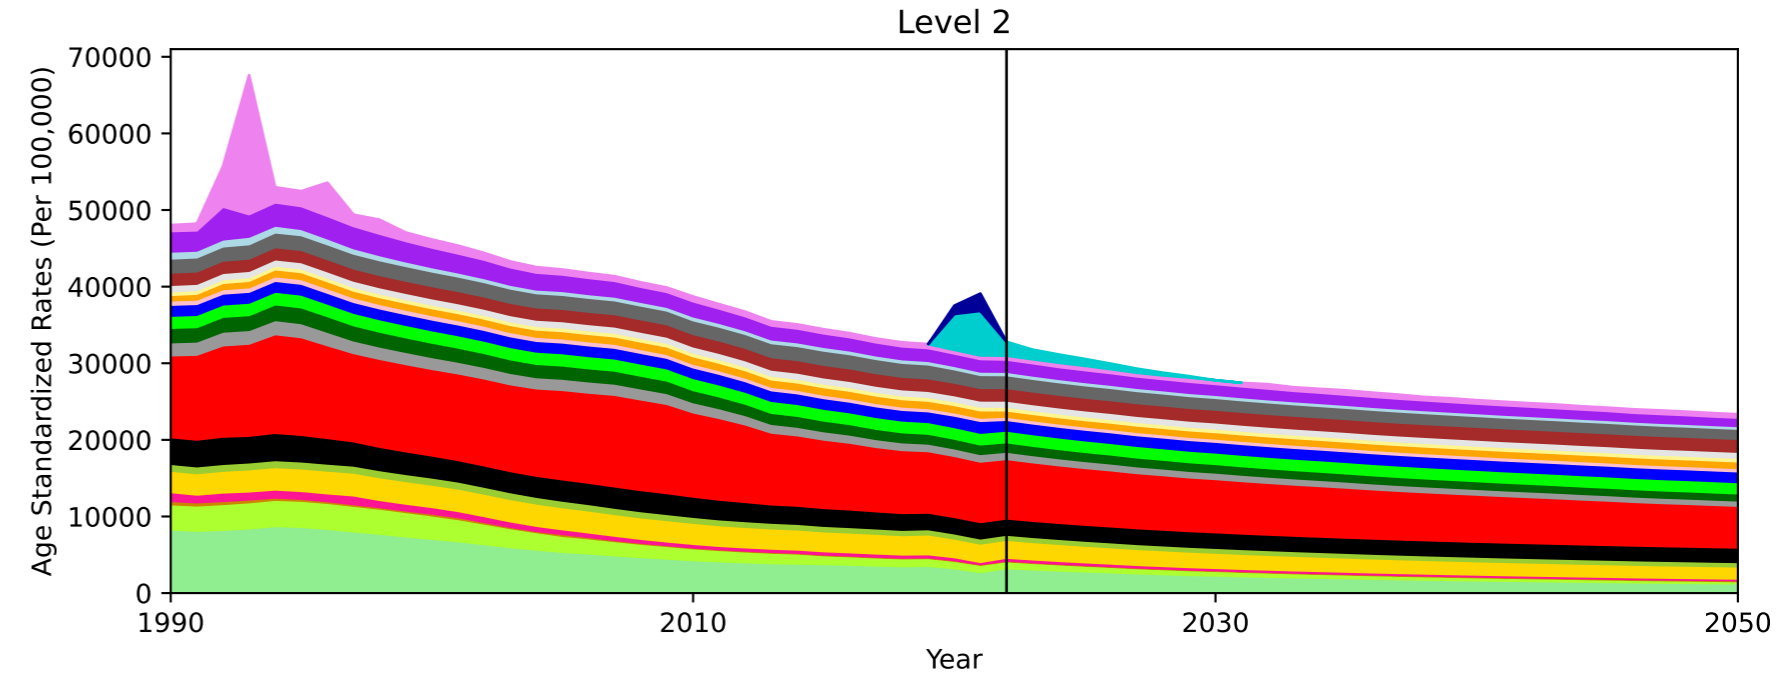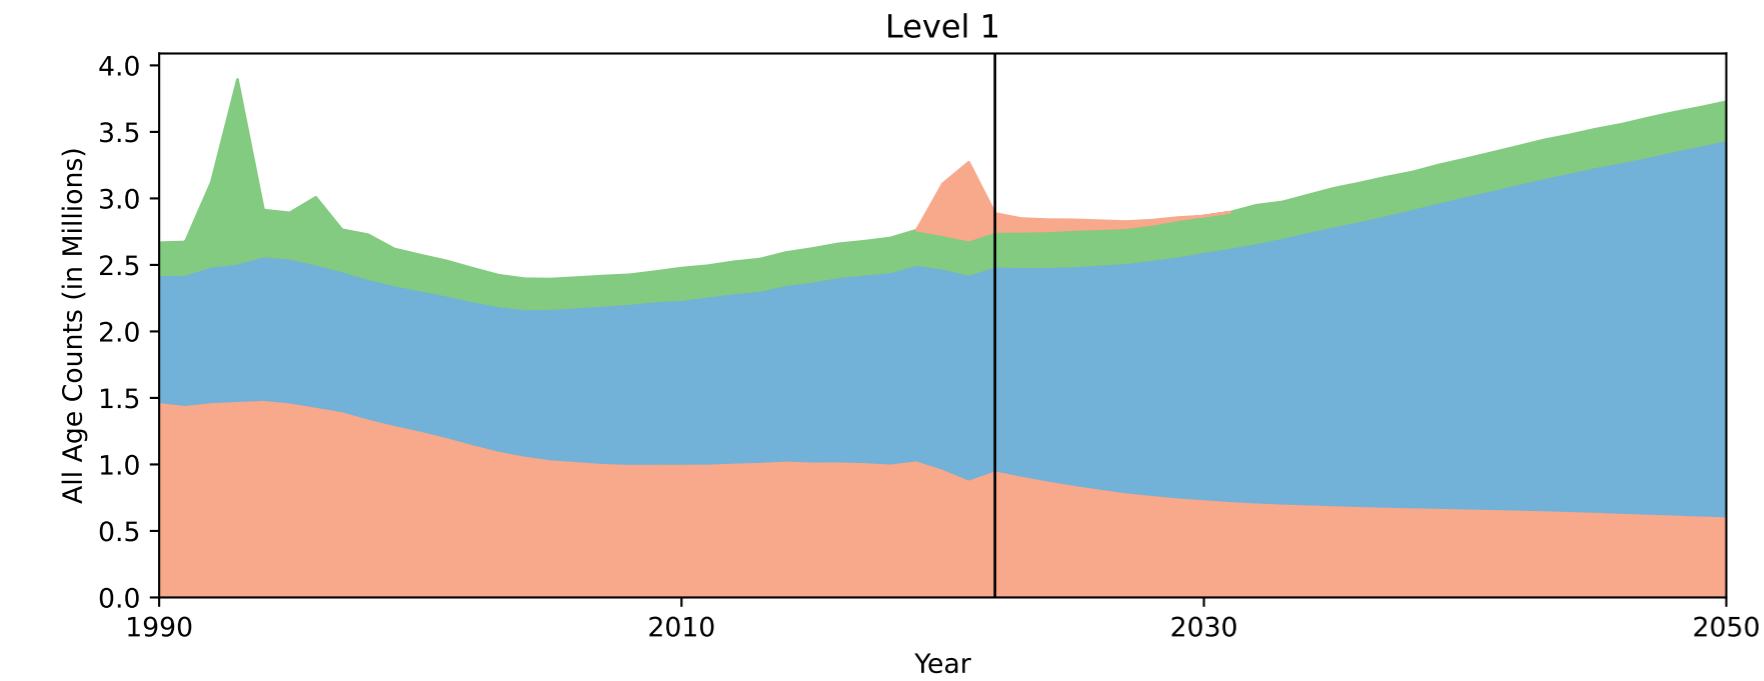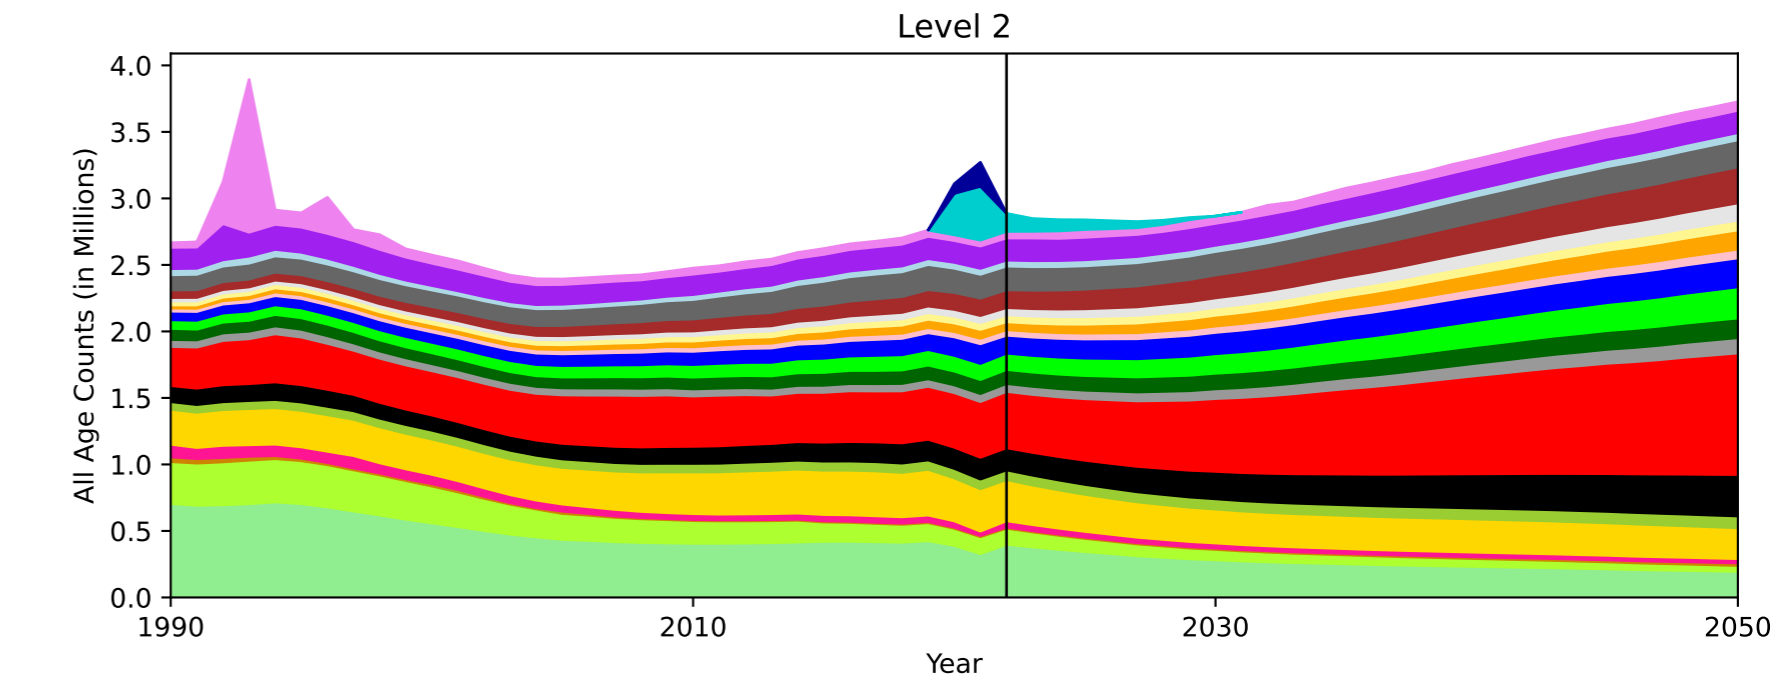

# Turkmenistan

Level 1

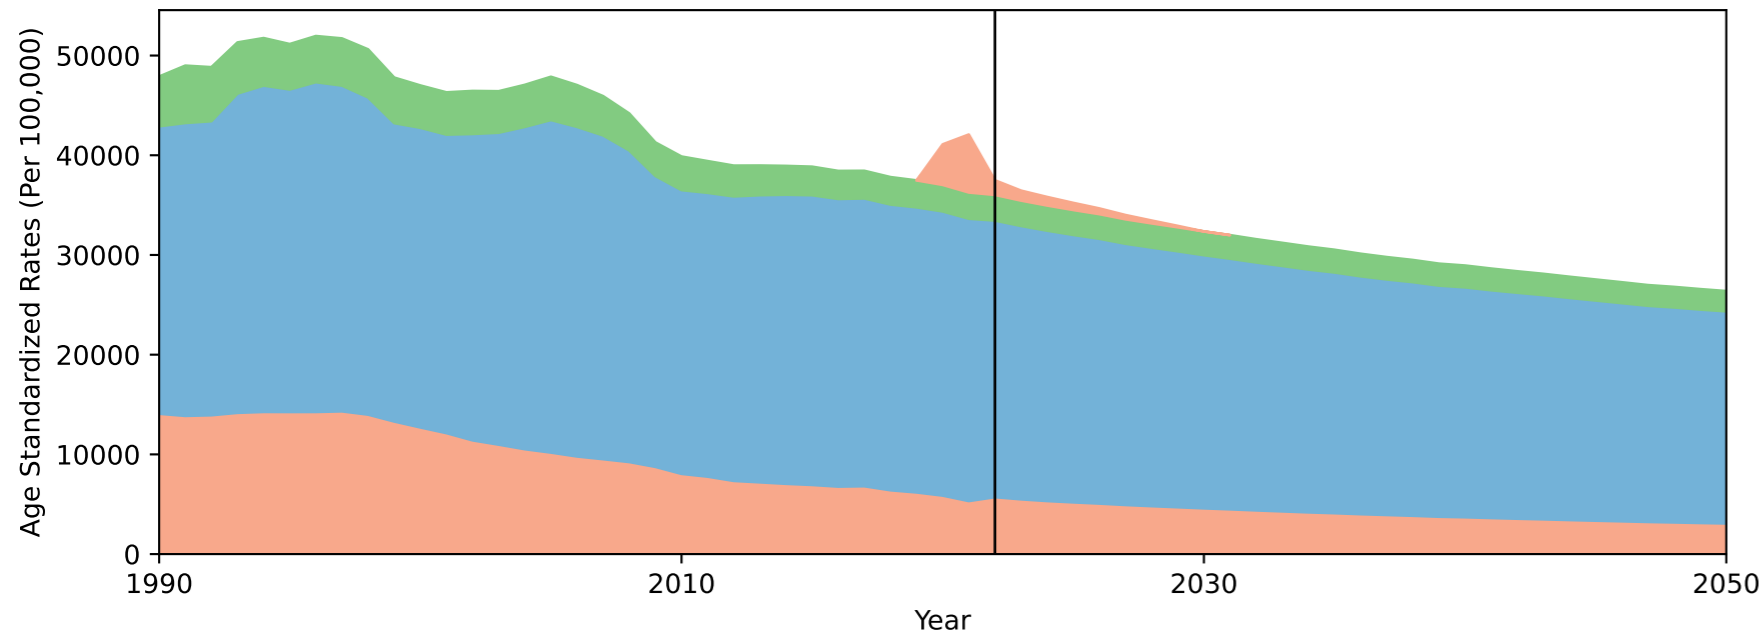

Level 2

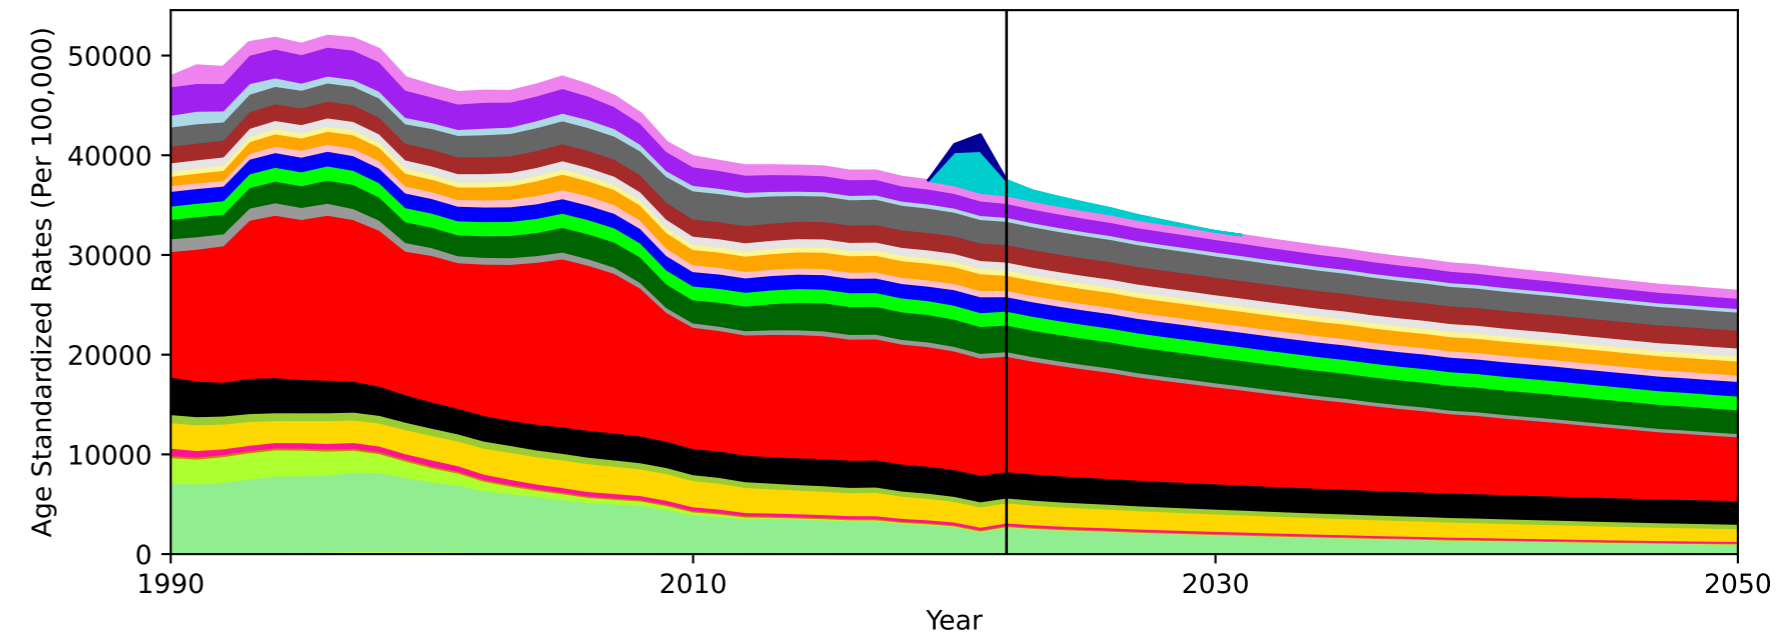

Level 1

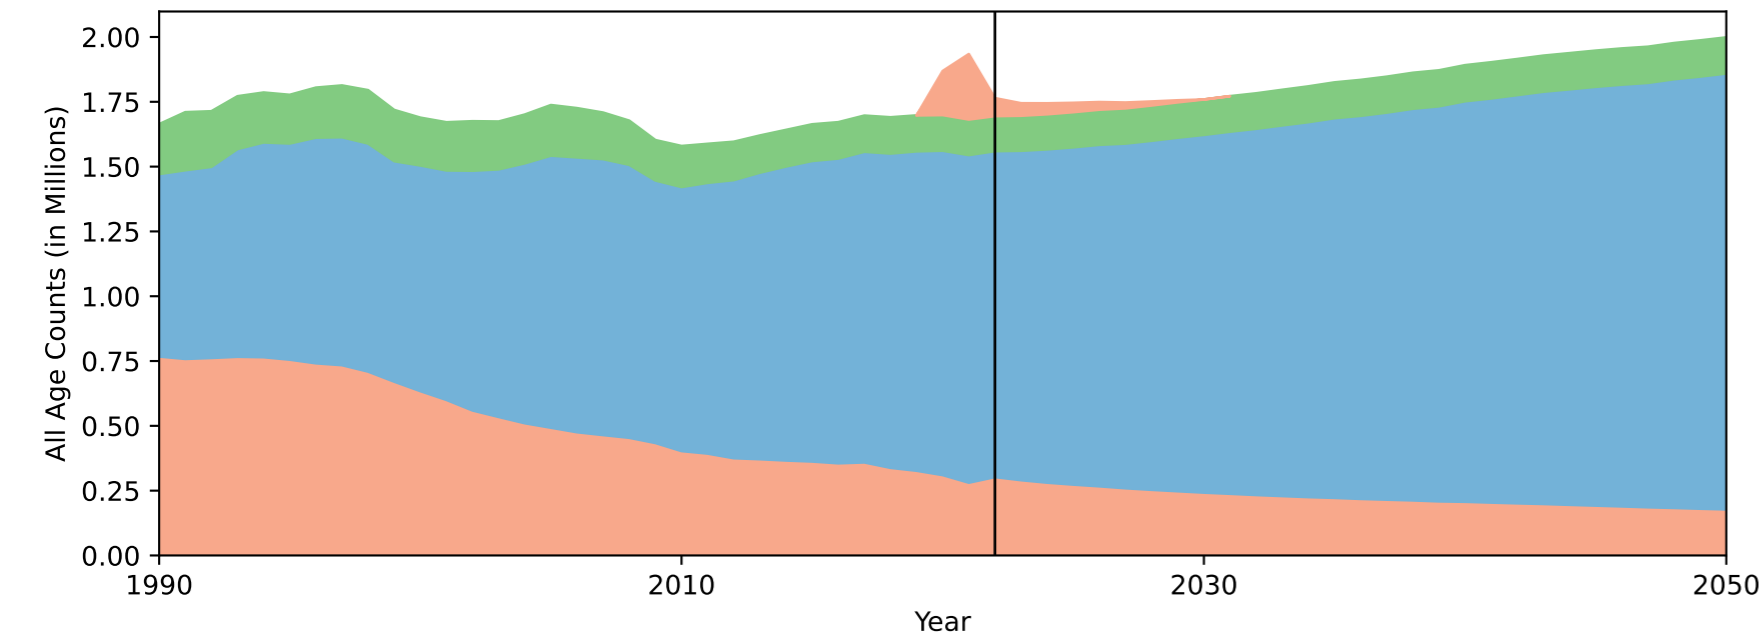

Level 2

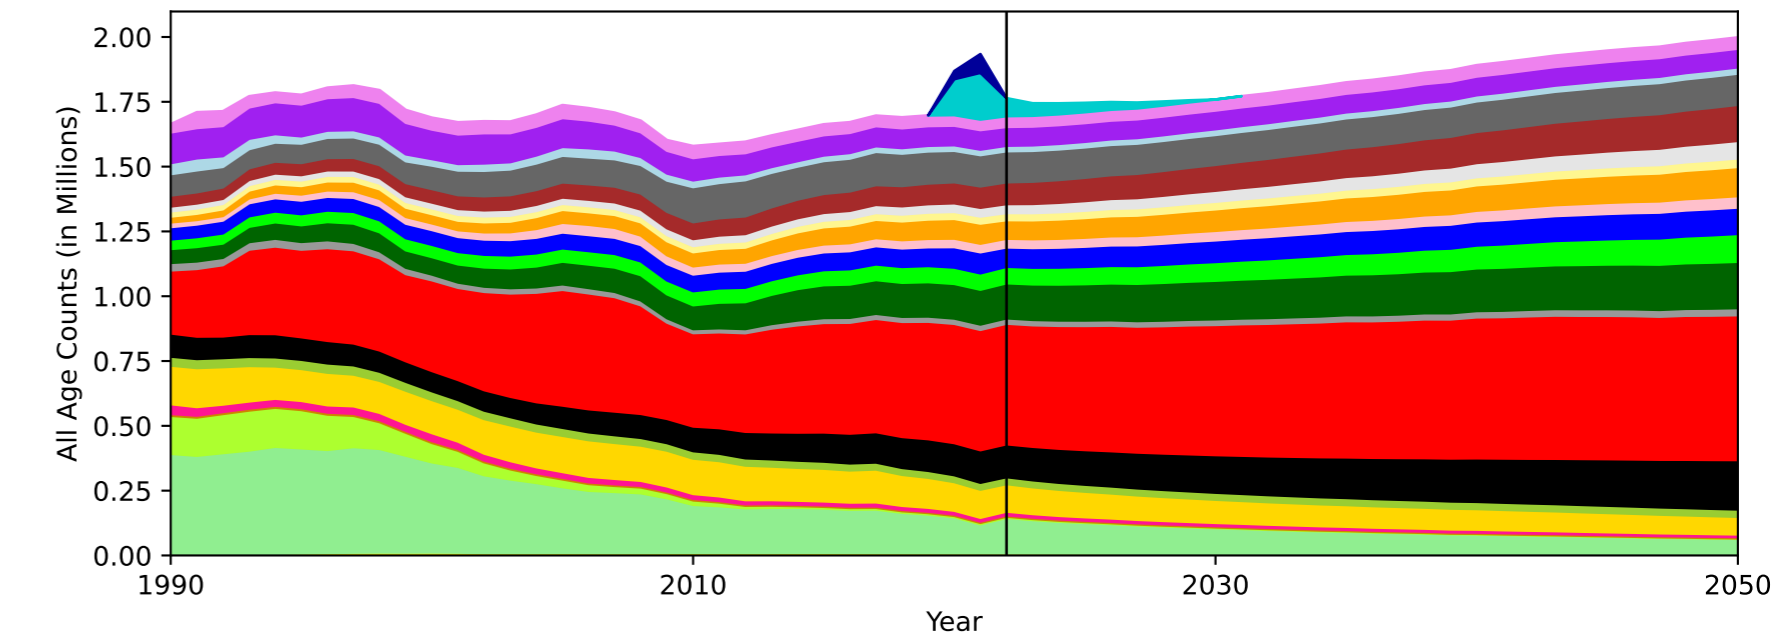

# Uzbekistan

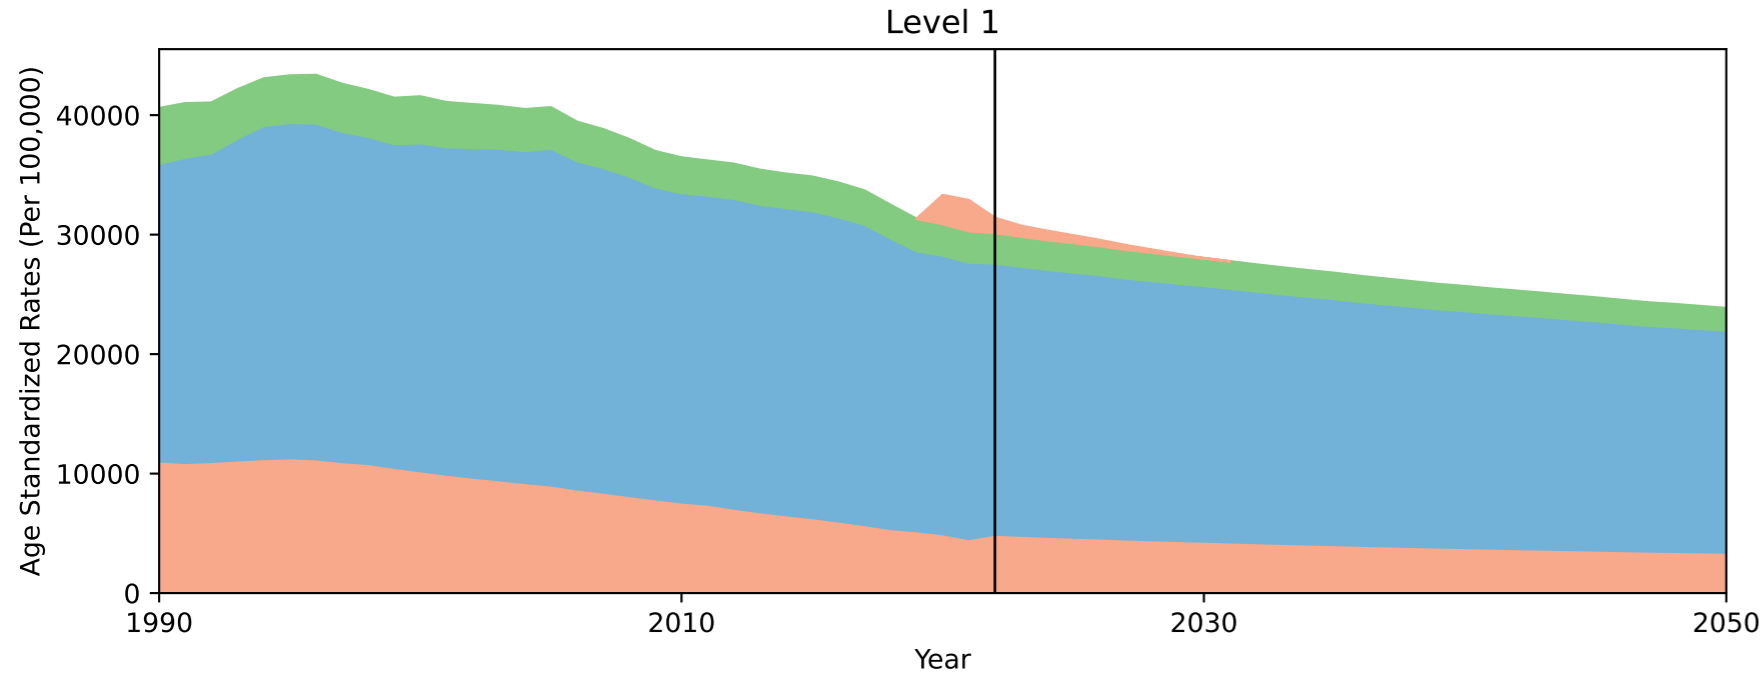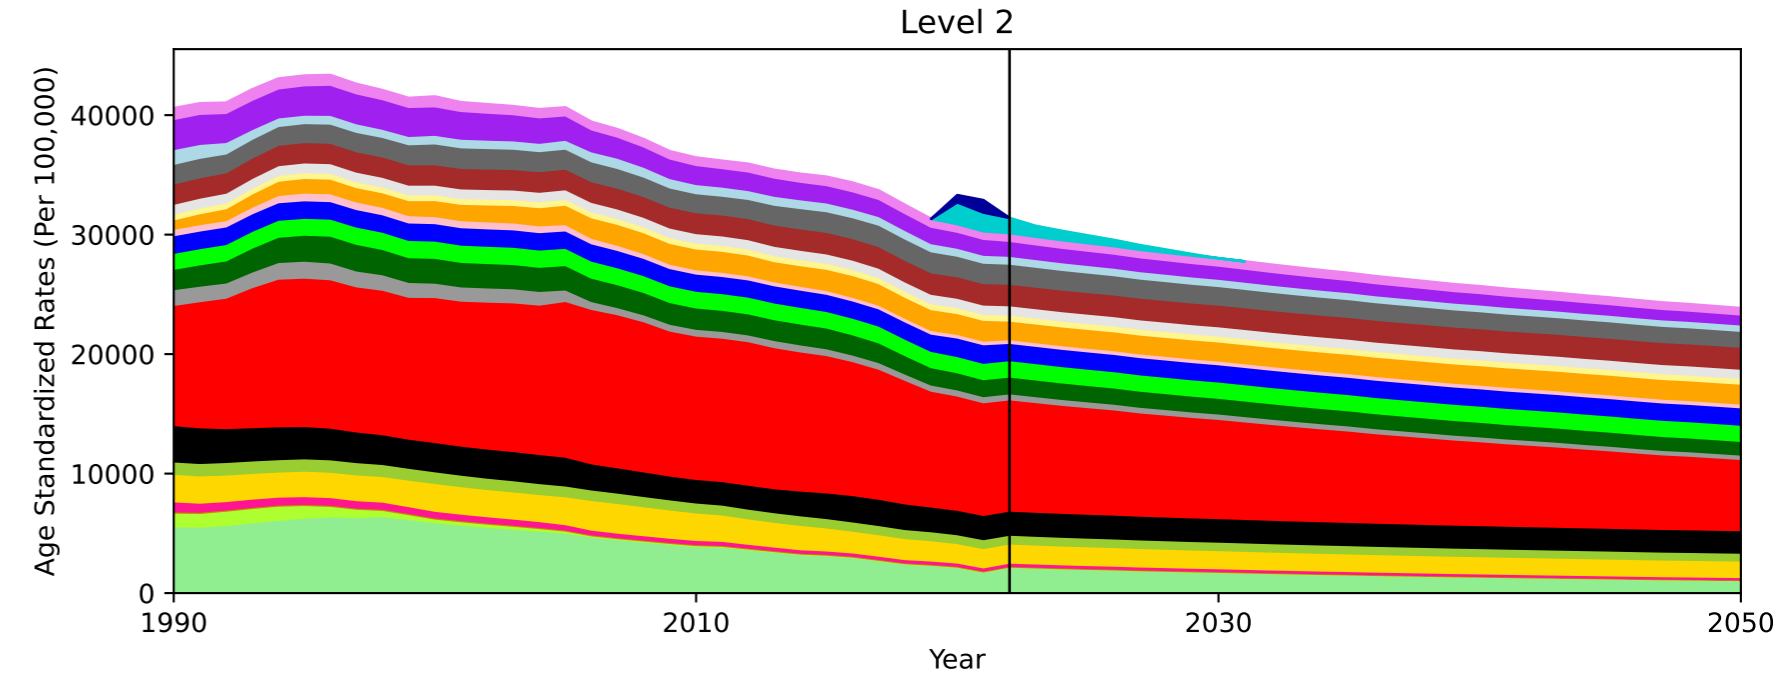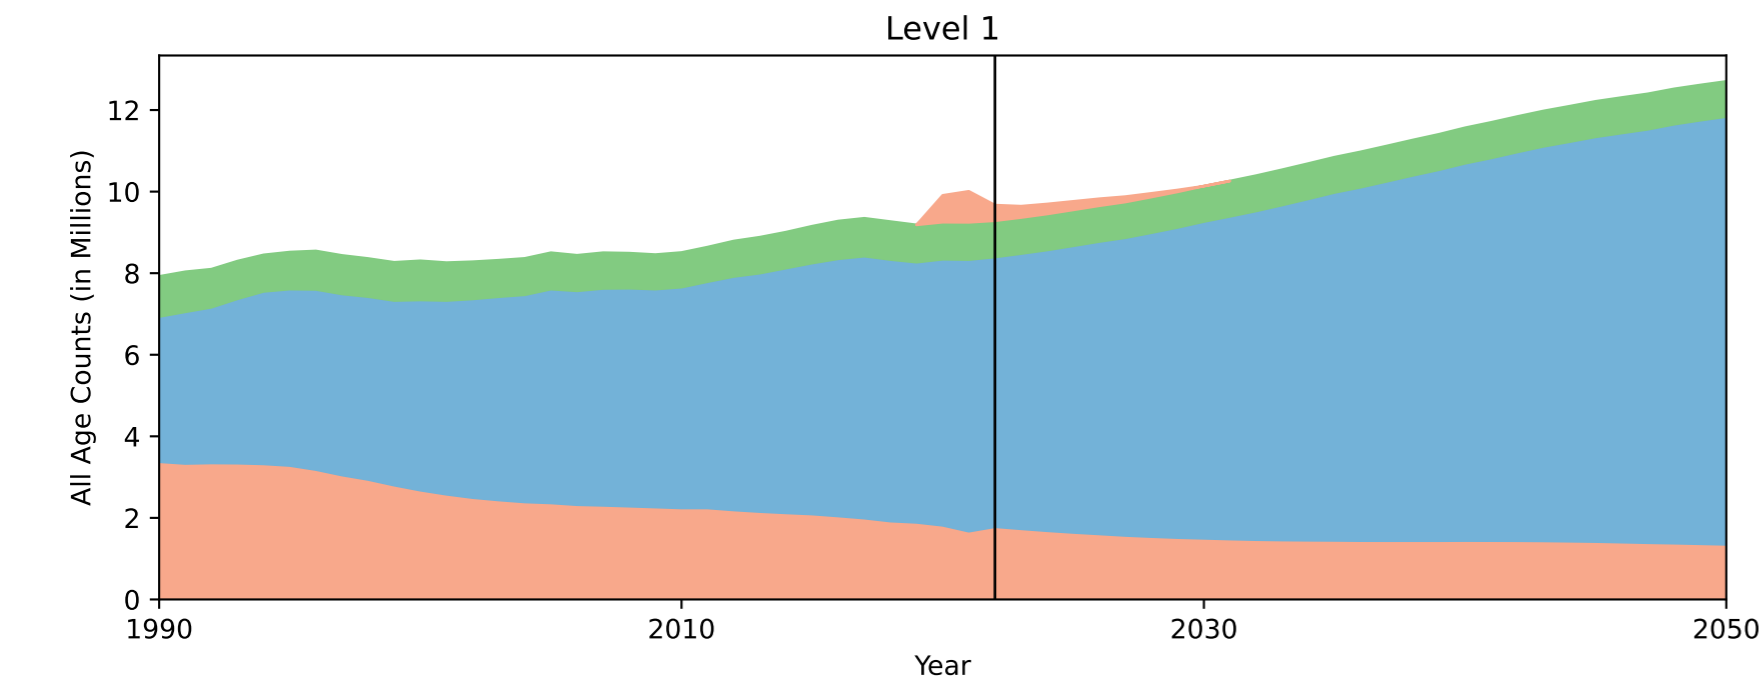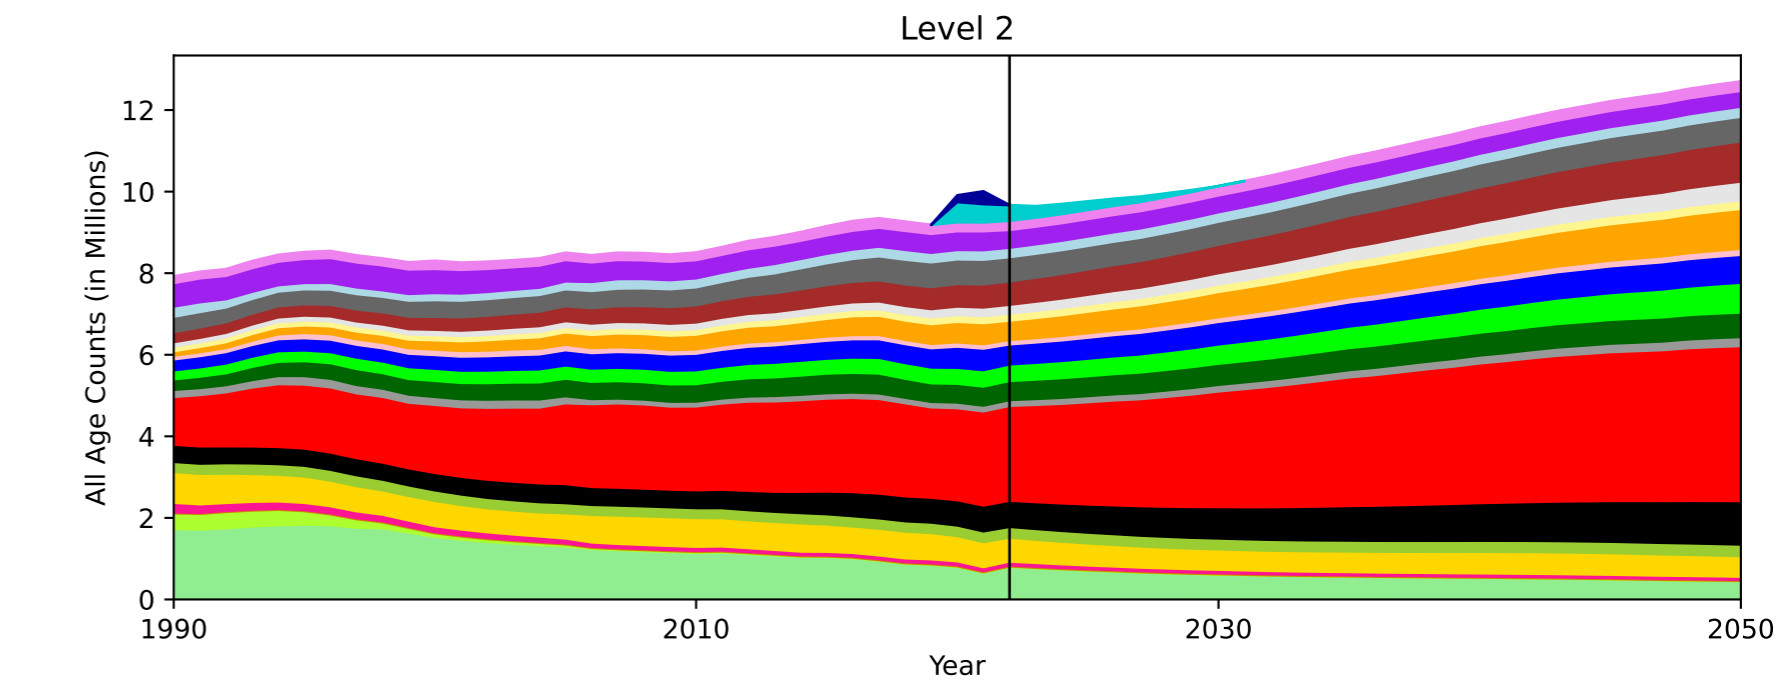

# Albania

Level 1

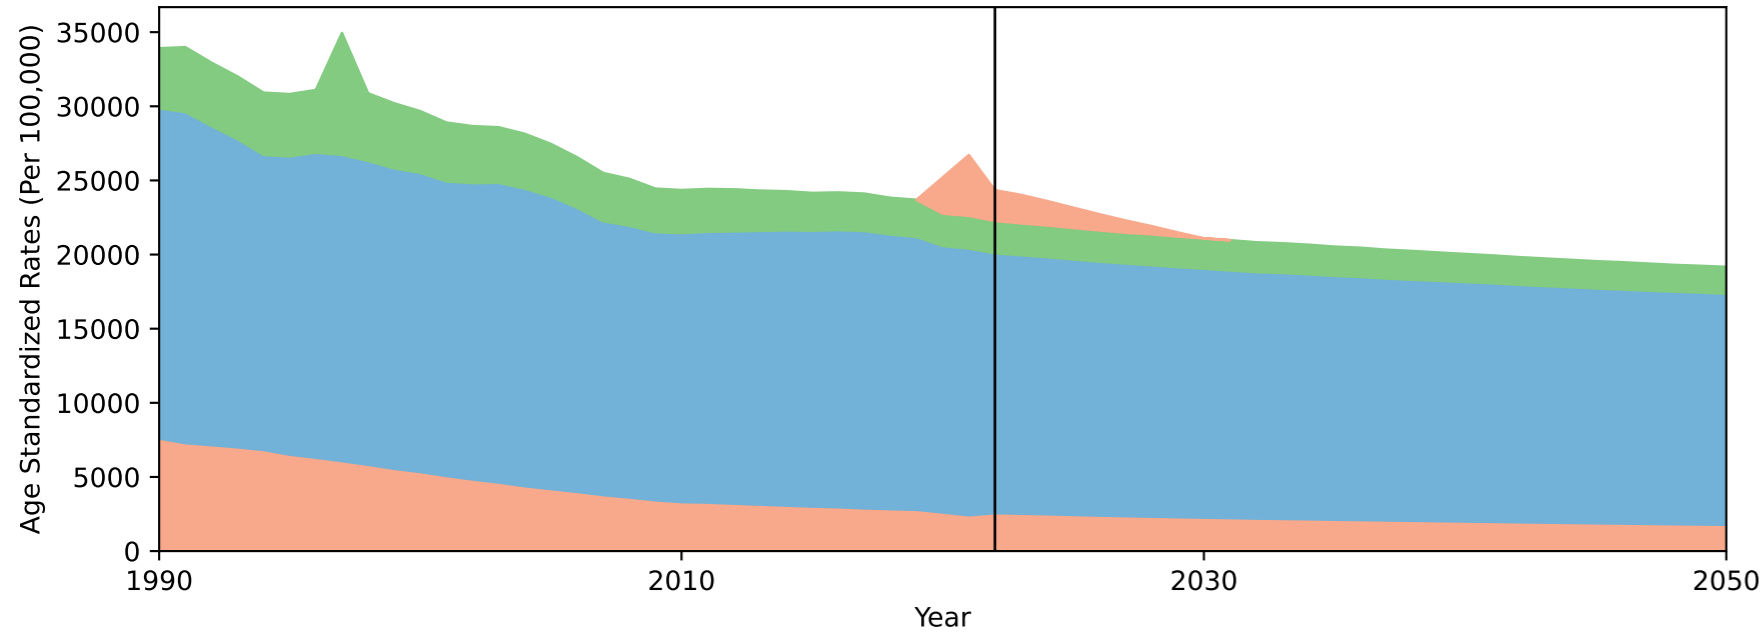

Level 2

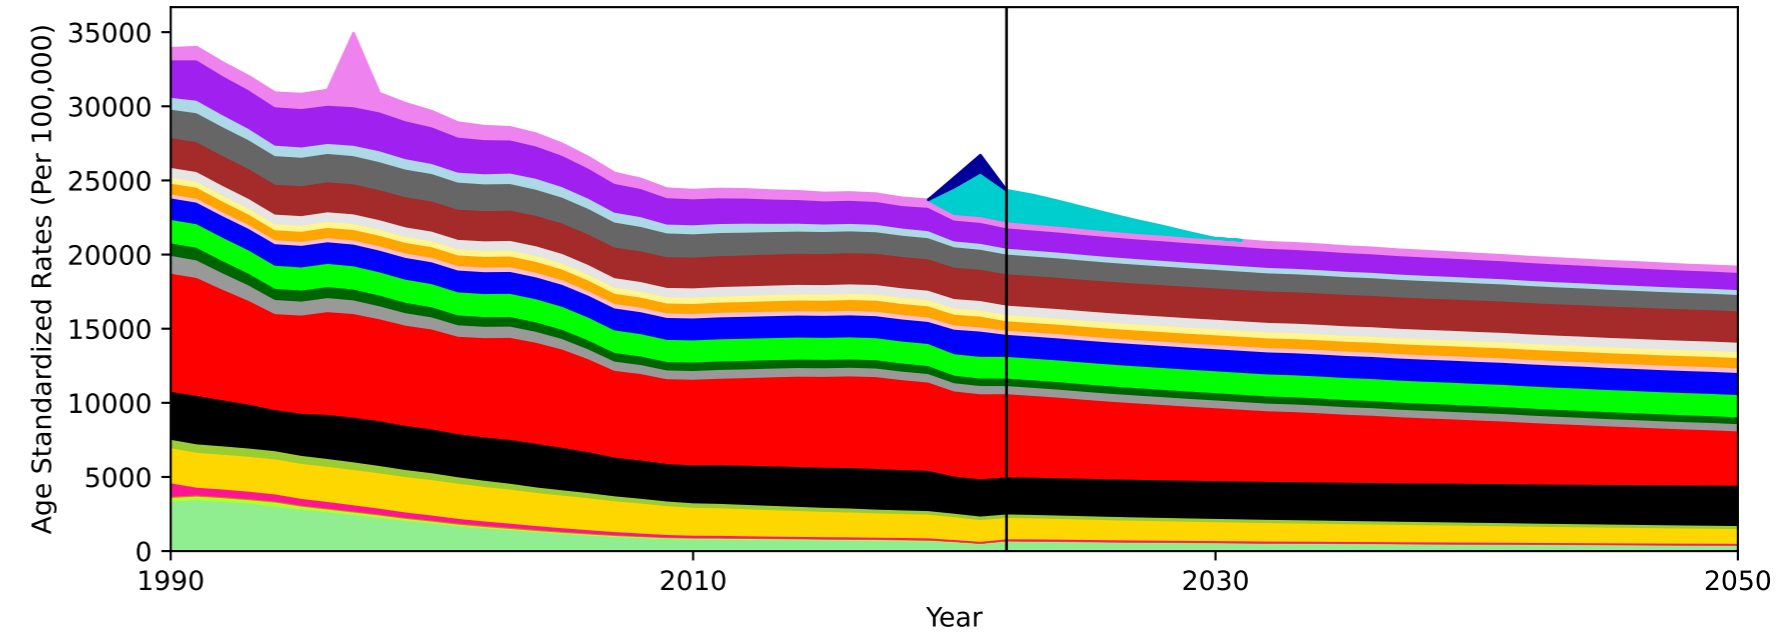

Level 1

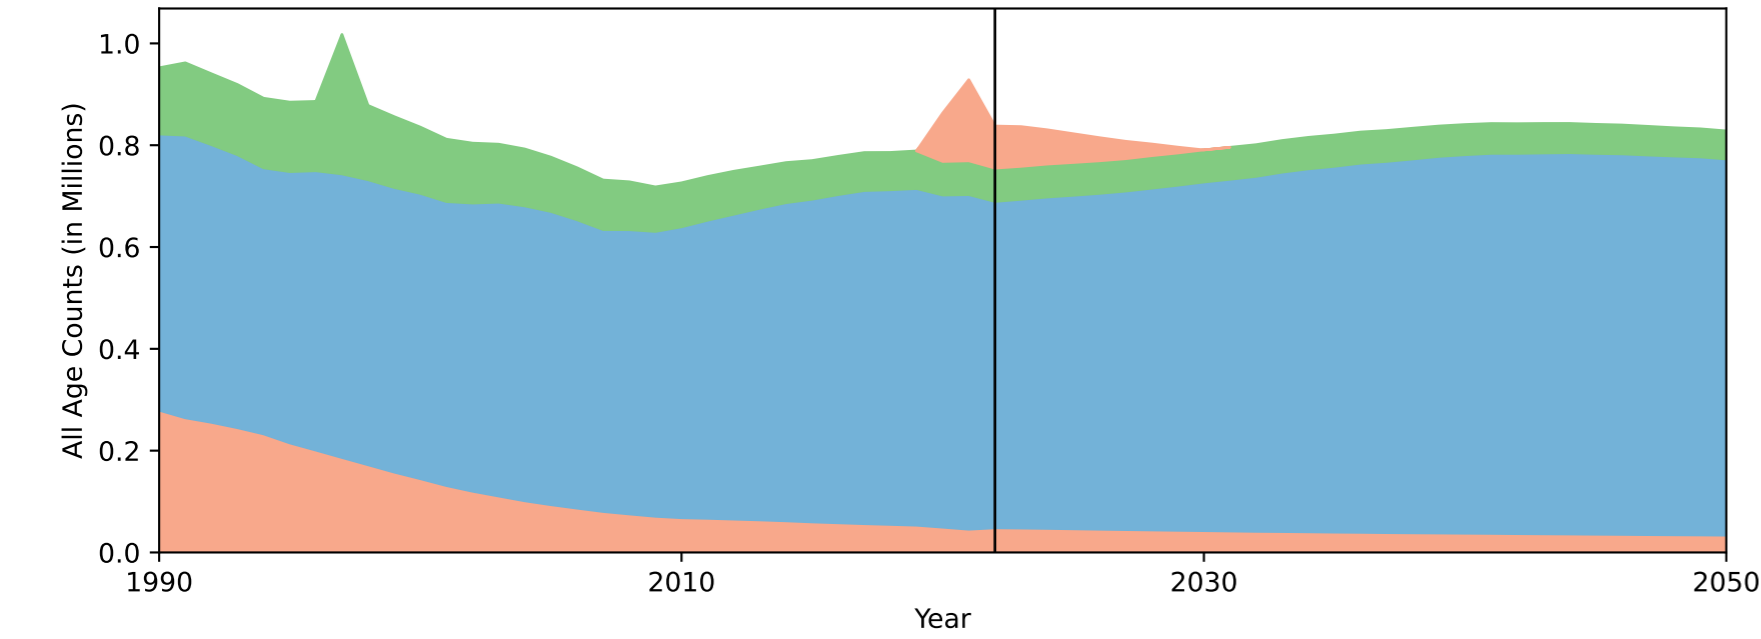

Level 2

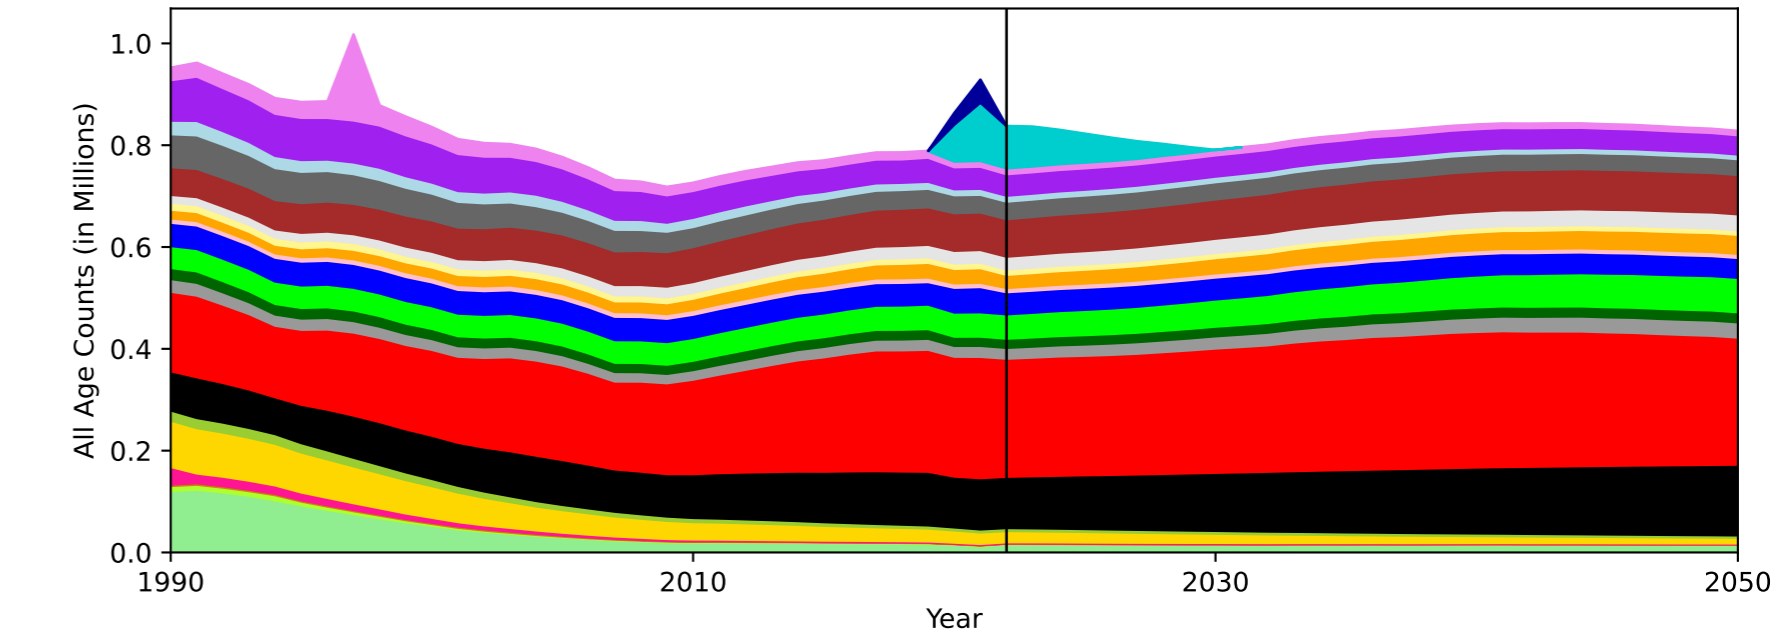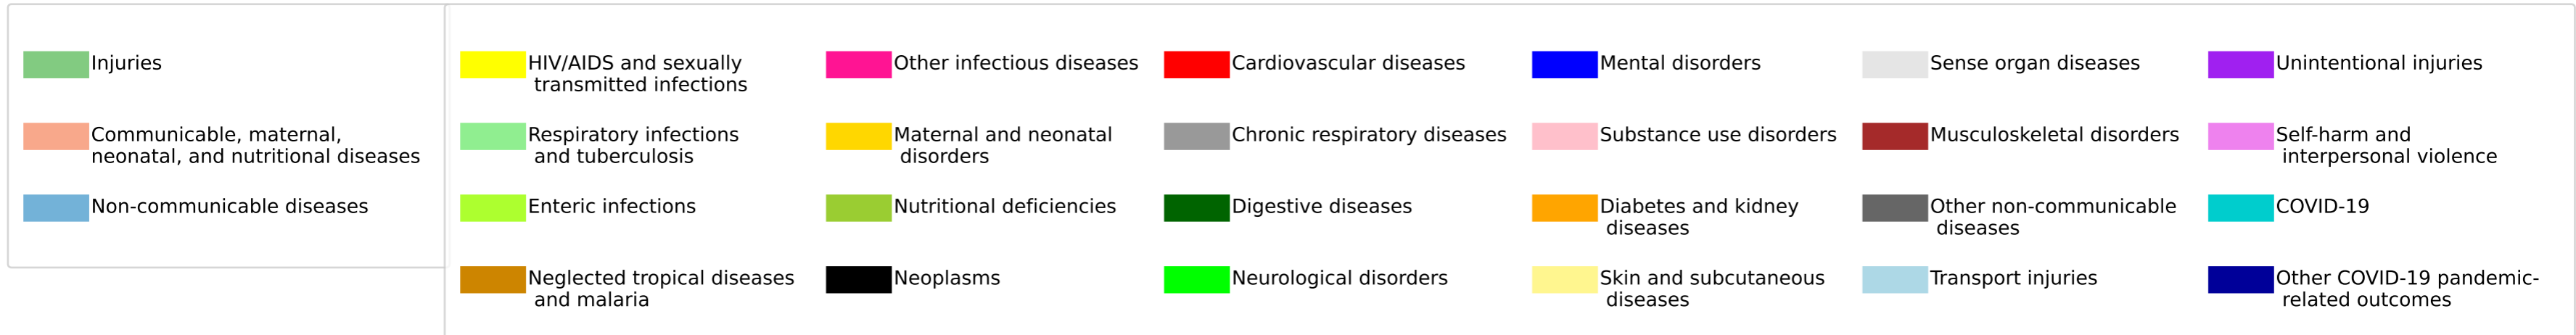

# Bosnia And Herzegovina

Supplemental Results Figure S4. Age-standardised DALY rates and all age DALY counts and by Level 1 and Level 2 causes, 1990–2050

255

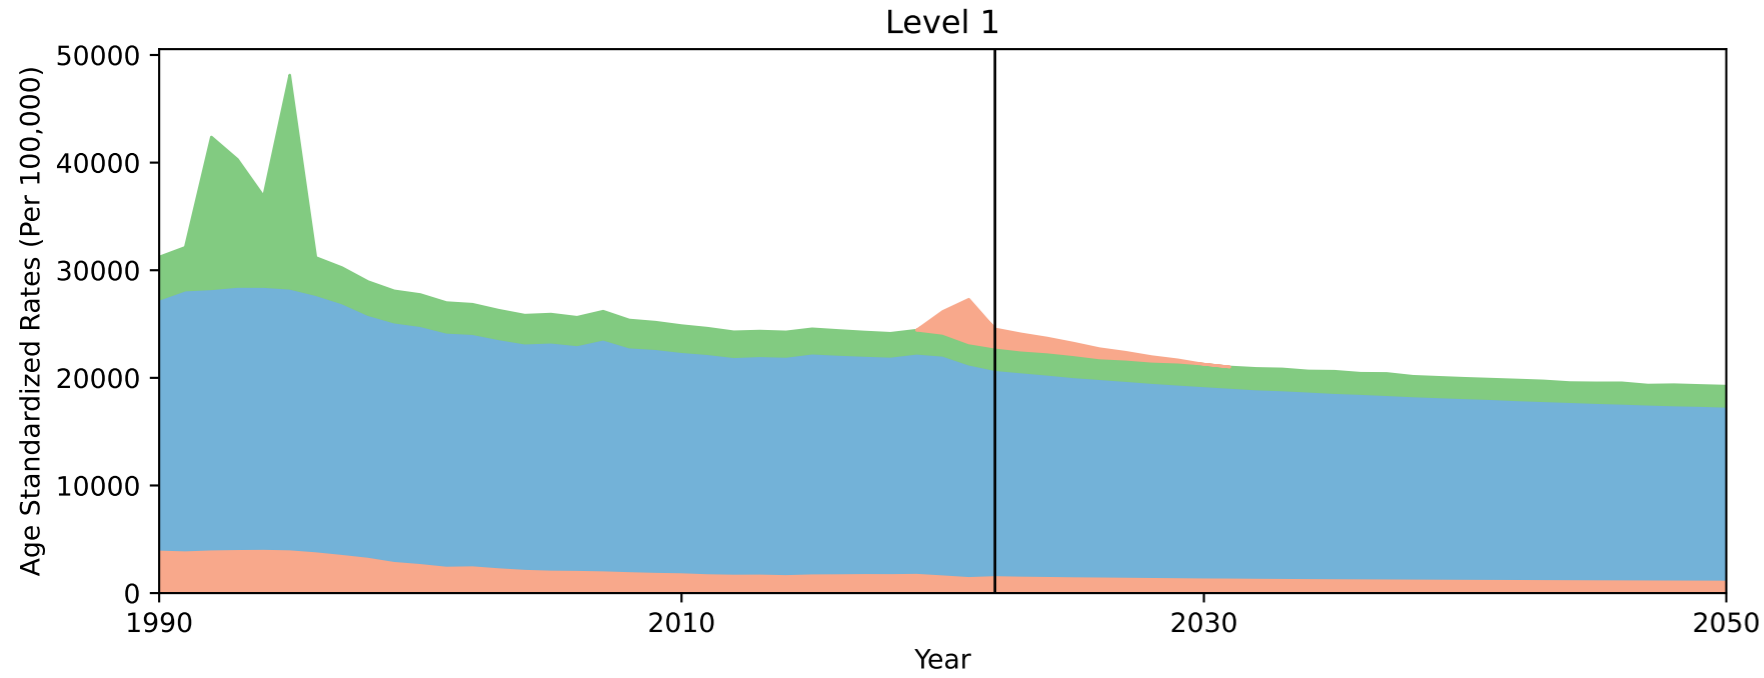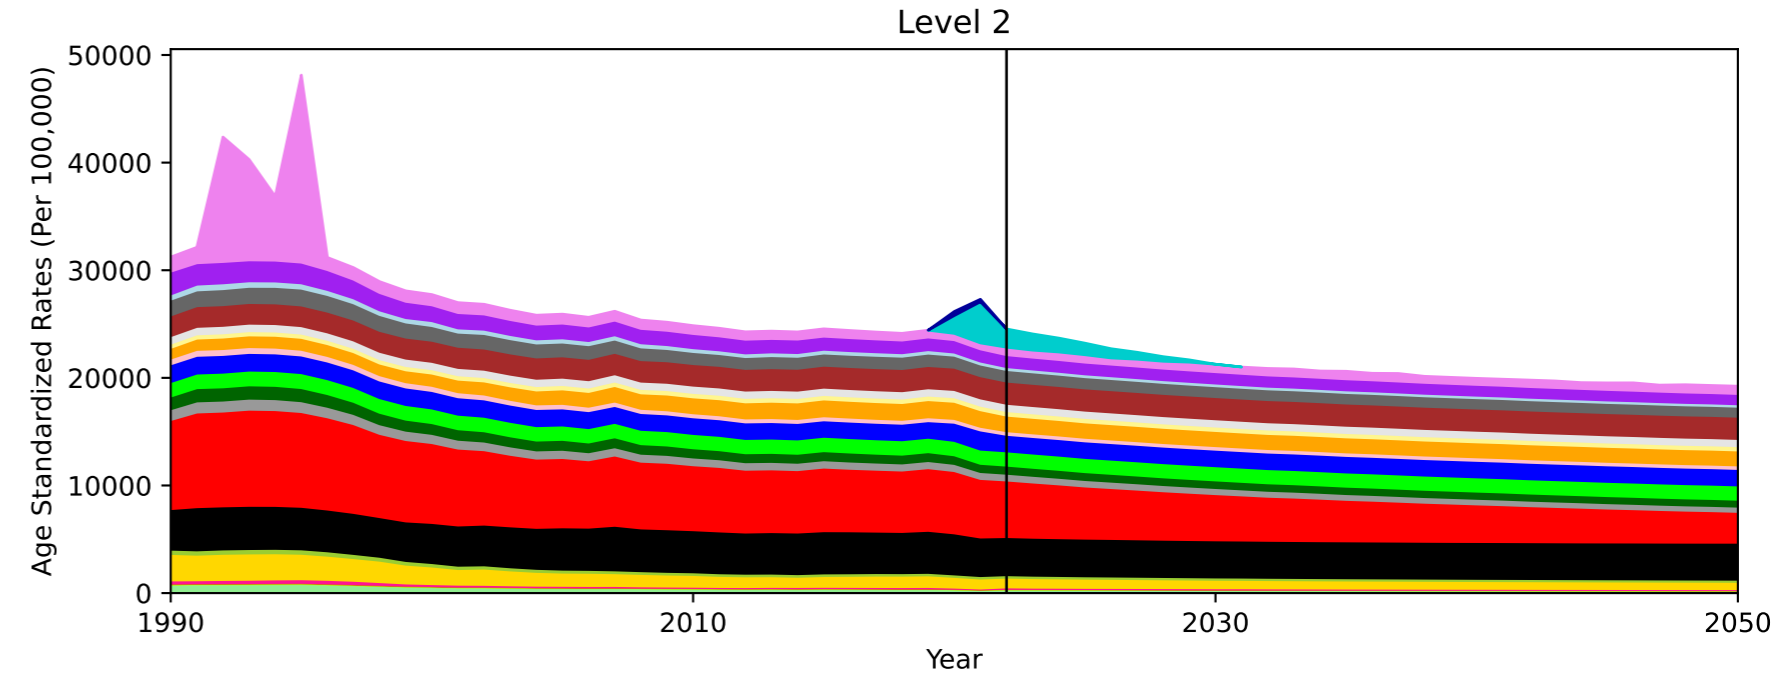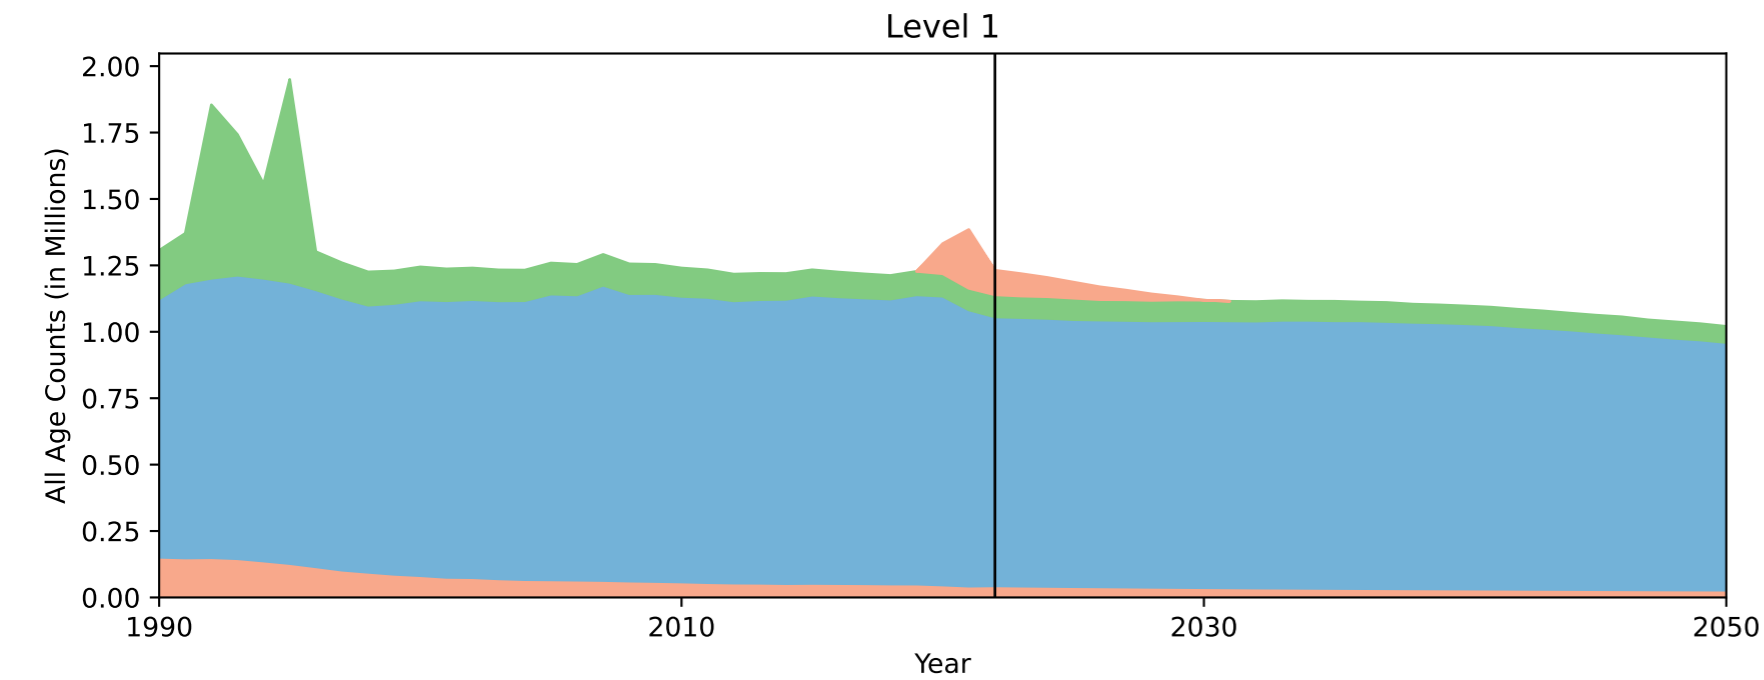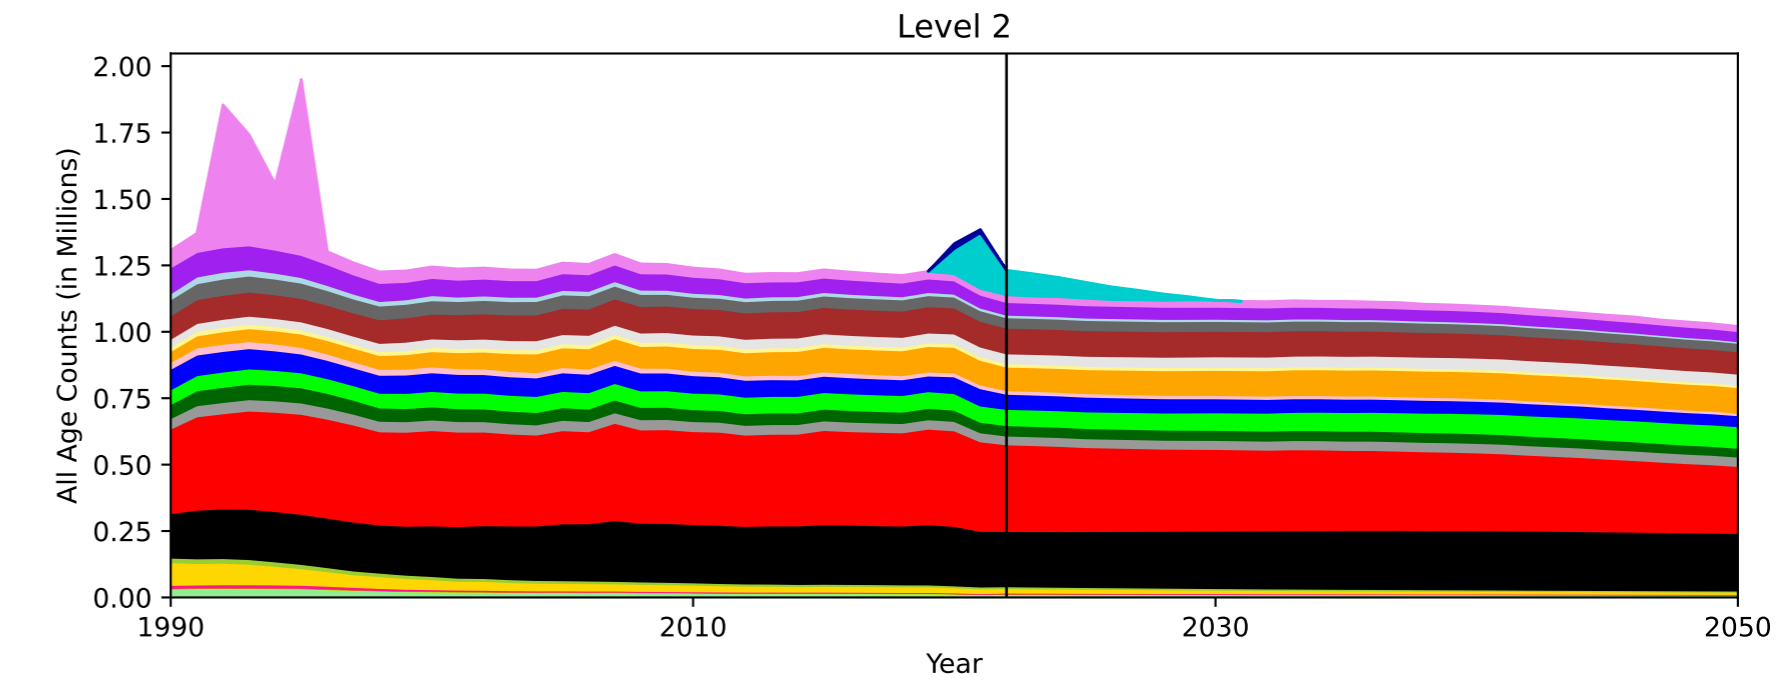



# Bulgaria

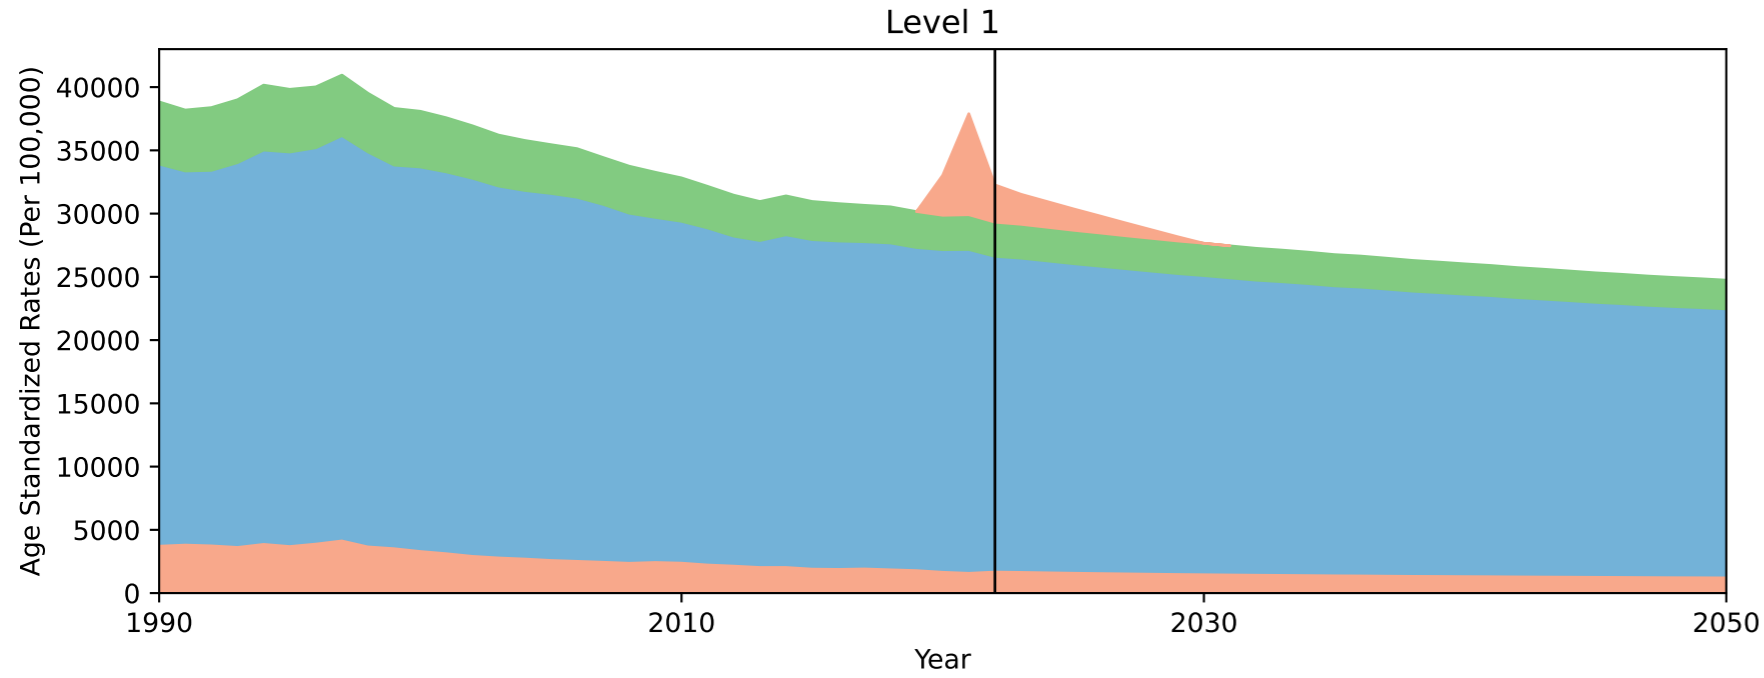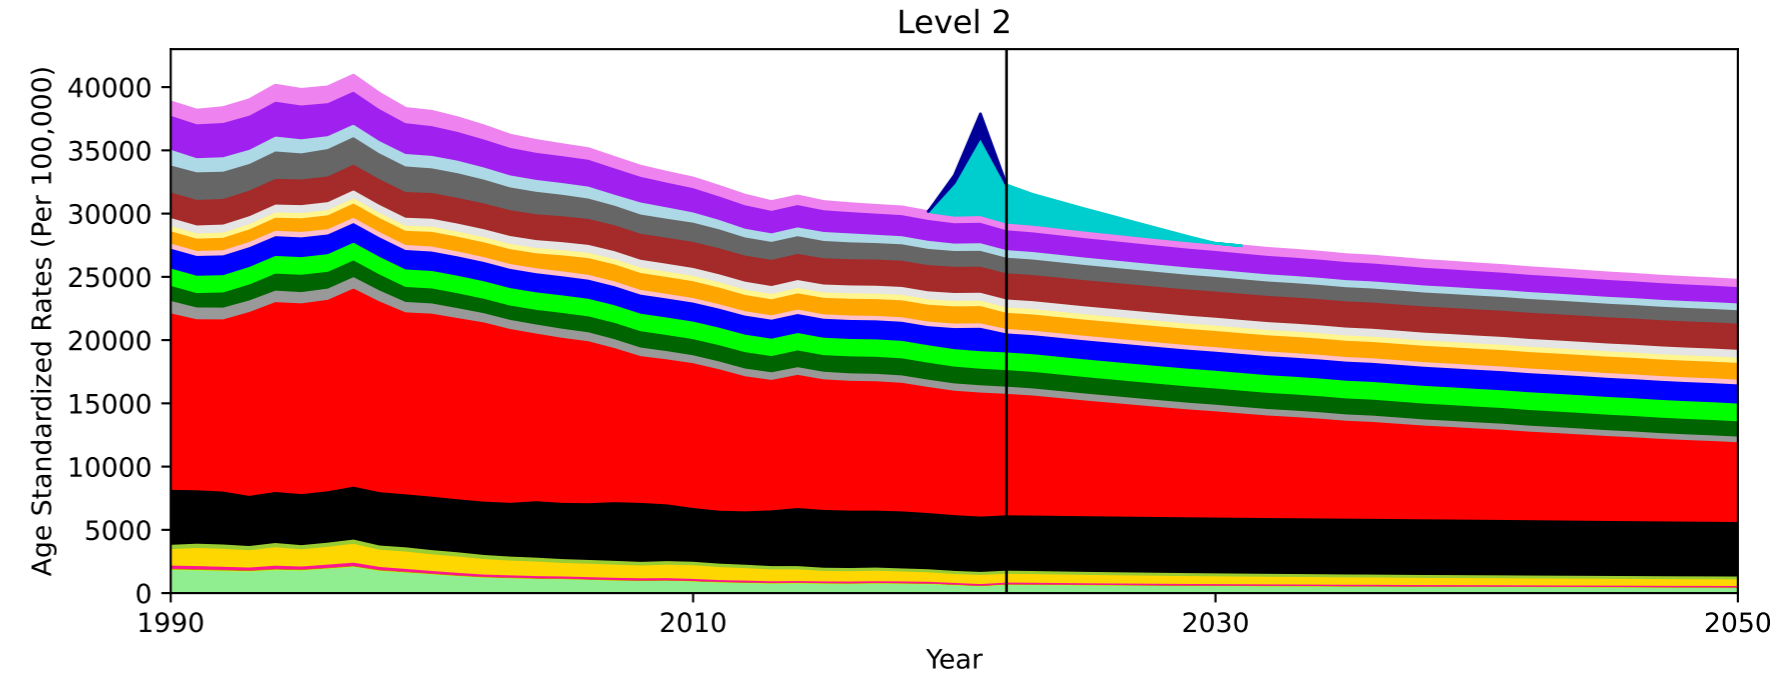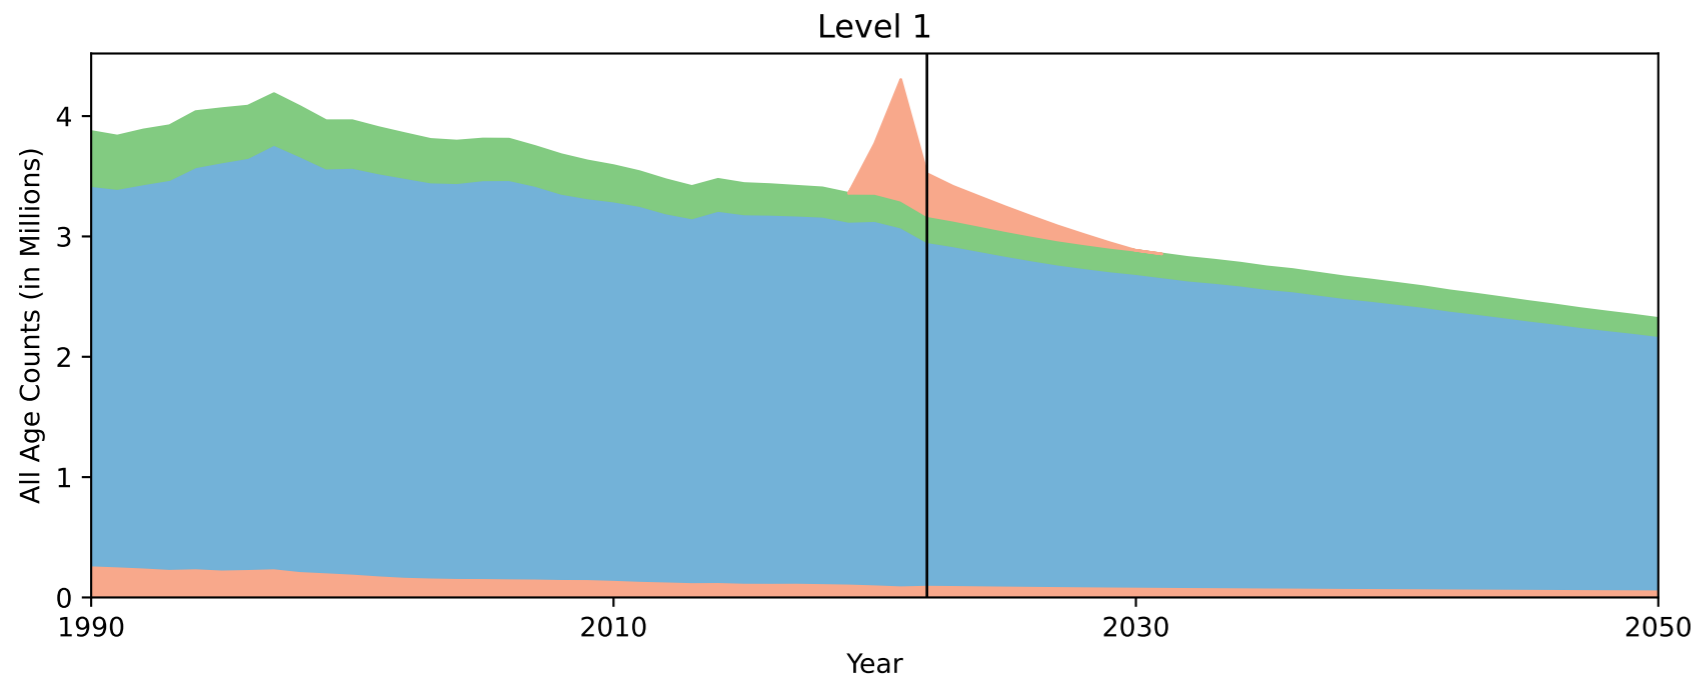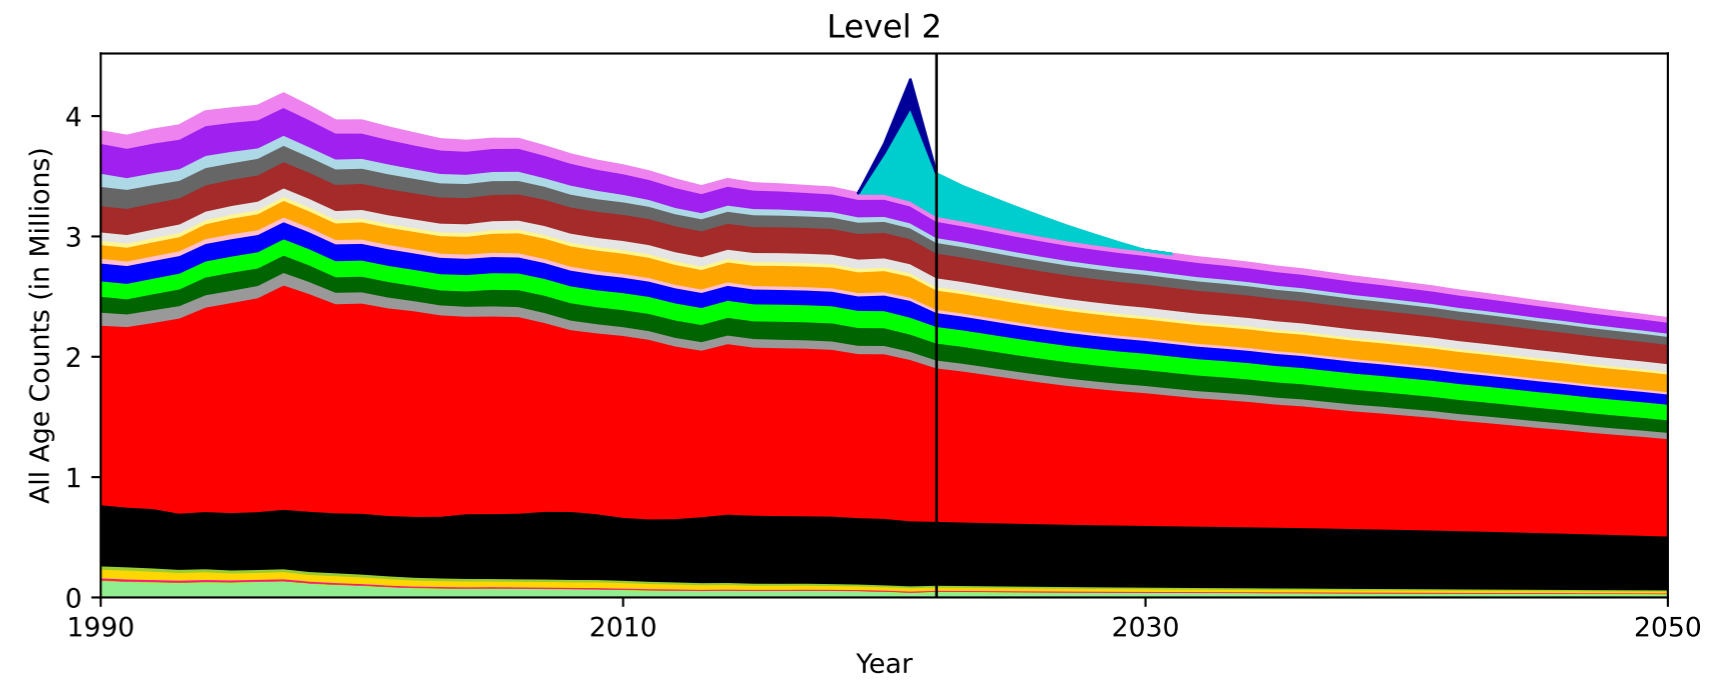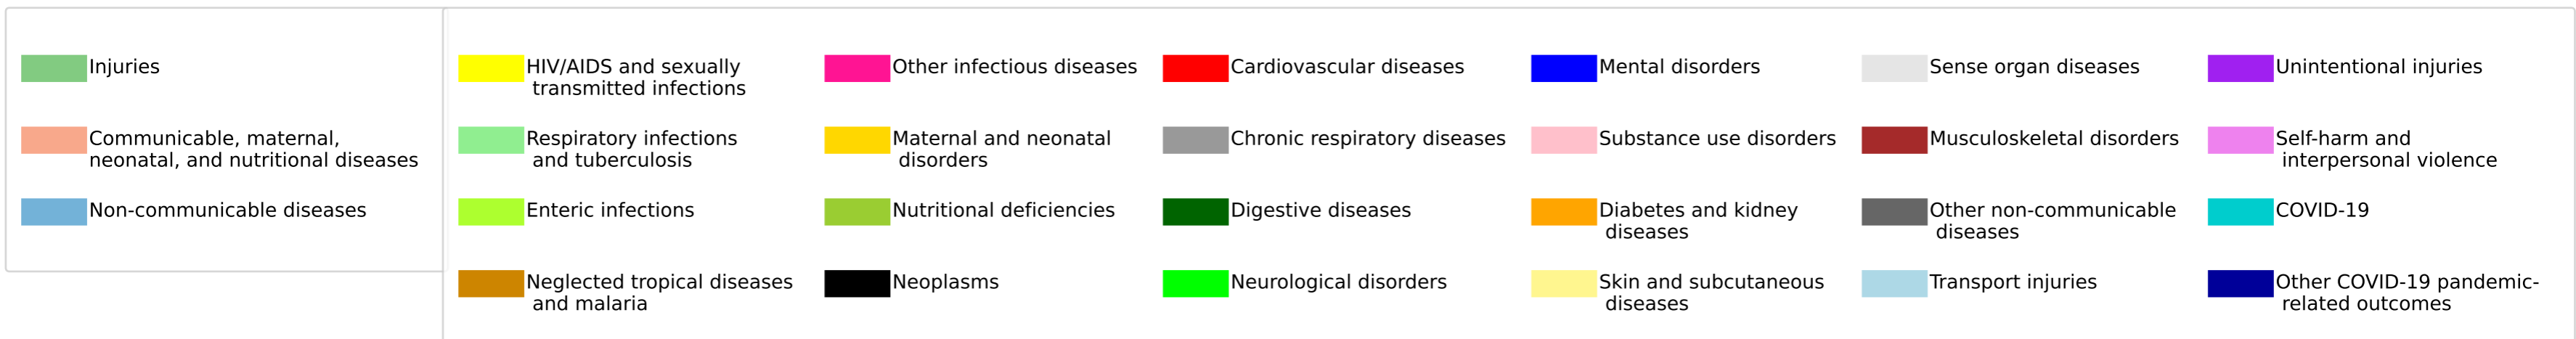

Level 1

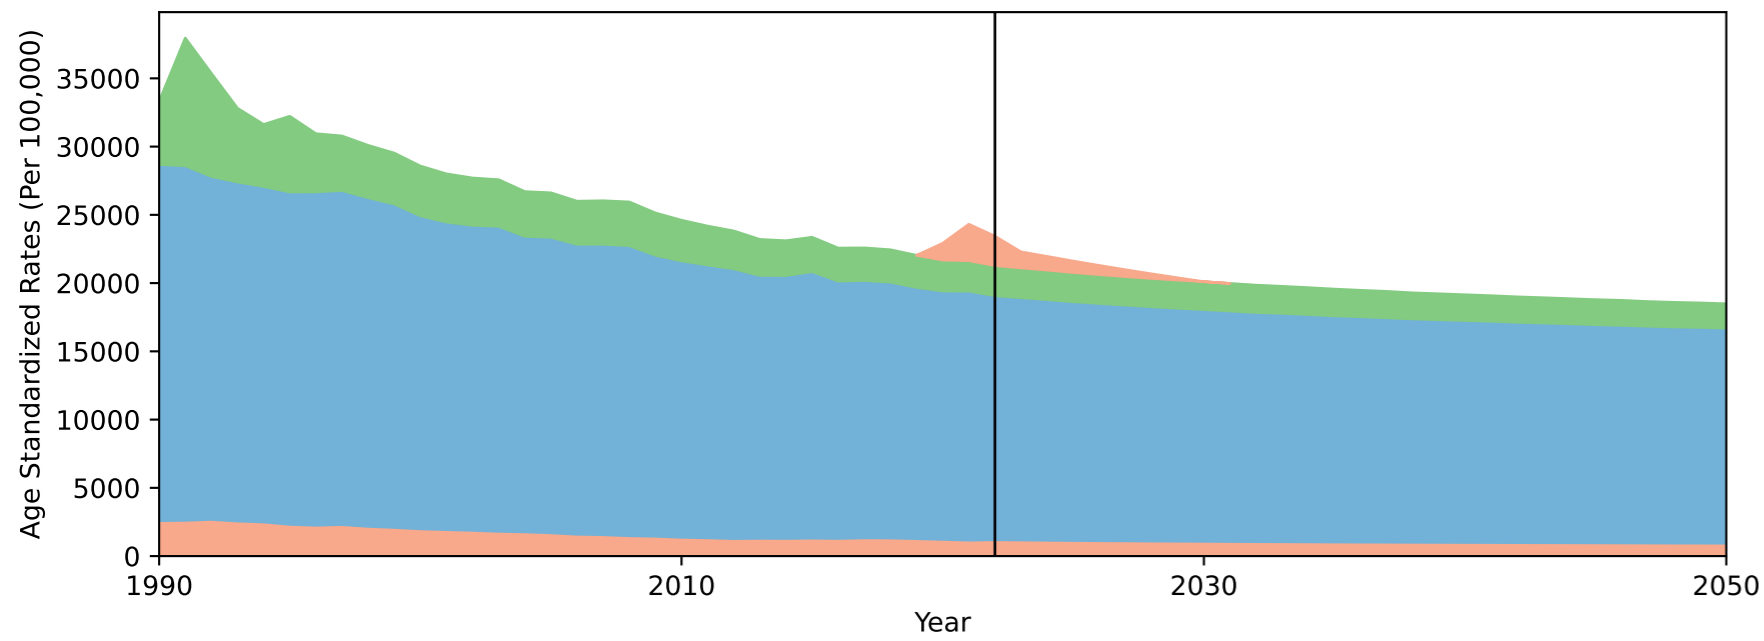

Level 2

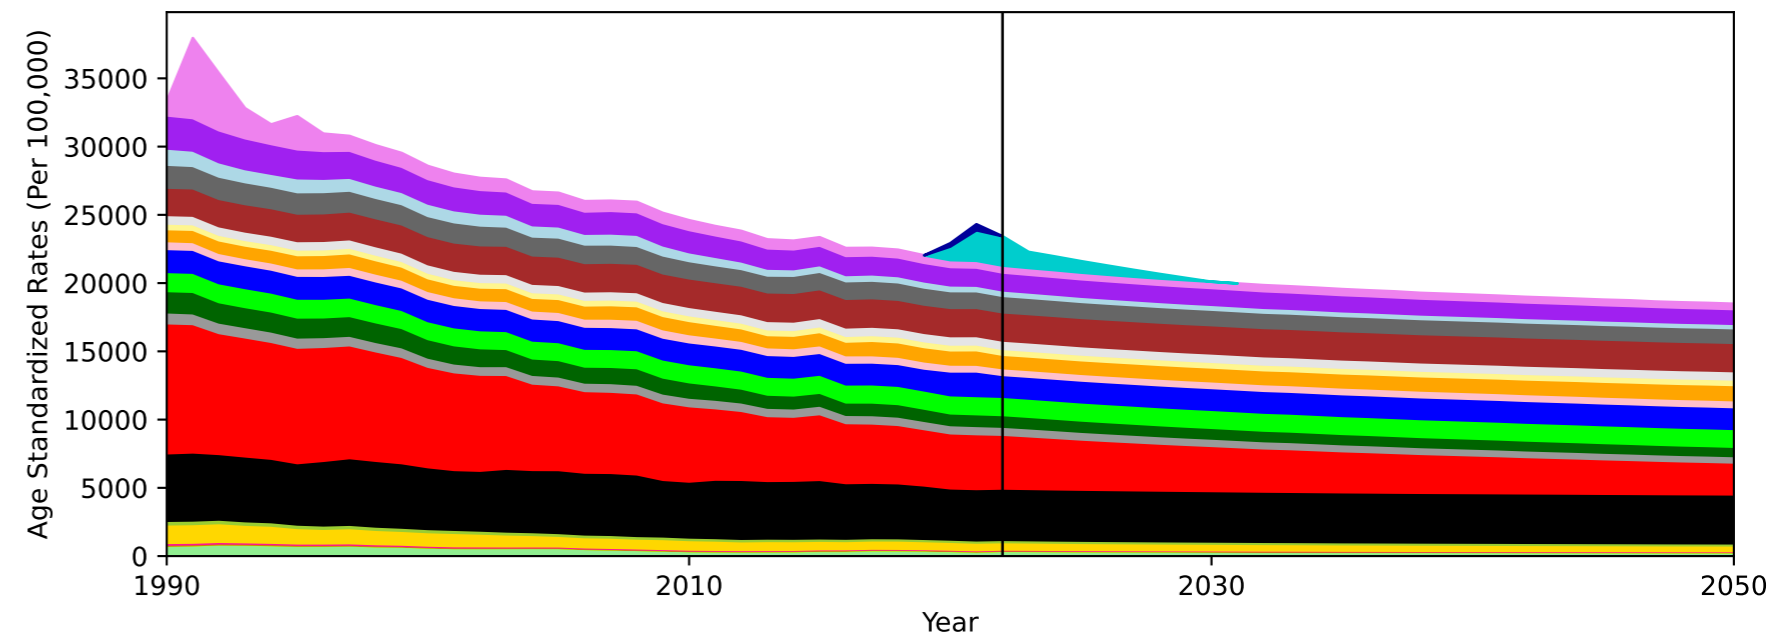

Level 1

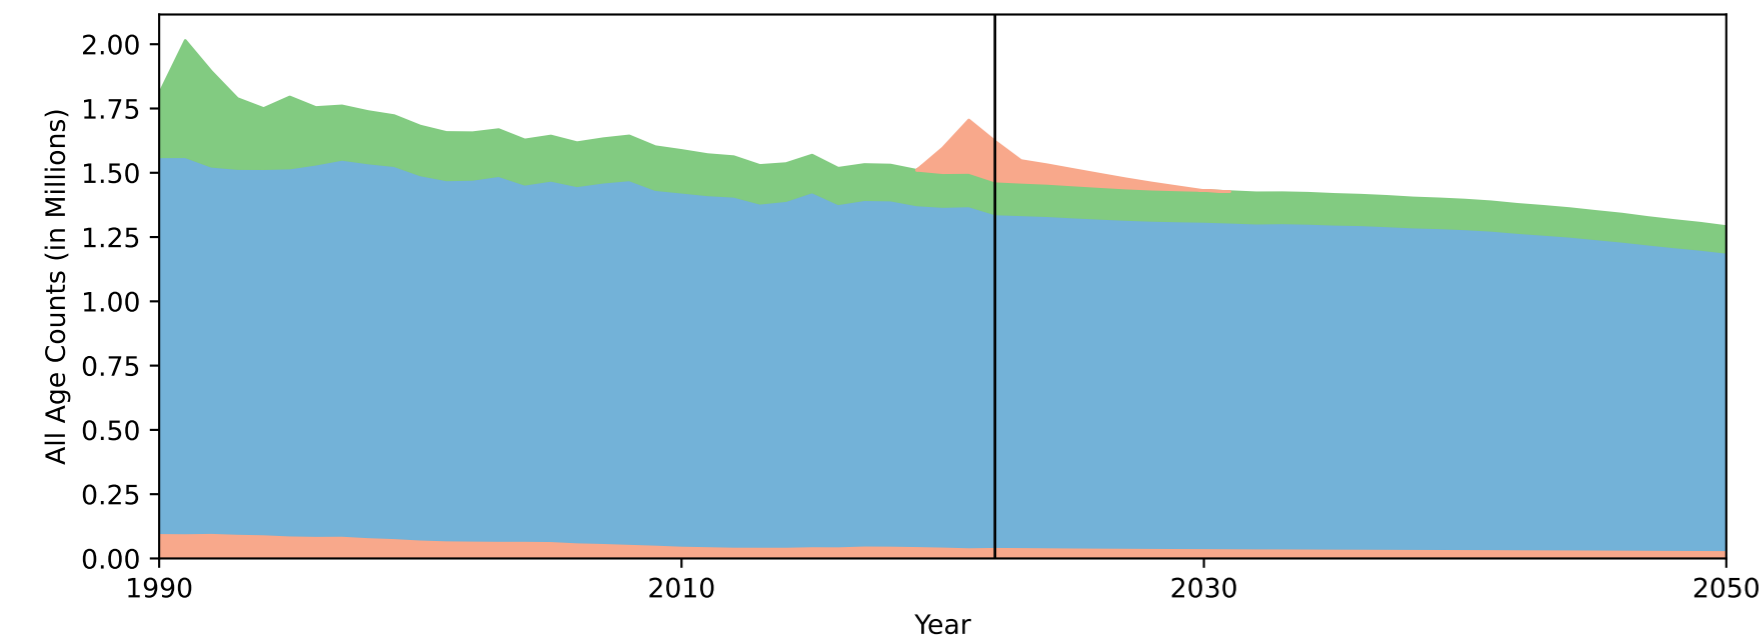

Level 2

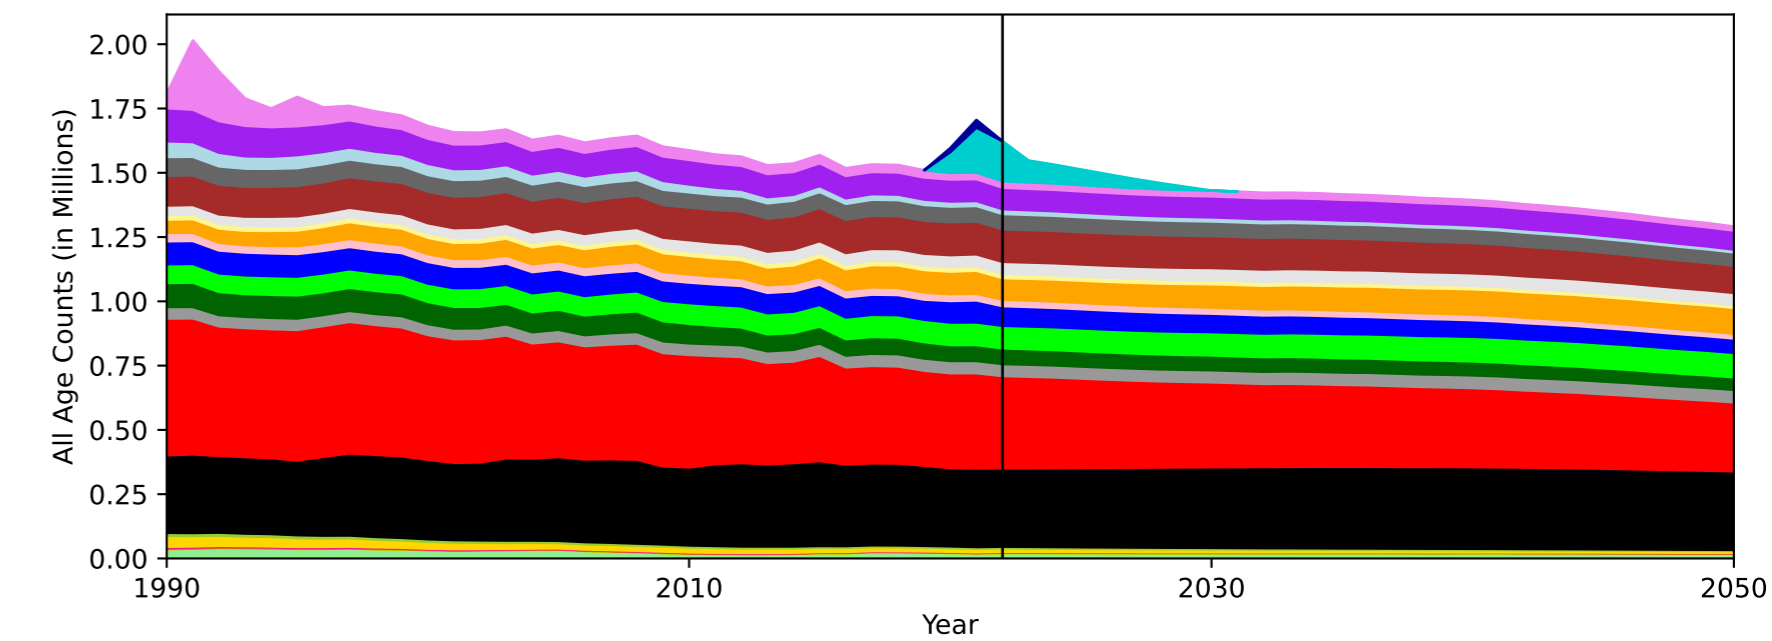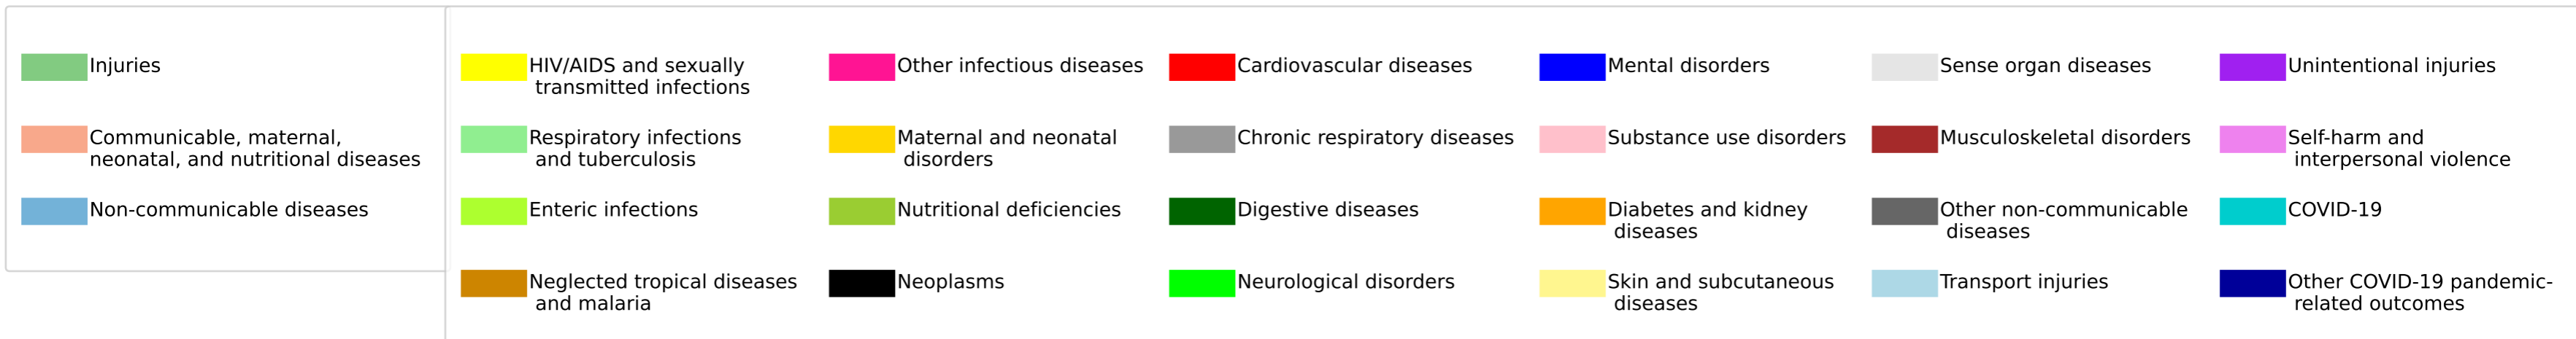

# Czechia

Level 1

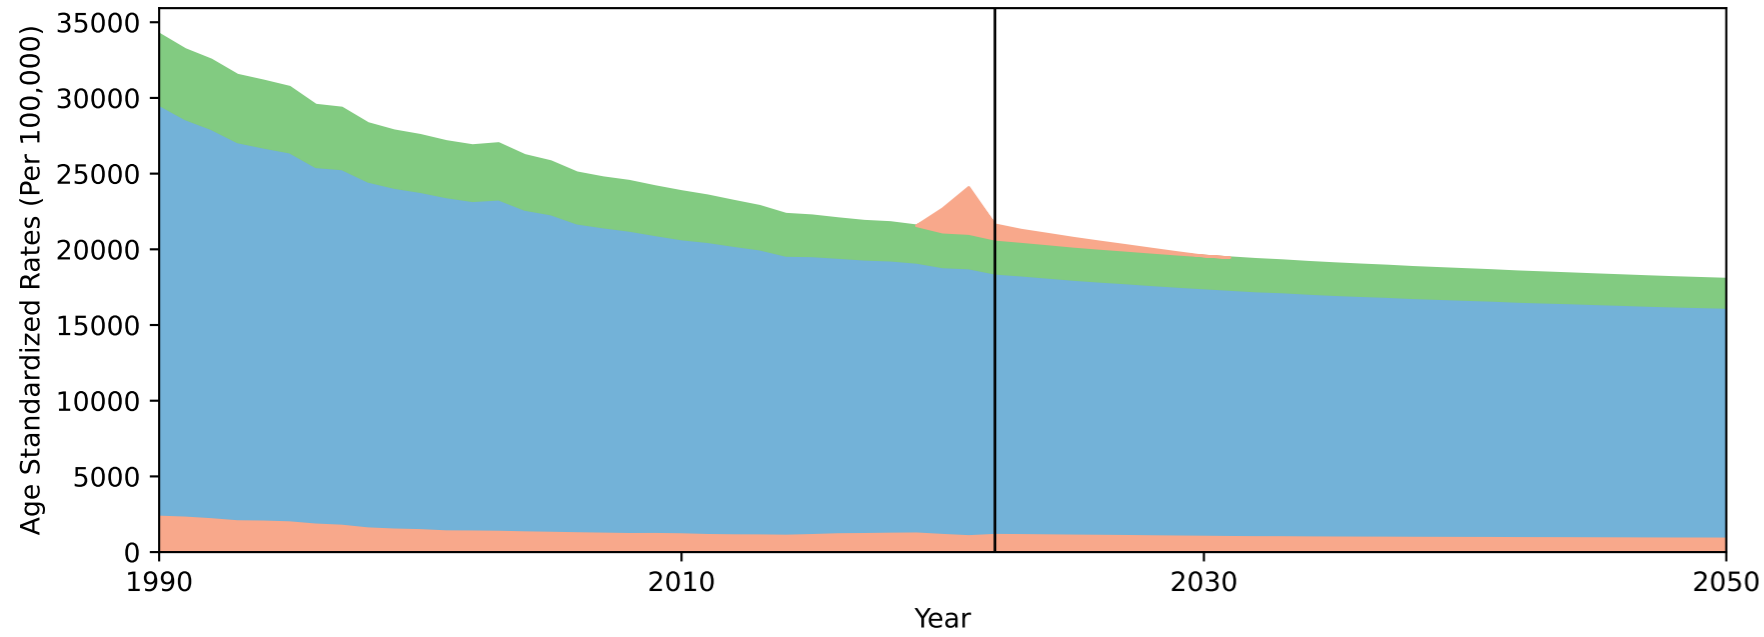

Level 2

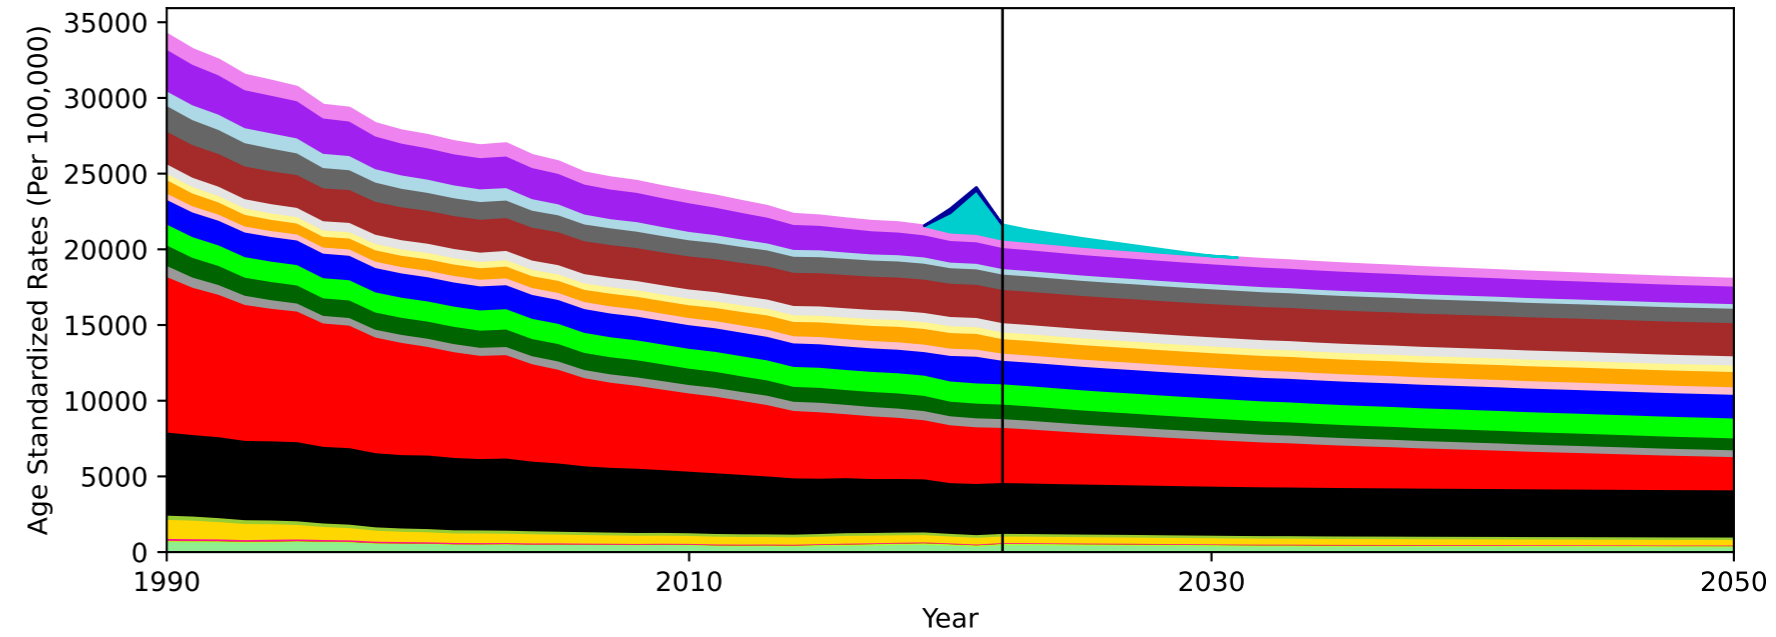

Level 1

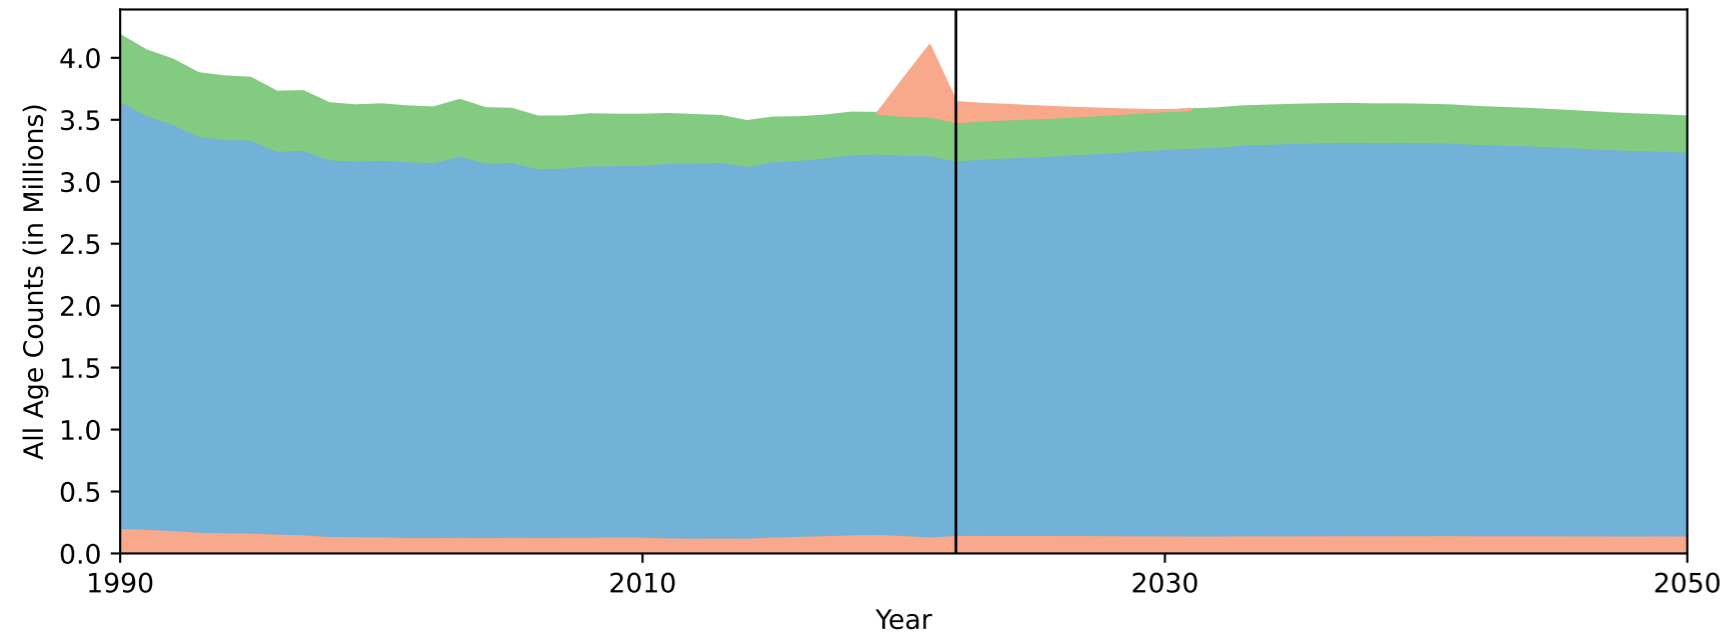

Level 2

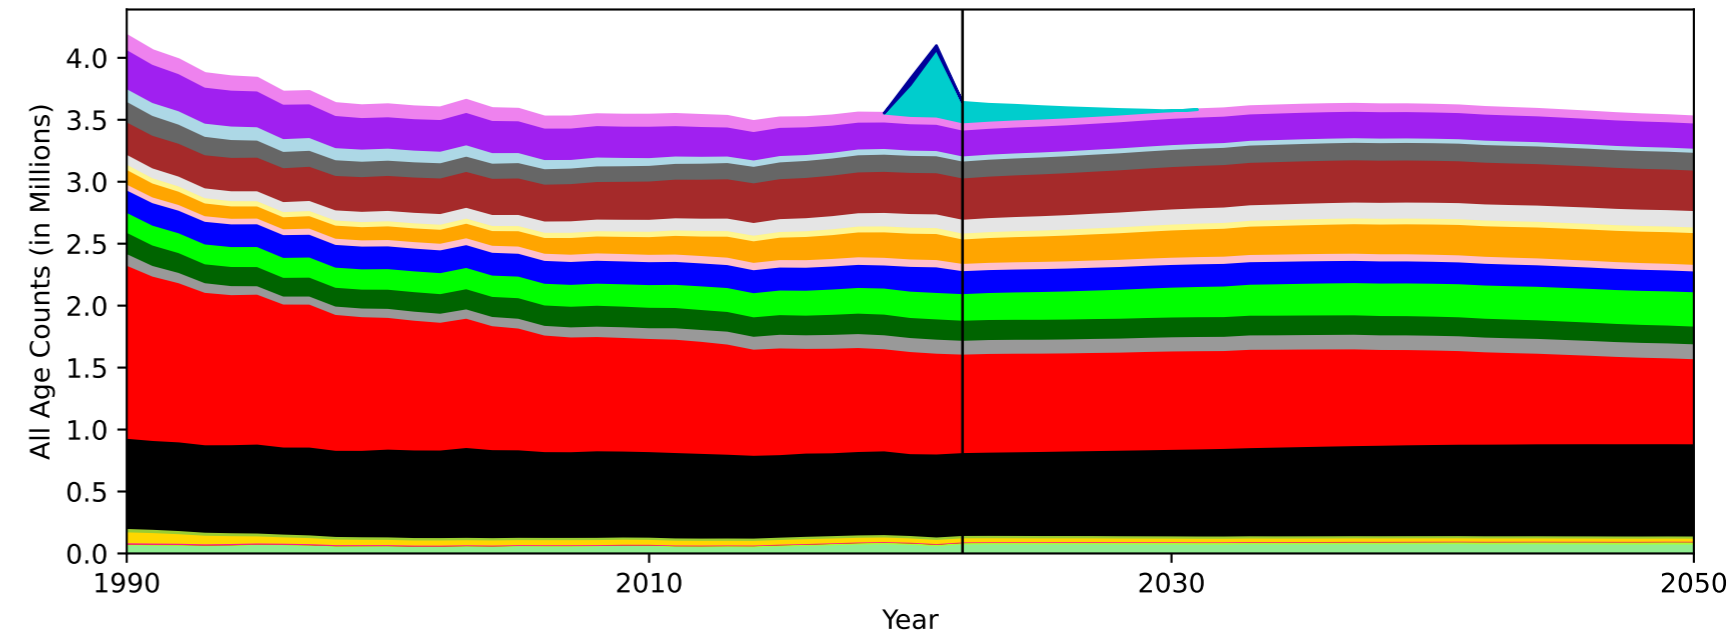

# Hungary

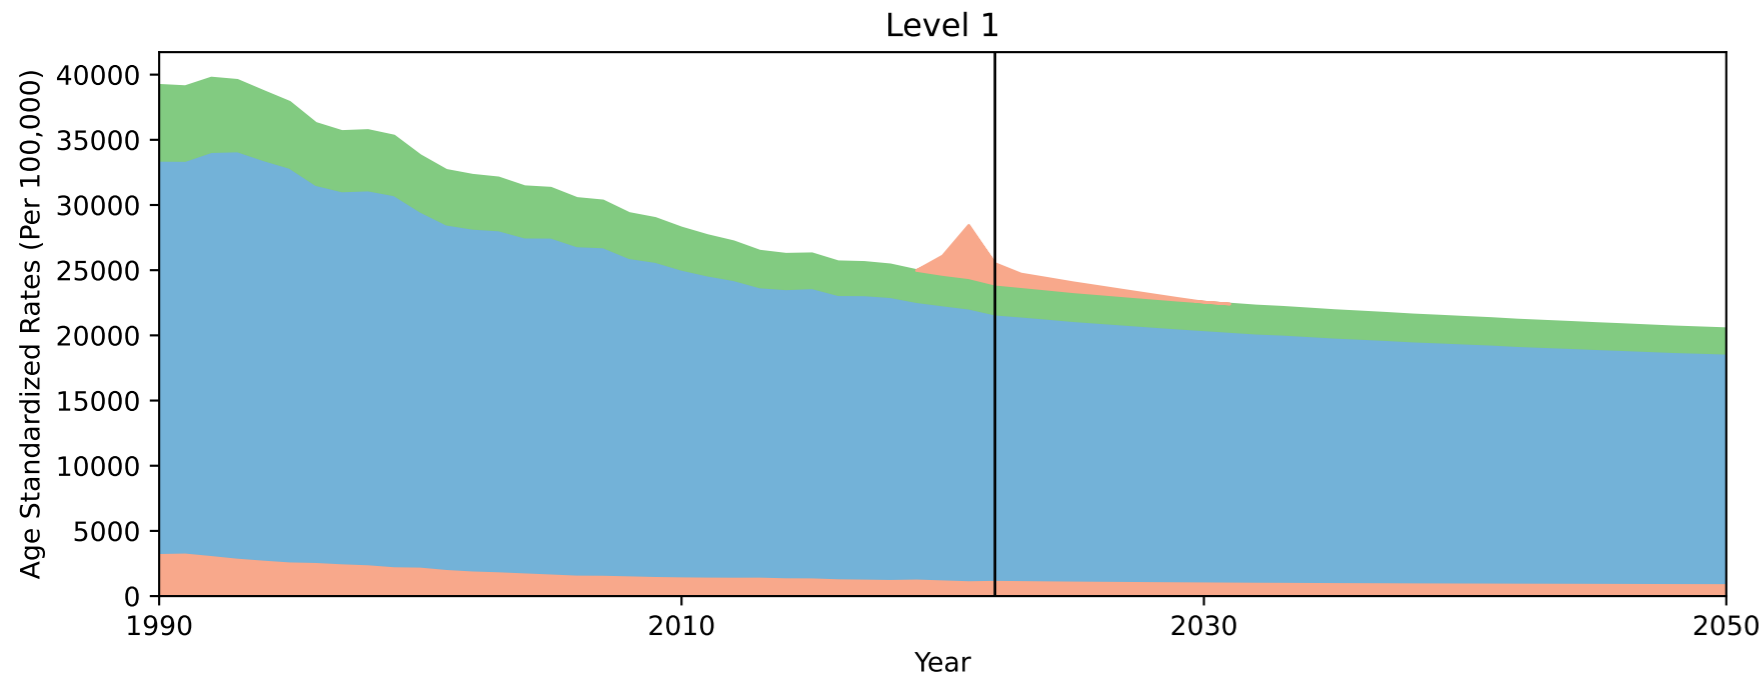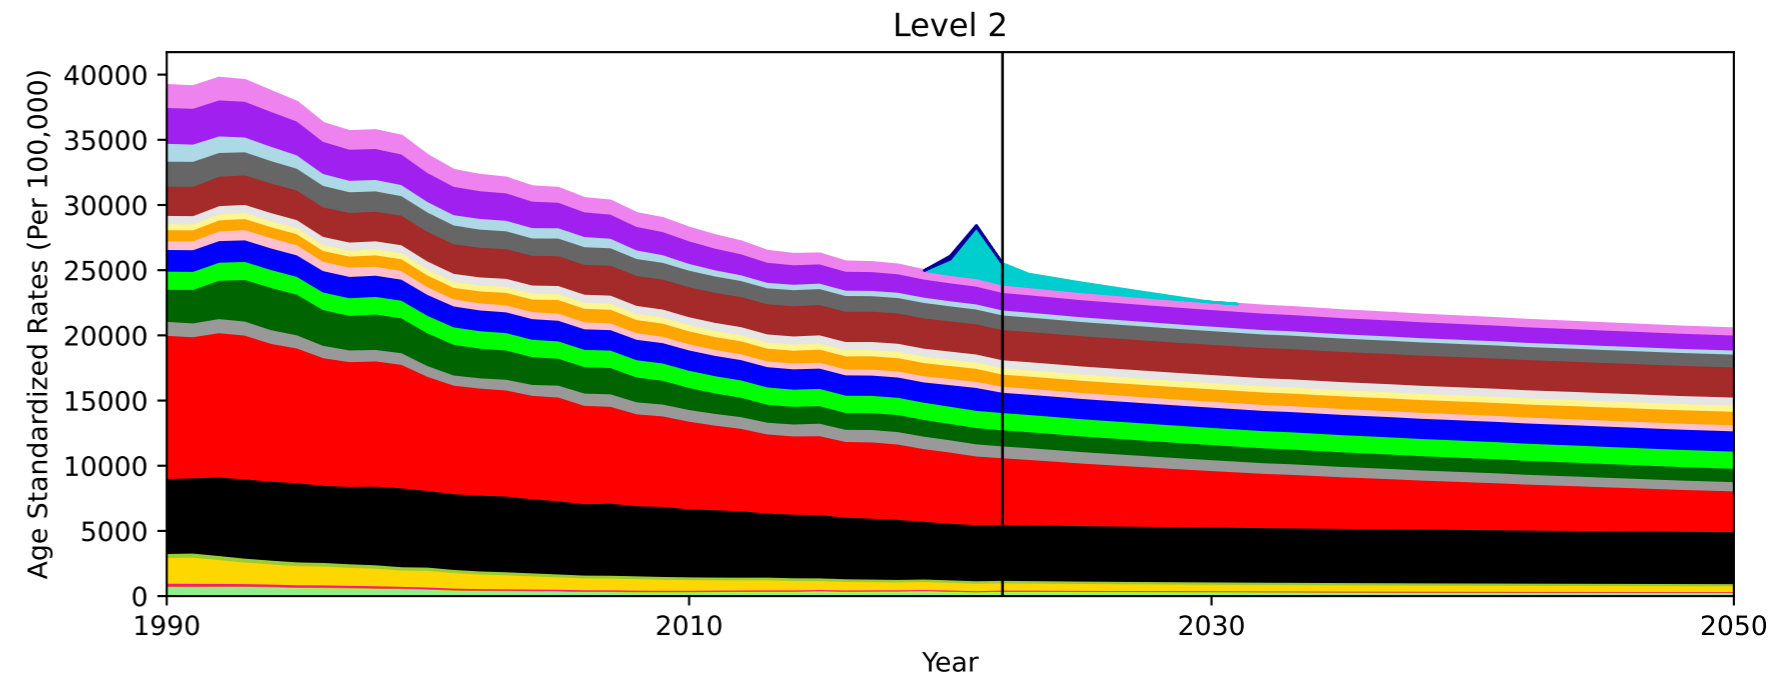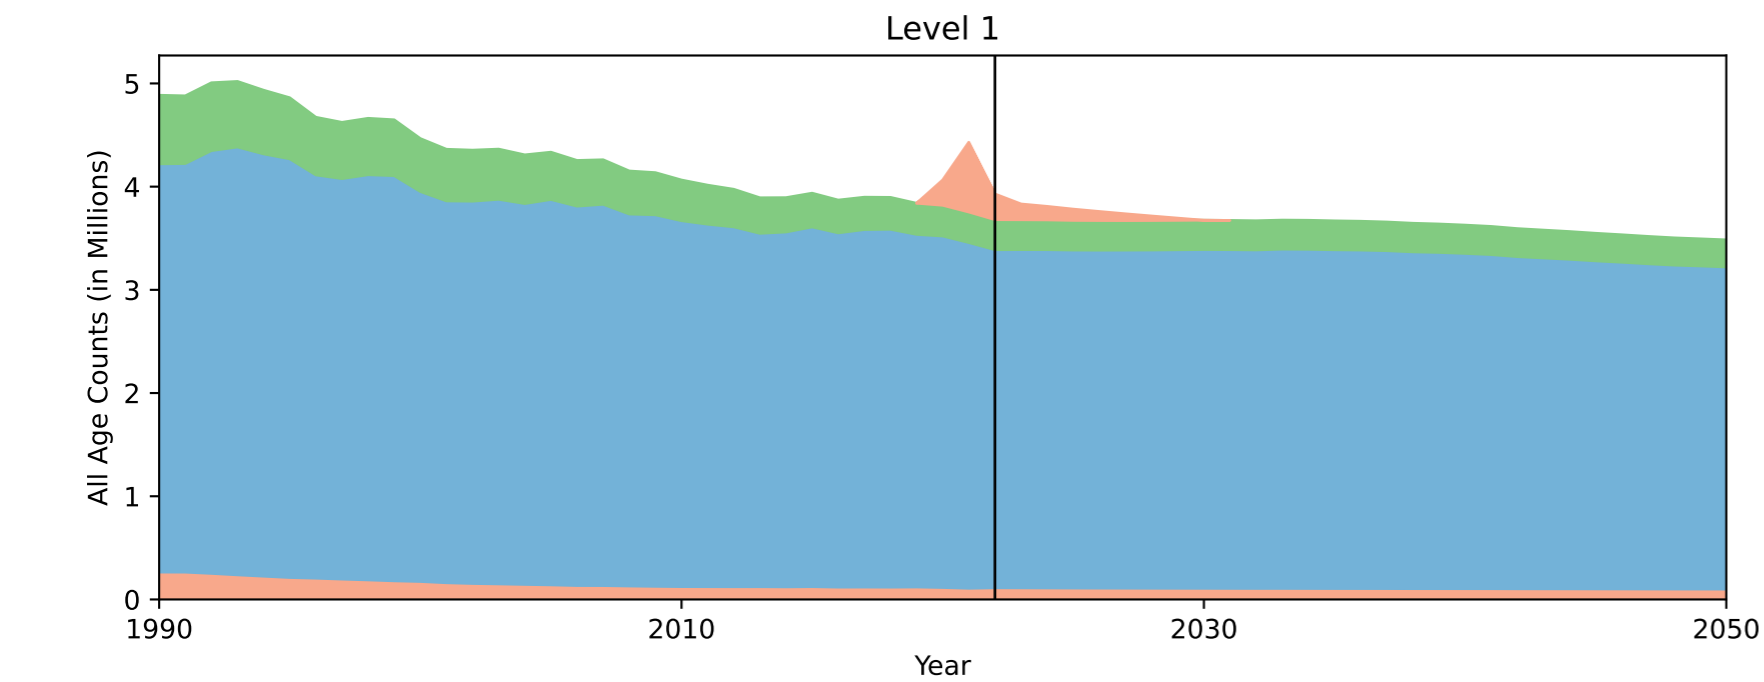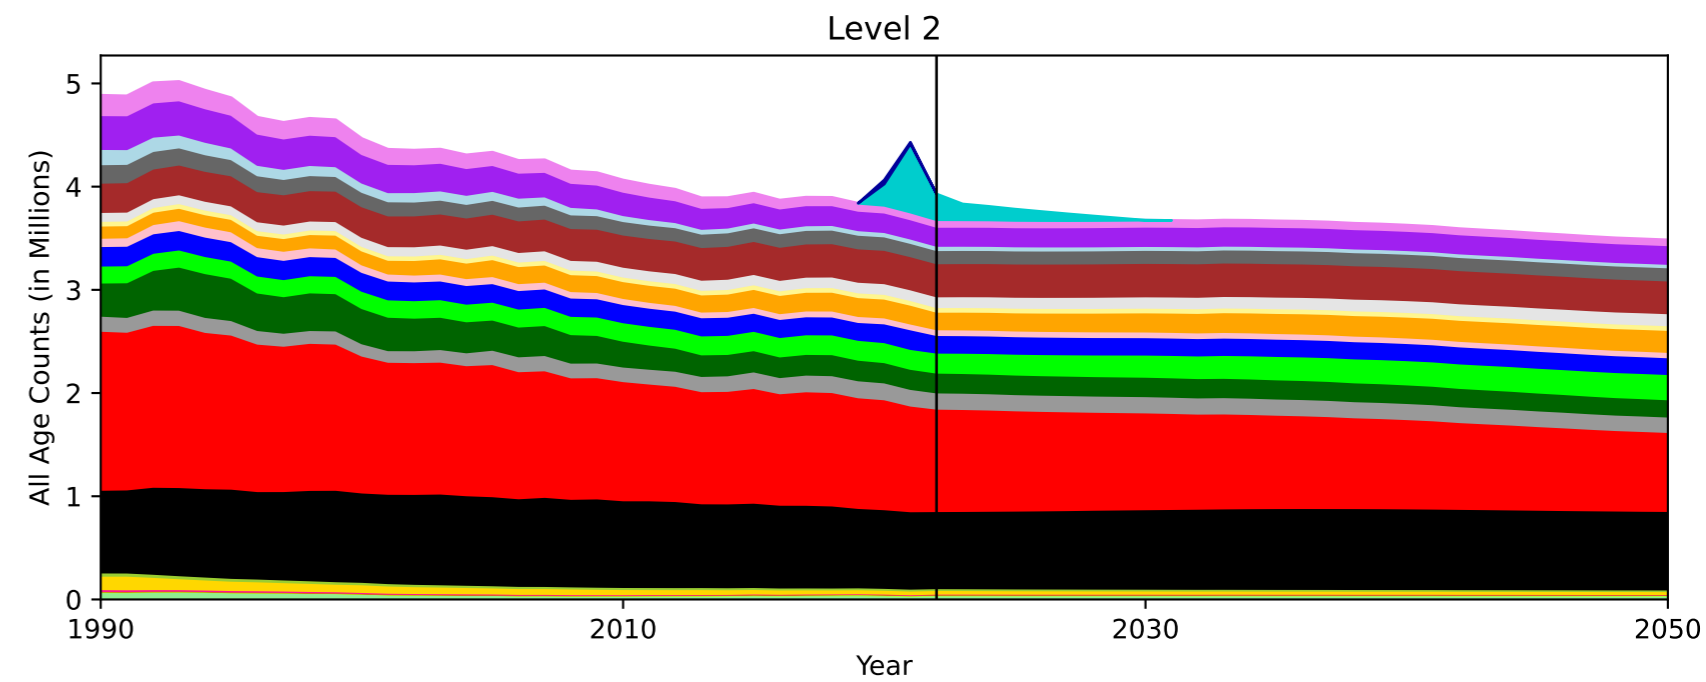

# Montenegro

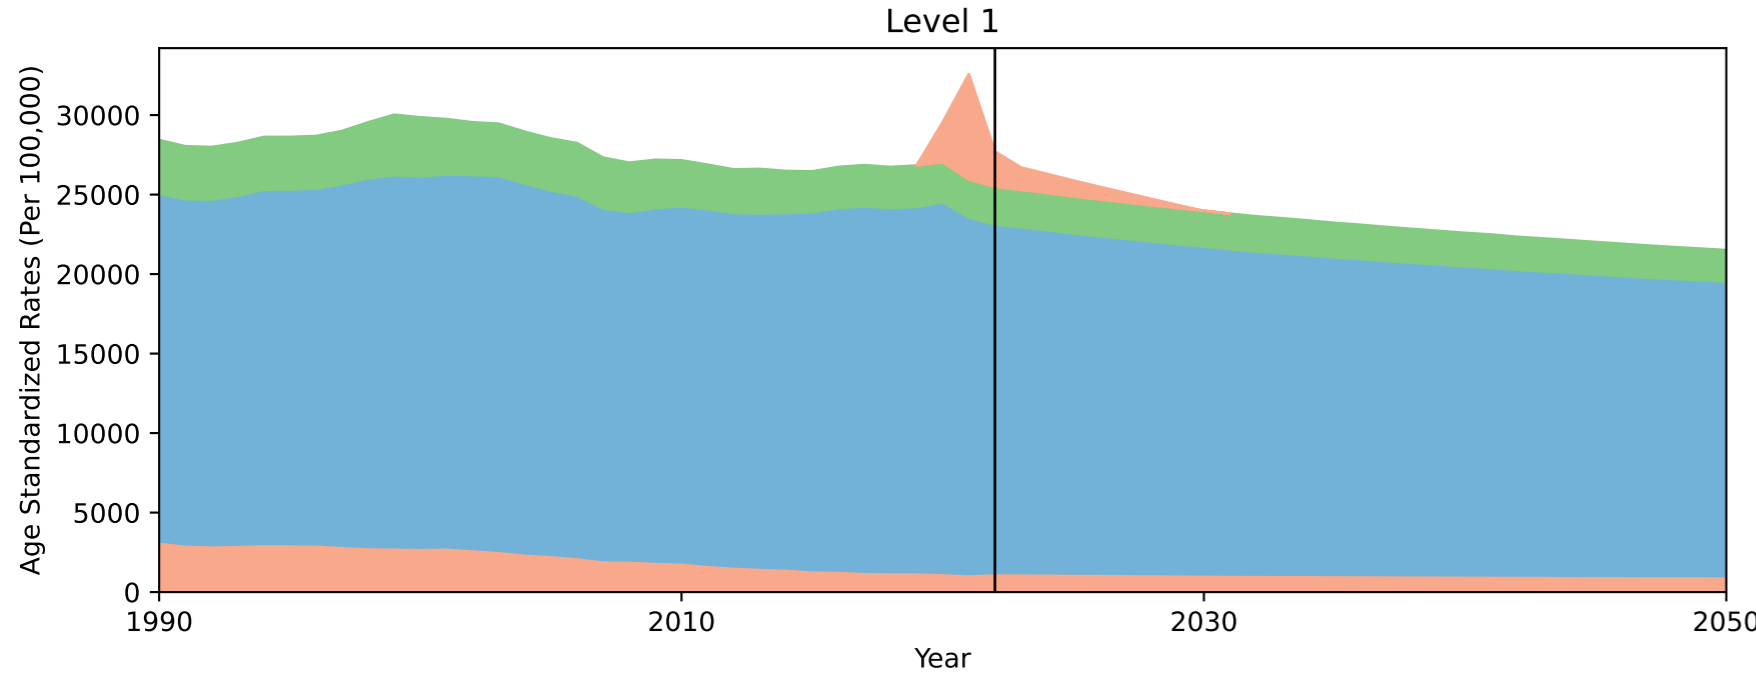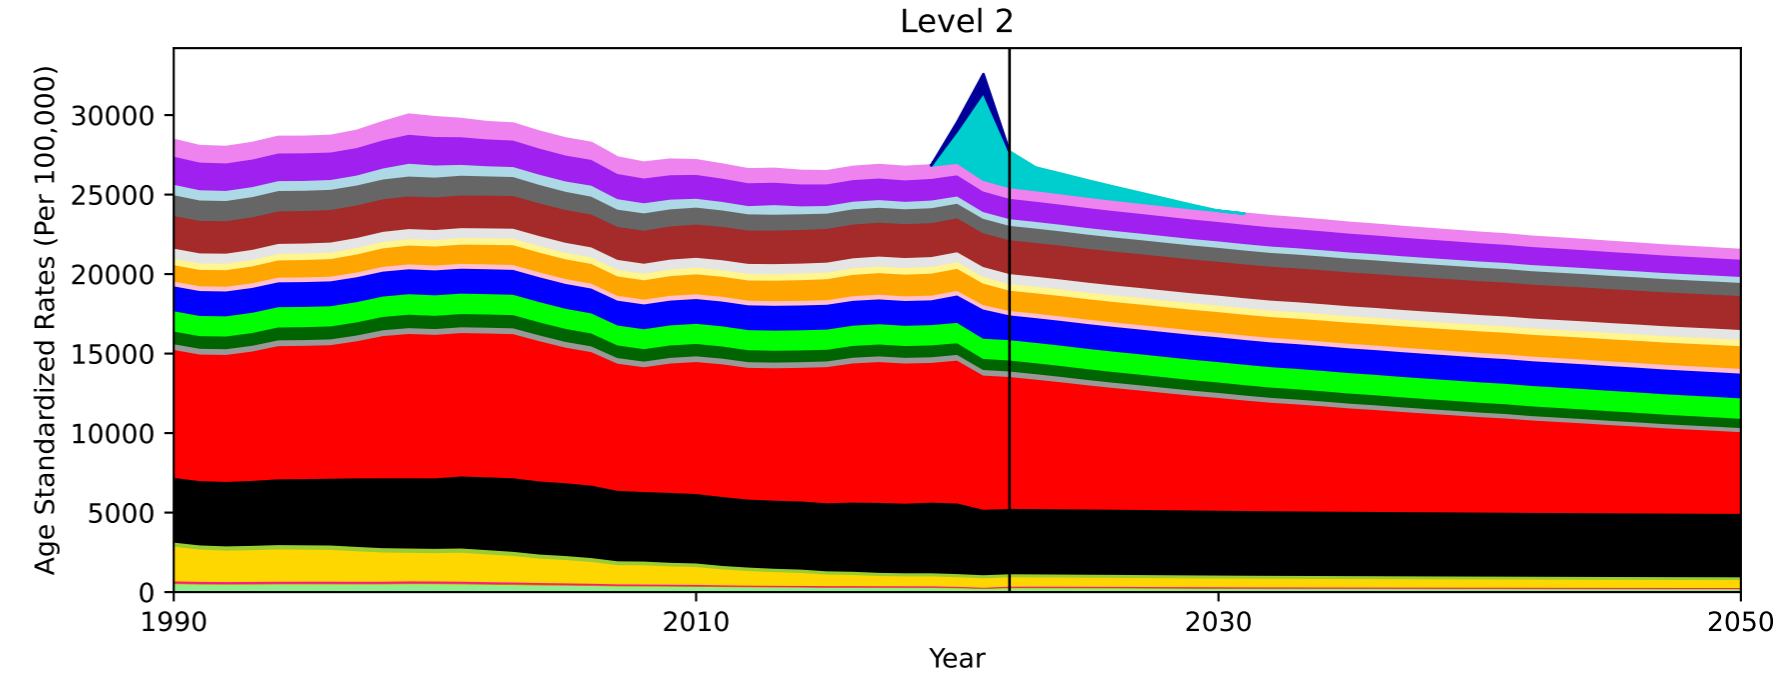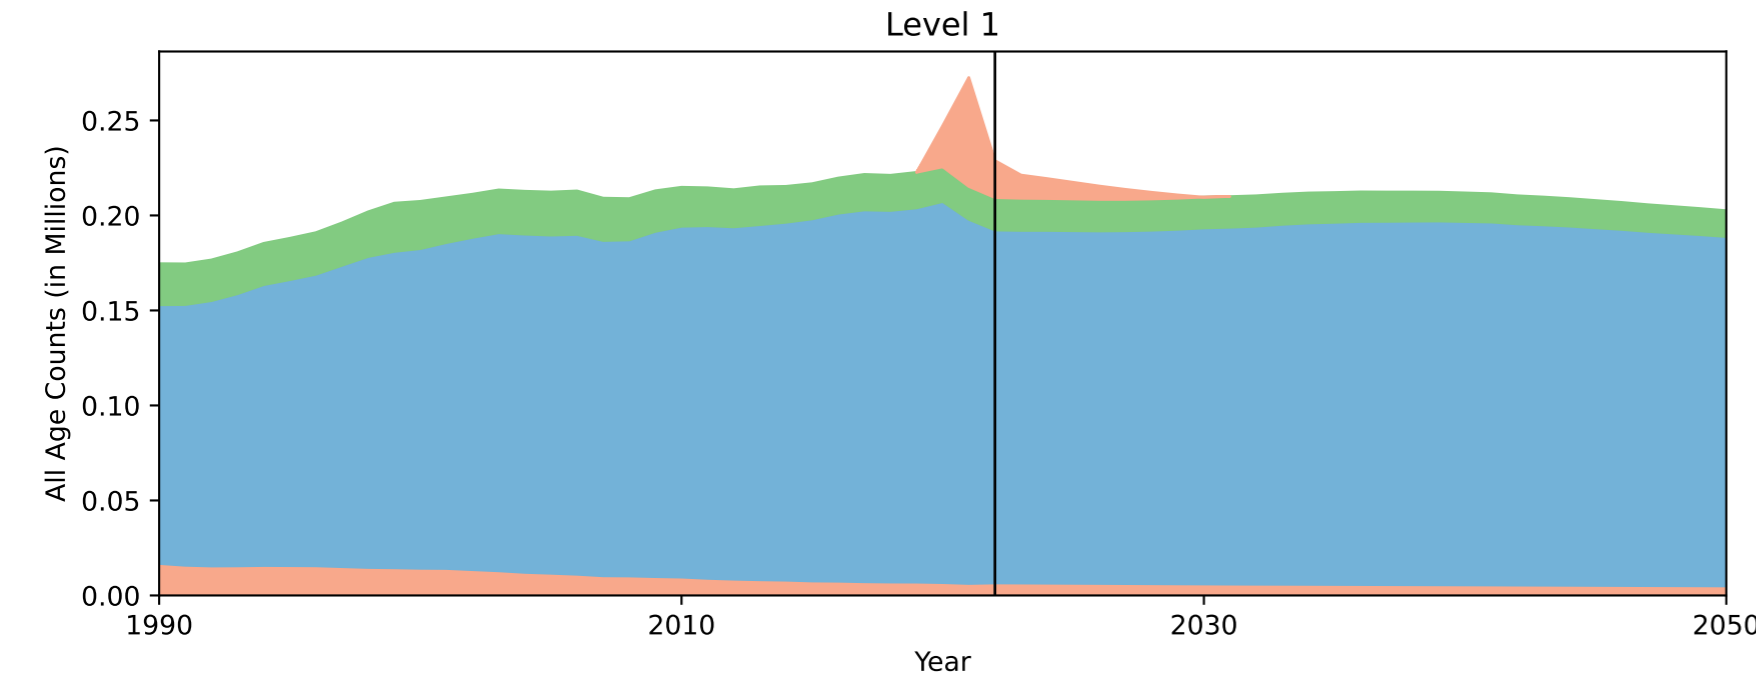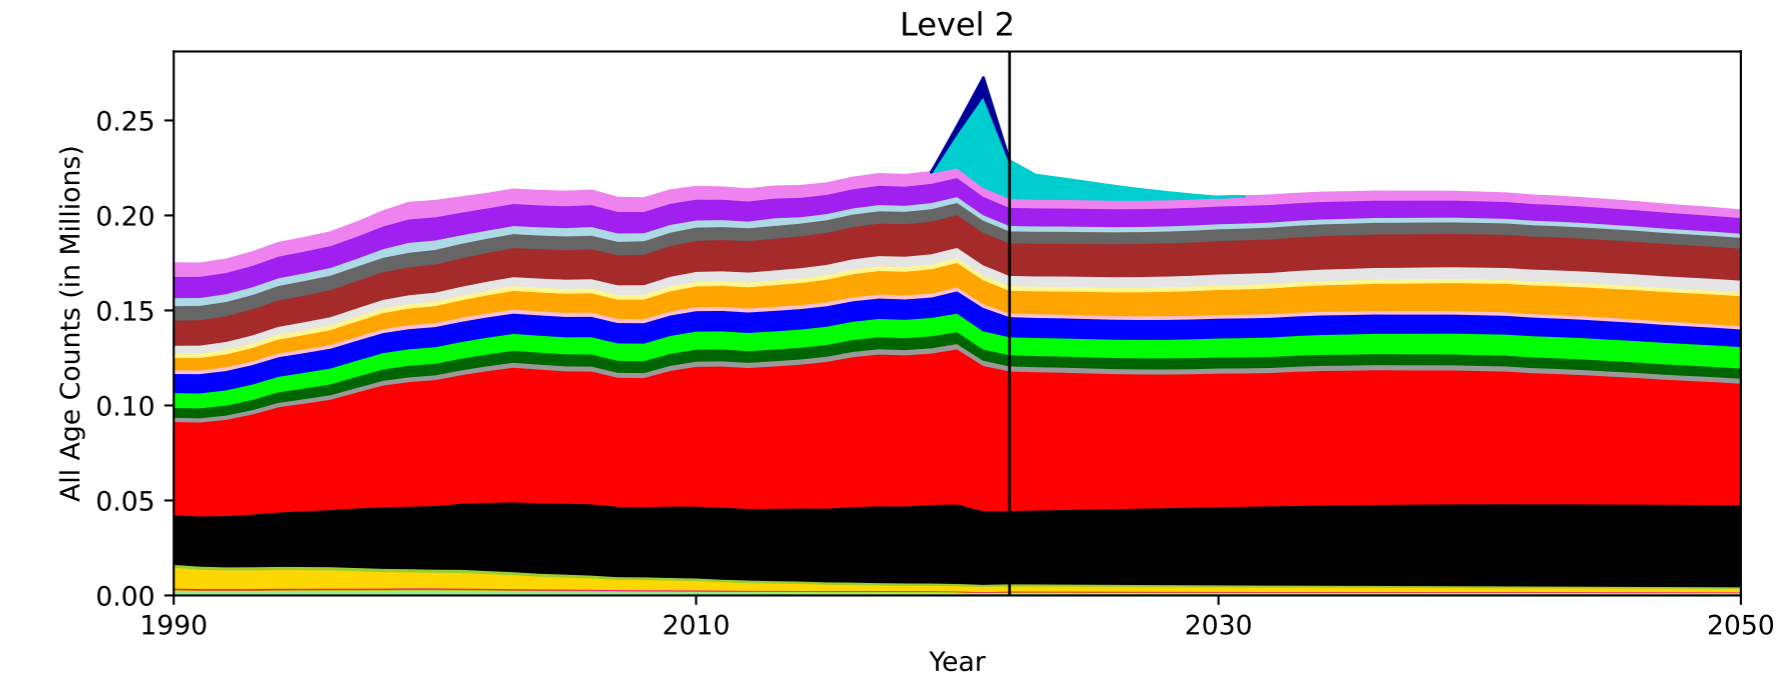

# North Macedonia

Supplemental Results Figure S4. Age-standardised DALY rates and all age DALY counts and by Level 1 and Level 2 causes, 1990–2050

261

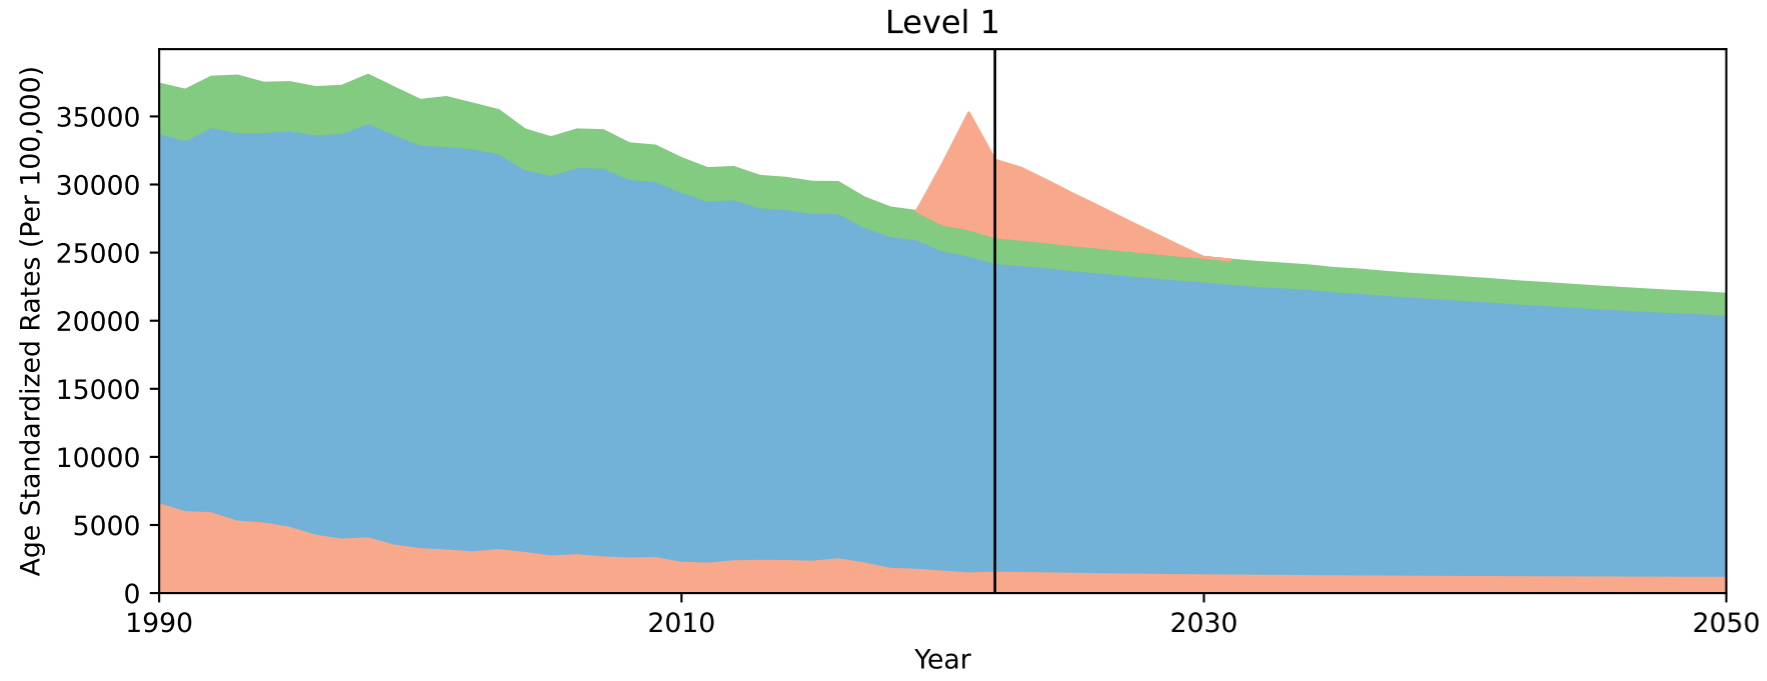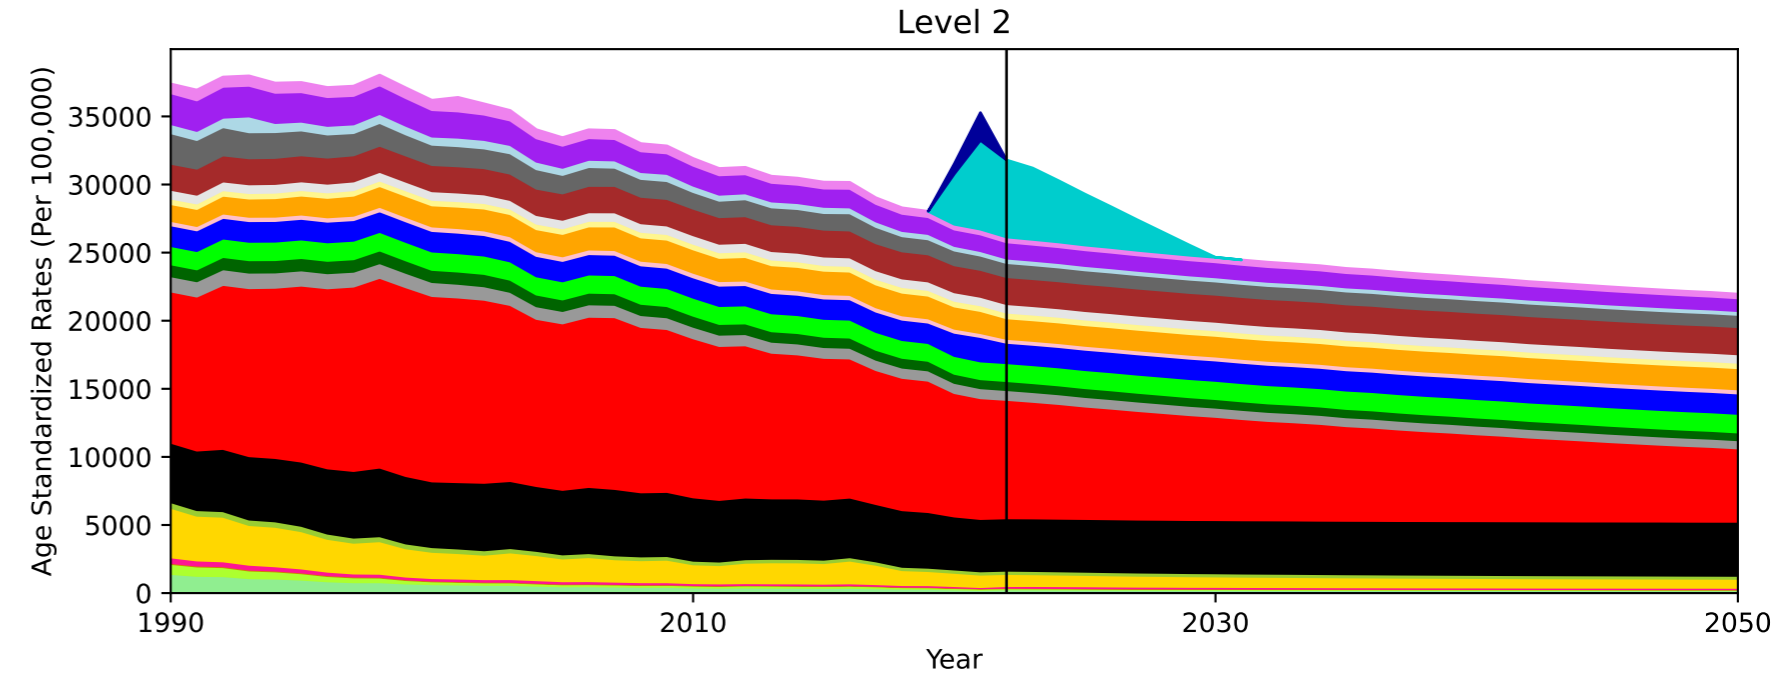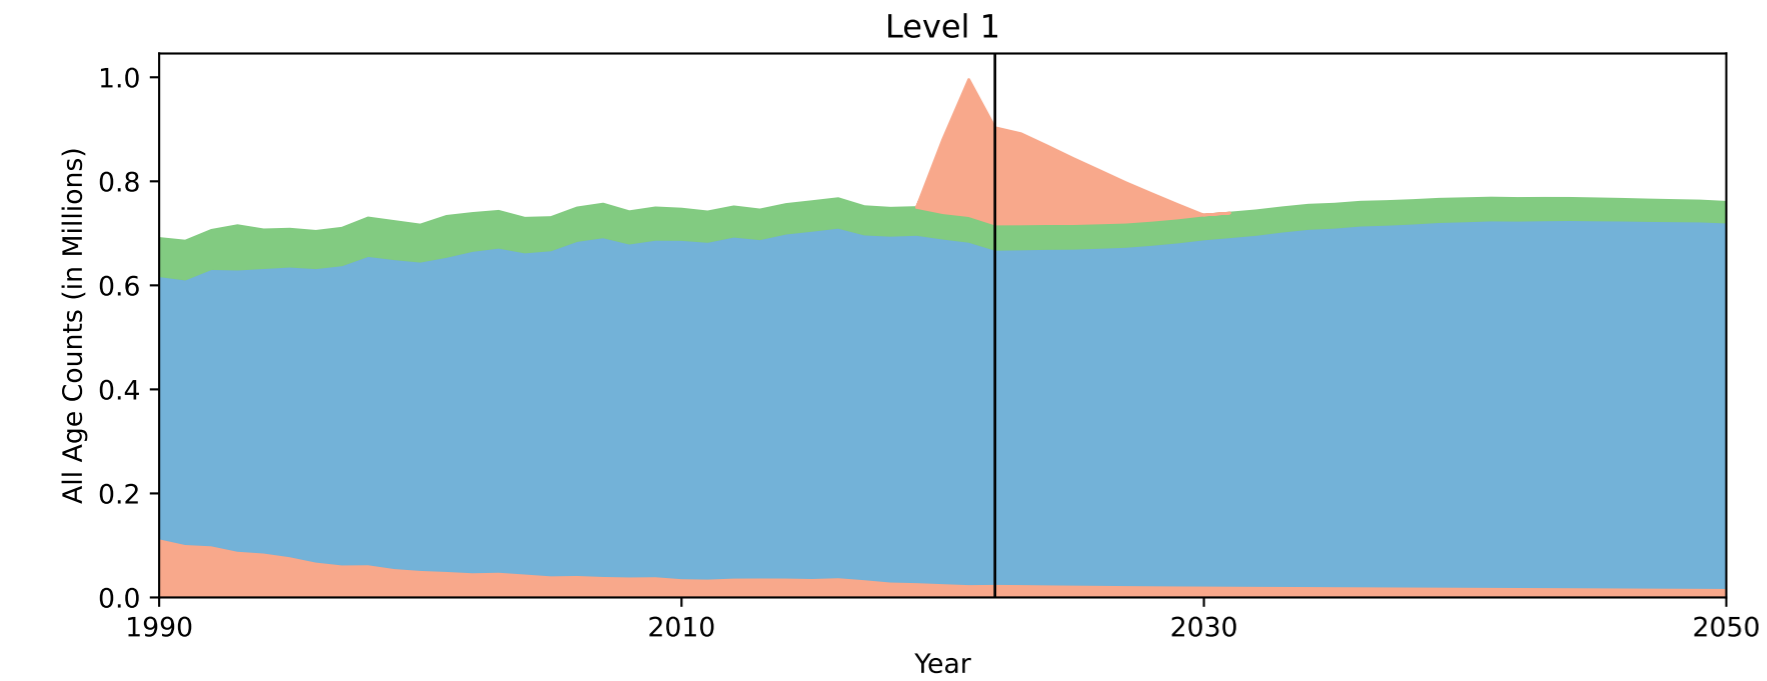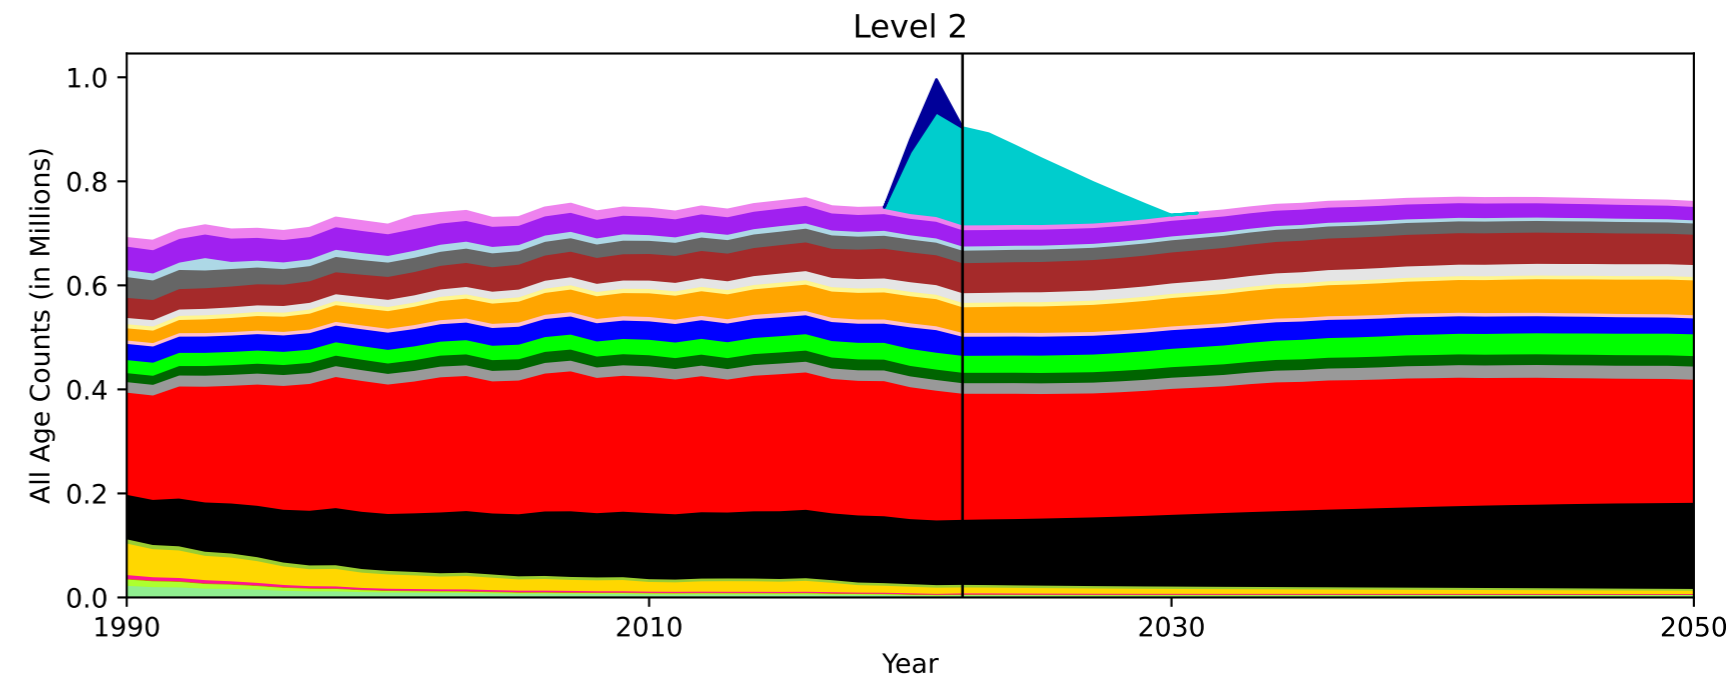

Level 1

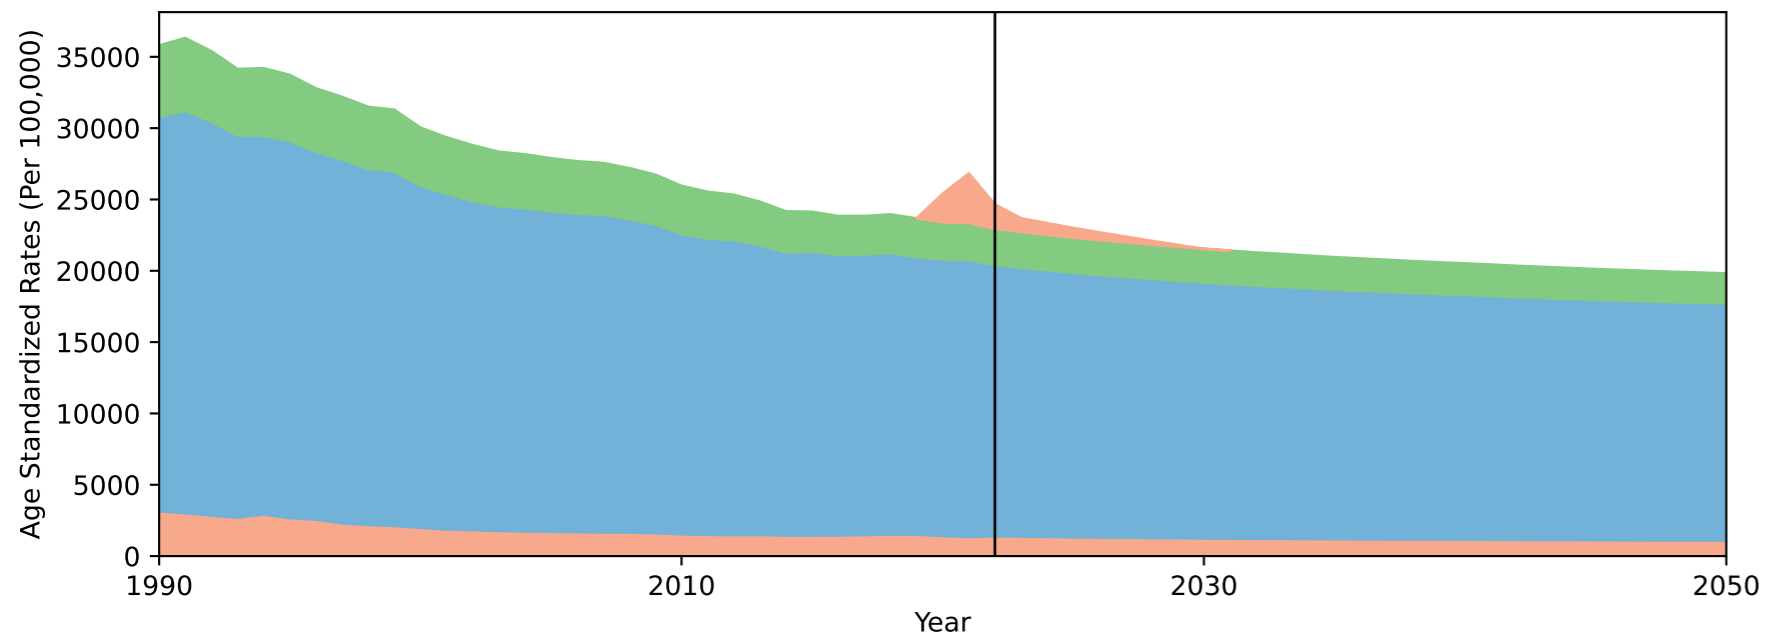

Level 2

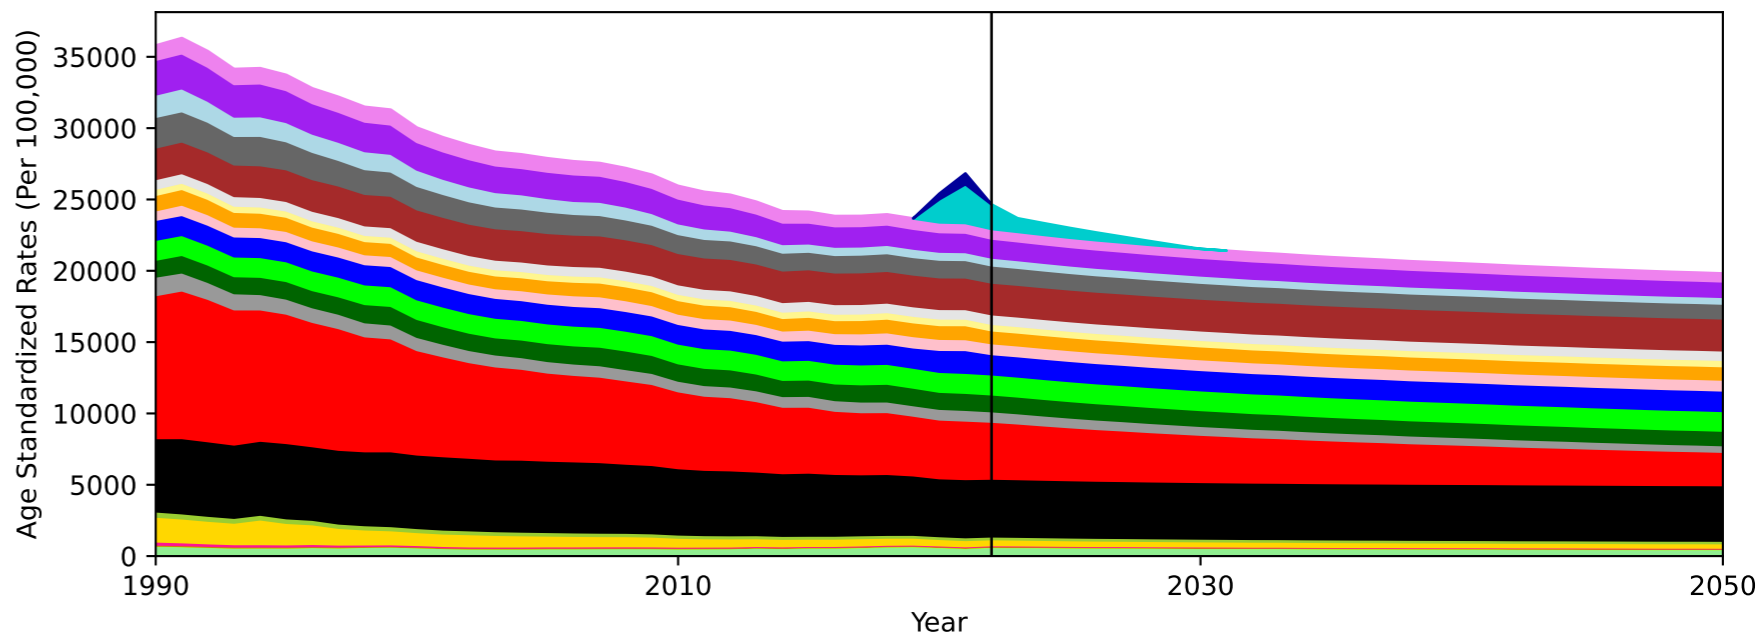

Level 1

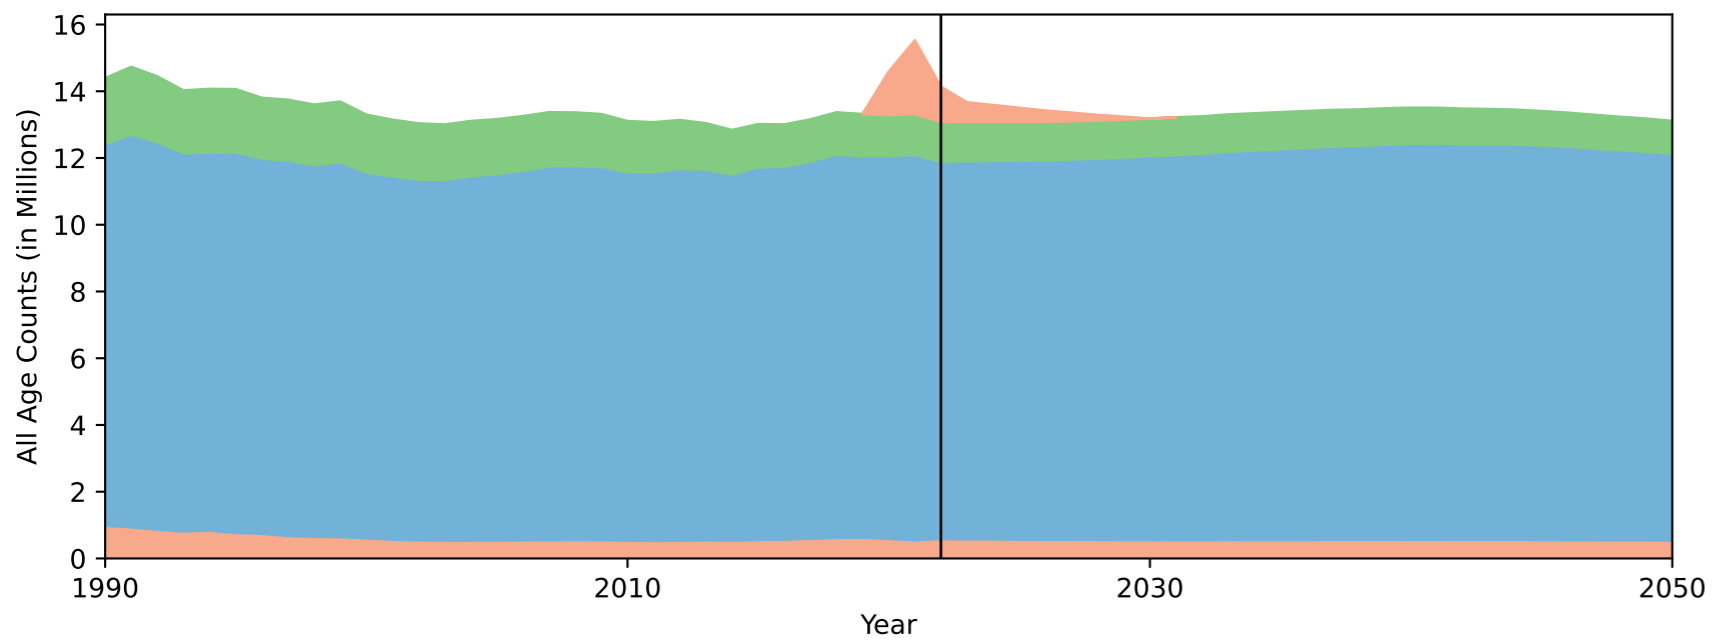

Level 2

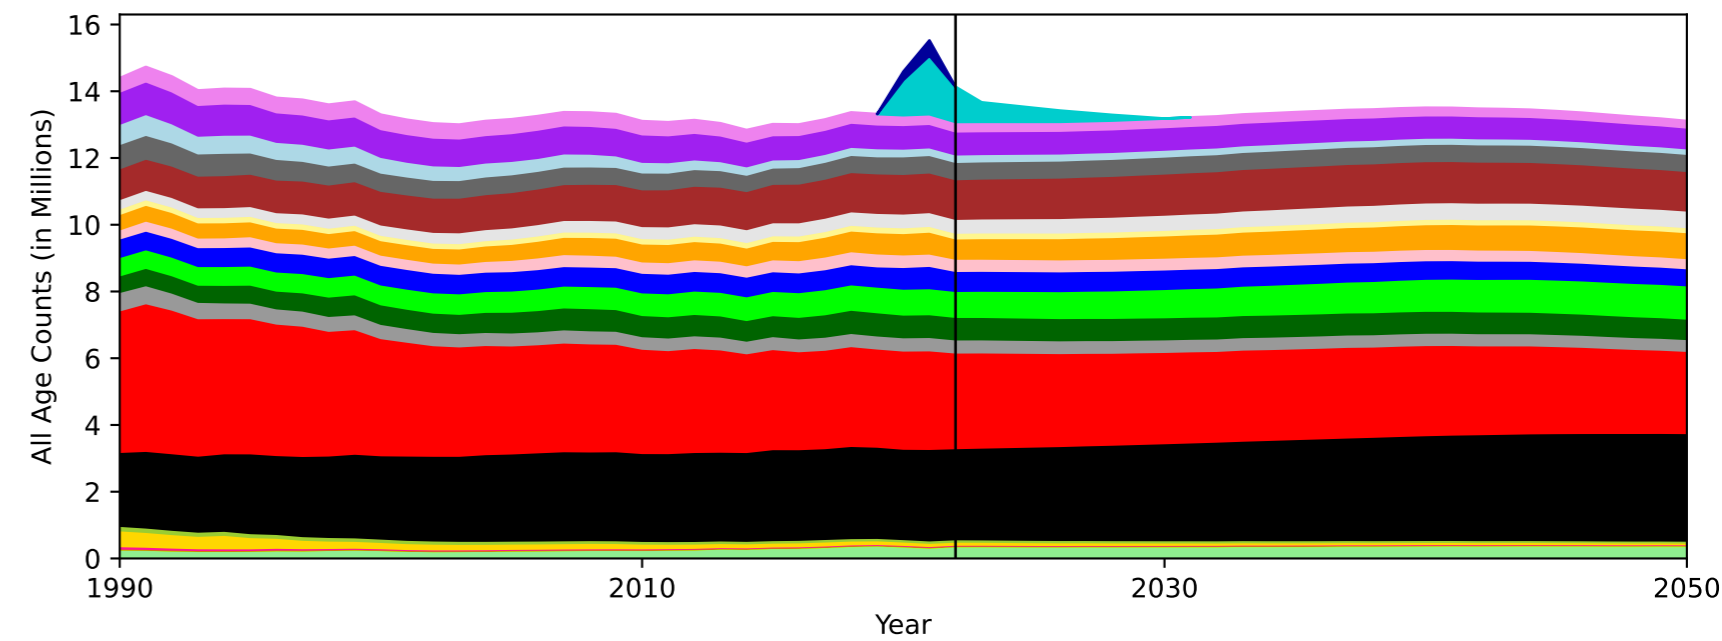

# Romania

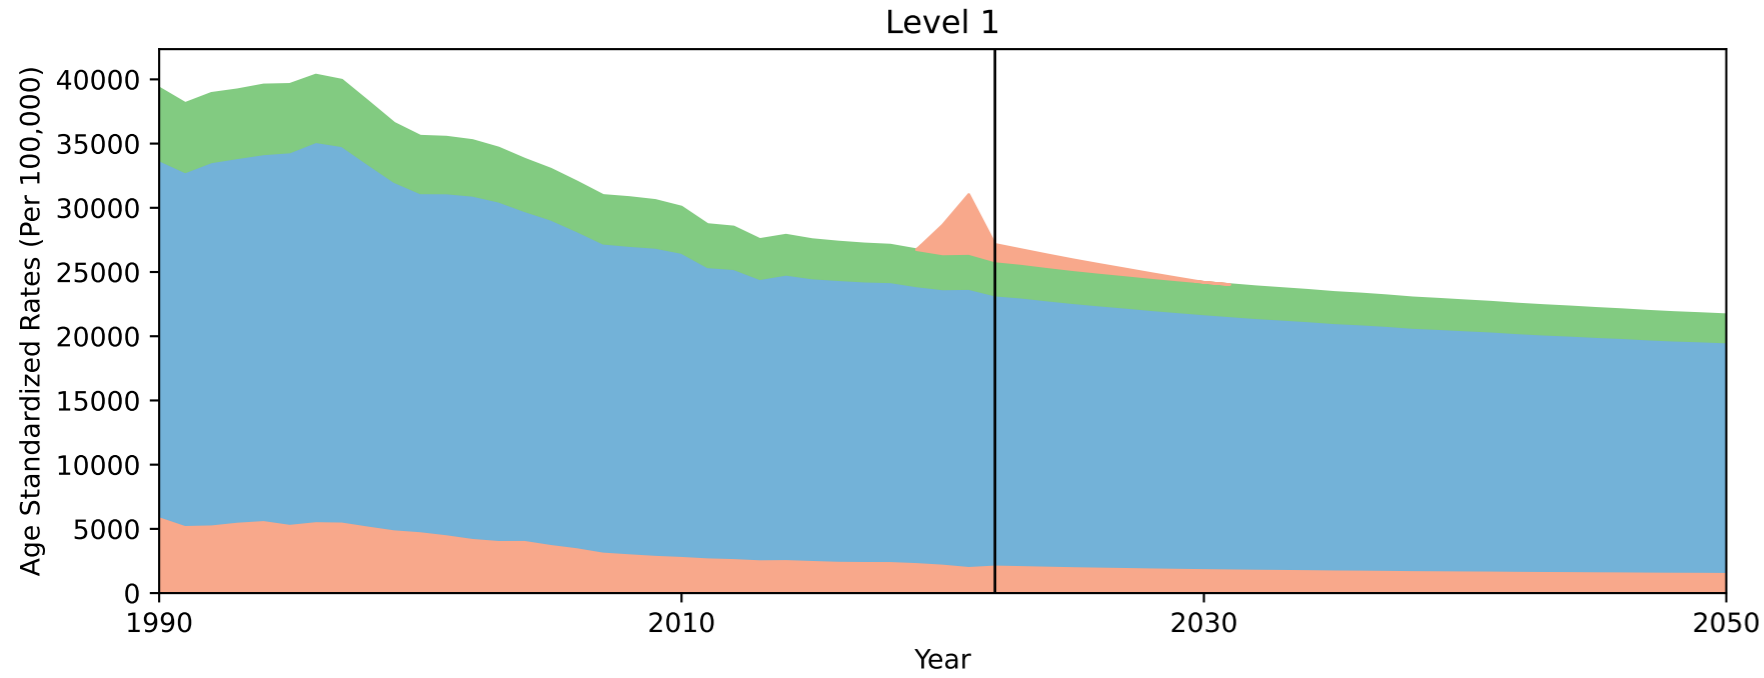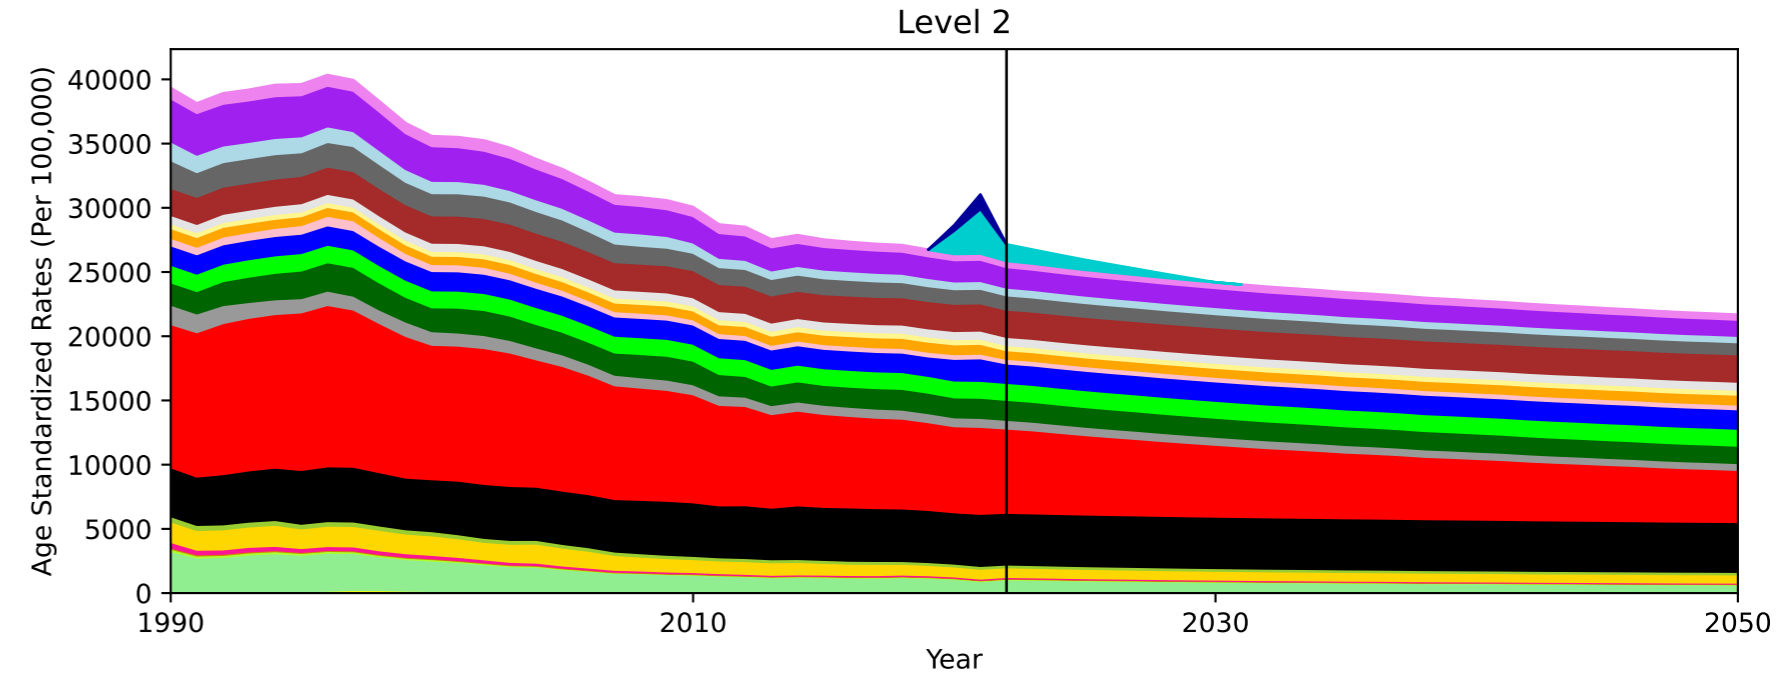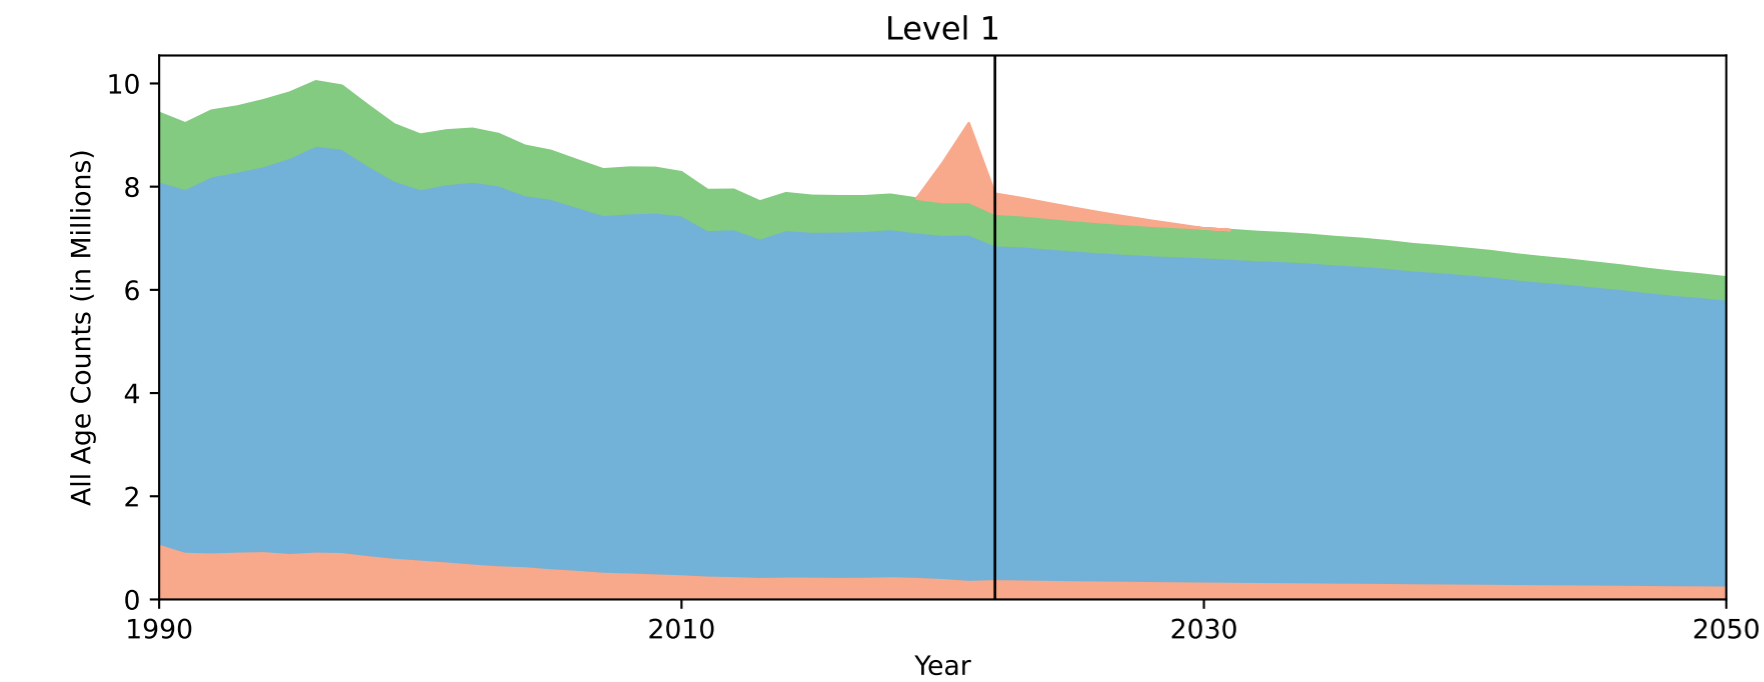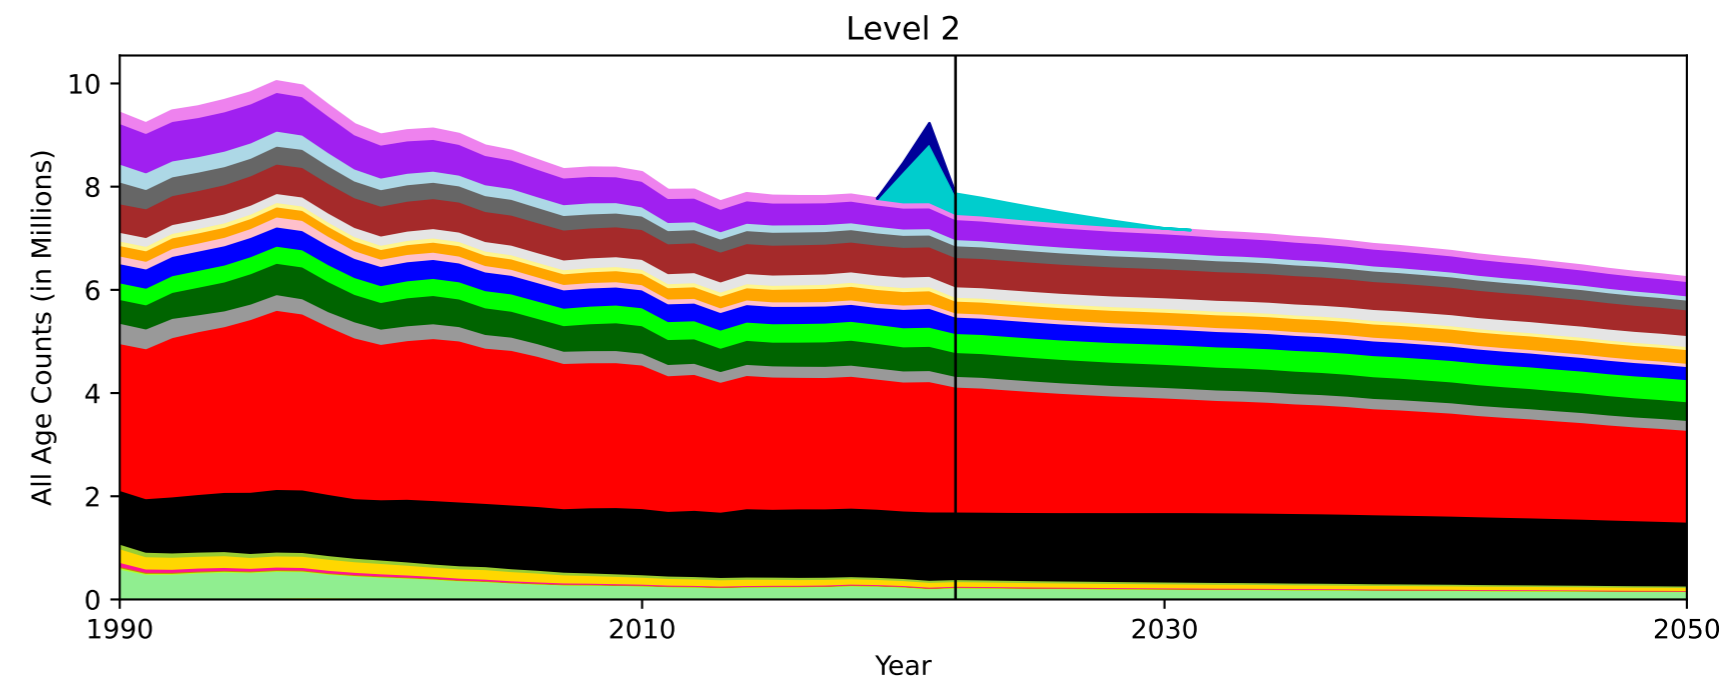



Level 1

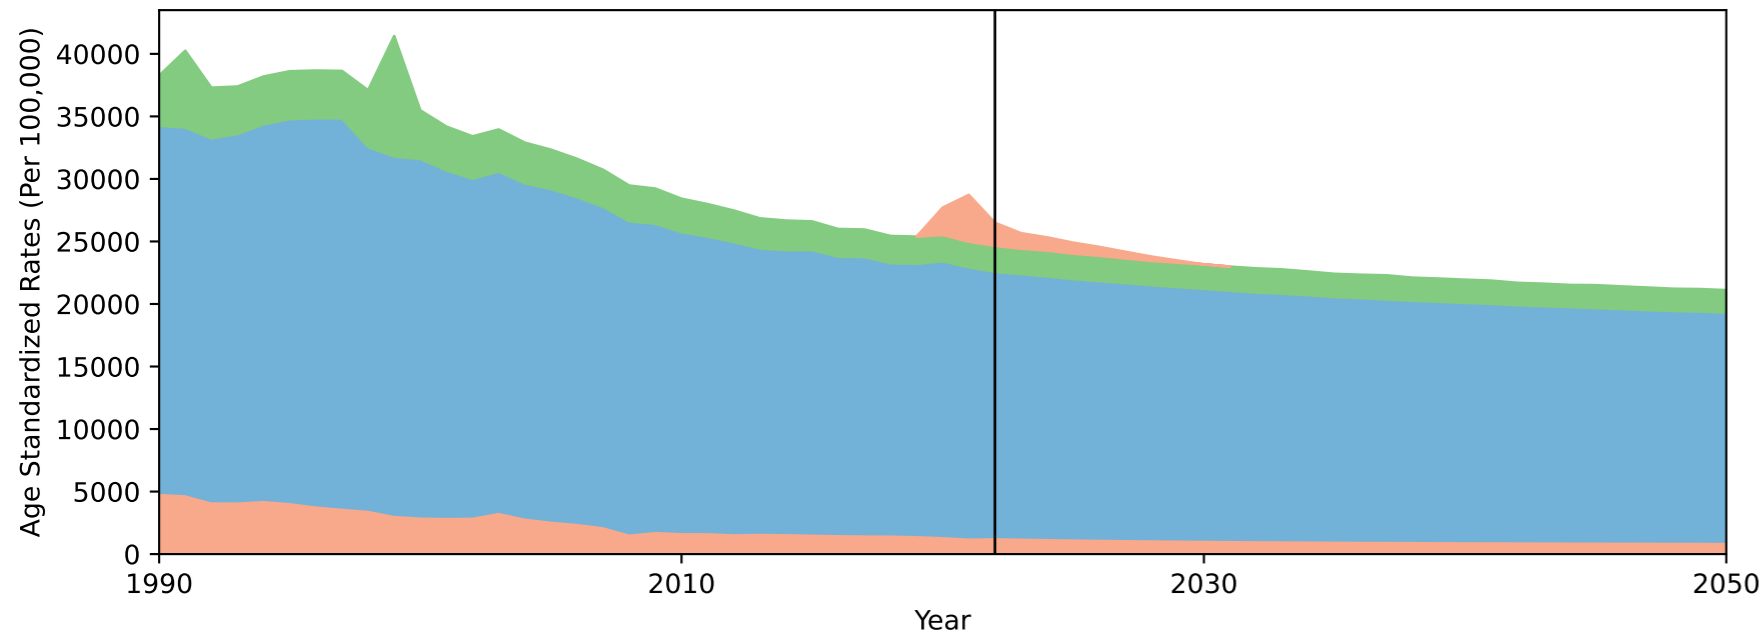

Level 2

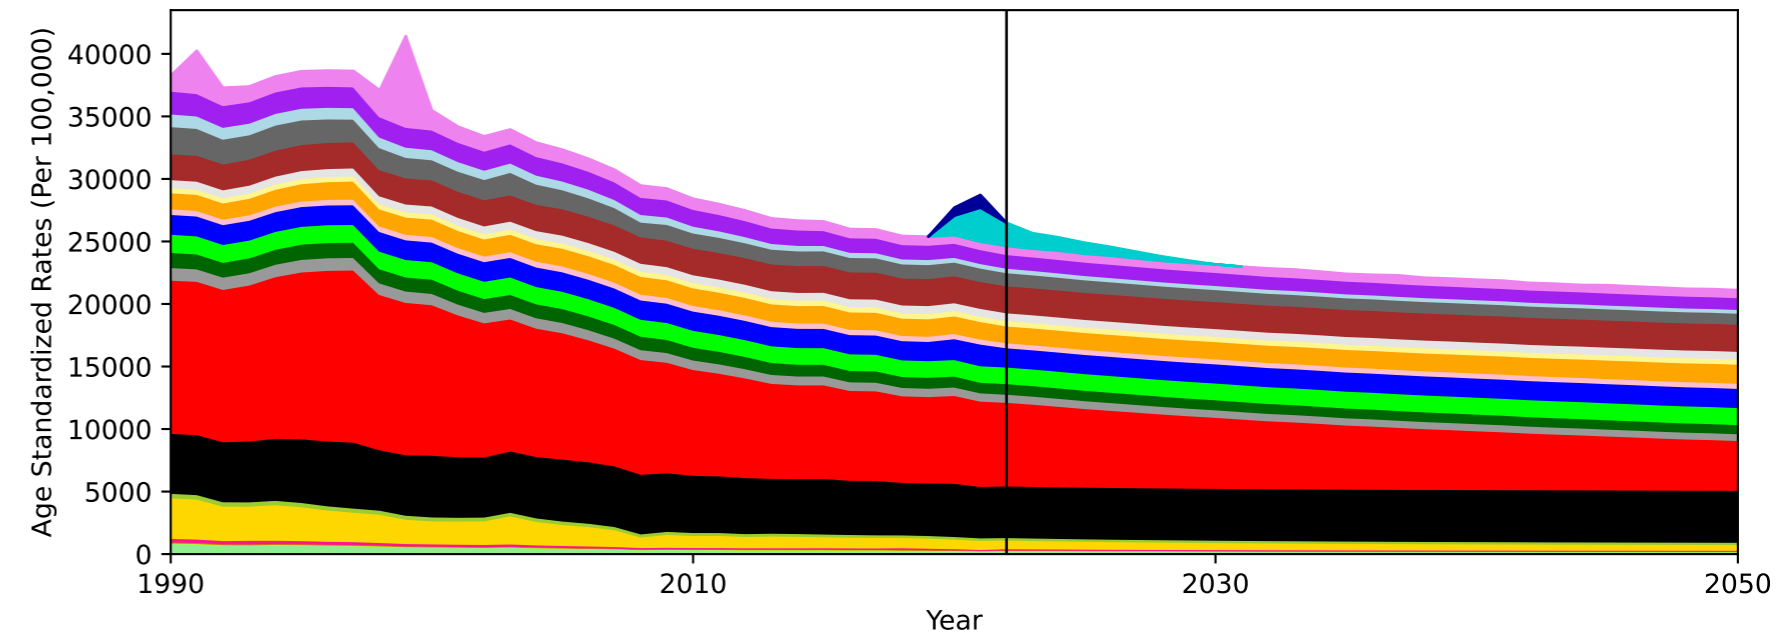

Level 1

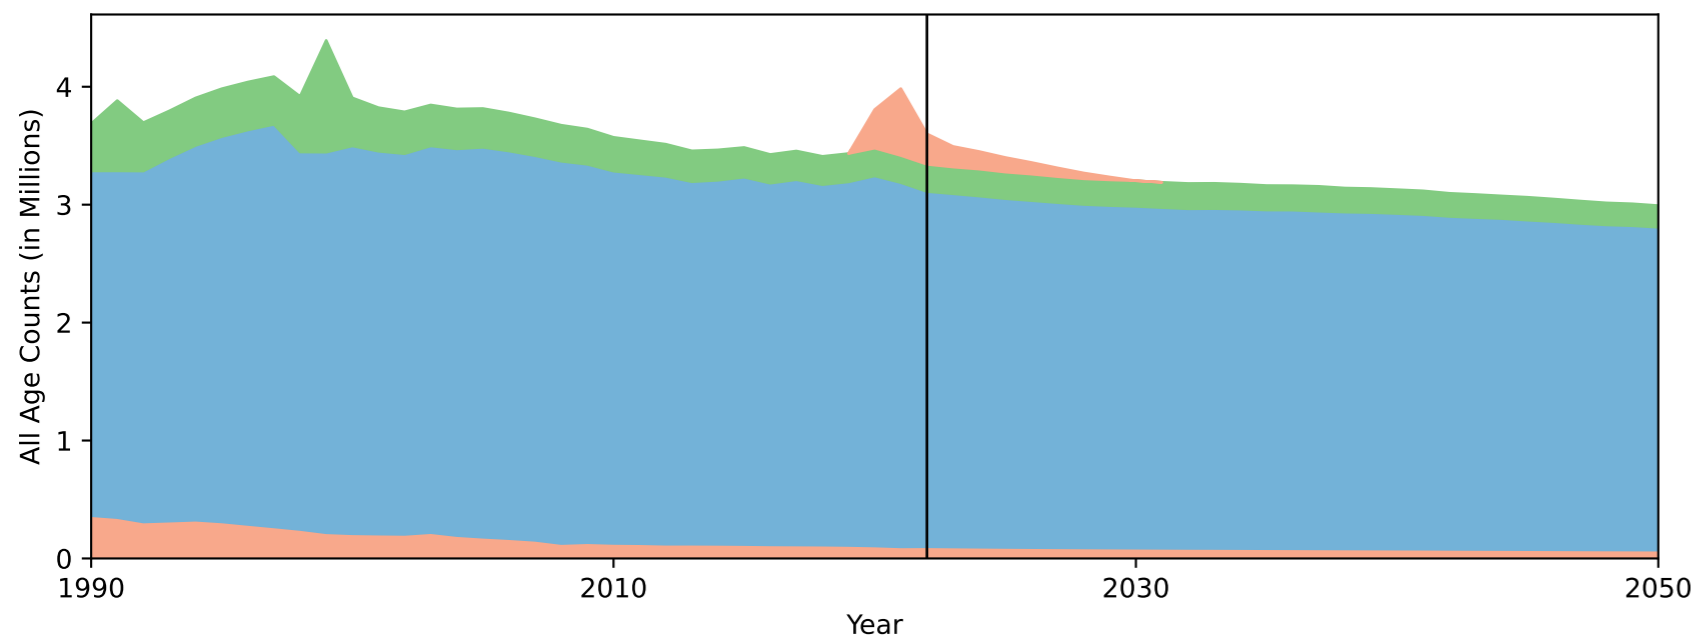

Level 2

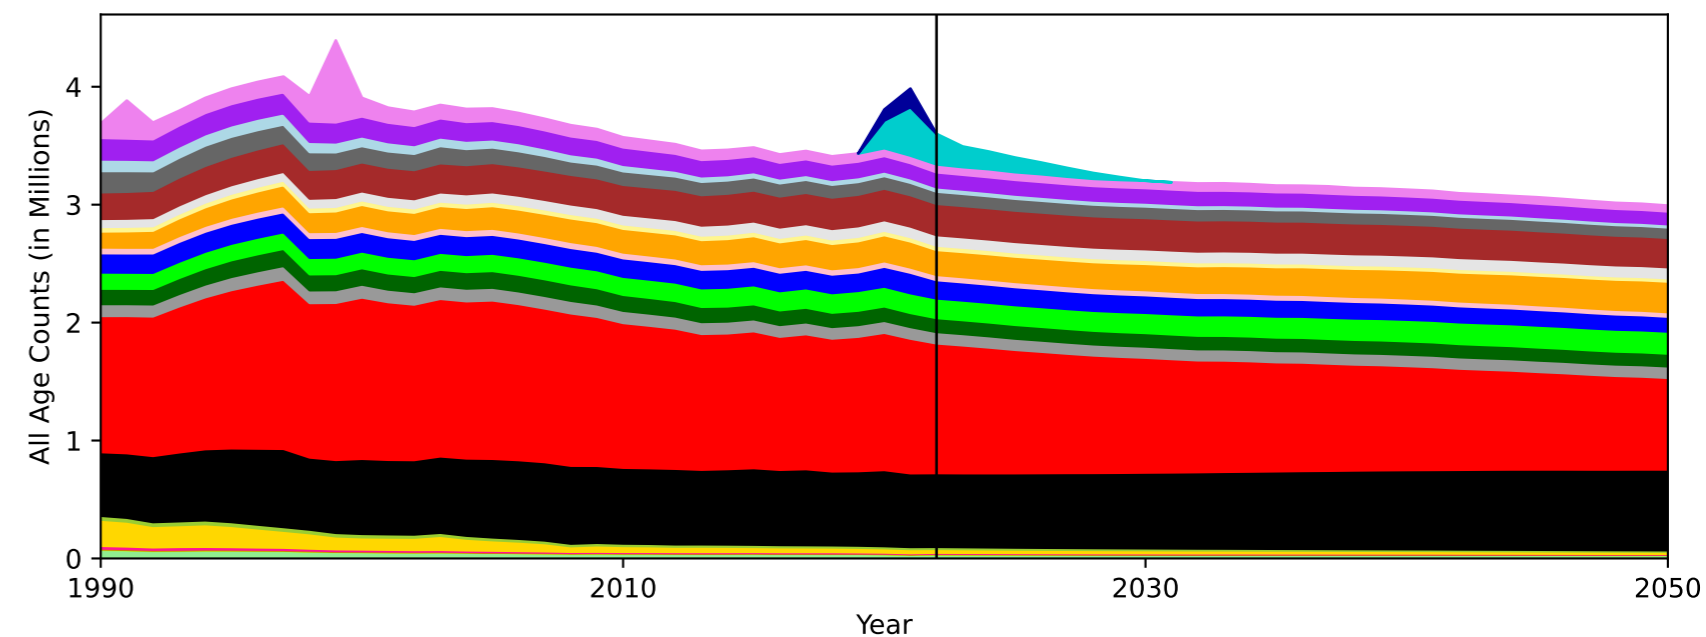

# Slovakia

Level 1

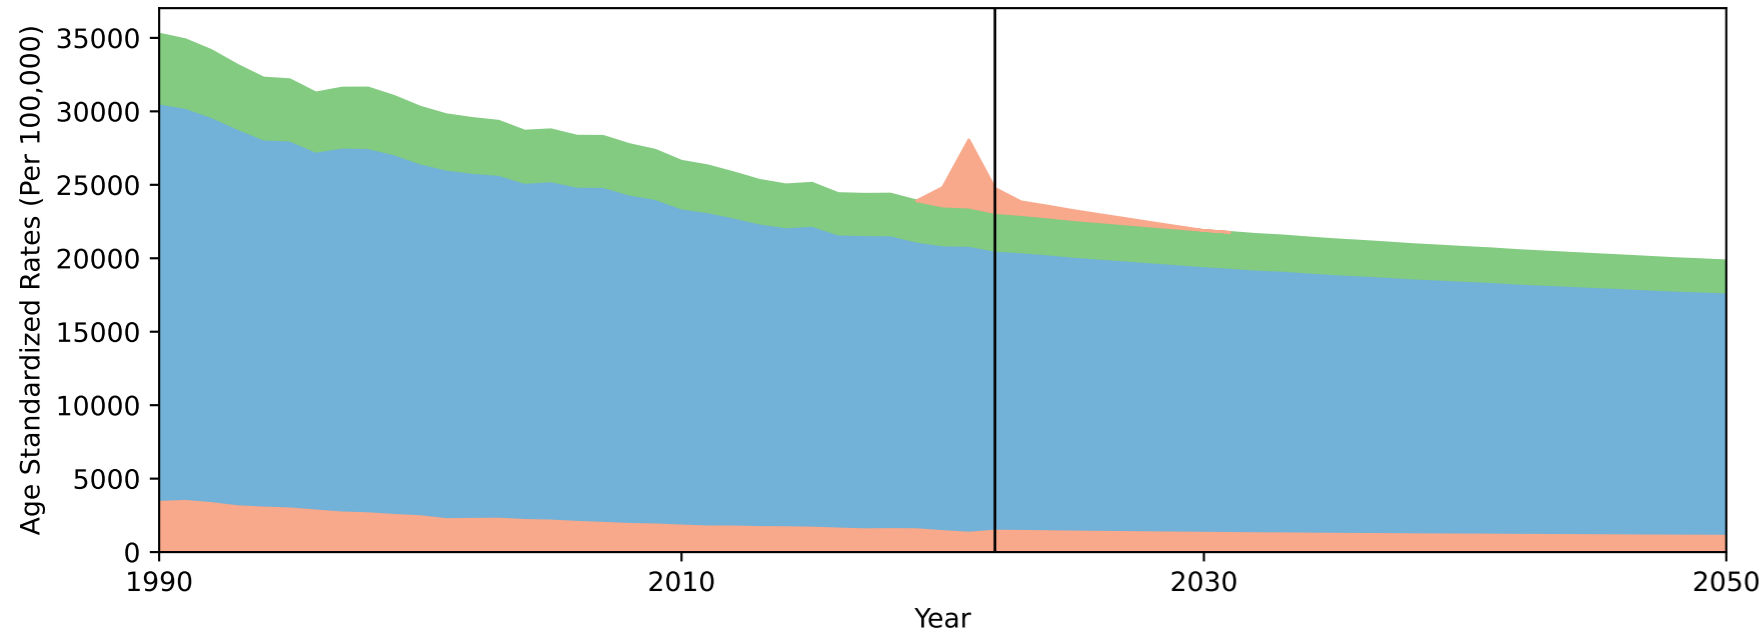

Level 2

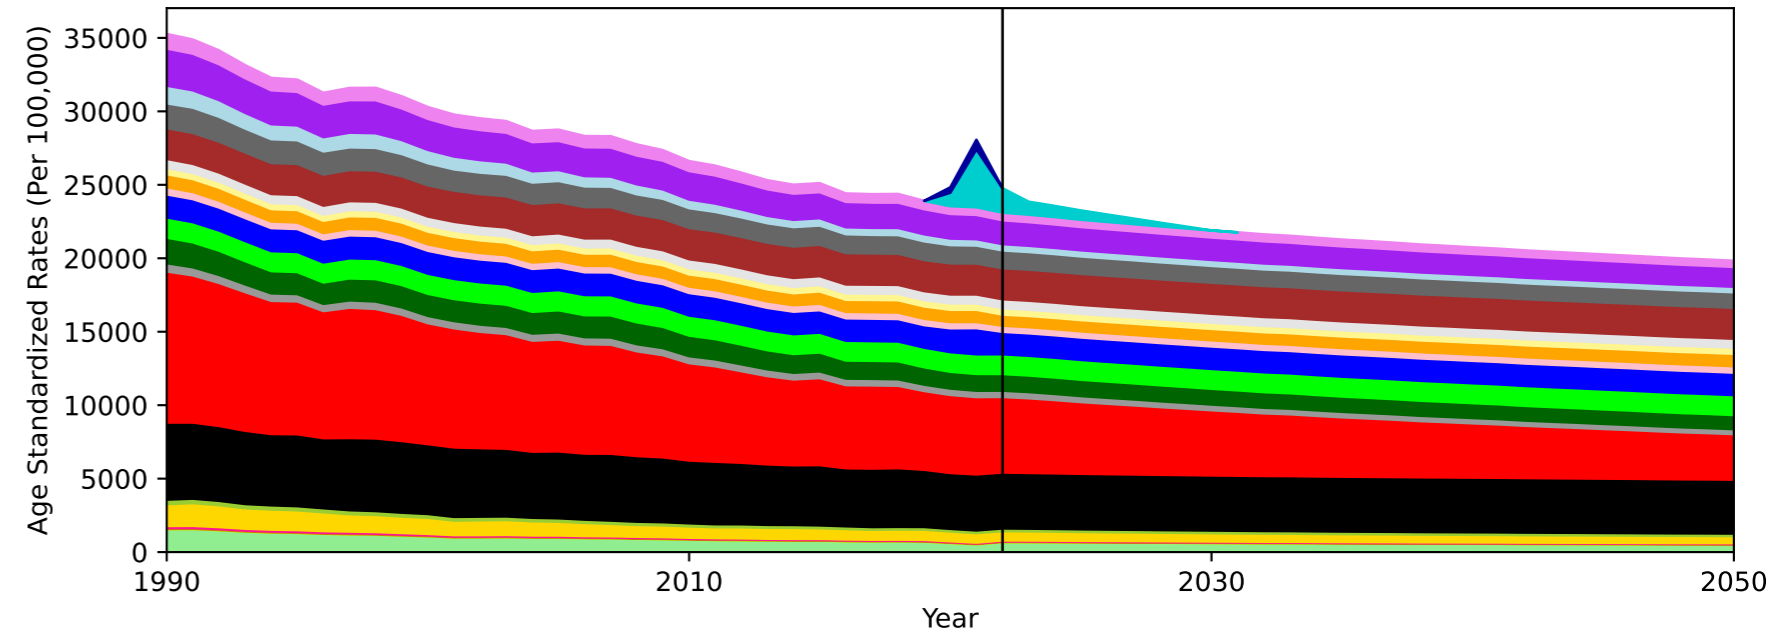

Level 1

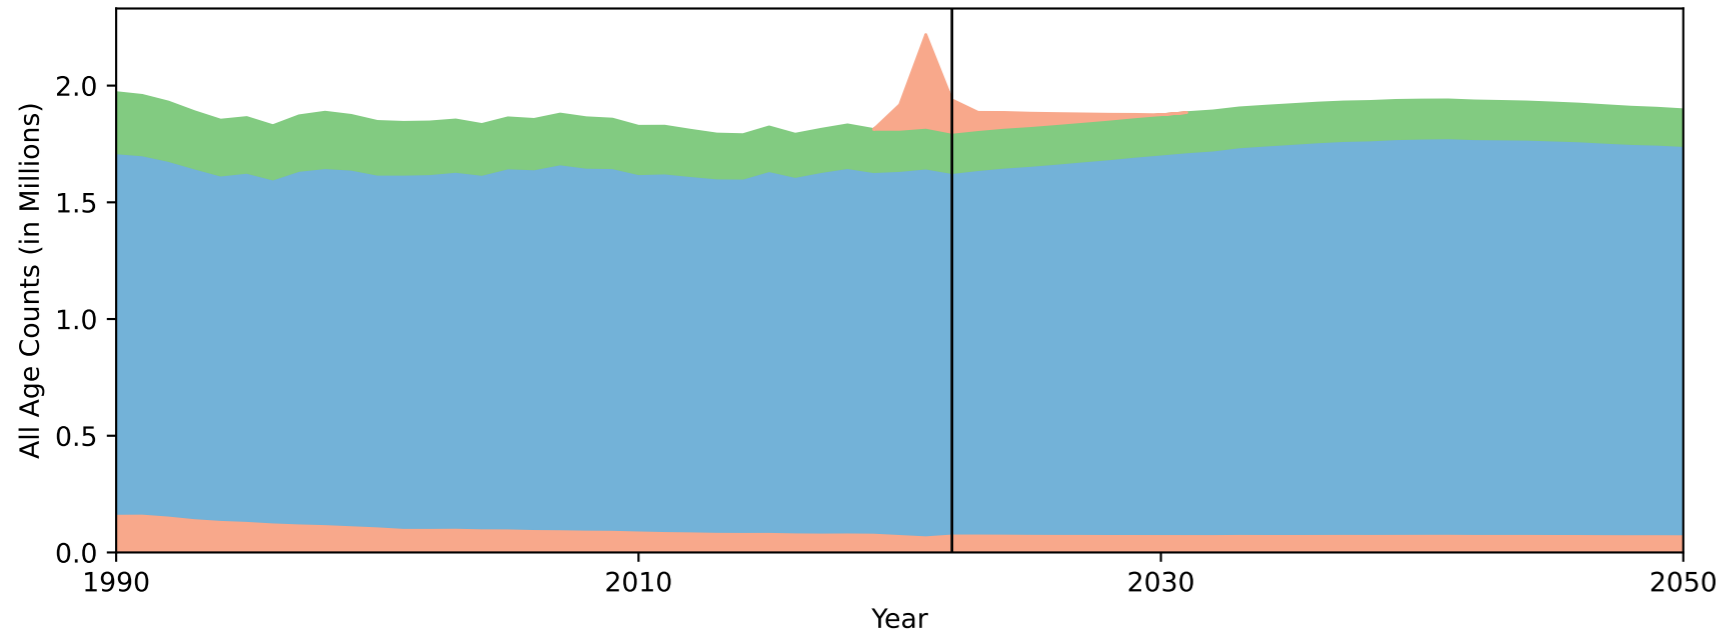

Level 2

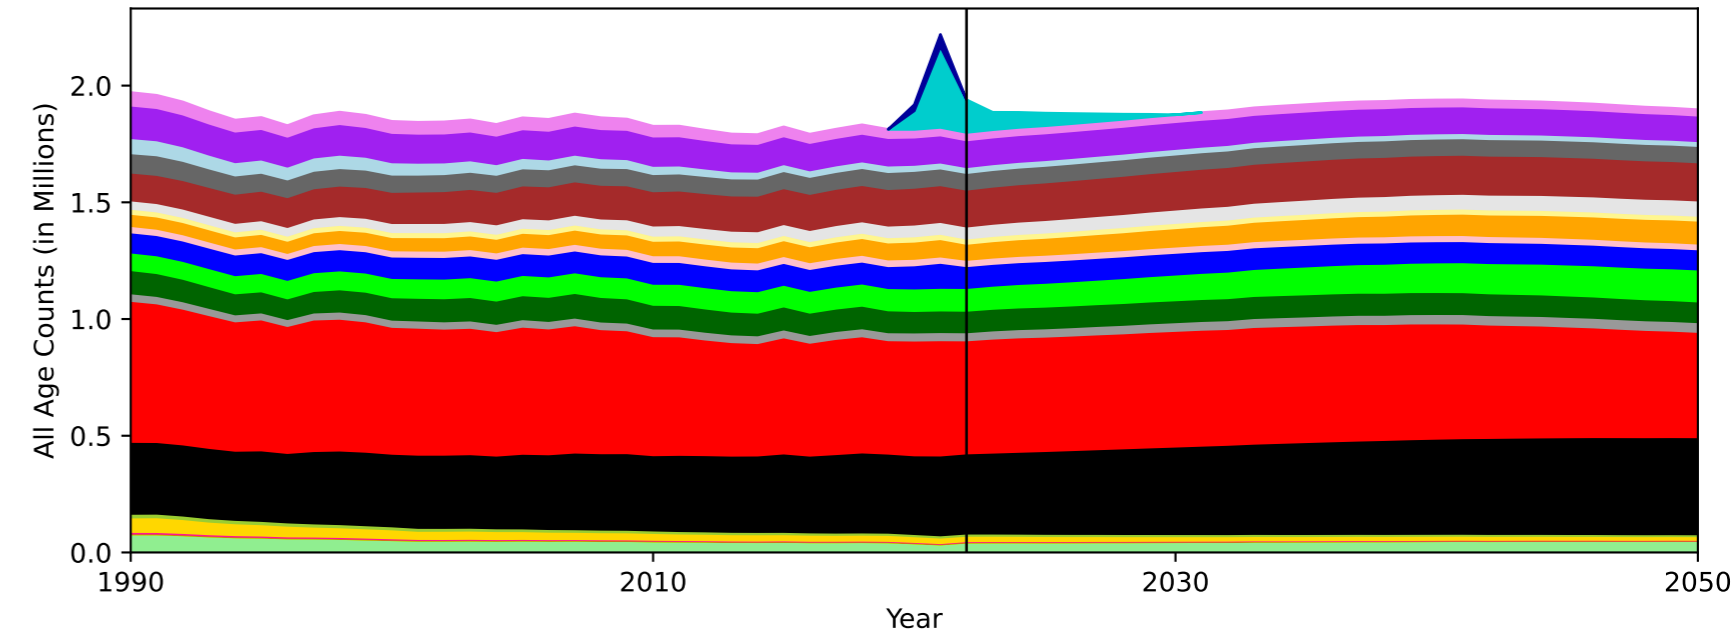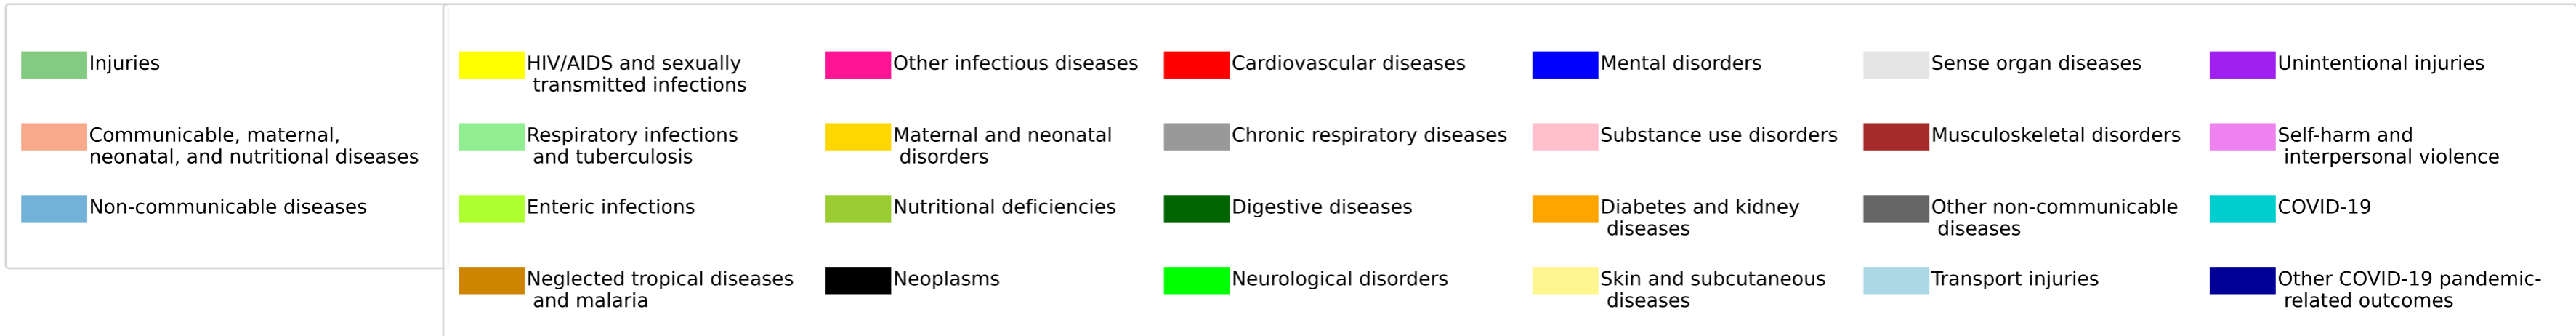

# Slovenia

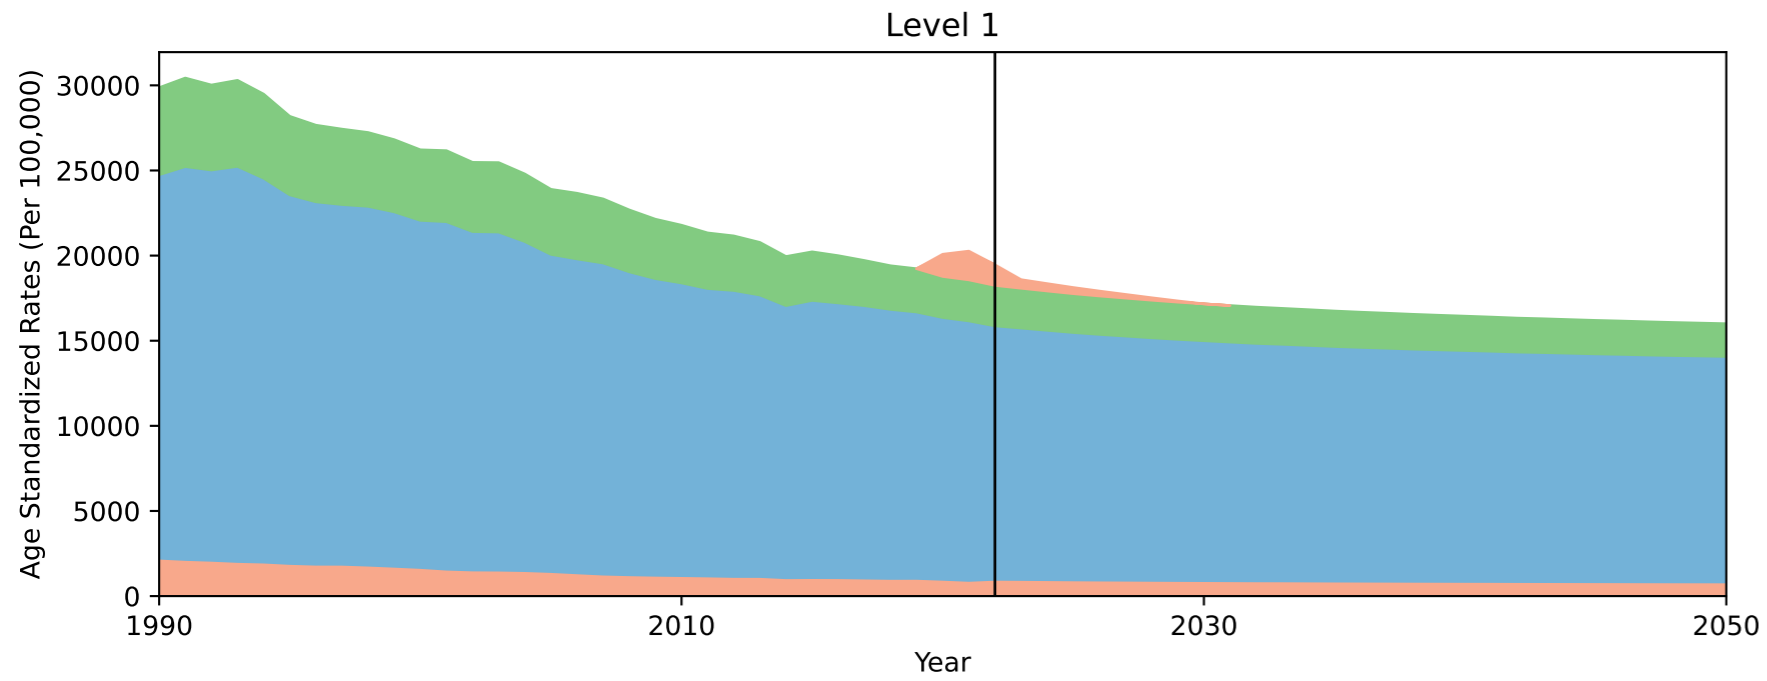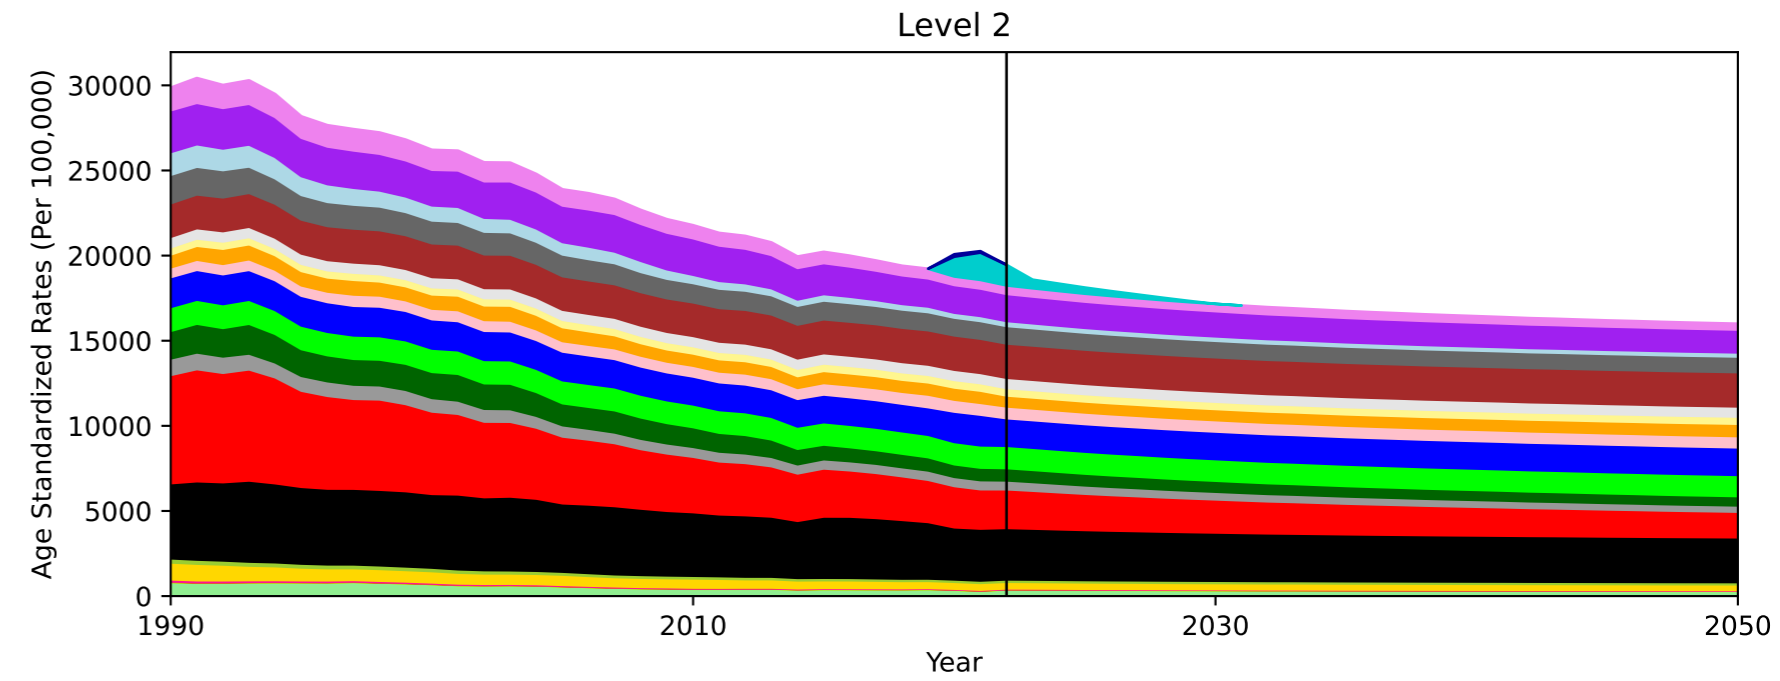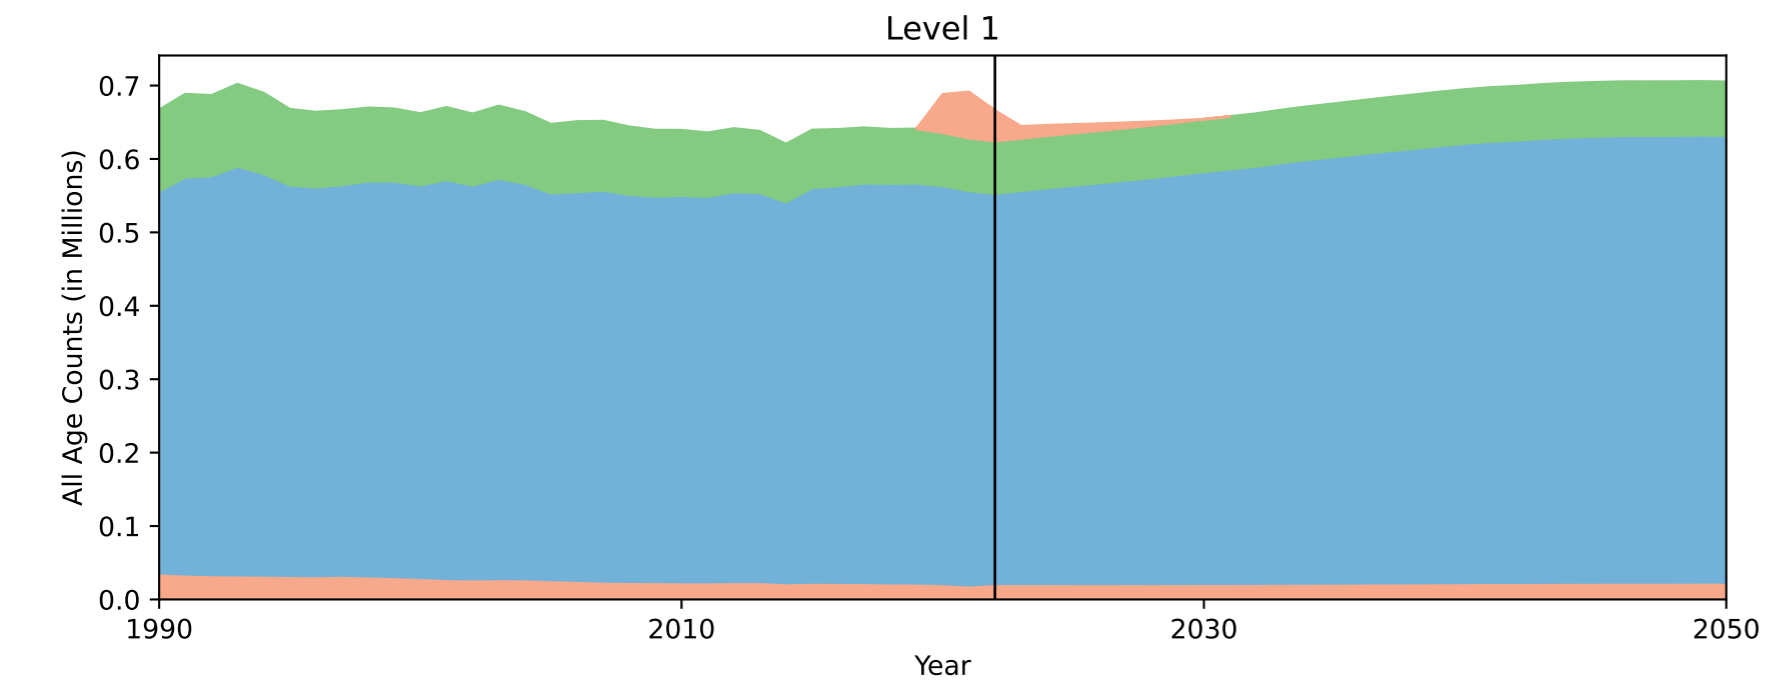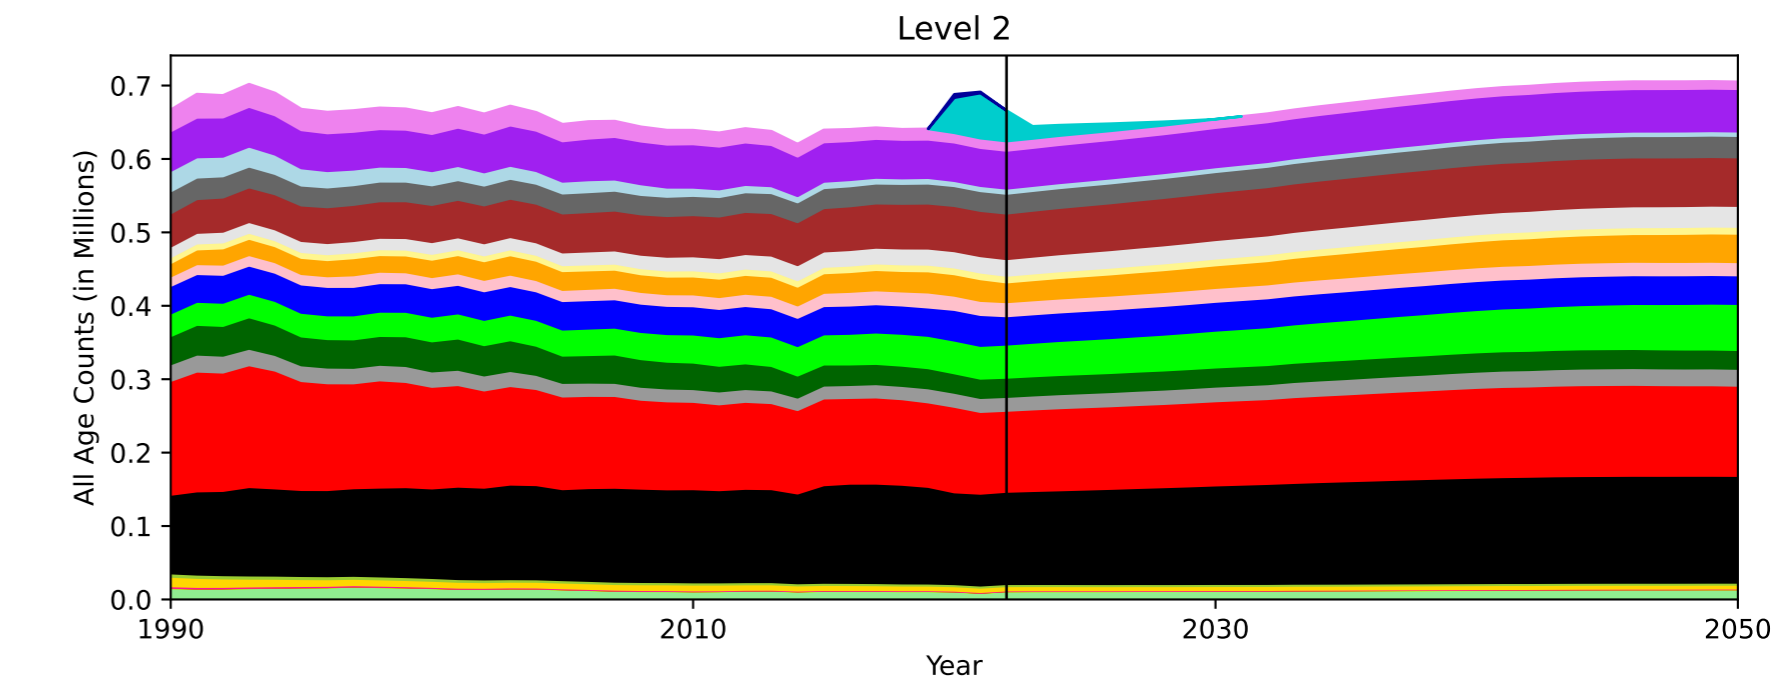

# Belarus

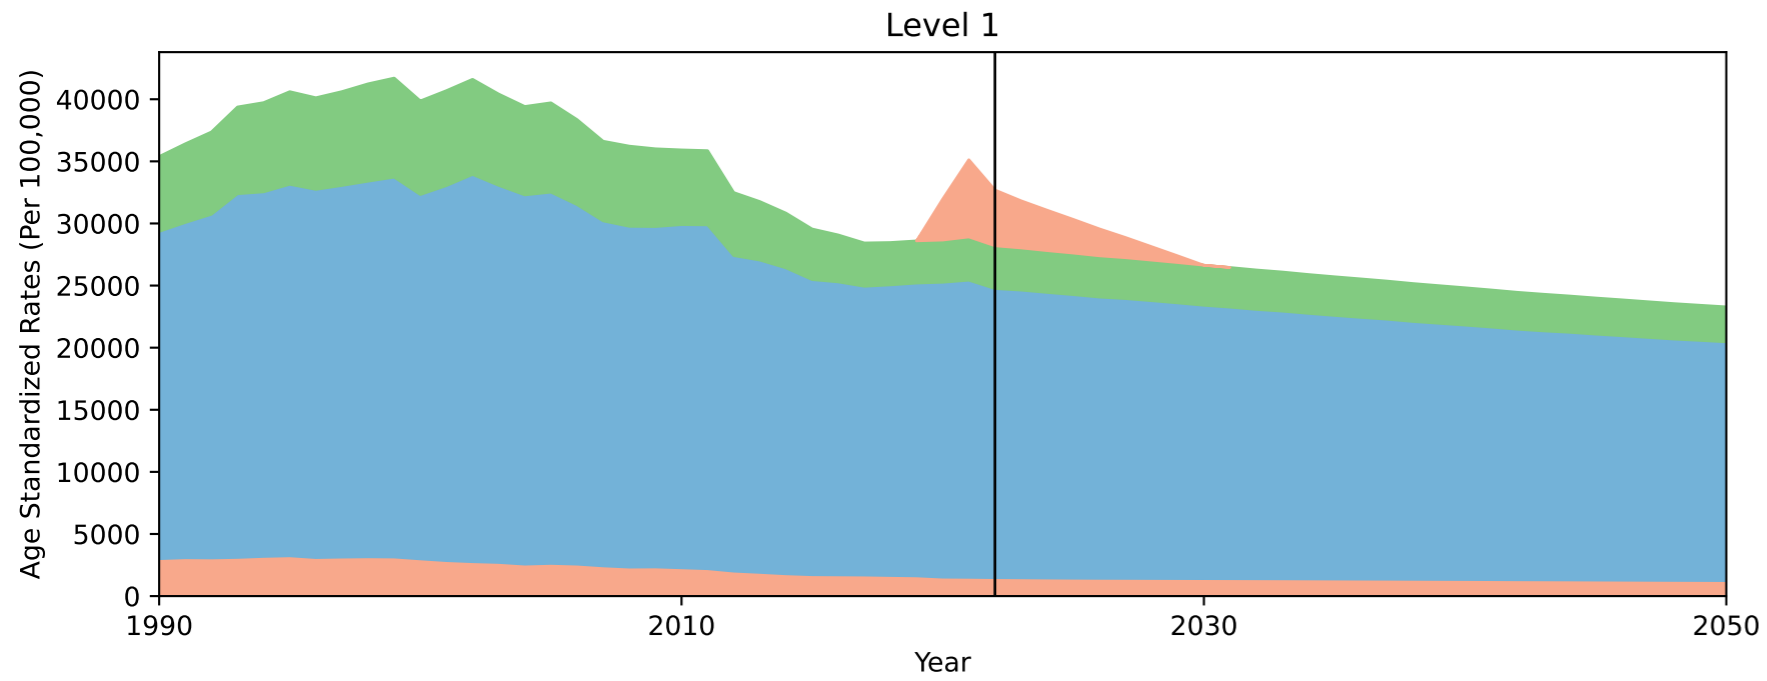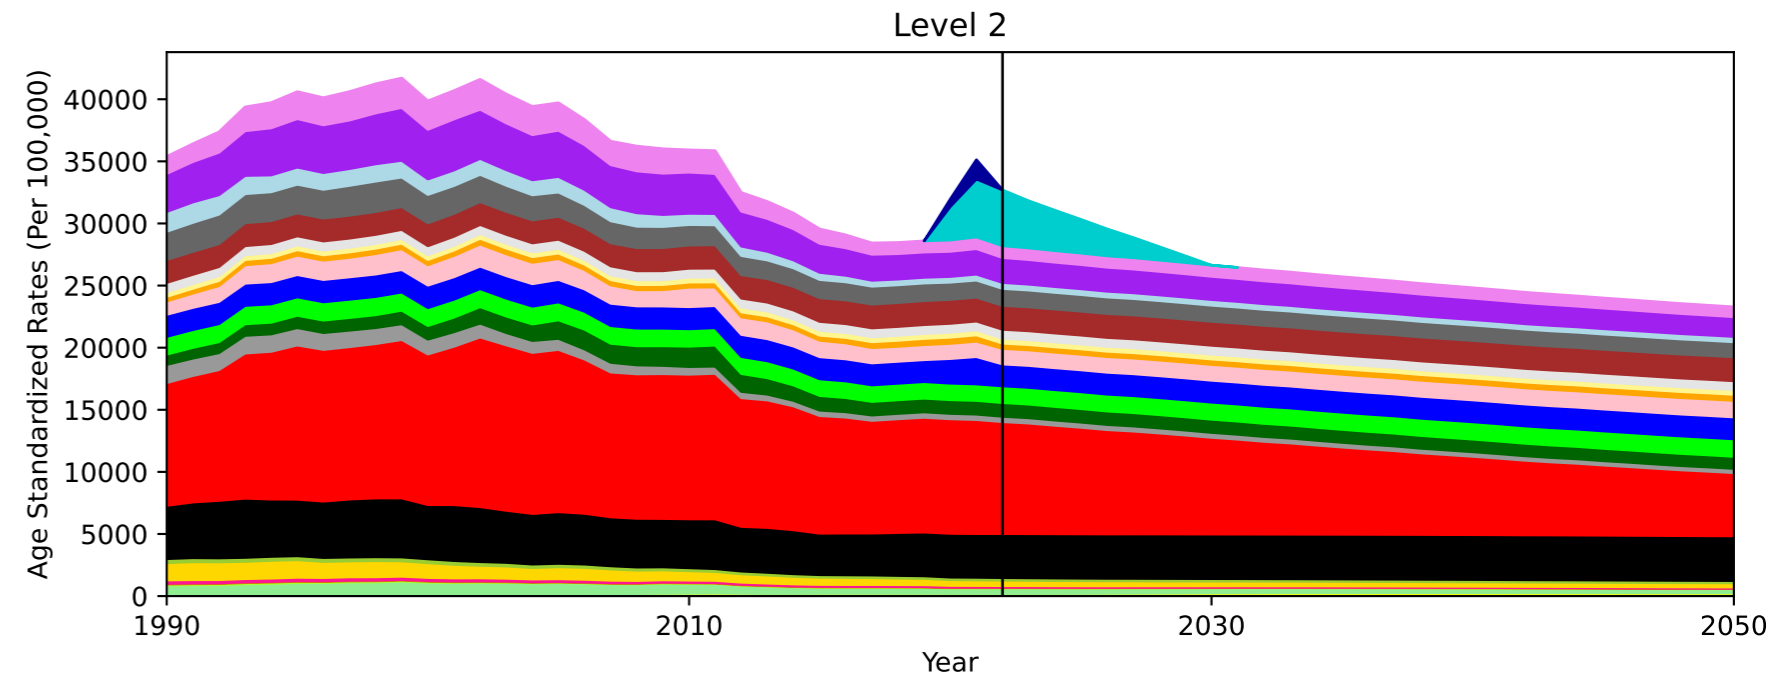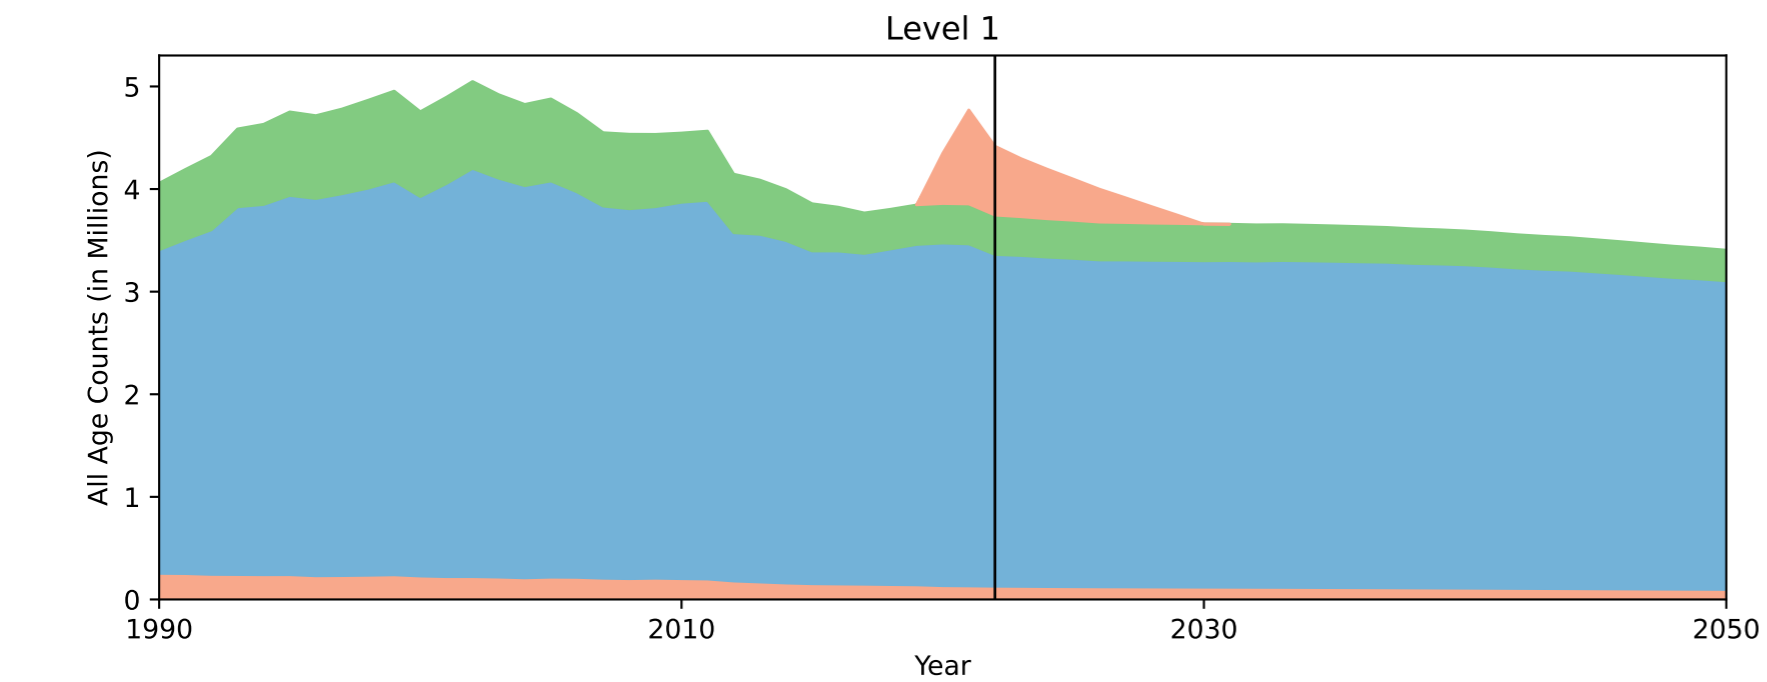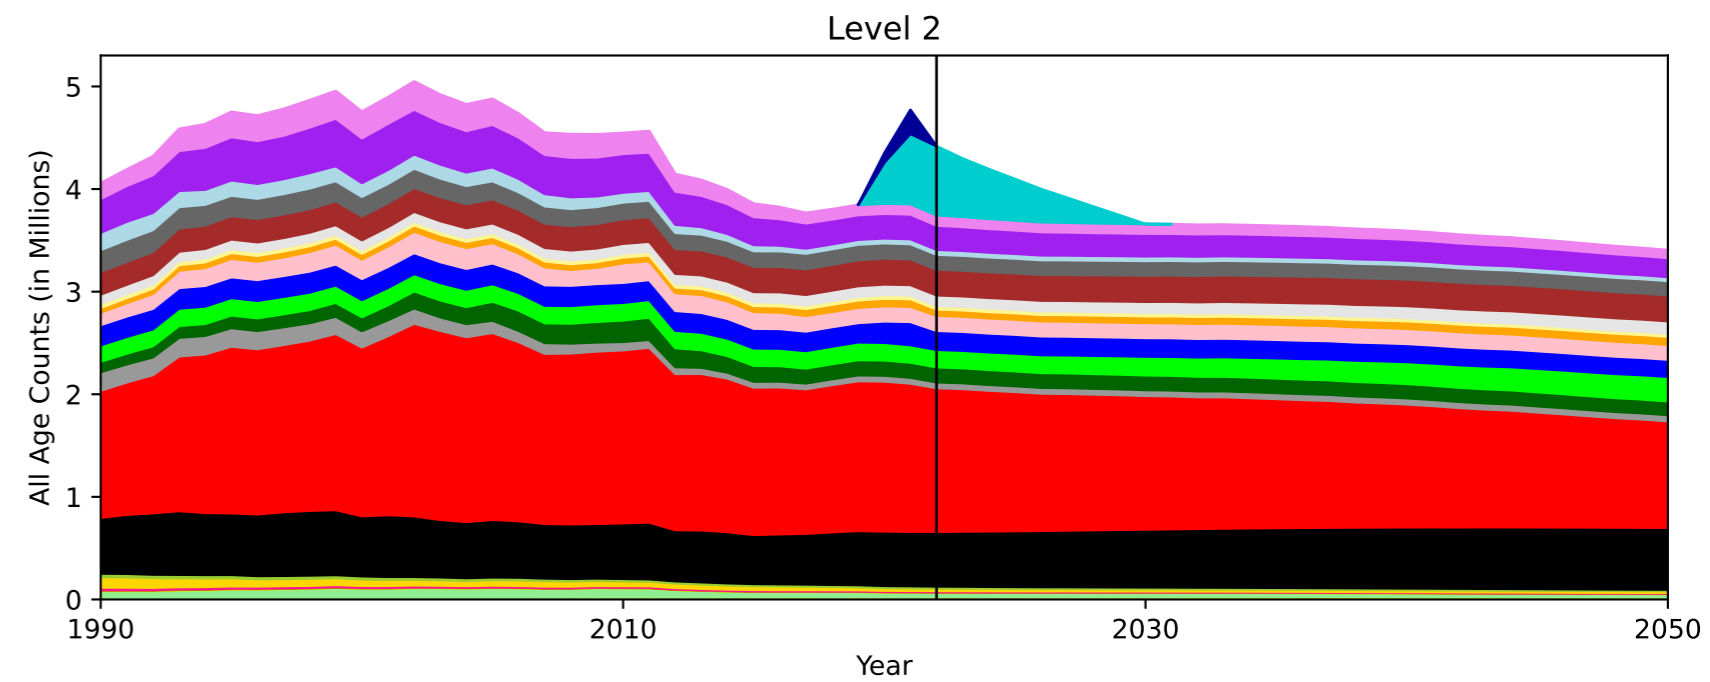

Level 1

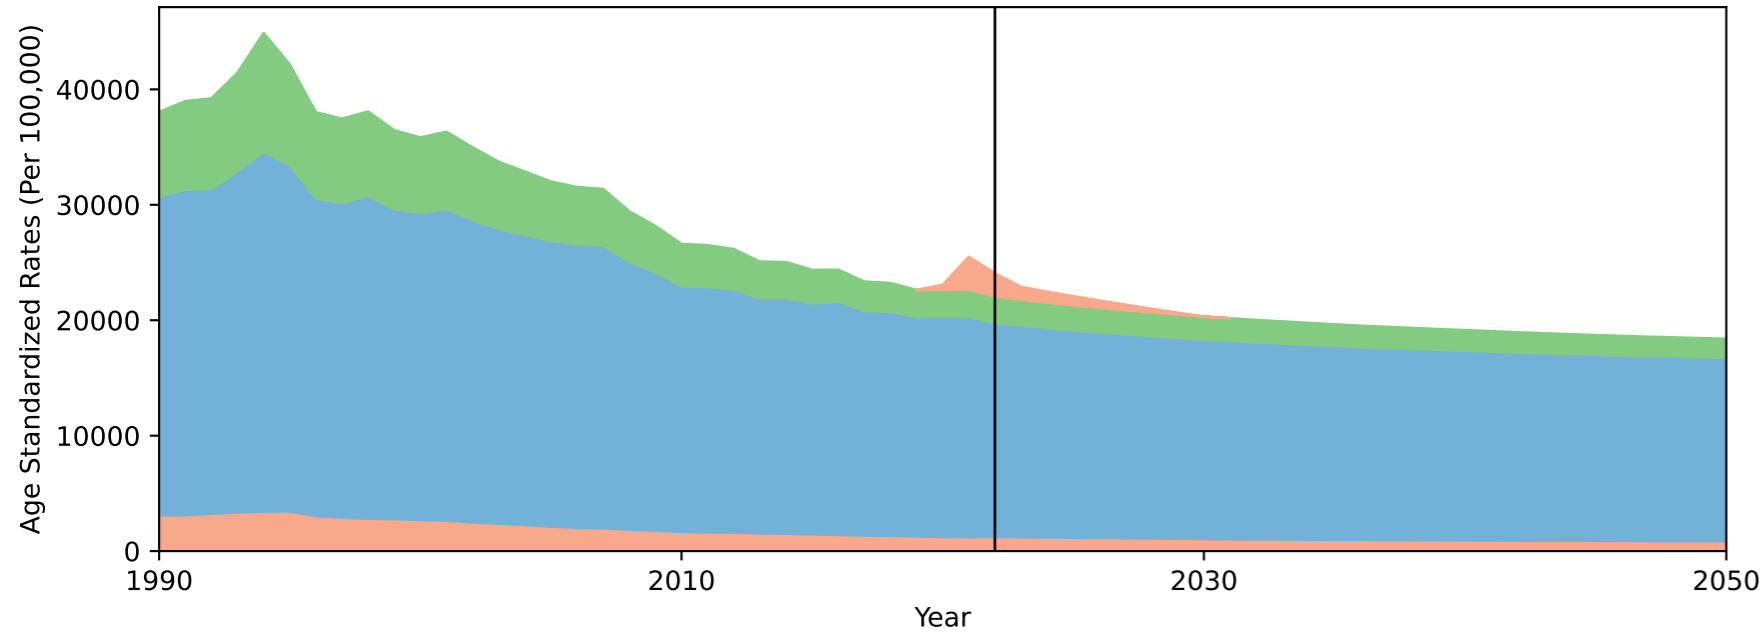

Level 2

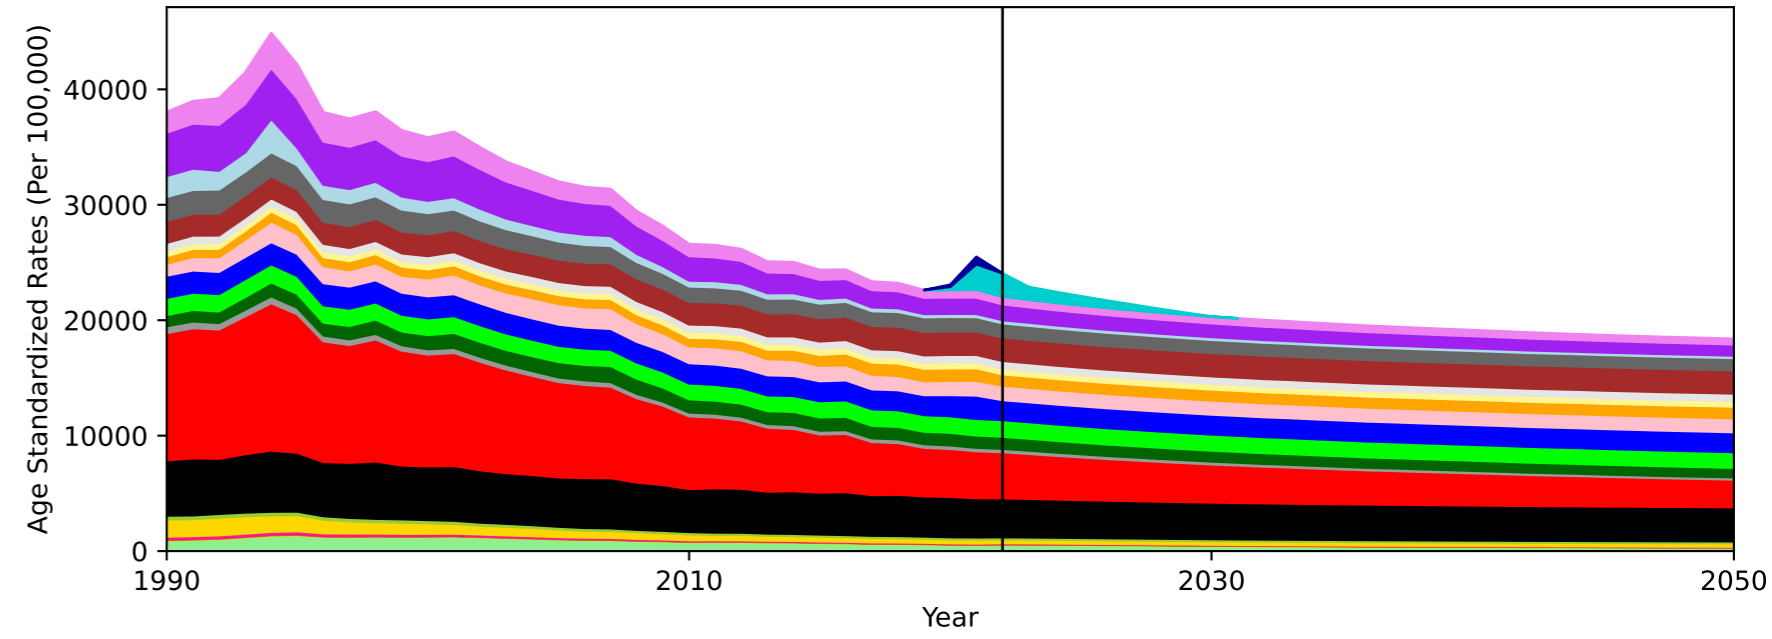

Level 1

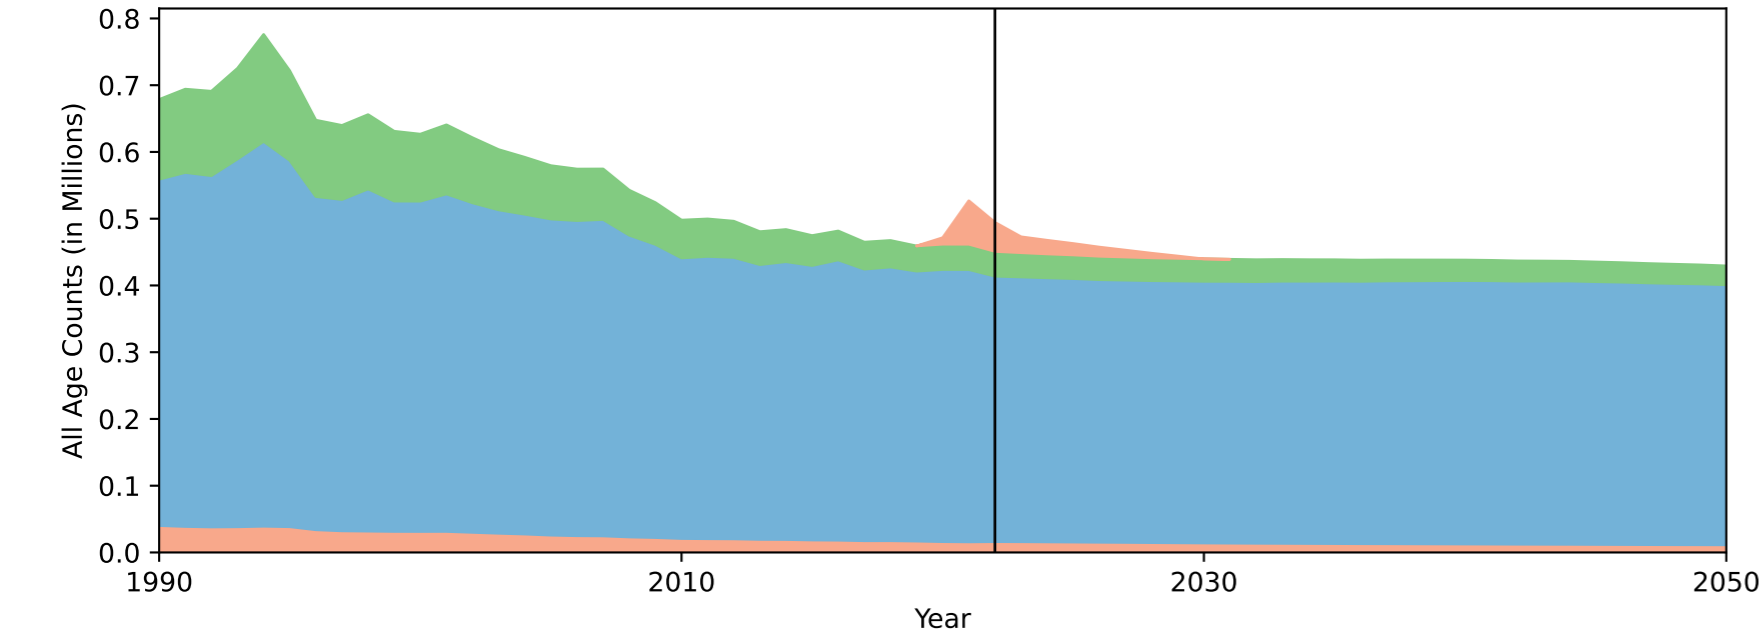

Level 2

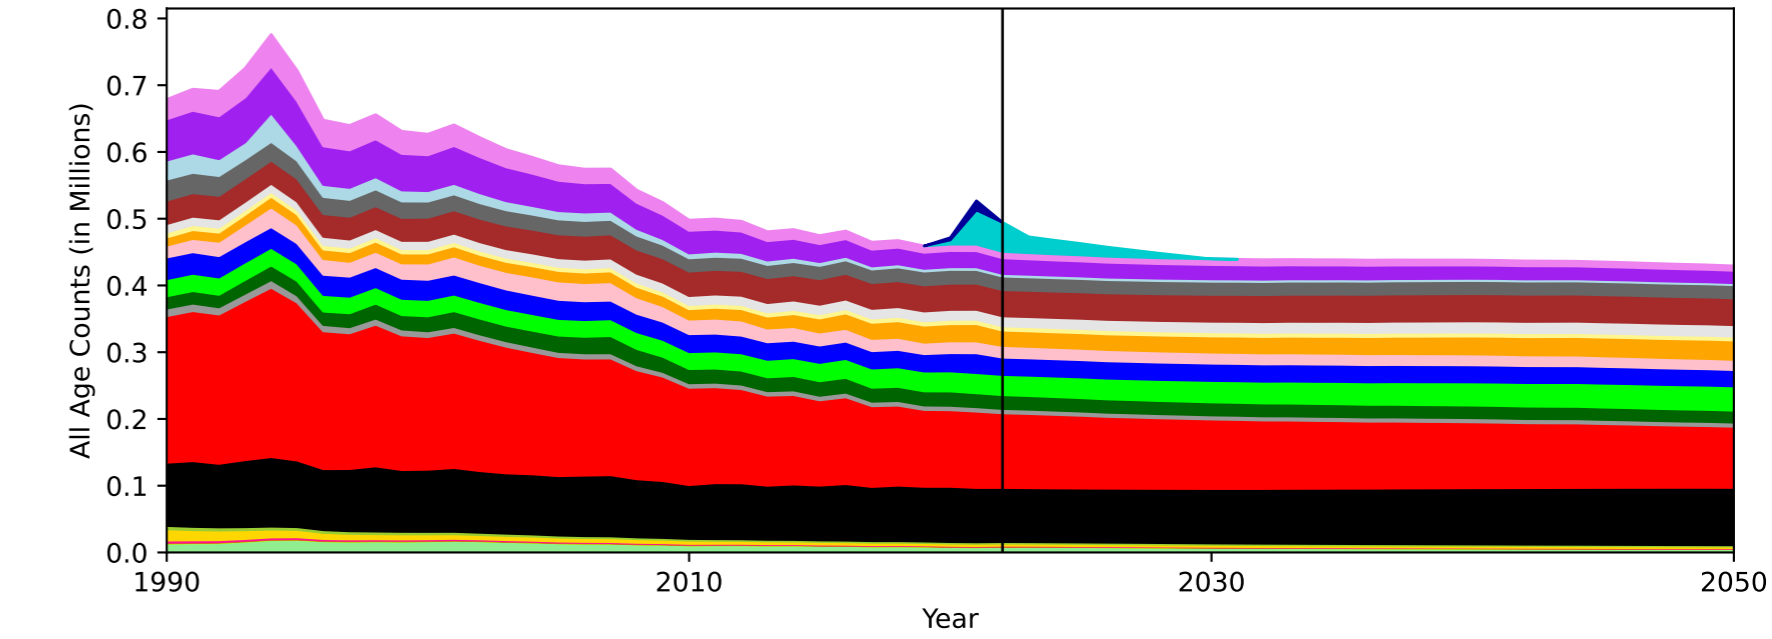

Level 1

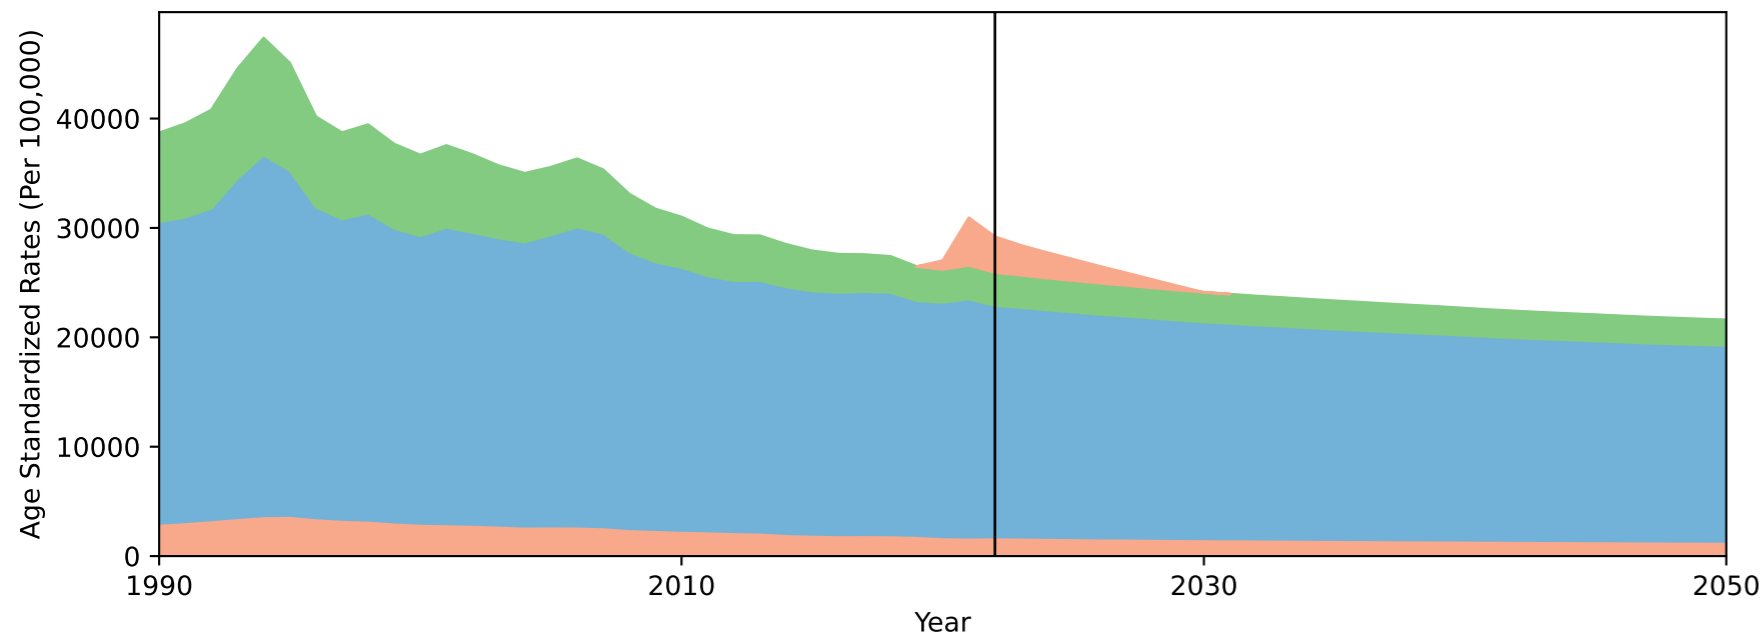

Level 2

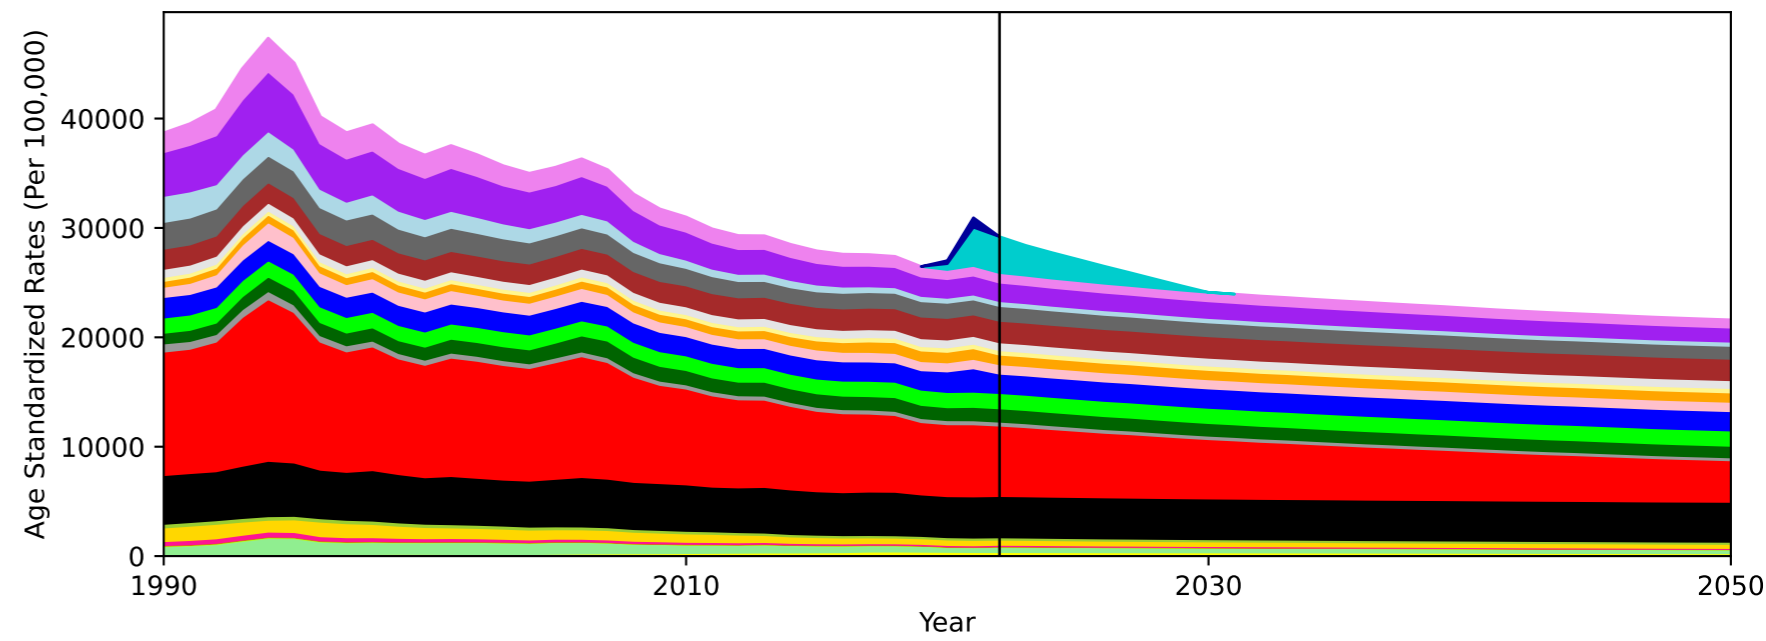

Level 1

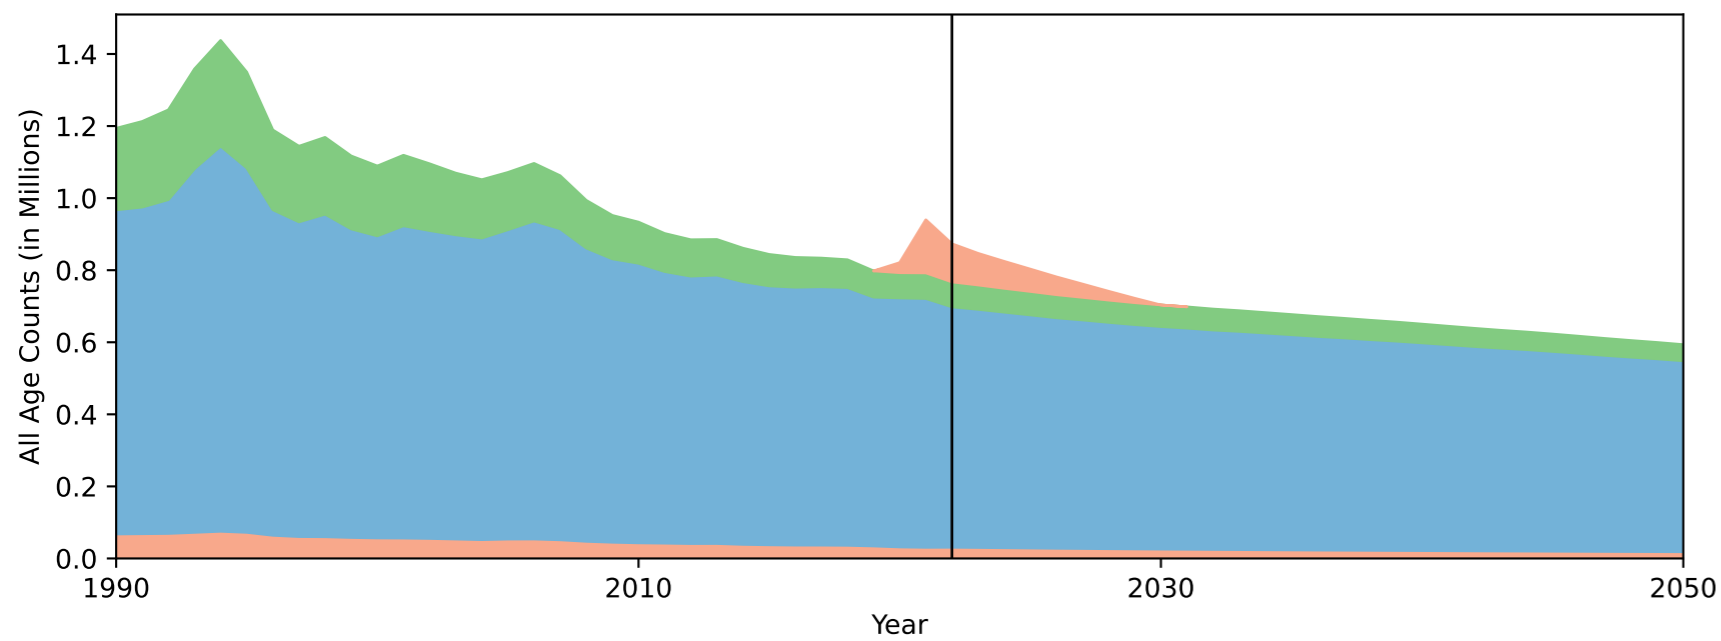

Level 2

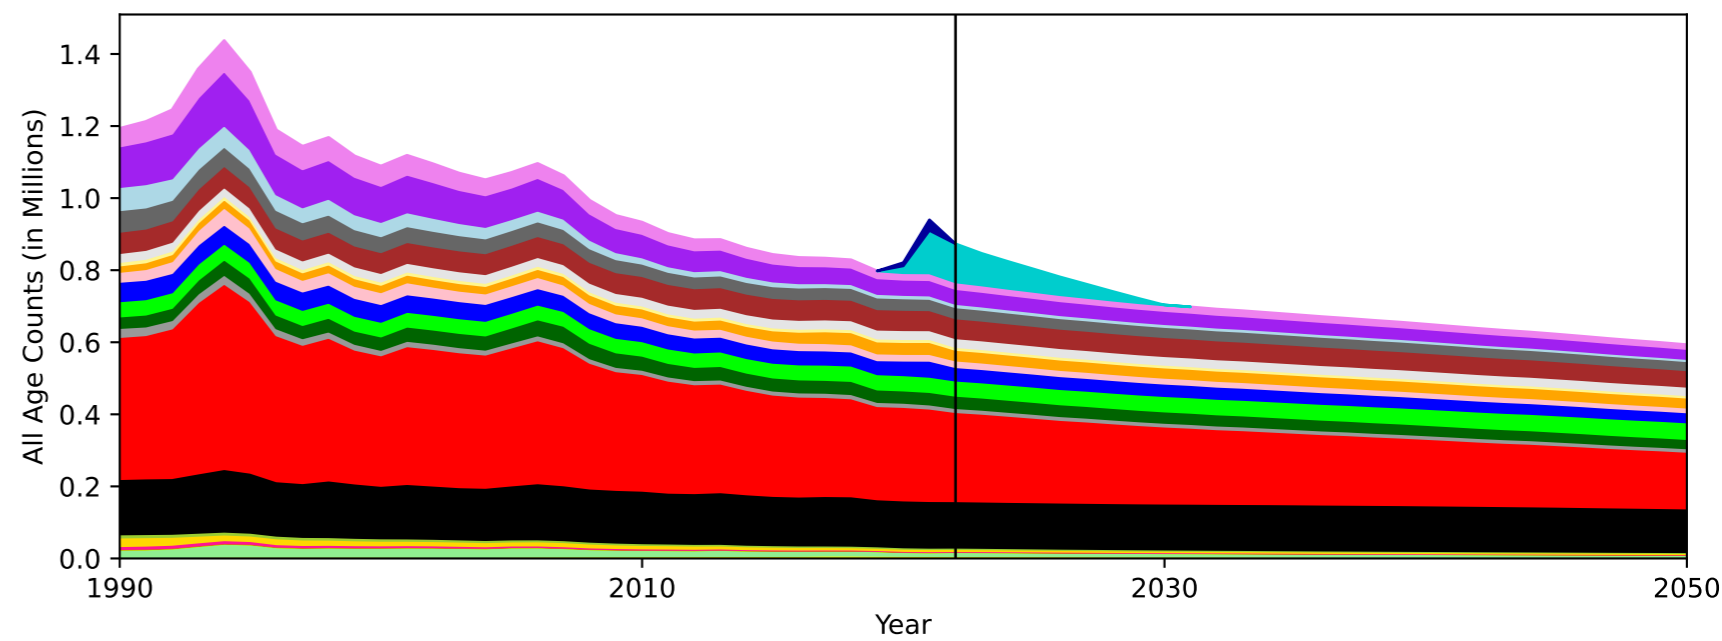

# Lithuania

Level 1

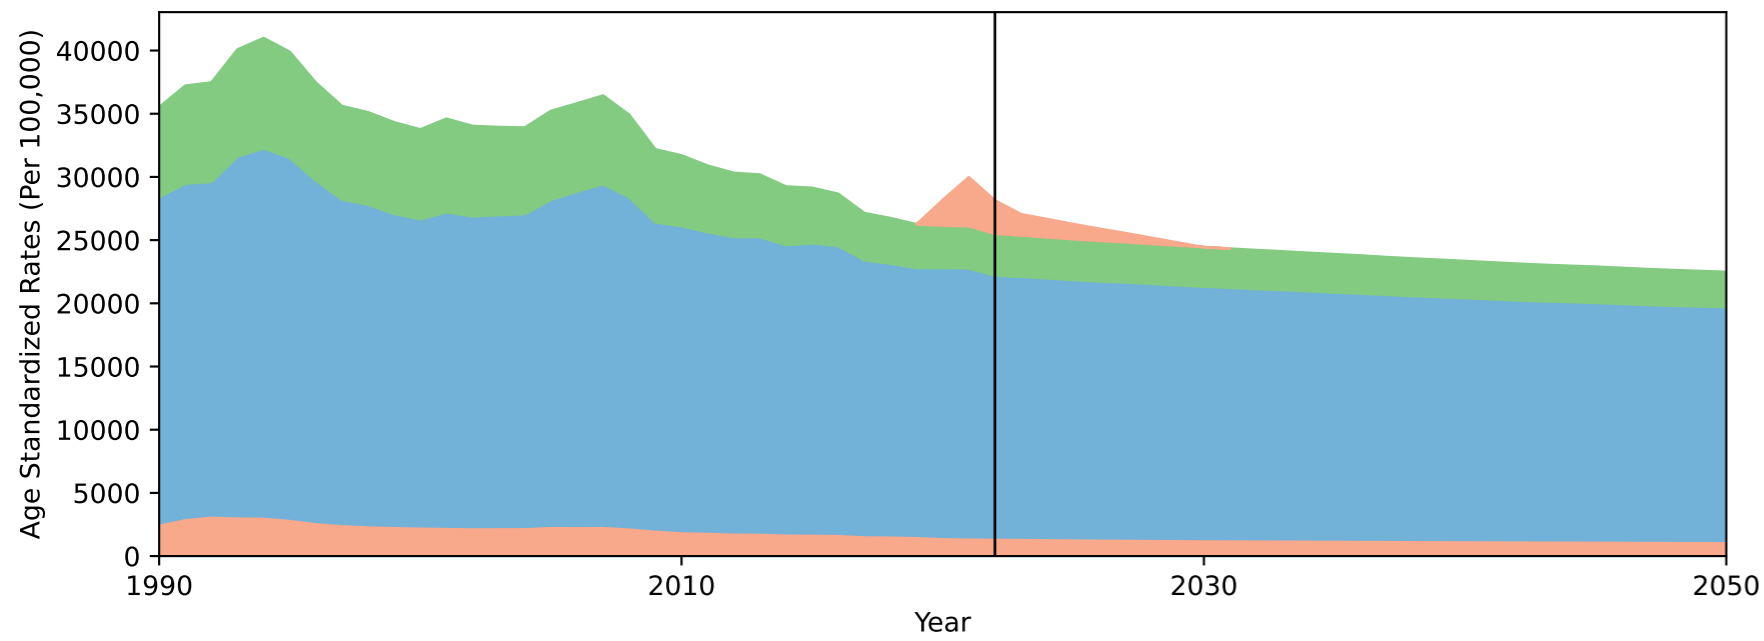

Level 2

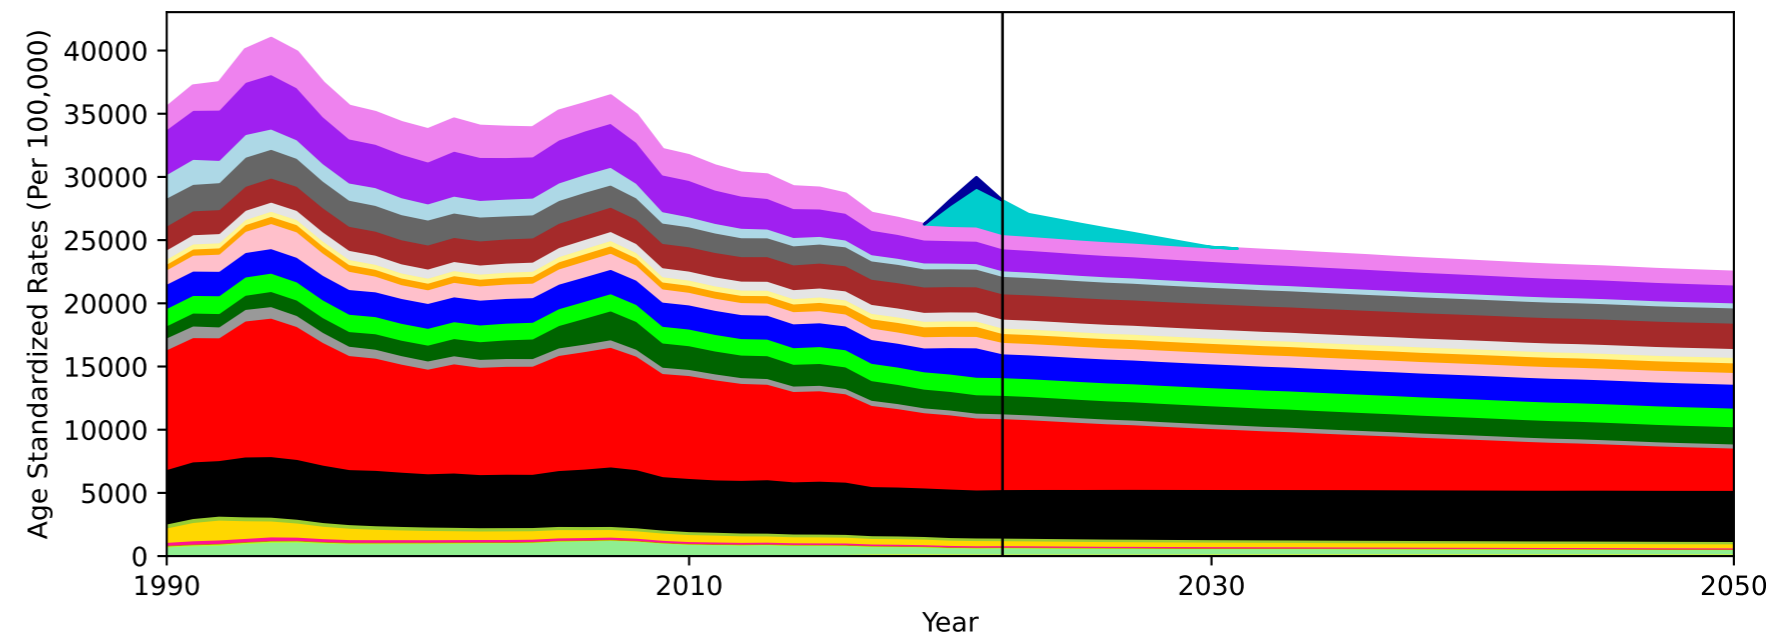

Level 1

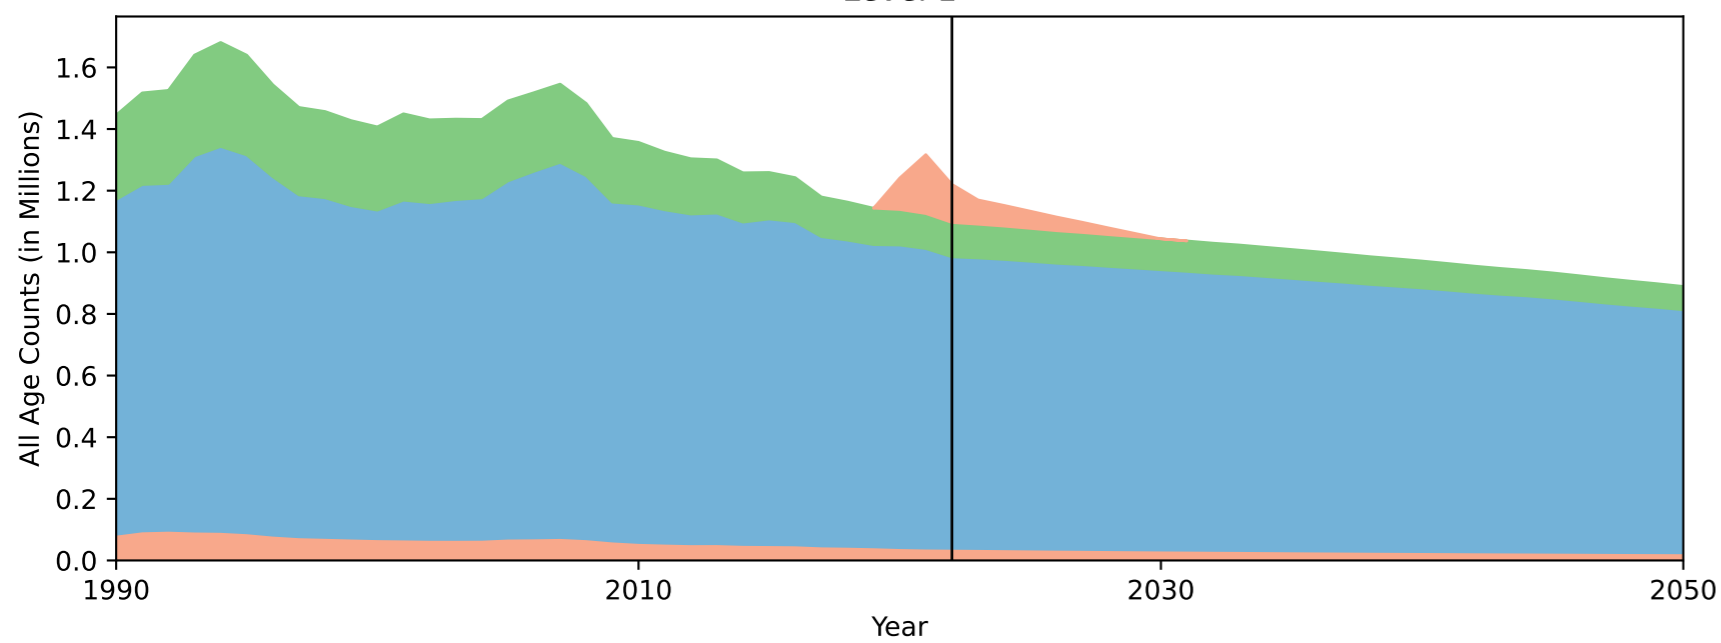

Level 2

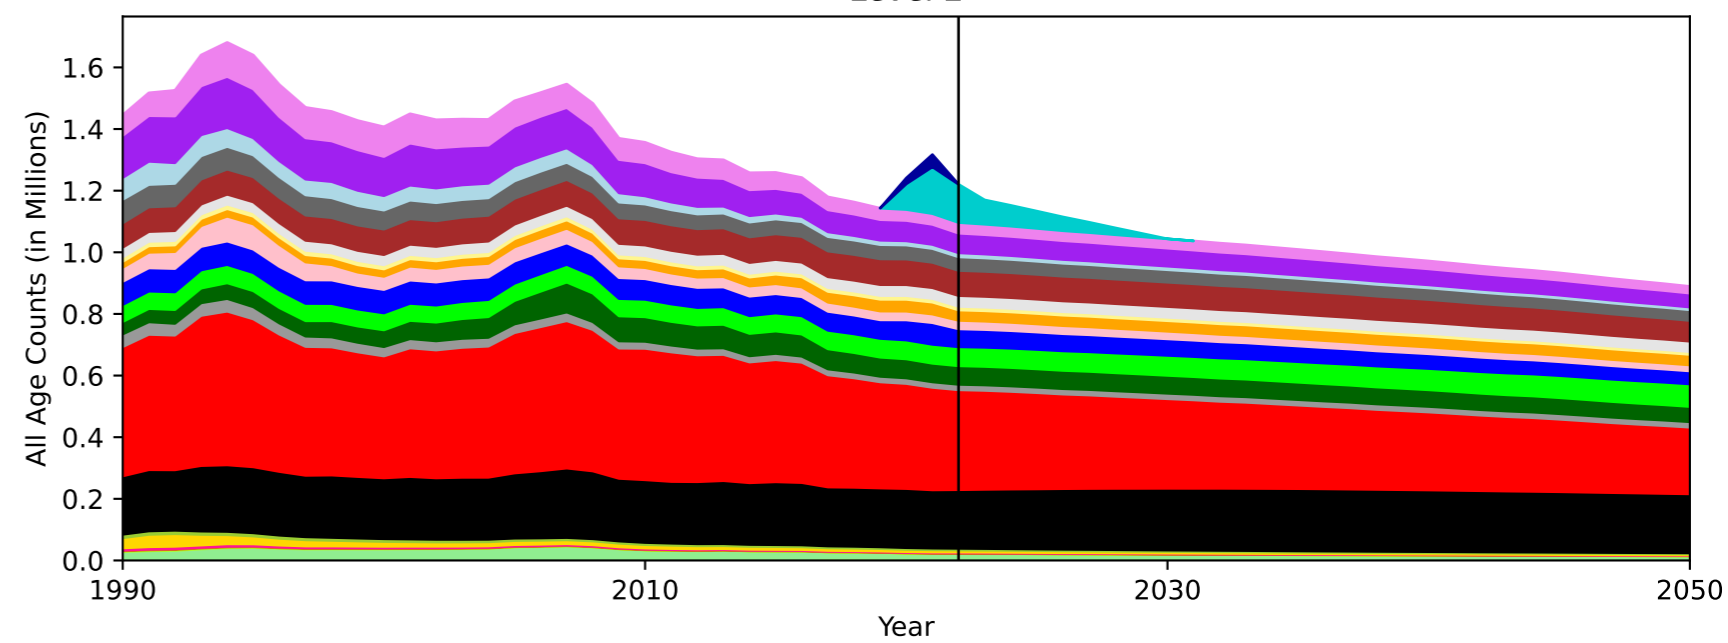

# Moldova

Level 1

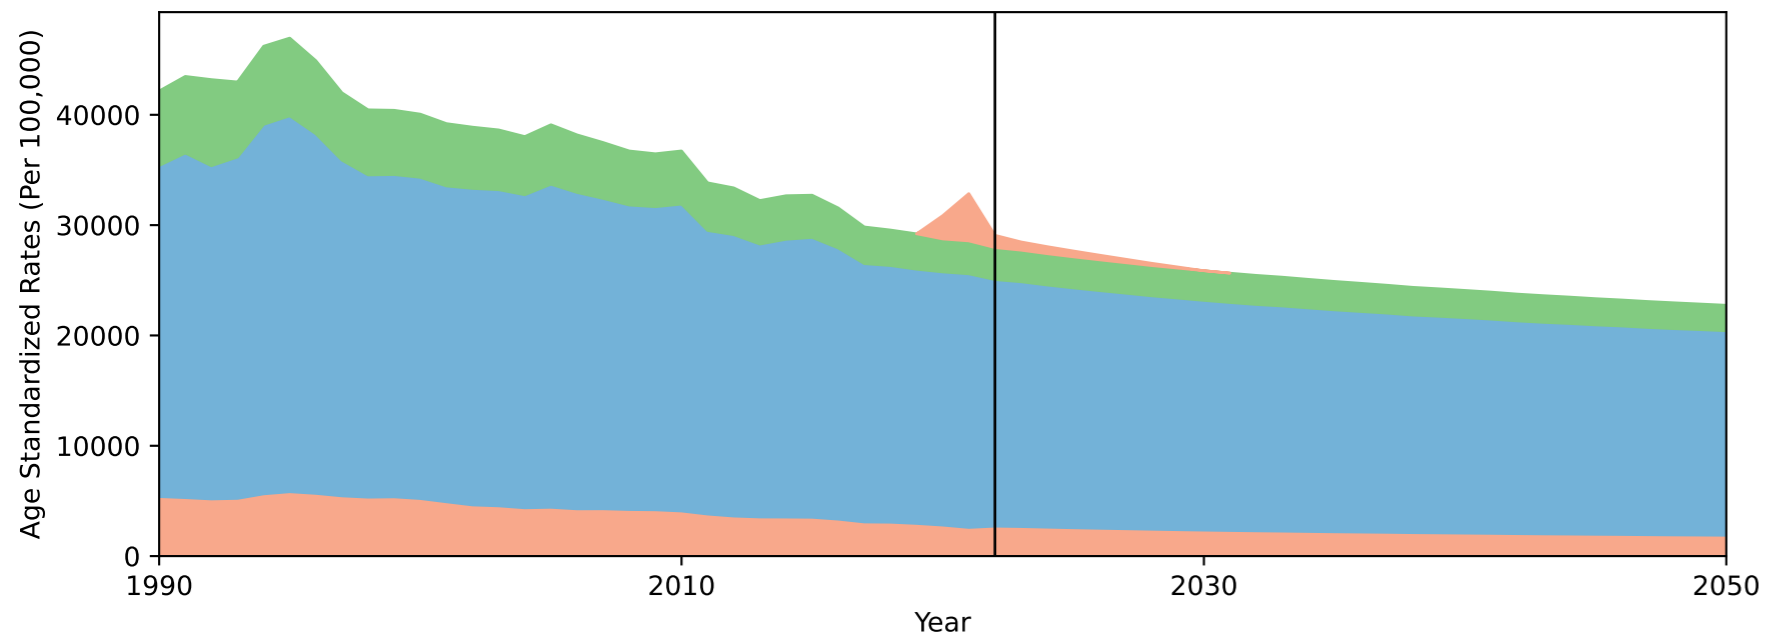

Level 2

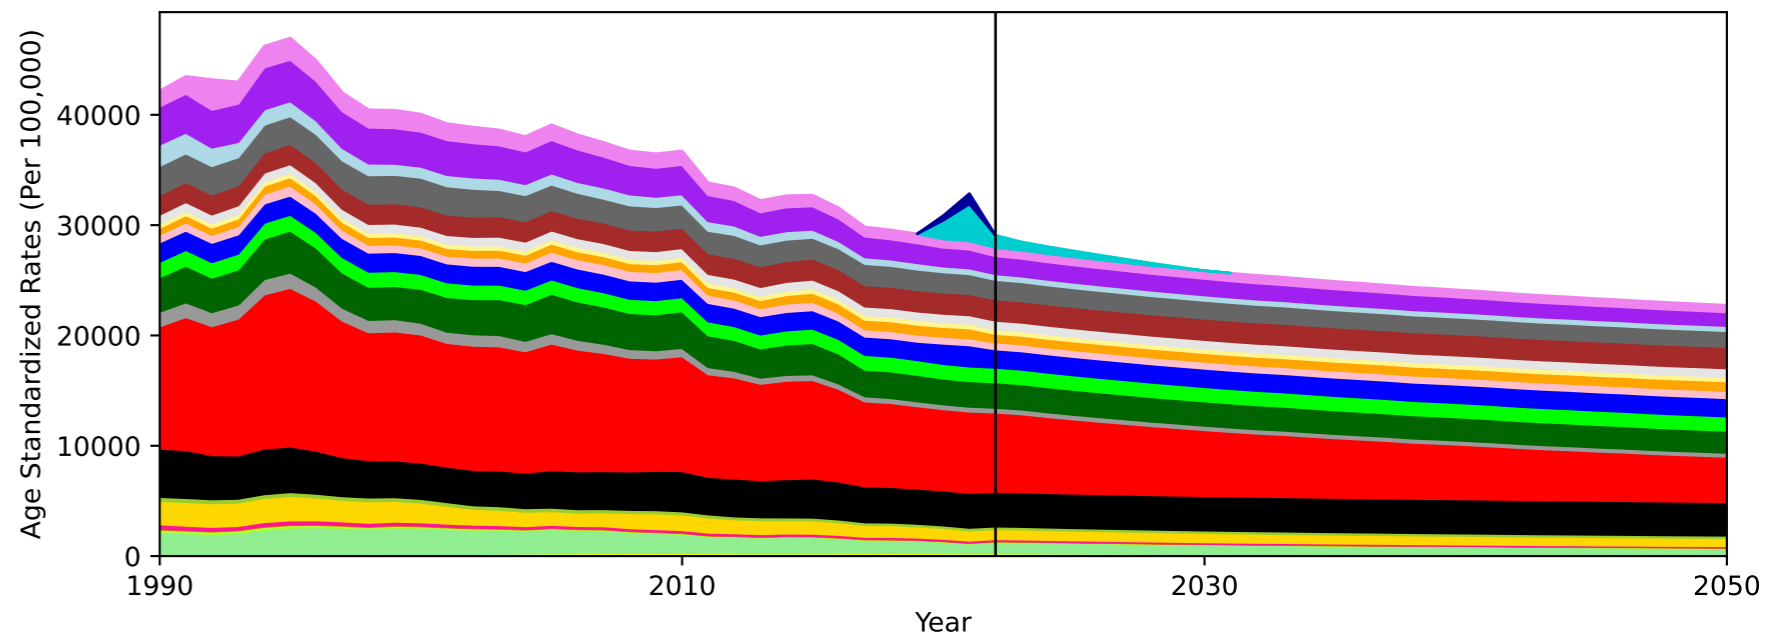

Level 1

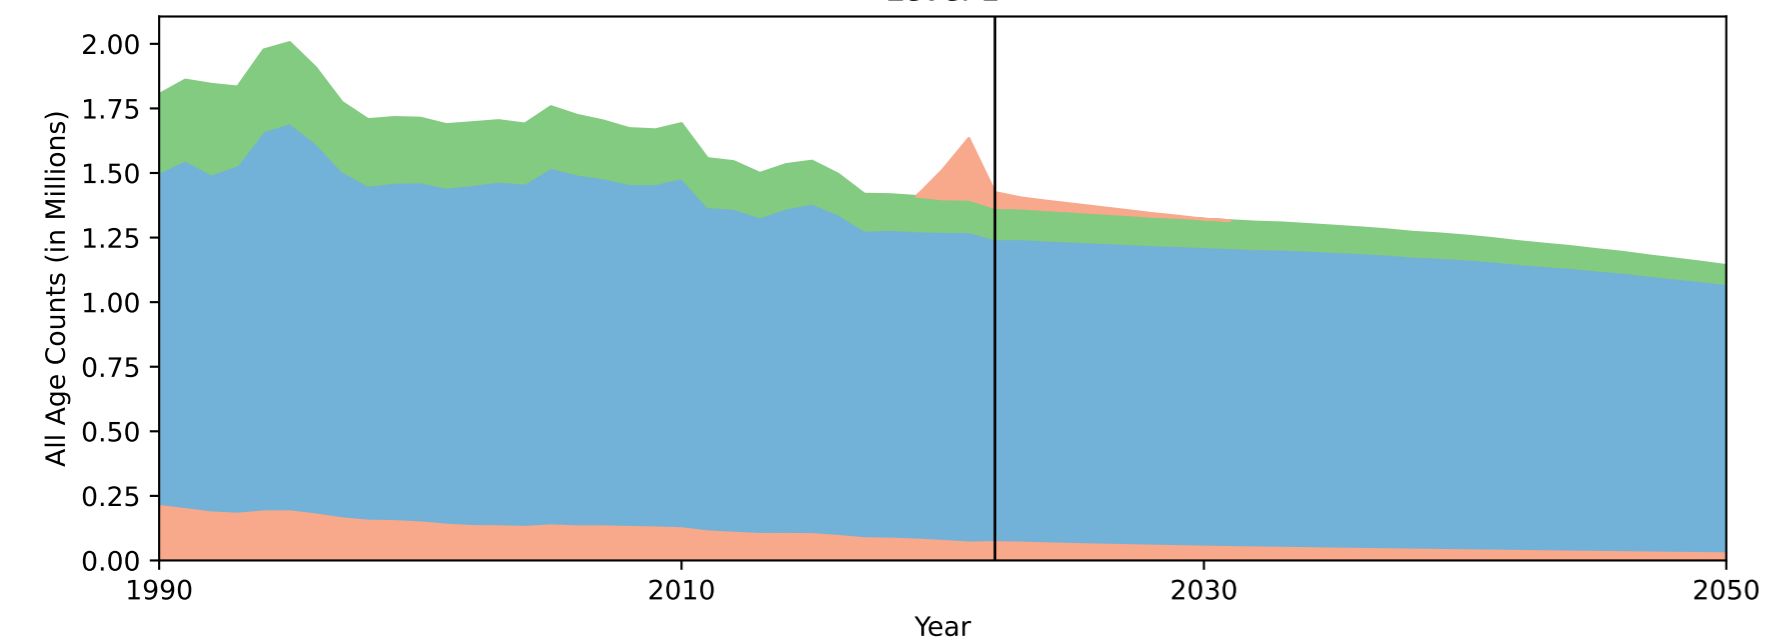

Level 2

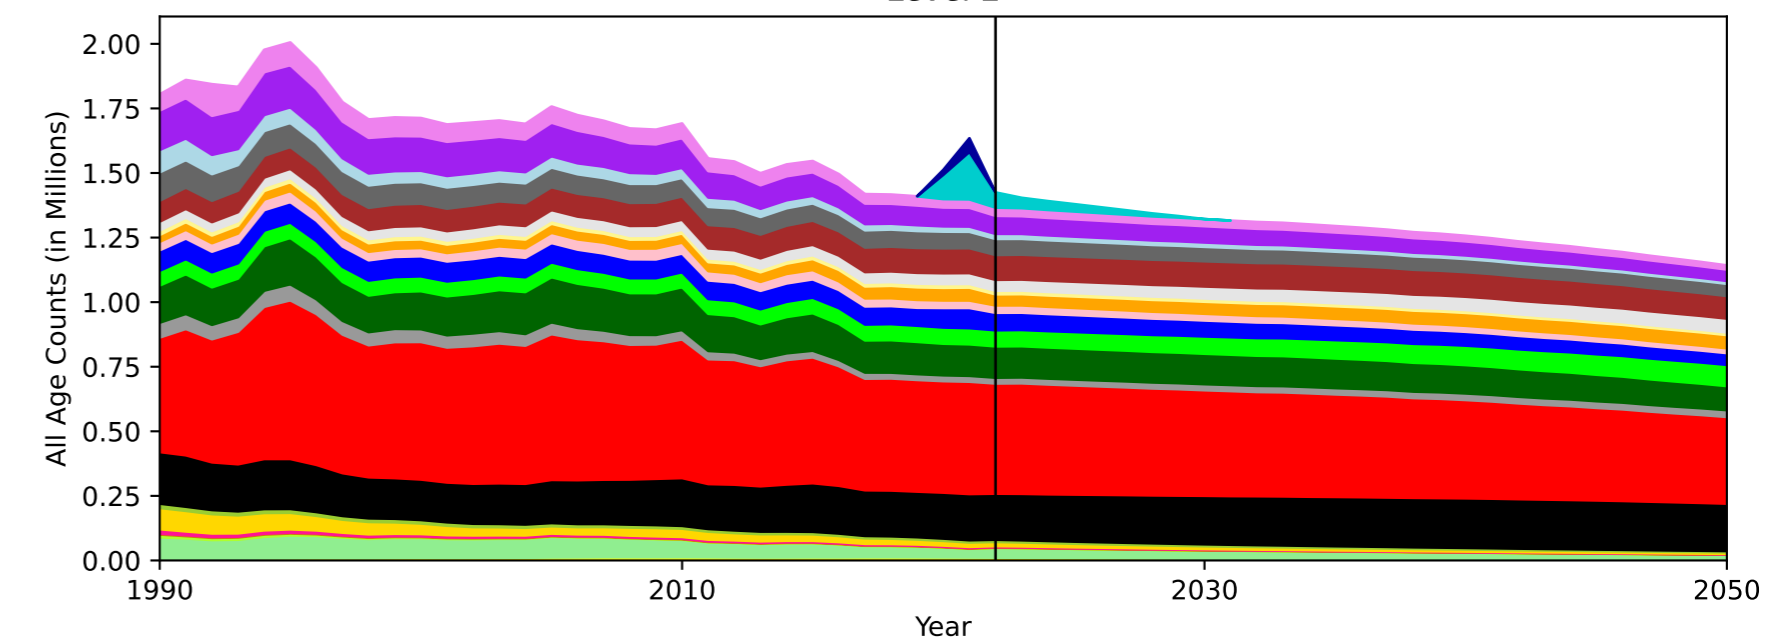



# Russia

Level 1

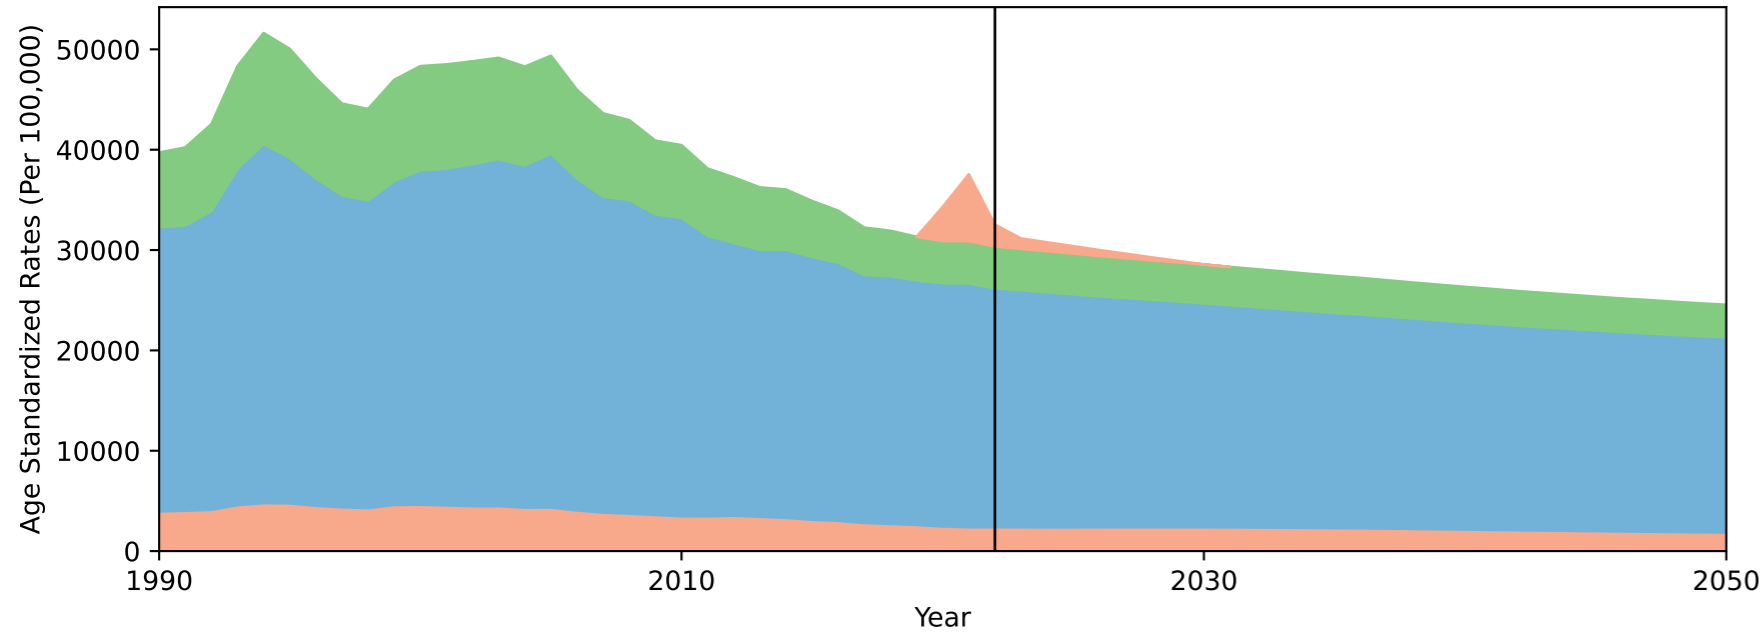

Level 2

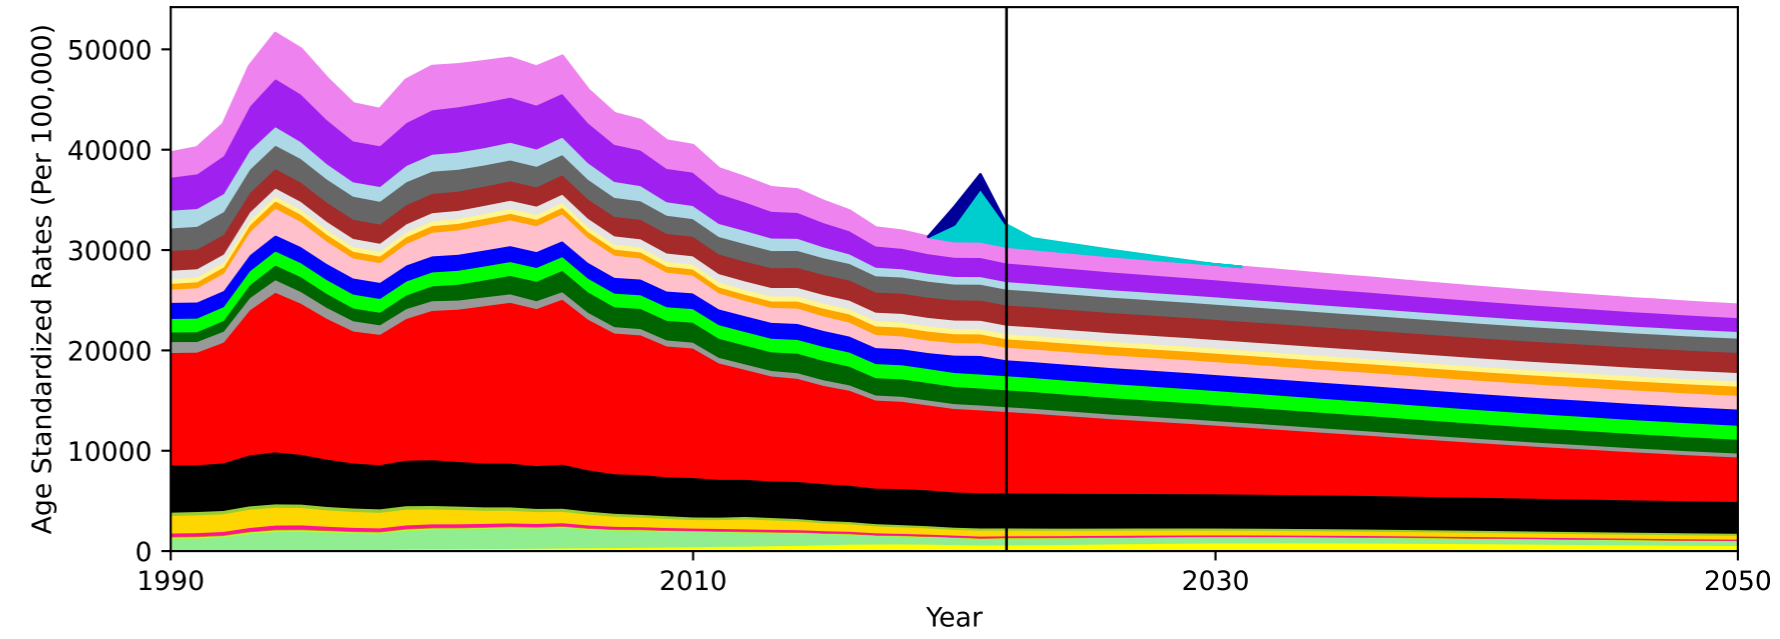

Level 1

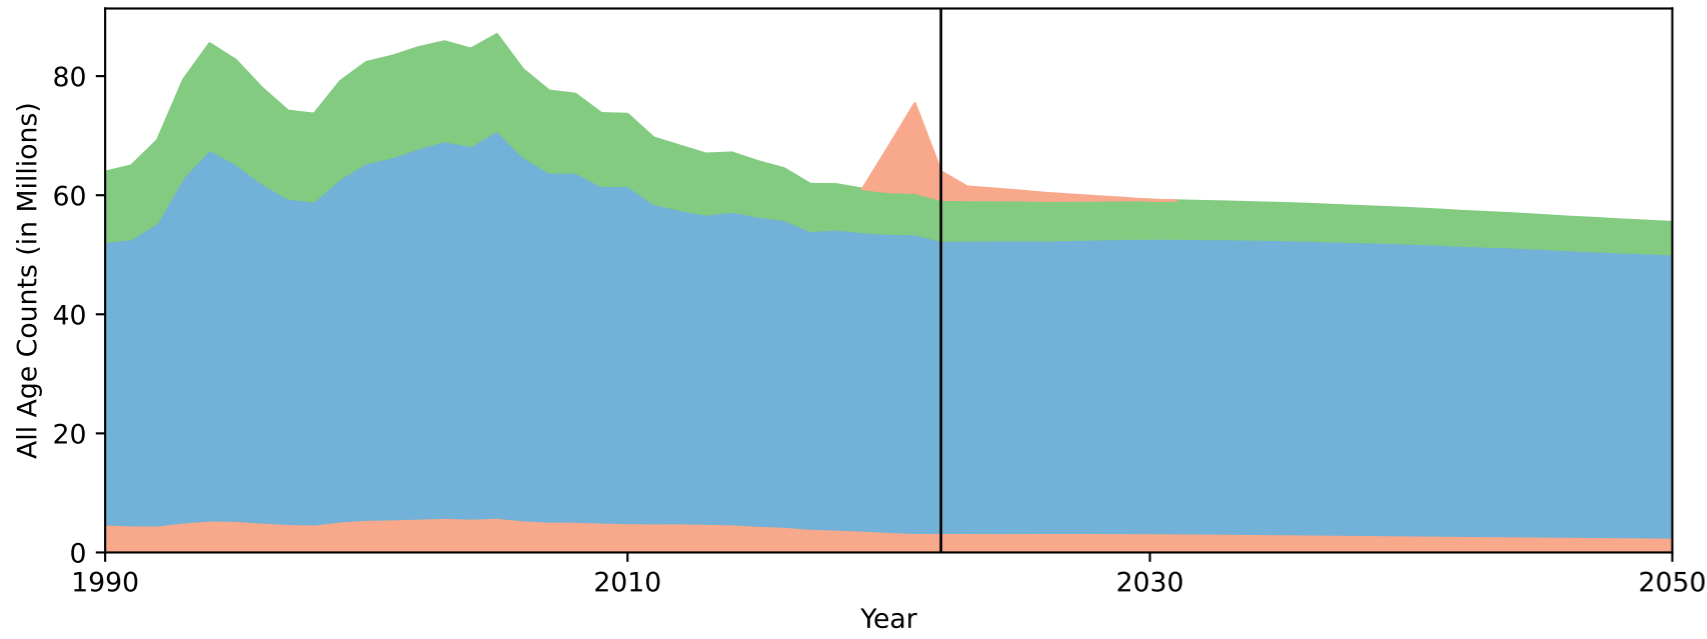

Level 2

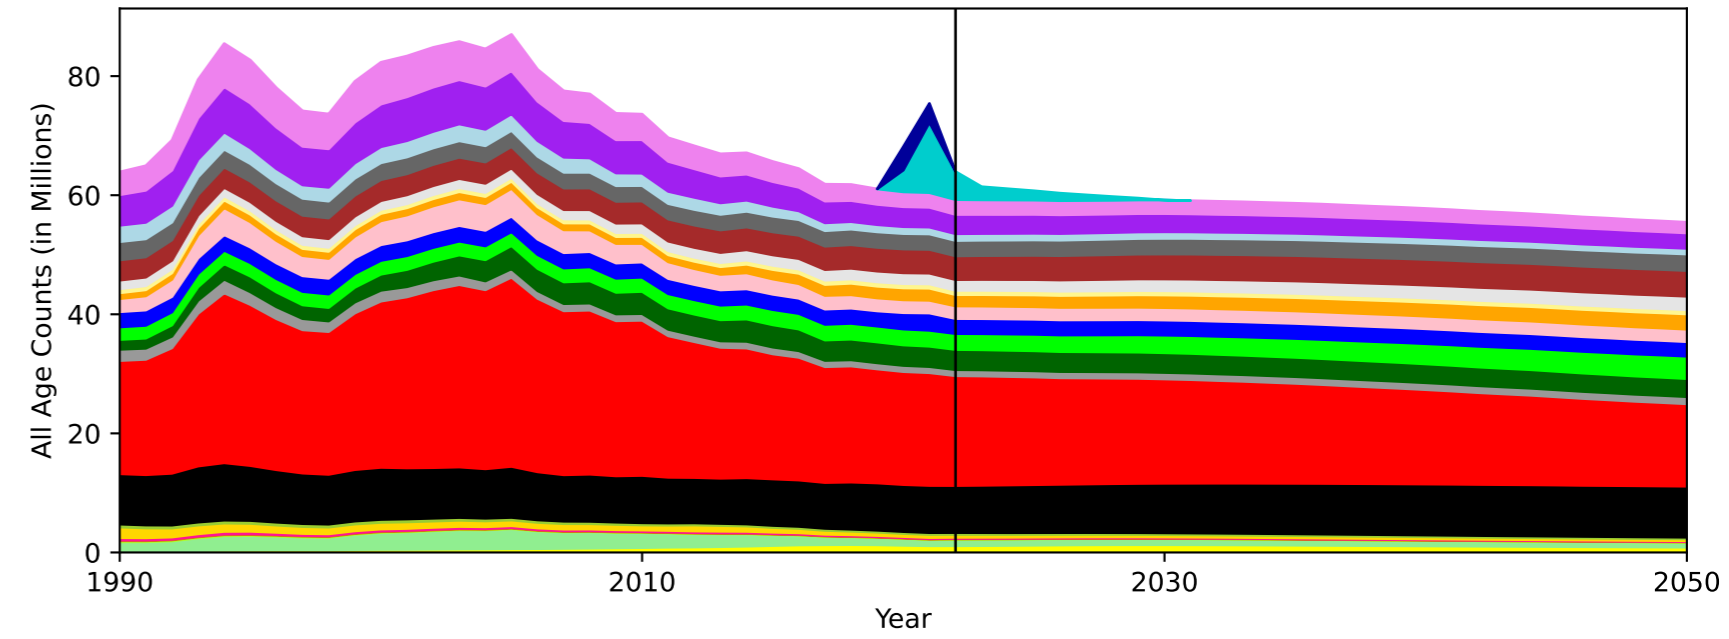

# Ukraine

Level 1

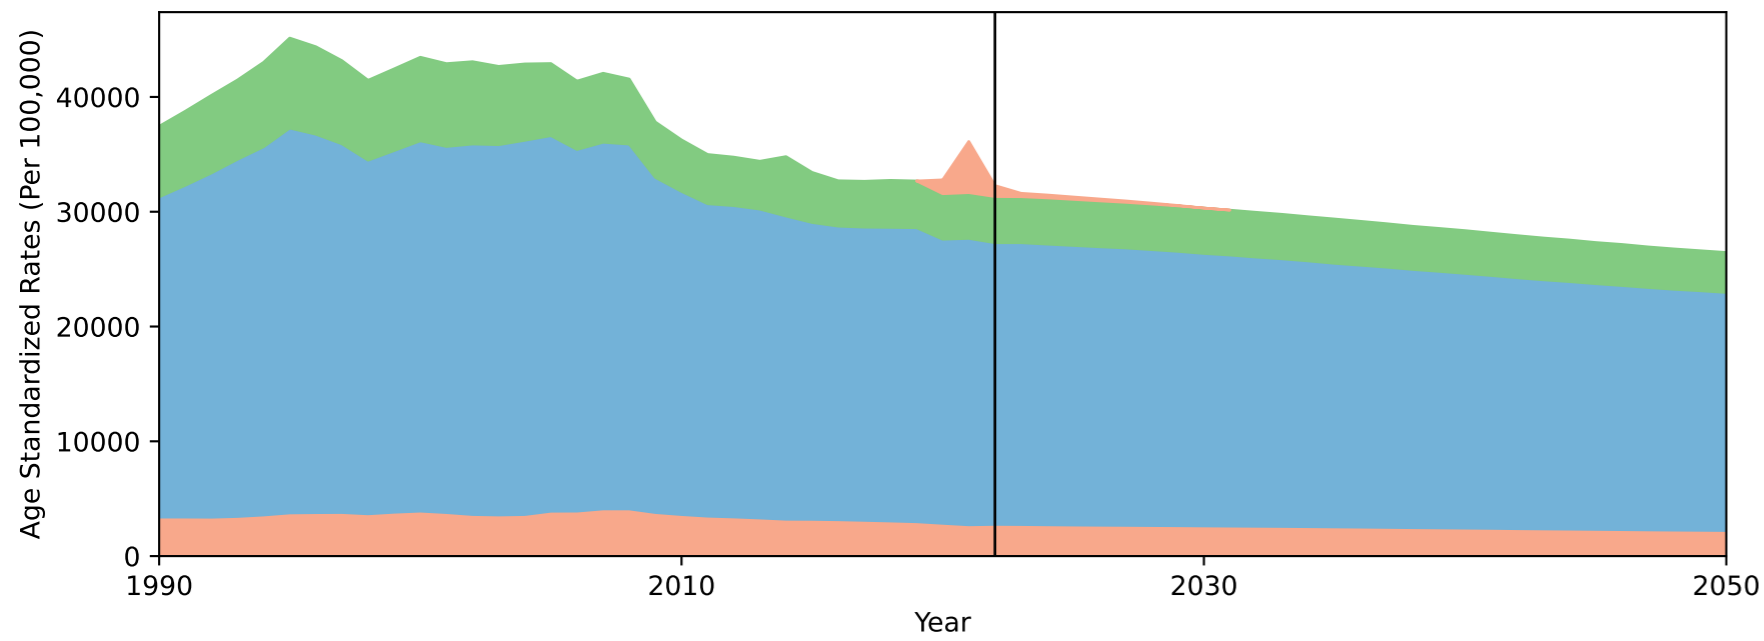

Level 2

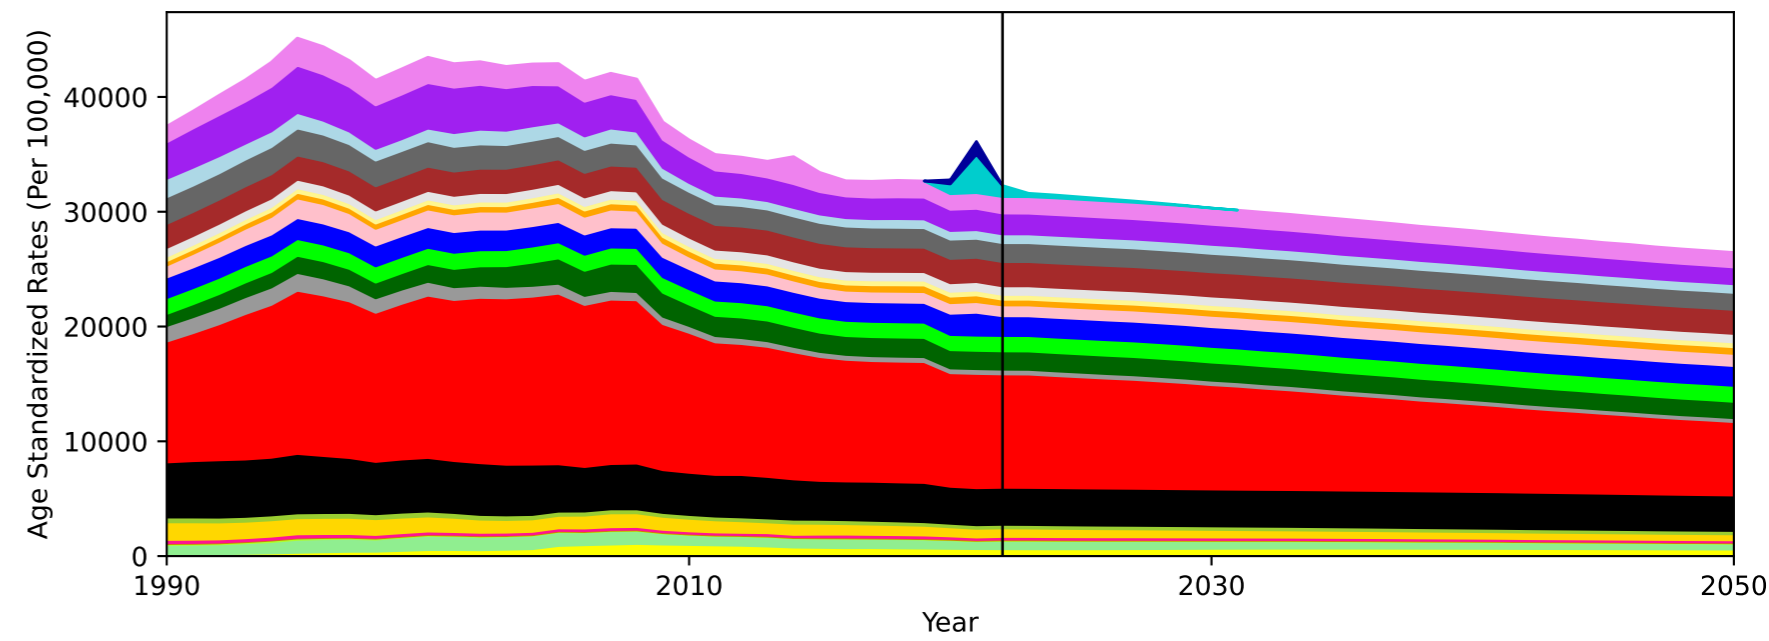

Level 1

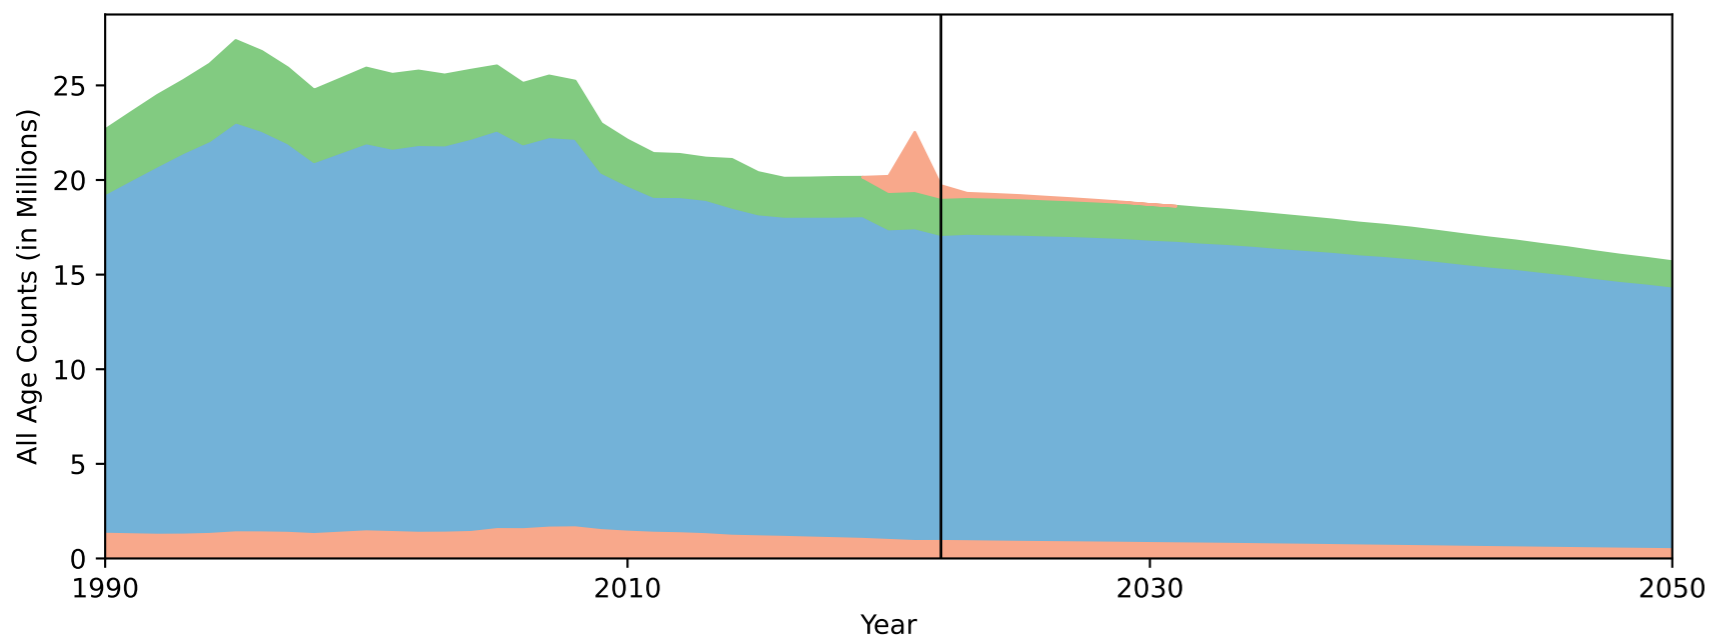

Level 2

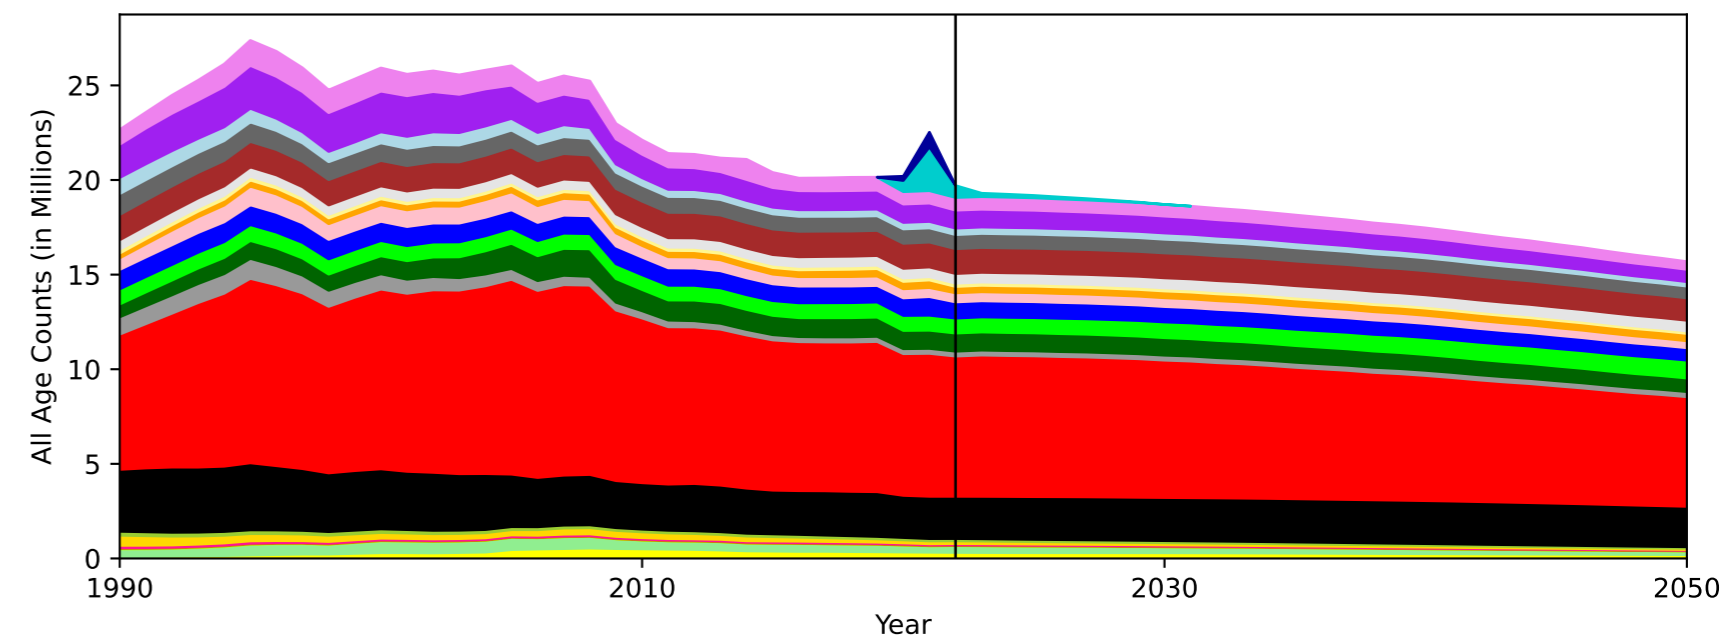

# Australia

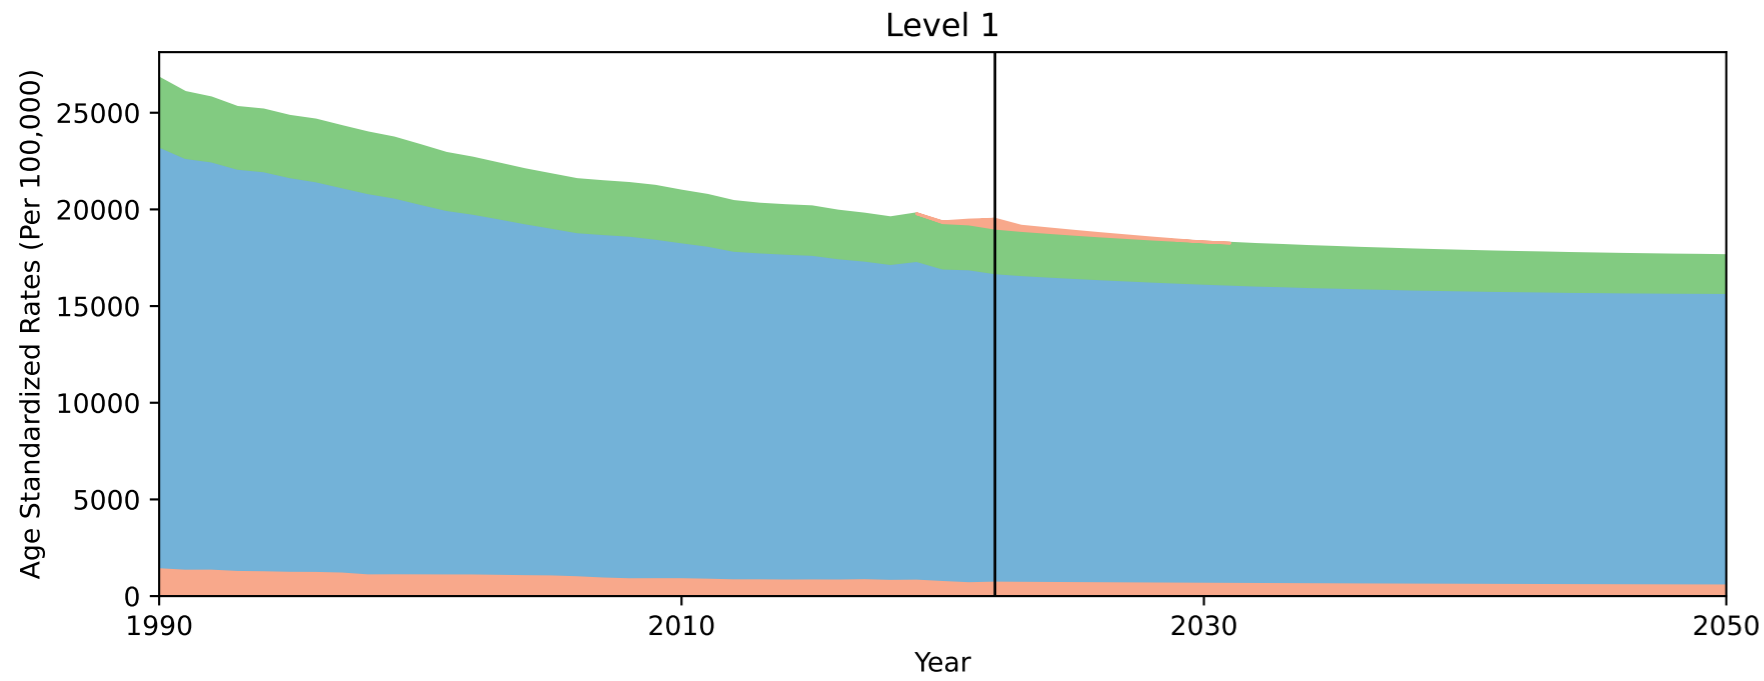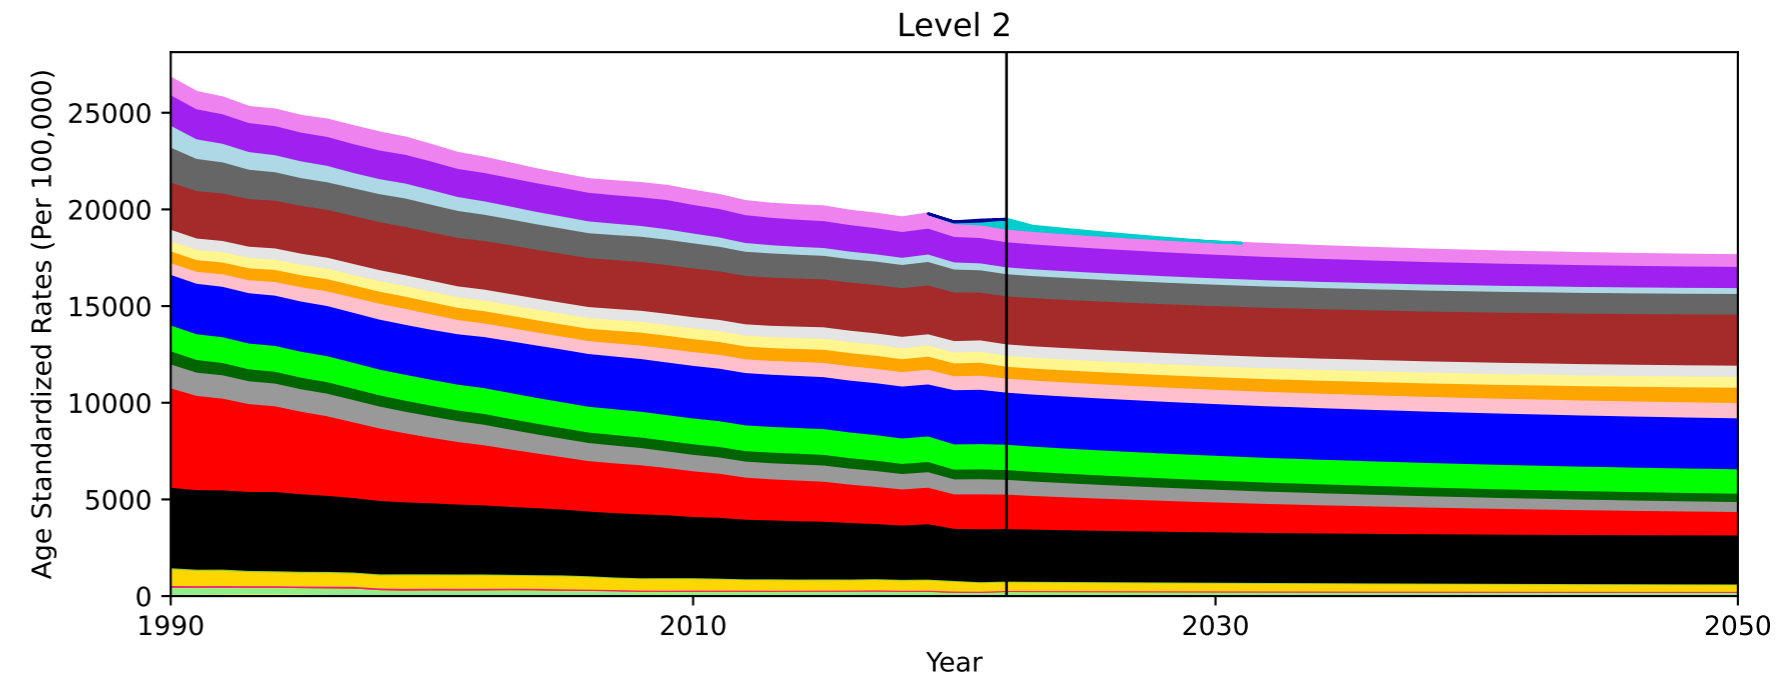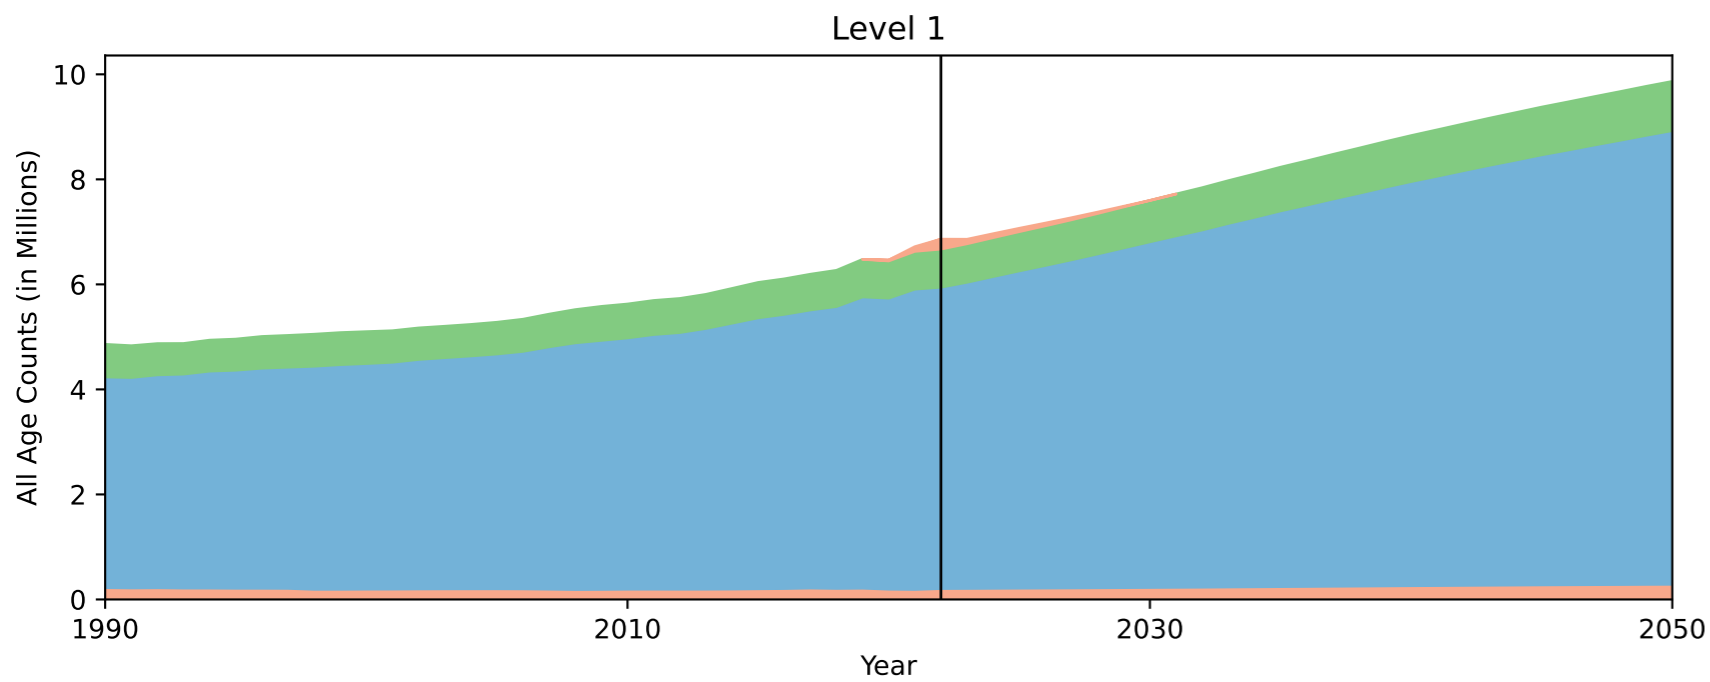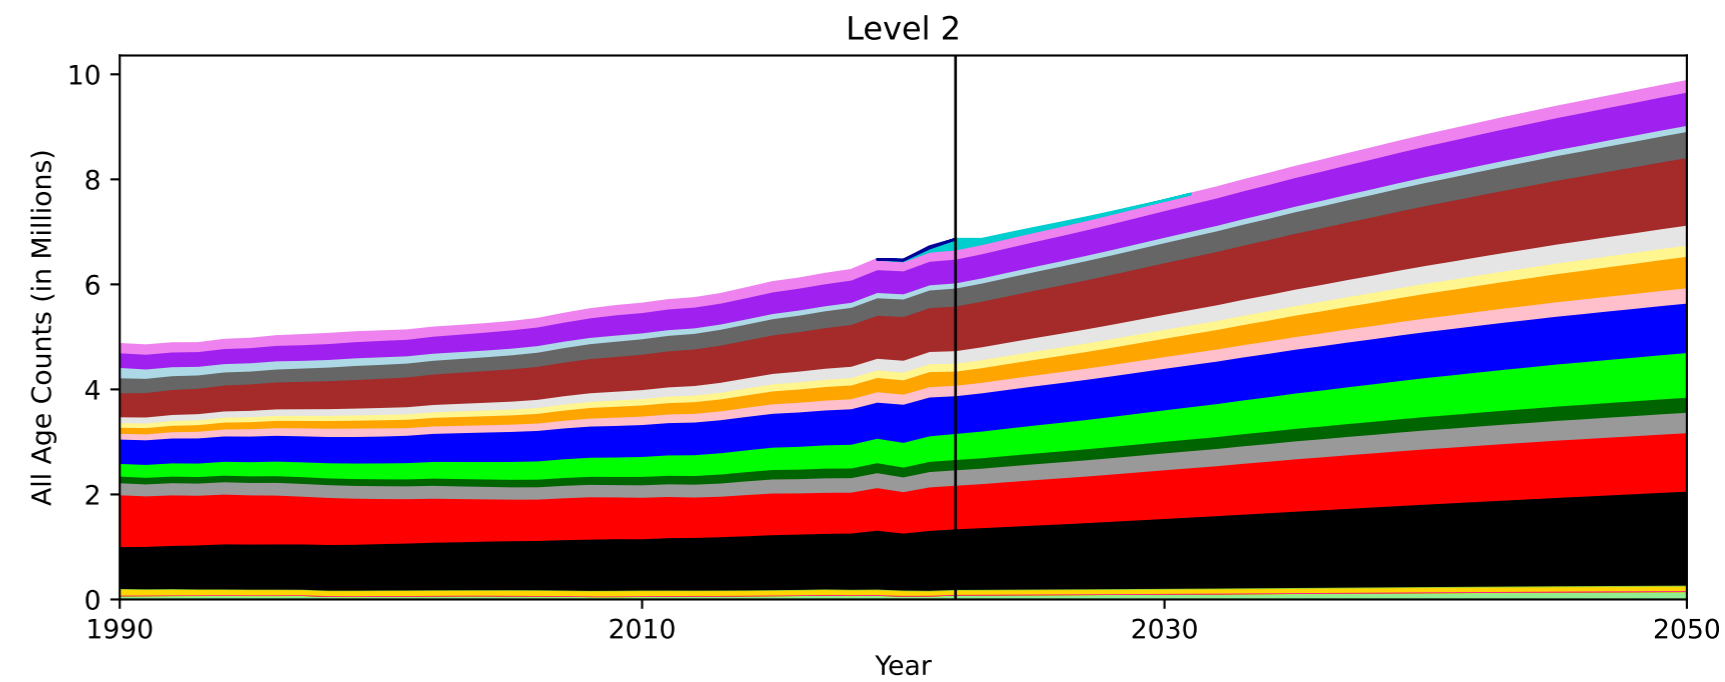

# New Zealand

Level 1

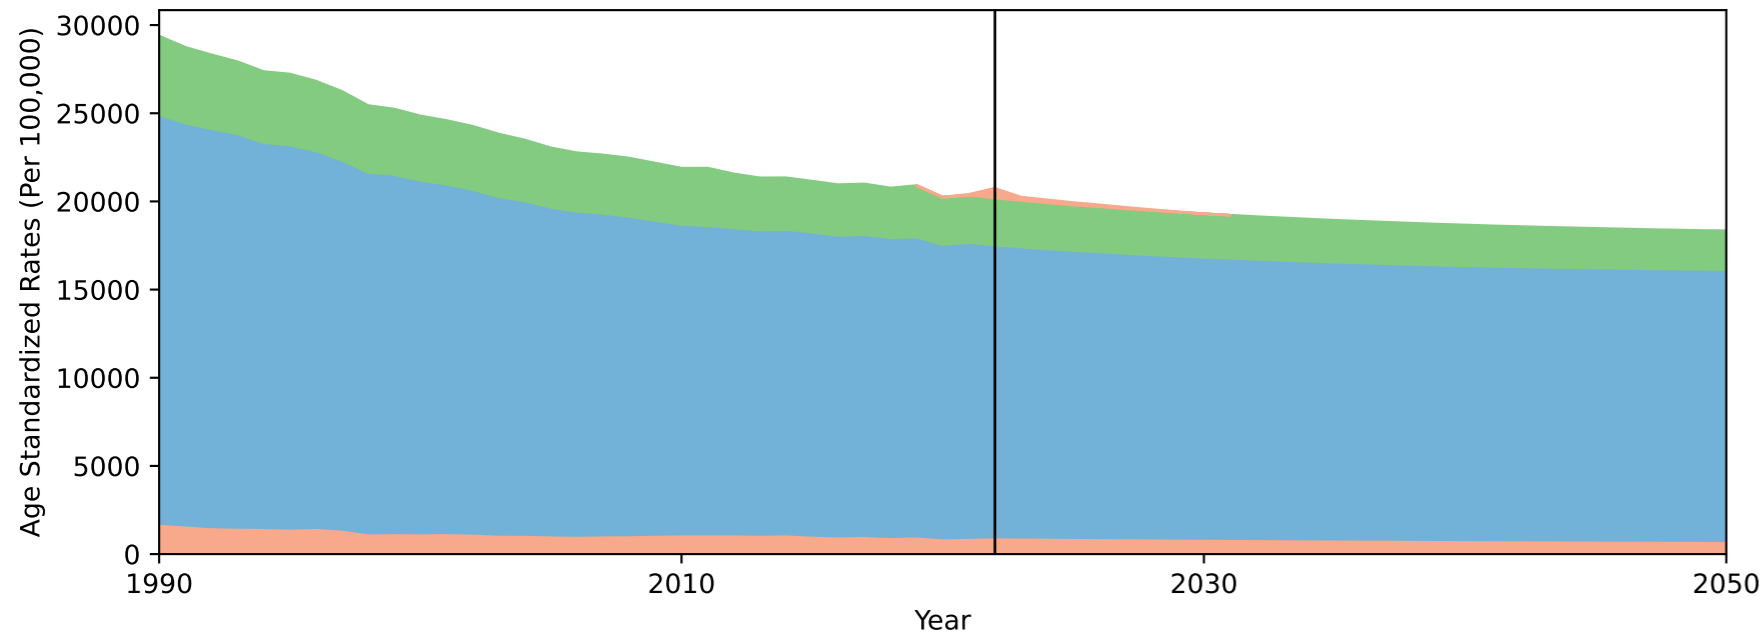

Level 2

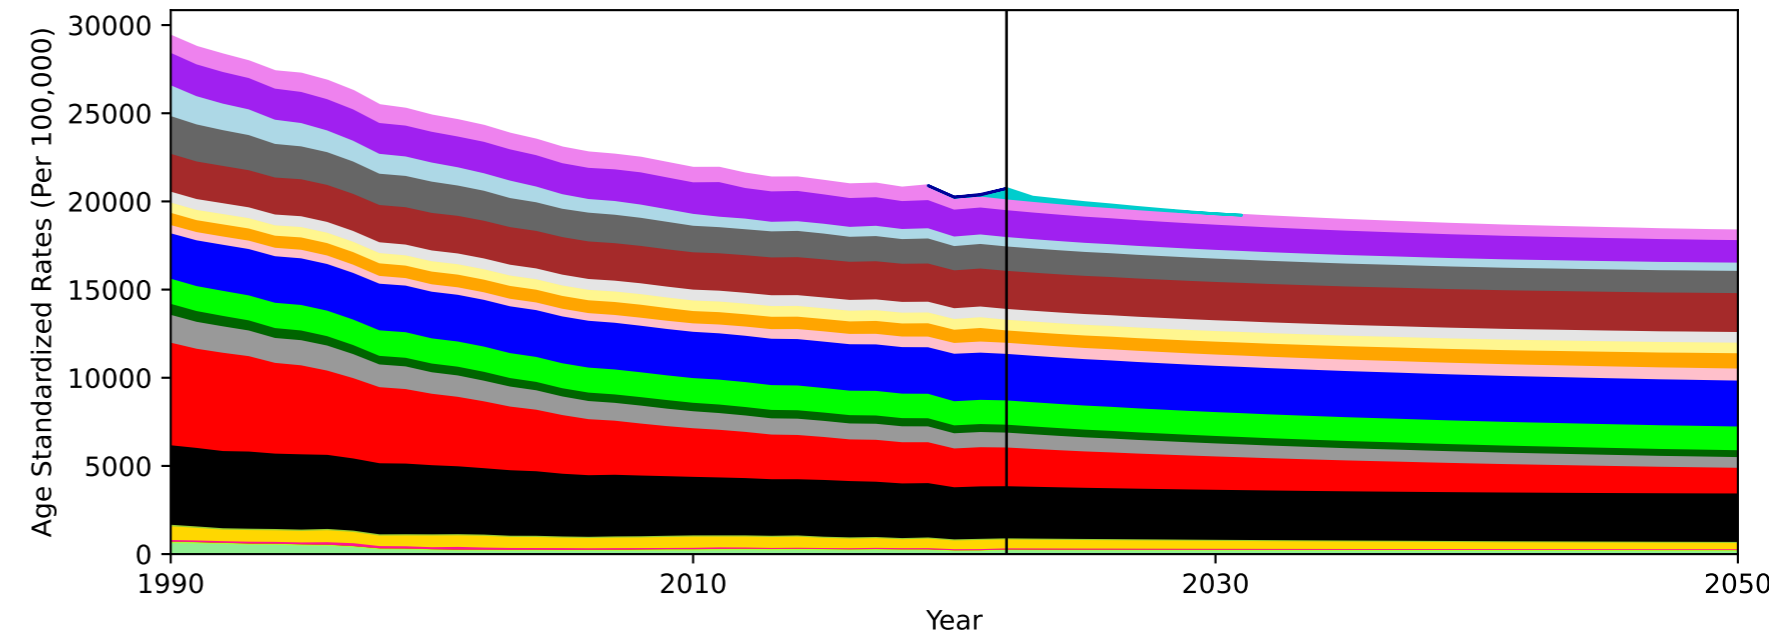

Level 1

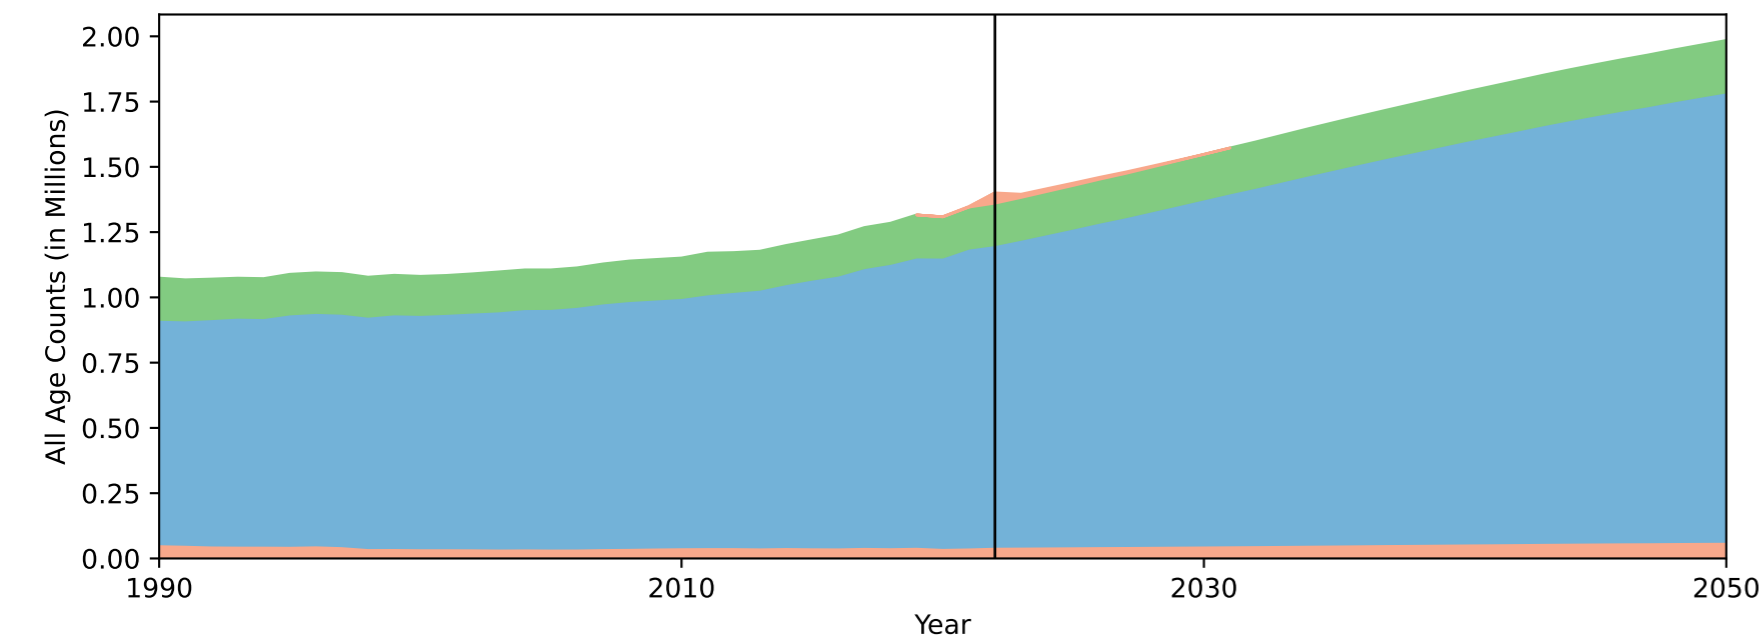

Level 2

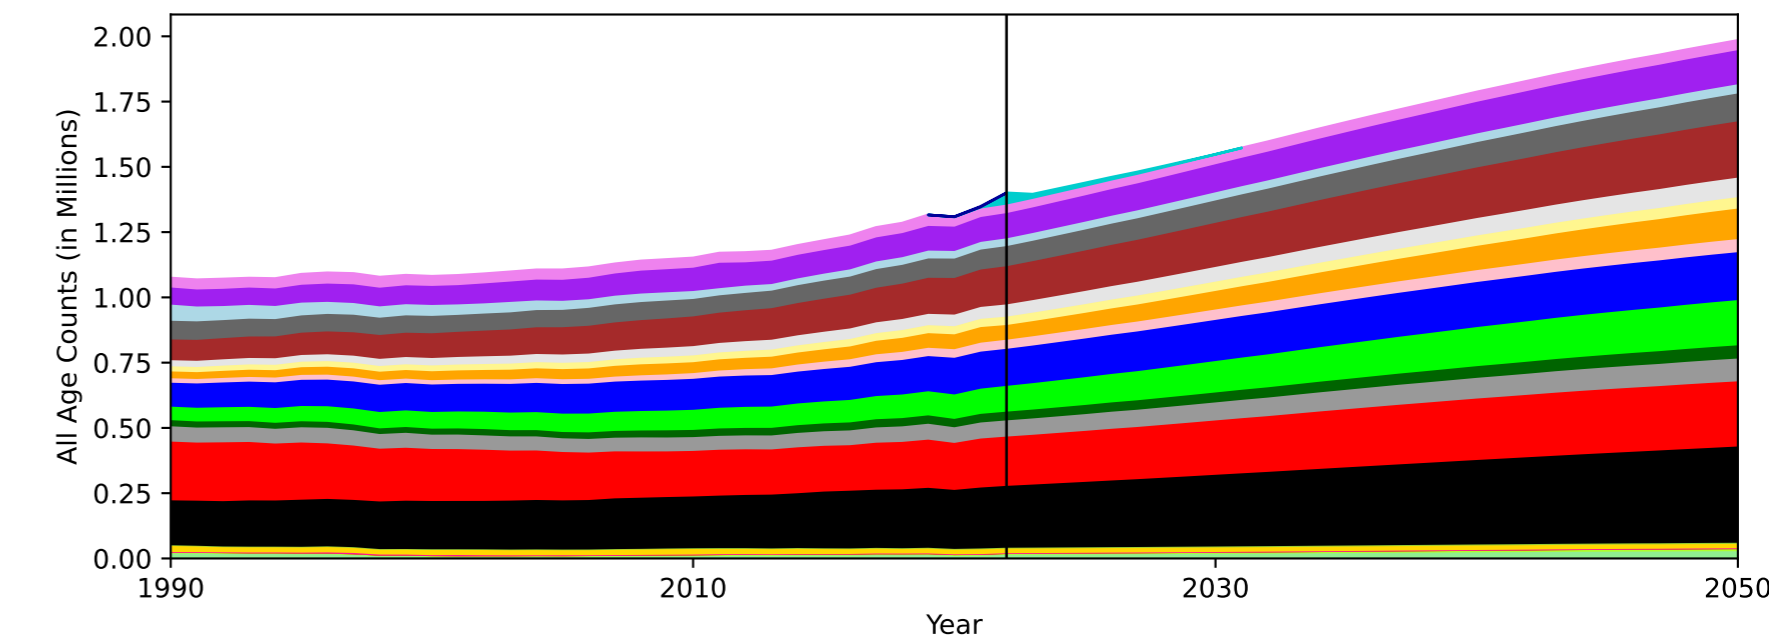

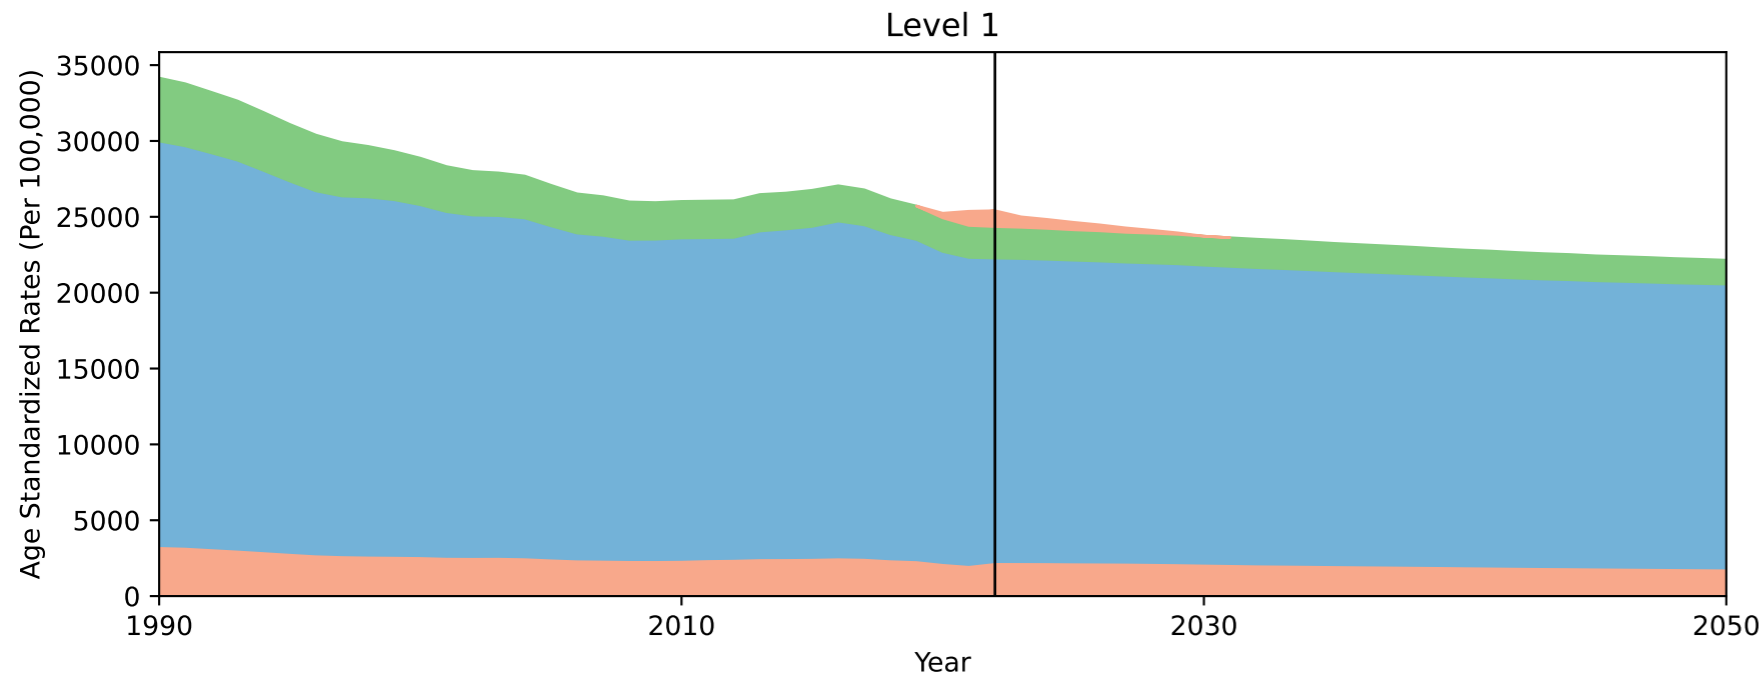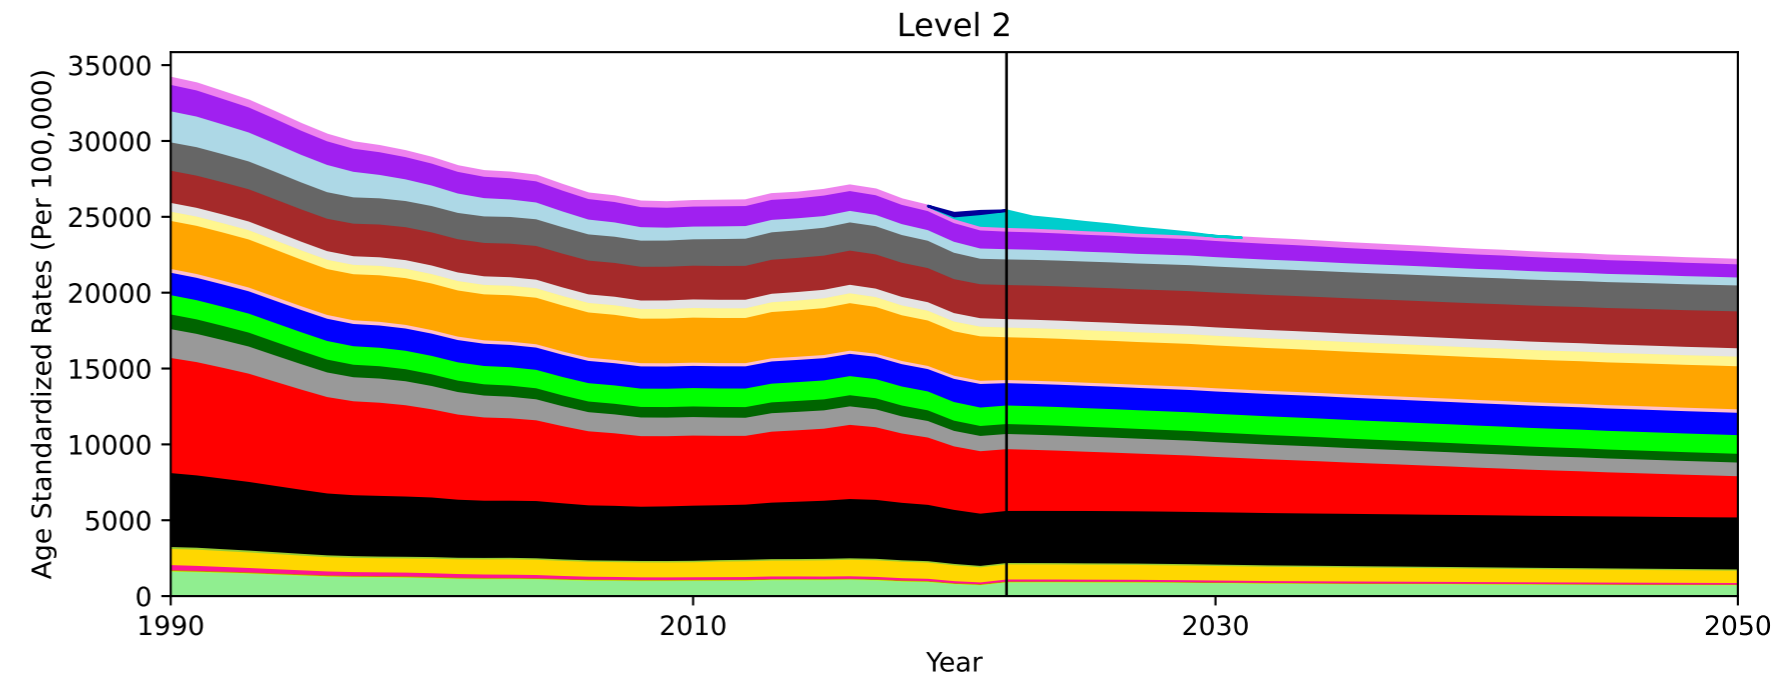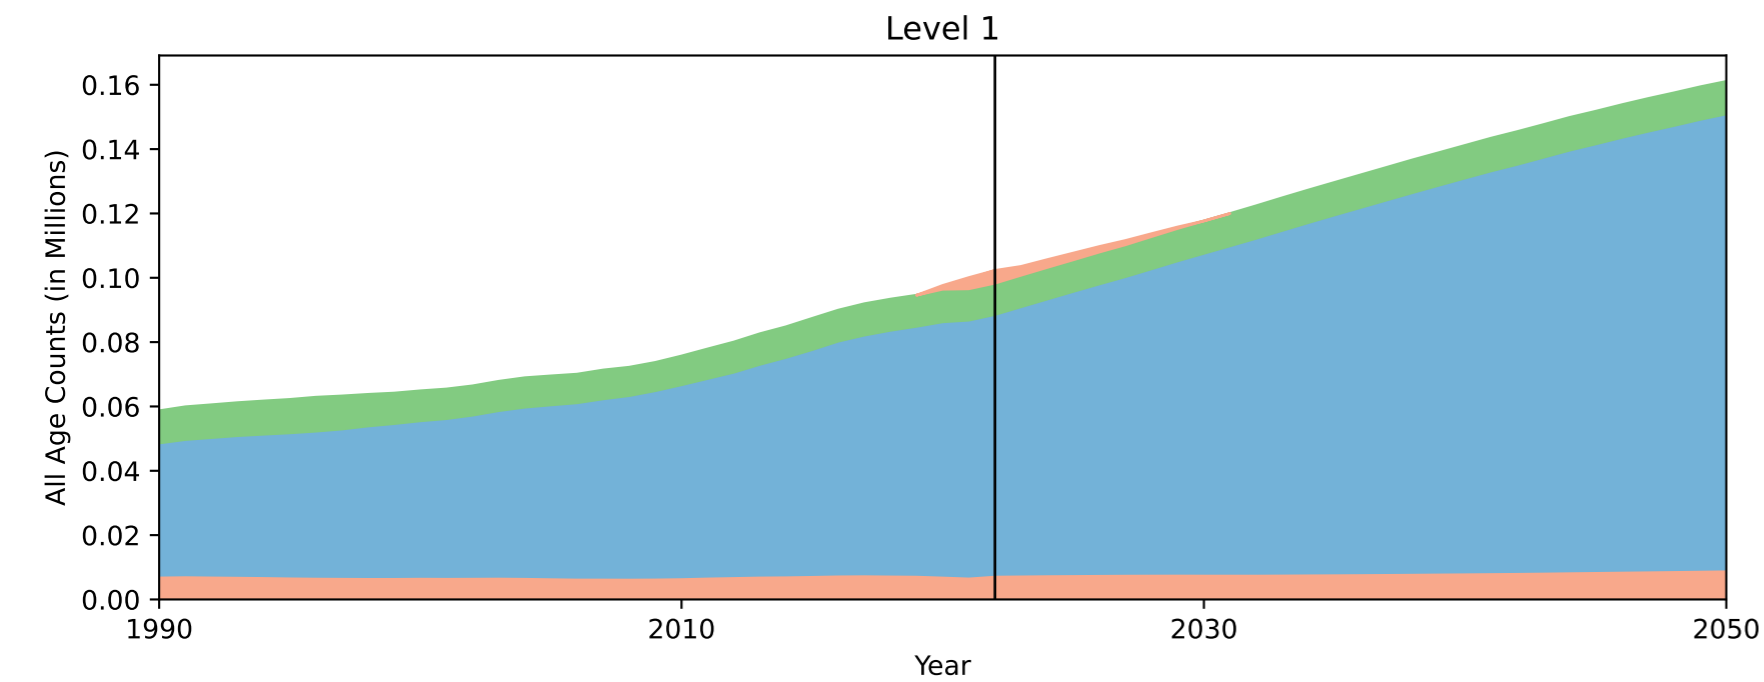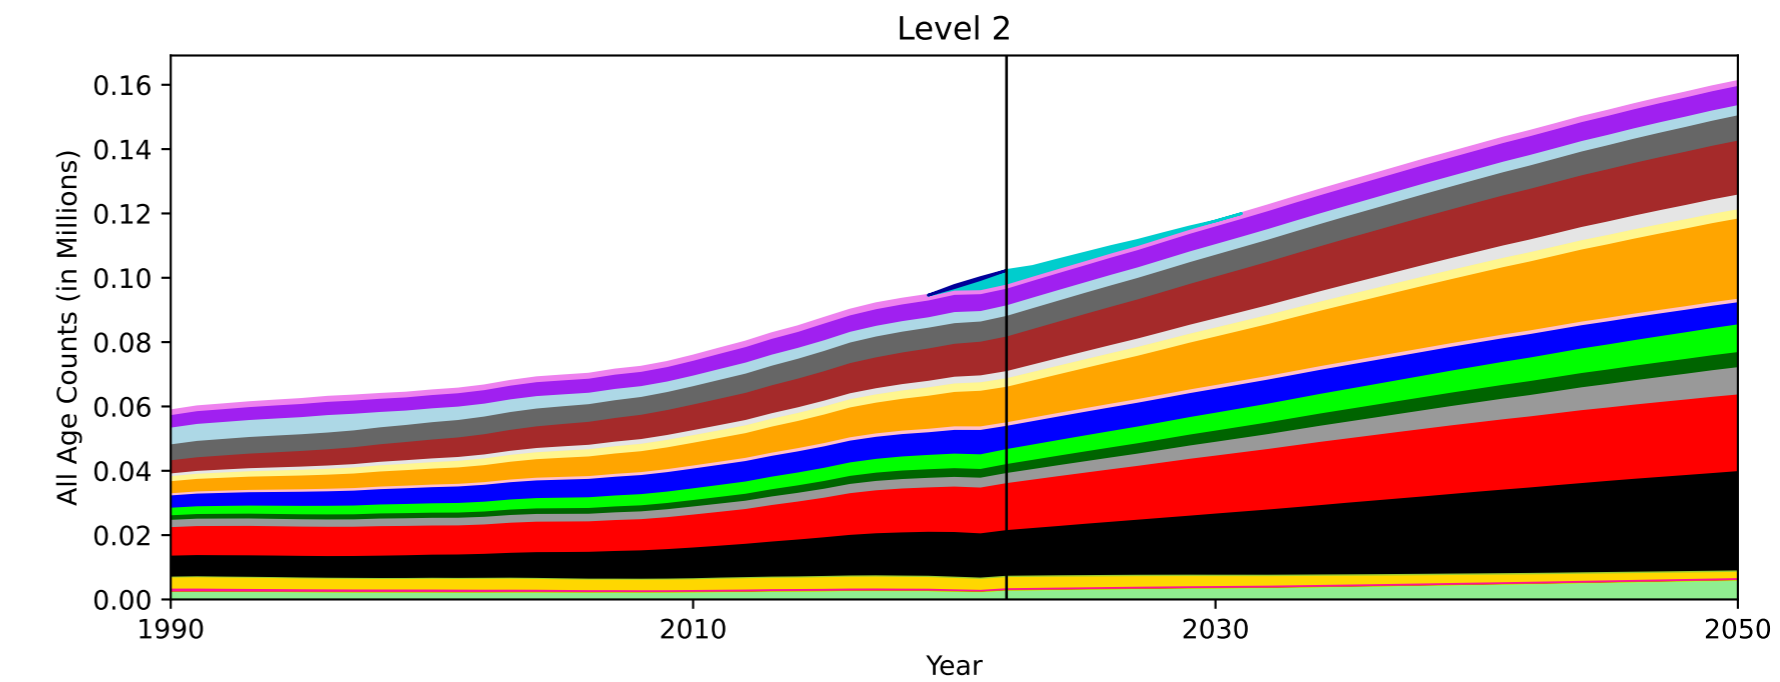

Level 1

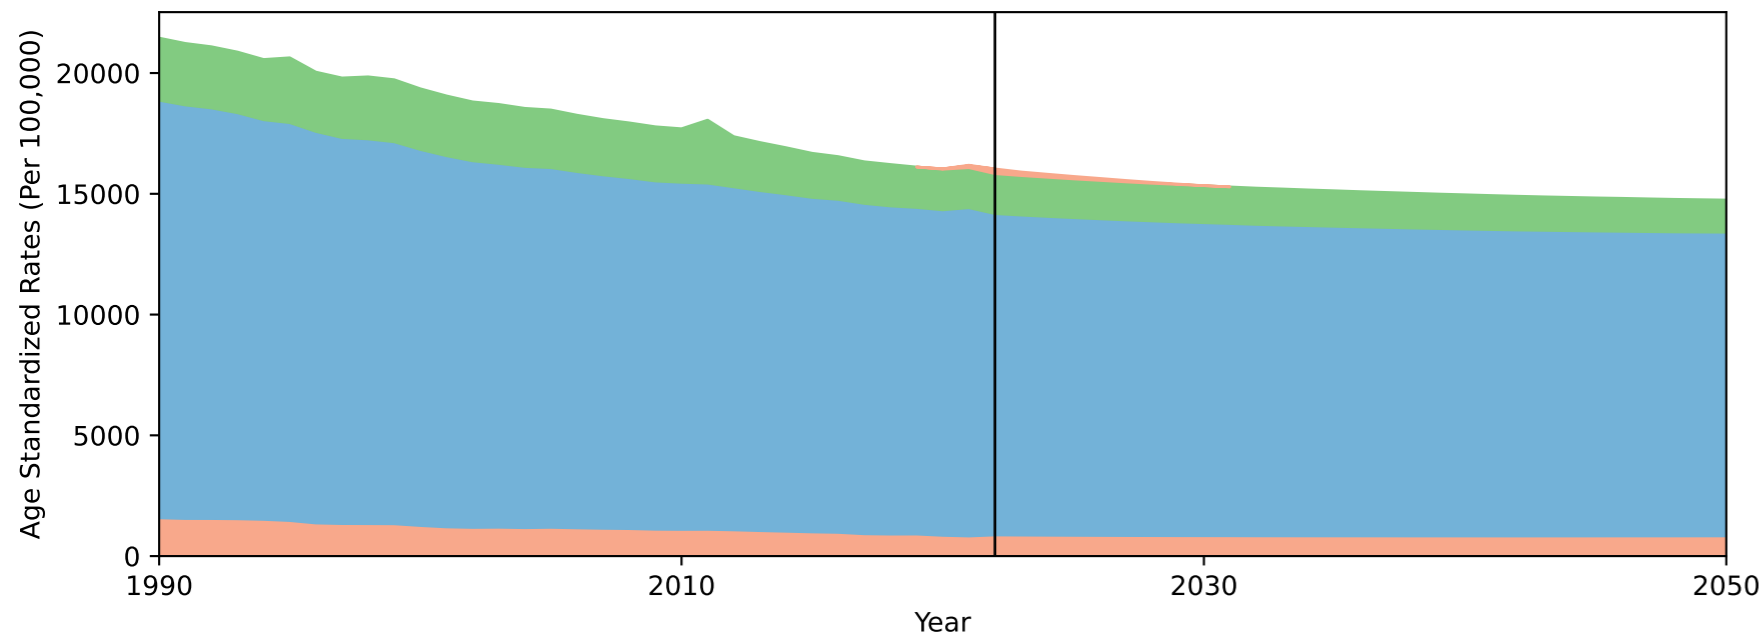

Level 2

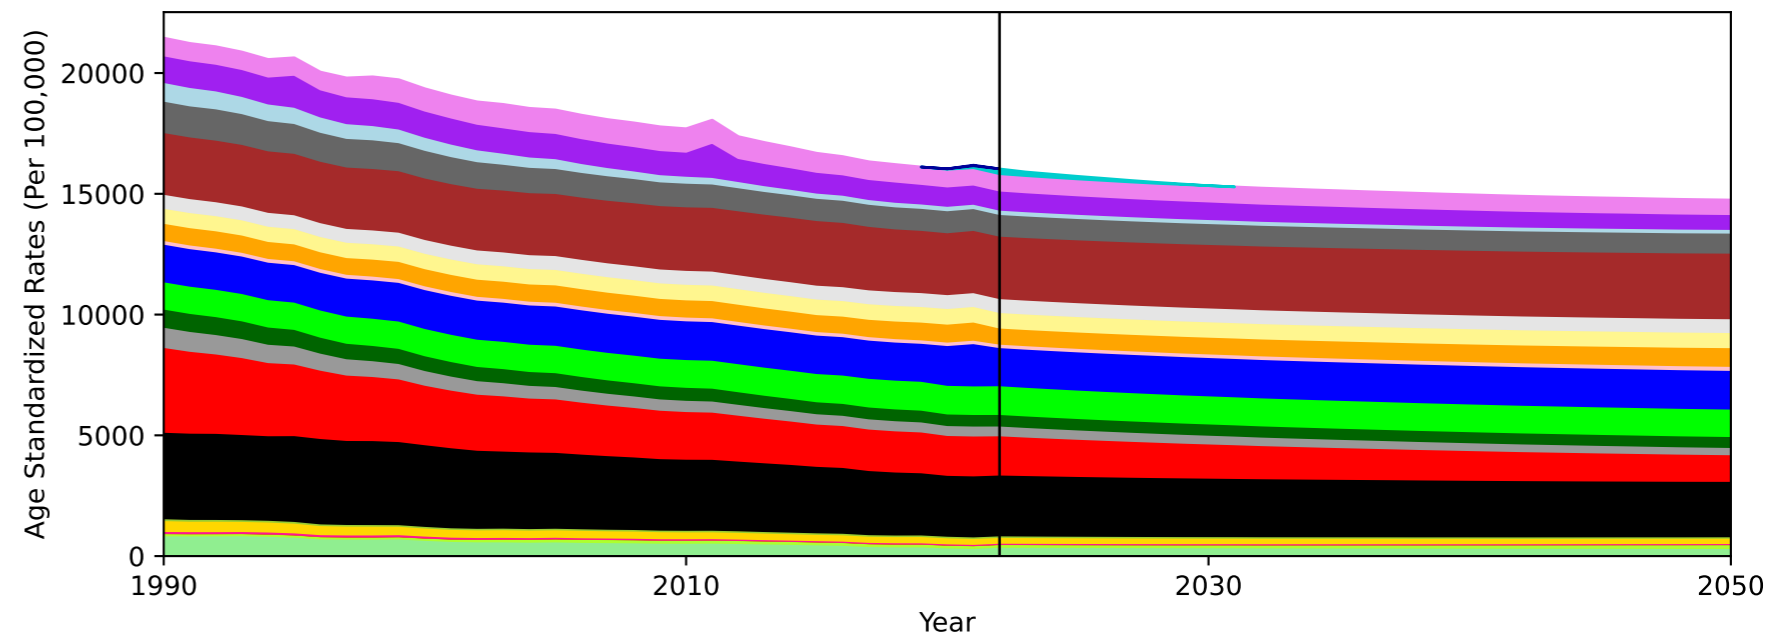

Level 1

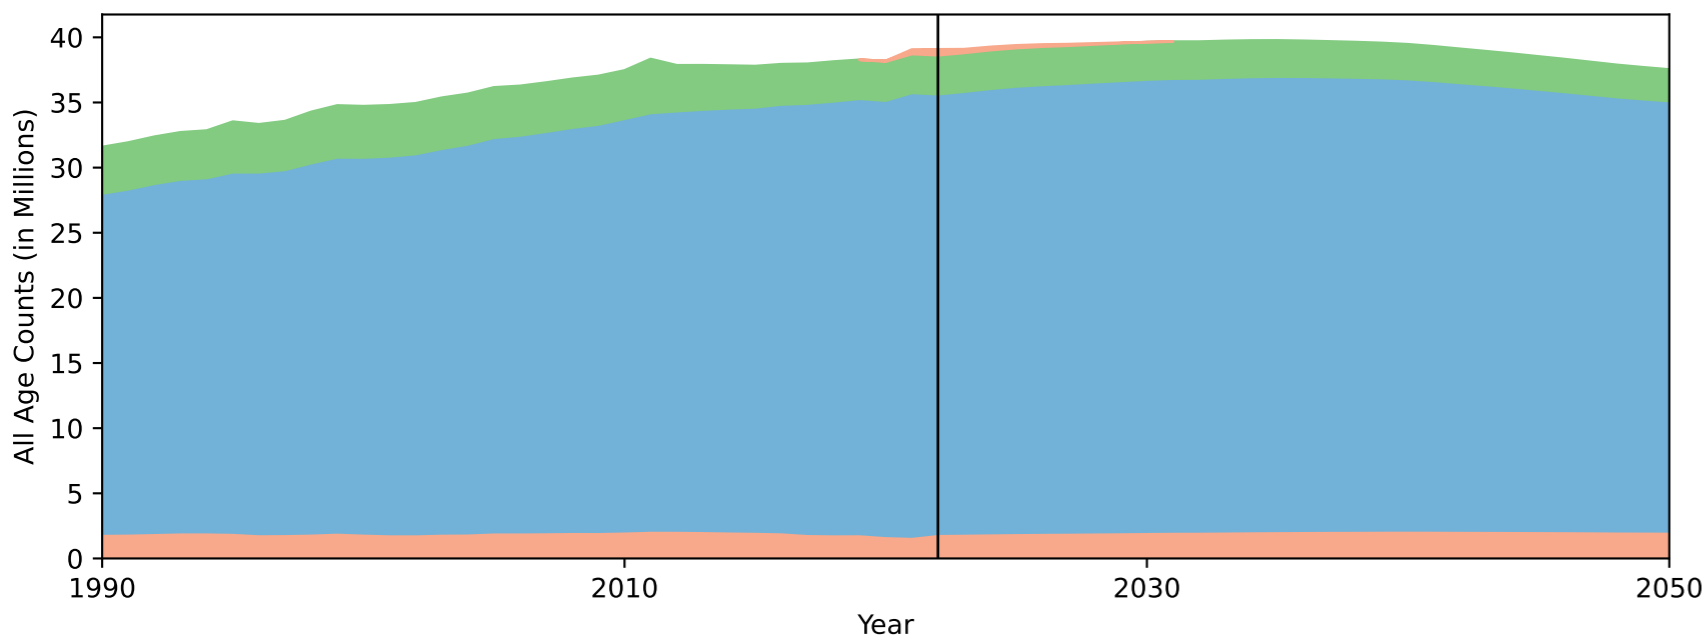

Level 2

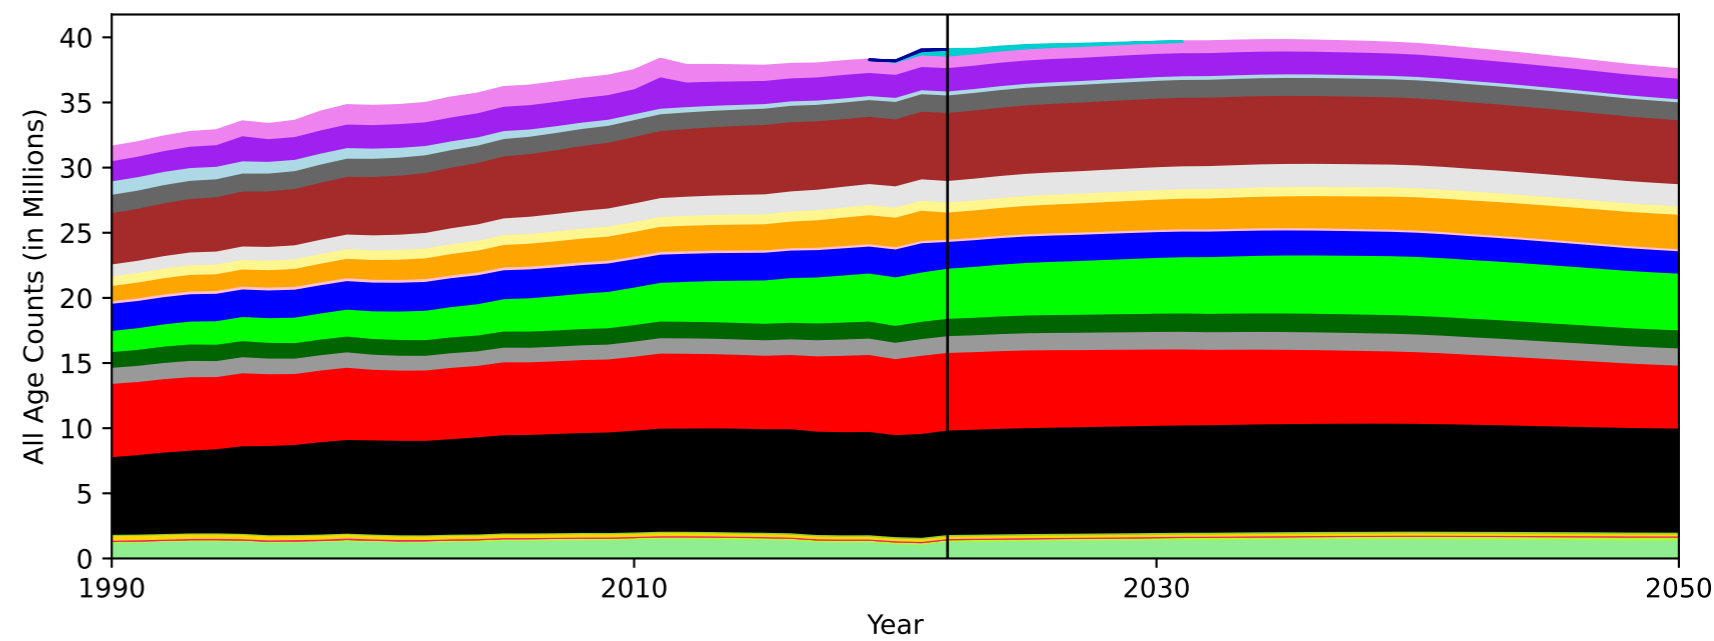

# South Korea

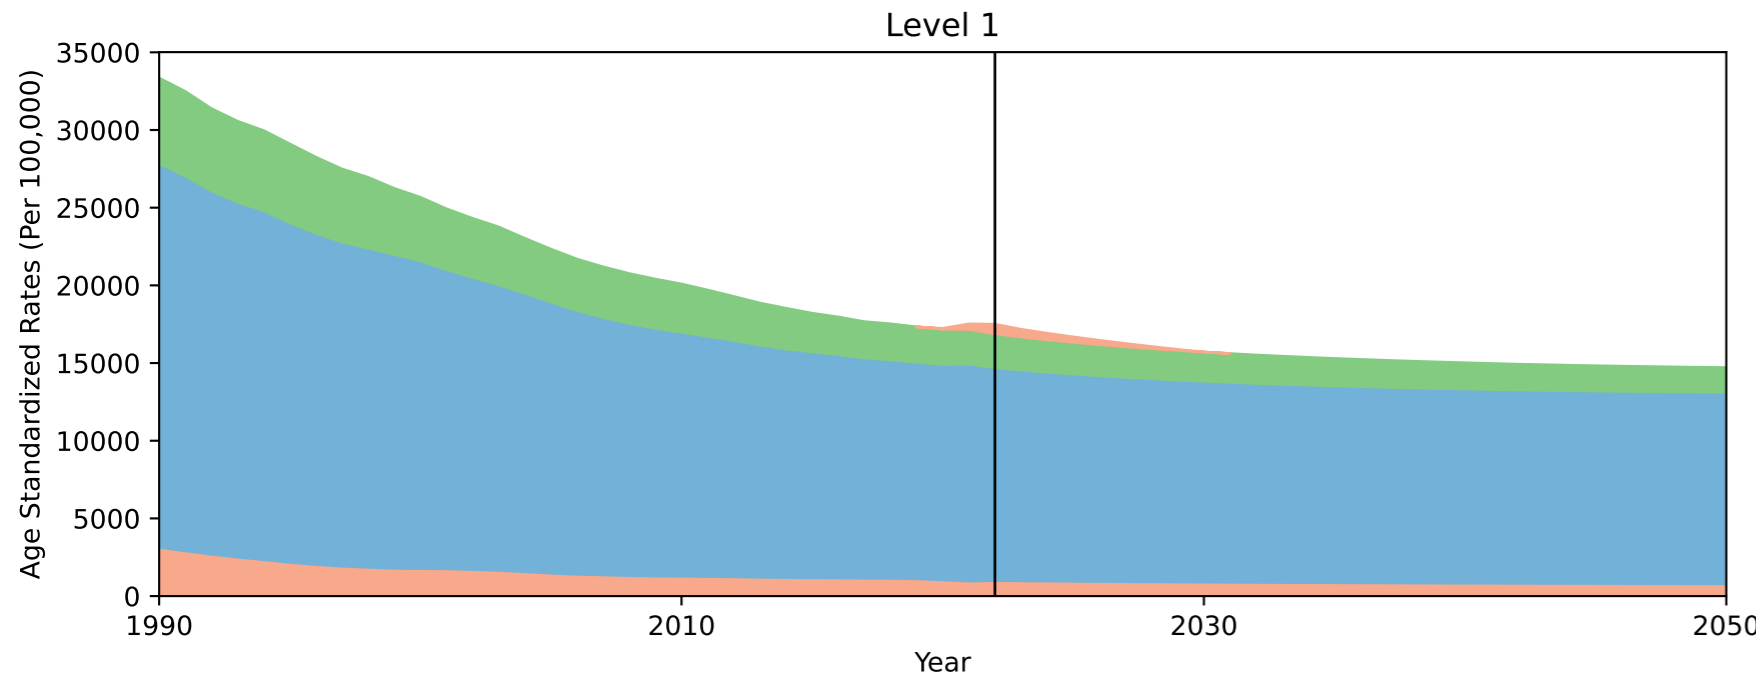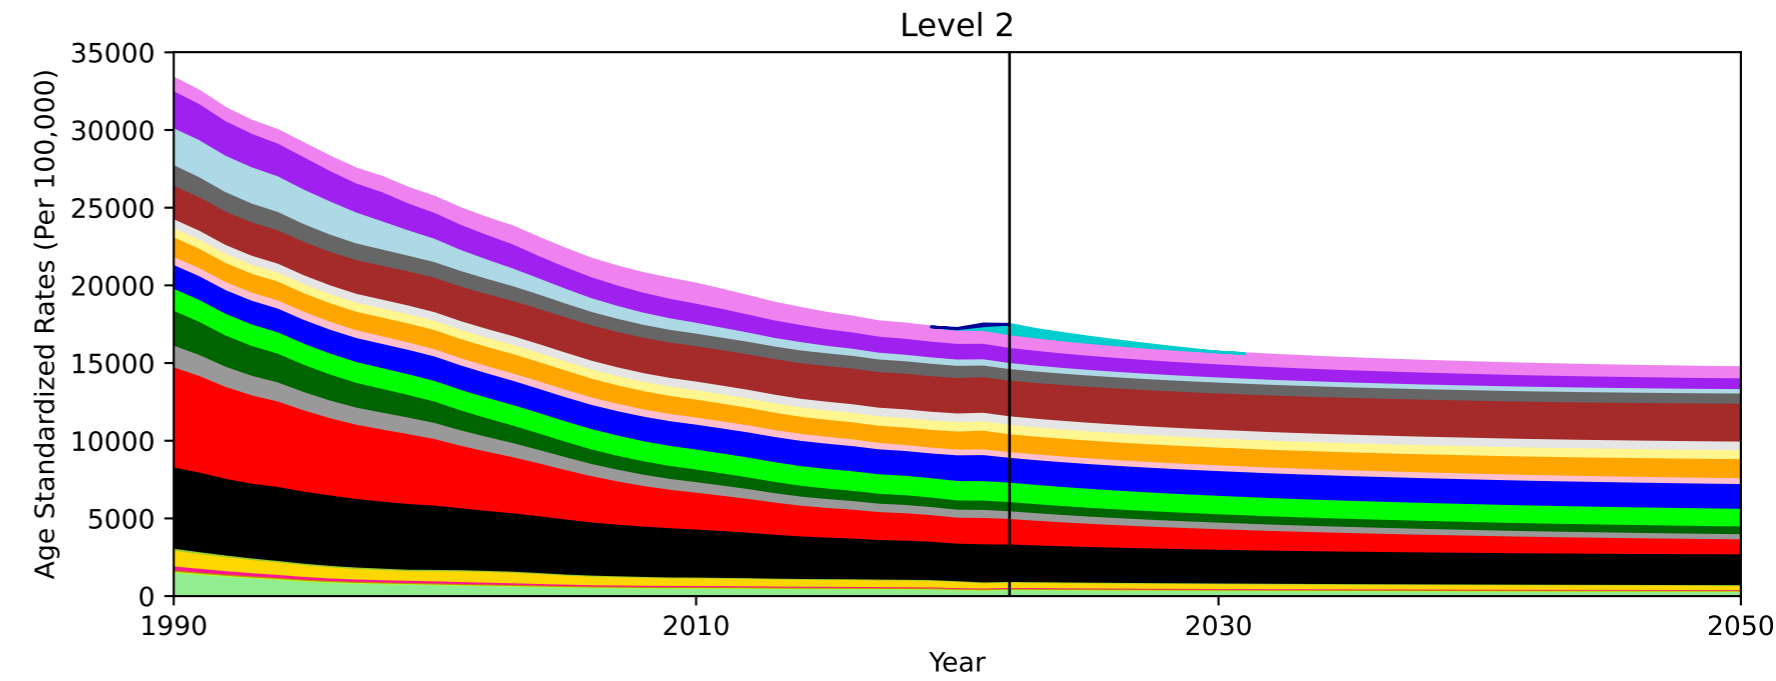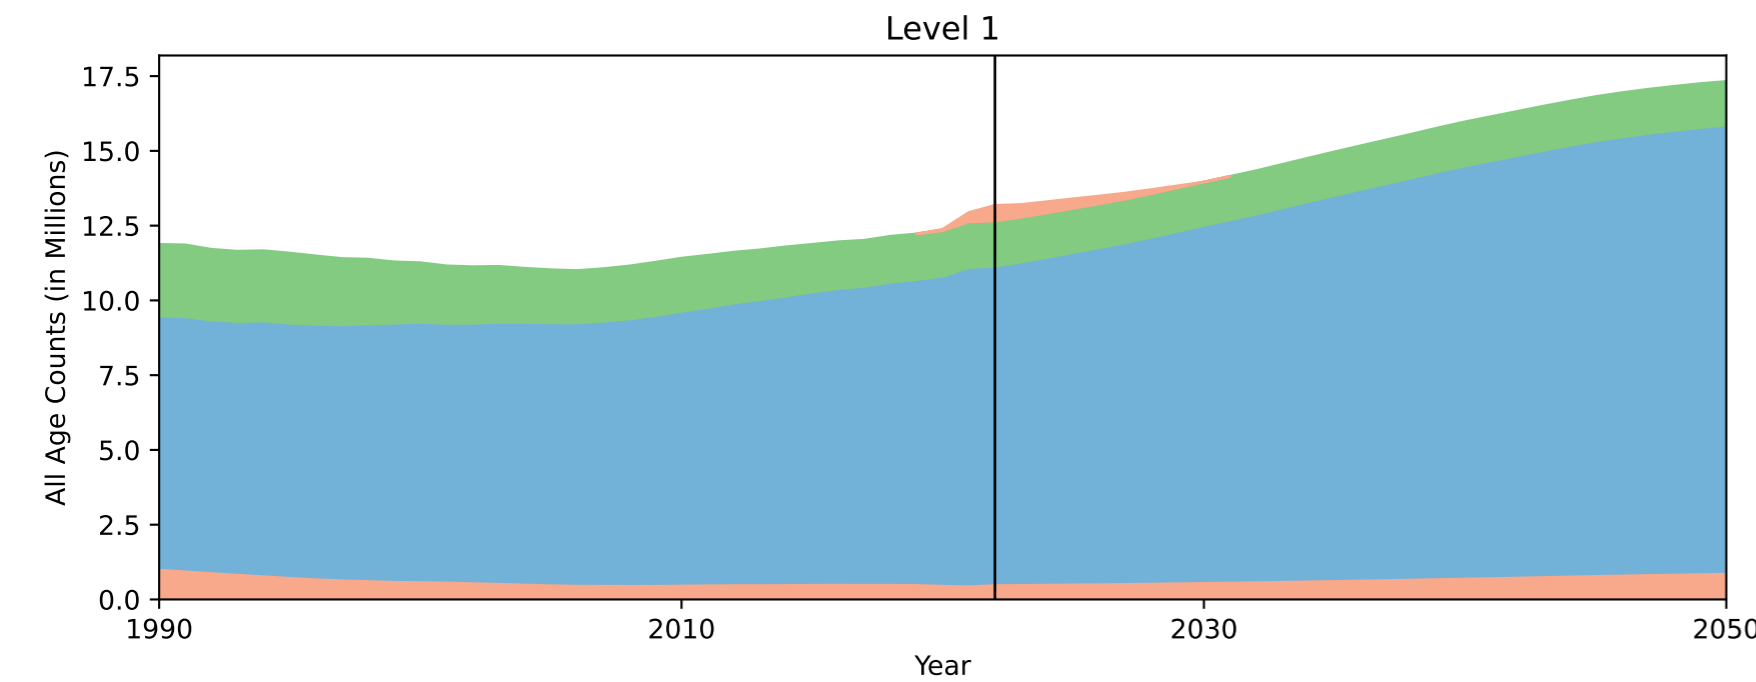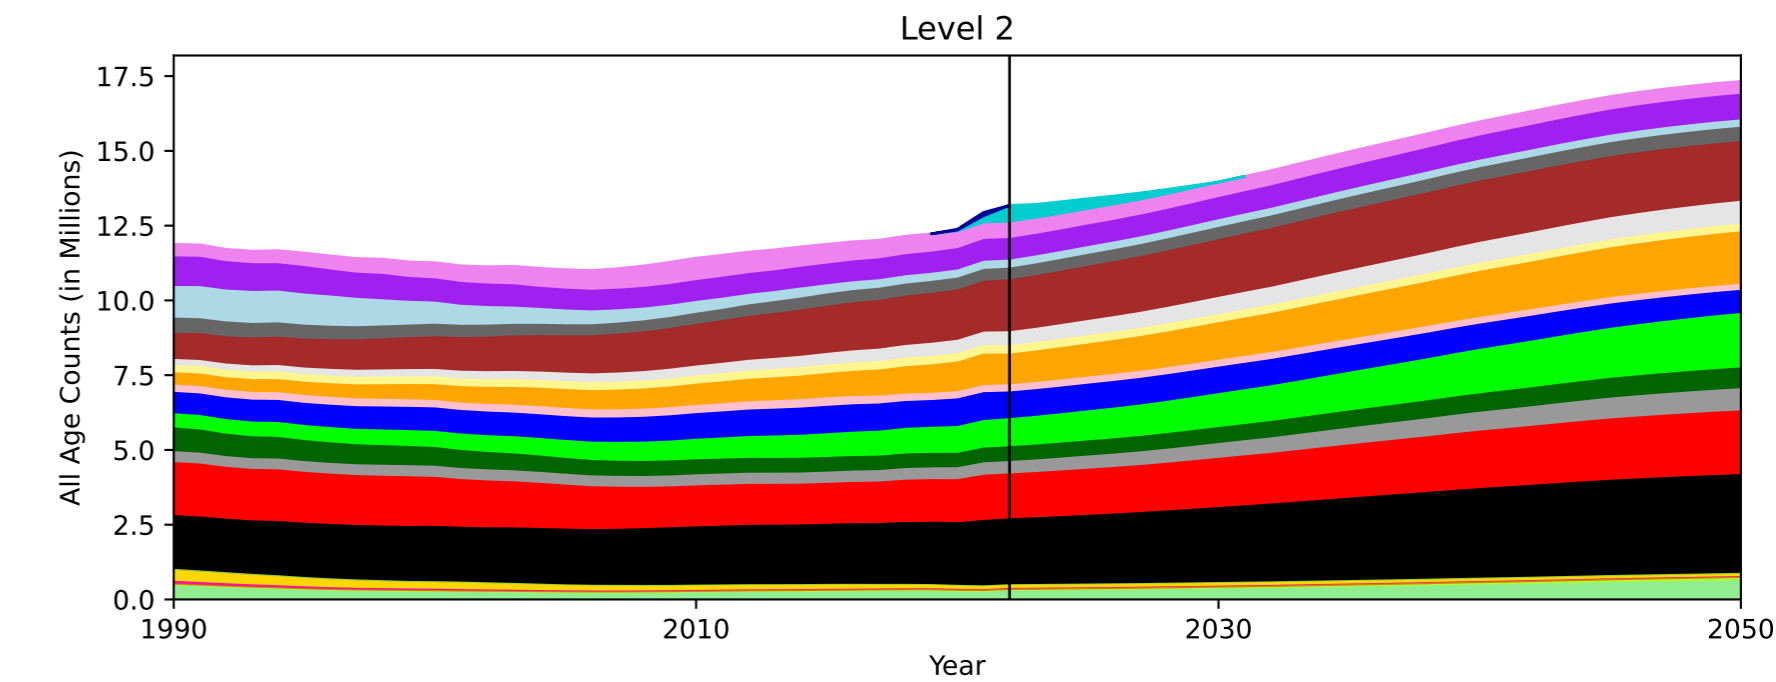

# Singapore

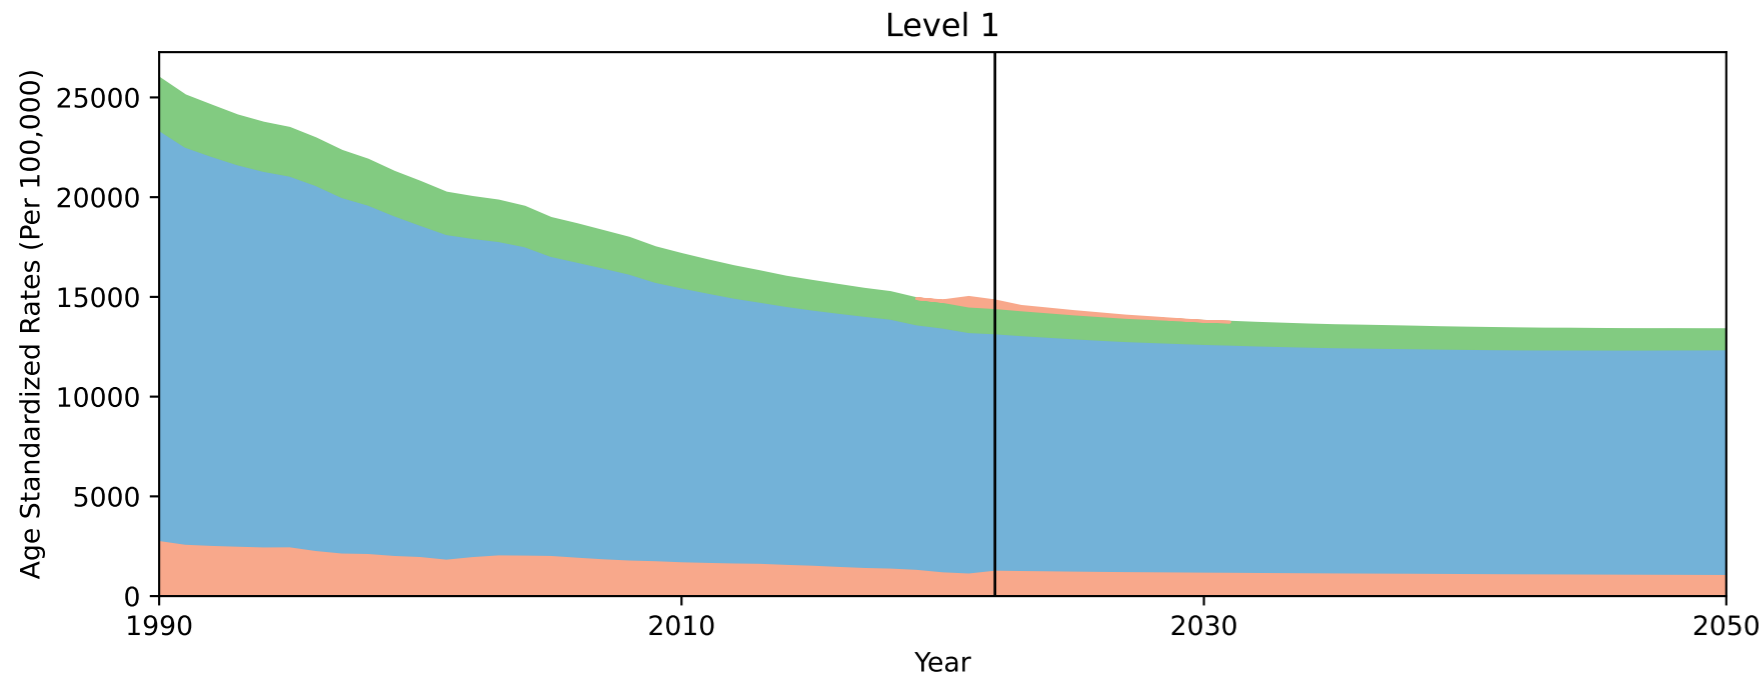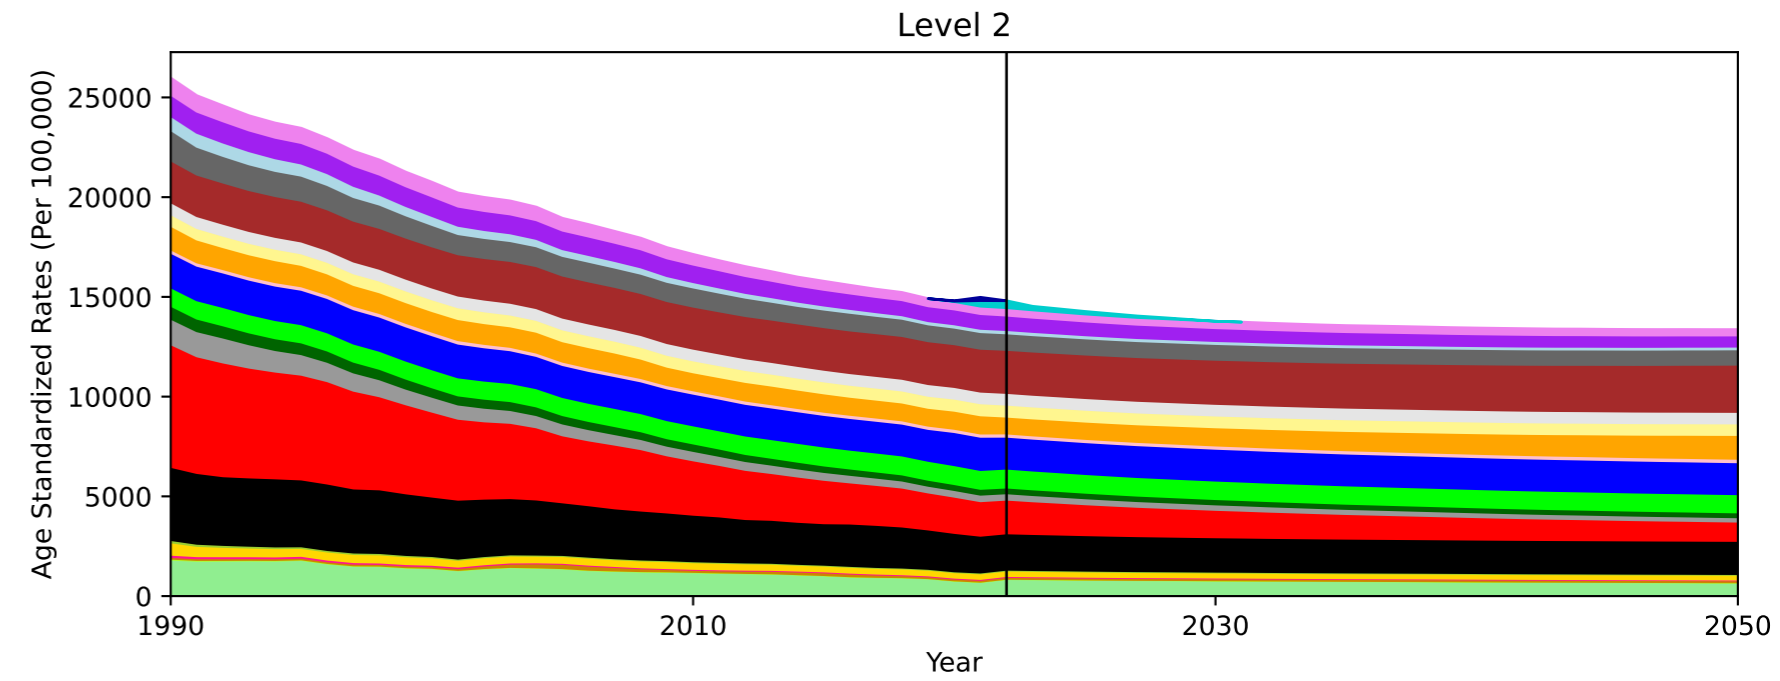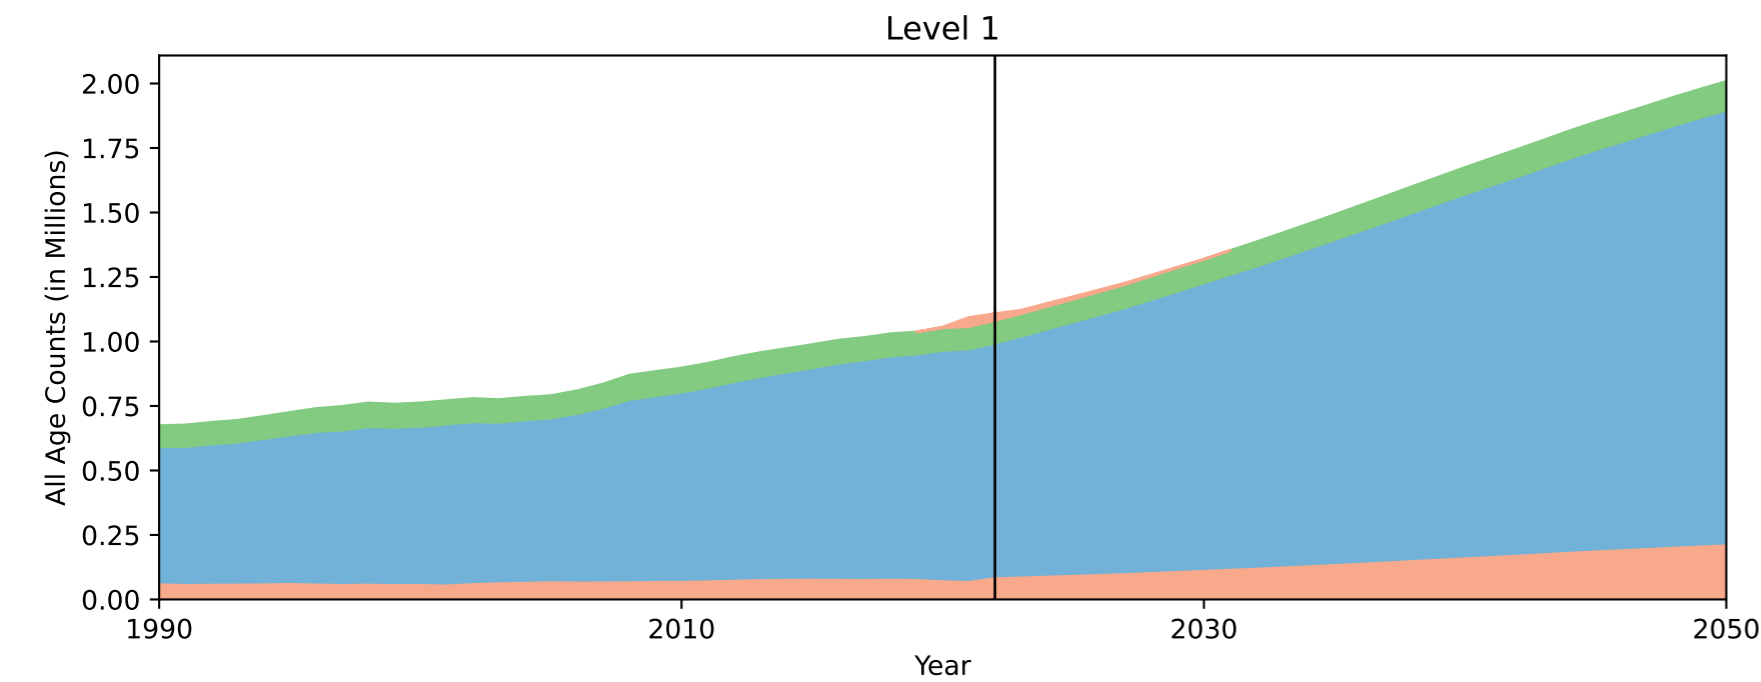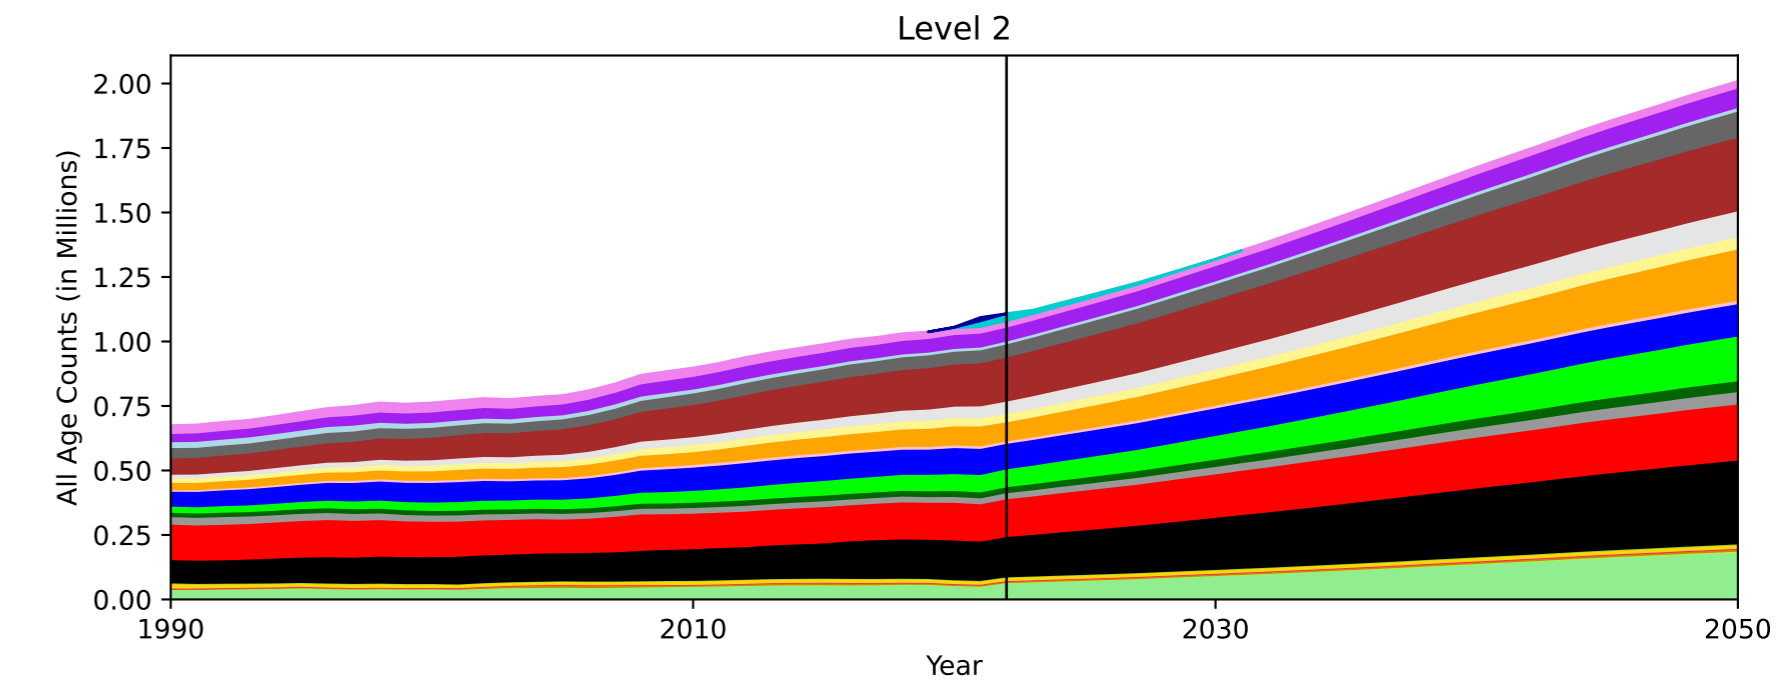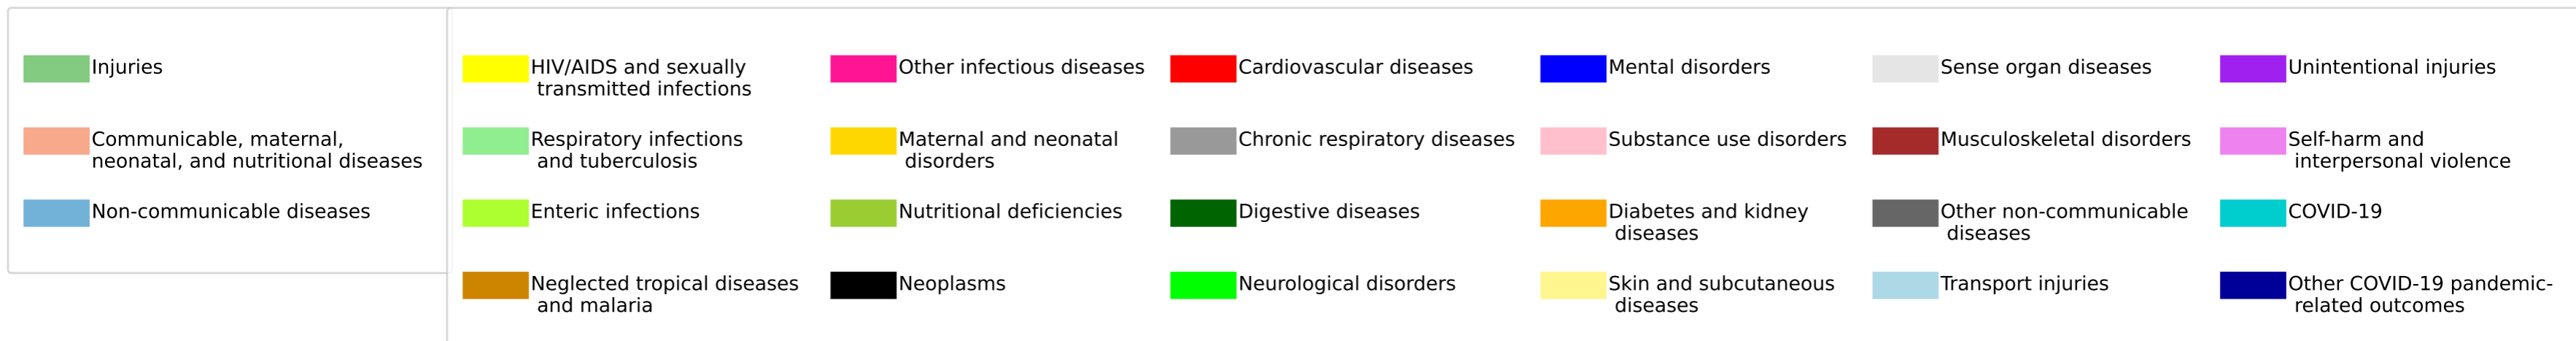



# Canada

Level 1

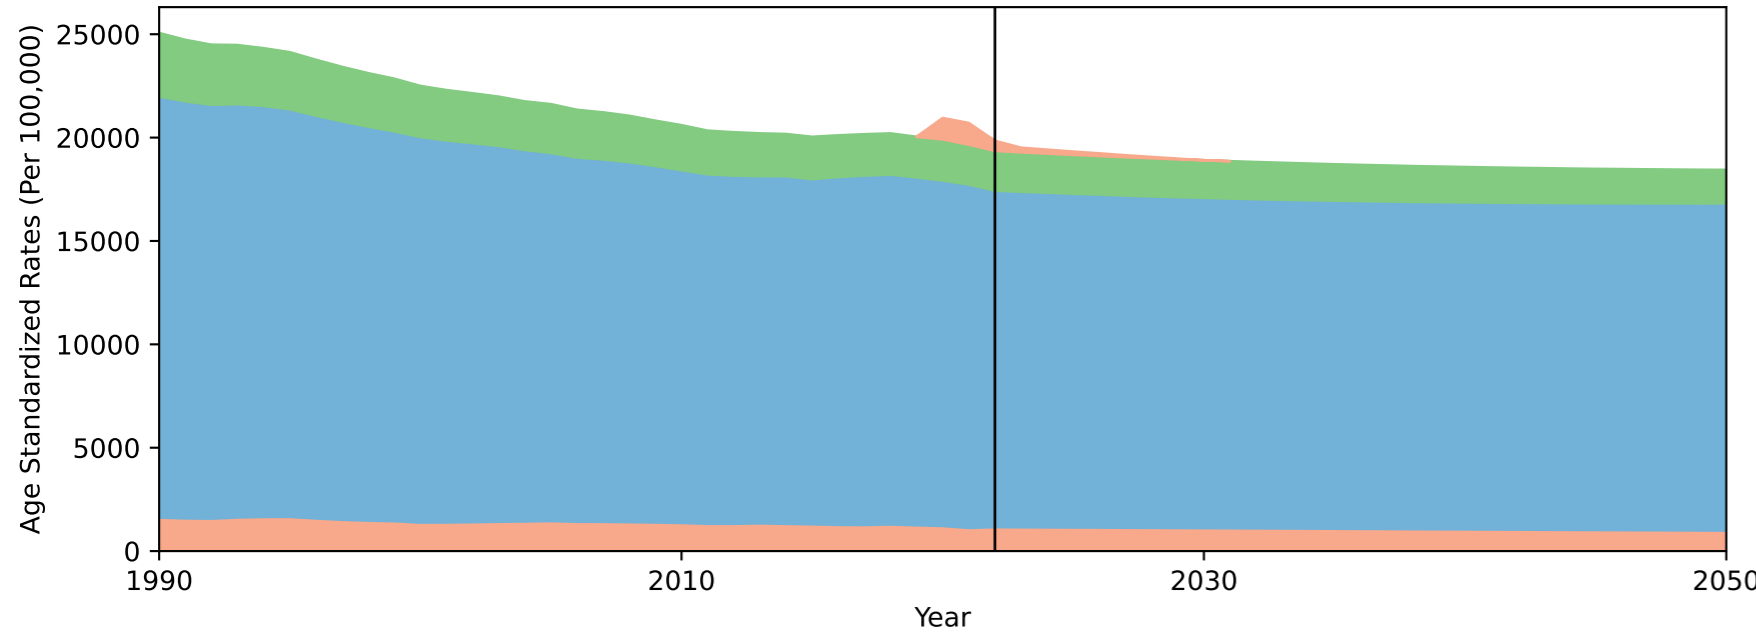

Level 2

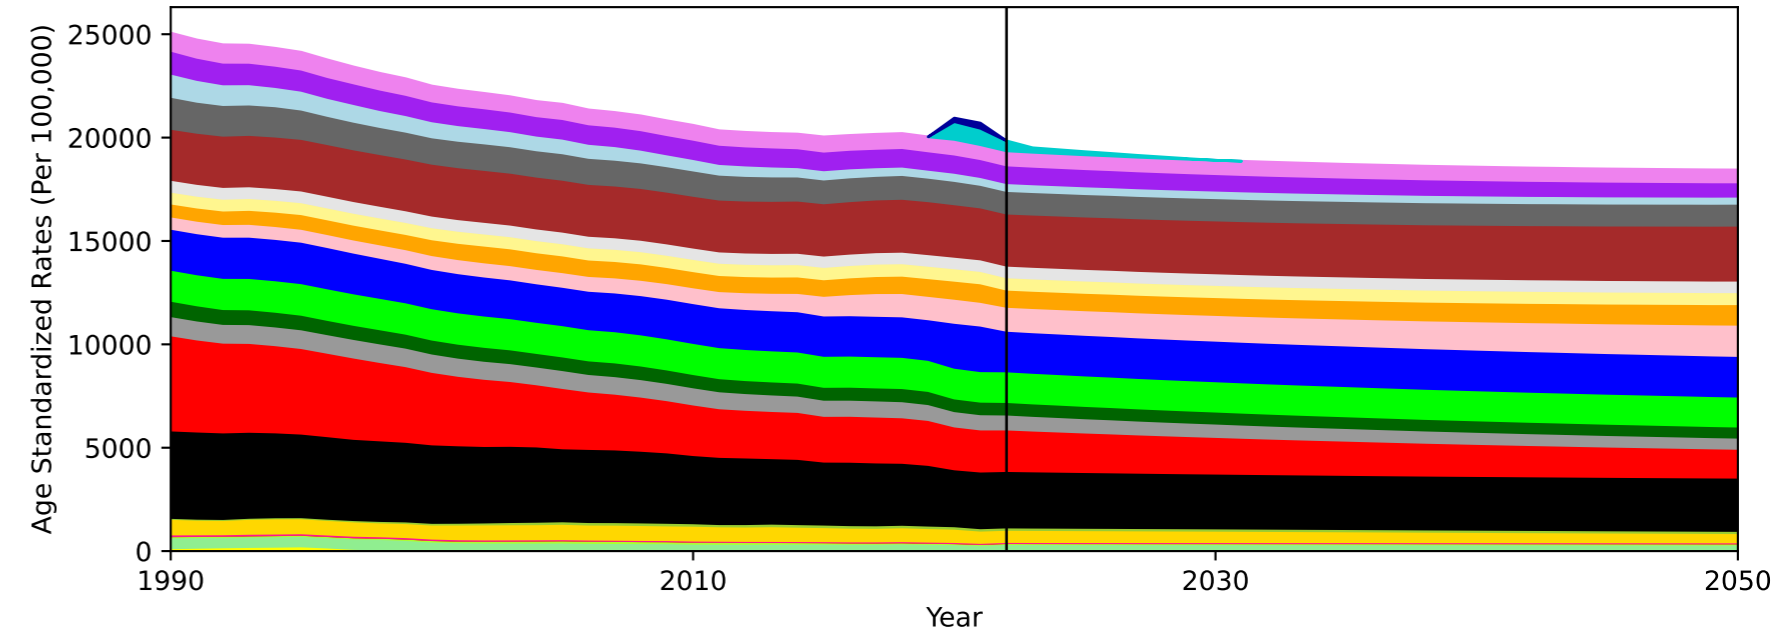

Level 1

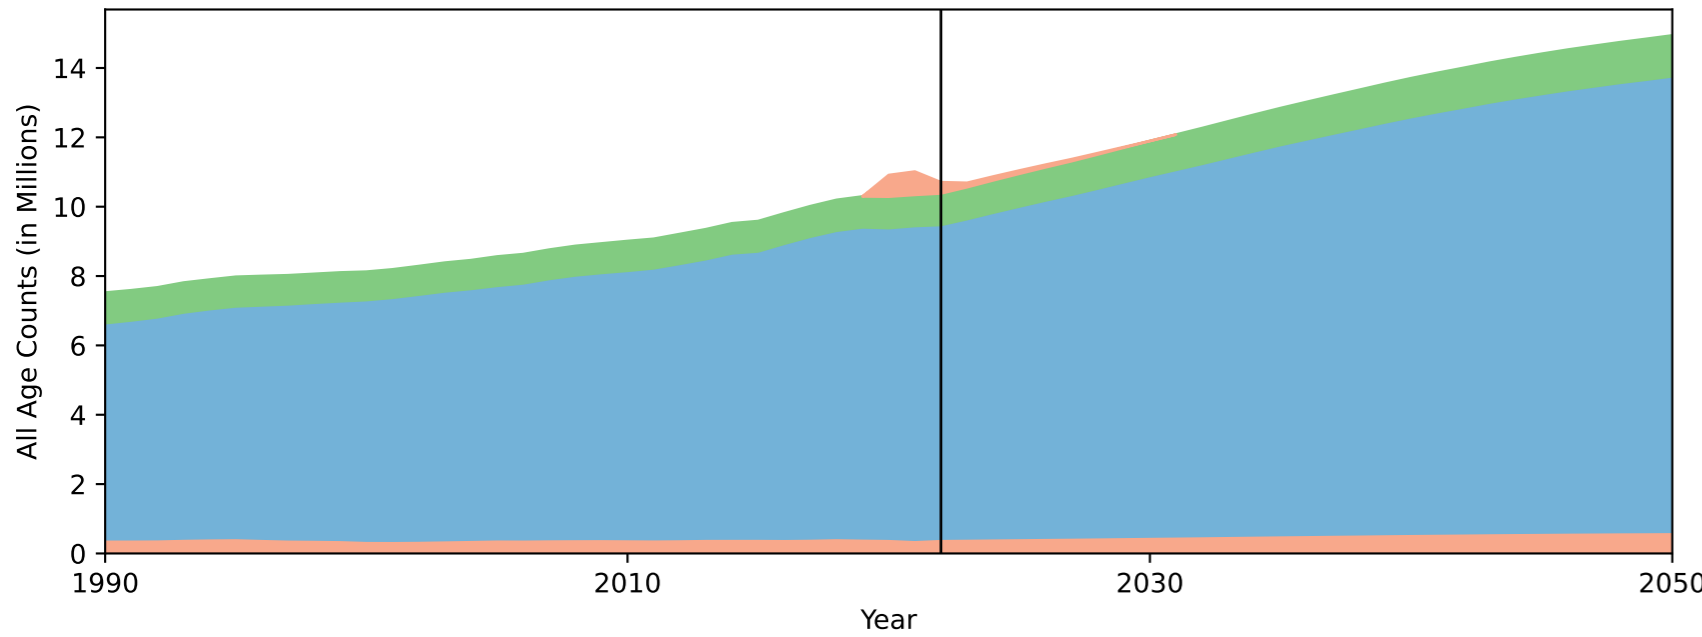

Level 2

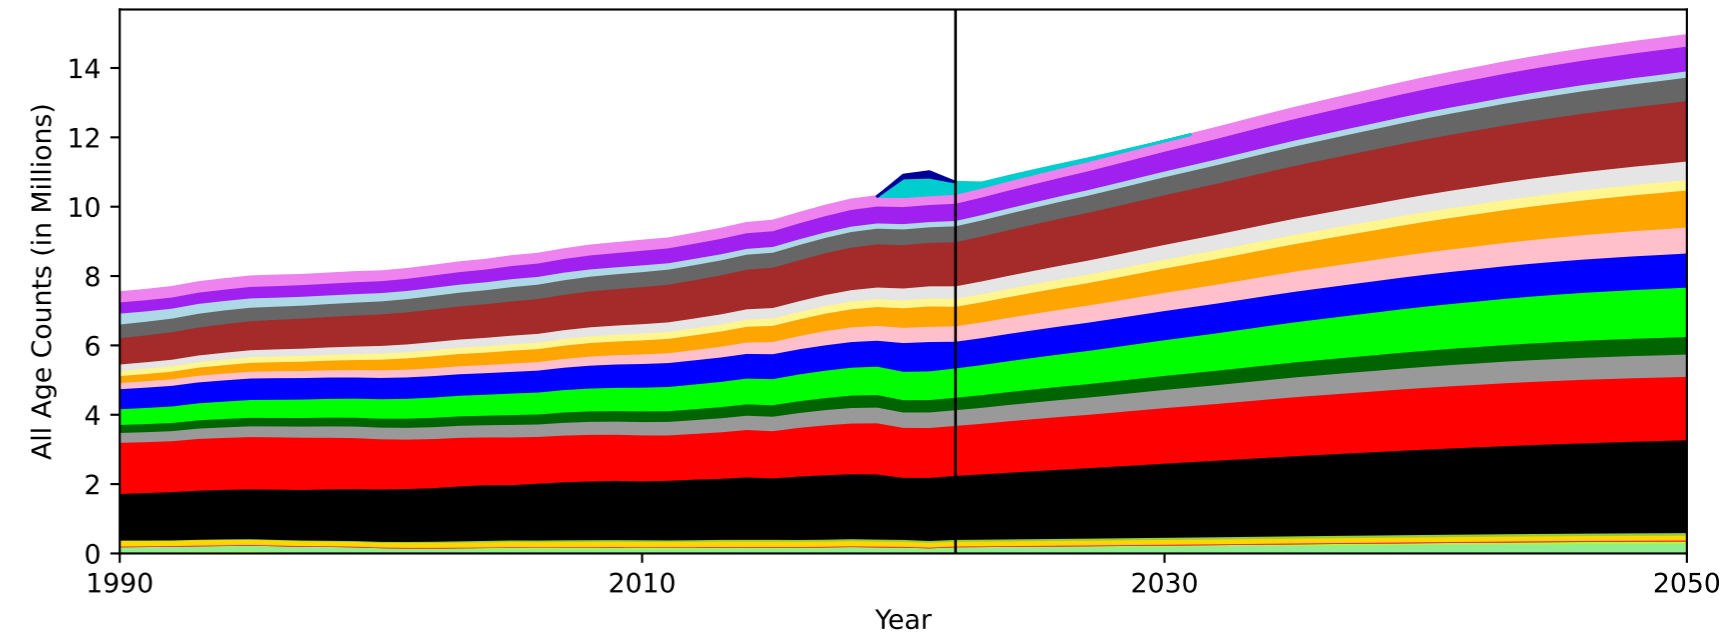

# Greenland

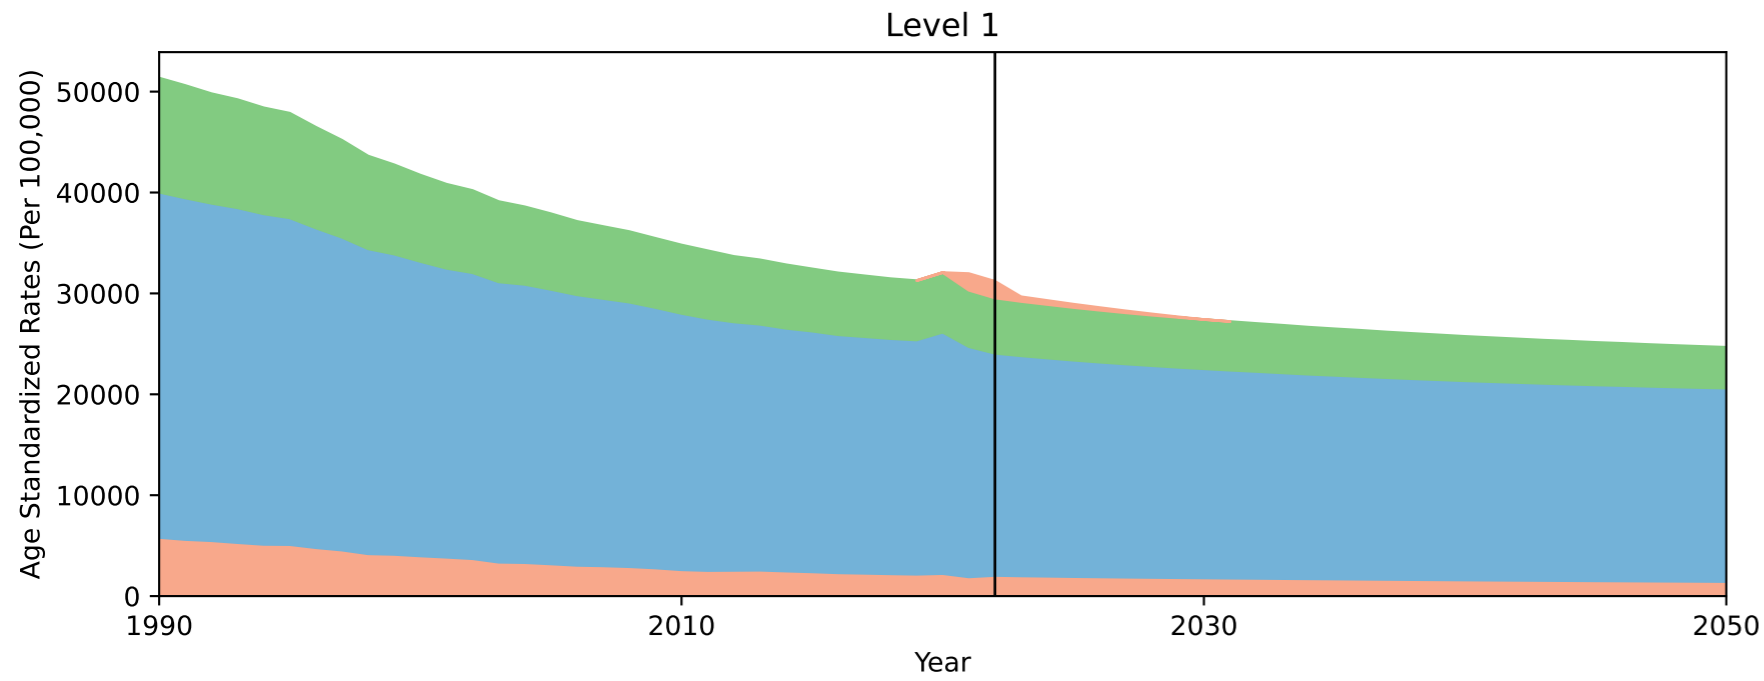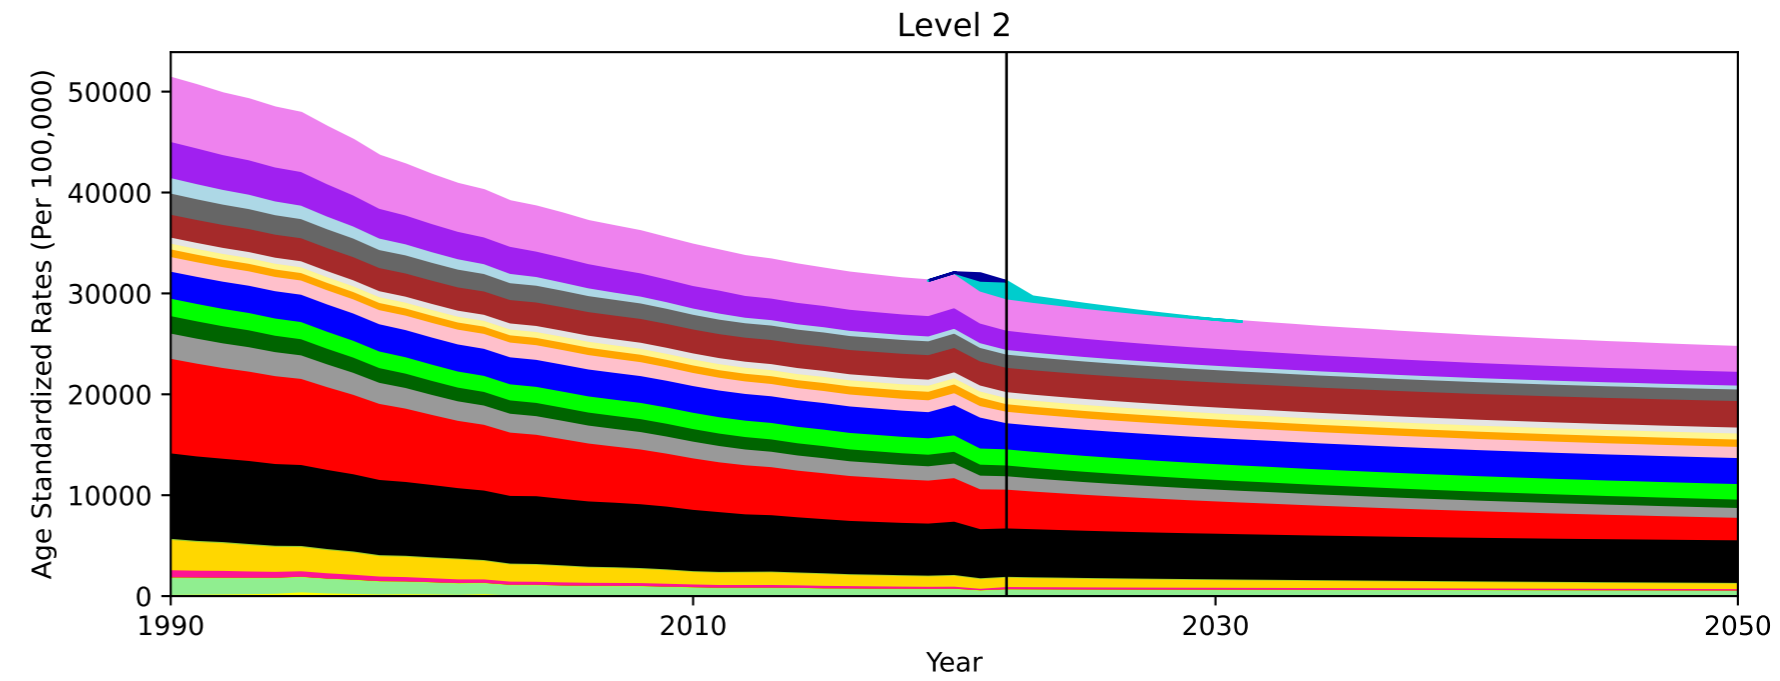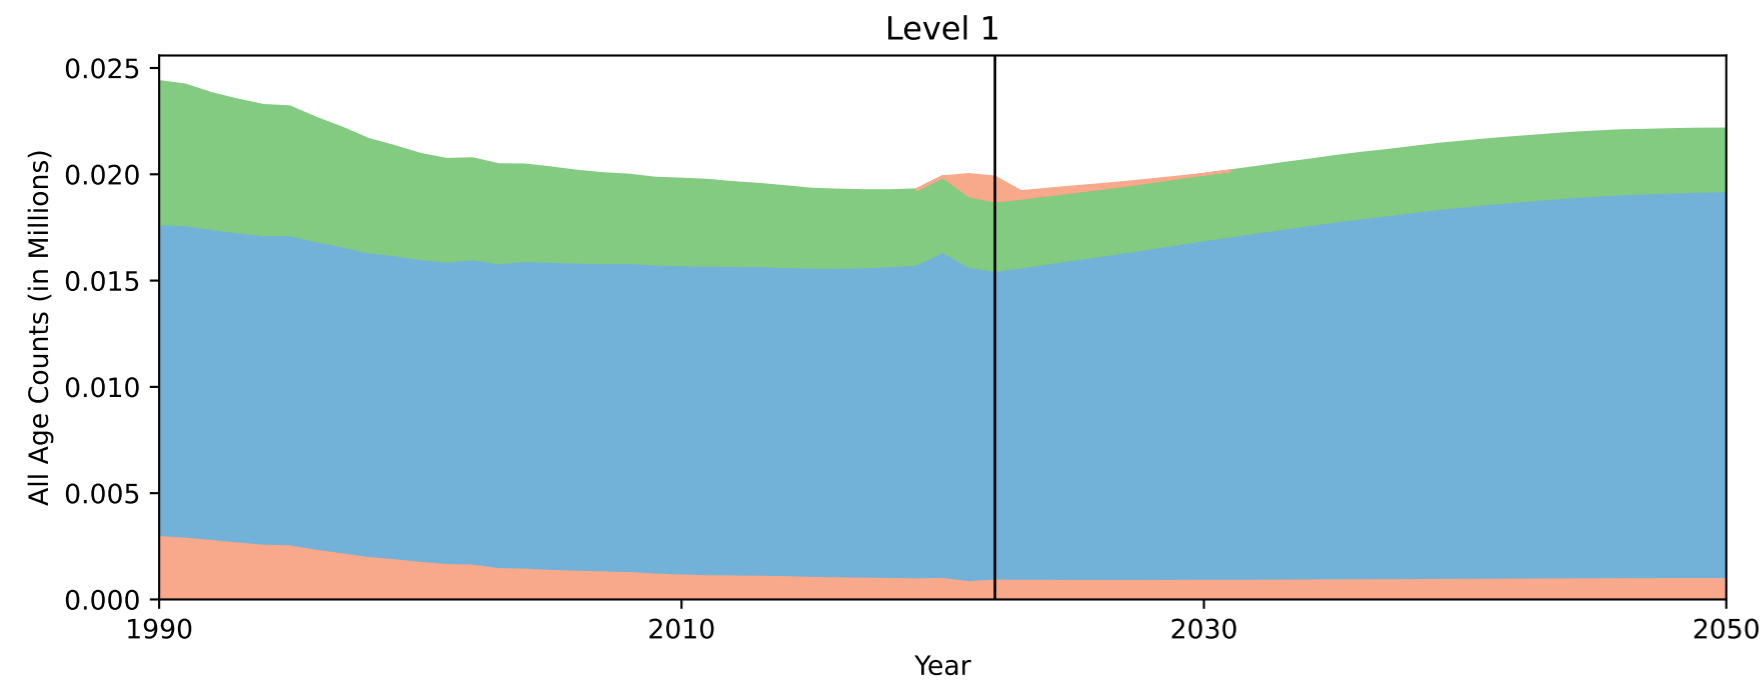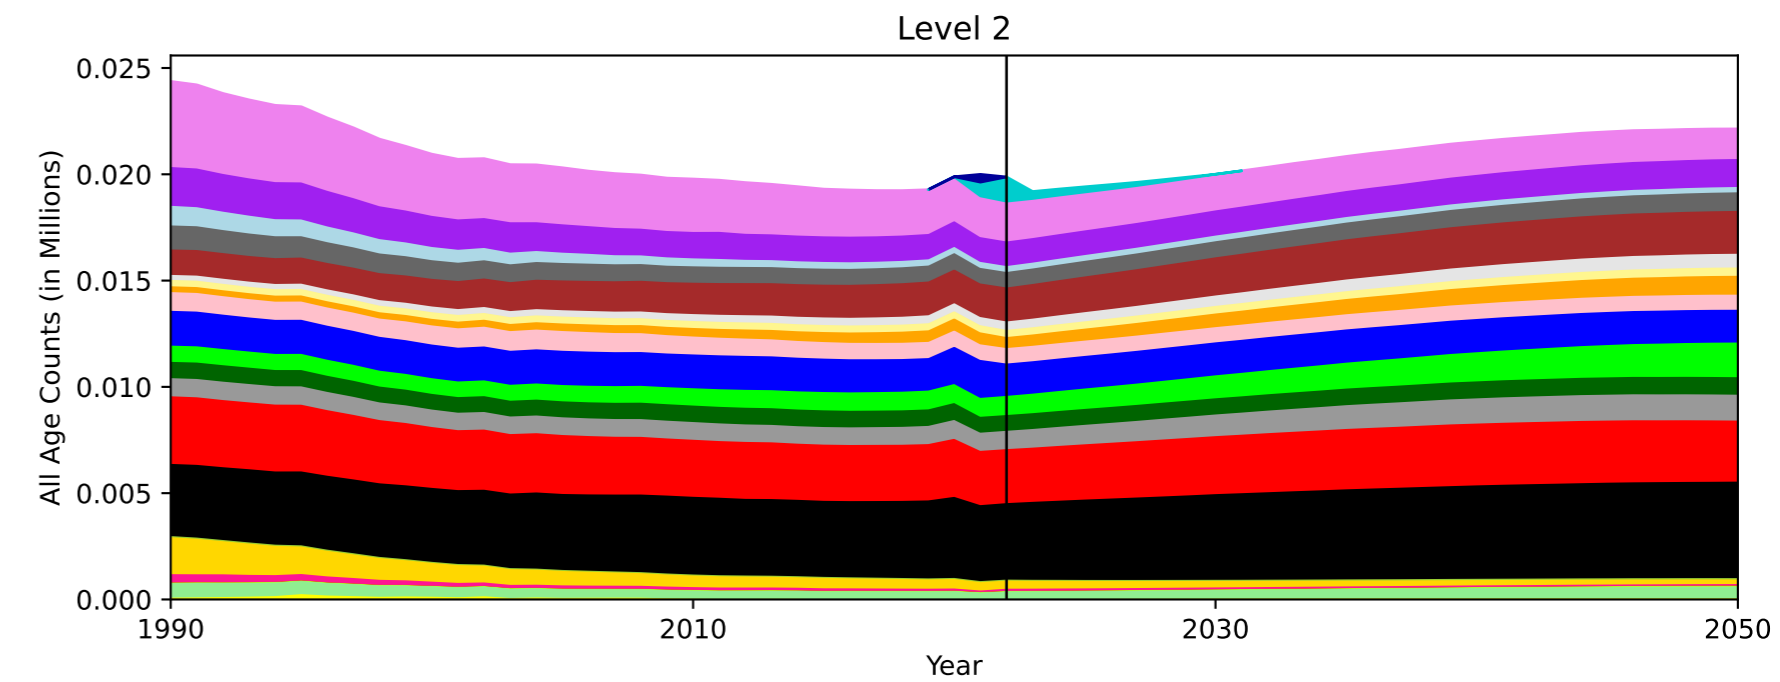

# USA

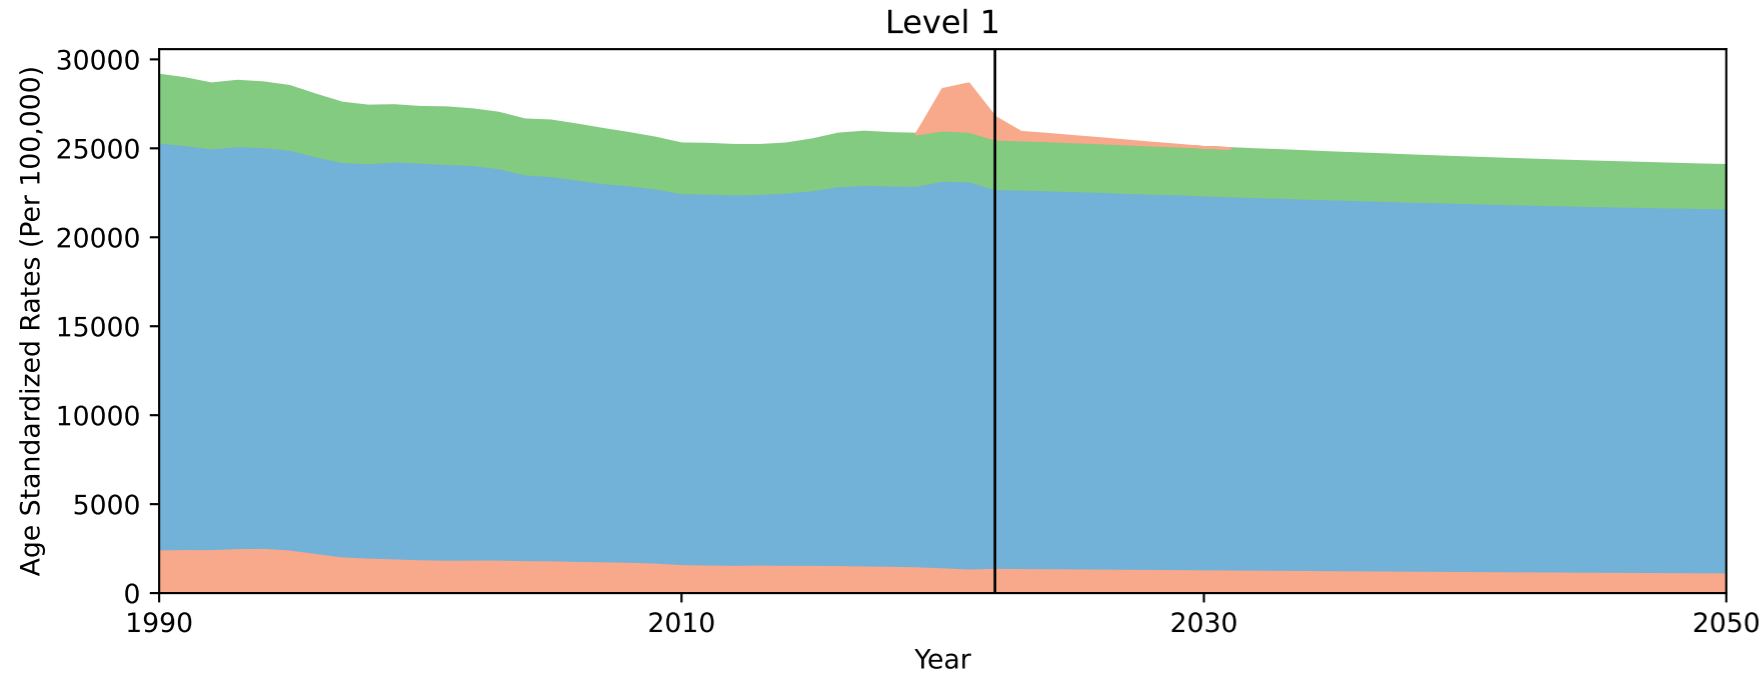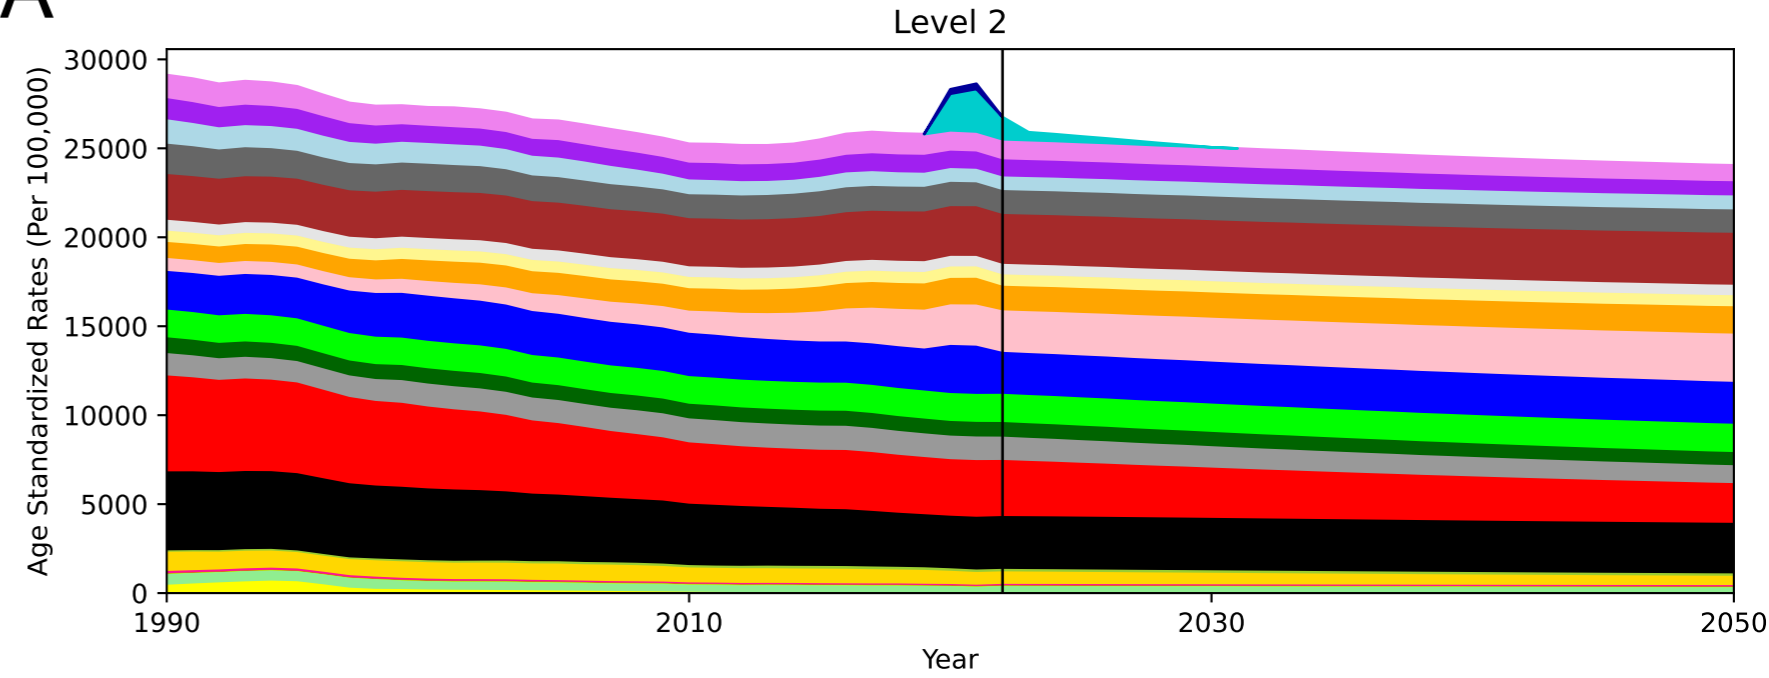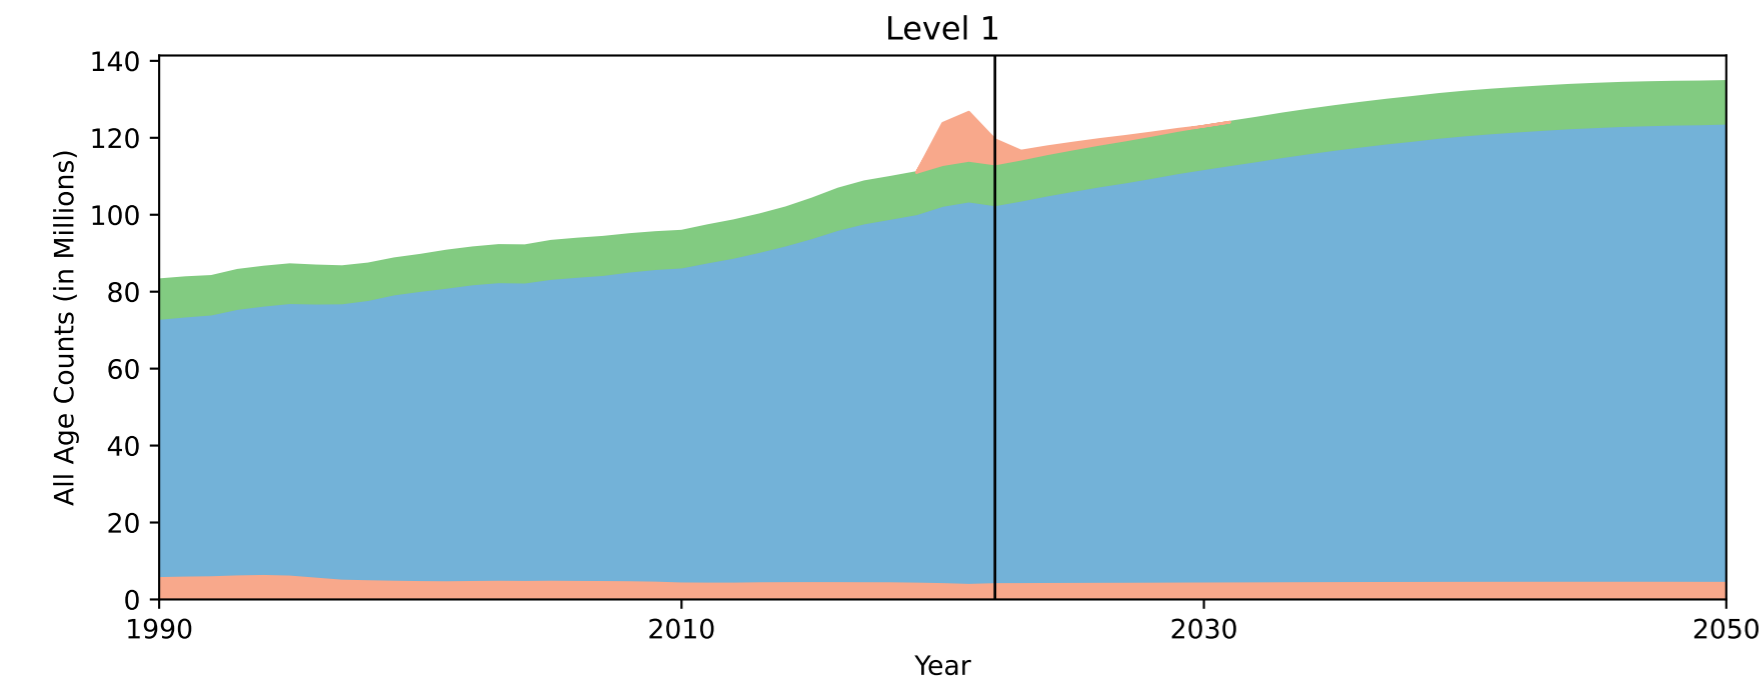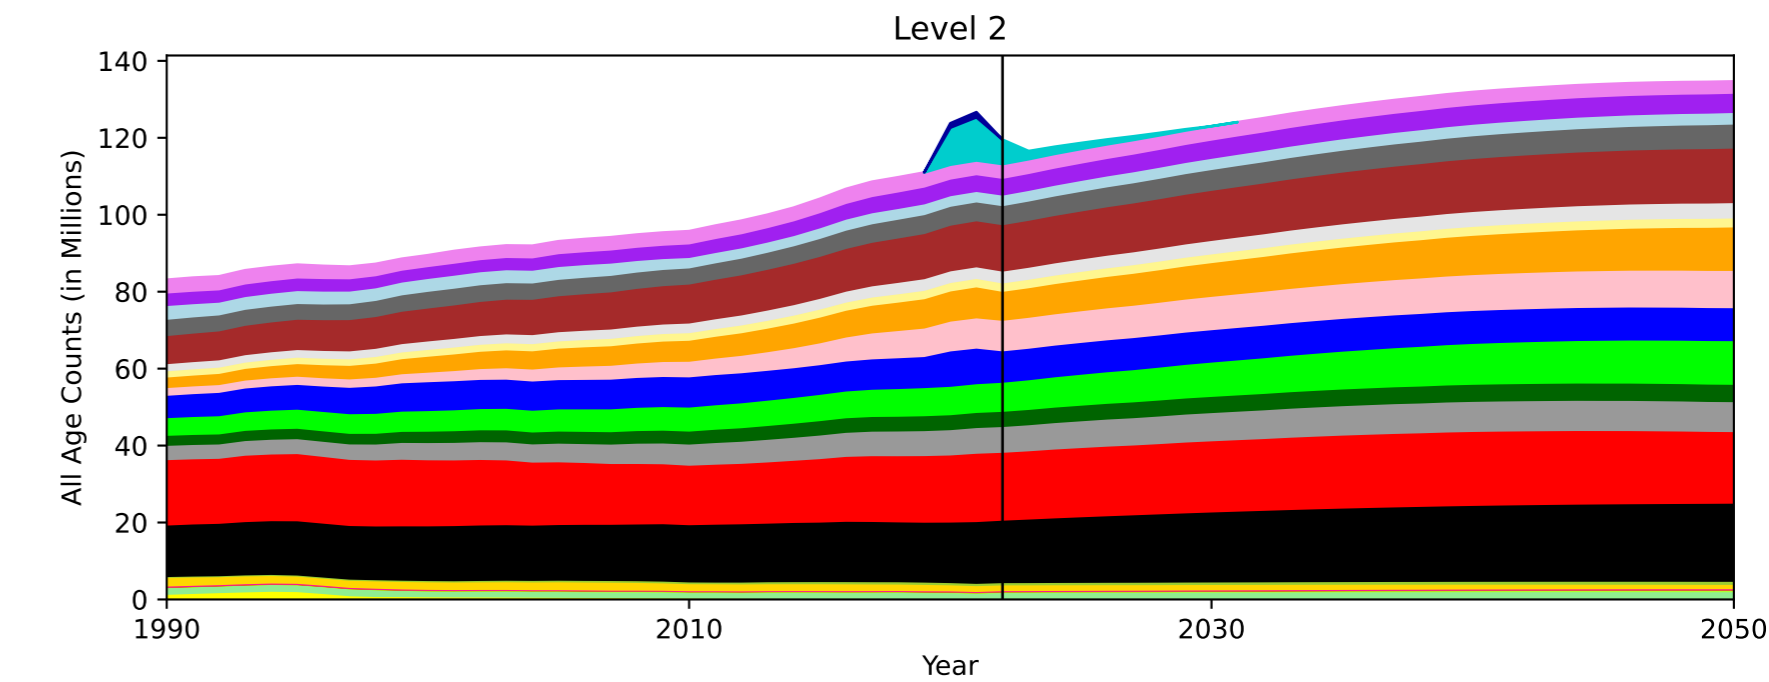

# Argentina

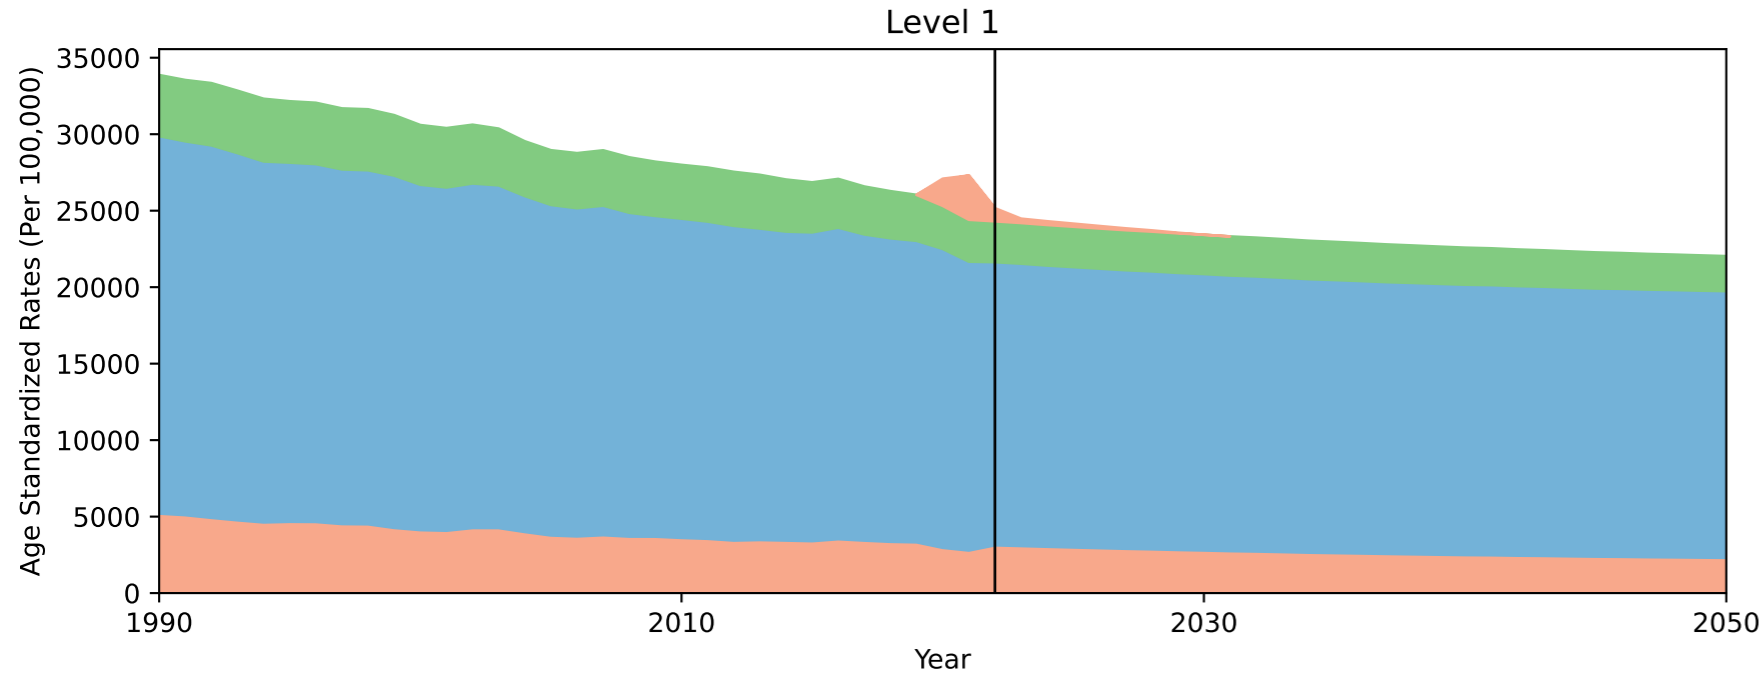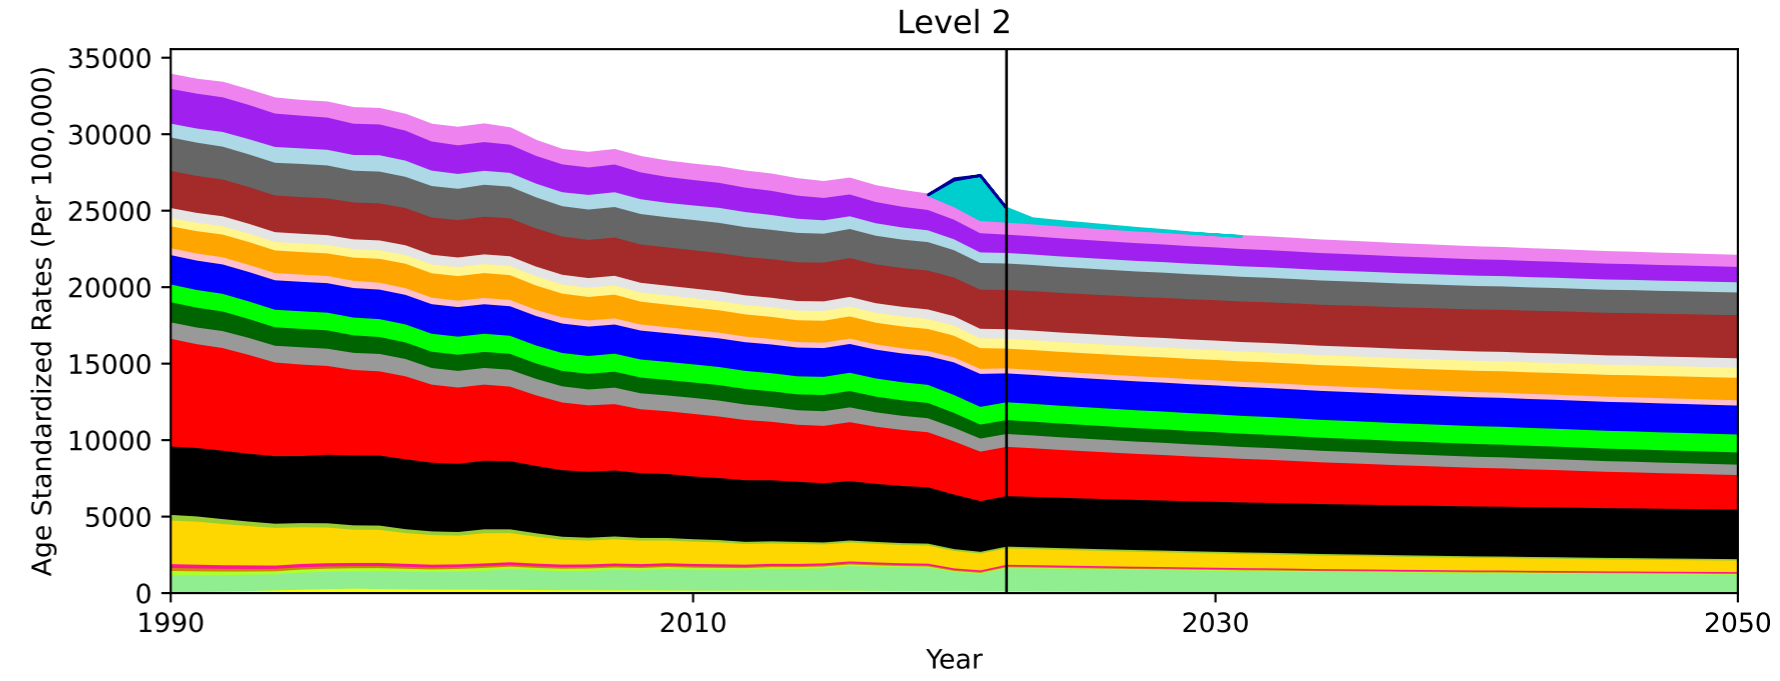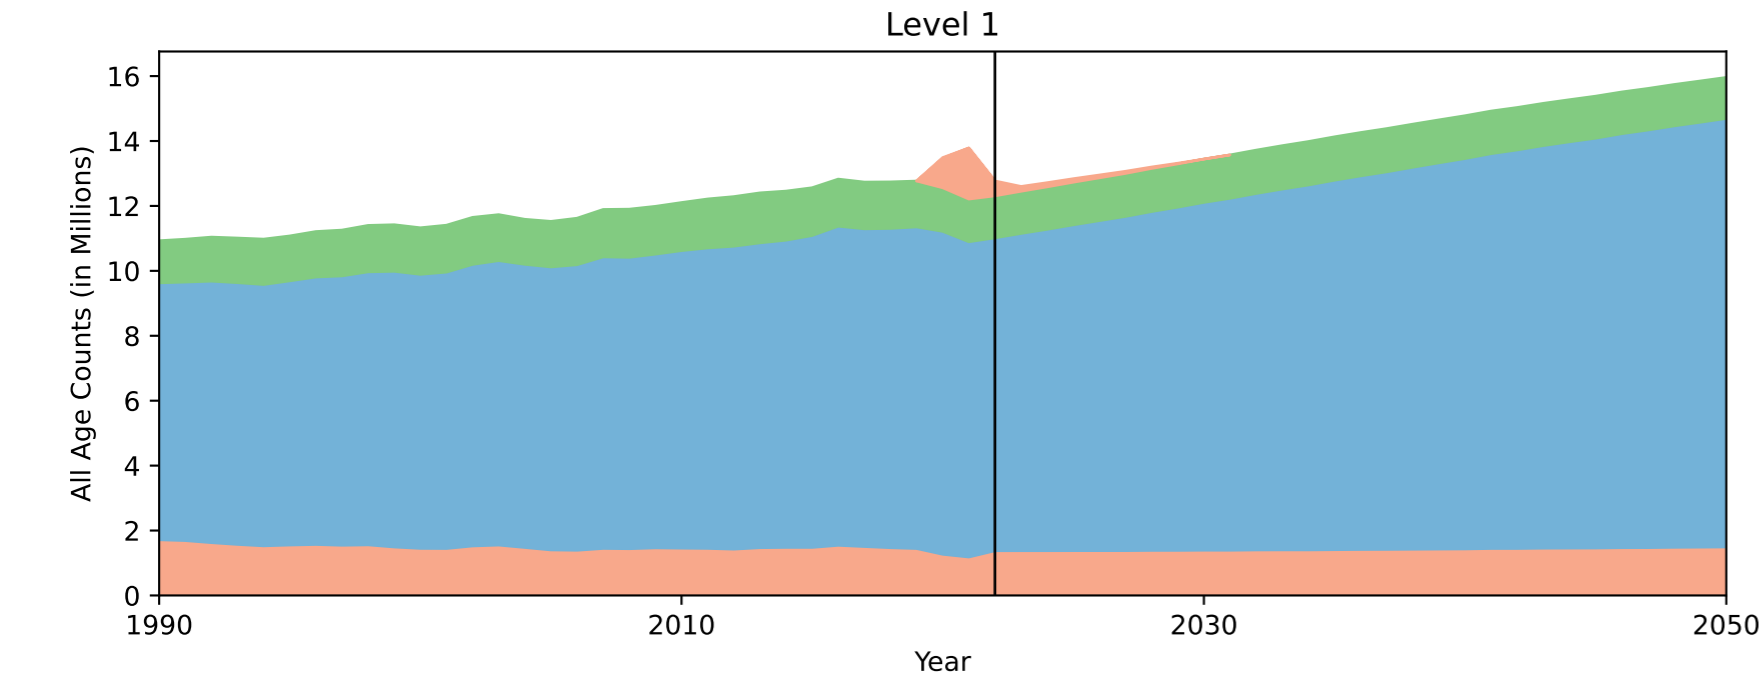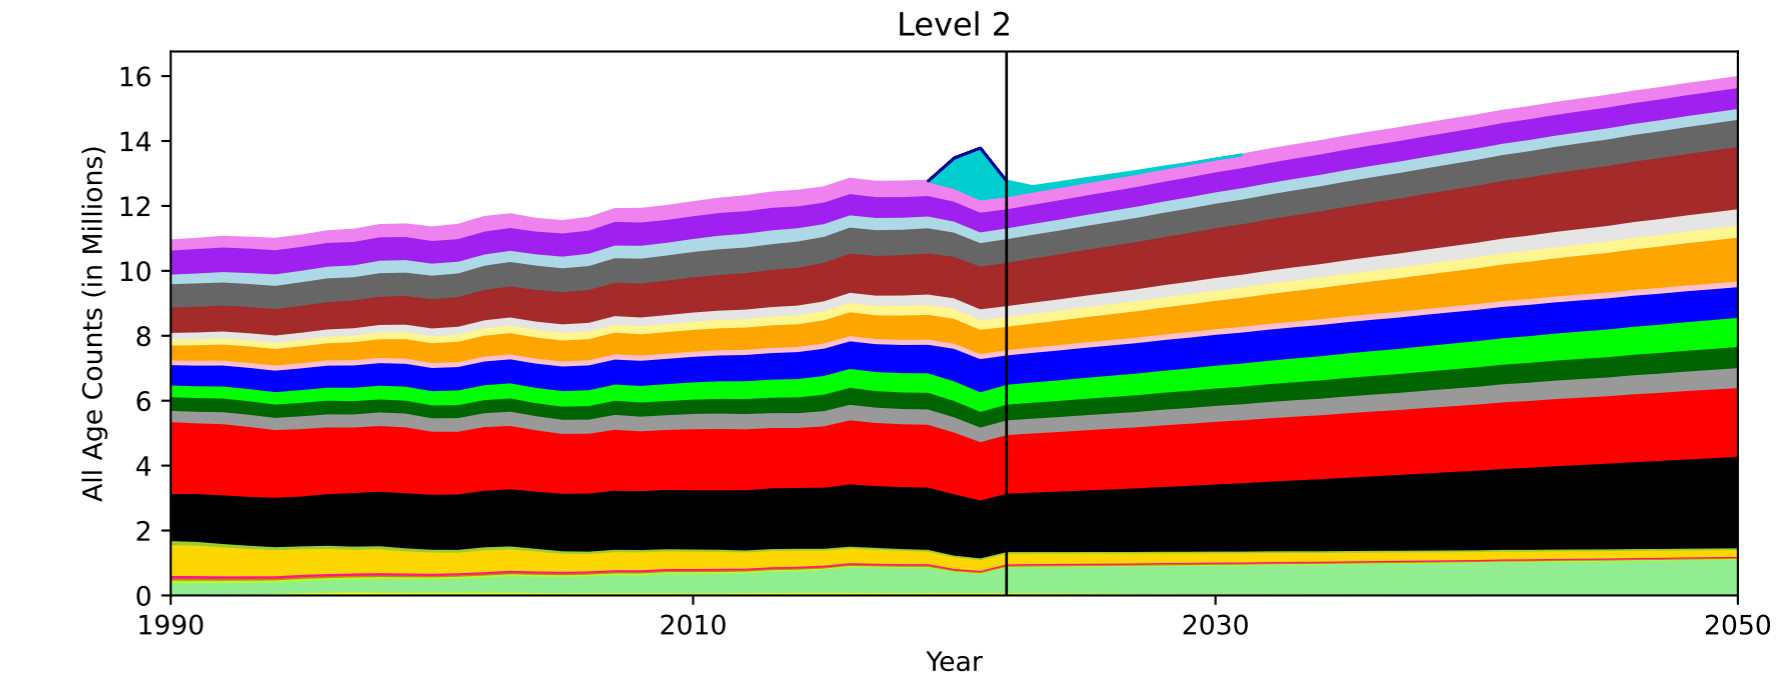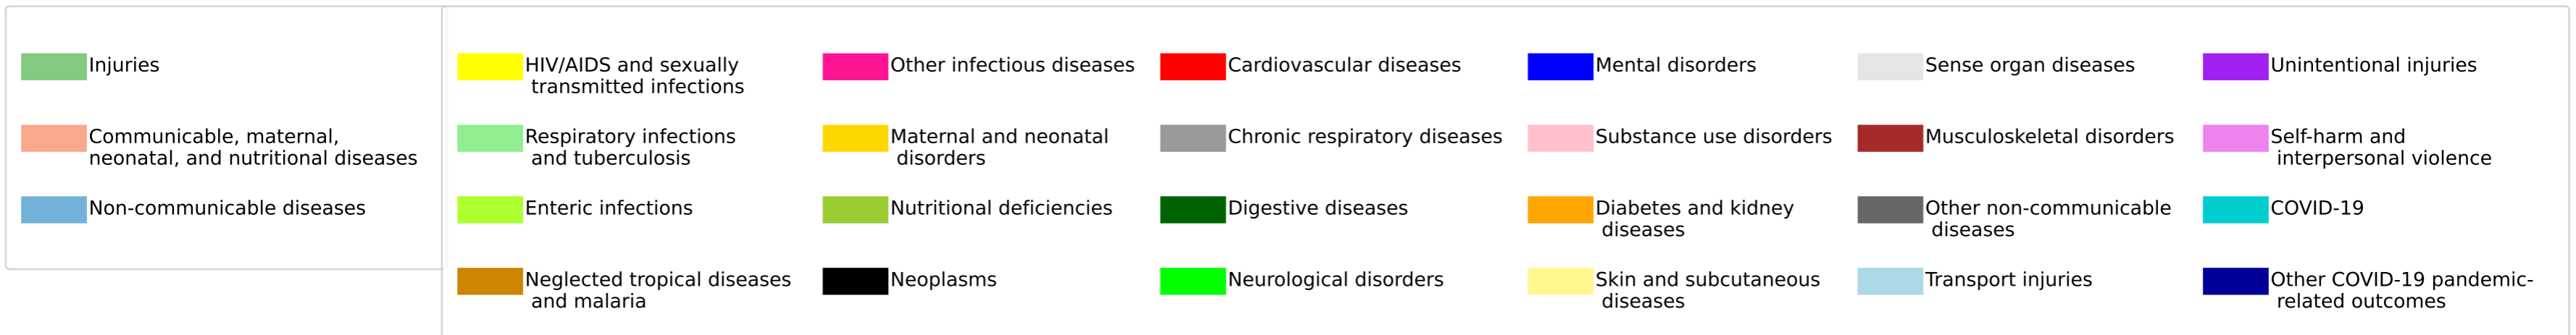

# Chile

Level 1

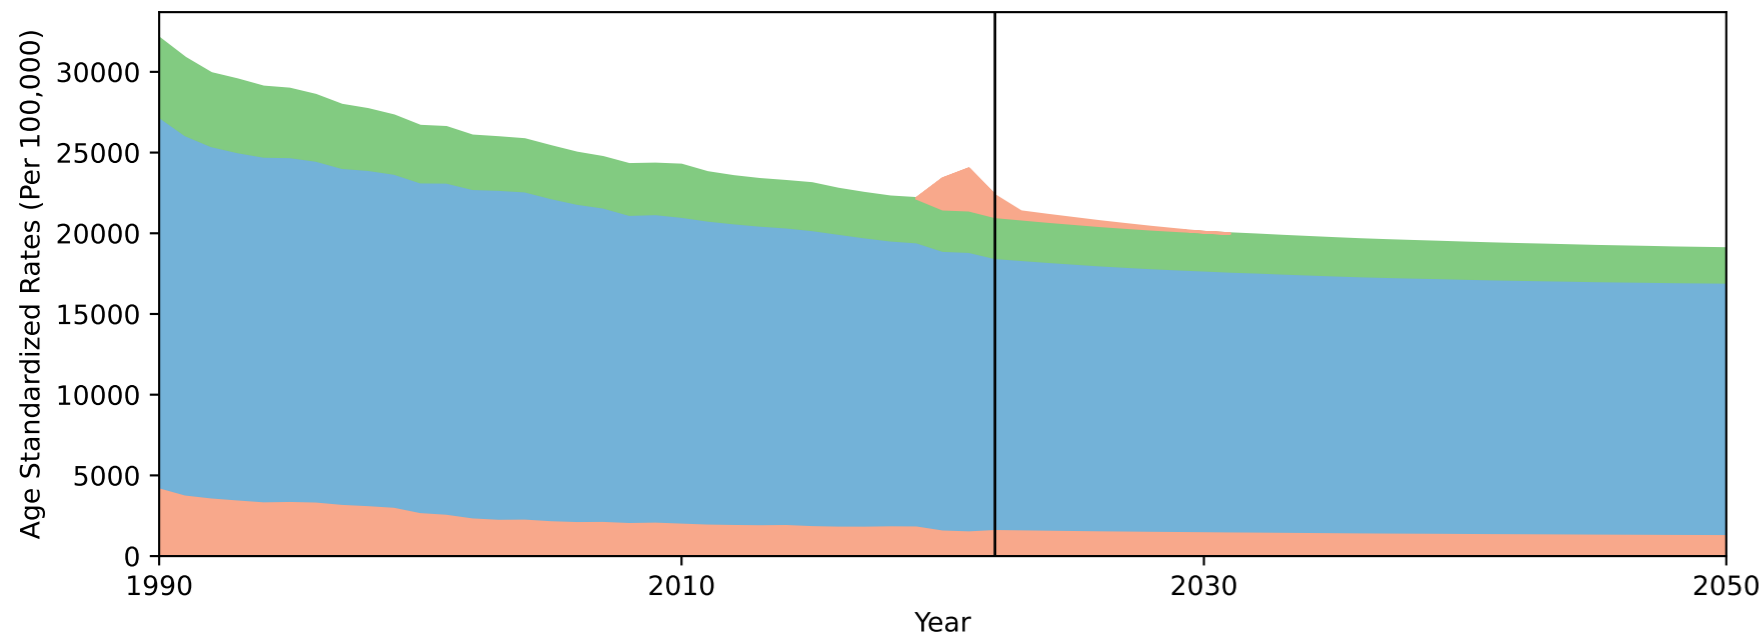

Level 2

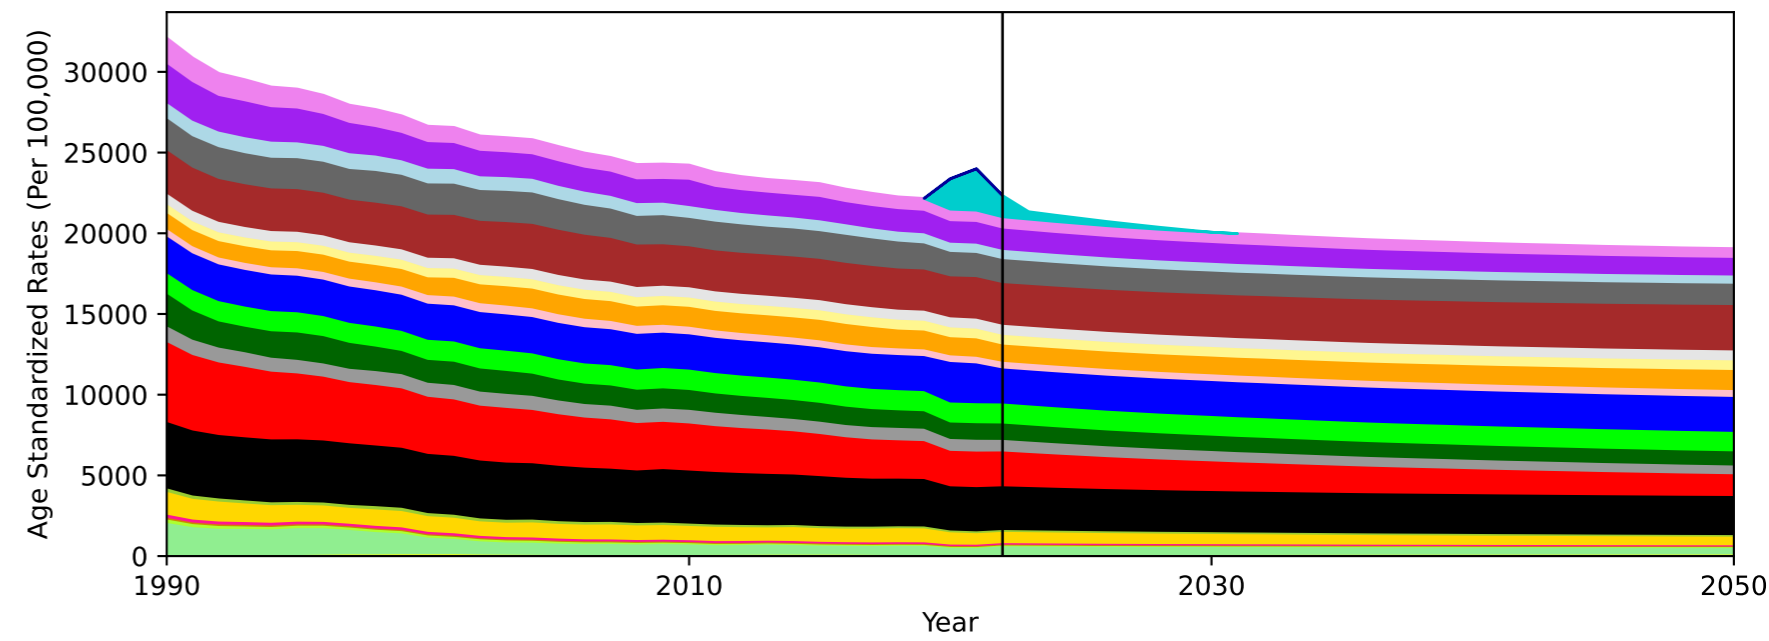

Level 1

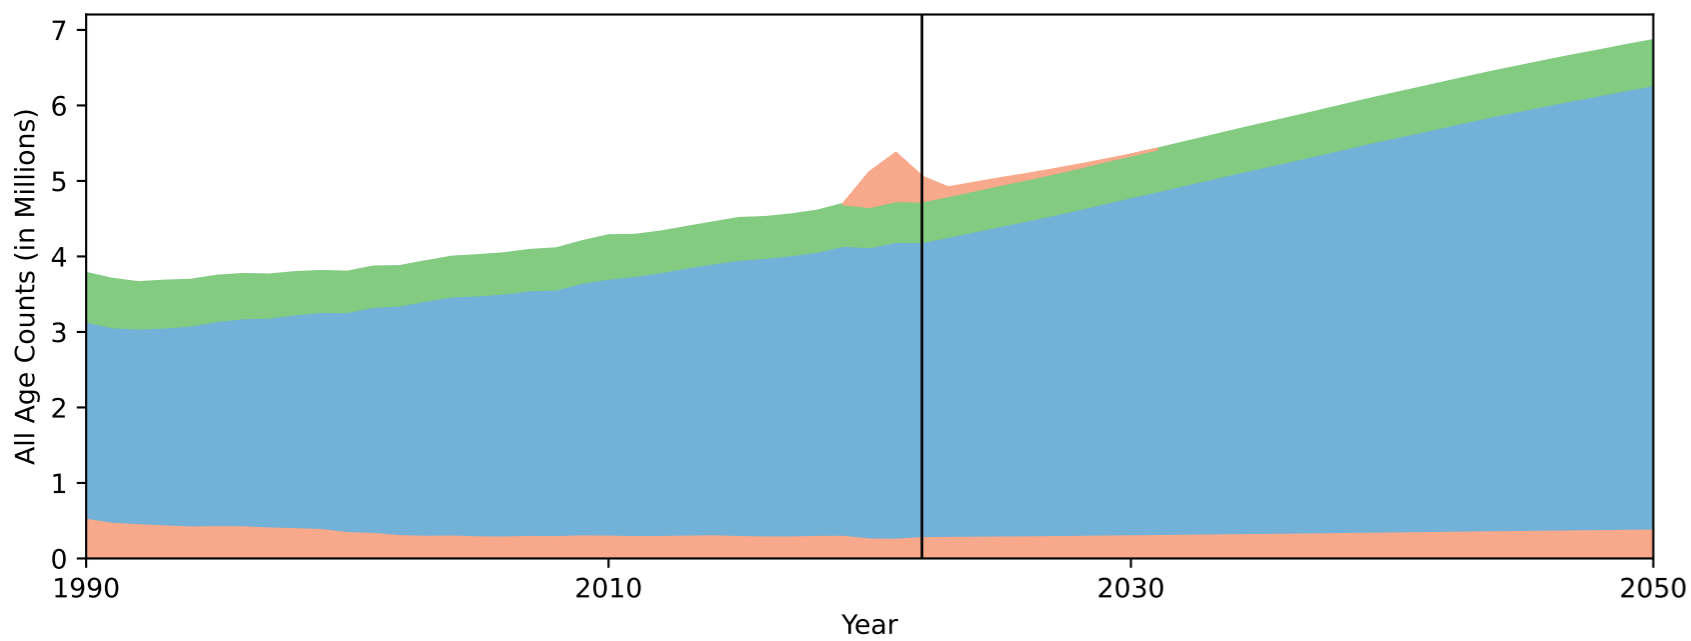

Level 2

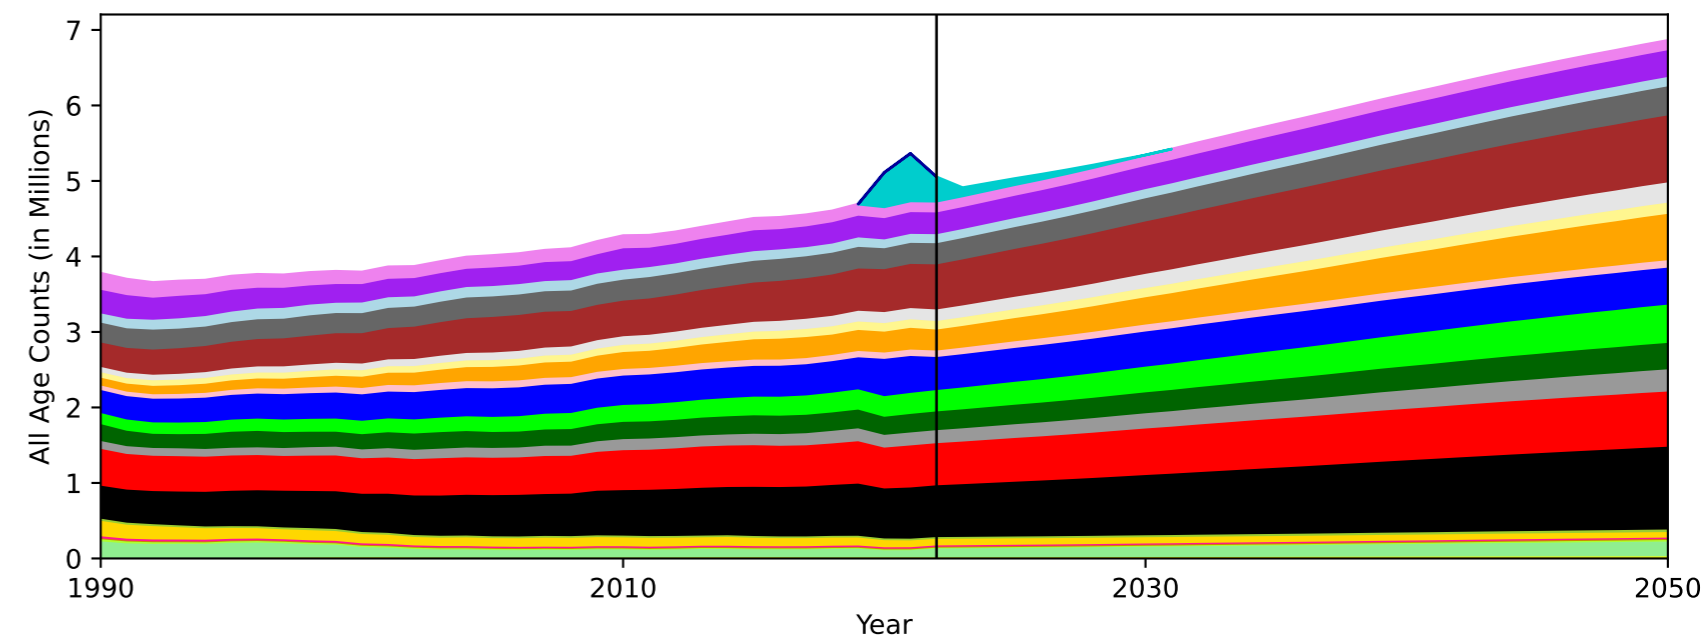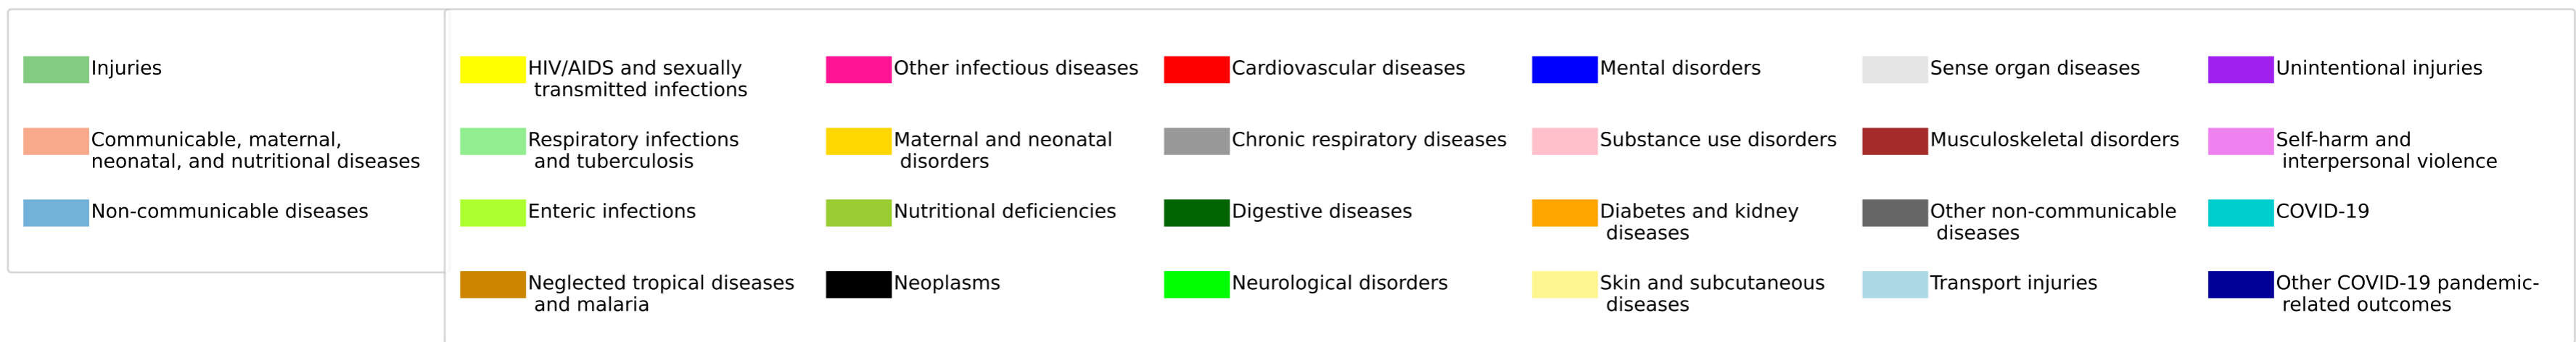

# Uruguay

Level 1

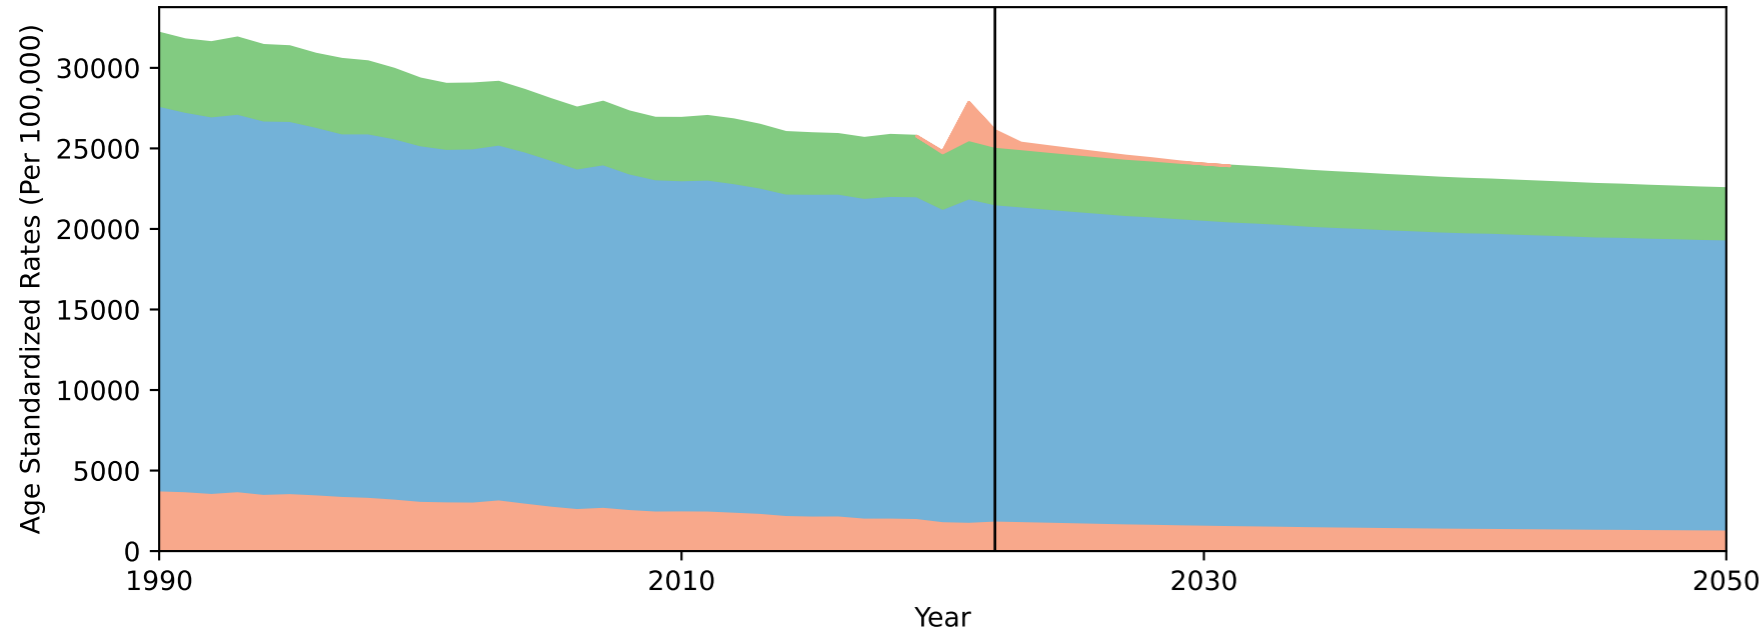

Level 2

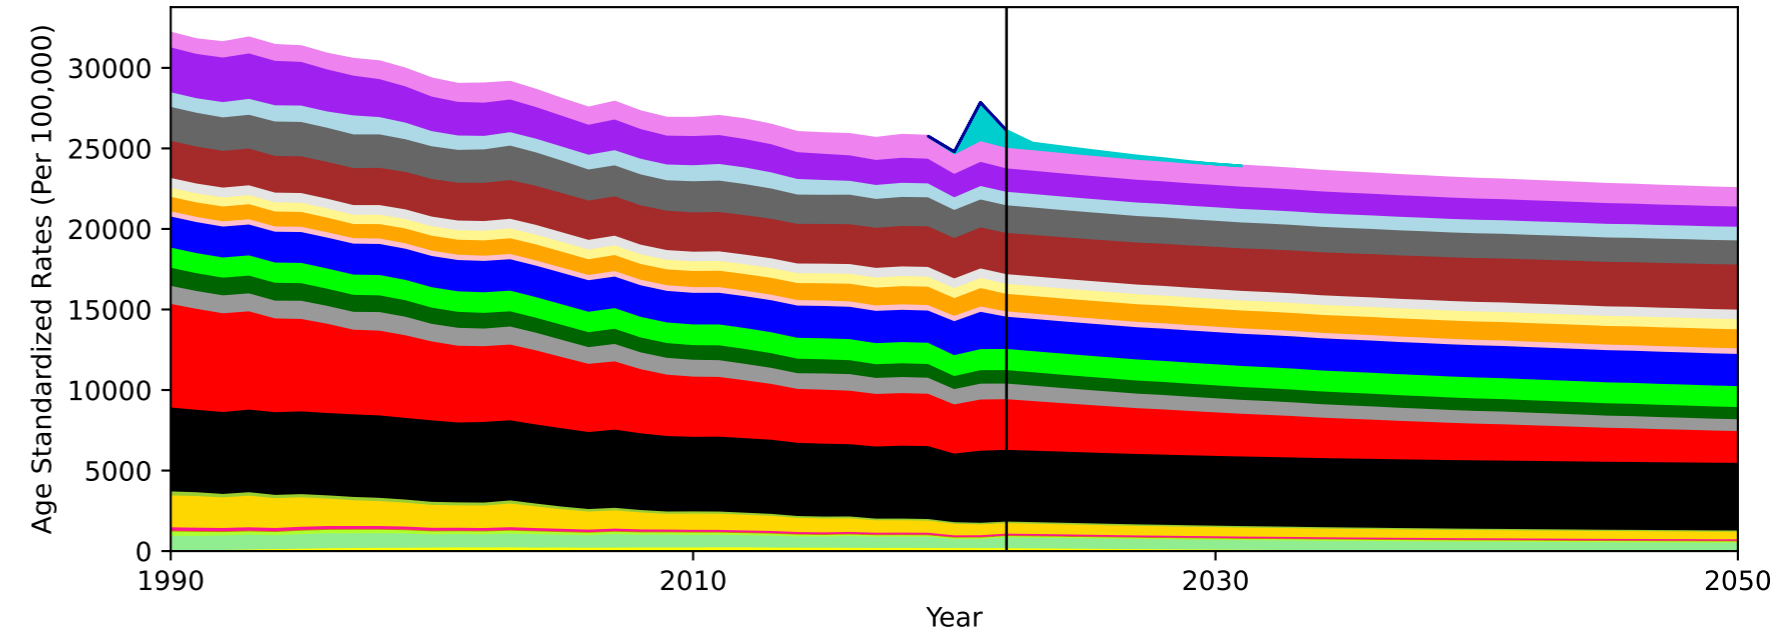

Level 1

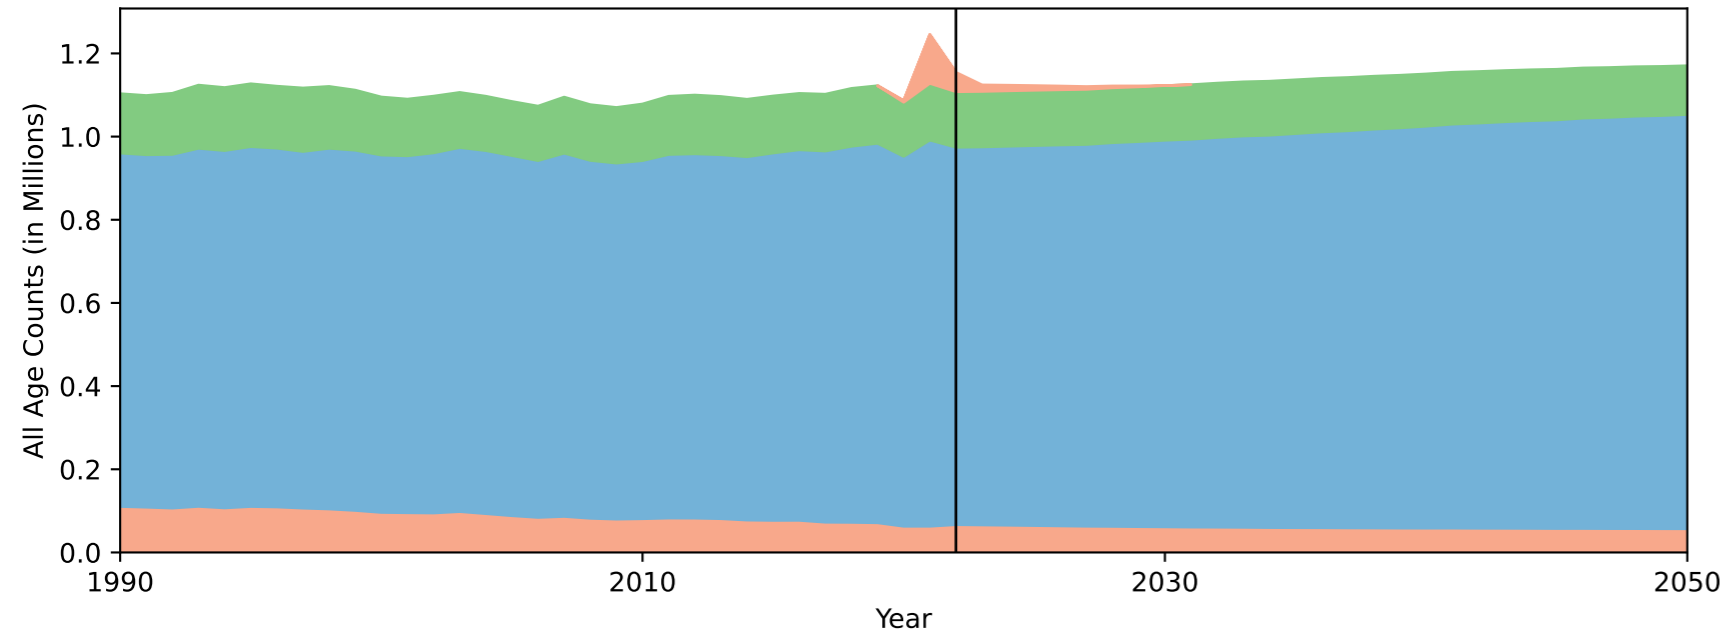

Level 2

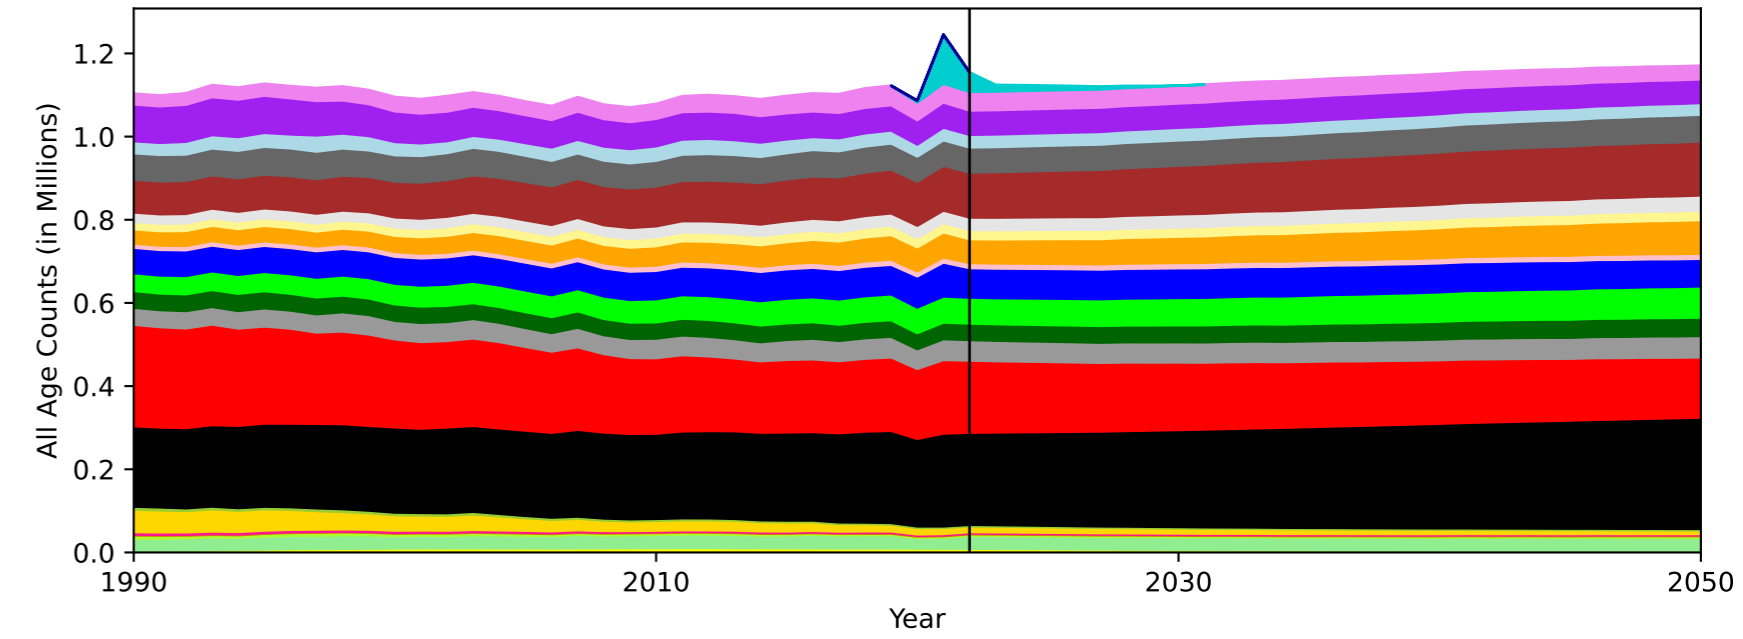

# Andorra

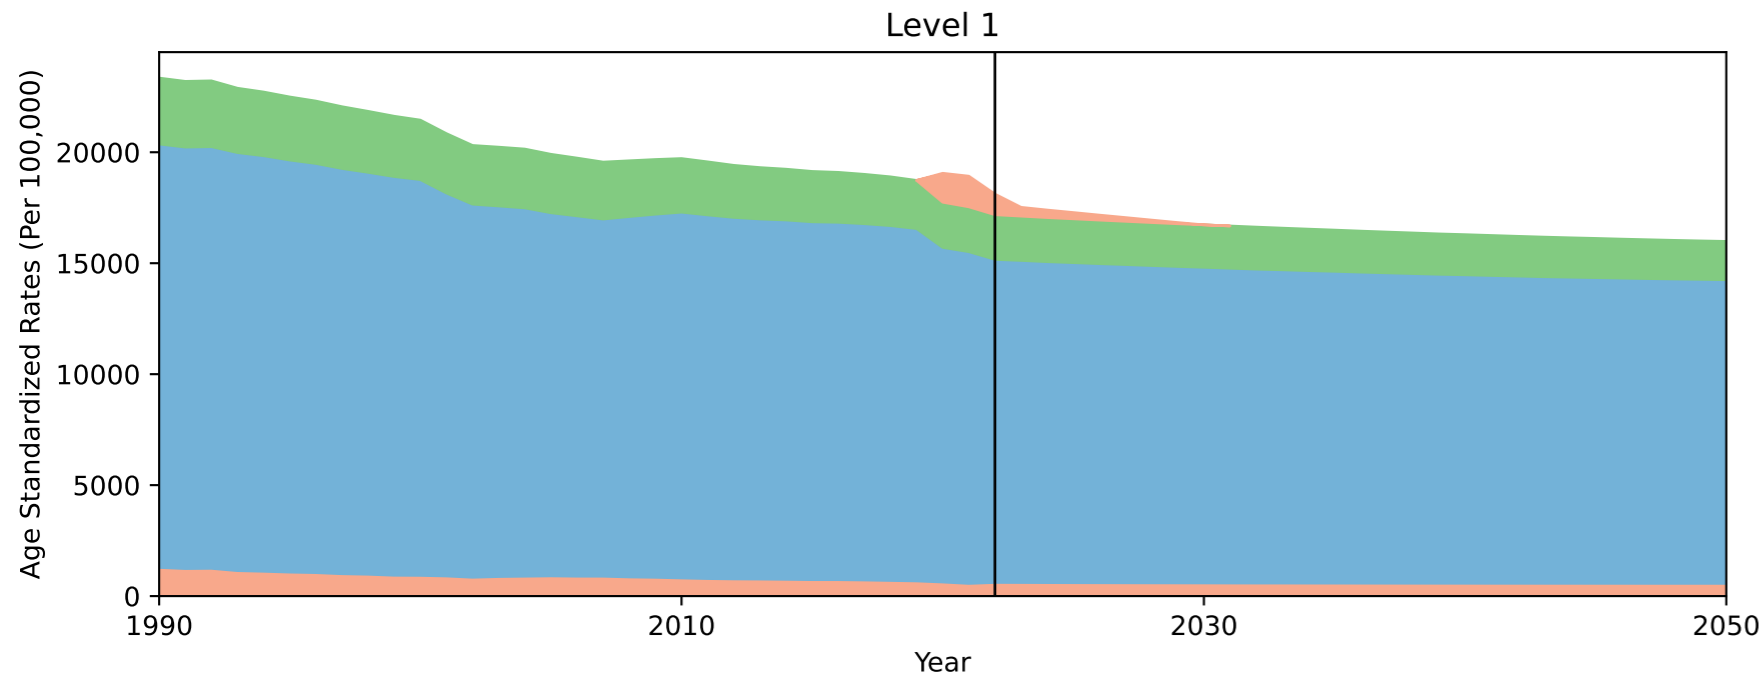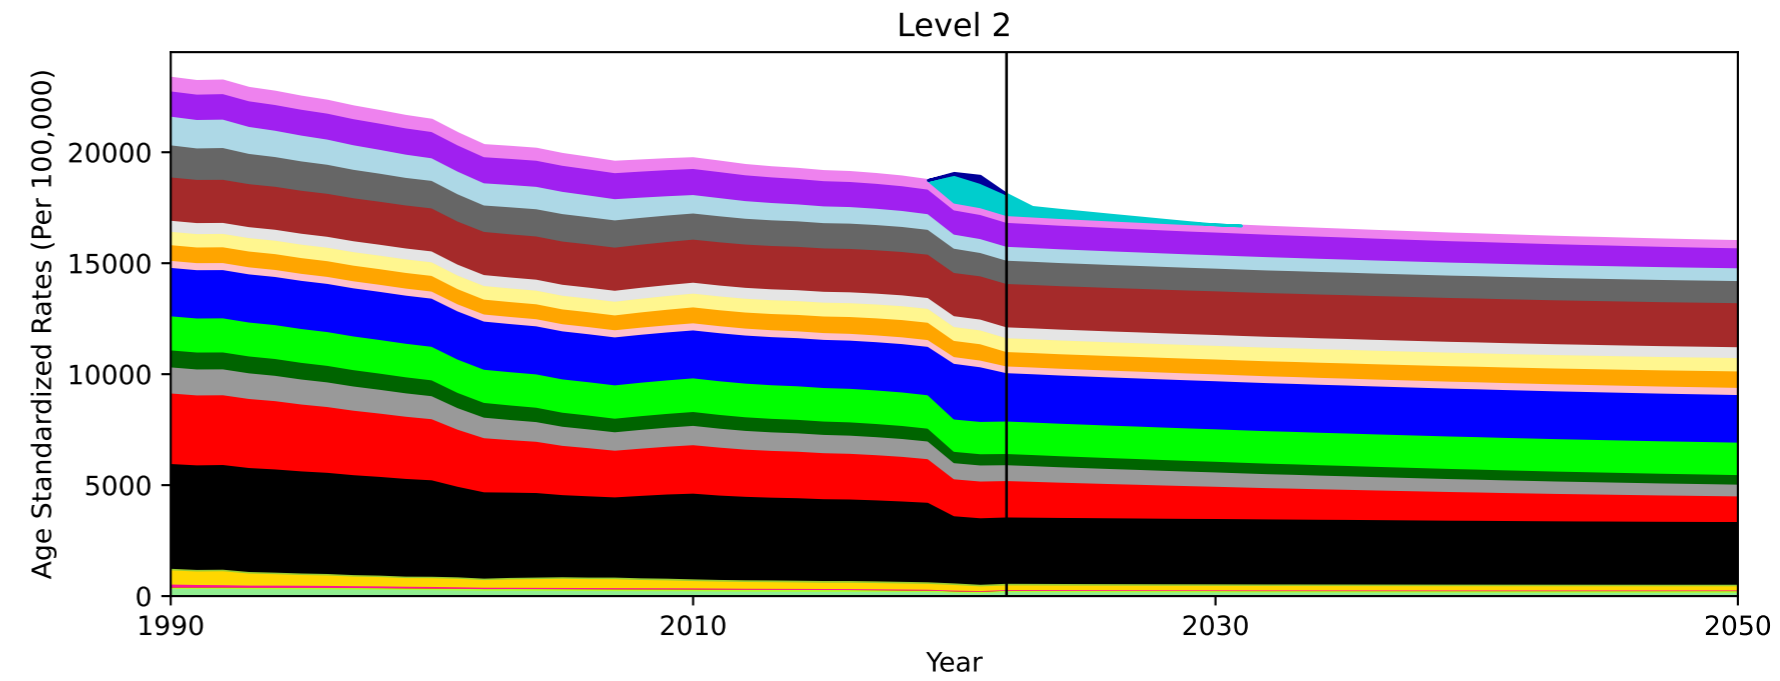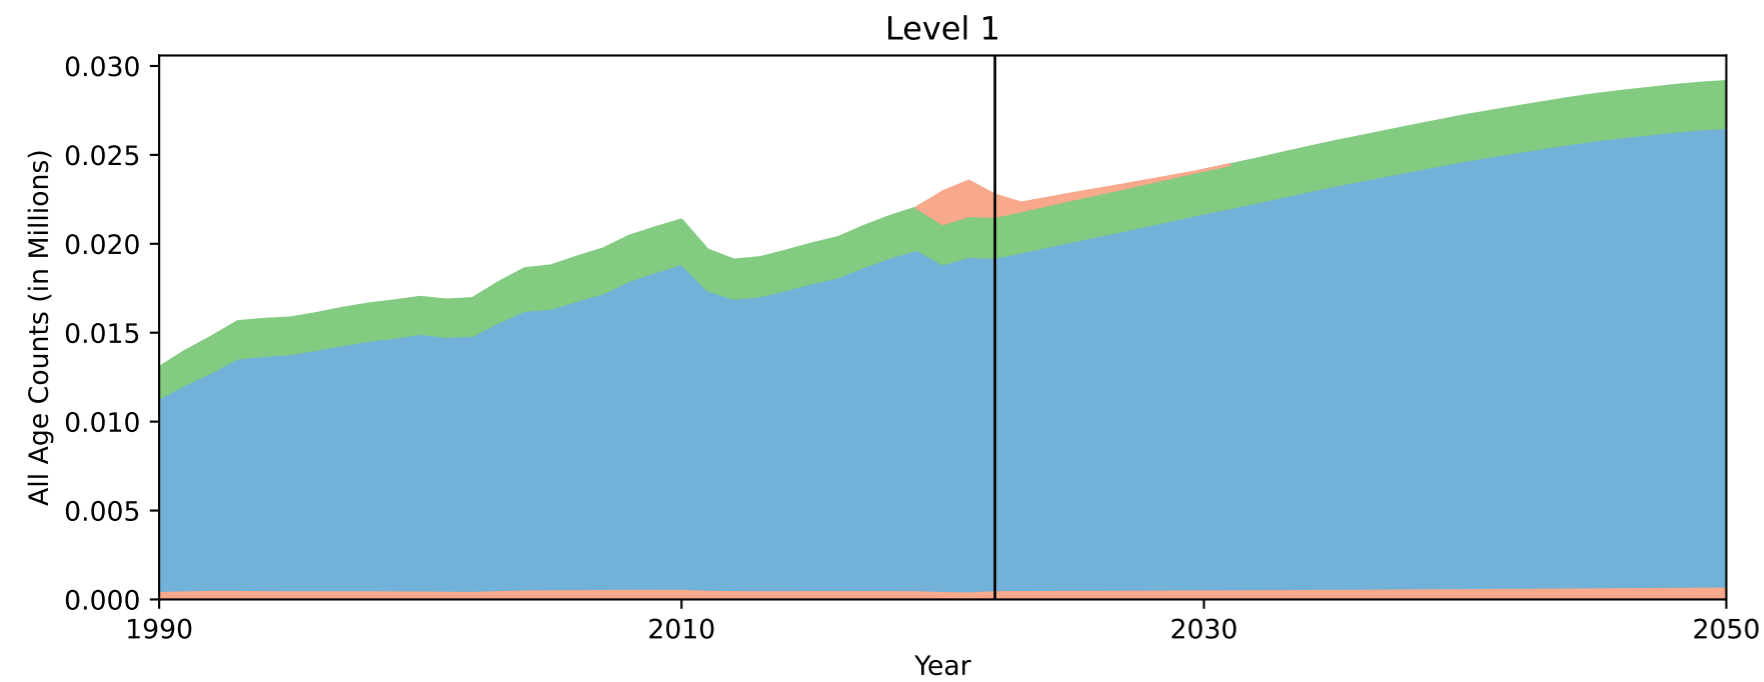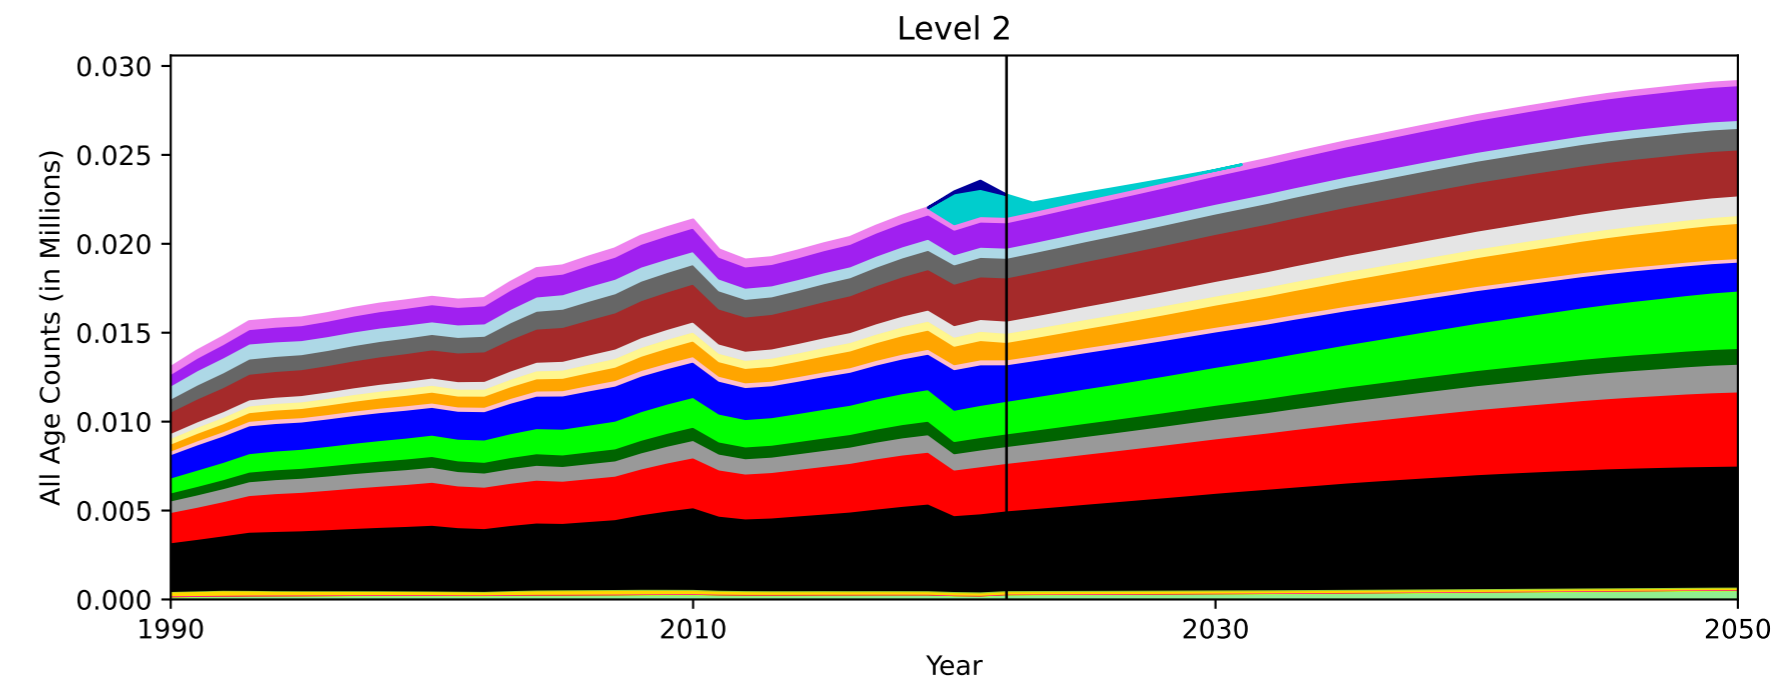

Level 1

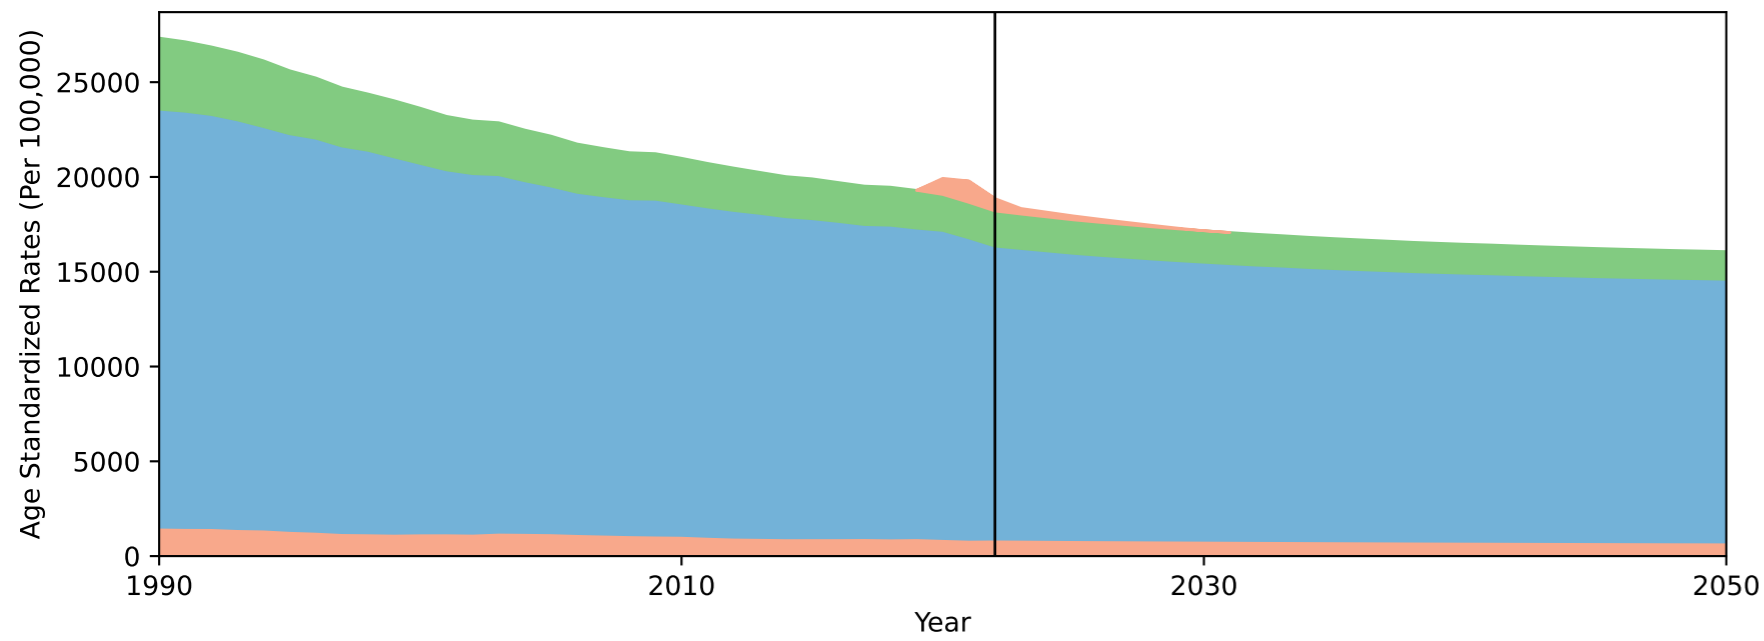

Level 2

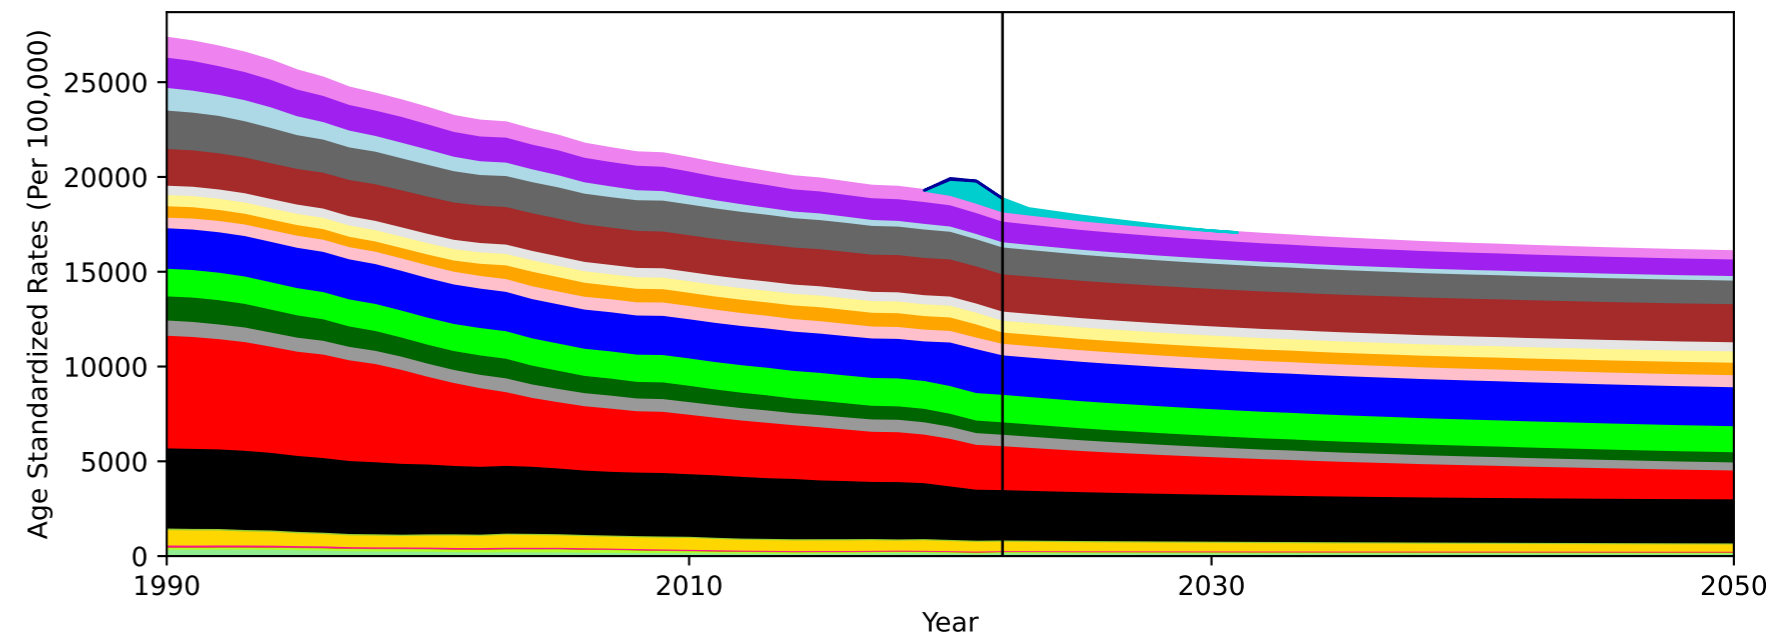

Level 1

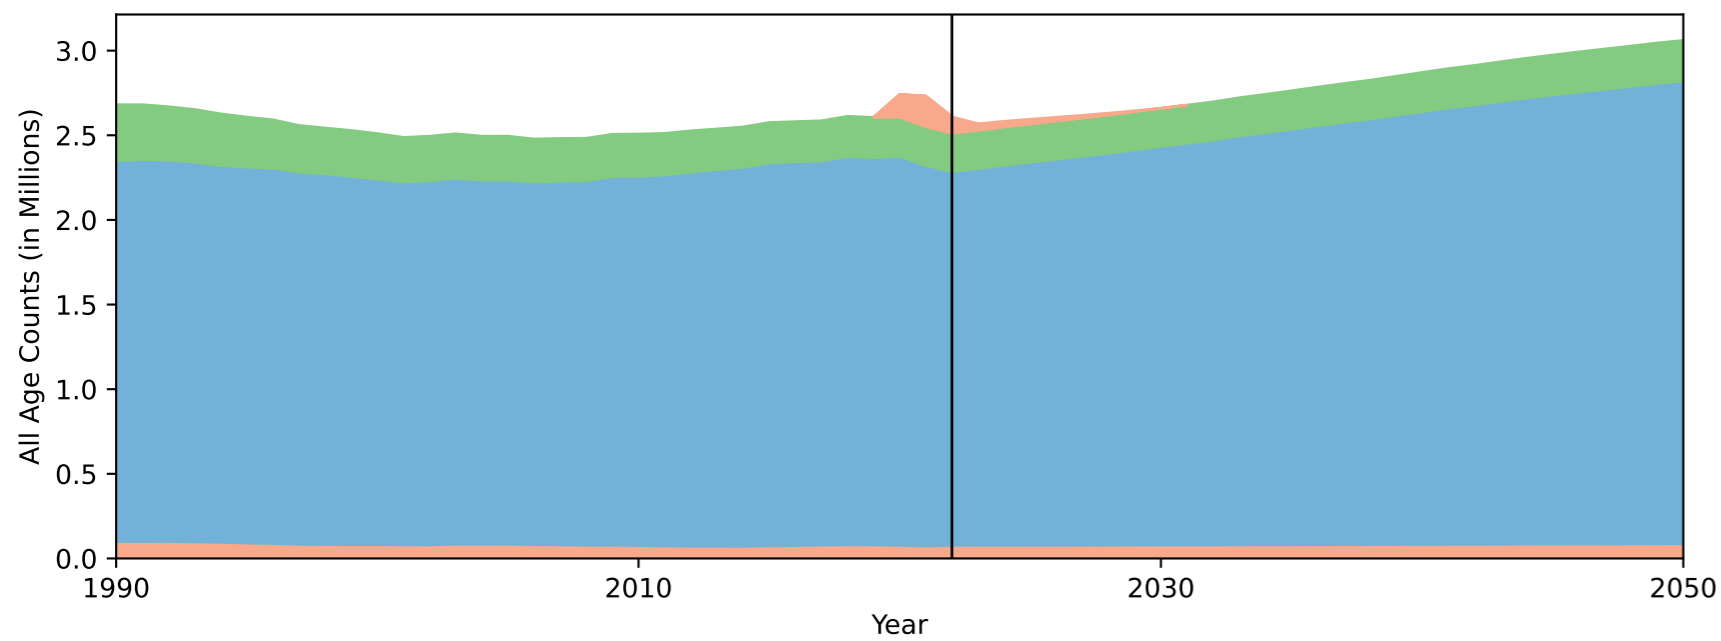

Level 2

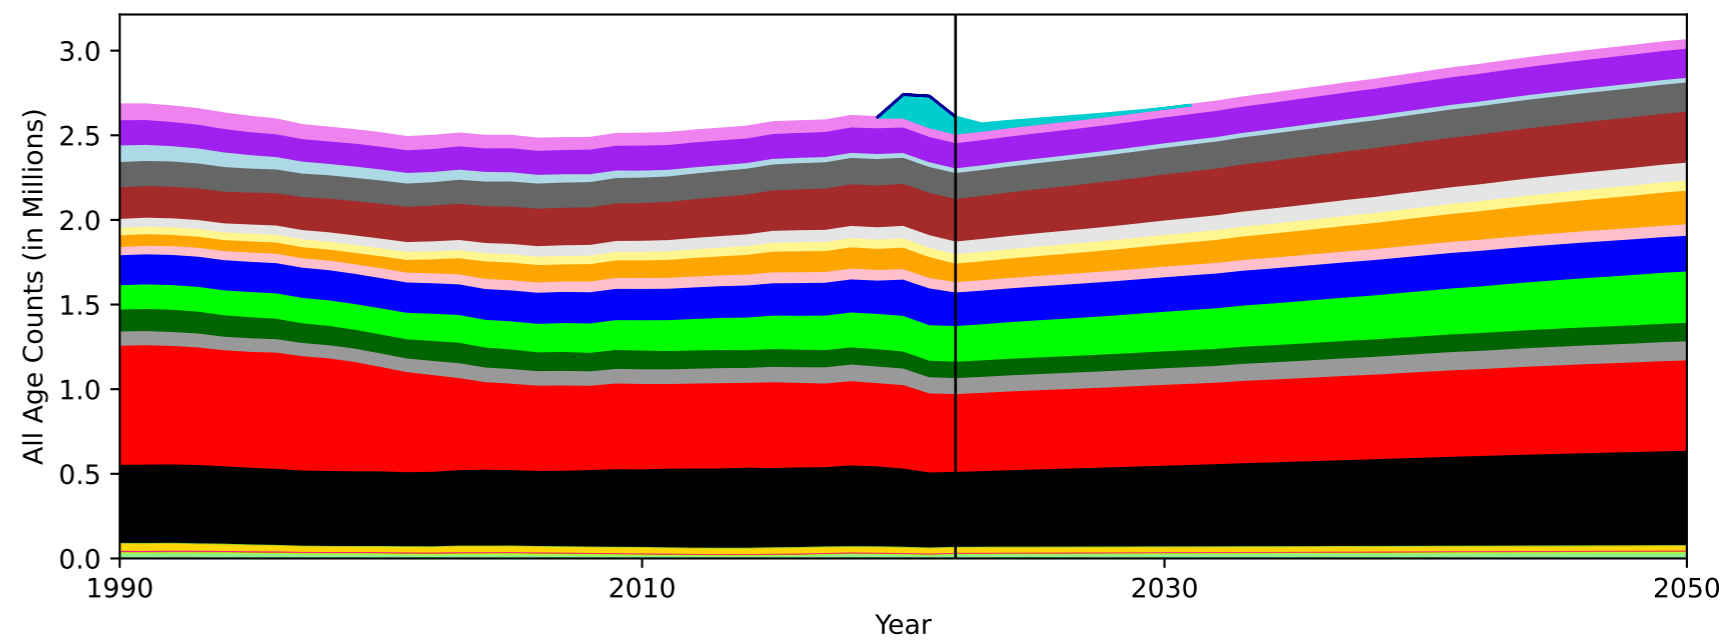



# Belgium

Level 1

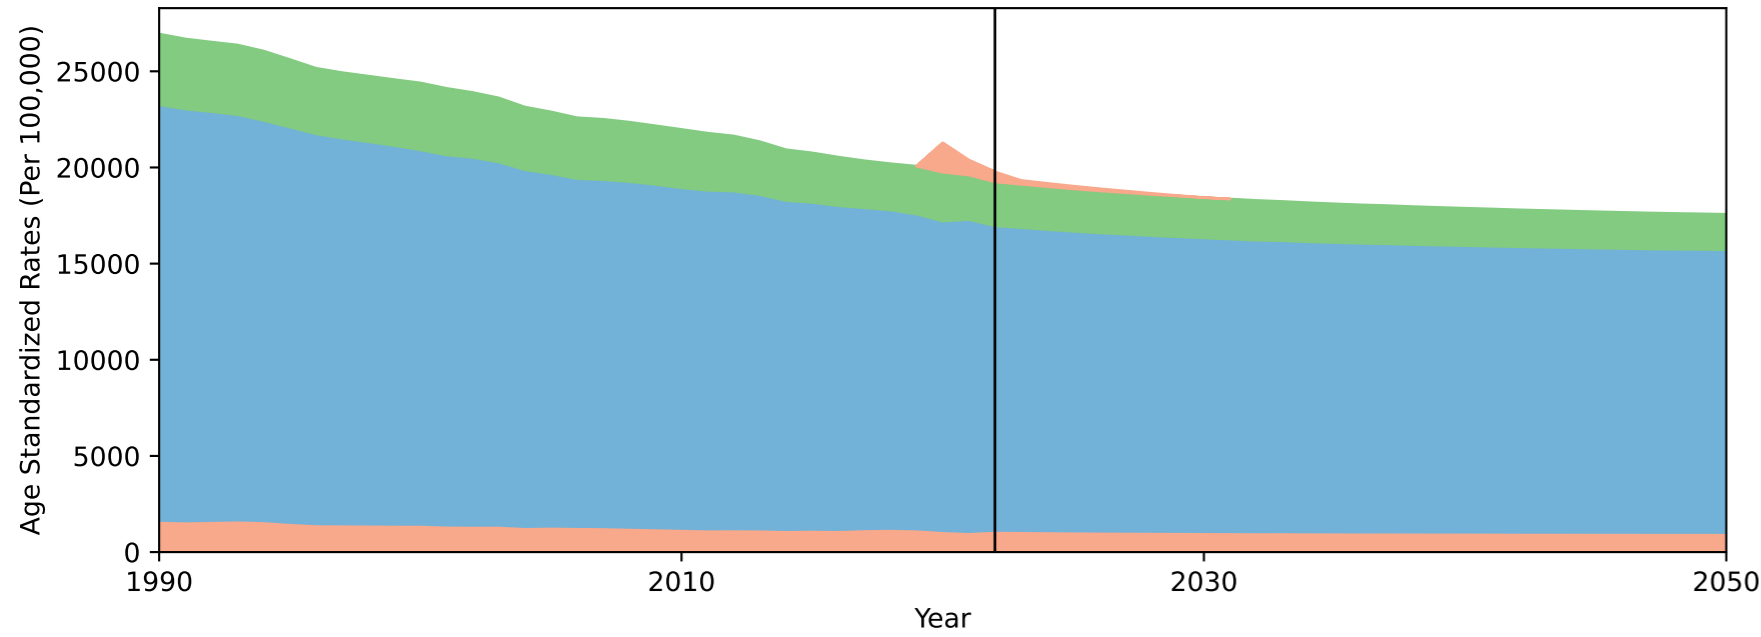

Level 2

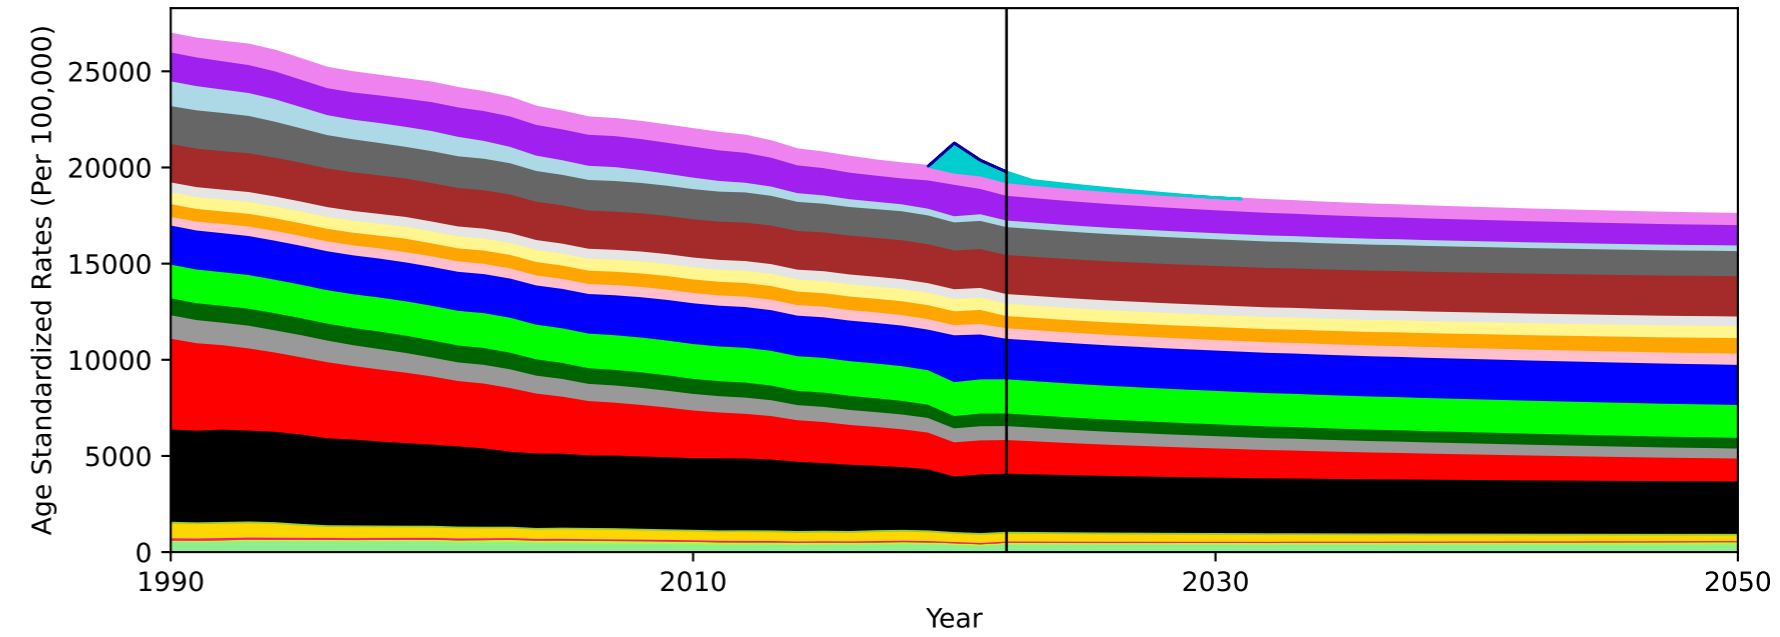

Level 1

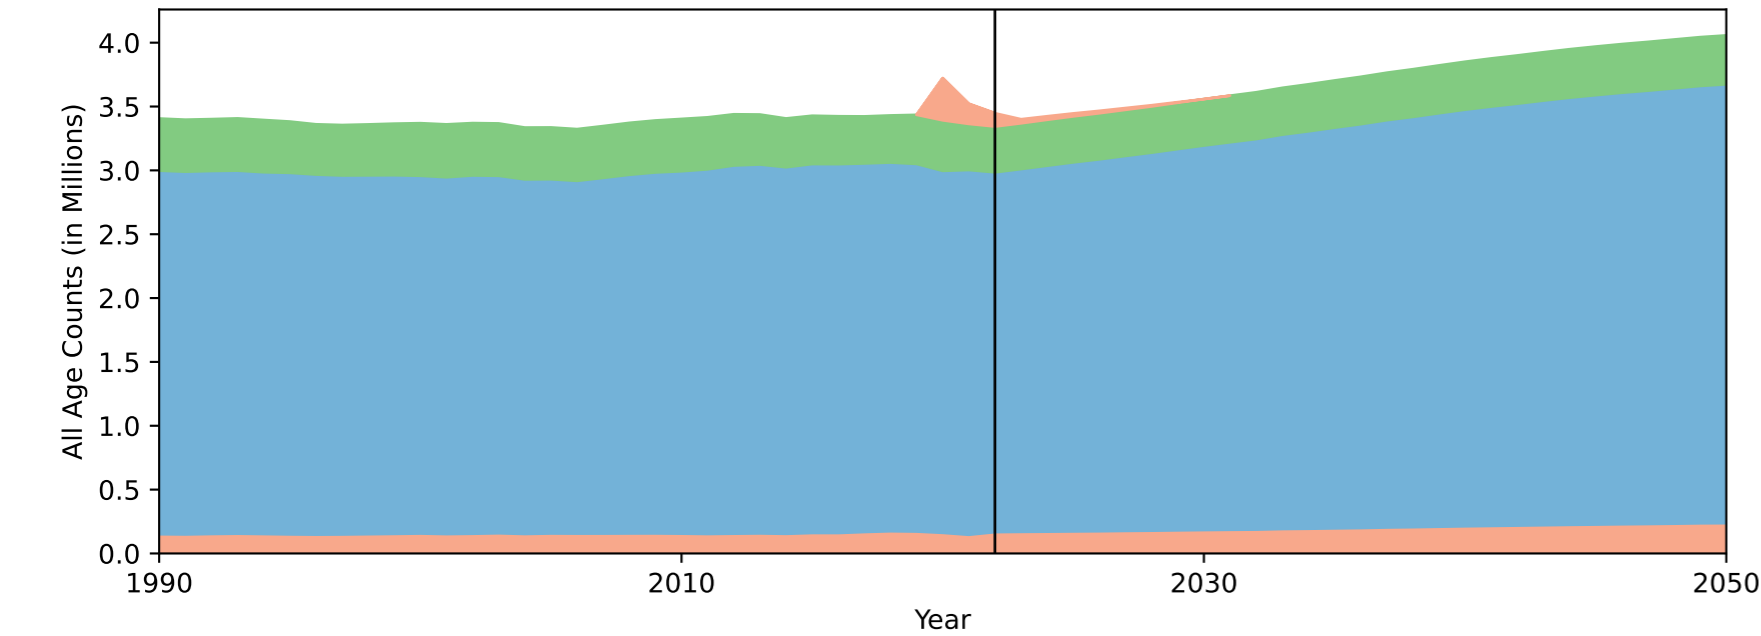

Level 2

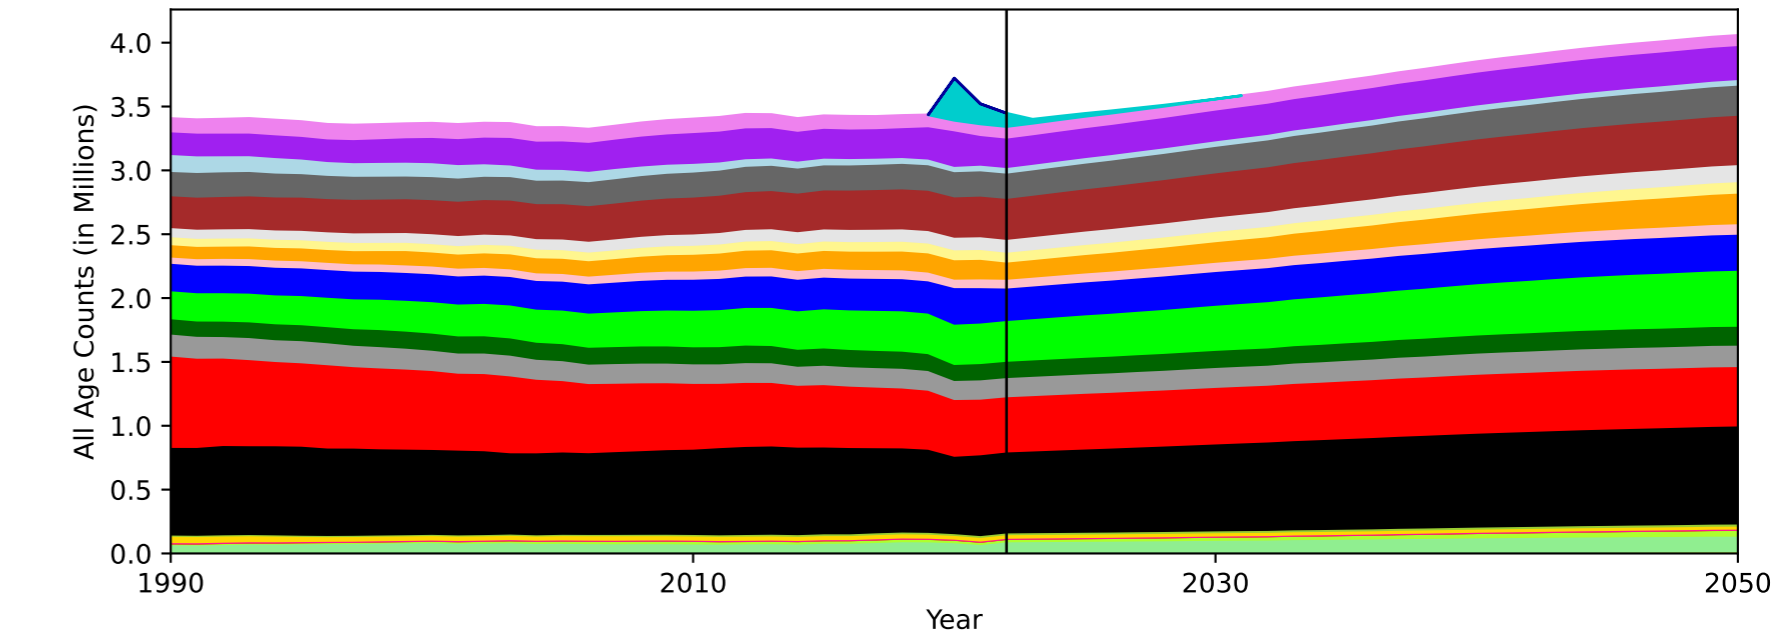

# Cyprus

Level 1

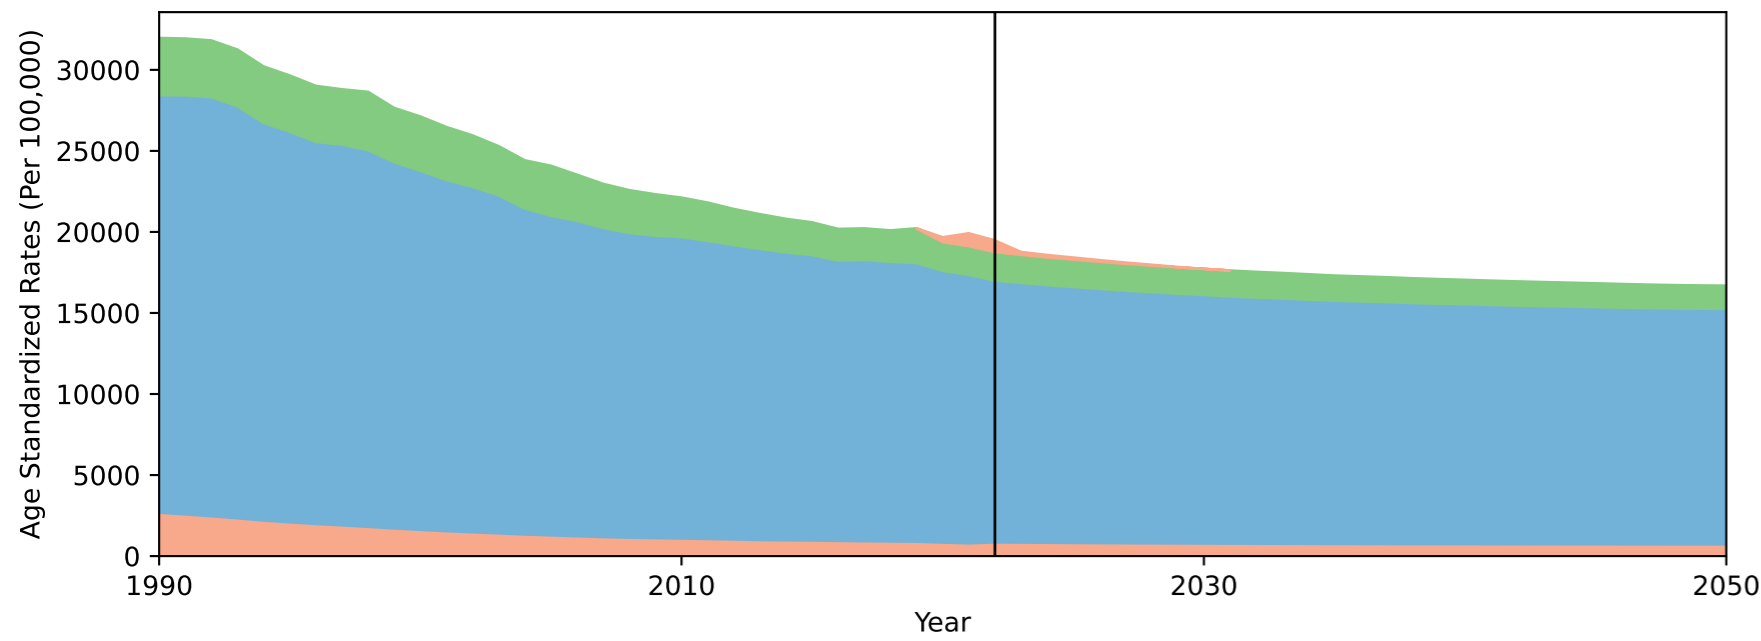

Level 2

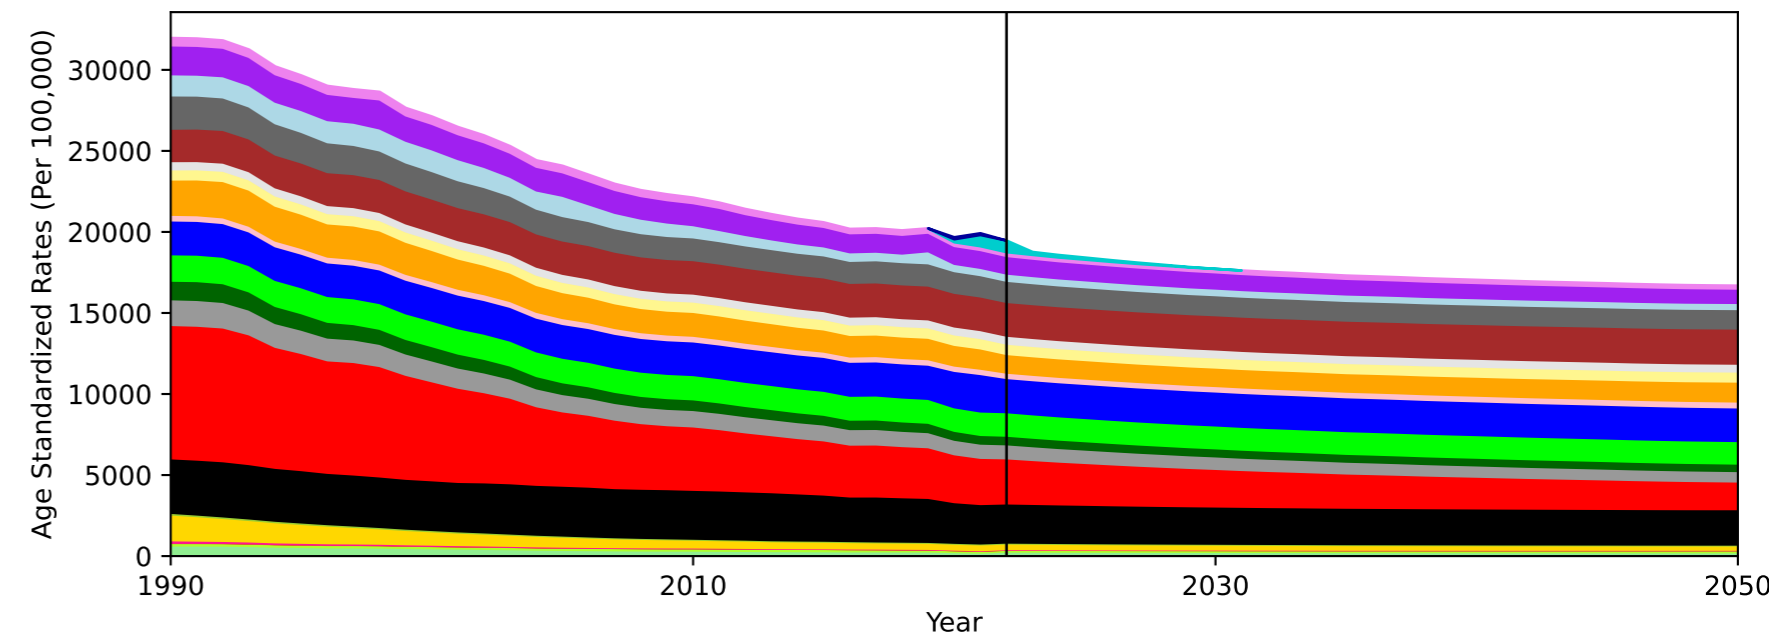

Level 1

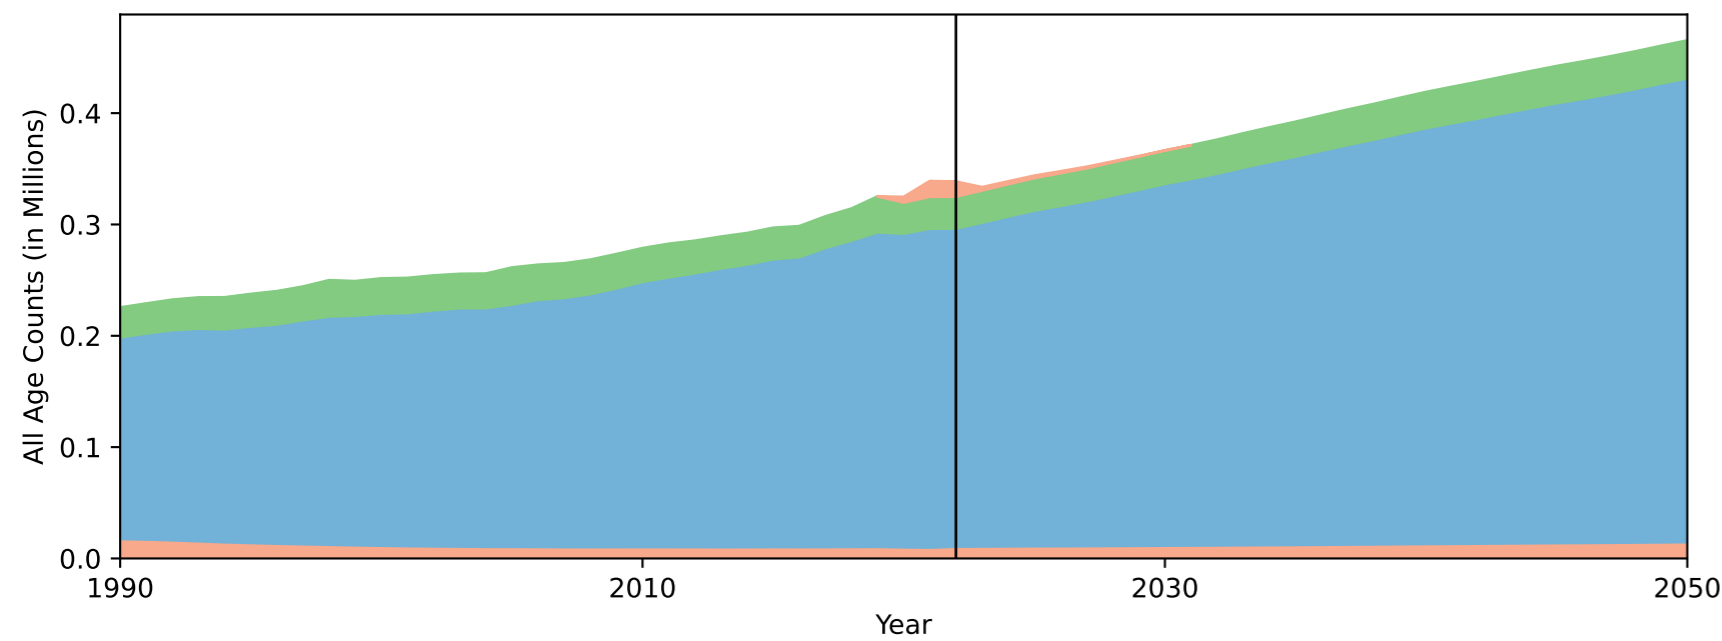

Level 2

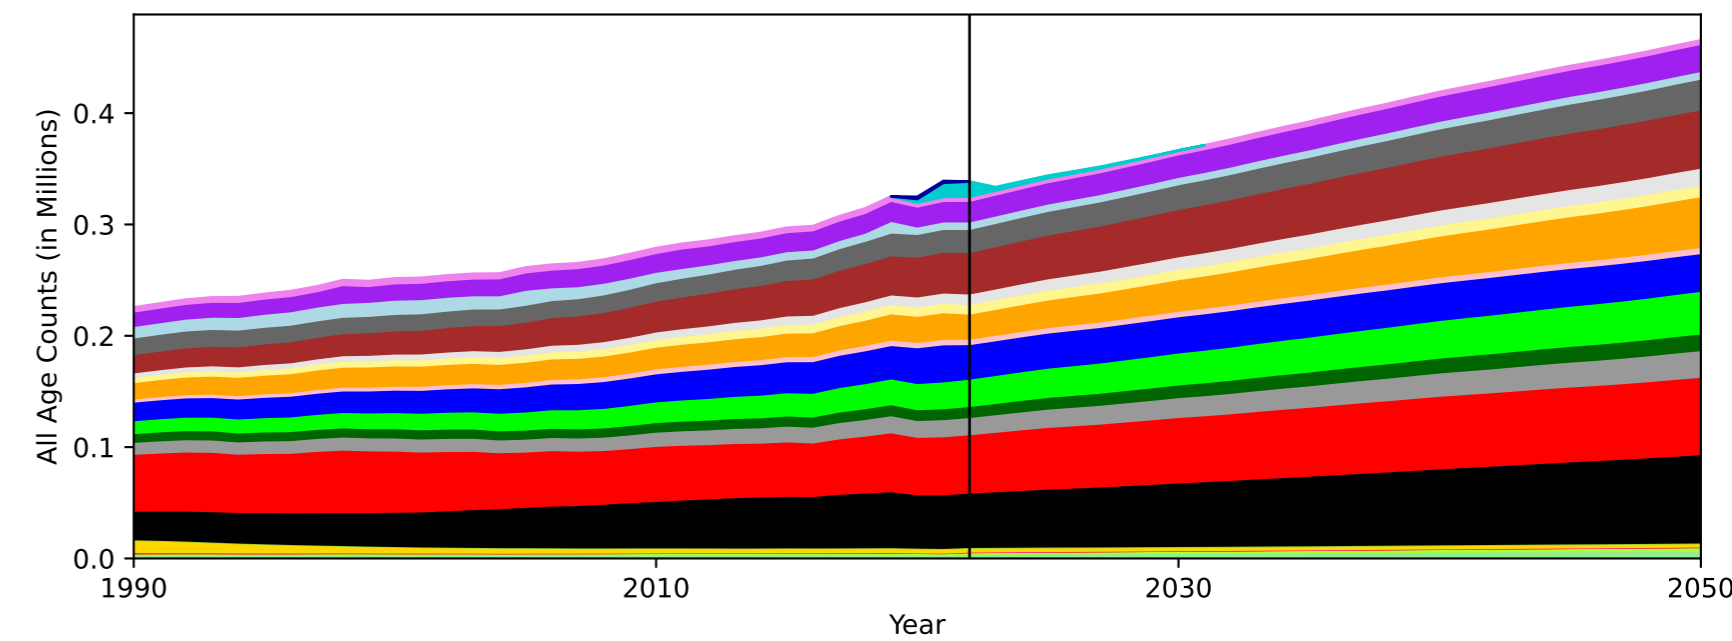

# Denmark

Level 1

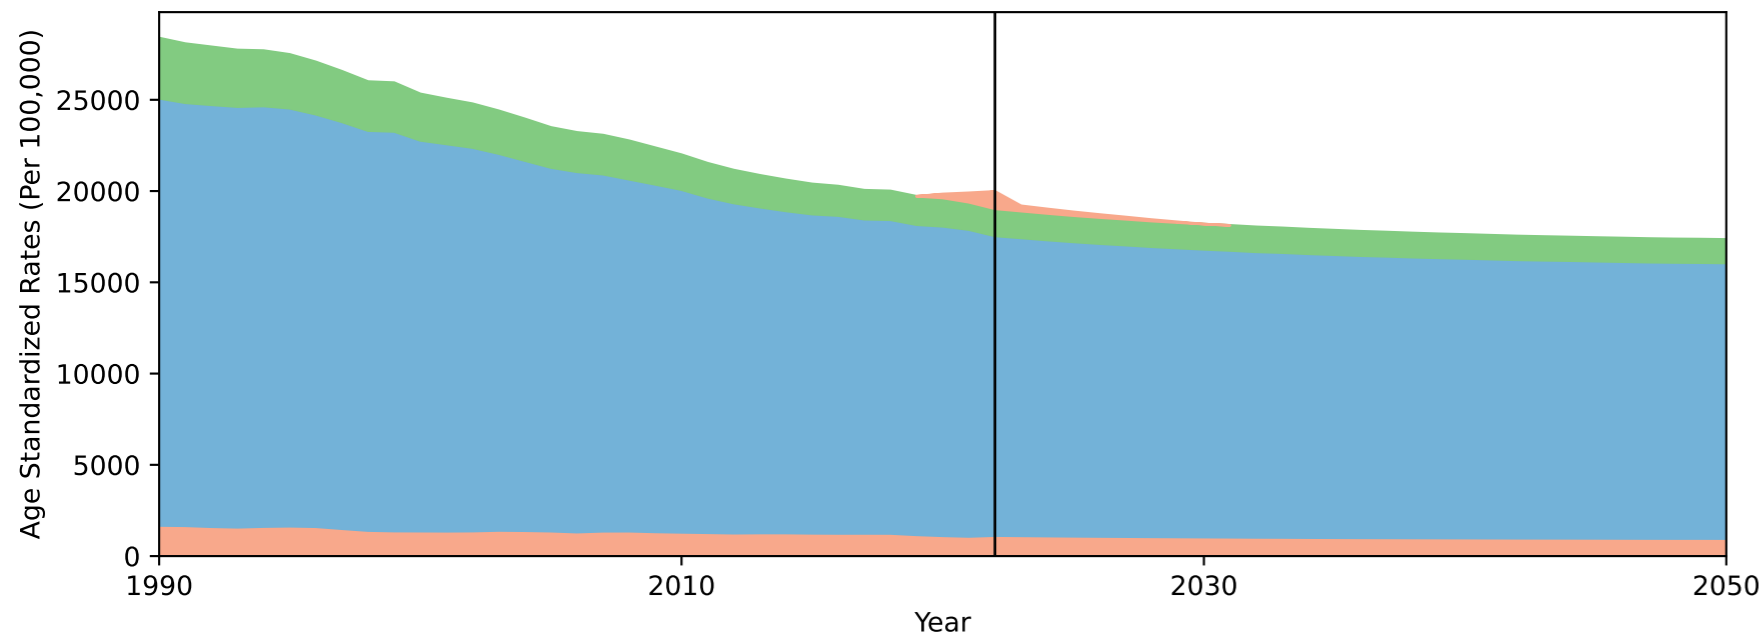

Level 2

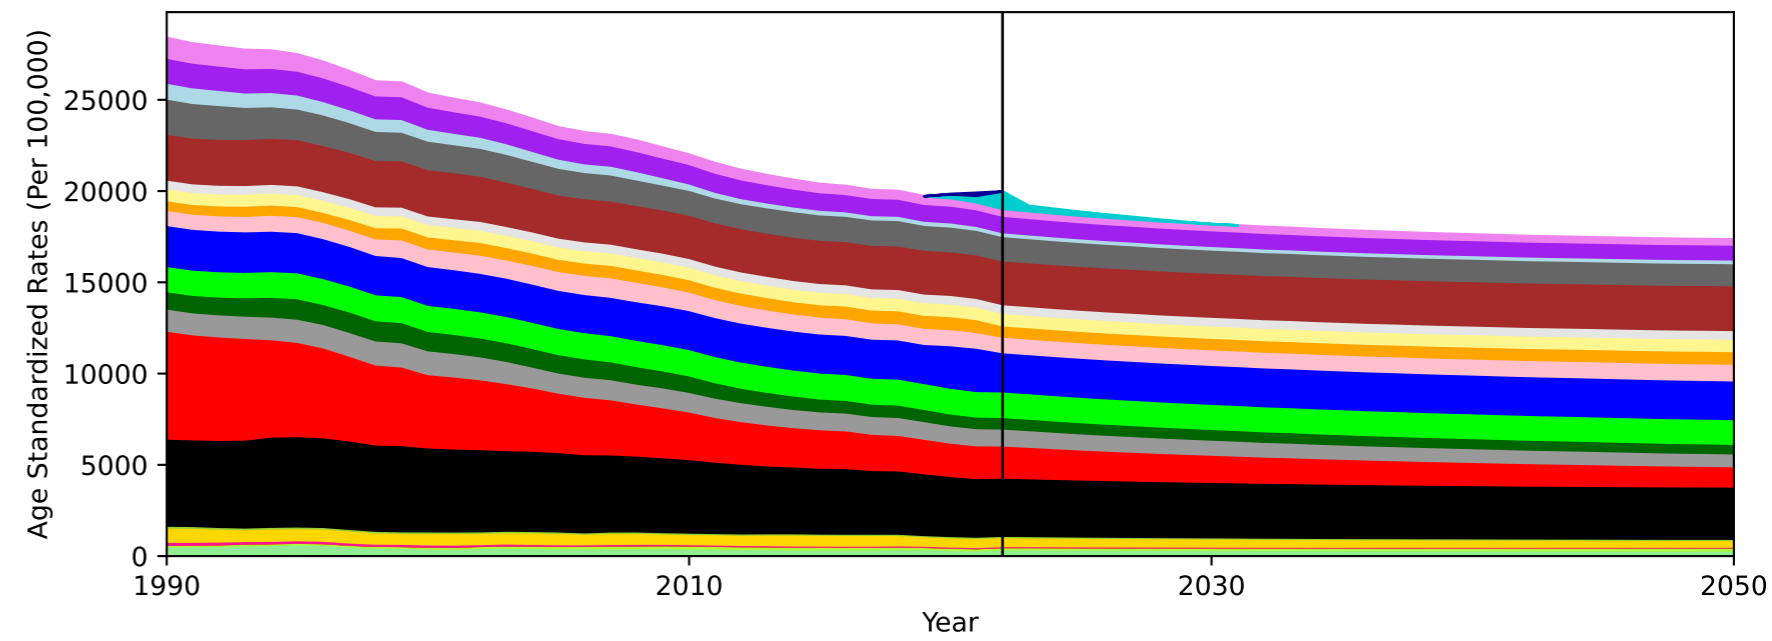

Level 1

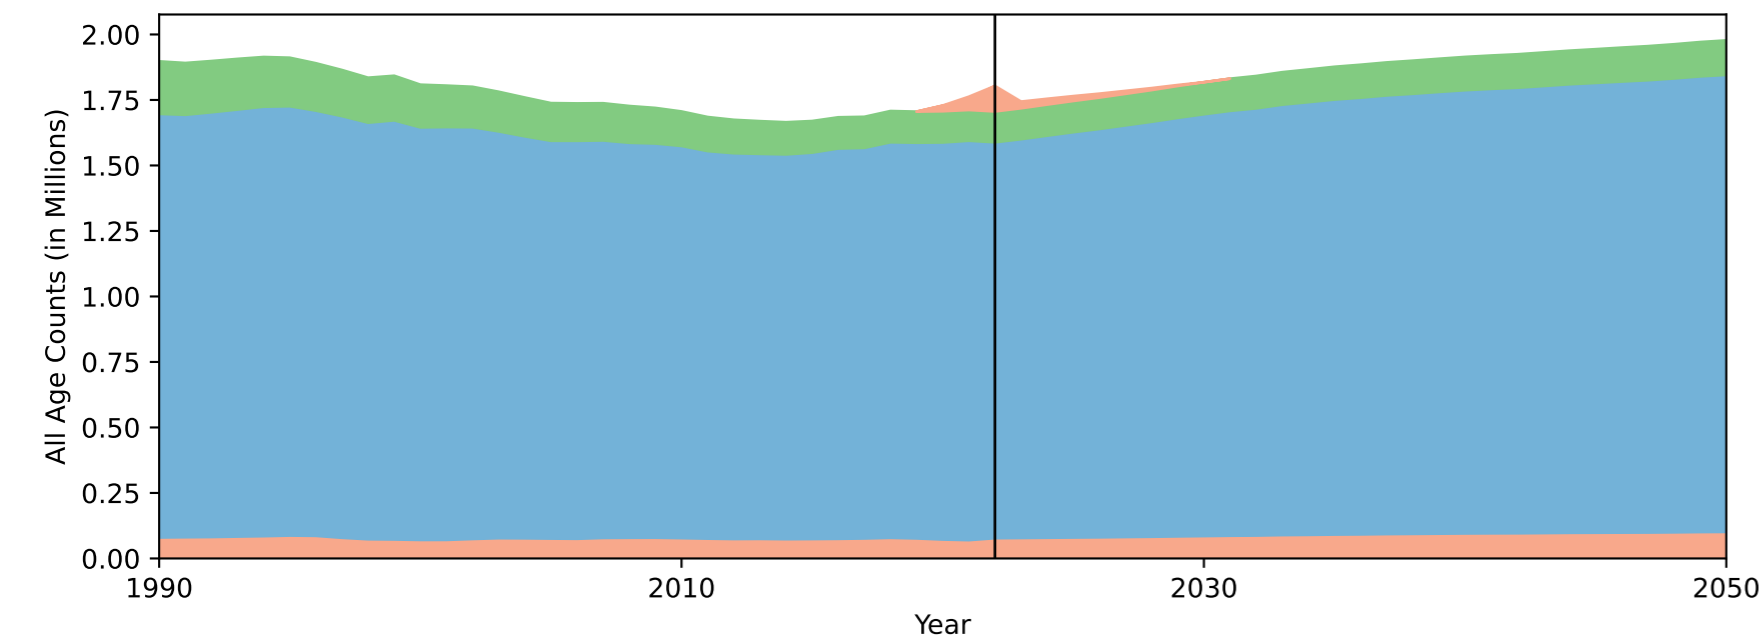

Level 2

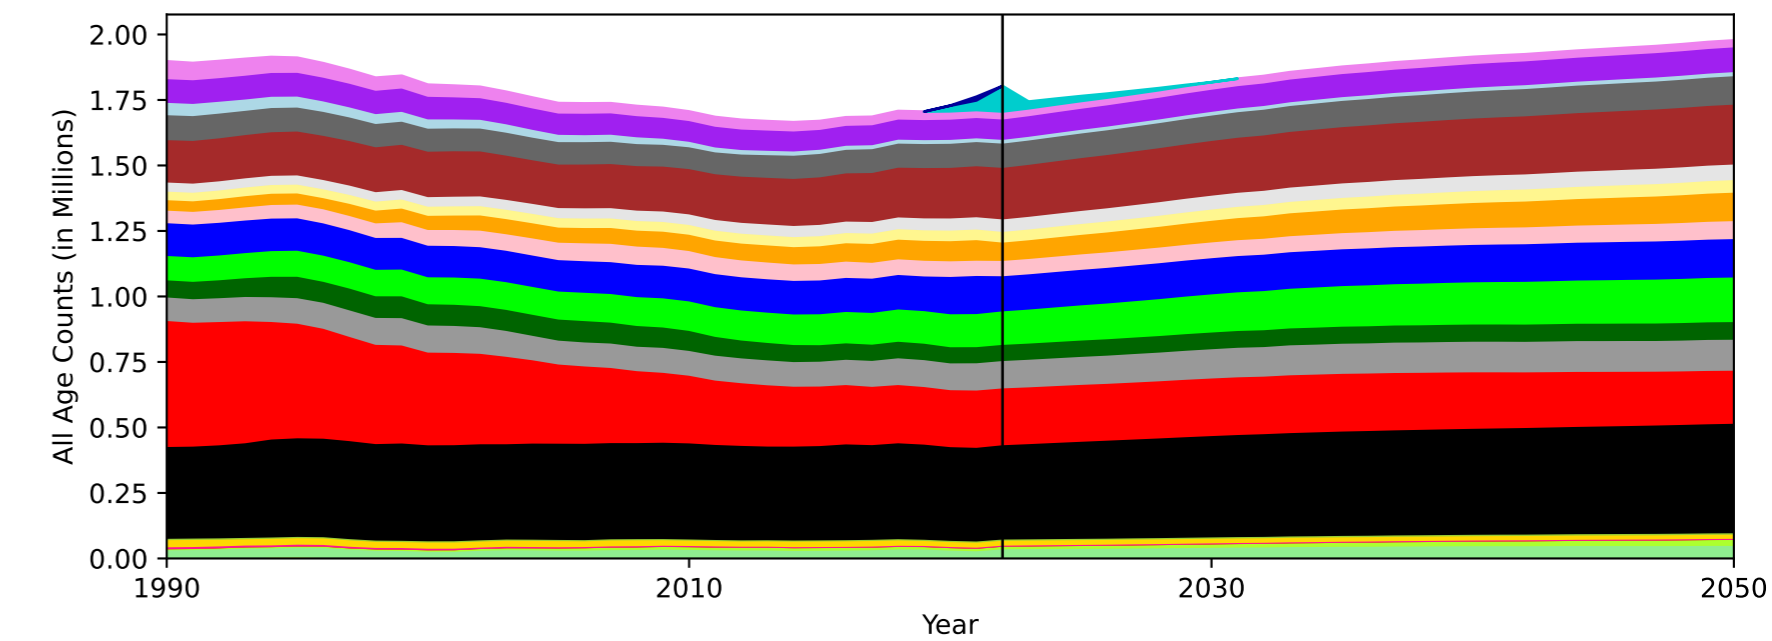

Level 1

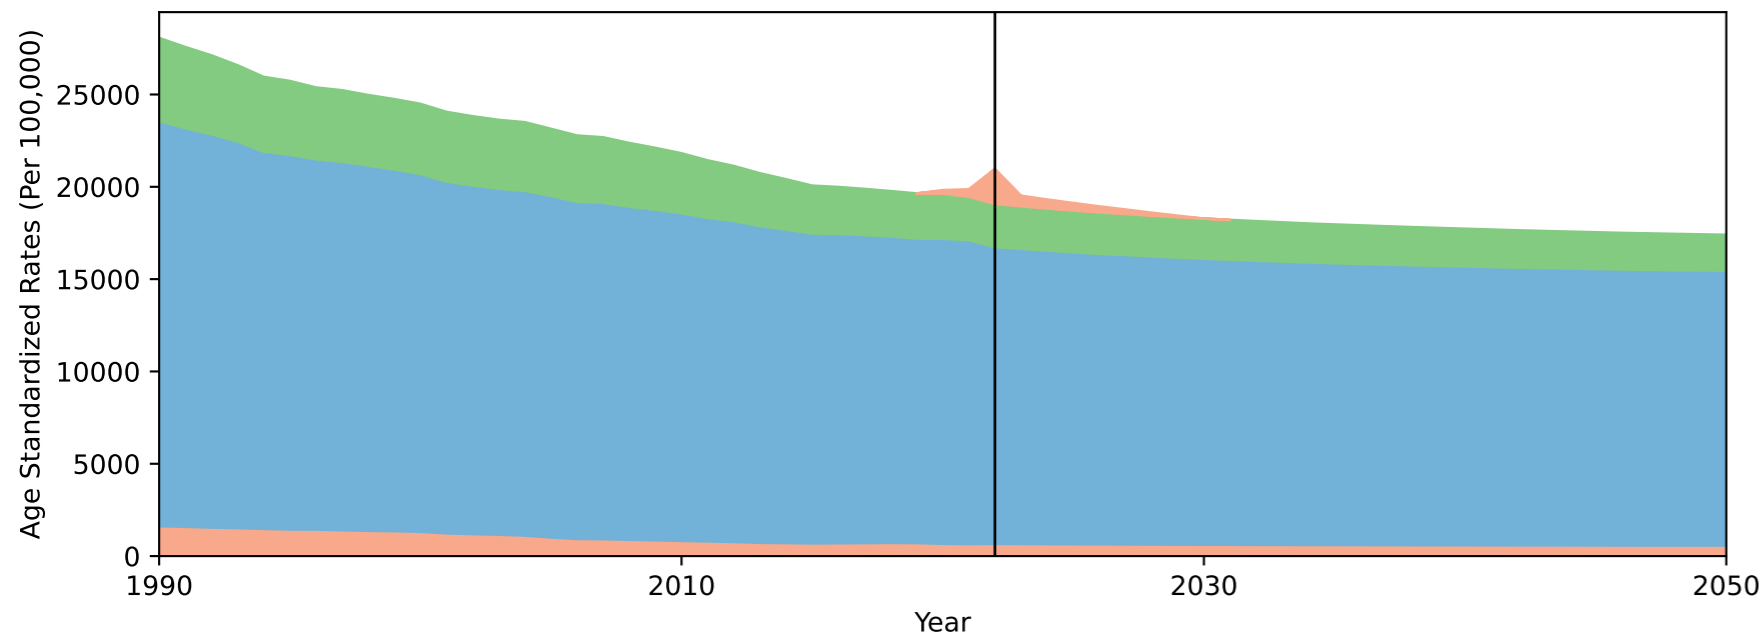

Level 2

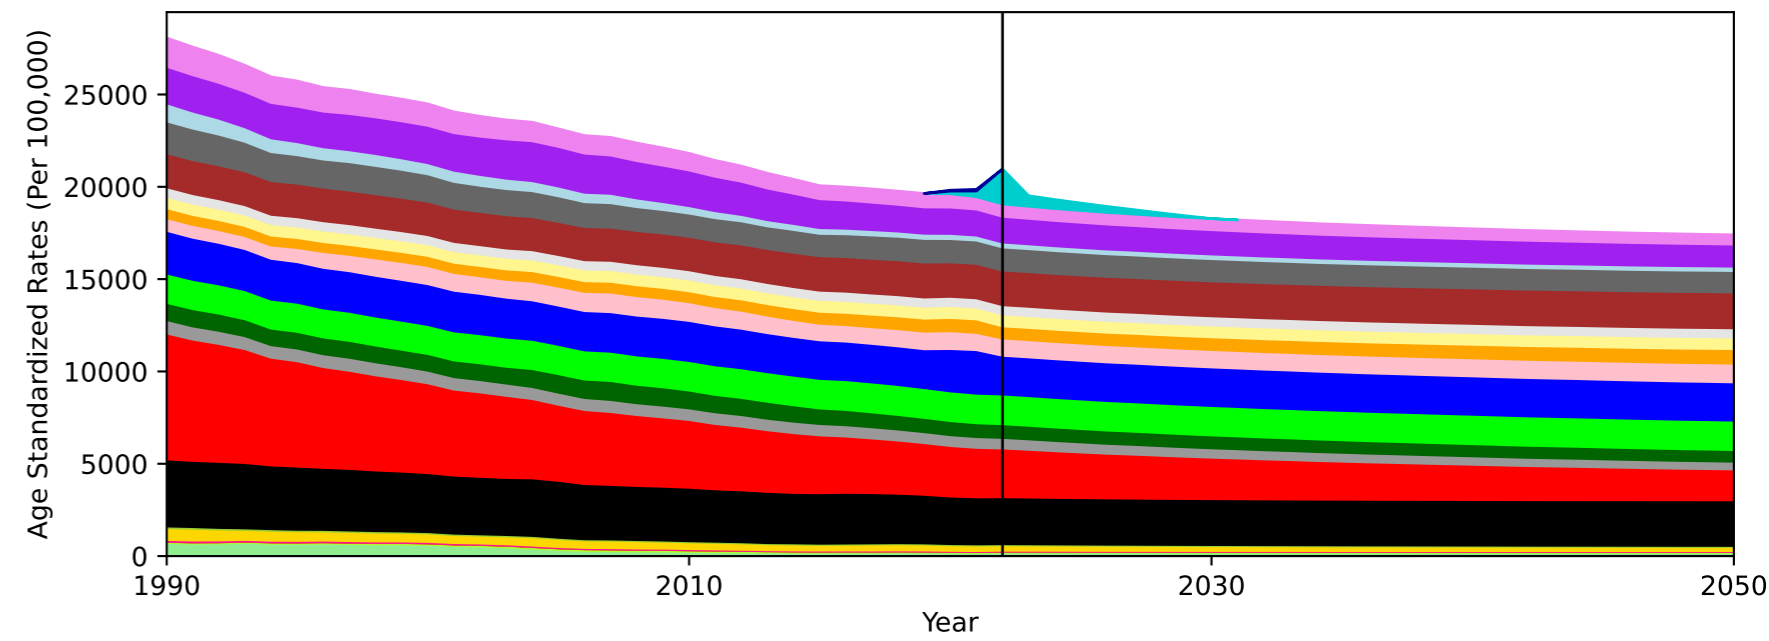

Level 1

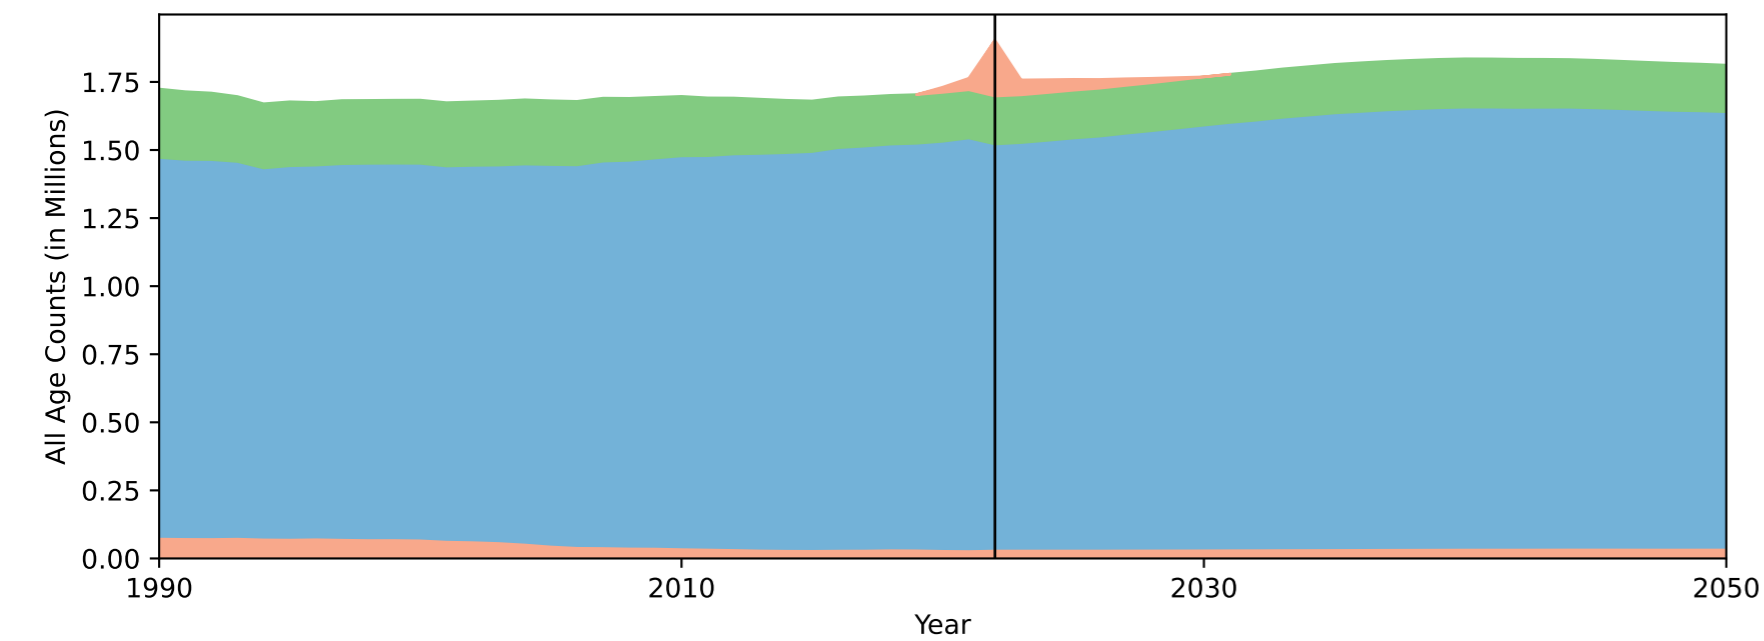

Level 2

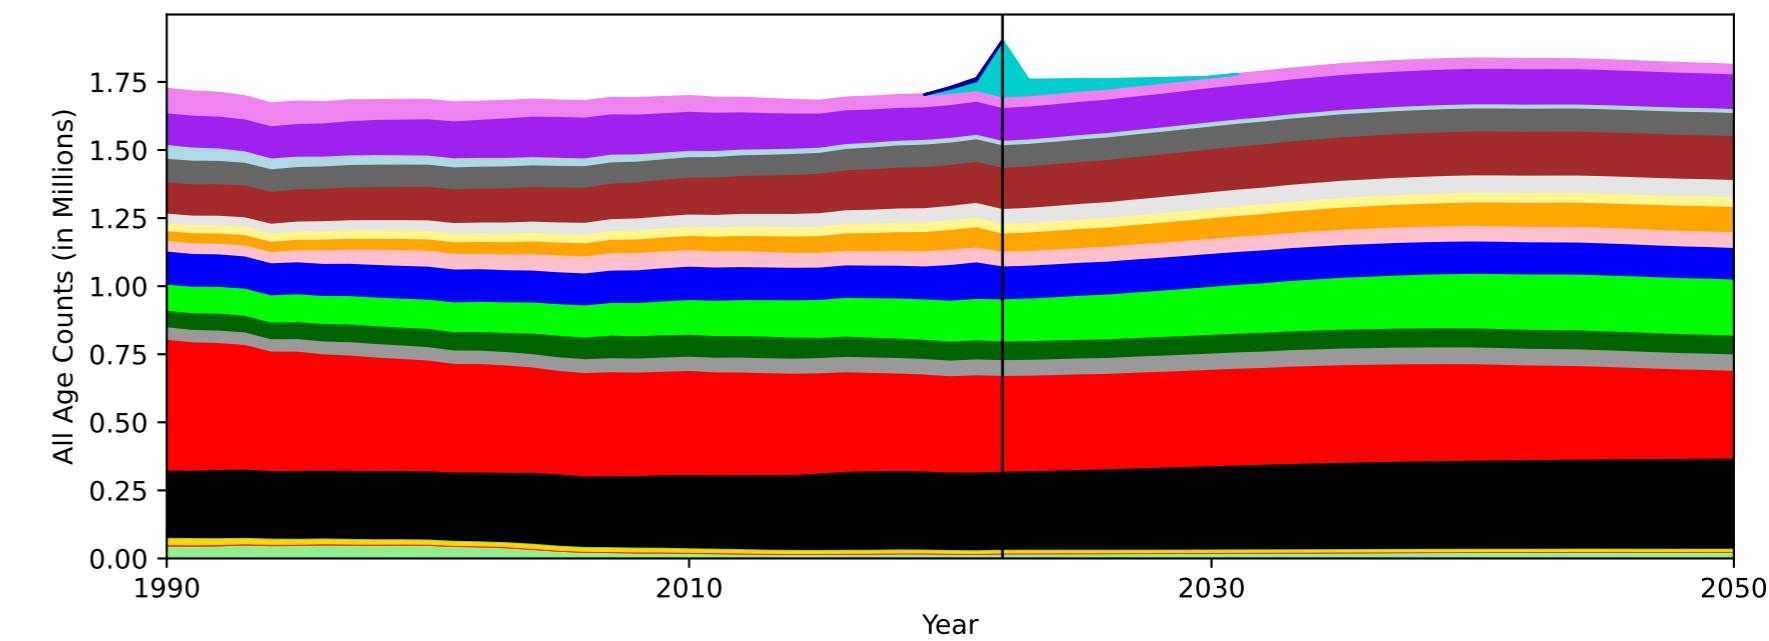

# France

Level 1

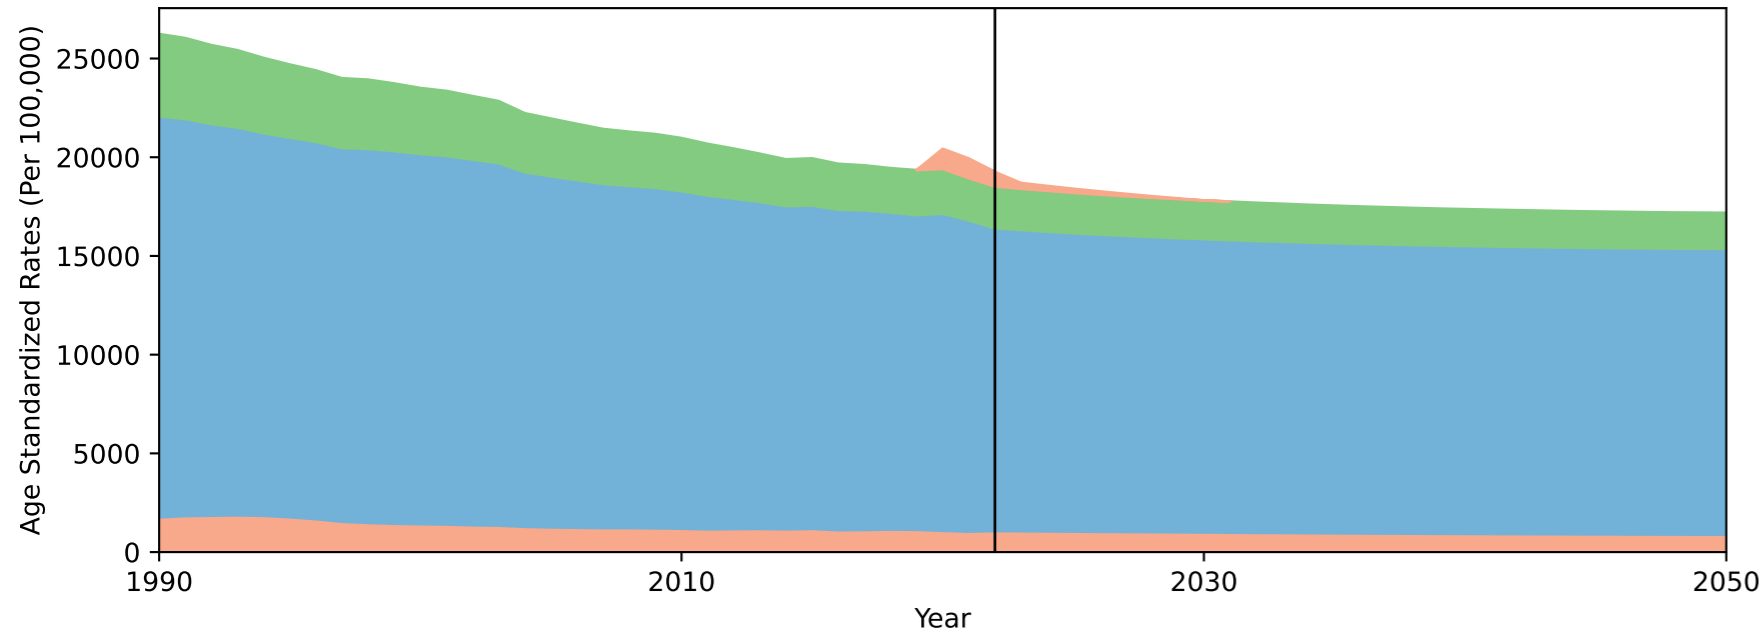

Level 2

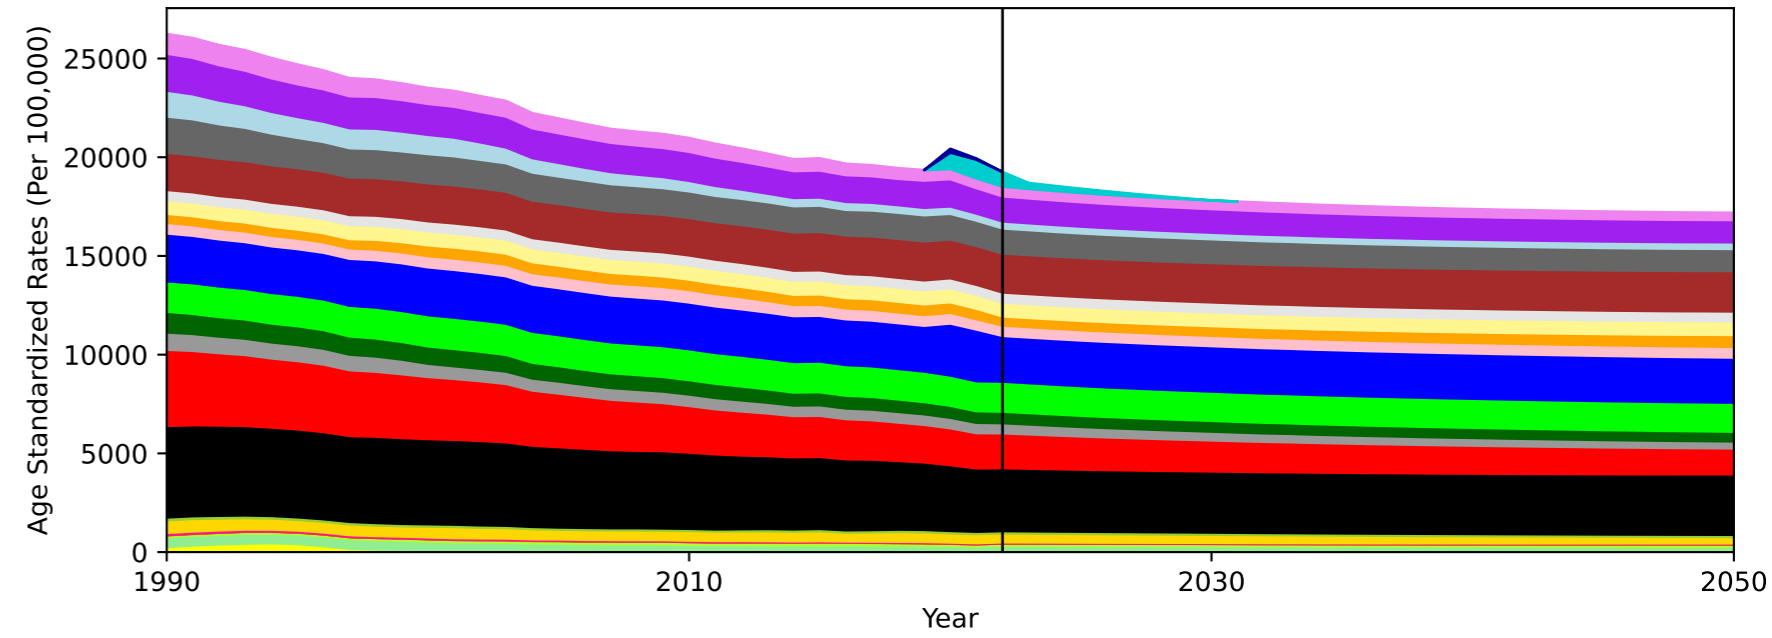

Level 1

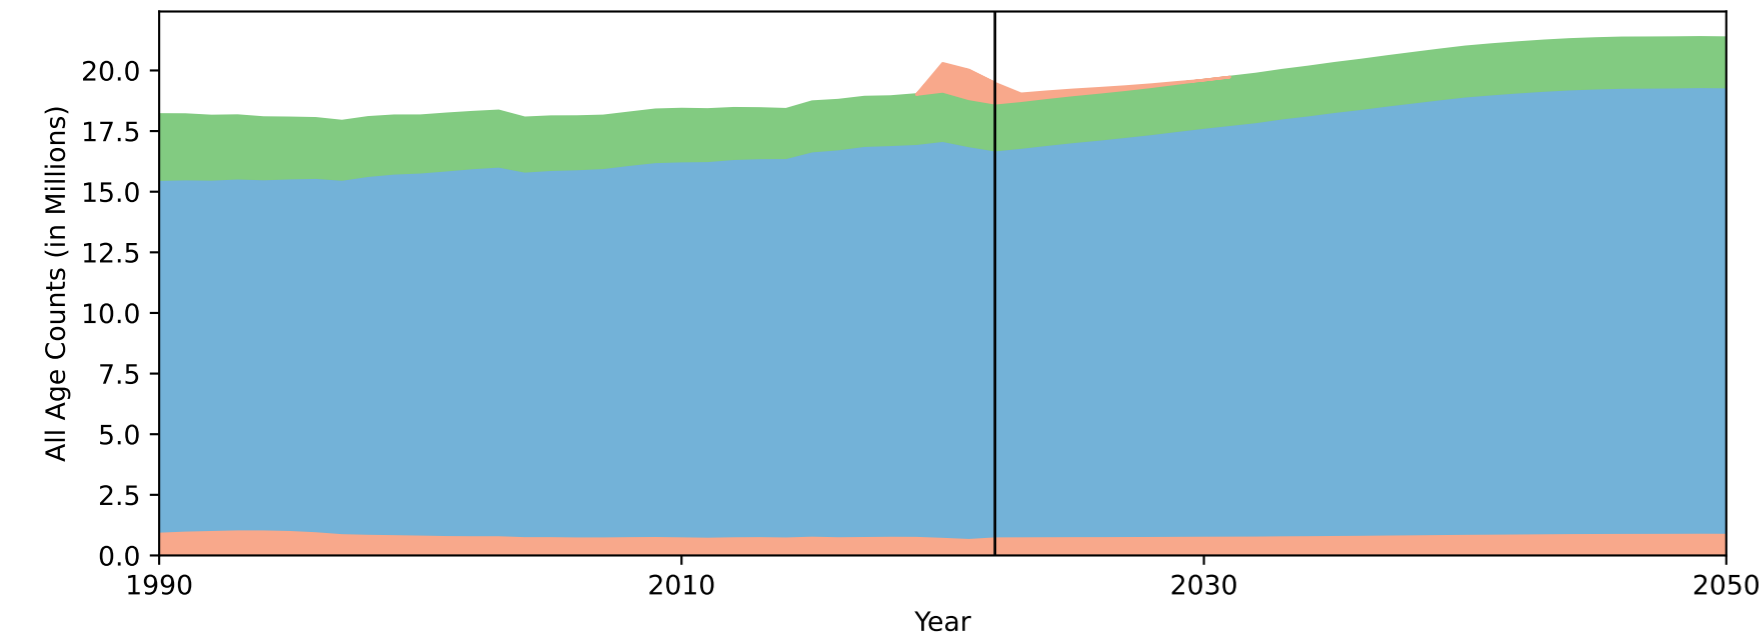

Level 2

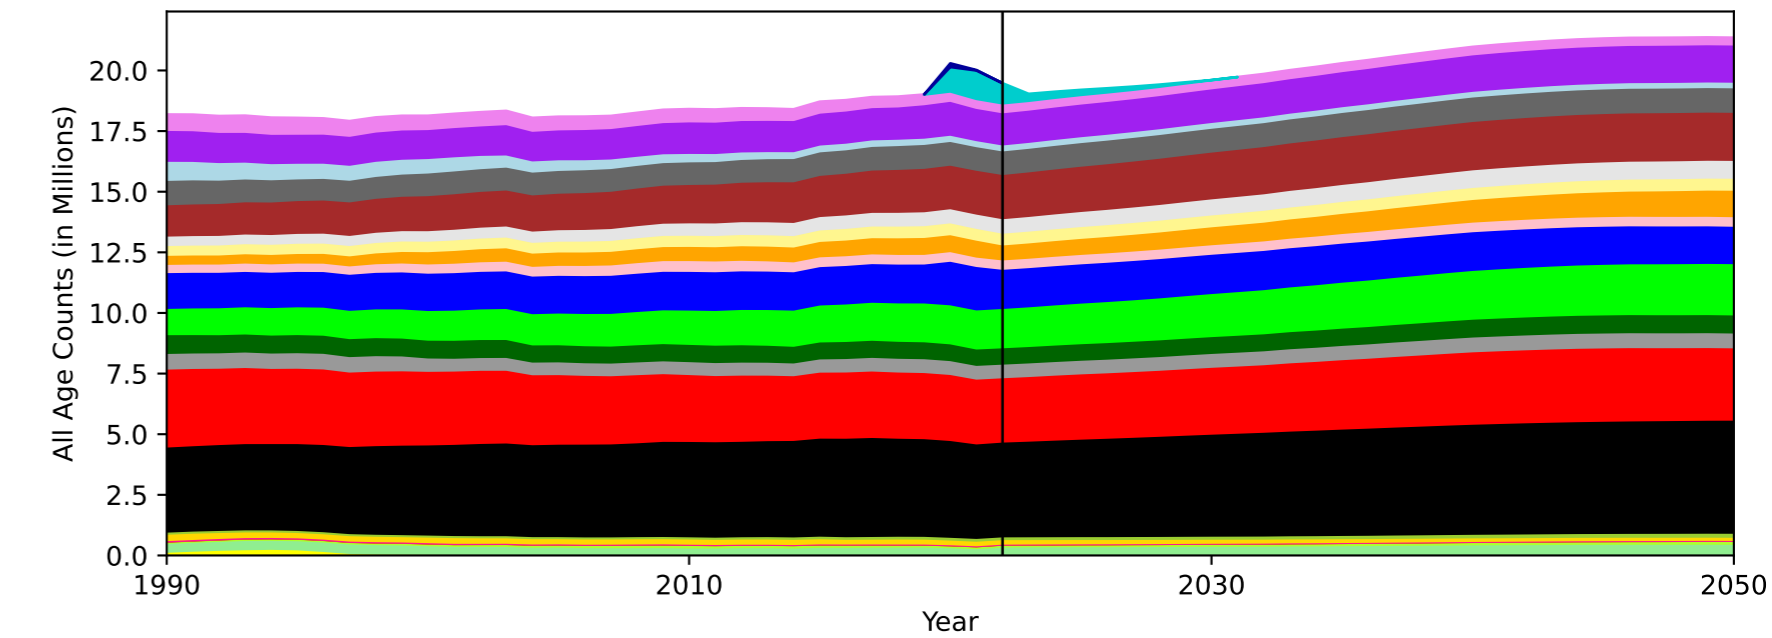

# Germany

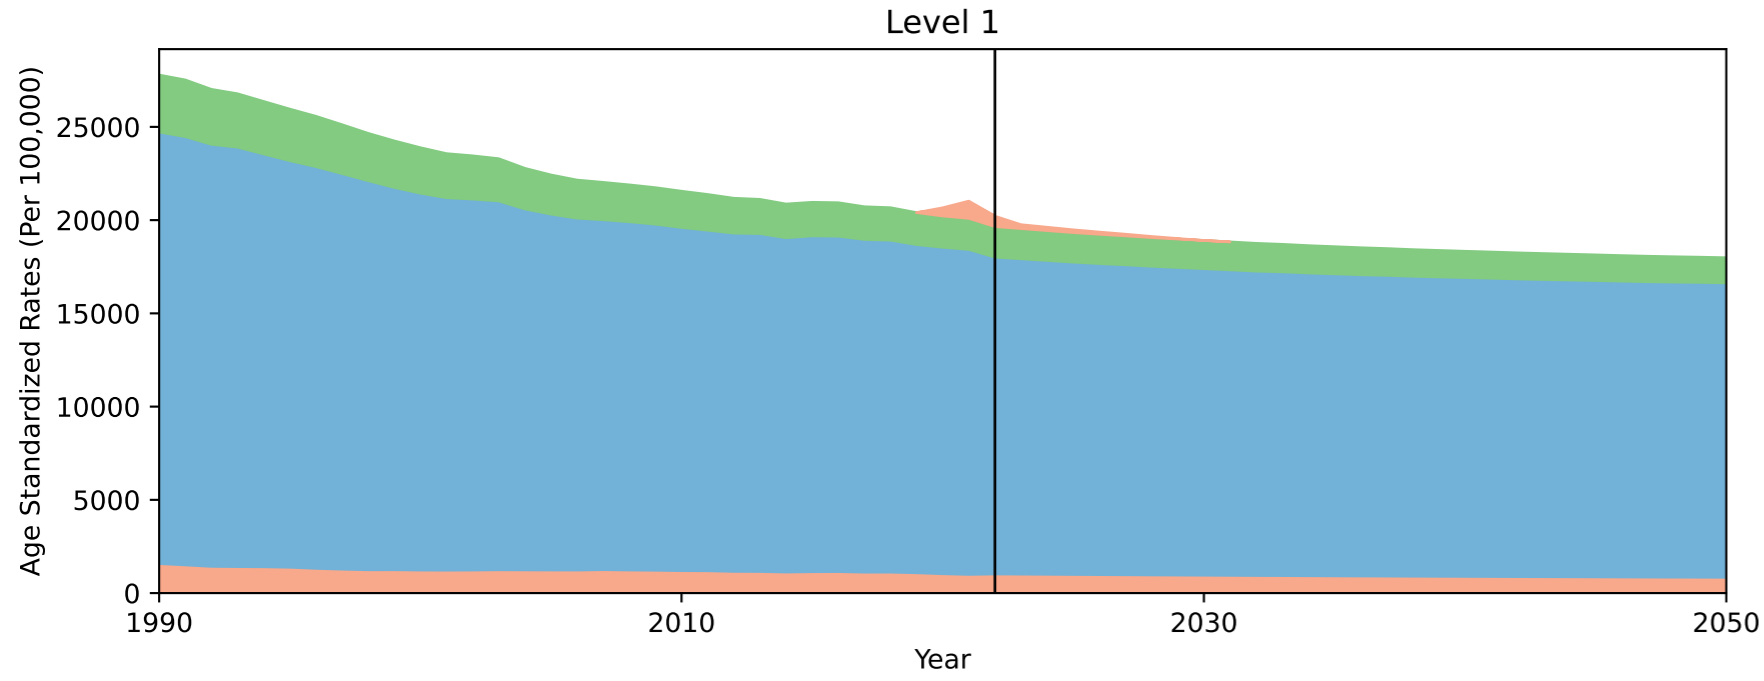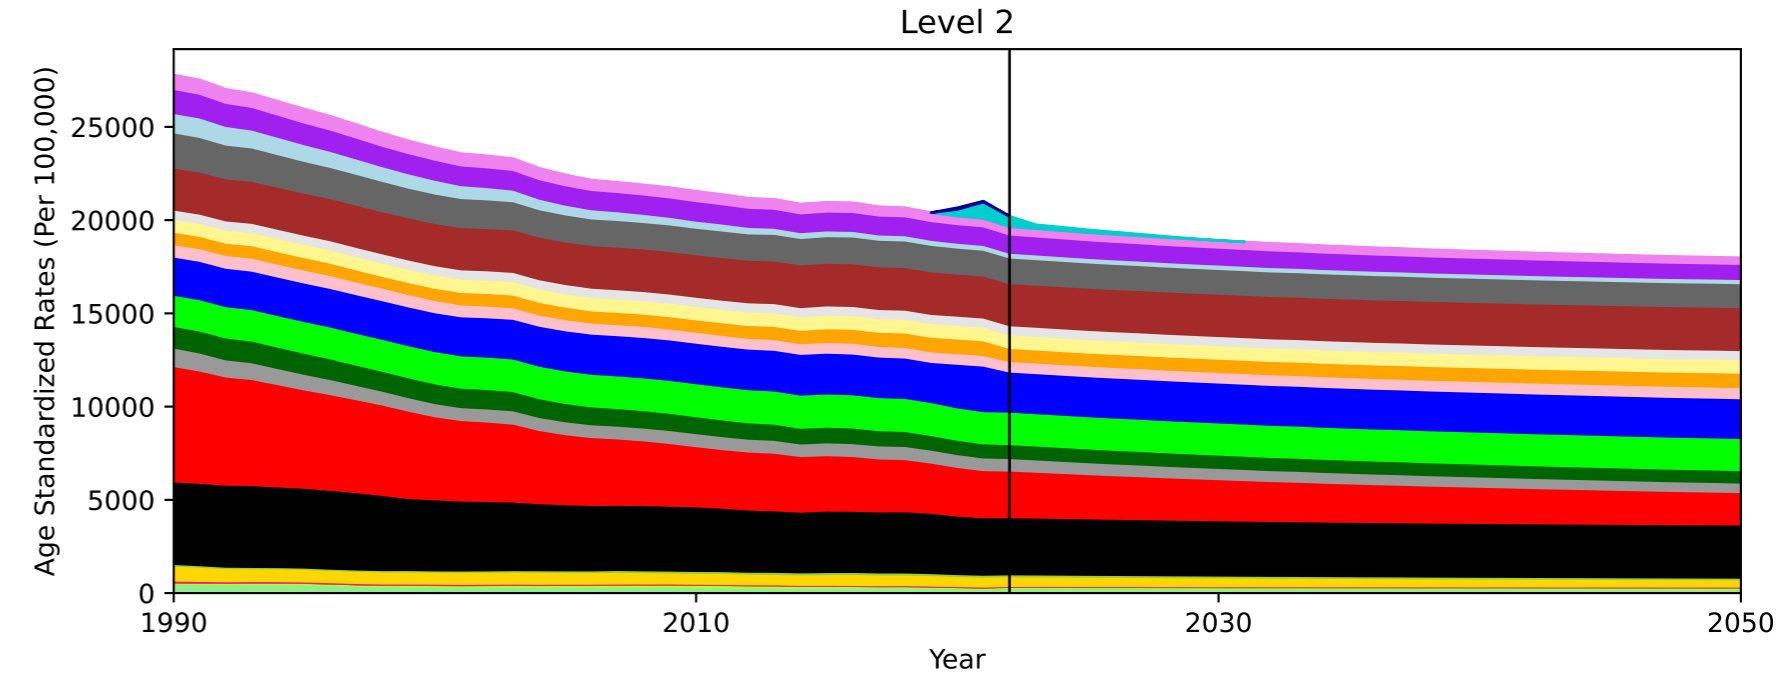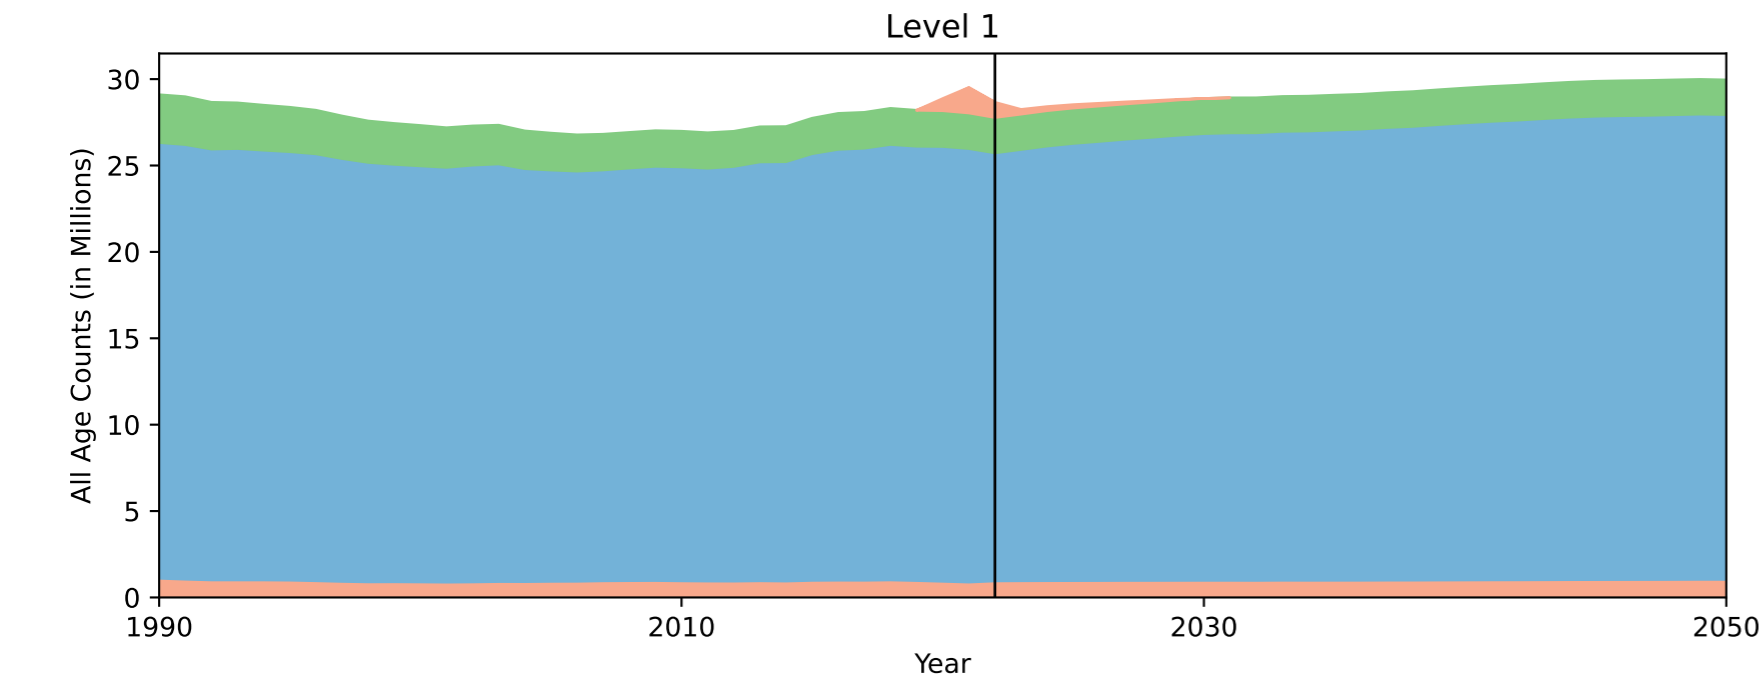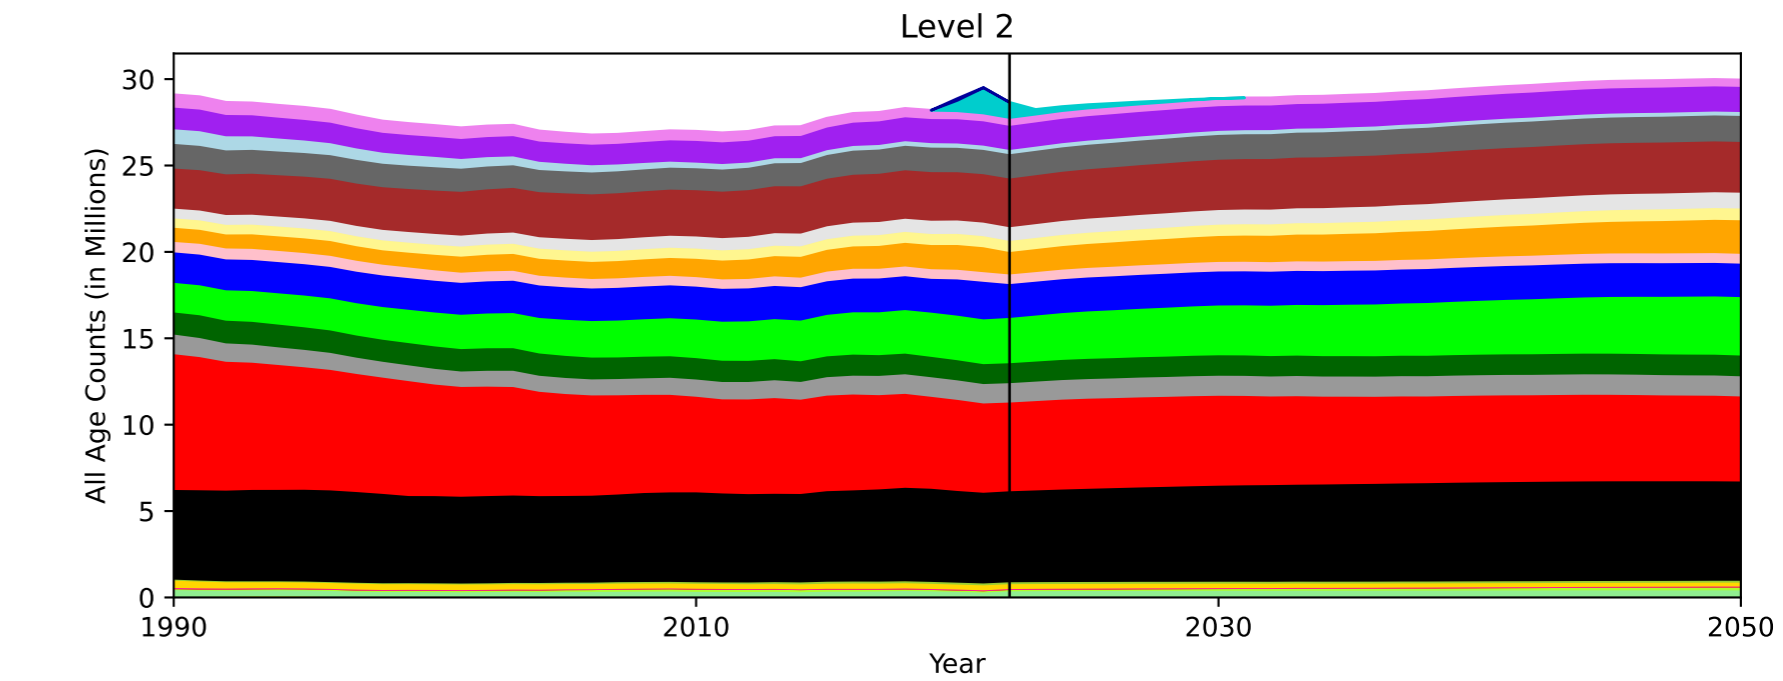

Level 1

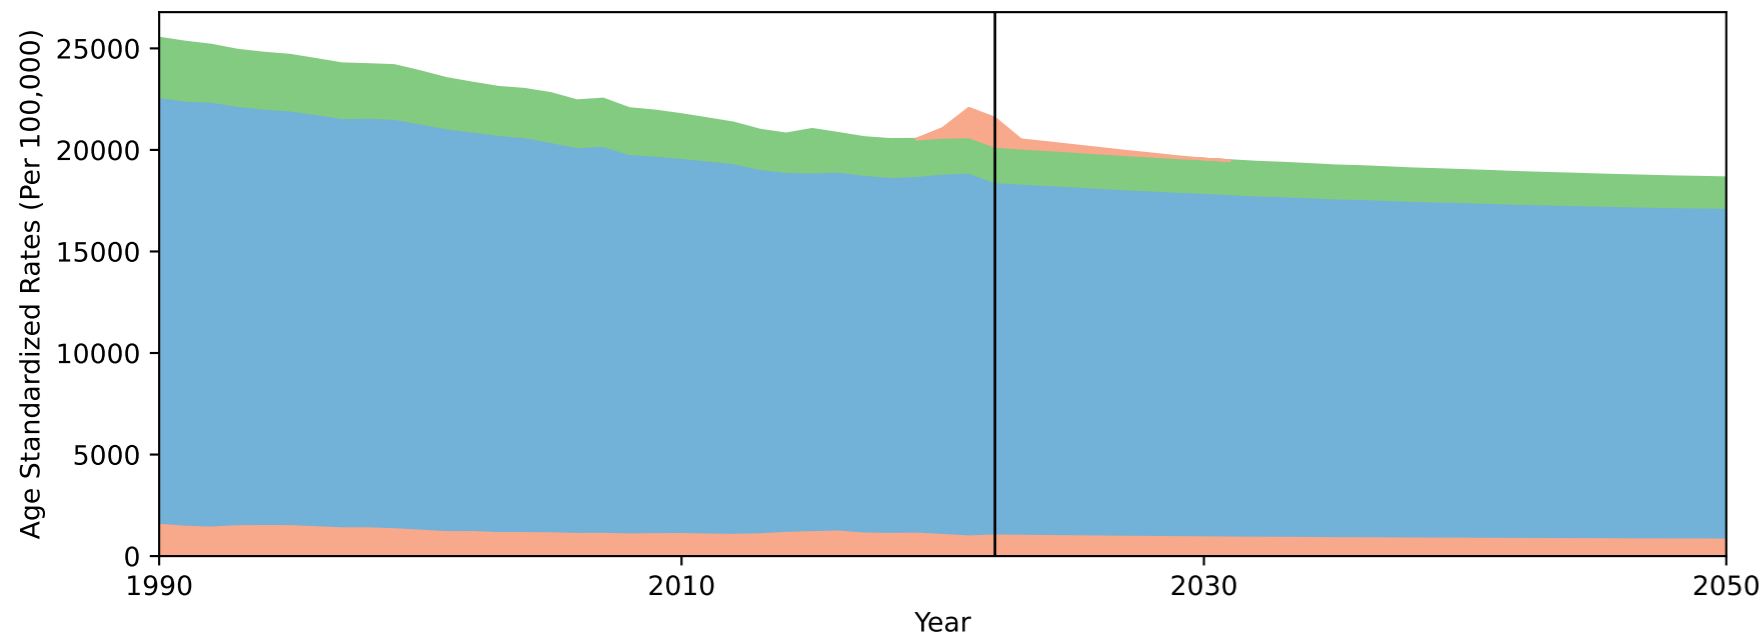

Level 2

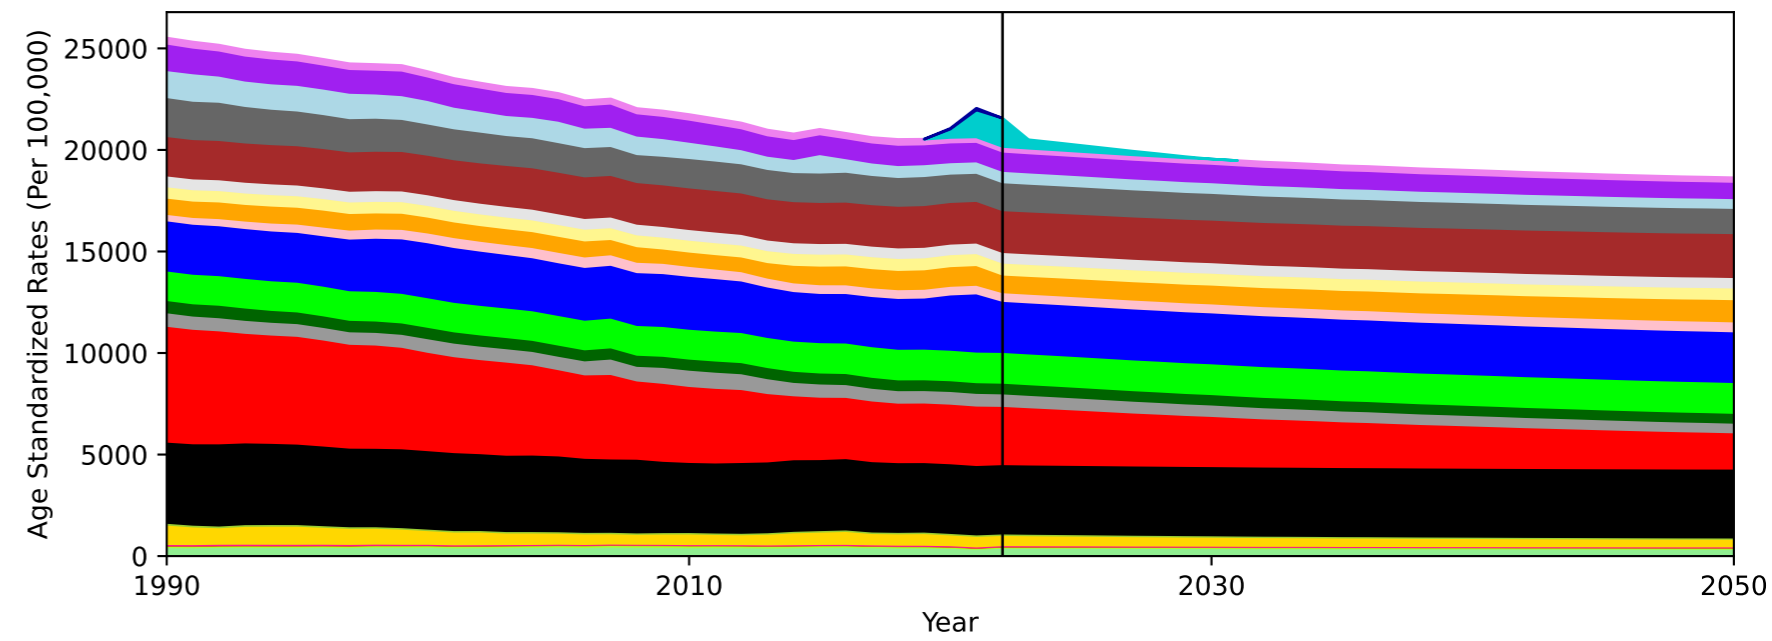

Level 1

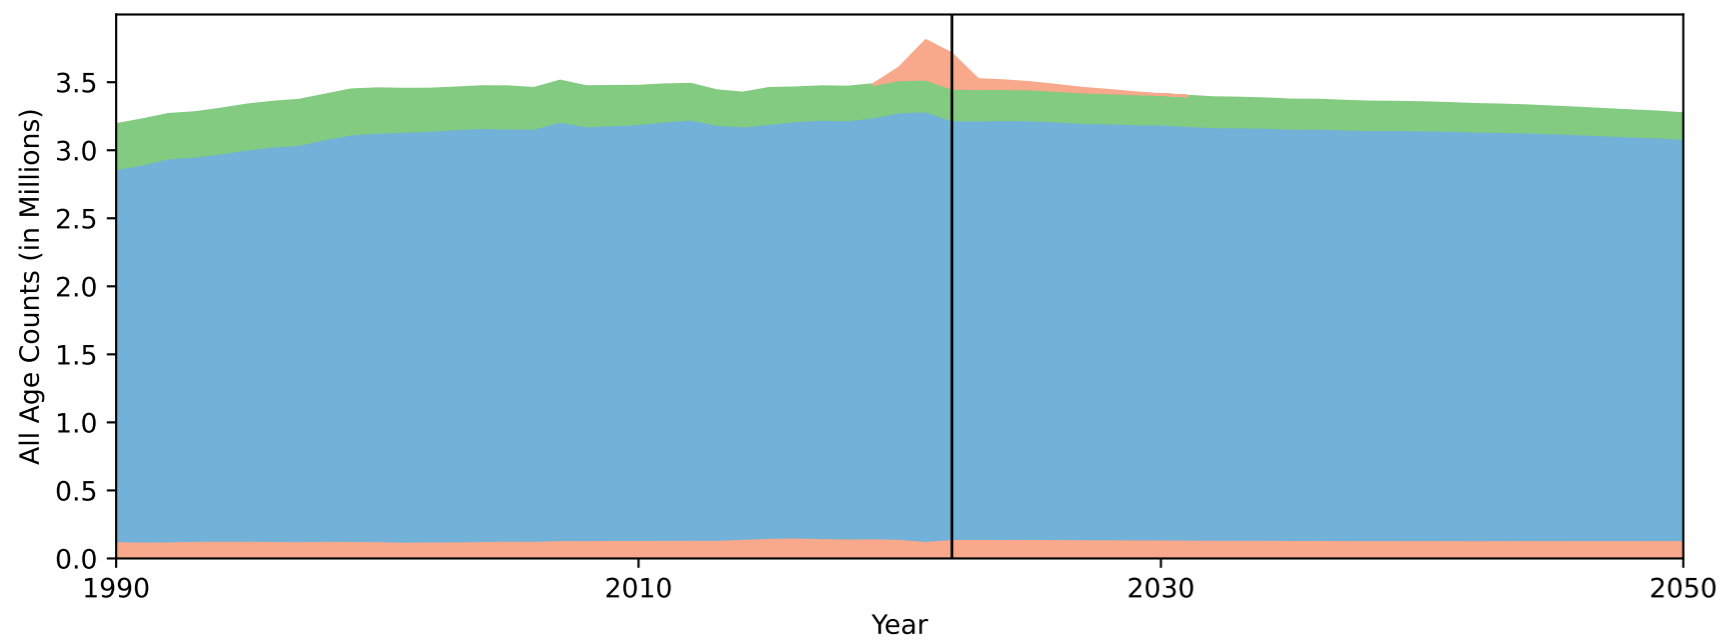

Level 2

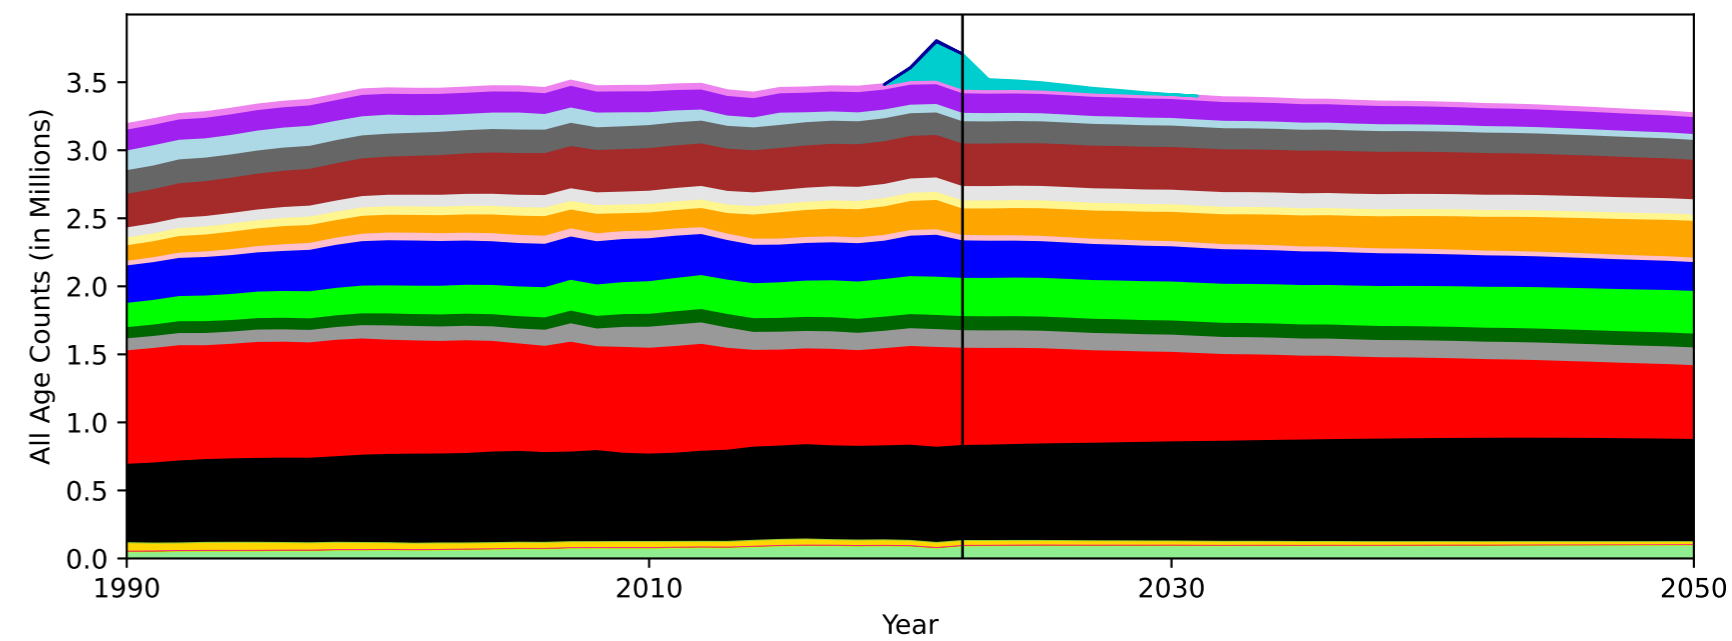

Level 1

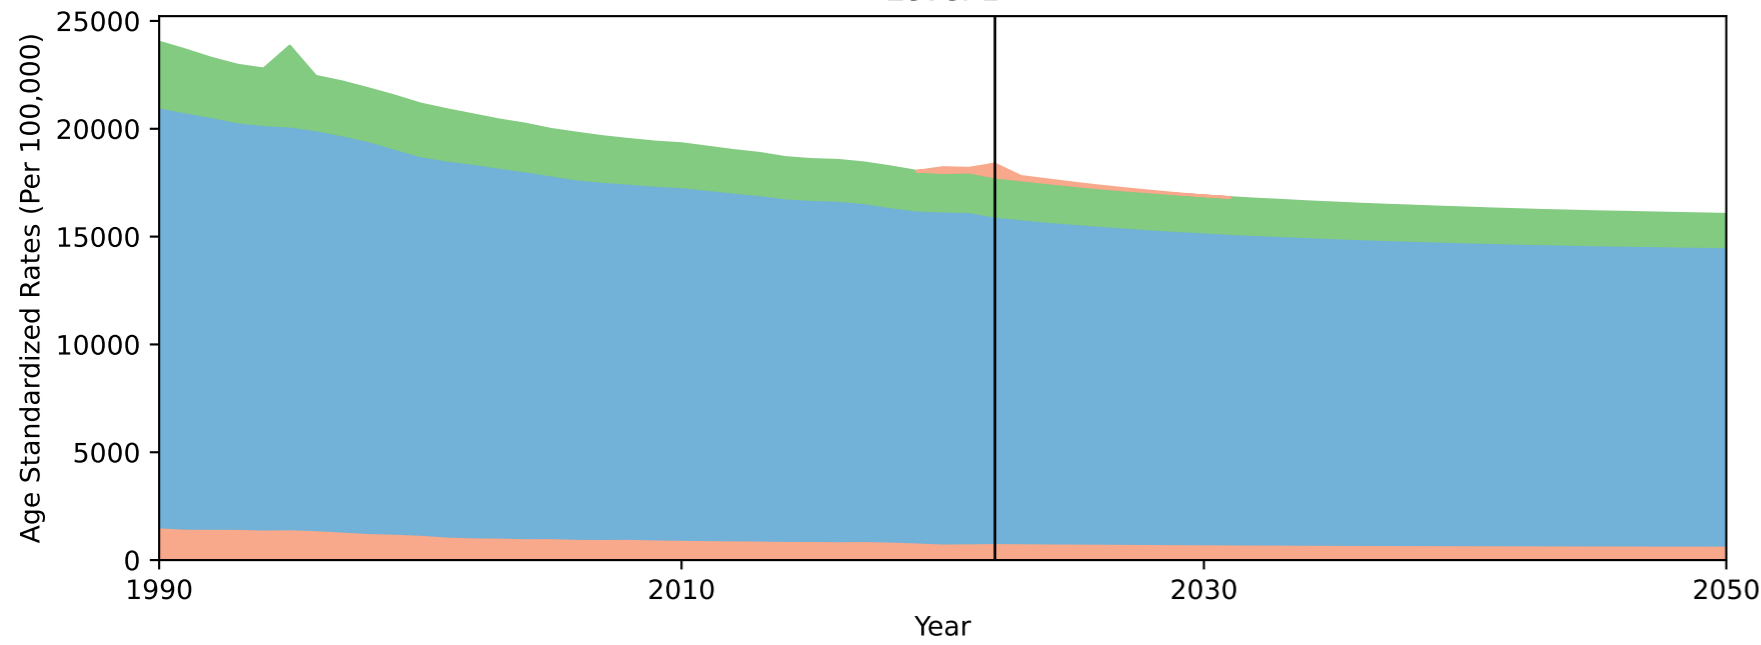

Level 2

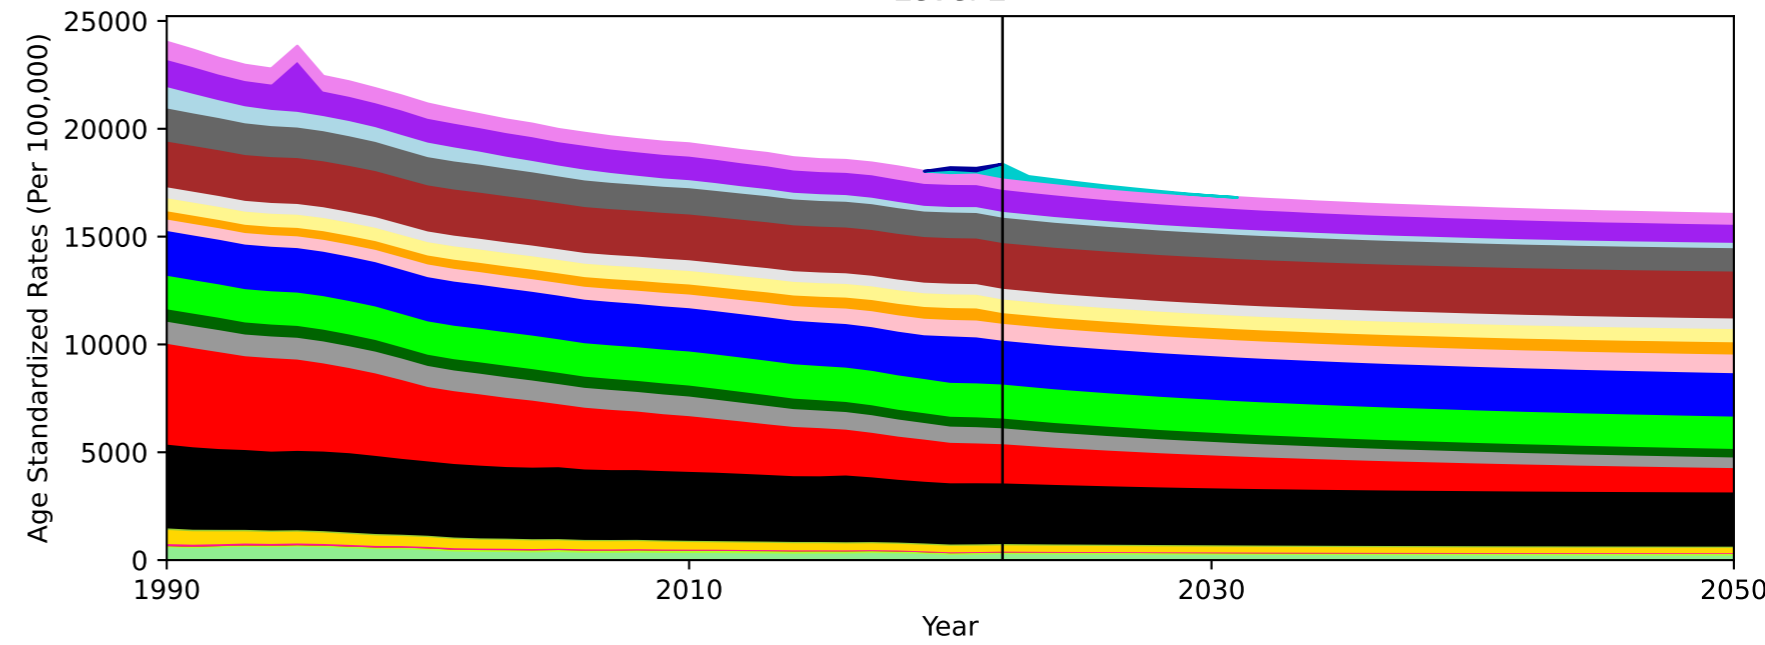

Level 1

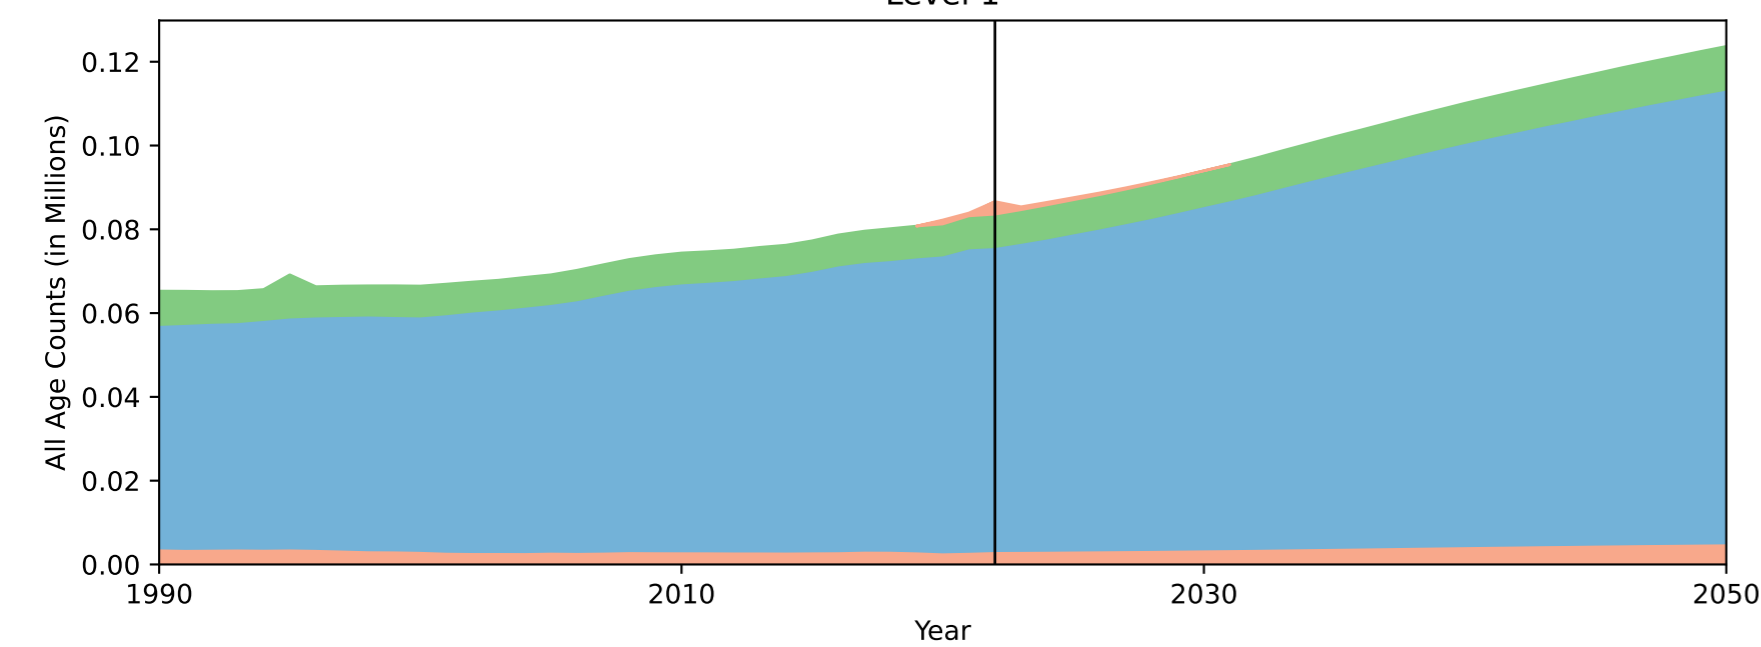

Level 2

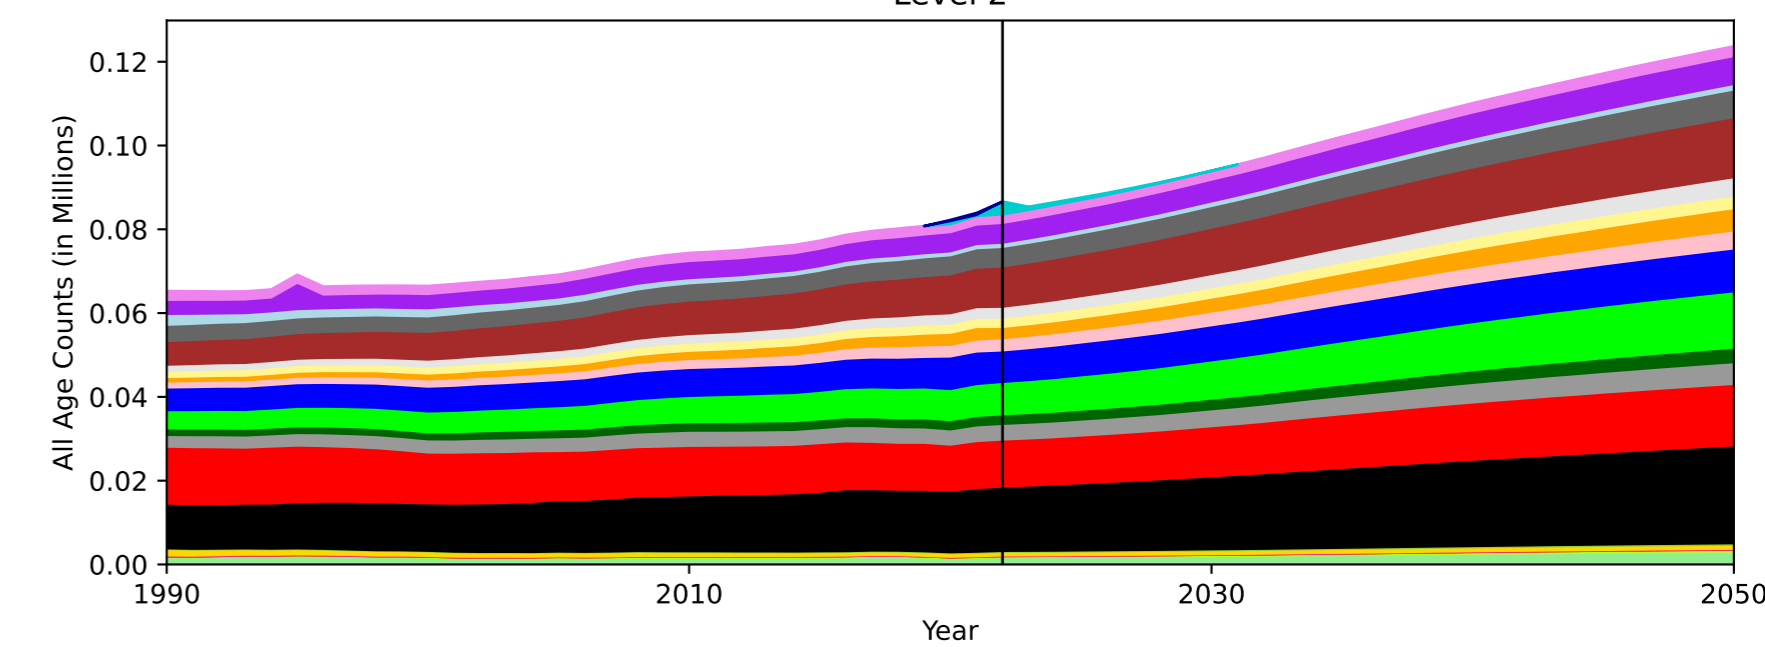



Level 1

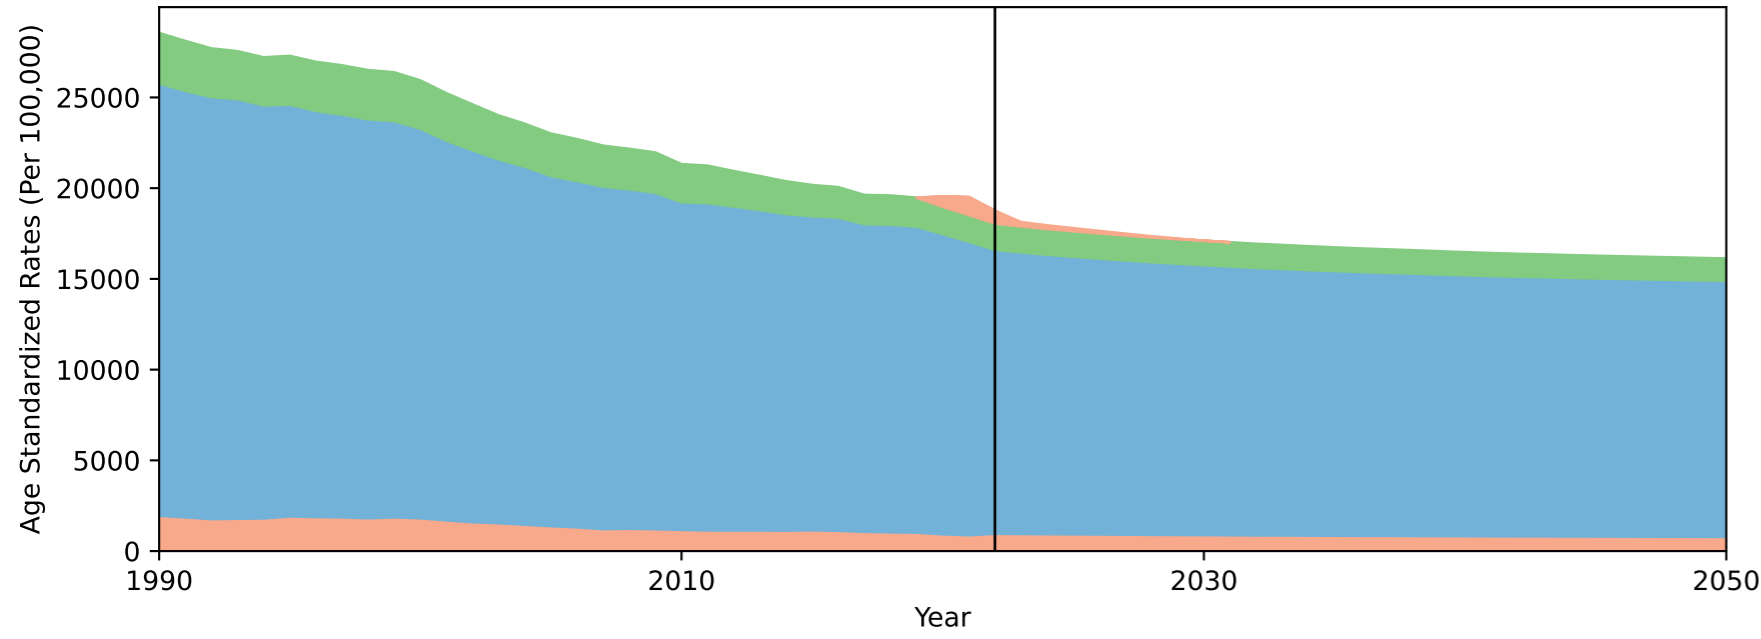

Level 2

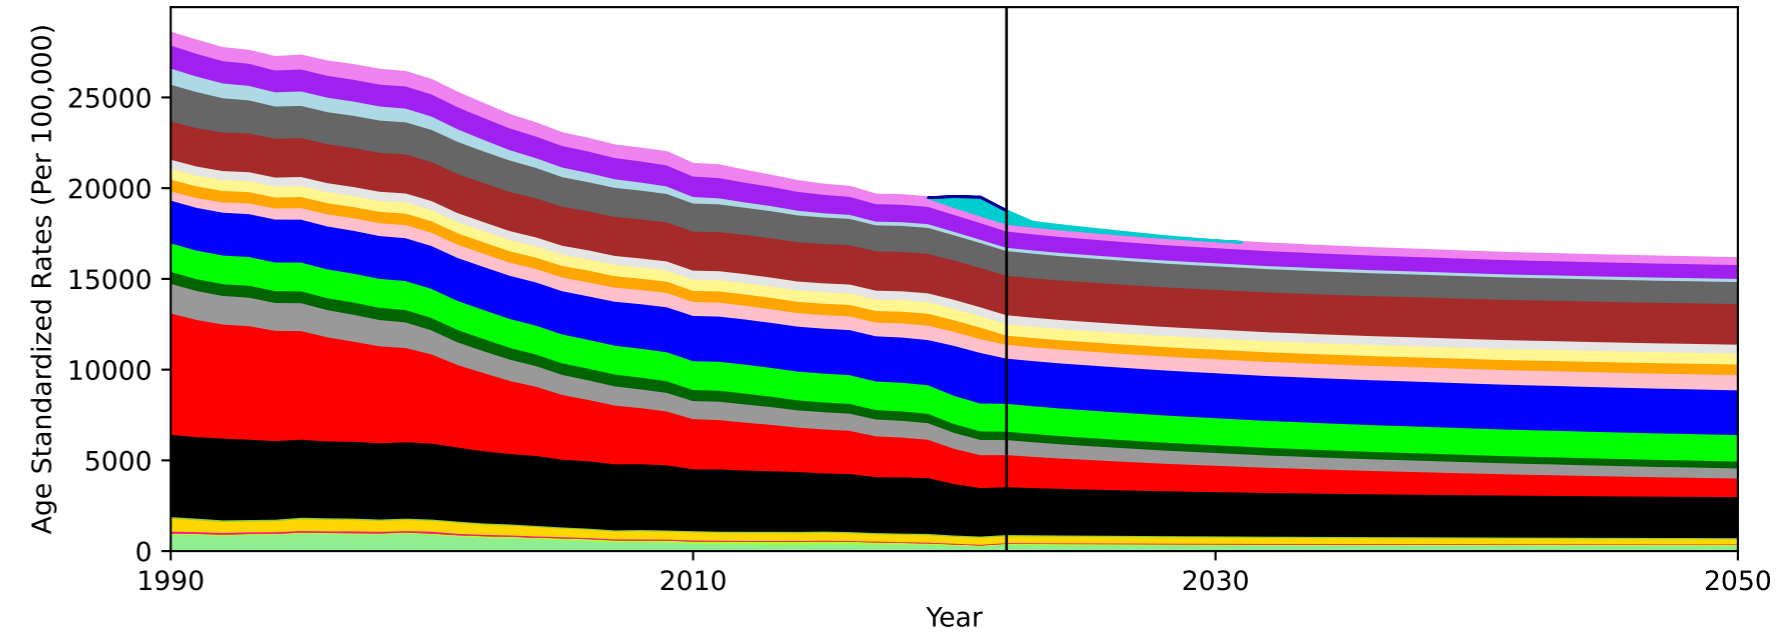

Level 1

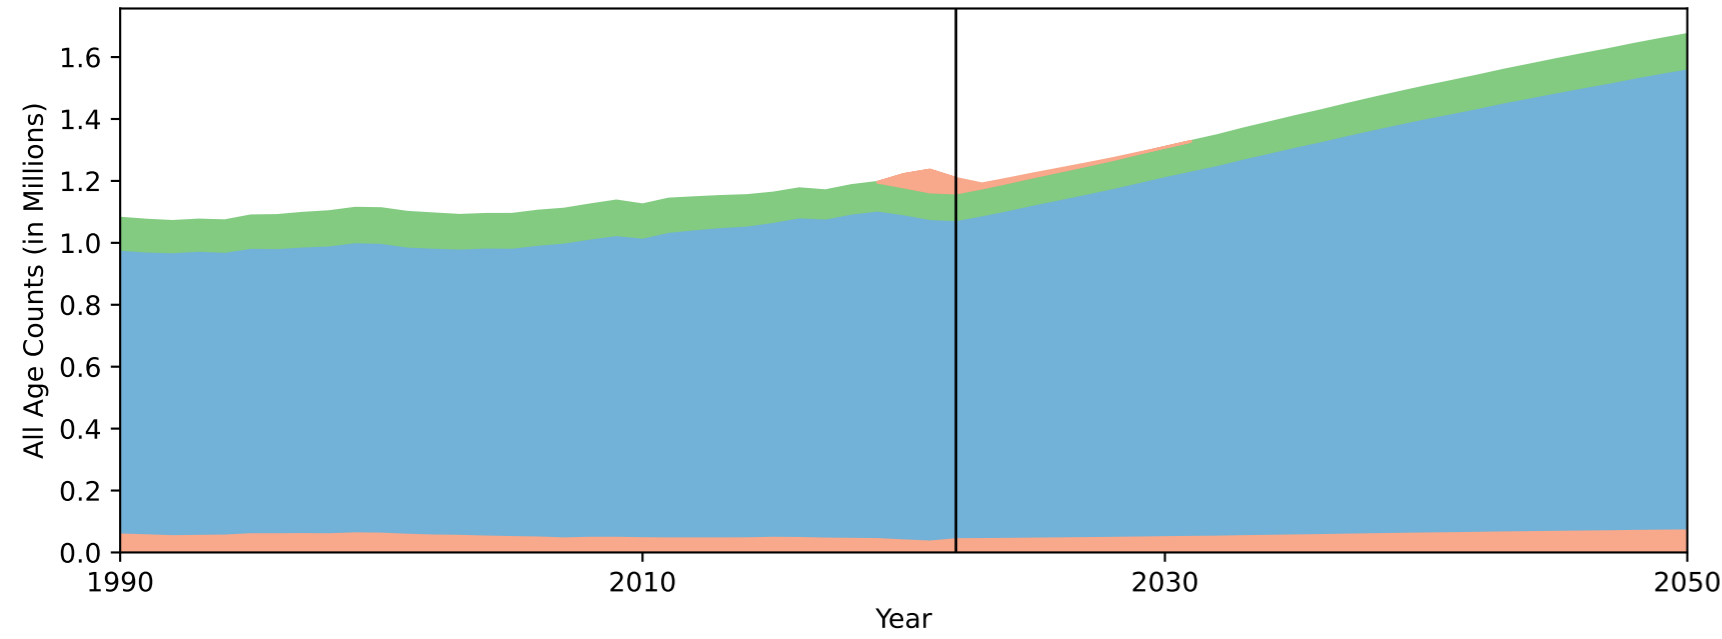

Level 2

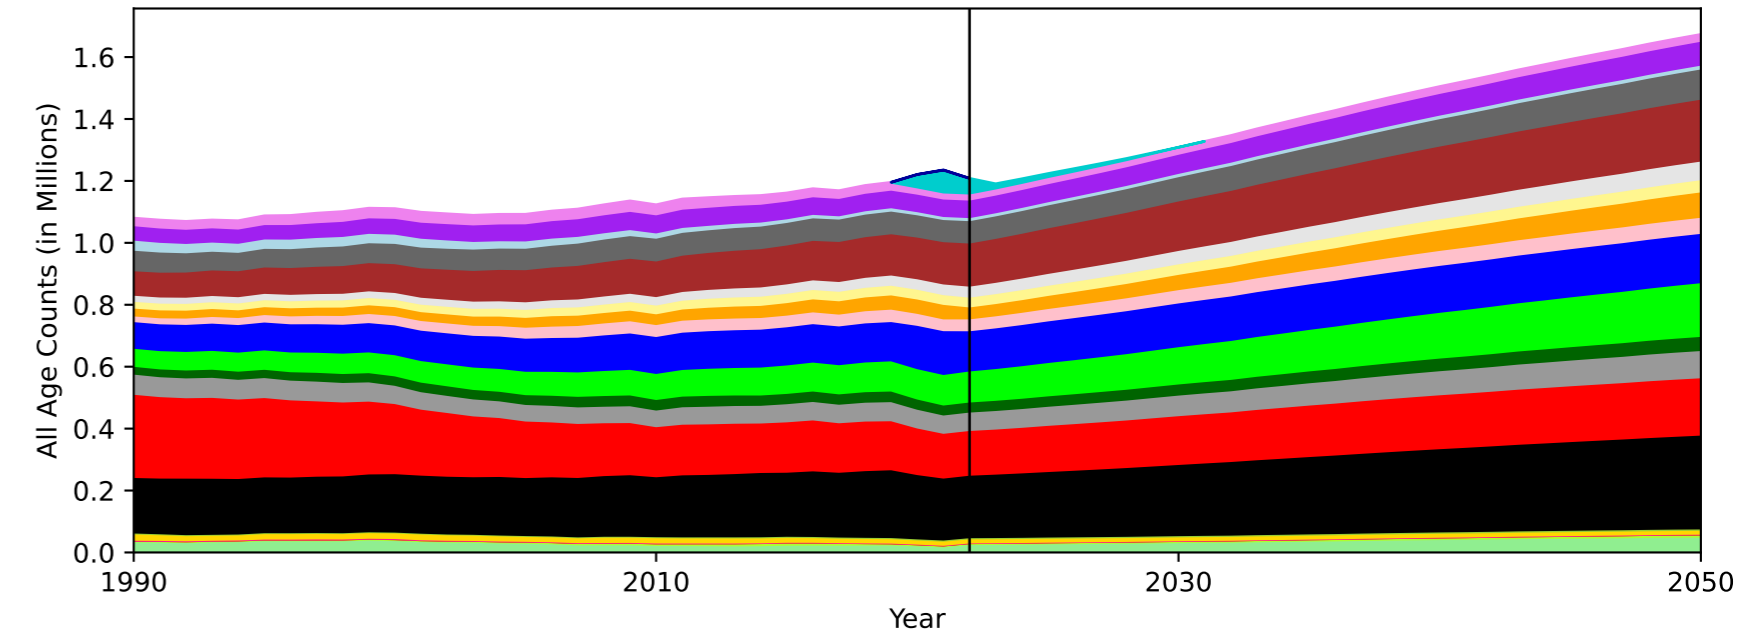

# Israel

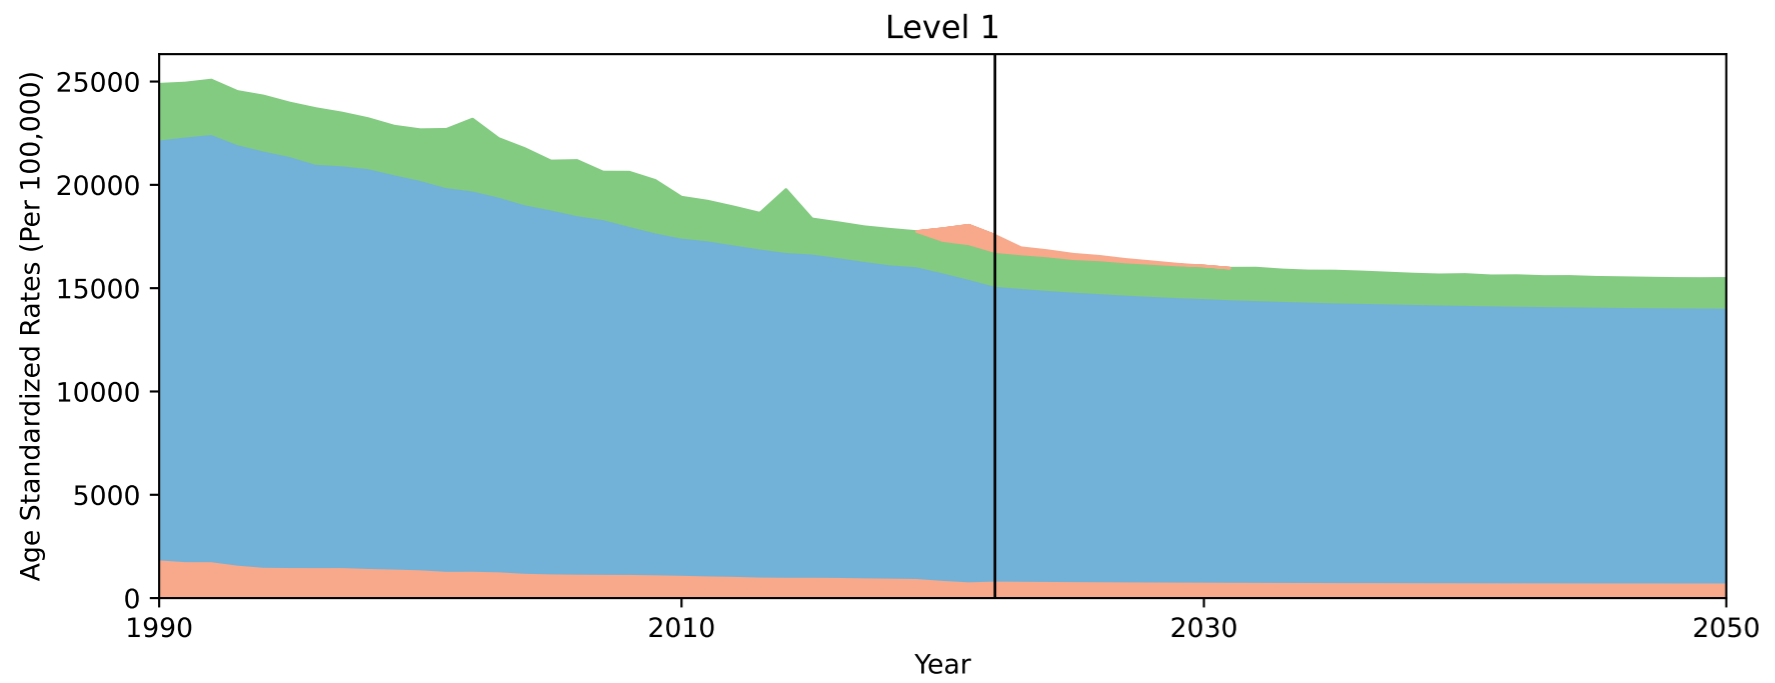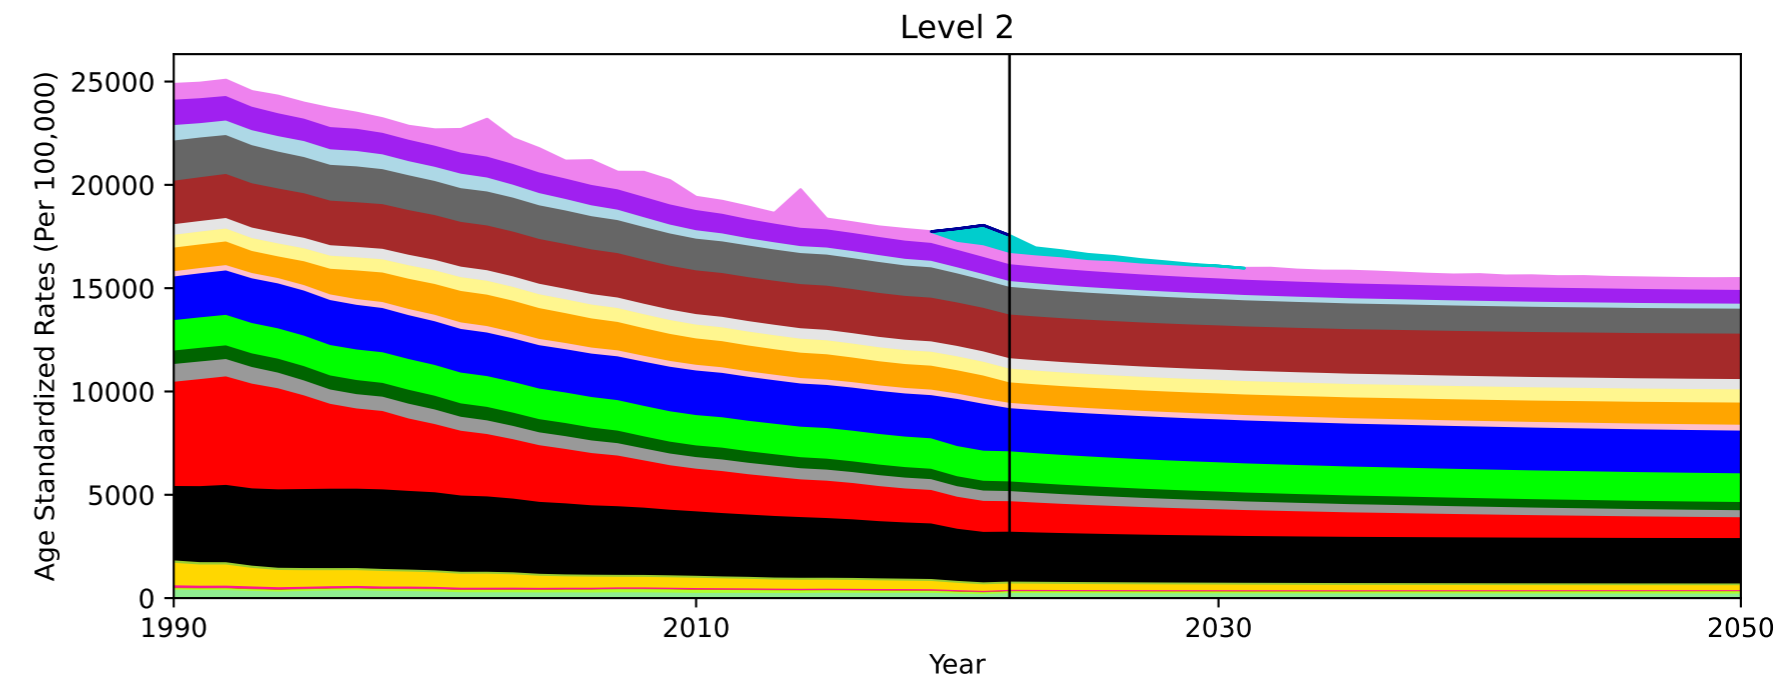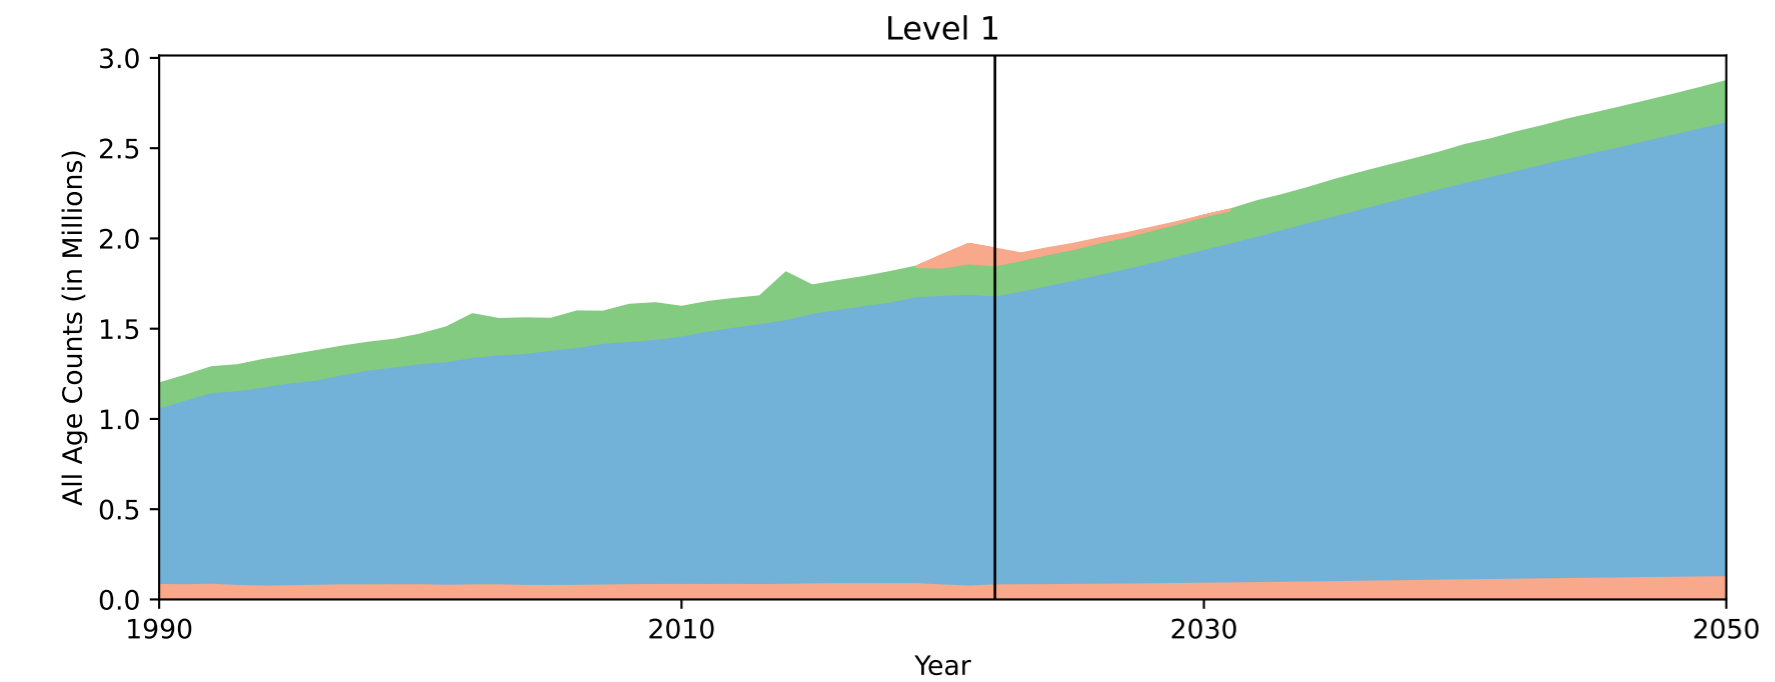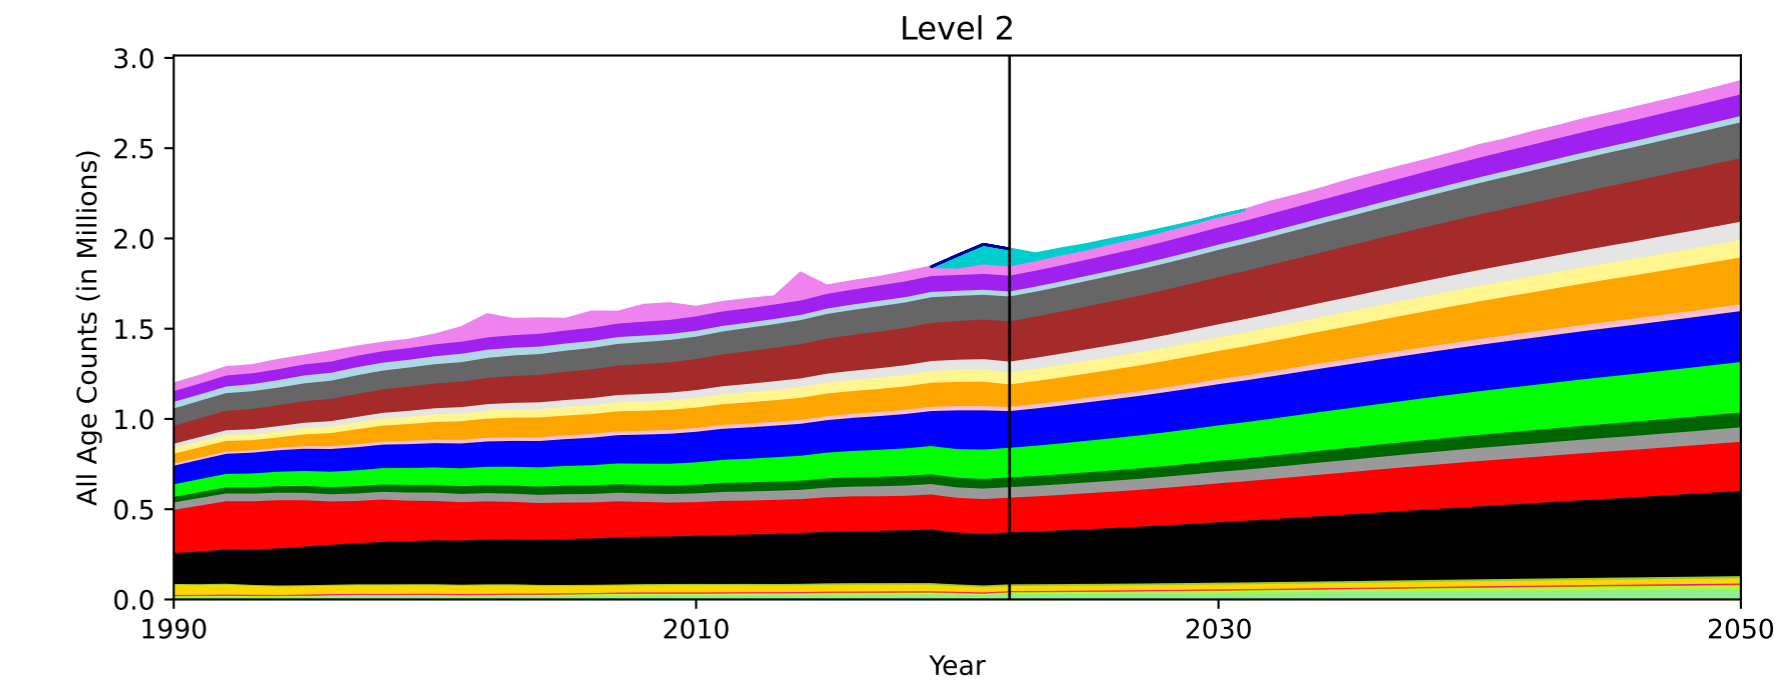

# Italy

Level 1

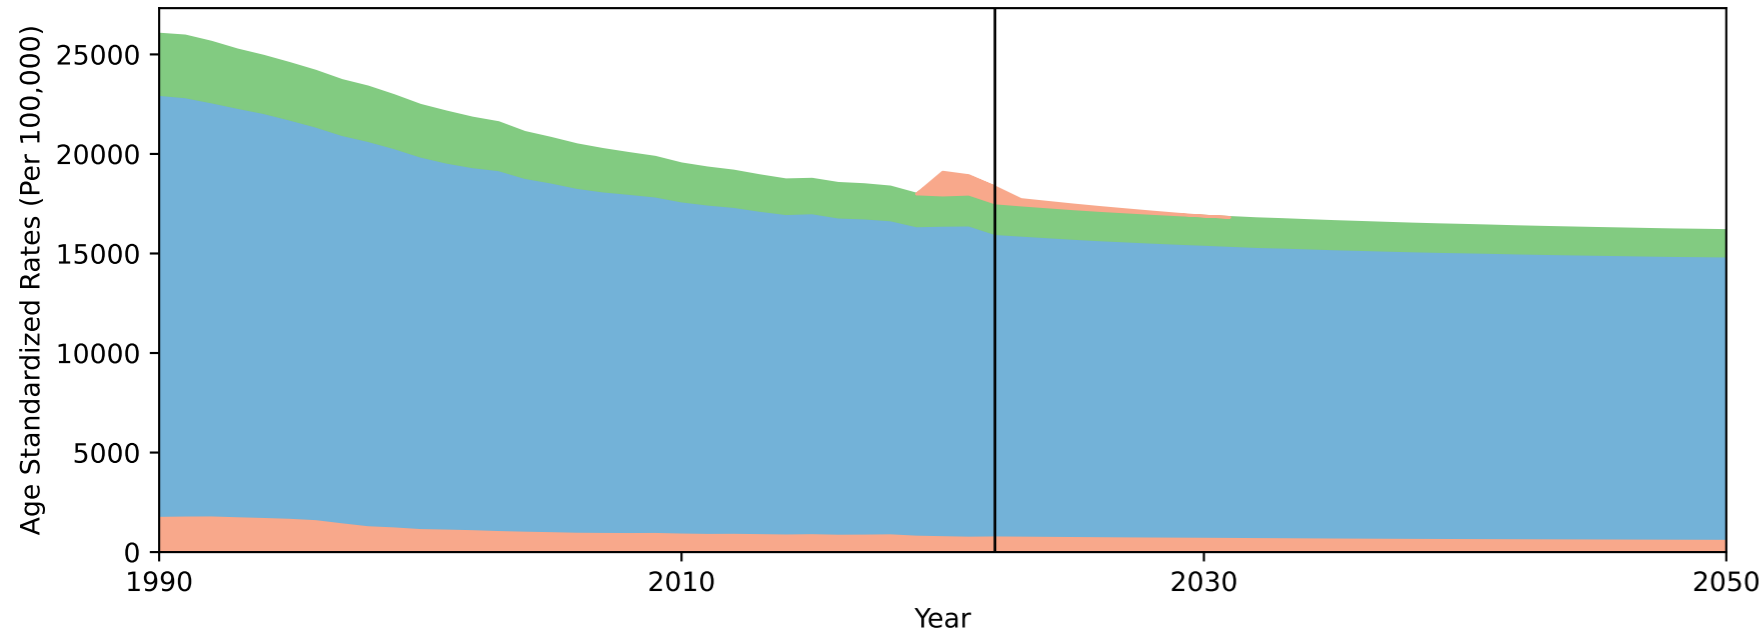

Level 2

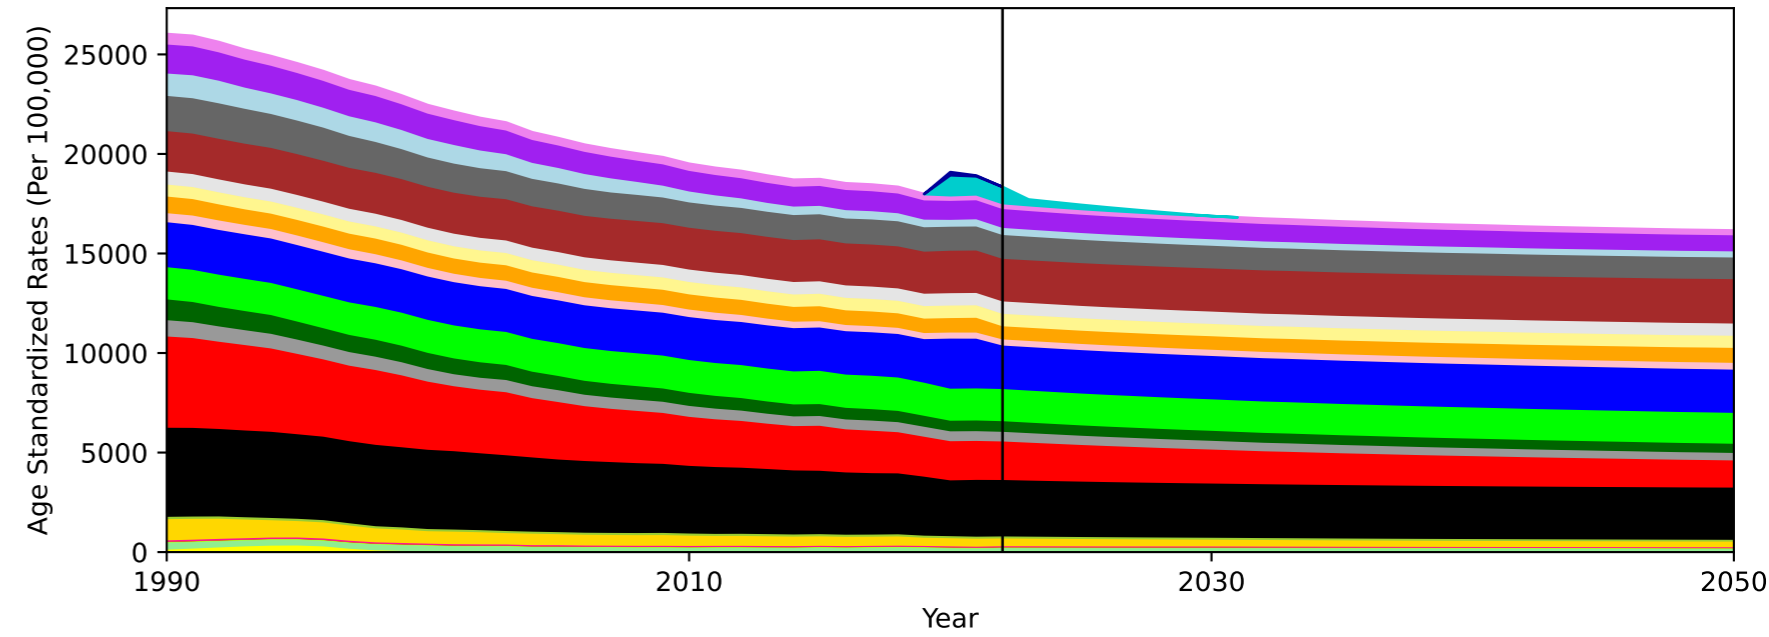

Level 1

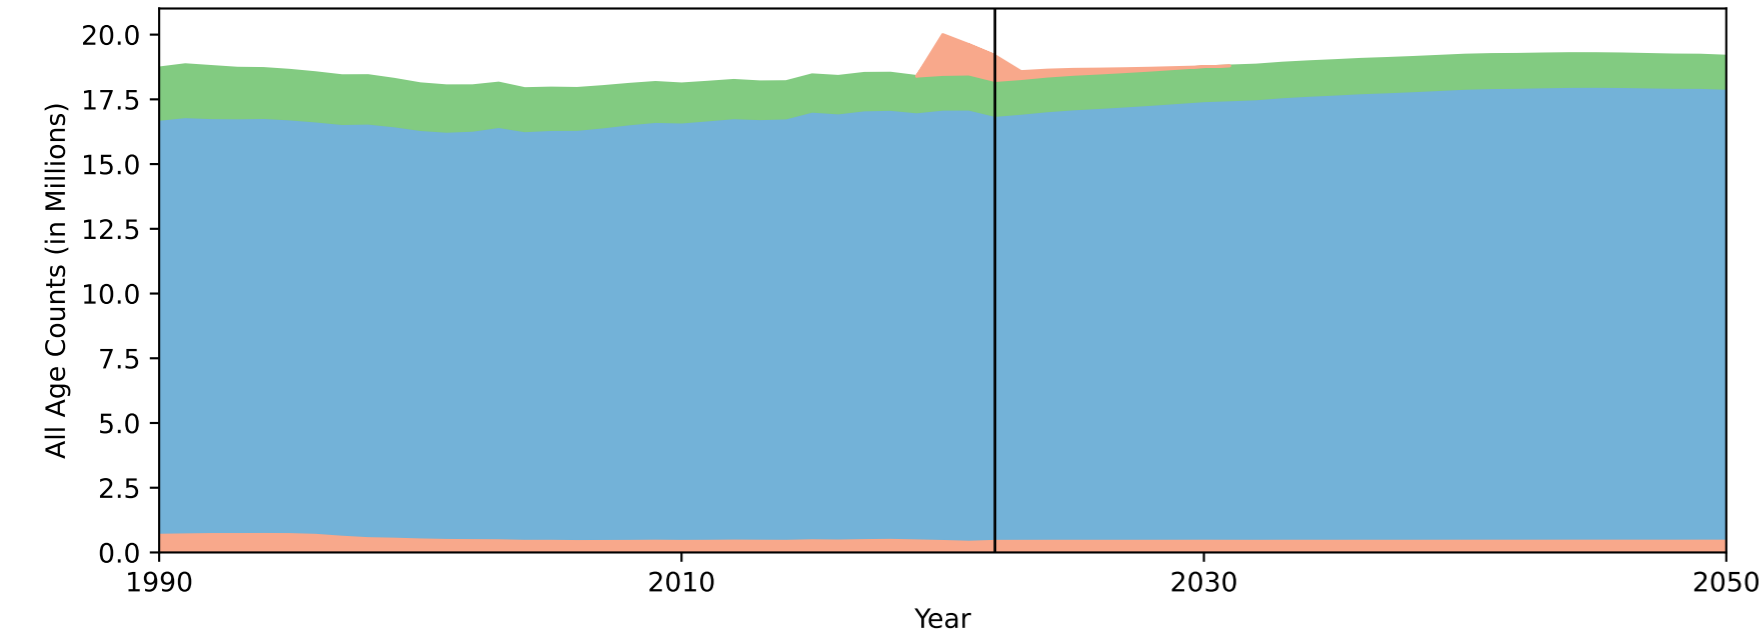

Level 2

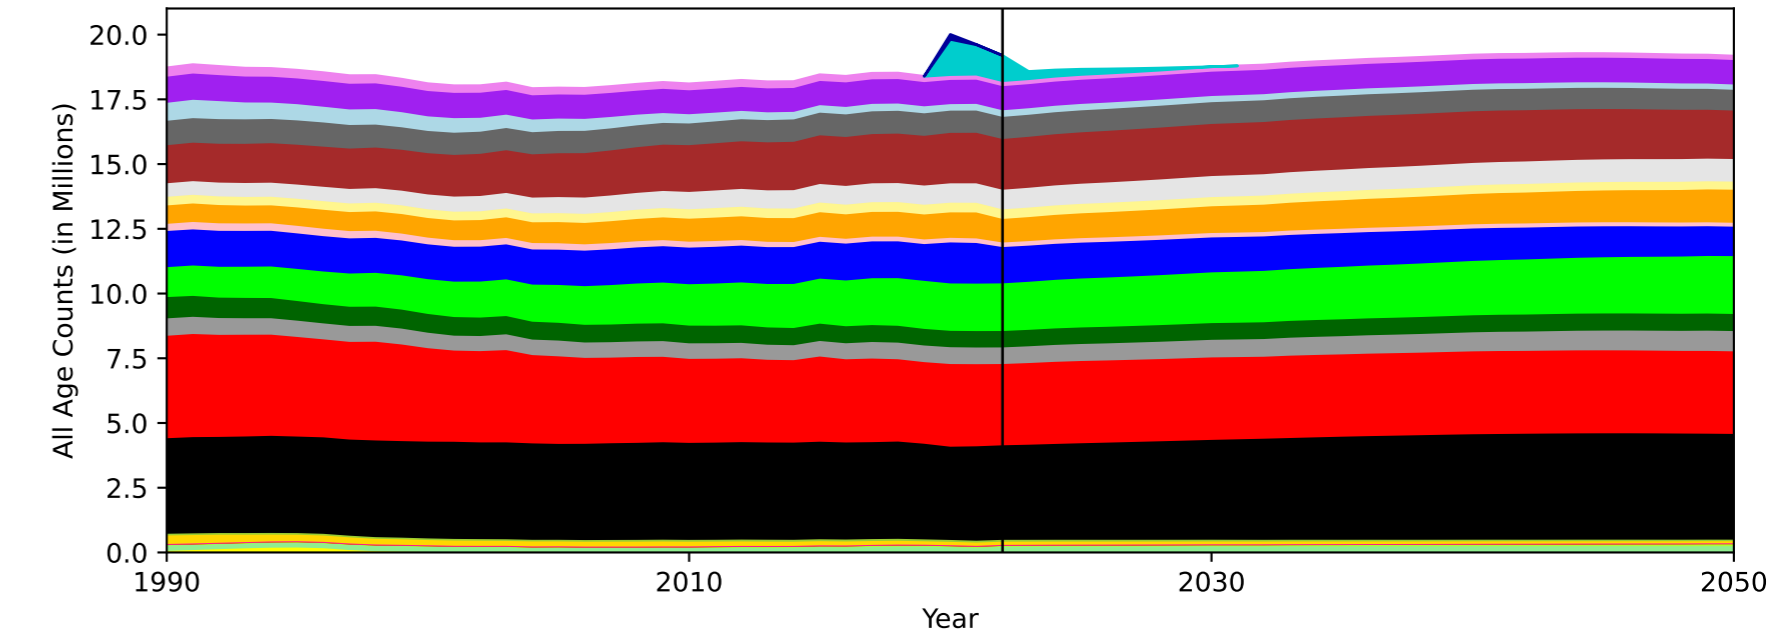

# Luxembourg

Level 1

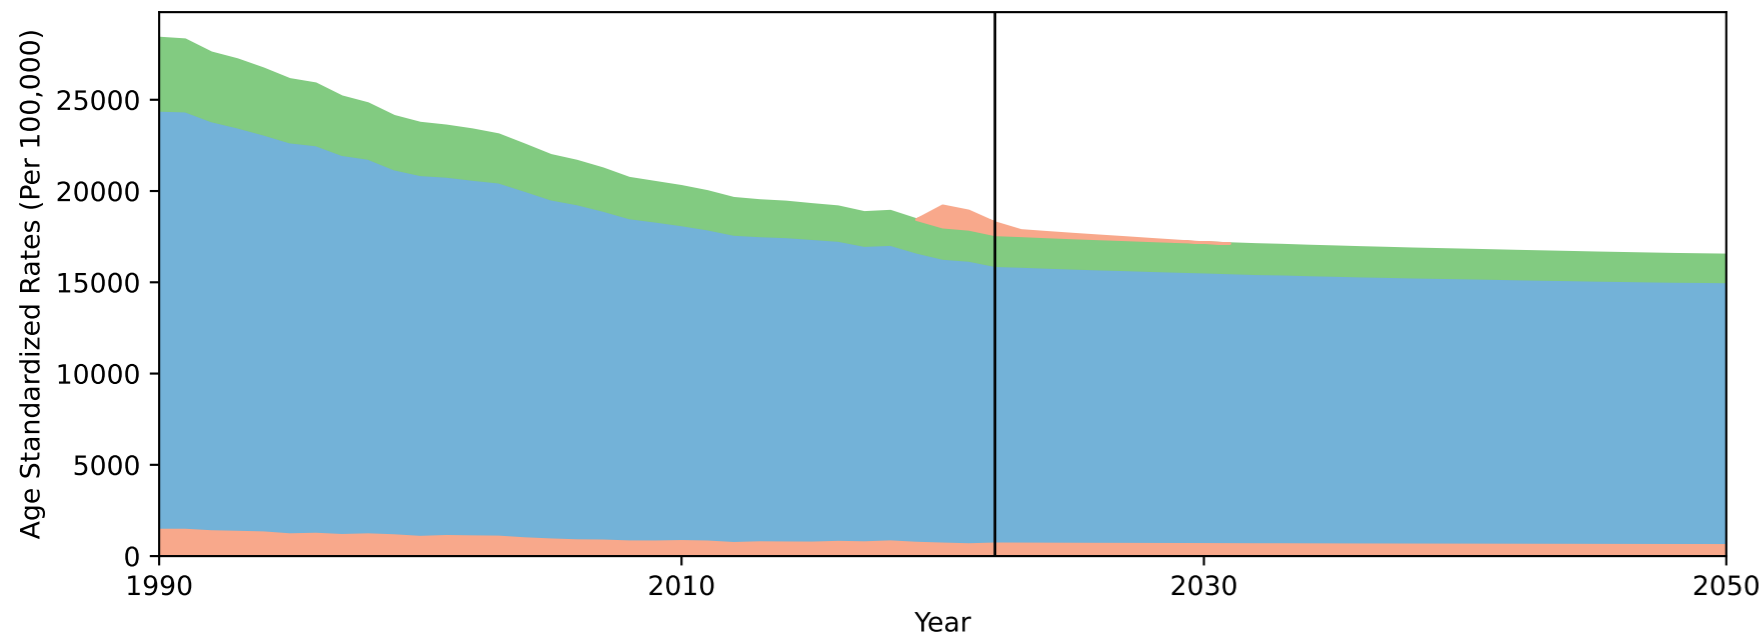

Level 2

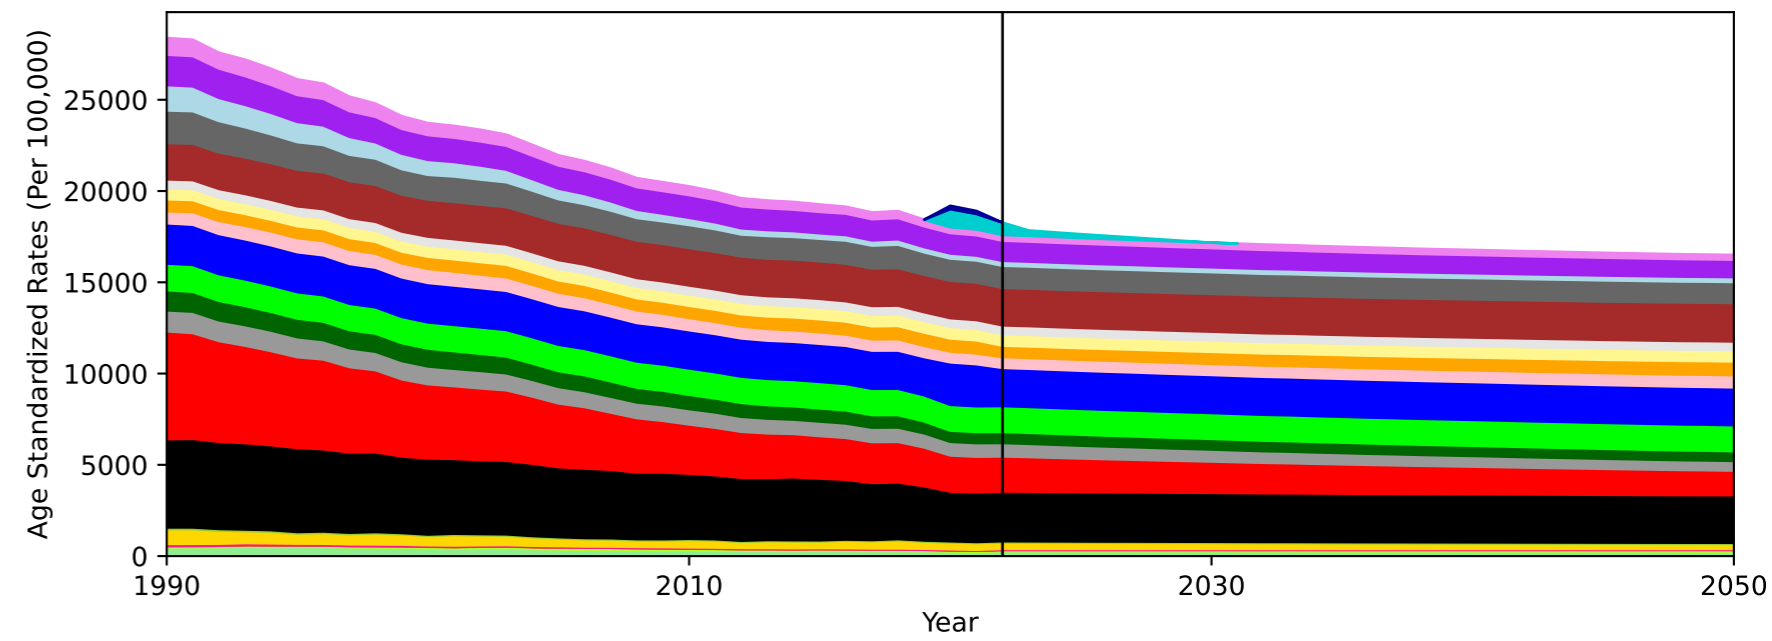

Level 1

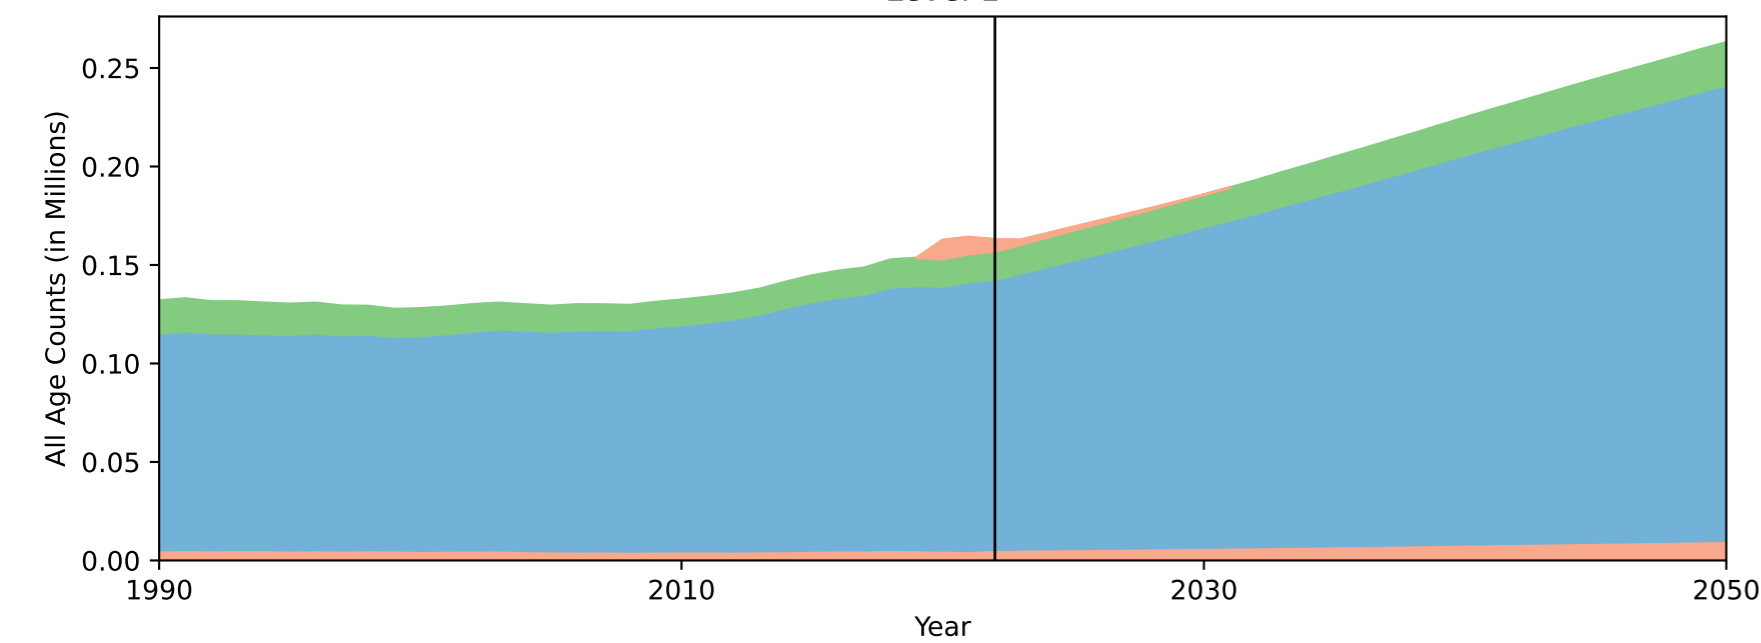

Level 2

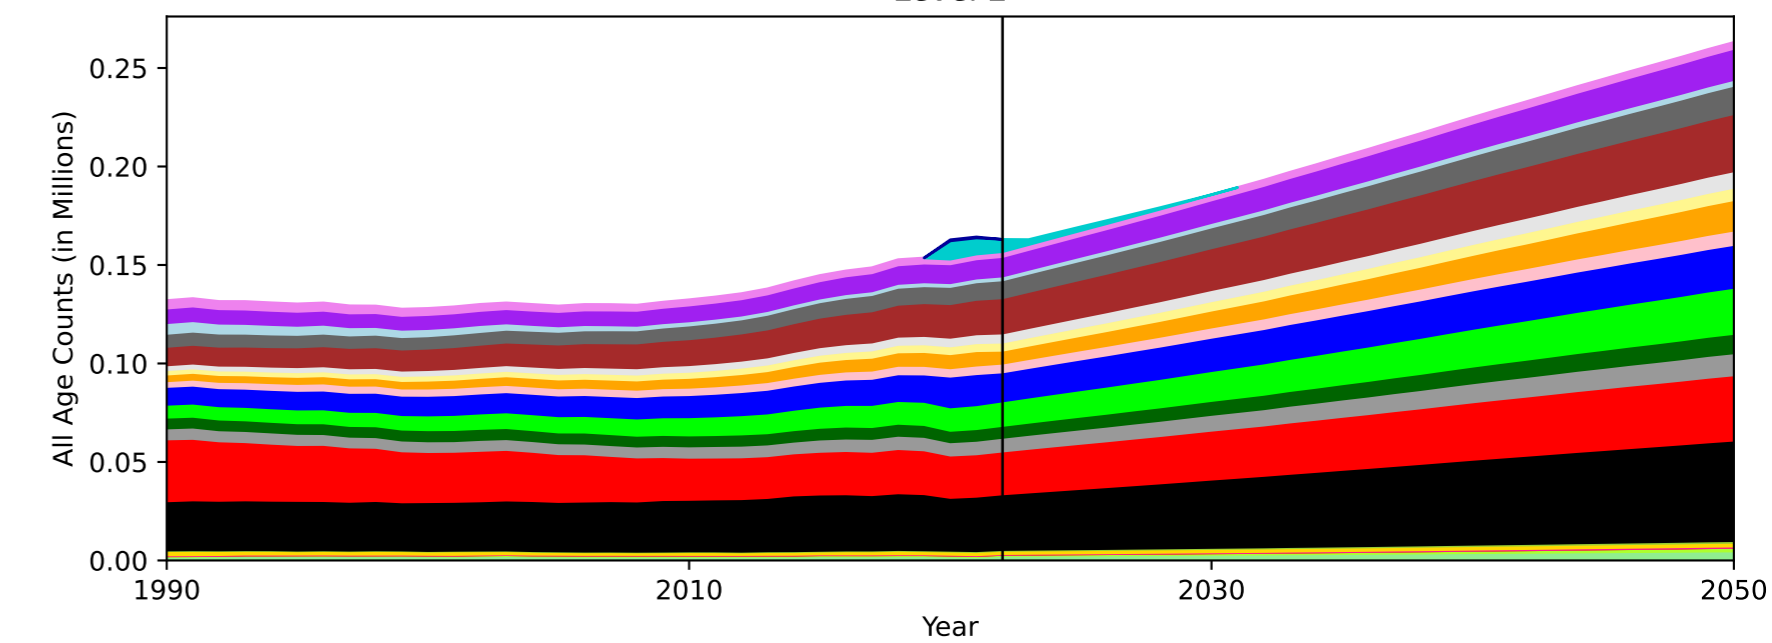

Level 1

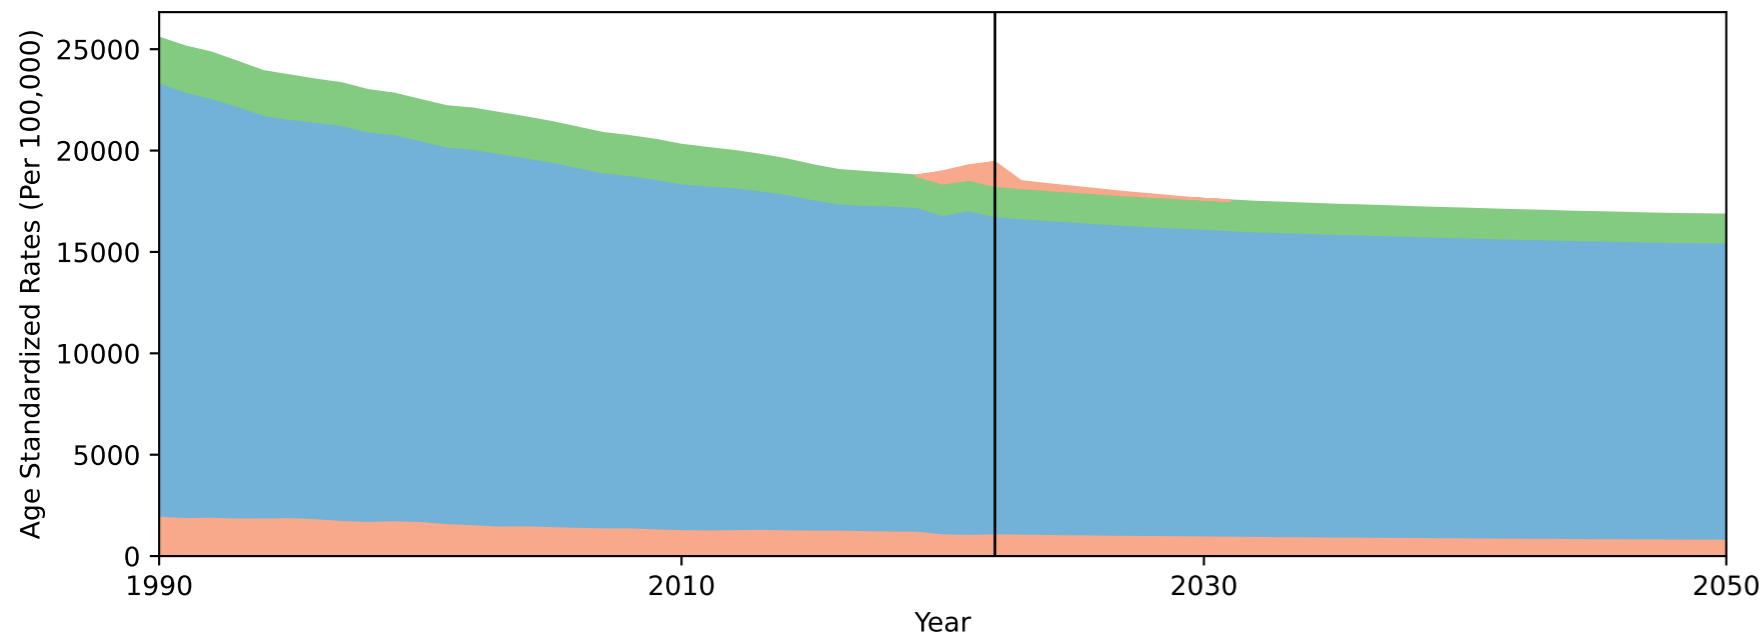

Level 2

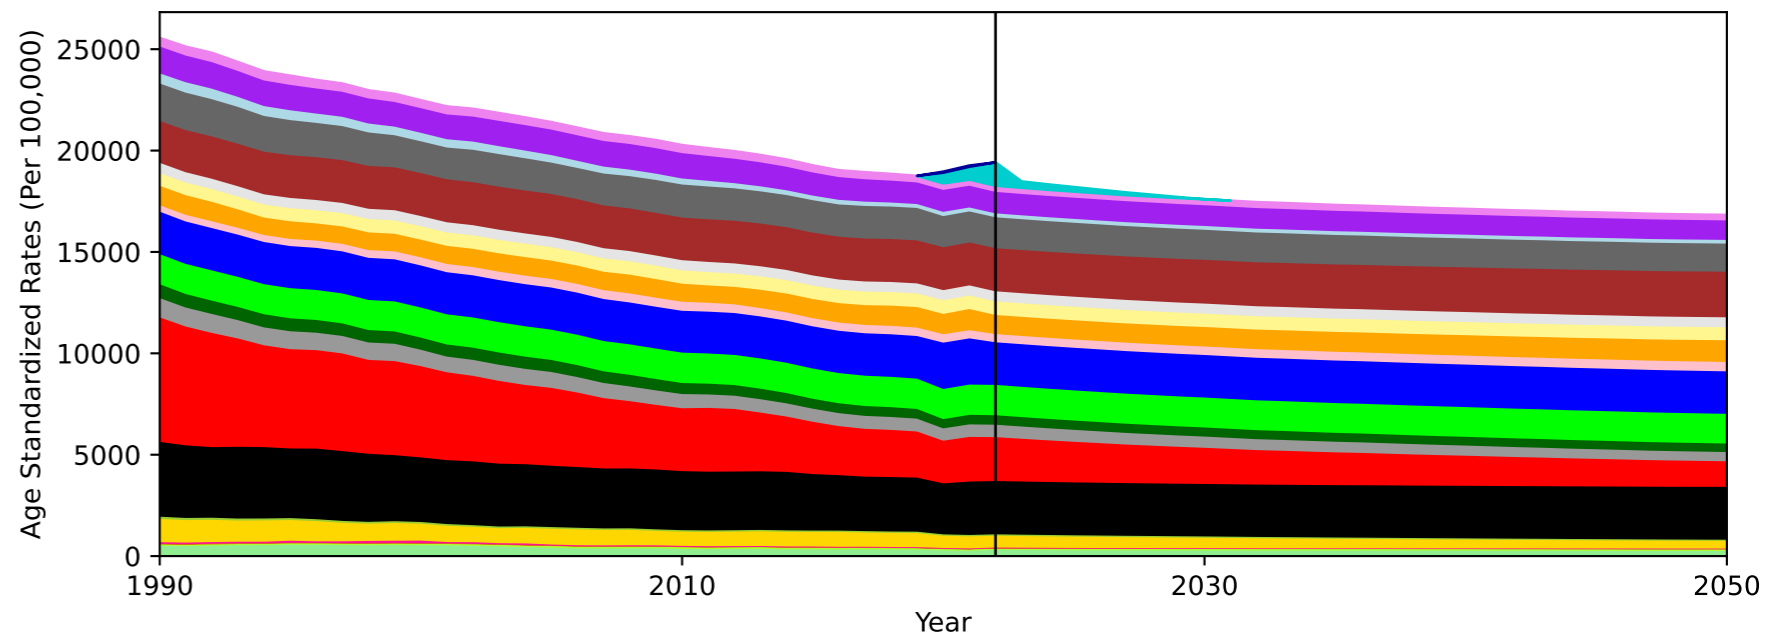

Level 1

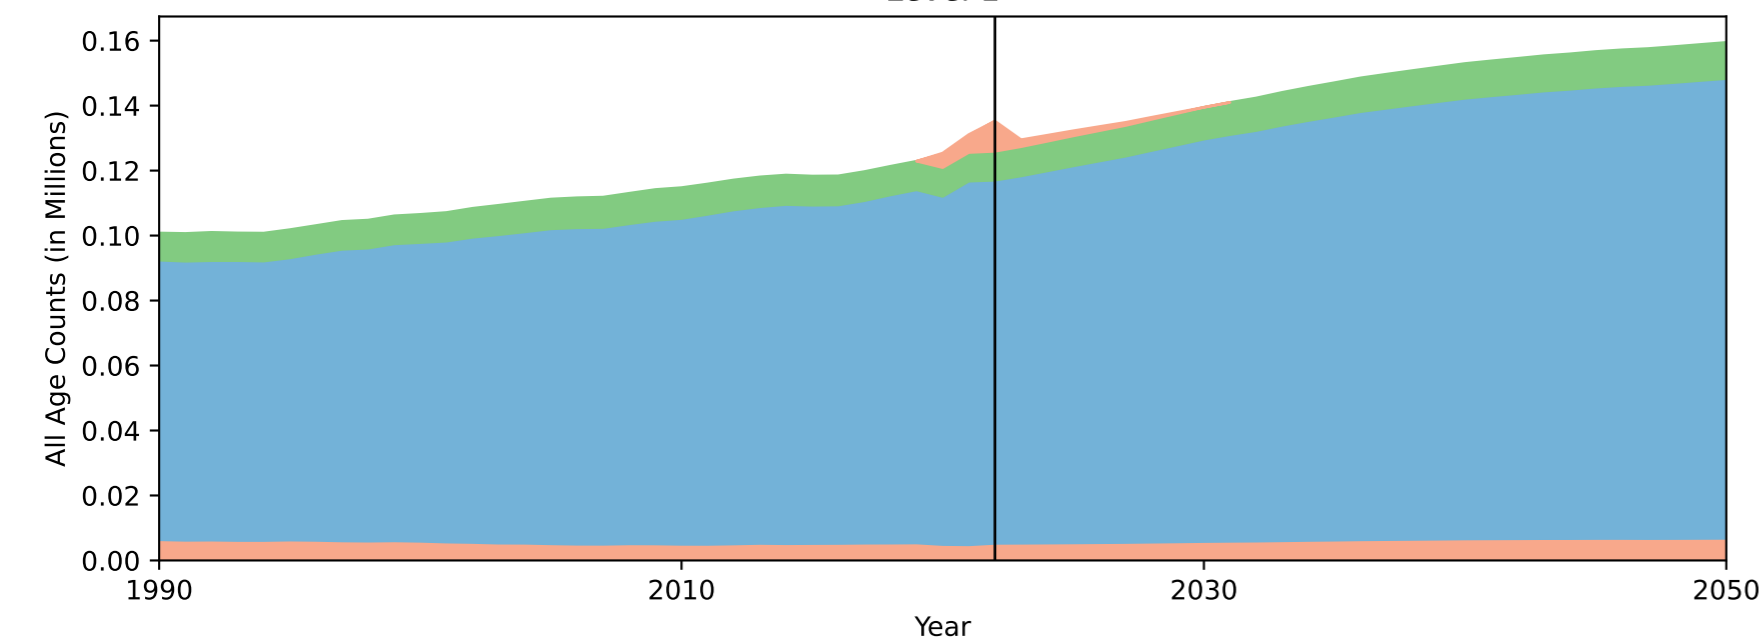

Level 2

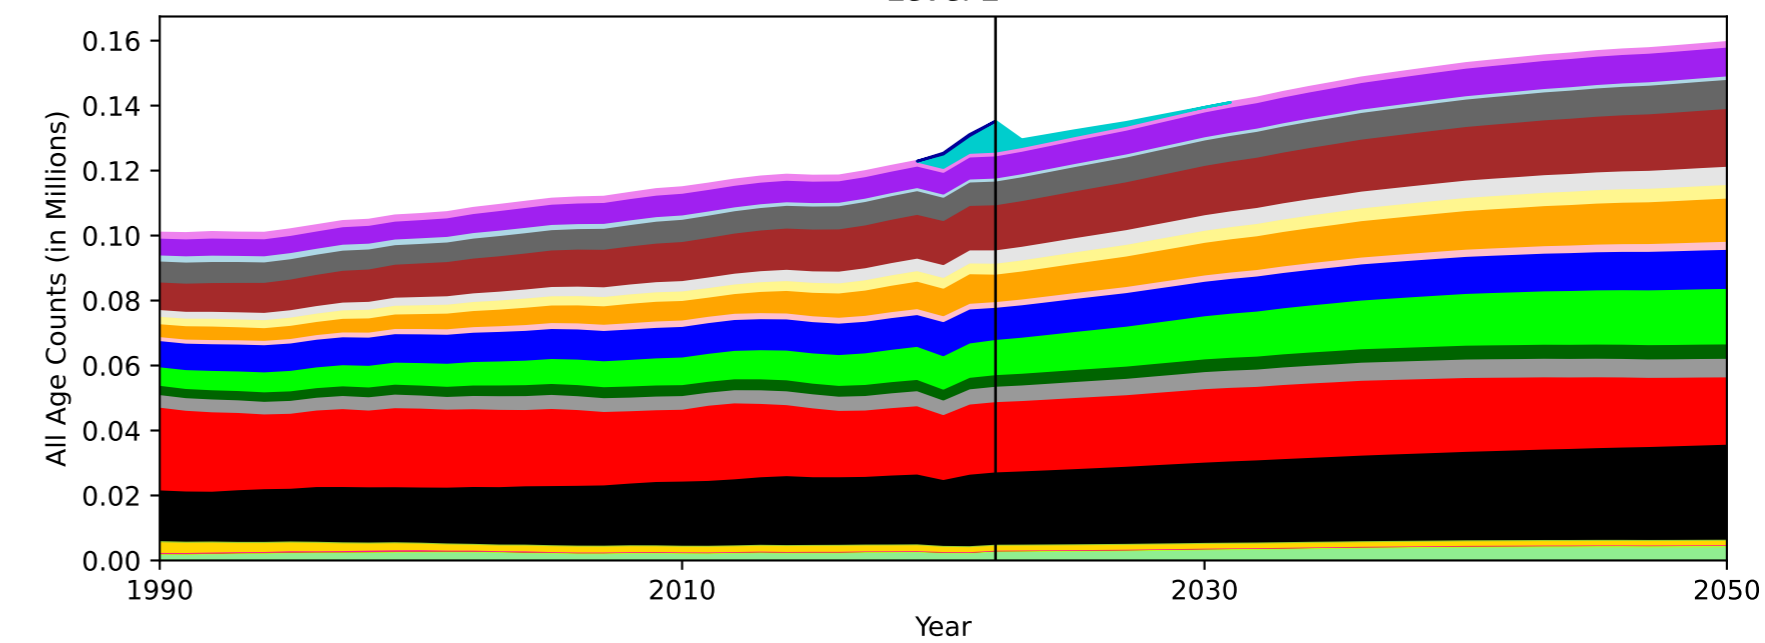

# Monaco

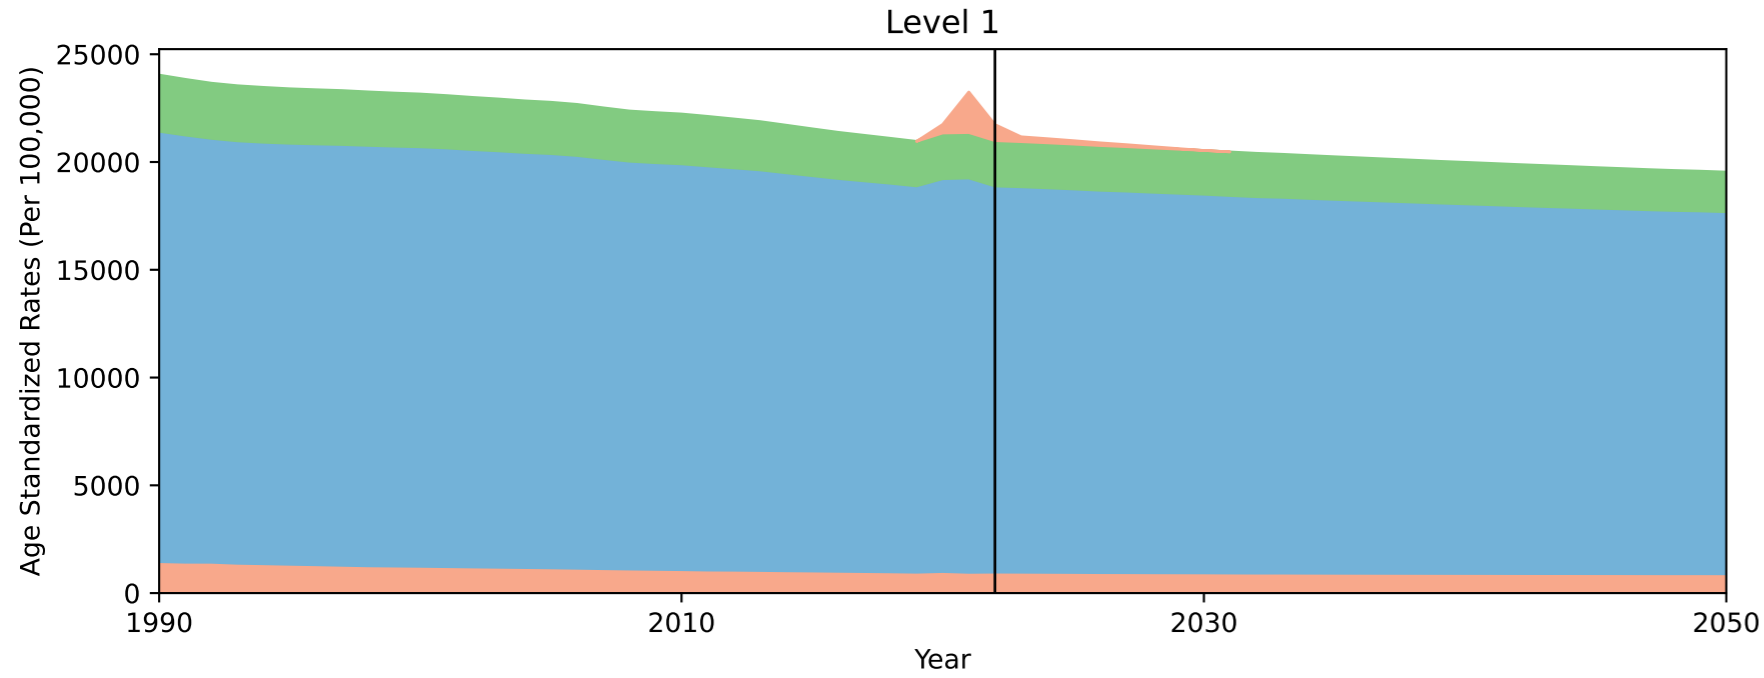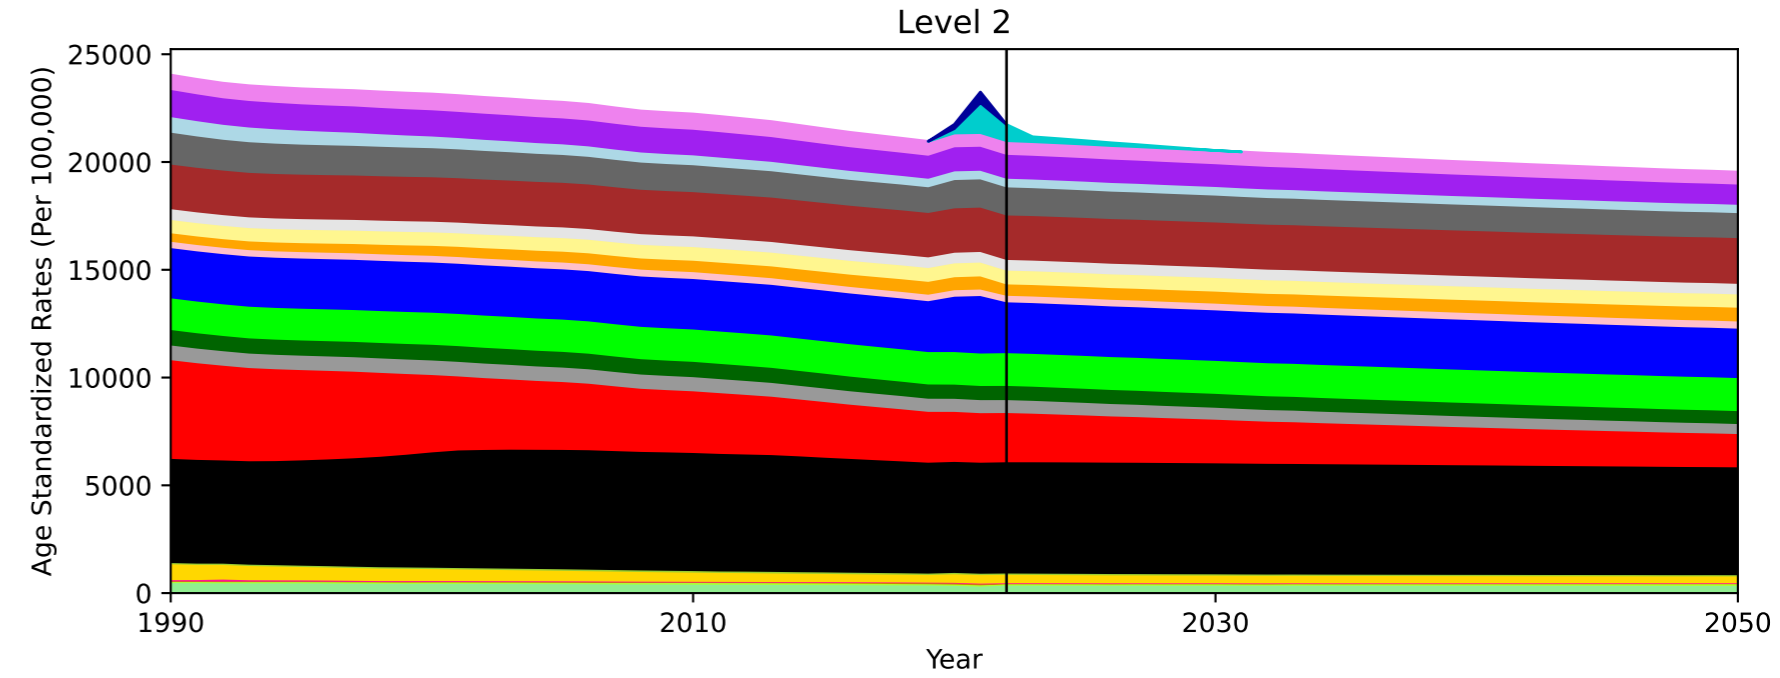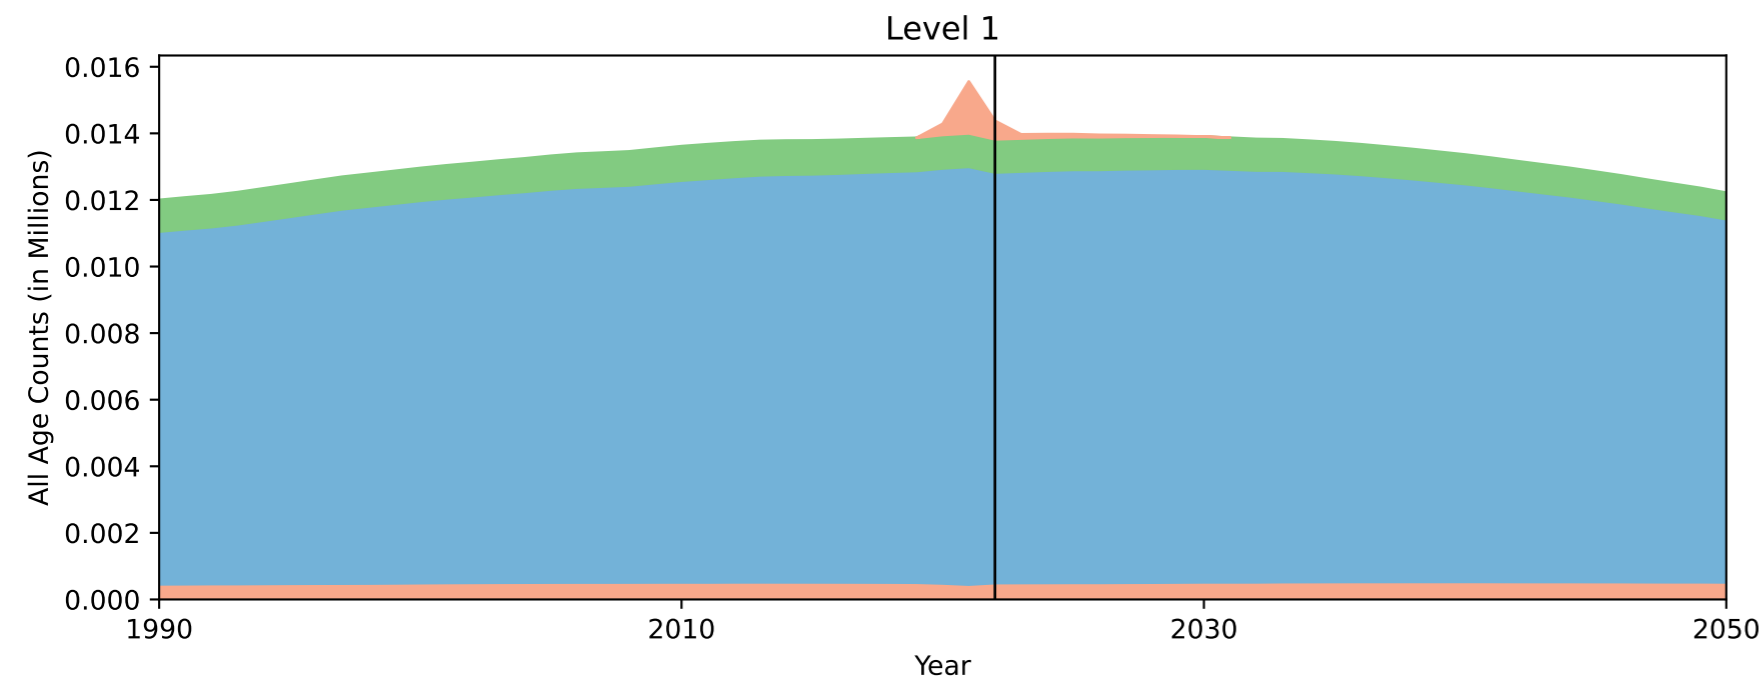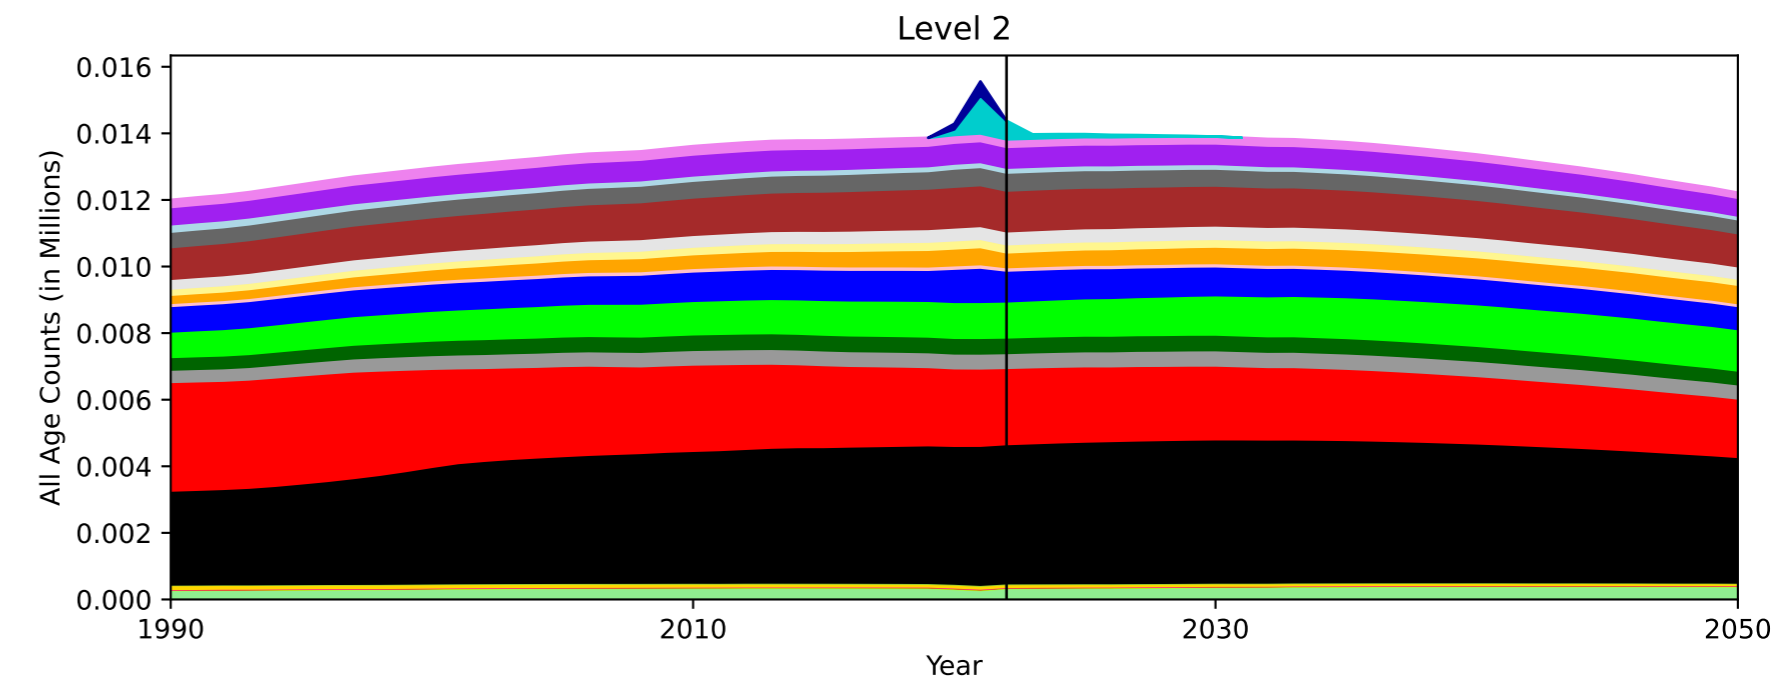

# Netherlands

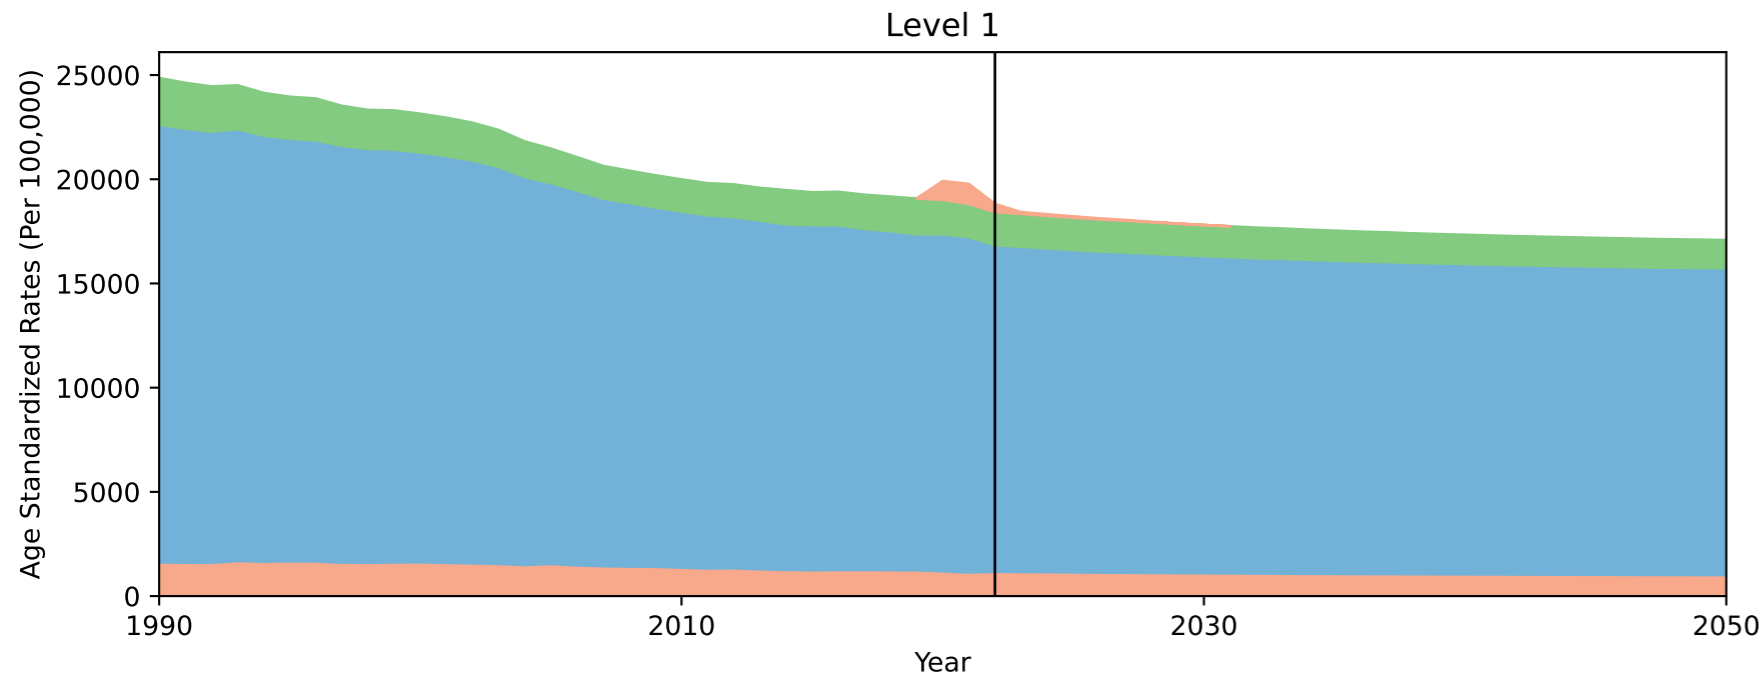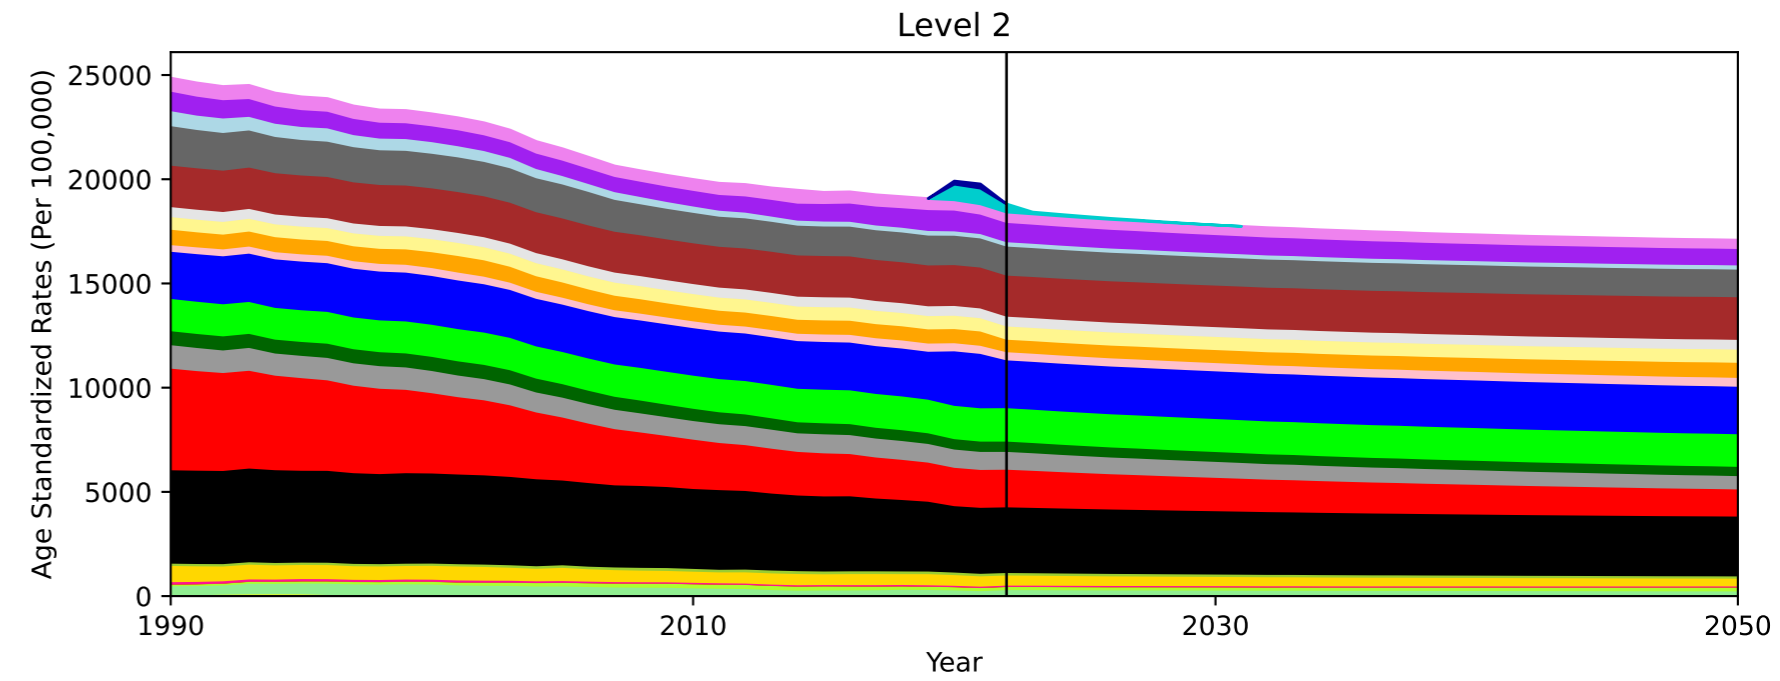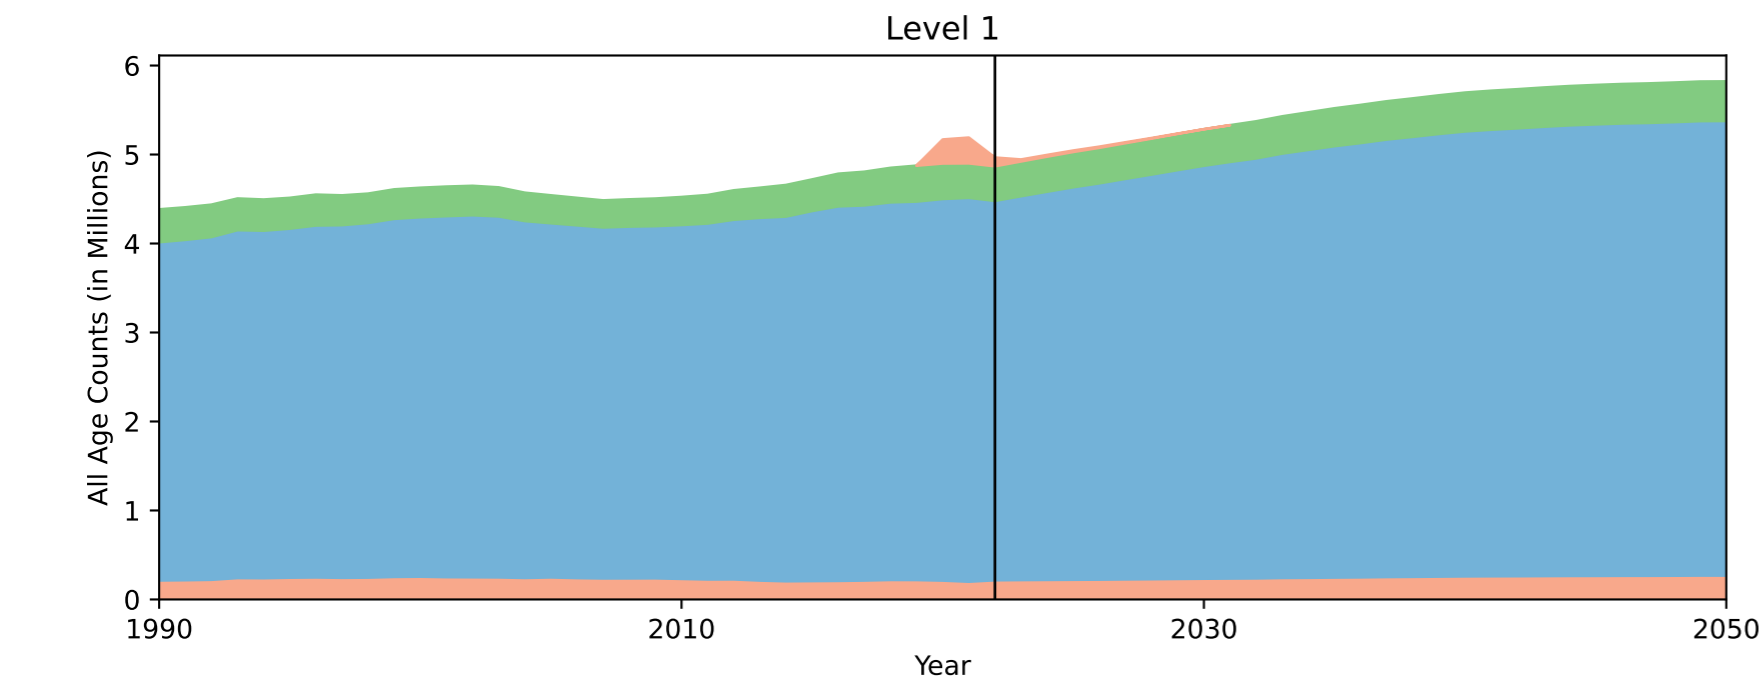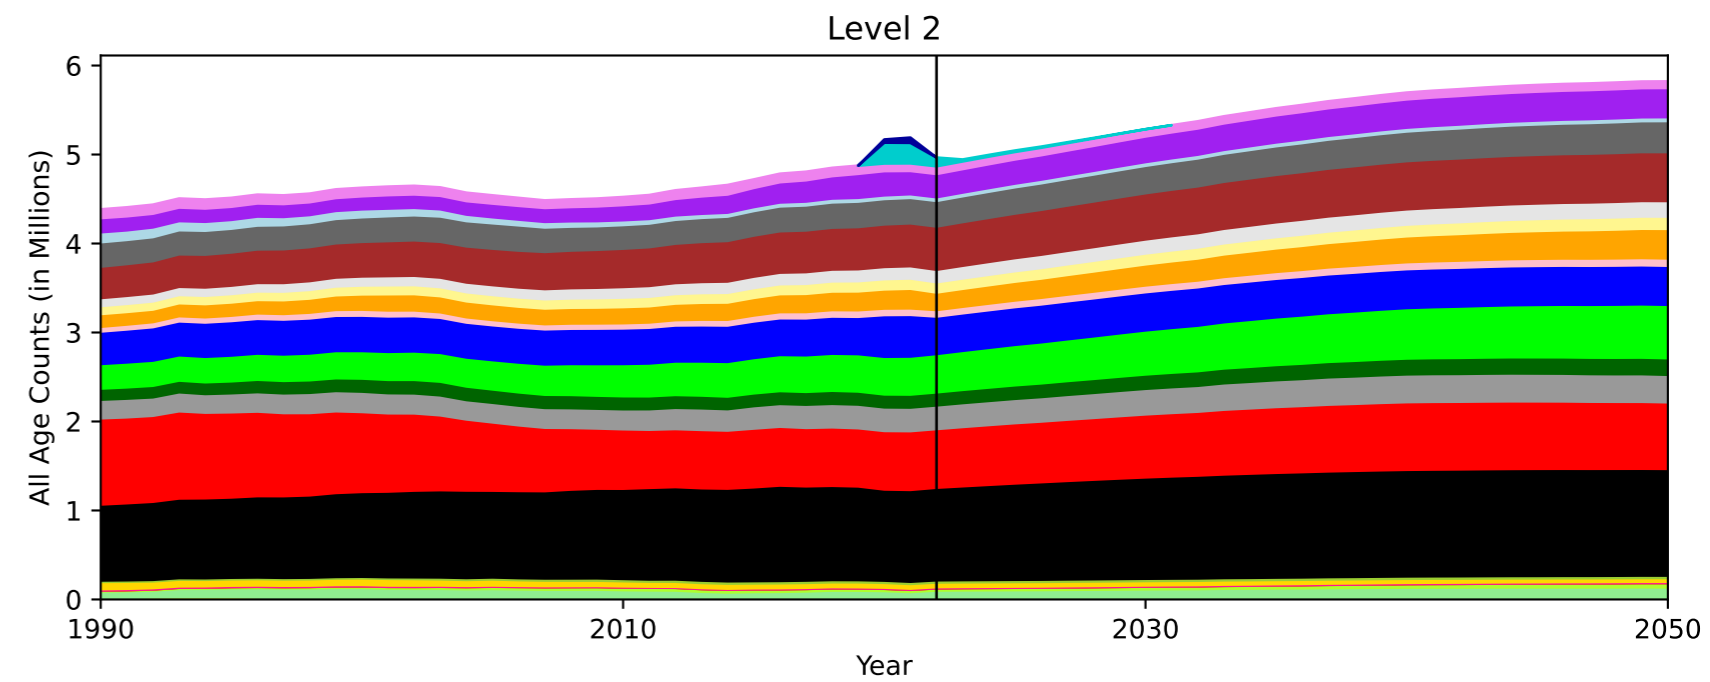

# Norway

Level 1

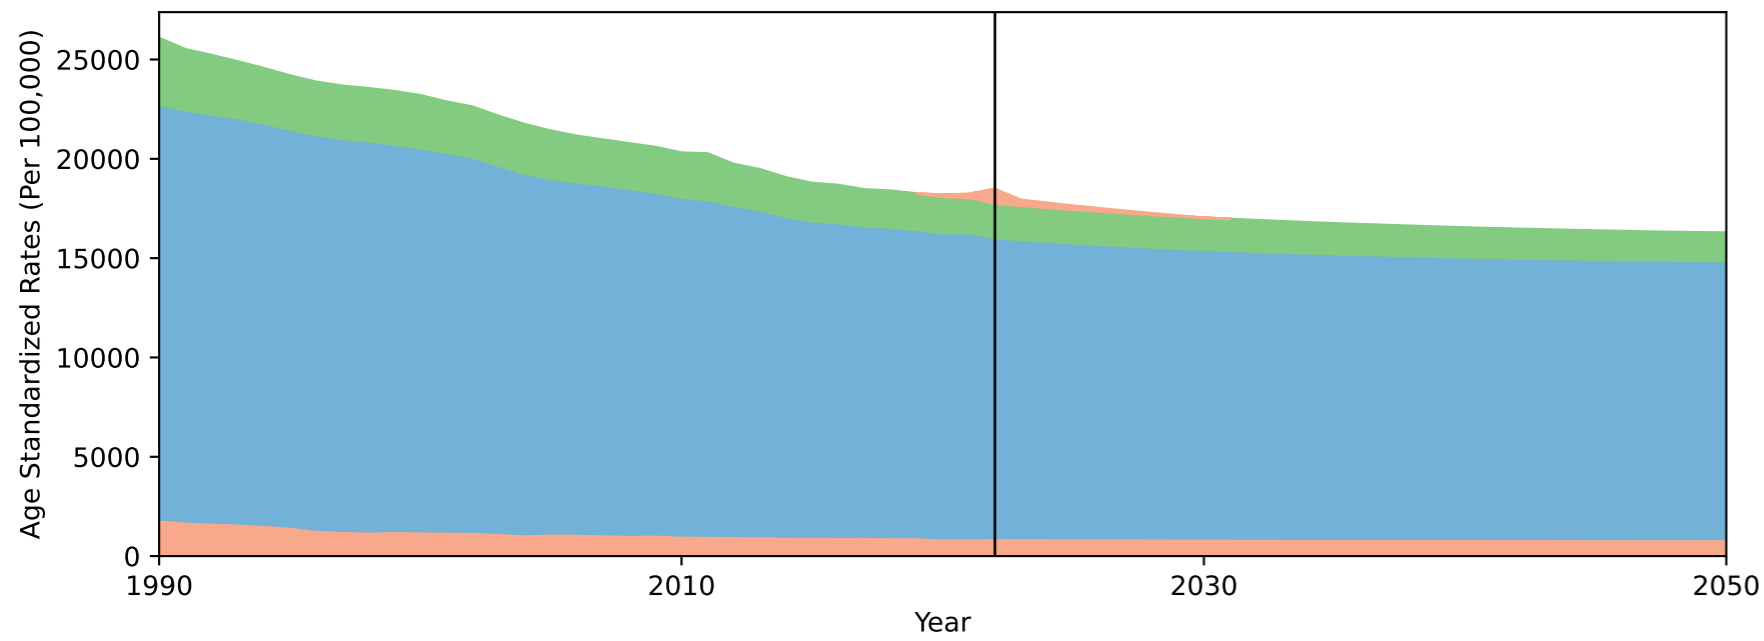

Level 2

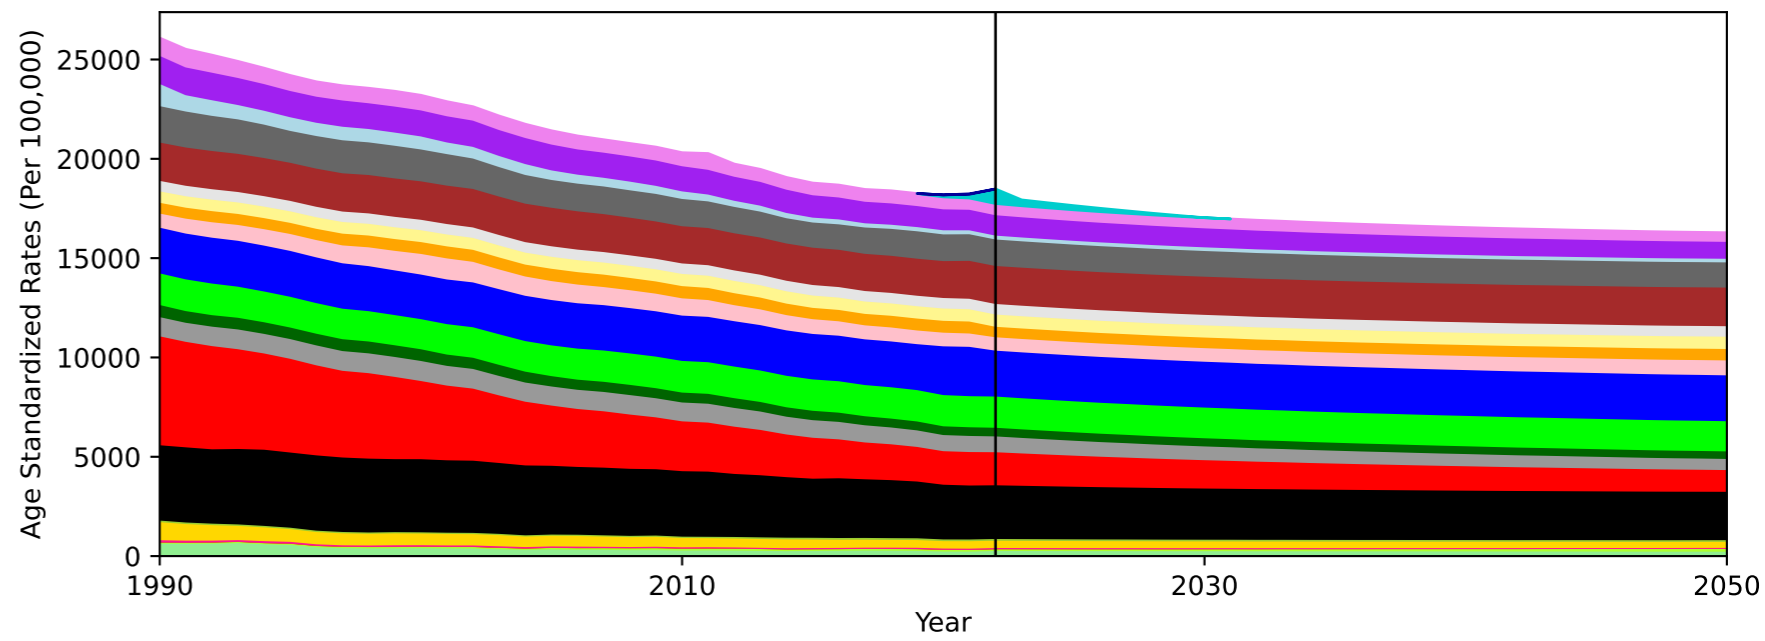

Level 1

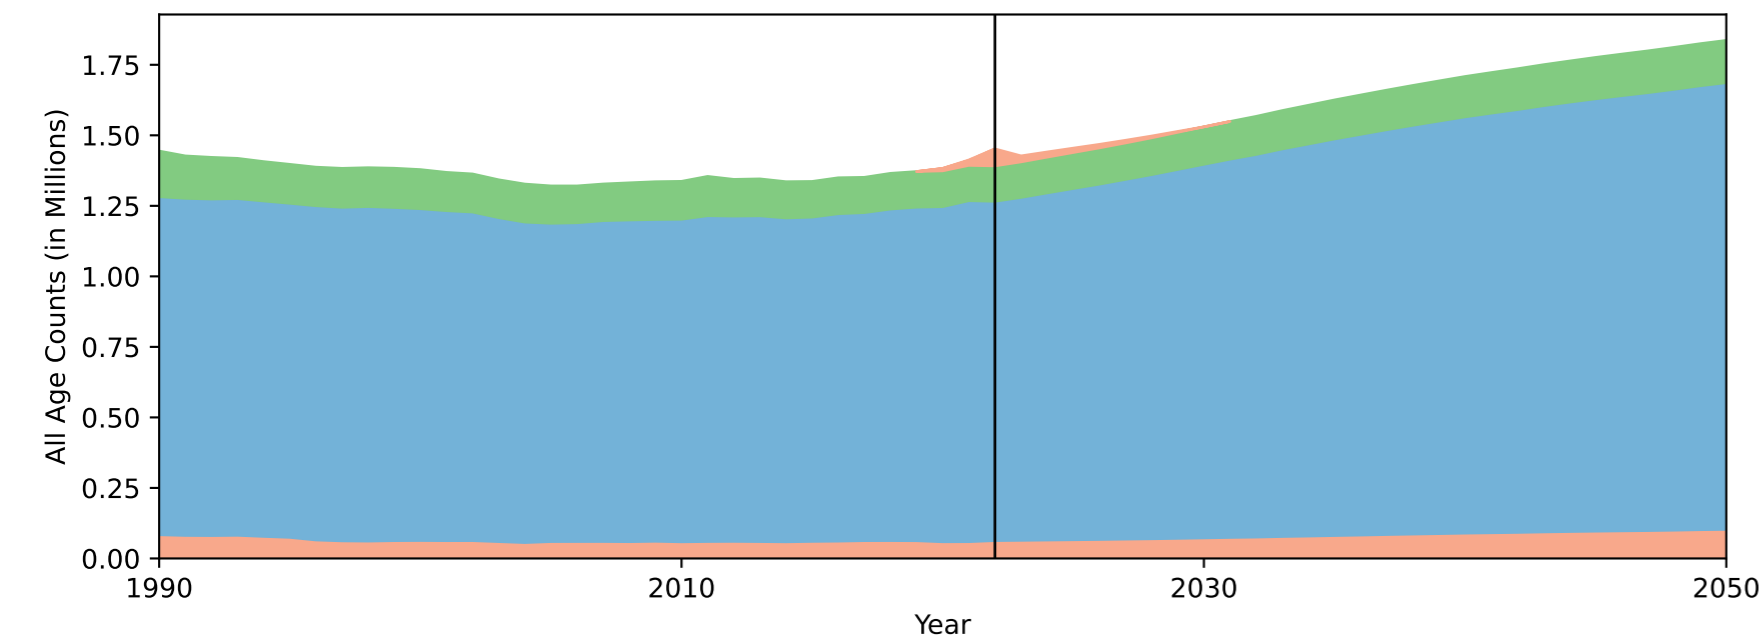

Level 2

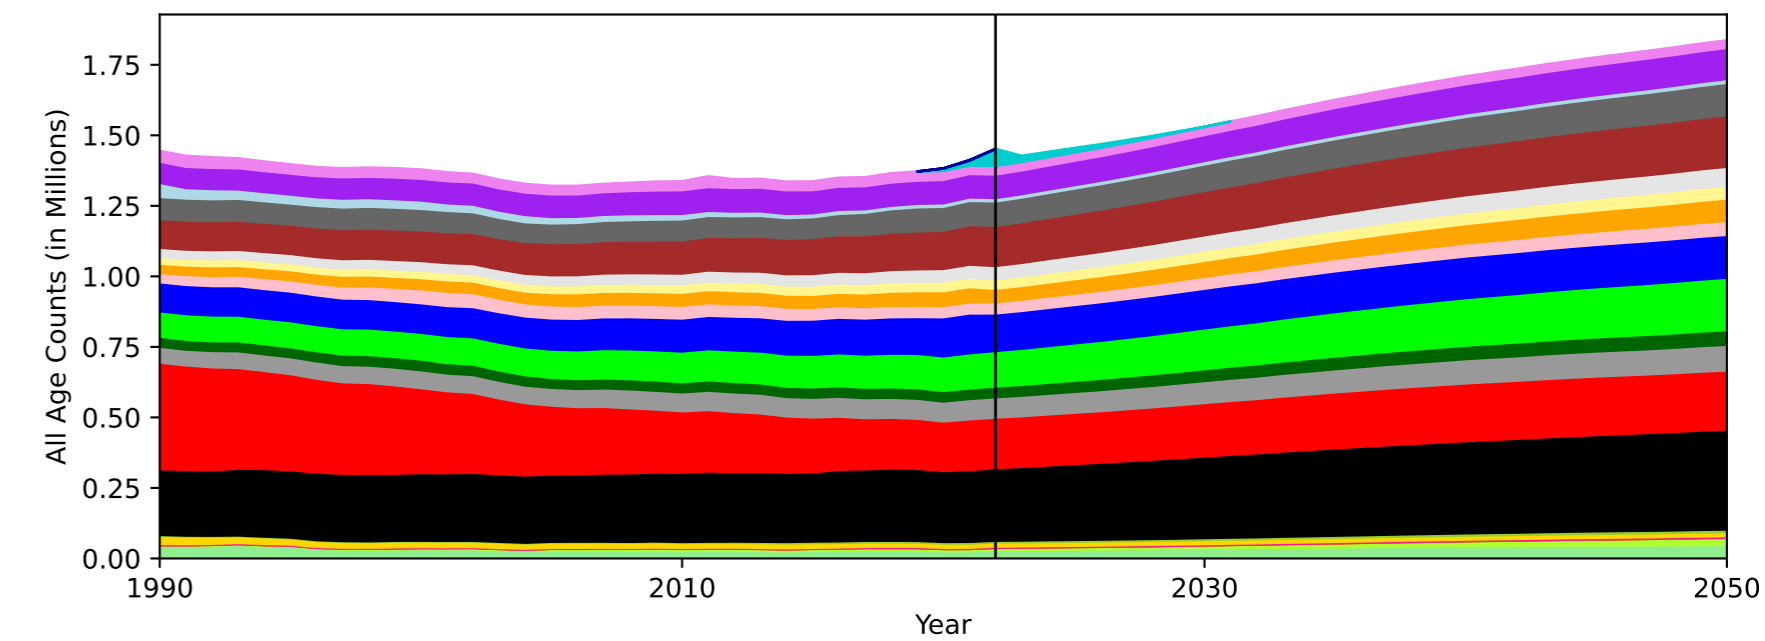



Level 1

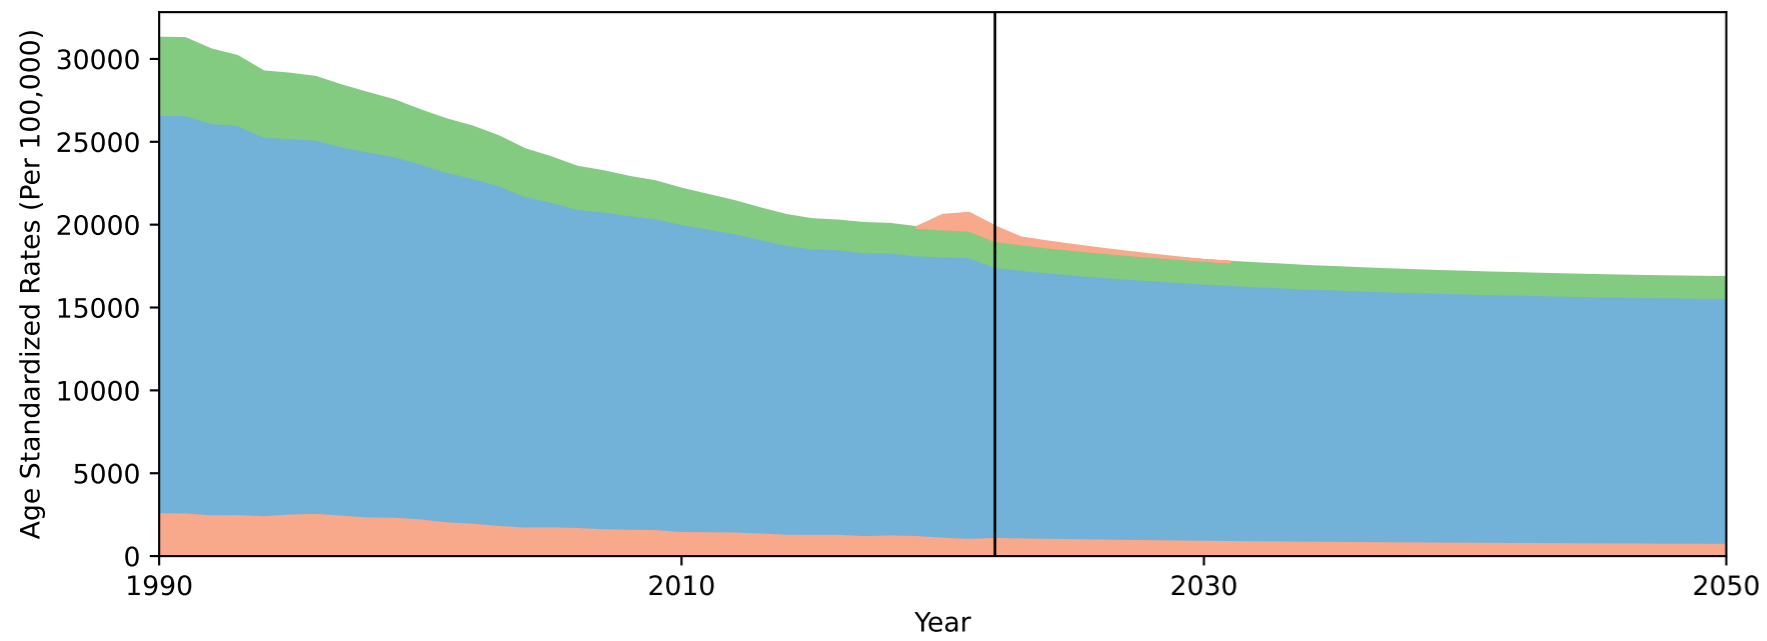

Level 2

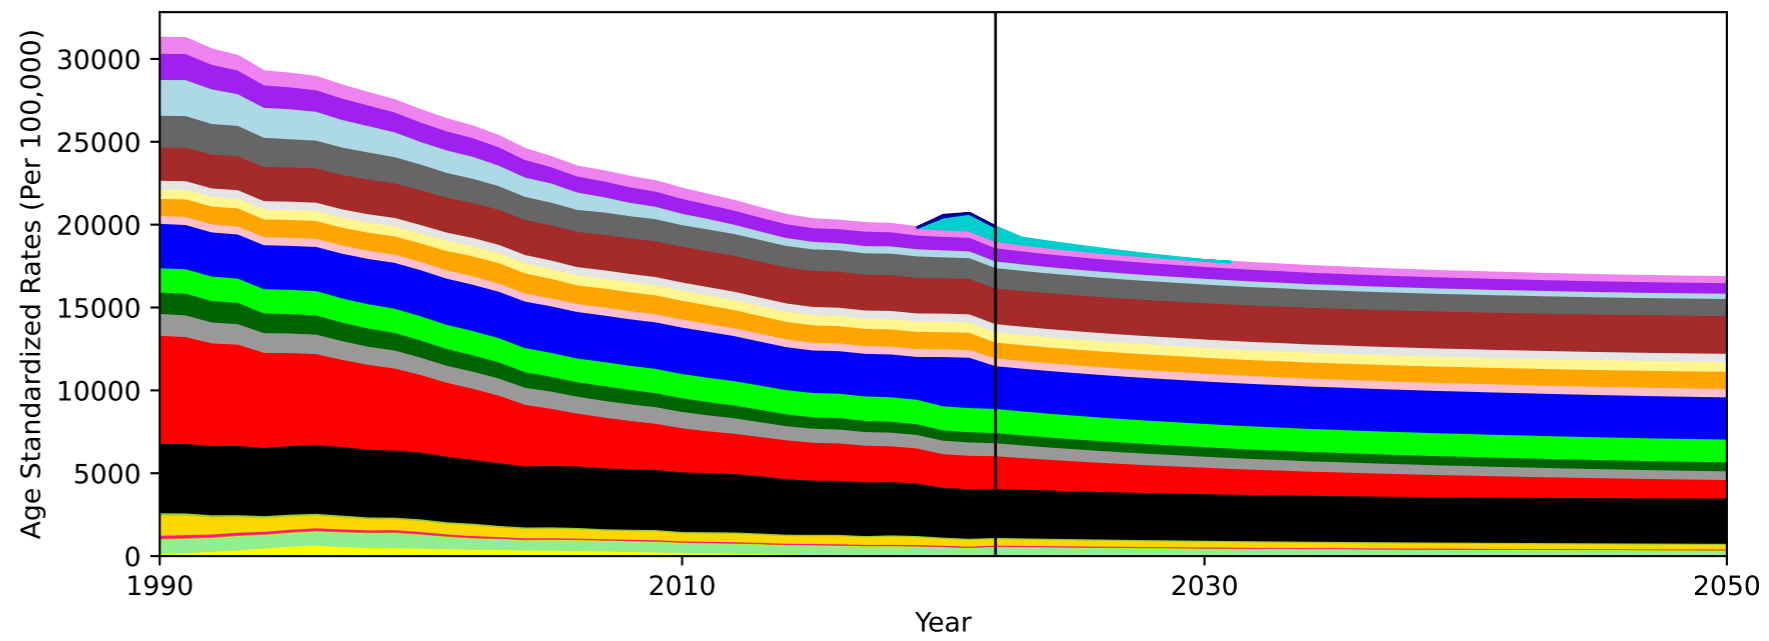

Level 1

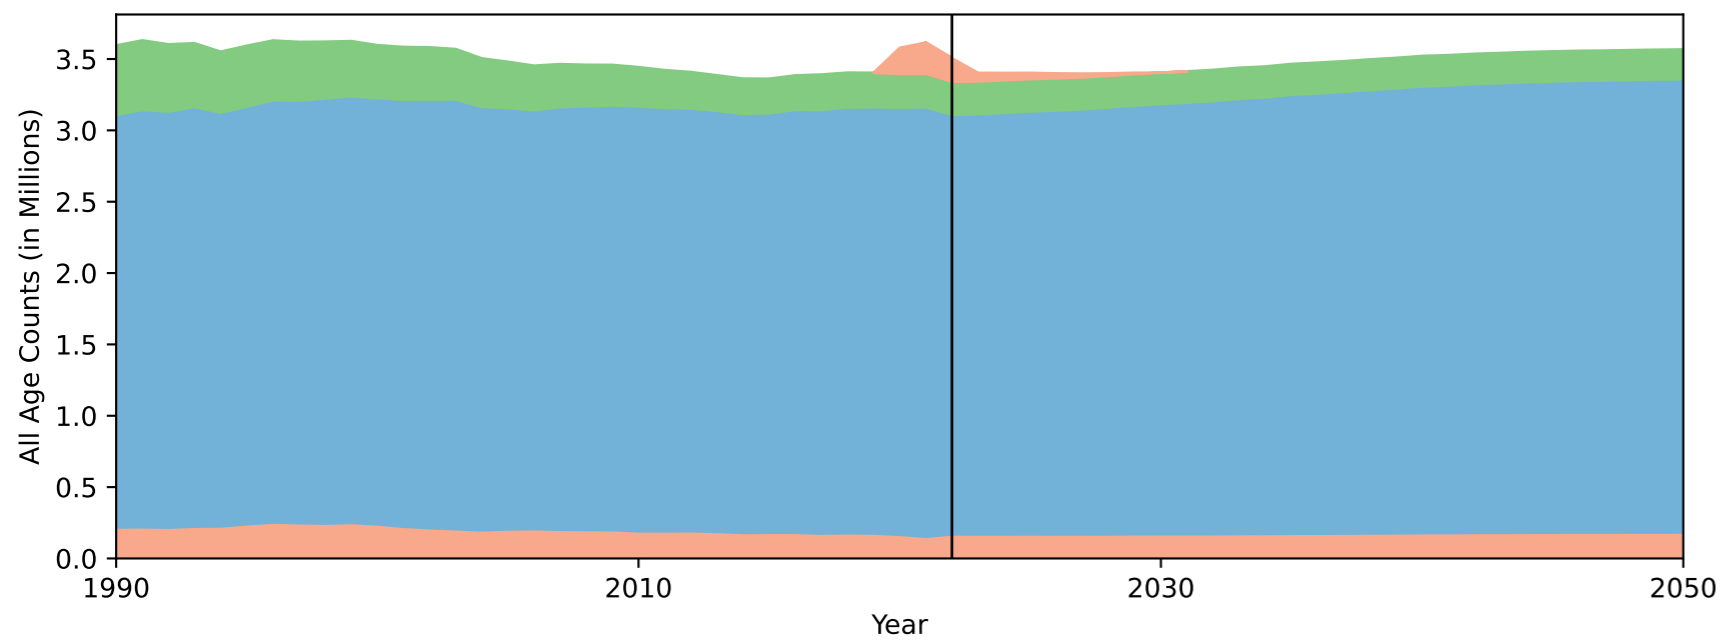

Level 2

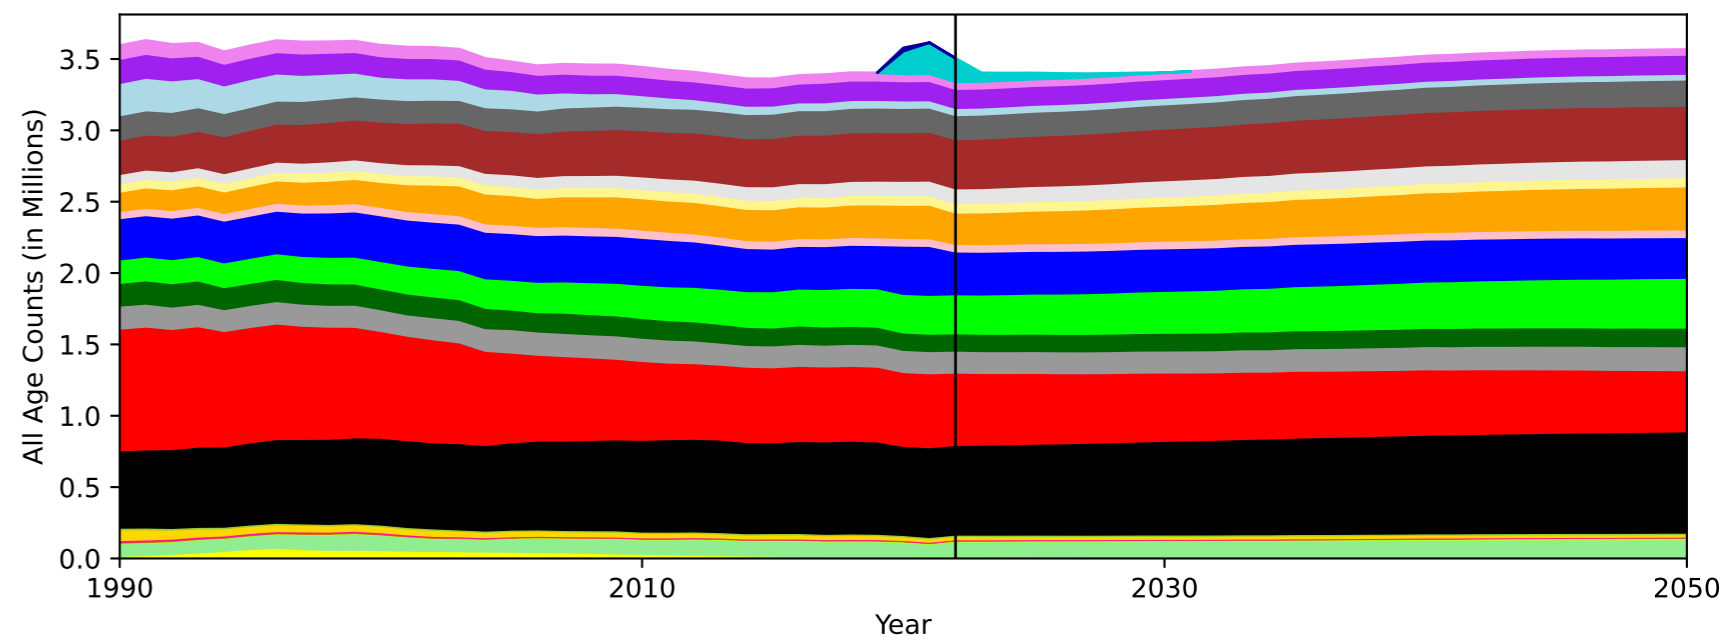

# San Marino

Supplemental Results Figure S4. Age-standardised DALY rates and all age DALY counts and by Level 1 and Level 2 causes, 1990–2050

305

Level 1

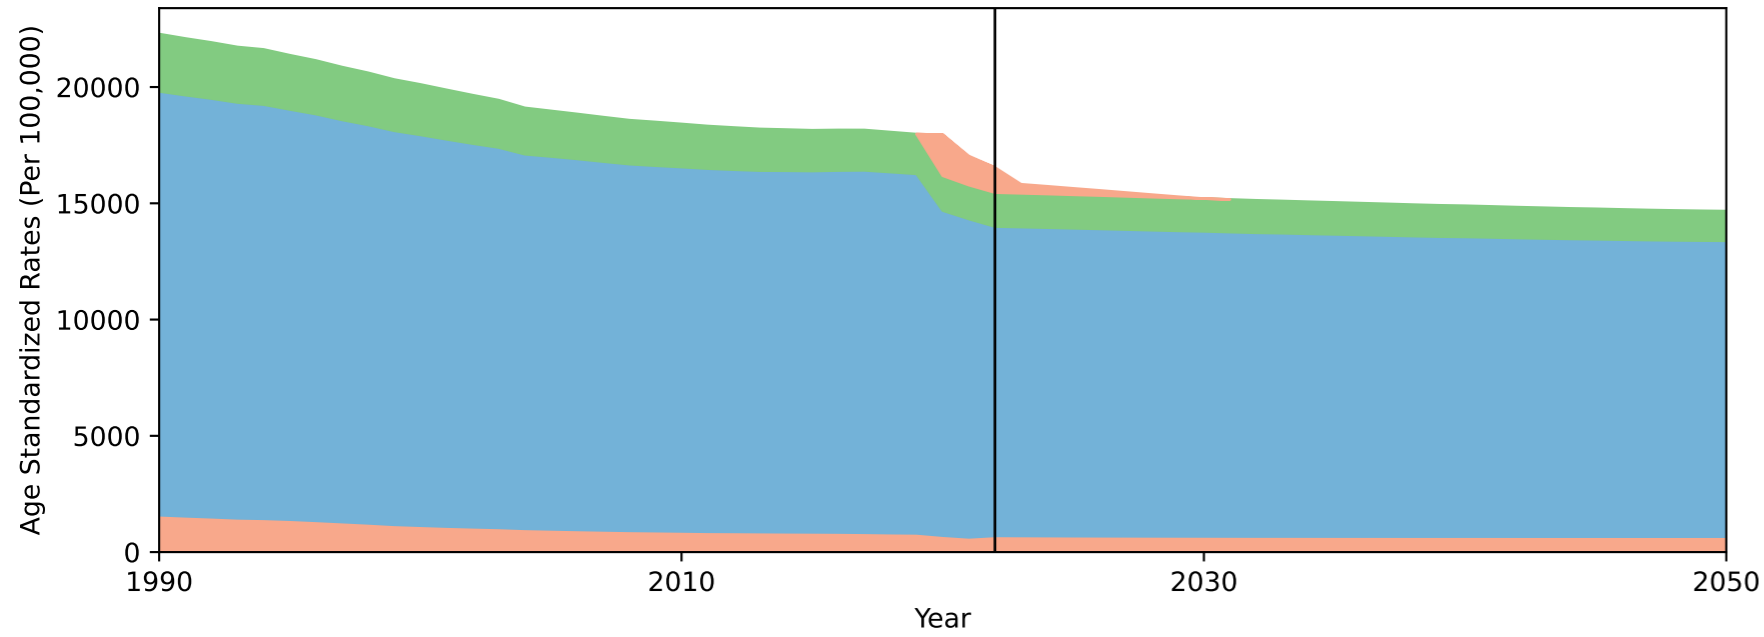

Level 2

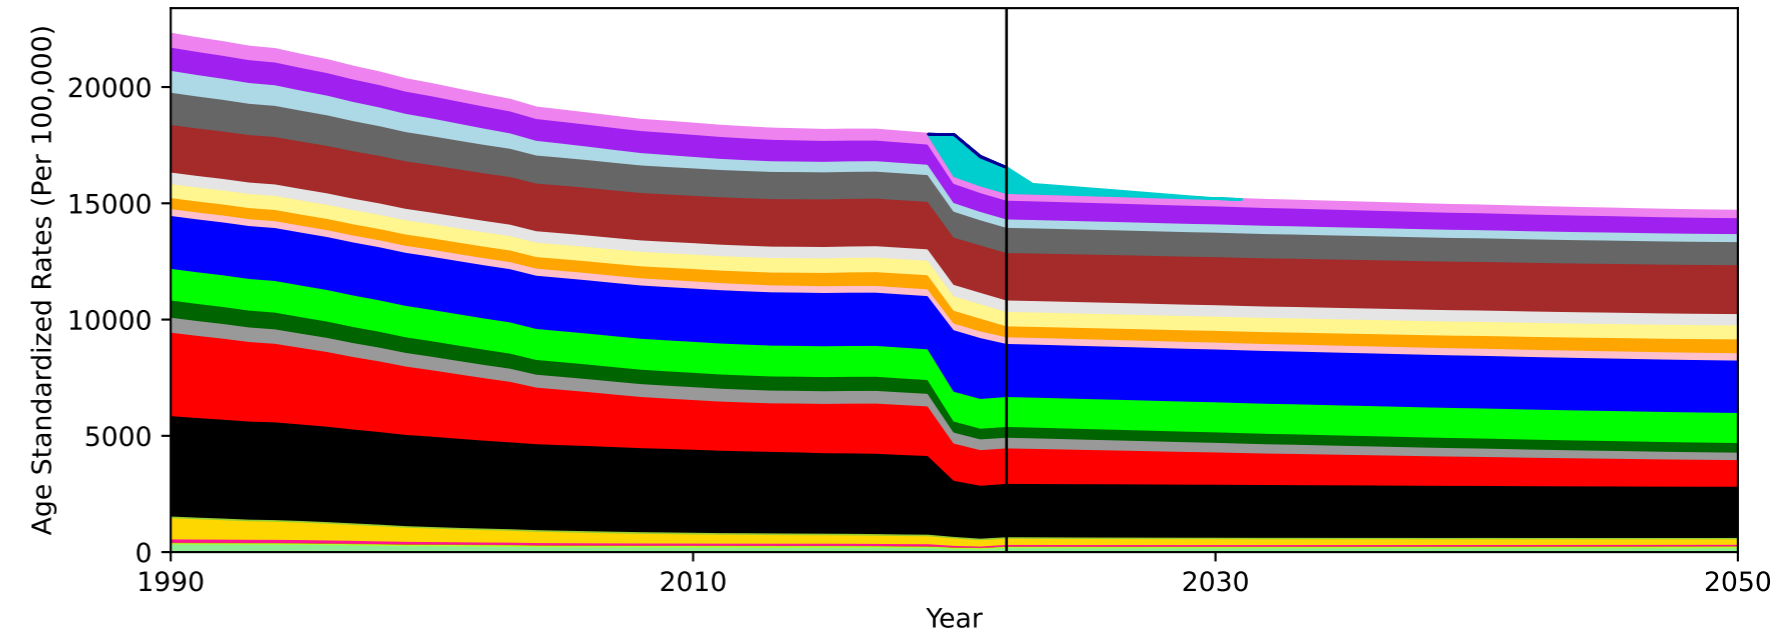

Level 1

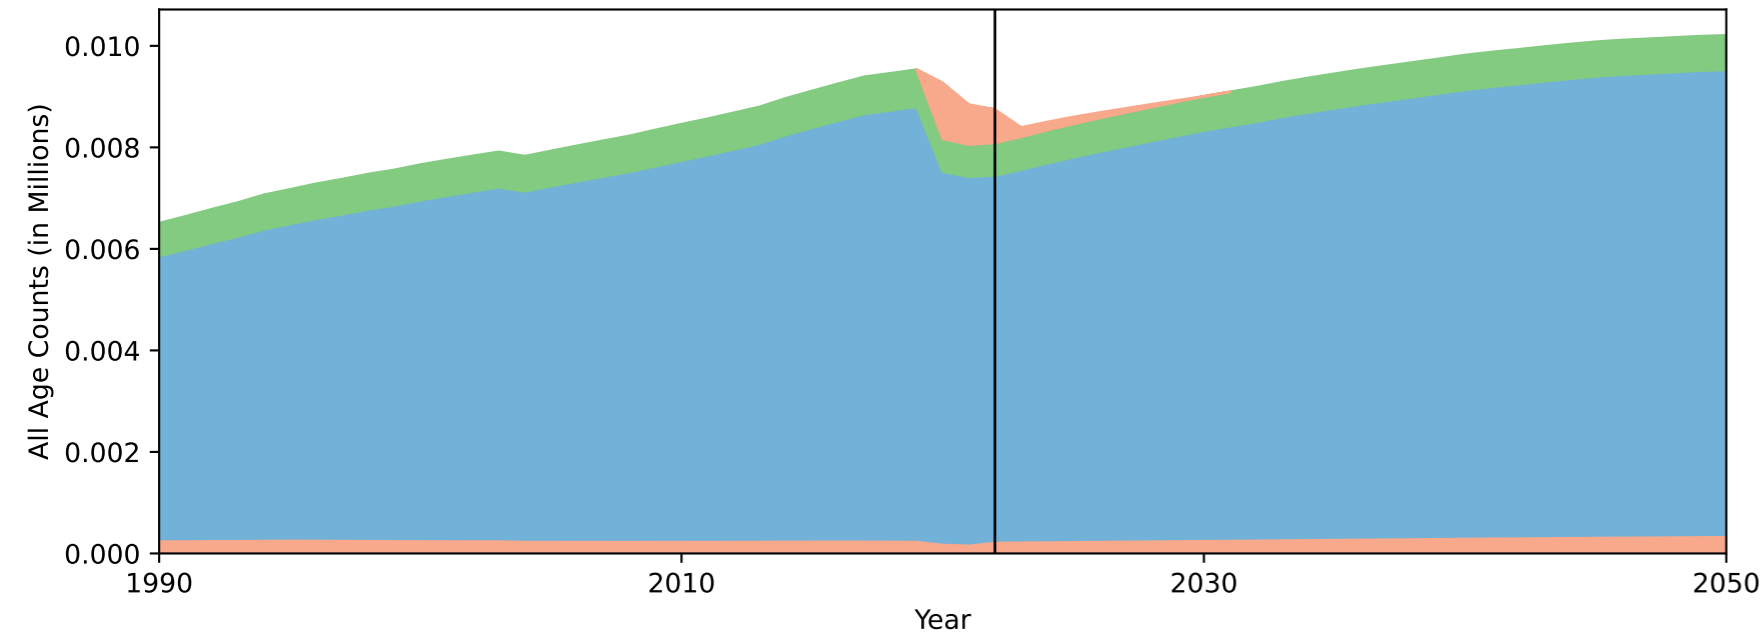

Level 2

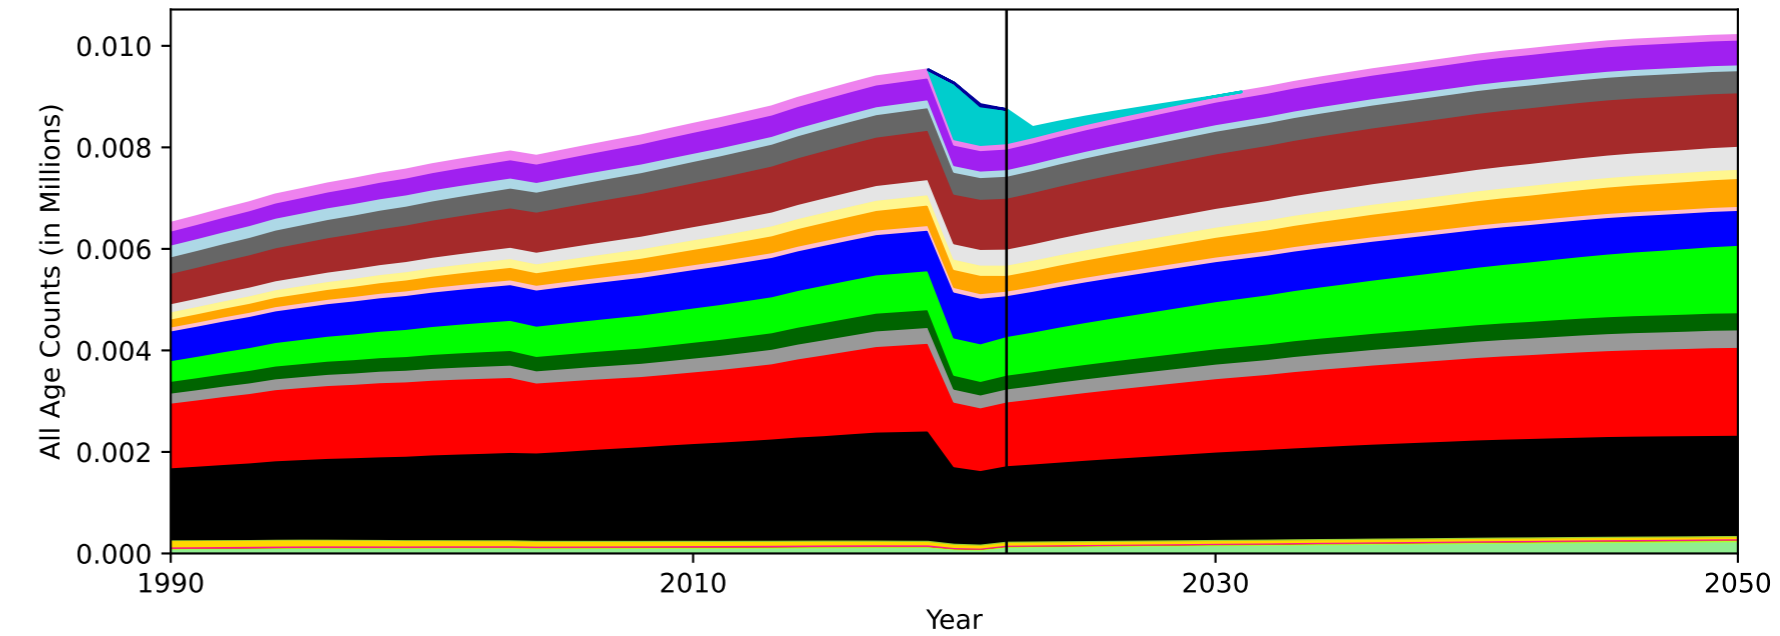

# Spain

Level 1

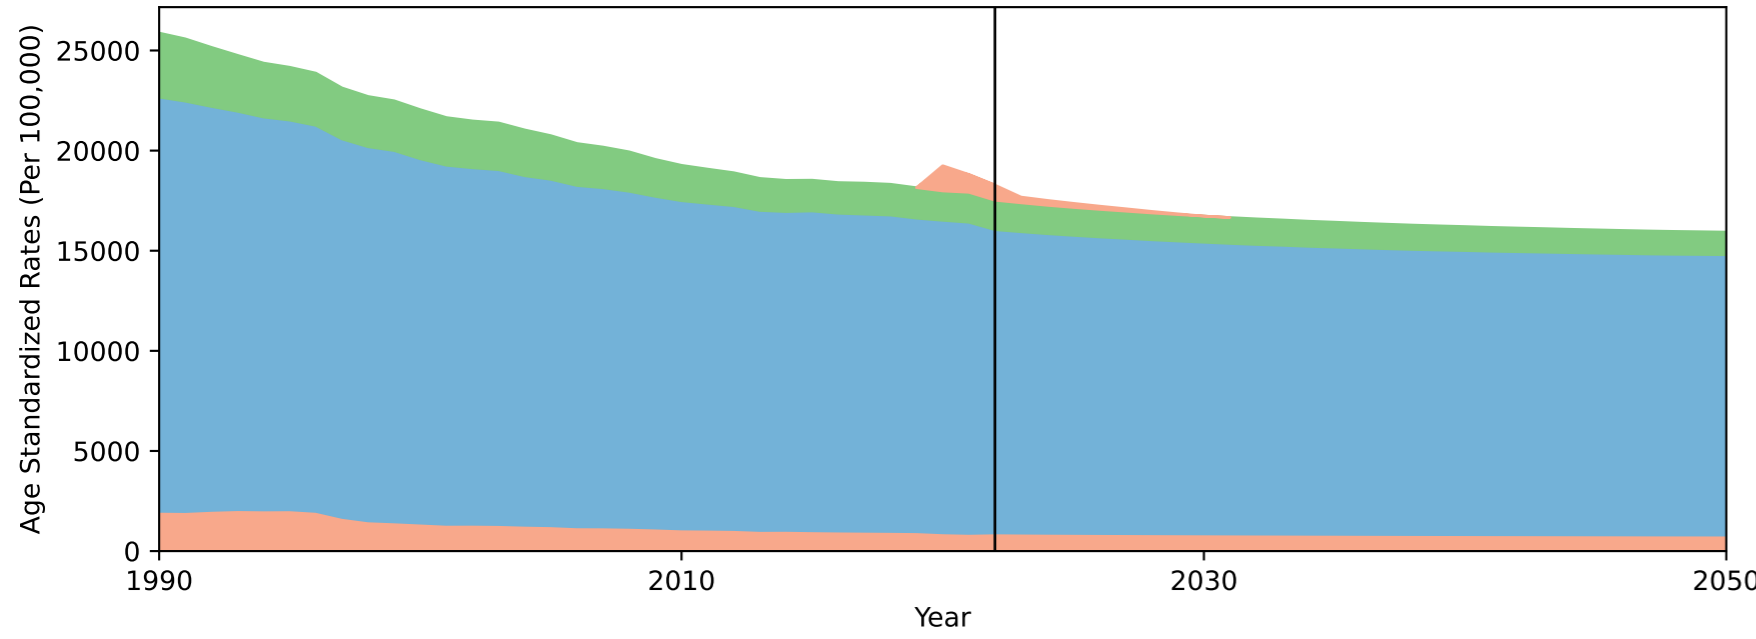

Level 2

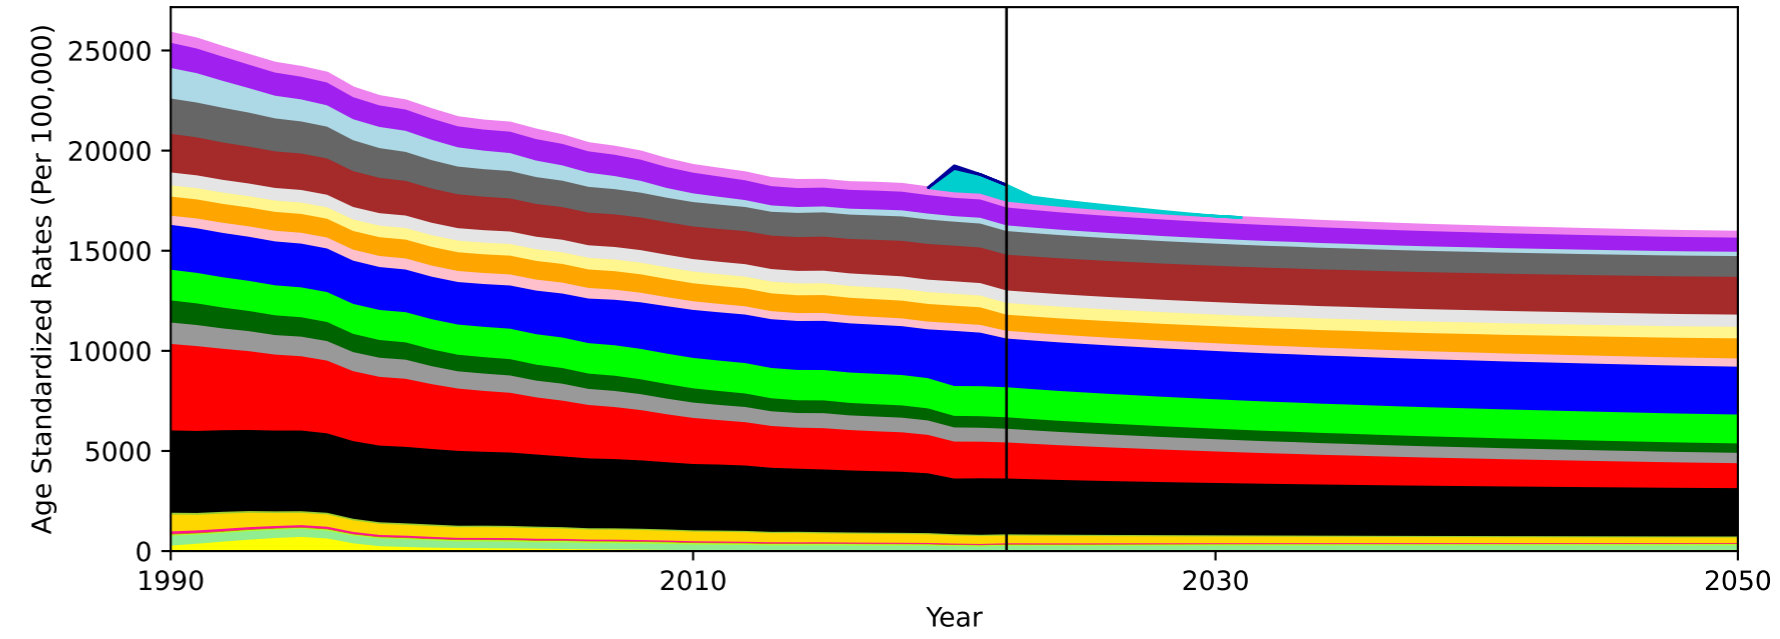

Level 1

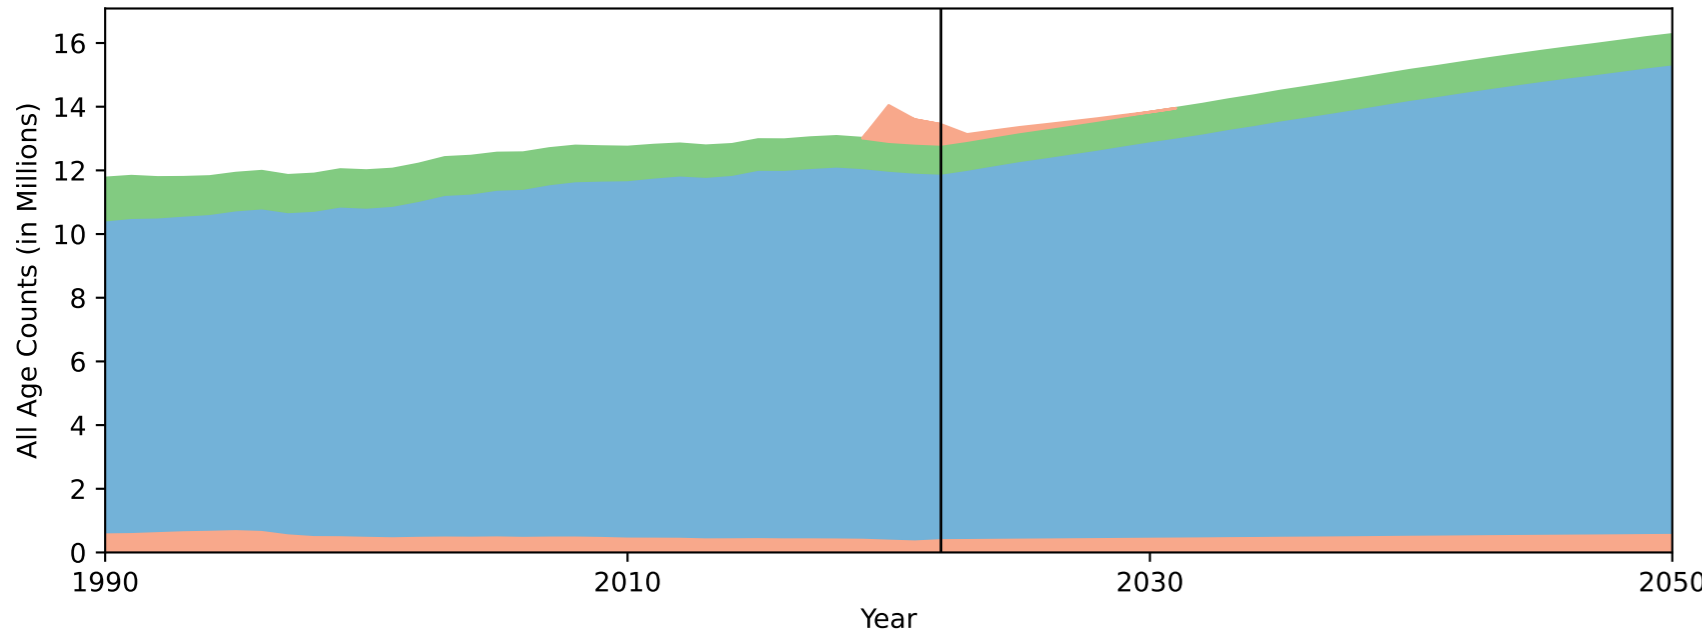

Level 2

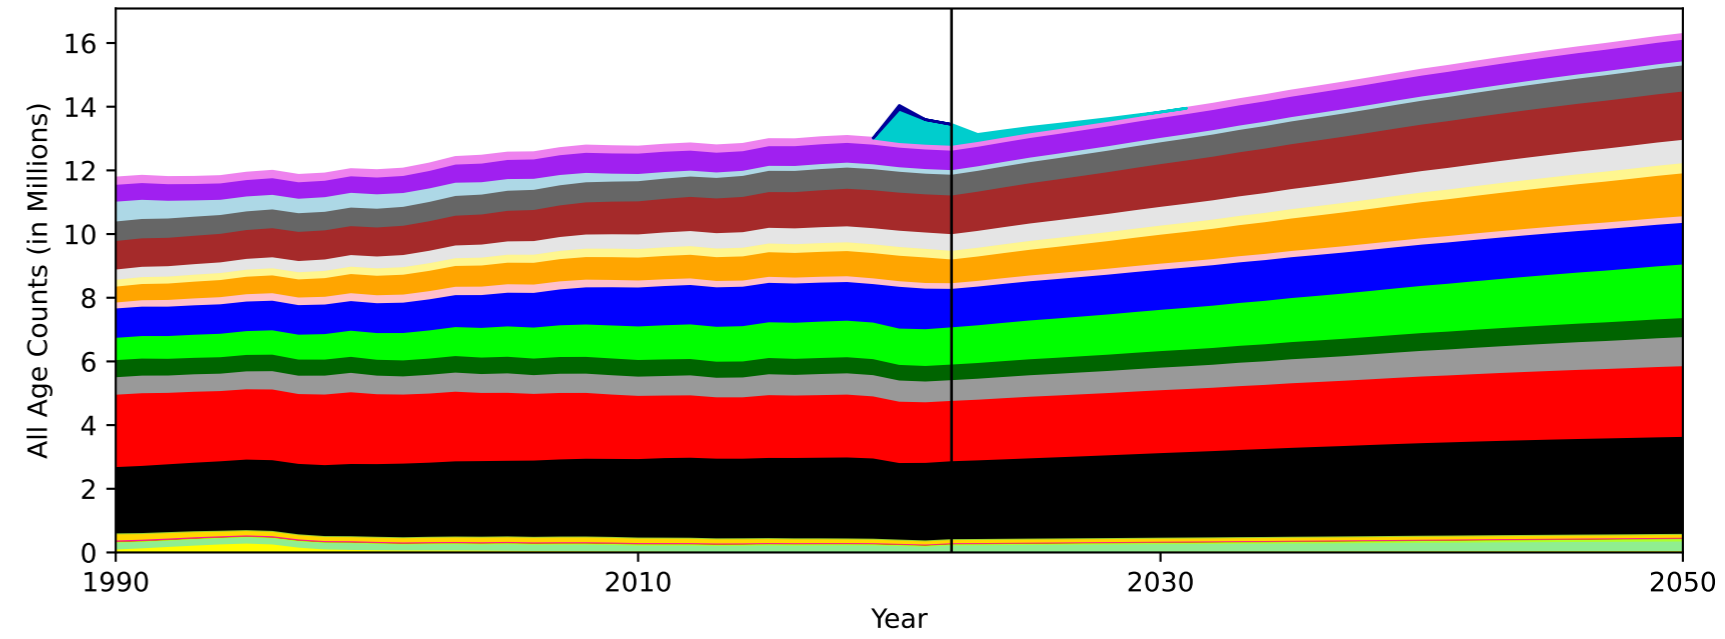

# Sweden

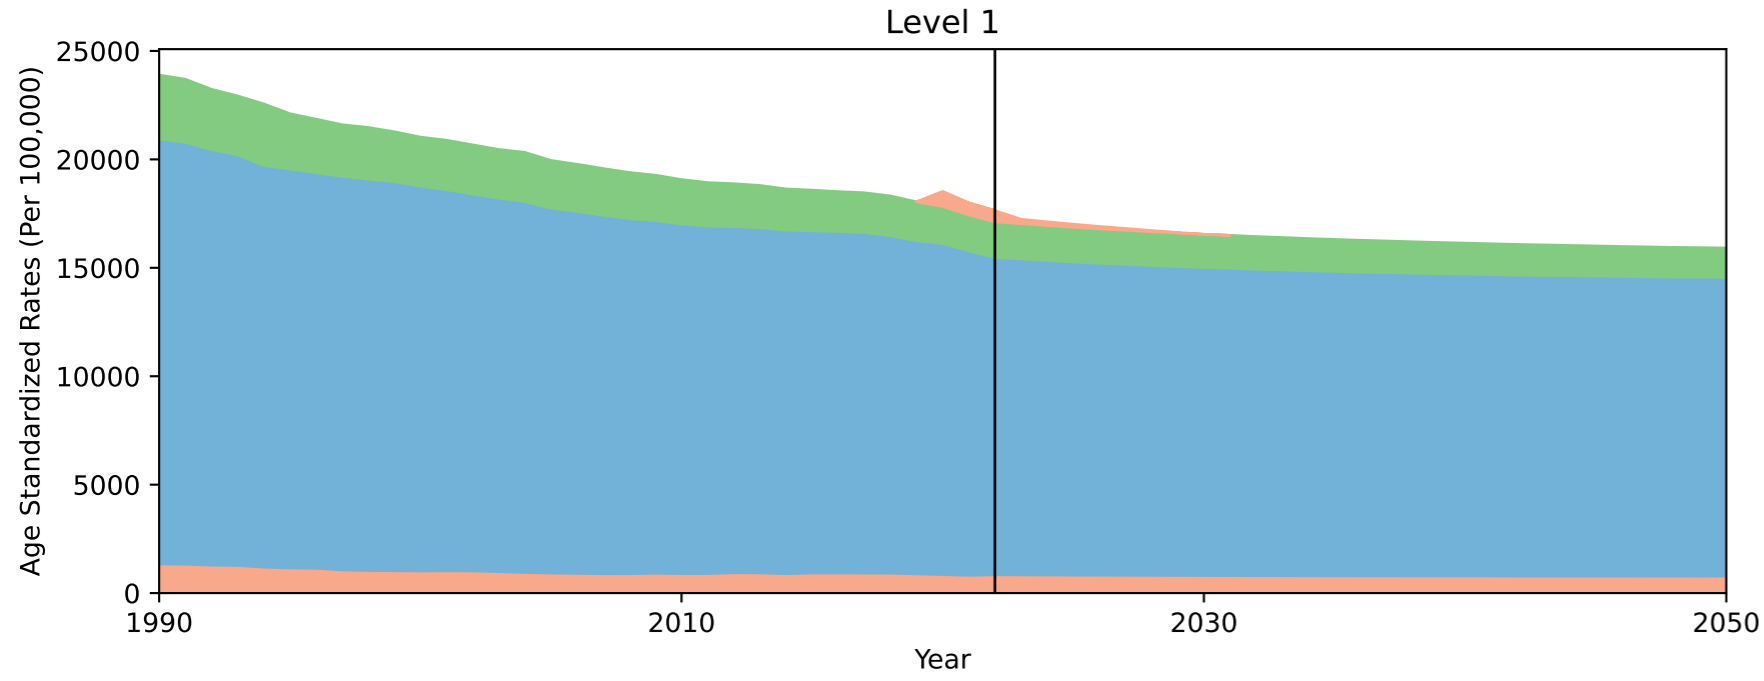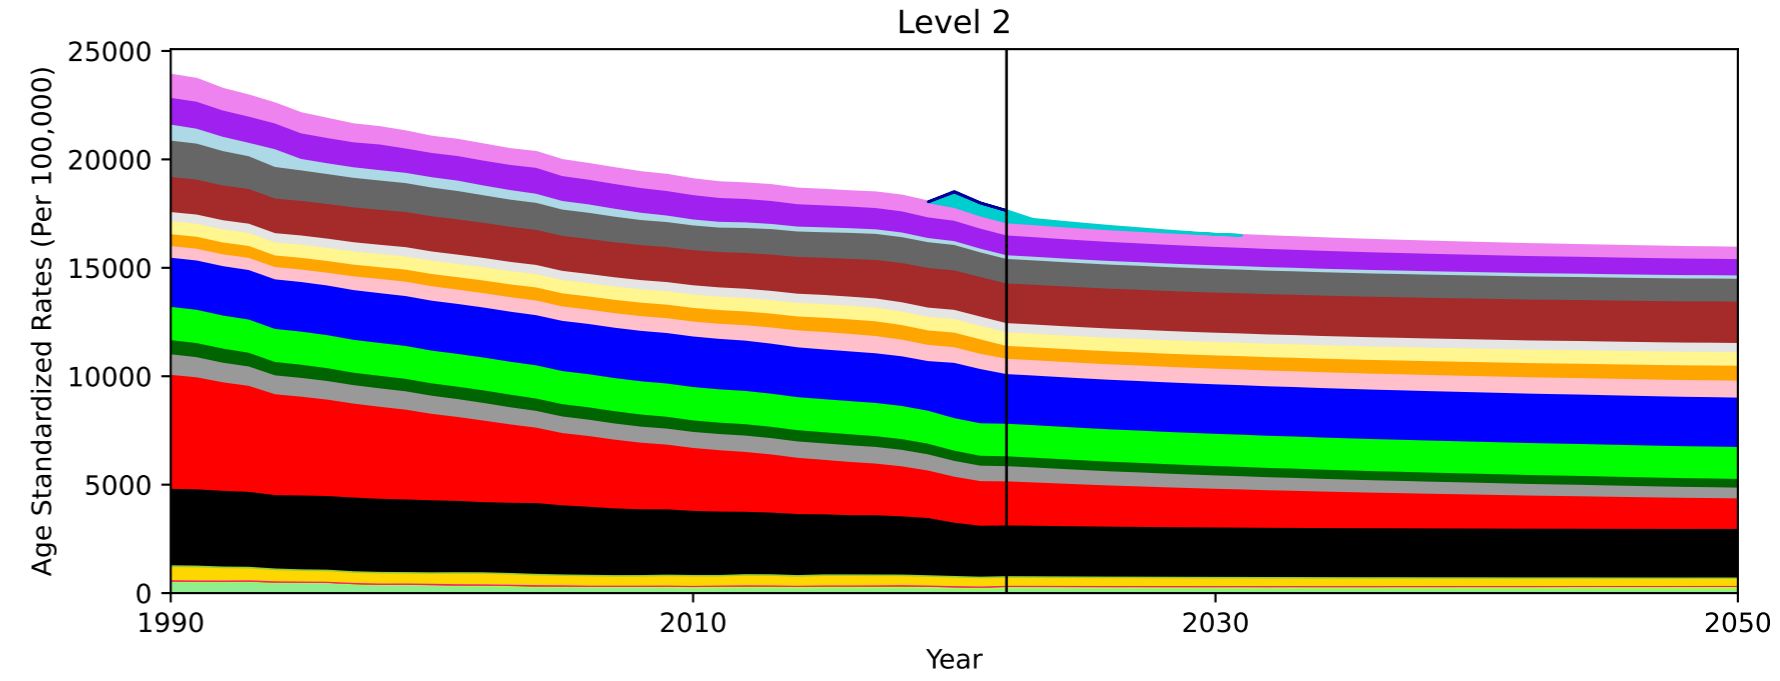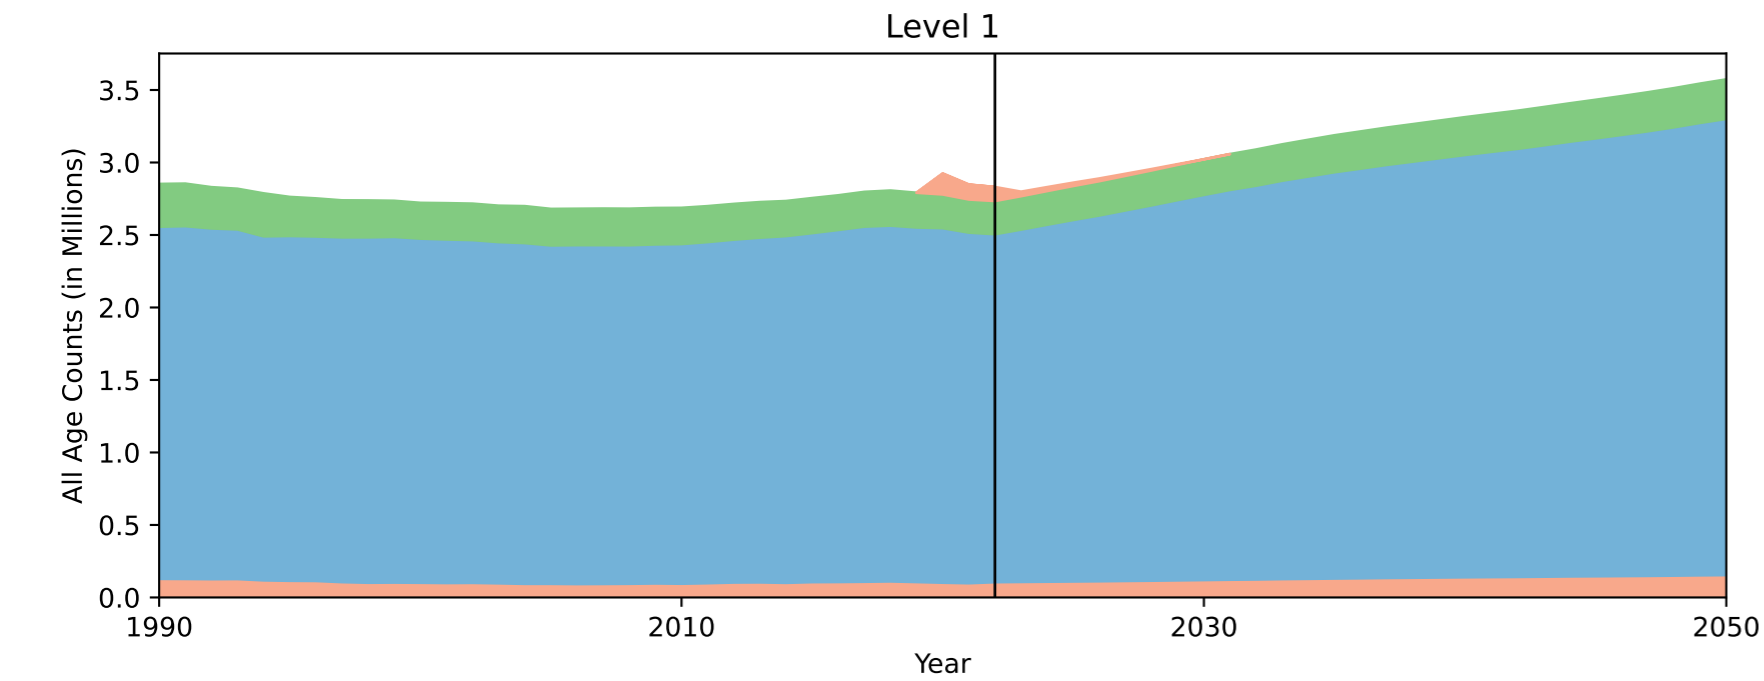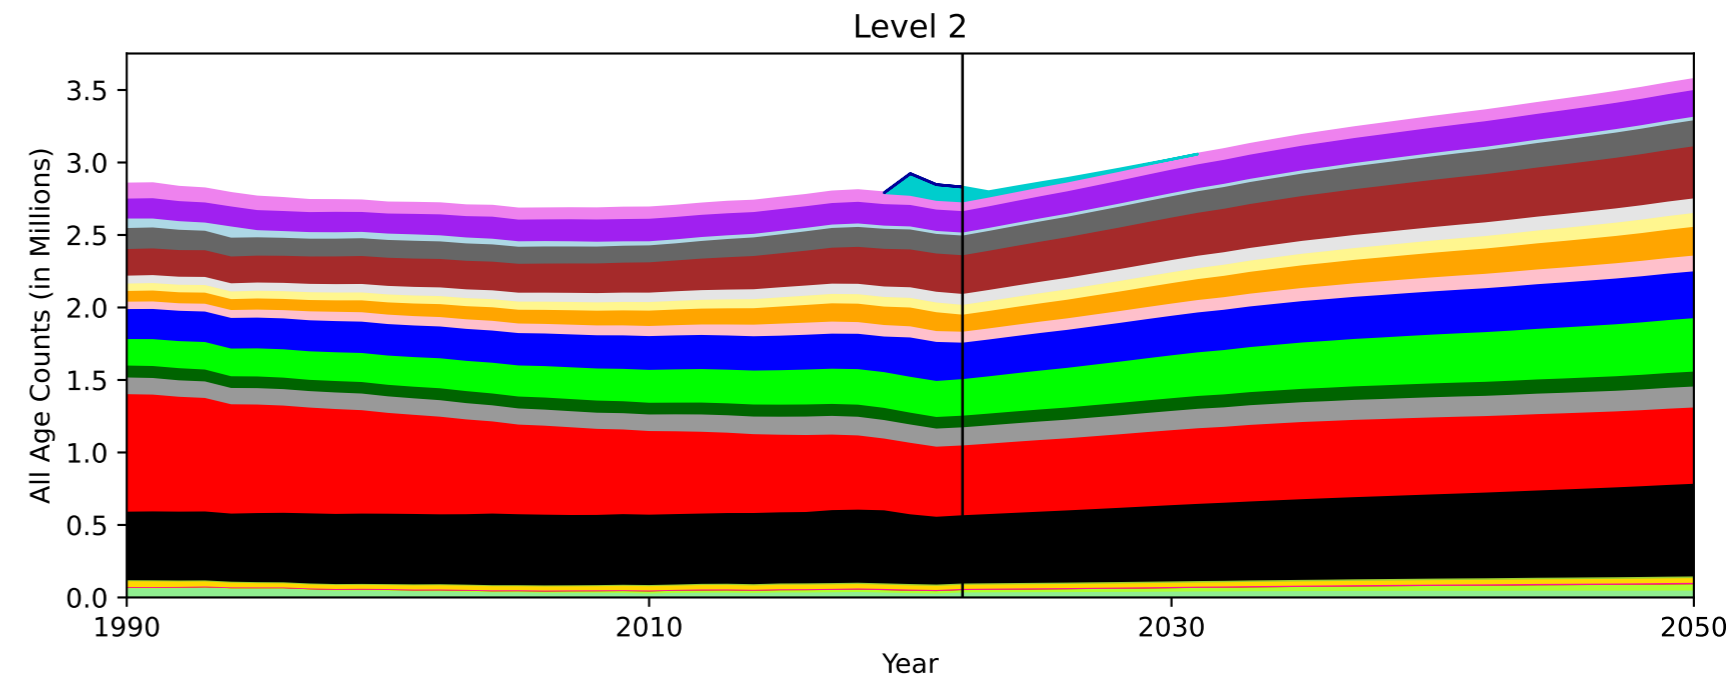

# Switzerland

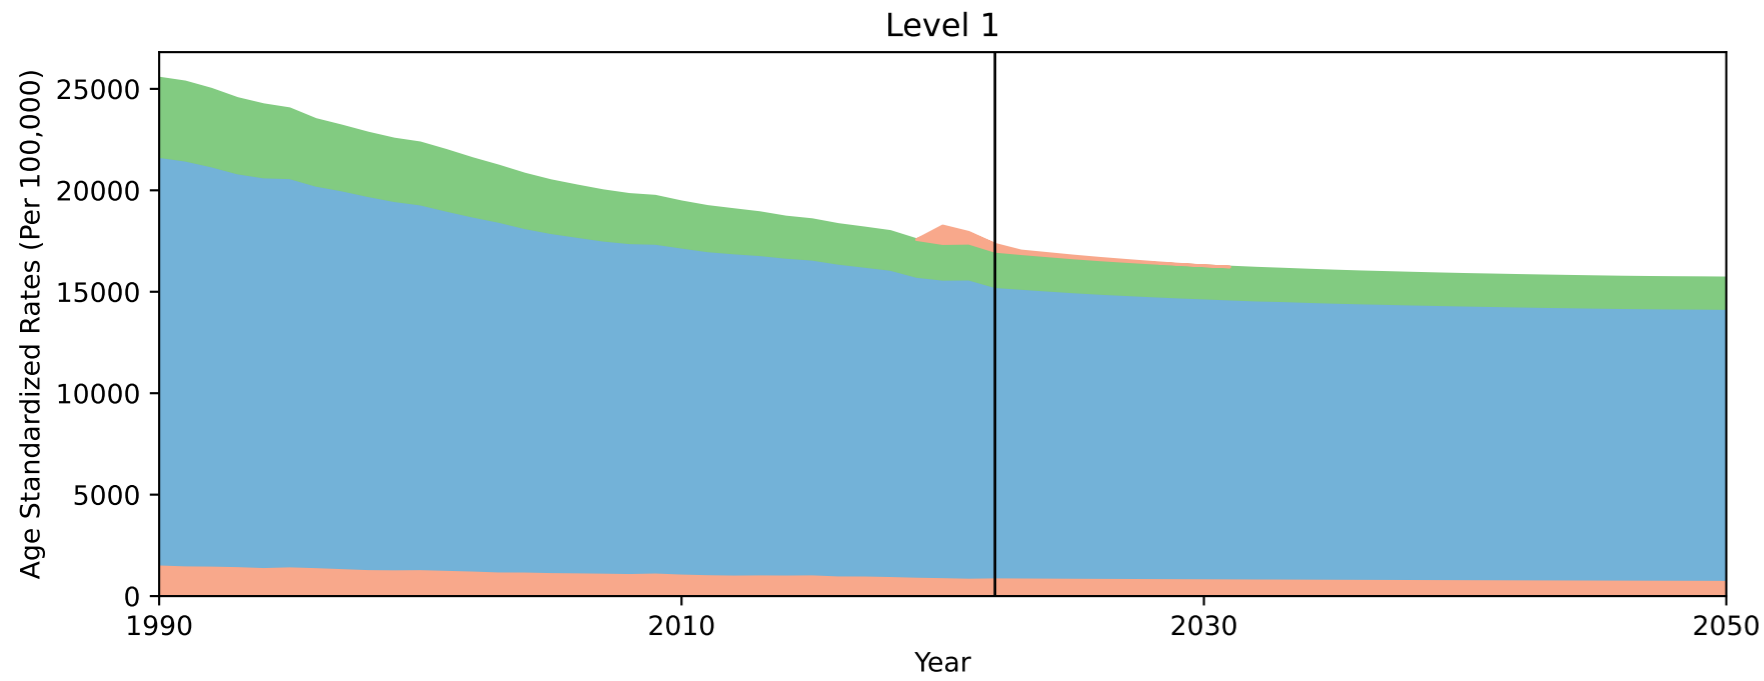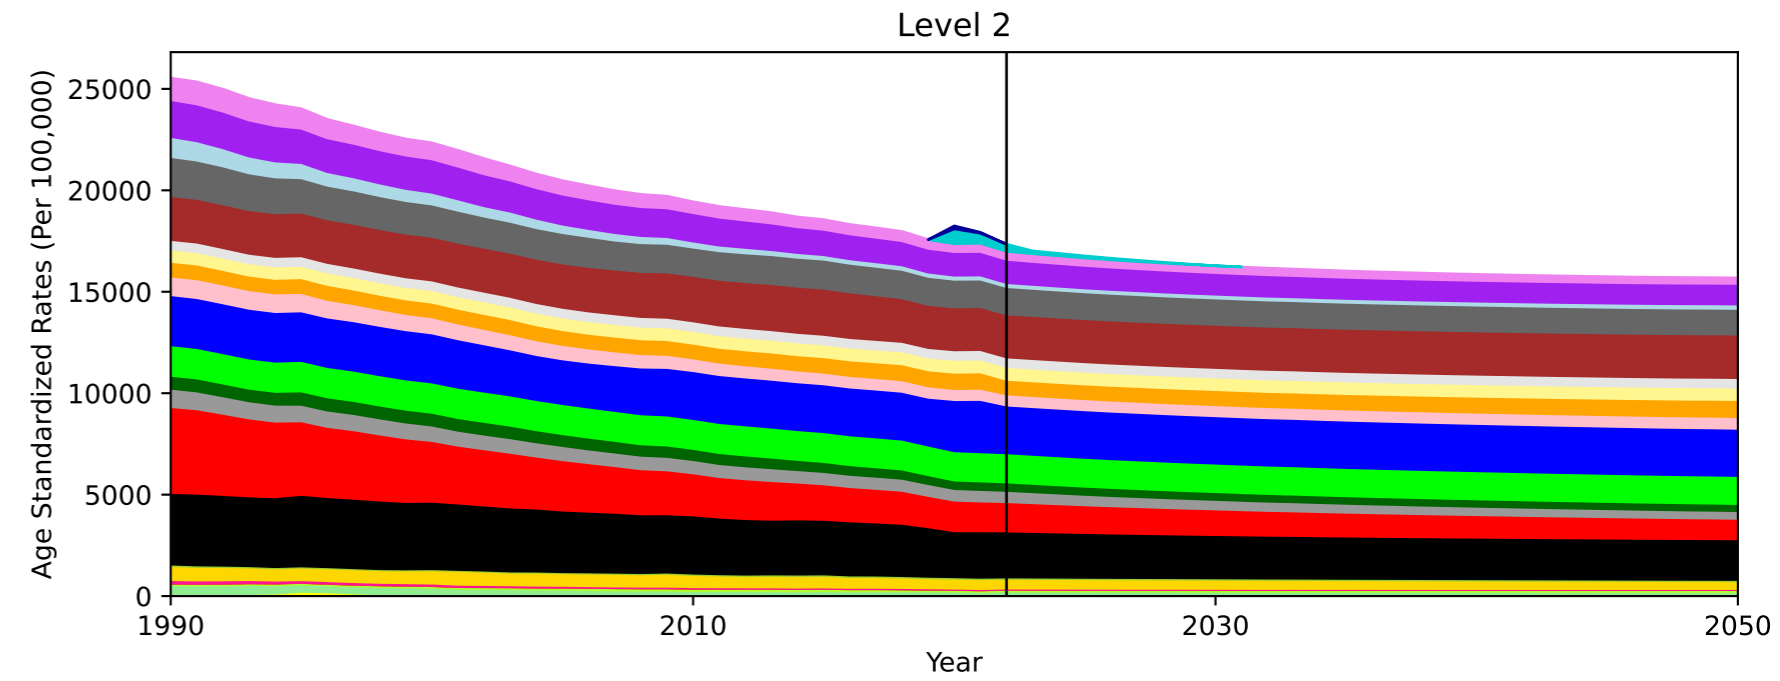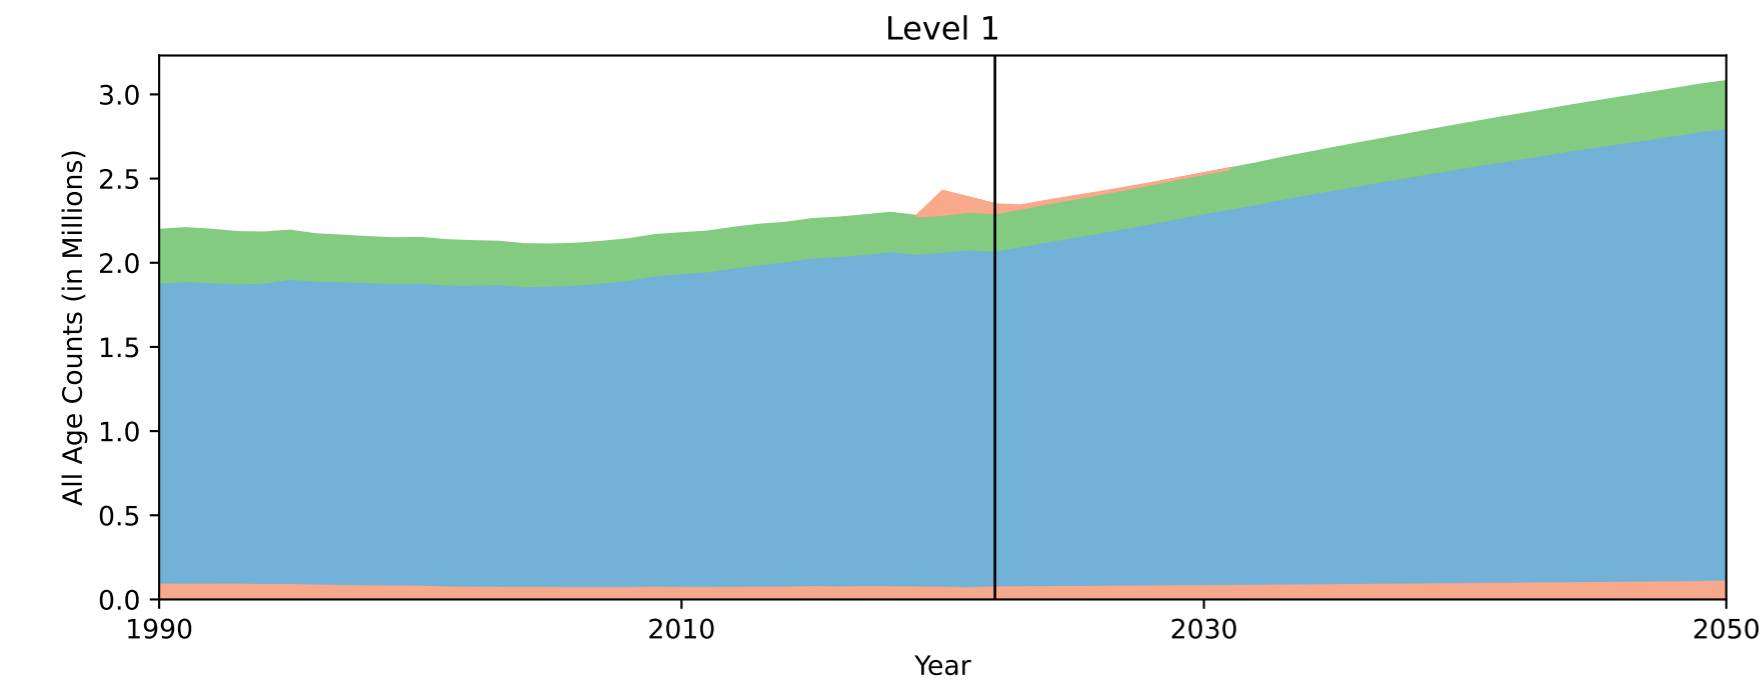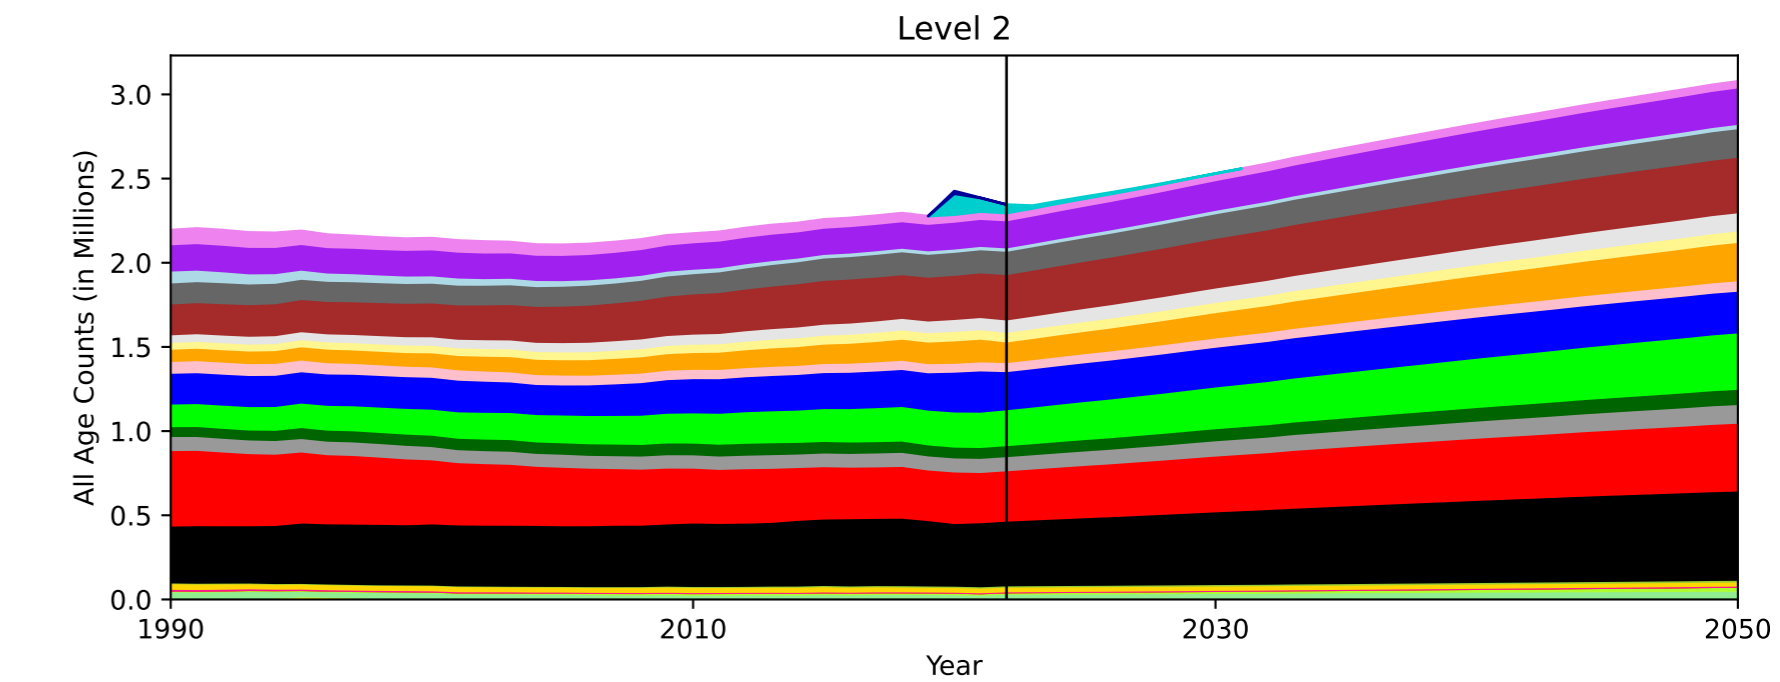

UK

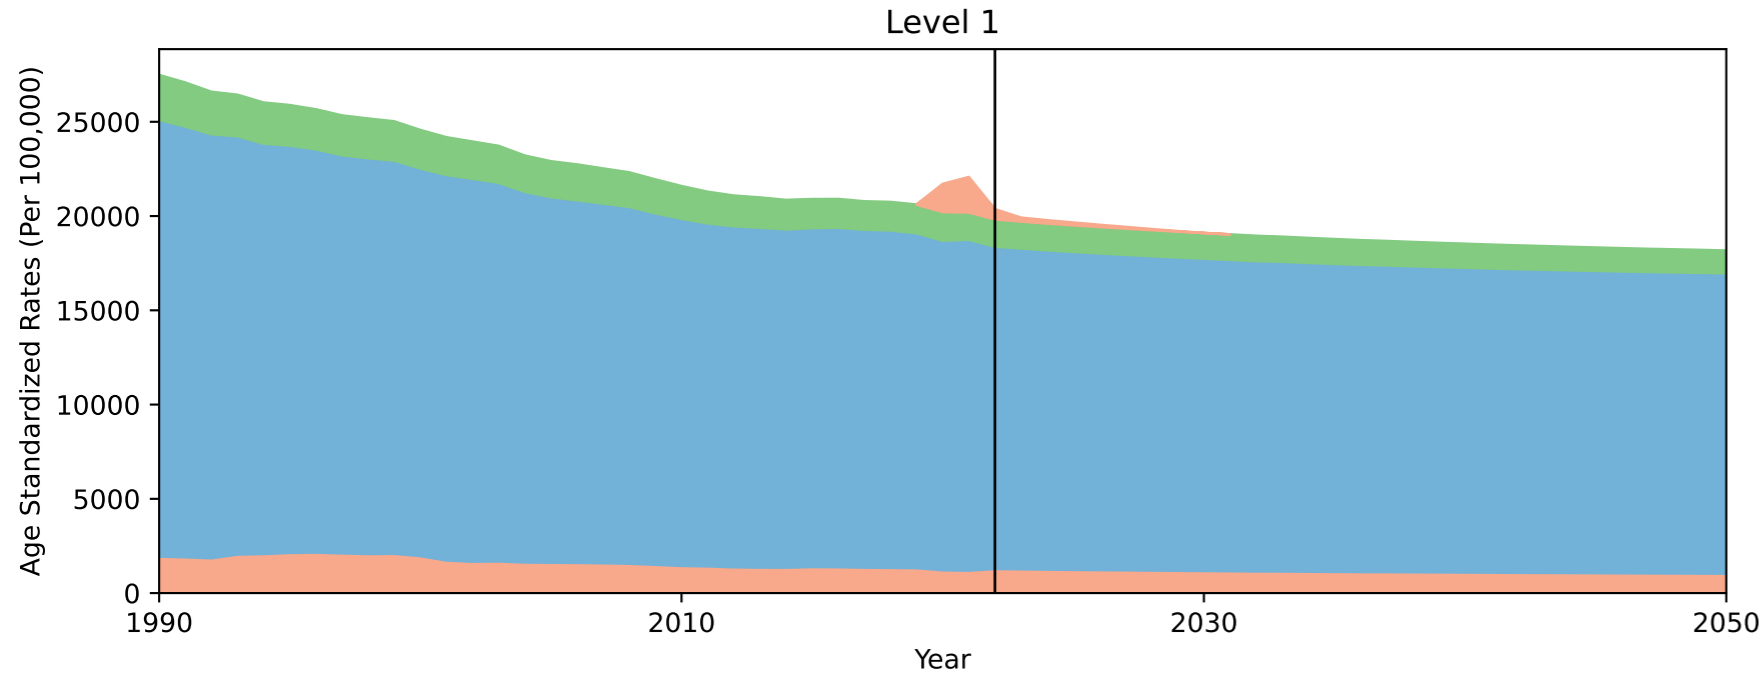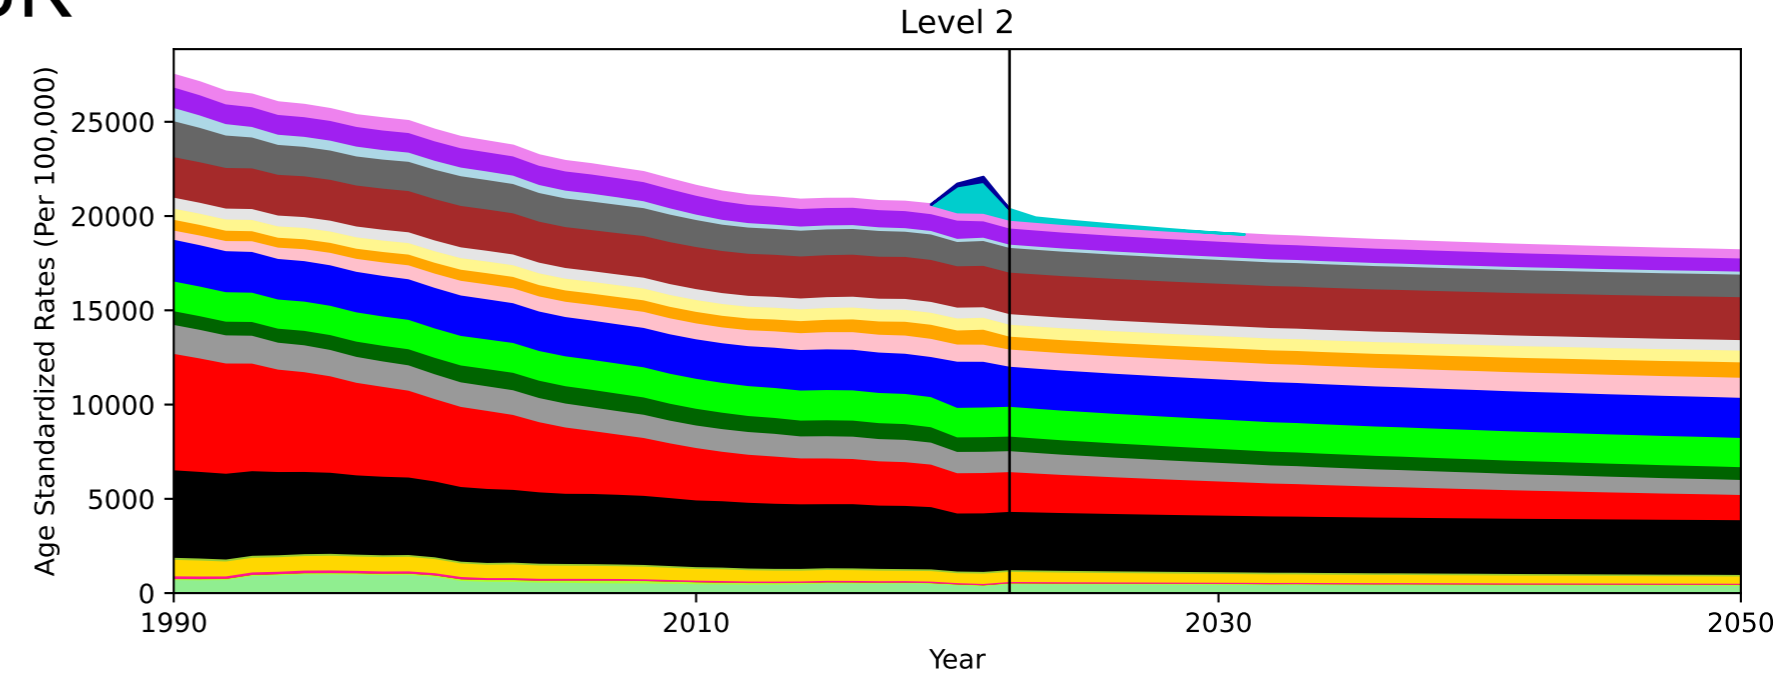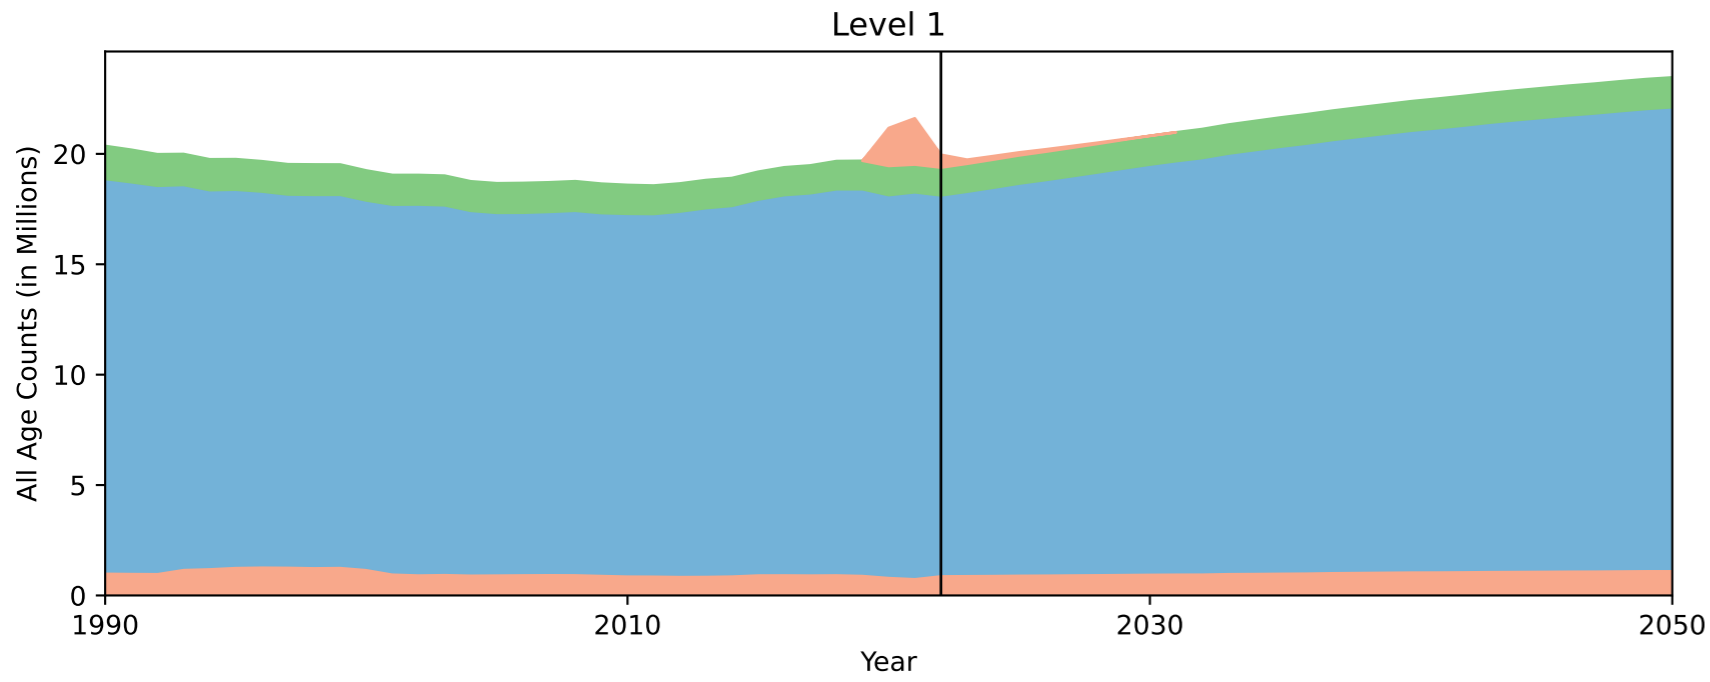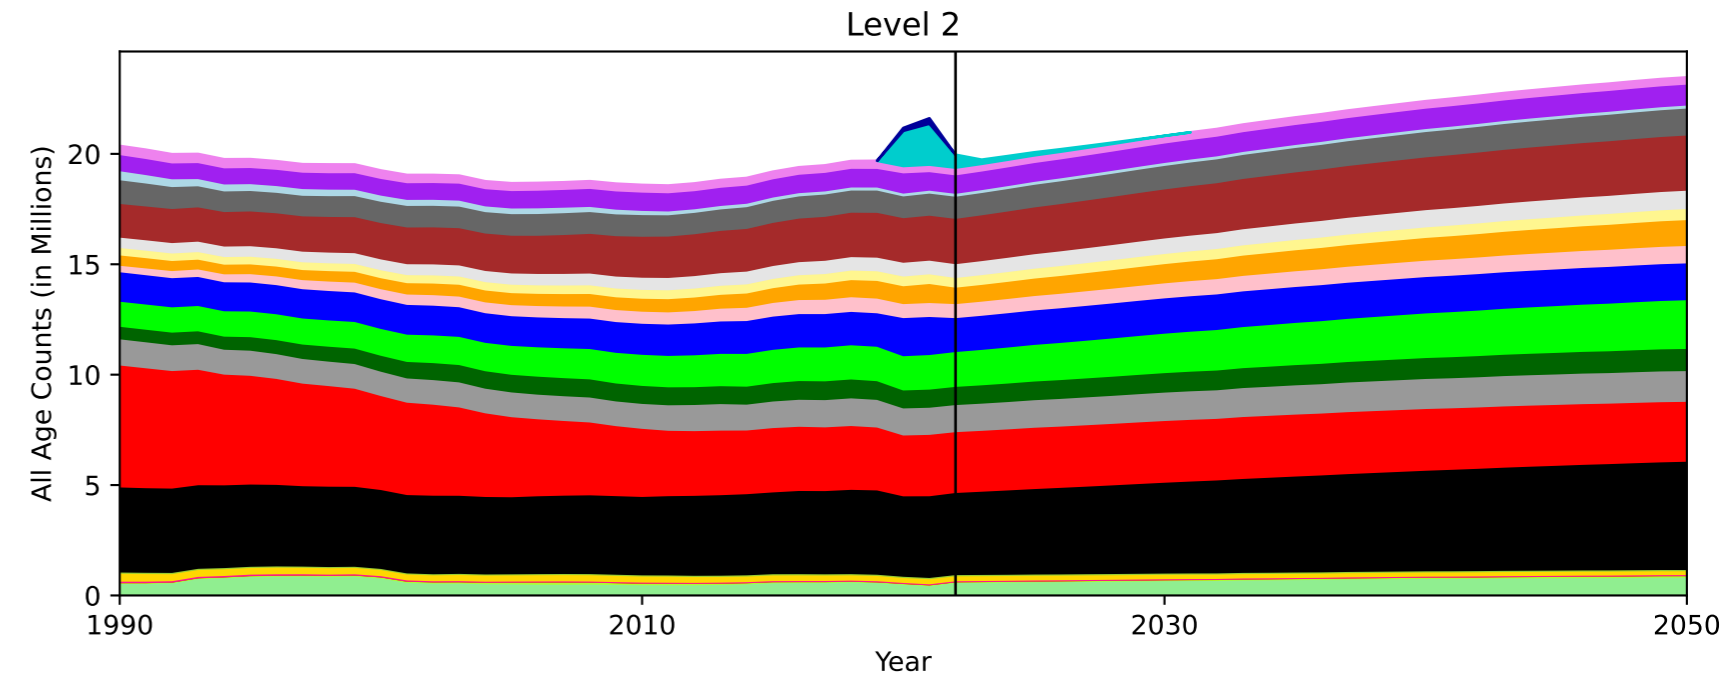

# Bolivia

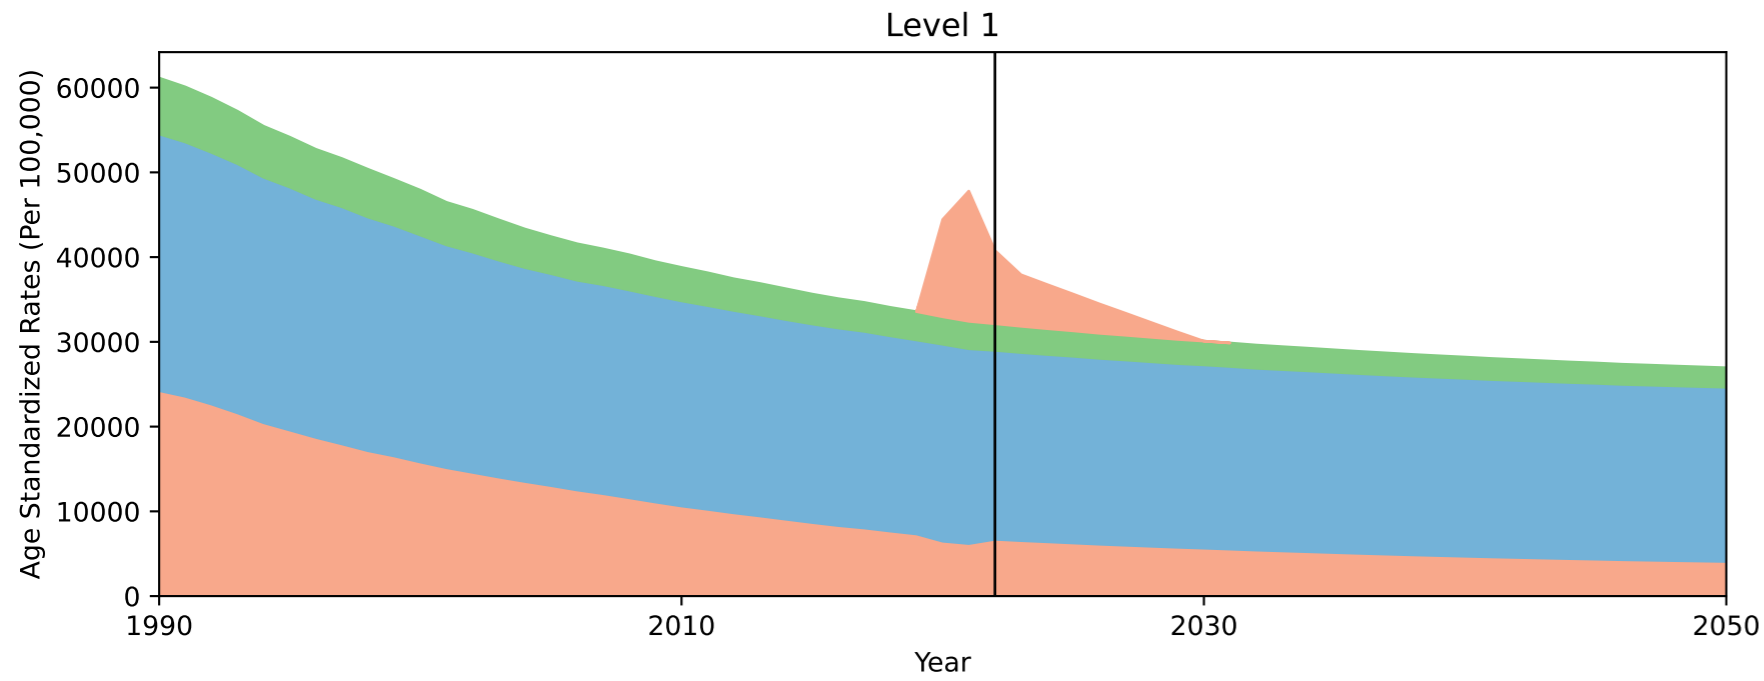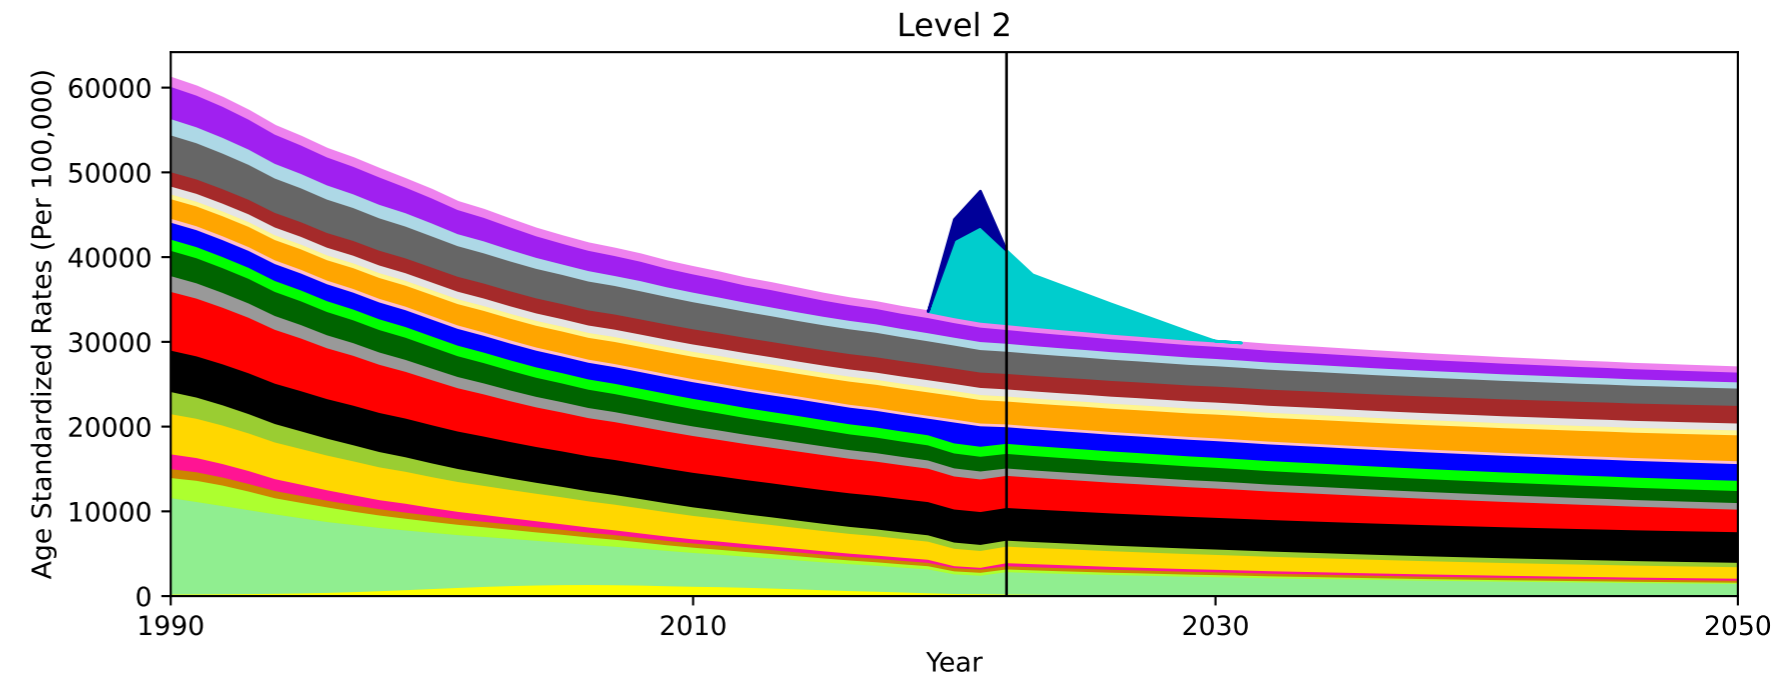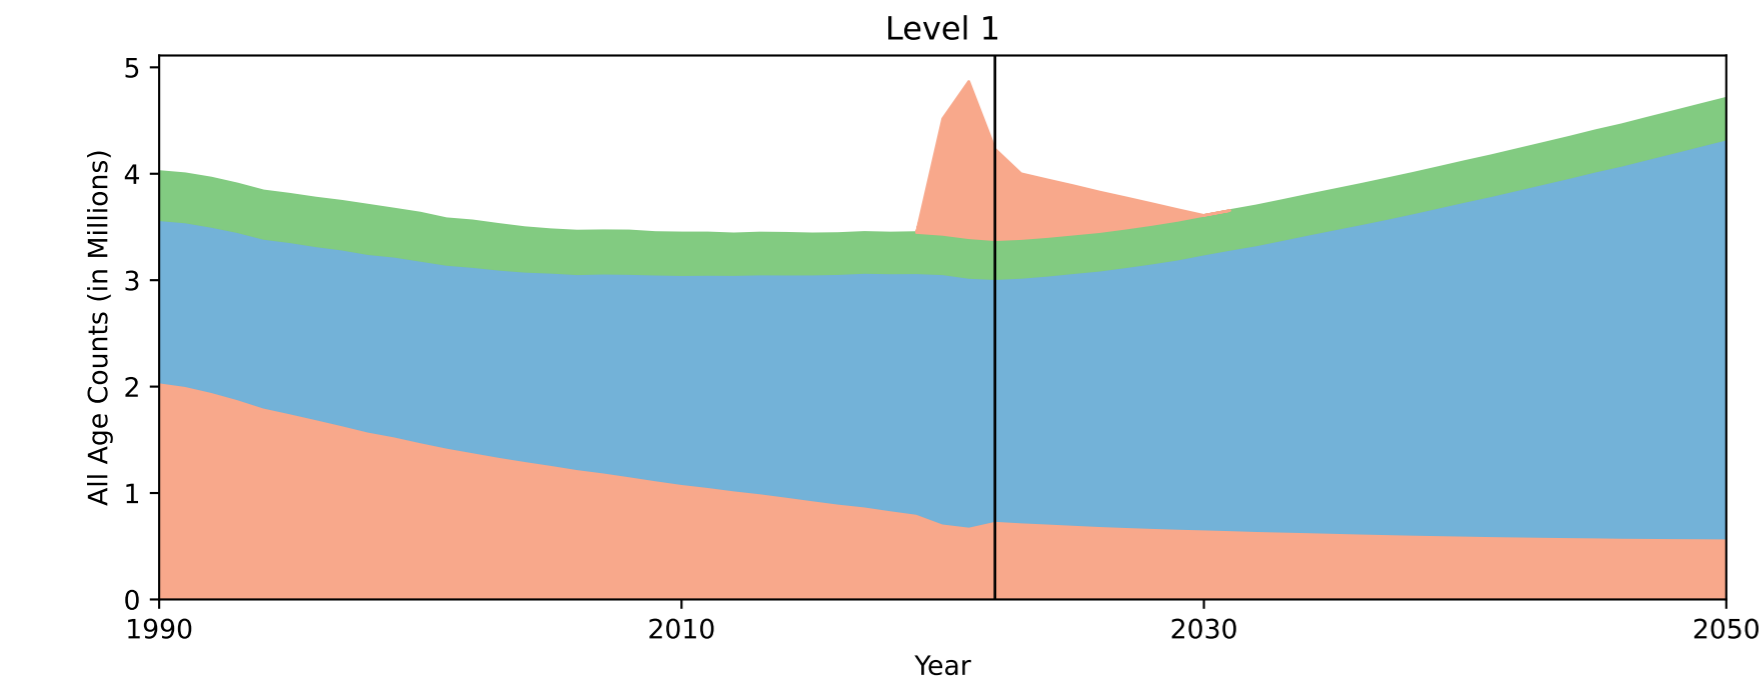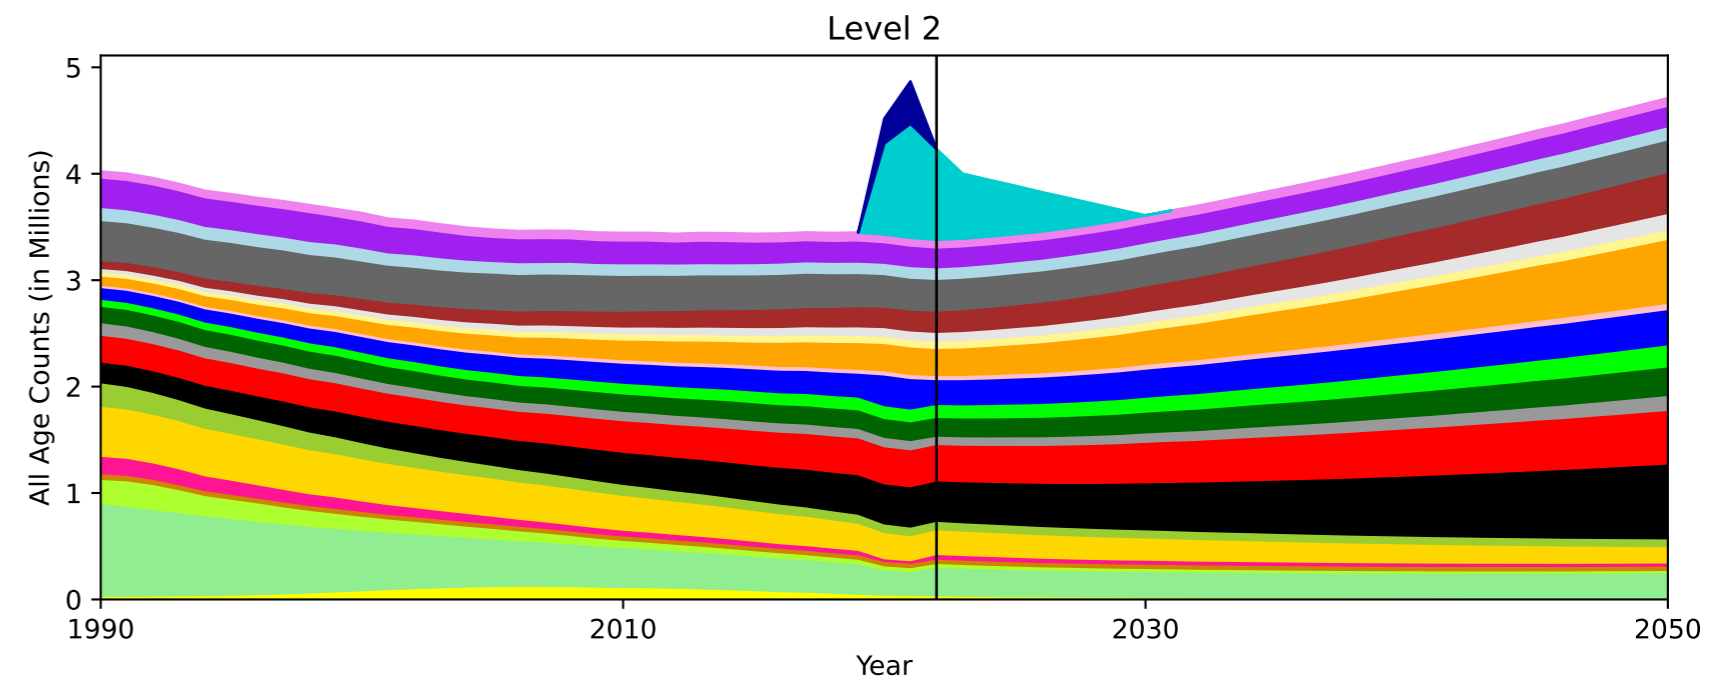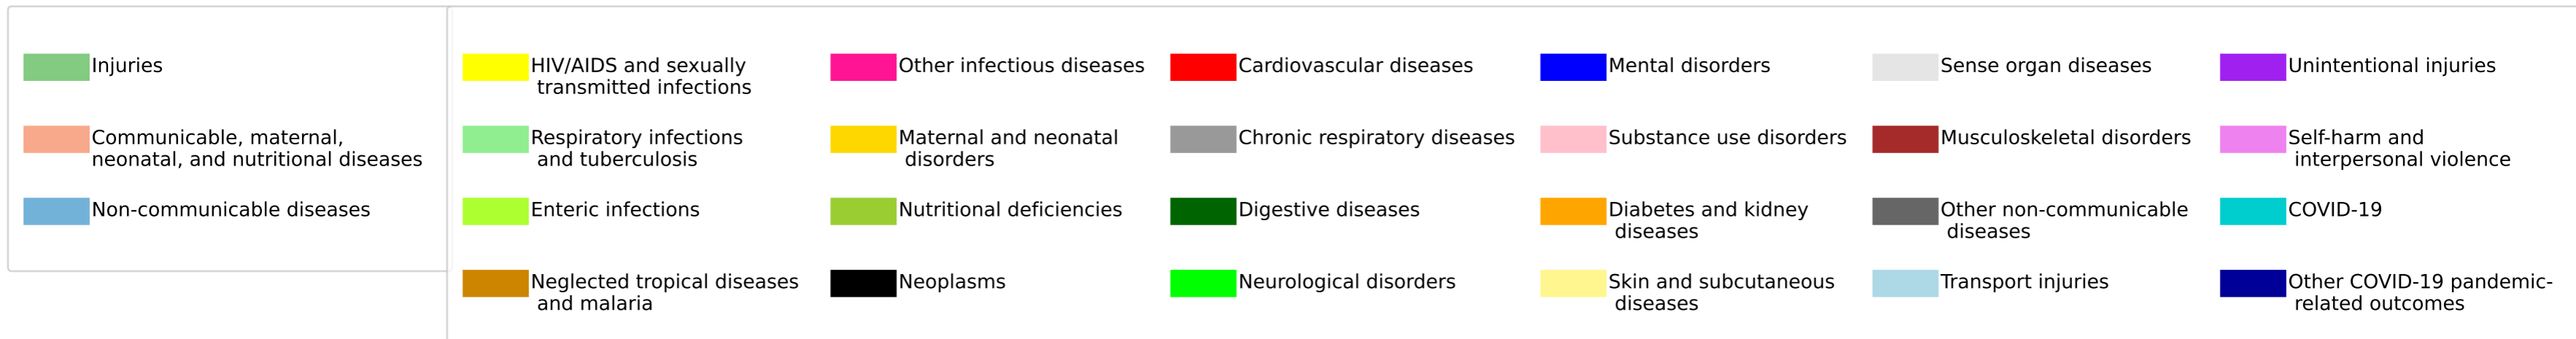

Level 1

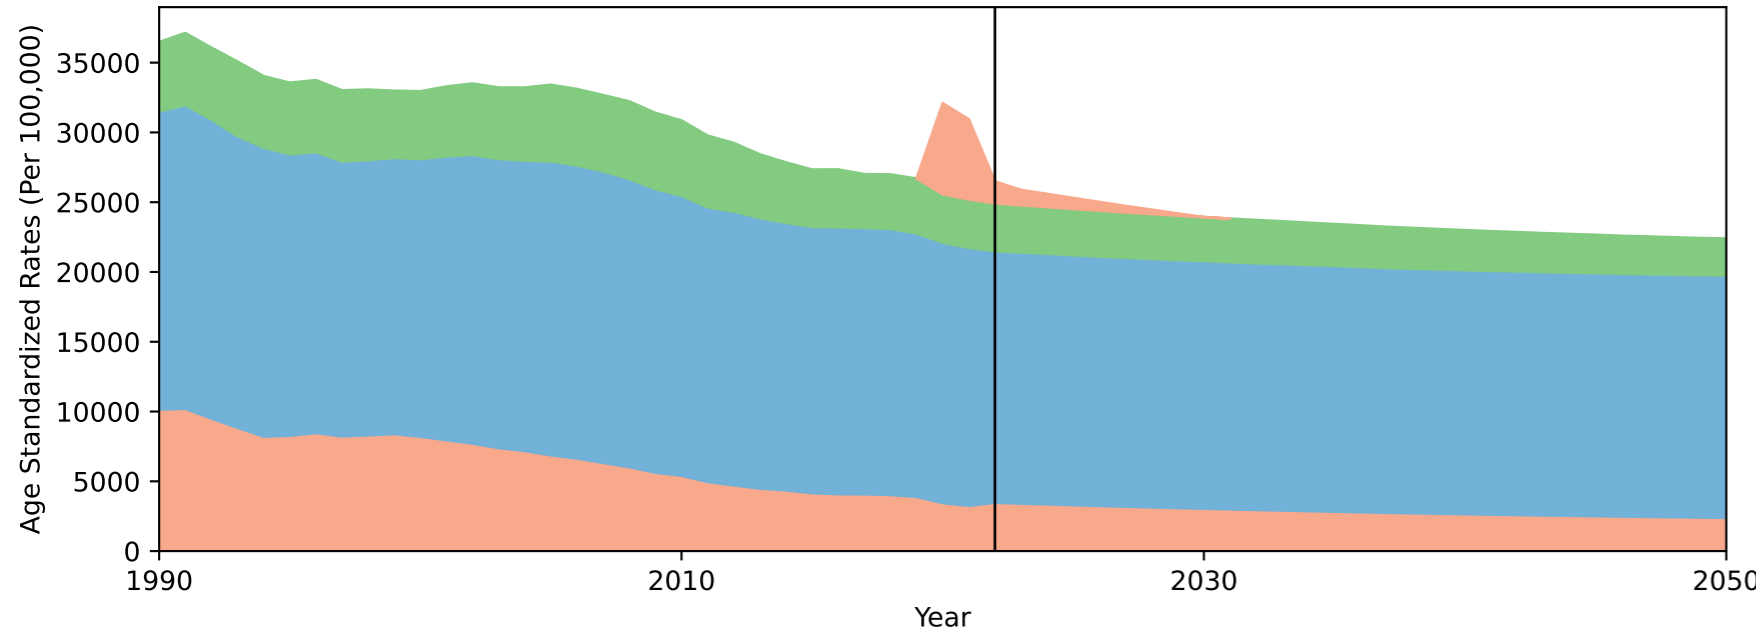

Level 2

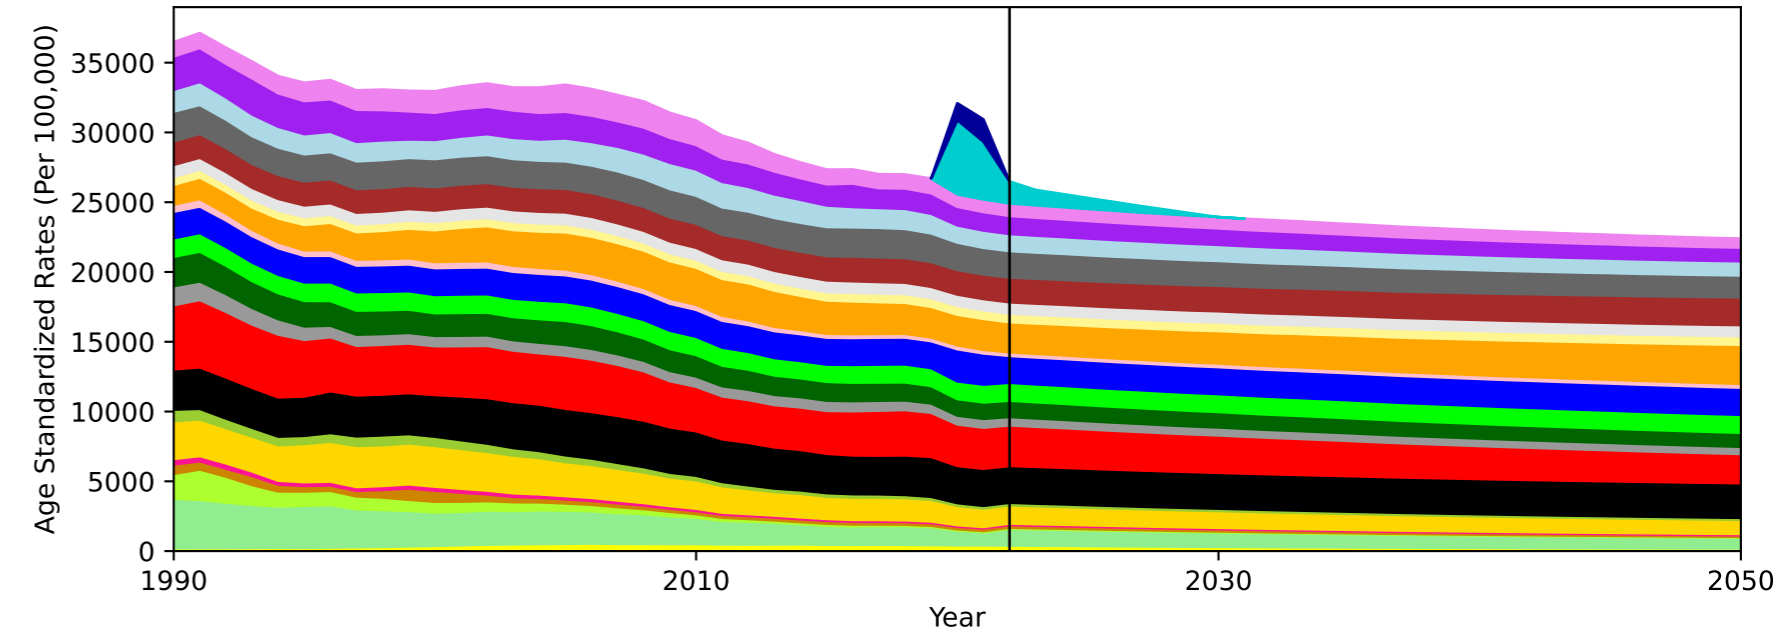

Level 1

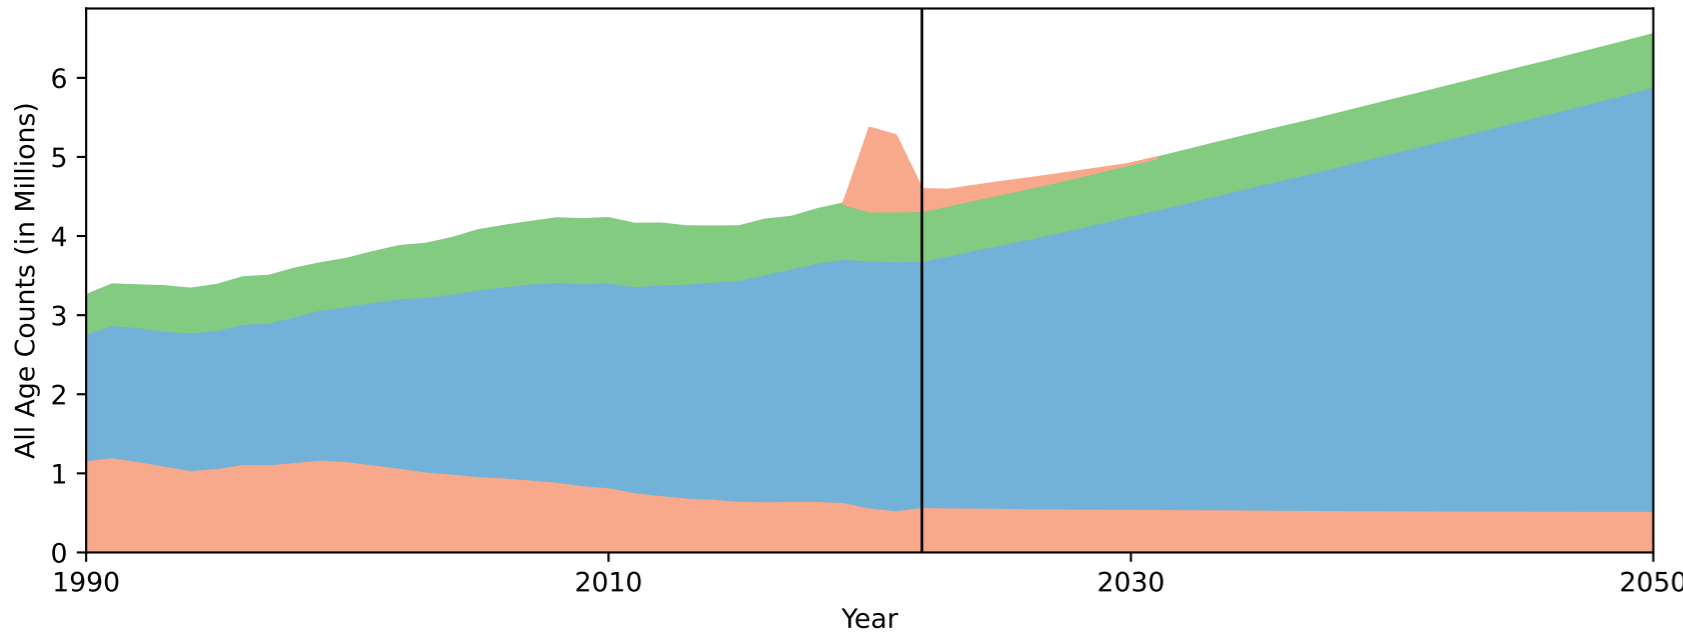

Level 2

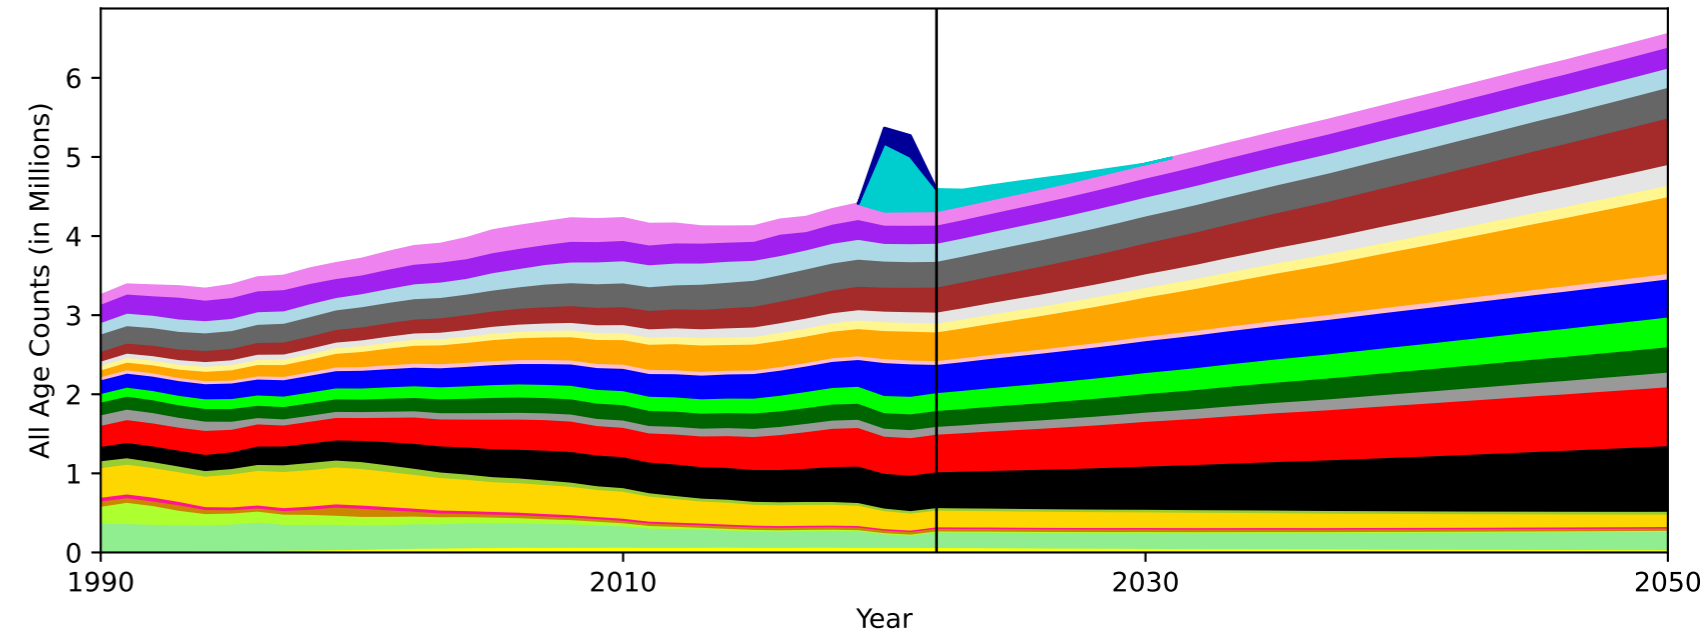



Level 1

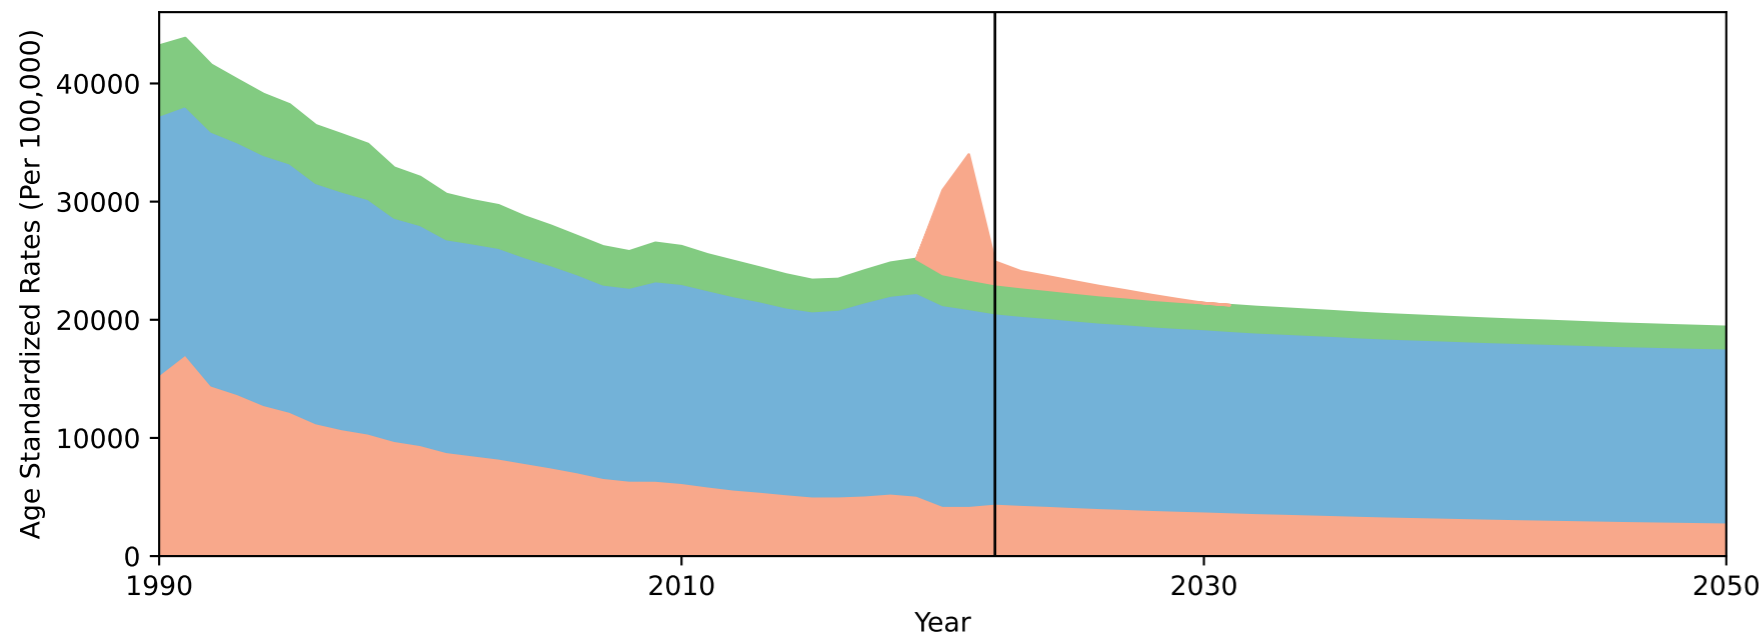

Level 2

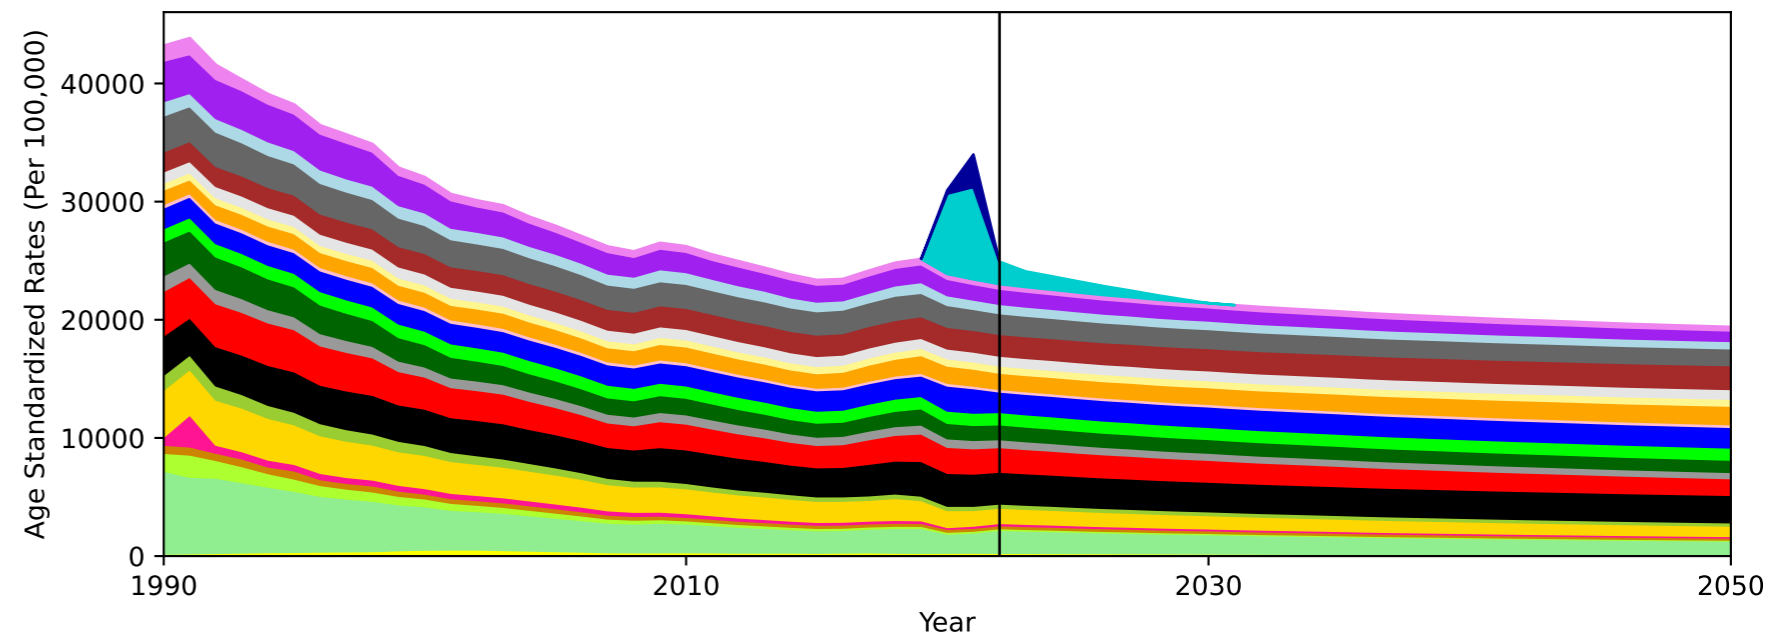

Level 1

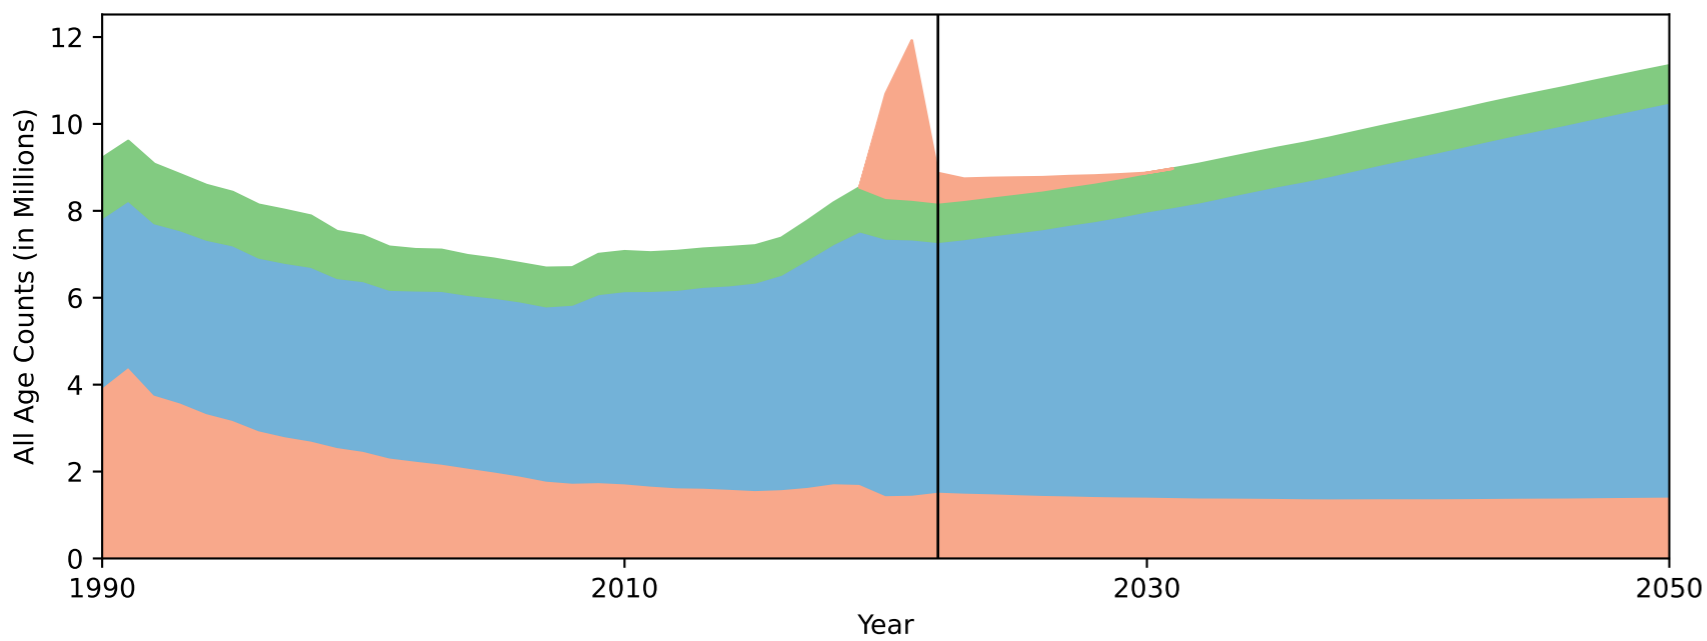

Level 2

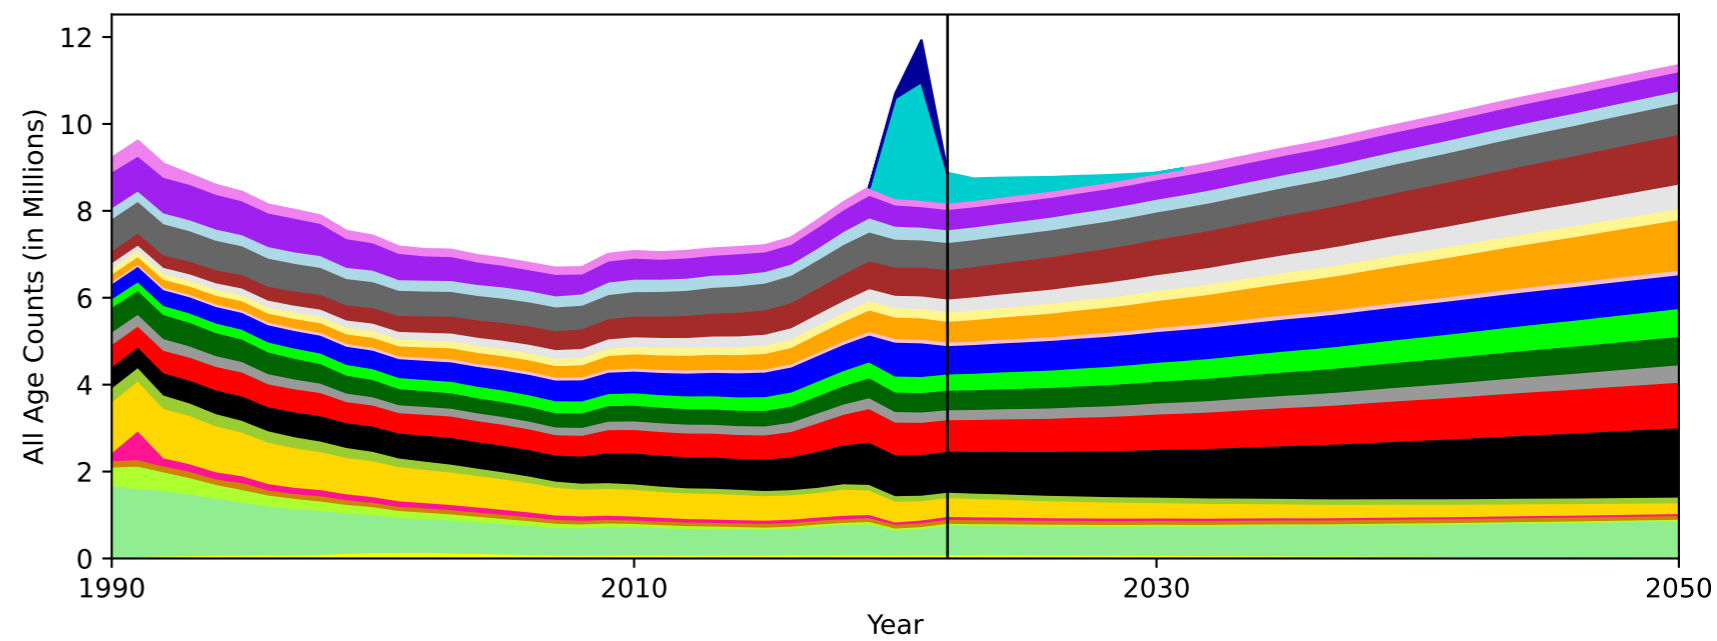

# Antigua And Barbuda

Supplemental Results Figure S4. Age-standardised DALY rates and all age DALY counts and by Level 1 and Level 2 causes, 1990–2050

313

Level 1

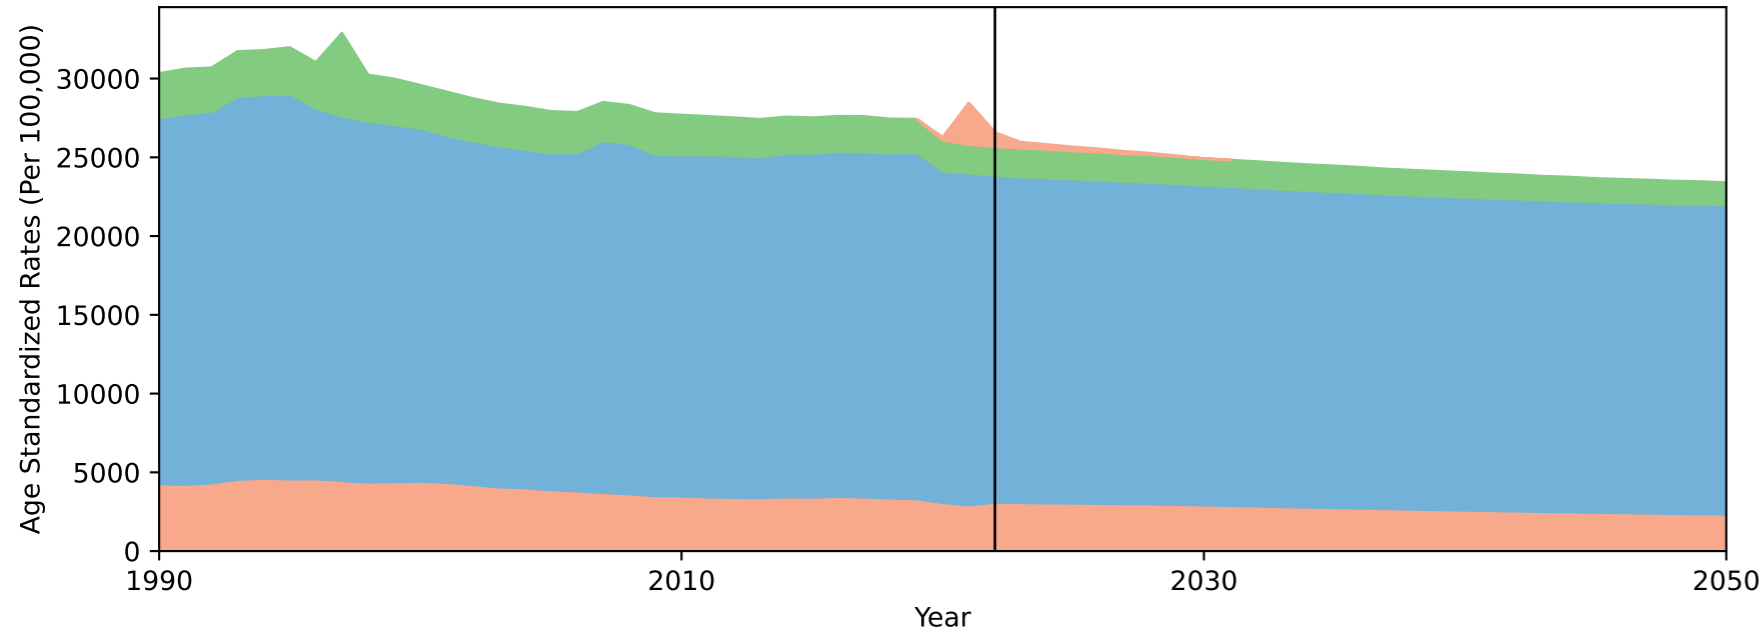

Level 2

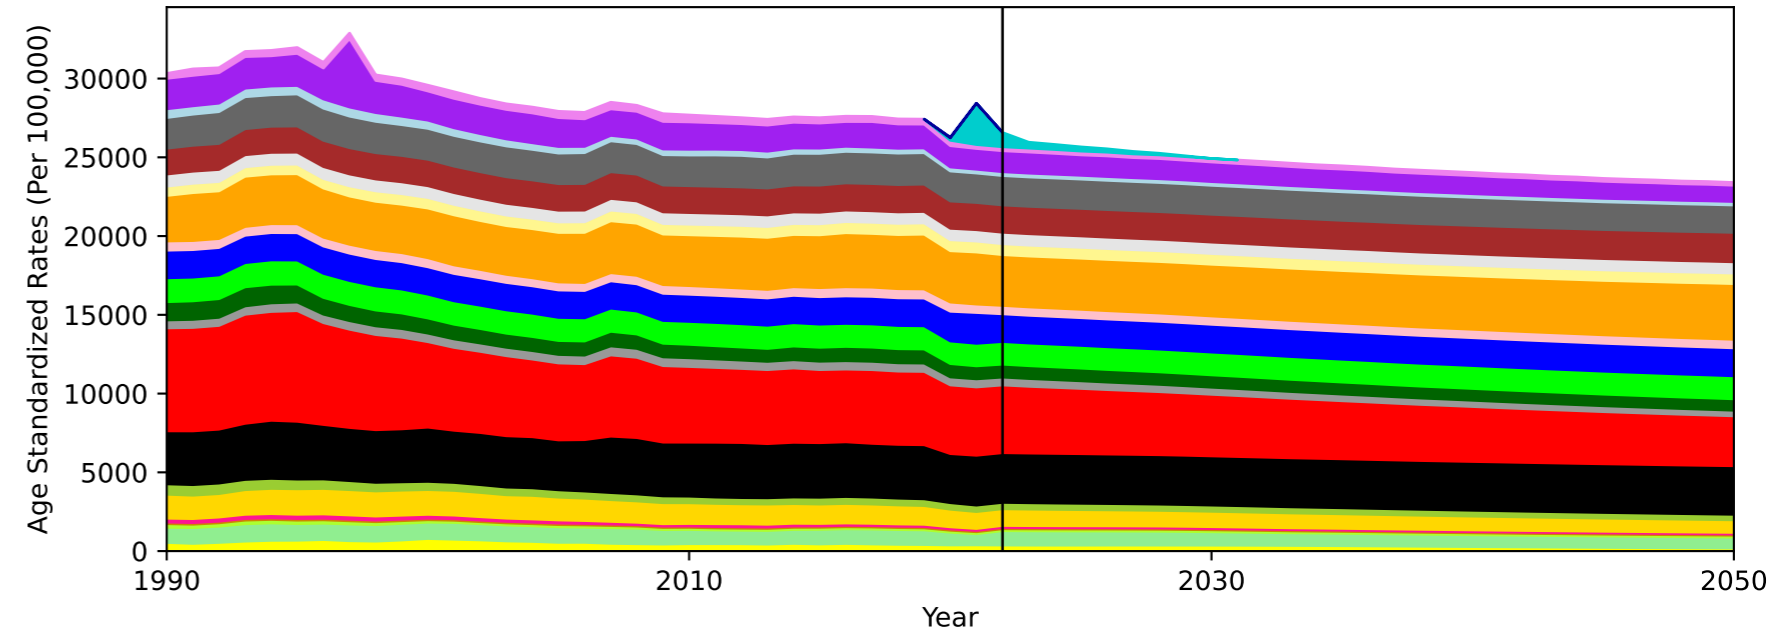

Level 1

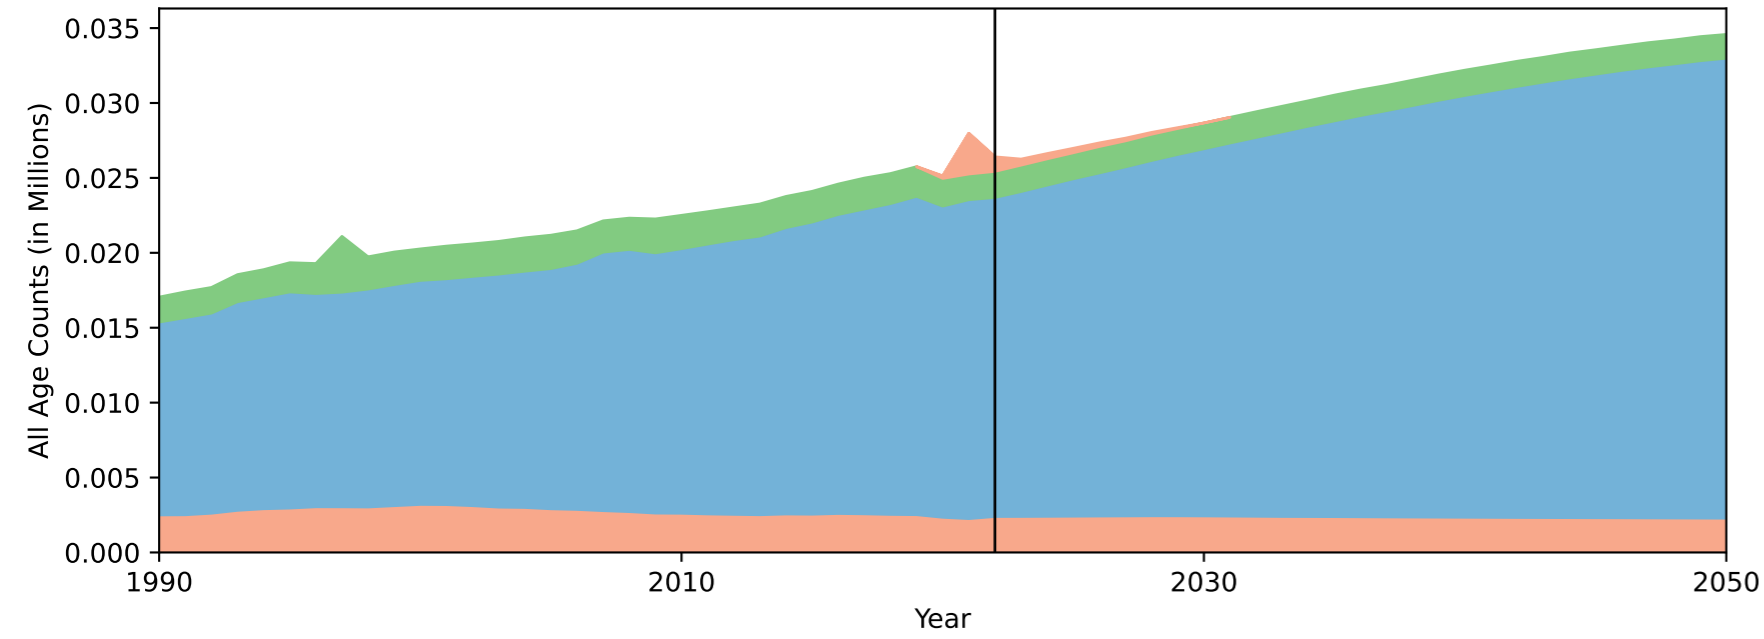

Level 2

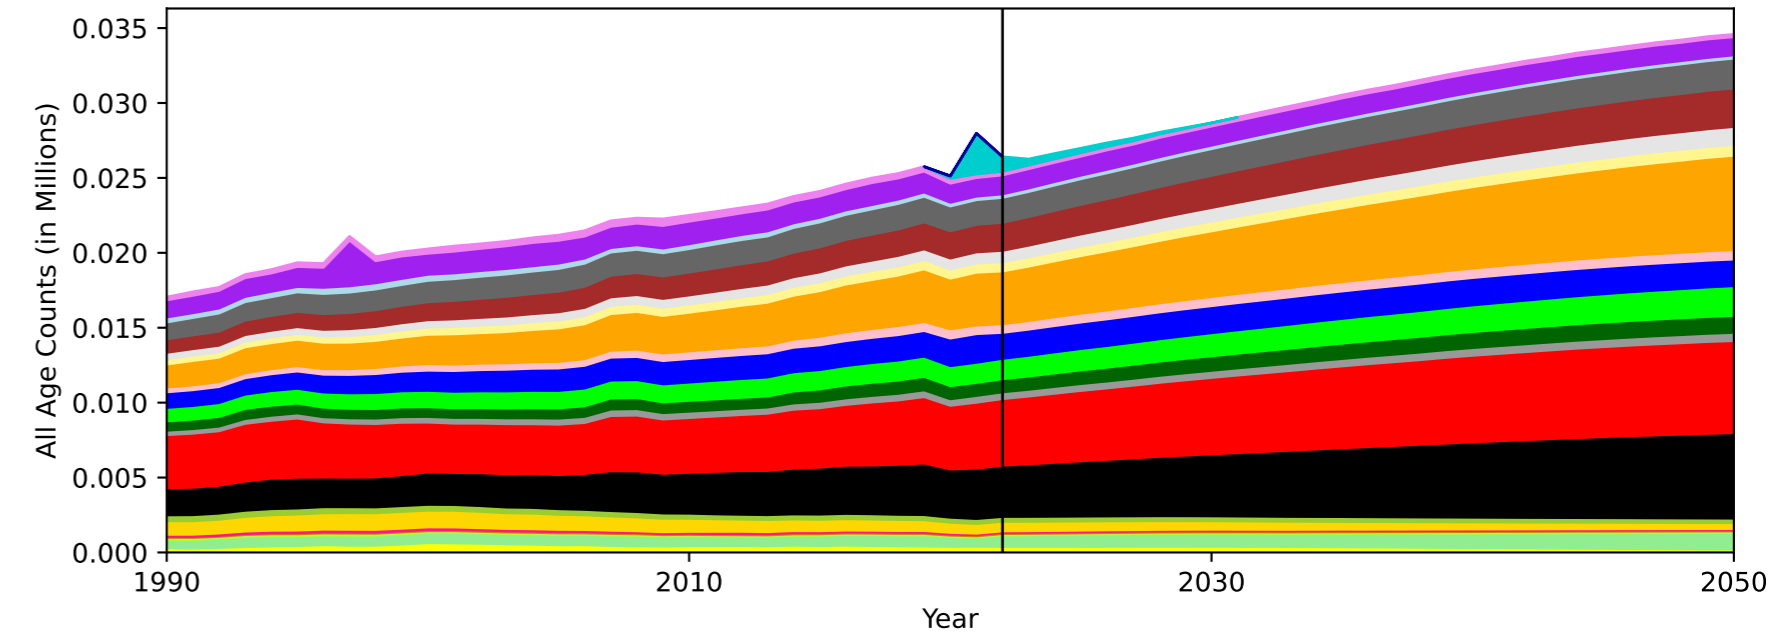

# The Bahamas

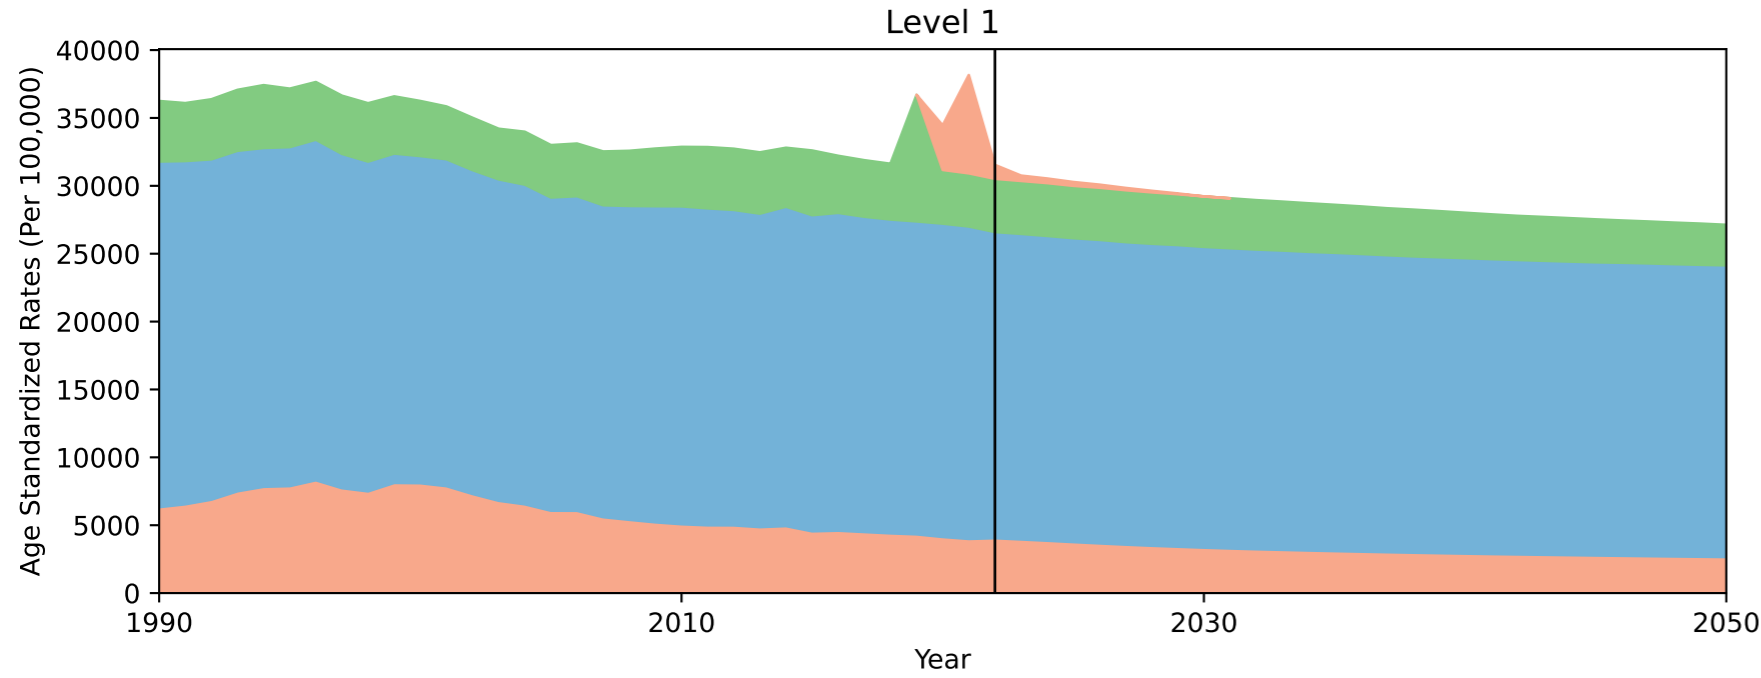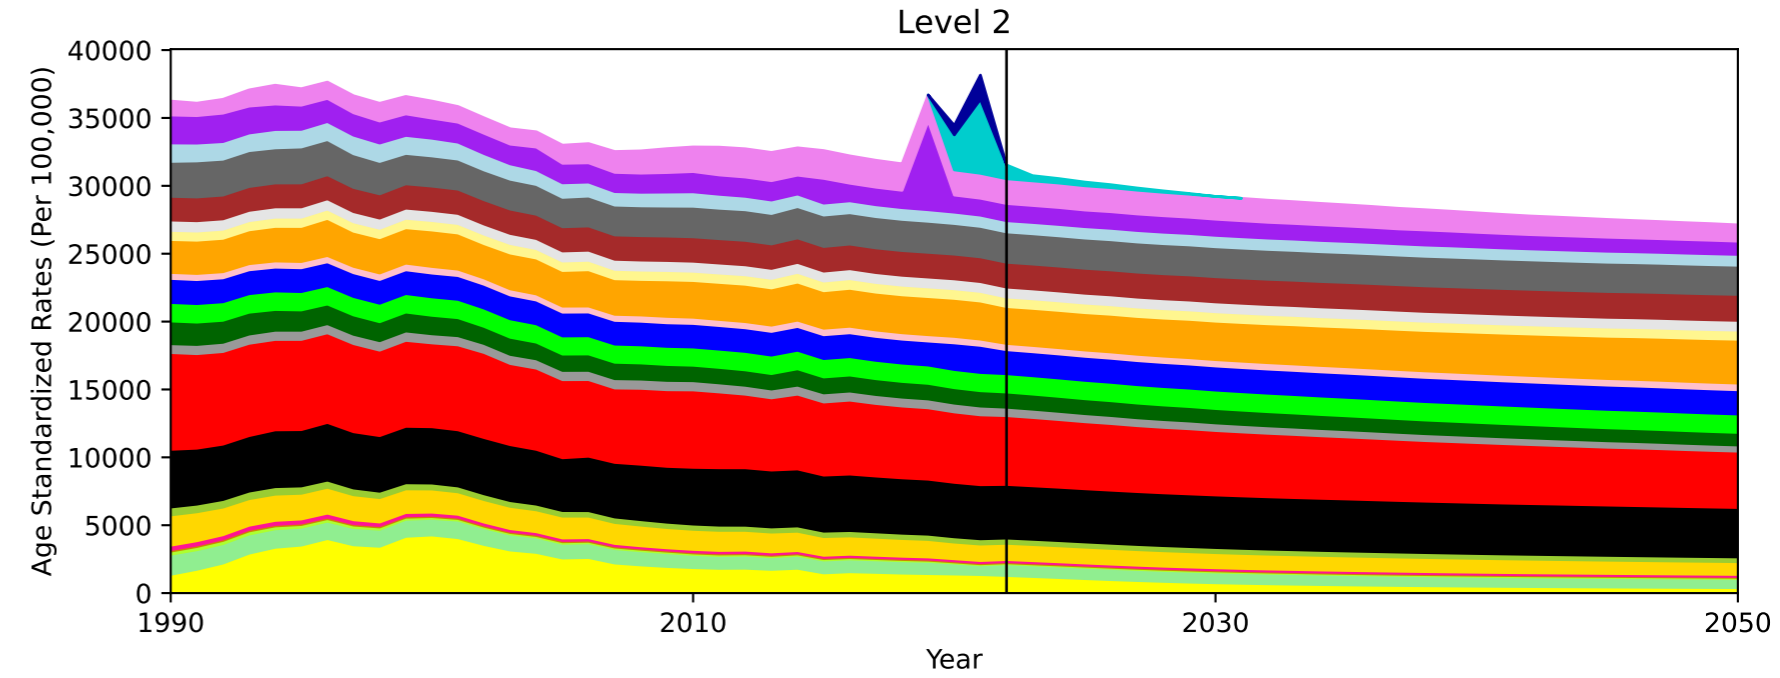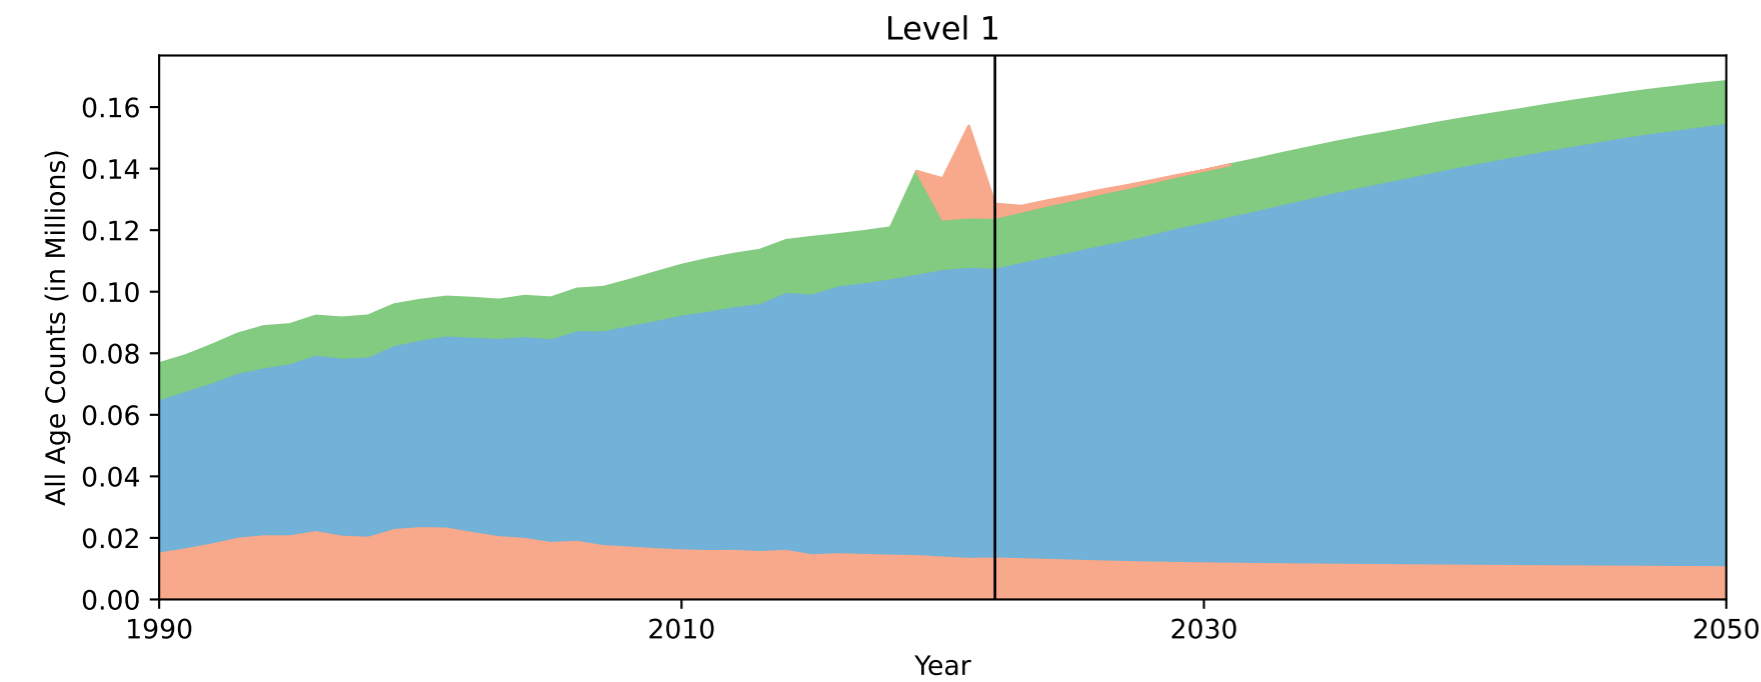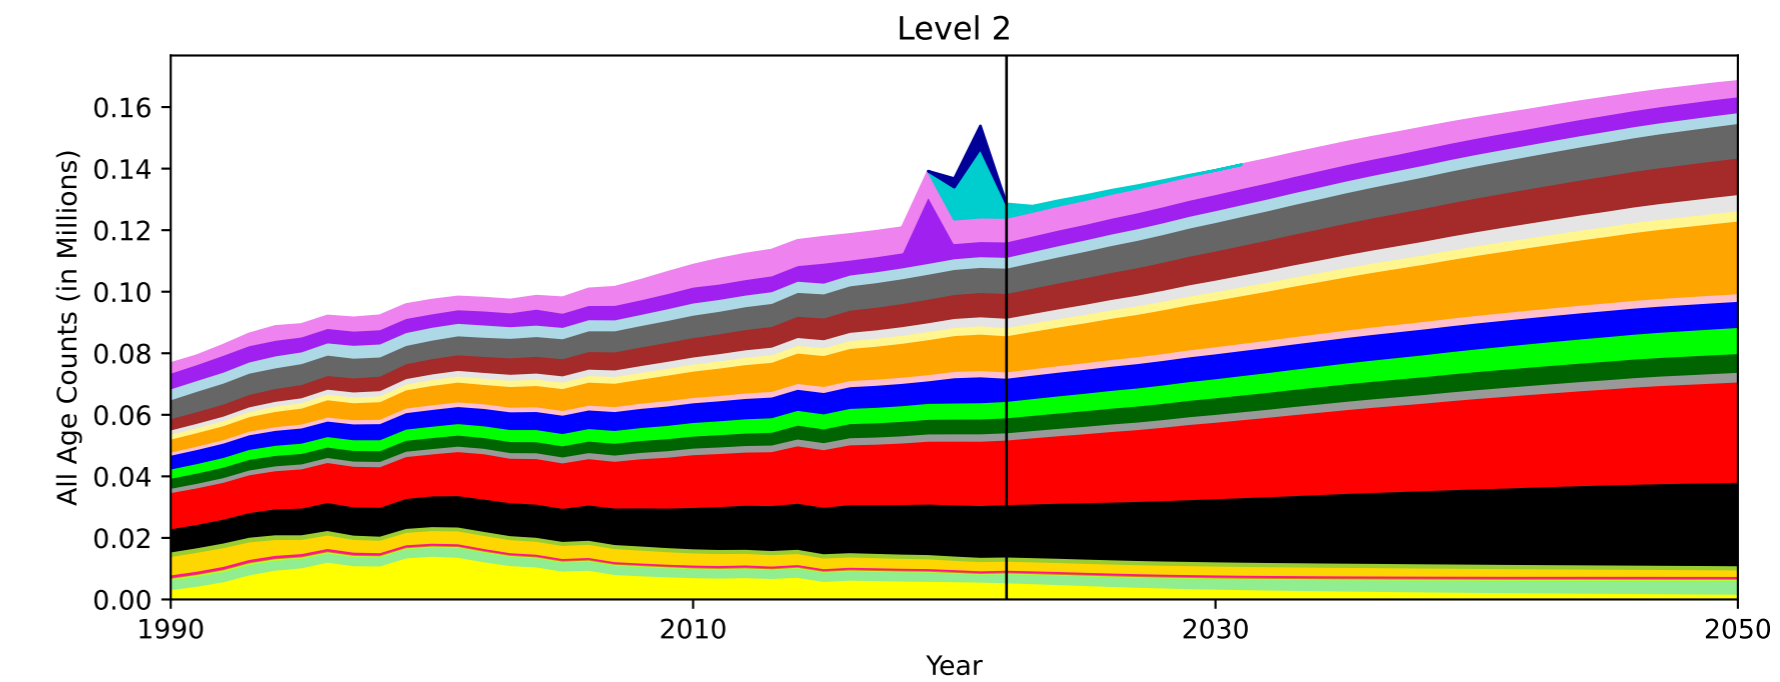

# Barbados

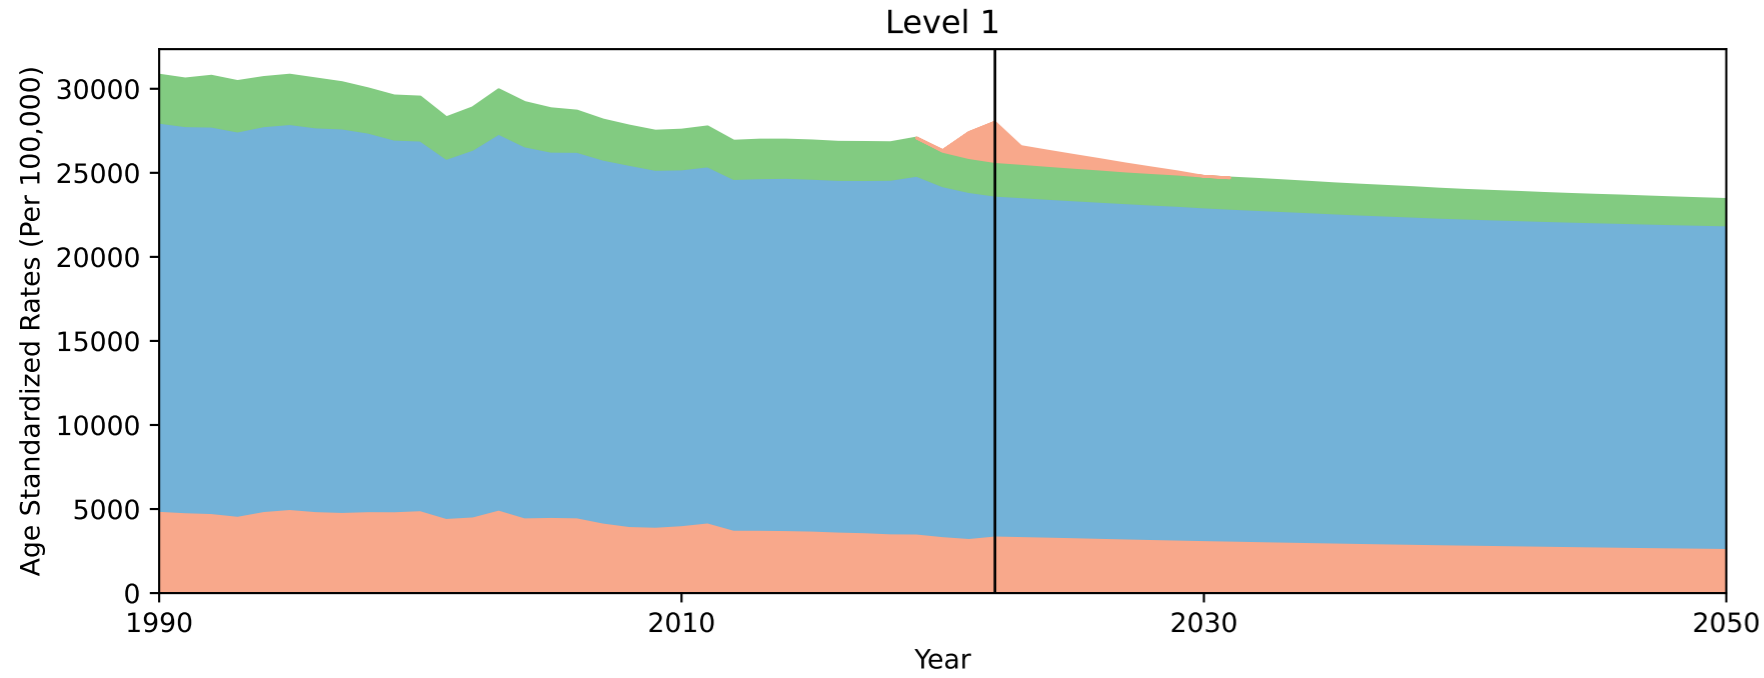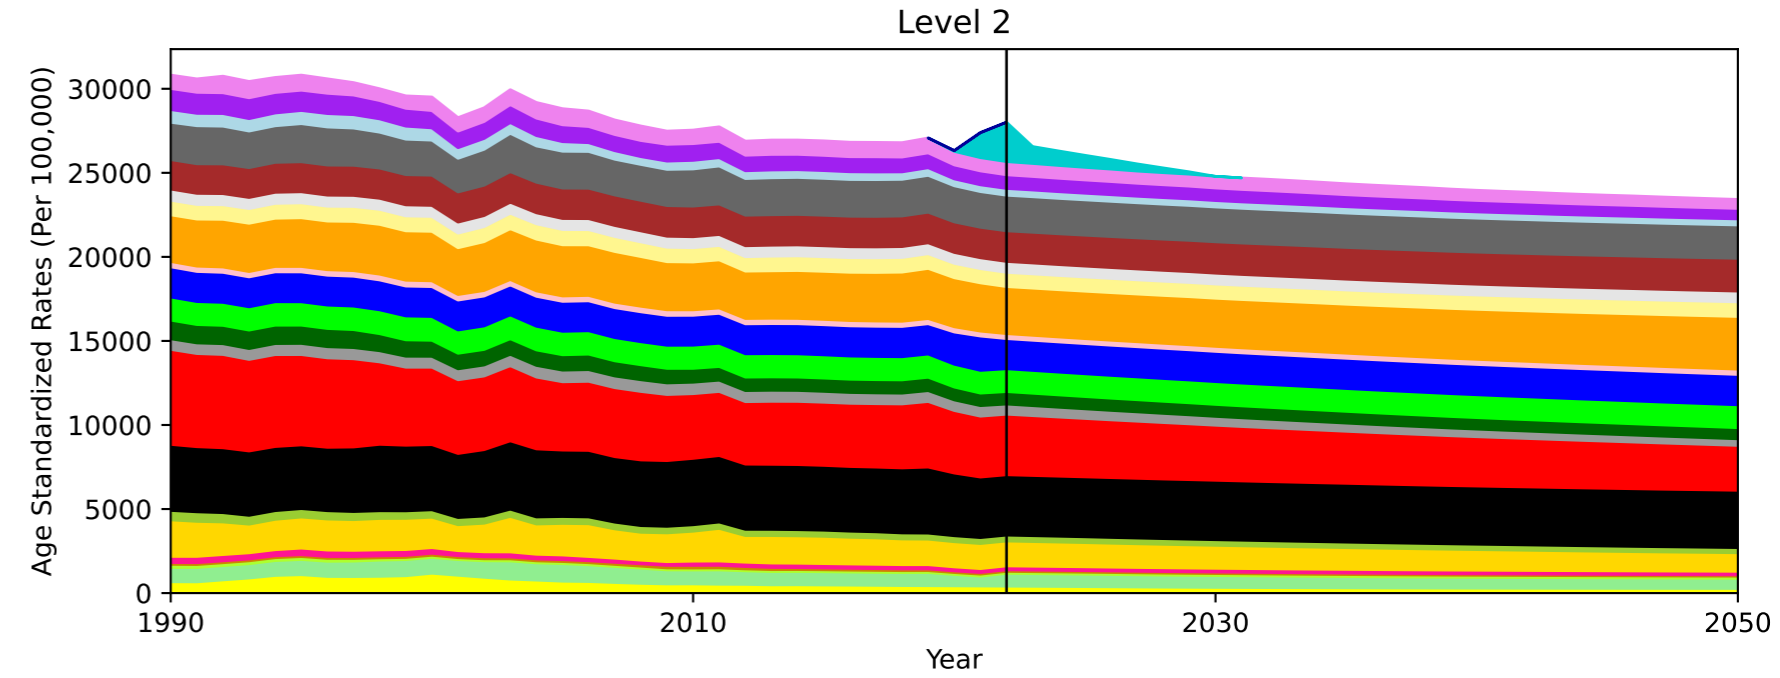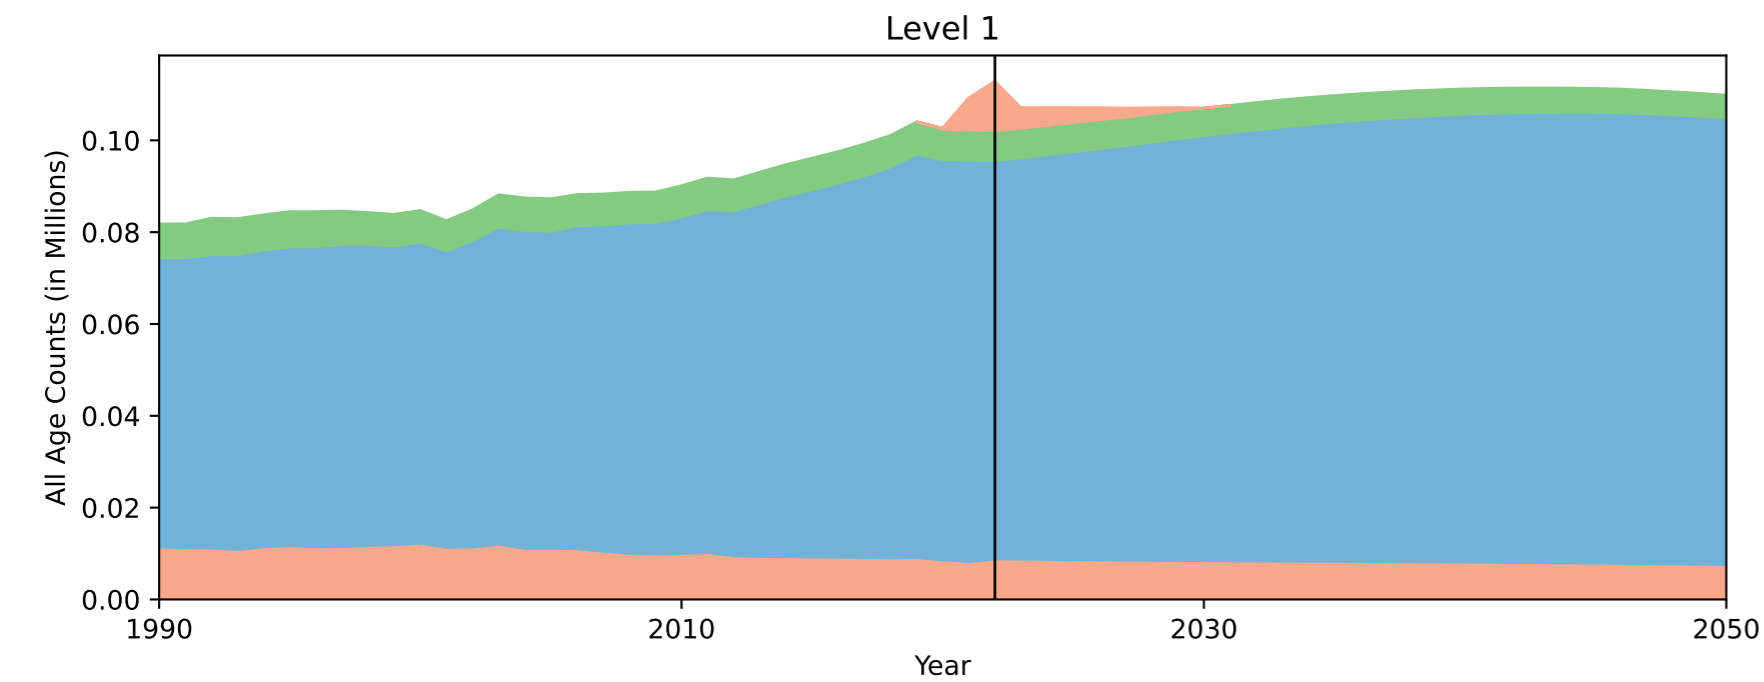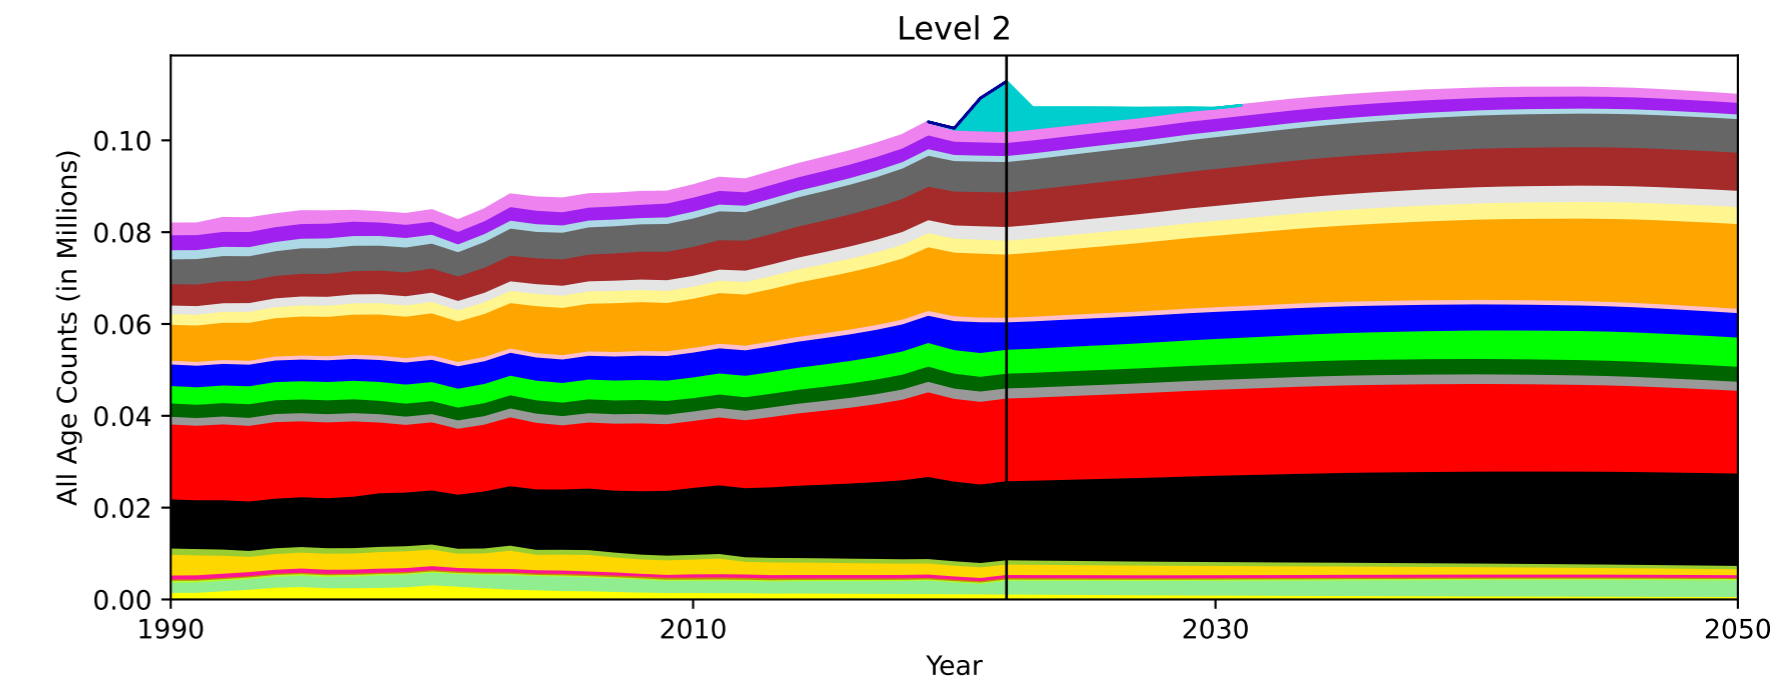

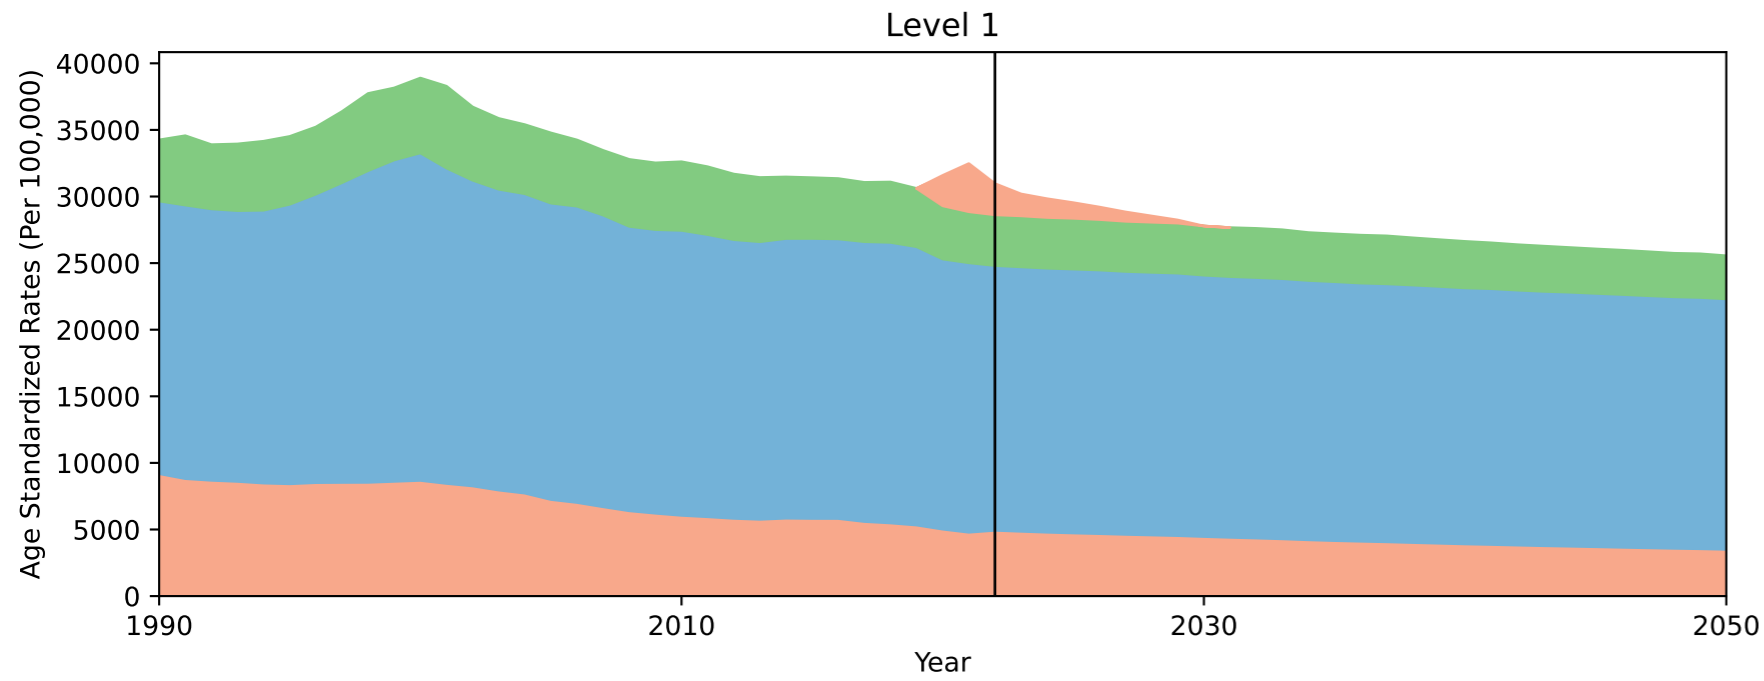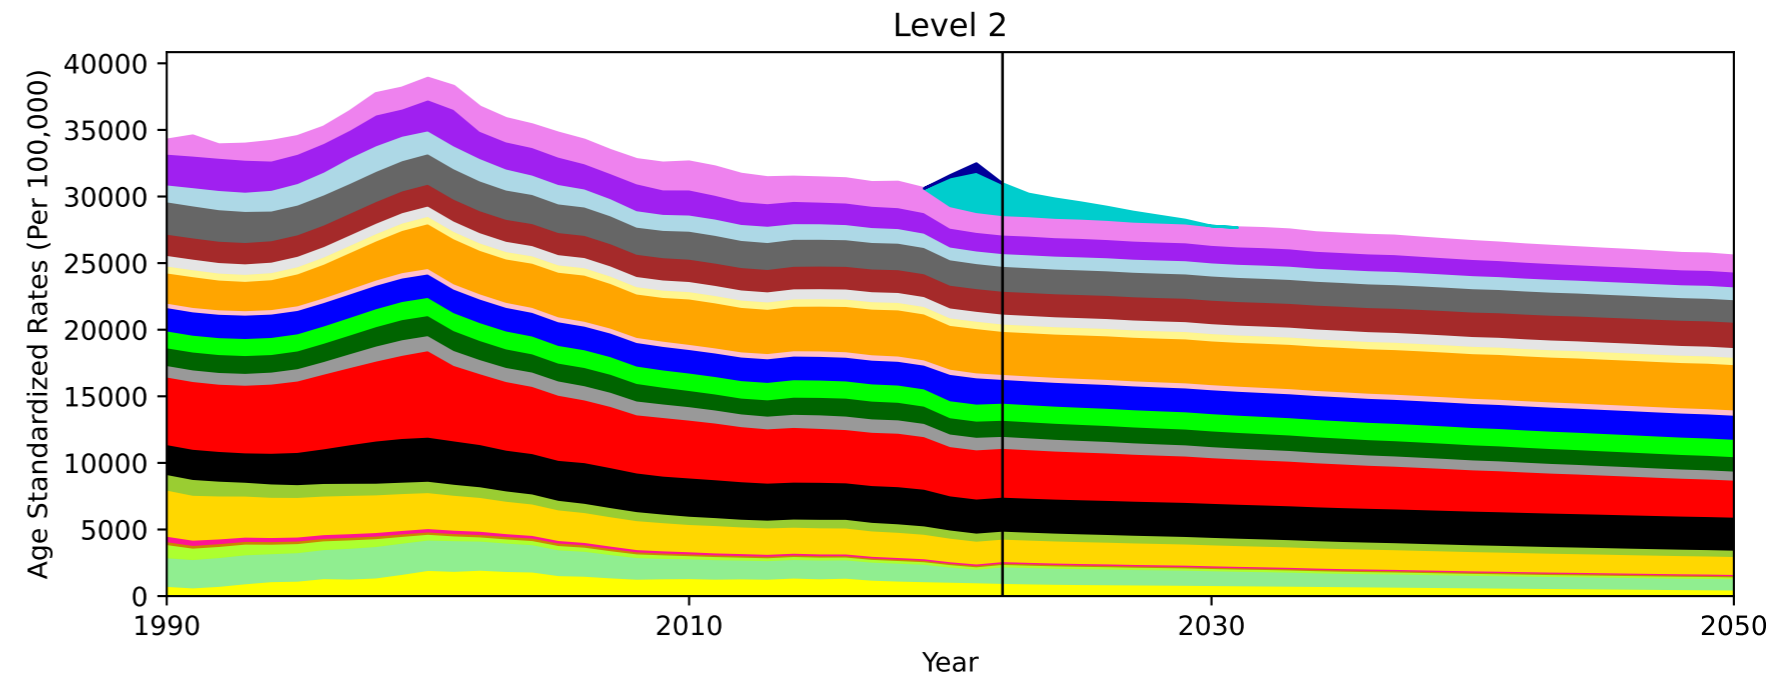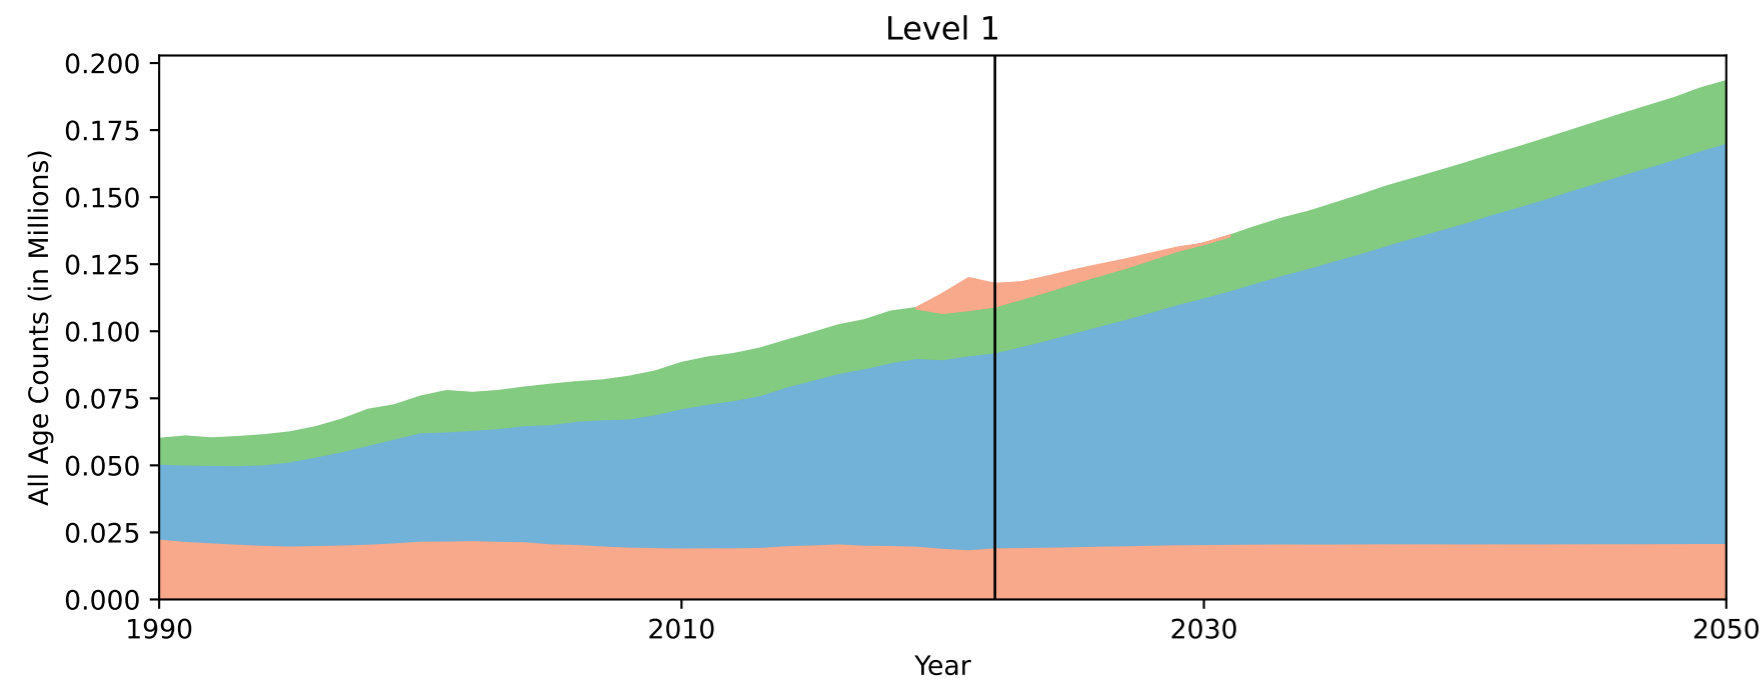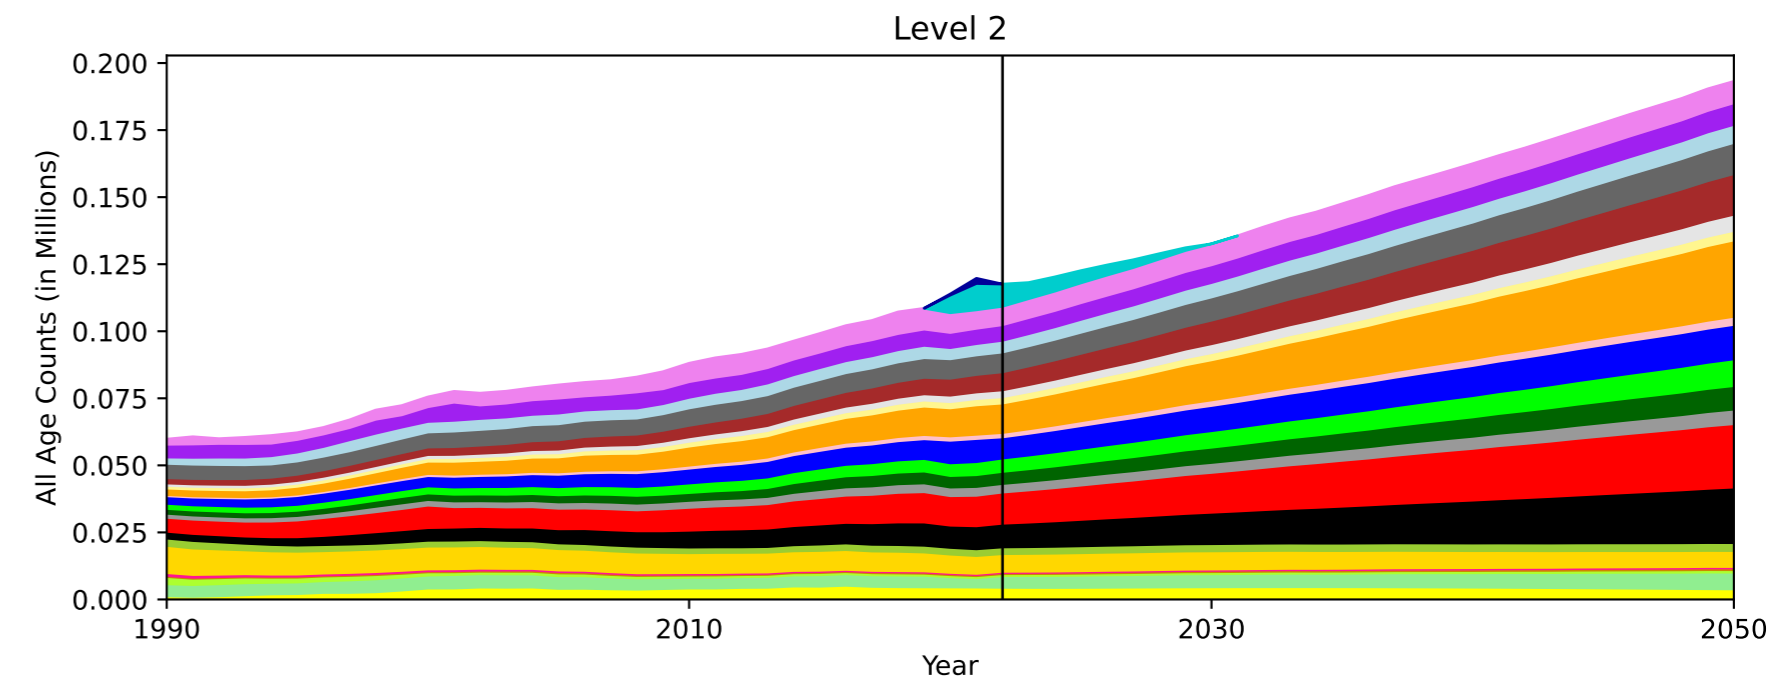

# Bermuda

Level 1

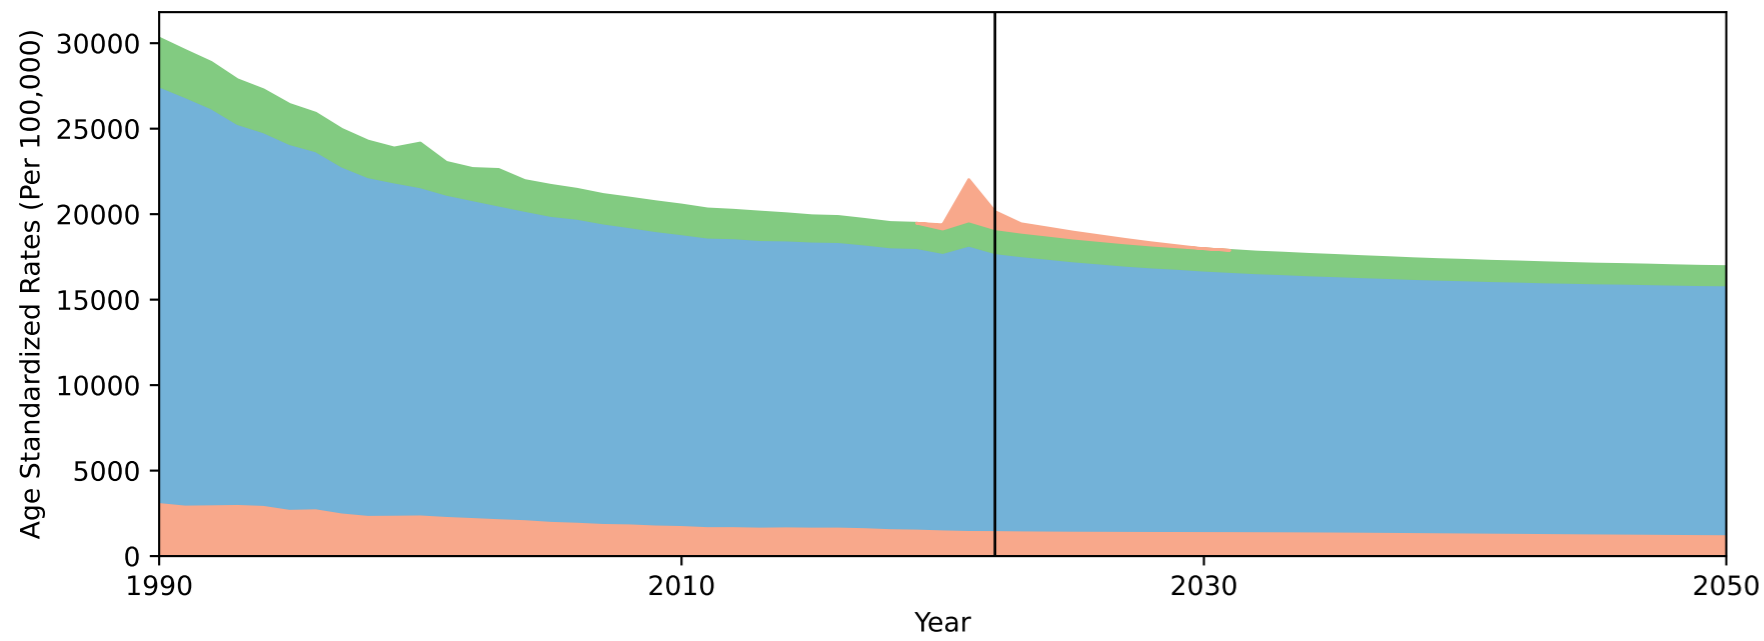

Level 2

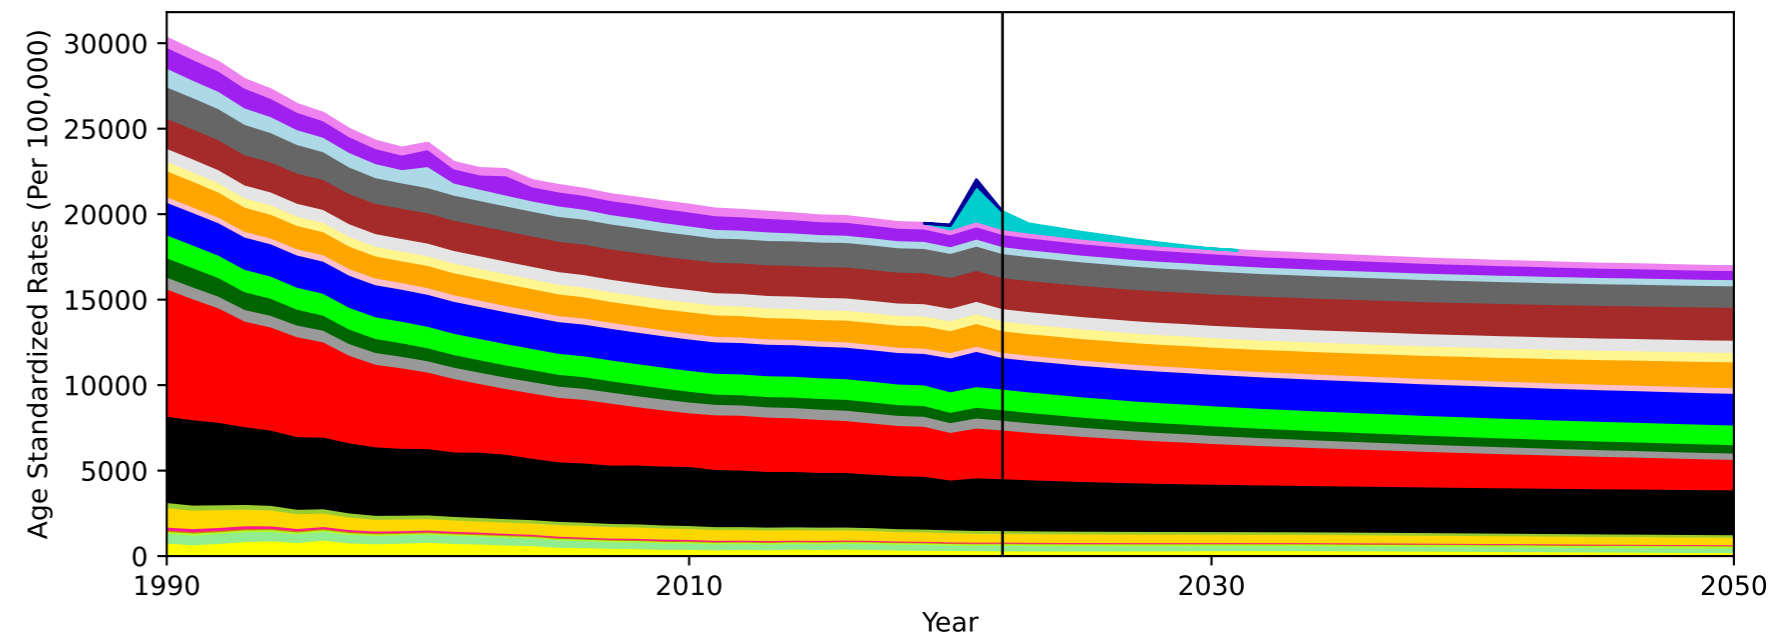

Level 1

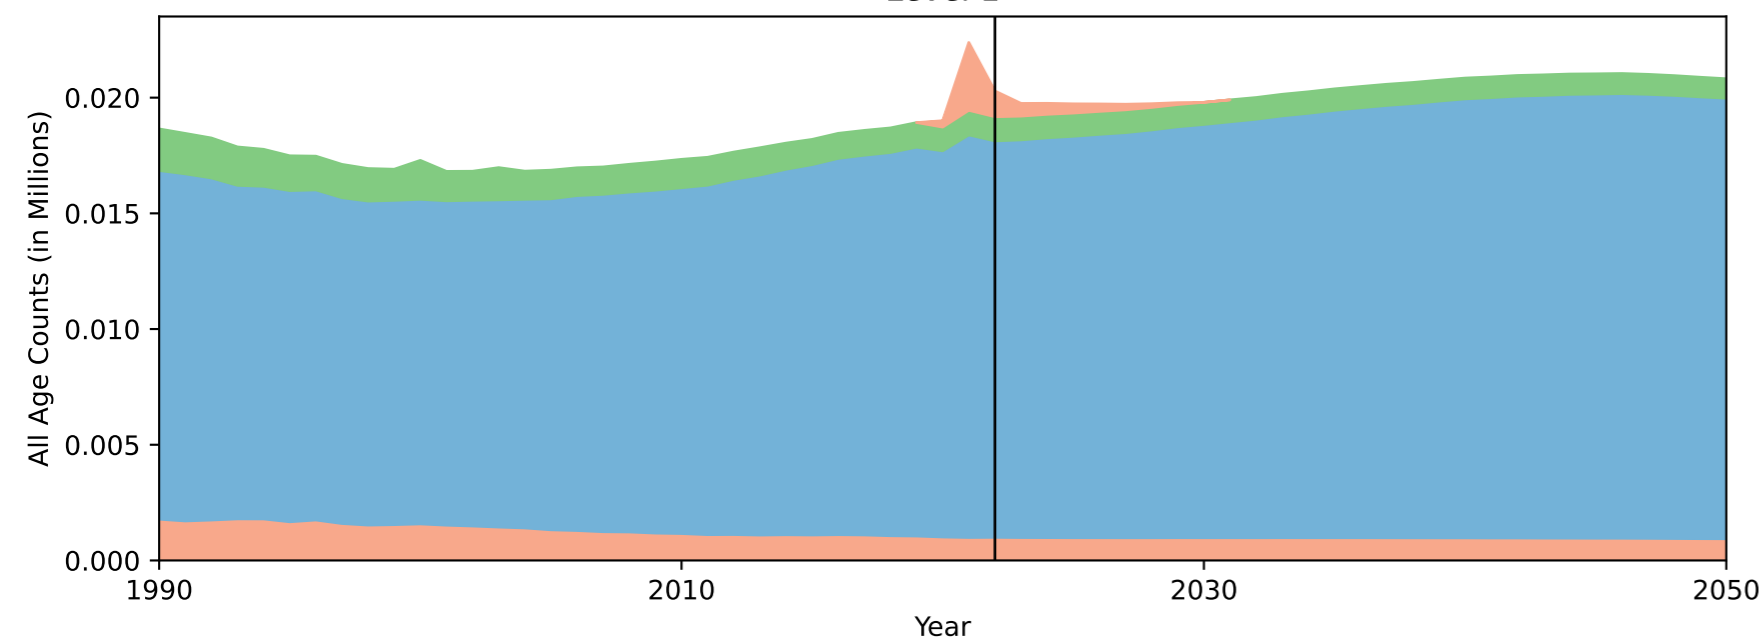

Level 2

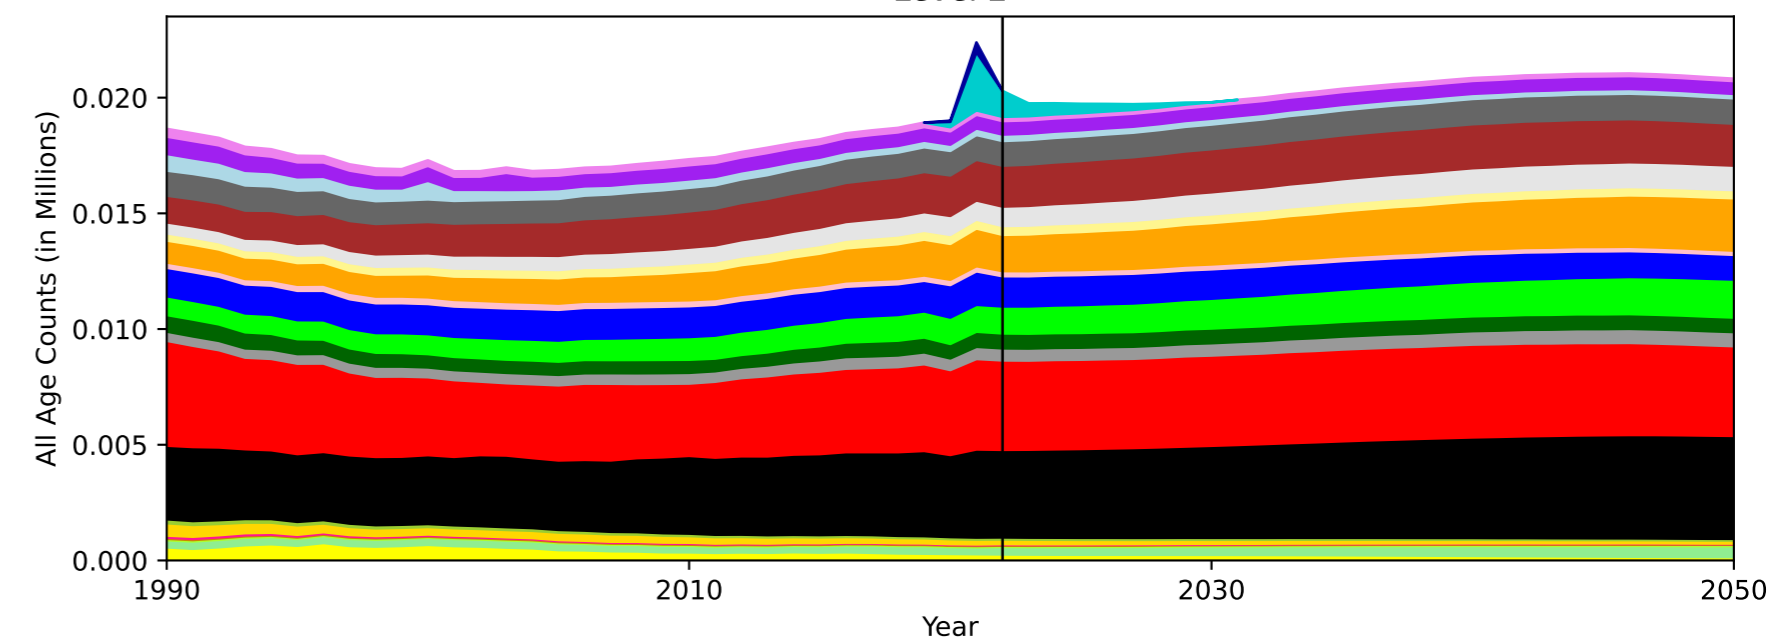

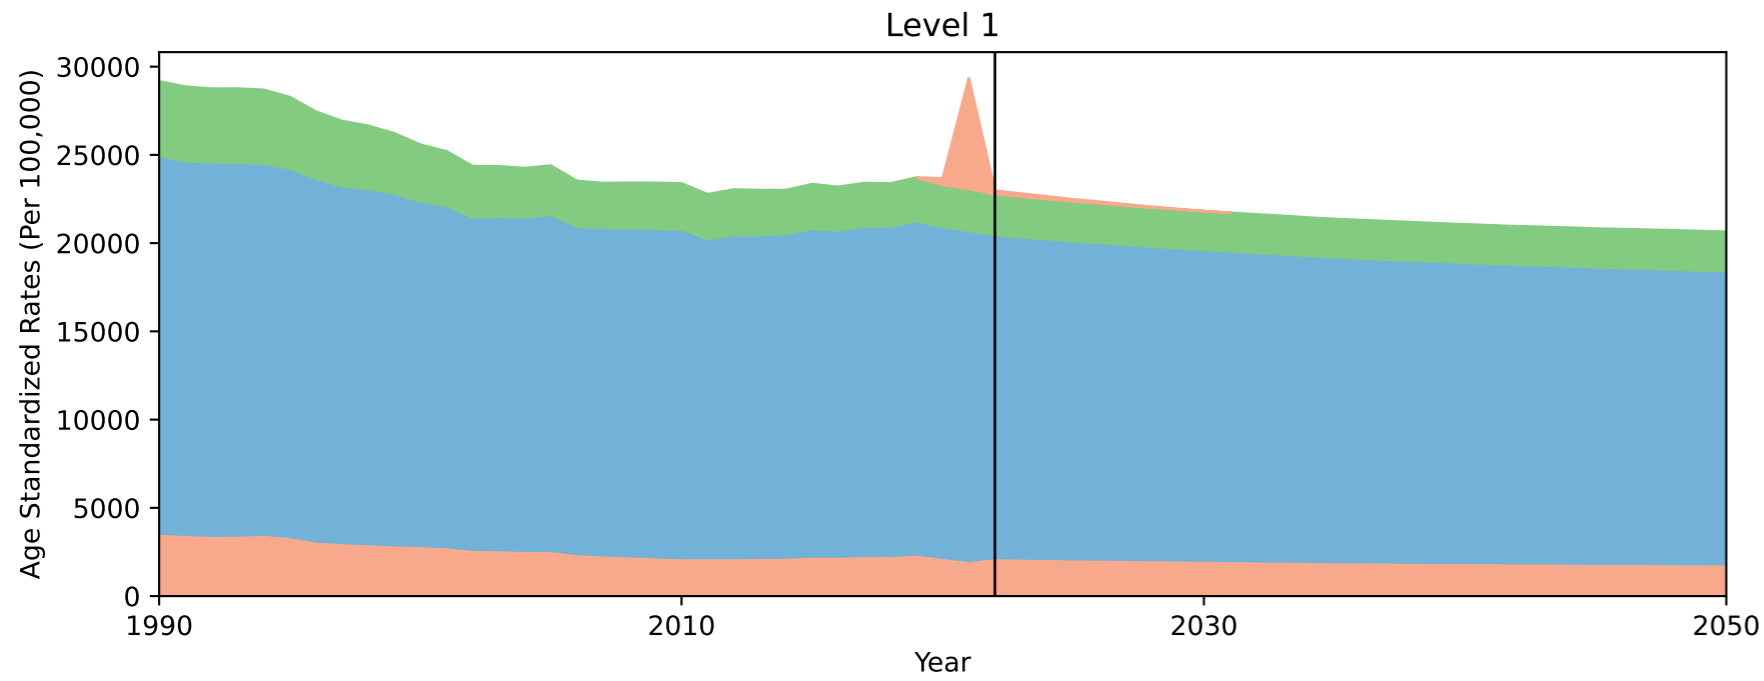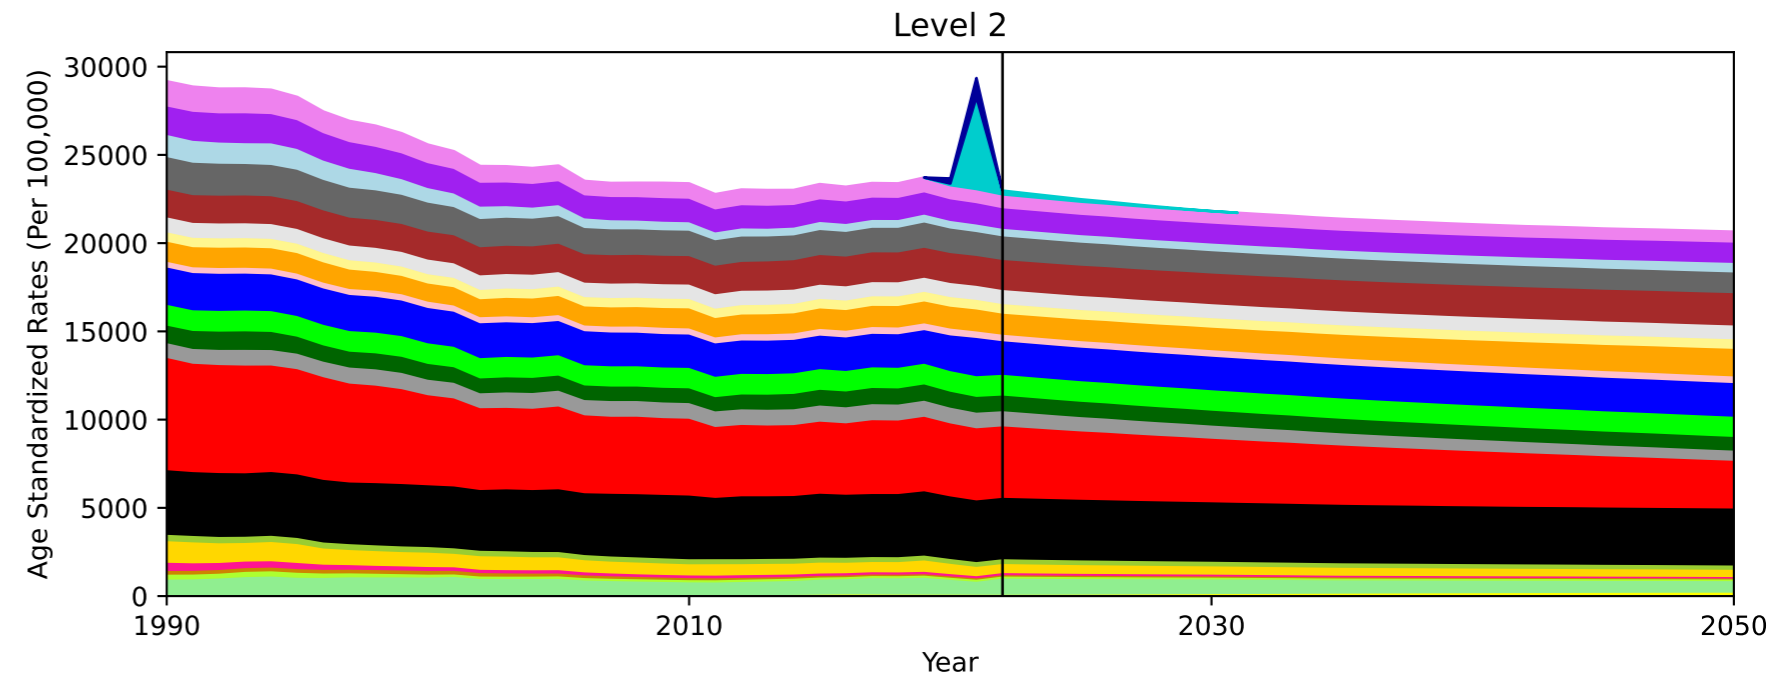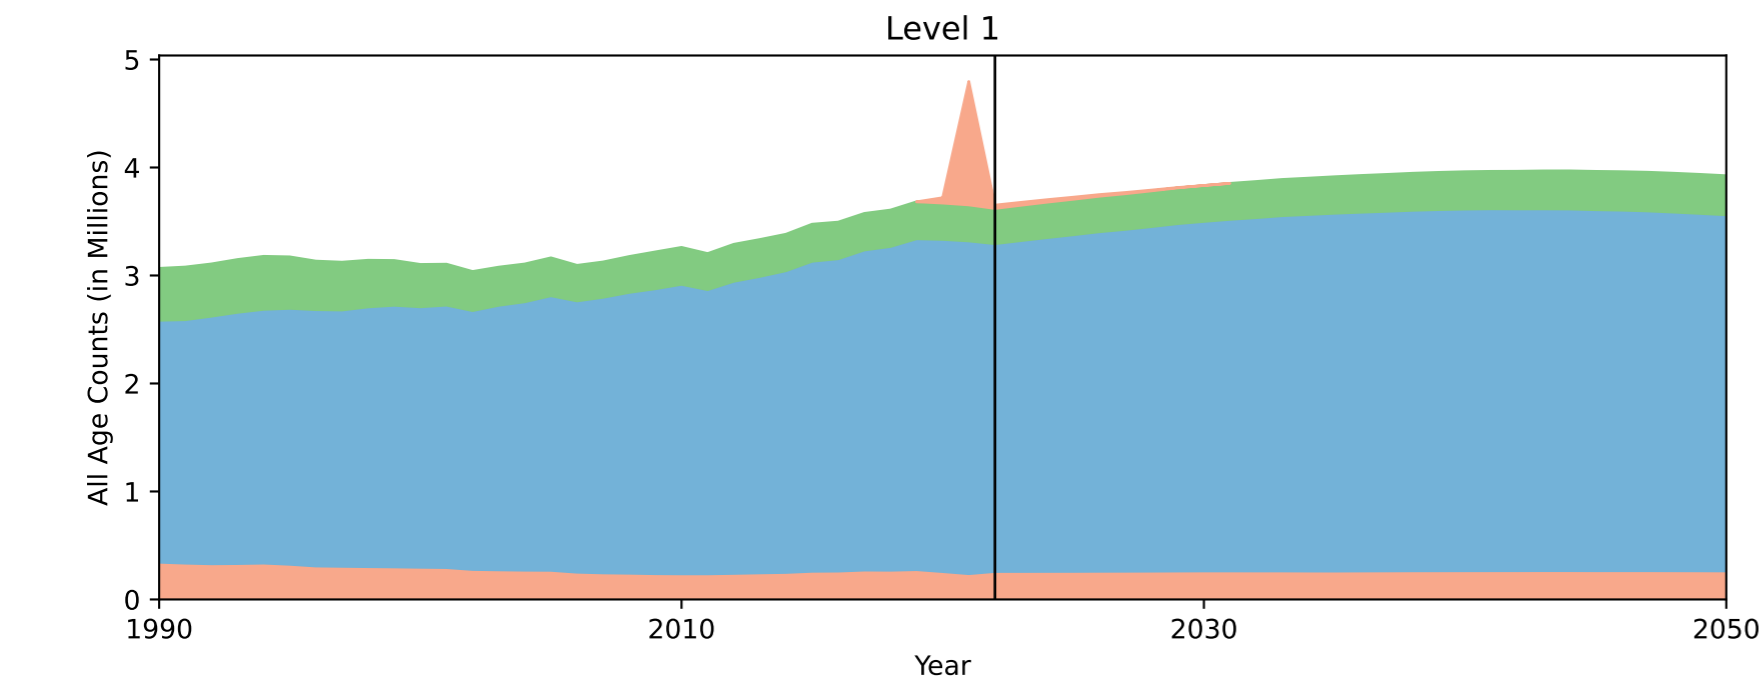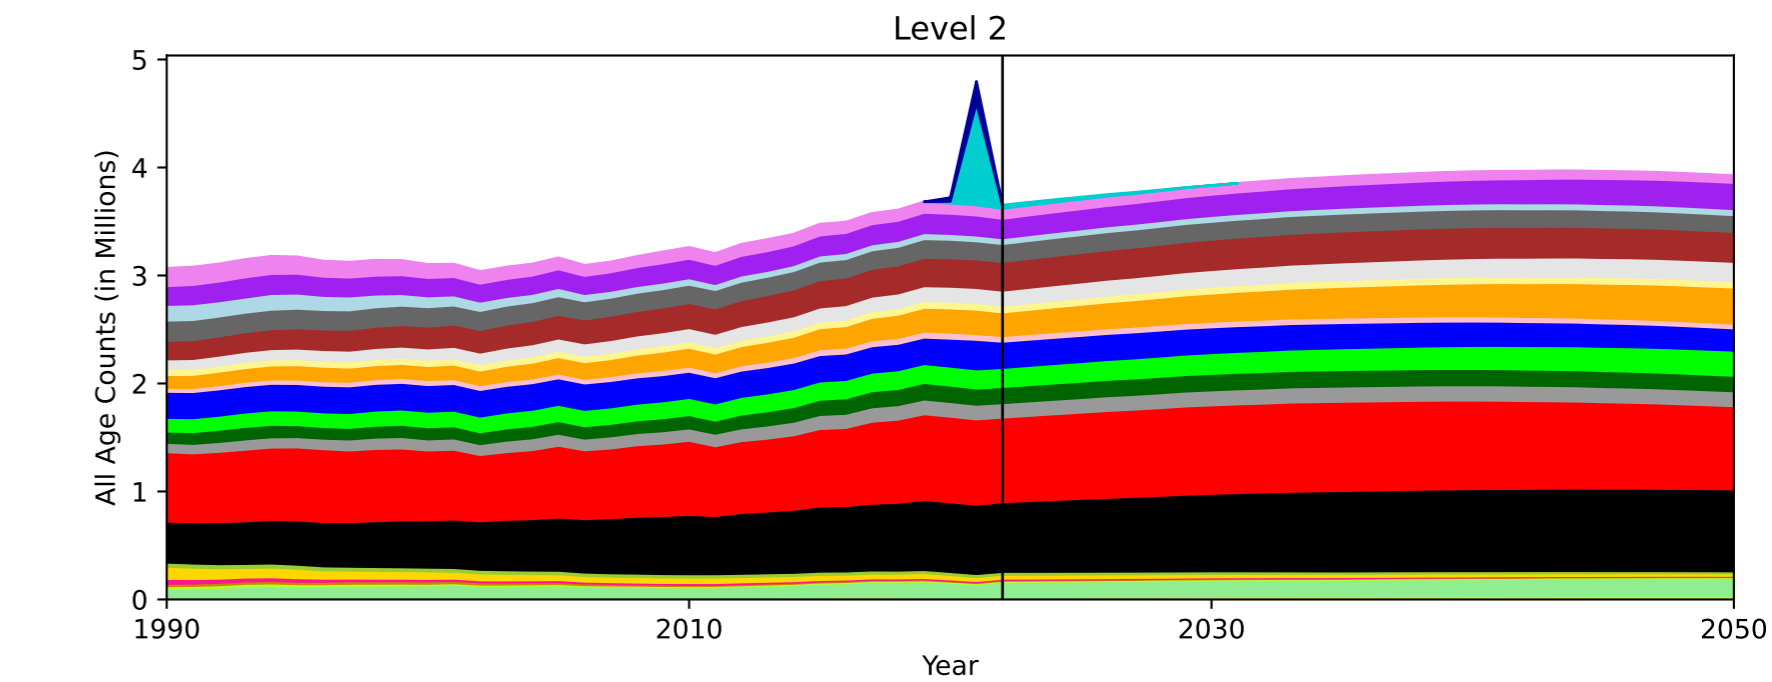

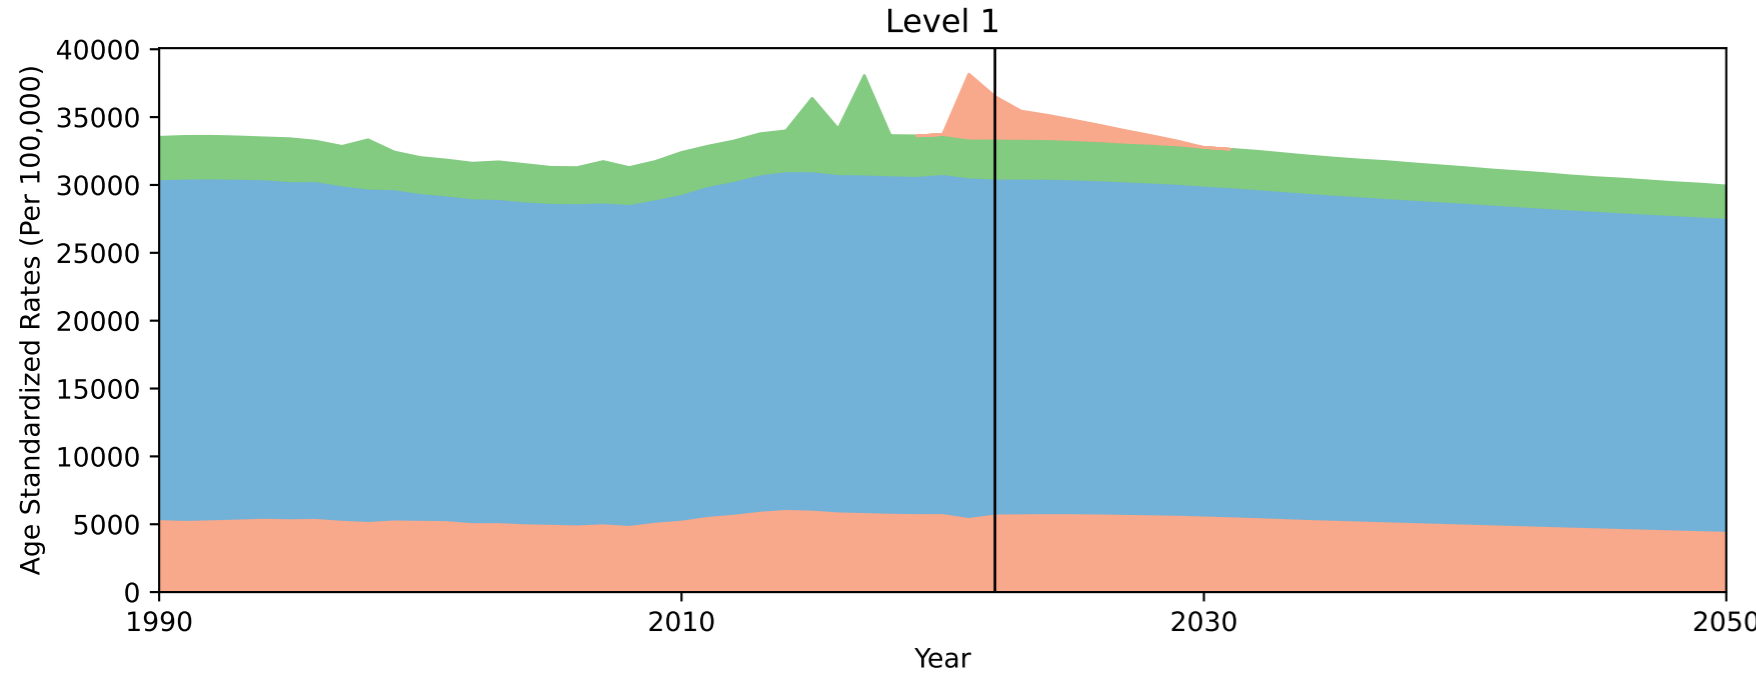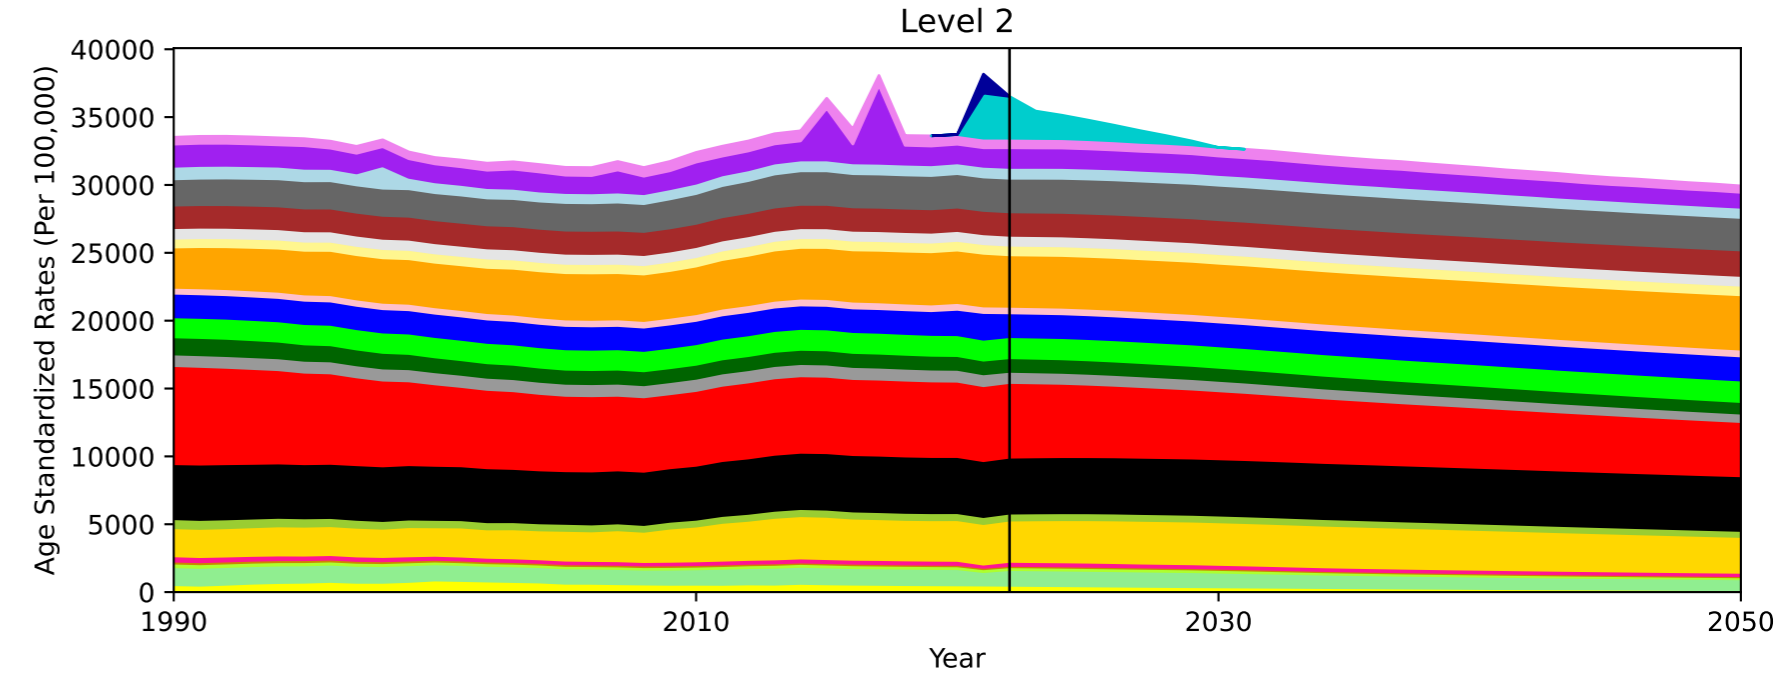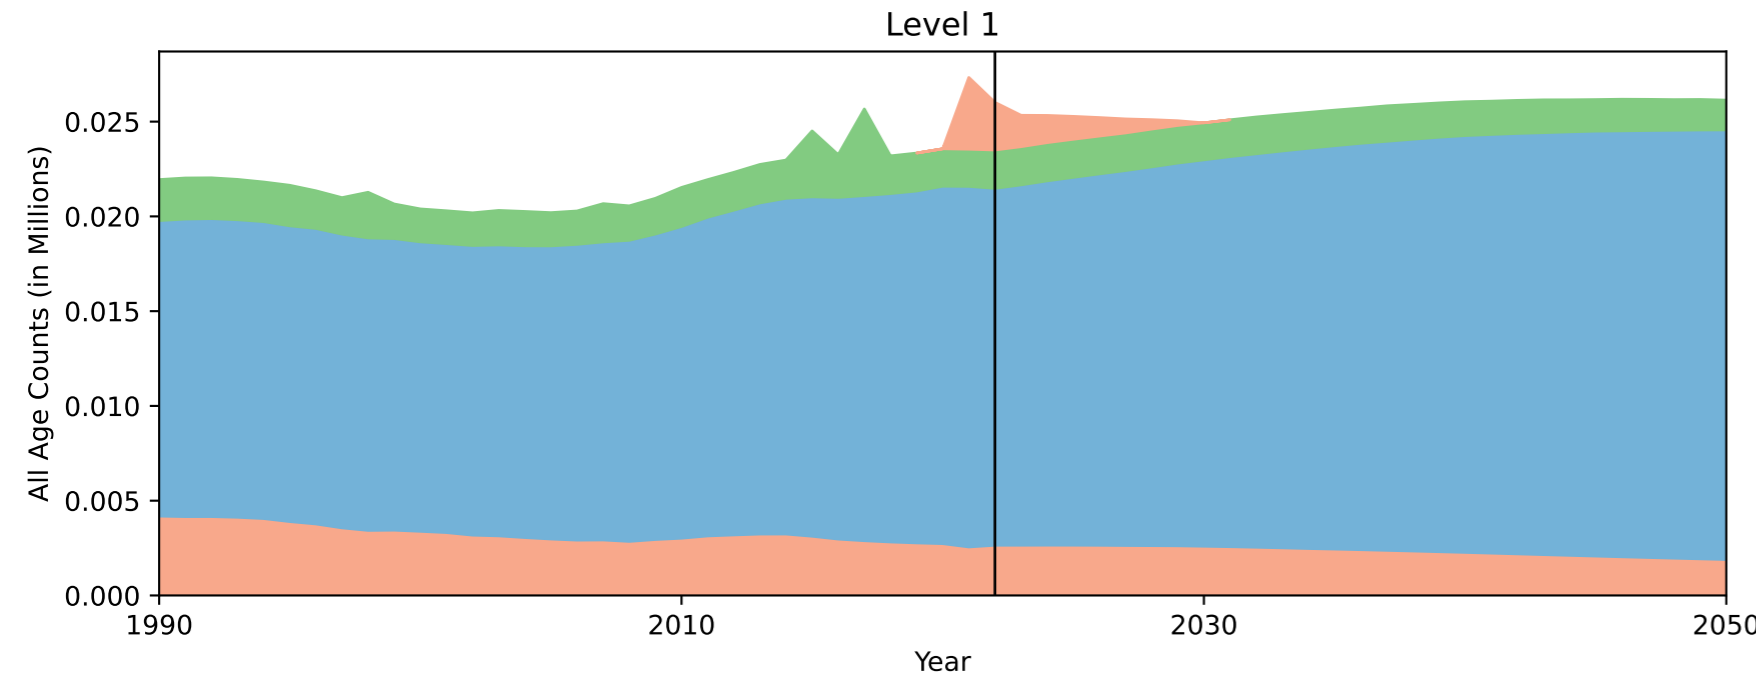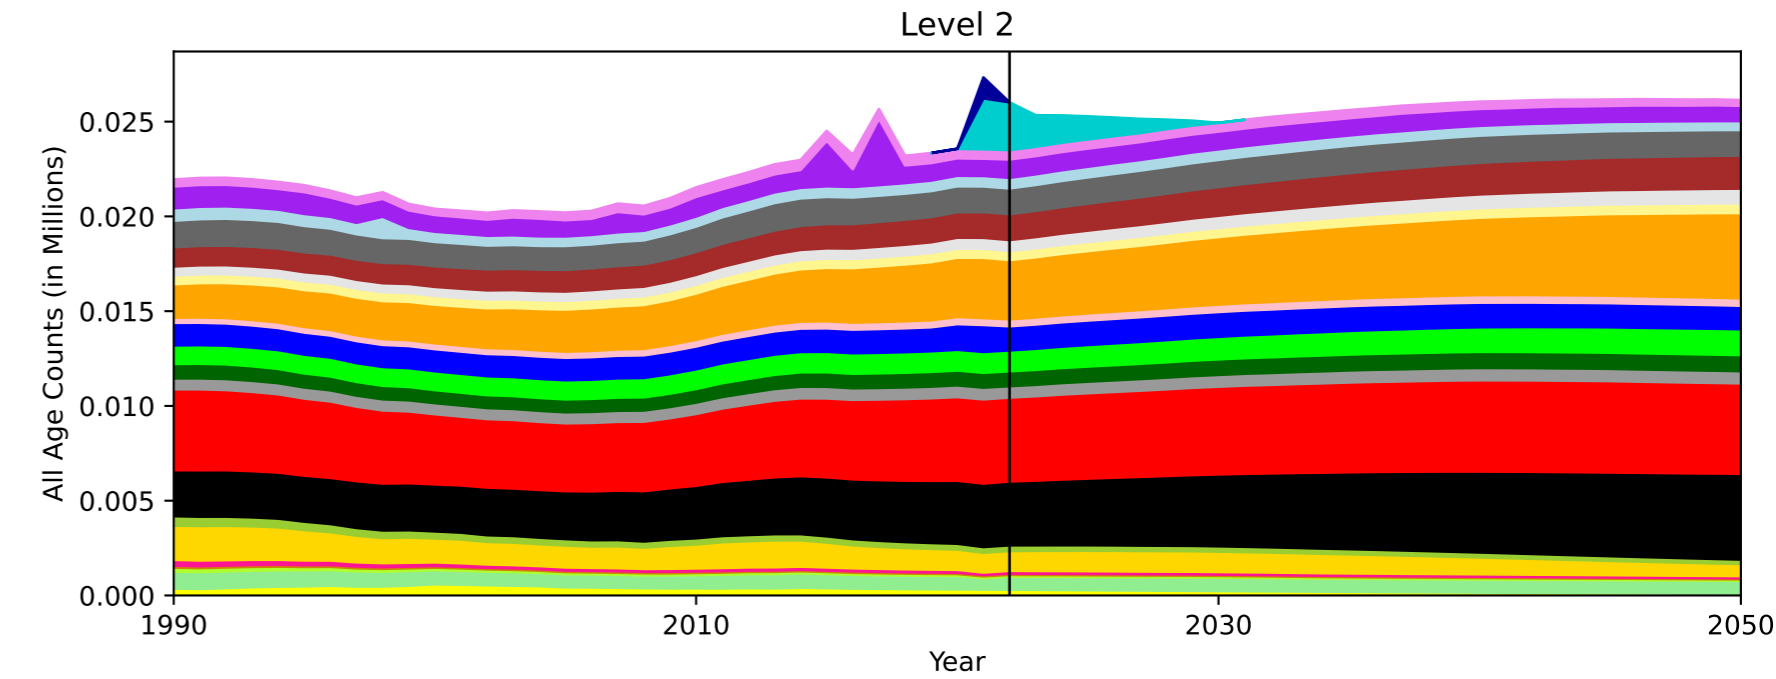



# Dominican Republic

Level 1

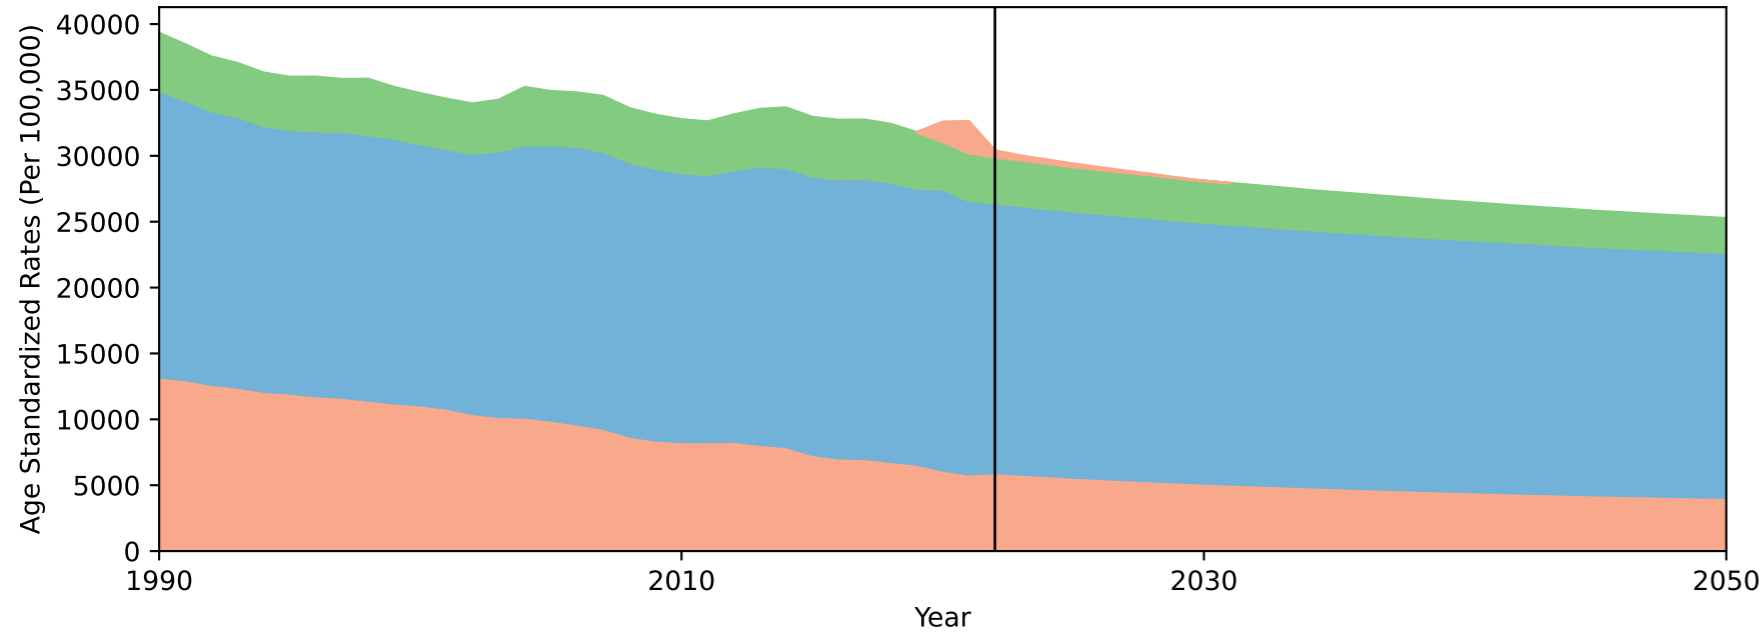

Level 2

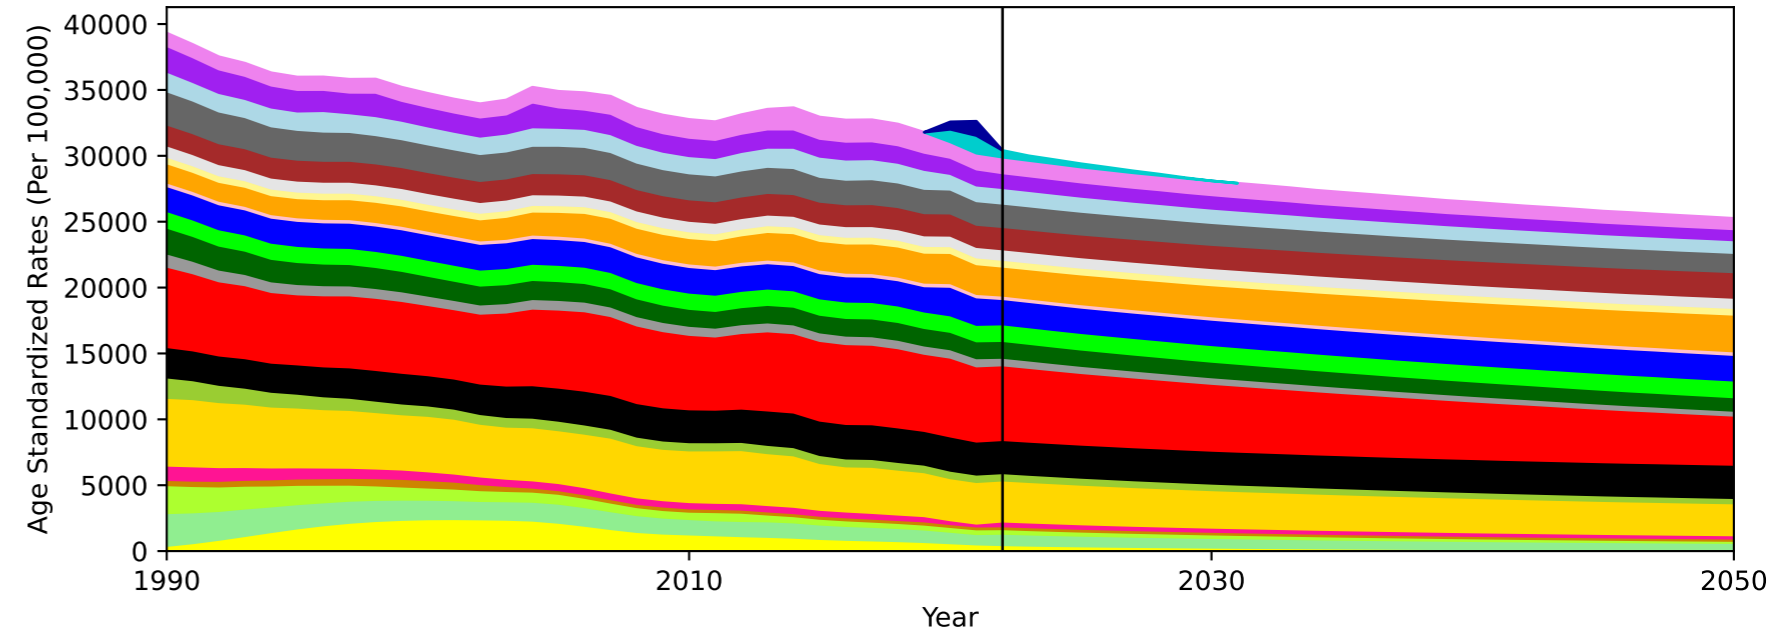

Level 1

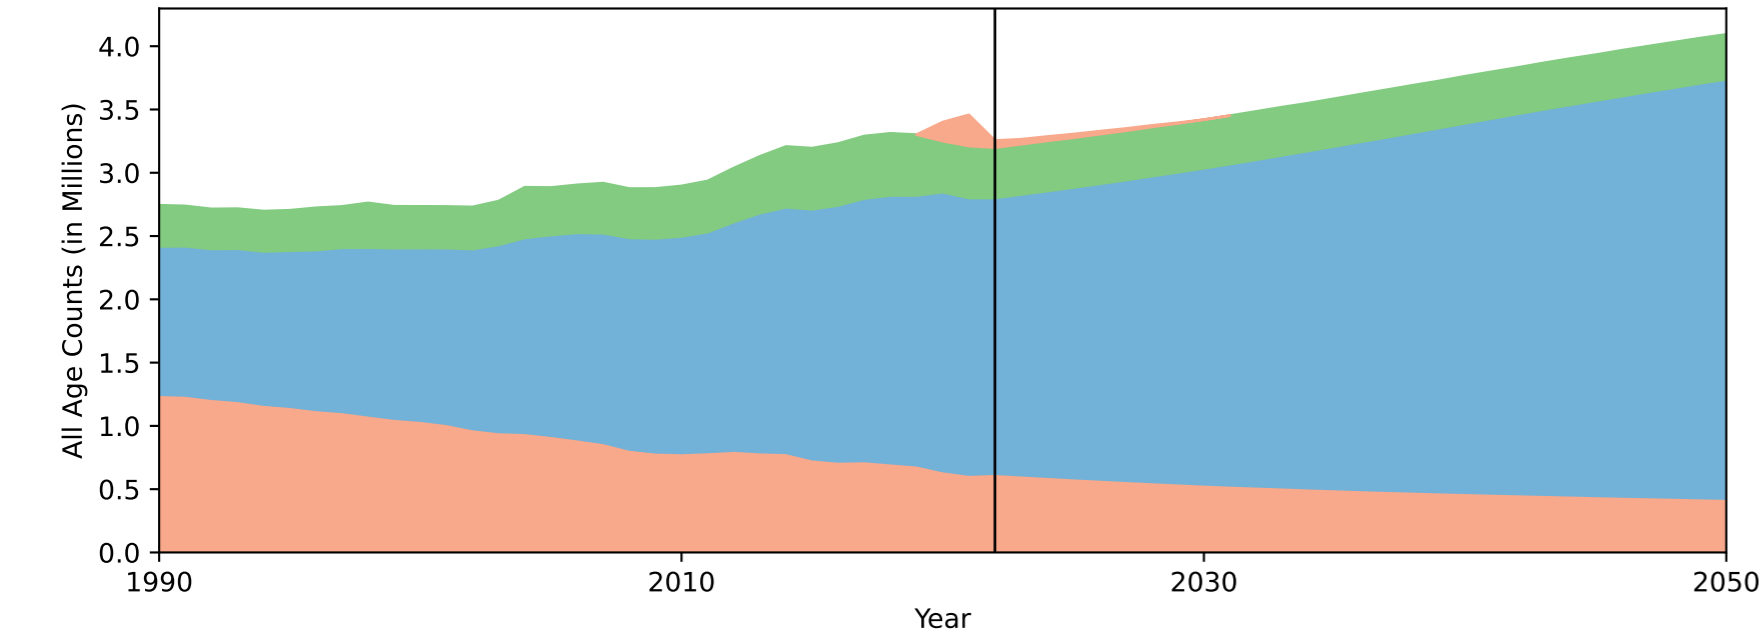

Level 2

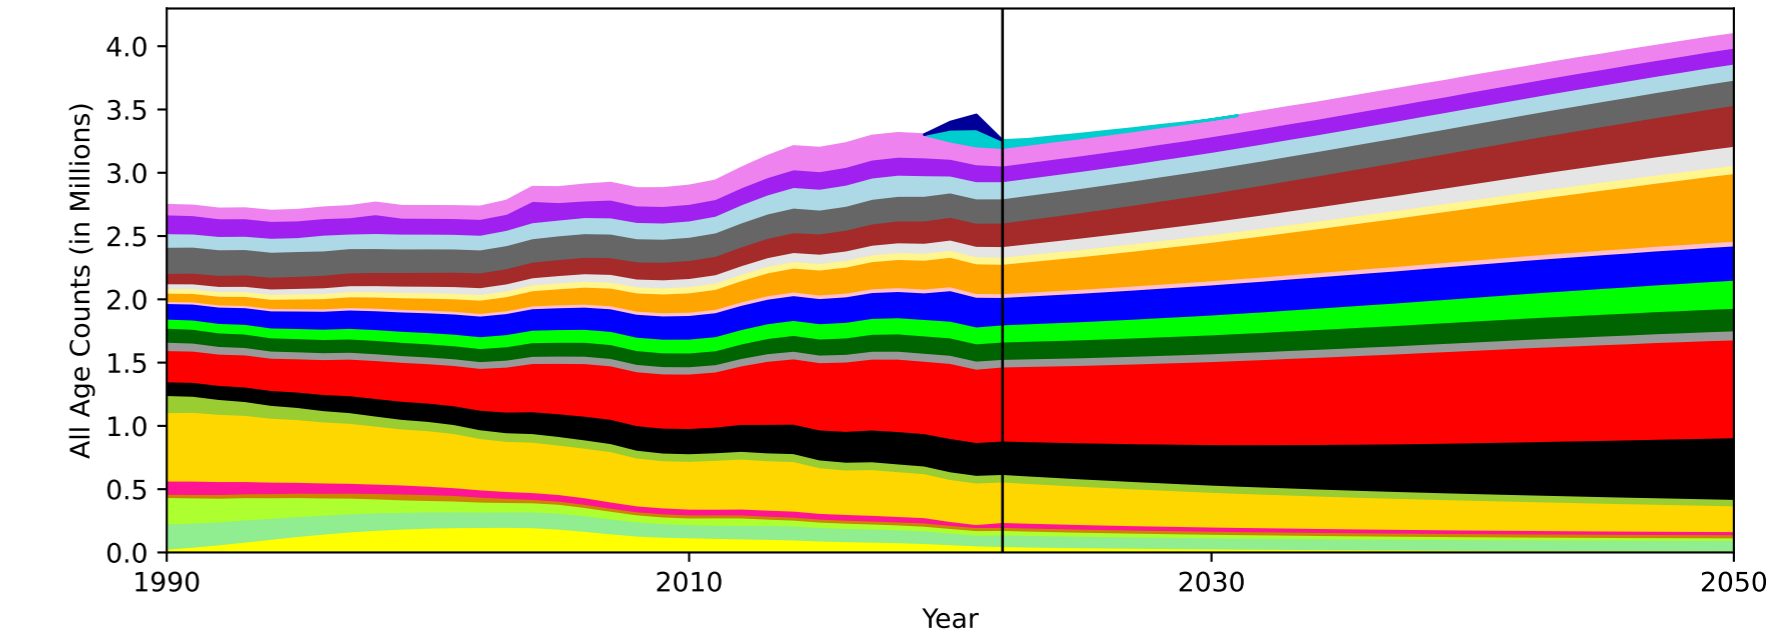

# Grenada

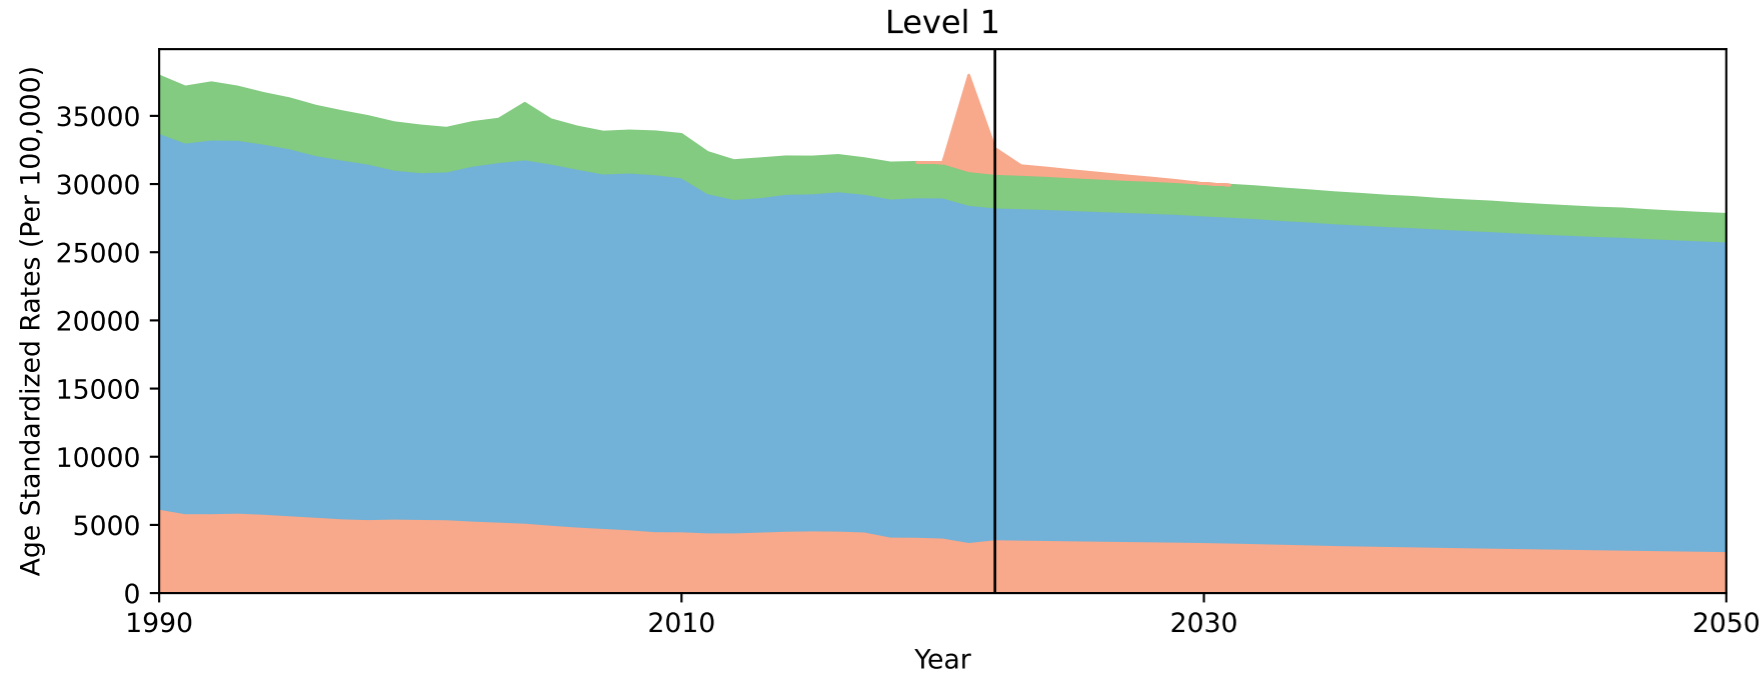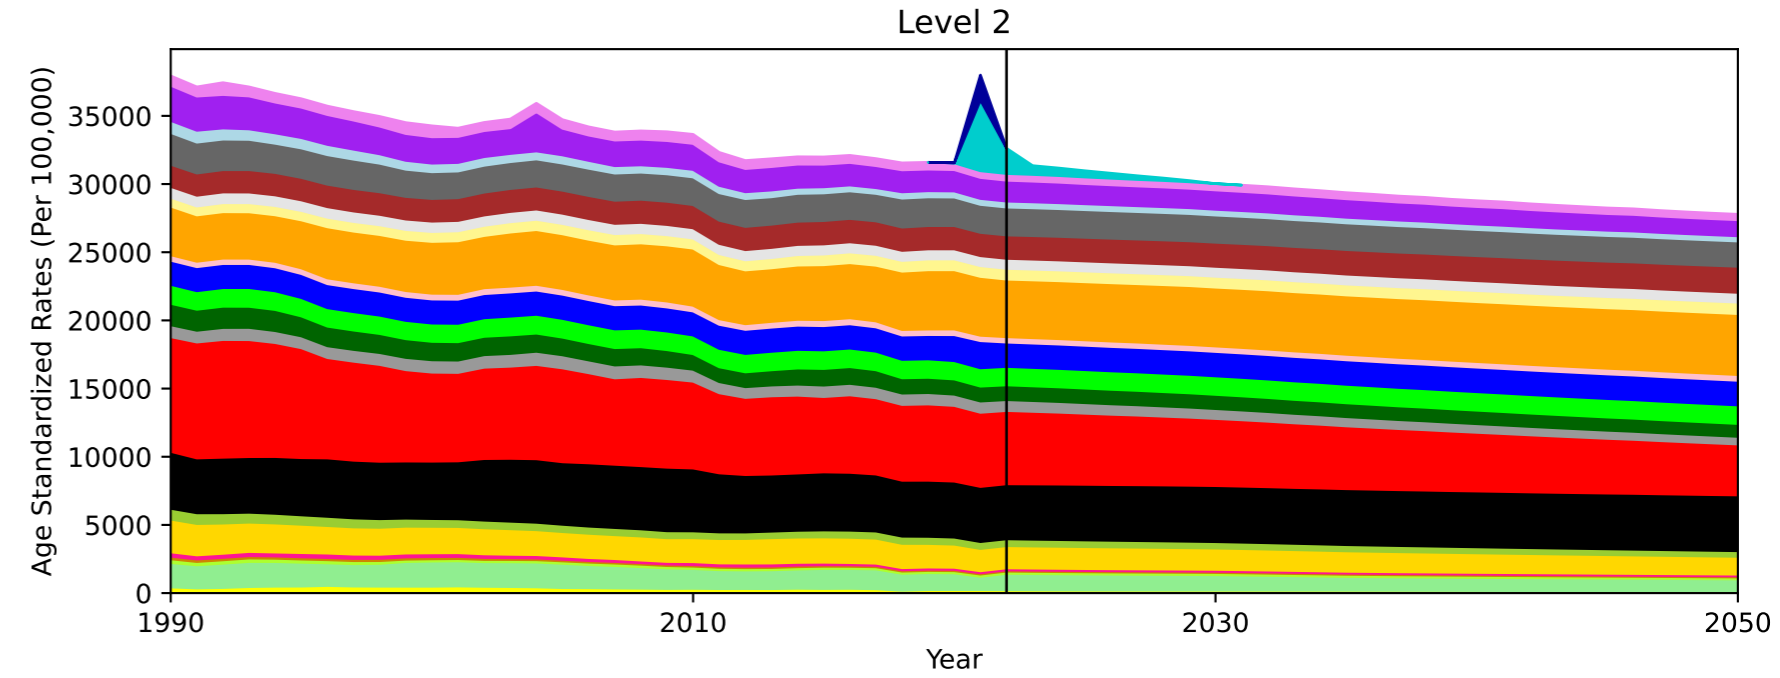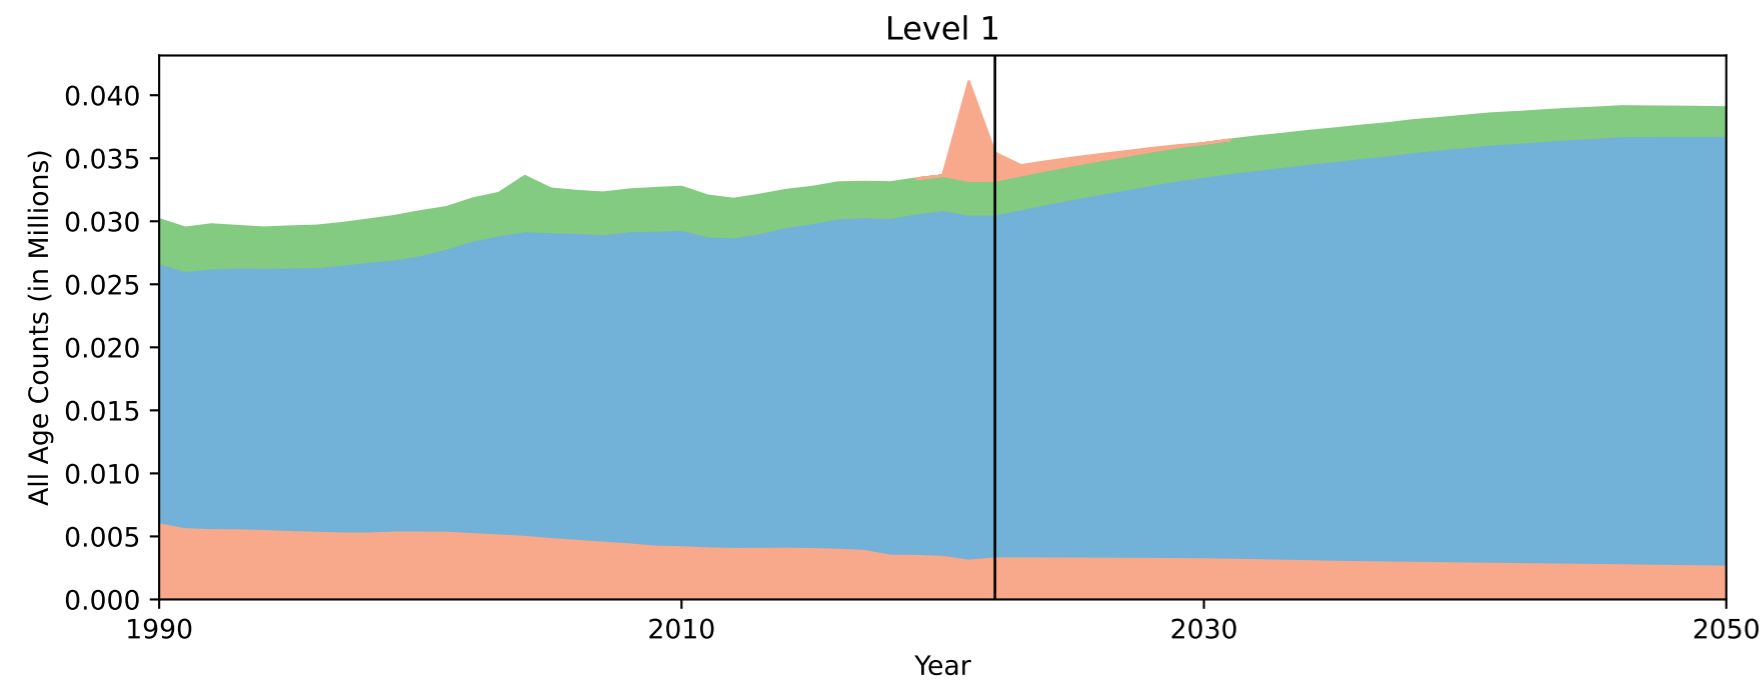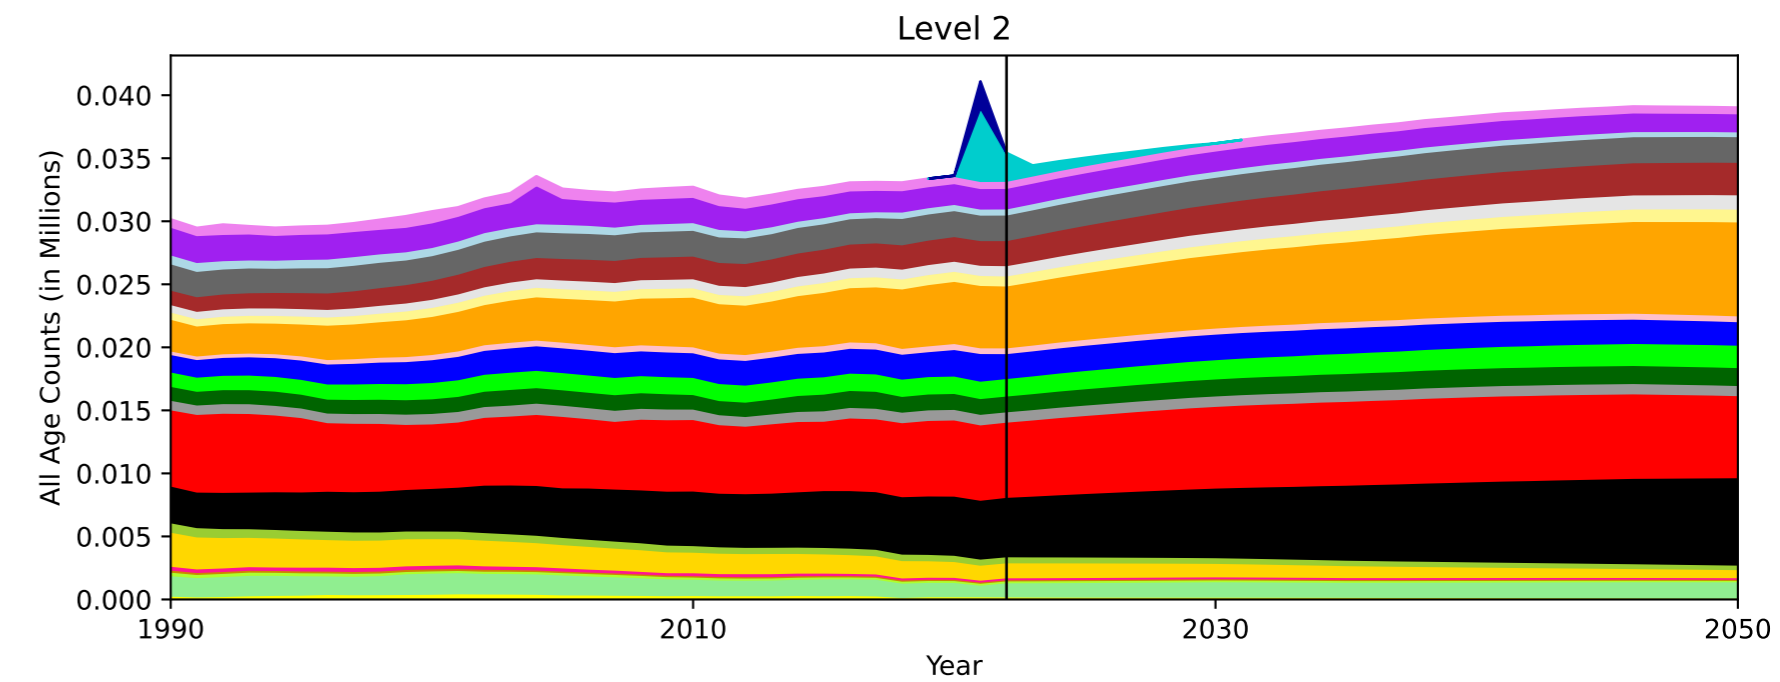

# Guyana

Level 1

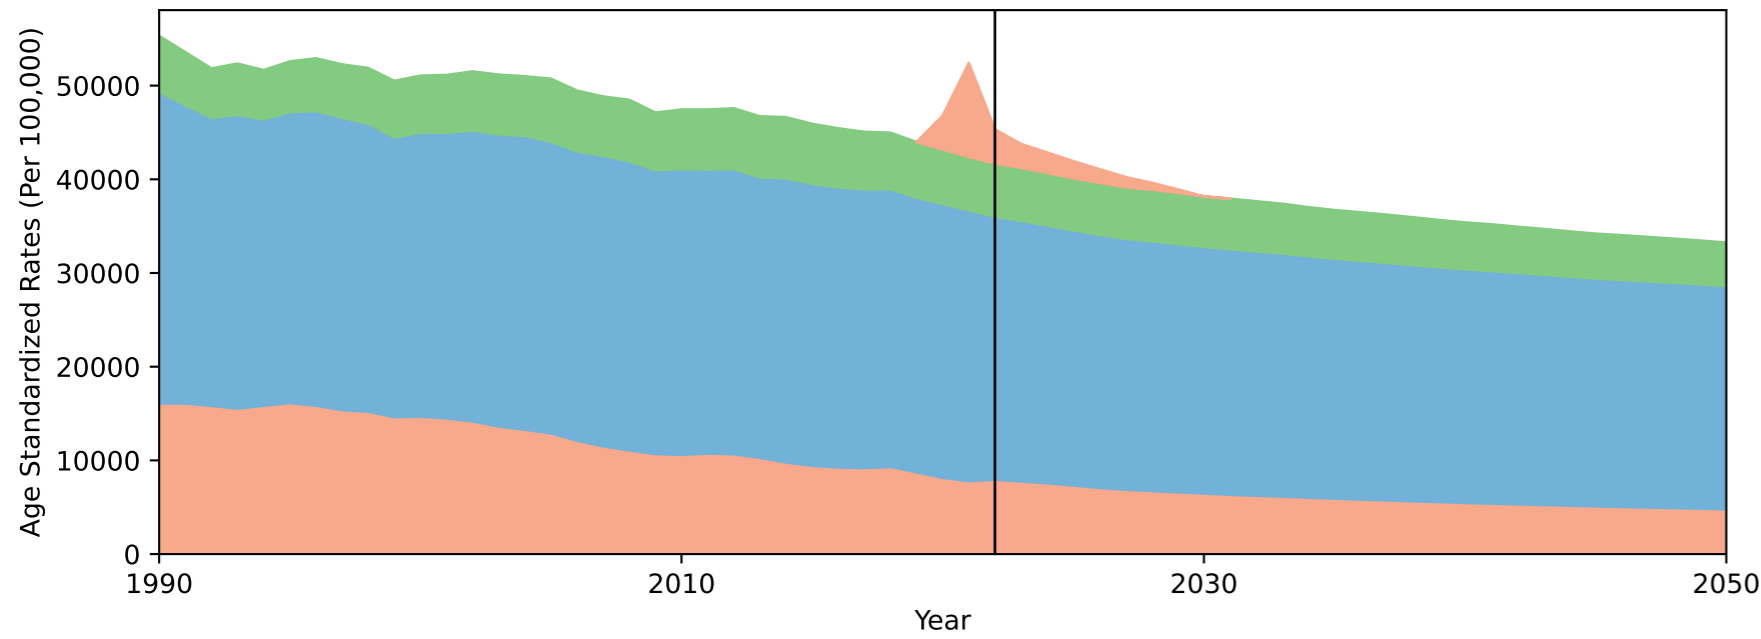

Level 2

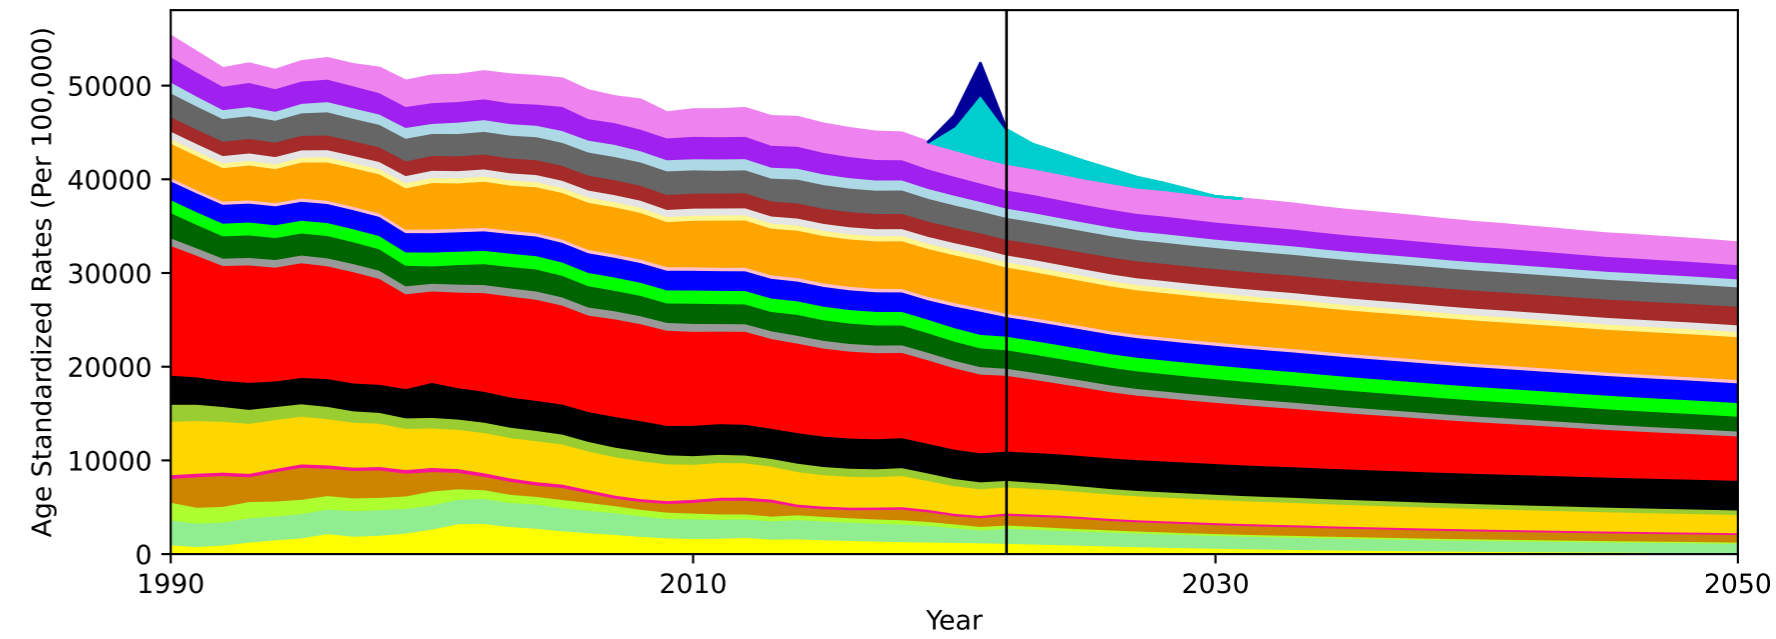

Level 1

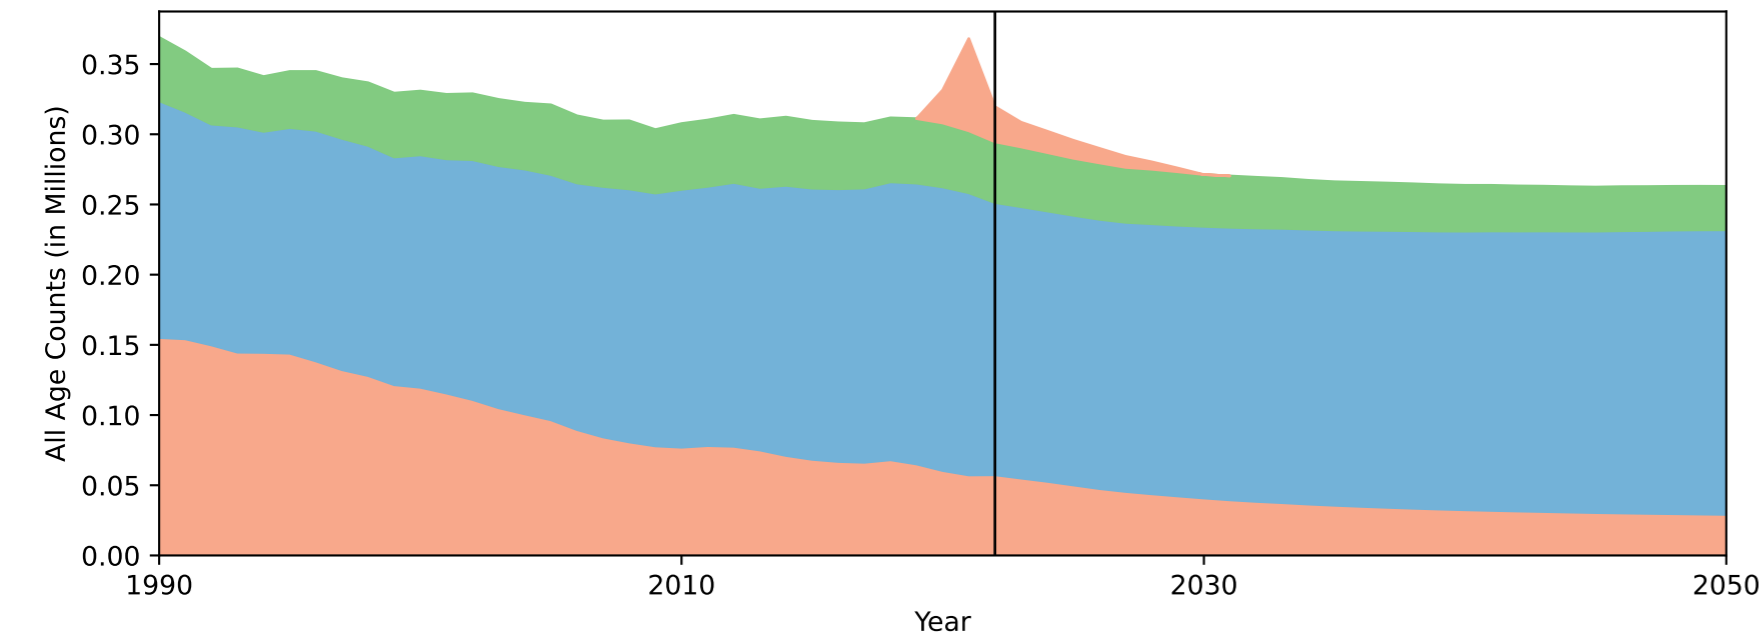

Level 2

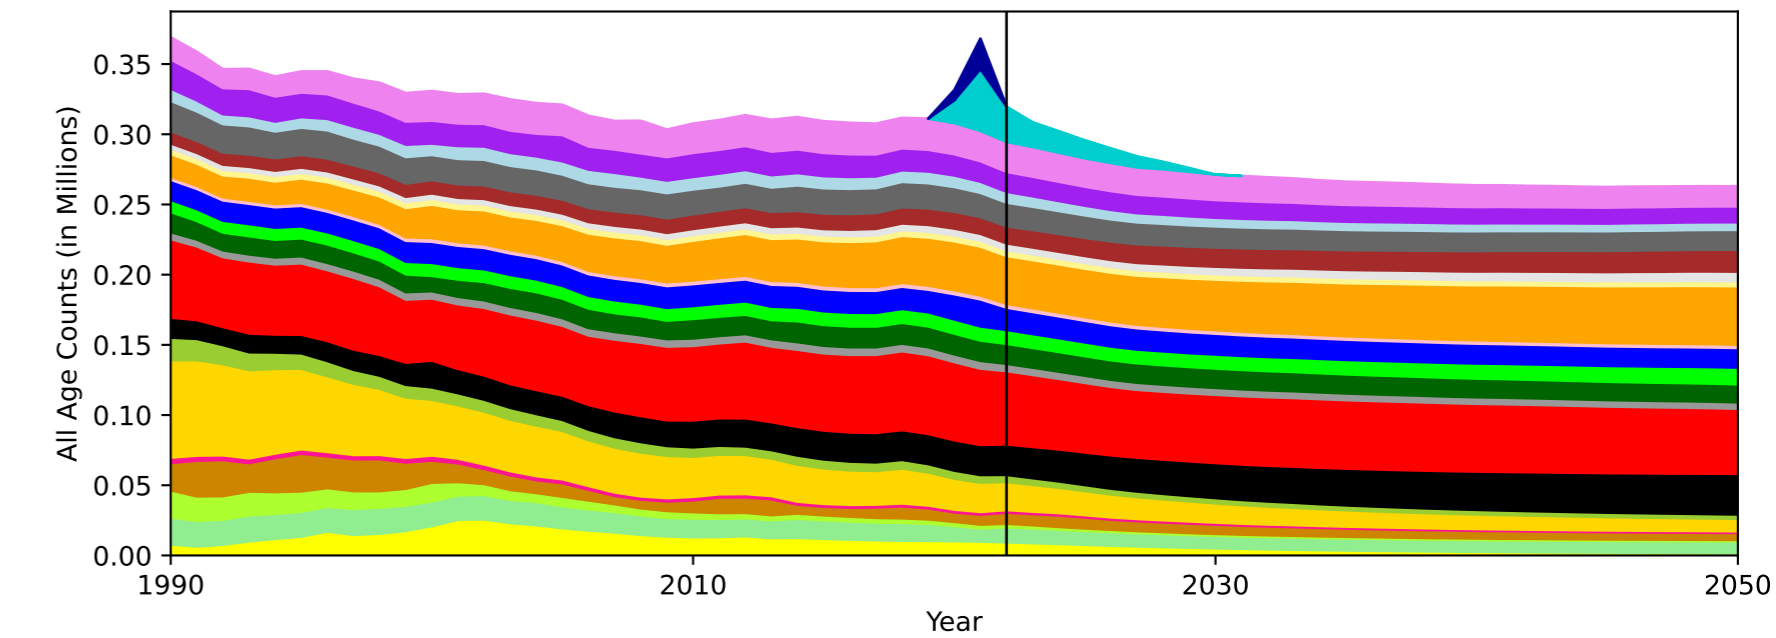

# Haiti

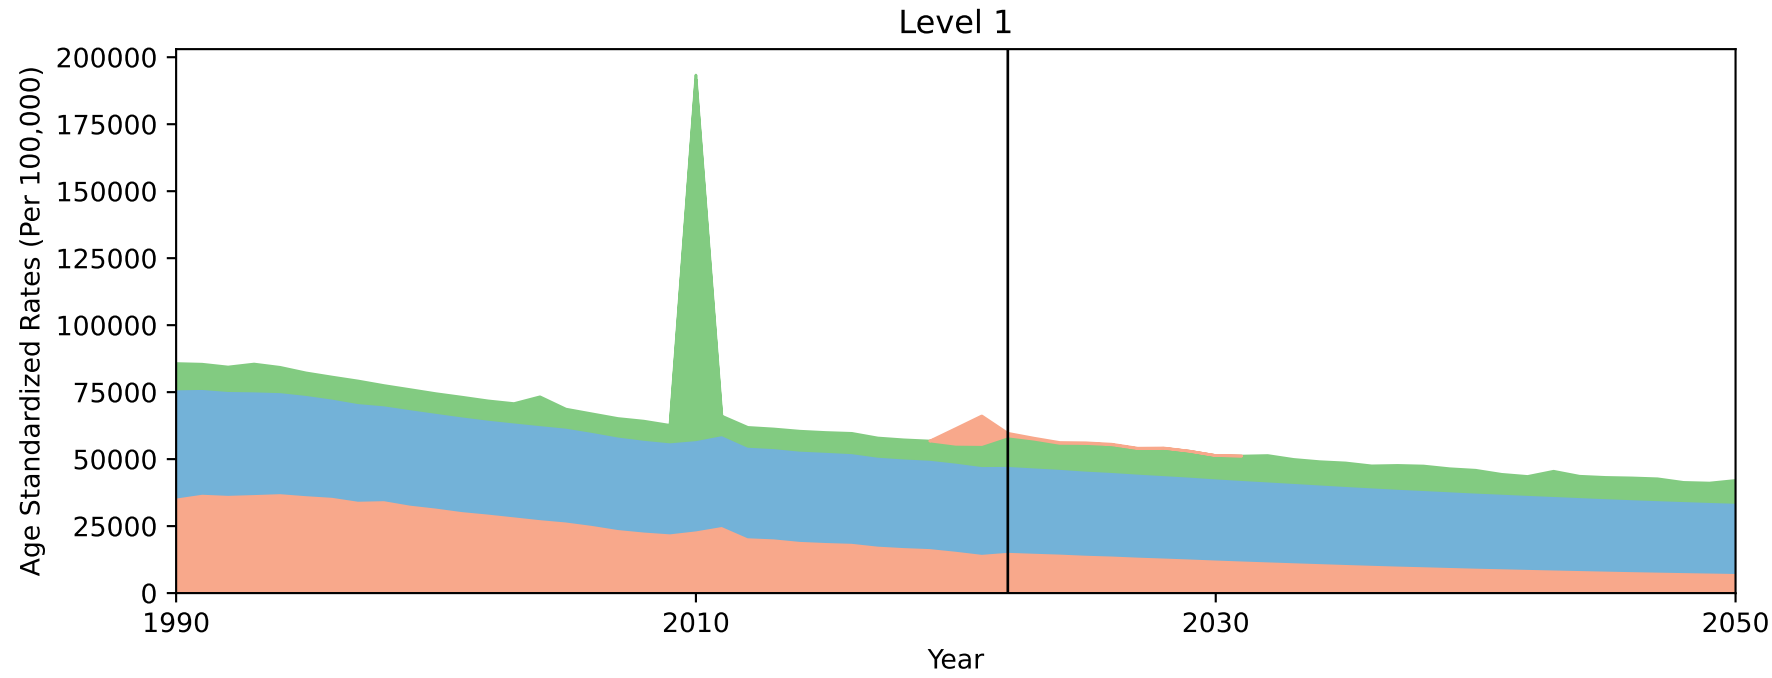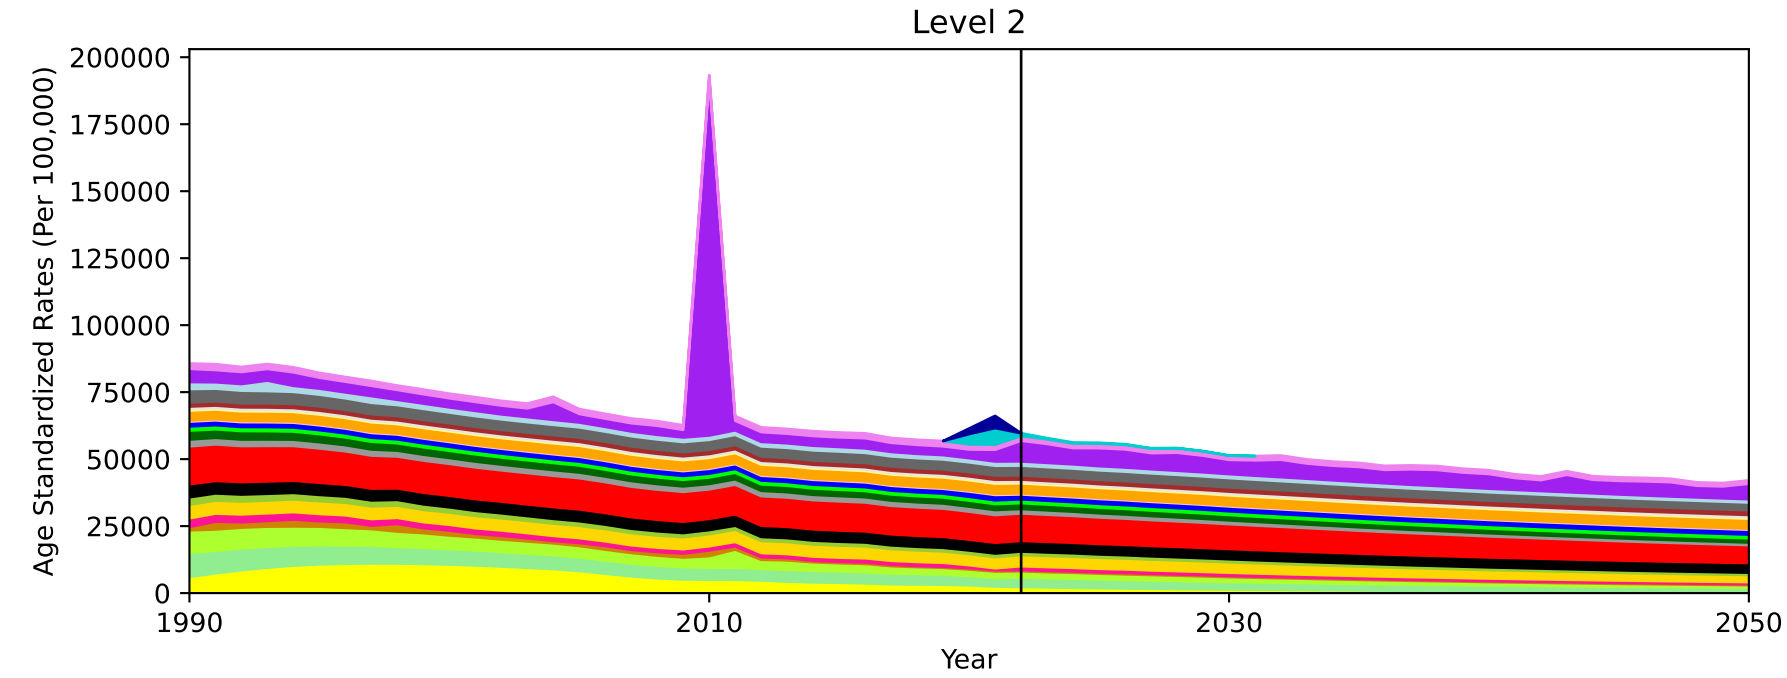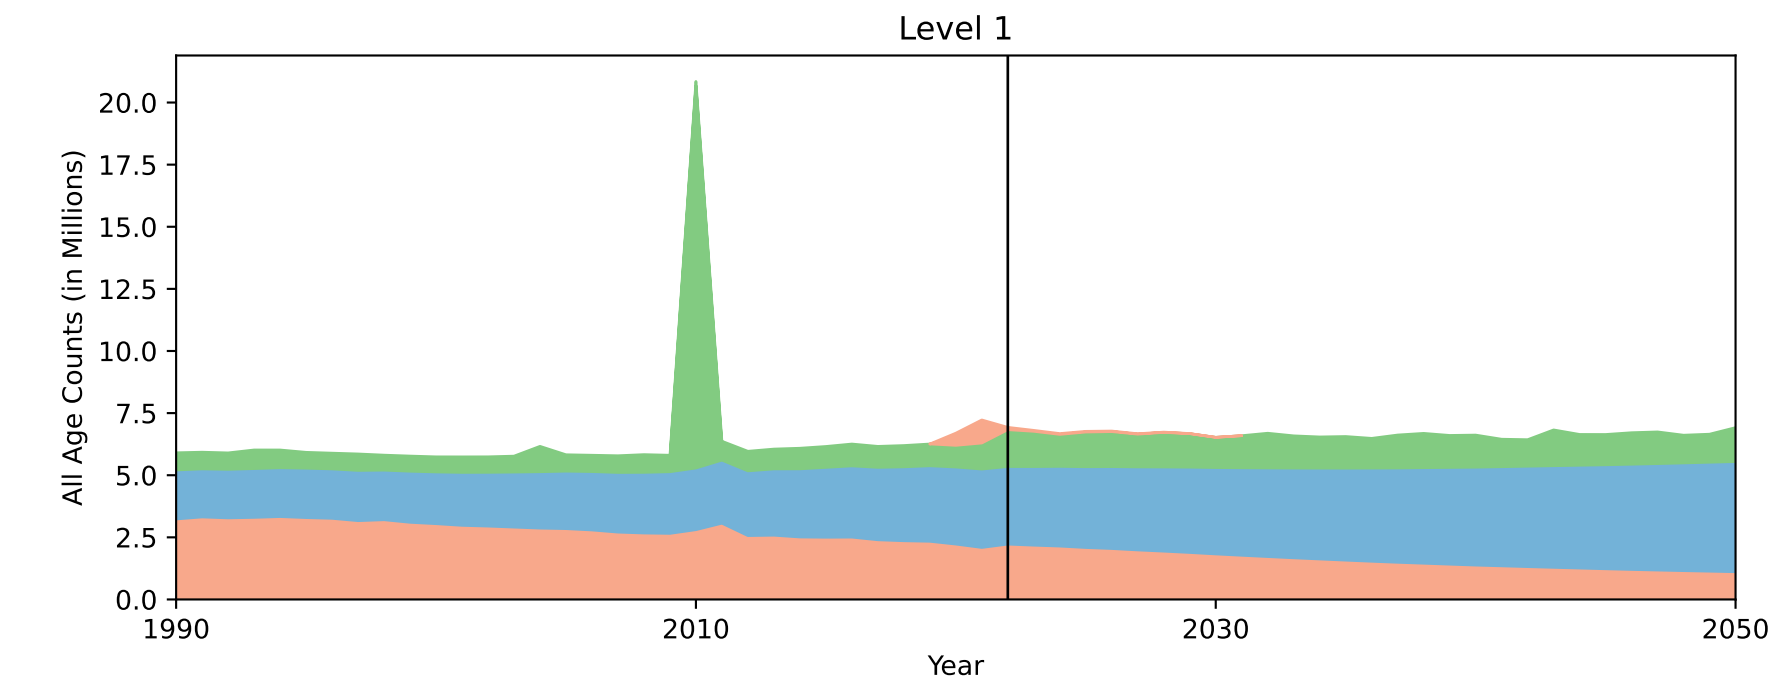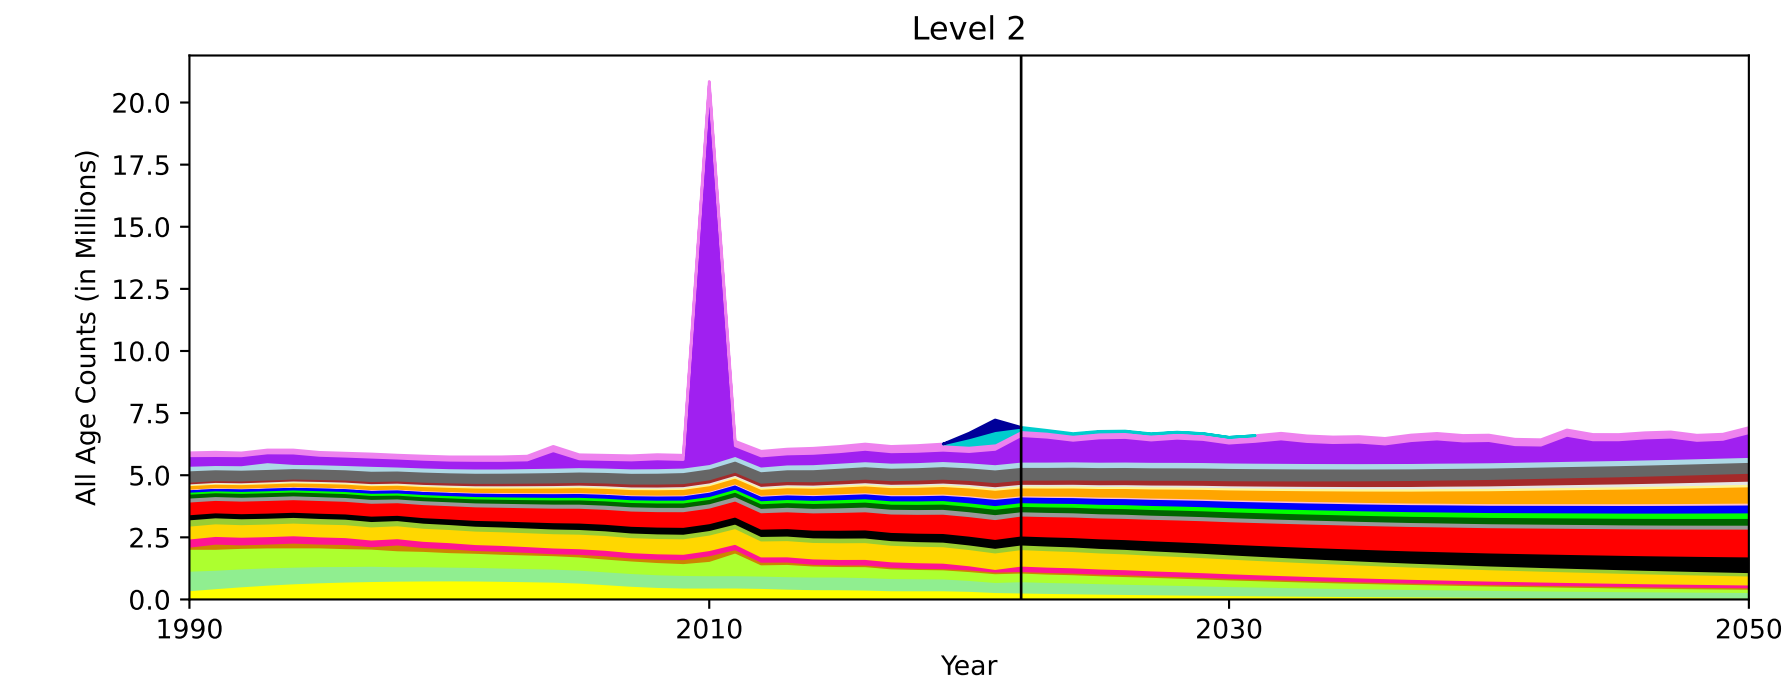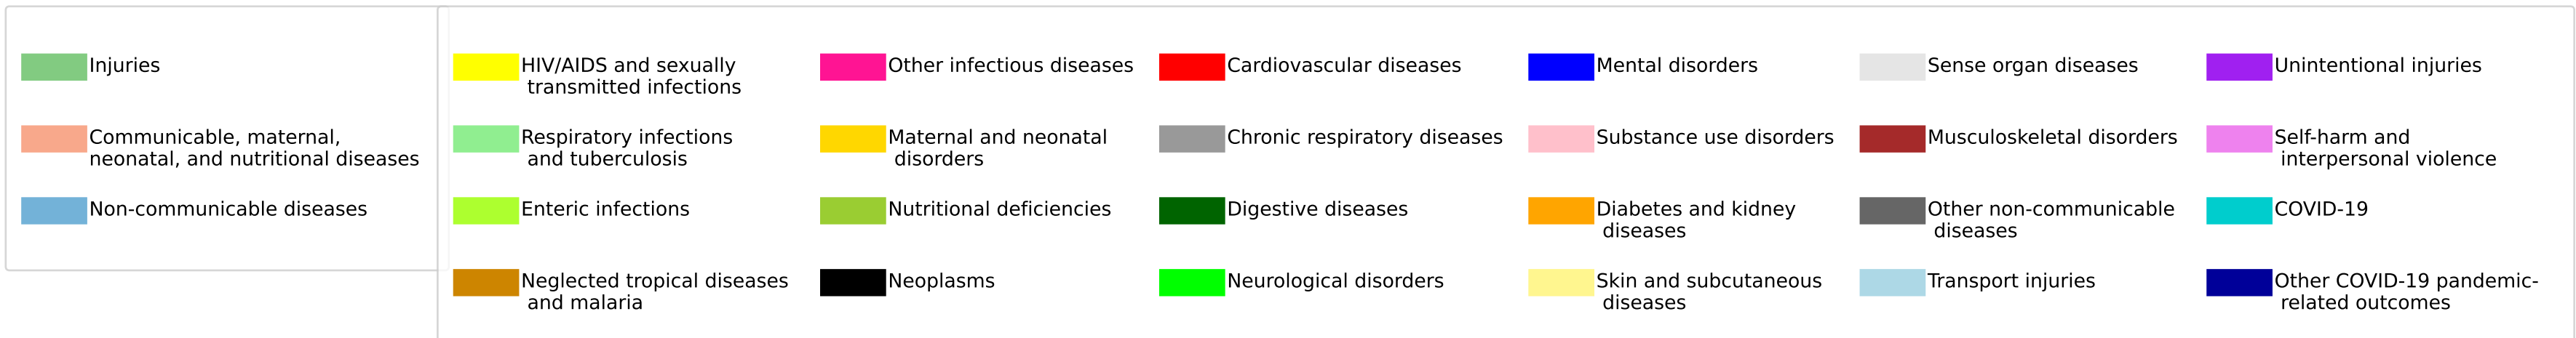

Level 1

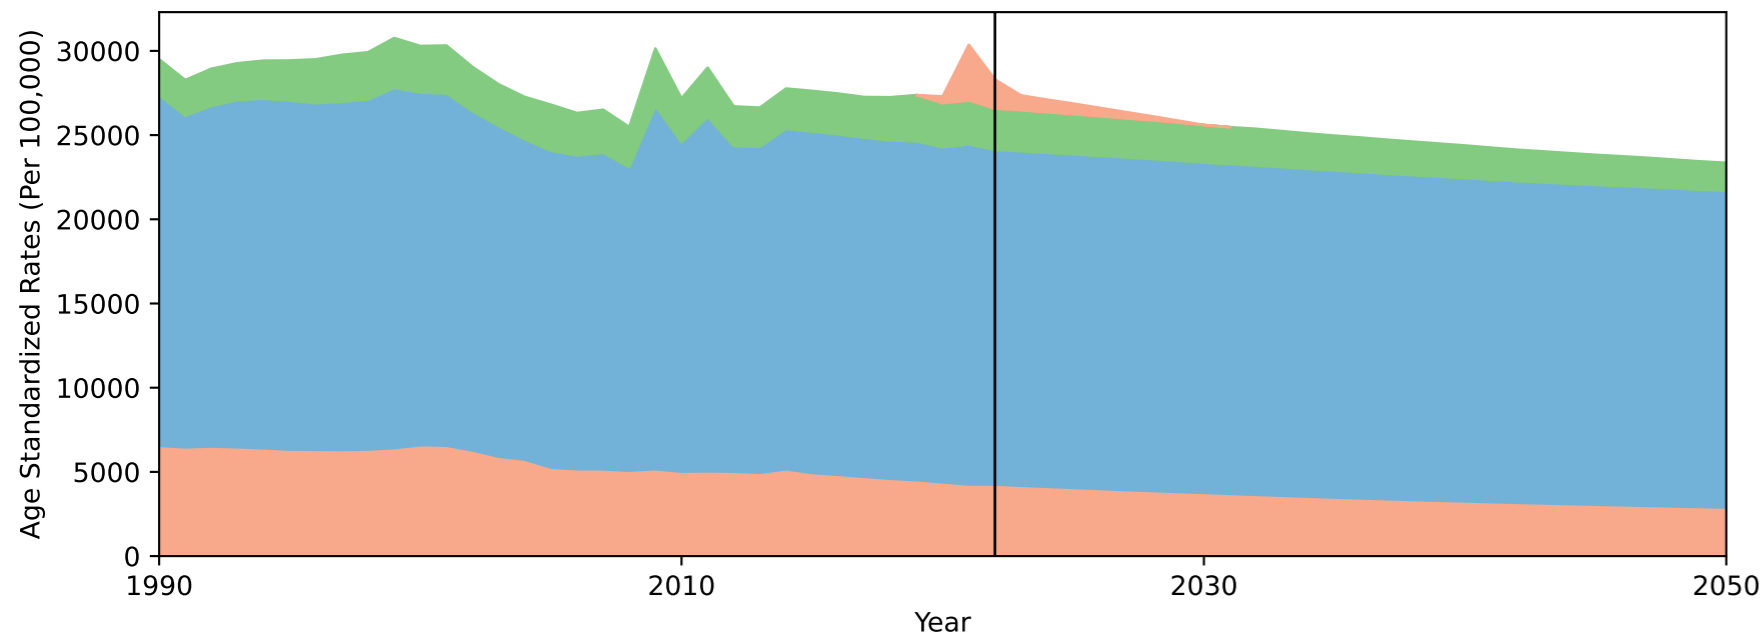

Level 2

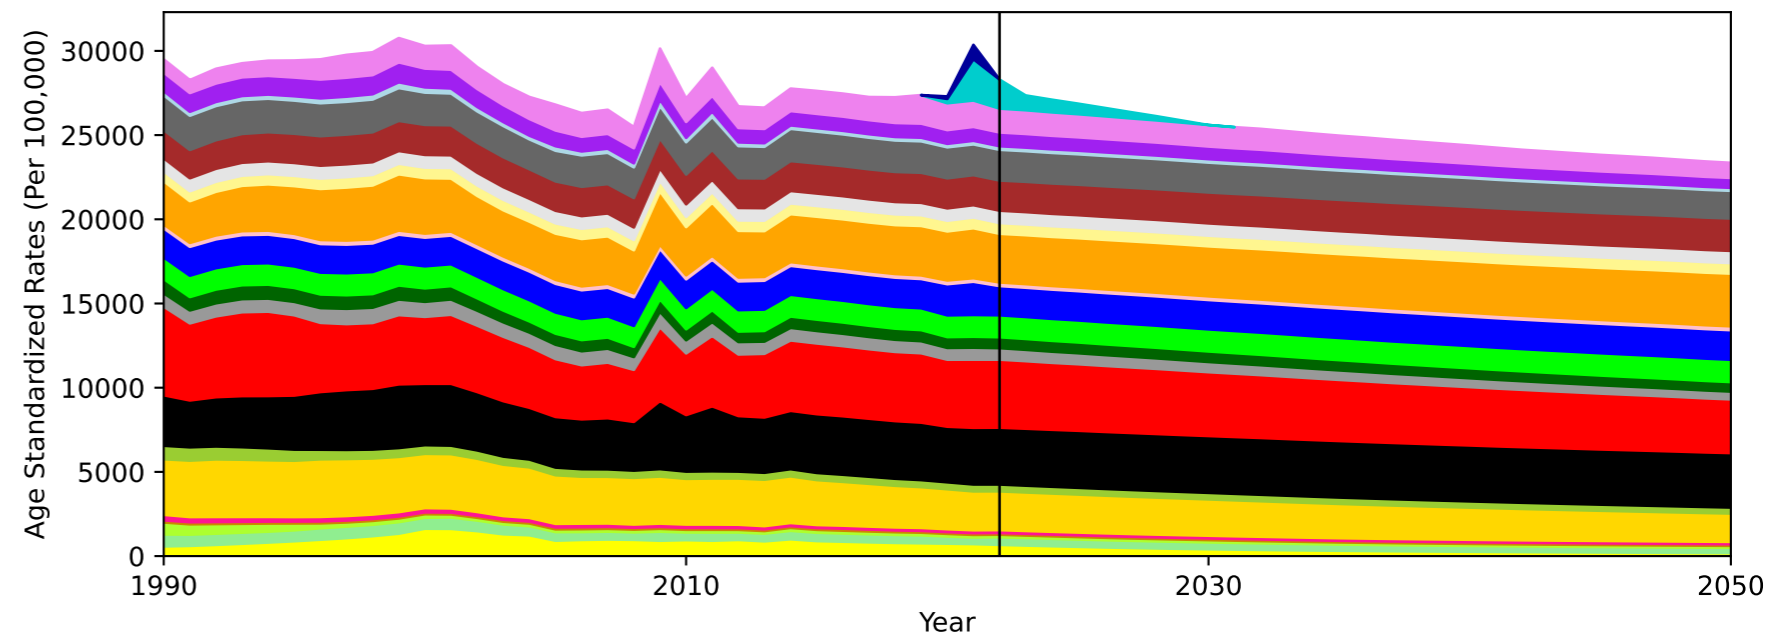

Level 1

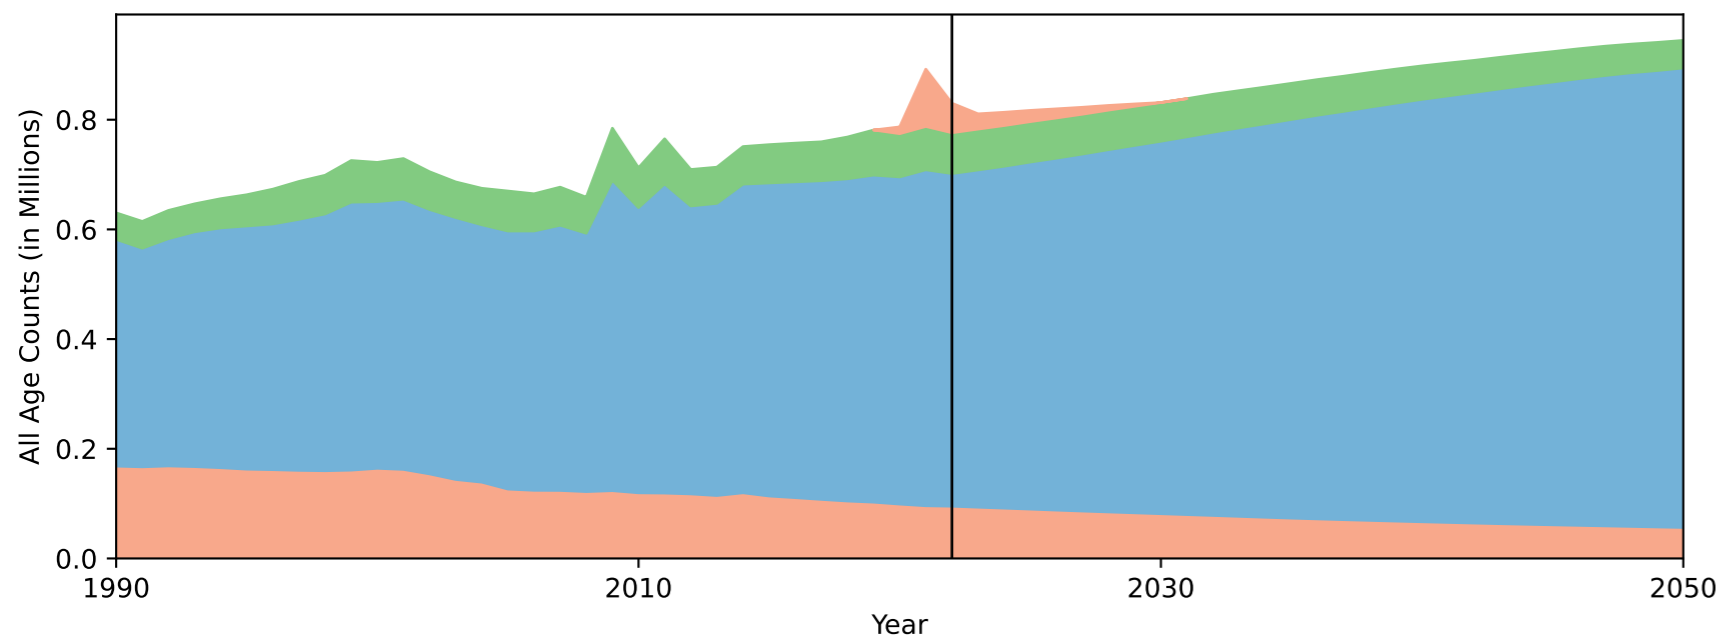

Level 2

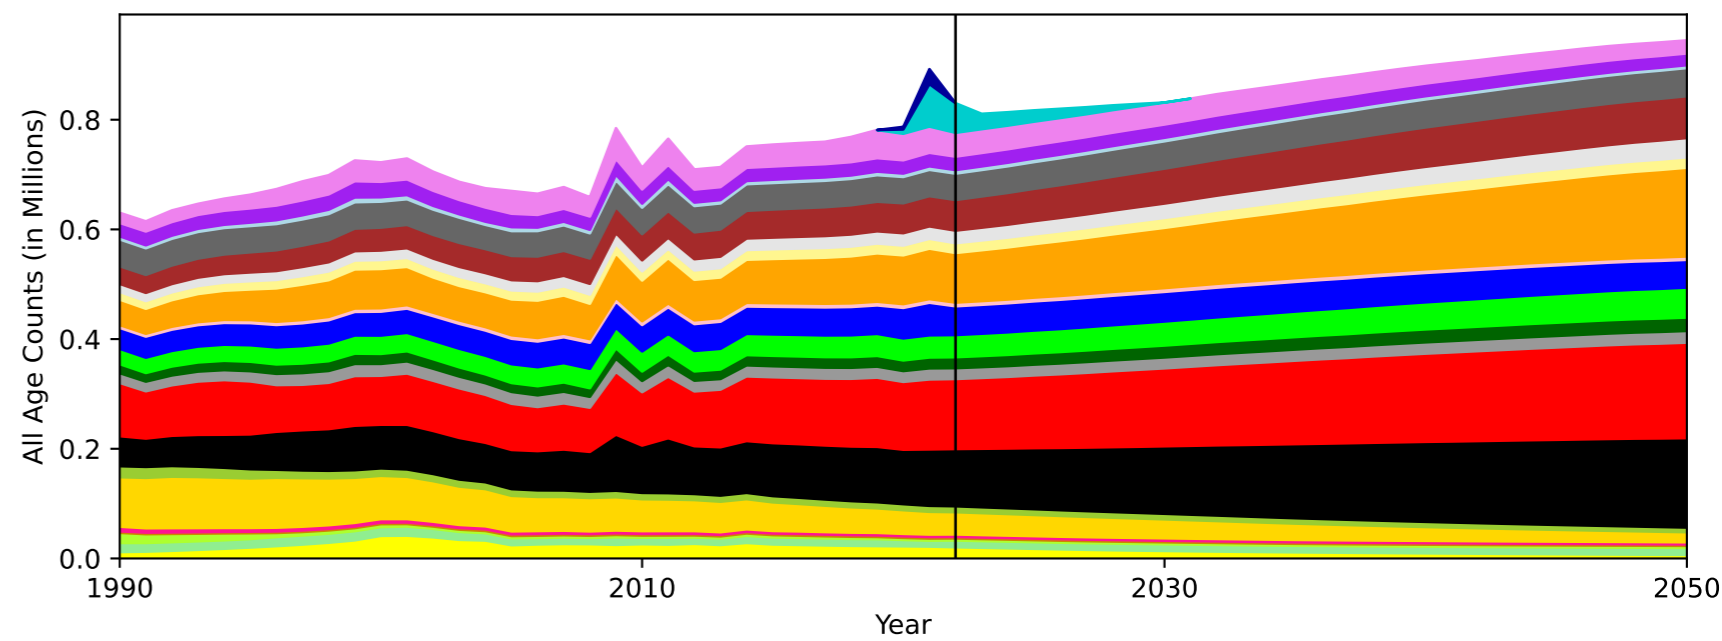

# Puerto Rico

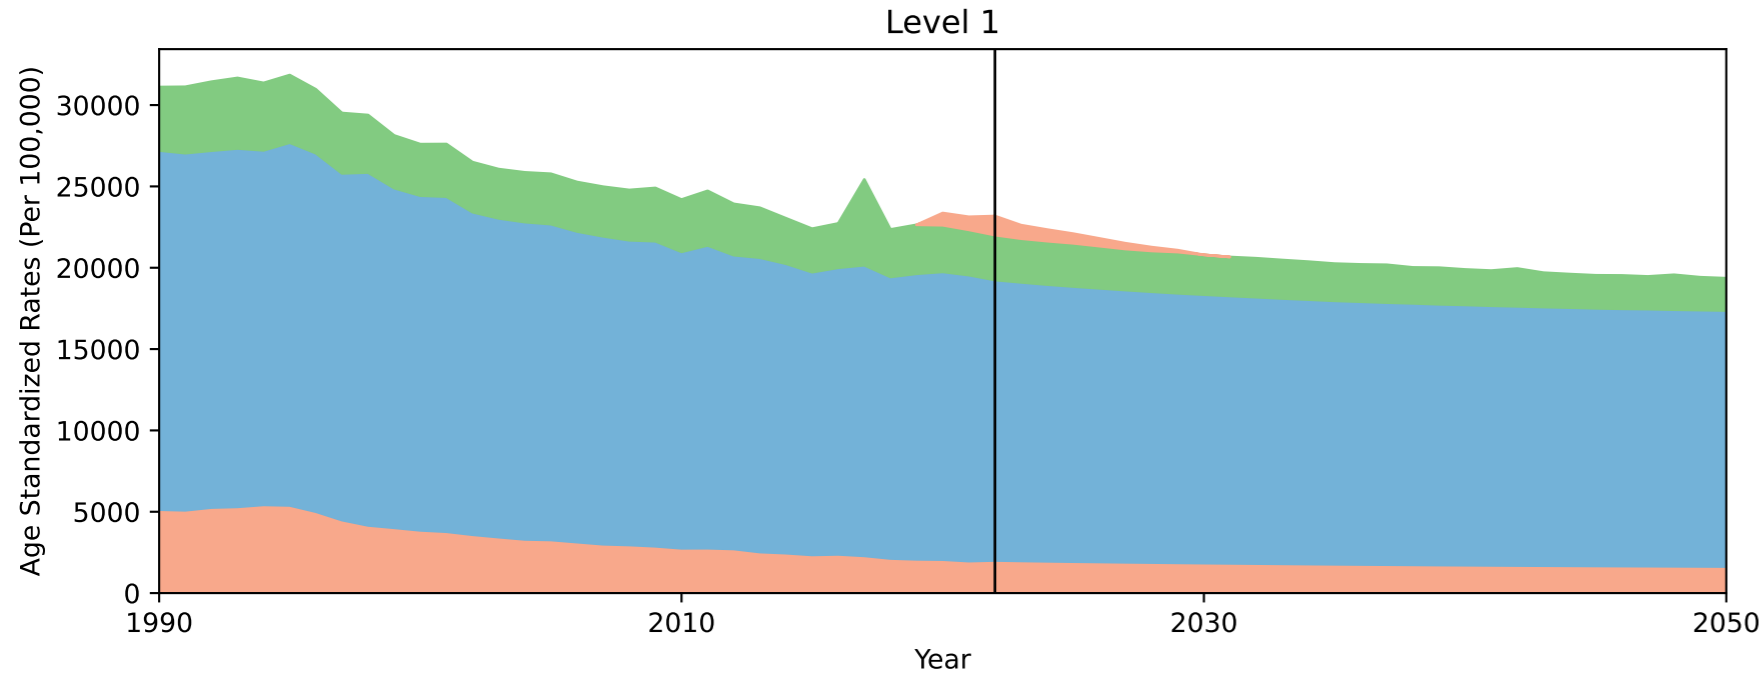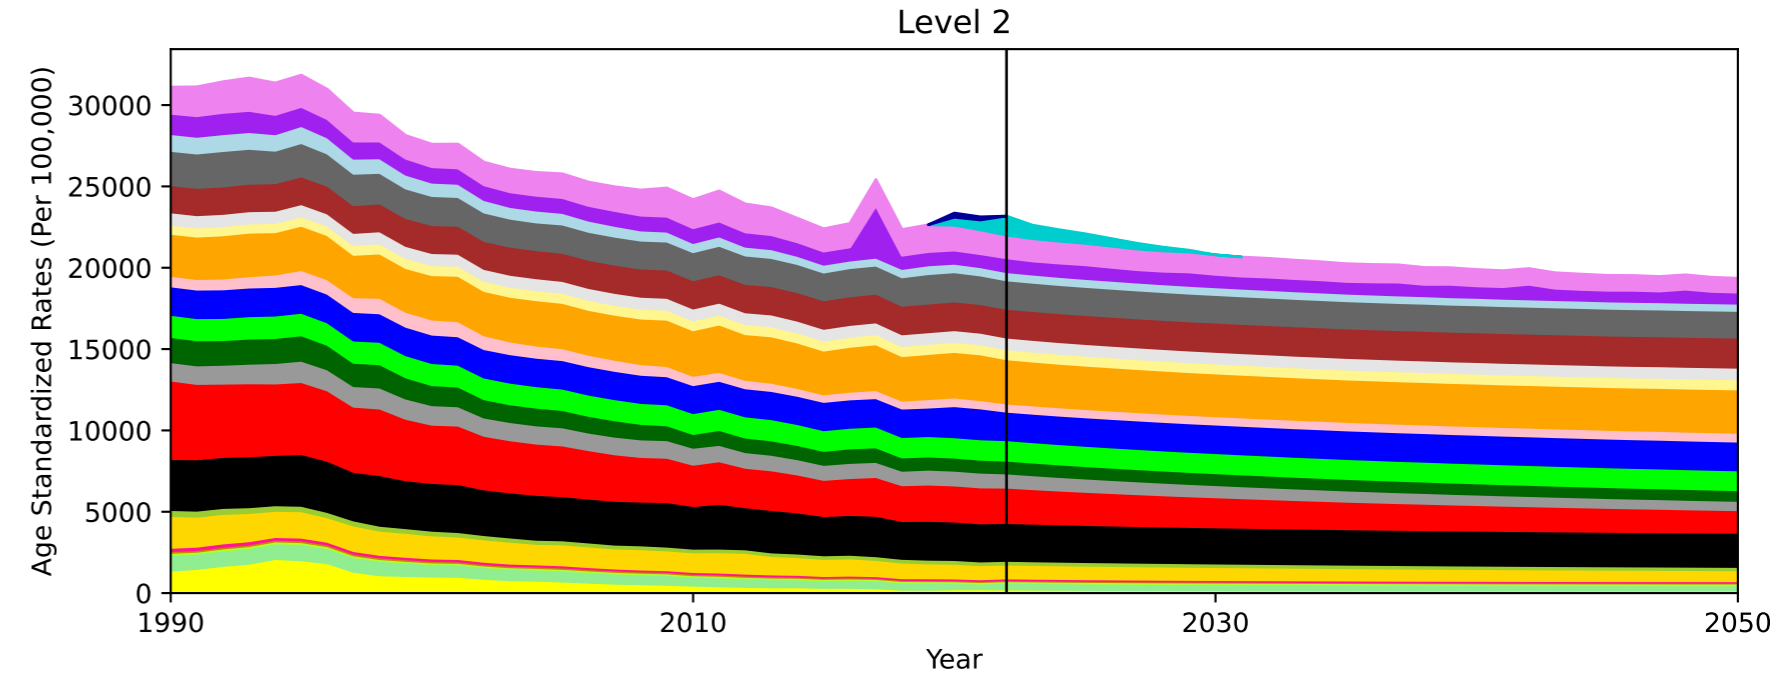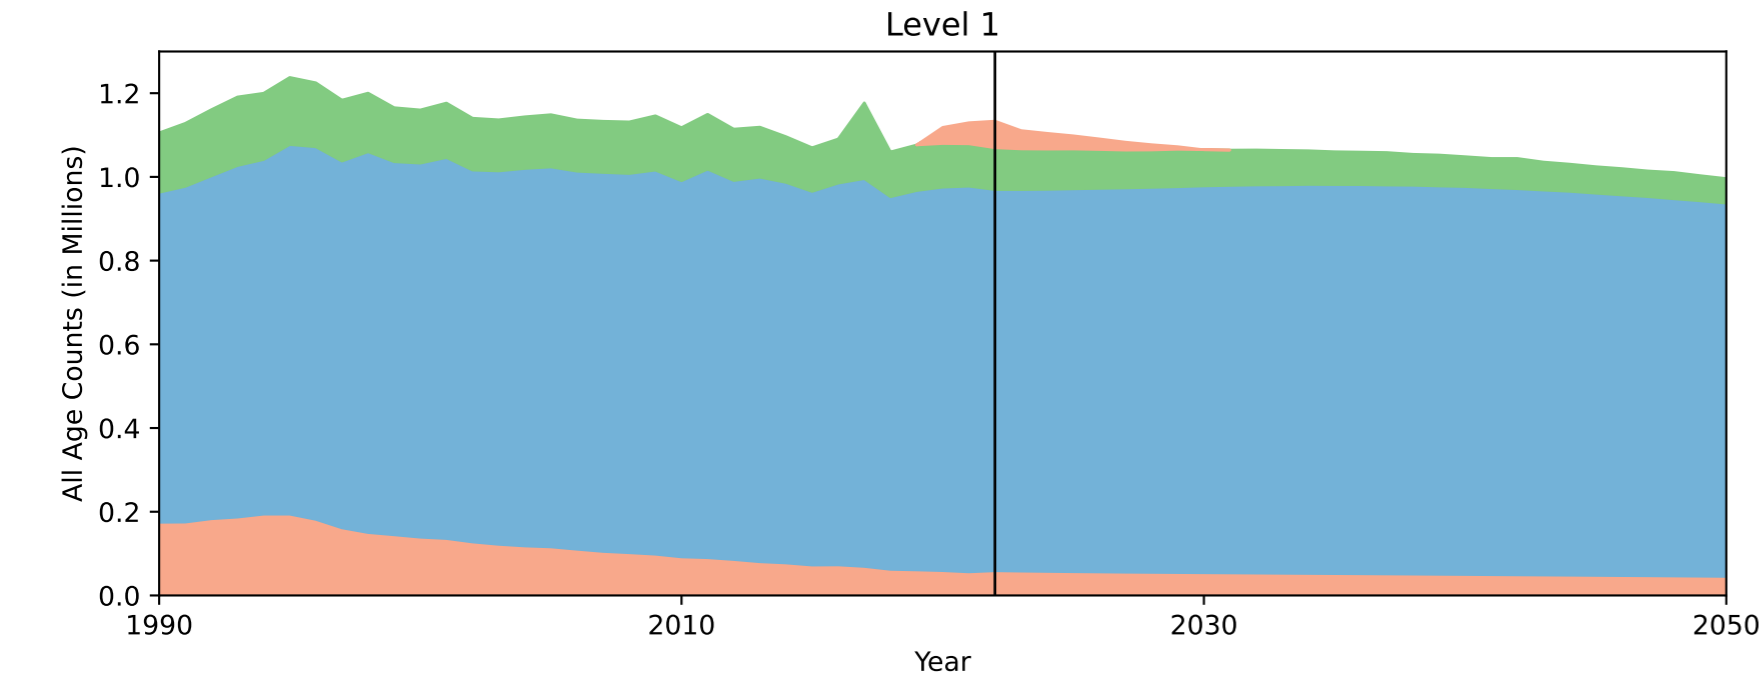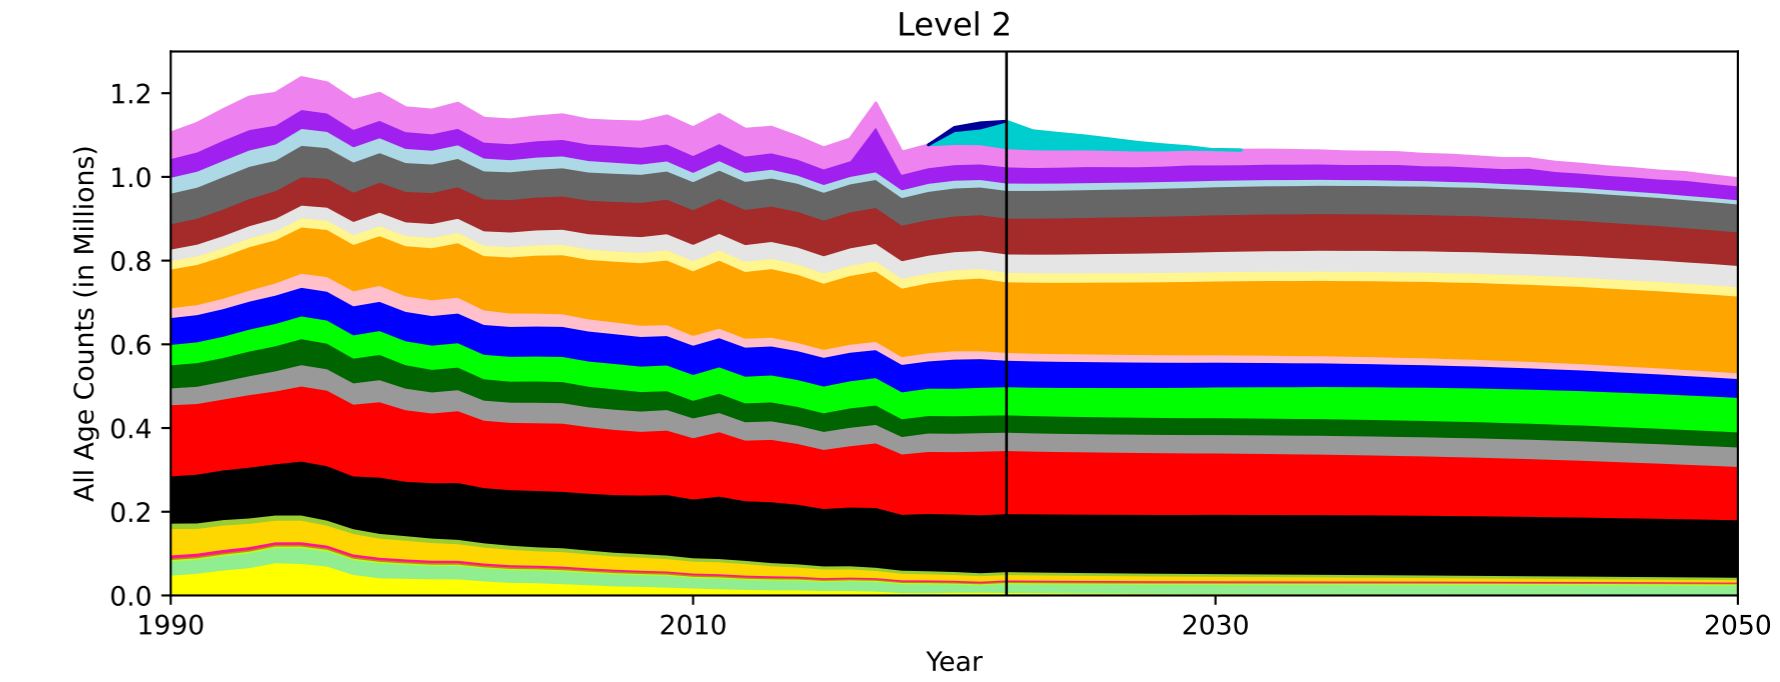

# Saint Kitts And Nevis

Supplemental Results Figure S4. Age-standardised DALY rates and all age DALY counts and by Level 1 and Level 2 causes, 1990–2050

326

Level 1

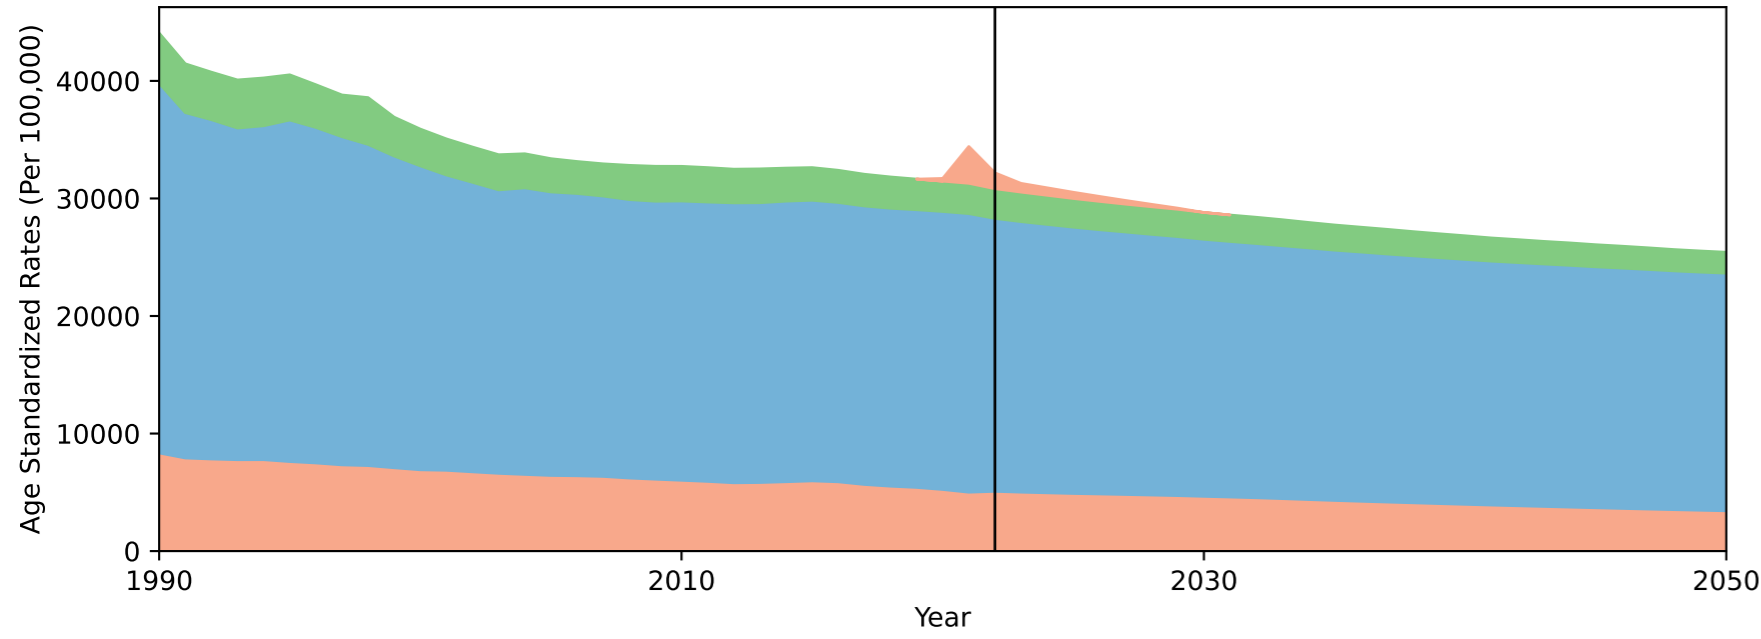

Level 2

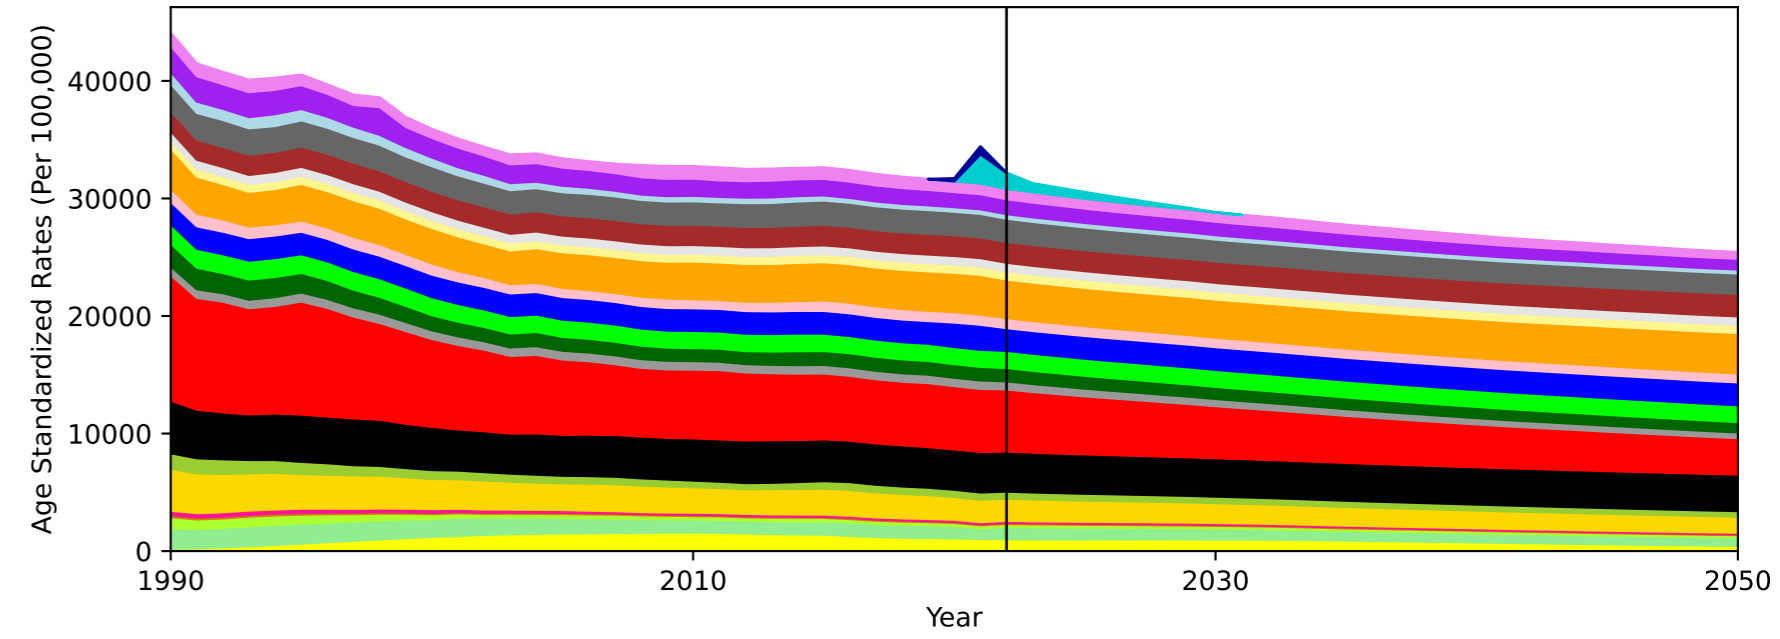

Level 1

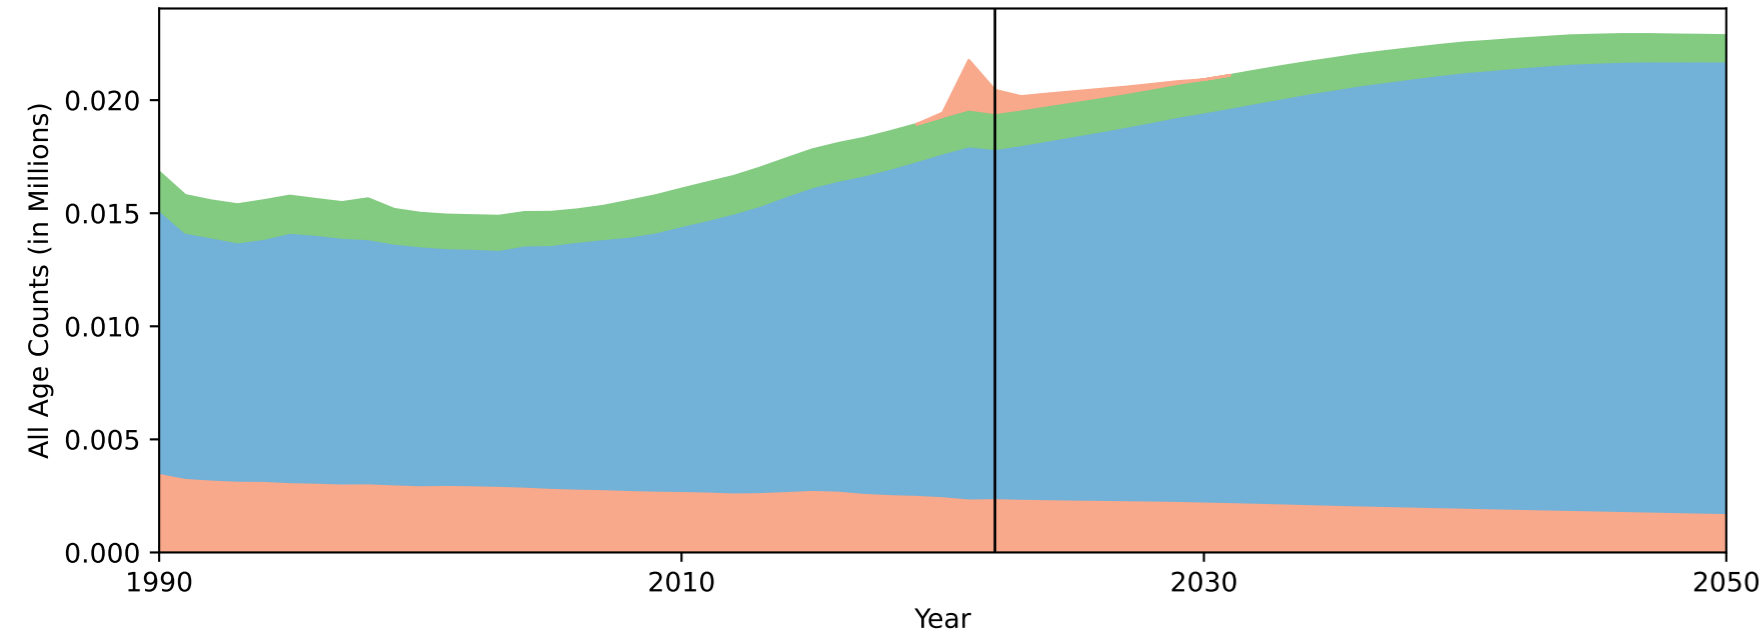

Level 2

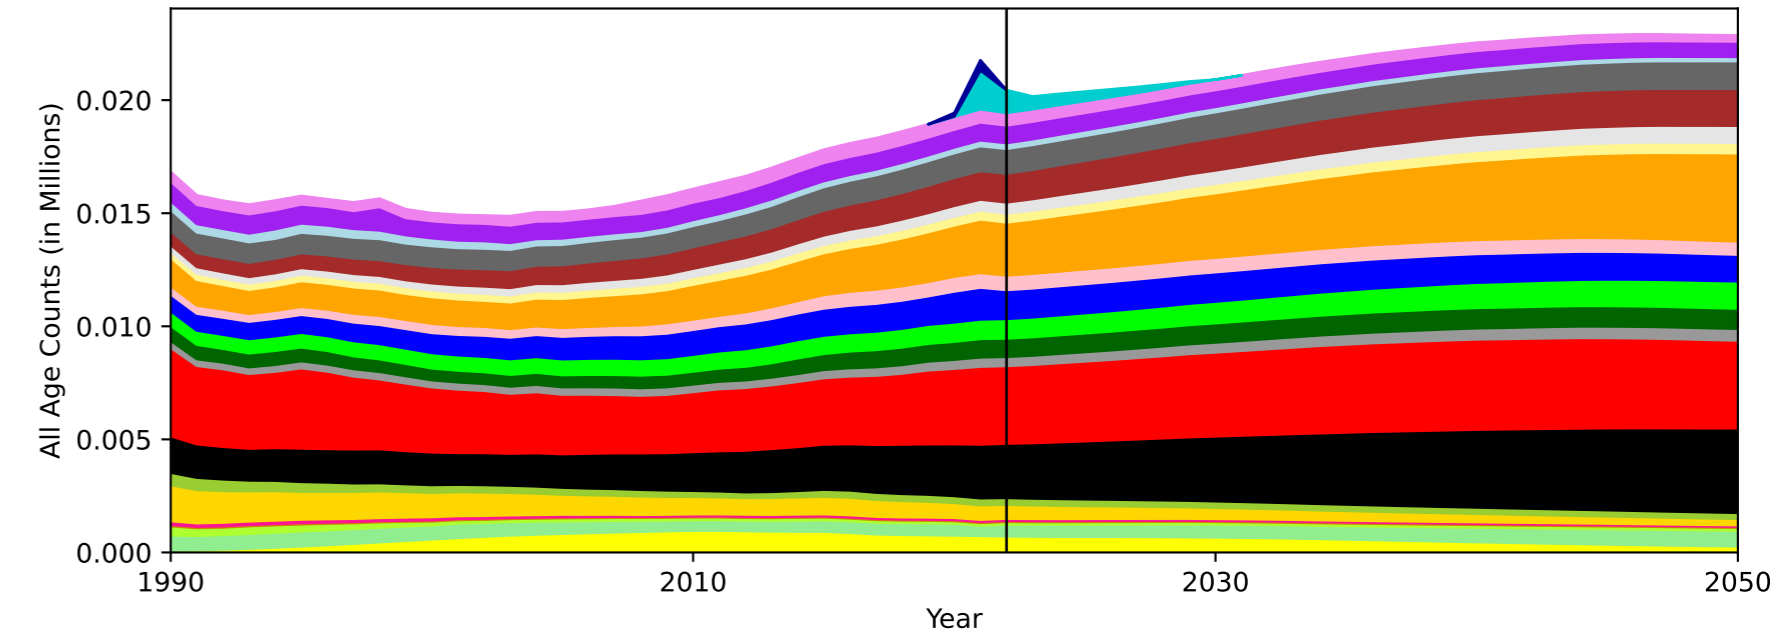

# Saint Lucia

Level 1

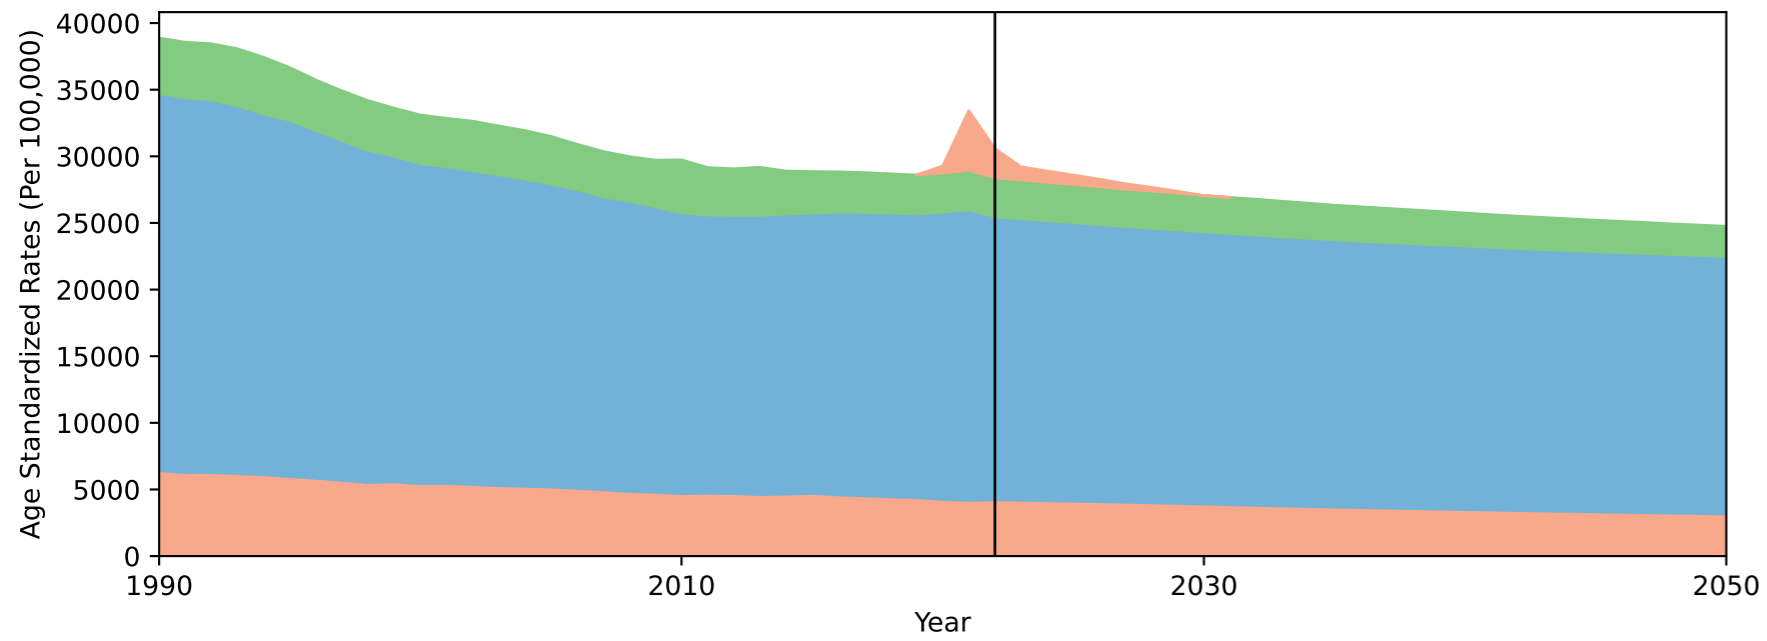

Level 2

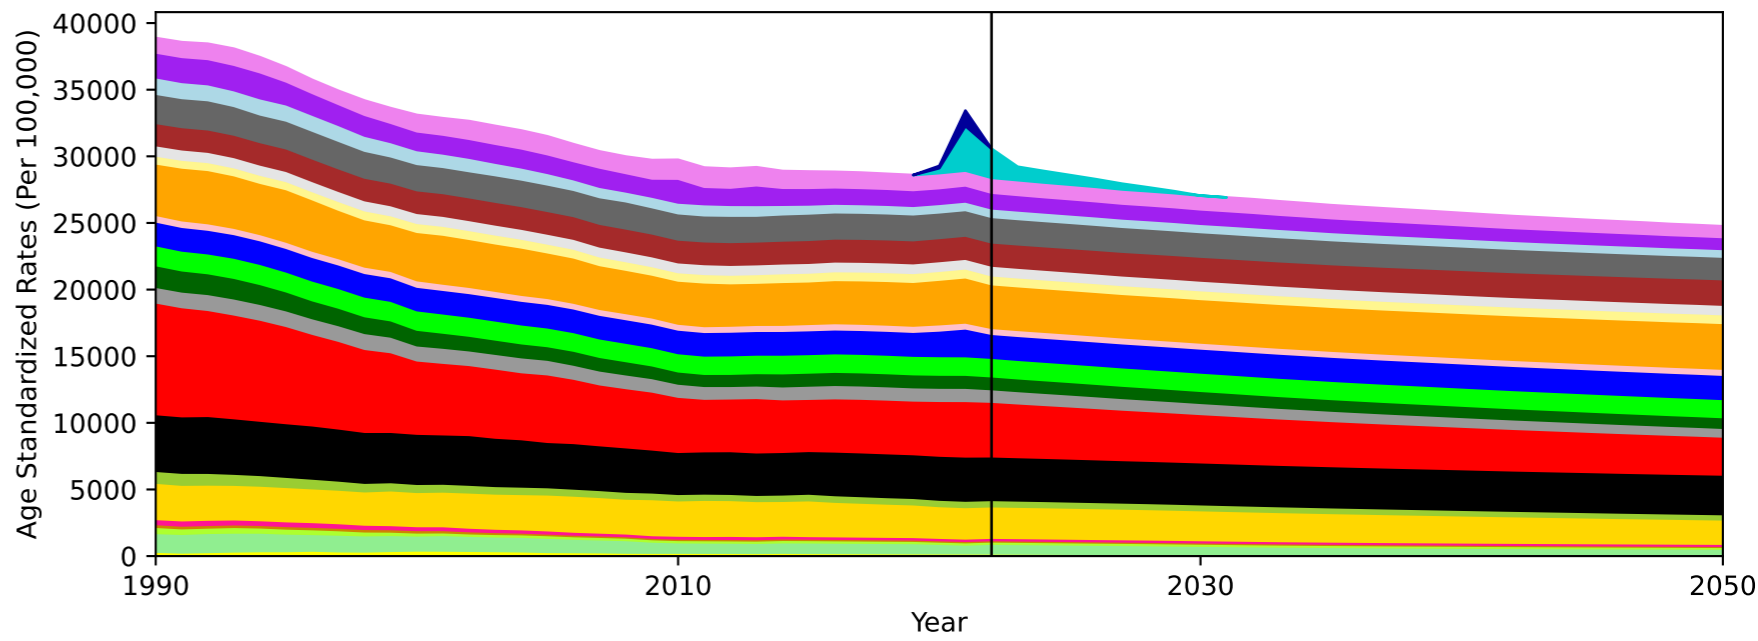

Level 1

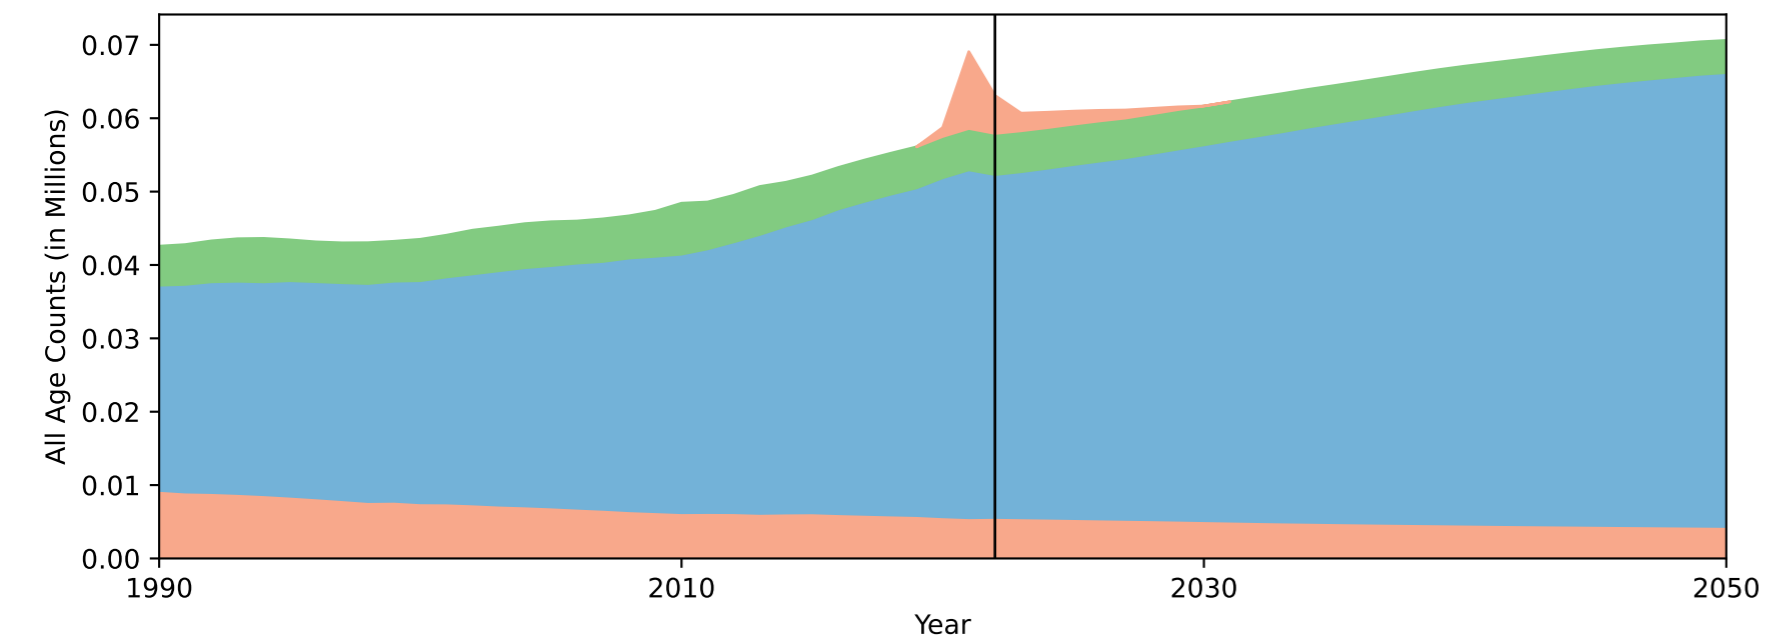

Level 2

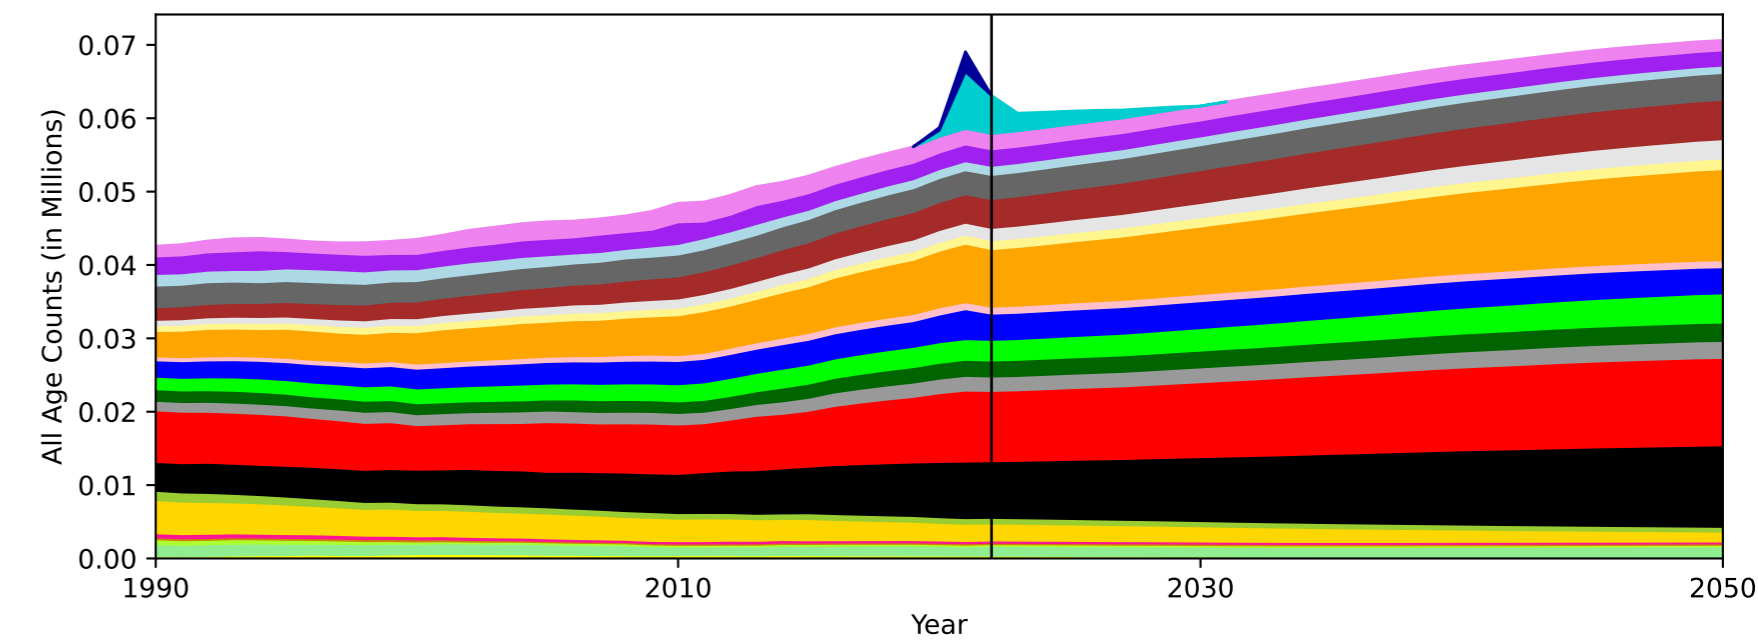



# Saint Vincent And The Grenadines

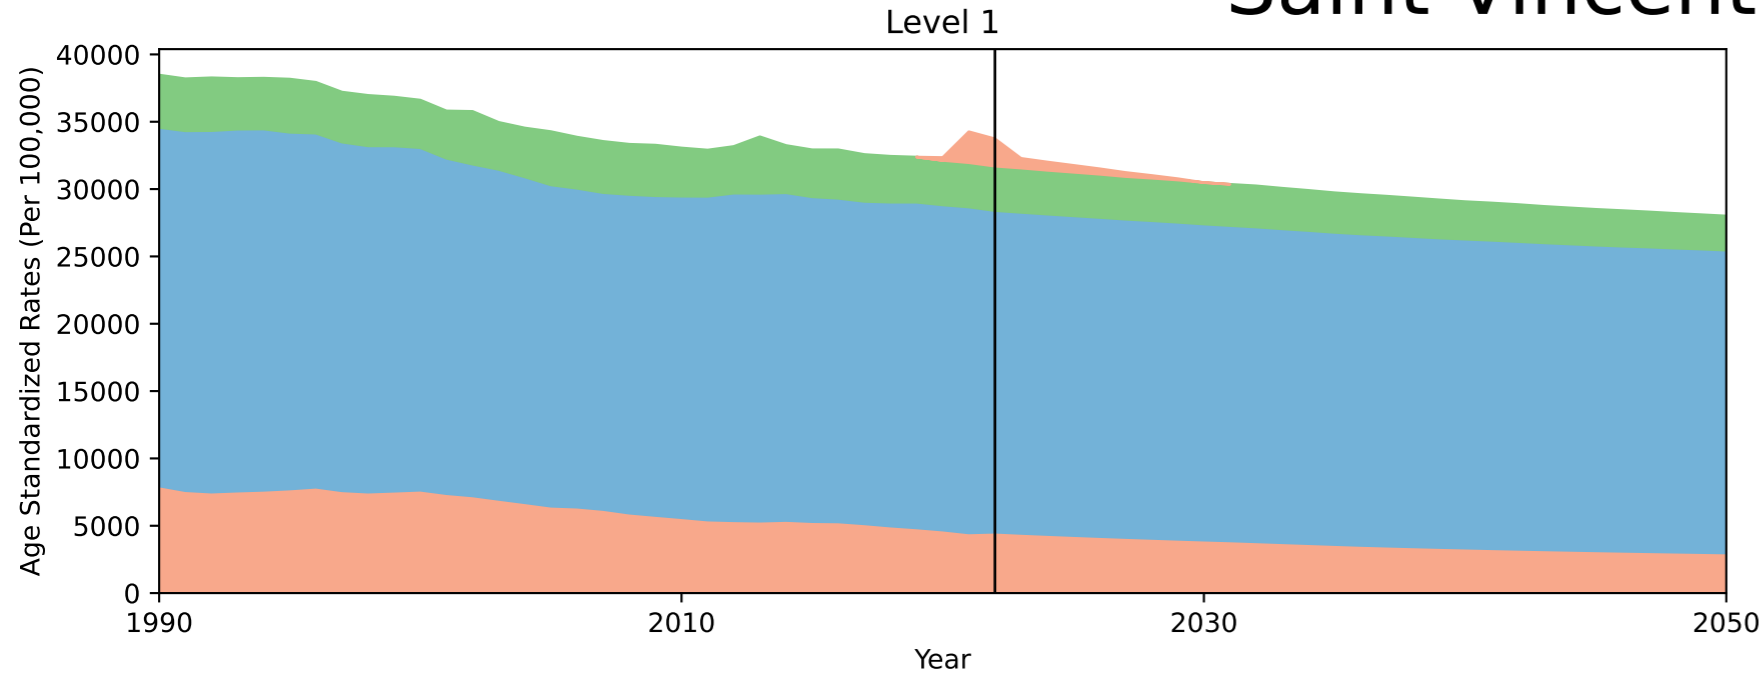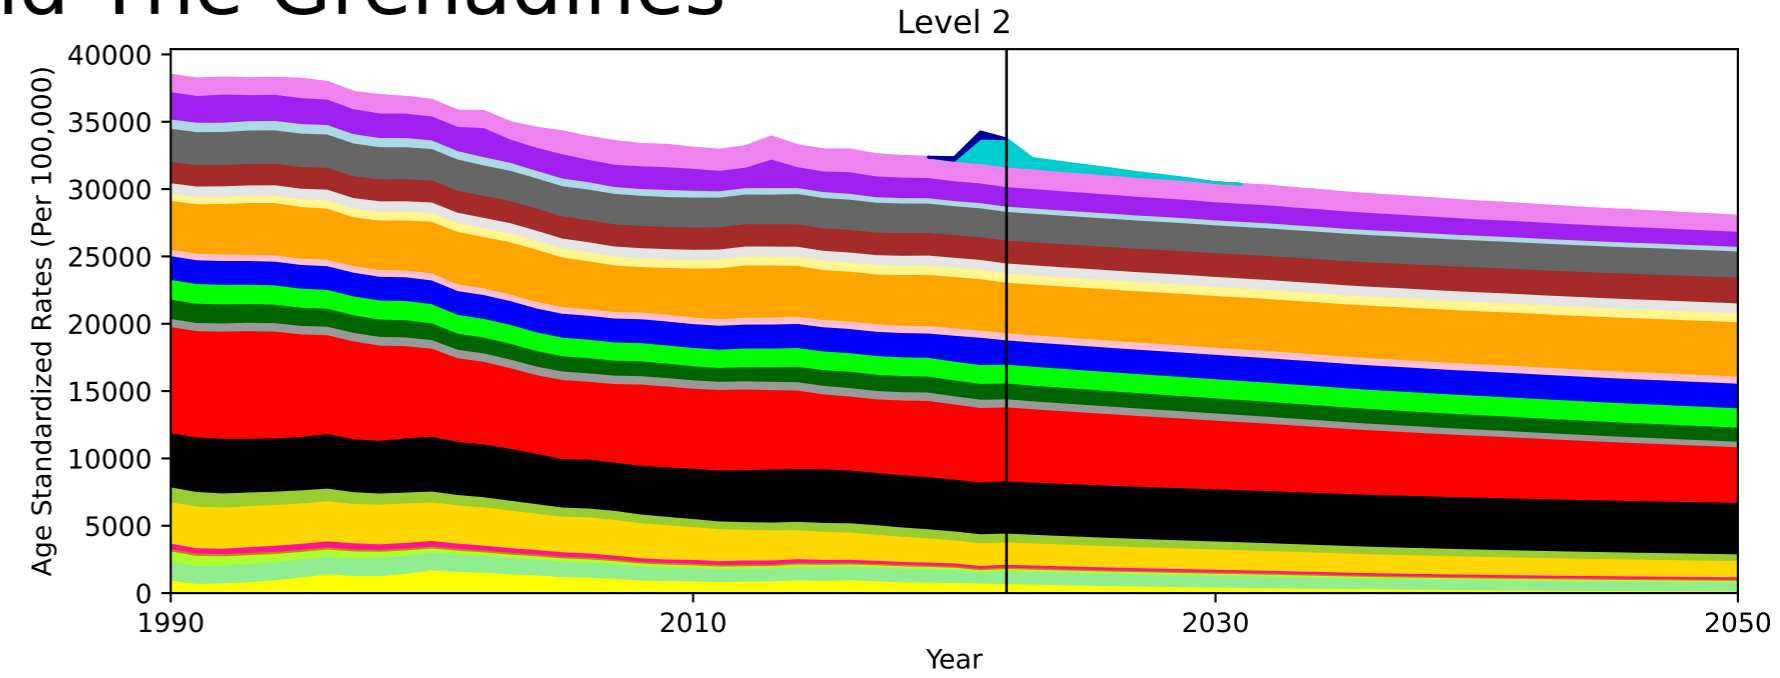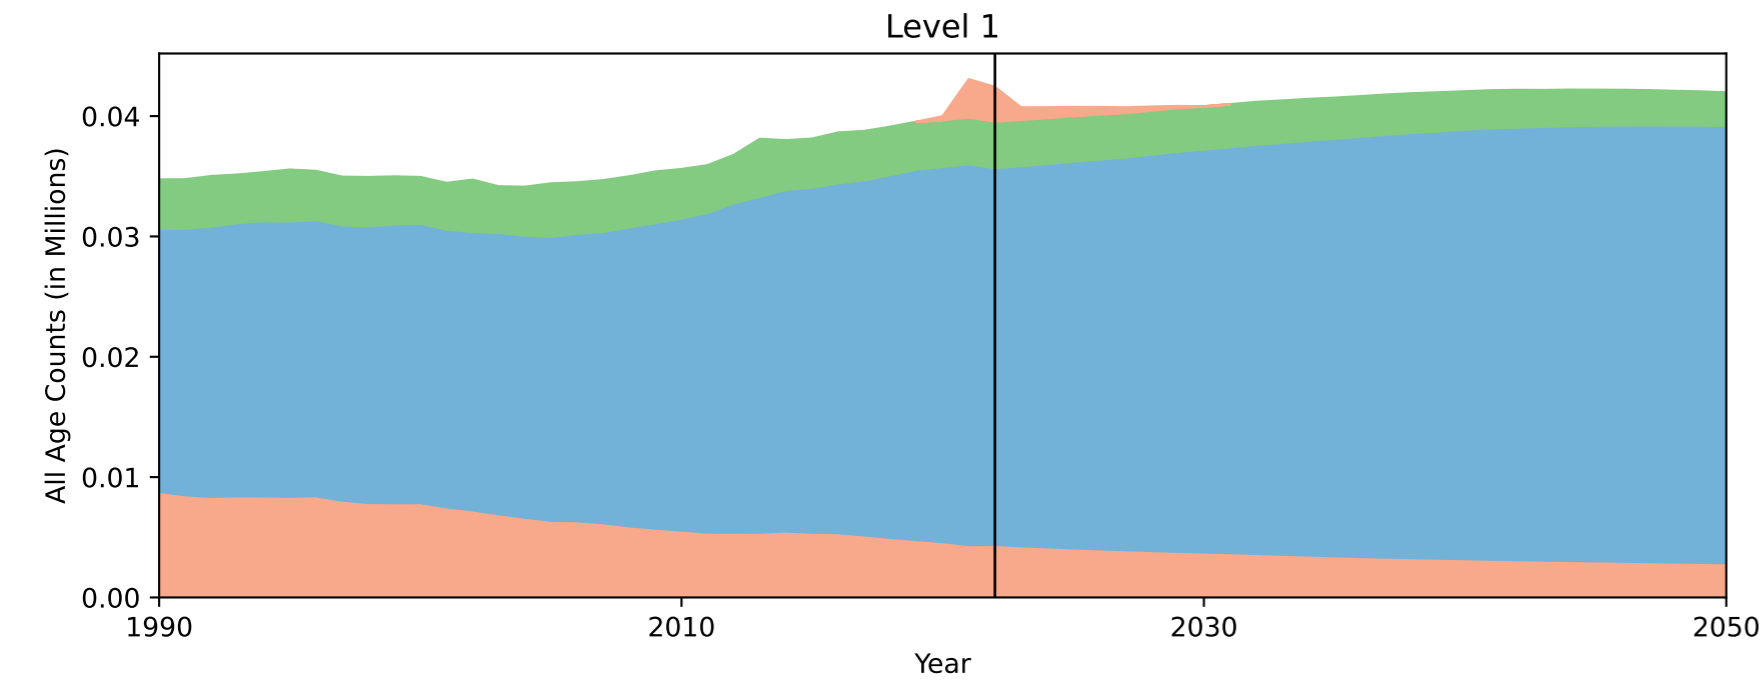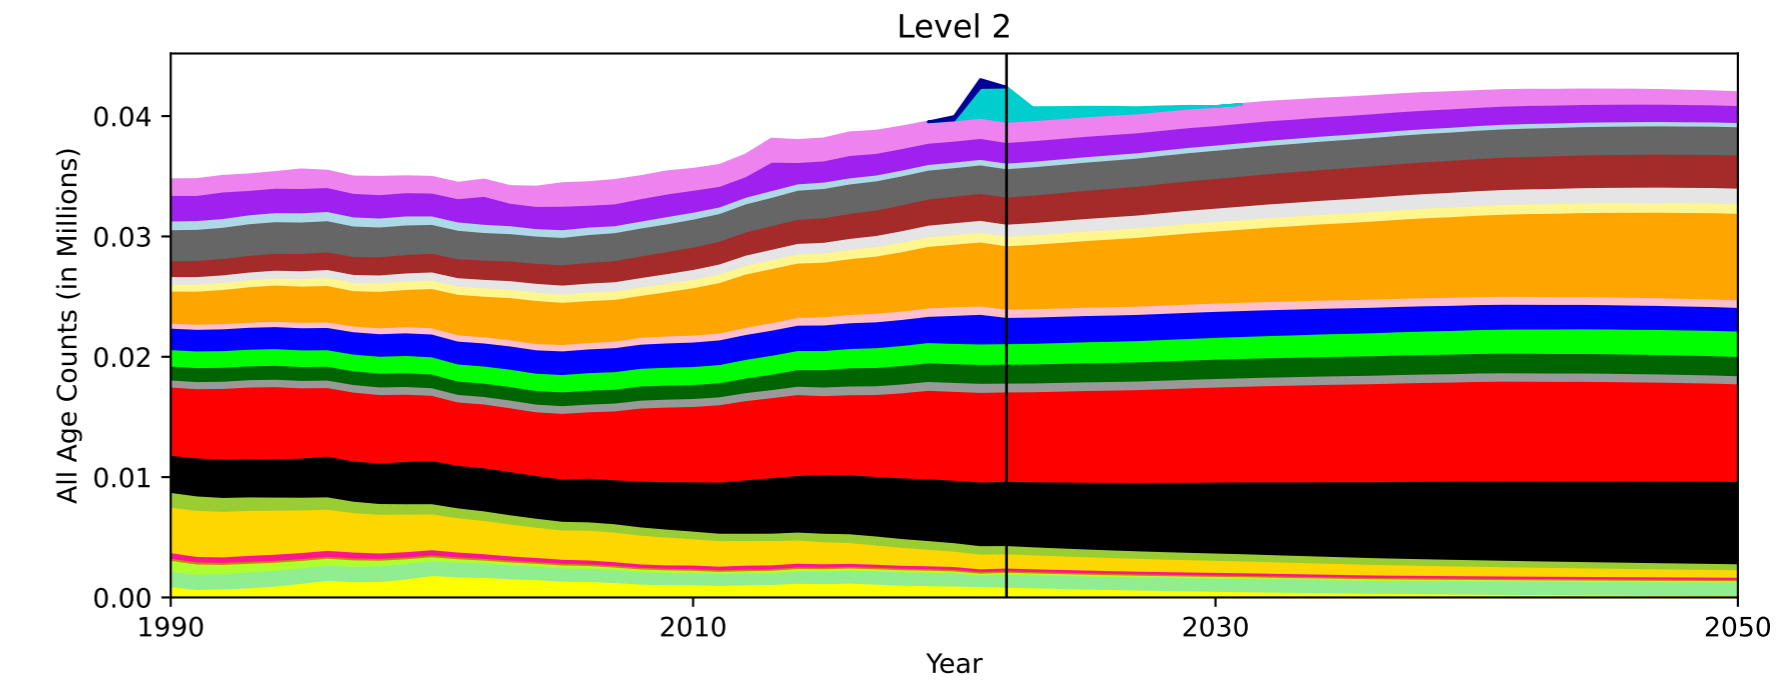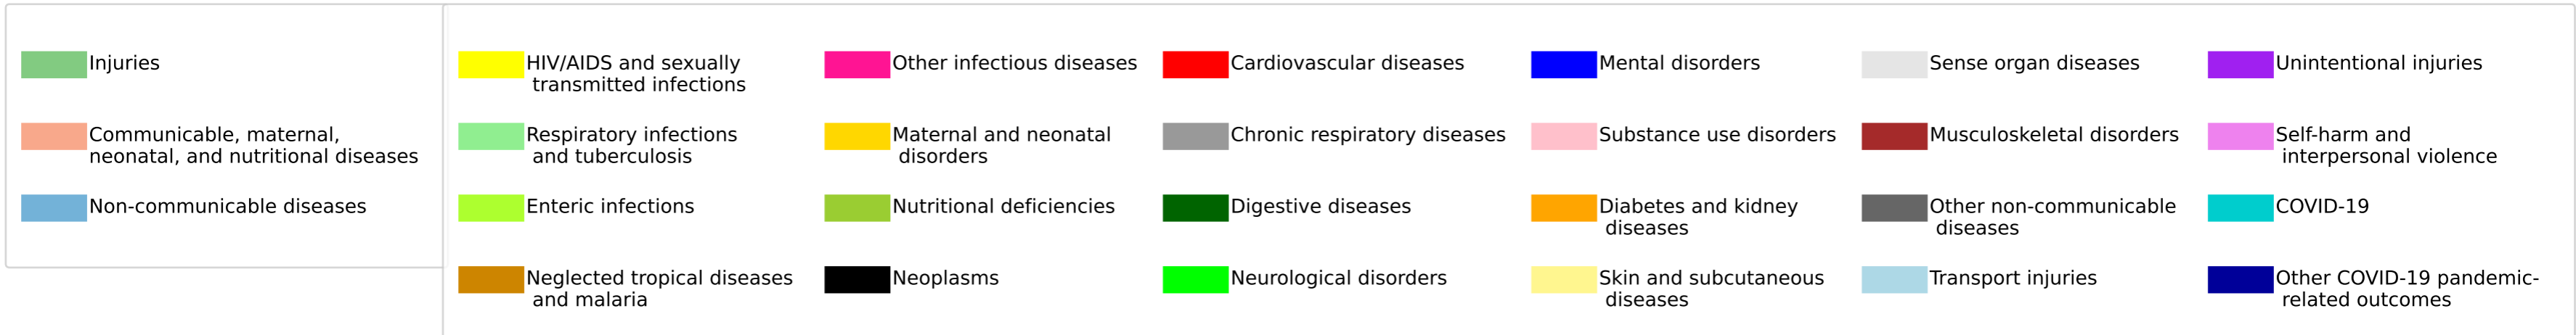

# Suriname

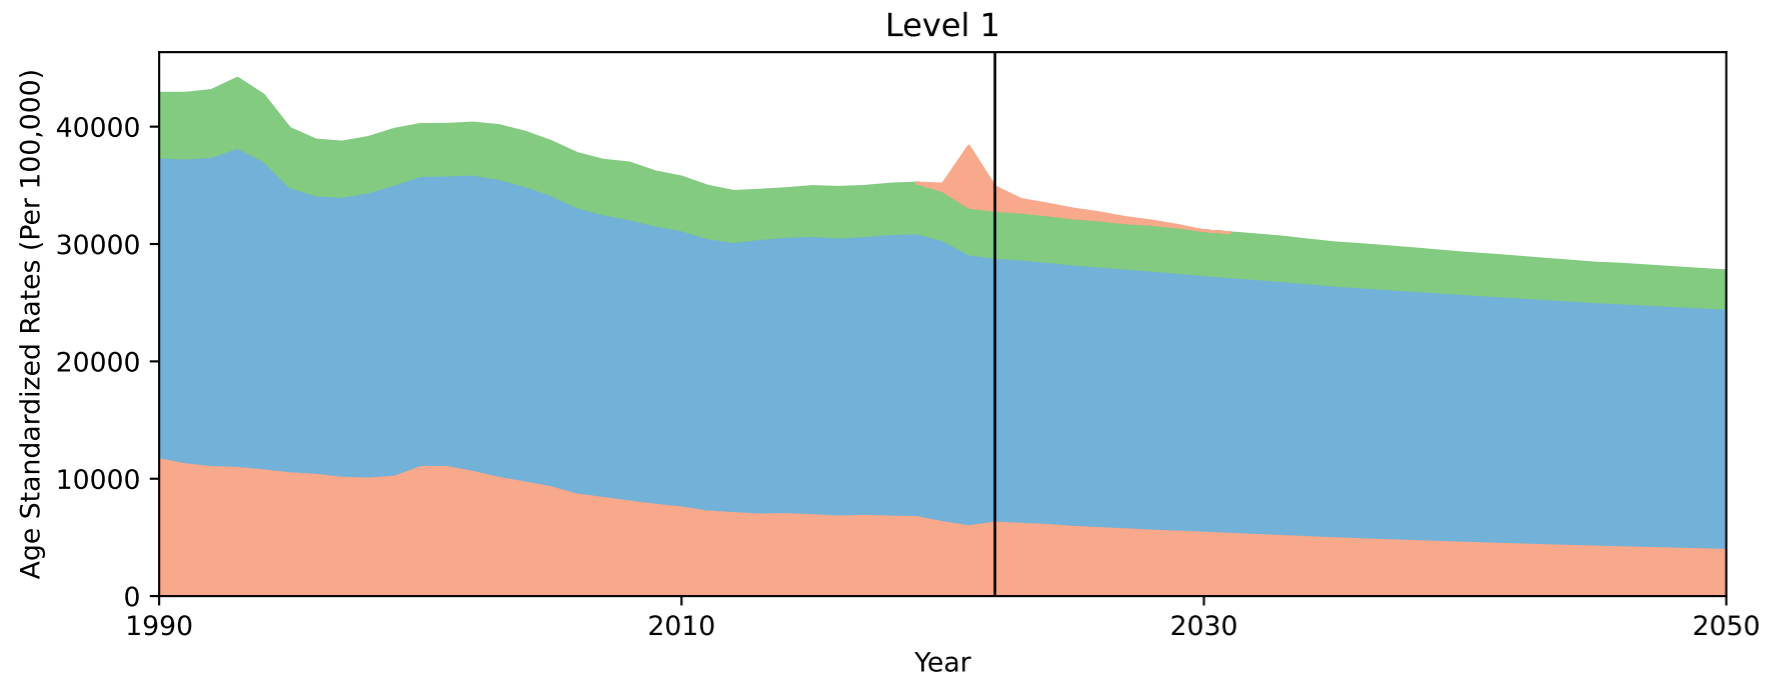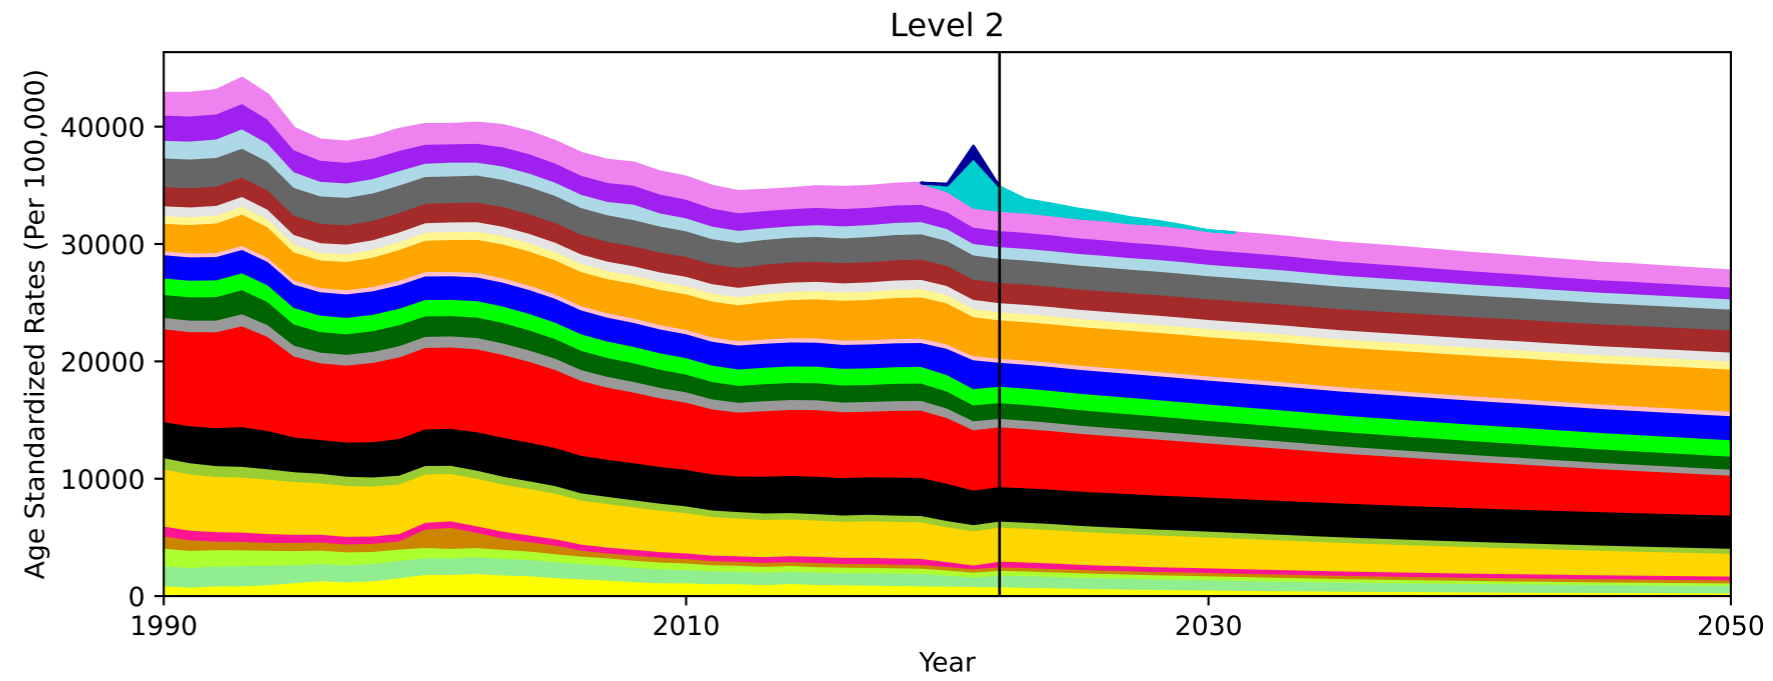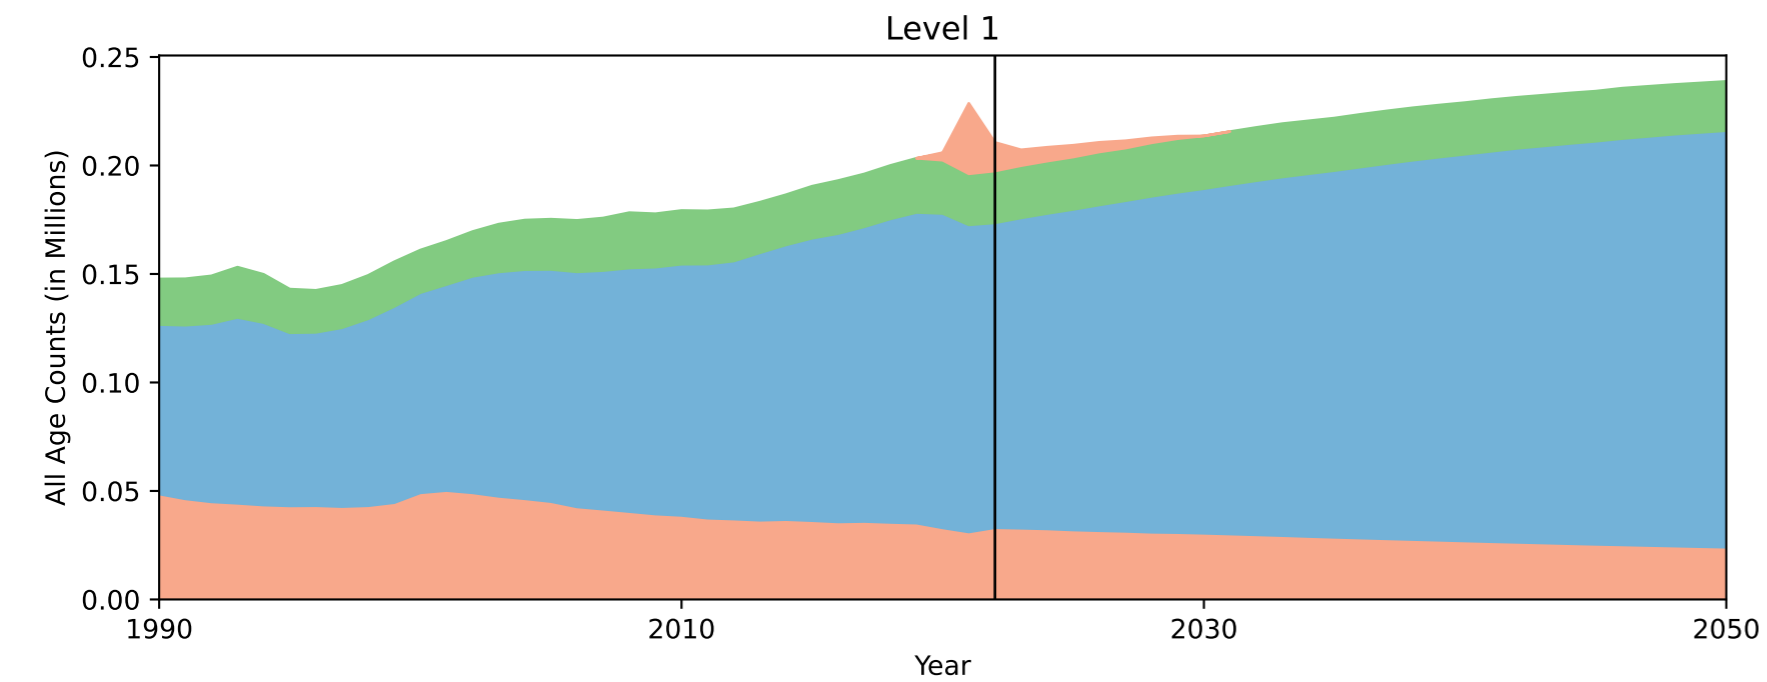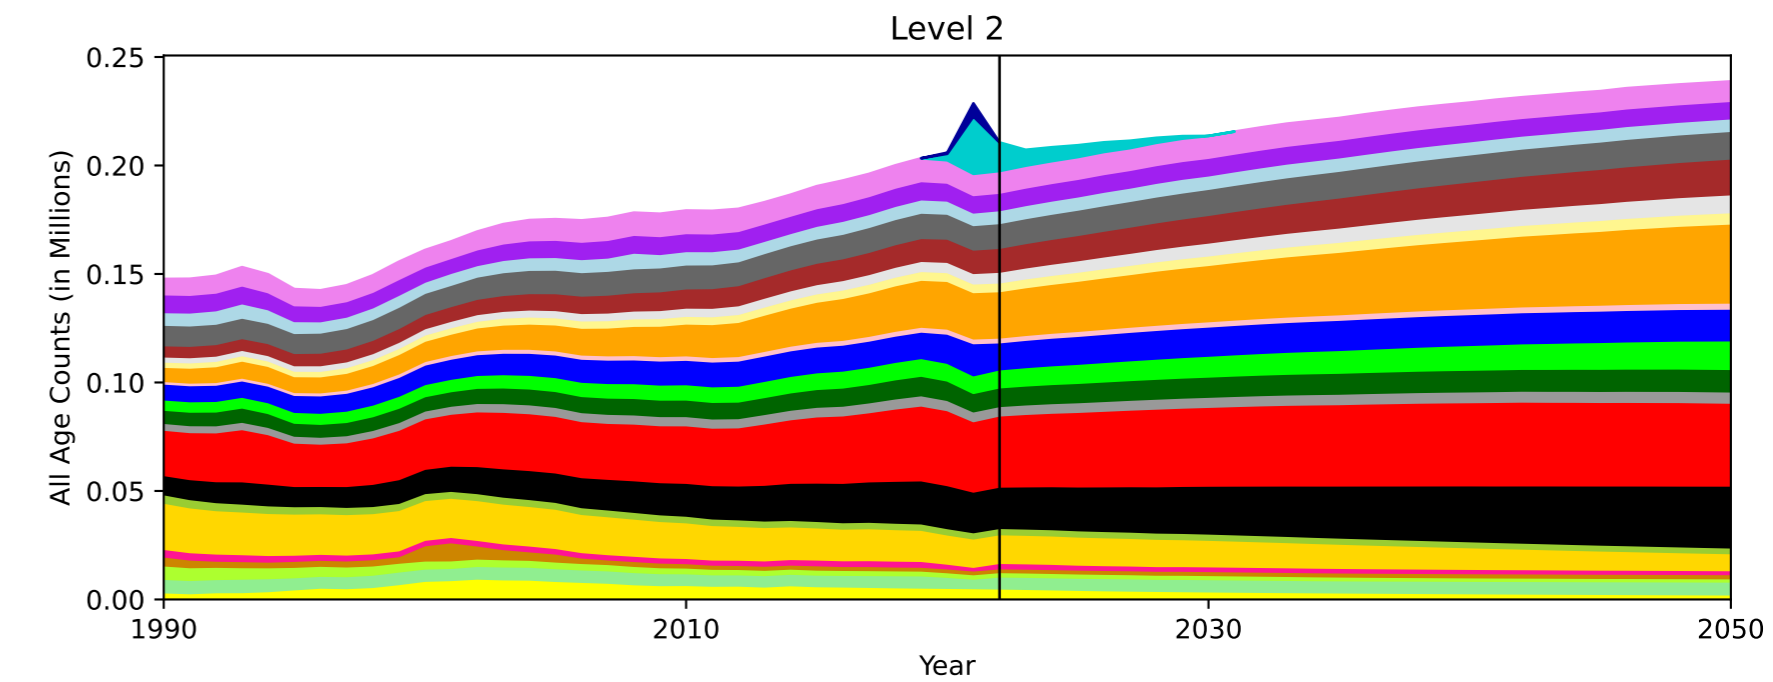

# Trinidad And Tobago

Supplemental Results Figure S4. Age-standardised DALY rates and all age DALY counts and by Level 1 and Level 2 causes, 1990–2050

330

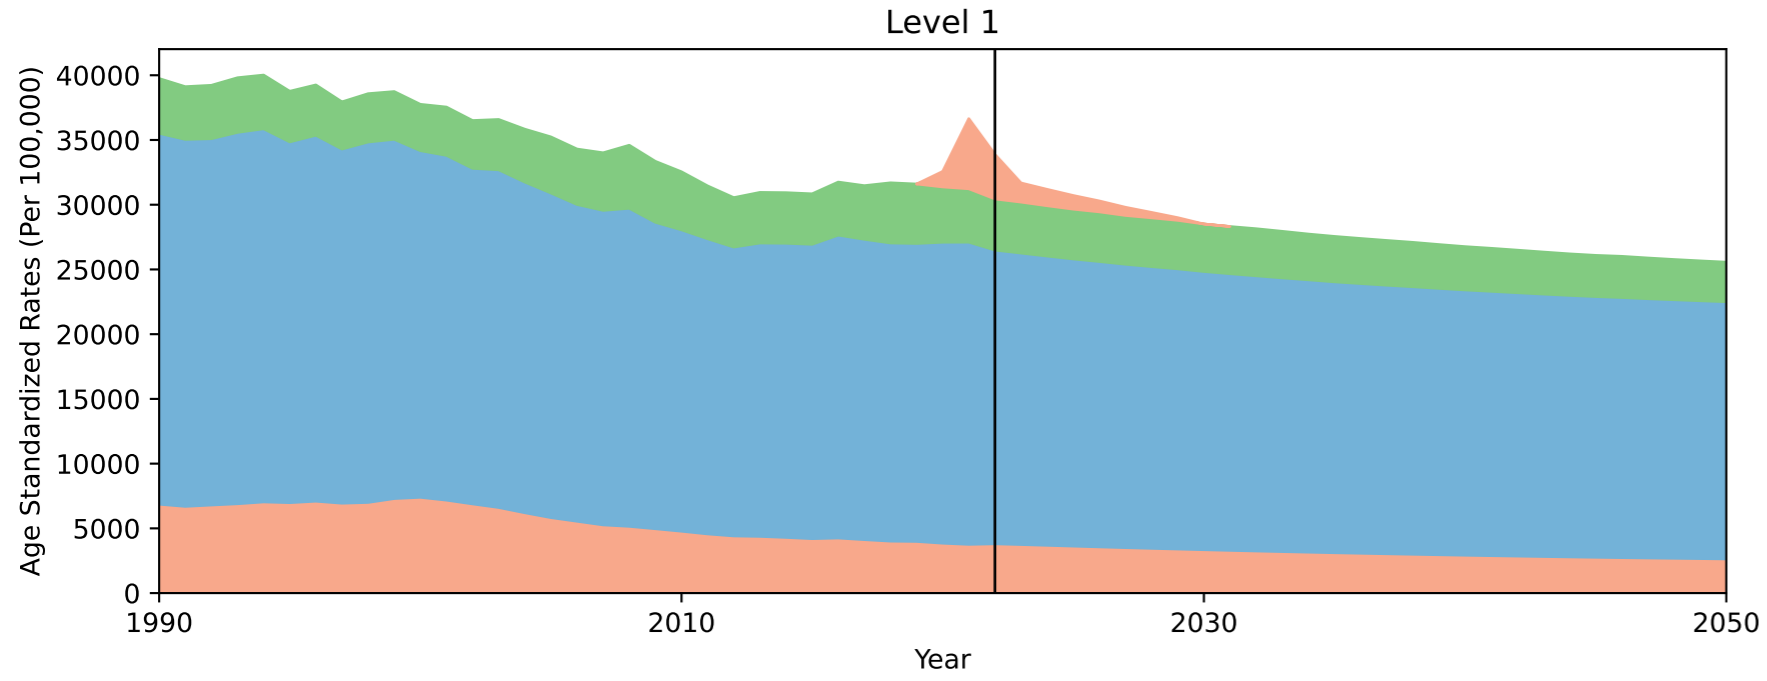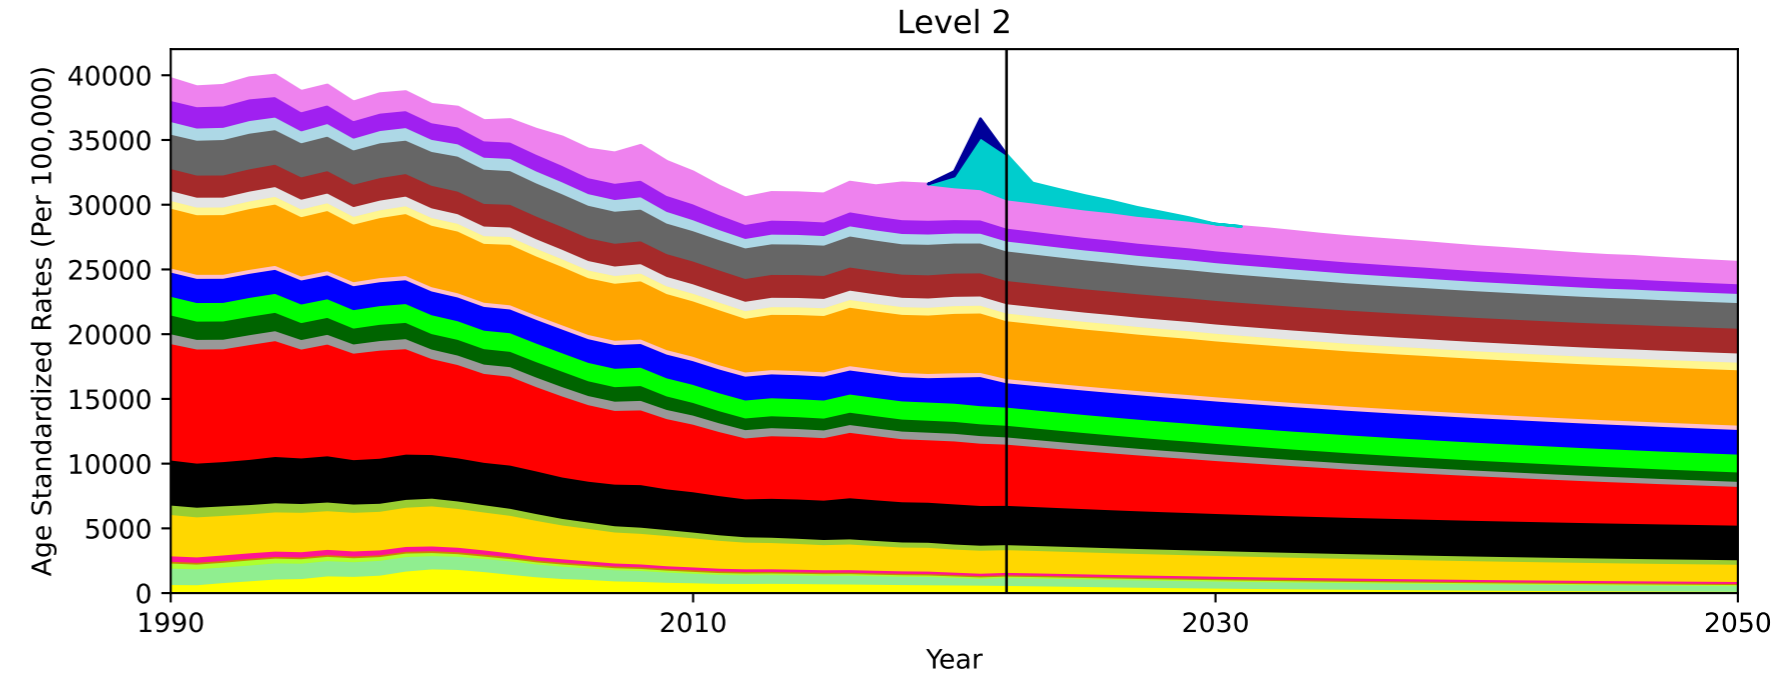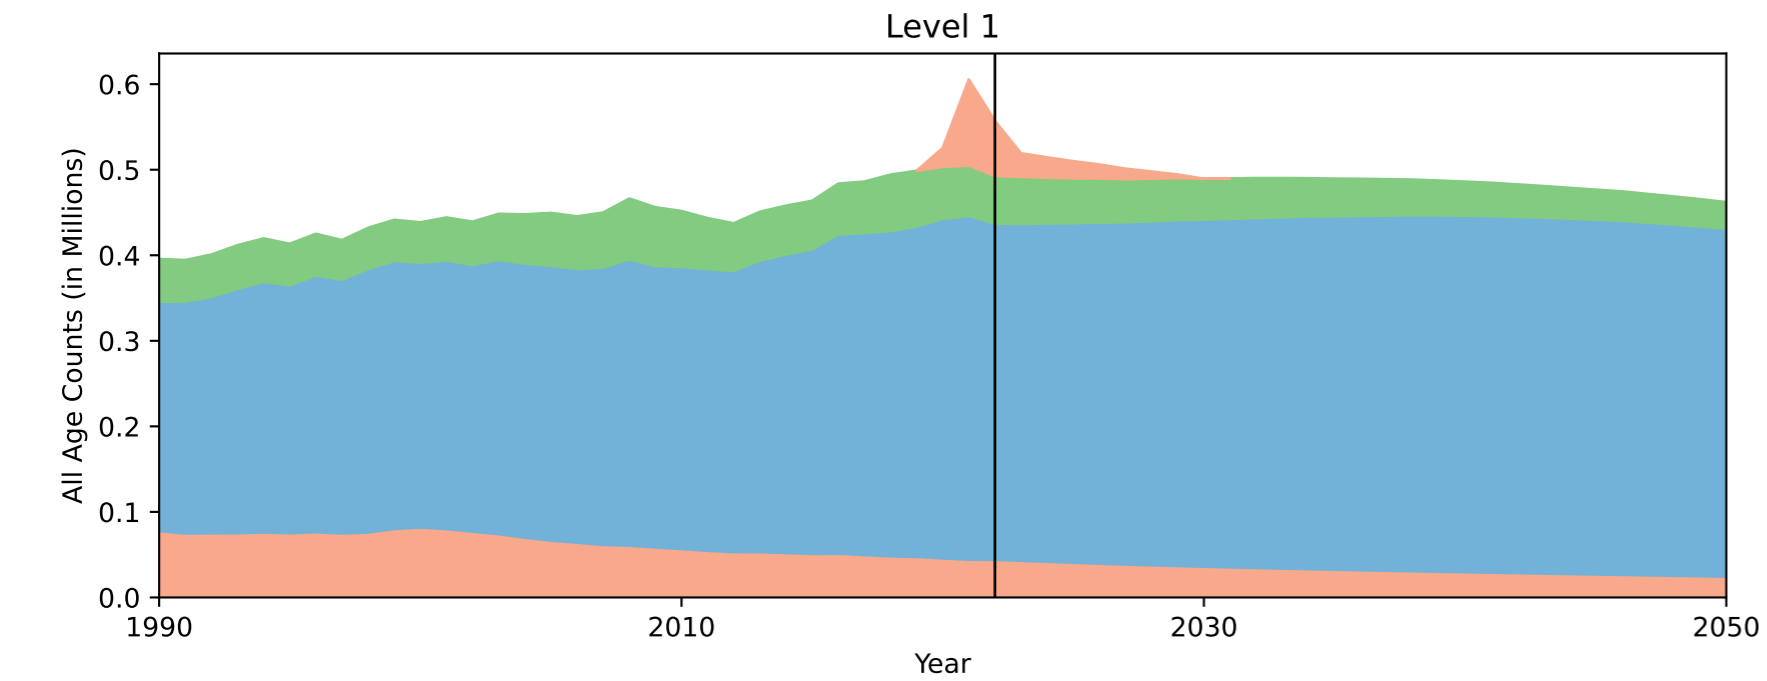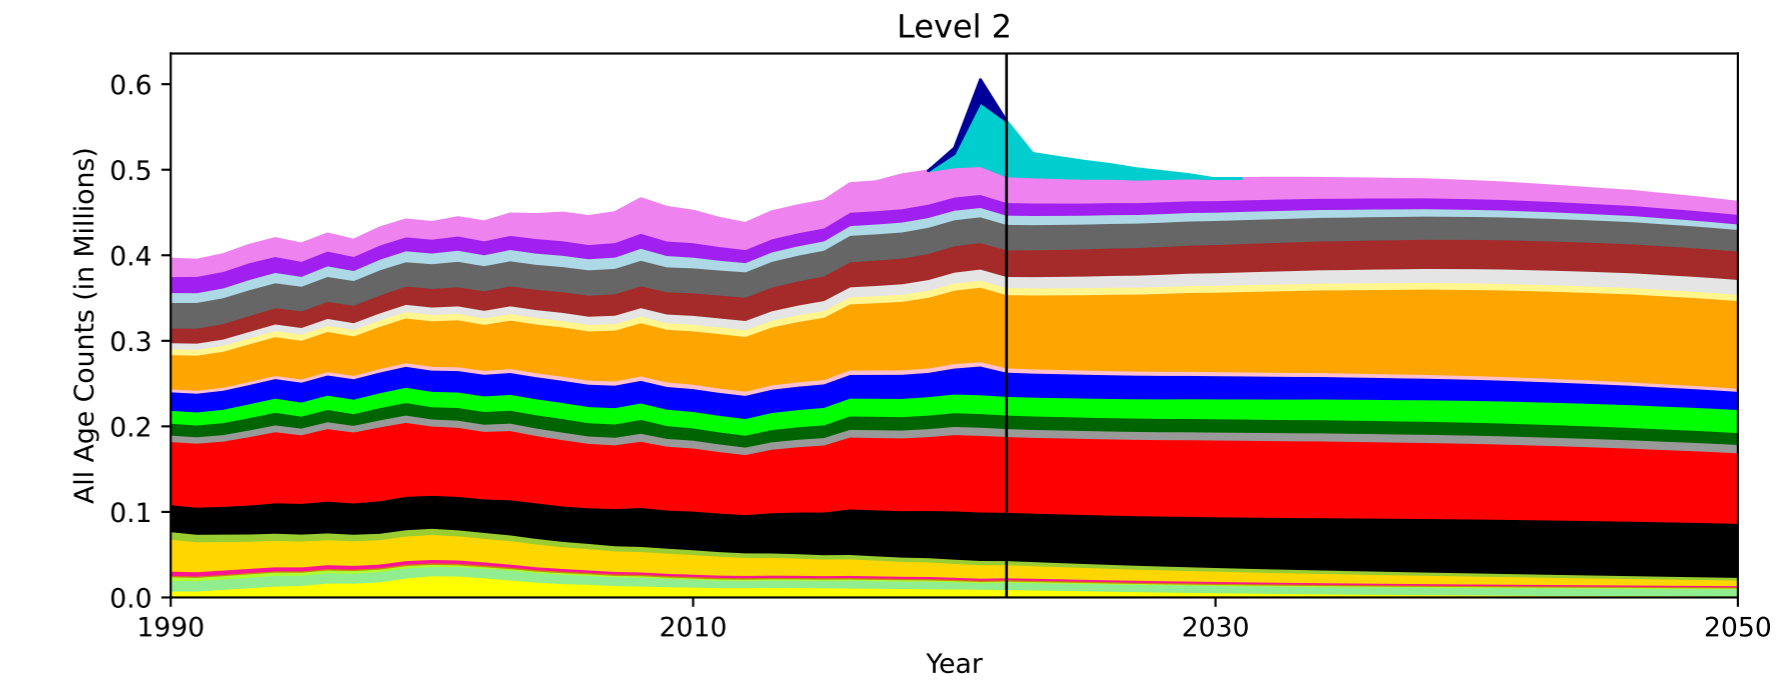

# Virgin Islands

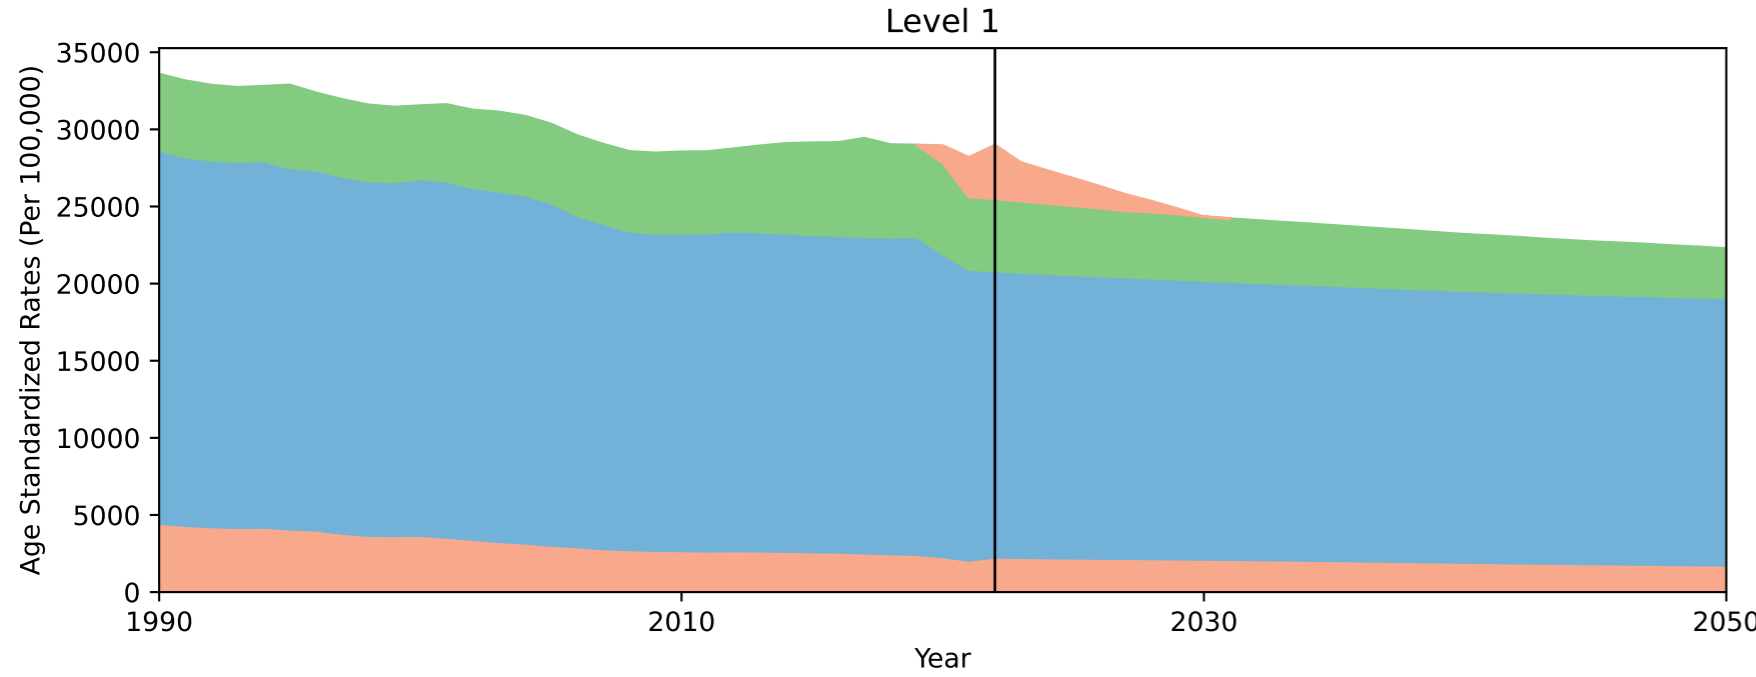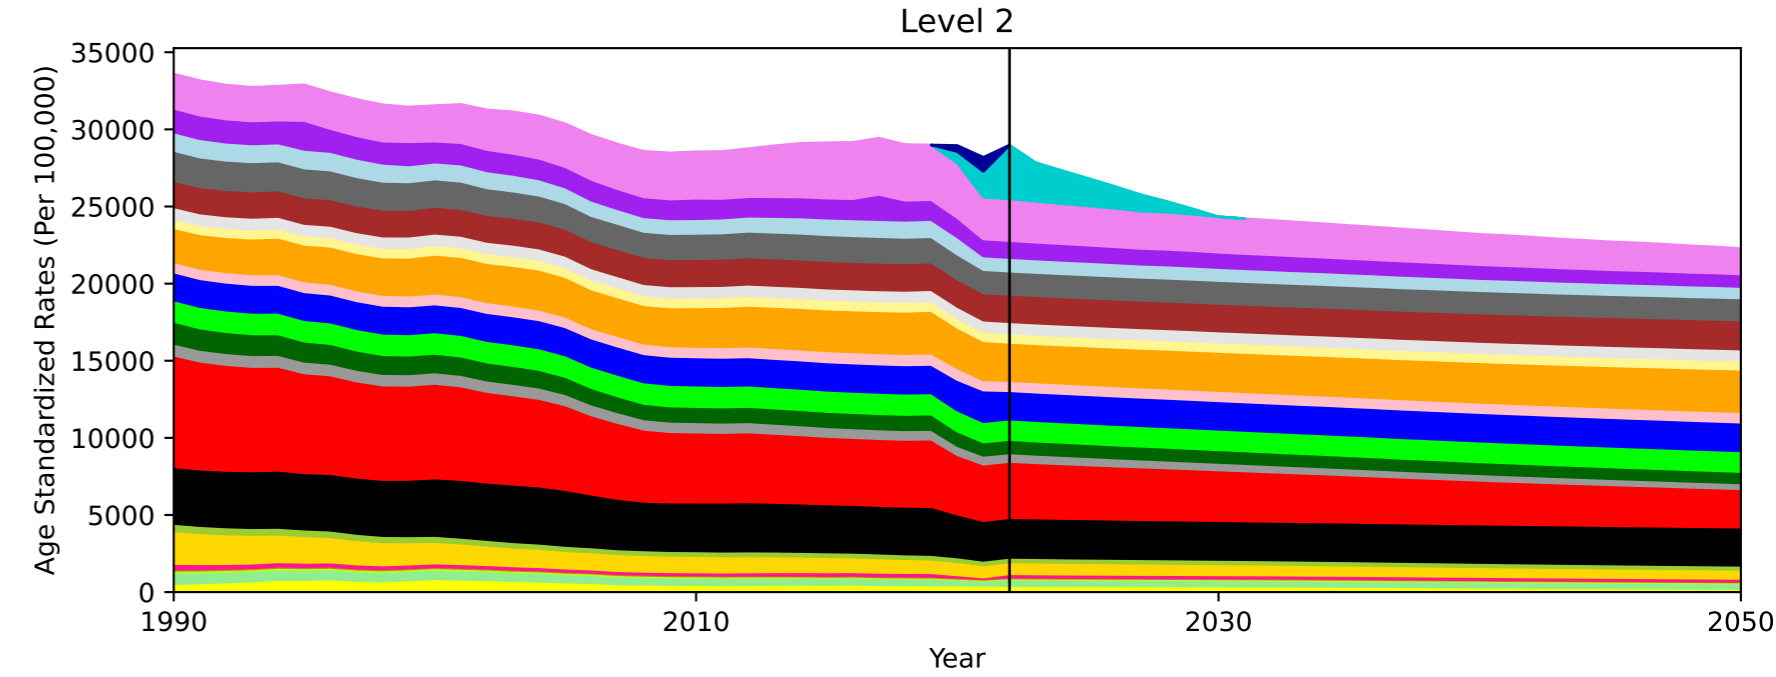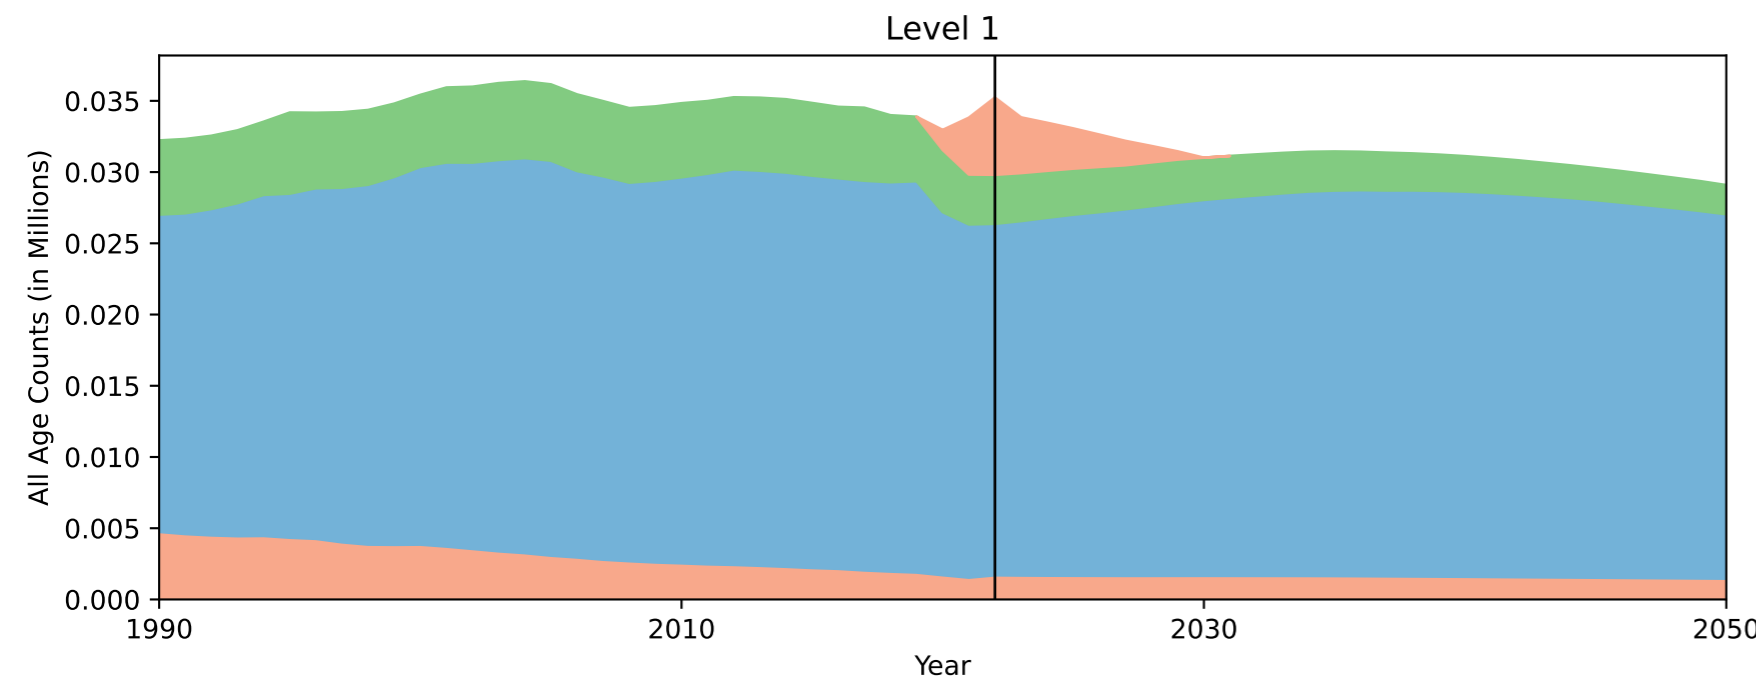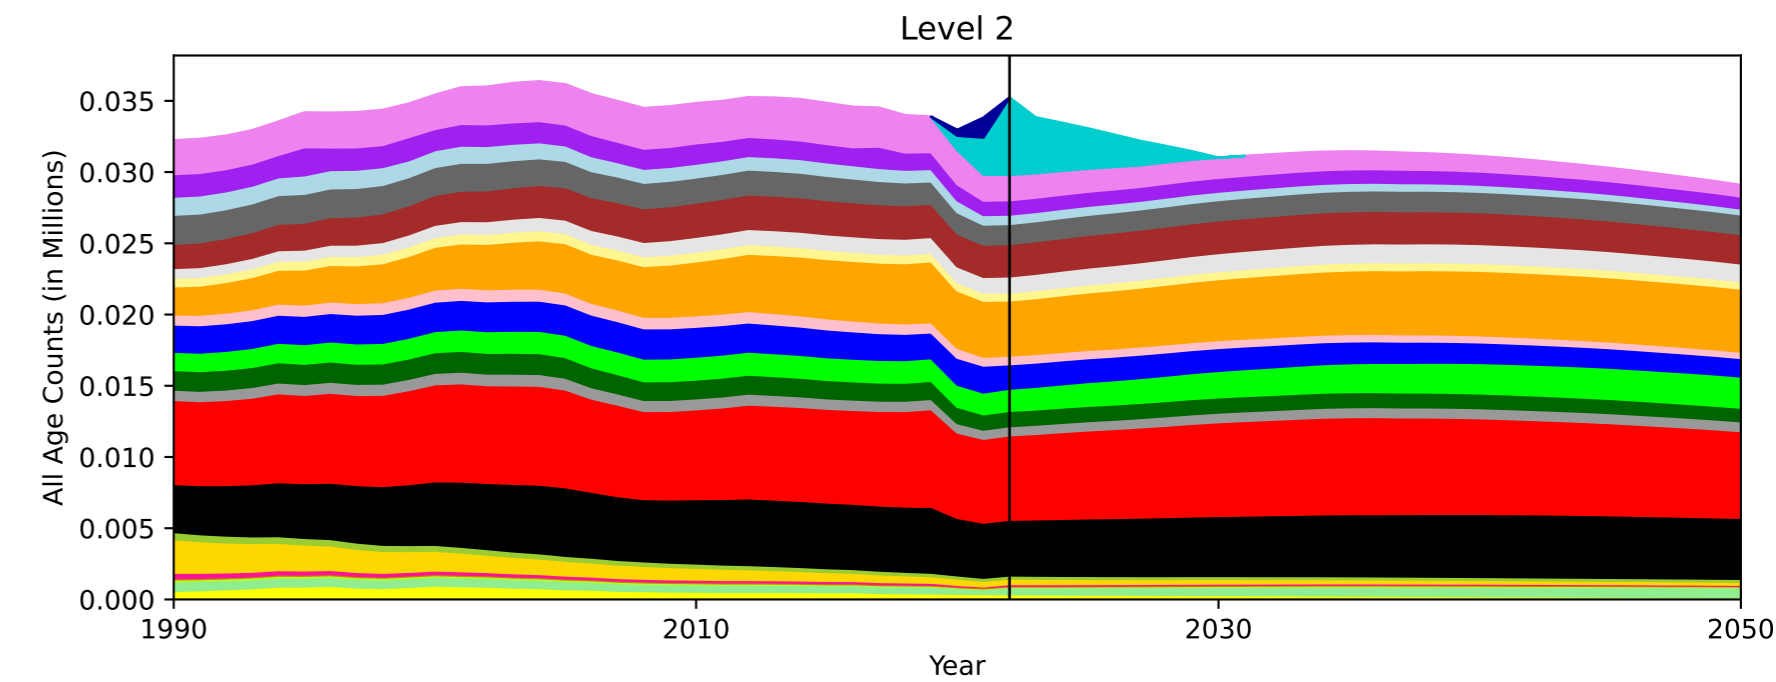

# Colombia

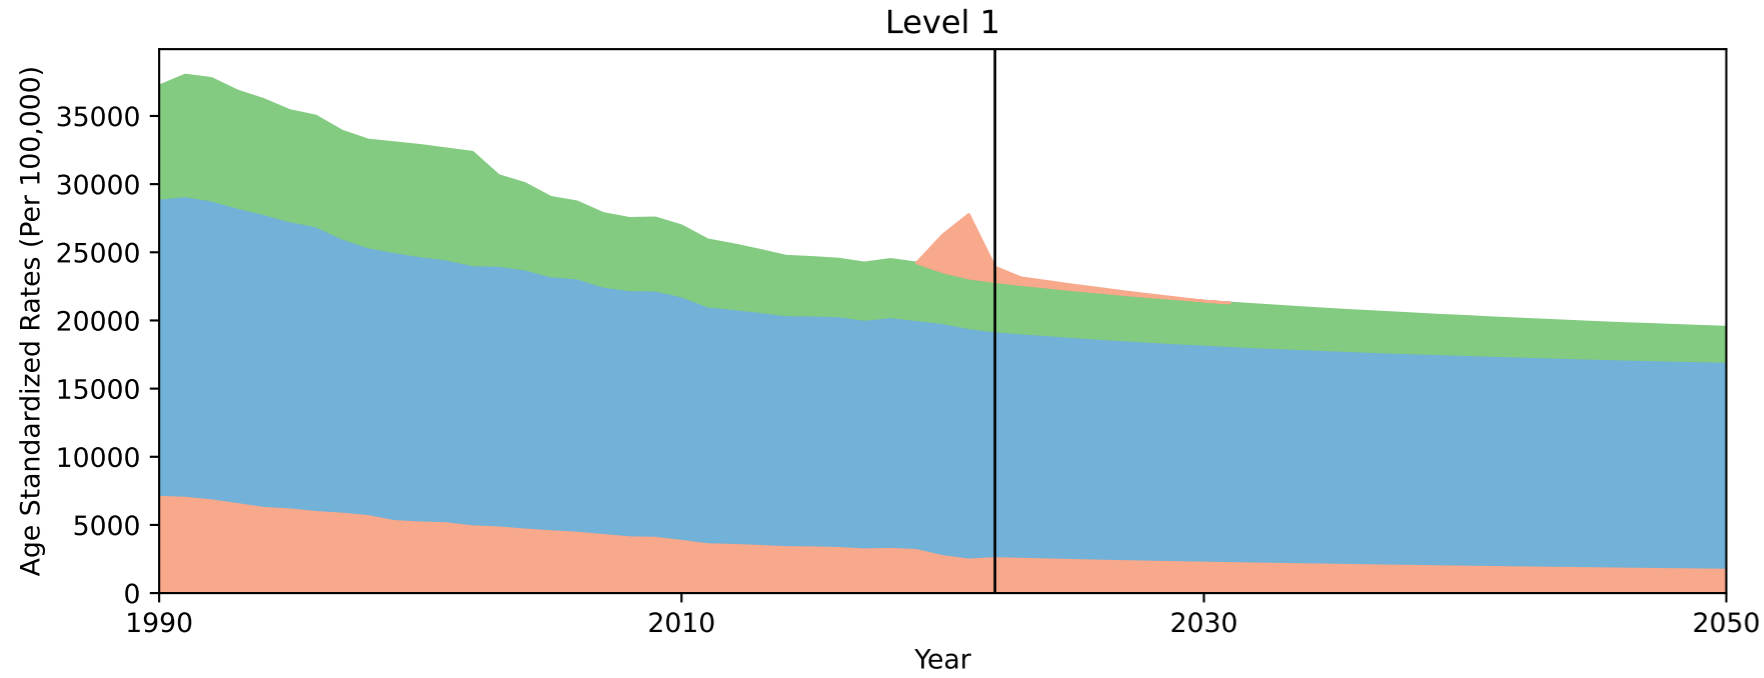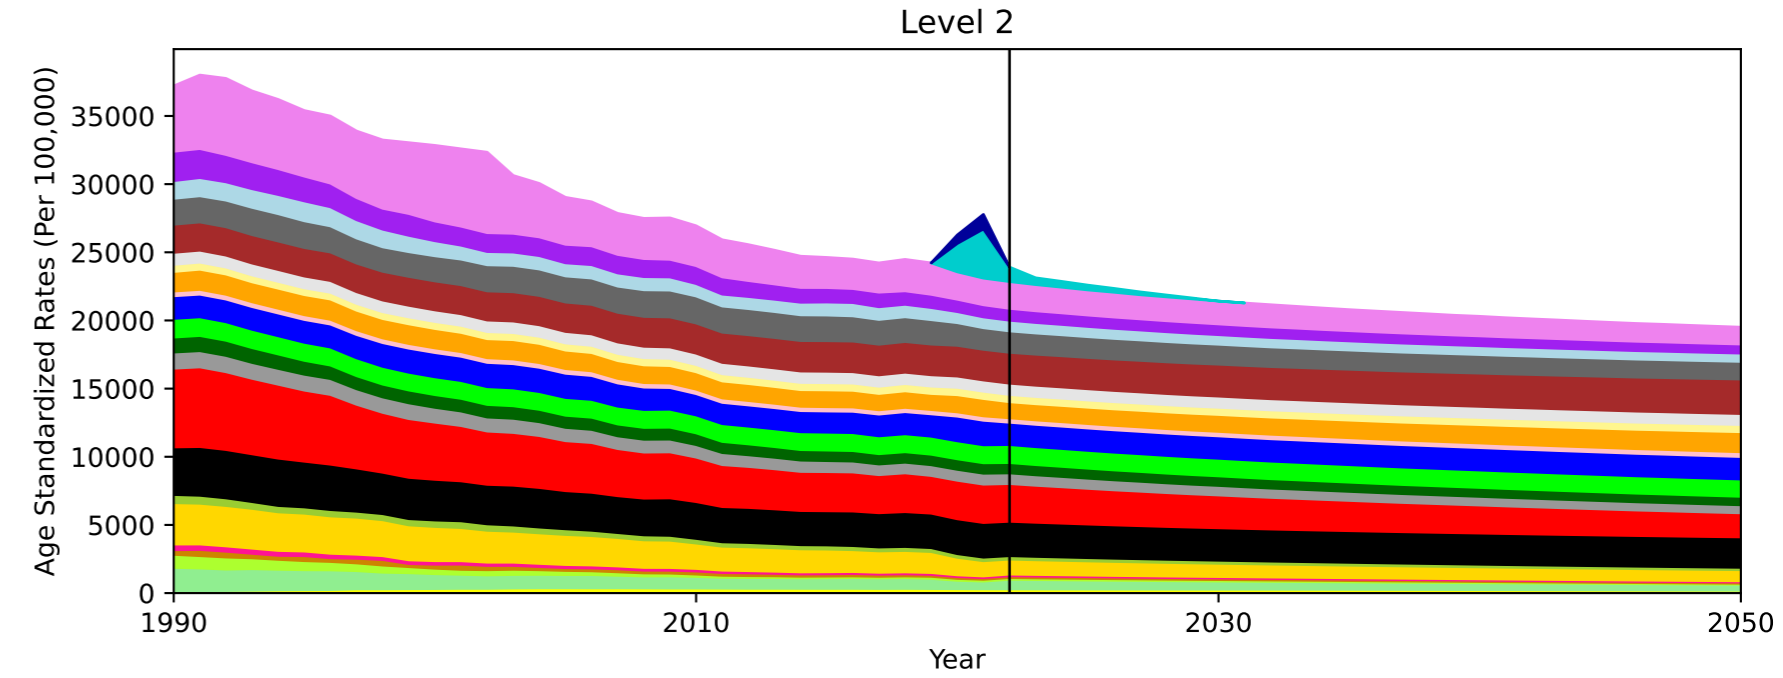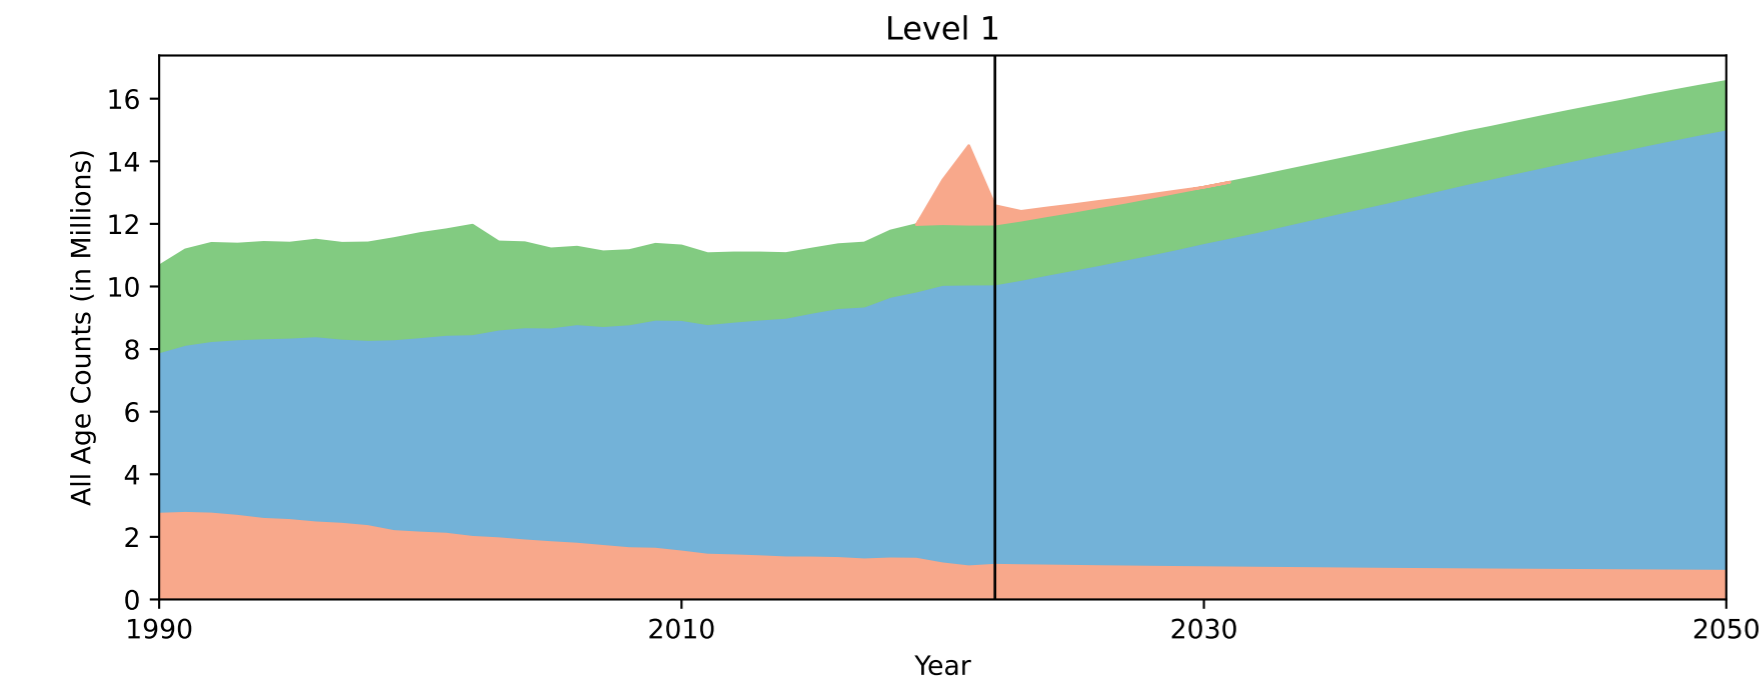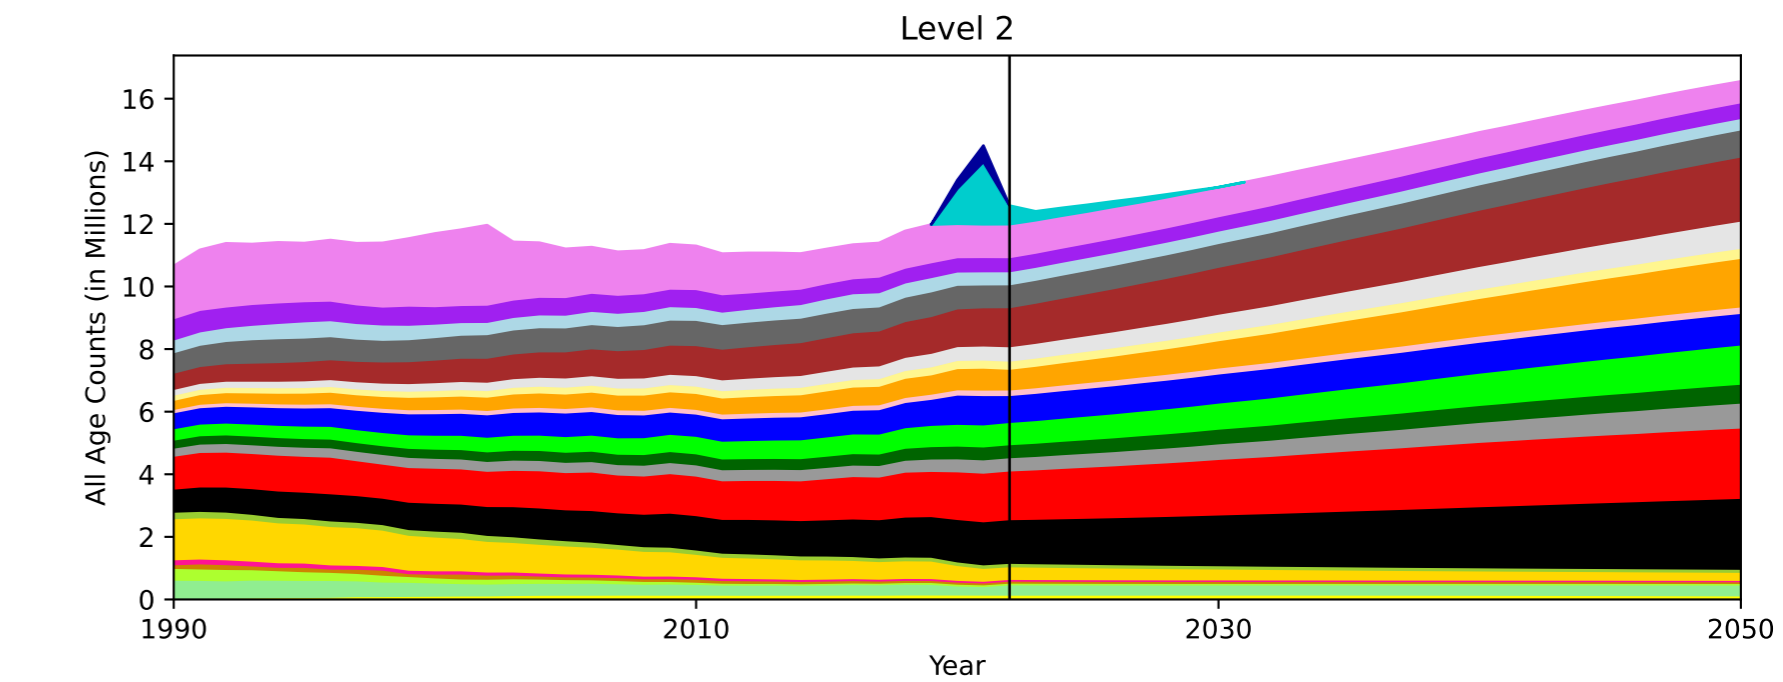

# Costa Rica

Level 1

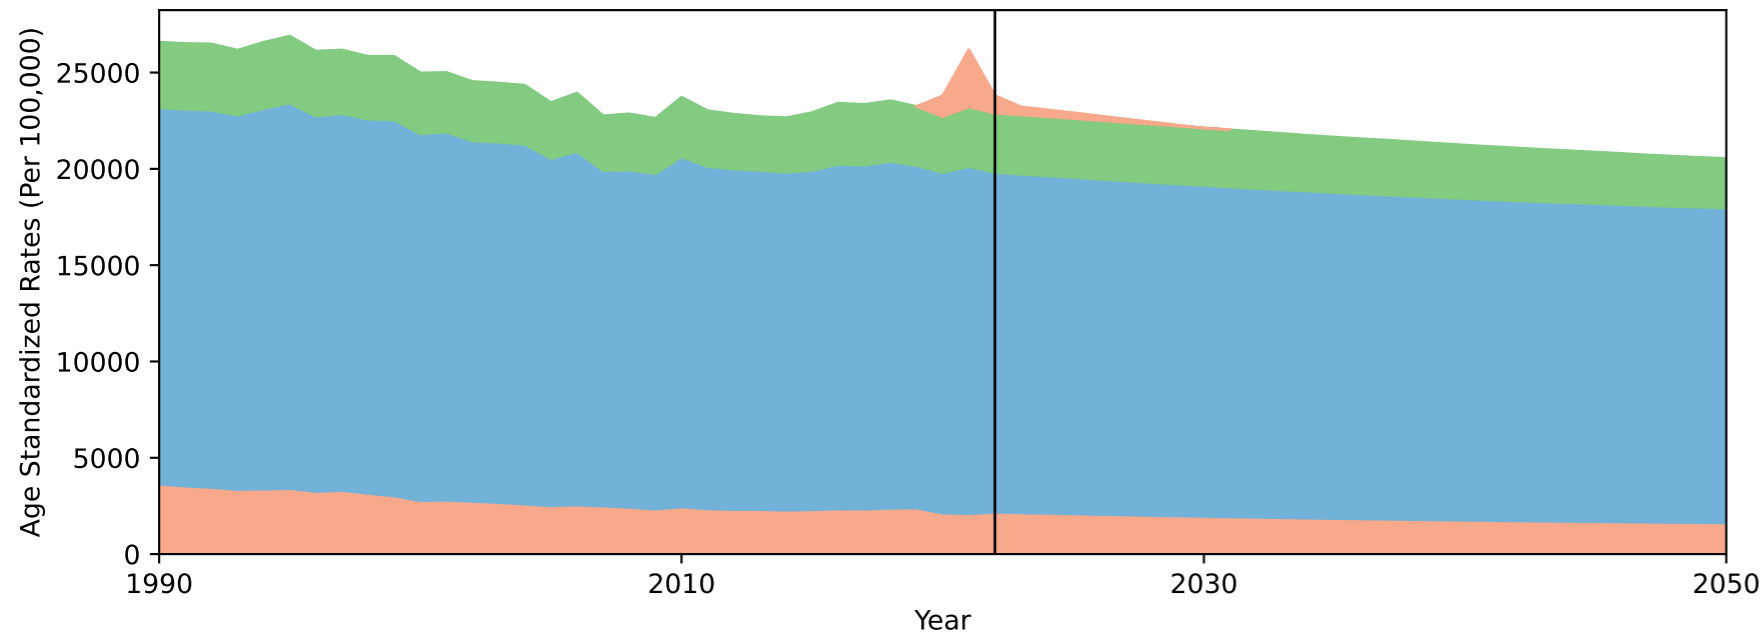

Level 2

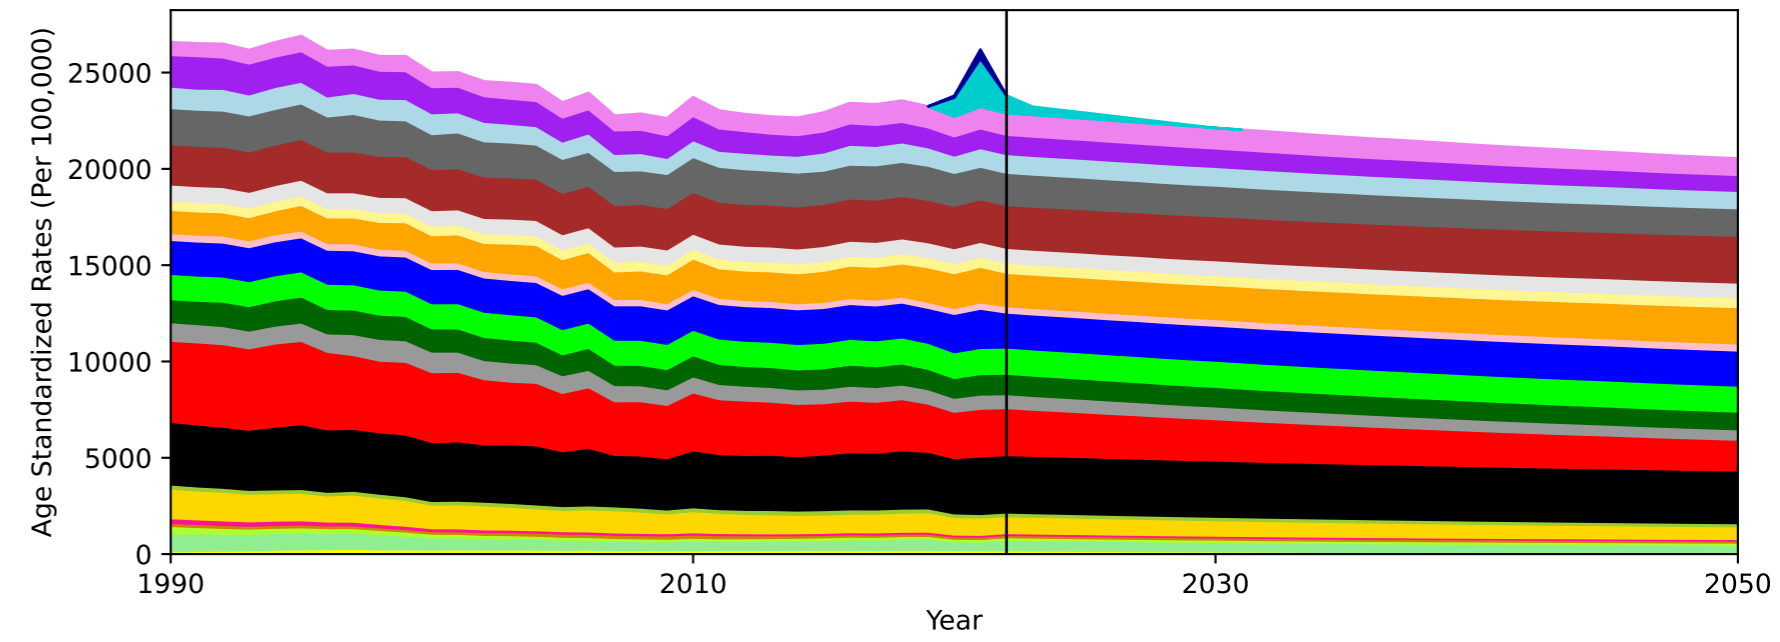

Level 1

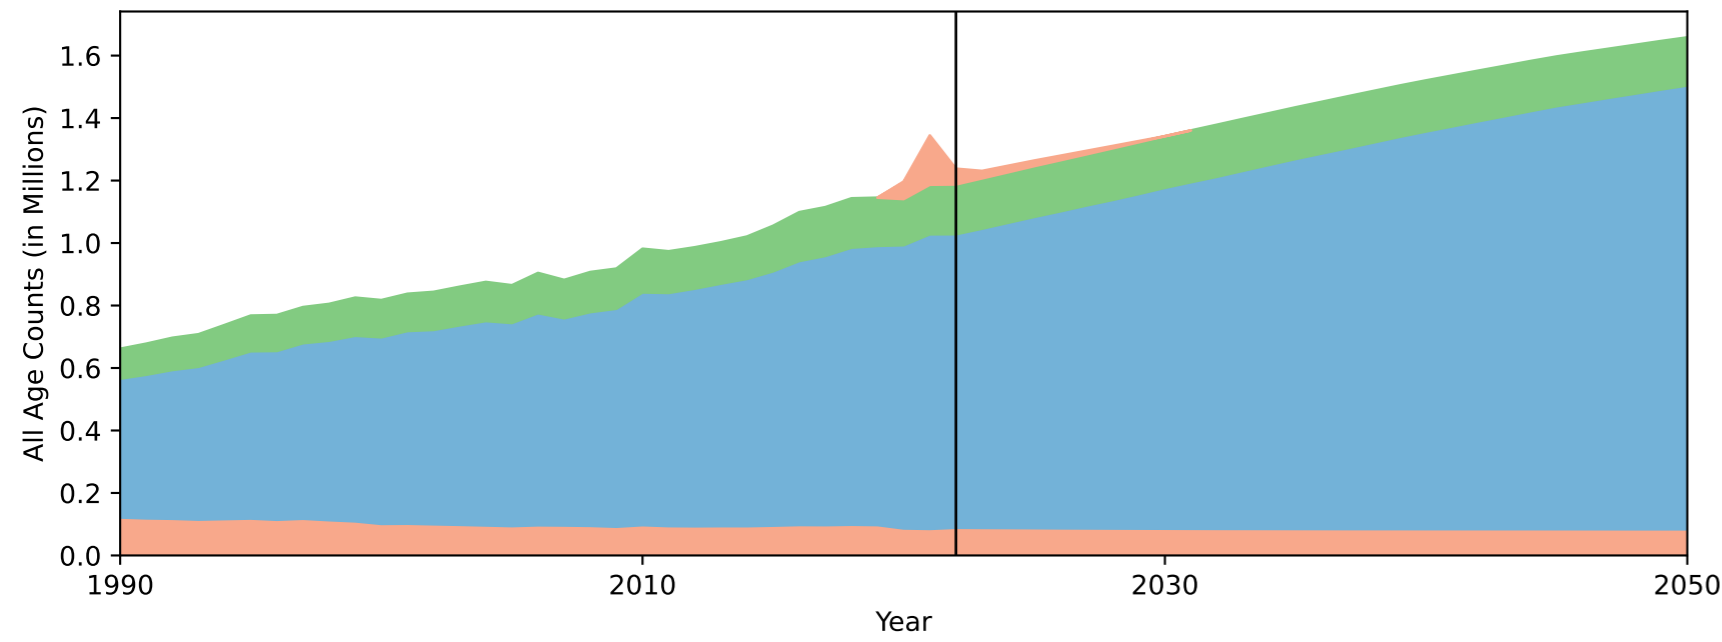

Level 2

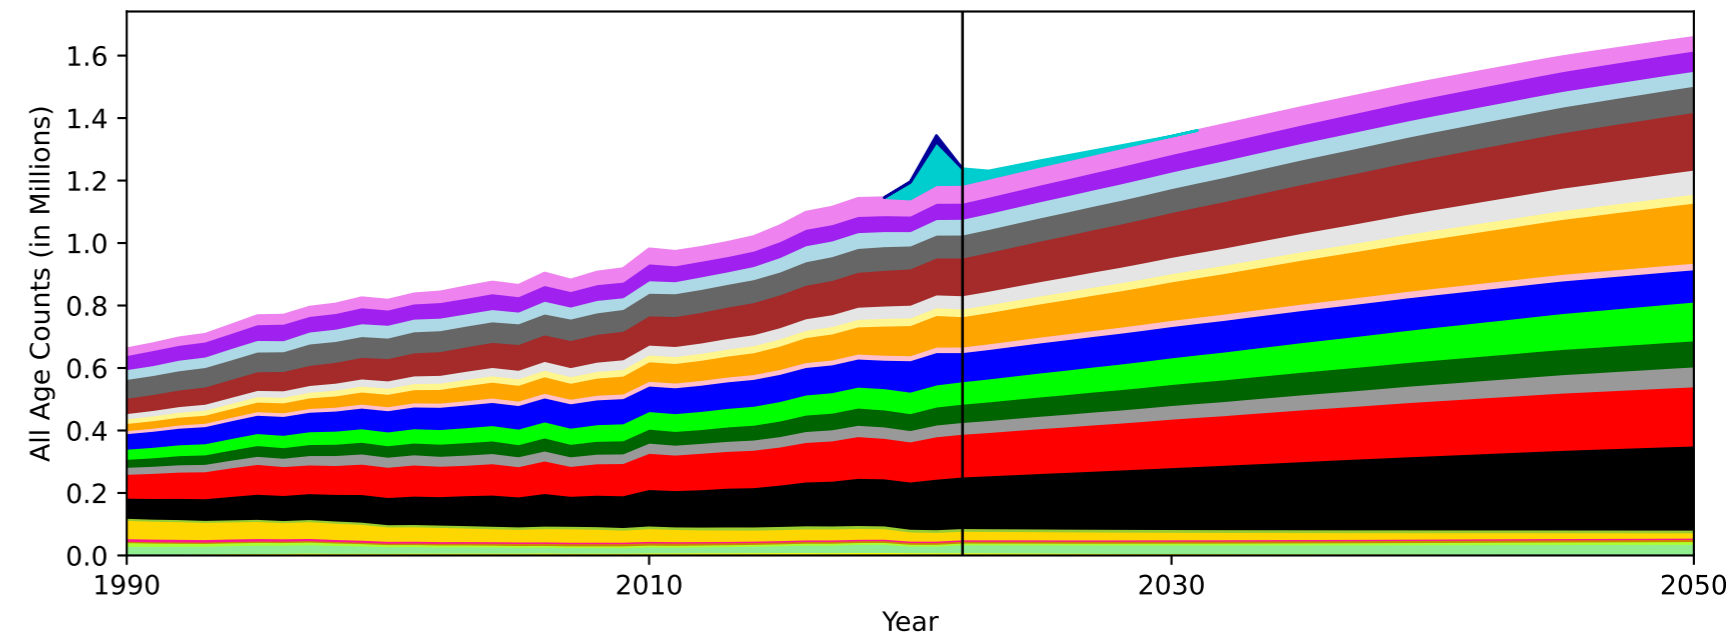

Level 1

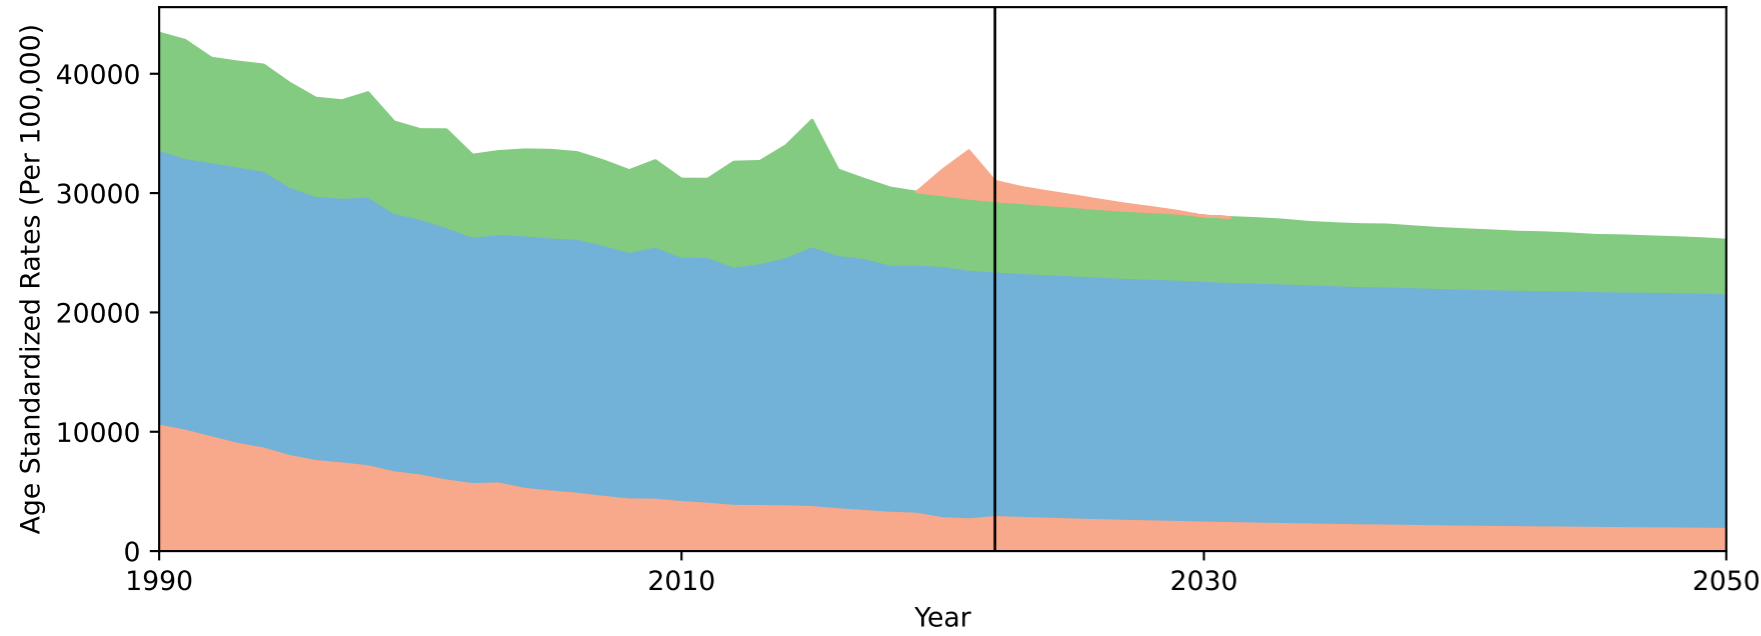

Level 2

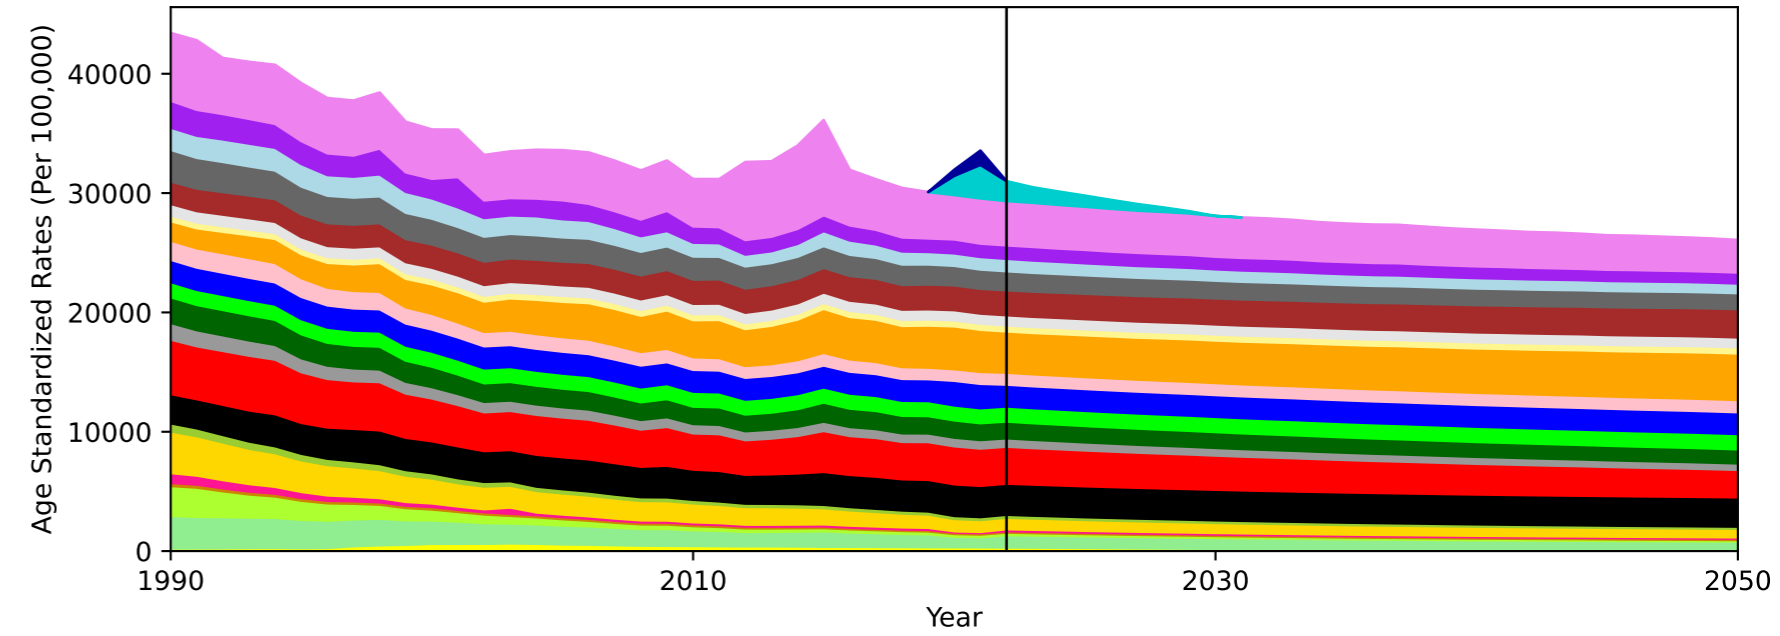

Level 1

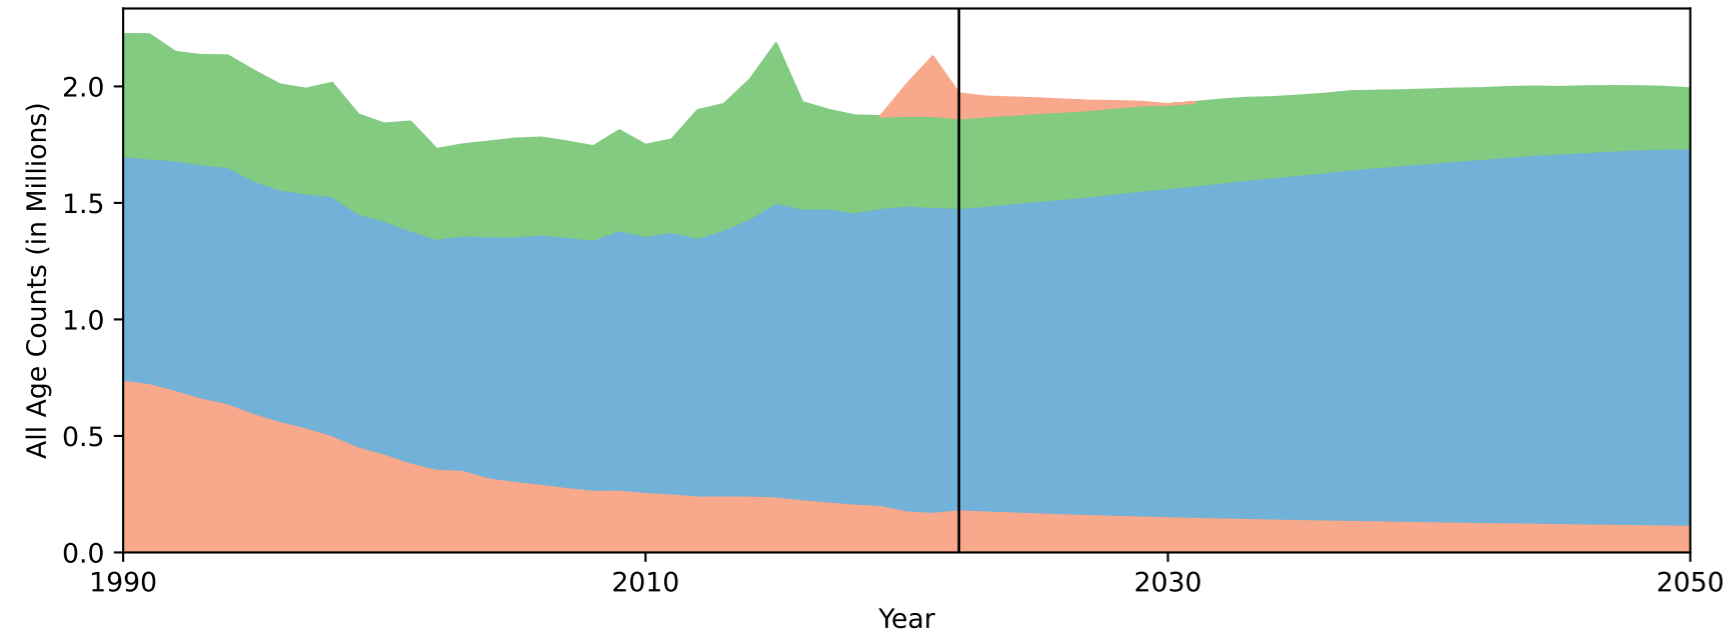

Level 2

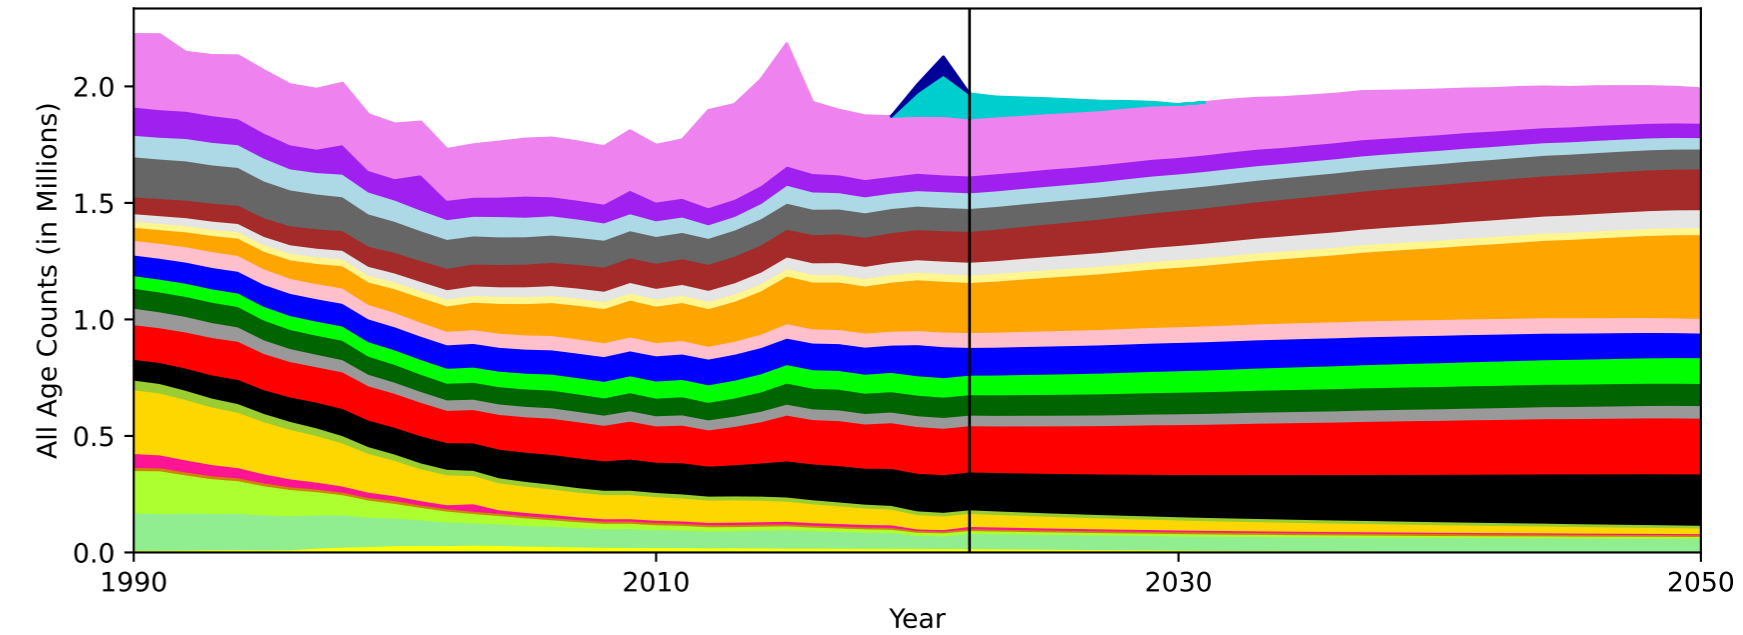

# Guatemala

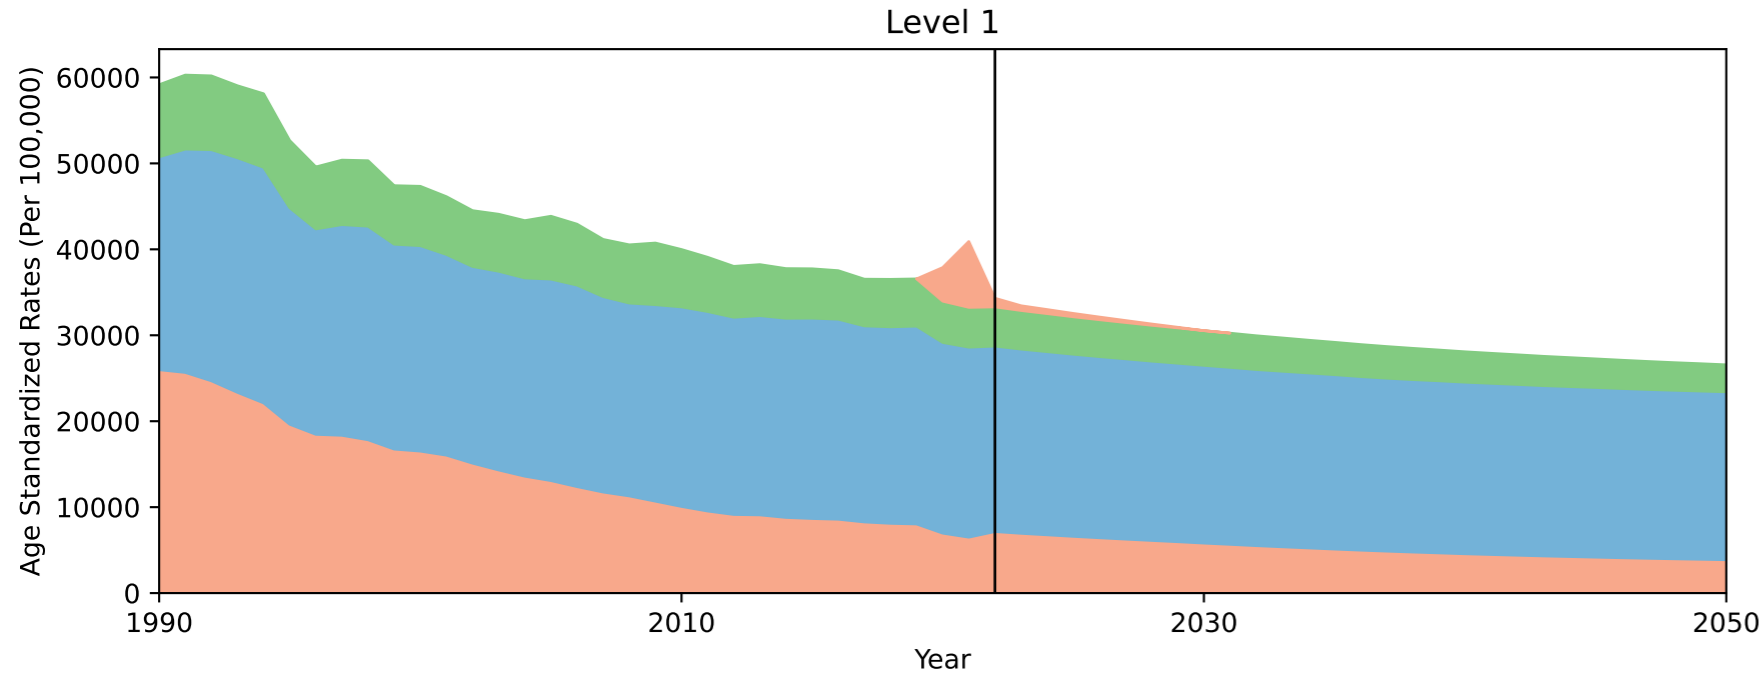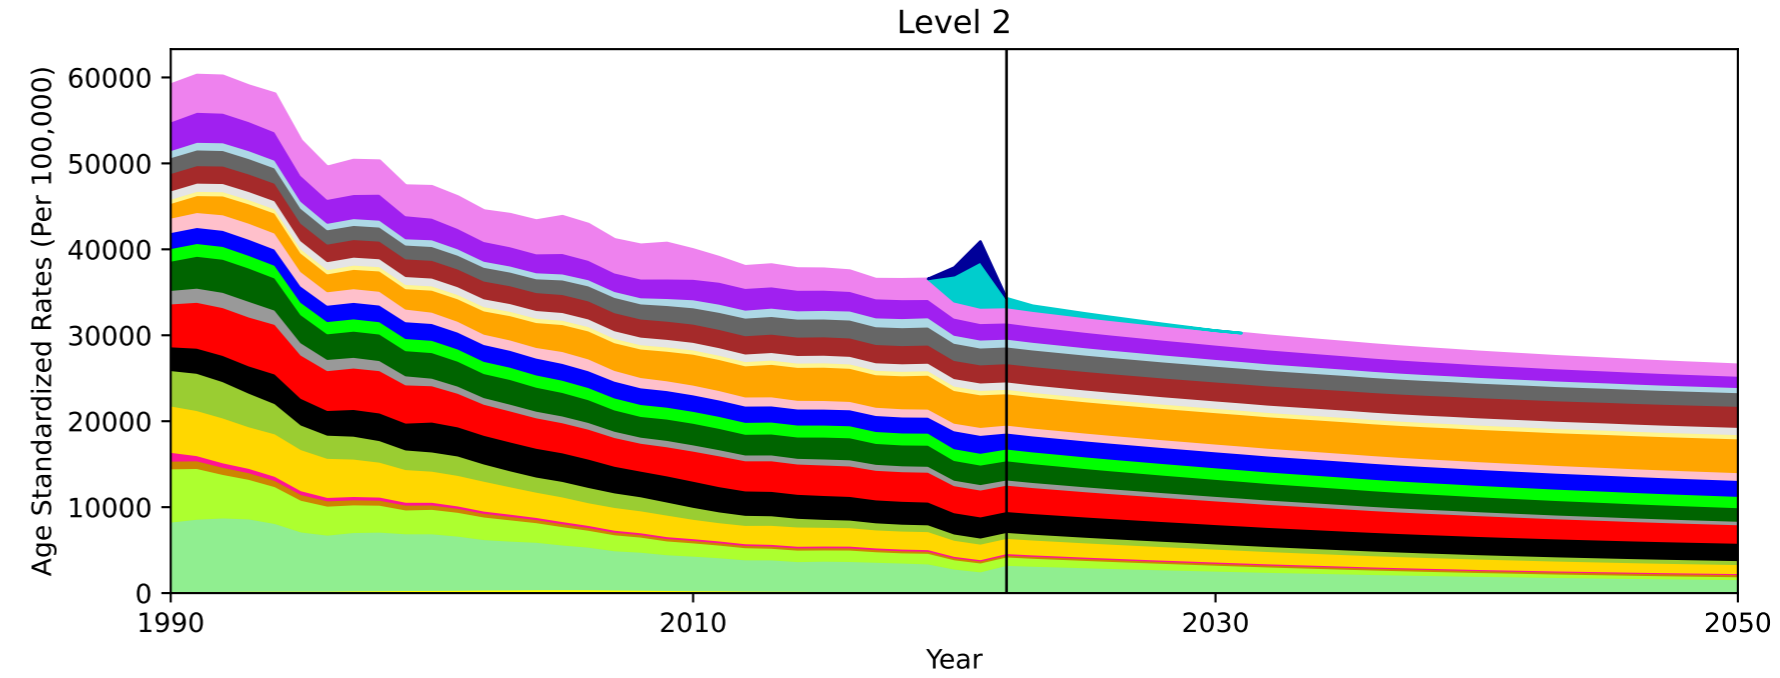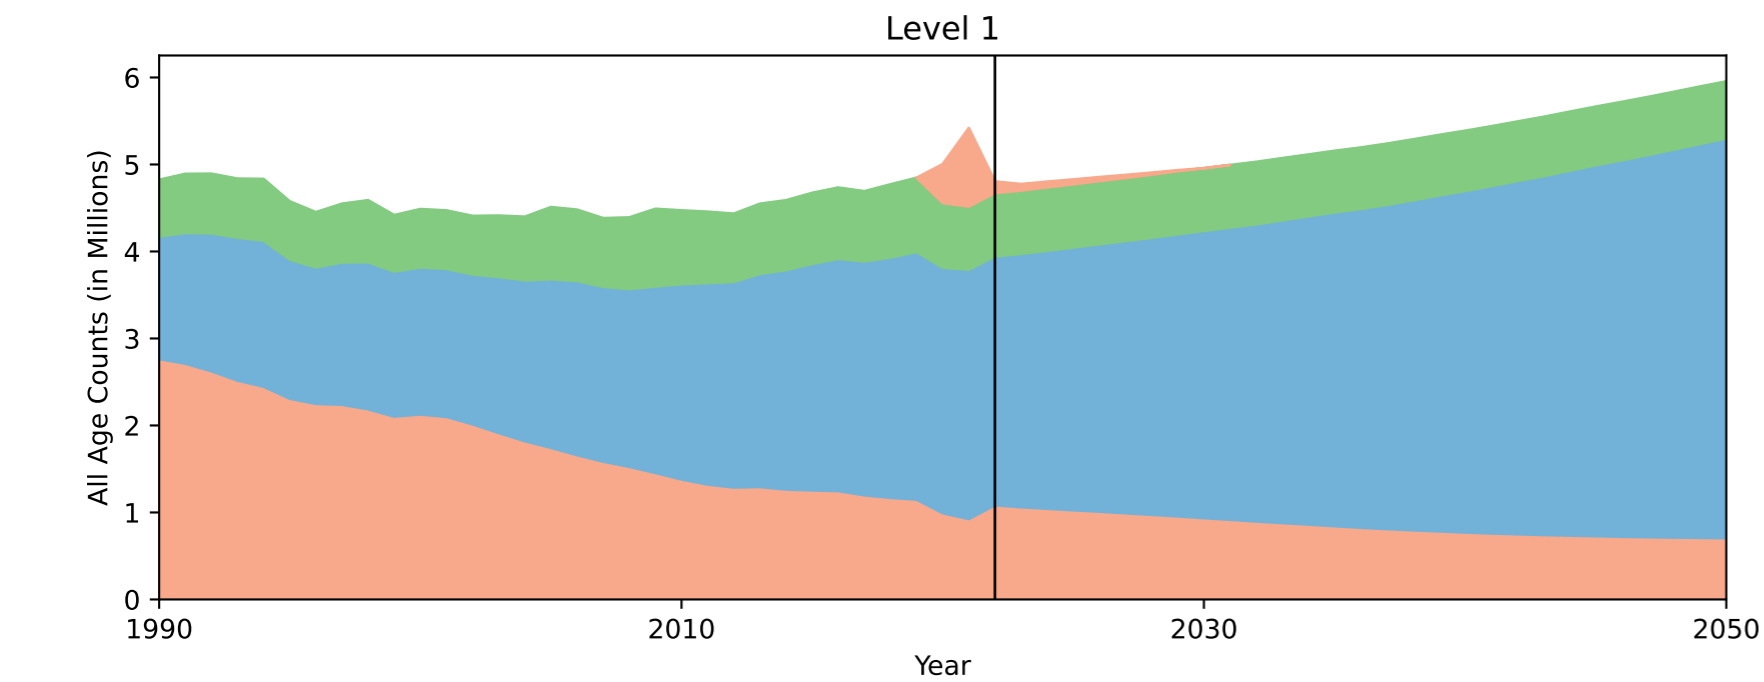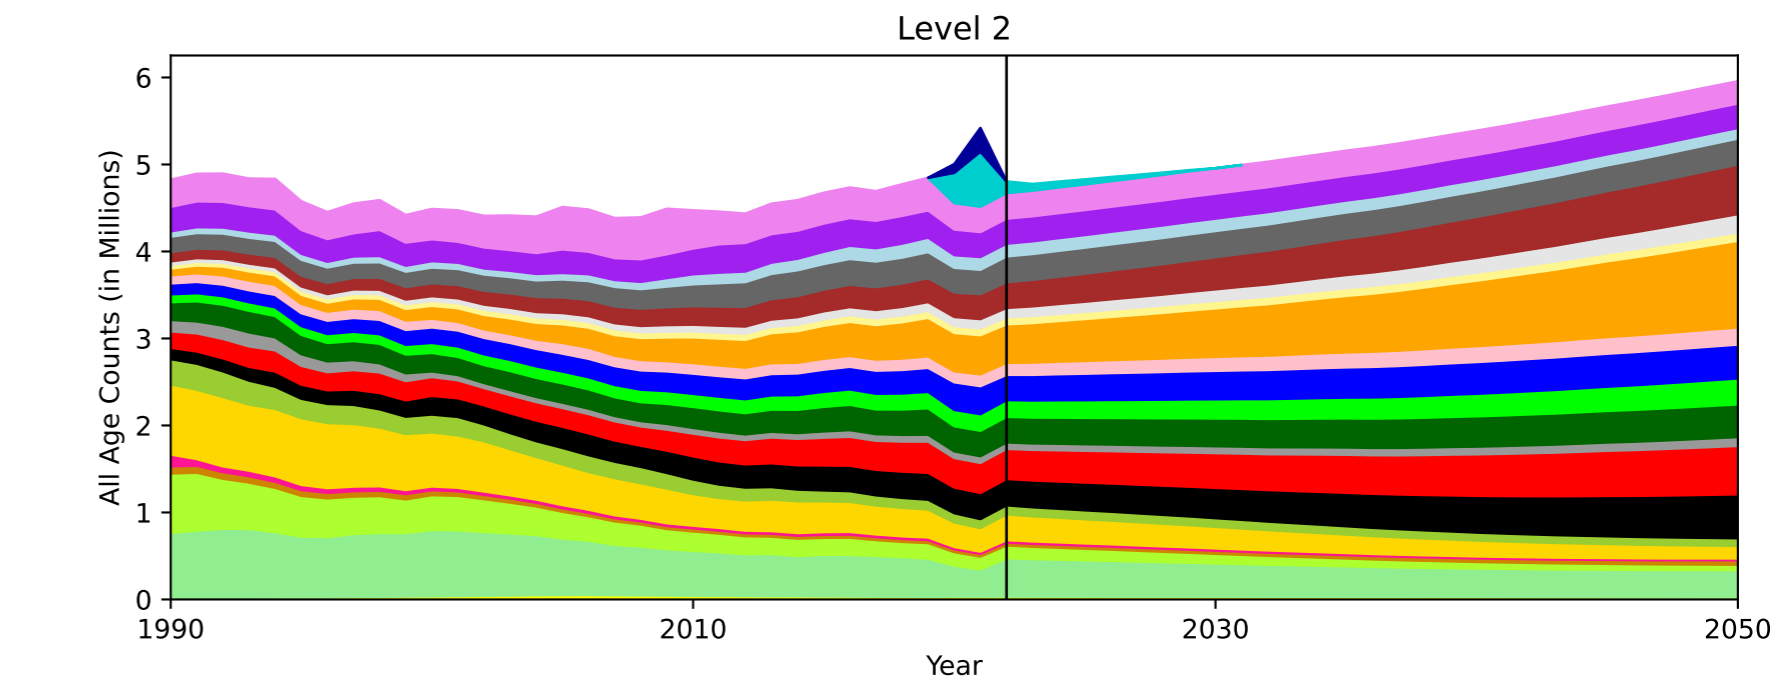



# Honduras

Level 1

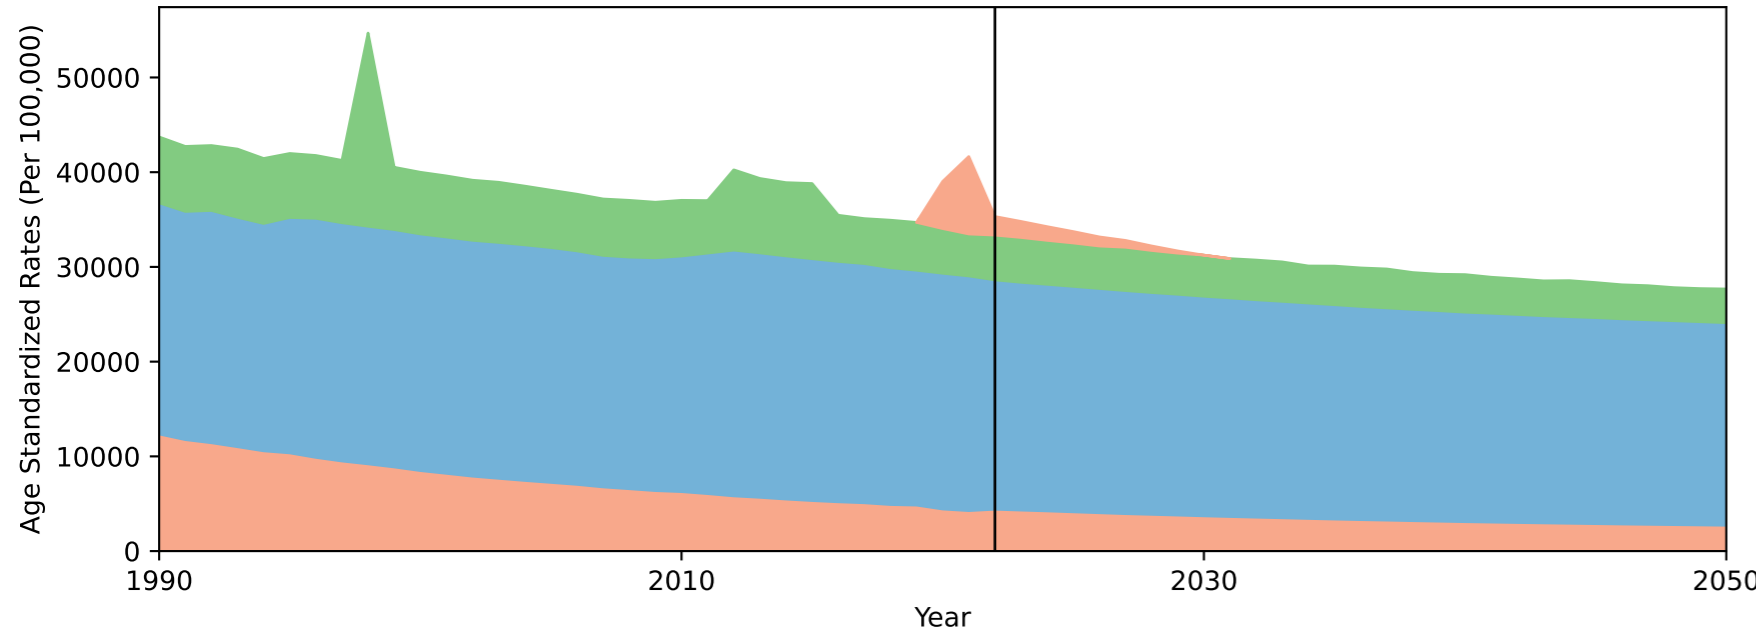

Level 2

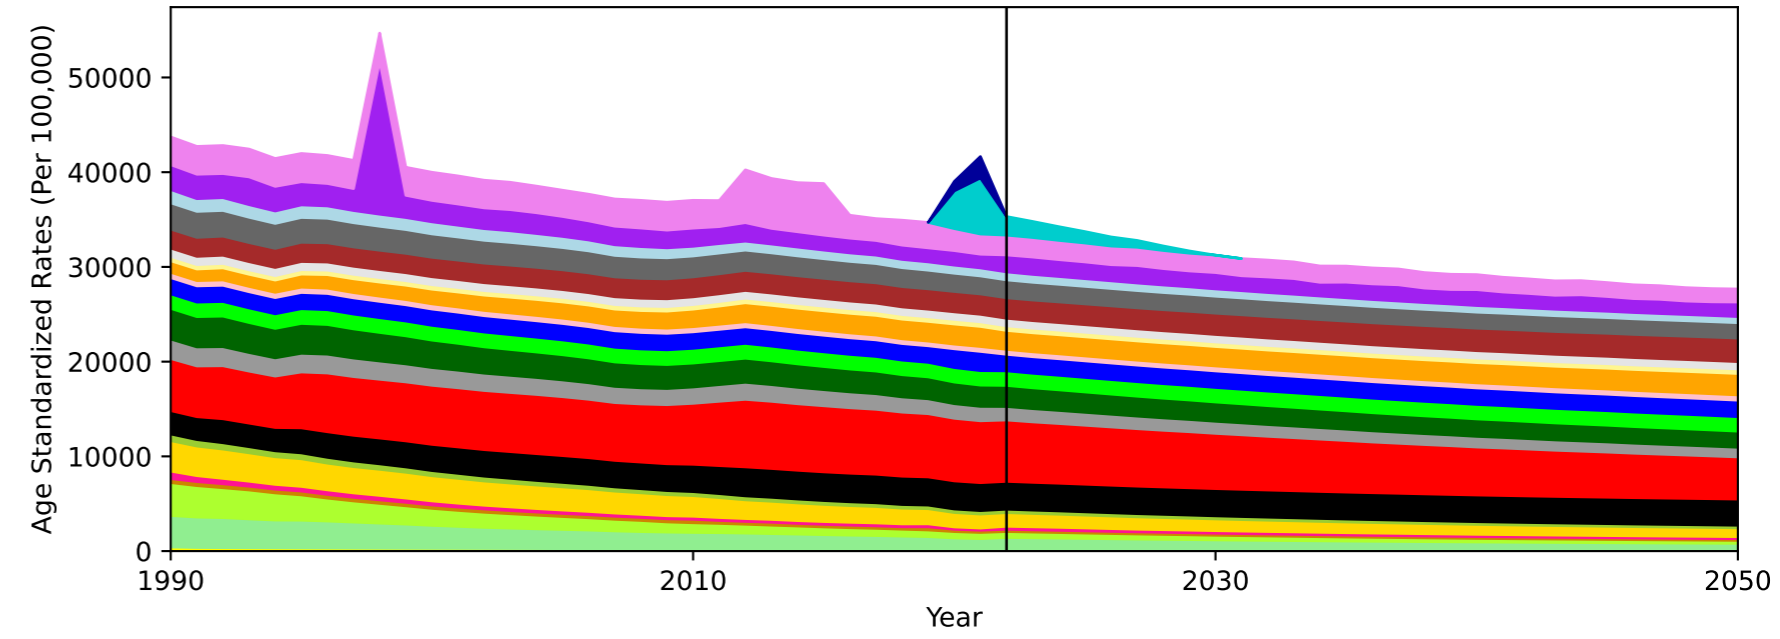

Level 1

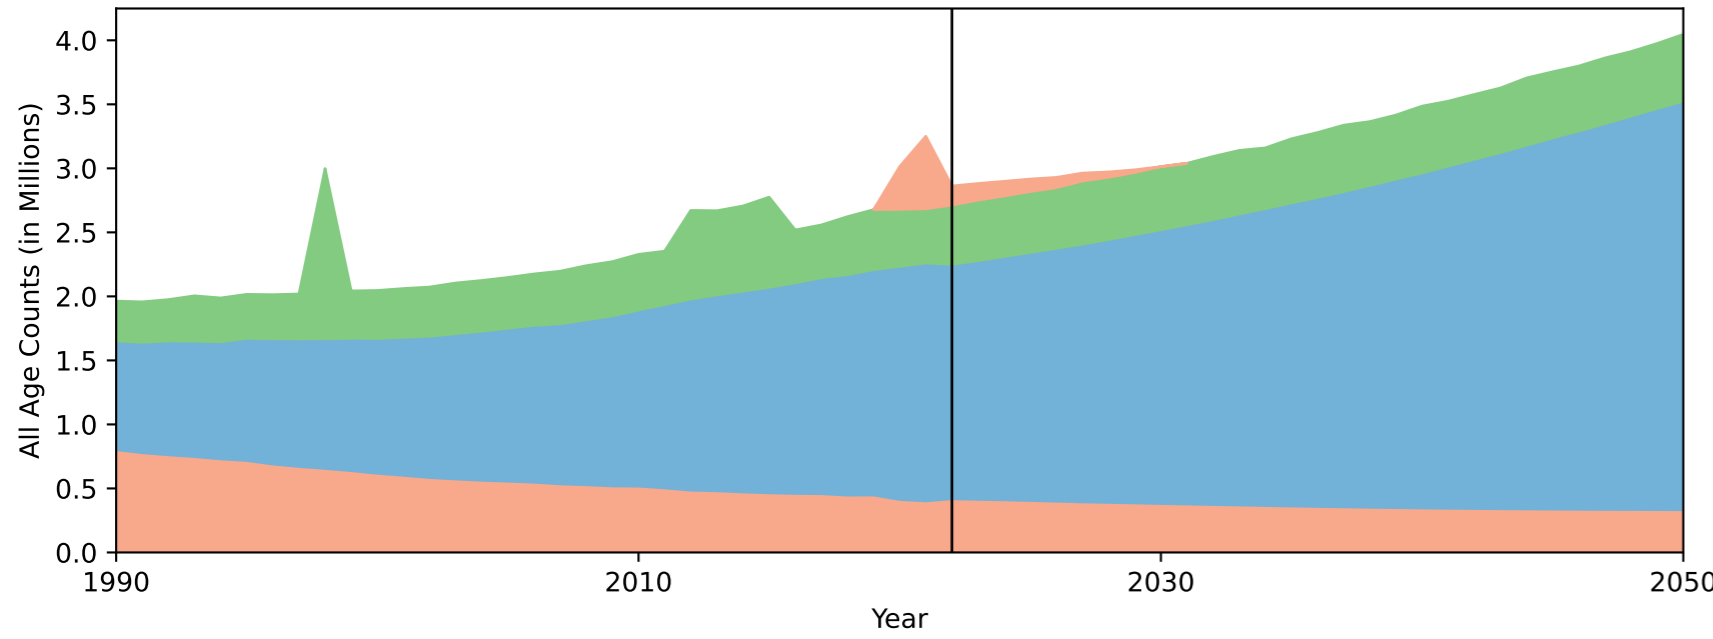

Level 2

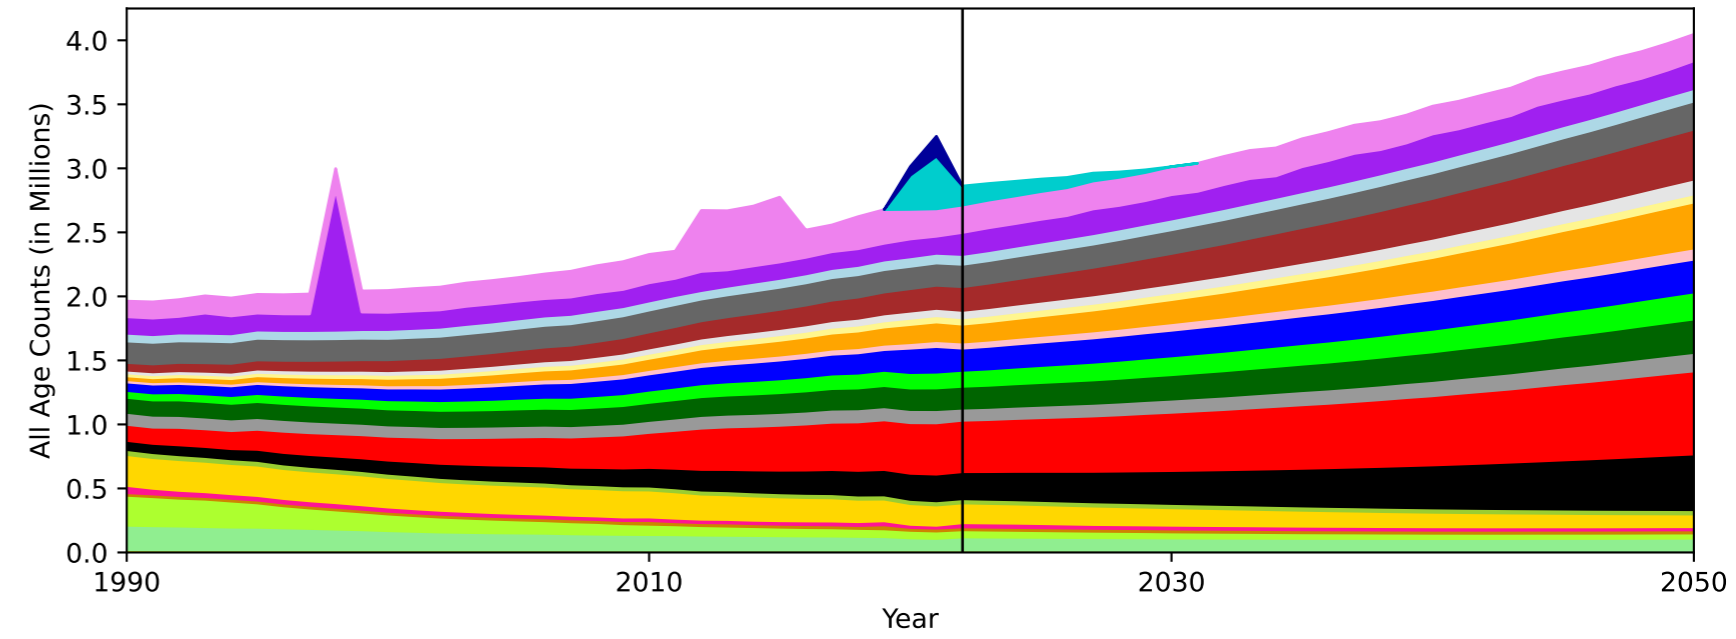

# Mexico

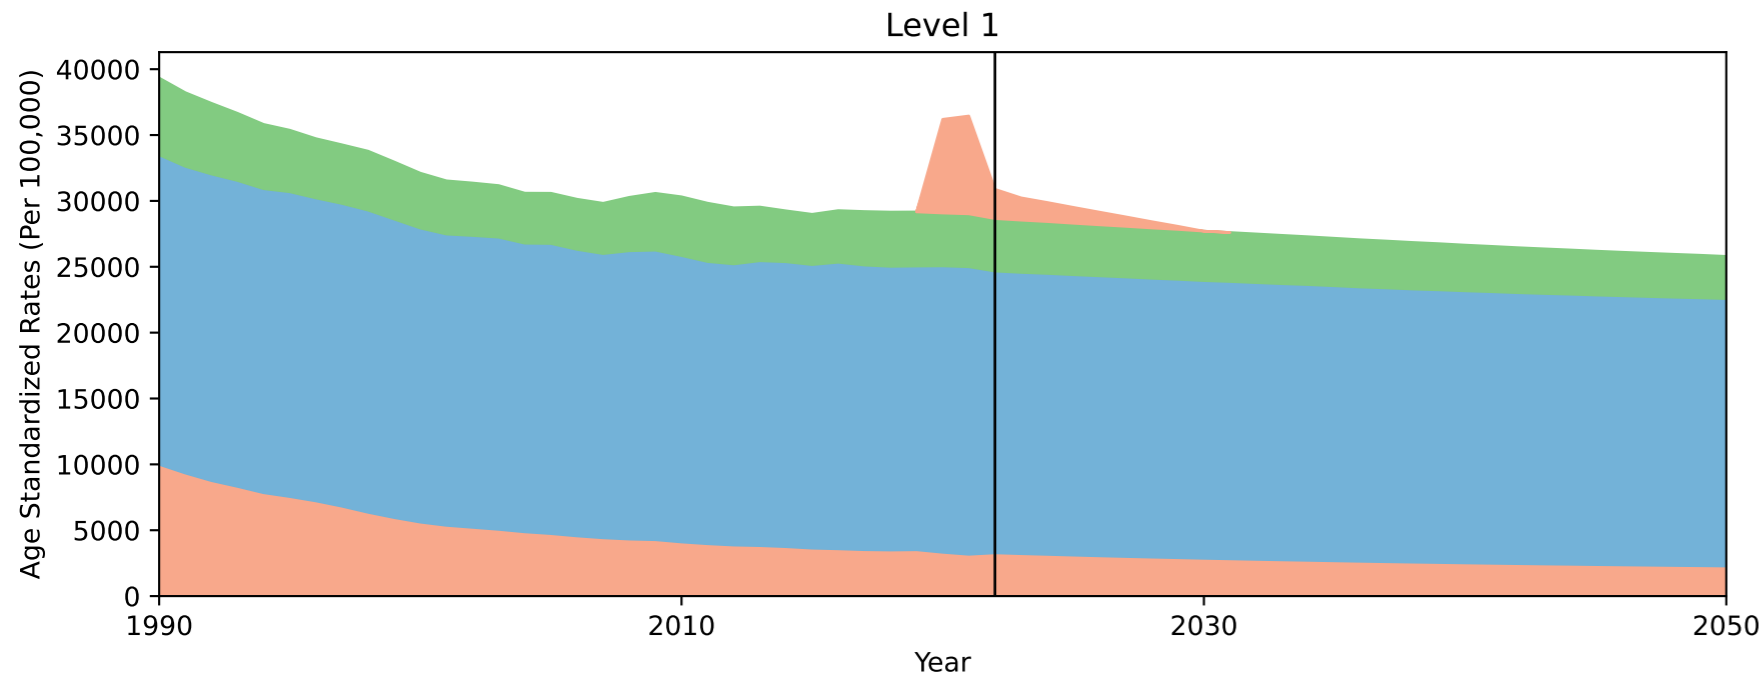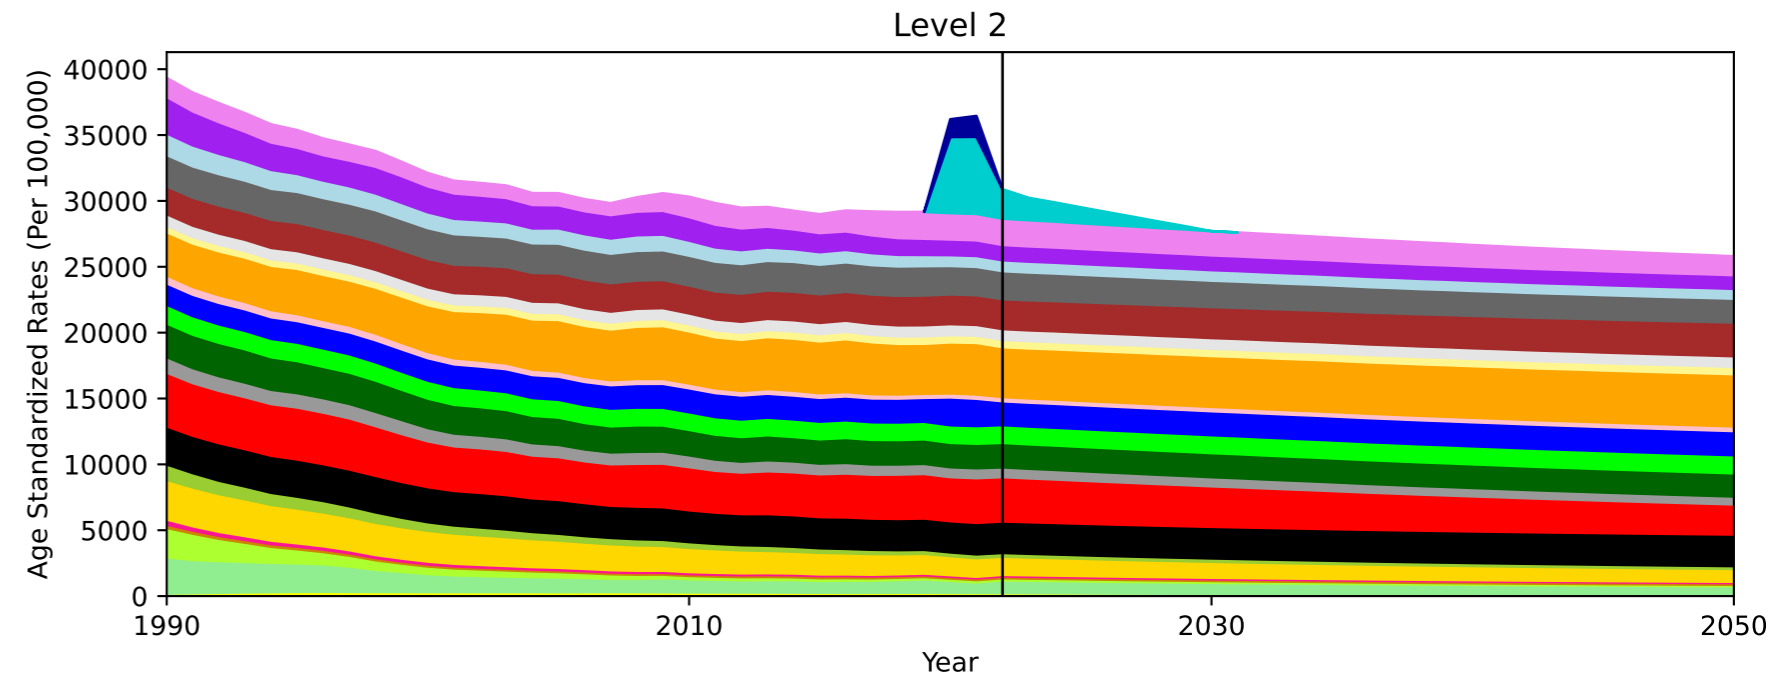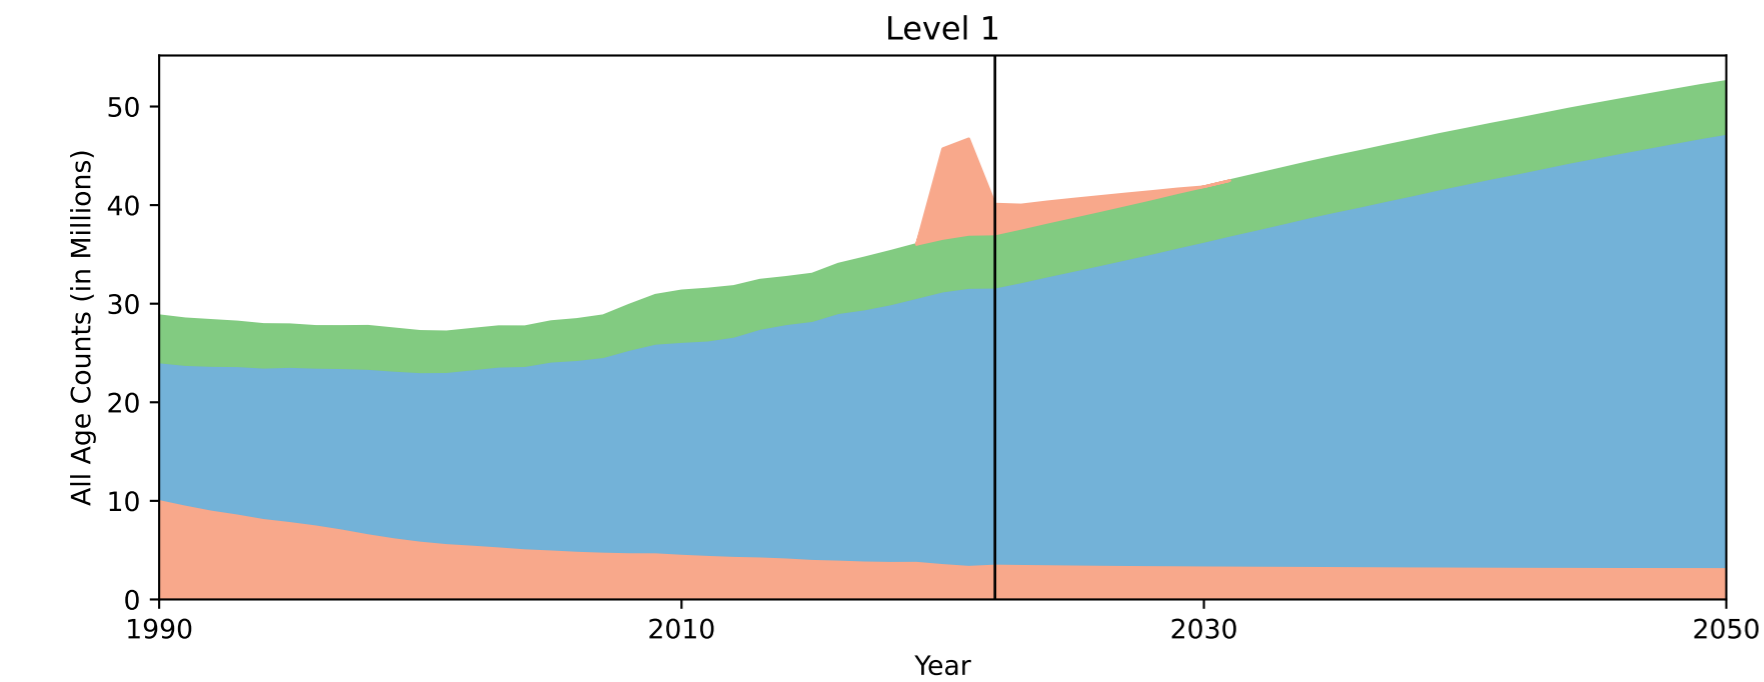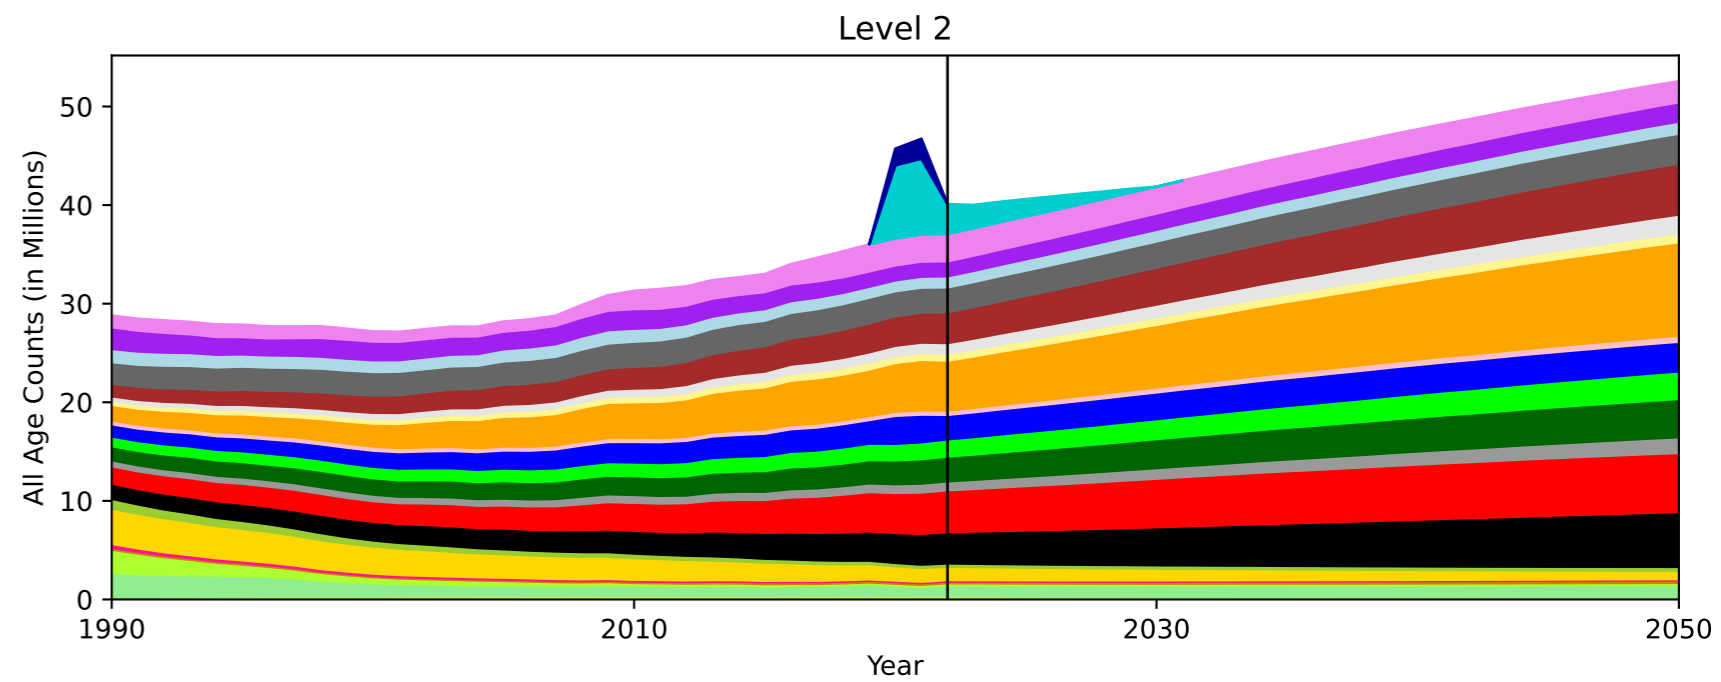

# Nicaragua

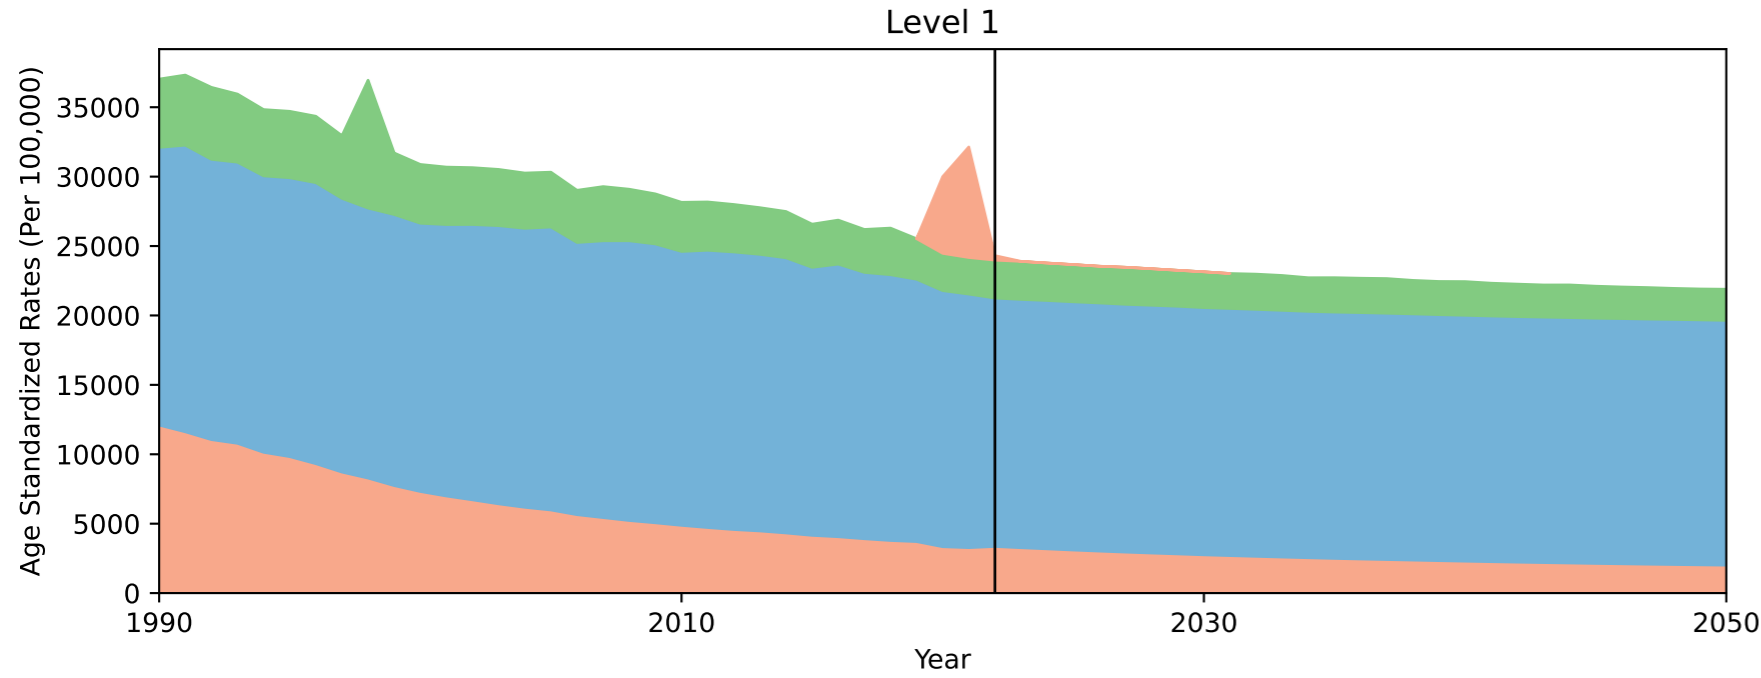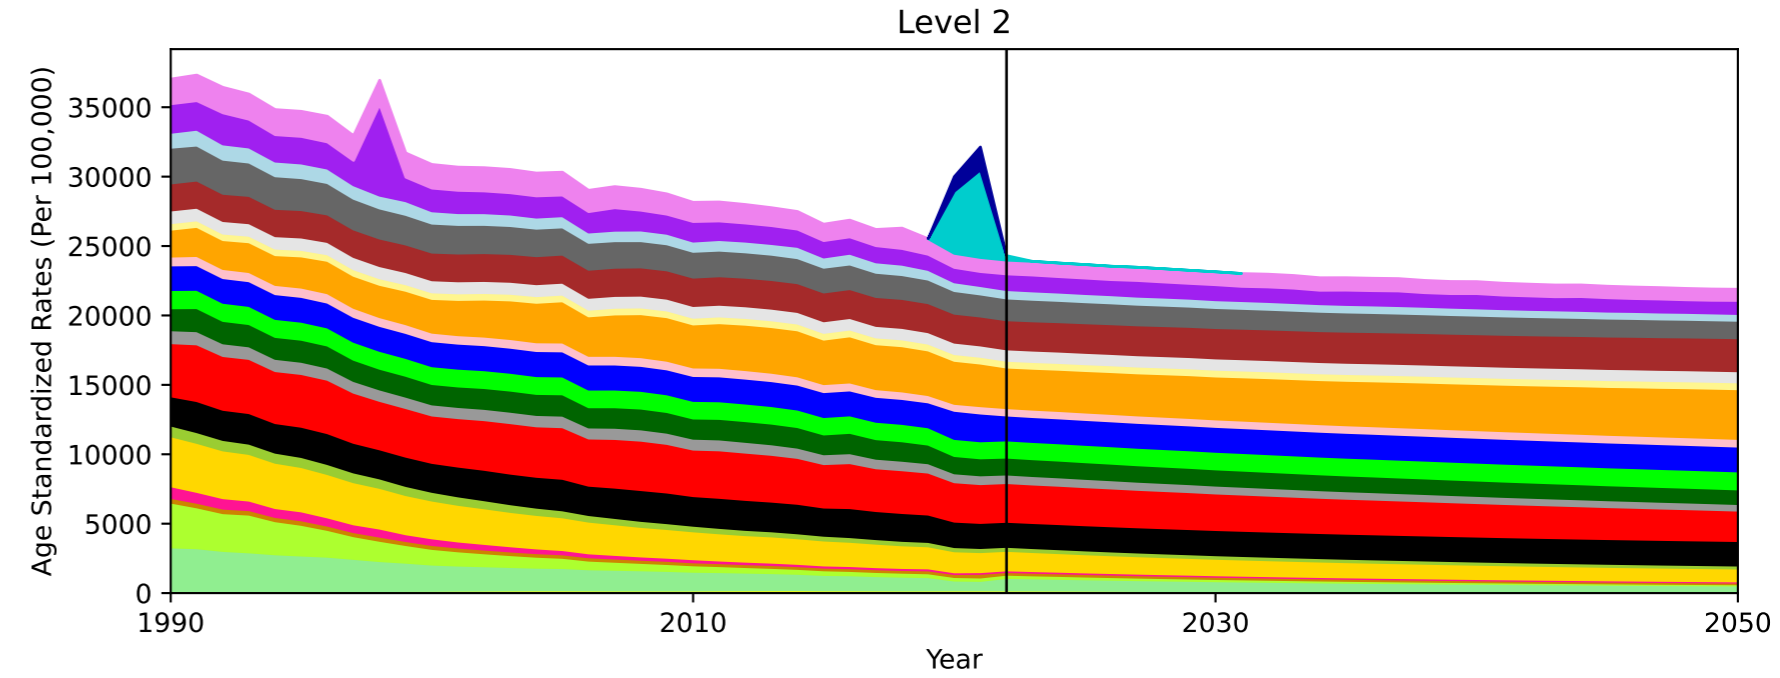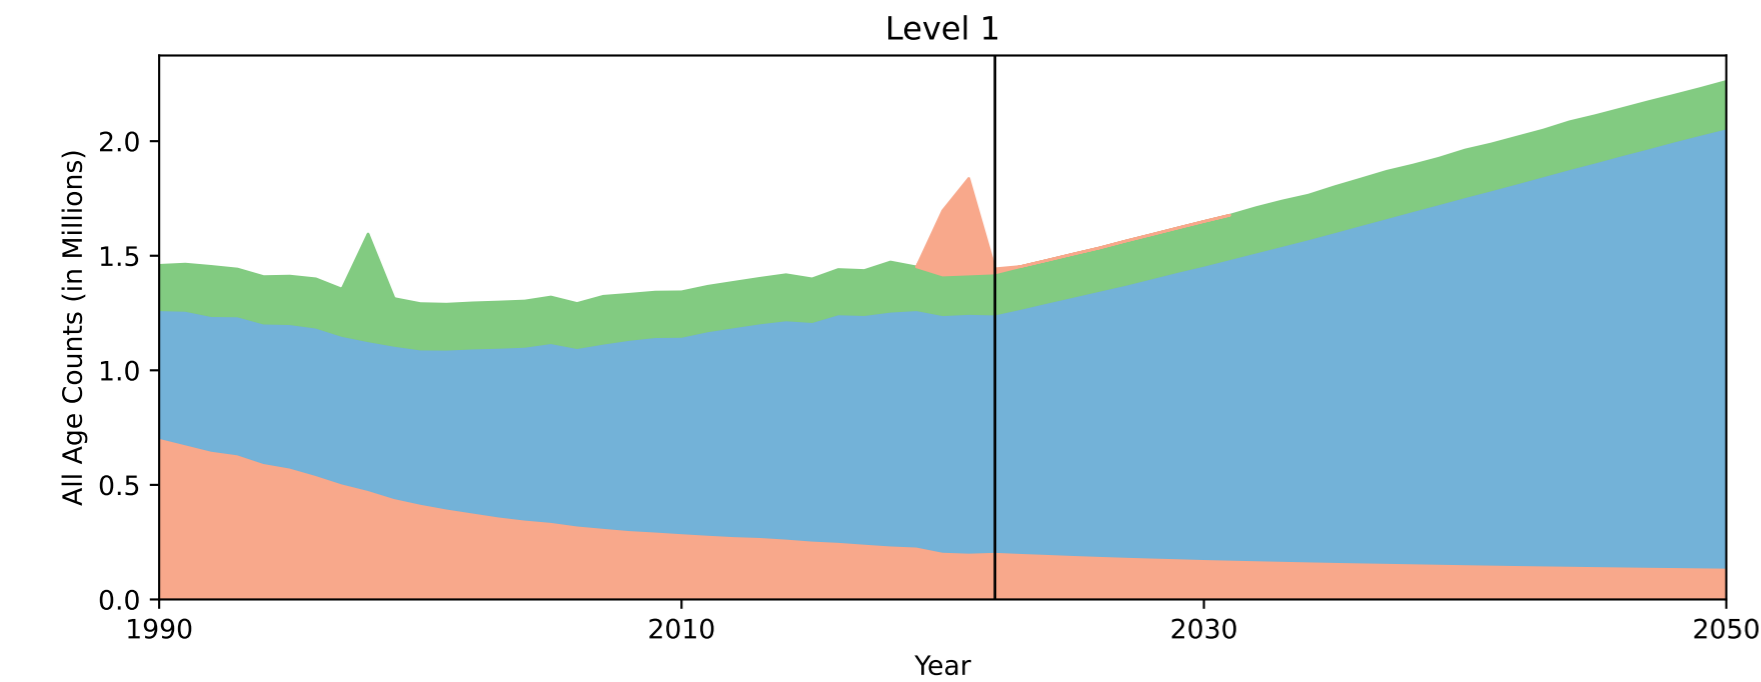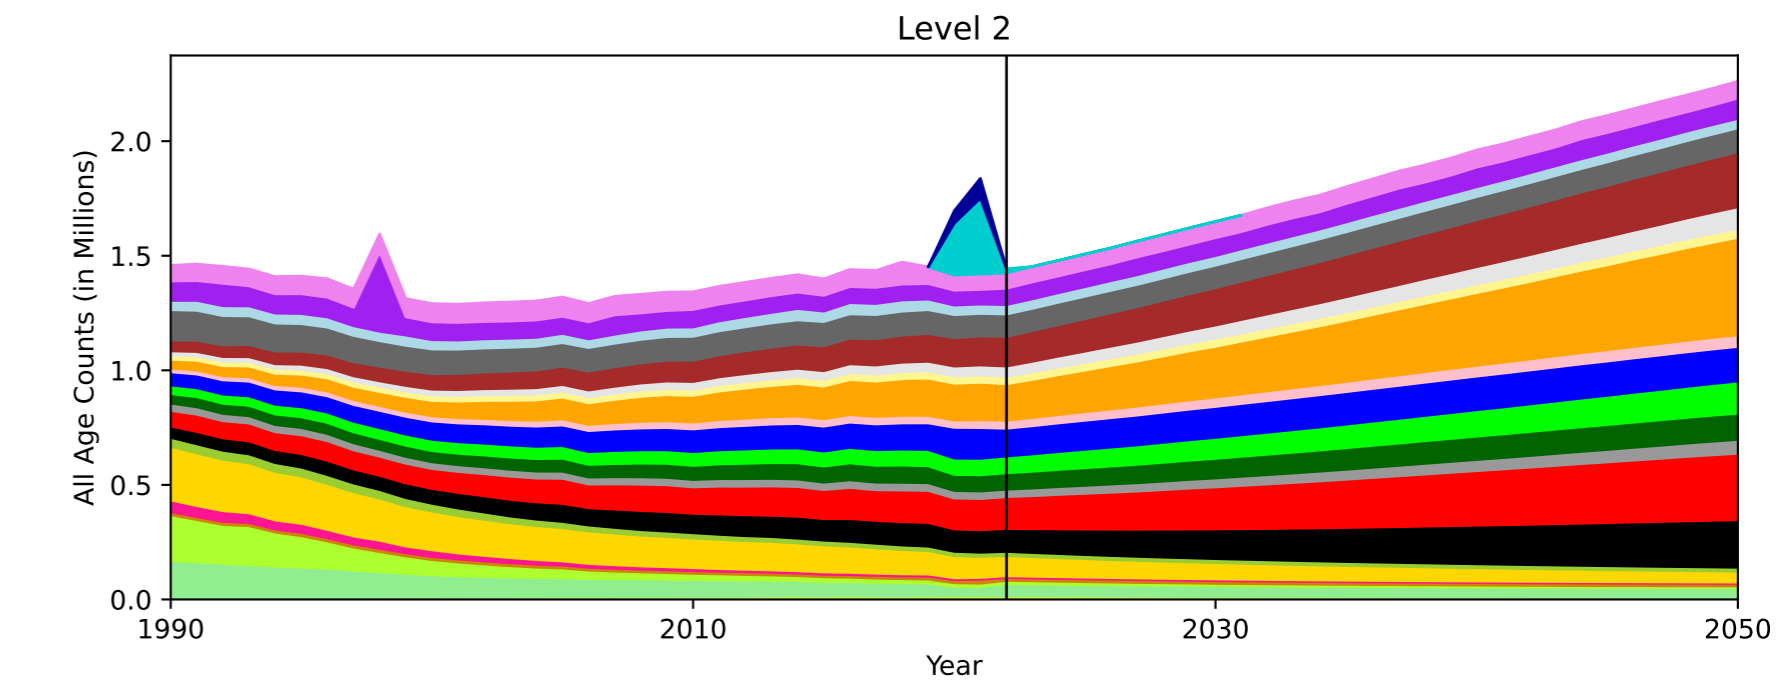

# Panama

Level 1

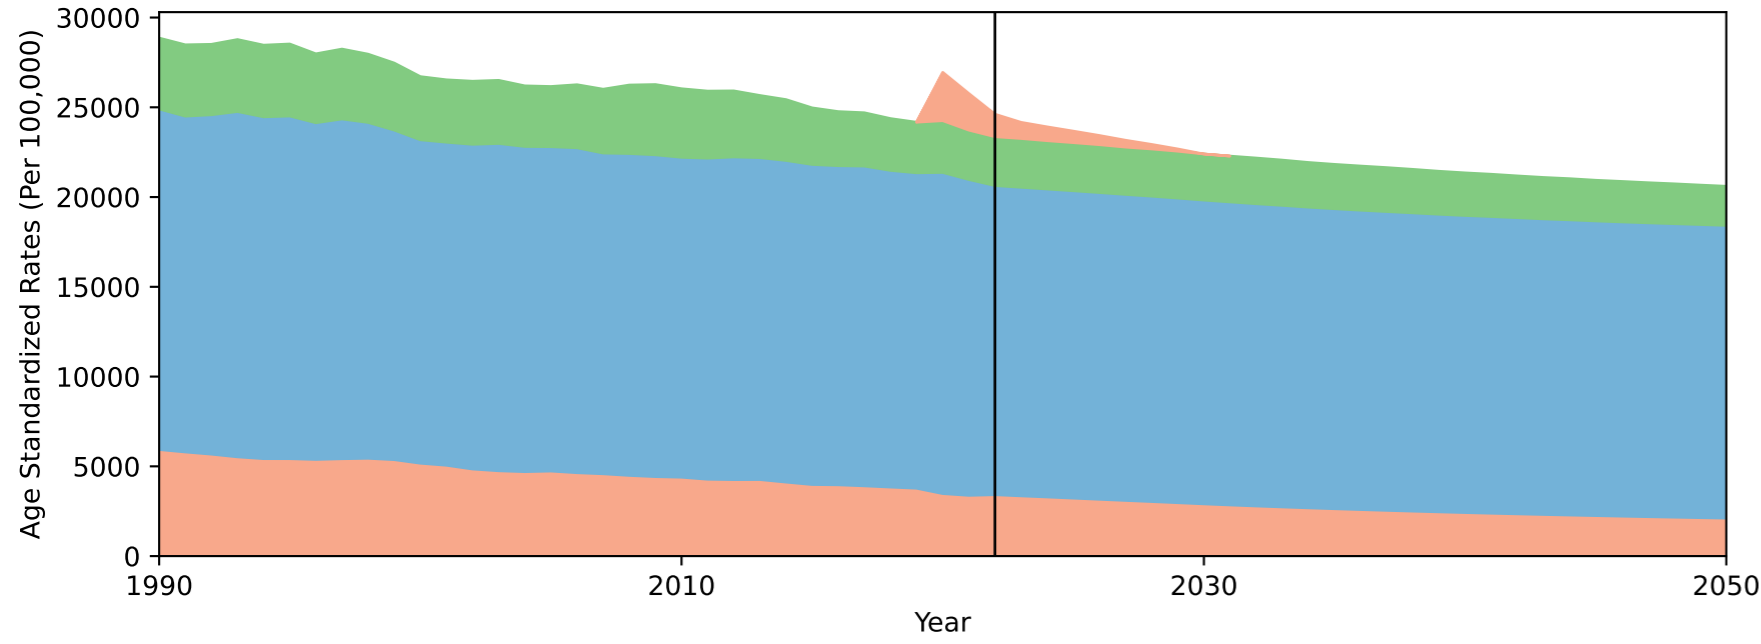

Level 2

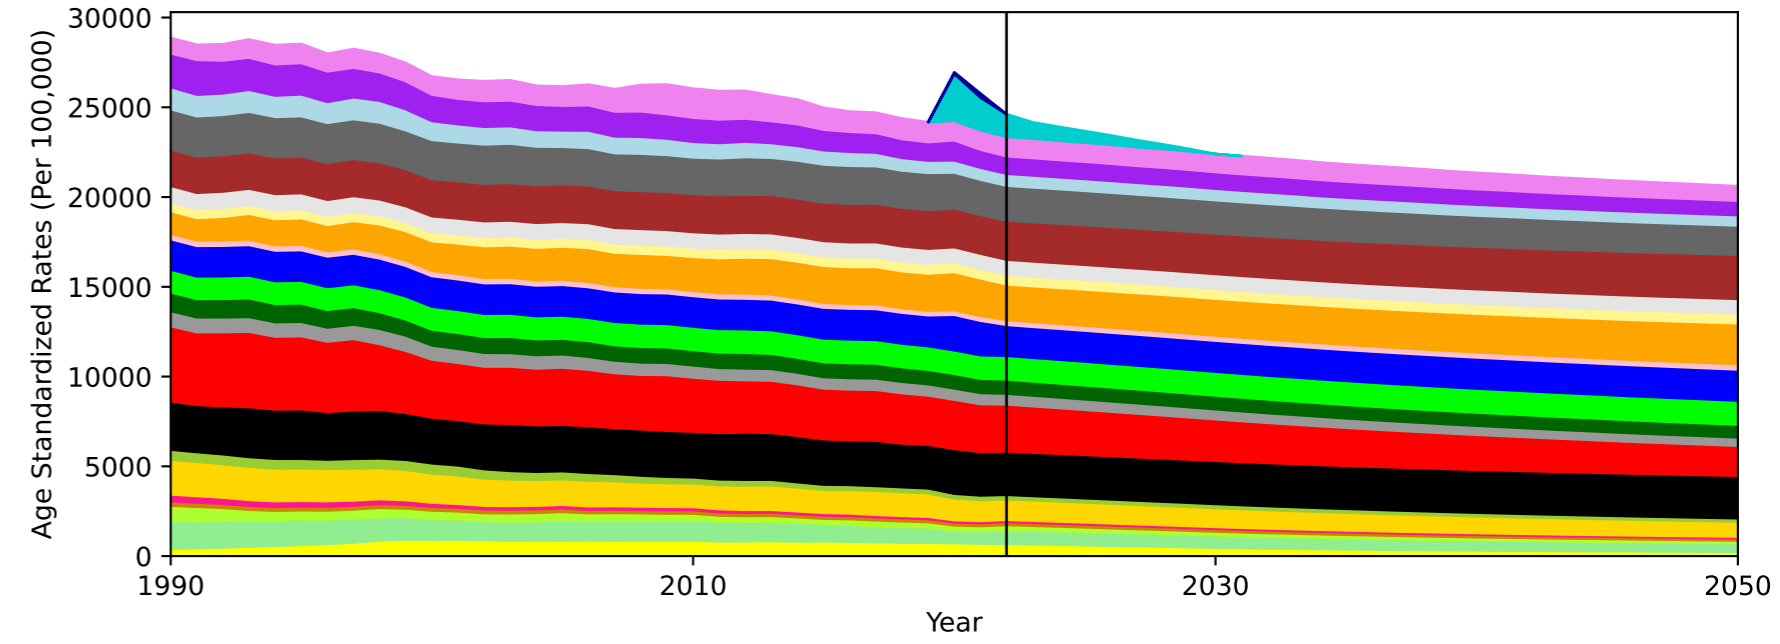

Level 1

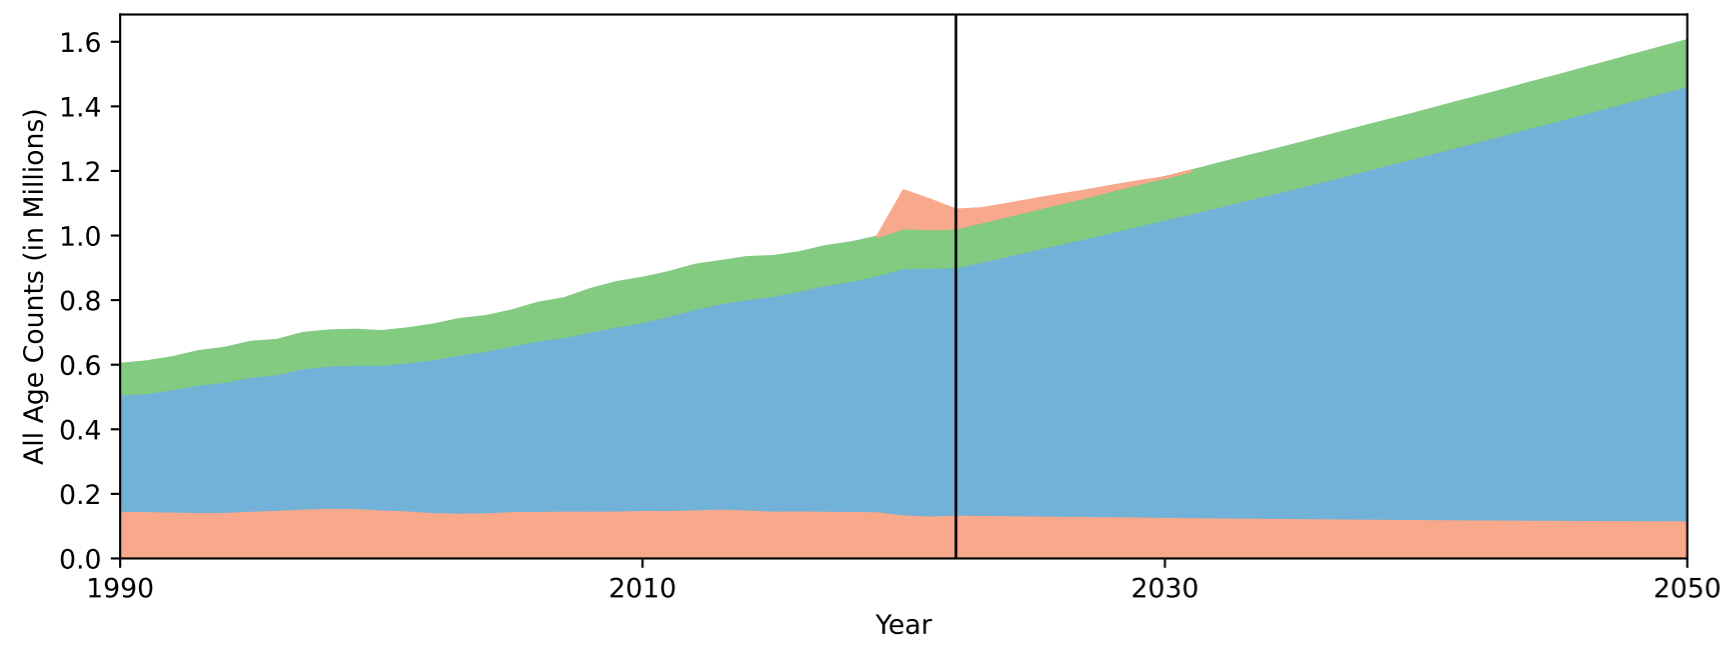

Level 2

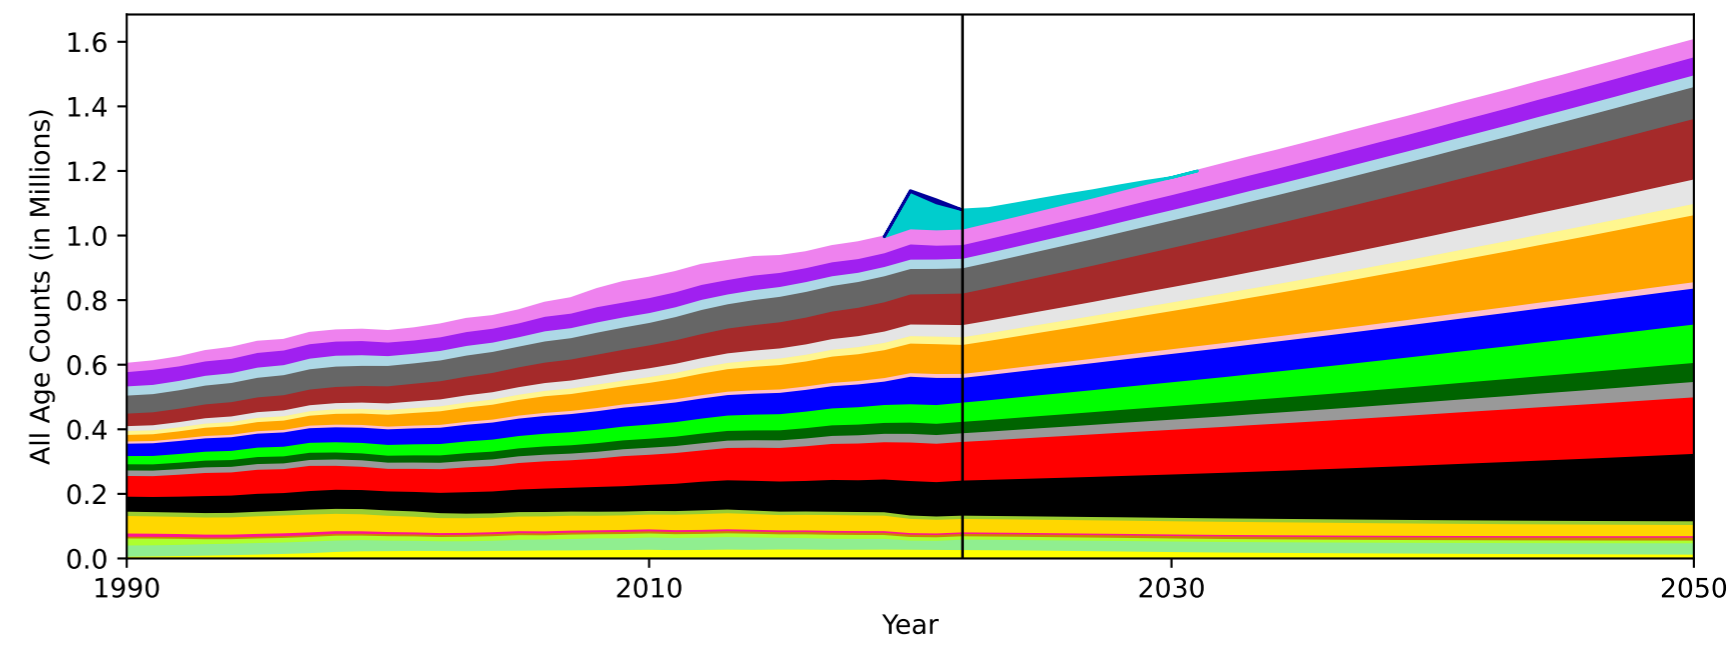

# Venezuela

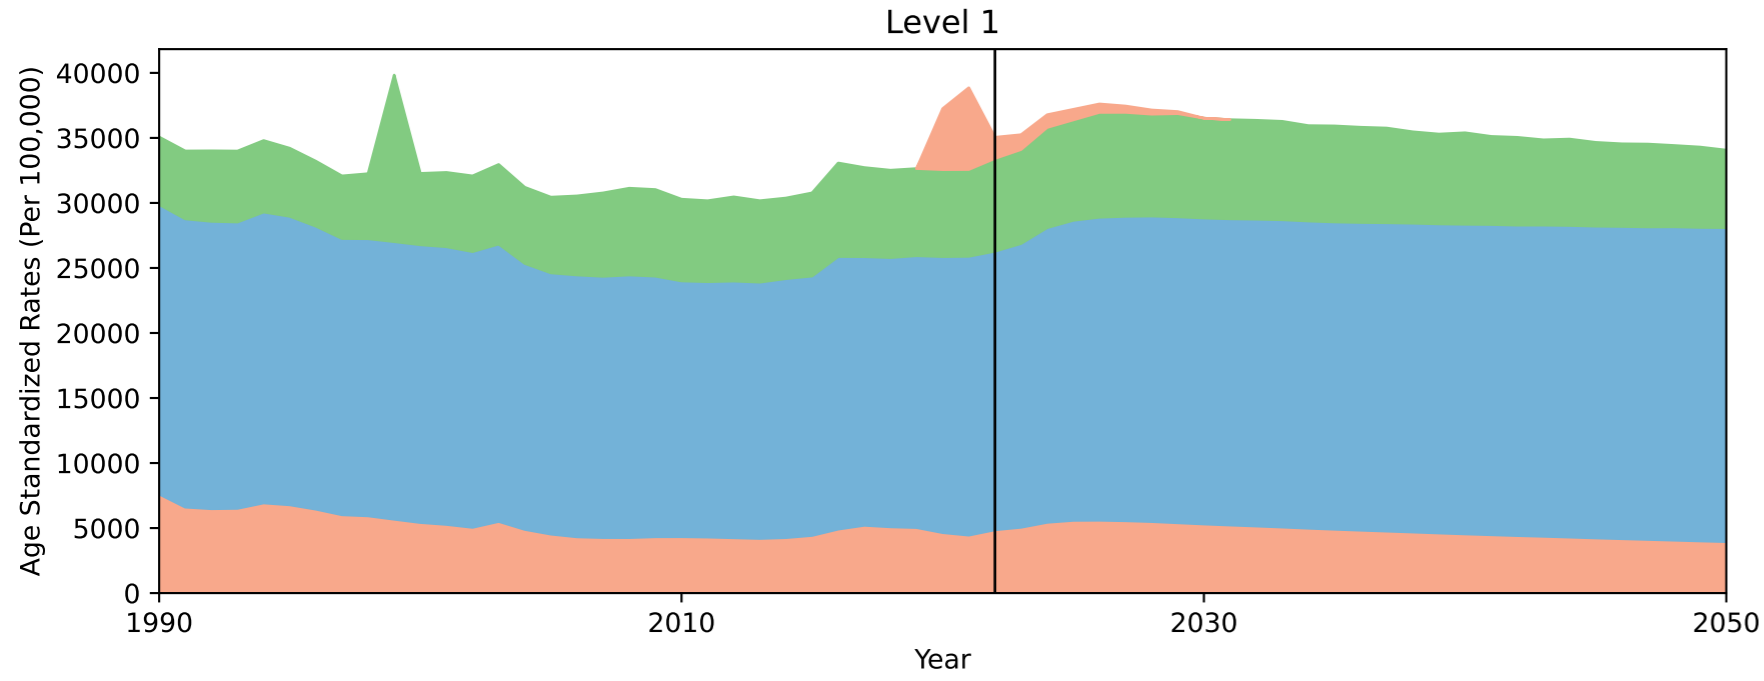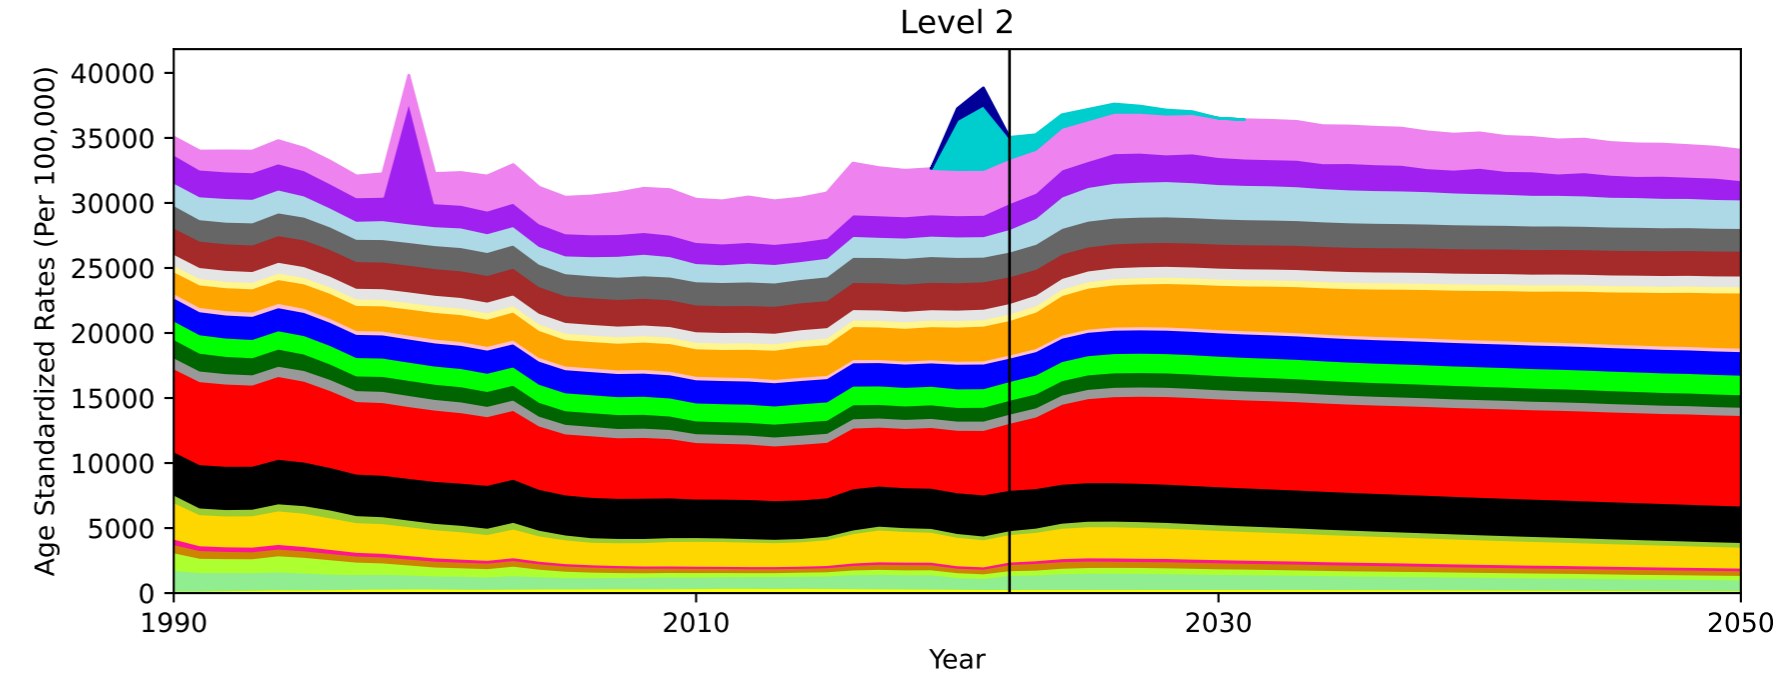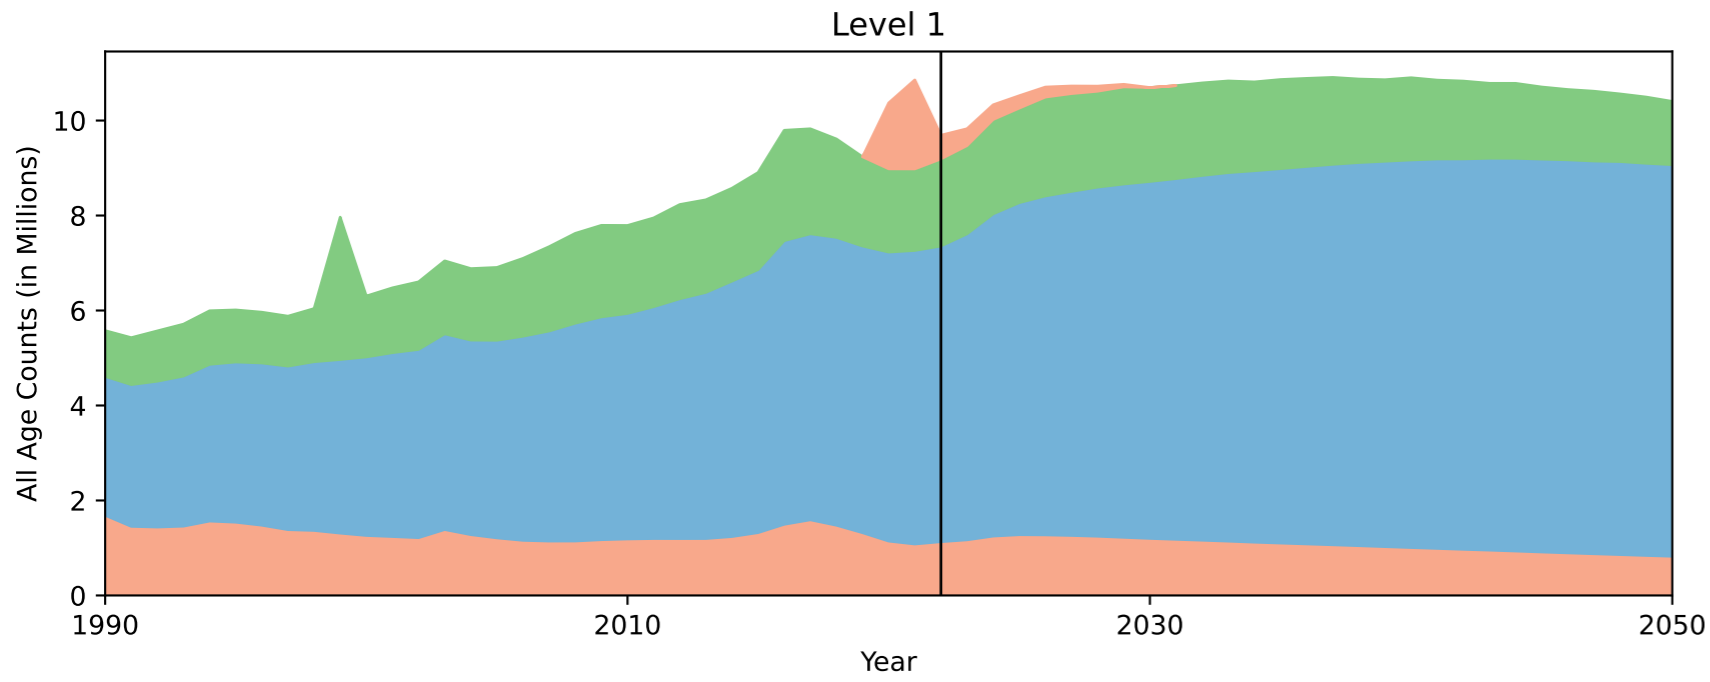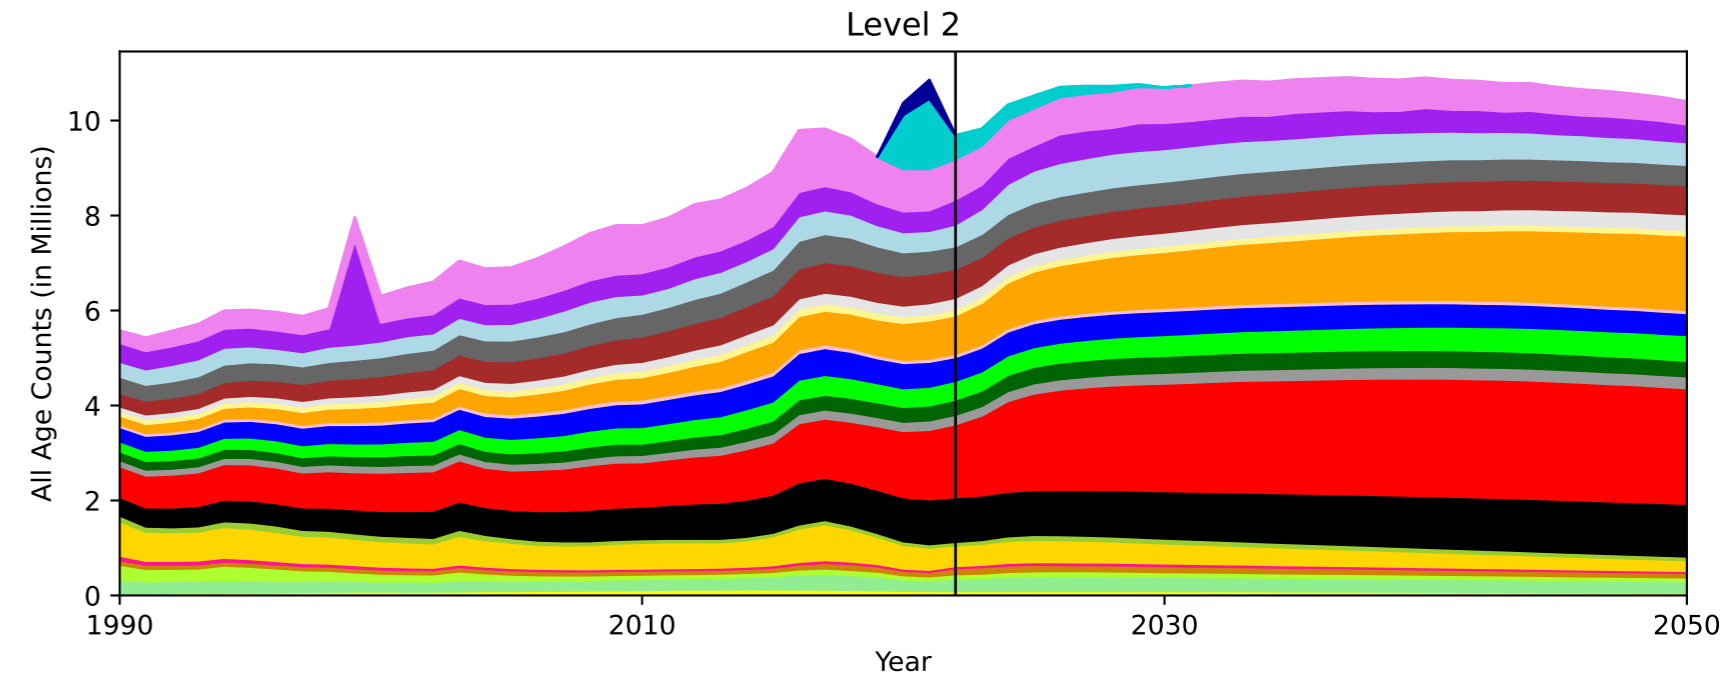

# Brazil

Level 1

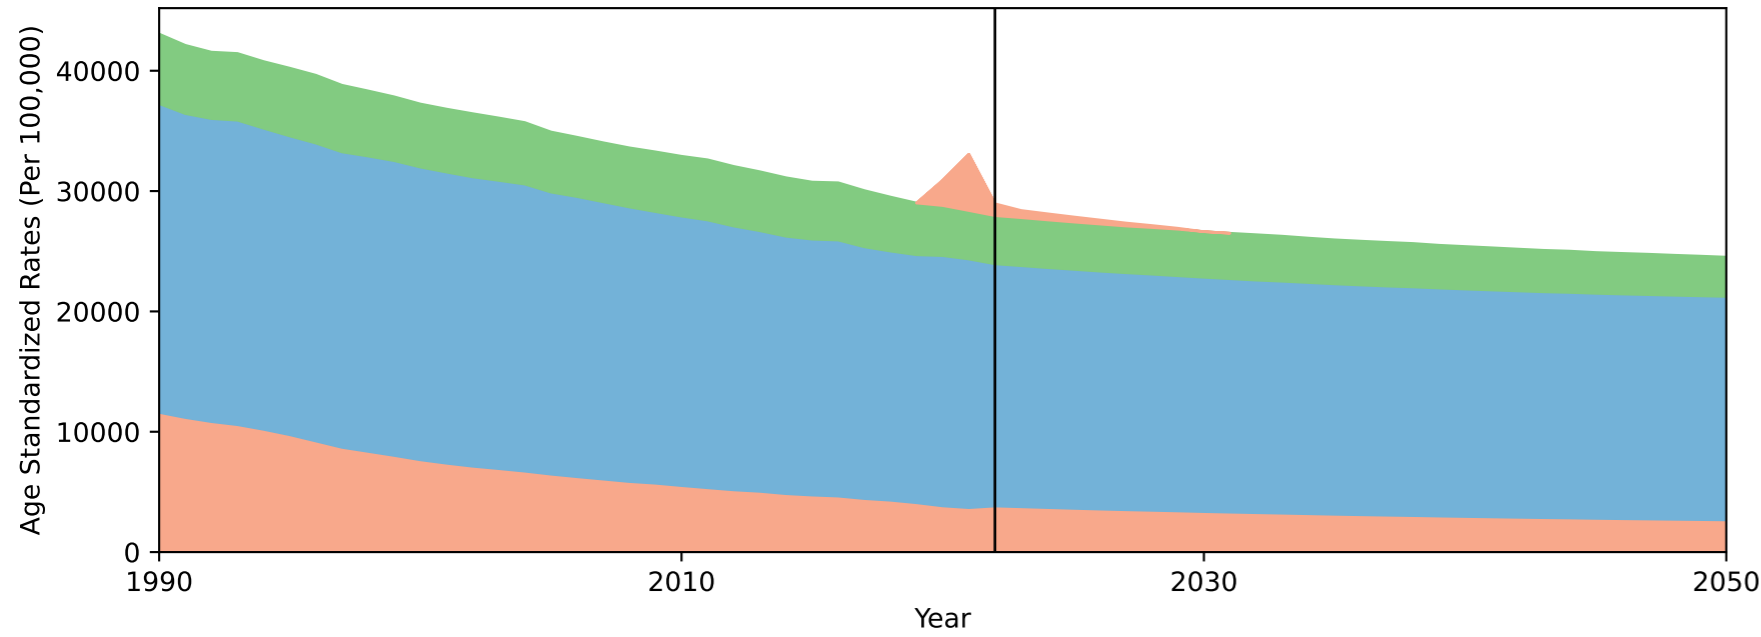

Level 2

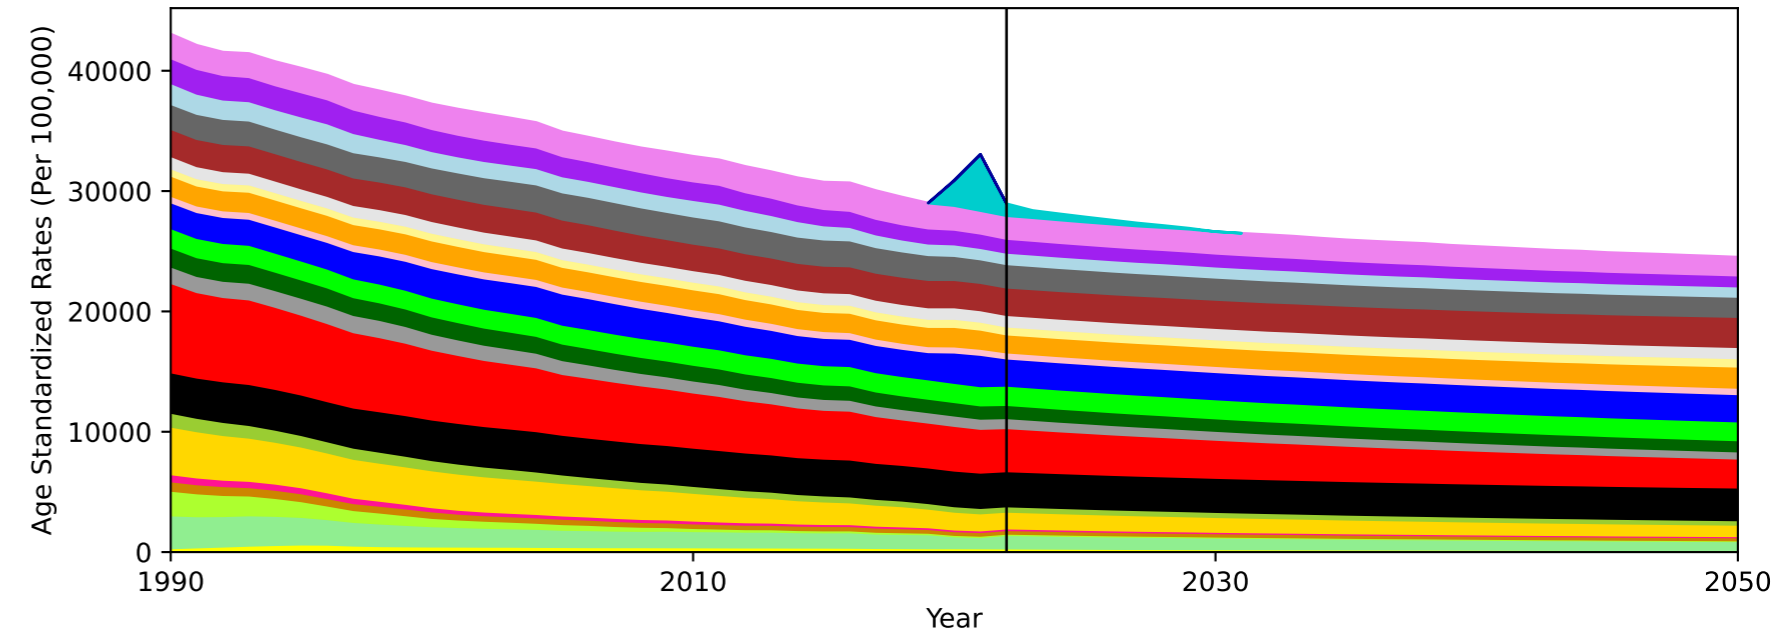

Level 1

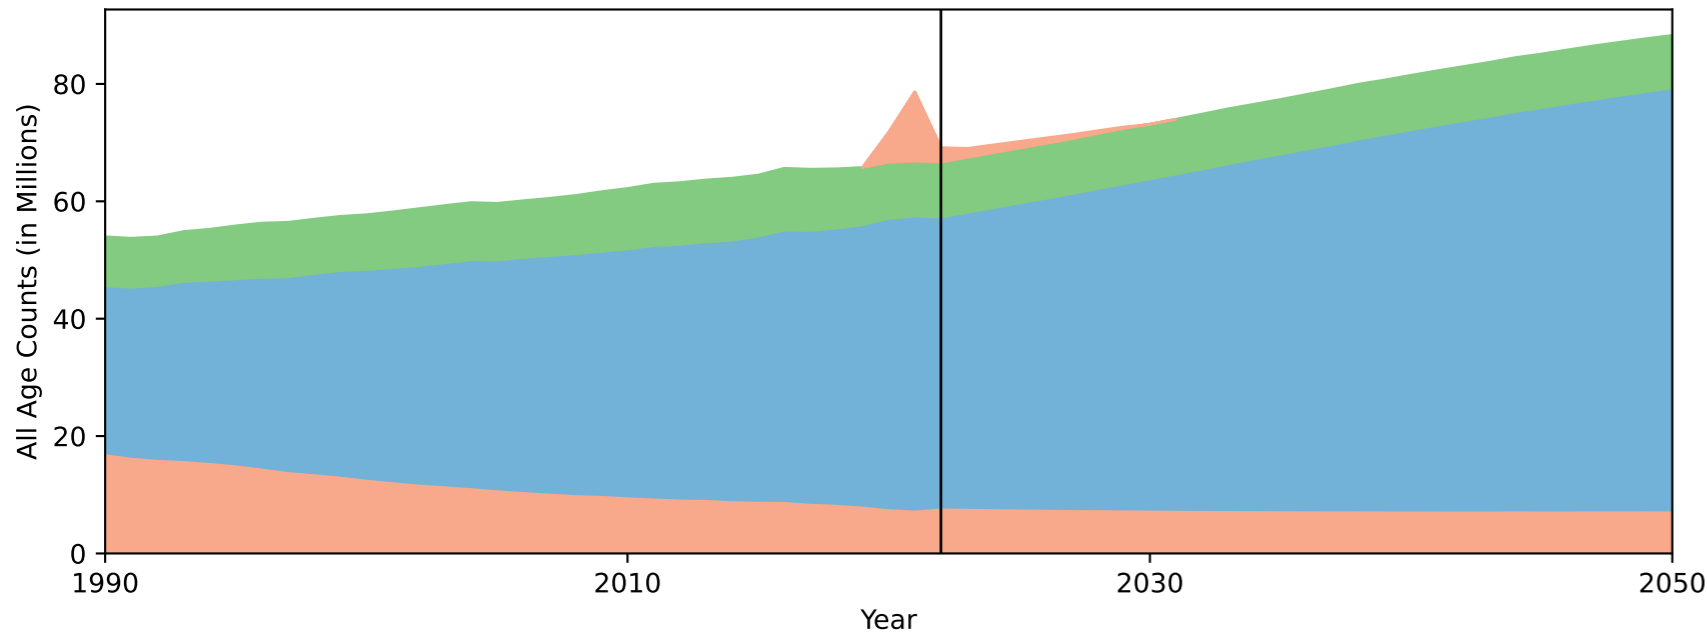

Level 2

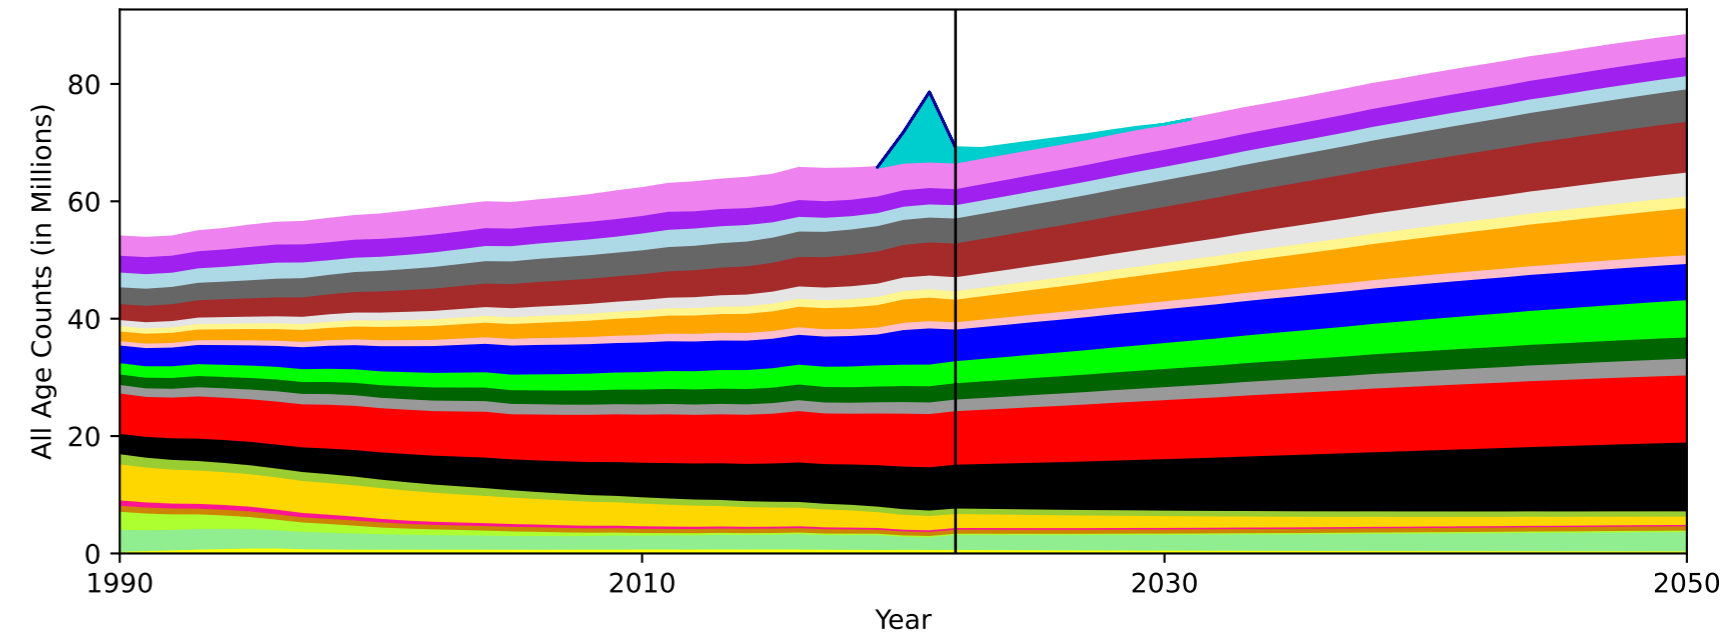

# Paraguay

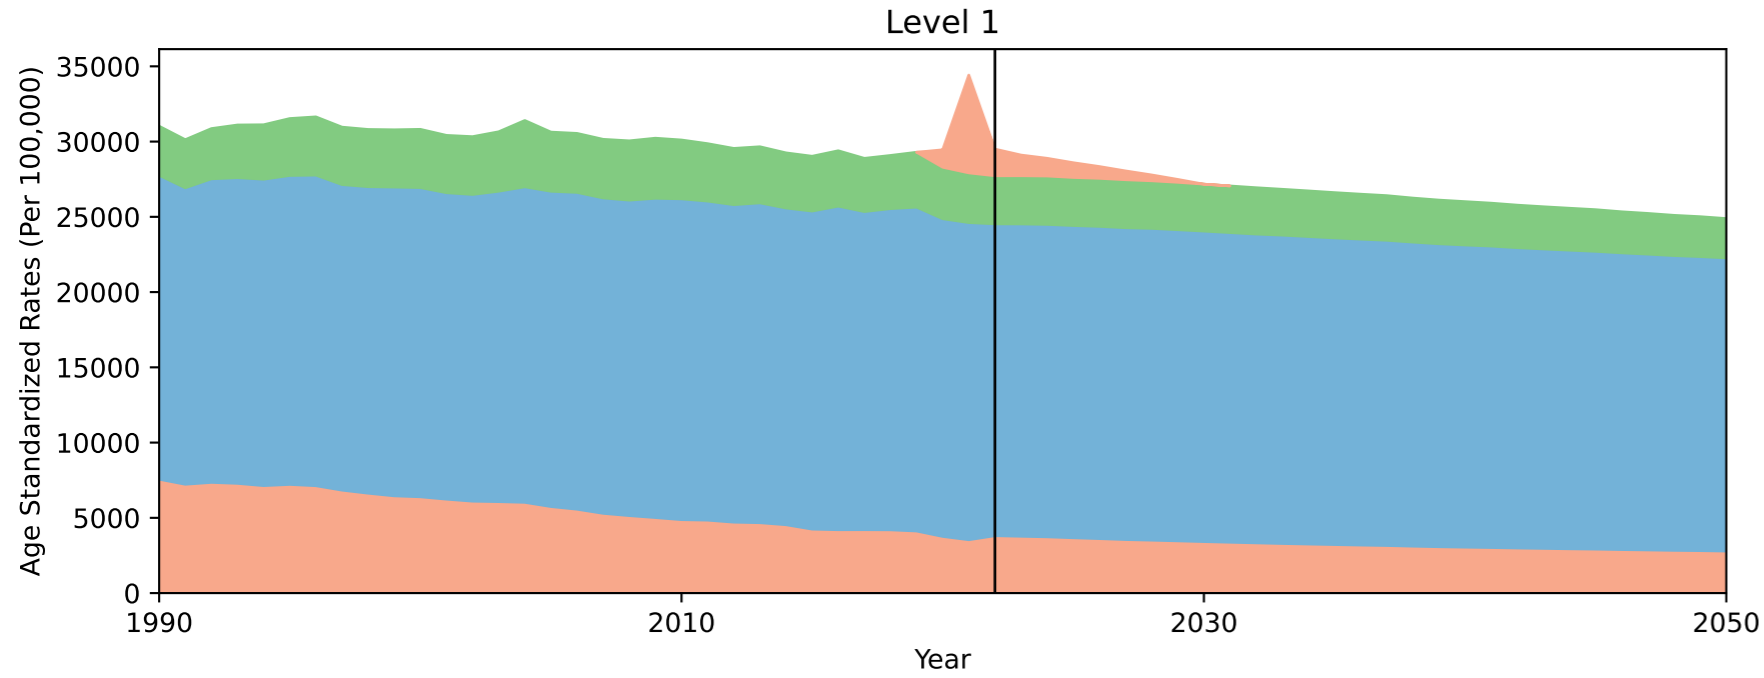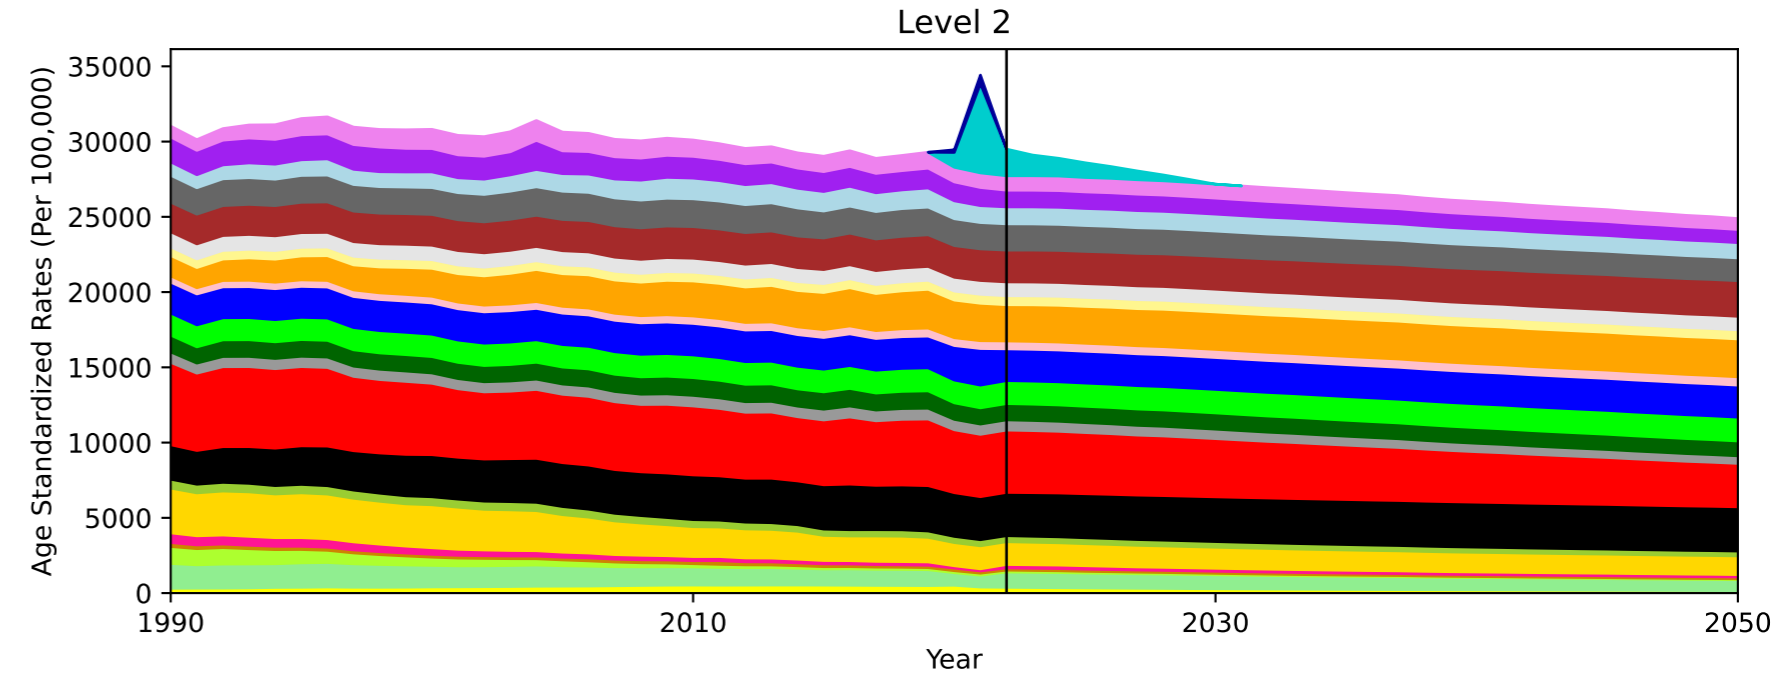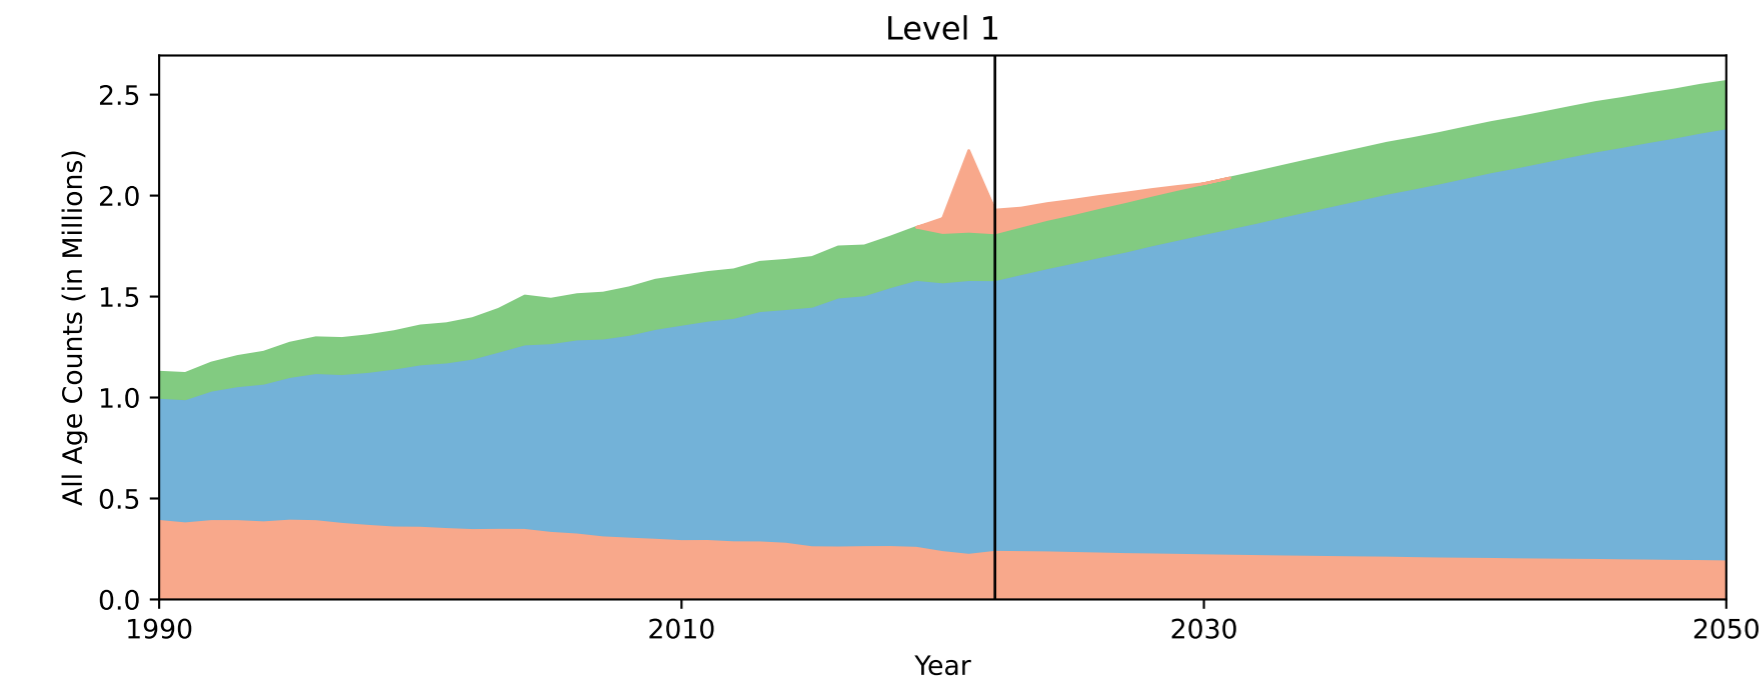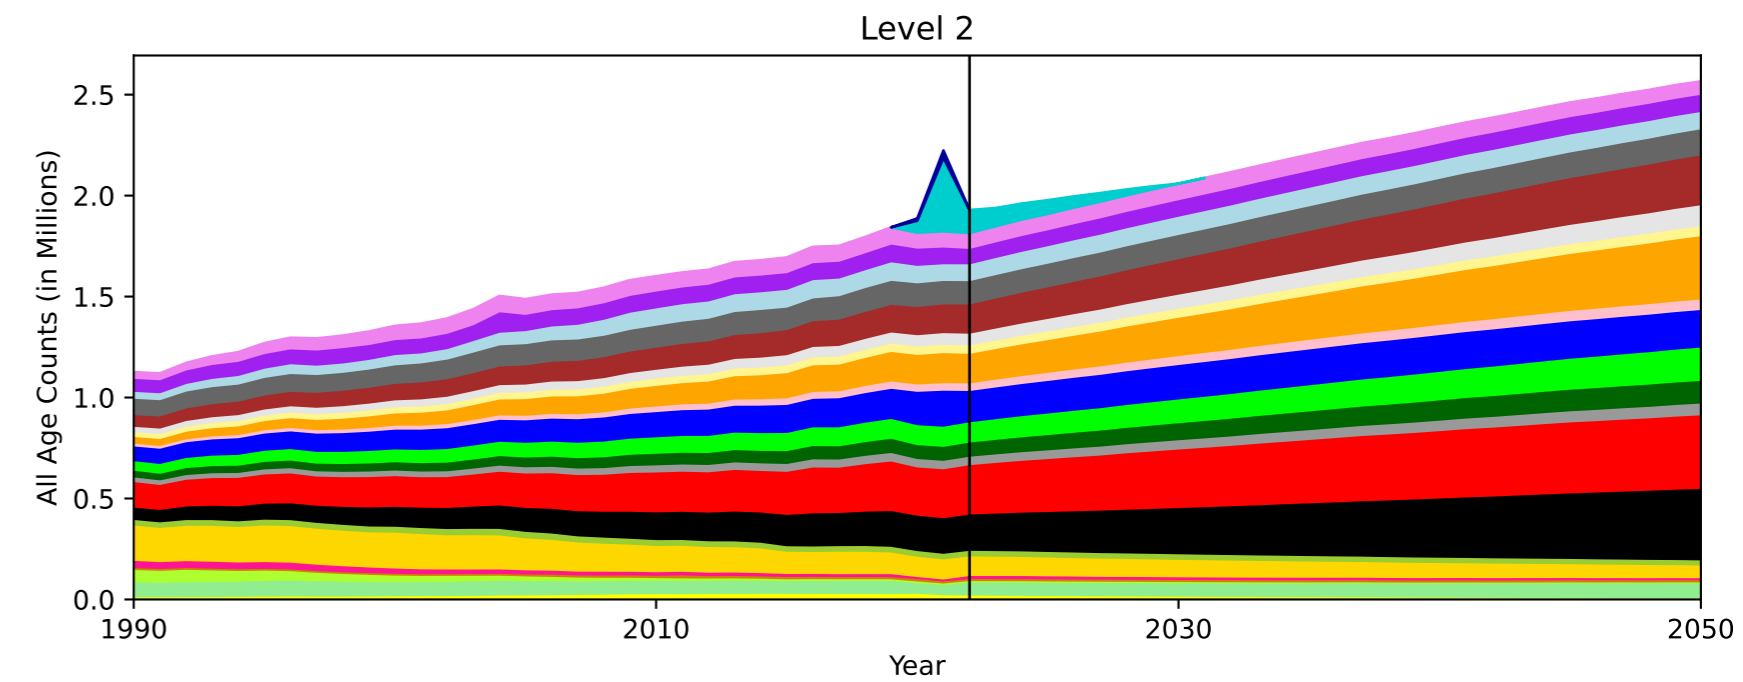

# Afghanistan

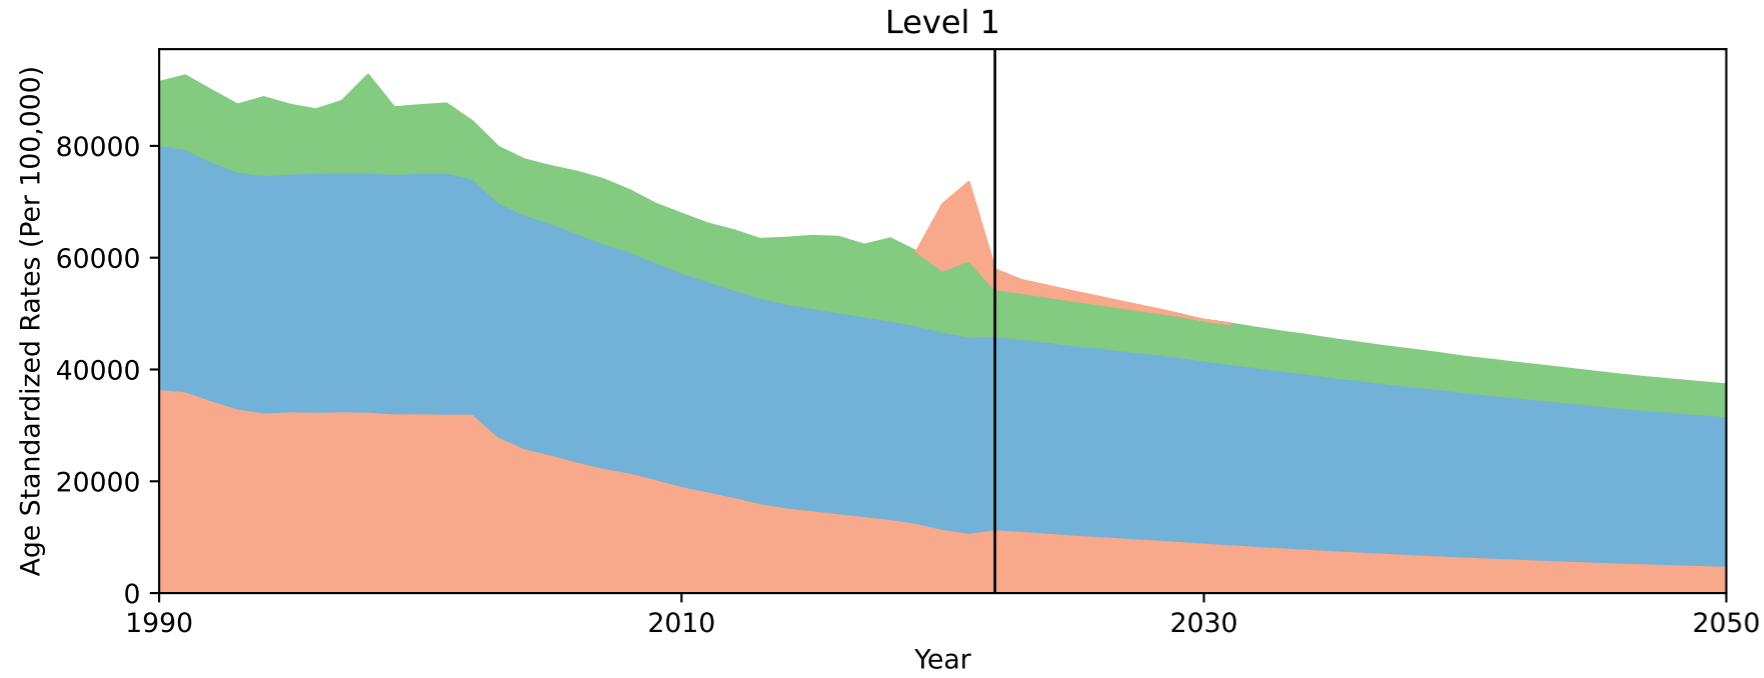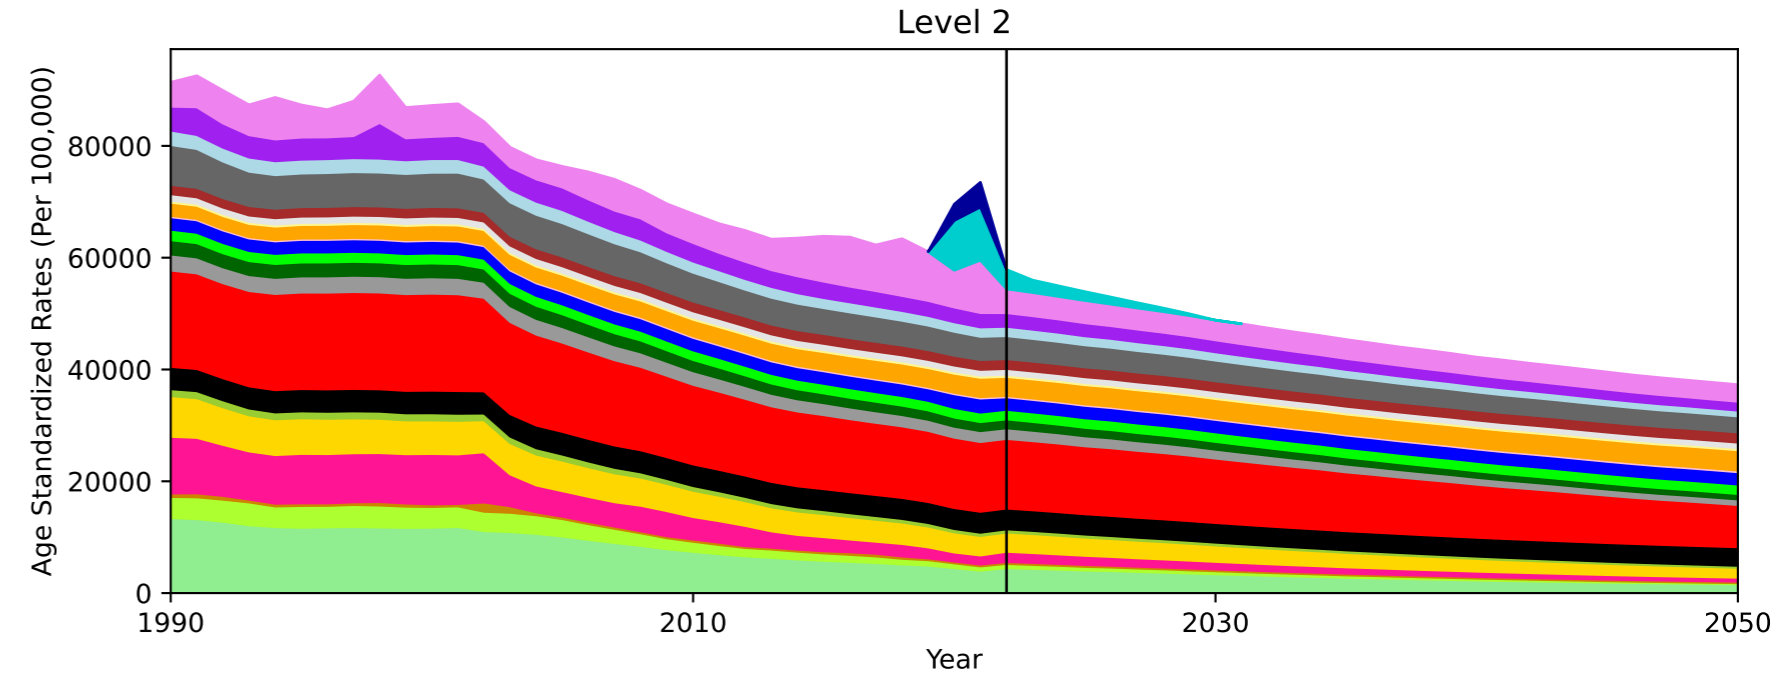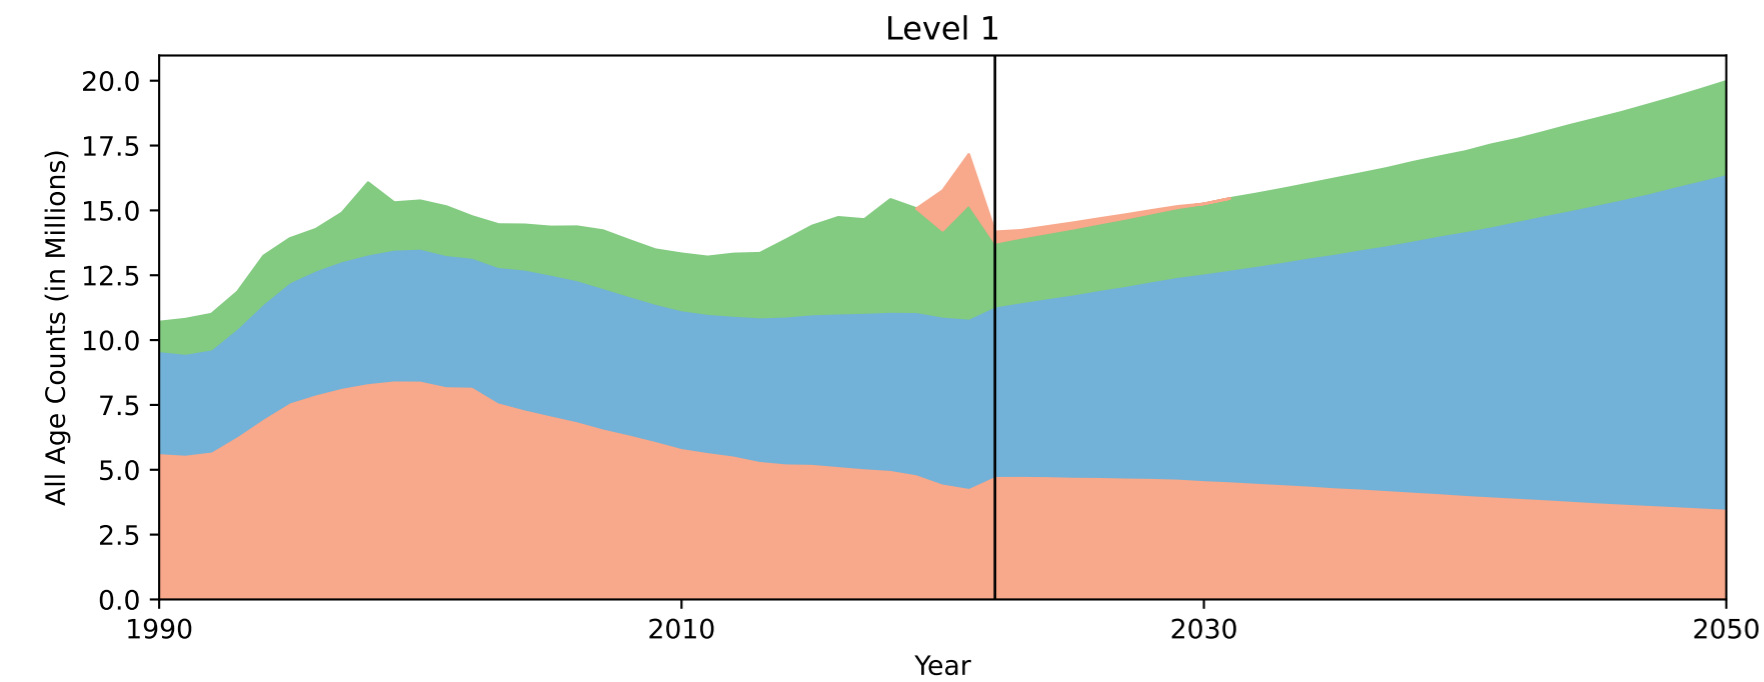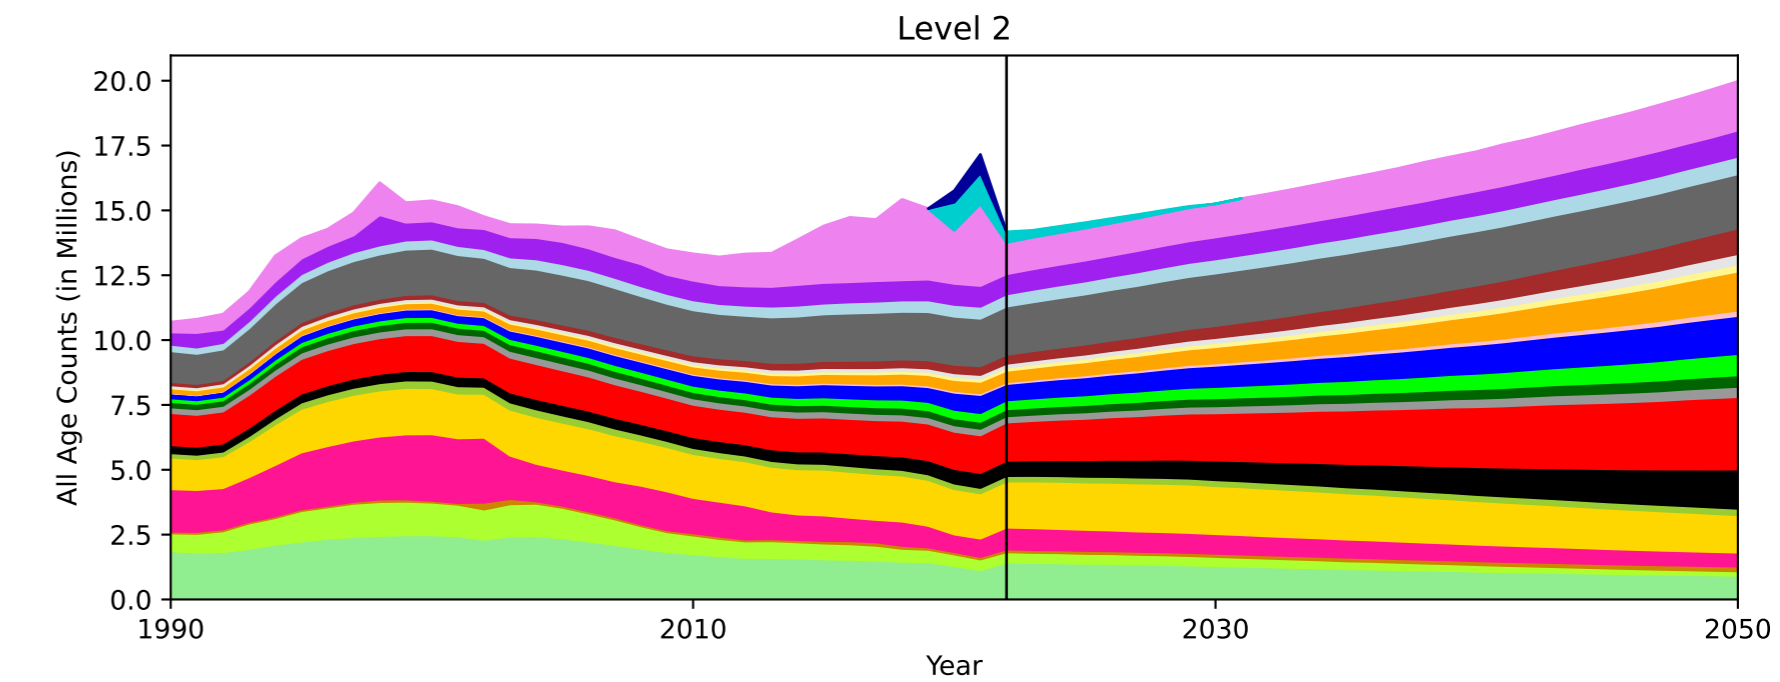



# Algeria

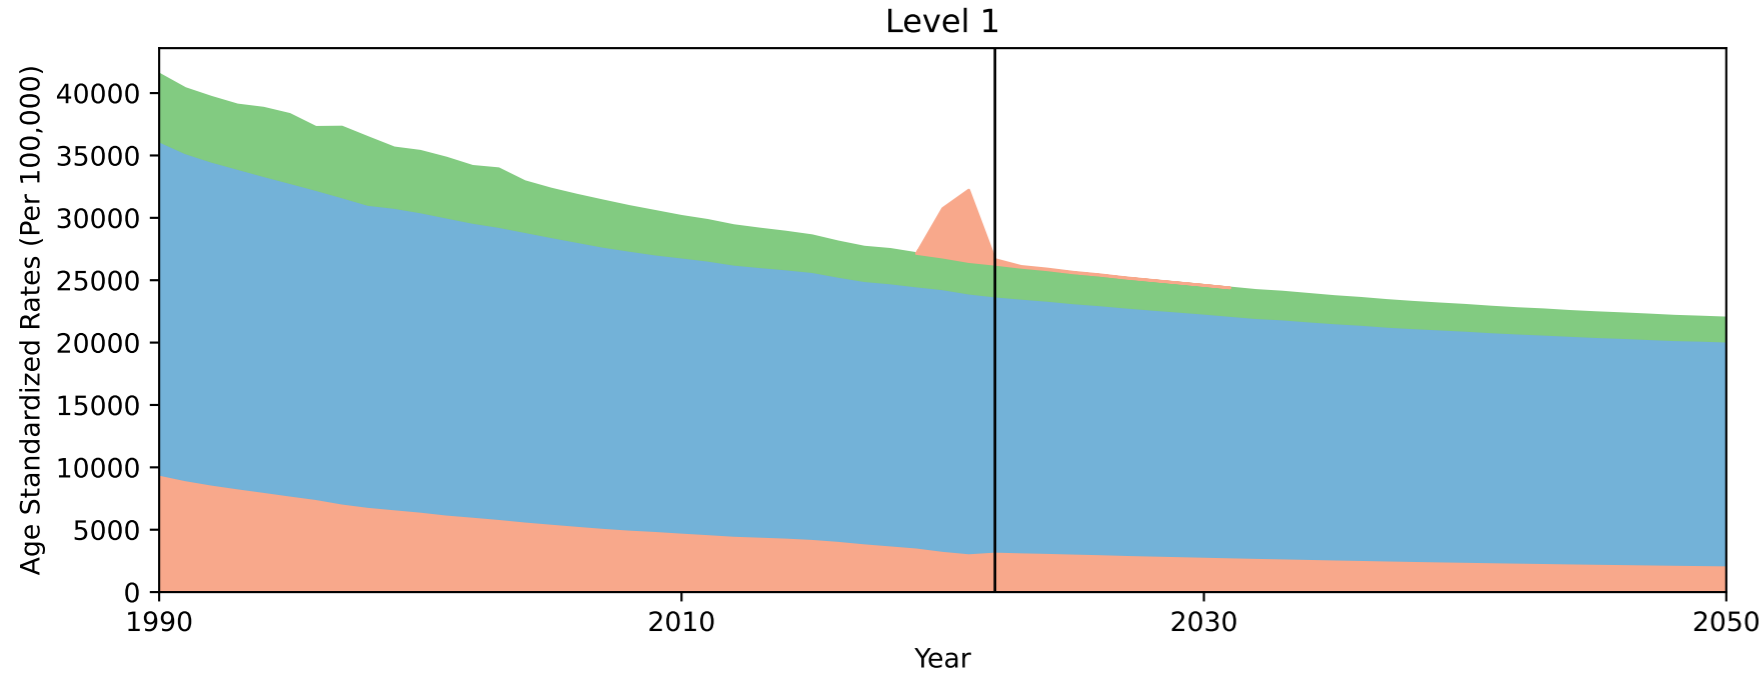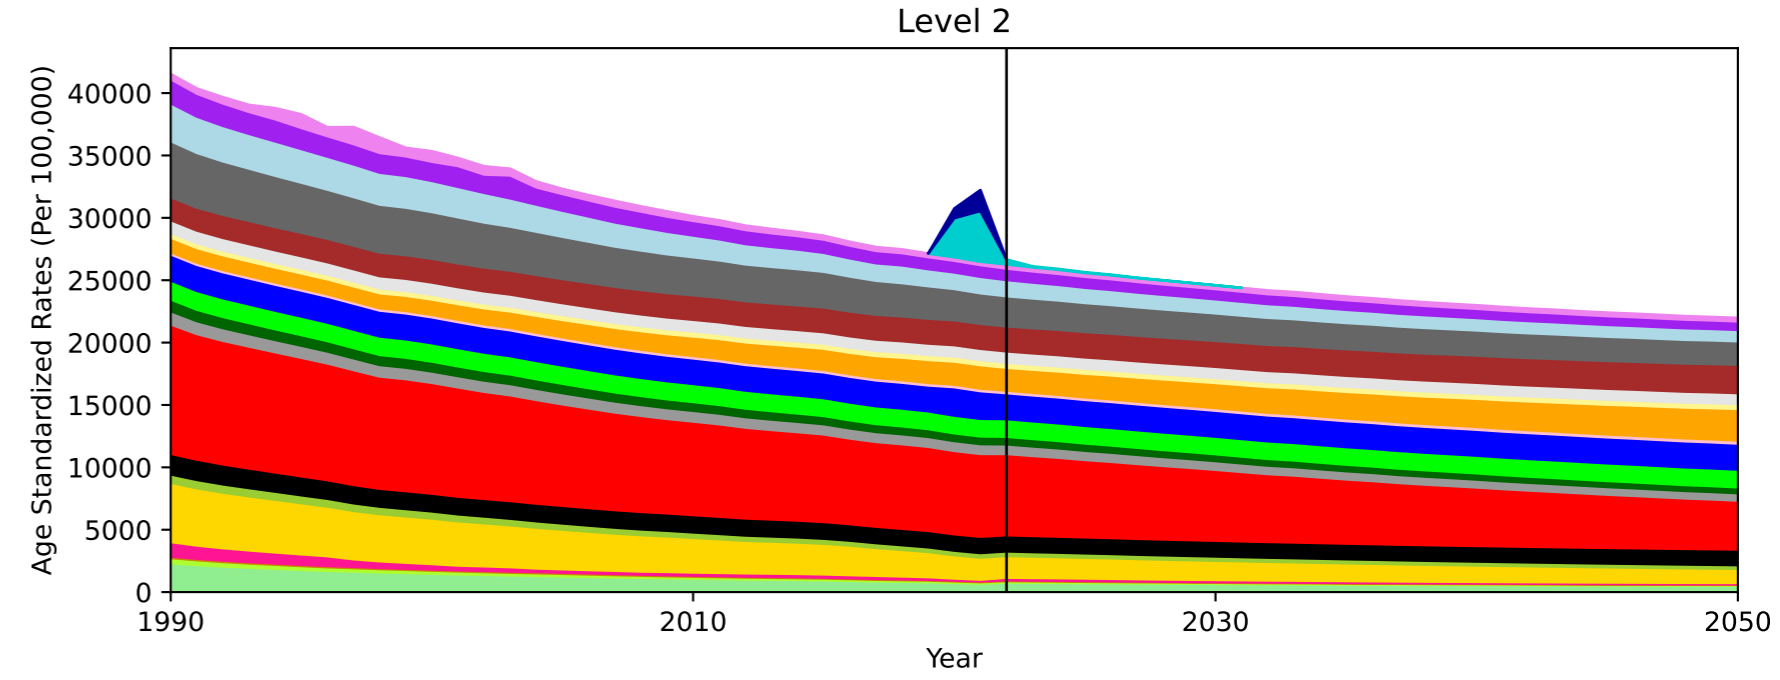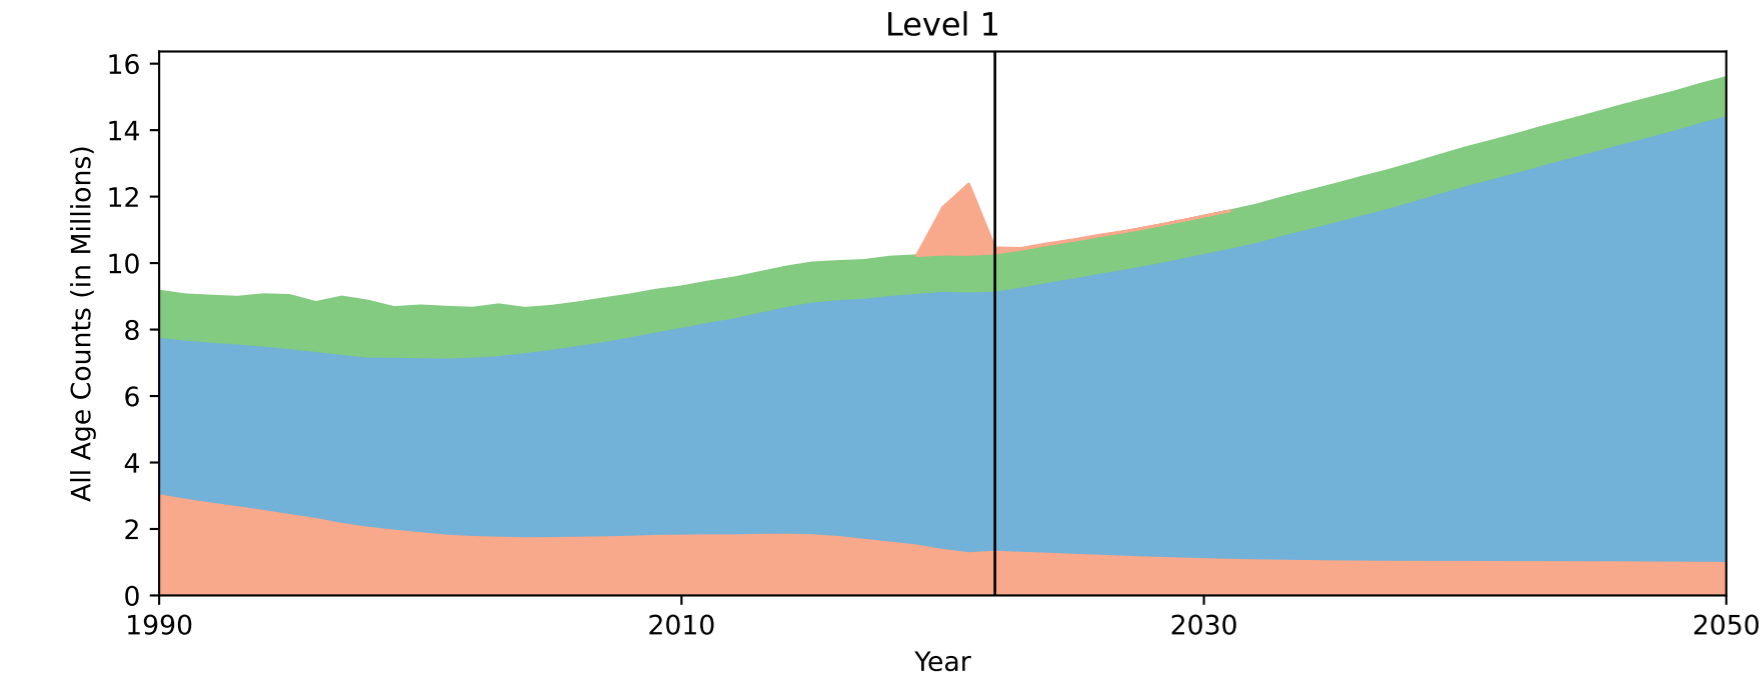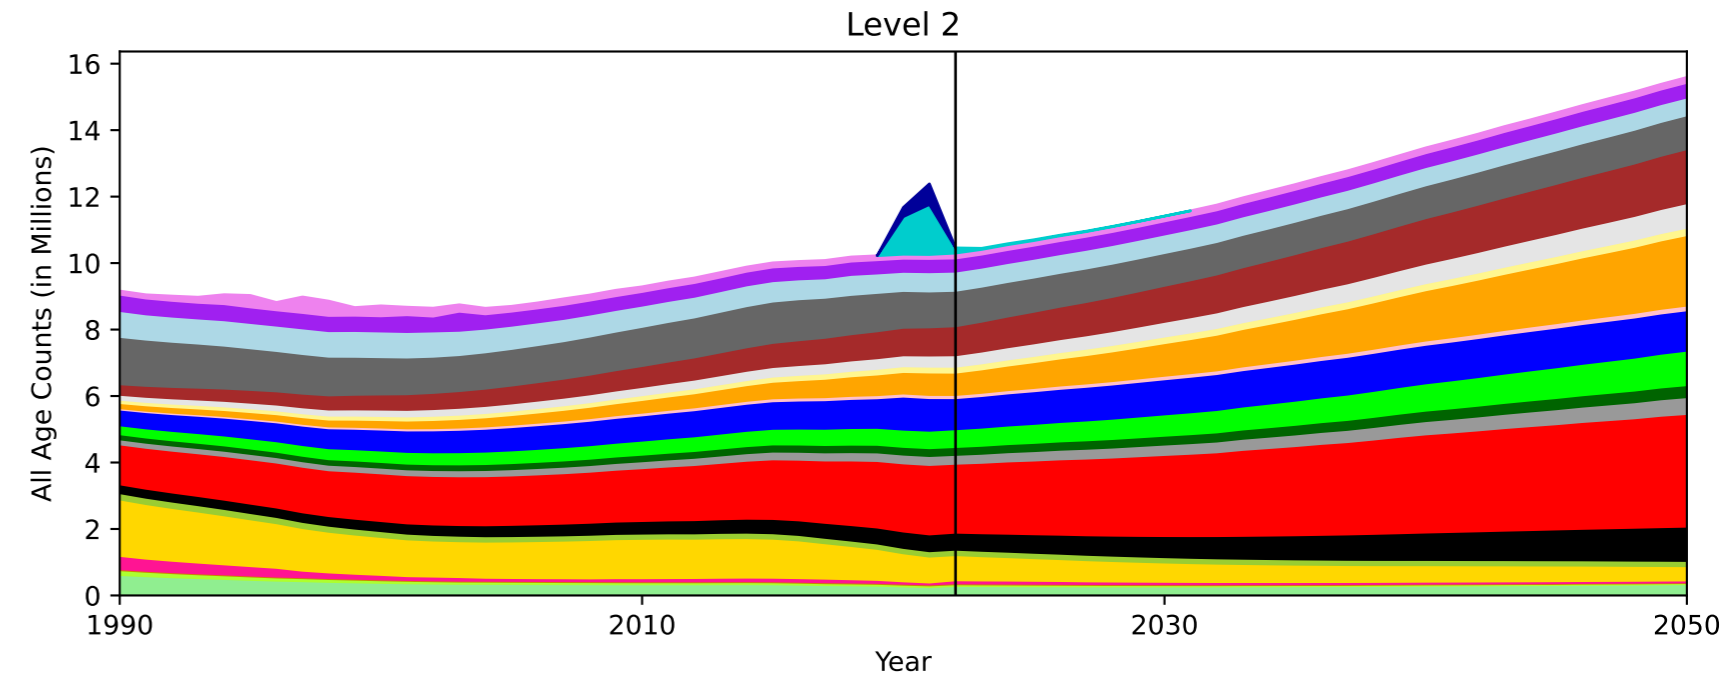

Level 1

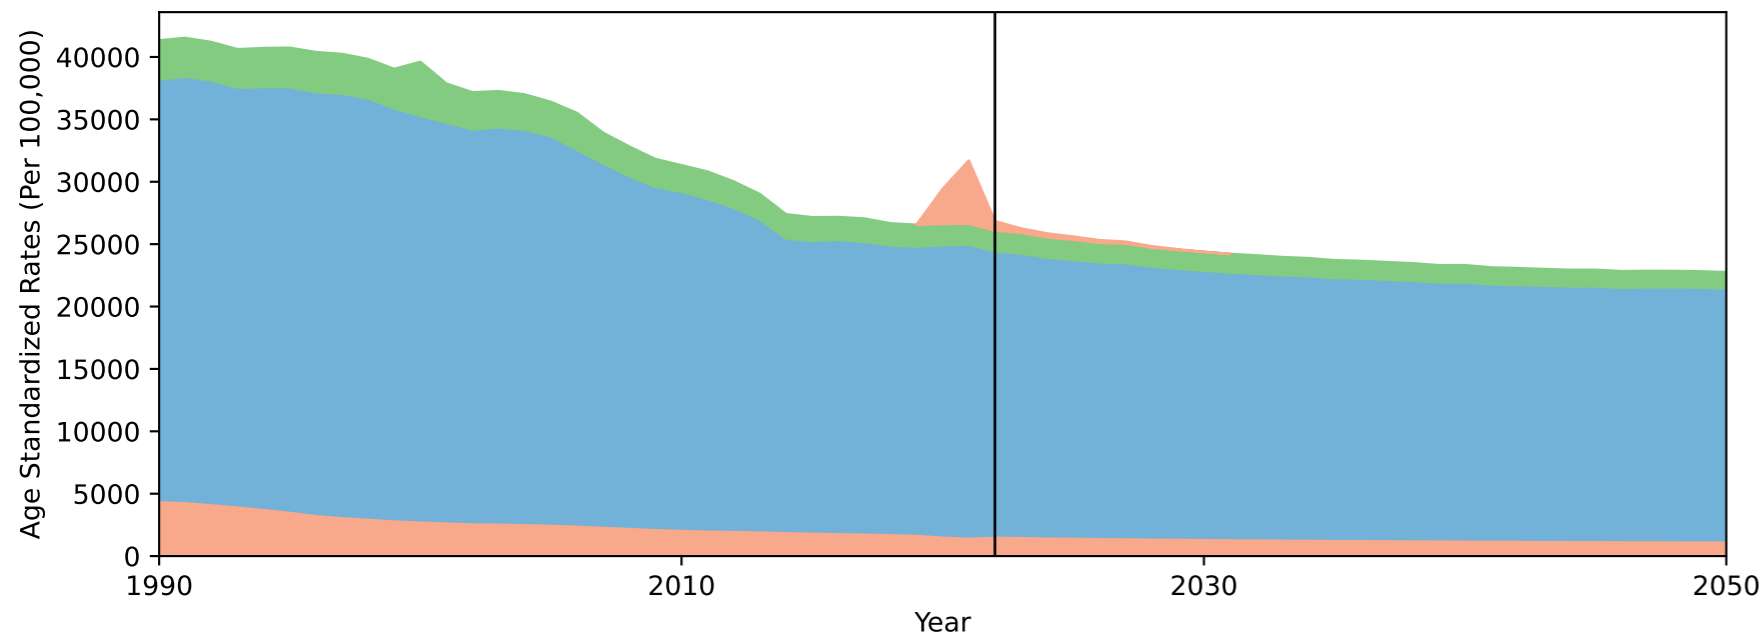

Level 2

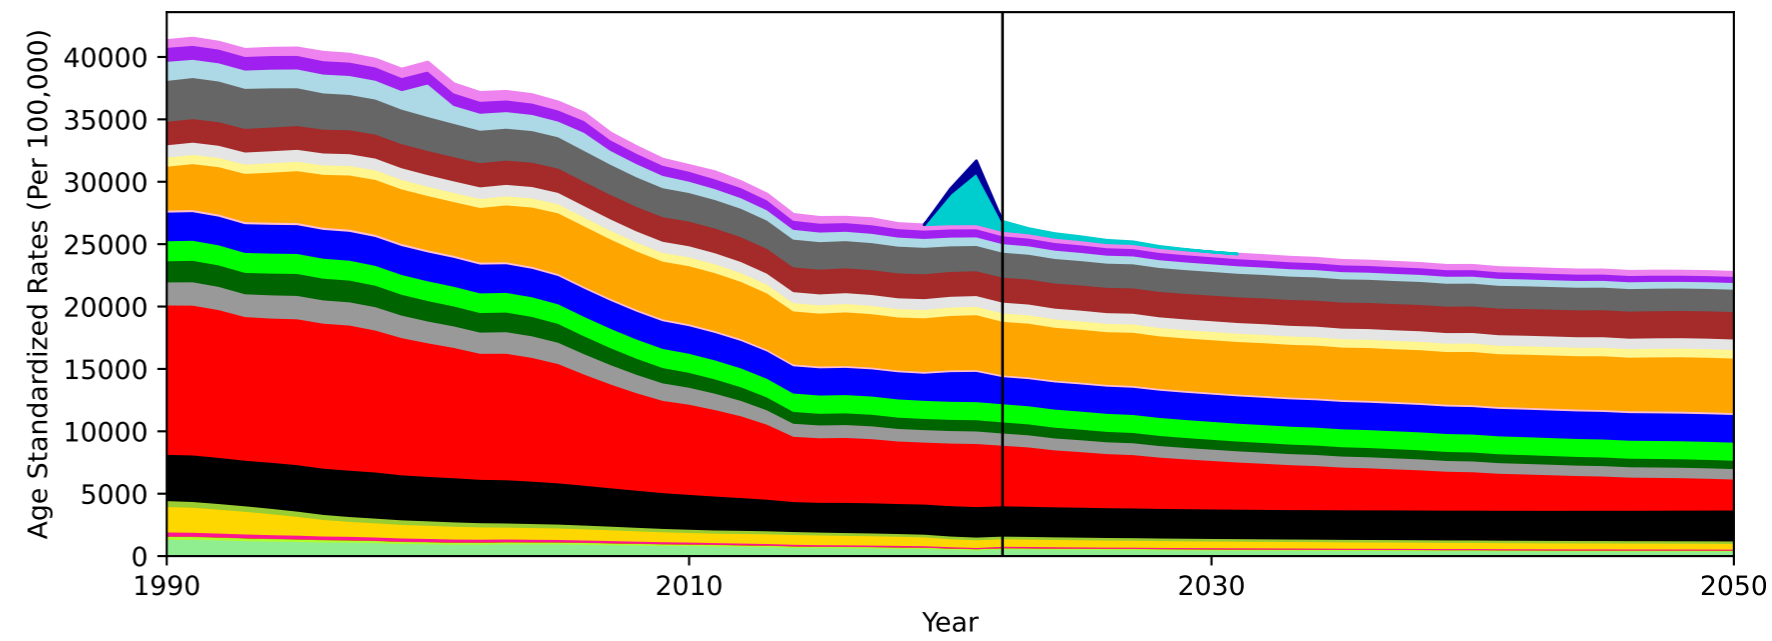

Level 1

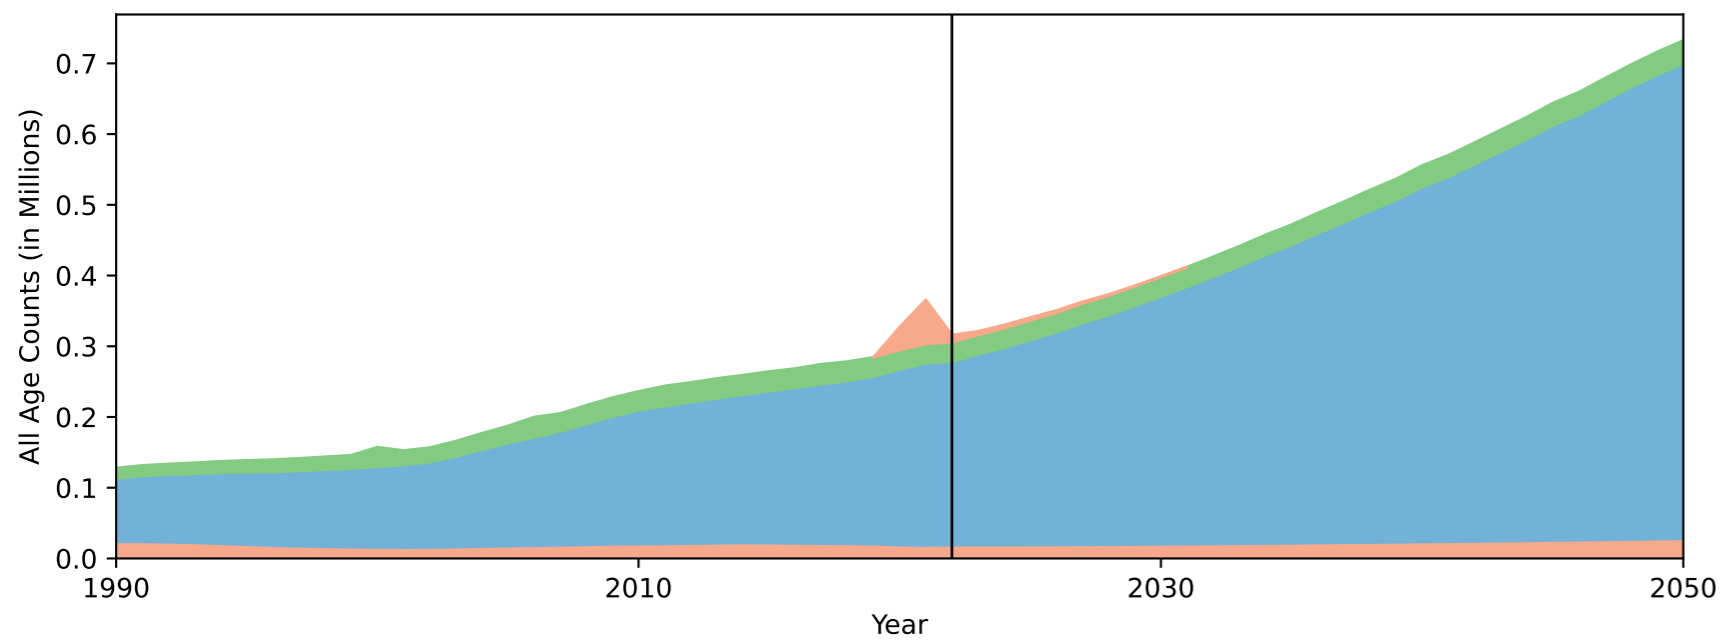

Level 2

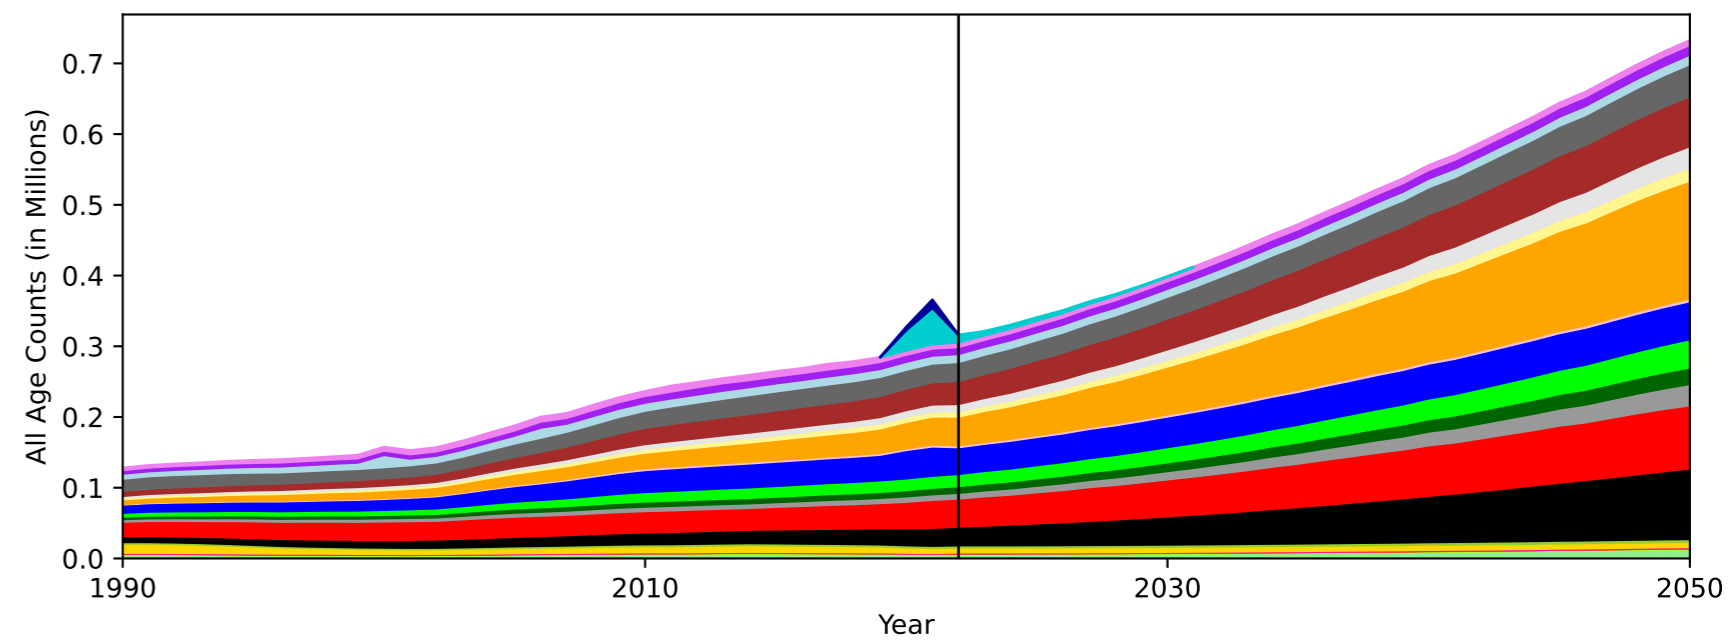

# Egypt

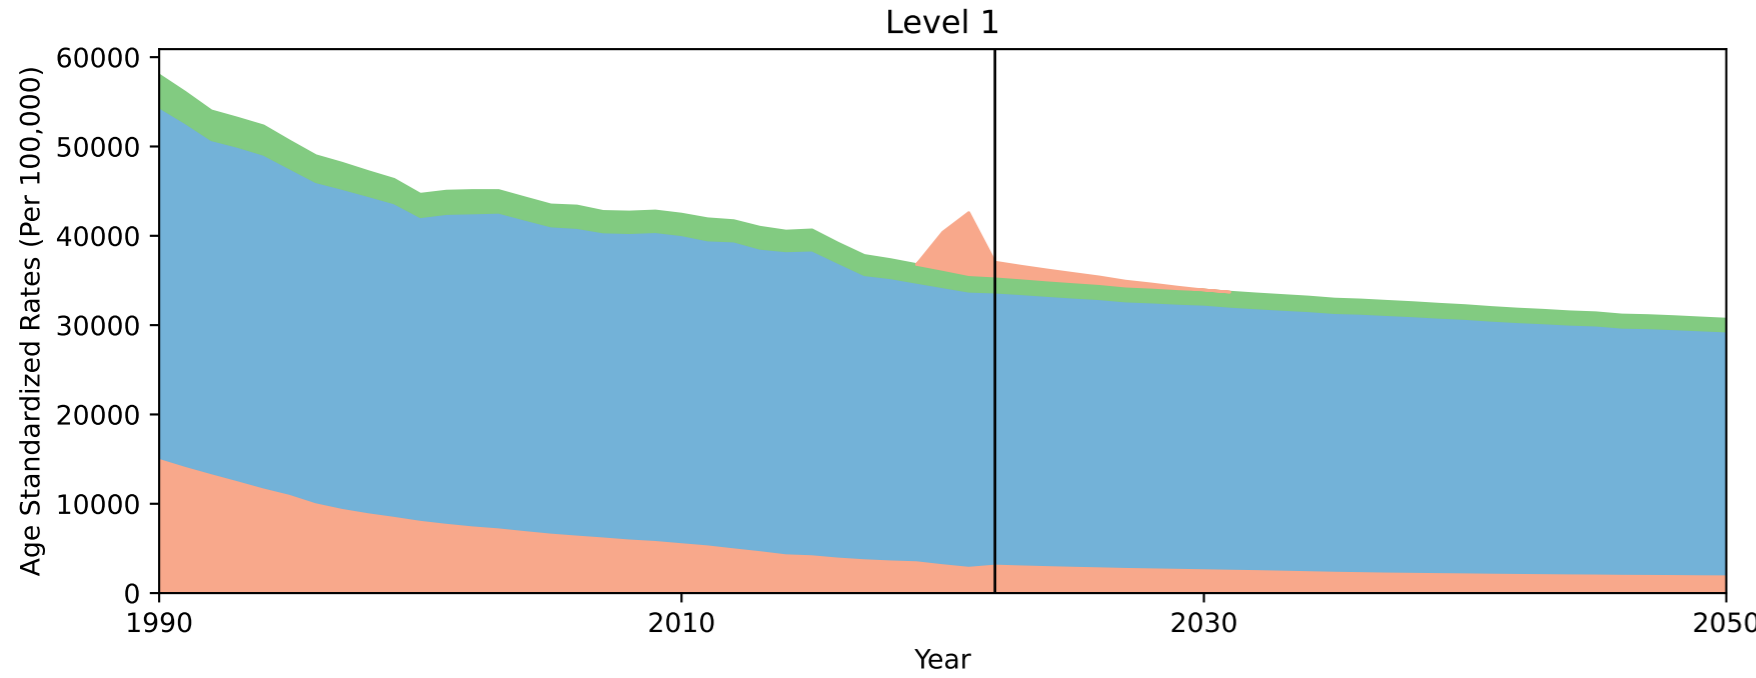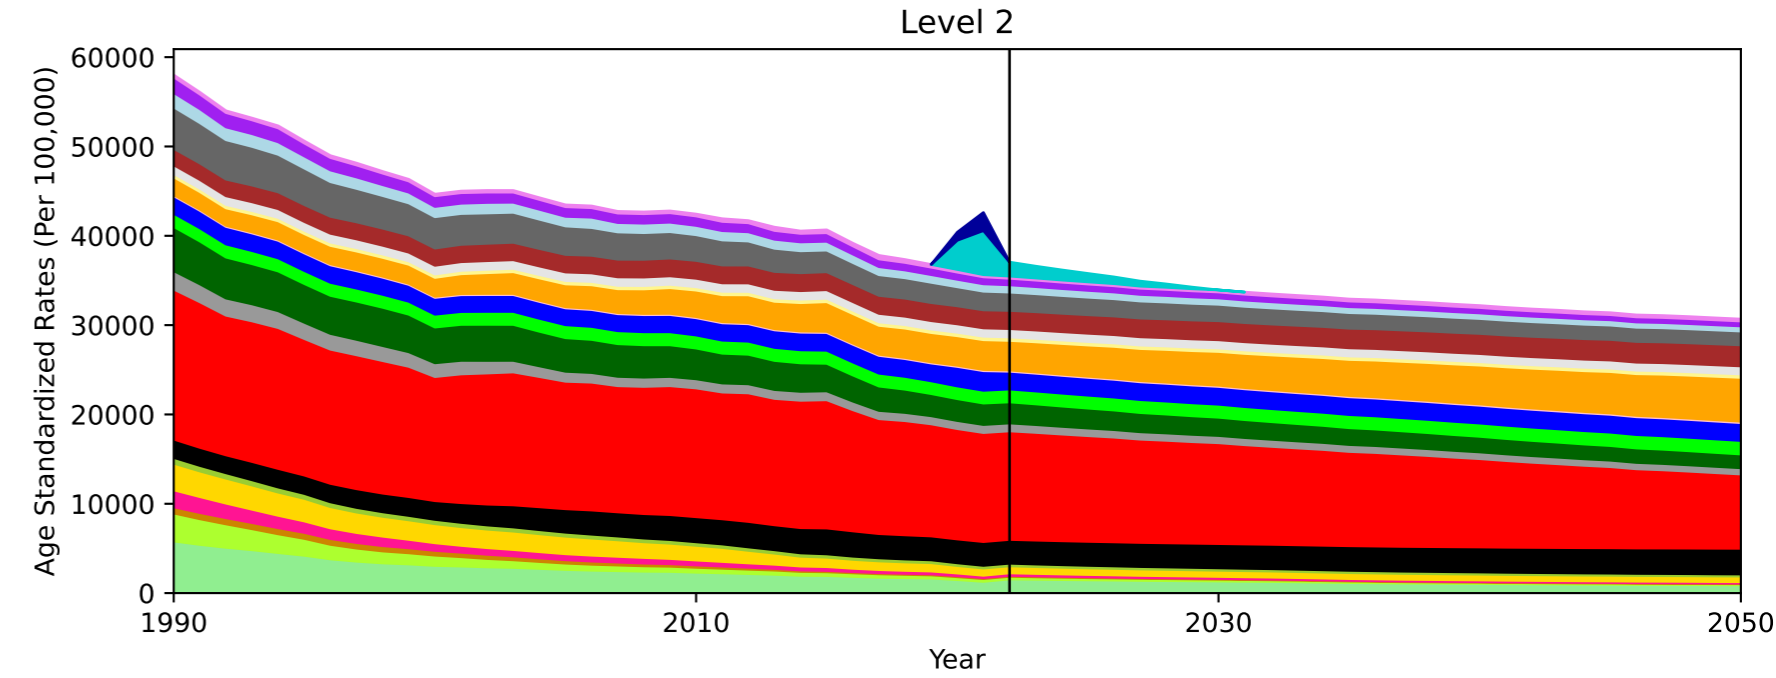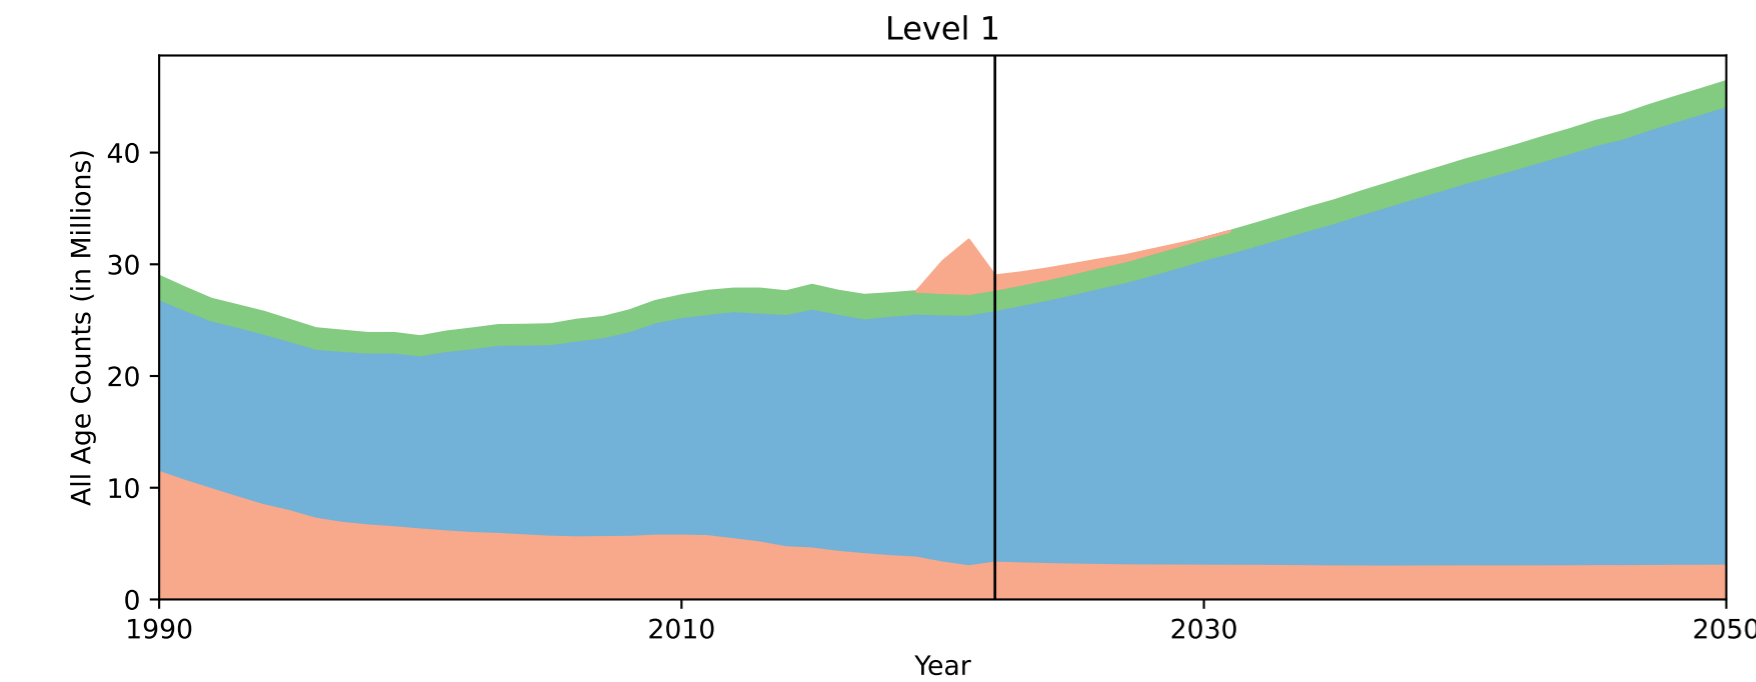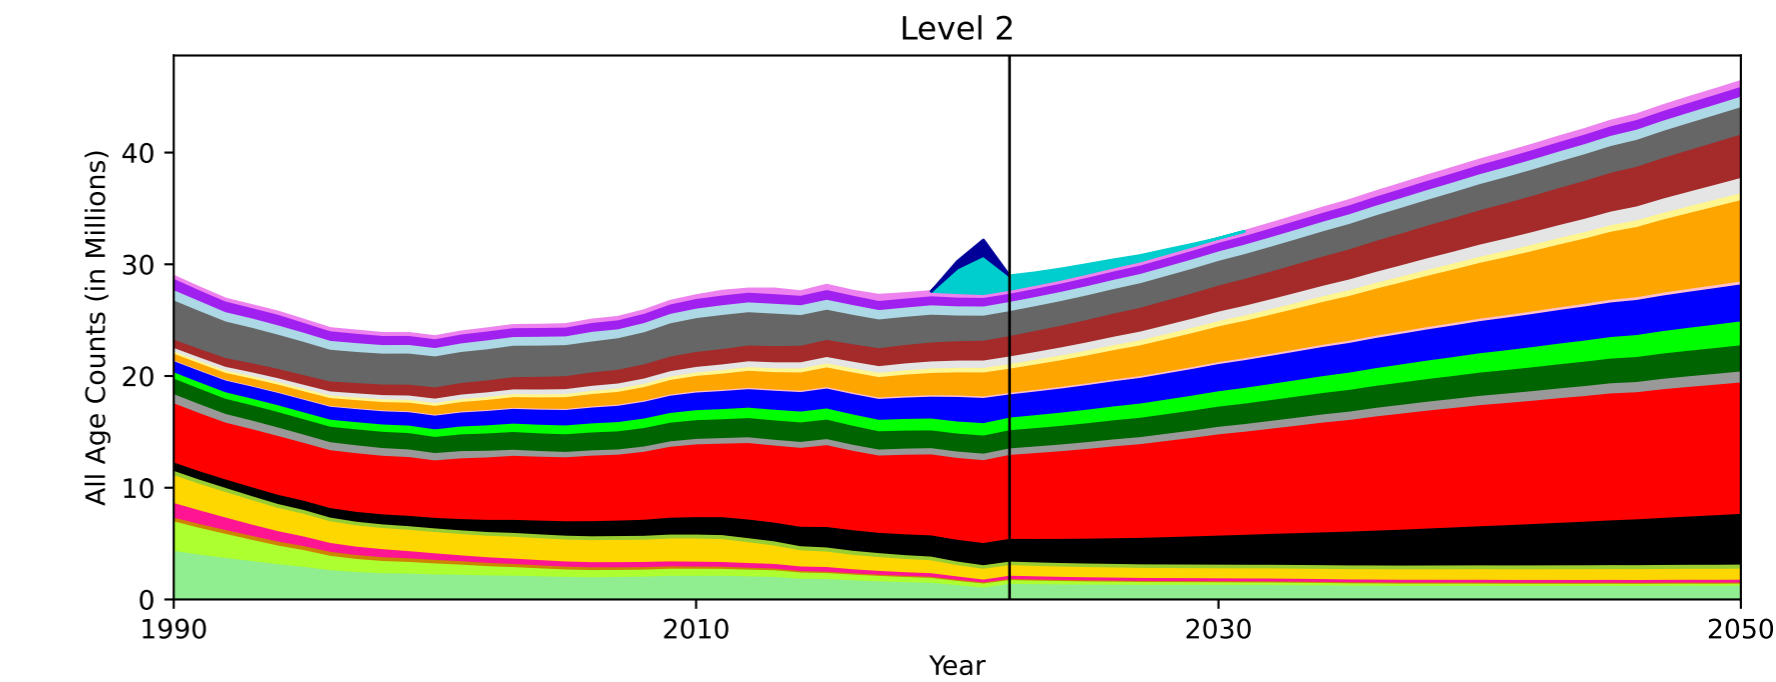

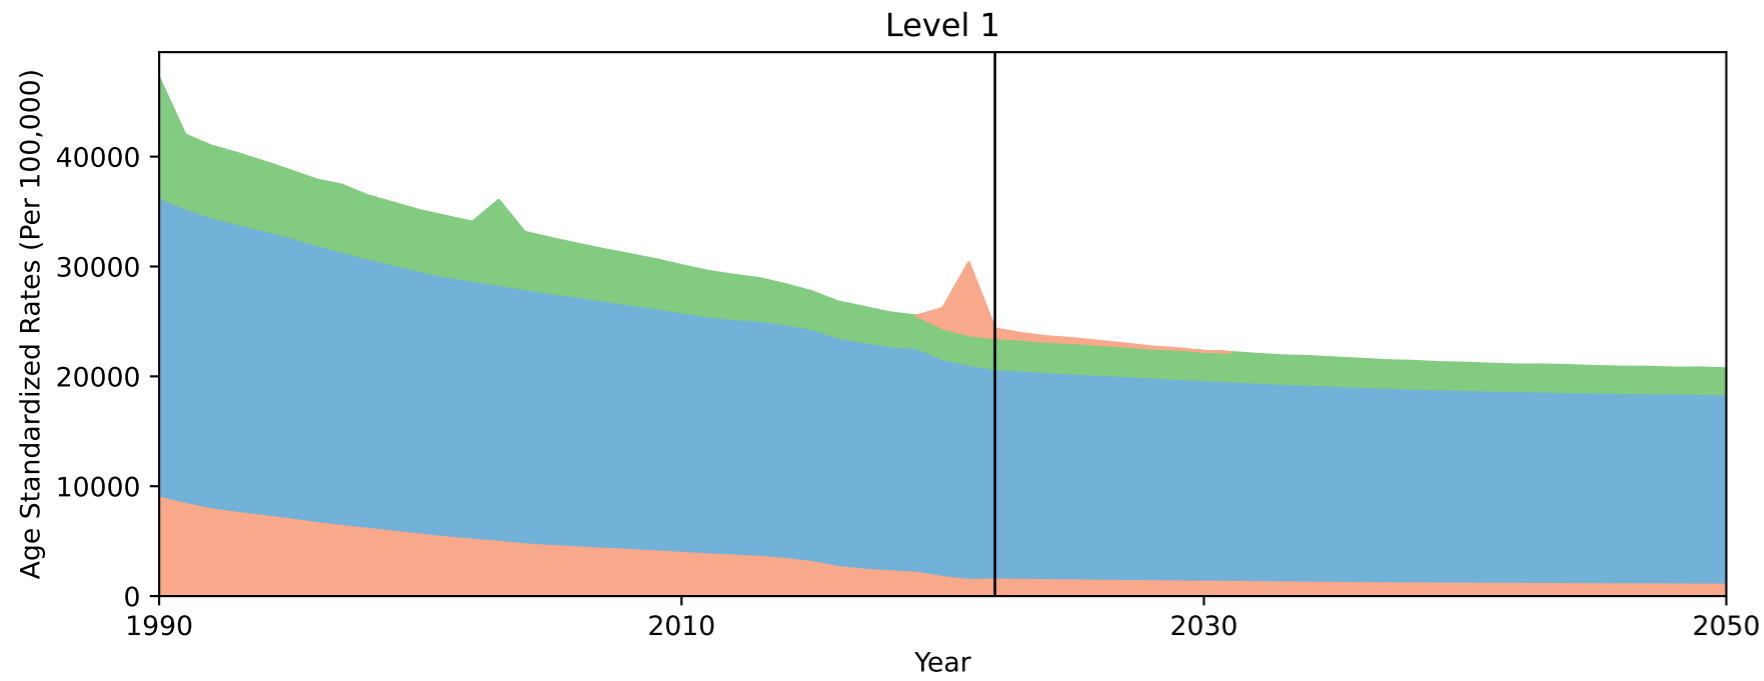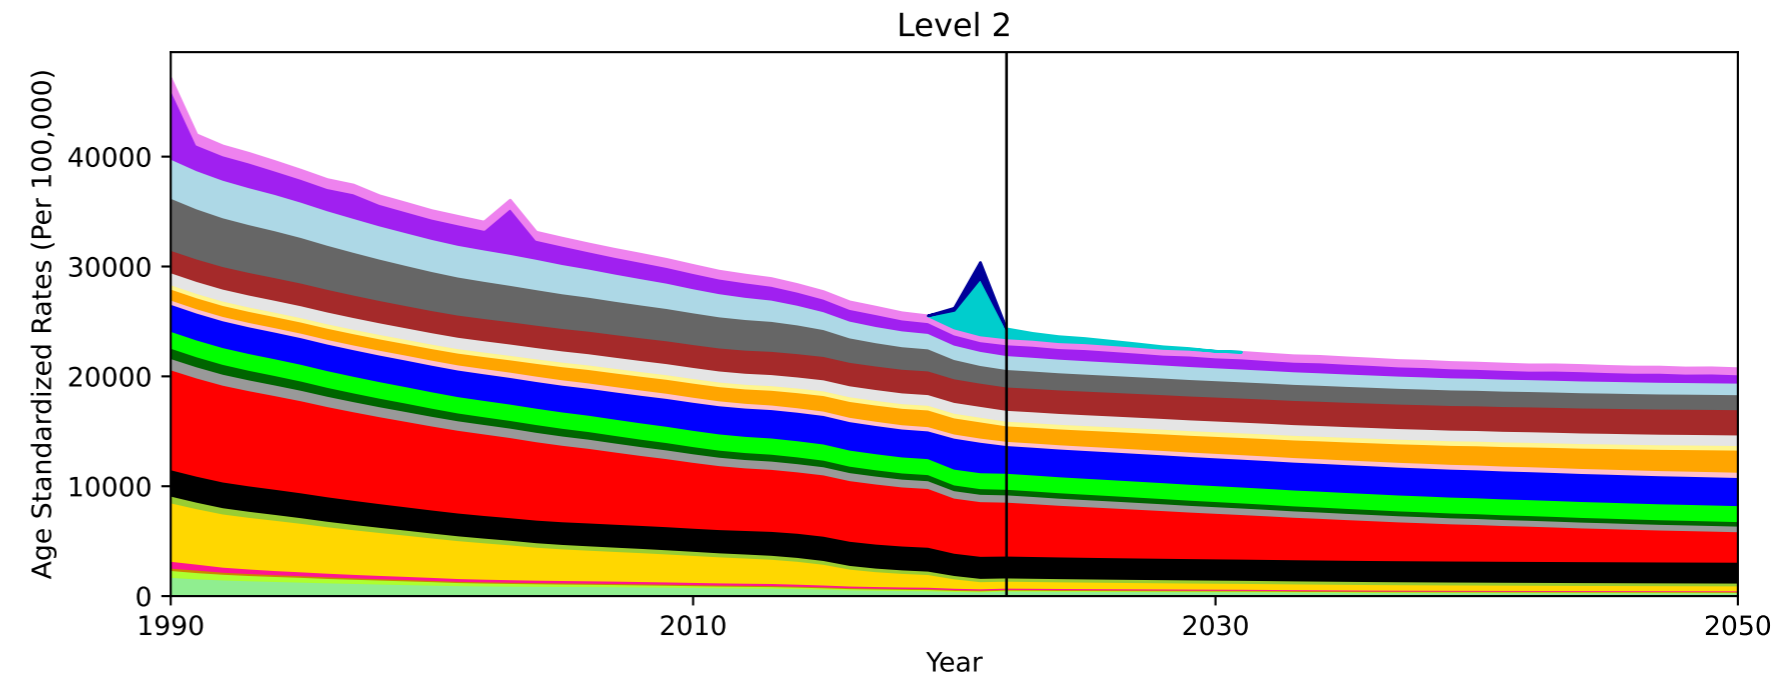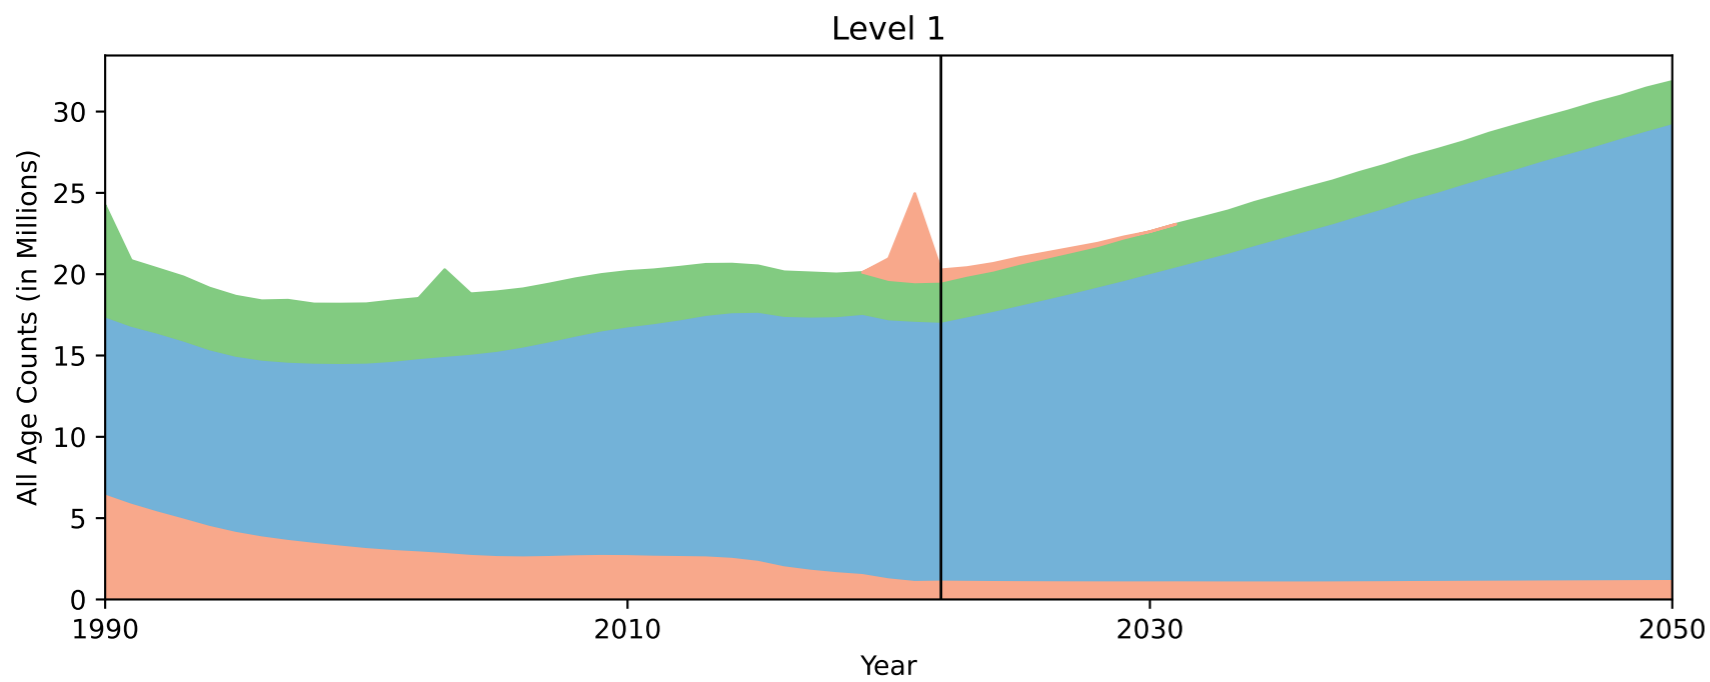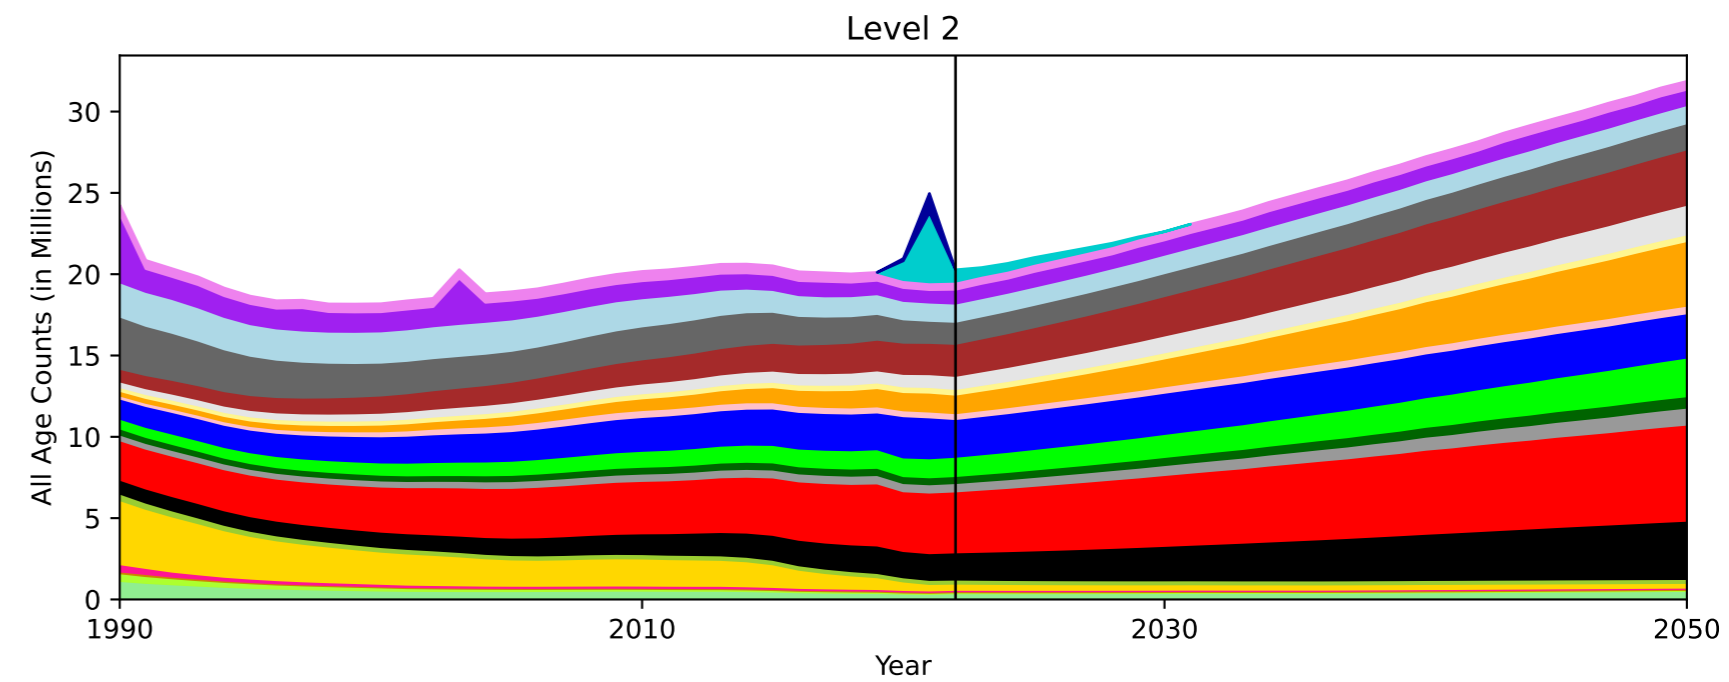

# Iraq

Level 1

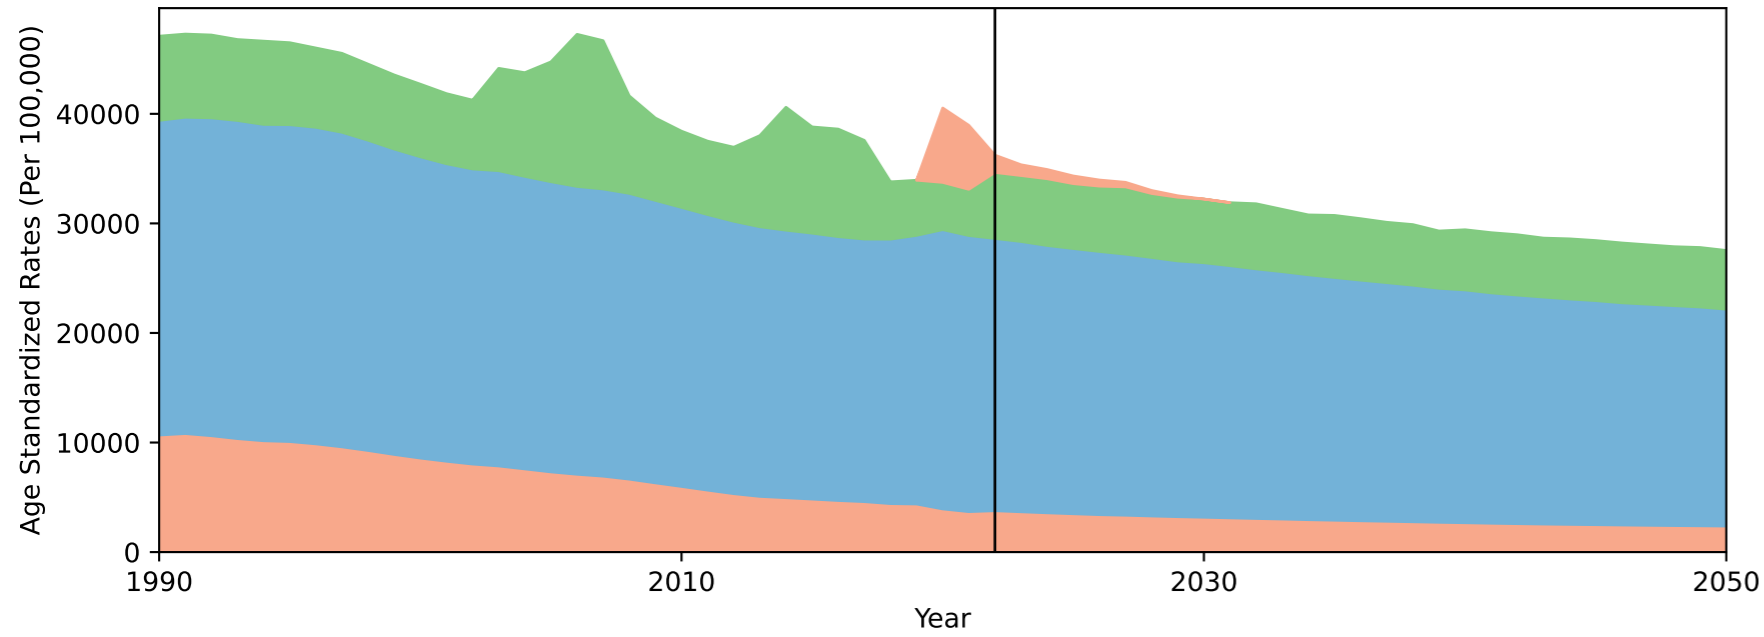

Level 2

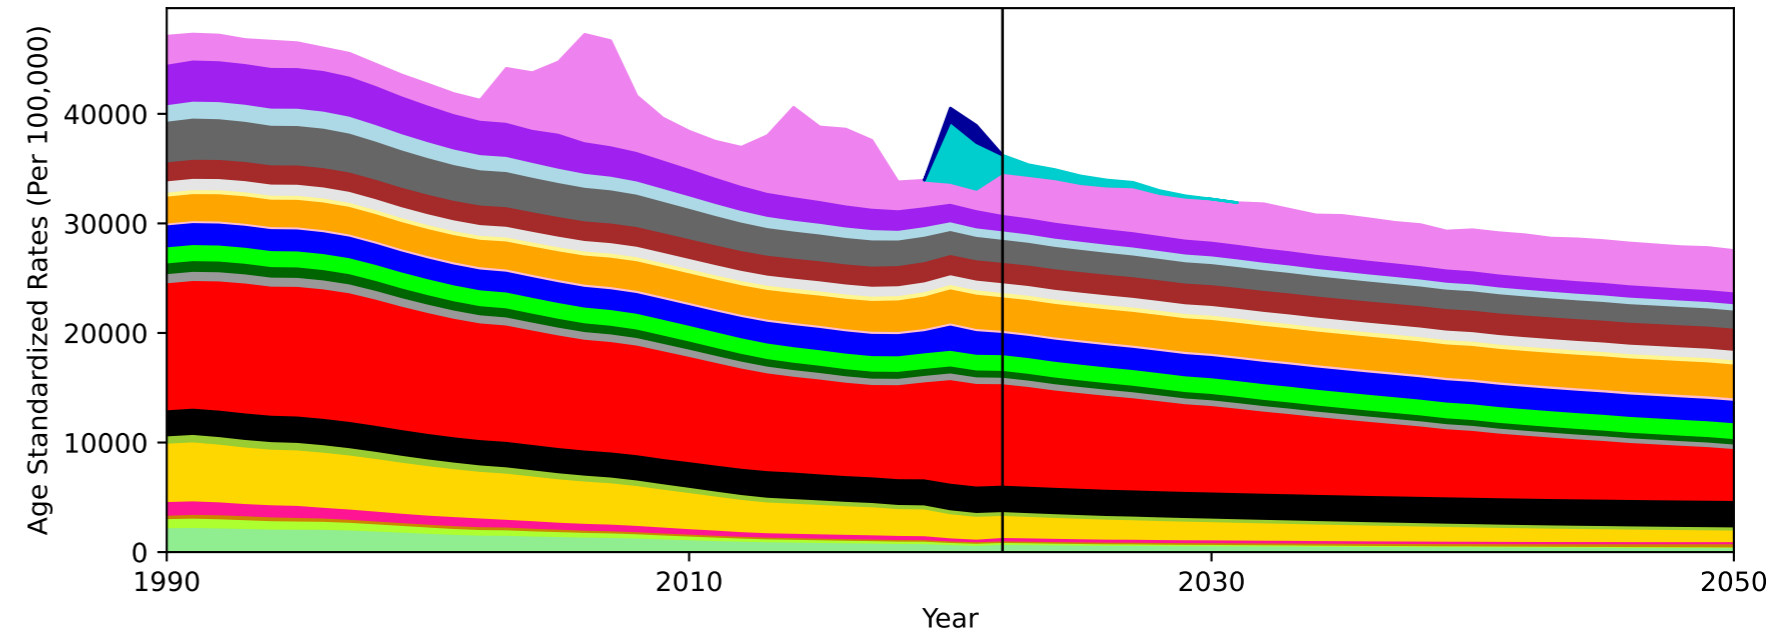

Level 1

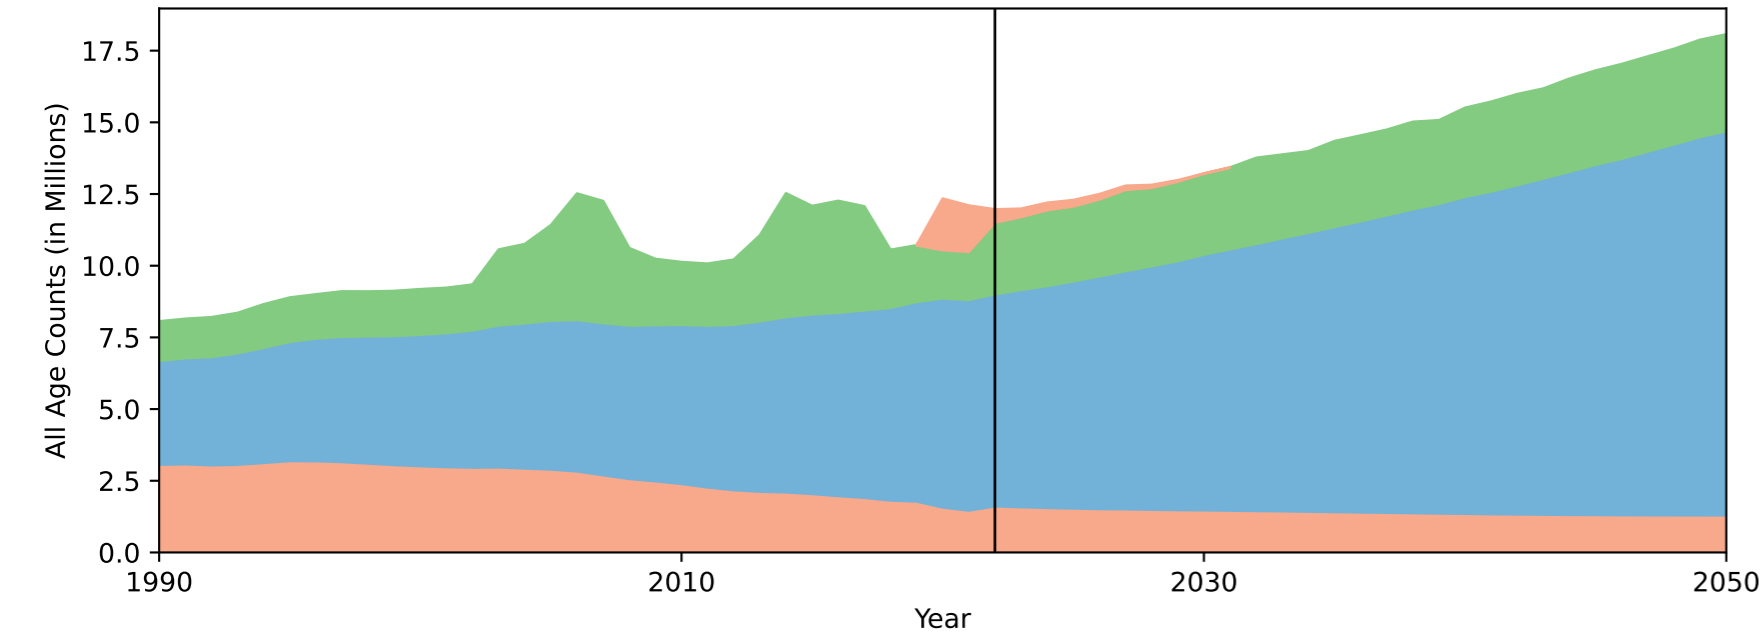

Level 2

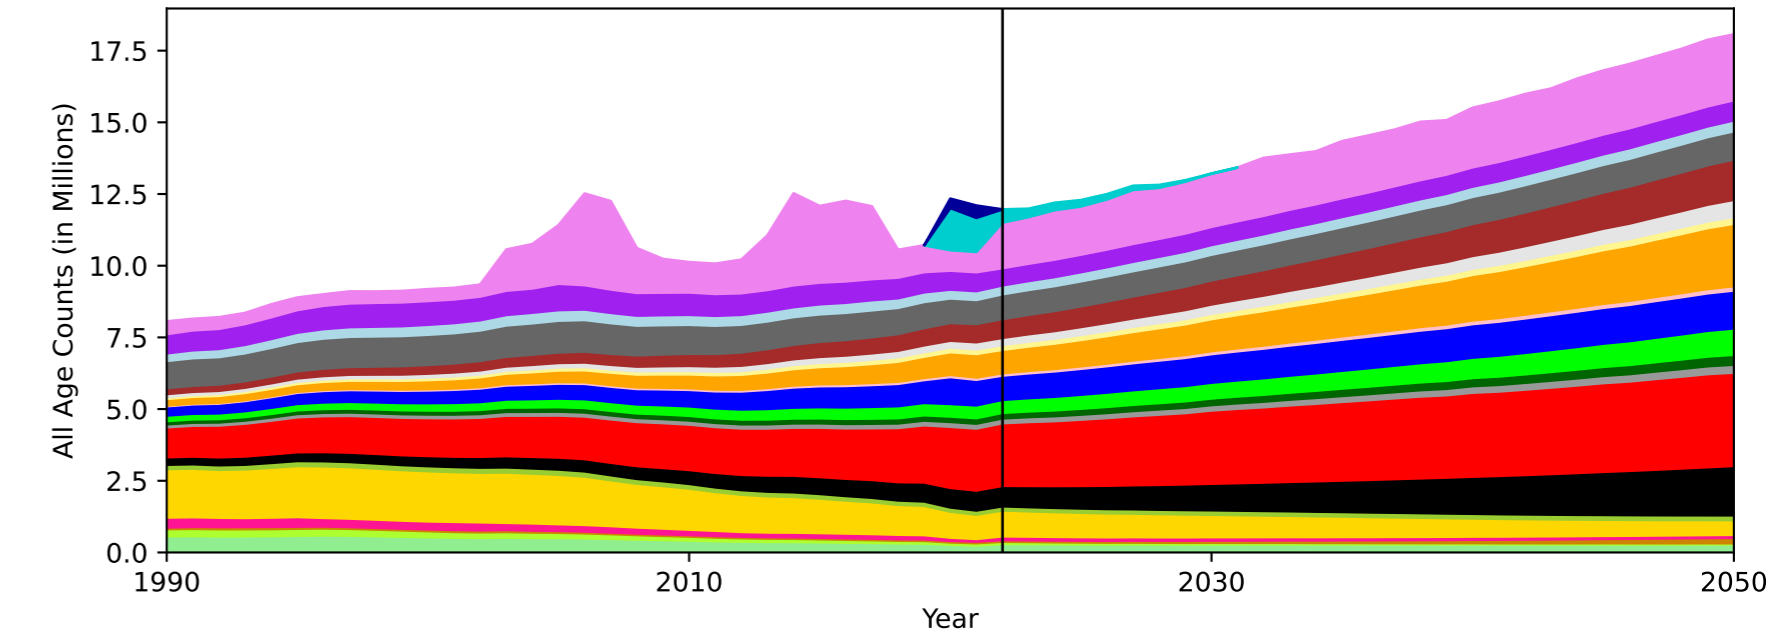

# Jordan

Level 1

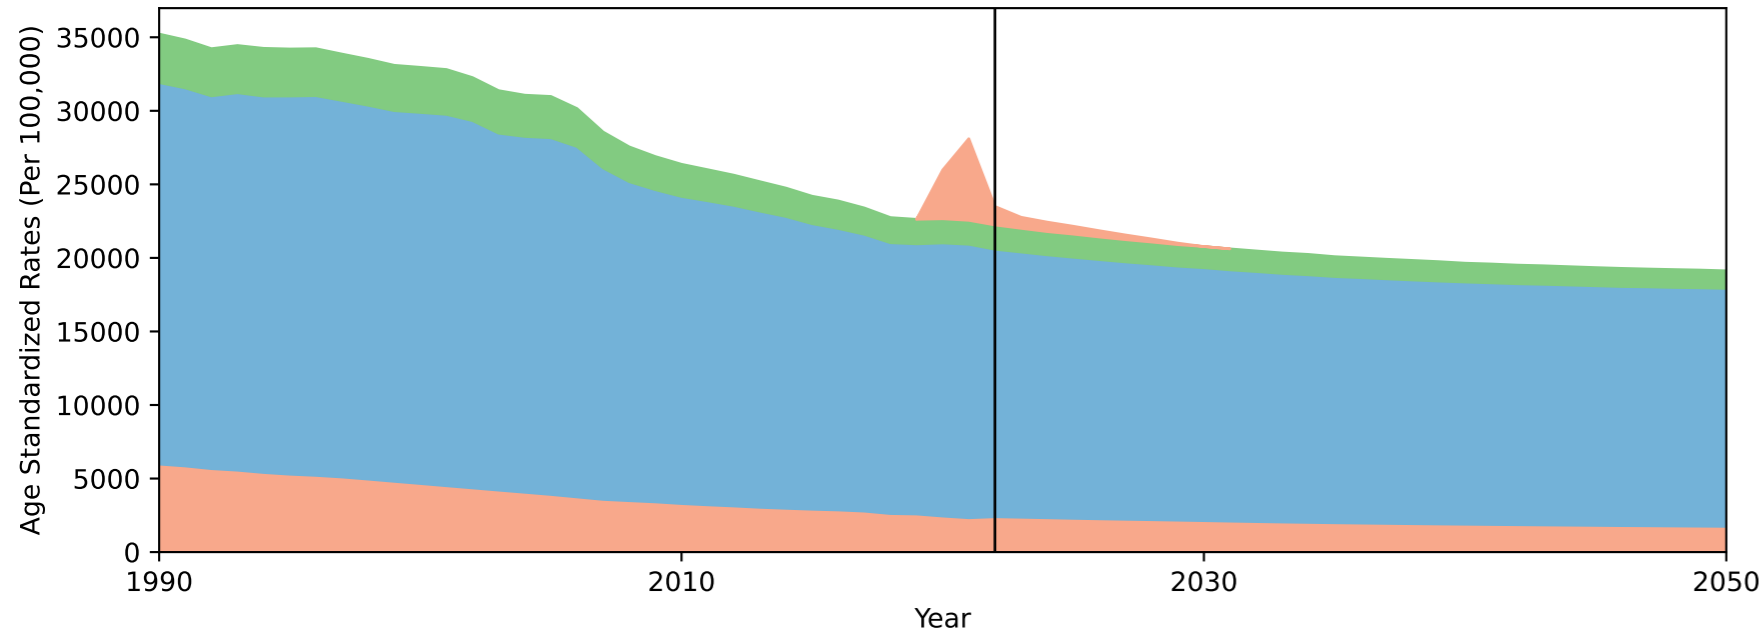

Level 2

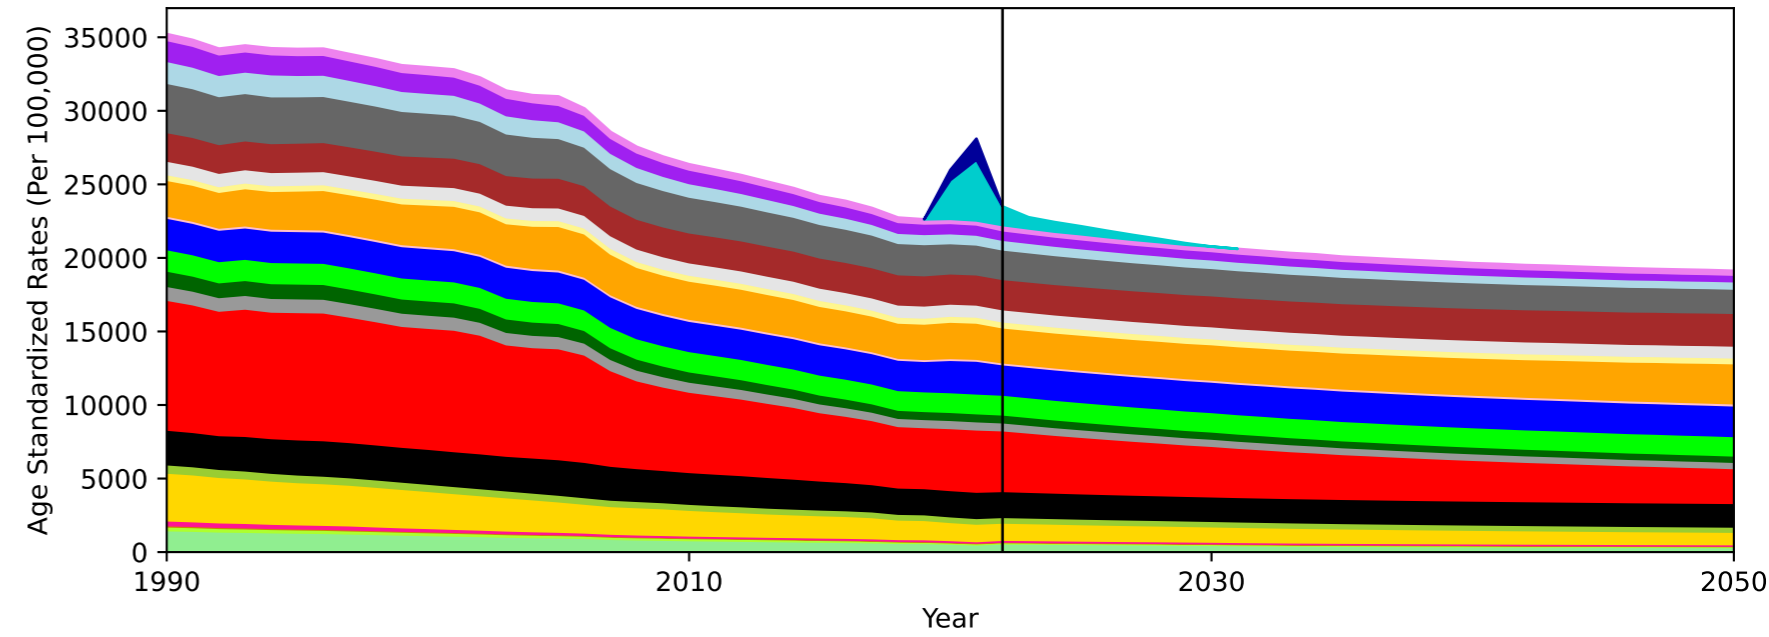

Level 1

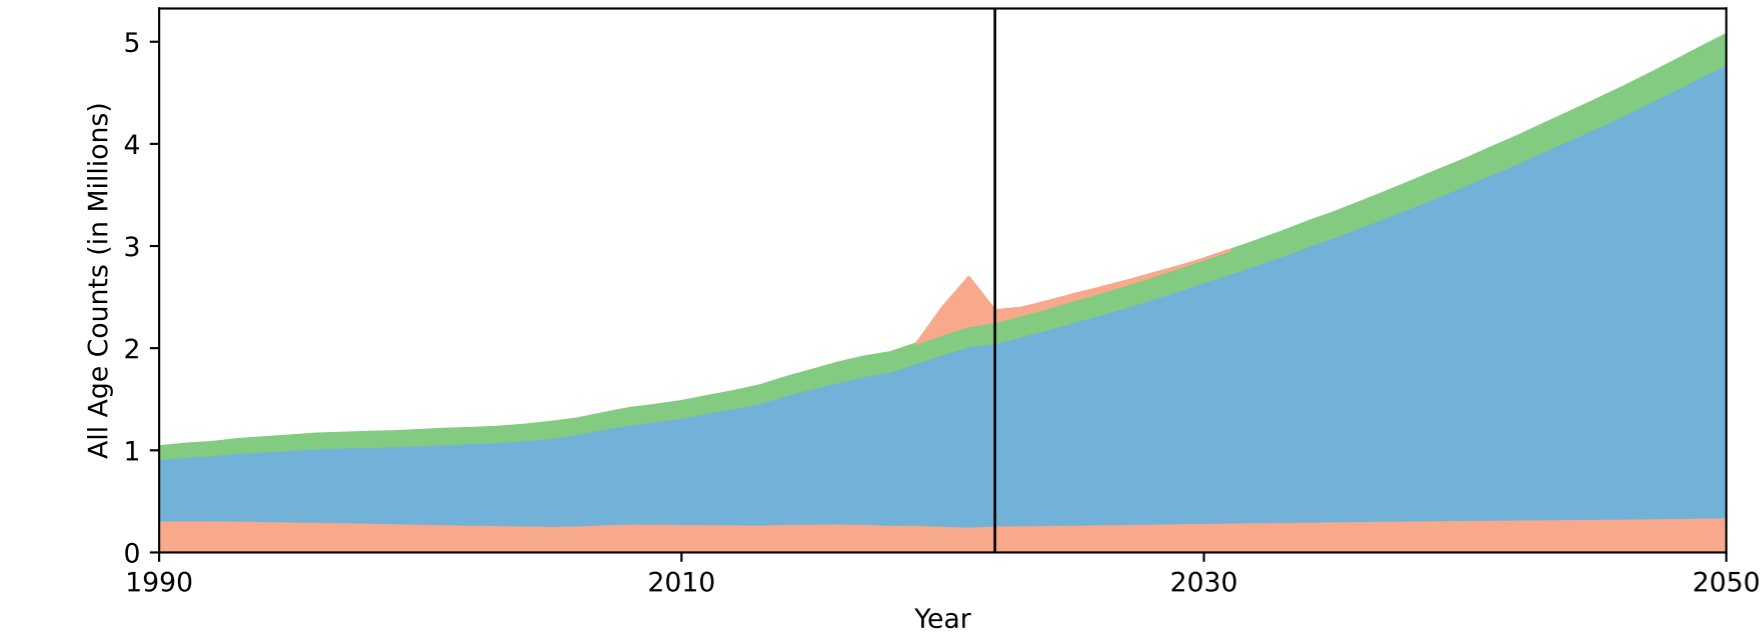

Level 2

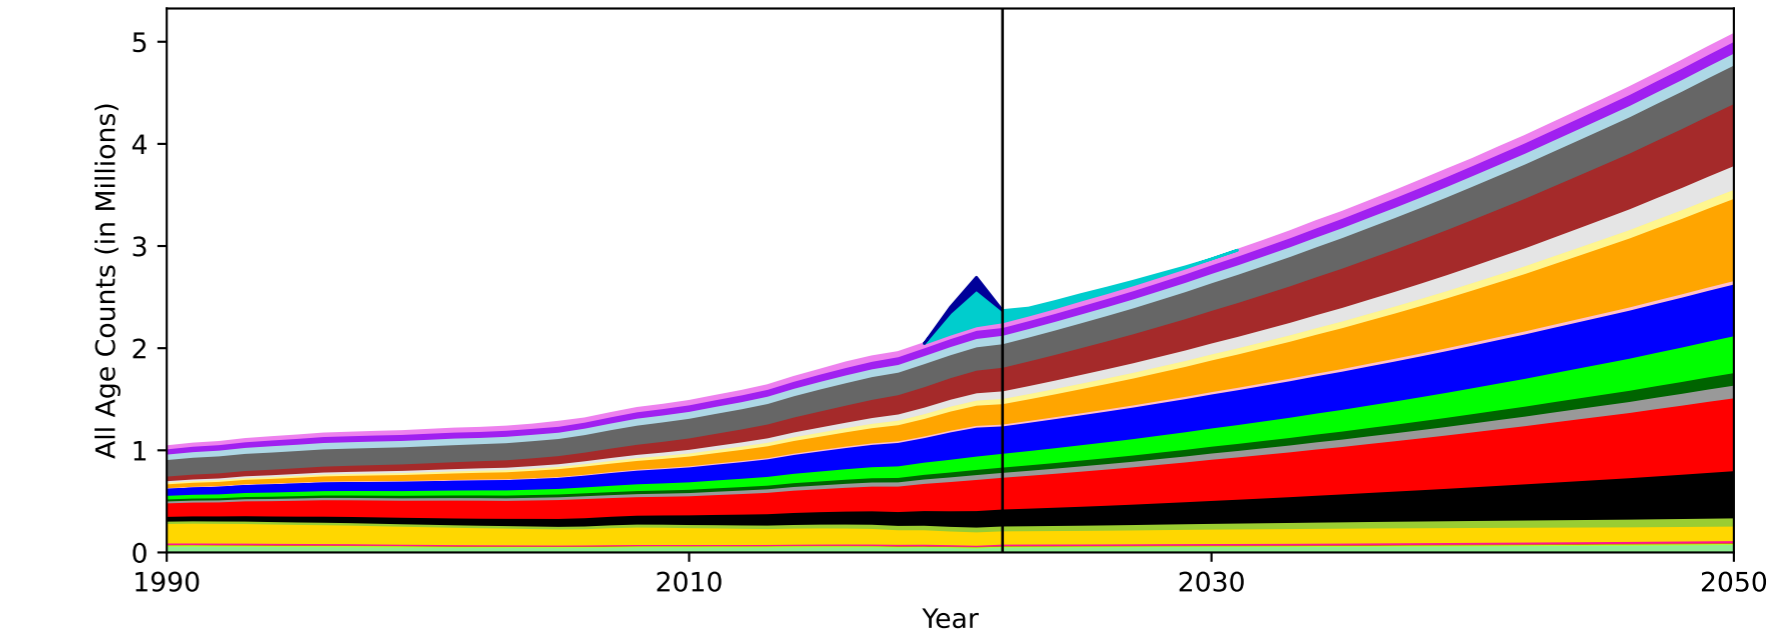

Level 1

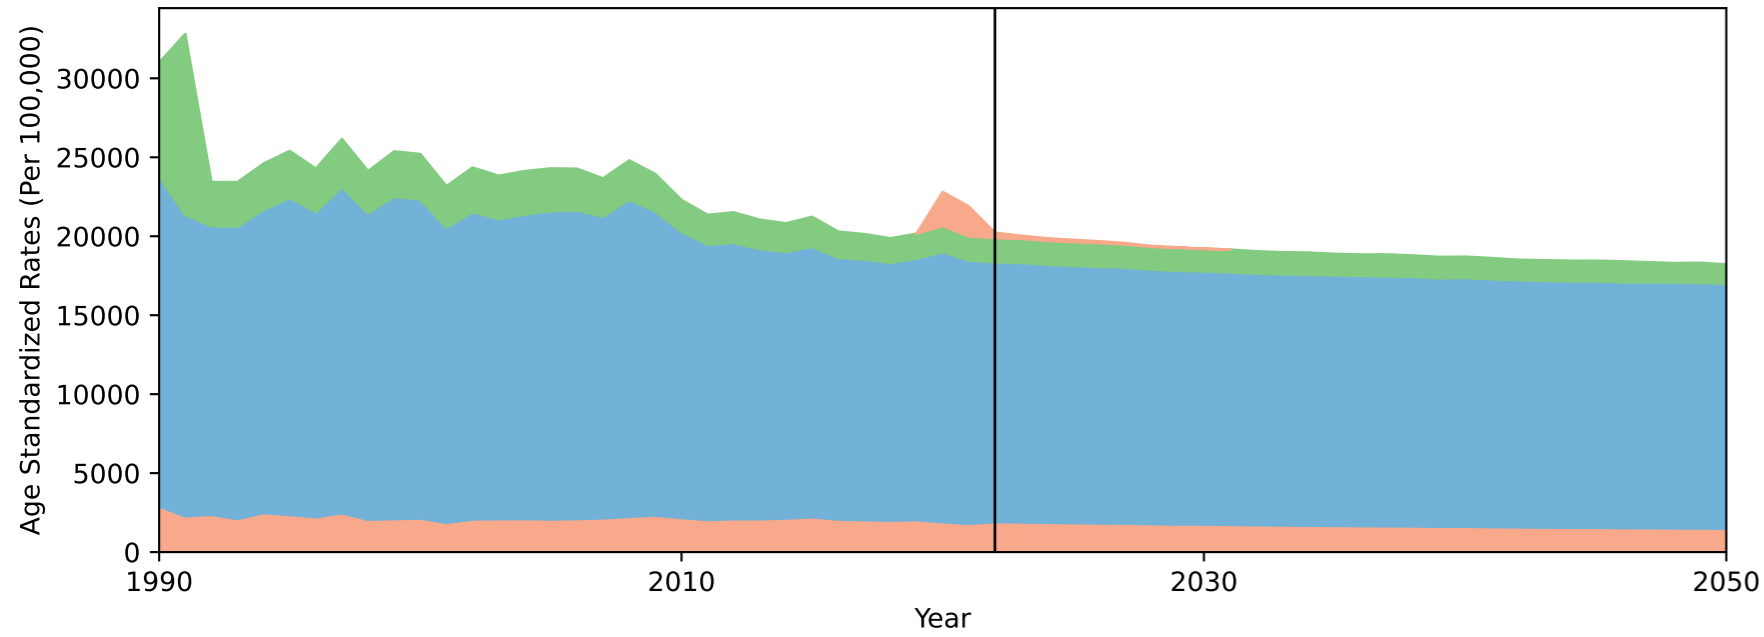

Level 2

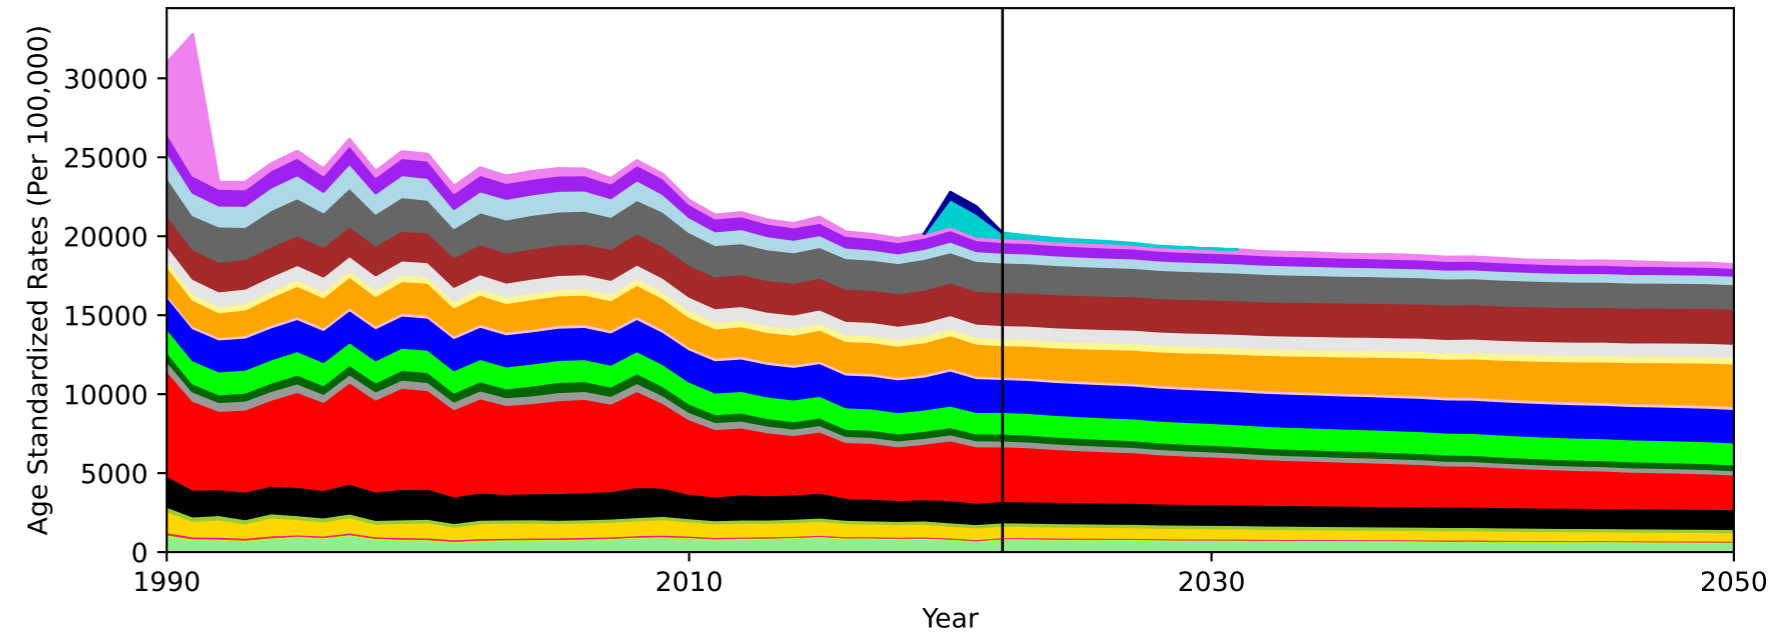

Level 1

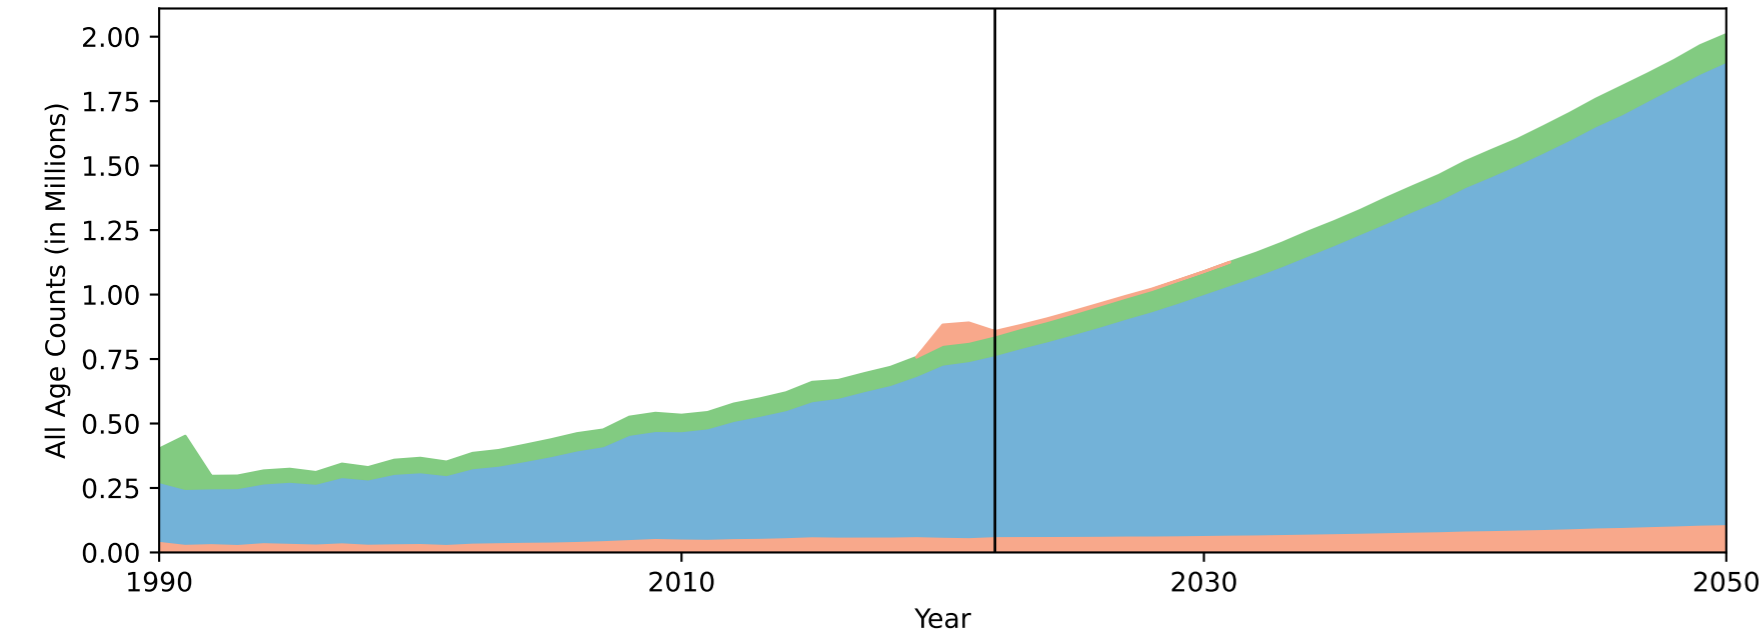

Level 2

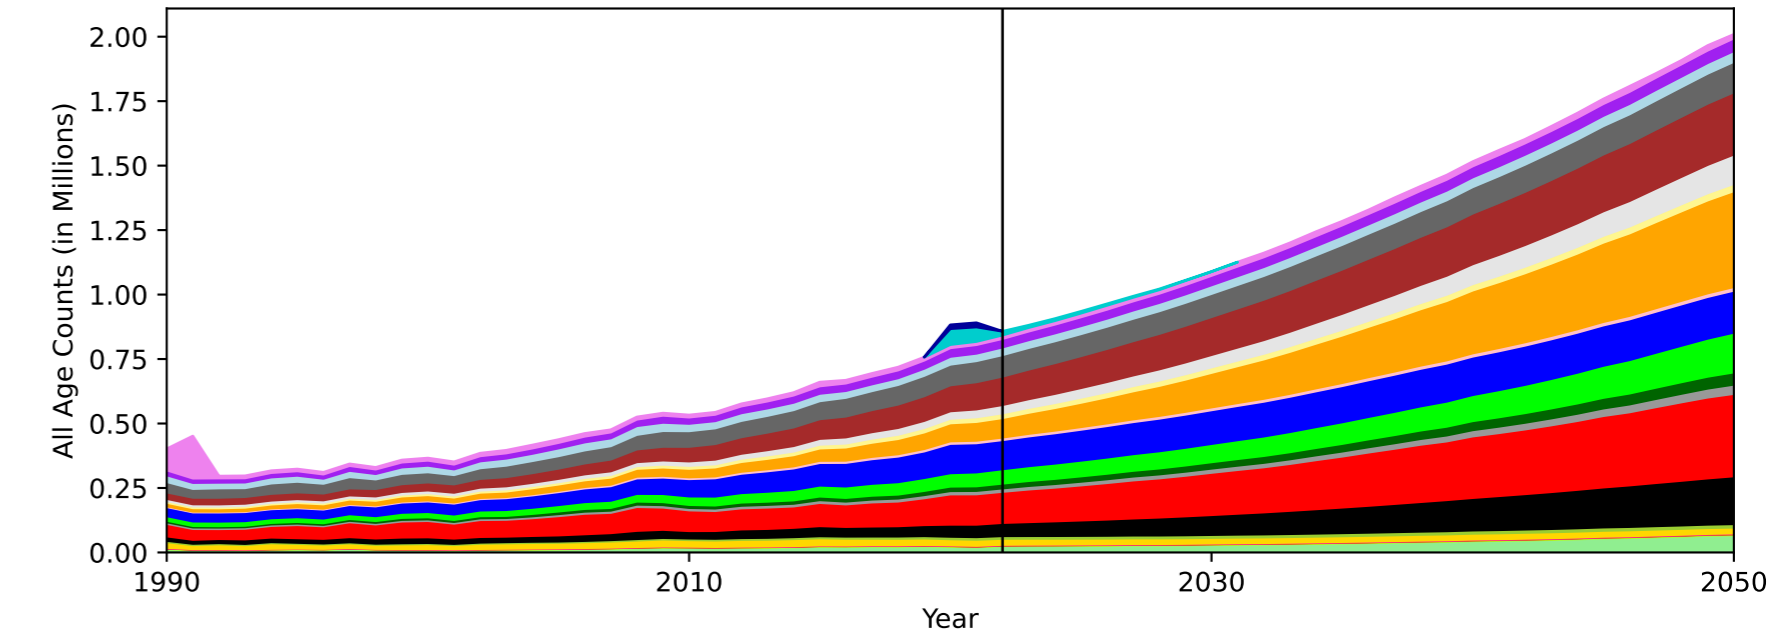

# Lebanon

Level 1

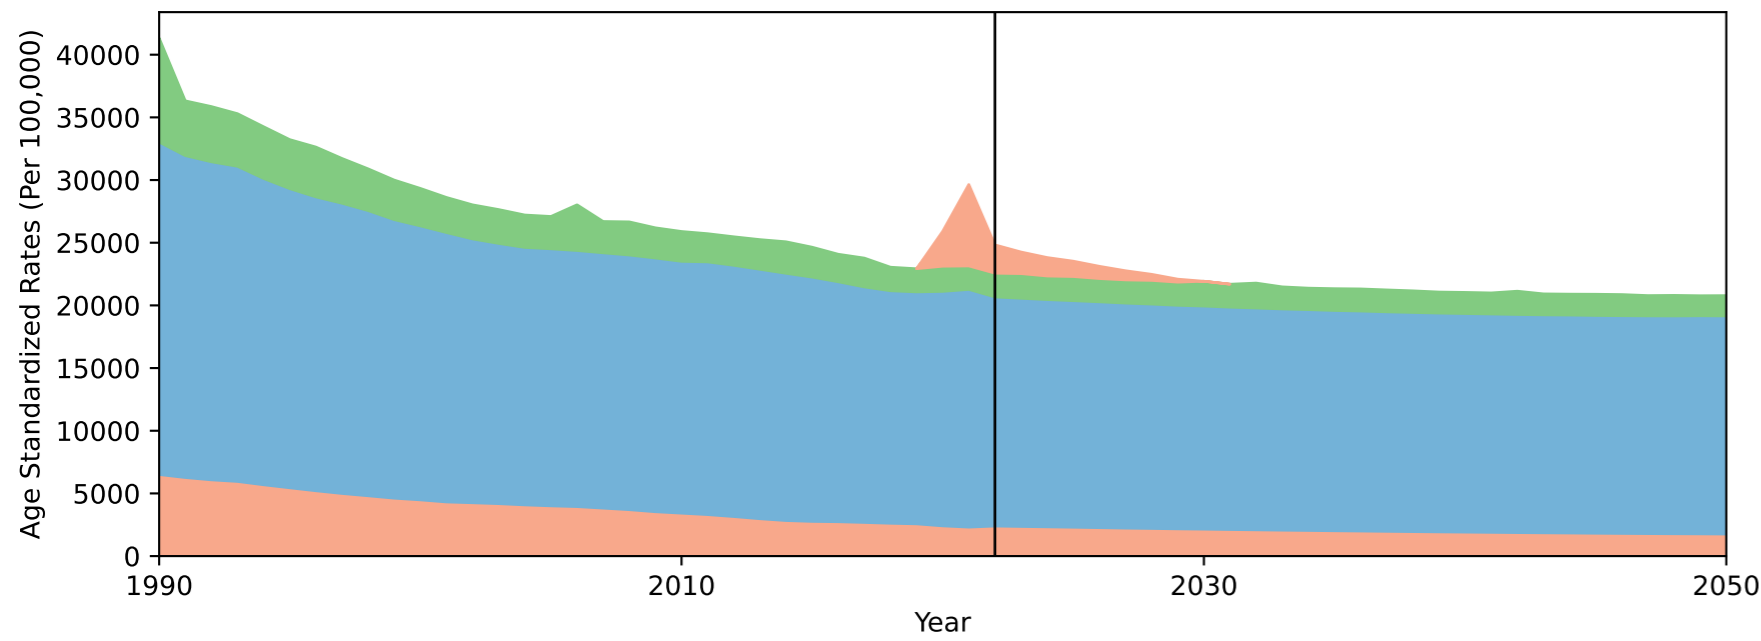

Level 2

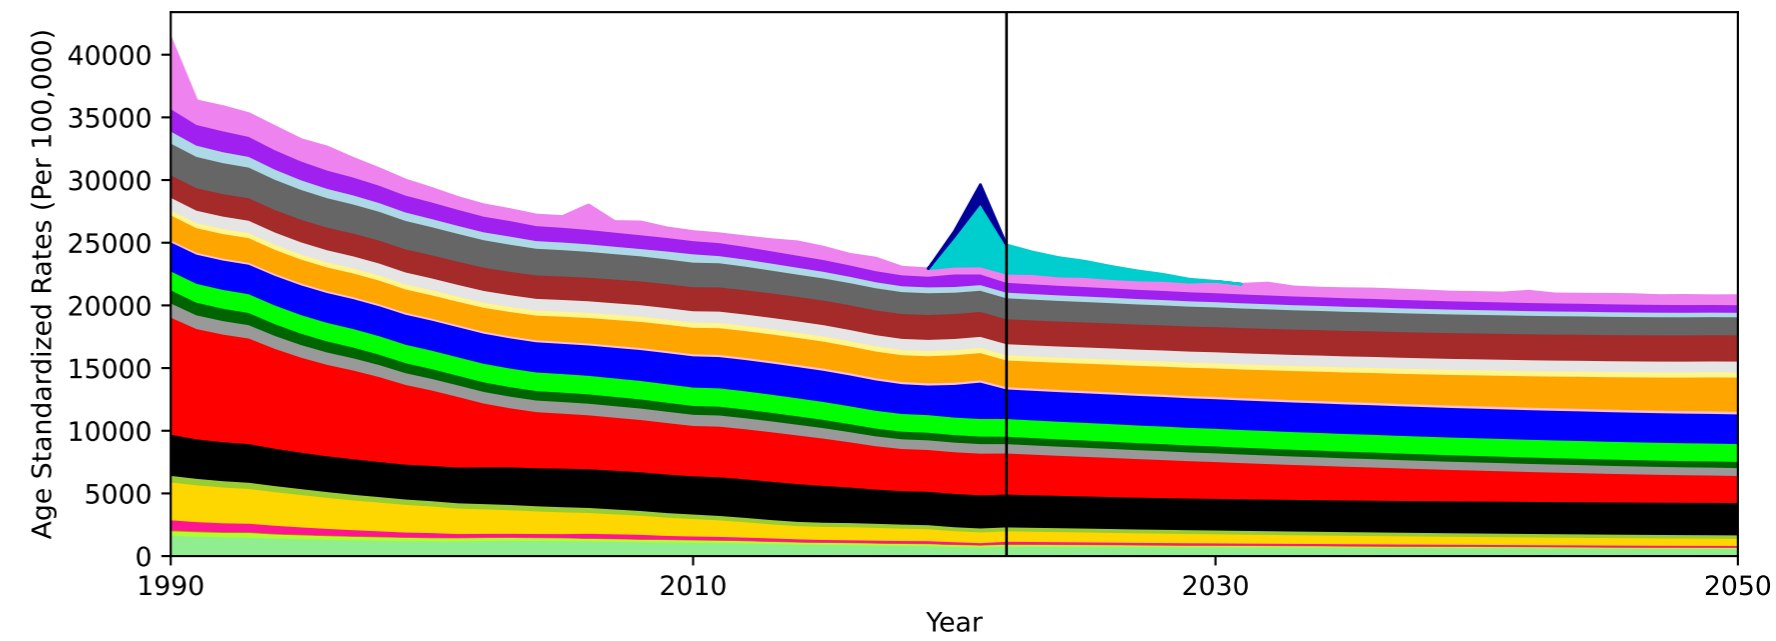

Level 1

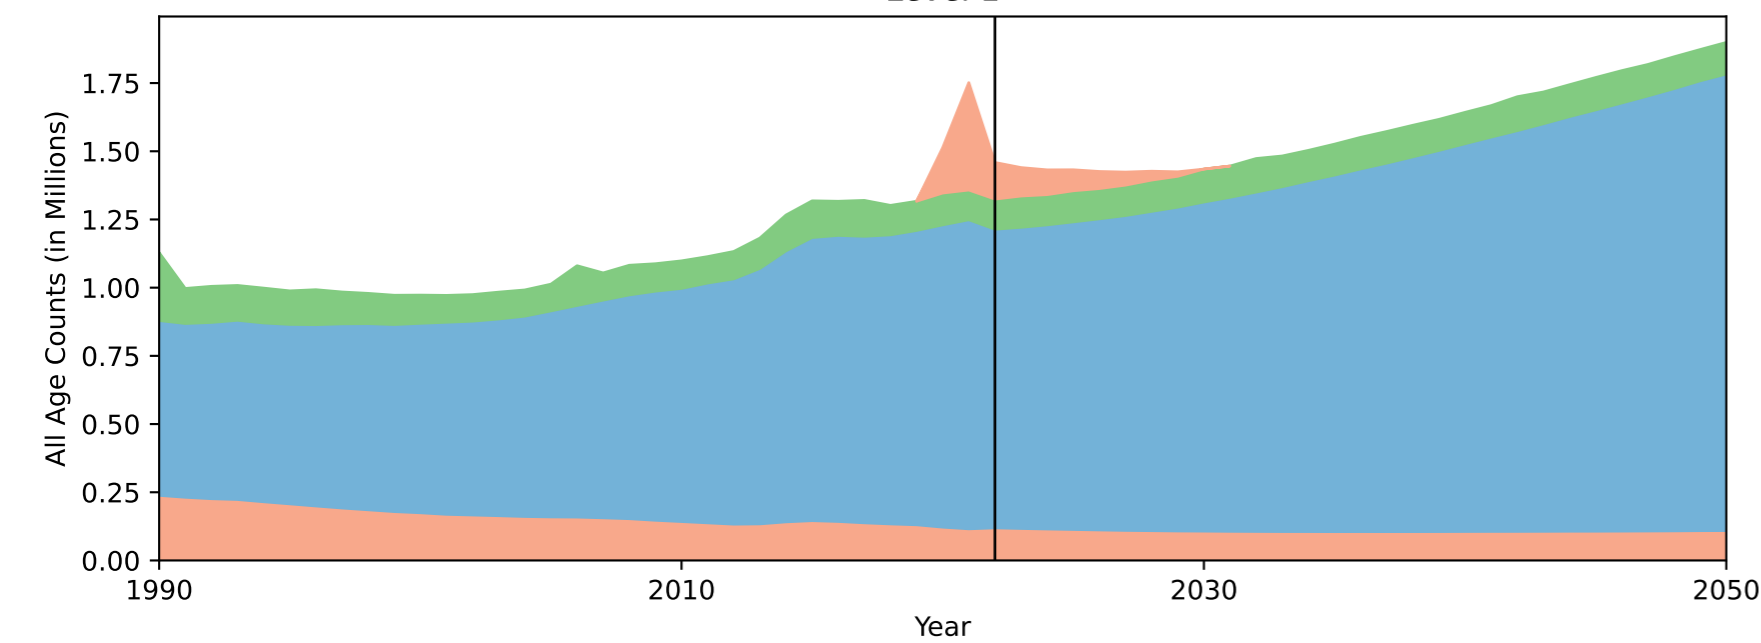

Level 2

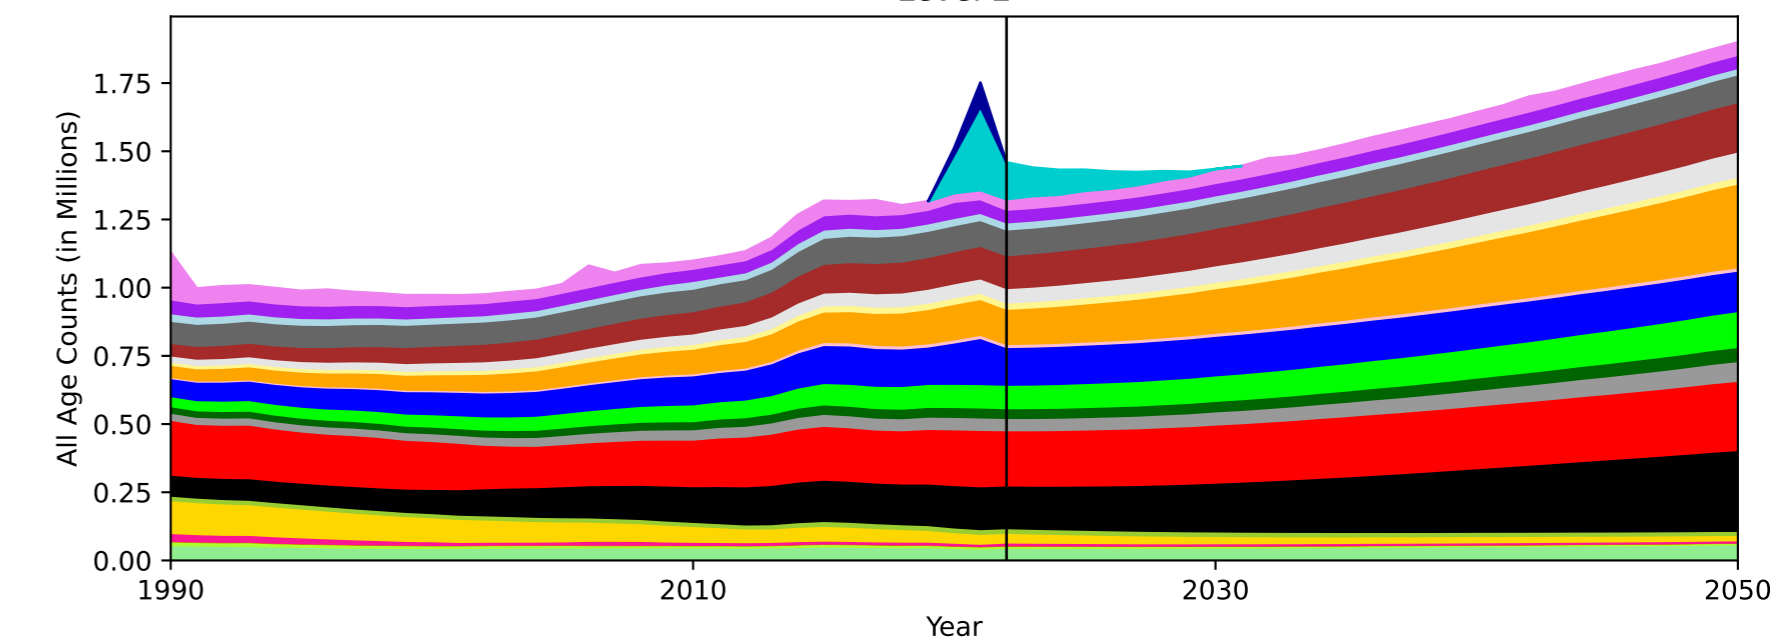



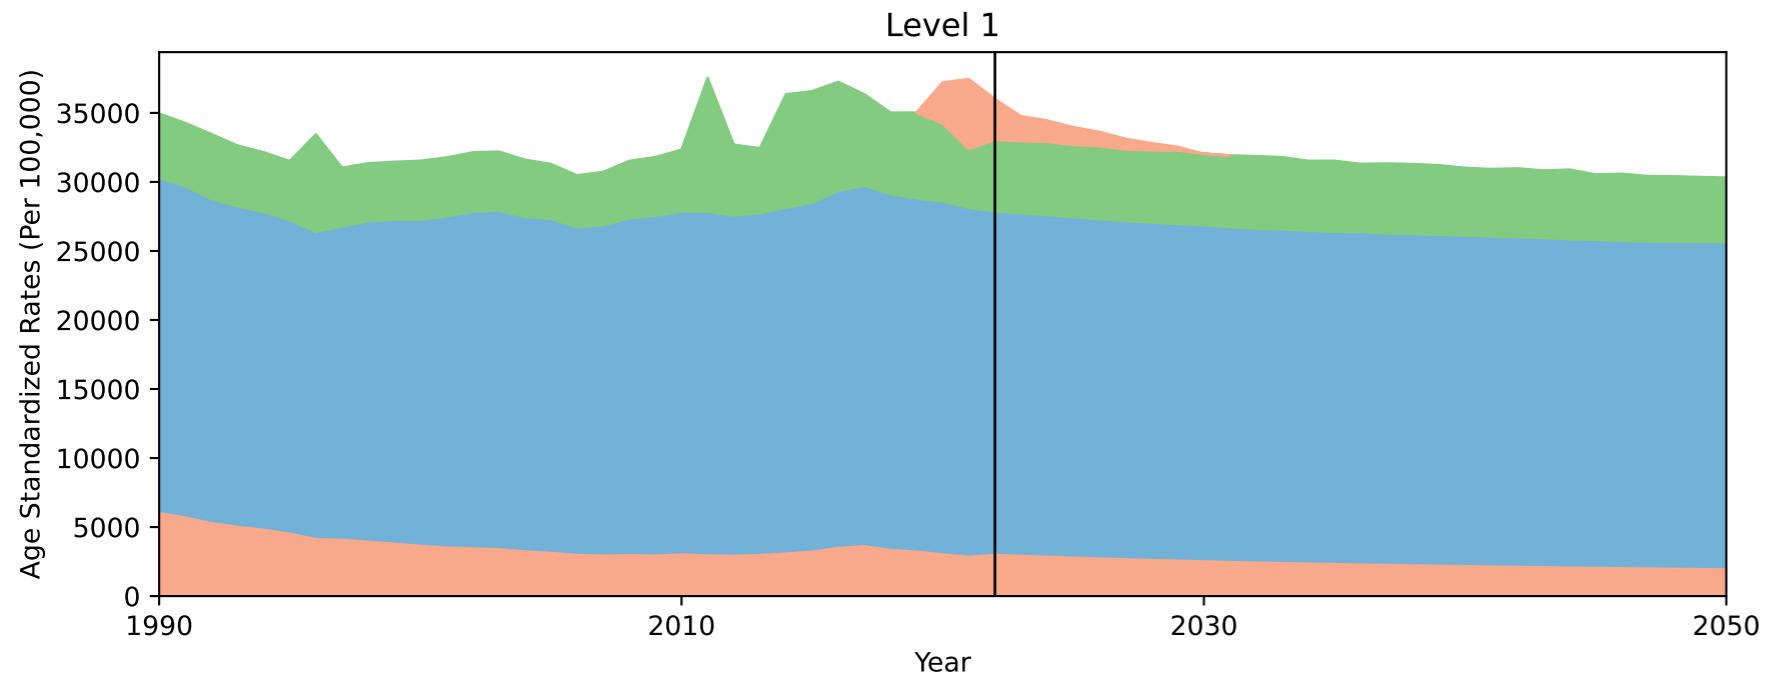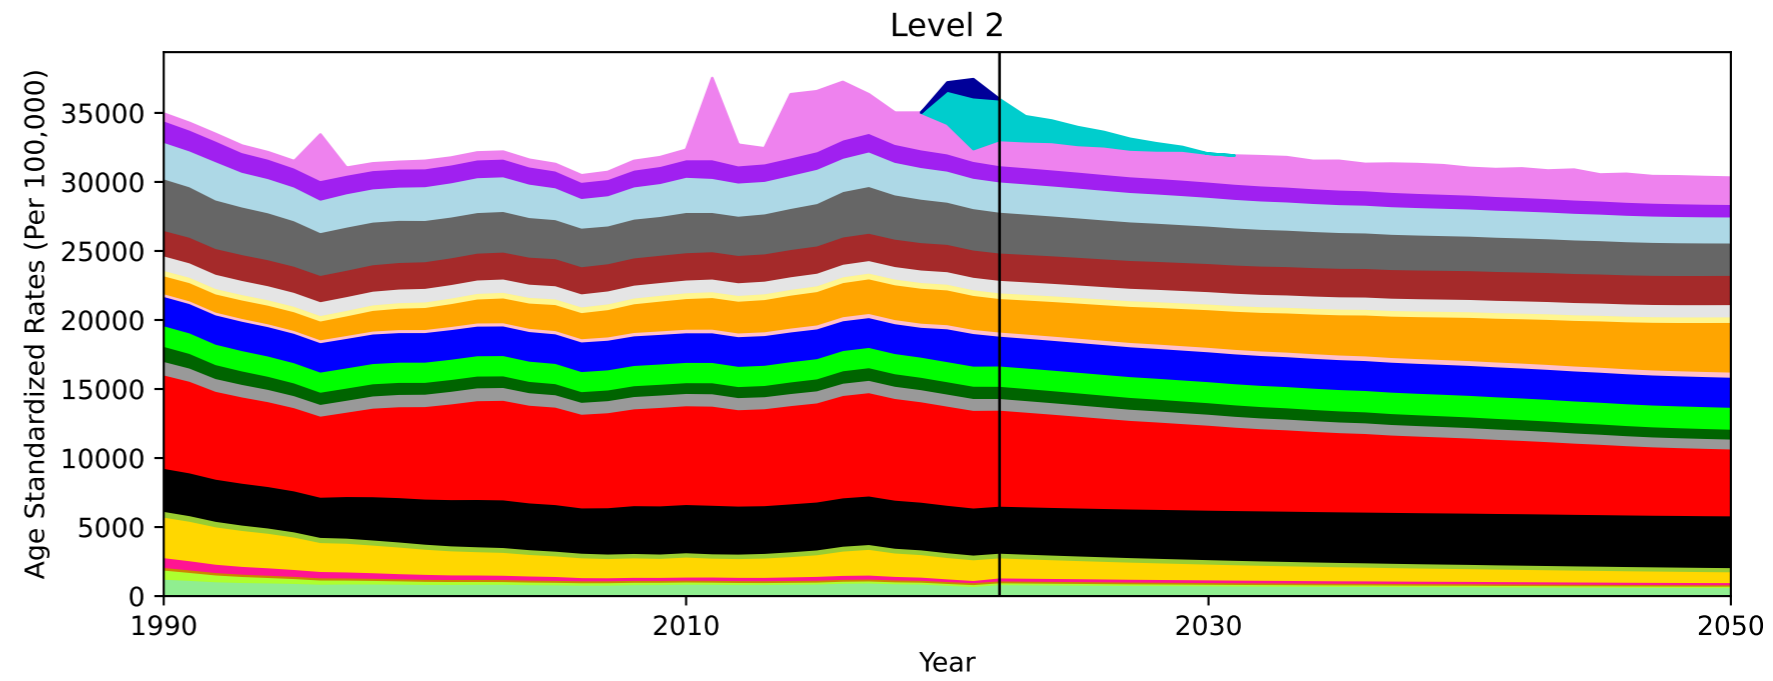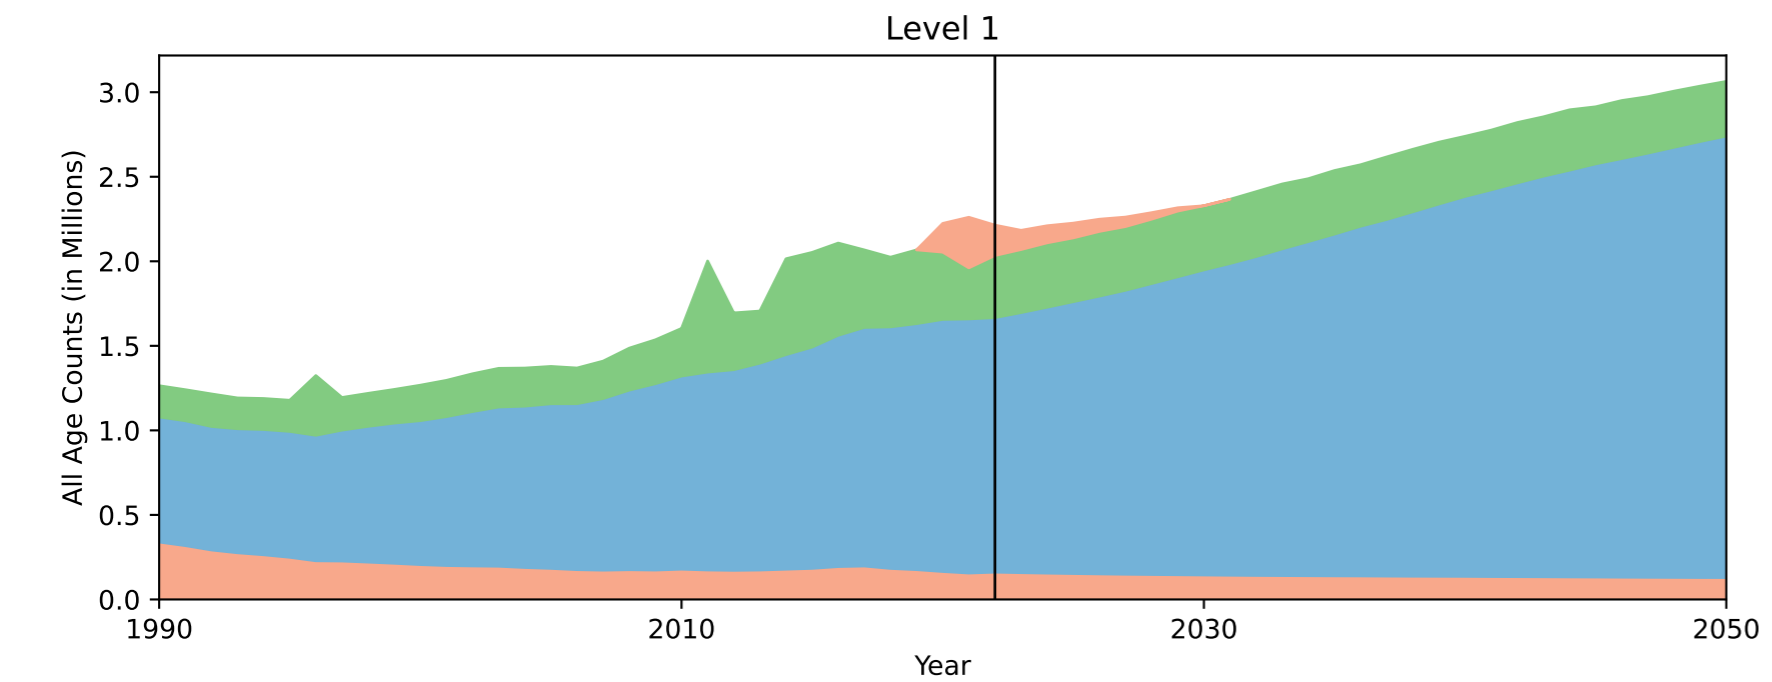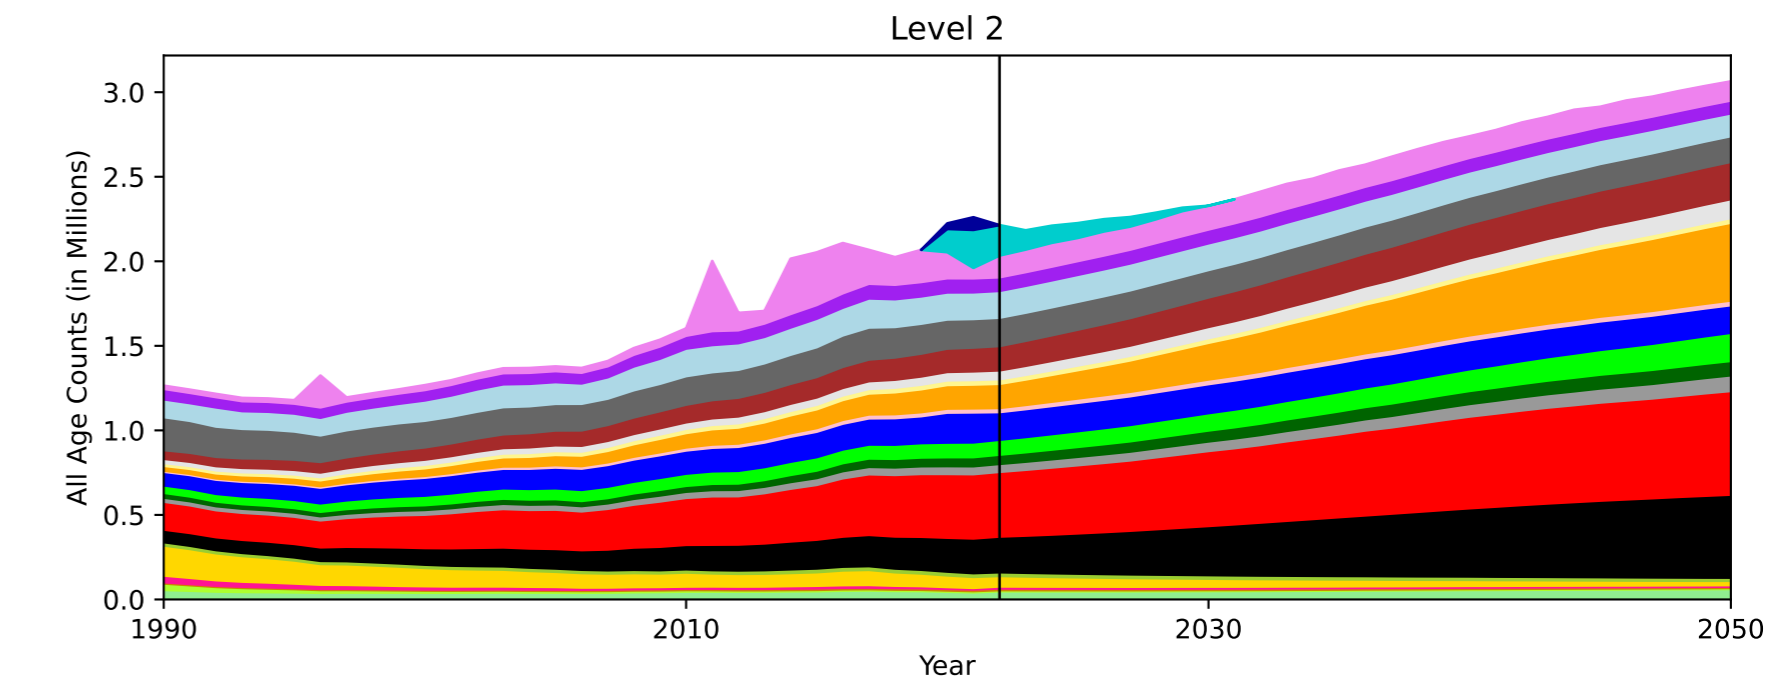

Level 1

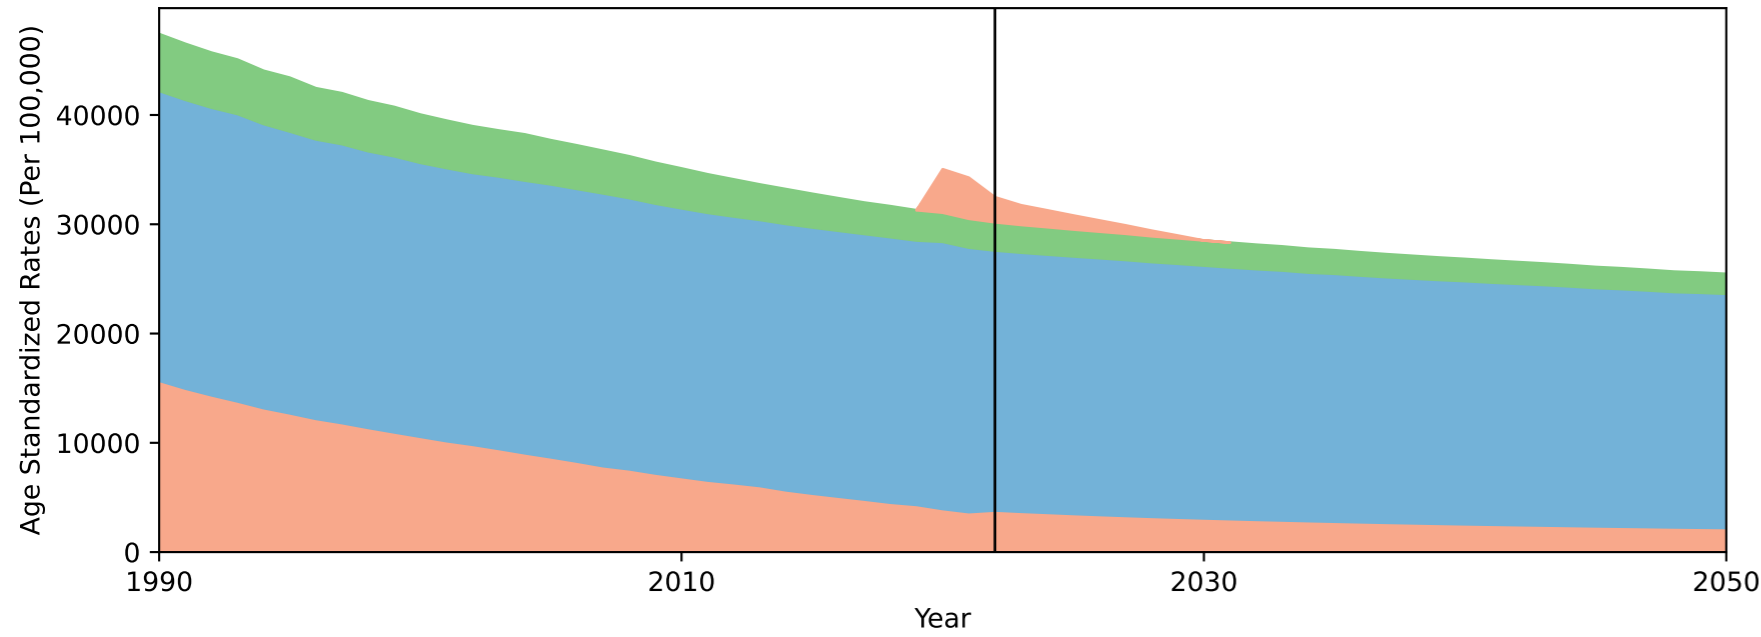

Level 2

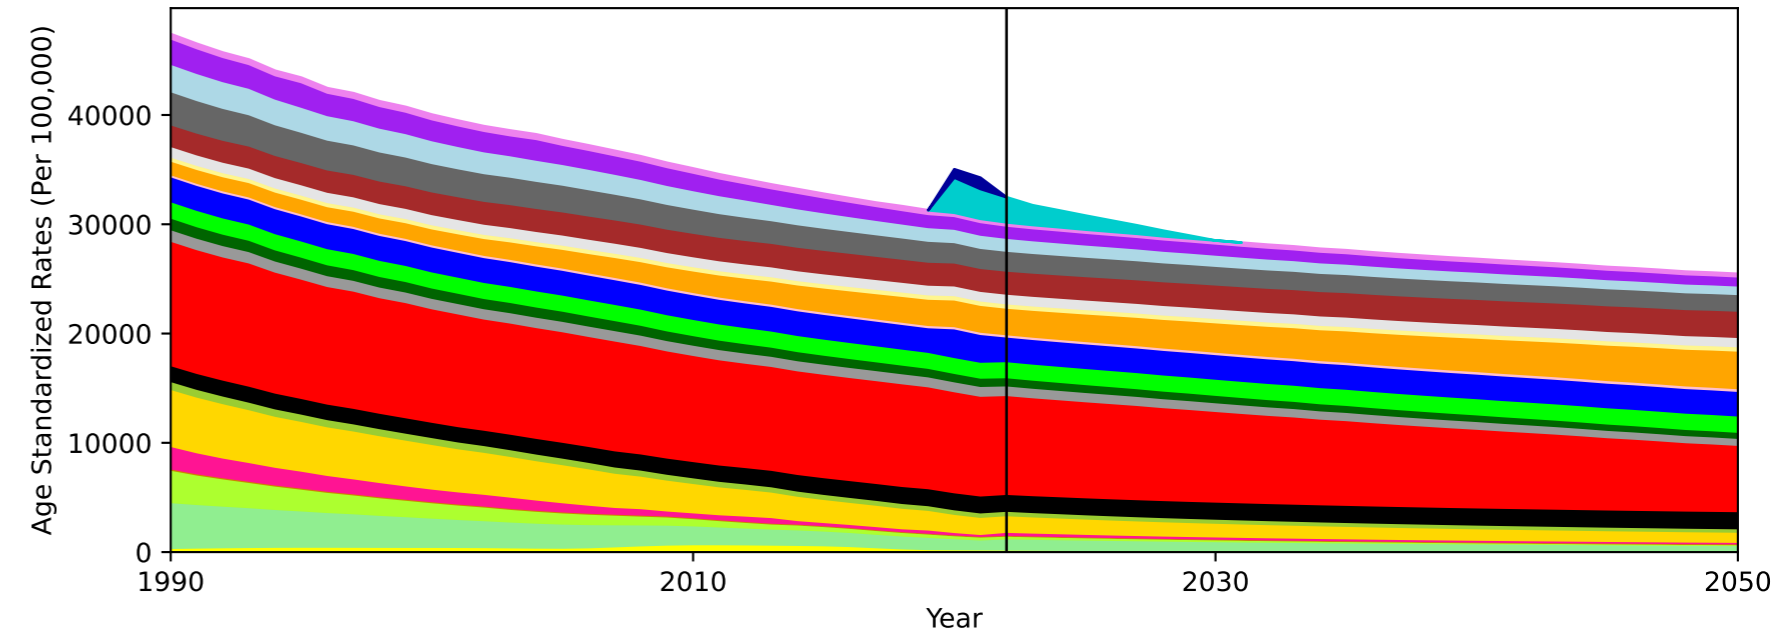

Level 1

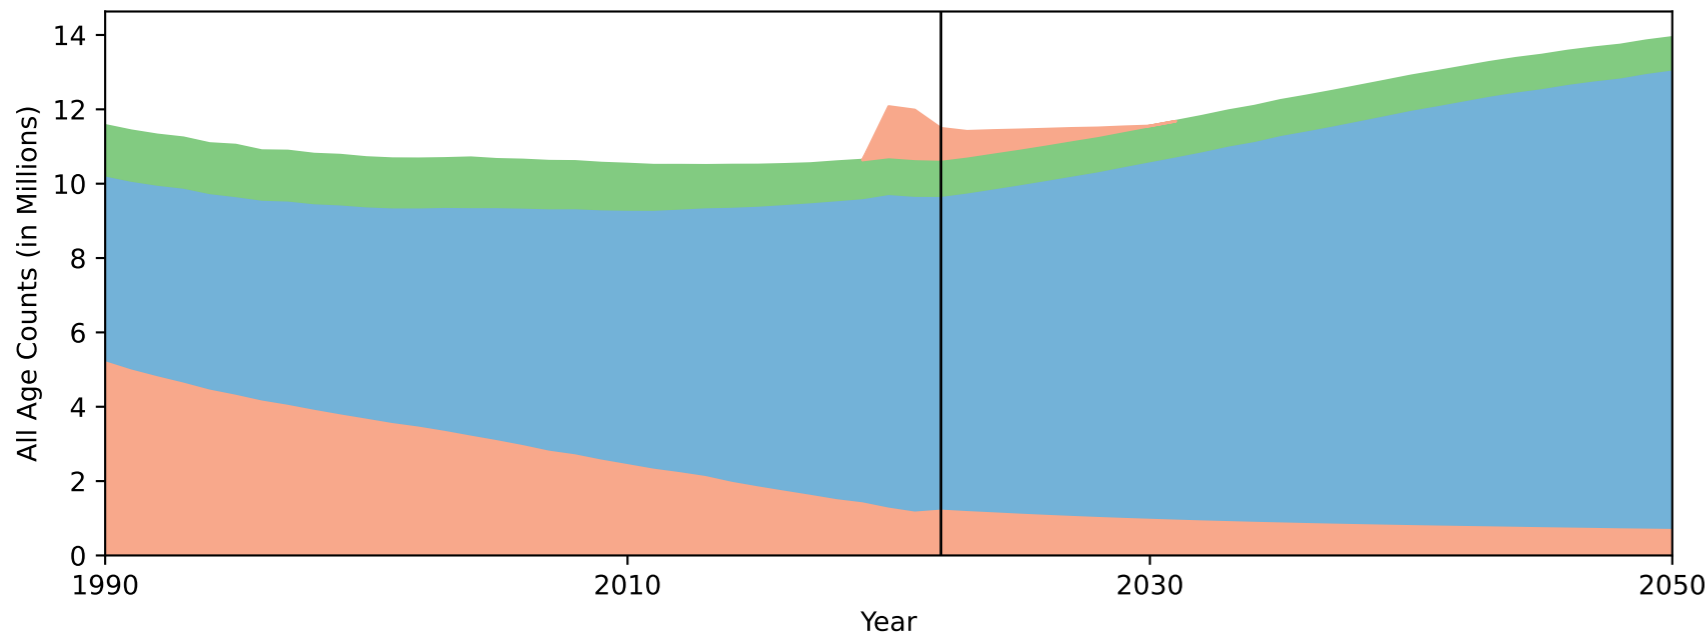

Level 2

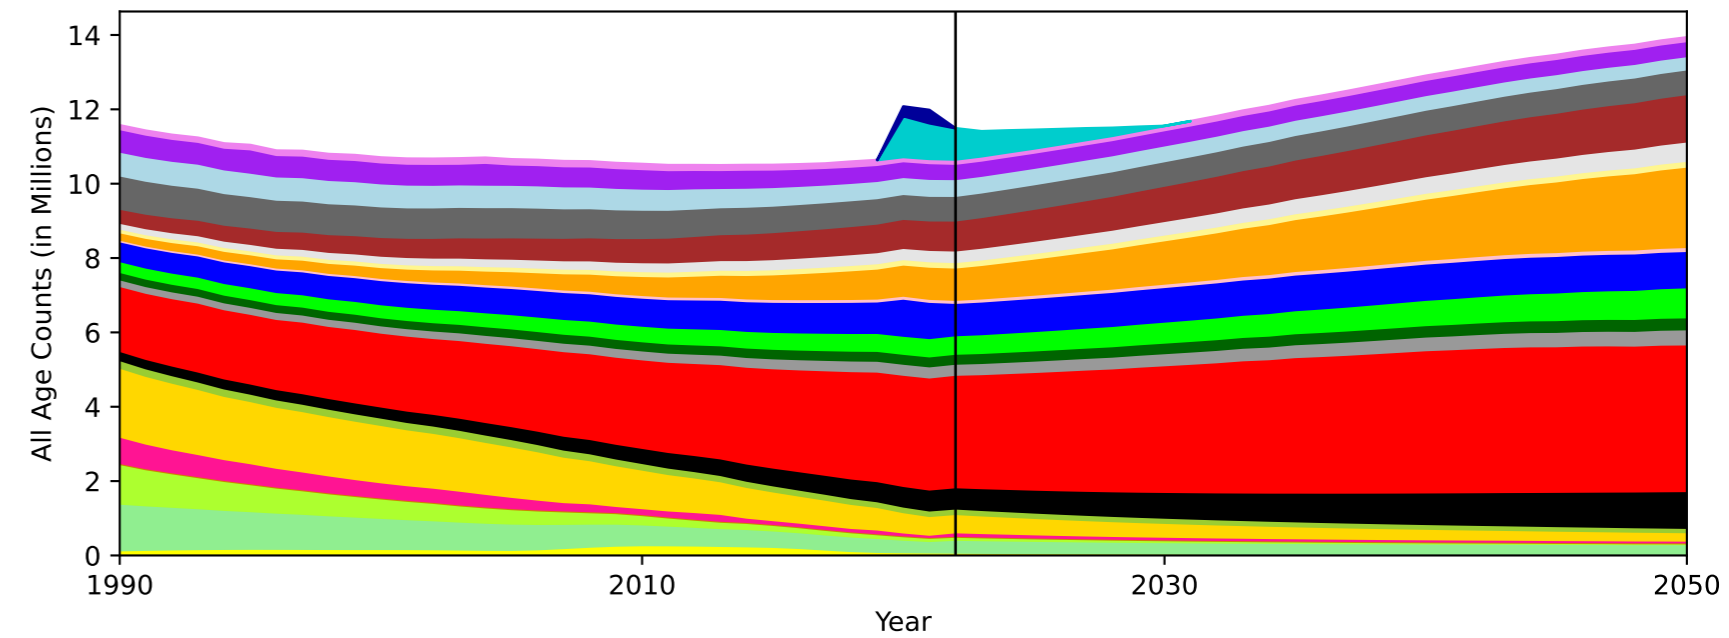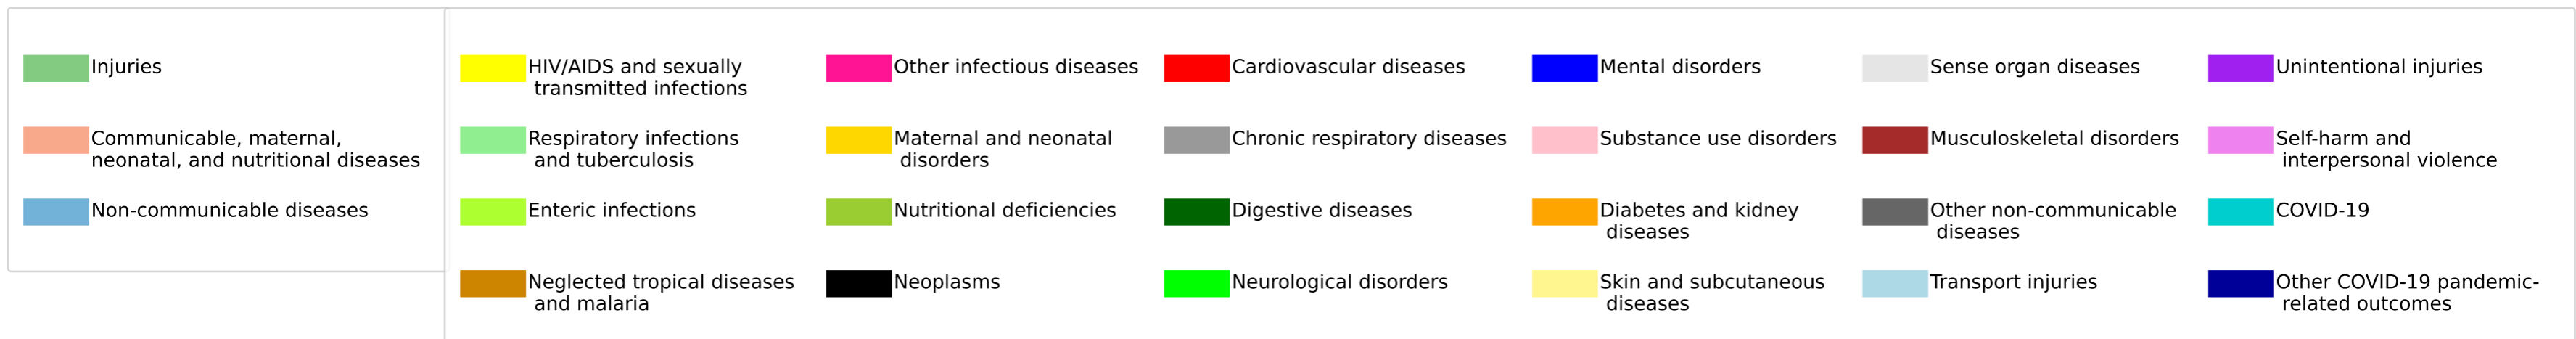

Level 1

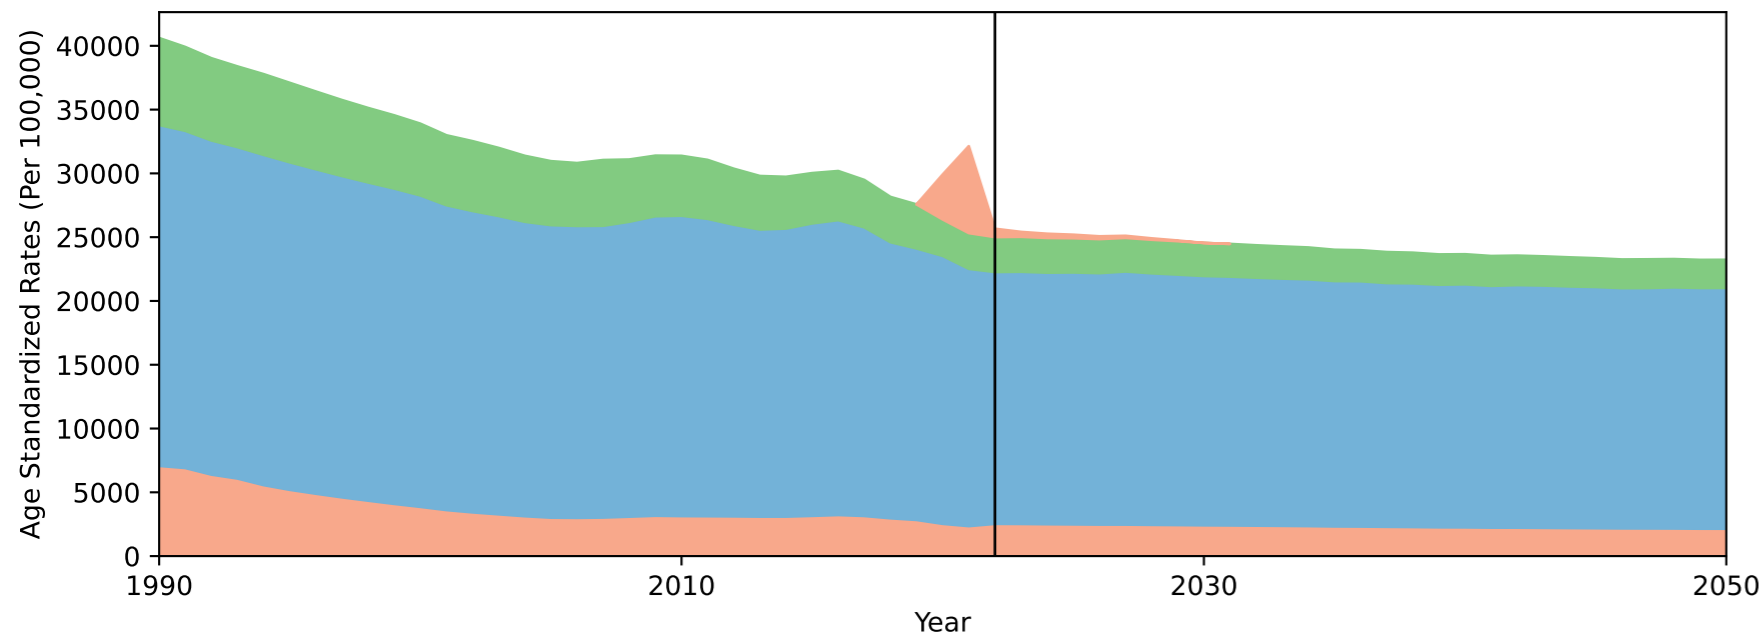

Level 2

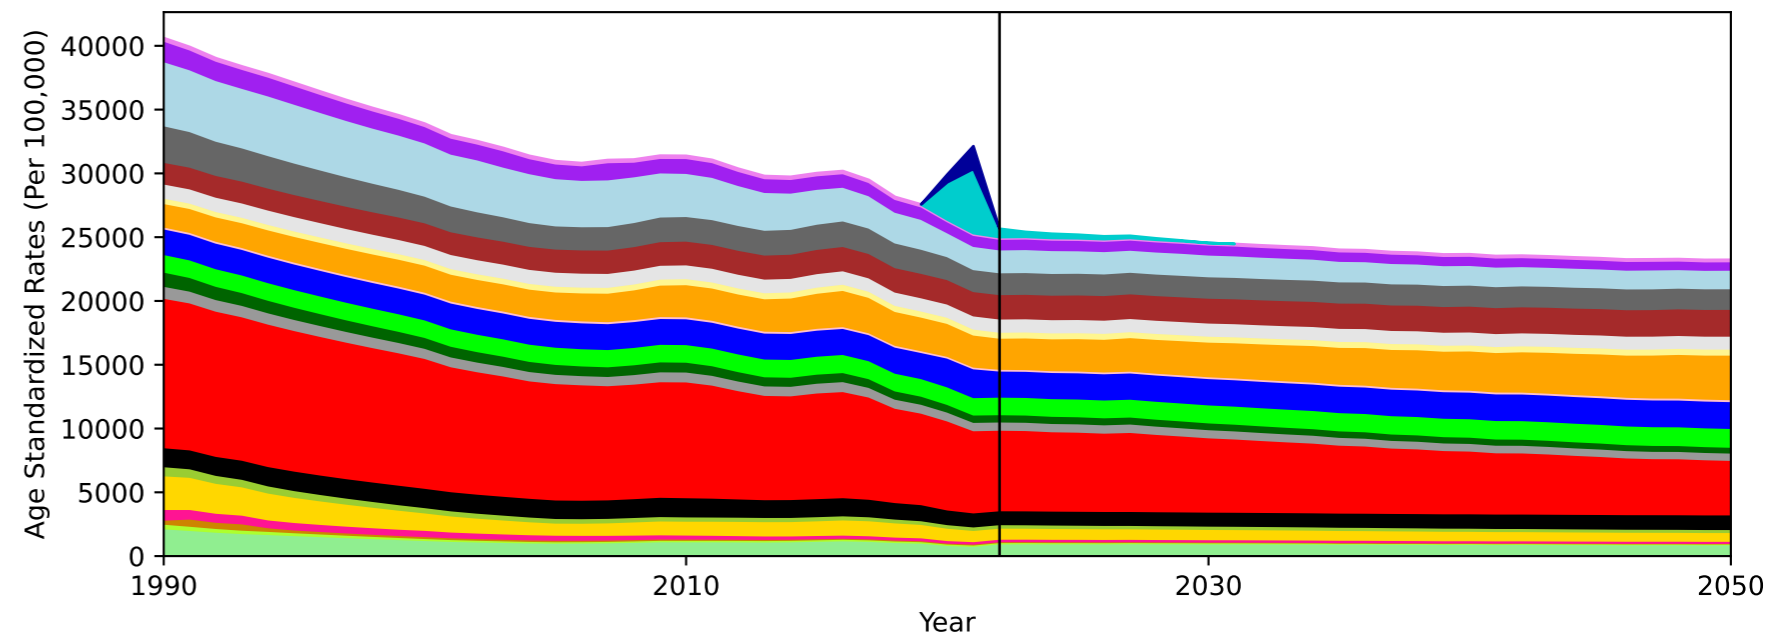

Level 1

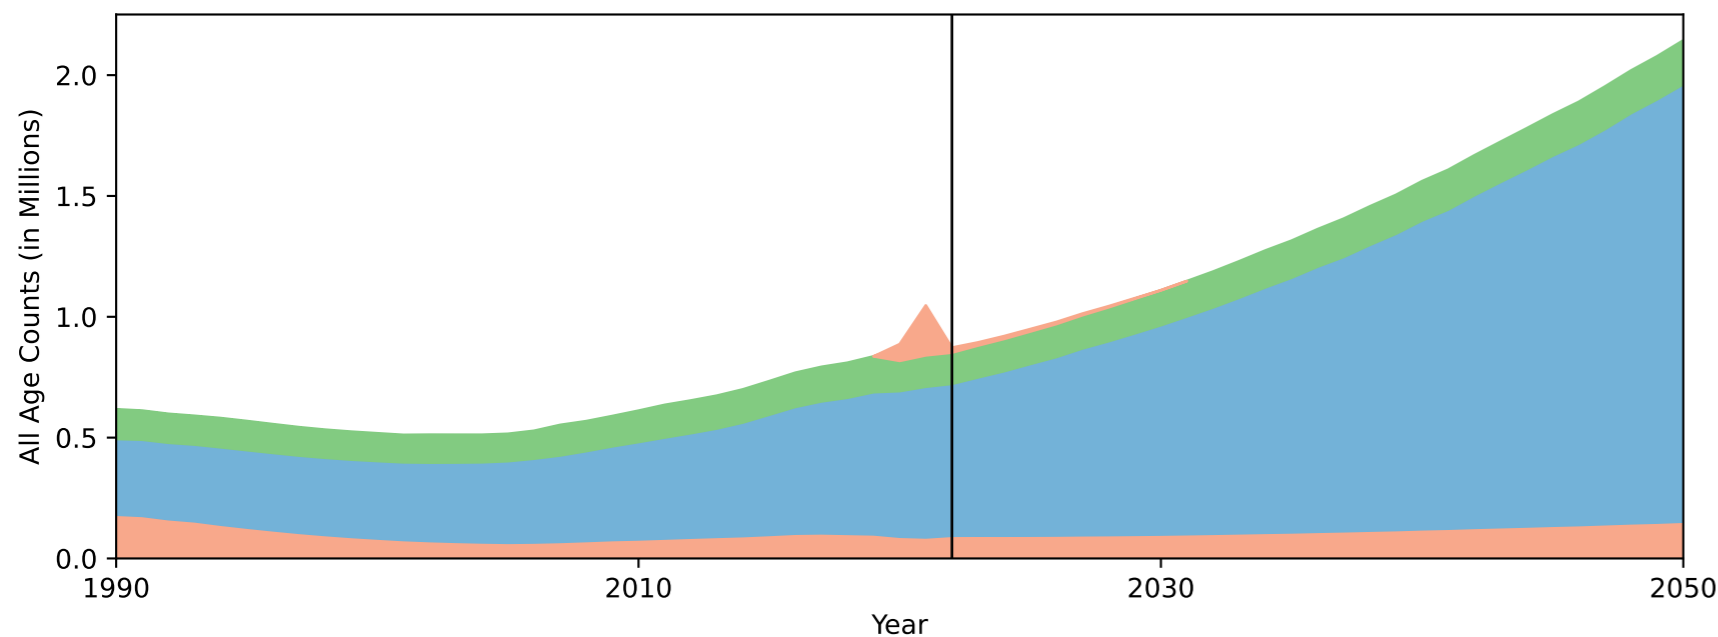

Level 2

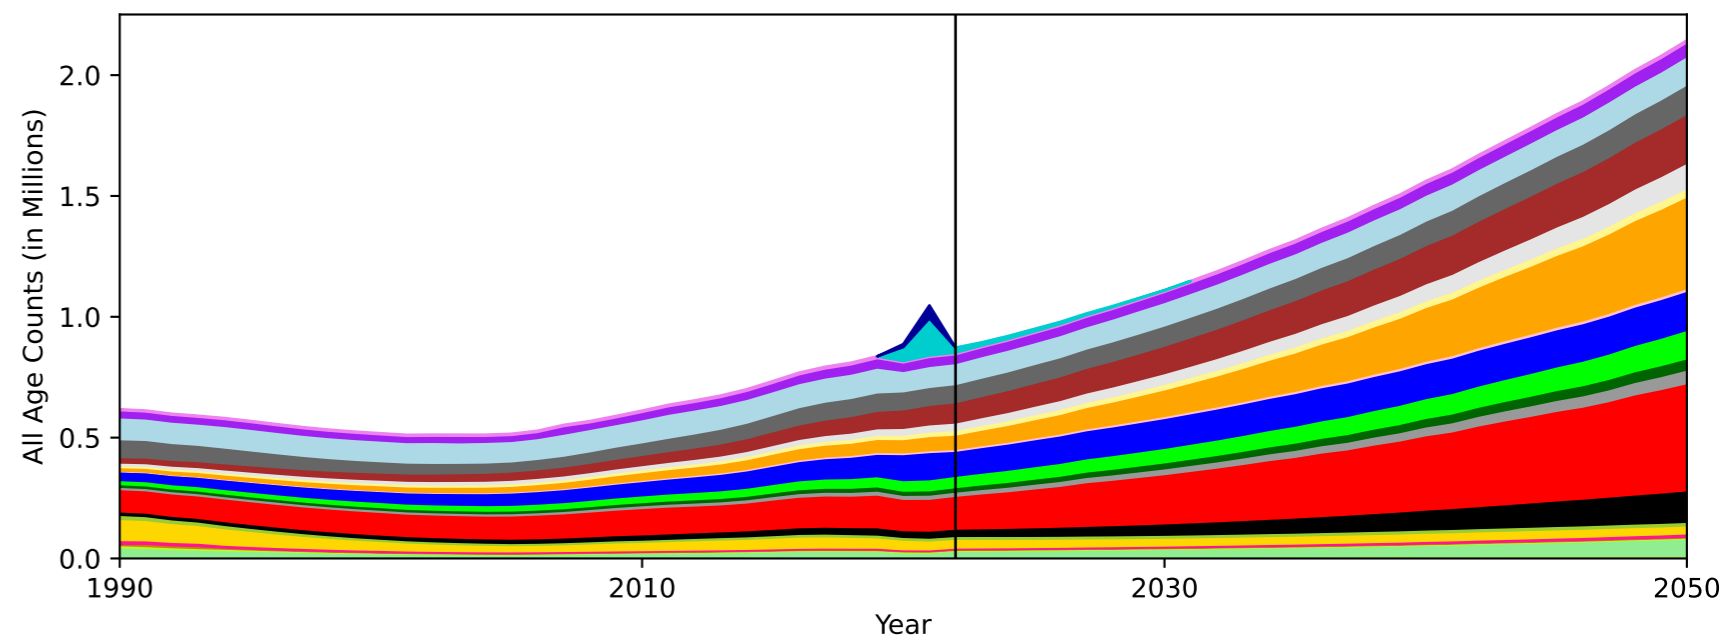

# Palestine

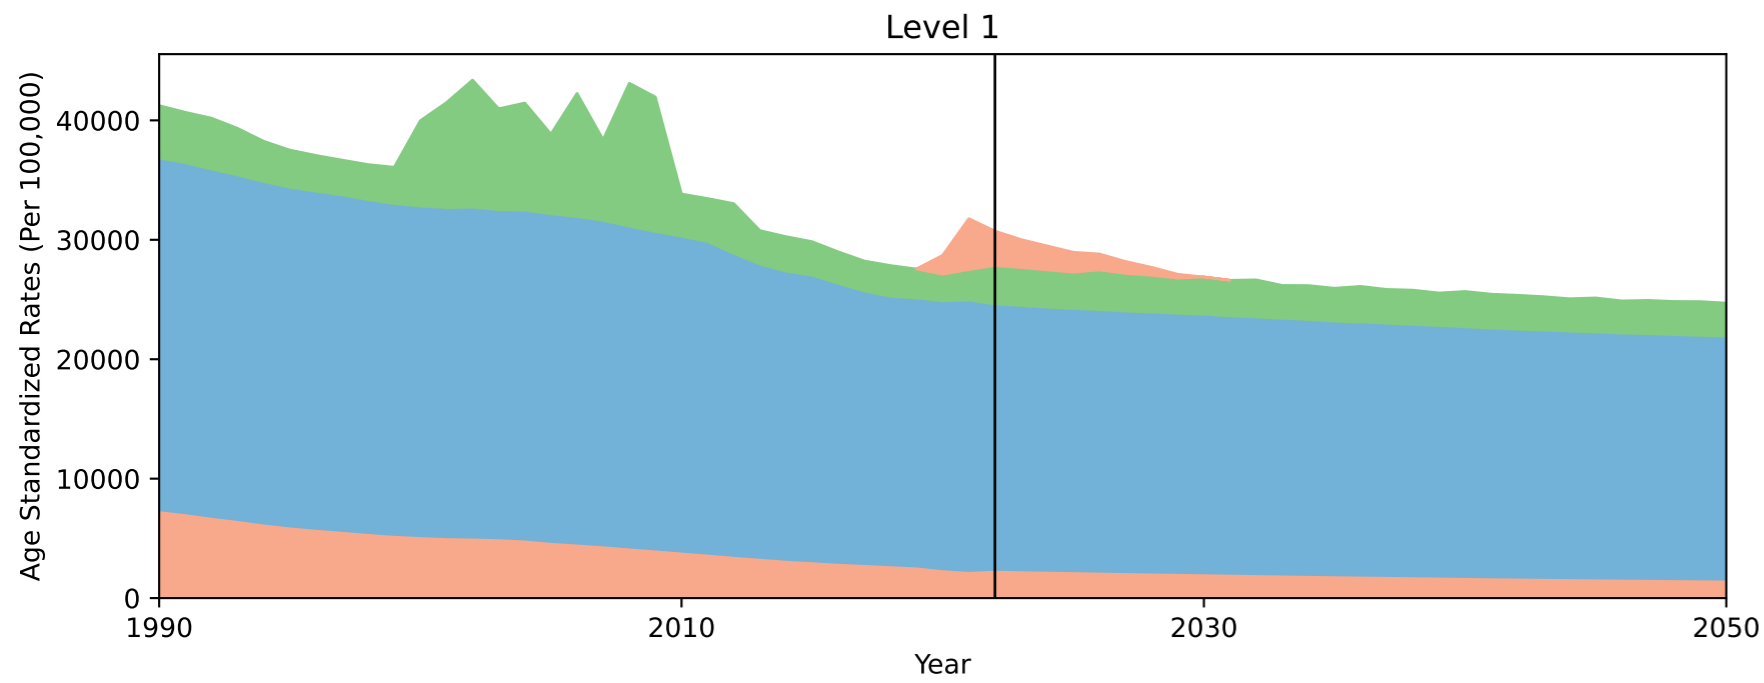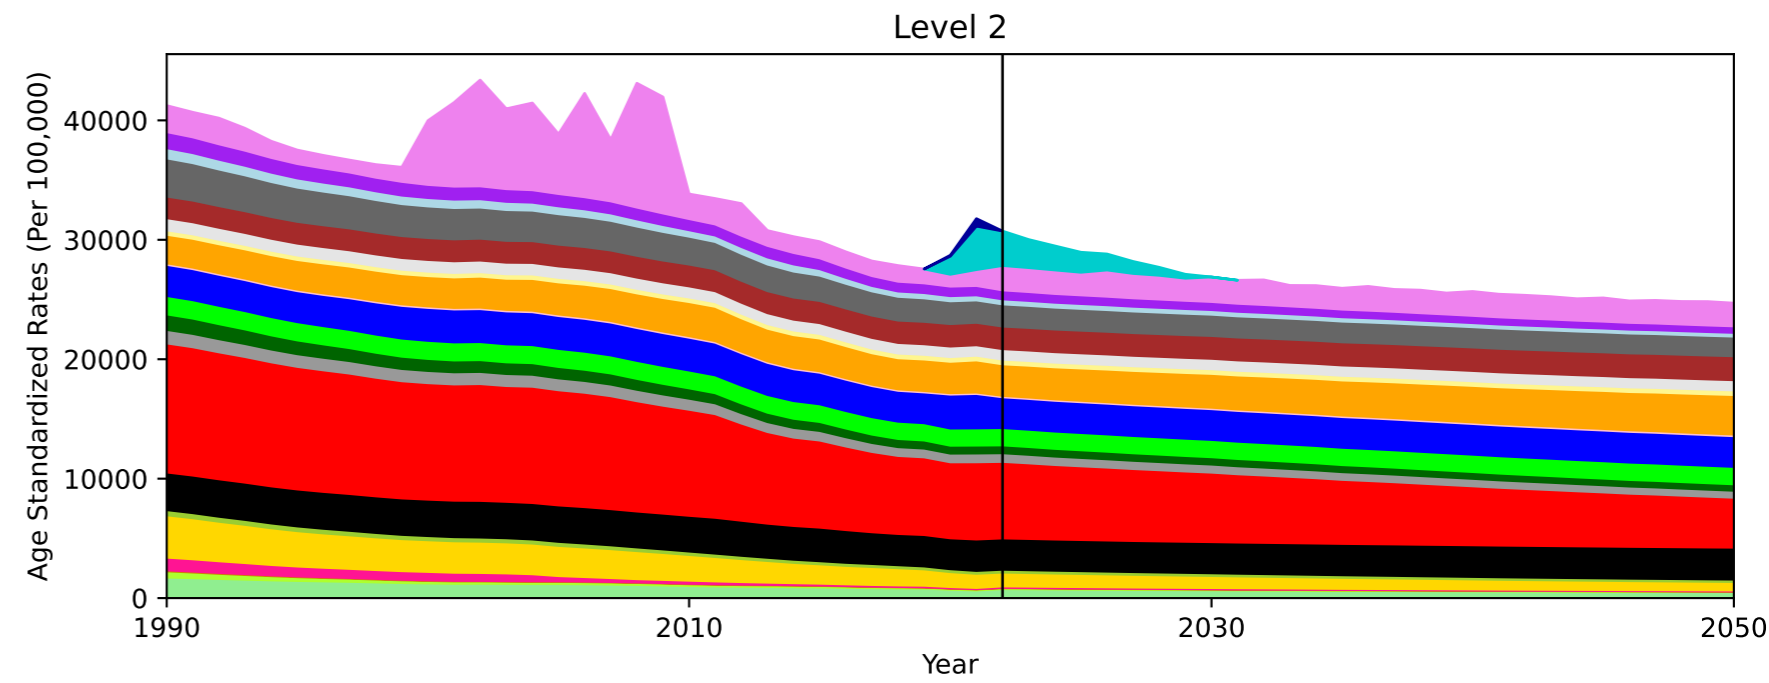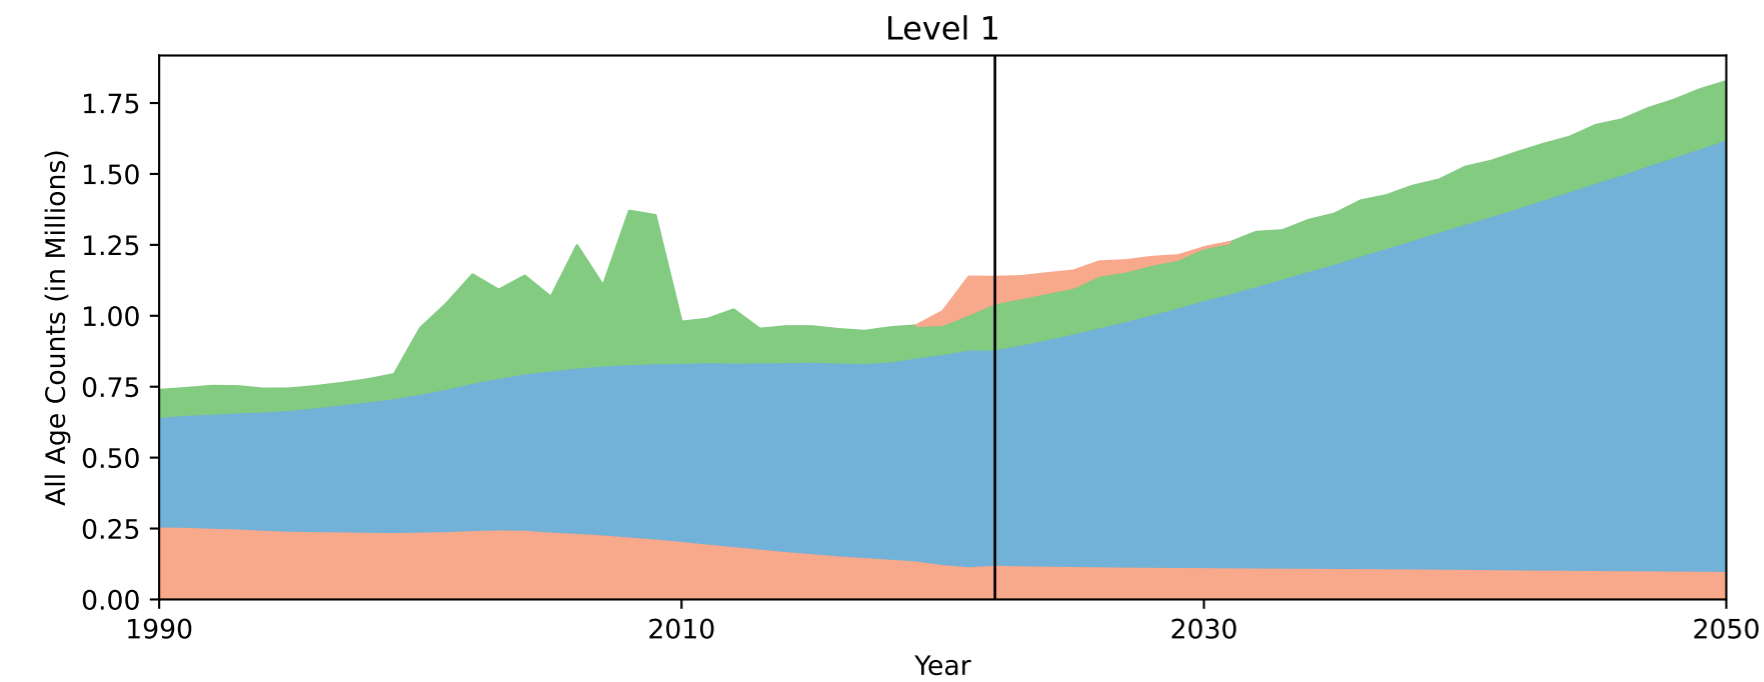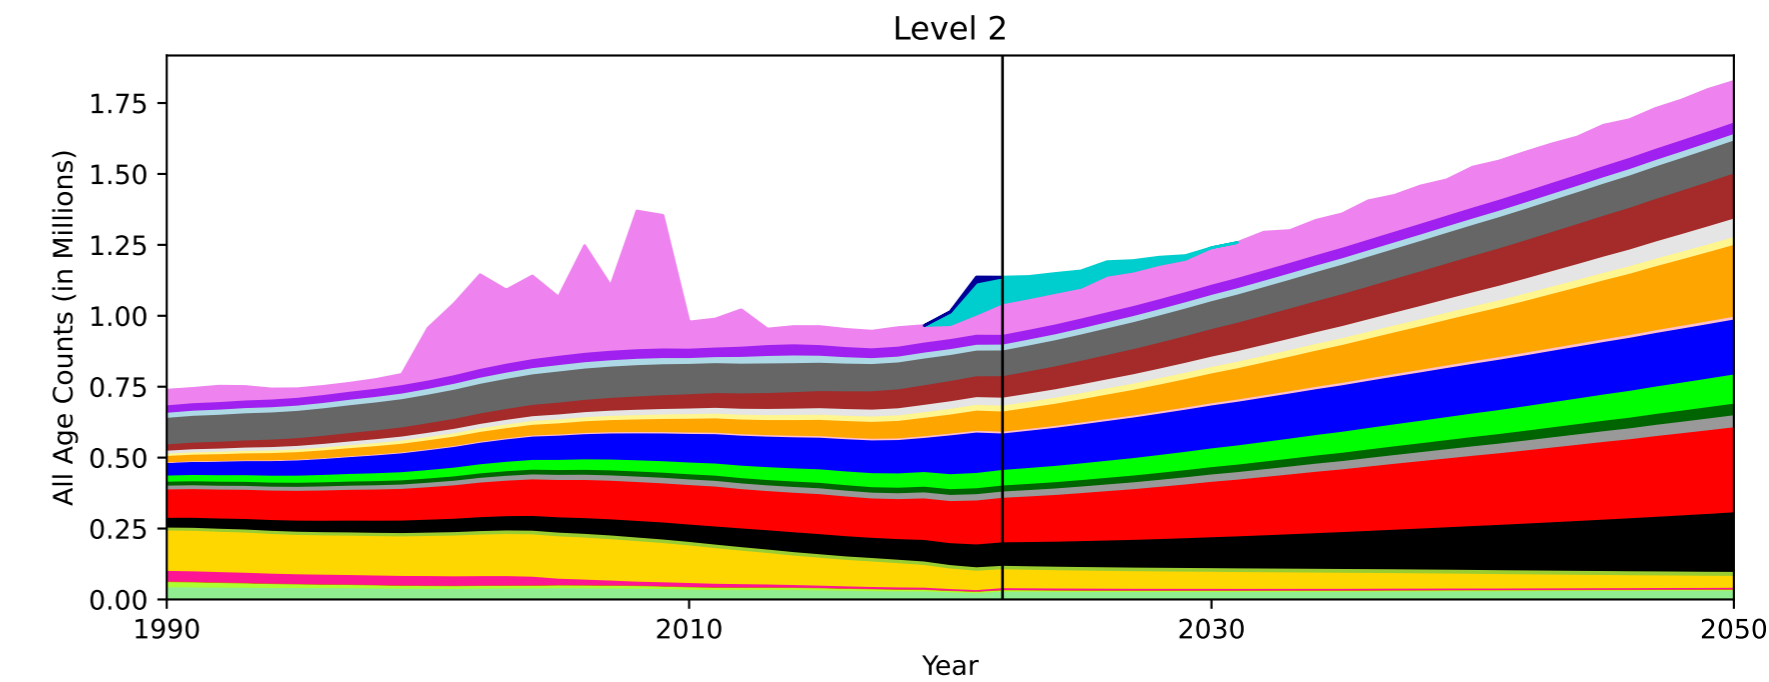

# Qatar

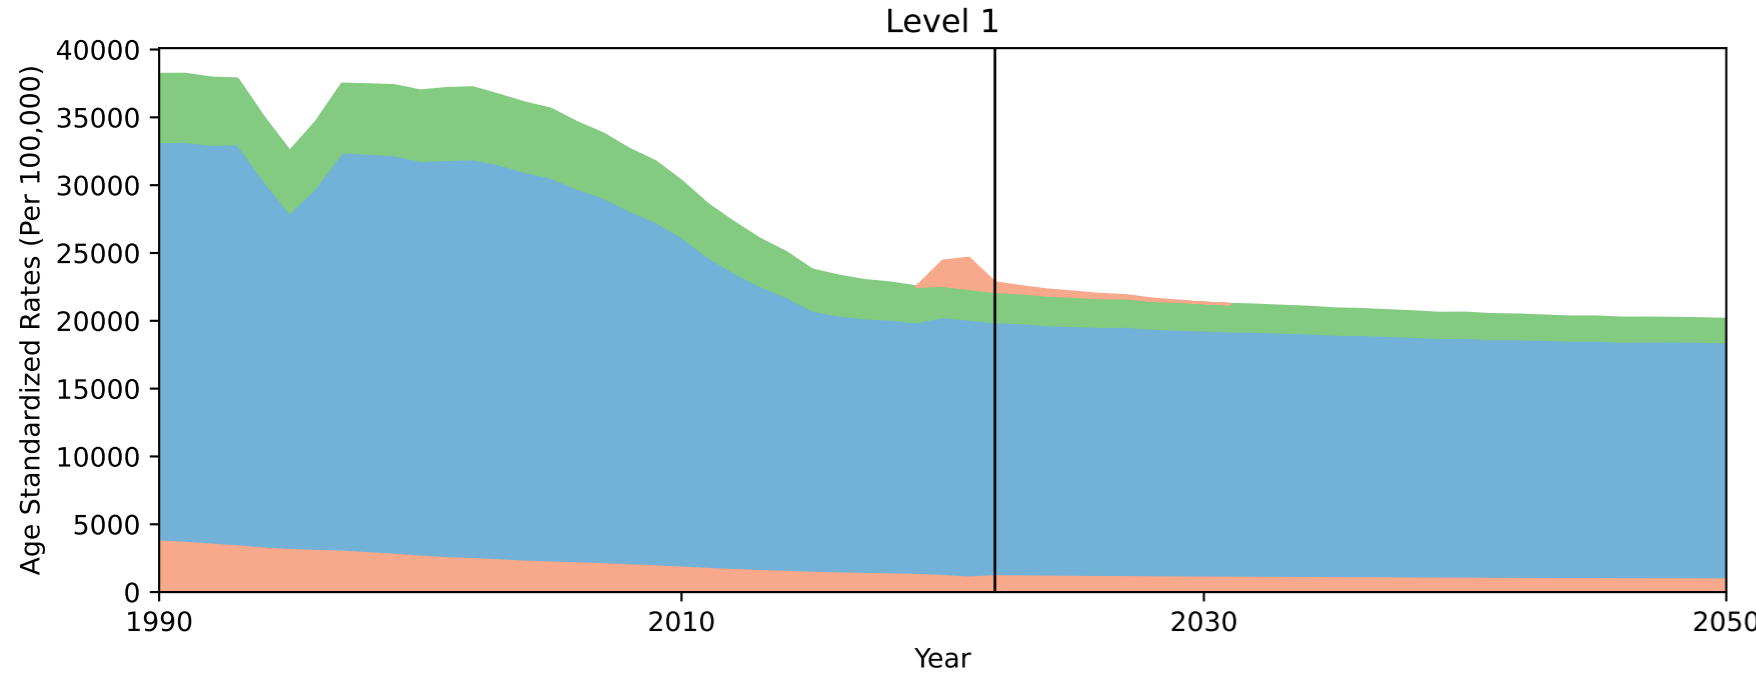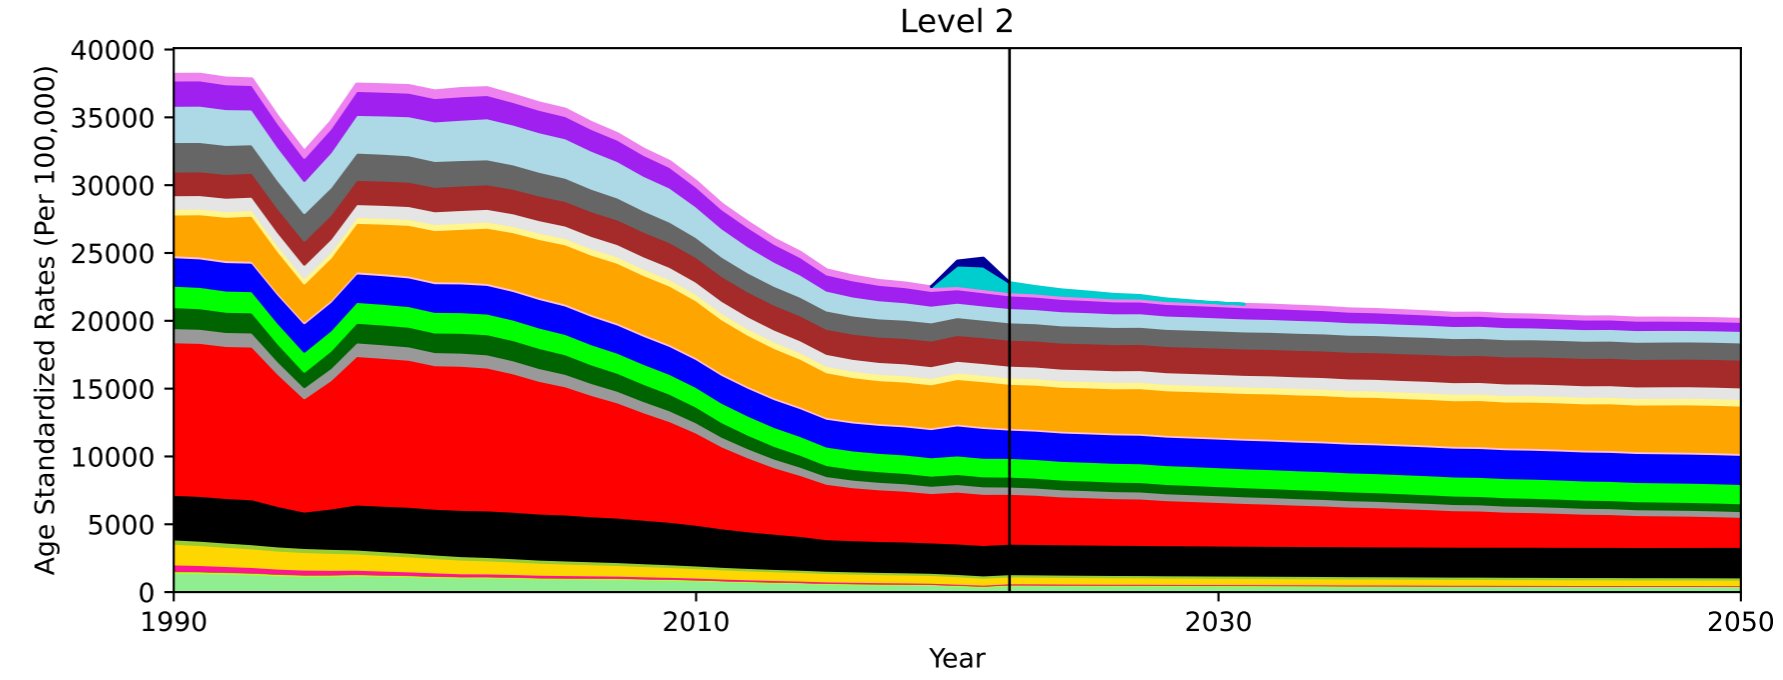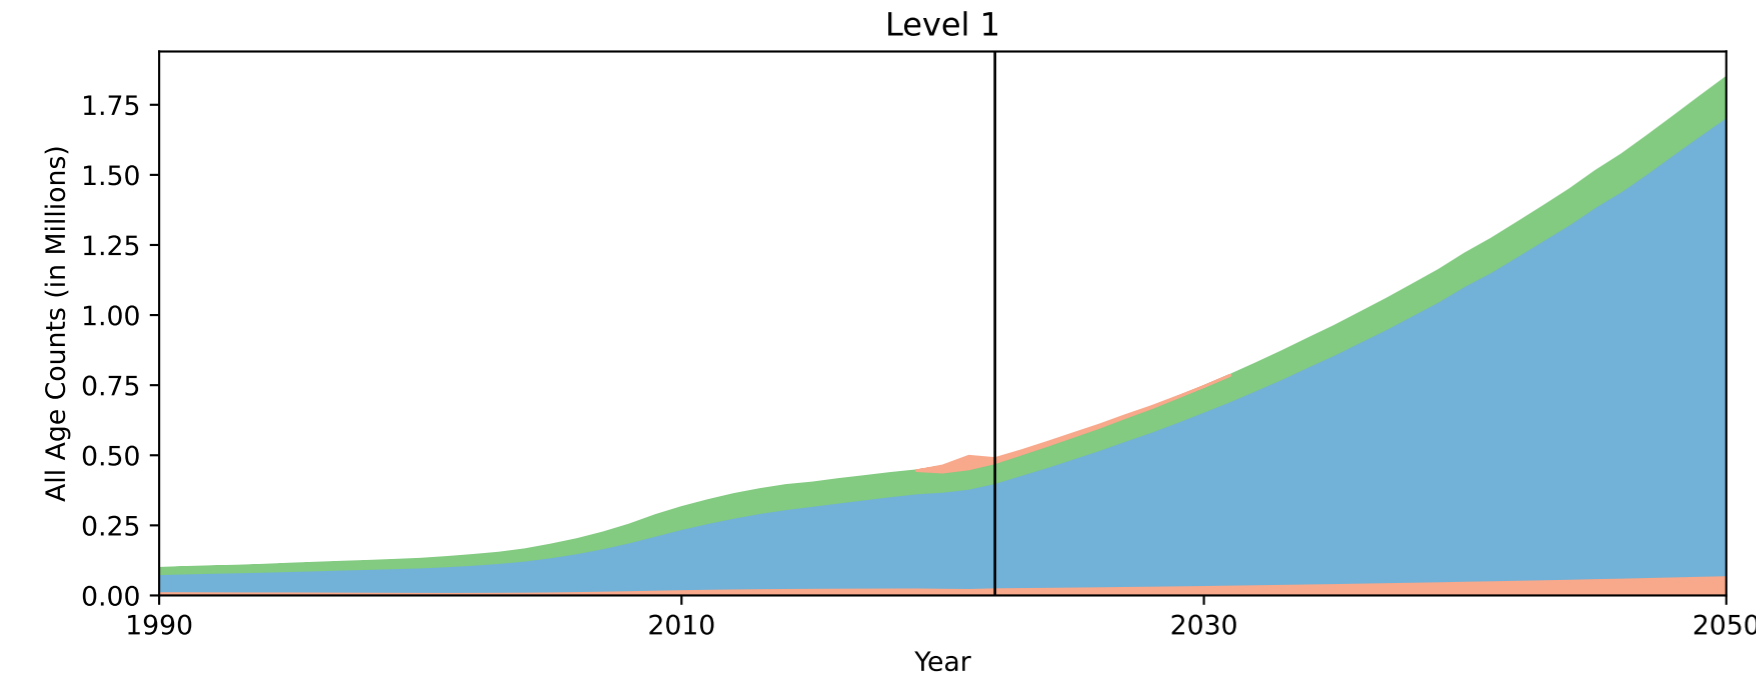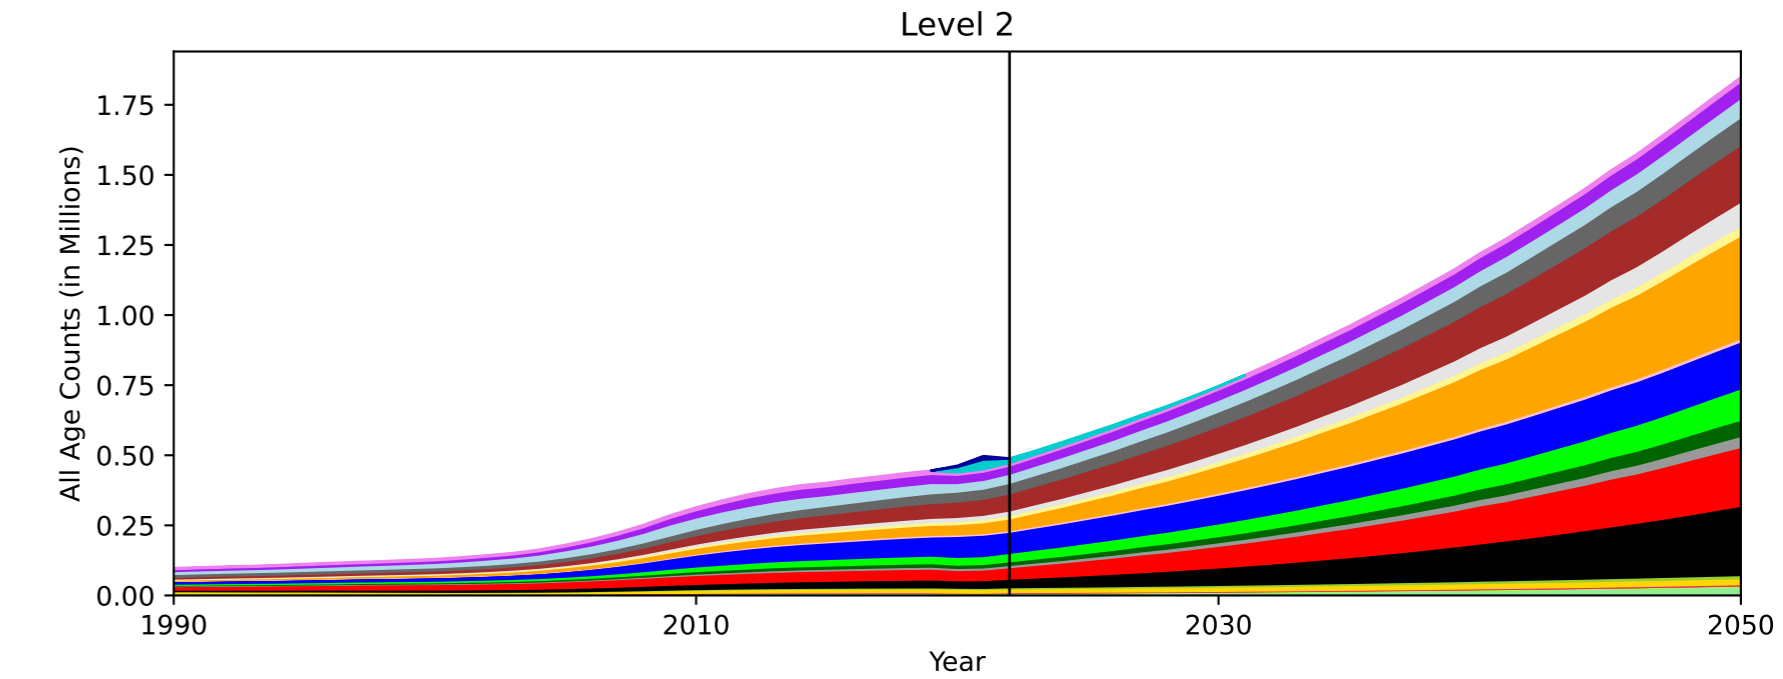

# Saudi Arabia

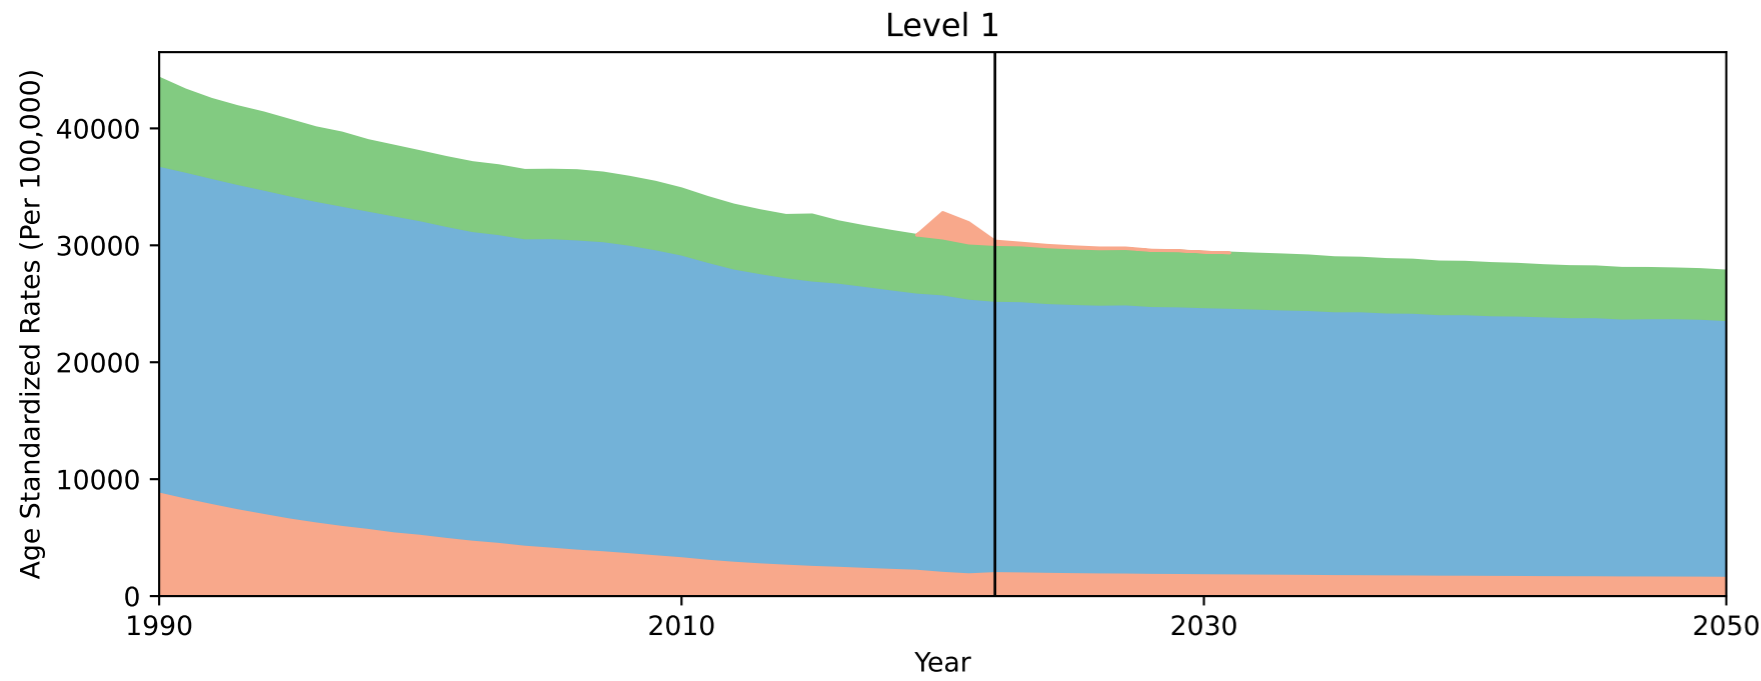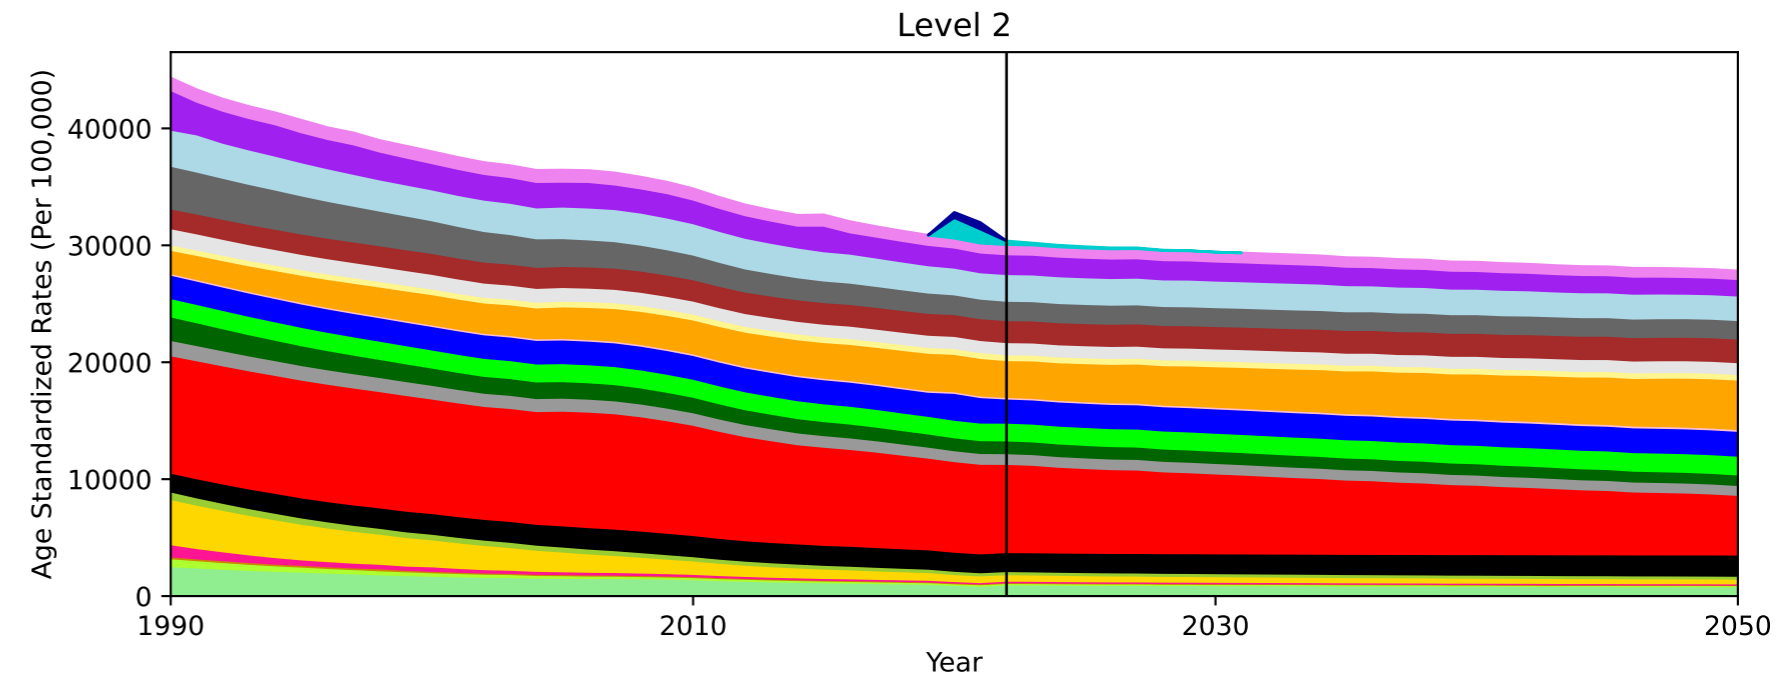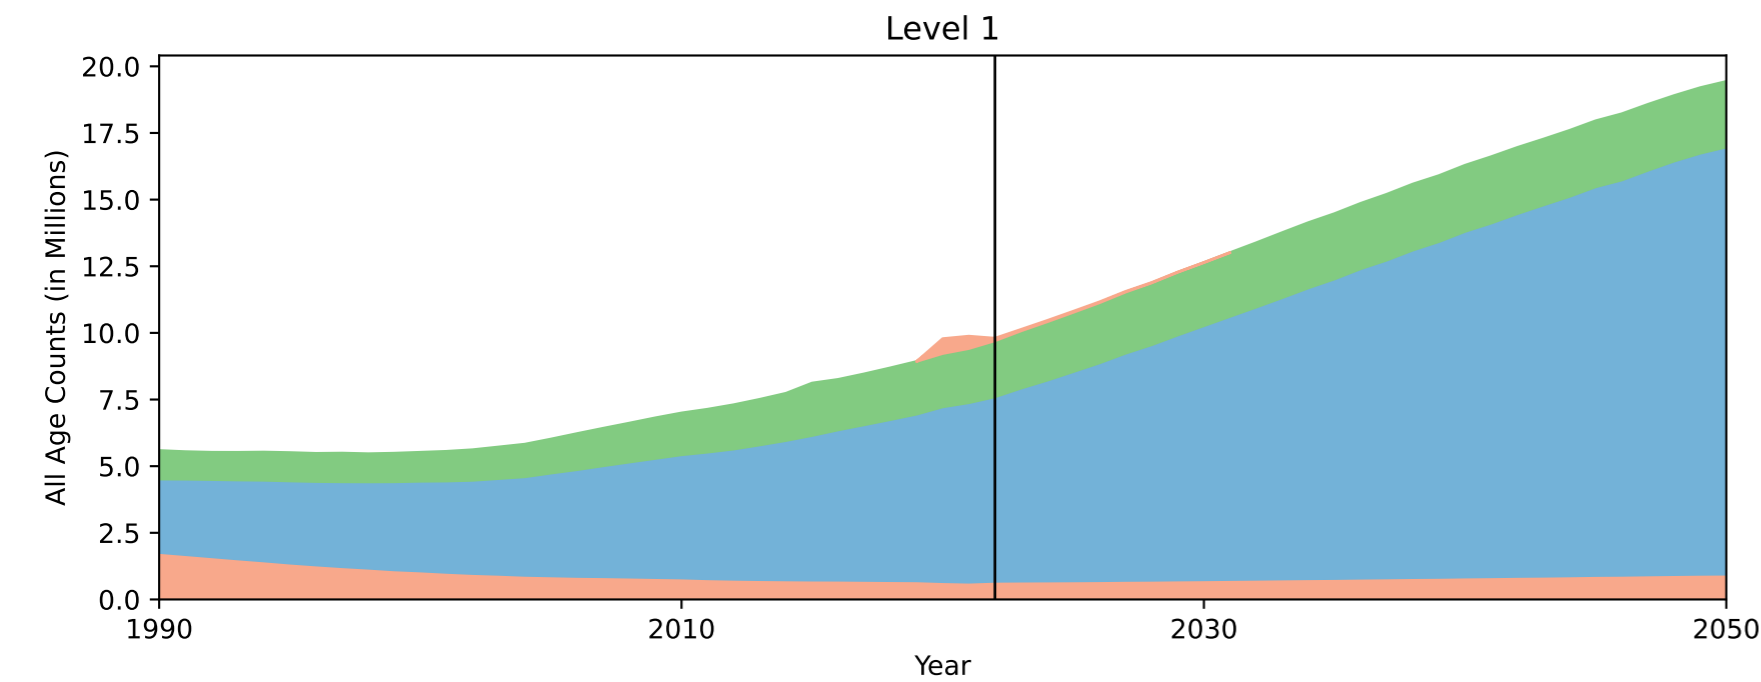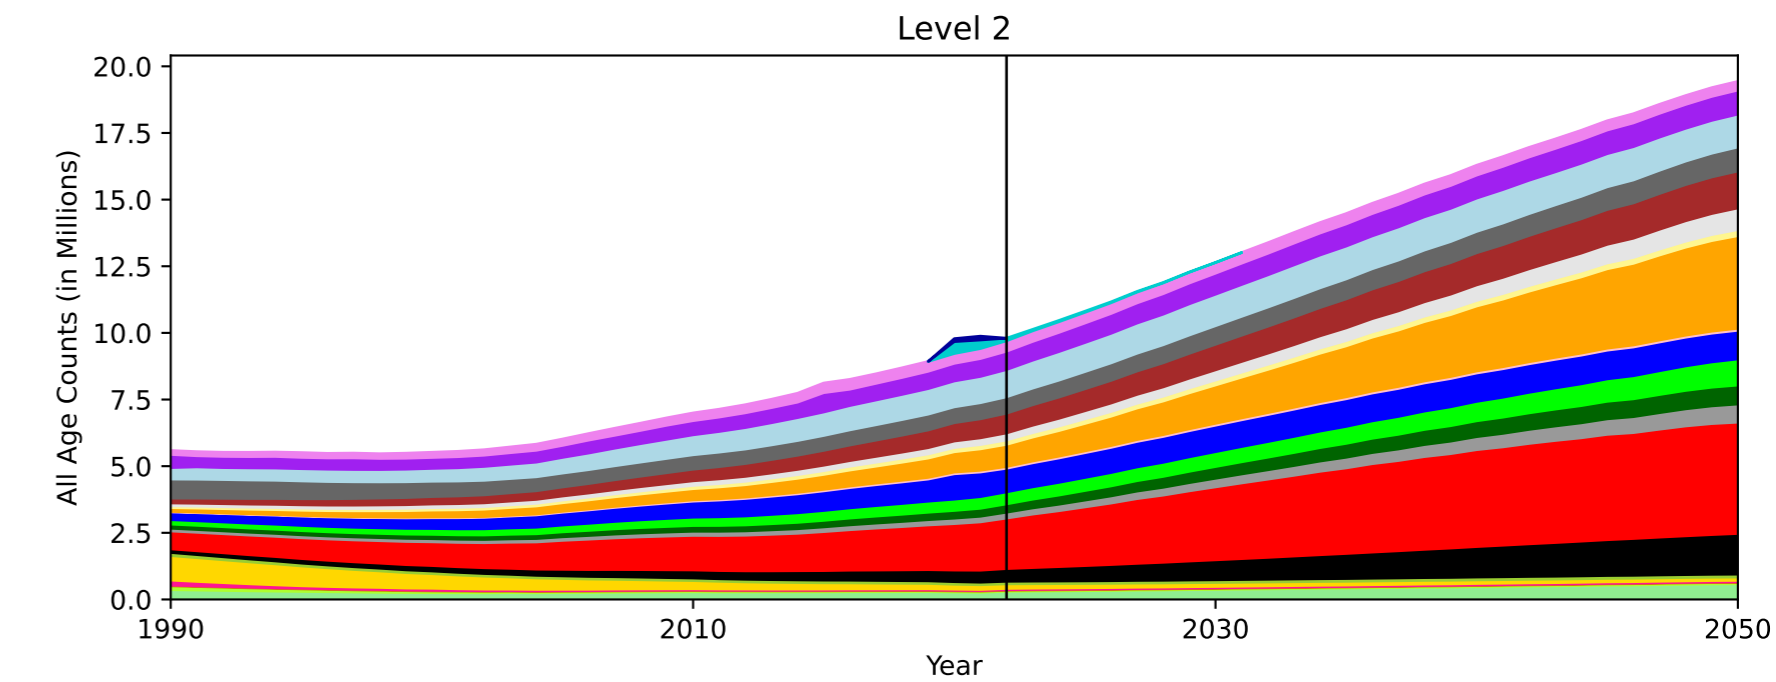

Level 1

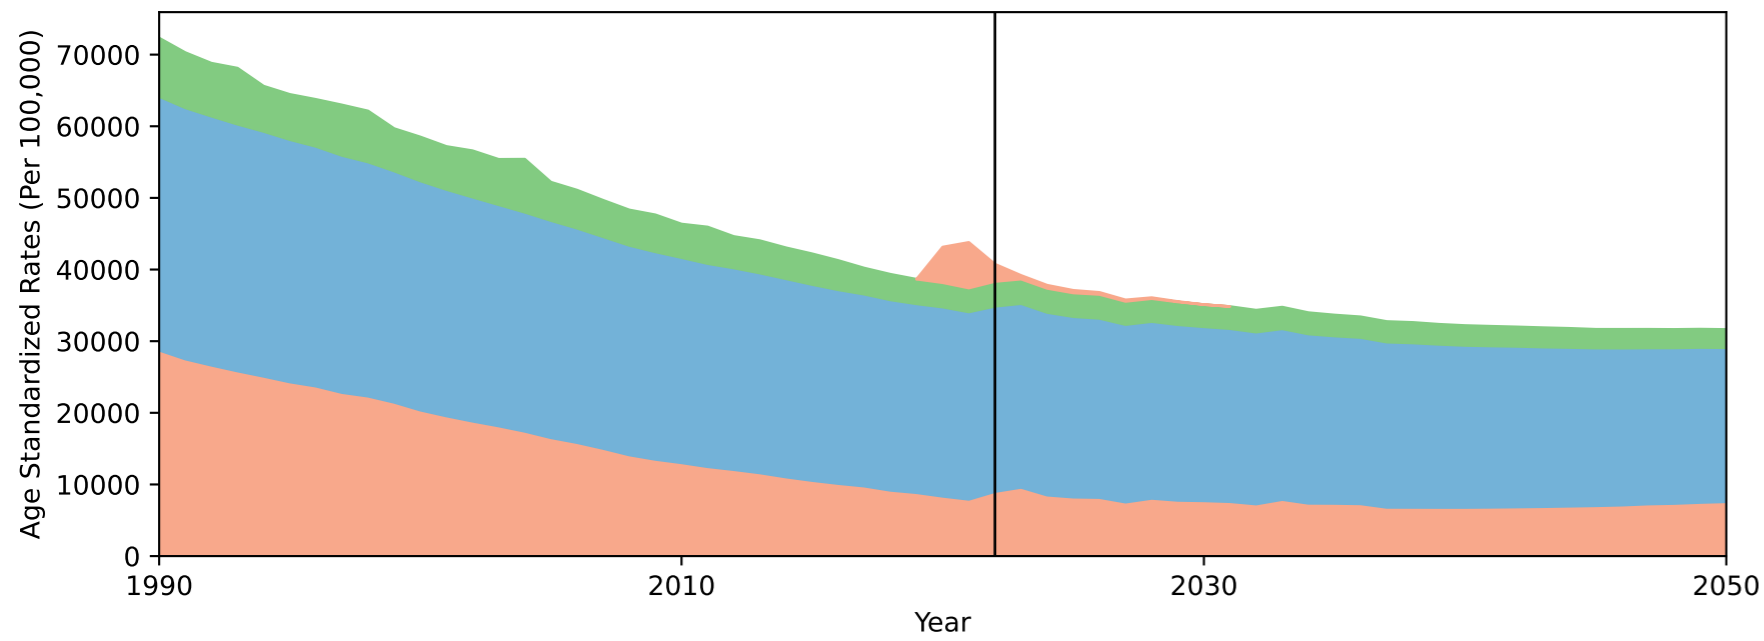

Level 2

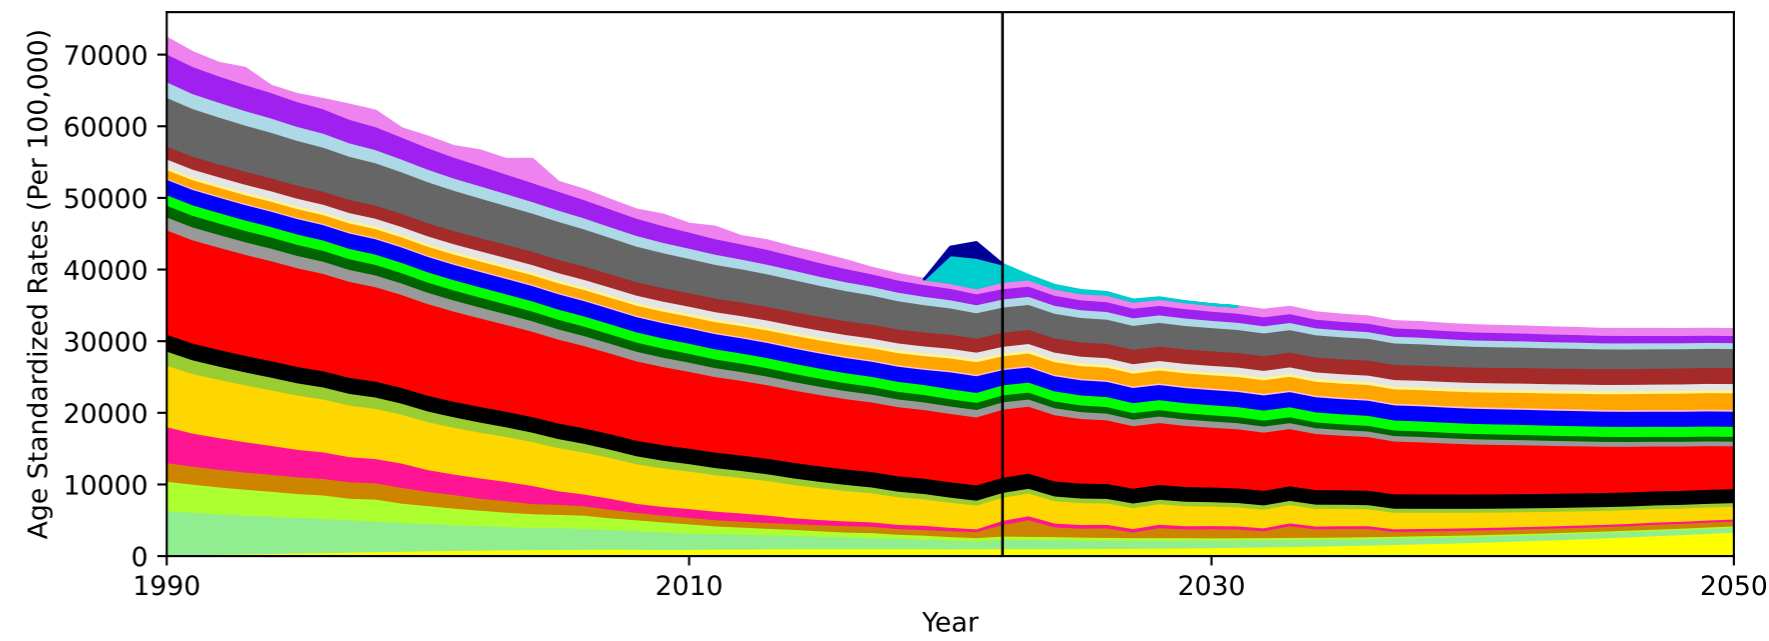

Level 1

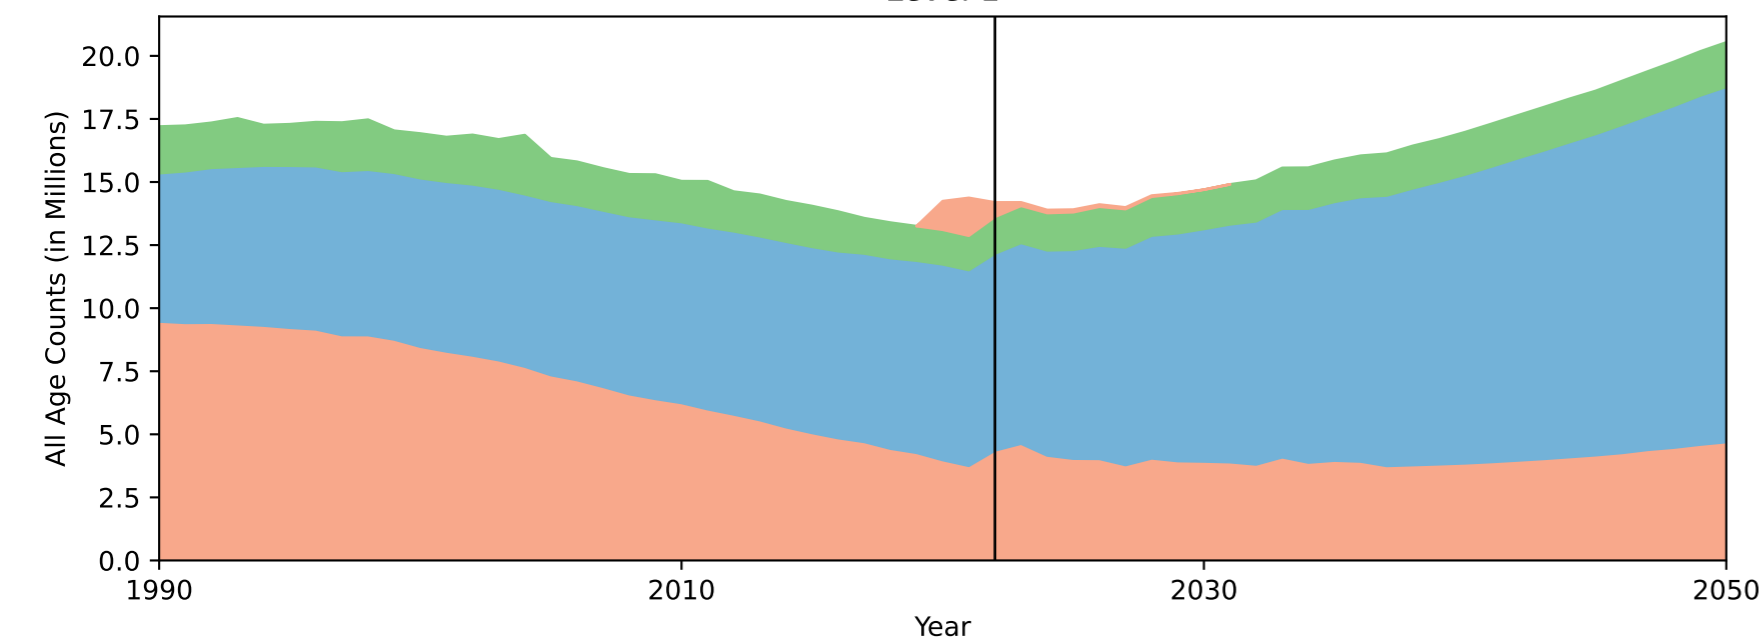

Level 2

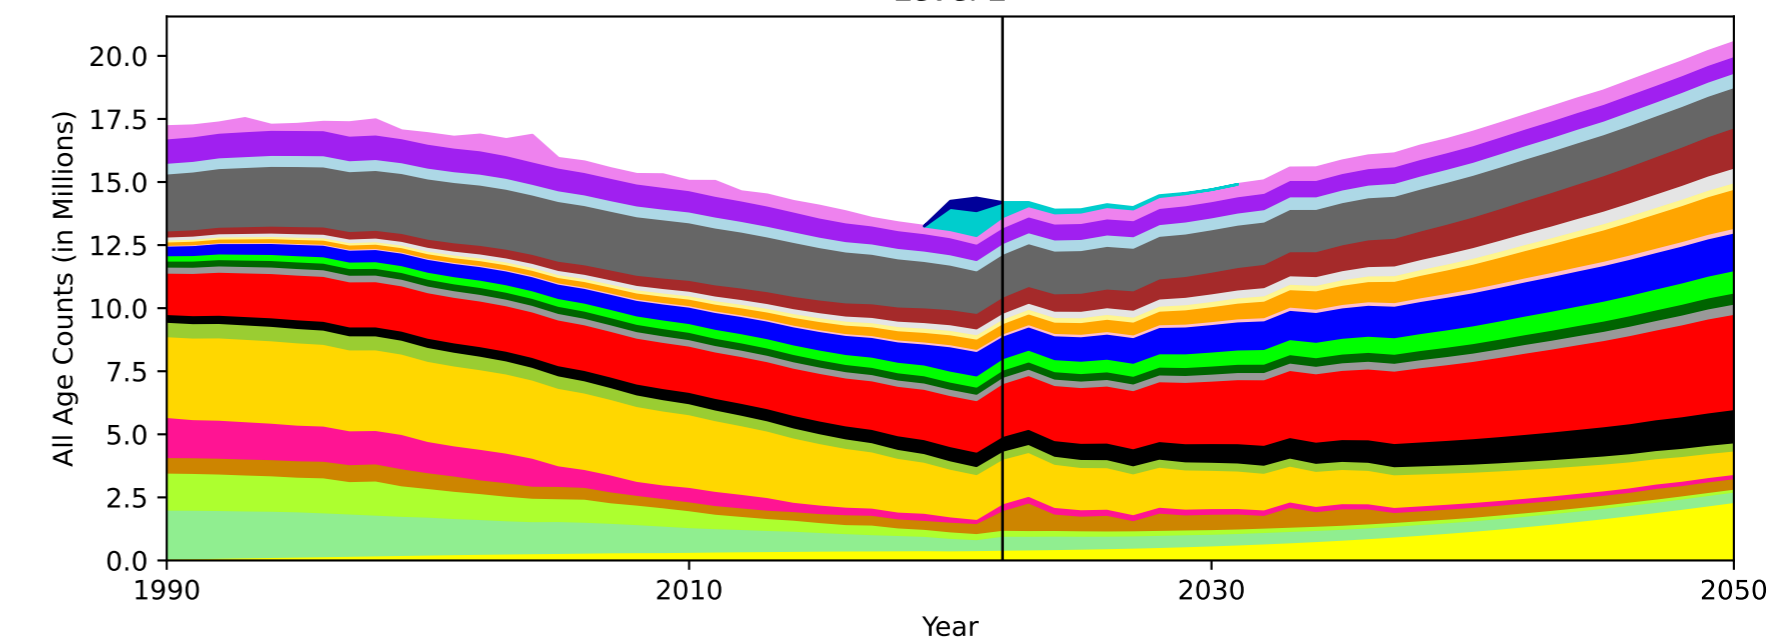

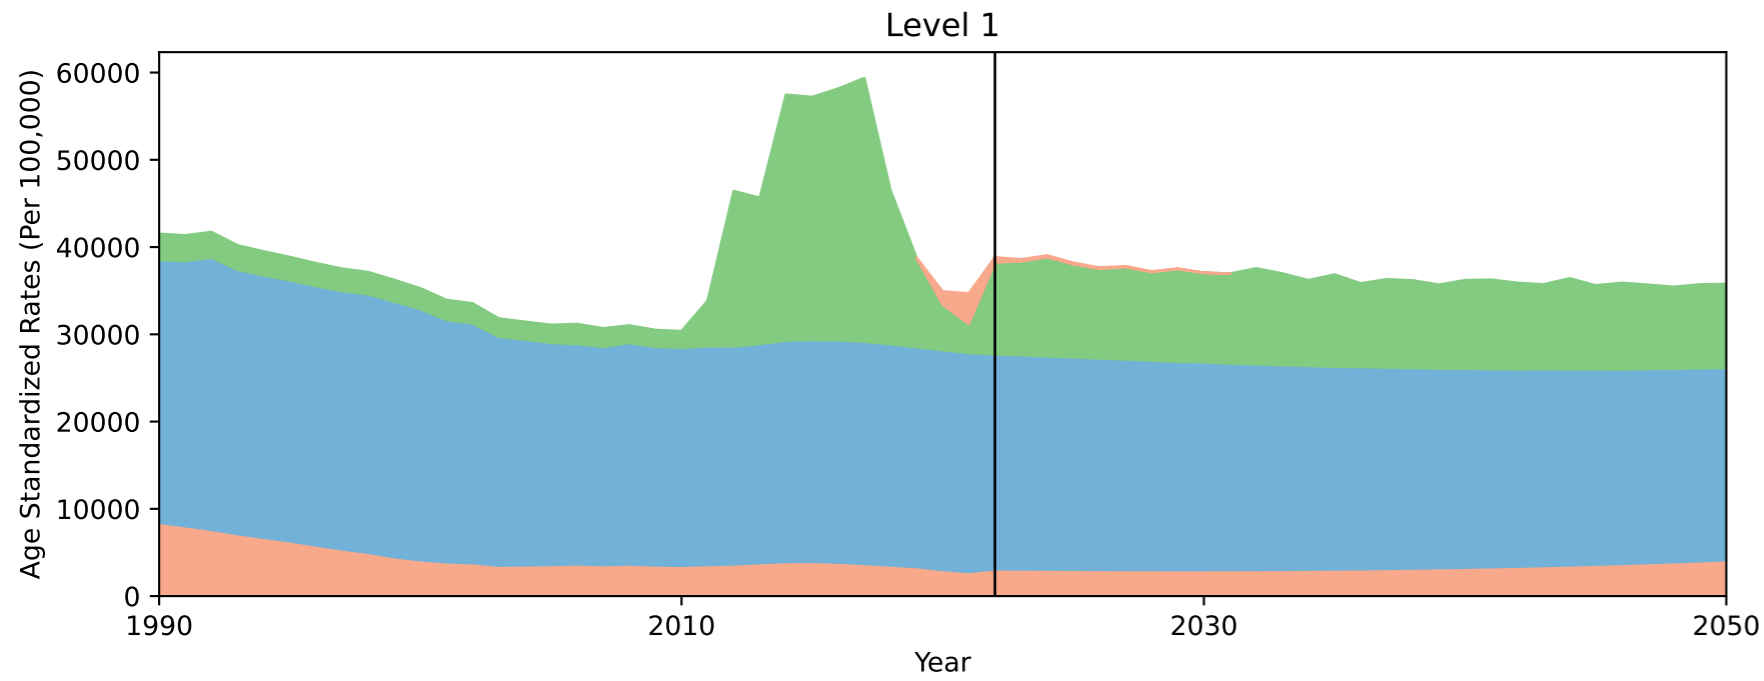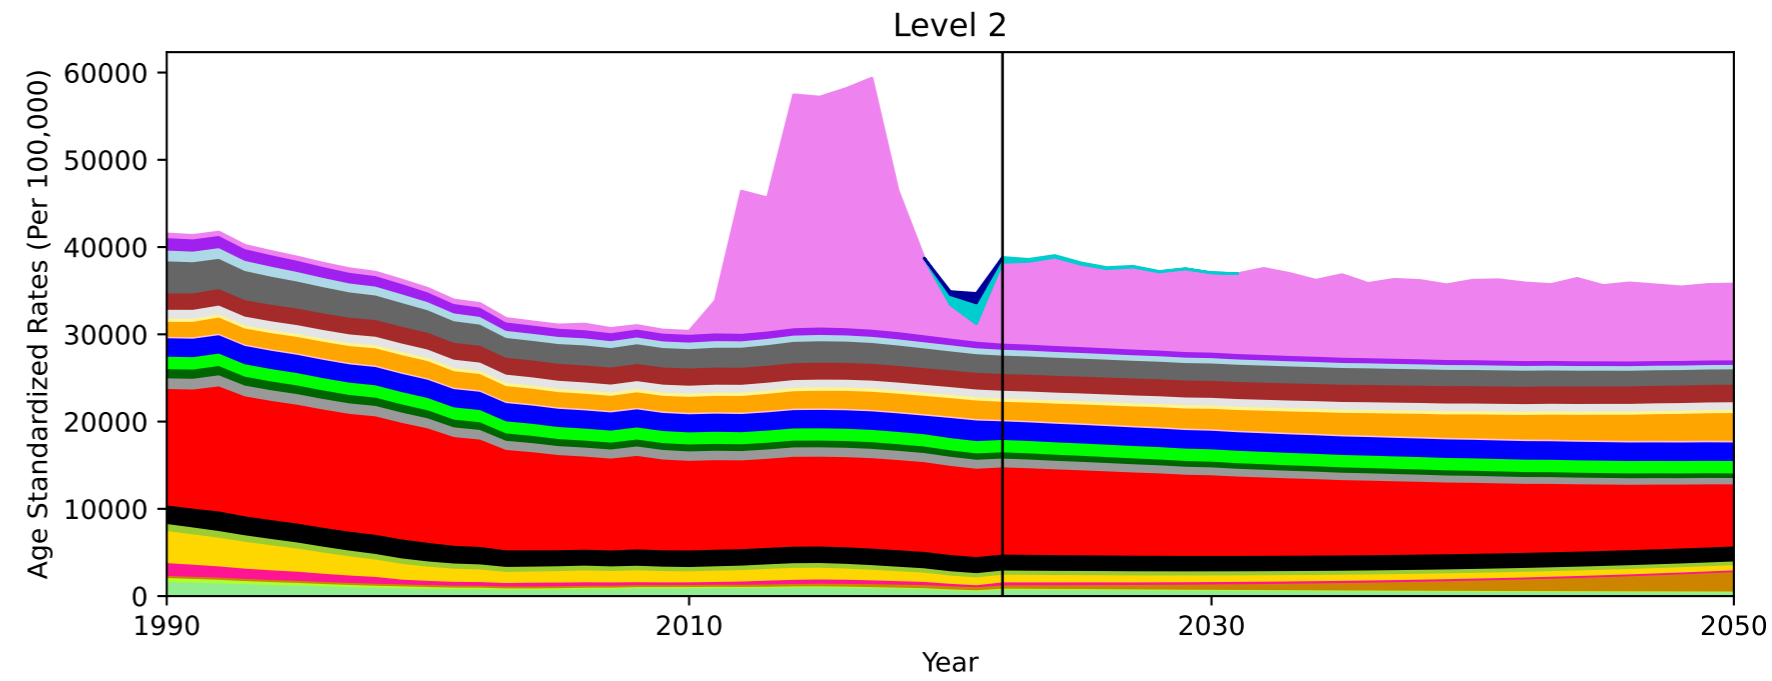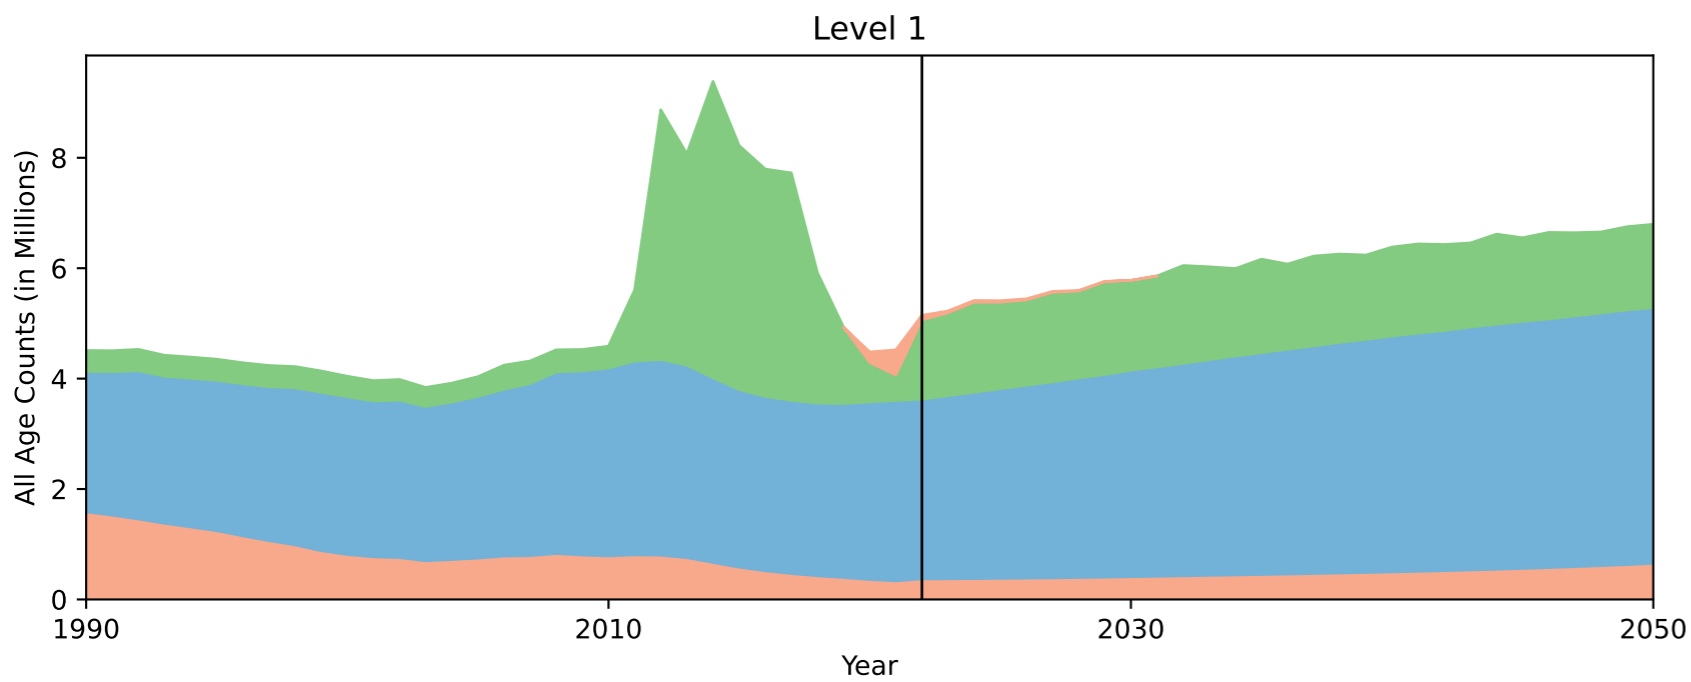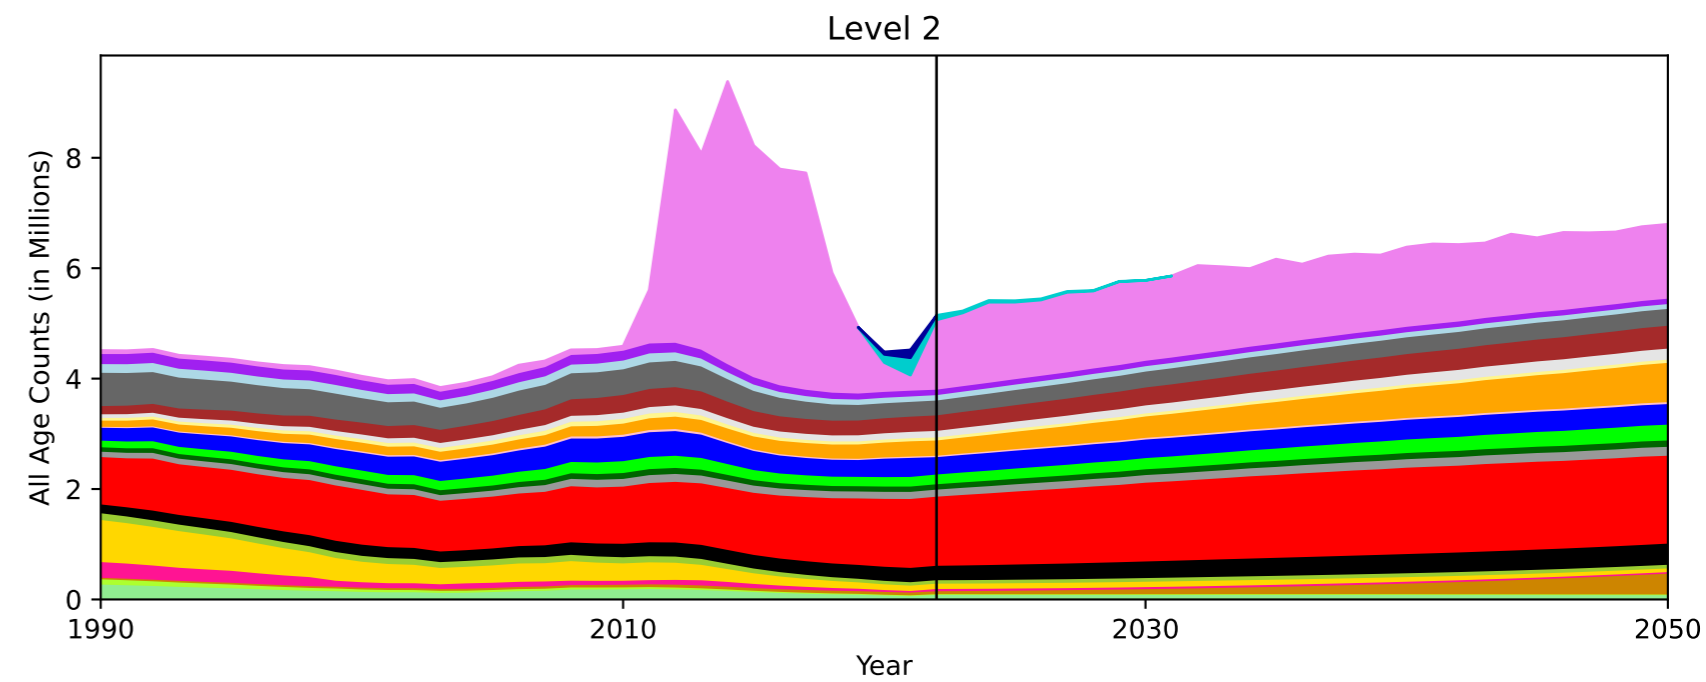



# Tunisia

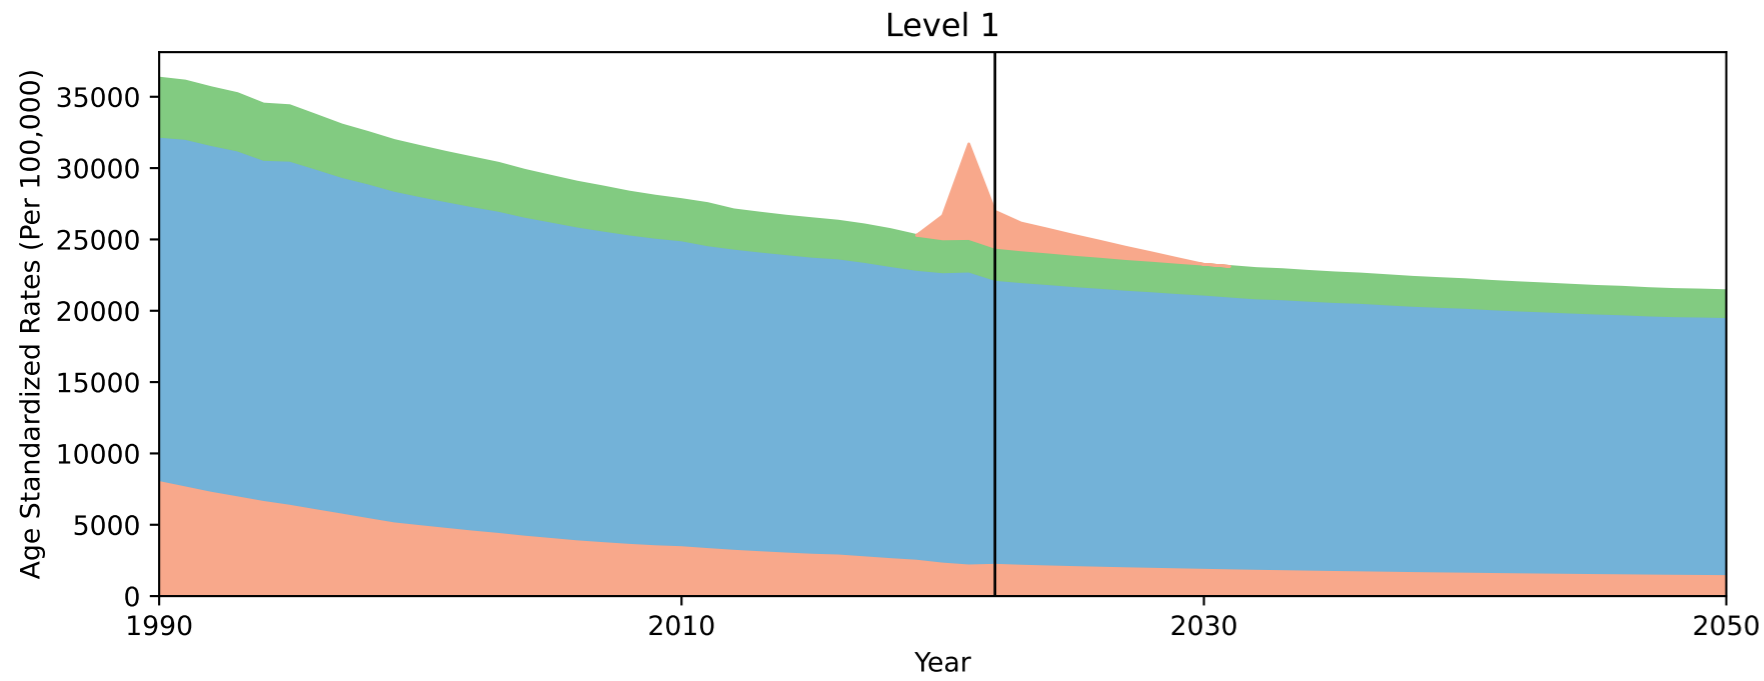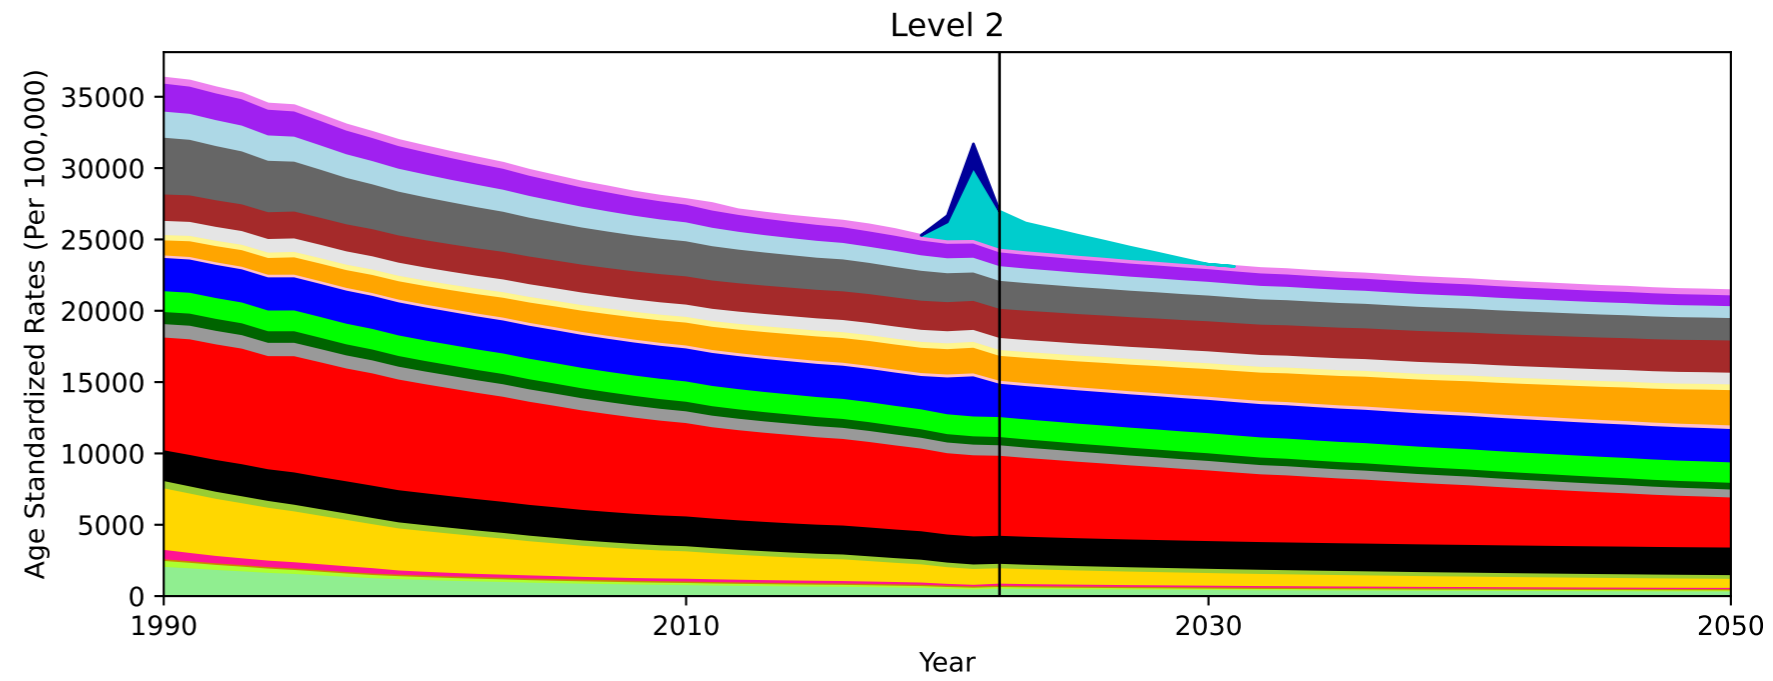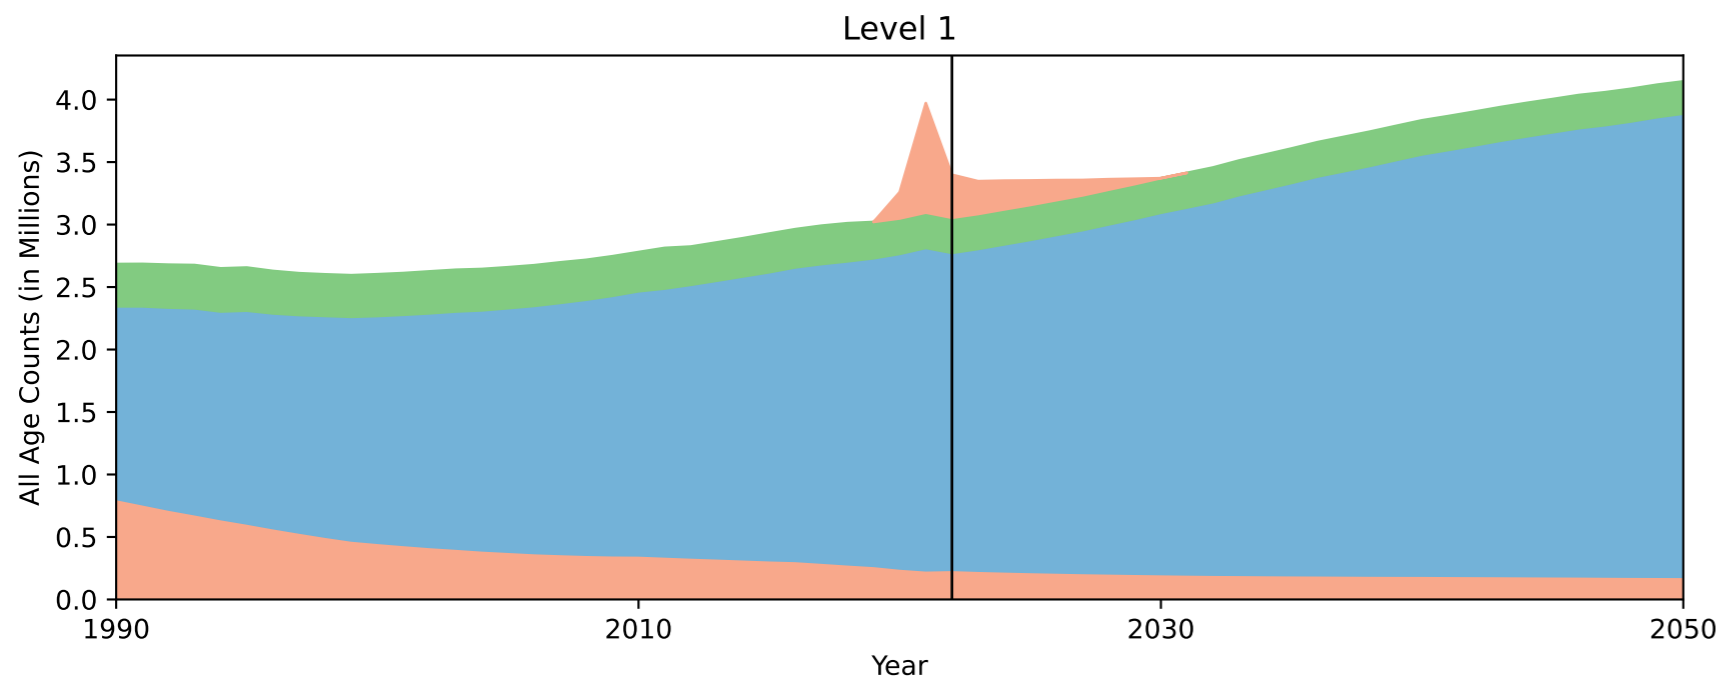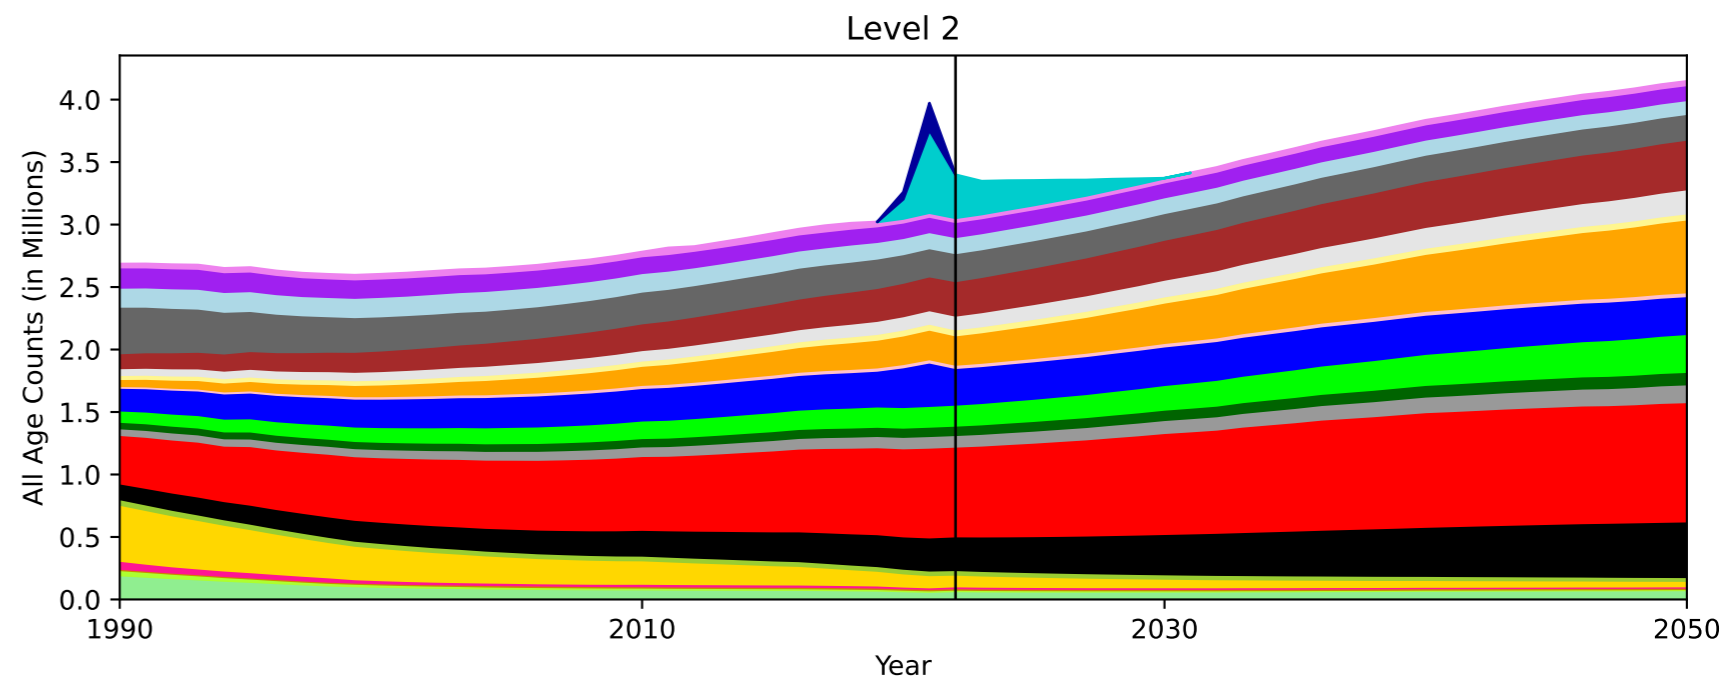

Level 1

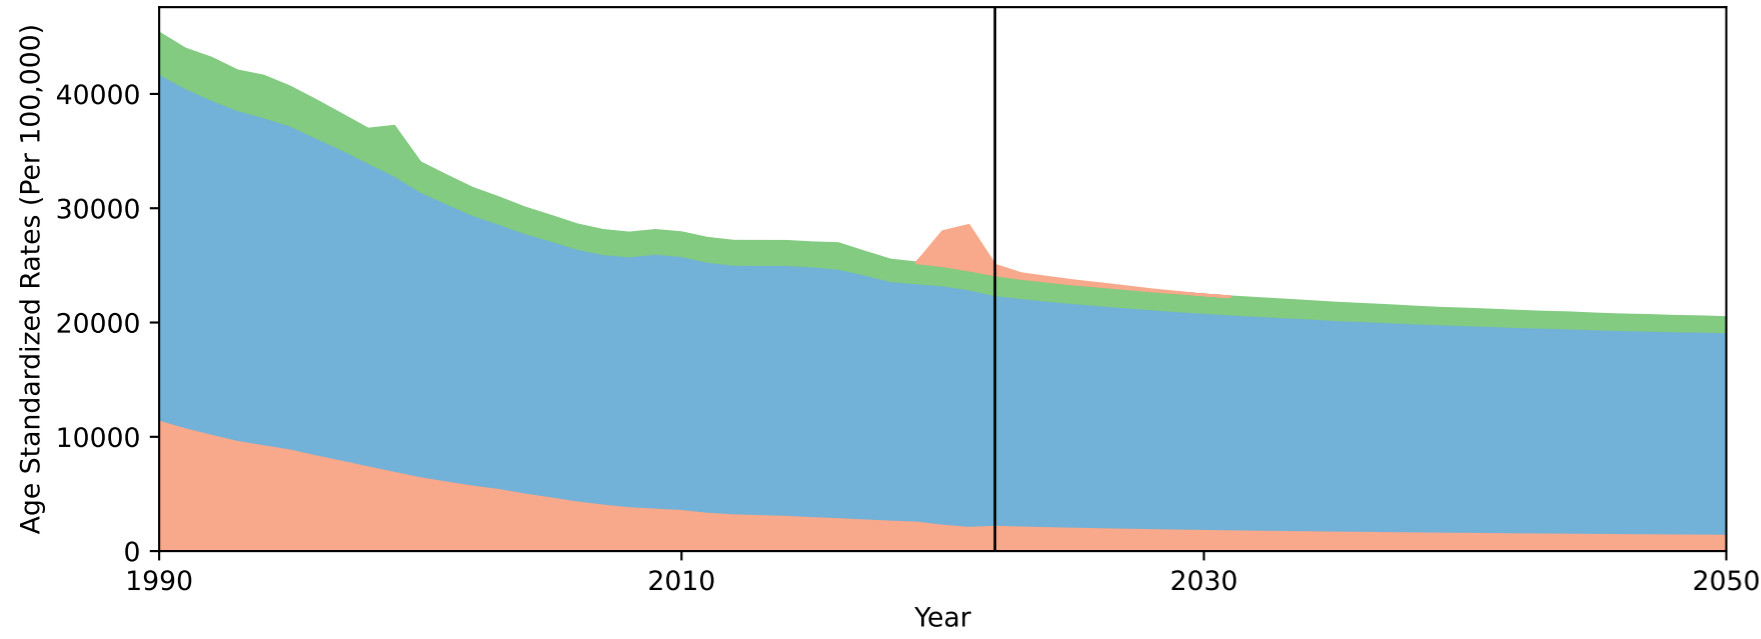

Level 2

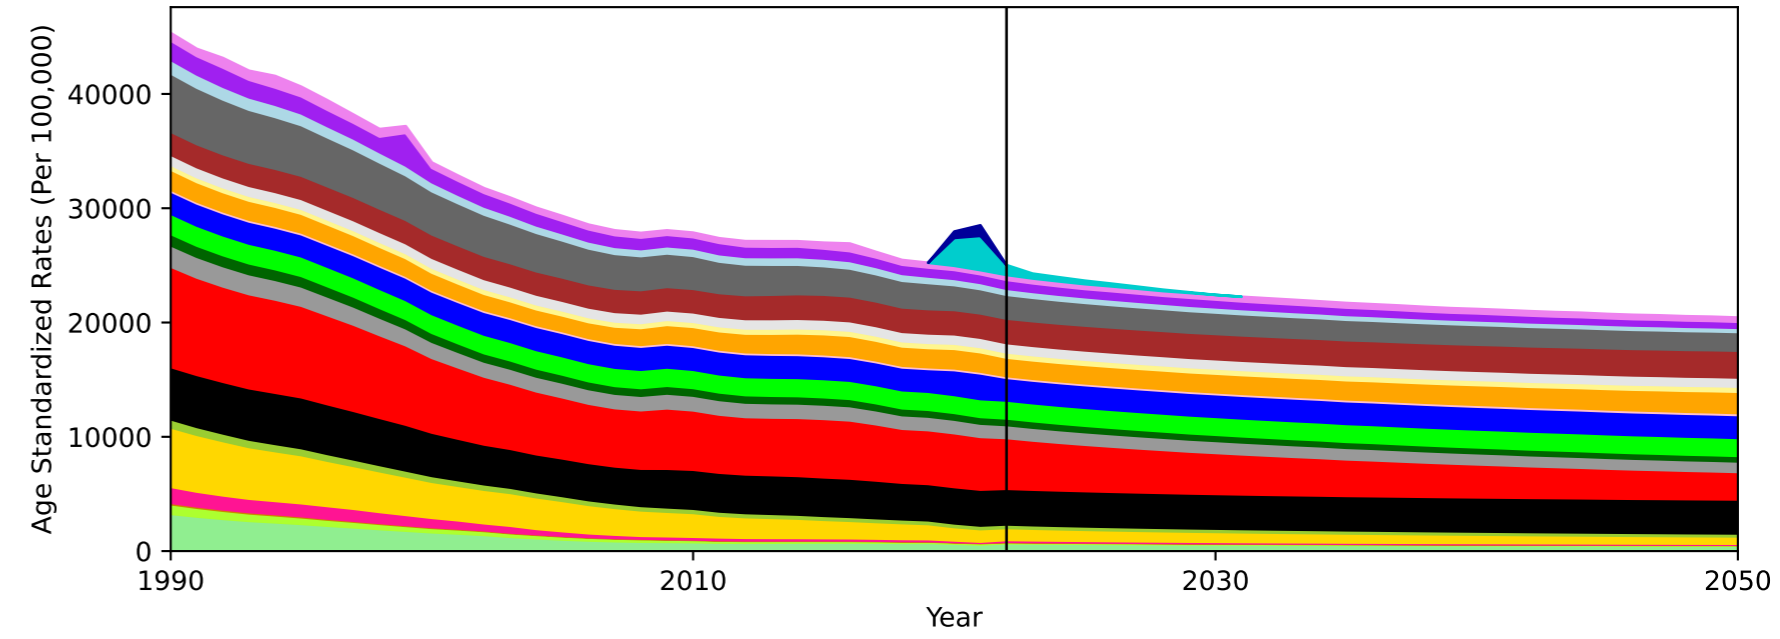

Level 1

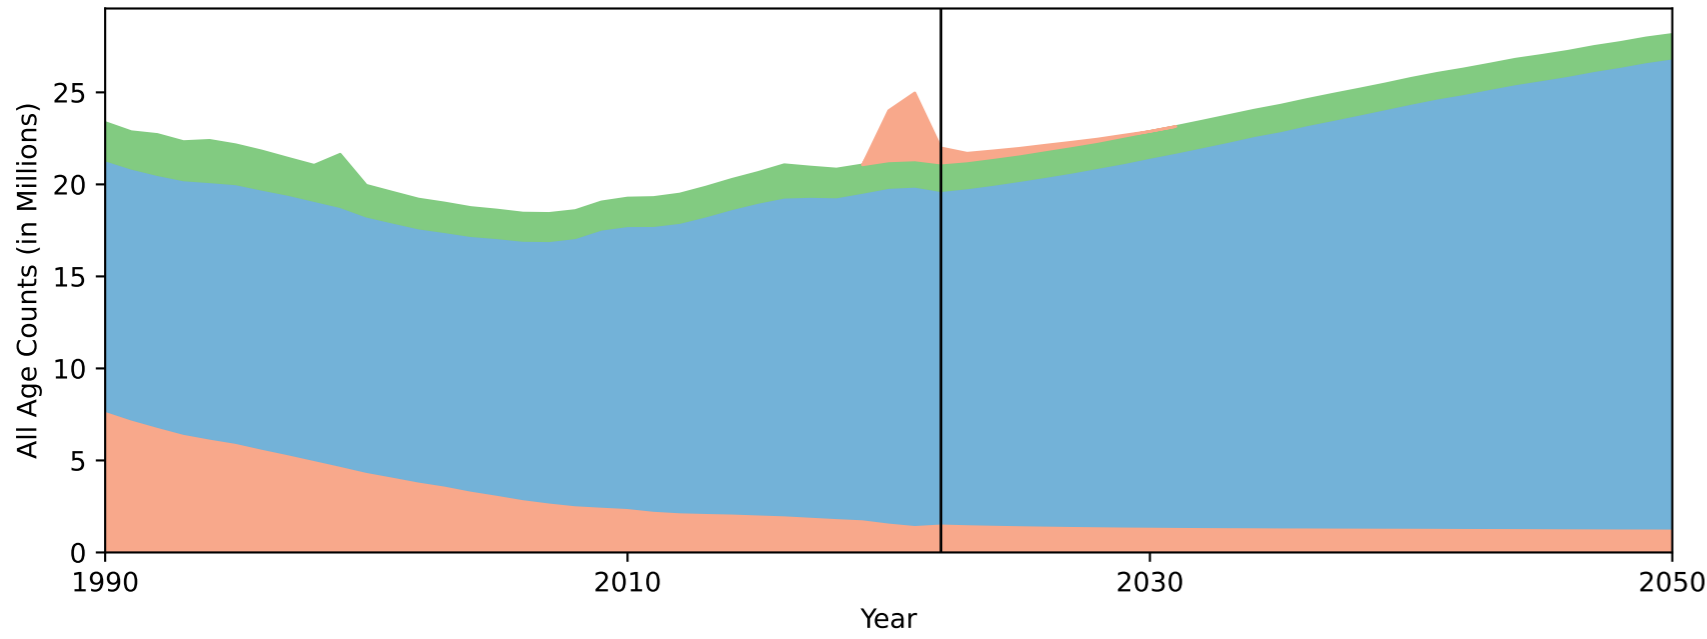

Level 2

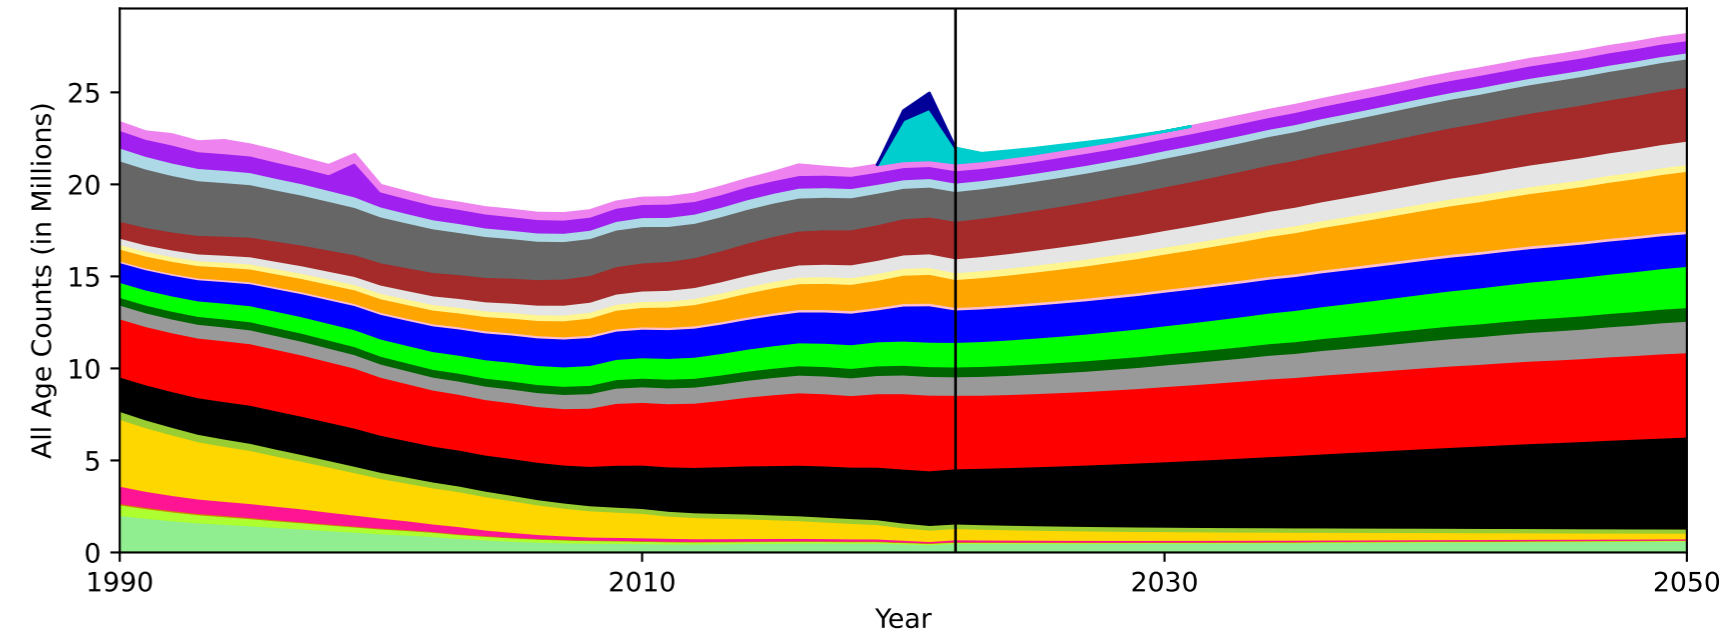

Level 1

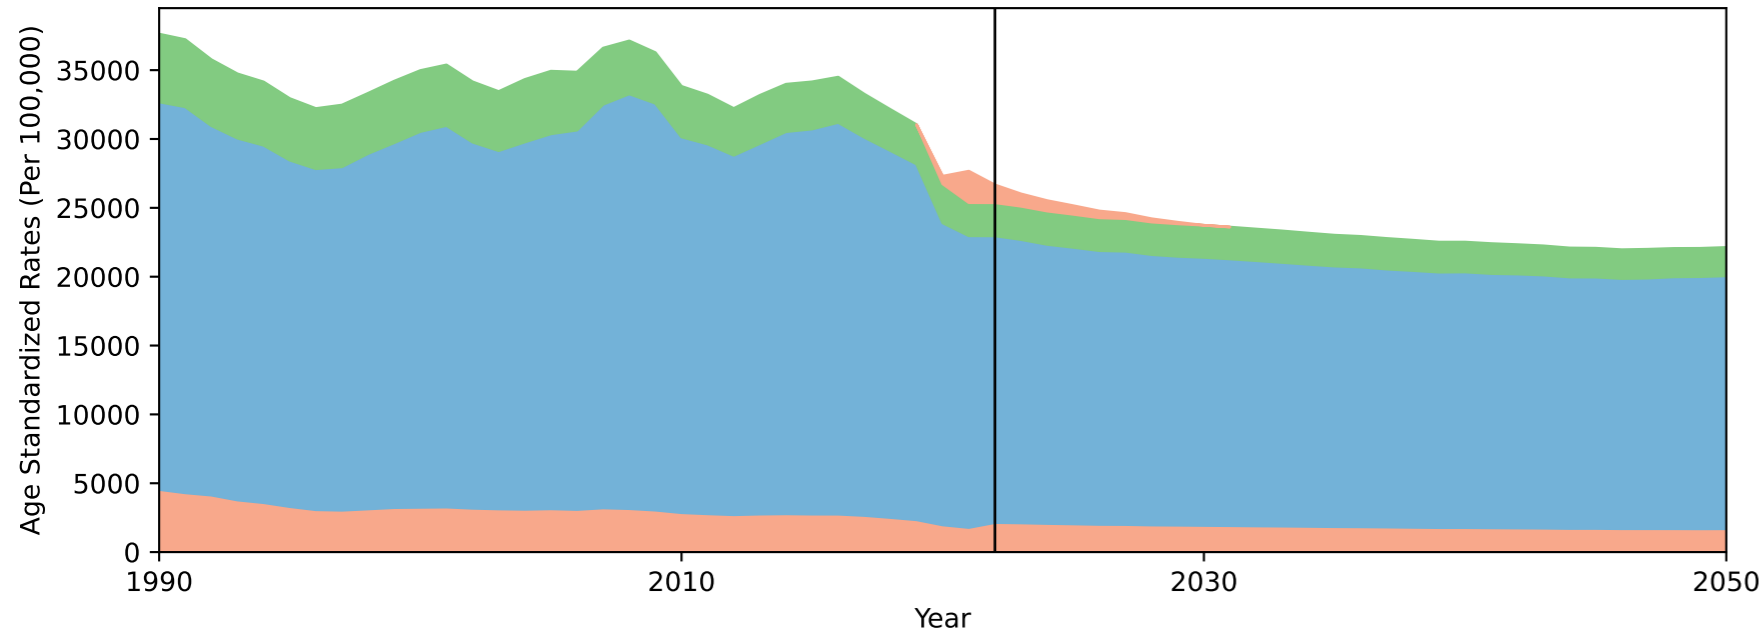

Level 2

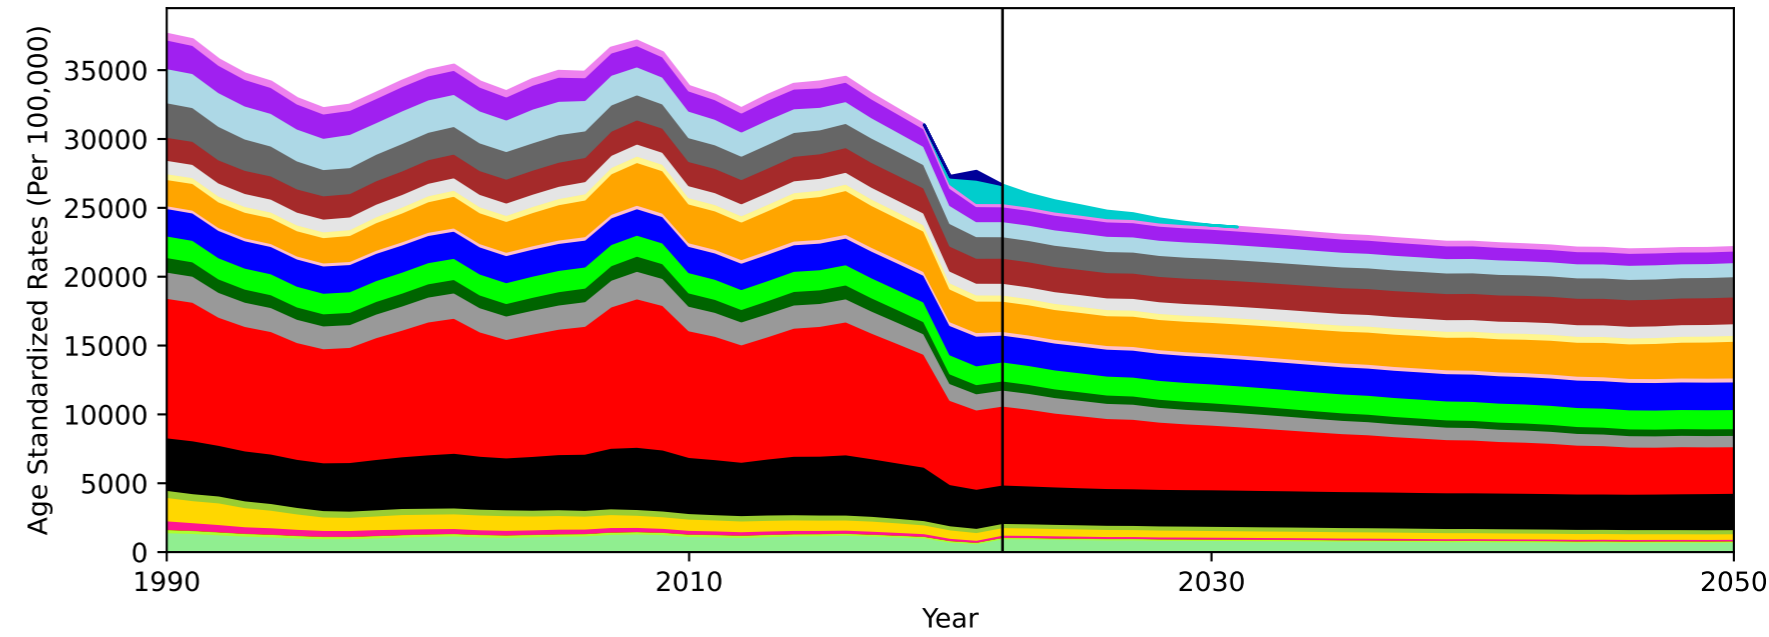

Level 1

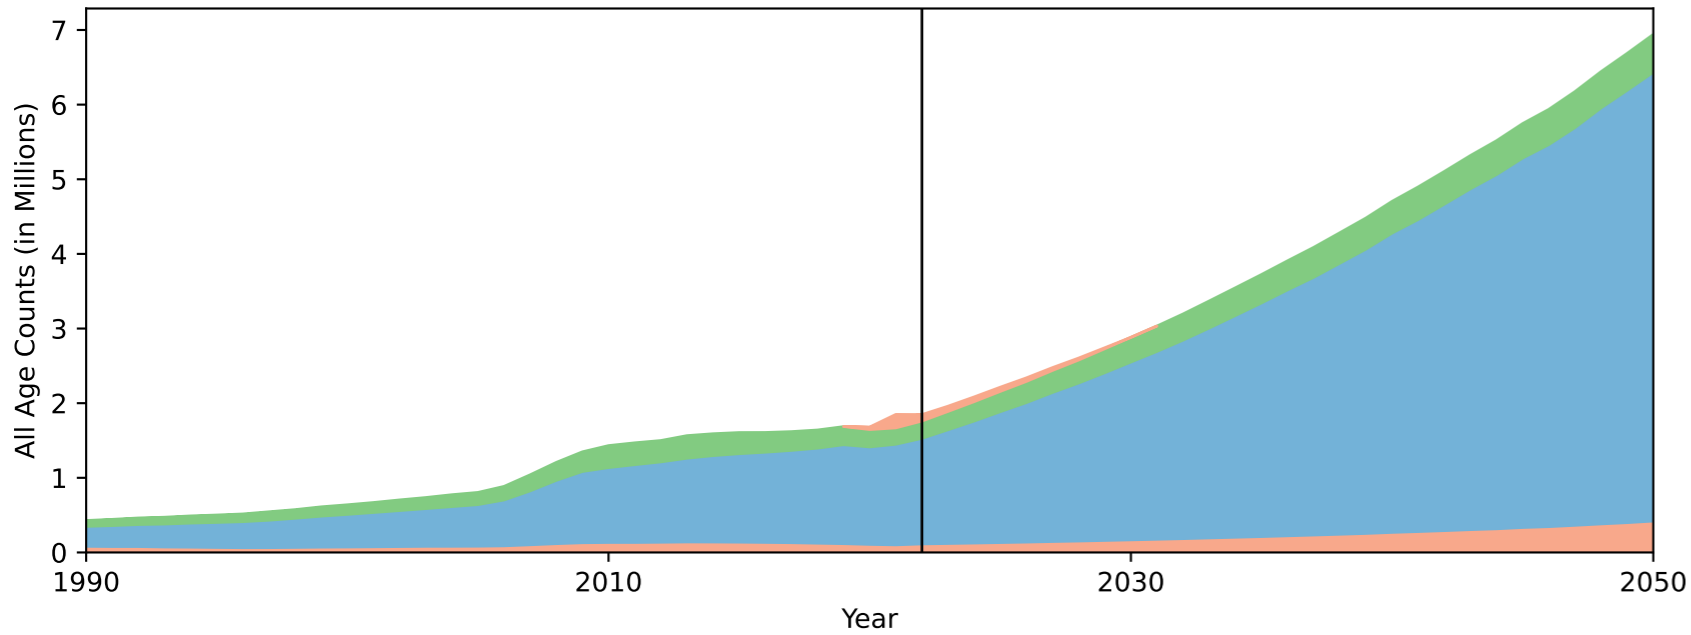

Level 2

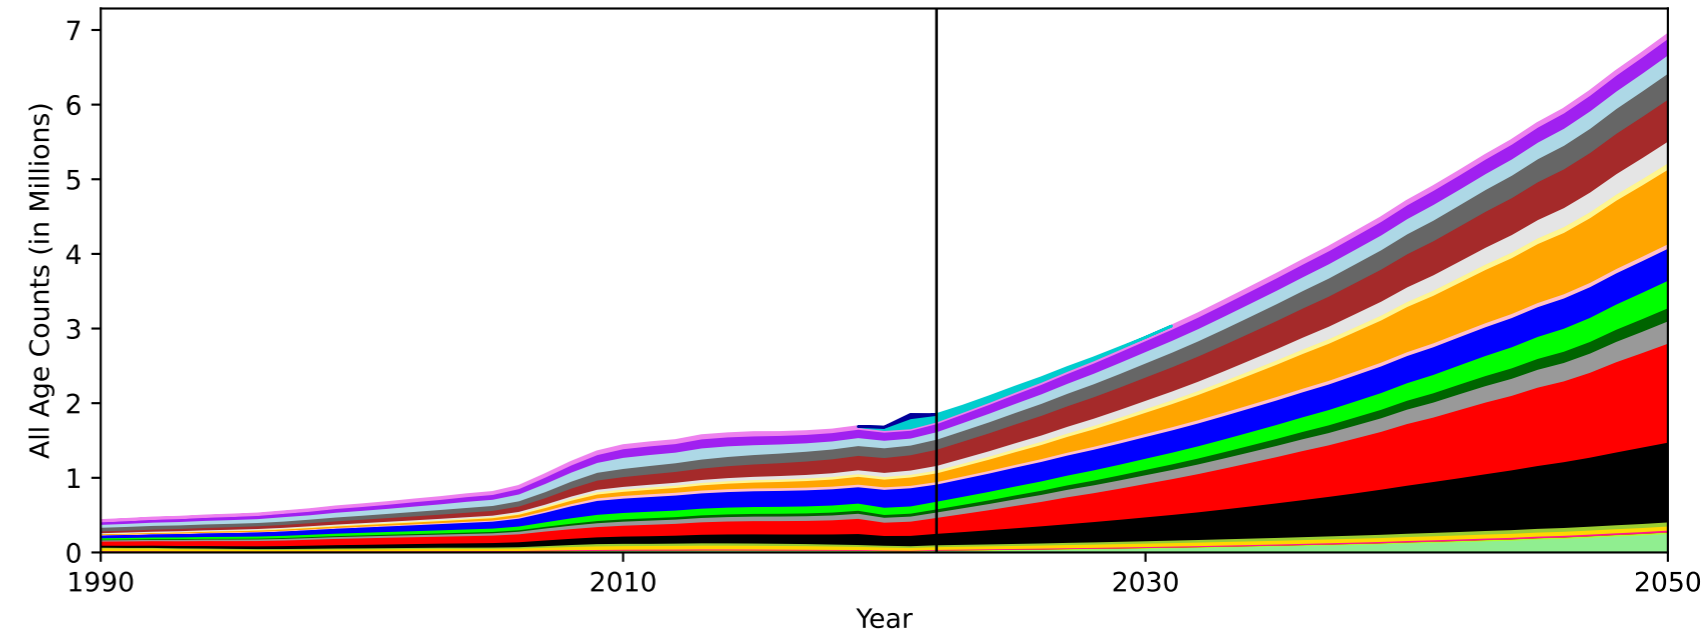

# Yemen

Level 1

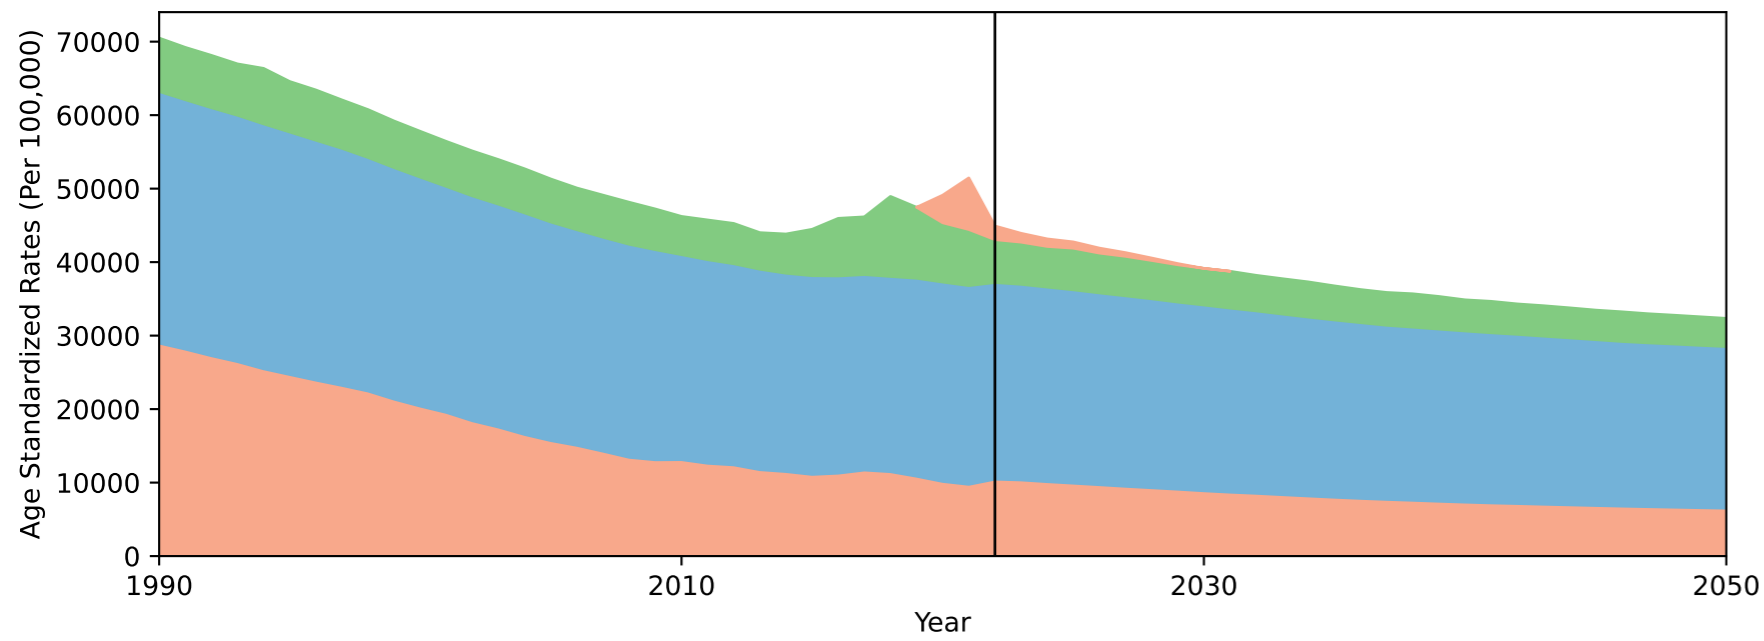

Level 2

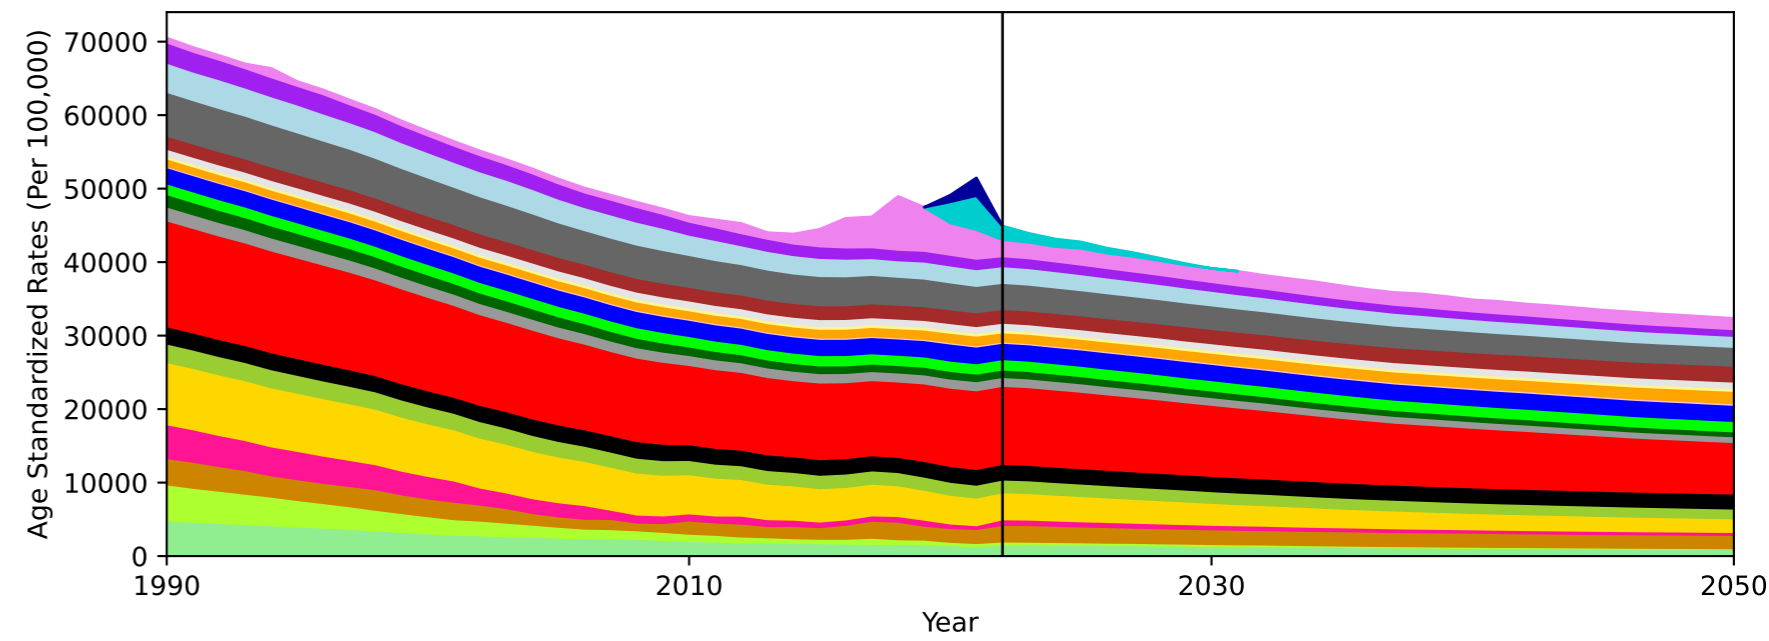

Level 1

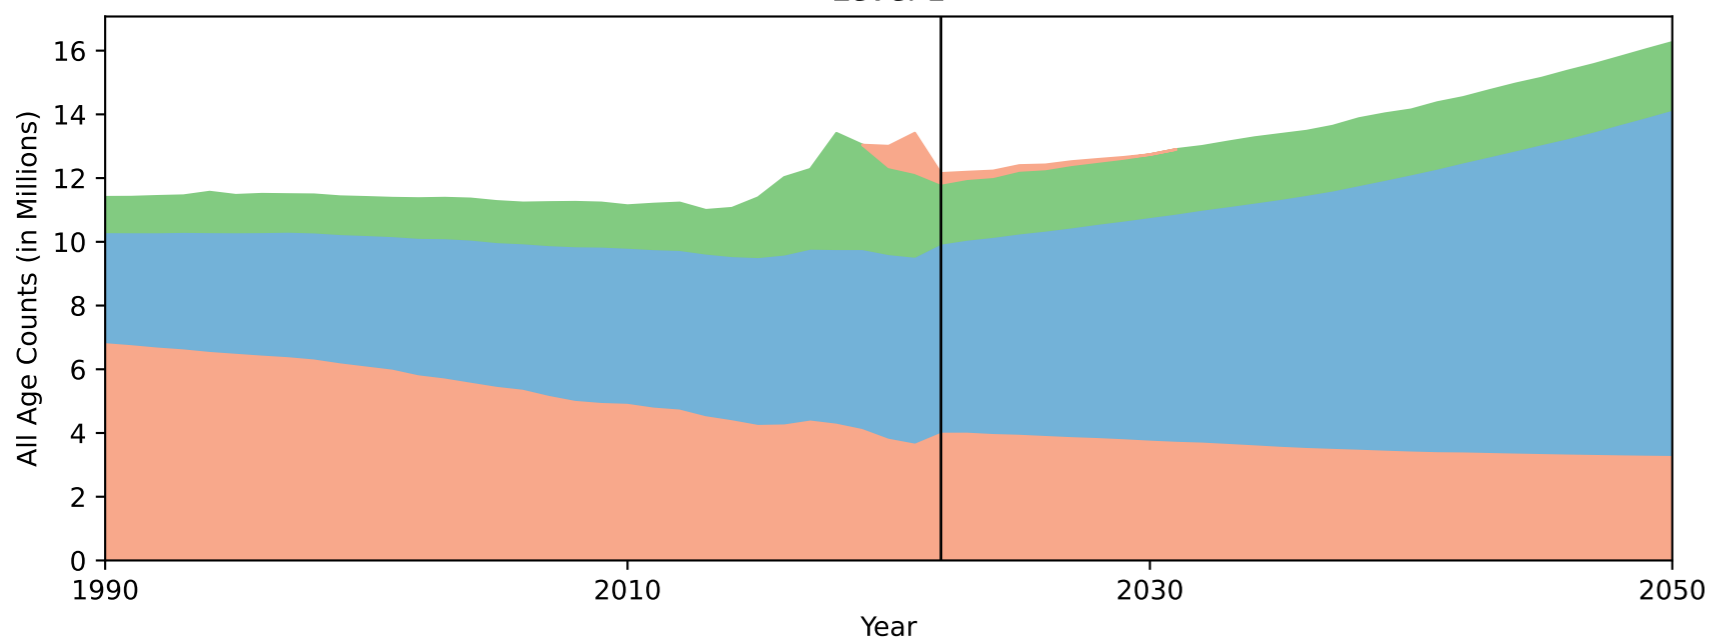

Level 2

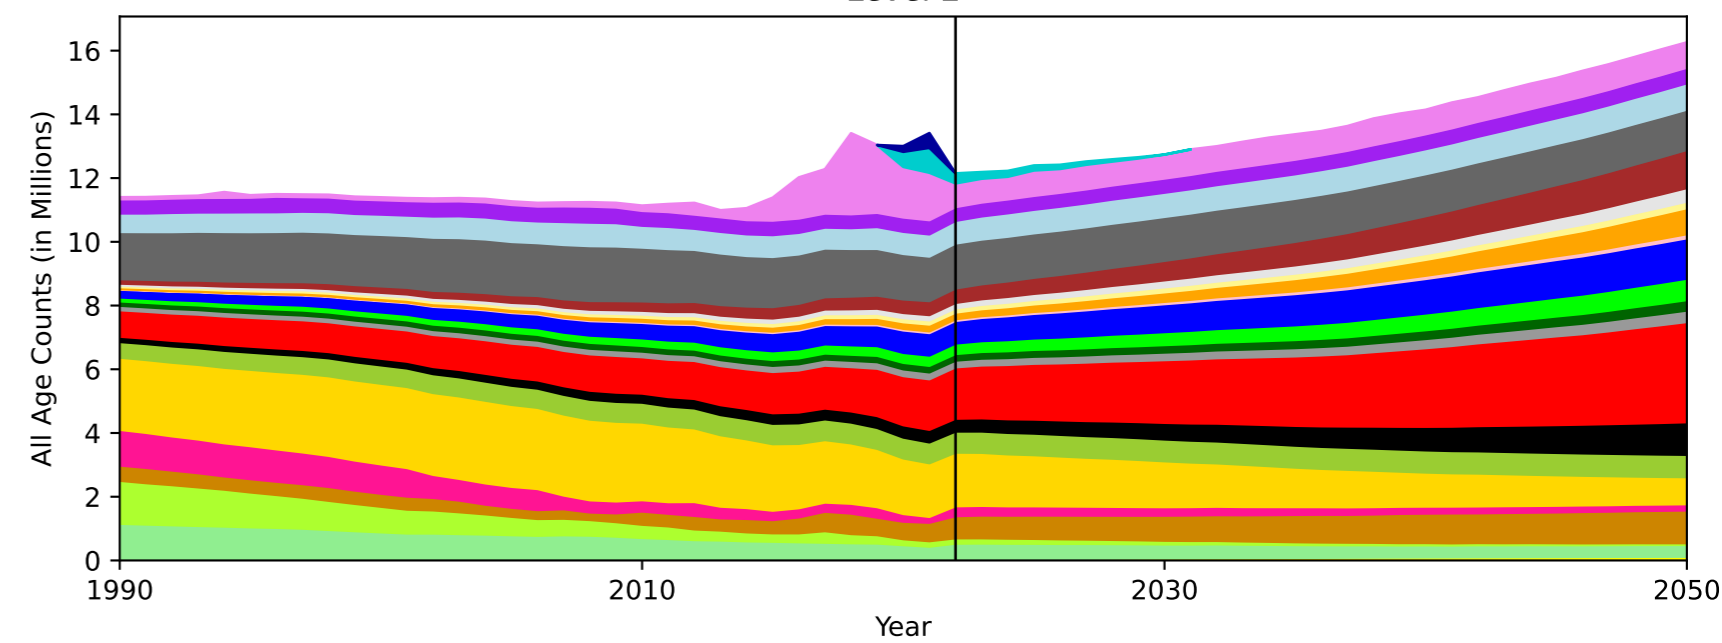

# Bangladesh

Level 1

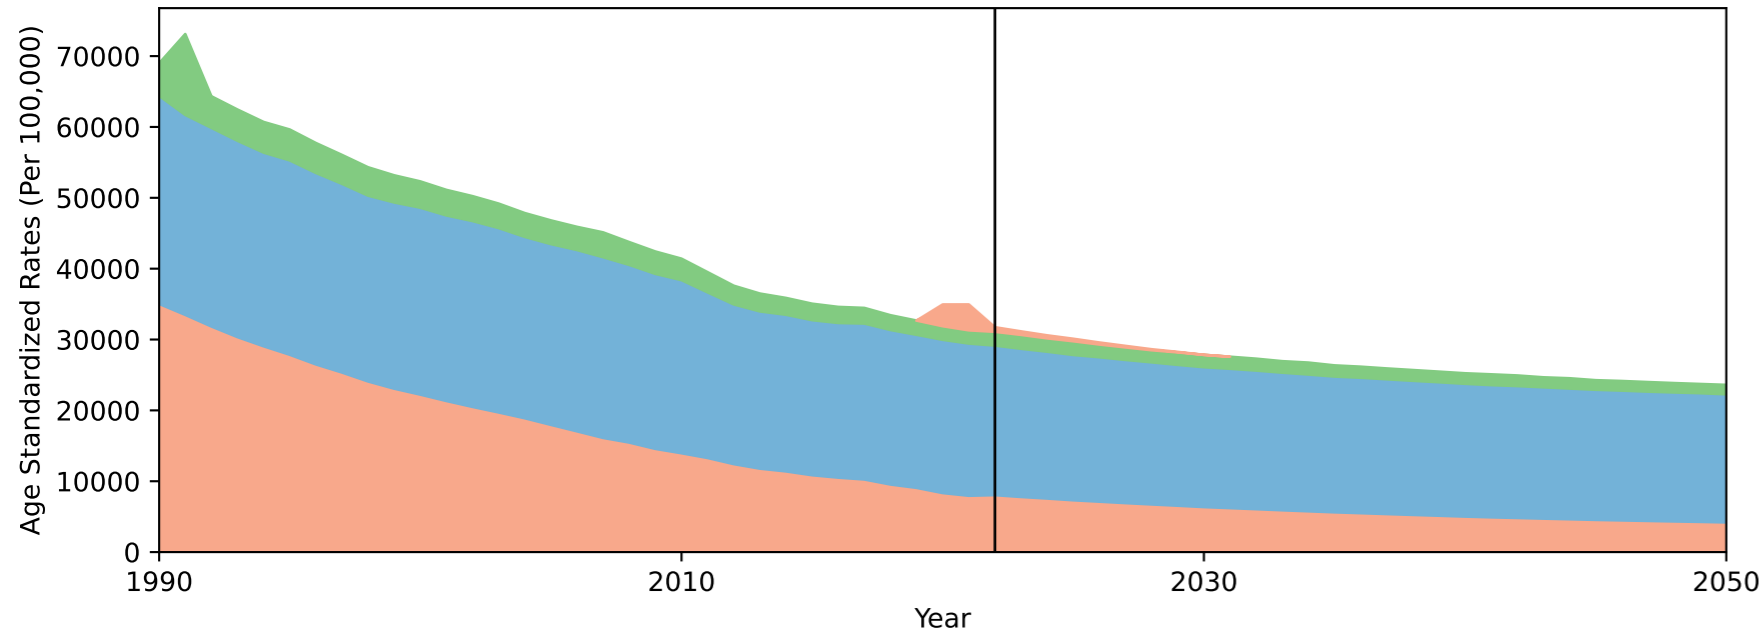

Level 2

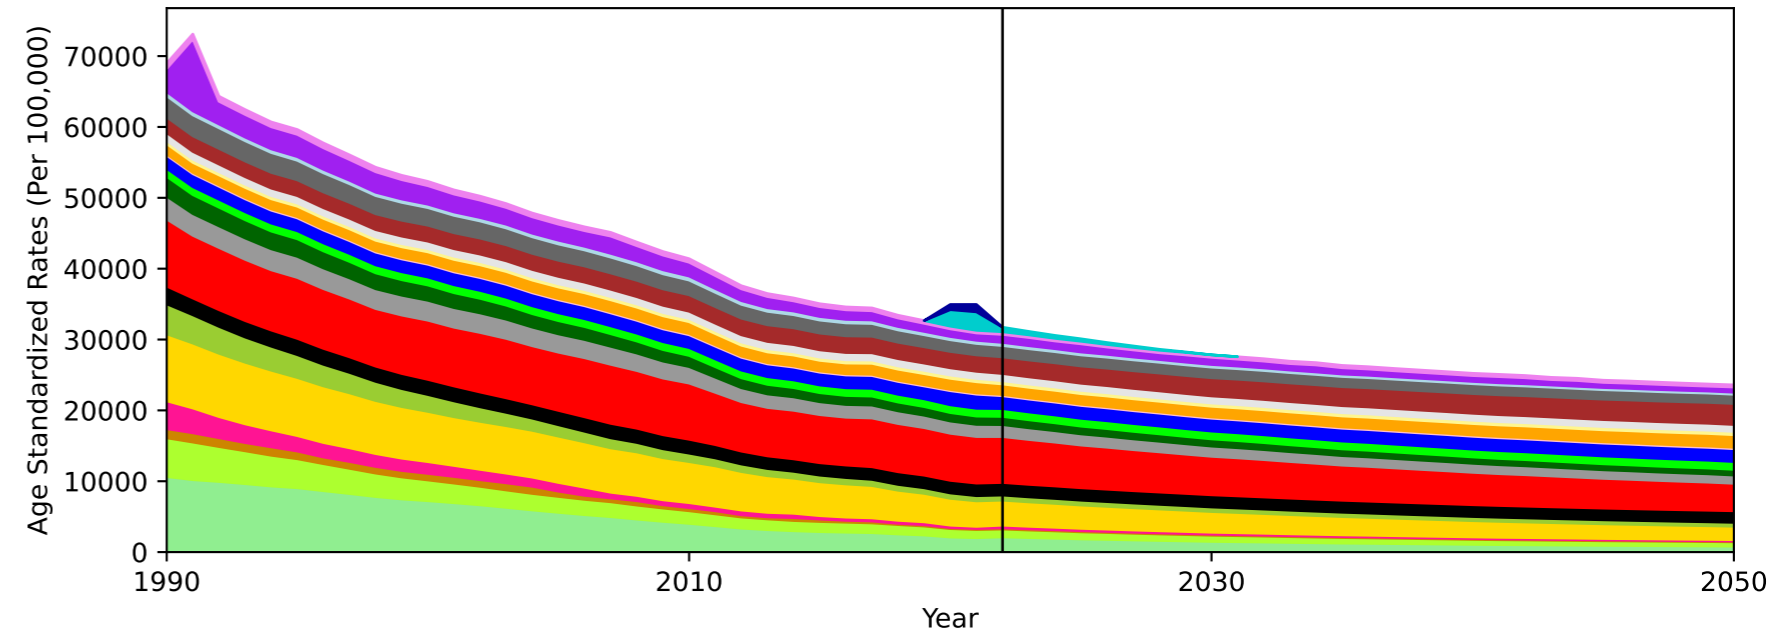

Level 1

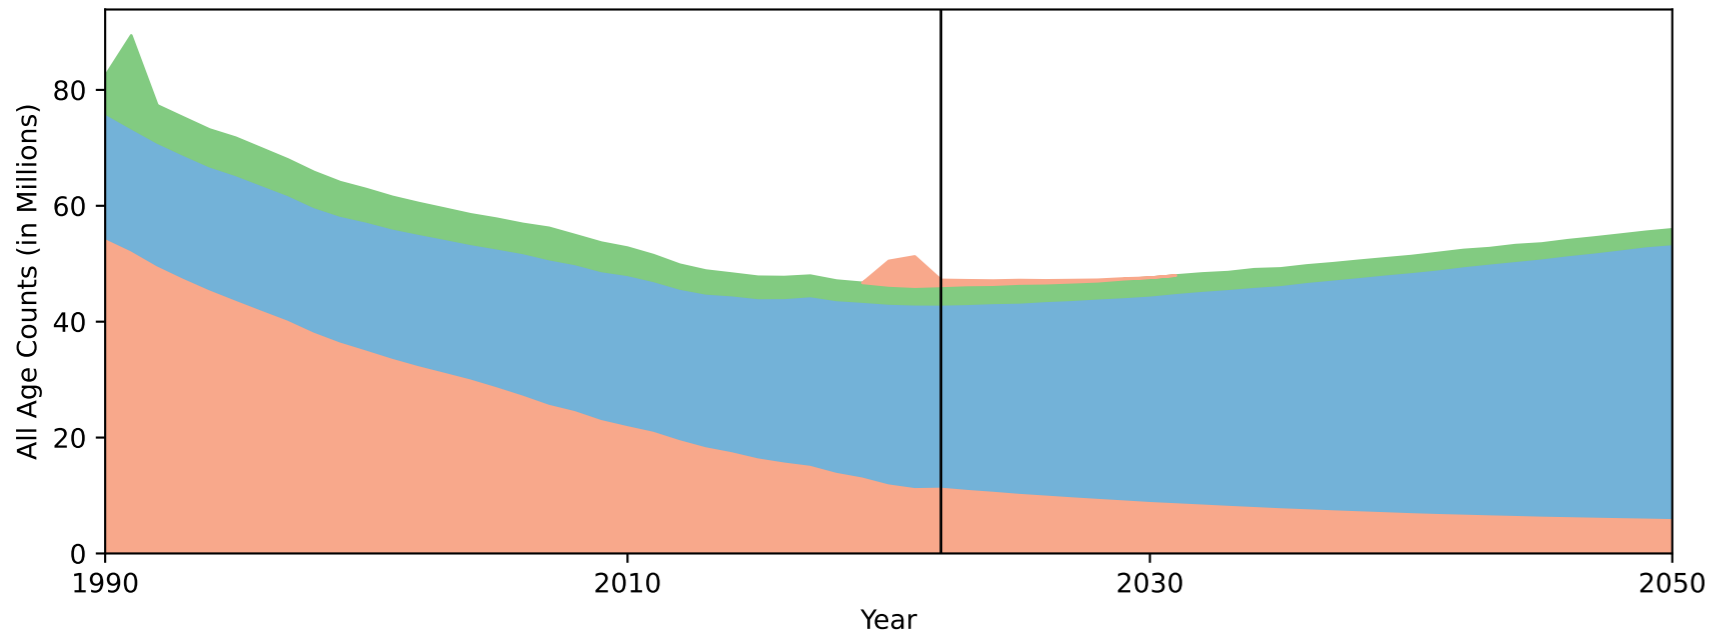

Level 2

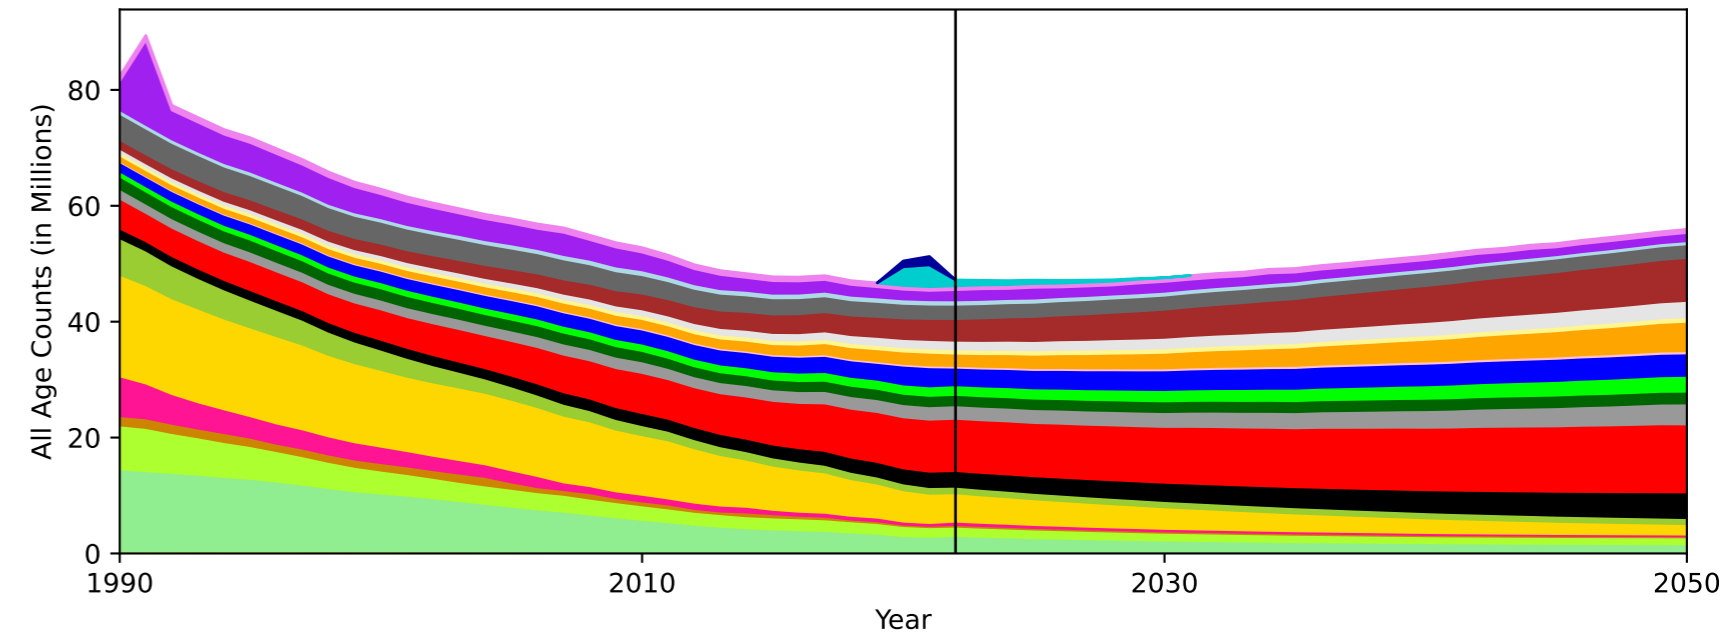

# Bhutan

Level 1

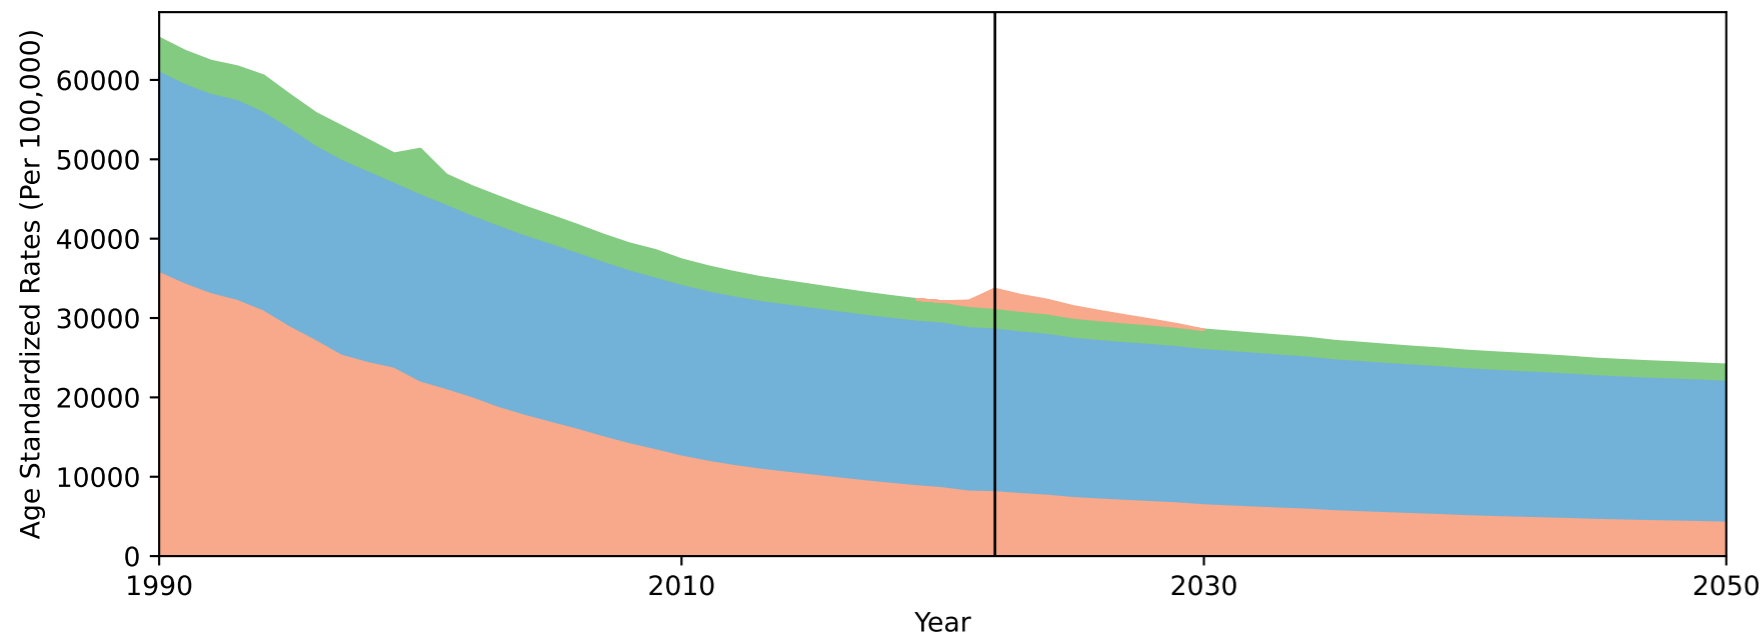

Level 2

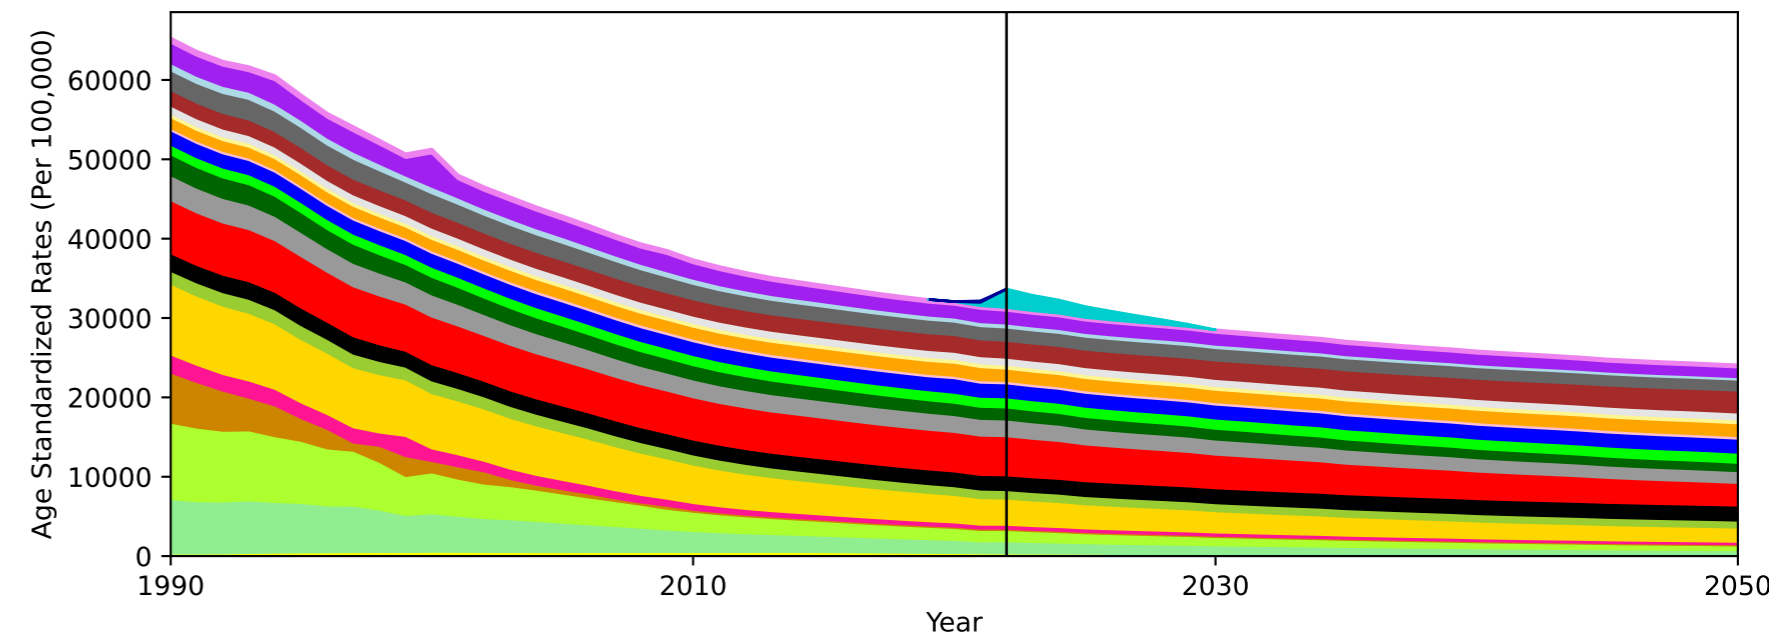

Level 1

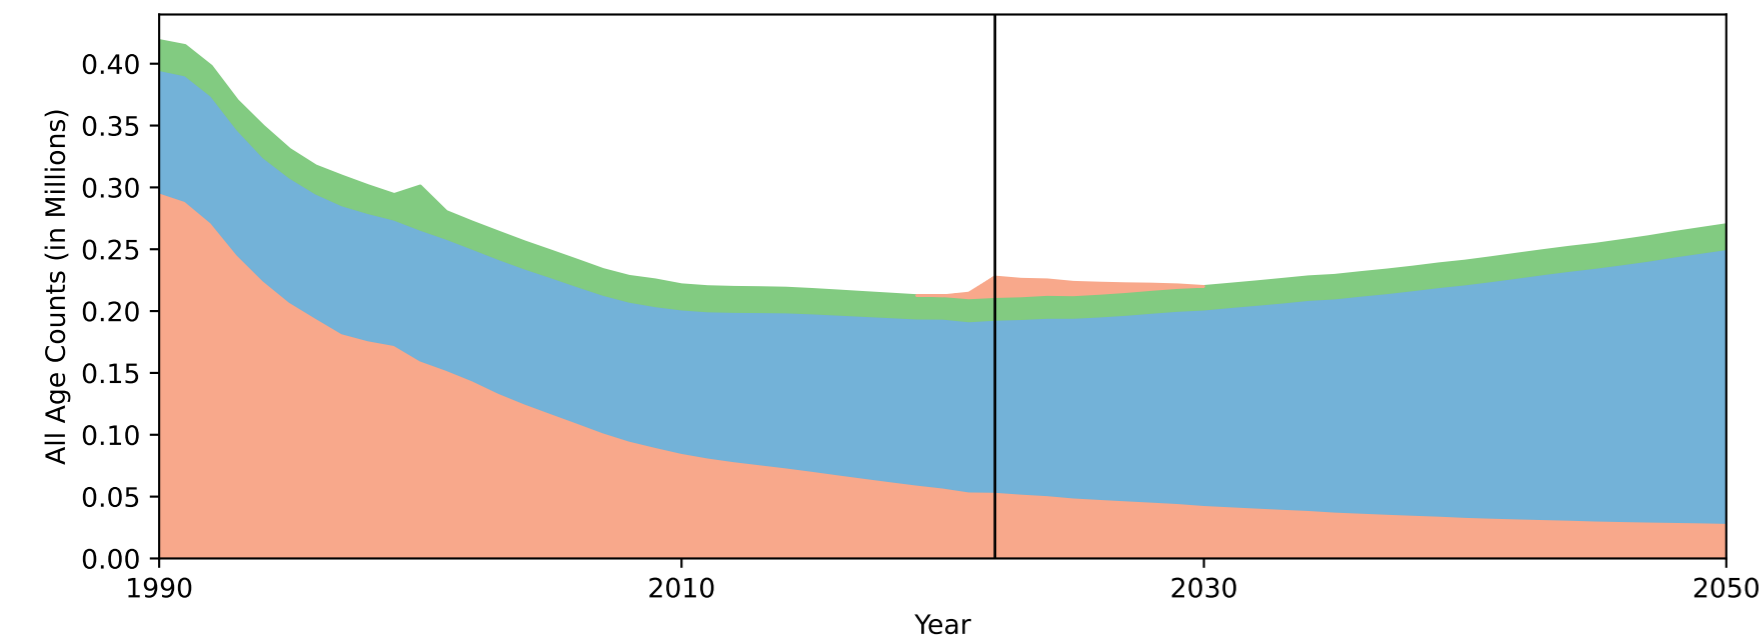

Level 2

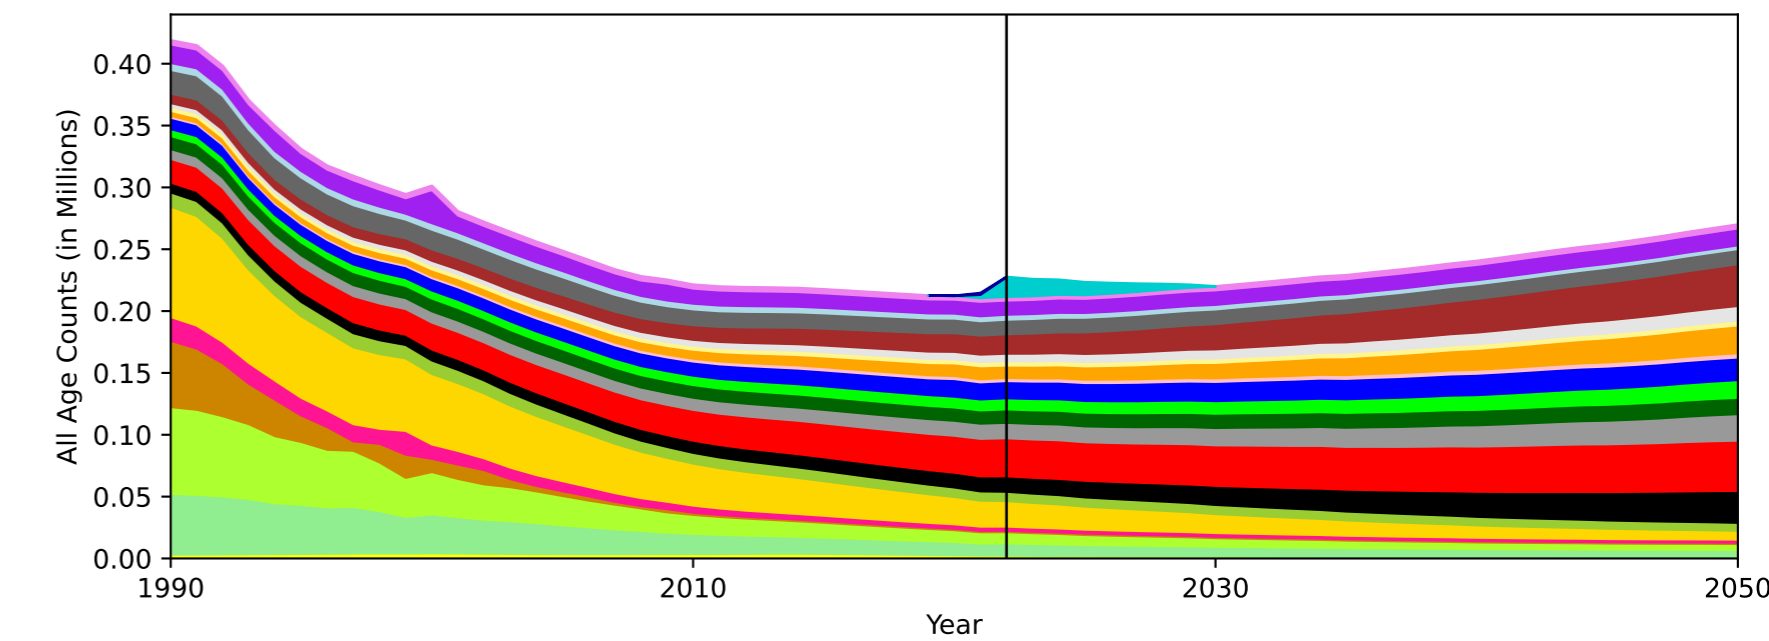

# India

Level 1

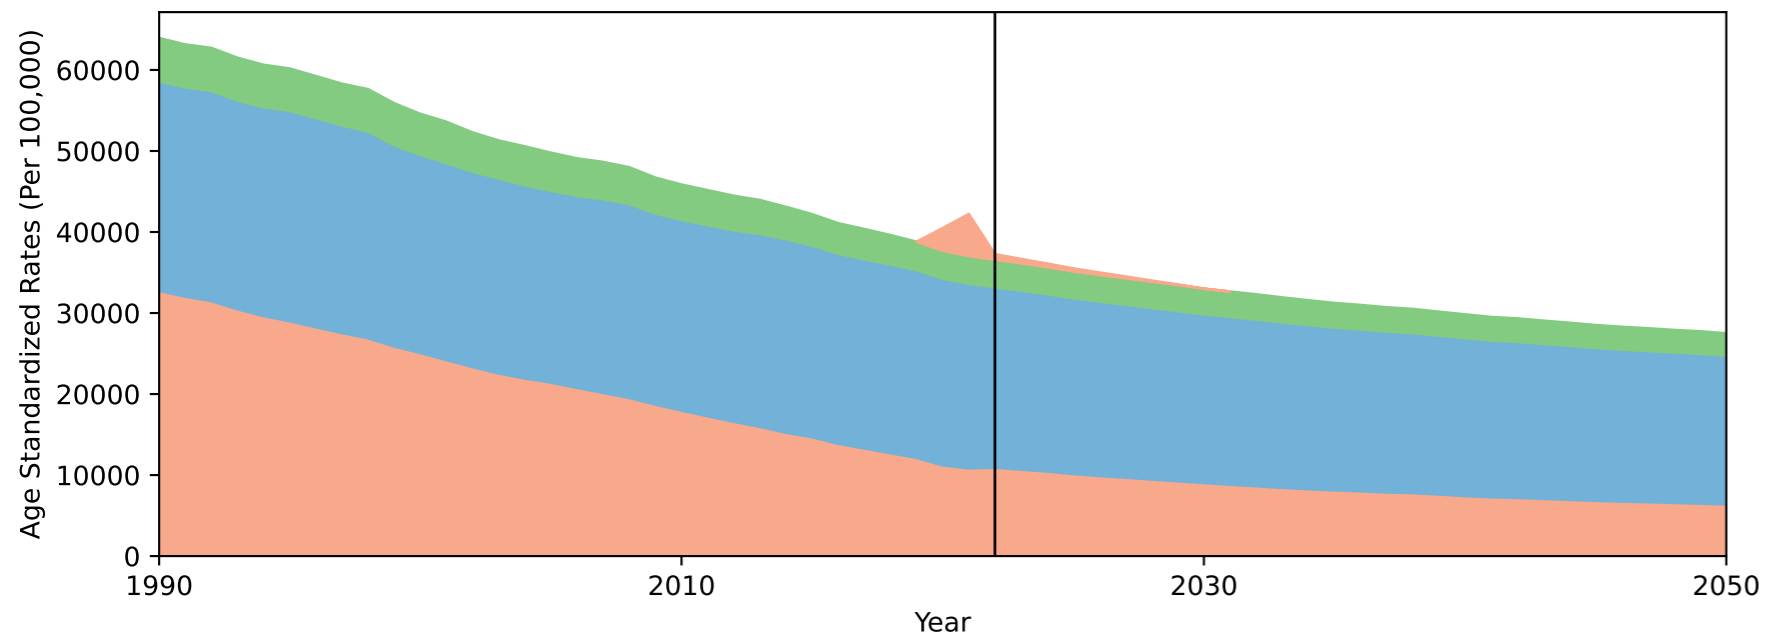

Level 2

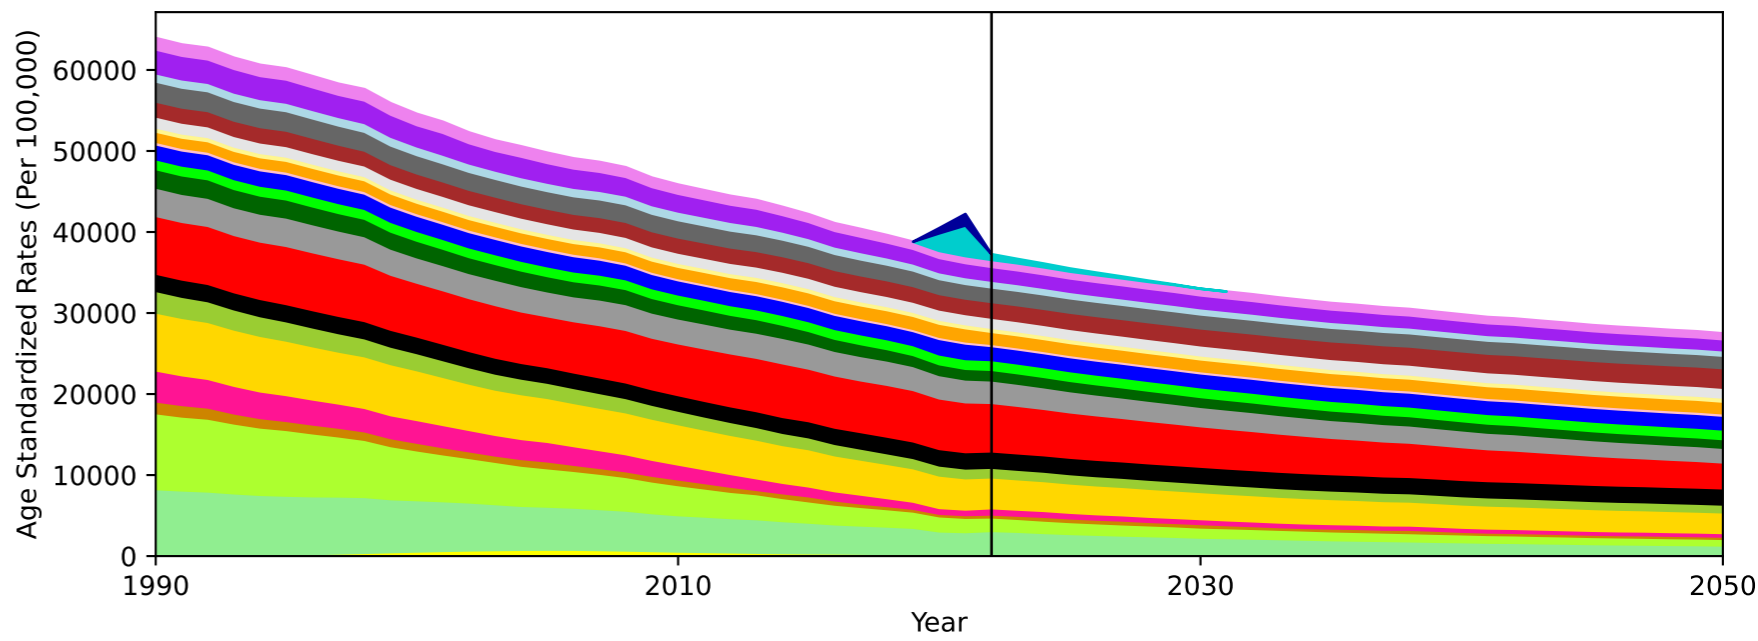

Level 1

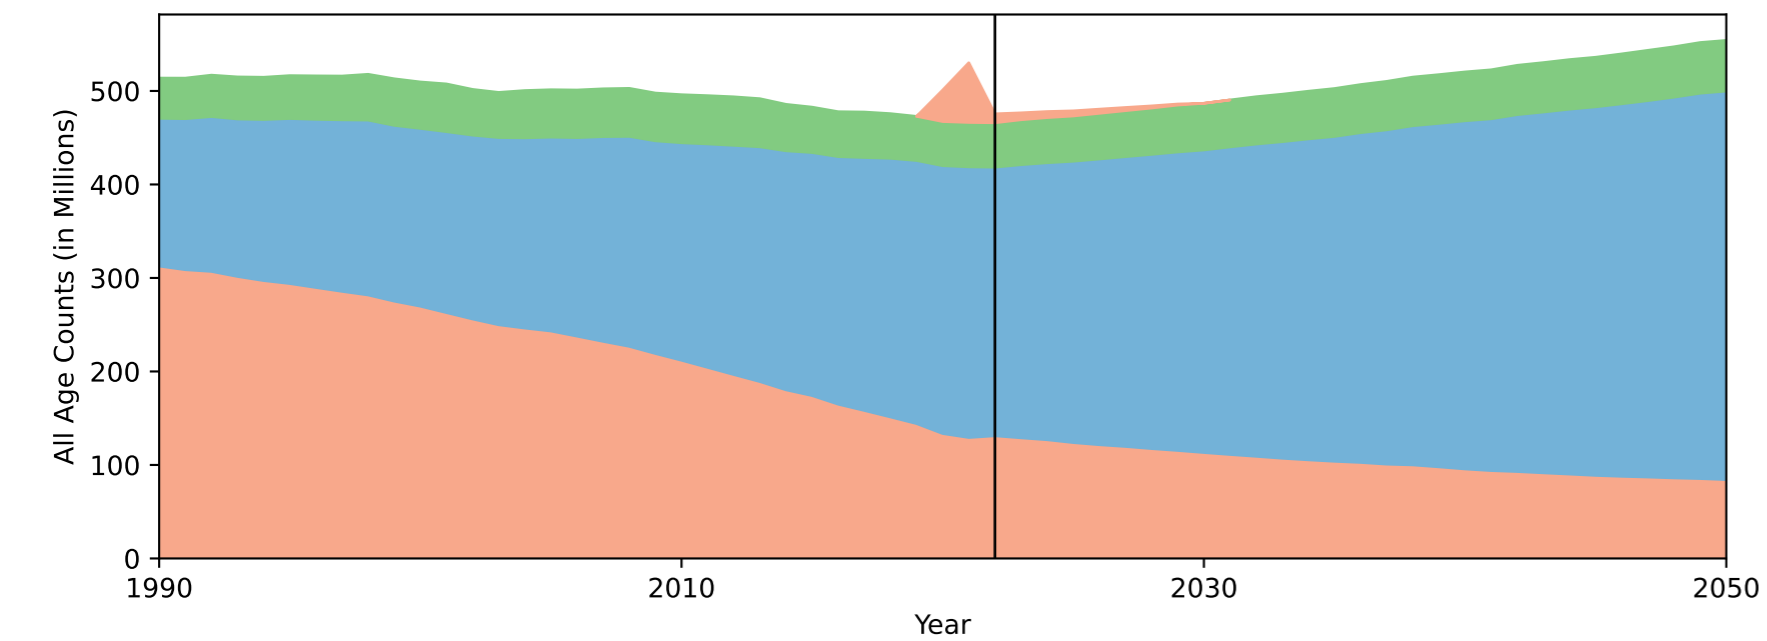

Level 2

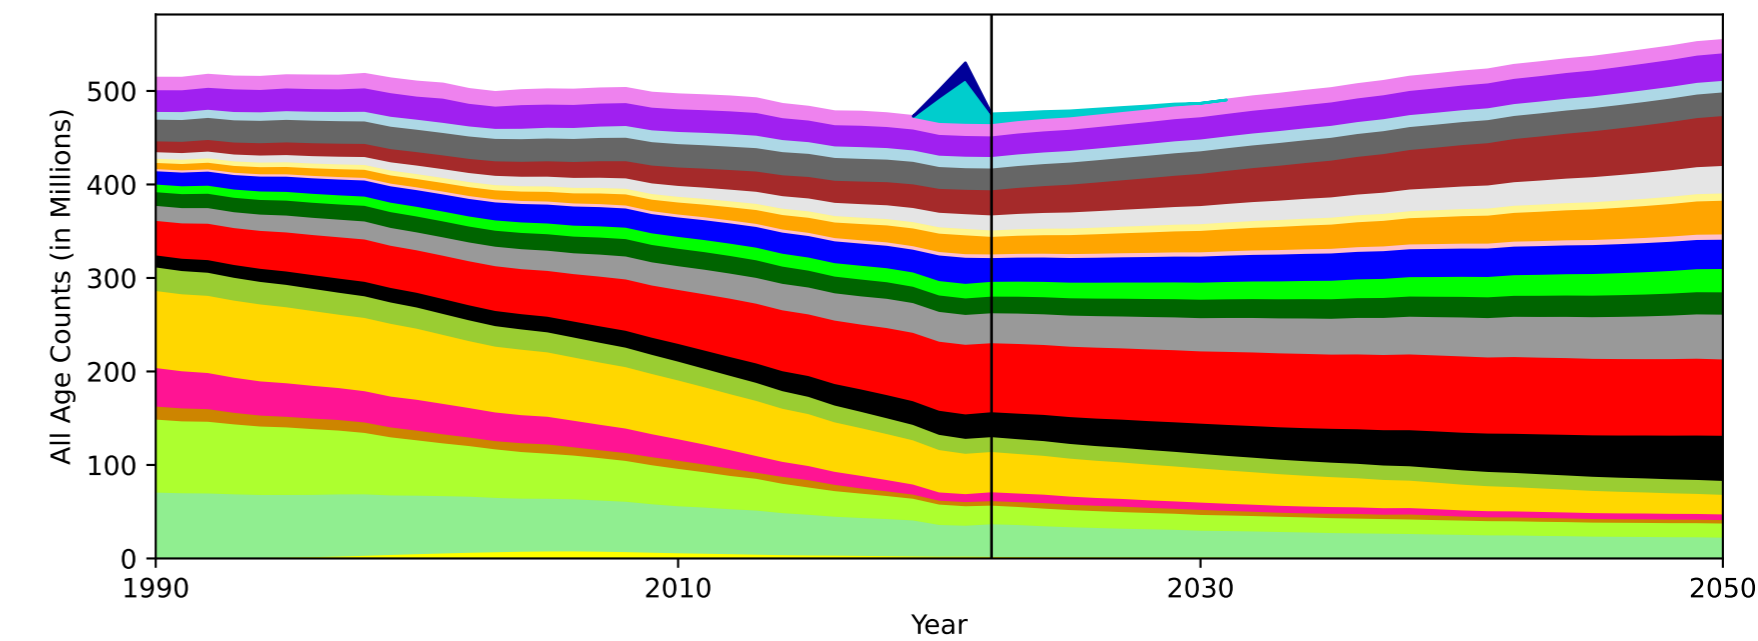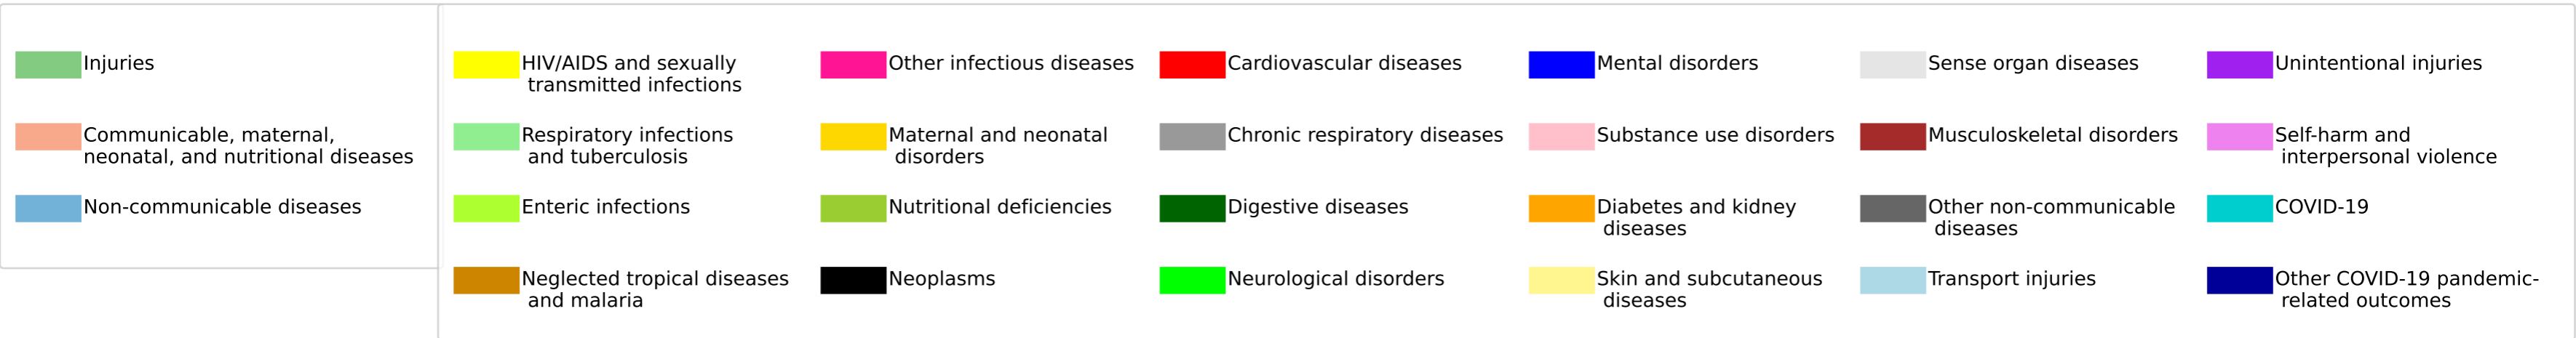

# Nepal

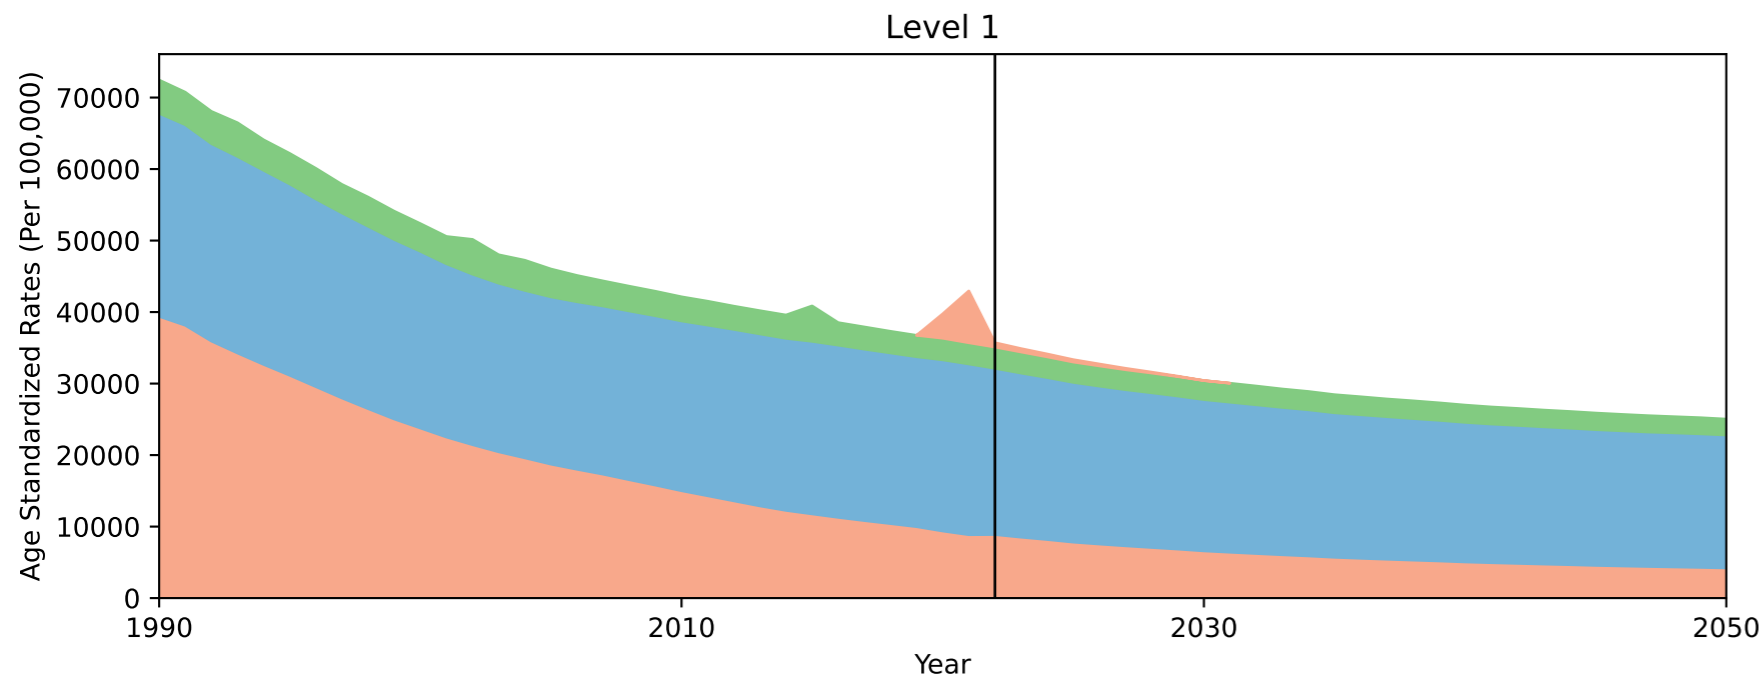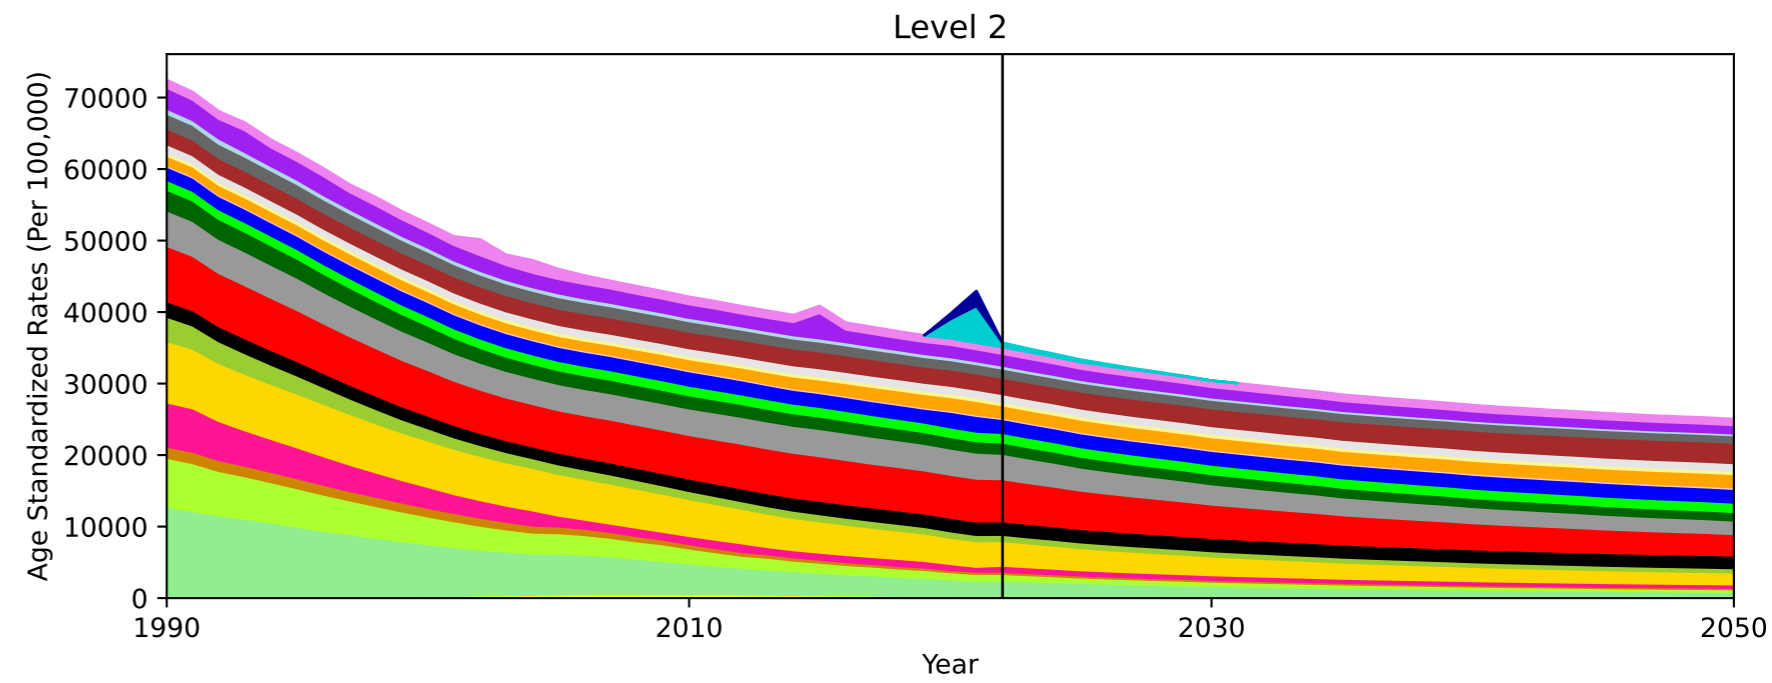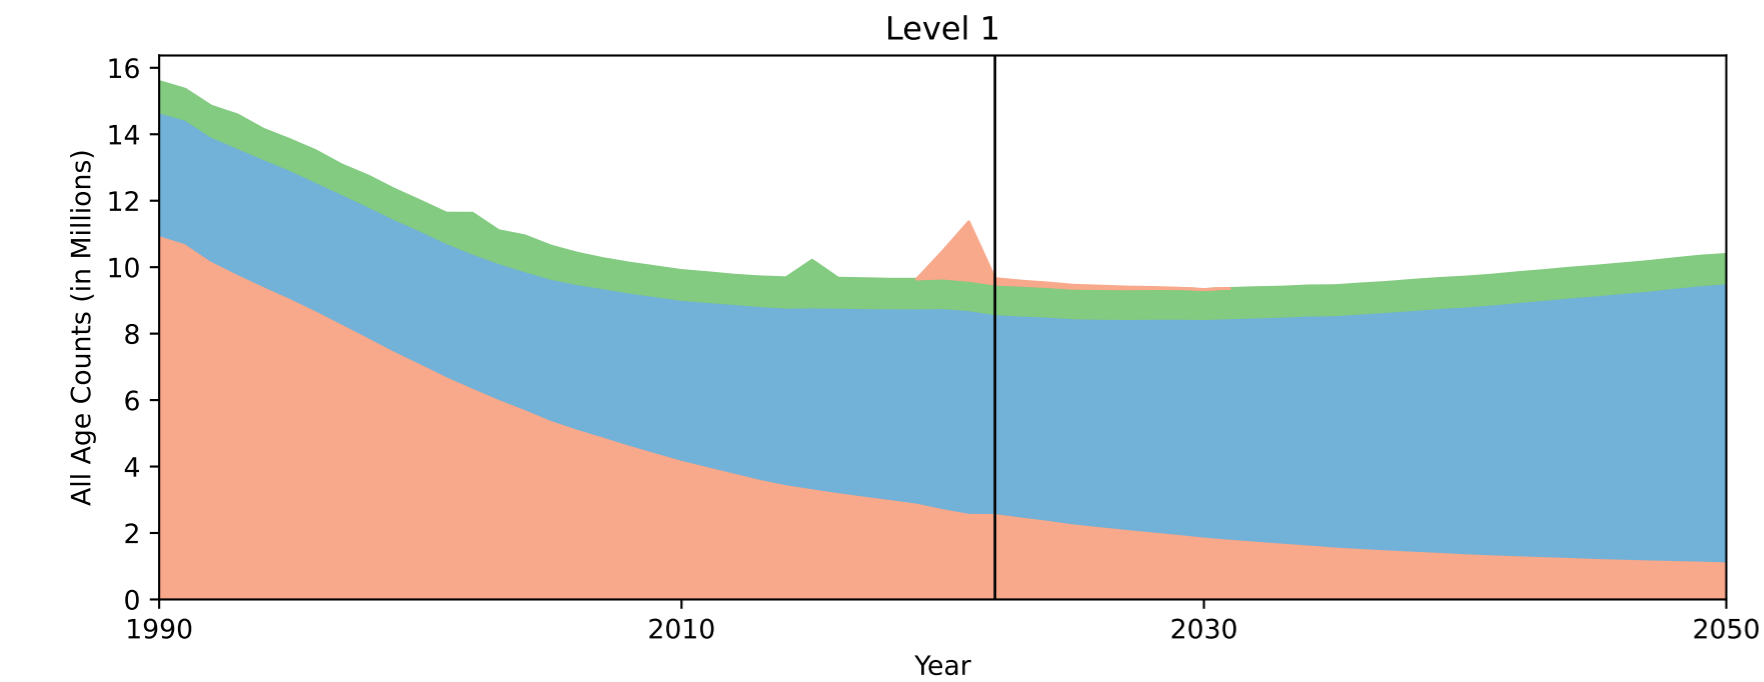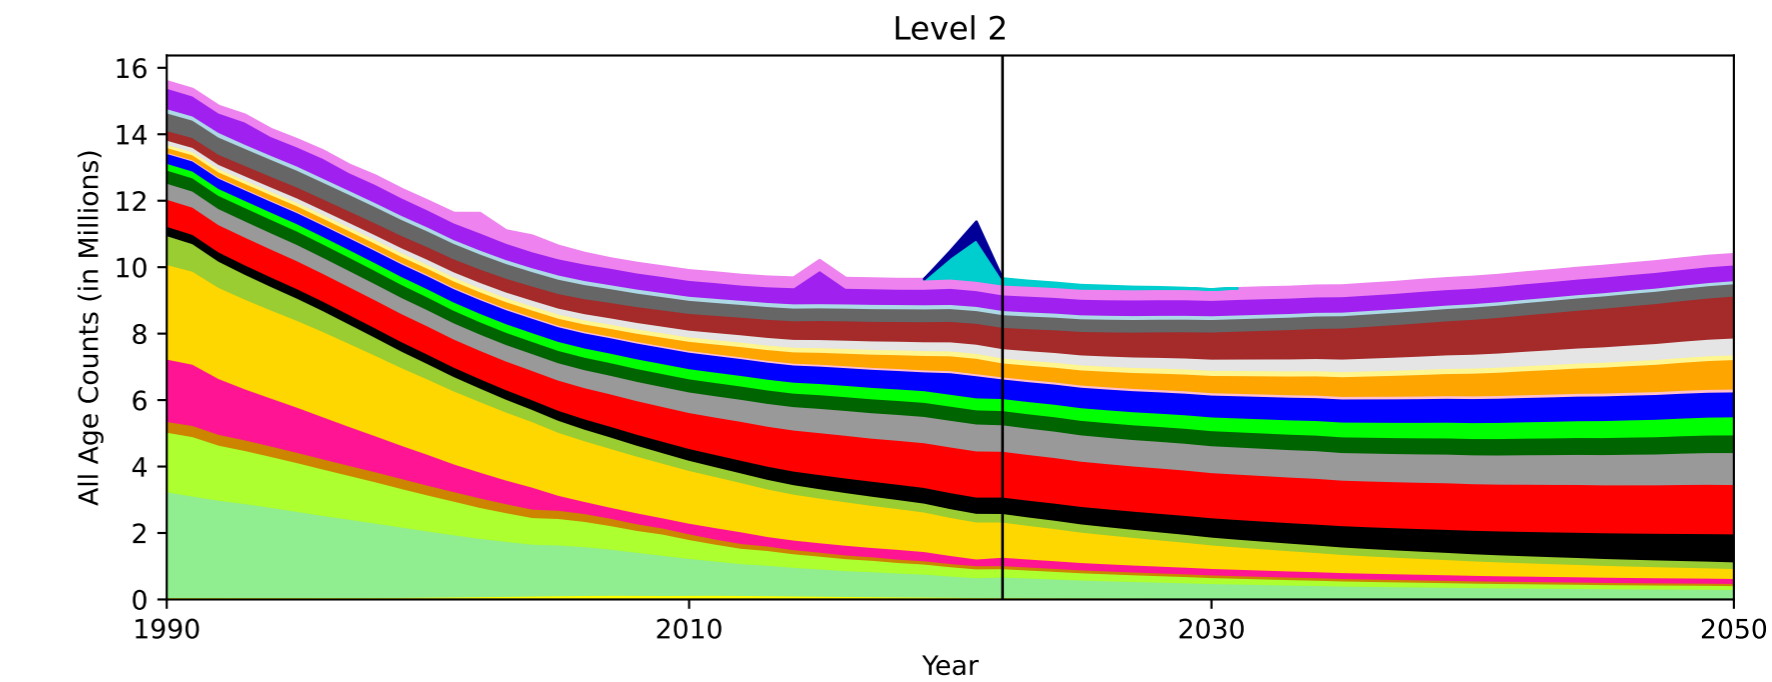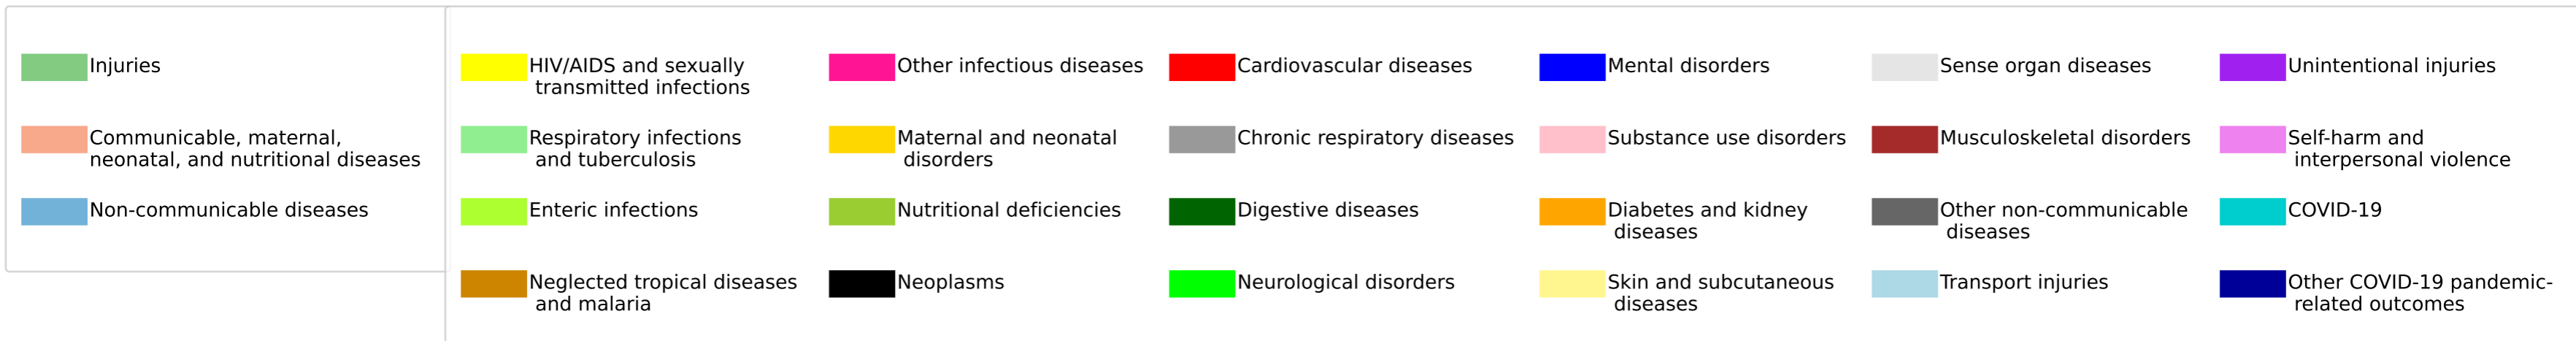



# Pakistan

Level 1

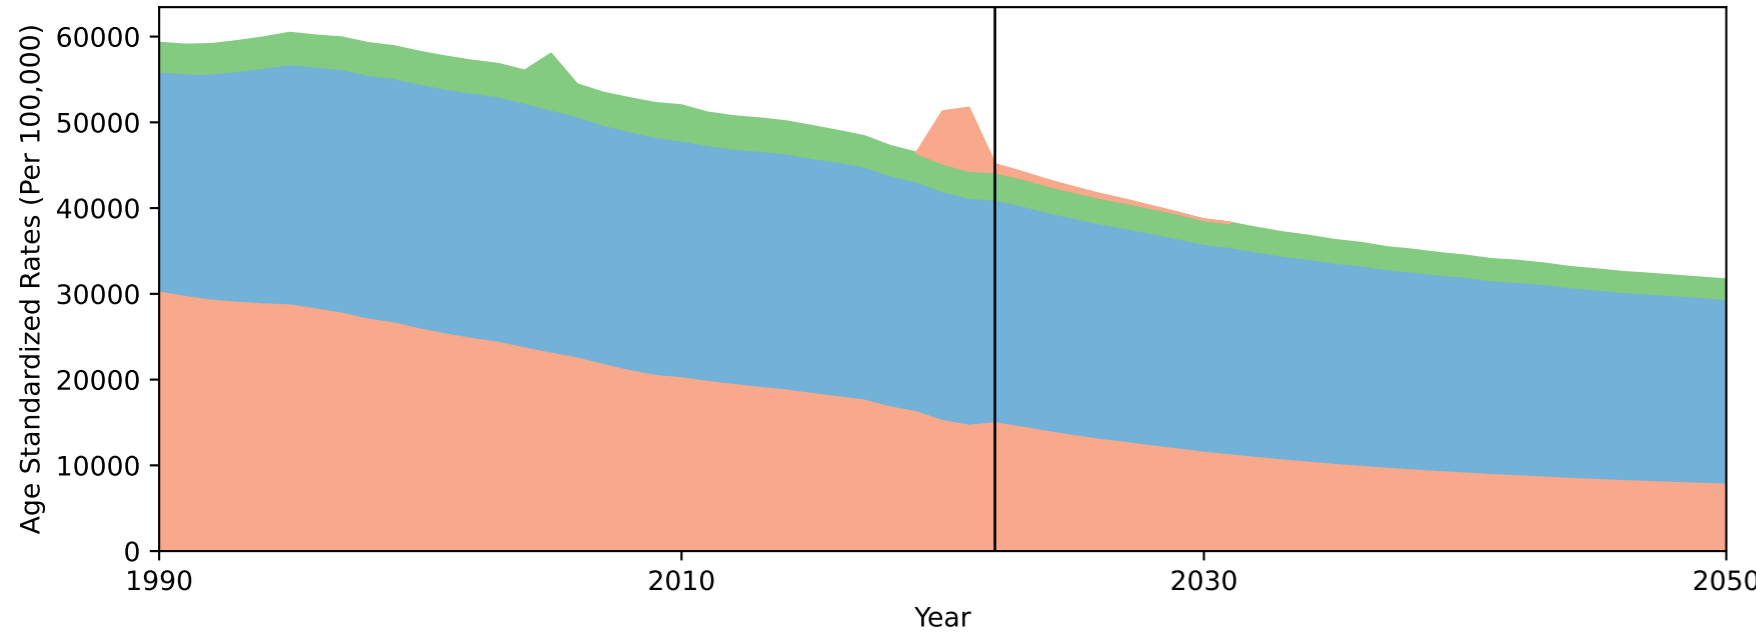

Level 2

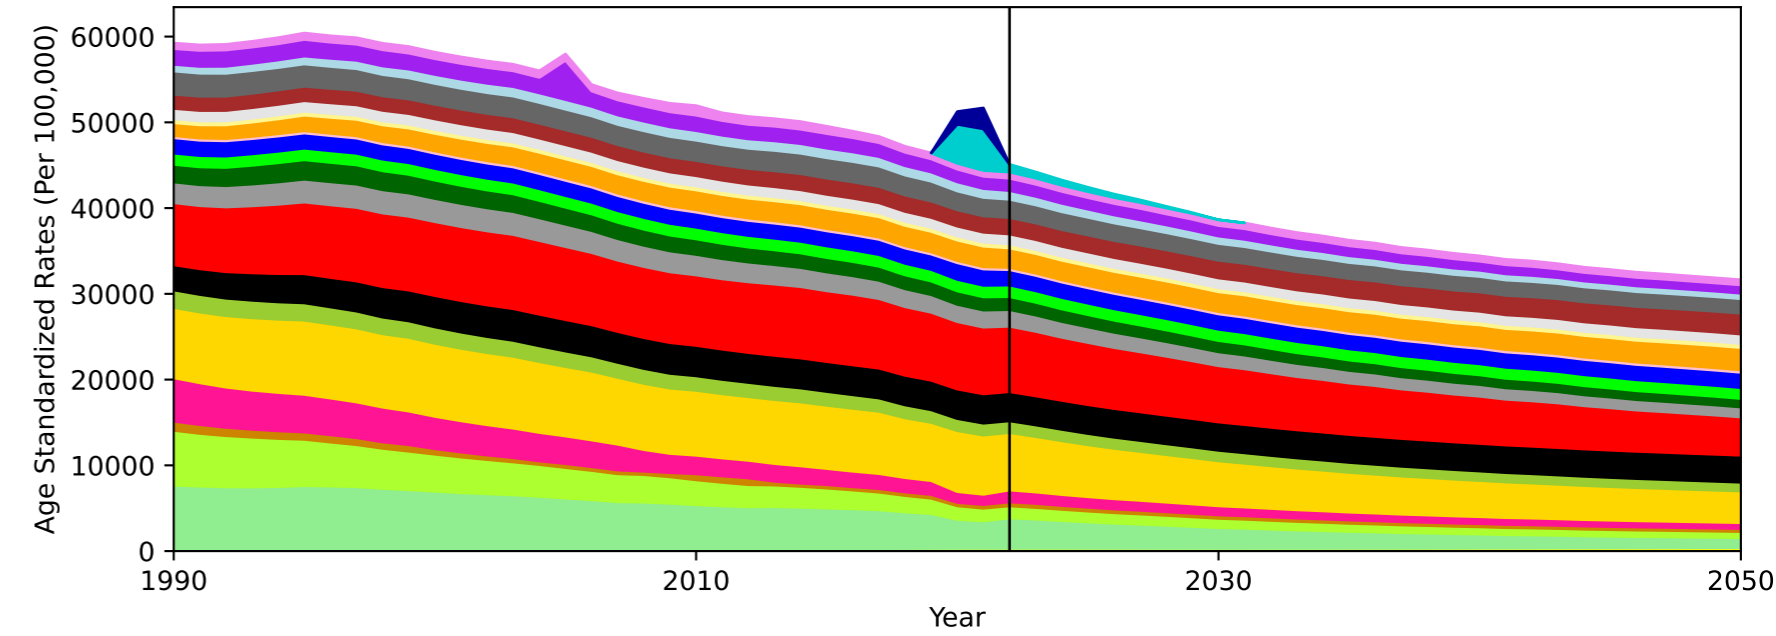

Level 1

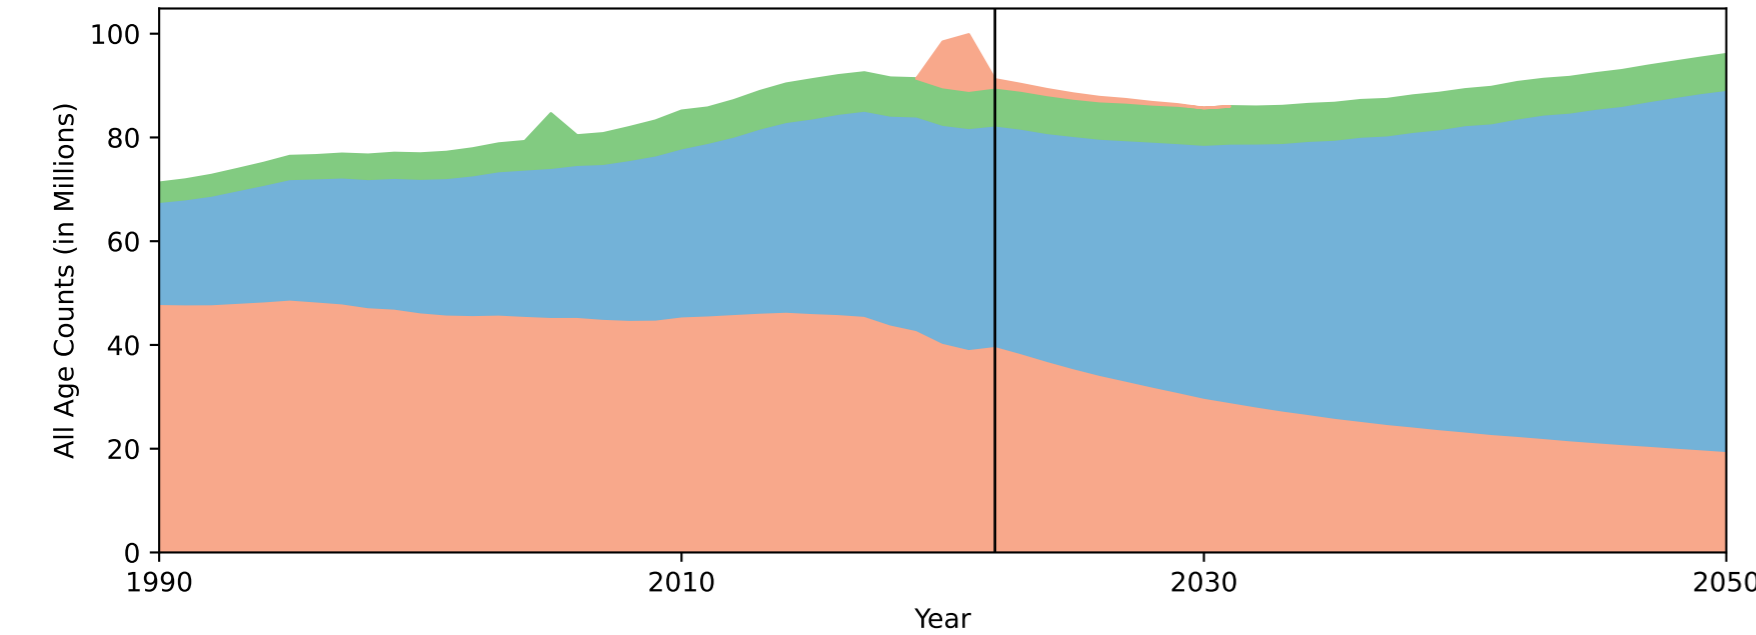

Level 2

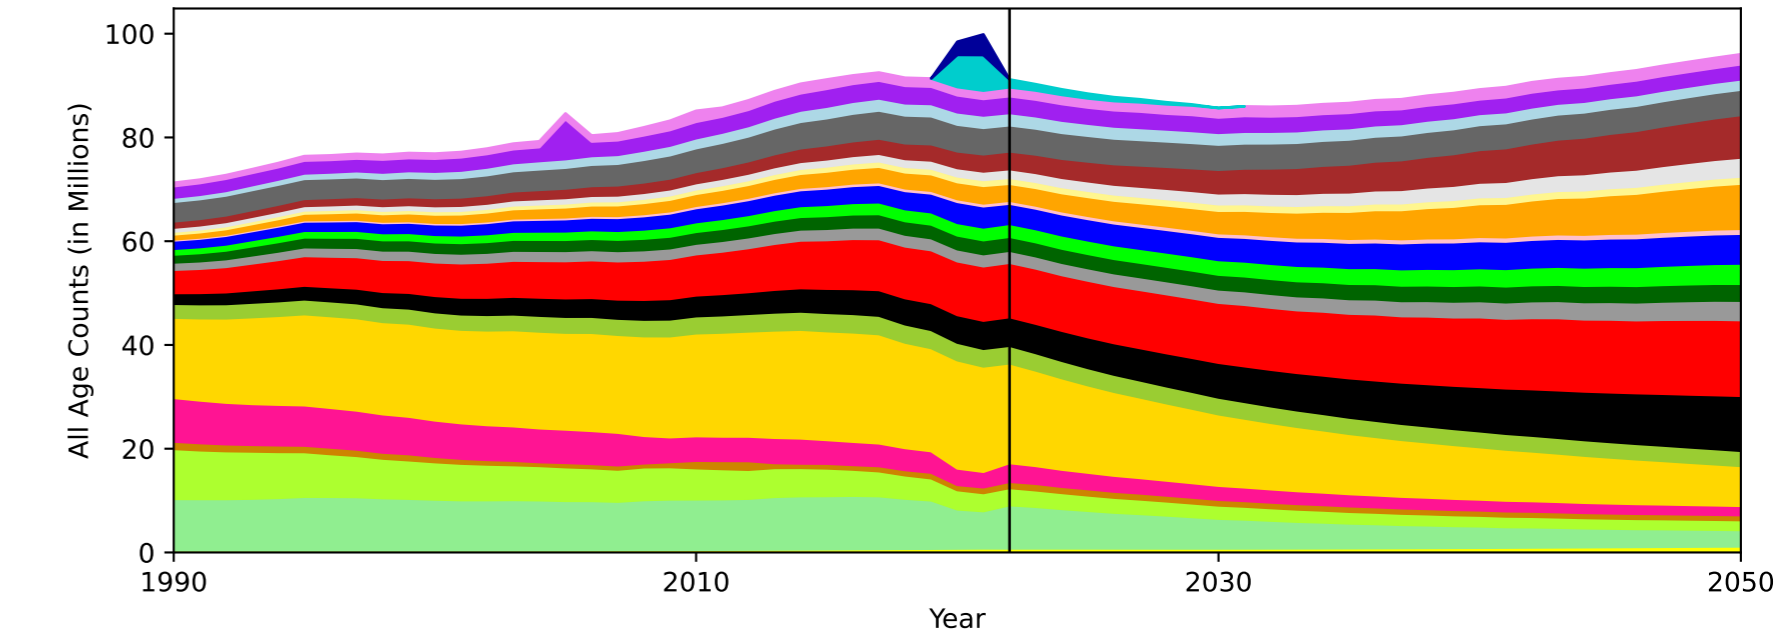

Level 1

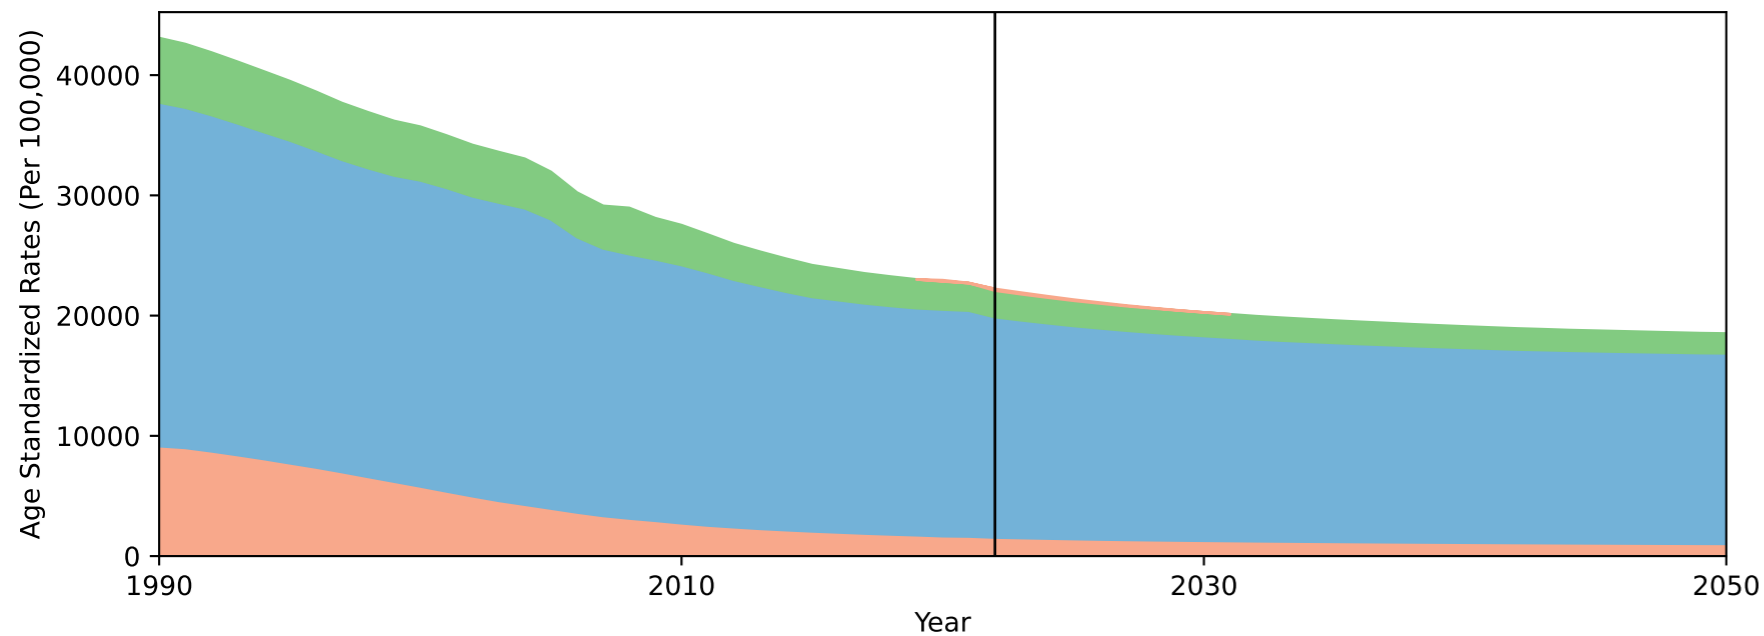

Level 2

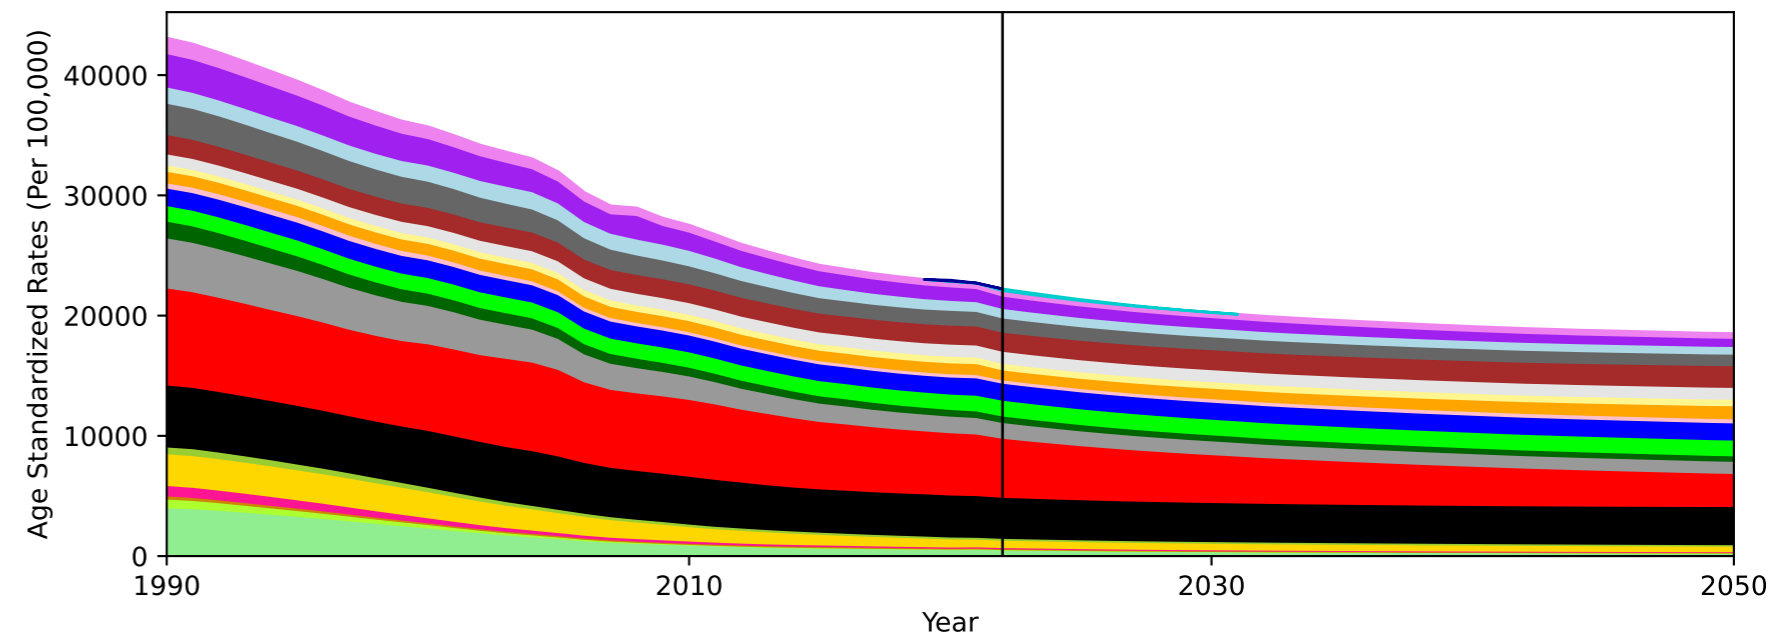

Level 1

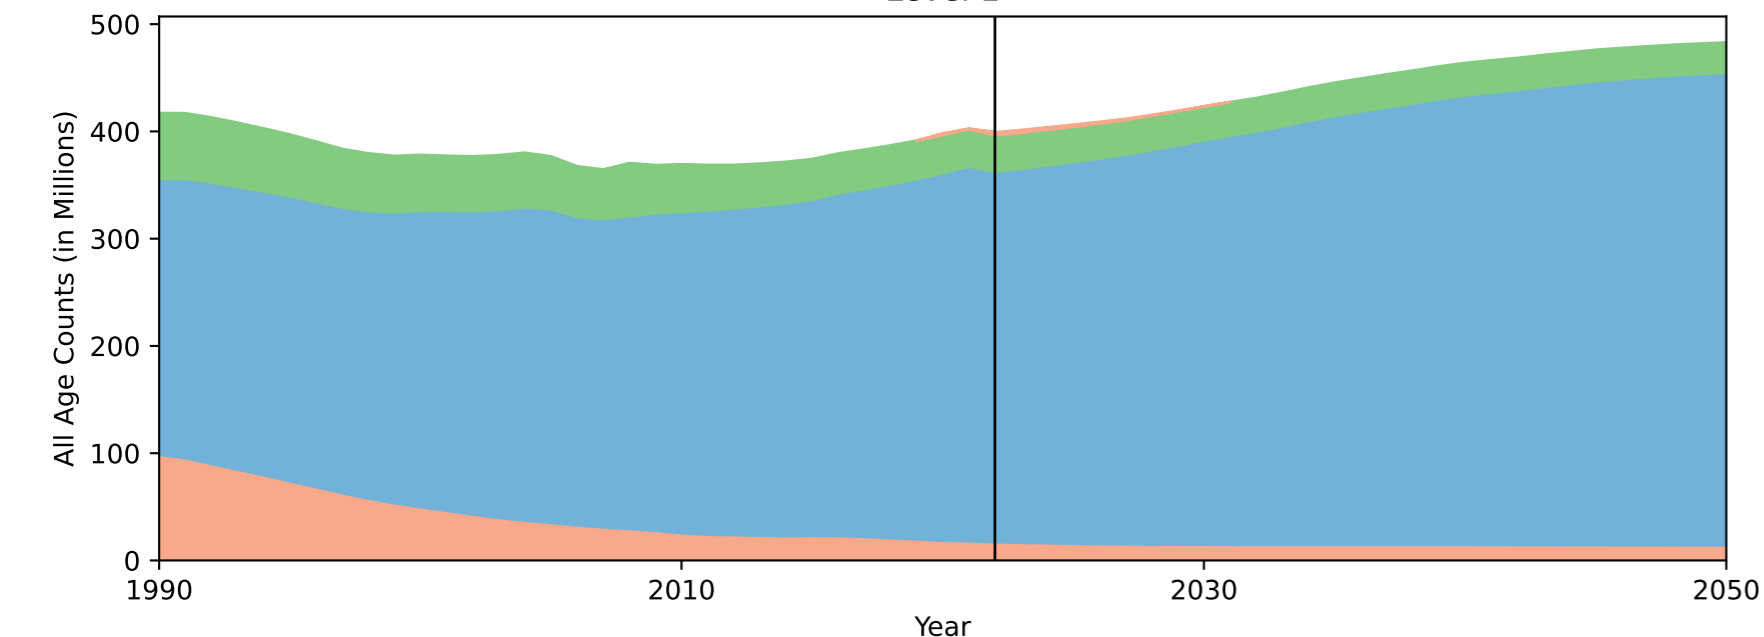

Level 2

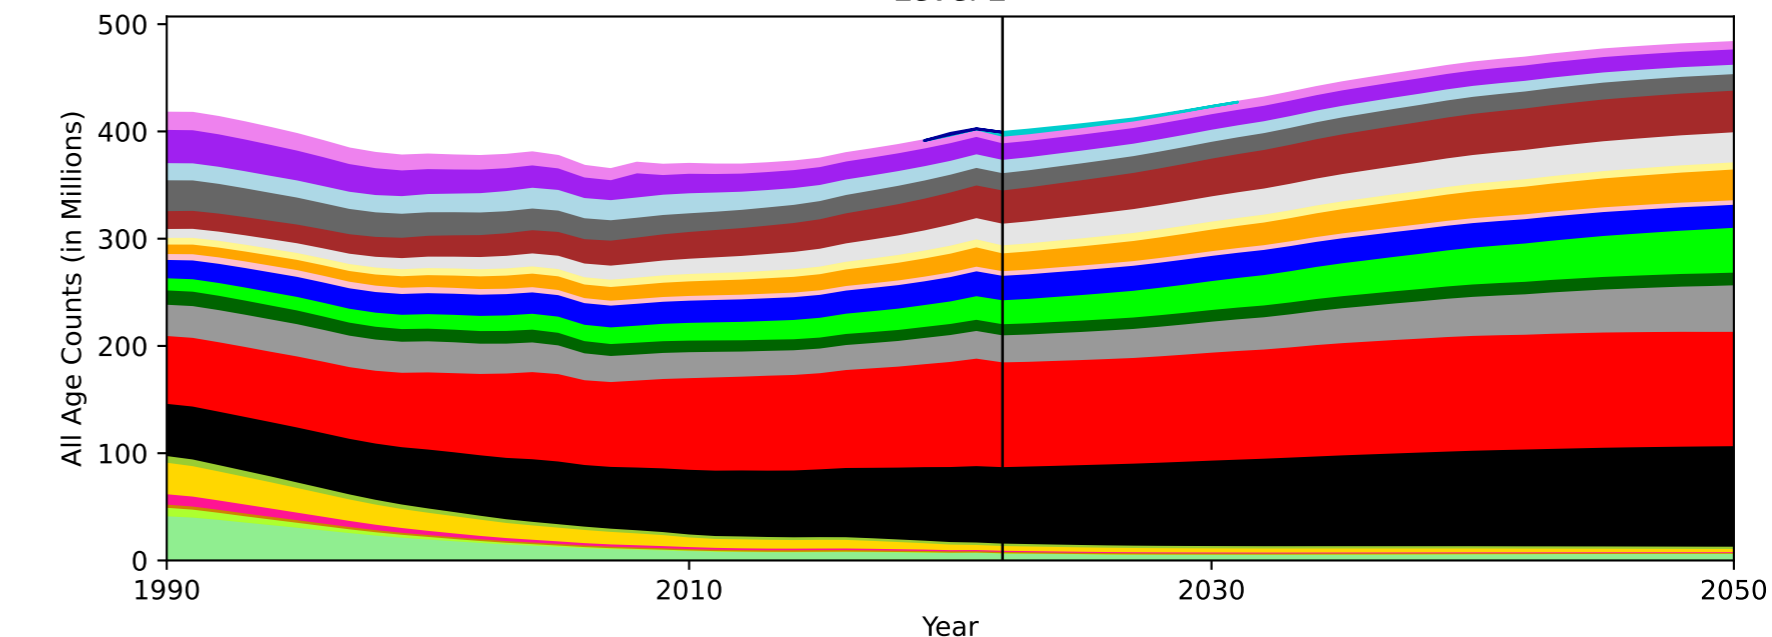

# North Korea

Level 1

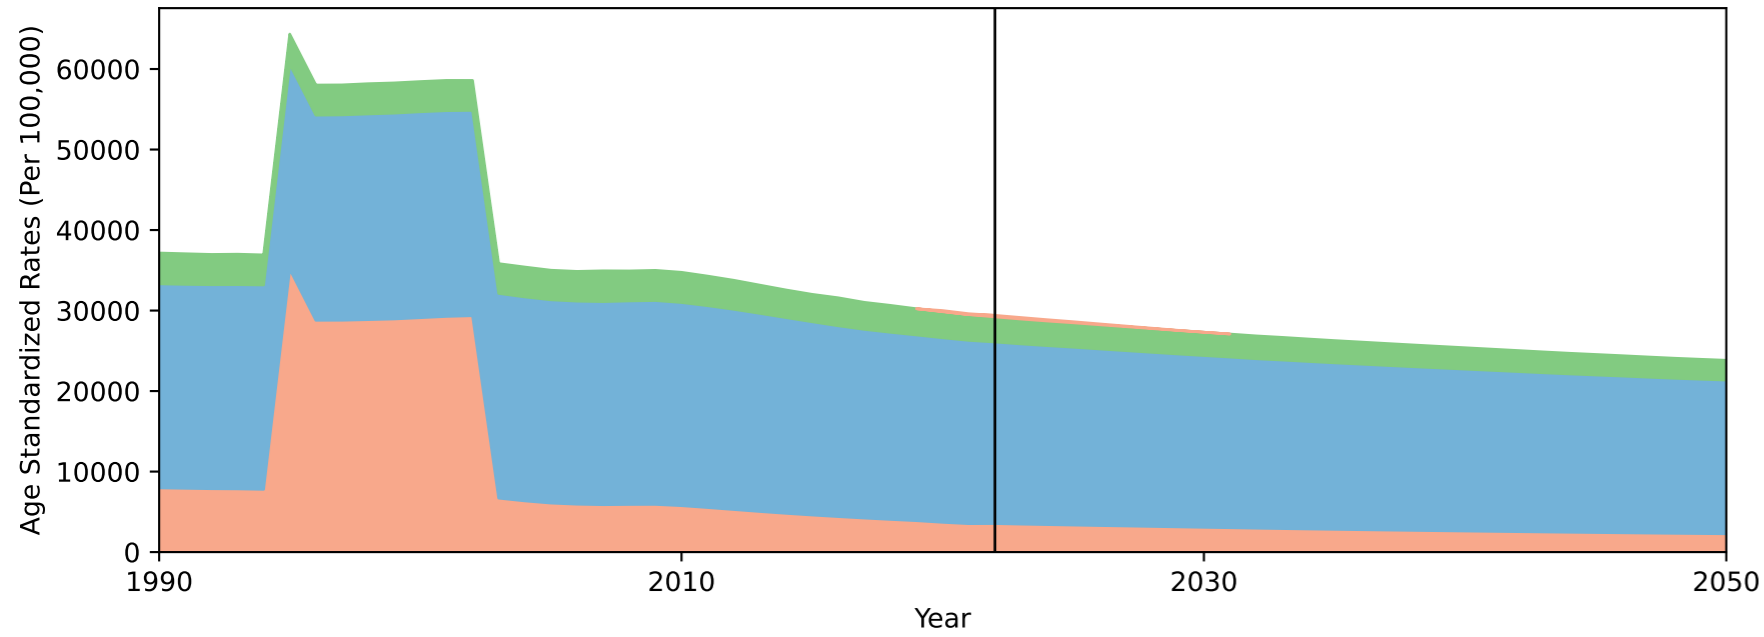

Level 2

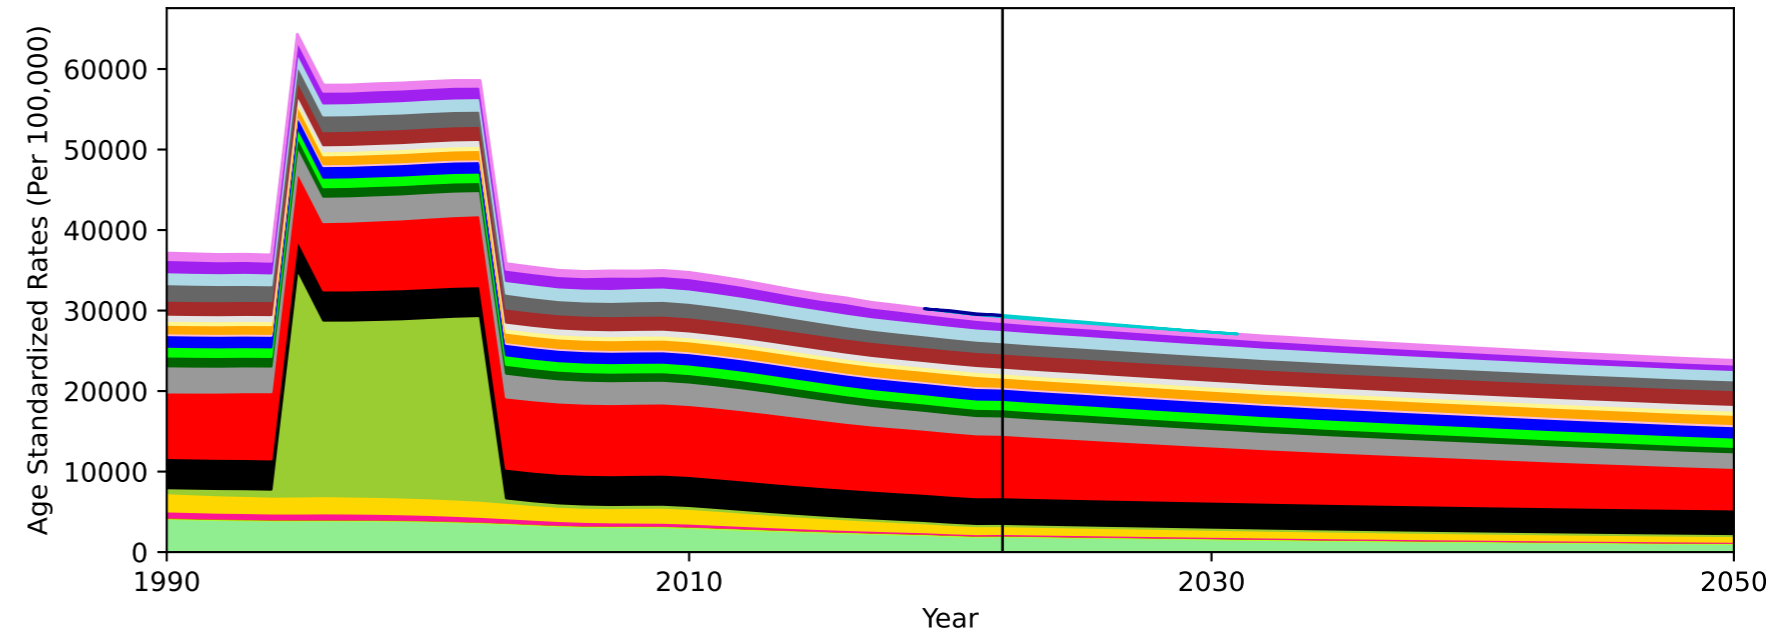

Level 1

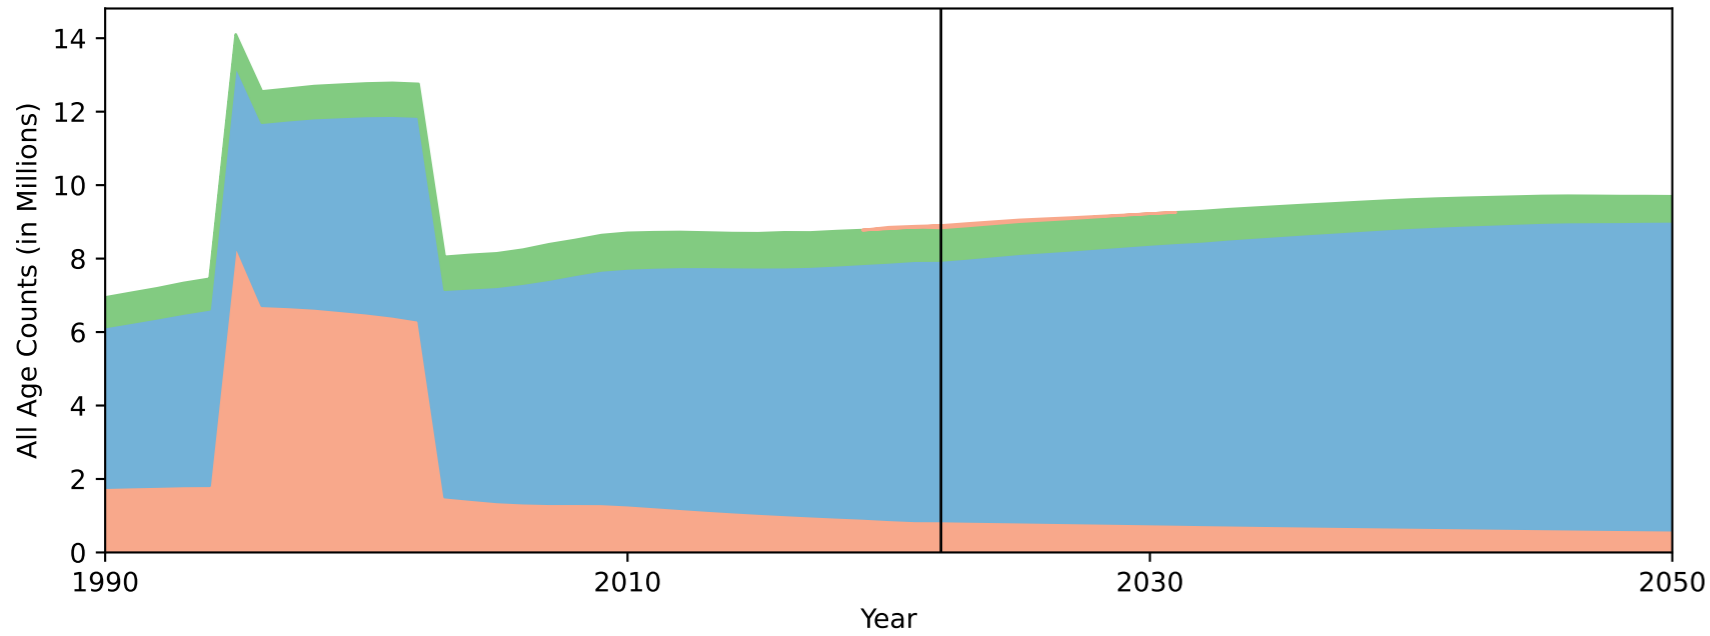

Level 2

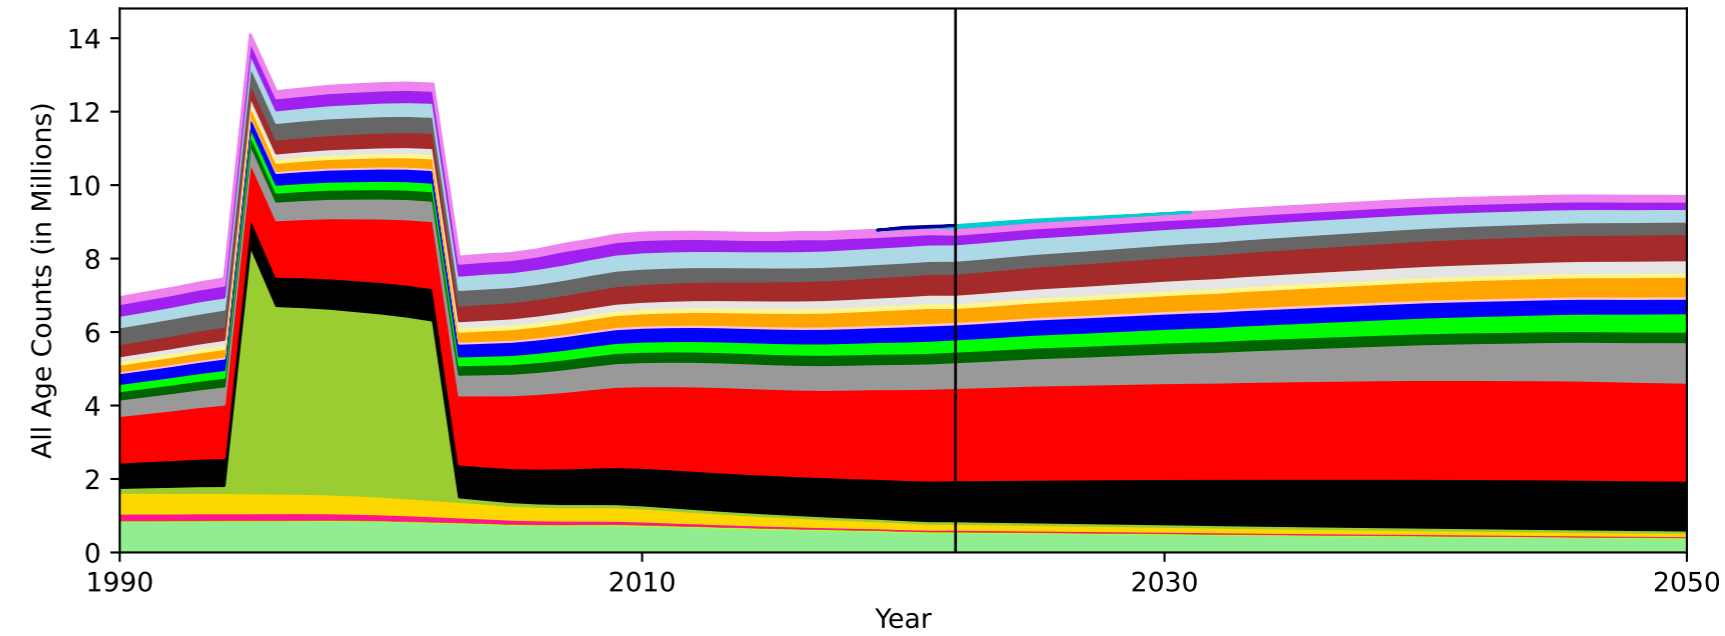

# Taiwan (Province Of China)

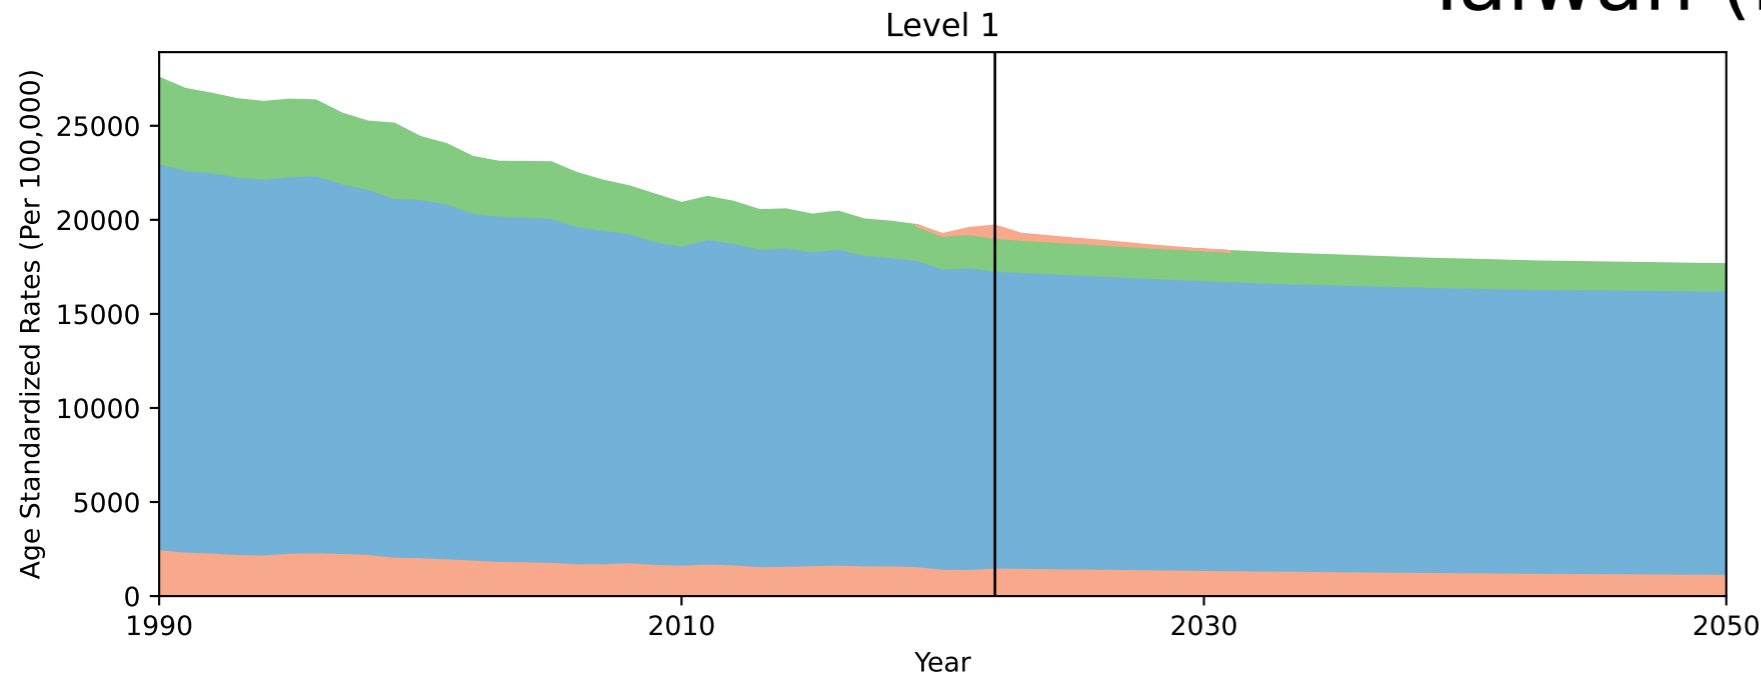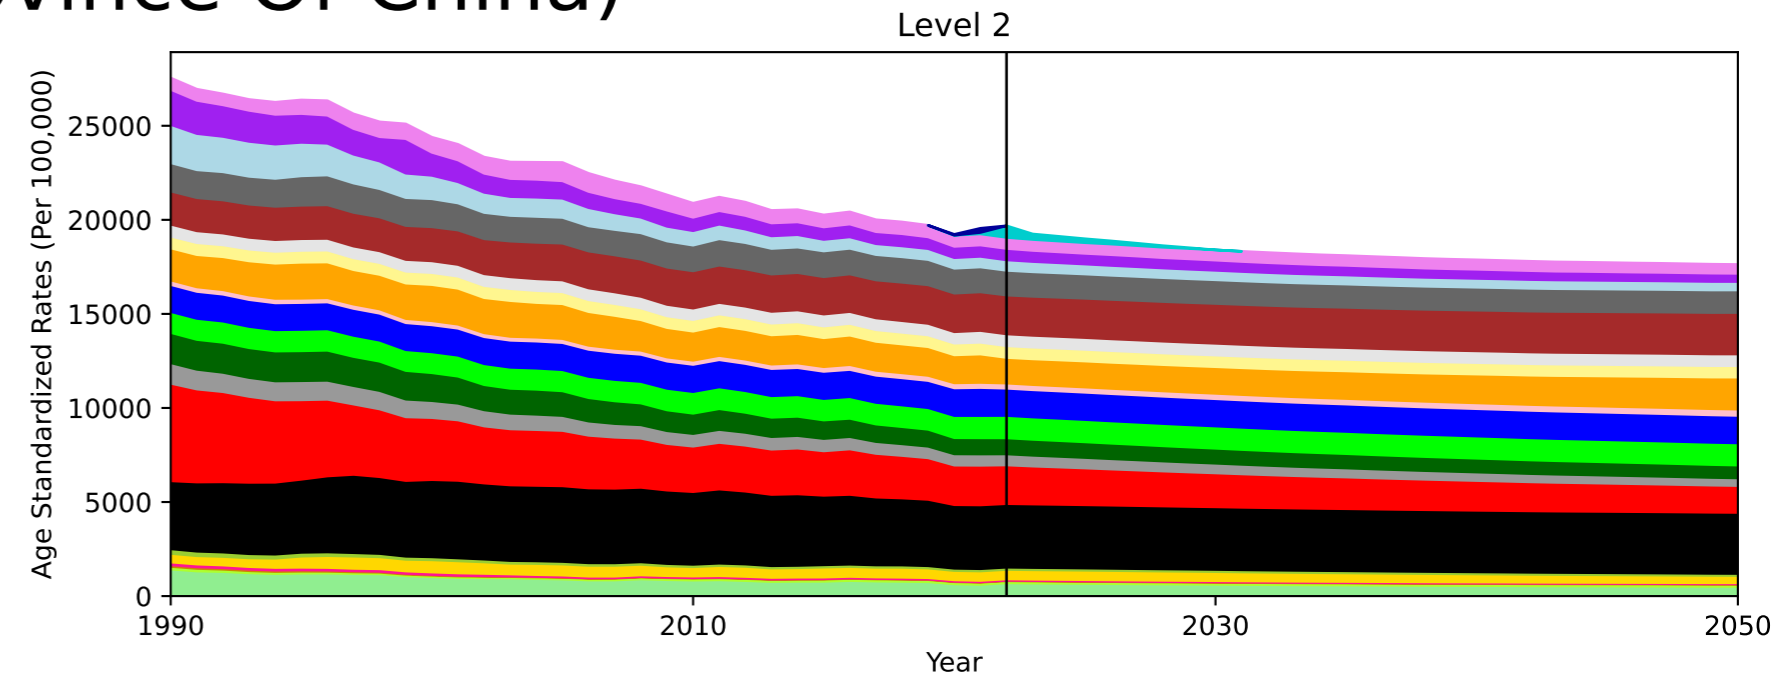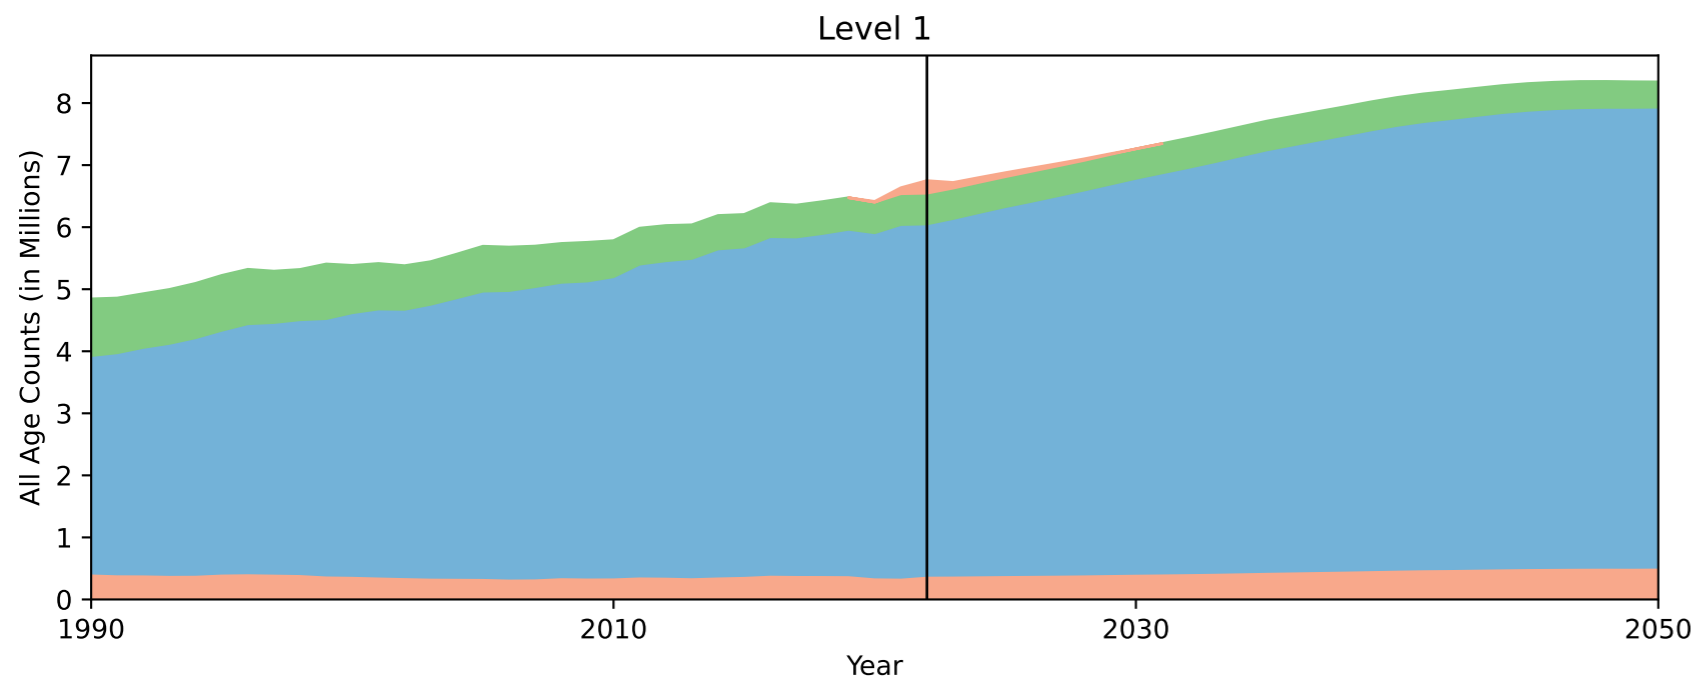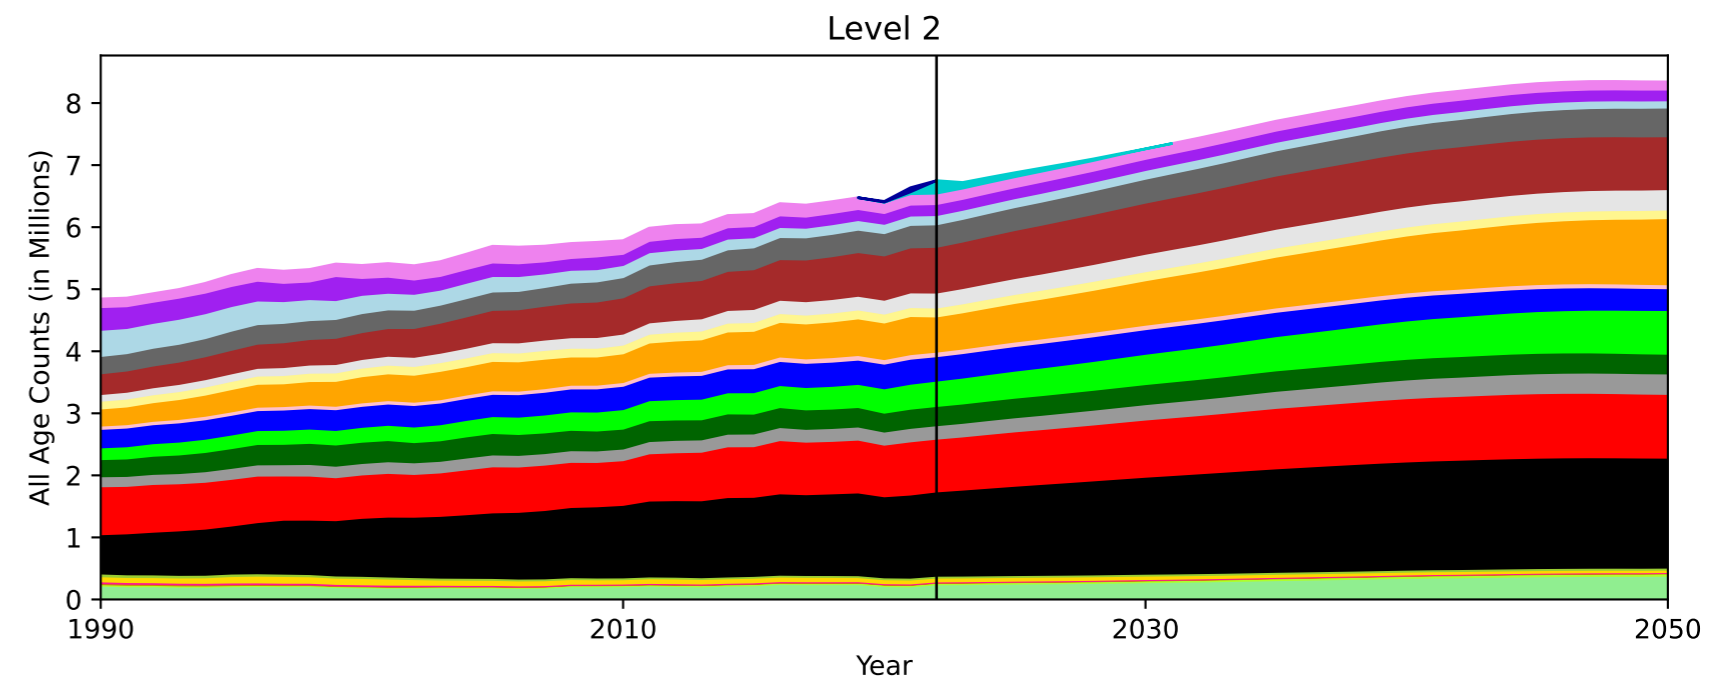

# American Samoa

Supplemental Results Figure S4. Age-standardised DALY rates and all age DALY counts and by Level 1 and Level 2 causes, 1990–2050

372

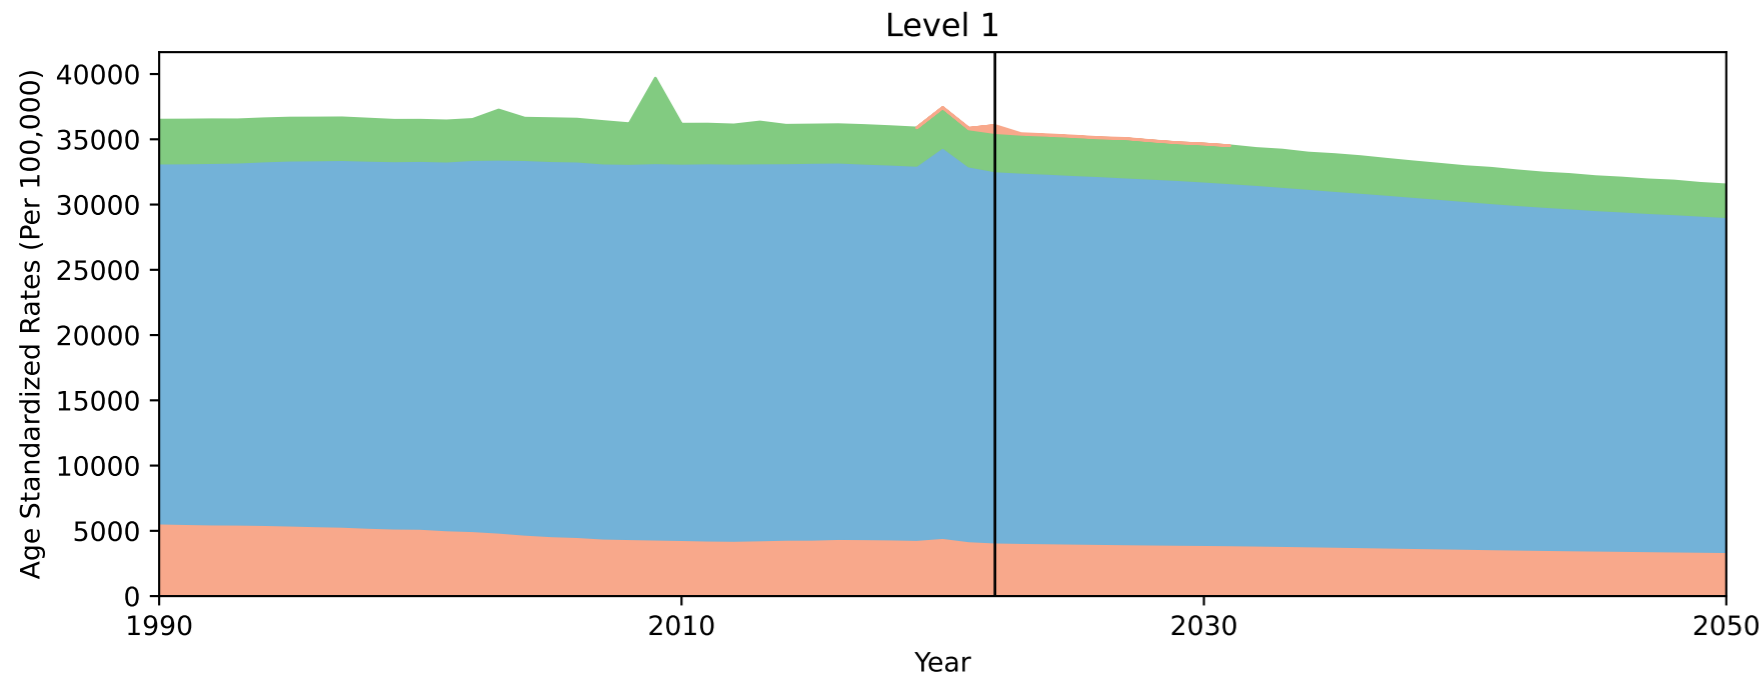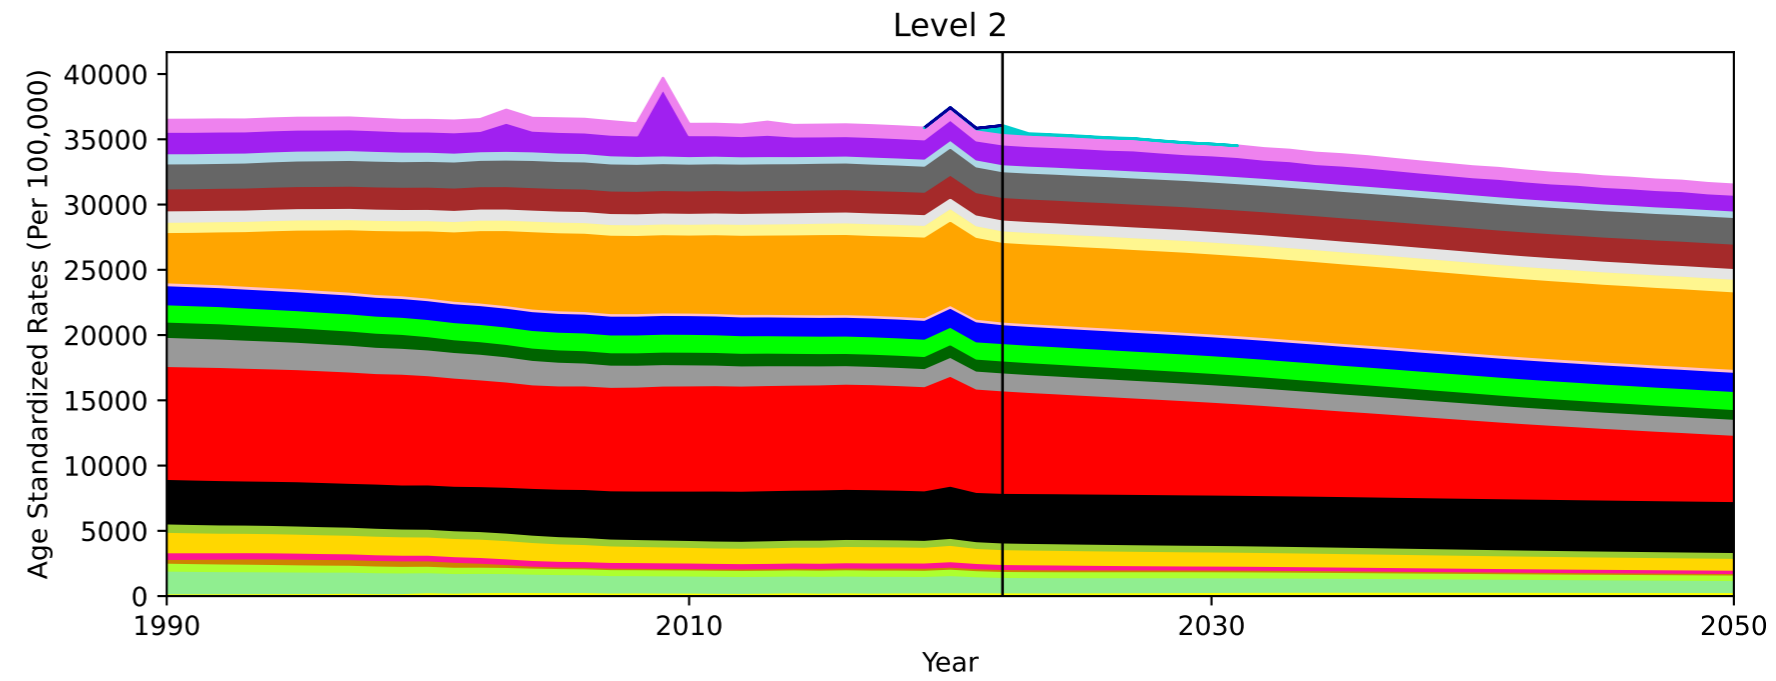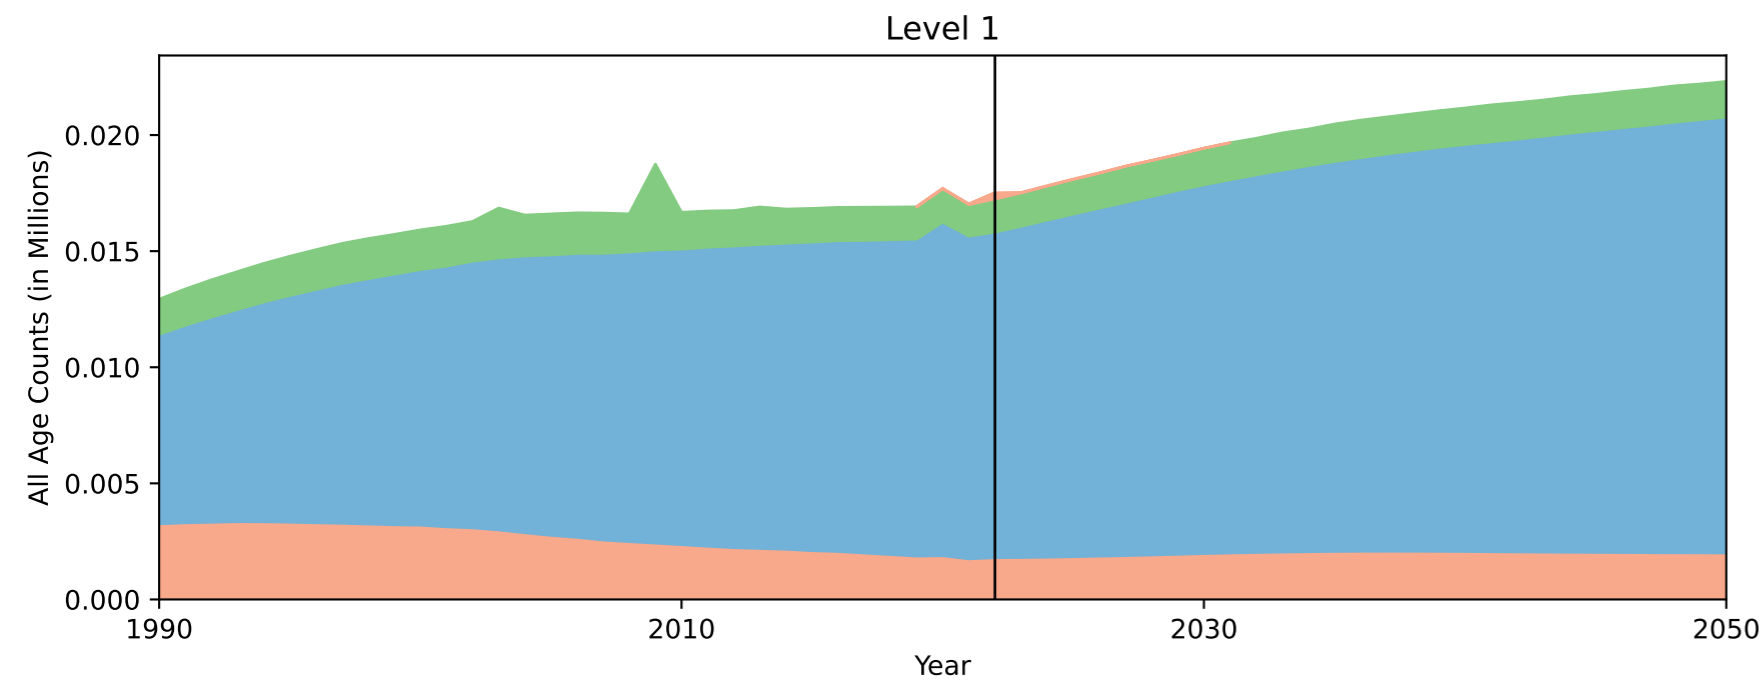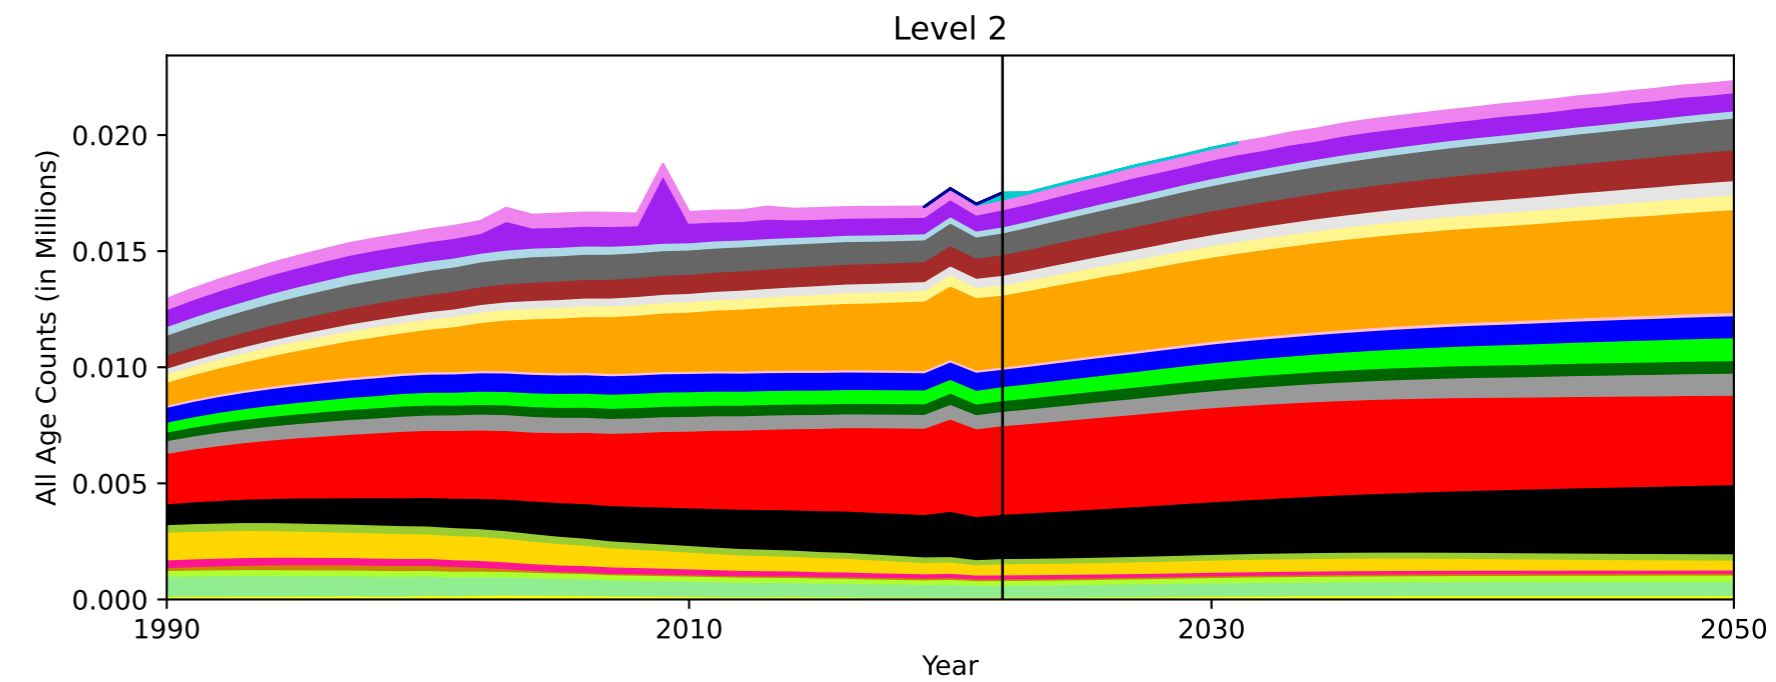

# Cook Islands

Level 1

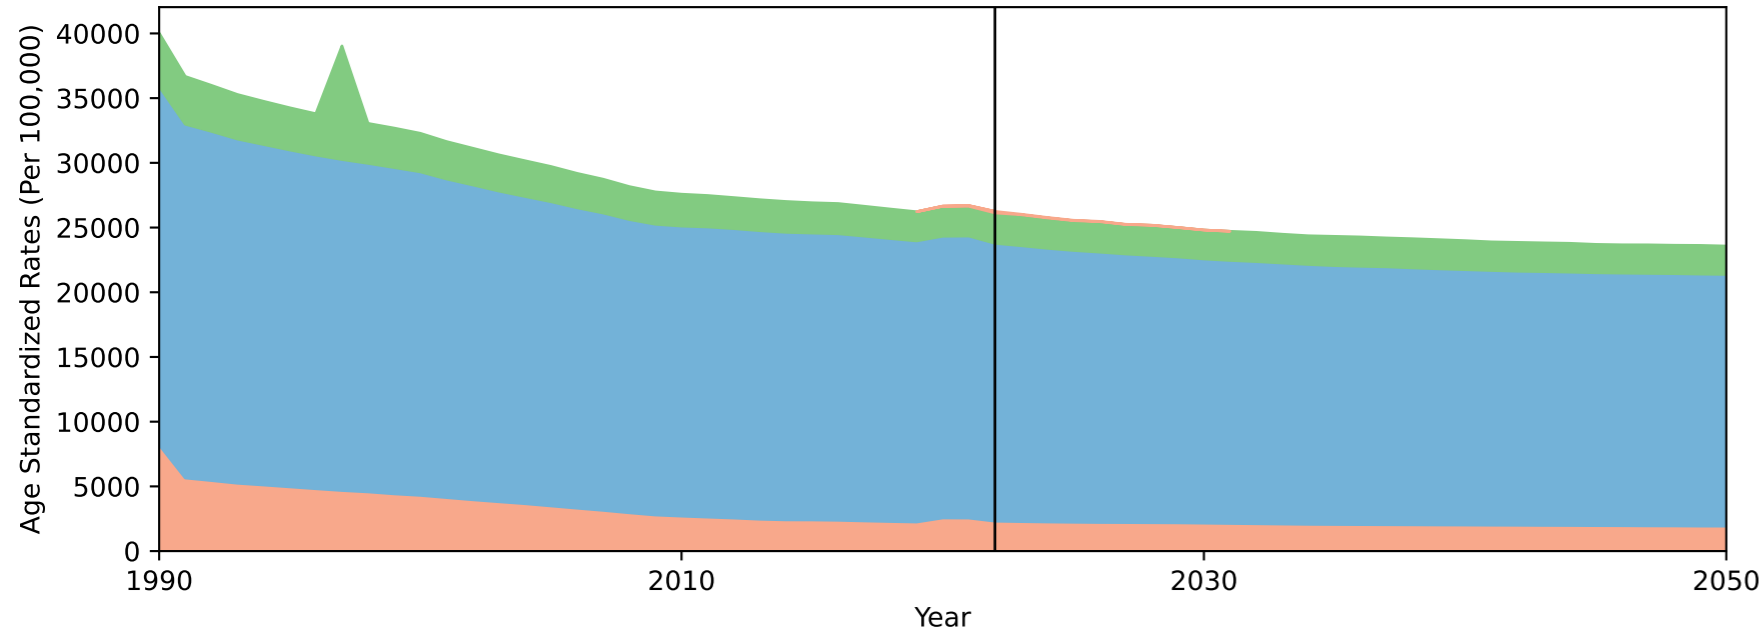

Level 2

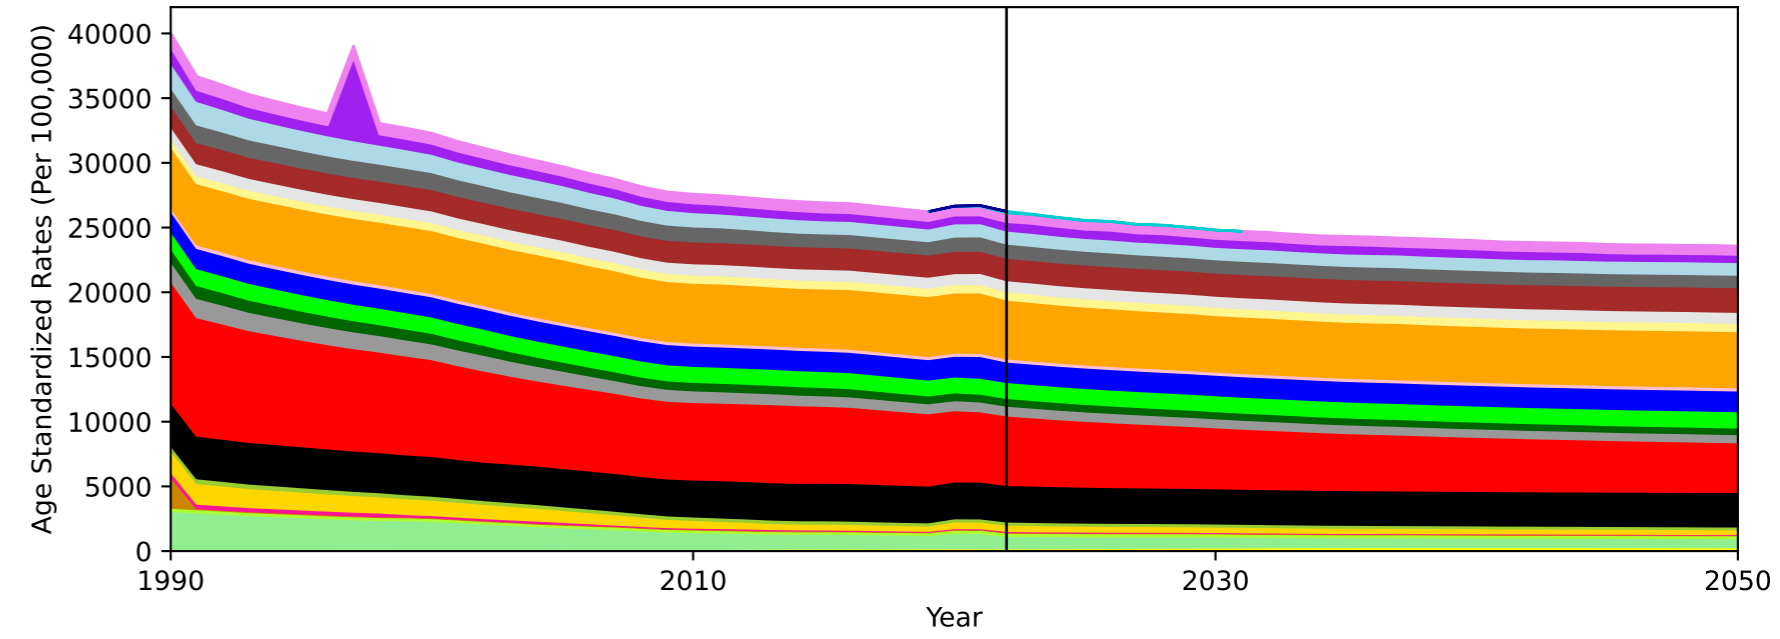

Level 1

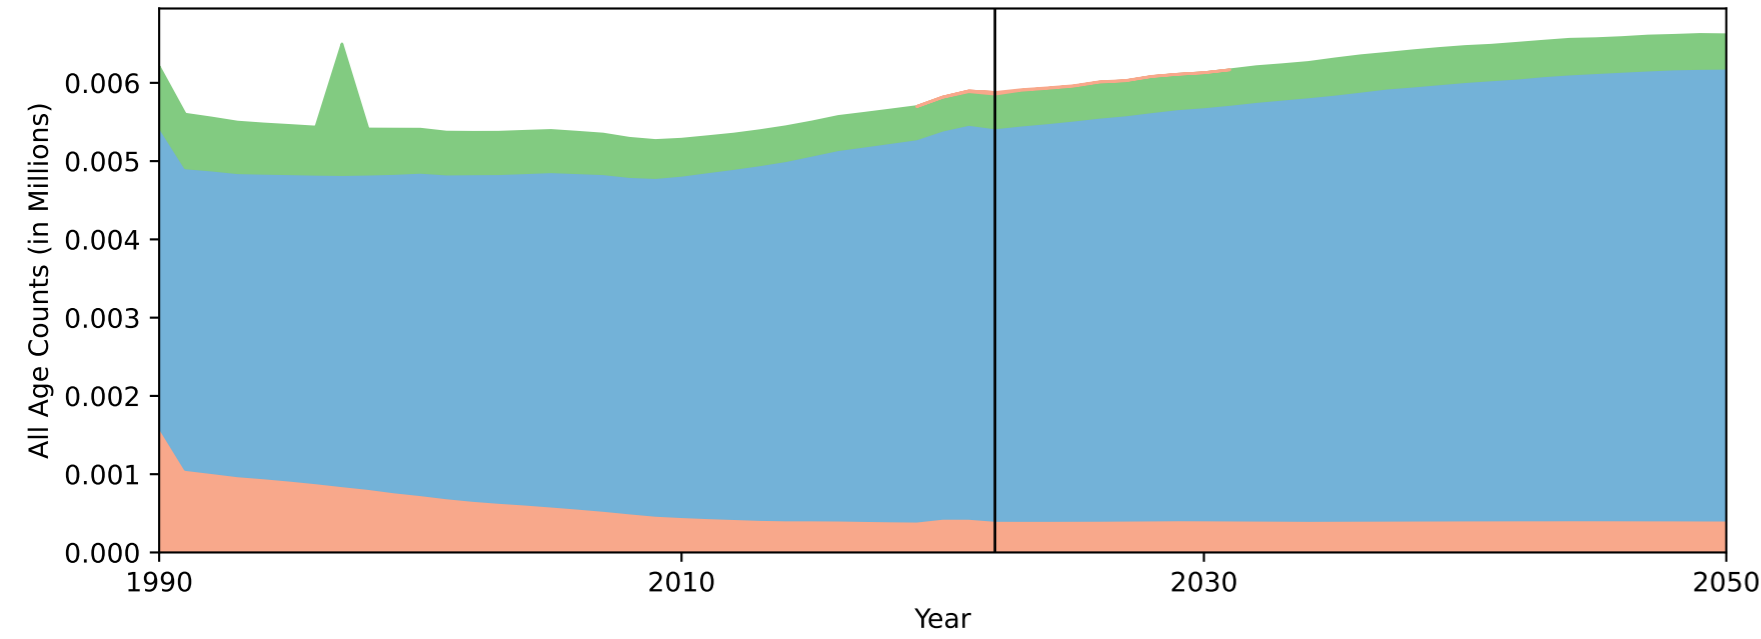

Level 2

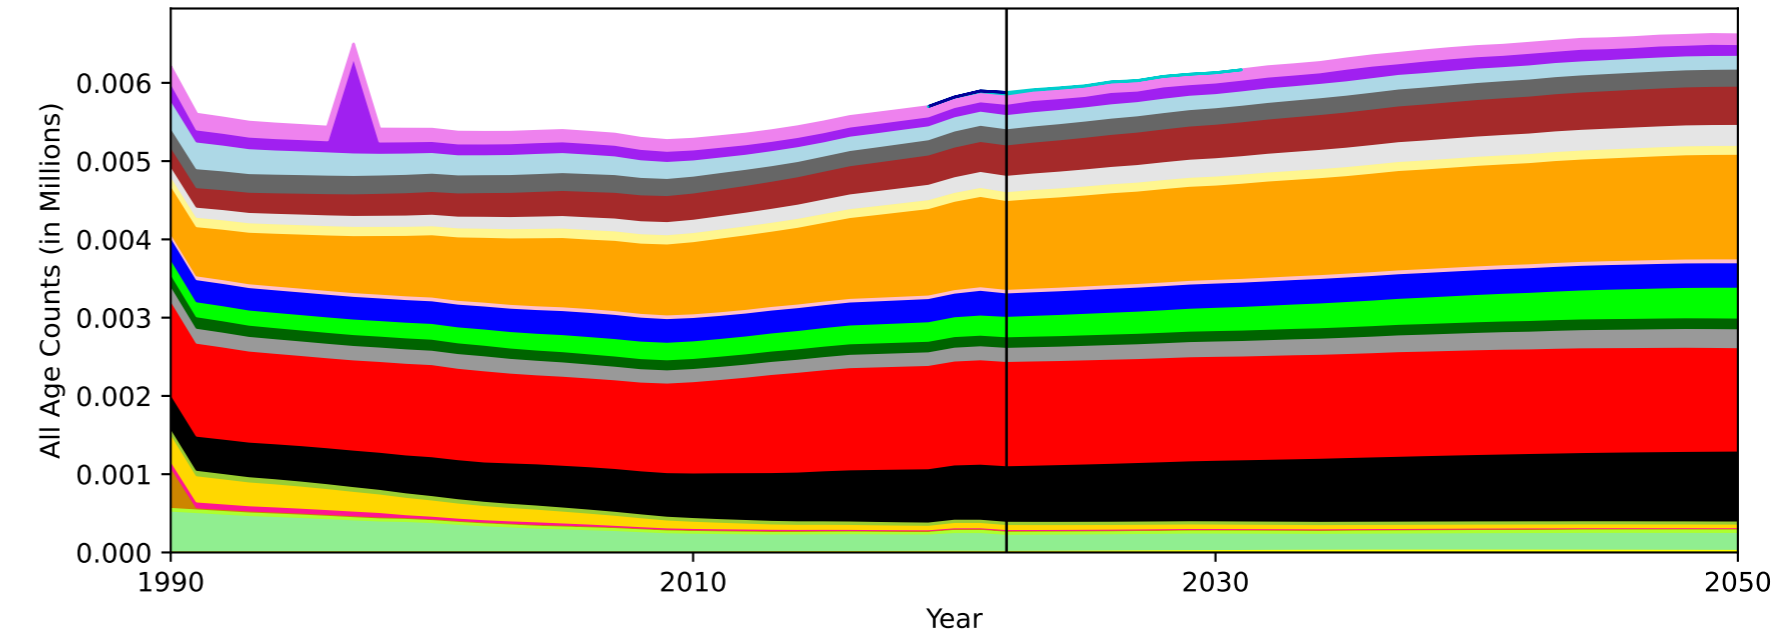

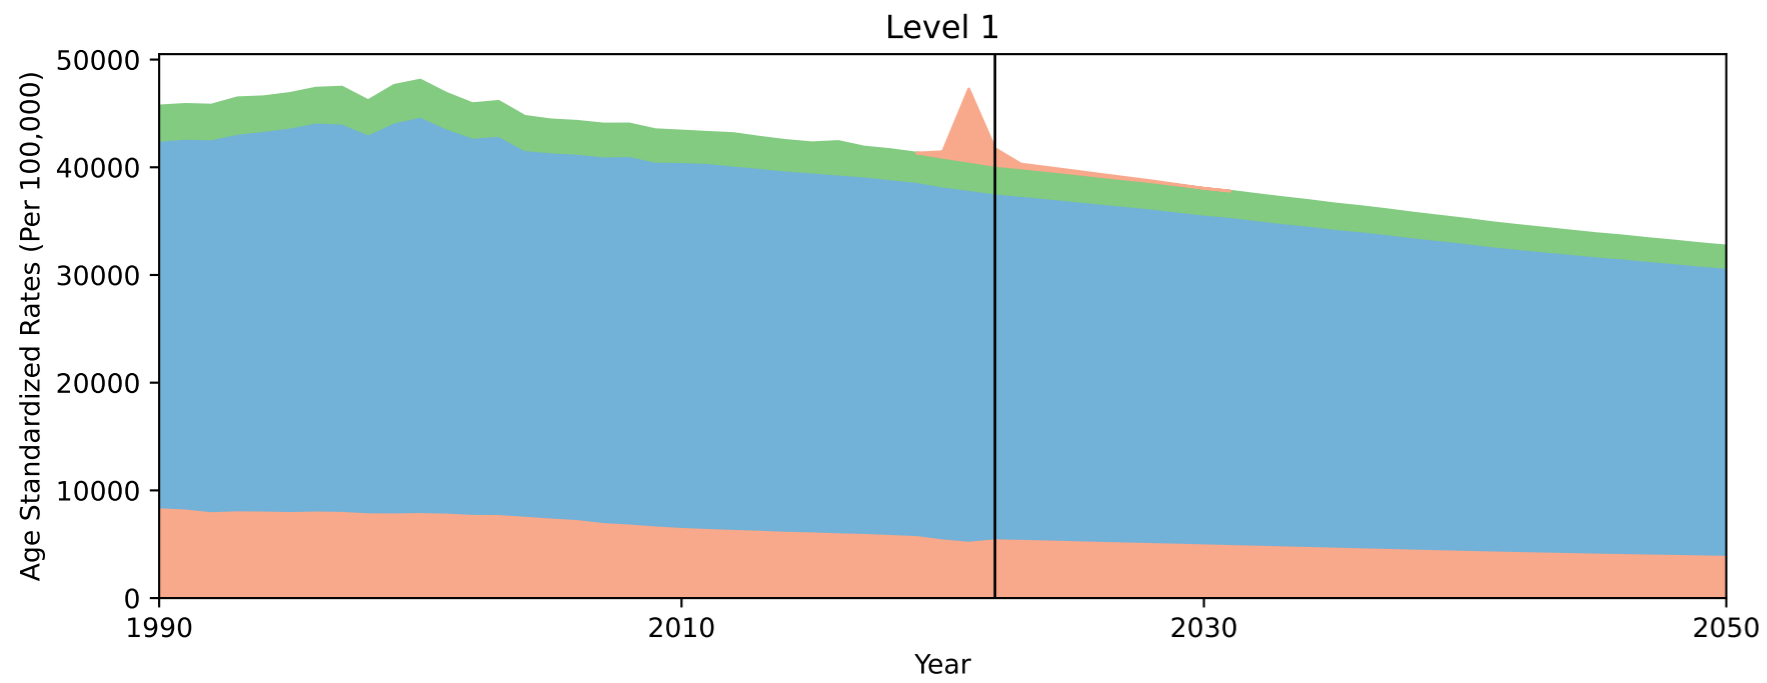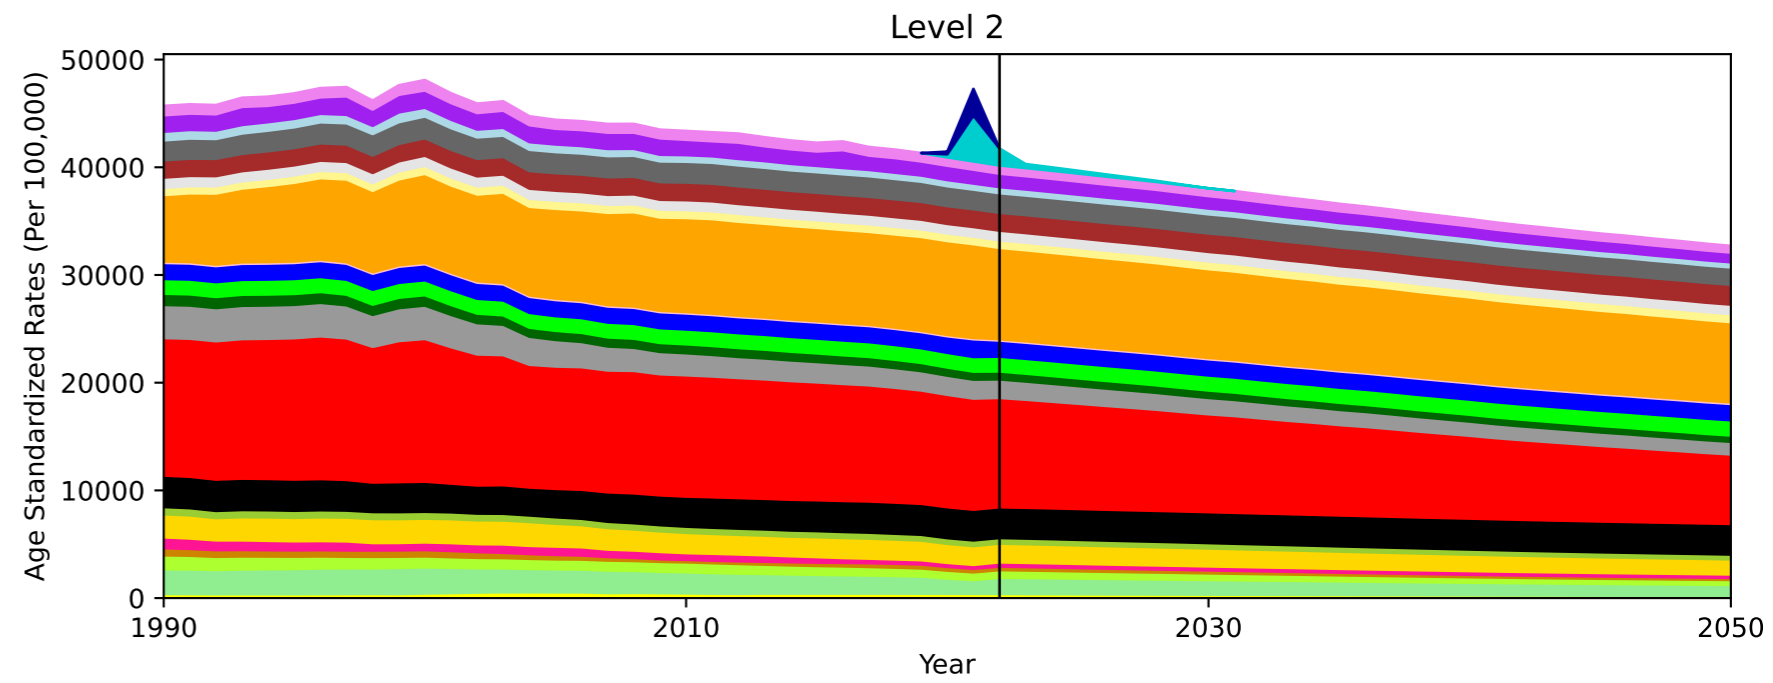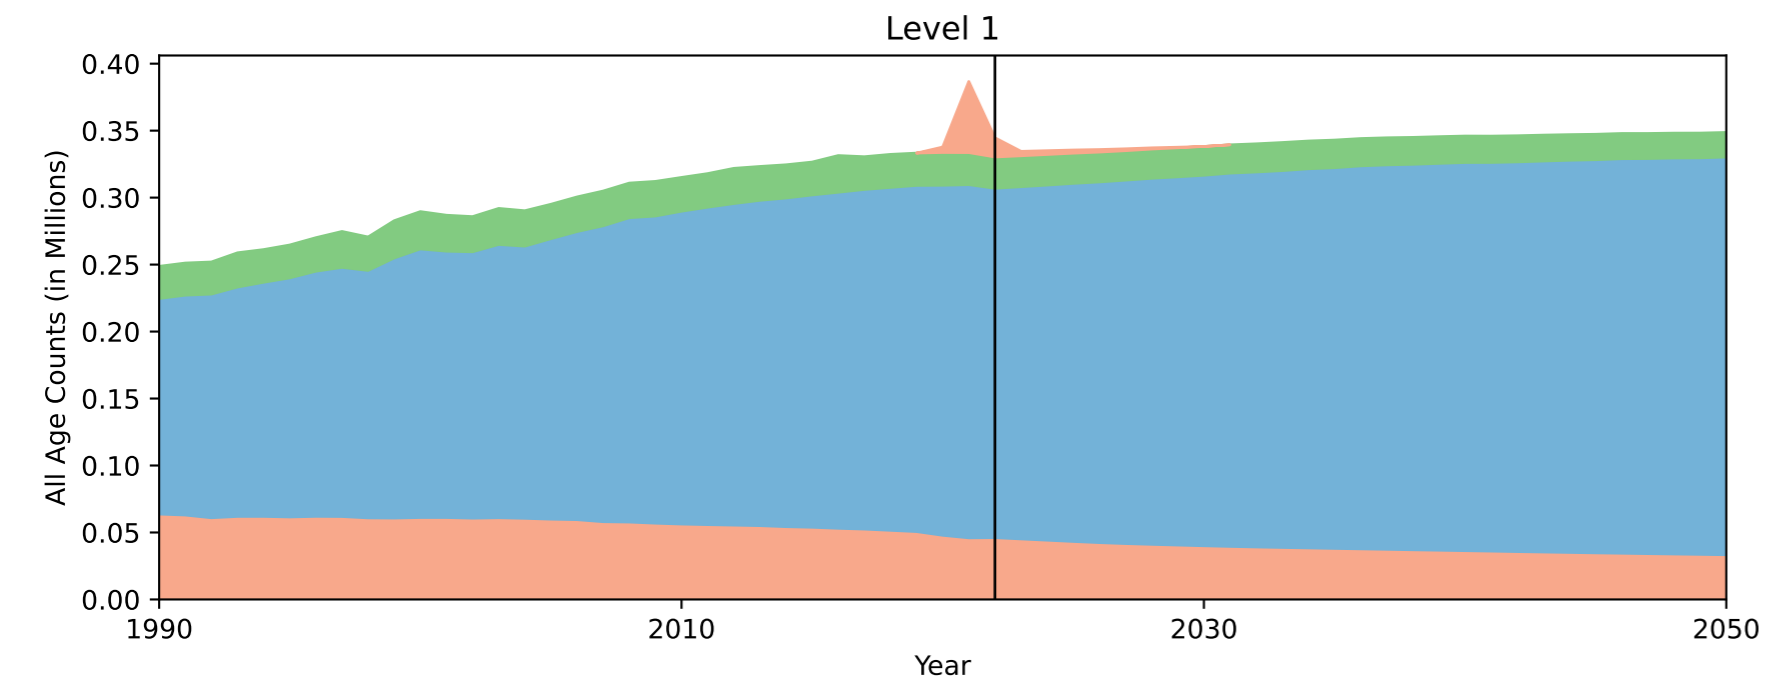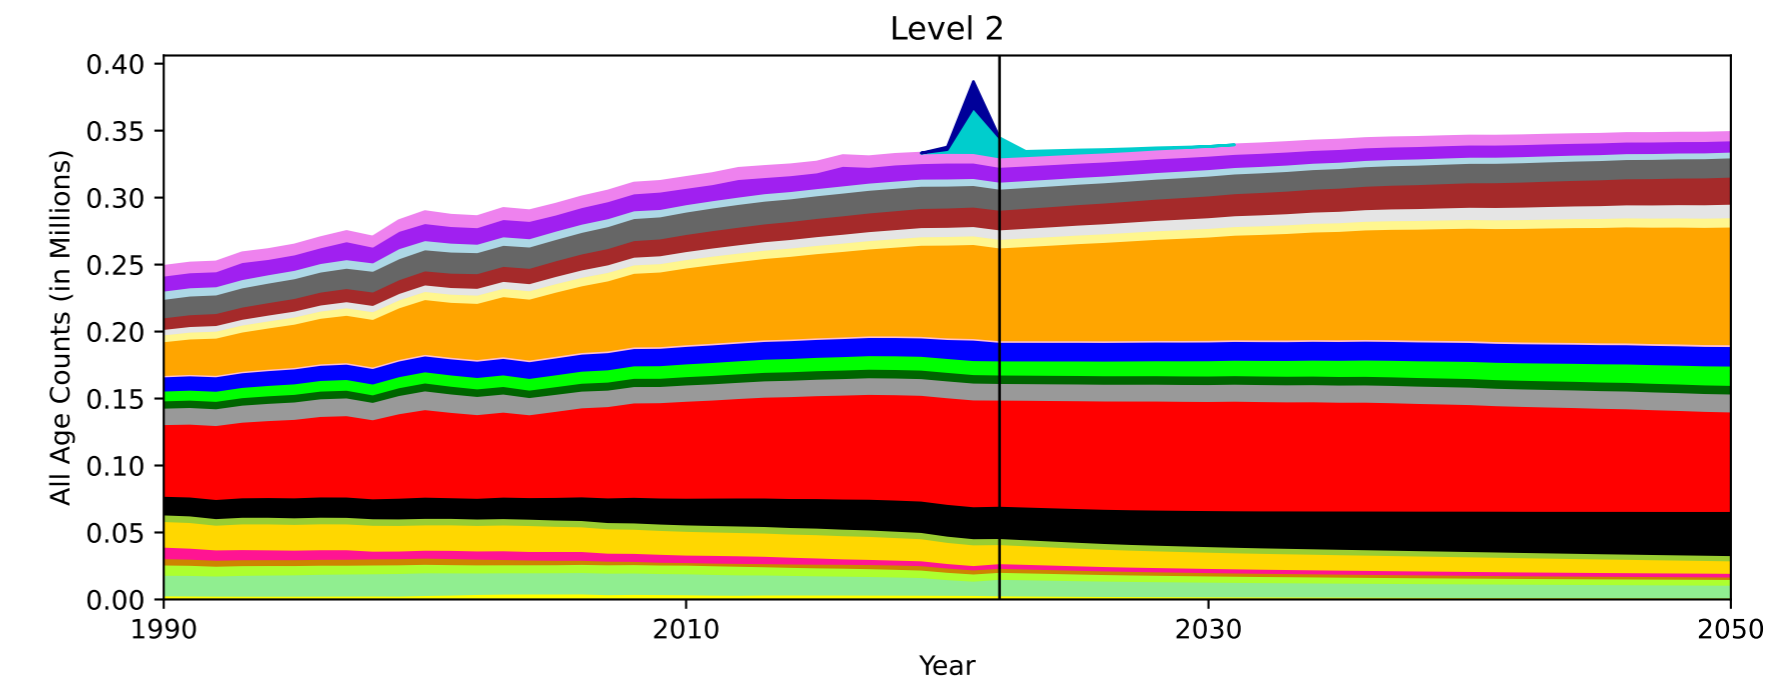

# Guam

Level 1

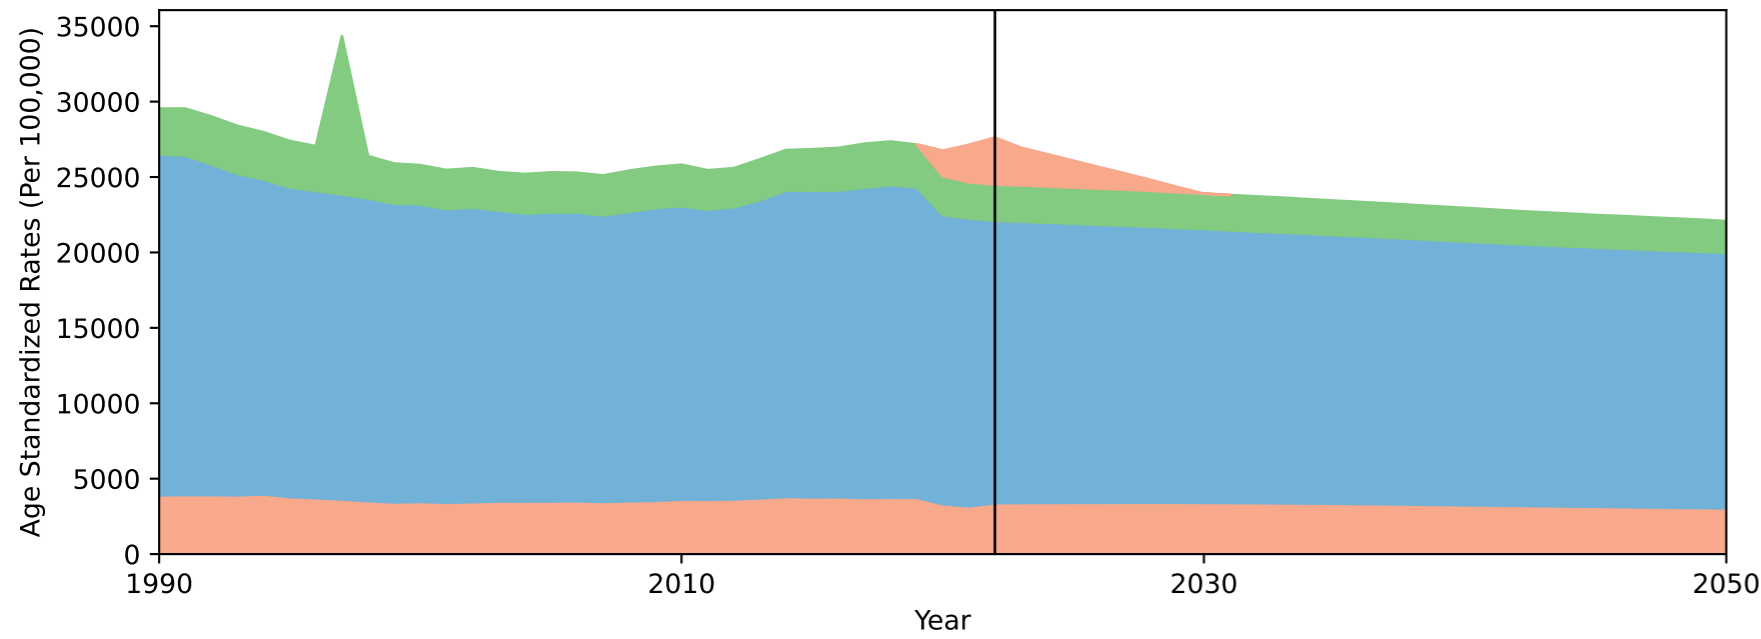

Level 2

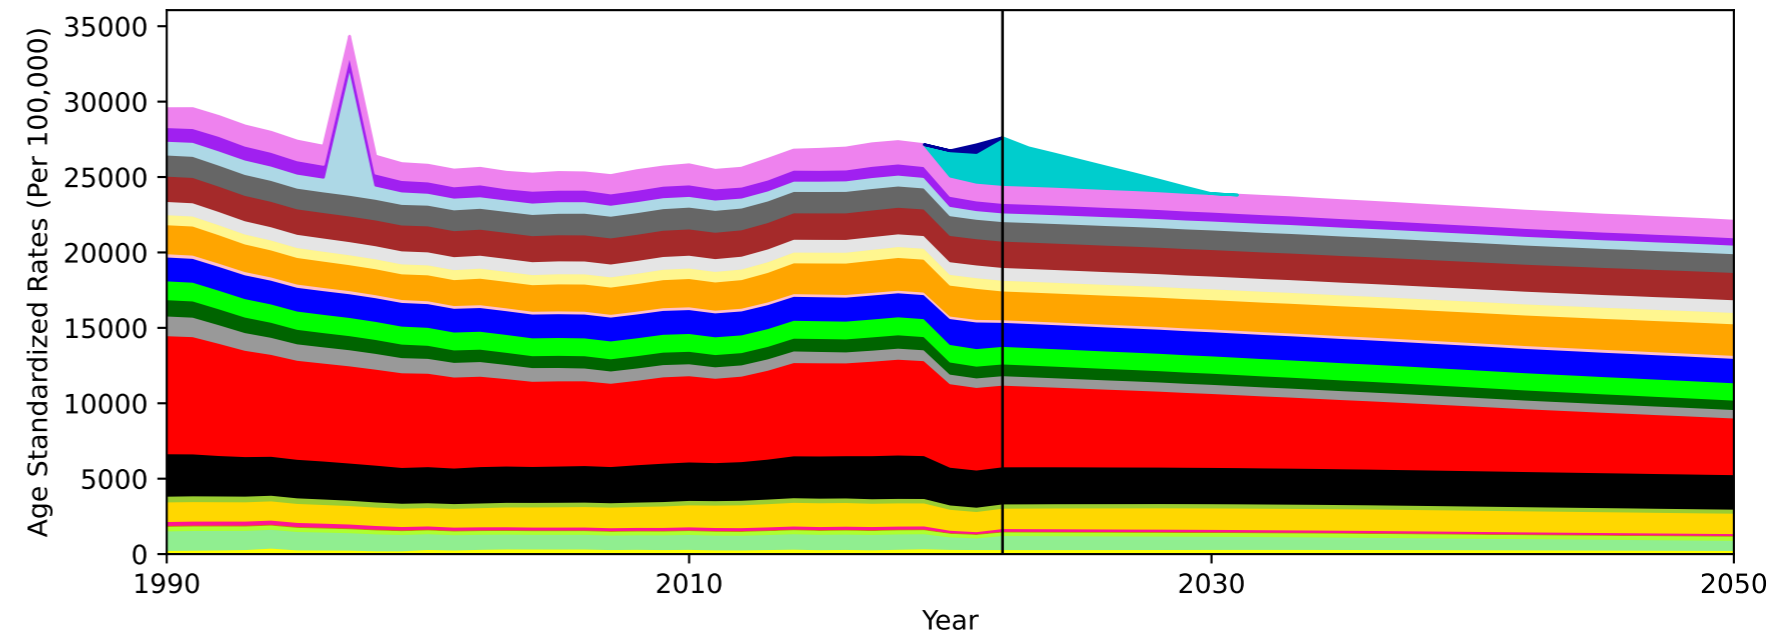

Level 1

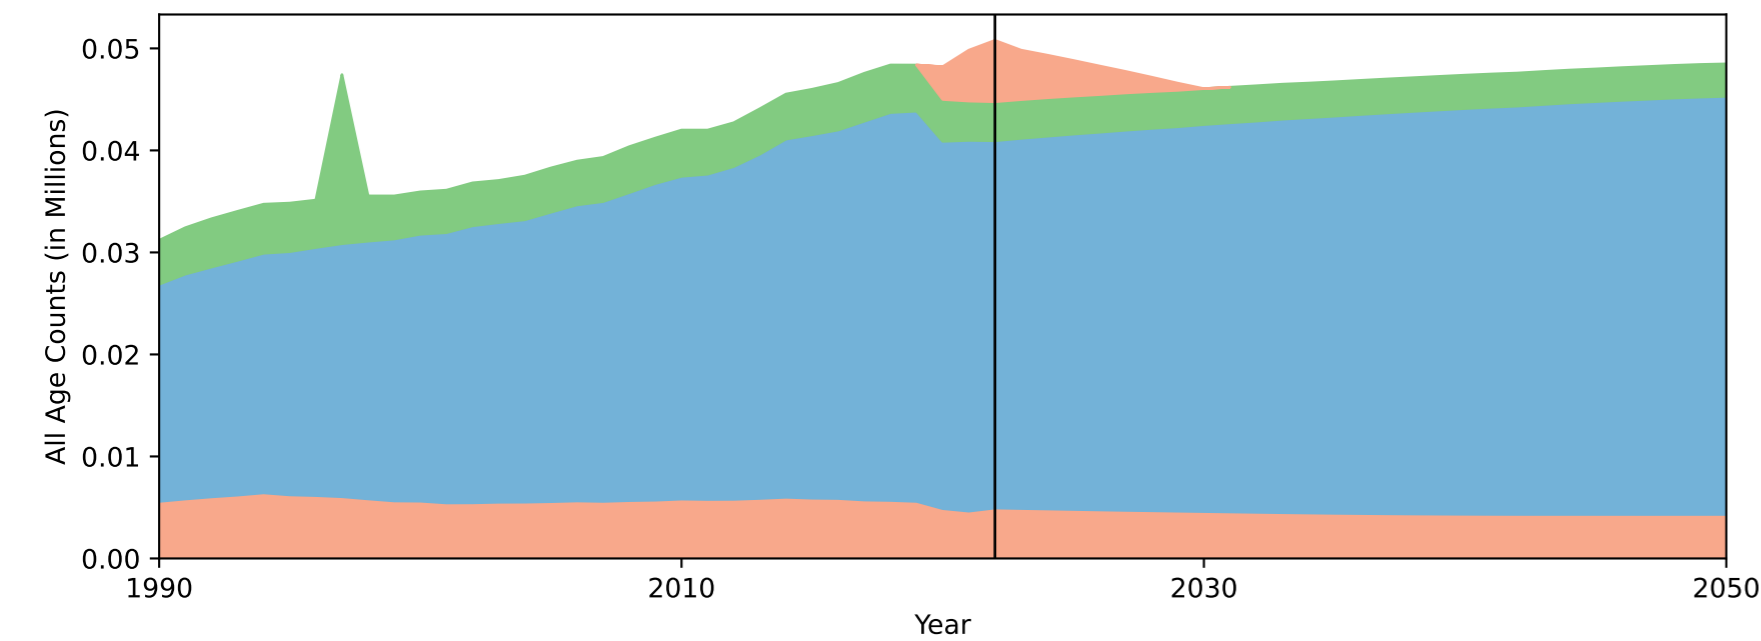

Level 2

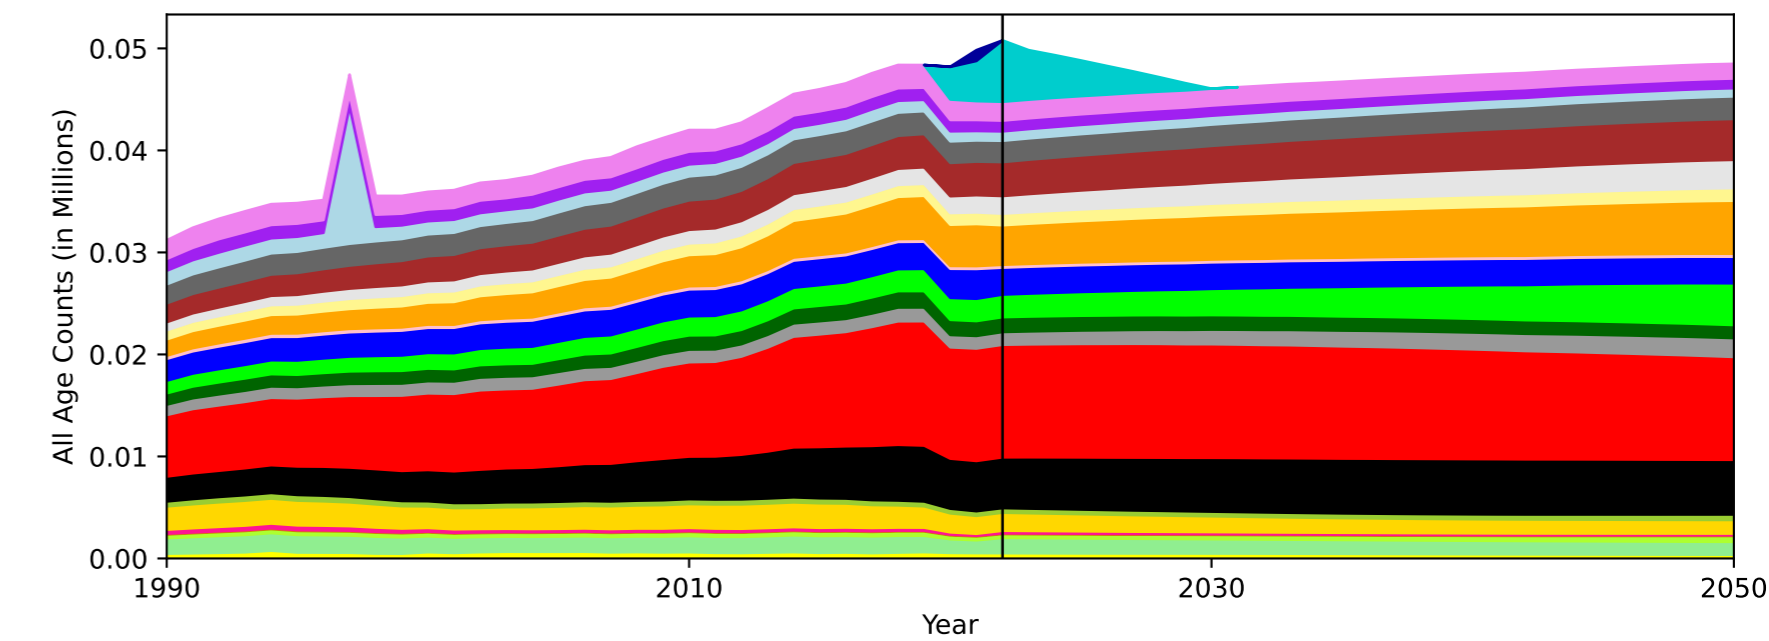



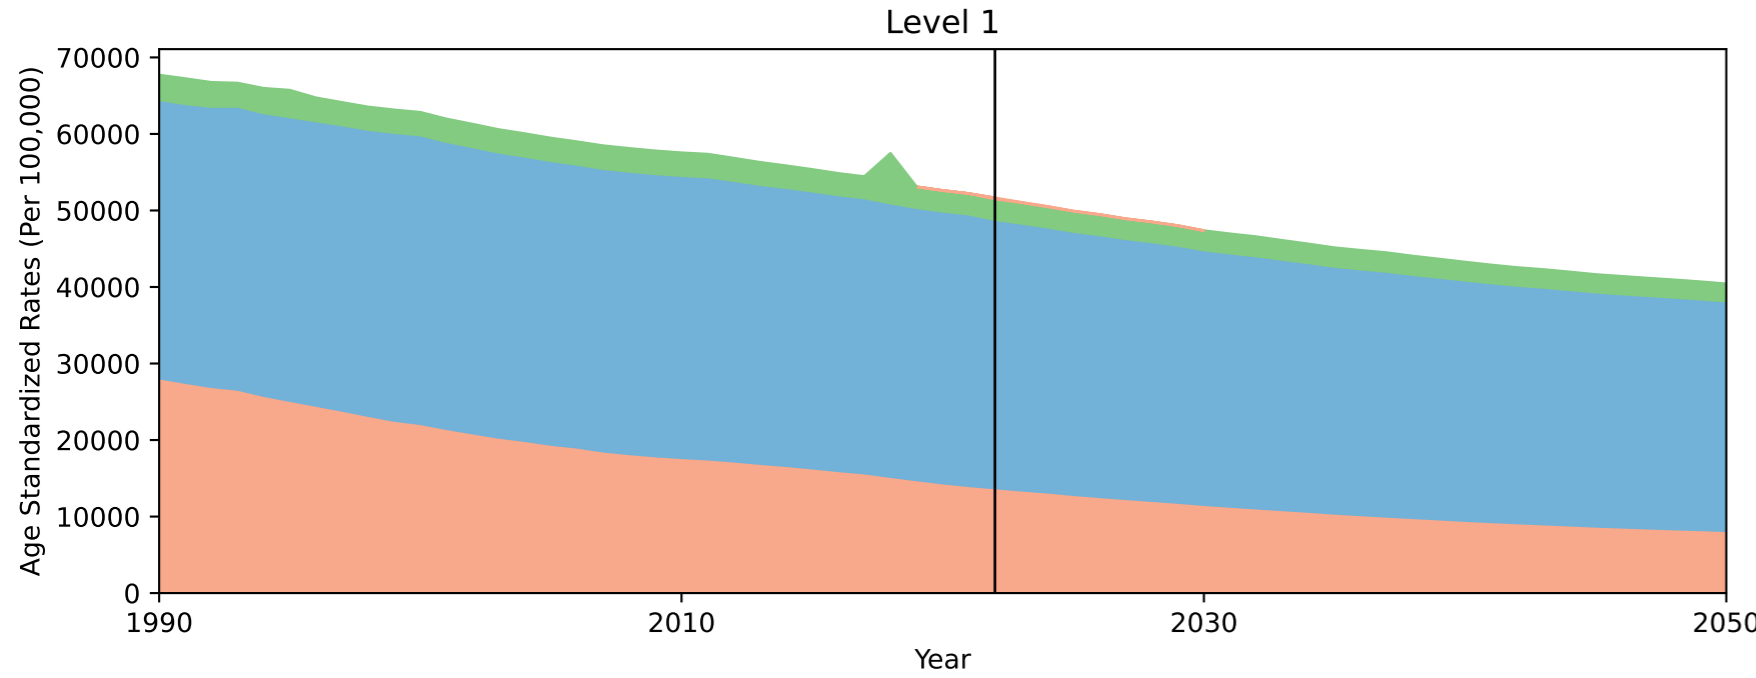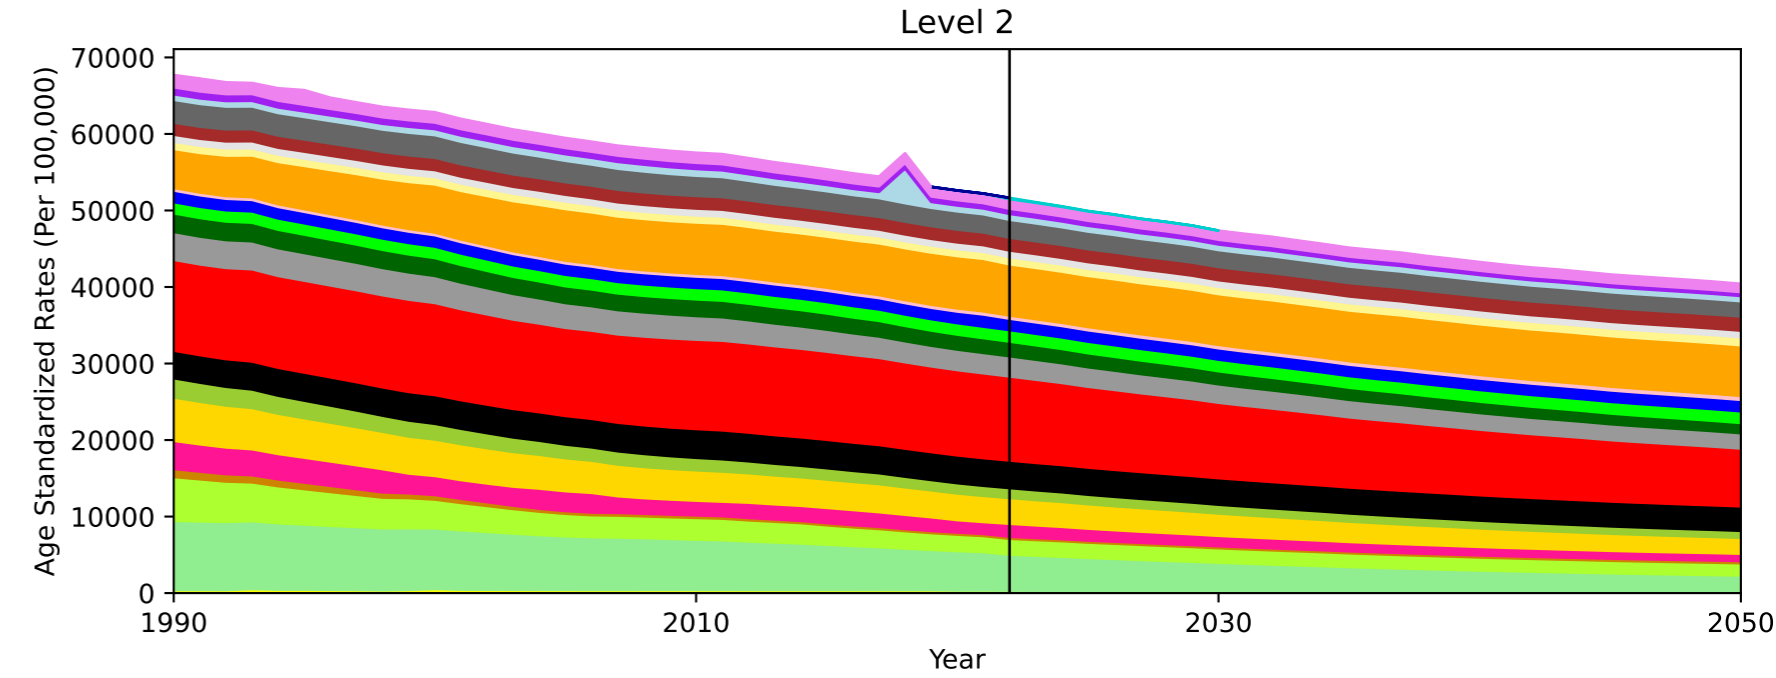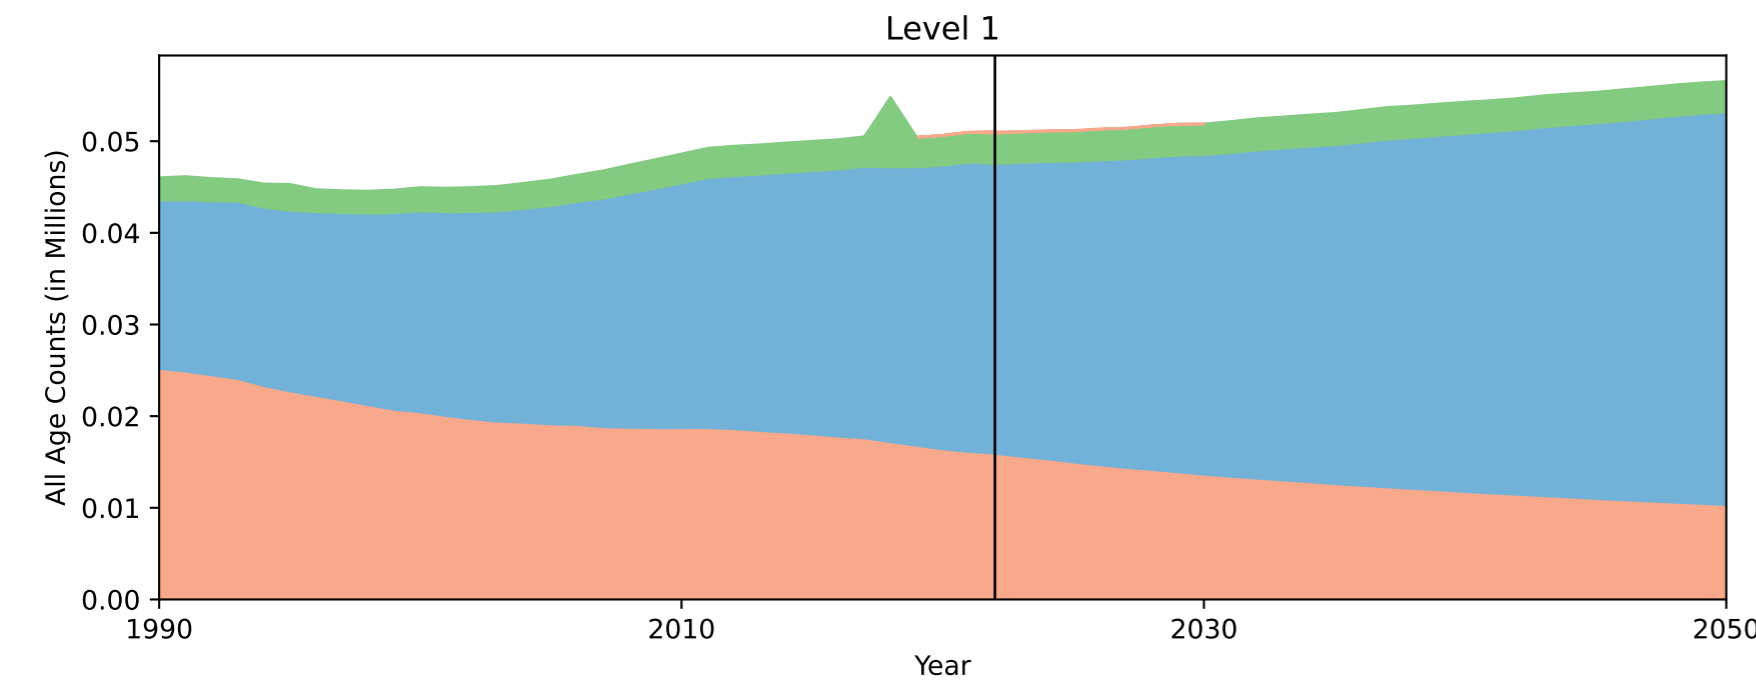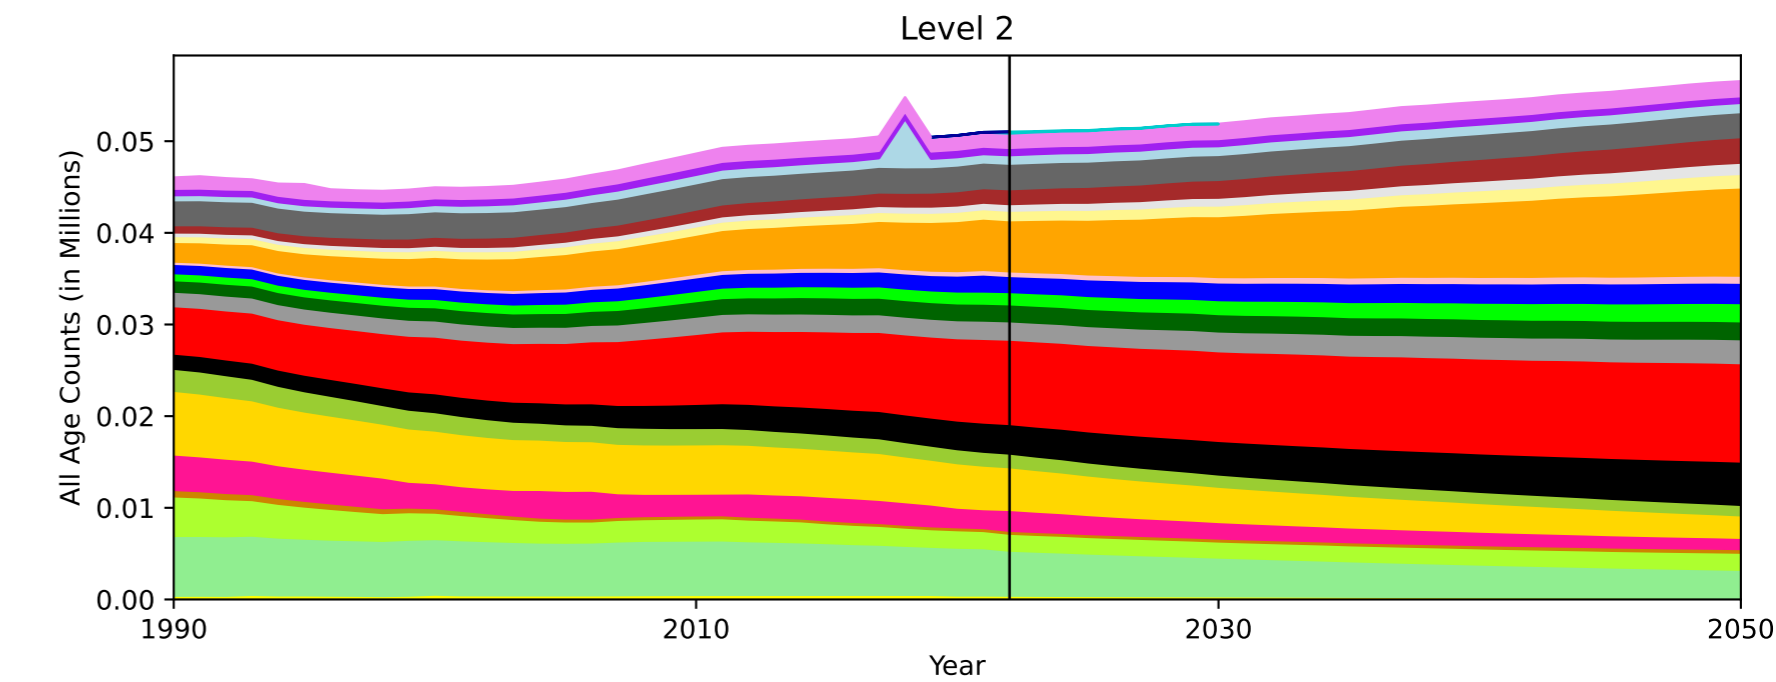

# Marshall Islands

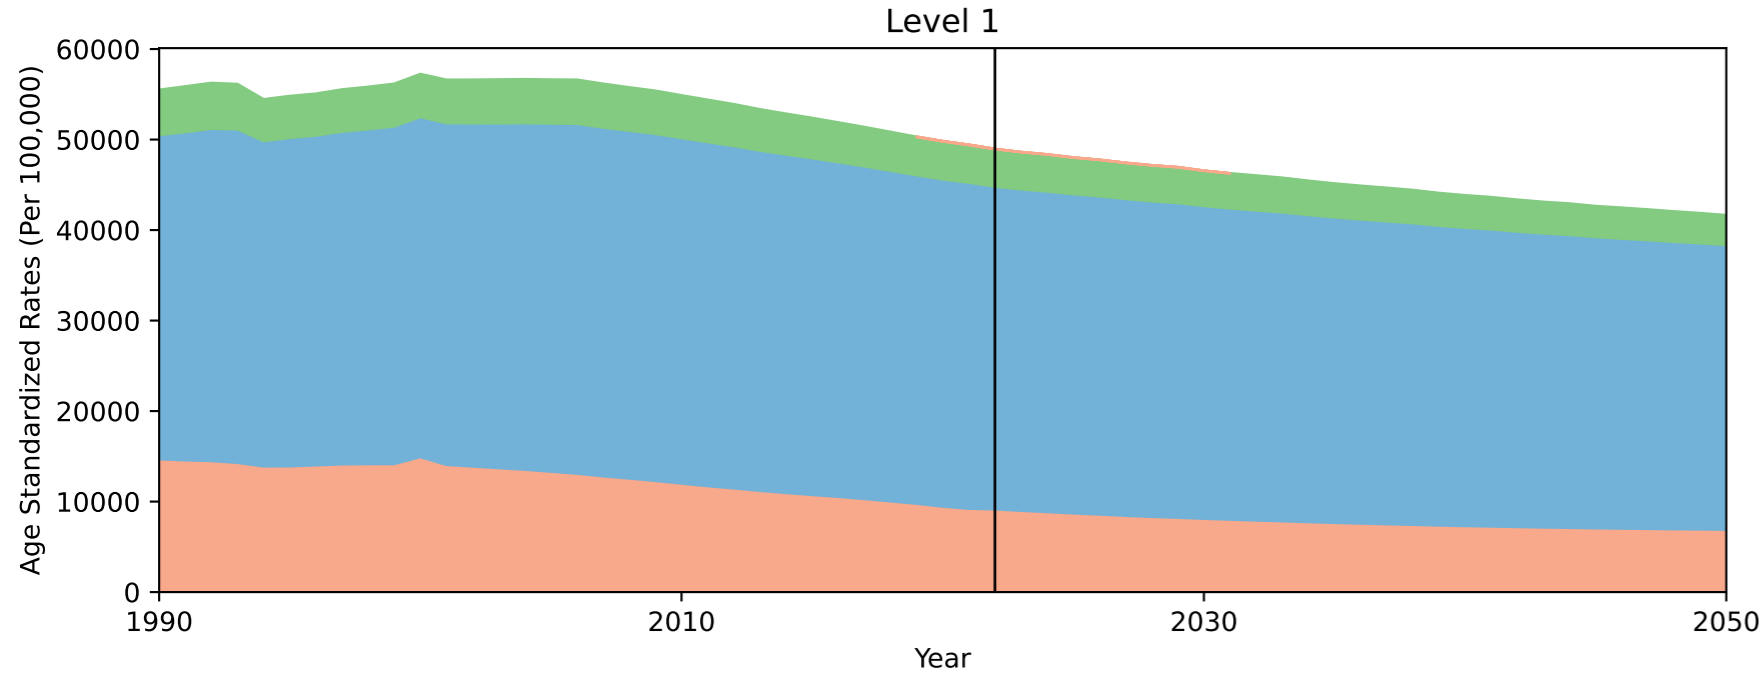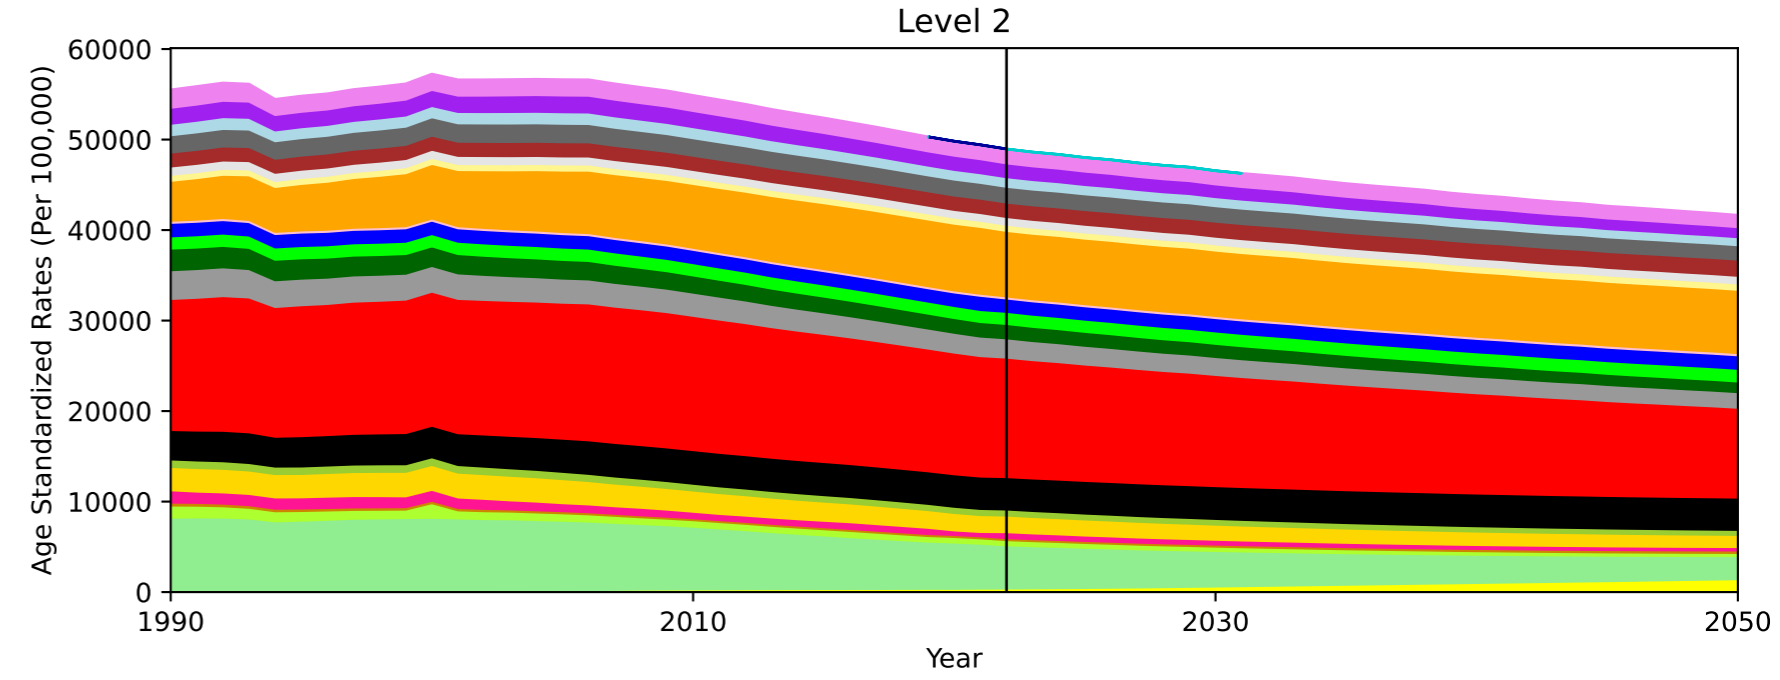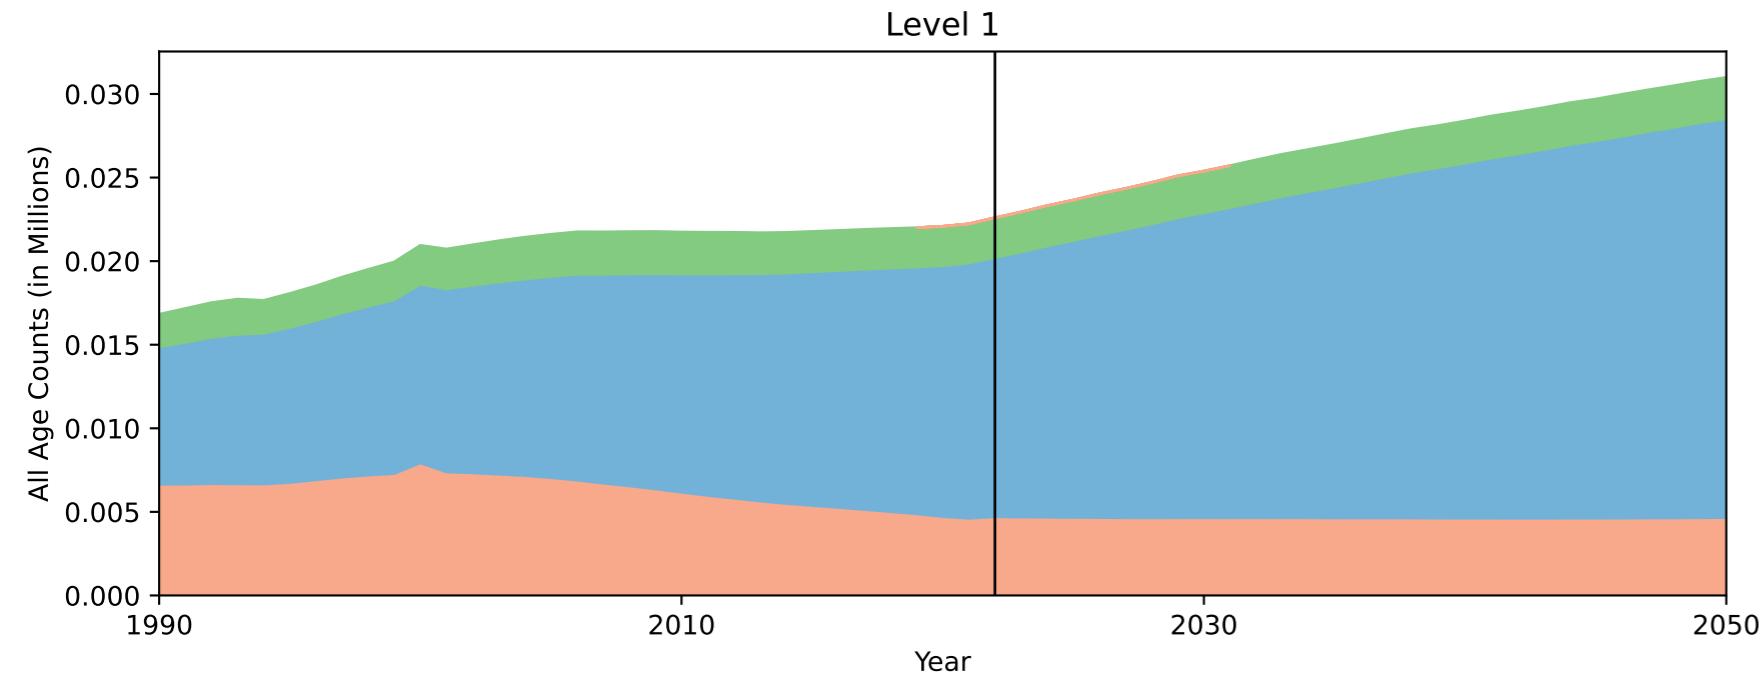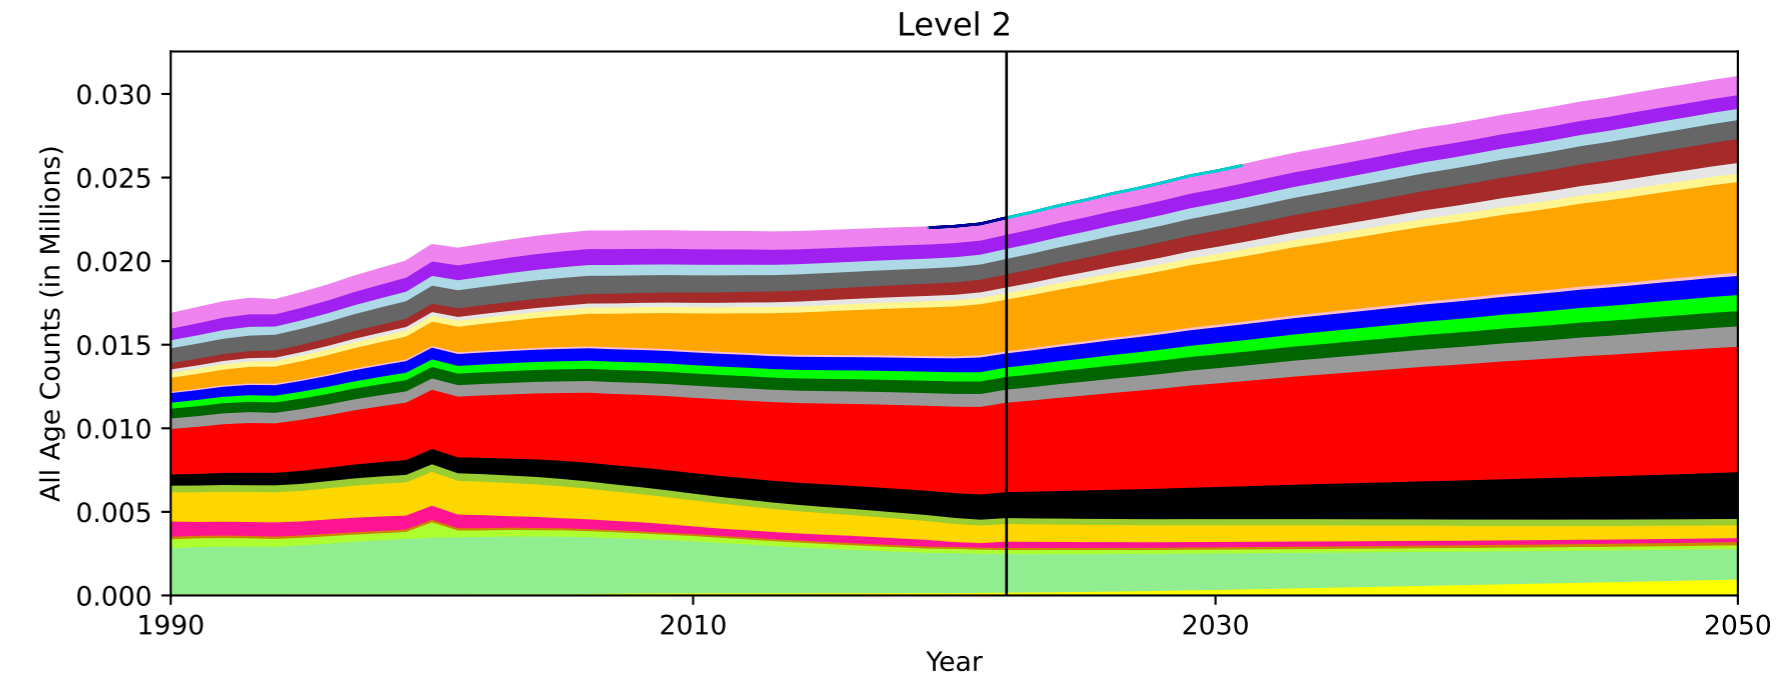

# Federated States Of Micronesia

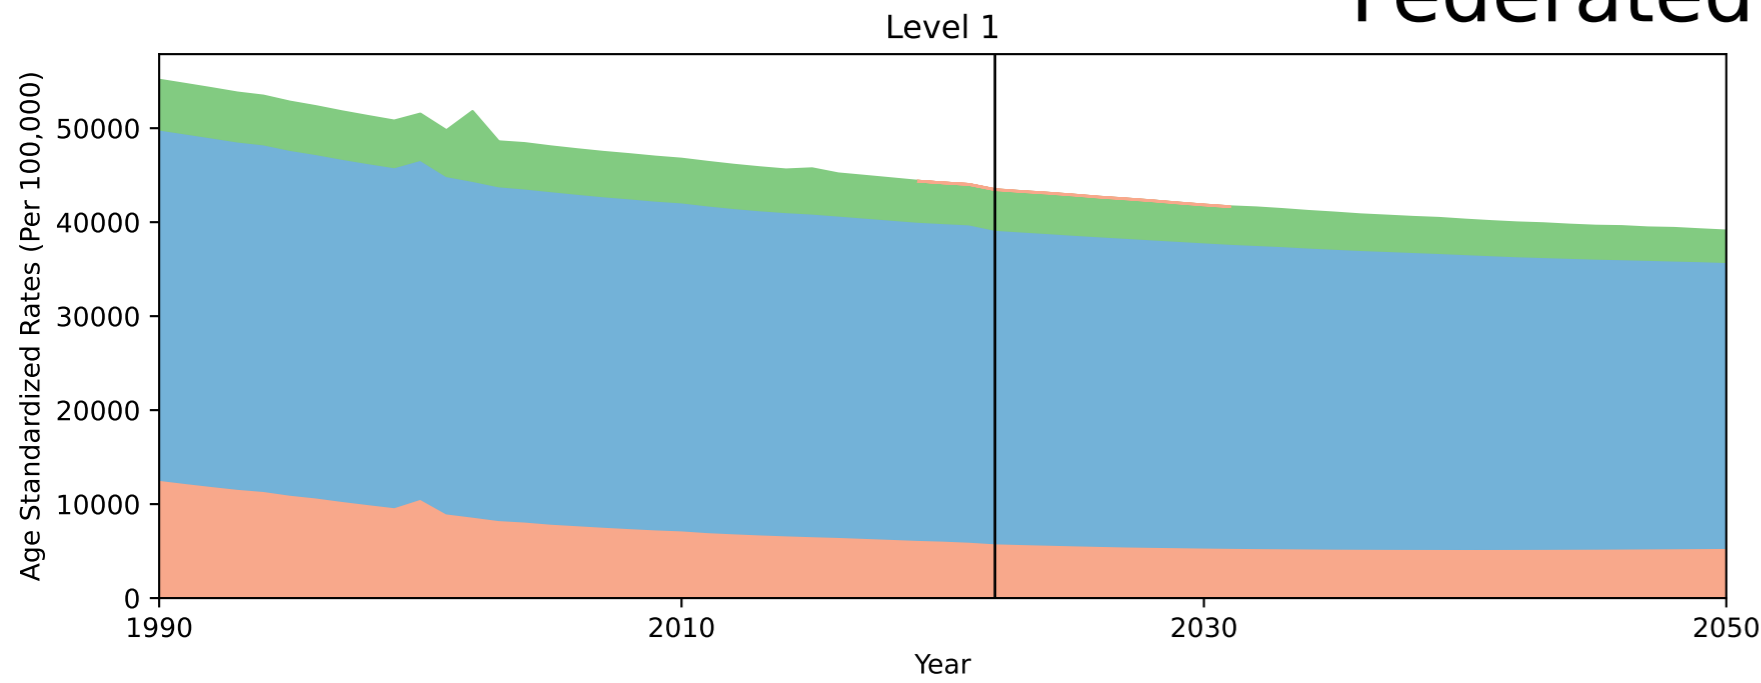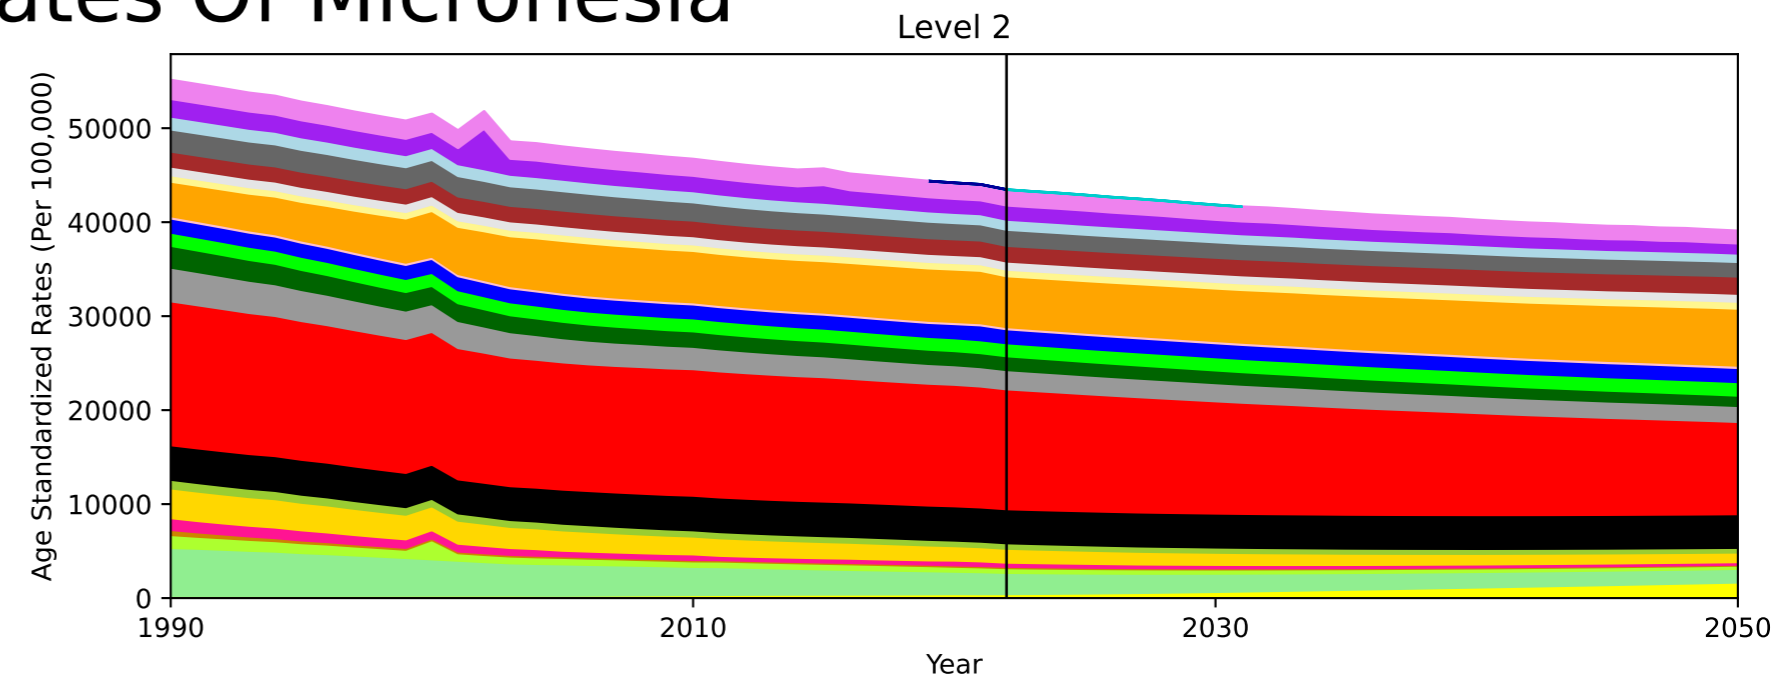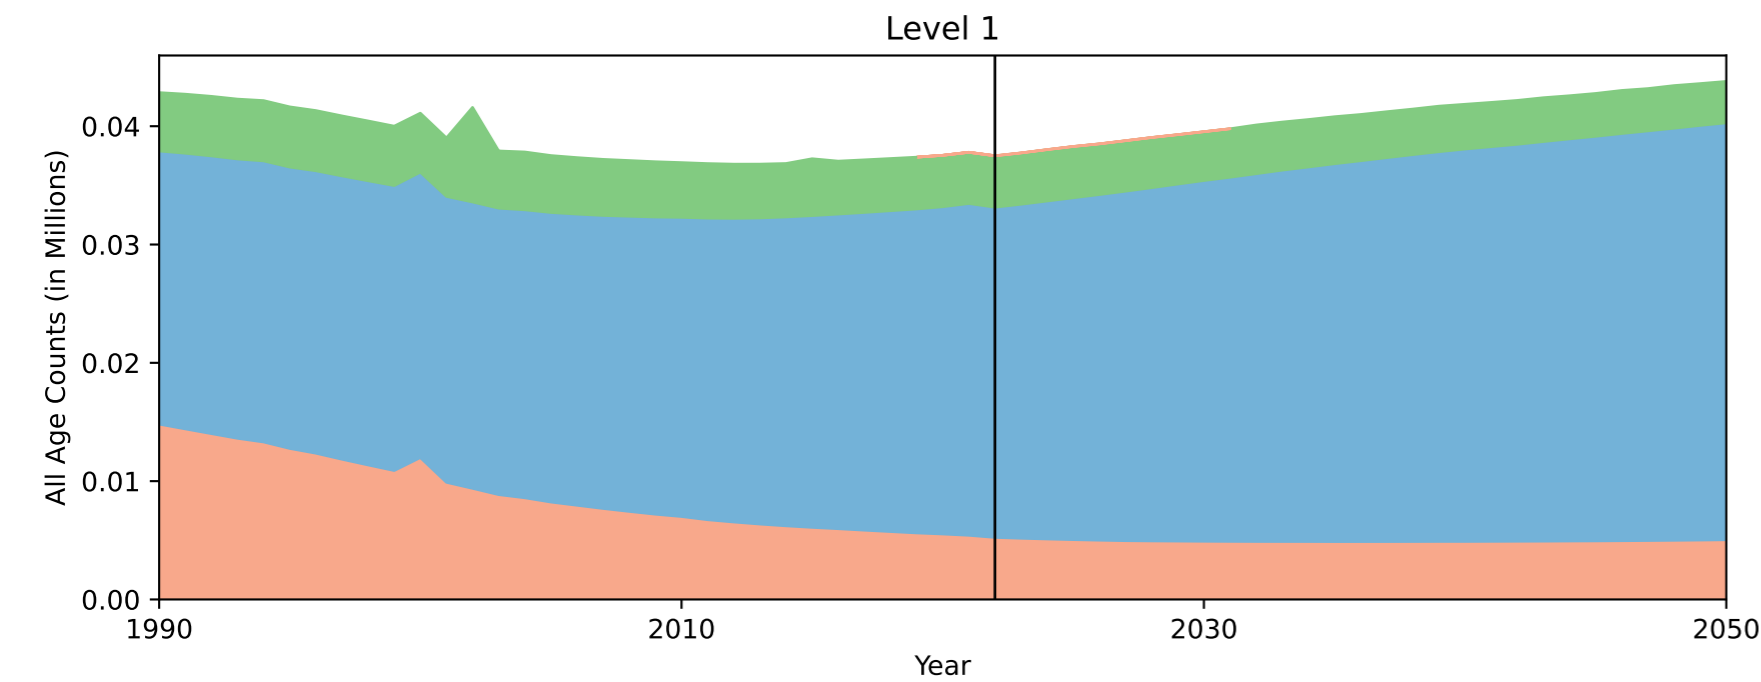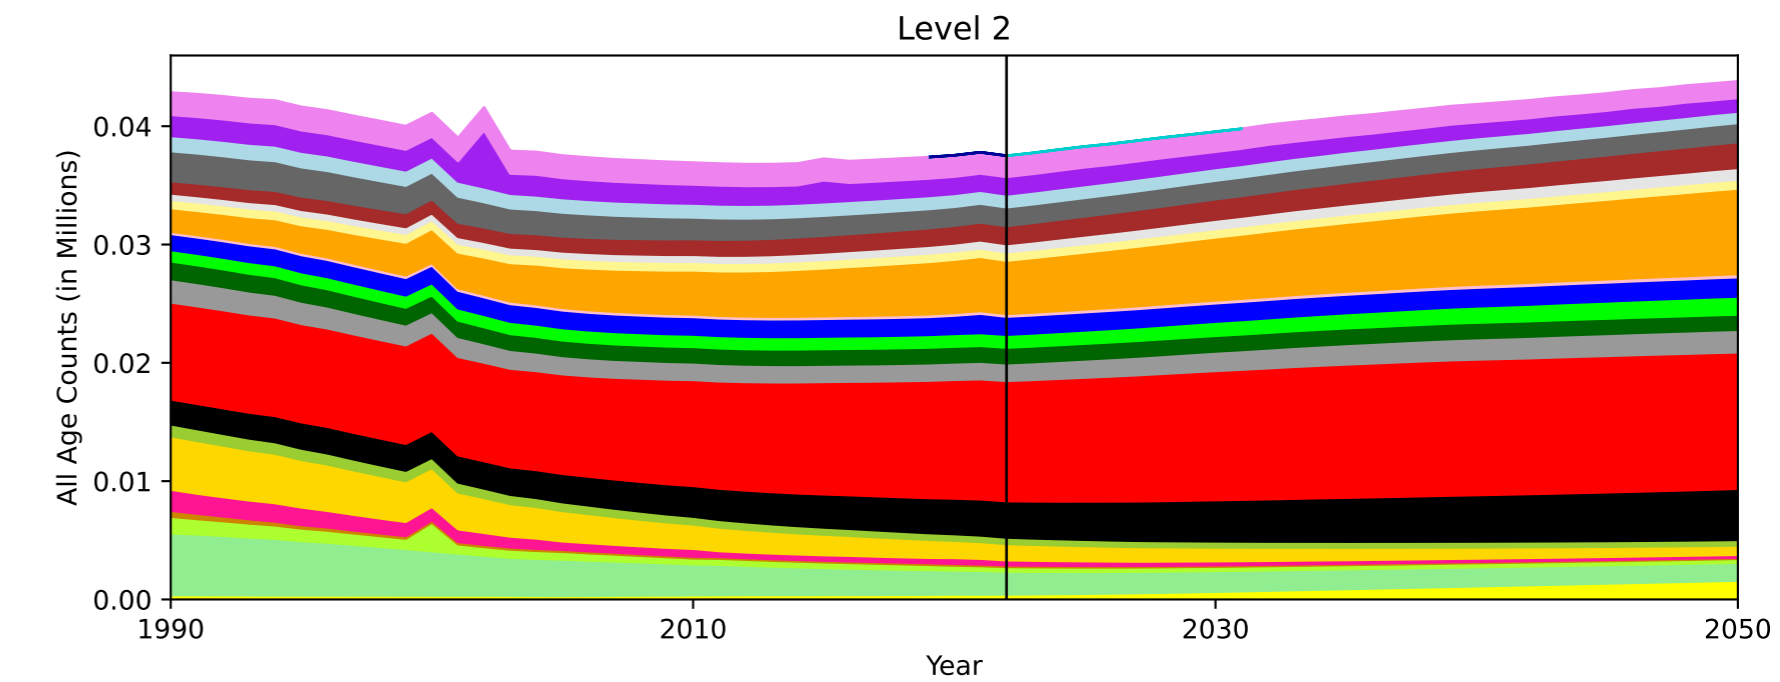

# Nauru

Level 1

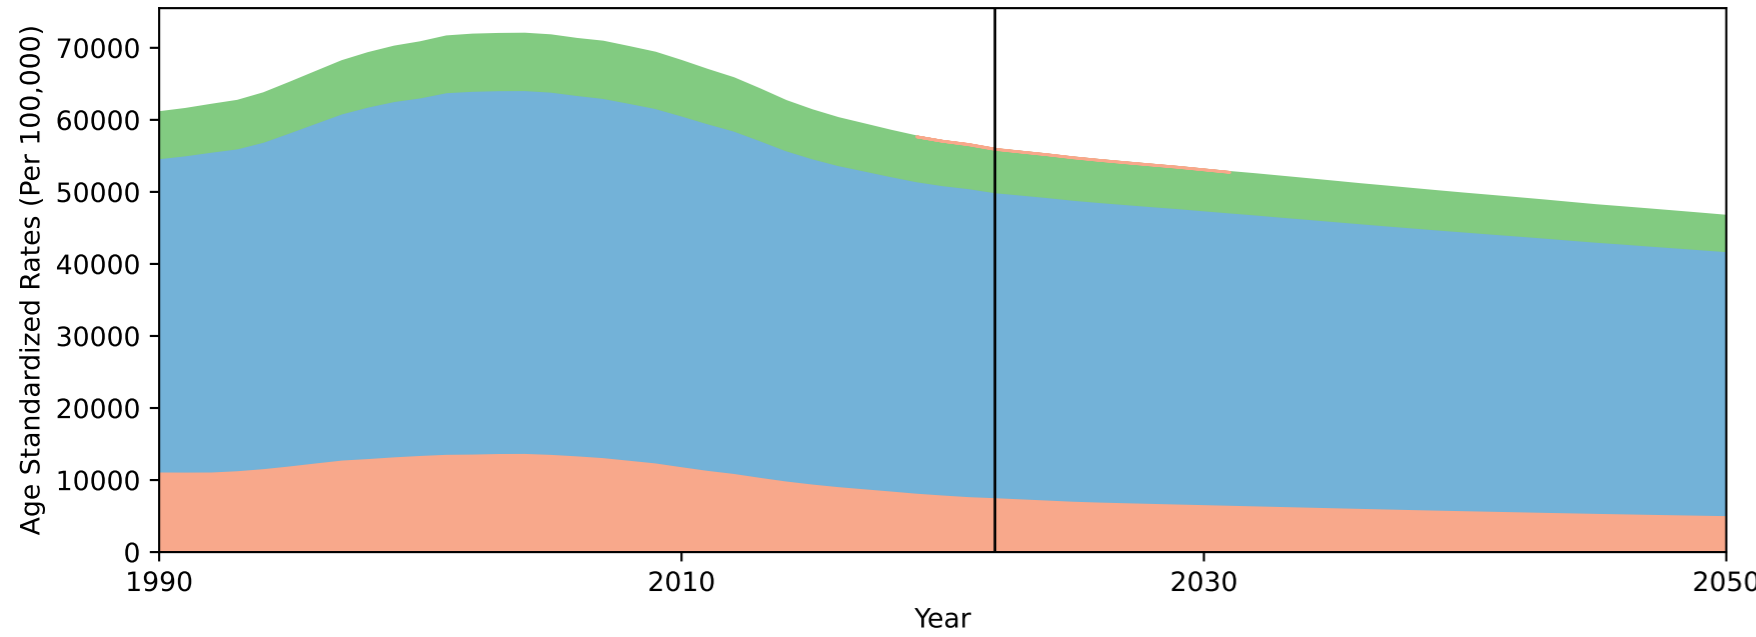

Level 2

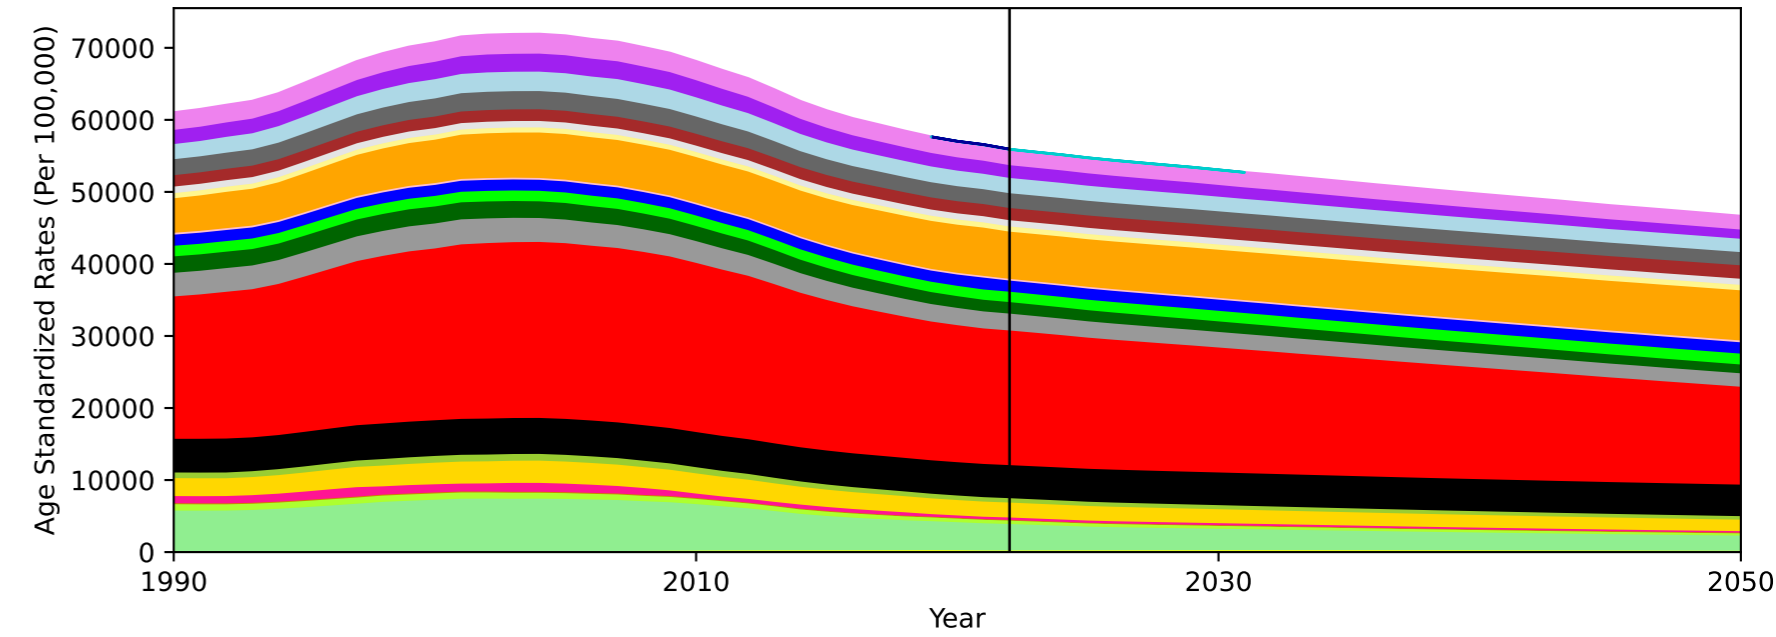

Level 1

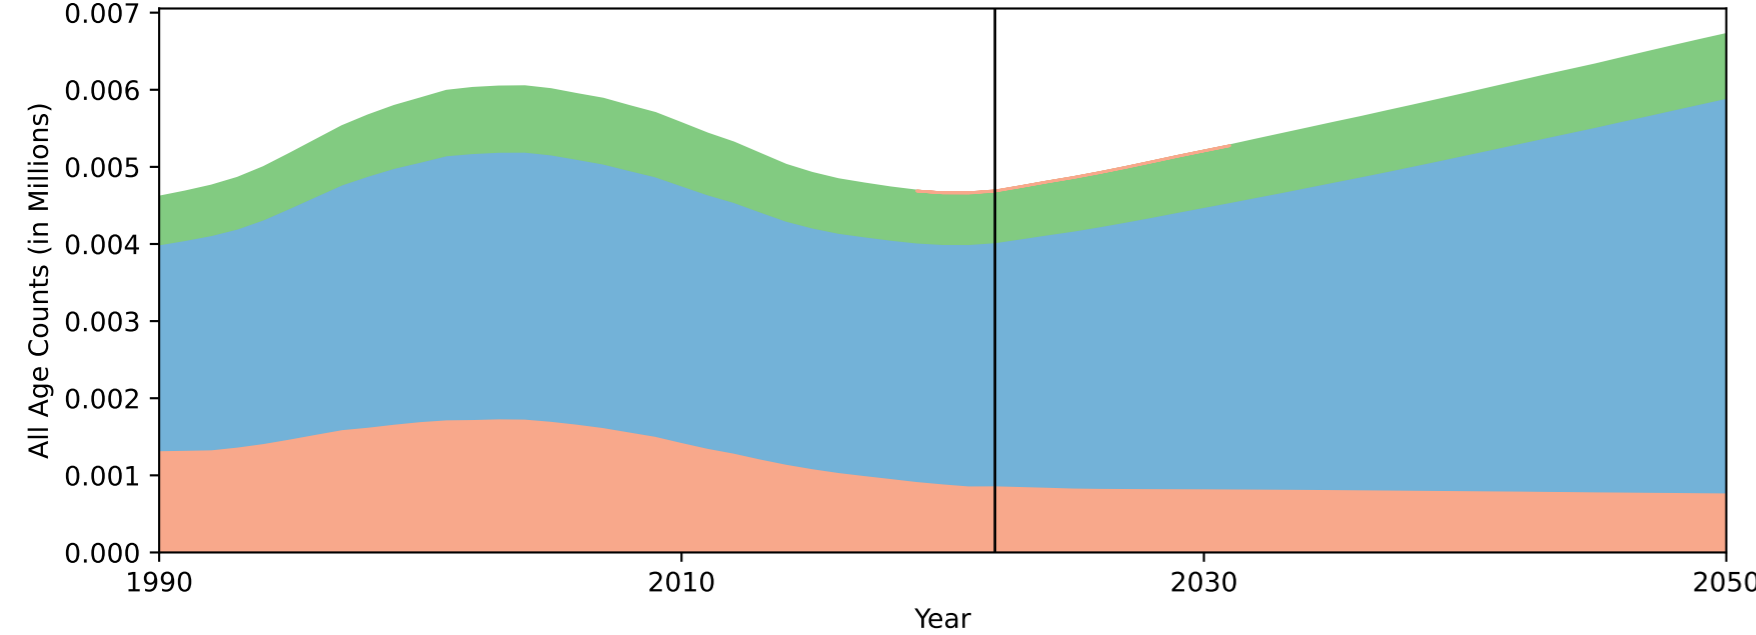

Level 2

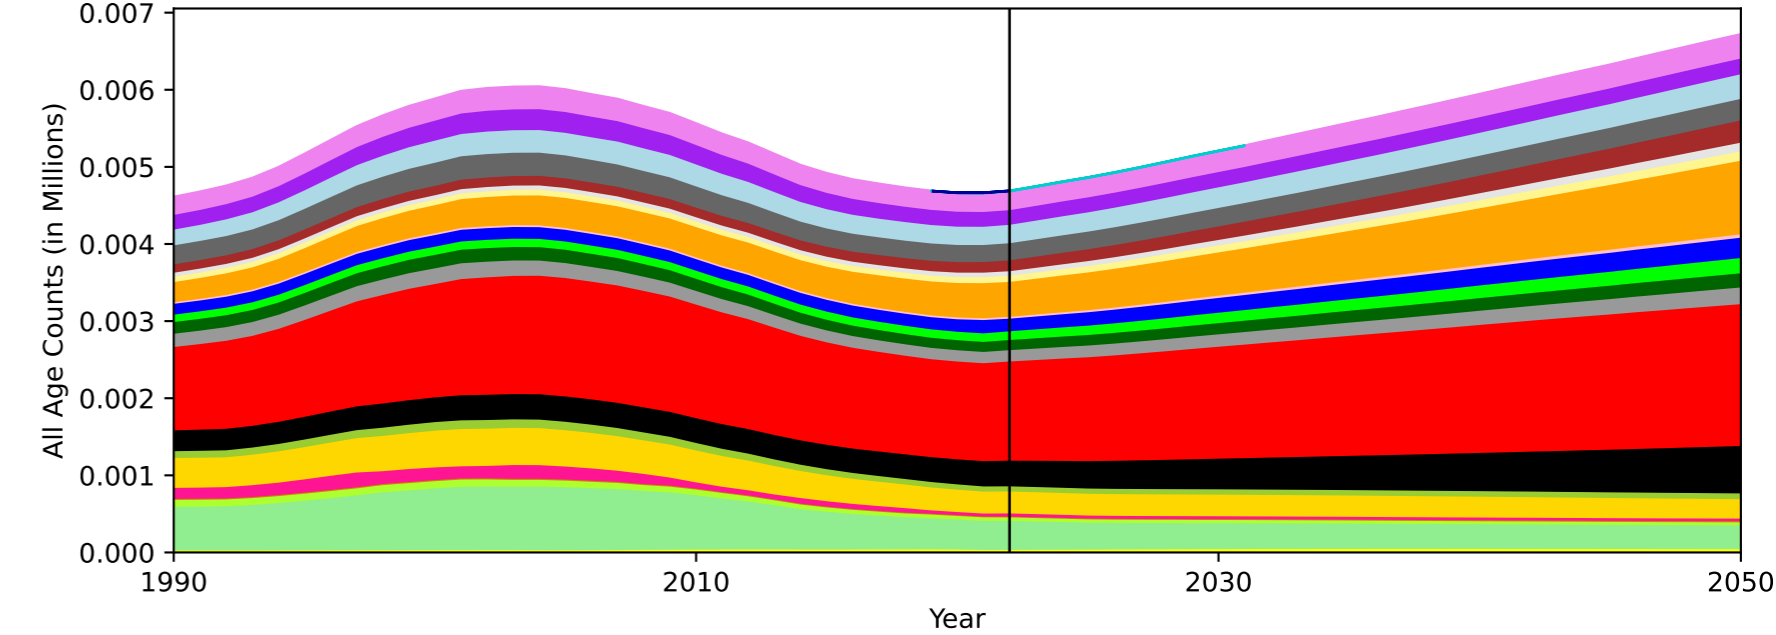

# Niue

Level 1

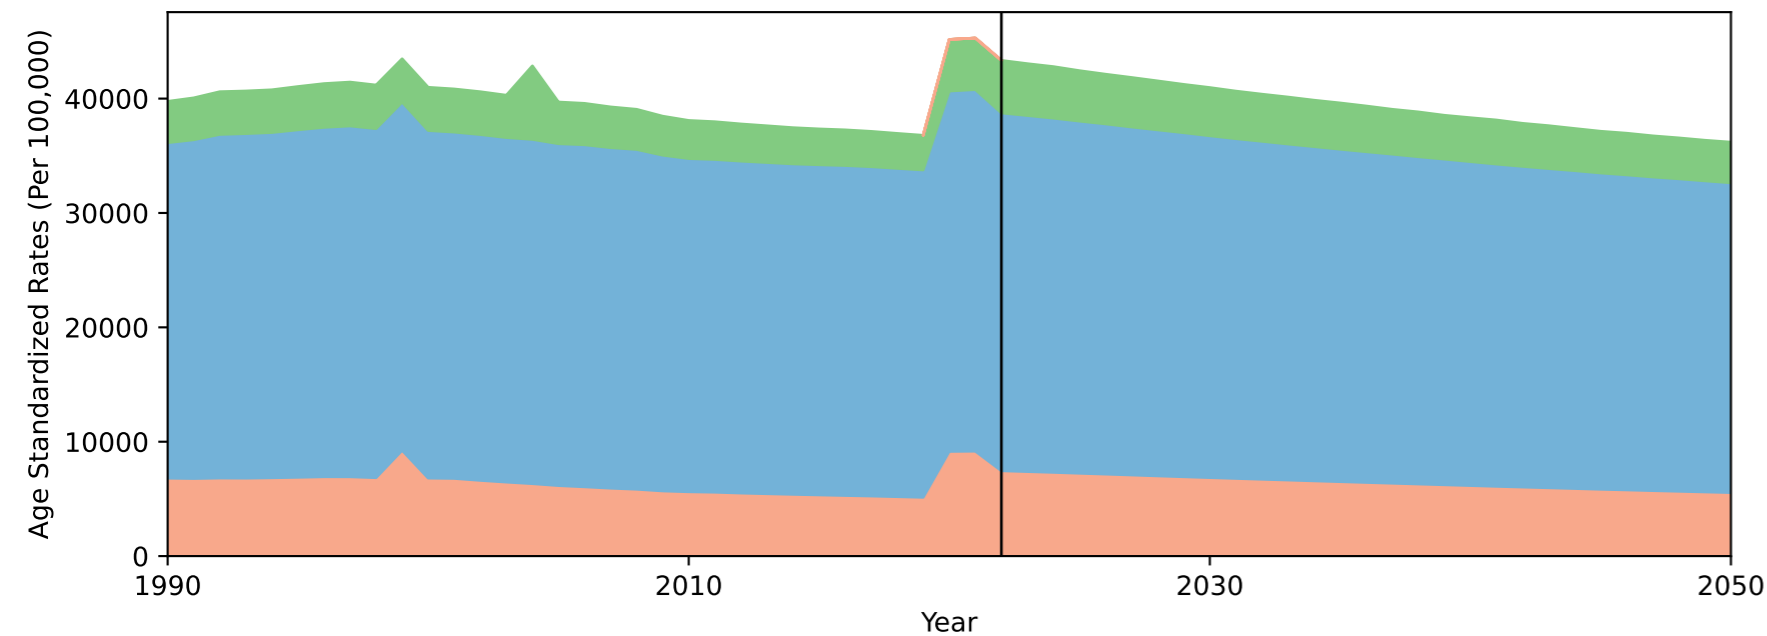

Level 2

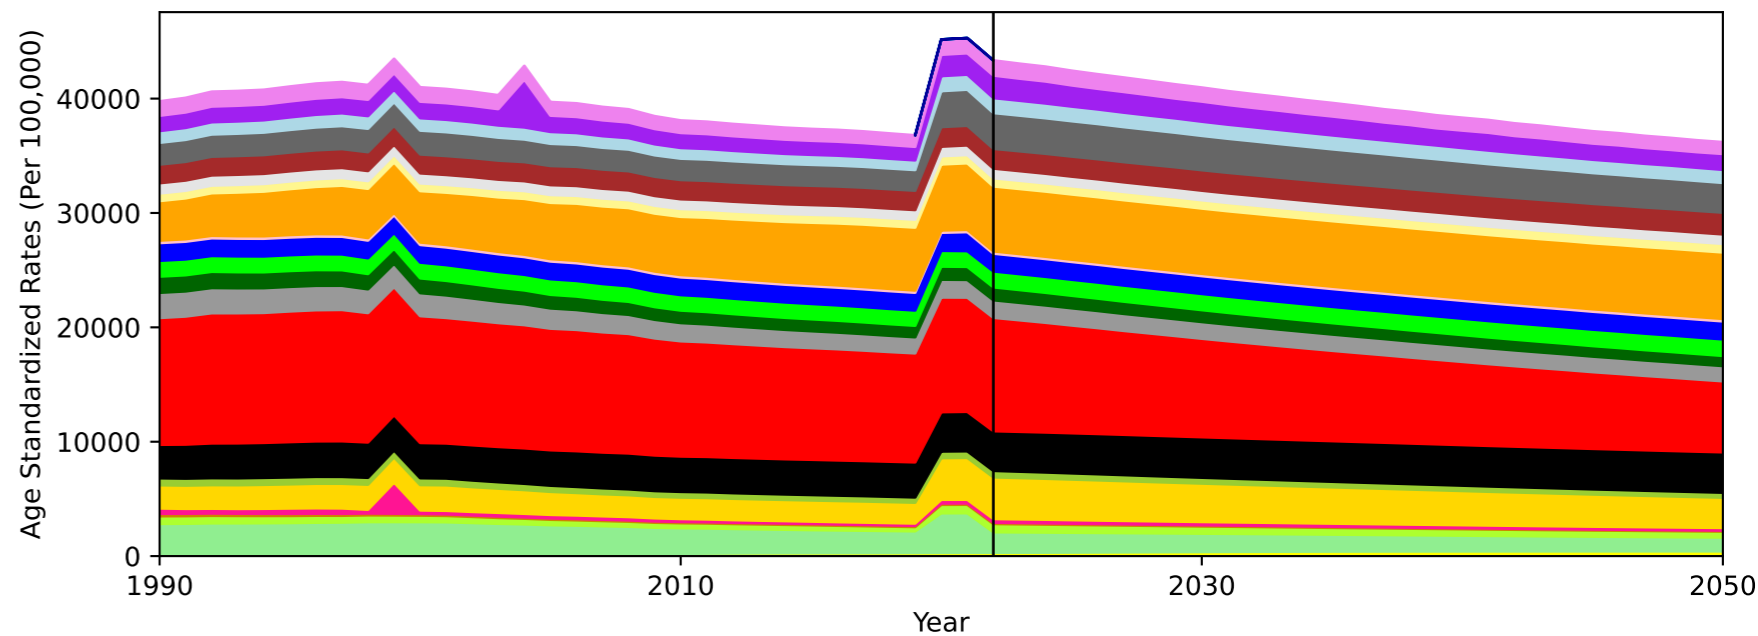

Level 1

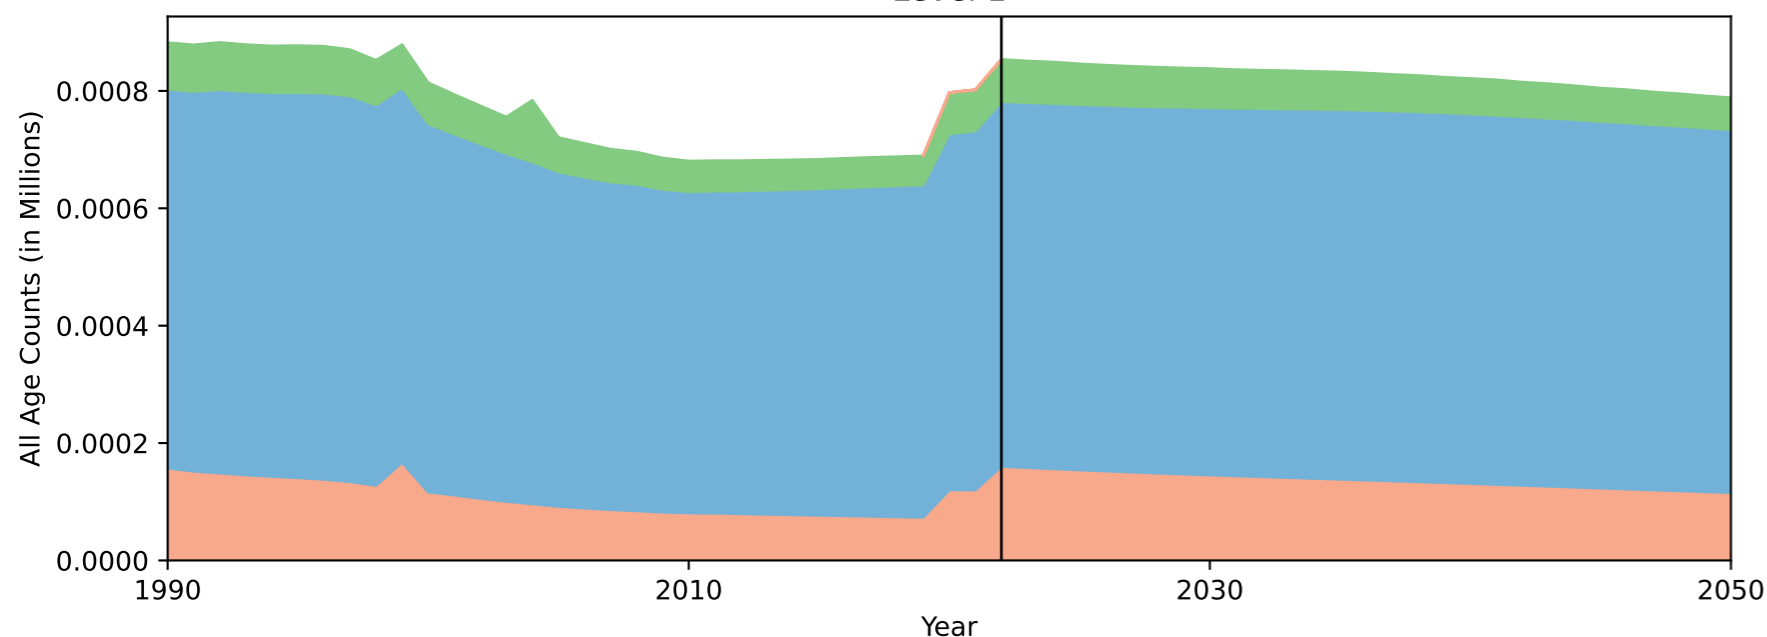

Level 2

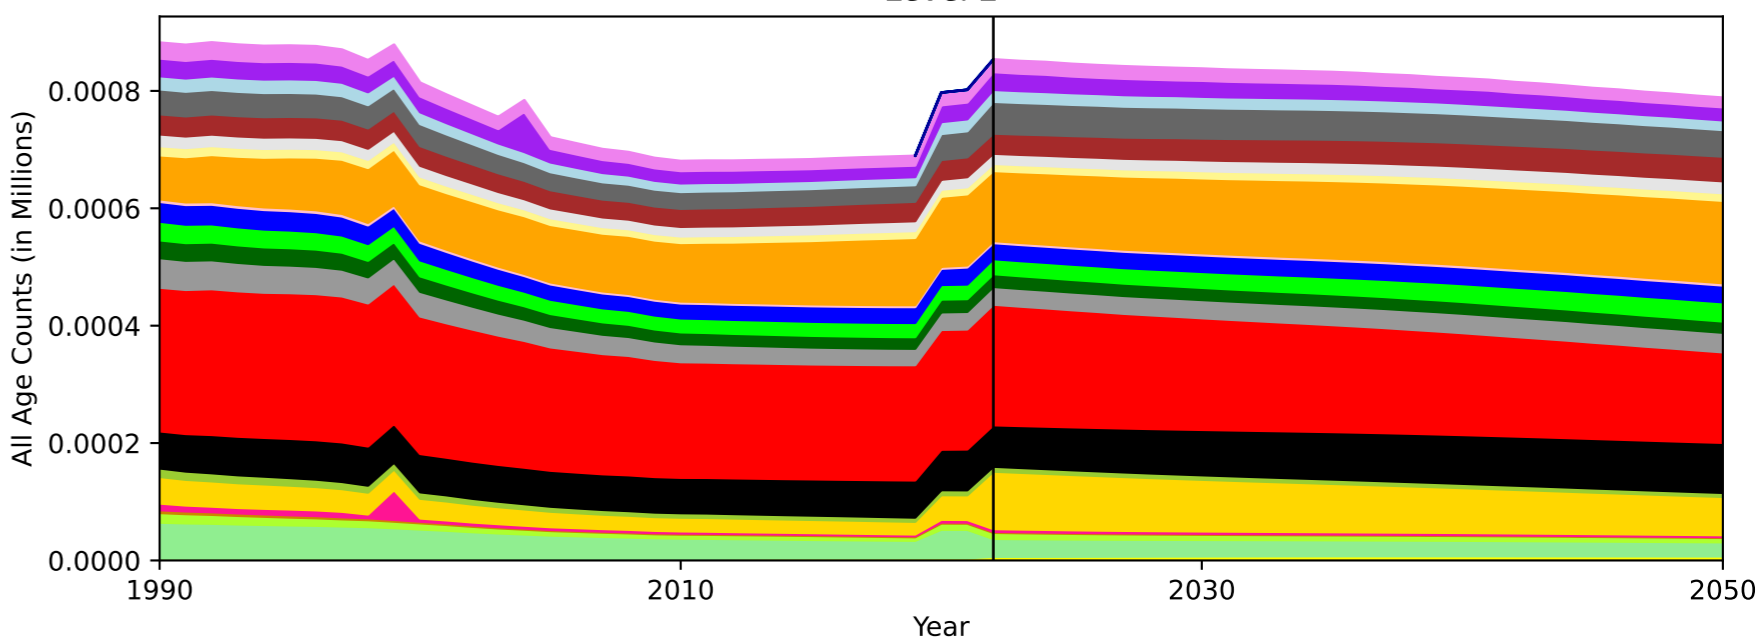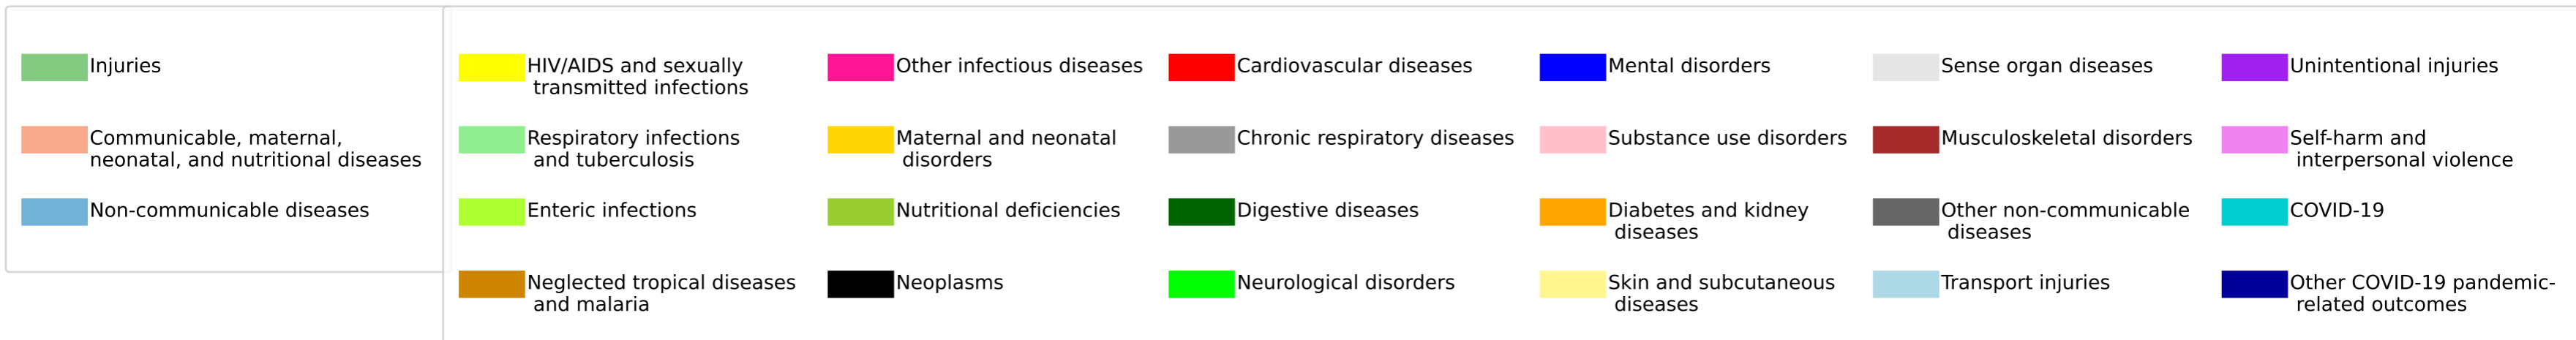

# Northern Mariana Islands

Level 1

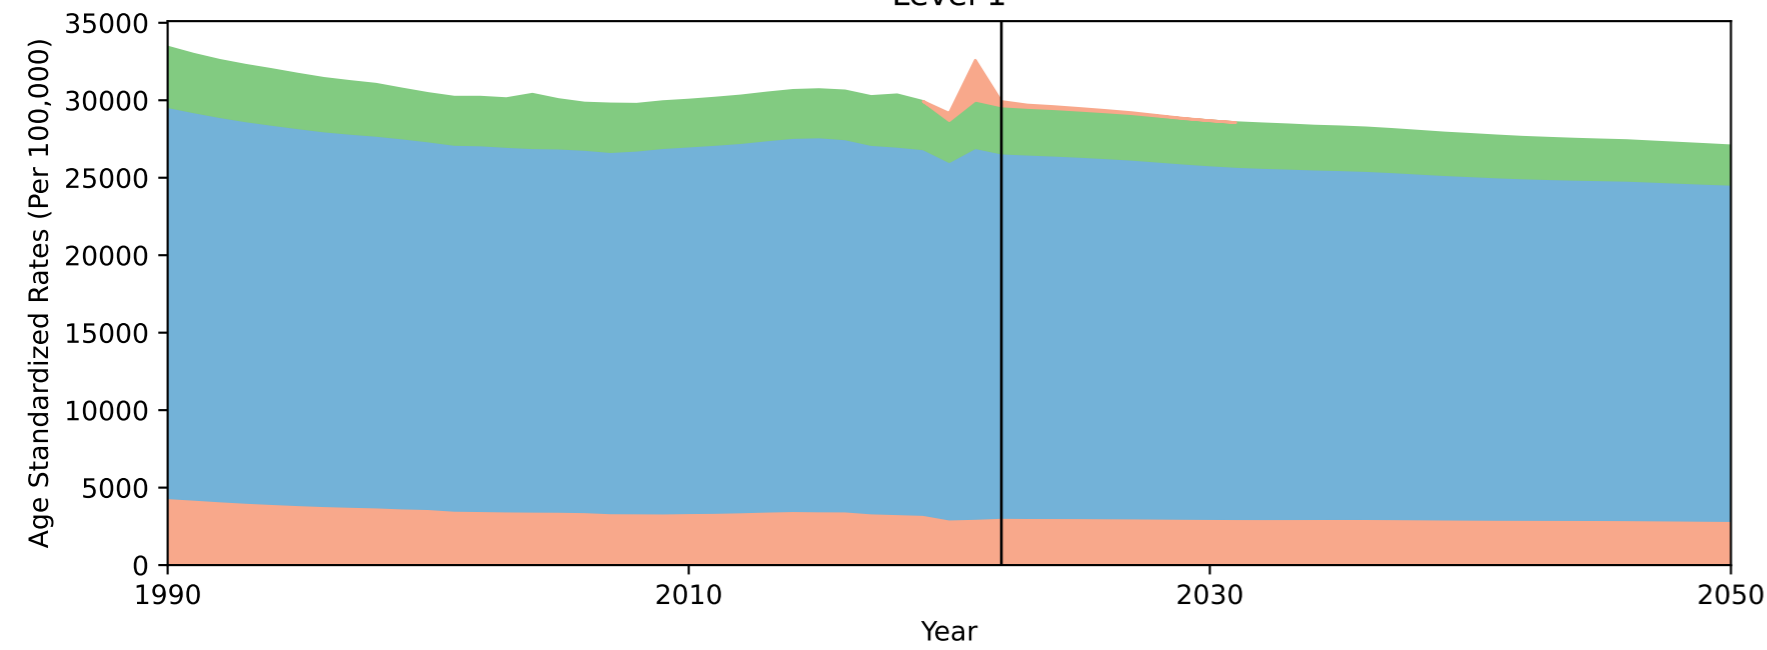

Level 2

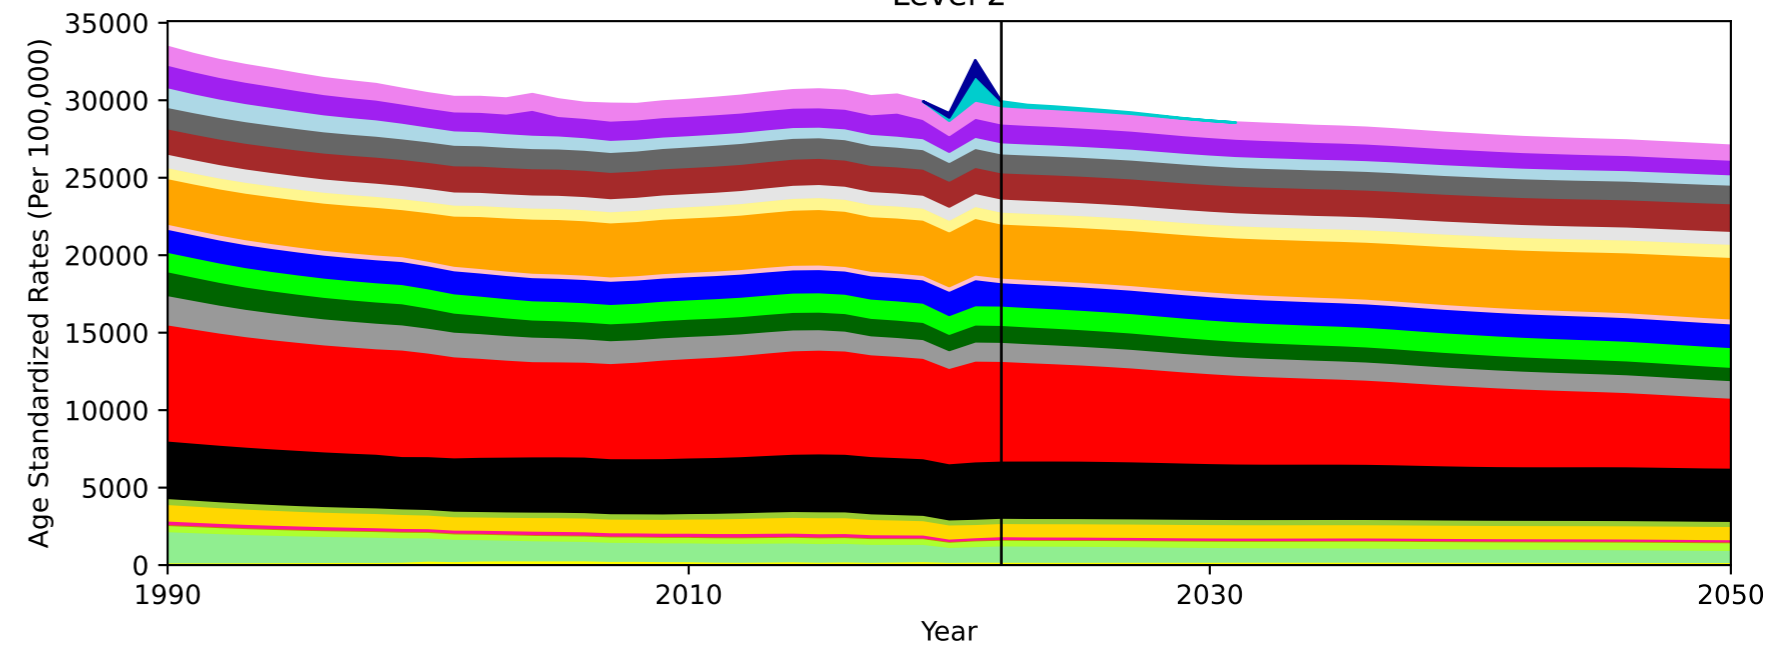

Level 1

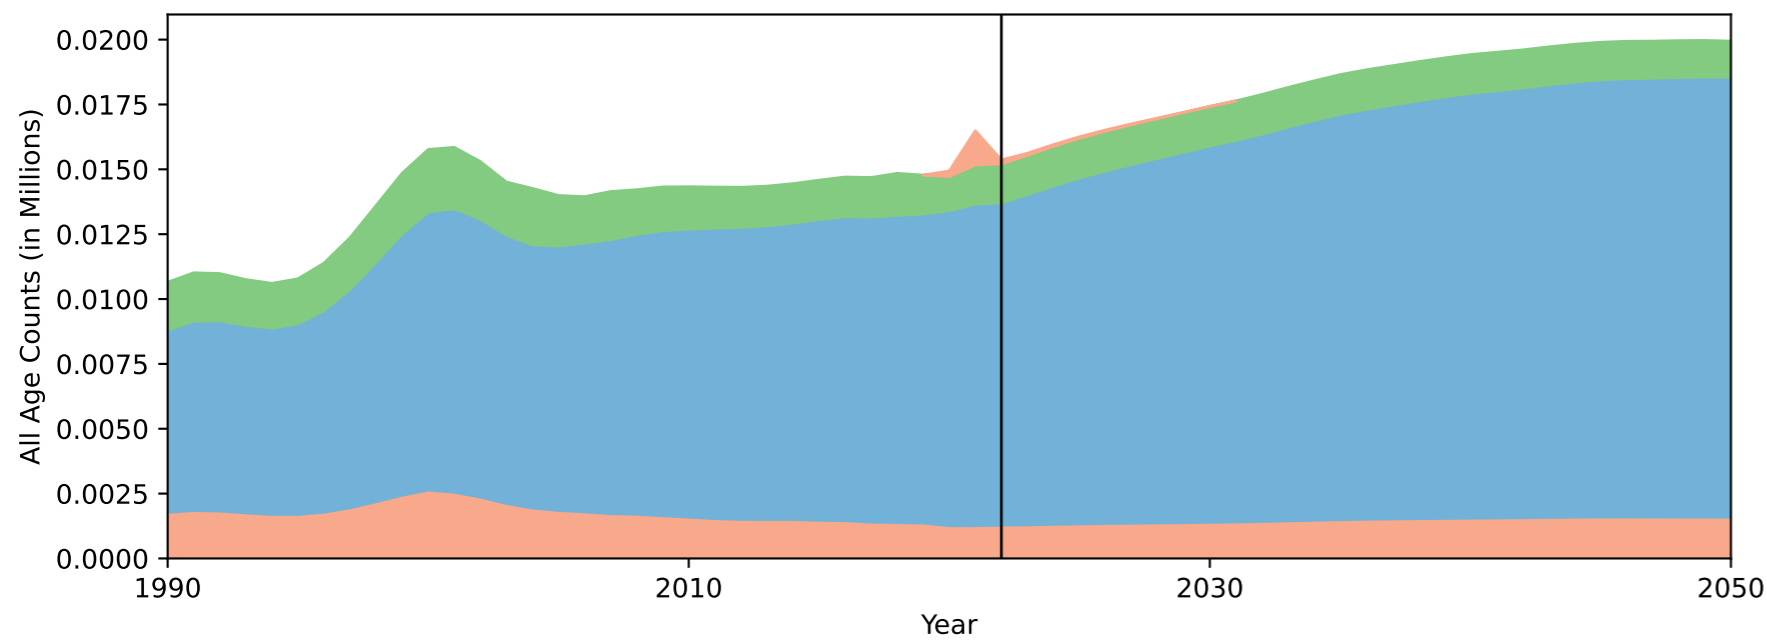

Level 2

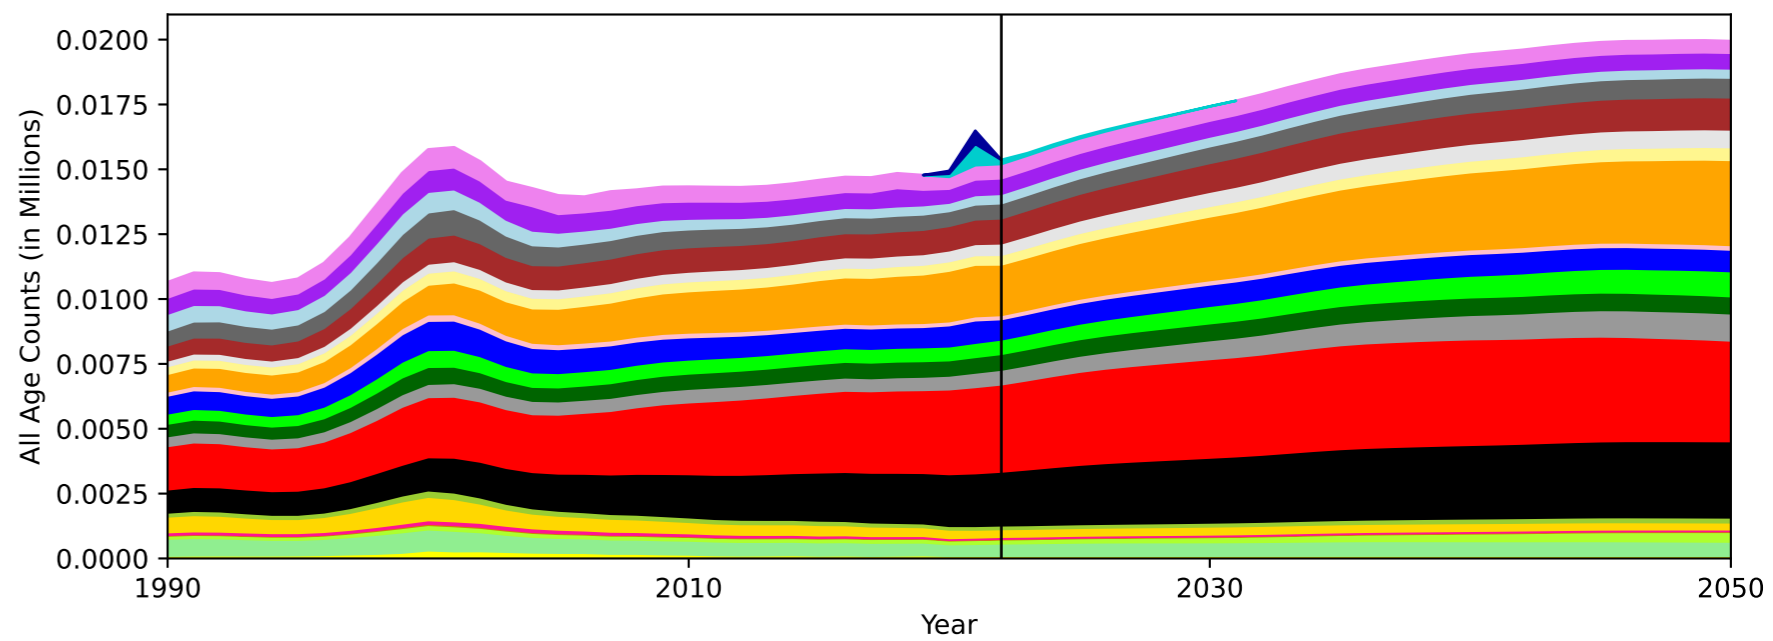

# Palau

Level 1

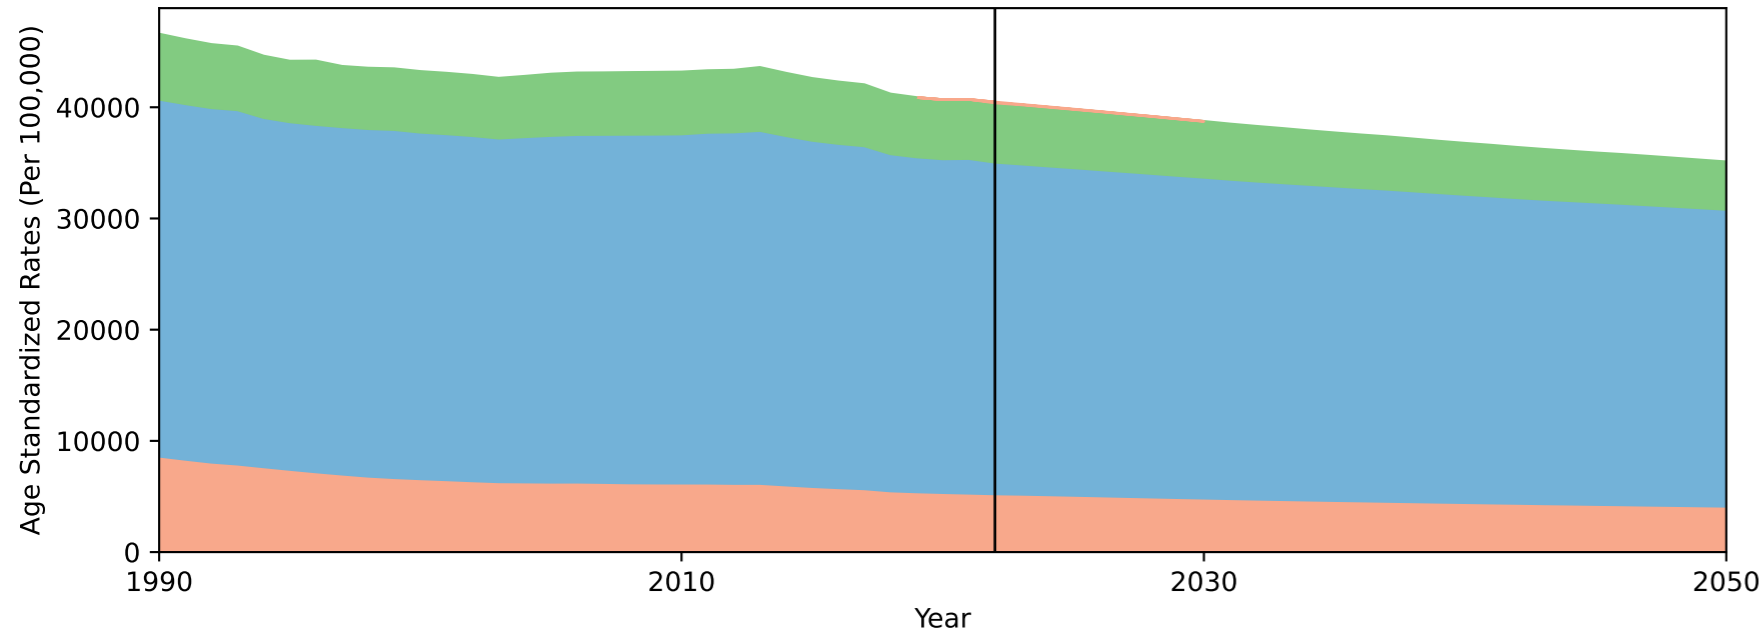

Level 2

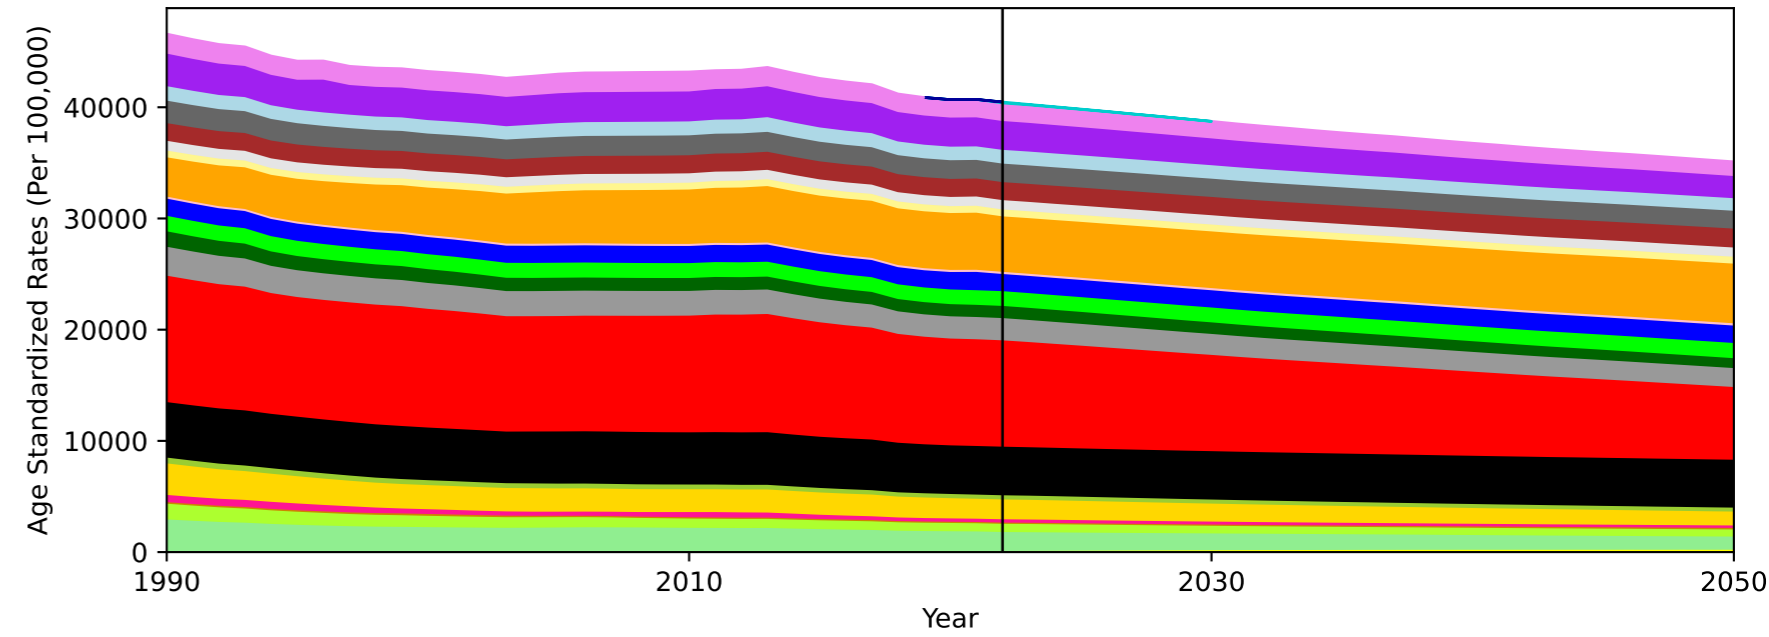

Level 1

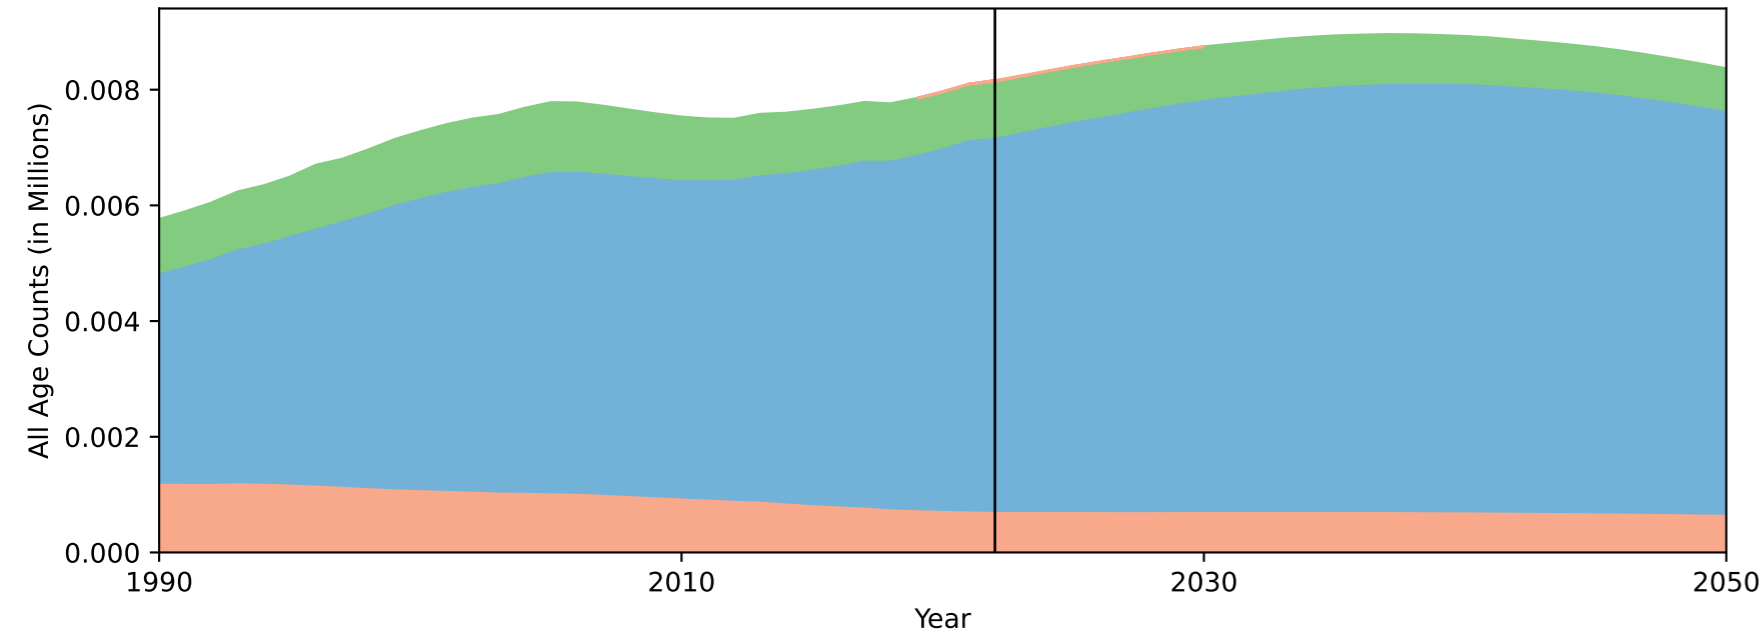

Level 2

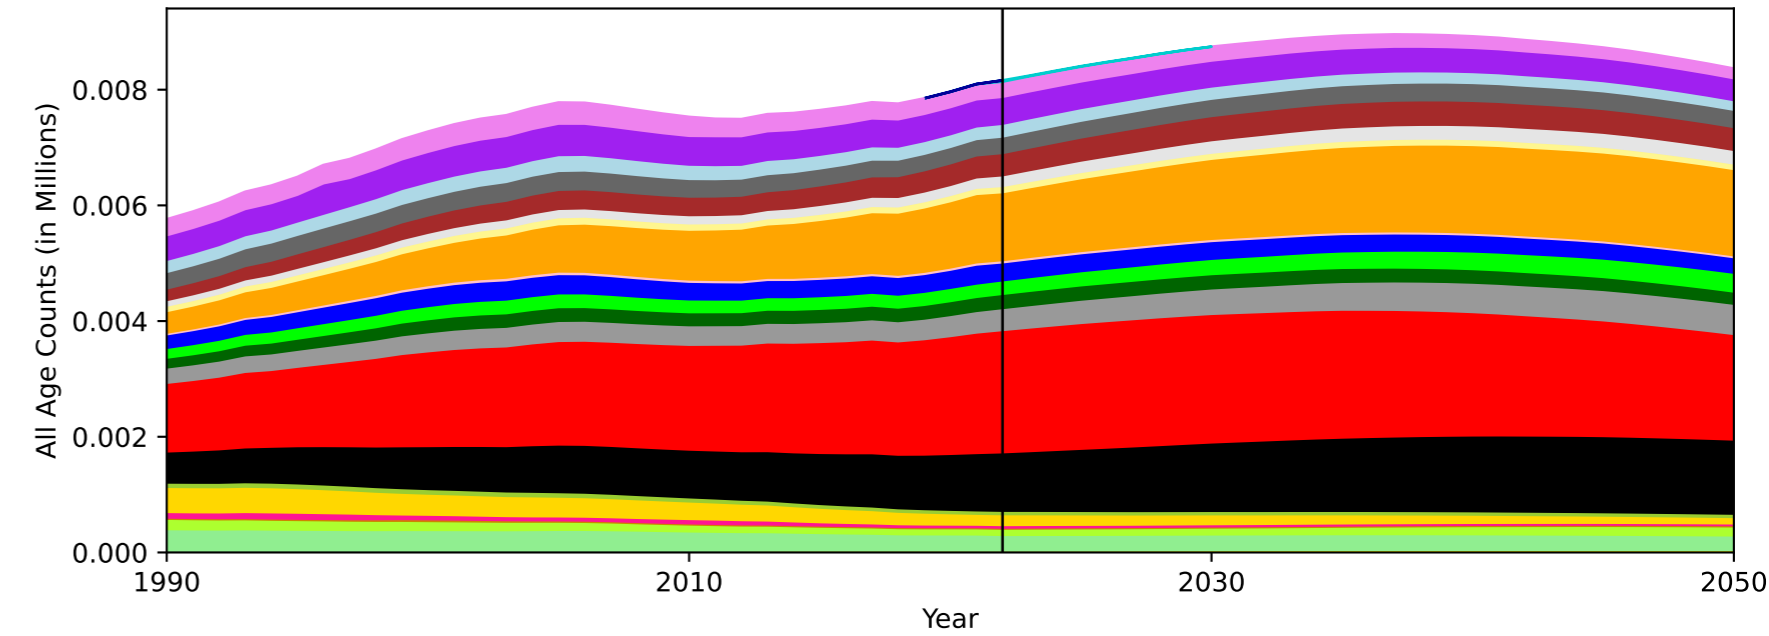

# Papua New Guinea

Level 1

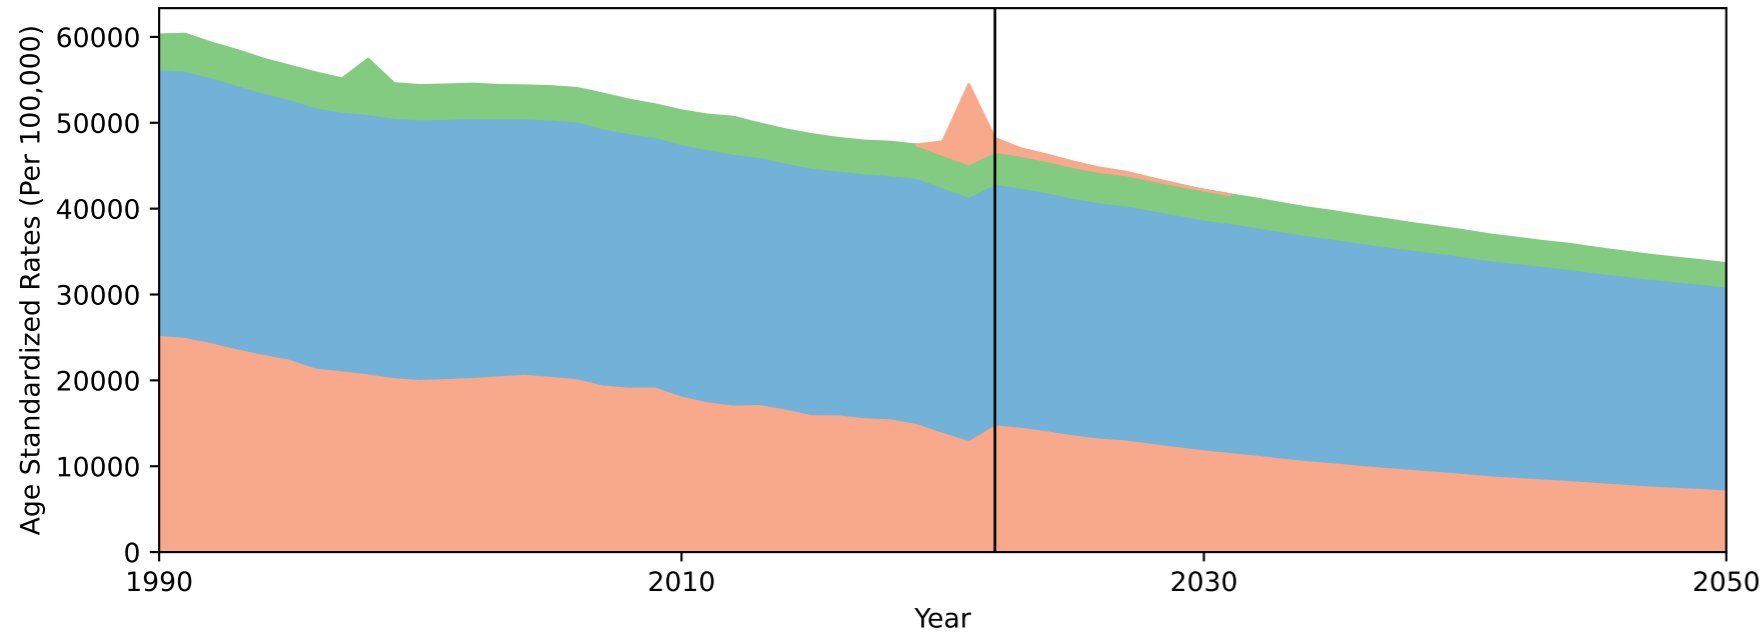

Level 2

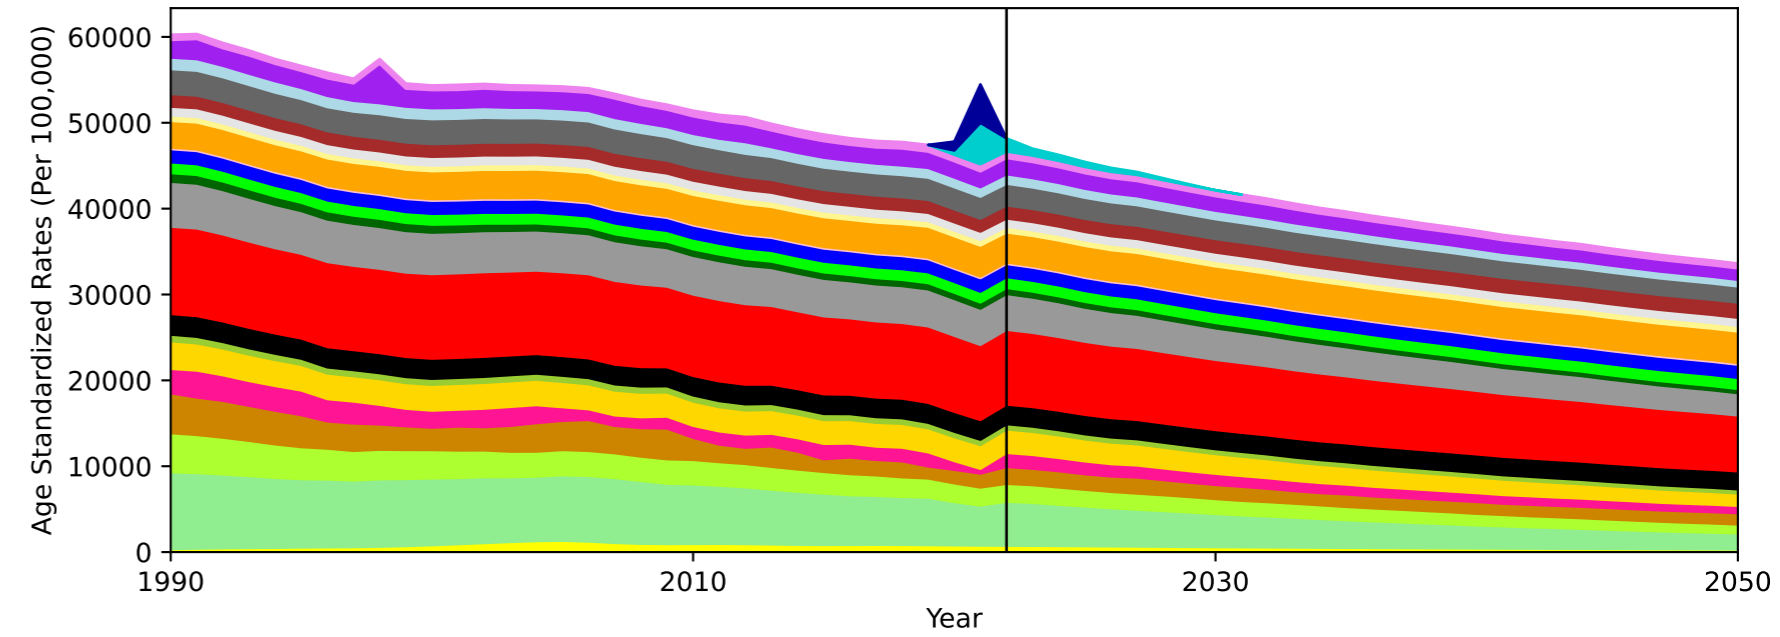

Level 1

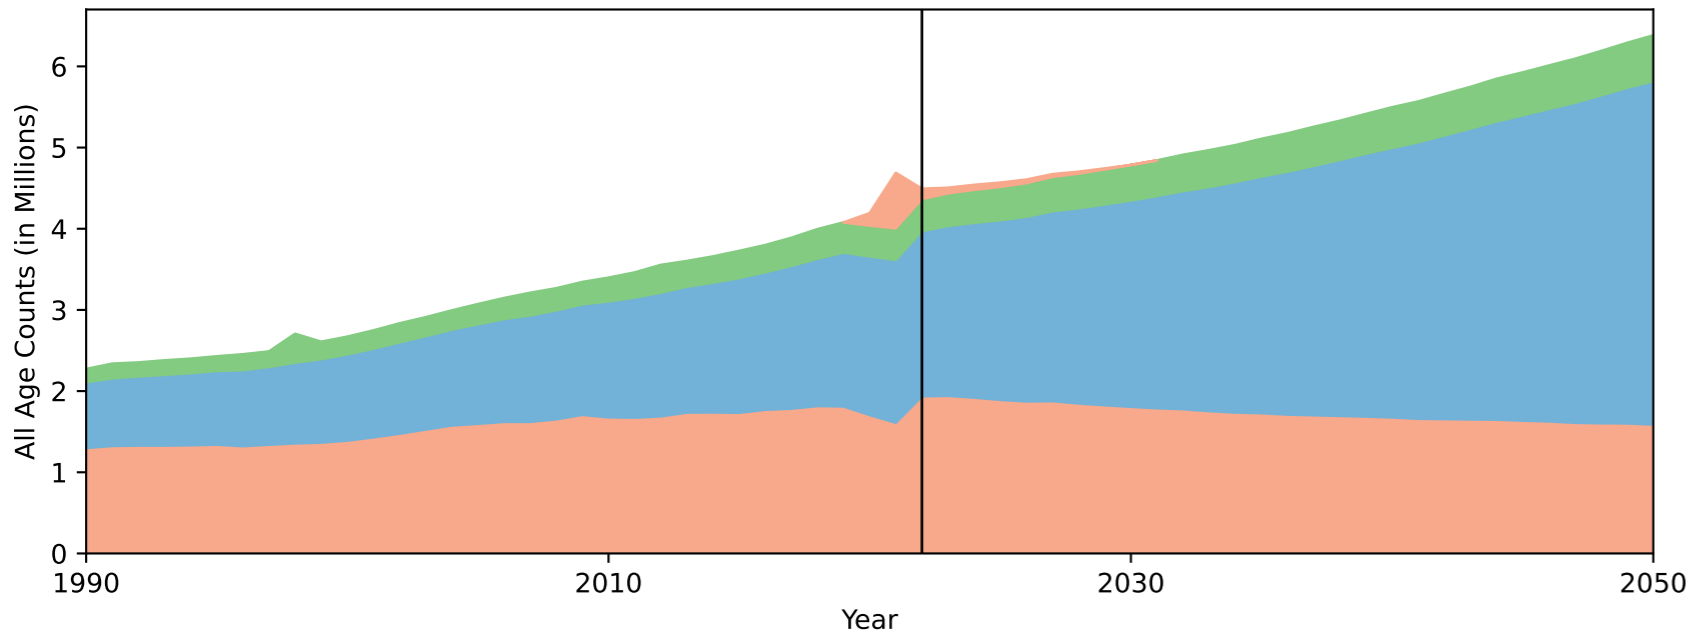

Level 2

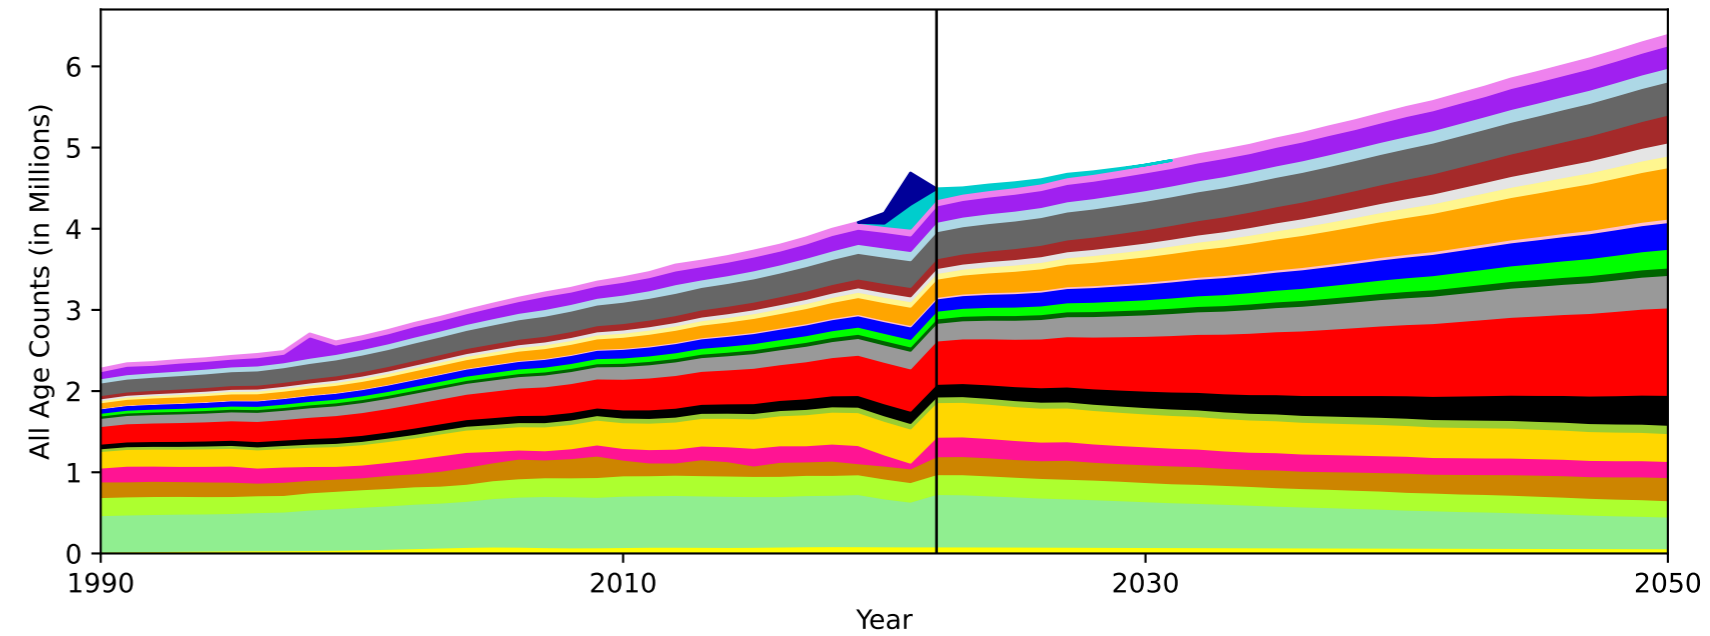



# Samoa

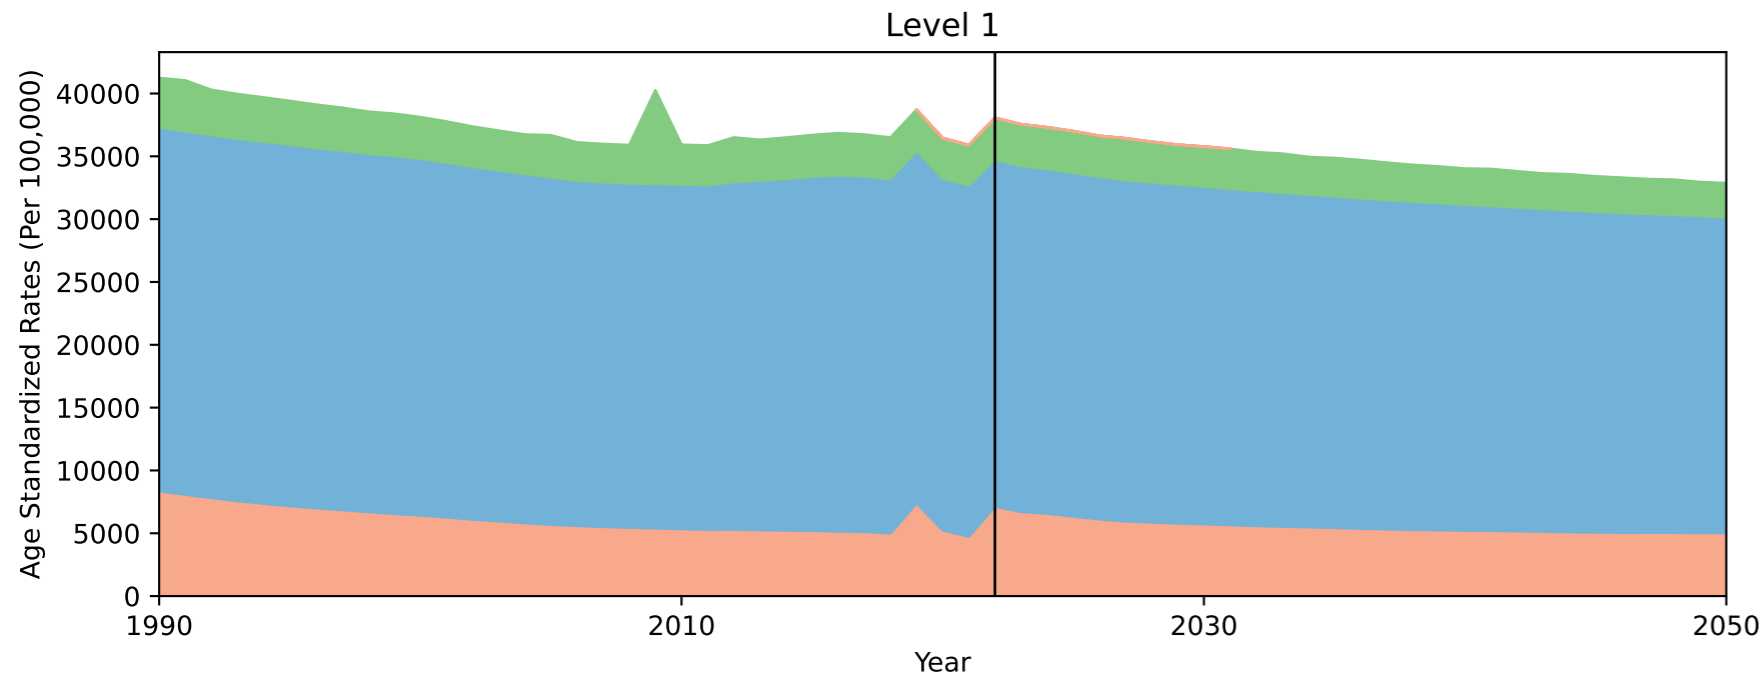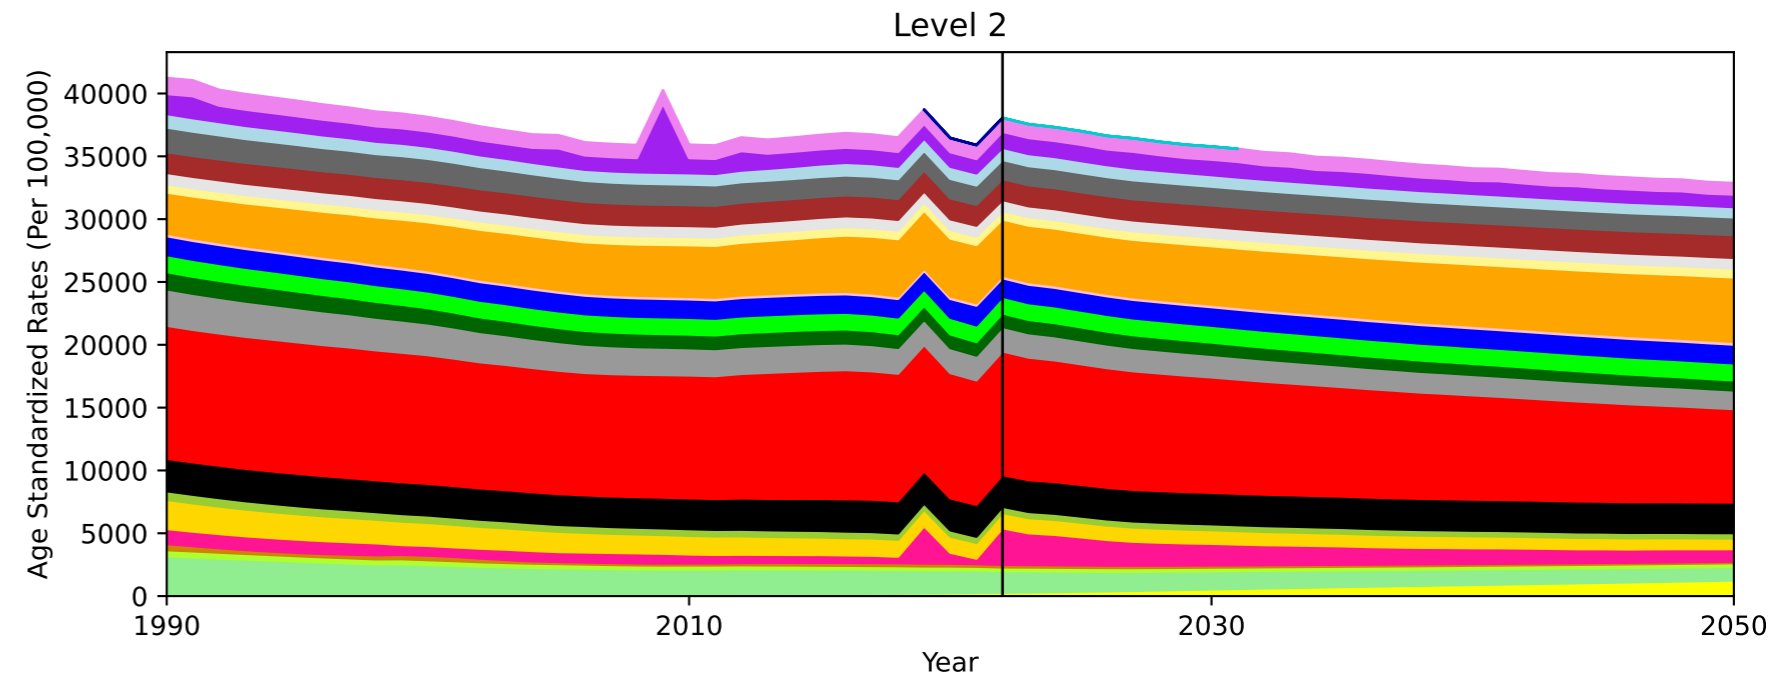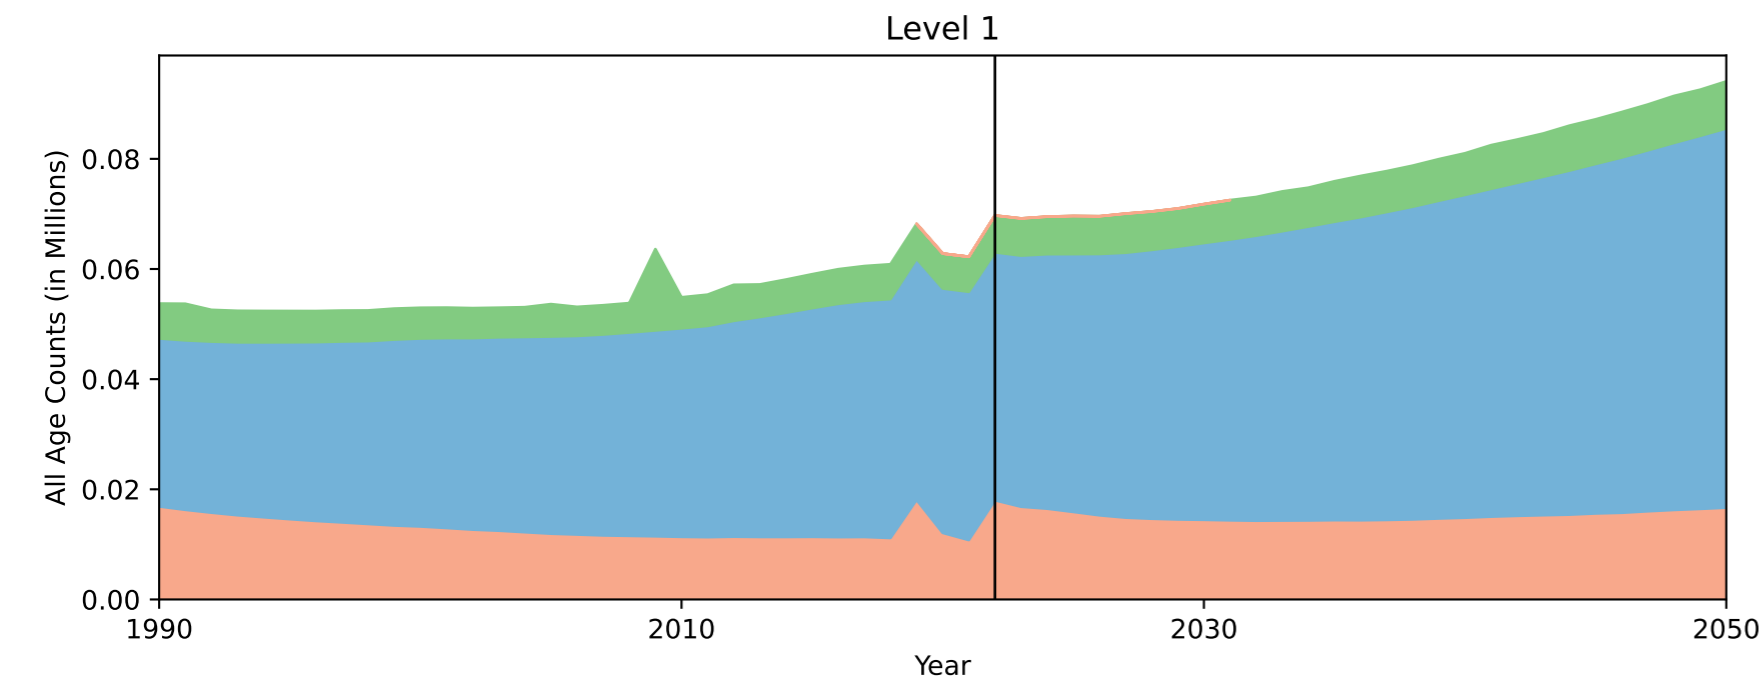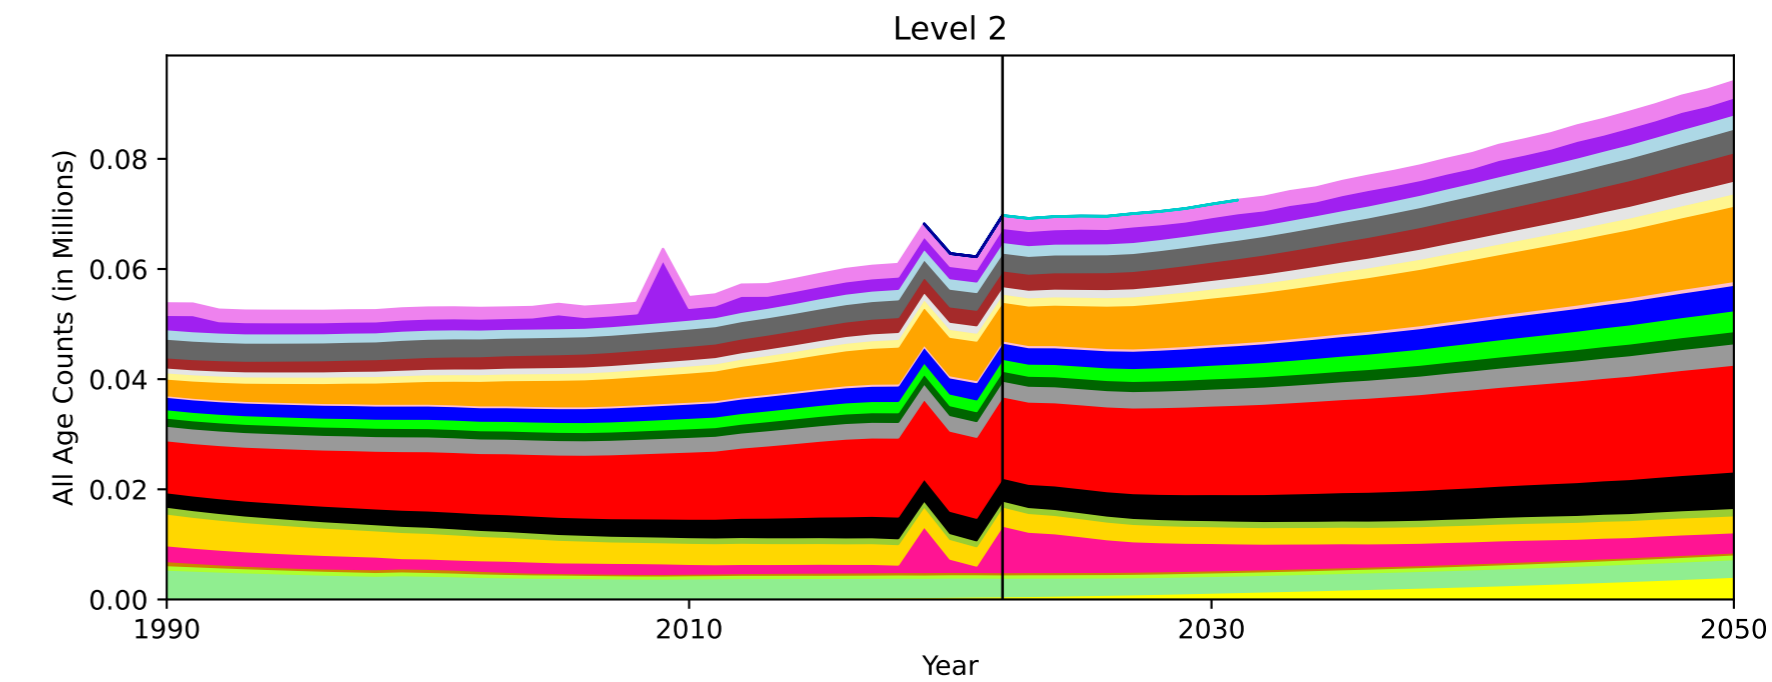

# Solomon Islands

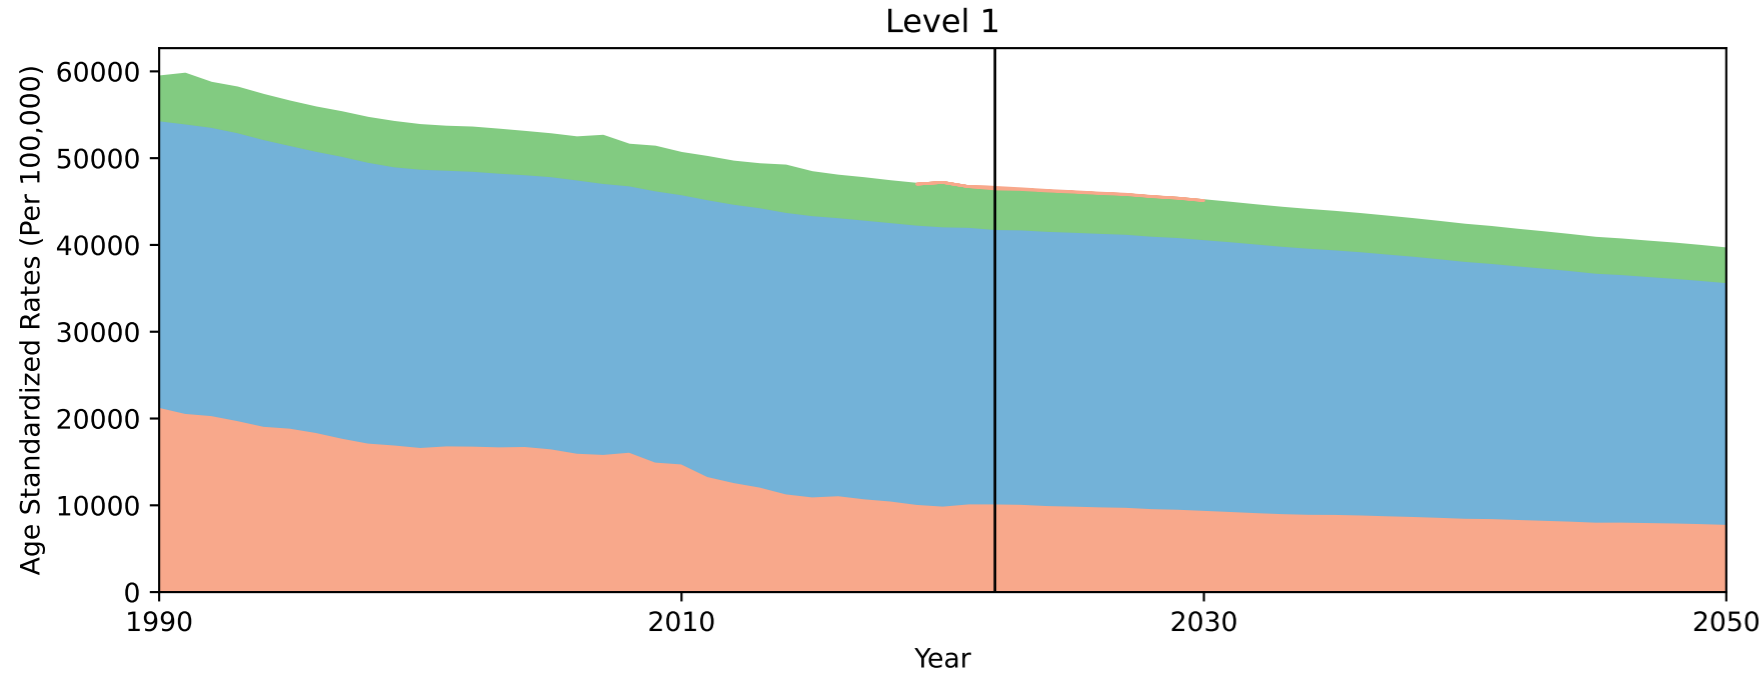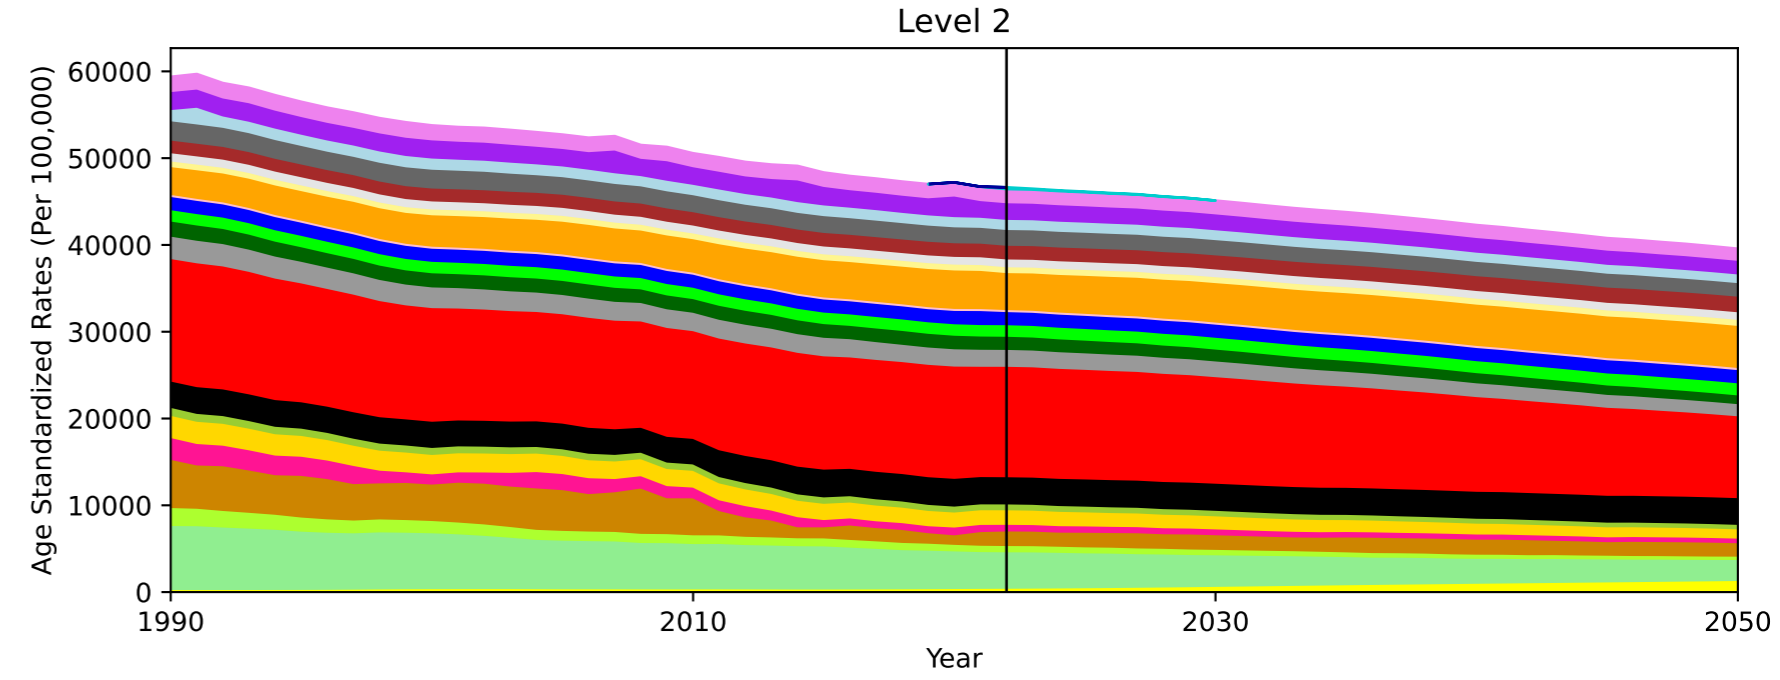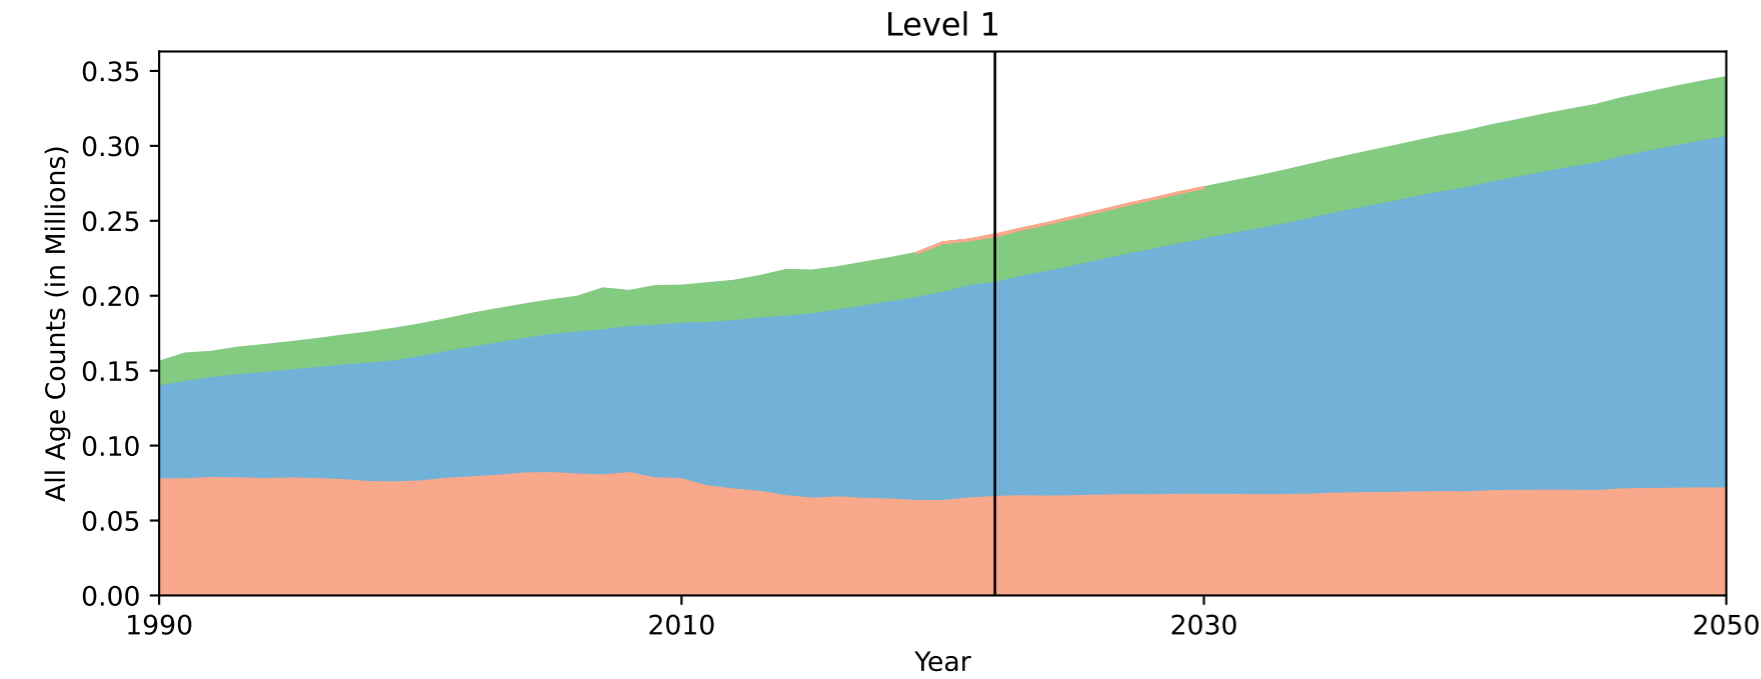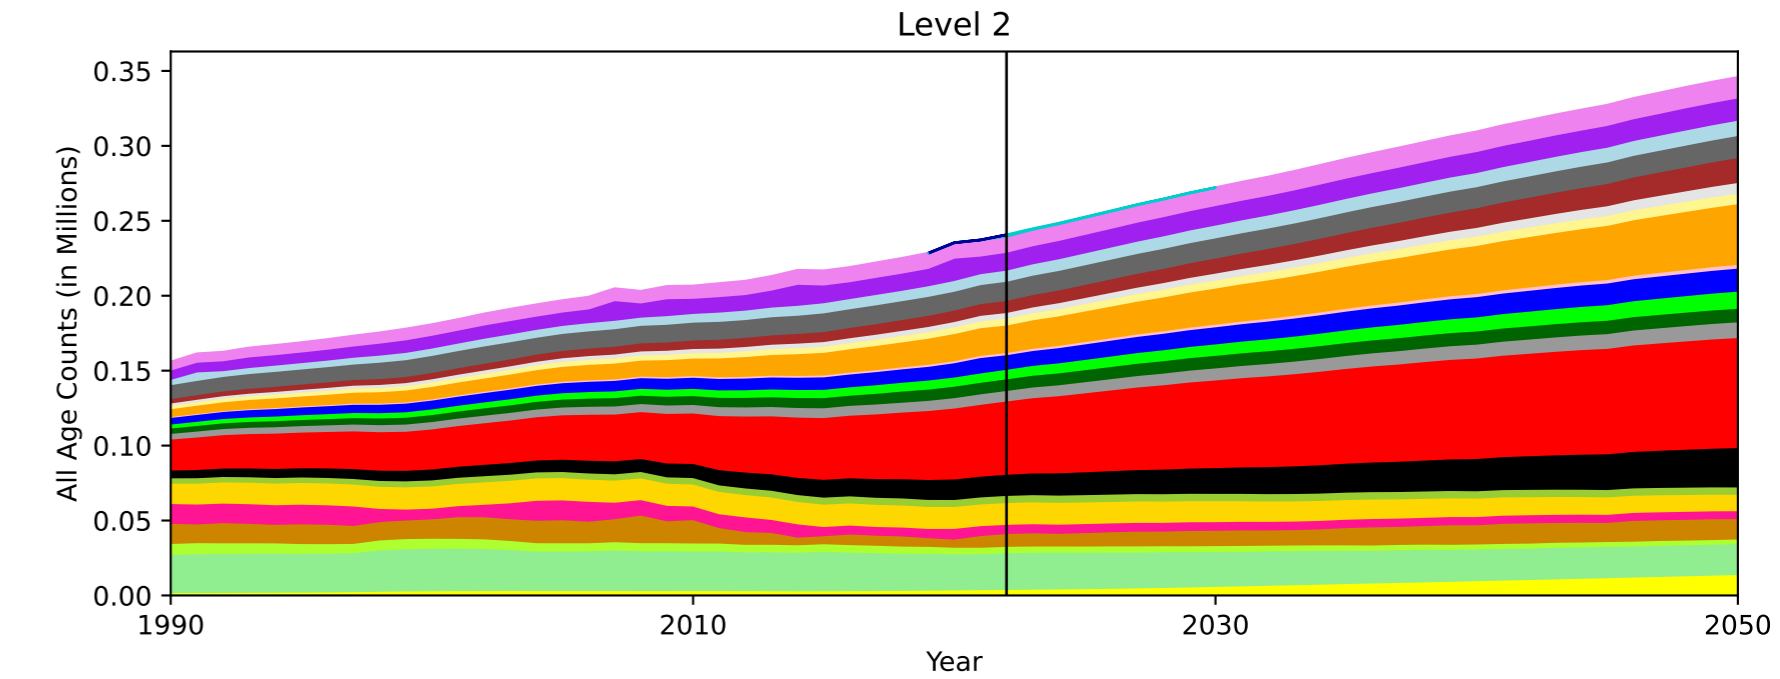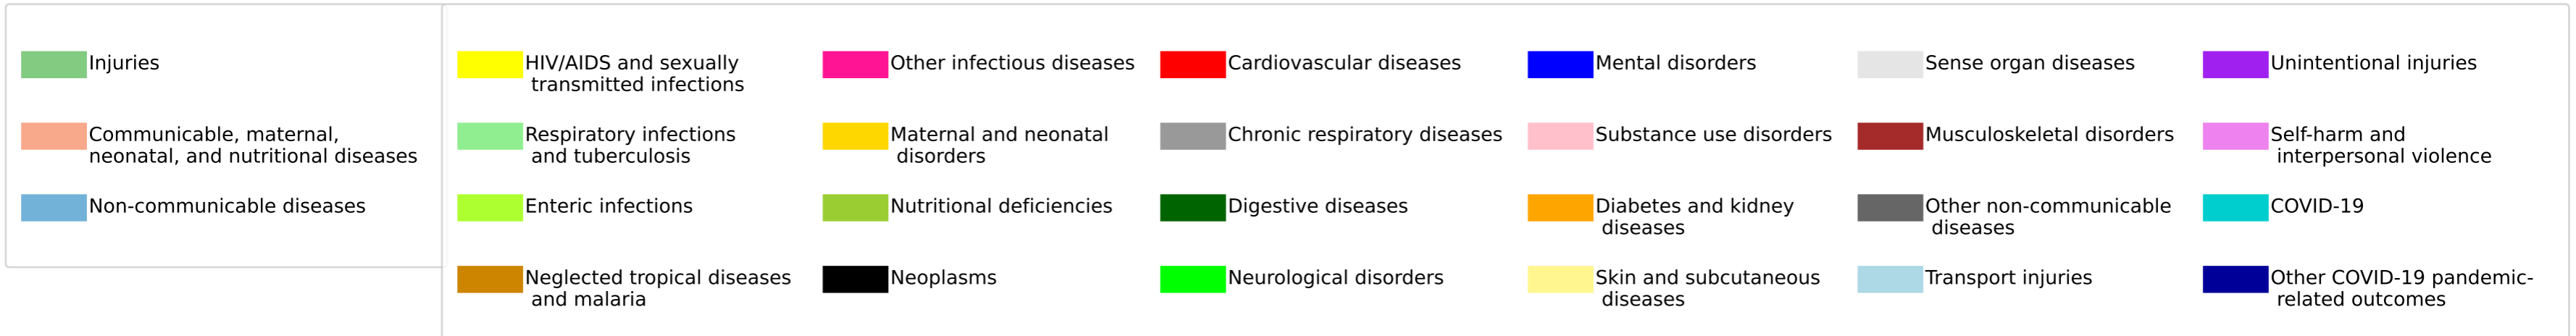

# Tokelau

Level 1

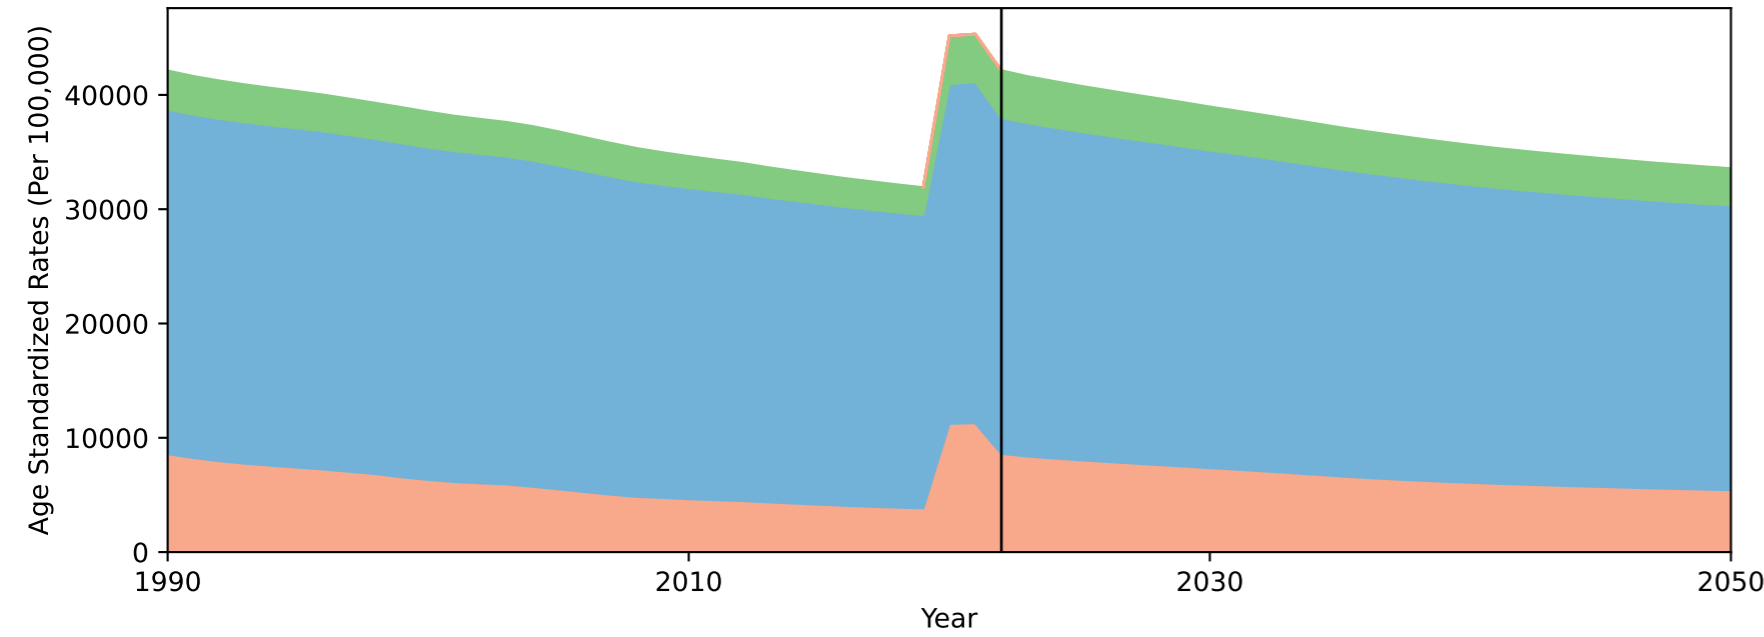

Level 2

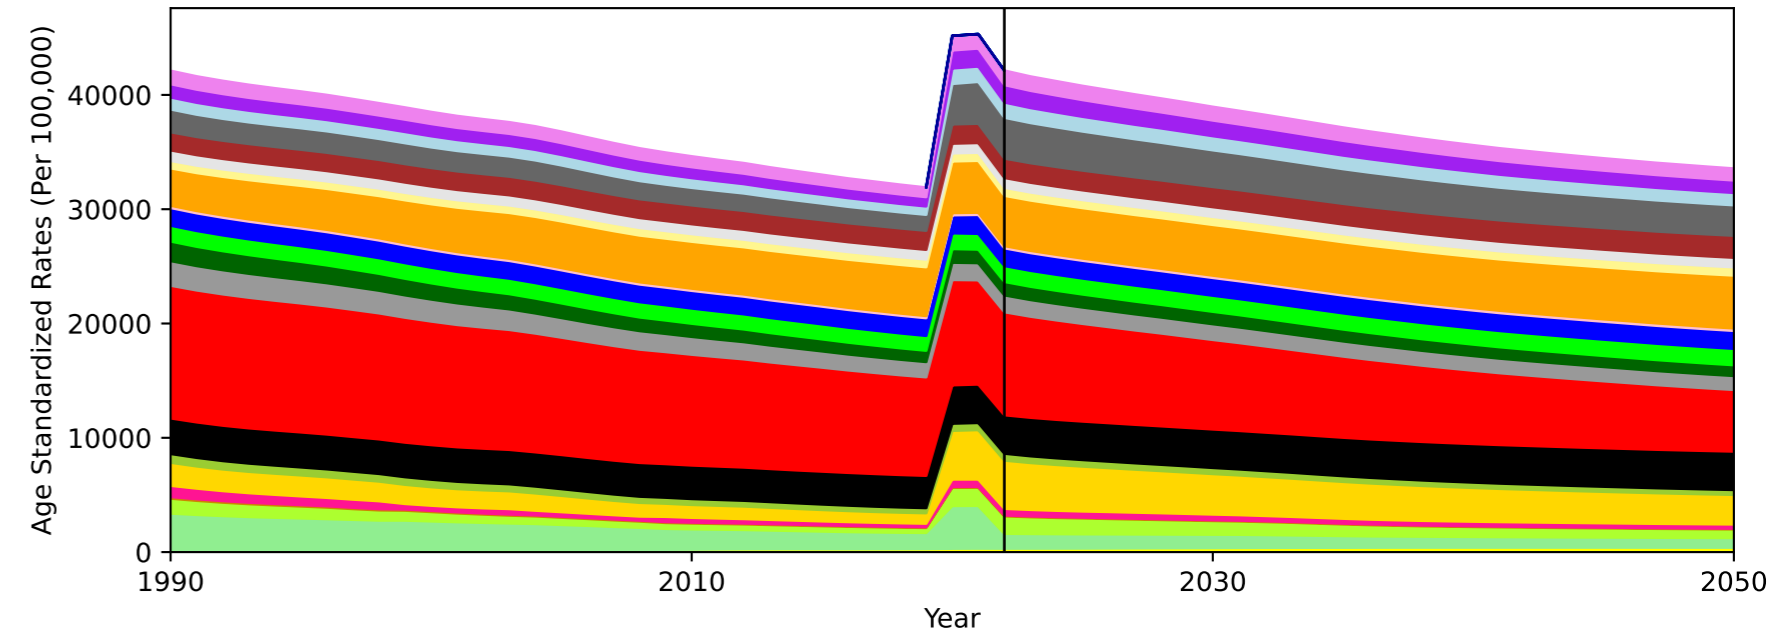

Level 1

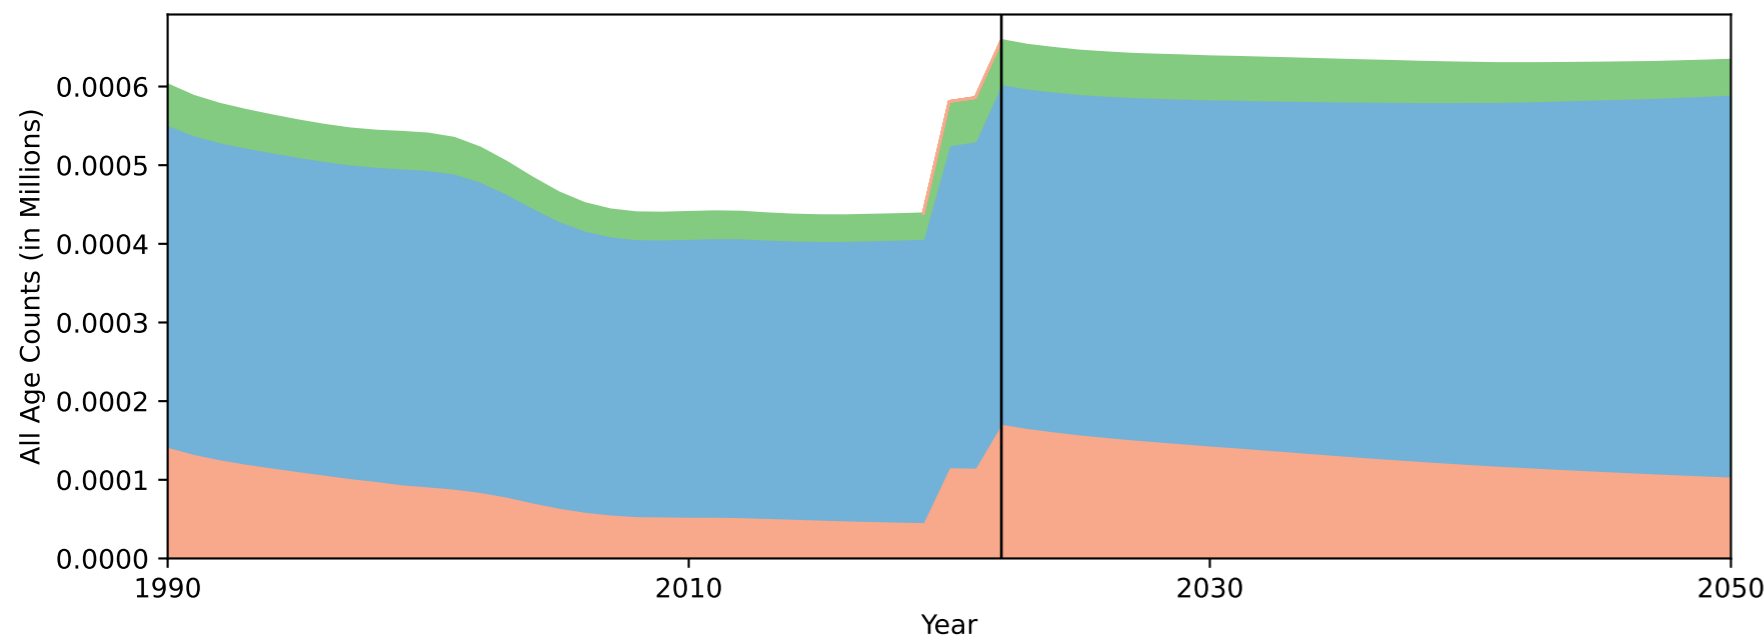

Level 2

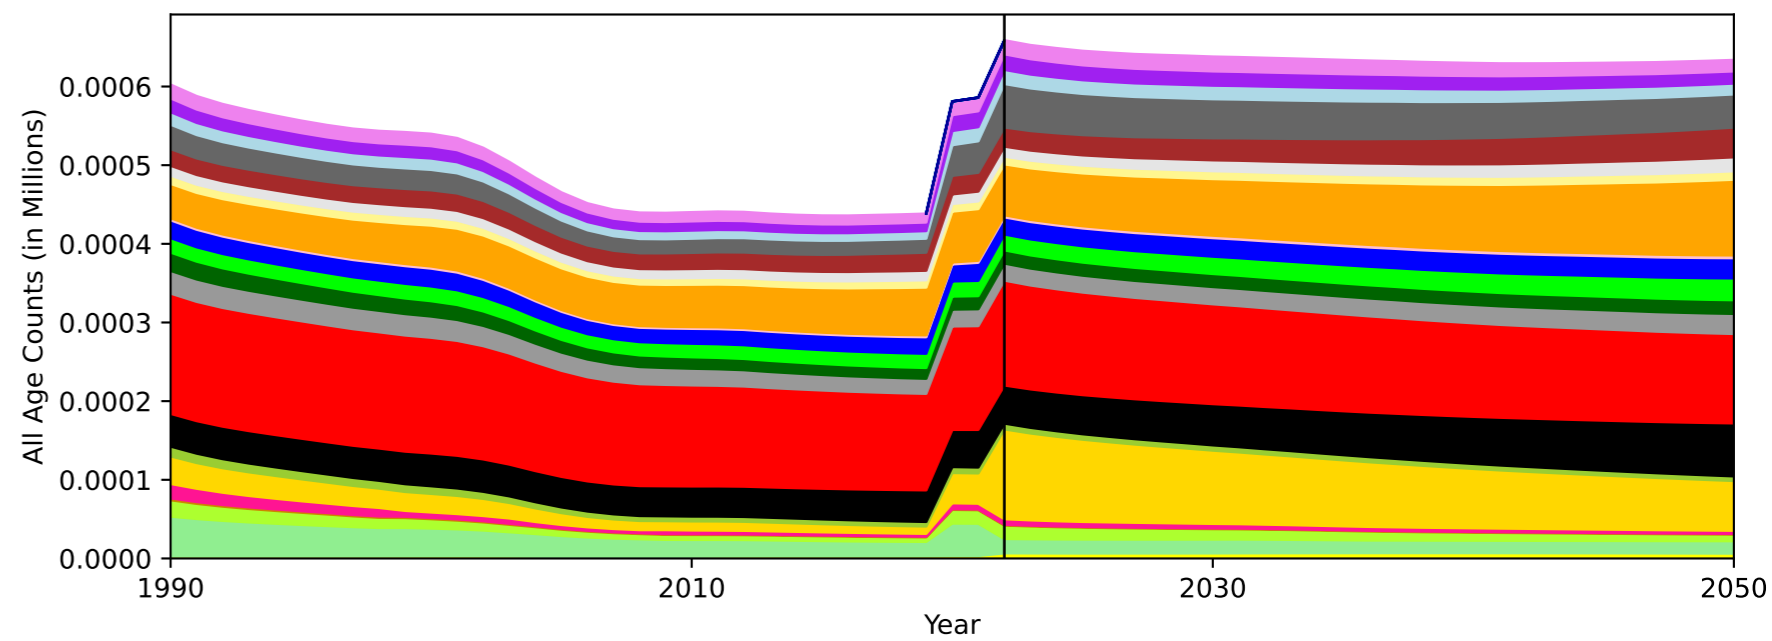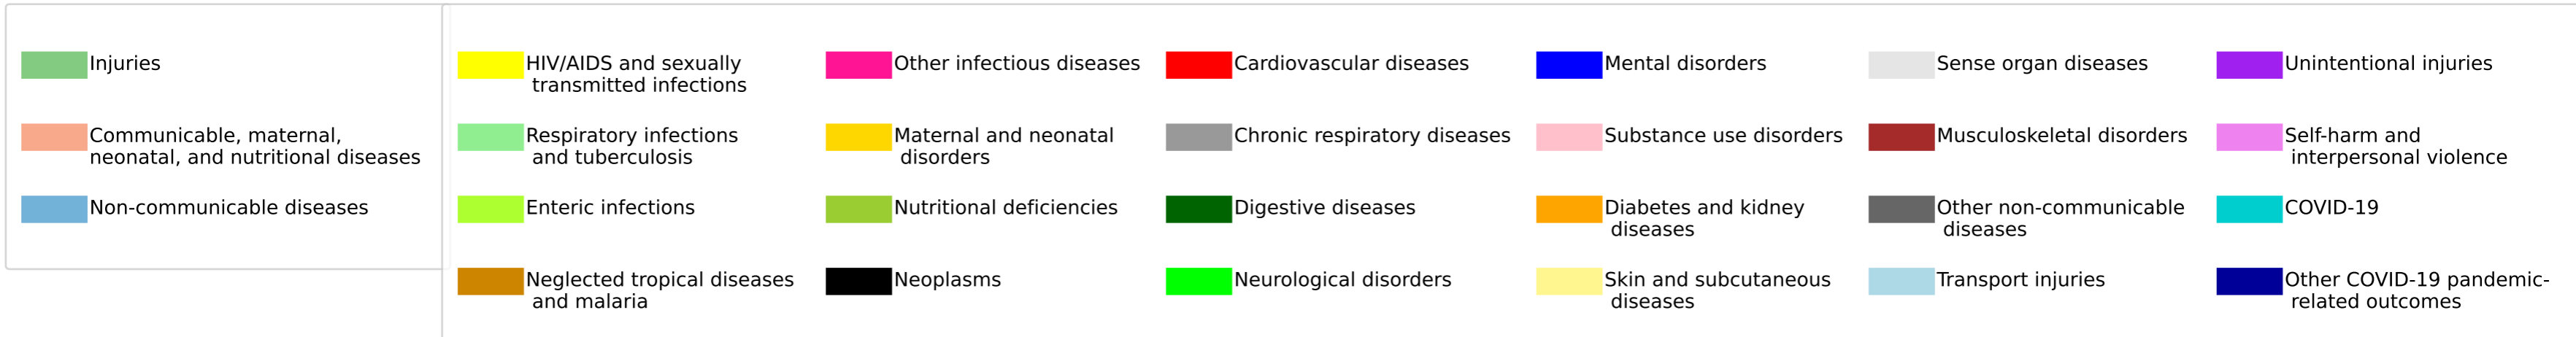

# Tonga

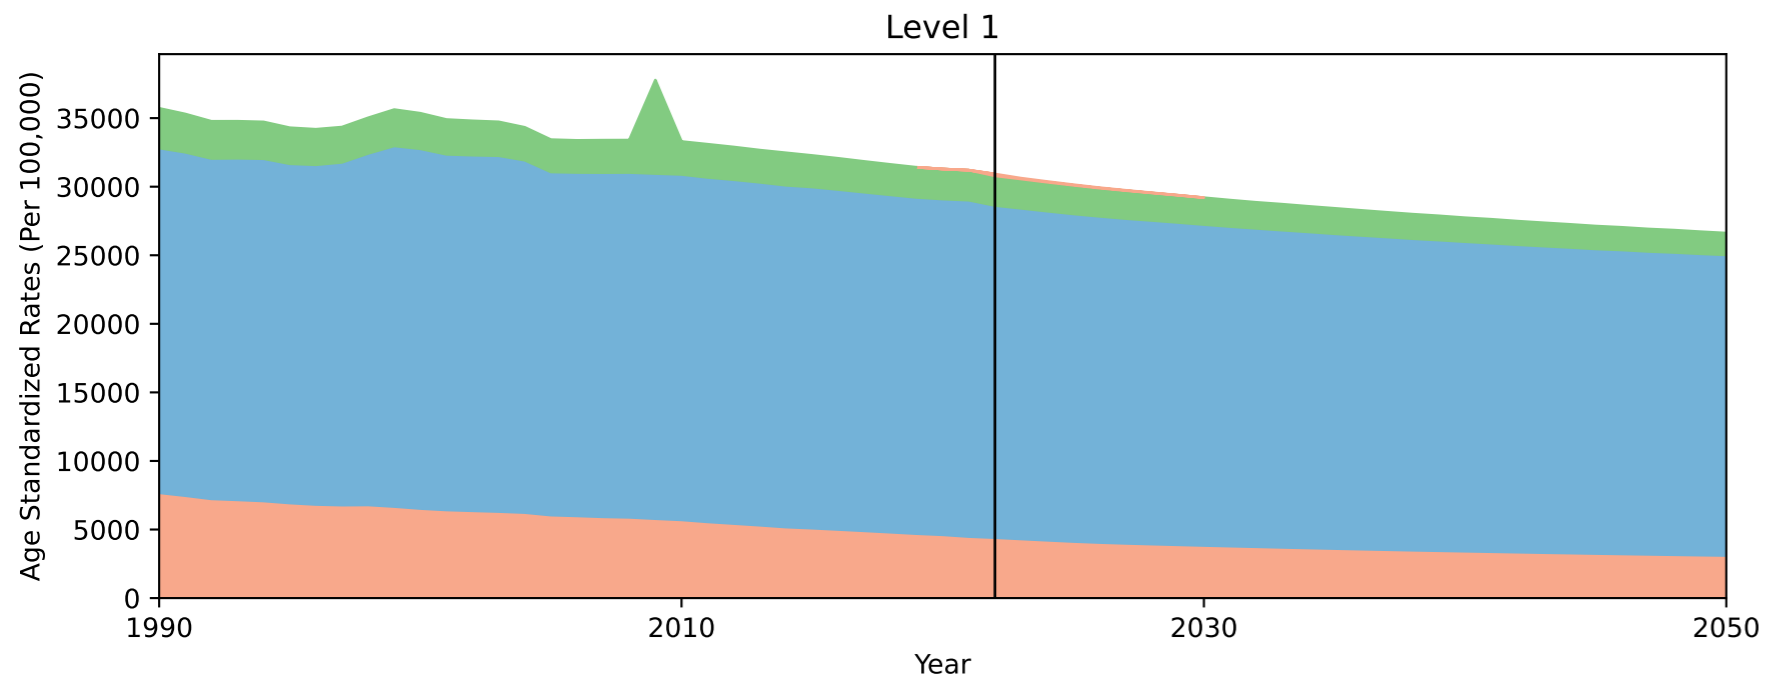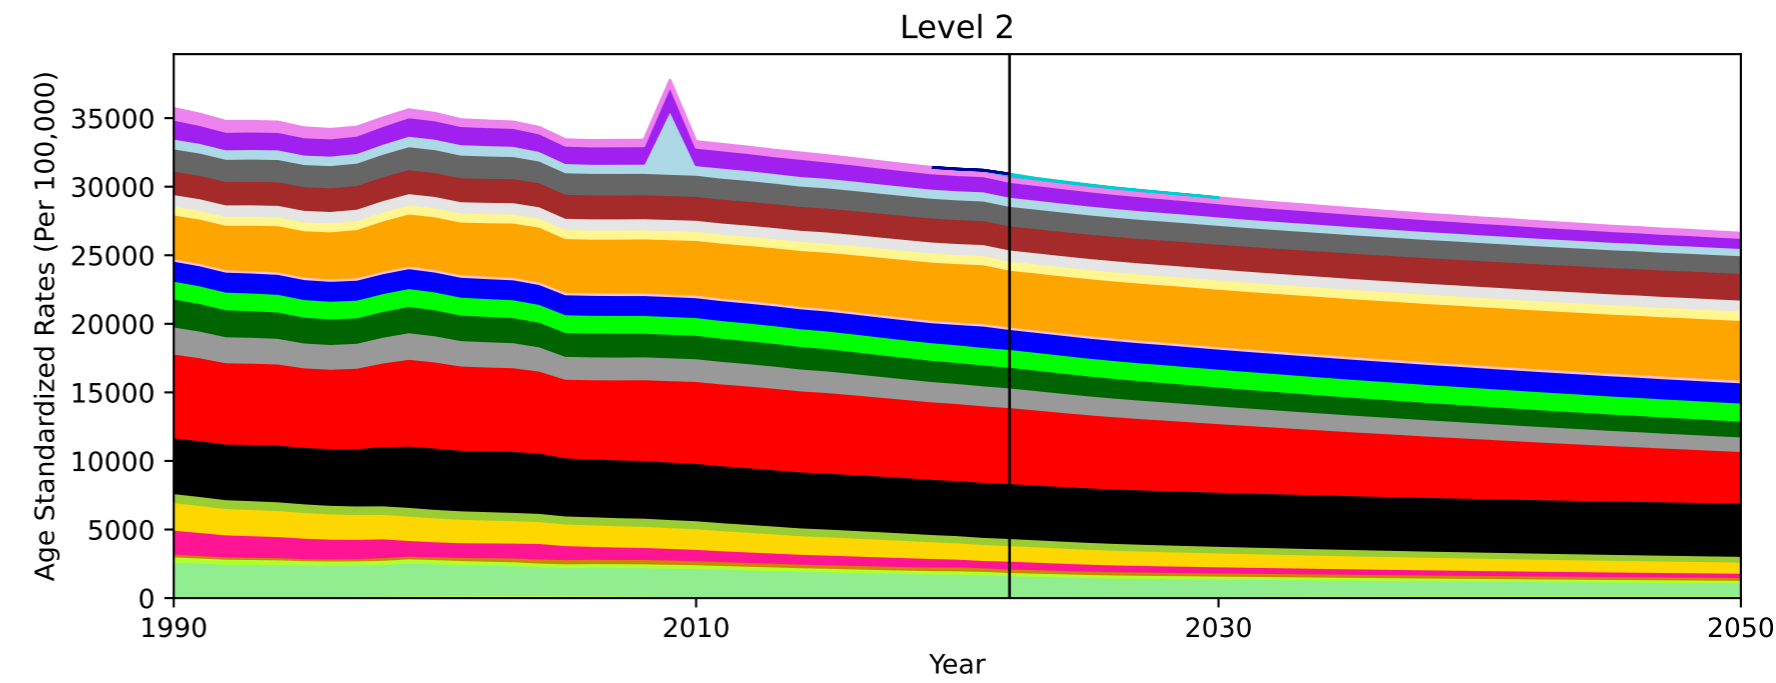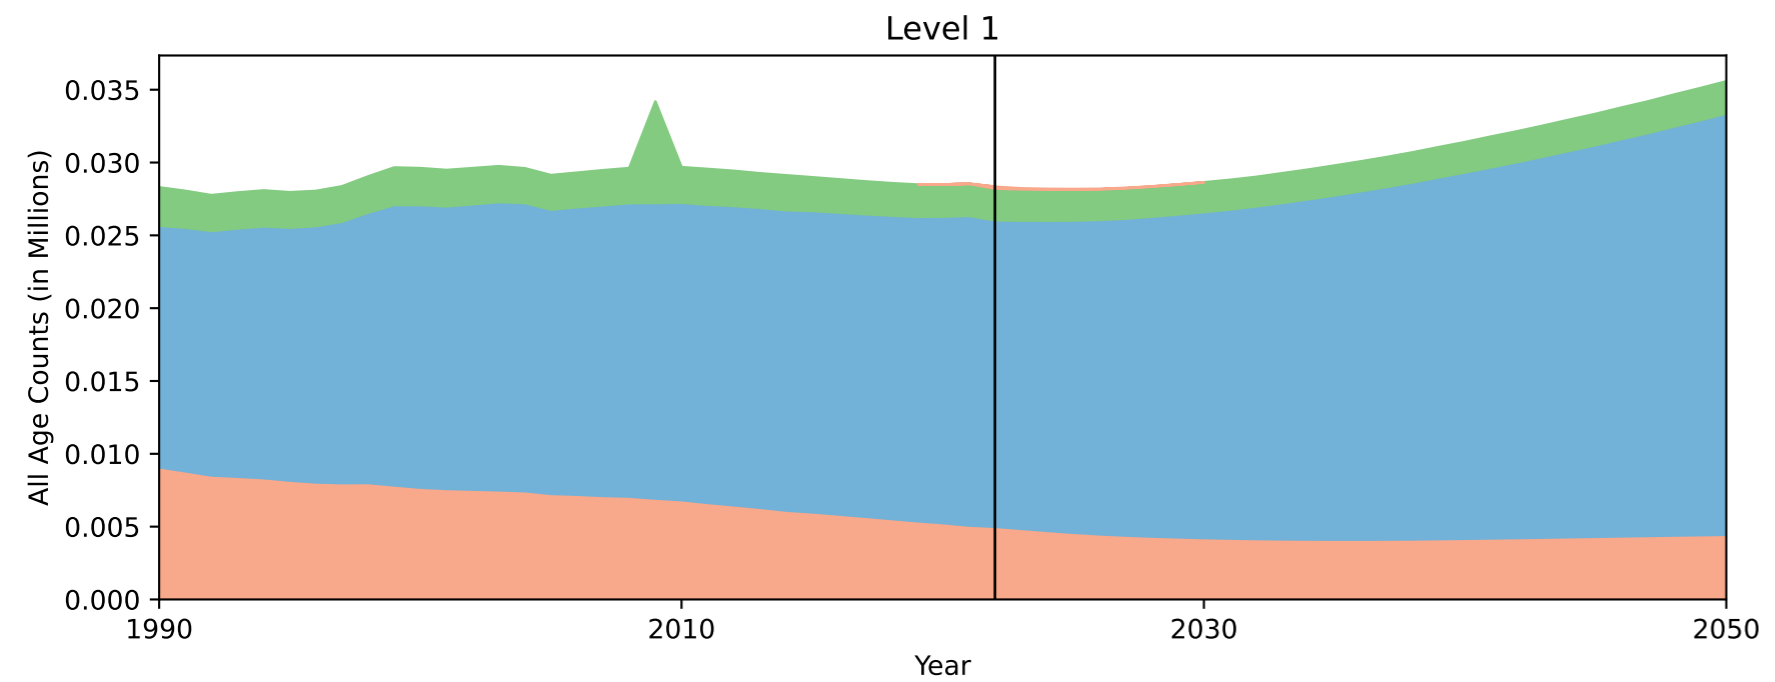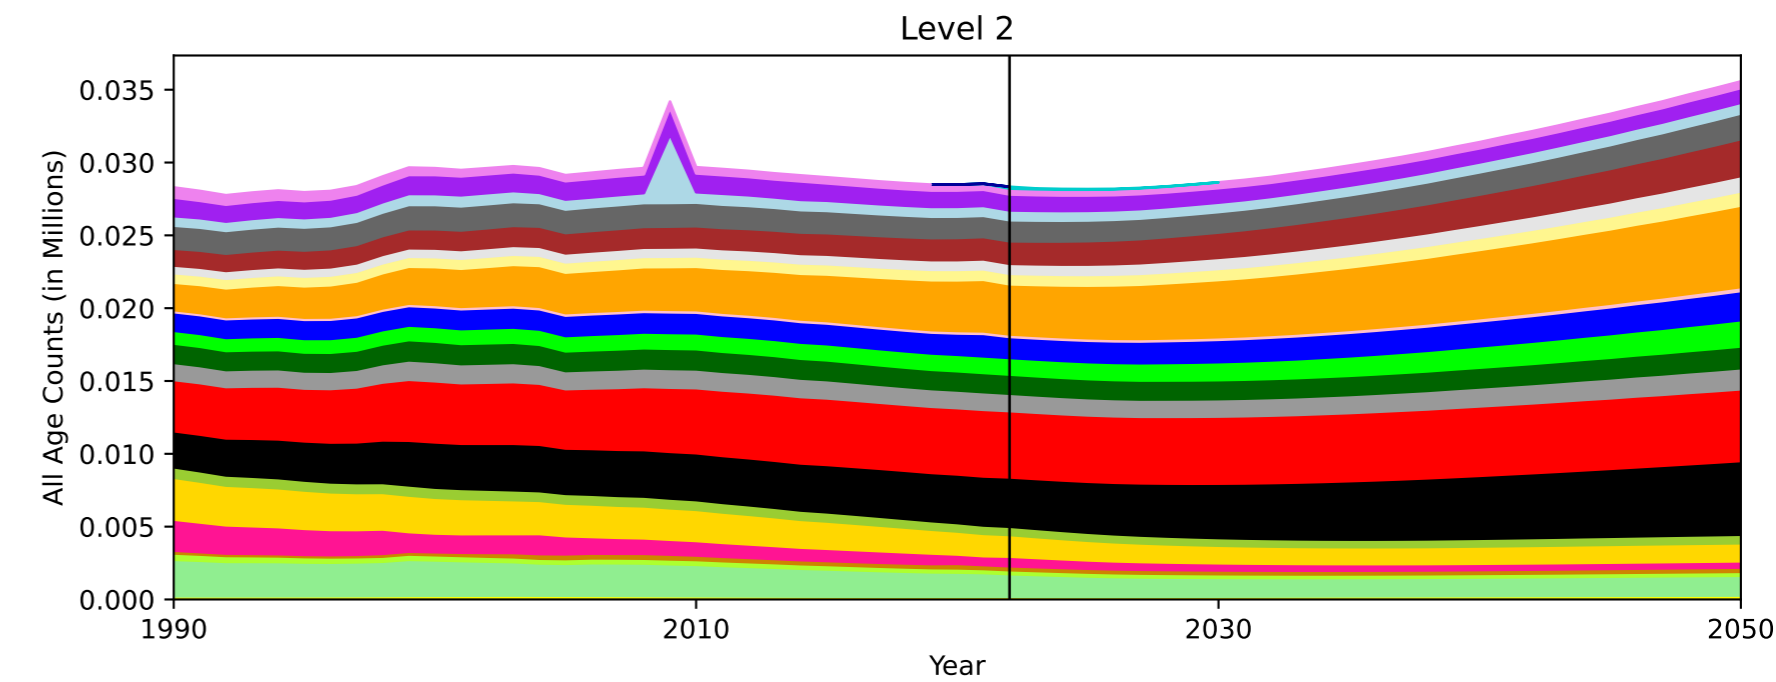

# Tuvalu

Level 1

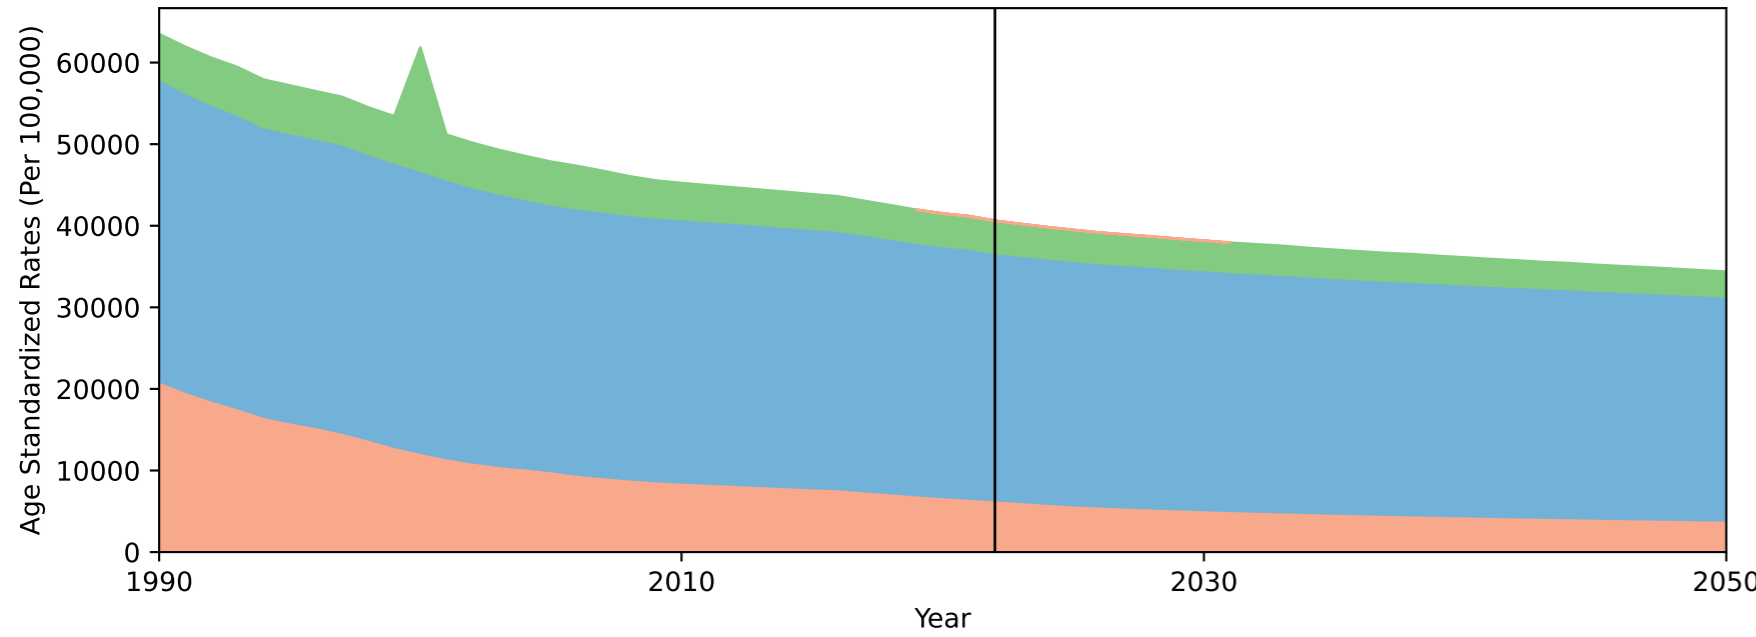

Level 2

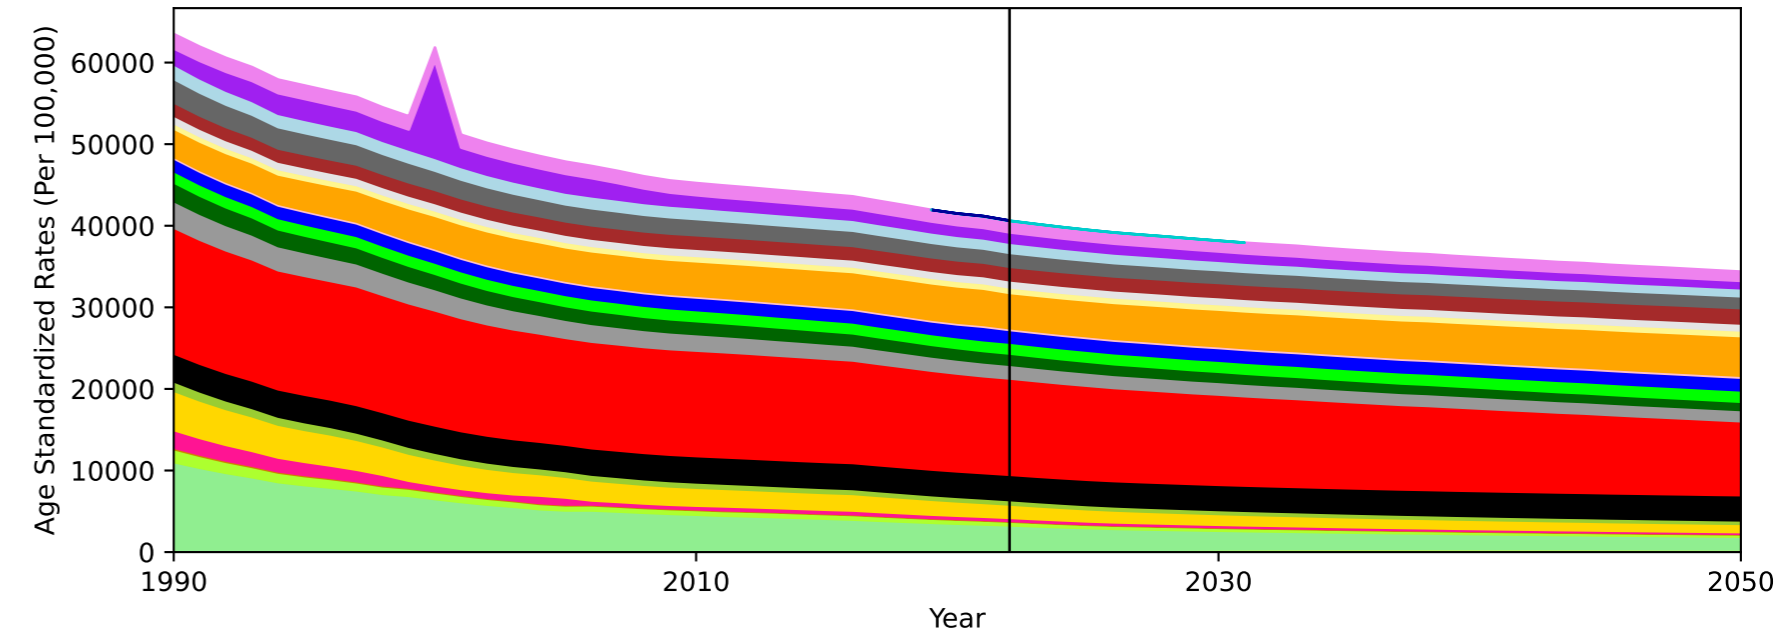

Level 1

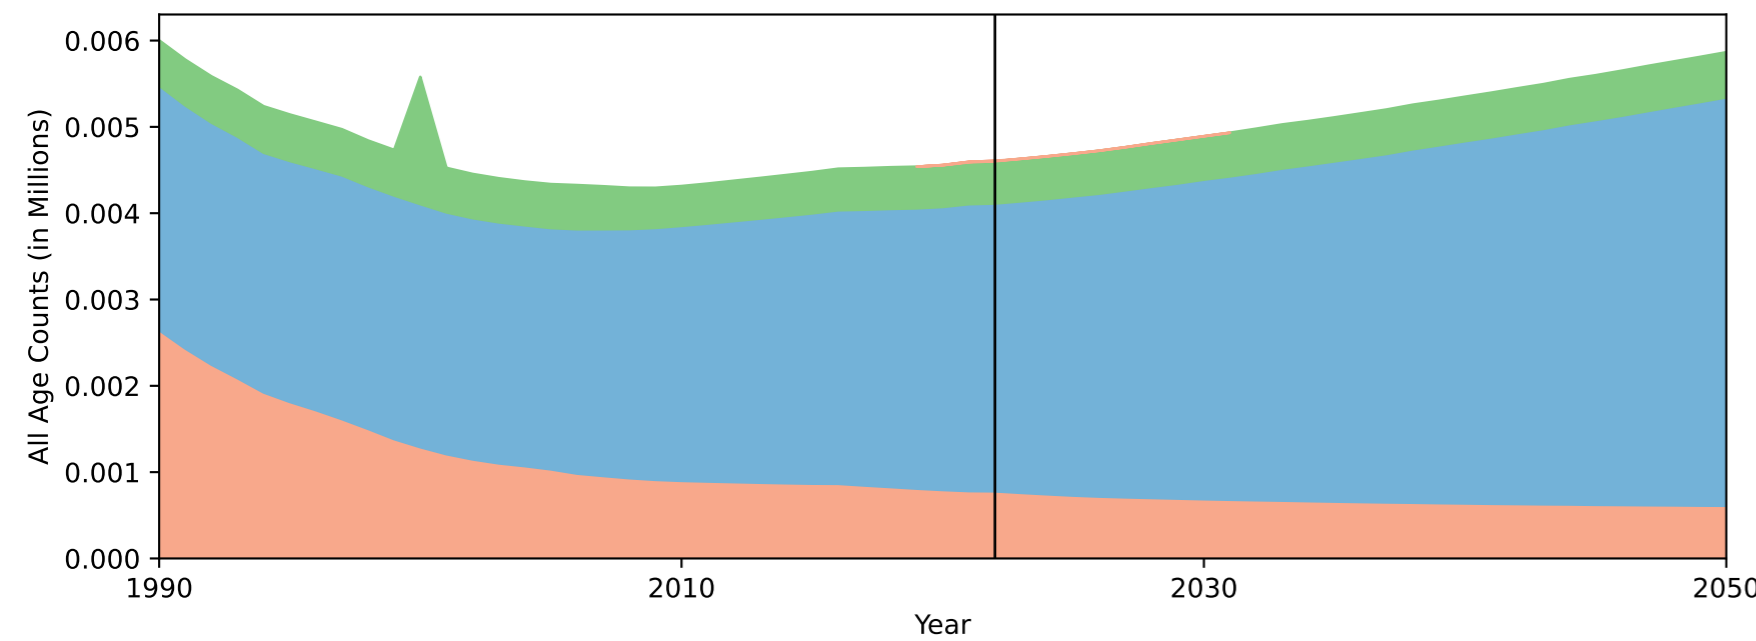

Level 2

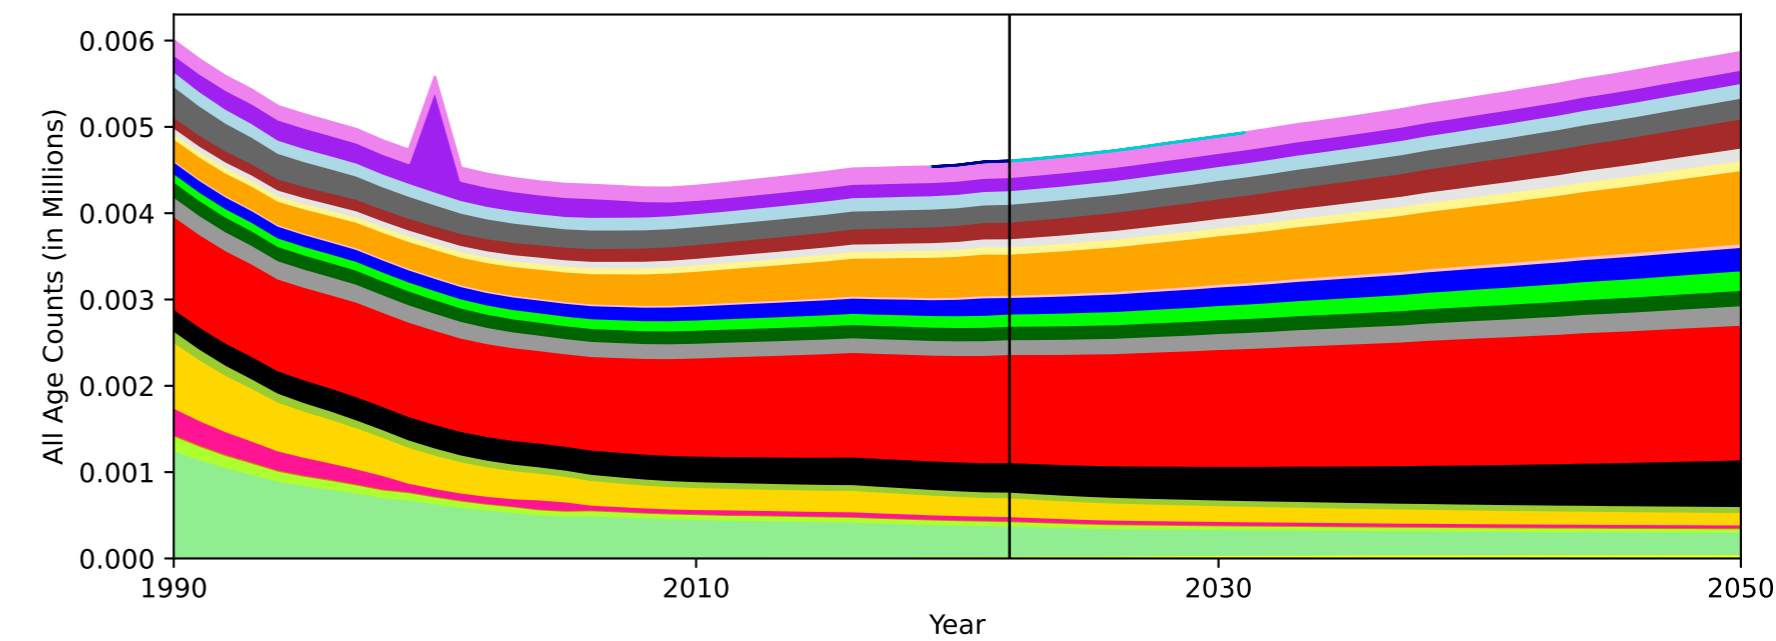

# Vanuatu

Level 1

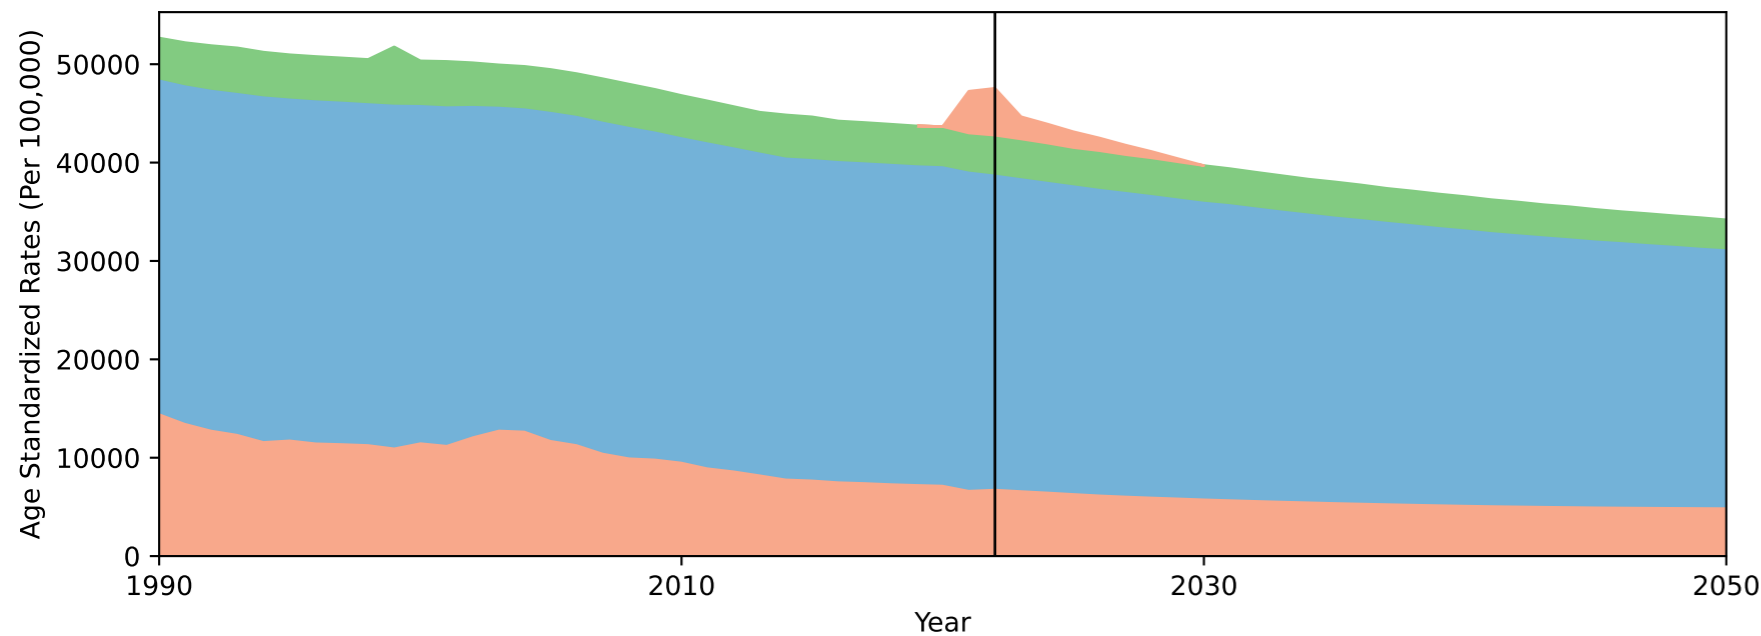

Level 2

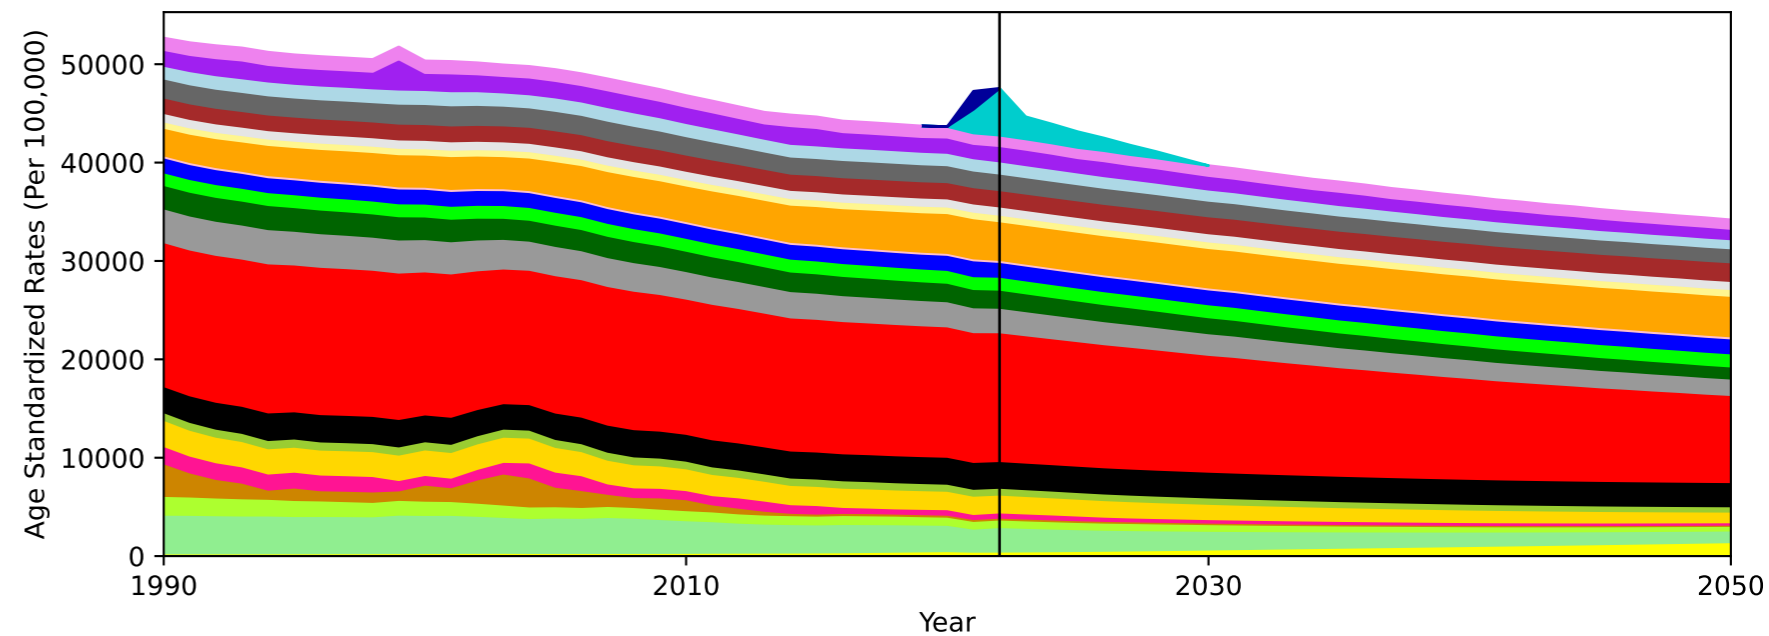

Level 1

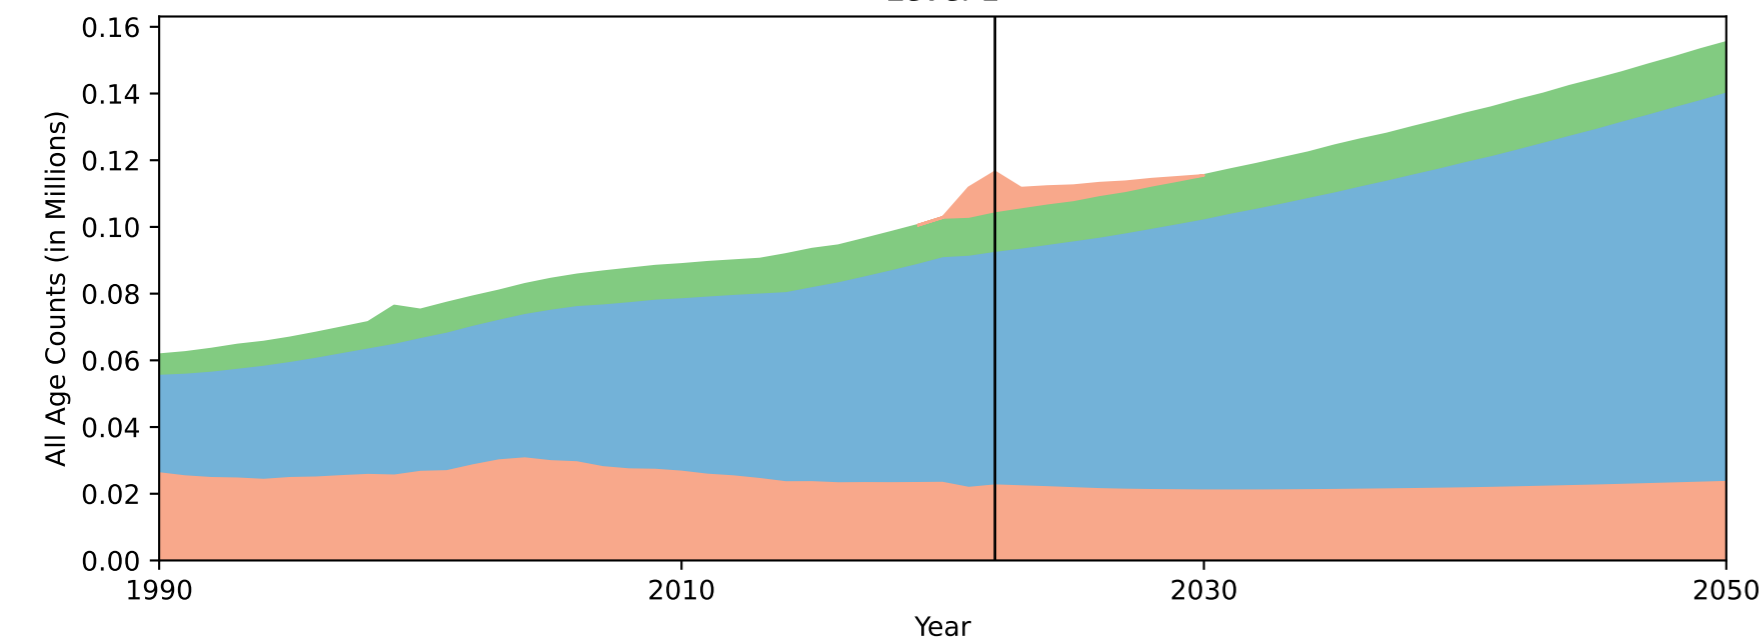

Level 2

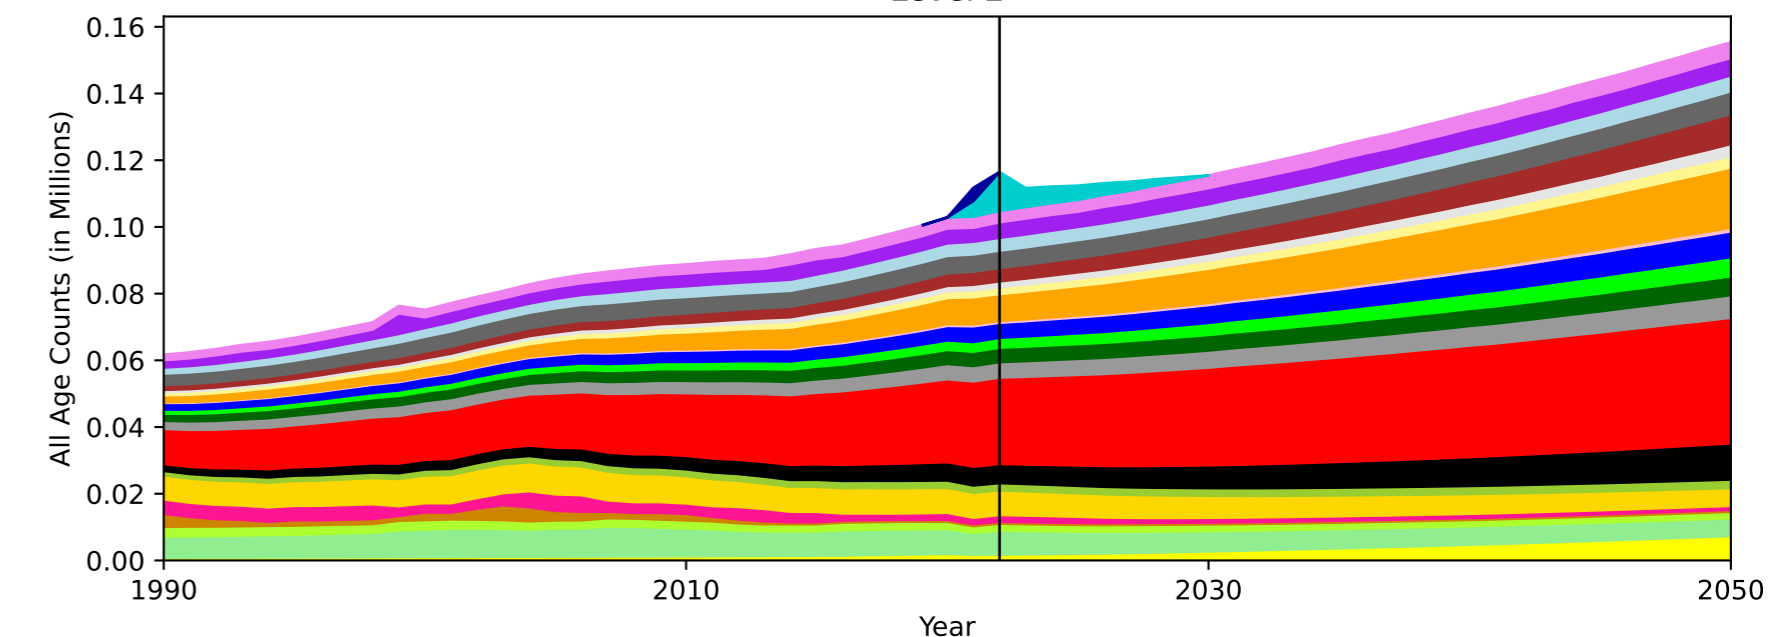

# Cambodia

Supplemental Results Figure S4. Age-standardised DALY rates and all age DALY counts and by Level 1 and Level 2 causes, 1990–2050

390

Level 1

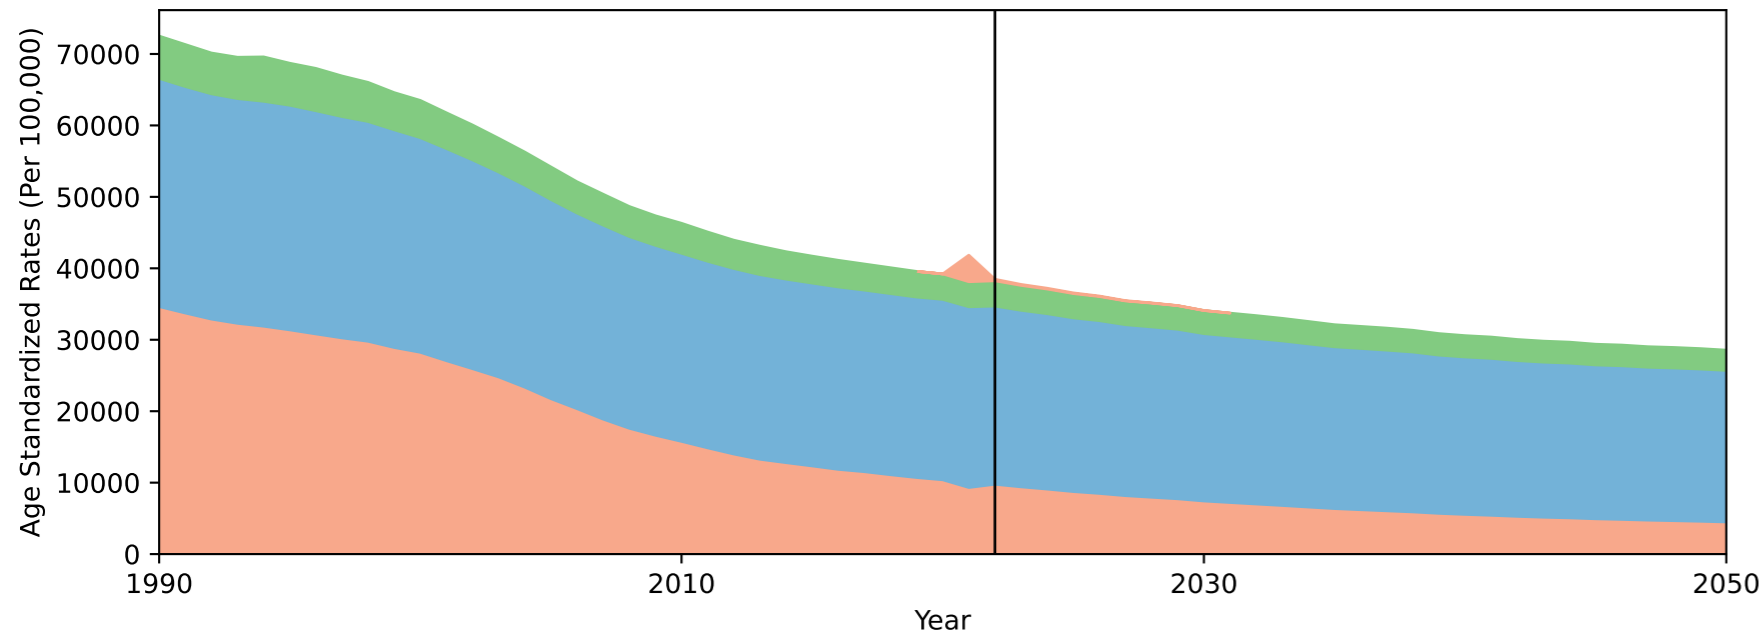

Level 2

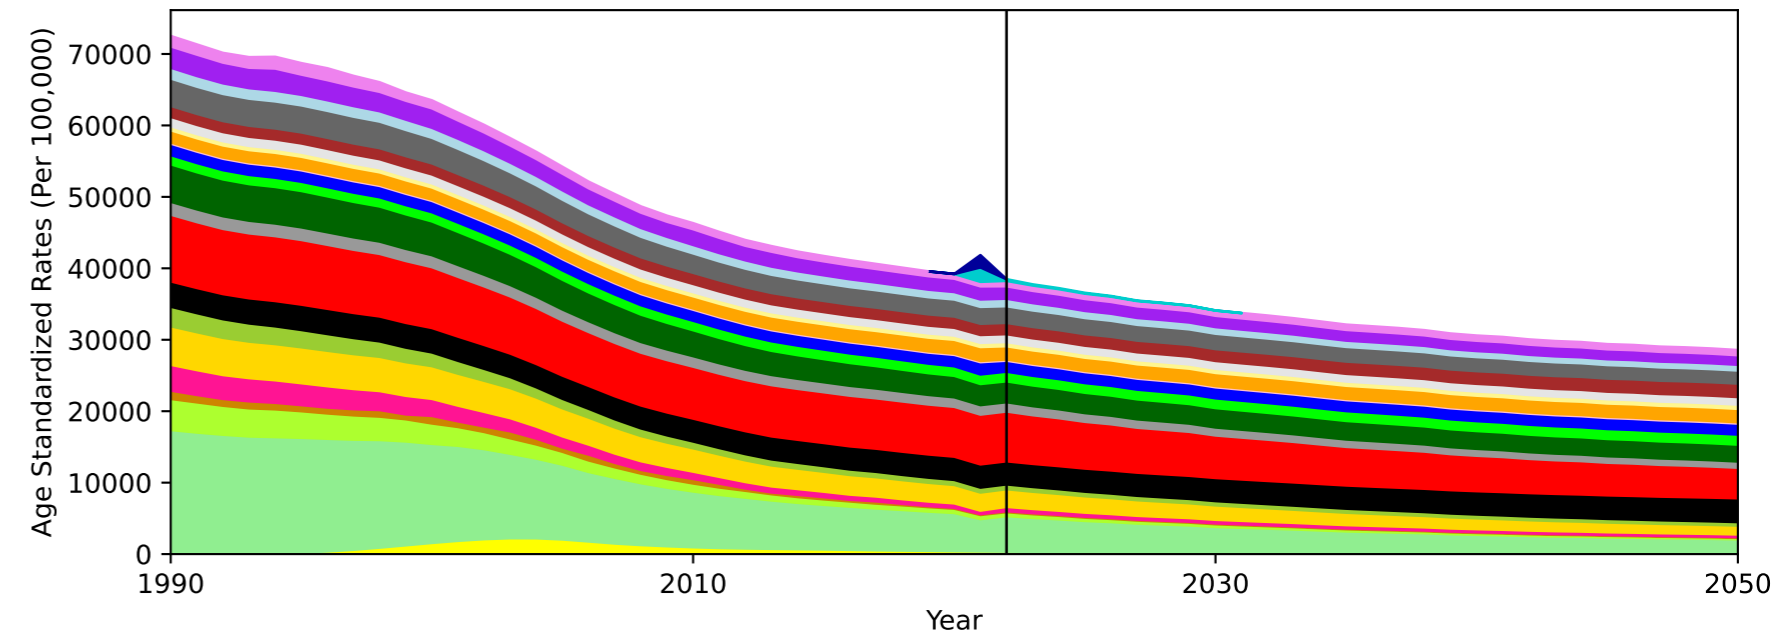

Level 1

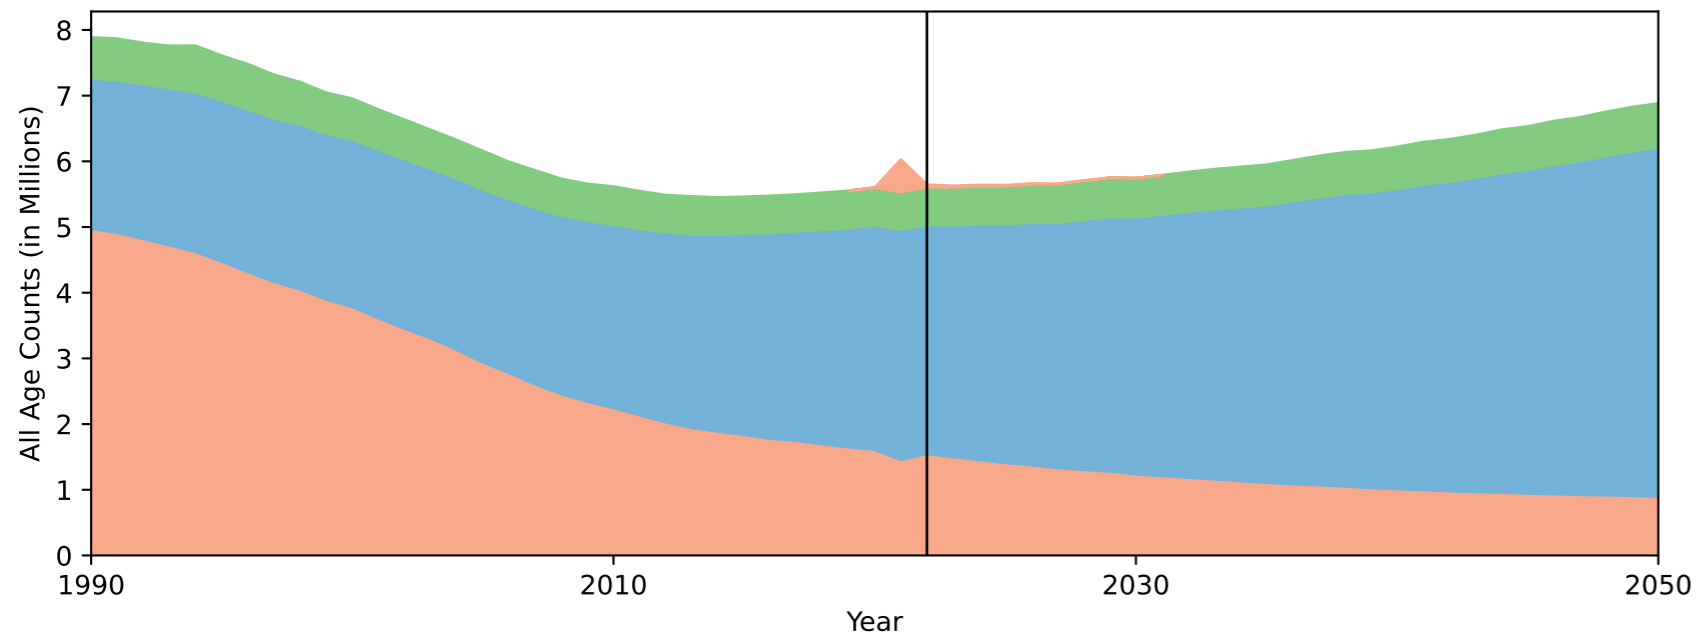

Level 2

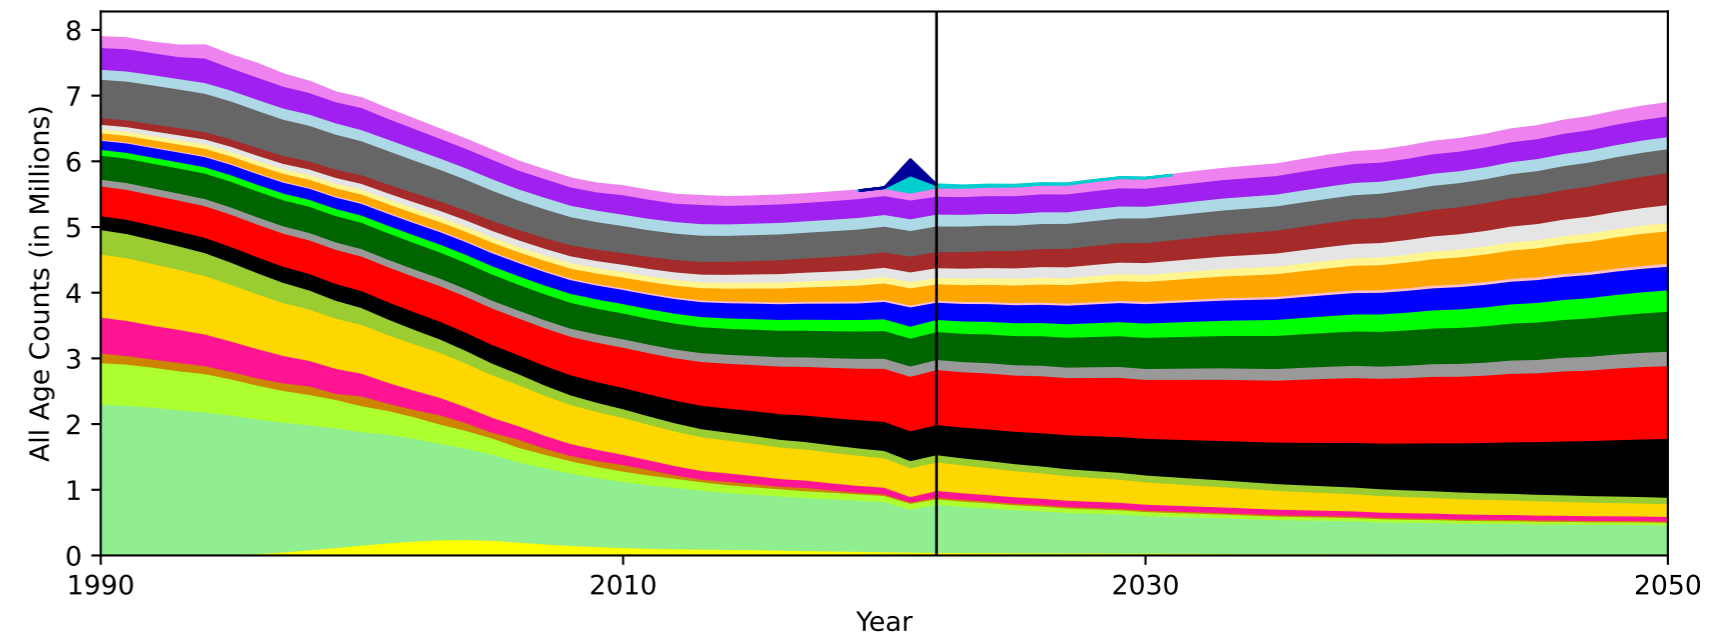

# Indonesia

Level 1

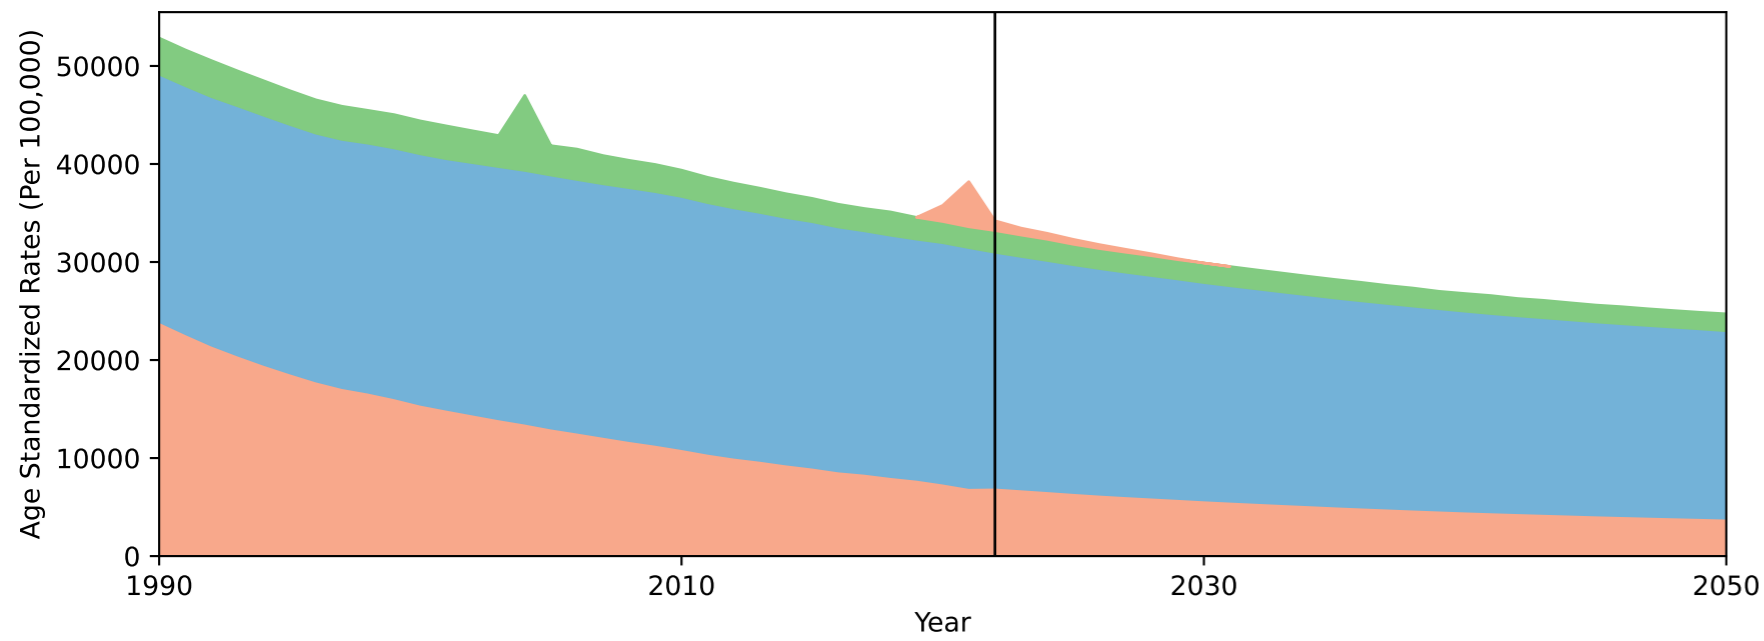

Level 2

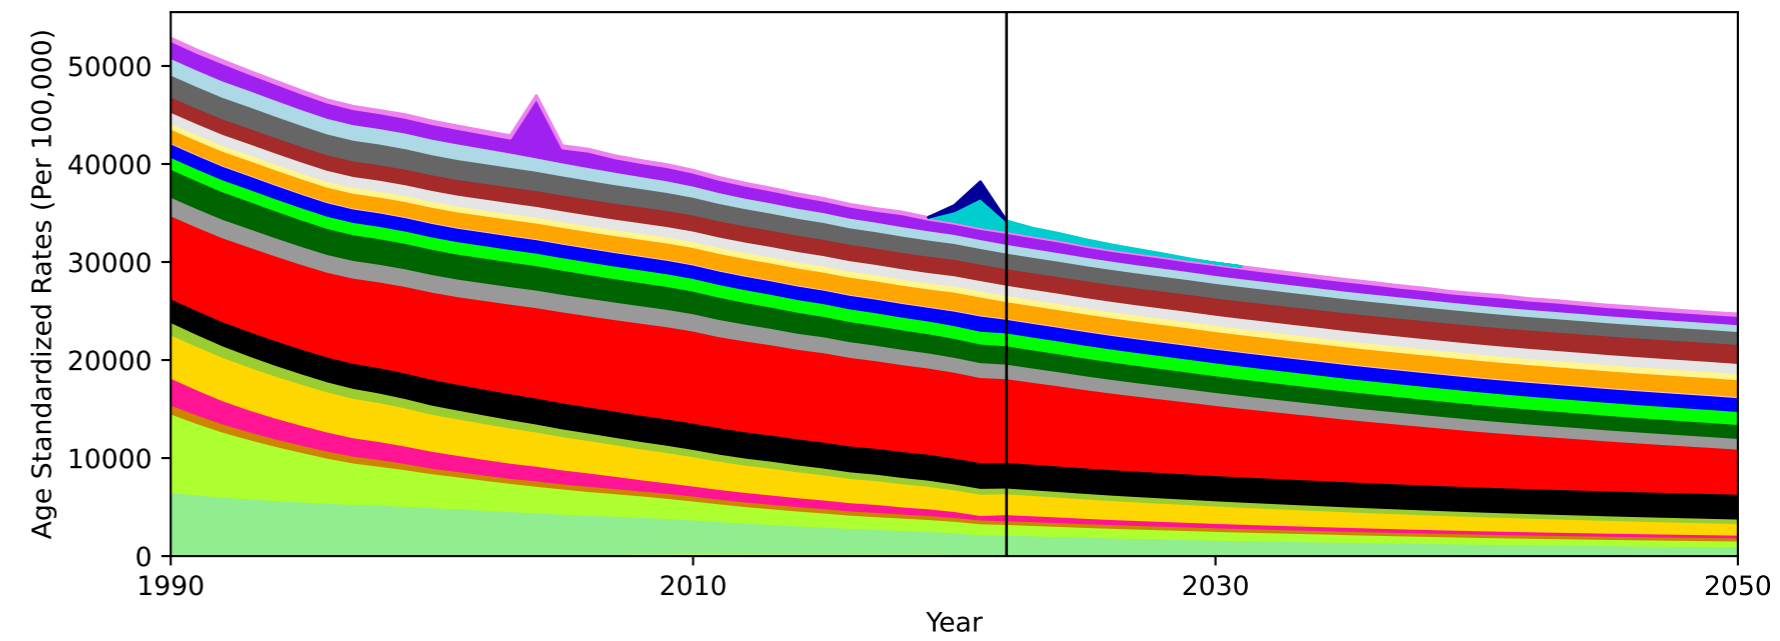

Level 1

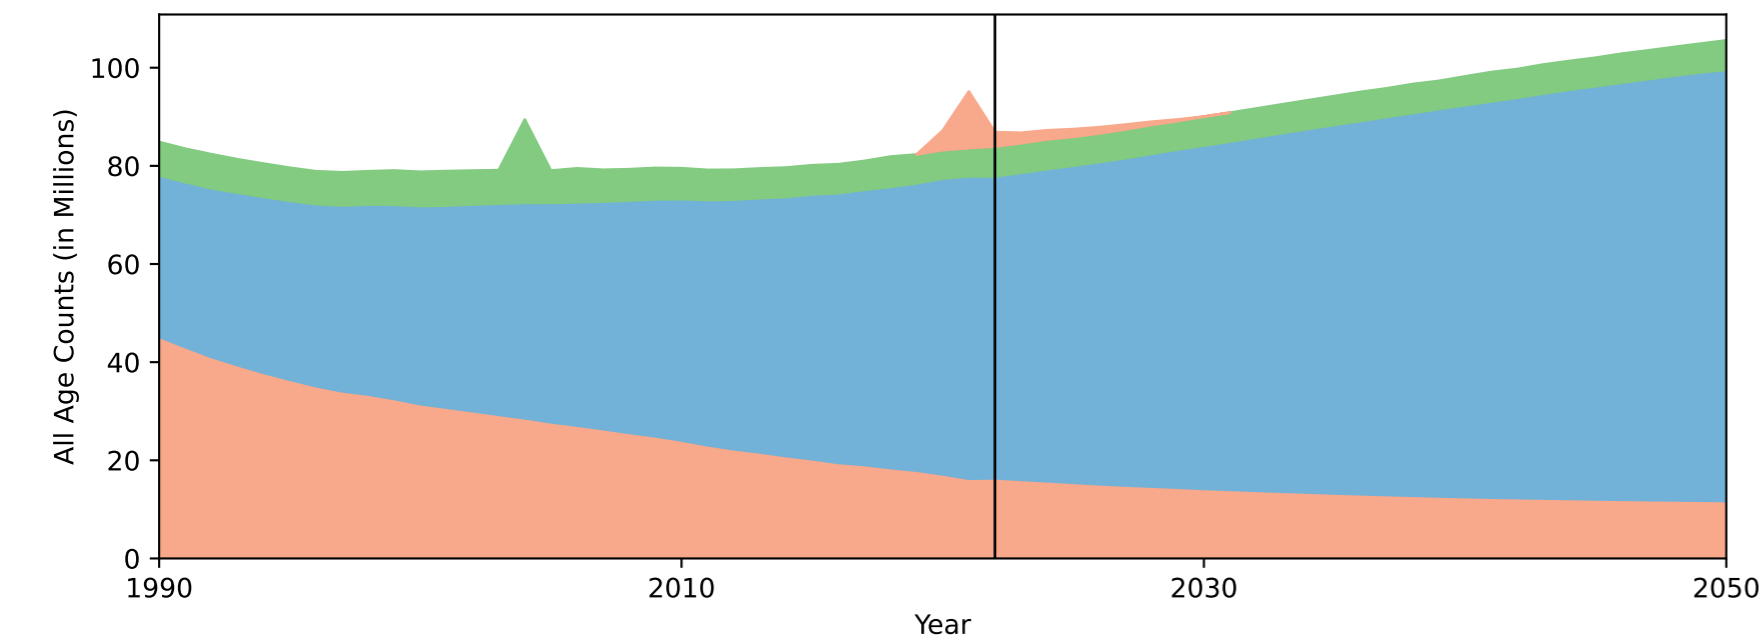

Level 2

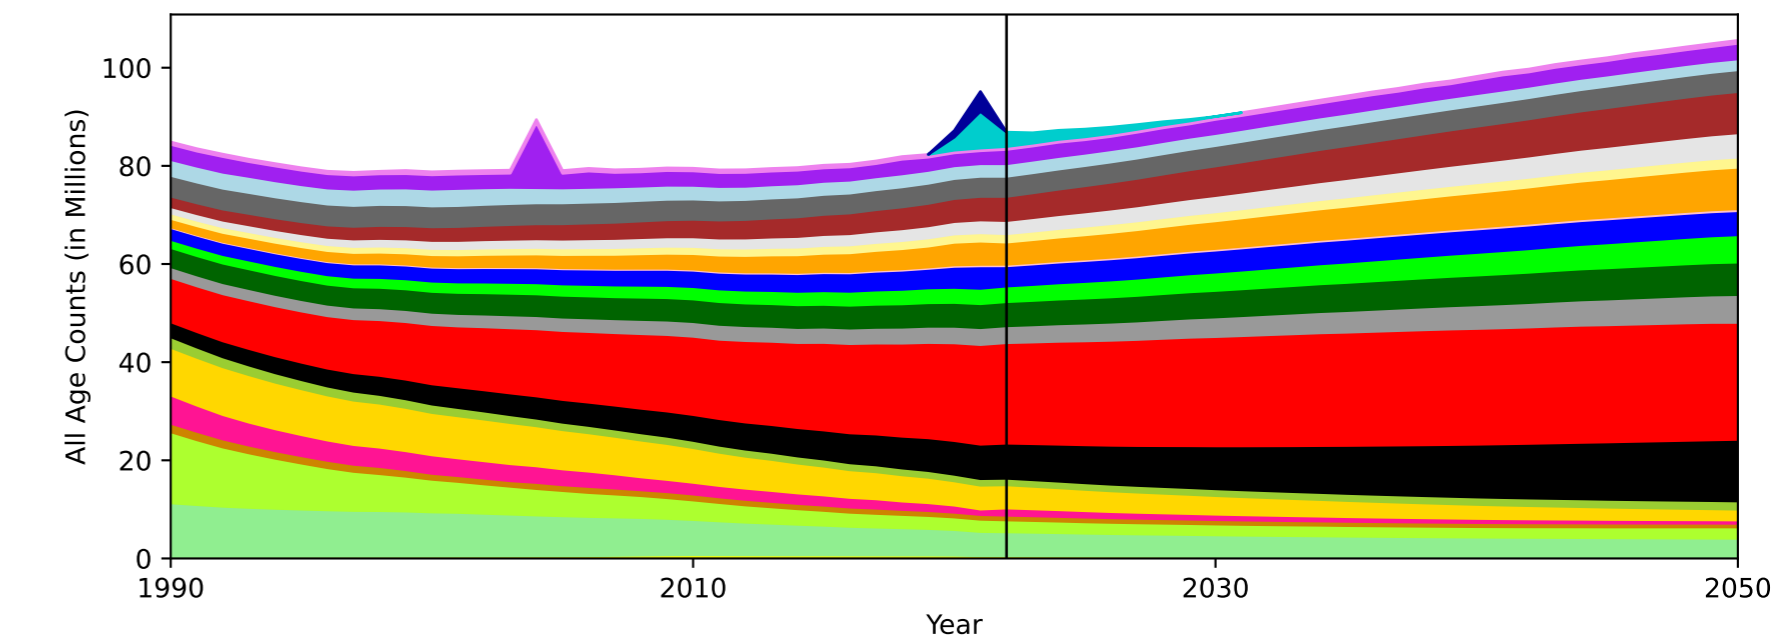



Level 1

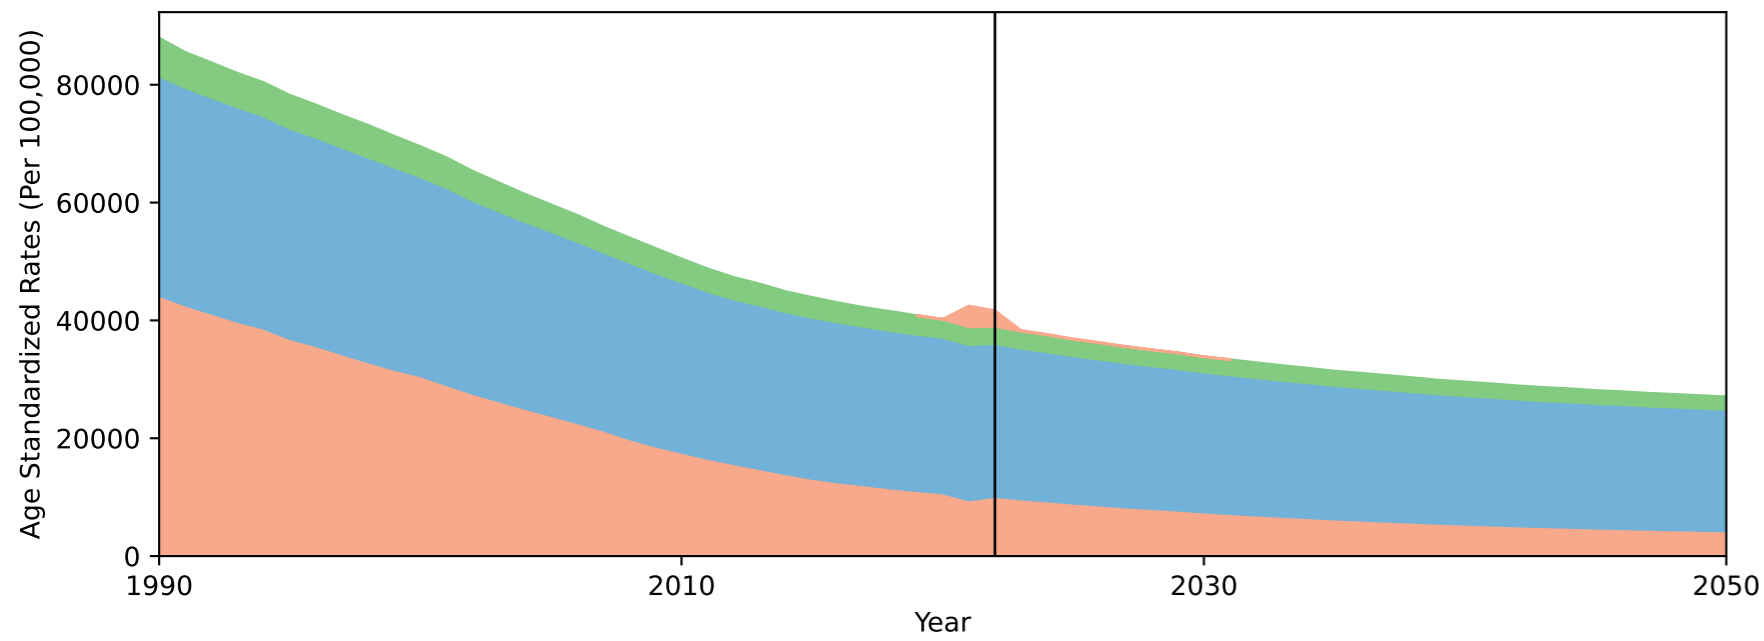

Level 2

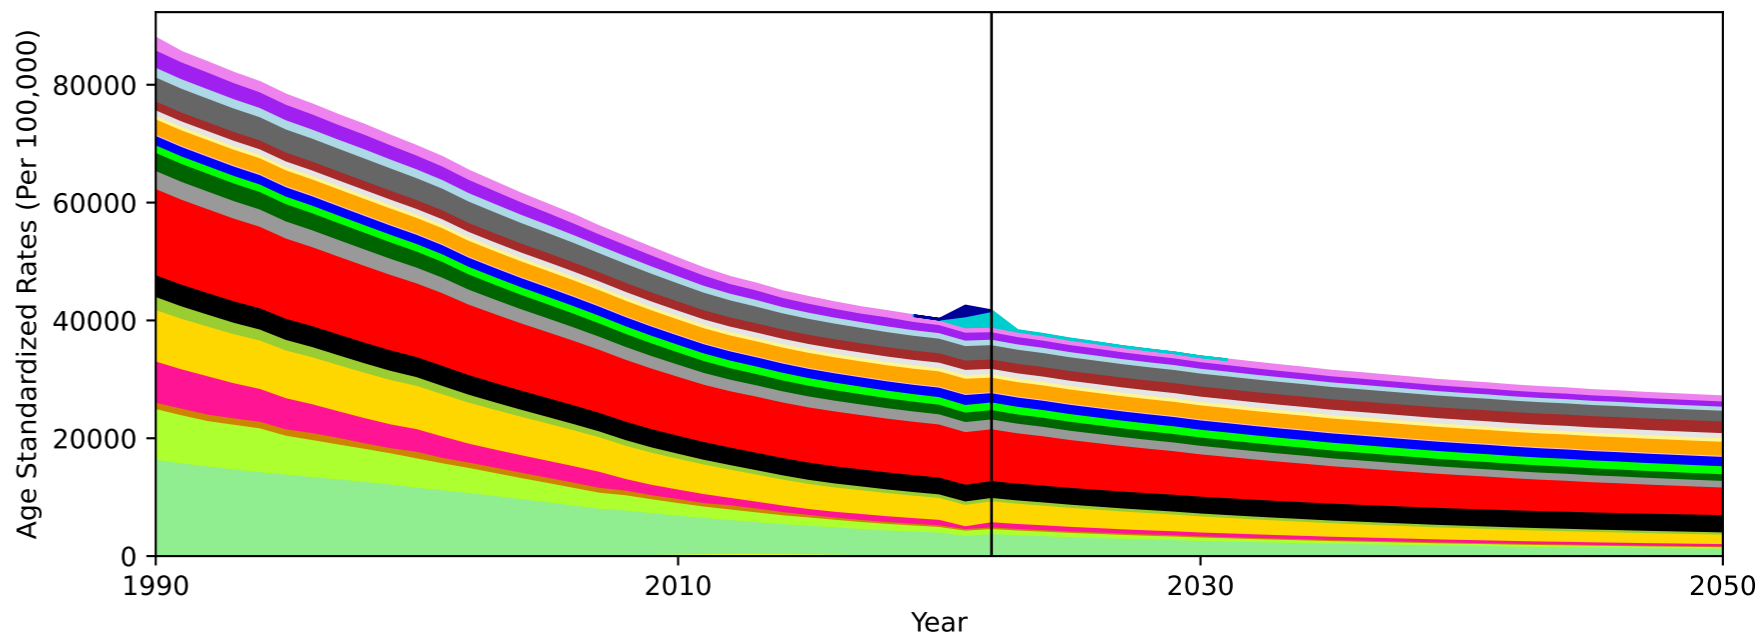

Level 1

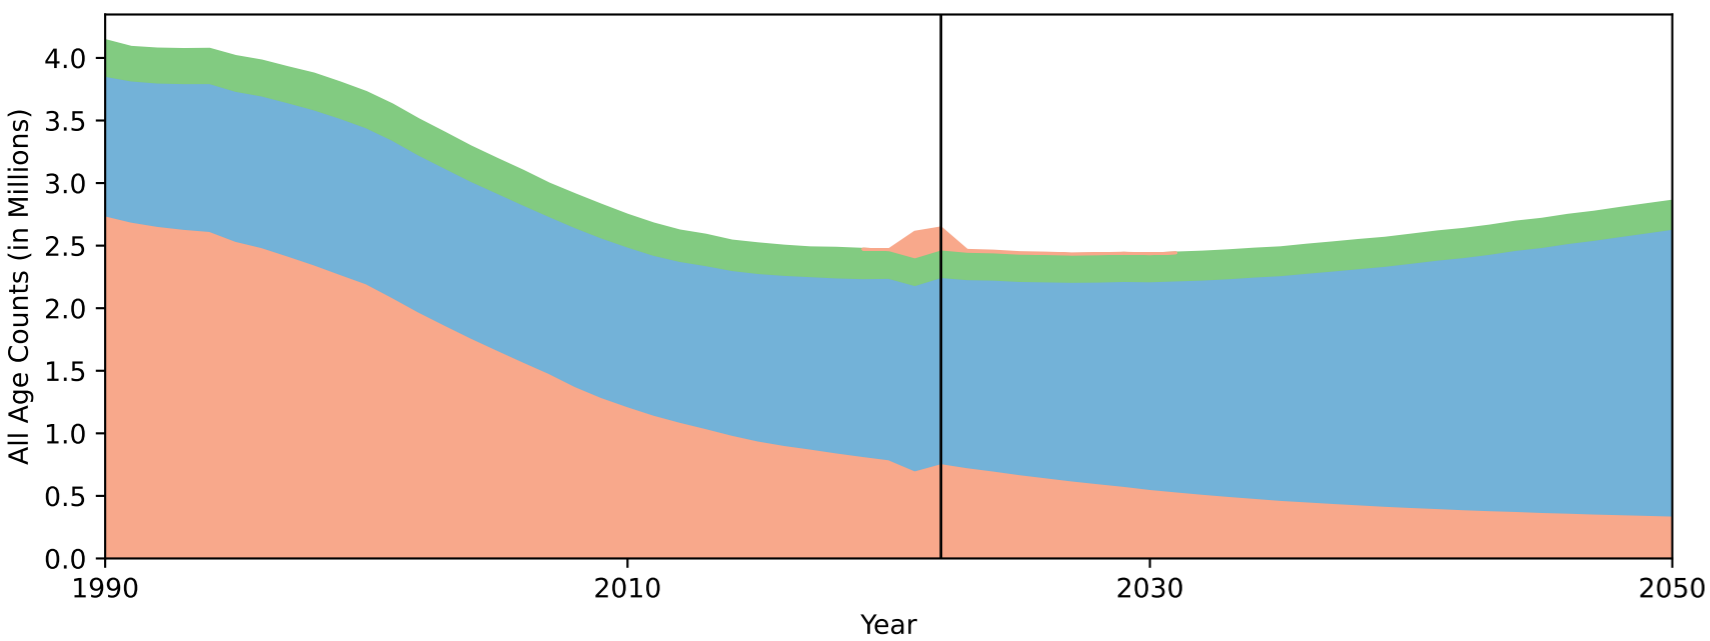

Level 2

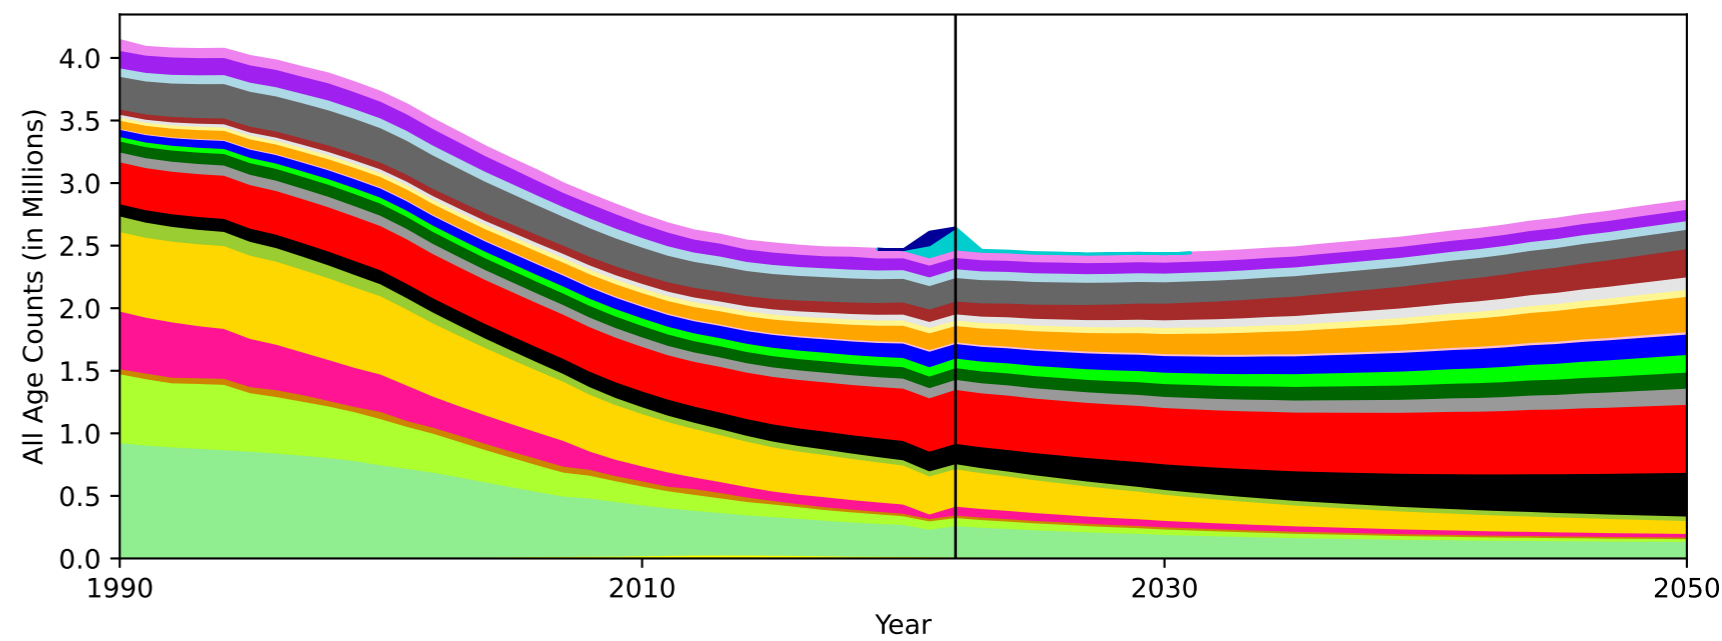

# Malaysia

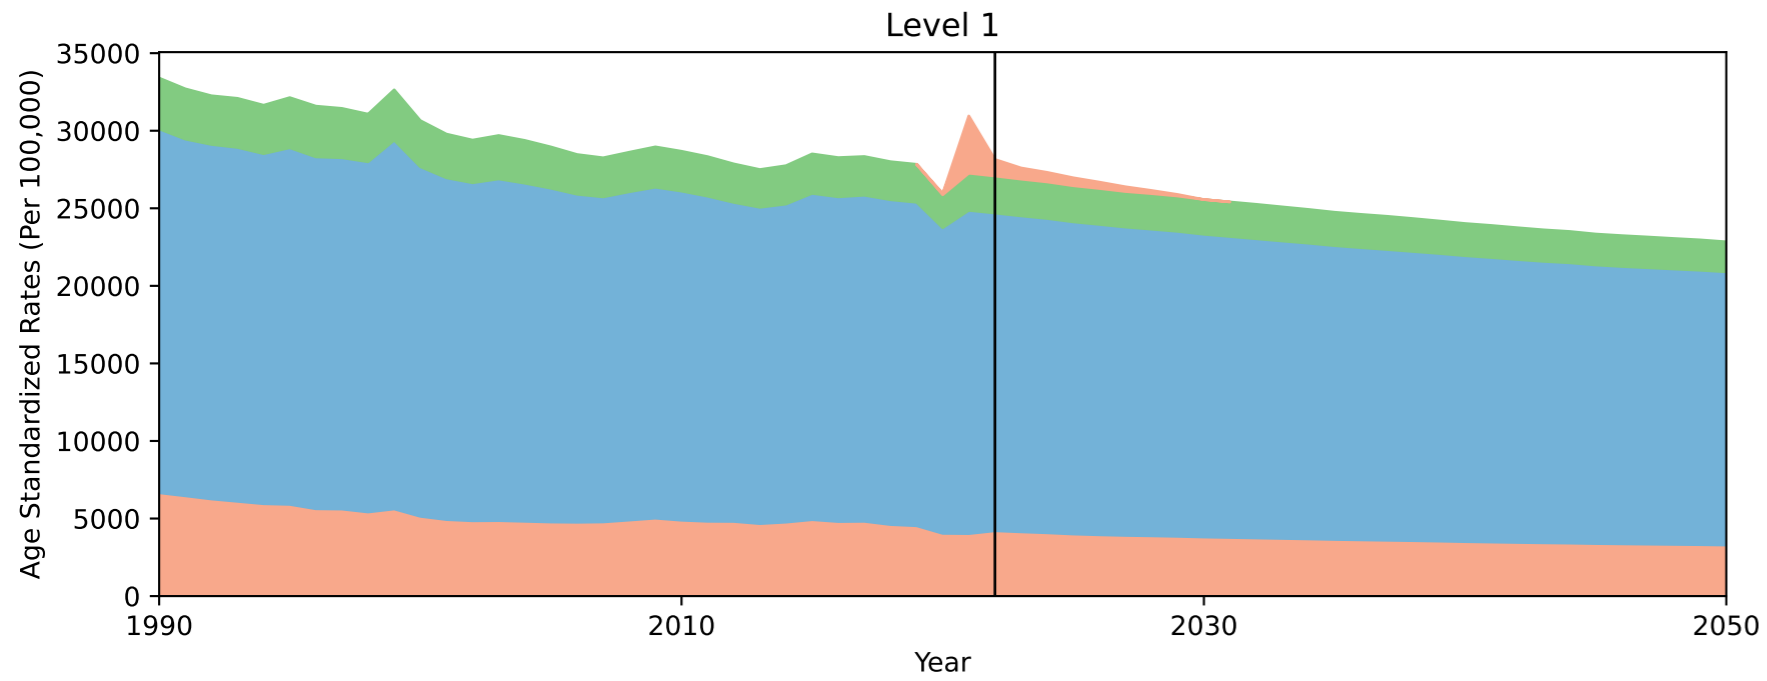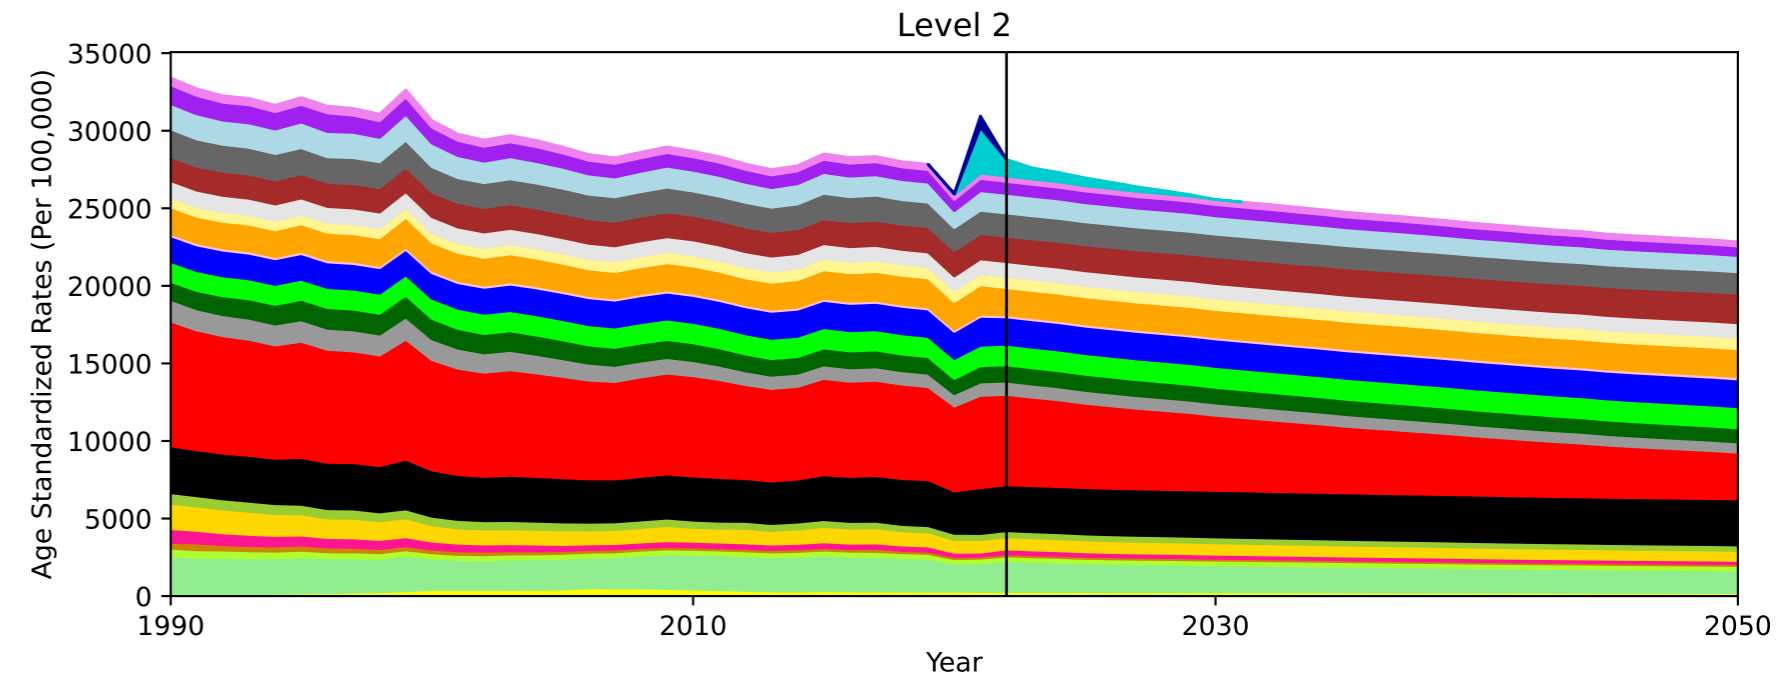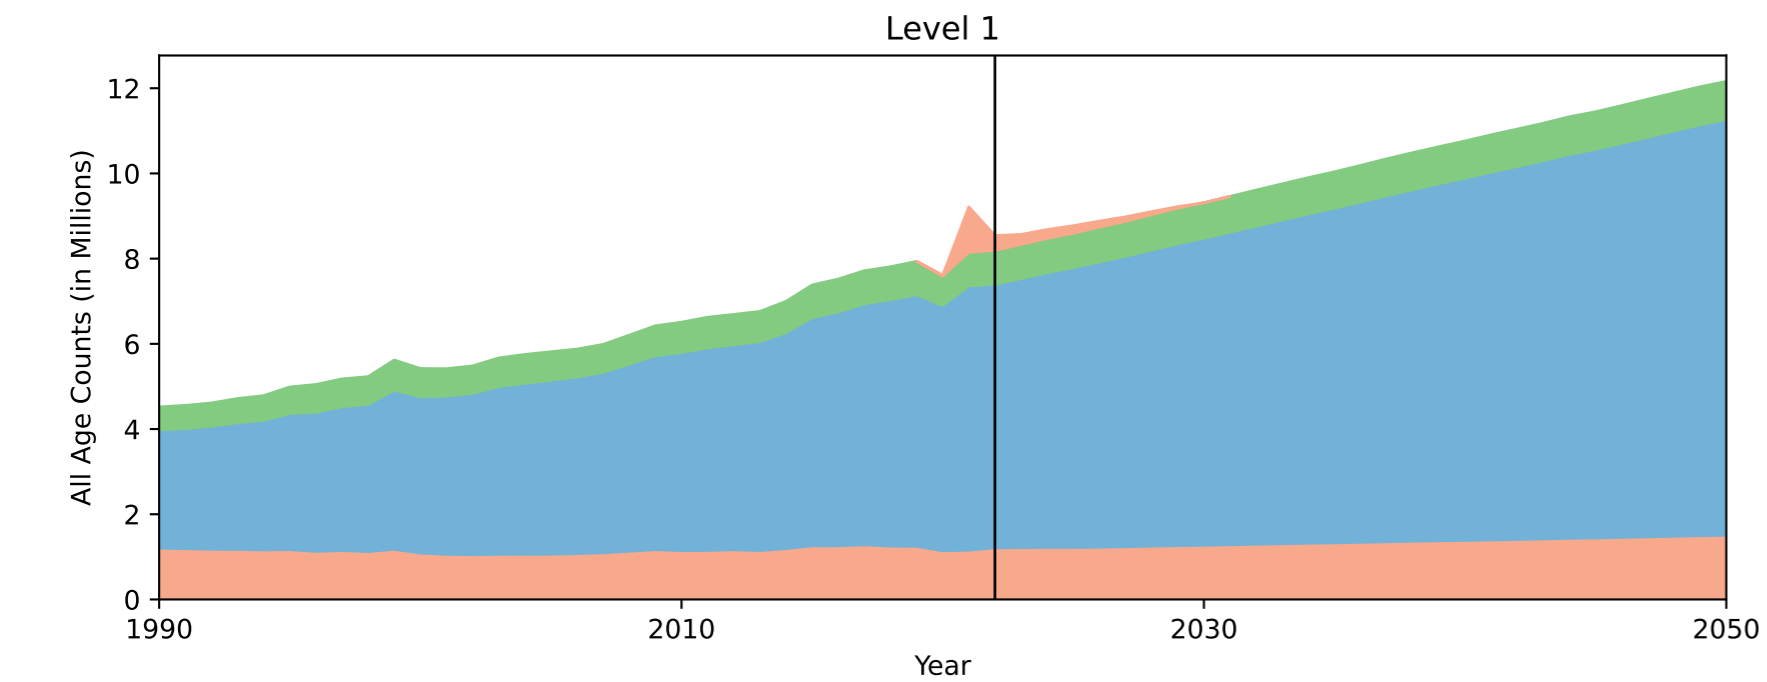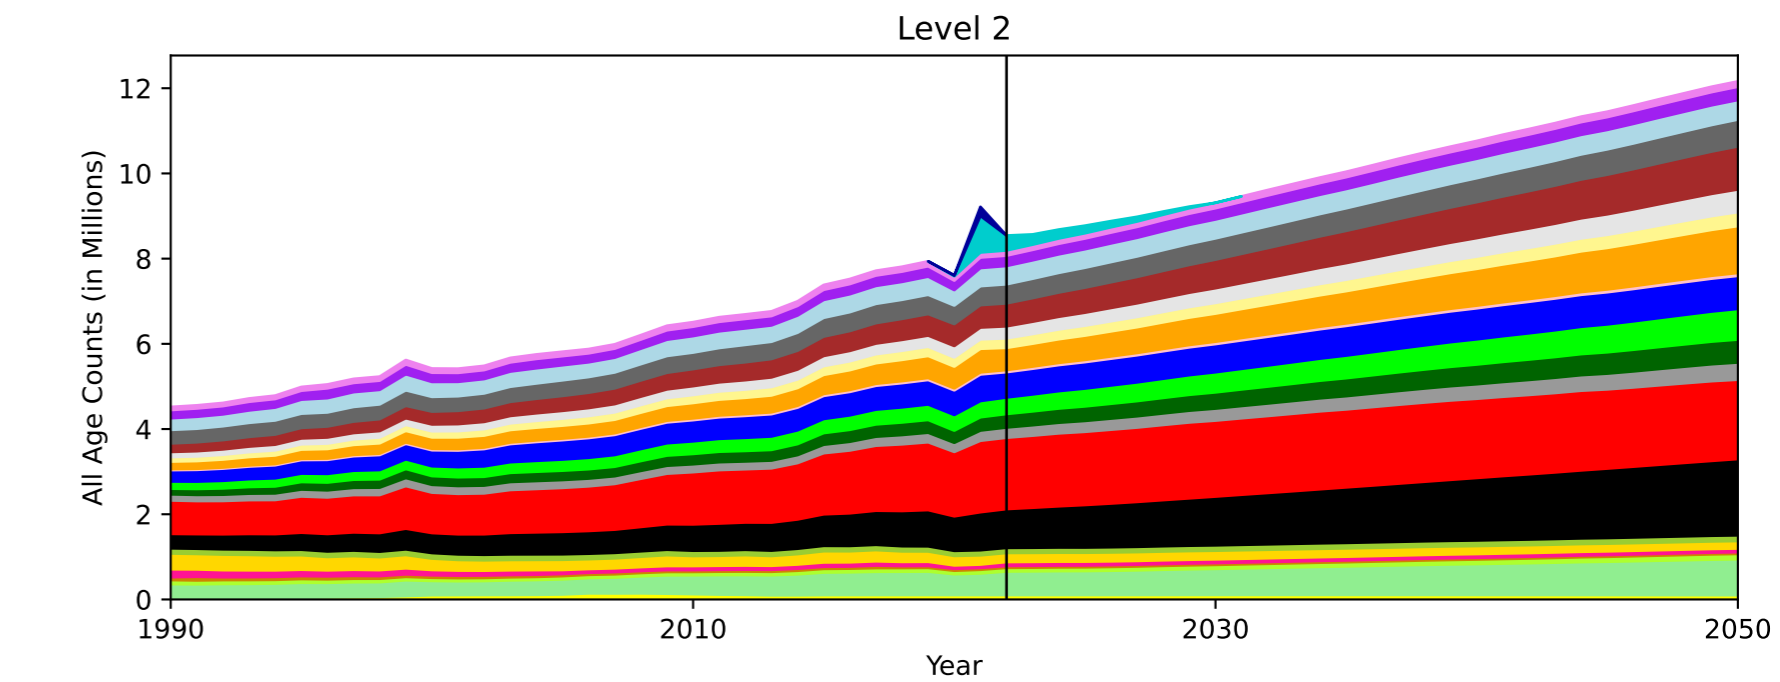

# Maldives

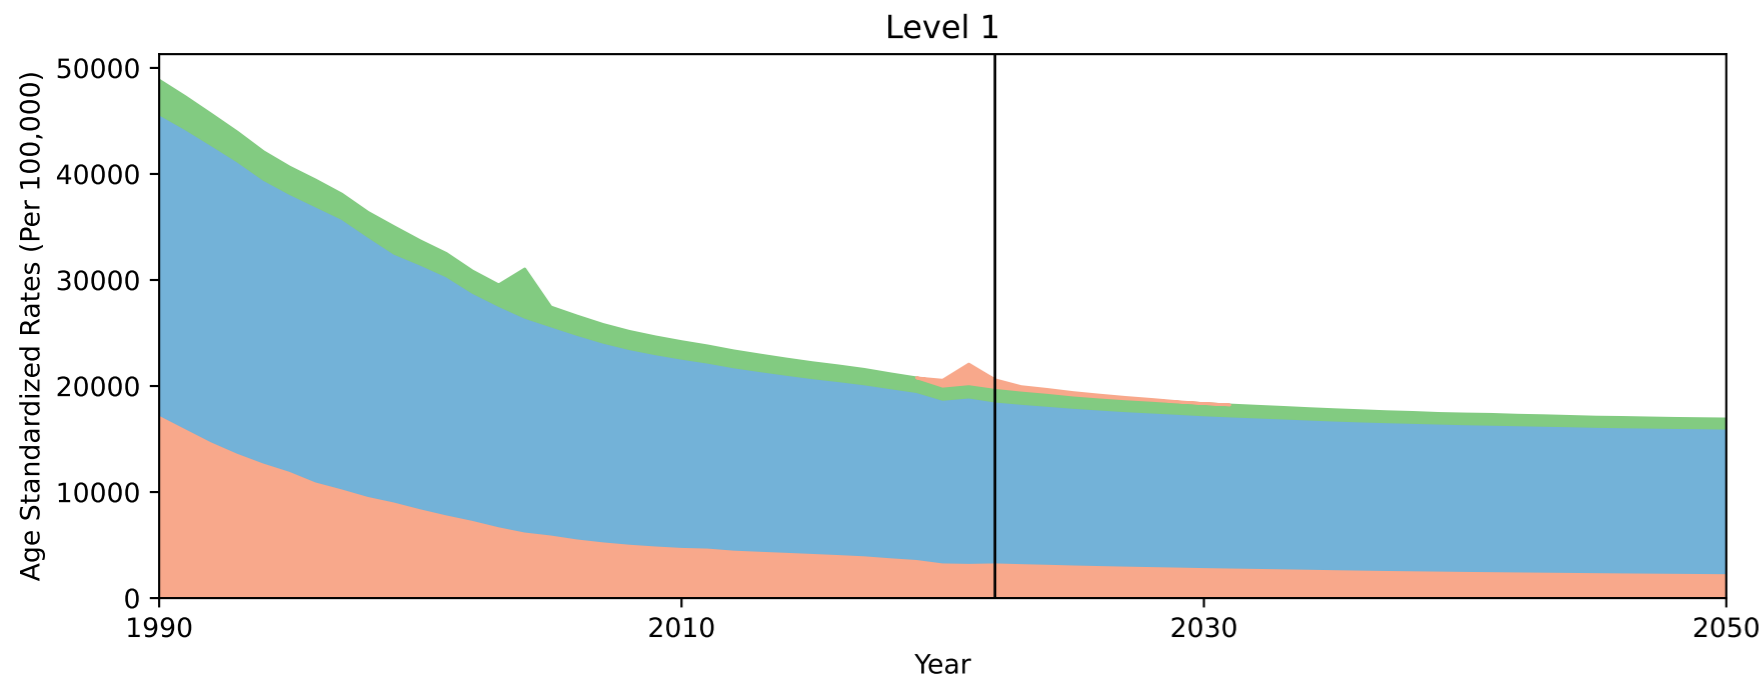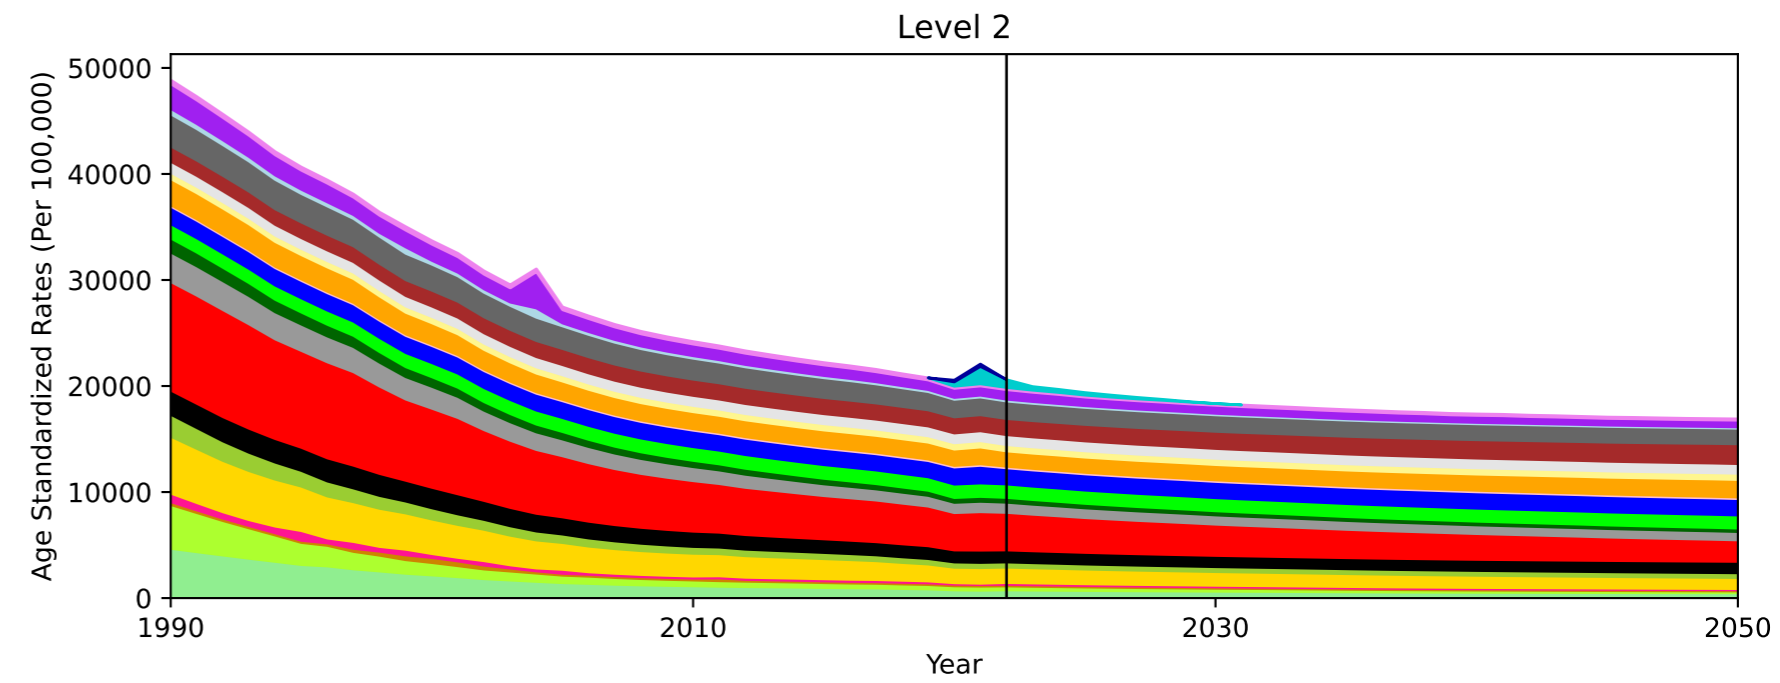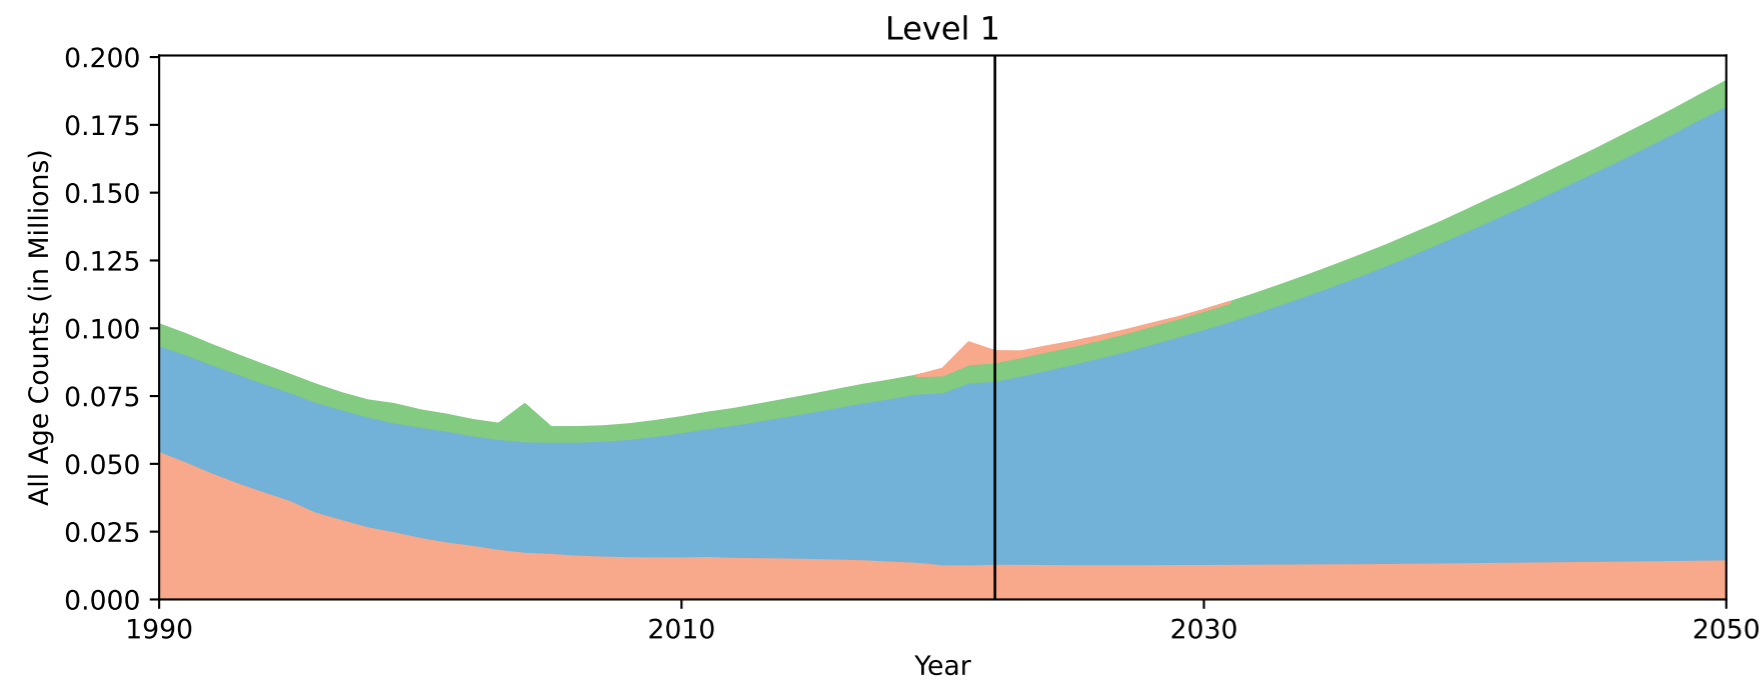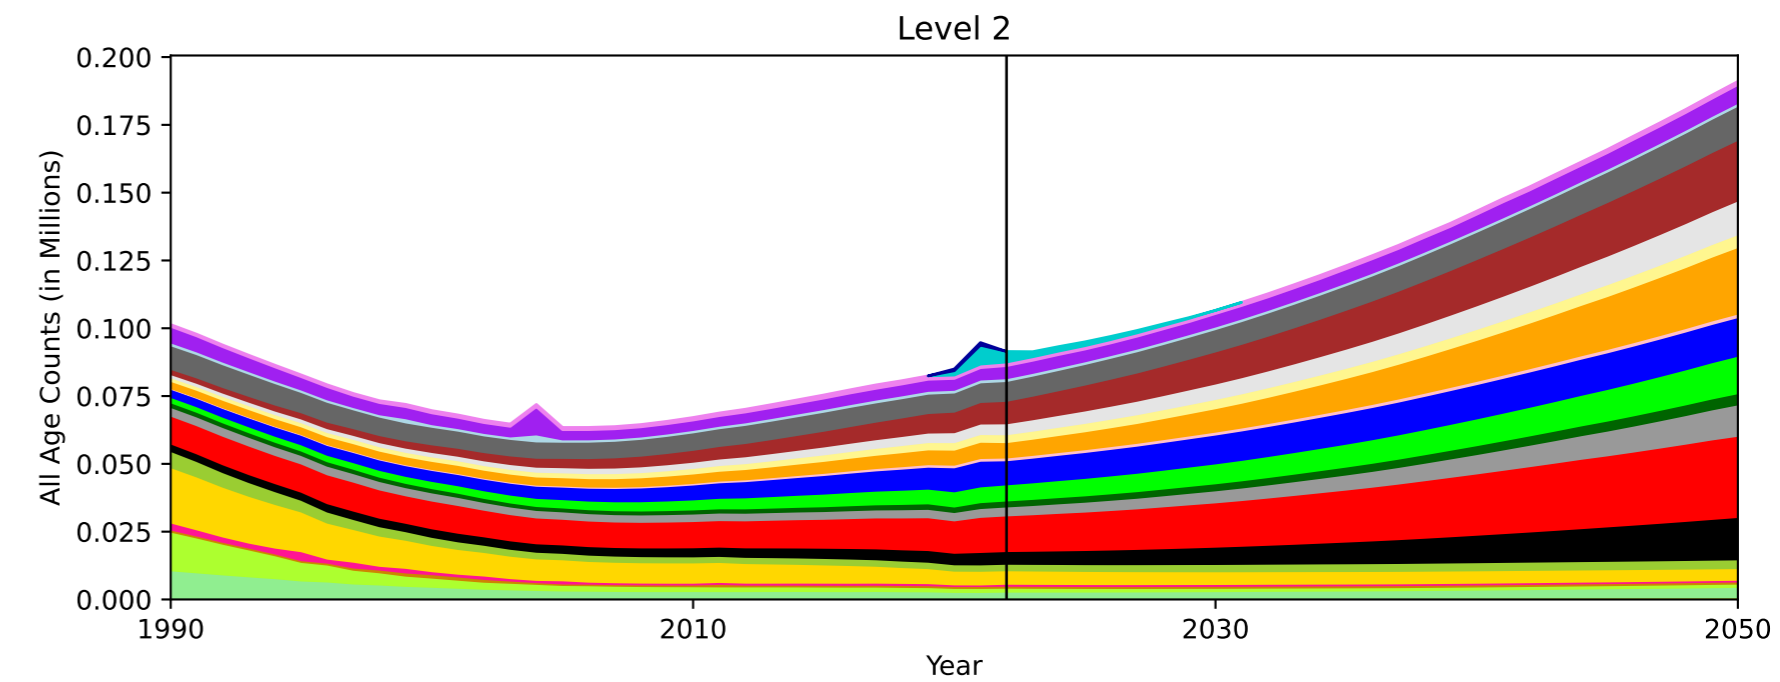

# Mauritius

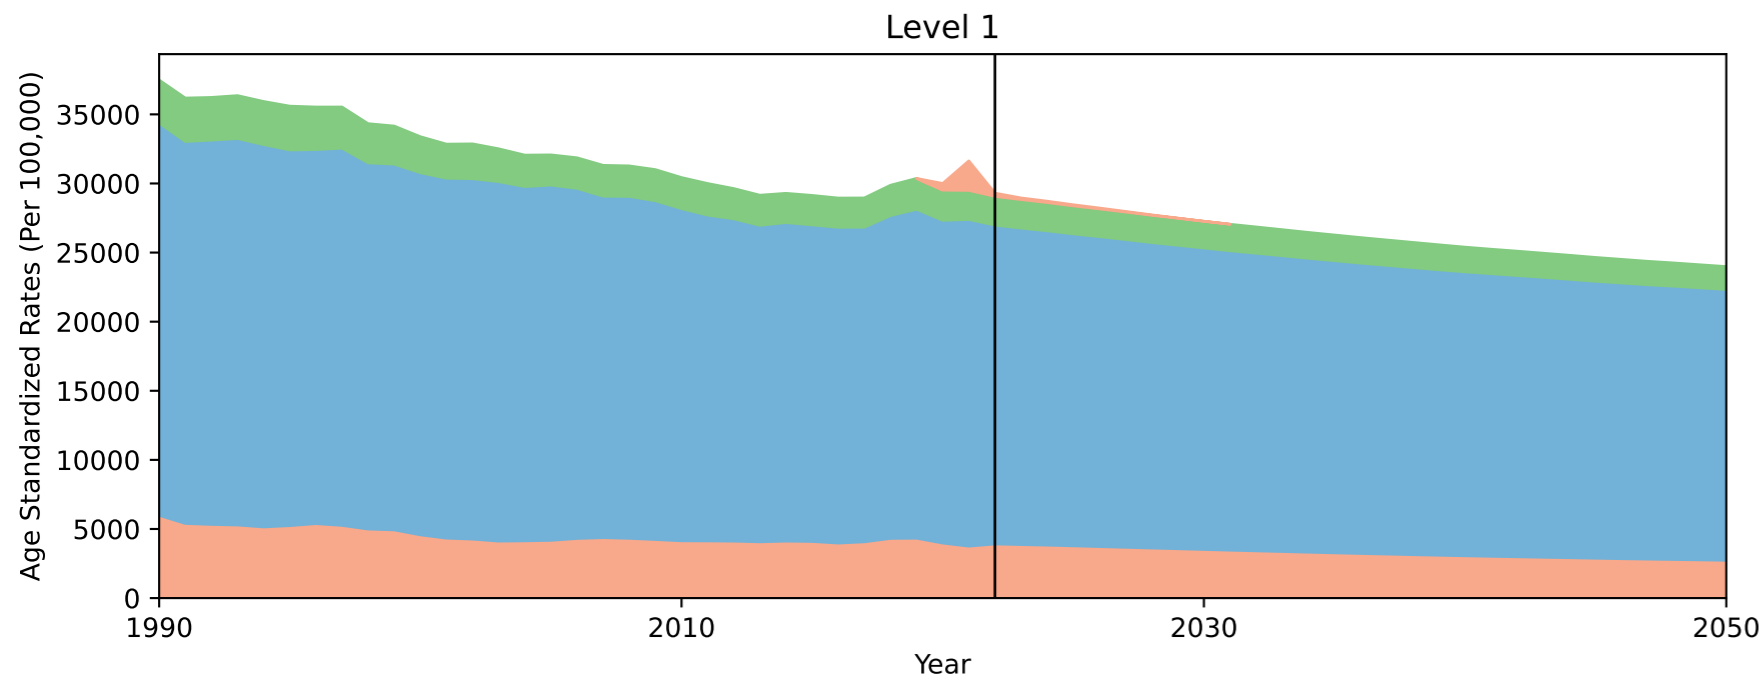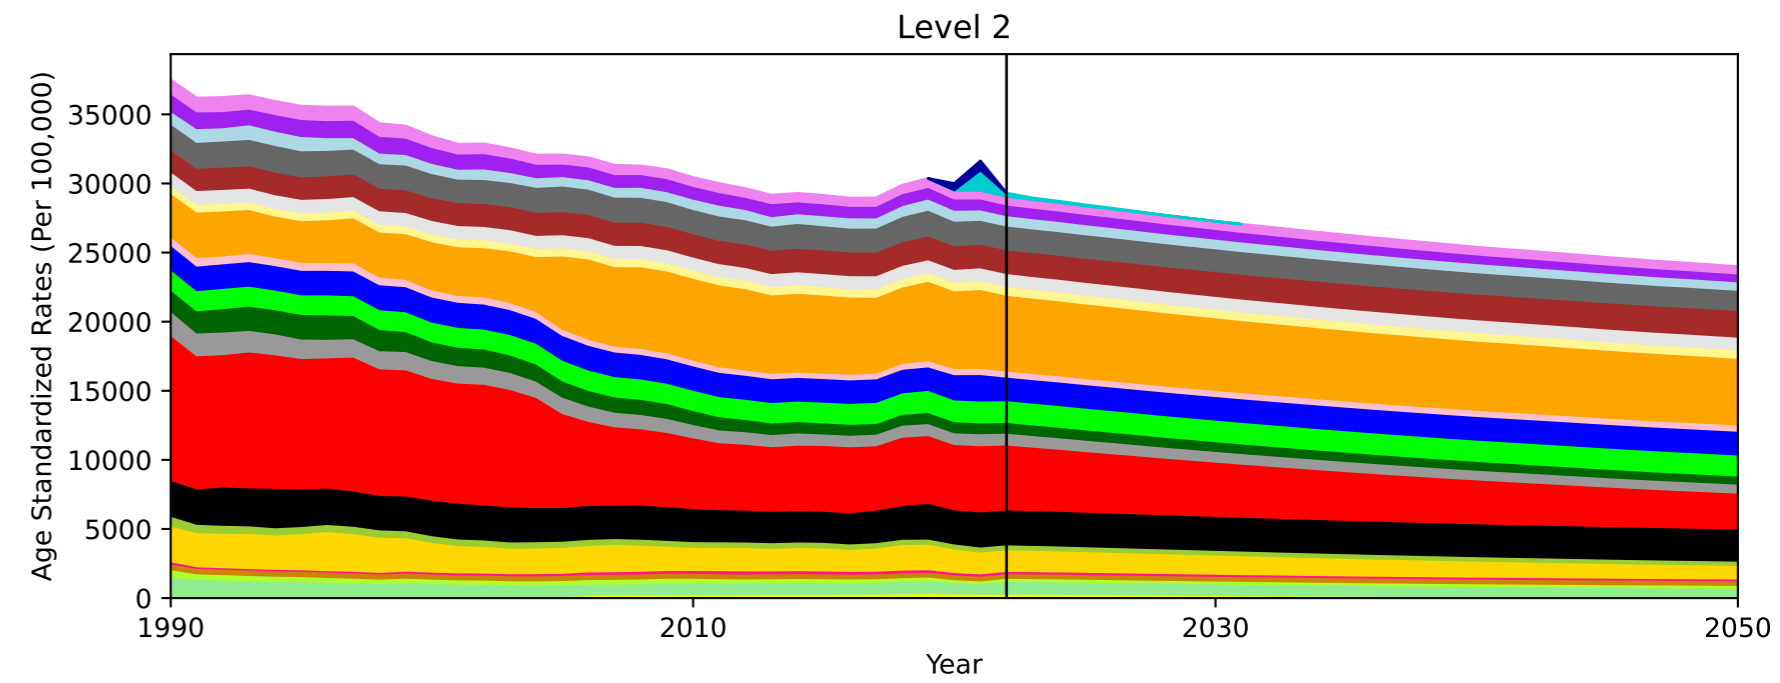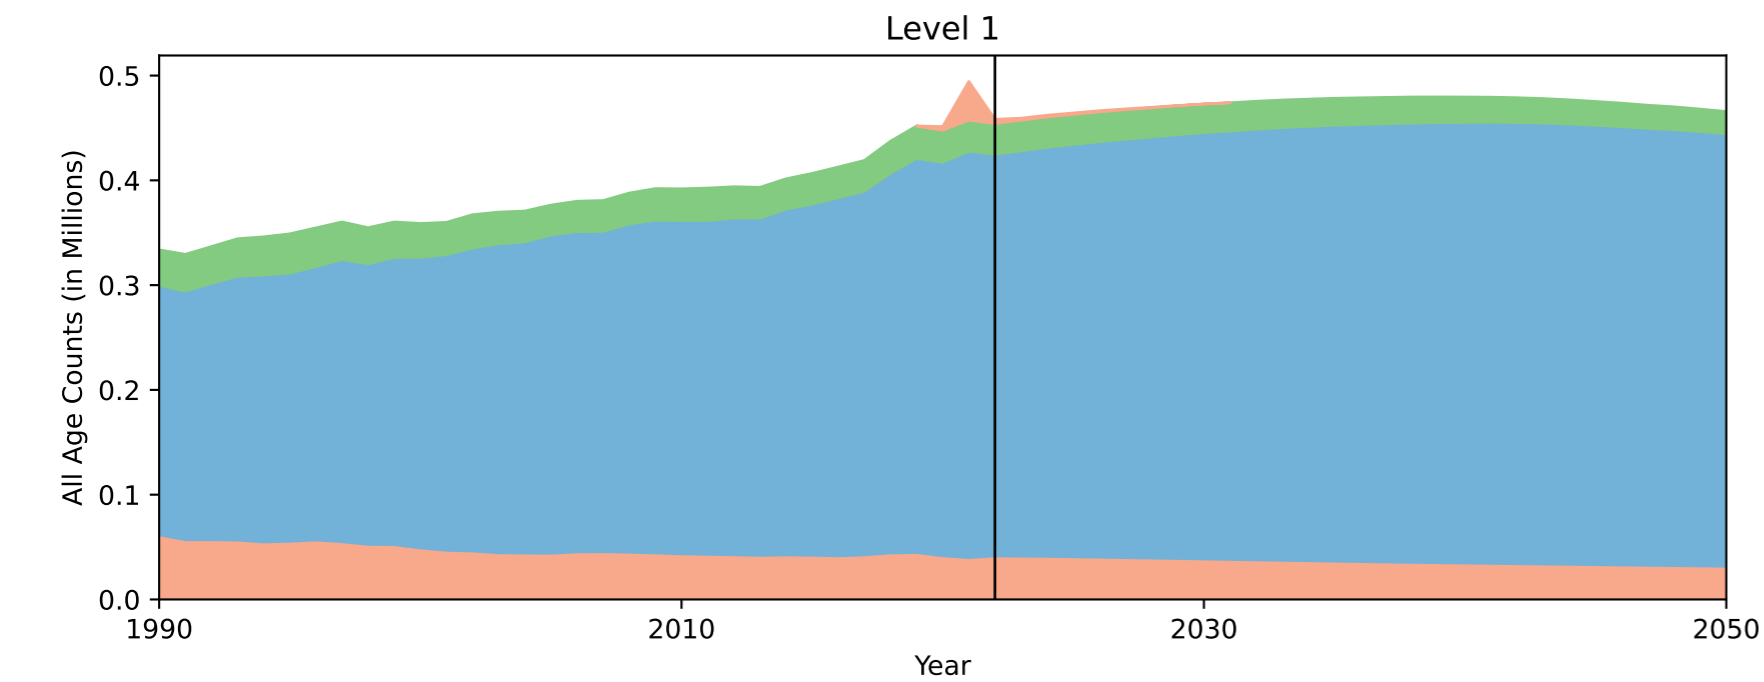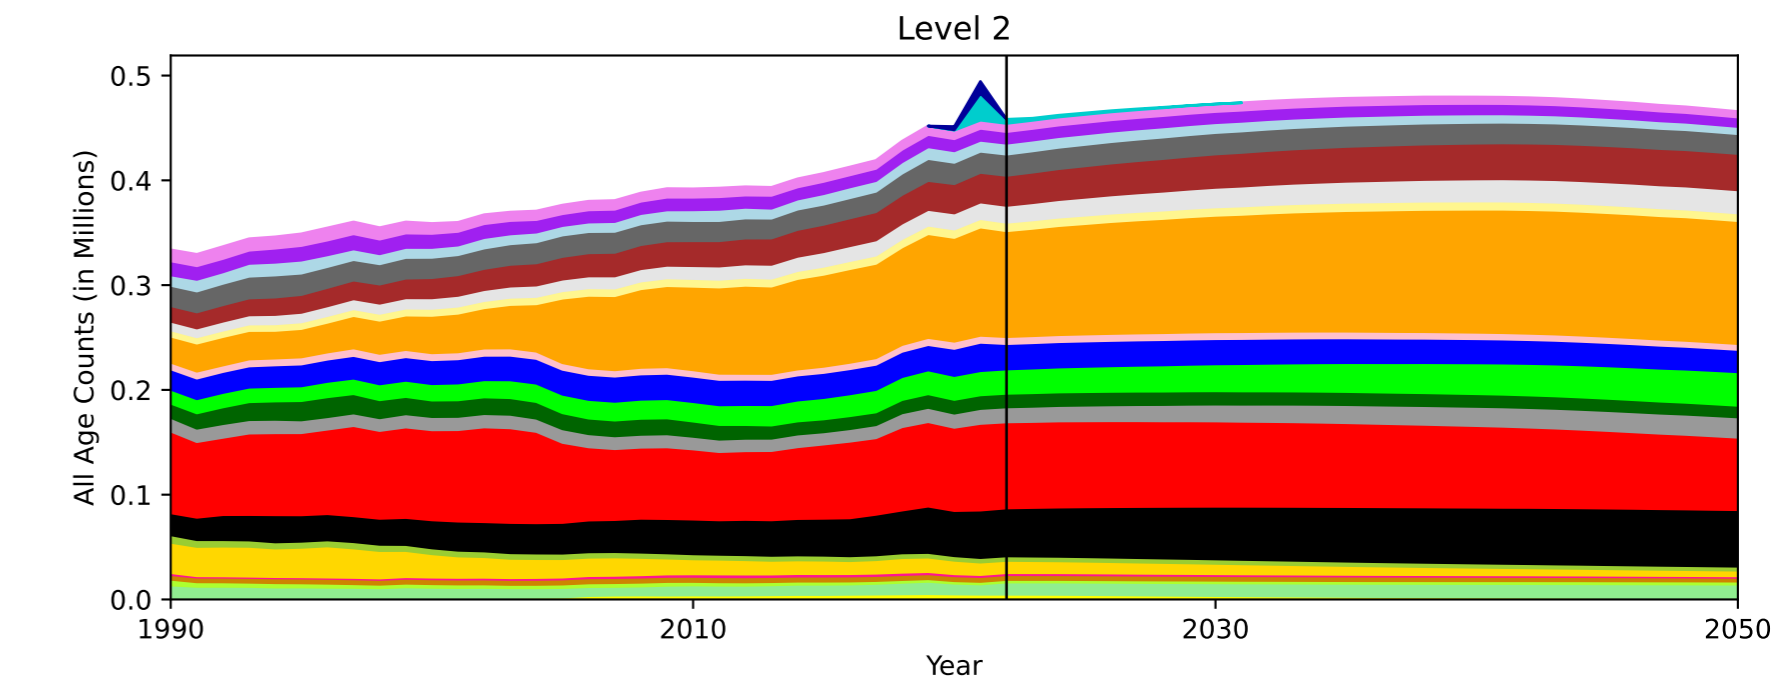

# Myanmar

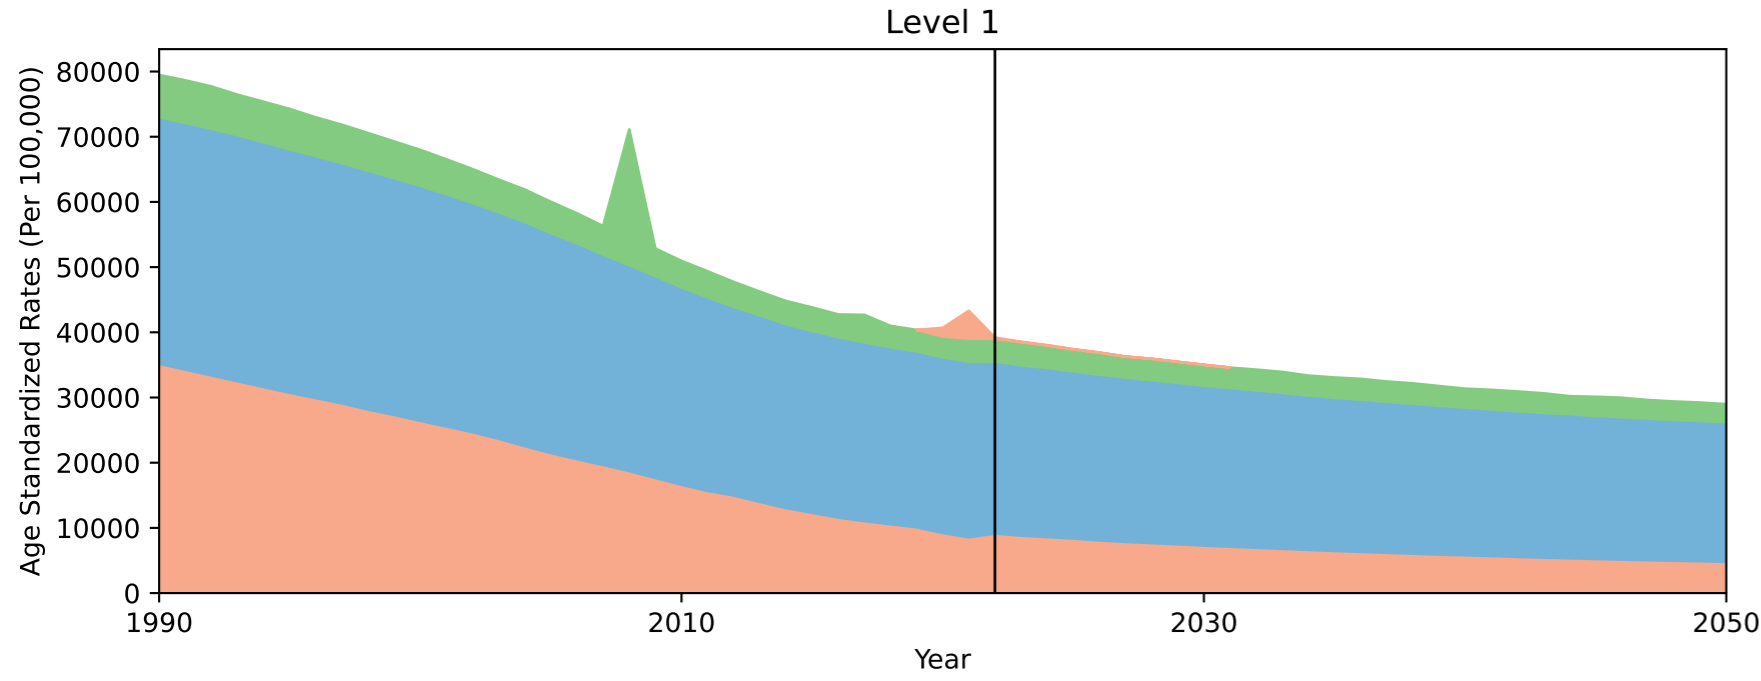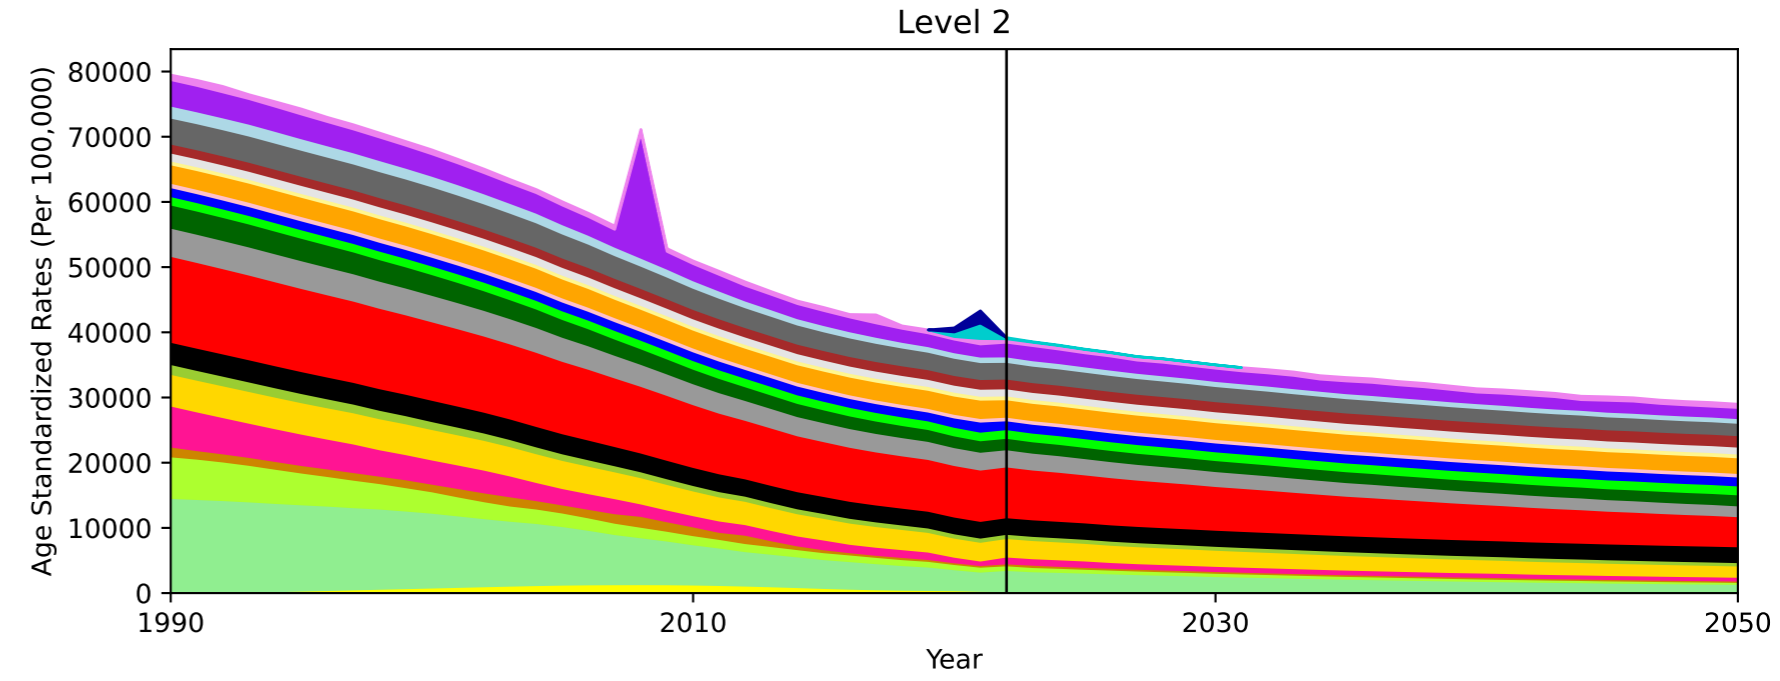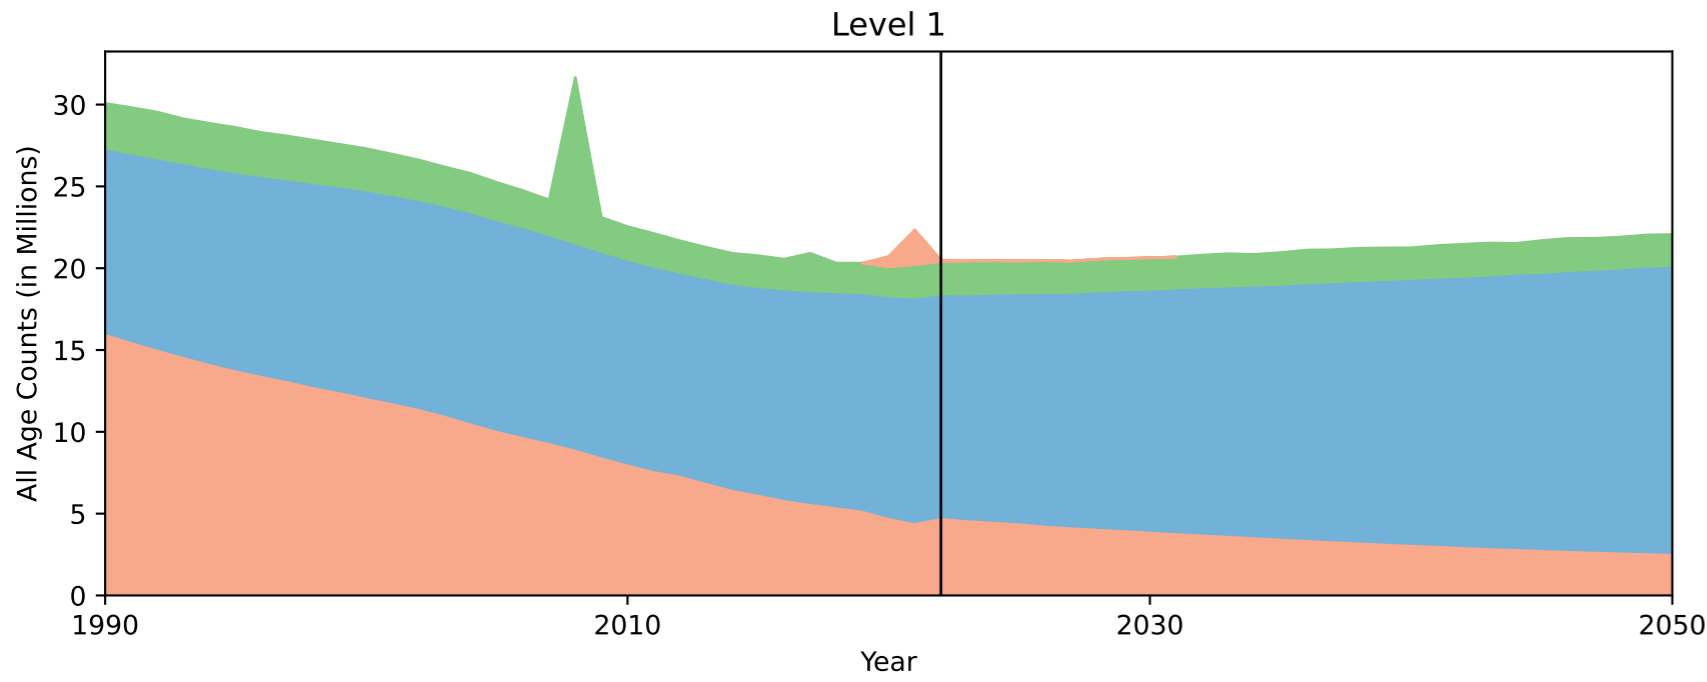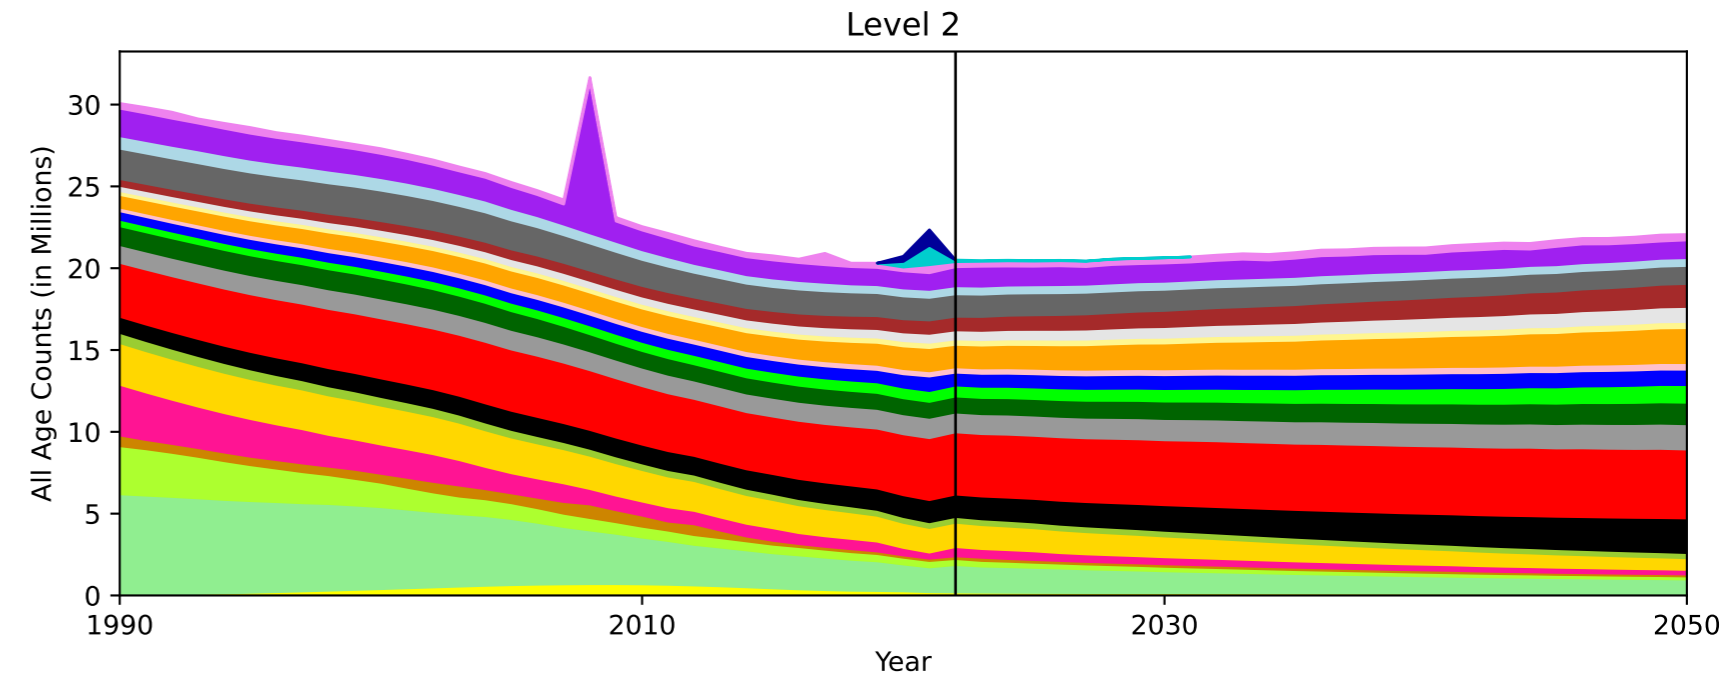

# Philippines

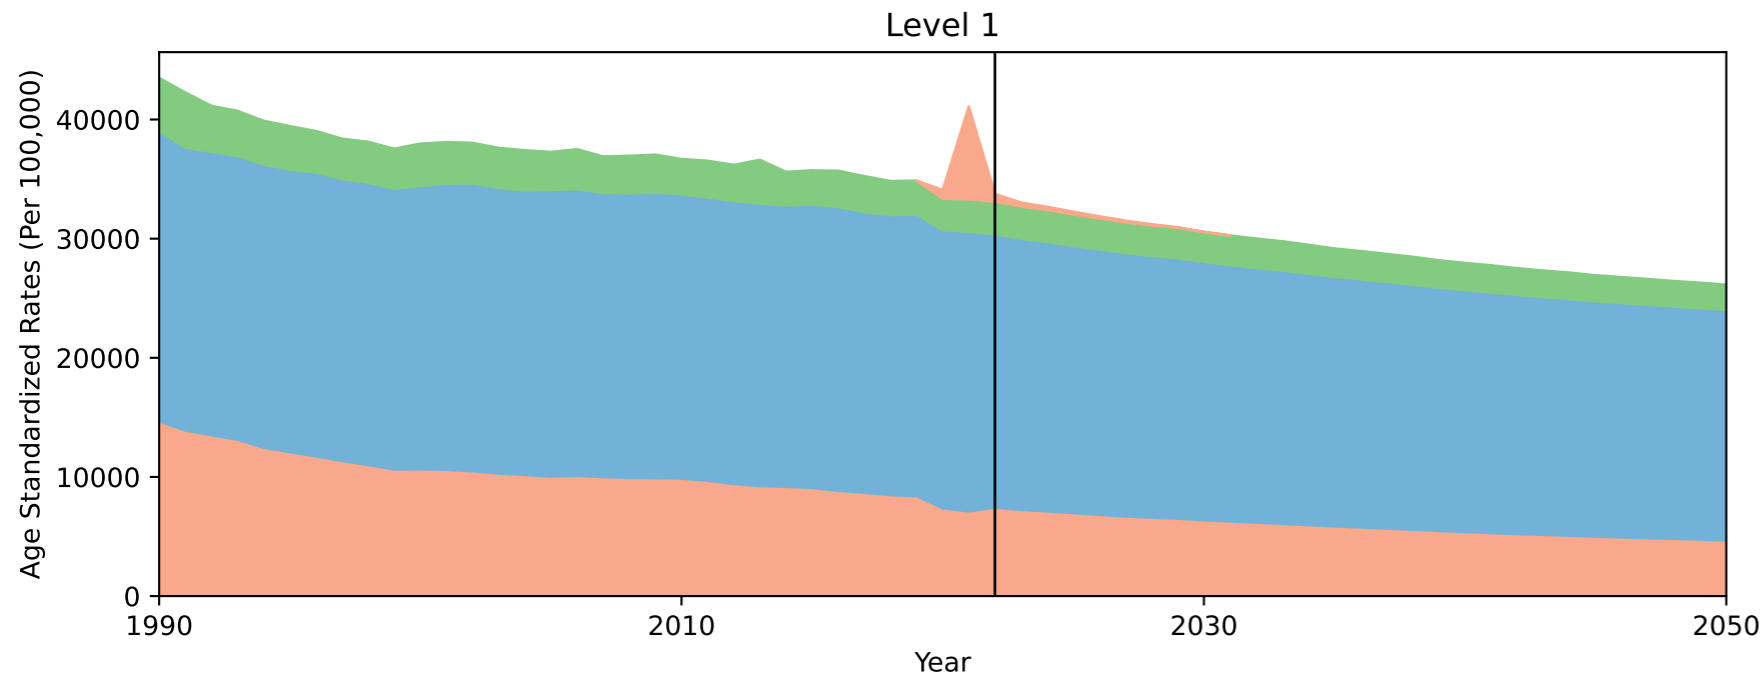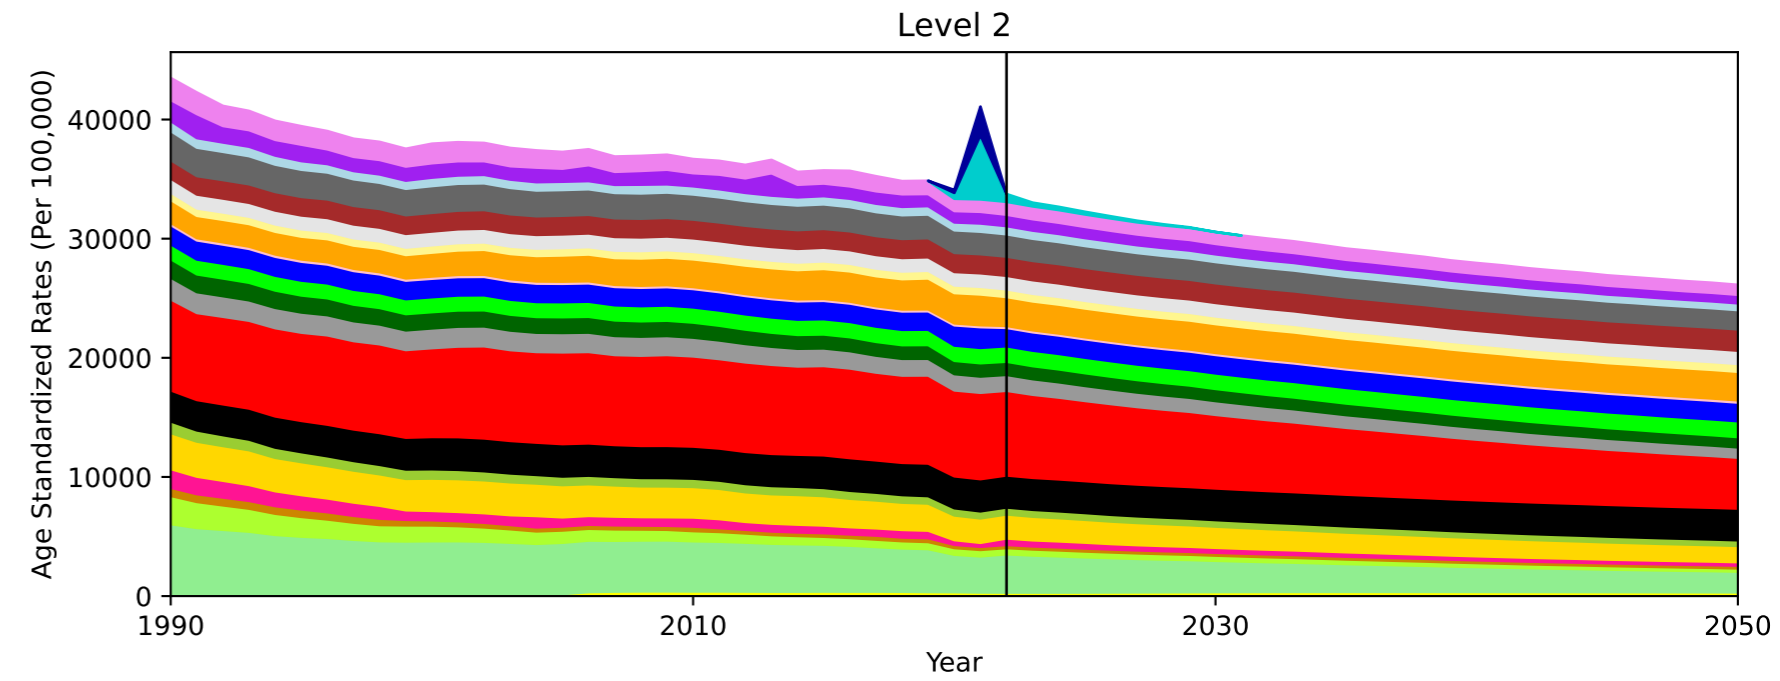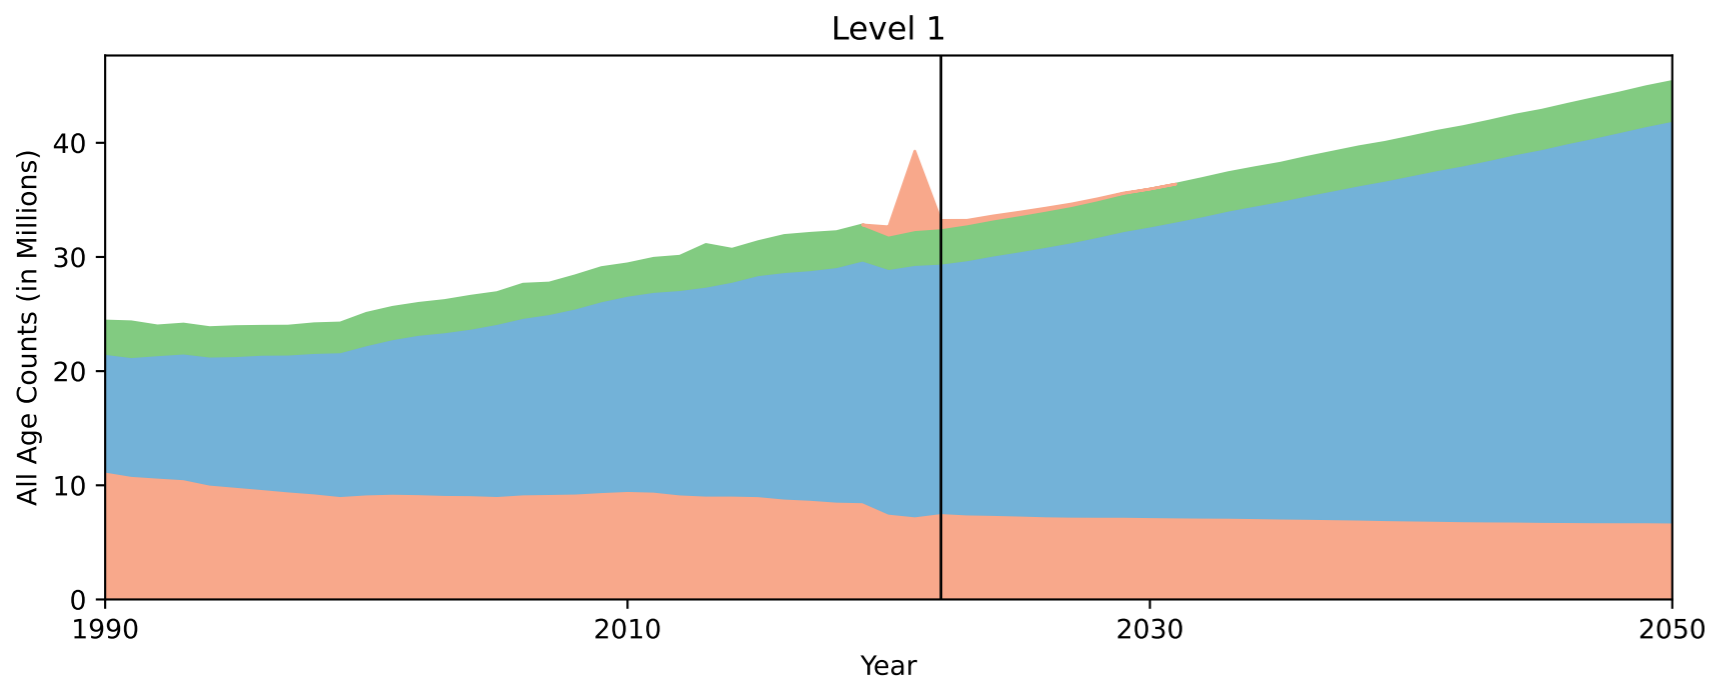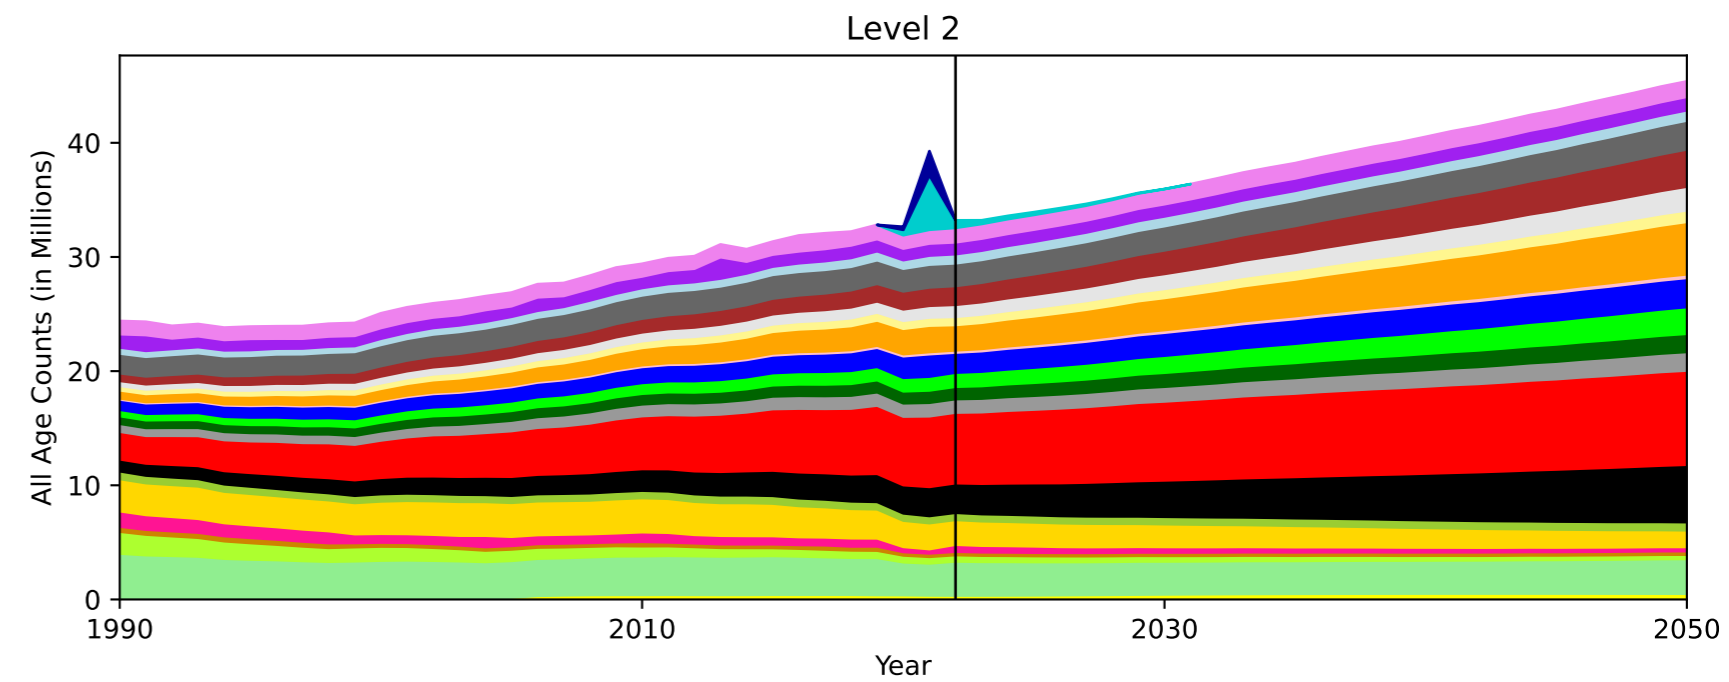

# Seychelles

Supplemental Results Figure S4. Age-standardised DALY rates and all age DALY counts and by Level 1 and Level 2 causes, 1990–2050

398

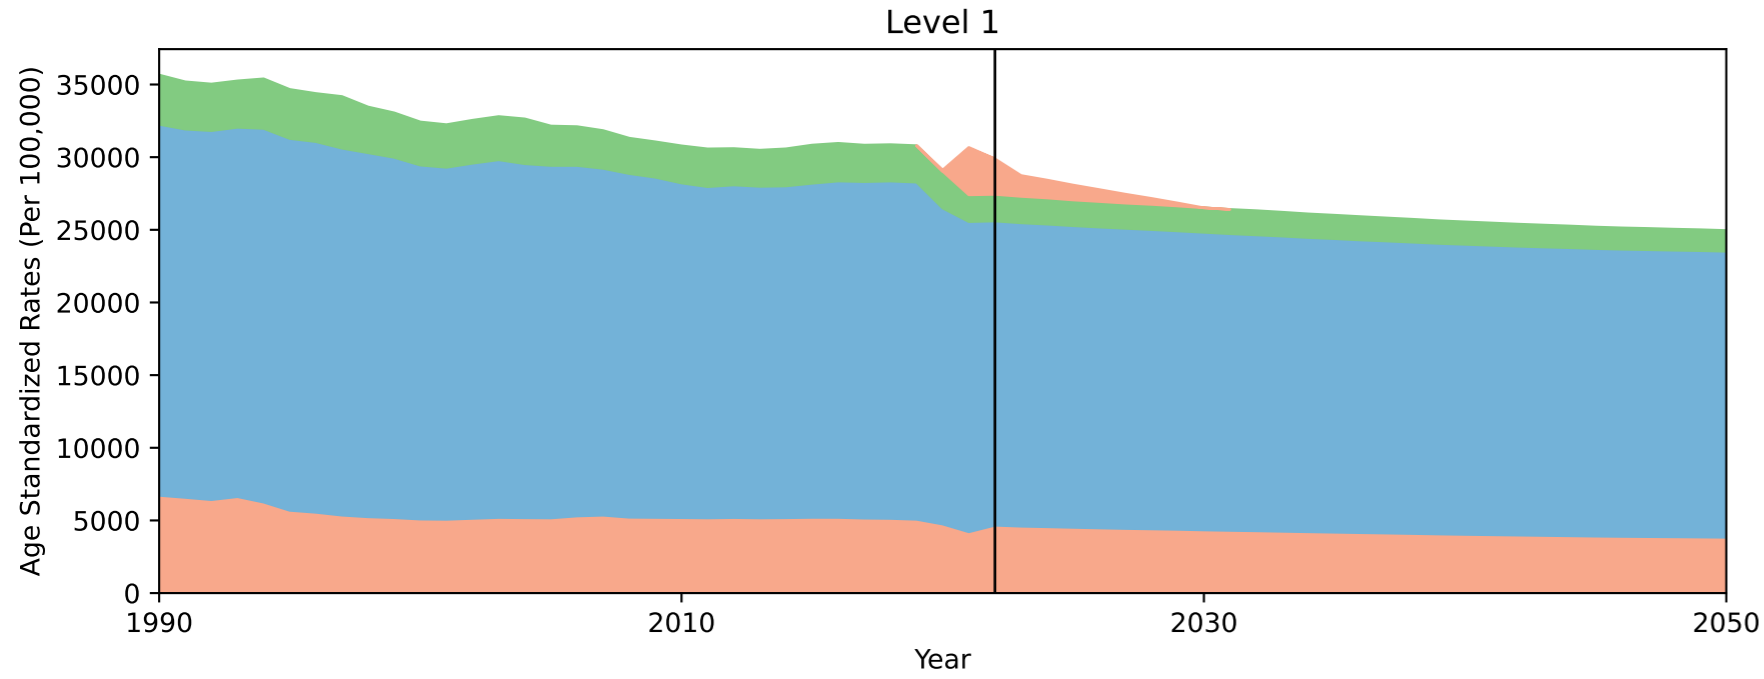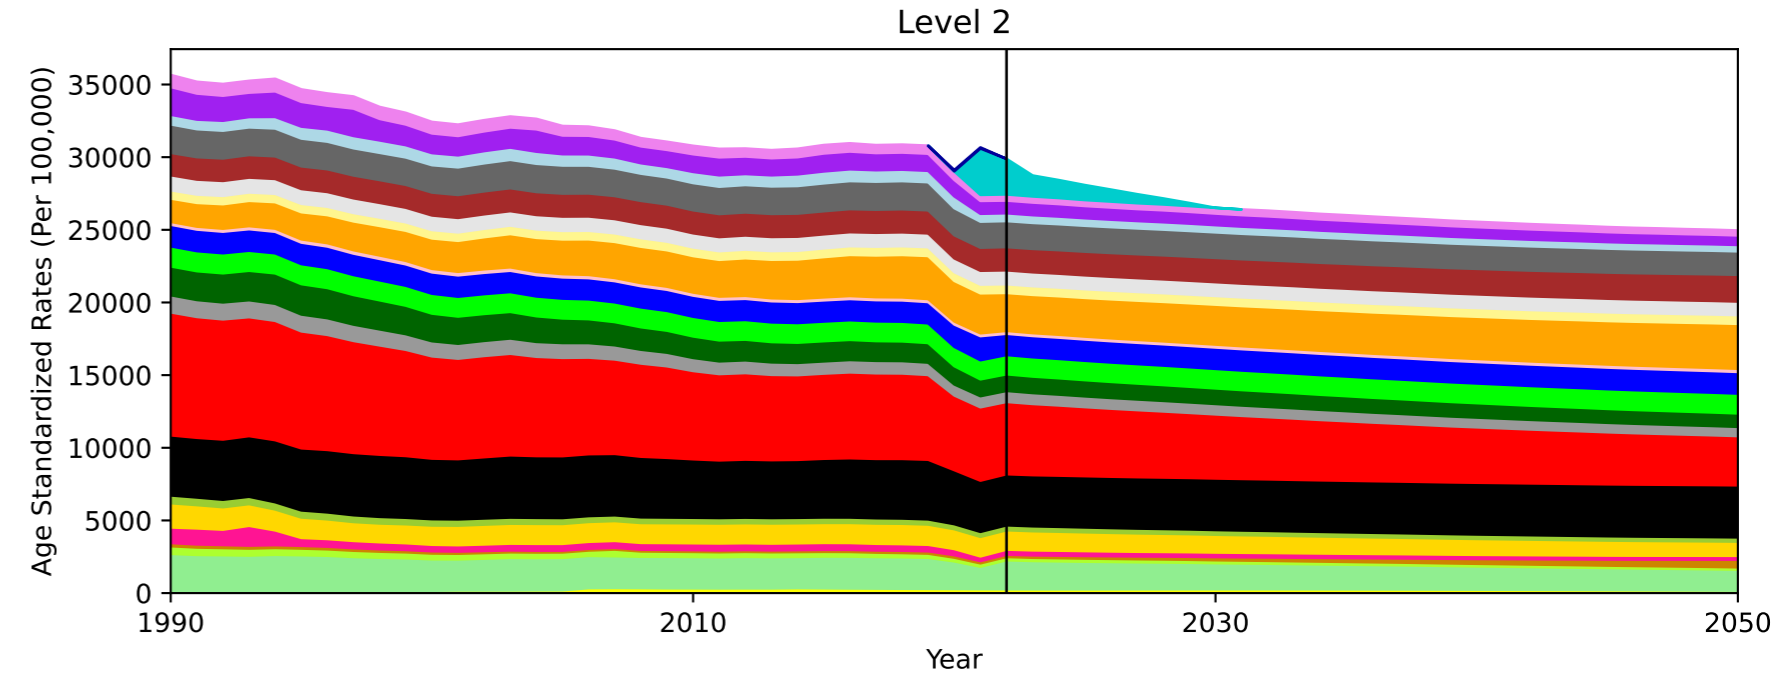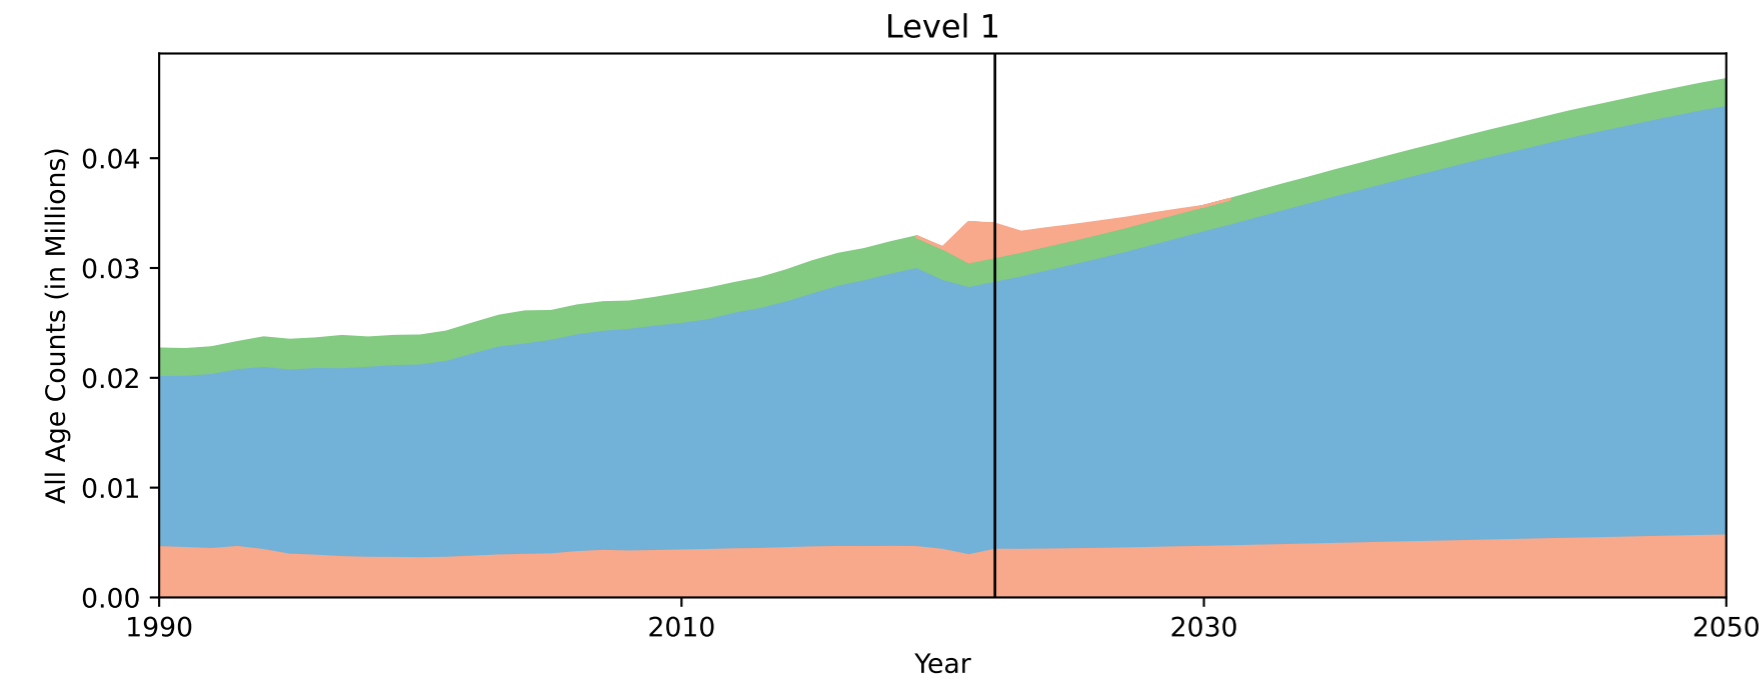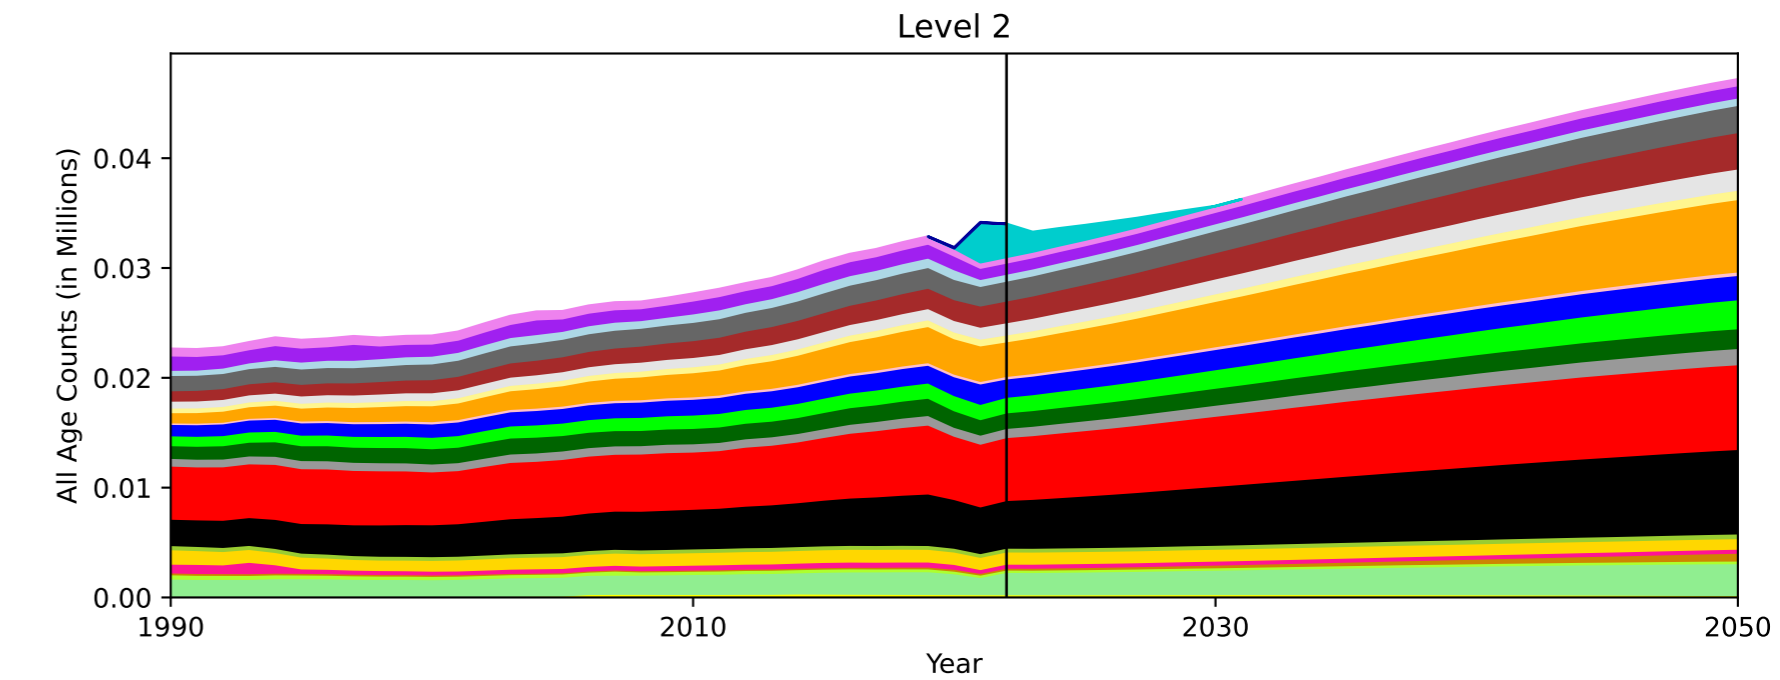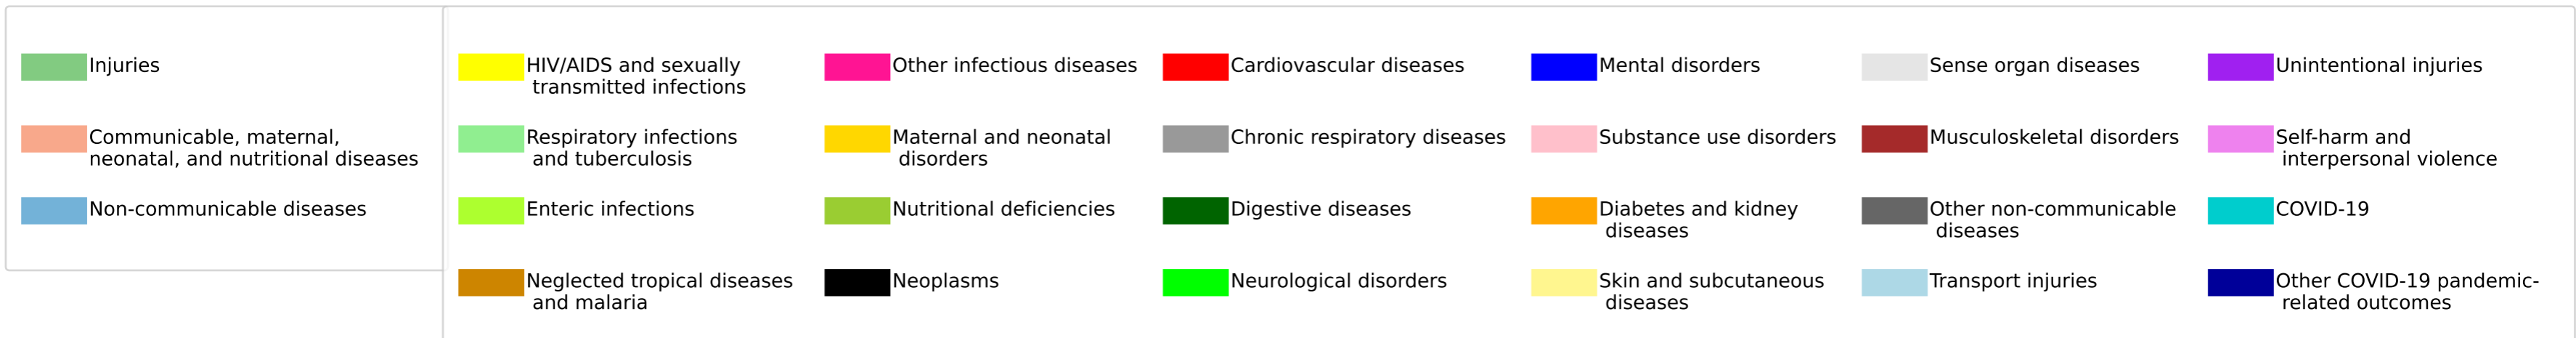

# Sri Lanka

Level 1

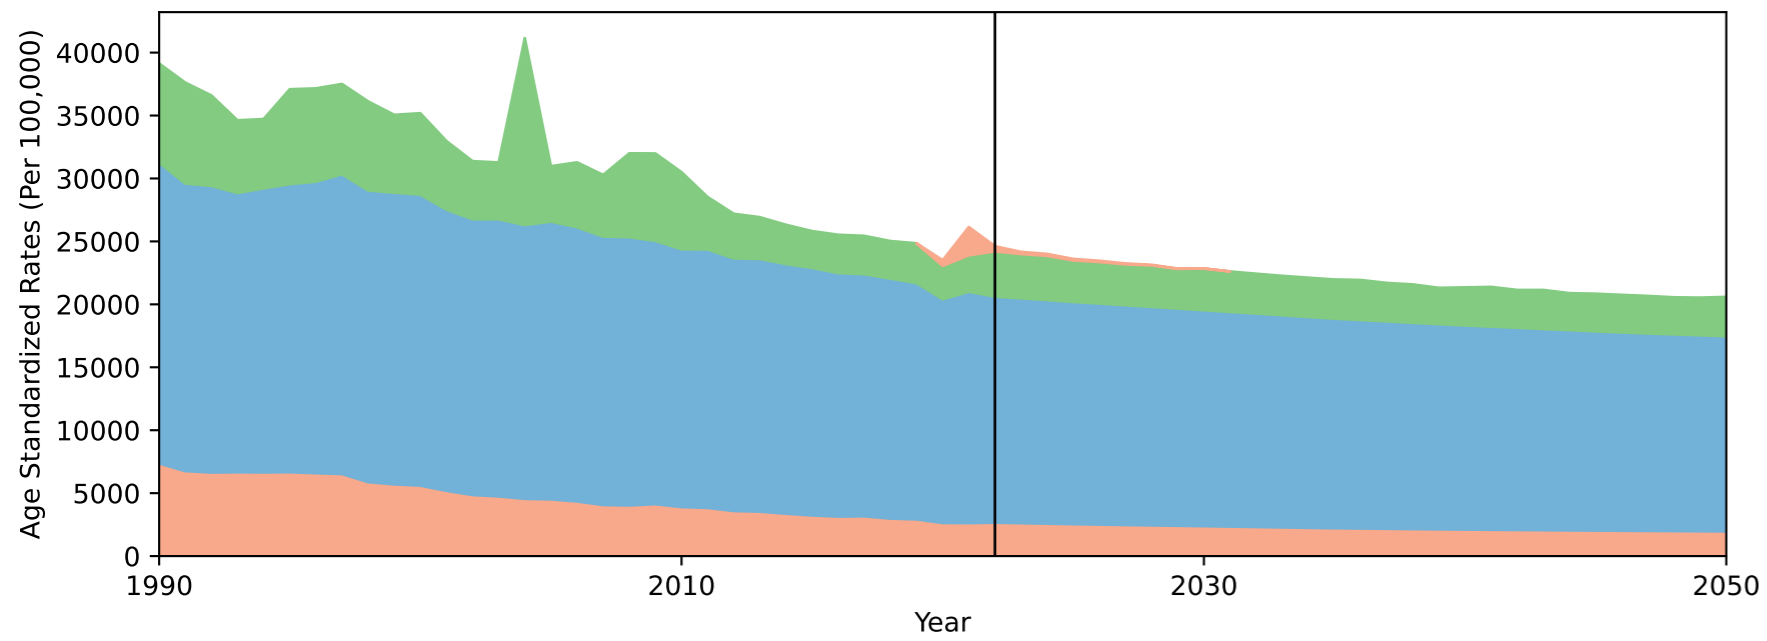

Level 2

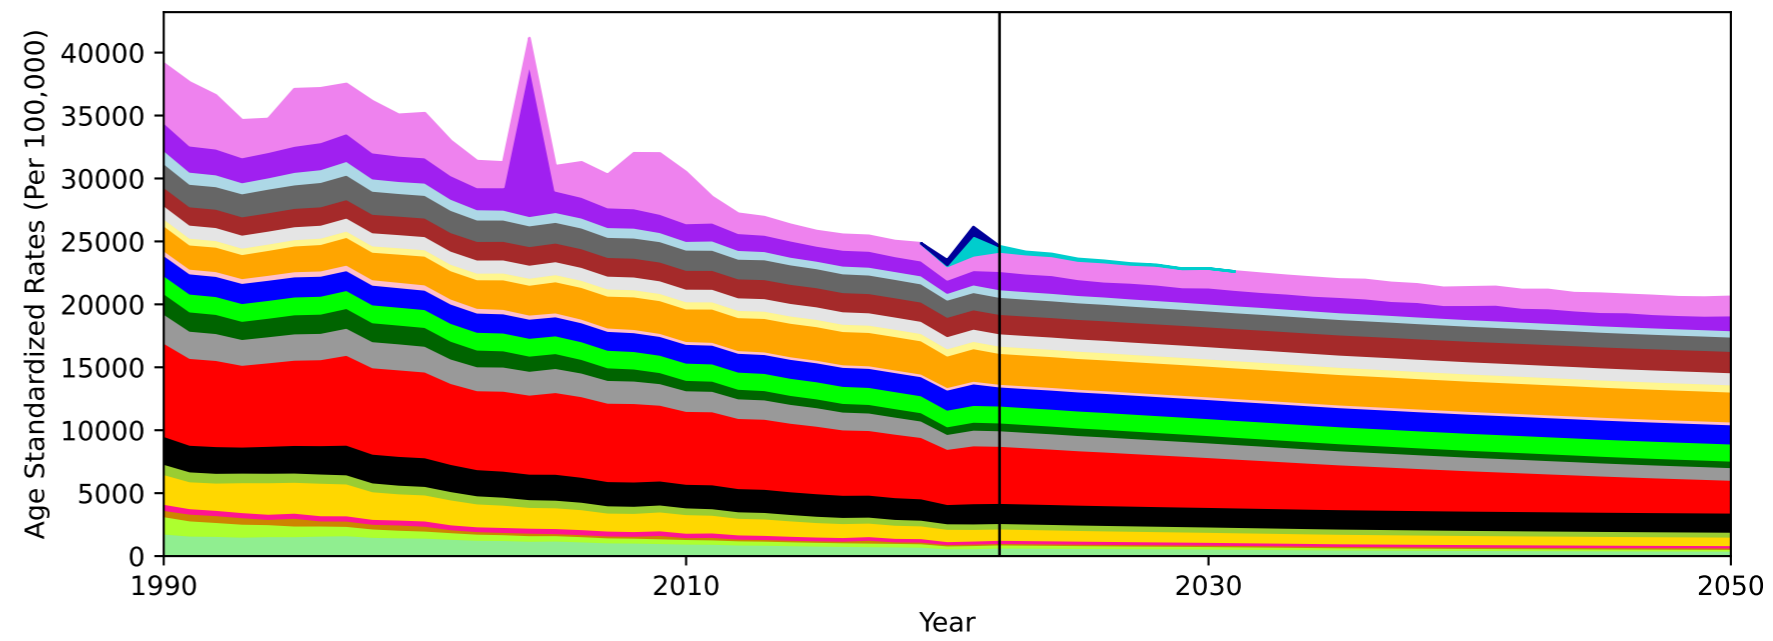

Level 1

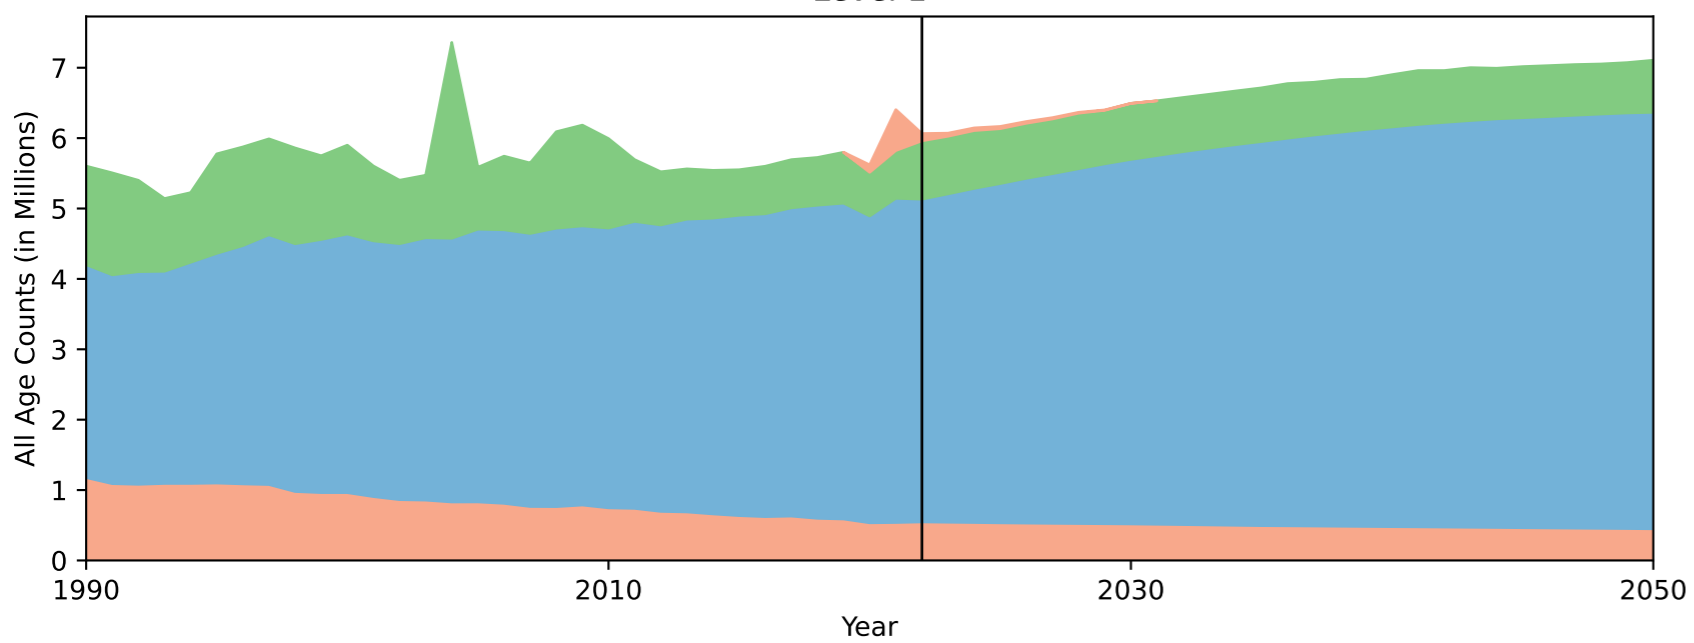

Level 2

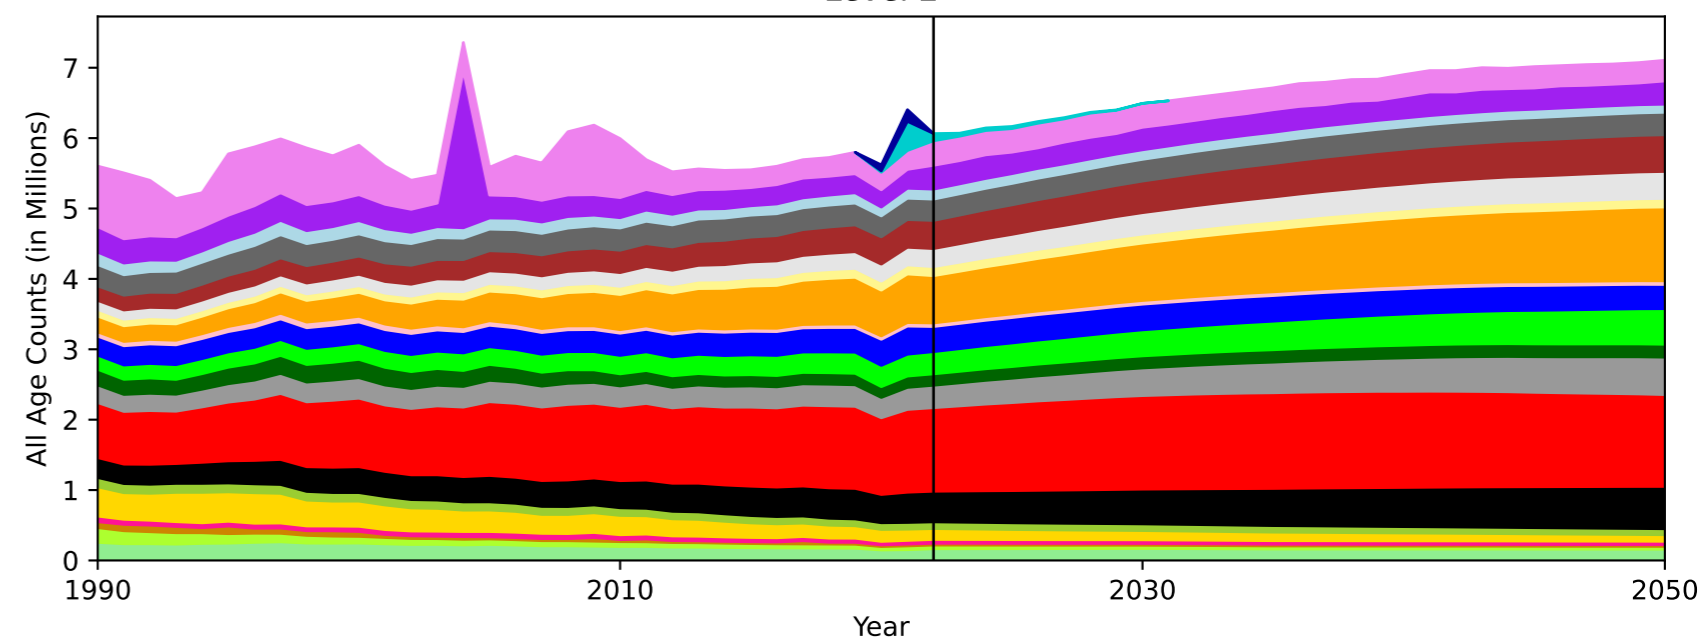



# Thailand

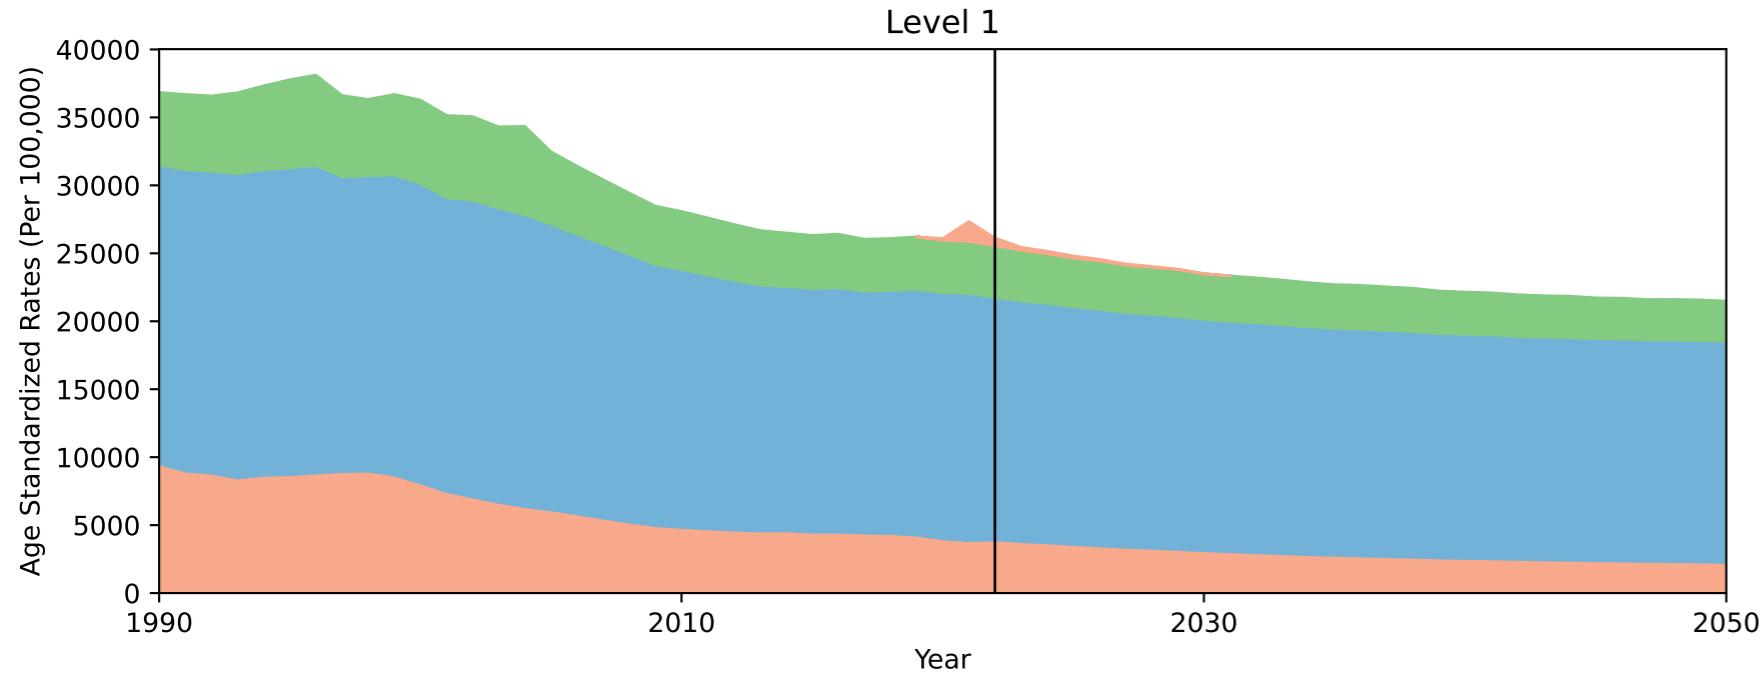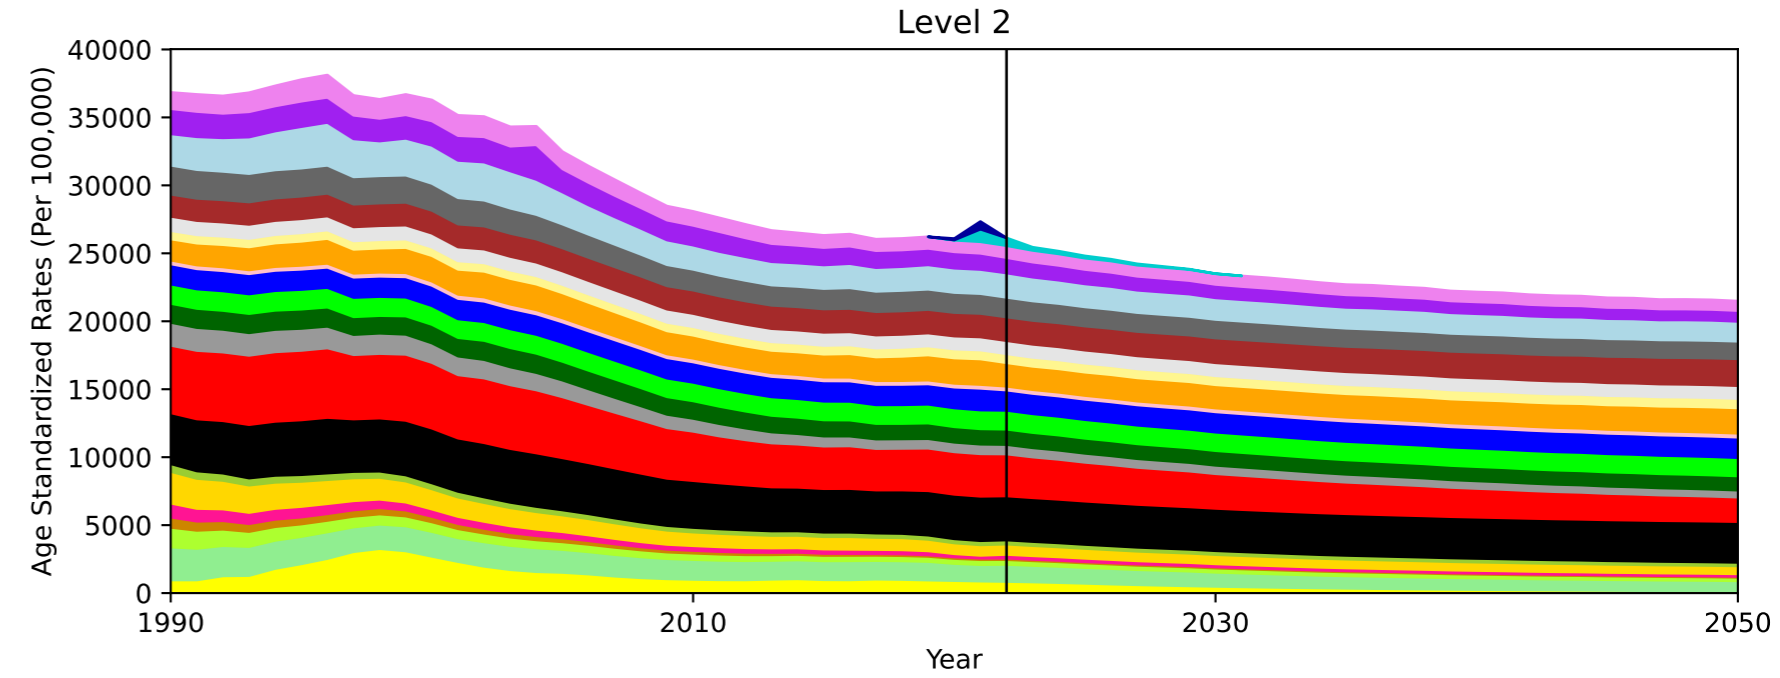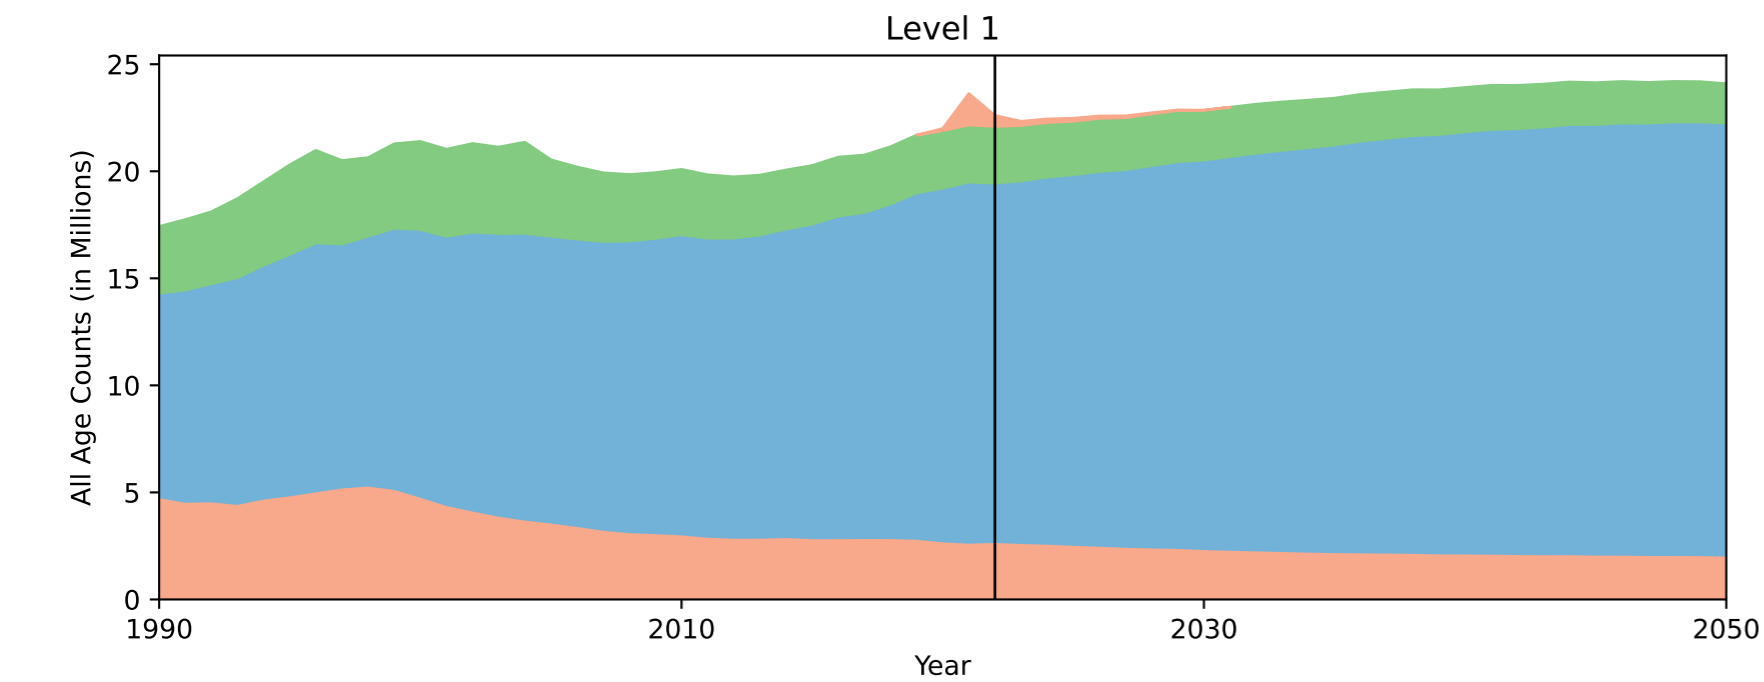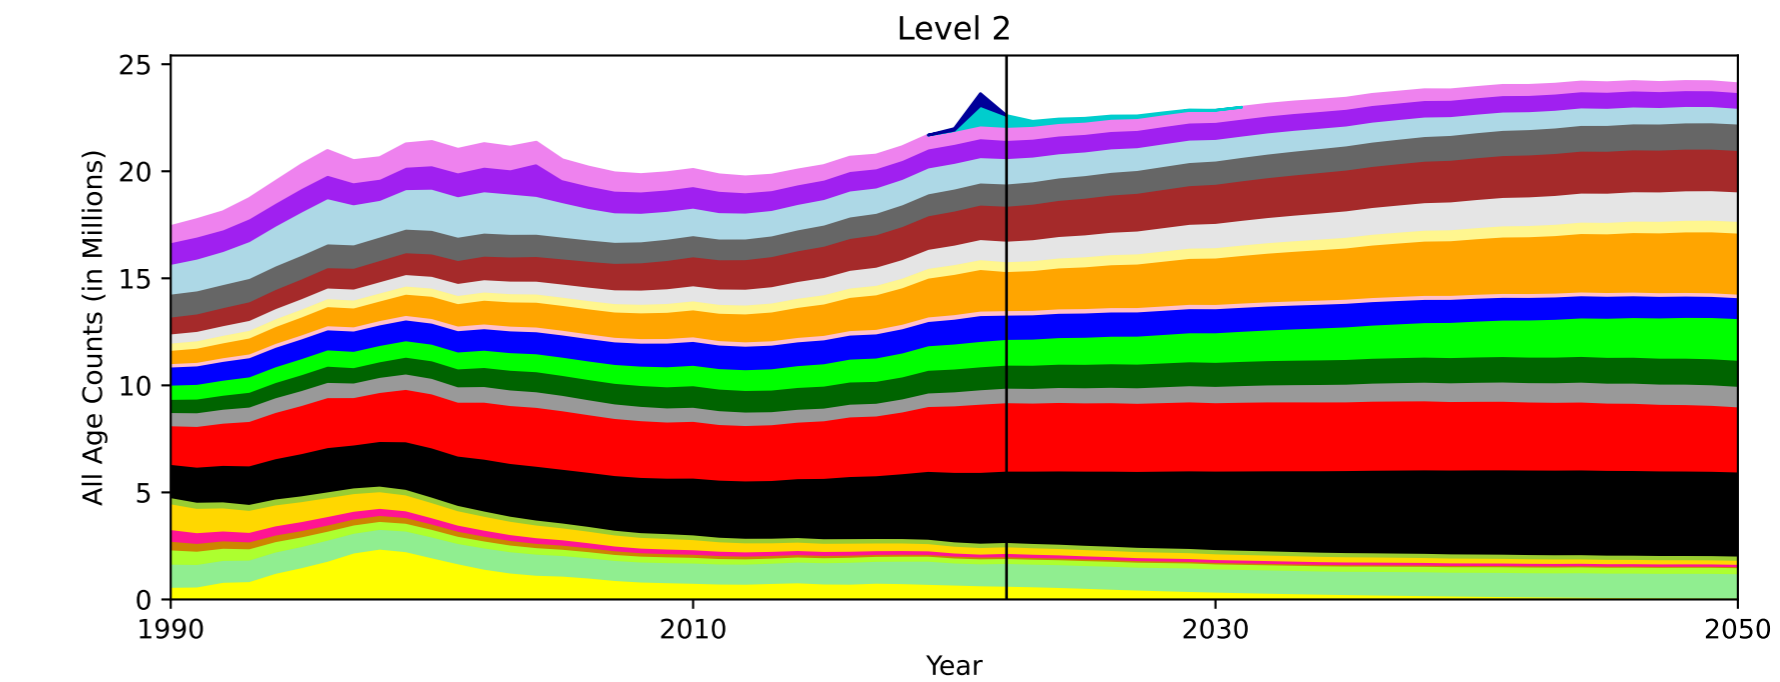

# Timor-Leste

Level 1

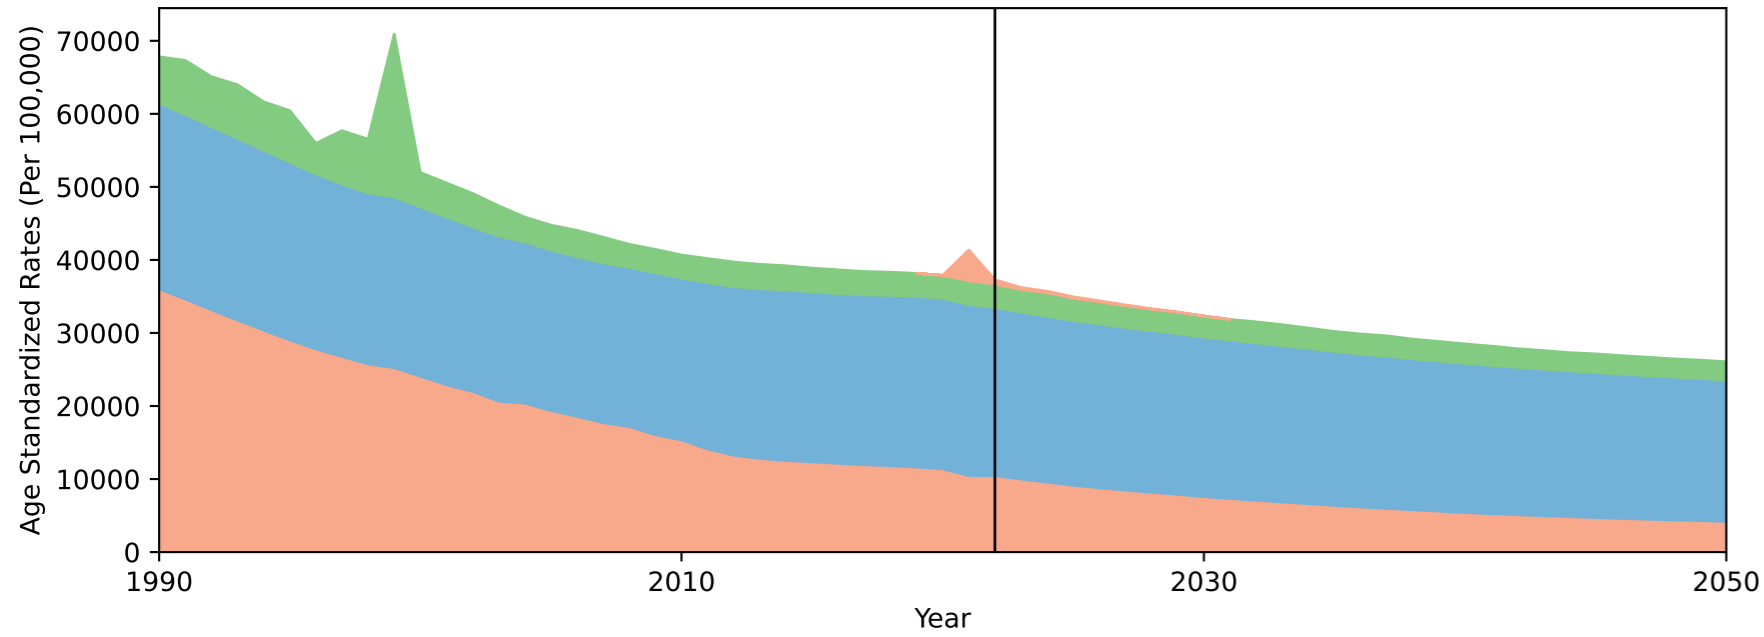

Level 2

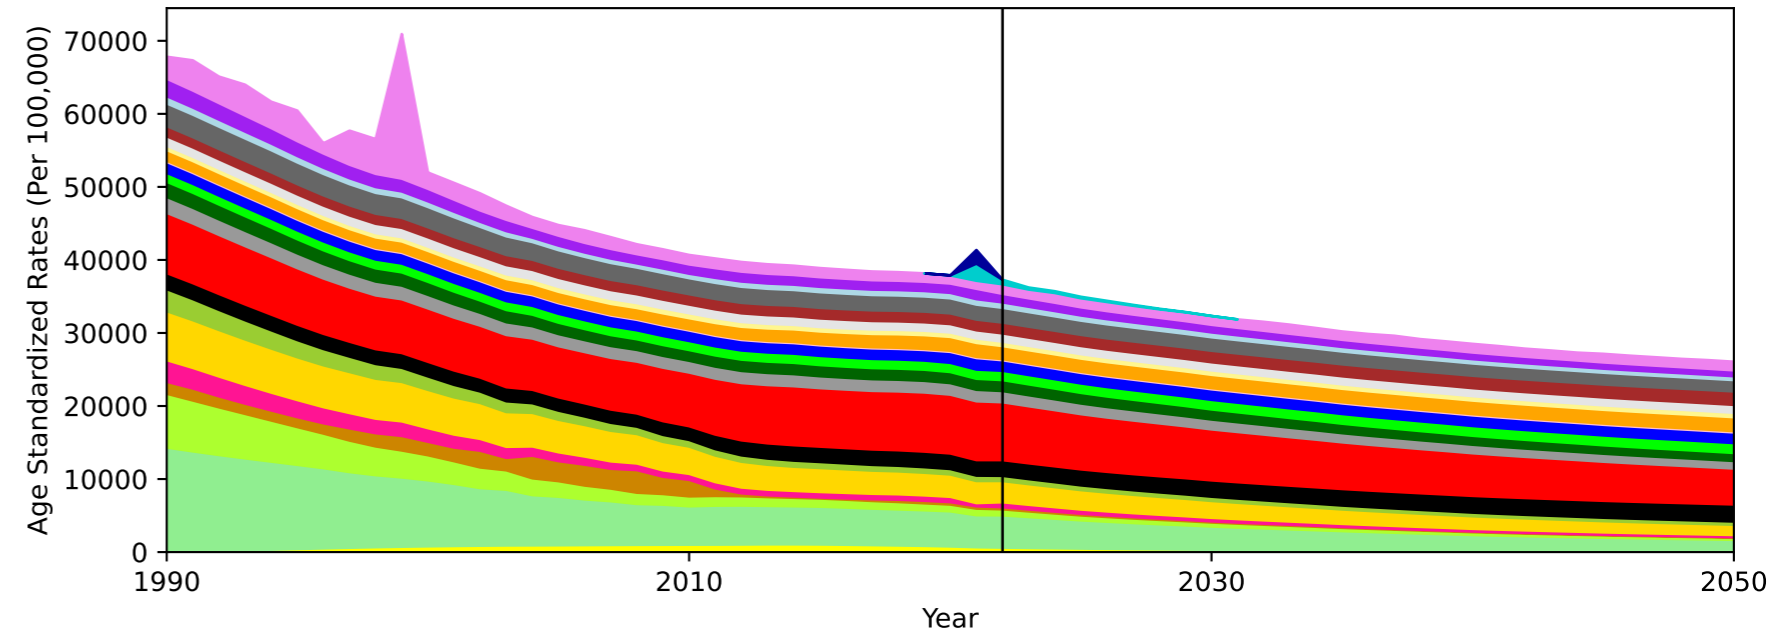

Level 1

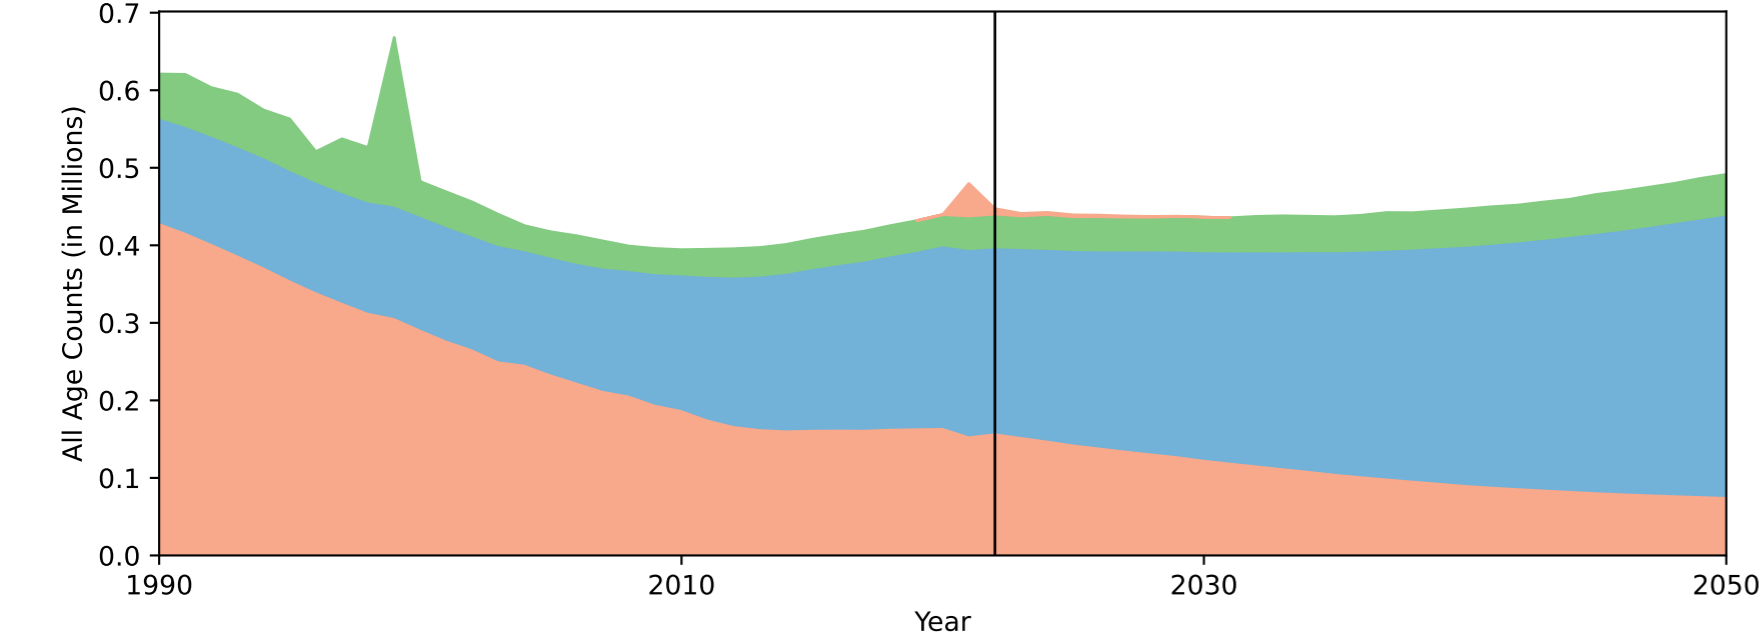

Level 2

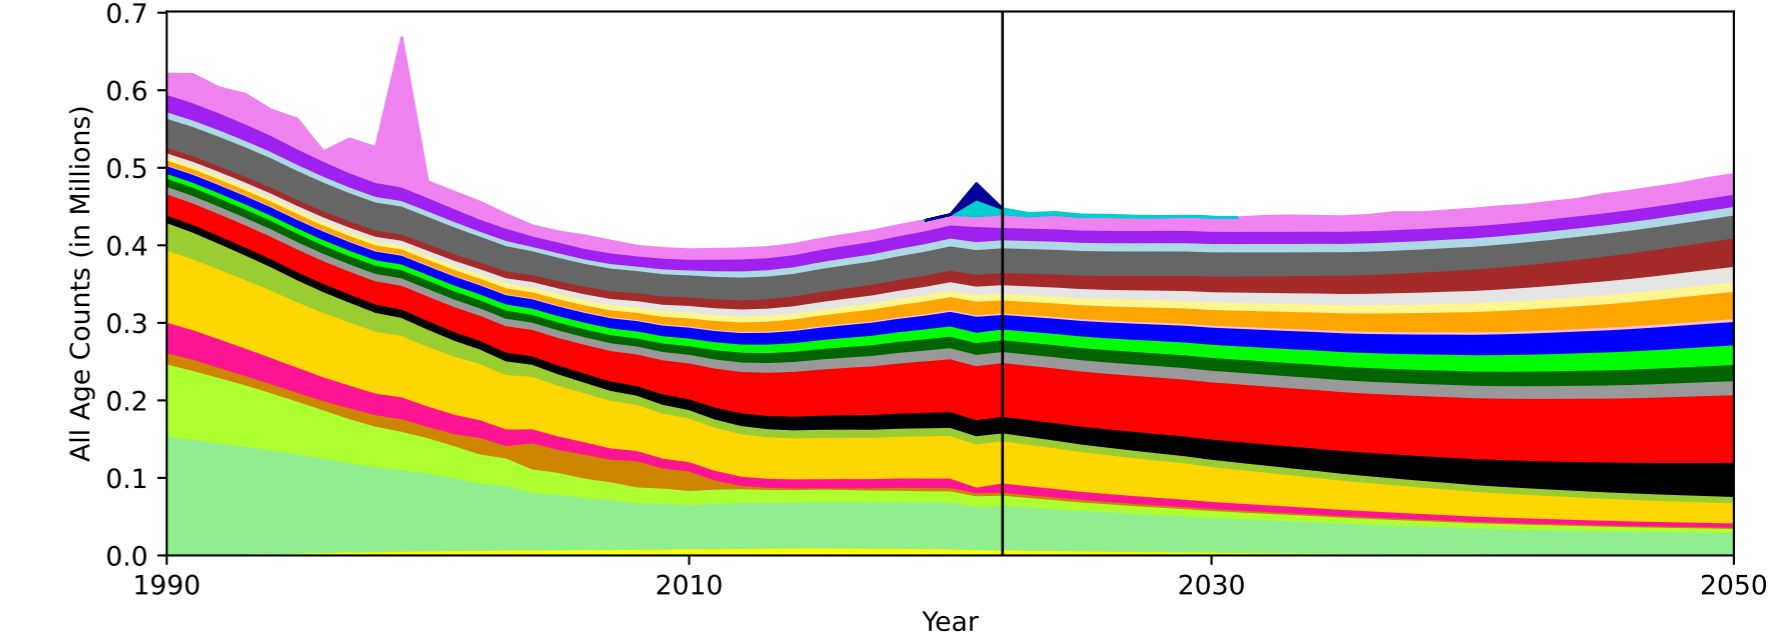

# Viet Nam

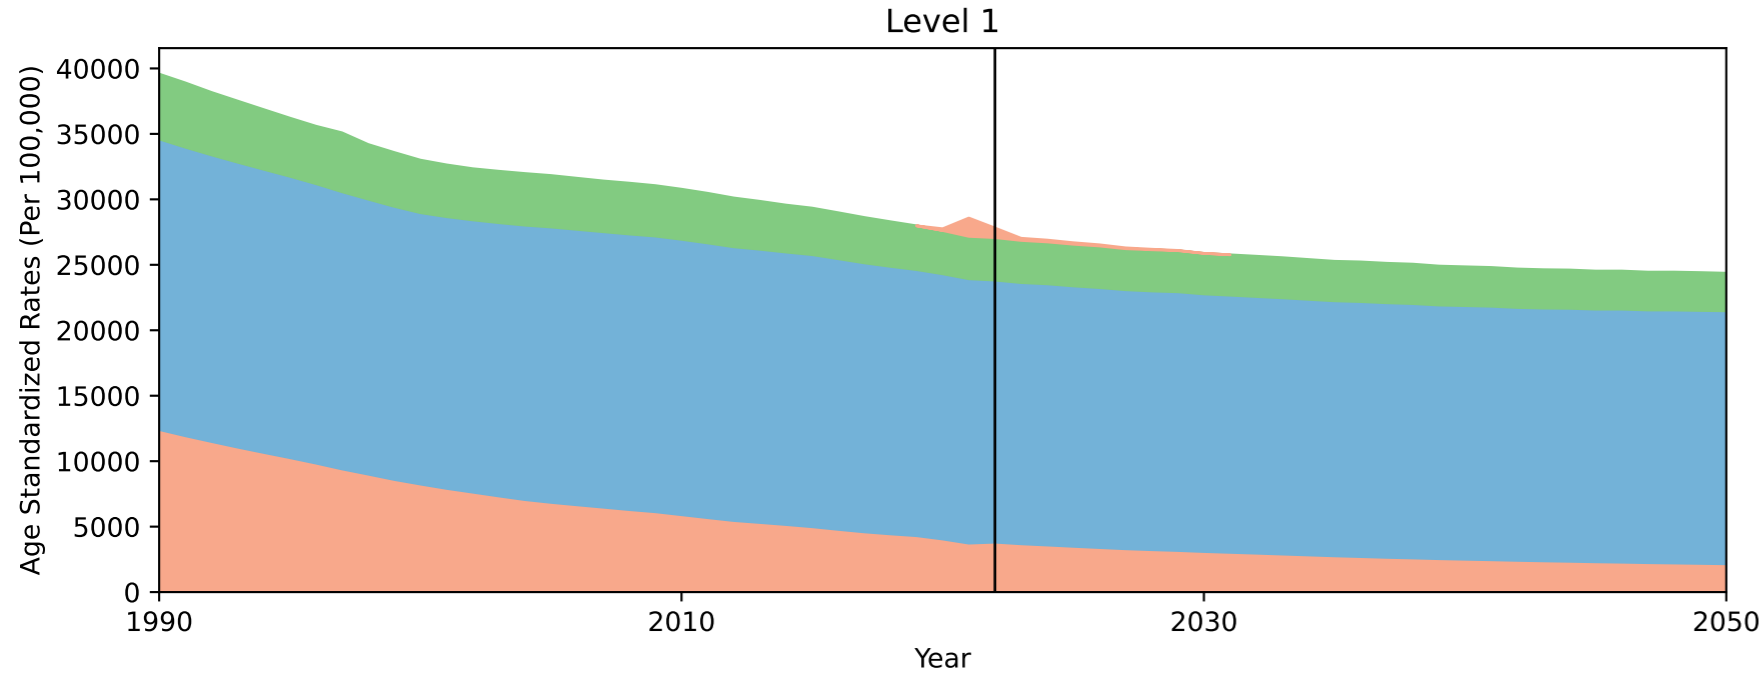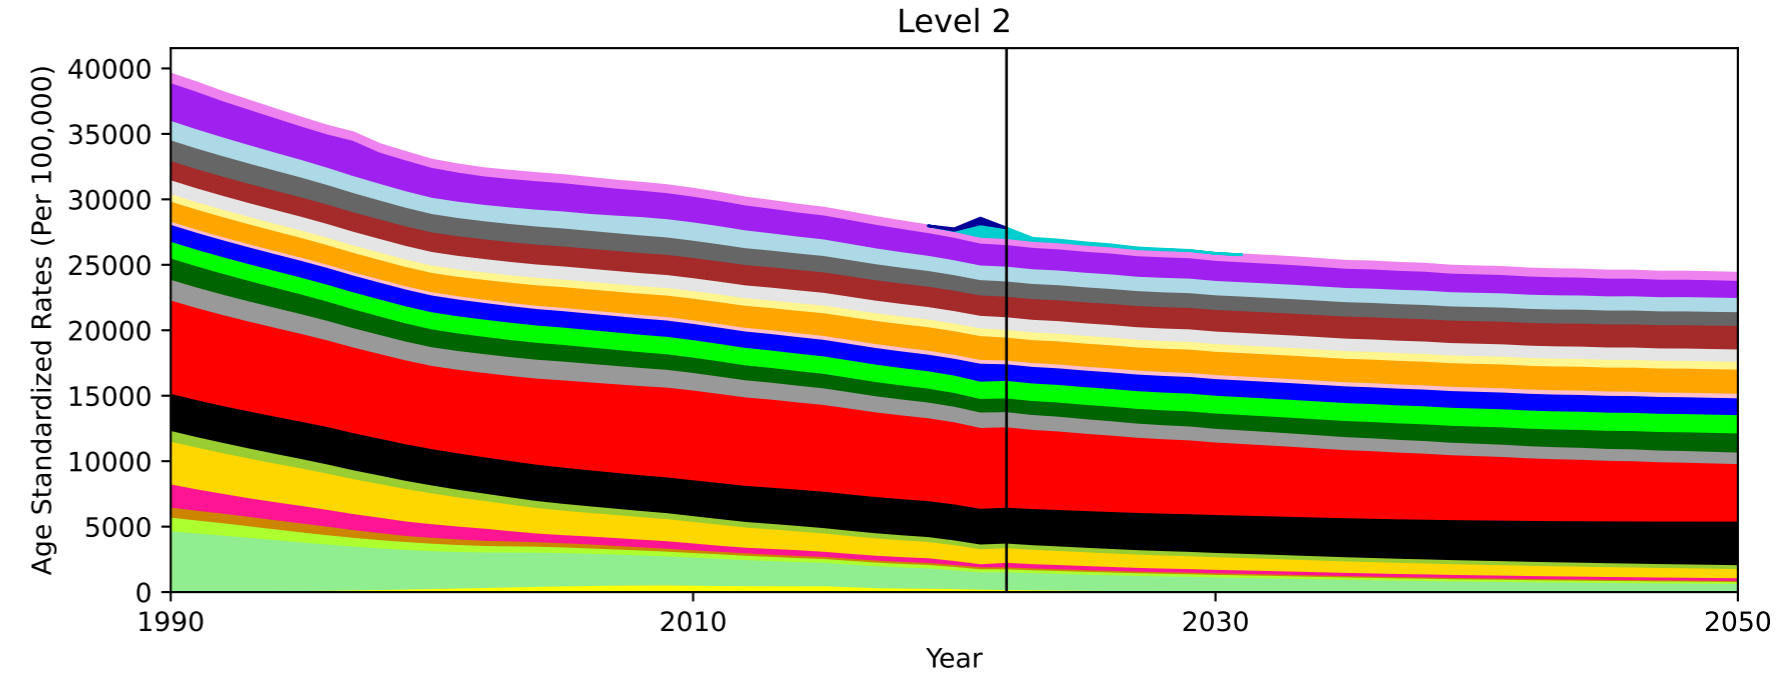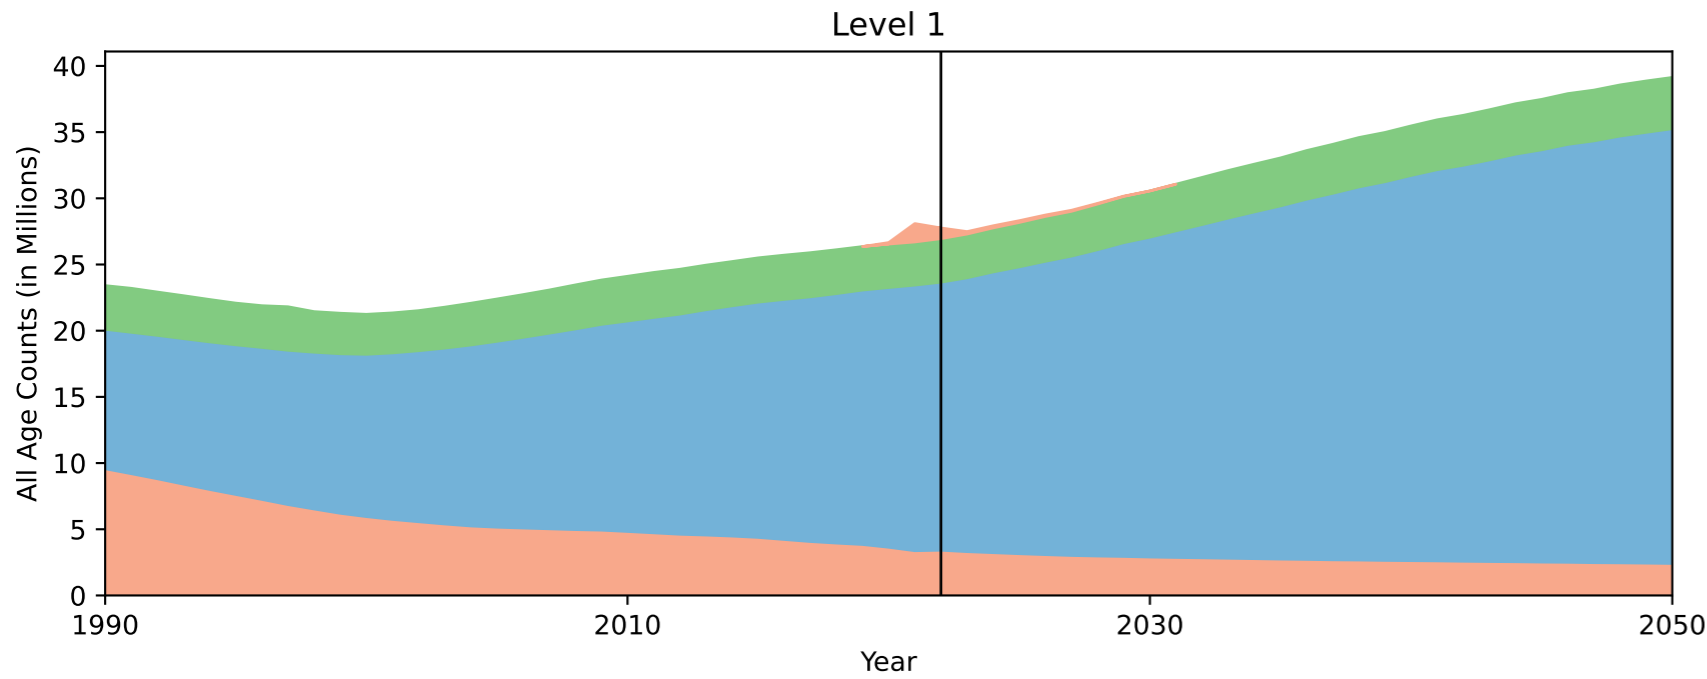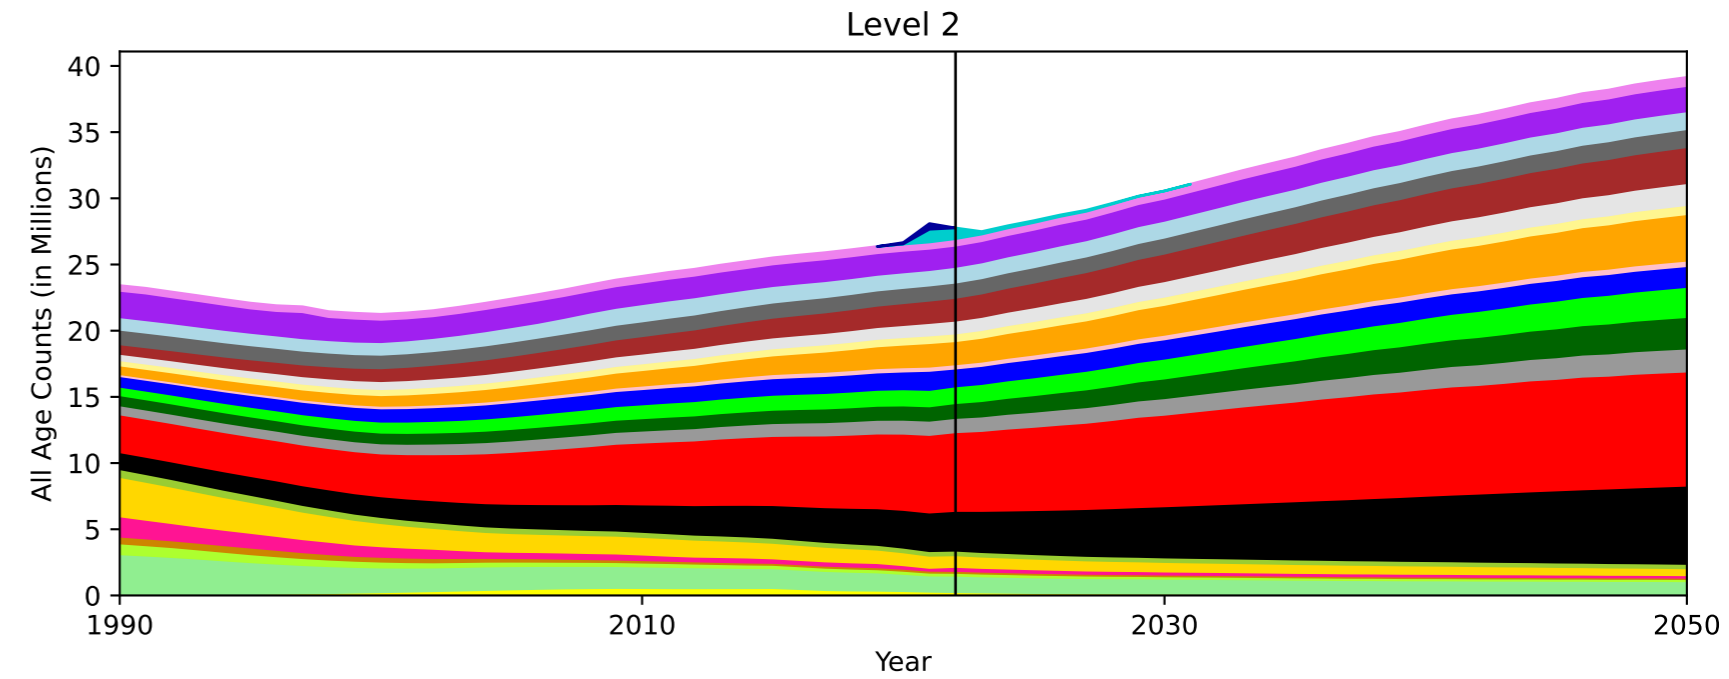

# Angola

Level 1

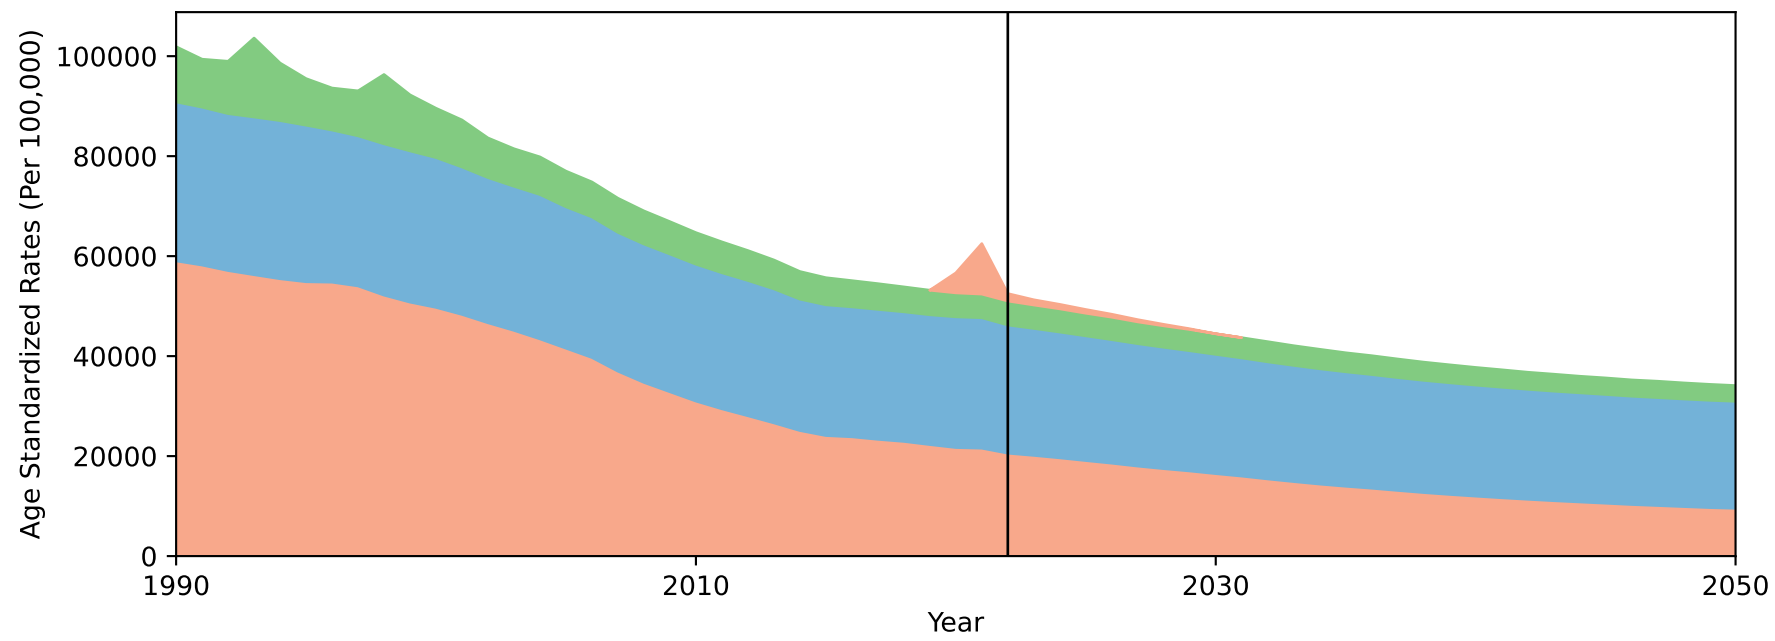

Level 2

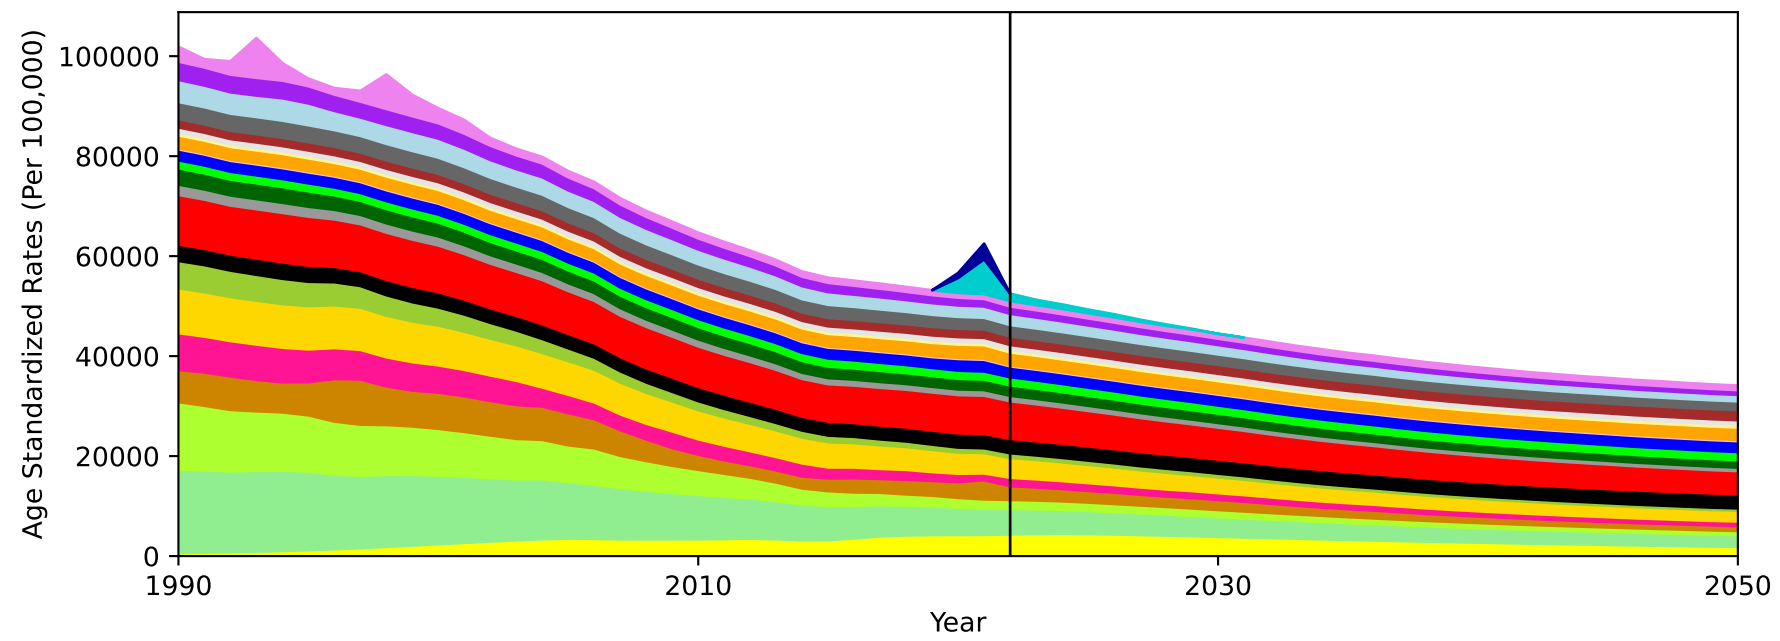

Level 1

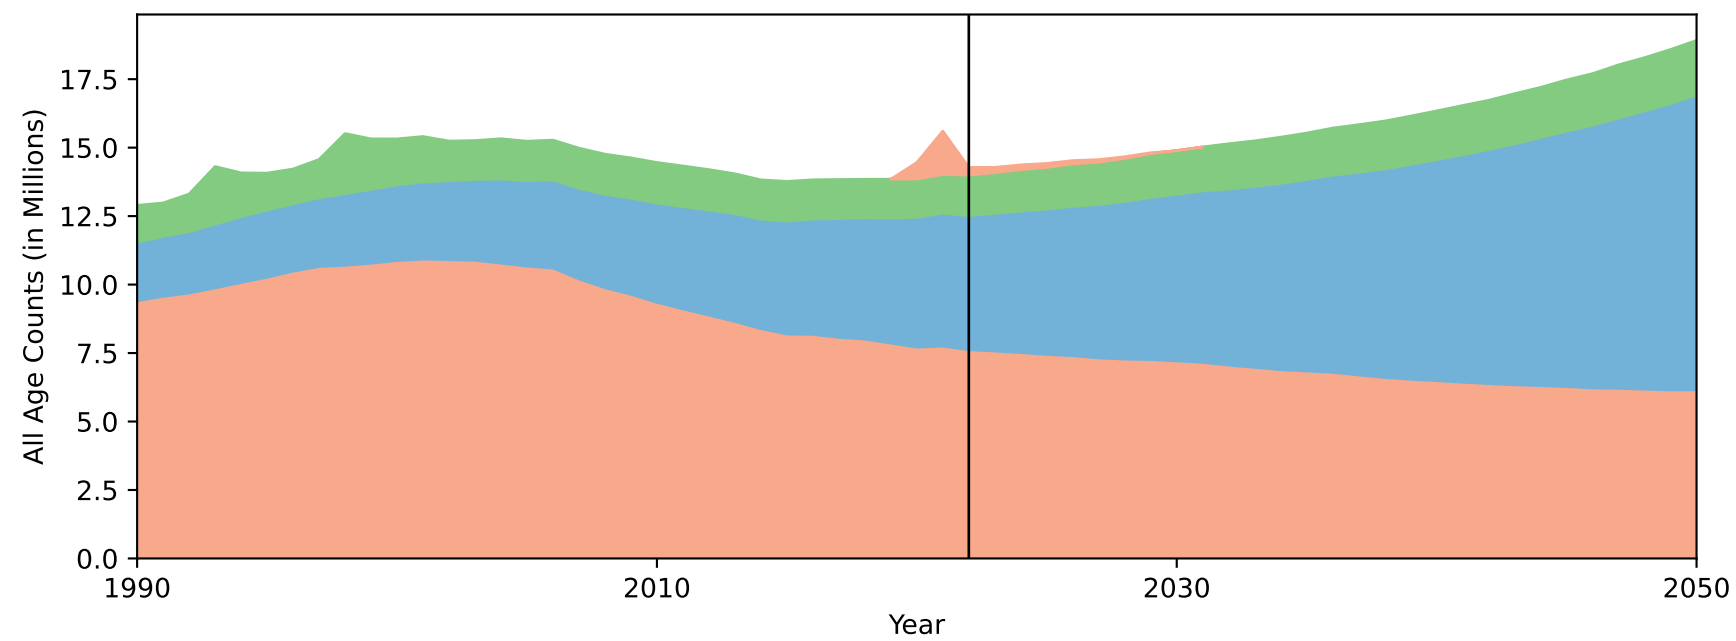

Level 2

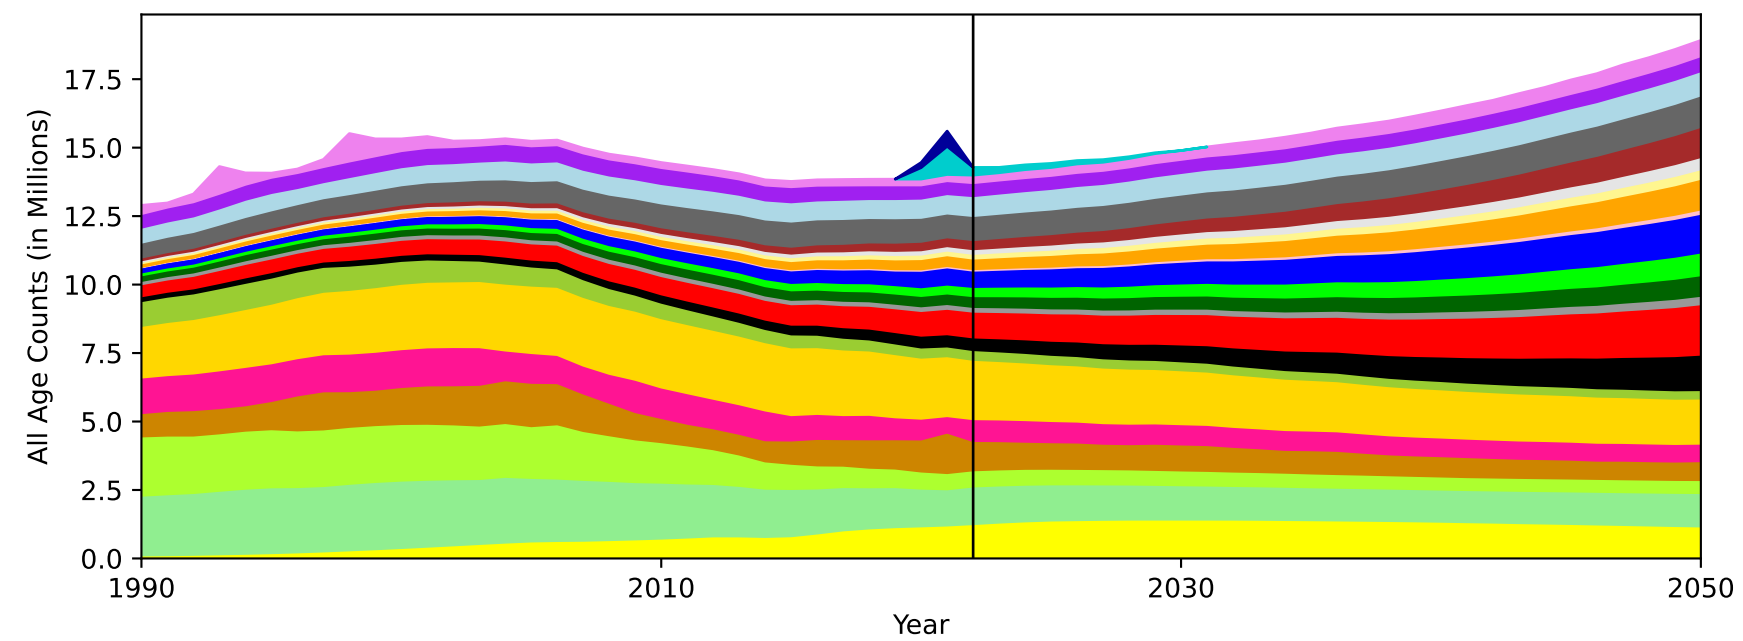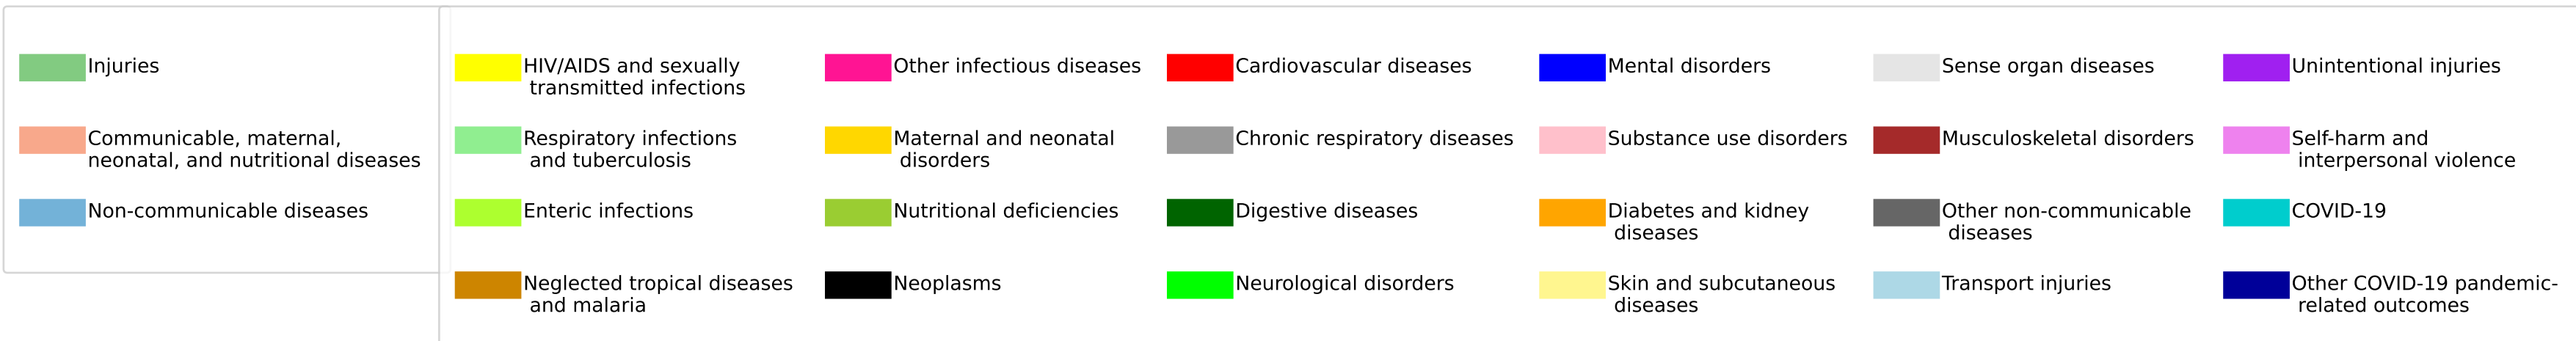

# Central African Republic

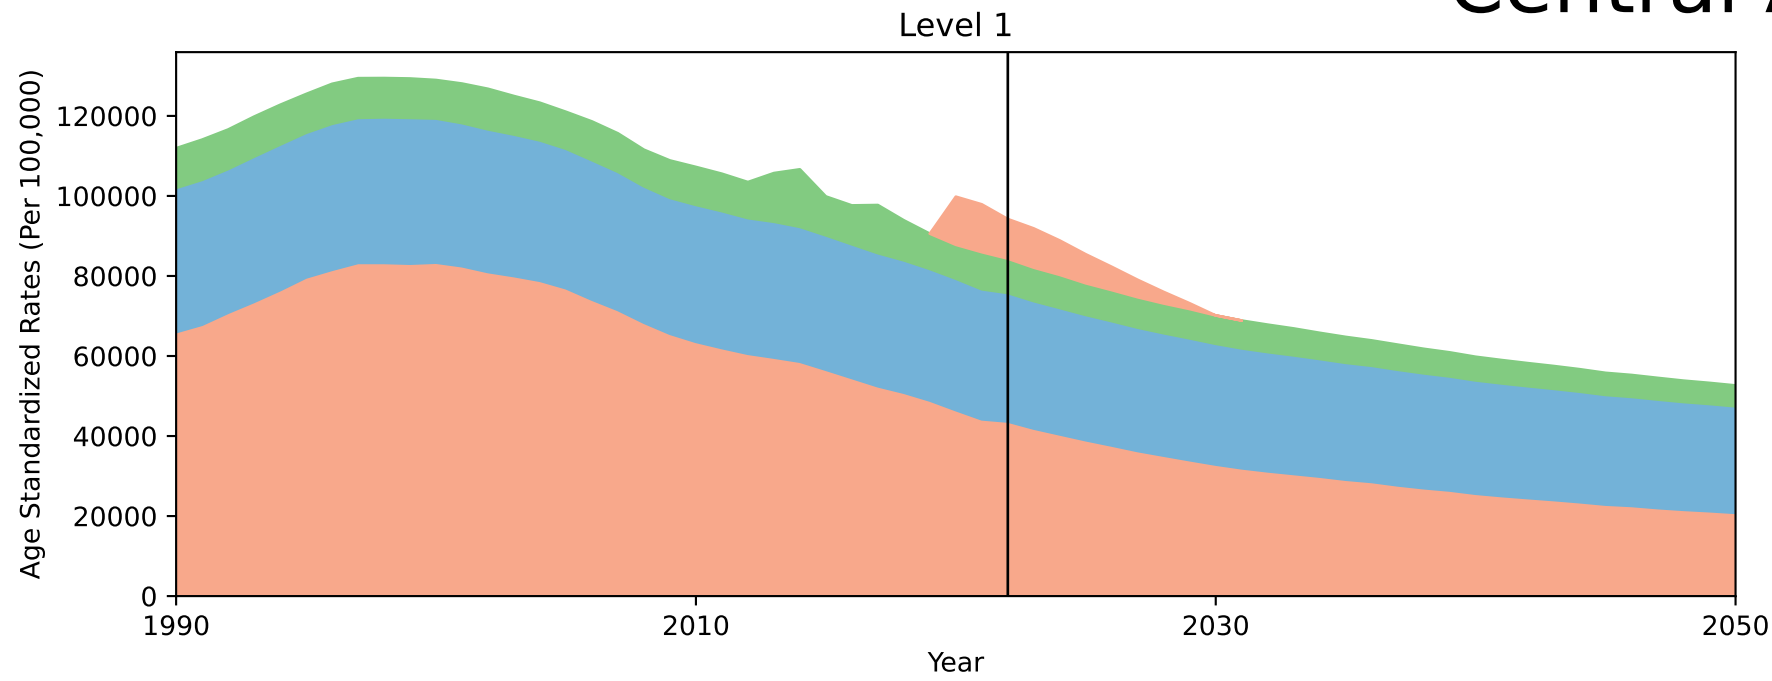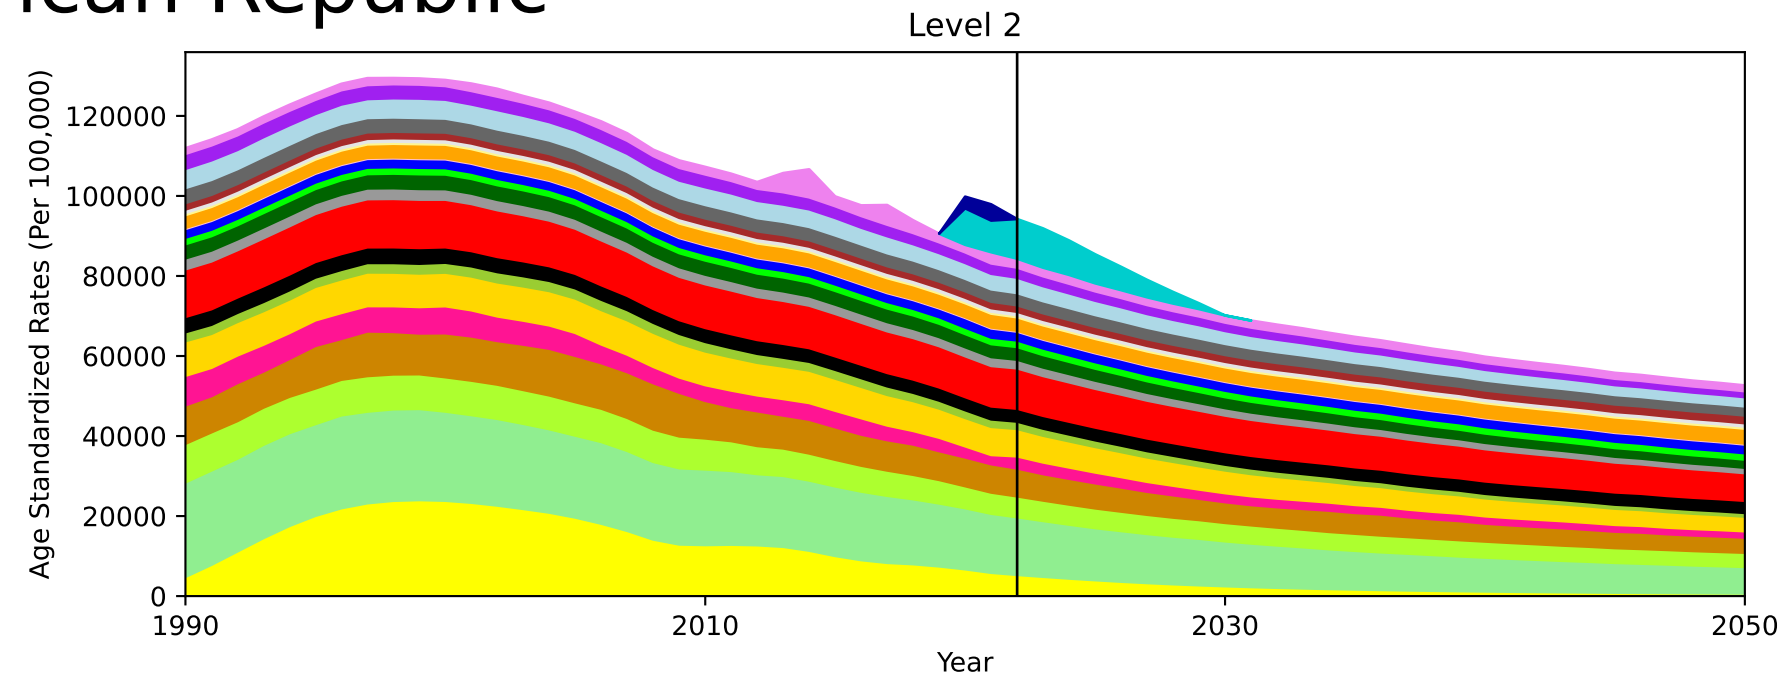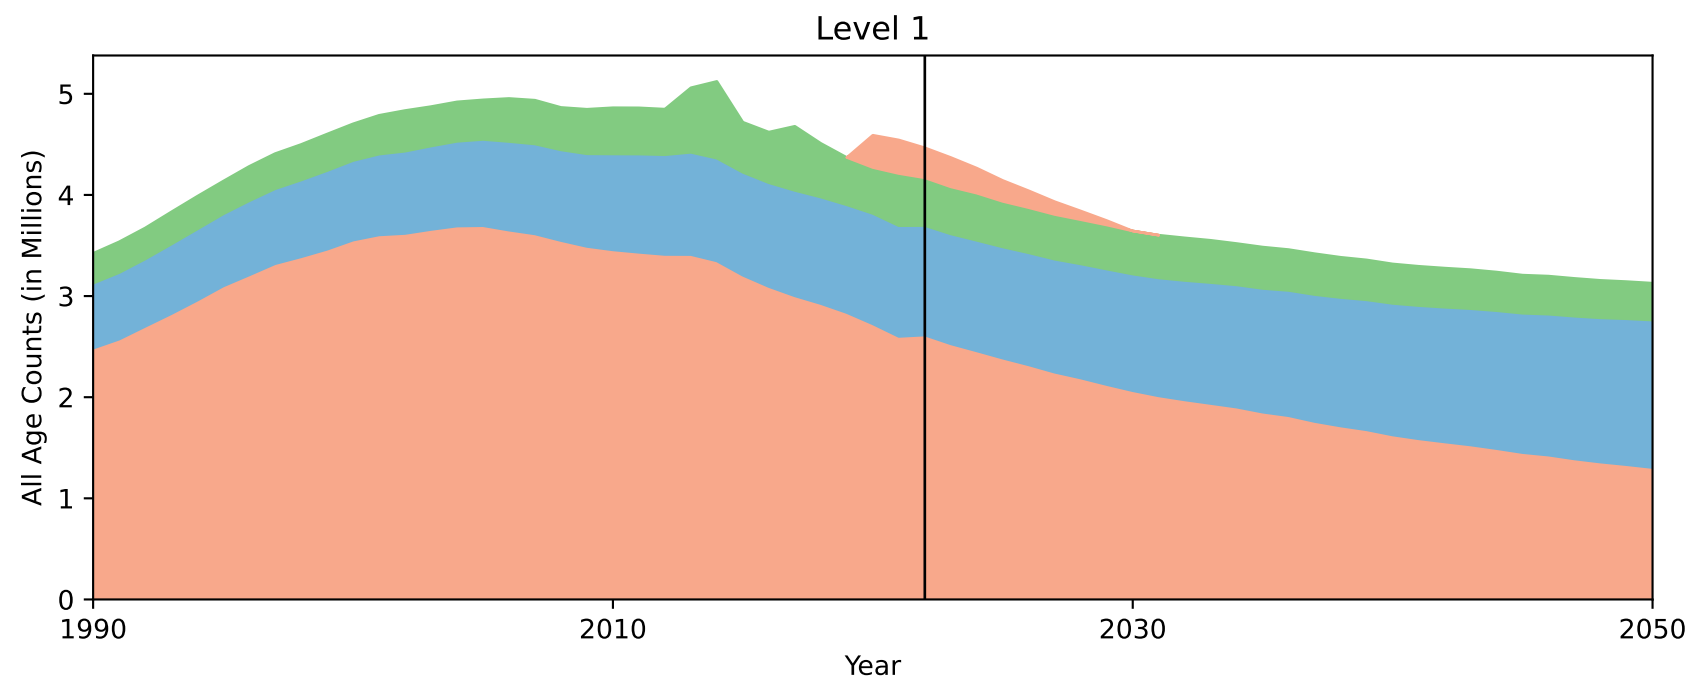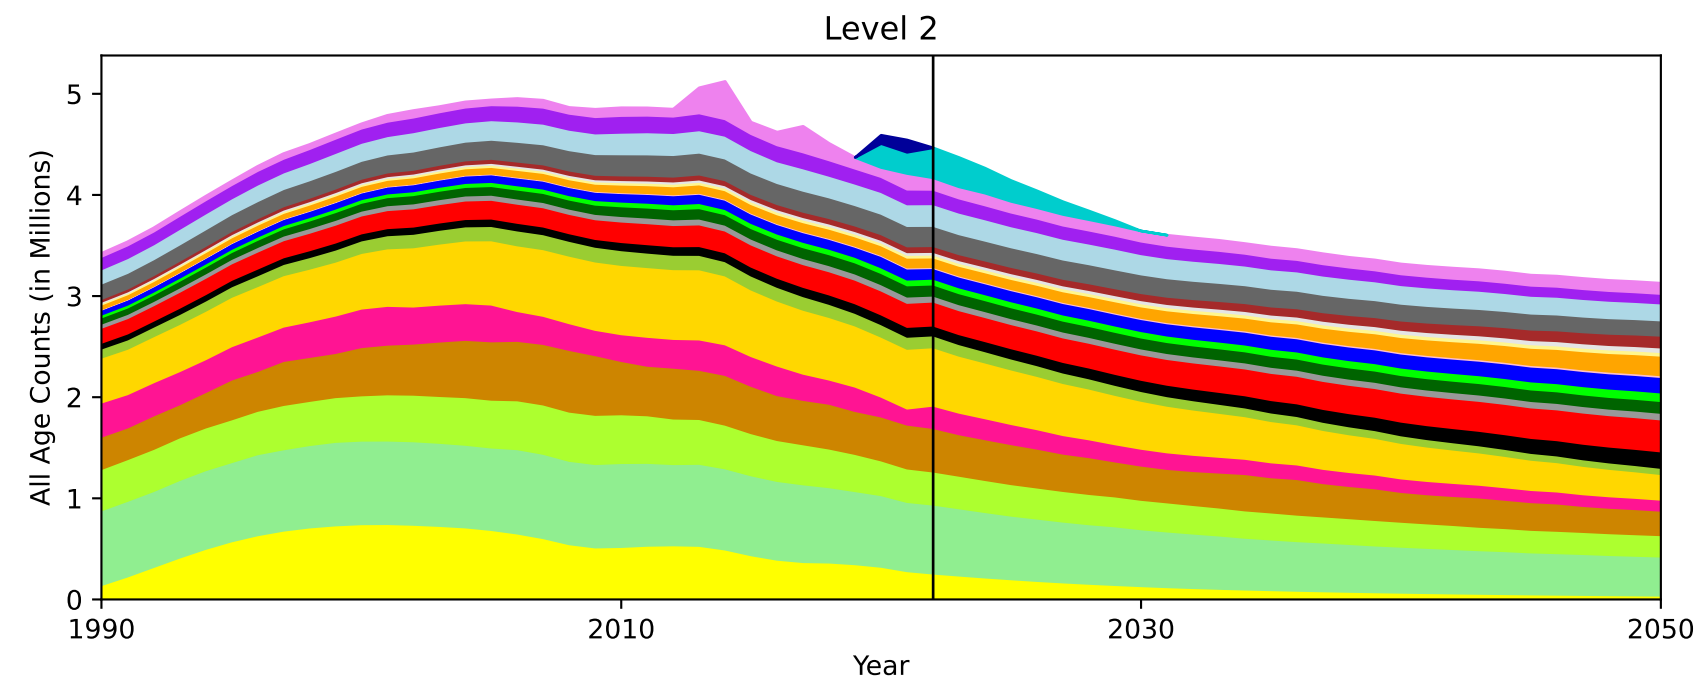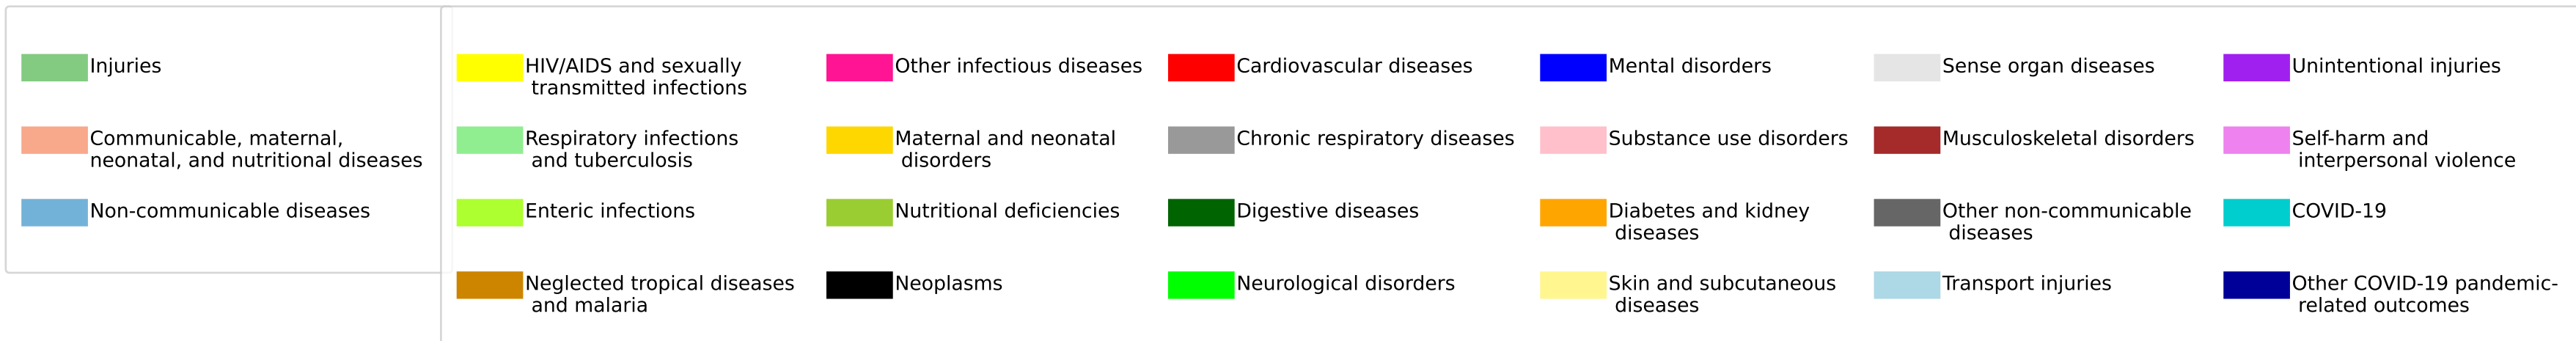

# Congo (Brazzaville)

Supplemental Results Figure S4. Age-standardised DALY rates and all age DALY counts and by Level 1 and Level 2 causes, 1990–2050

405

Level 1

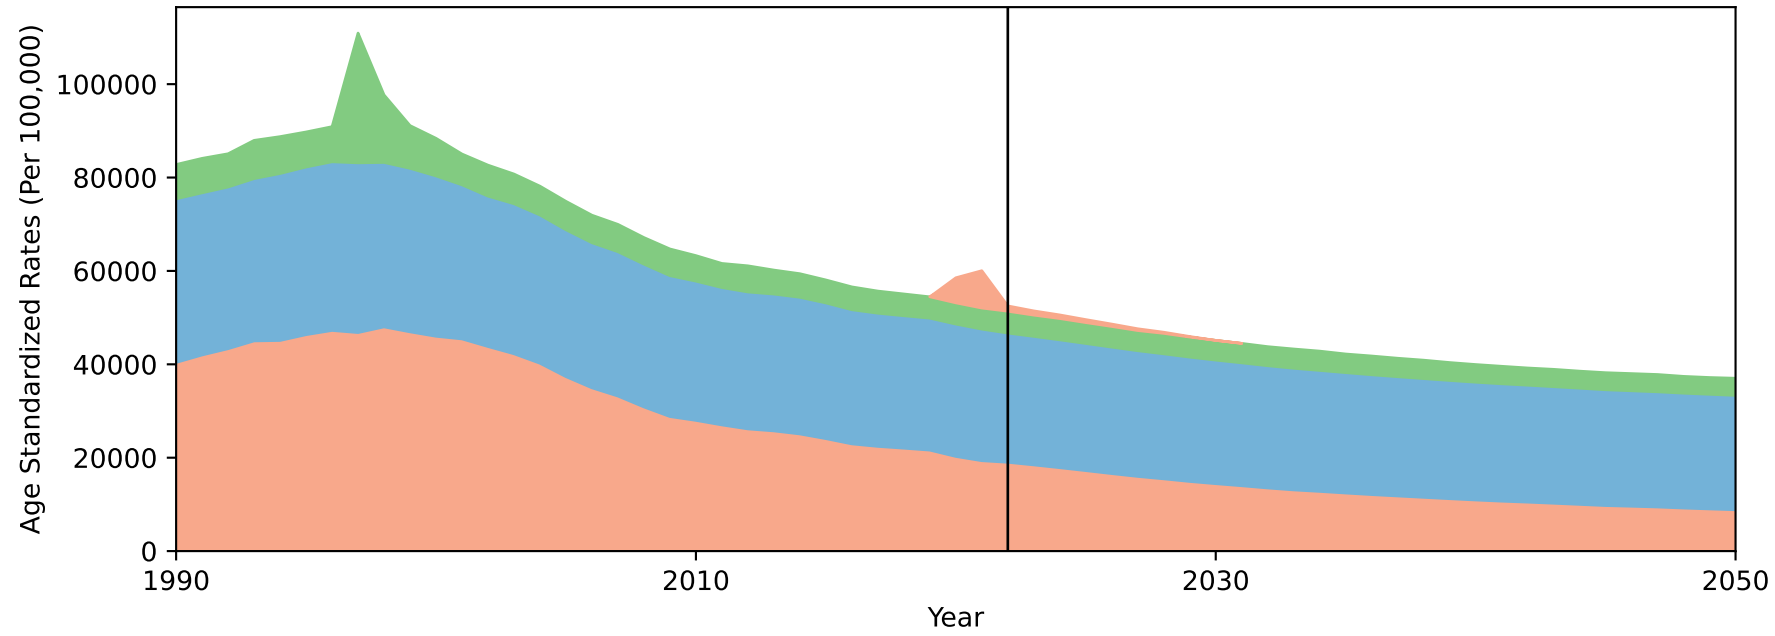

Level 2

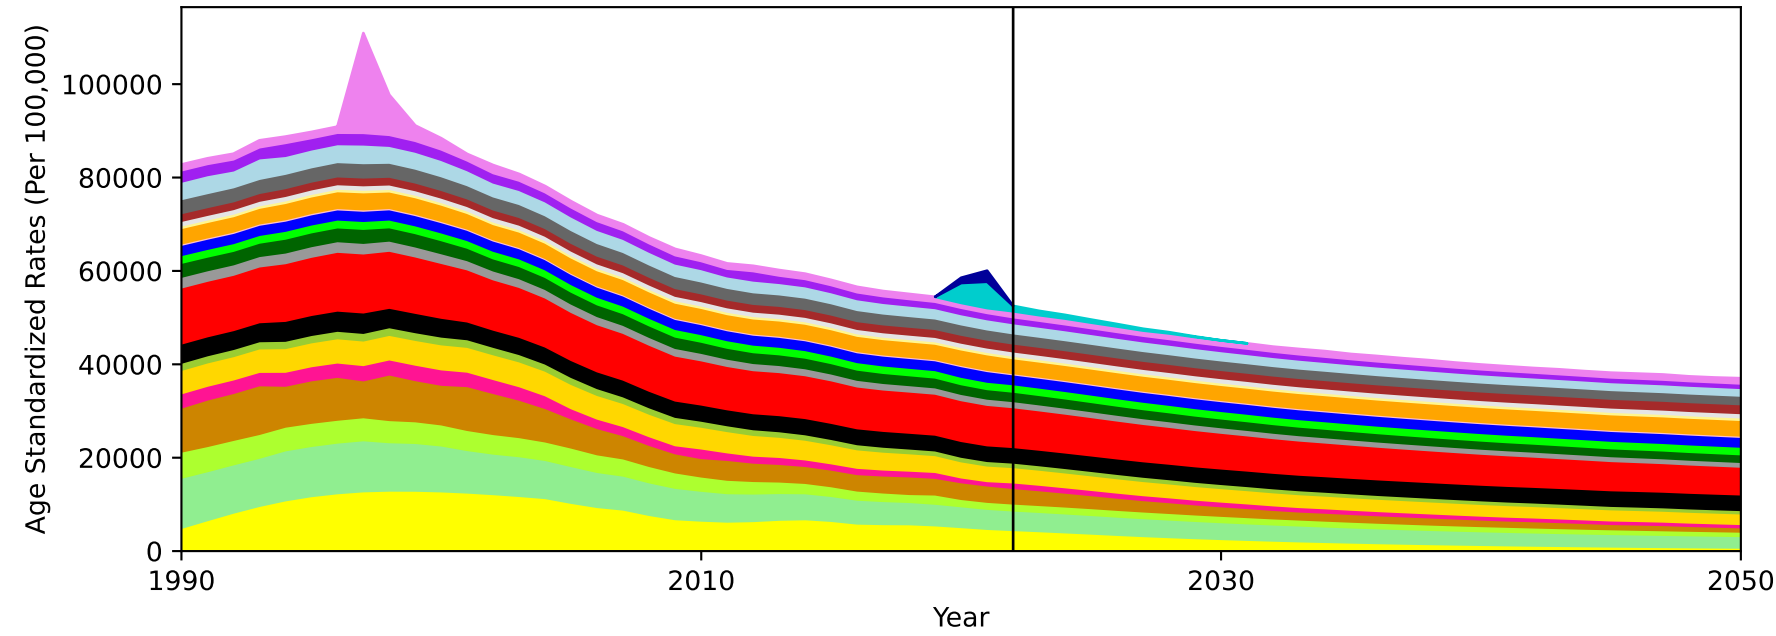

Level 1

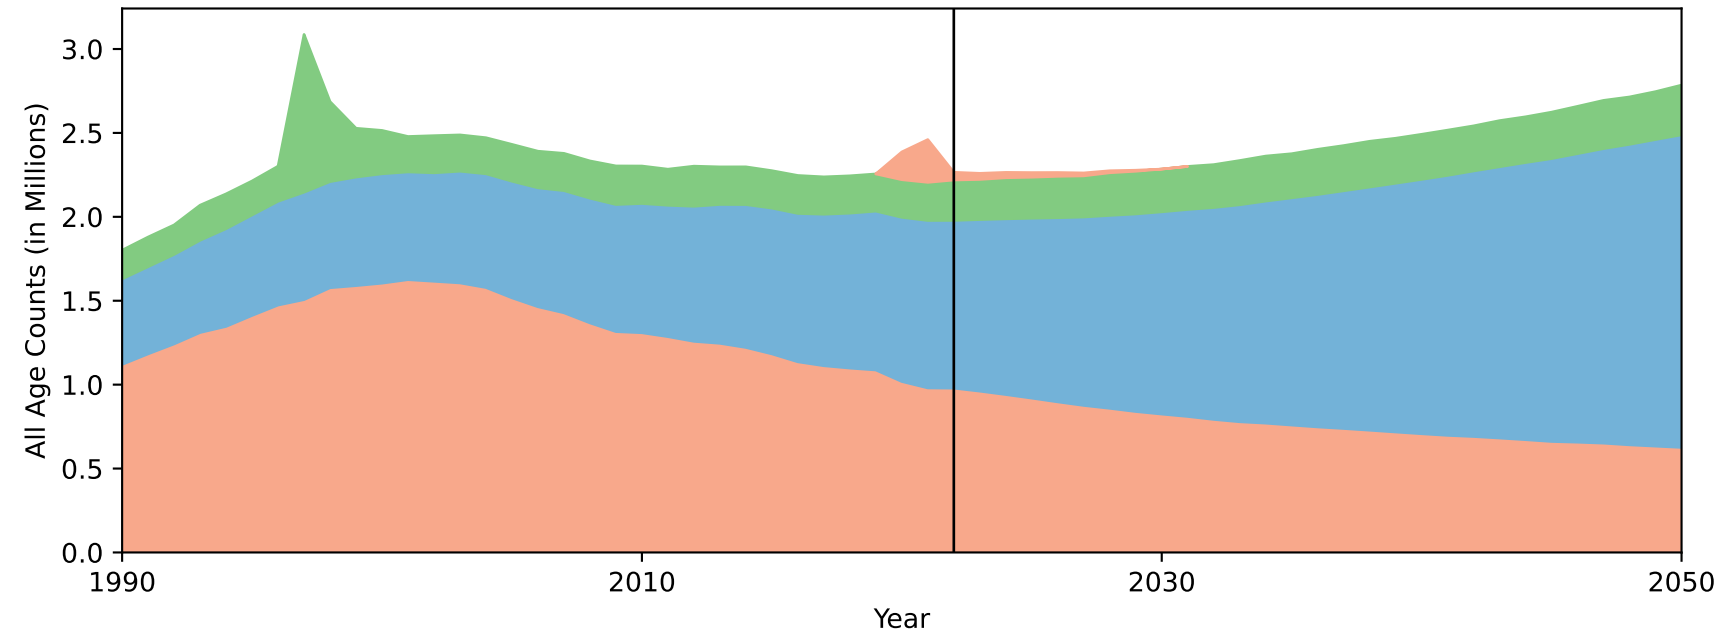

Level 2

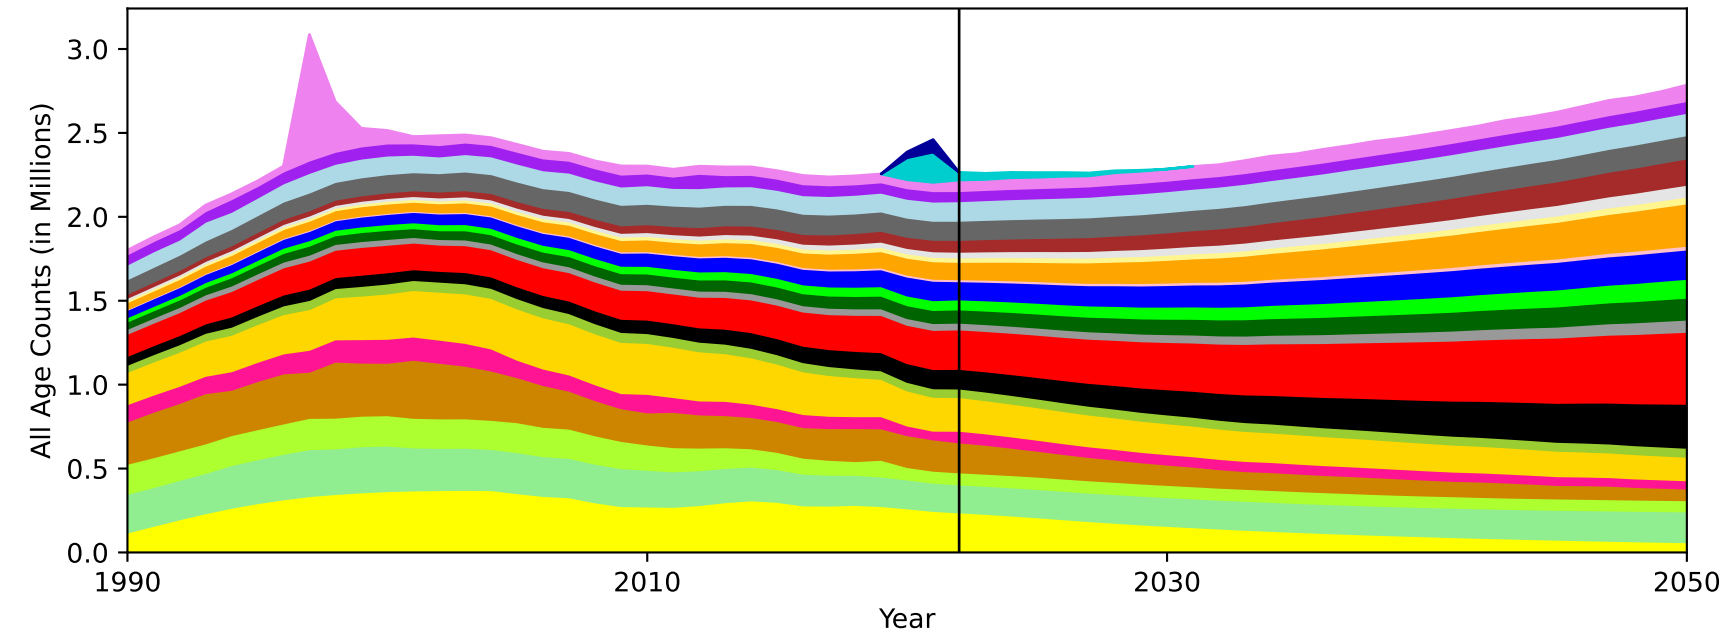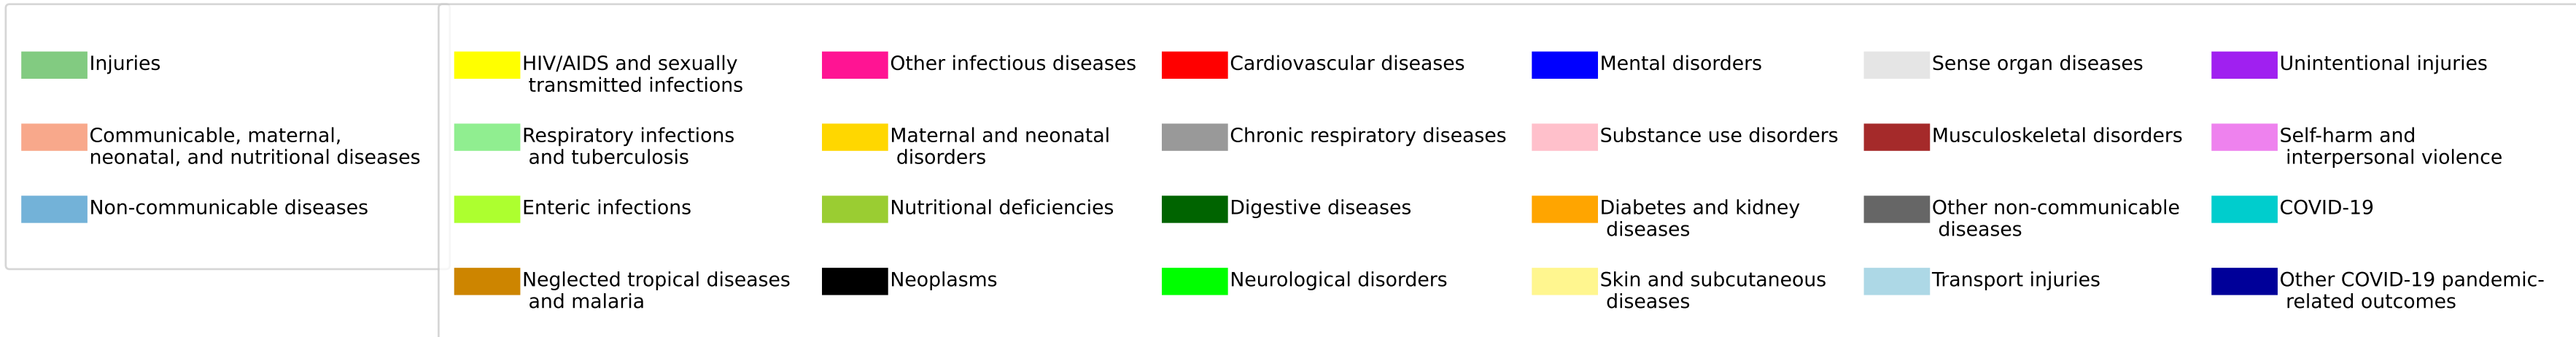

# DR Congo

Level 1

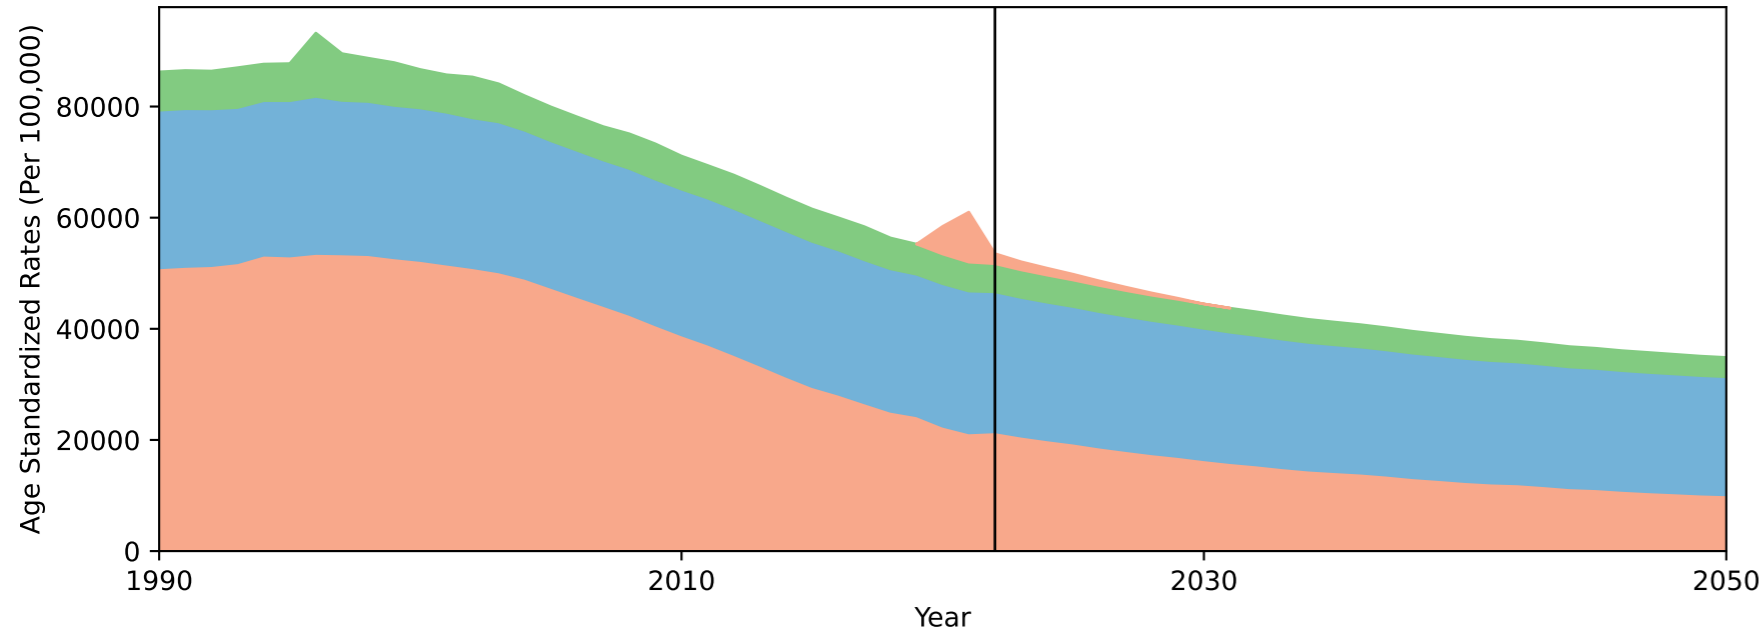

Level 2

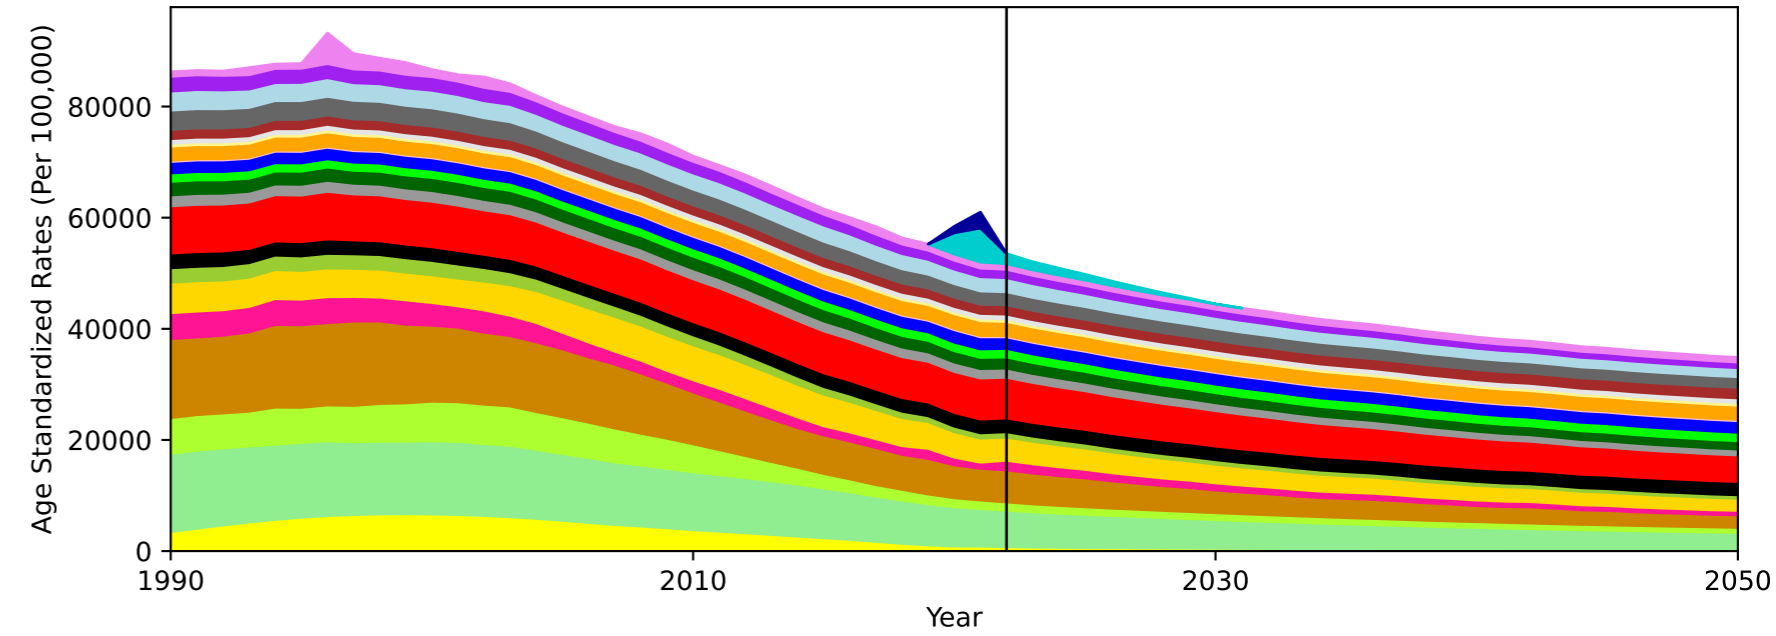

Level 1

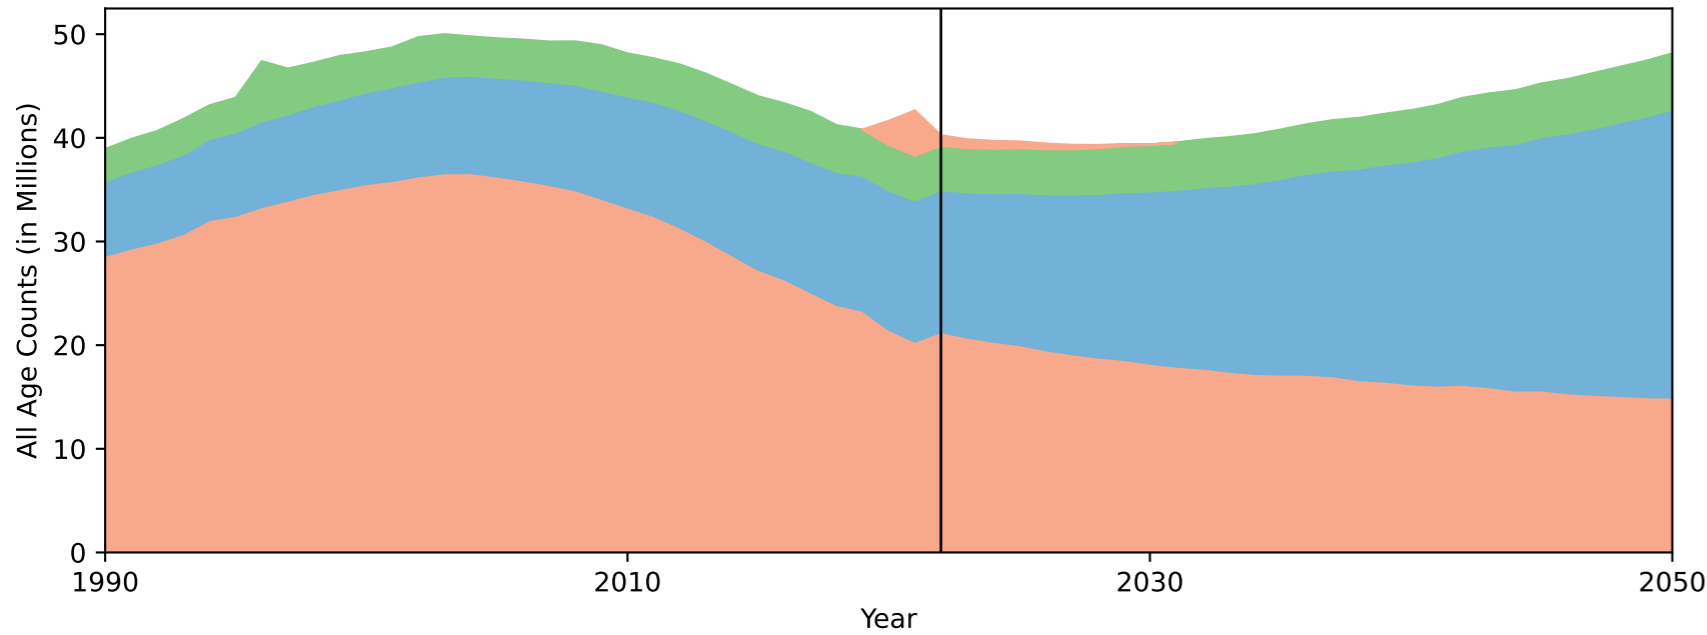

Level 2

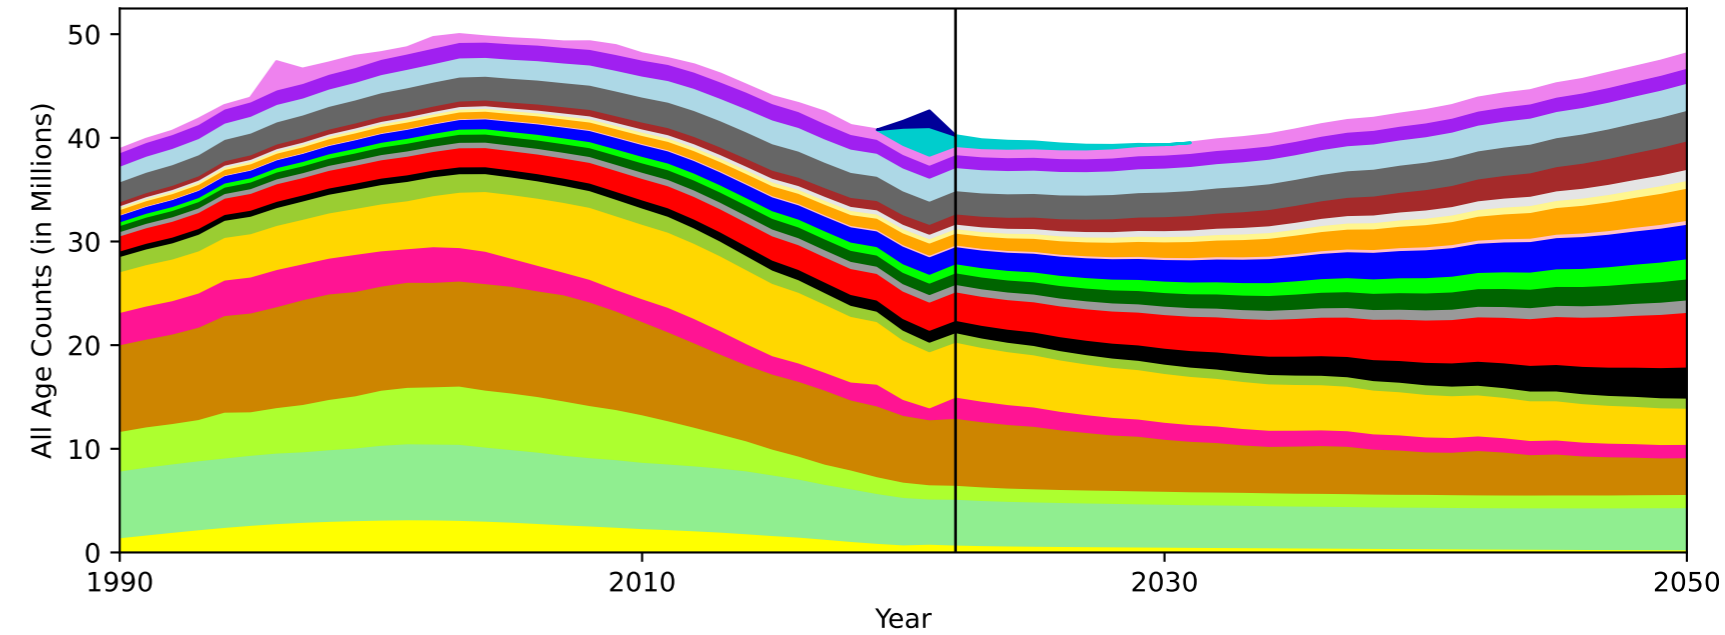

# Equatorial Guinea

Level 1

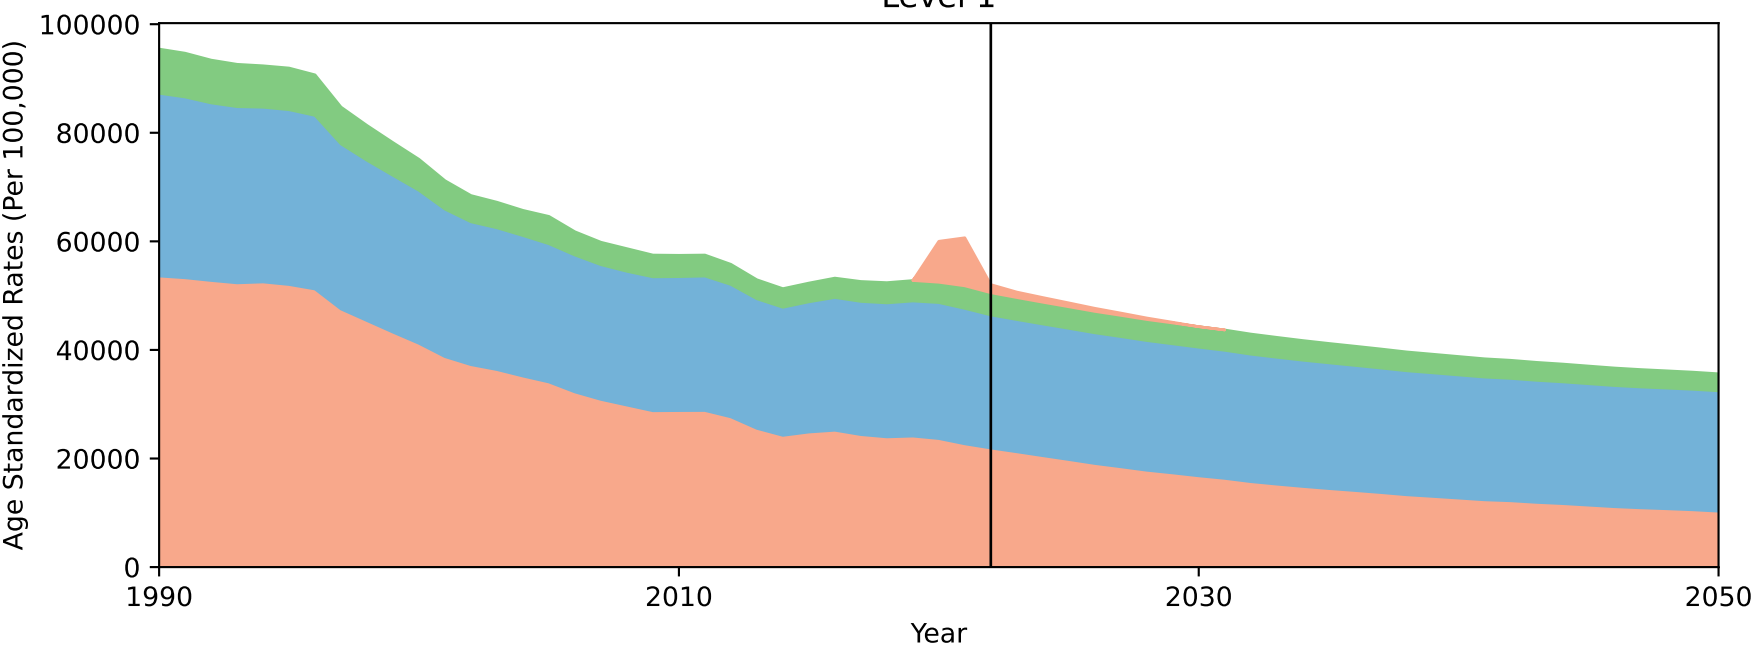

Level 2

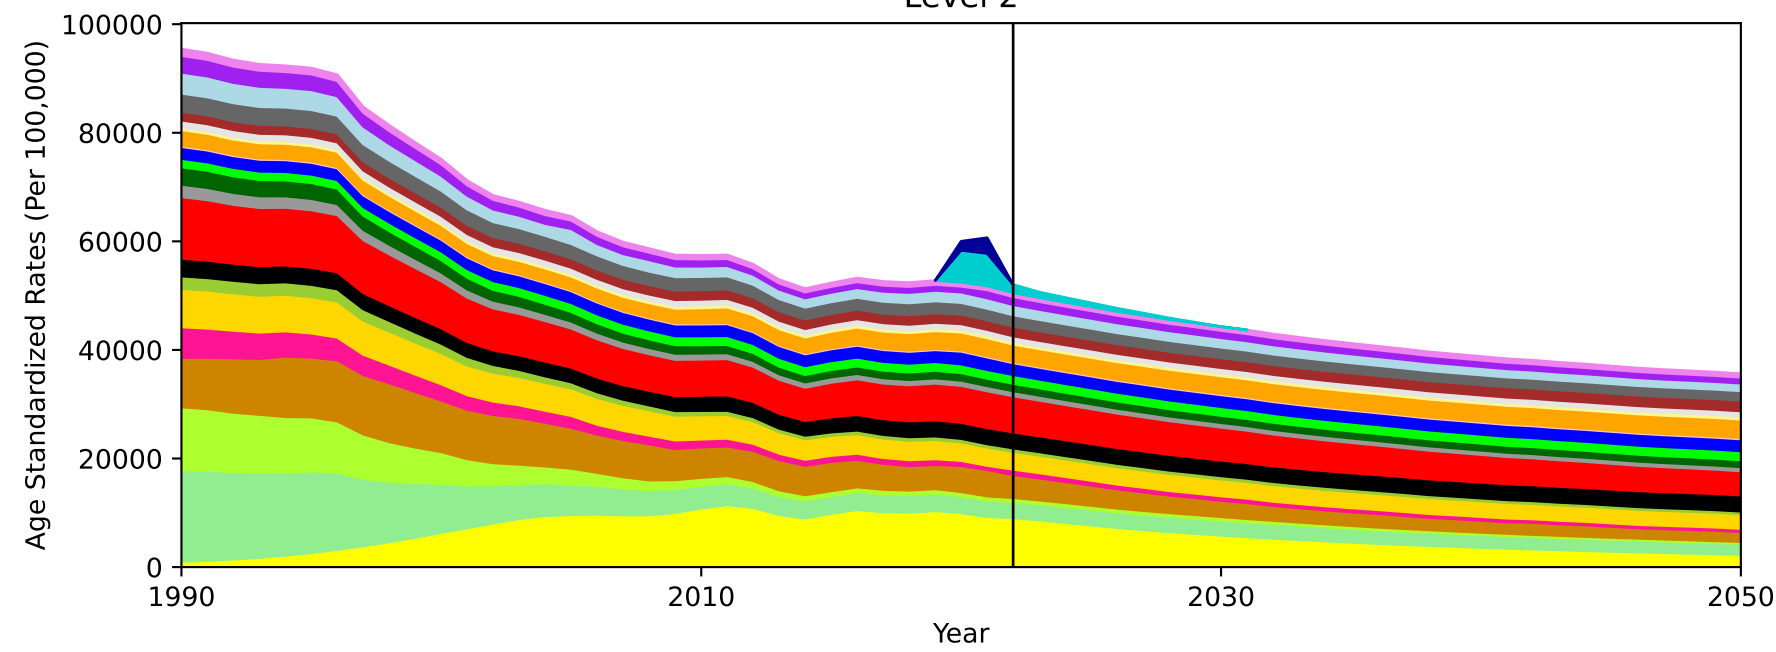

Level 1

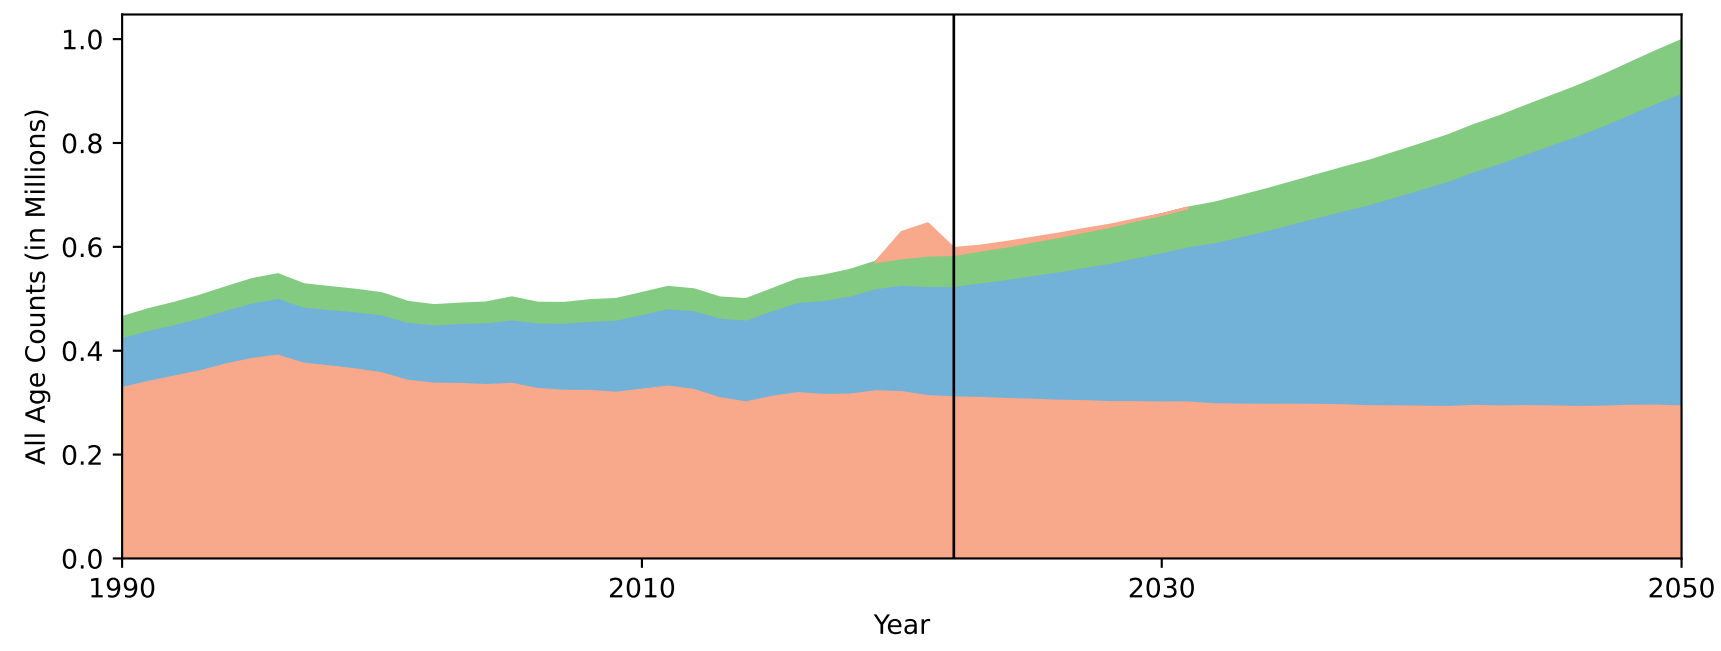

Level 2

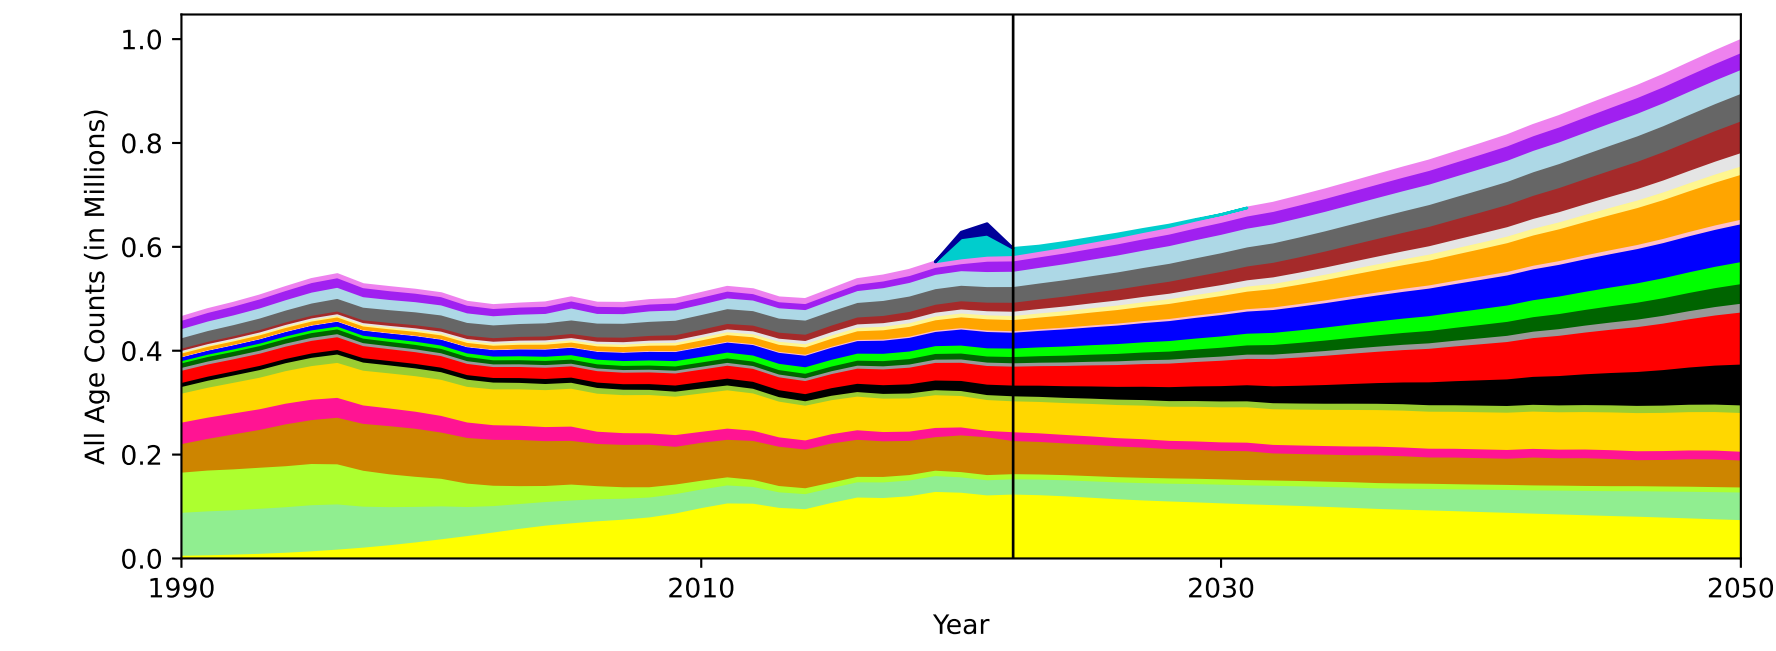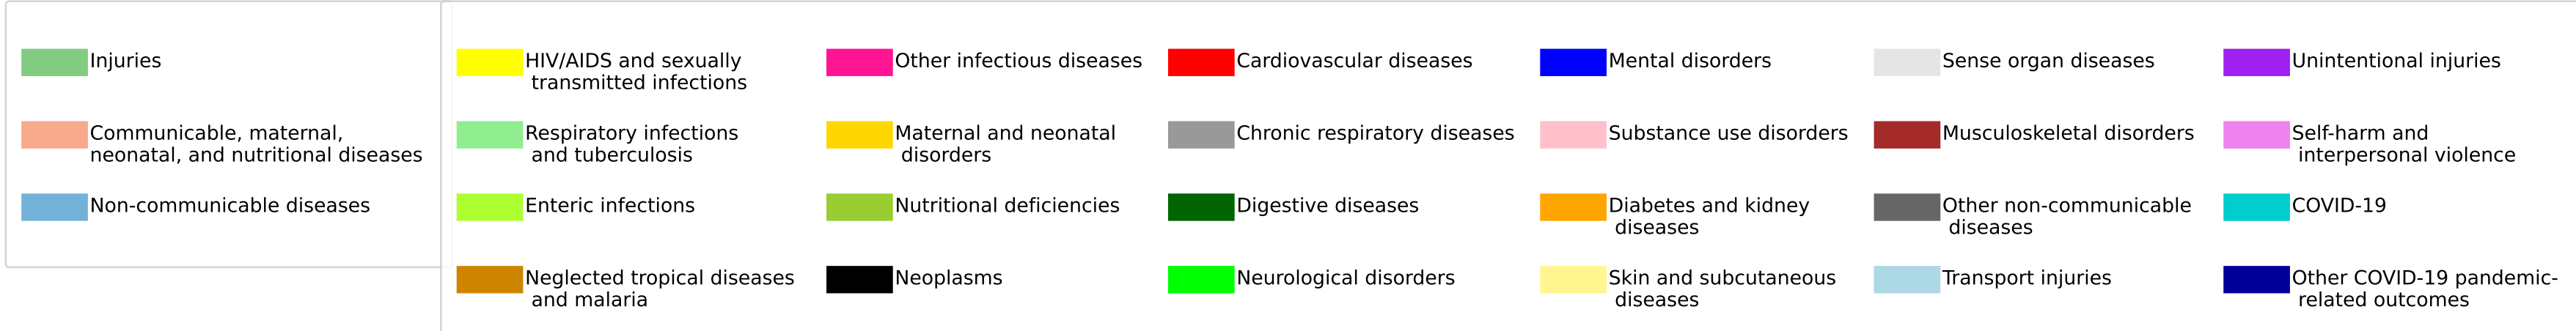



# Gabon

Level 1

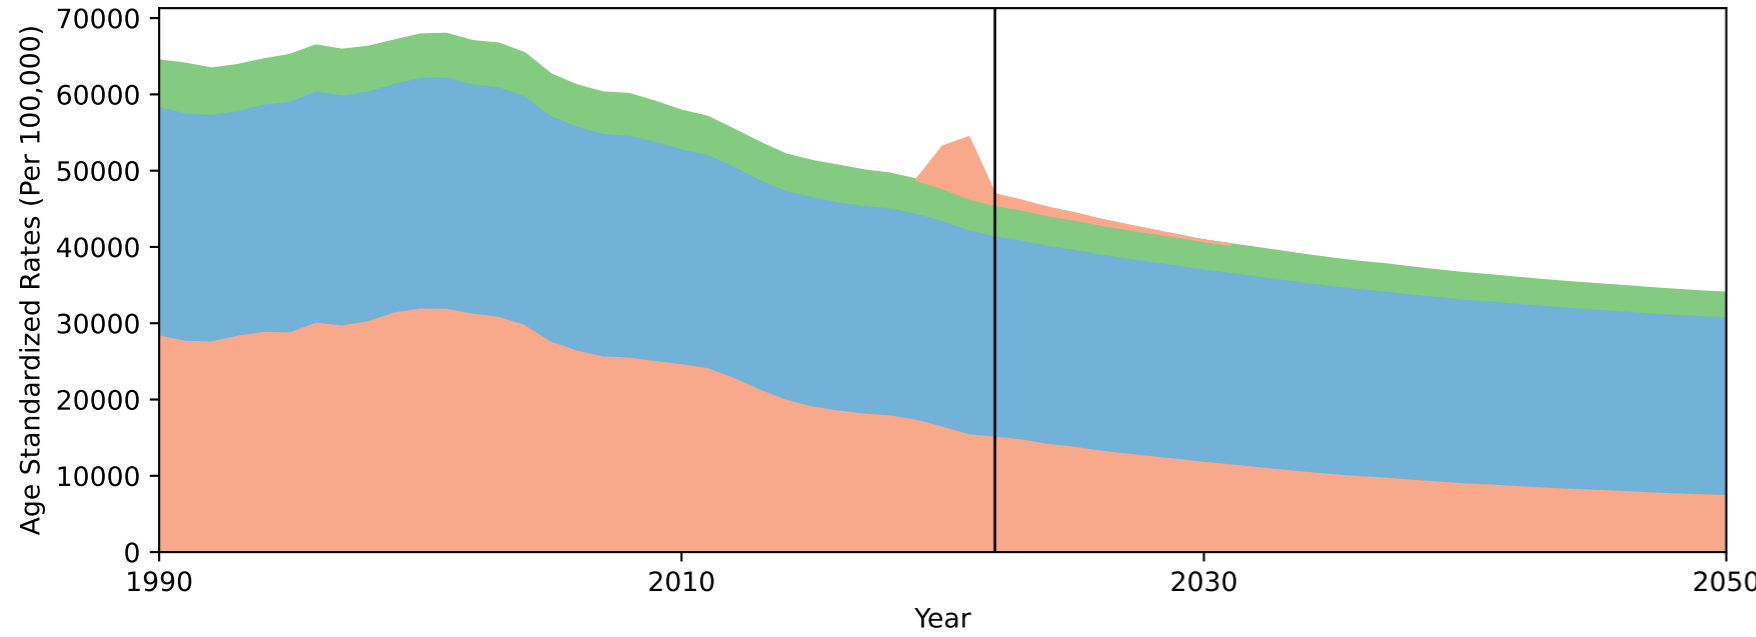

Level 2

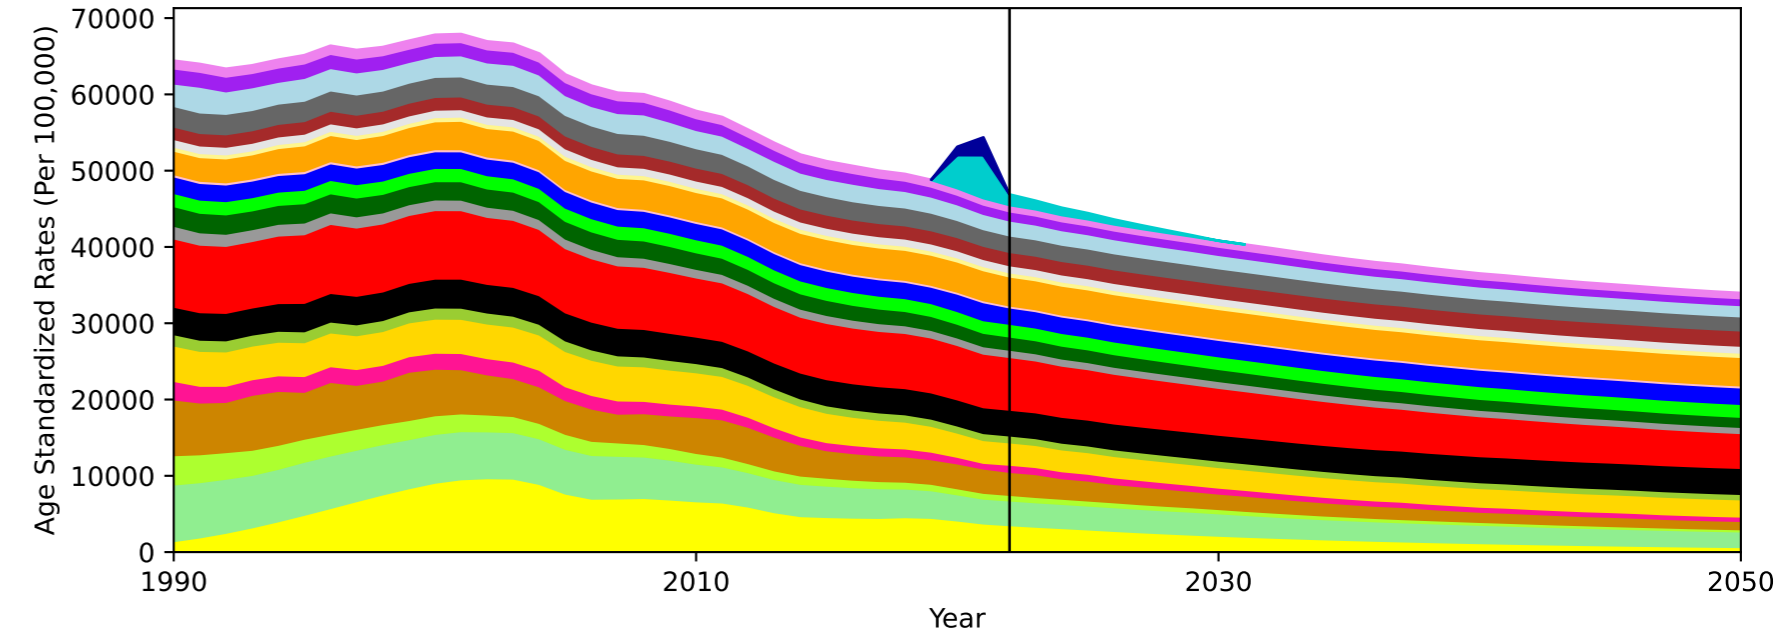

Level 1

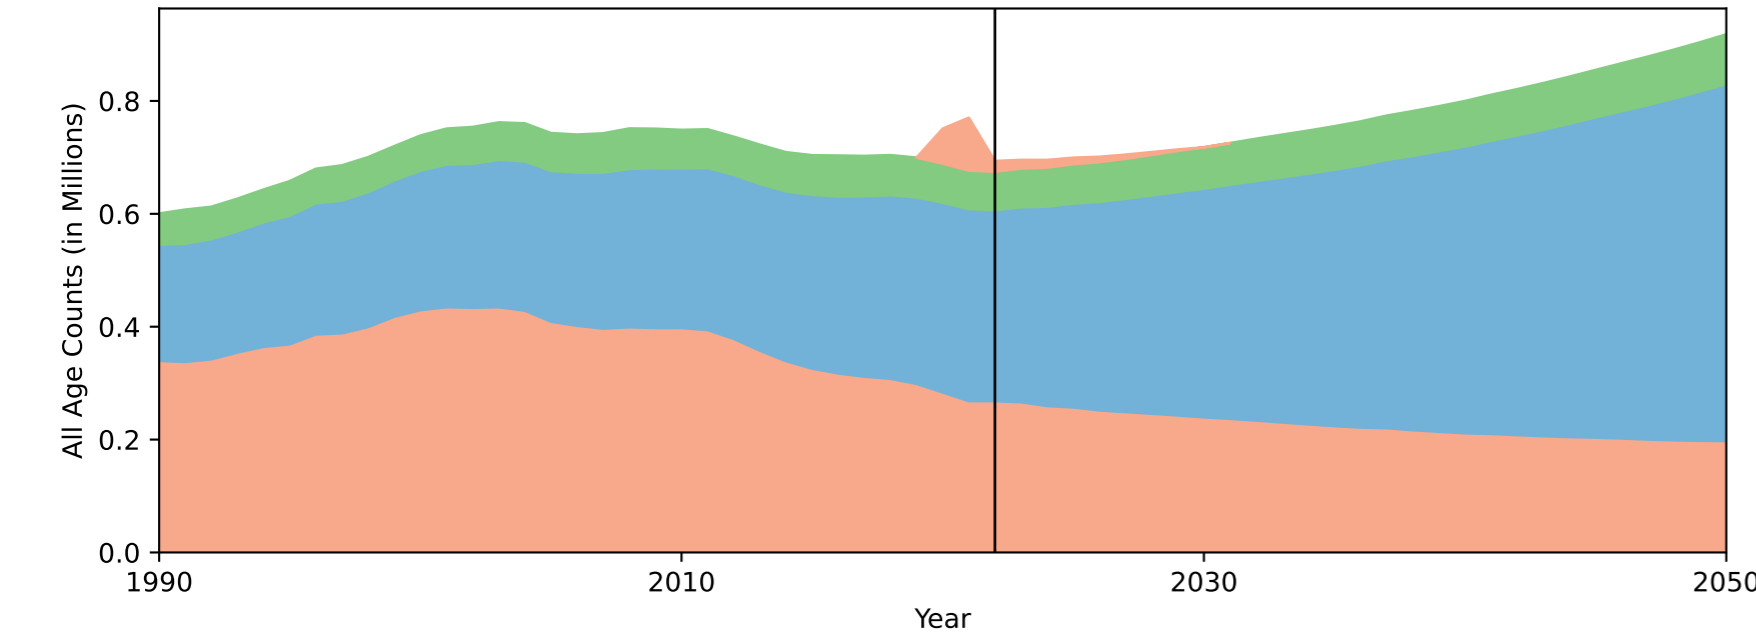

Level 2

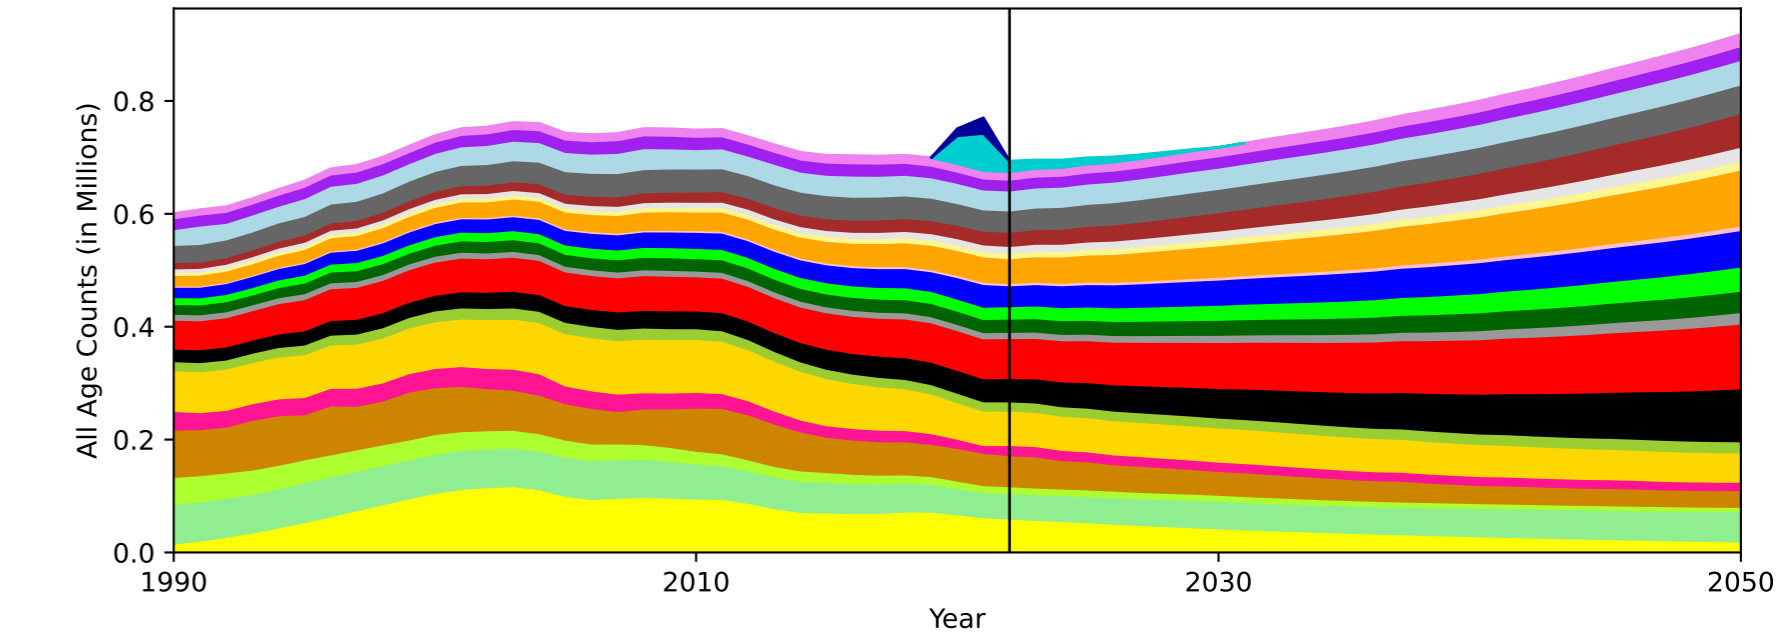

# Burundi

Level 1

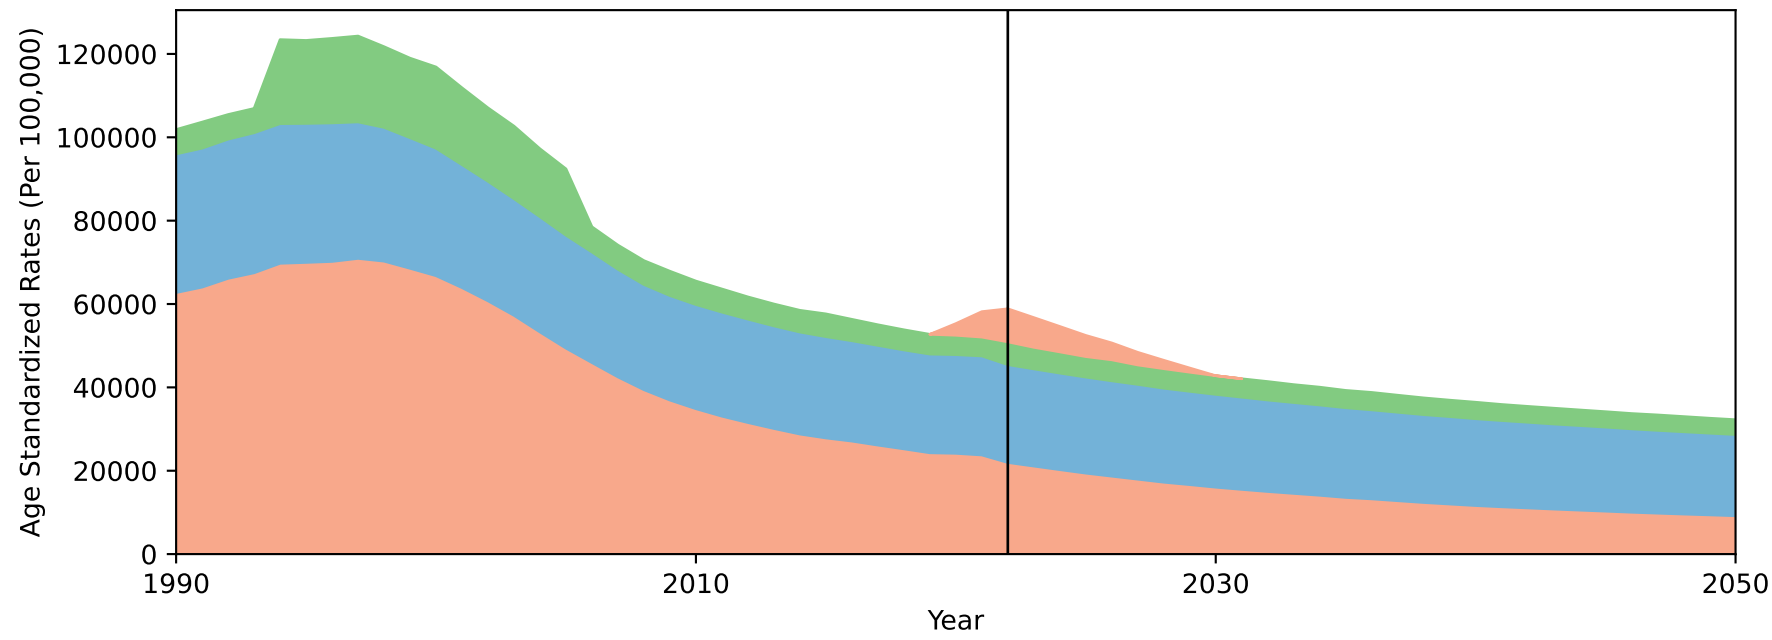

Level 2

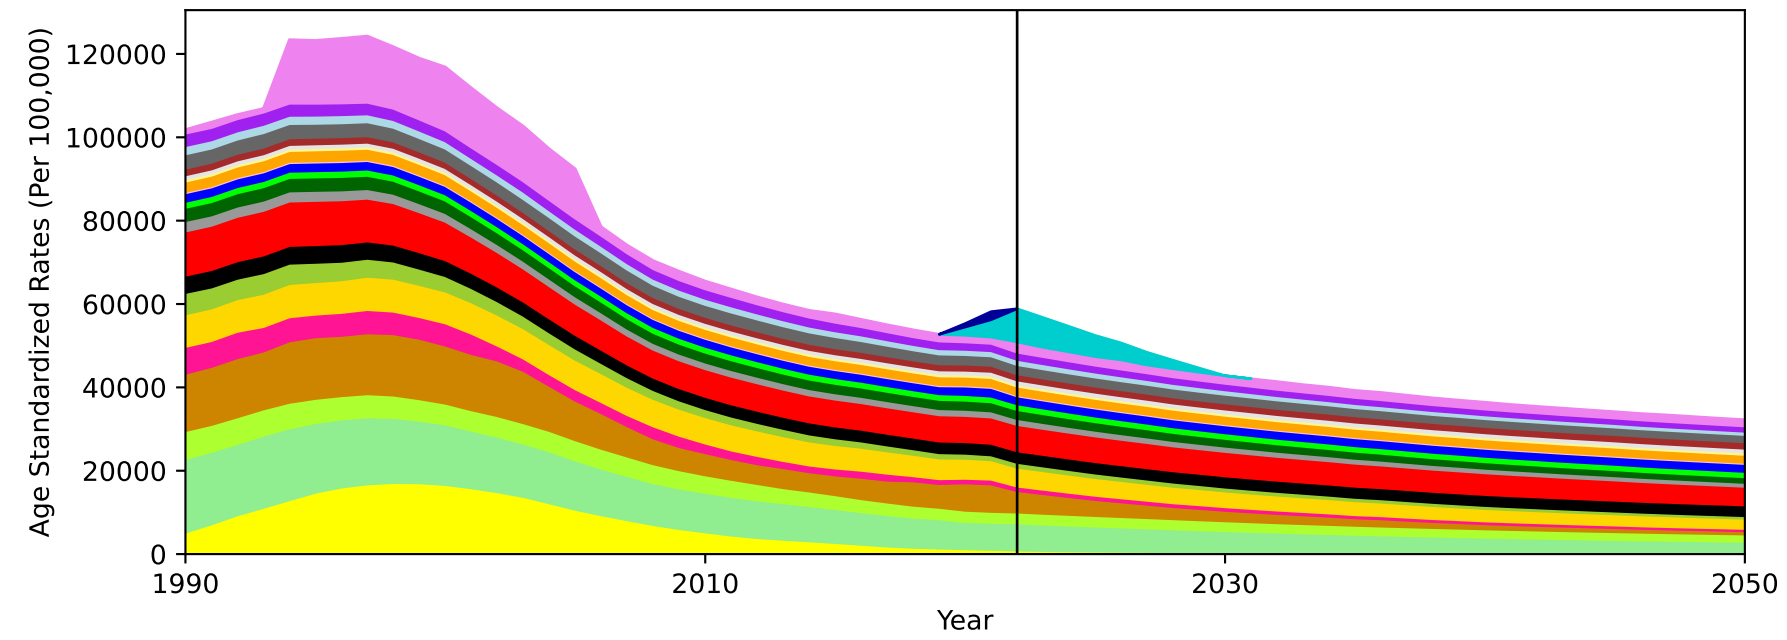

Level 1

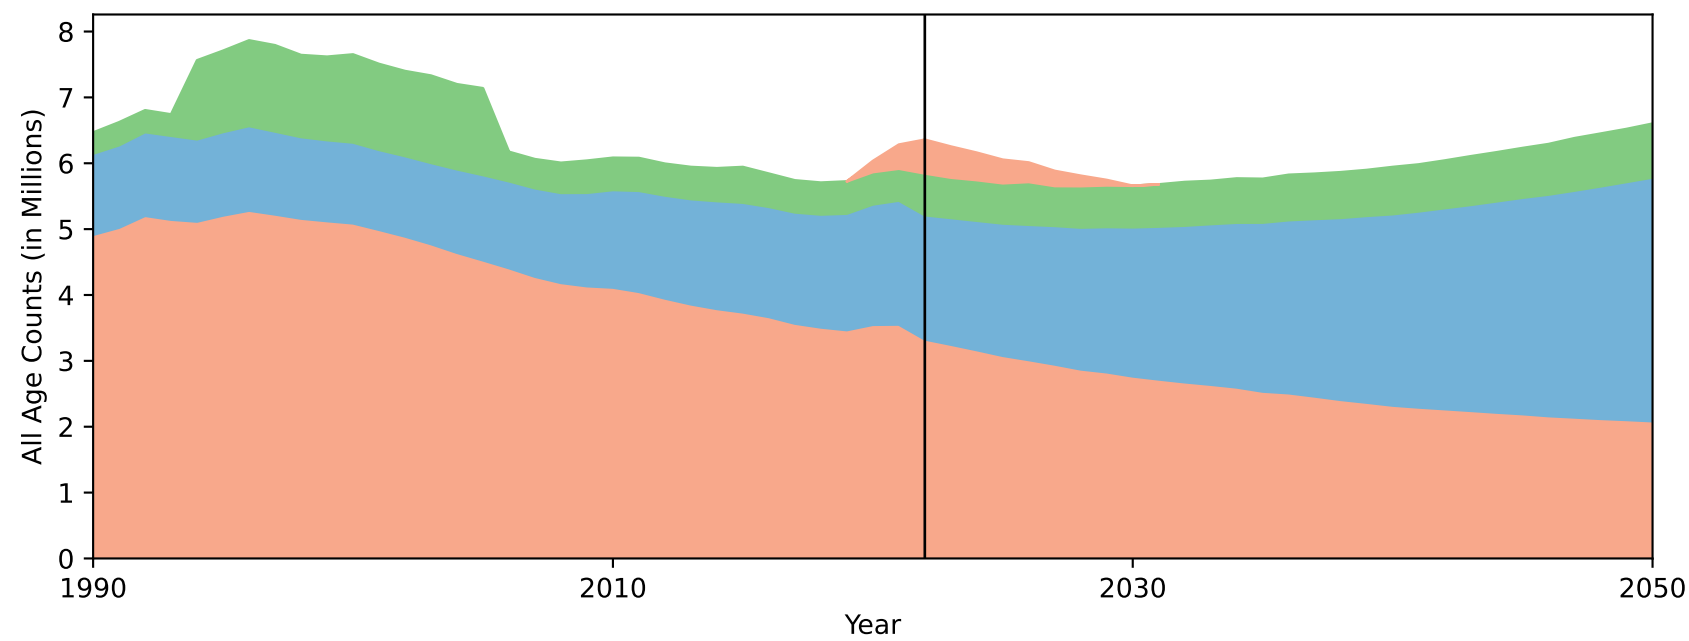

Level 2

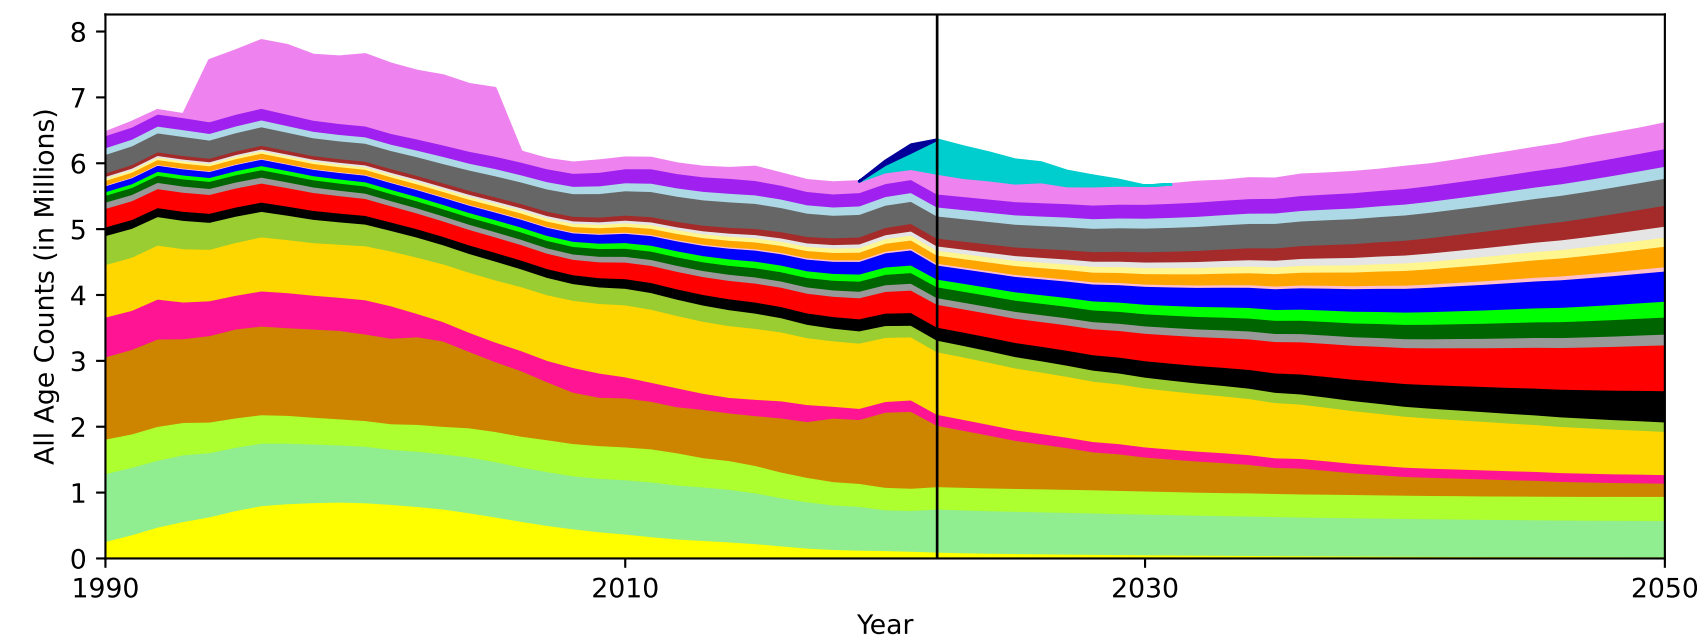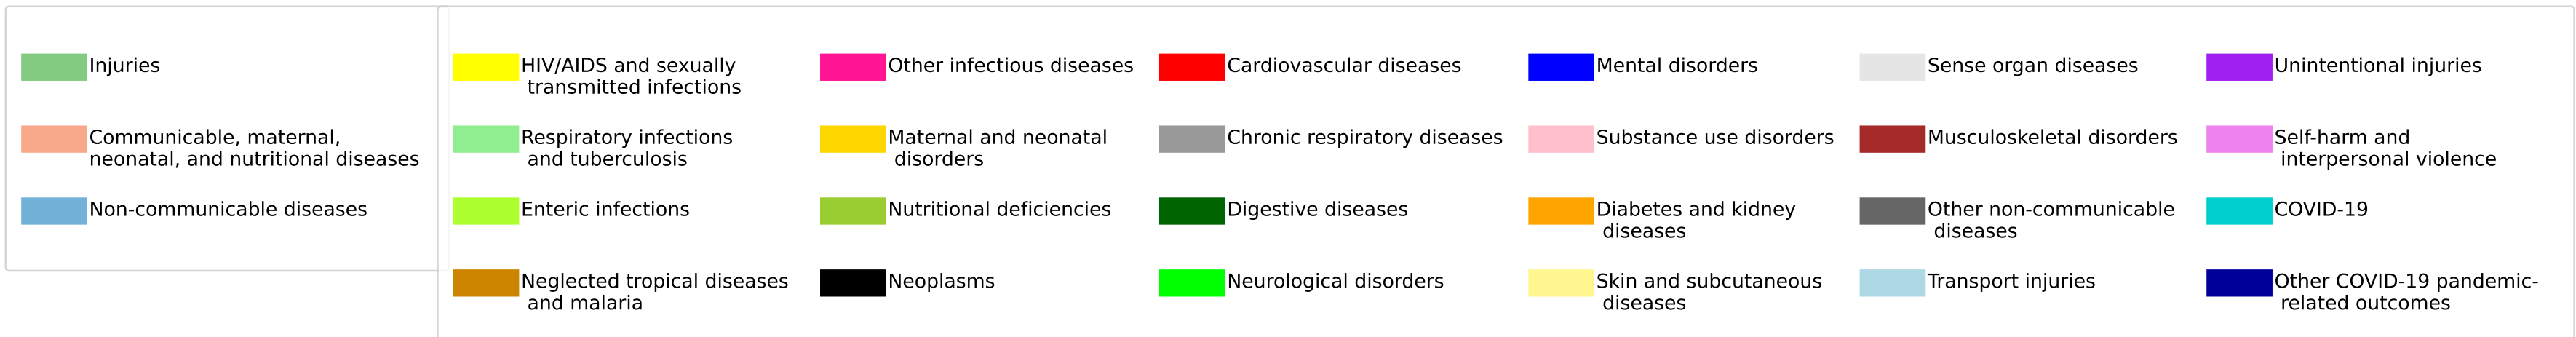

# Comoros

Level 1

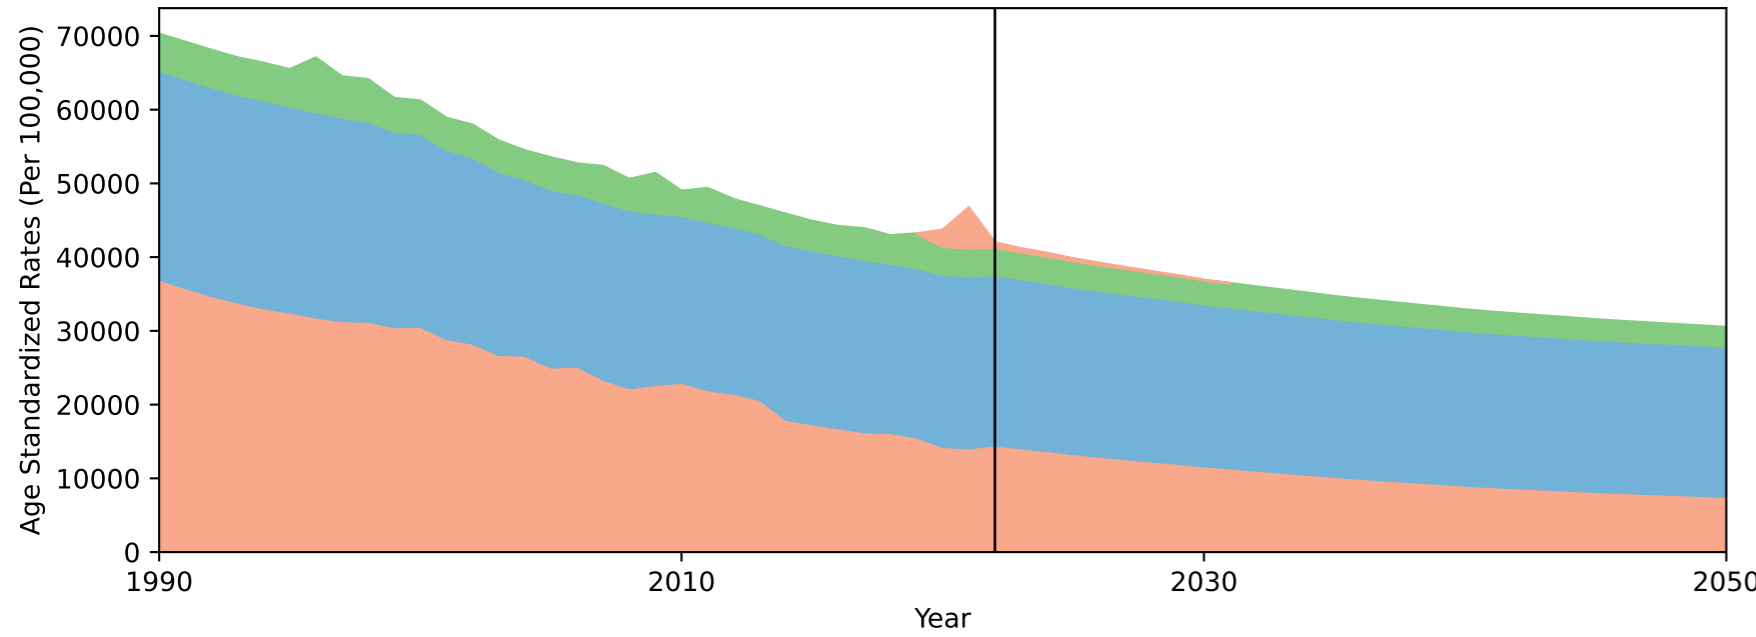

Level 2

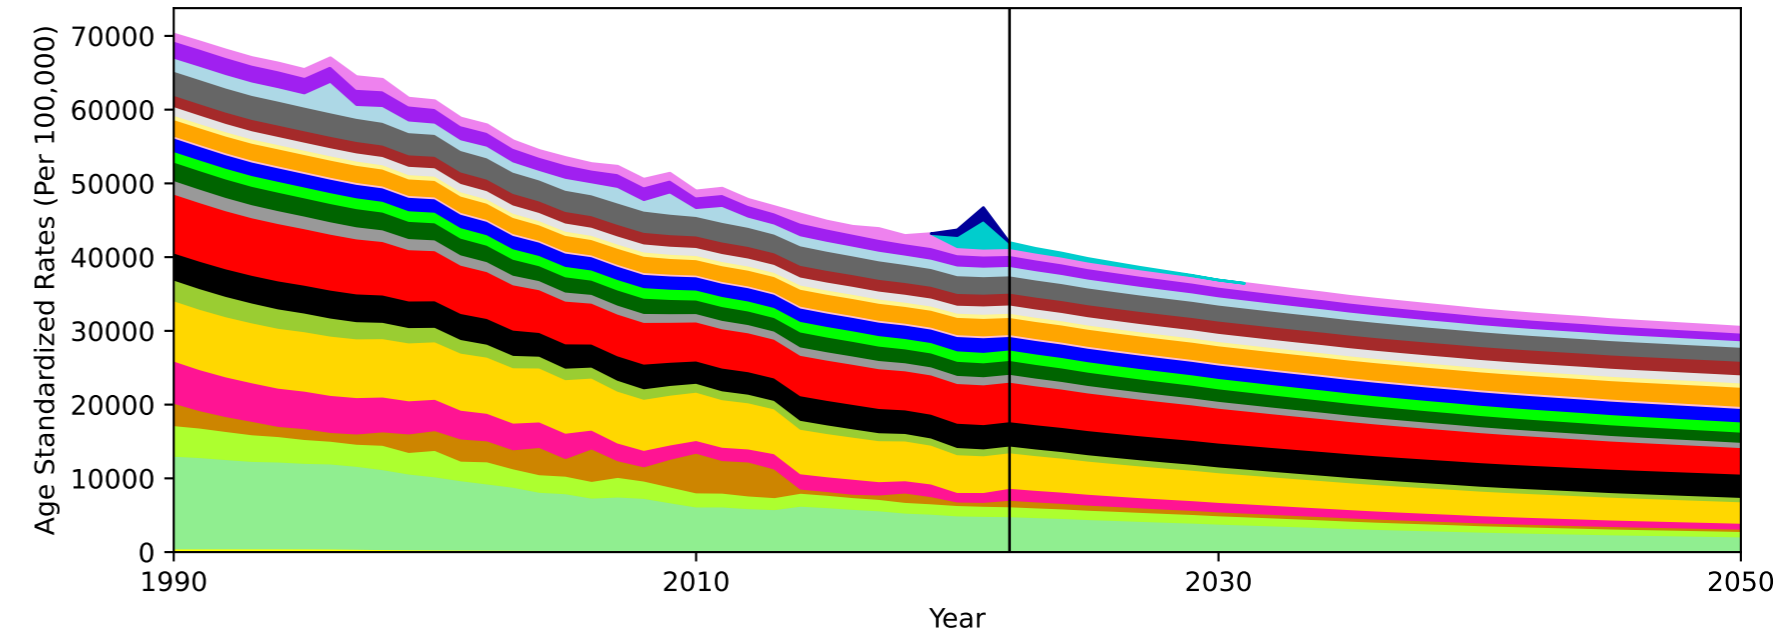

Level 1

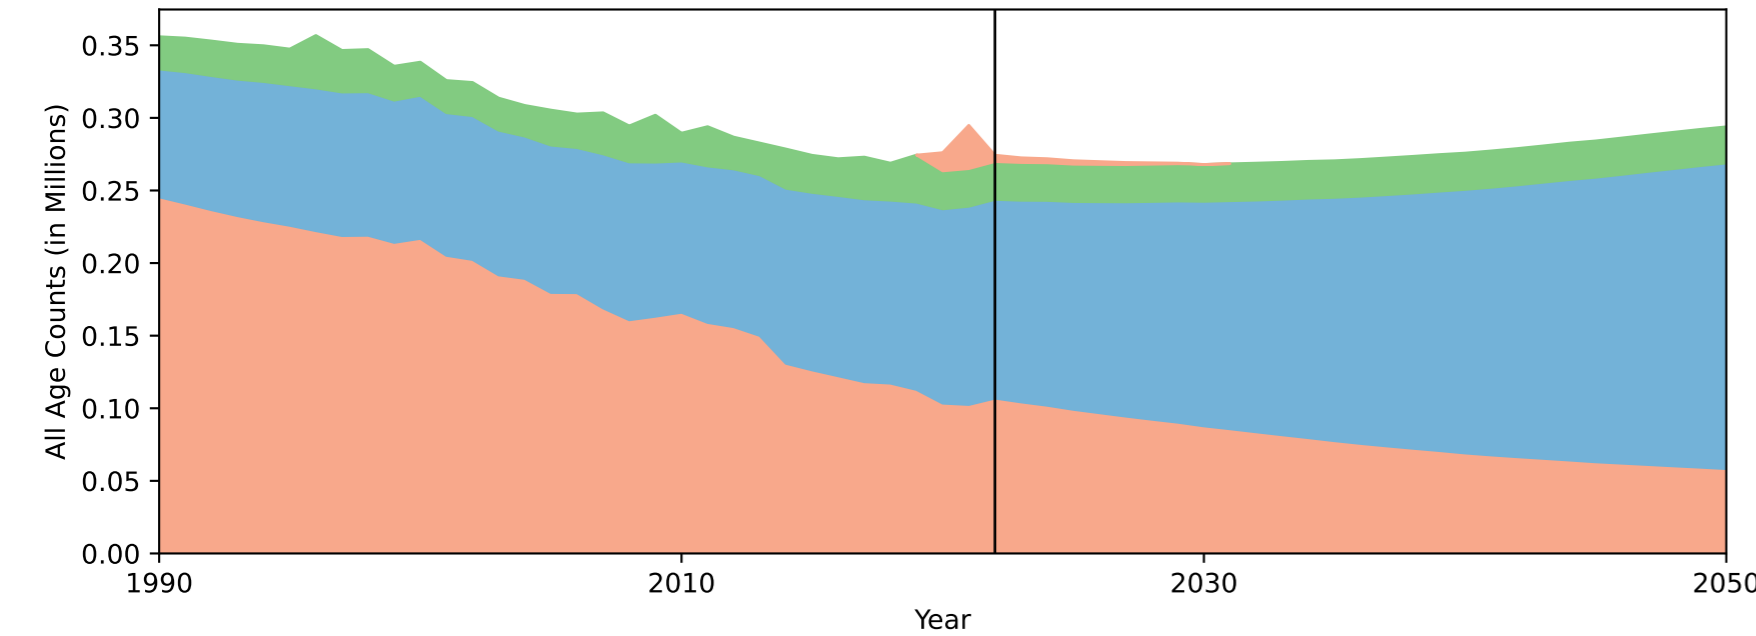

Level 2

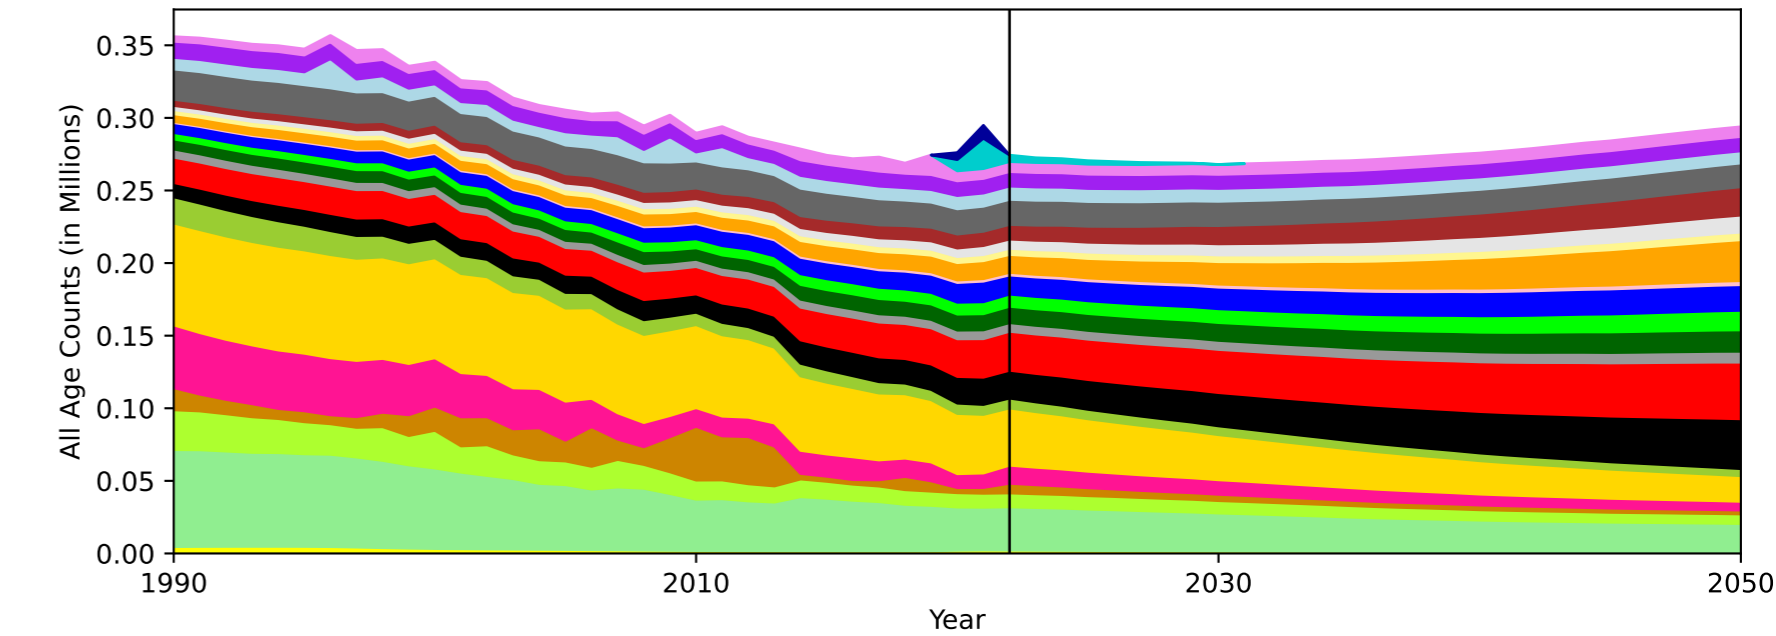

# Djibouti

Level 1

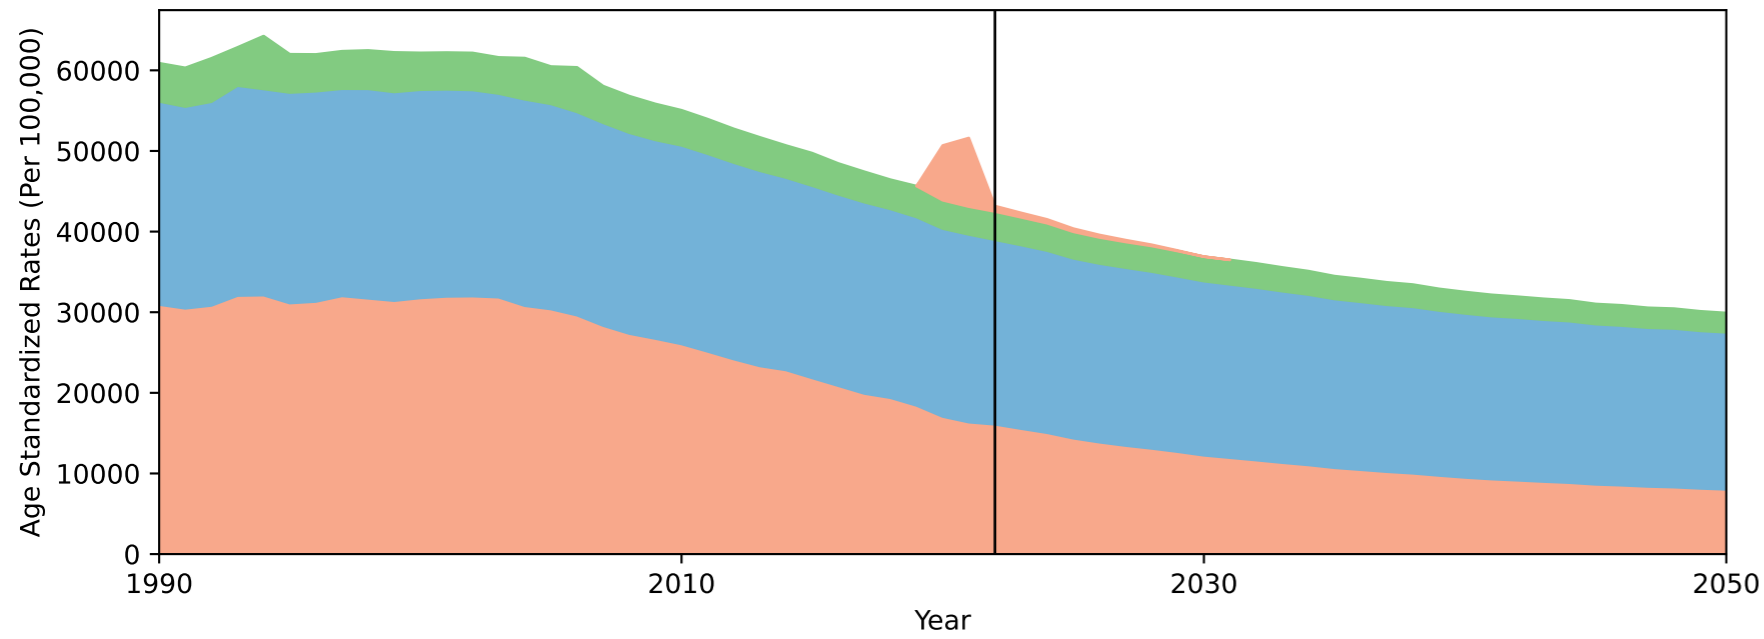

Level 2

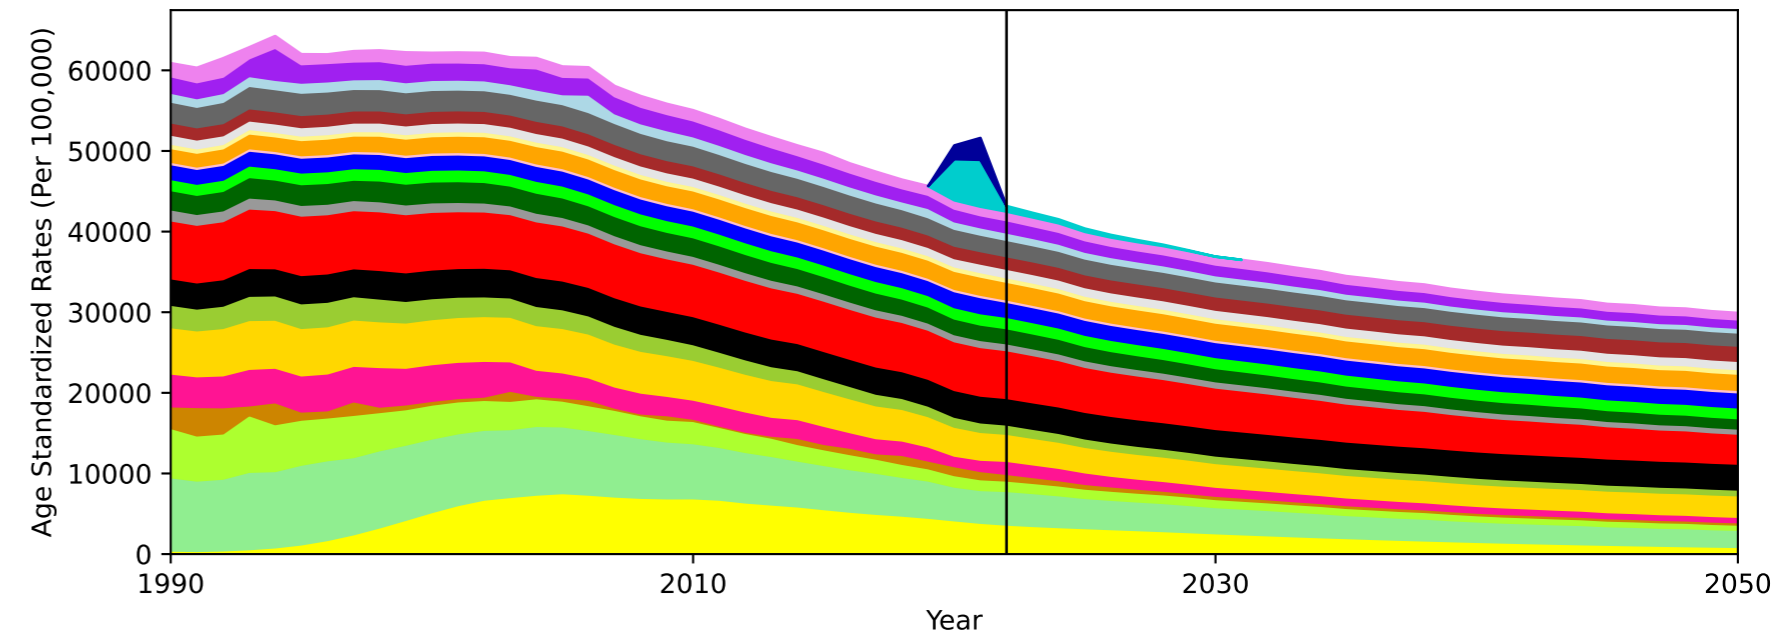

Level 1

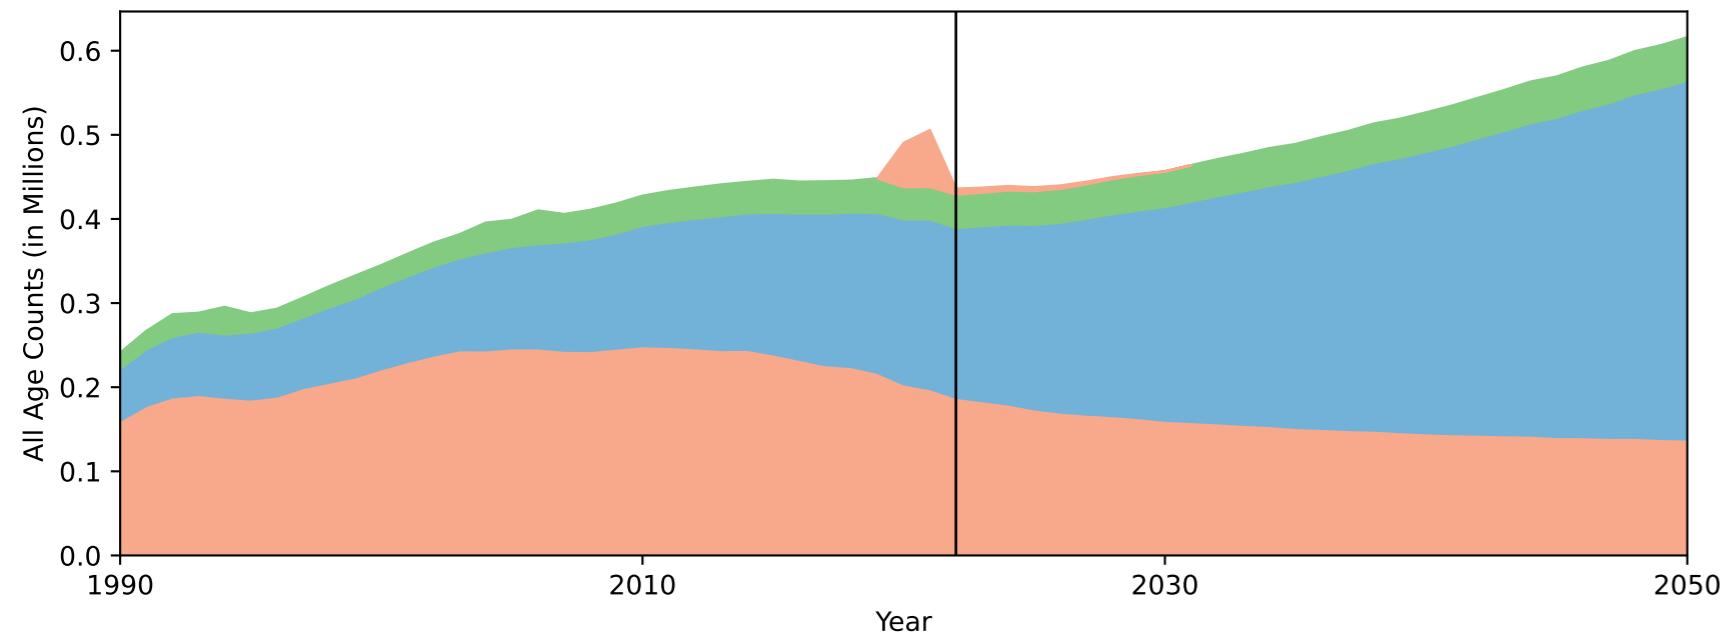

Level 2

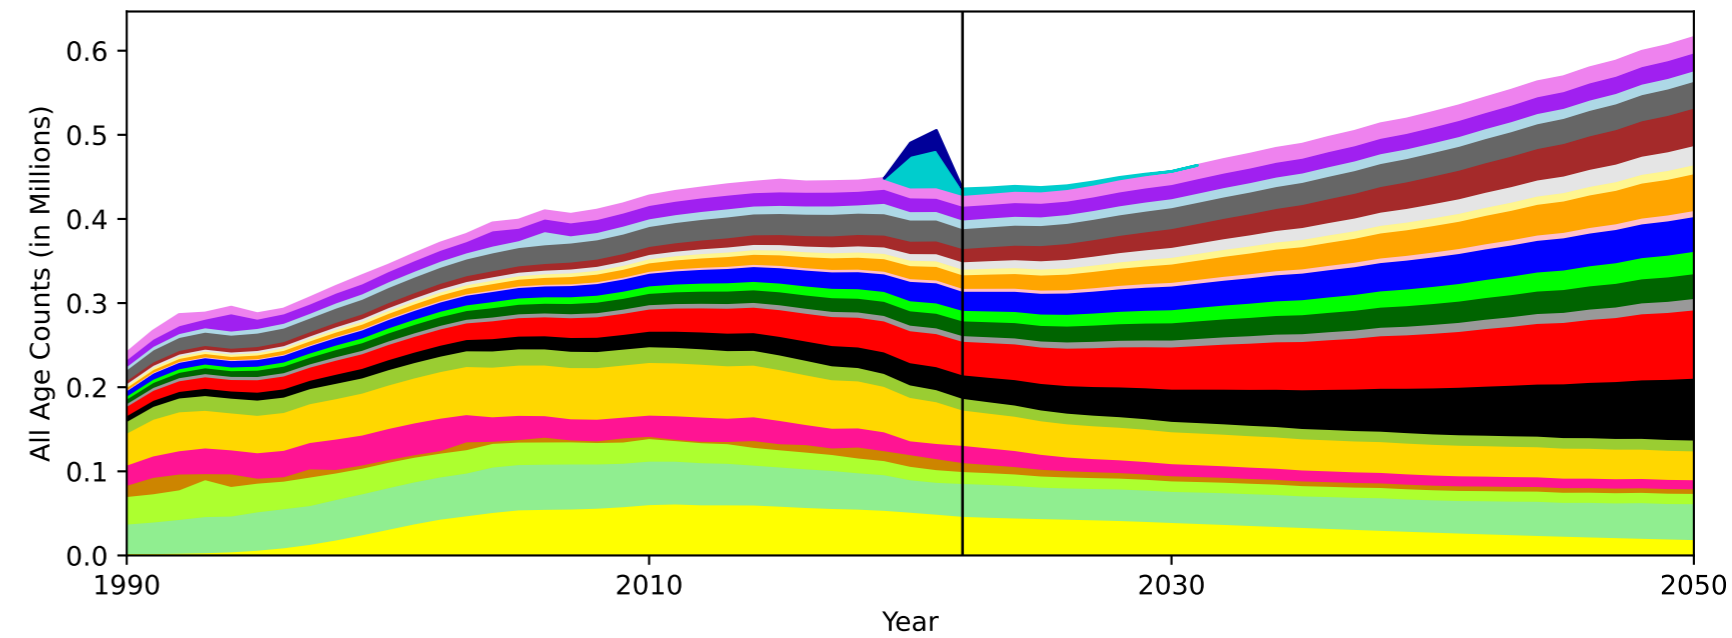

Level 1

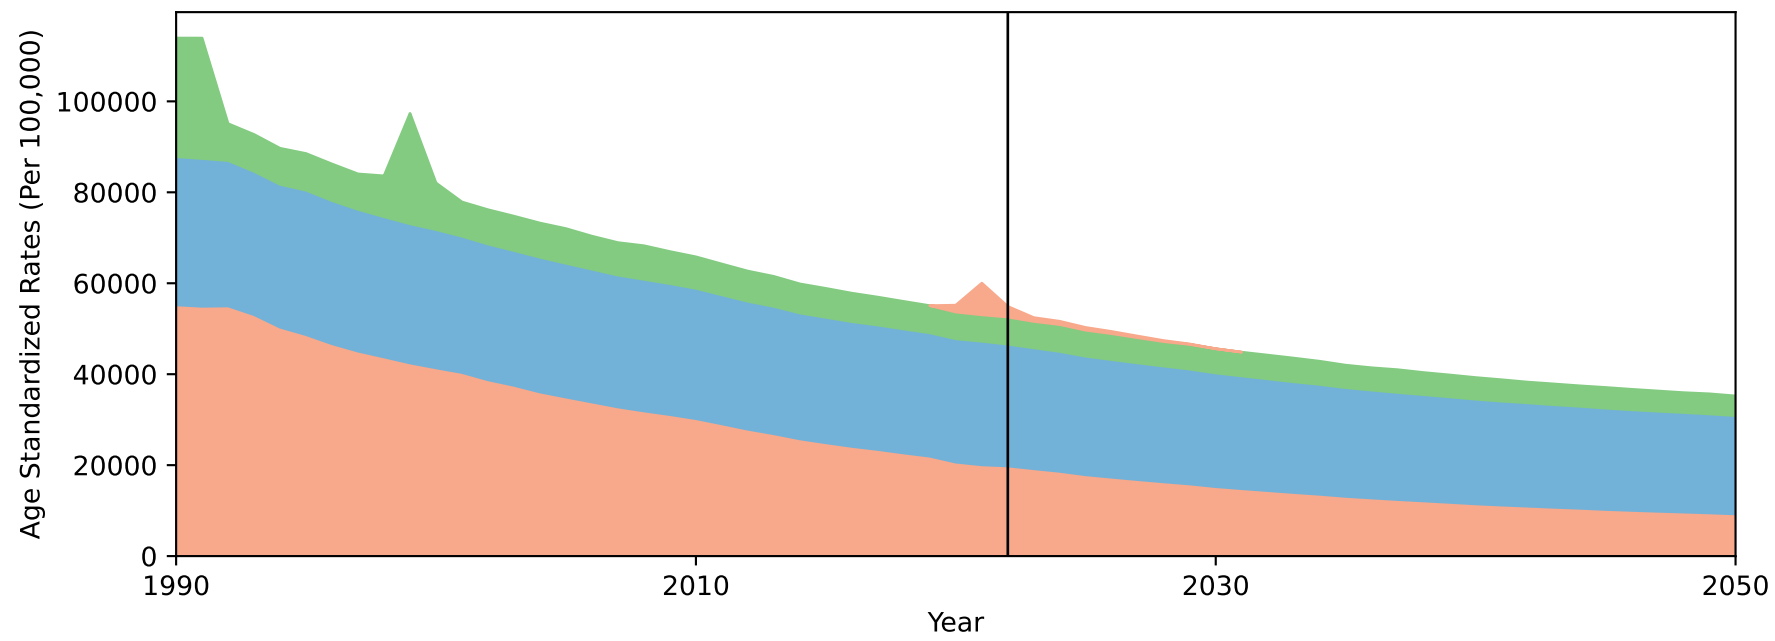

Level 2

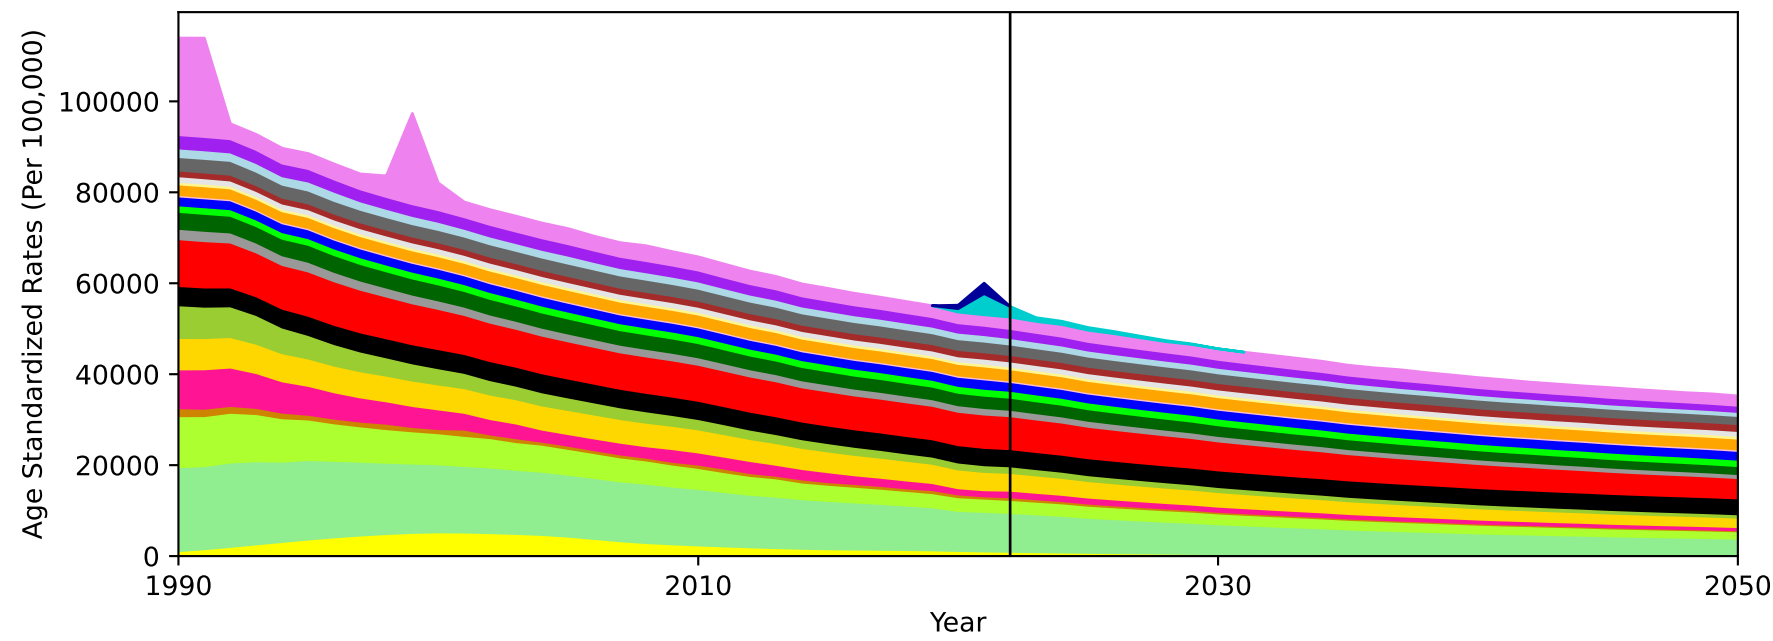

Level 1

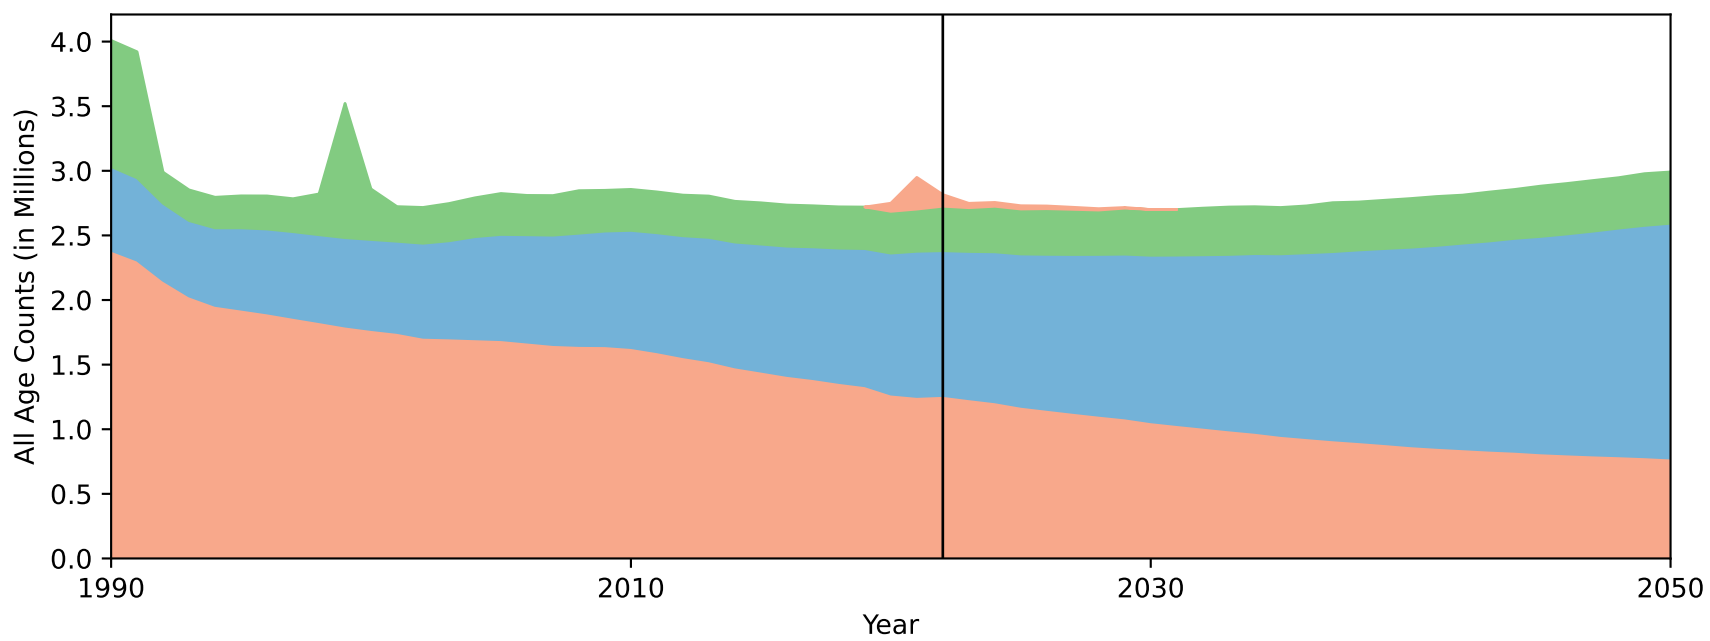

Level 2

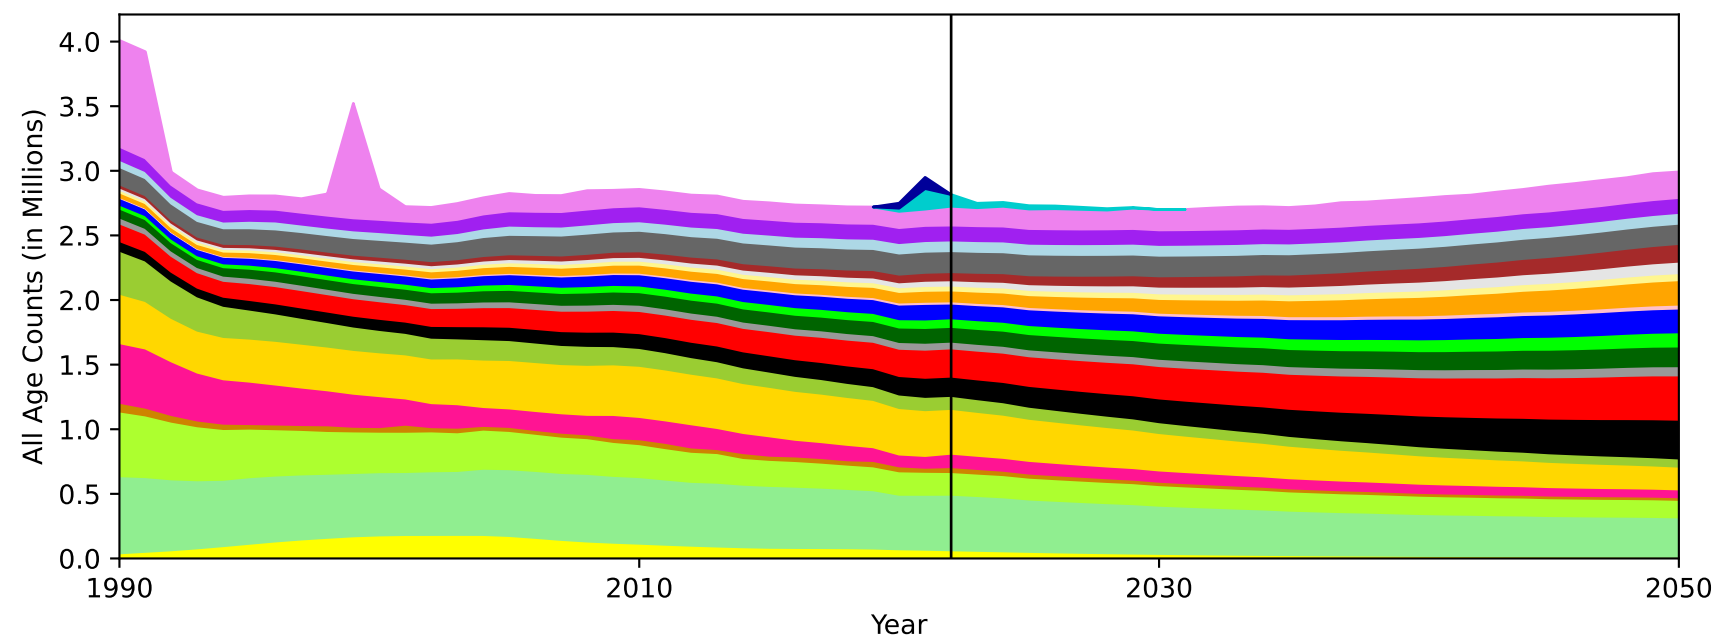

# Ethiopia

Level 1

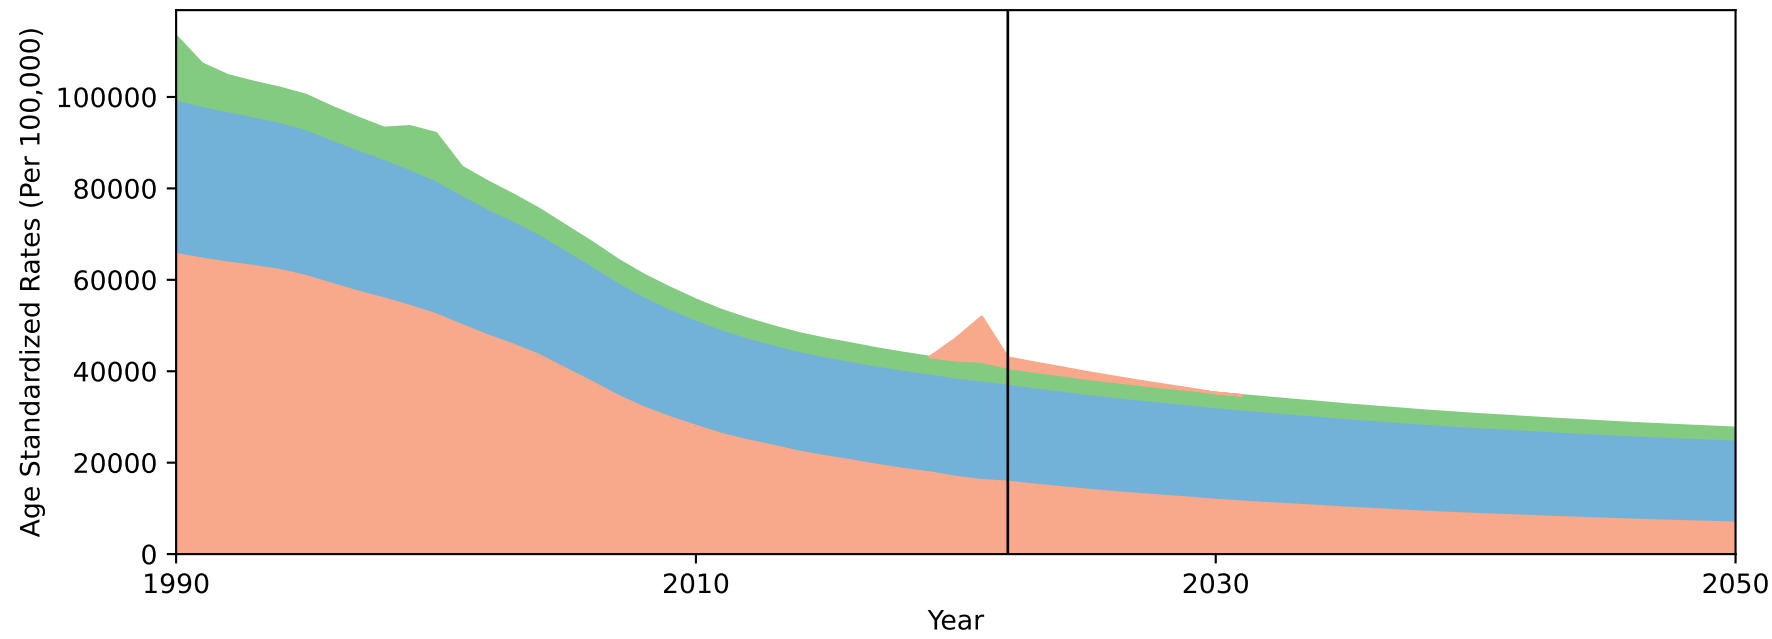

Level 2

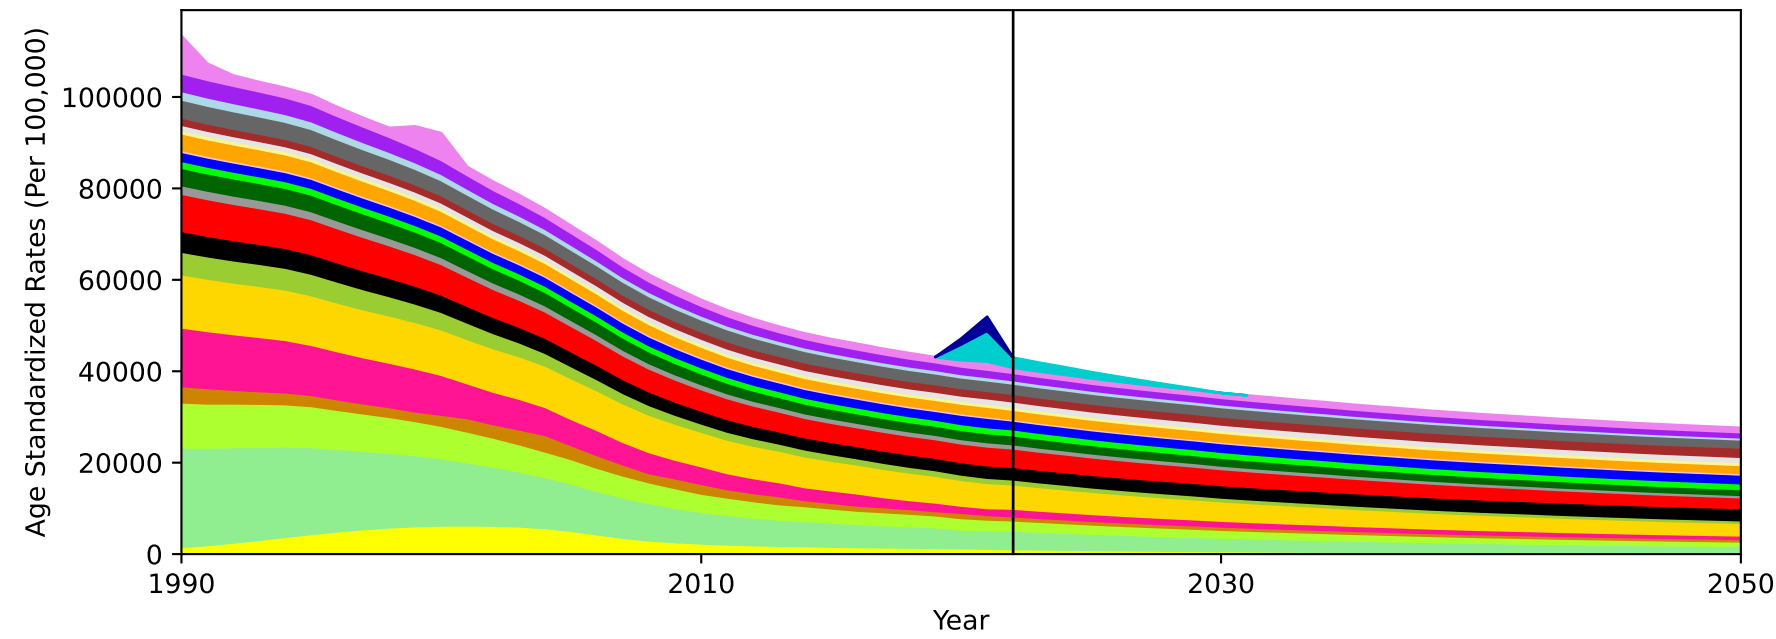

Level 1

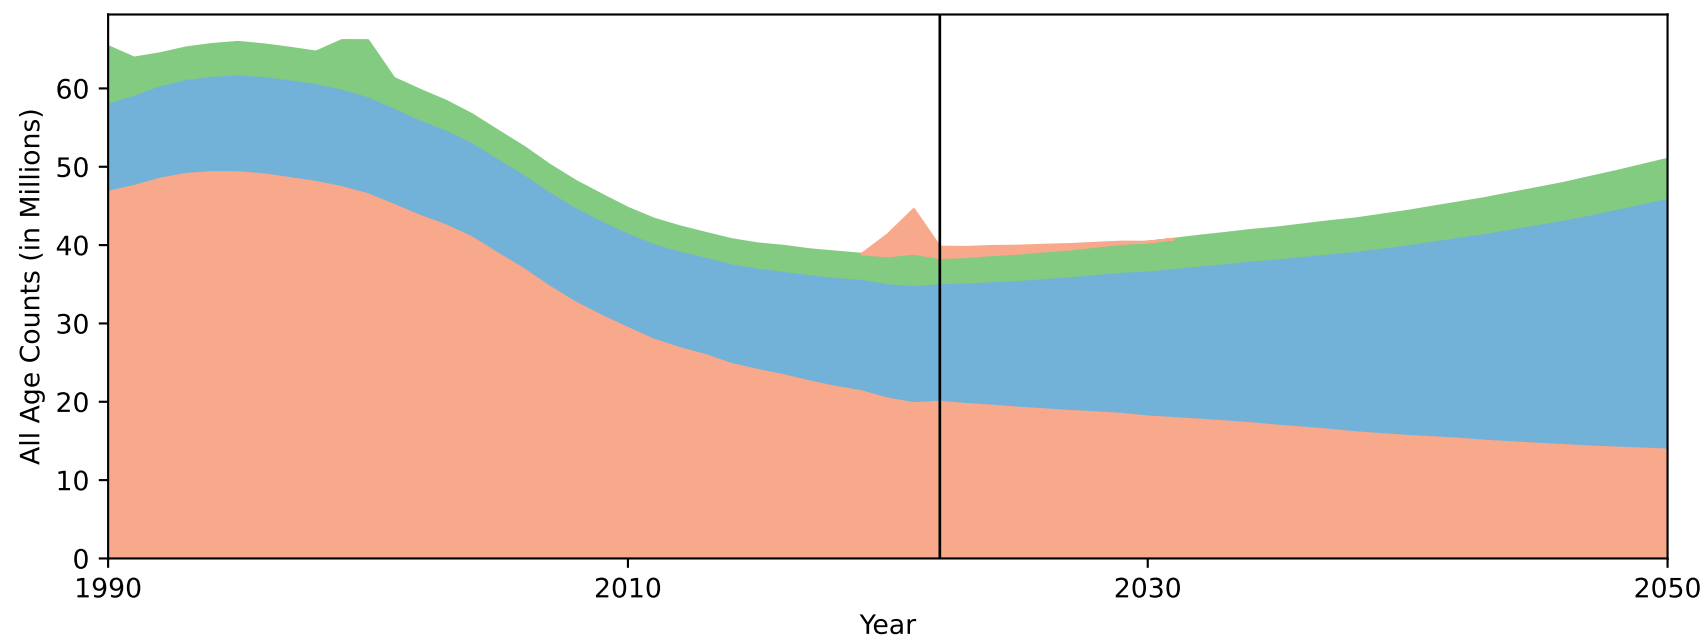

Level 2

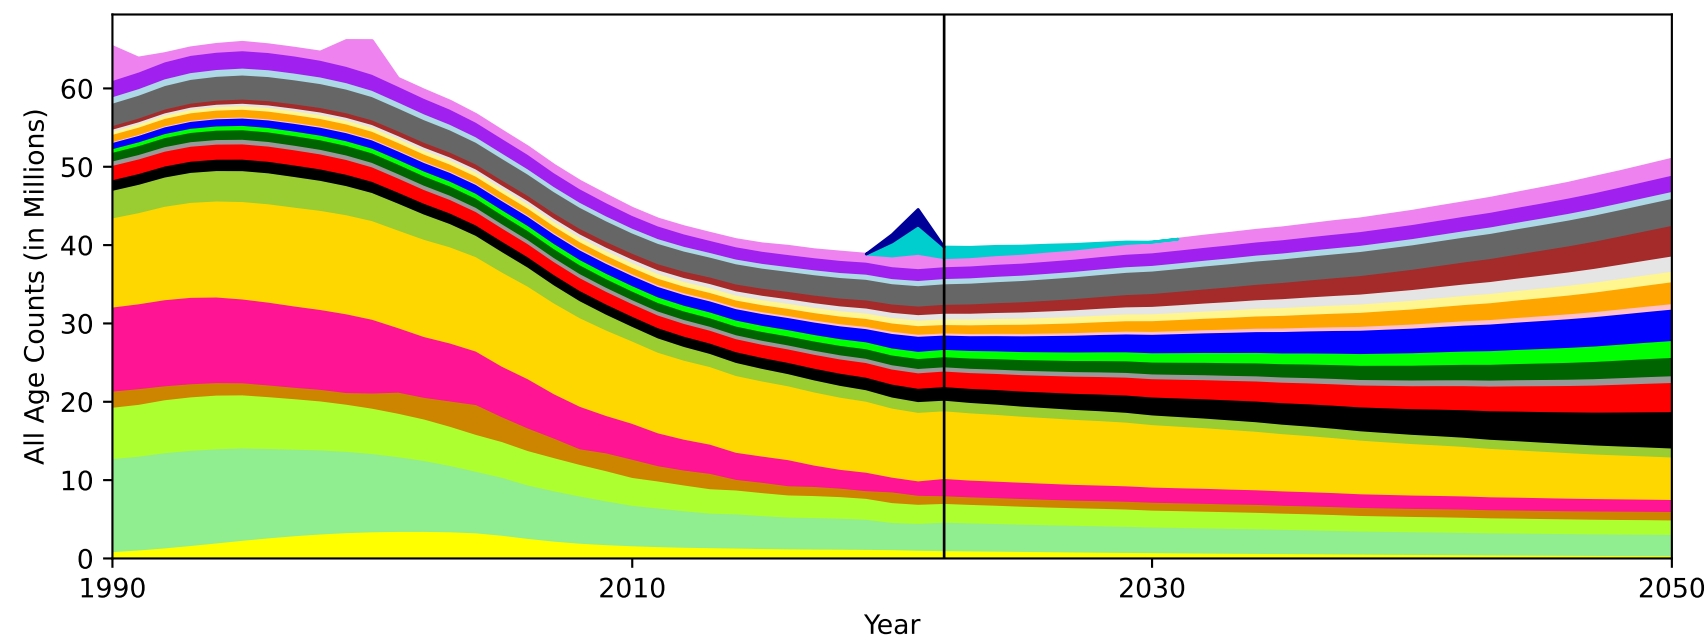

# Kenya

Level 1

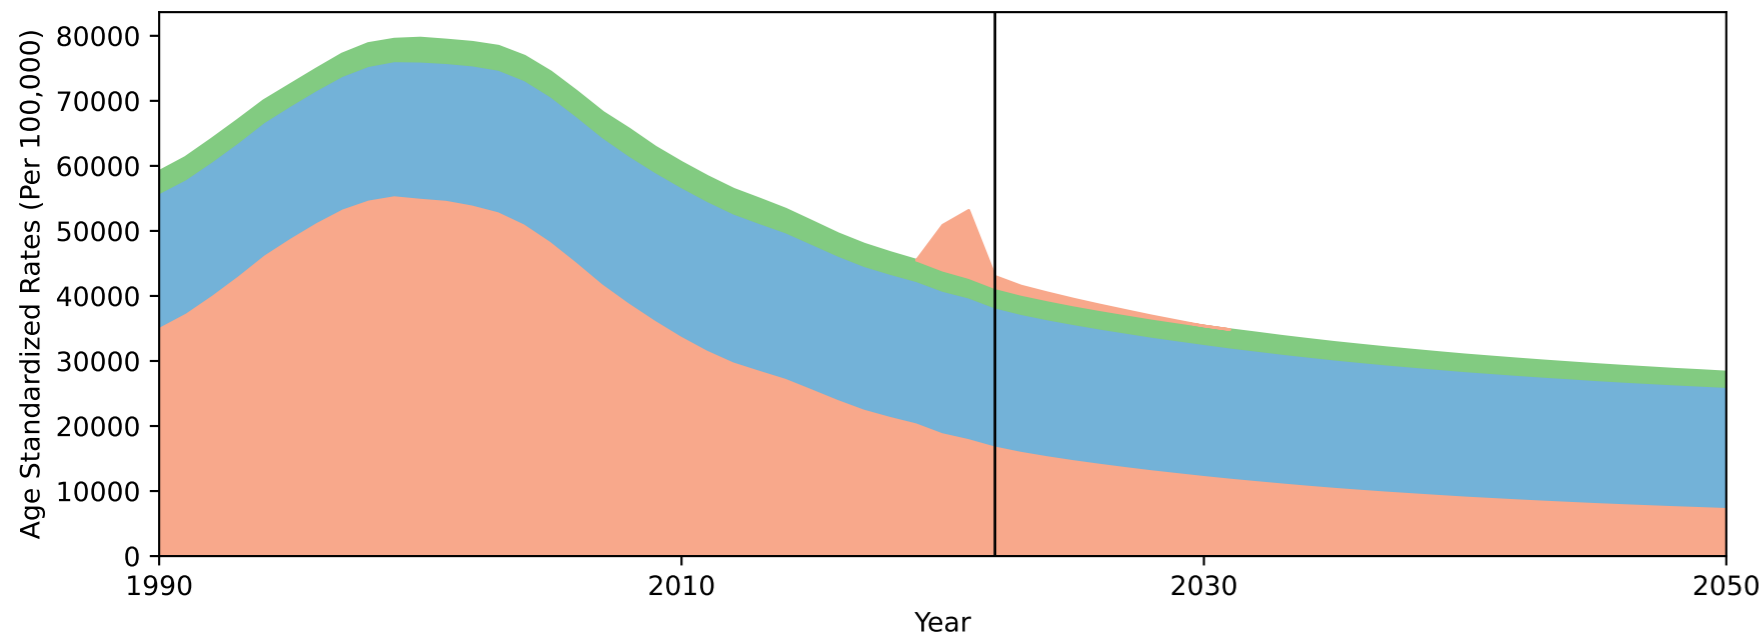

Level 2

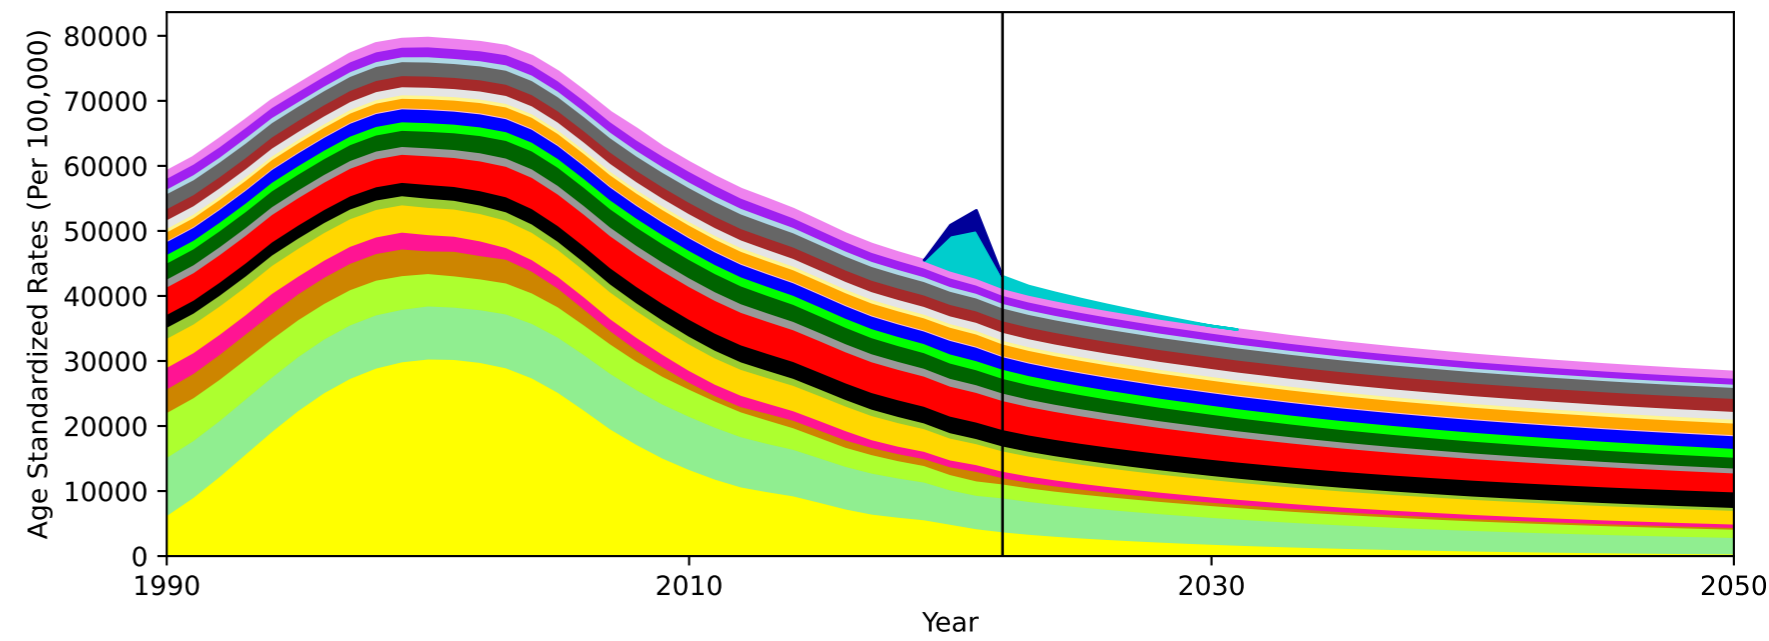

Level 1

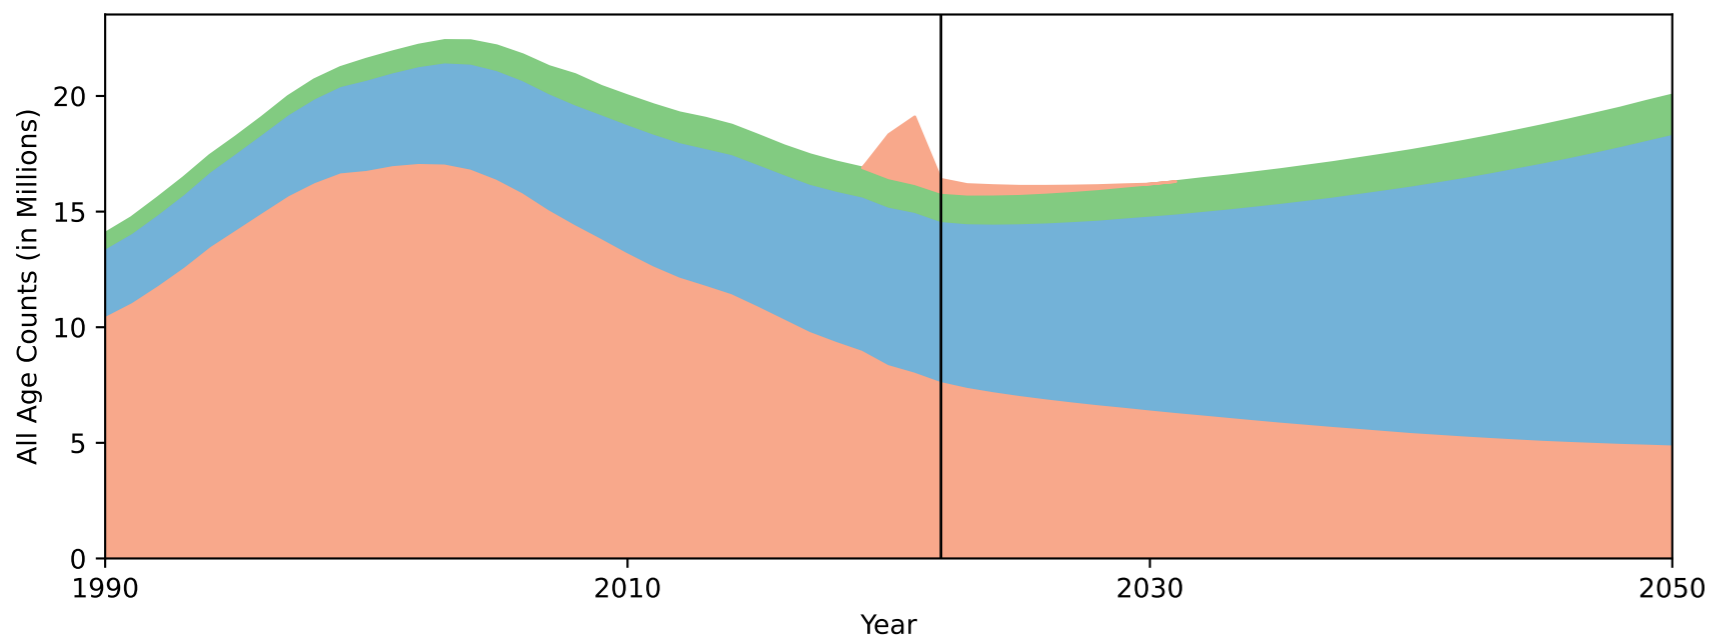

Level 2

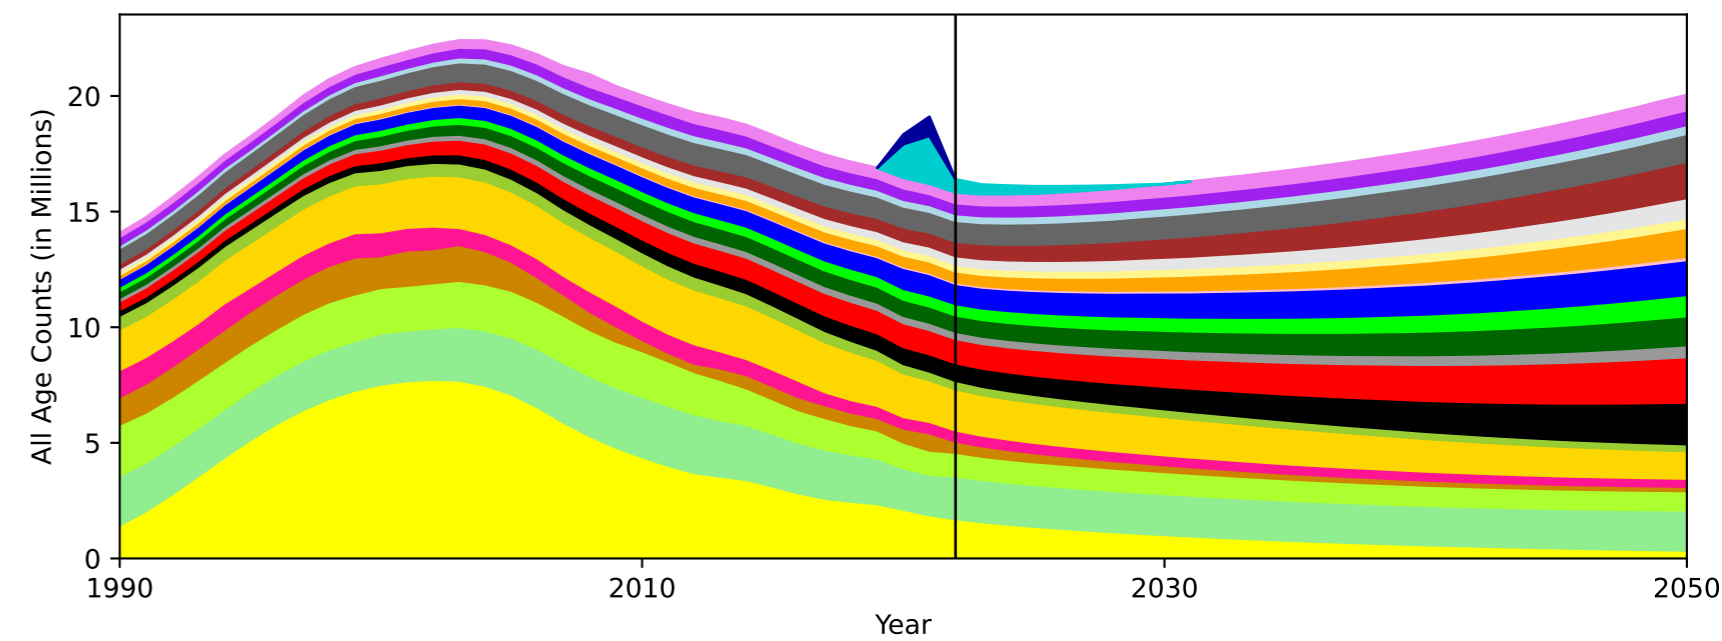

# Madagascar

Supplemental Results Figure S4. Age-standardised DALY rates and all age DALY counts and by Level 1 and Level 2 causes, 1990–2050

415

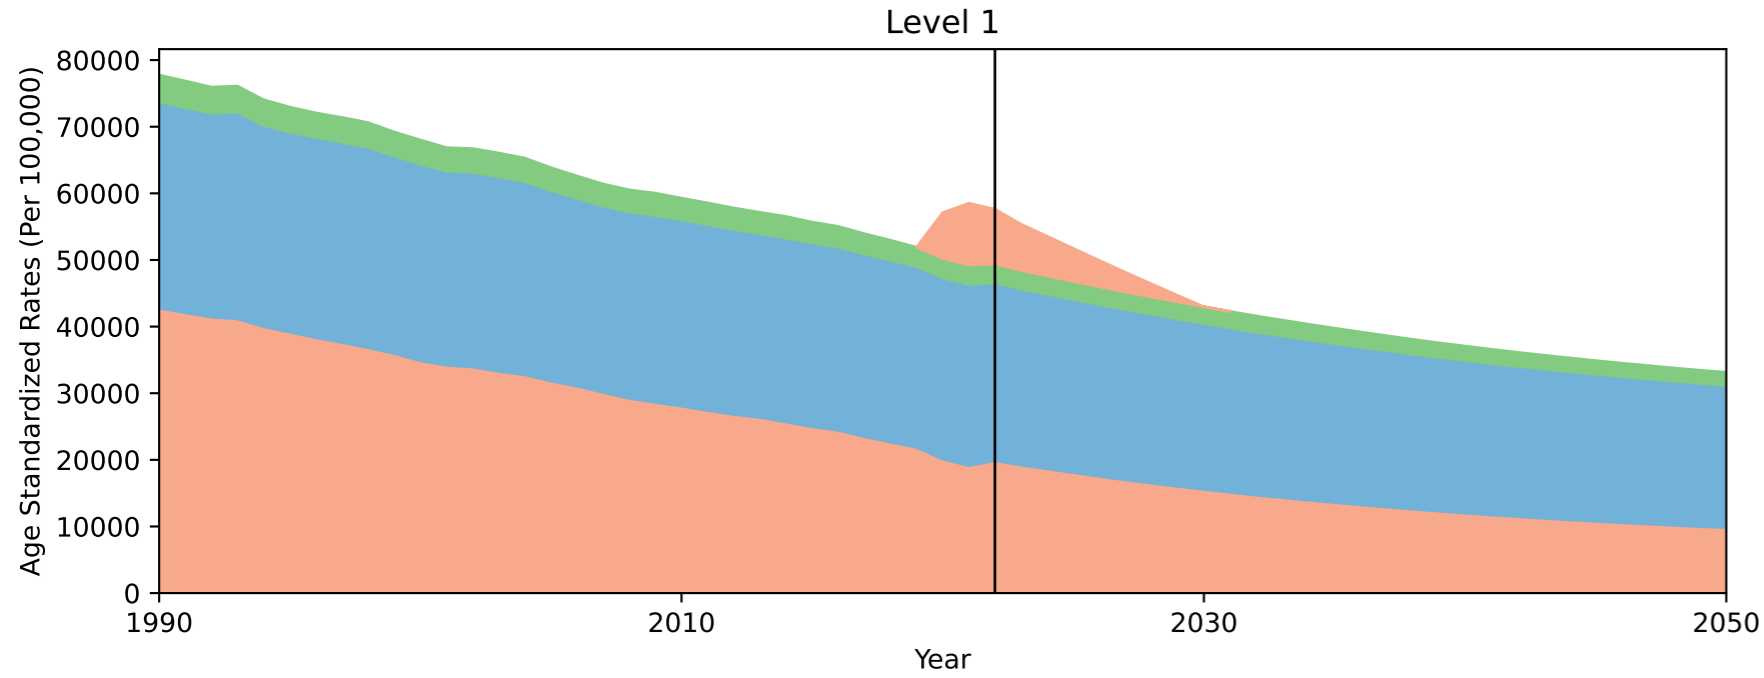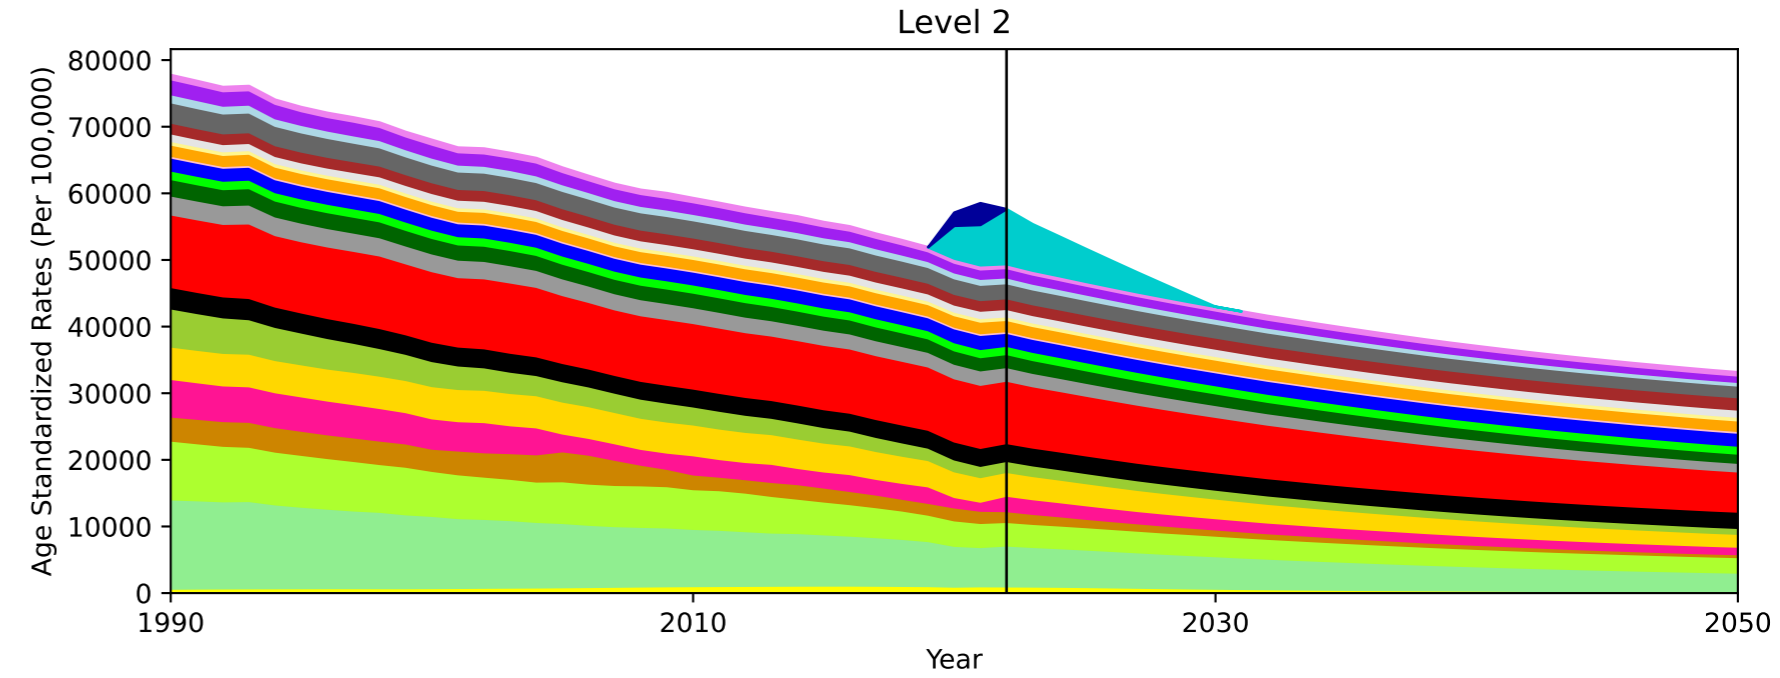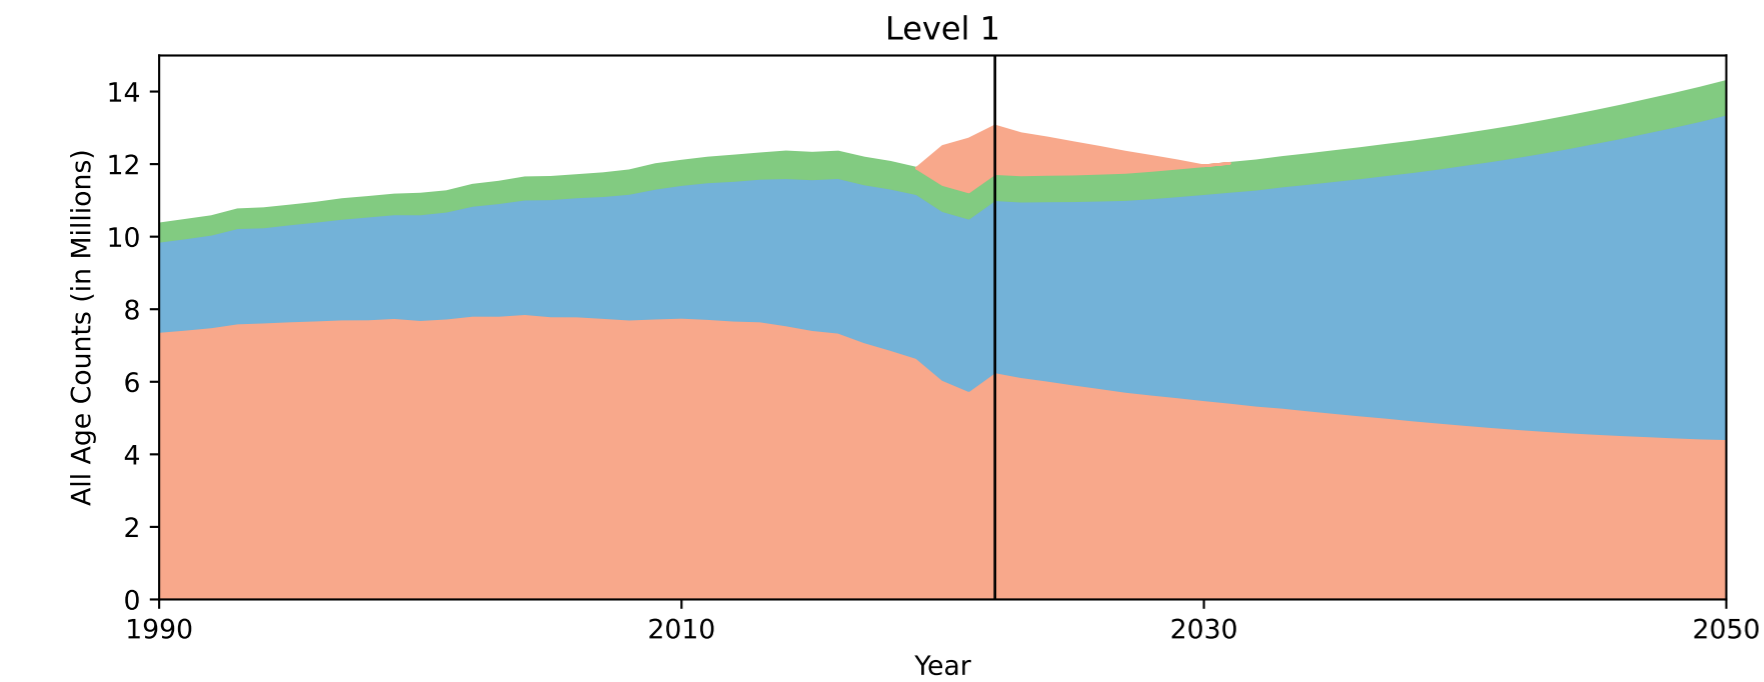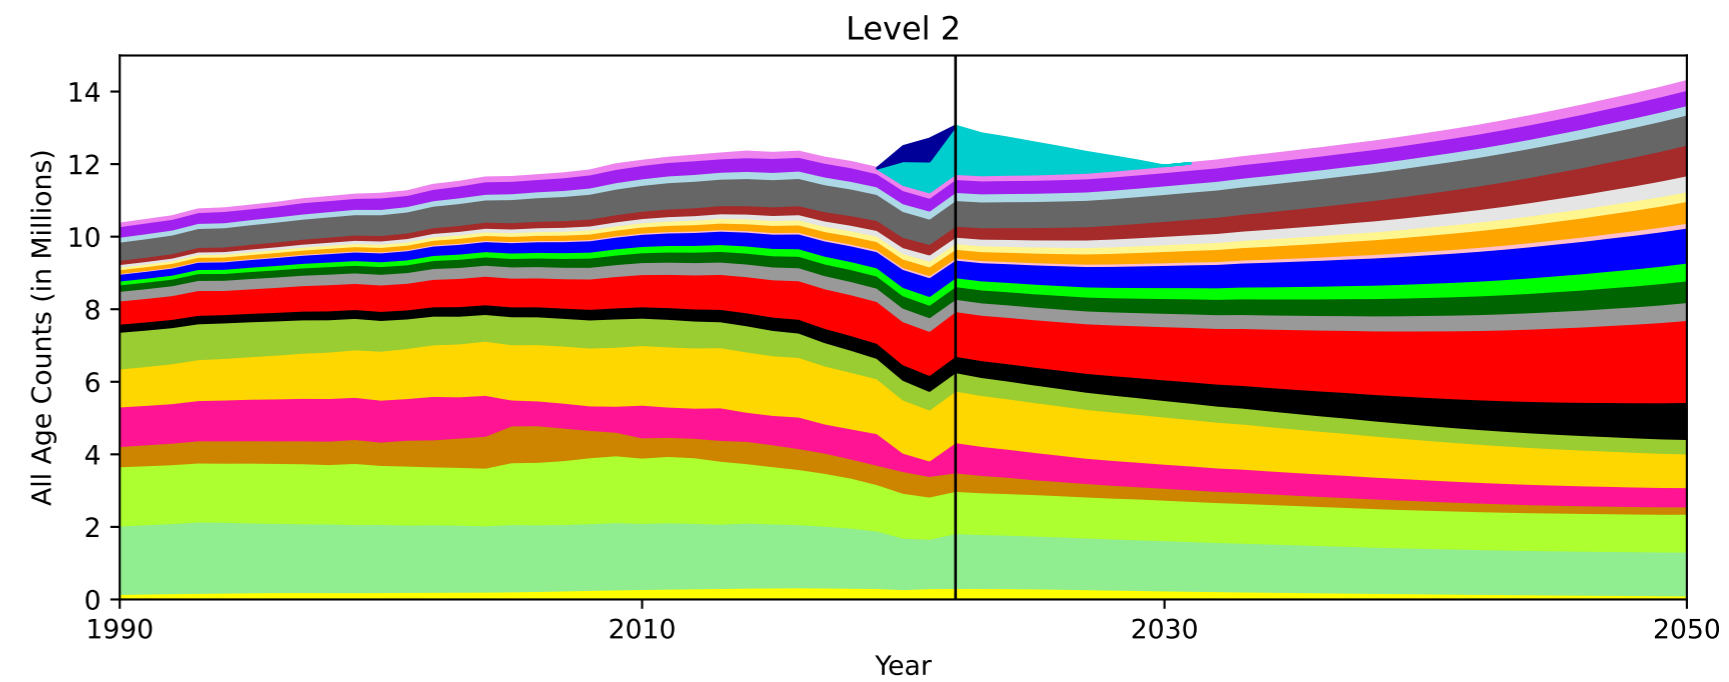



# Malawi

Level 1

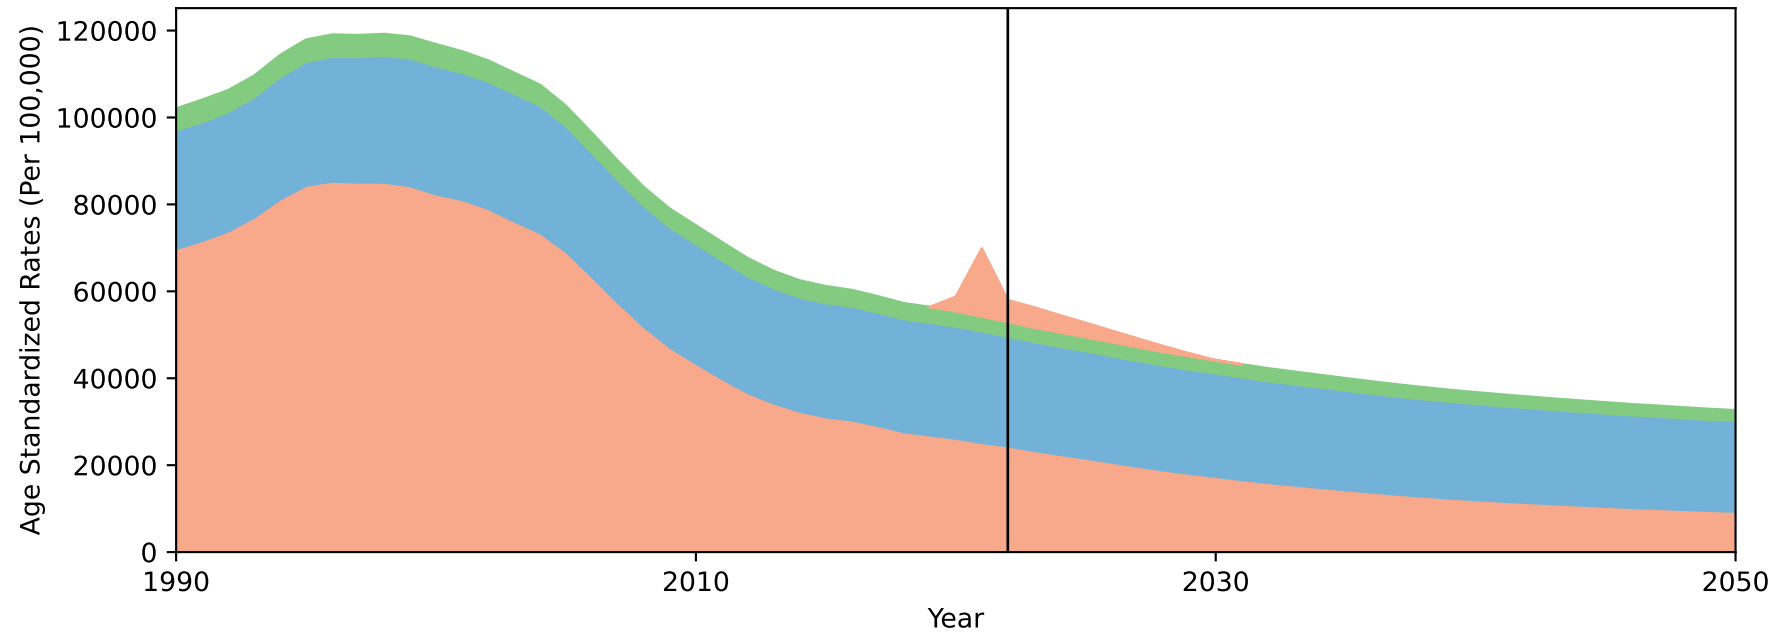

Level 2

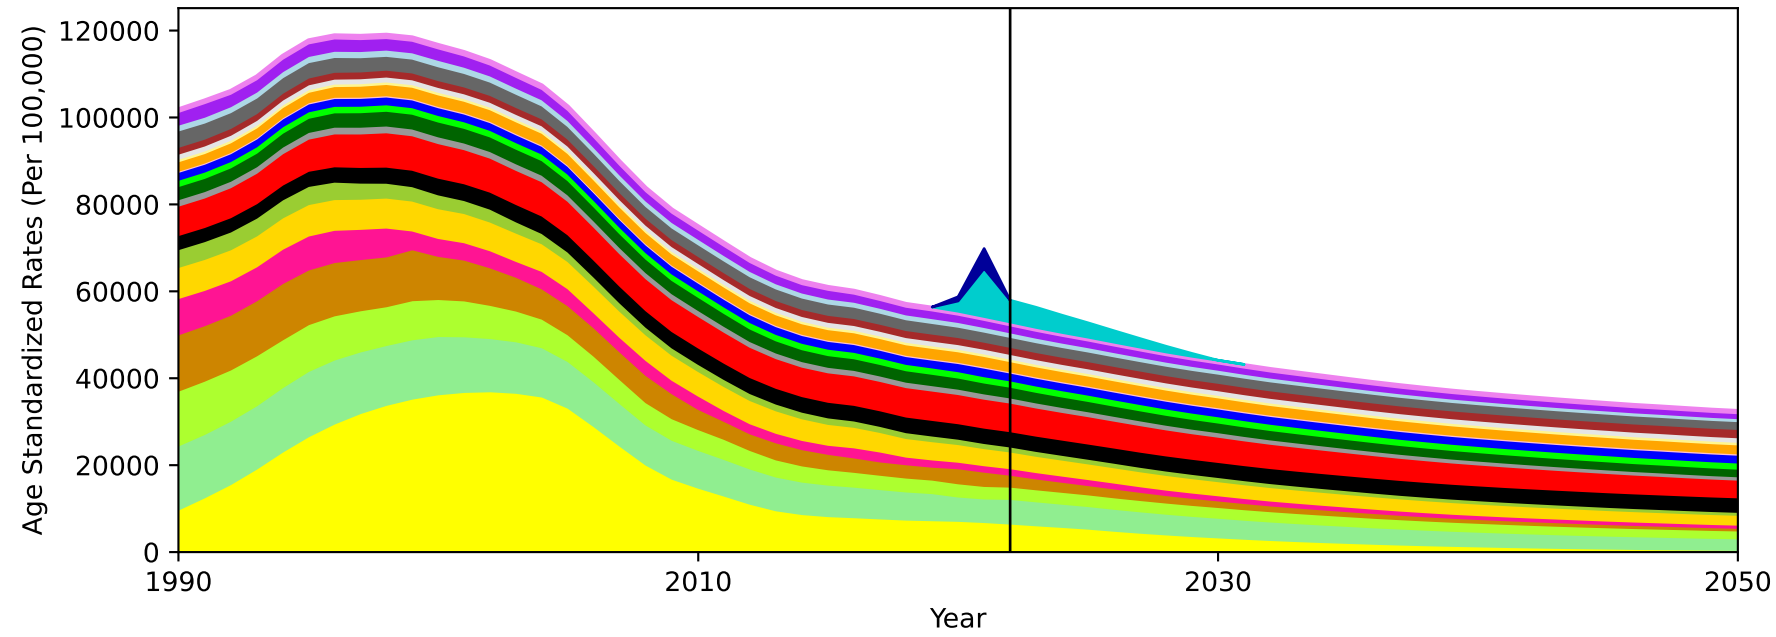

Level 1

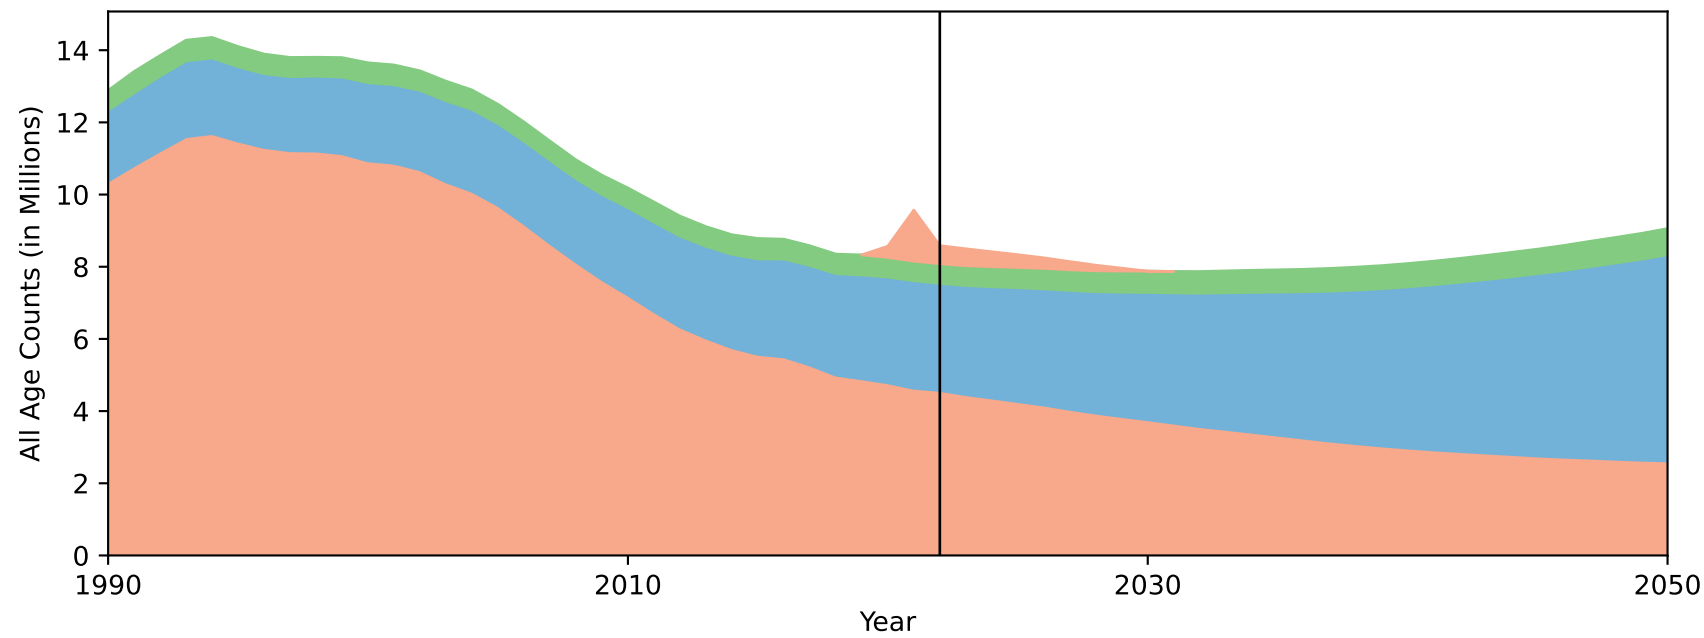

Level 2

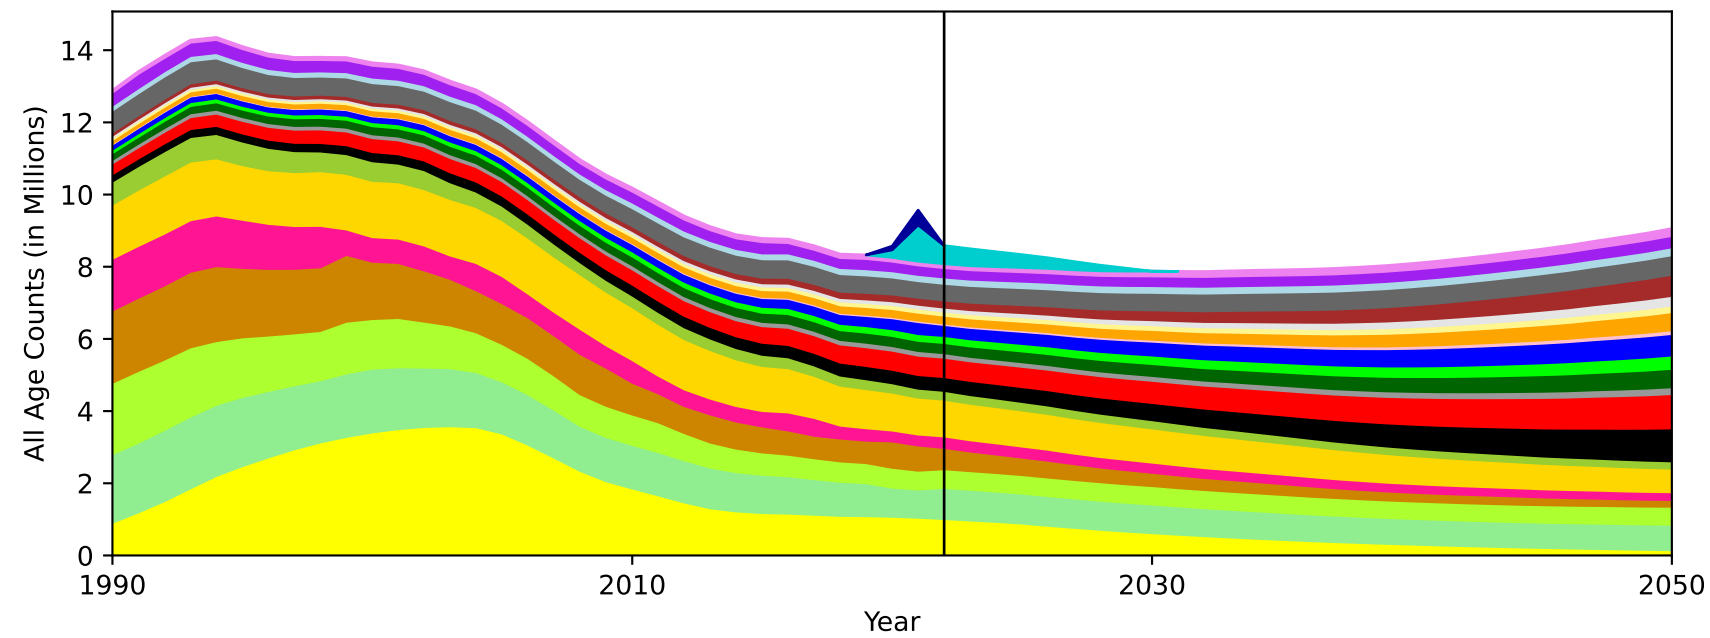

# Mozambique

Supplemental Results Figure S4. Age-standardised DALY rates and all age DALY counts and by Level 1 and Level 2 causes, 1990–2050

417

Level 1

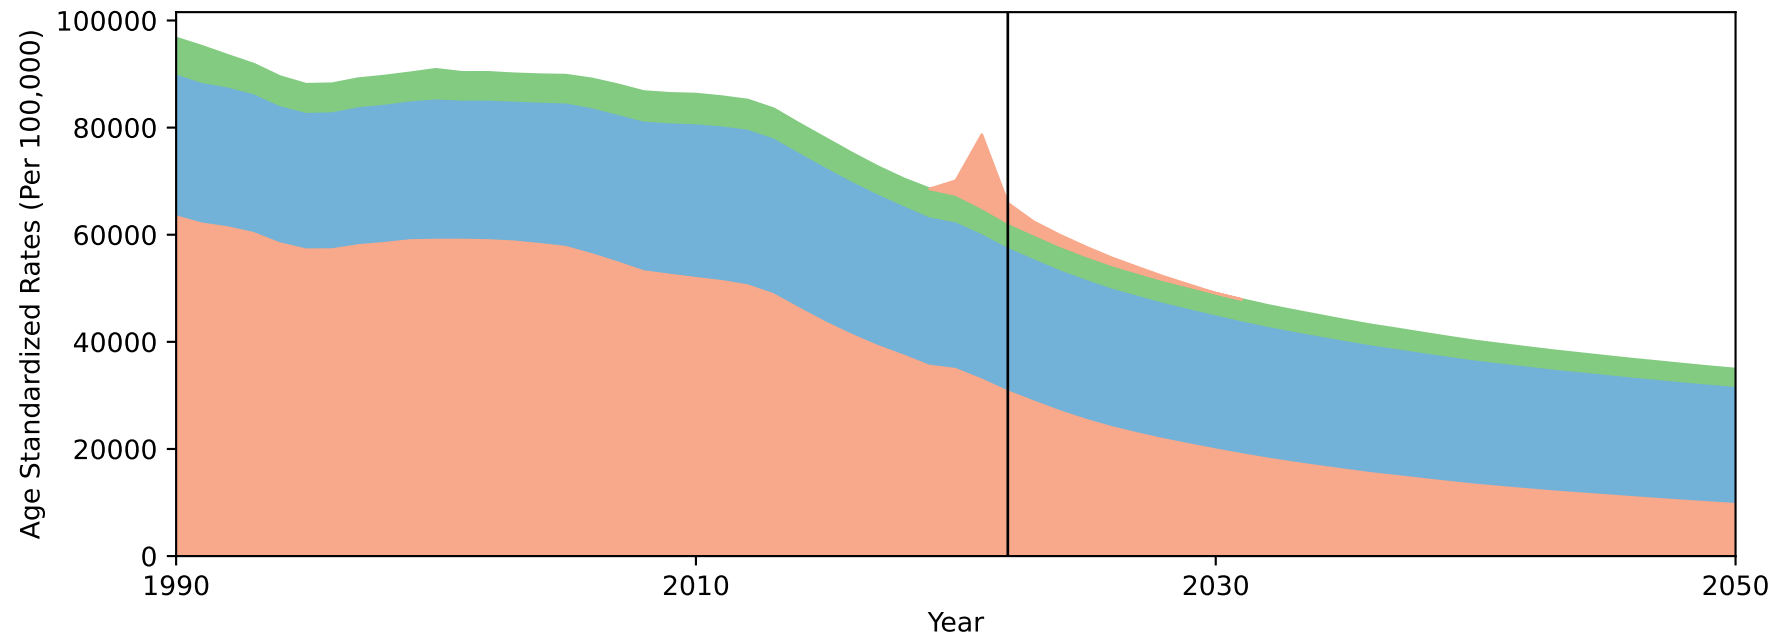

Level 2

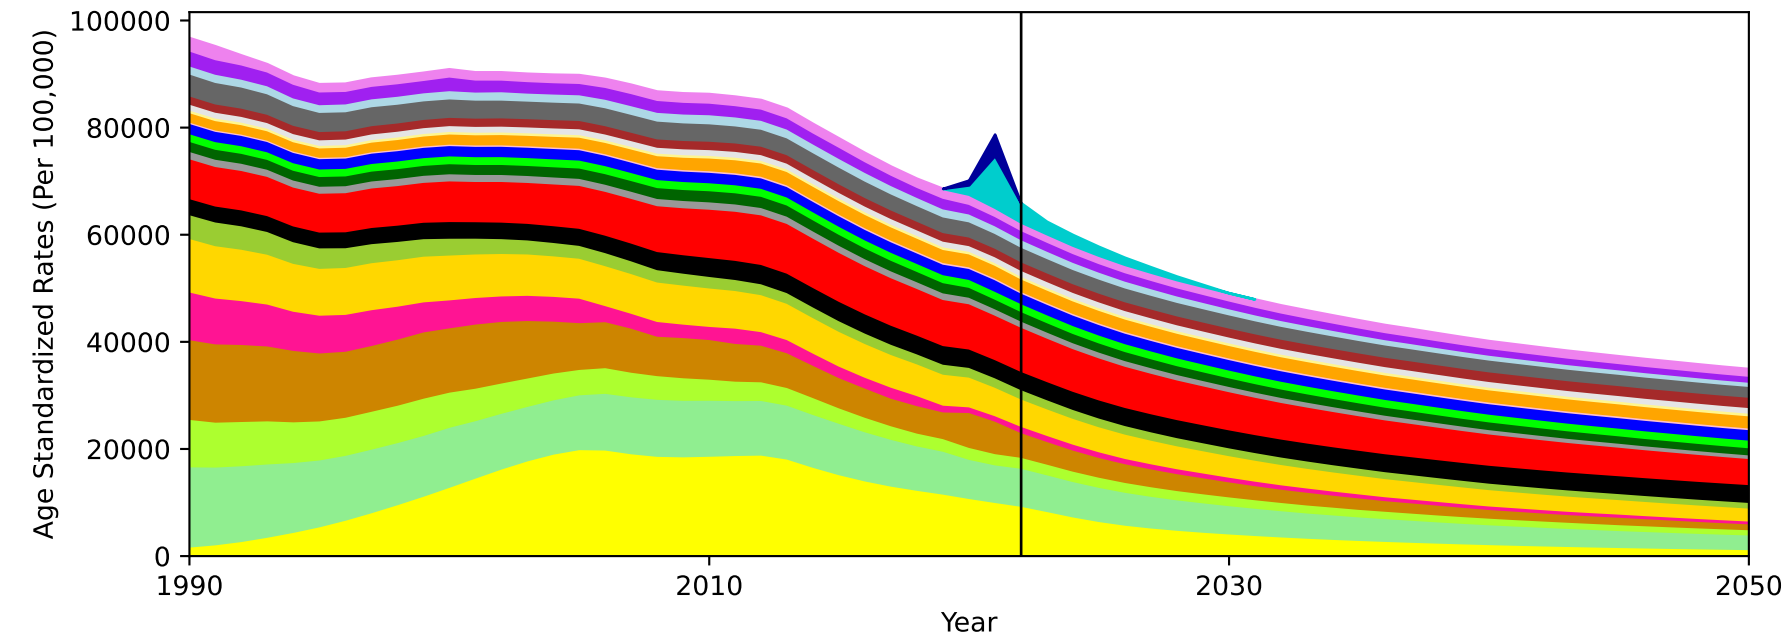

Level 1

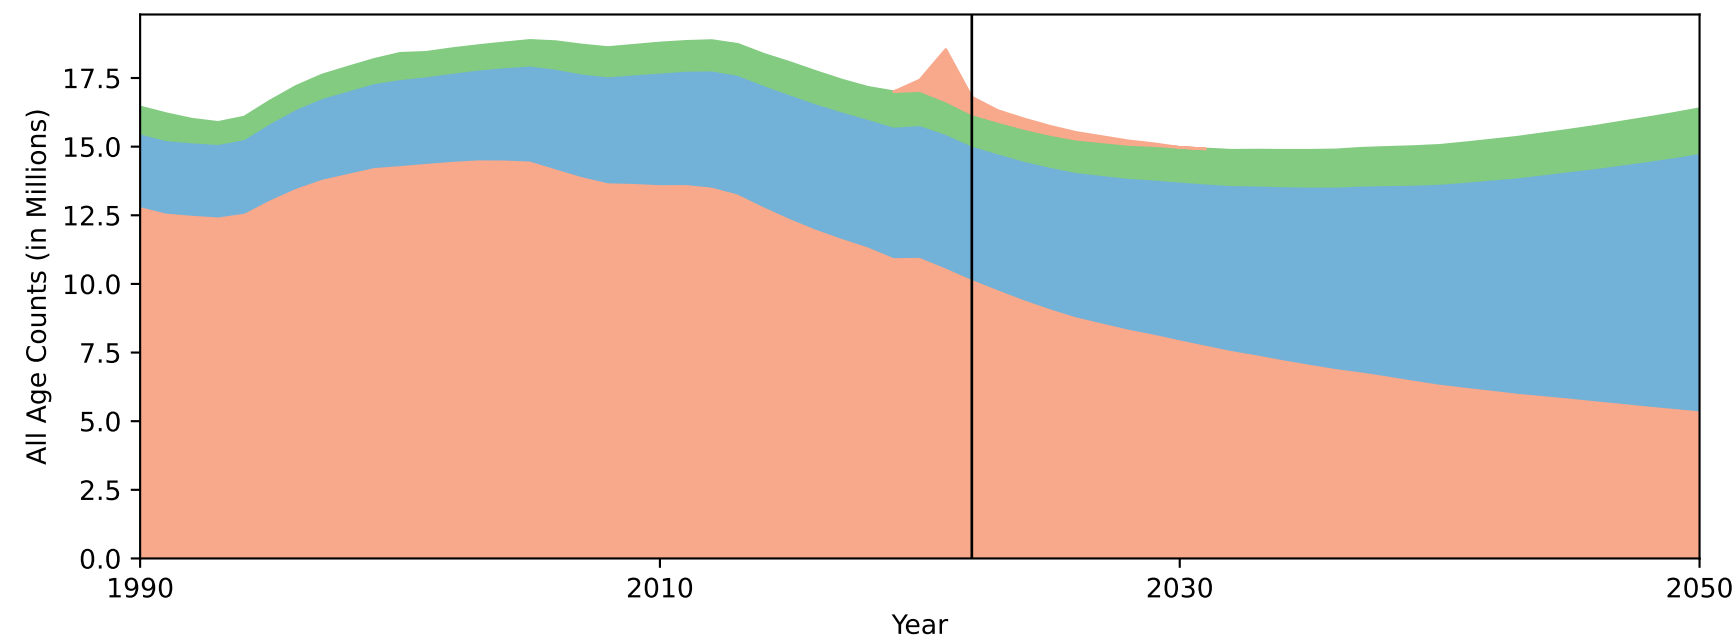

Level 2

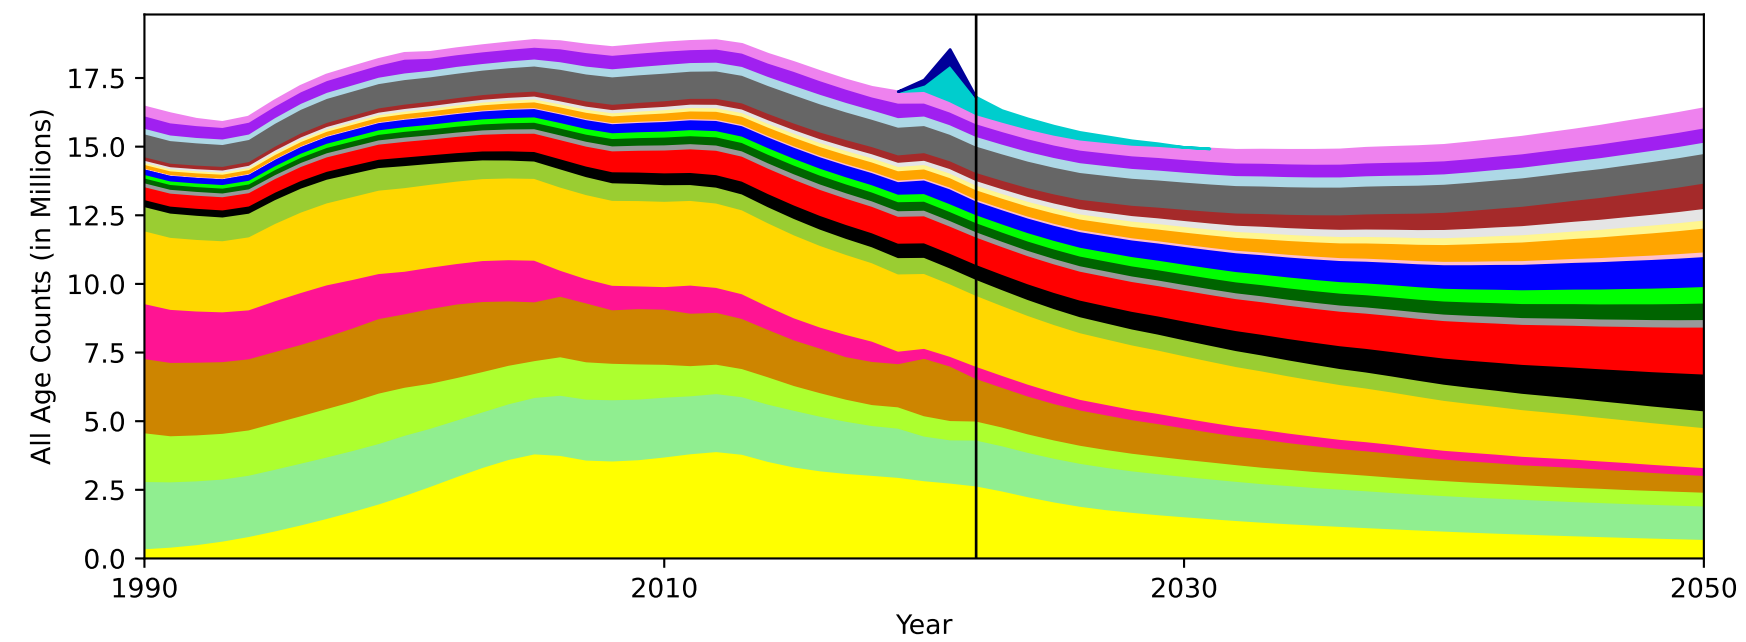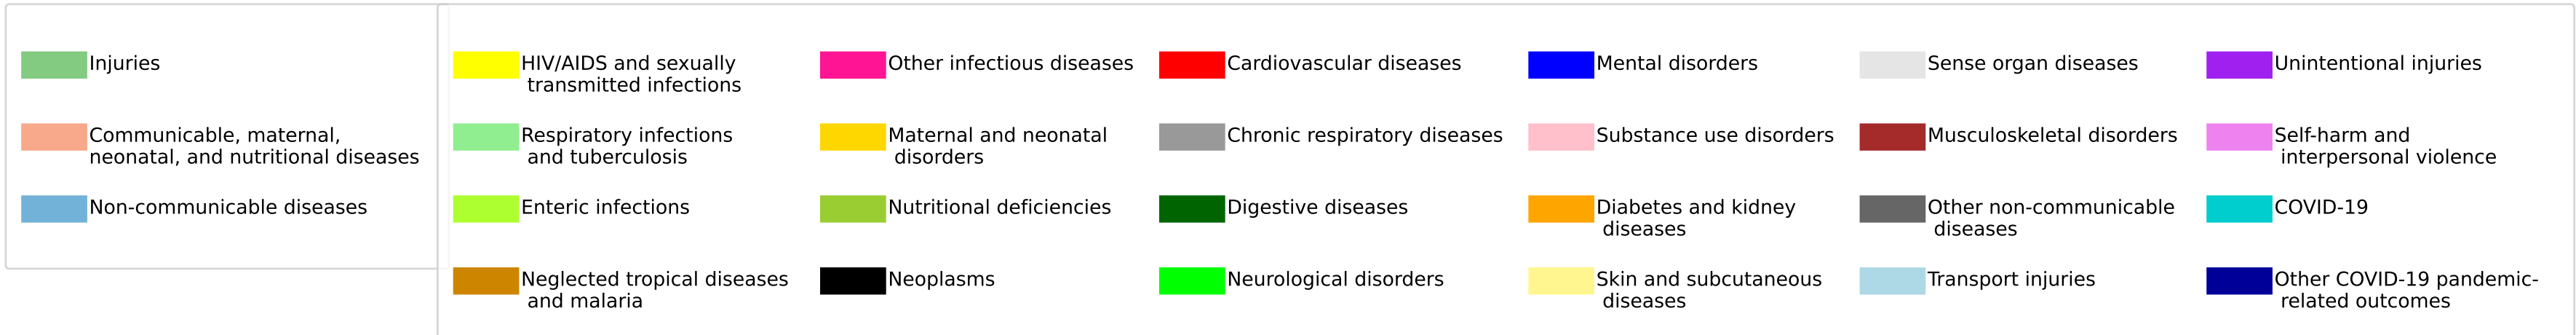

# Rwanda

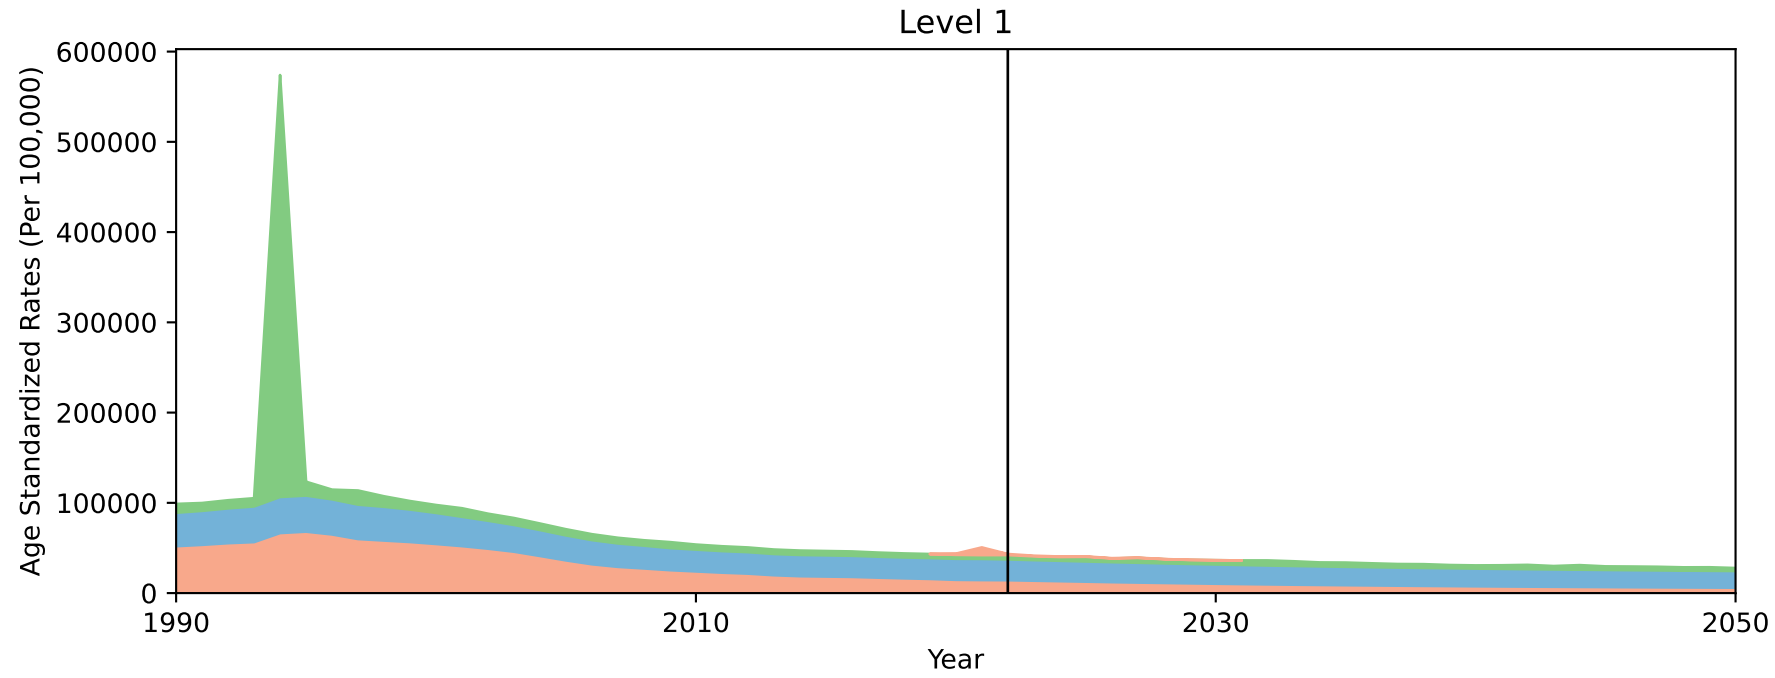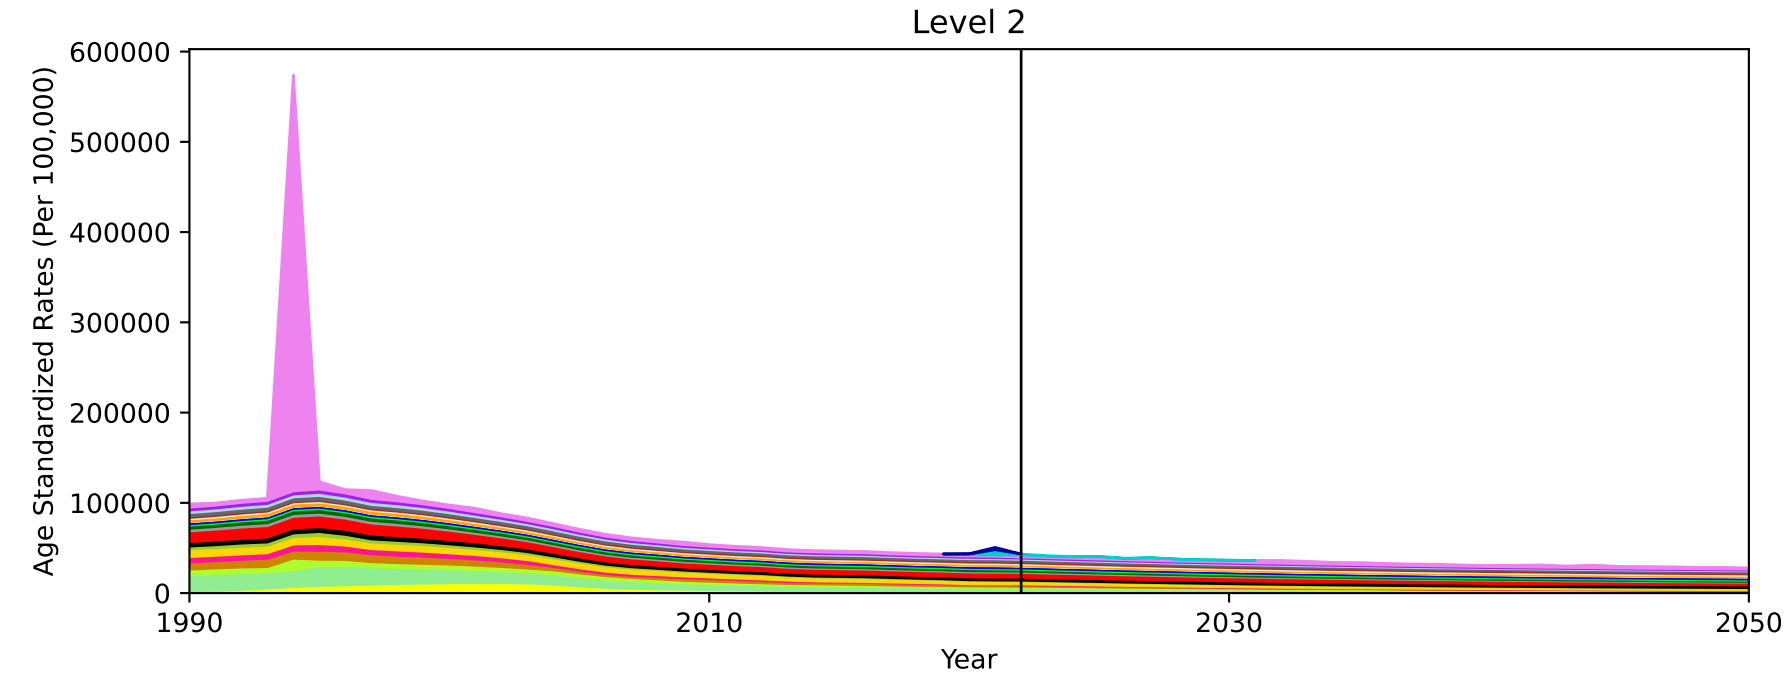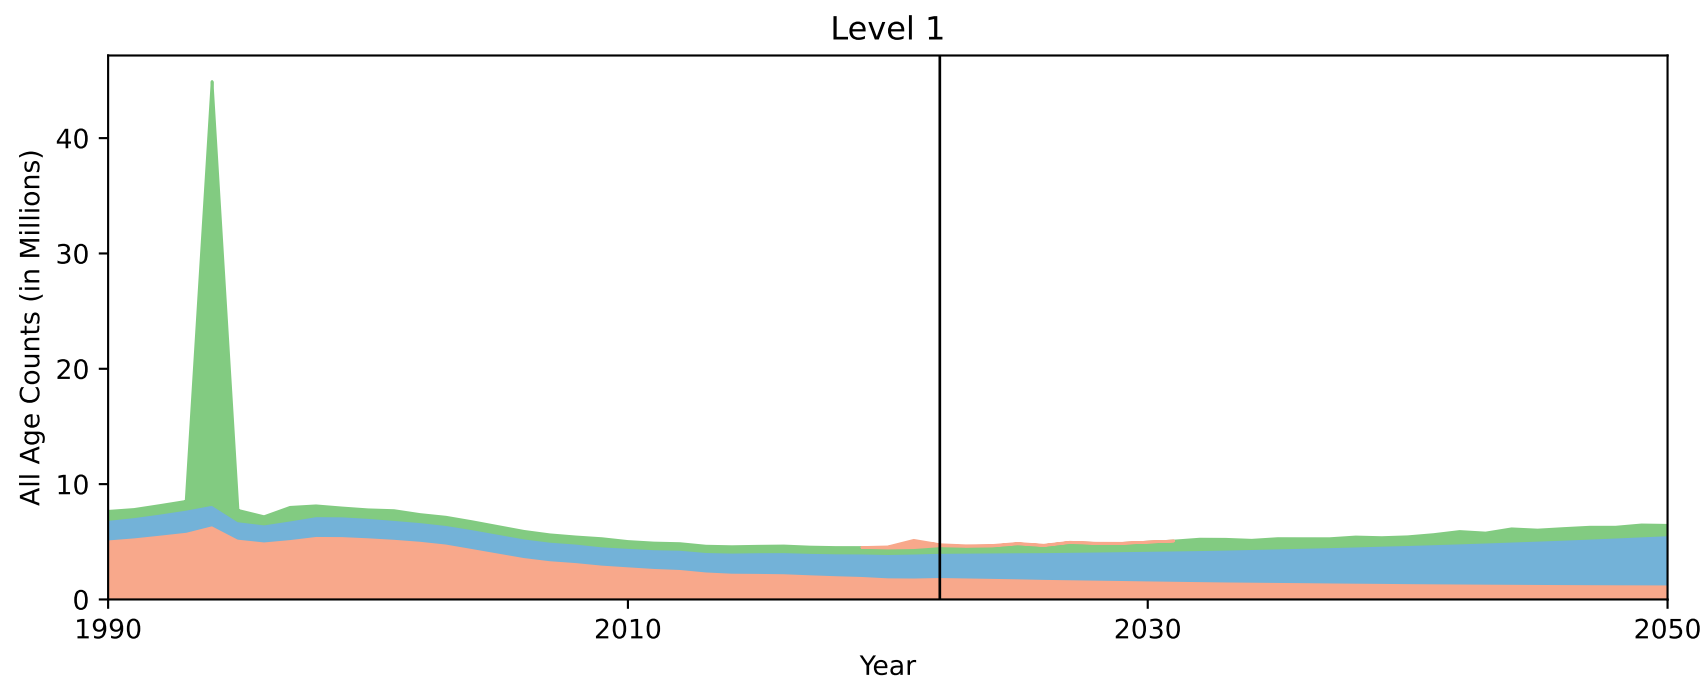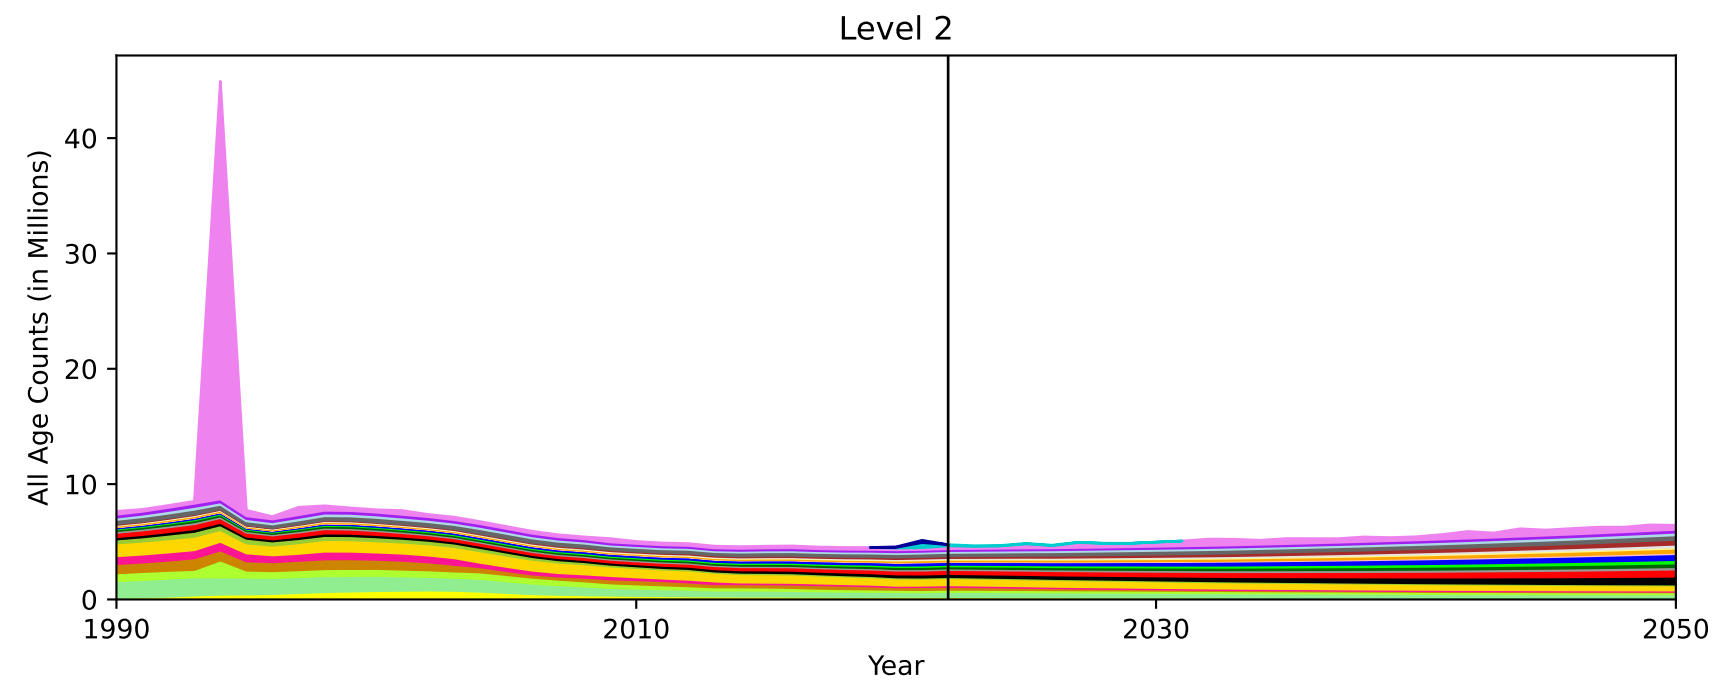

# Somalia

Level 1

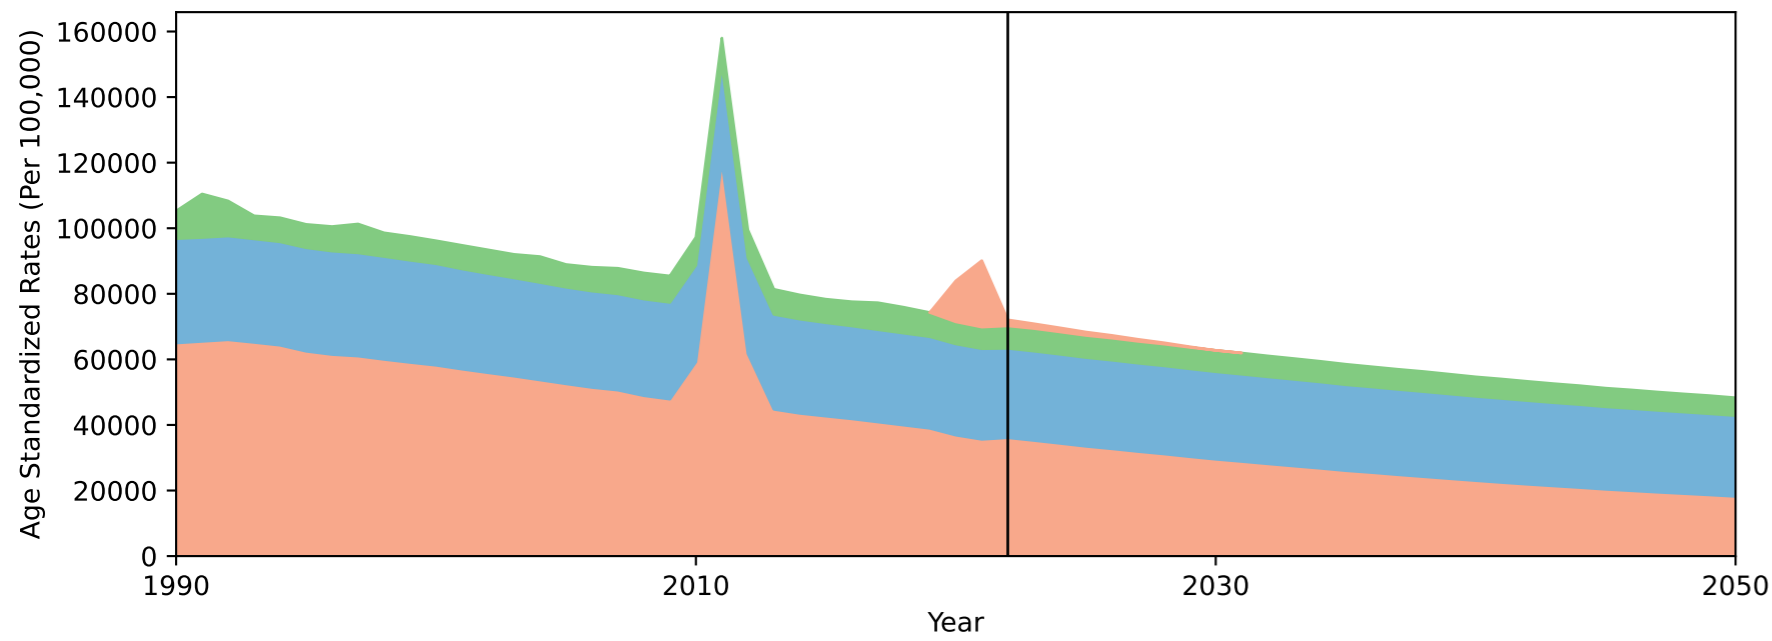

Level 2

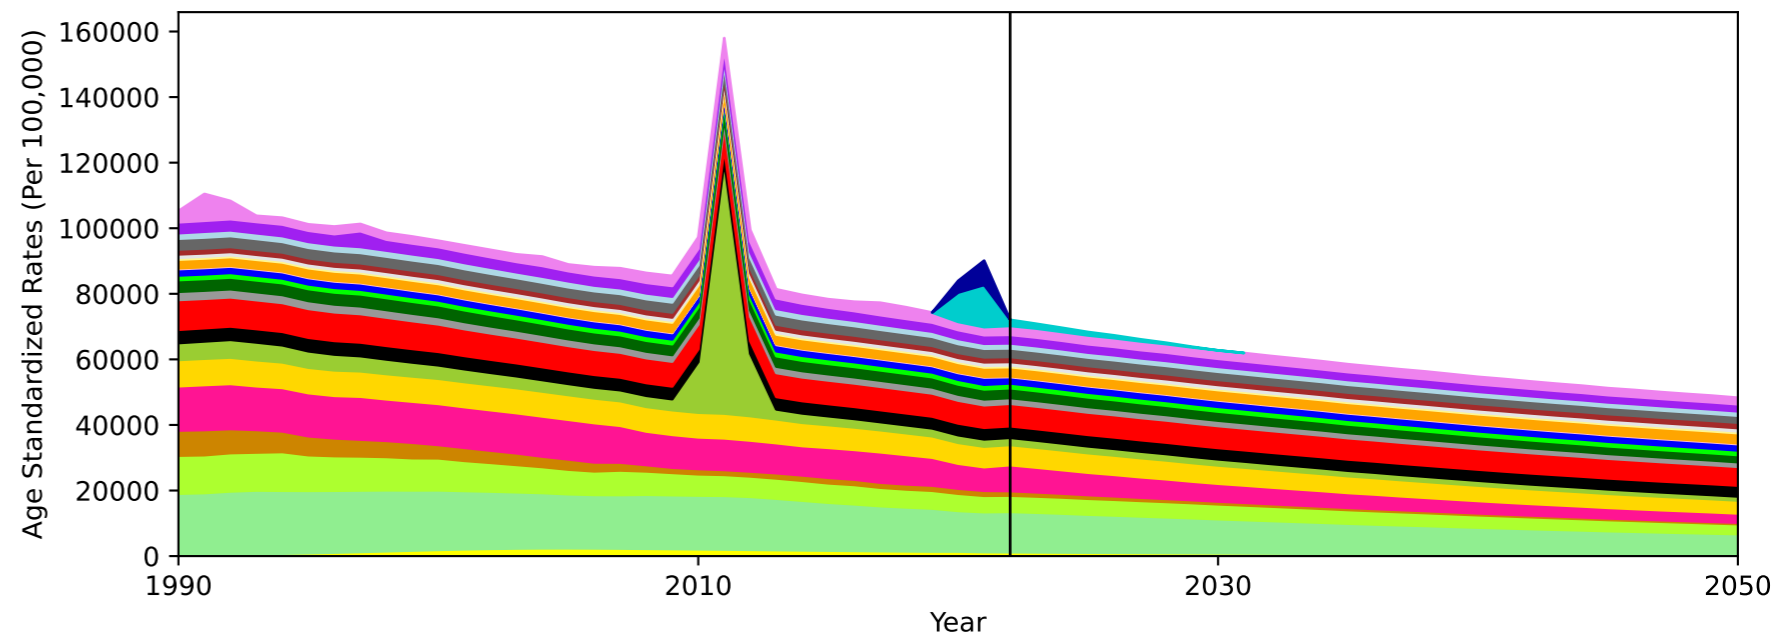

Level 1

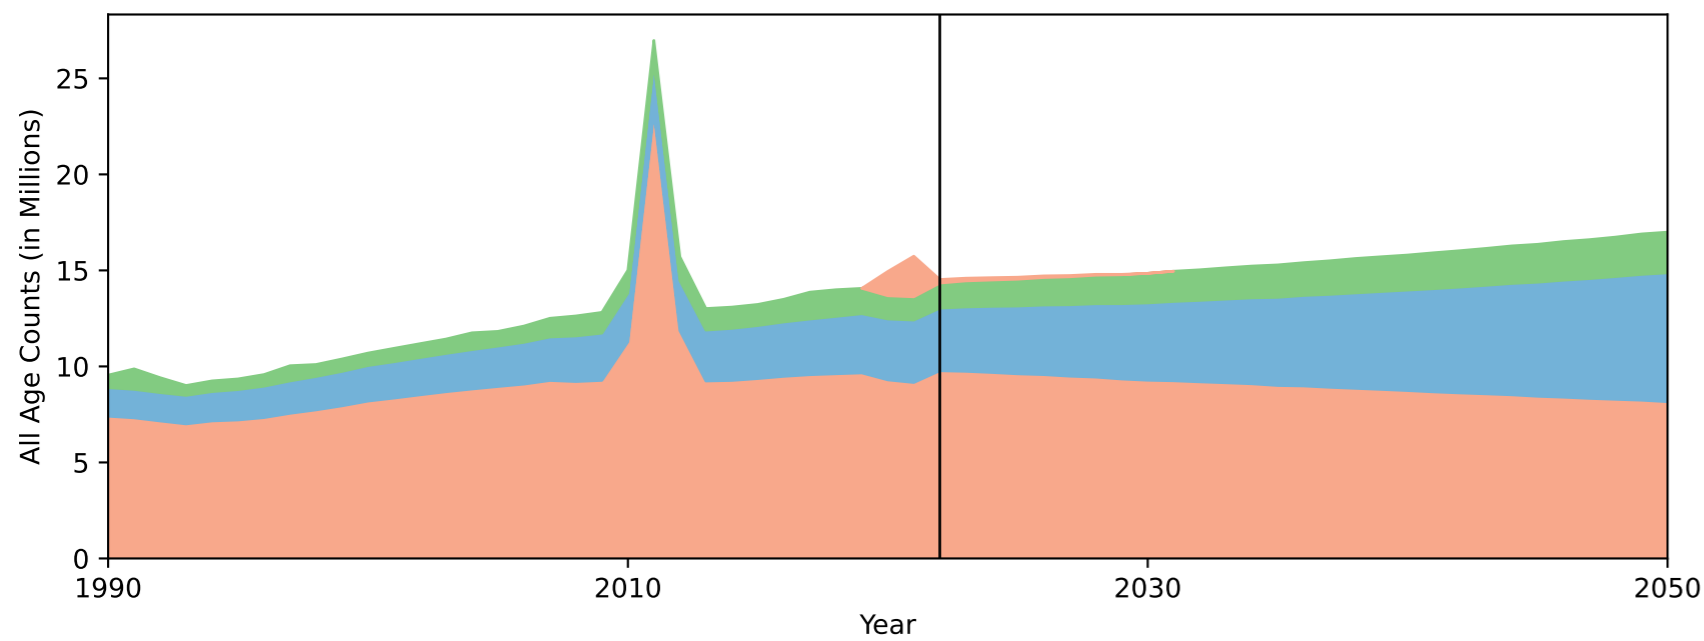

Level 2

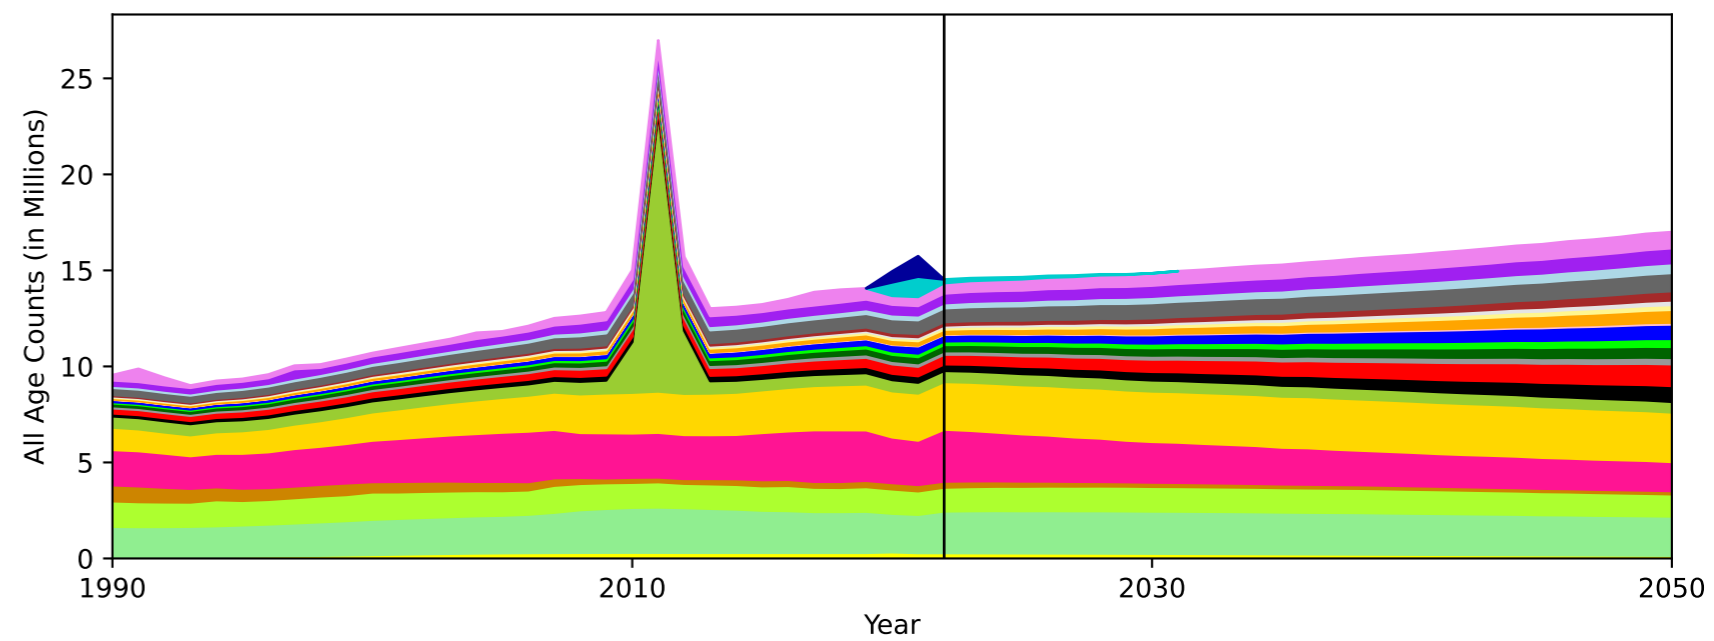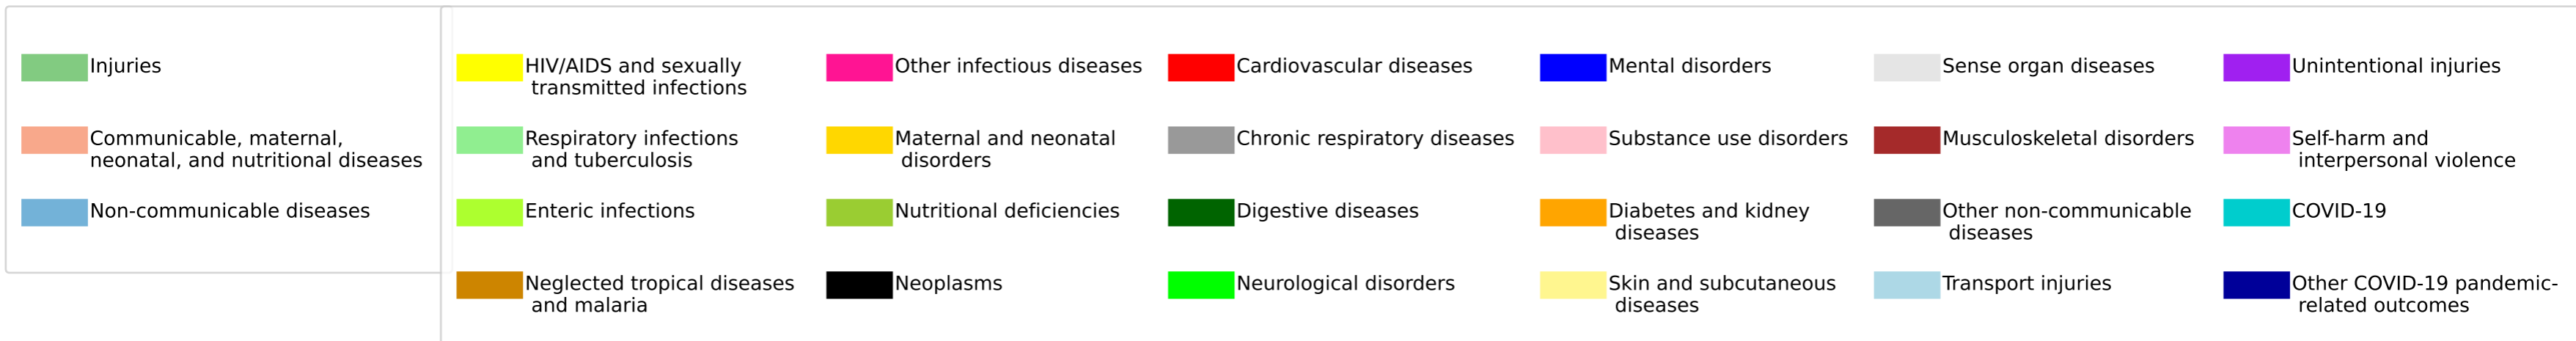

# South Sudan

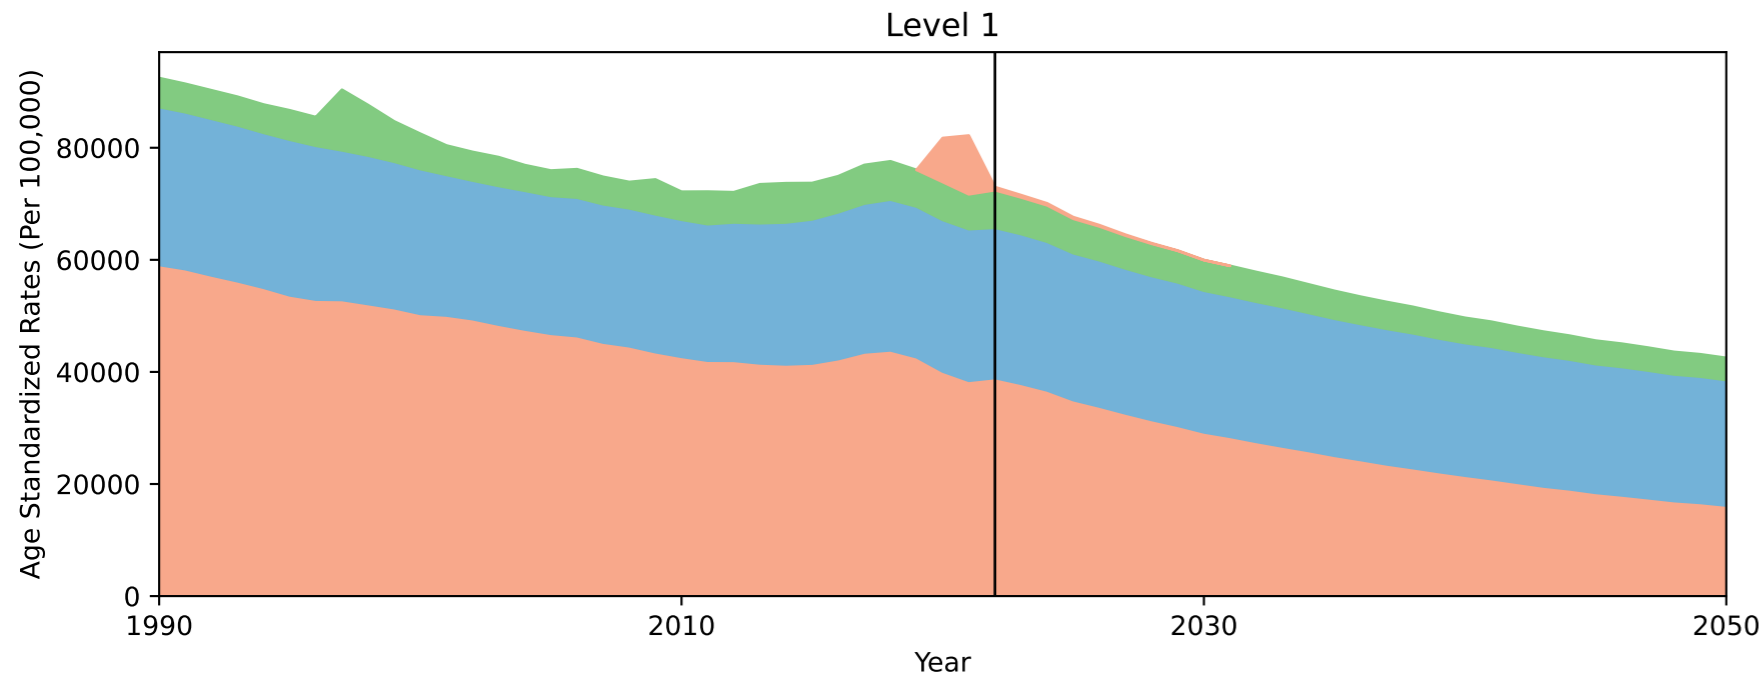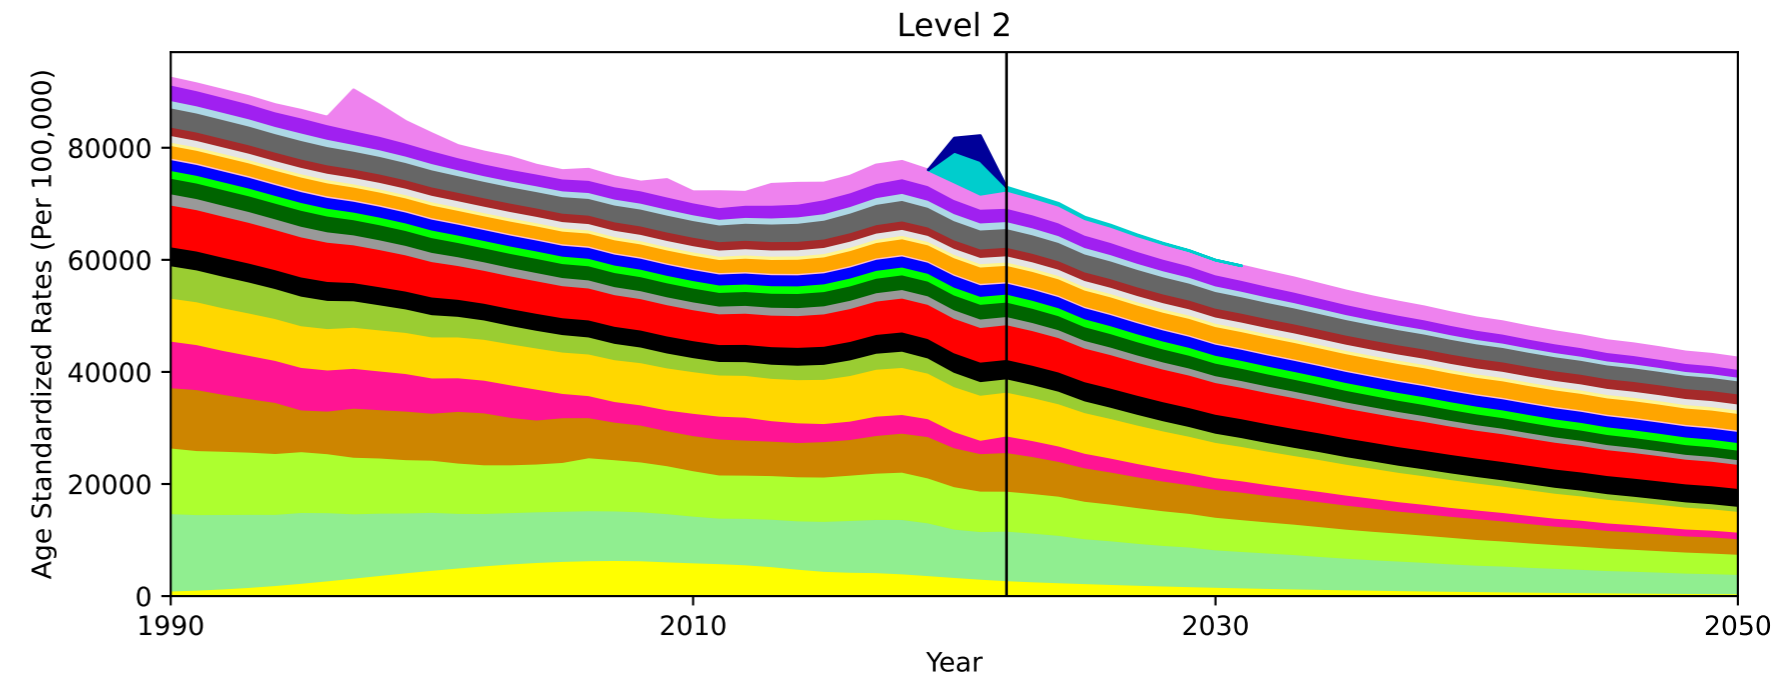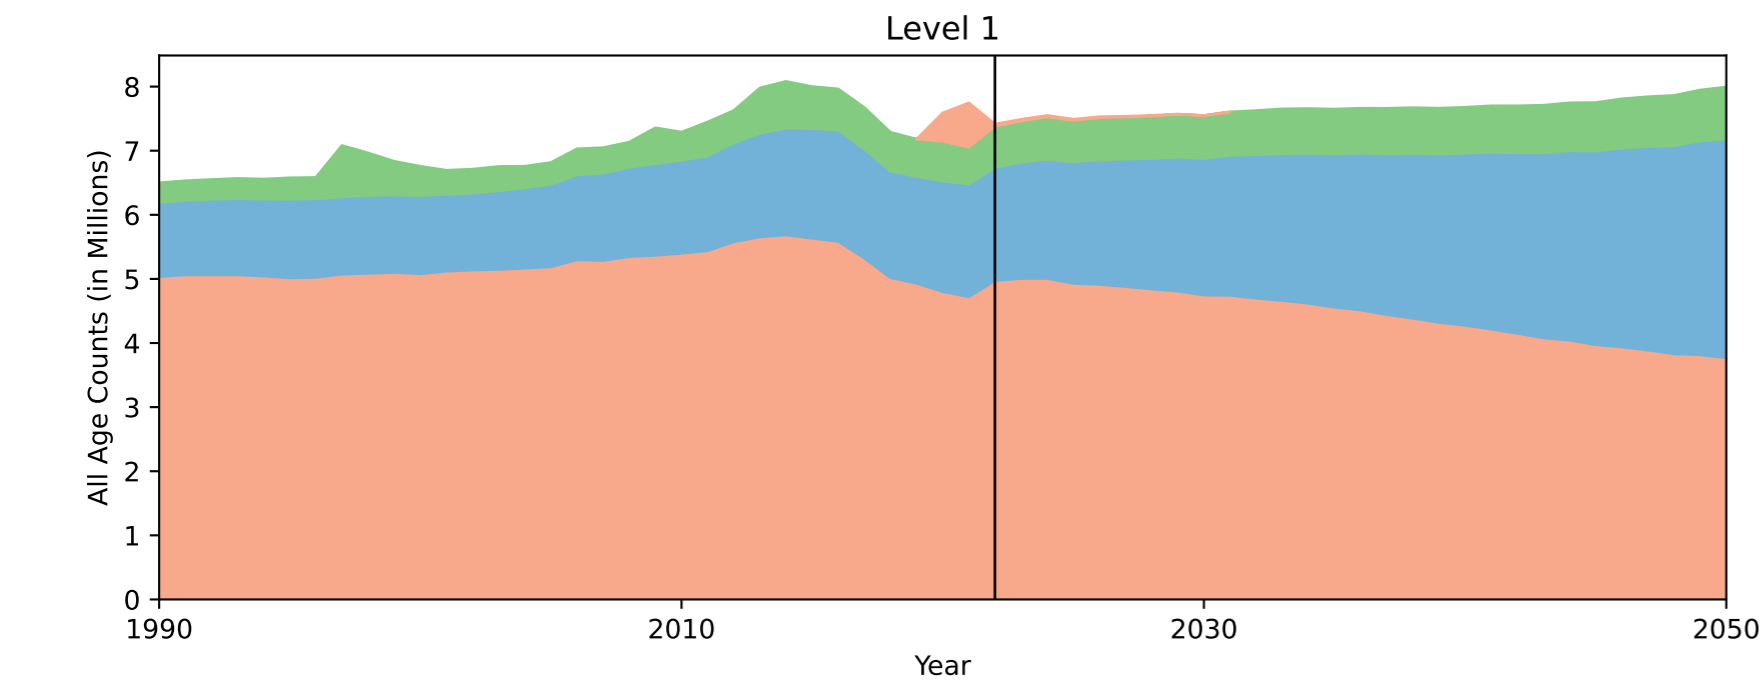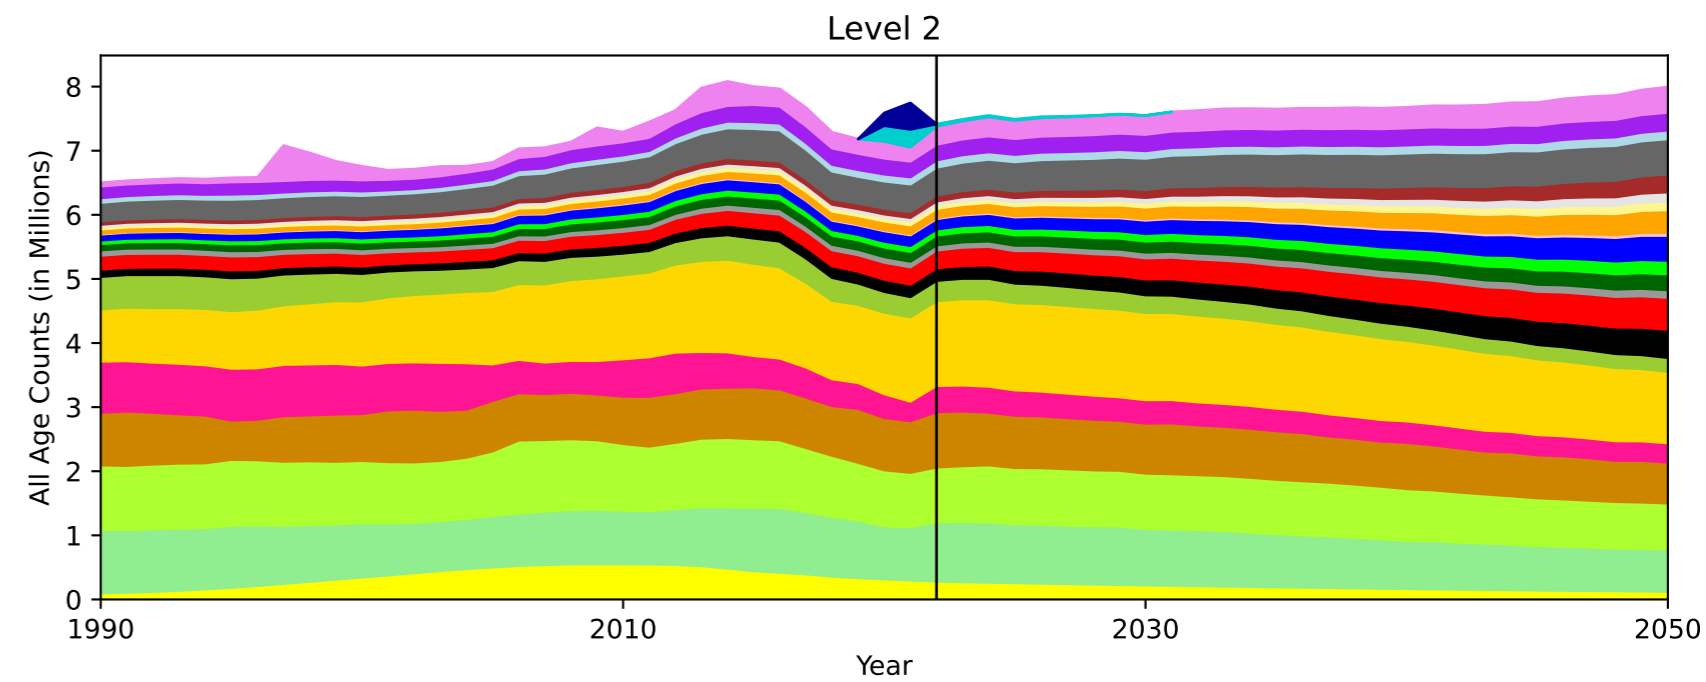

# Uganda

Level 1

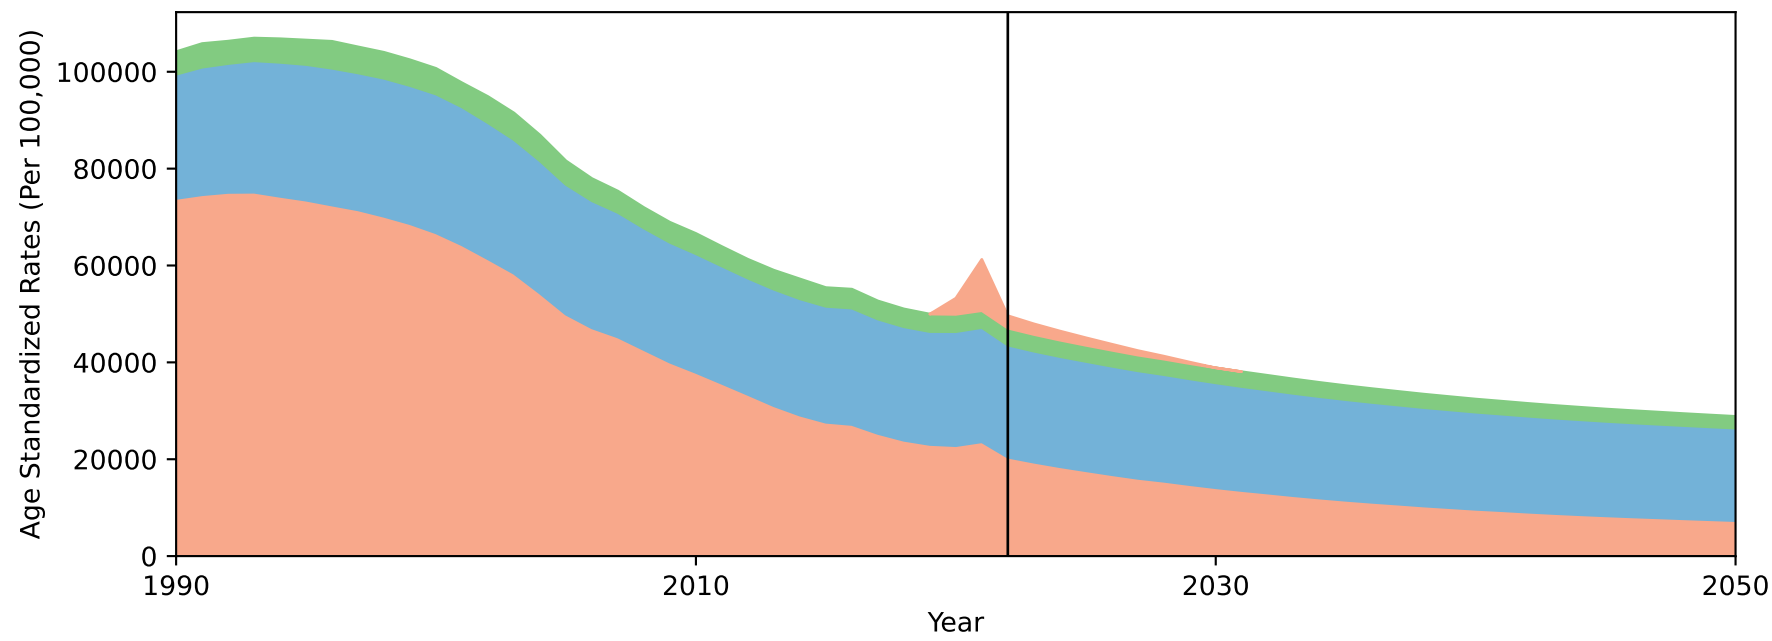

Level 2

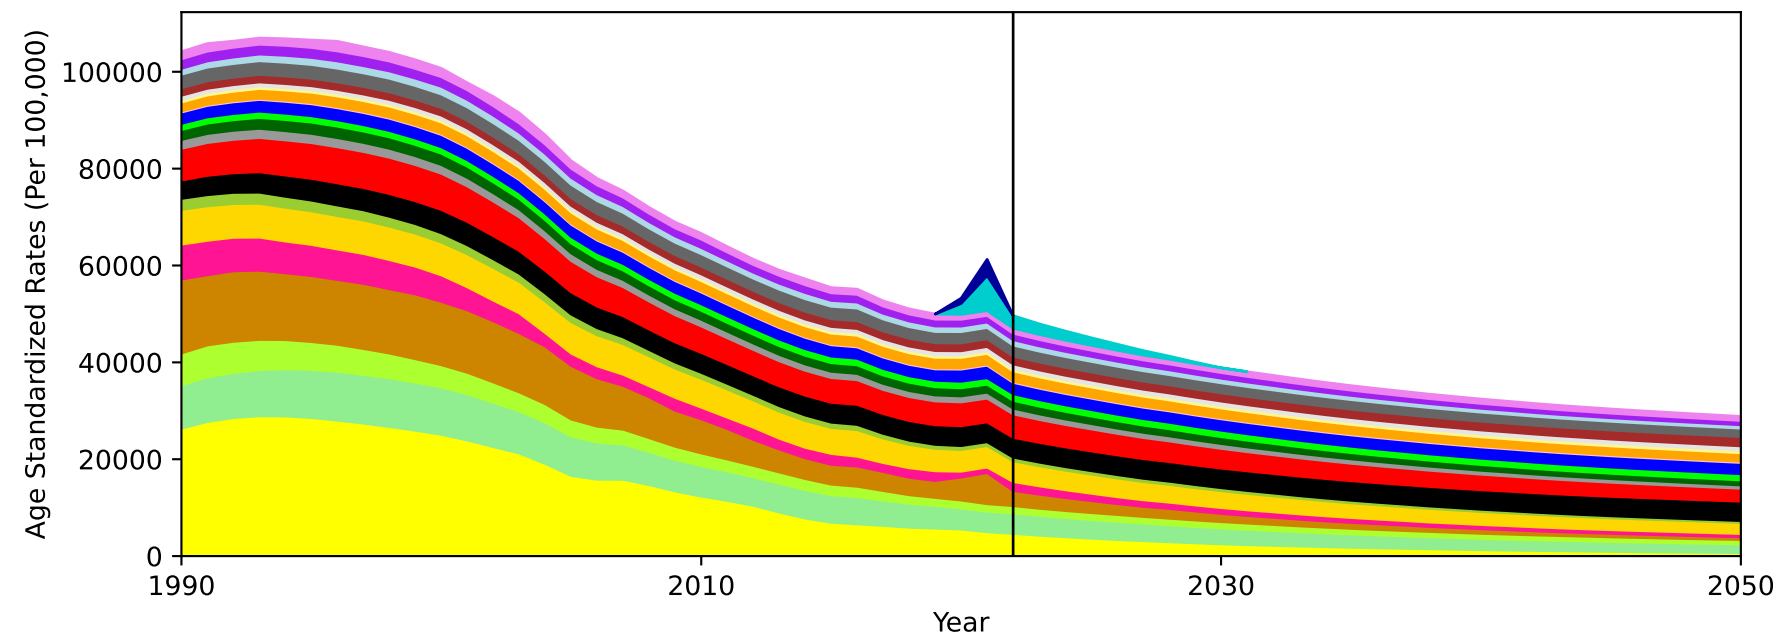

Level 1

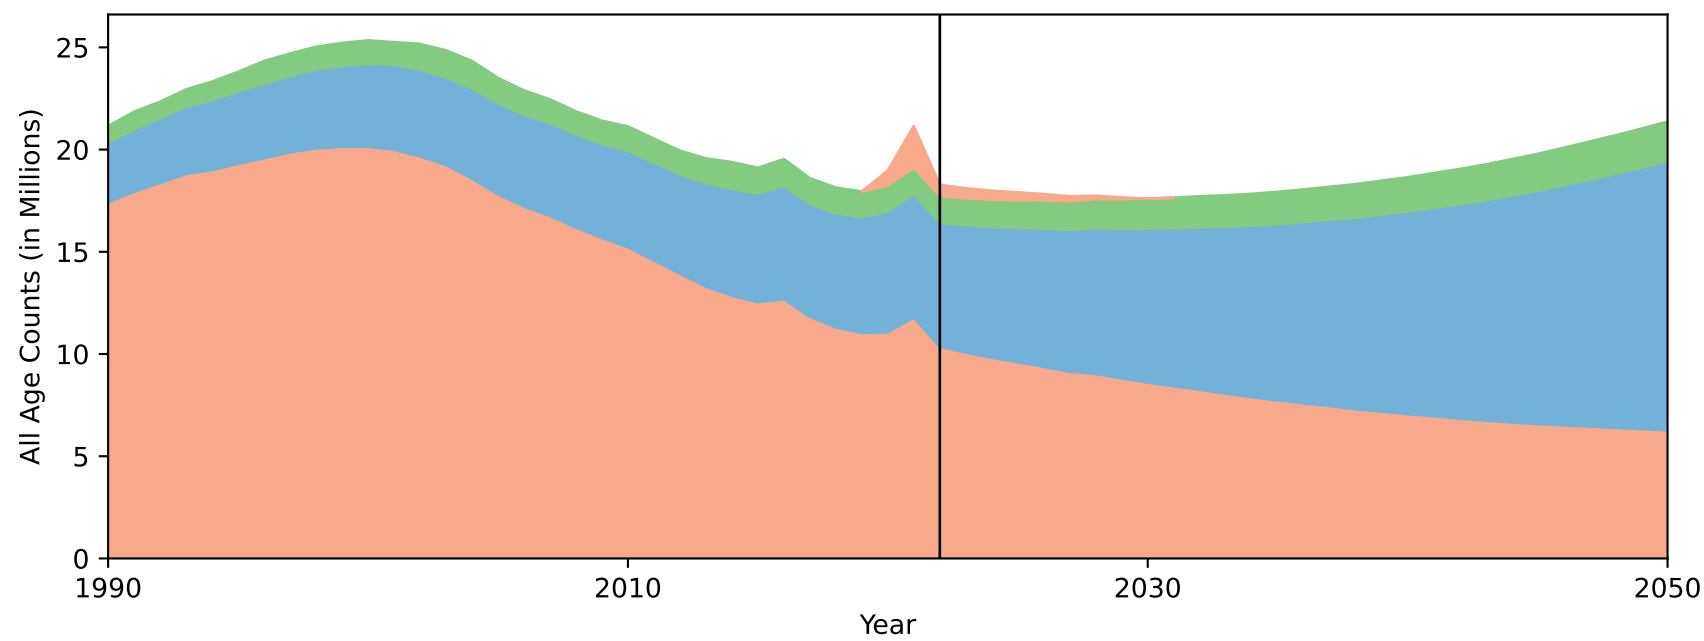

Level 2

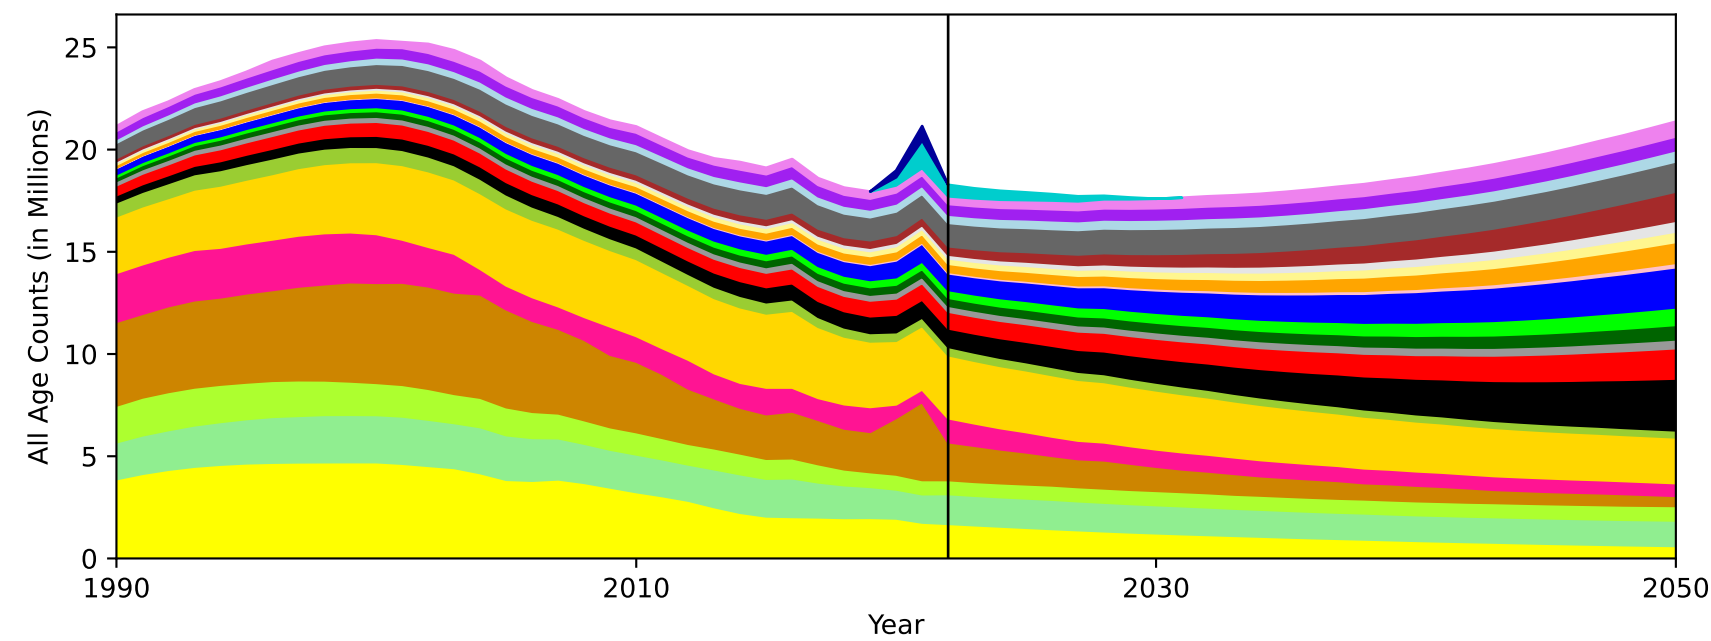

# Tanzania

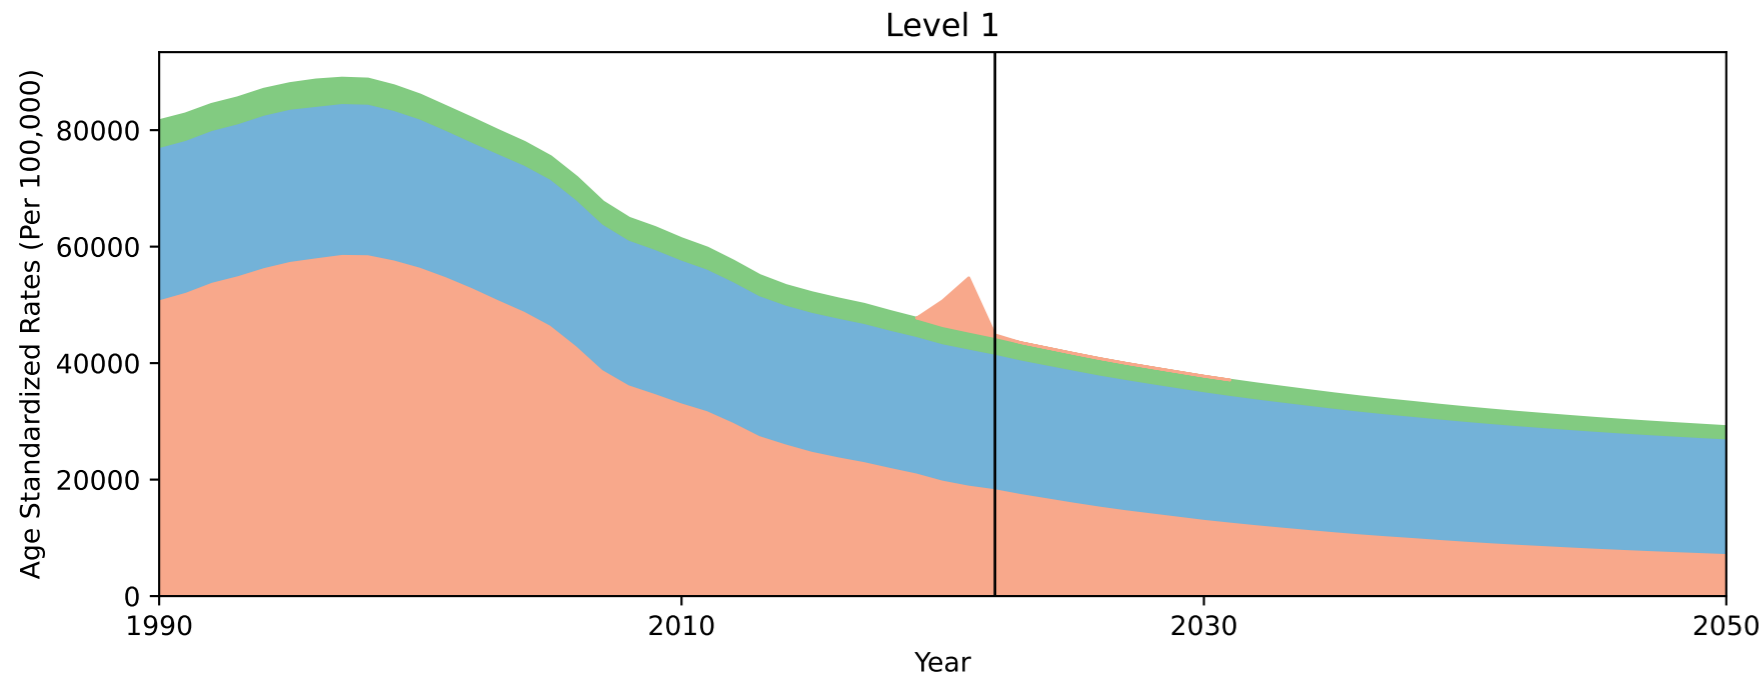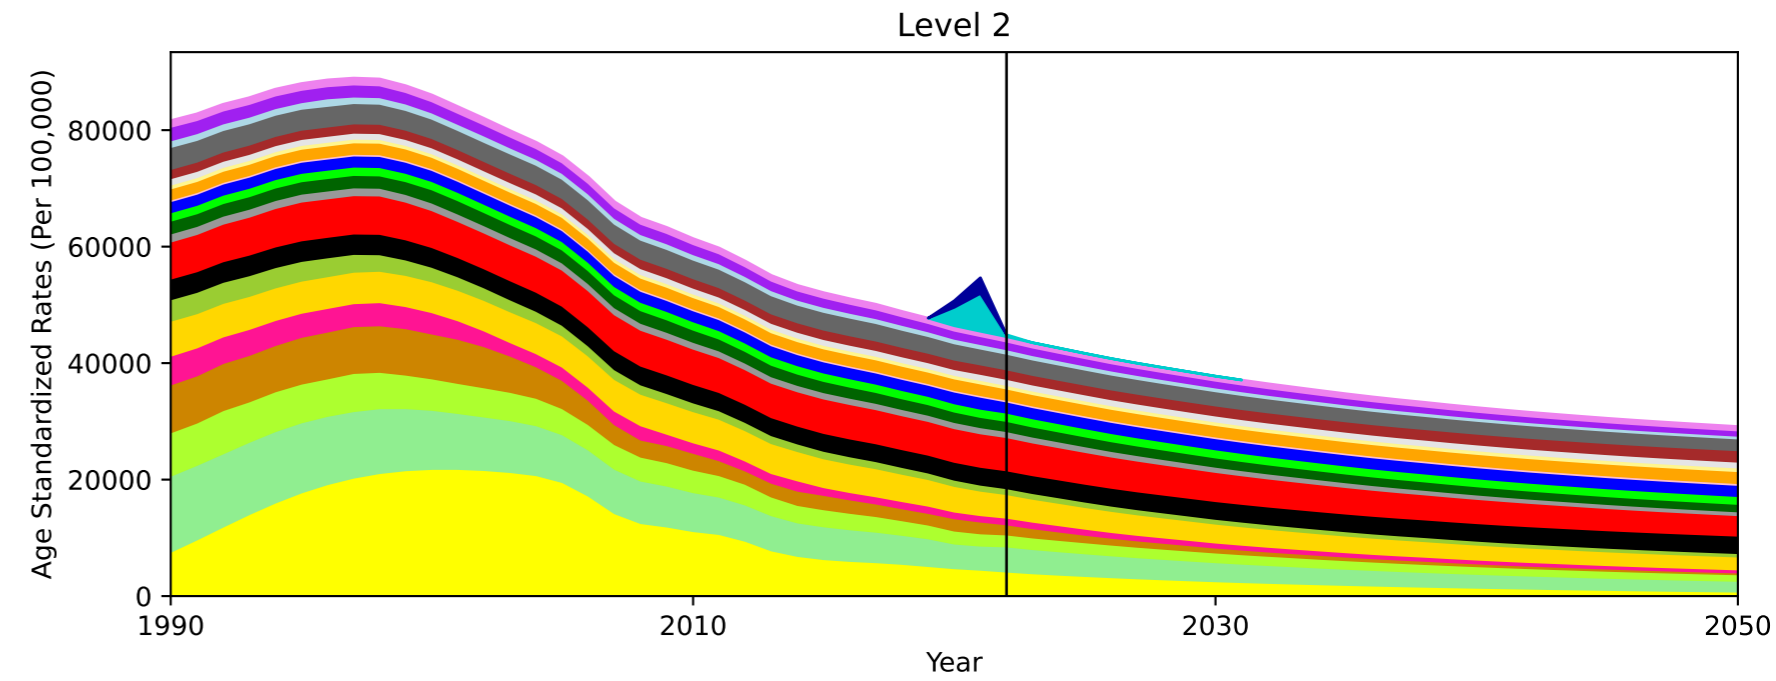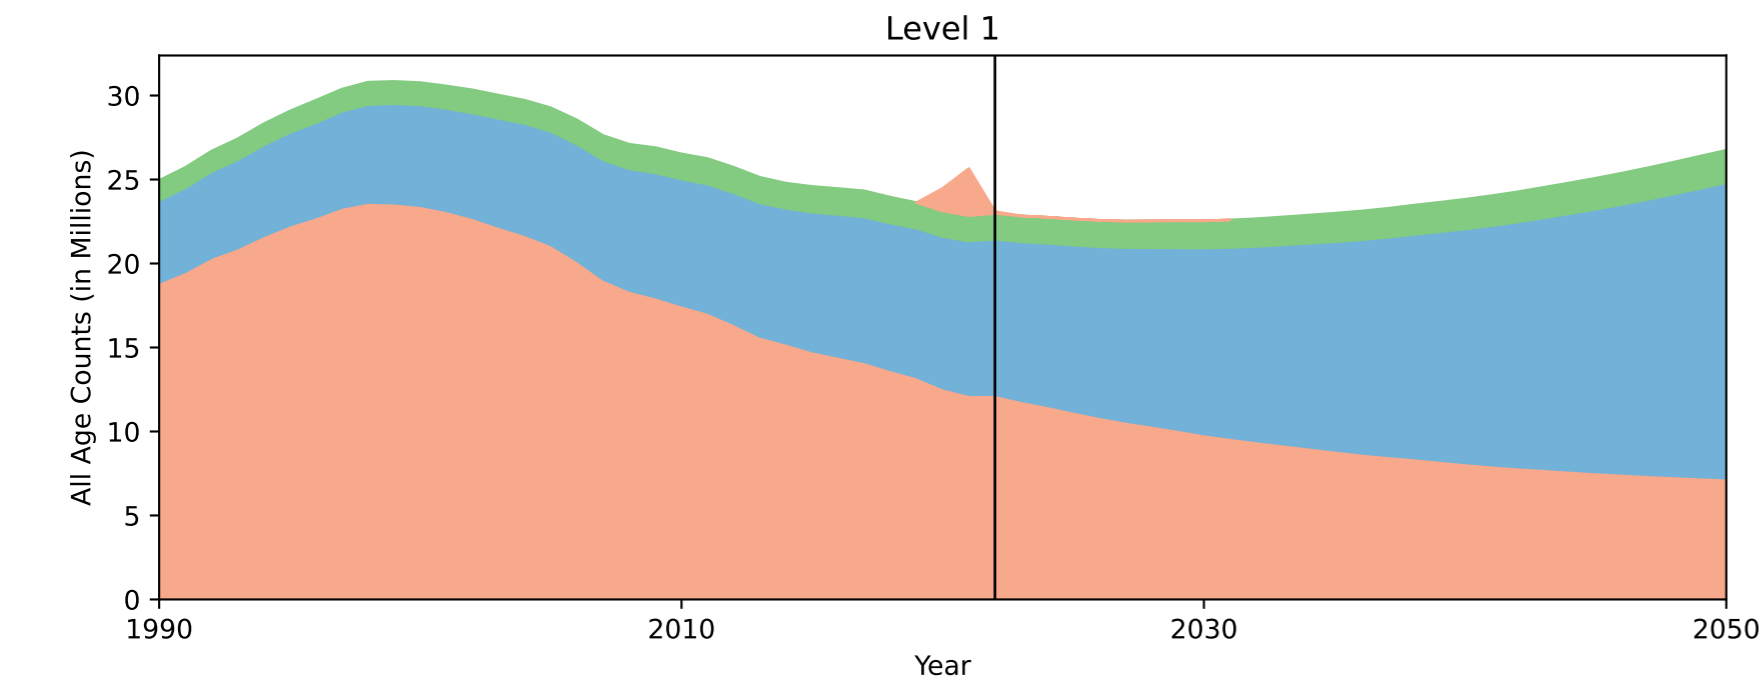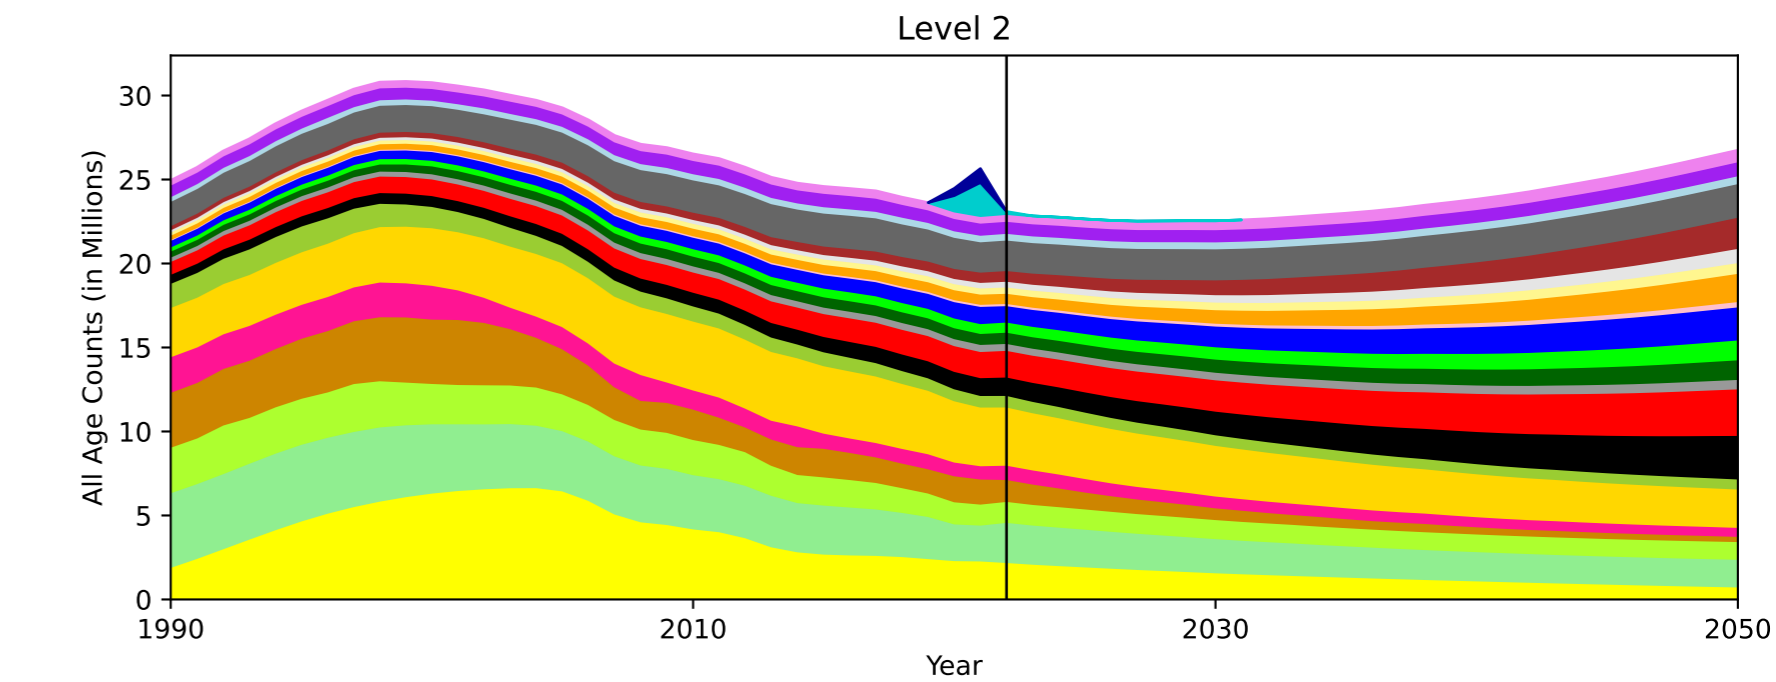

# Zambia

Level 1

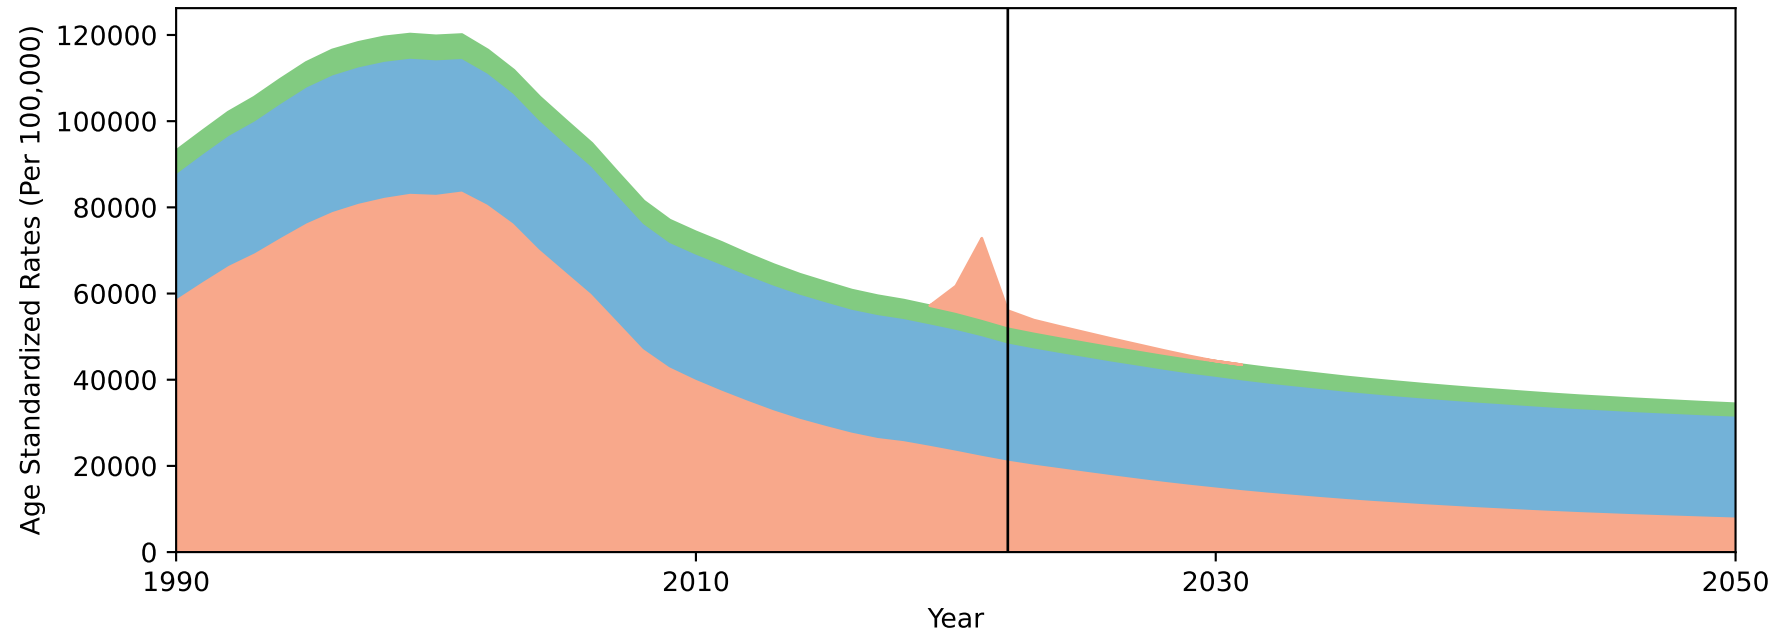

Level 2

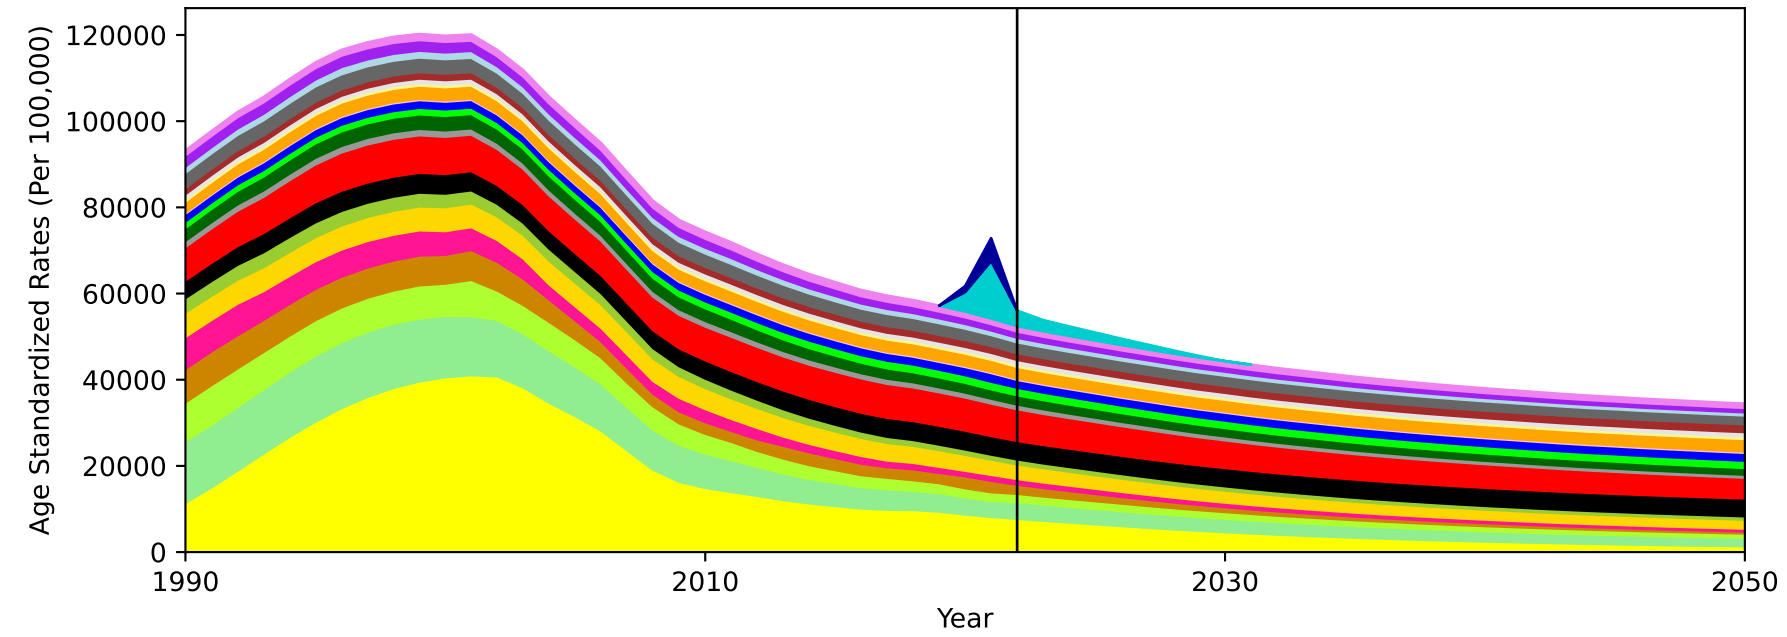

Level 1

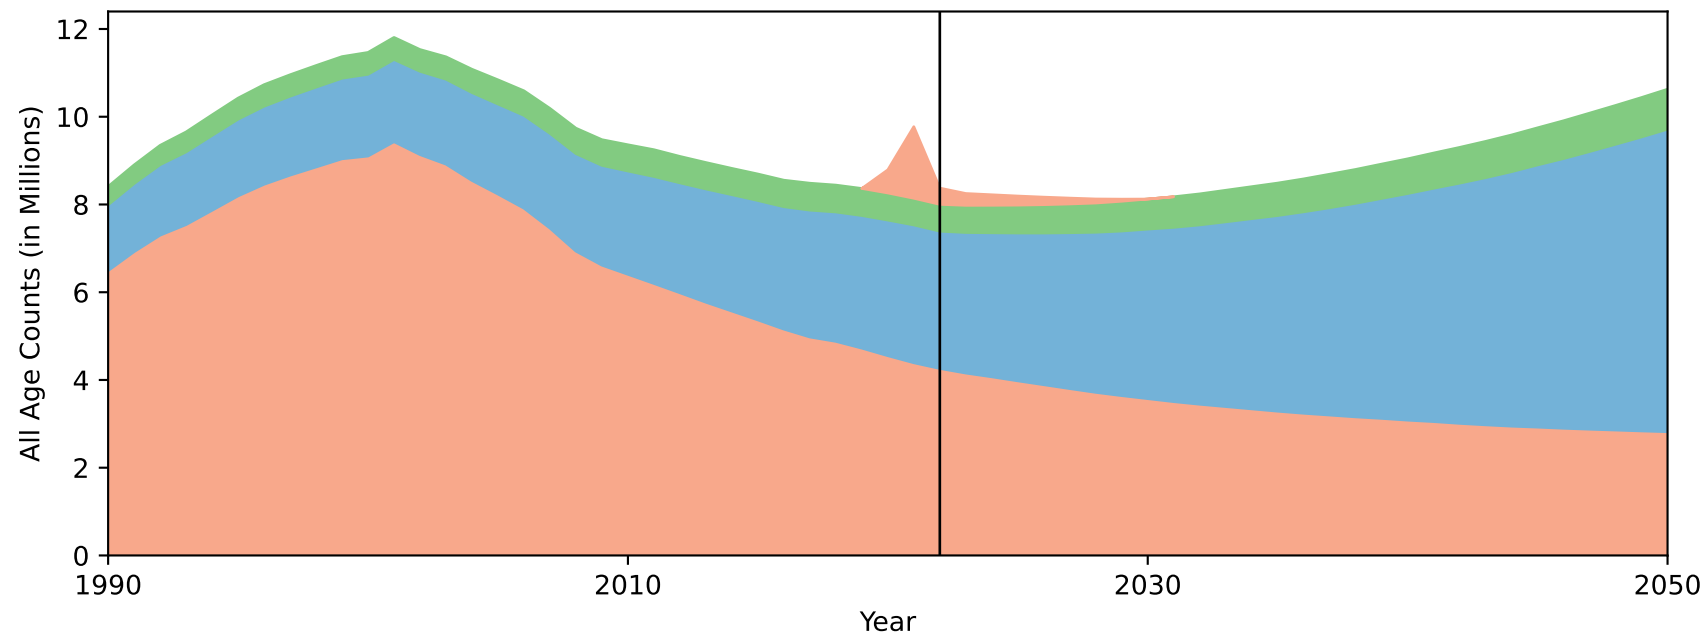

Level 2

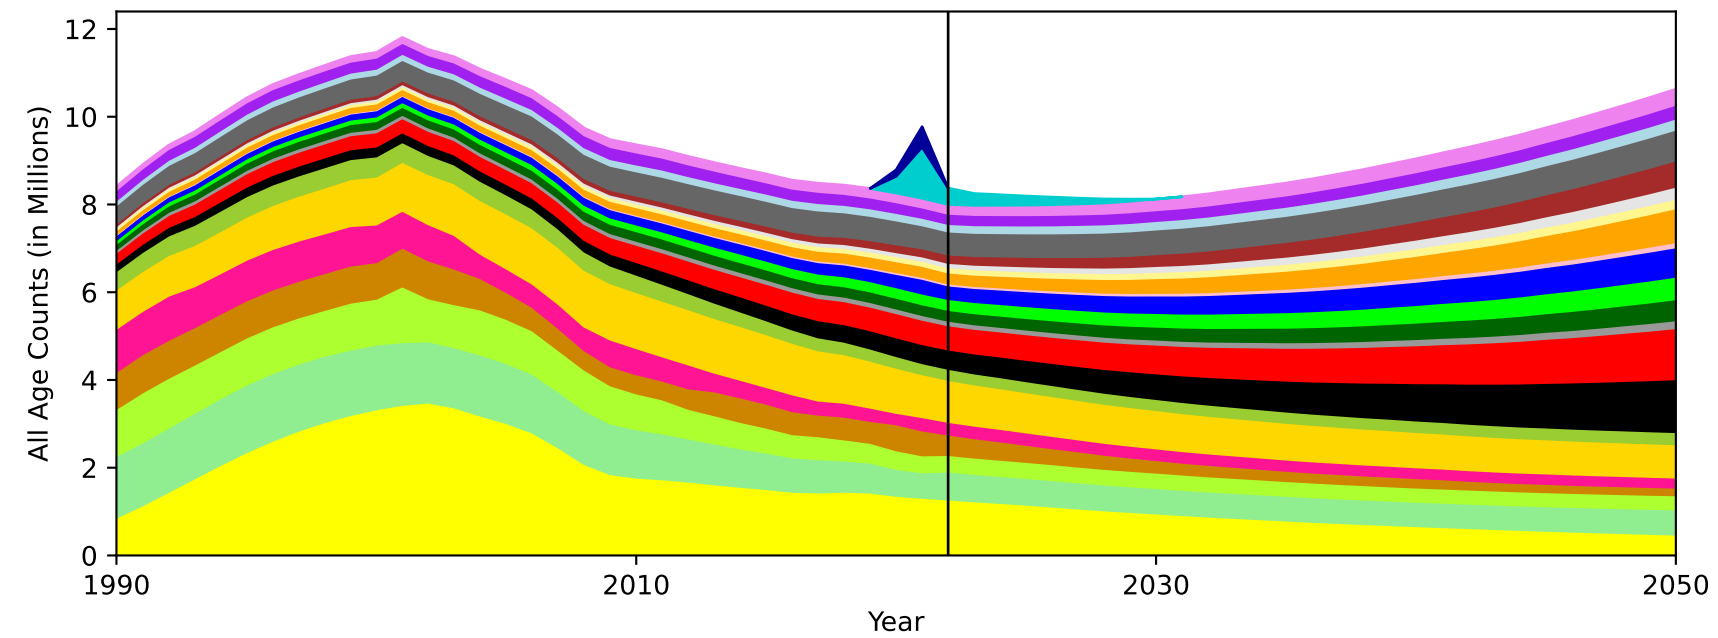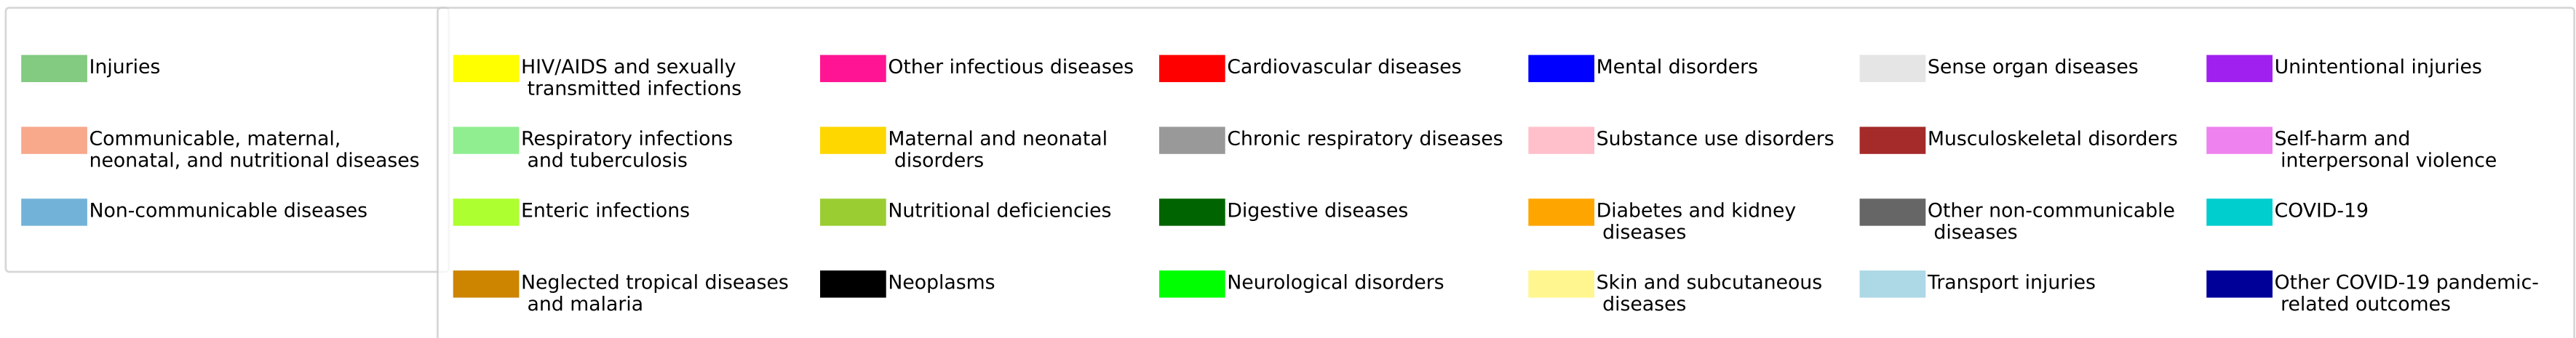



# Botswana

Level 1

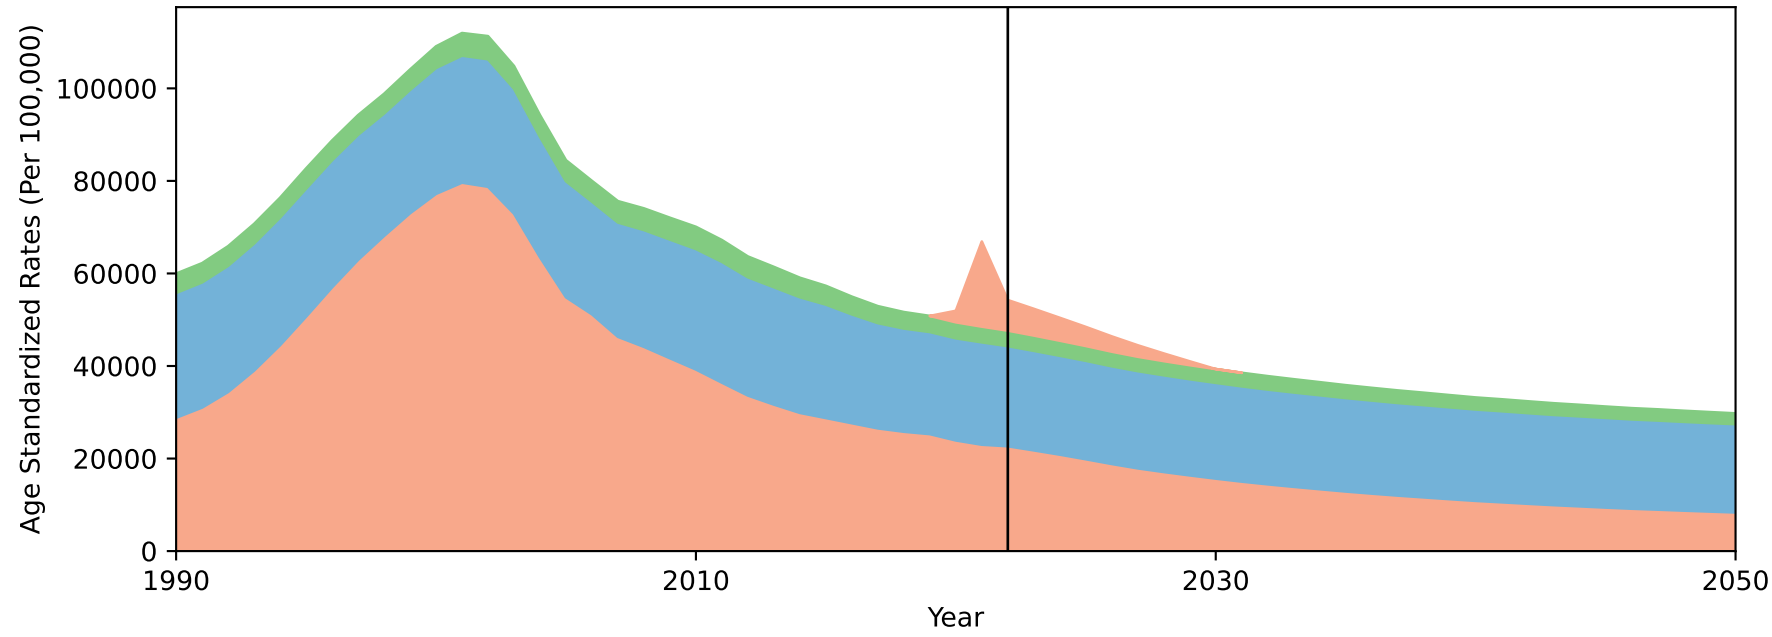

Level 2

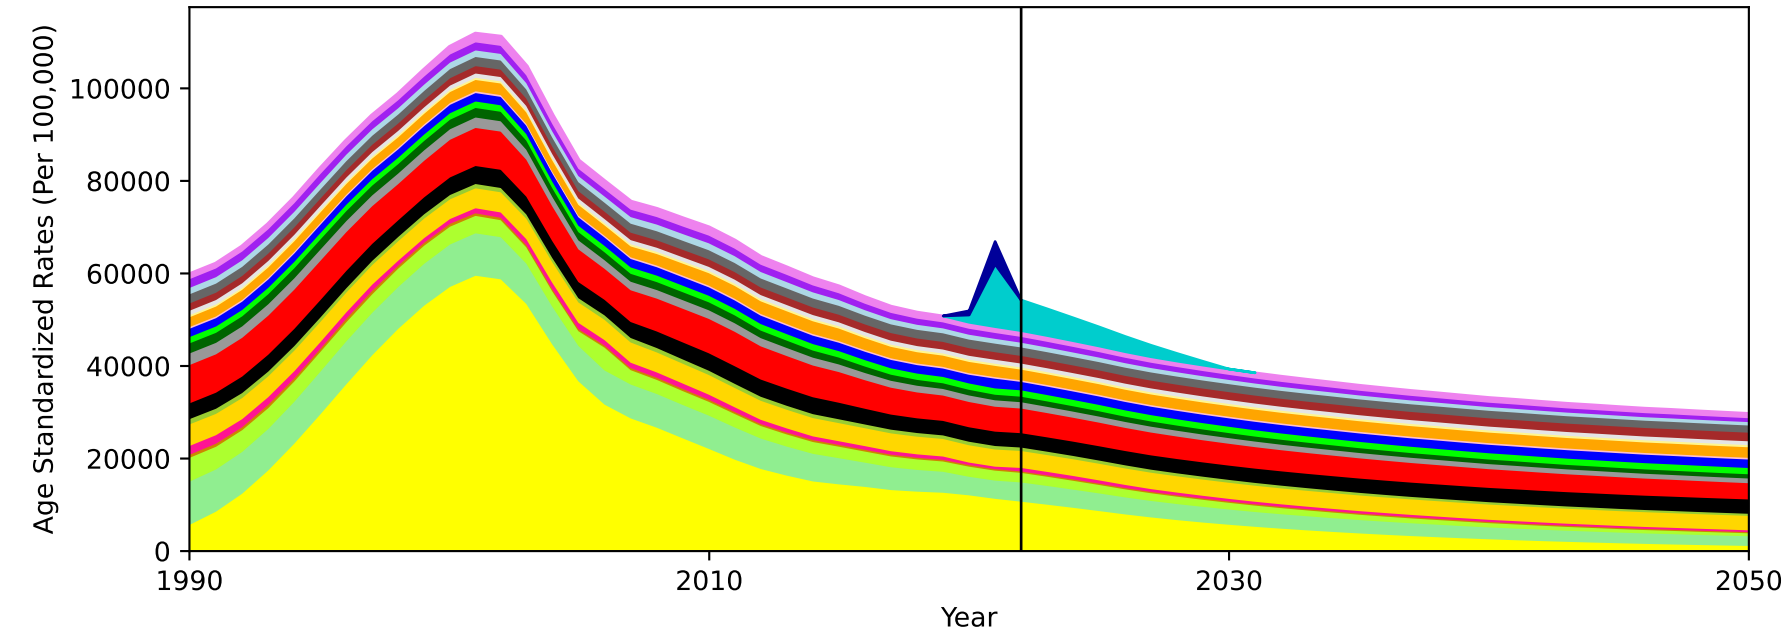

Level 1

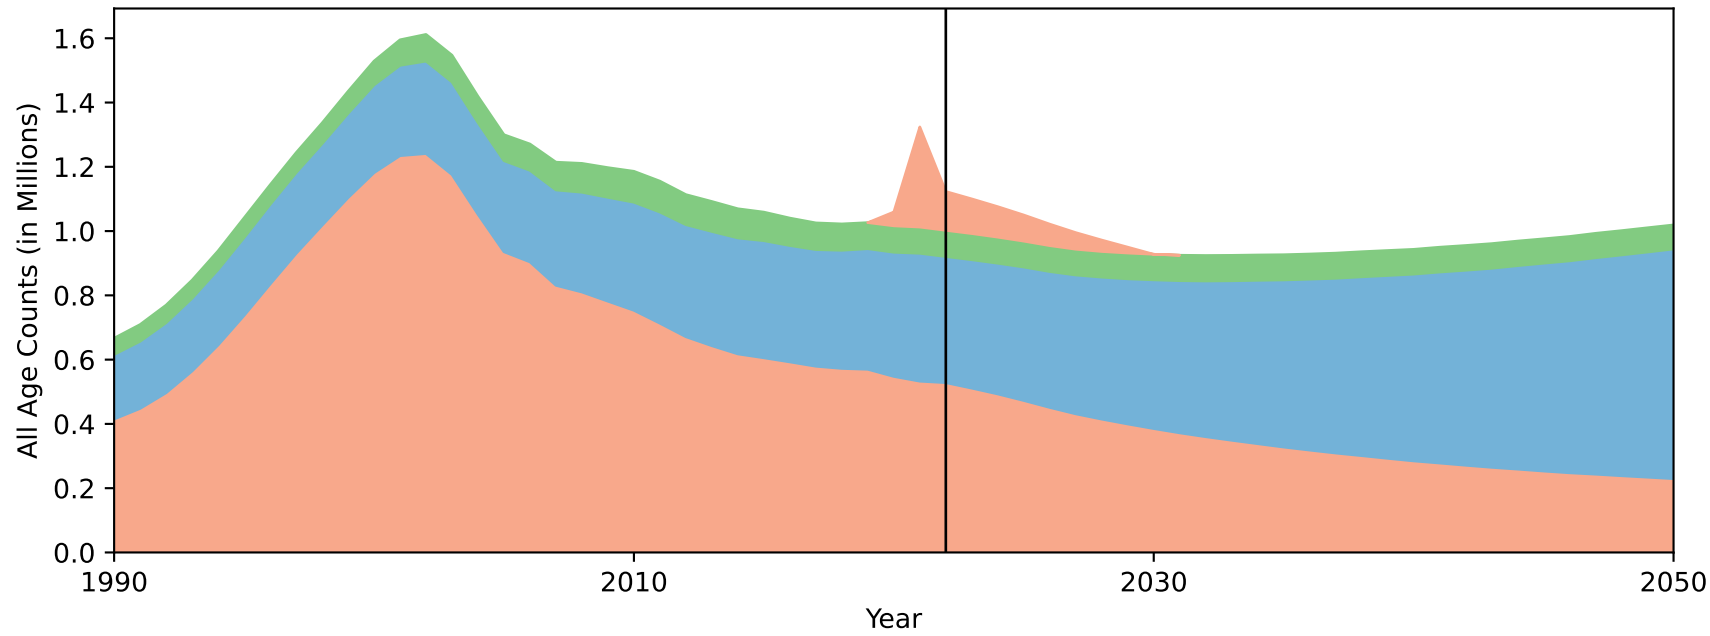

Level 2

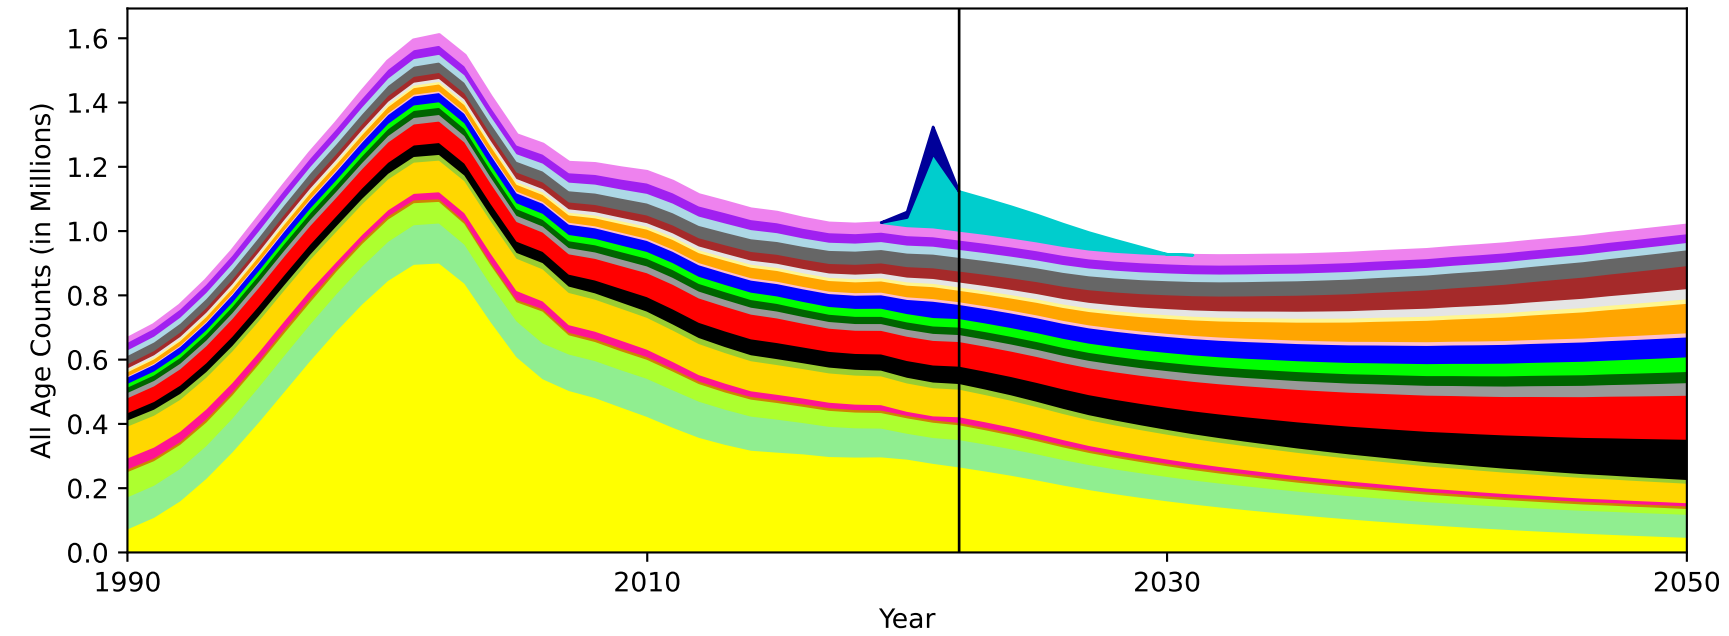

# Eswatini

Level 1

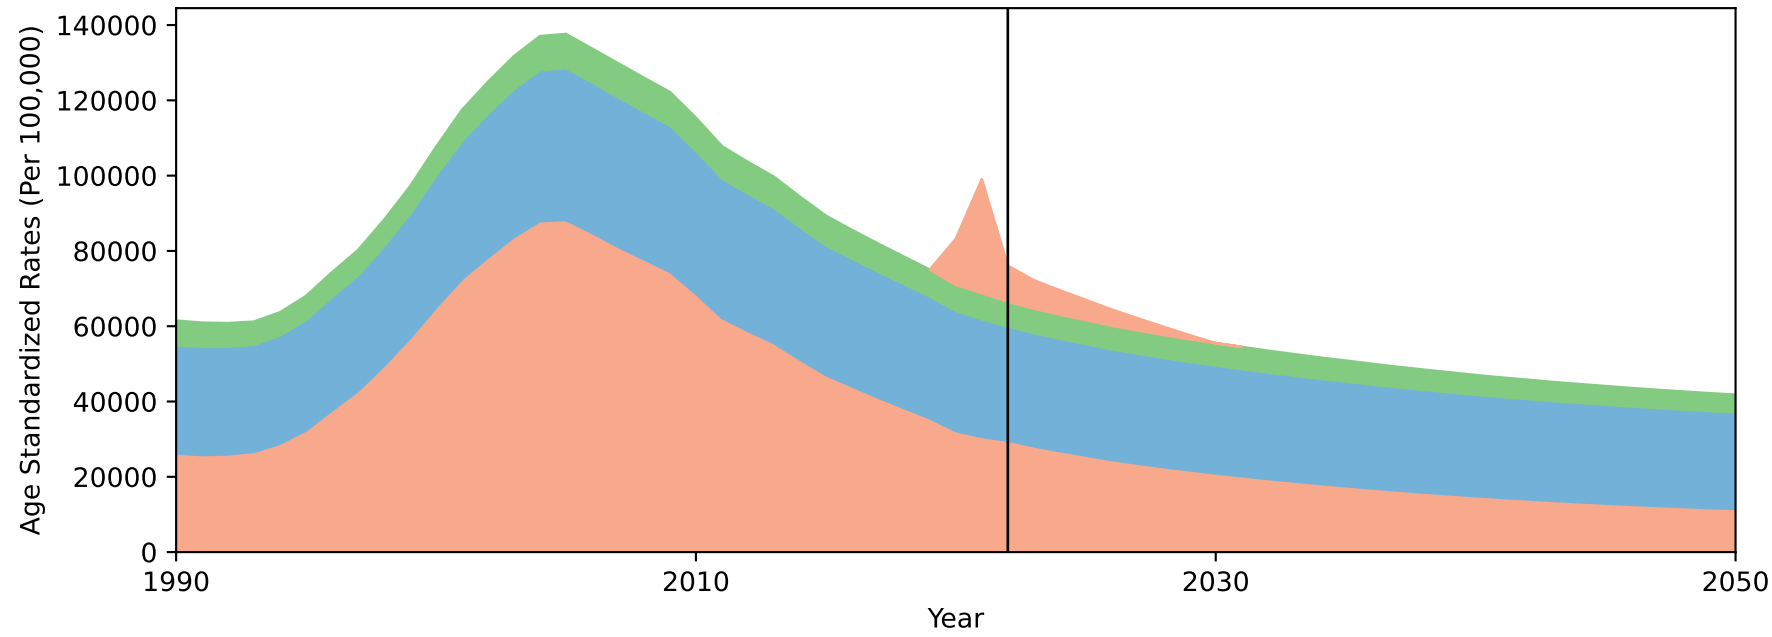

Level 2

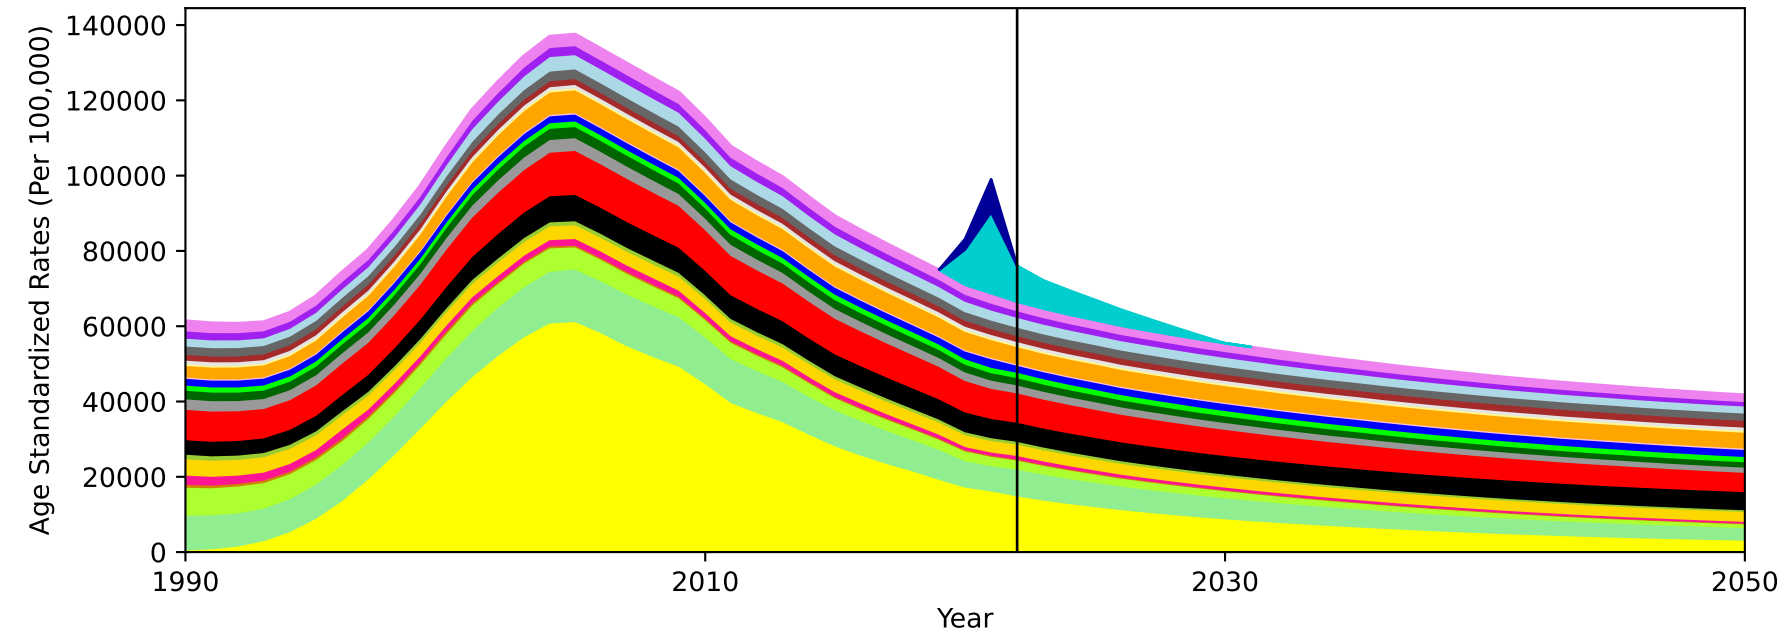

Level 1

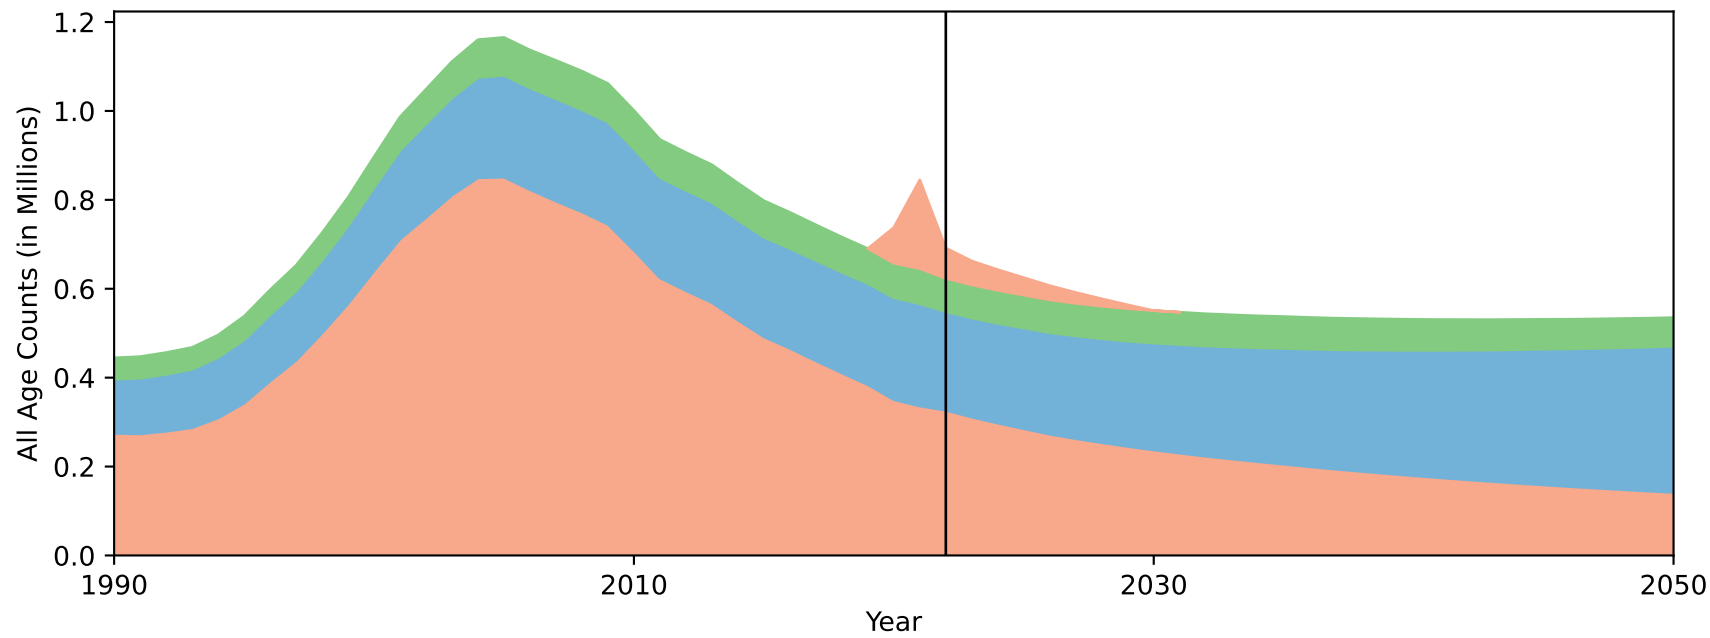

Level 2

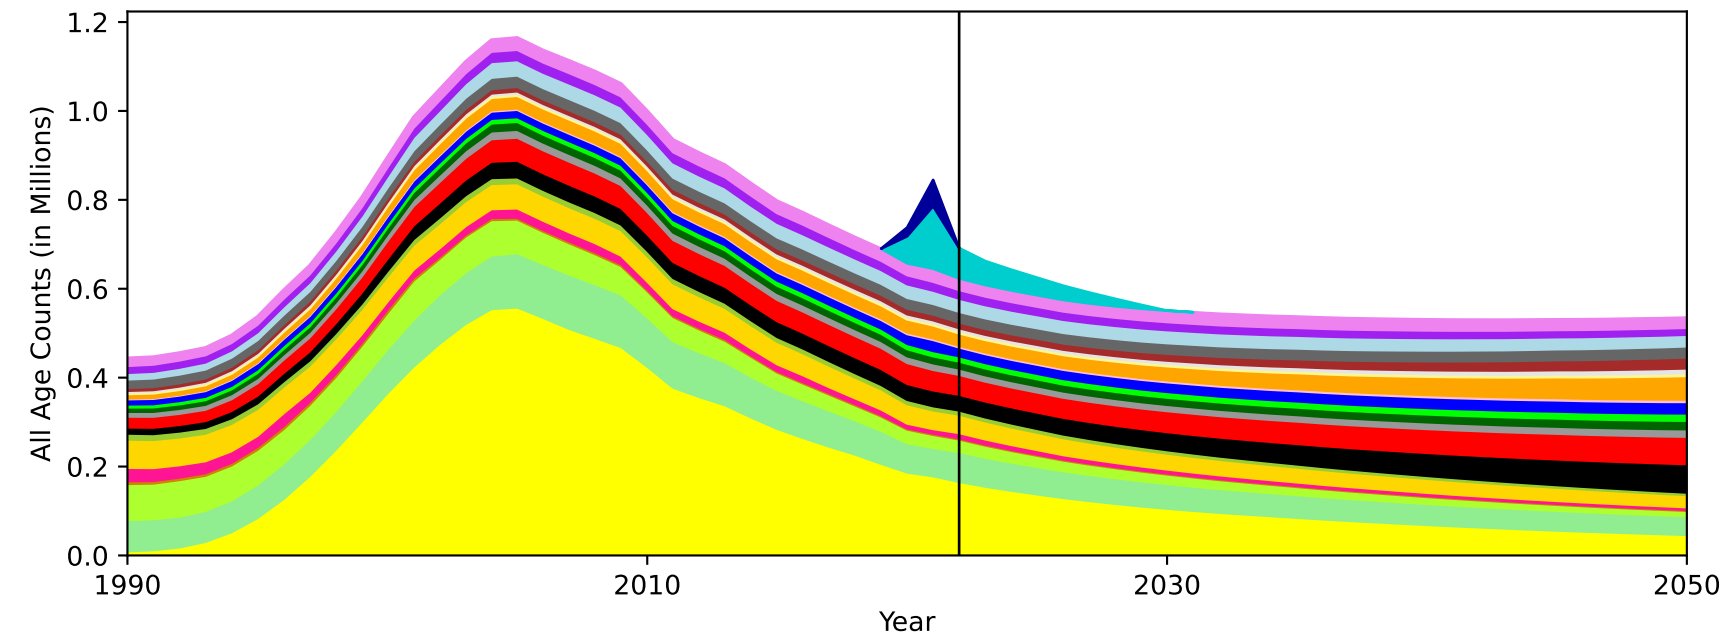

# Lesotho

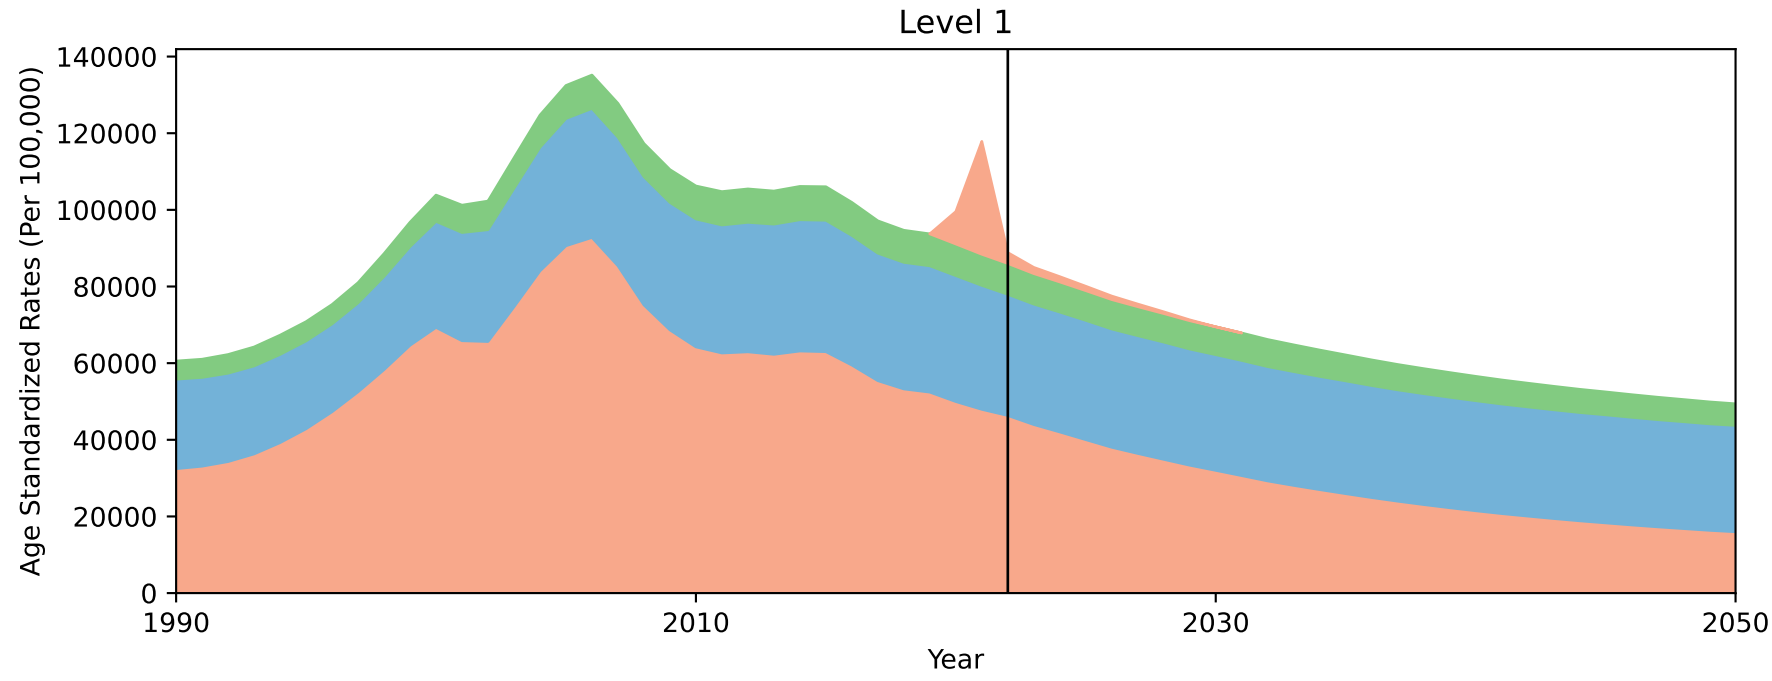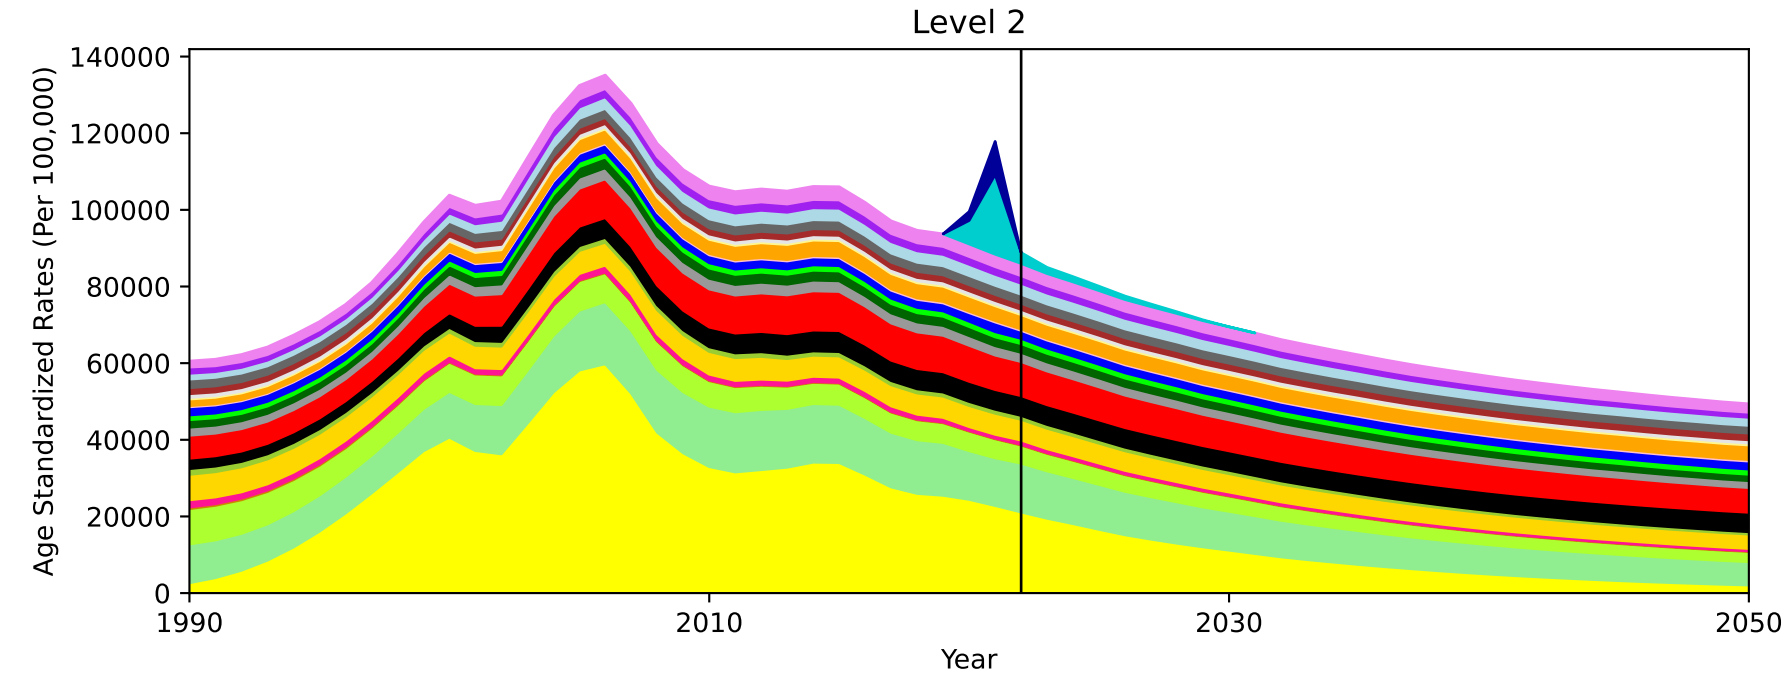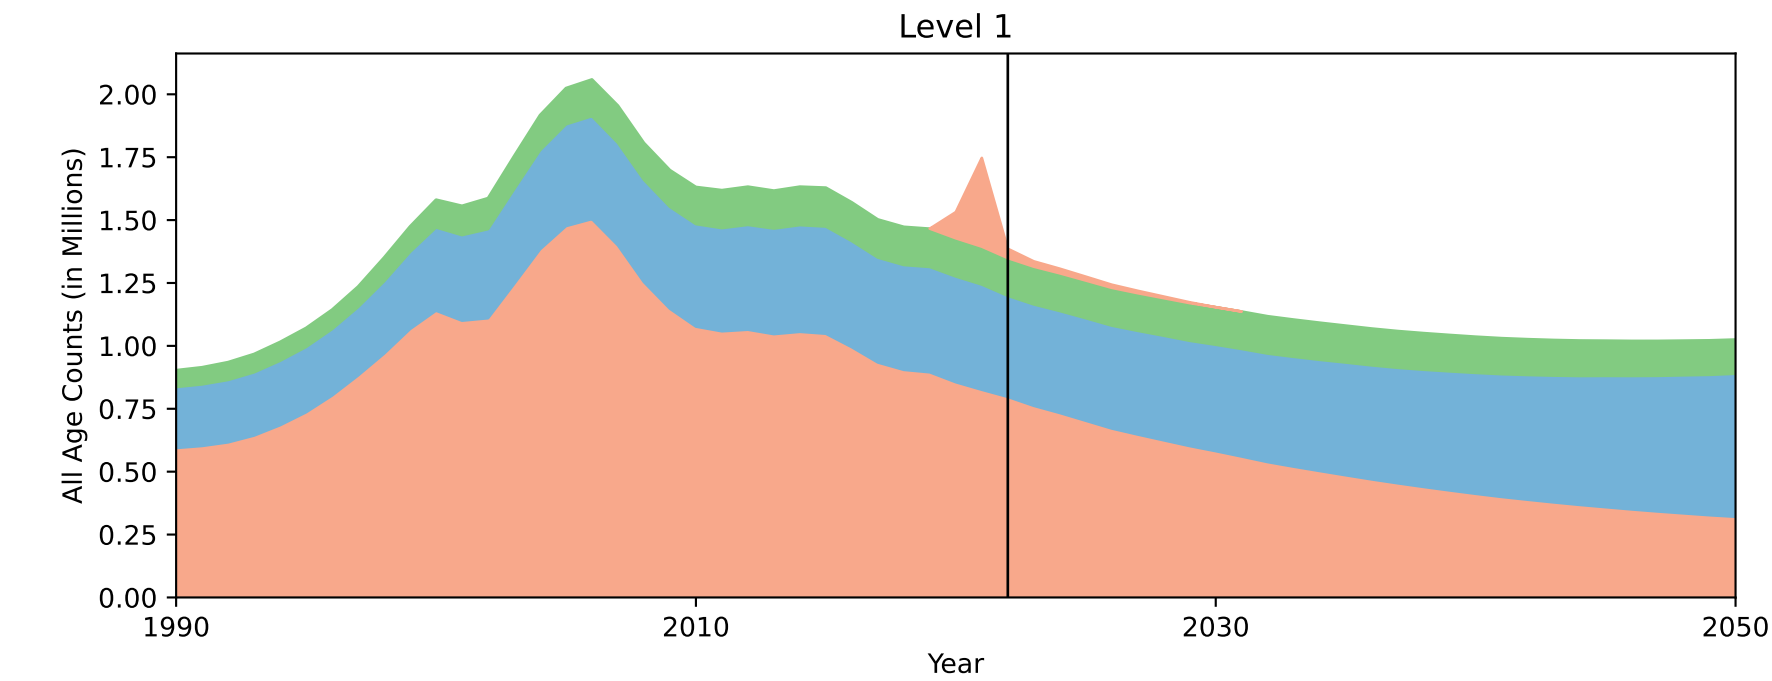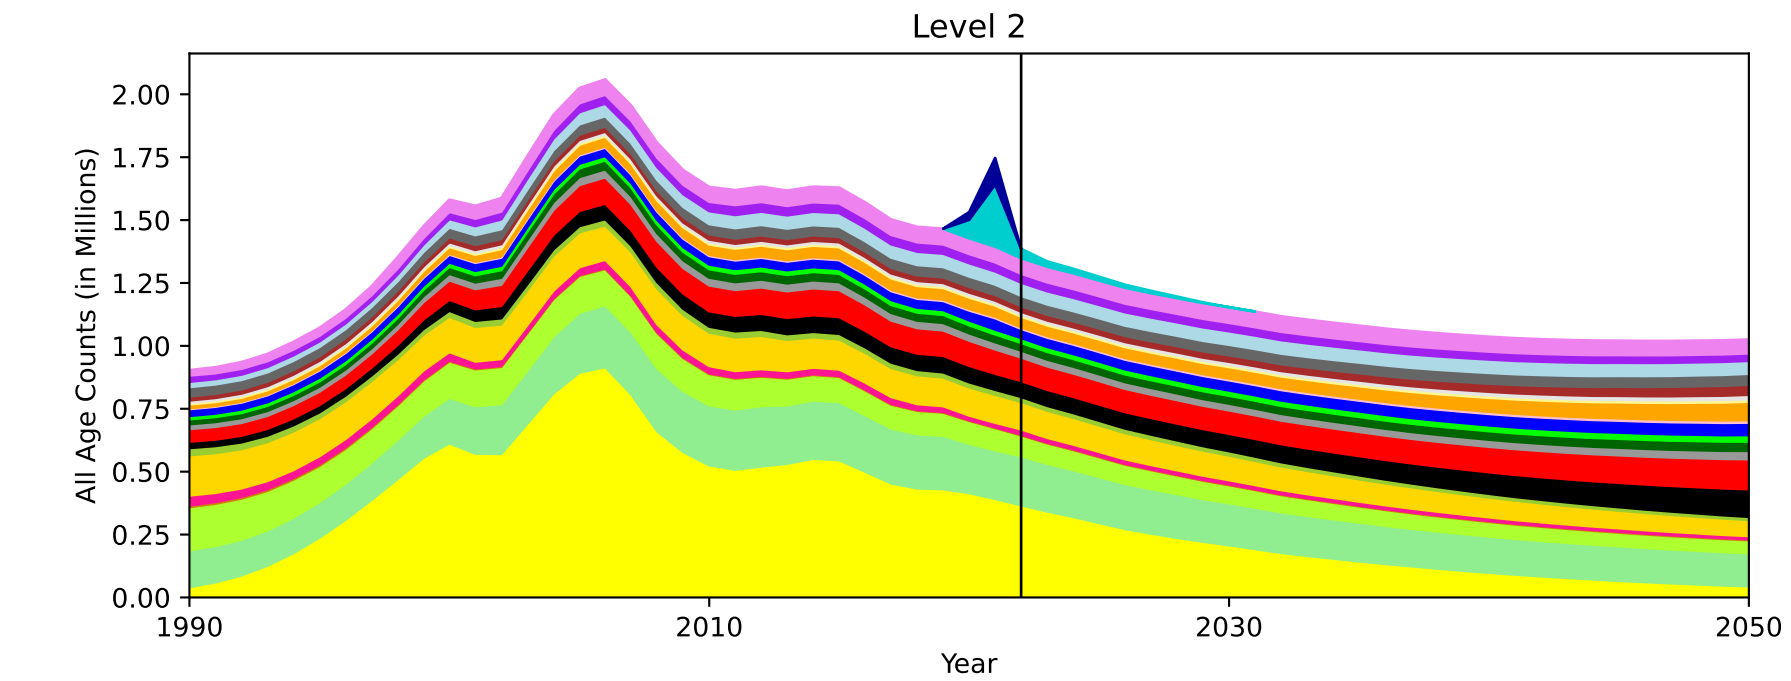

# Namibia

Level 1

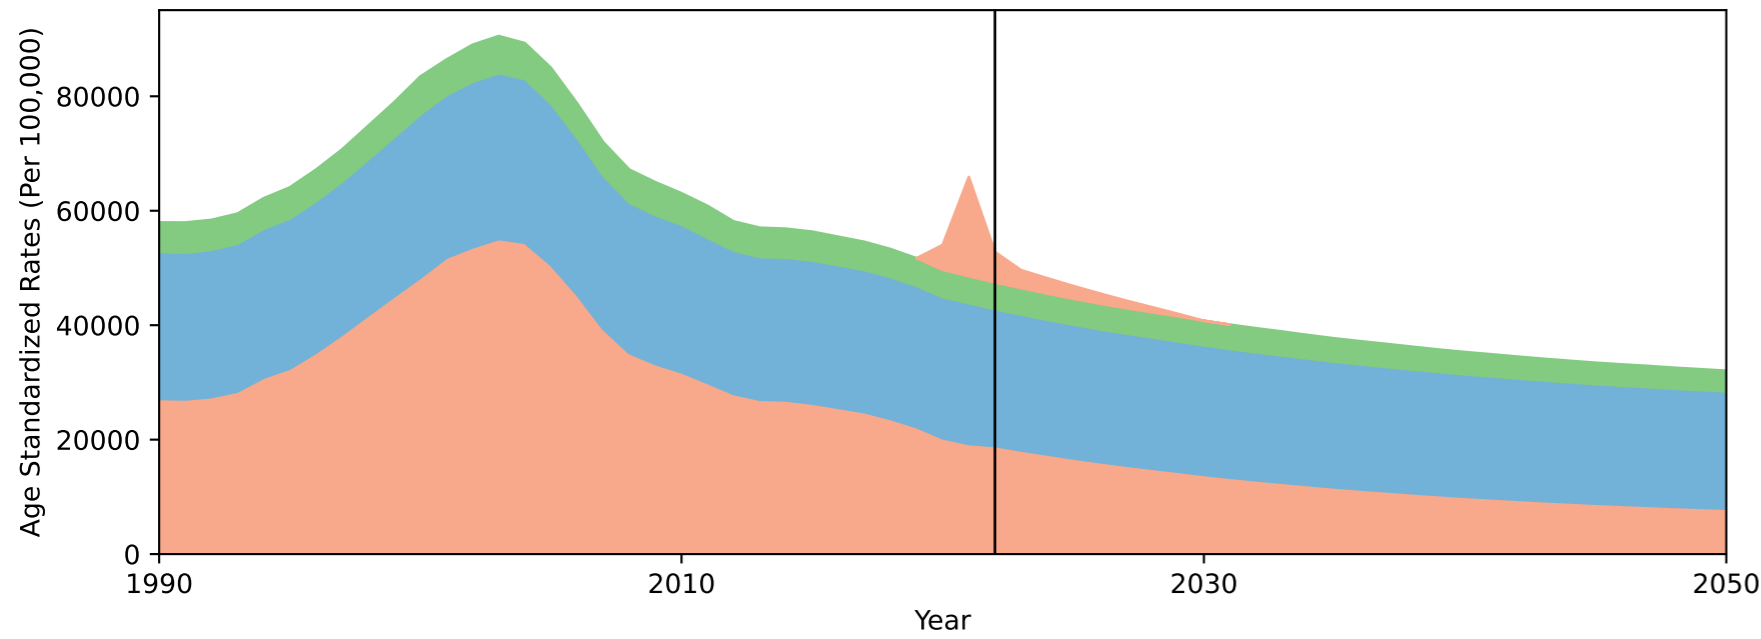

Level 2

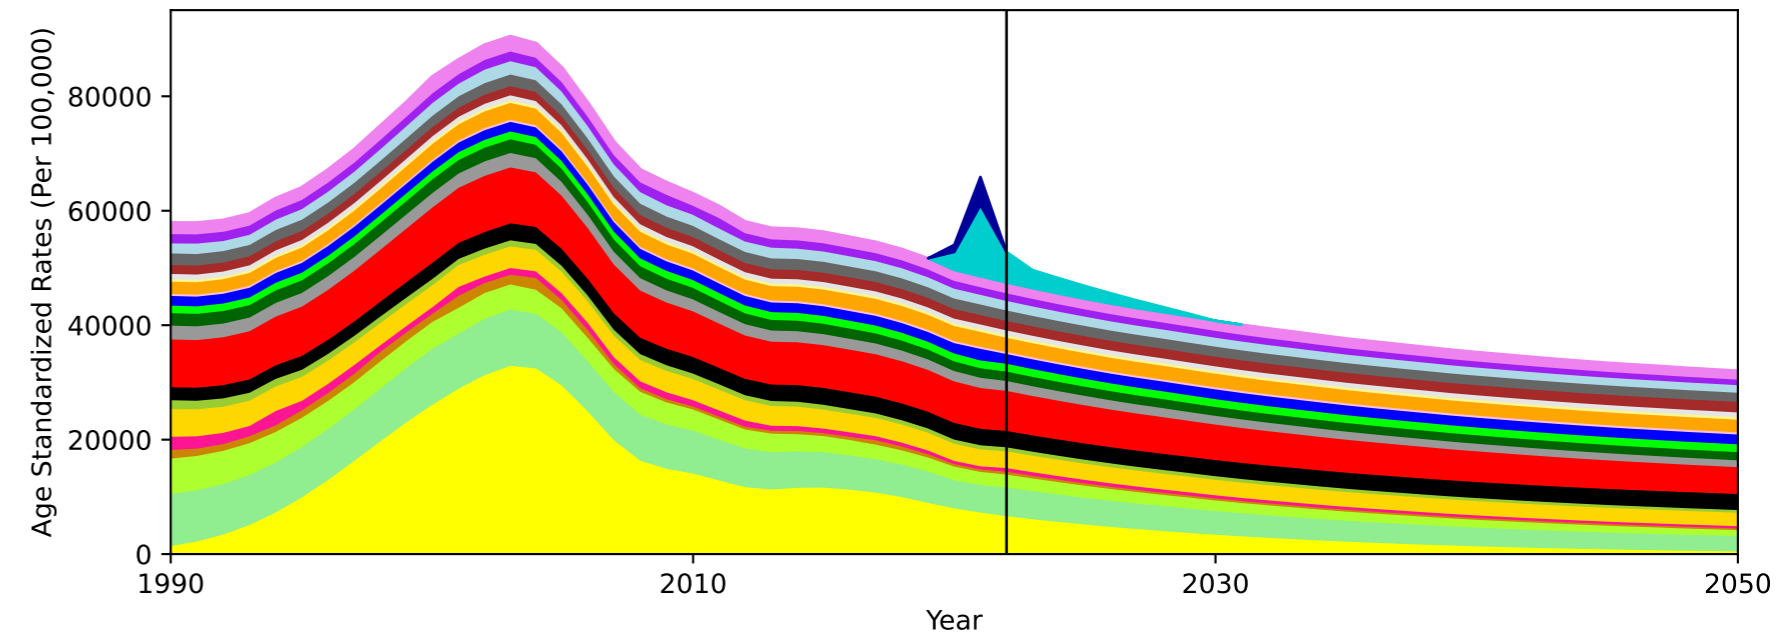

Level 1

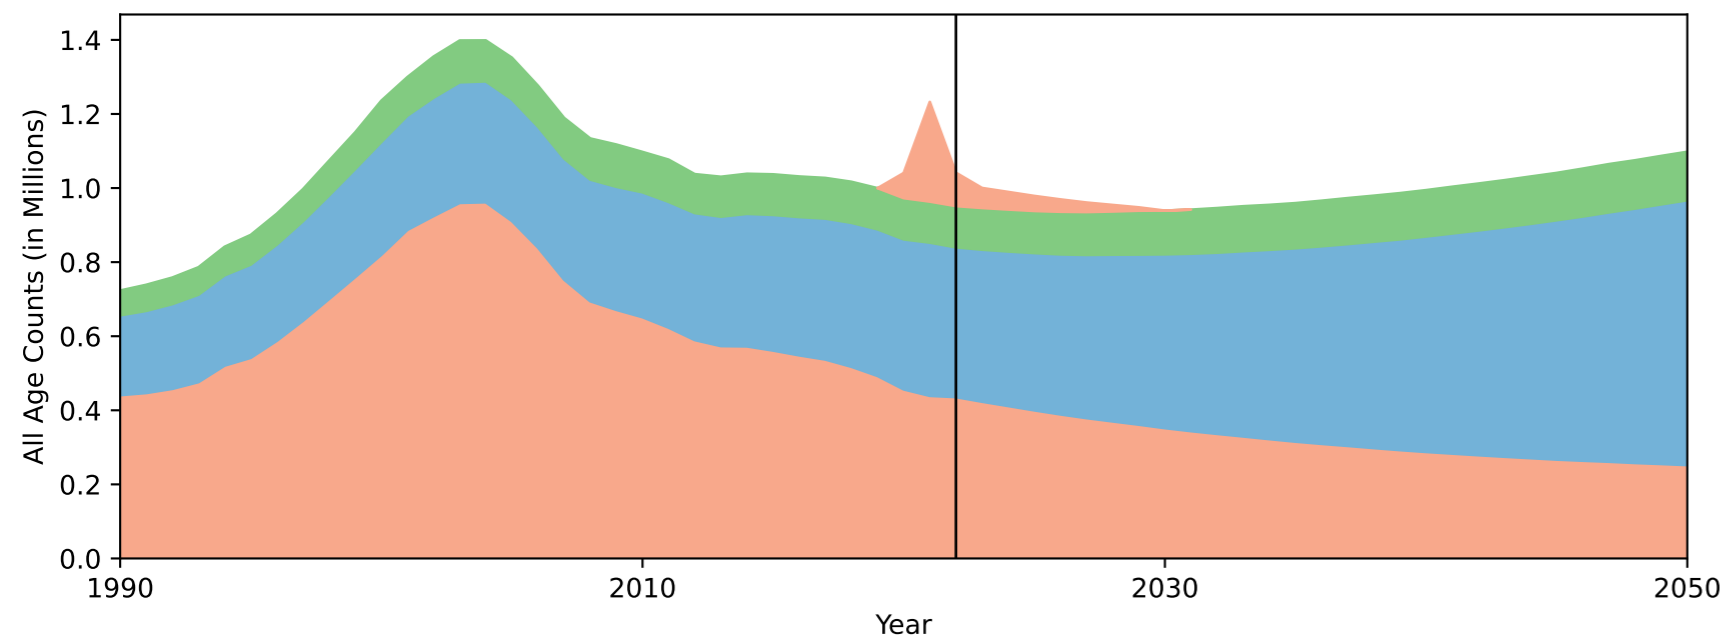

Level 2

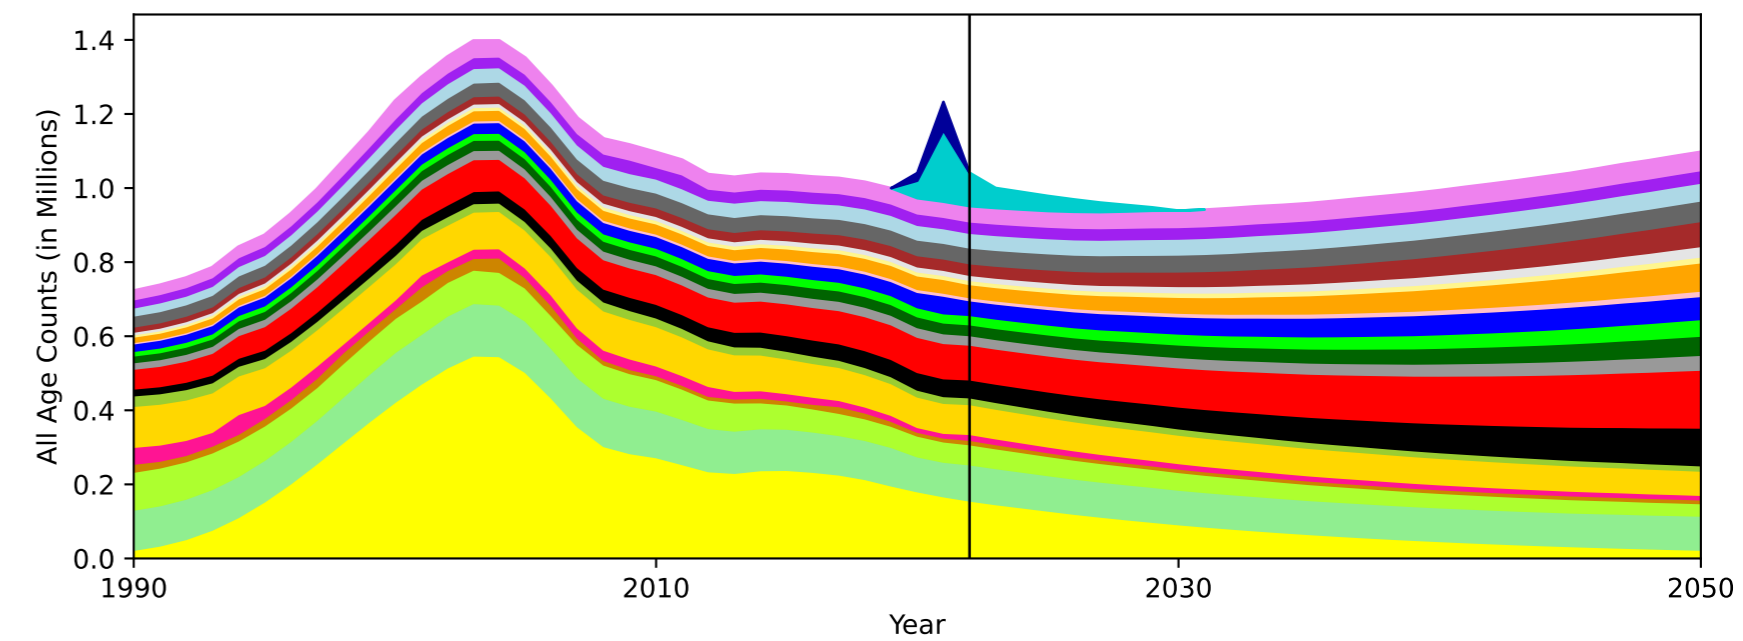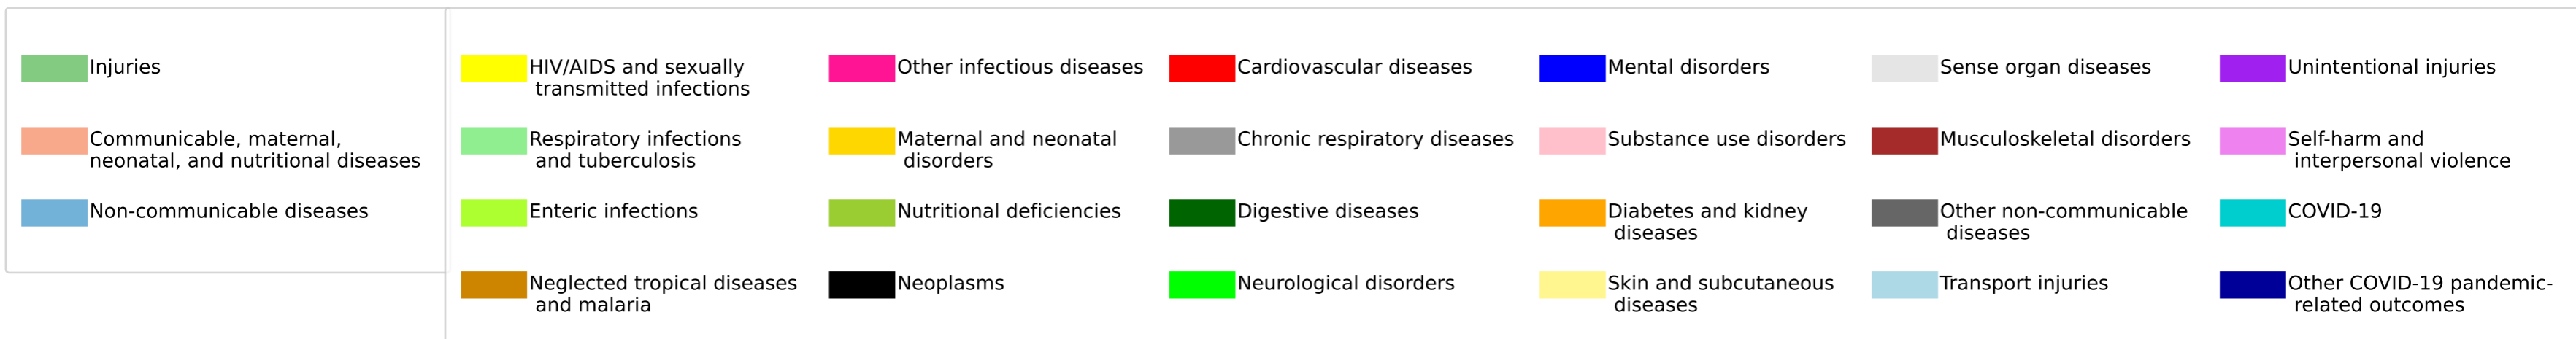

# South Africa

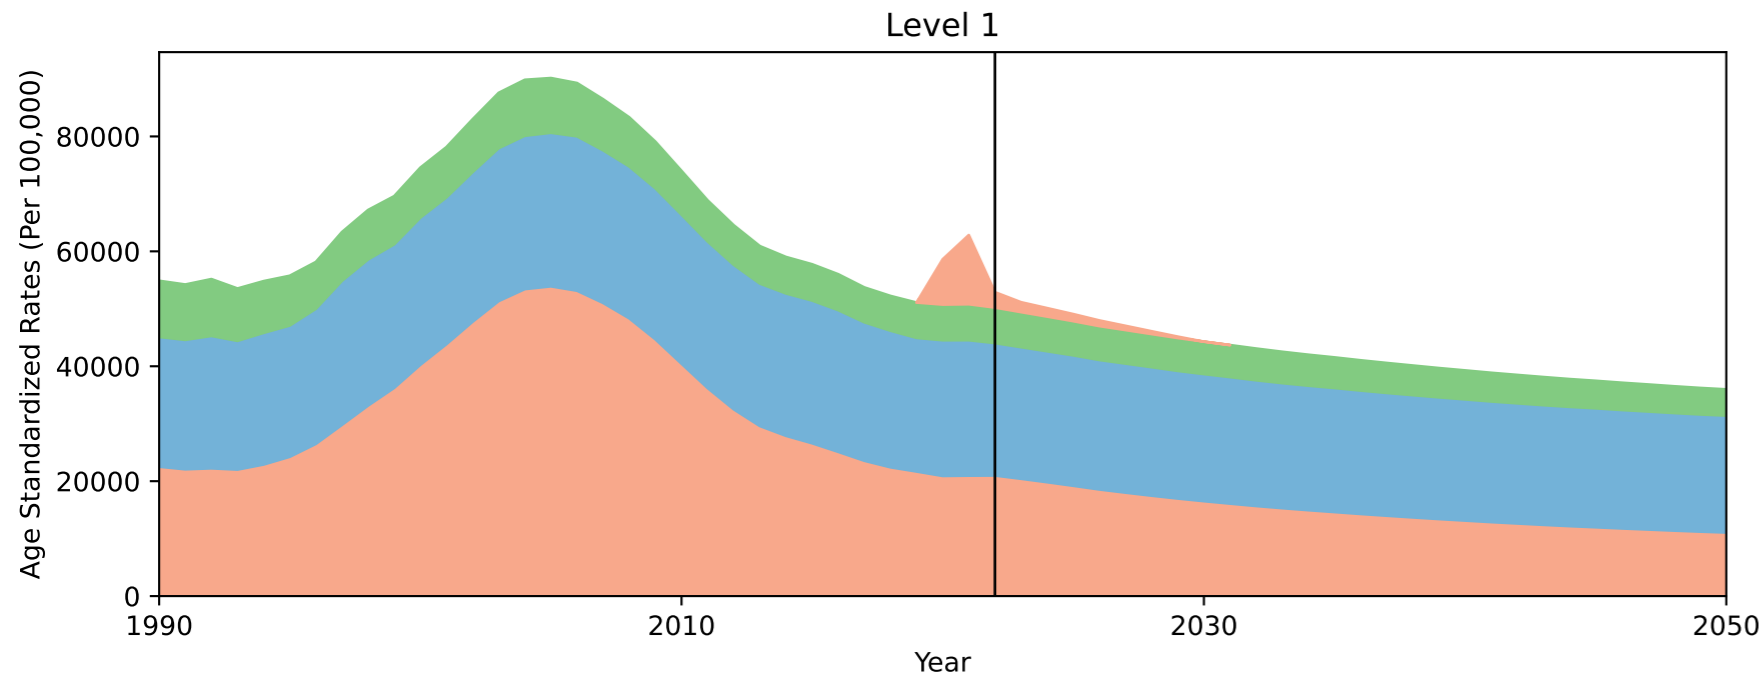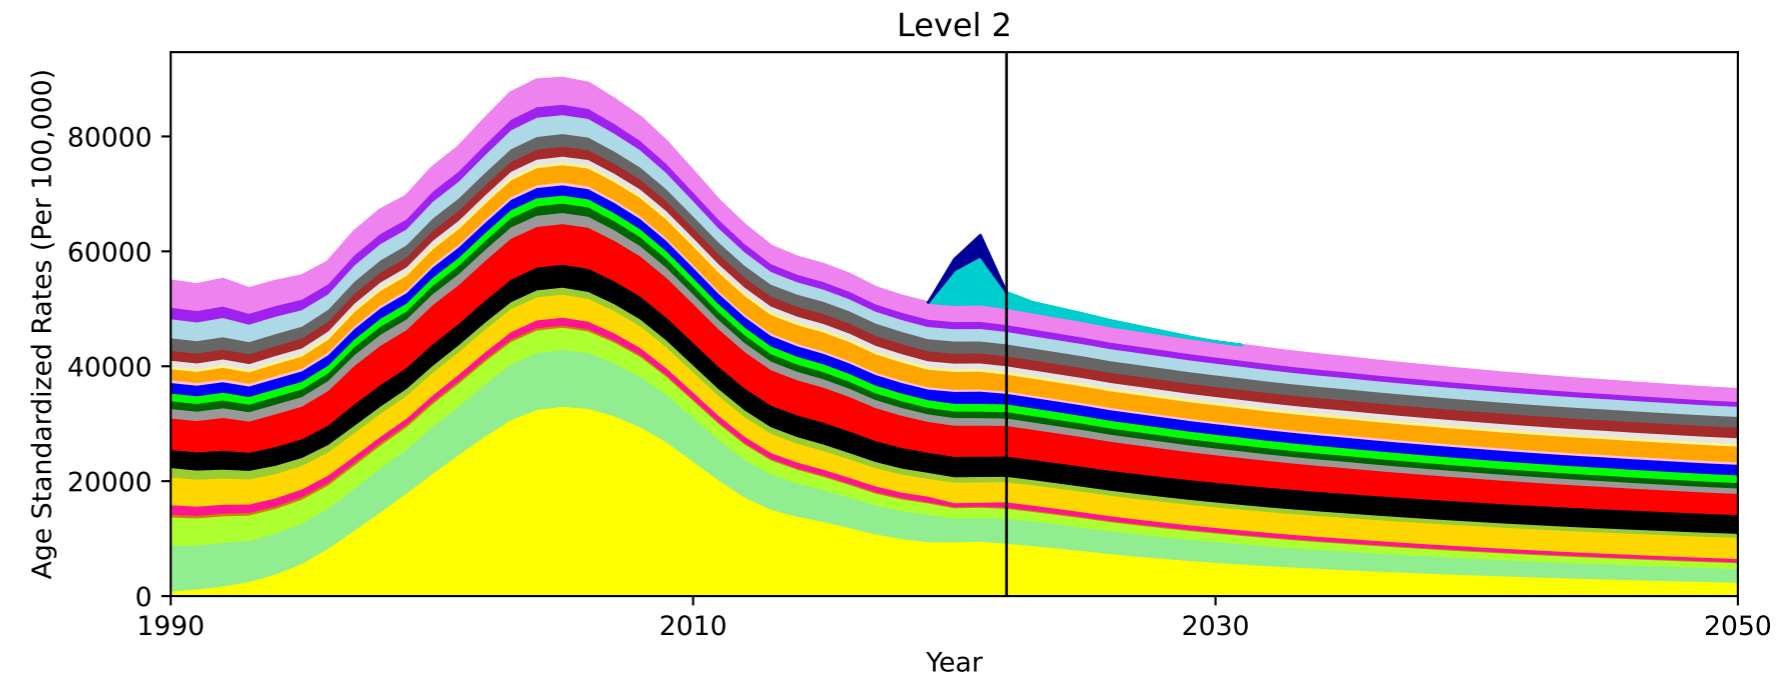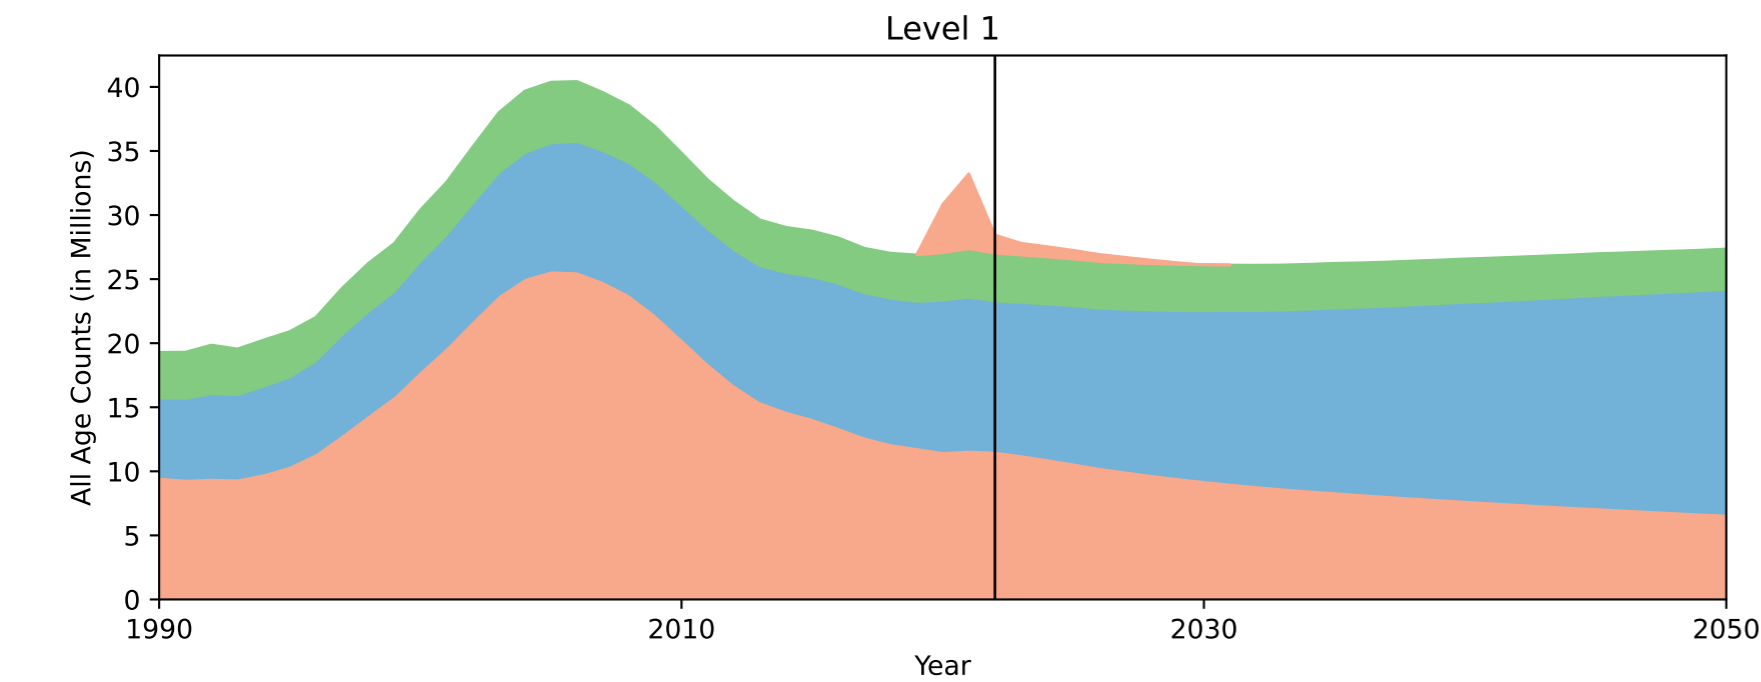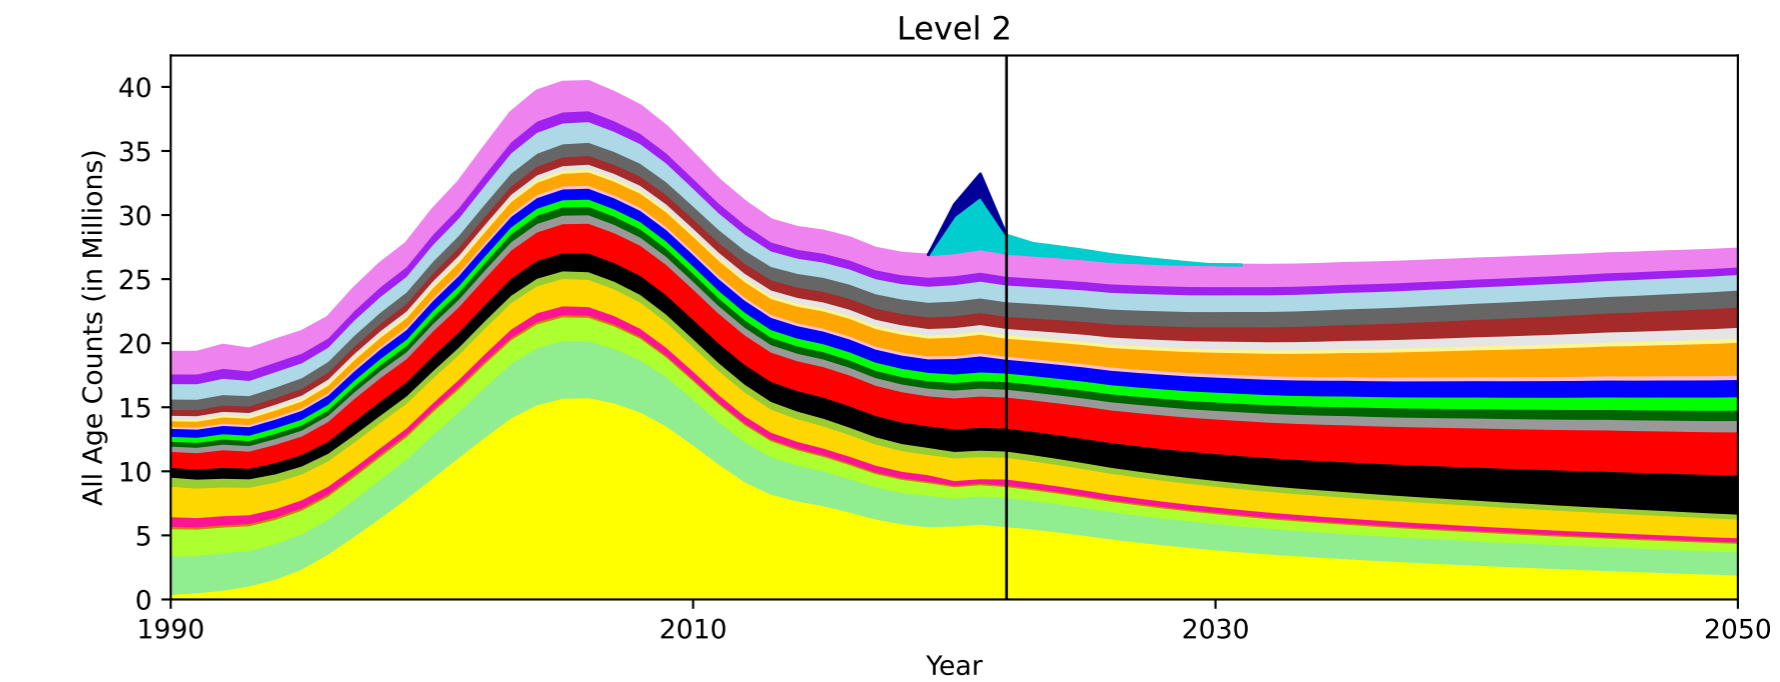

# Zimbabwe

Level 1

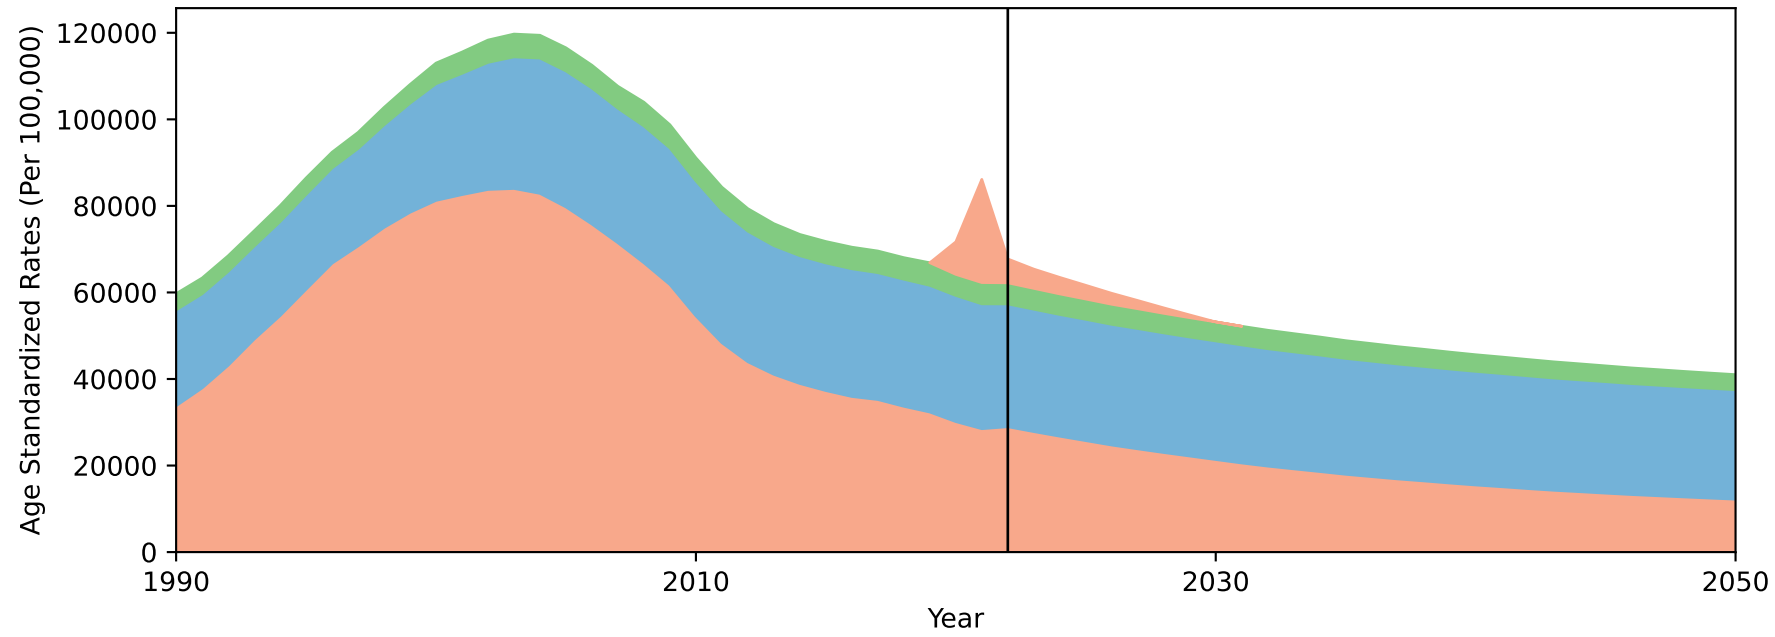

Level 2

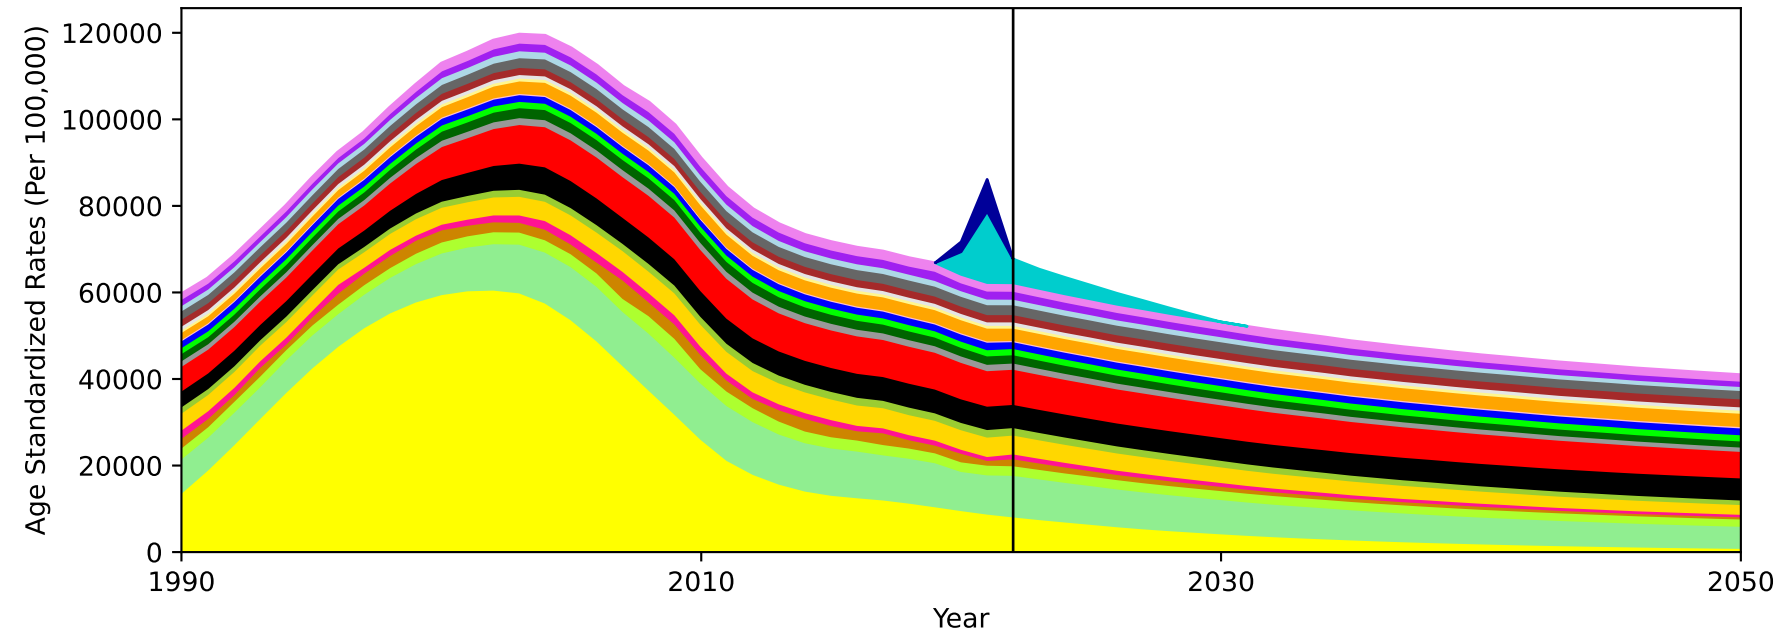

Level 1

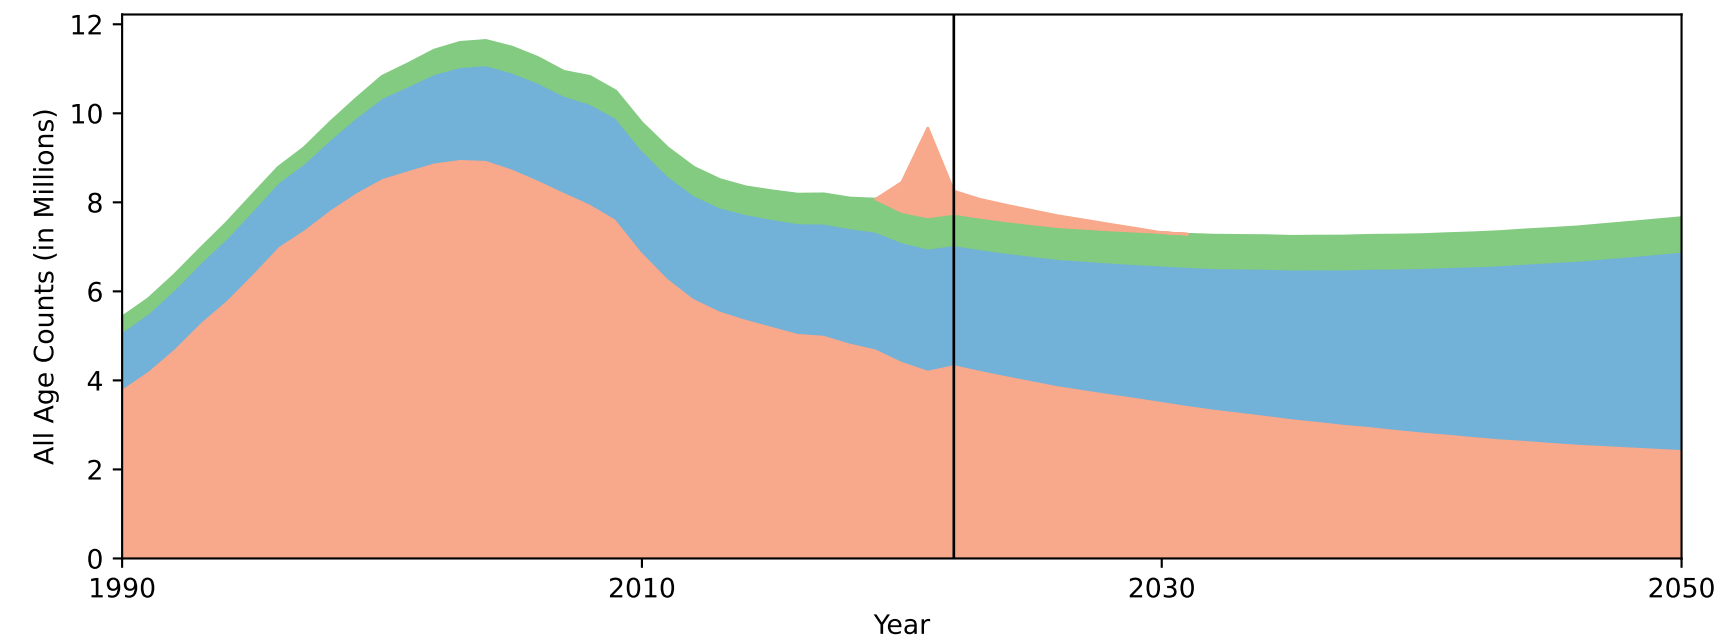

Level 2

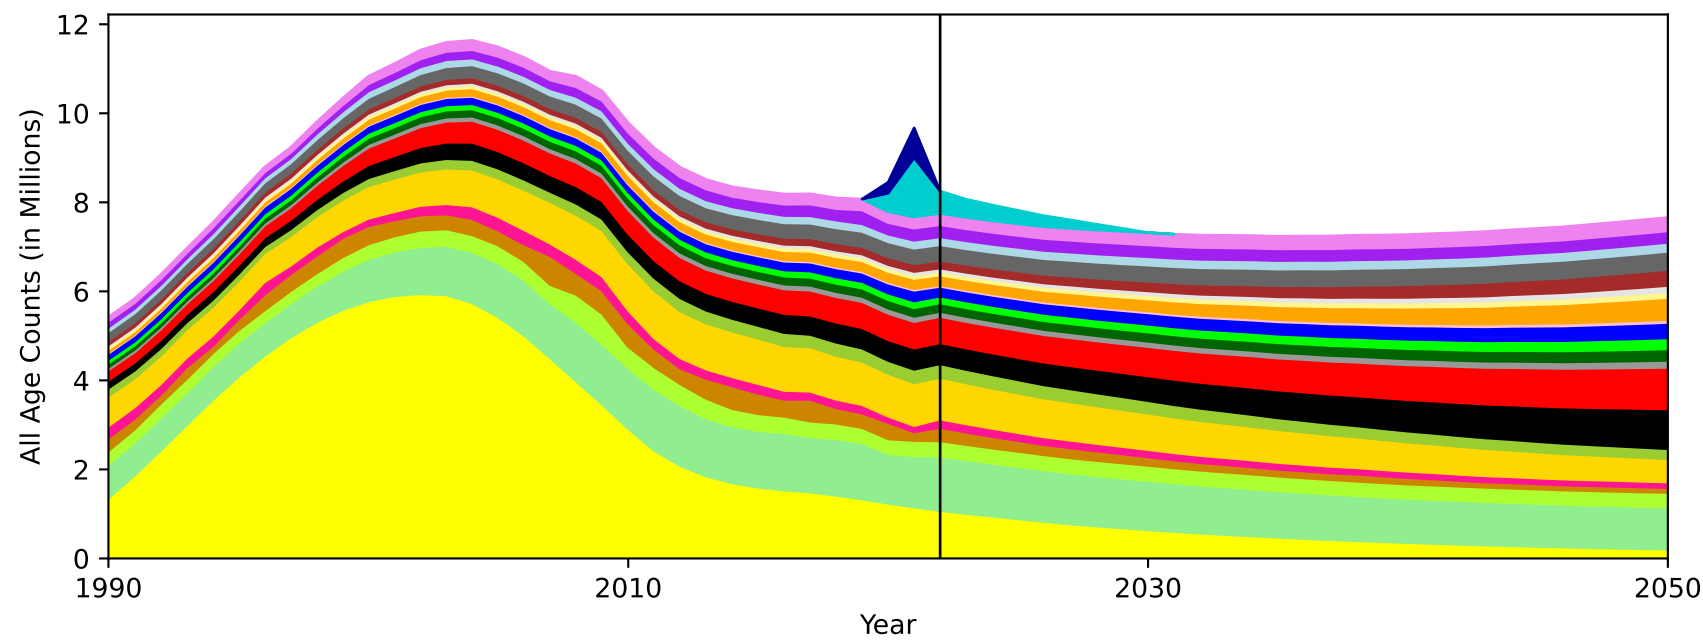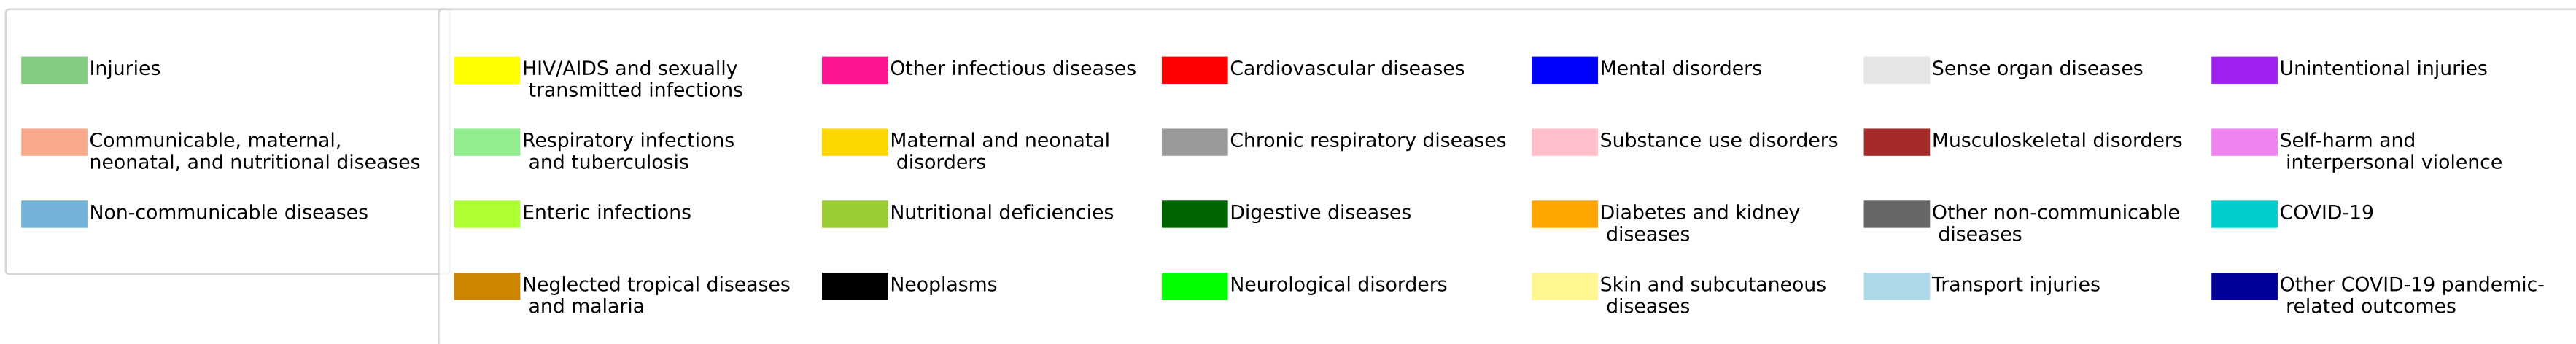

# Benin

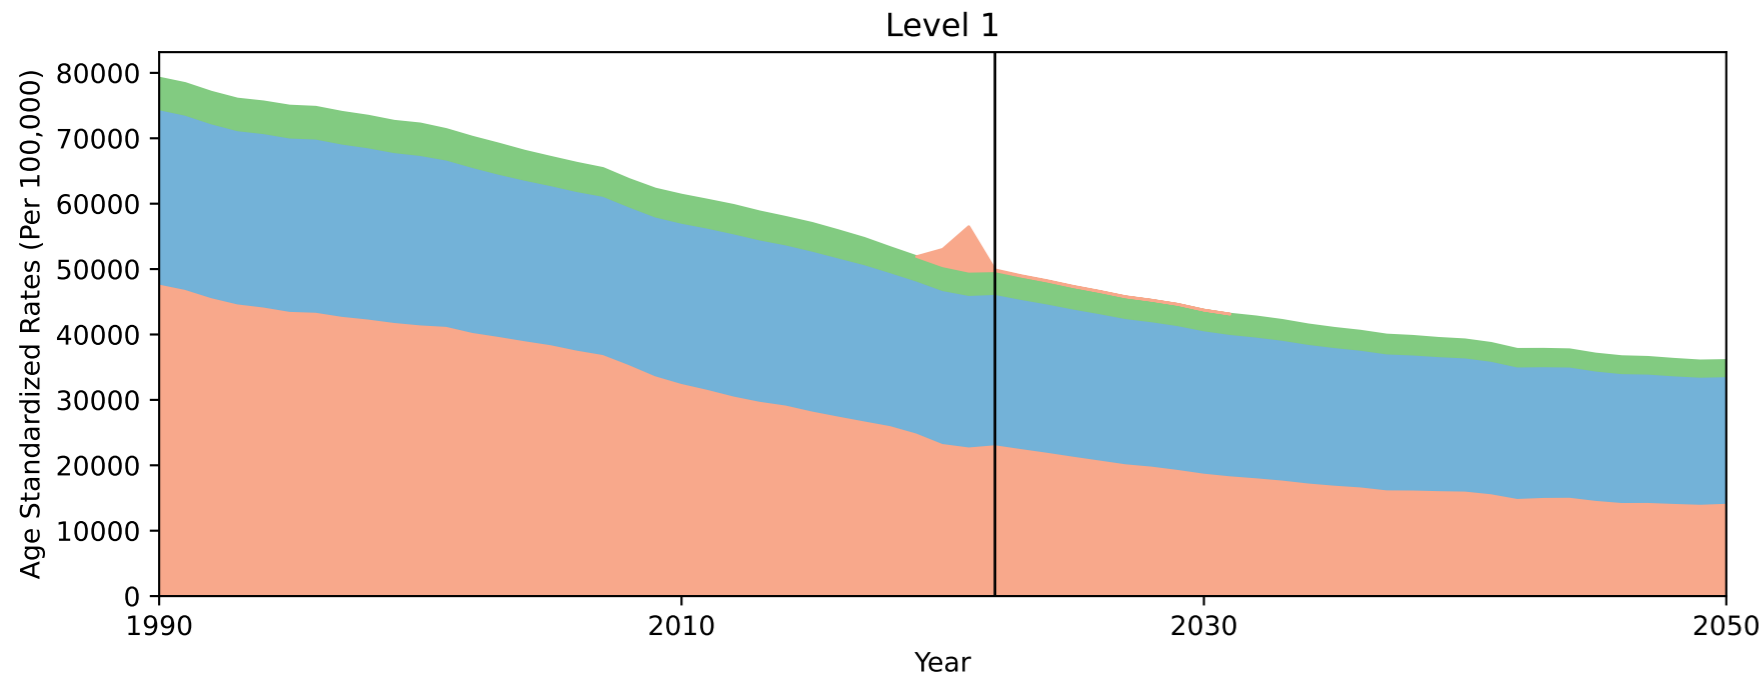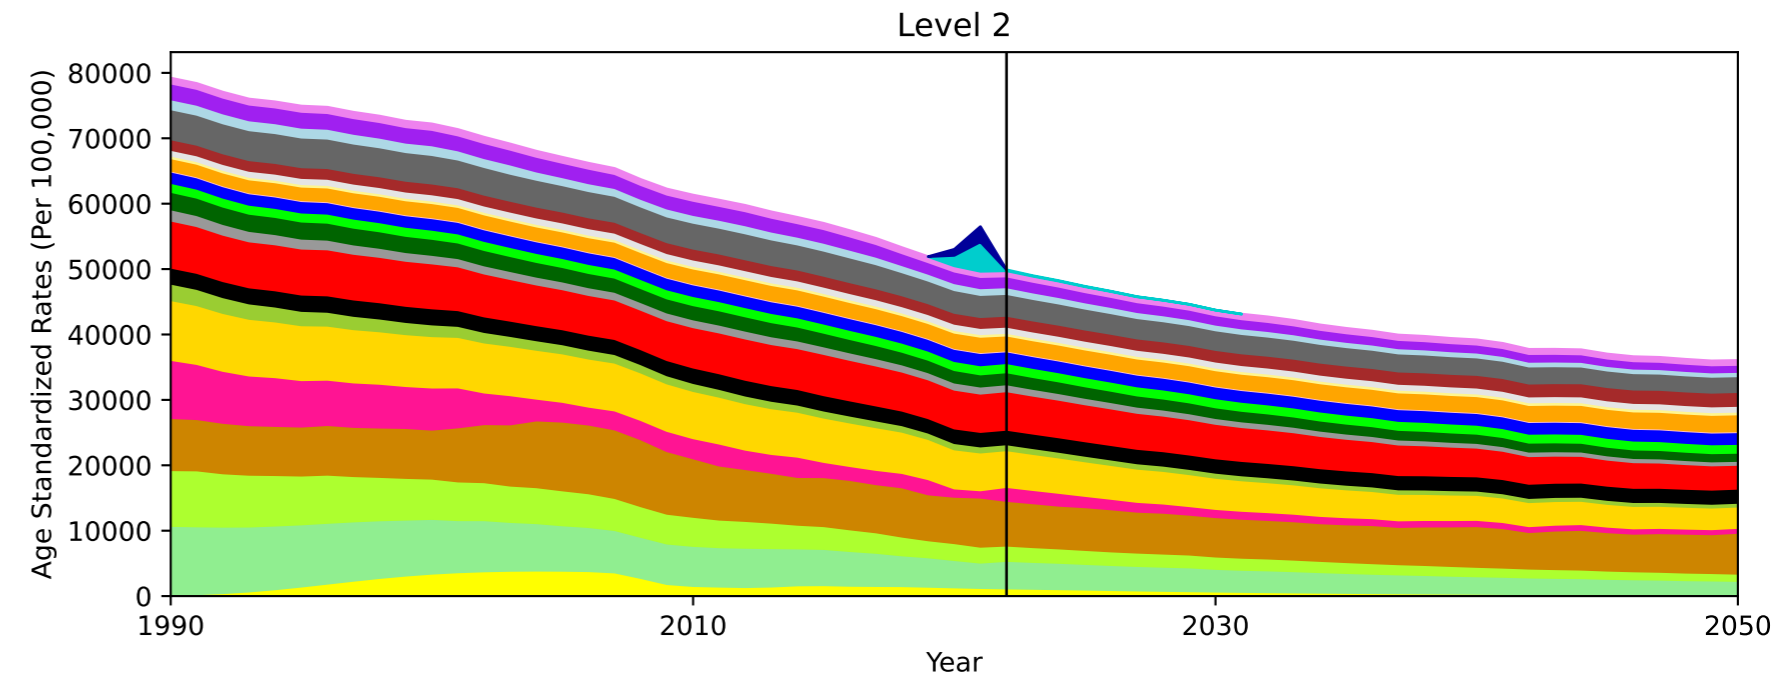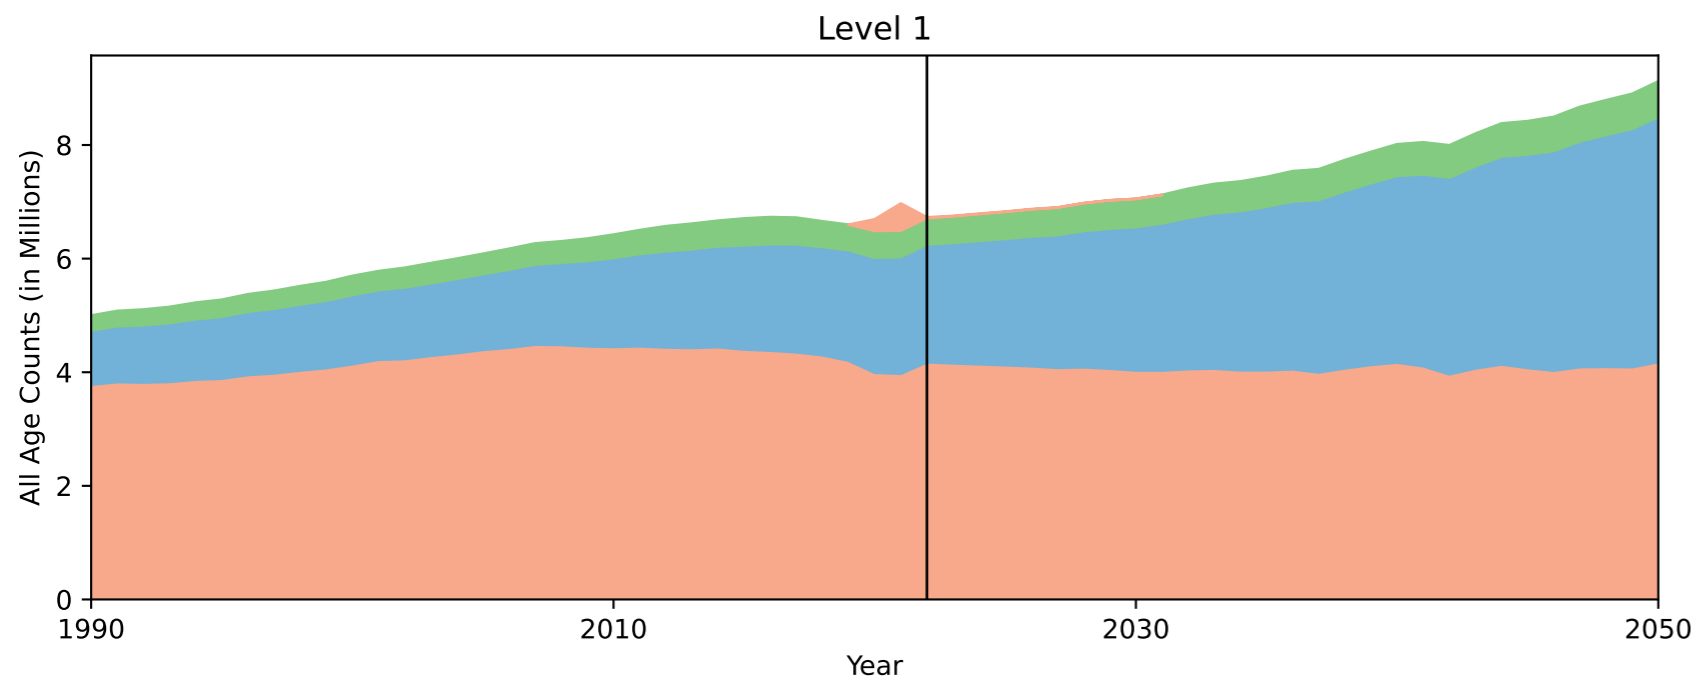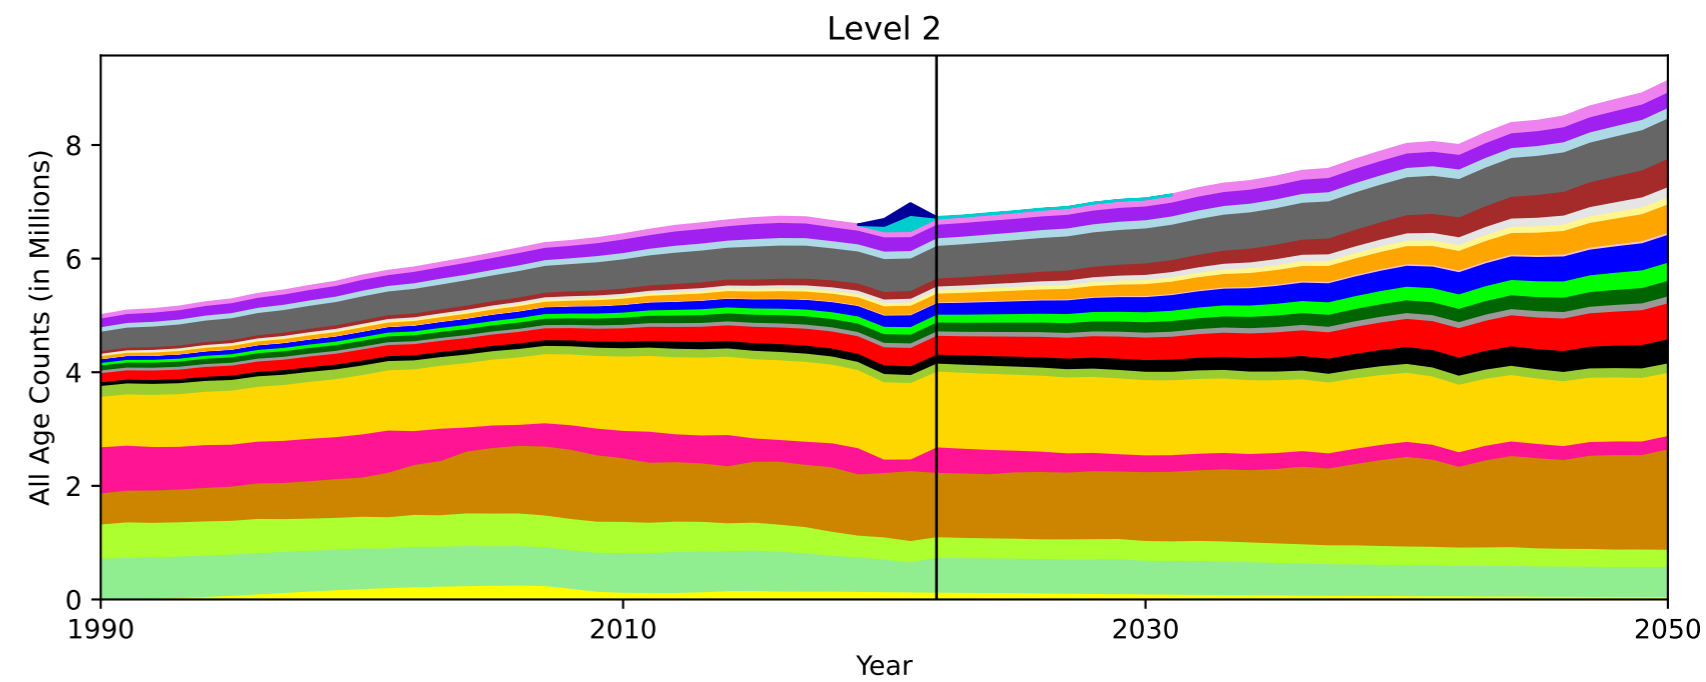

# Burkina Faso

Supplemental Results Figure S4. Age-standardised DALY rates and all age DALY counts and by Level 1 and Level 2 causes, 1990–2050

431

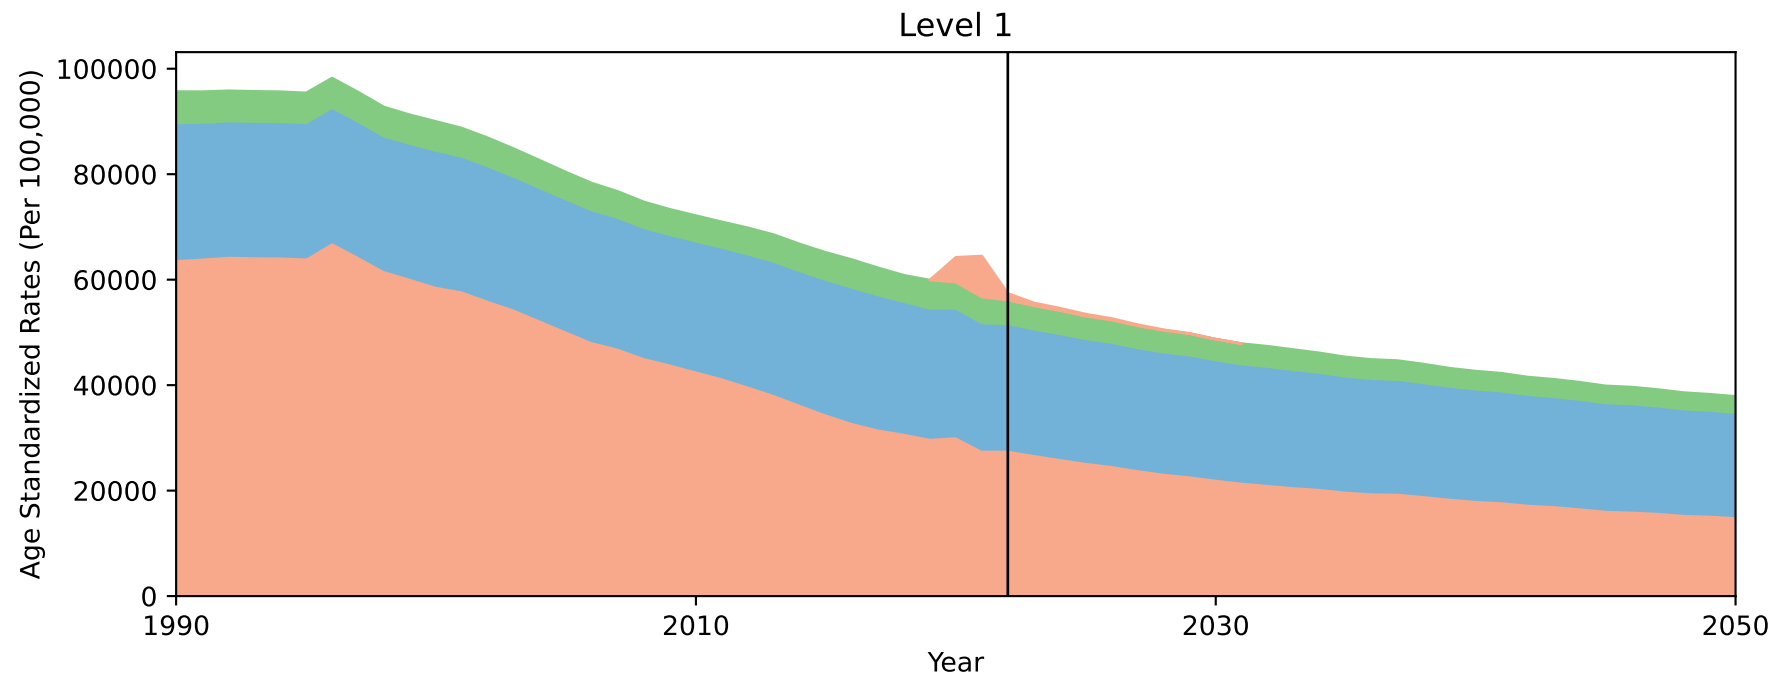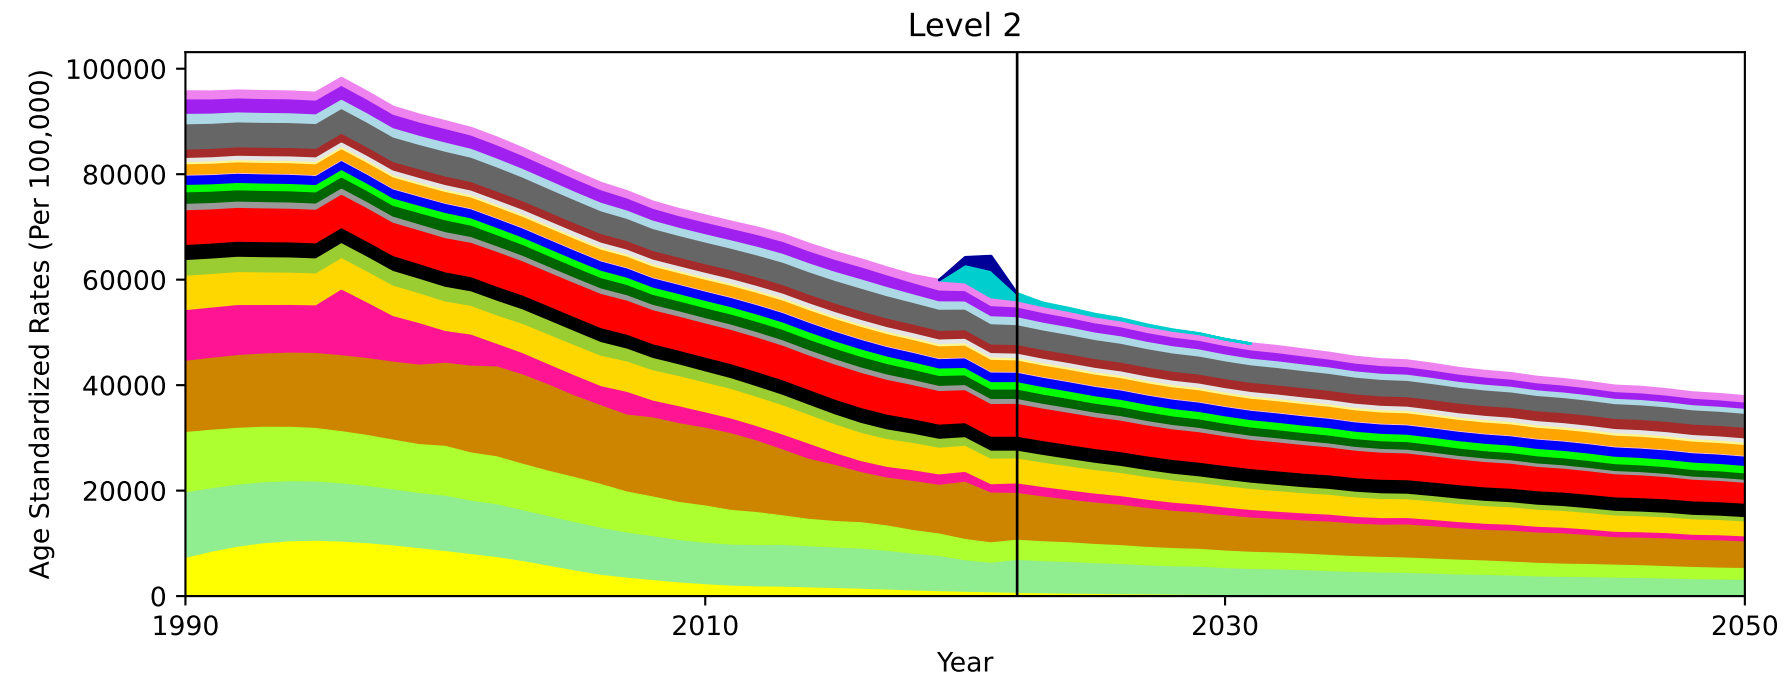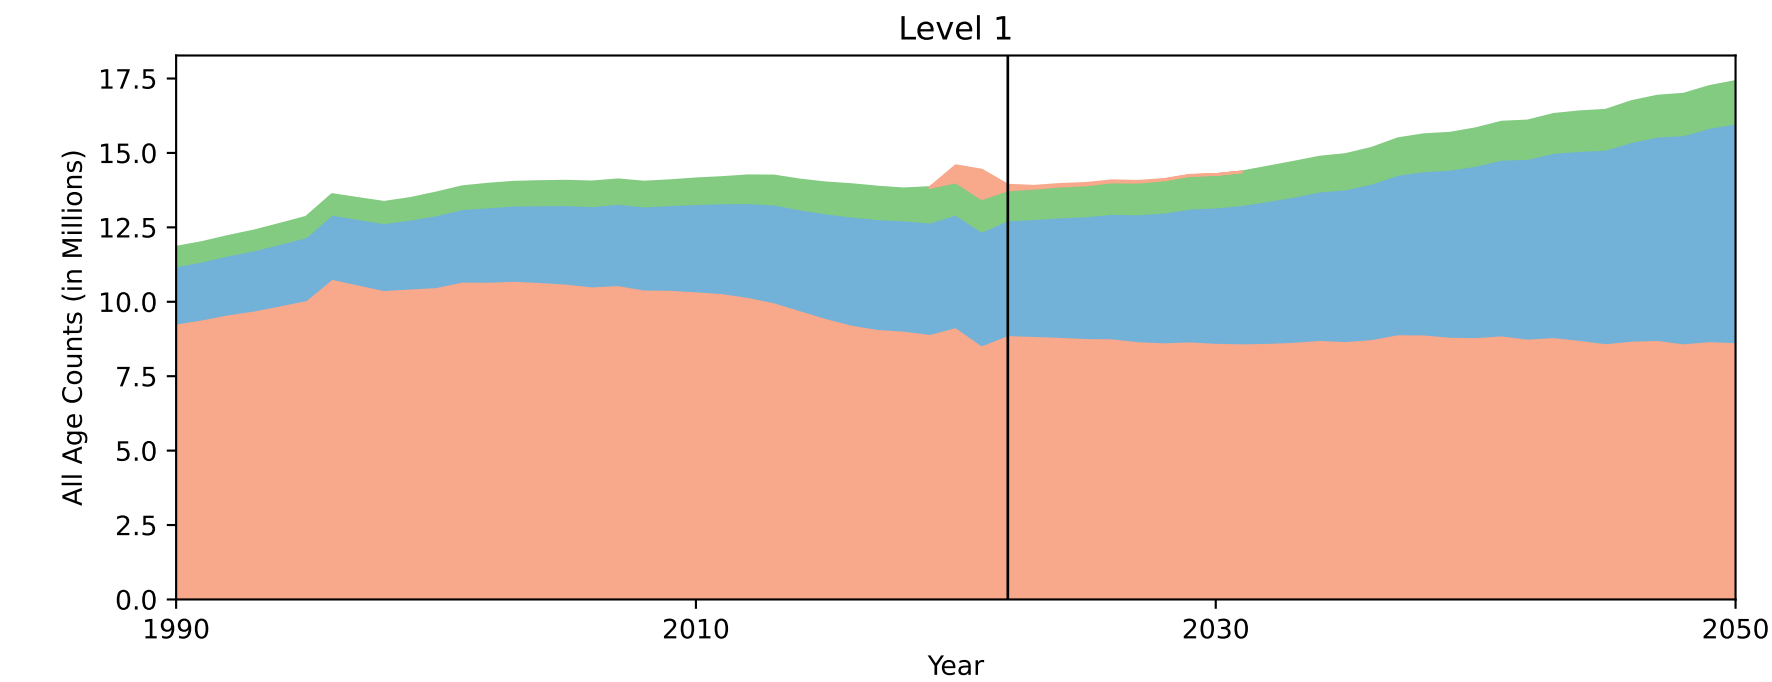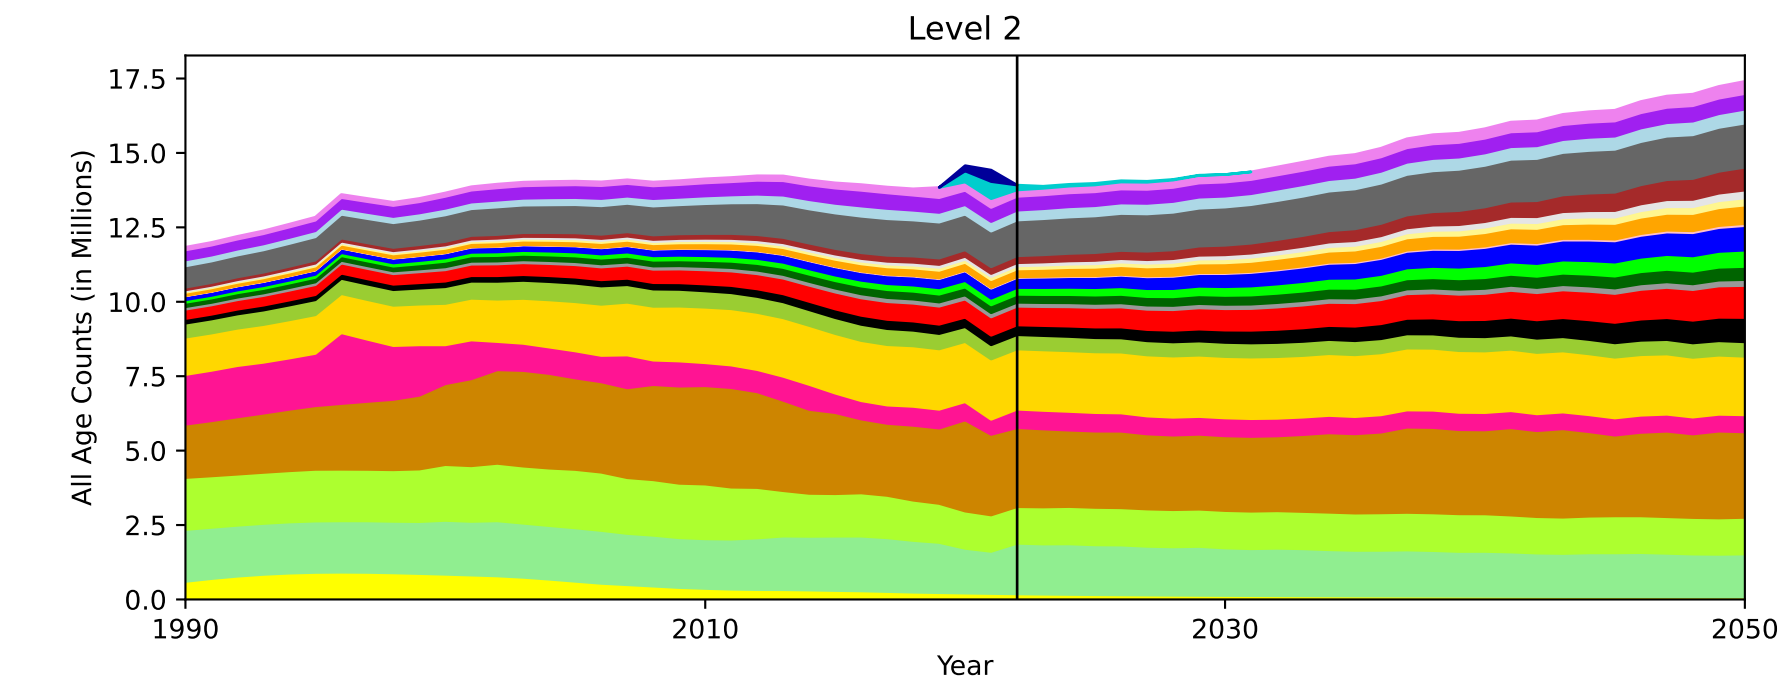



# Cabo Verde

Level 1

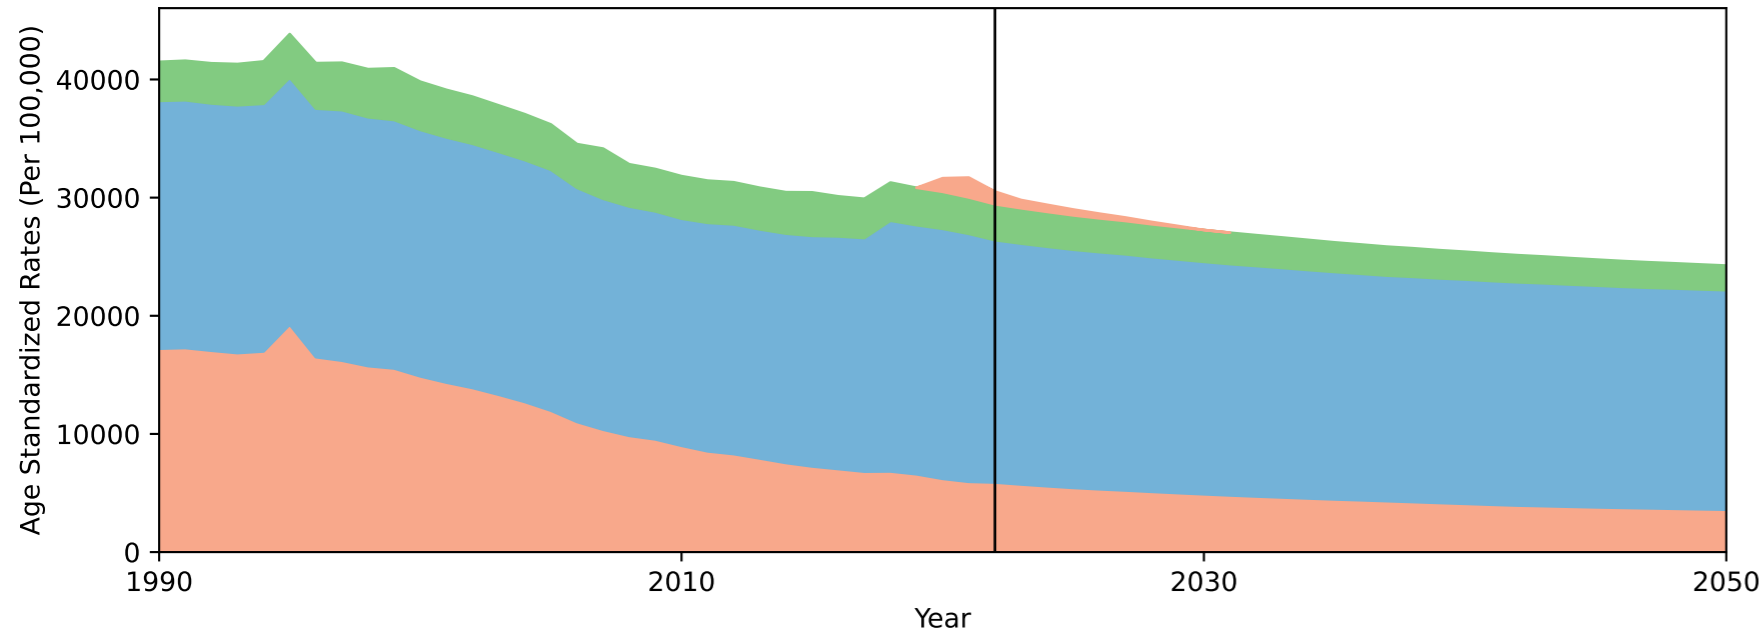

Level 2

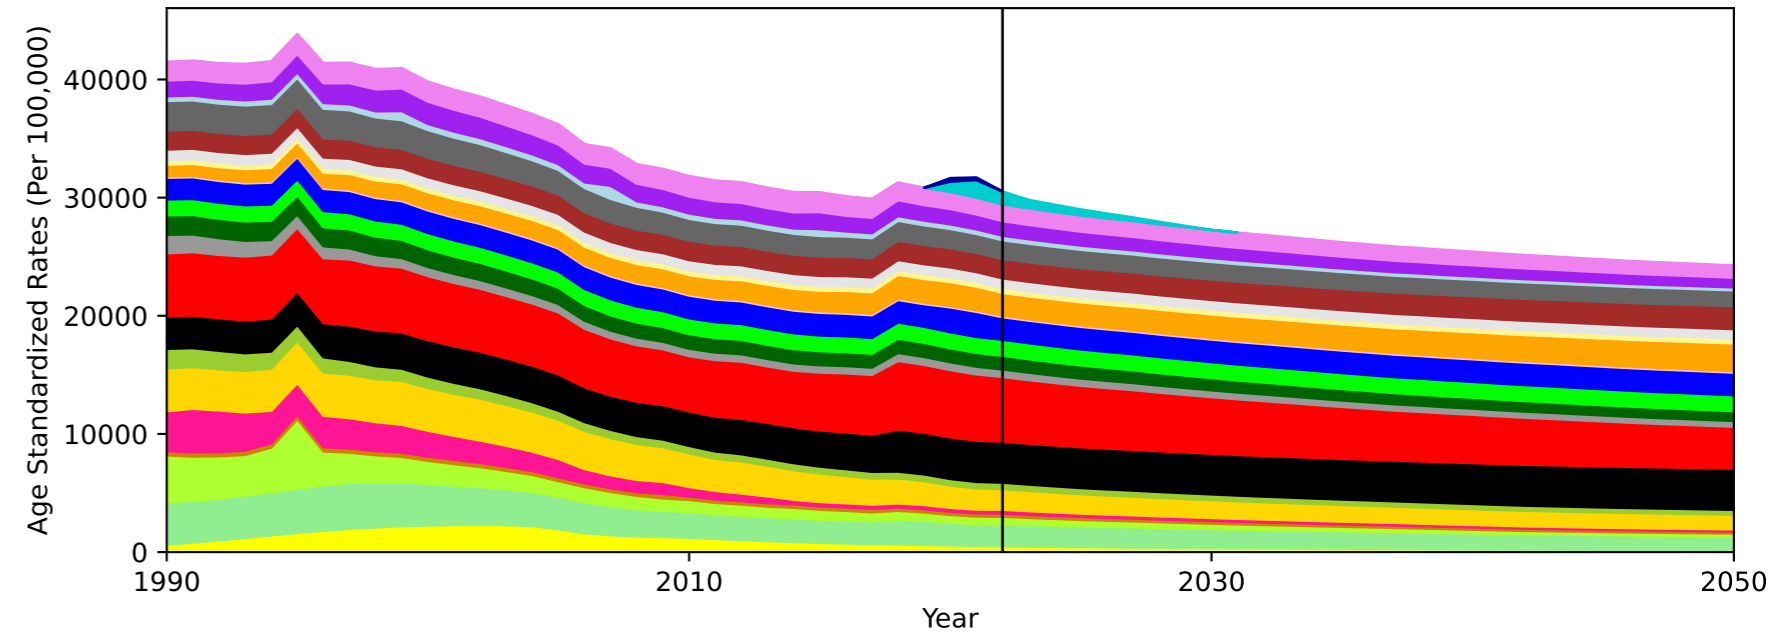

Level 1

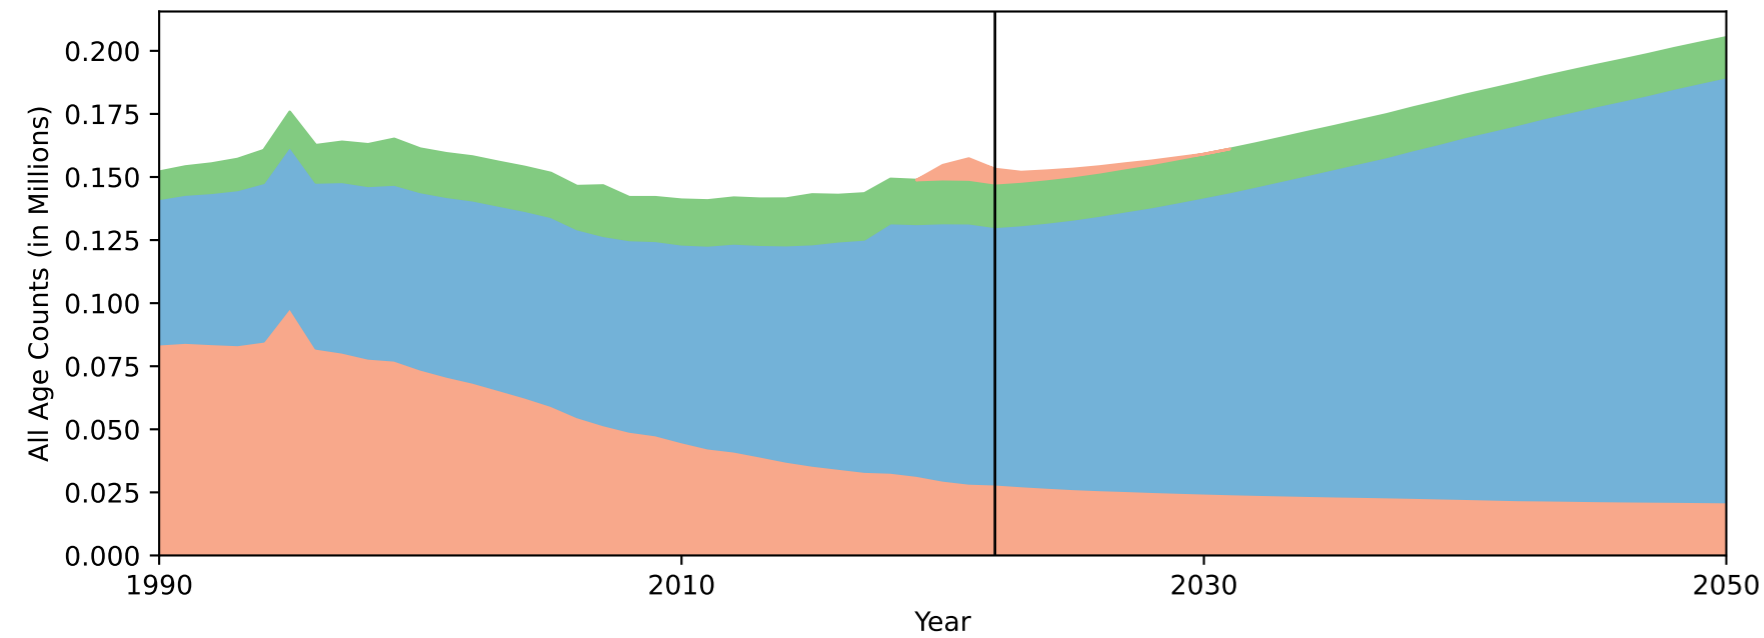

Level 2

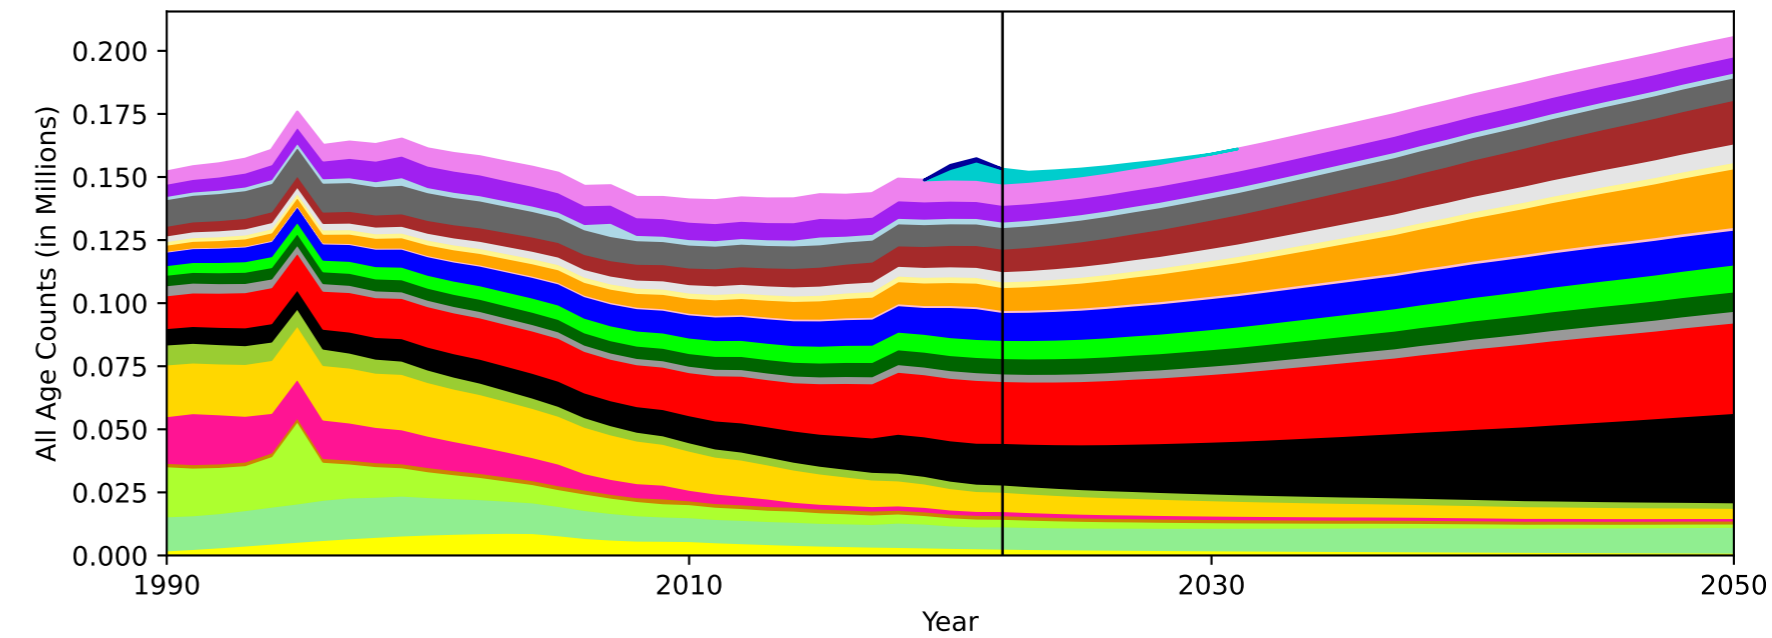

# Cameroon

Level 1

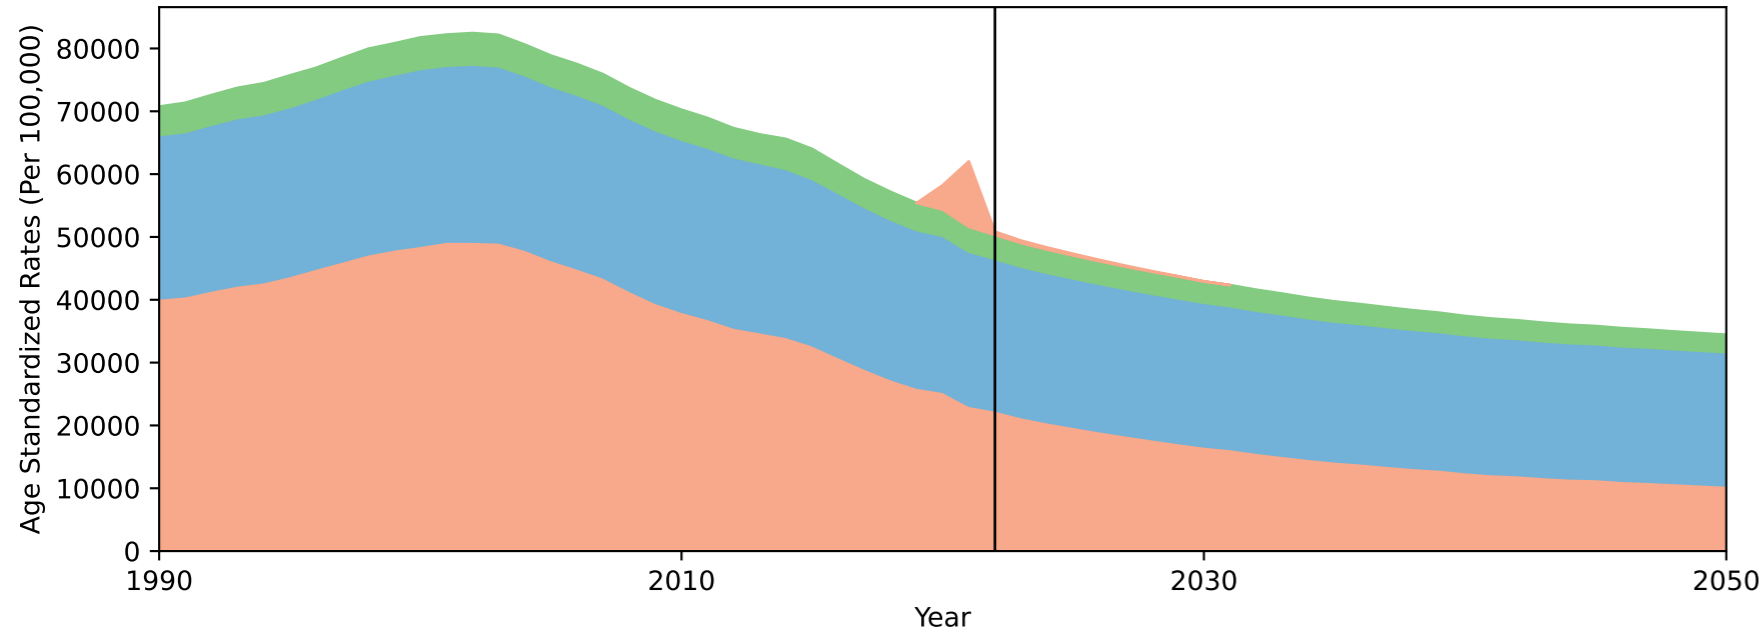

Level 2

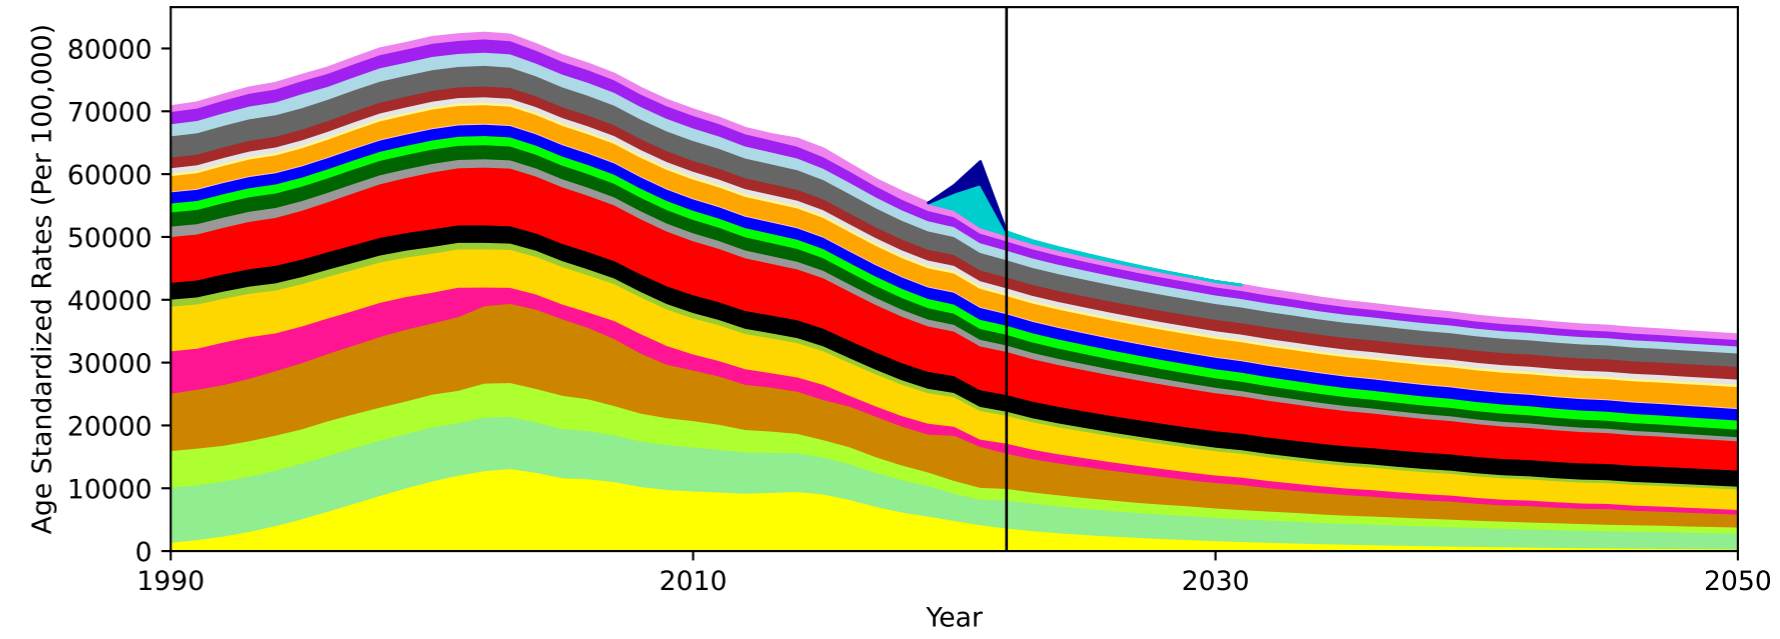

Level 1

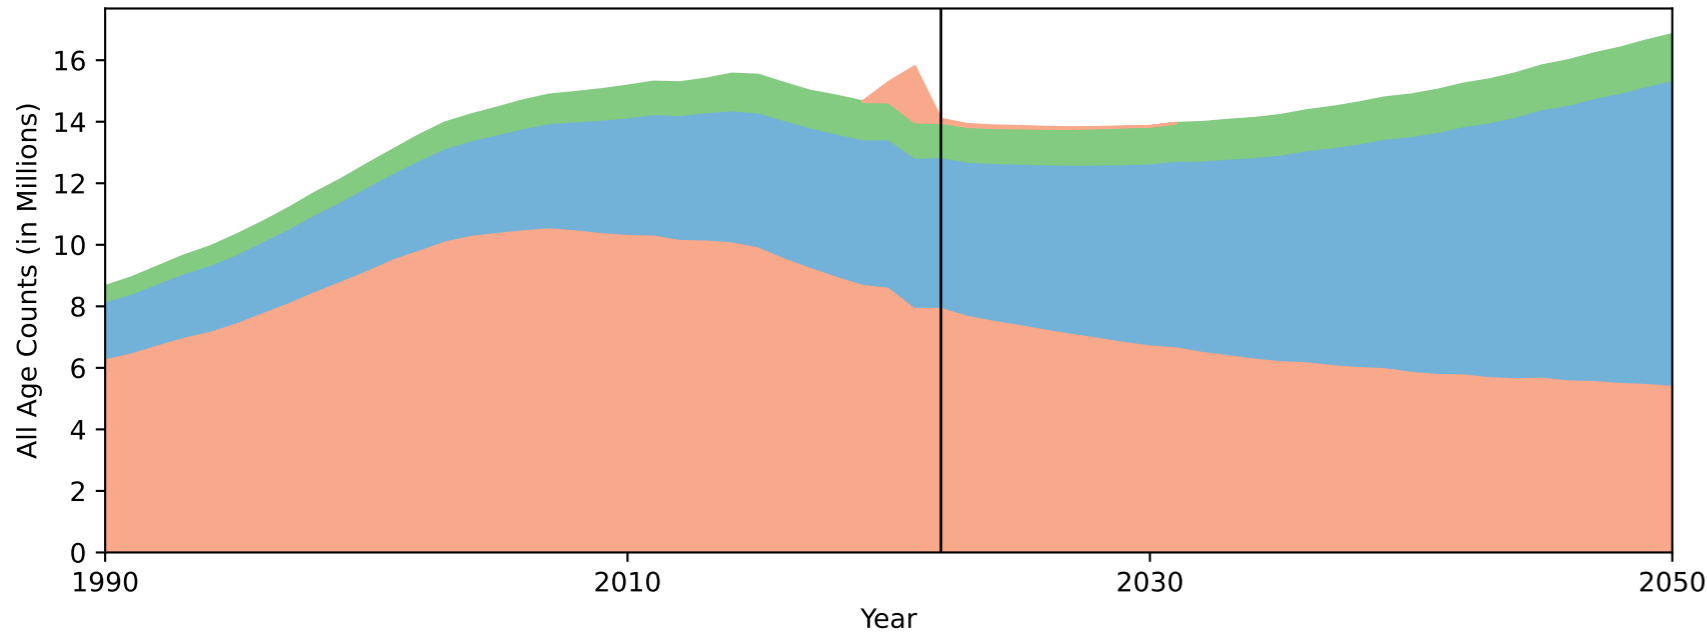

Level 2

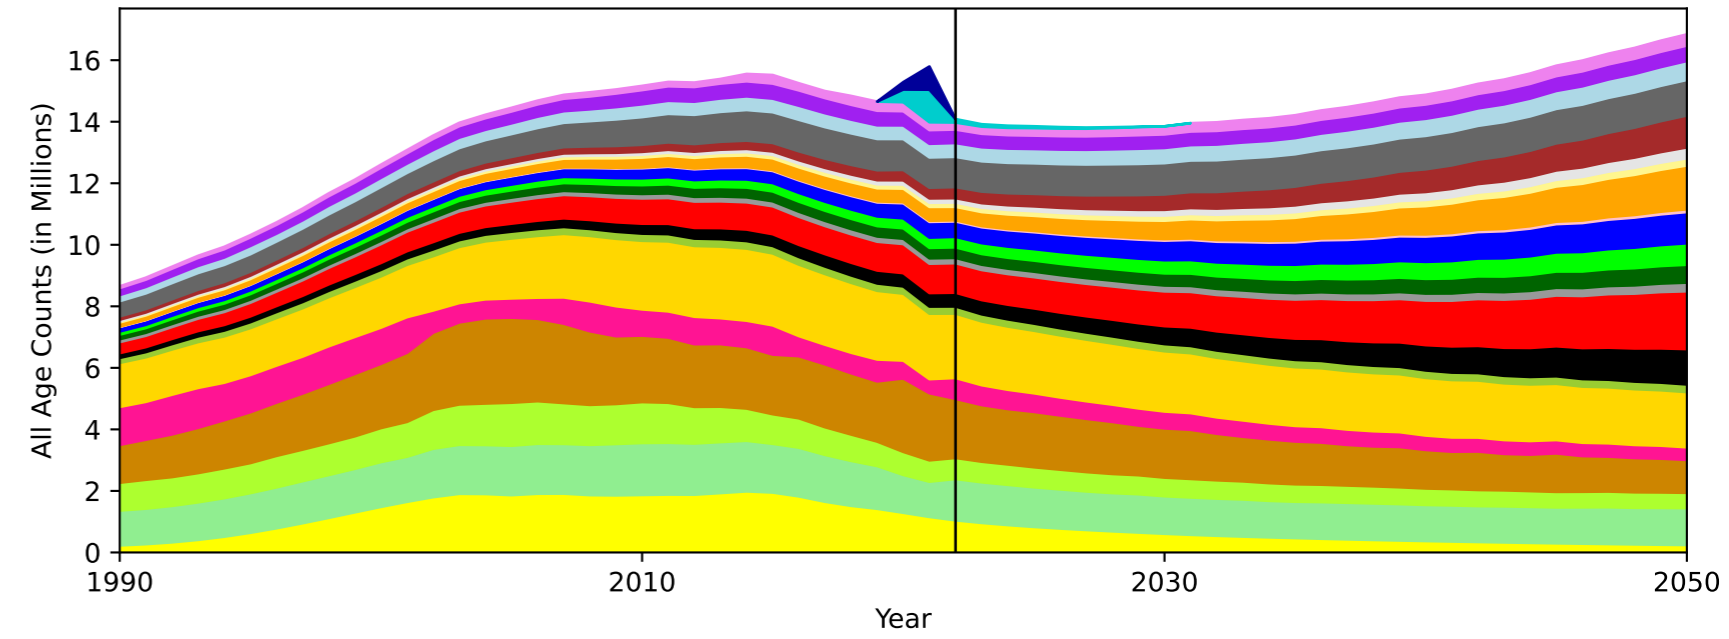

# Chad

Level 1

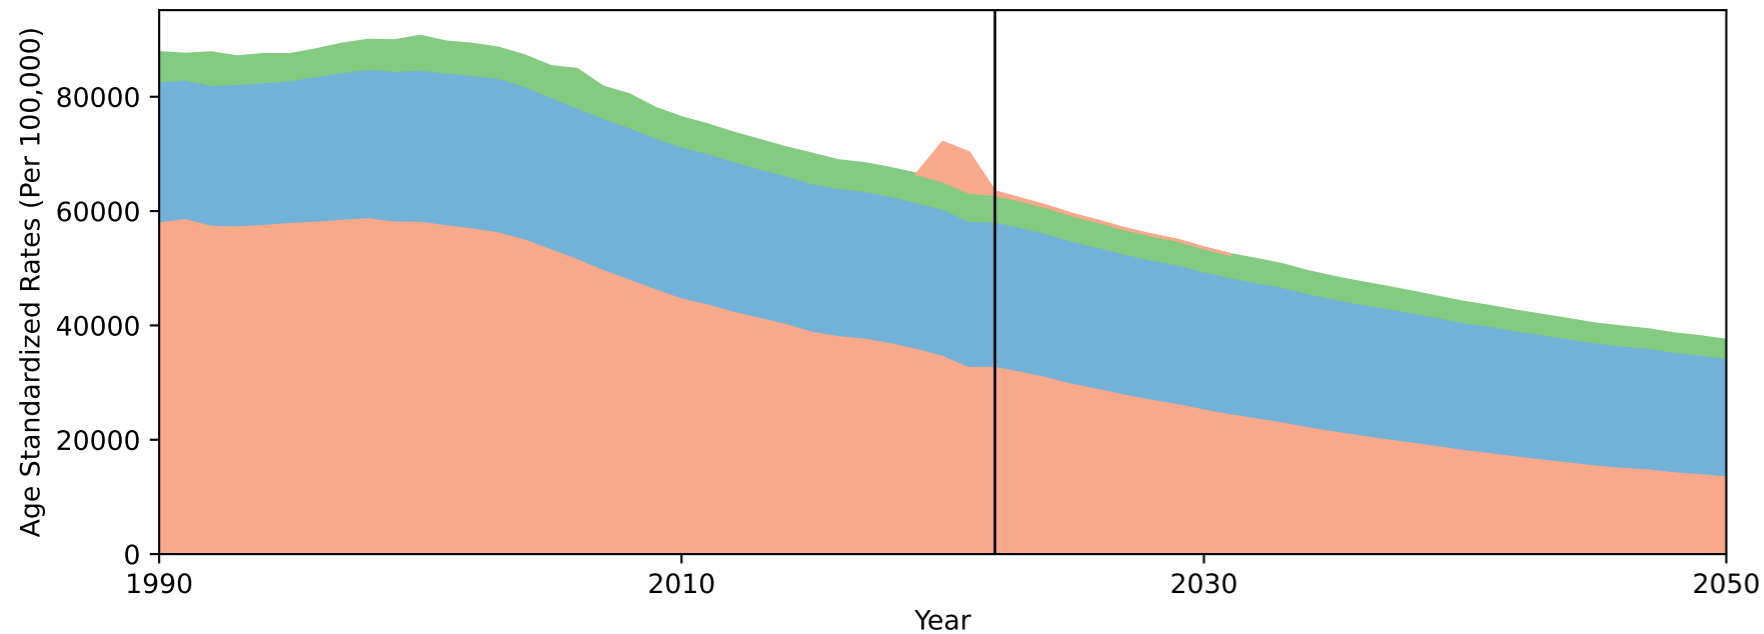

Level 2

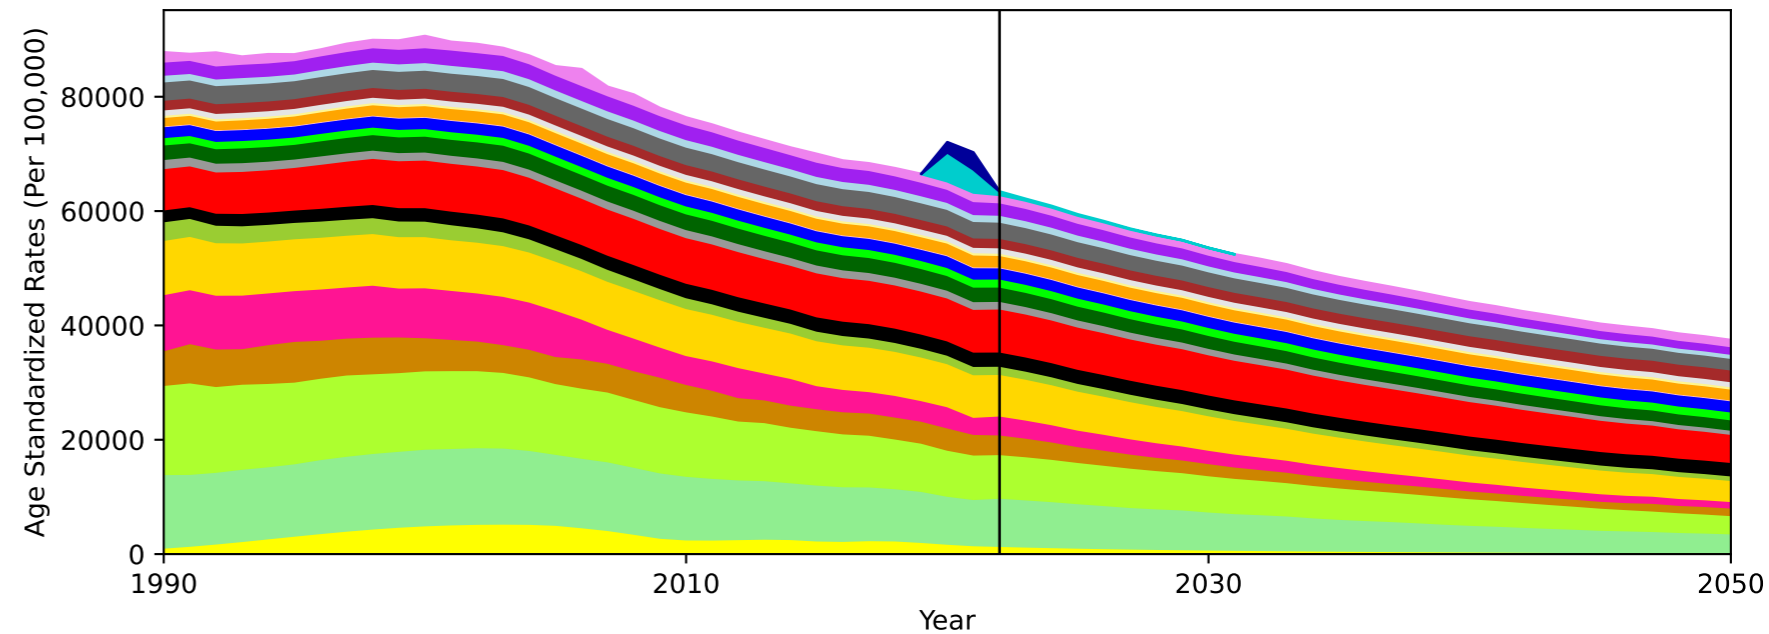

Level 1

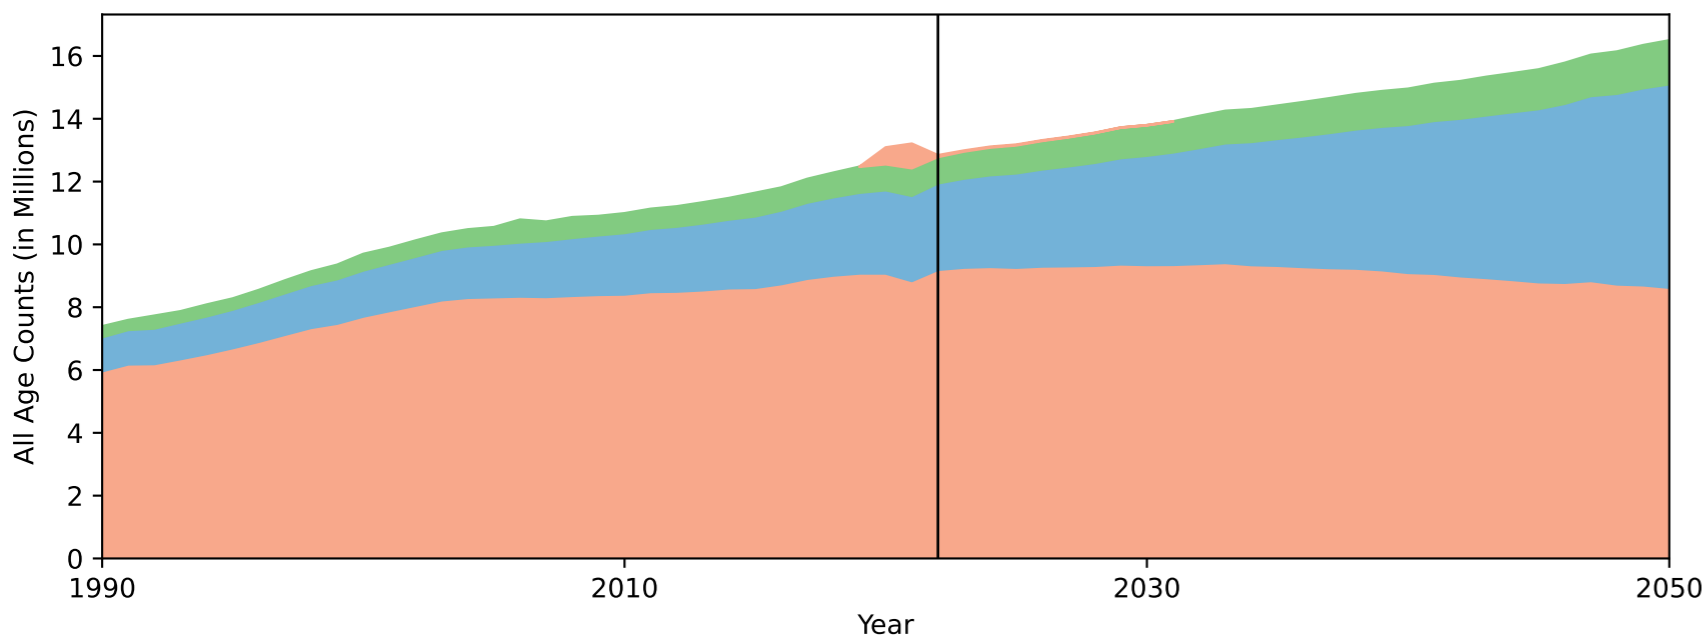

Level 2

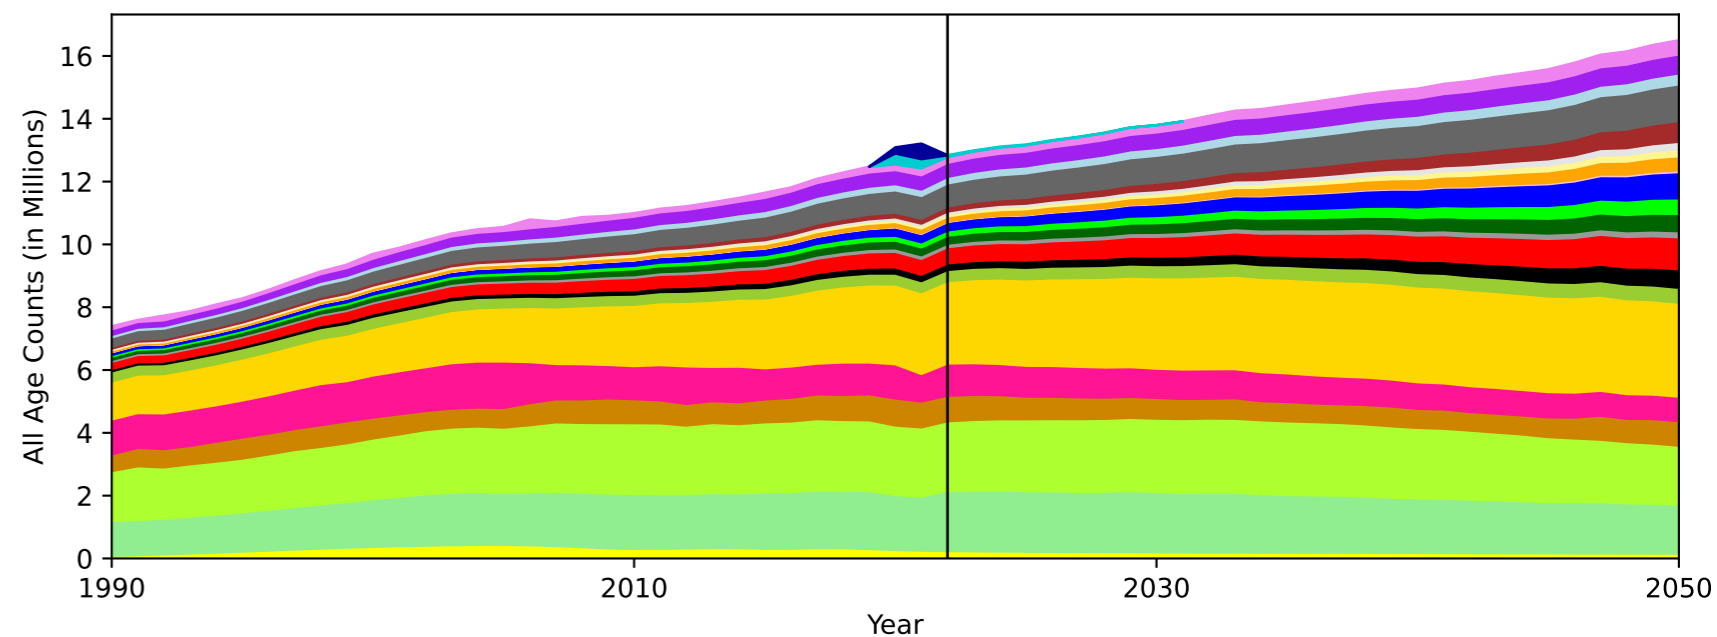

Level 1

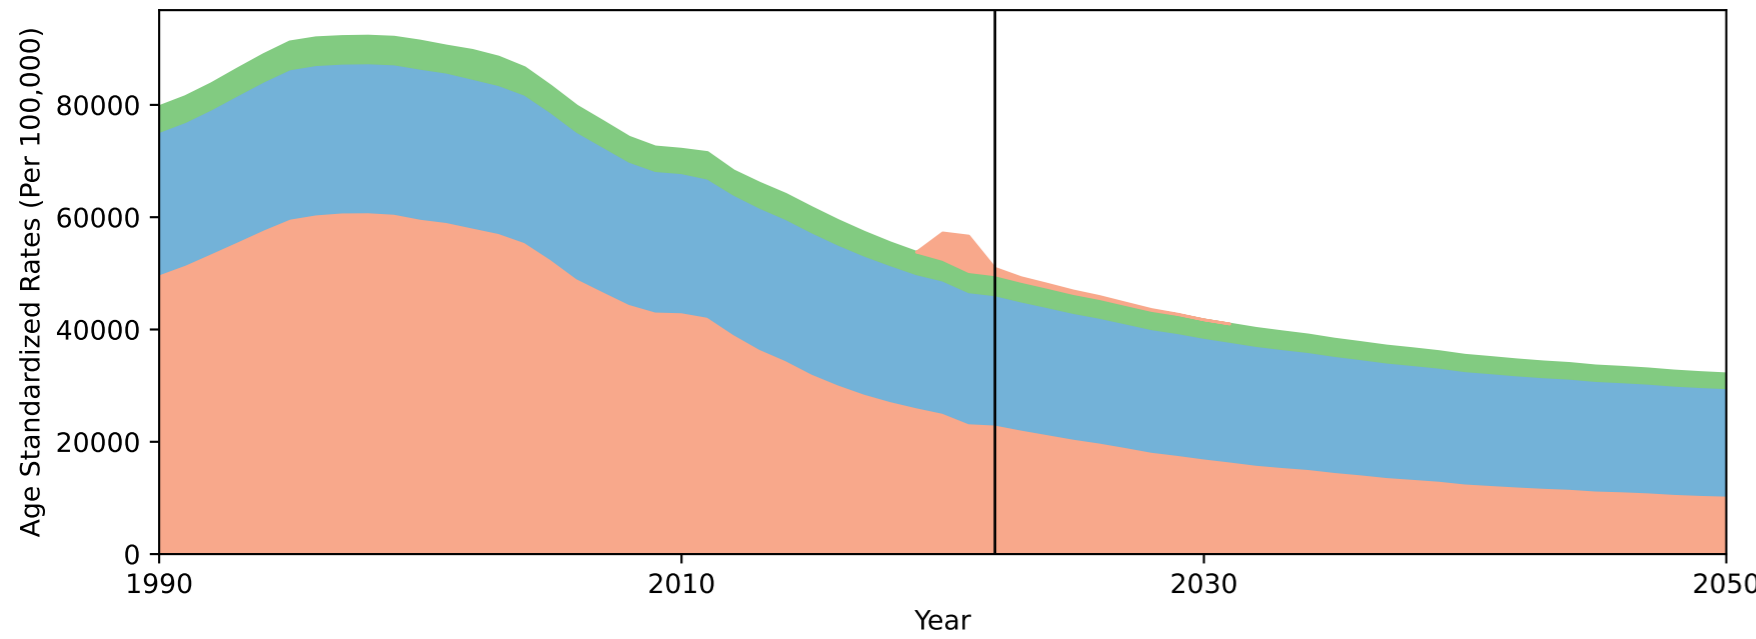

Level 2

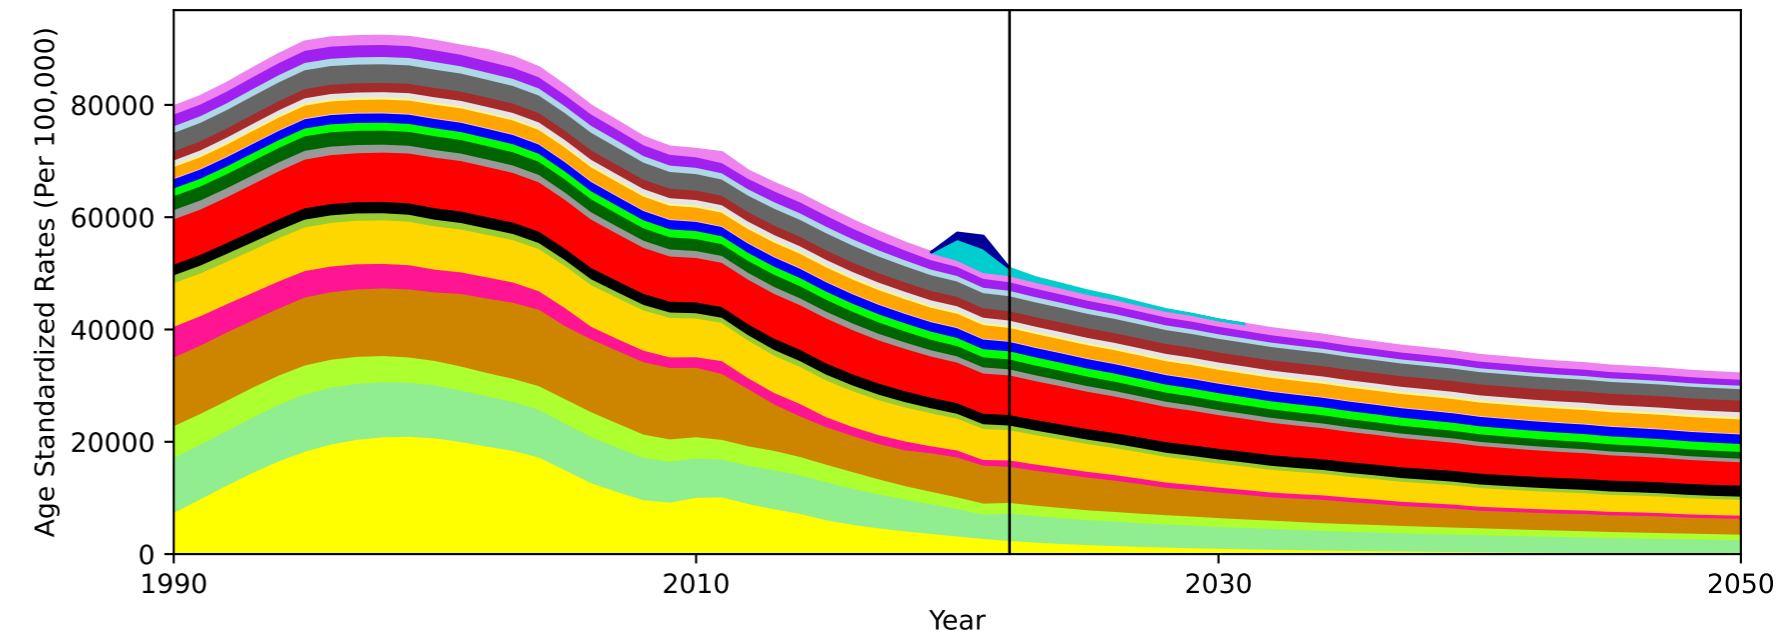

Level 1

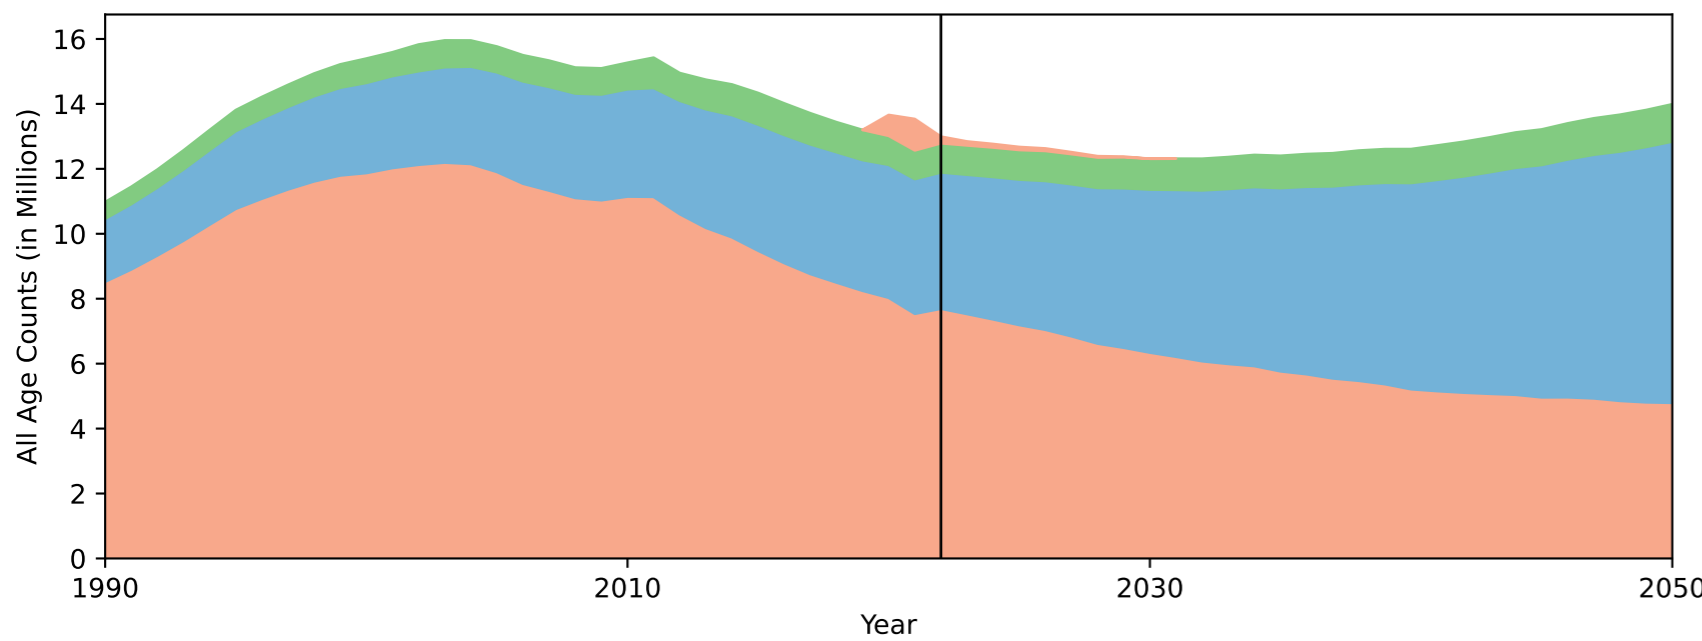

Level 2

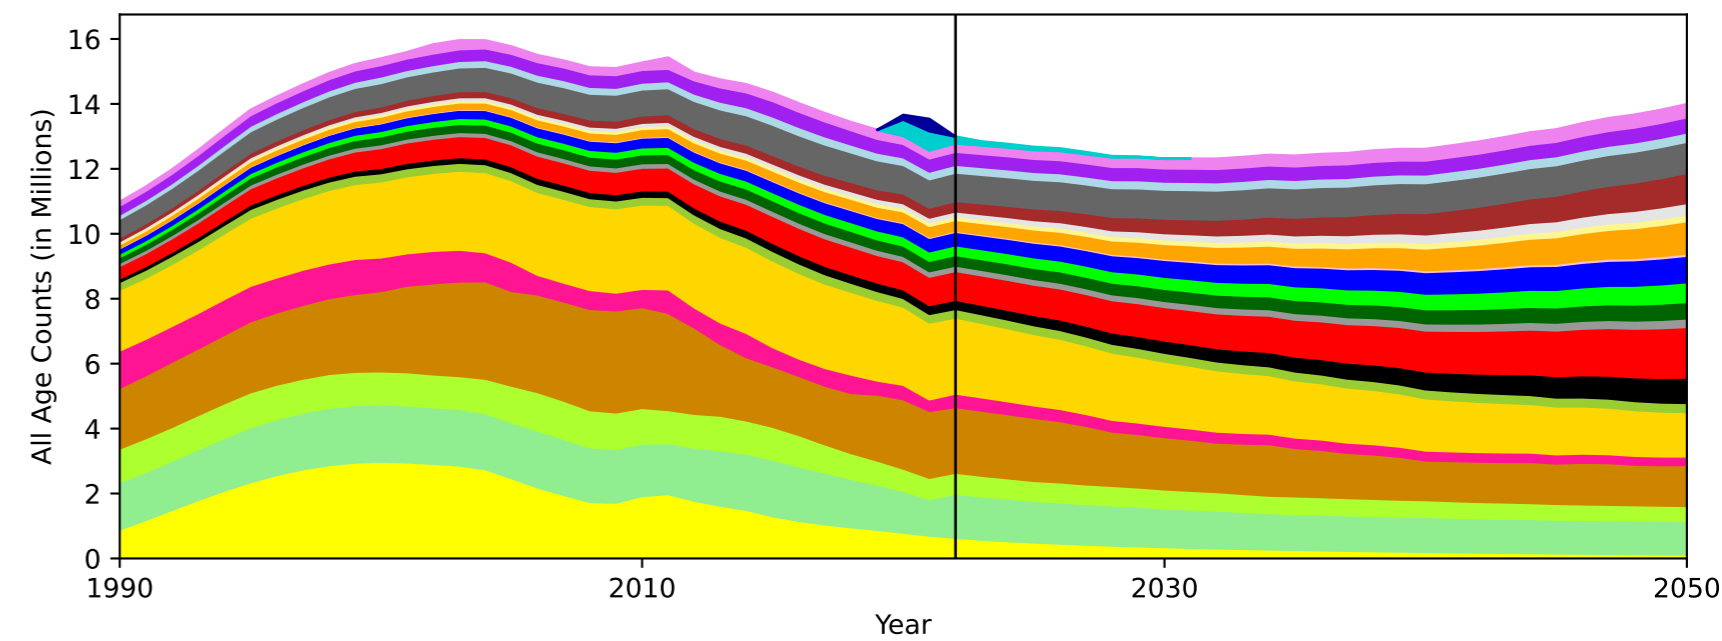

# The Gambia

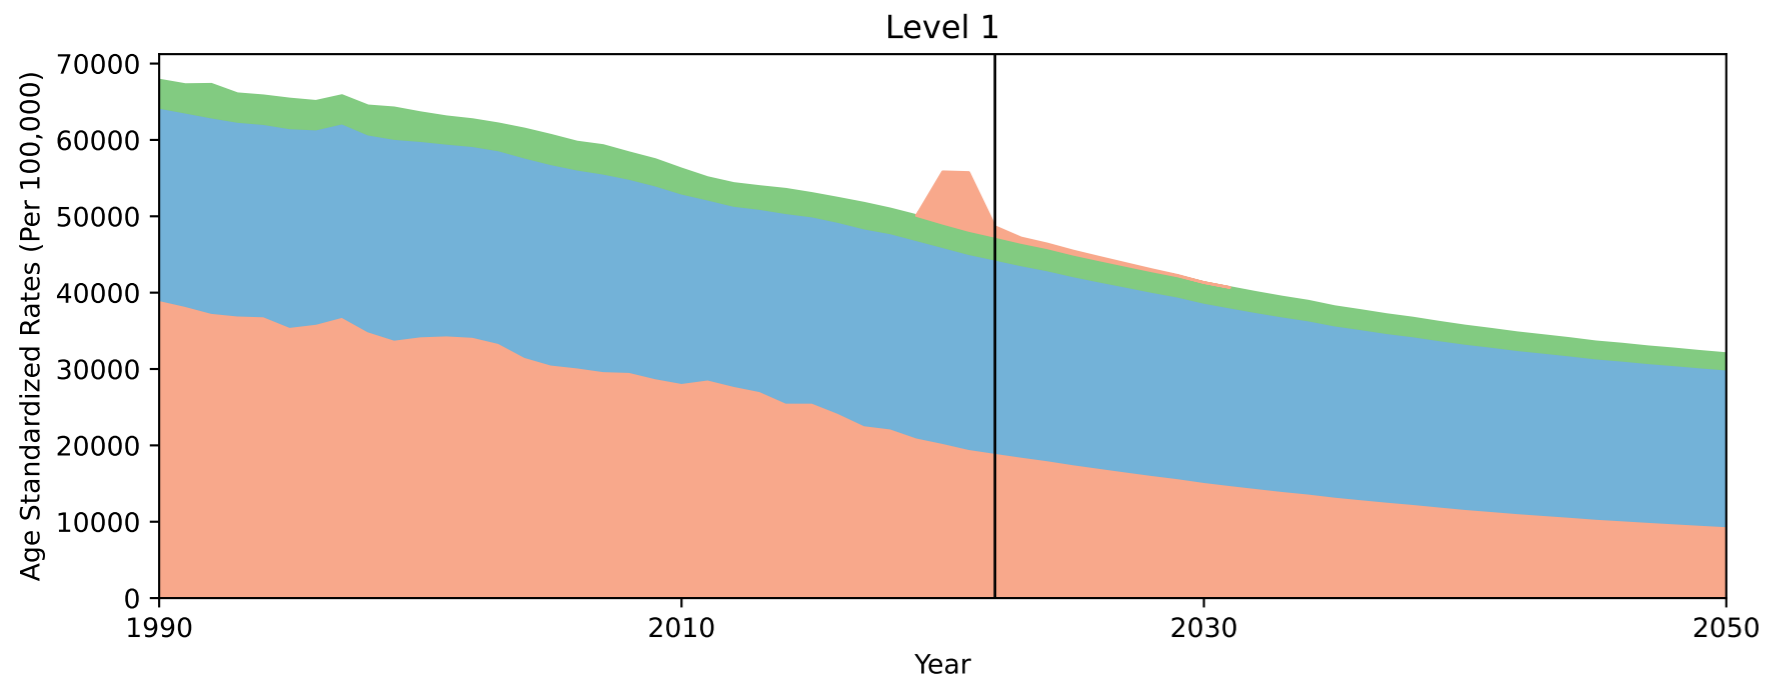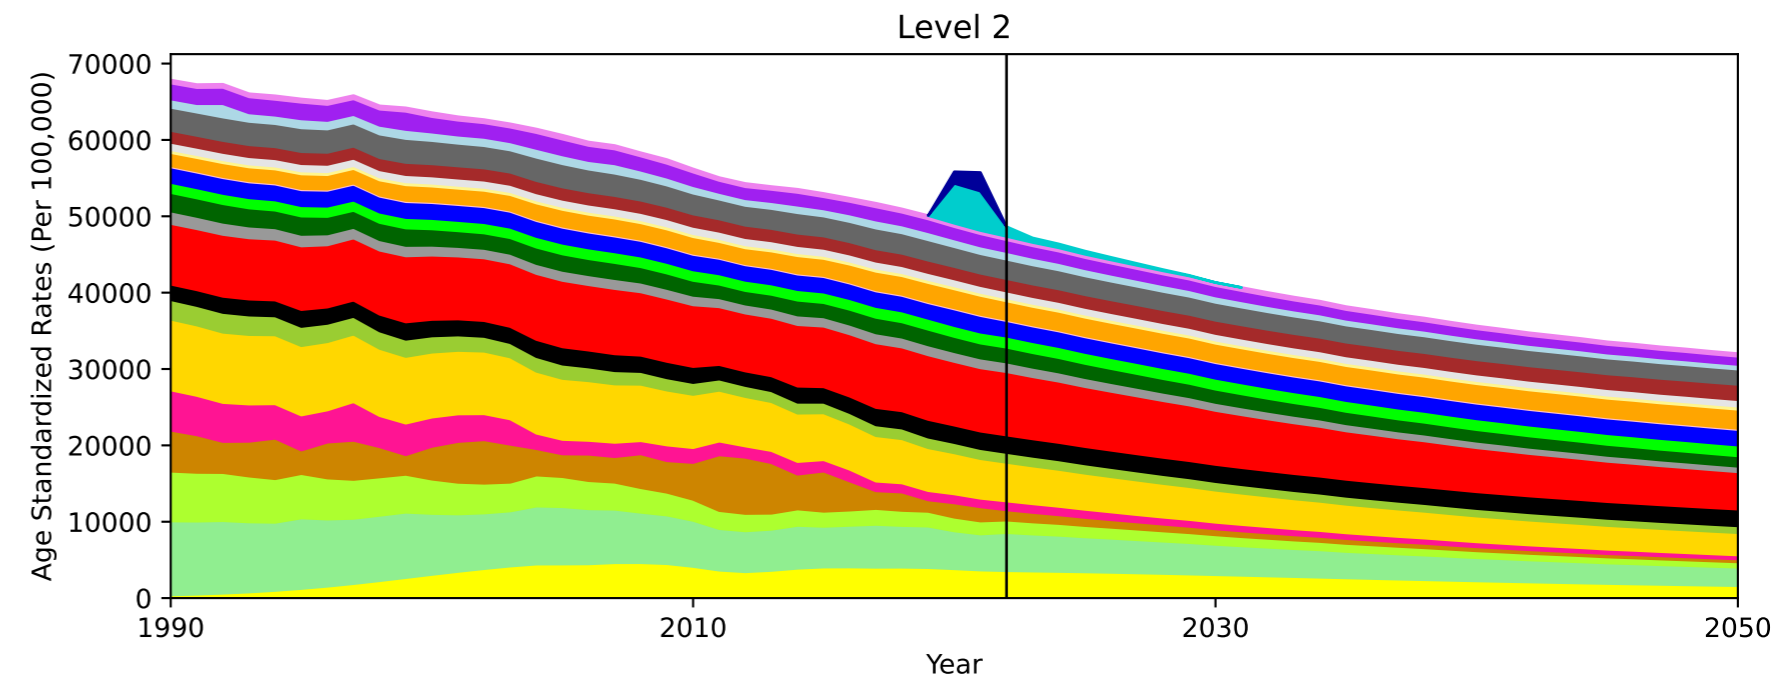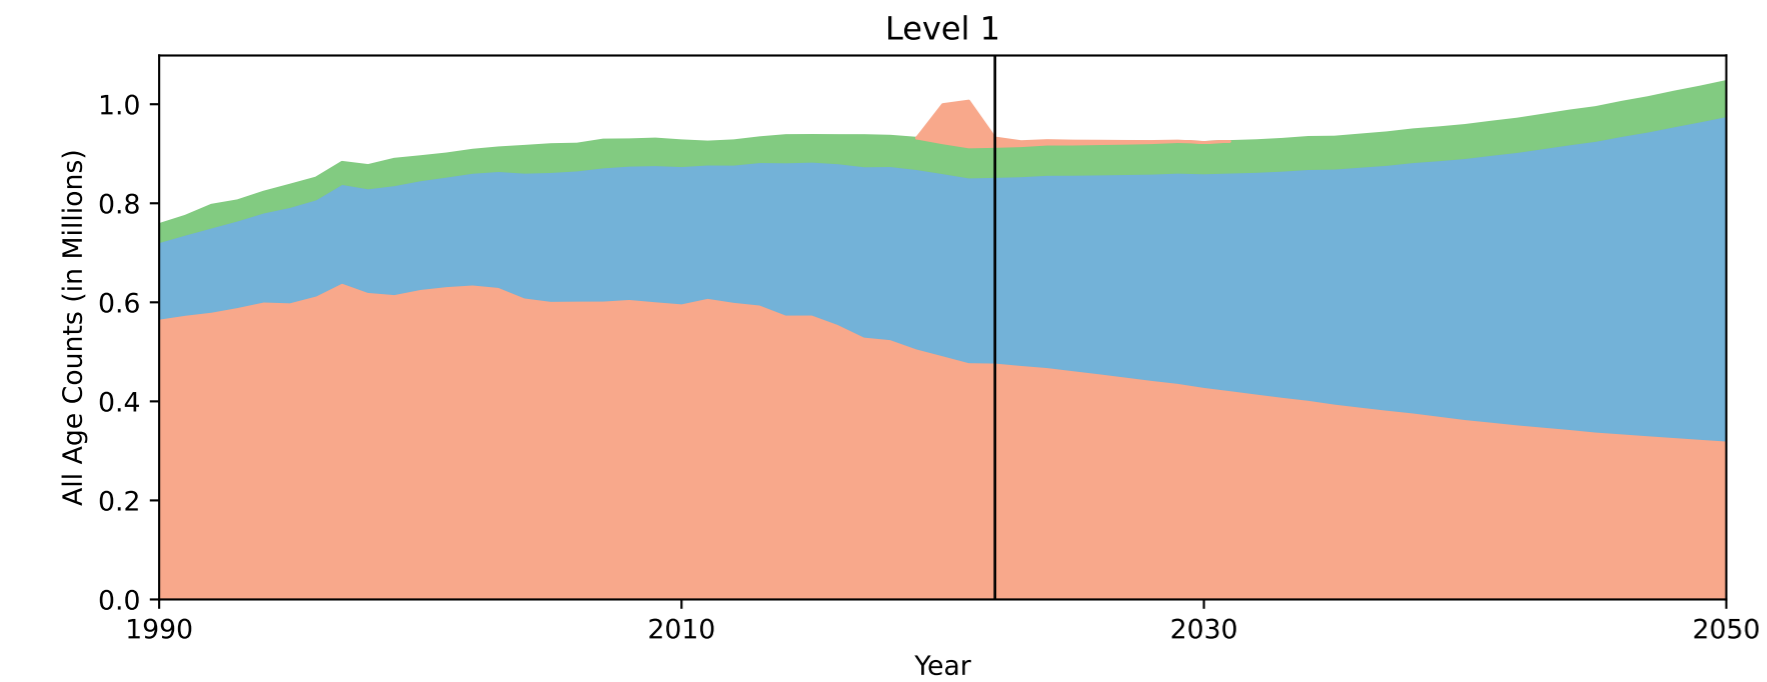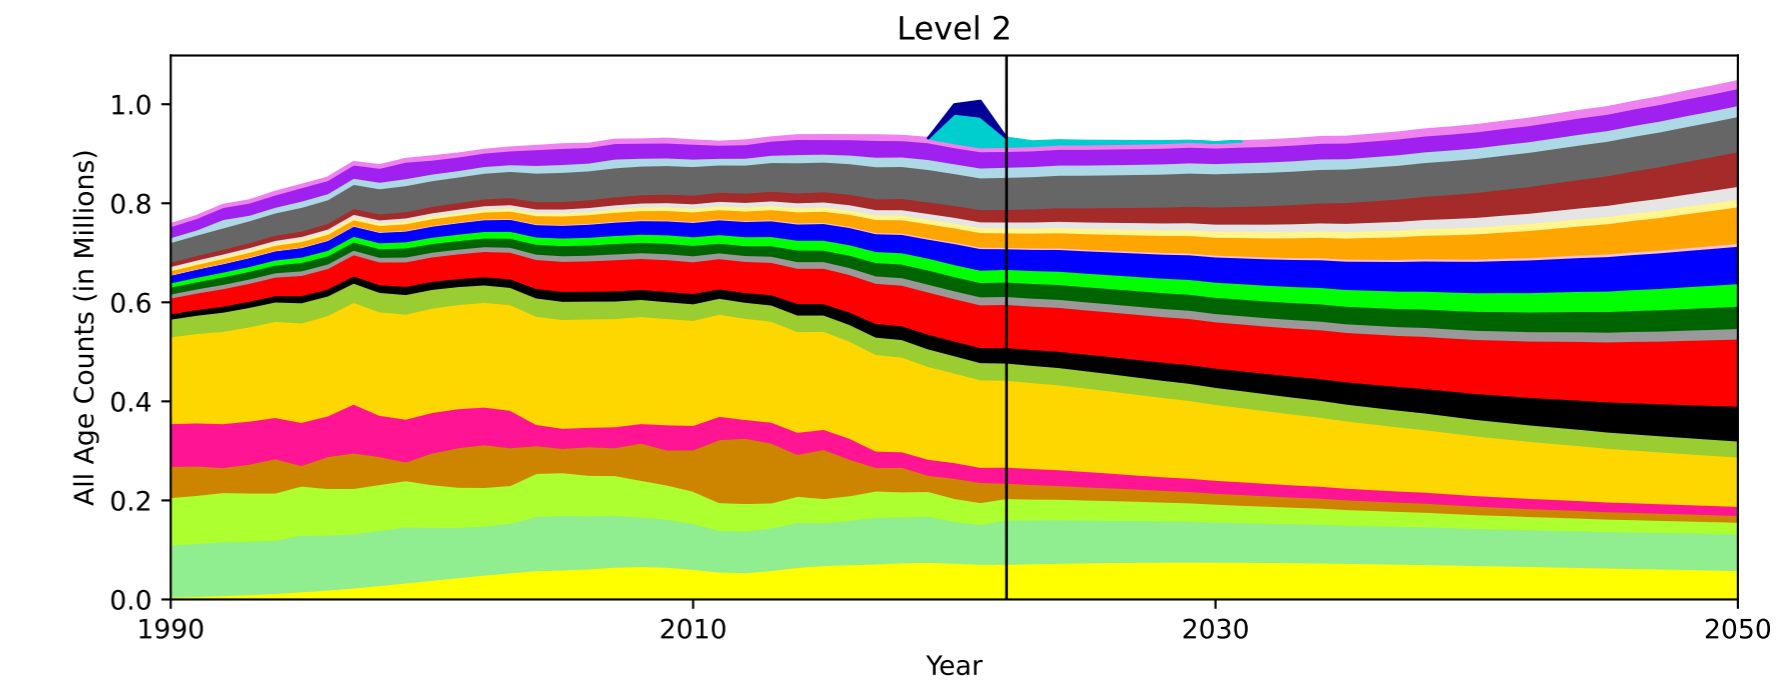

# Ghana

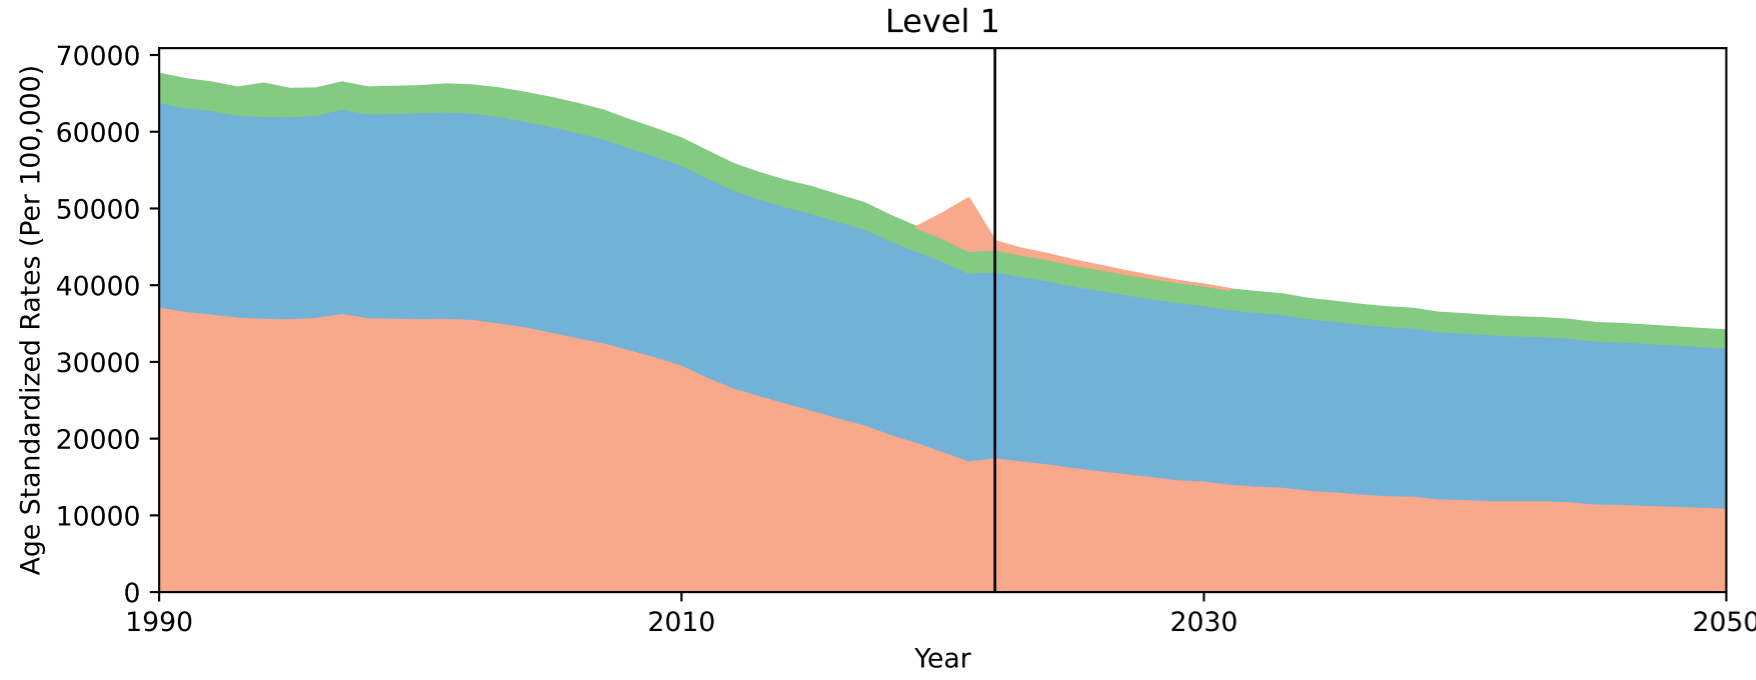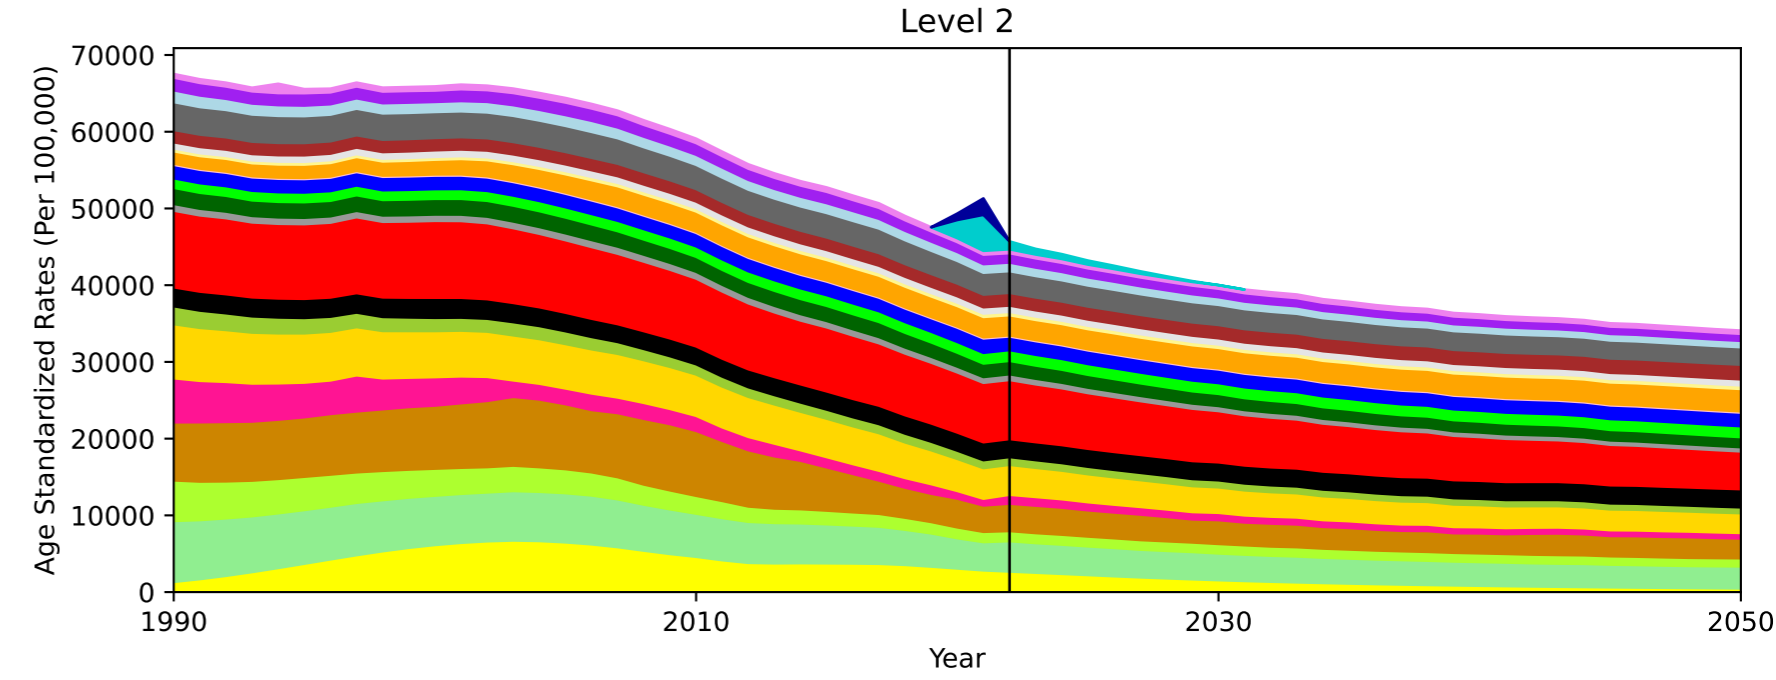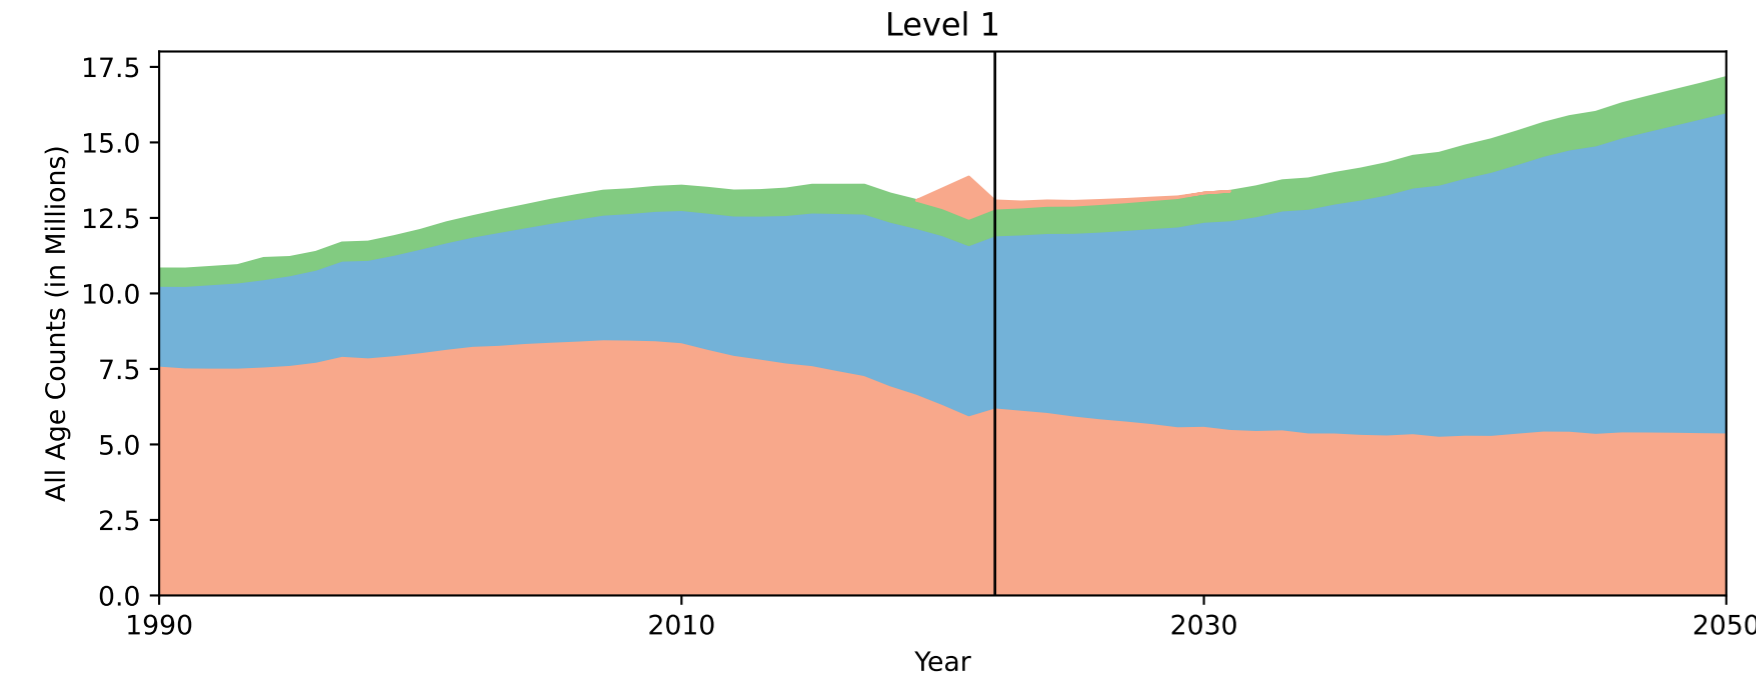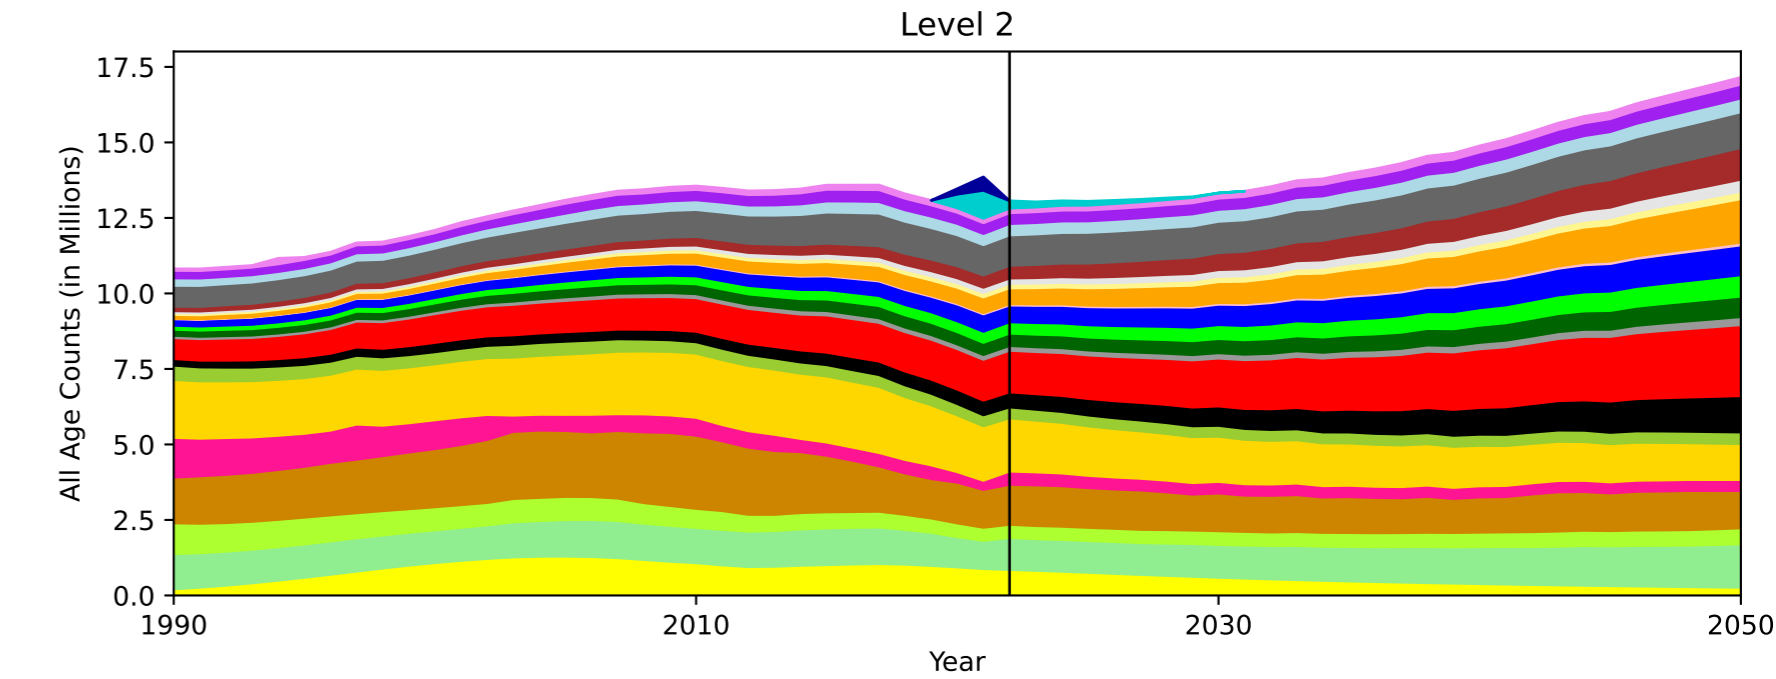

Level 1

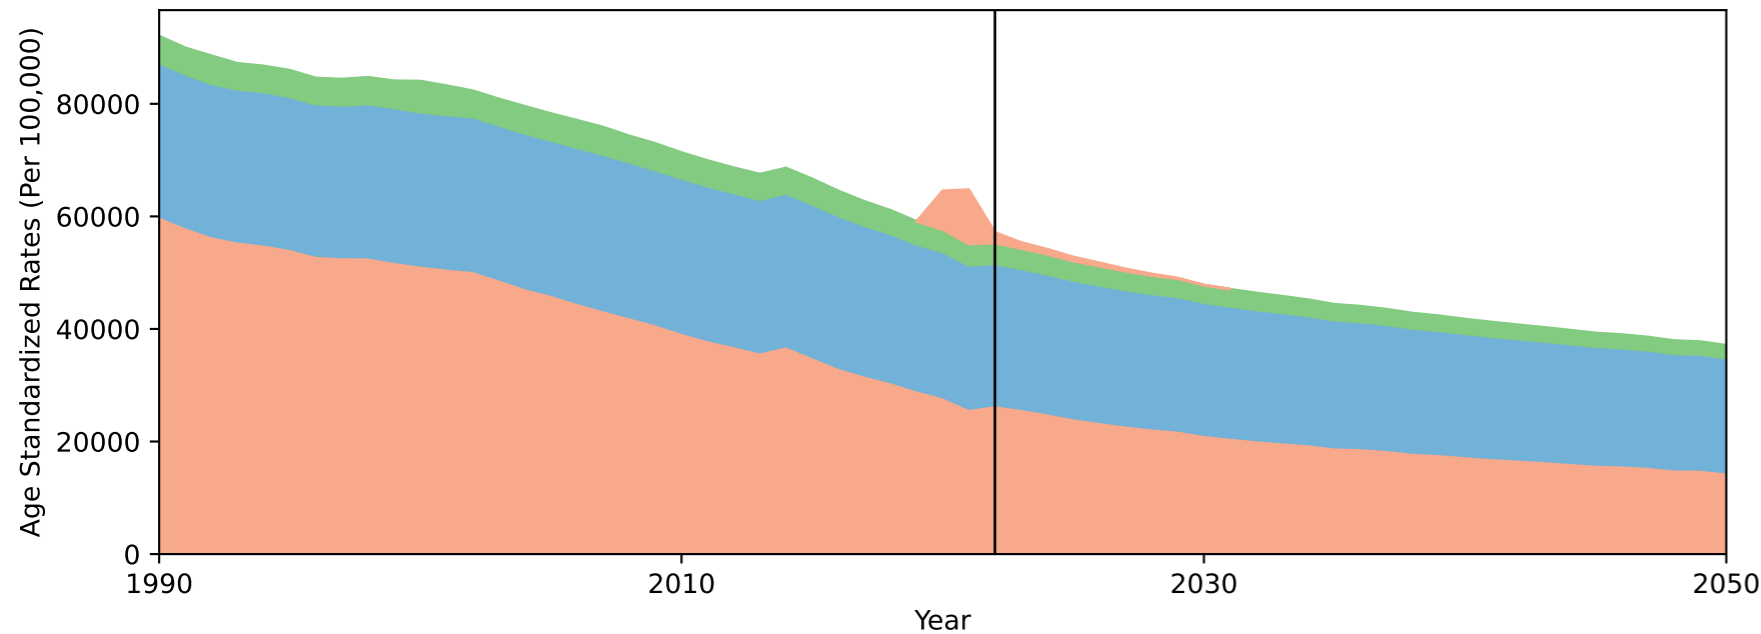

Level 2

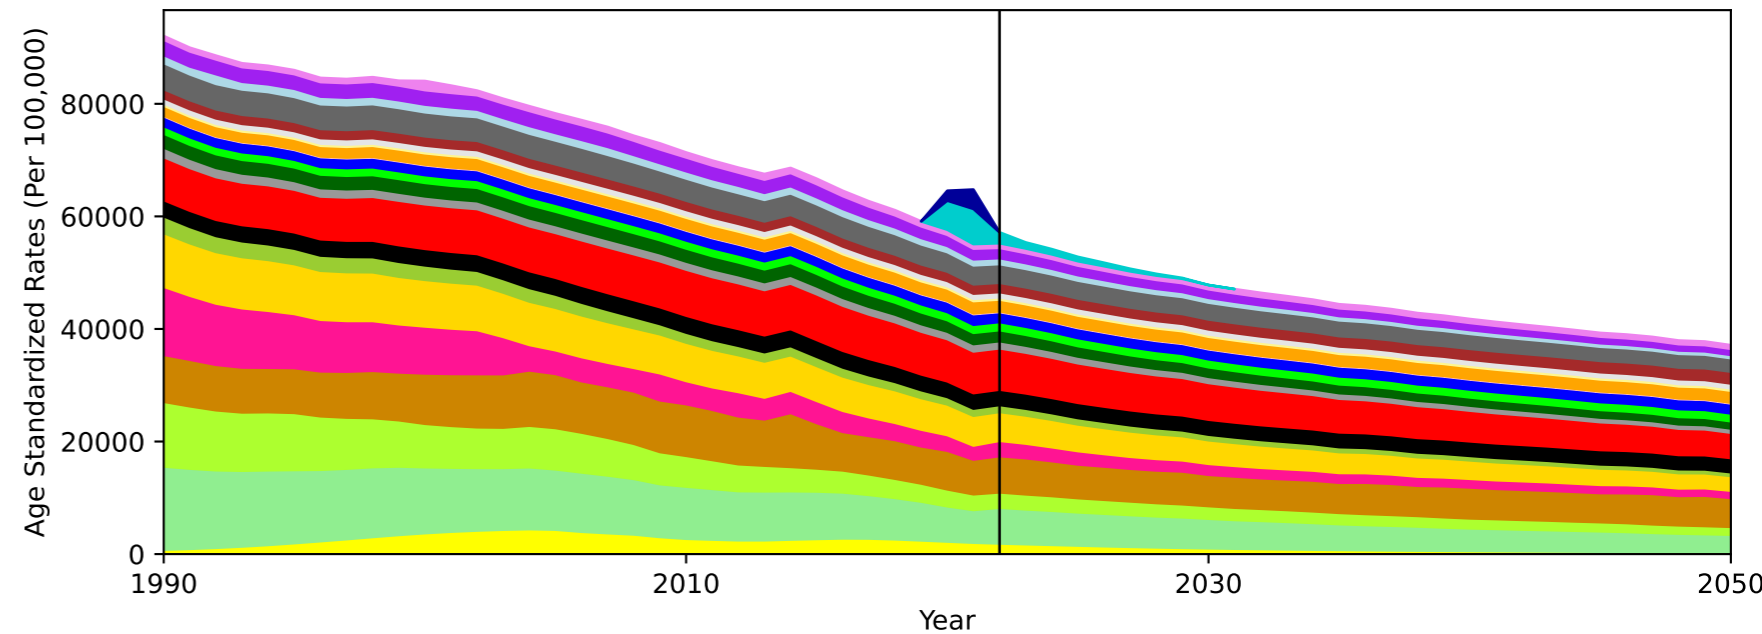

Level 1

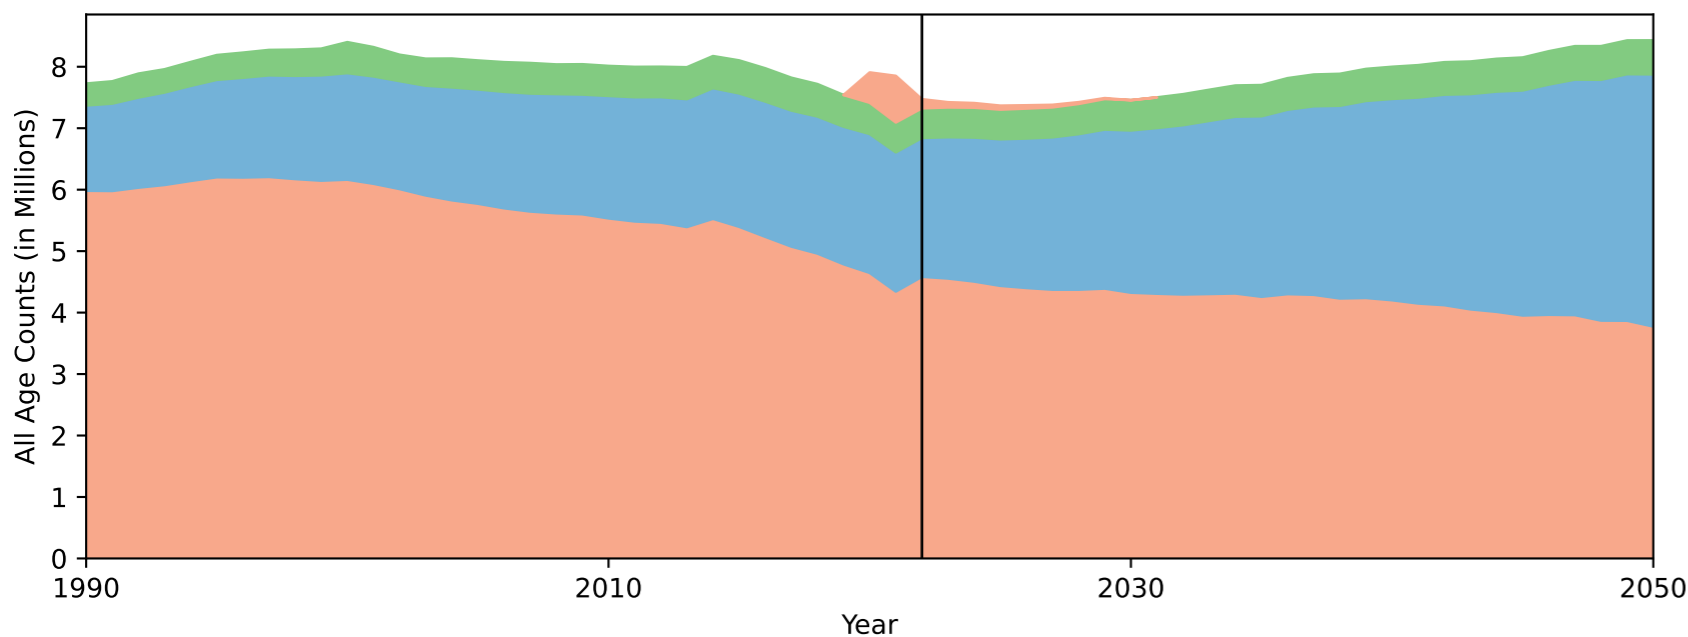

Level 2

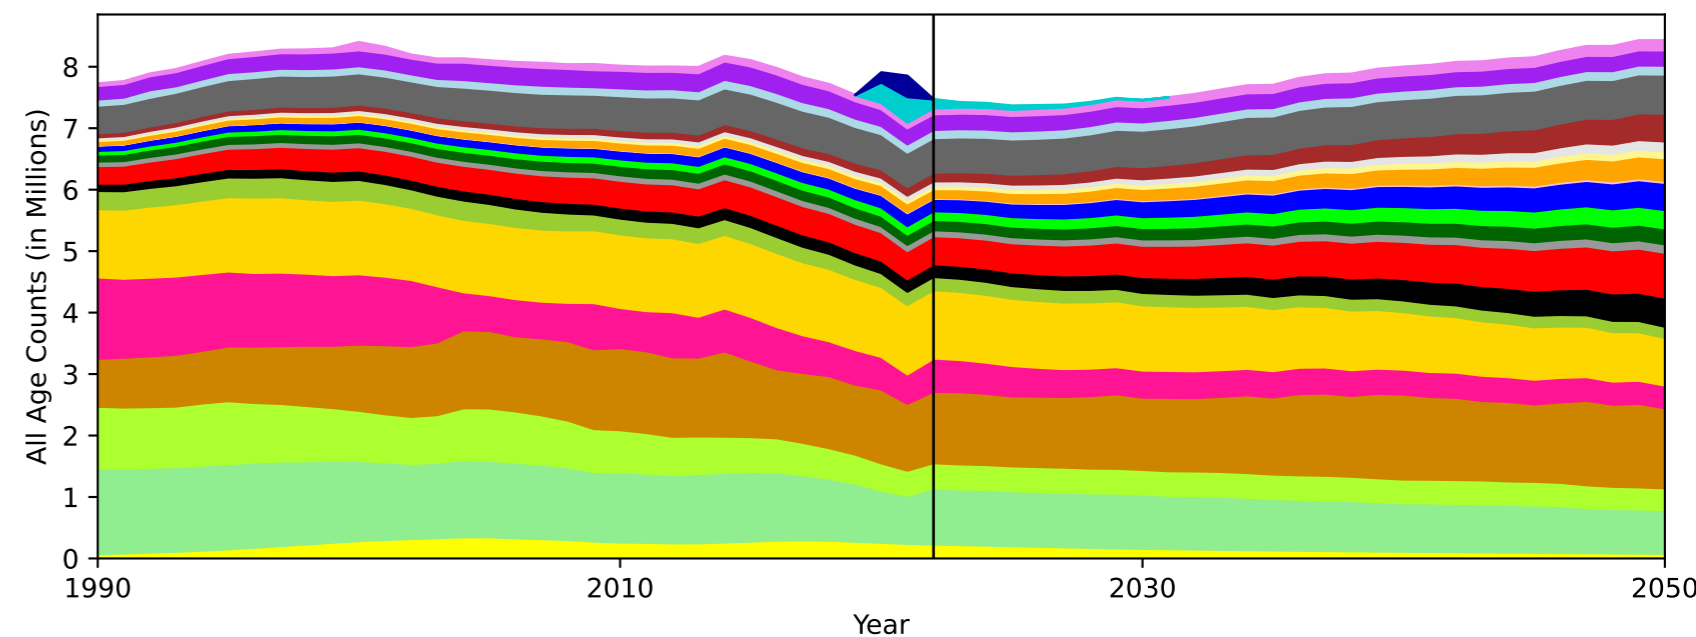

# Guinea-Bissau

Supplemental Results Figure S4. Age-standardised DALY rates and all age DALY counts and by Level 1 and Level 2 causes, 1990–2050

439

Level 1

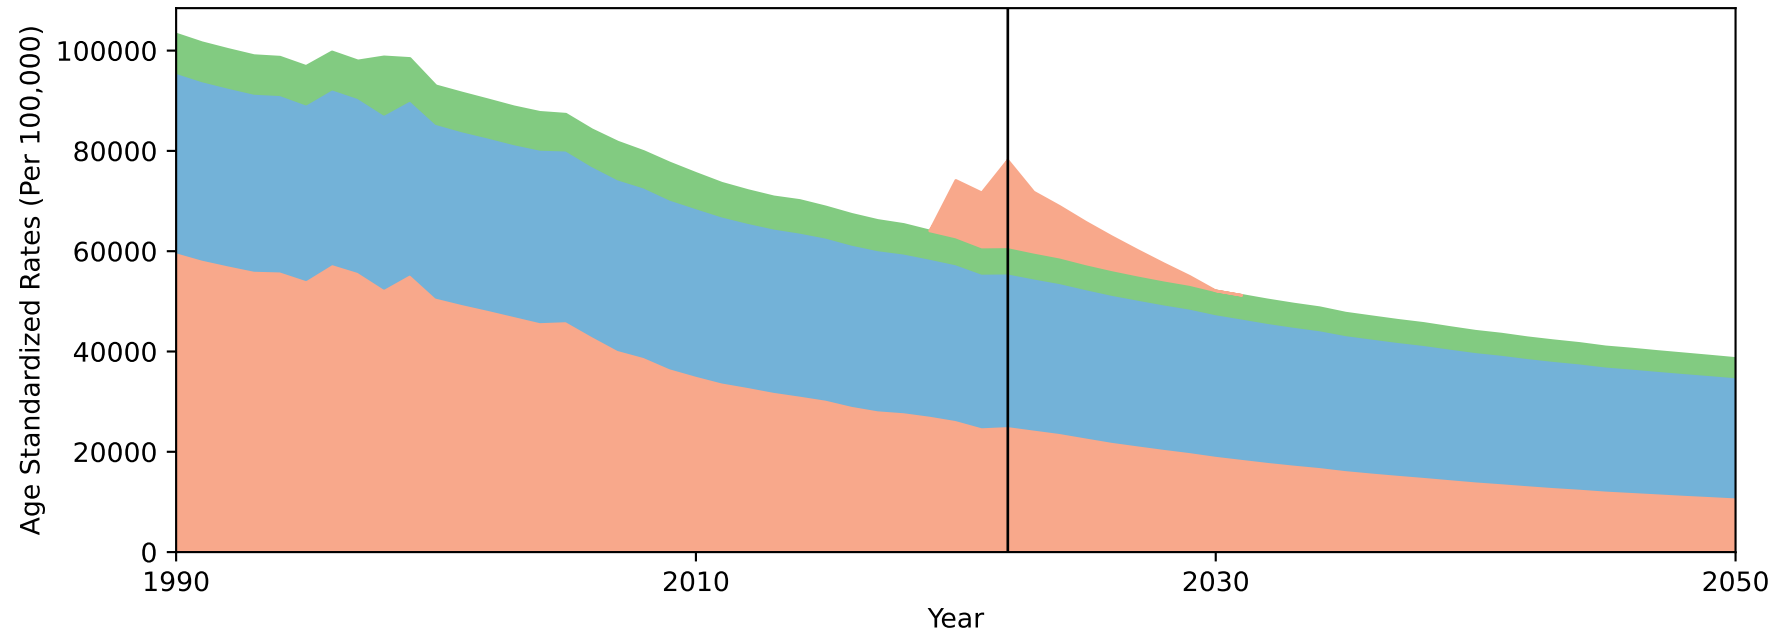

Level 2

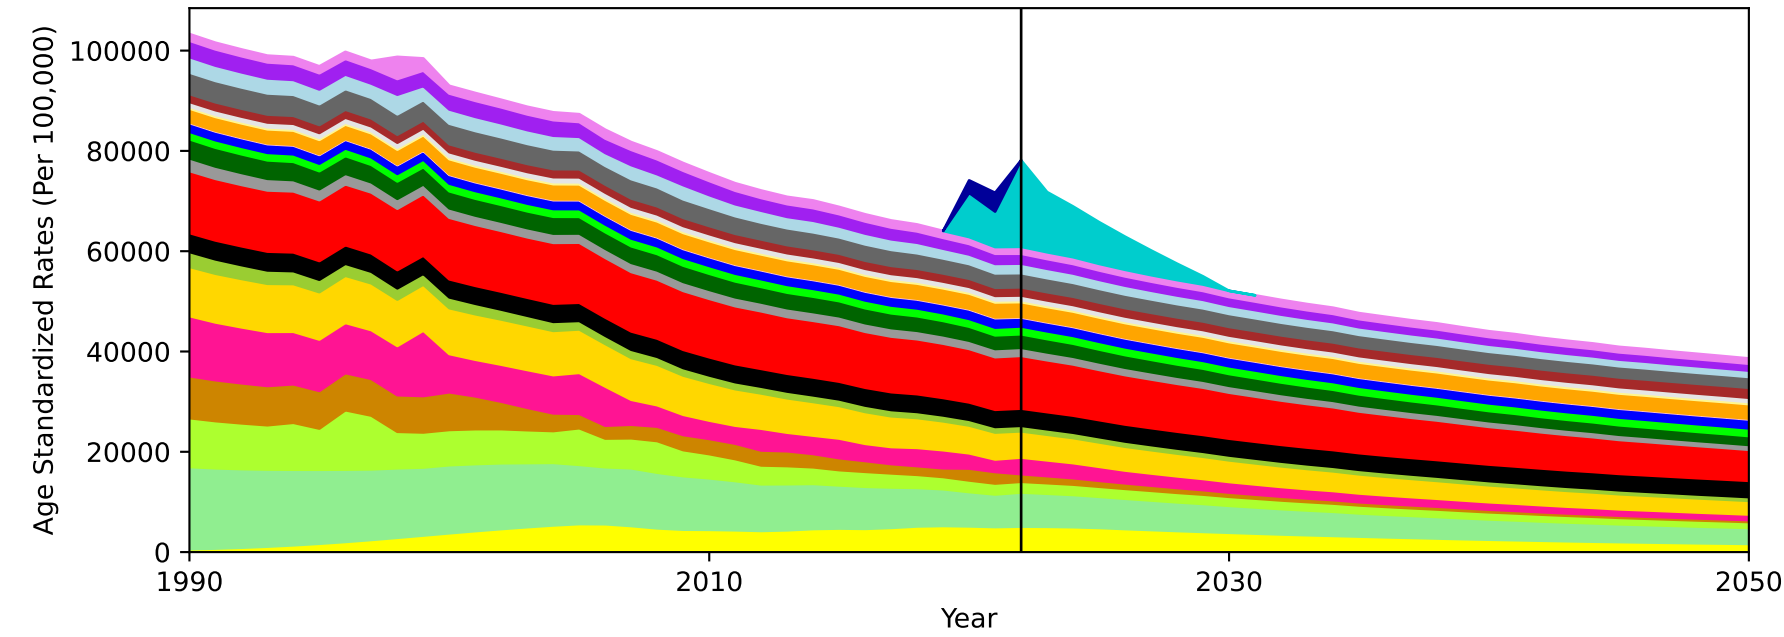

Level 1

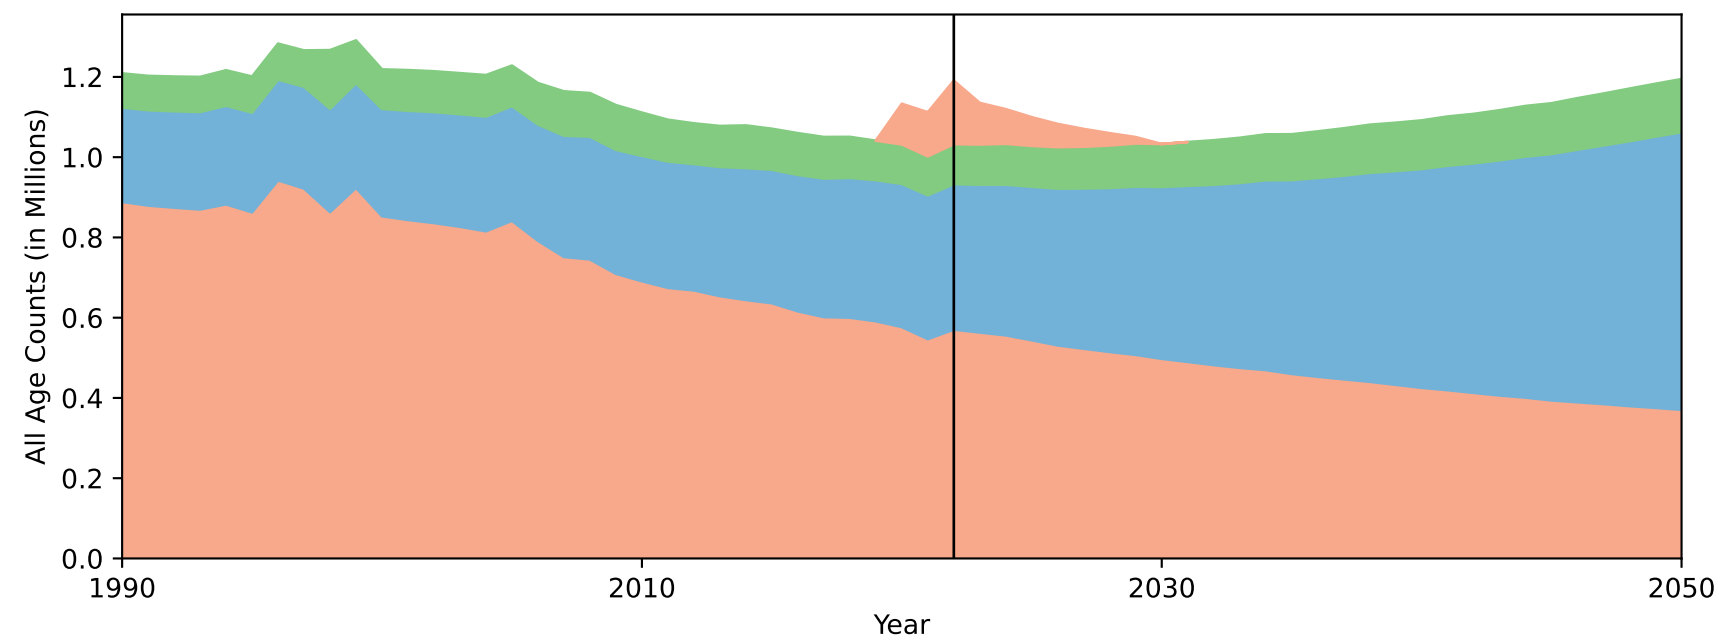

Level 2

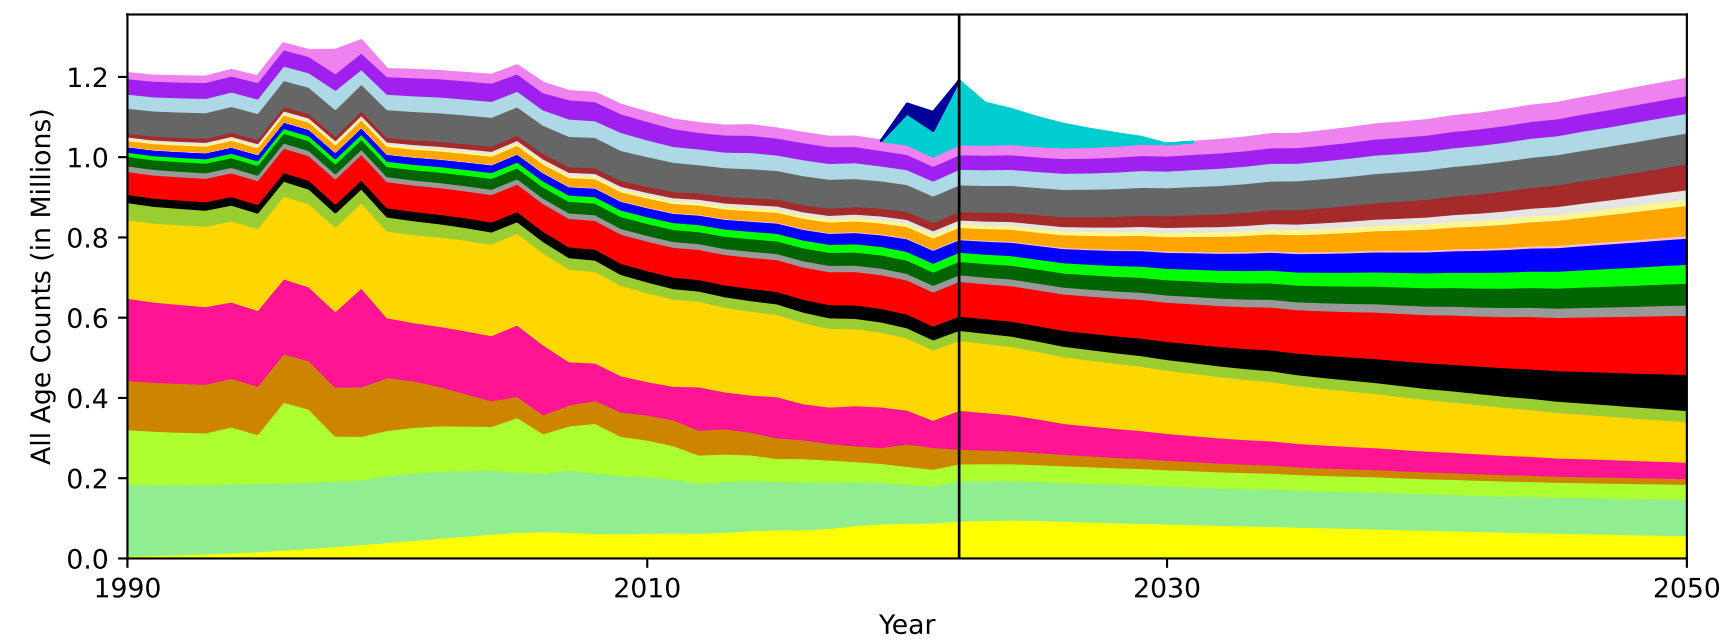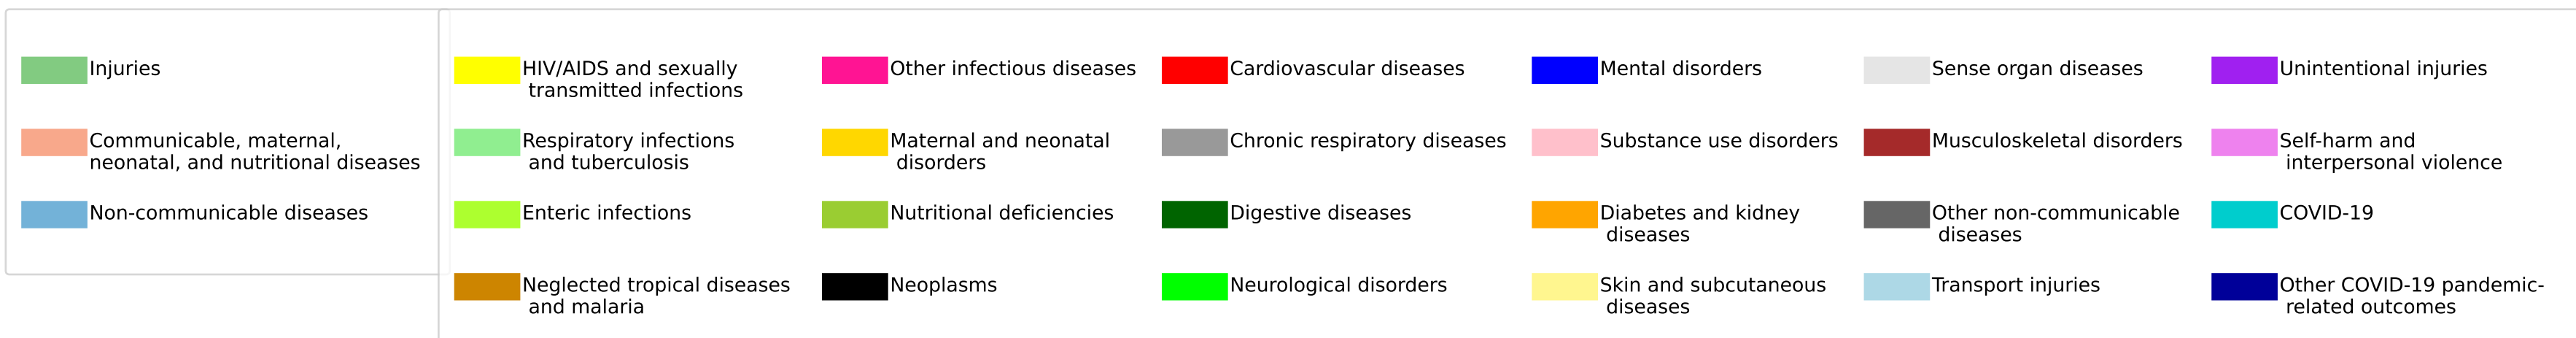



# Liberia

Level 1

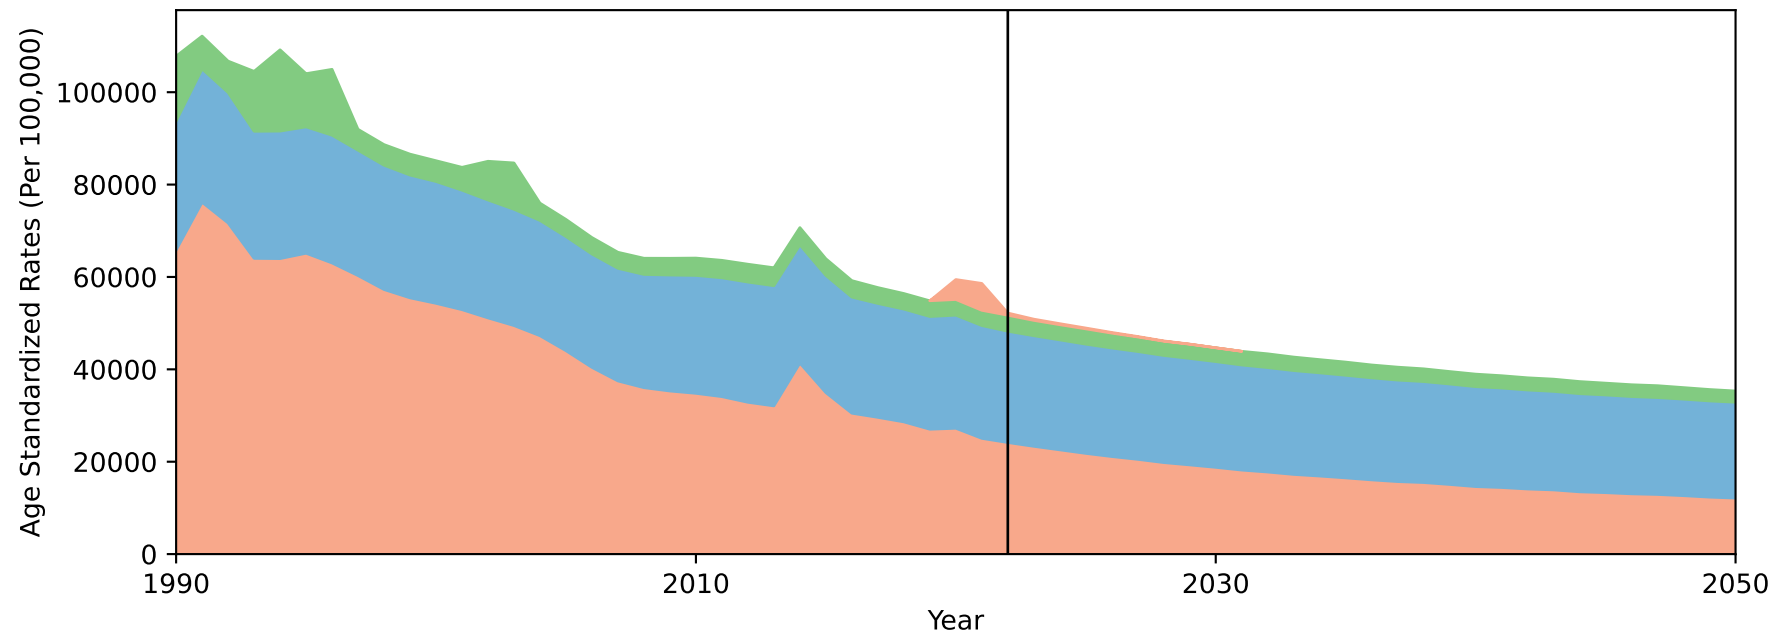

Level 2

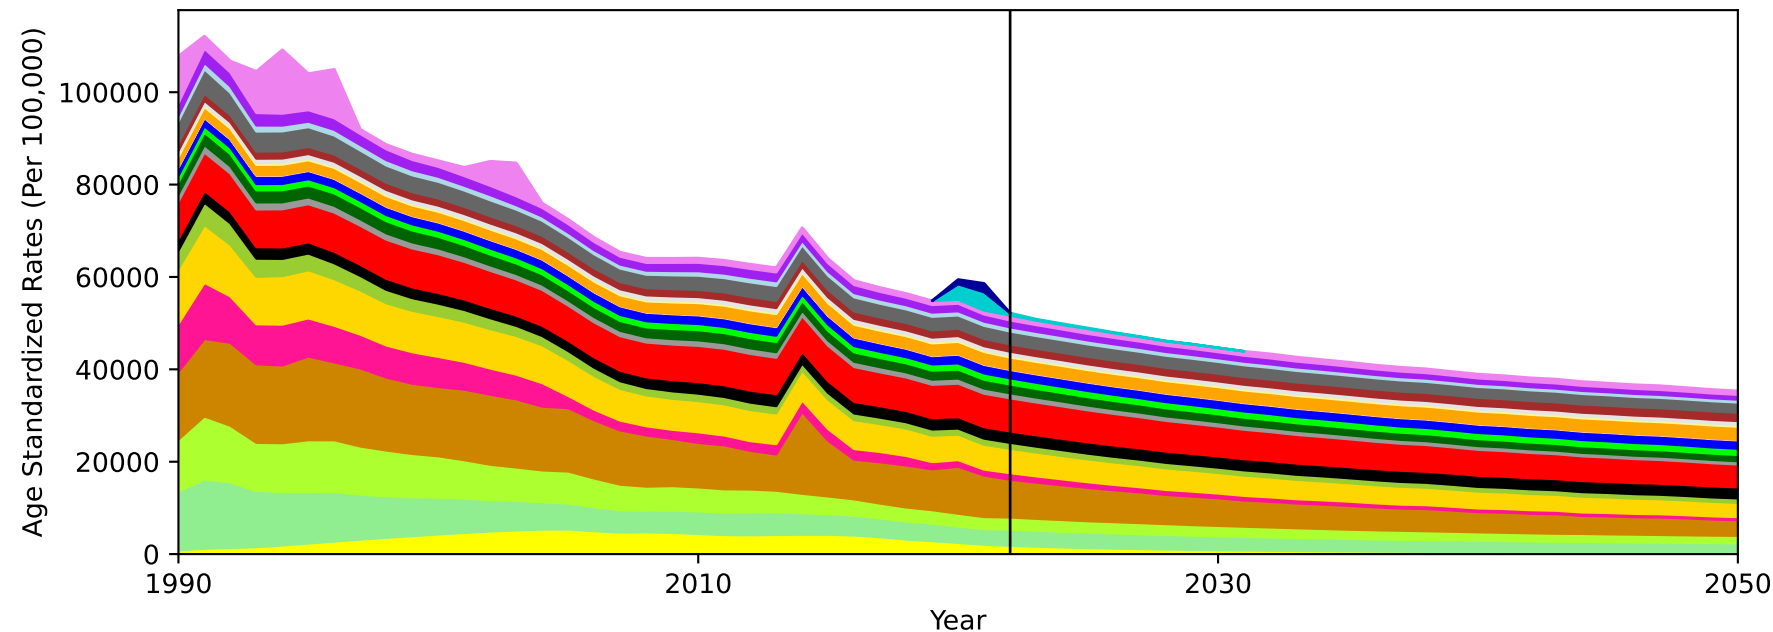

Level 1

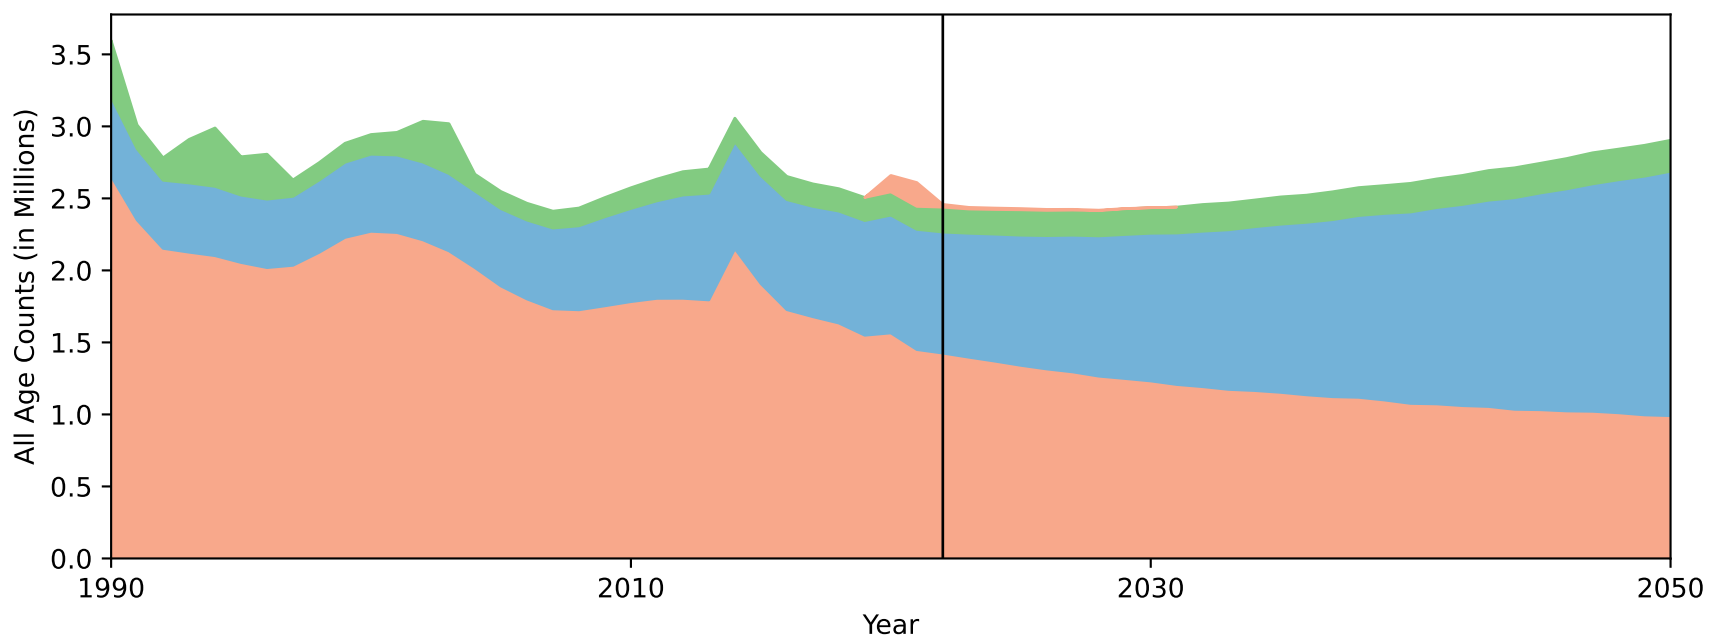

Level 2

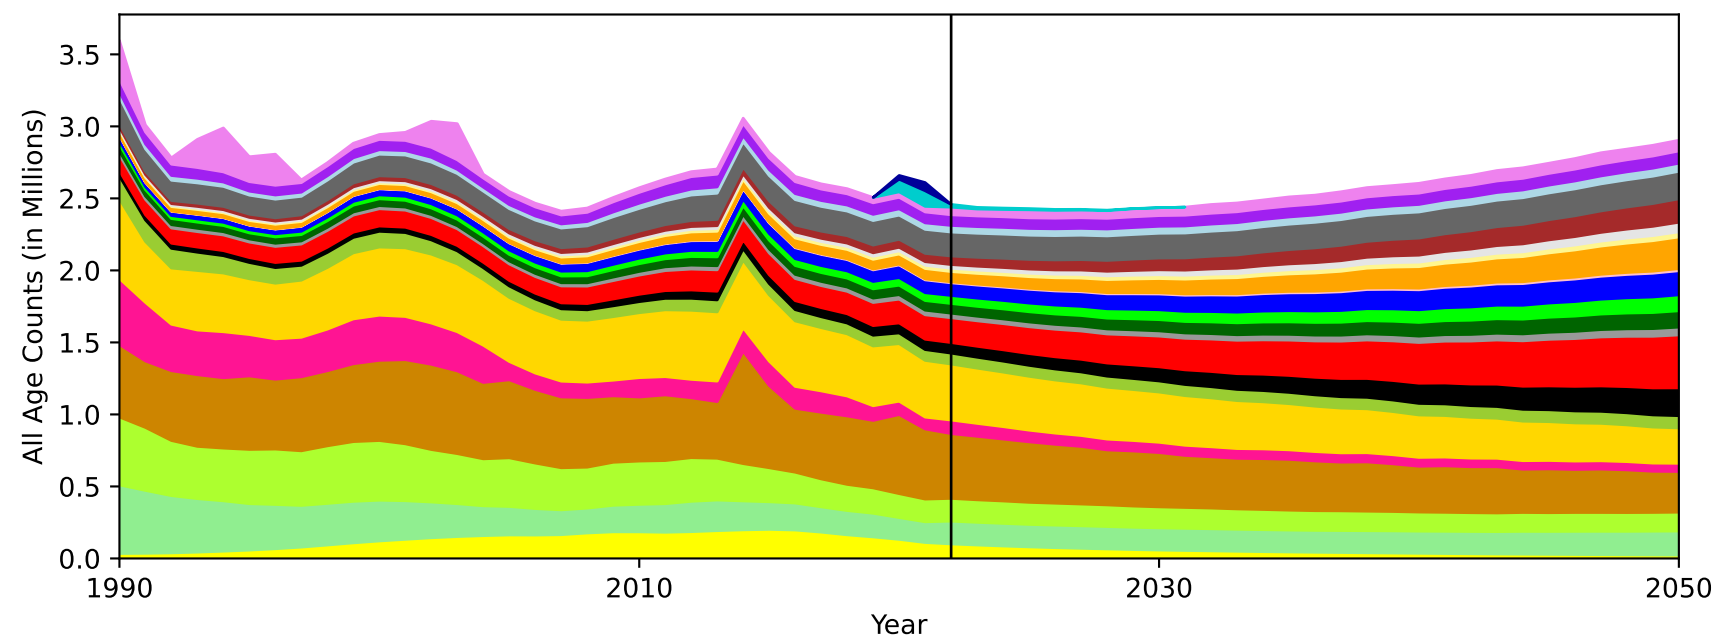

# Mali

Level 1

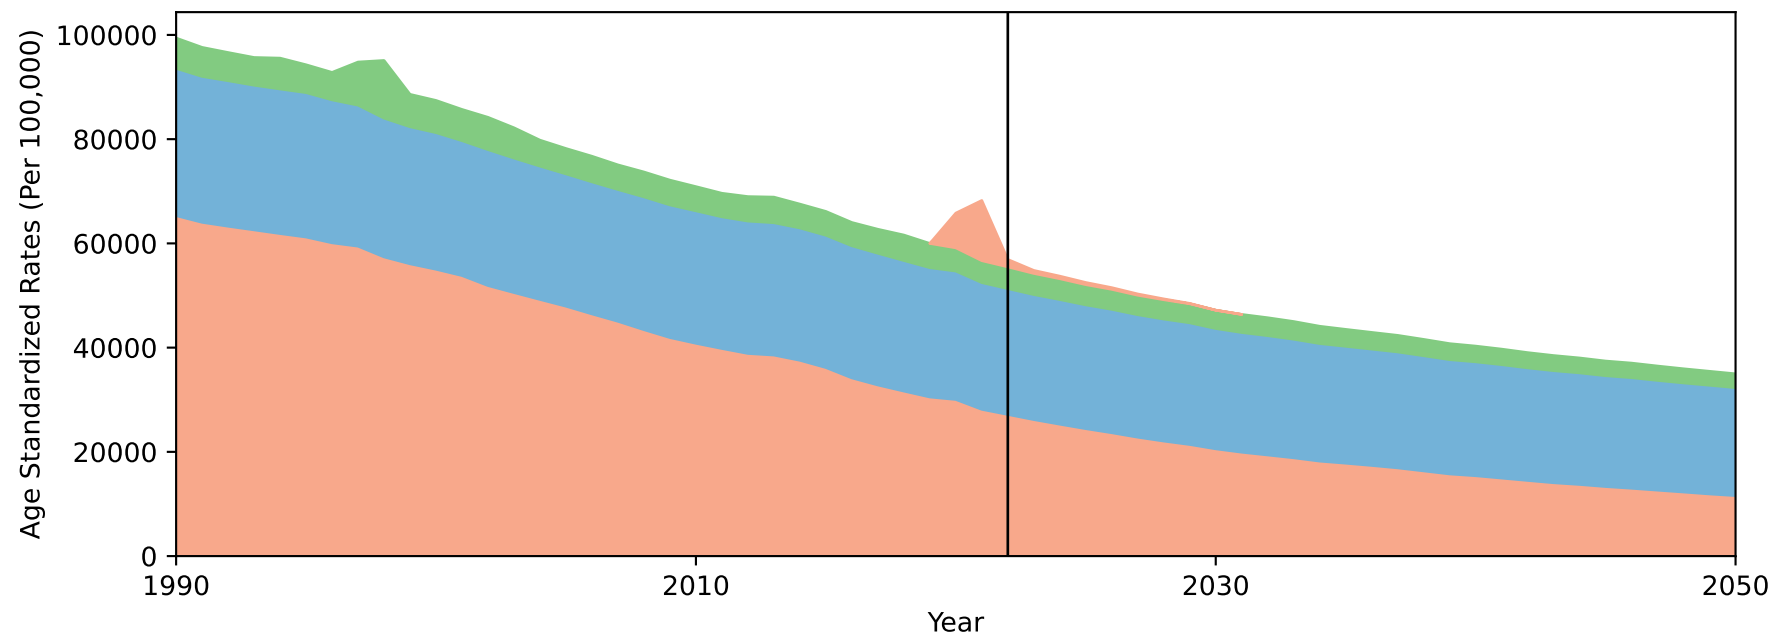

Level 2

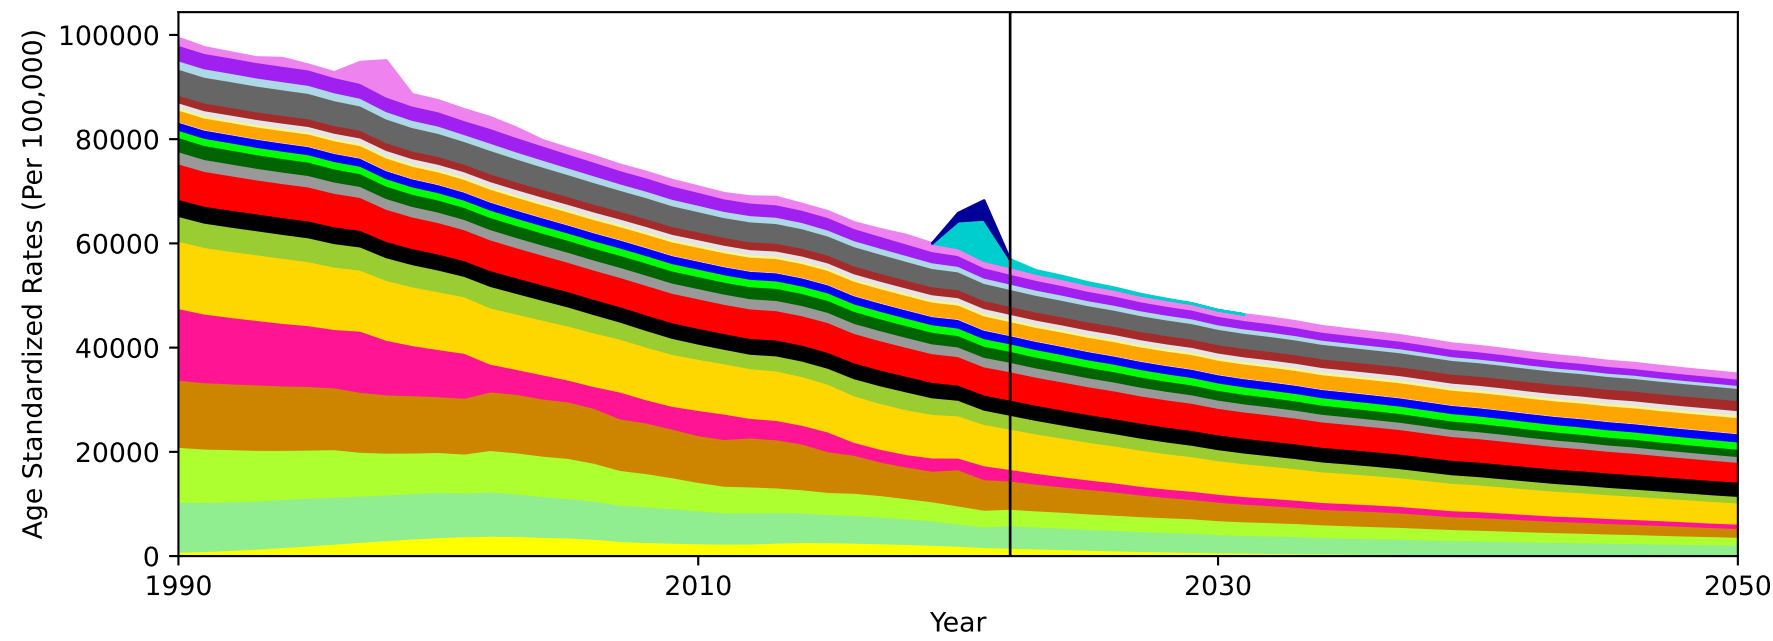

Level 1

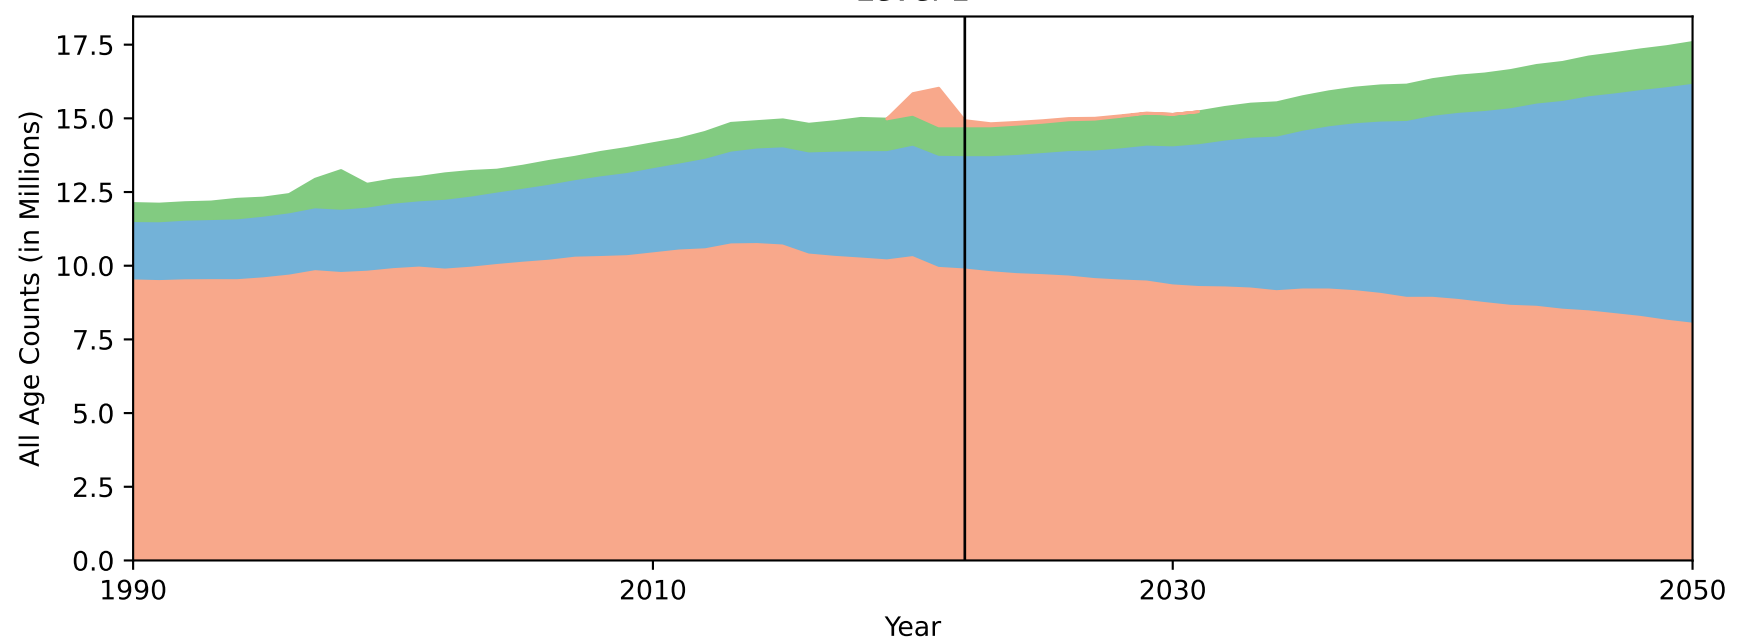

Level 2

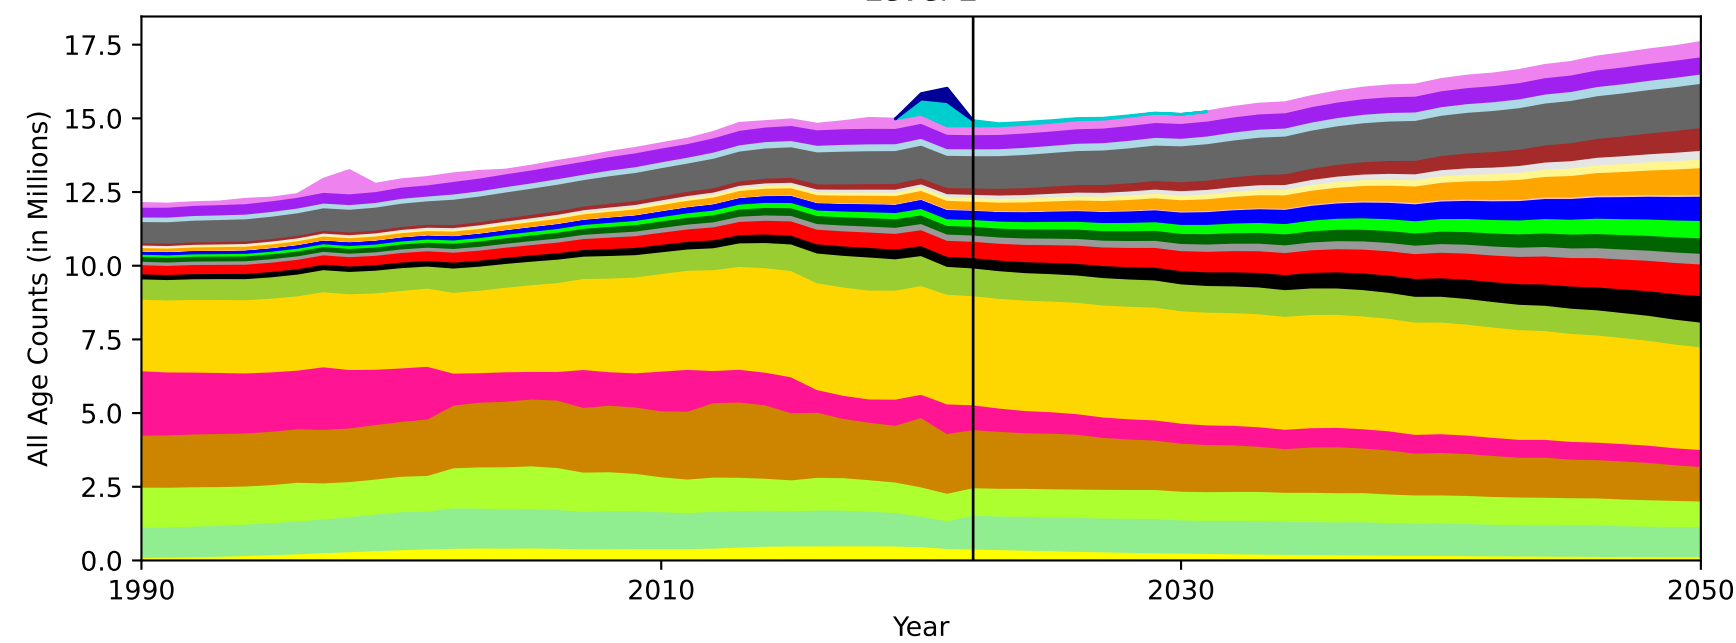

# Mauritania

Level 1

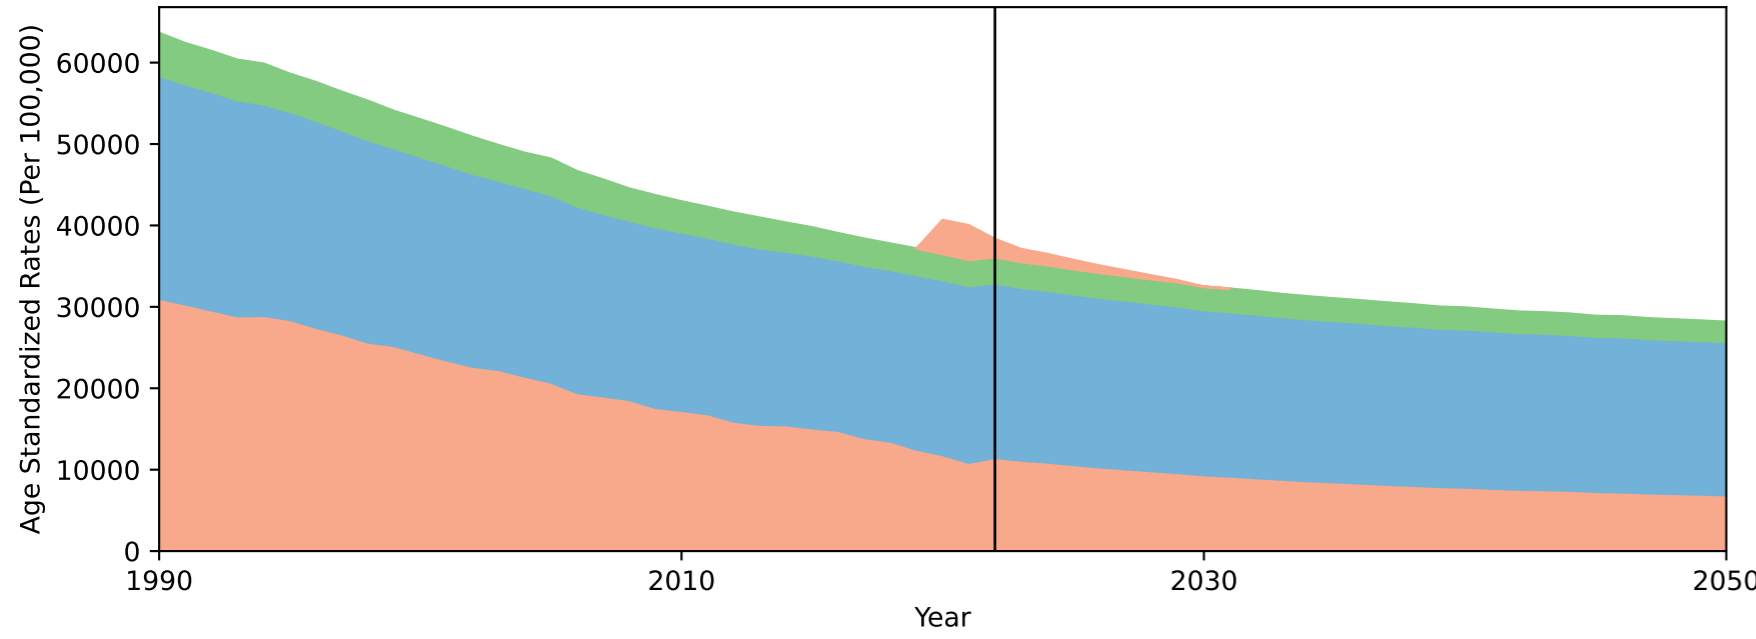

Level 2

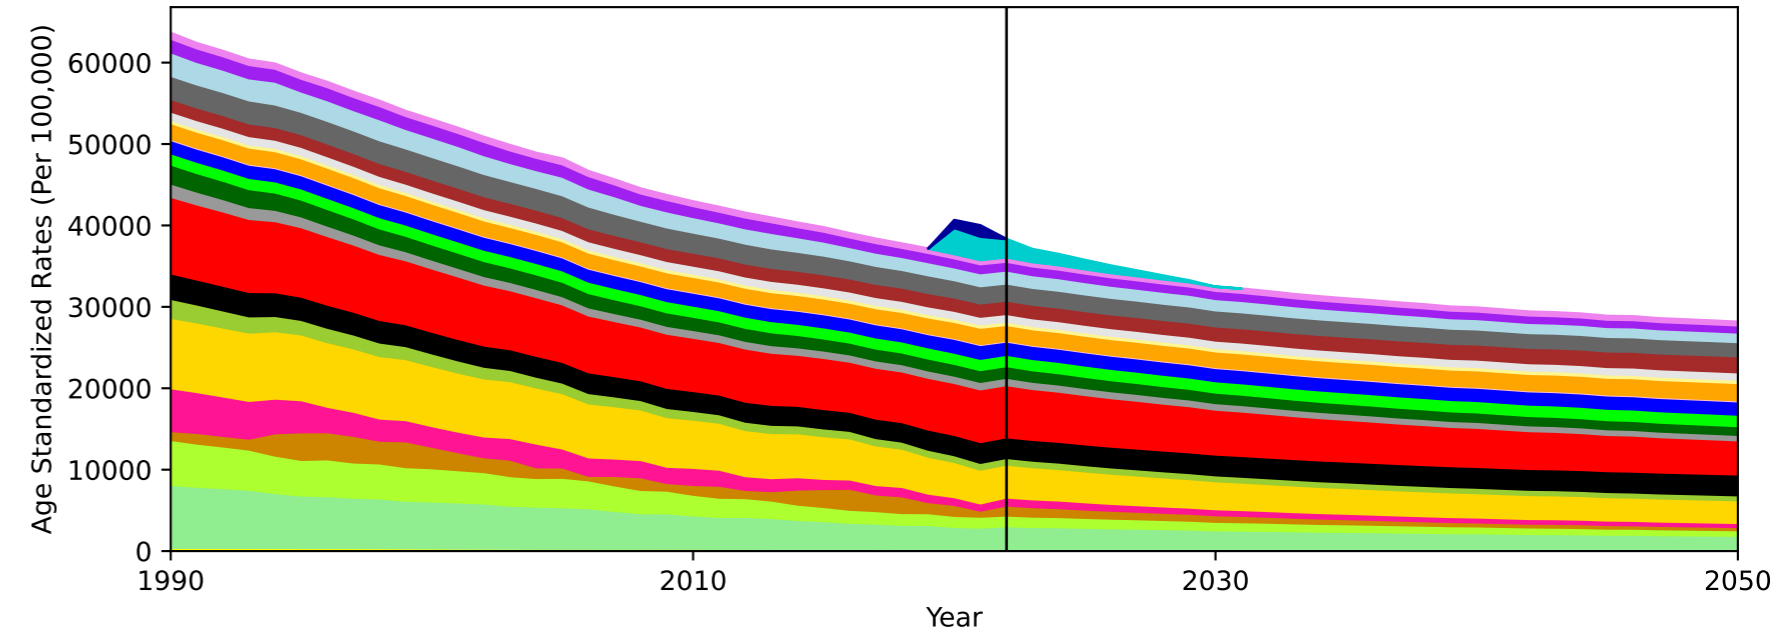

Level 1

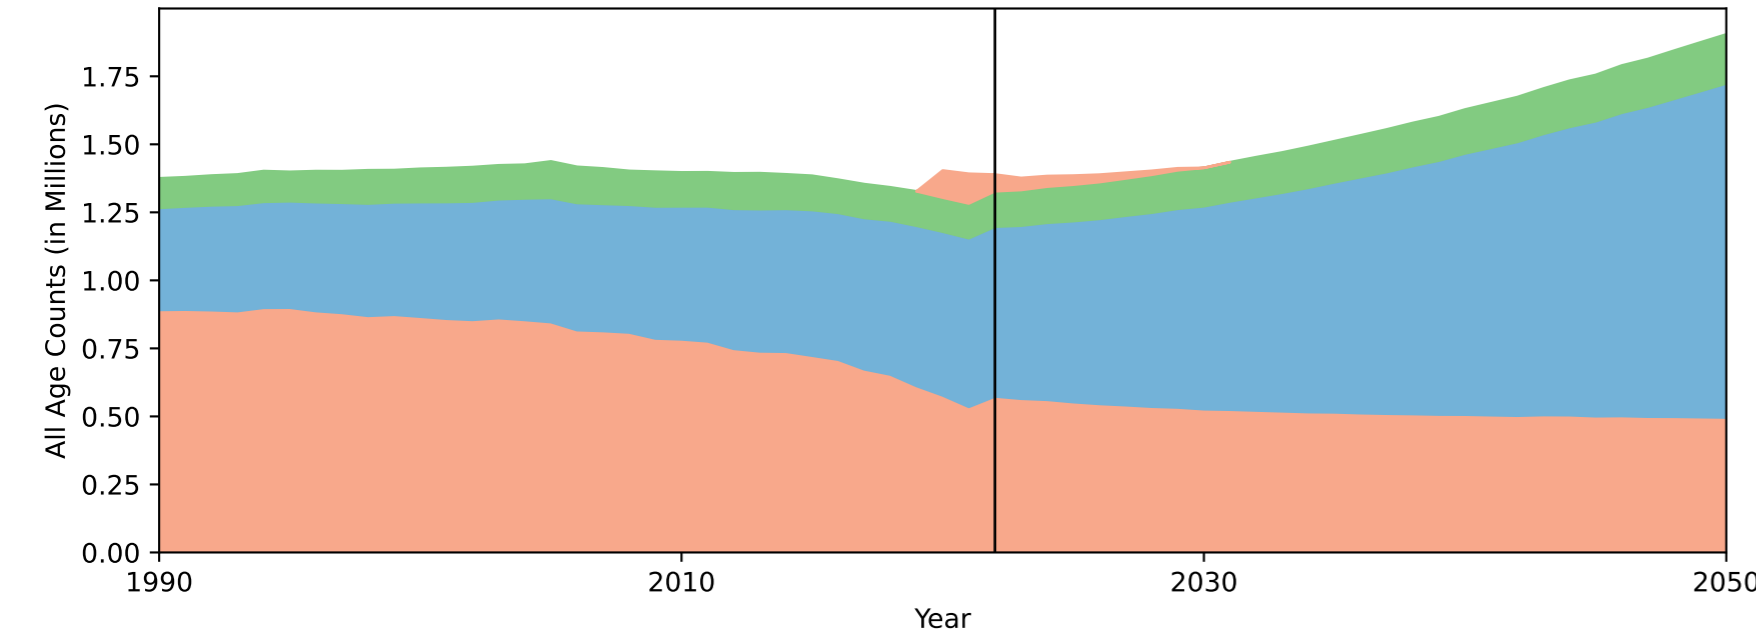

Level 2

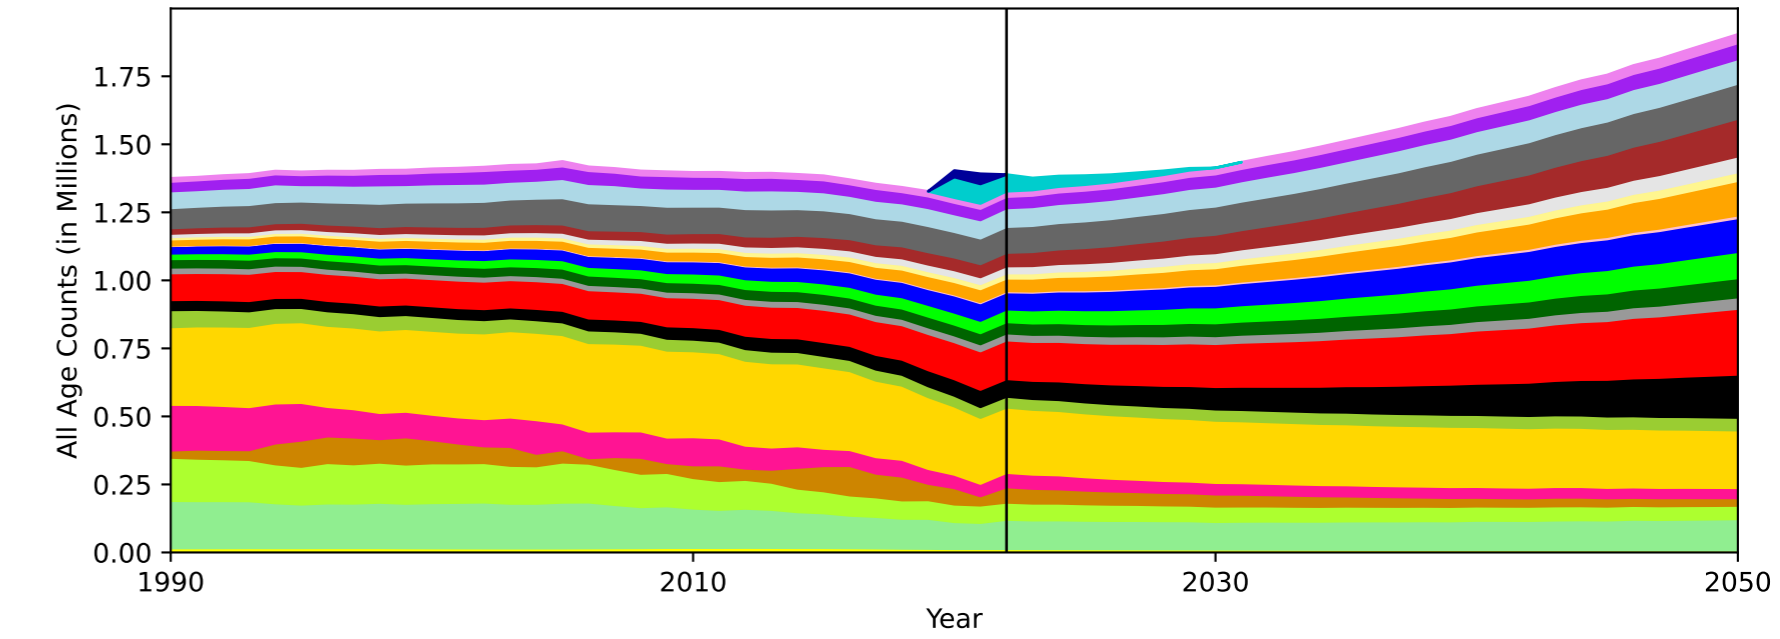

# Niger

Level 1

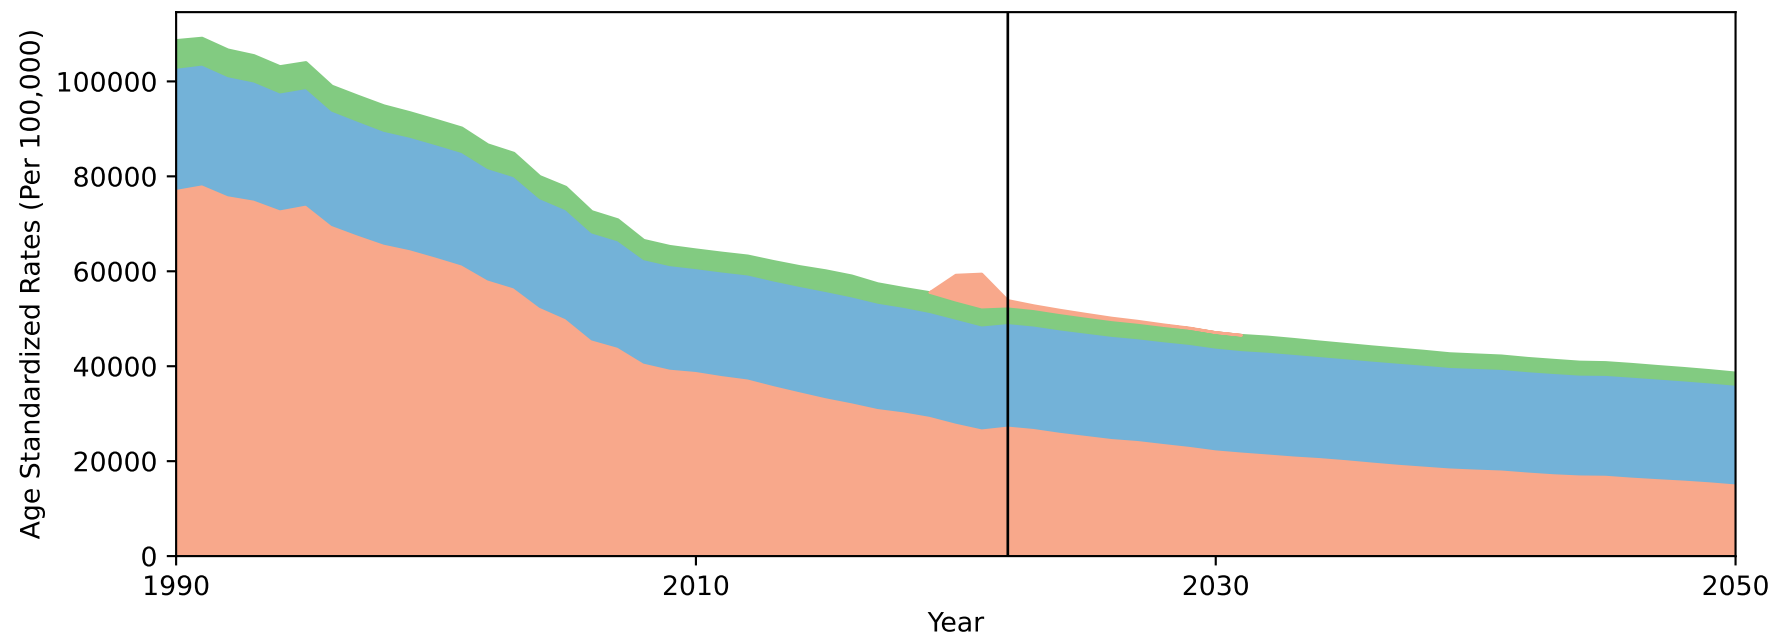

Level 2

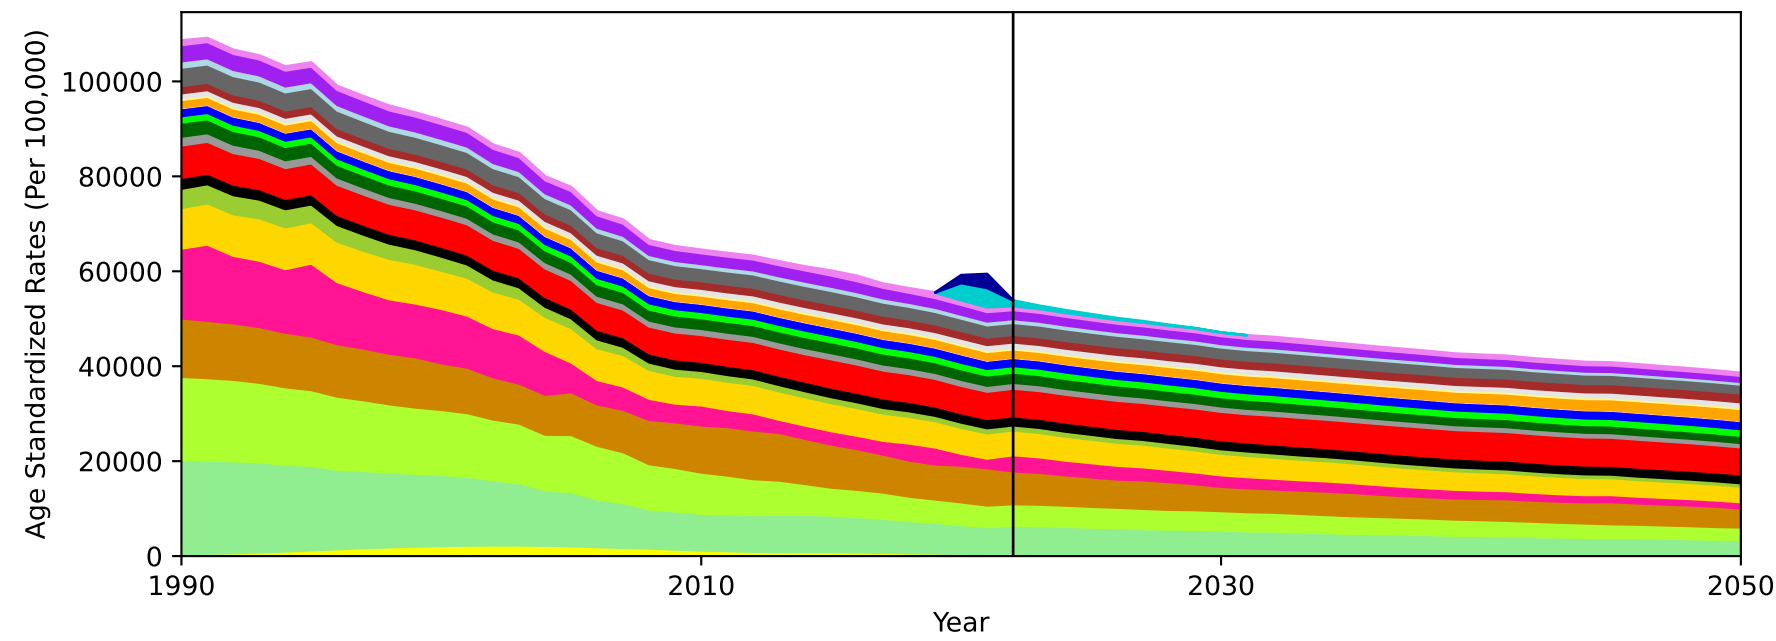

Level 1

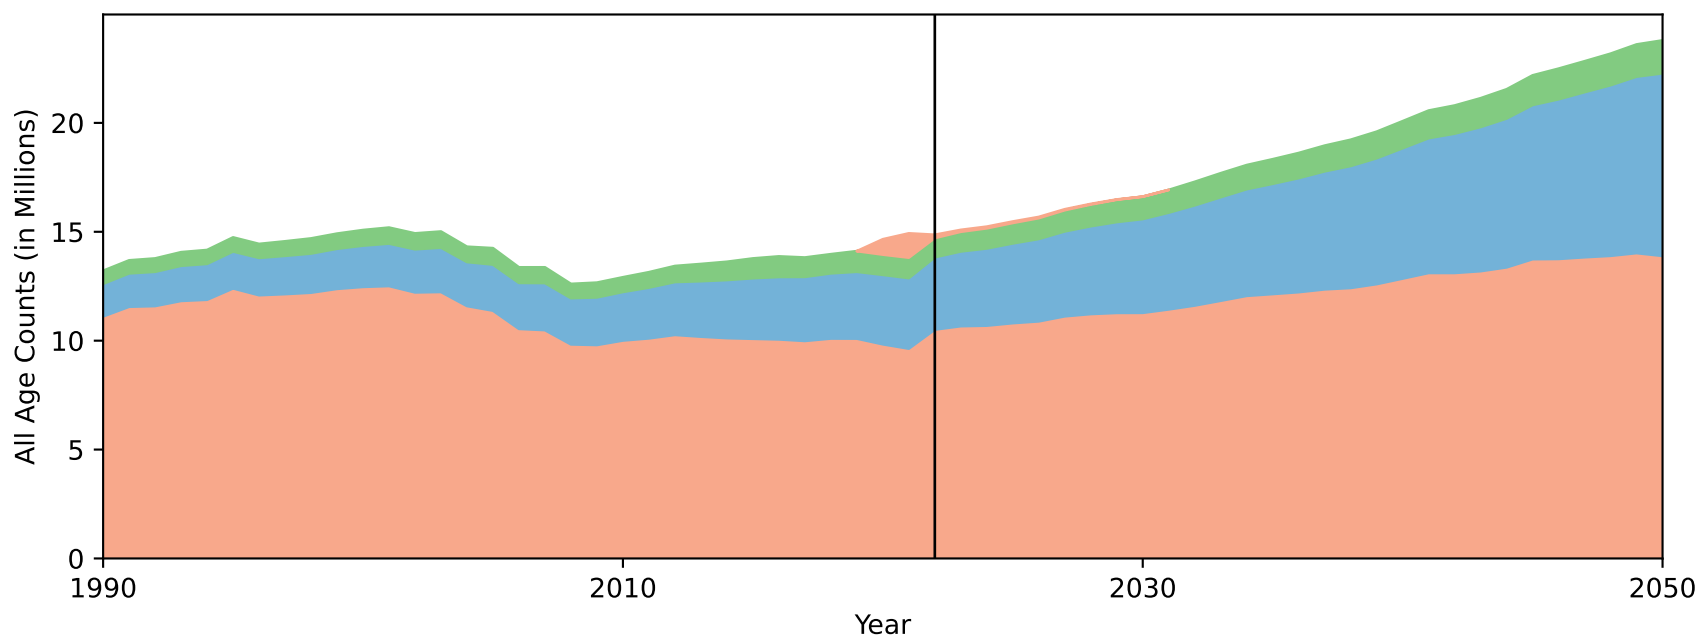

Level 2

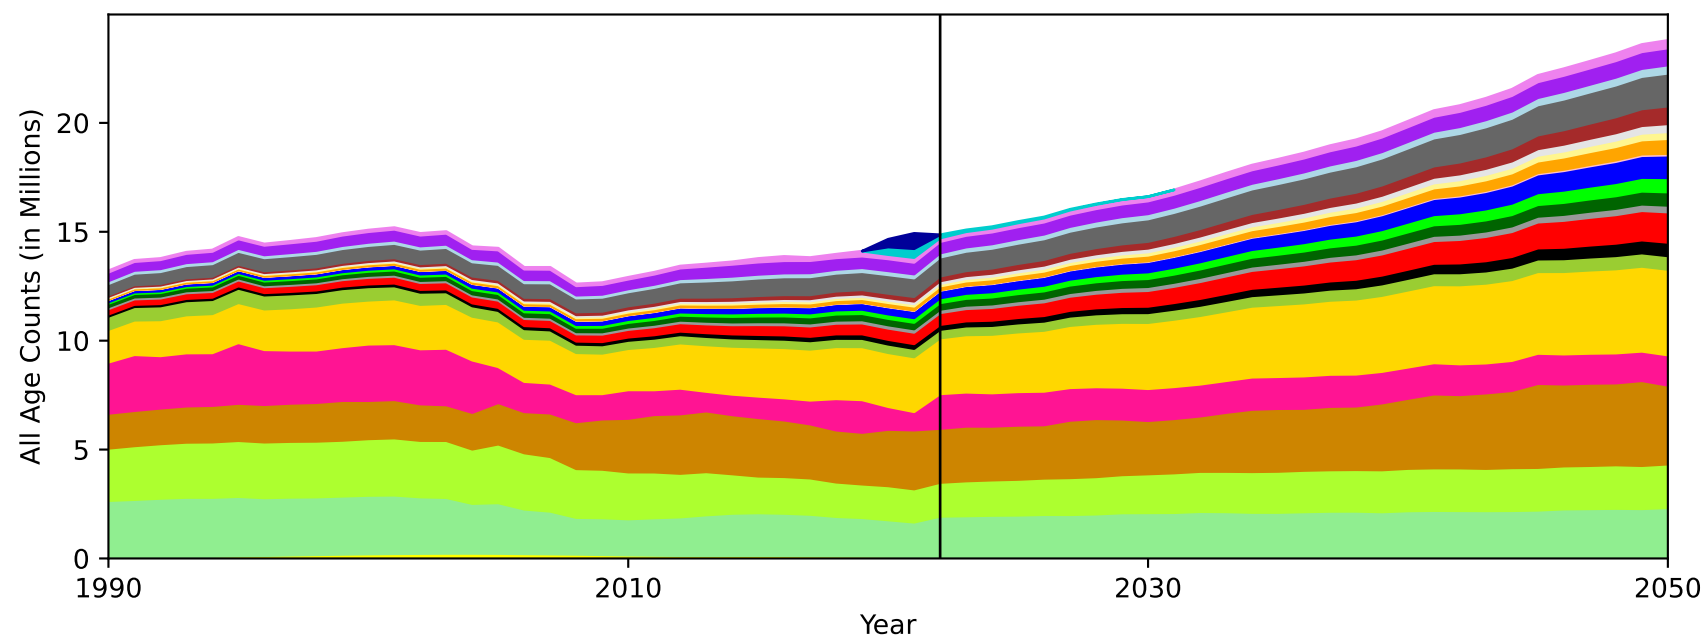

# Nigeria

Level 1

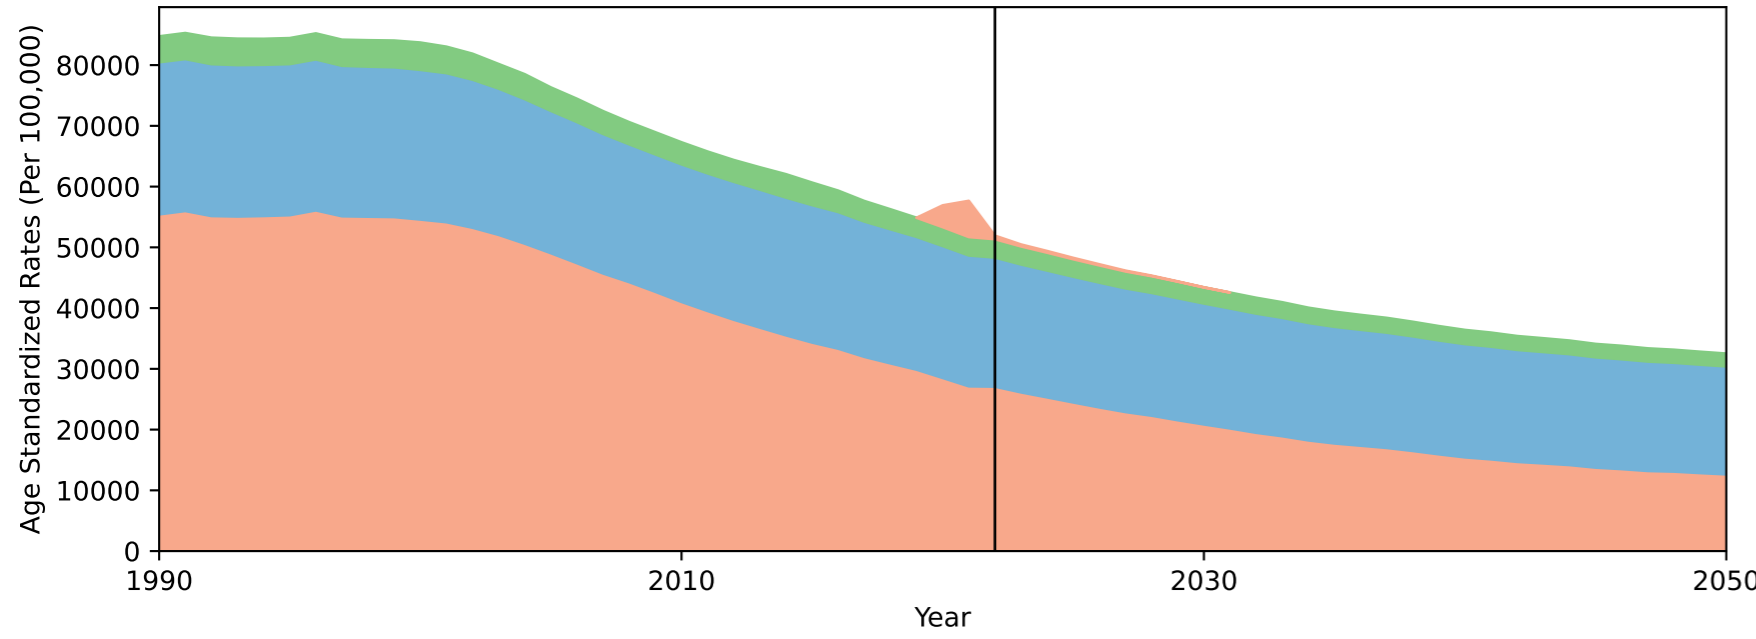

Level 2

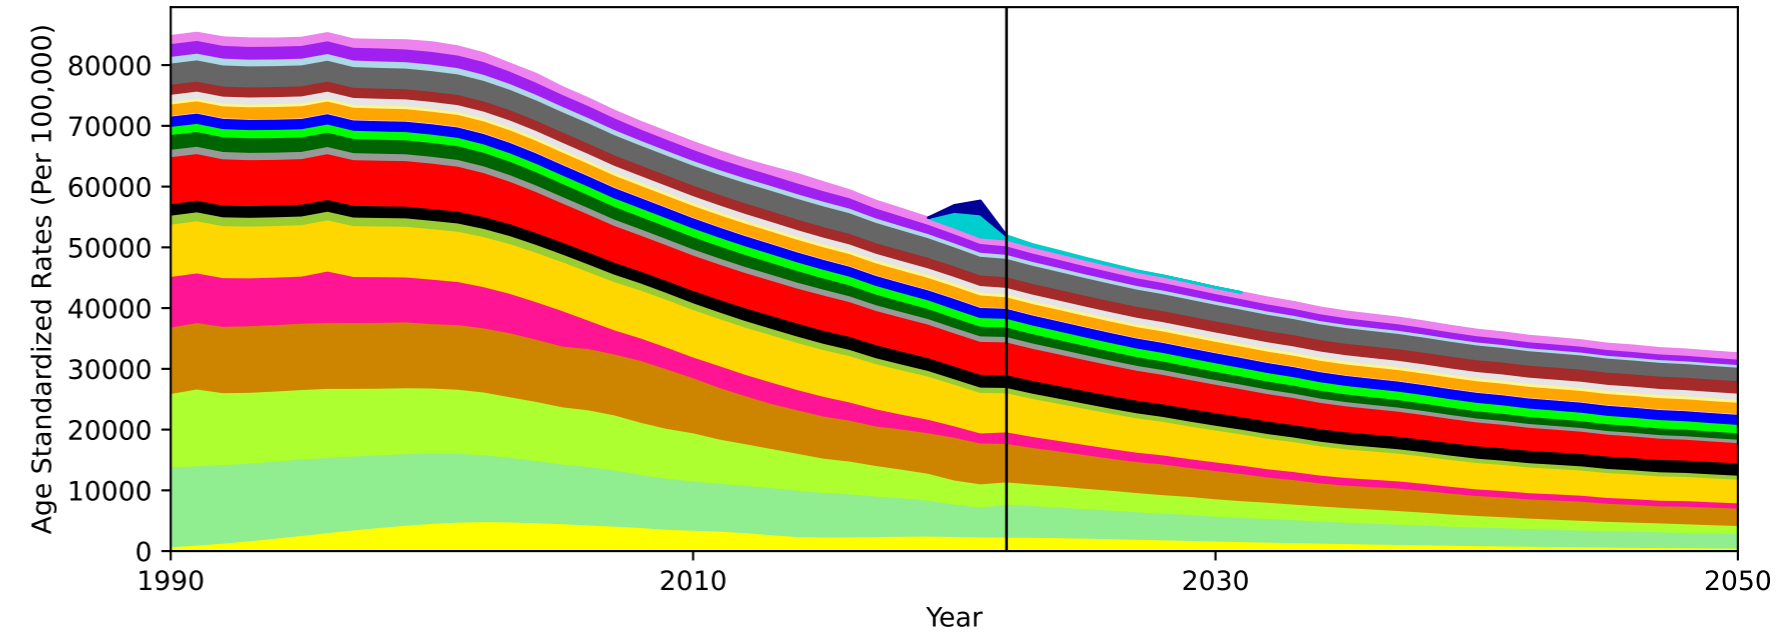

Level 1

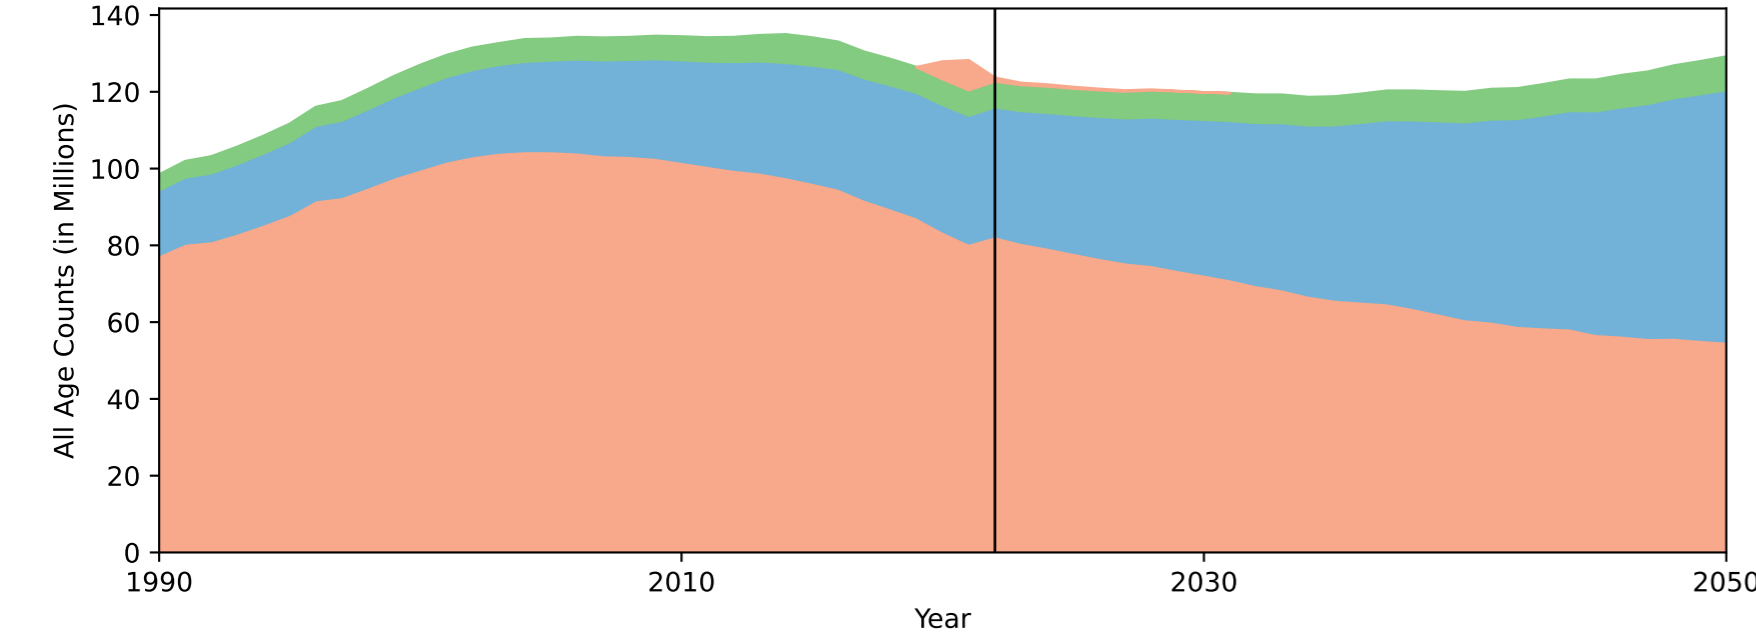

Level 2

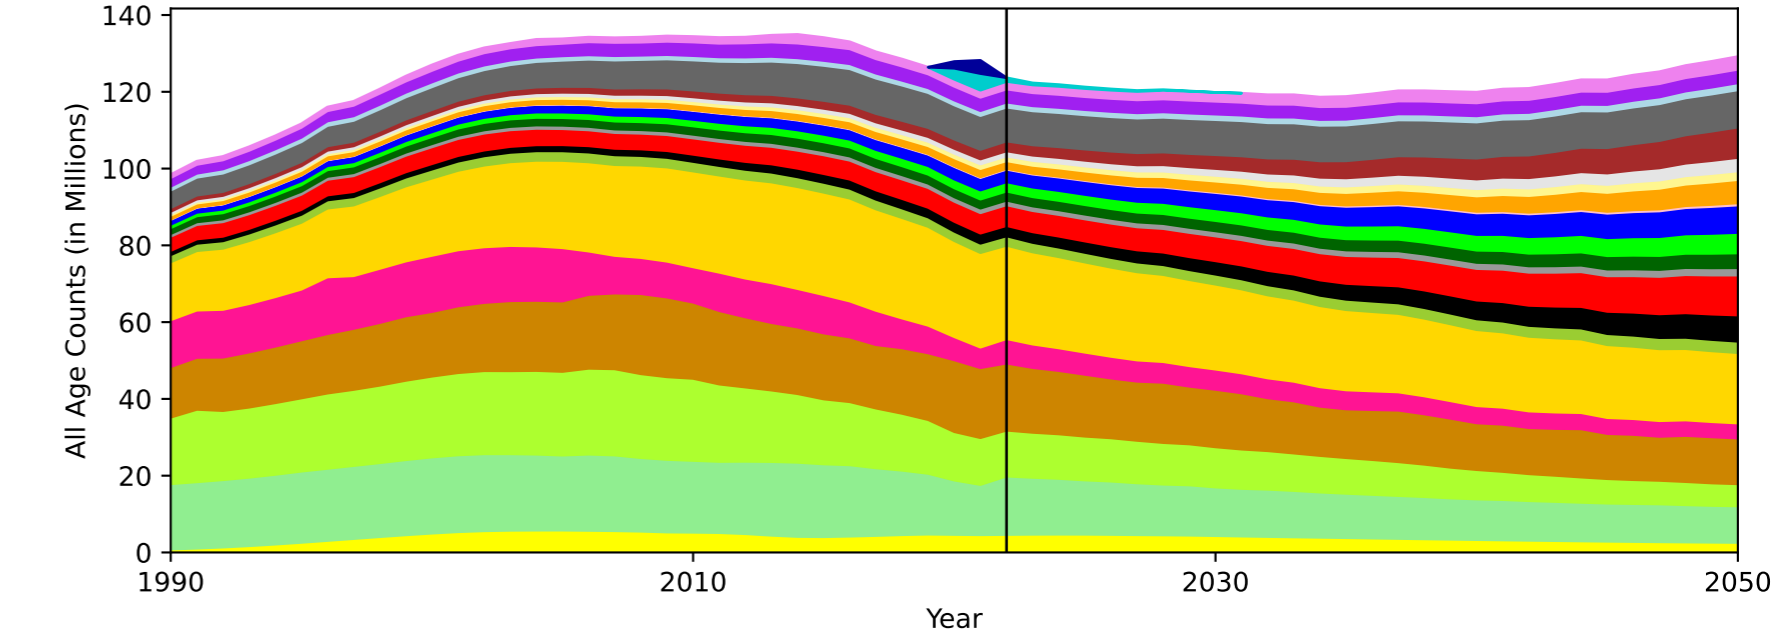

# São Tomé And Príncipe

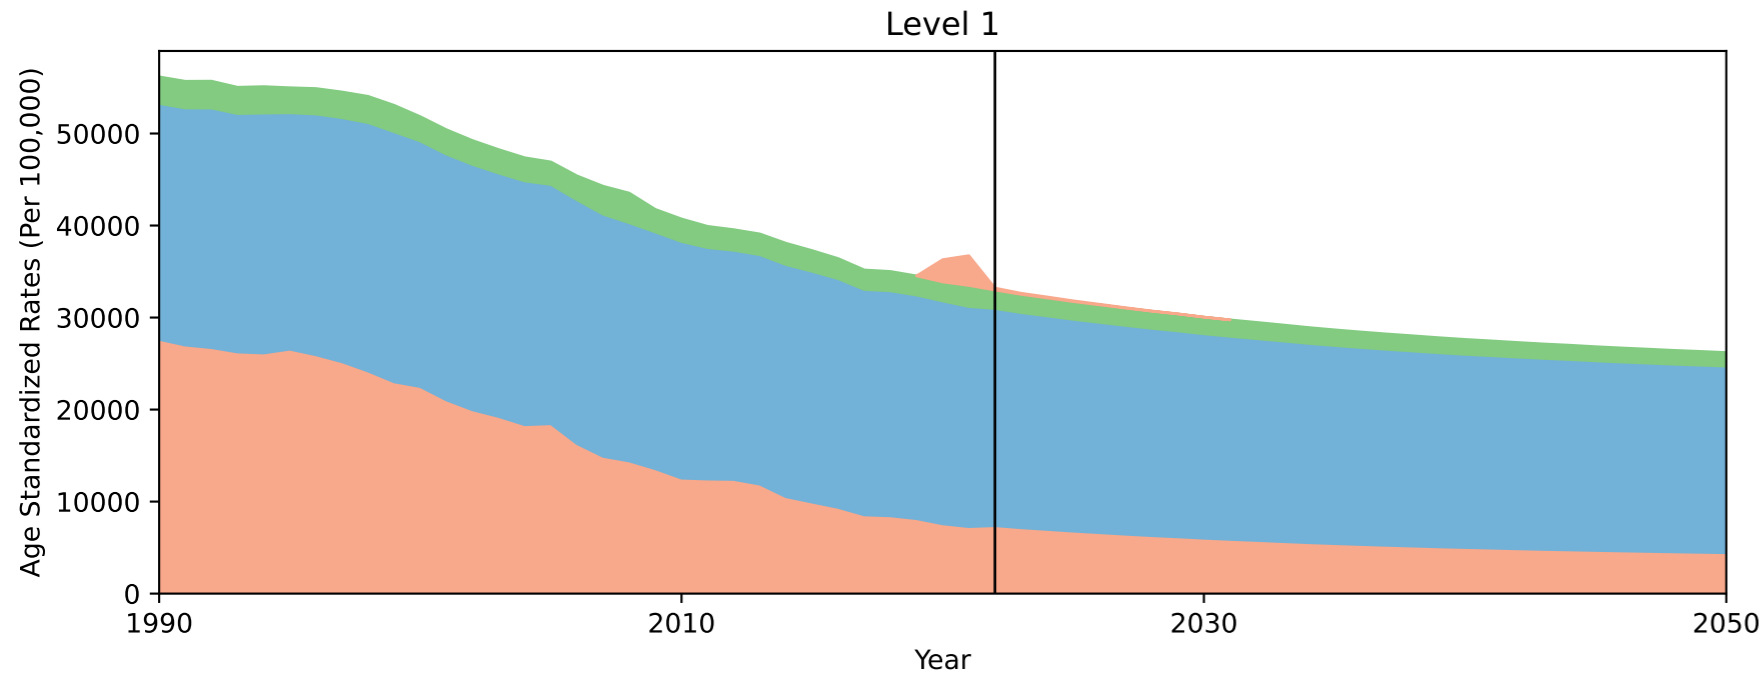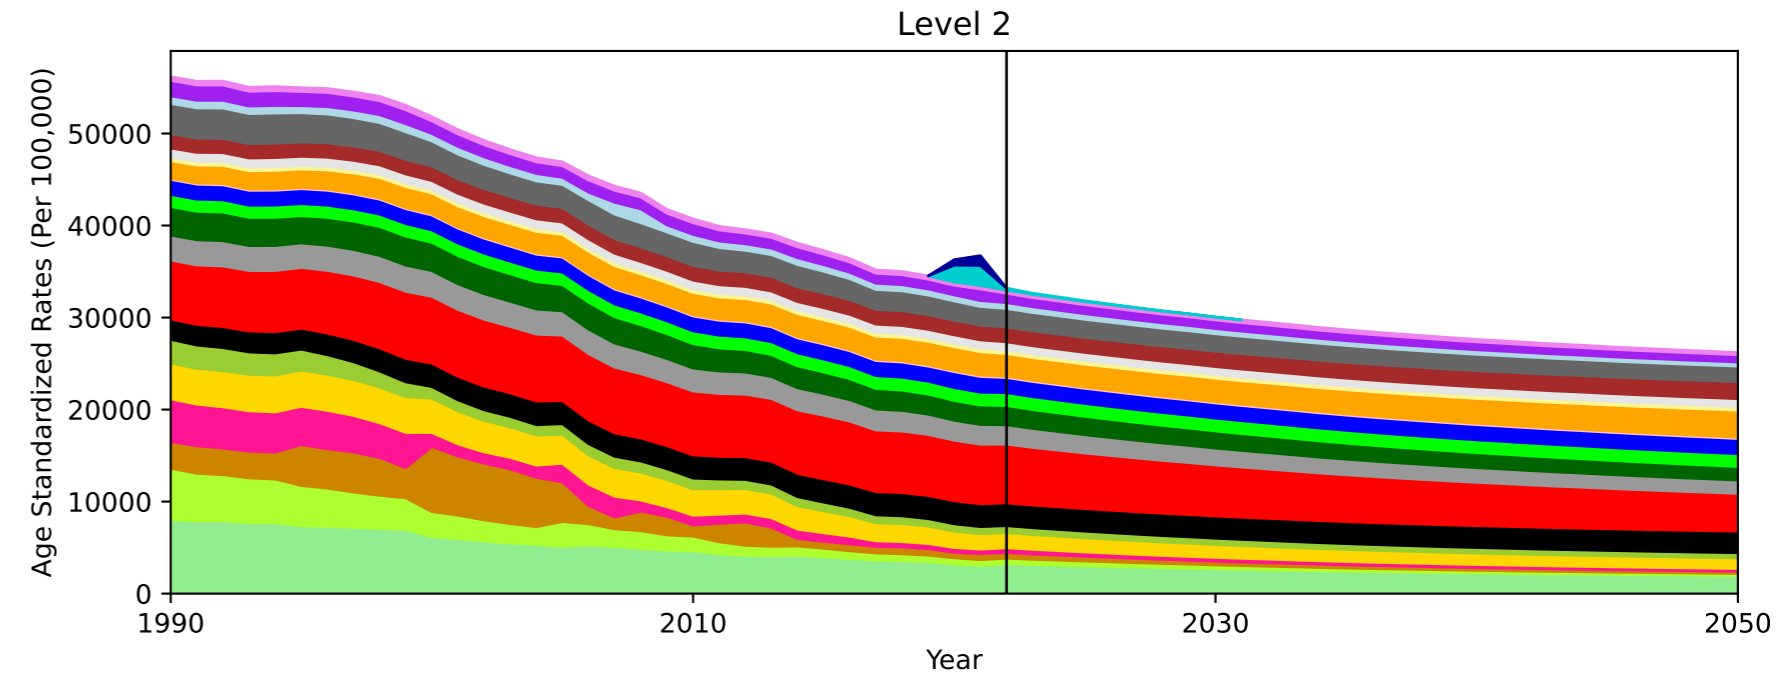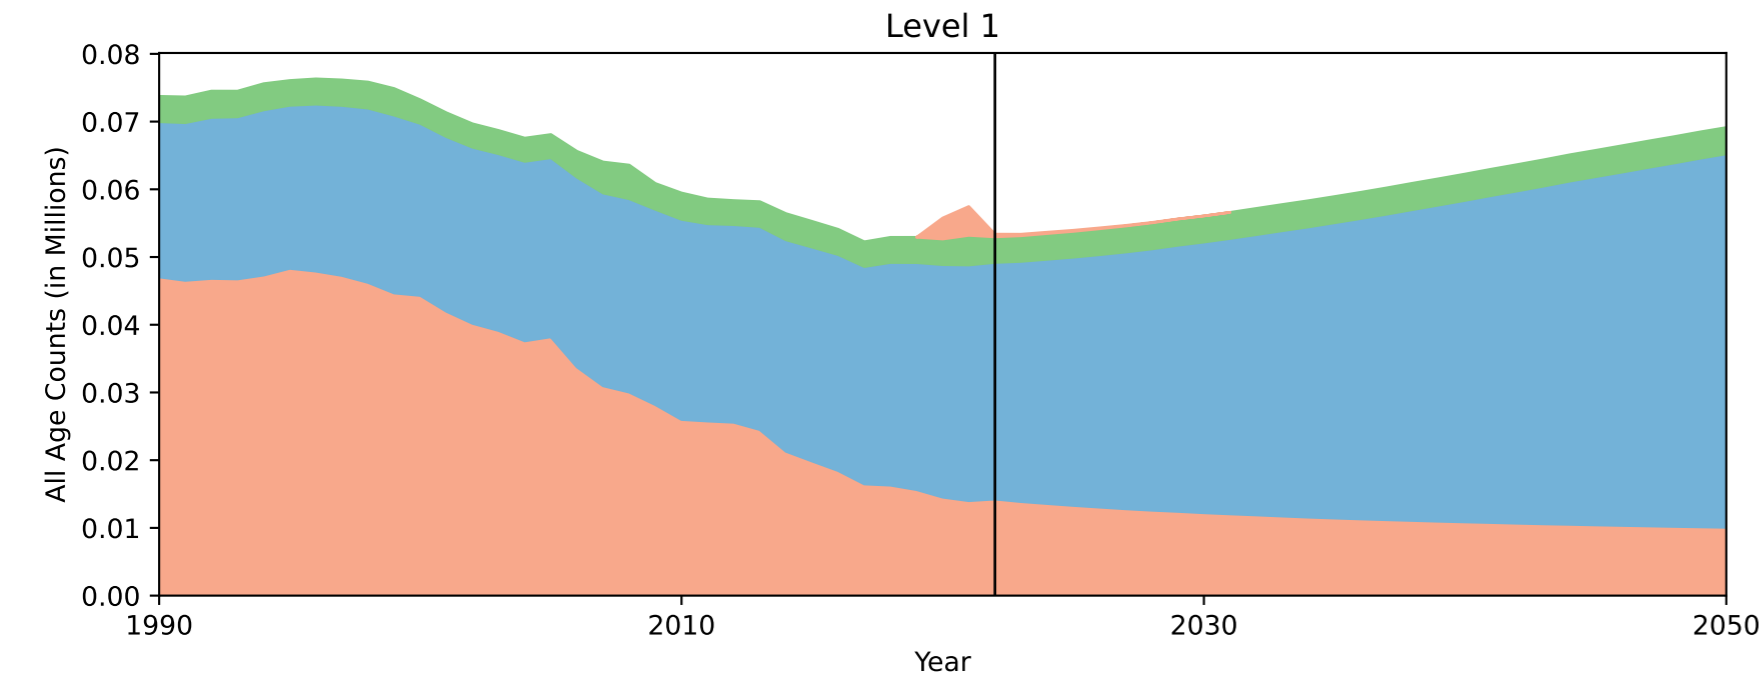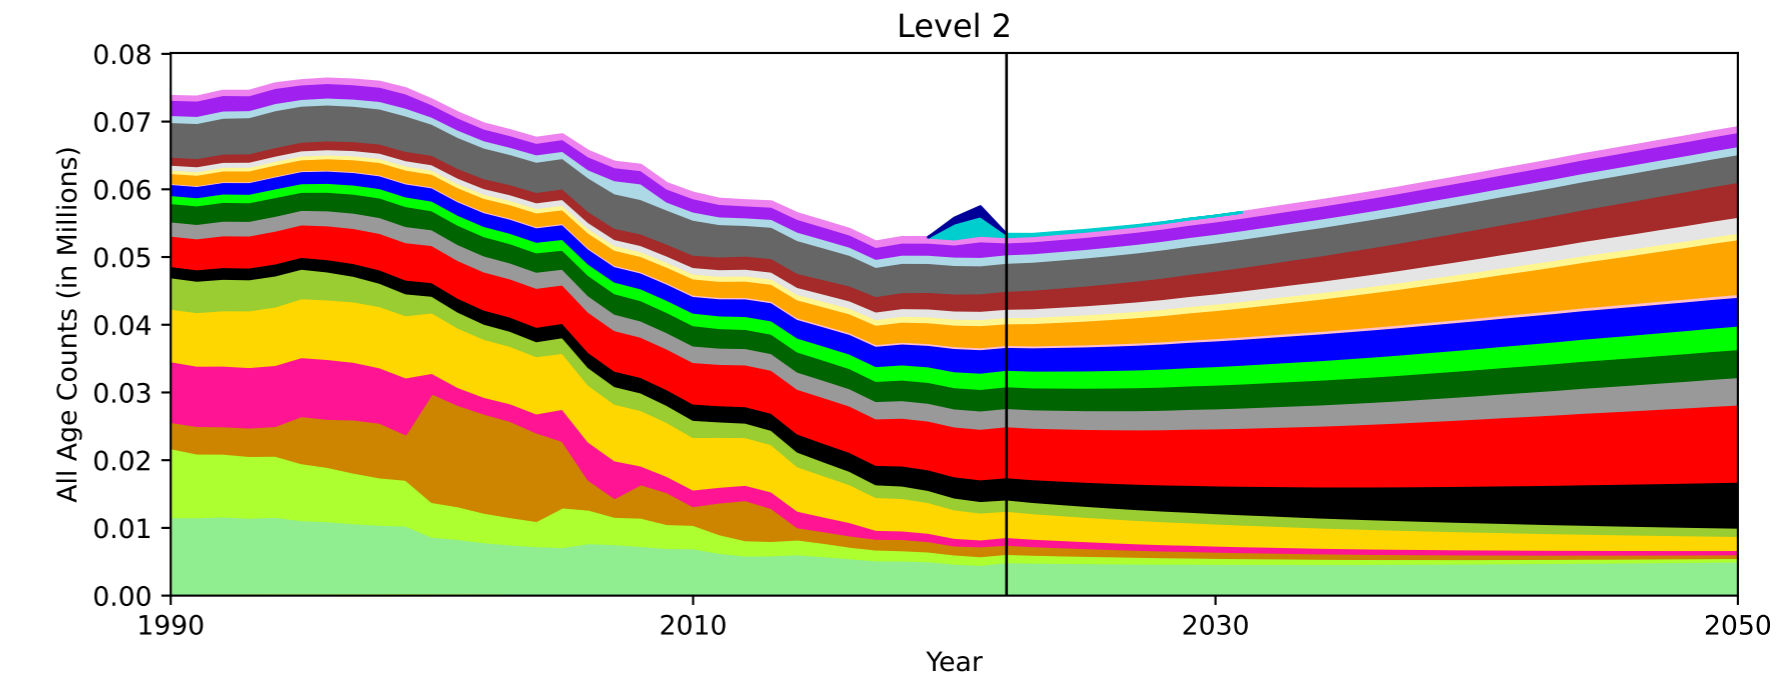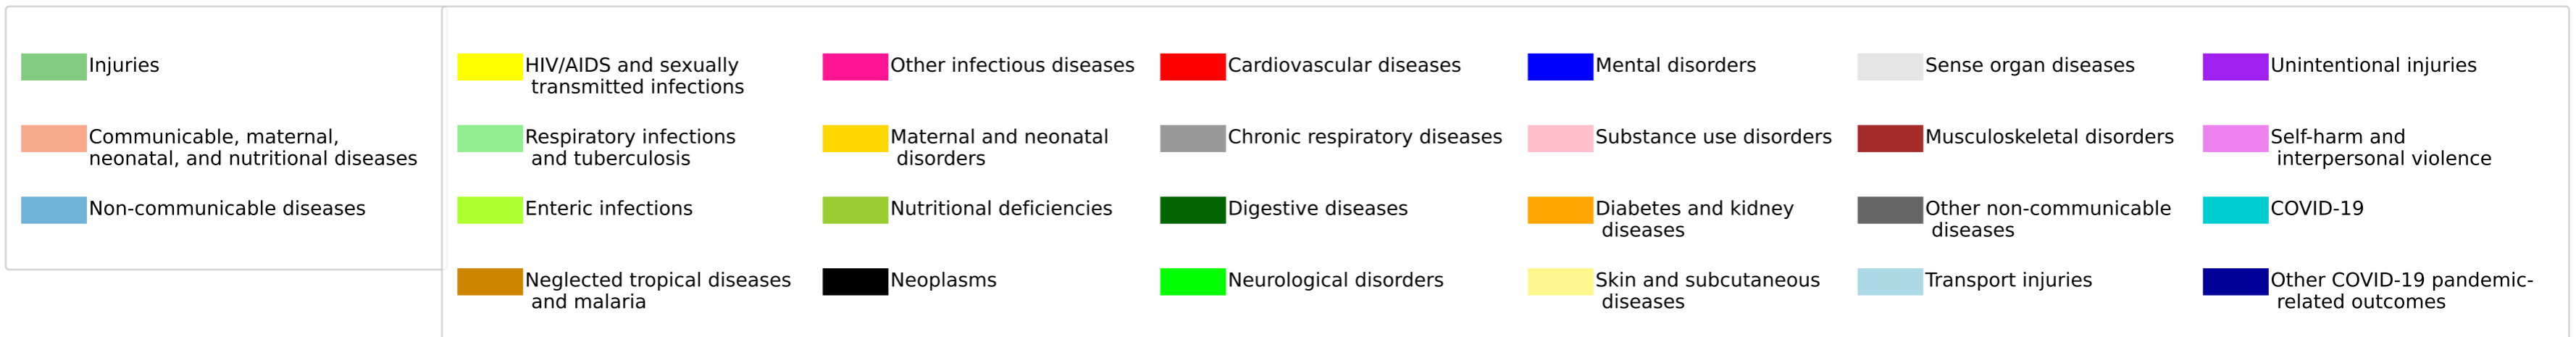

# Senegal

Level 1

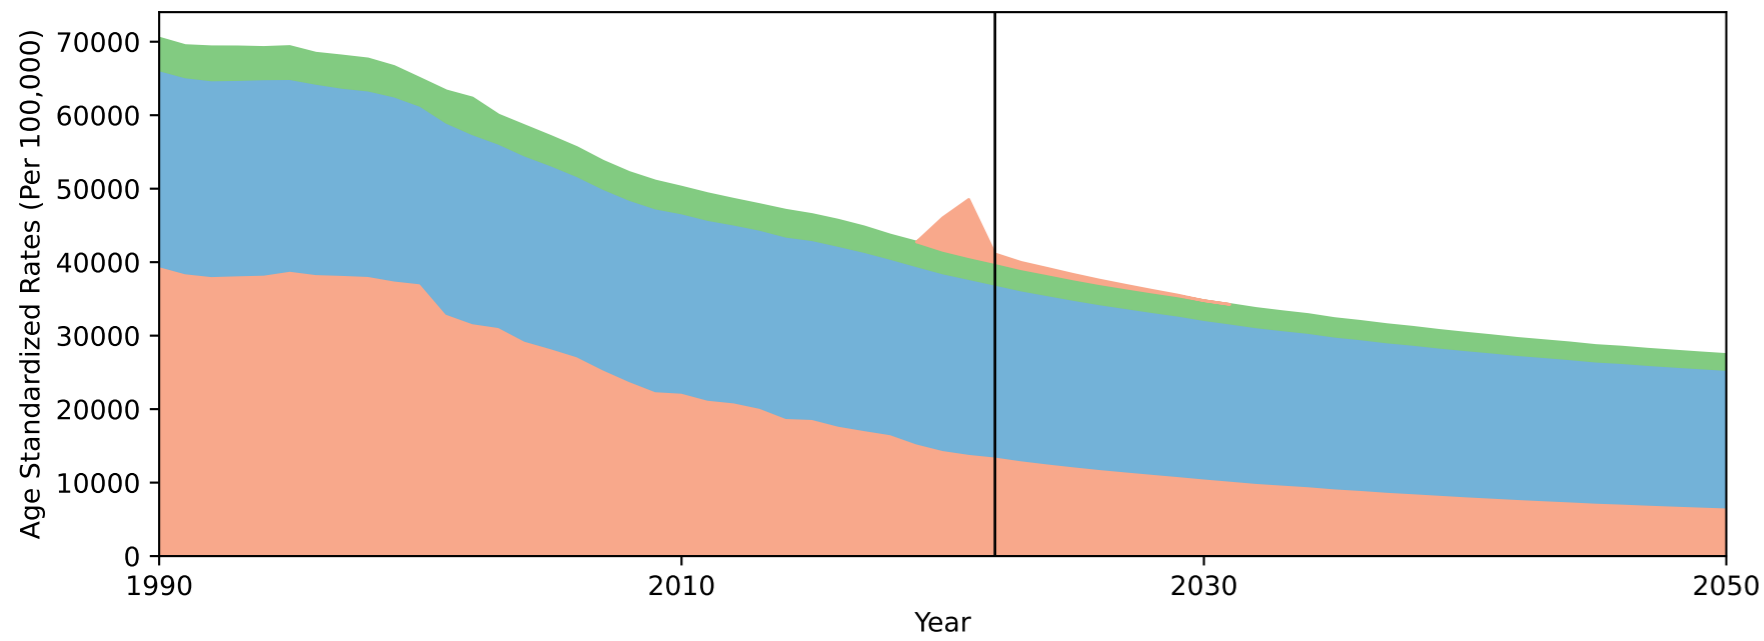

Level 2

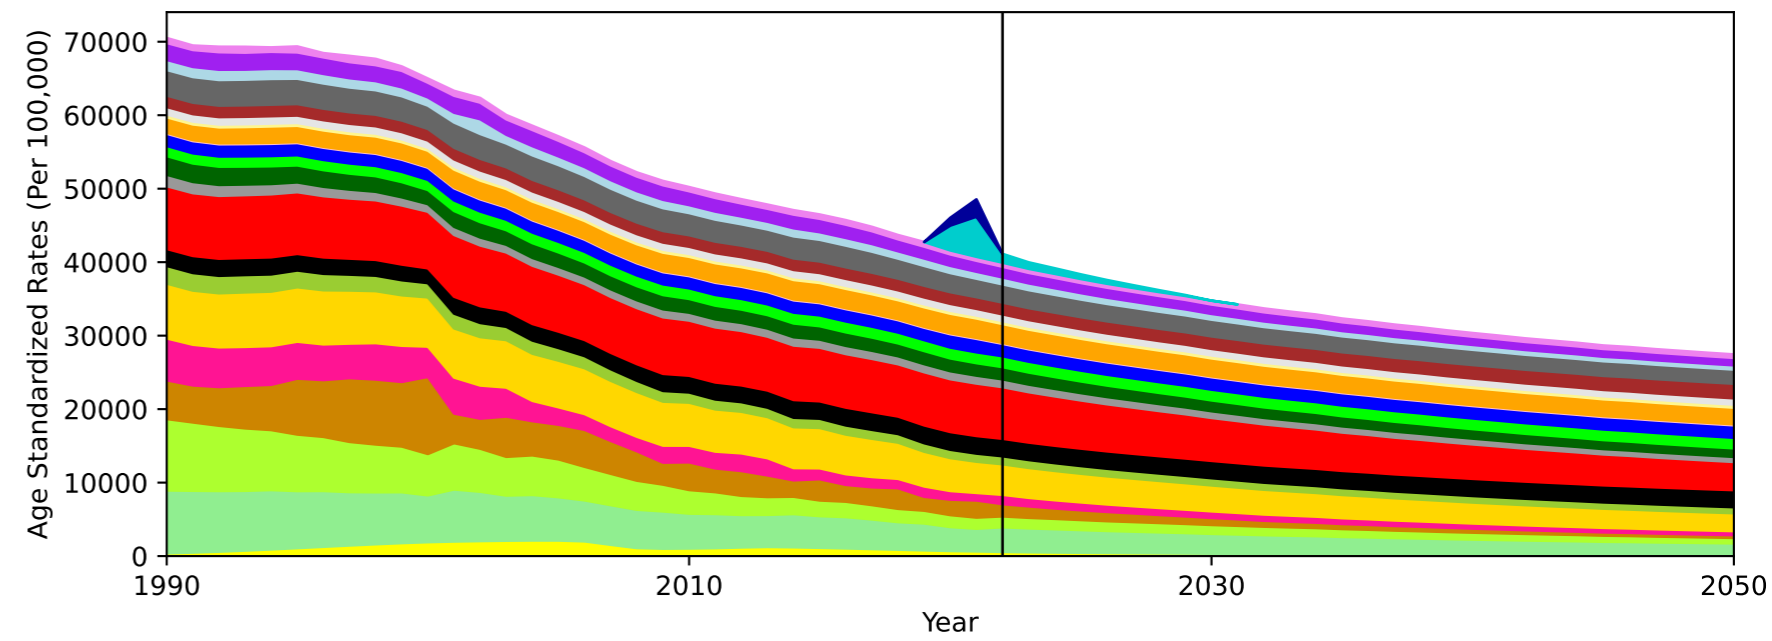

Level 1

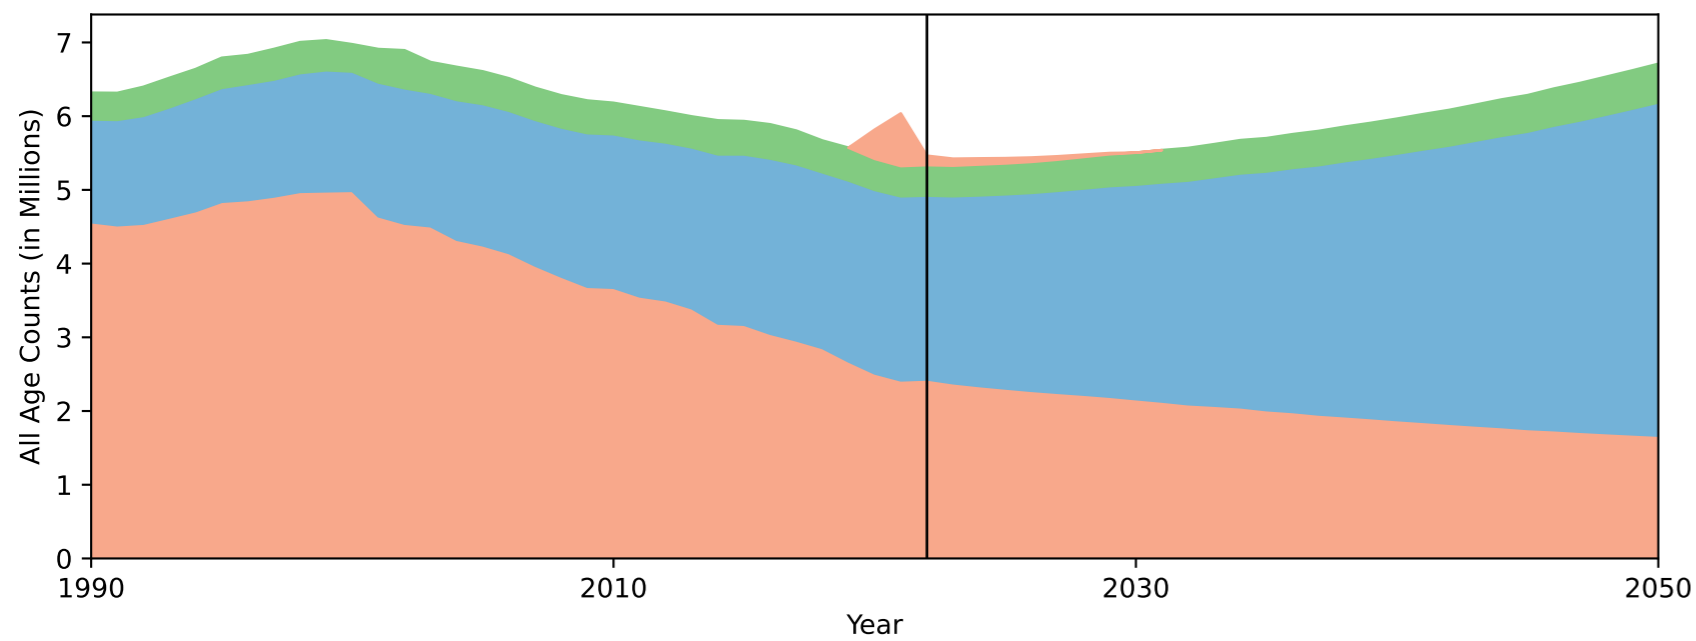

Level 2

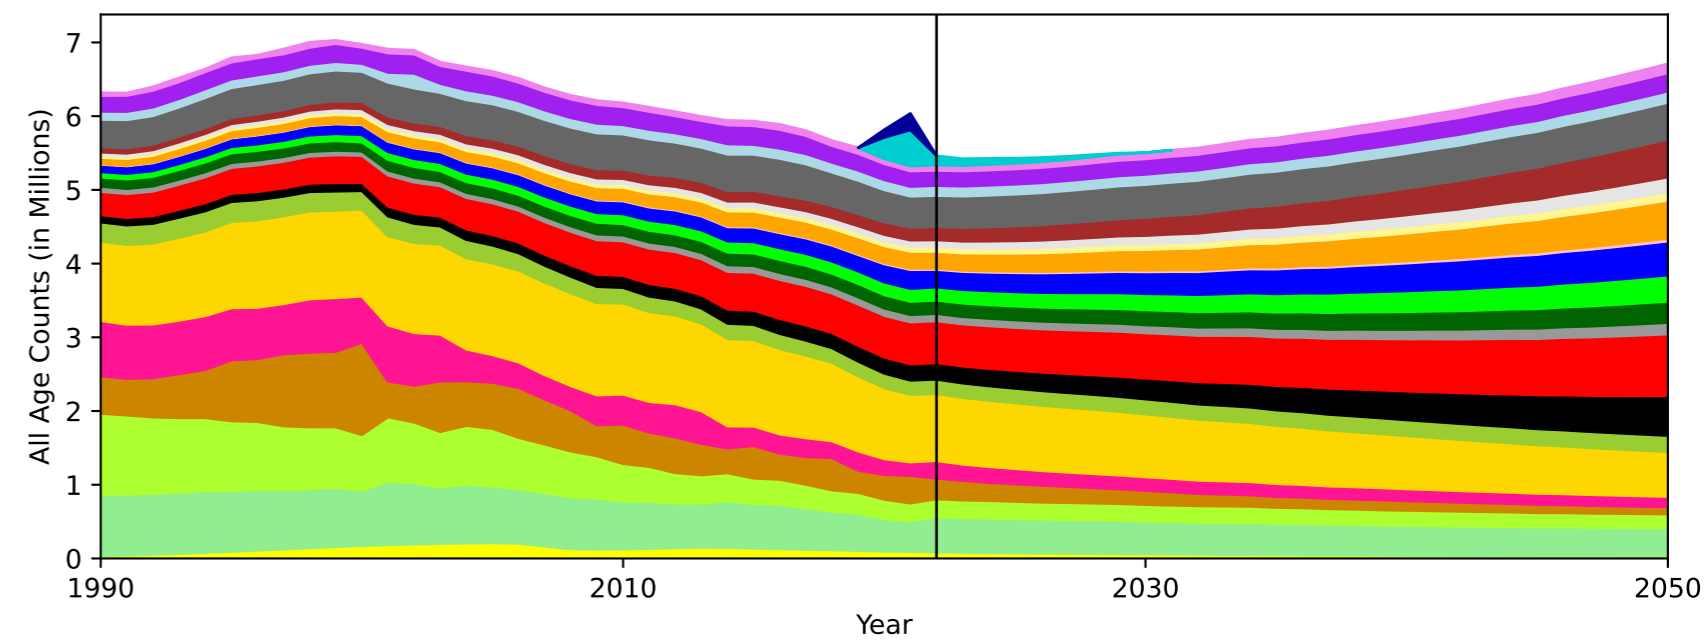

# Sierra Leone

Supplemental Results Figure S4. Age-standardised DALY rates and all age DALY counts and by Level 1 and Level 2 causes, 1990–2050

447

Level 1

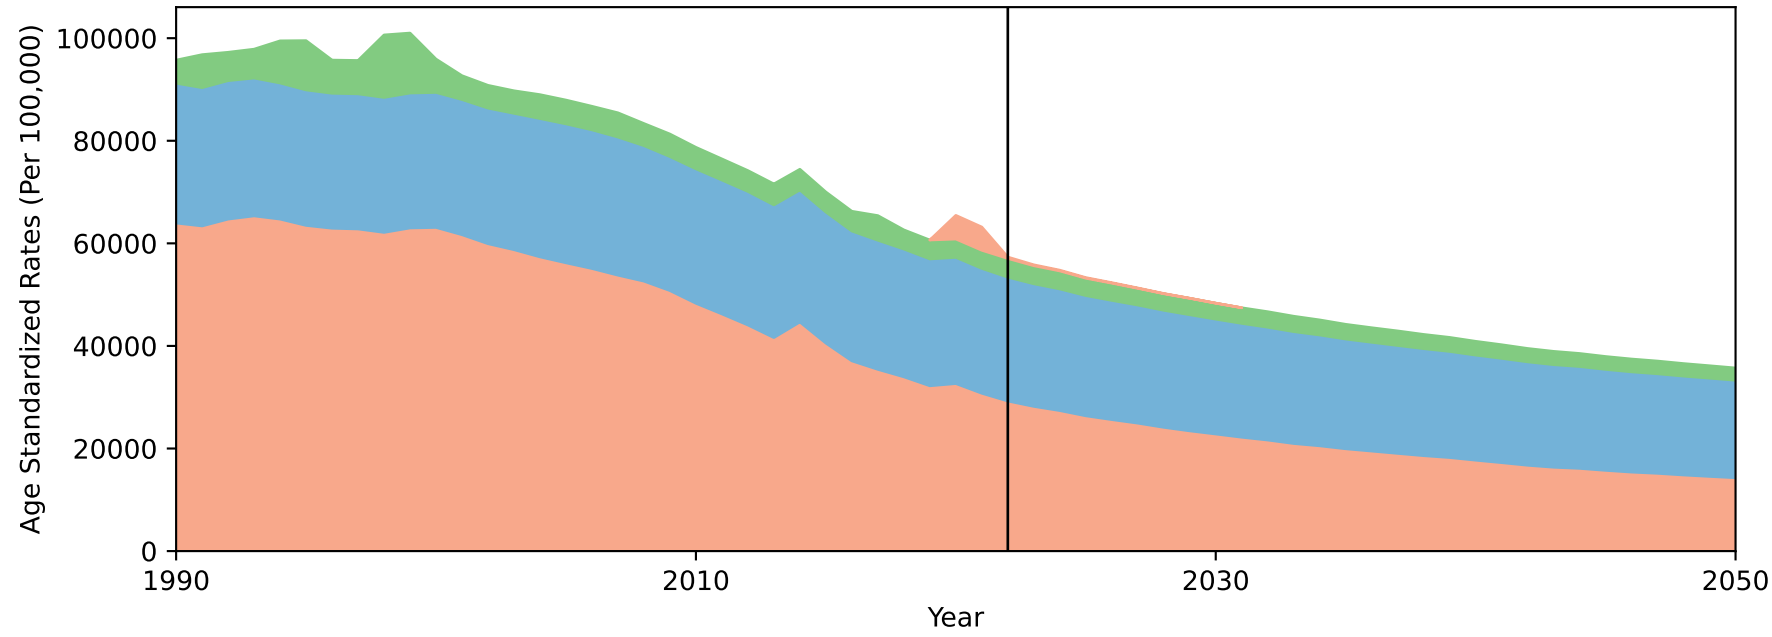

Level 2

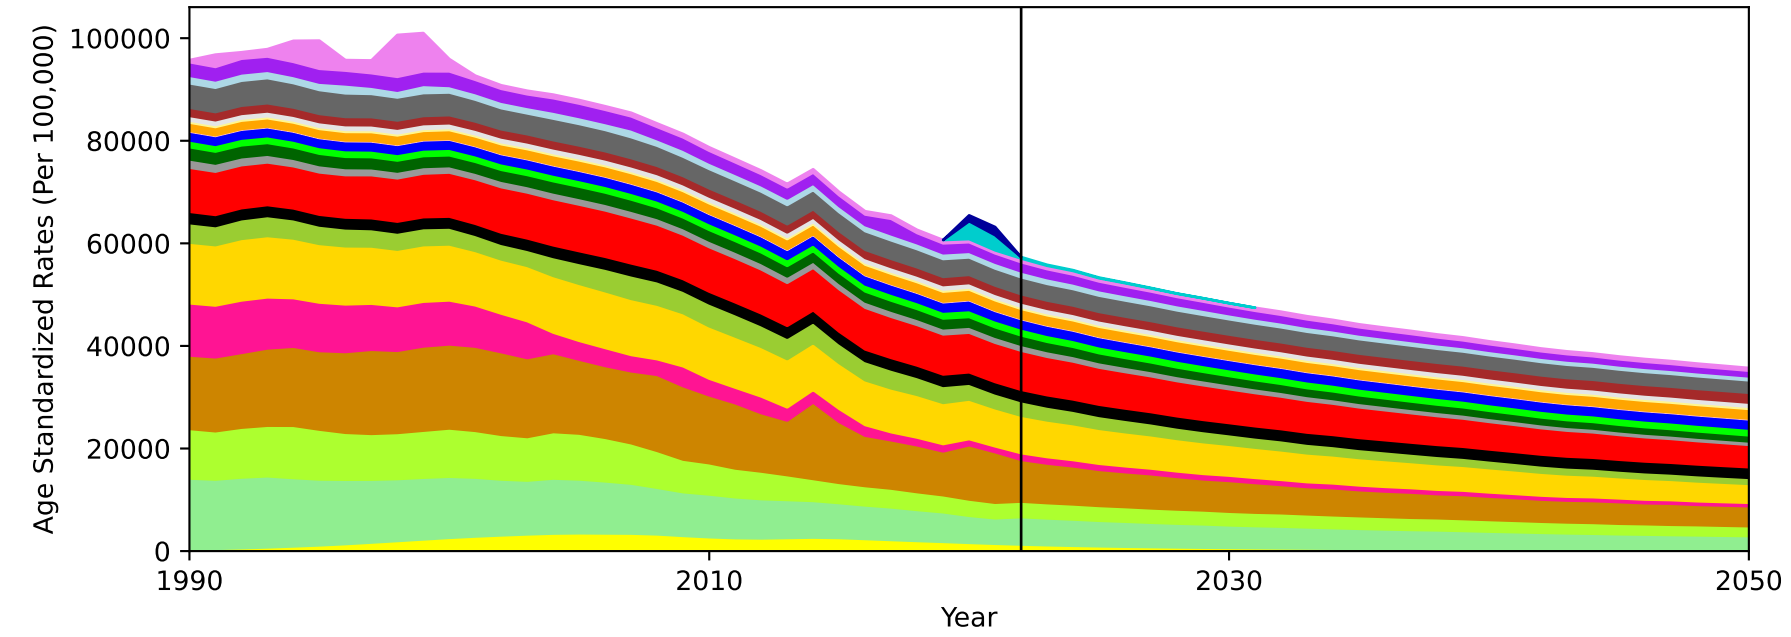

Level 1

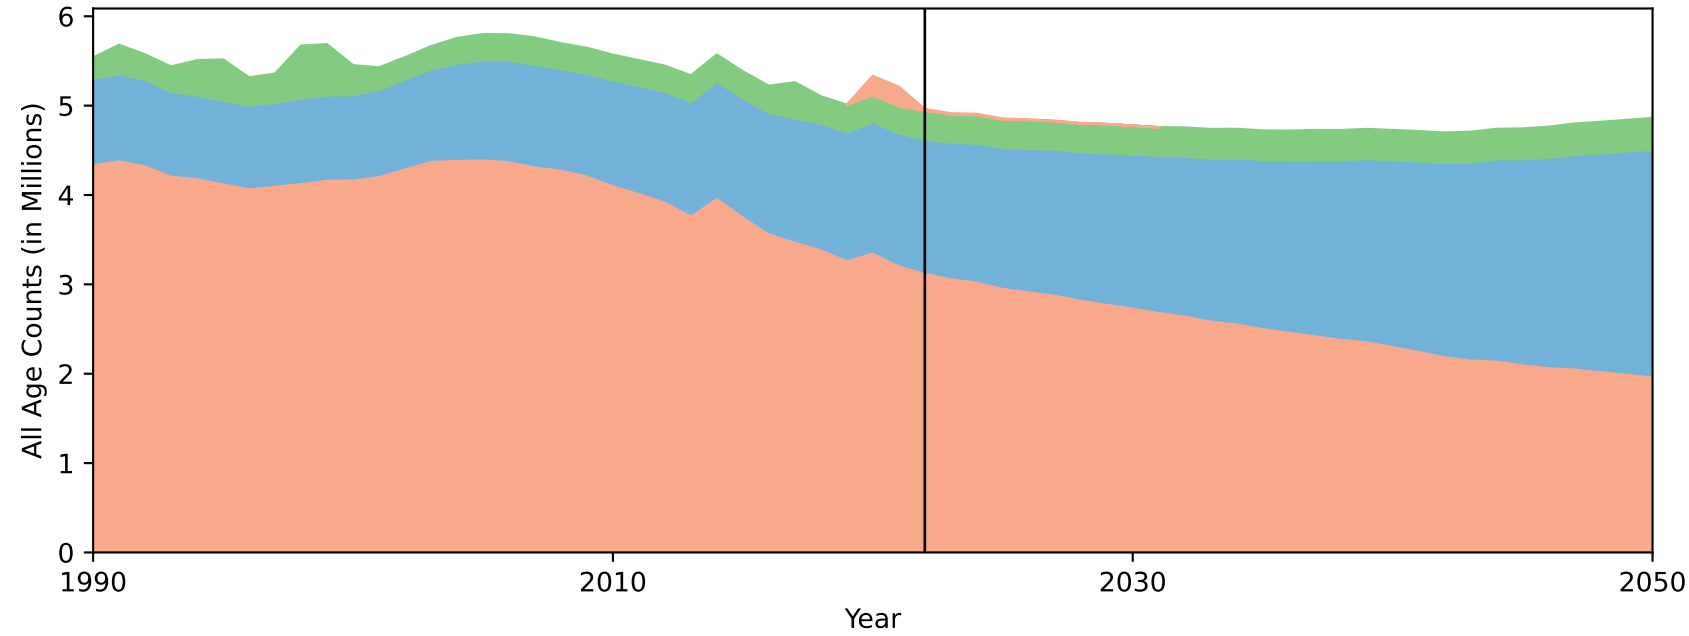

Level 2

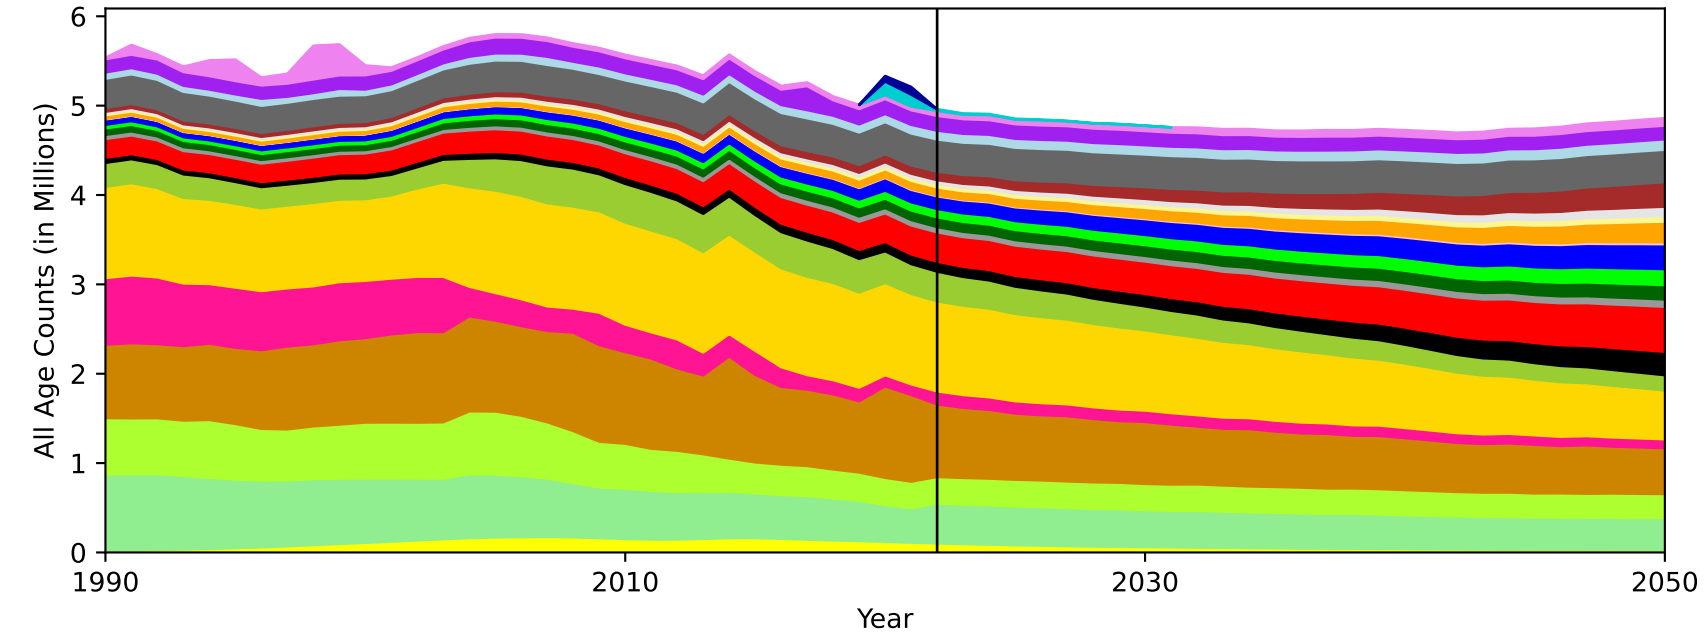



Level 1

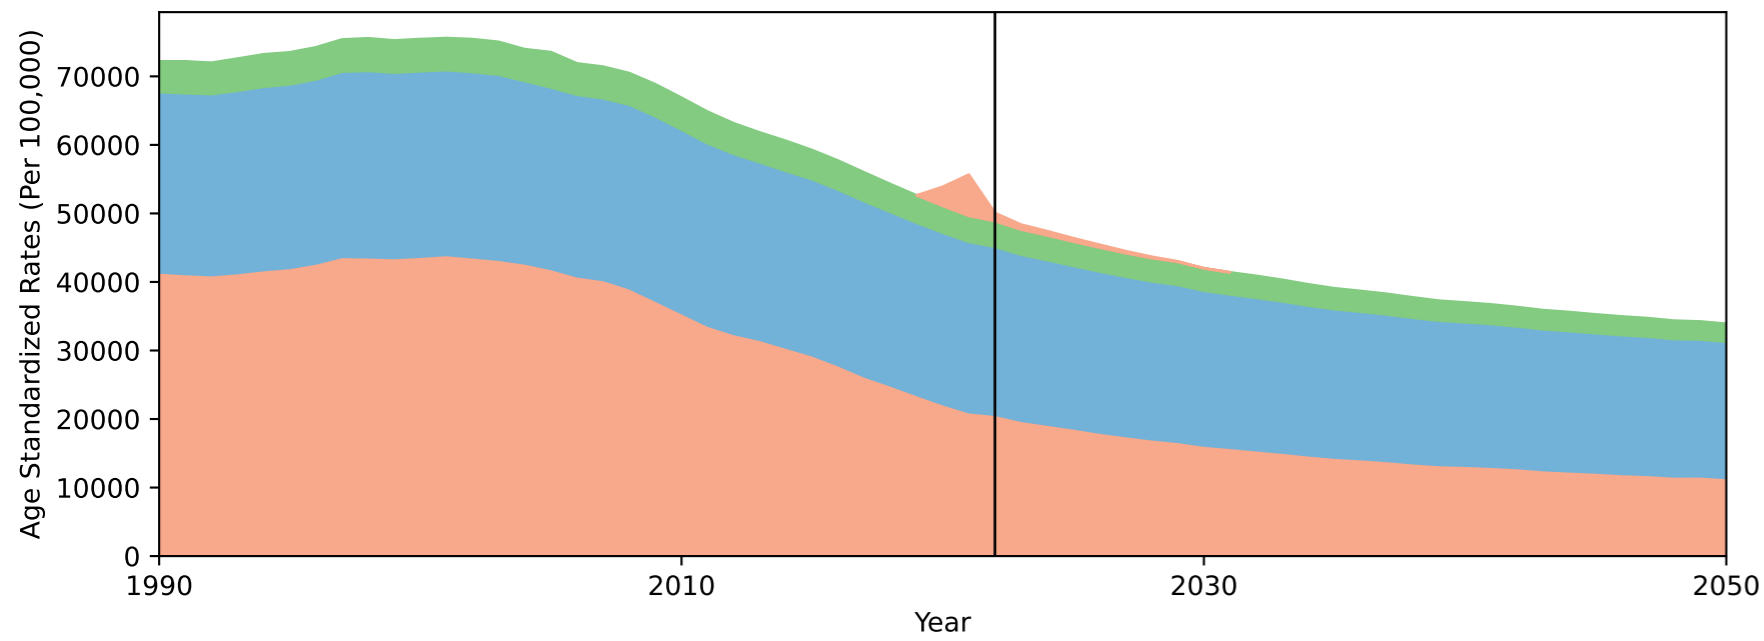

Level 2

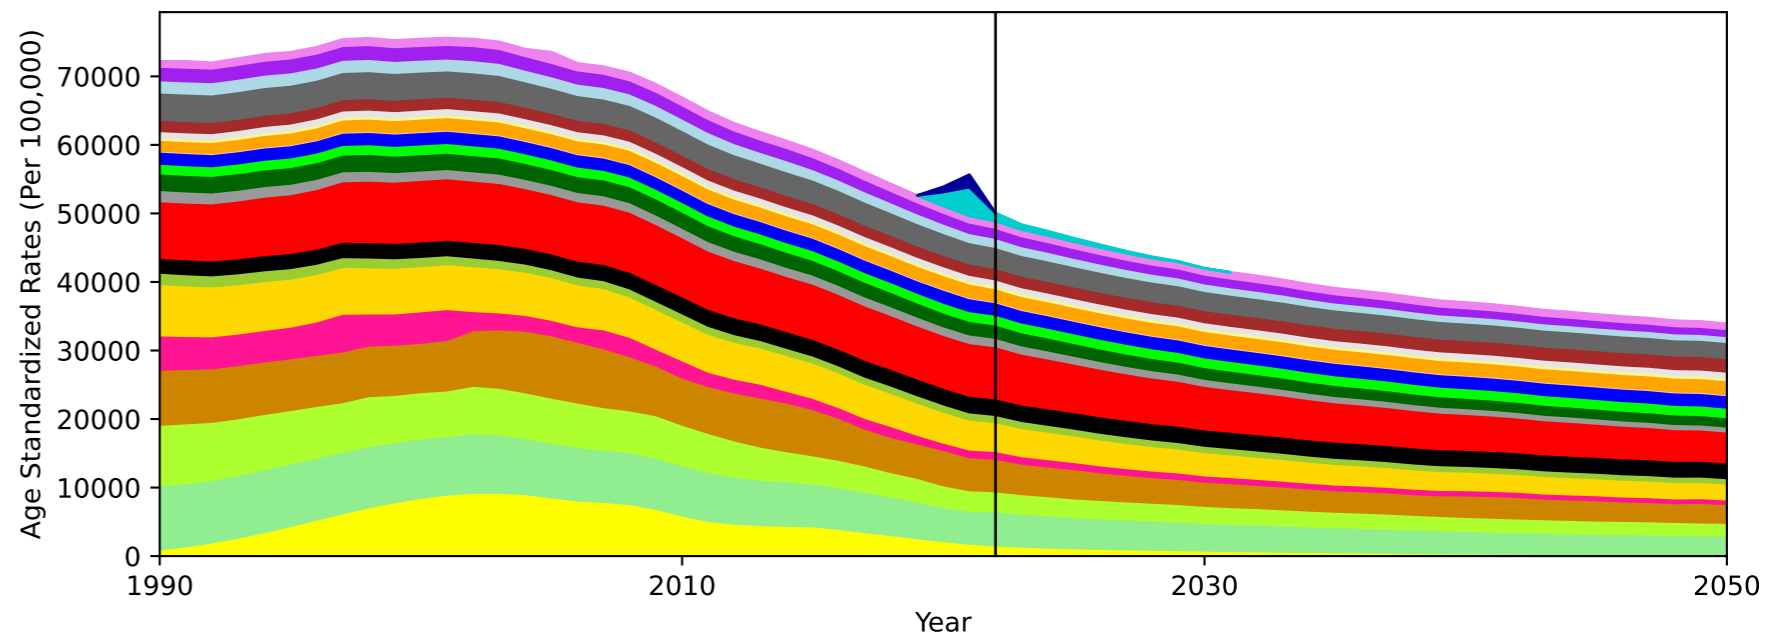

Level 1

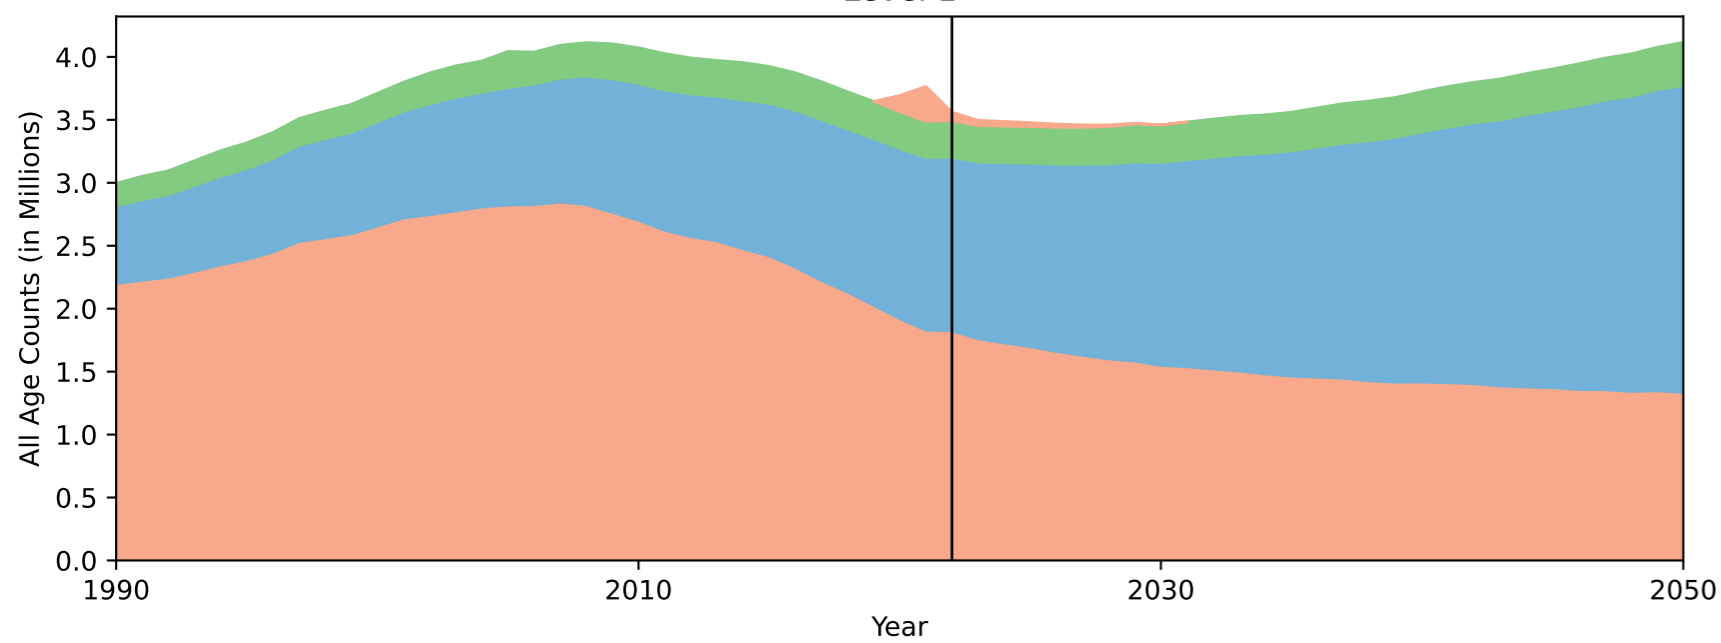

Level 2

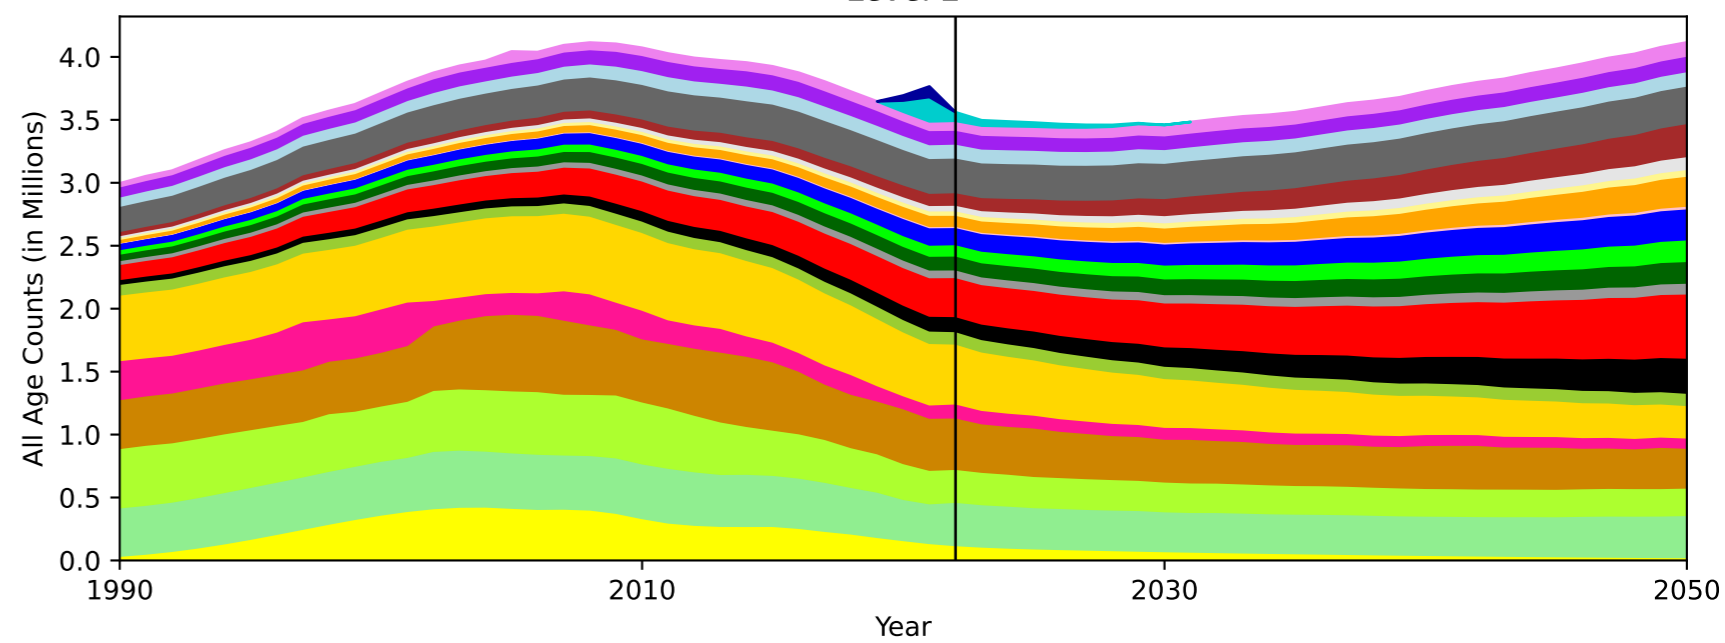

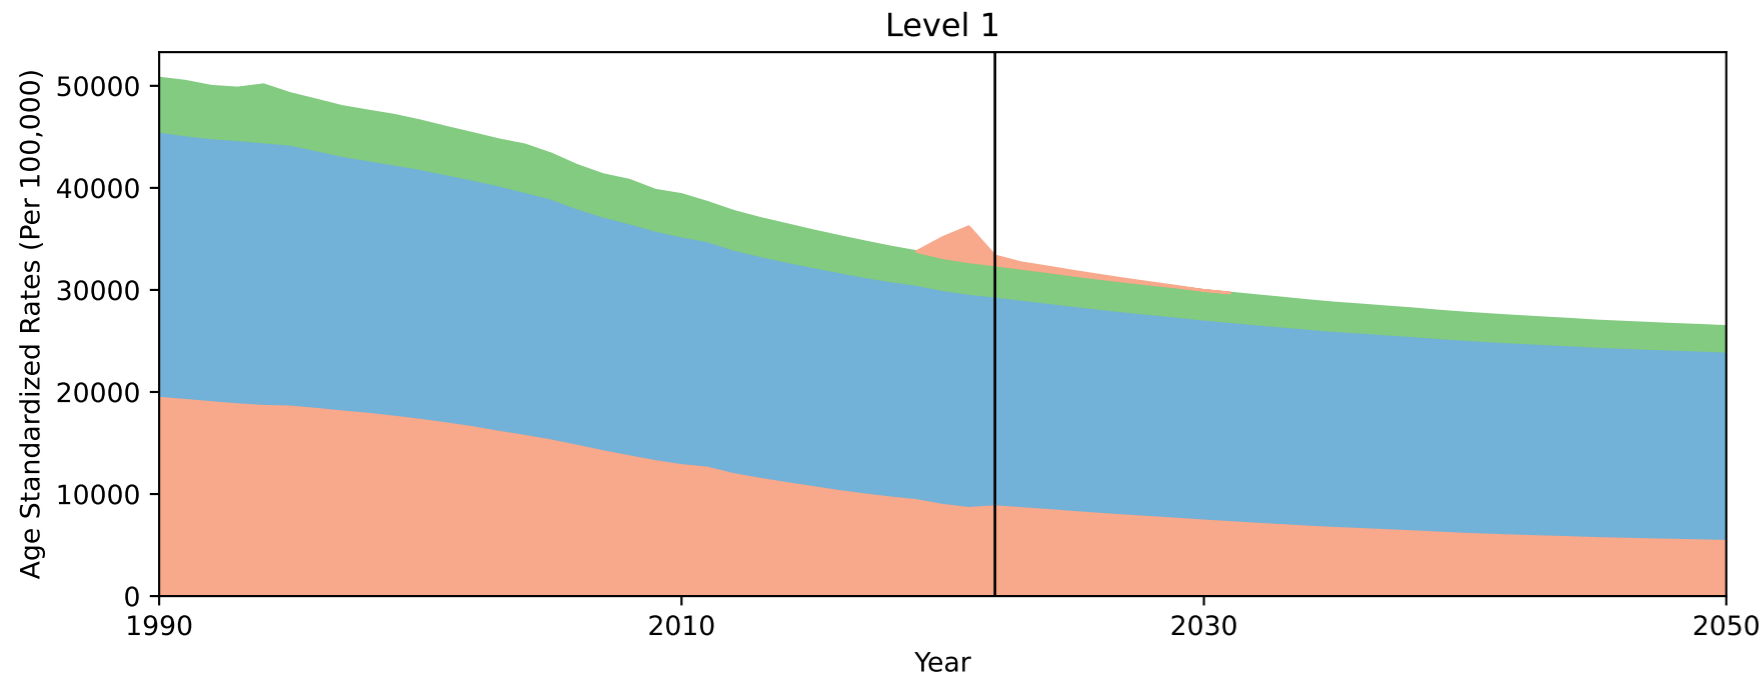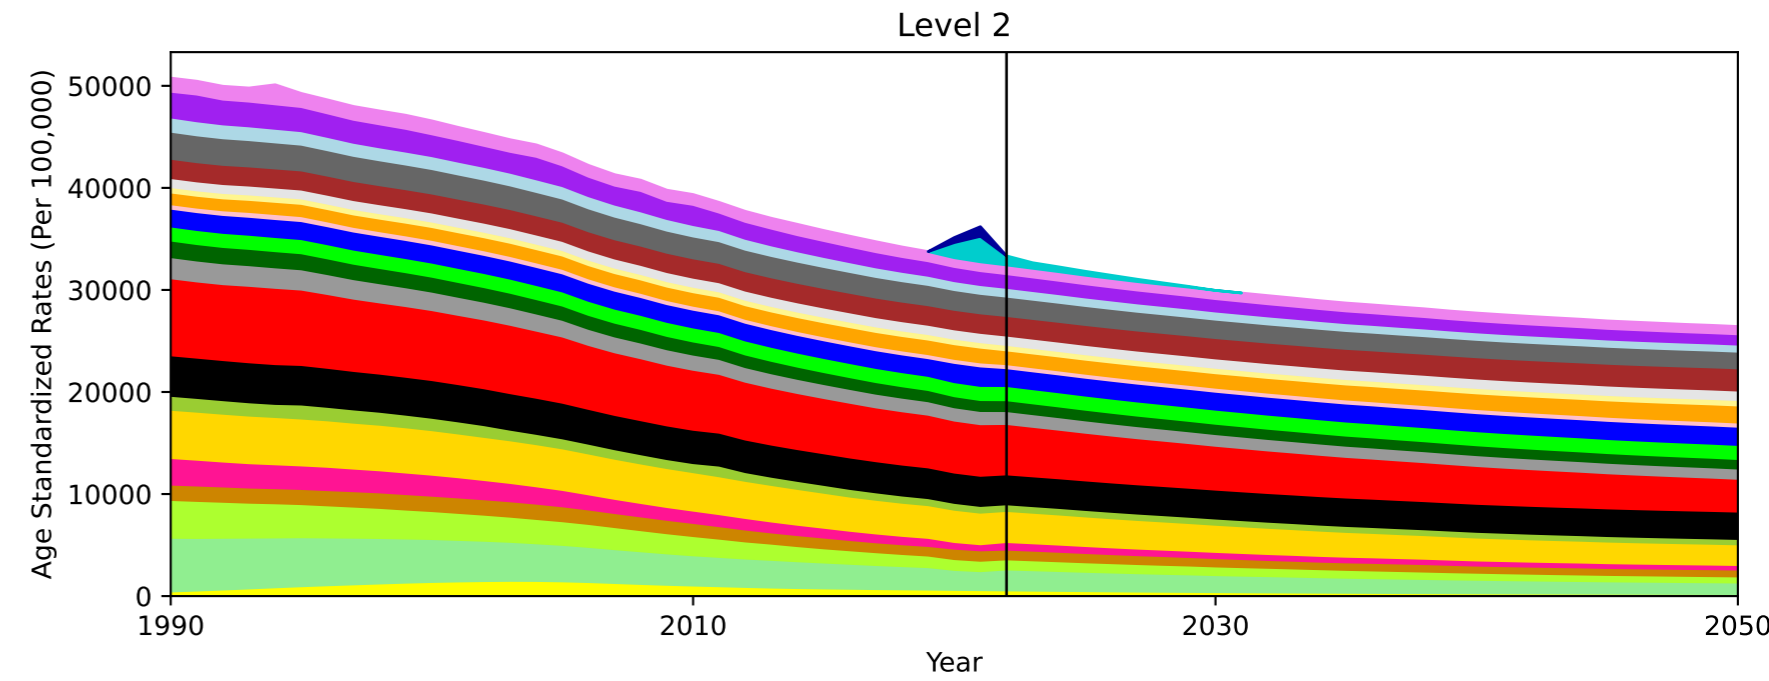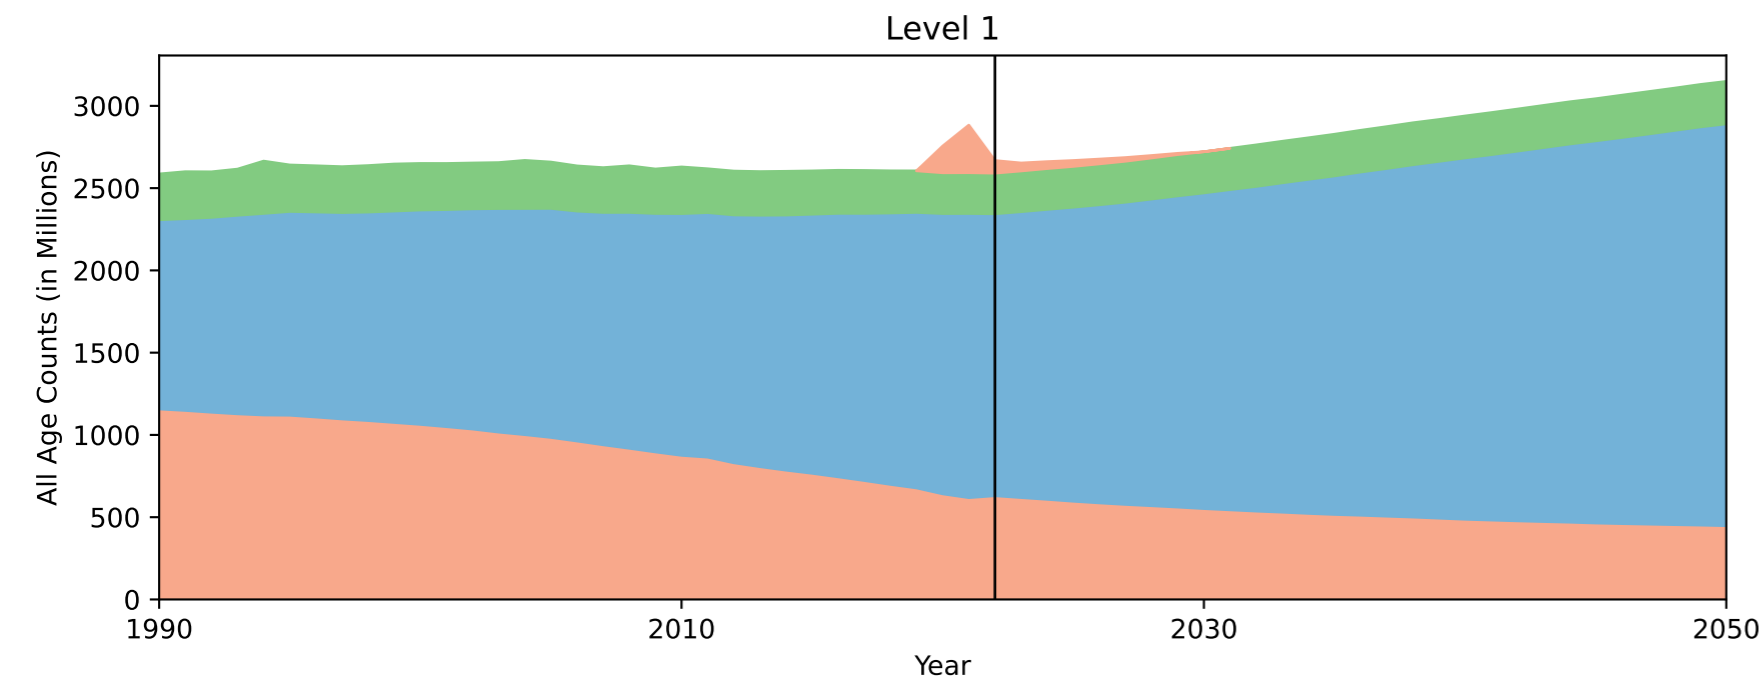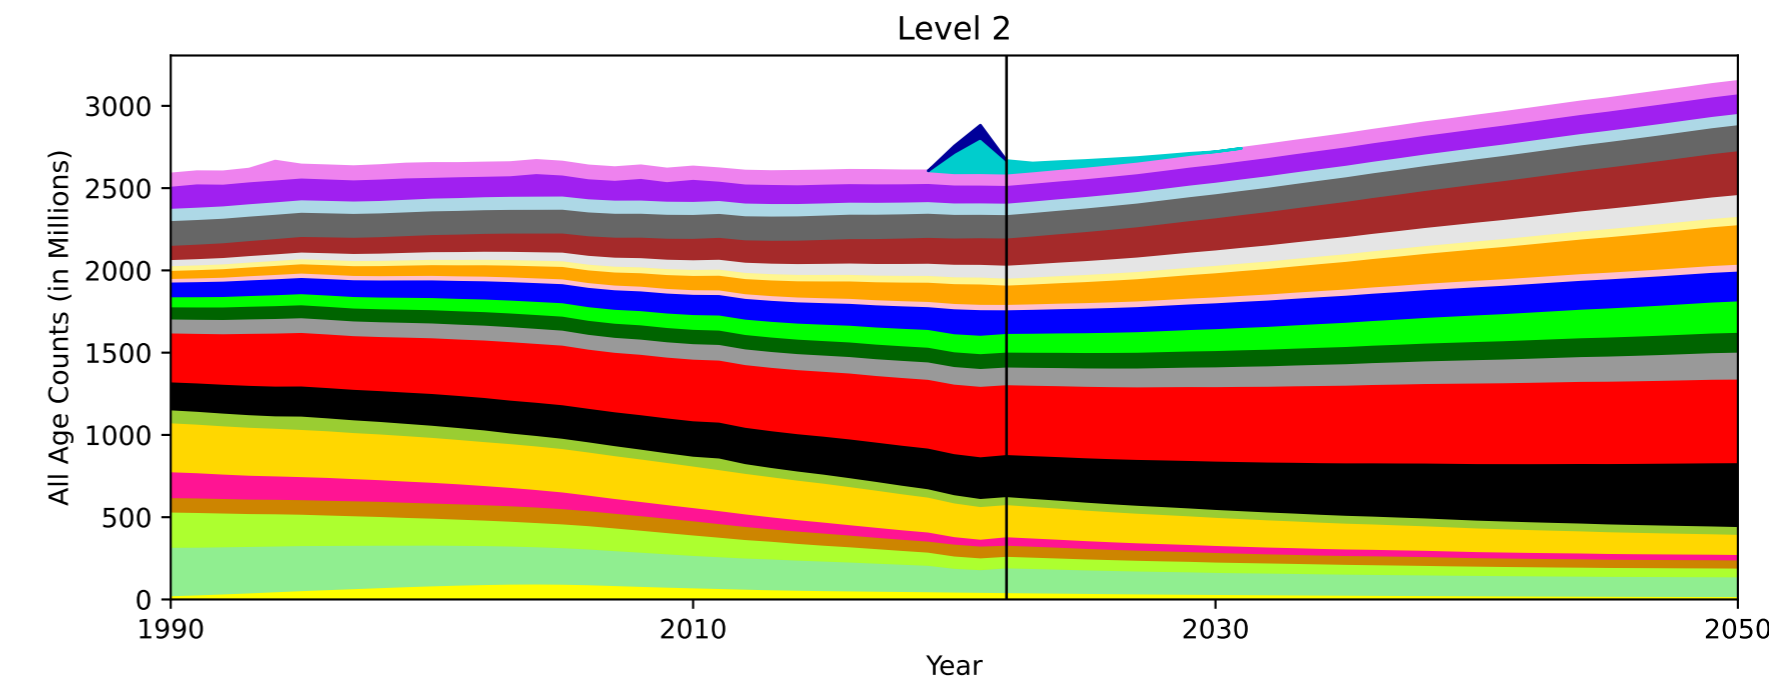

# Central Europe, Eastern Europe, And Central Asia

Level 1

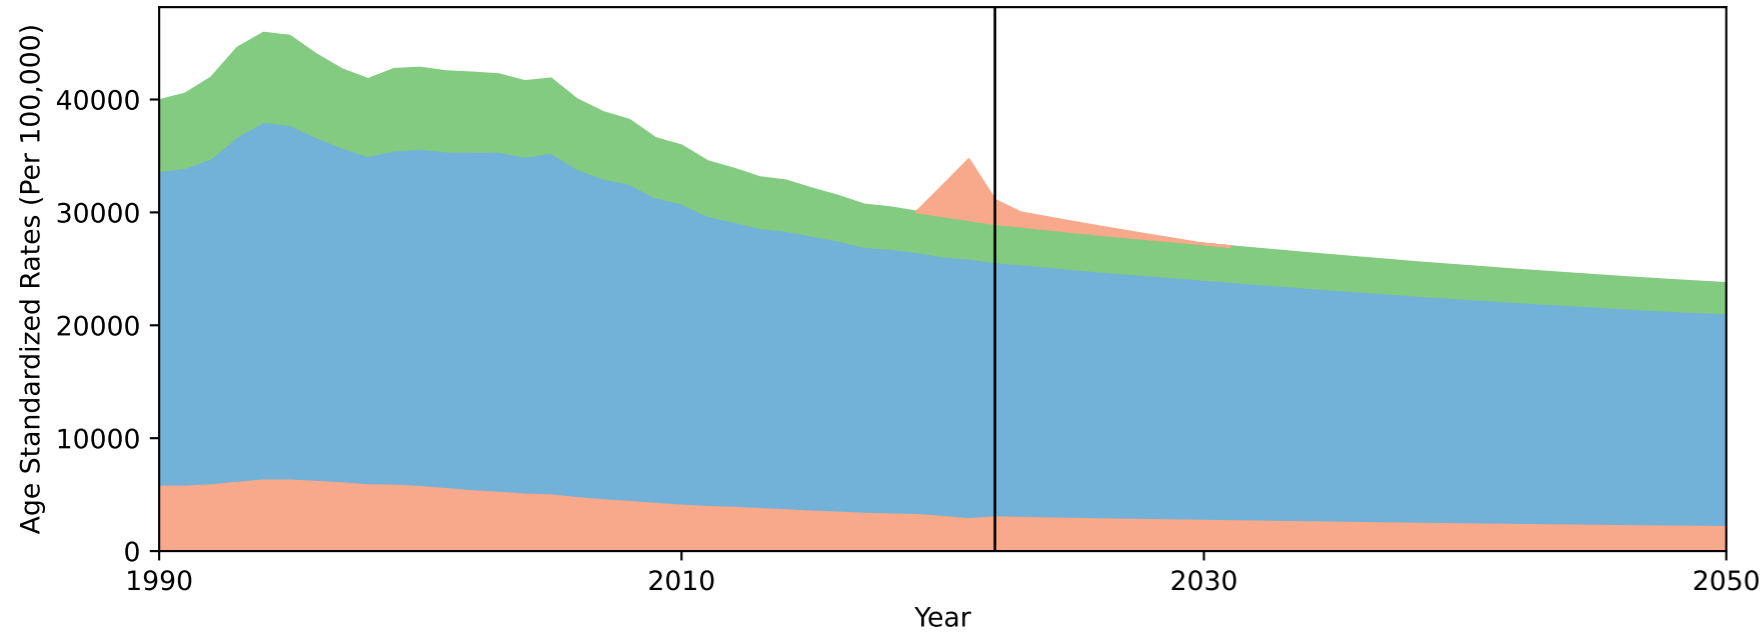

Level 2

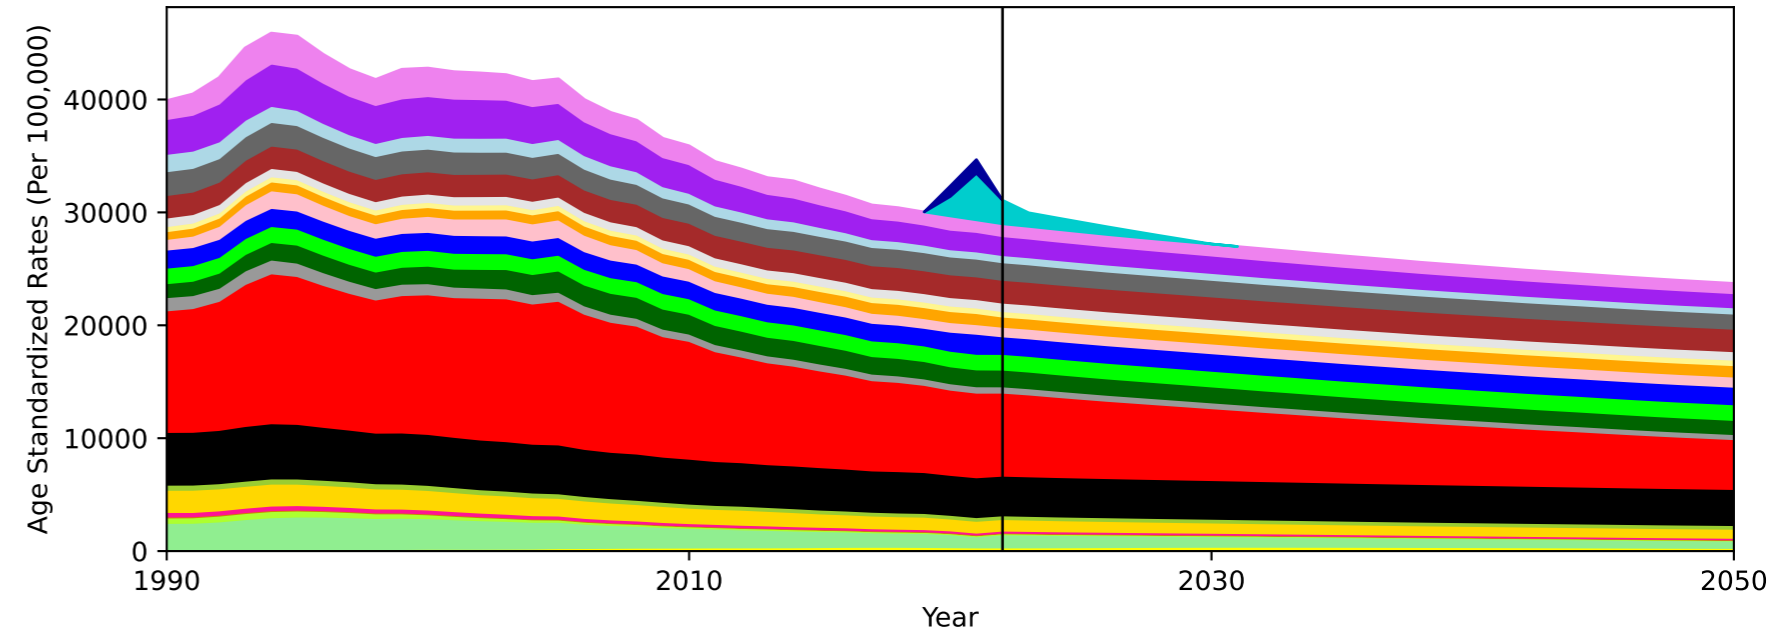

Level 1

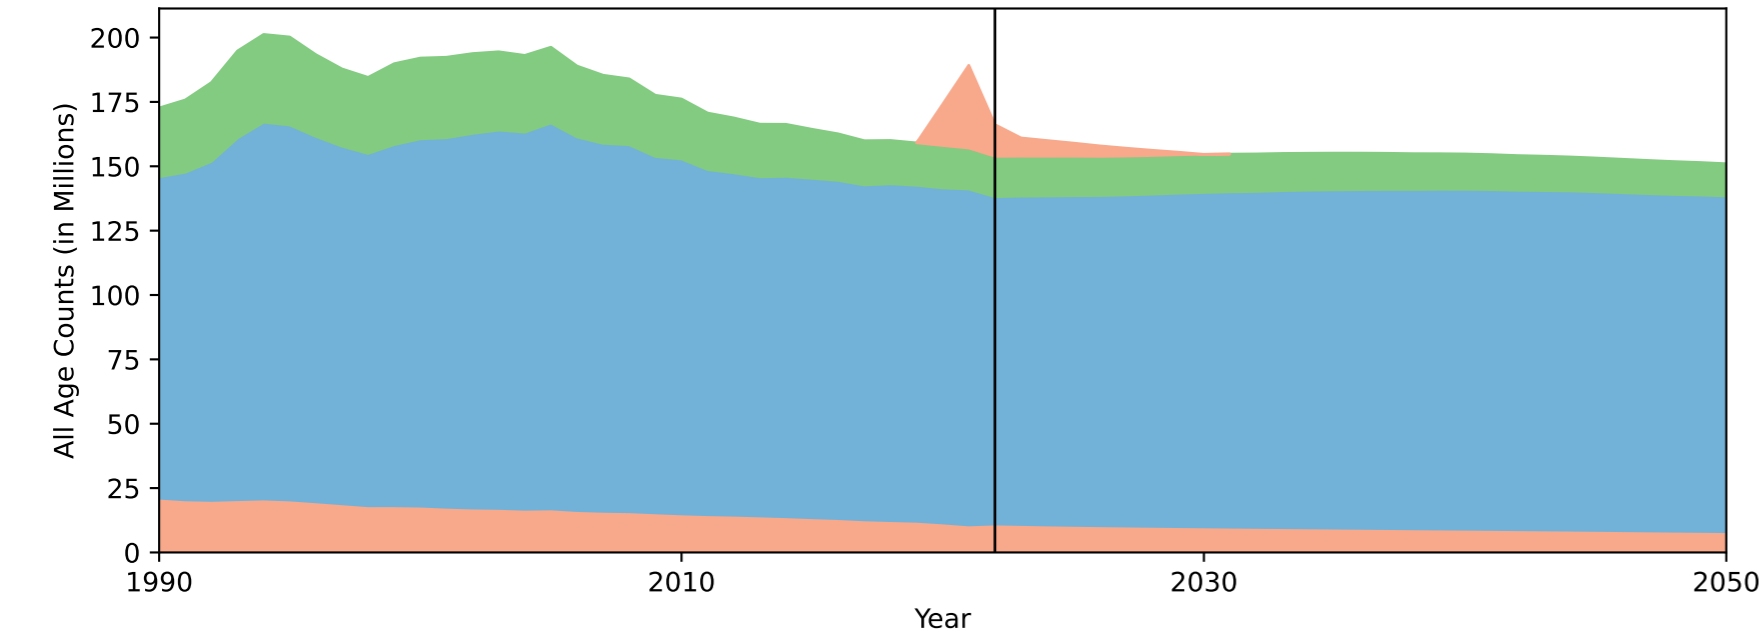

Level 2

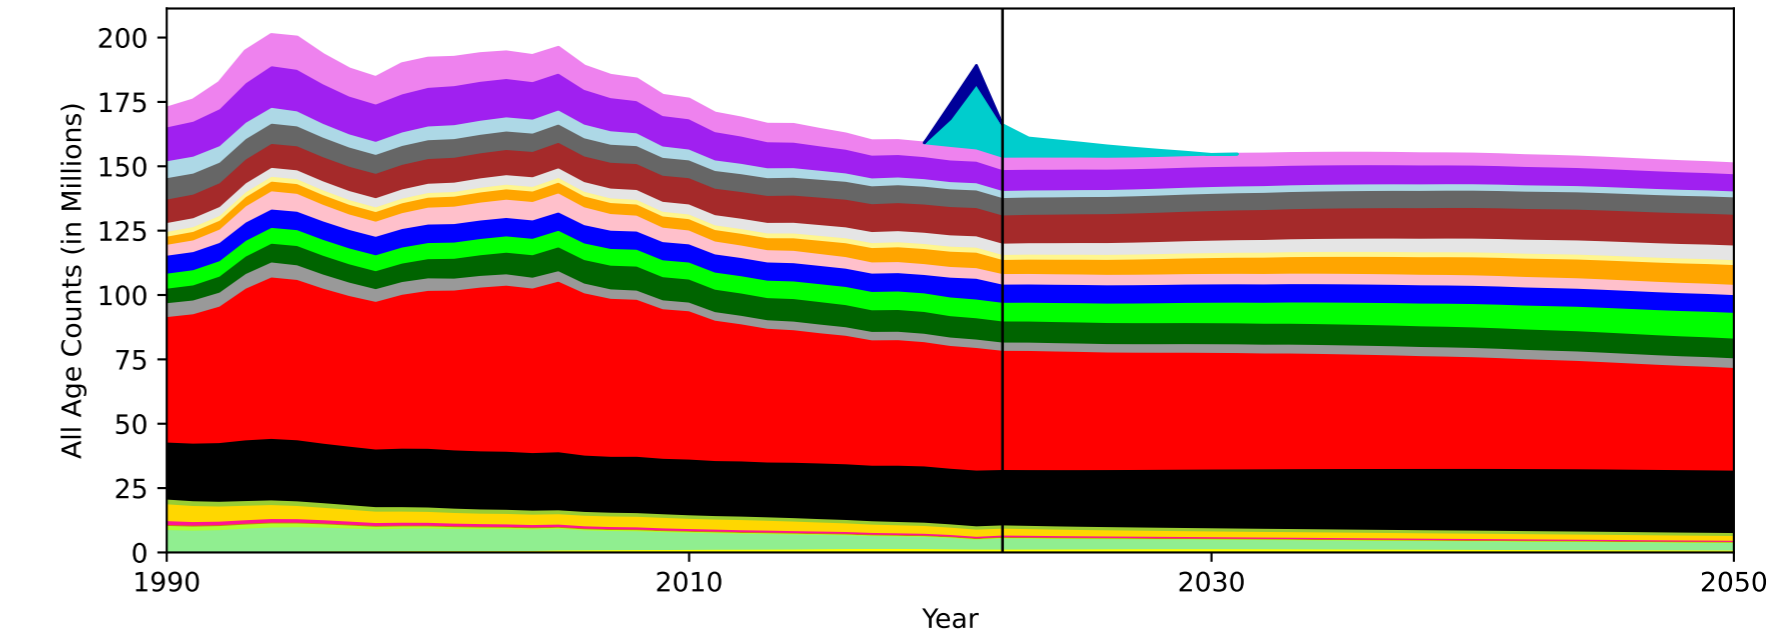

# High Income

Level 1

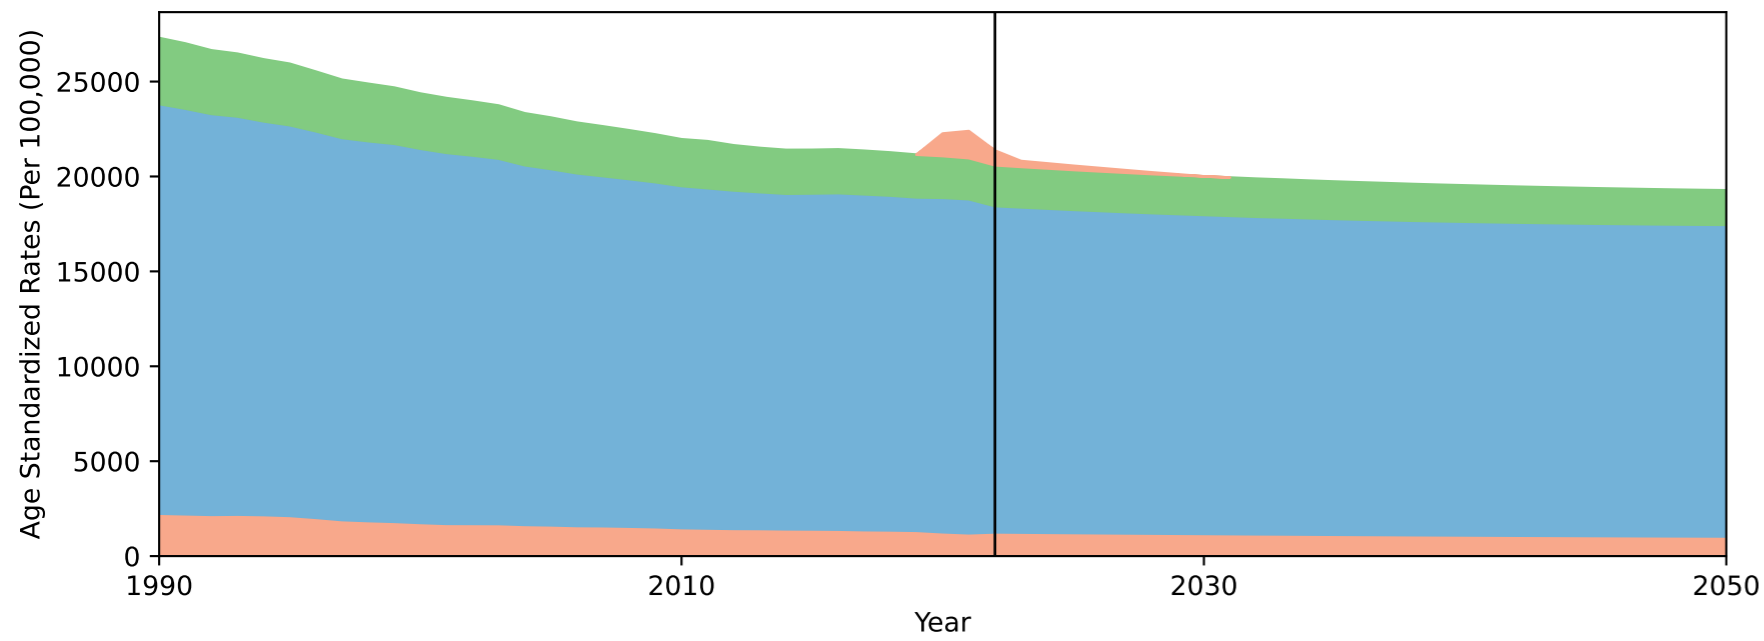

Level 2

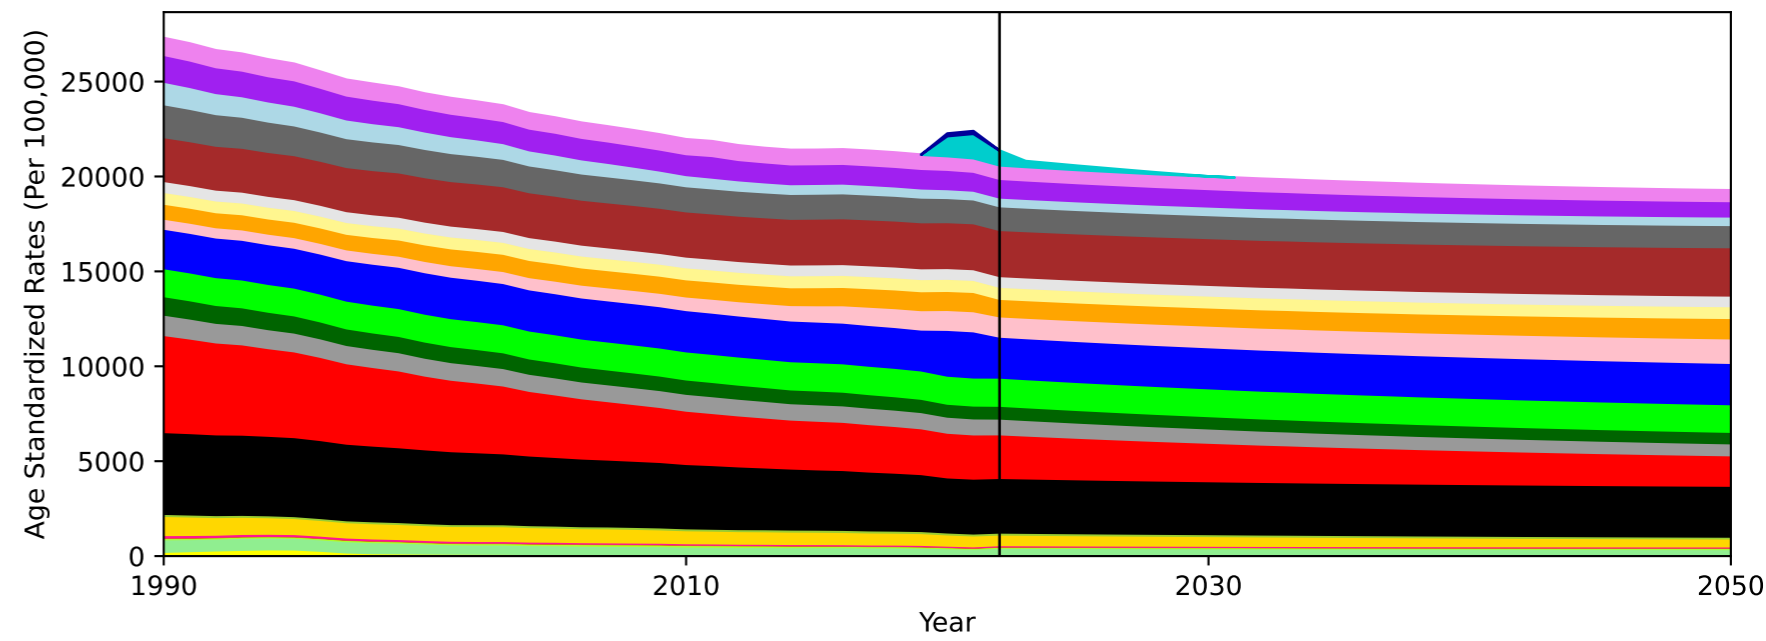

Level 1

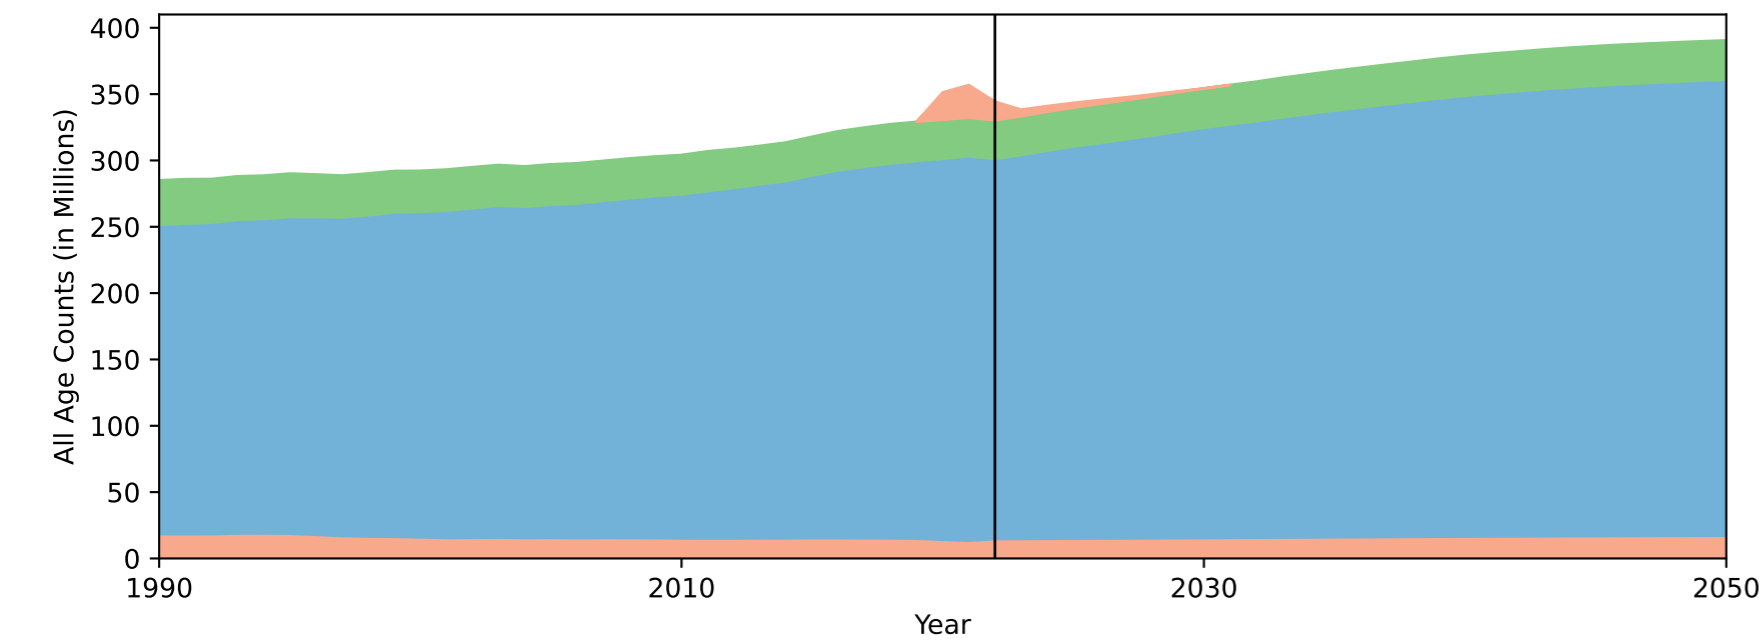

Level 2

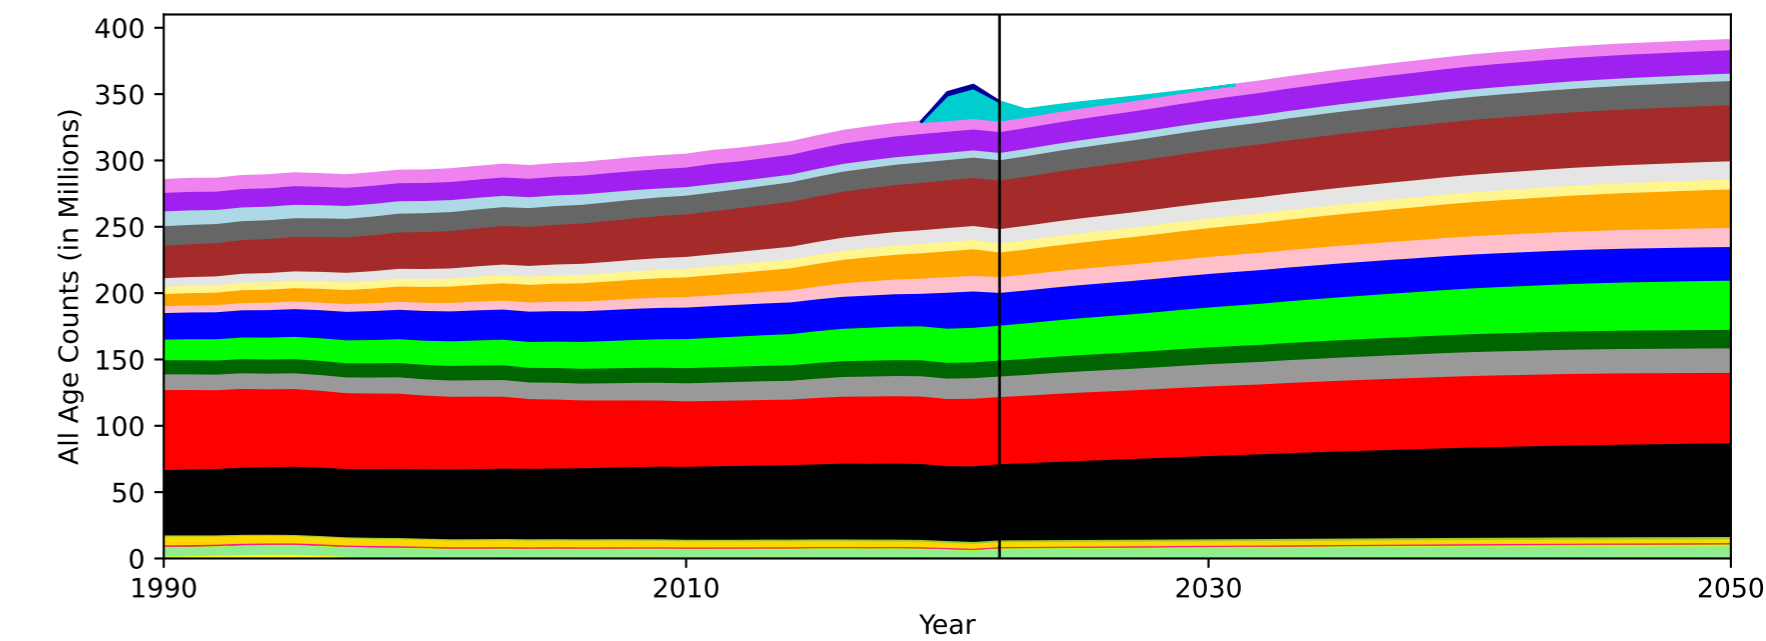

# Latin America And Caribbean

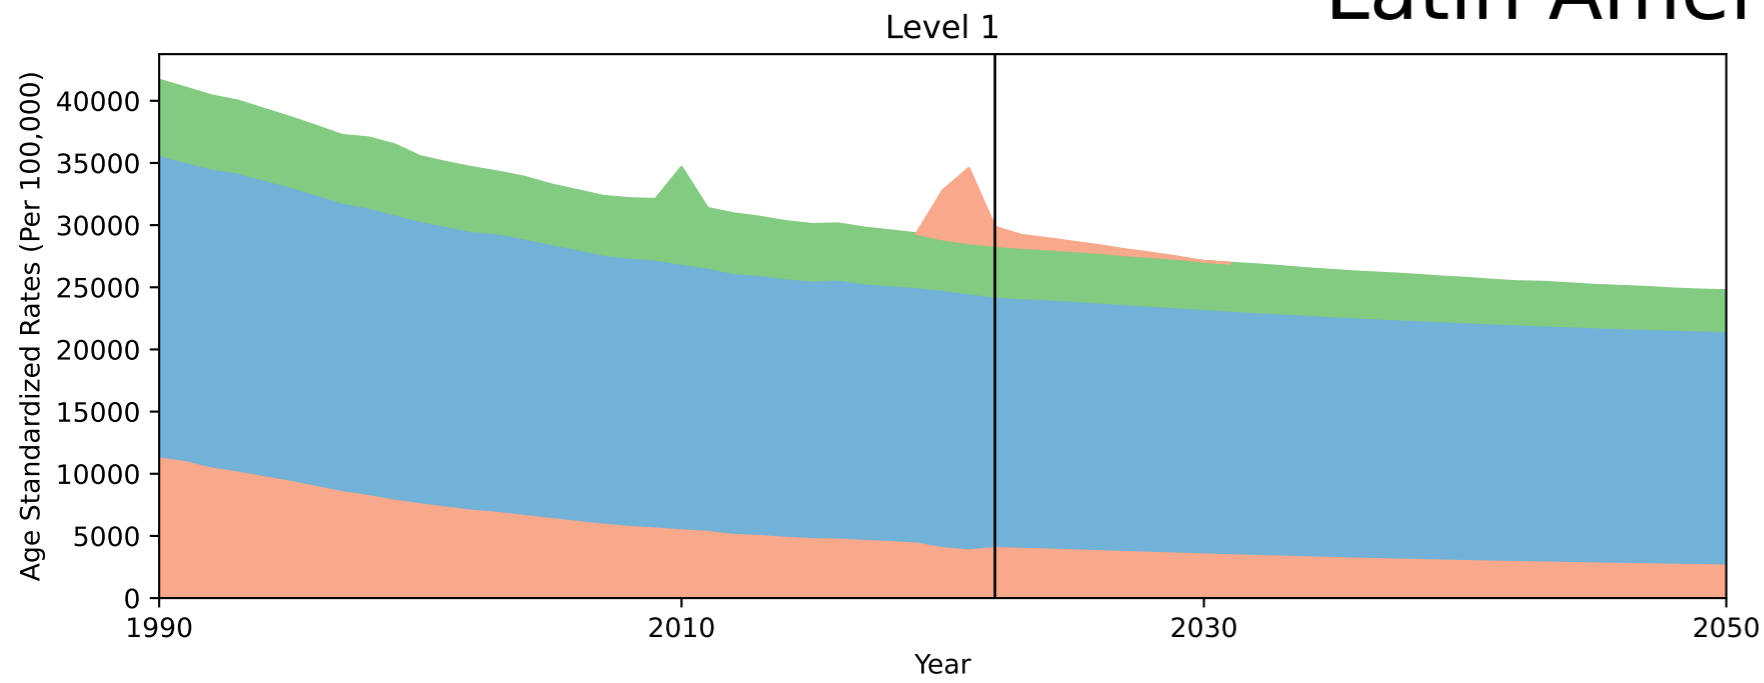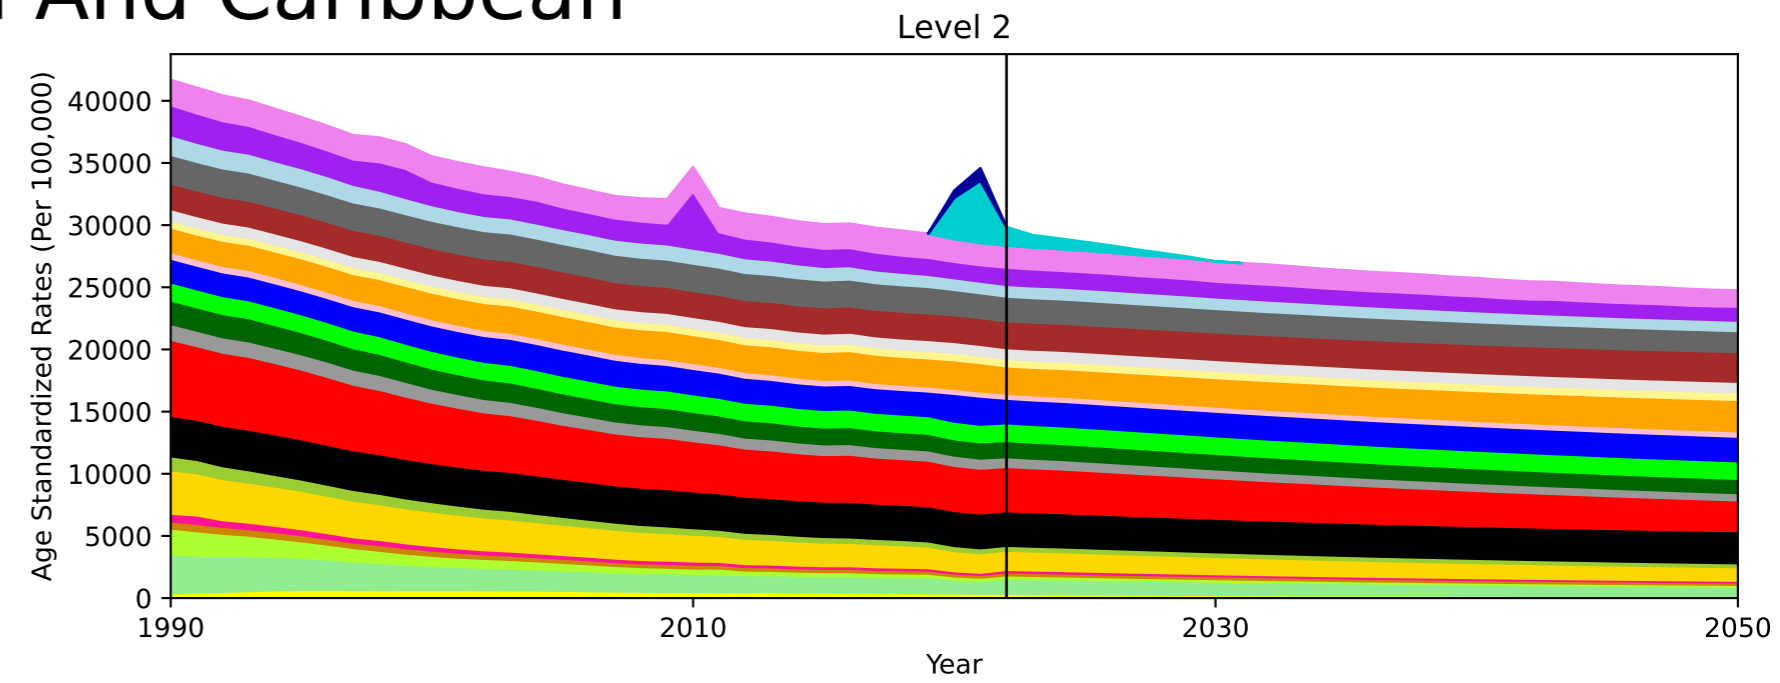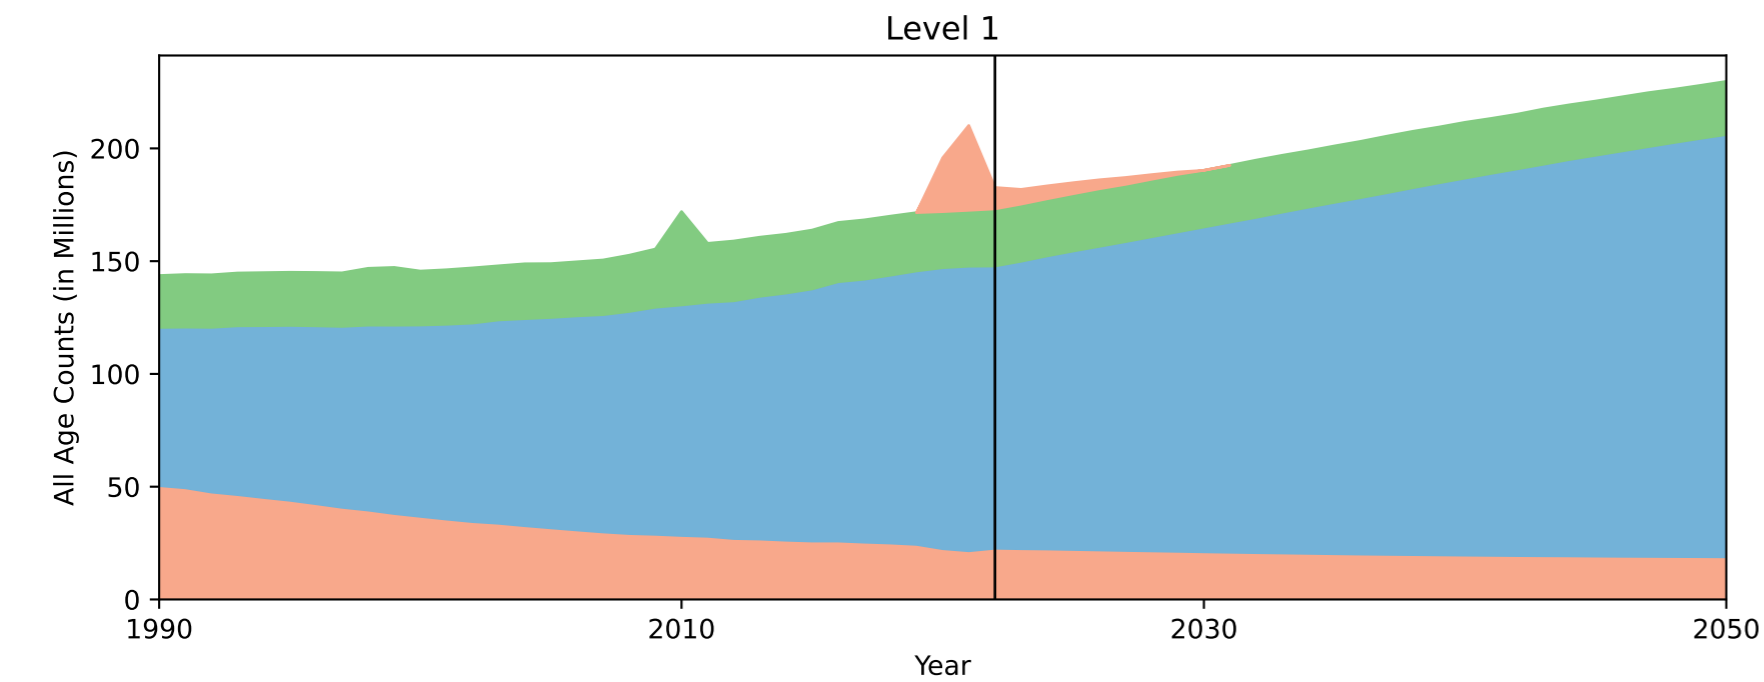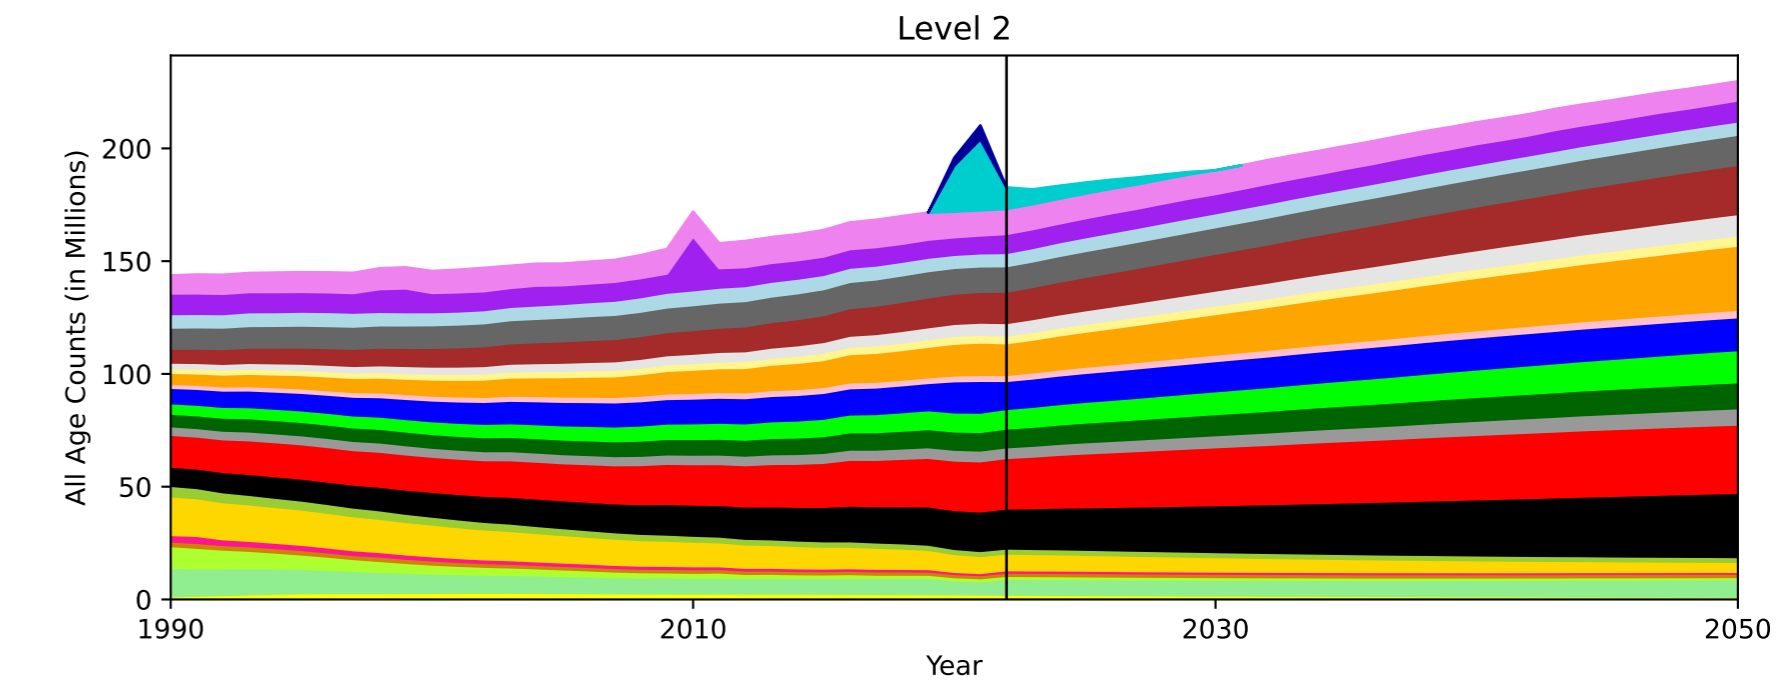

# North Africa And Middle East

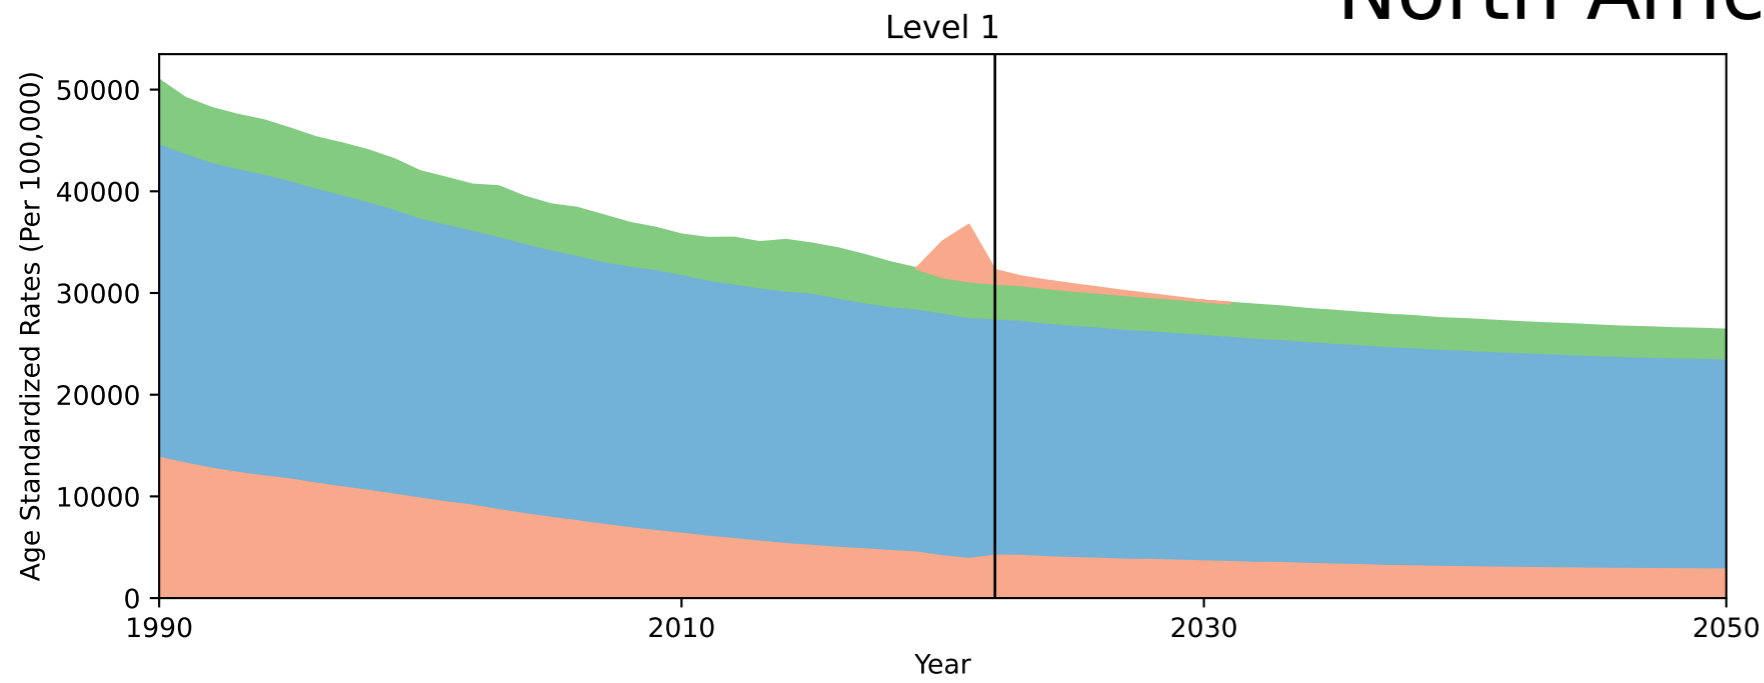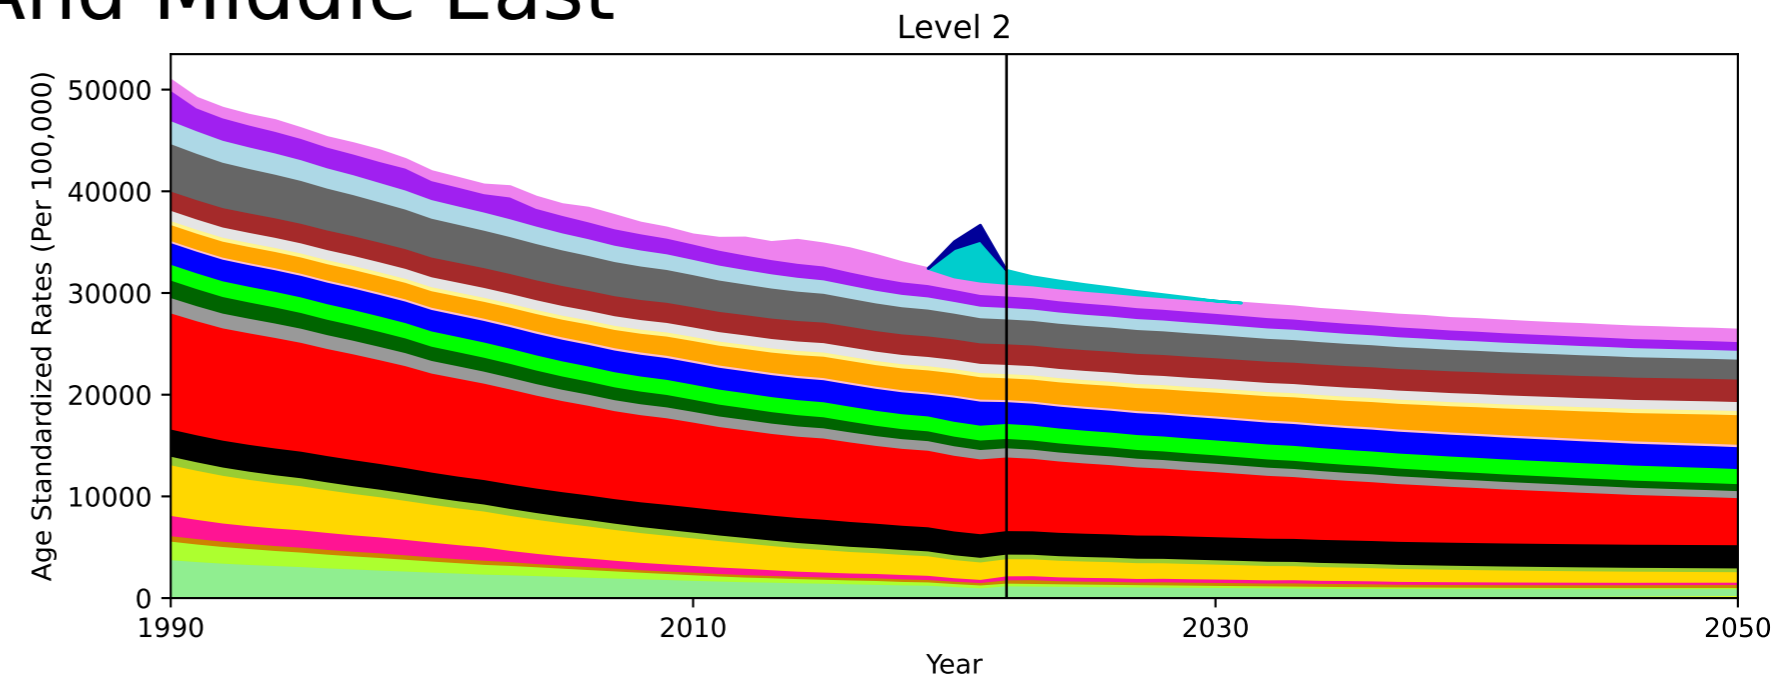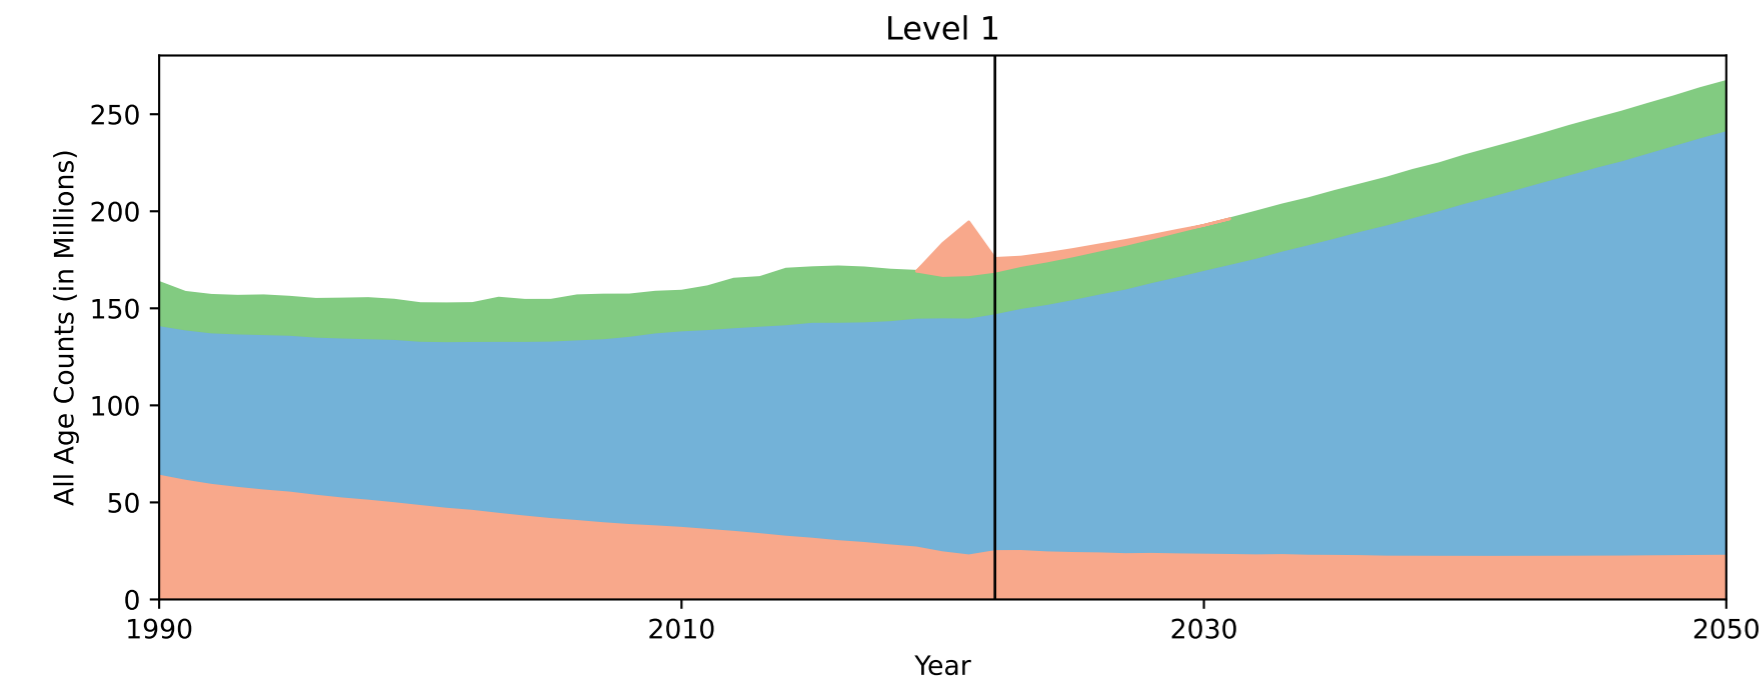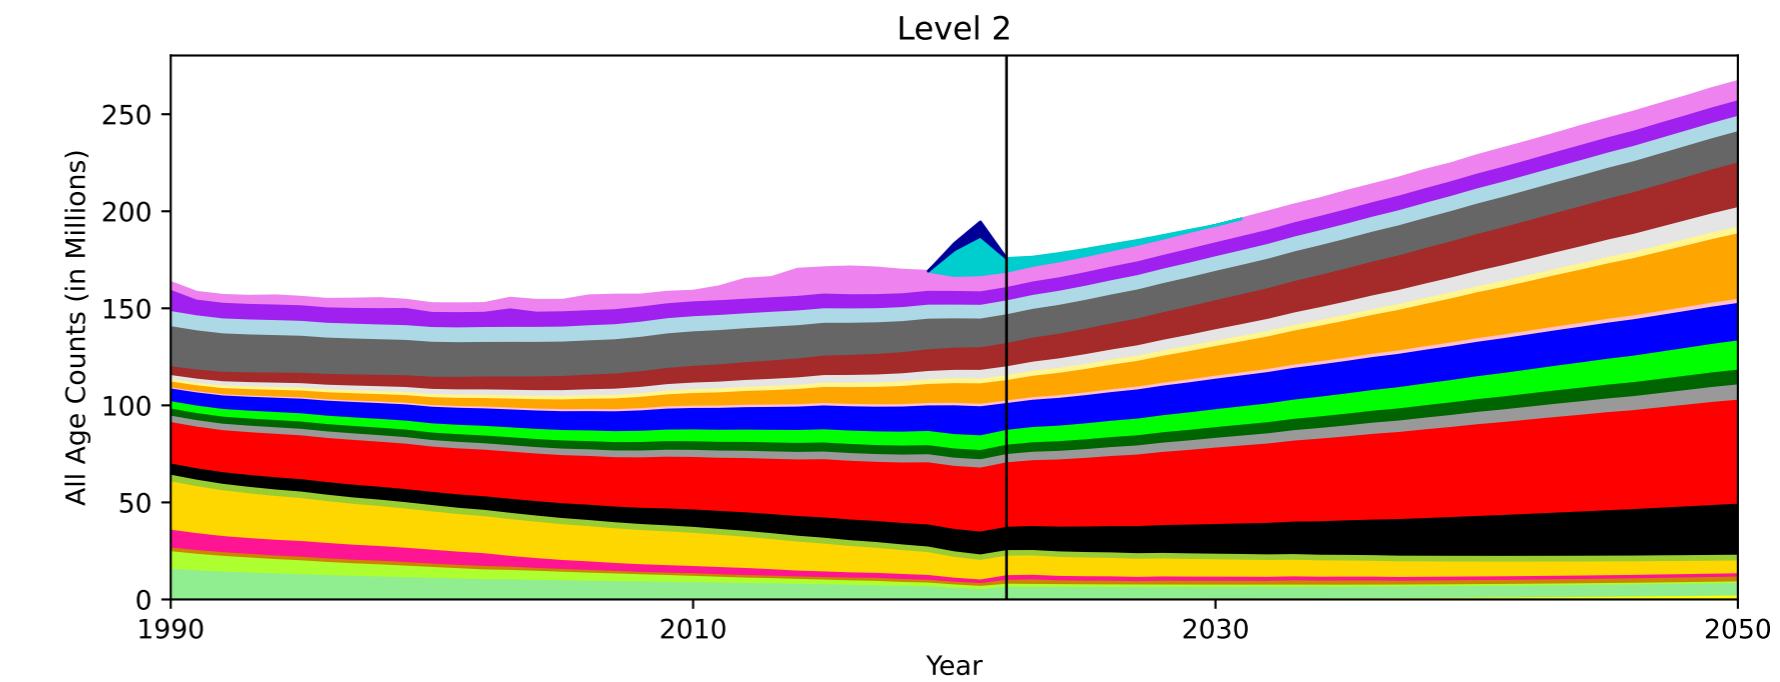

# South Asia

Level 1

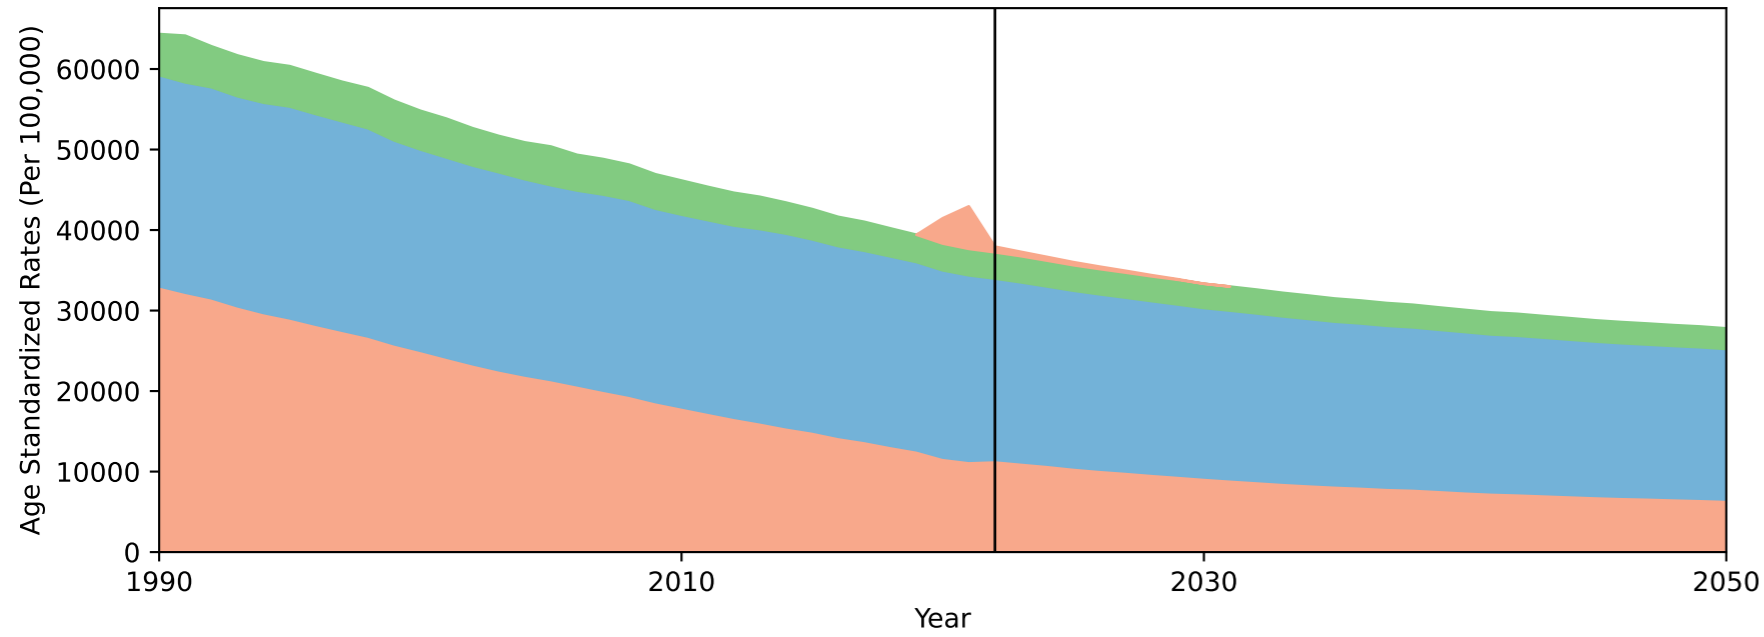

Level 2

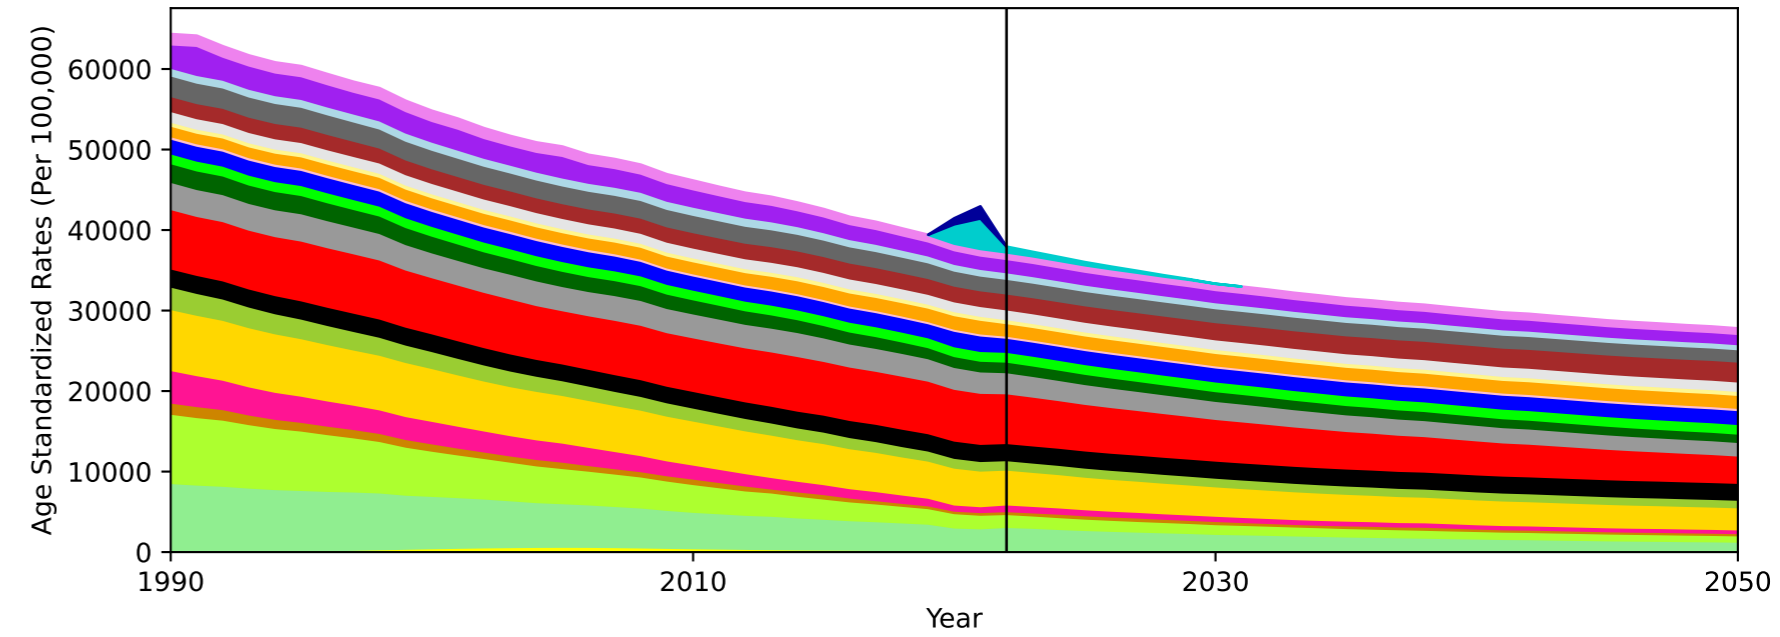

Level 1

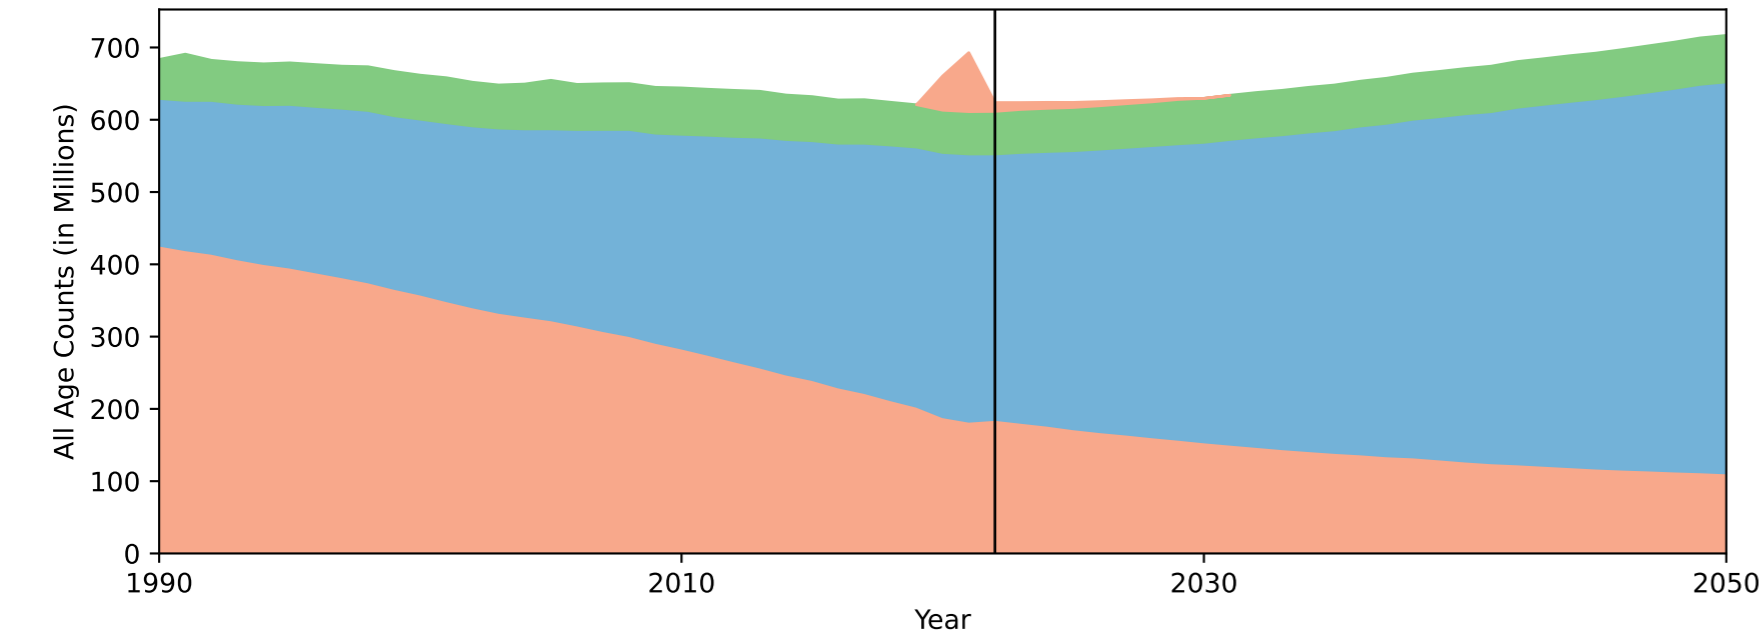

Level 2

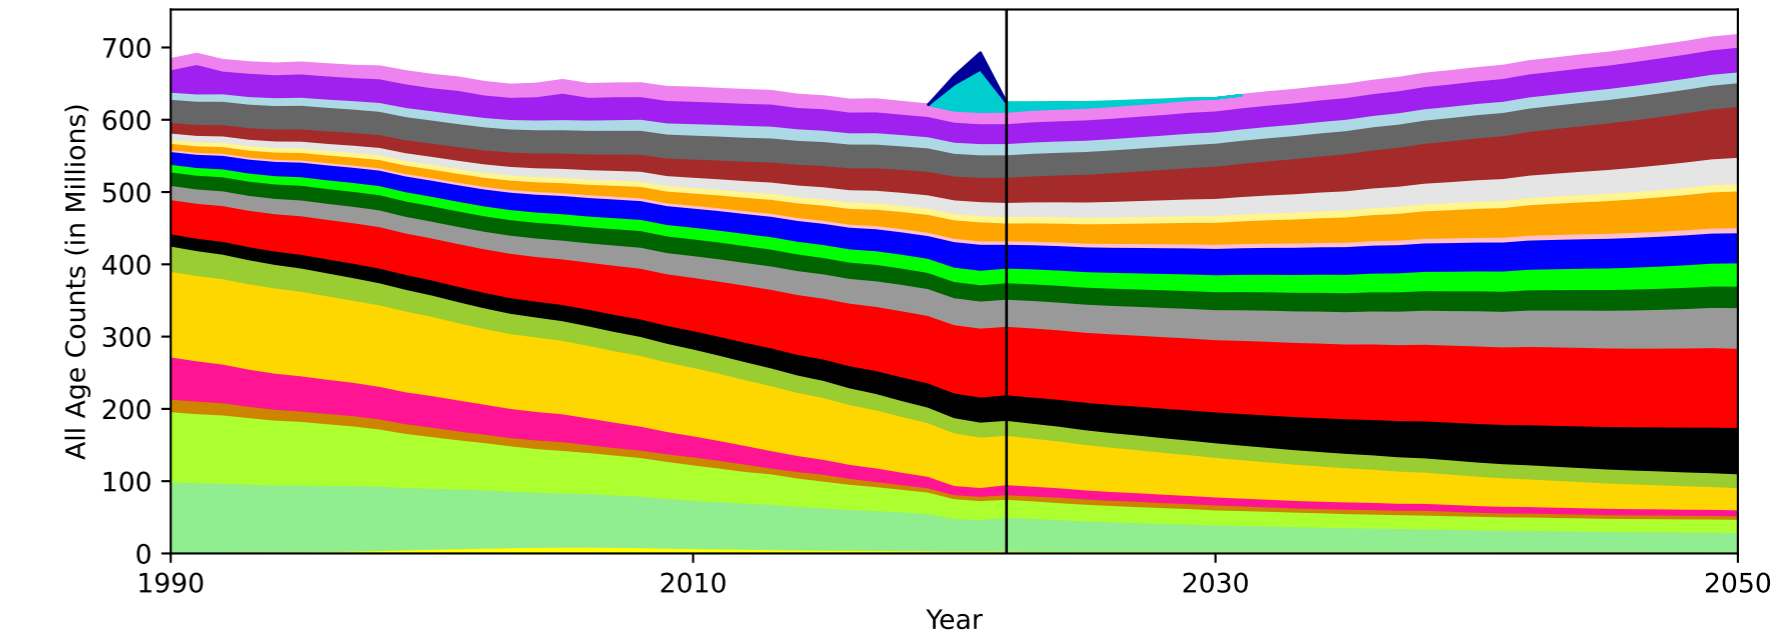

# Southeast Asia, East Asia, And Oceania

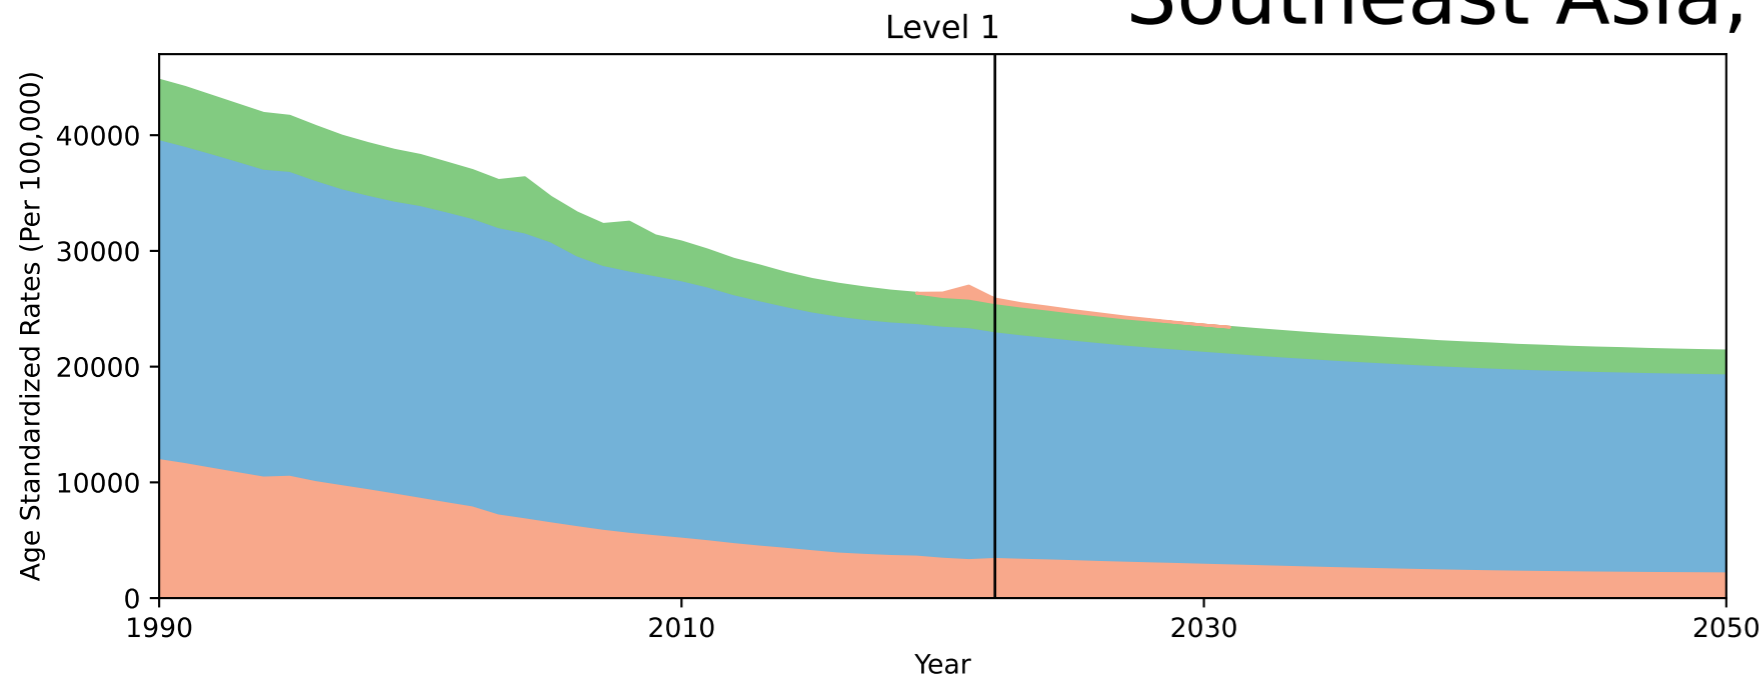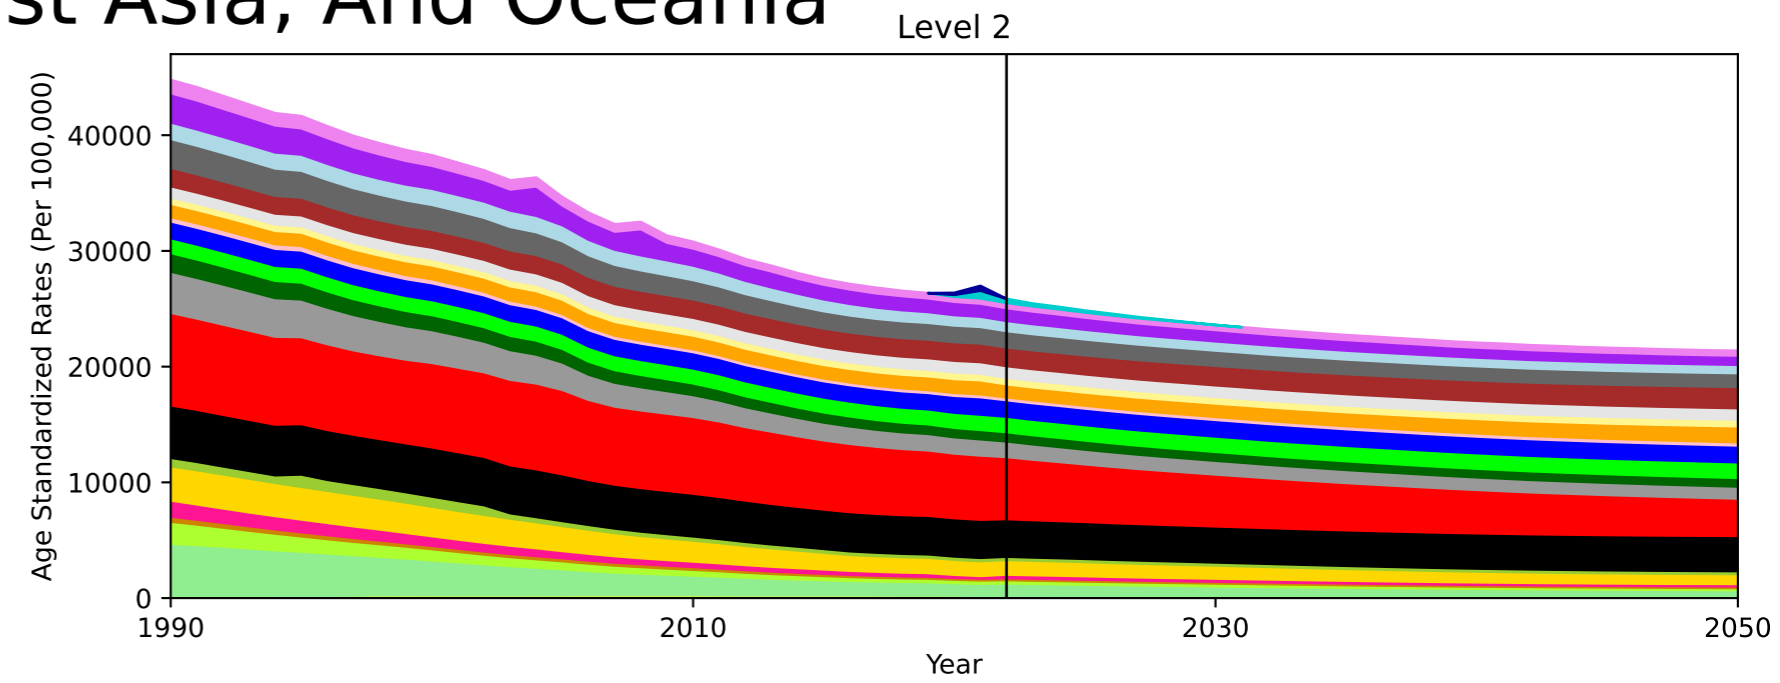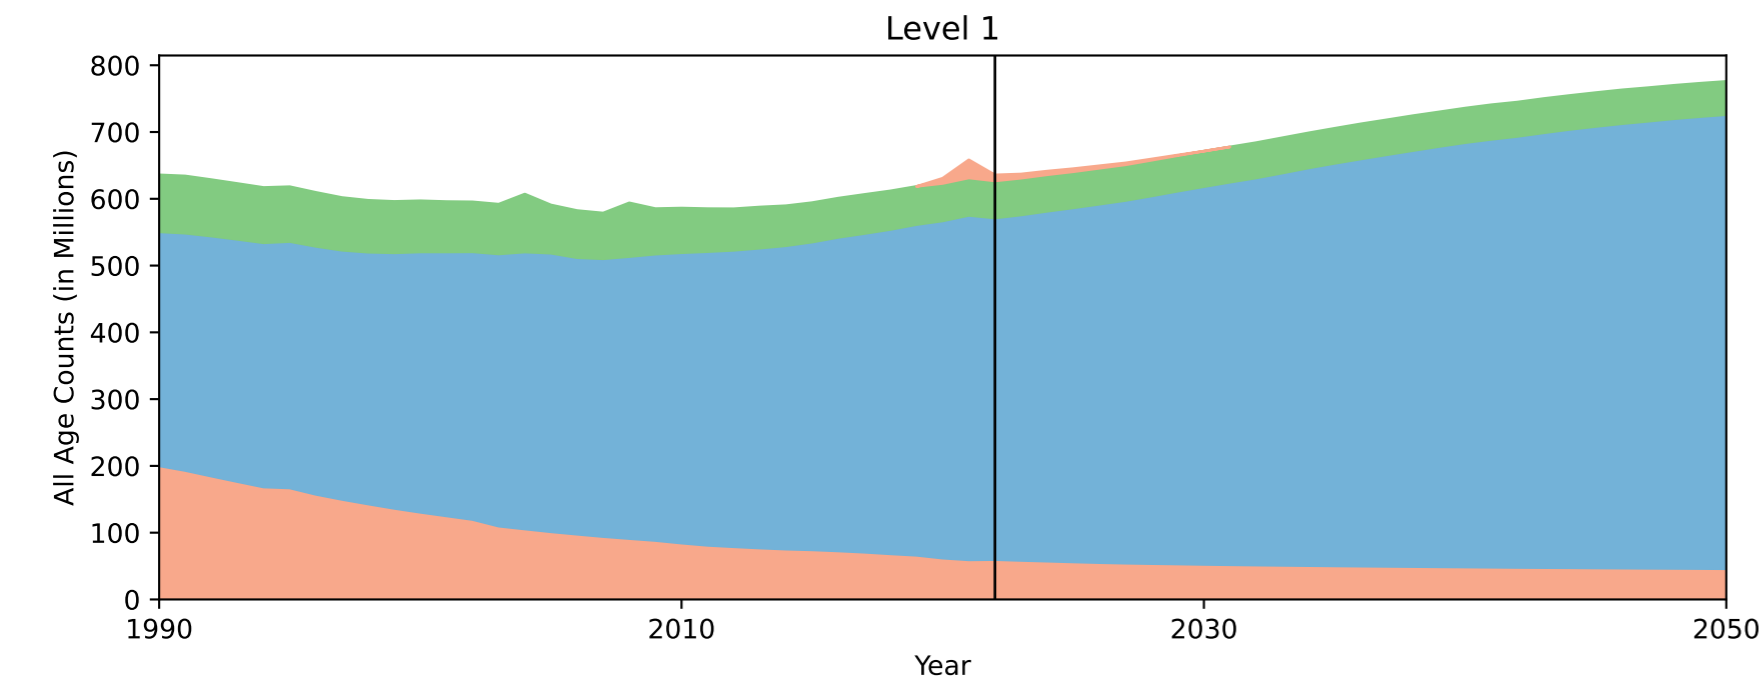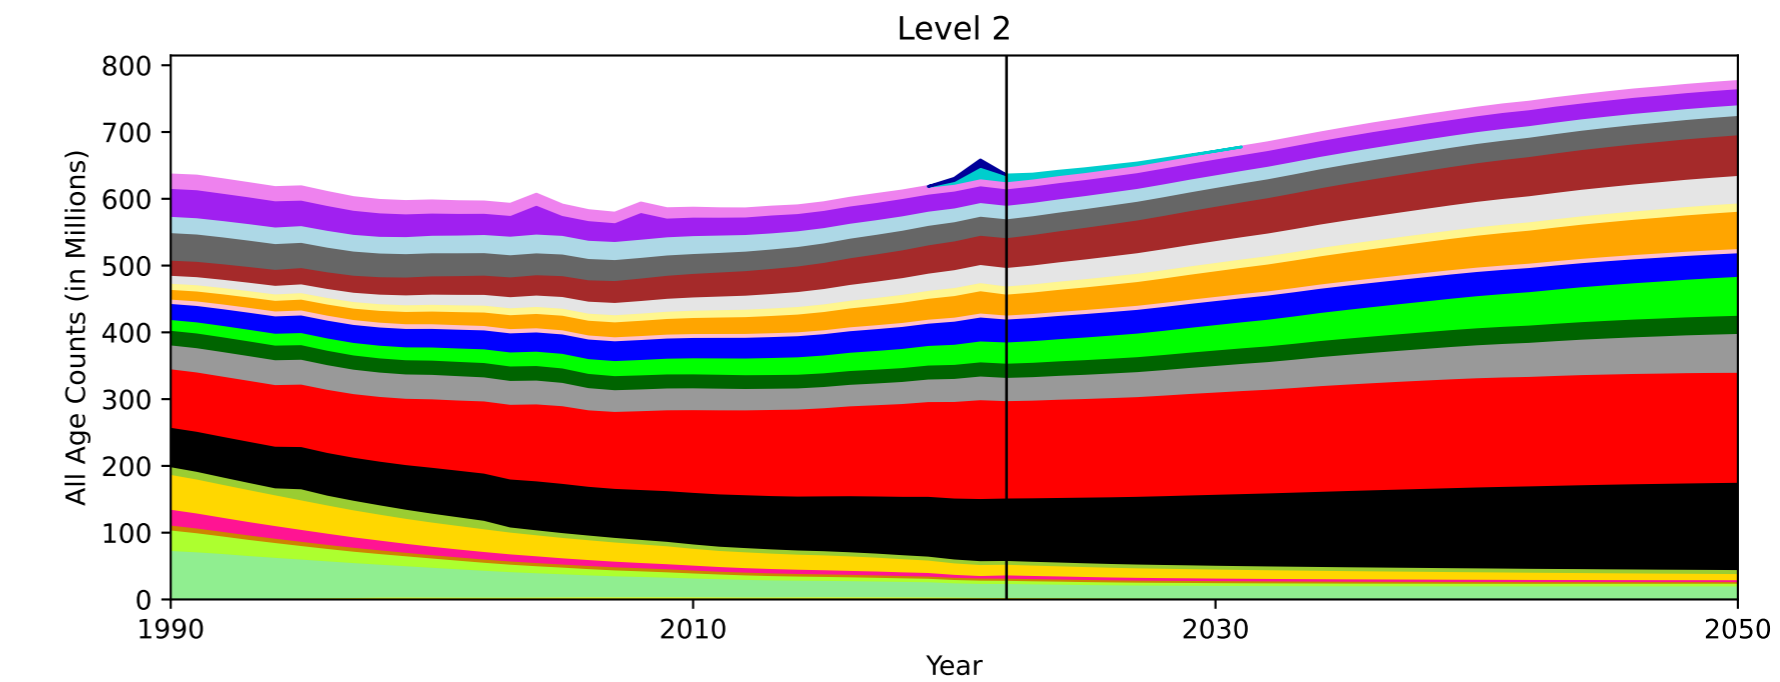



# Sub-Saharan Africa

Level 1

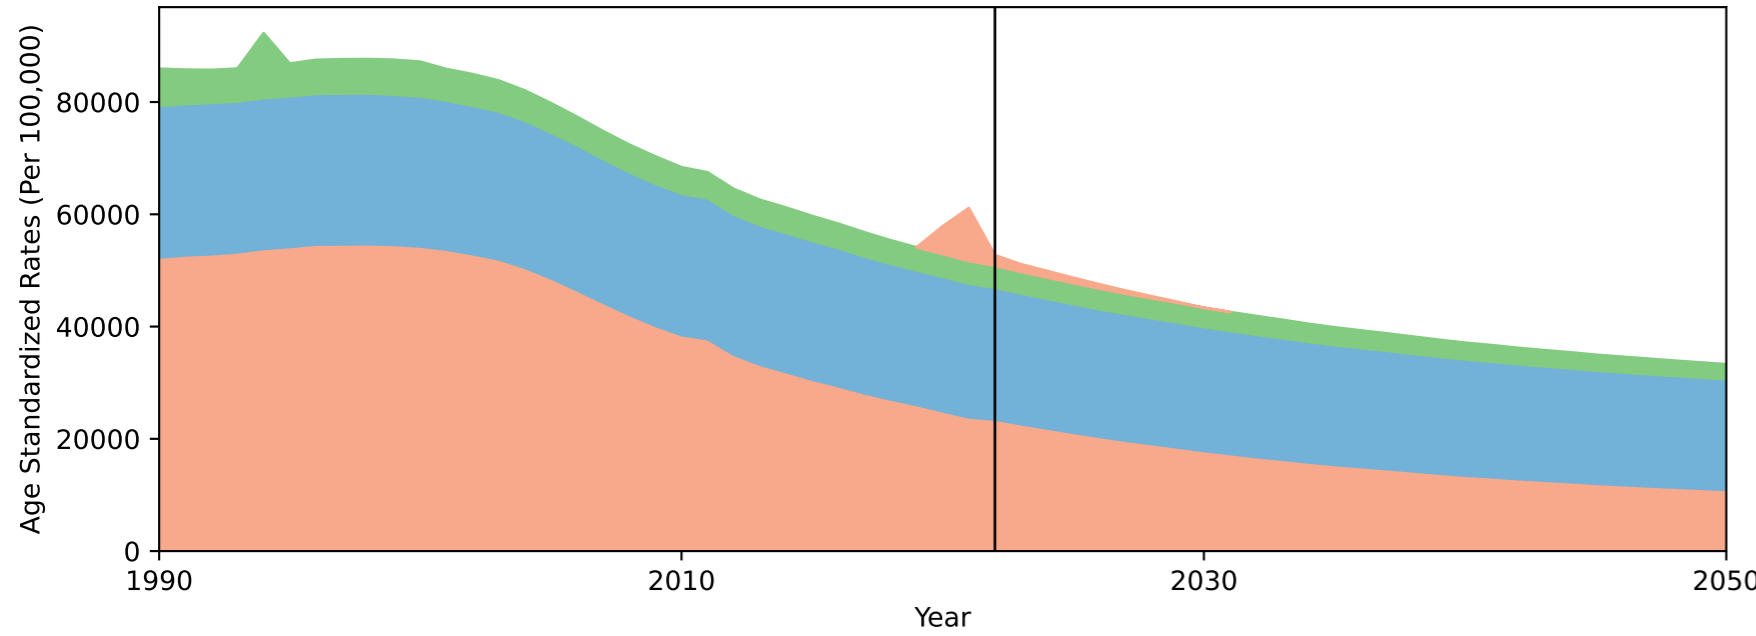

Level 2

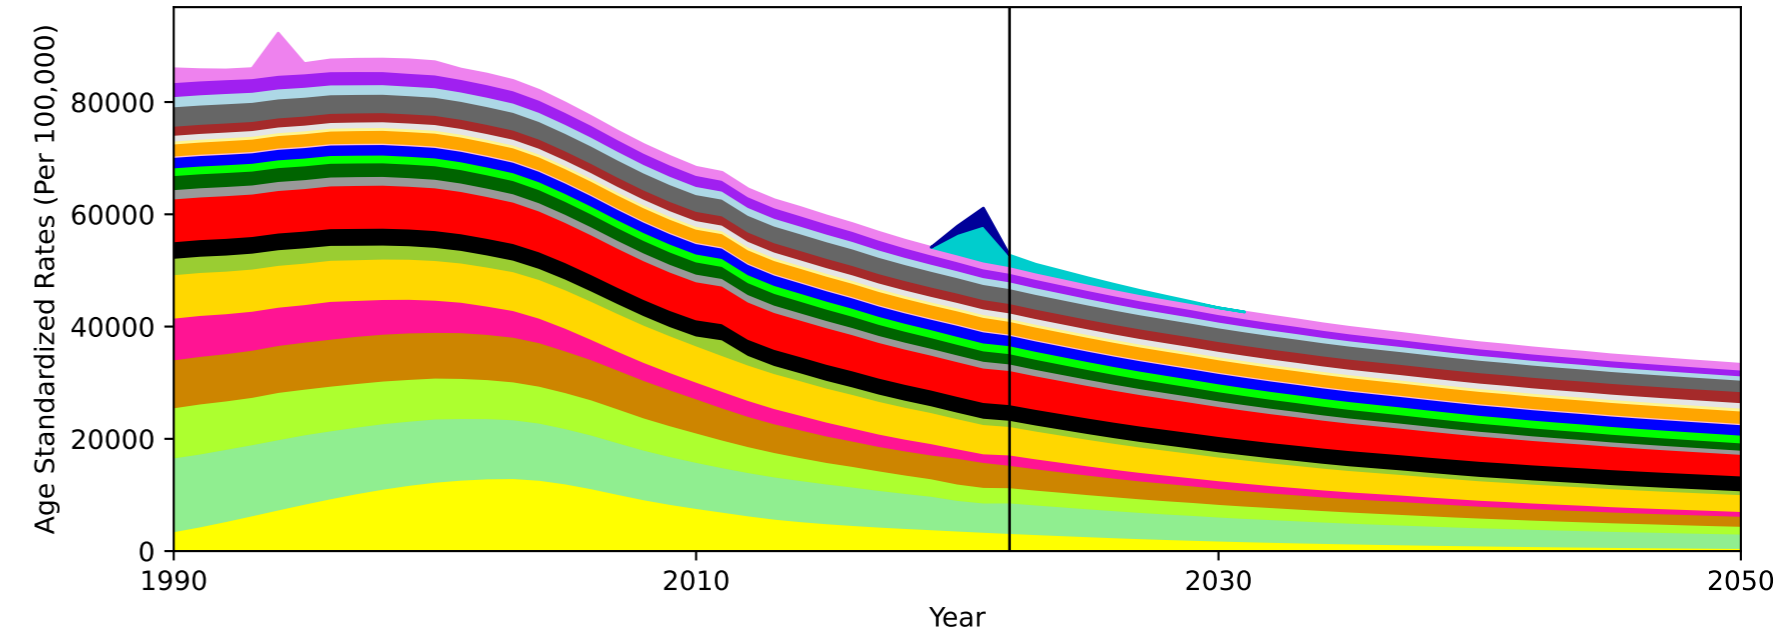

Level 1

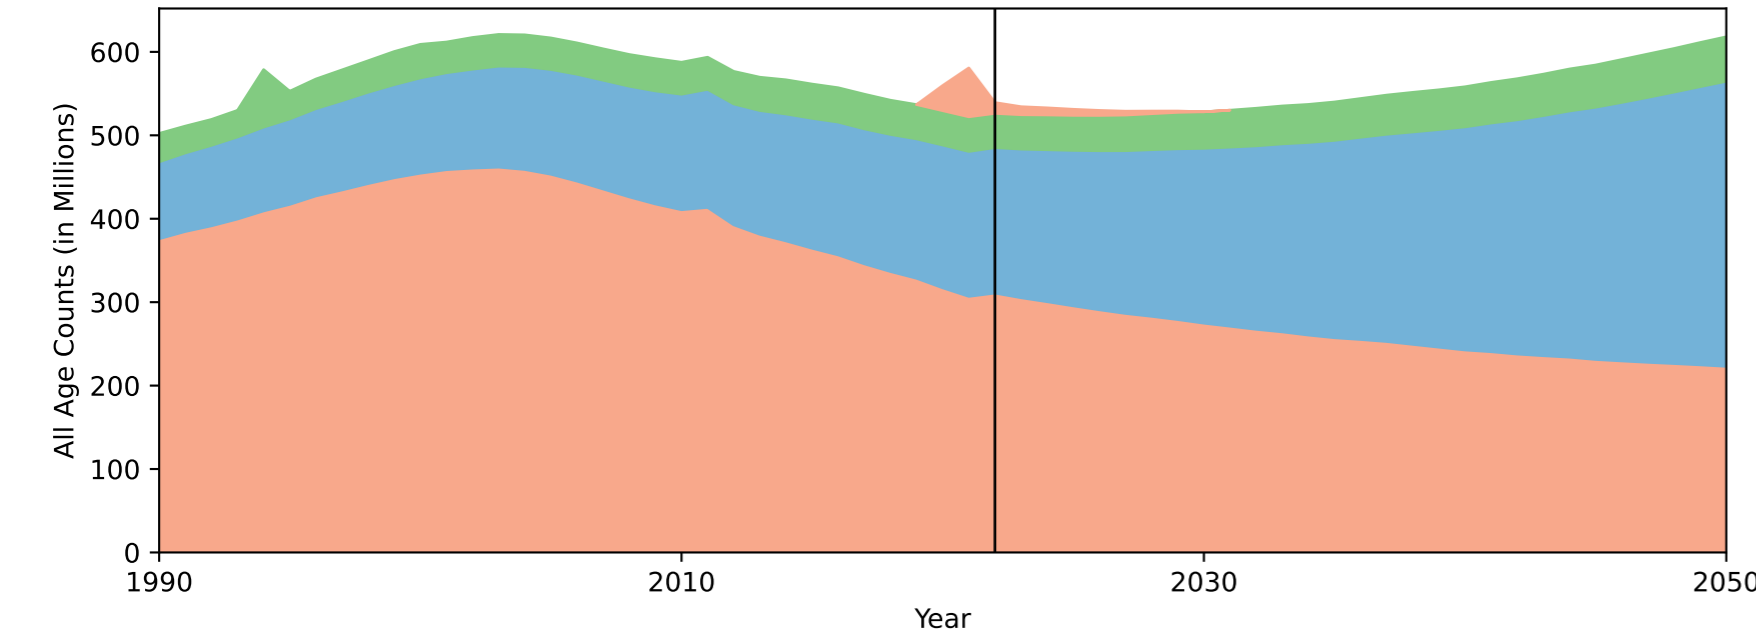

Level 2

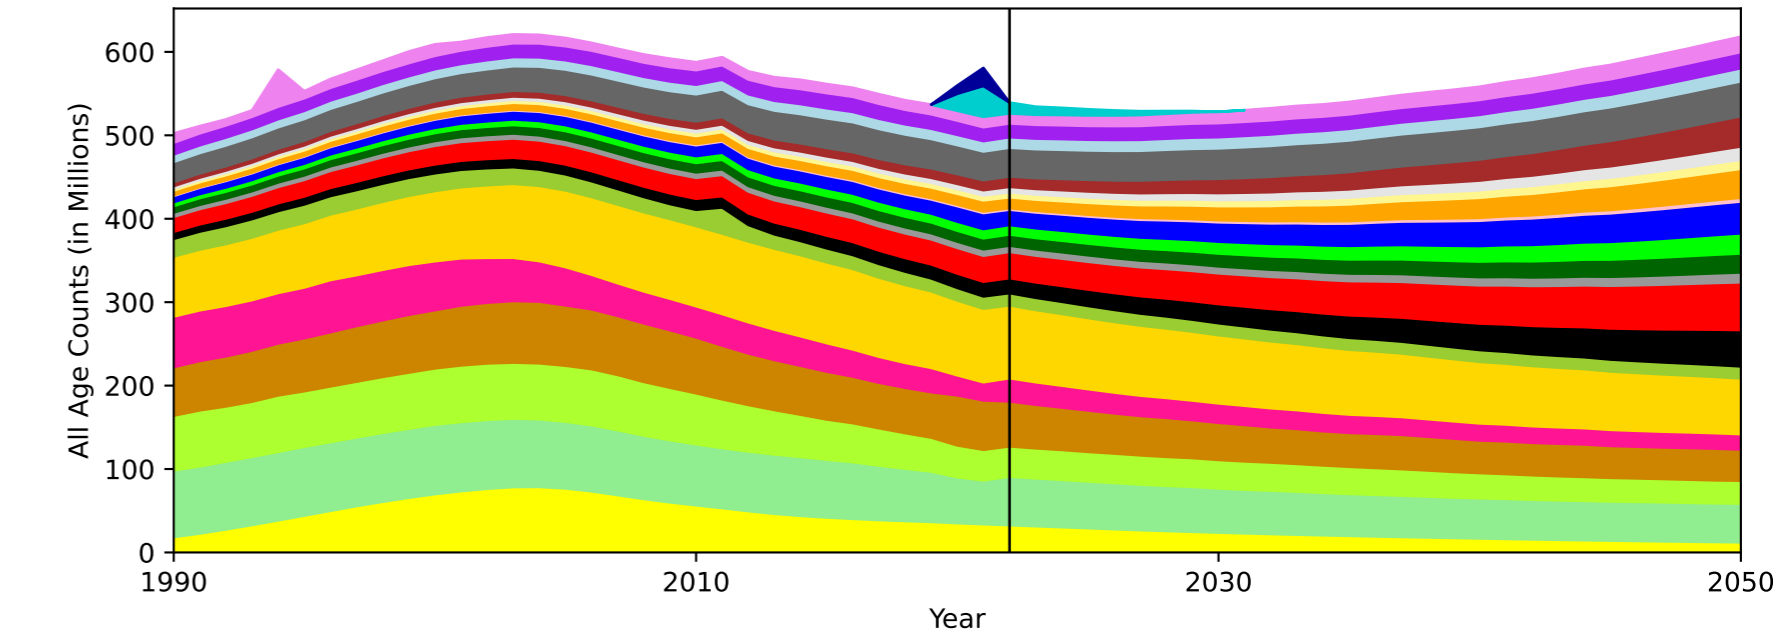

# Central Asia

Supplemental Results Figure S4. Age-standardised DALY rates and all age DALY counts and by Level 1 and Level 2 causes, 1990–2050

457

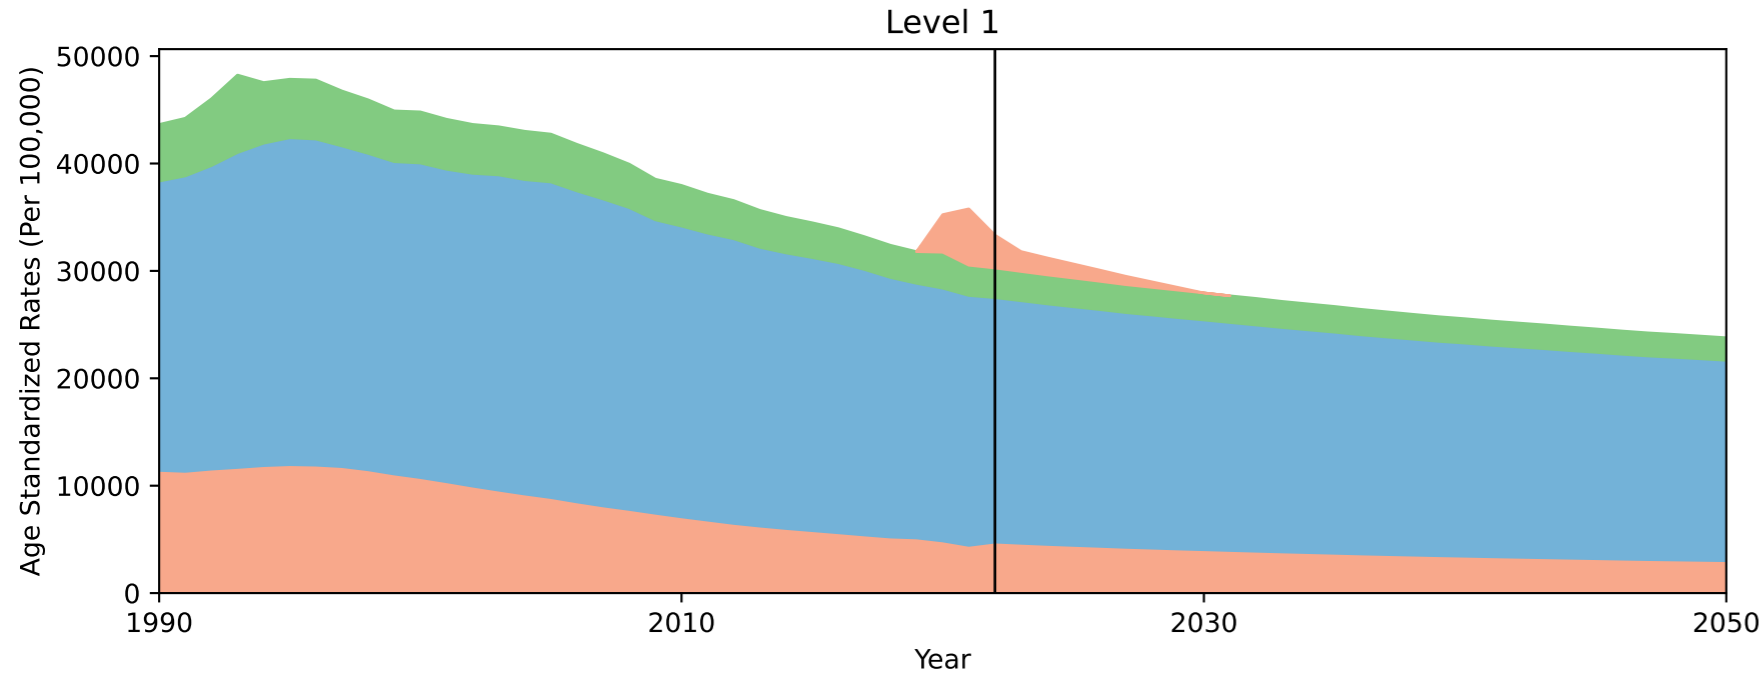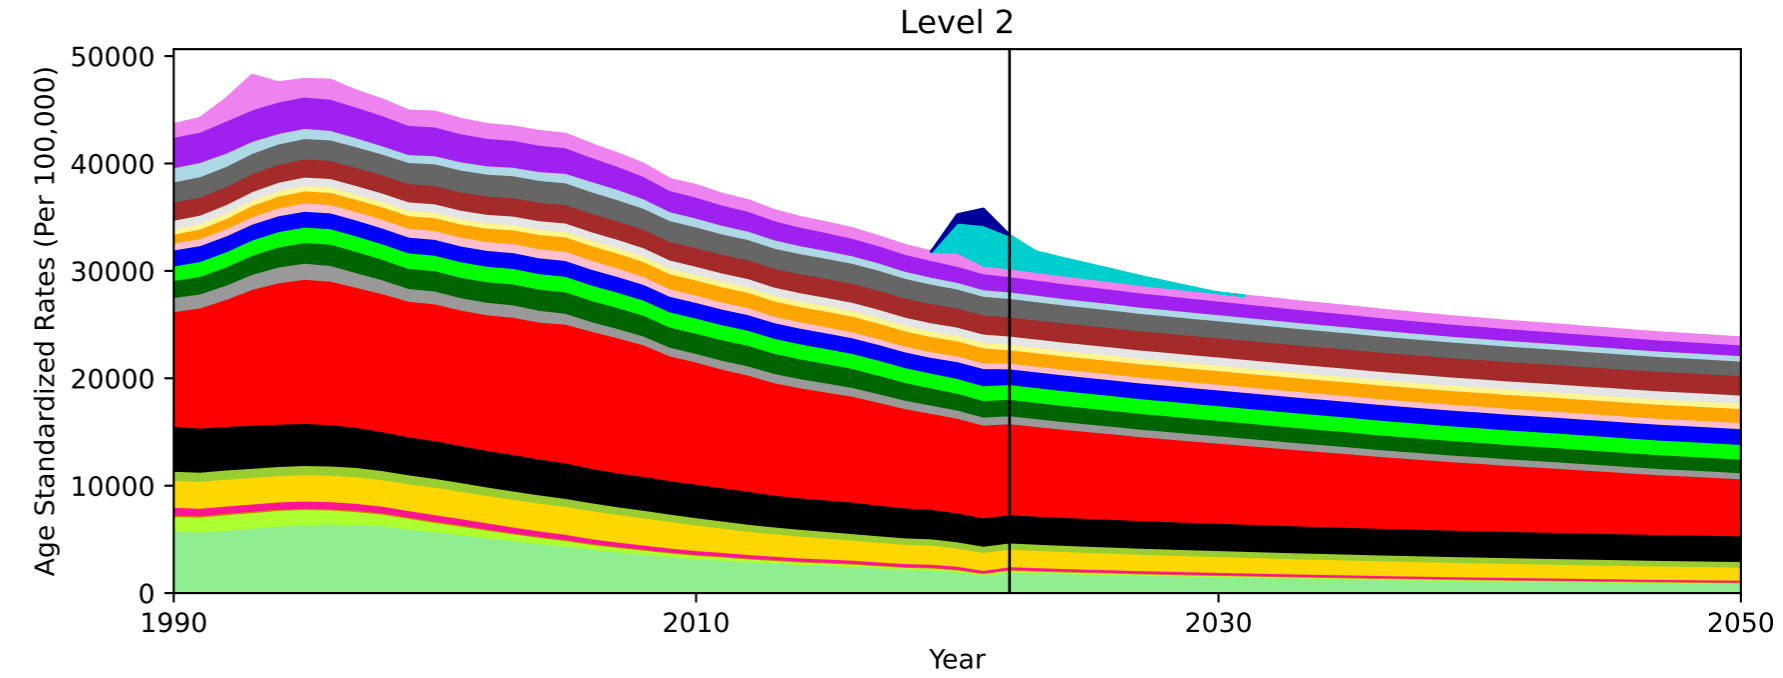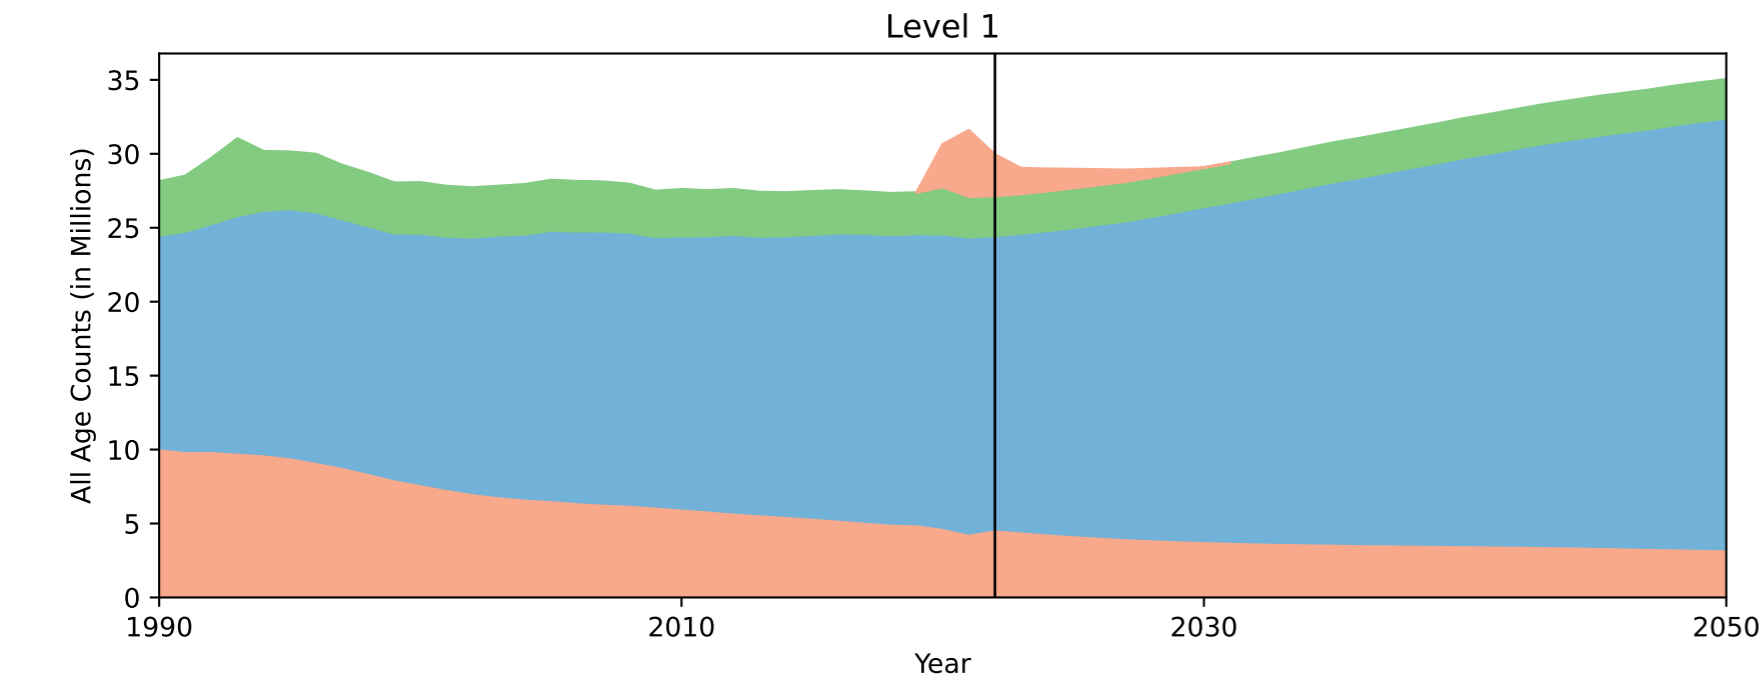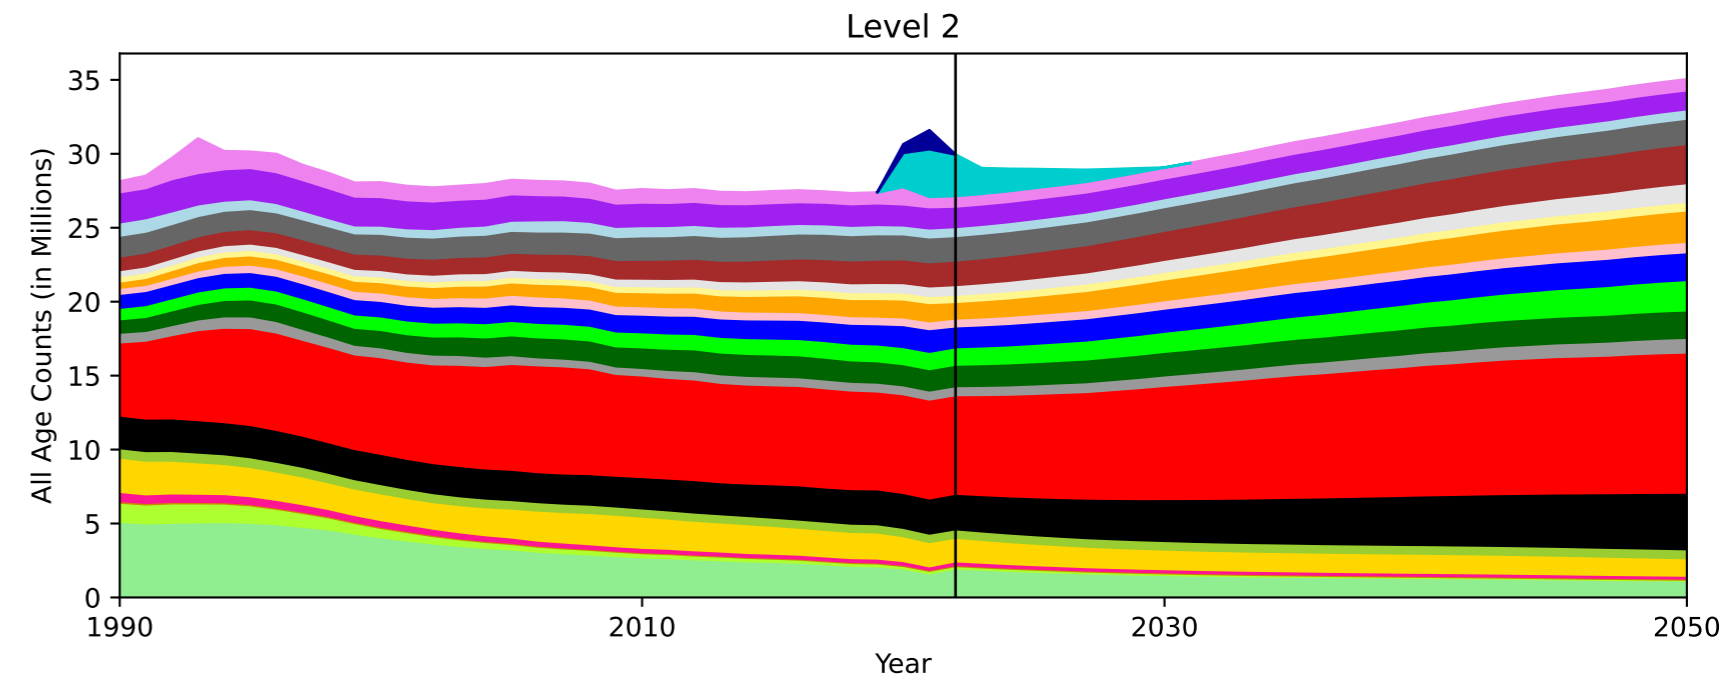

# Central Europe

Level 1

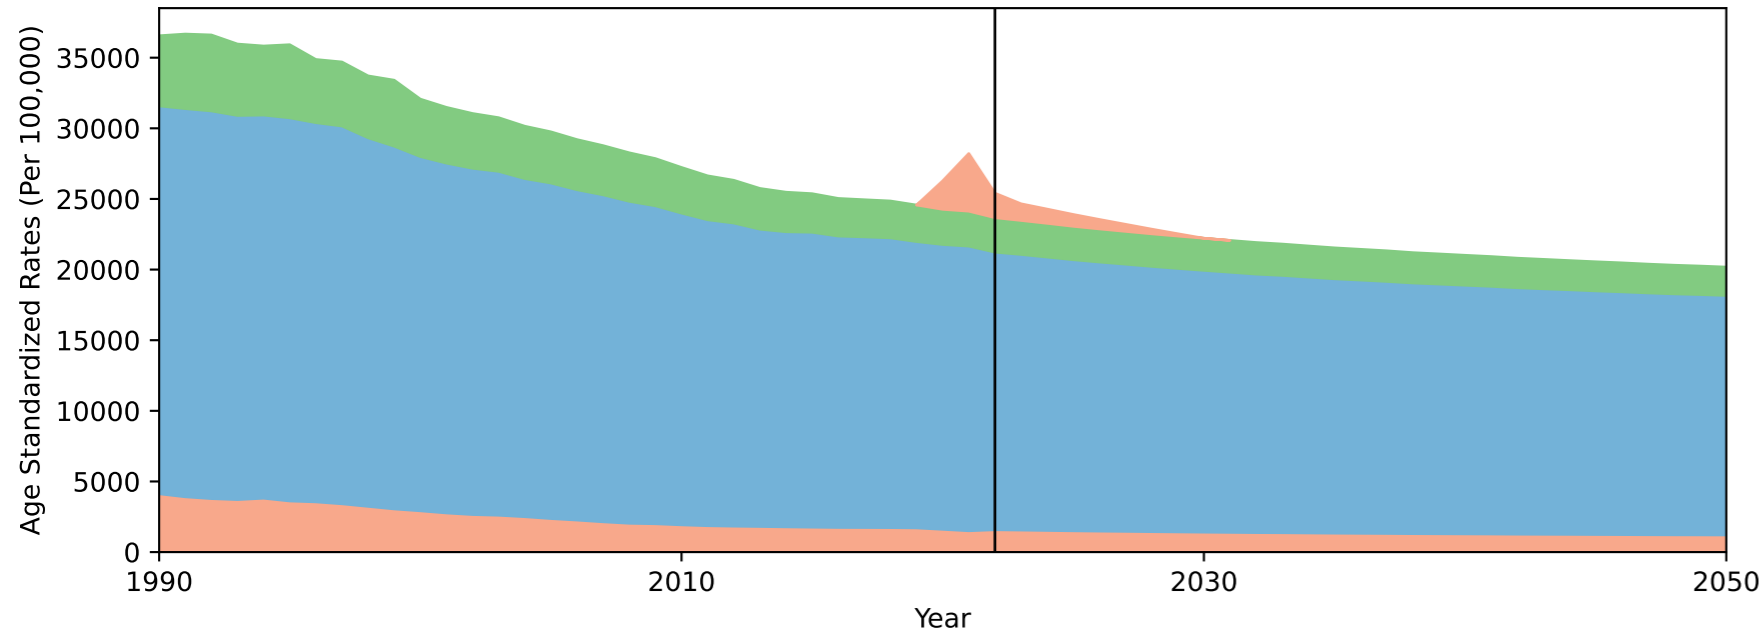

Level 2

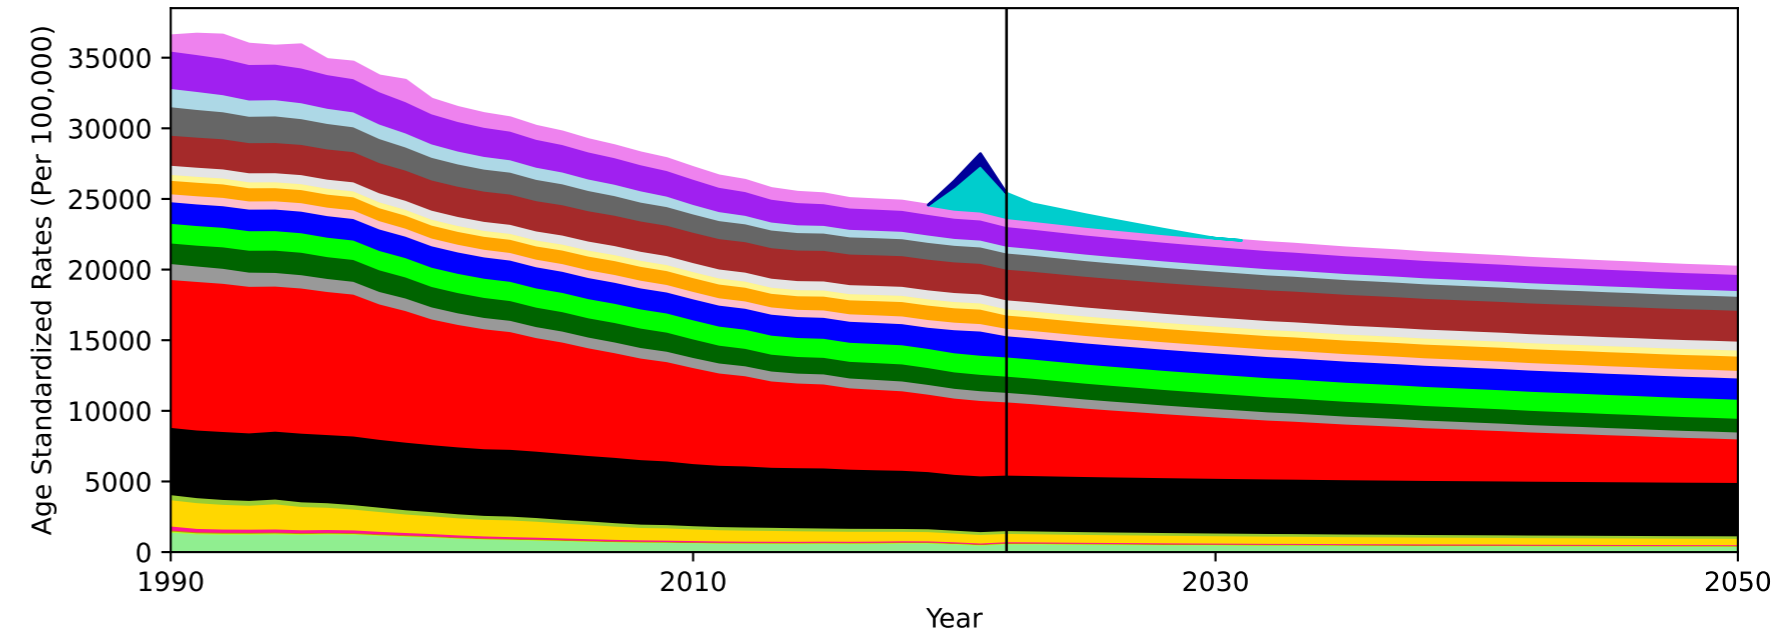

Level 1

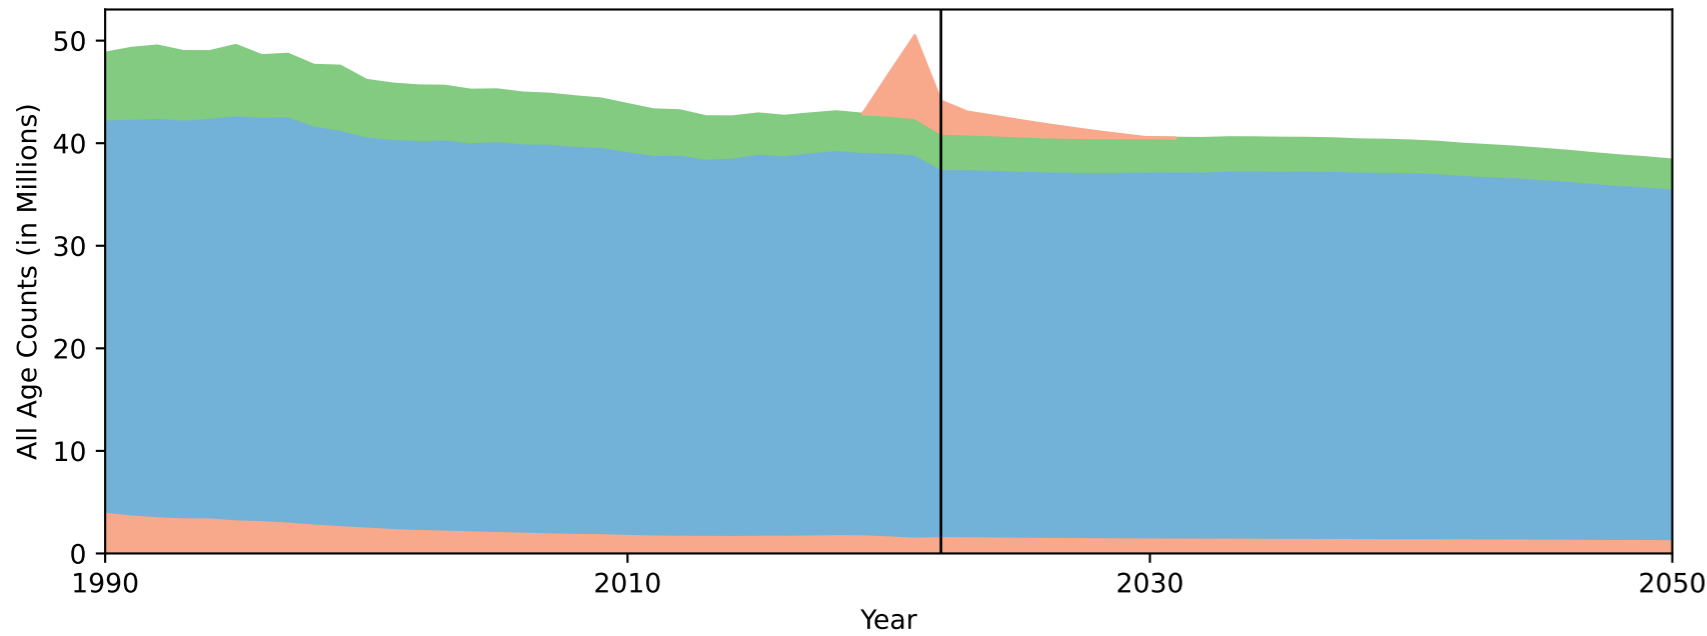

Level 2

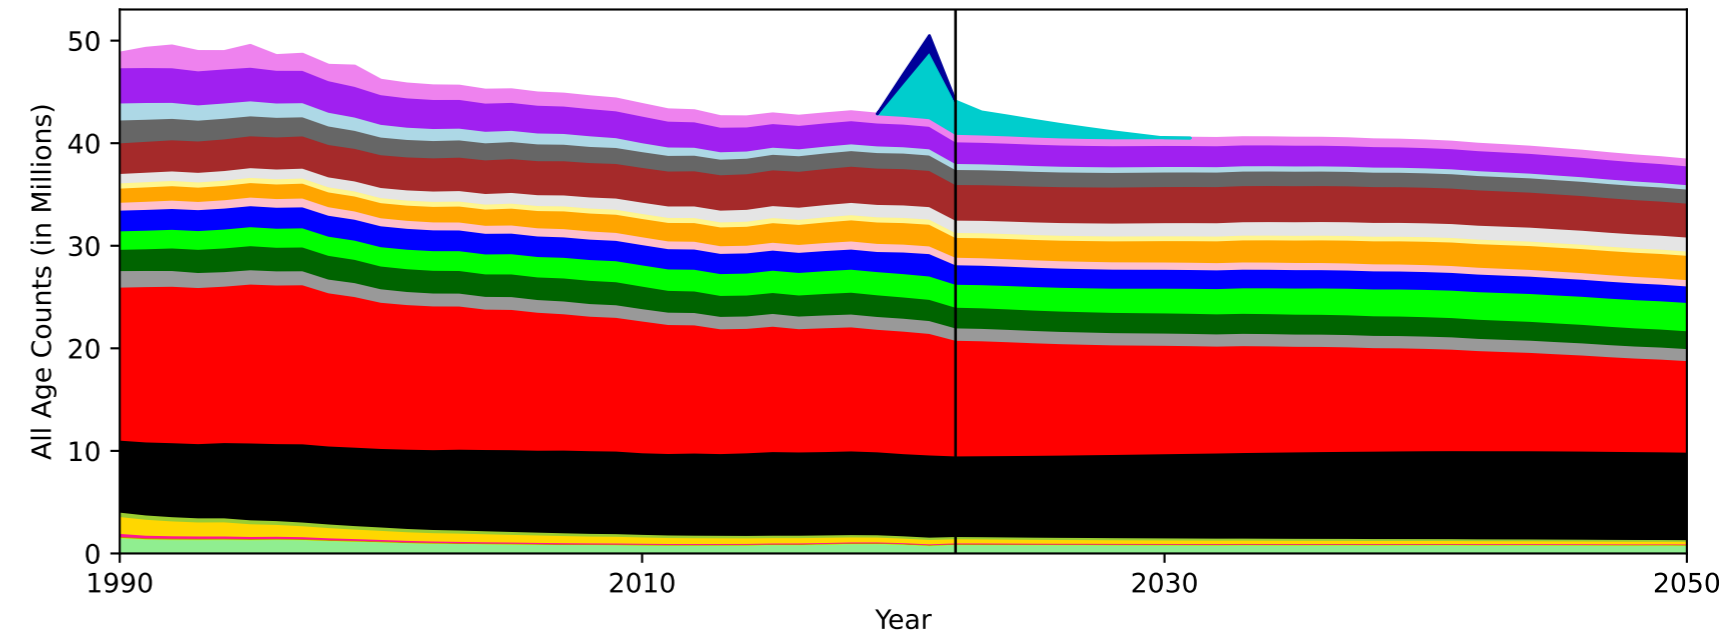

# Eastern Europe

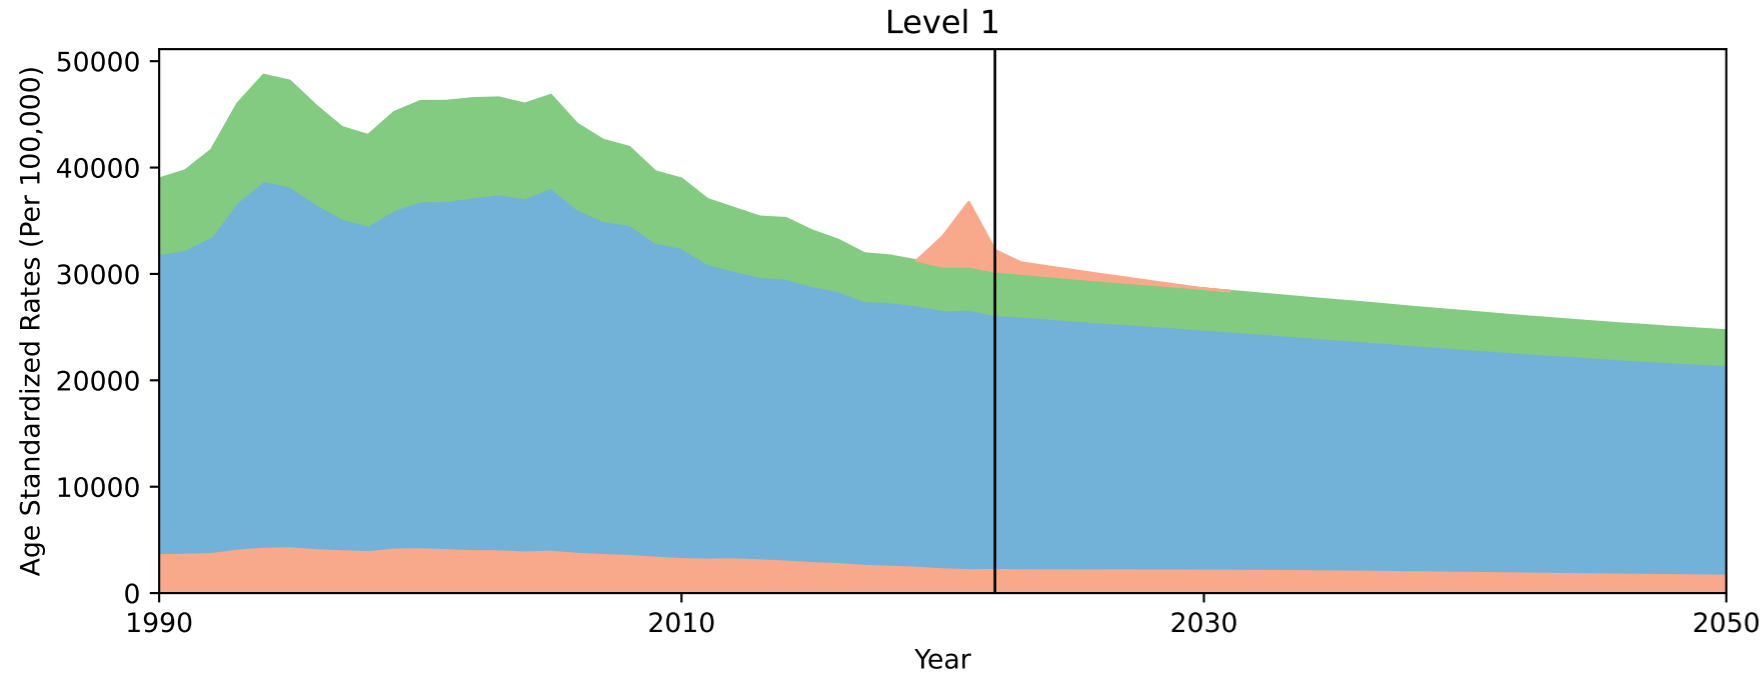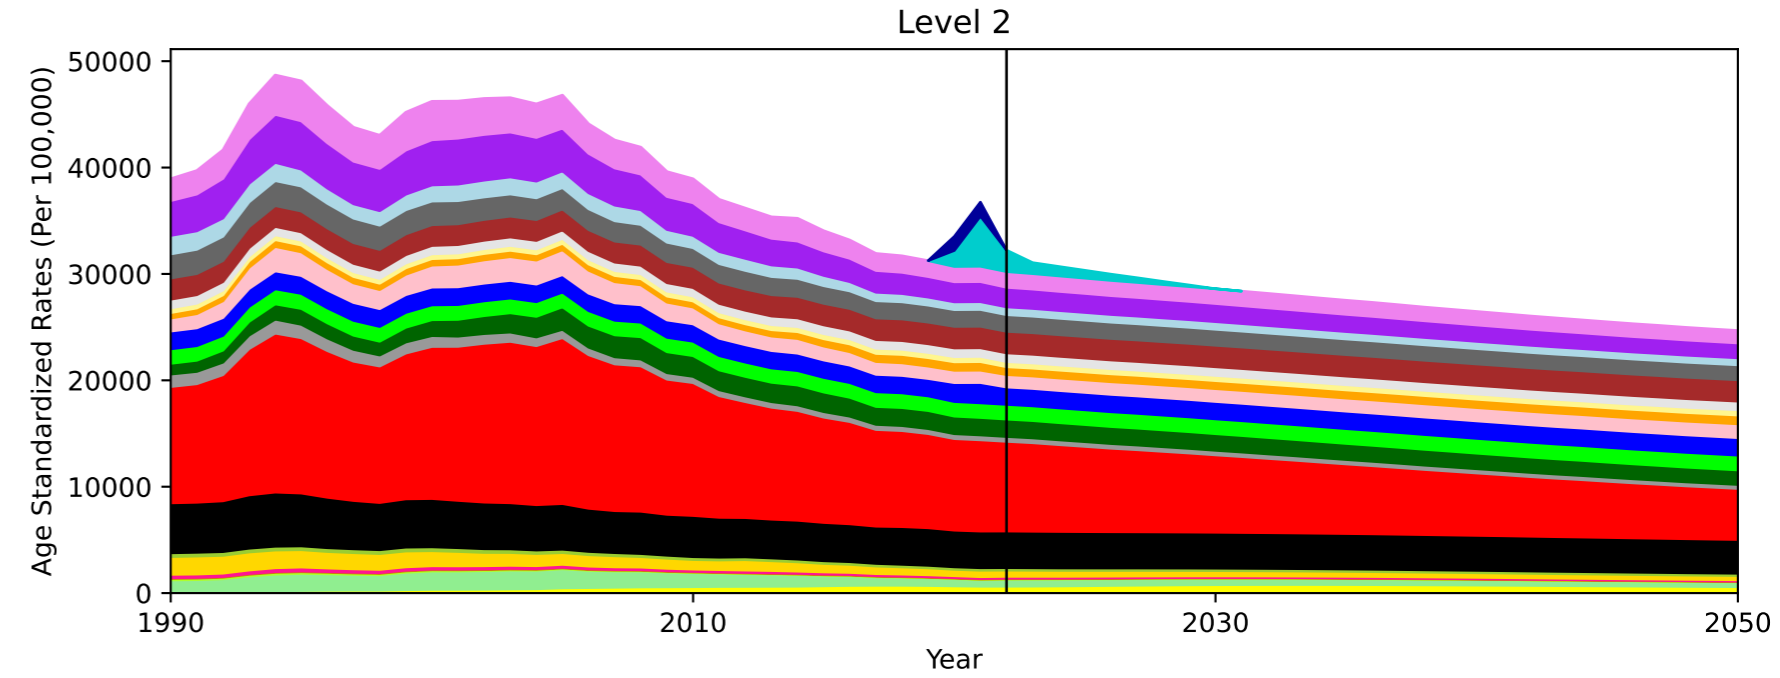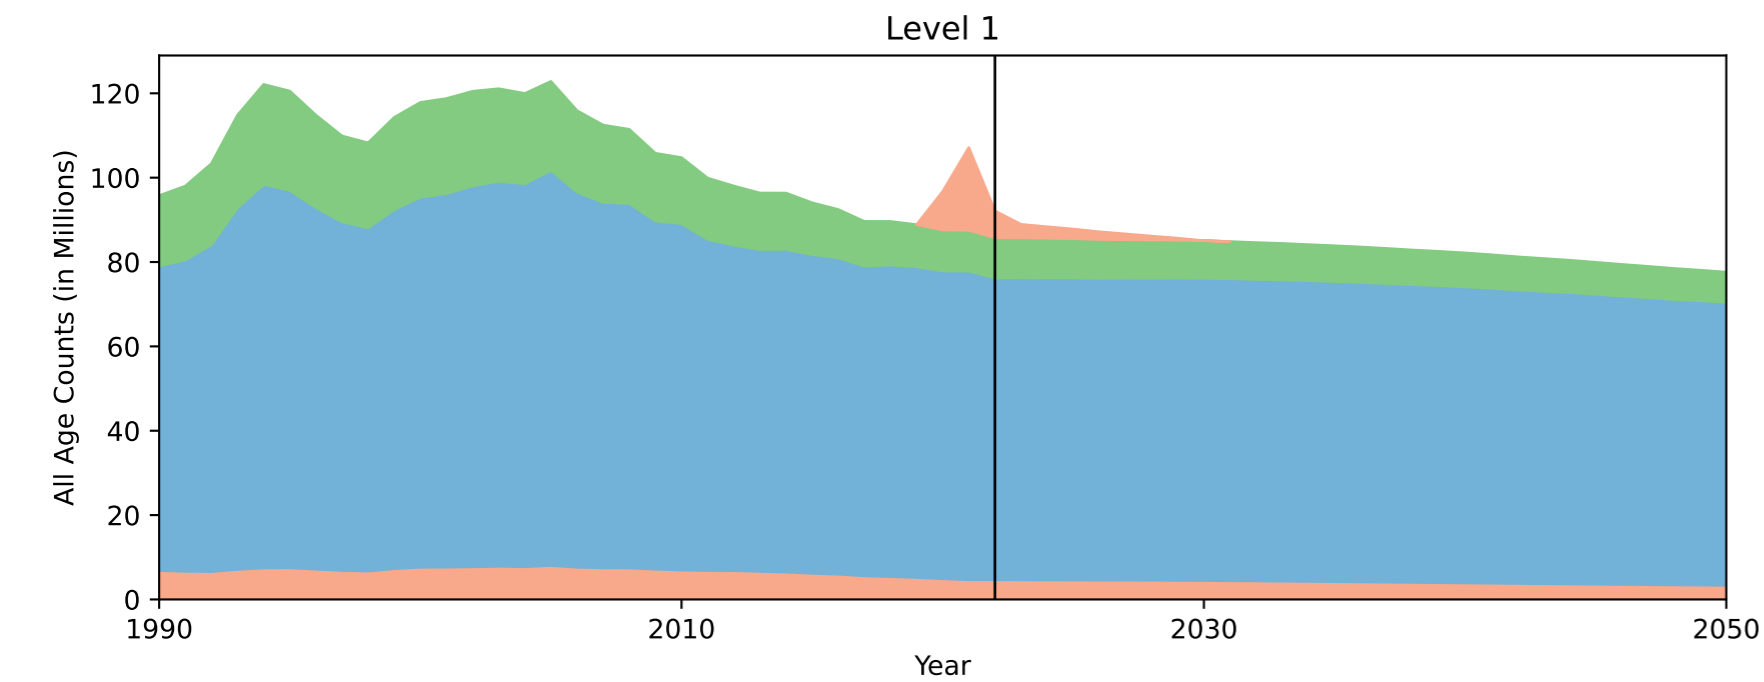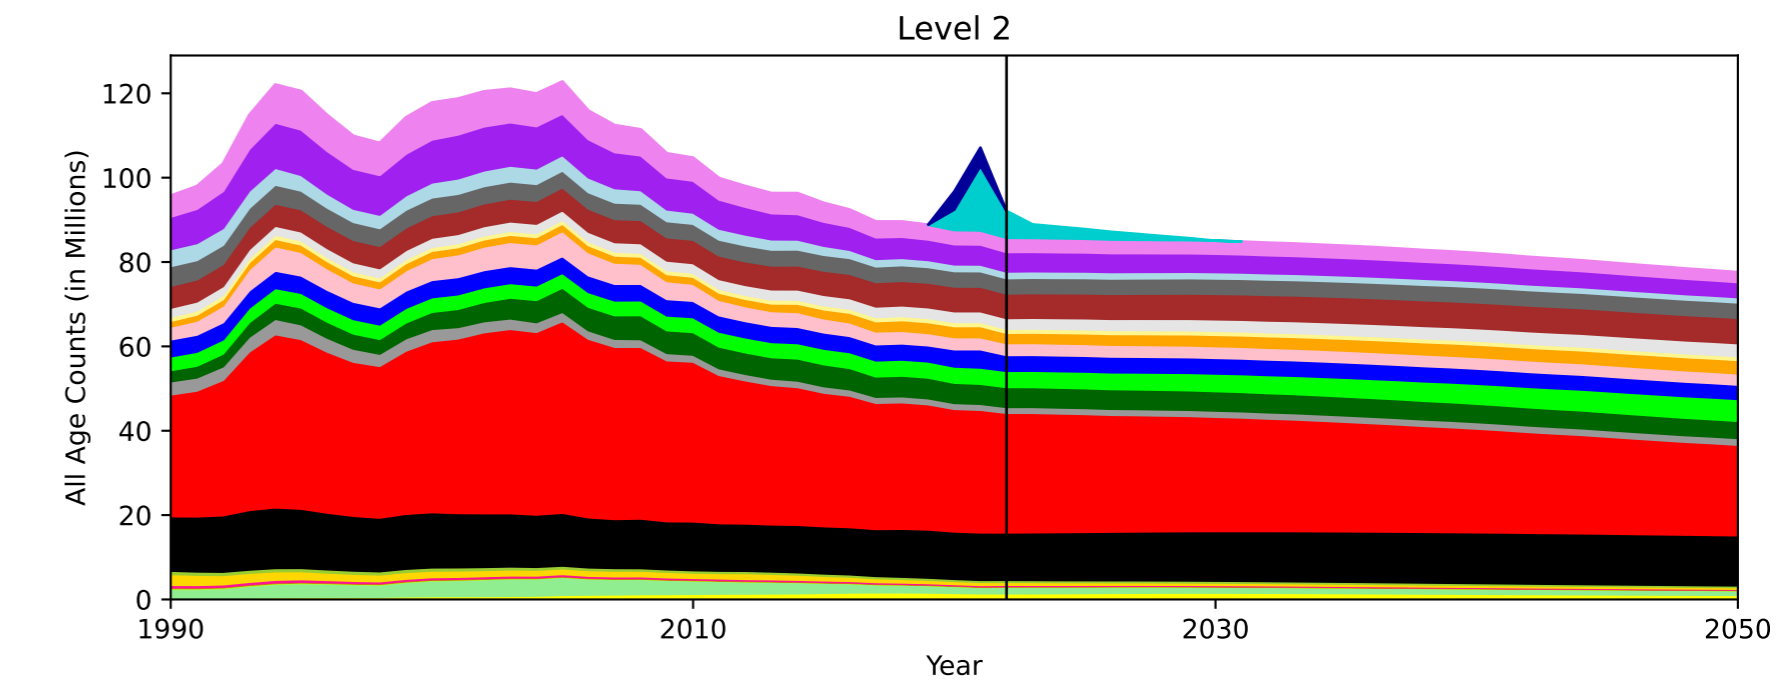

# Australasia

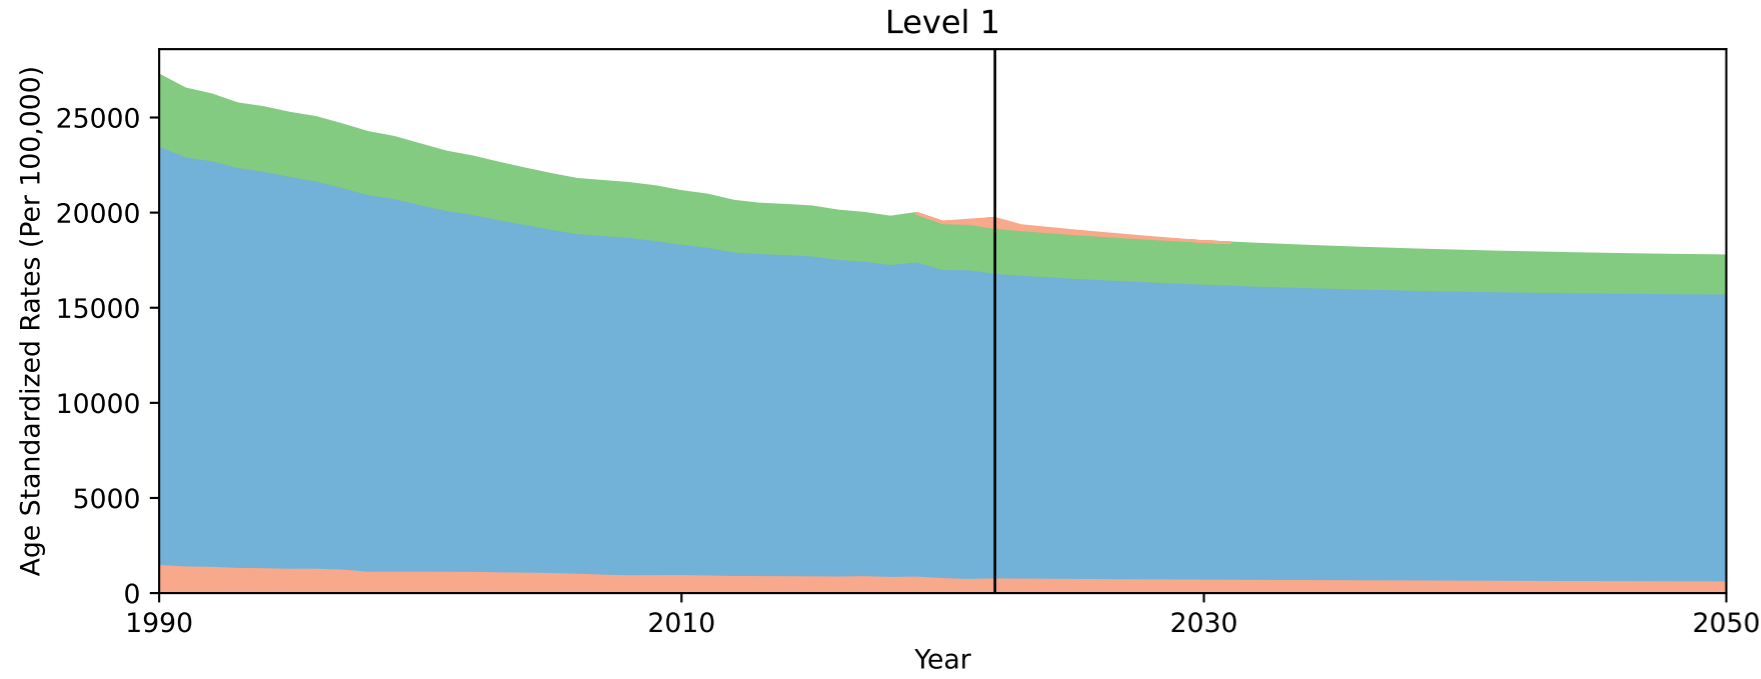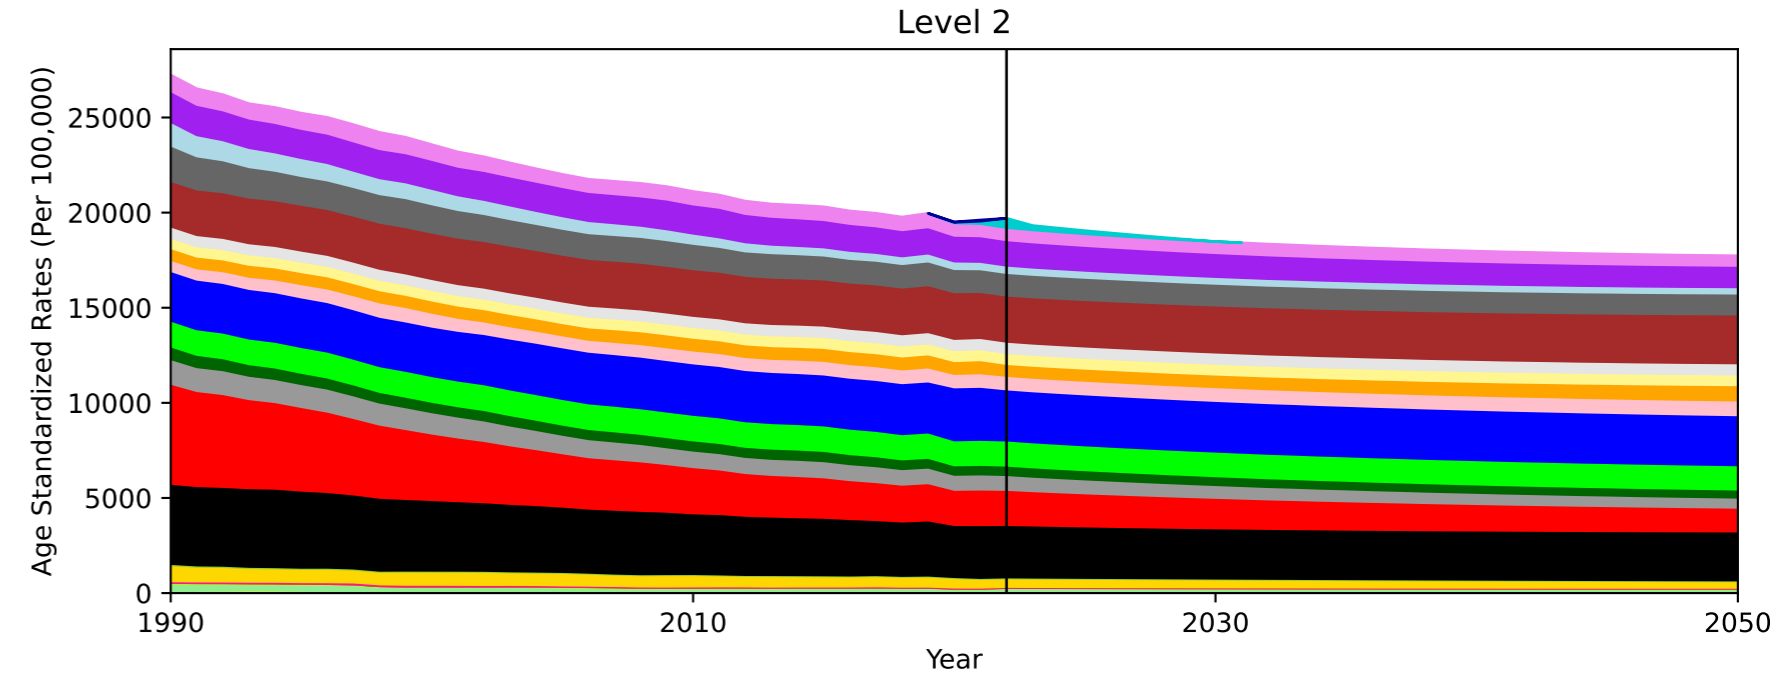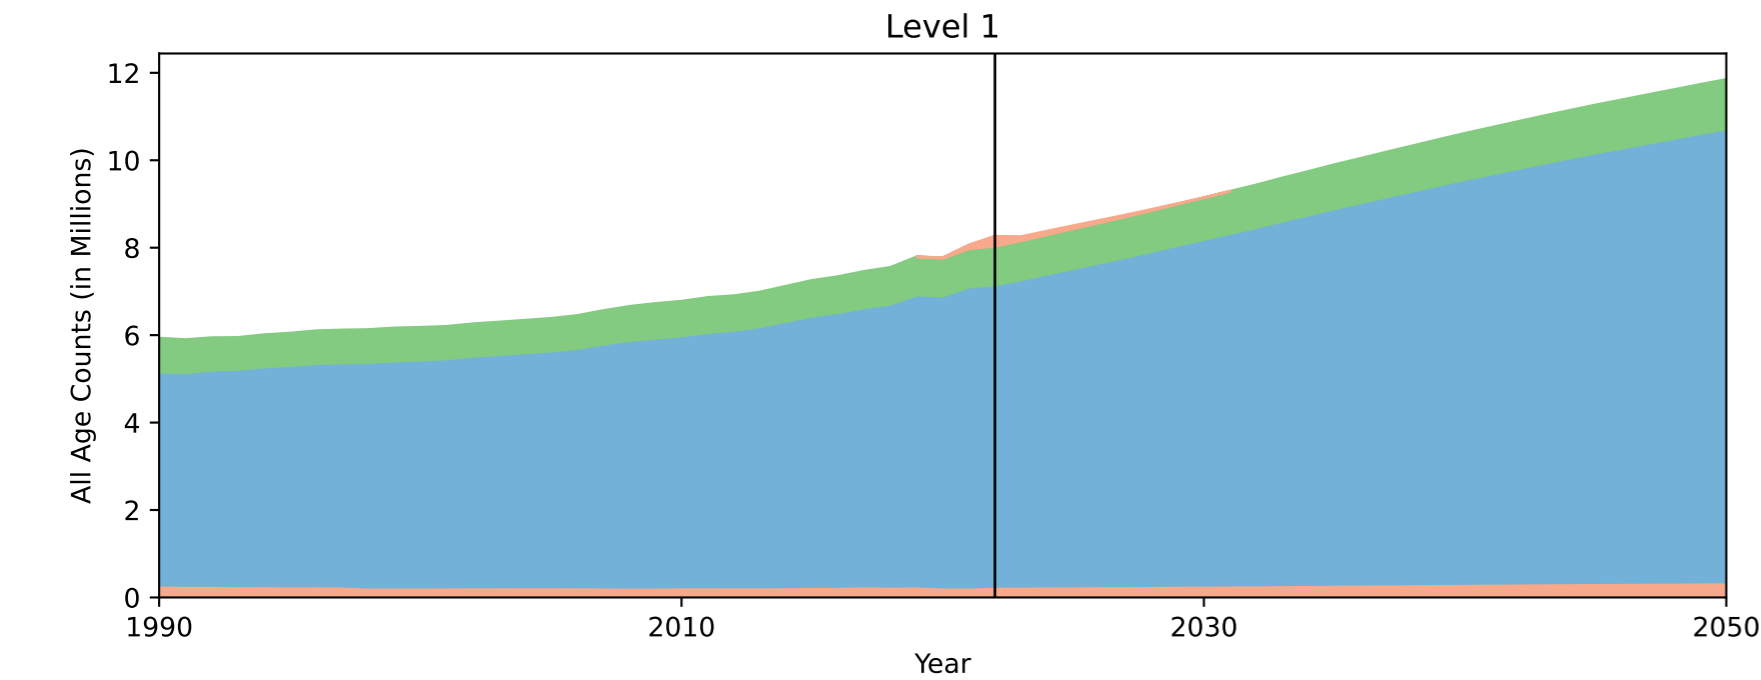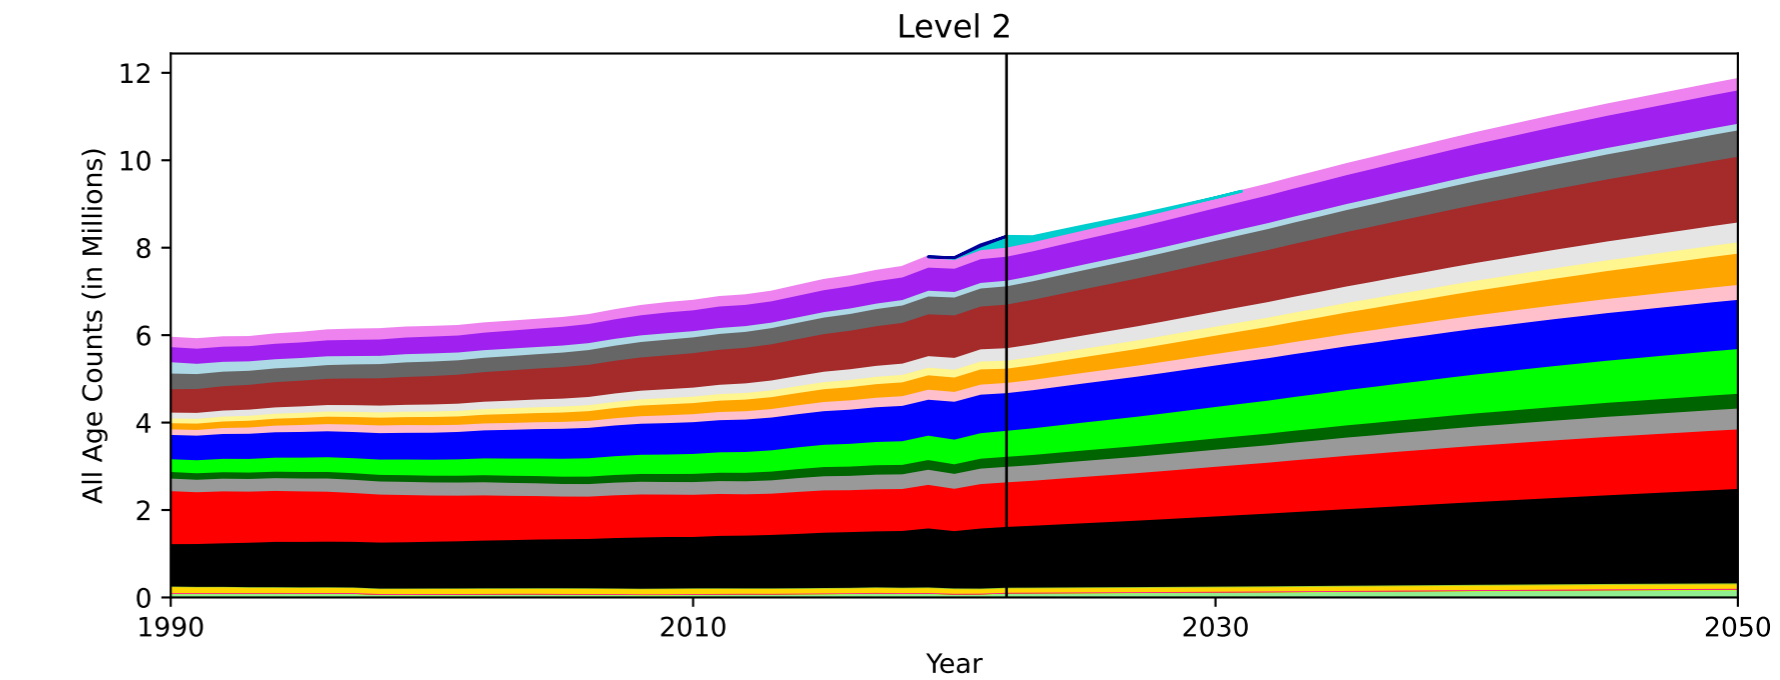

# High-Income Asia Pacific

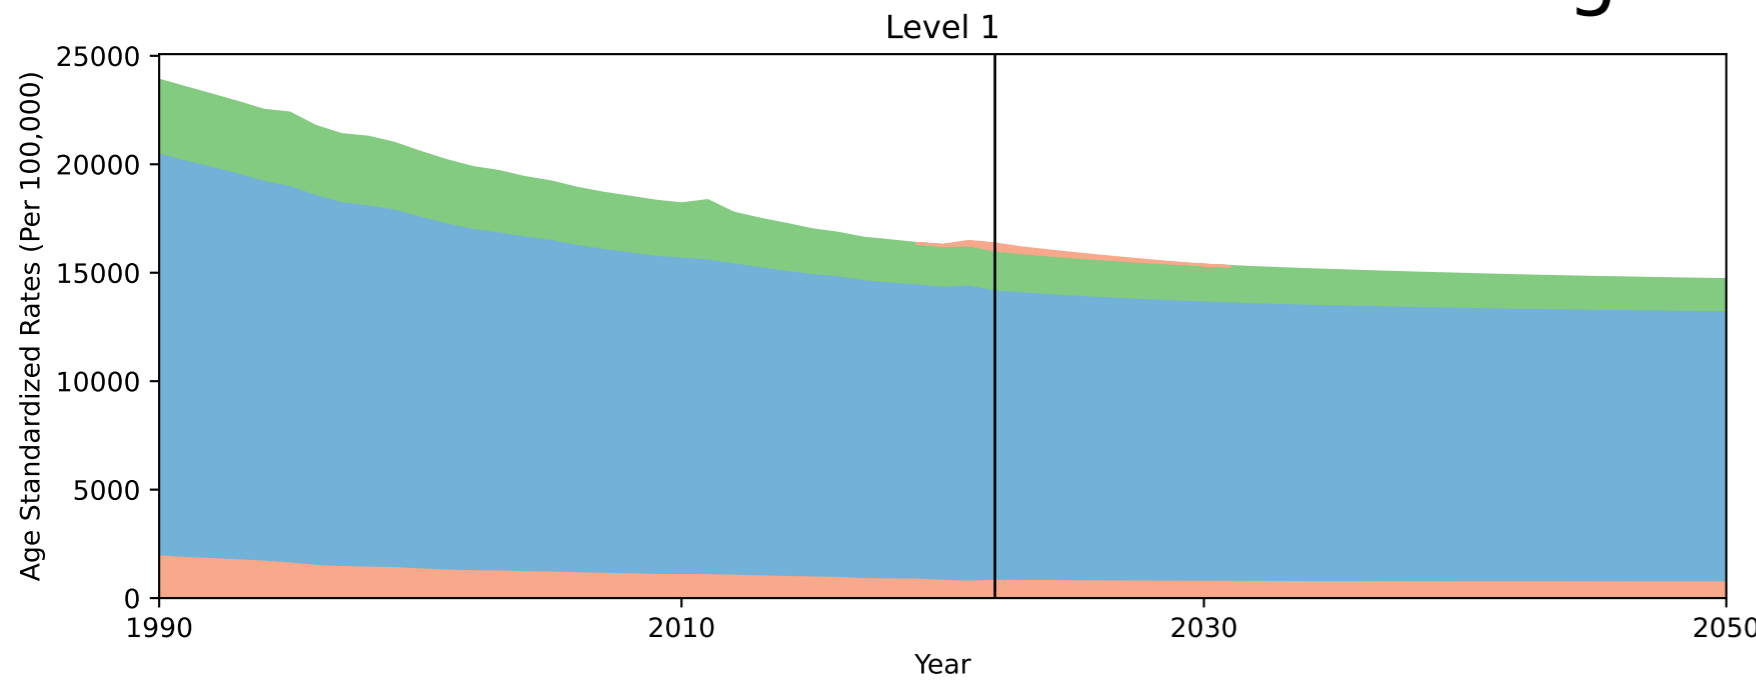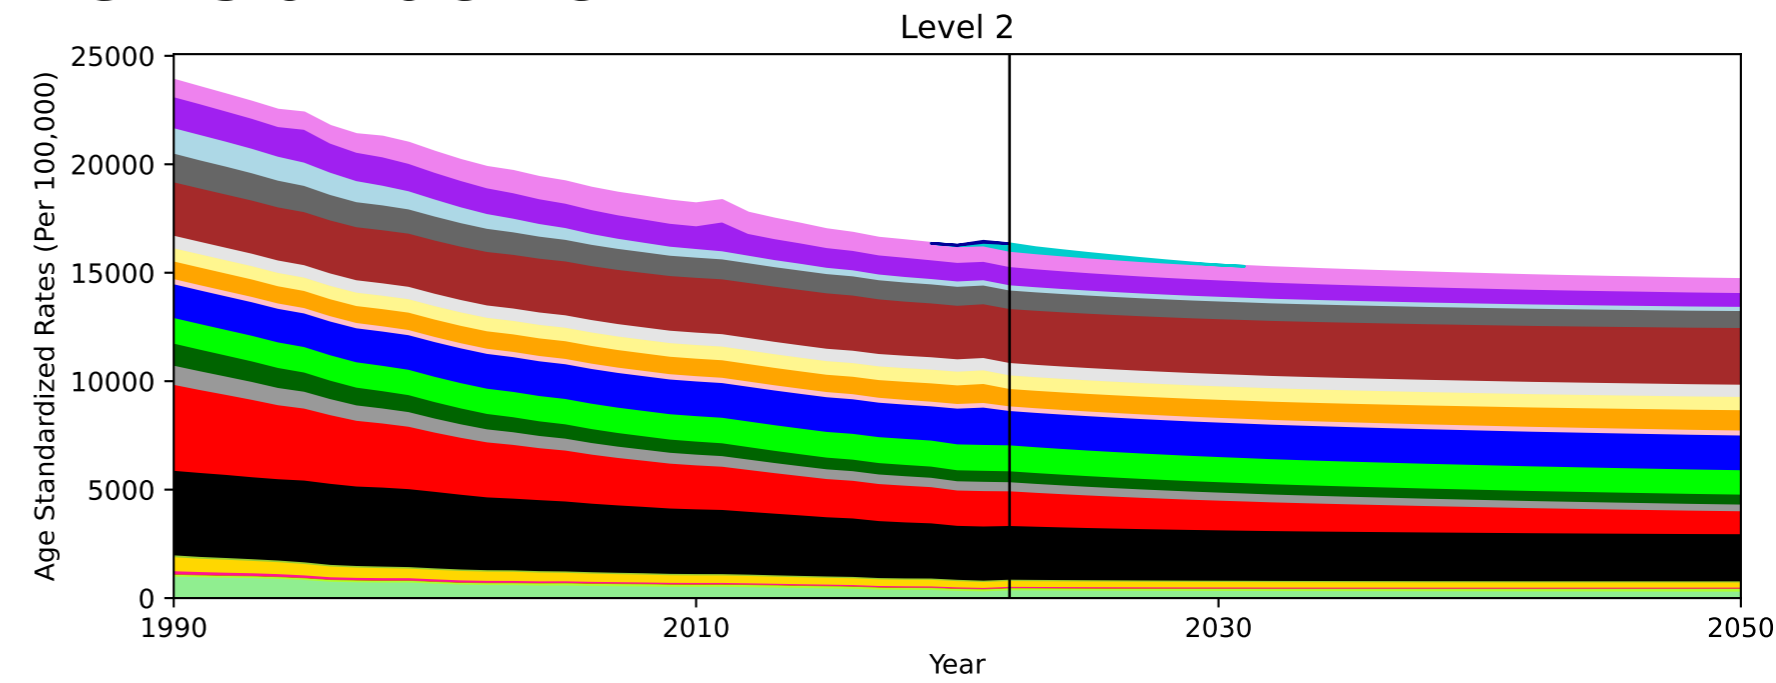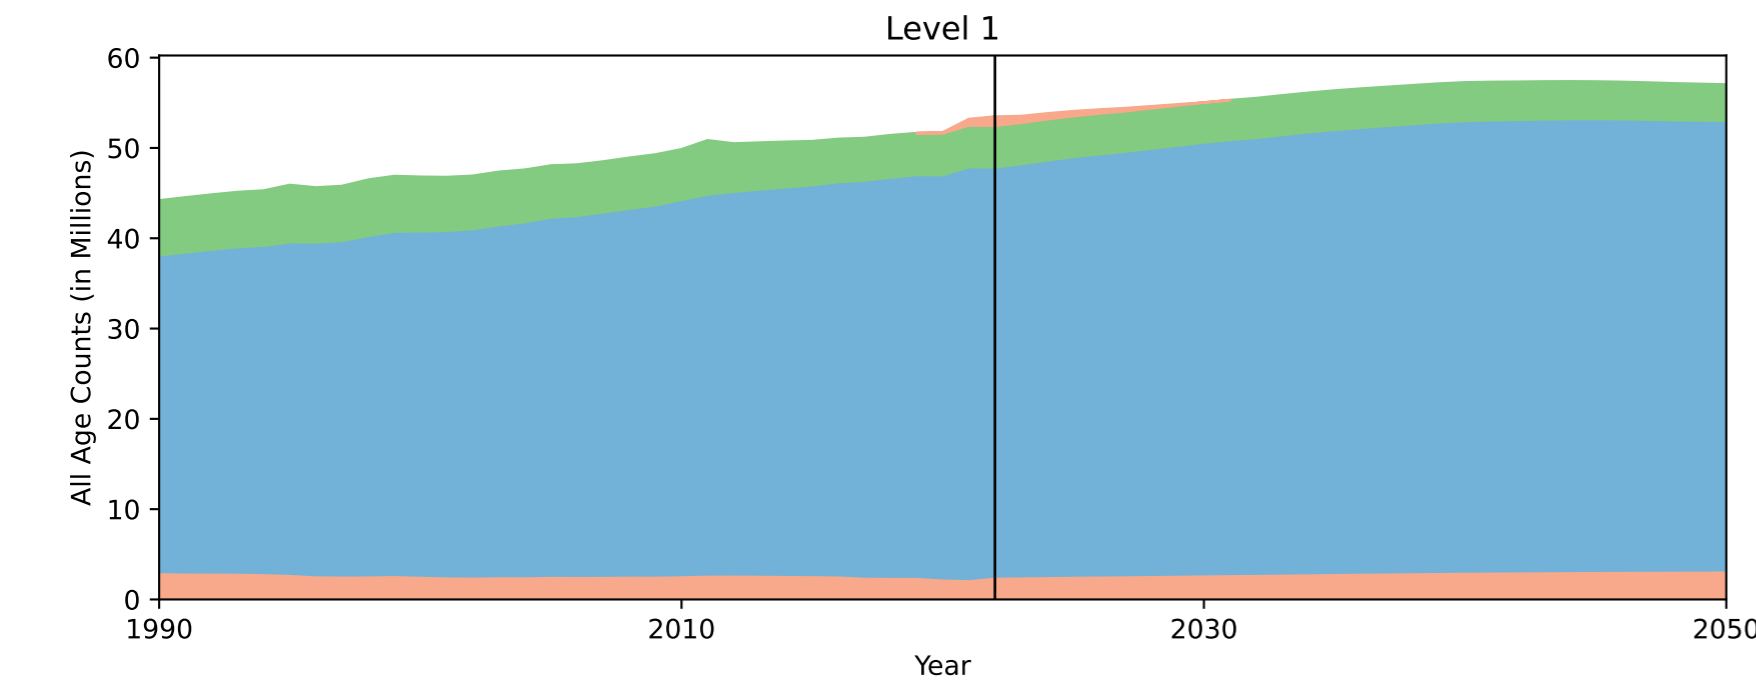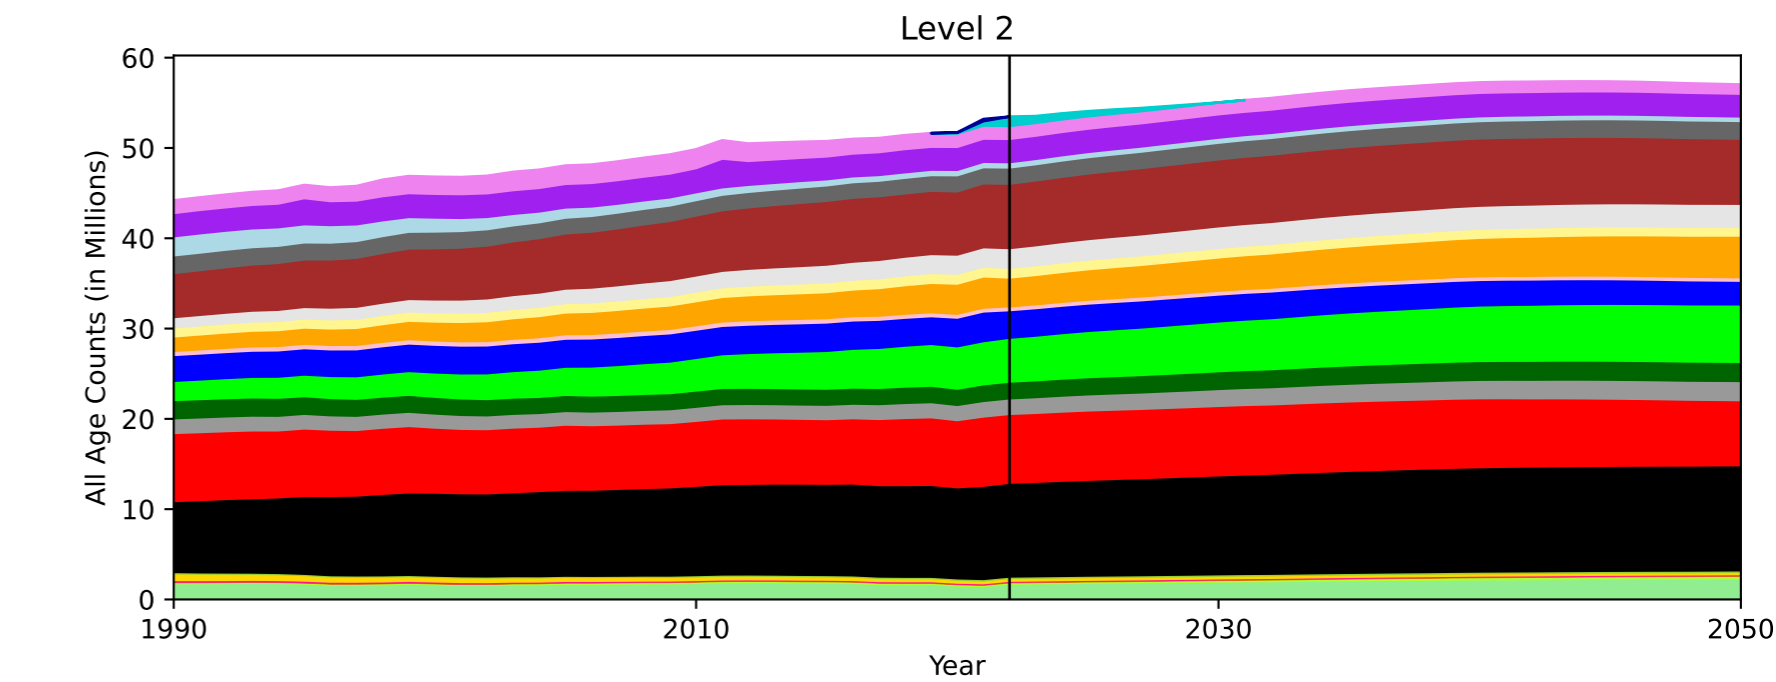

# High-Income North America

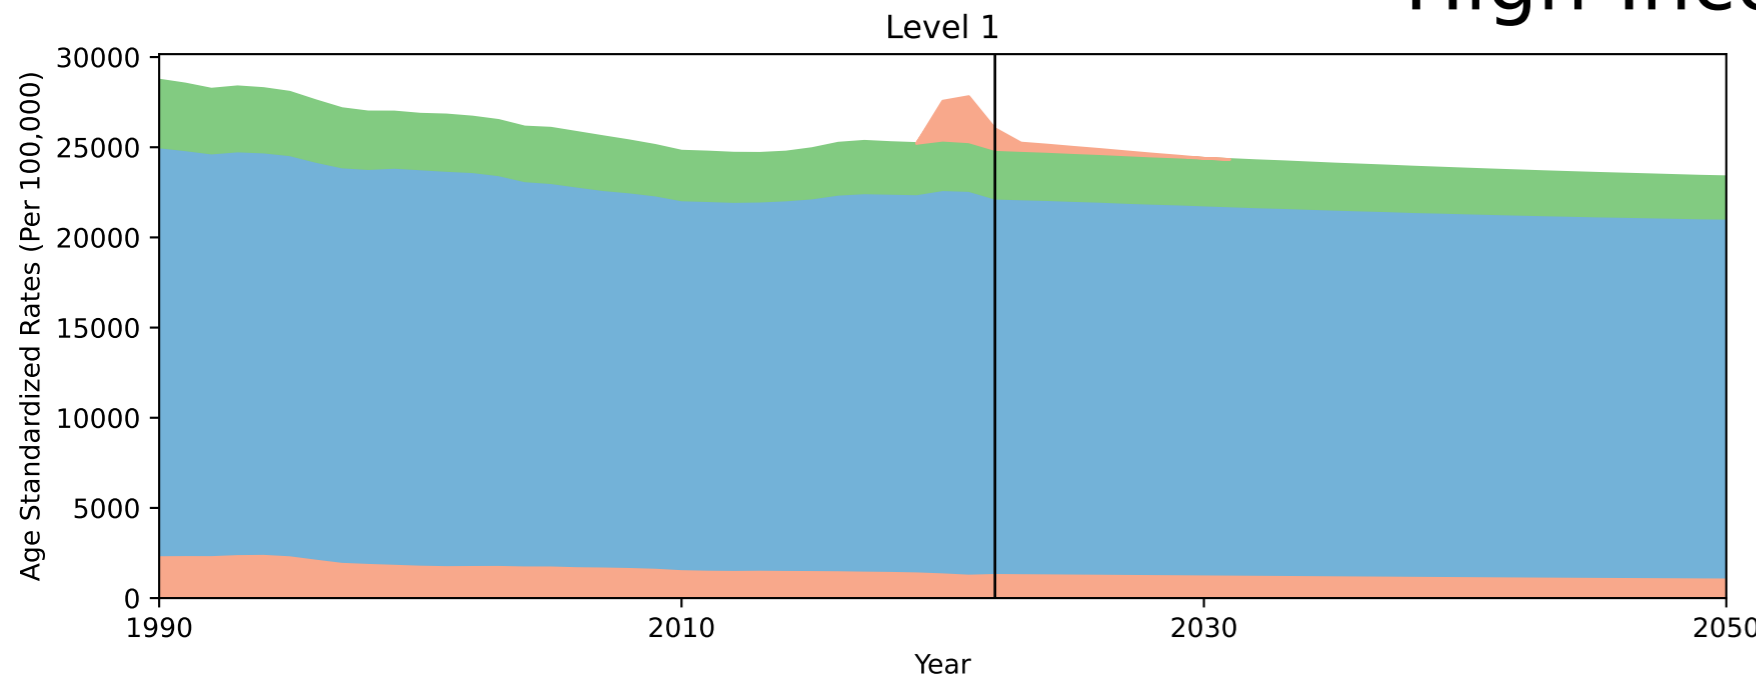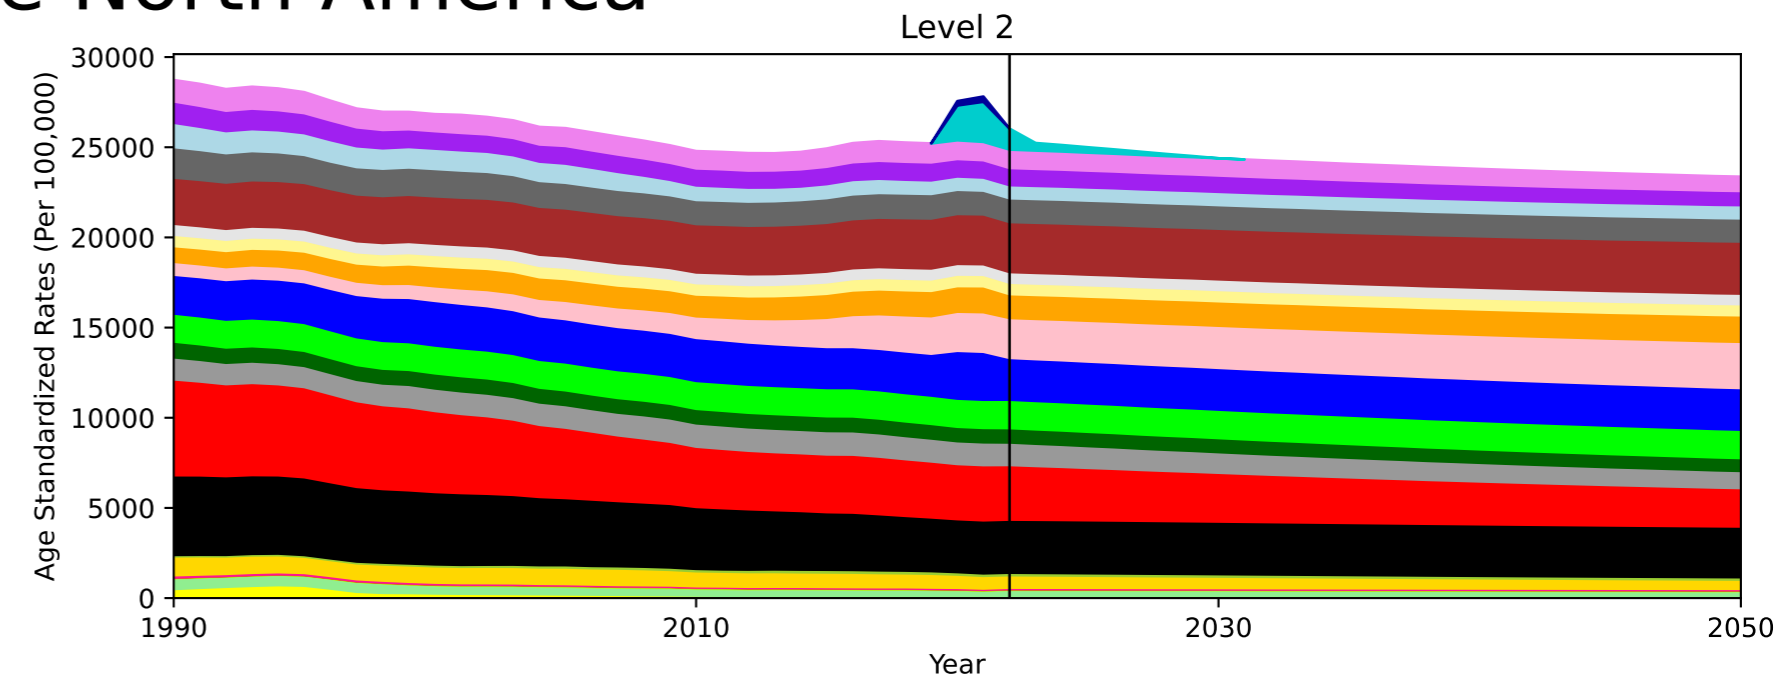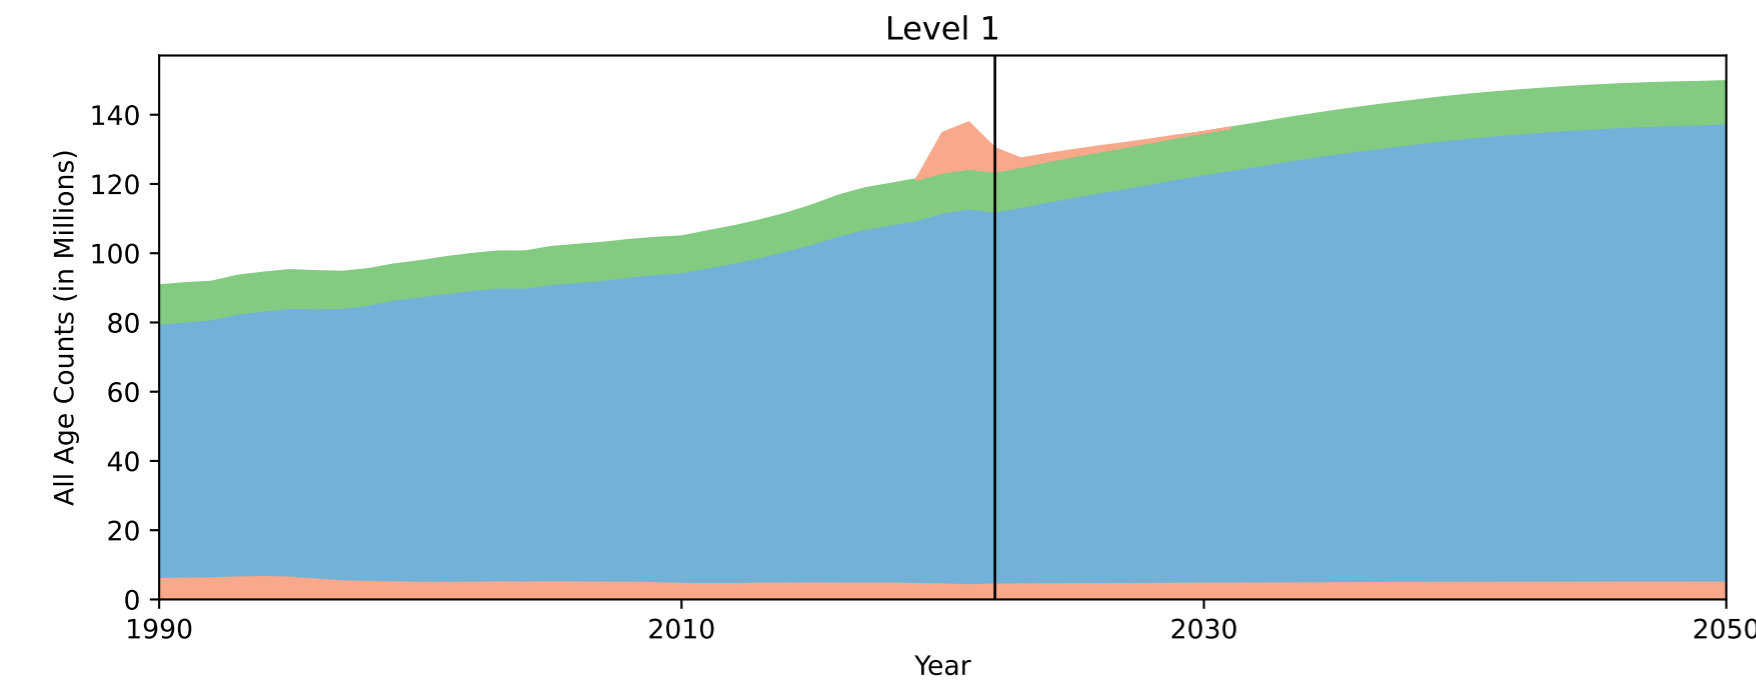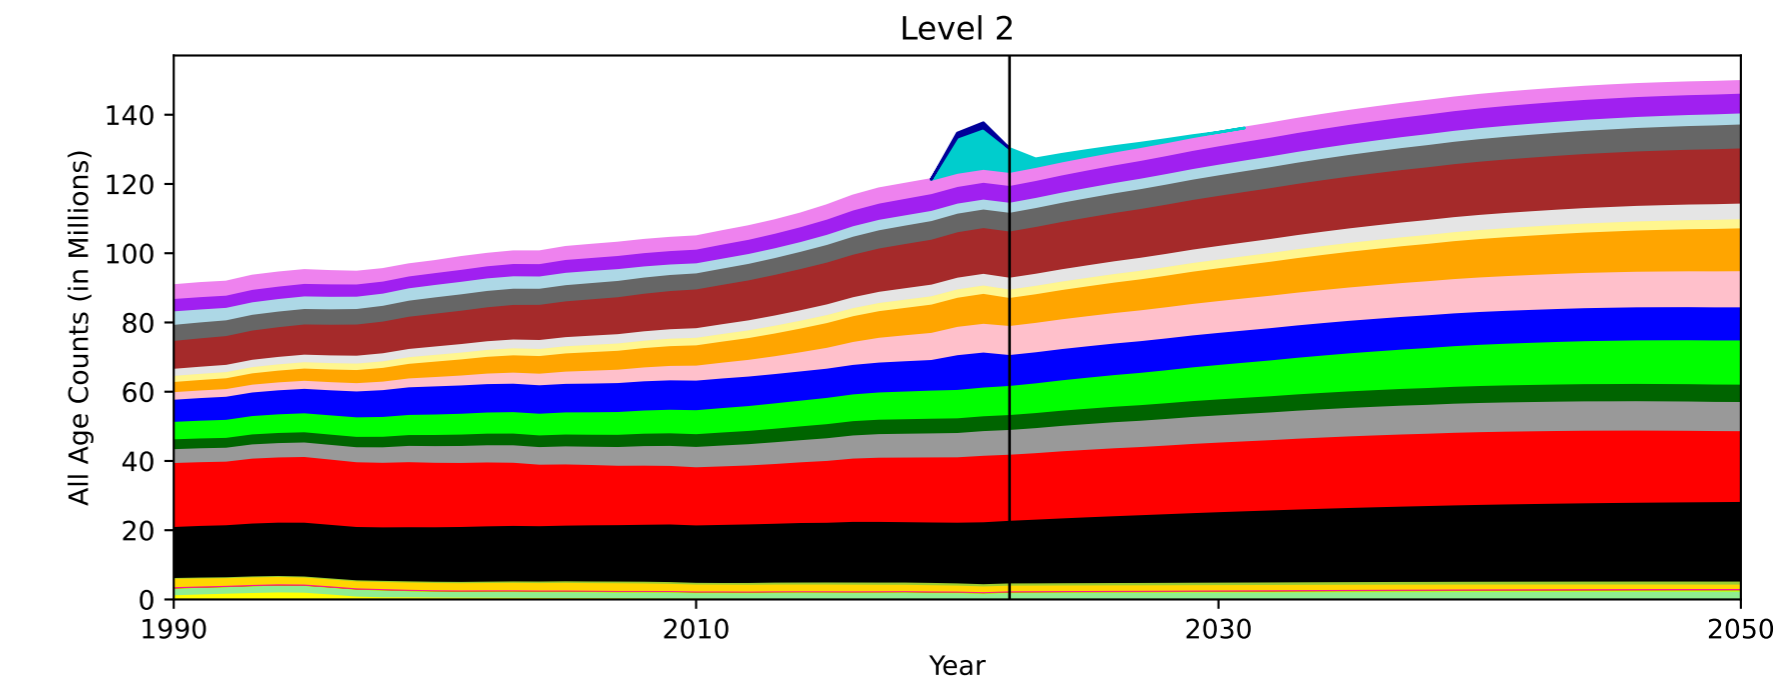

# Southern Latin America

Level 1

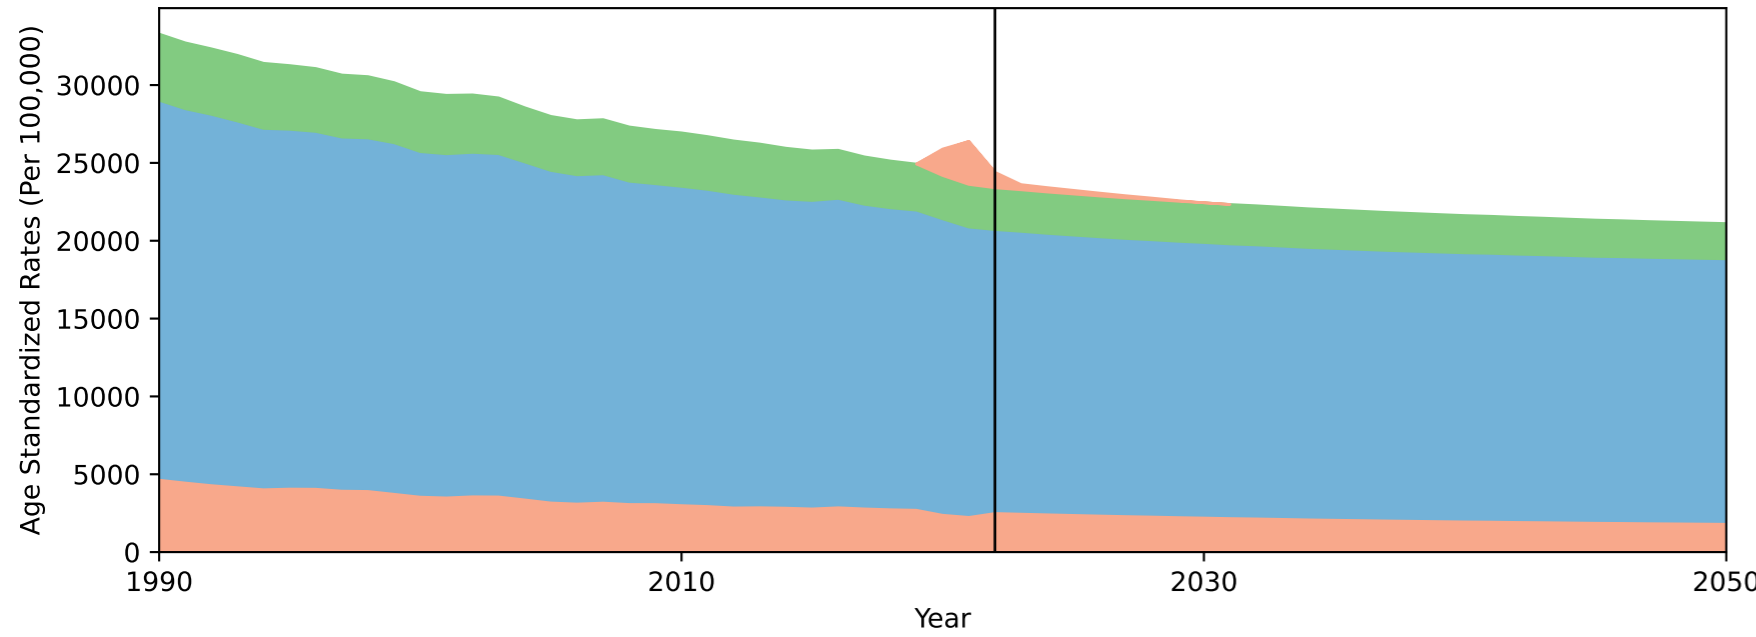

Level 2

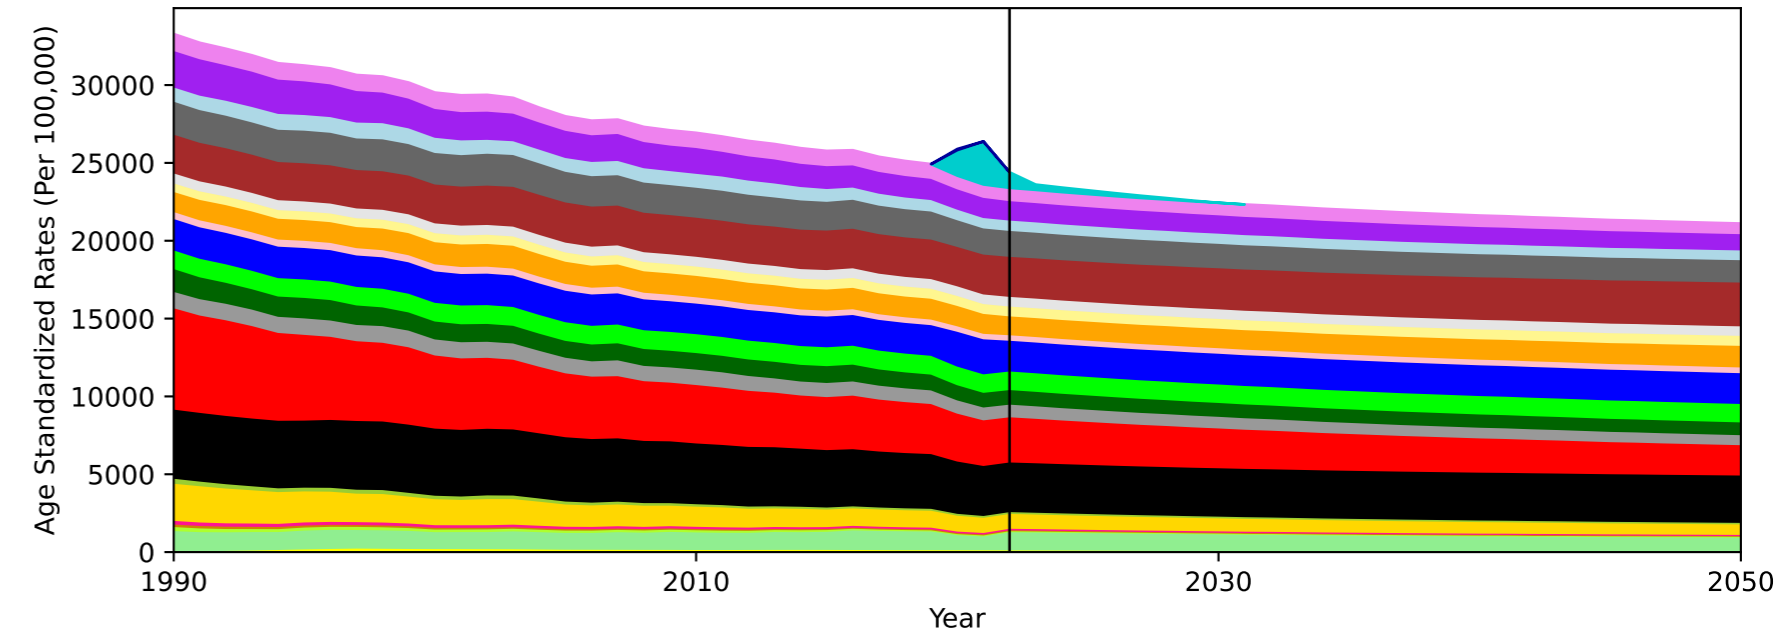

Level 1

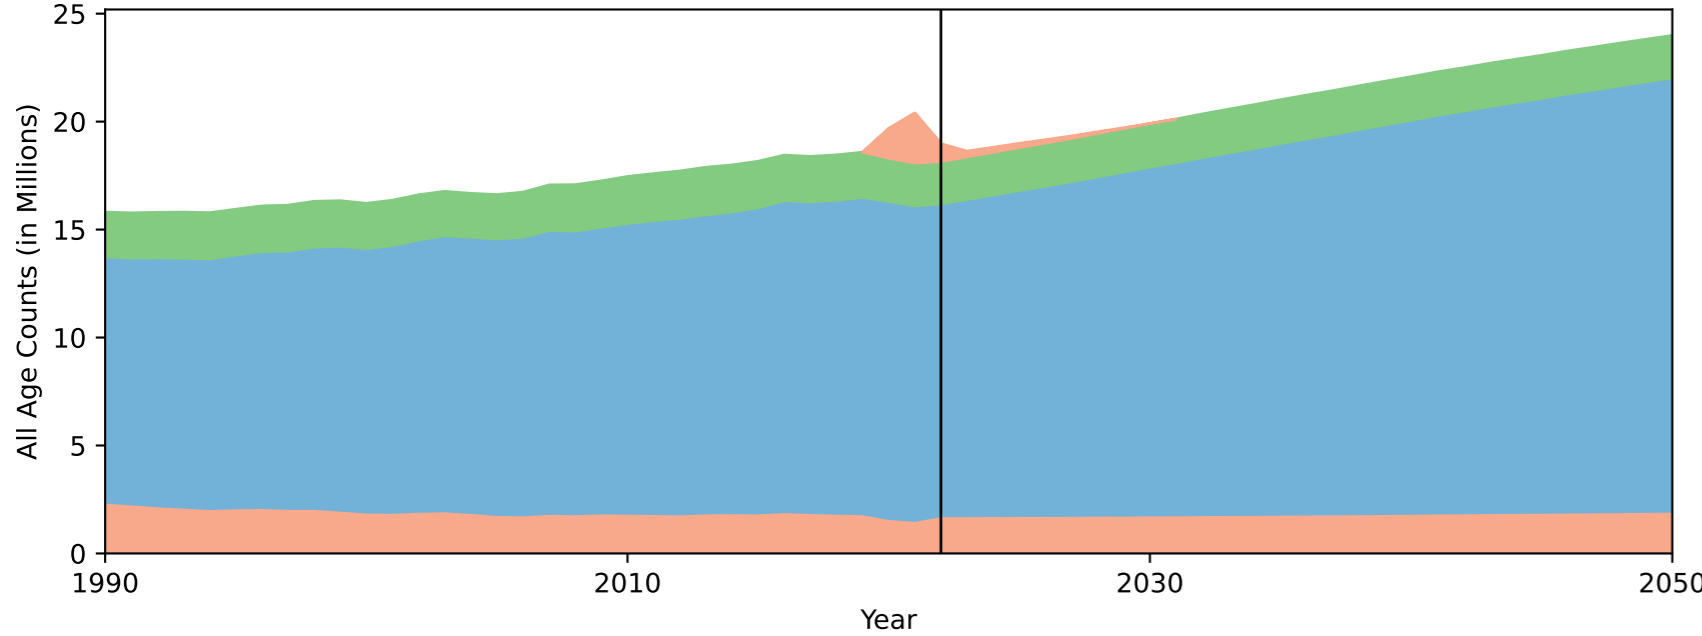

Level 2

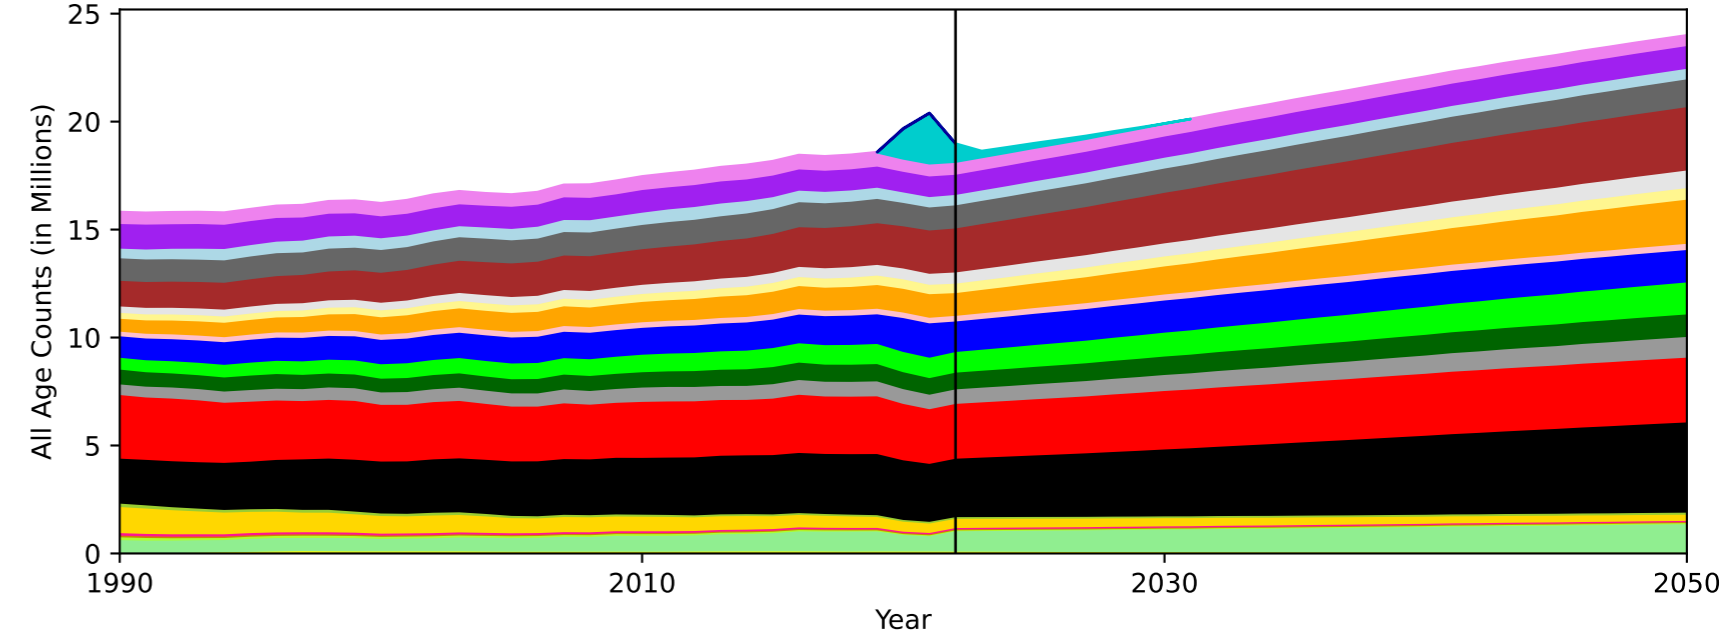



# Western Europe

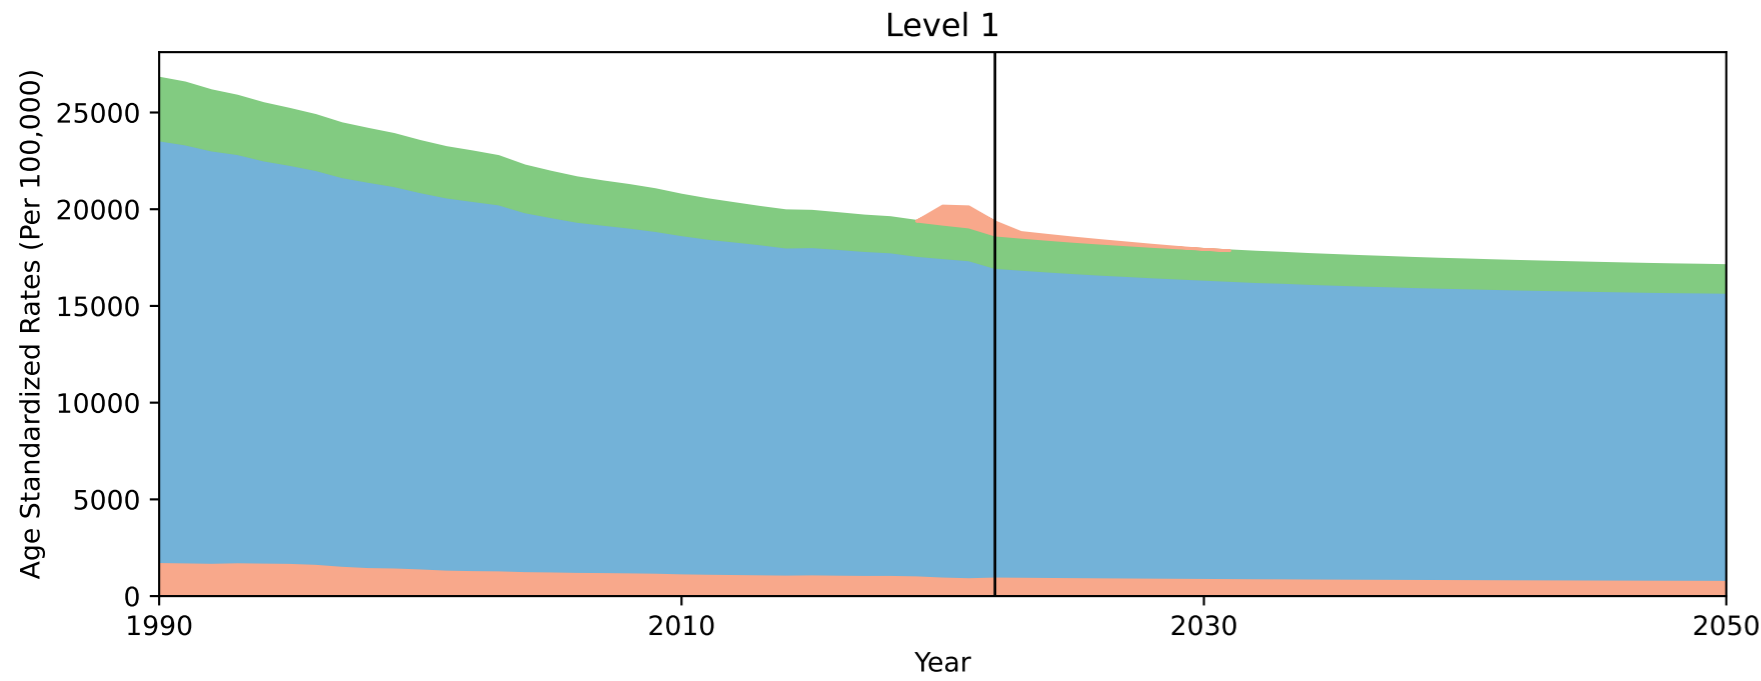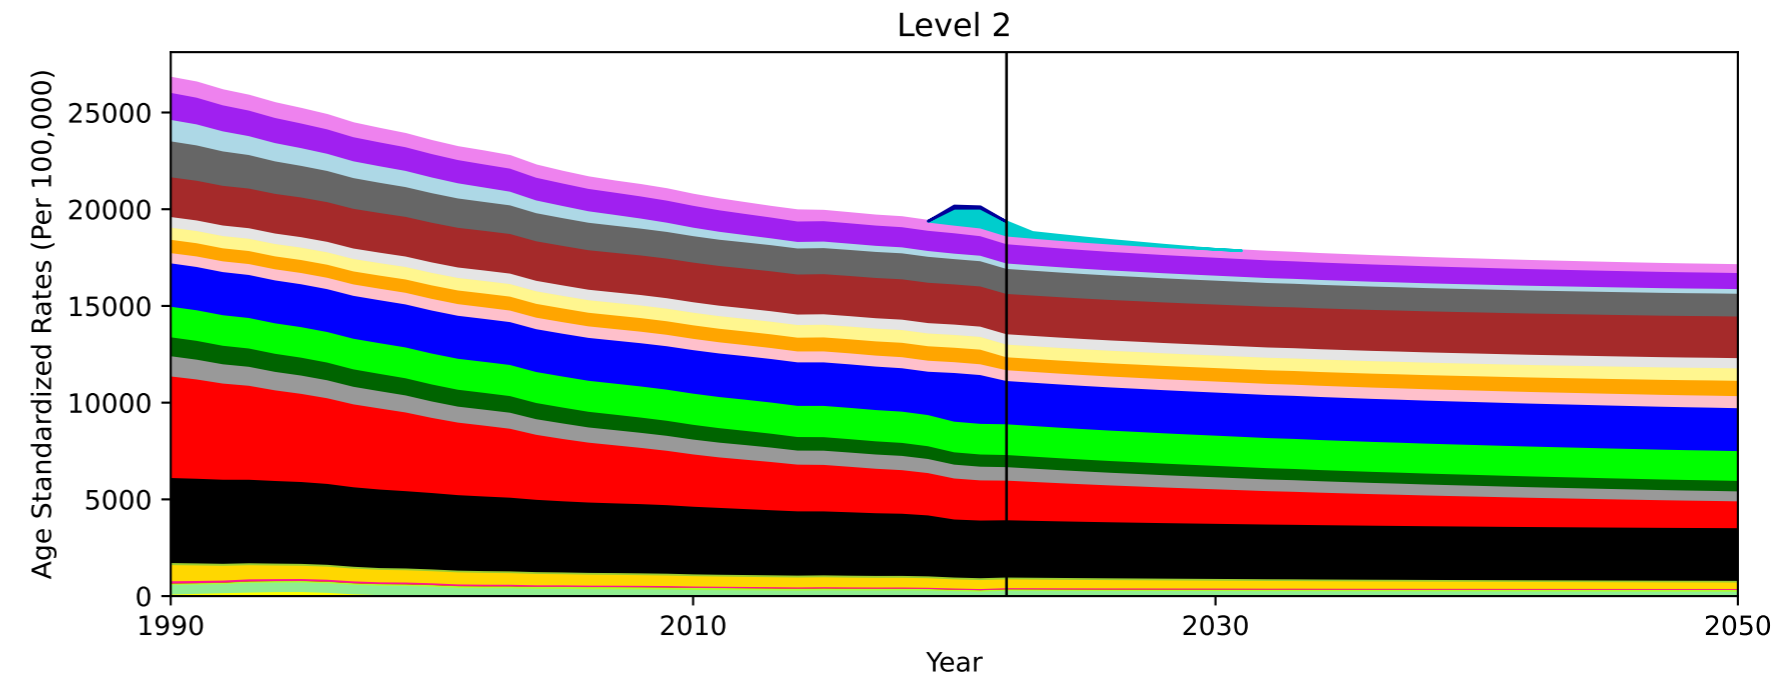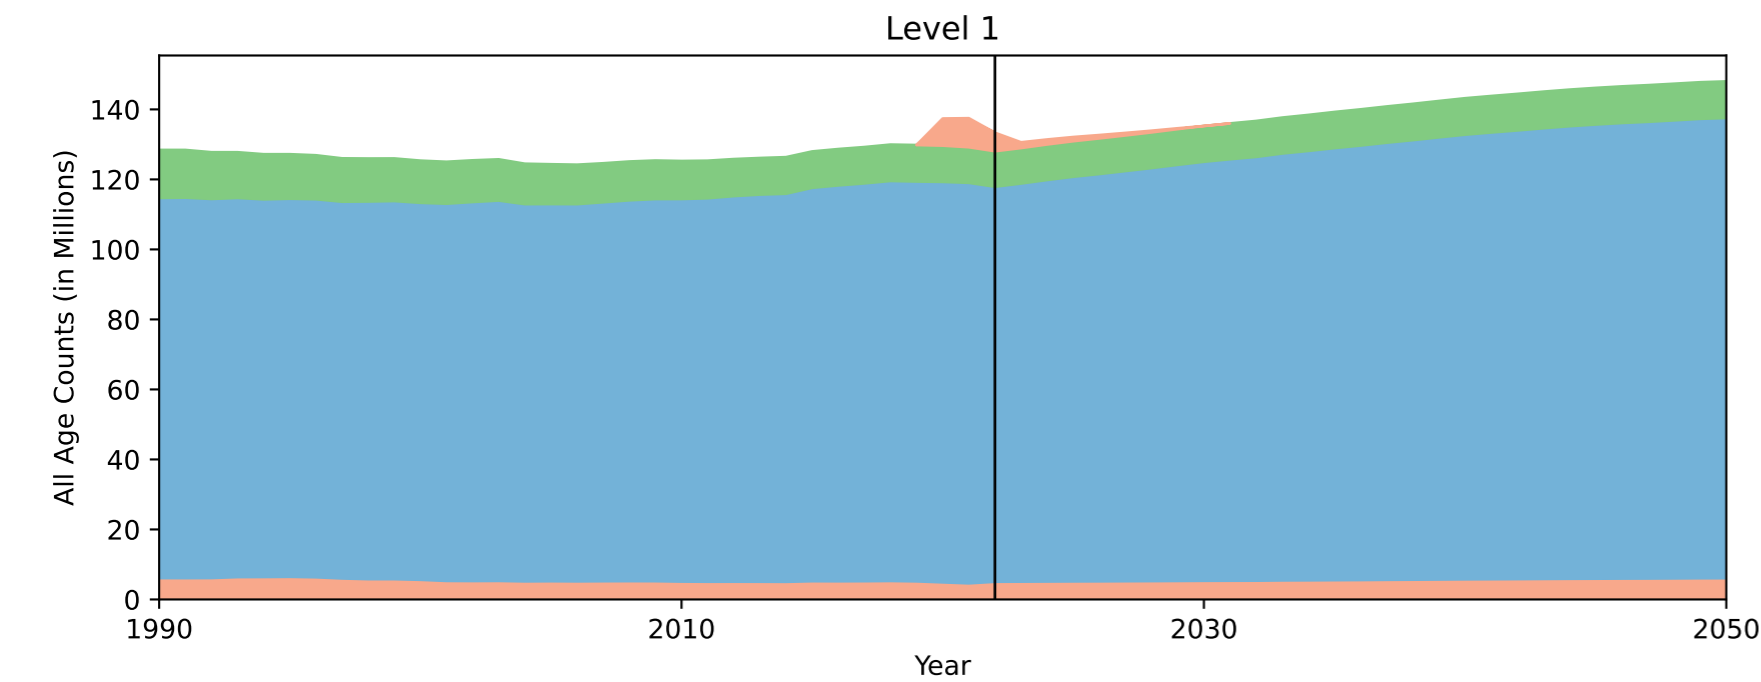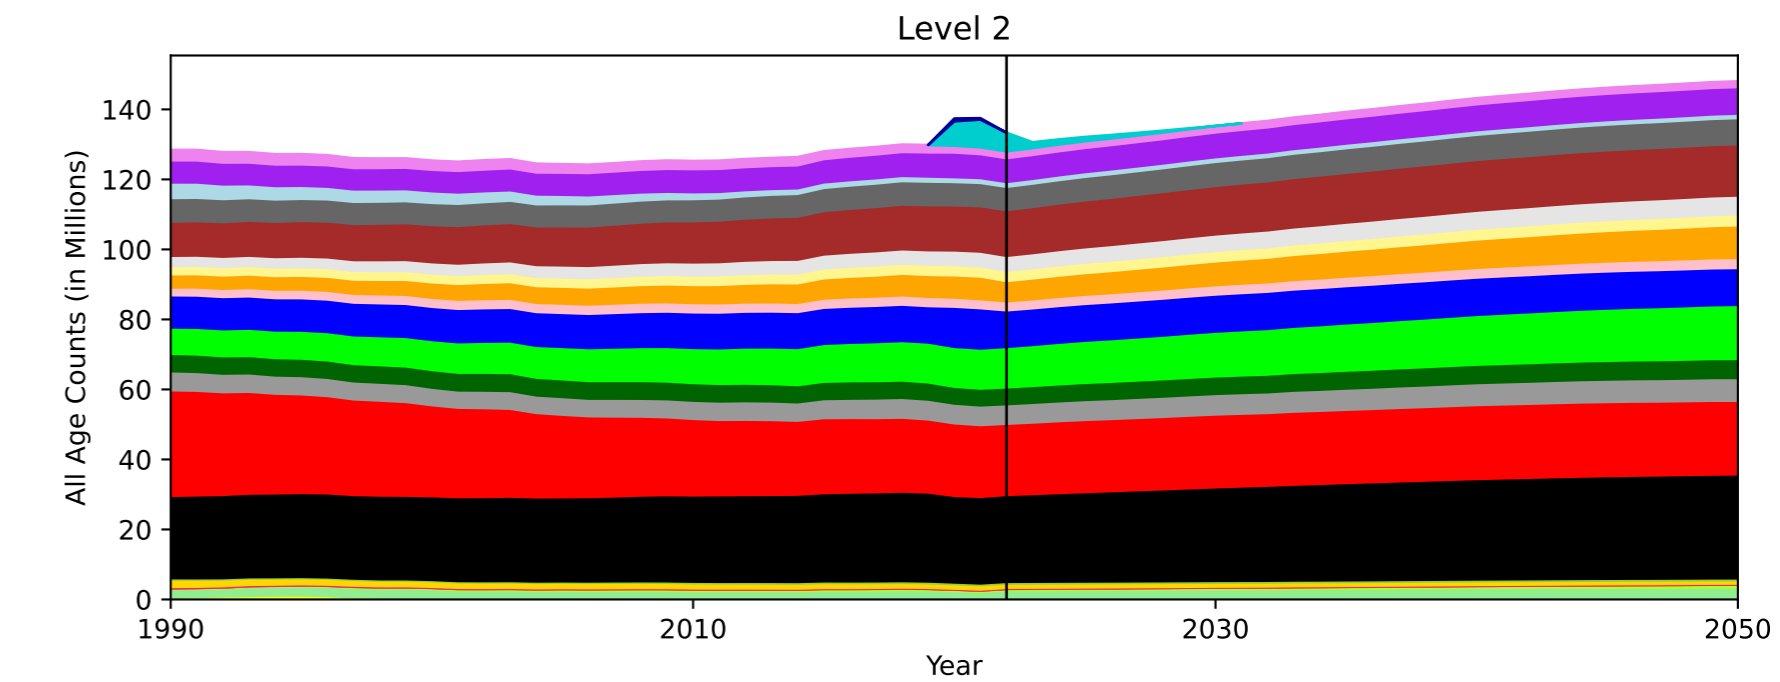

# Andean Latin America

Level 1

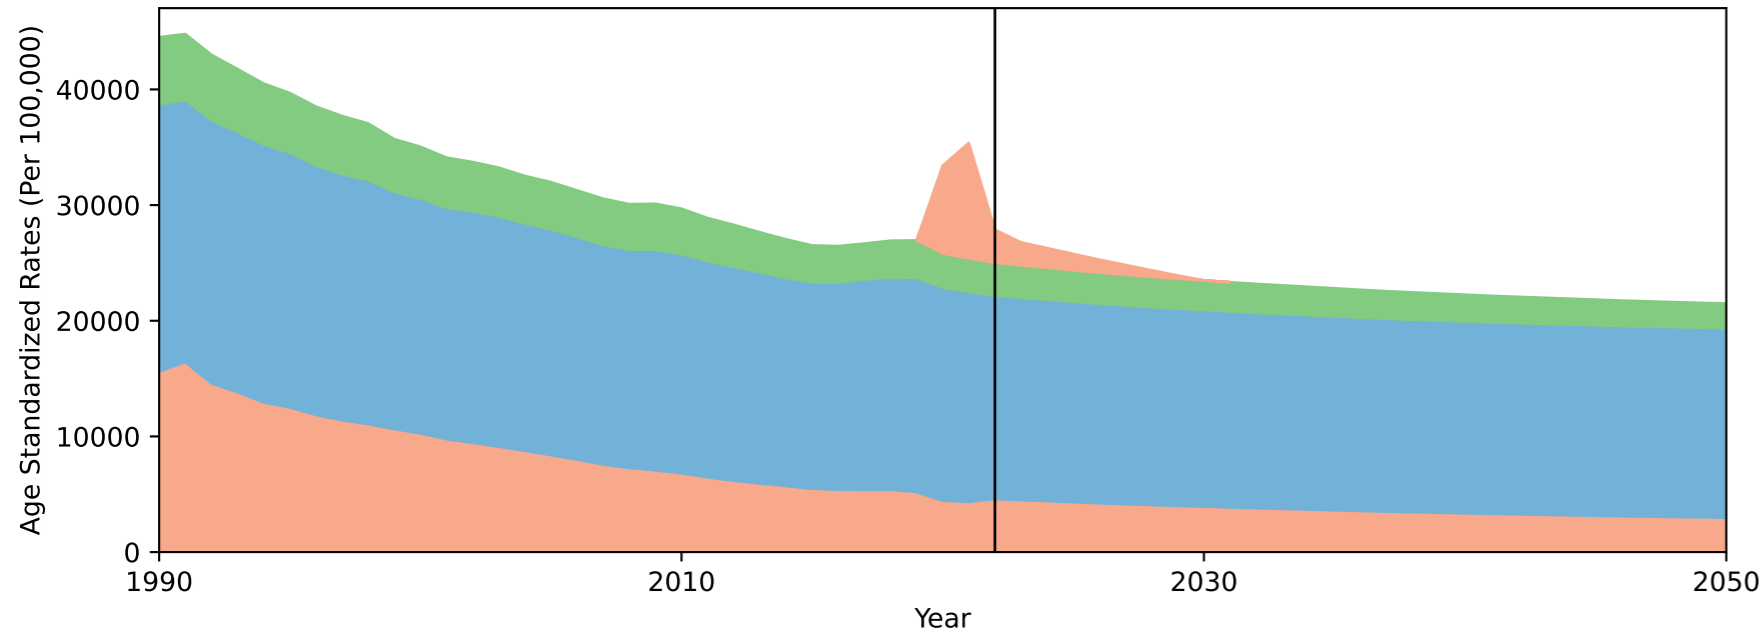

Level 2

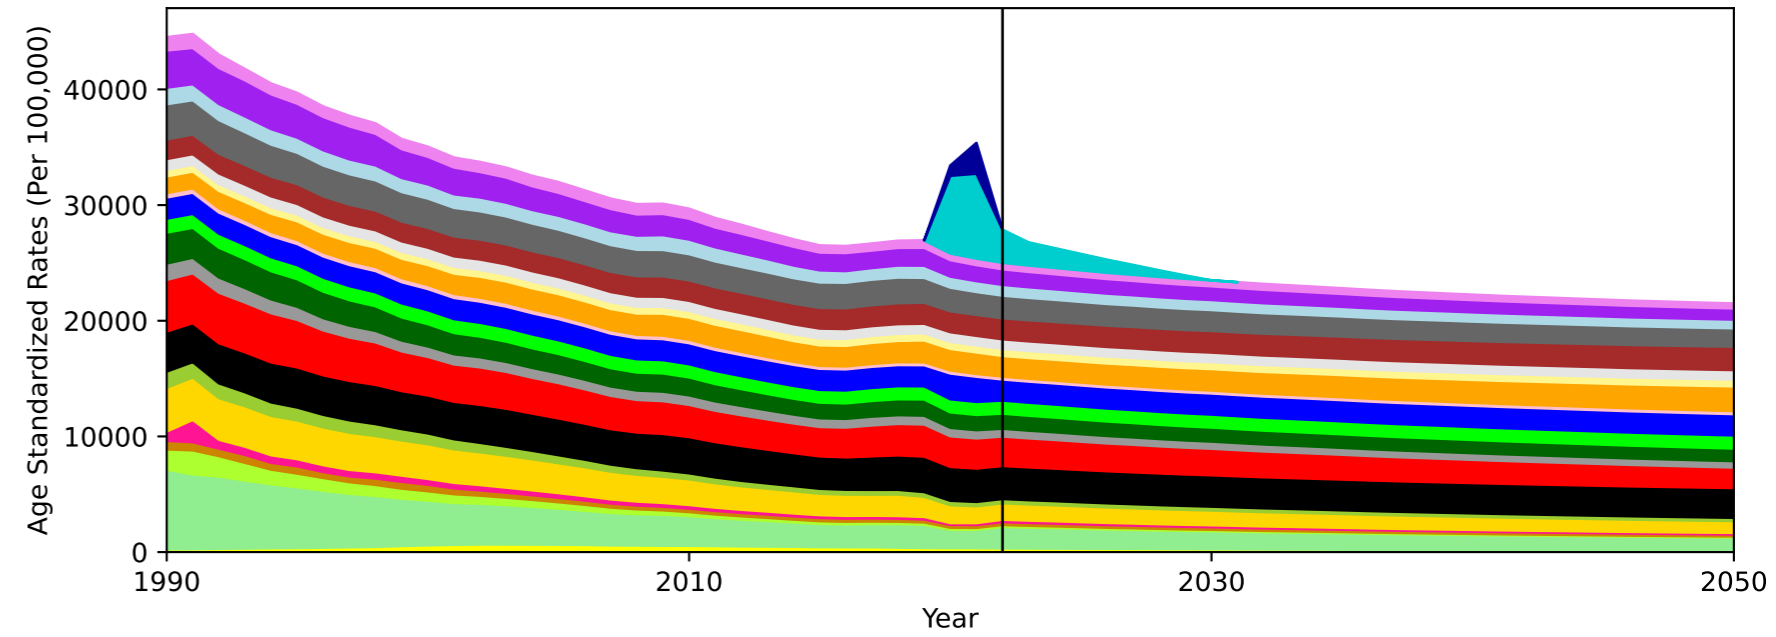

Level 1

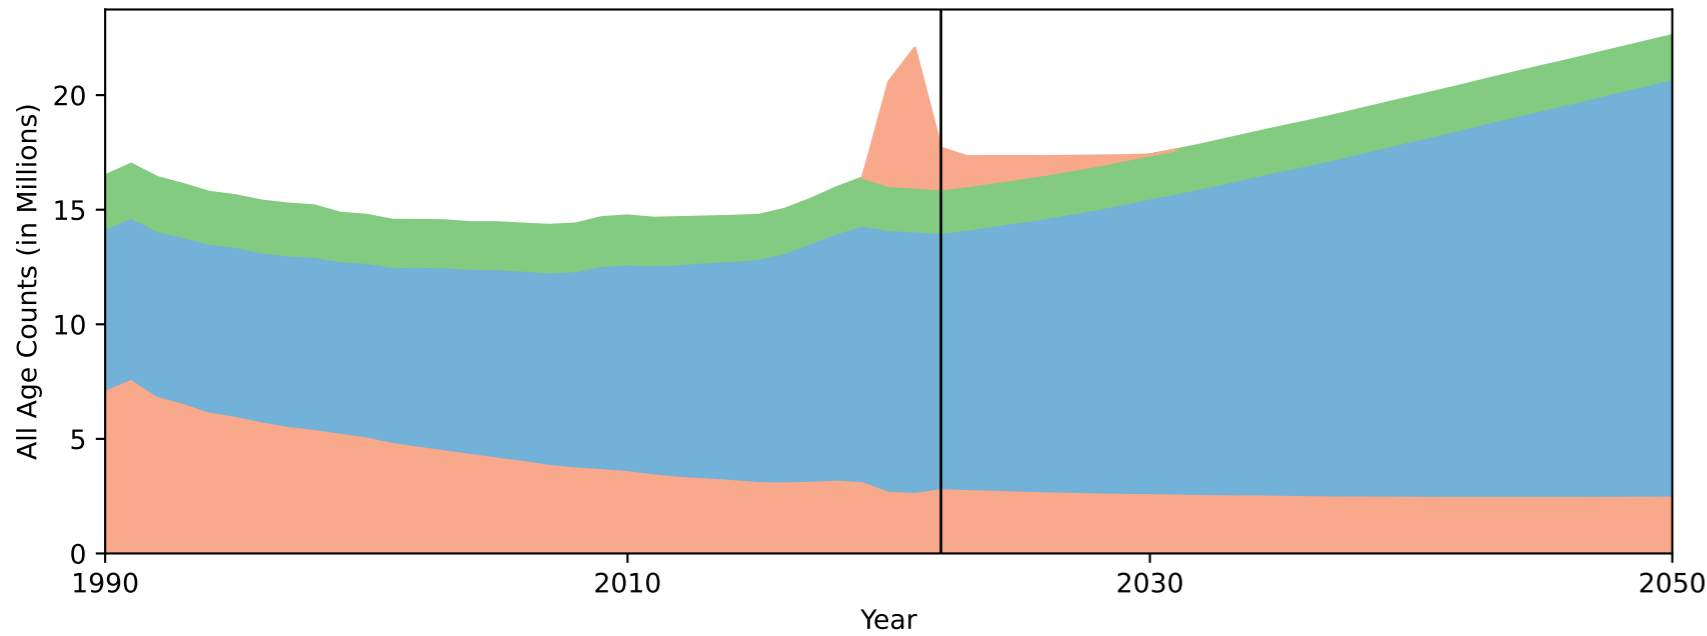

Level 2

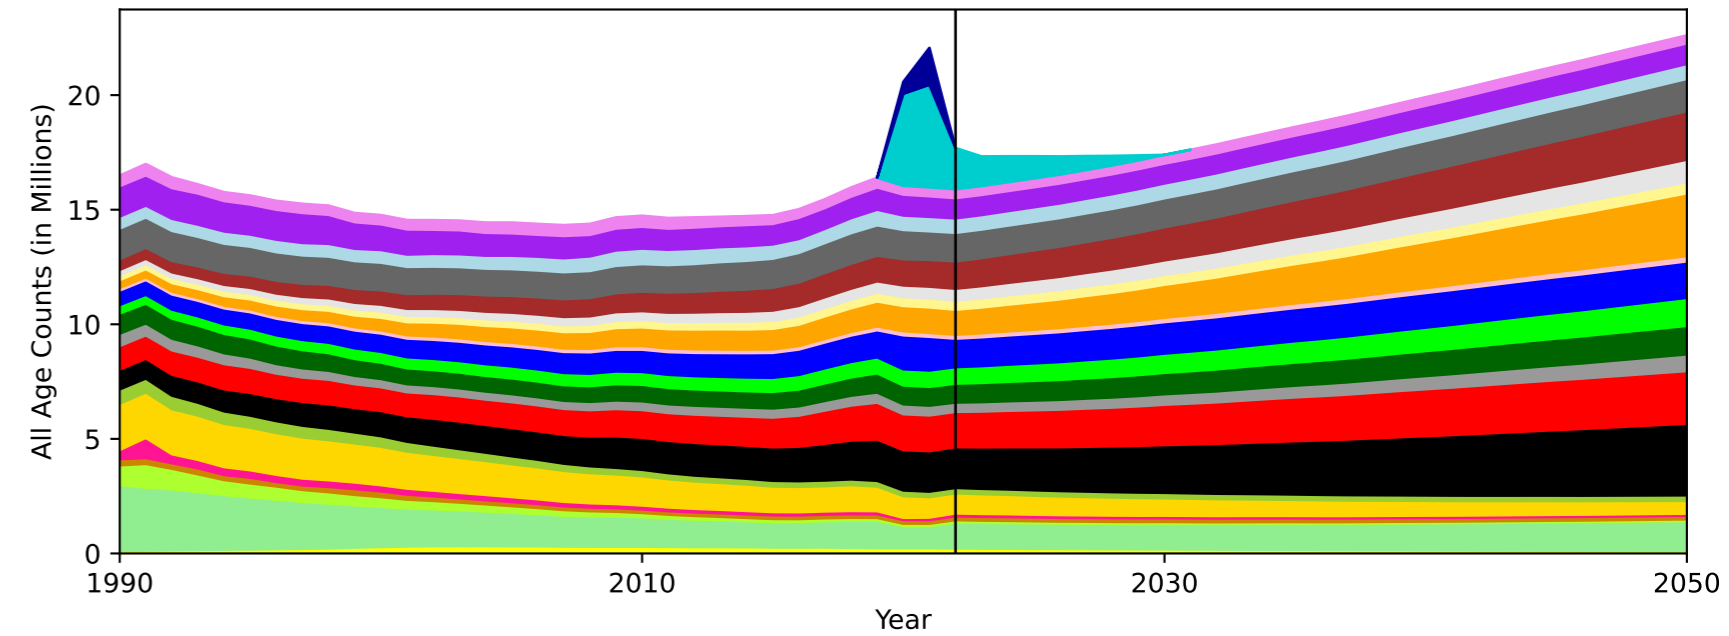

# Caribbean

Level 1

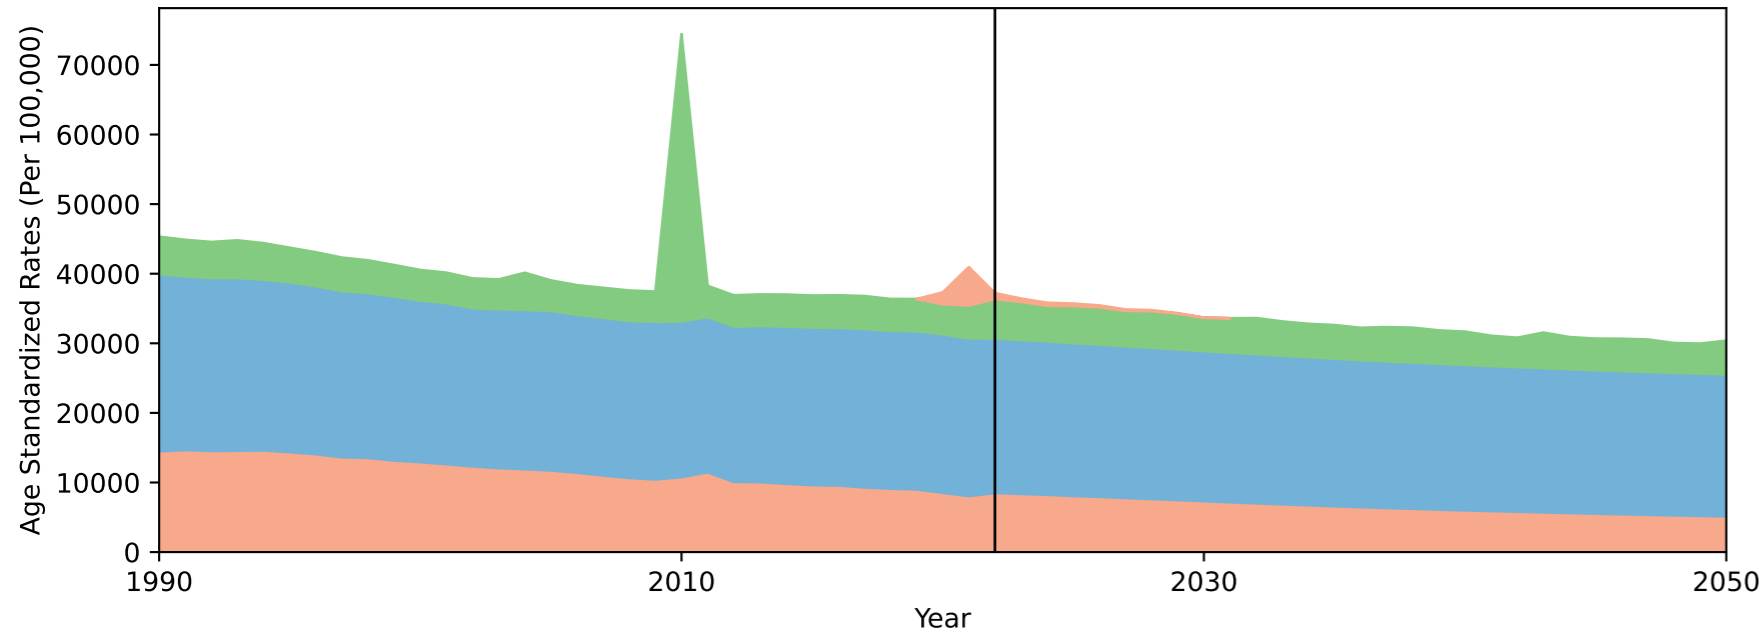

Level 2

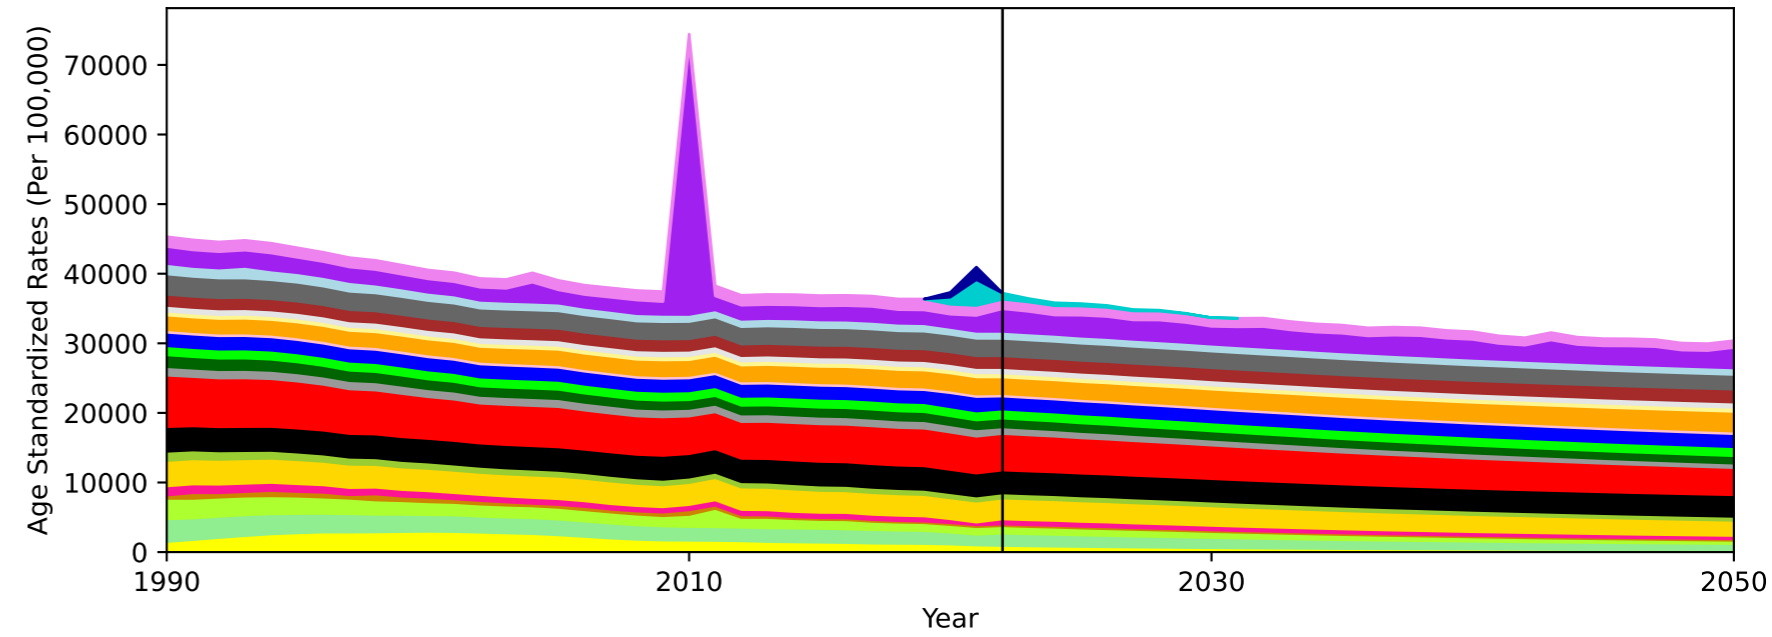

Level 1

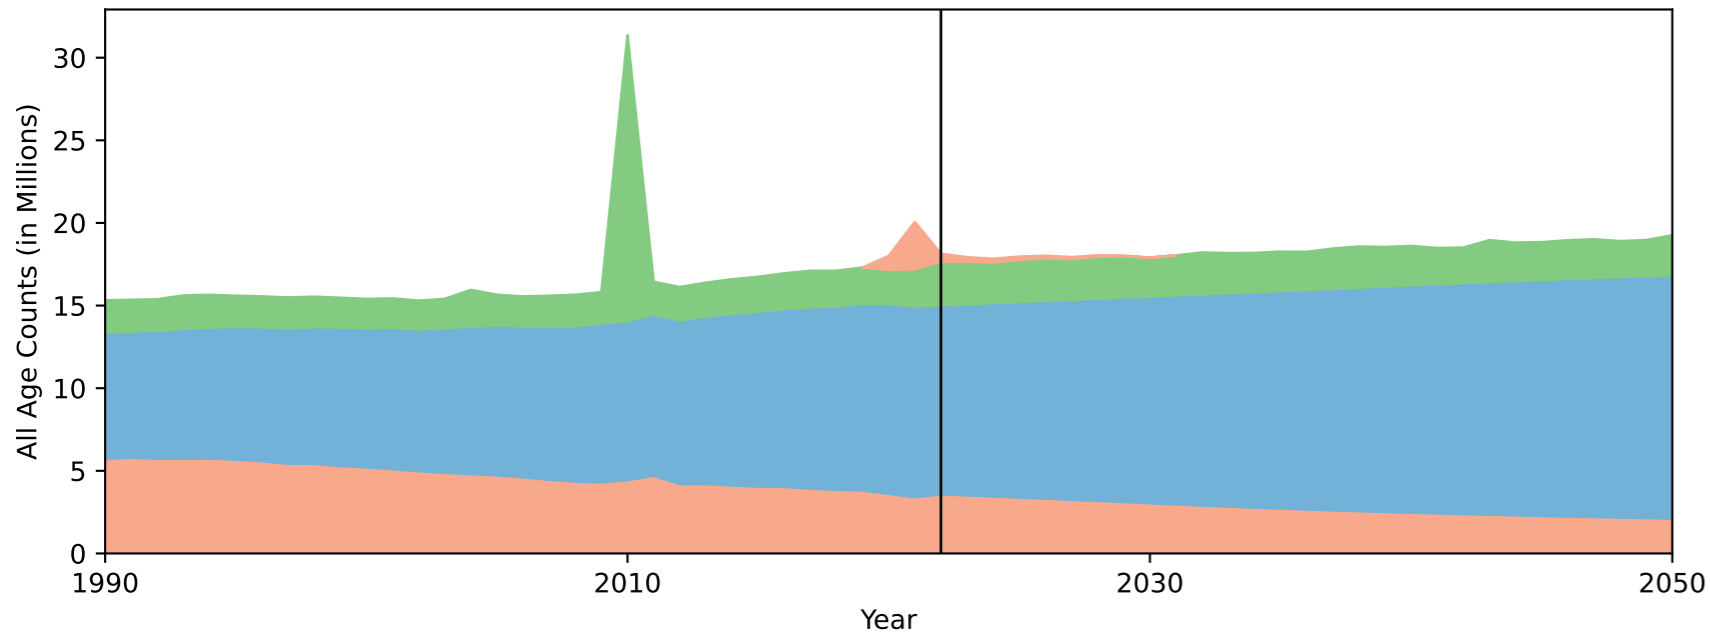

Level 2

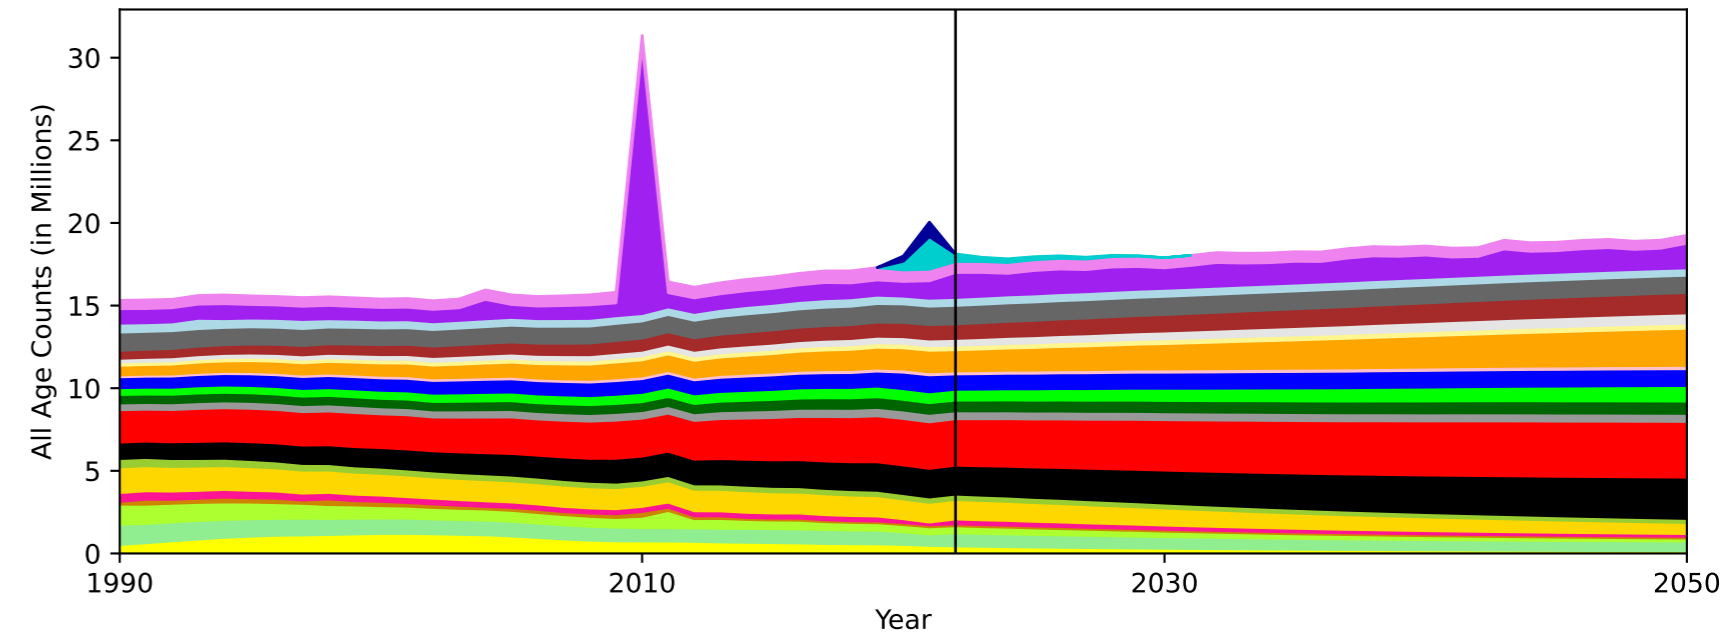

# Central Latin America

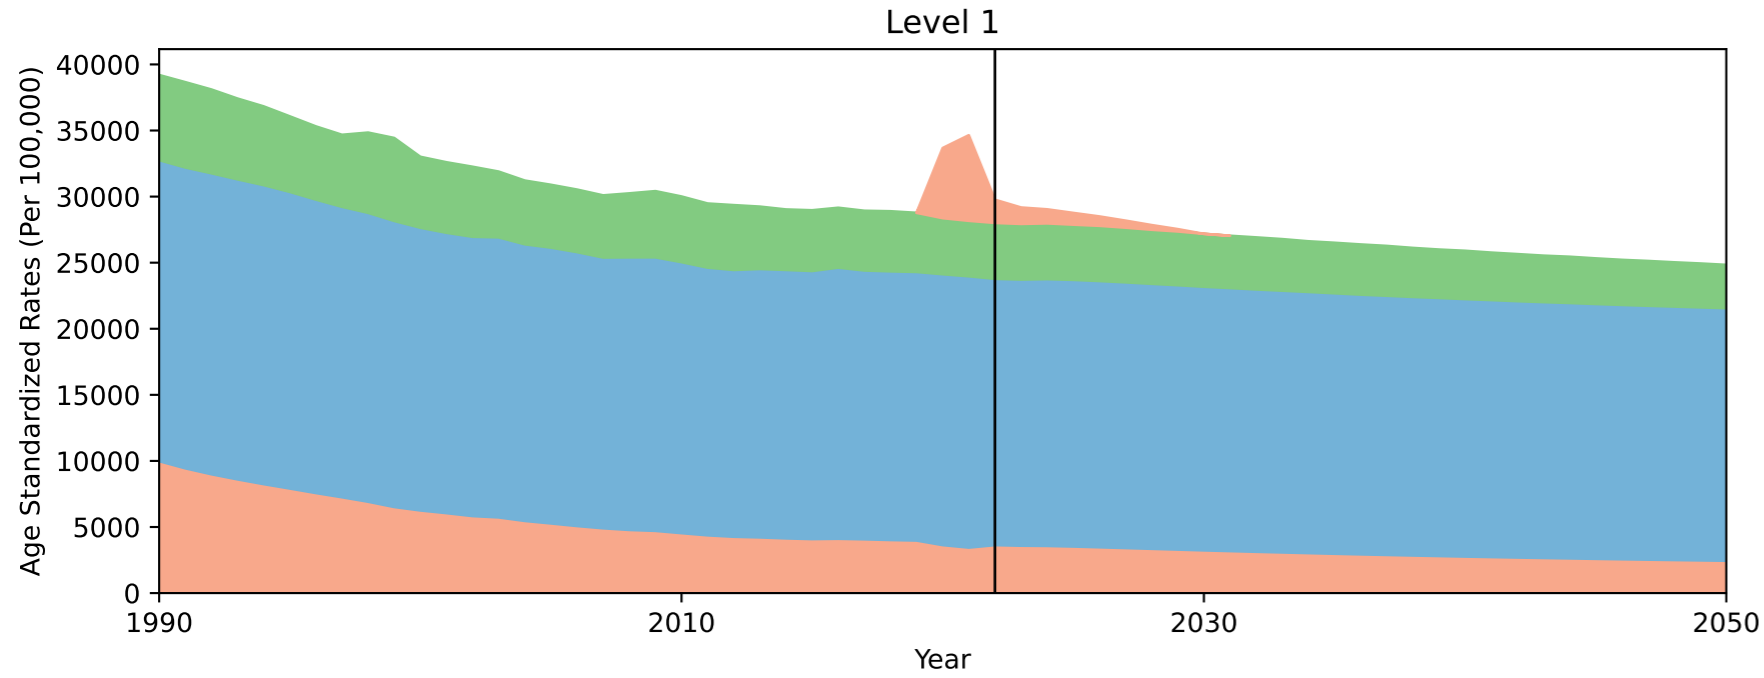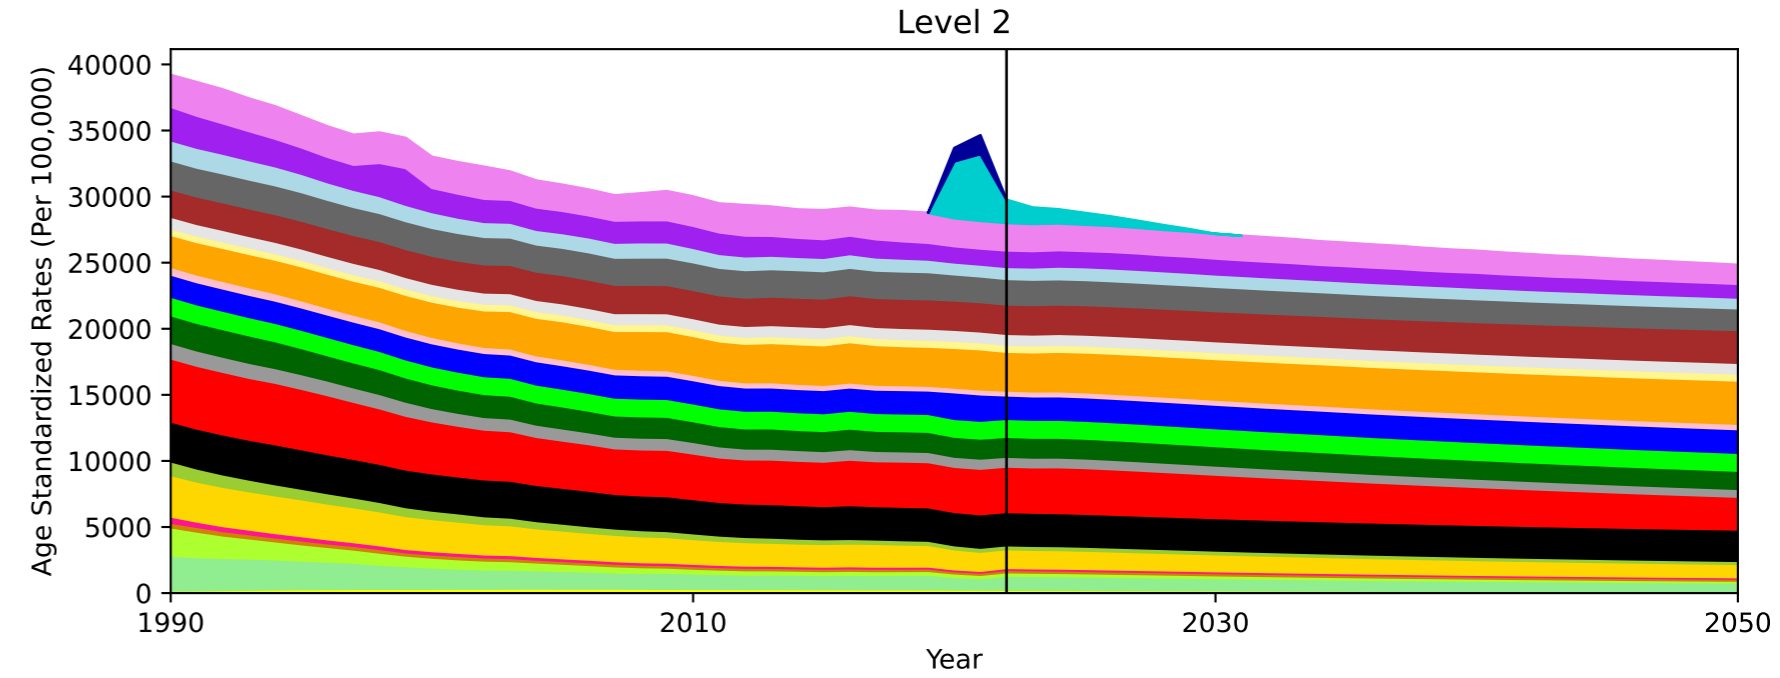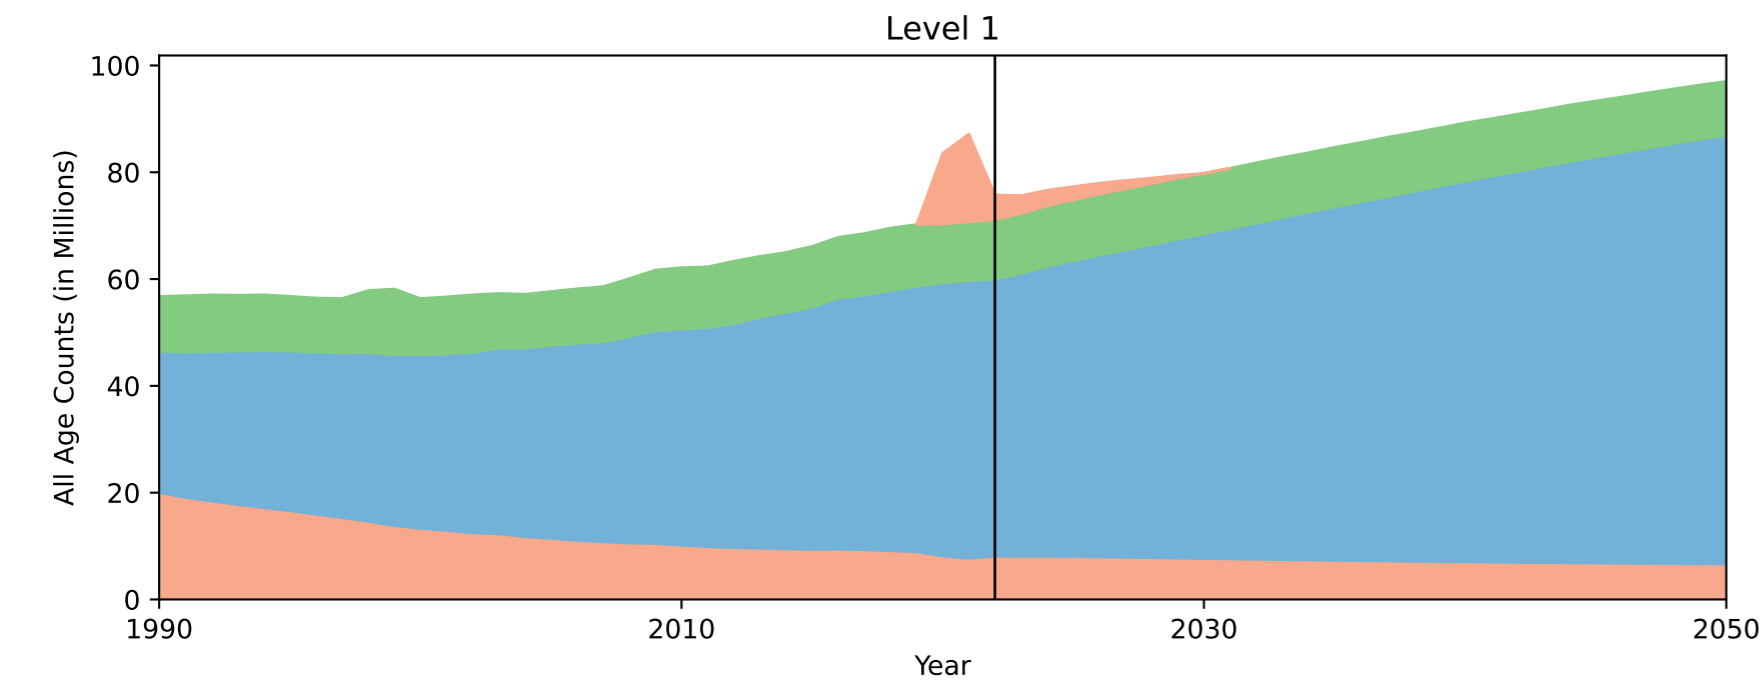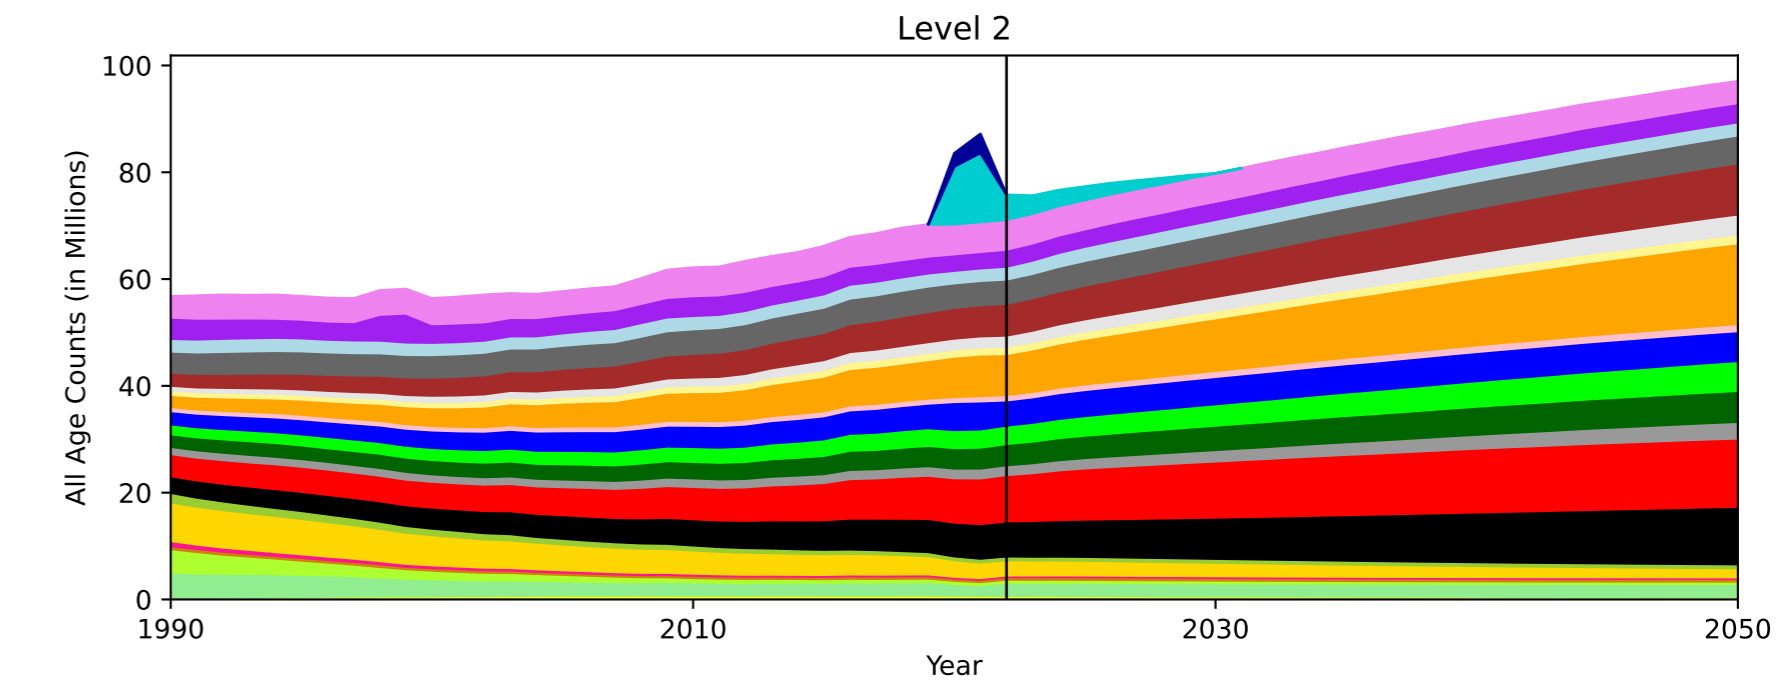

# Tropical Latin America

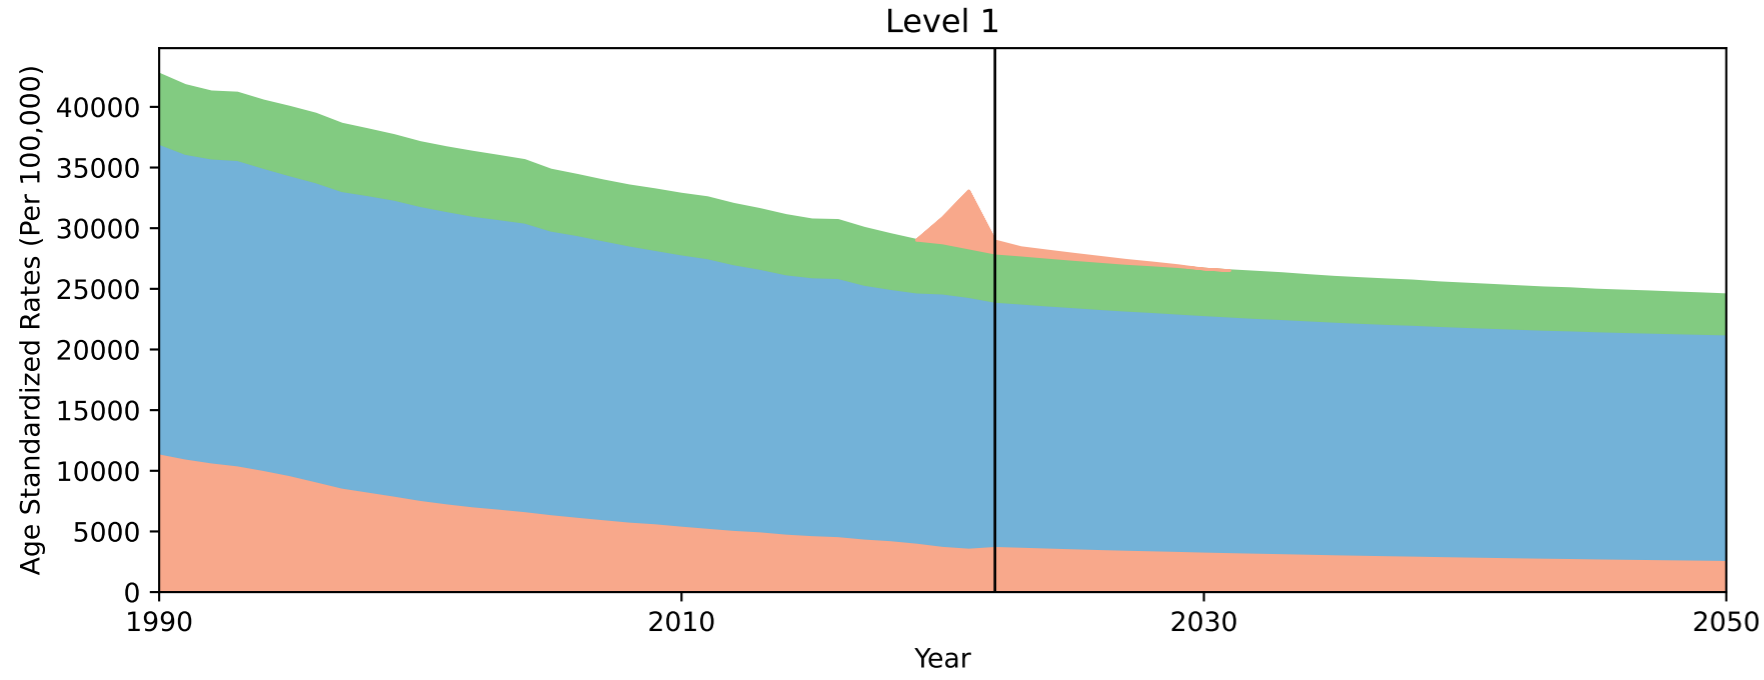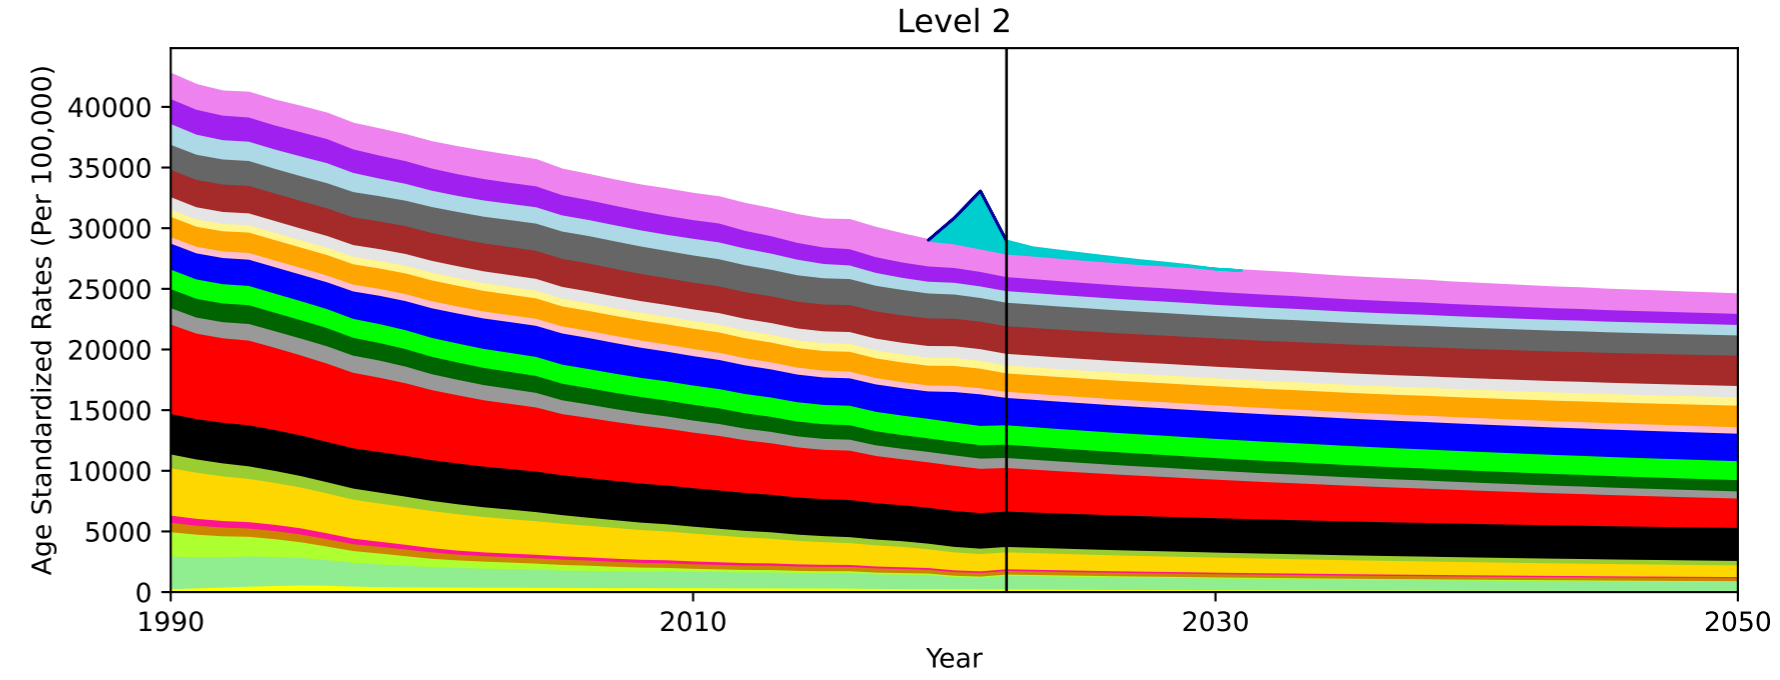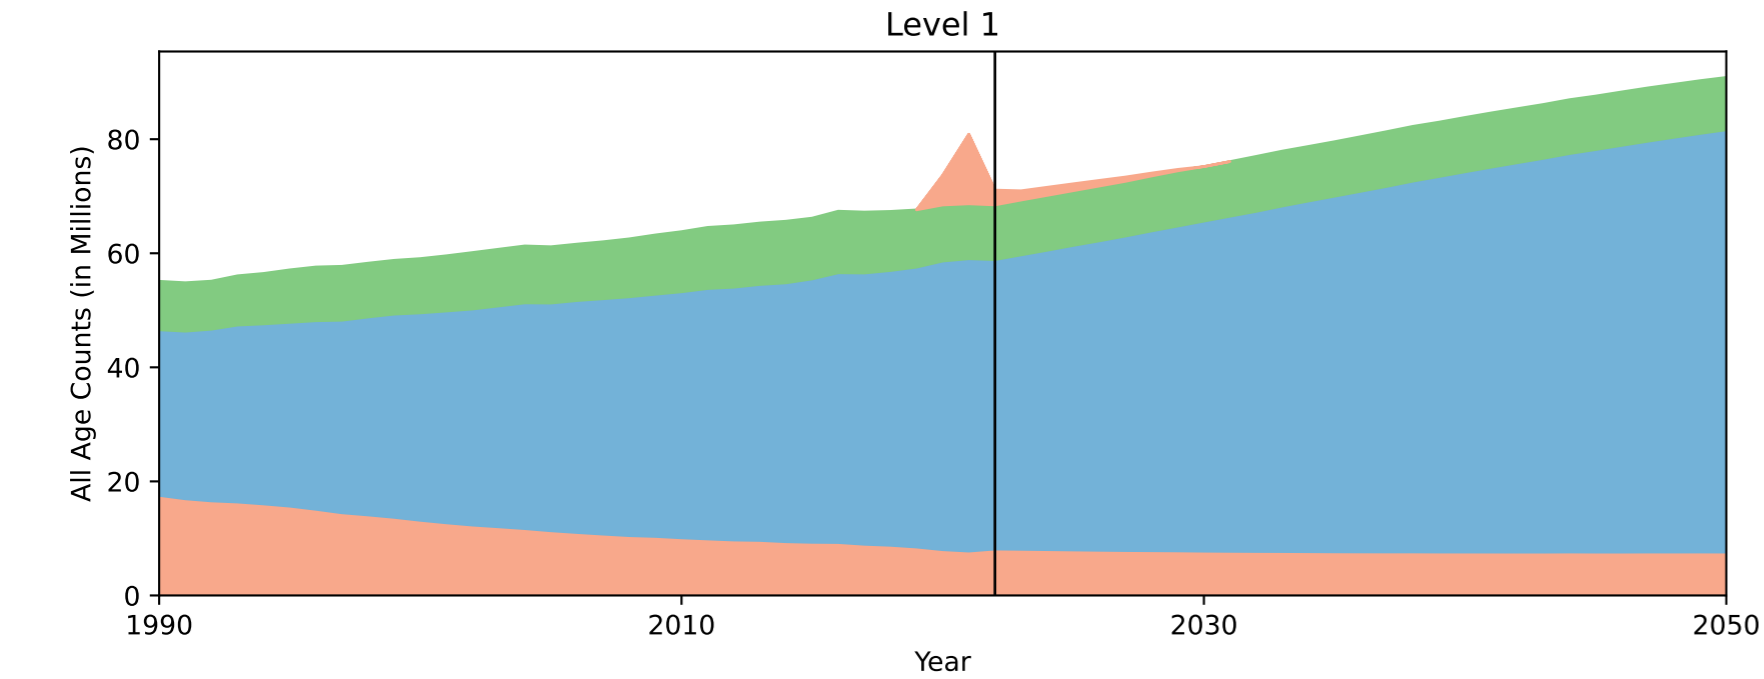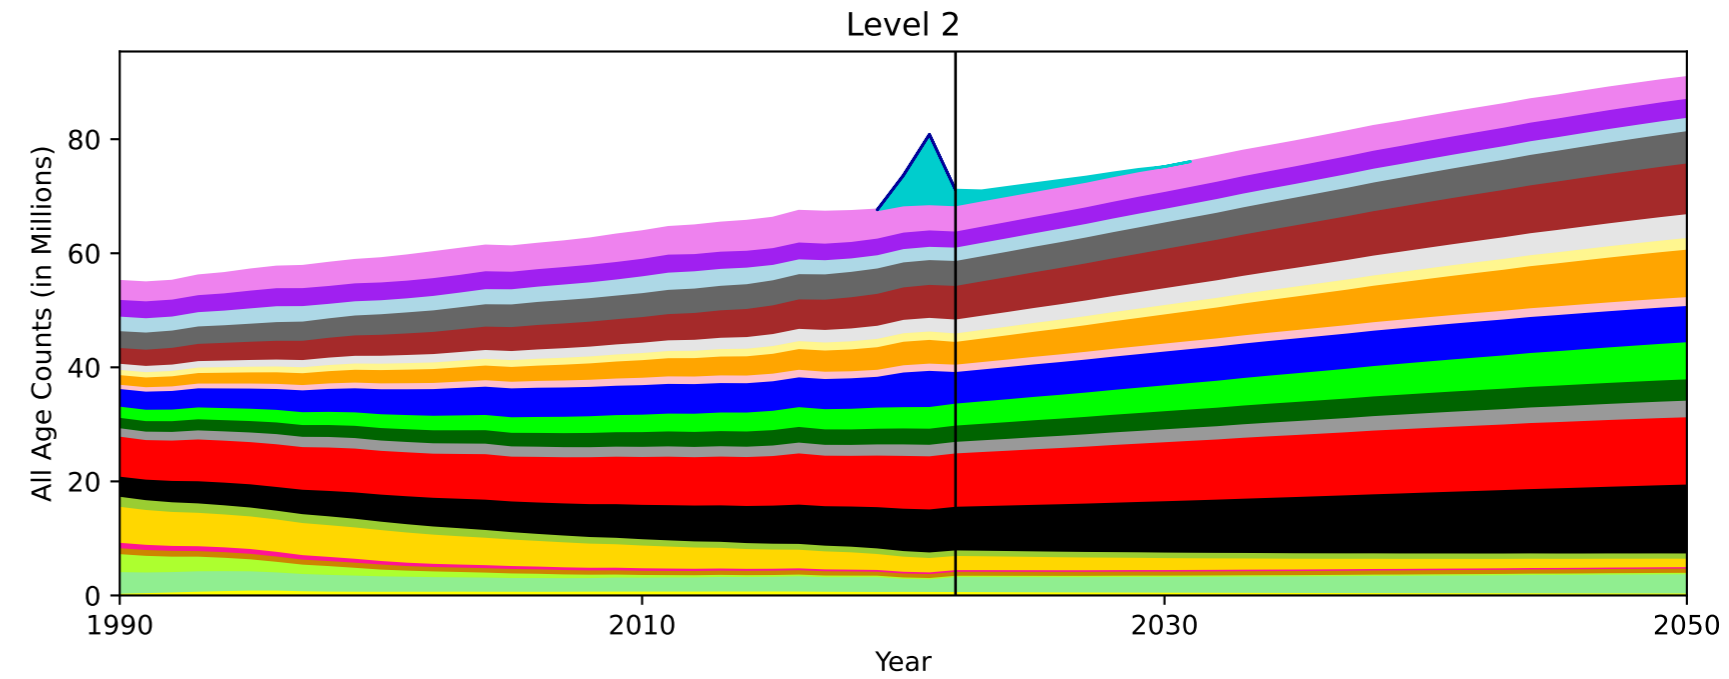

# North Africa And Middle East

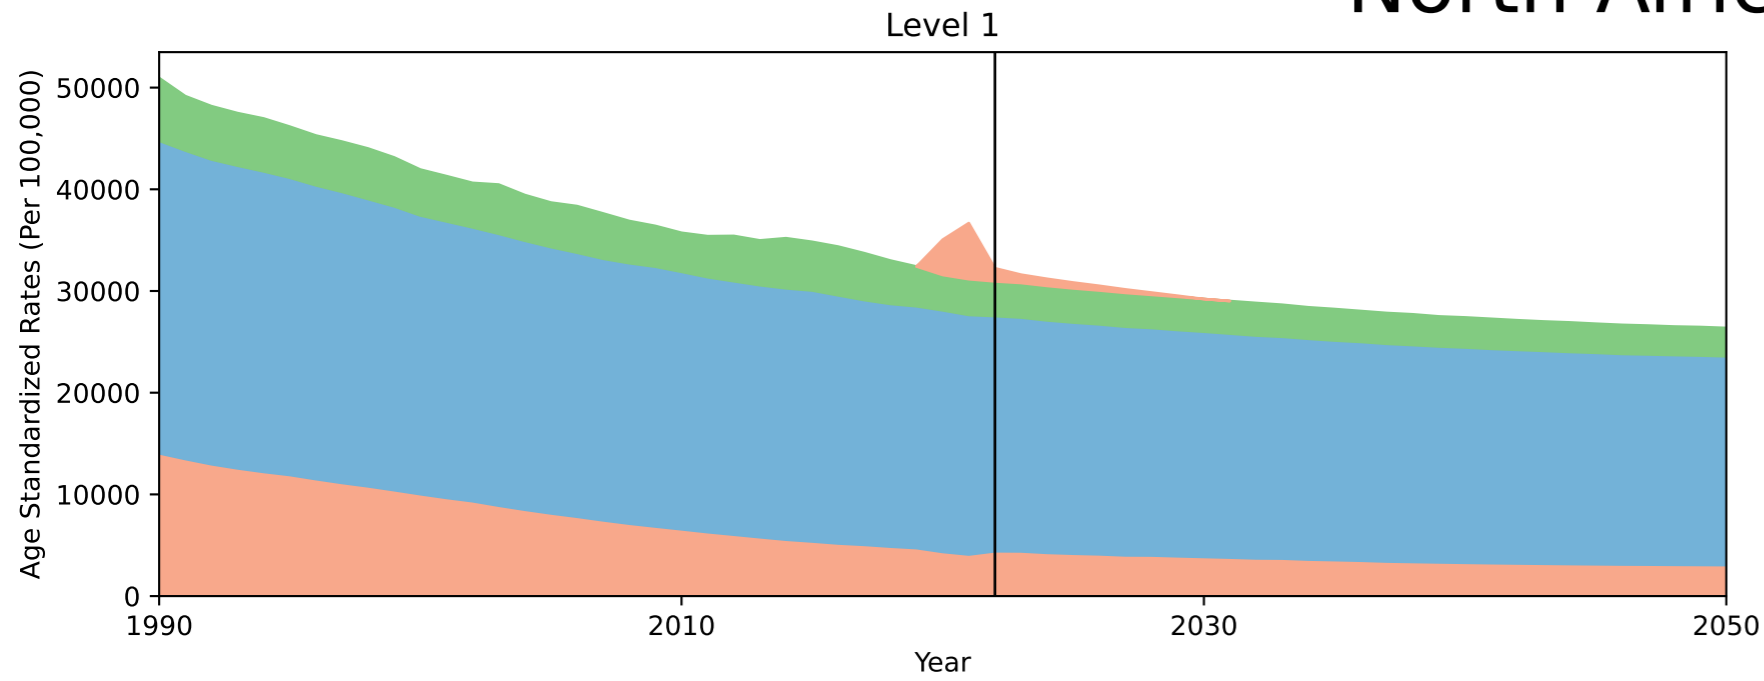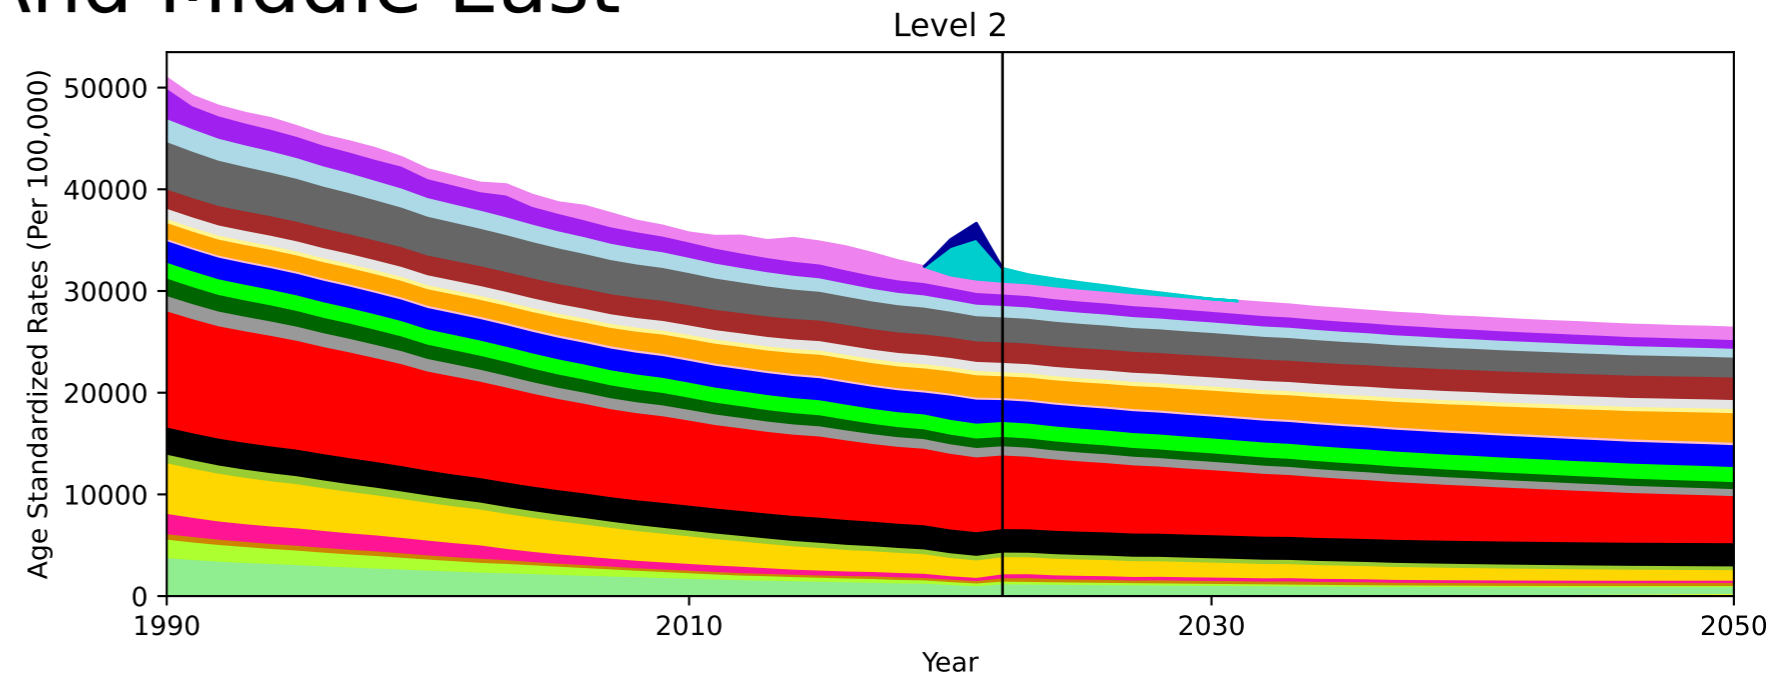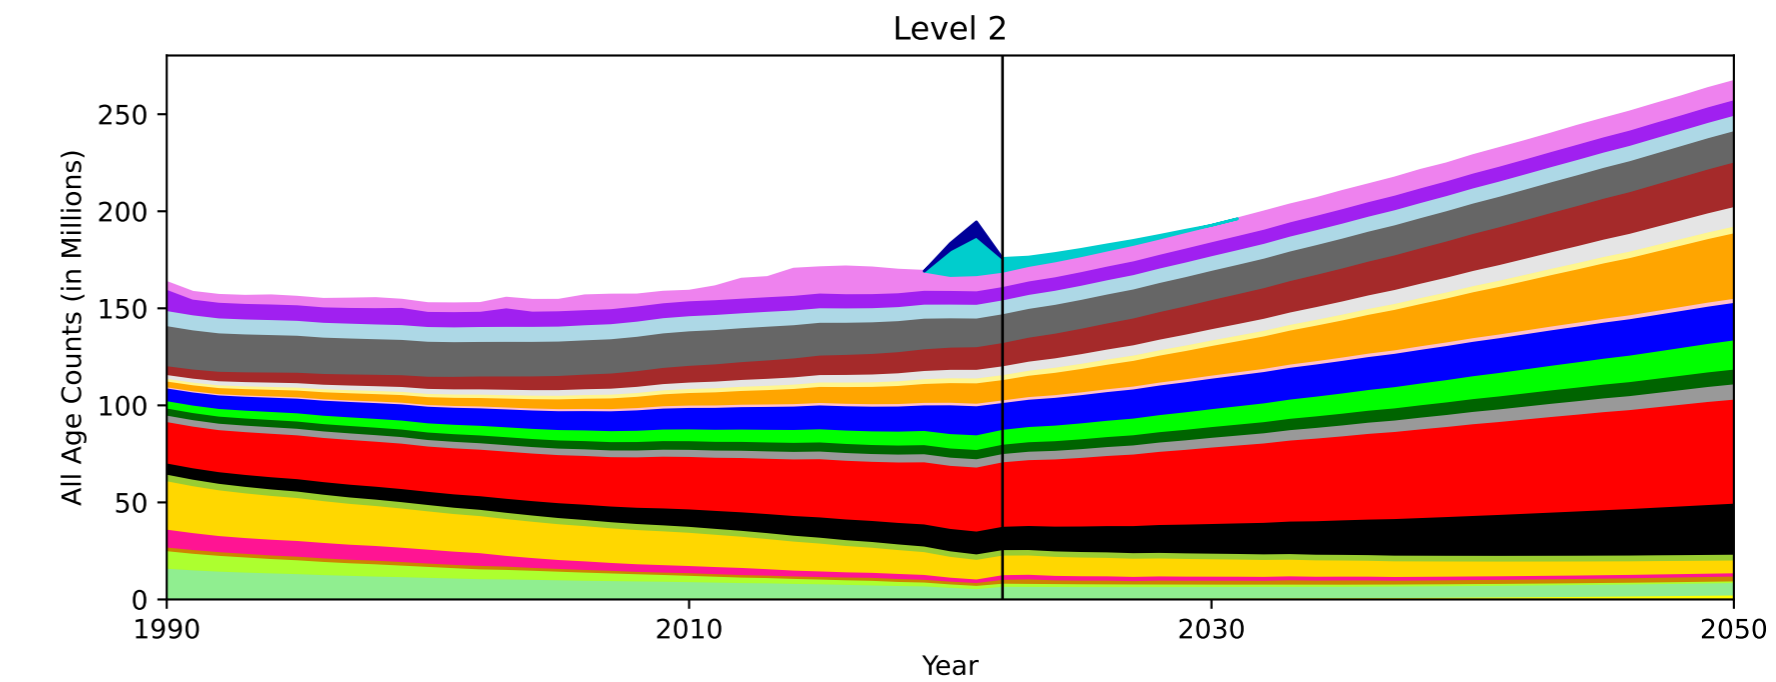

# South Asia

Level 1



Level 2



Level 1

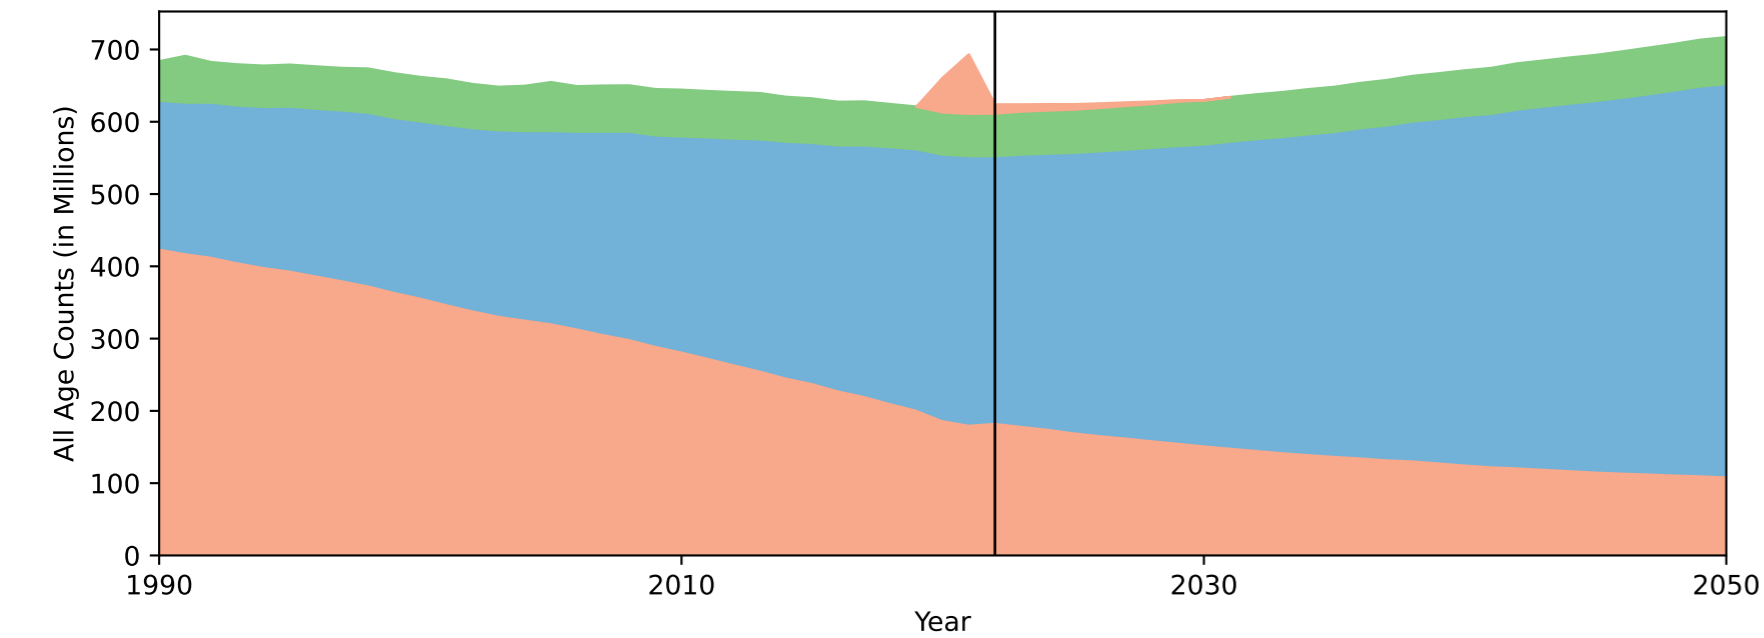

Level 2

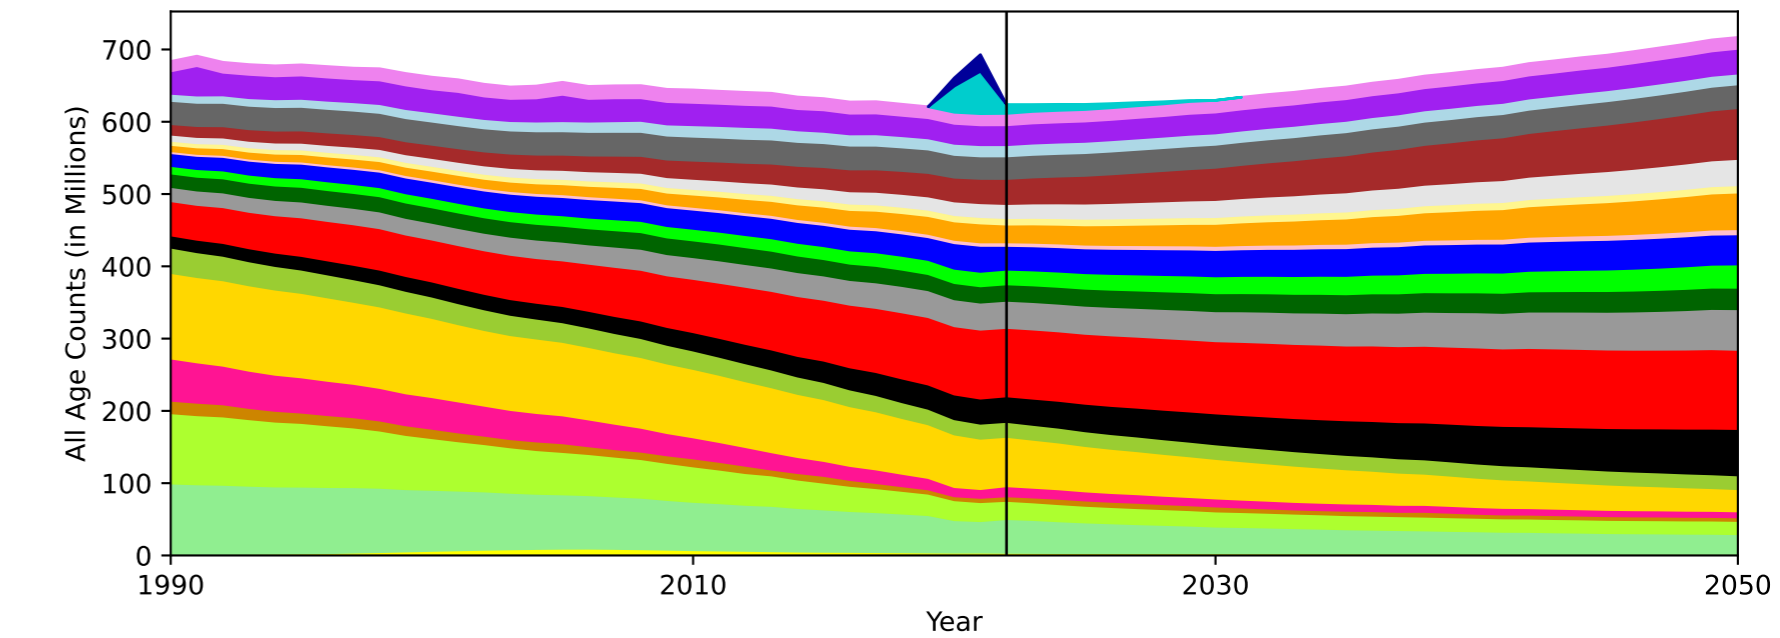

# East Asia

Level 1

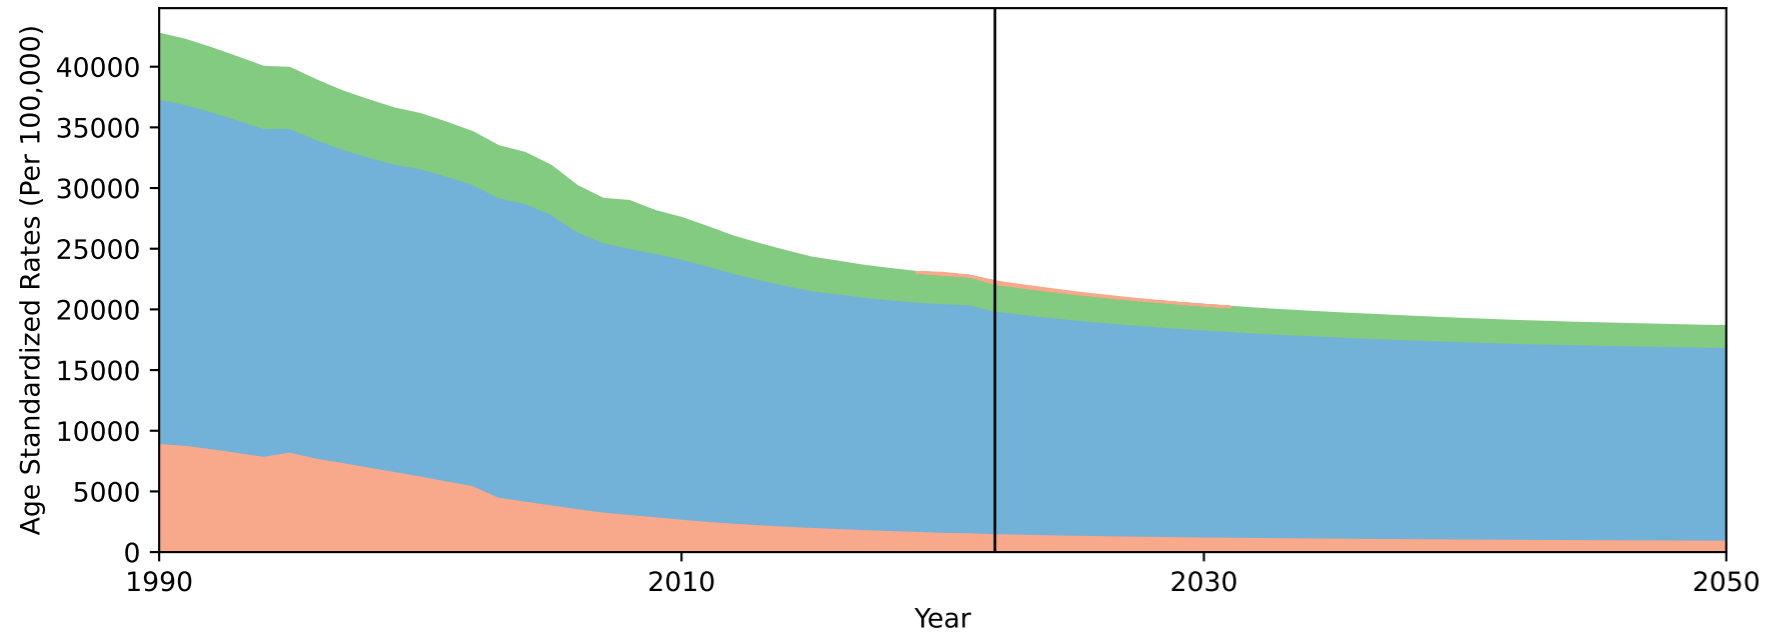

Level 2

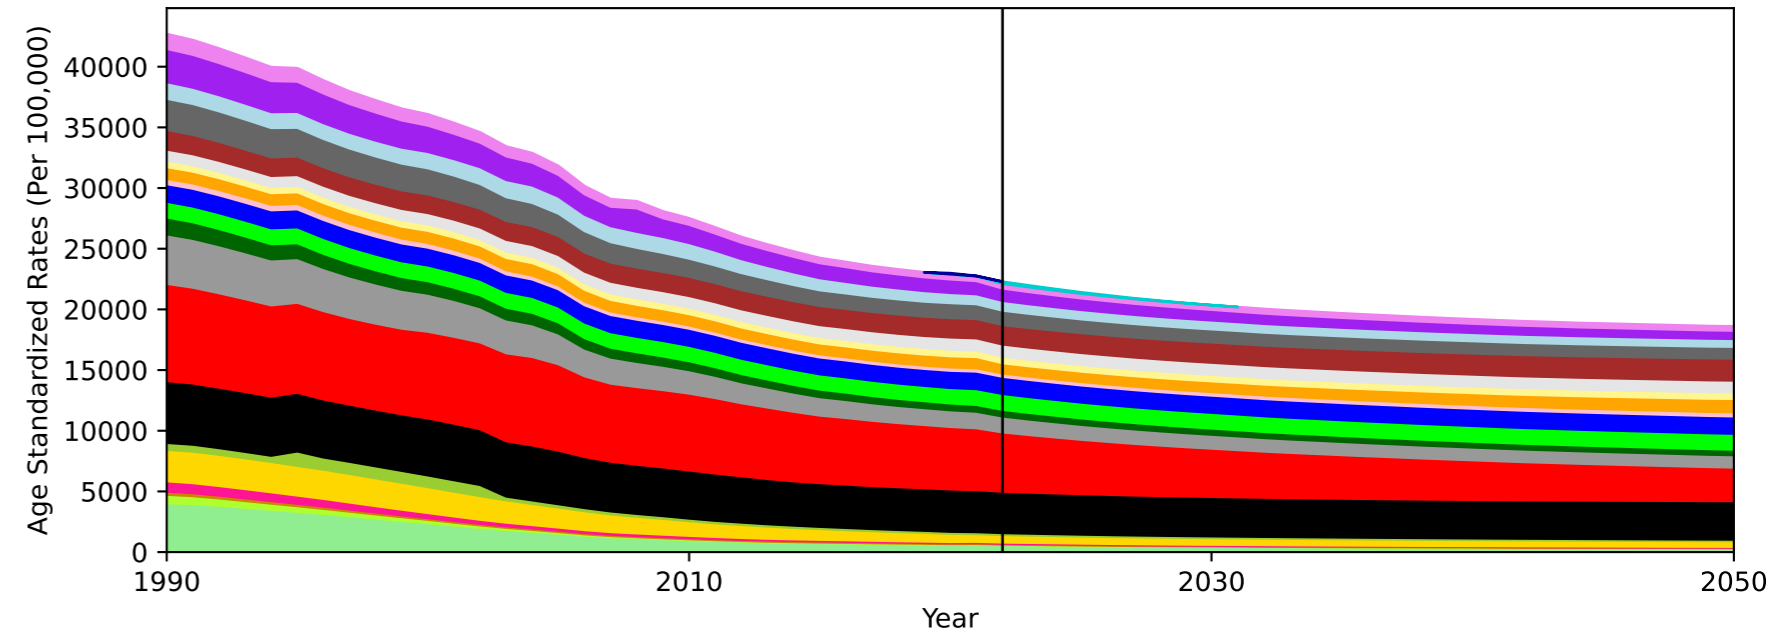

Level 1

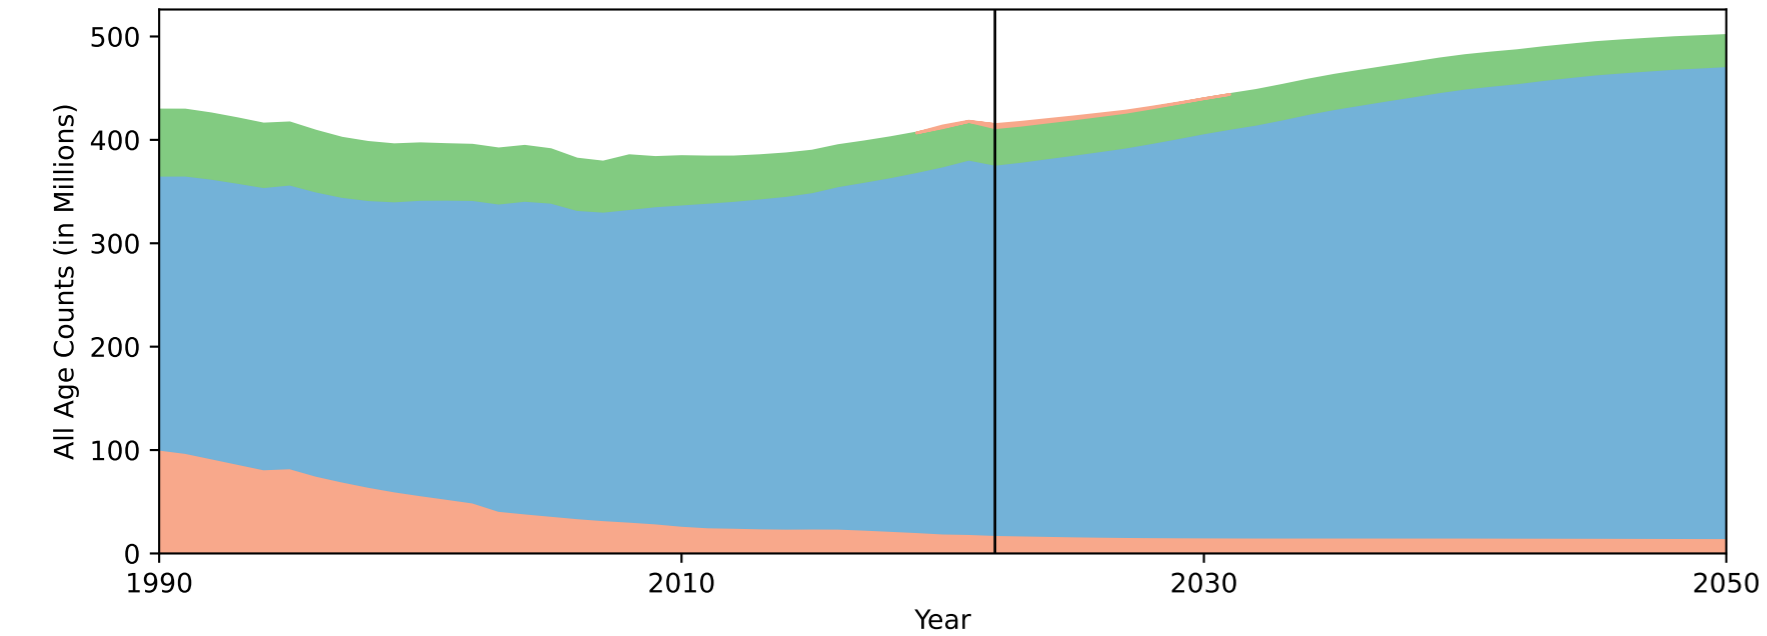

Level 2

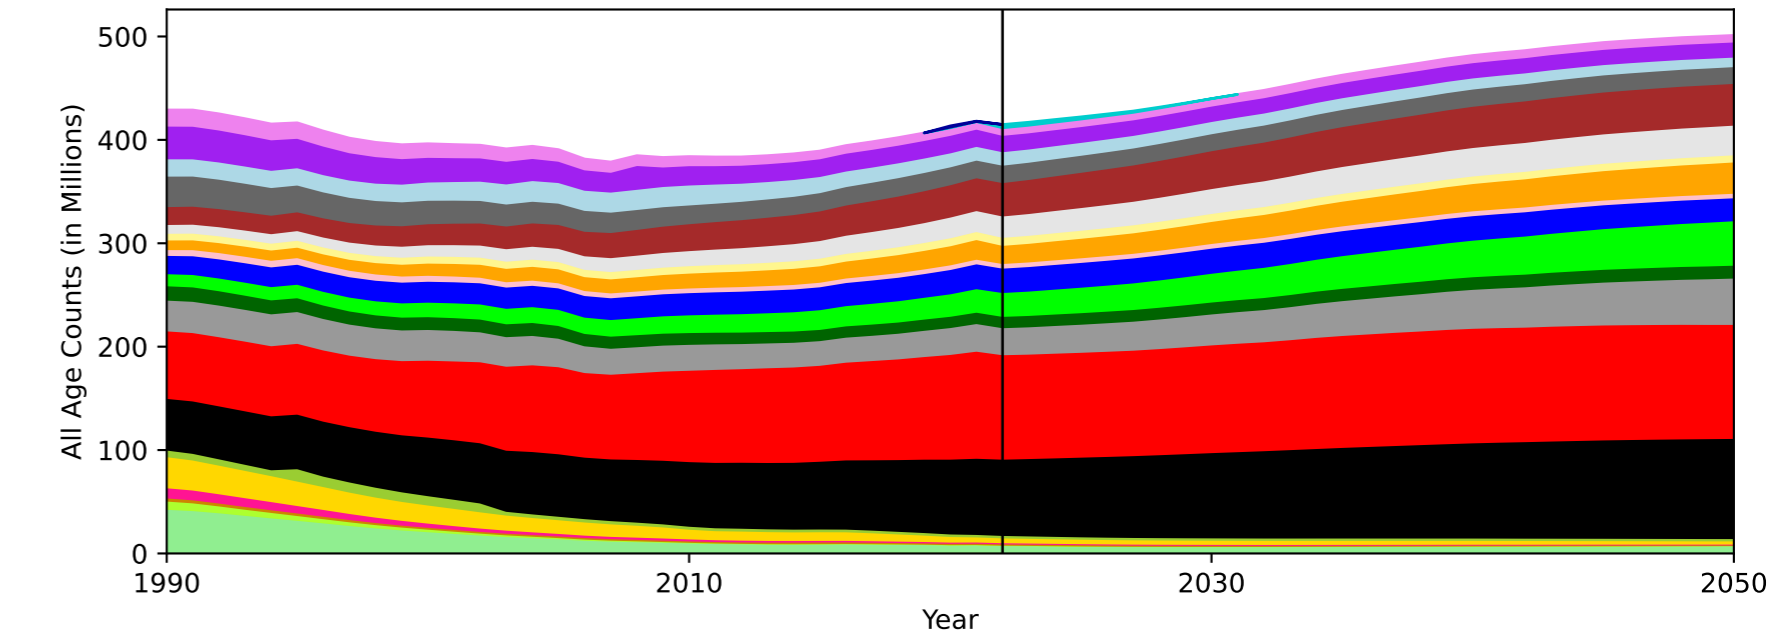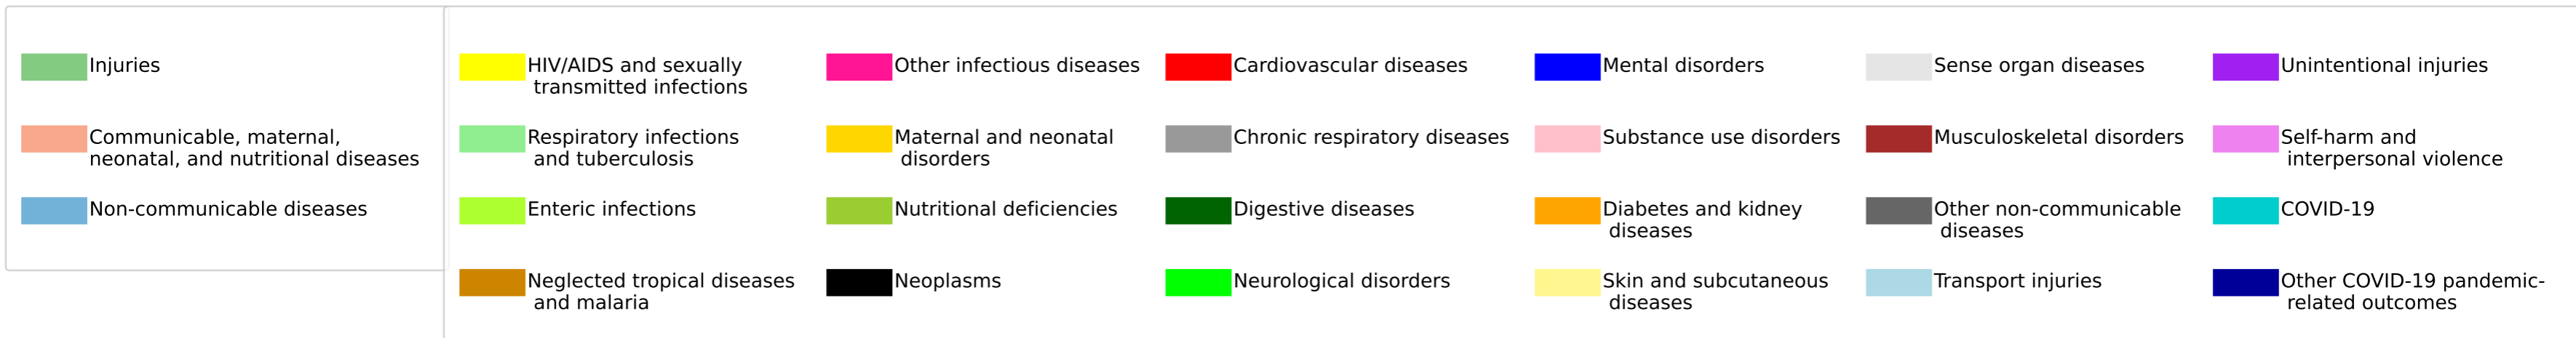



# Oceania

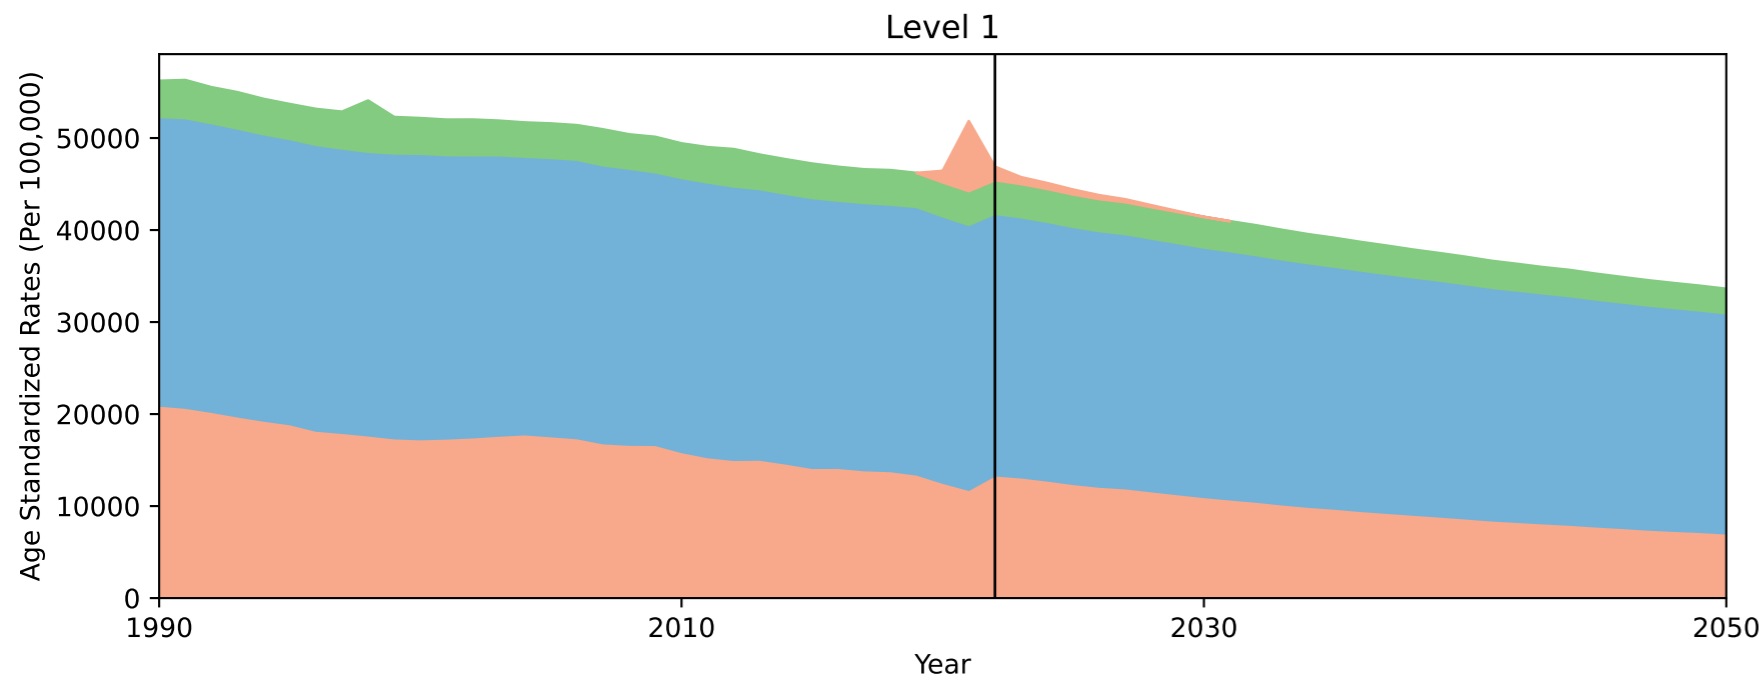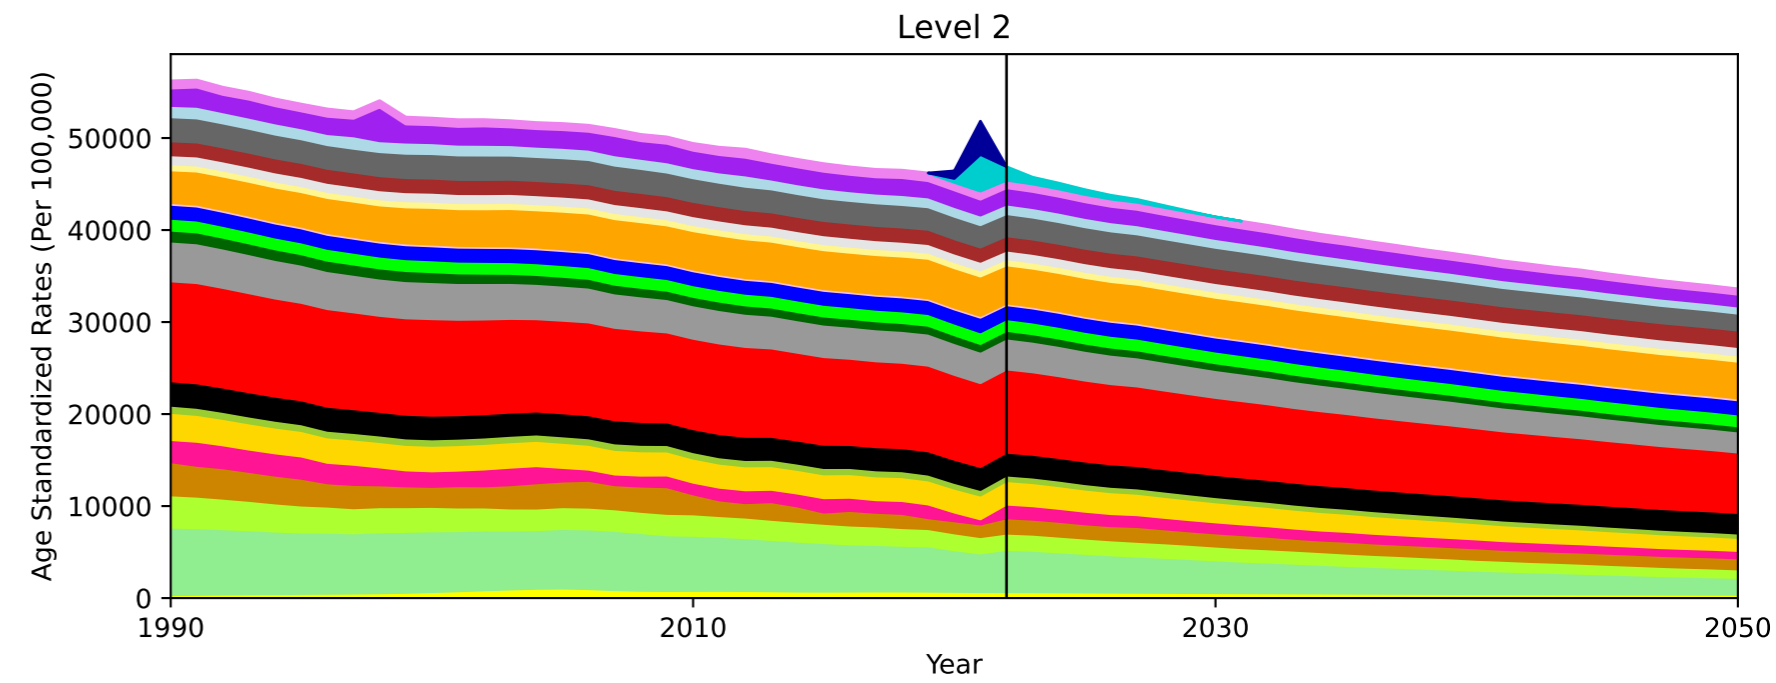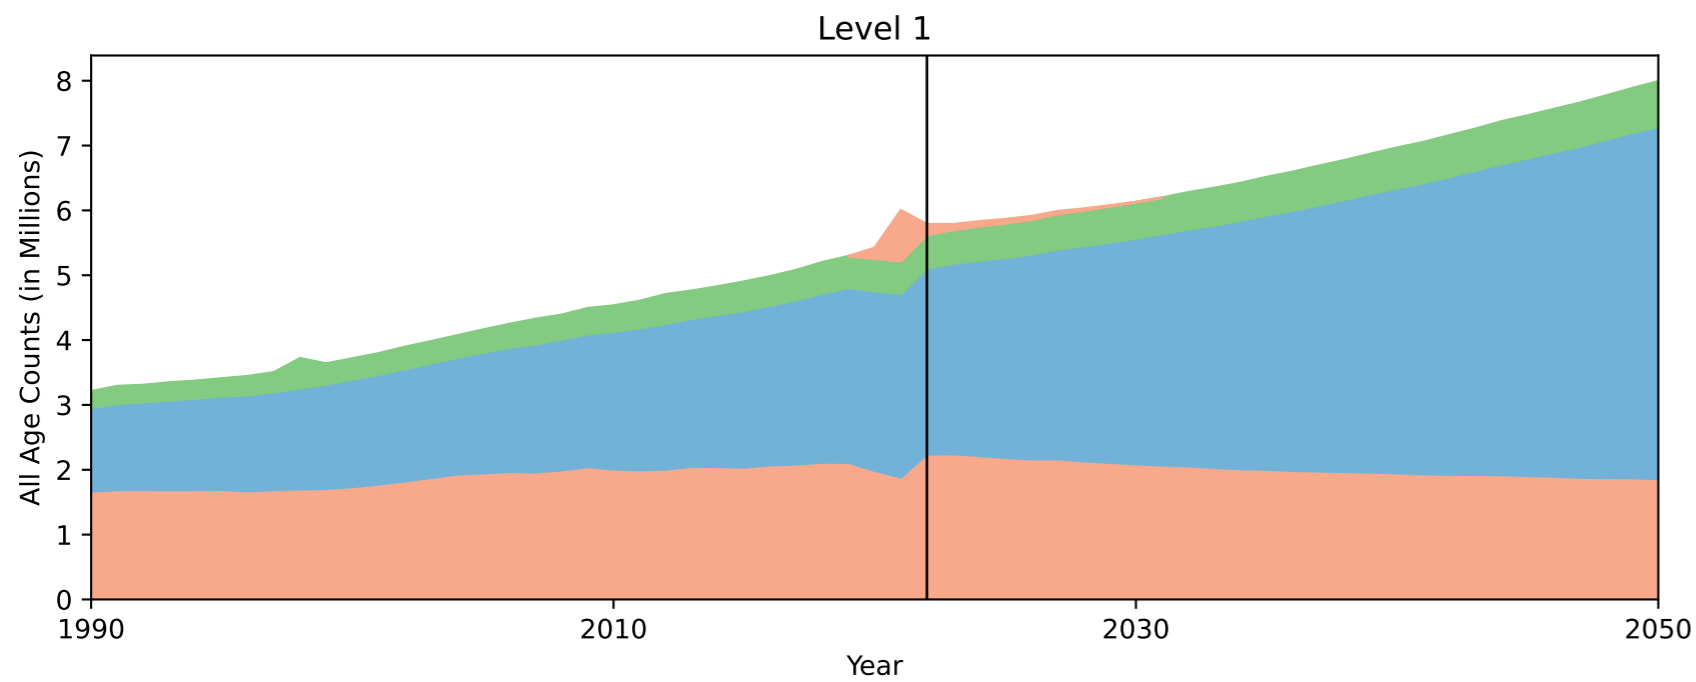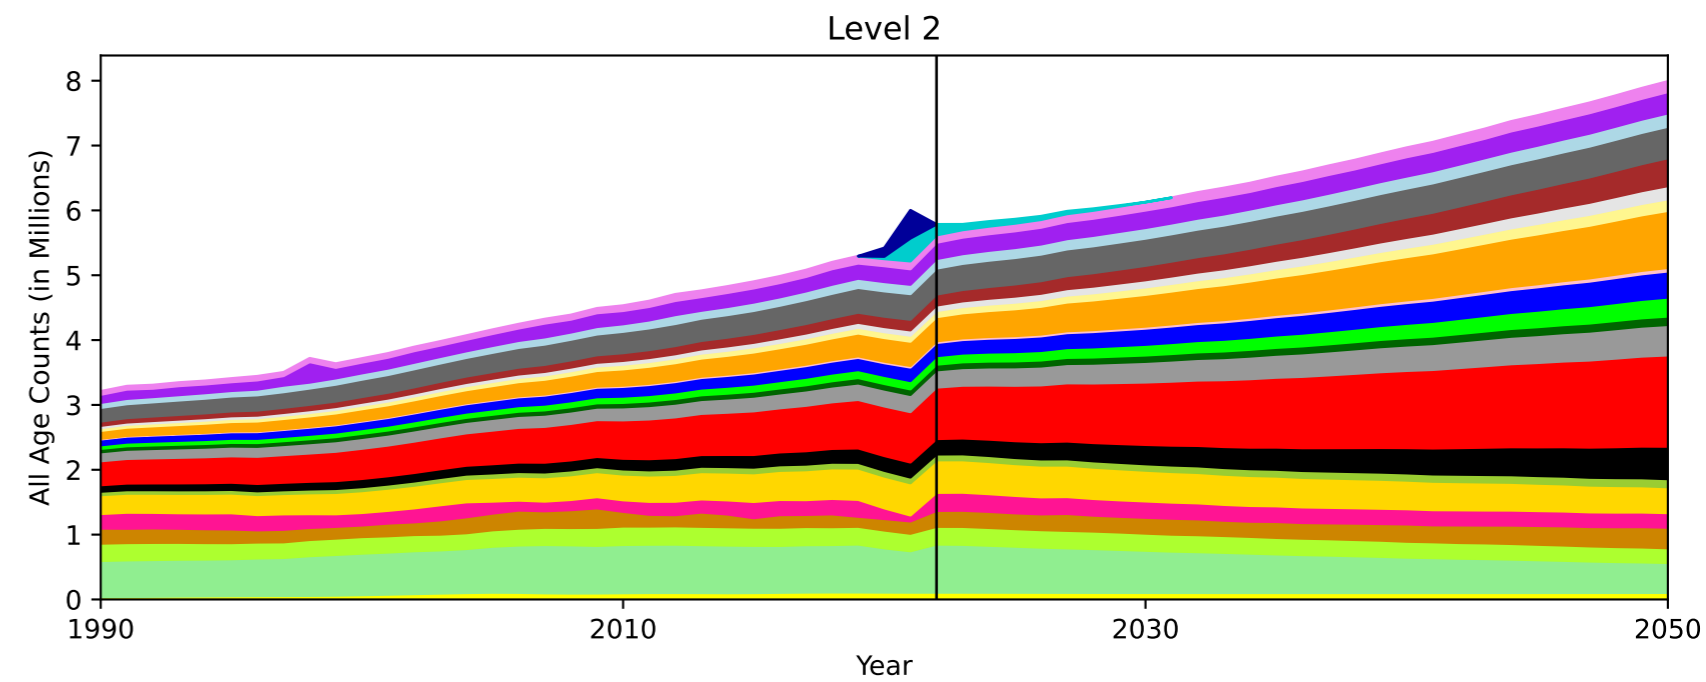

# Southeast Asia

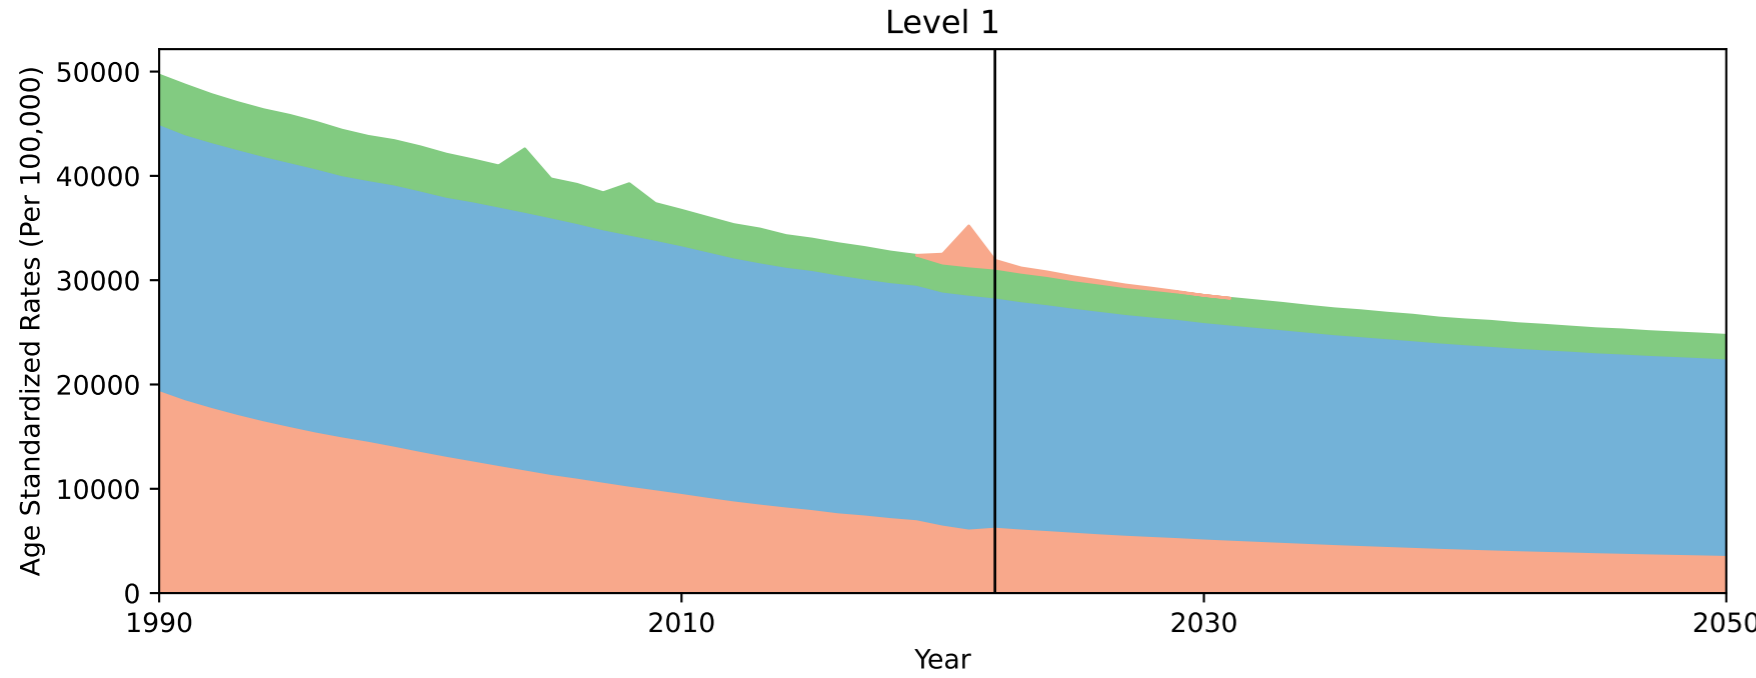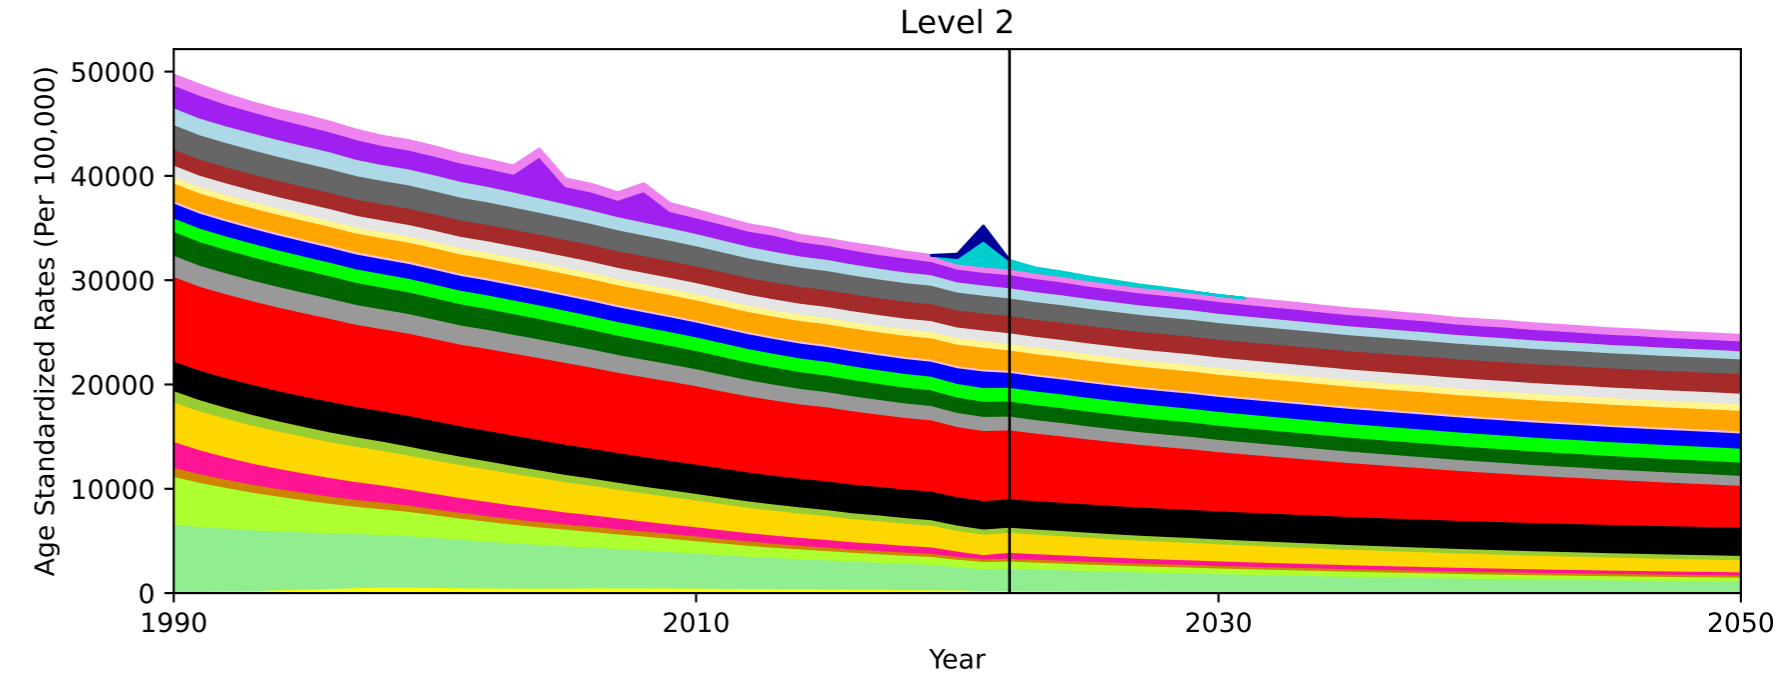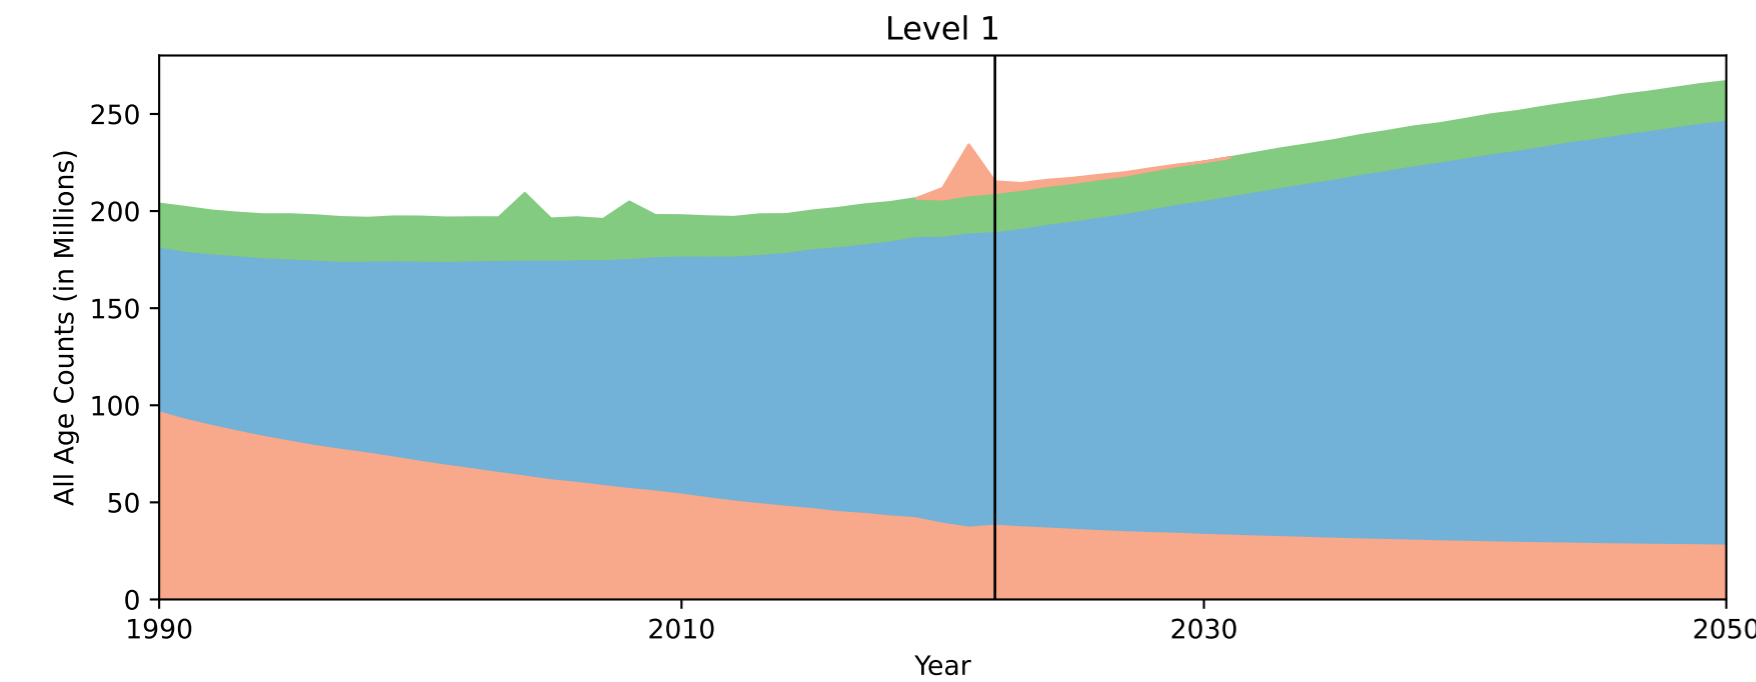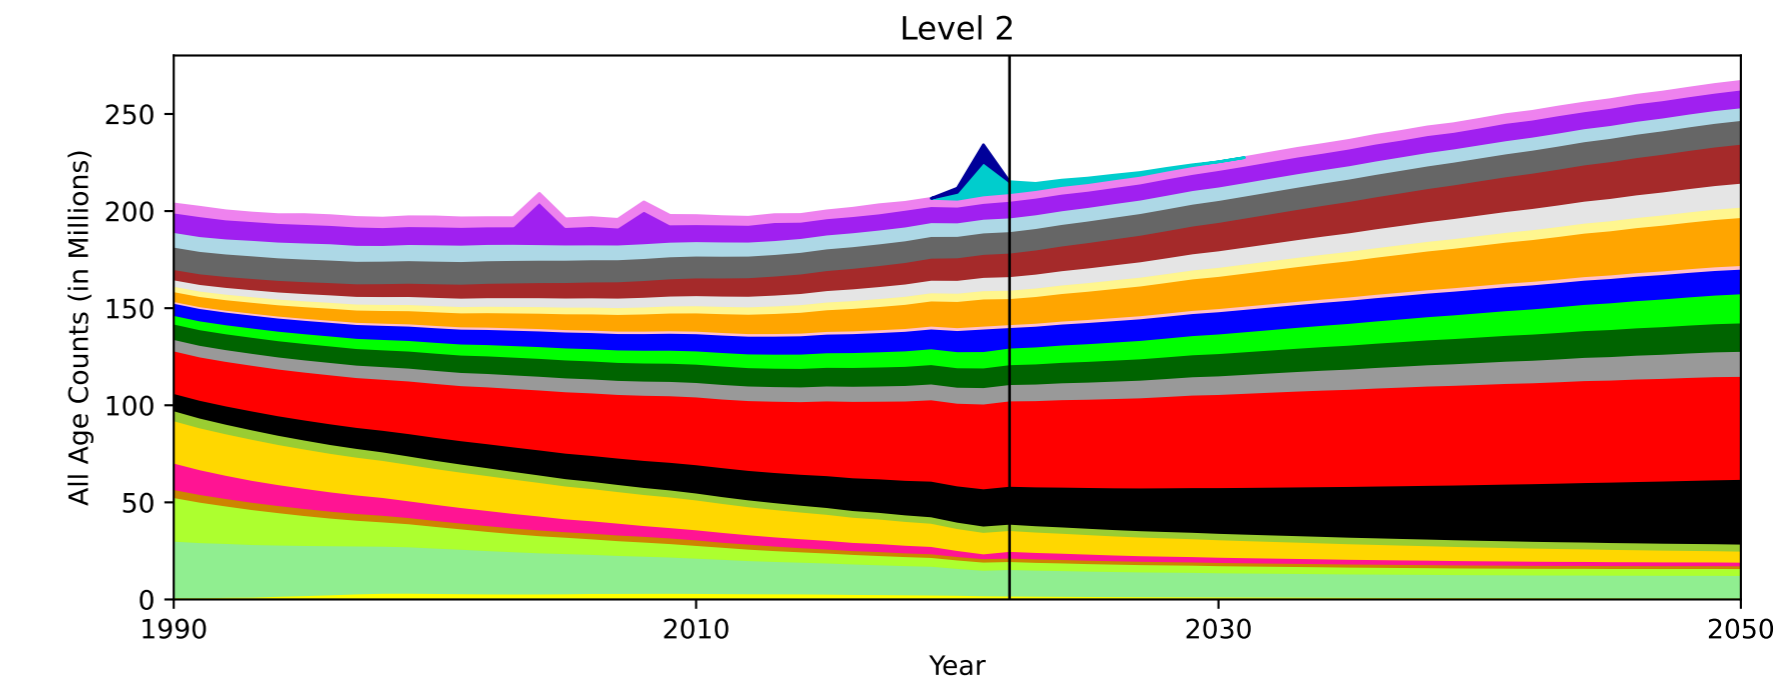

# Central Sub-Saharan Africa

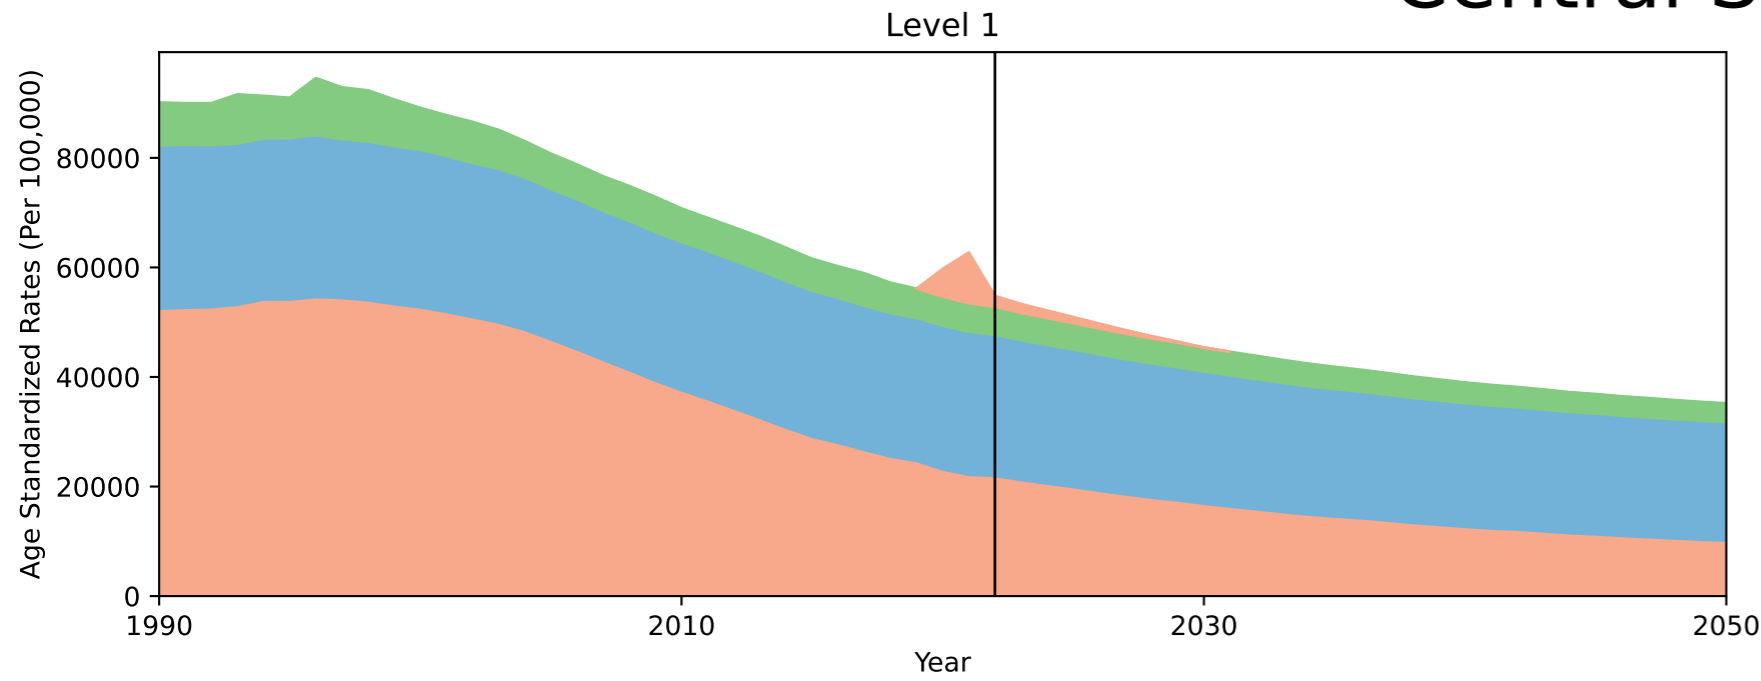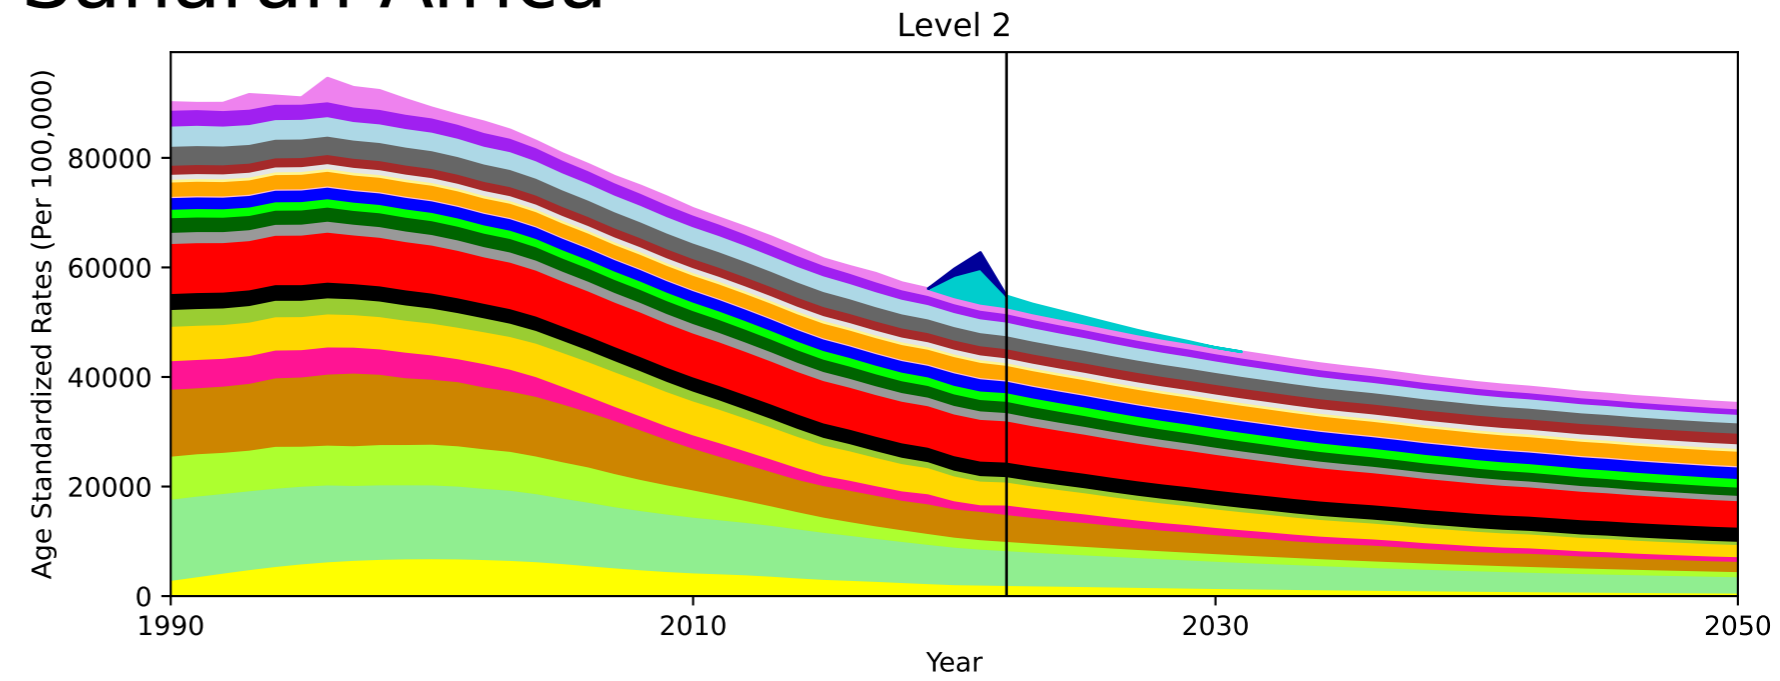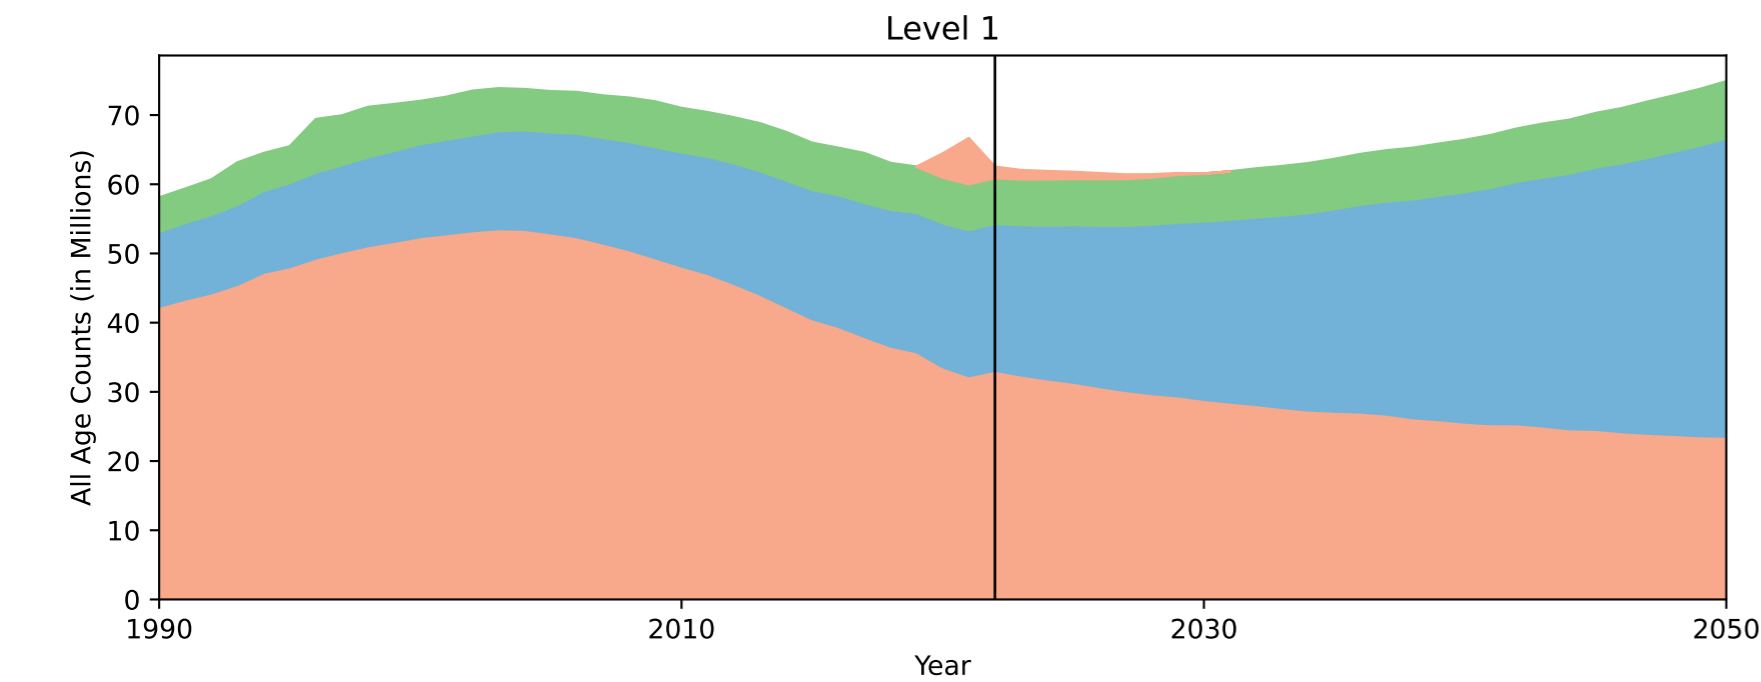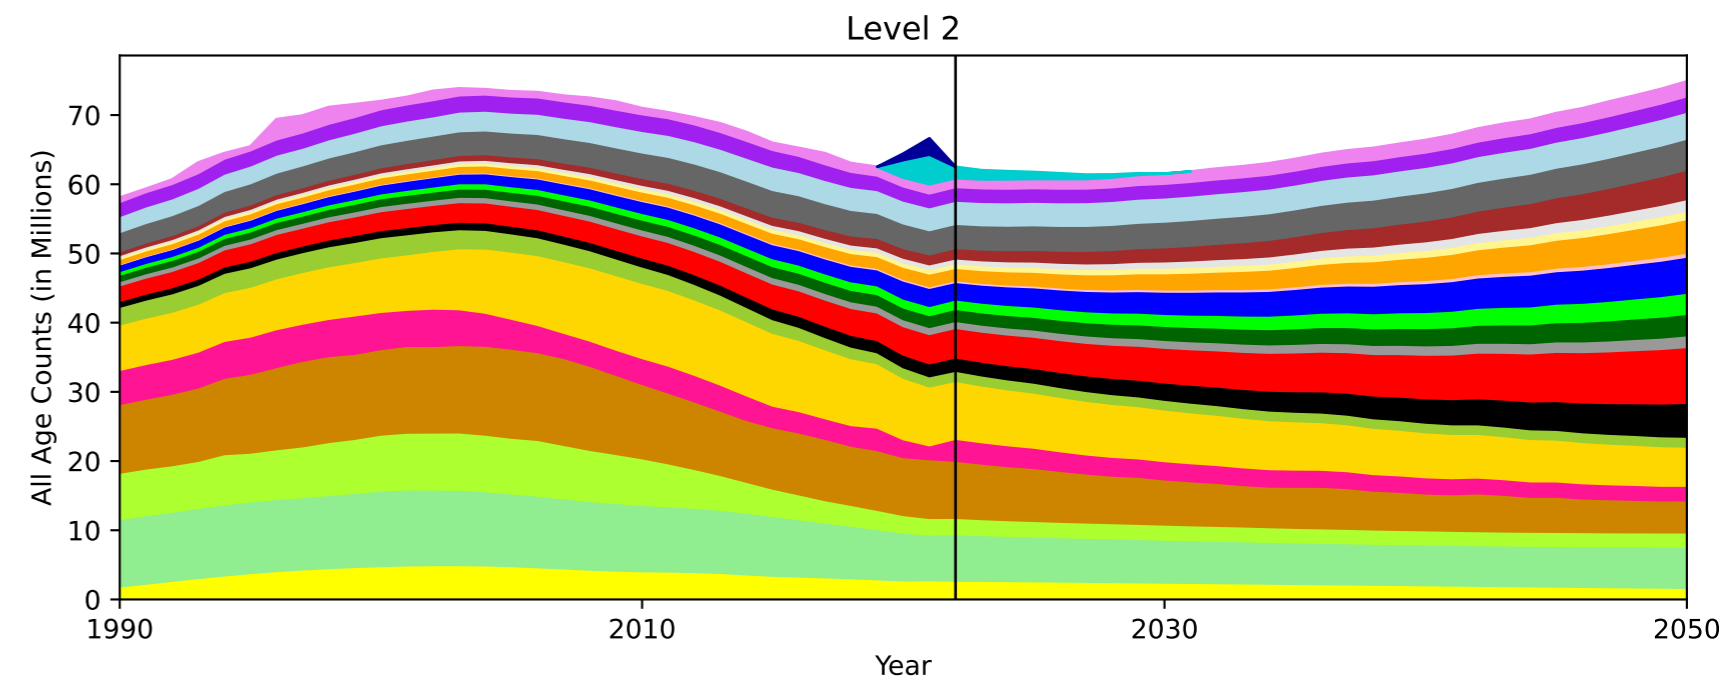

# Eastern Sub-Saharan Africa

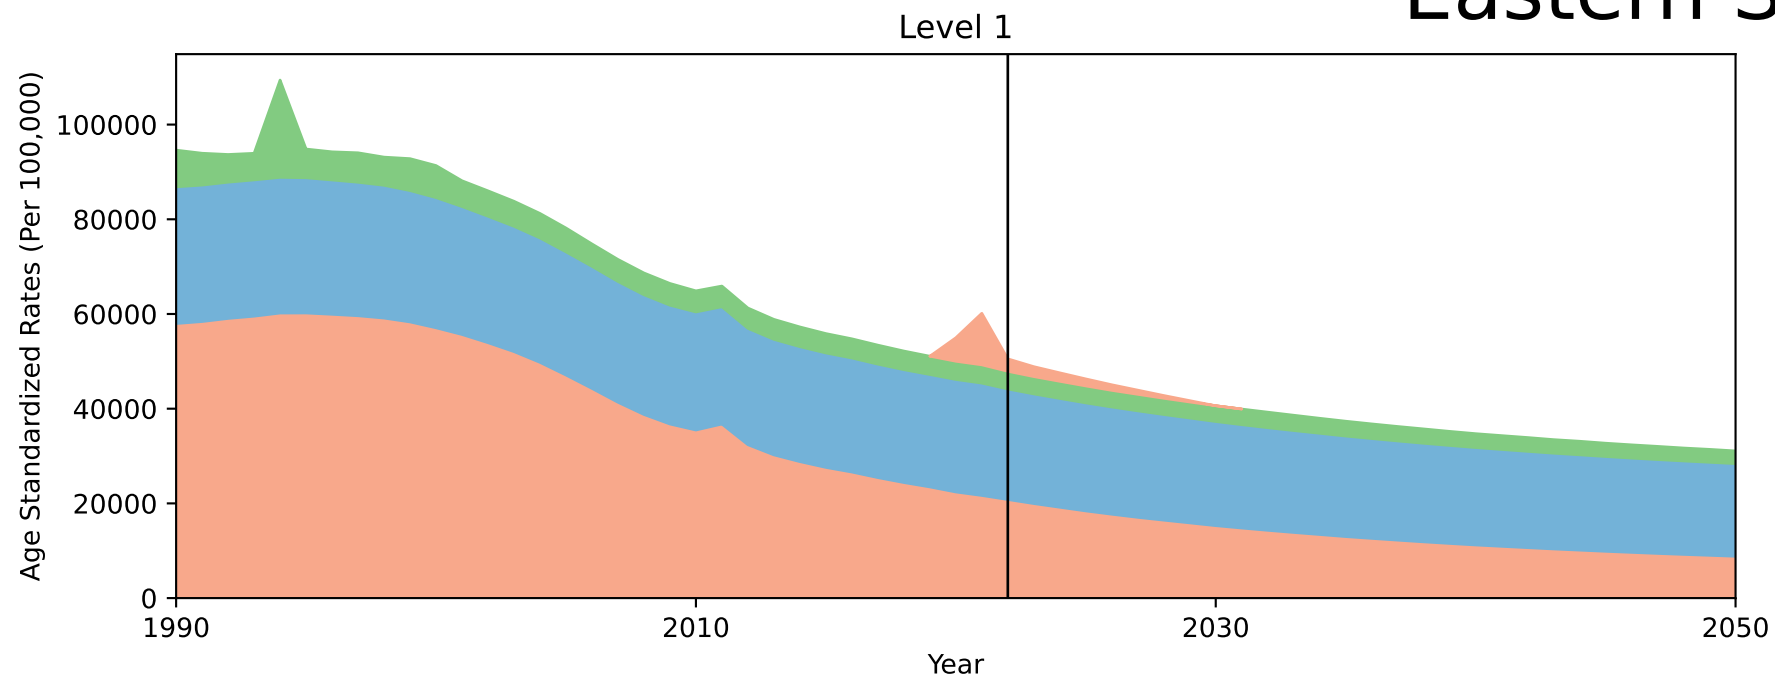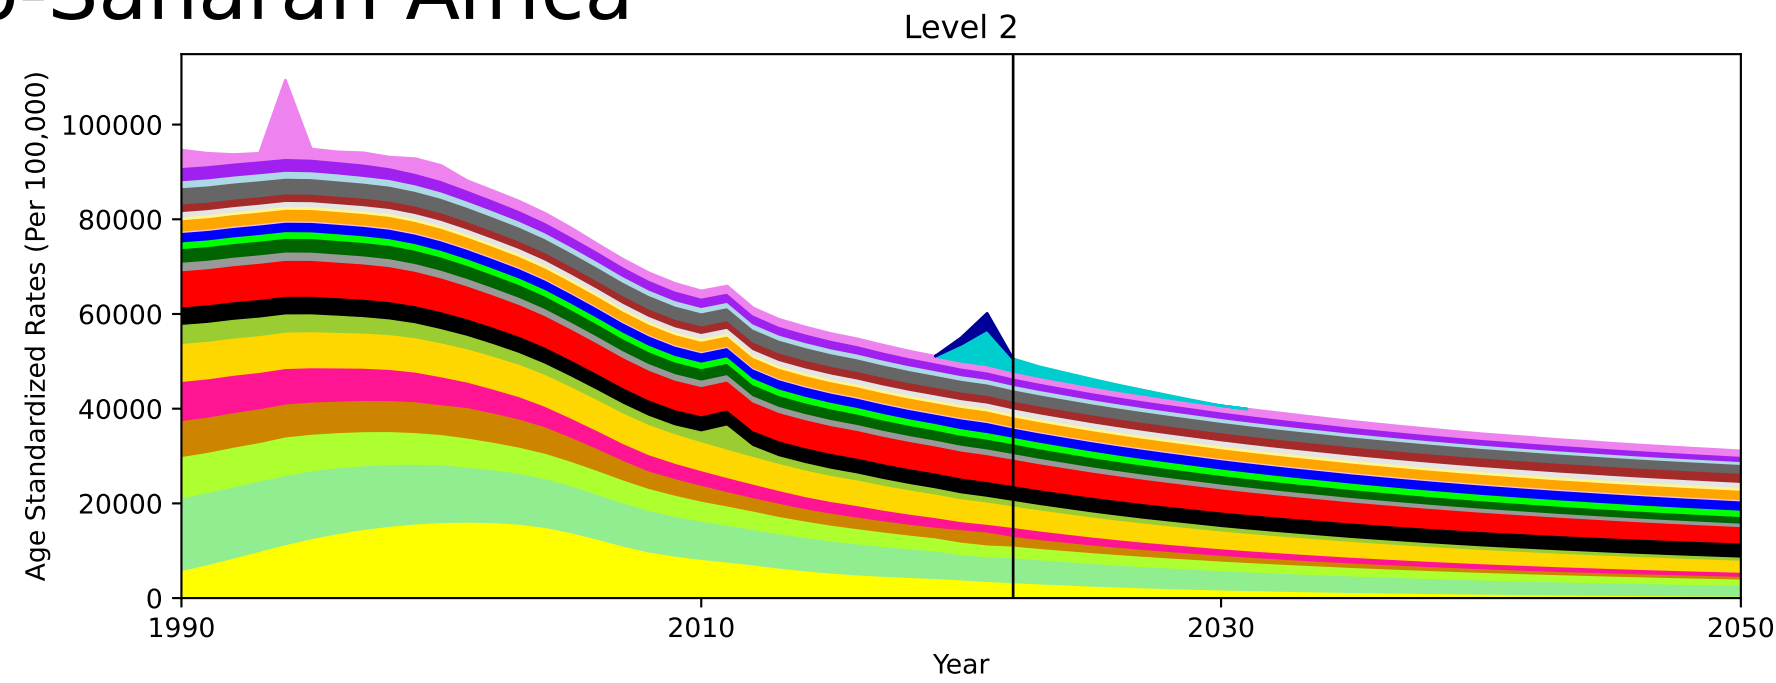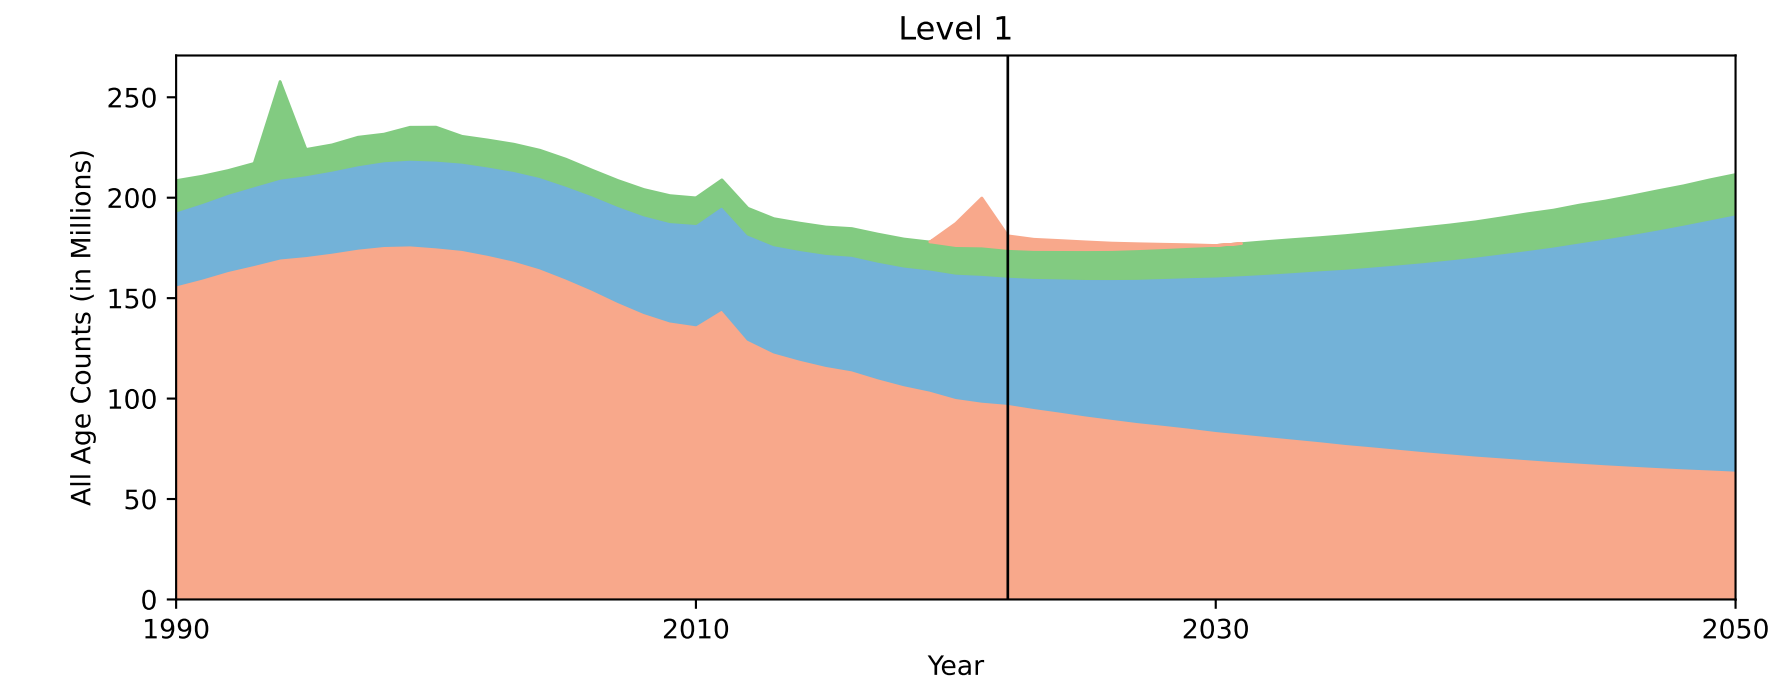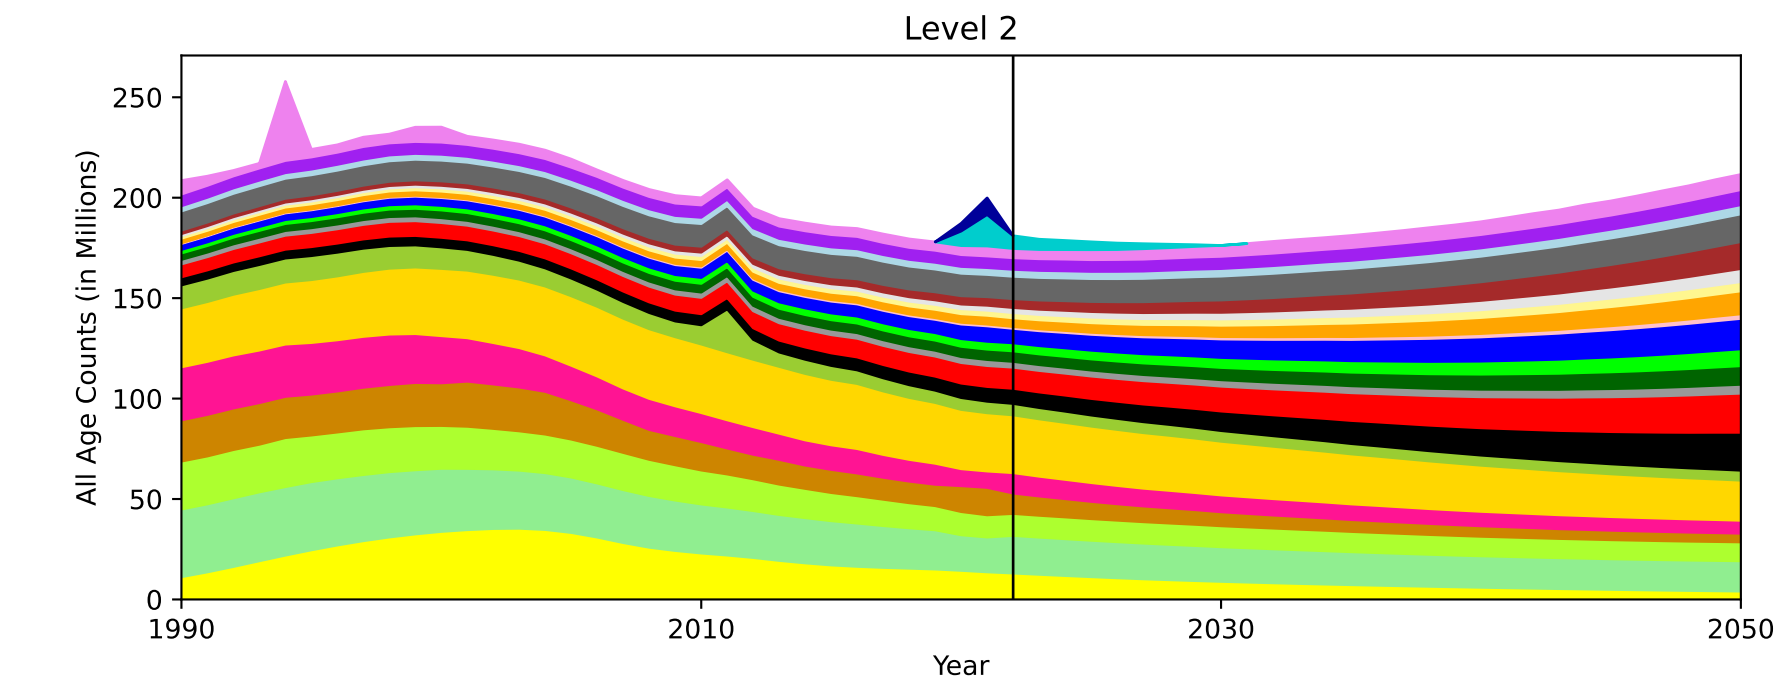

# Southern Sub-Saharan Africa

Level 1

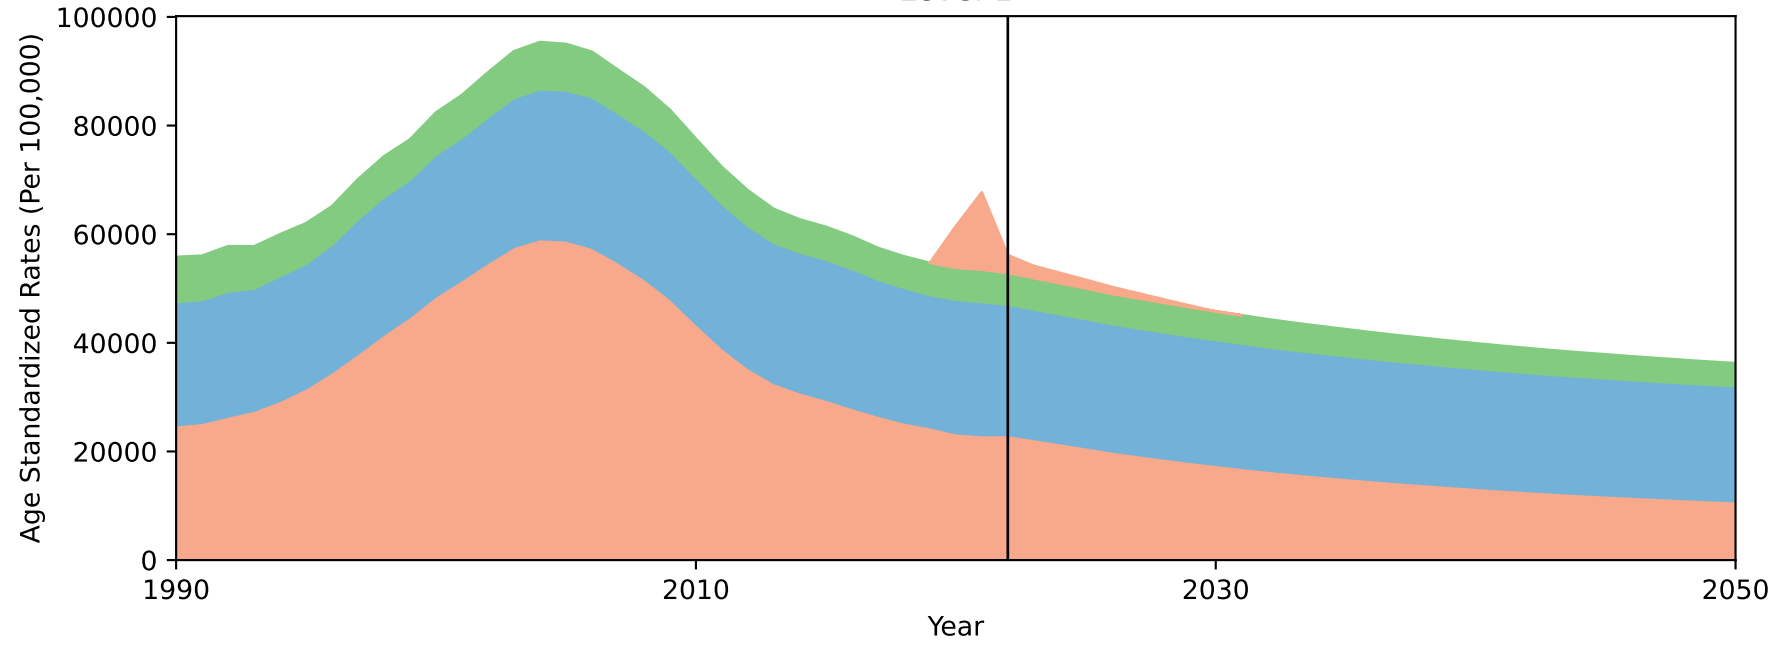

Level 2

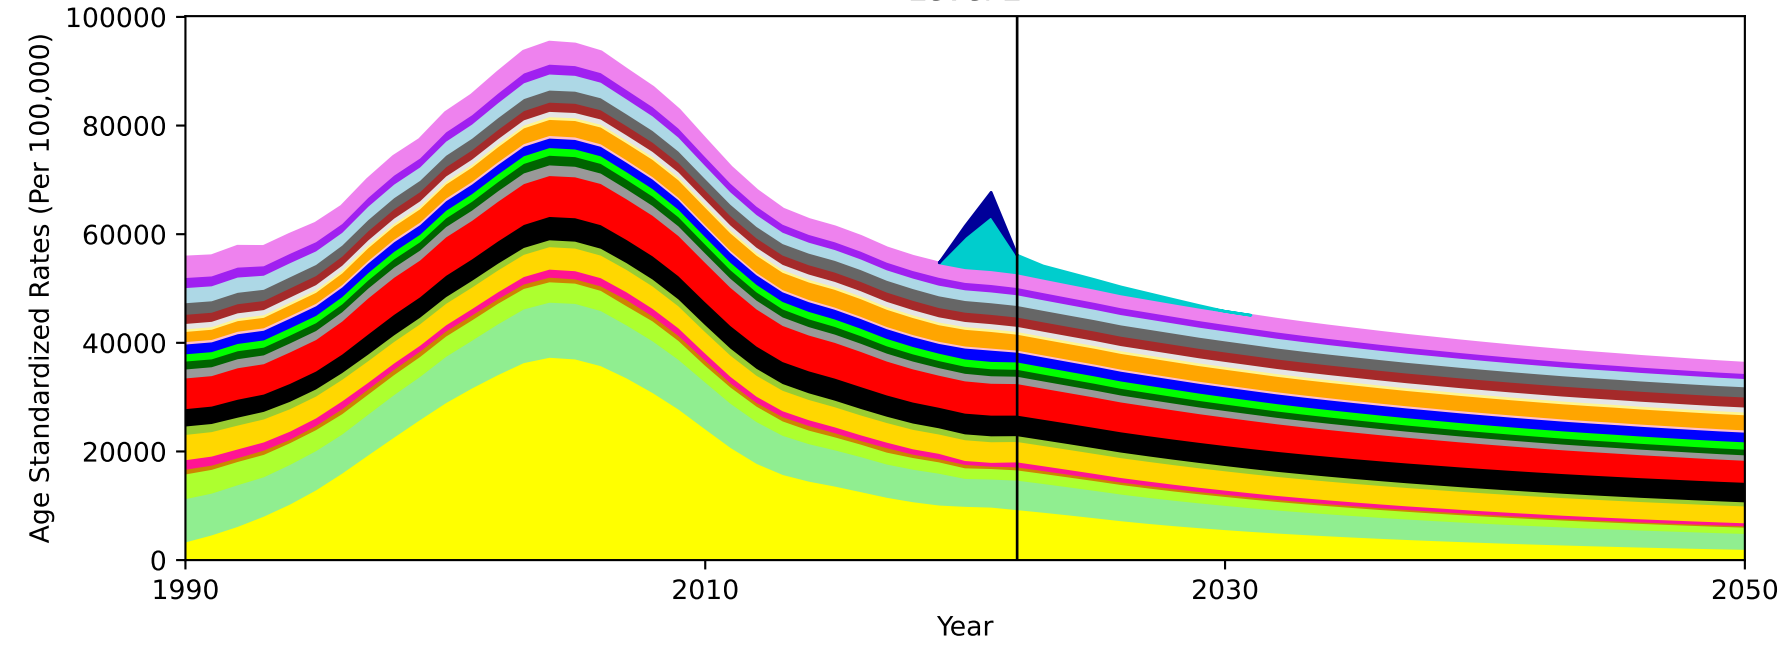

Level 1

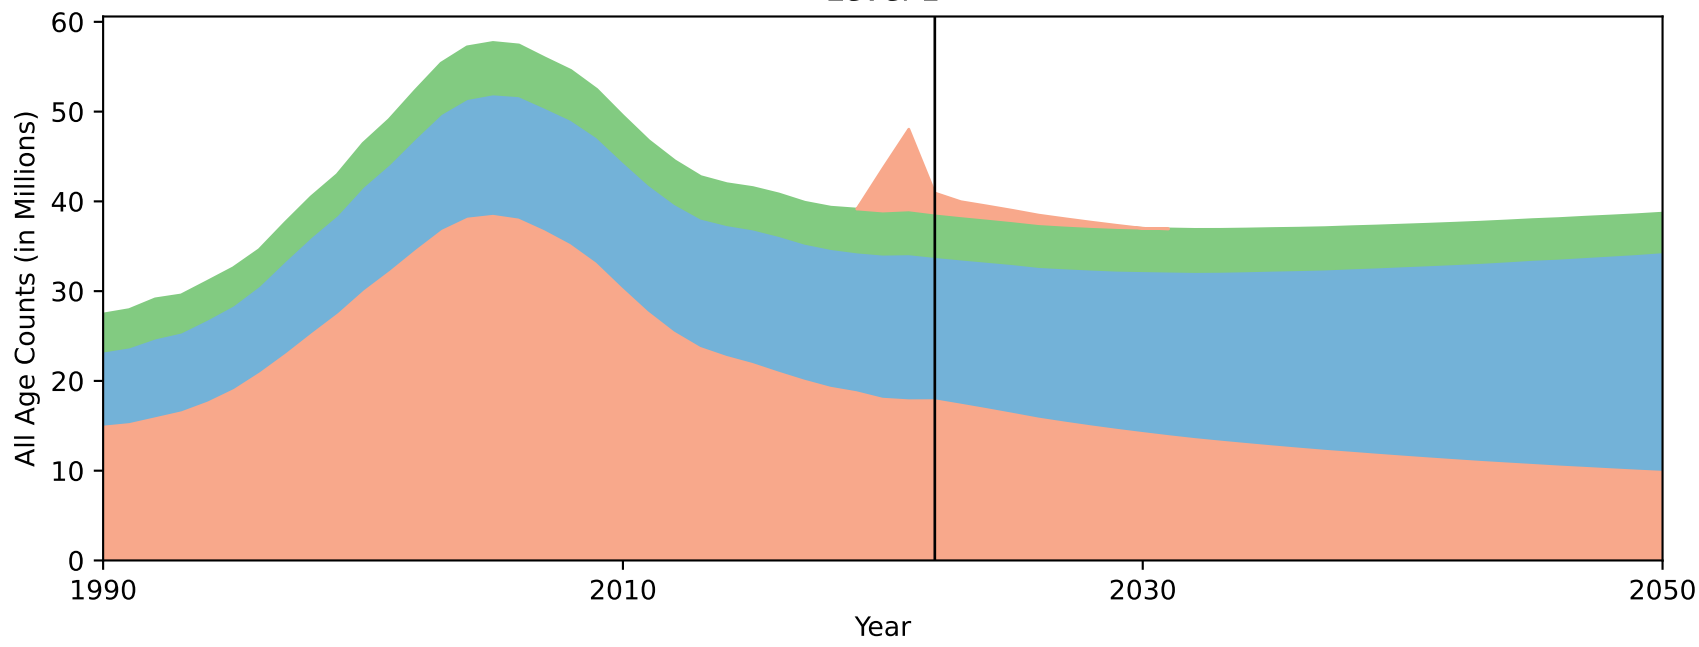

Level 2

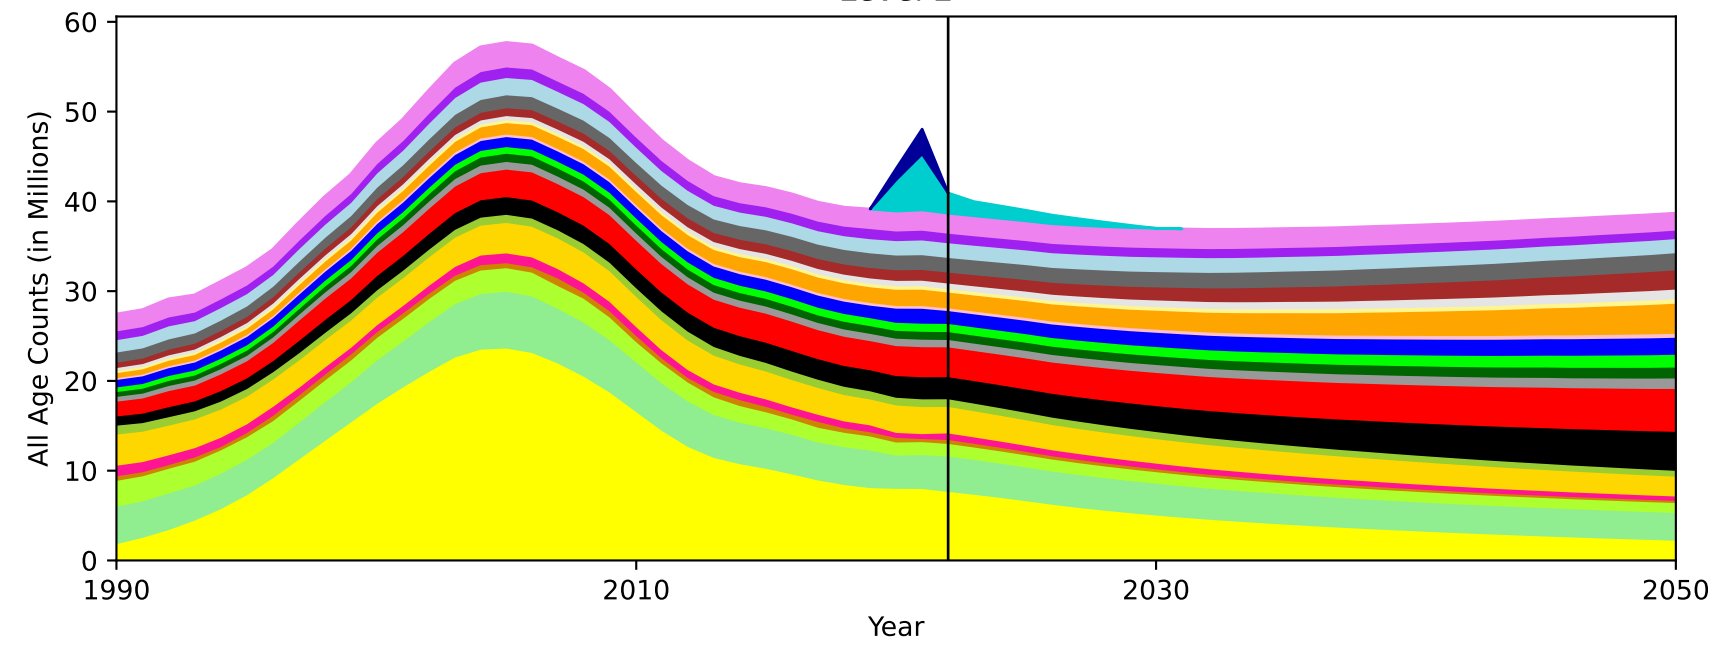

# Western Sub-Saharan Africa

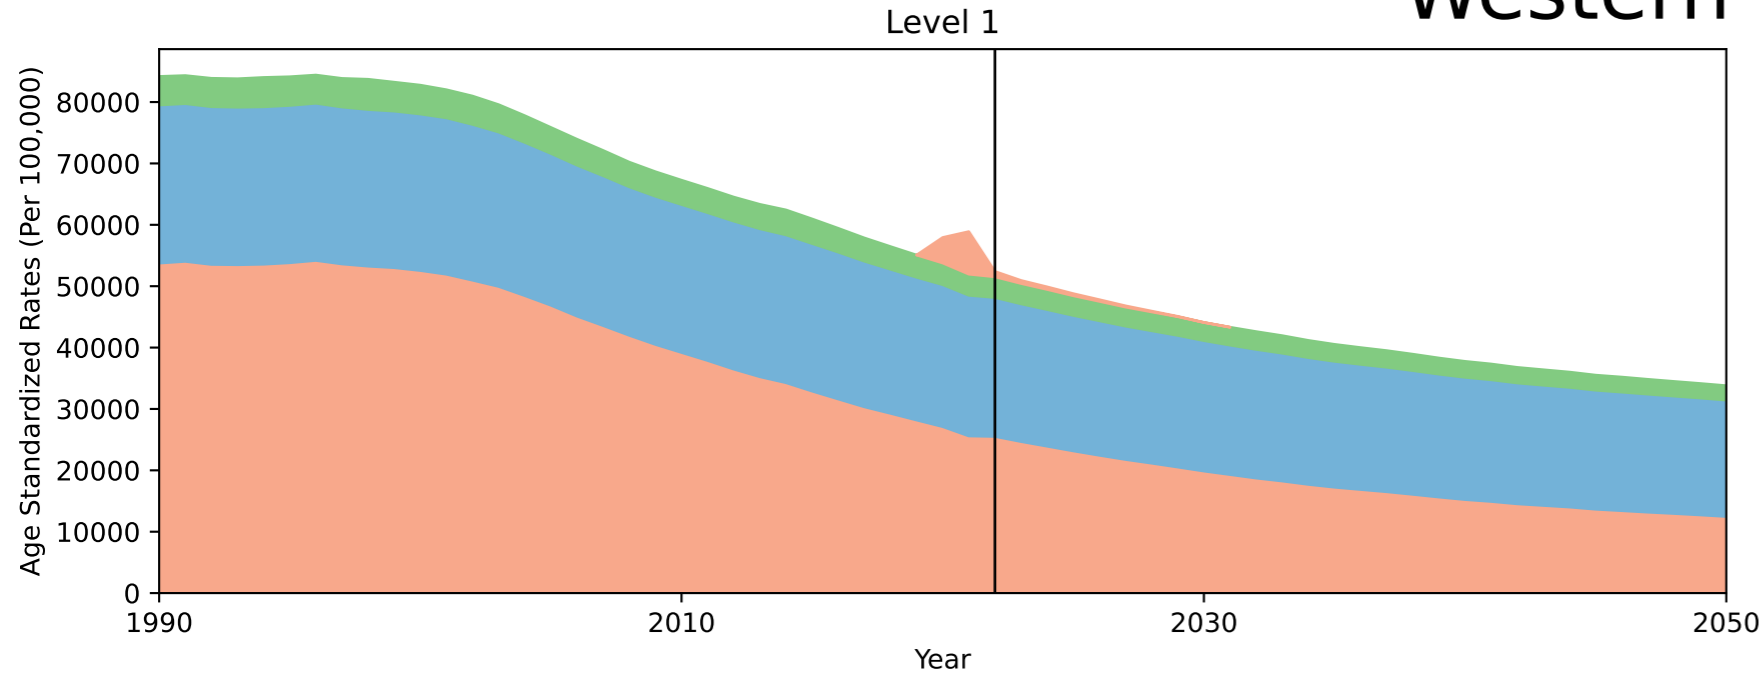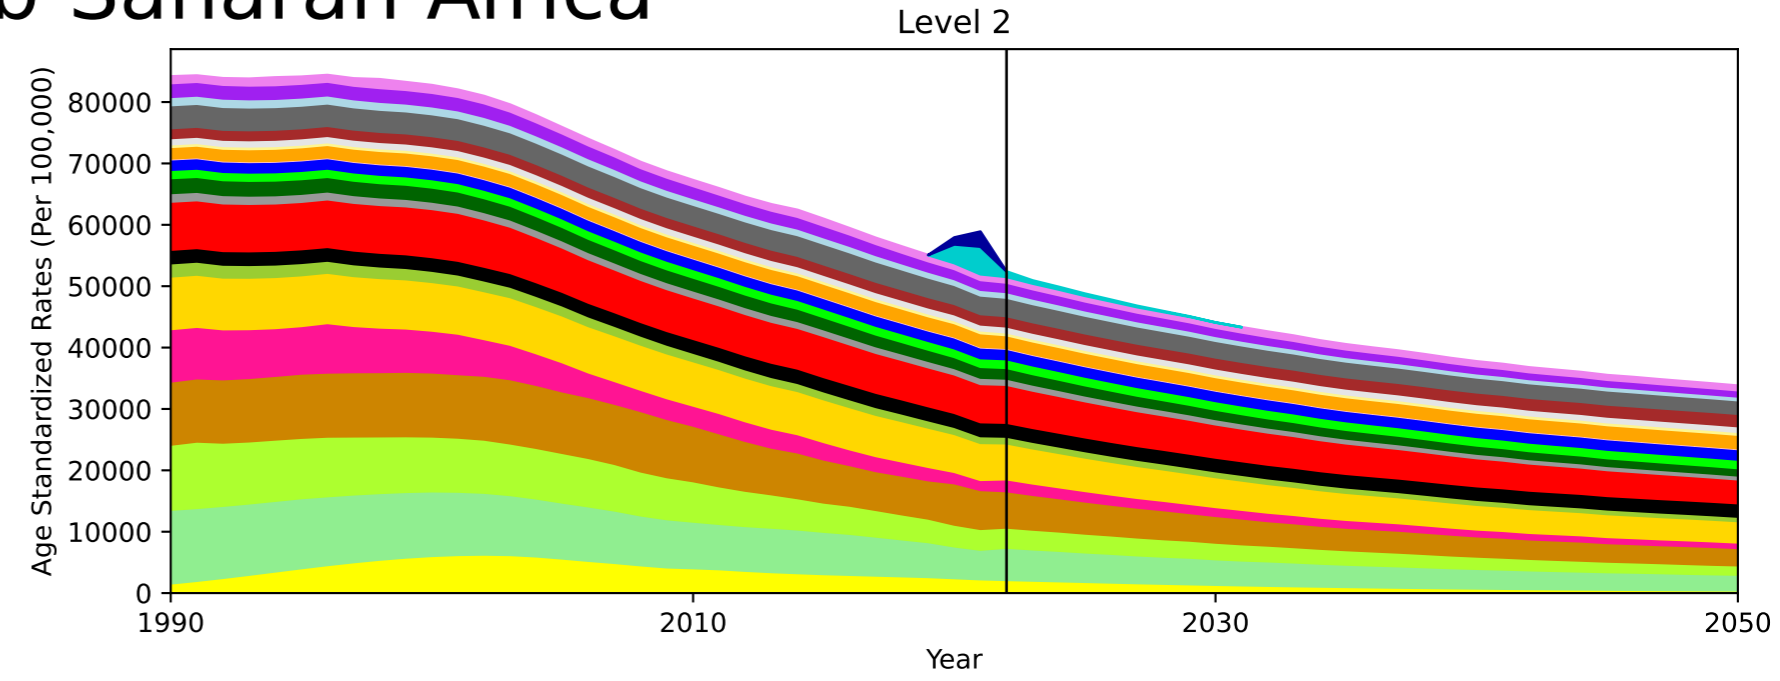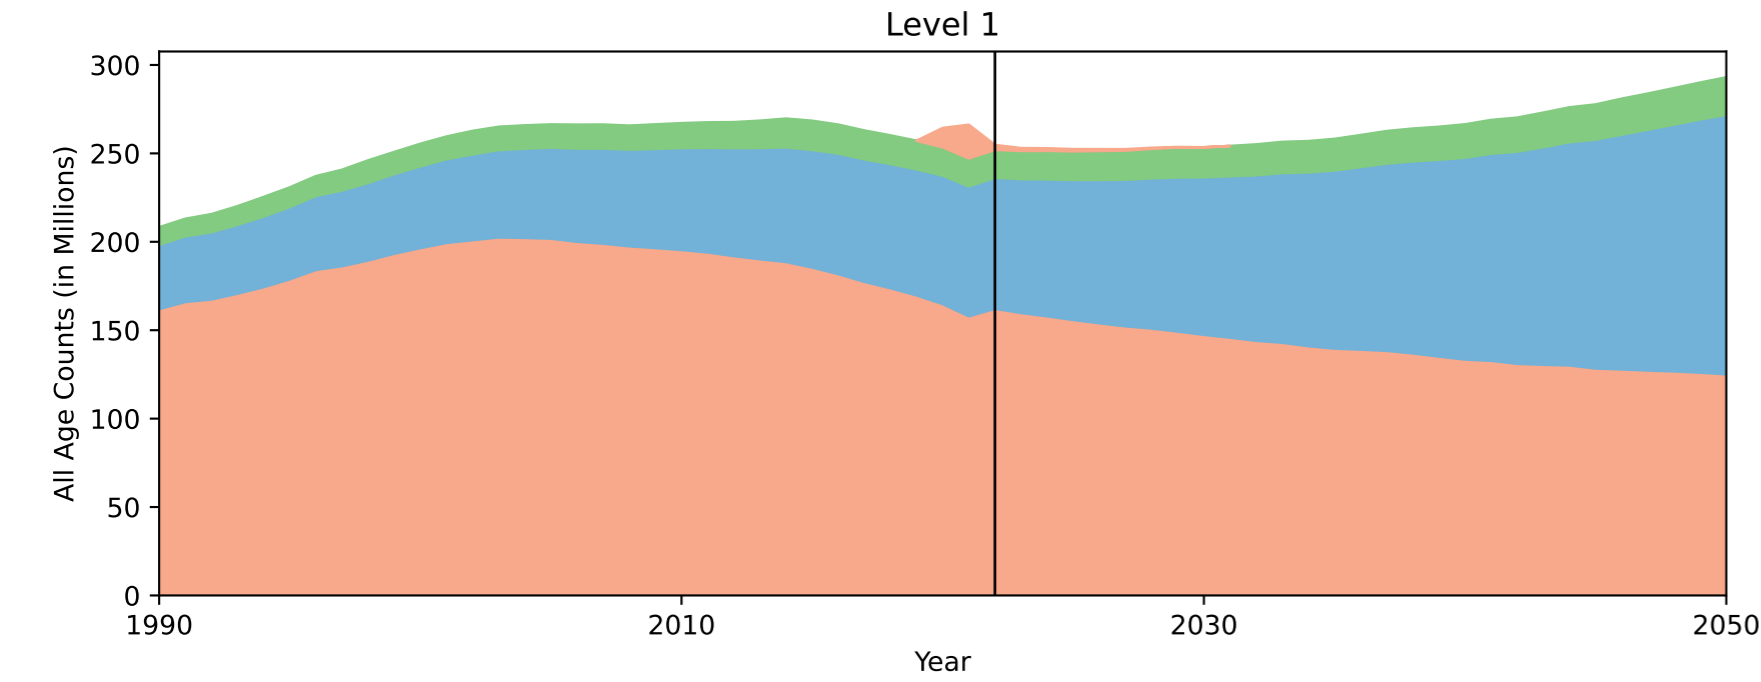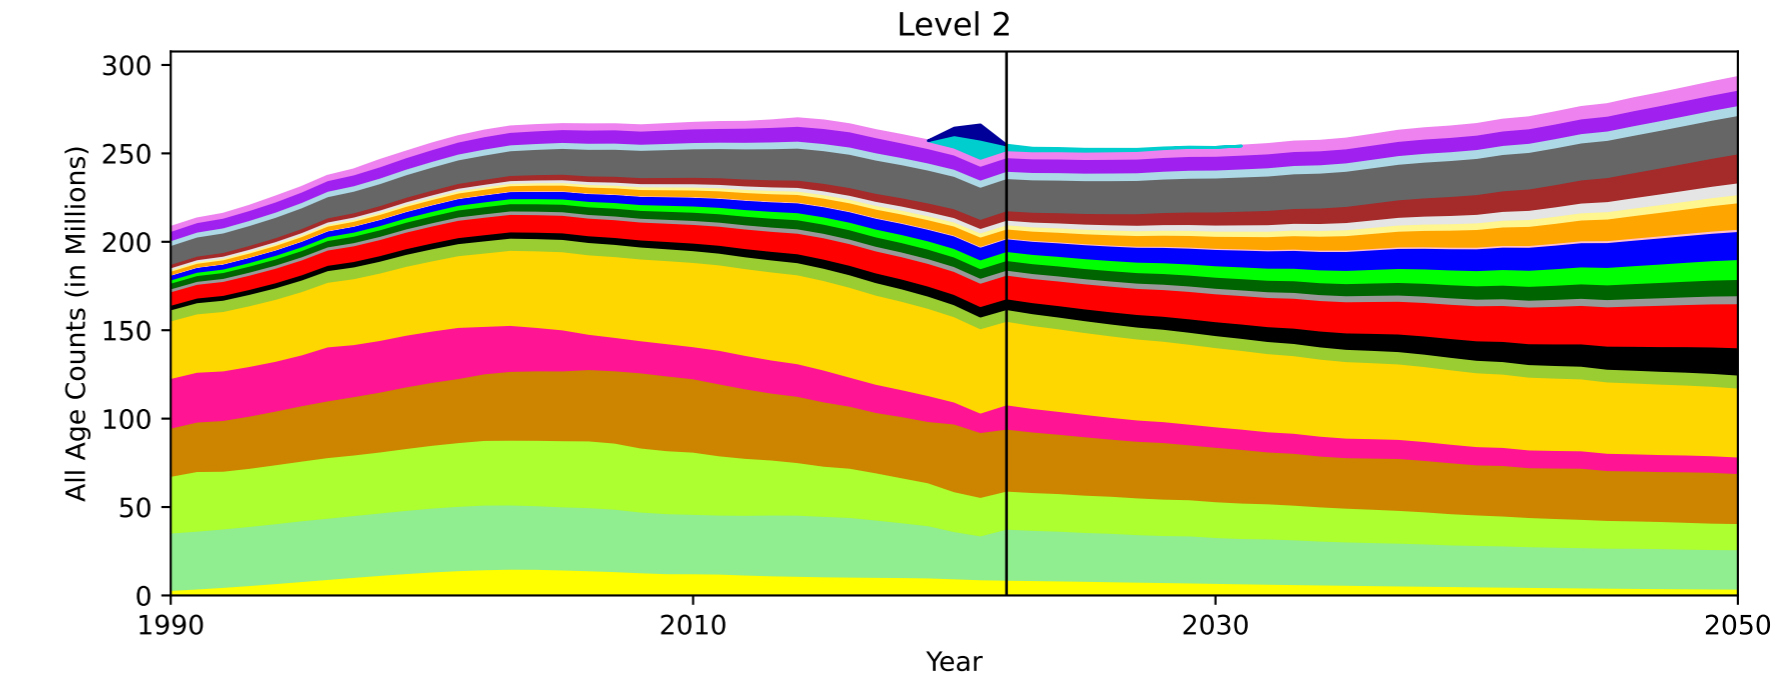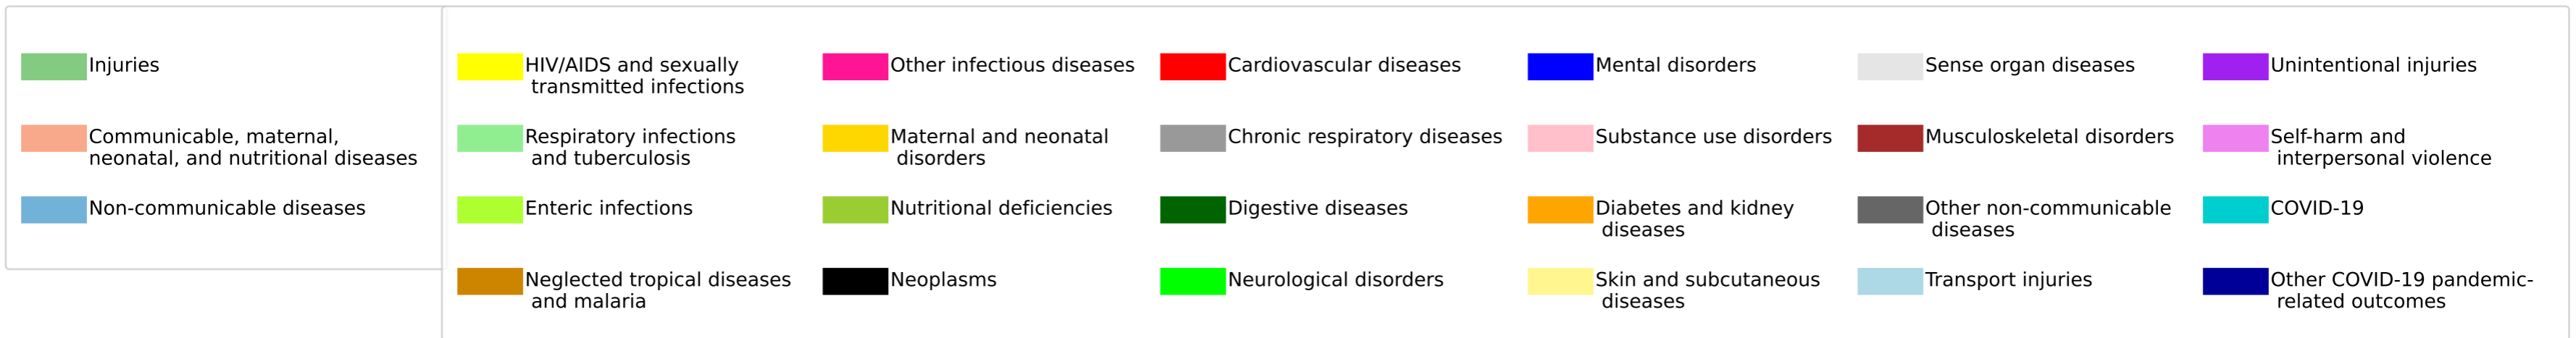

# Armenia

Level 1

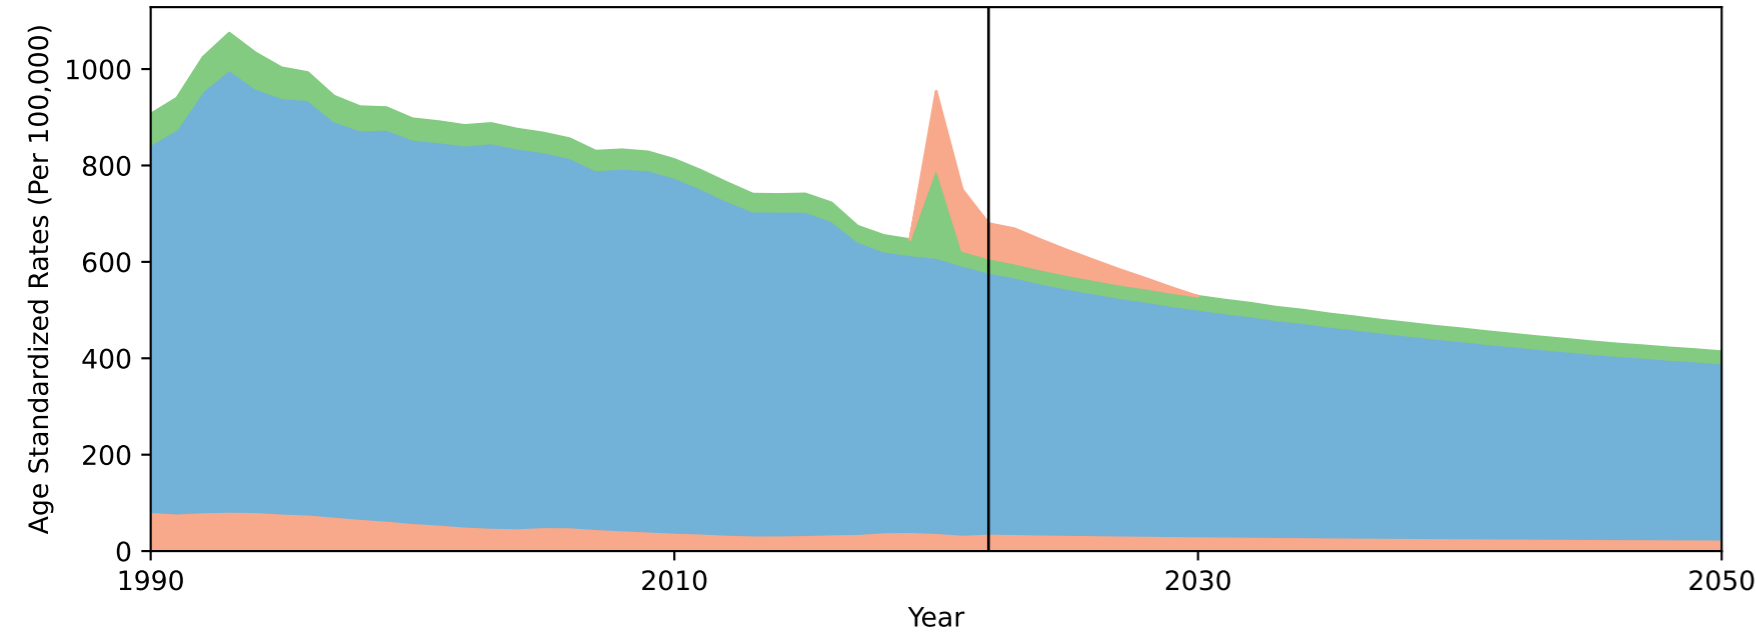

Level 2

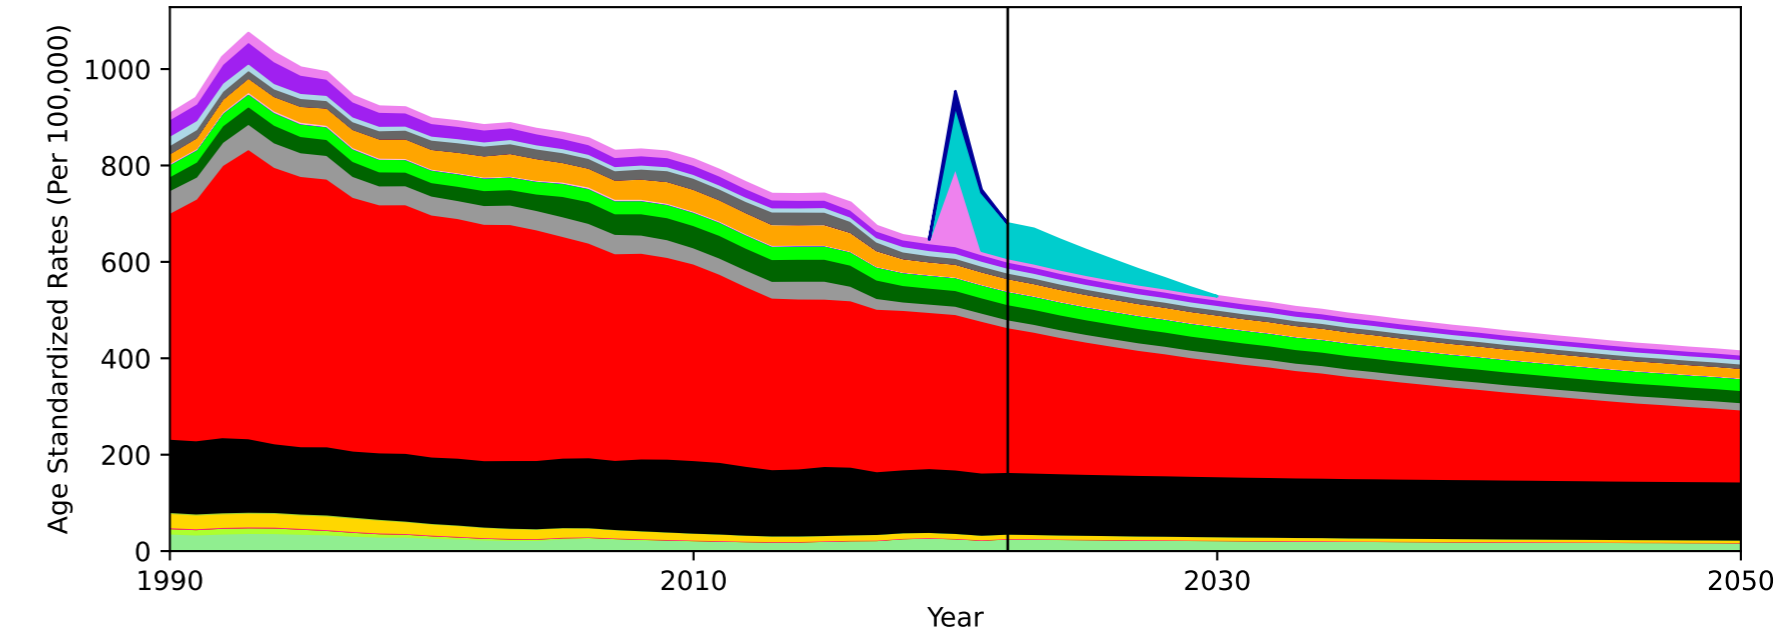

Level 1

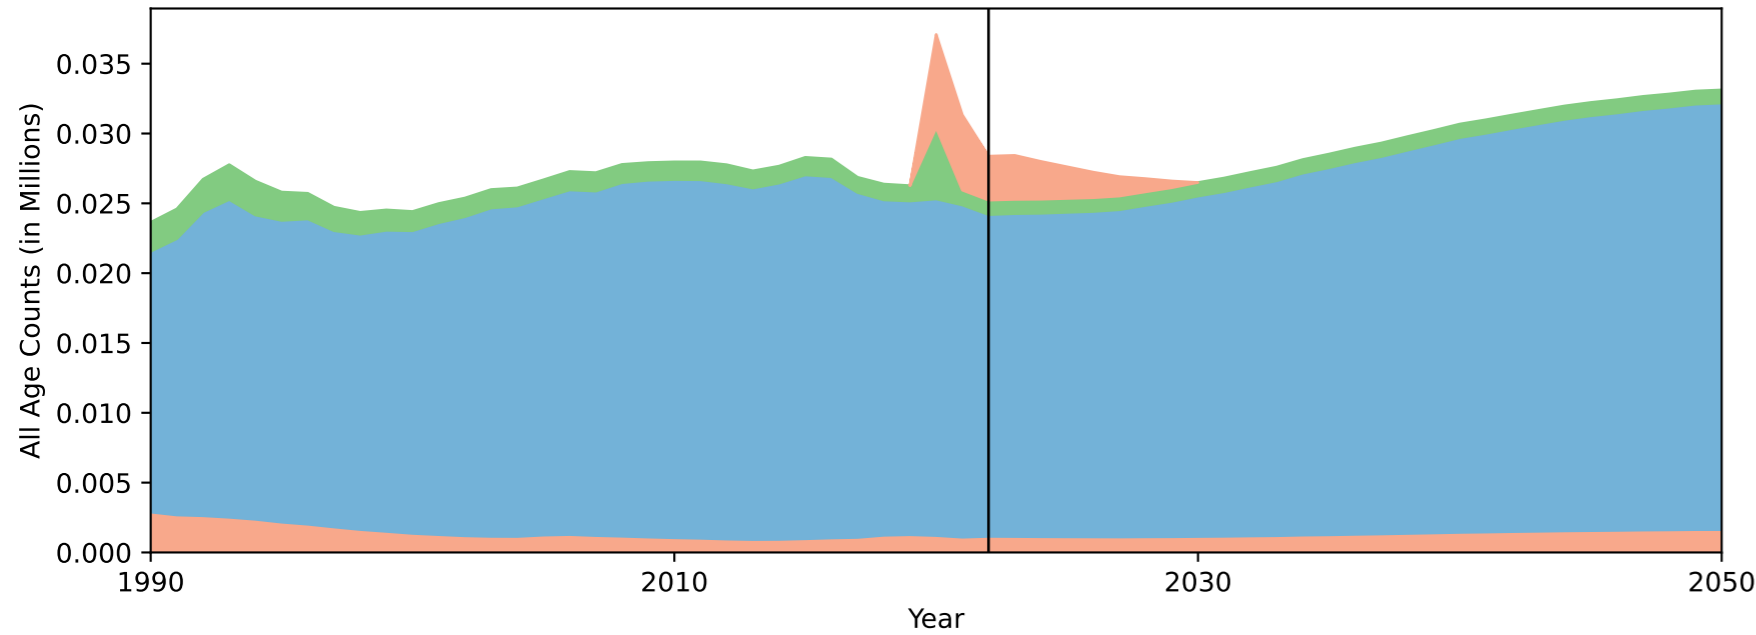

Level 2

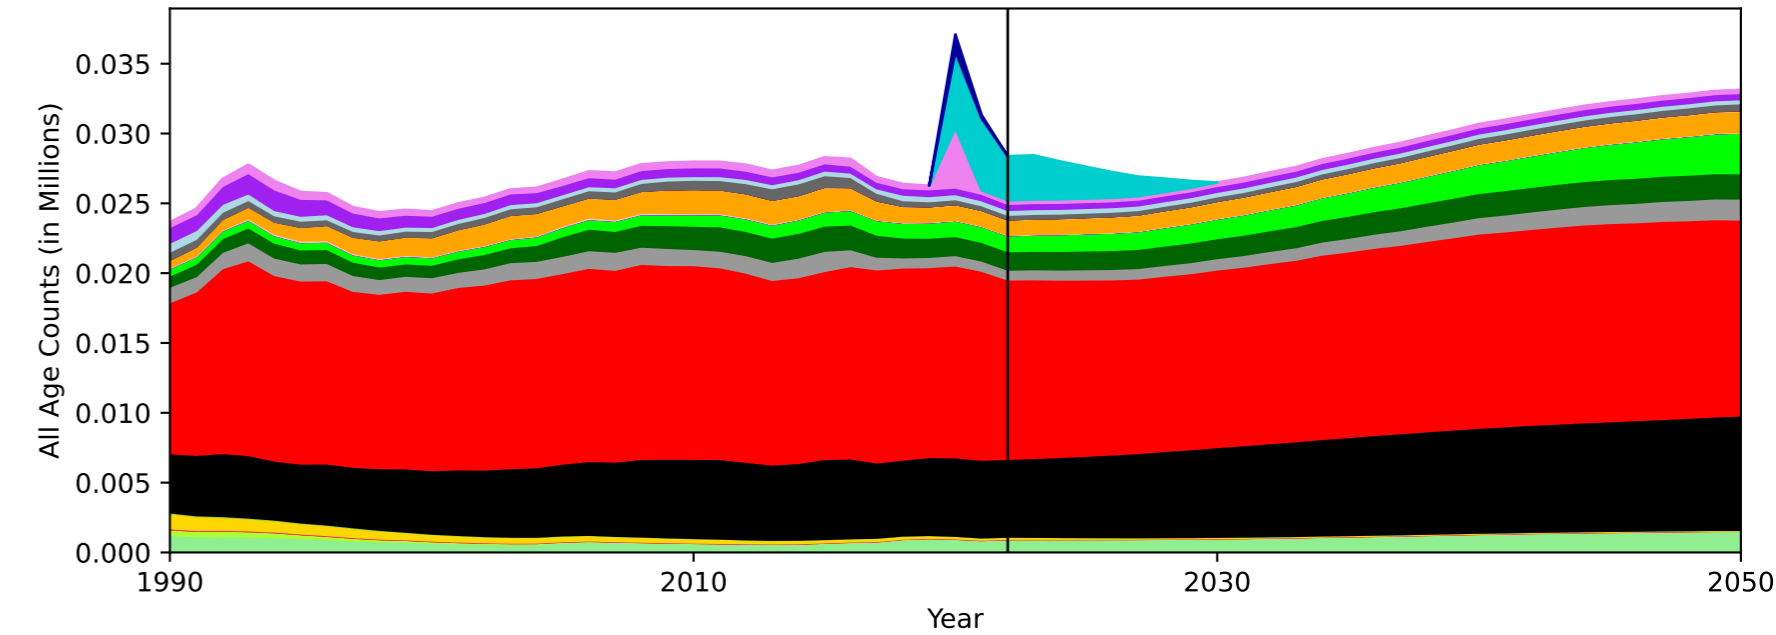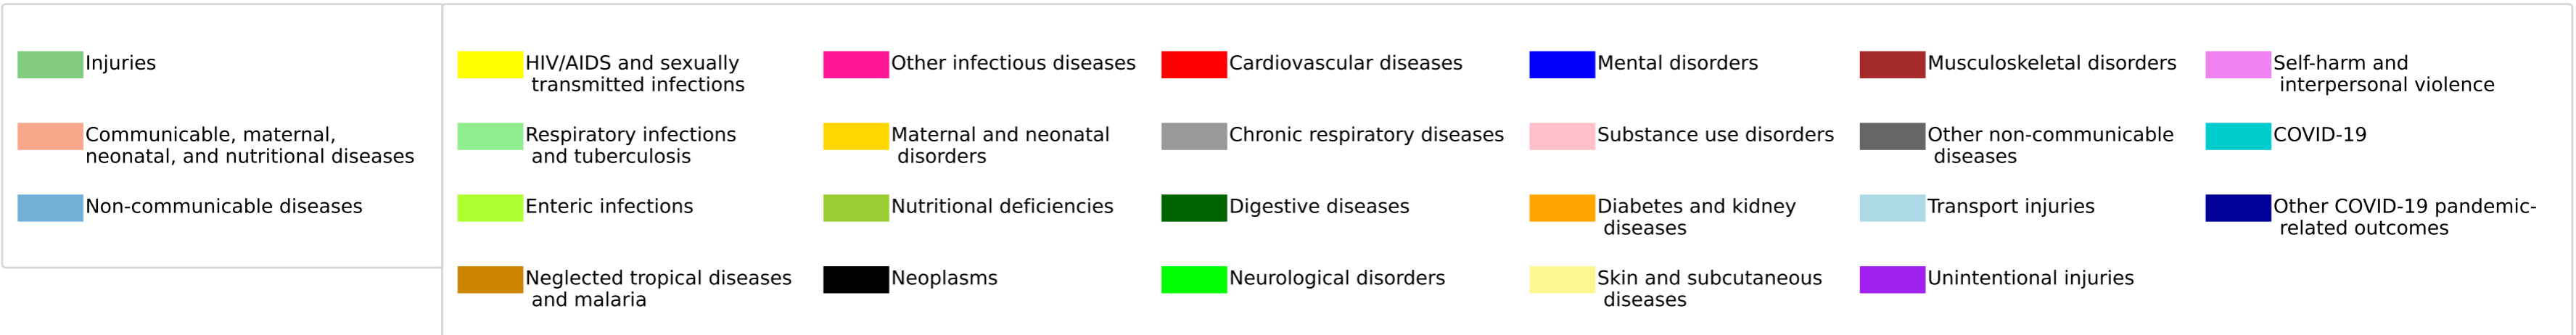

# Azerbaijan

Level 1

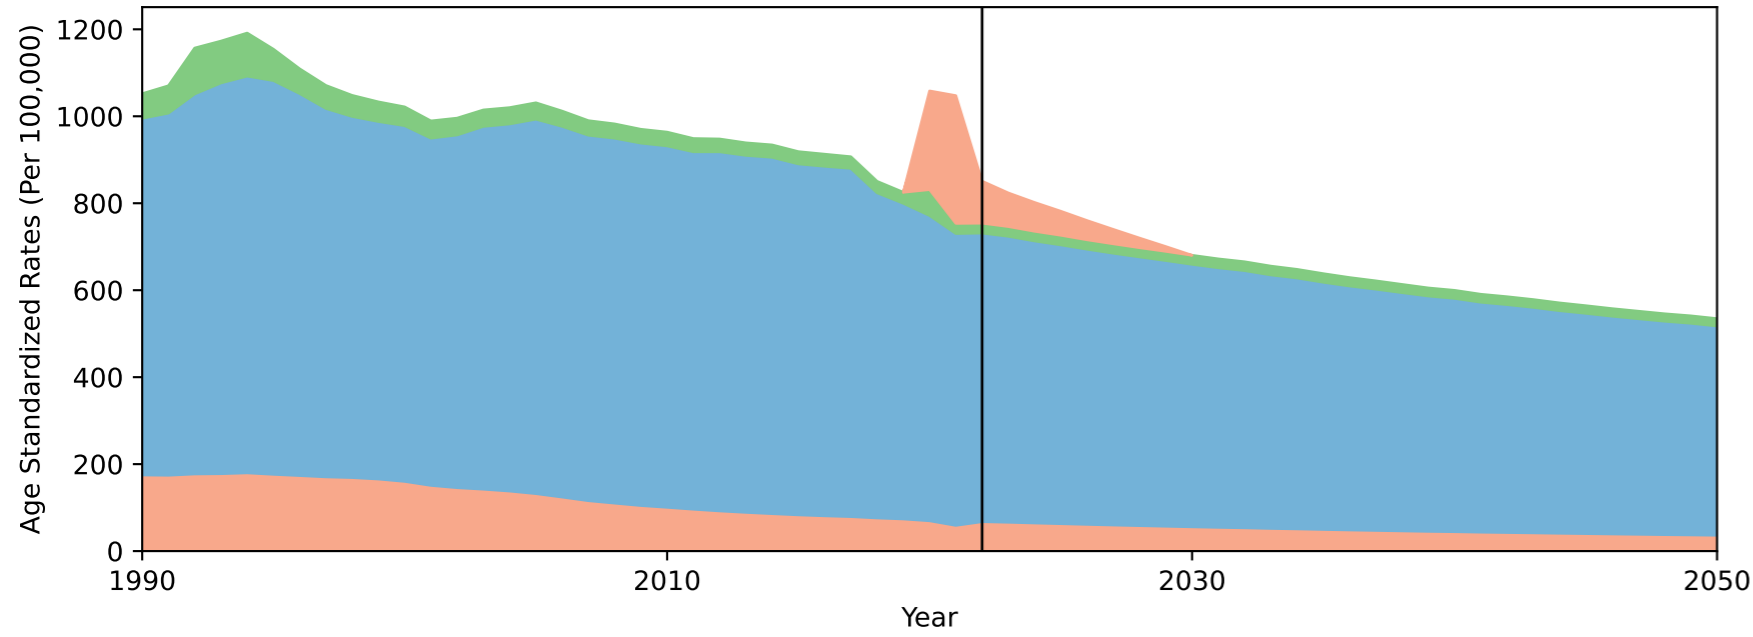

Level 2

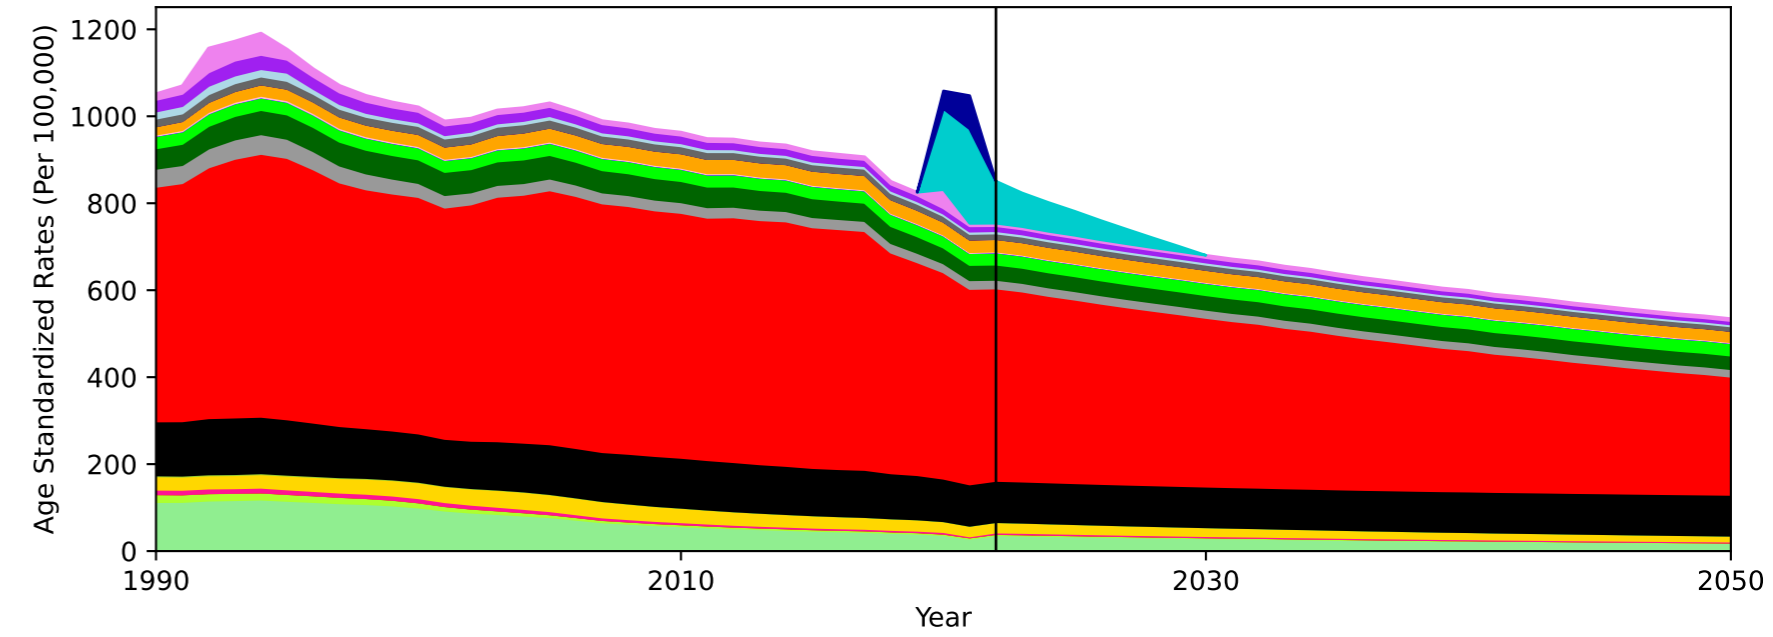

Level 1

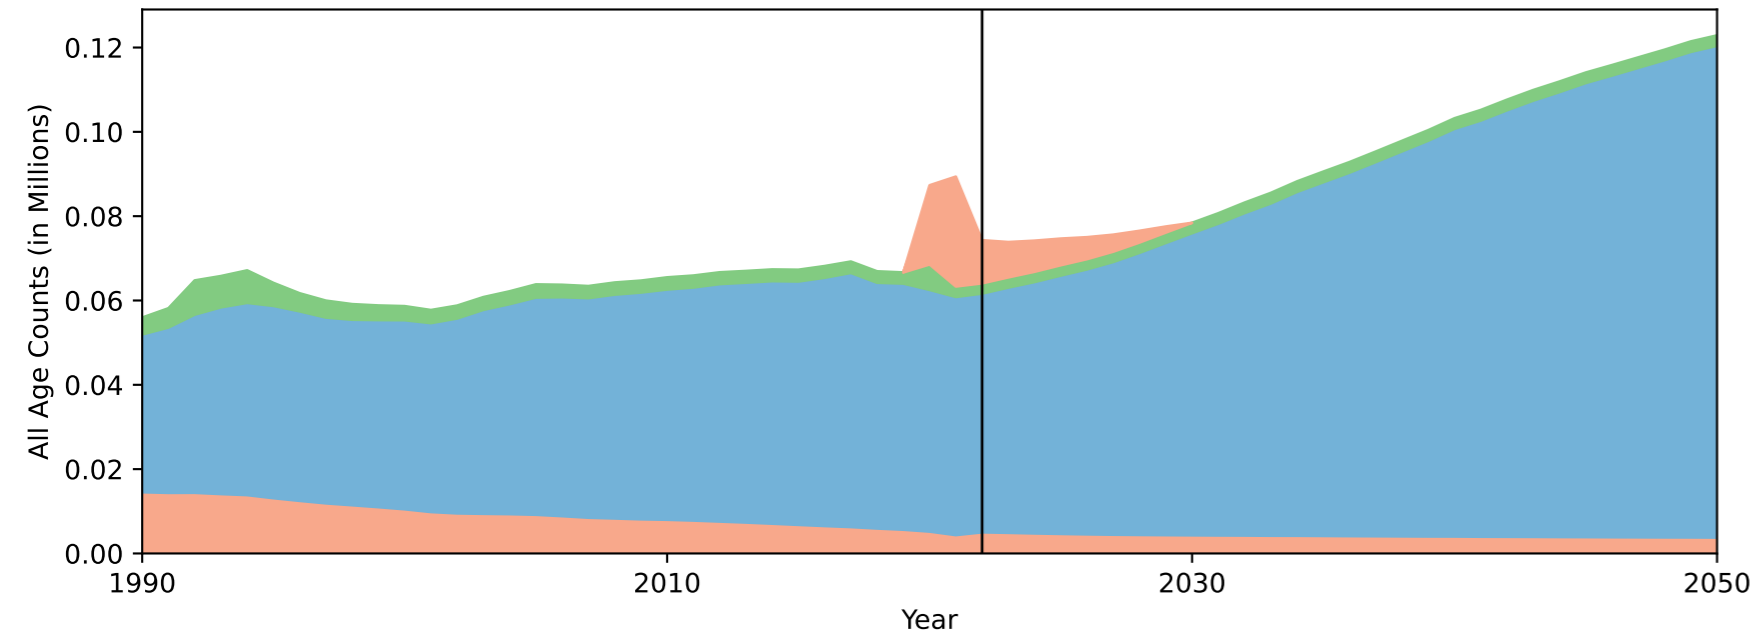

Level 2

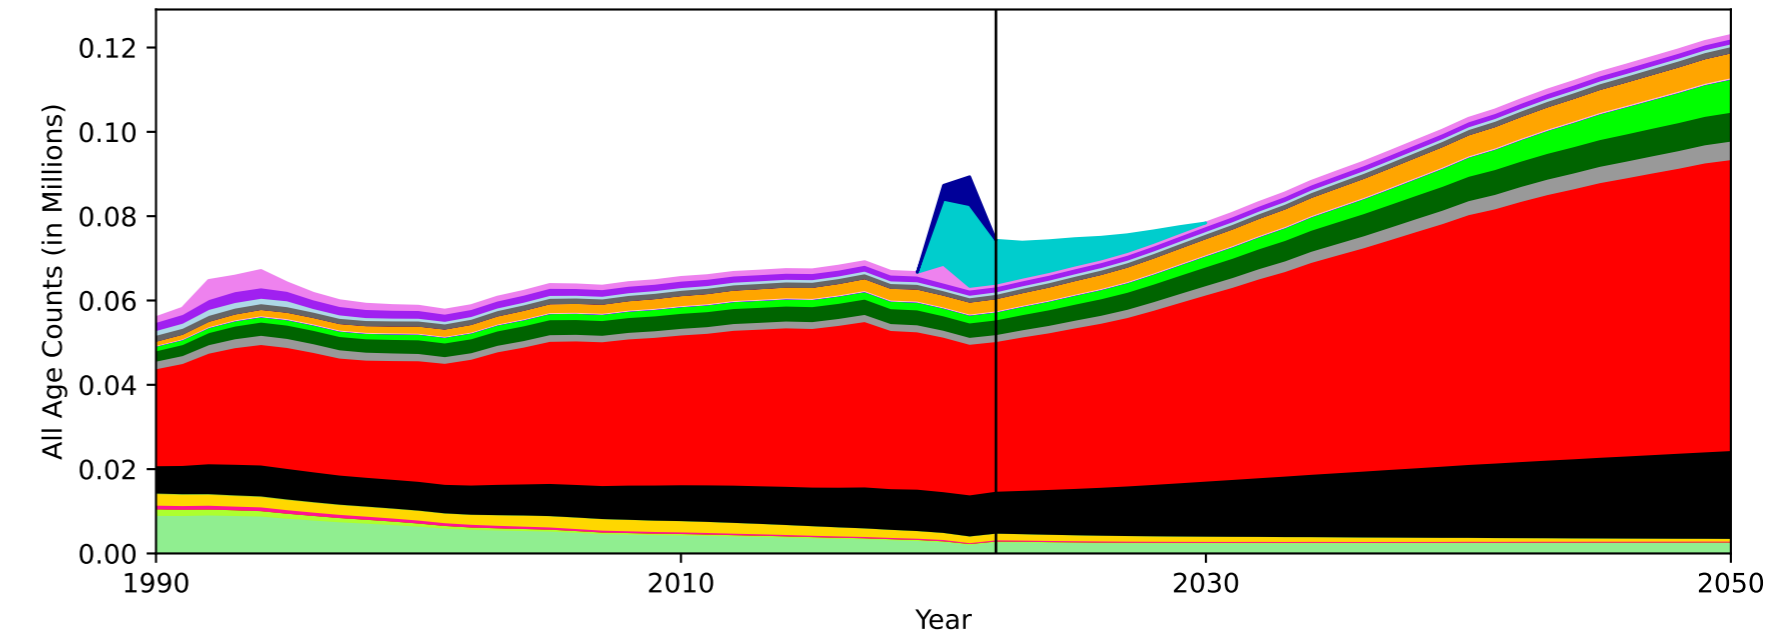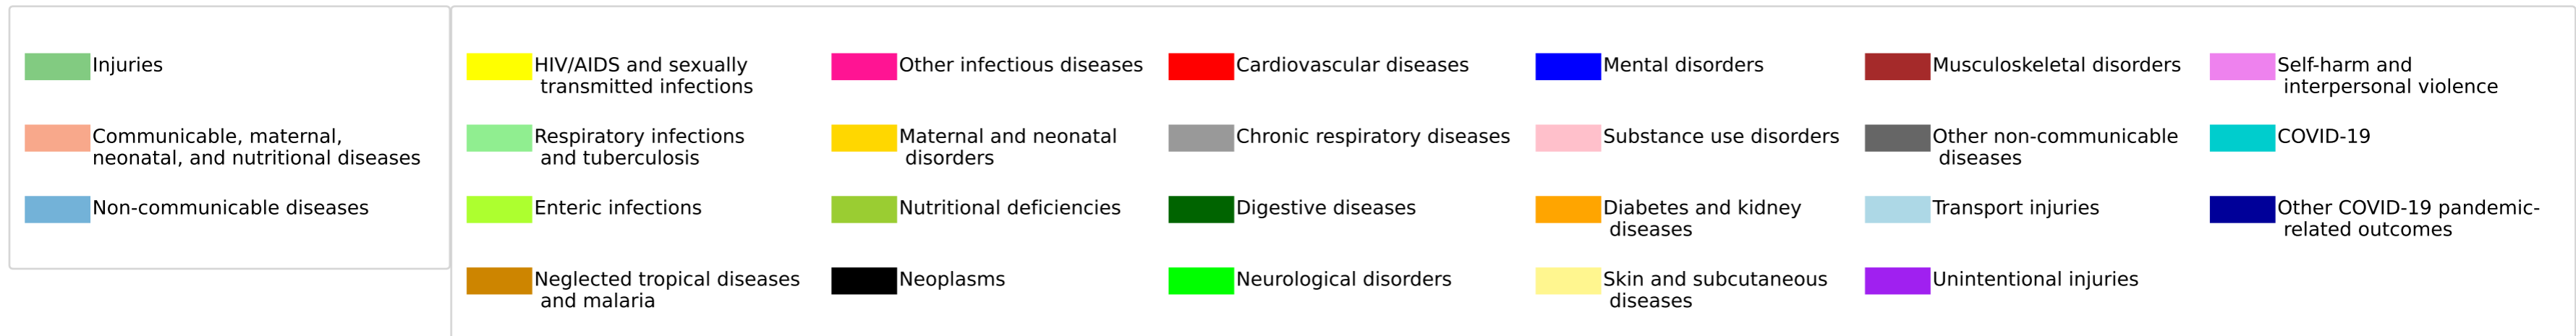



# Georgia

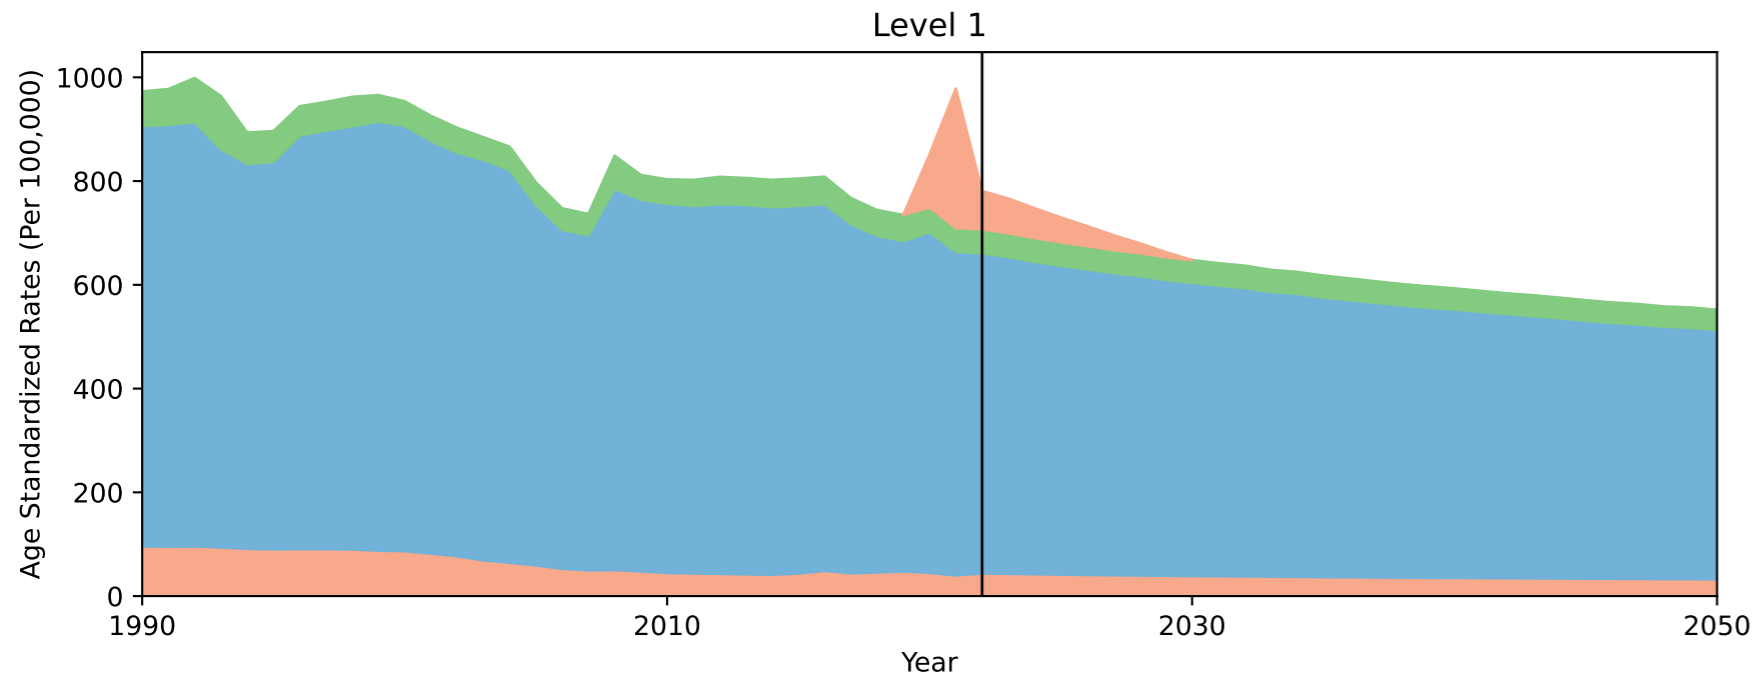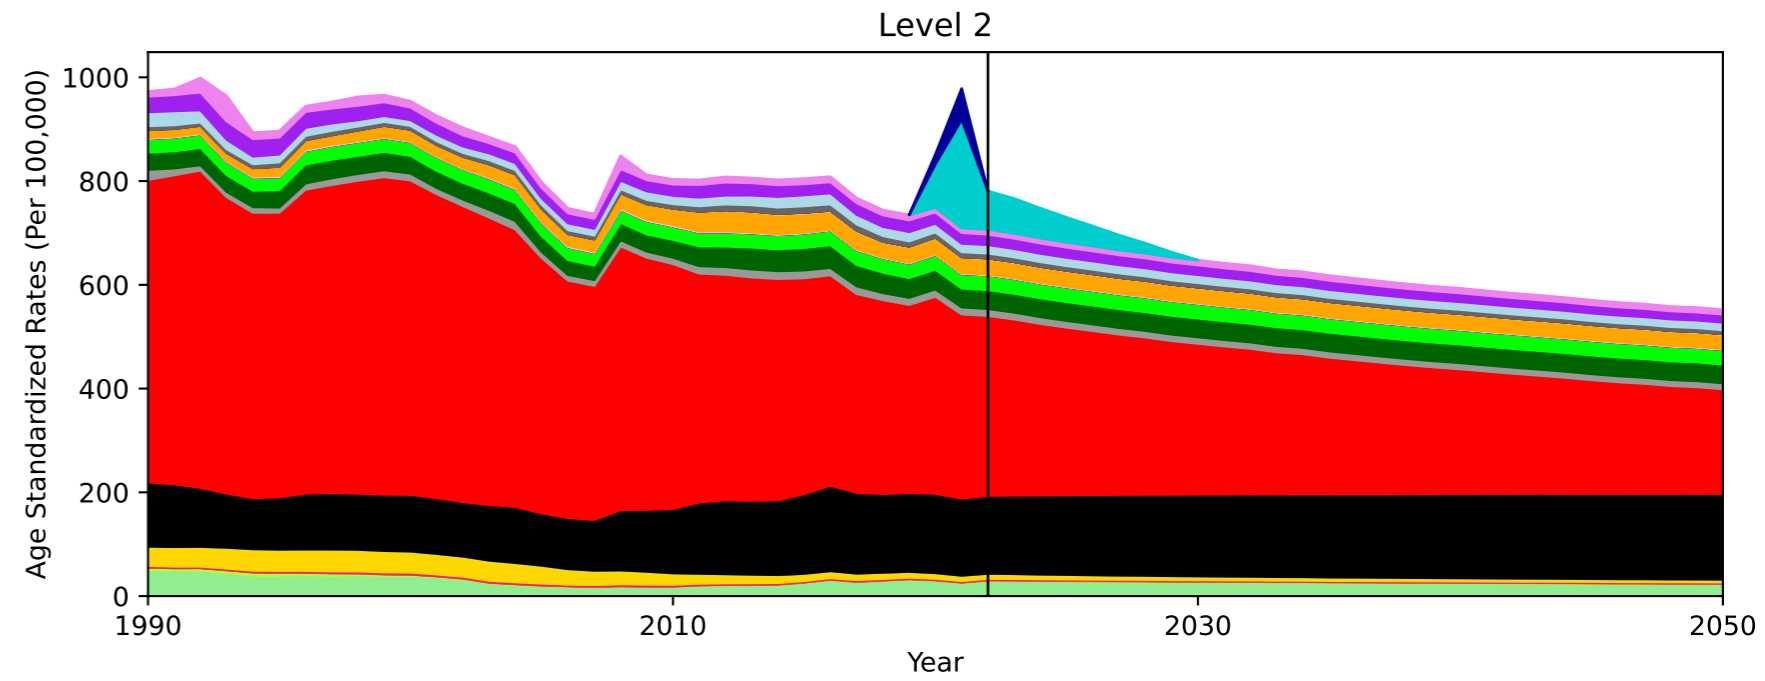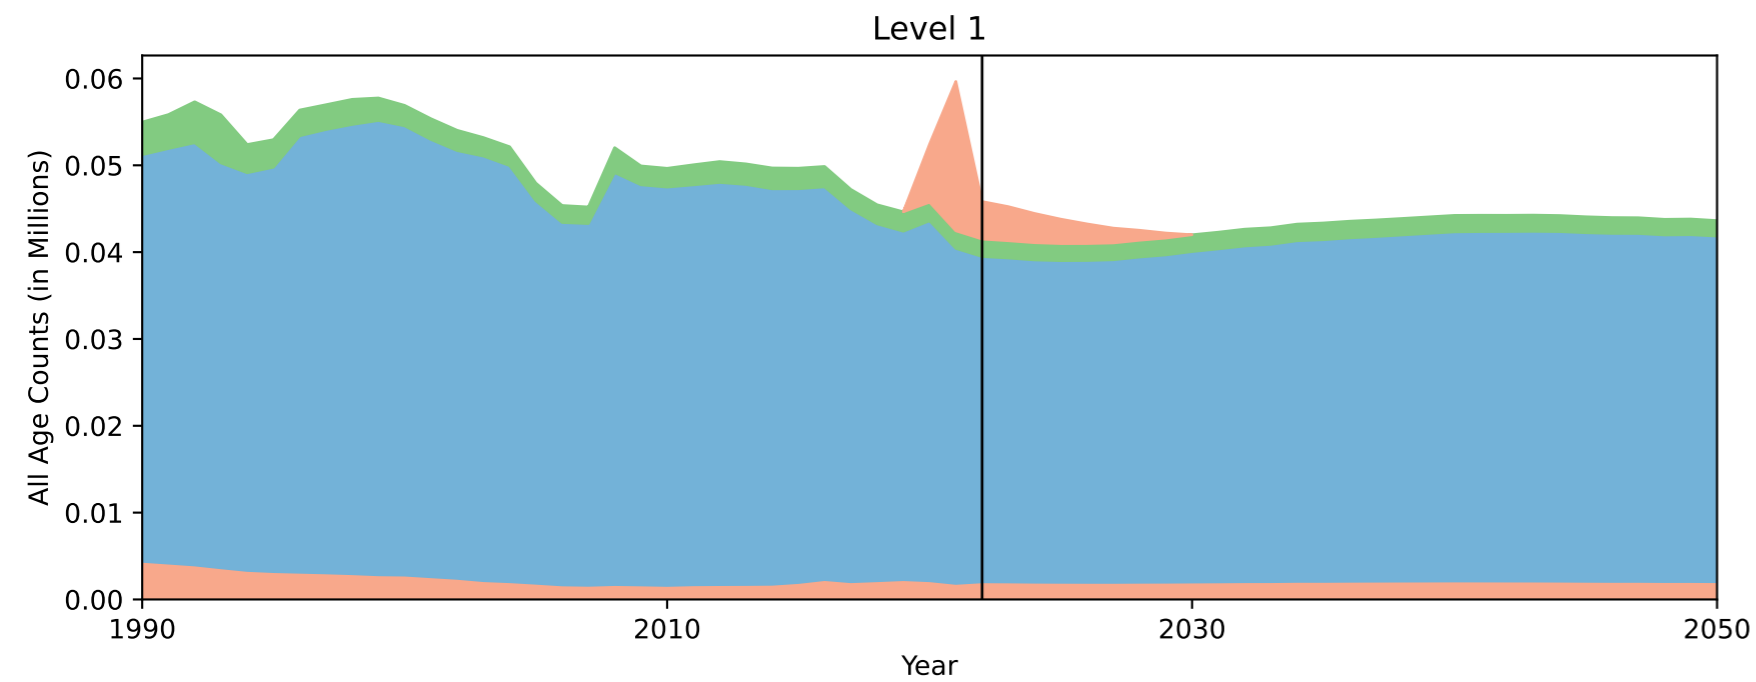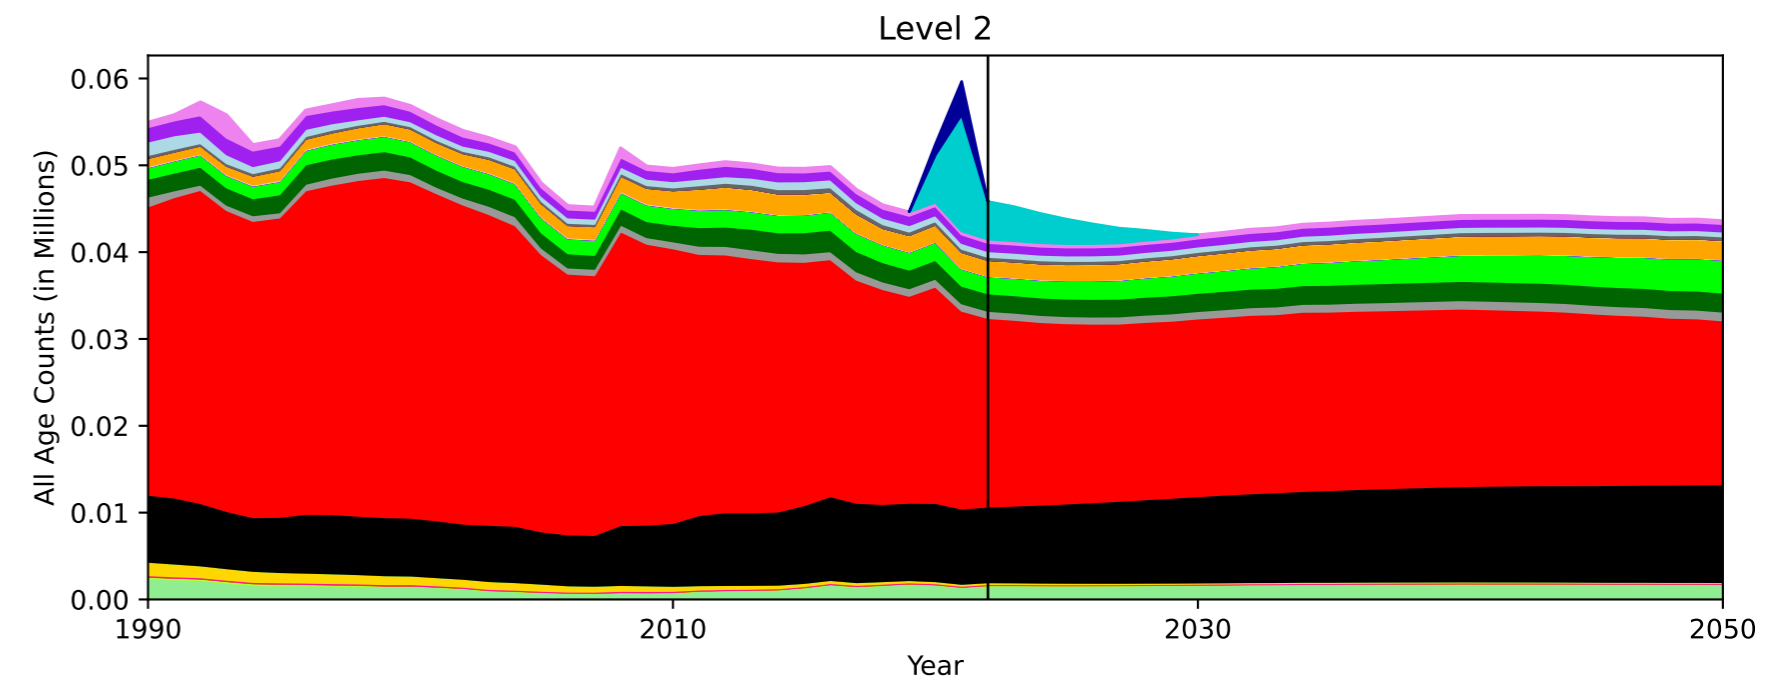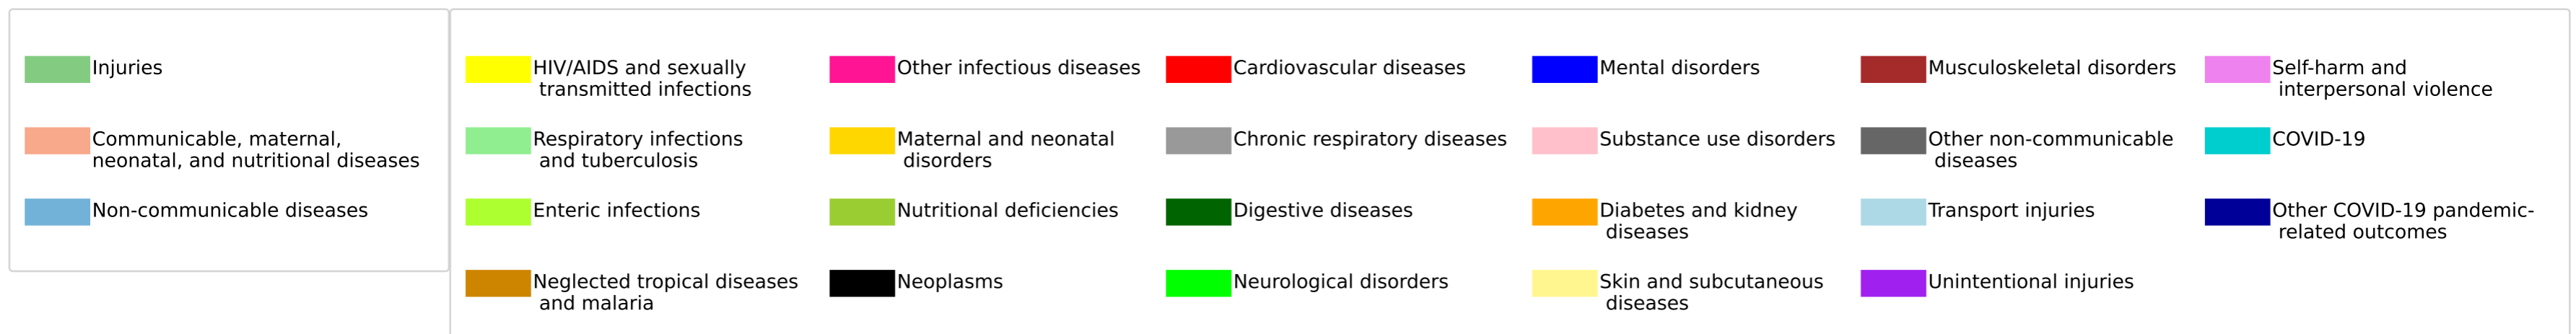

# Kazakhstan

Level 1

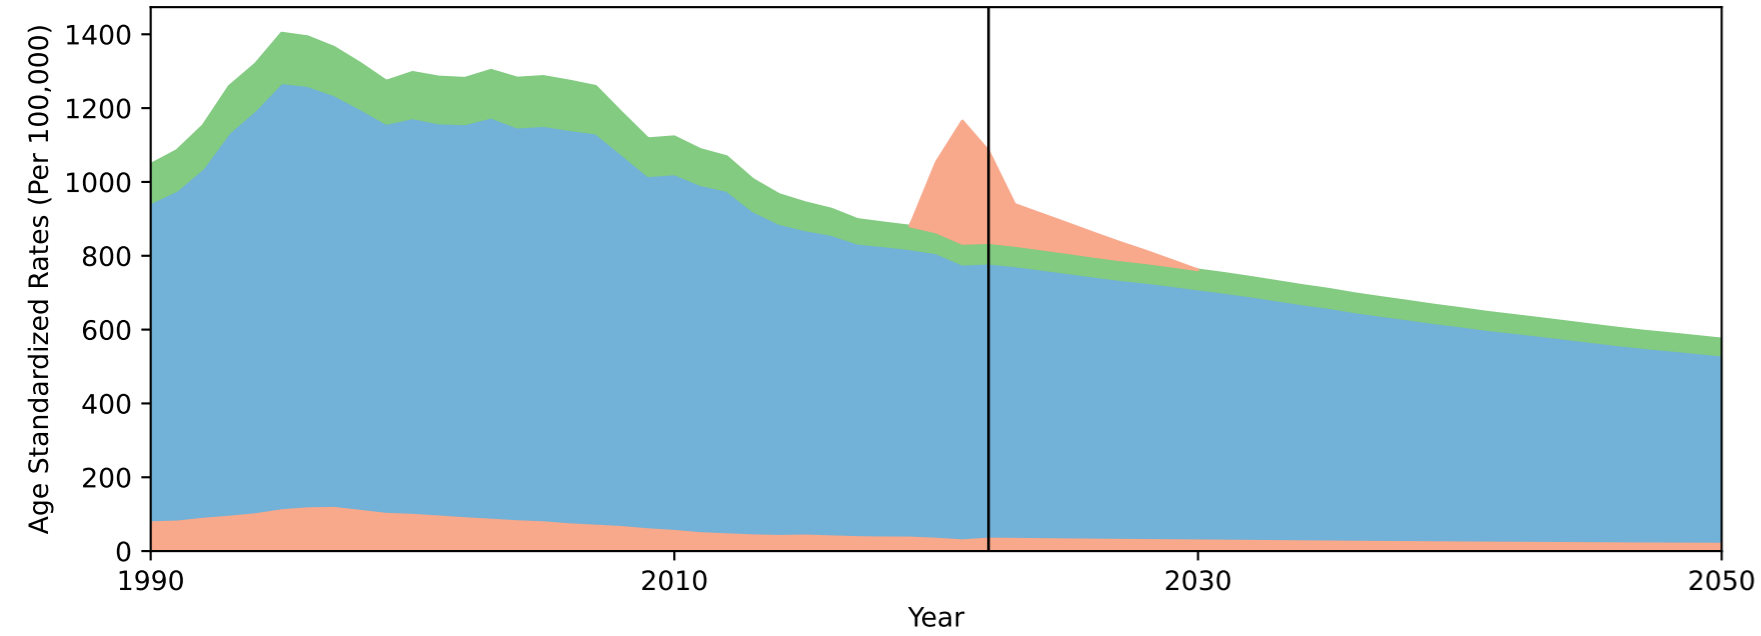

Level 2

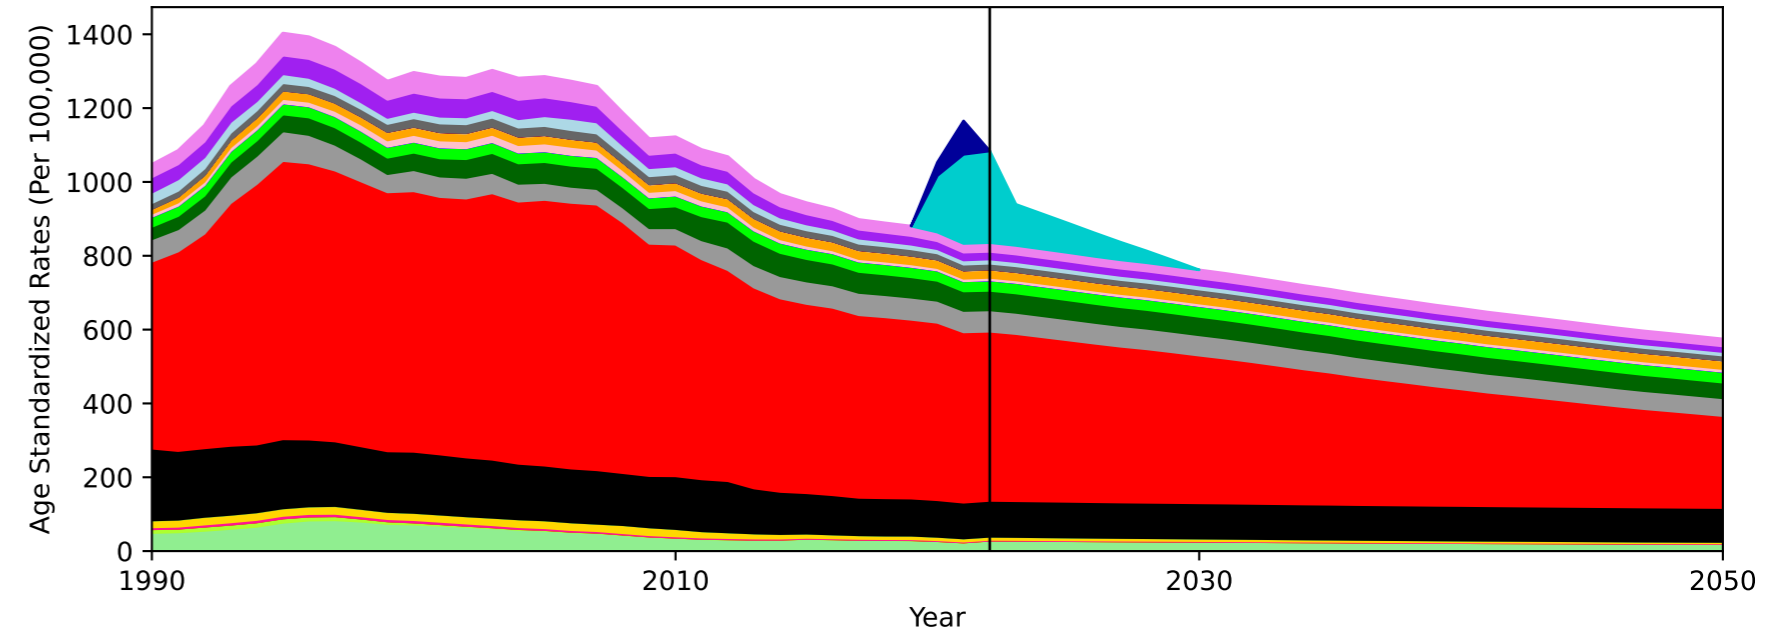

Level 1

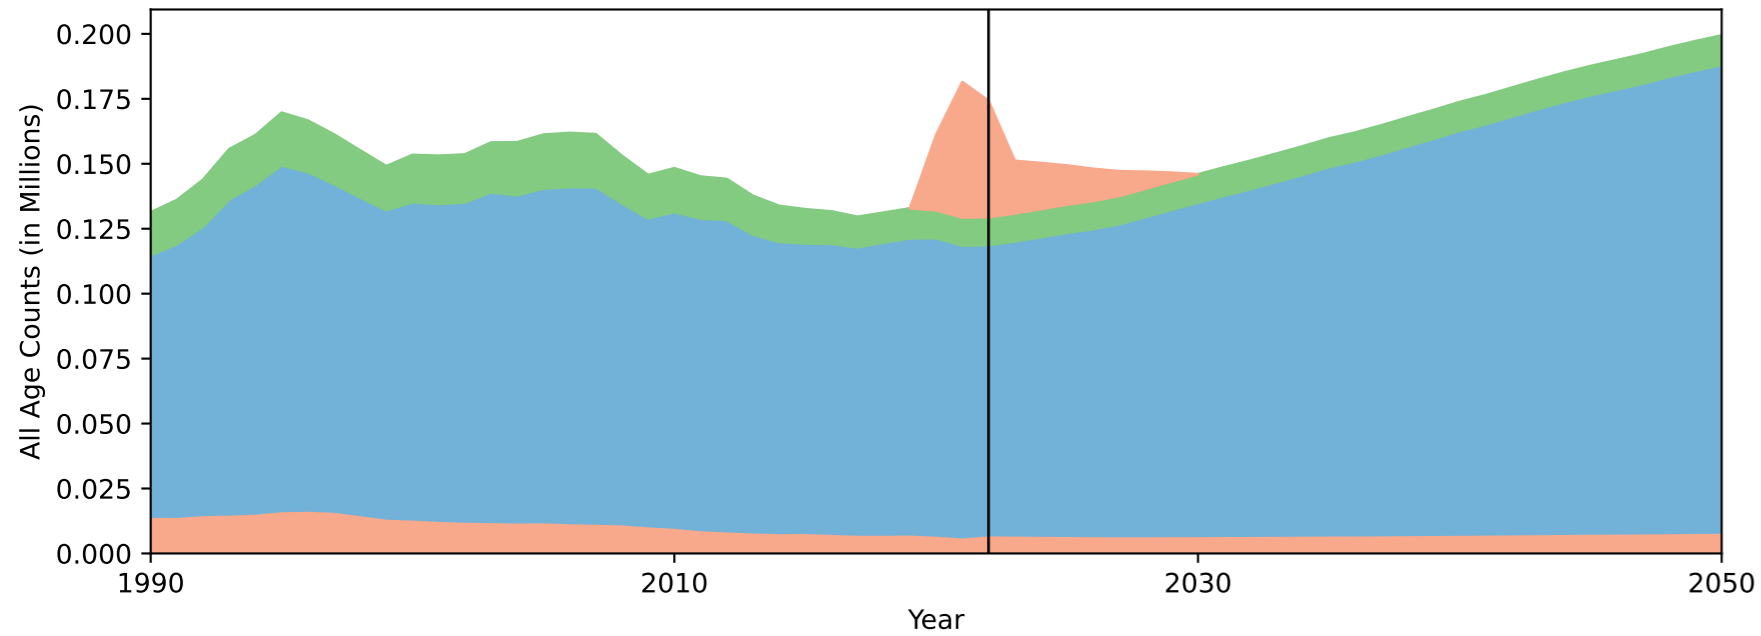

Level 2

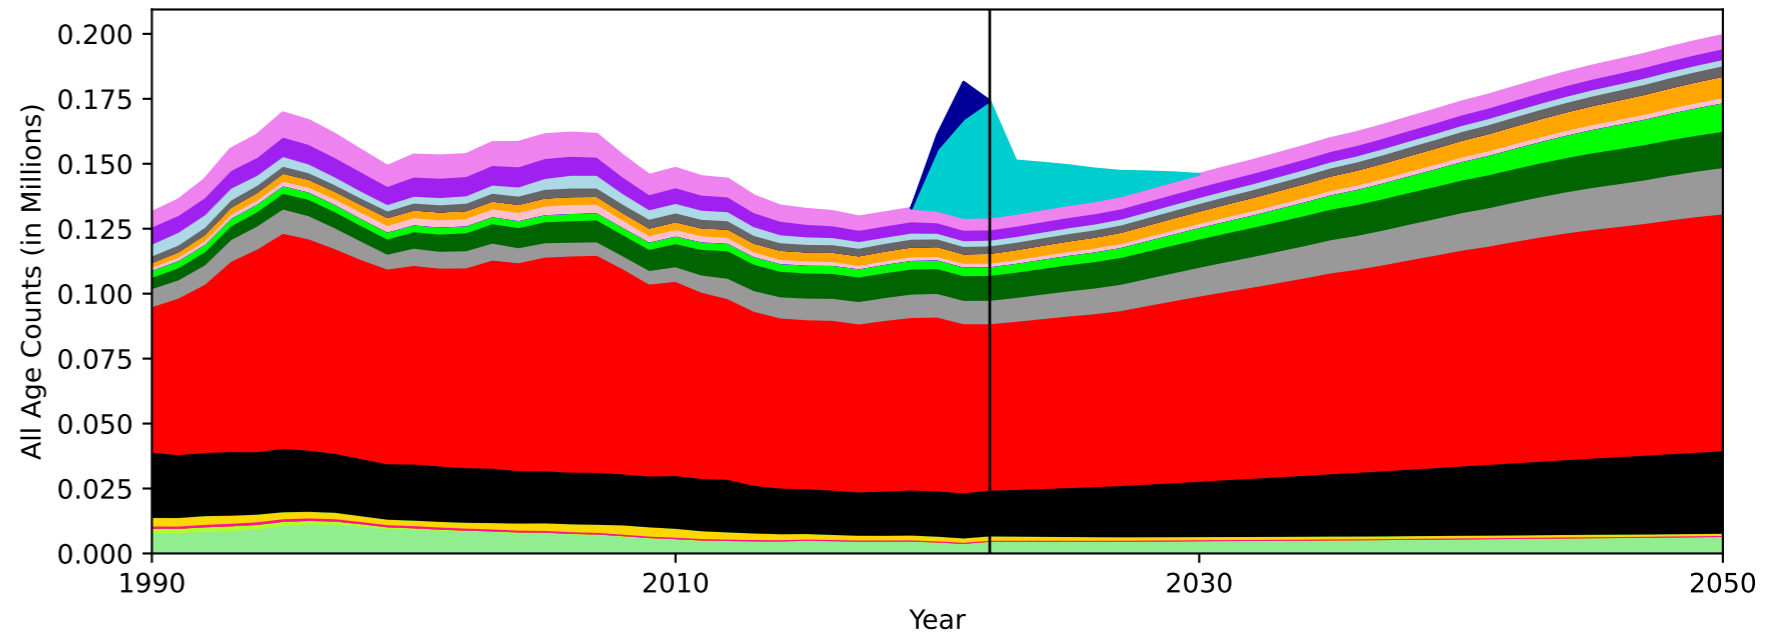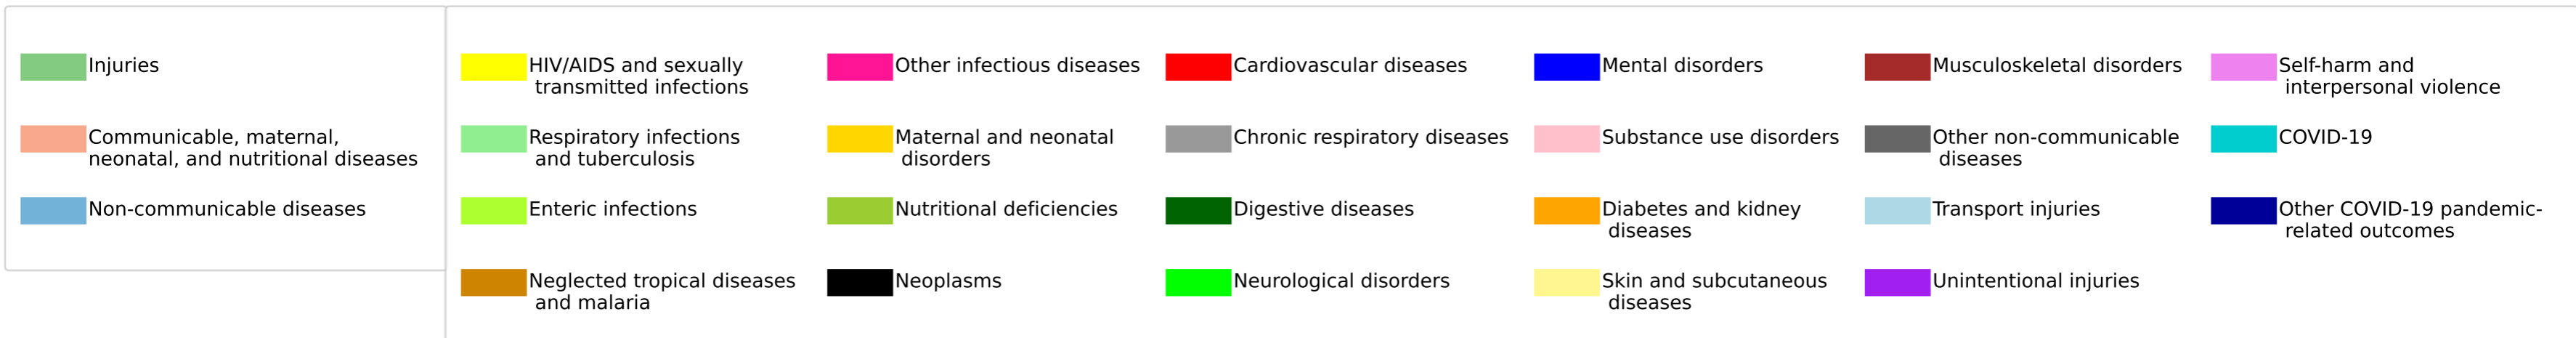

# Kyrgyzstan

Level 1

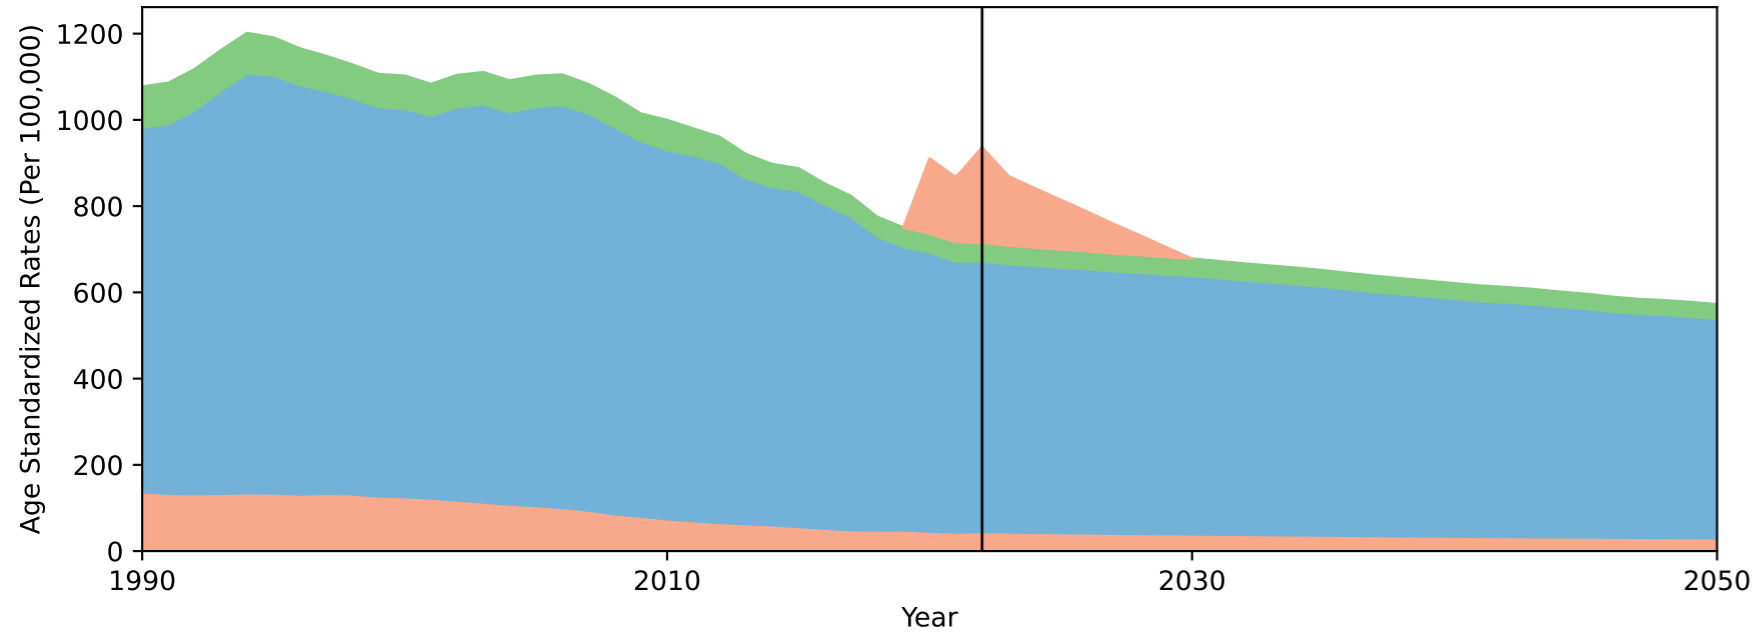

Level 2

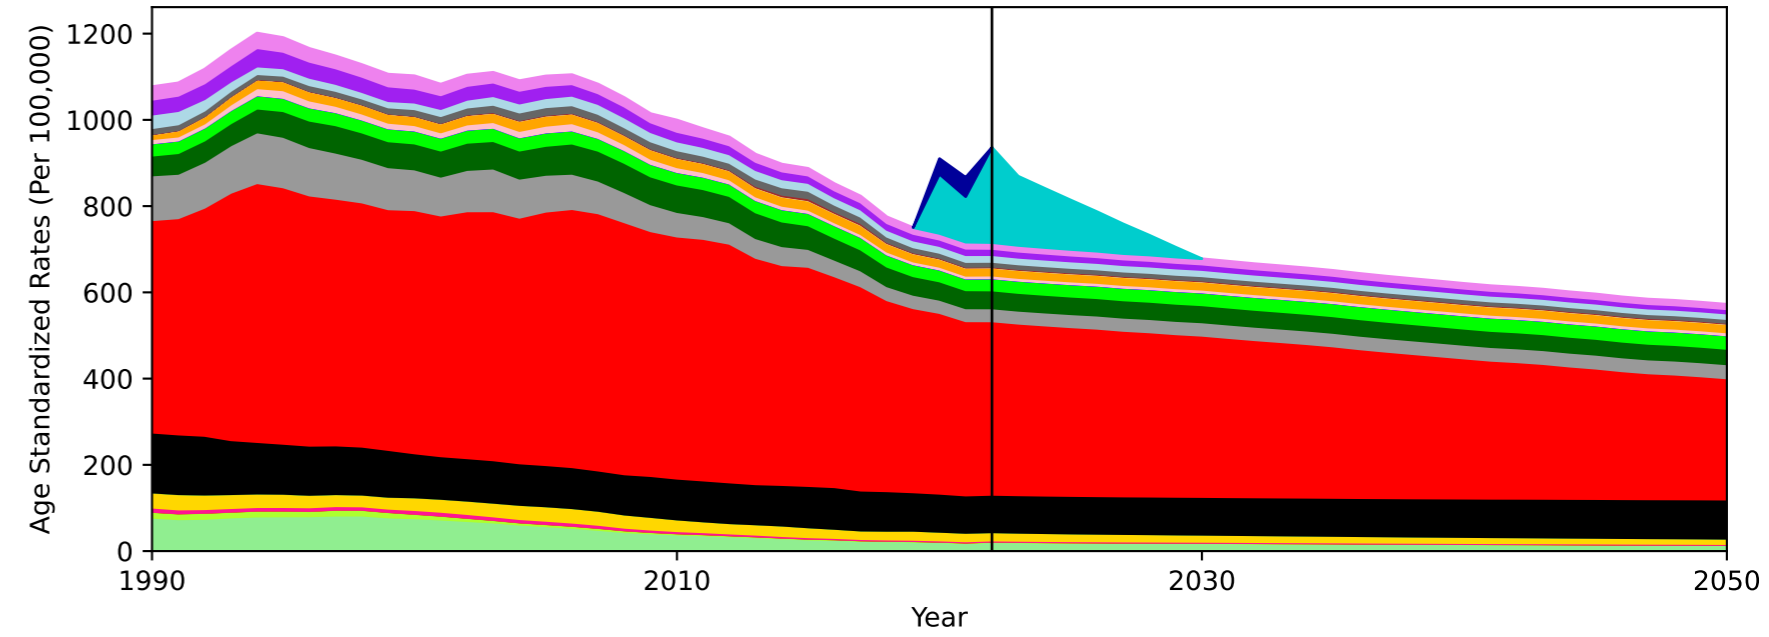

Level 1

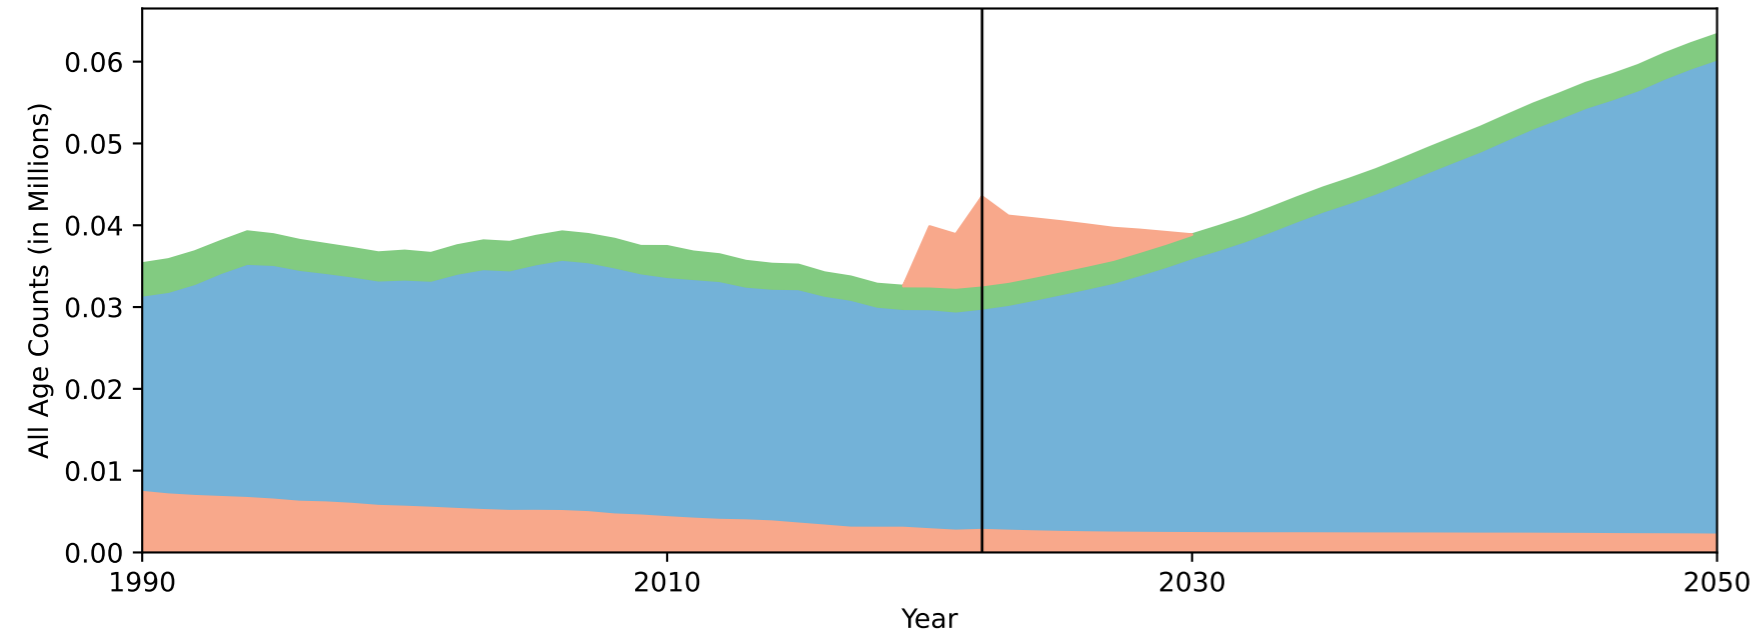

Level 2

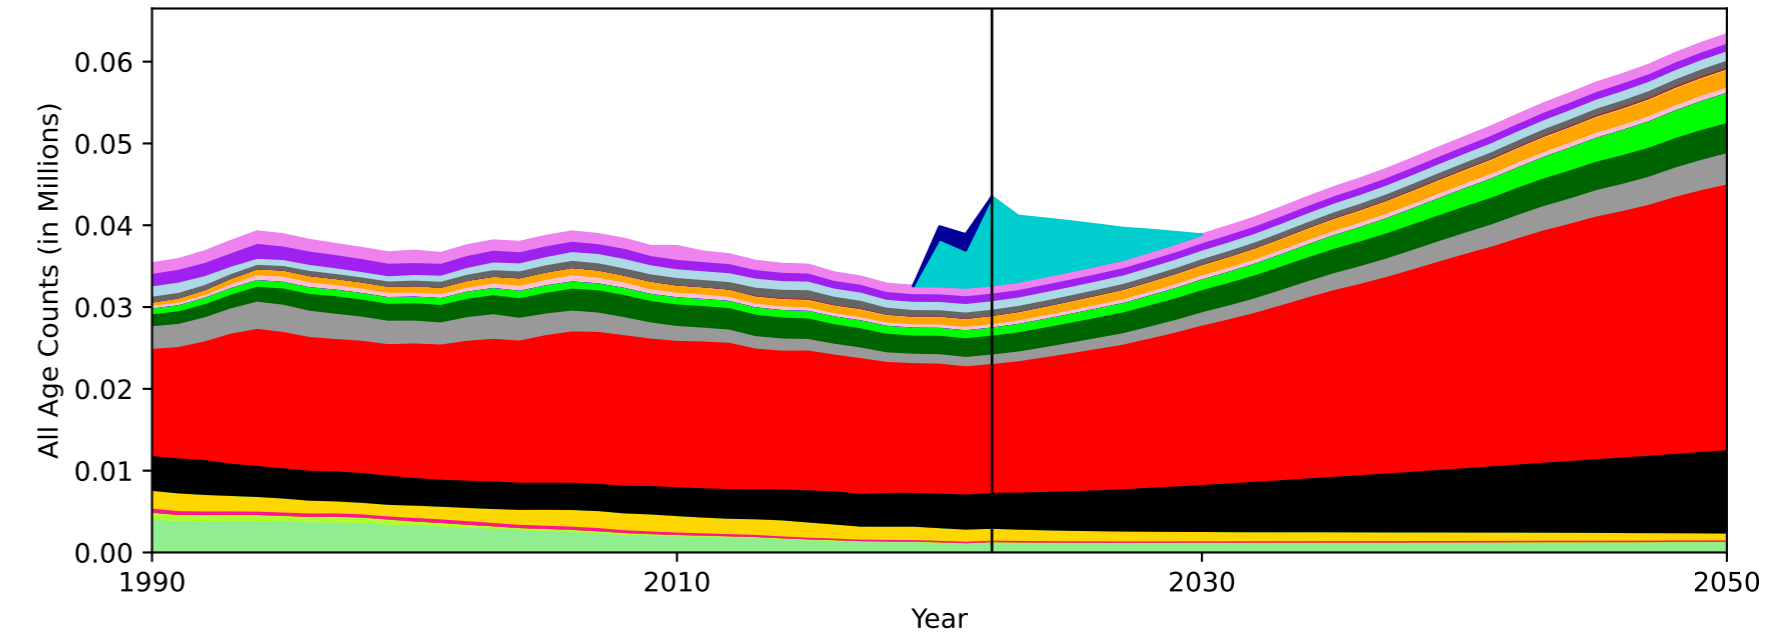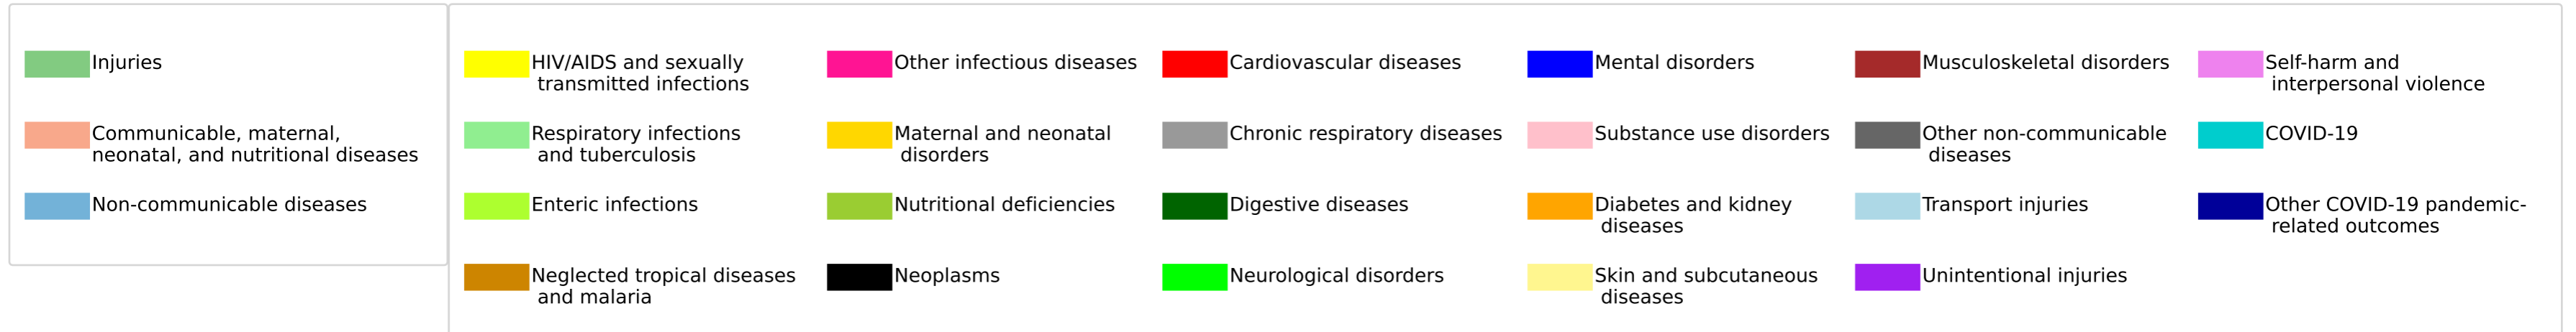

# Mongolia

Level 1

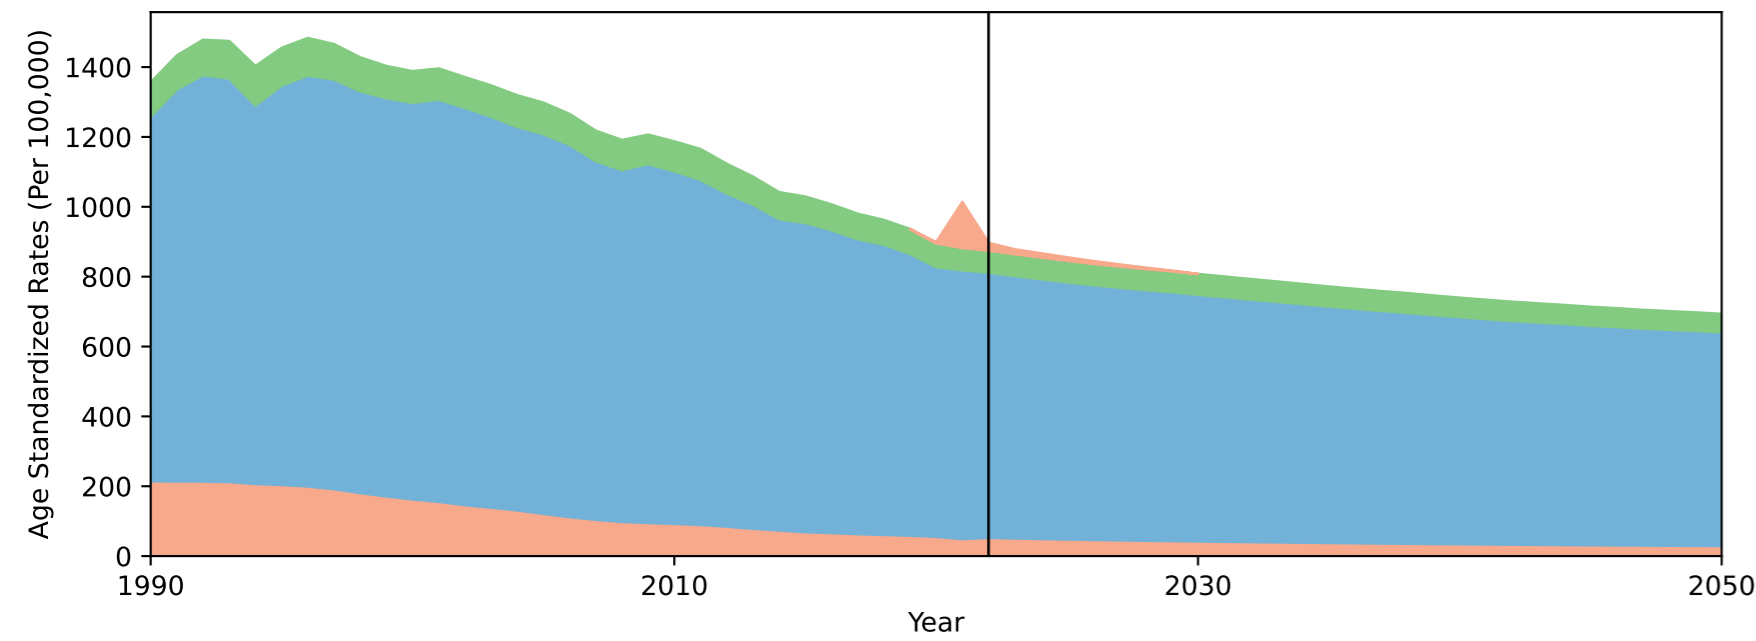

Level 2

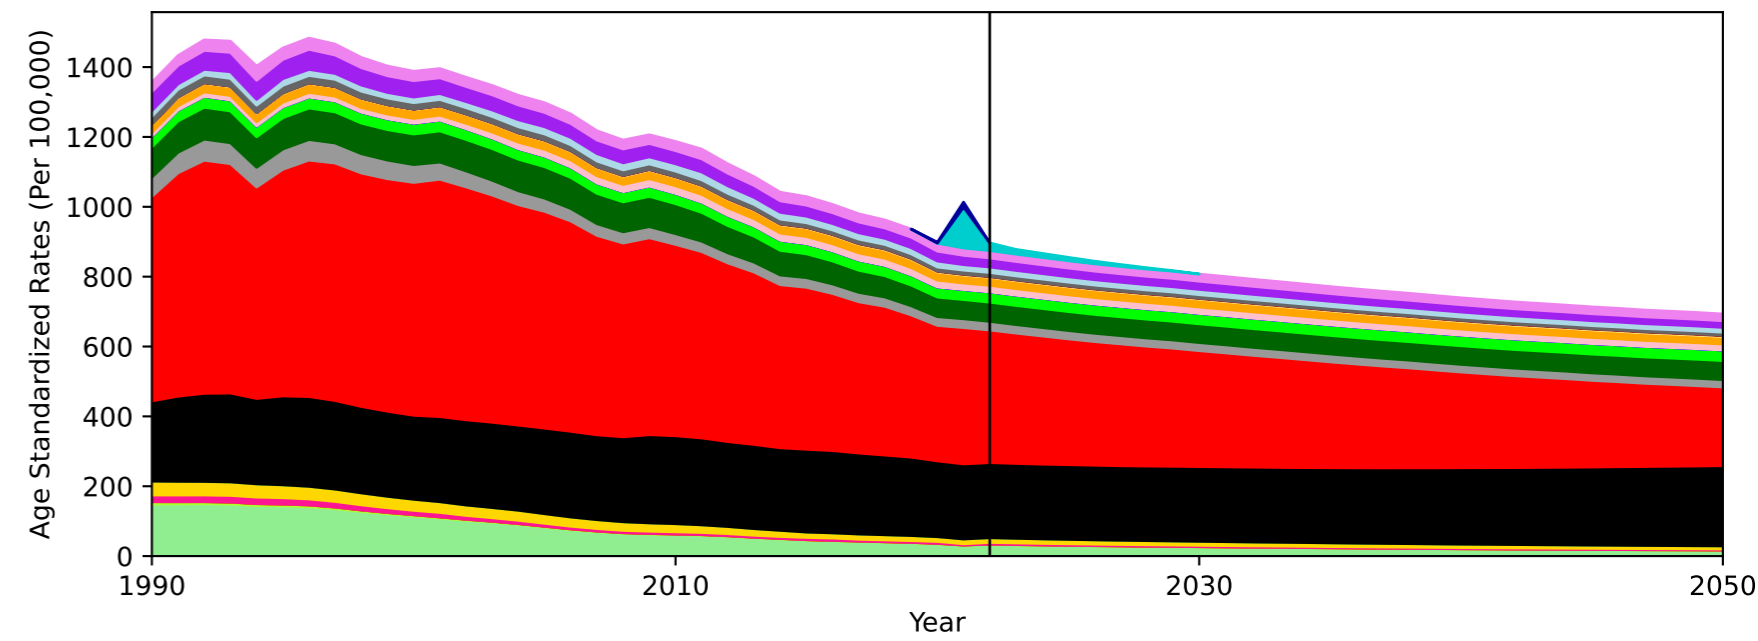

Level 1

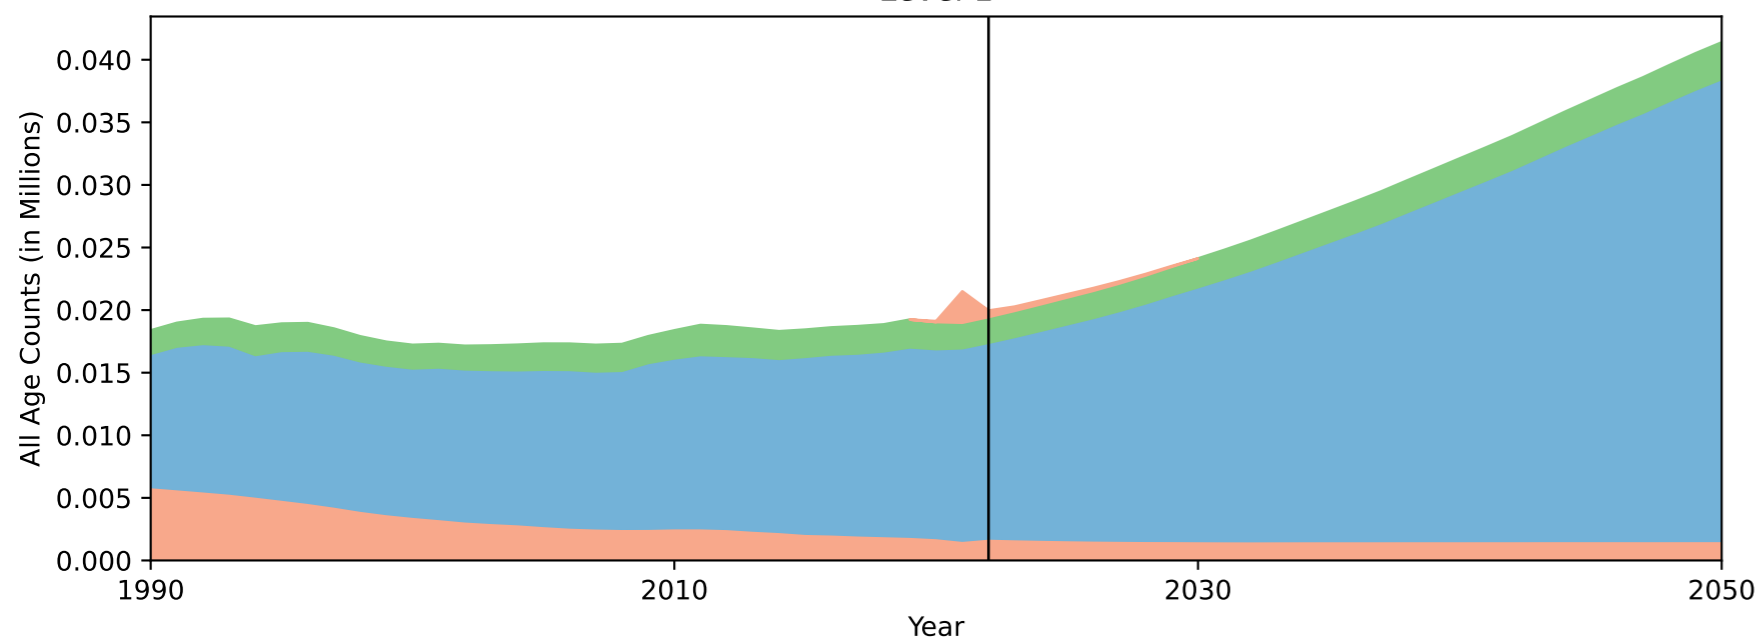

Level 2

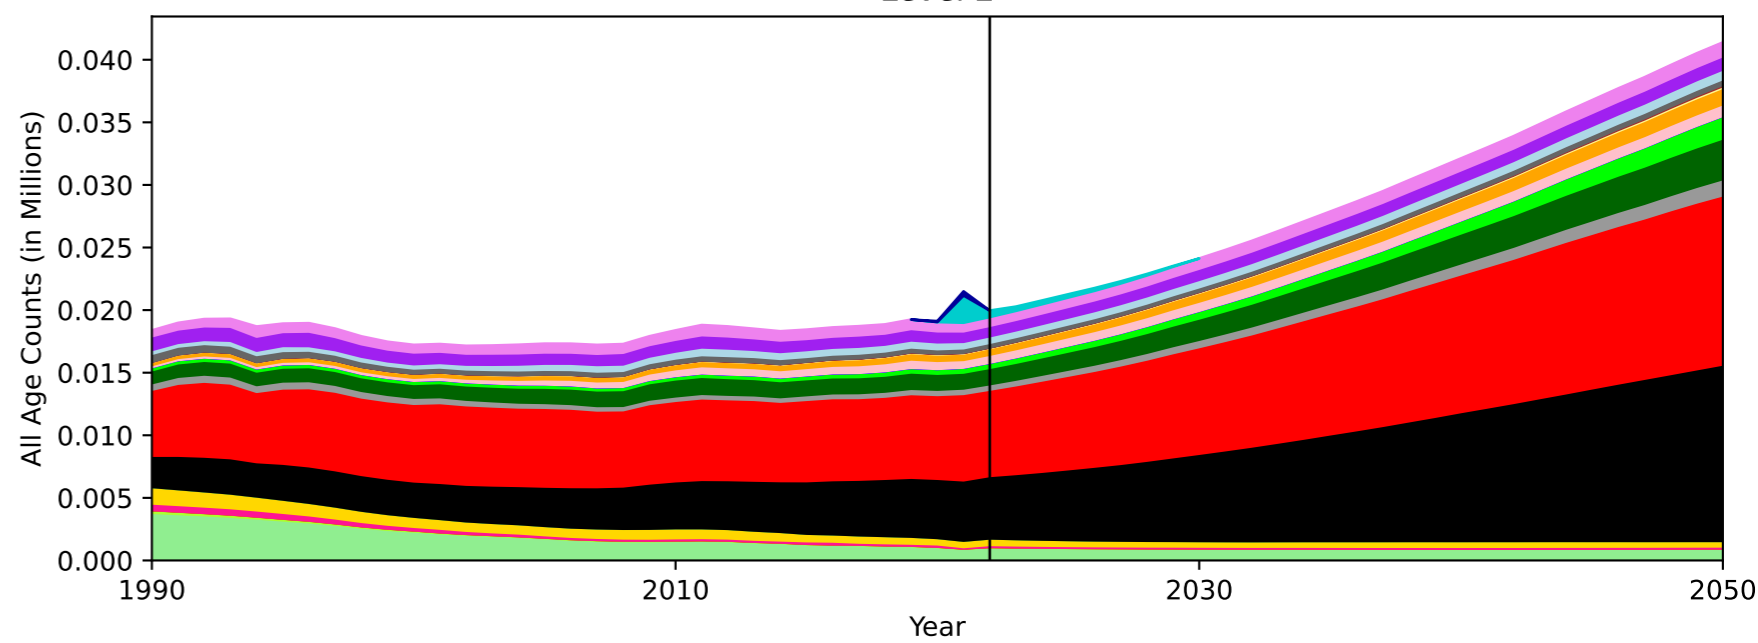

# Tajikistan

Level 1

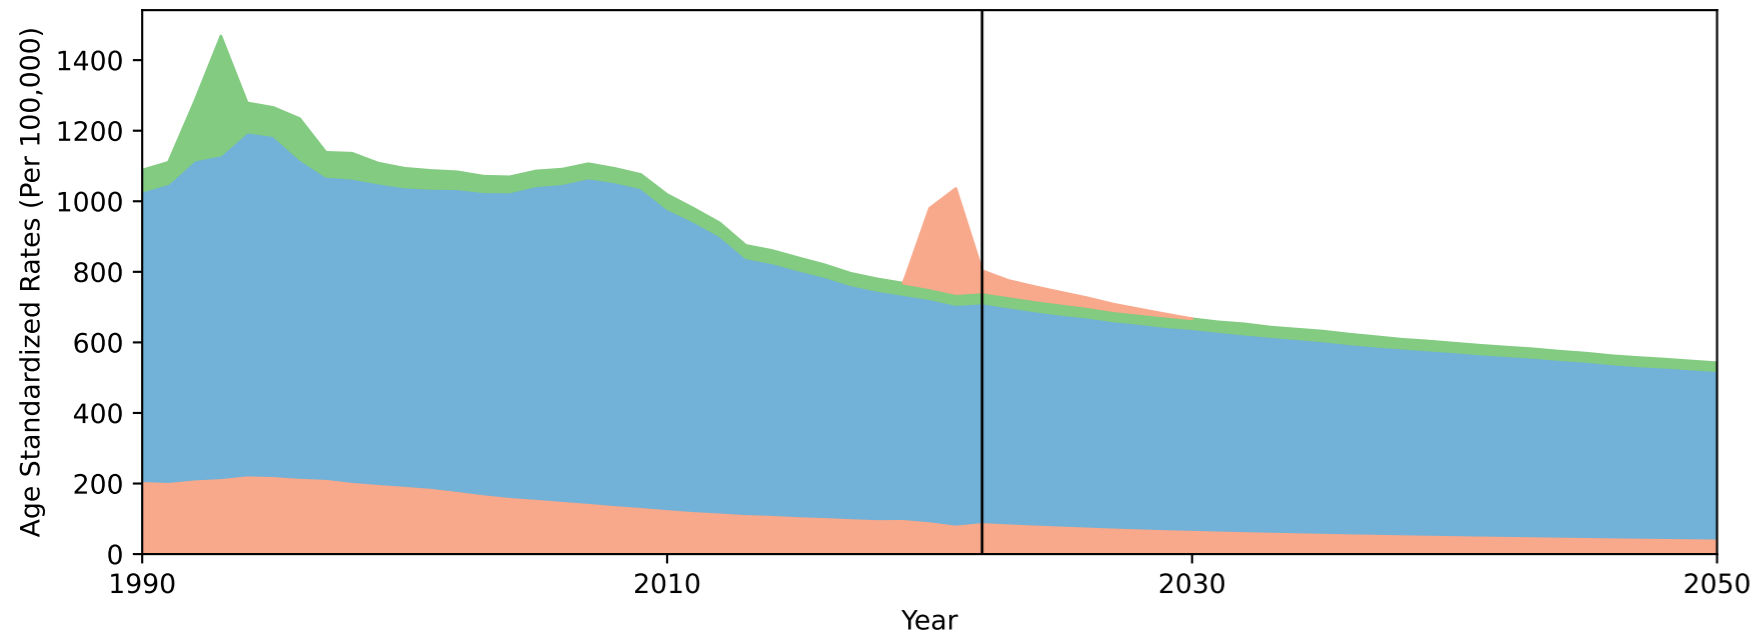

Level 2

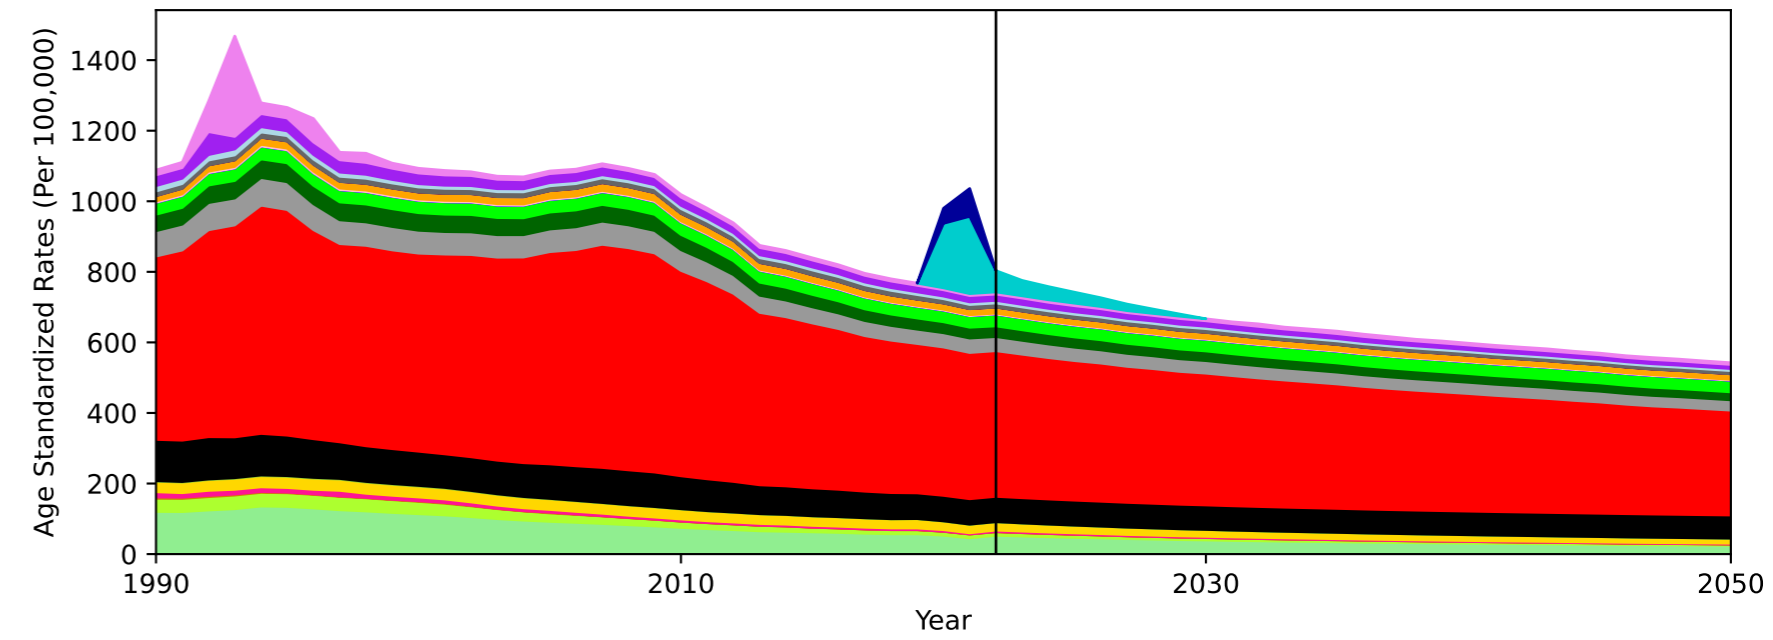

Level 1

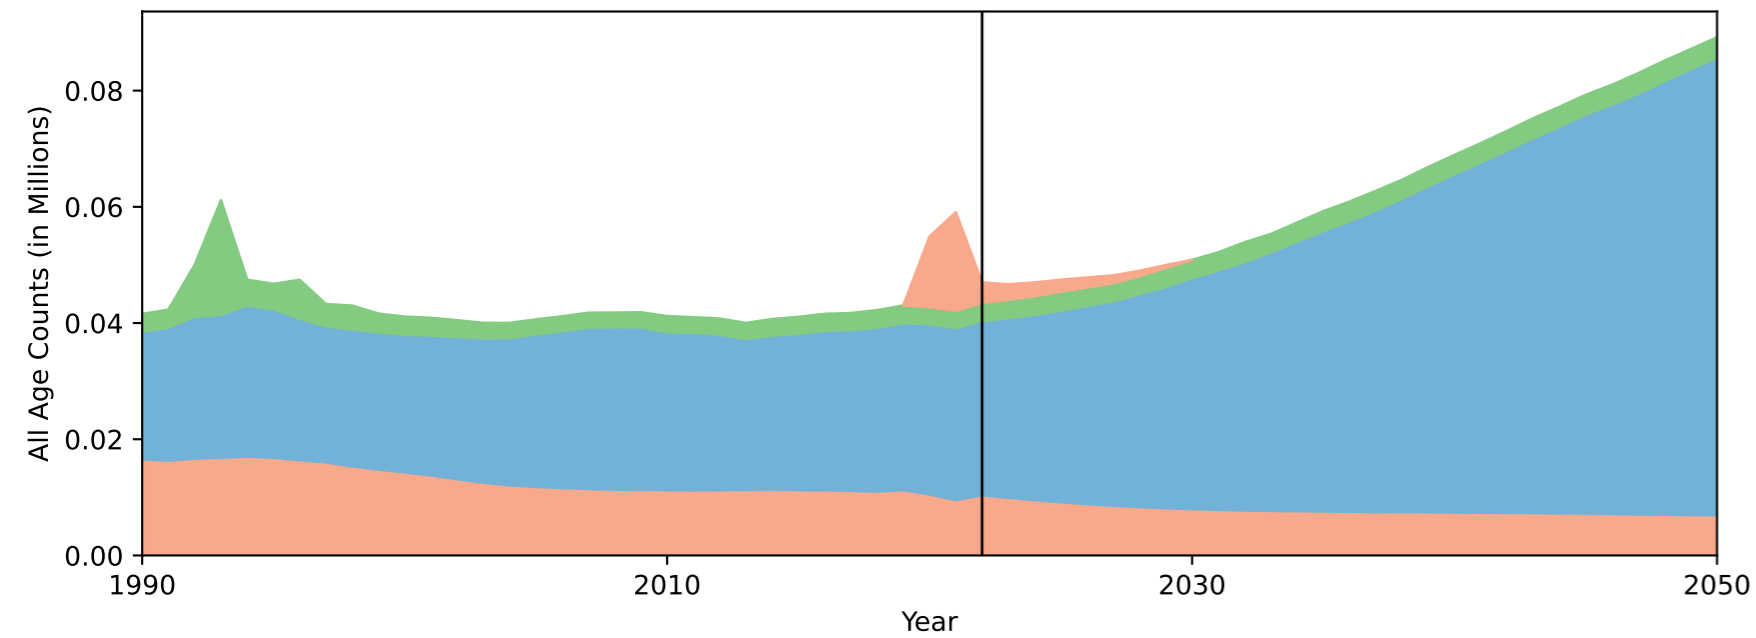

Level 2

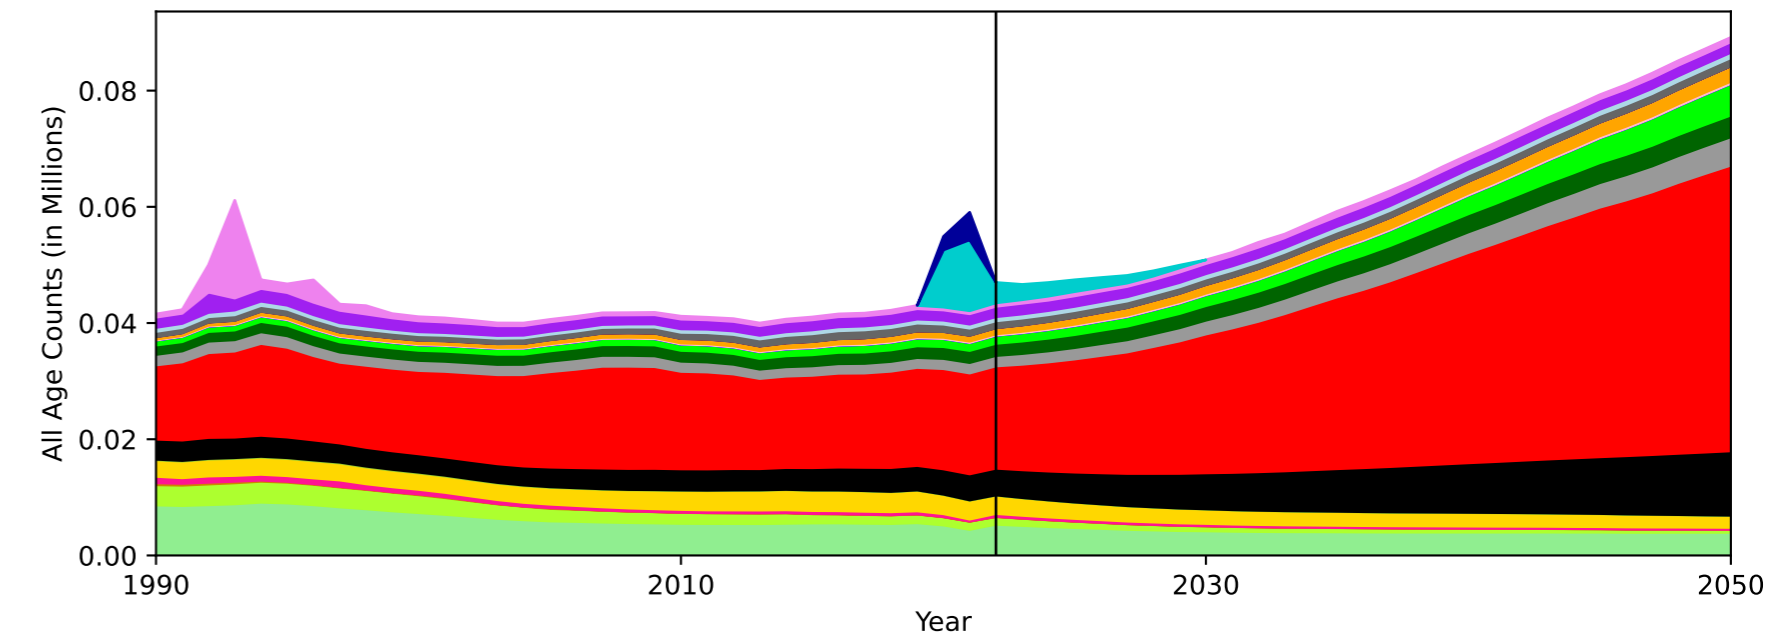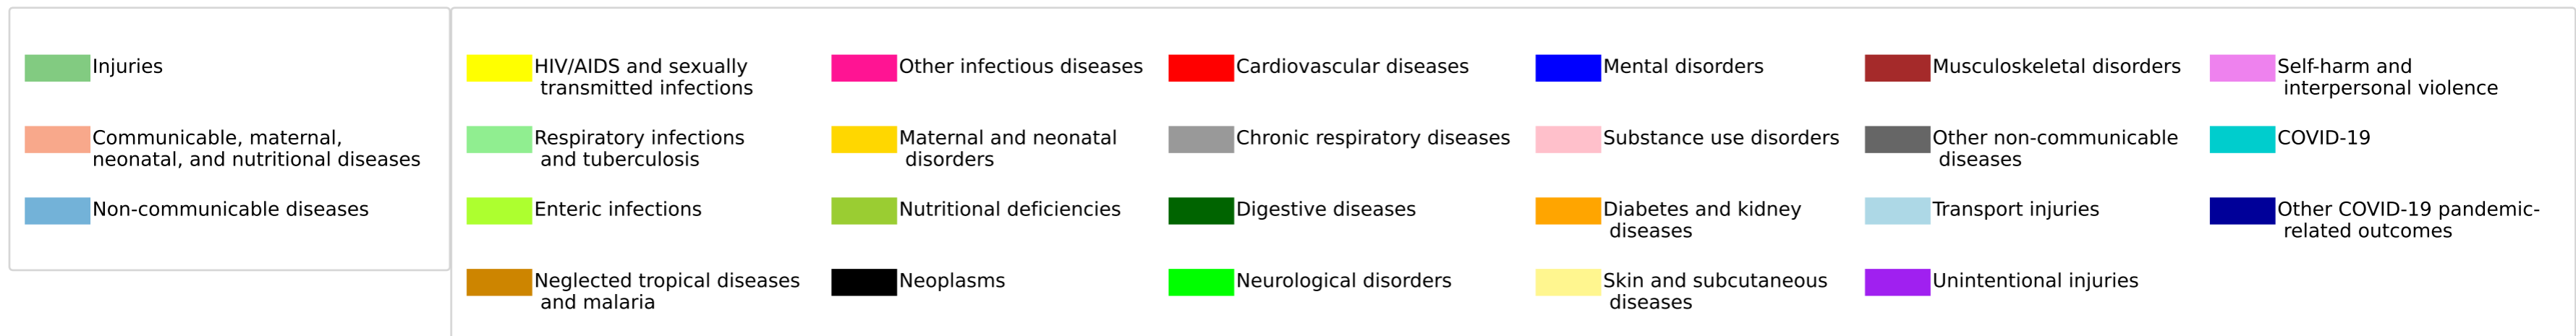

# Turkmenistan

Supplemental Results Figure S5. Age-standardised death rates and all age death counts and by Level 1 and Level 2 causes, 1990–2050

485

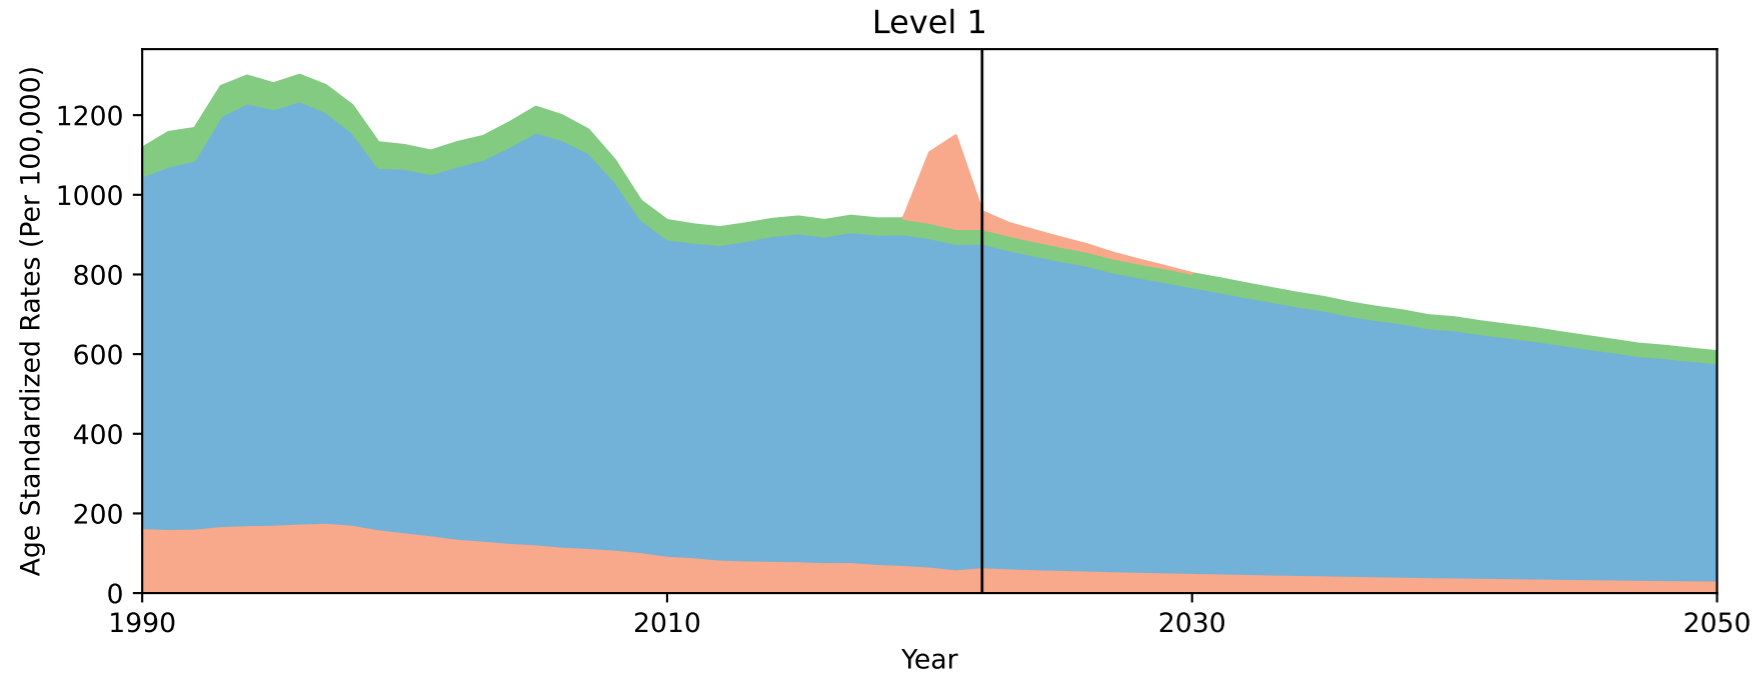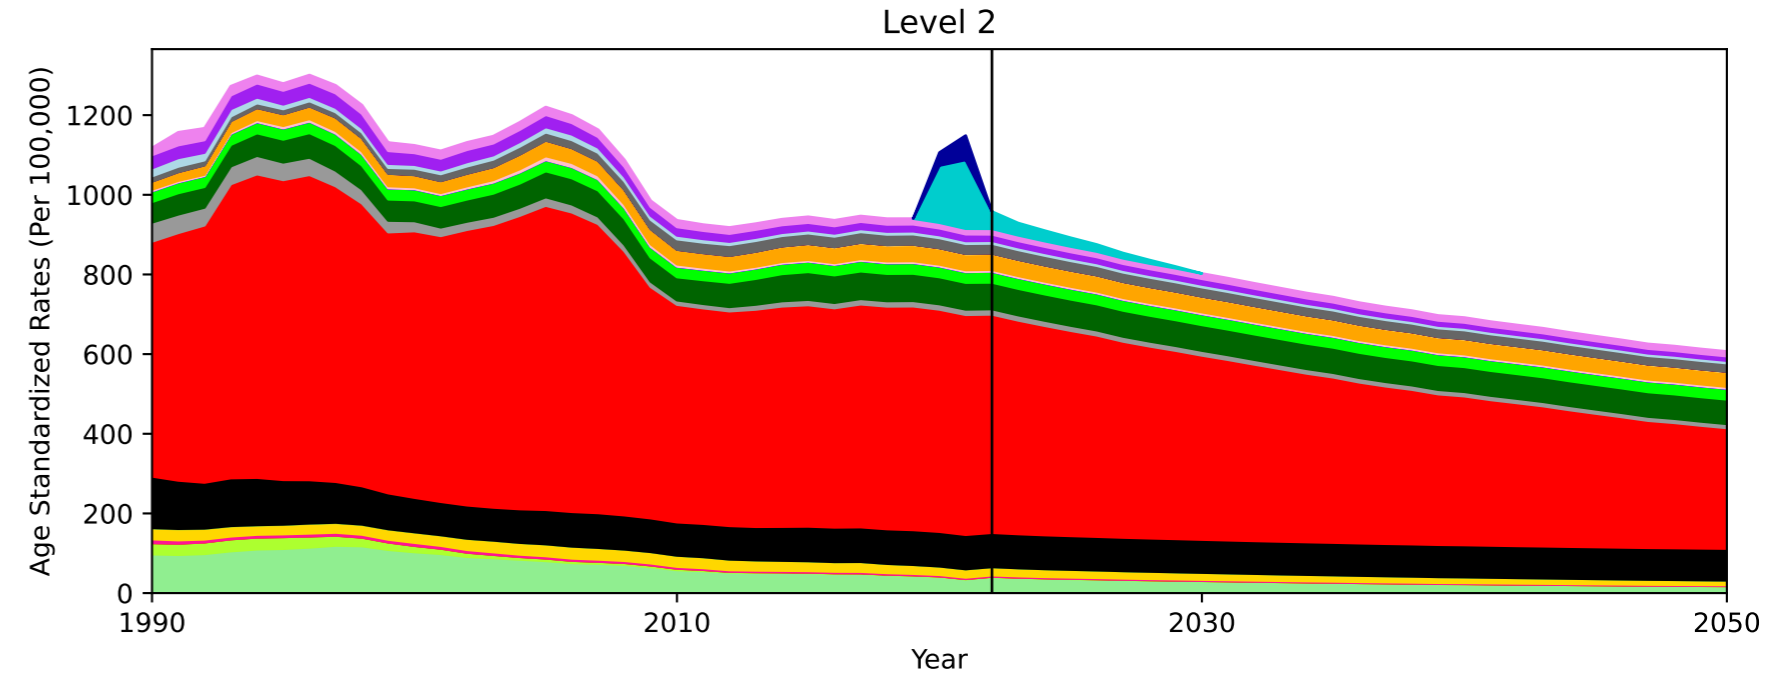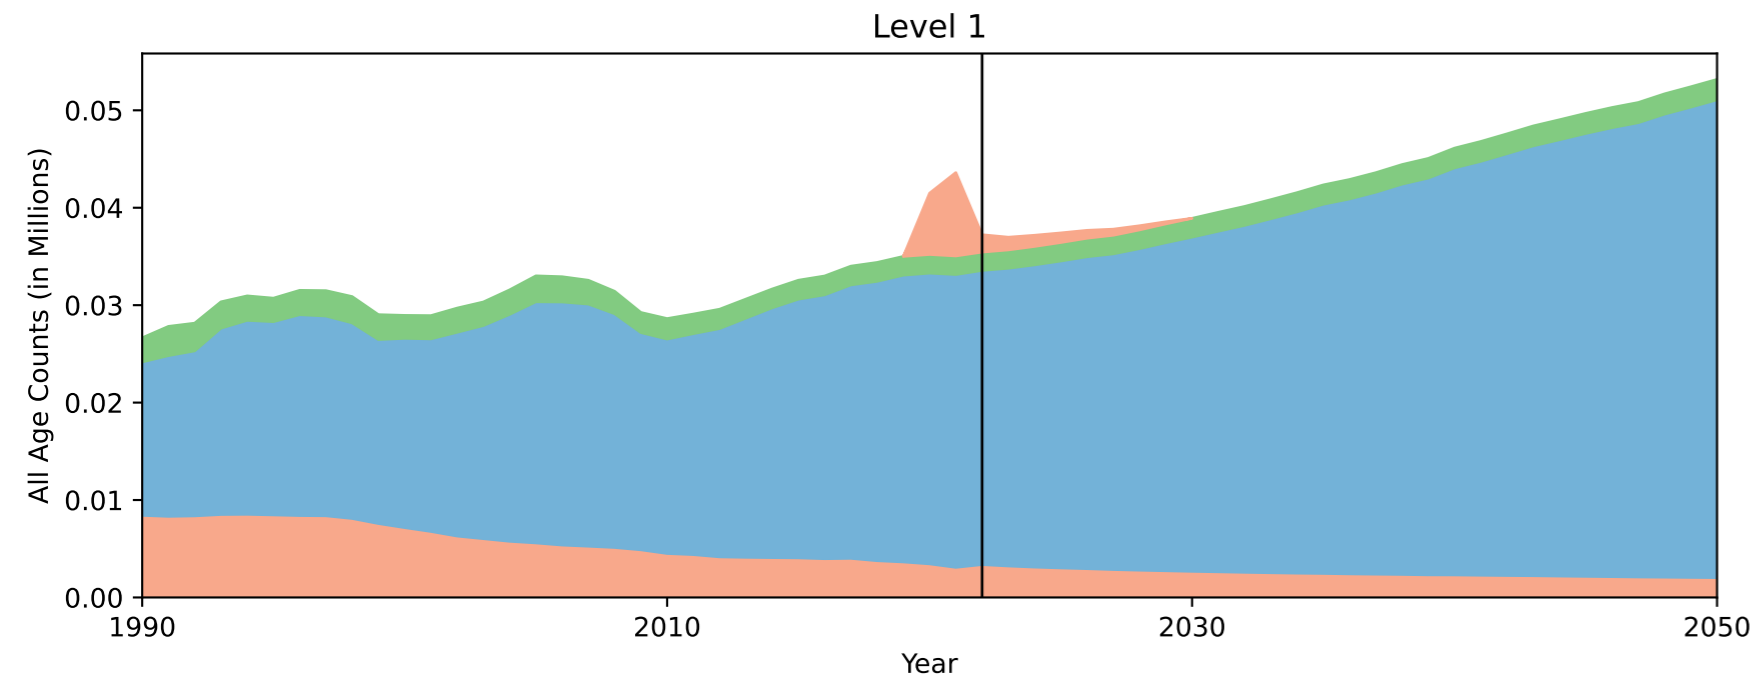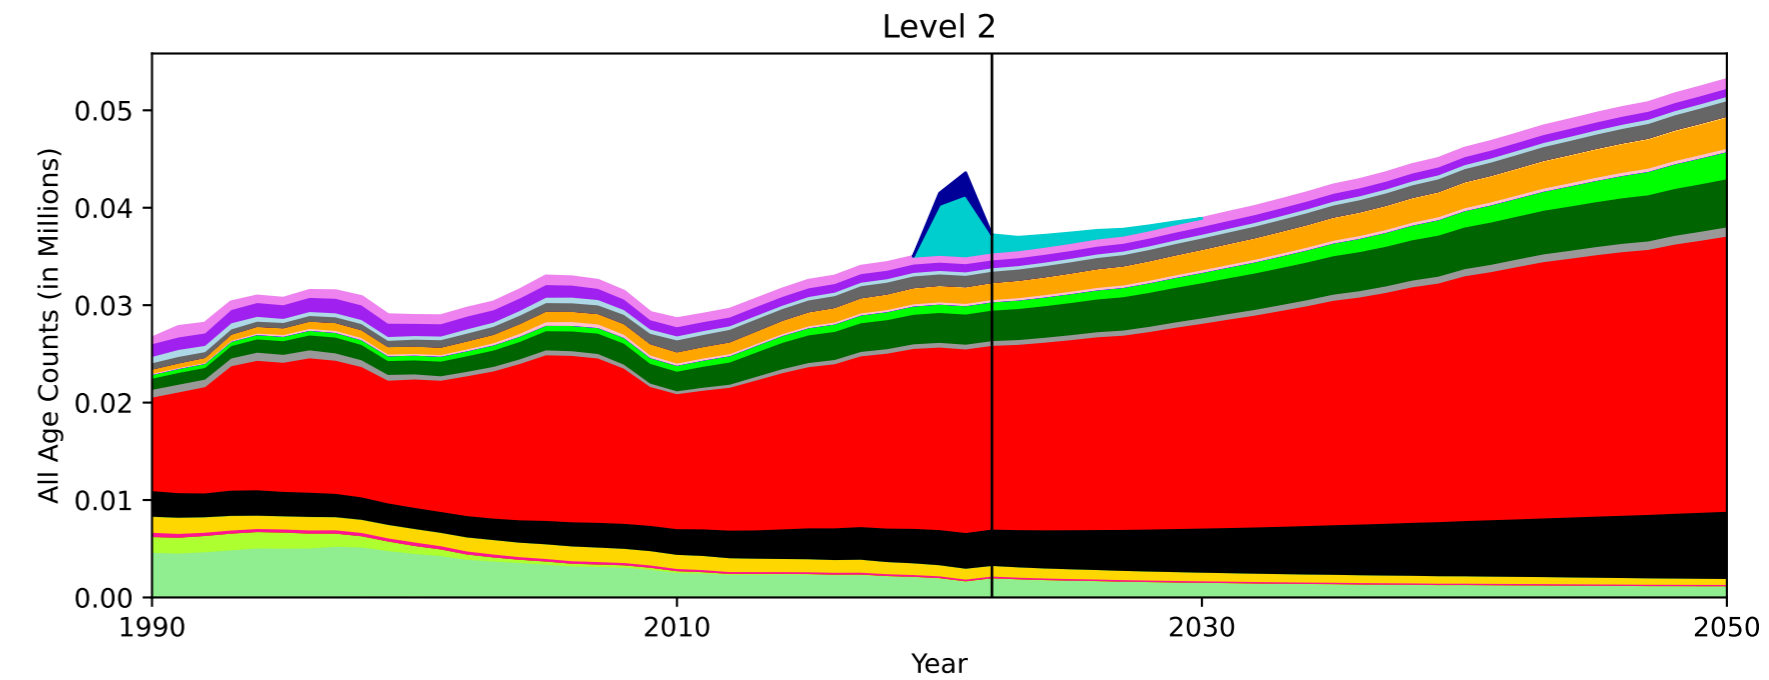

# Uzbekistan

Level 1

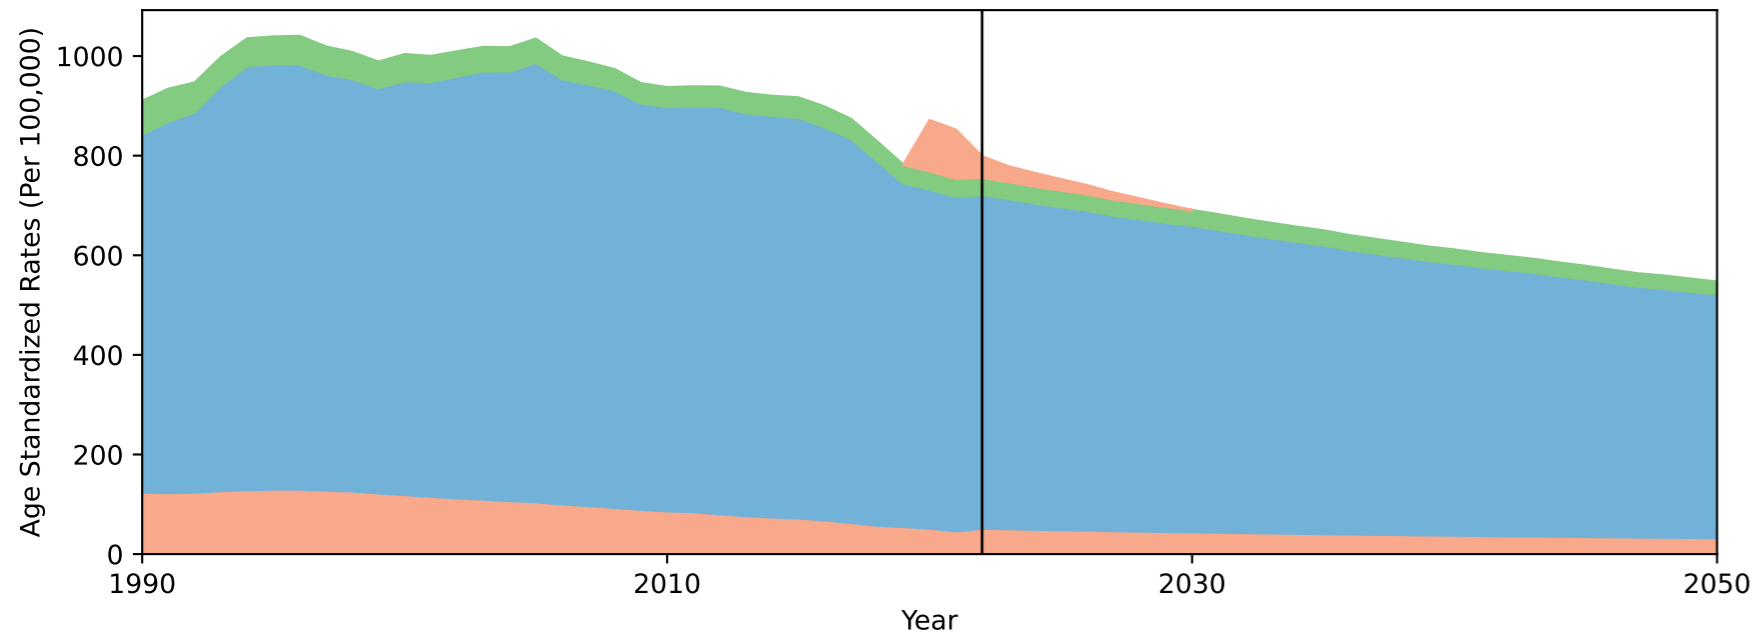

Level 2

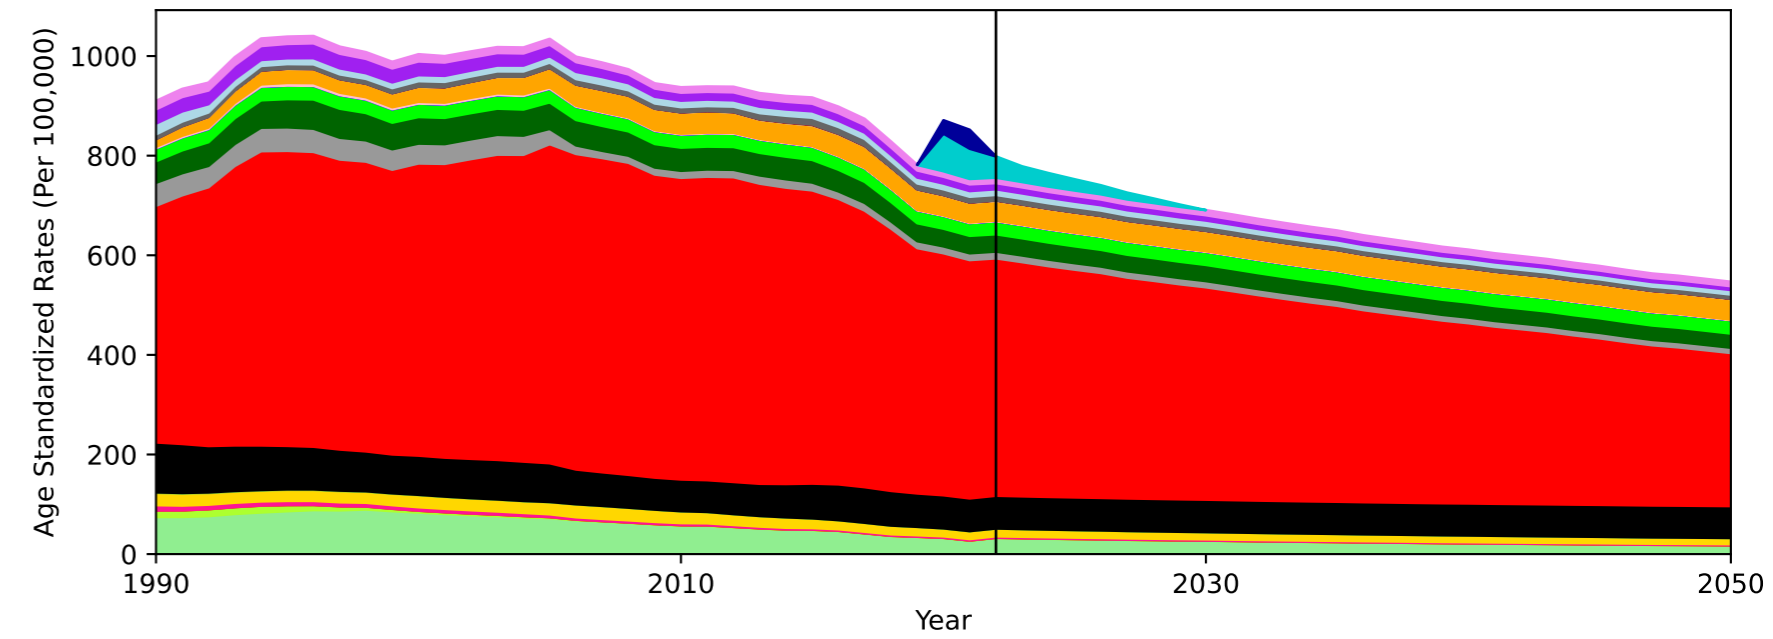

Level 1

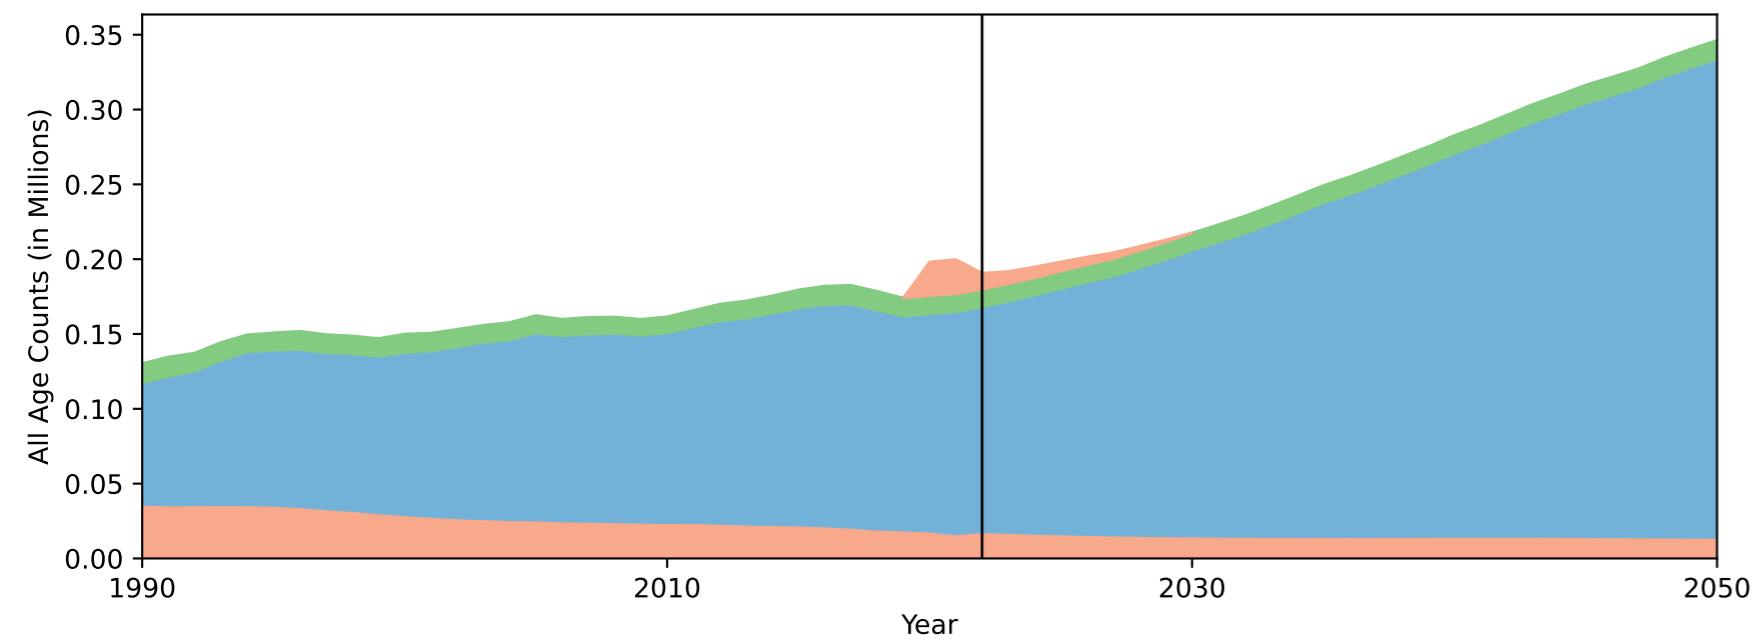

Level 2

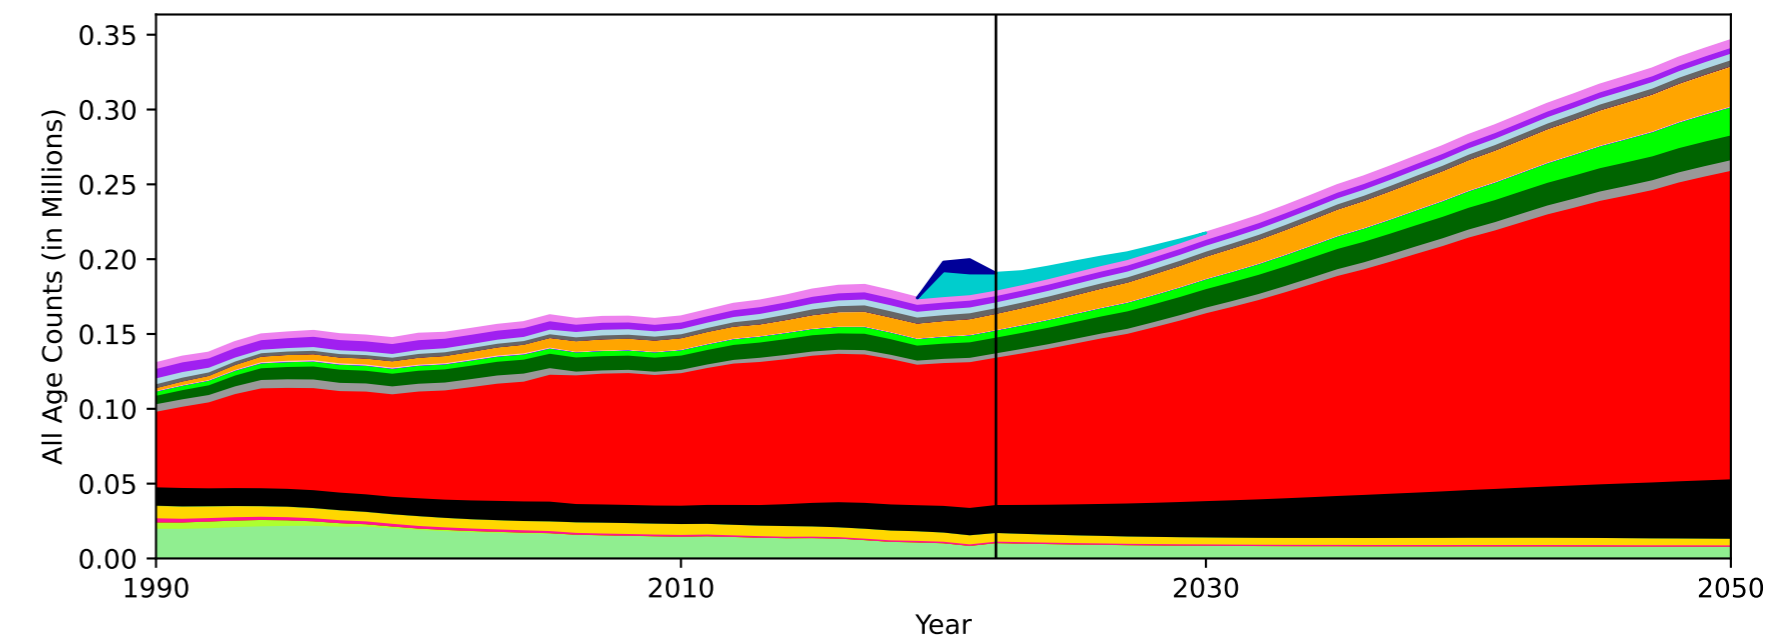

# Albania

Level 1

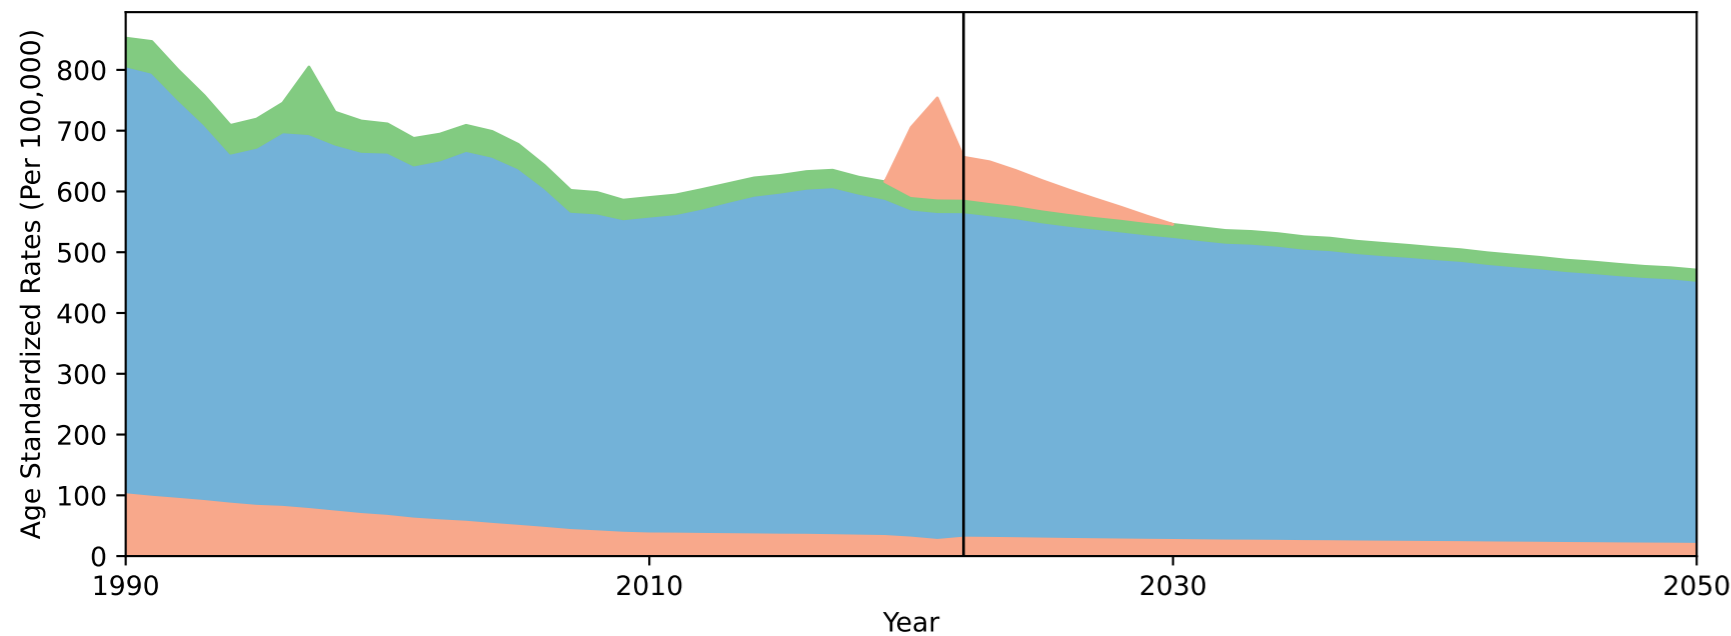

Level 2

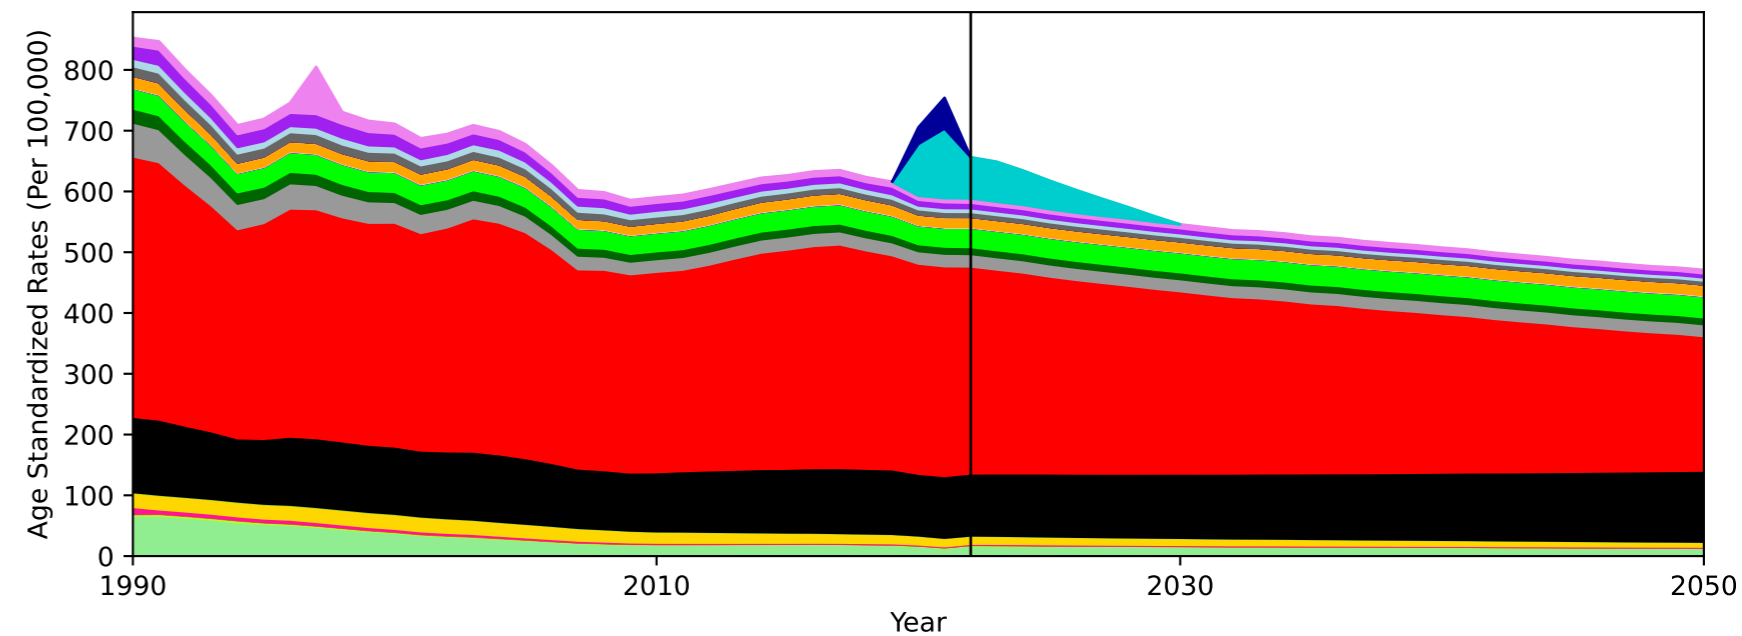

Level 1

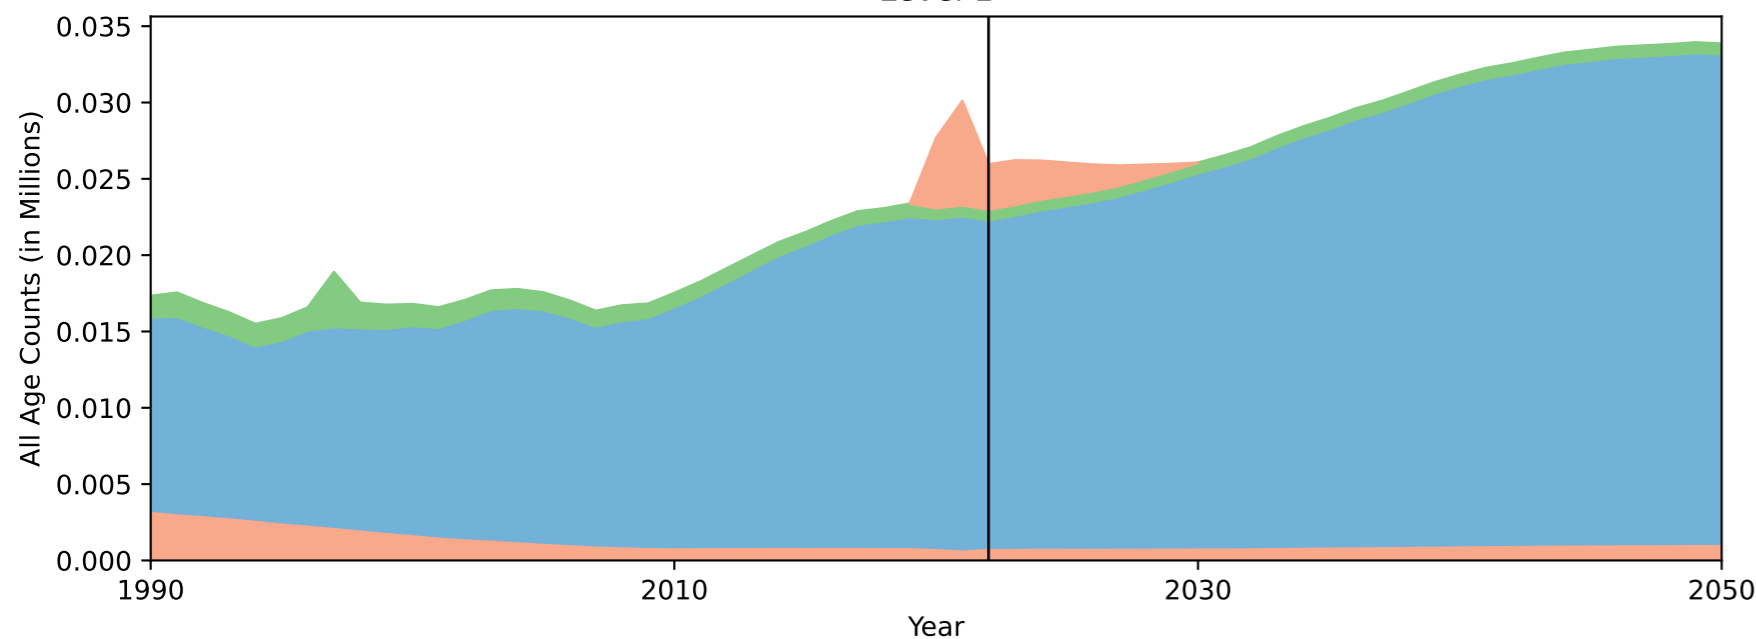

Level 2

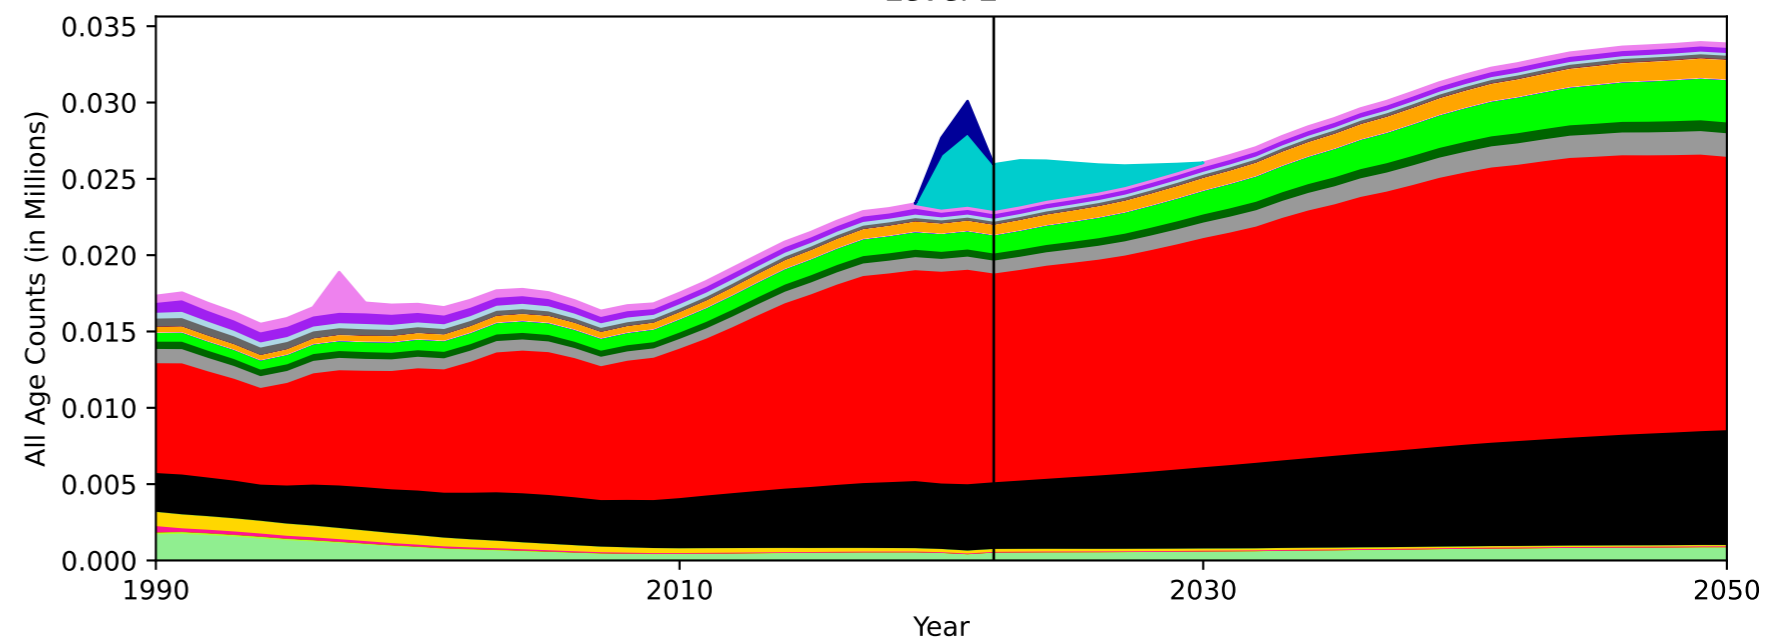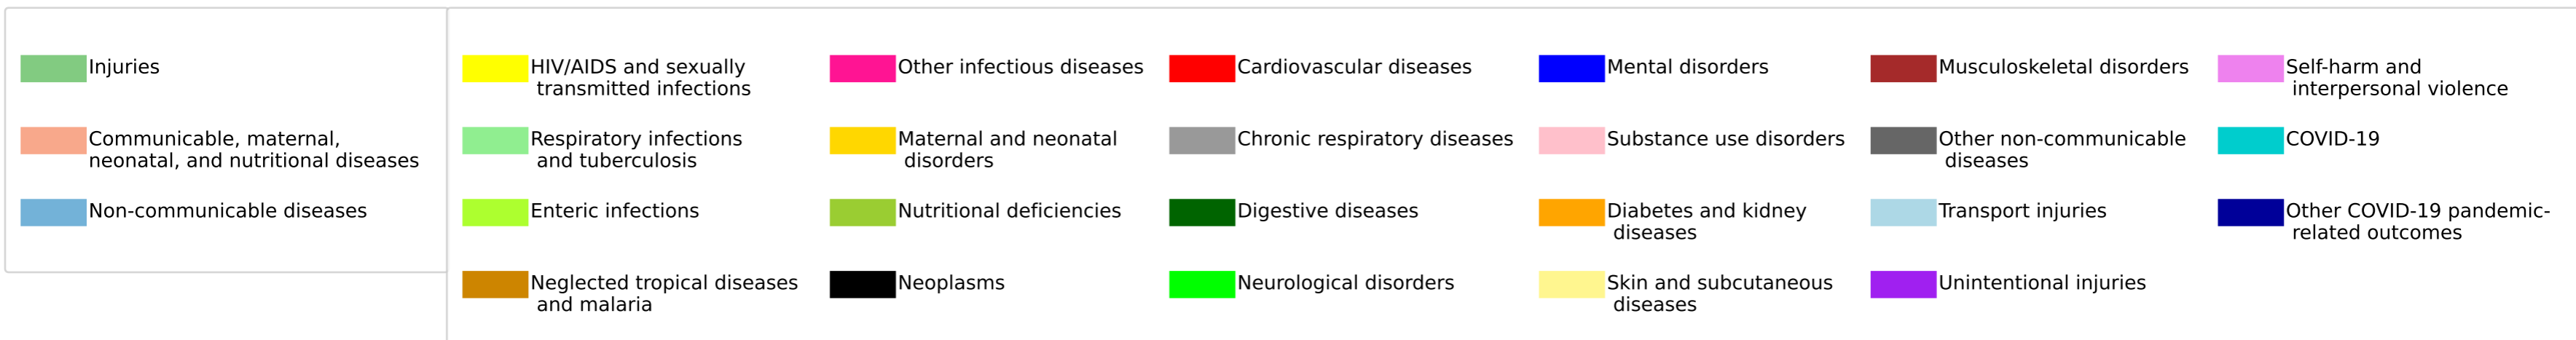



# Bosnia And Herzegovina

Level 1

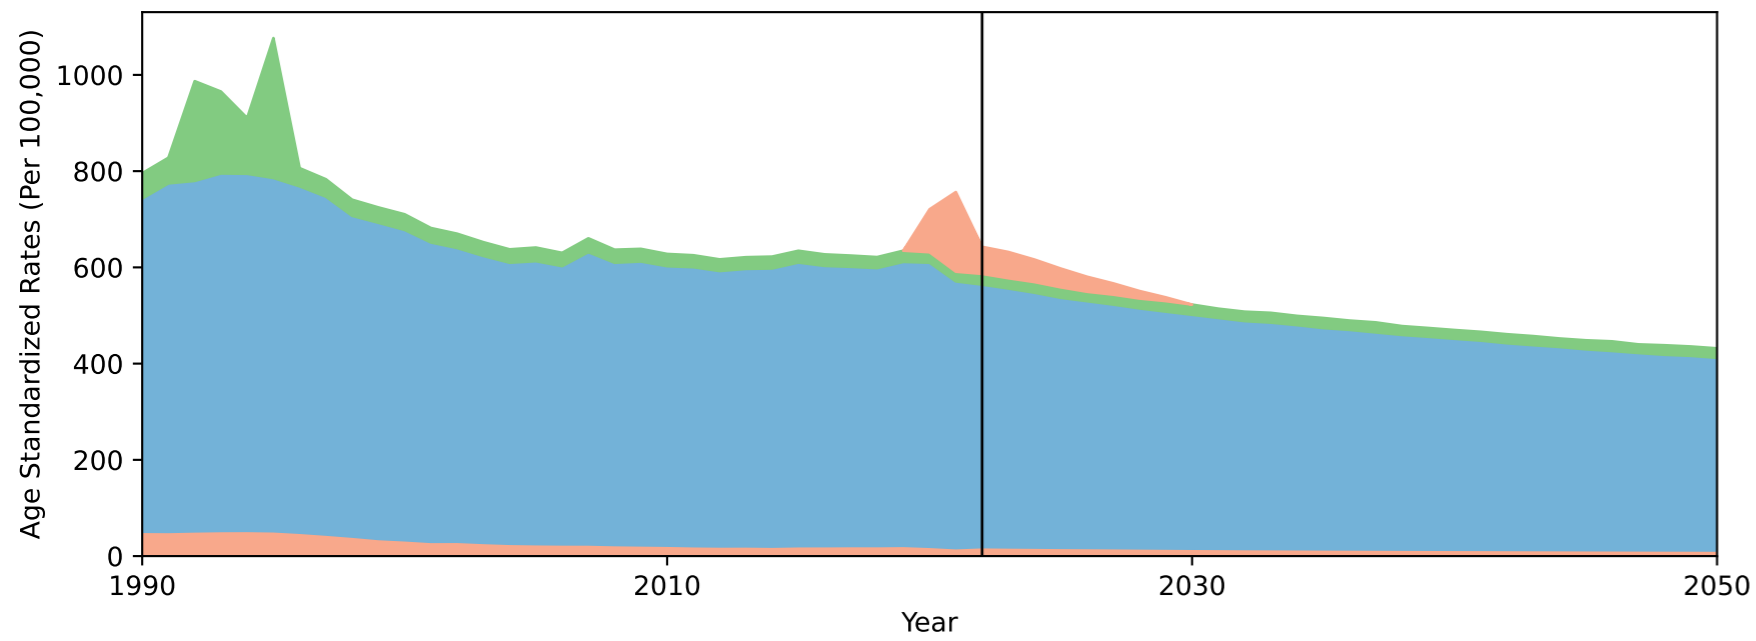

Level 2

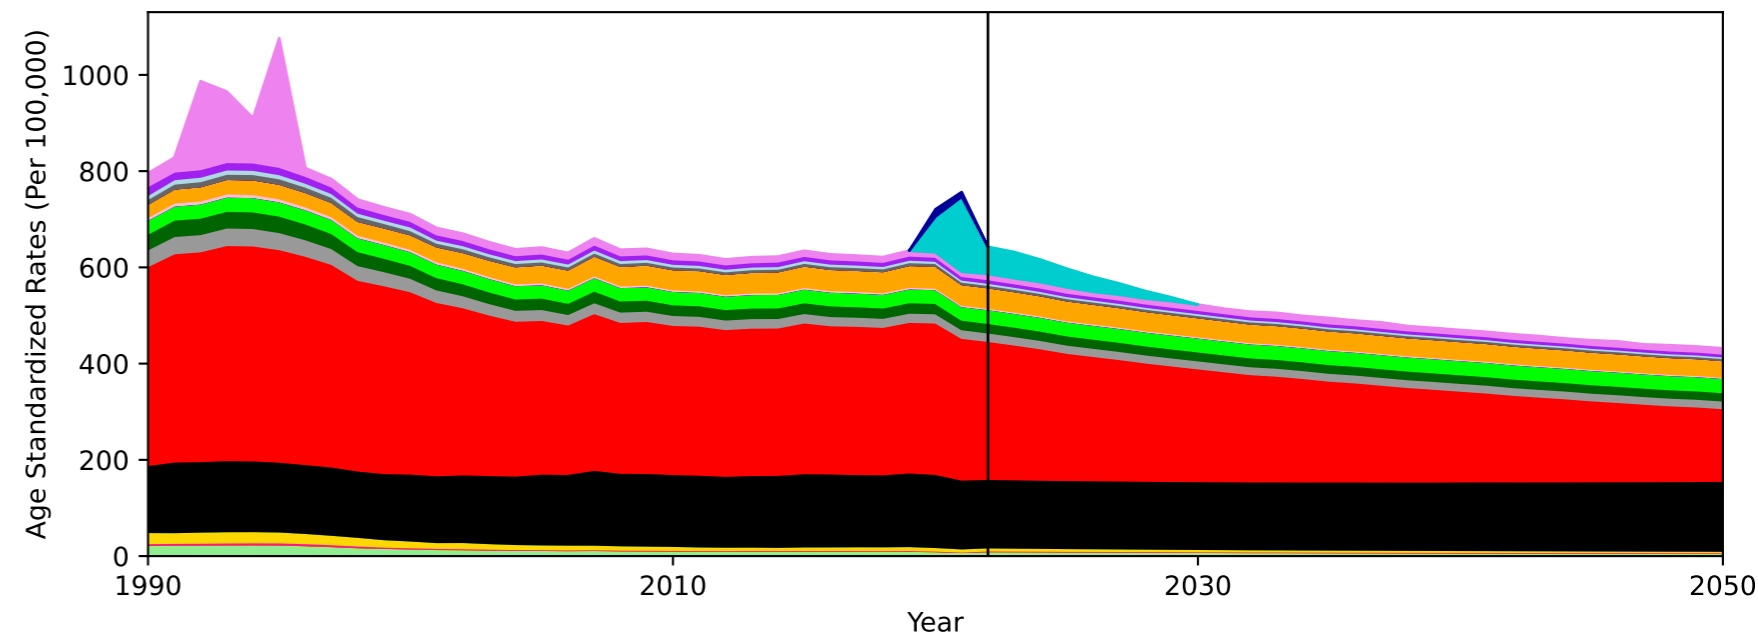

Level 1

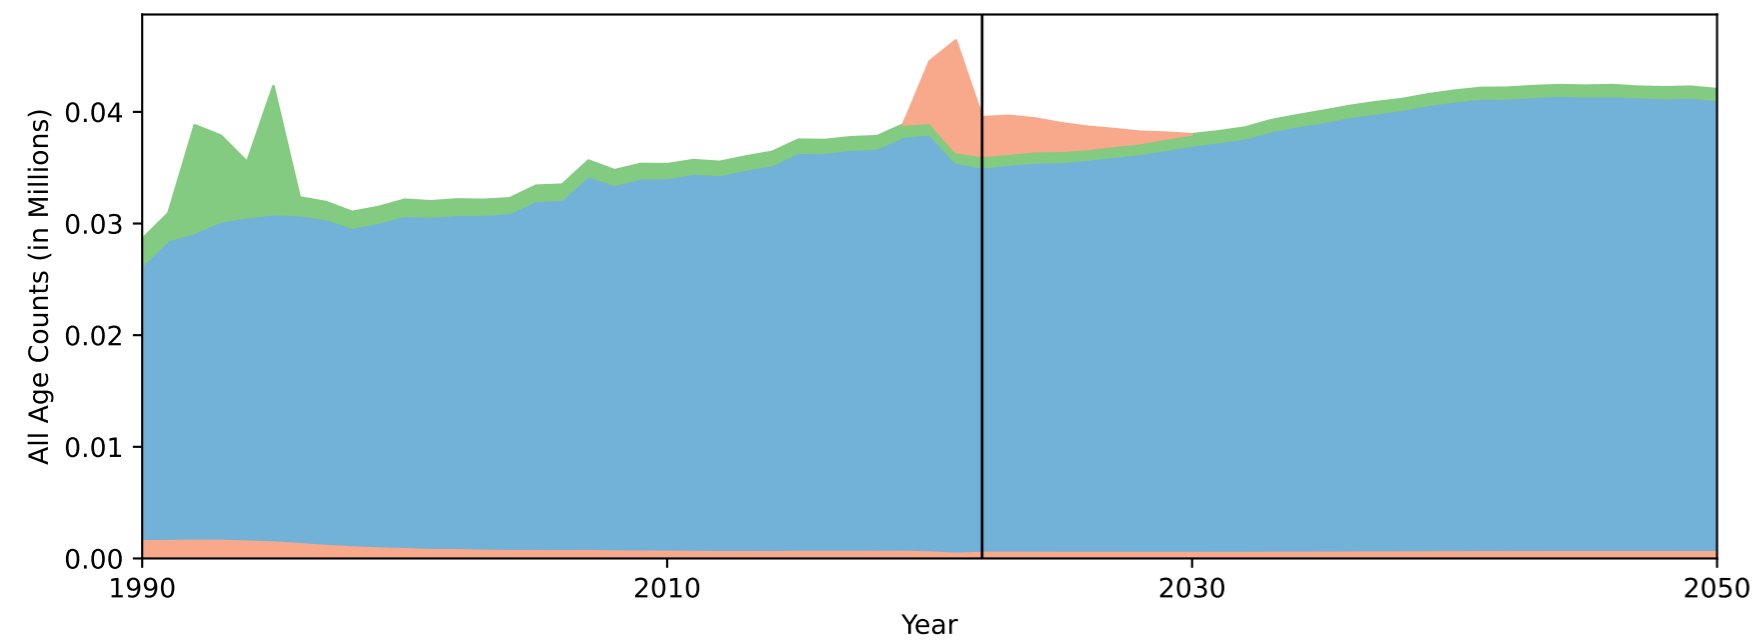

Level 2

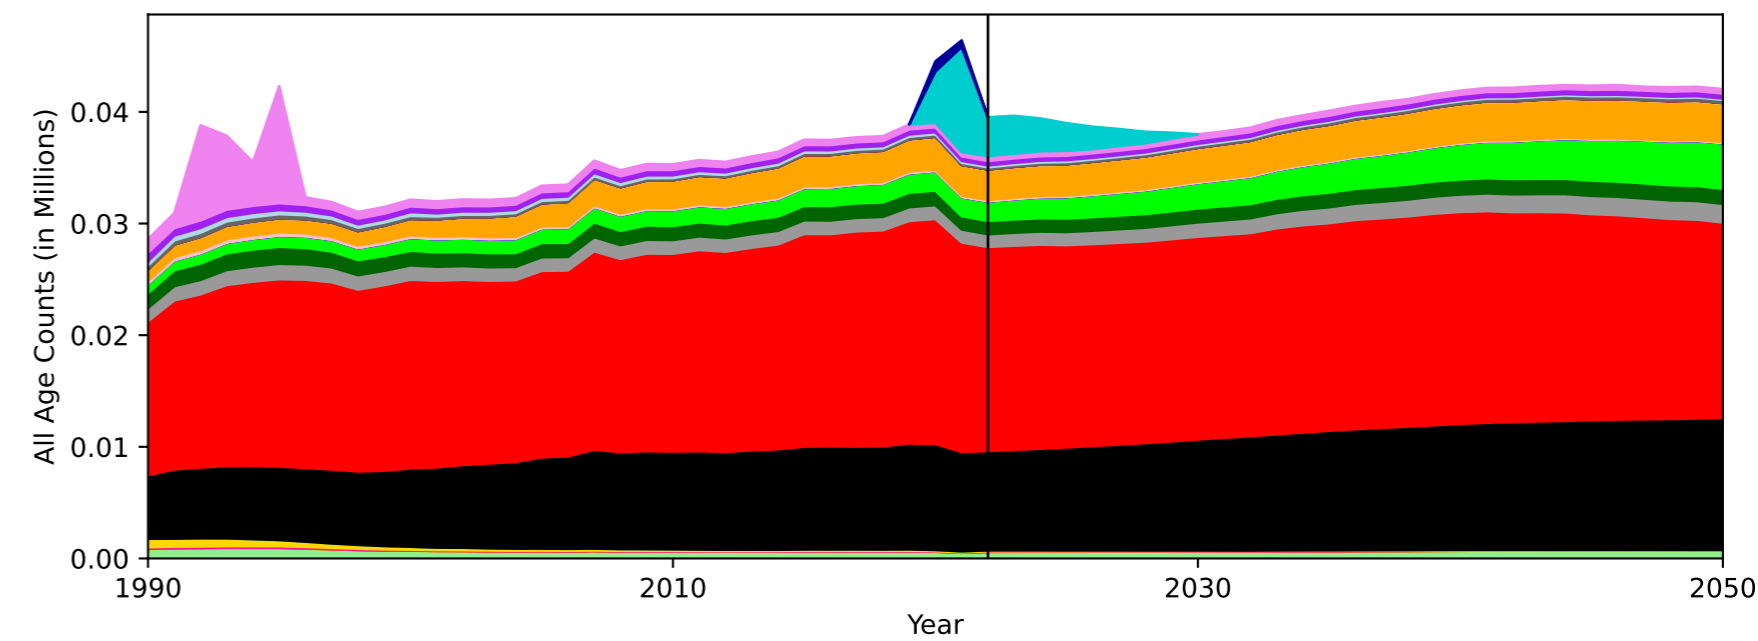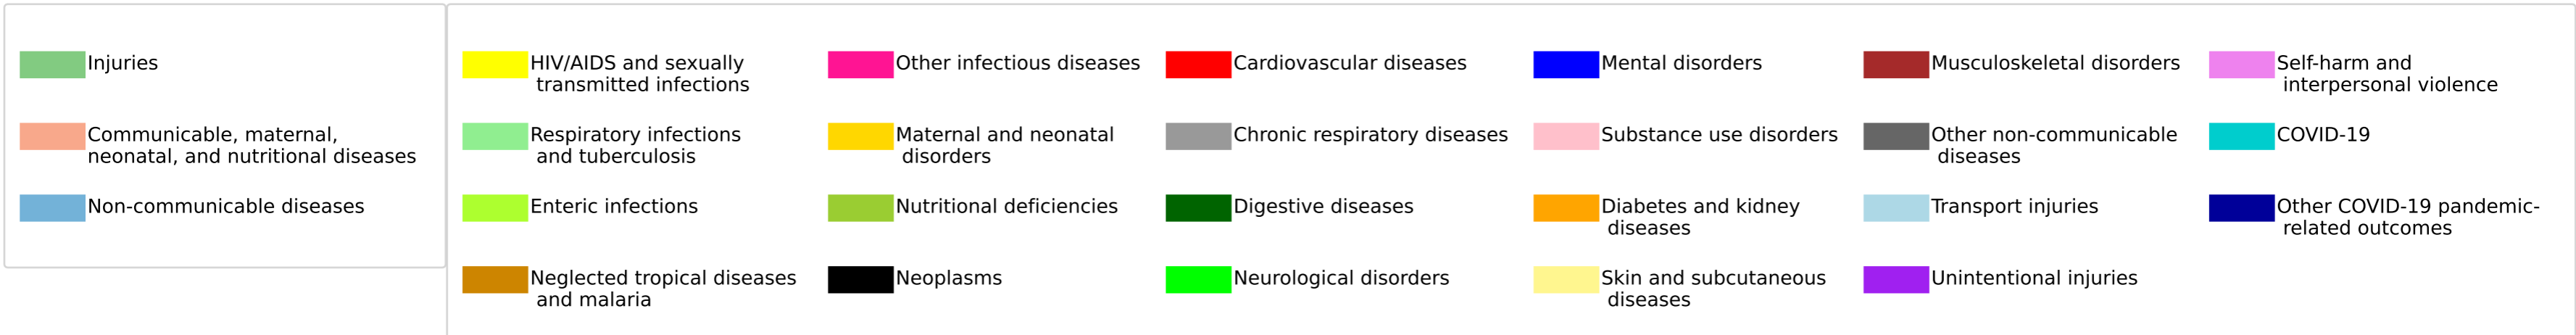

# Bulgaria

Level 1

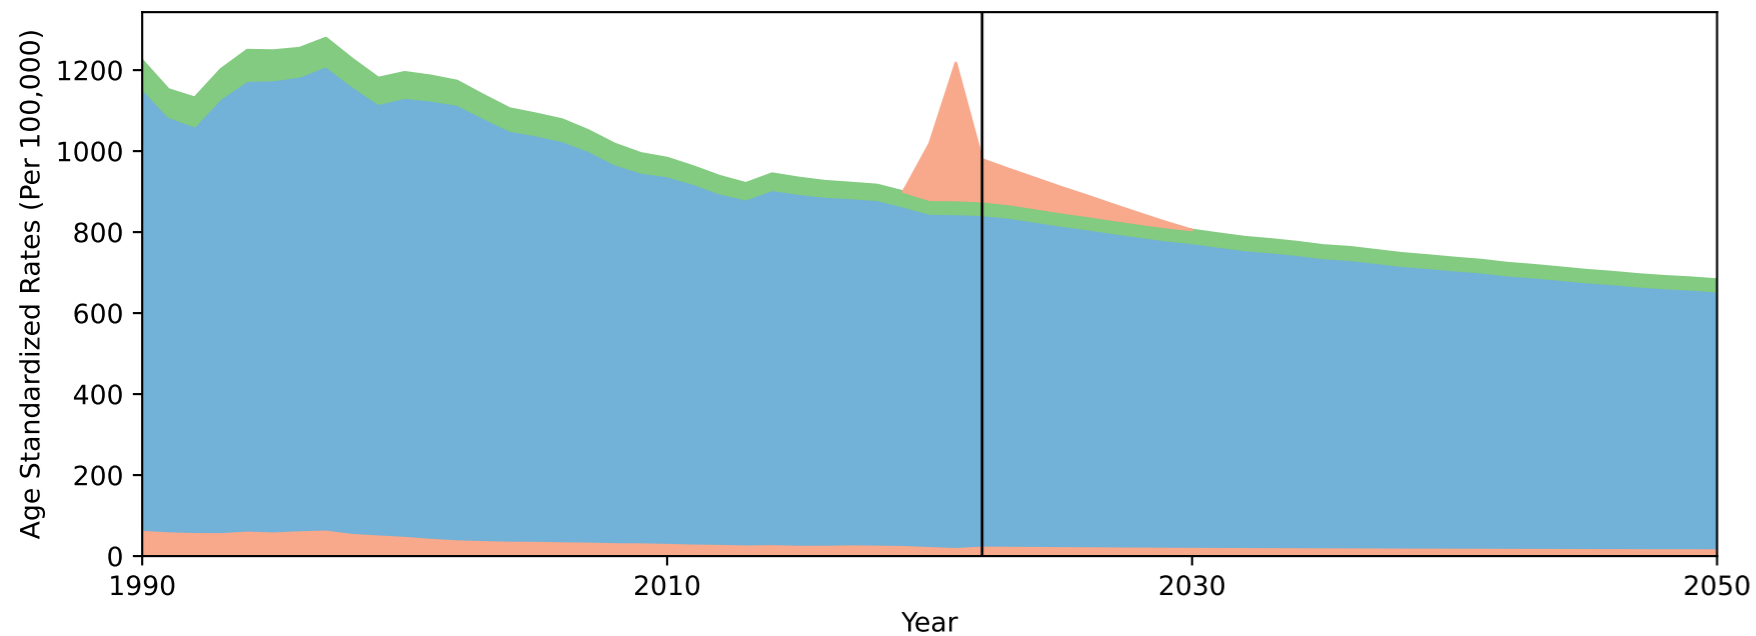

Level 2

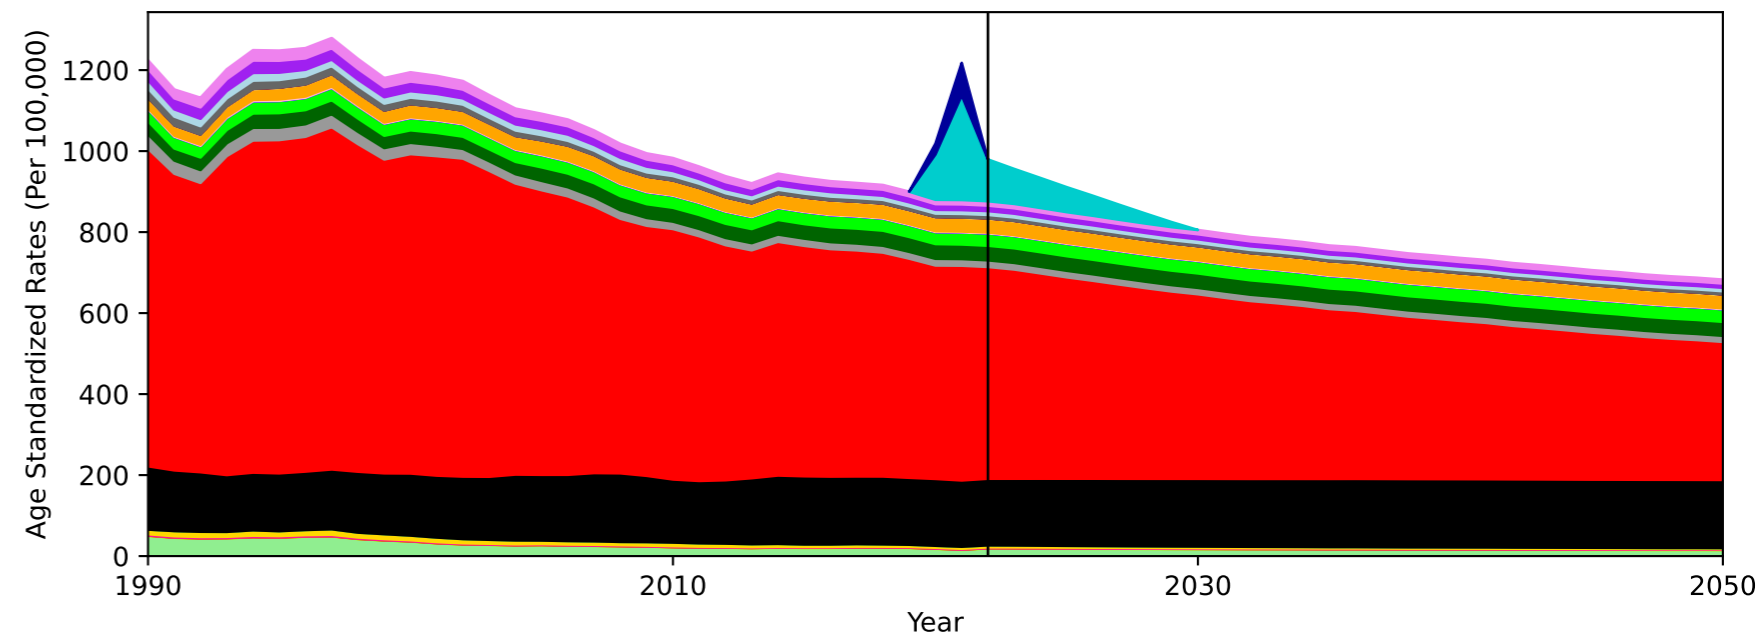

Level 1

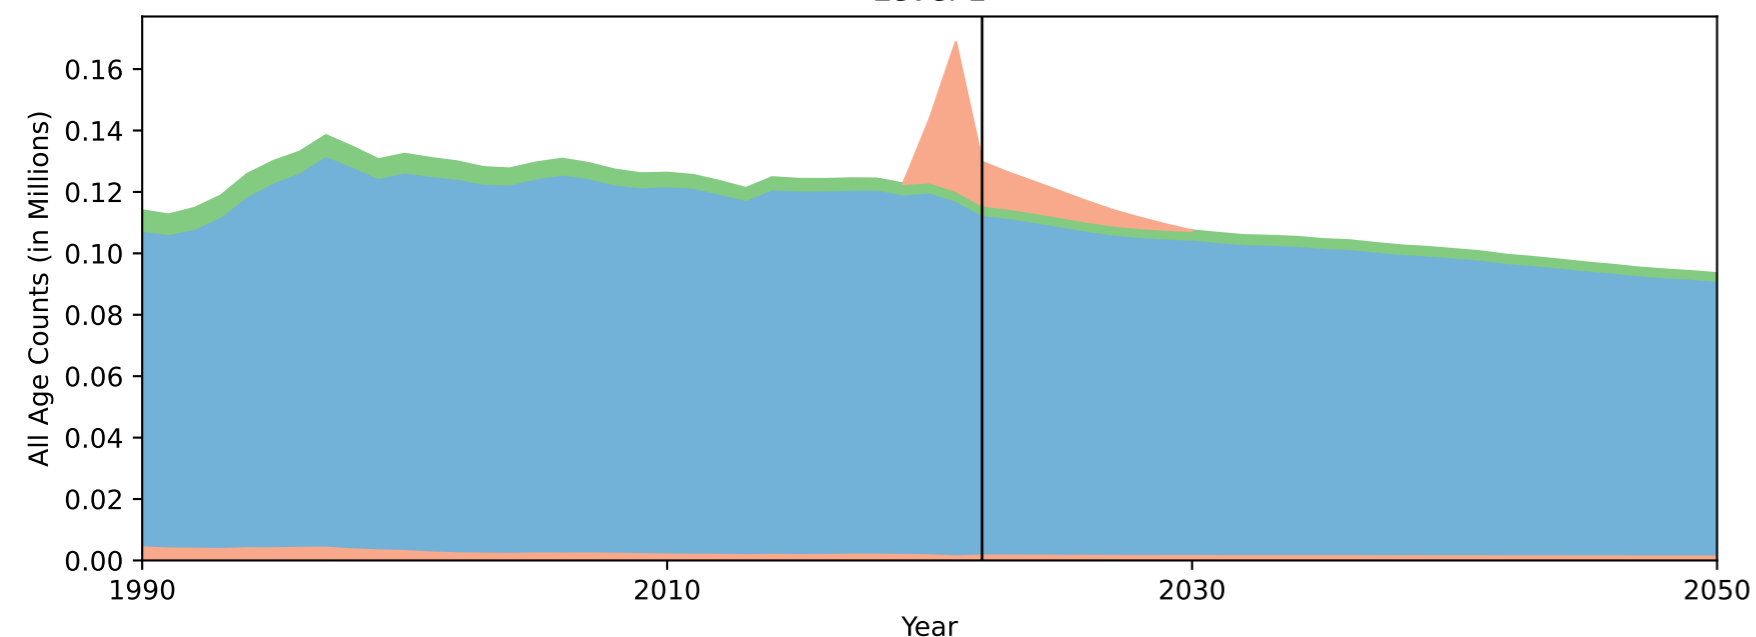

Level 2

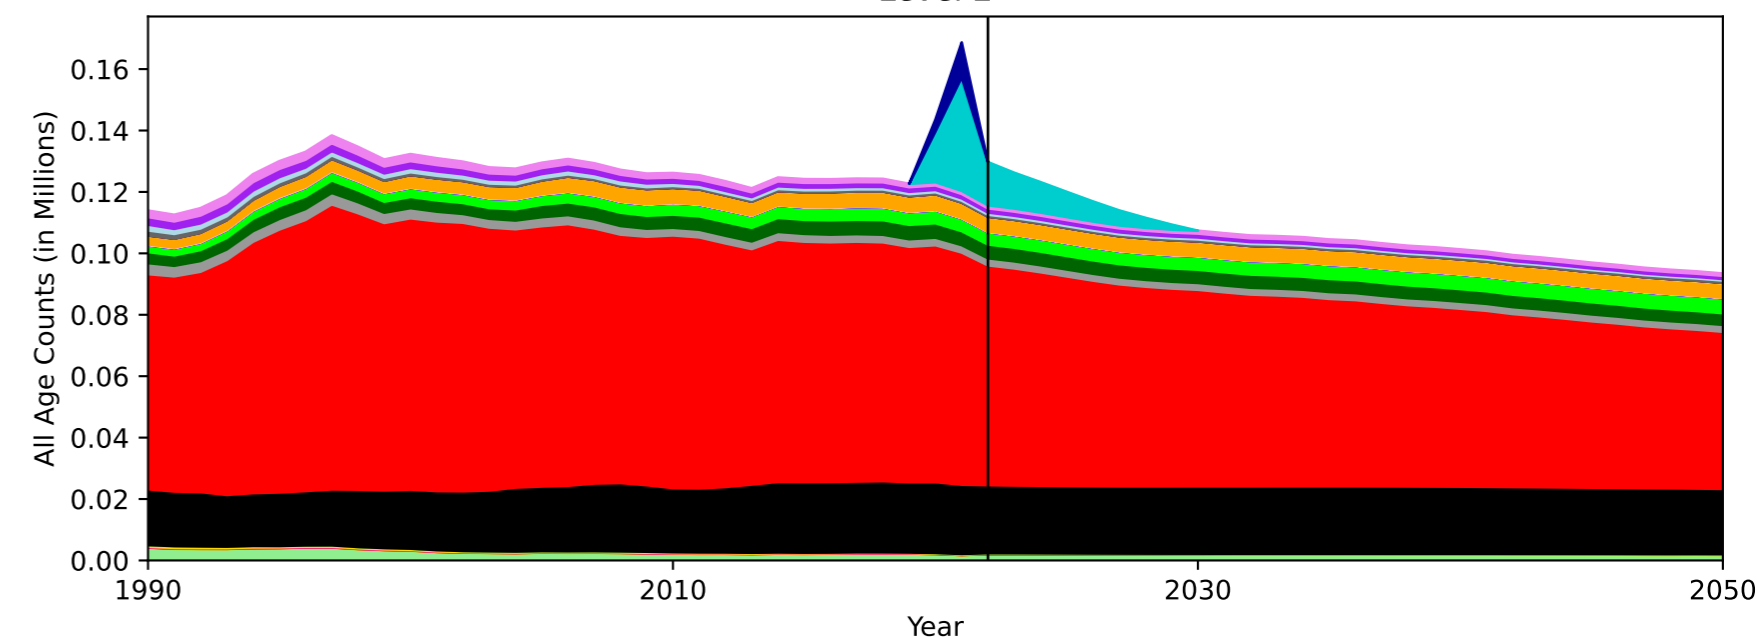

Level 1

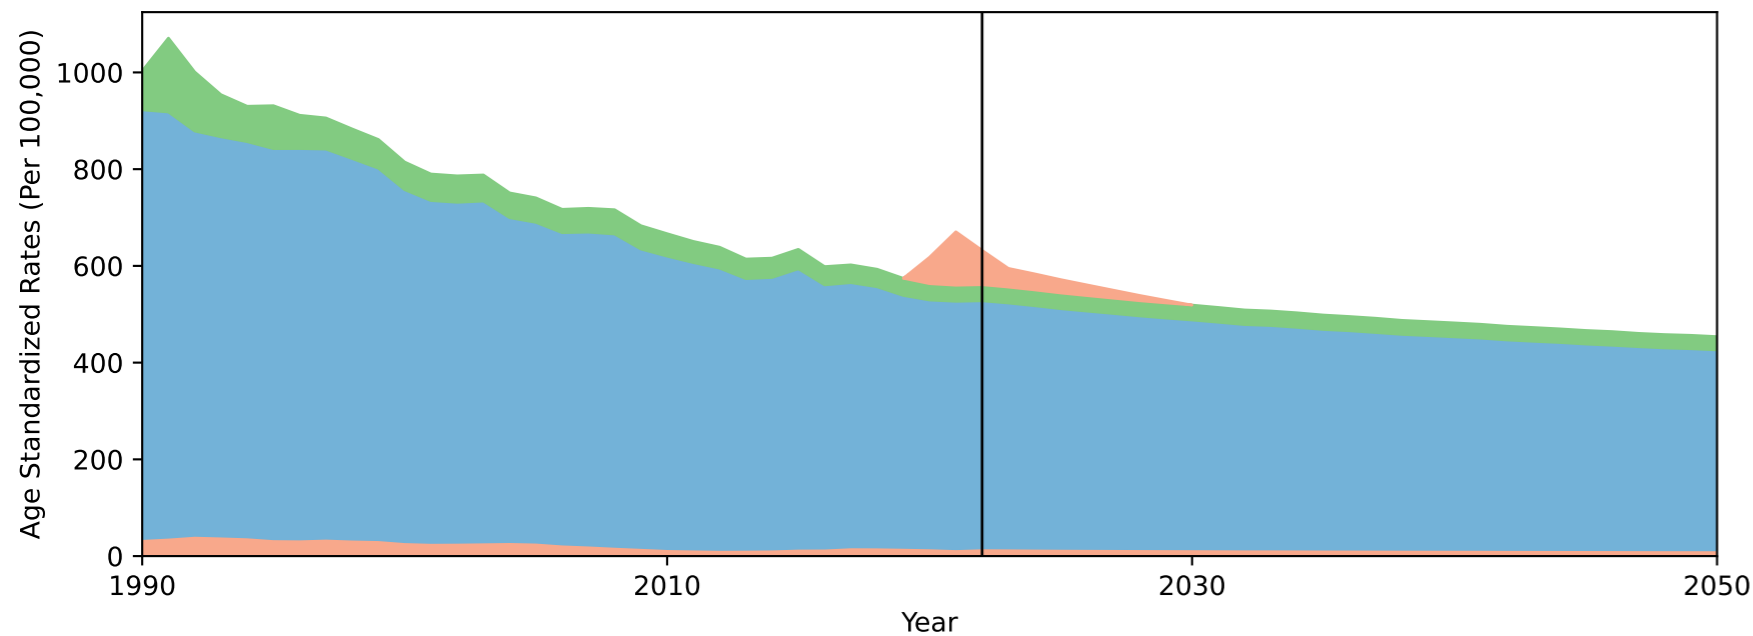

Level 2

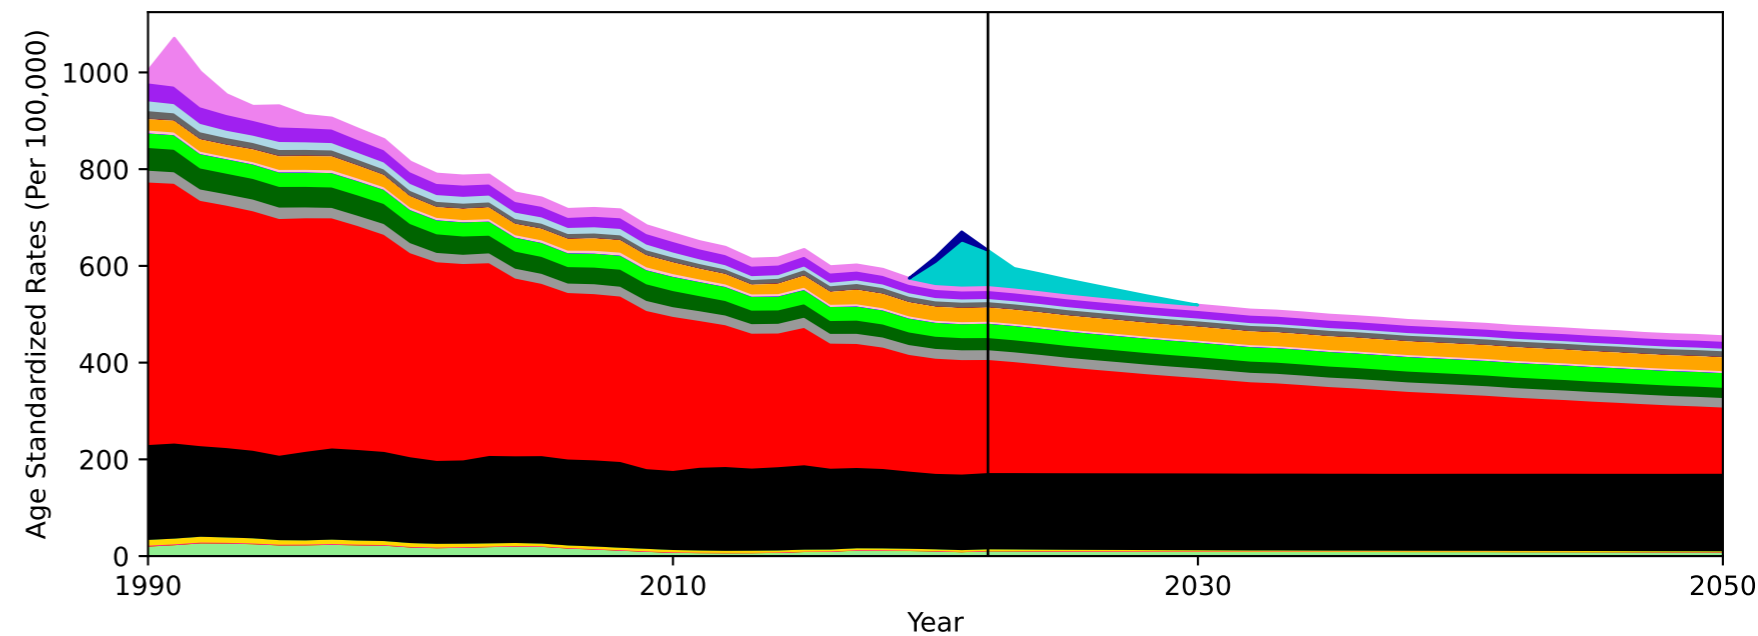

Level 1

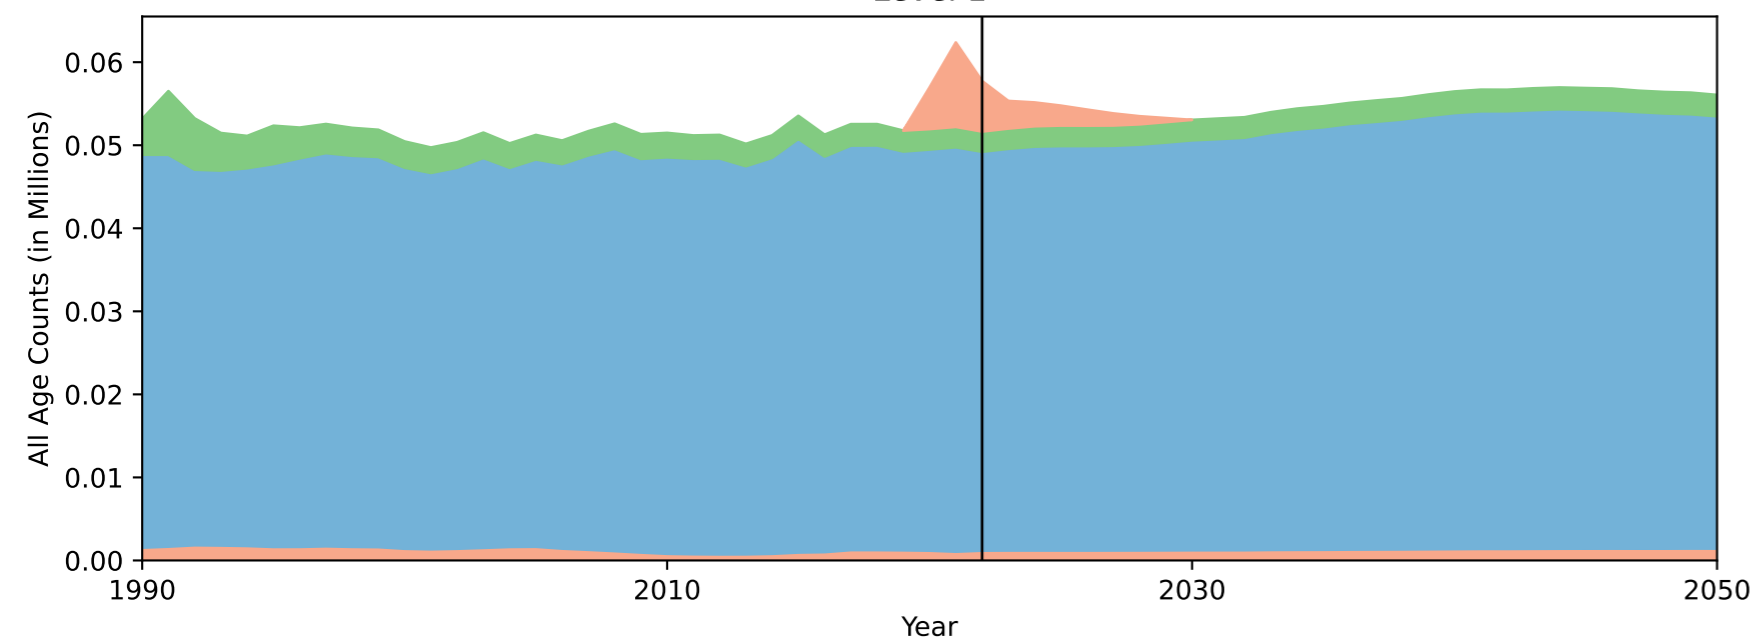

Level 2

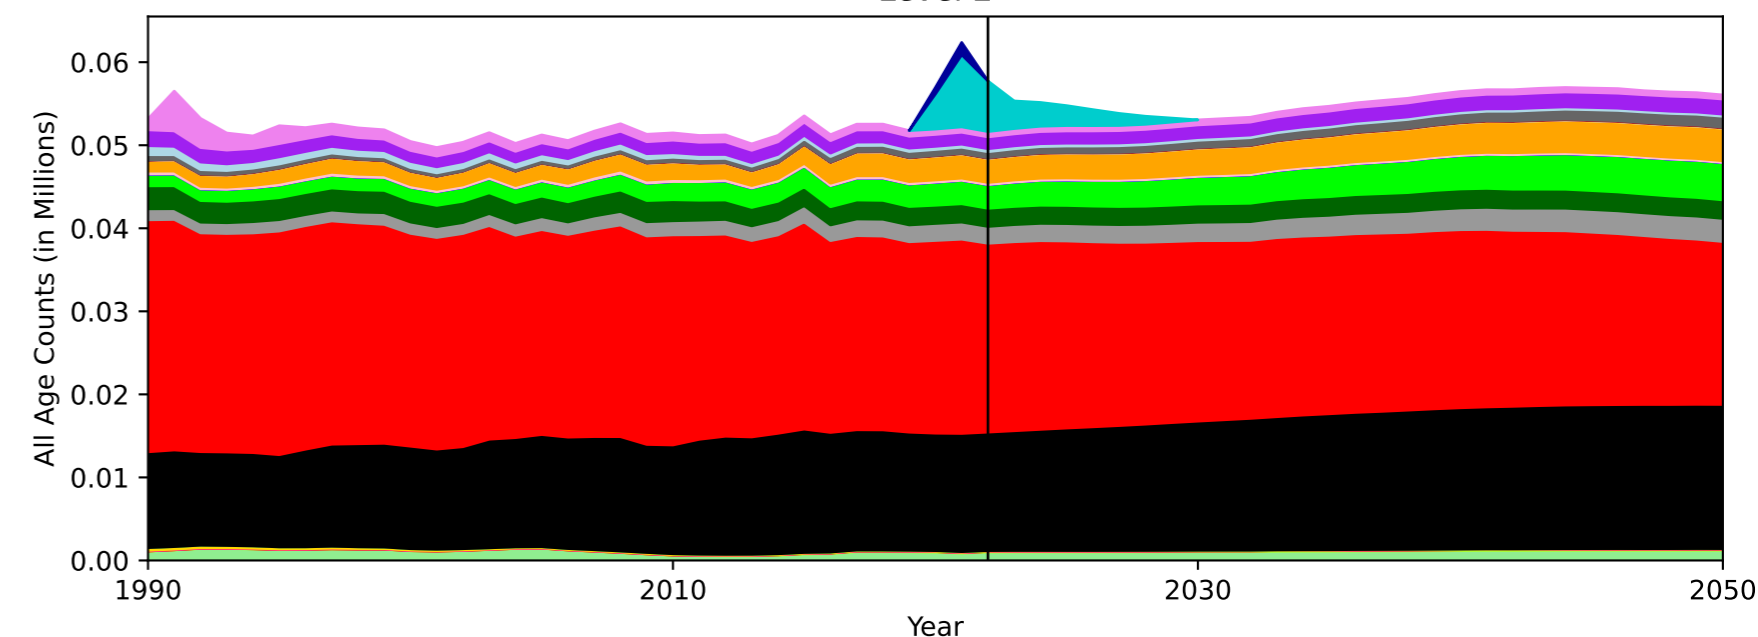

# Czechia

Level 1

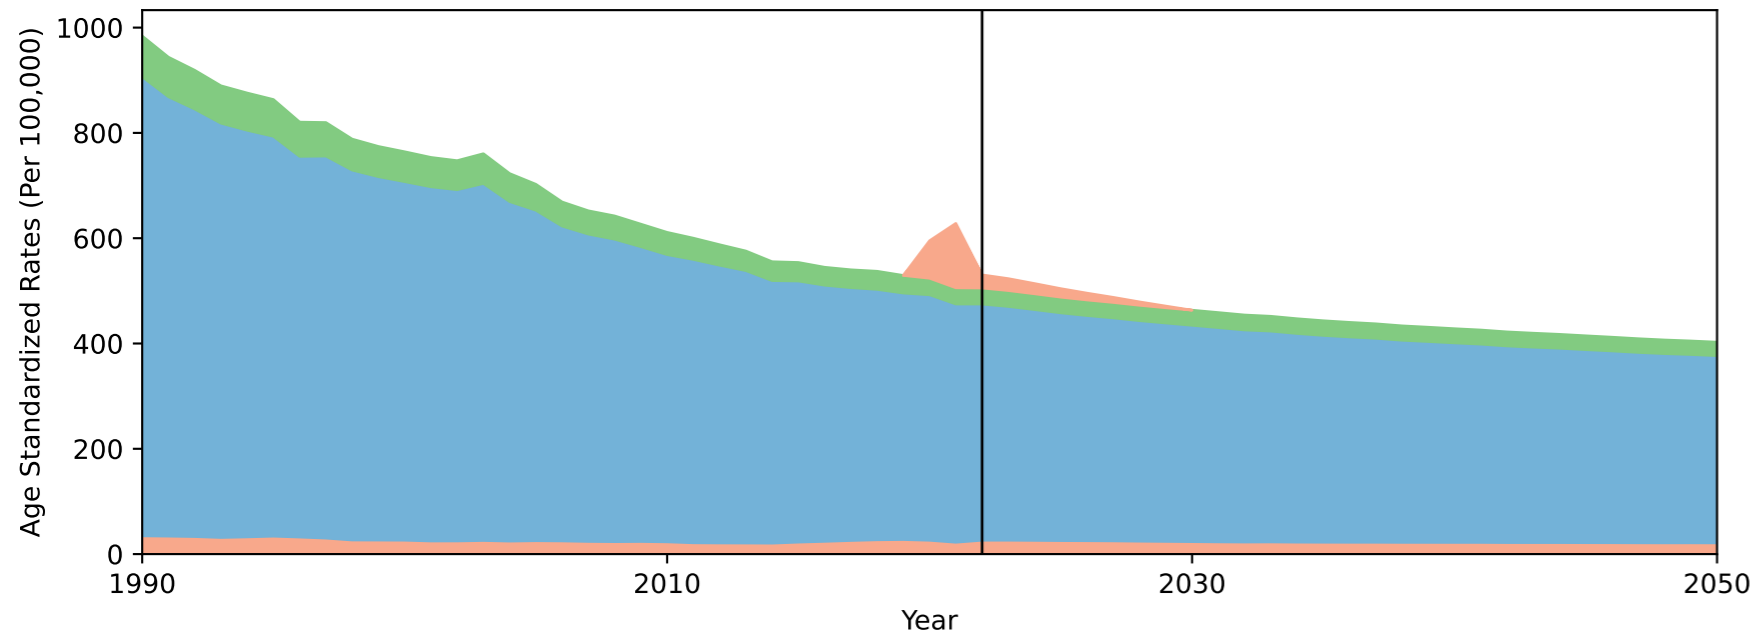

Level 2

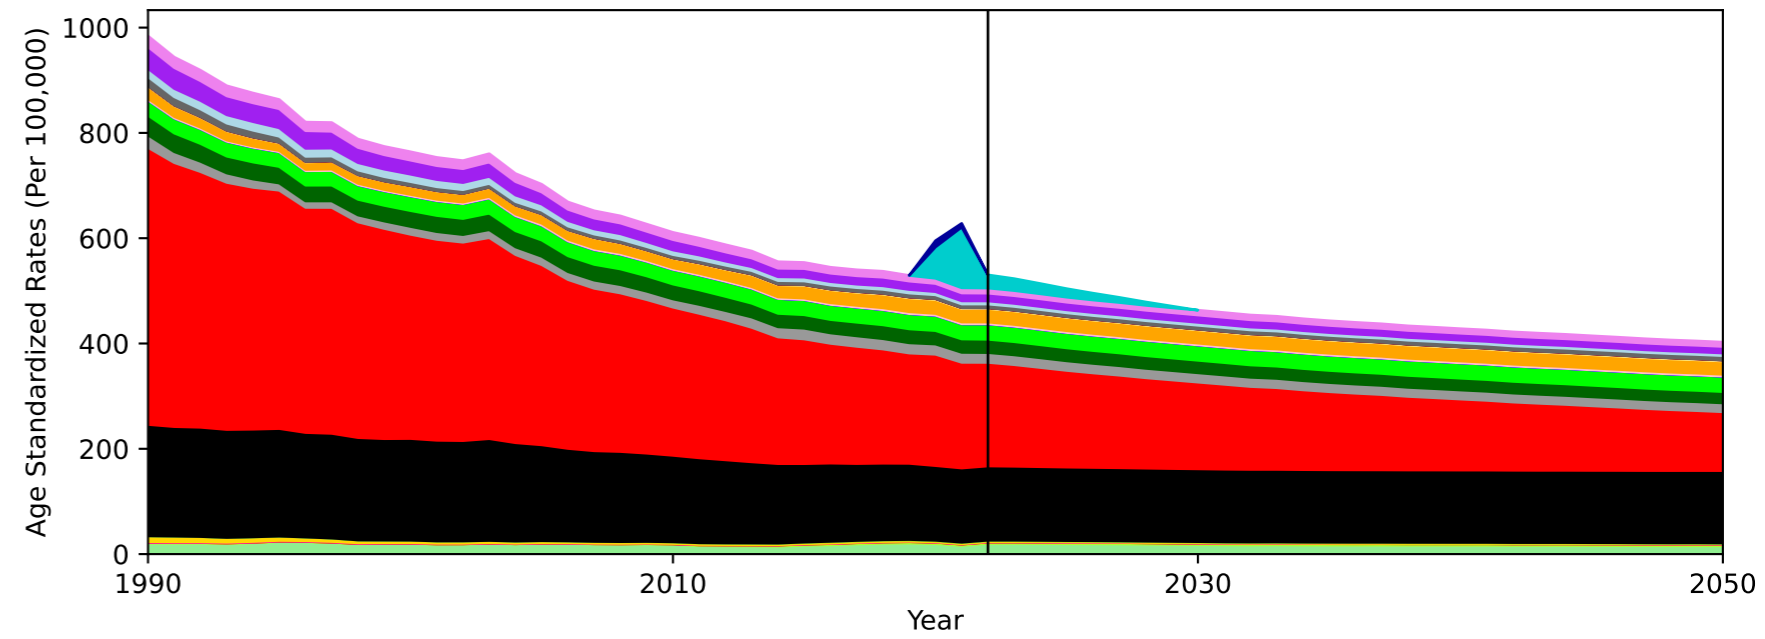

Level 1

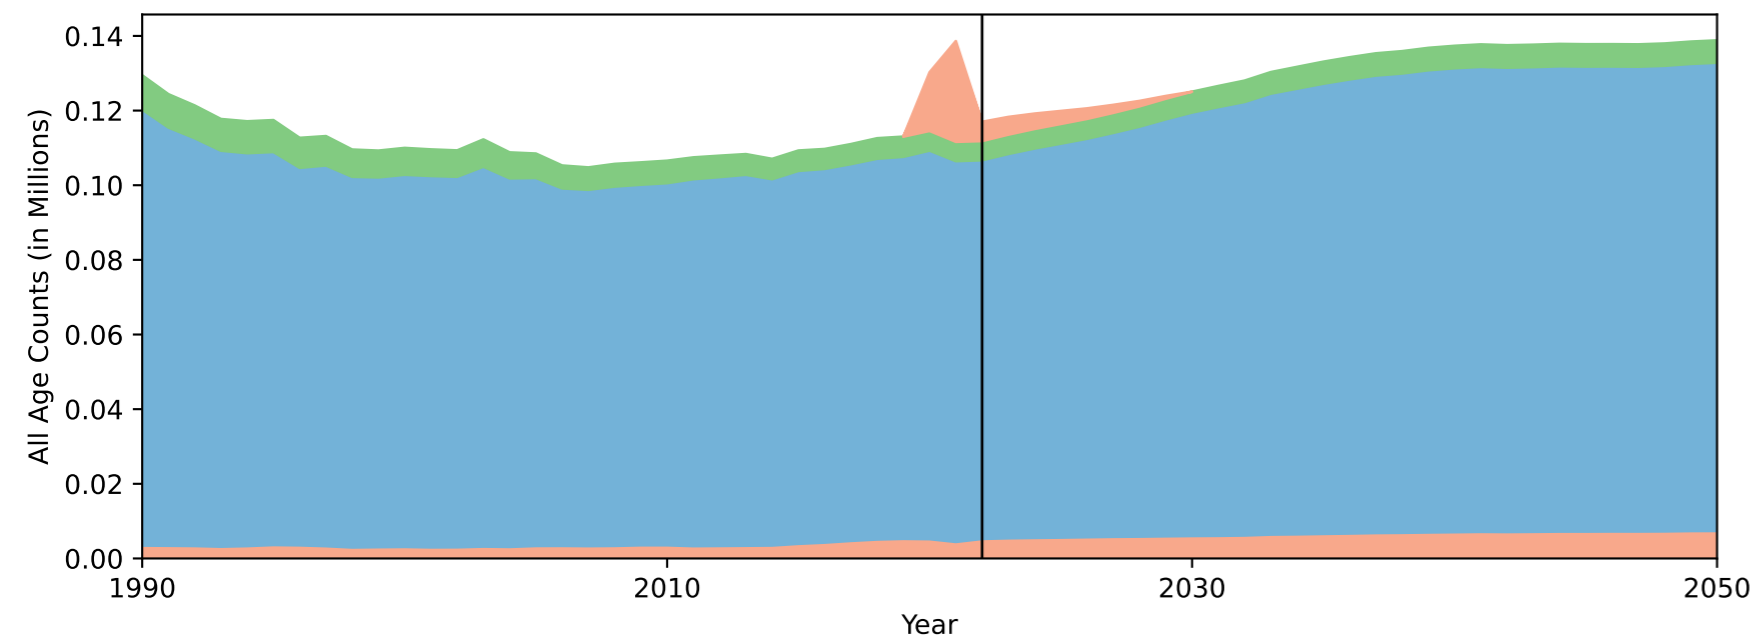

Level 2

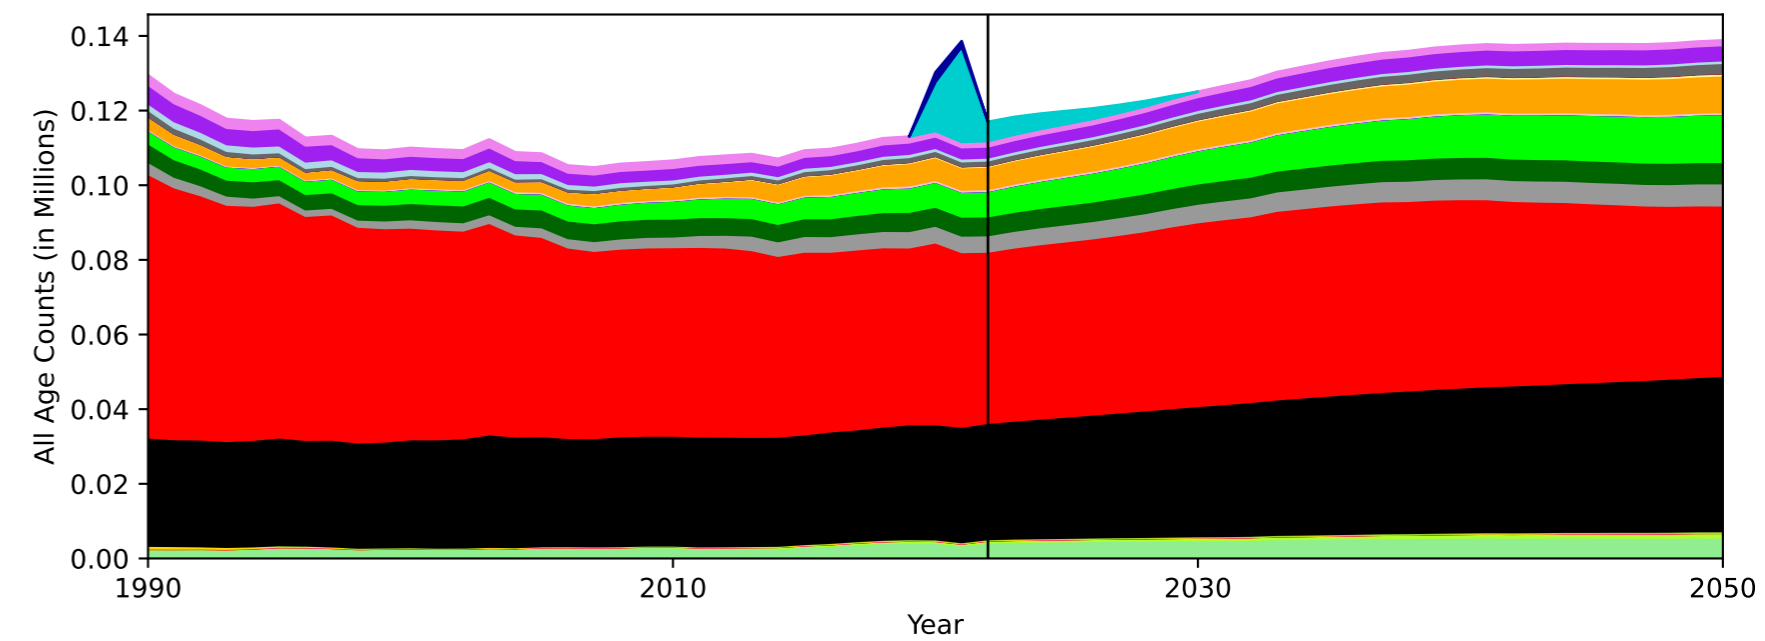

# Hungary

Level 1

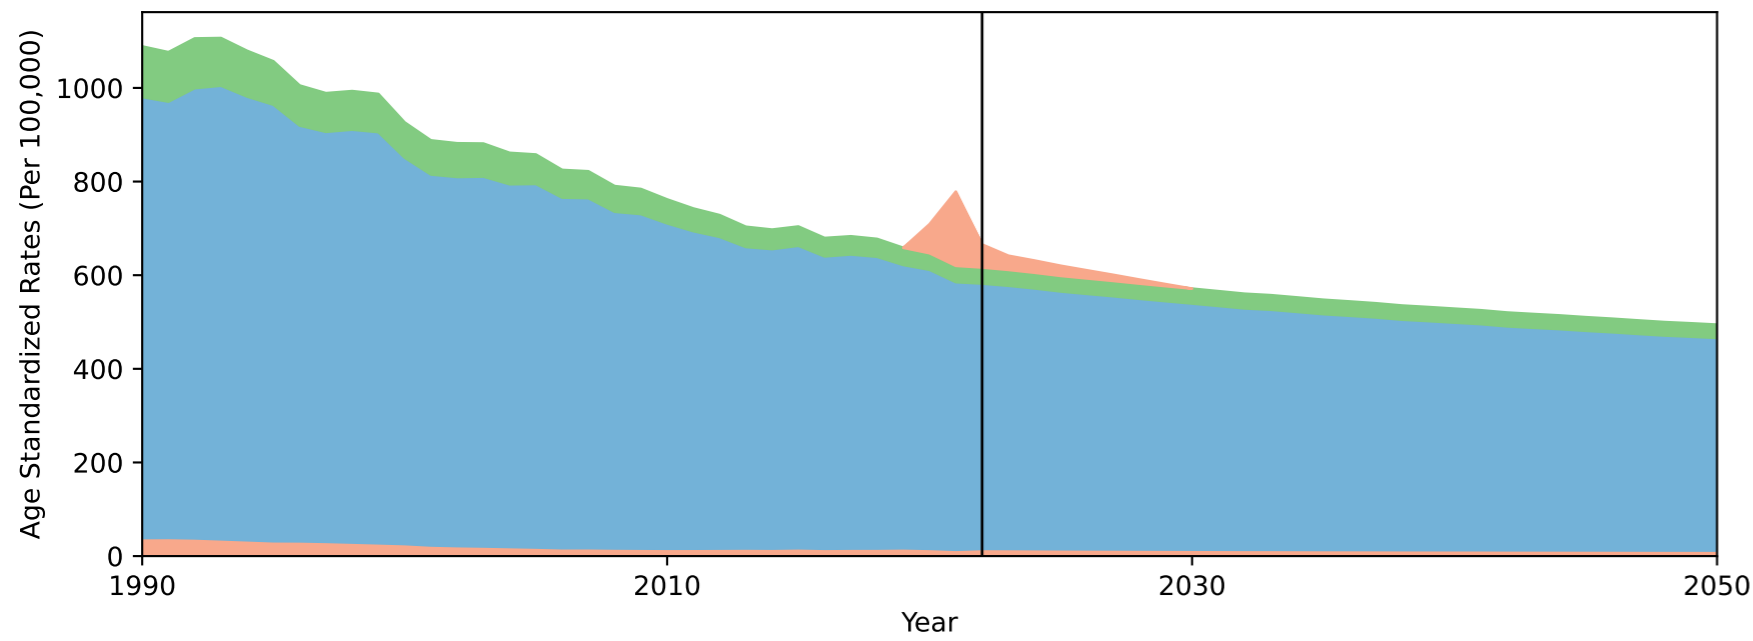

Level 2

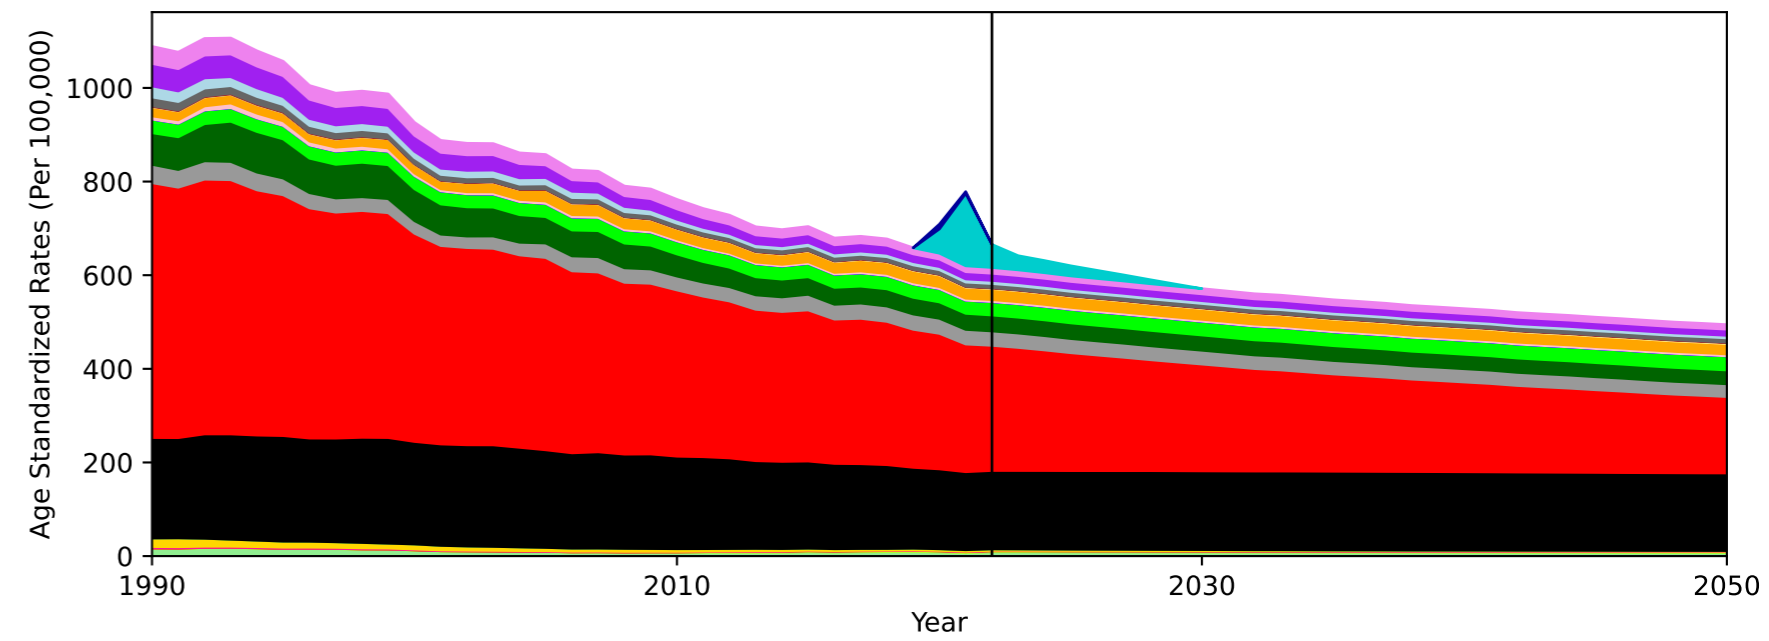

Level 1

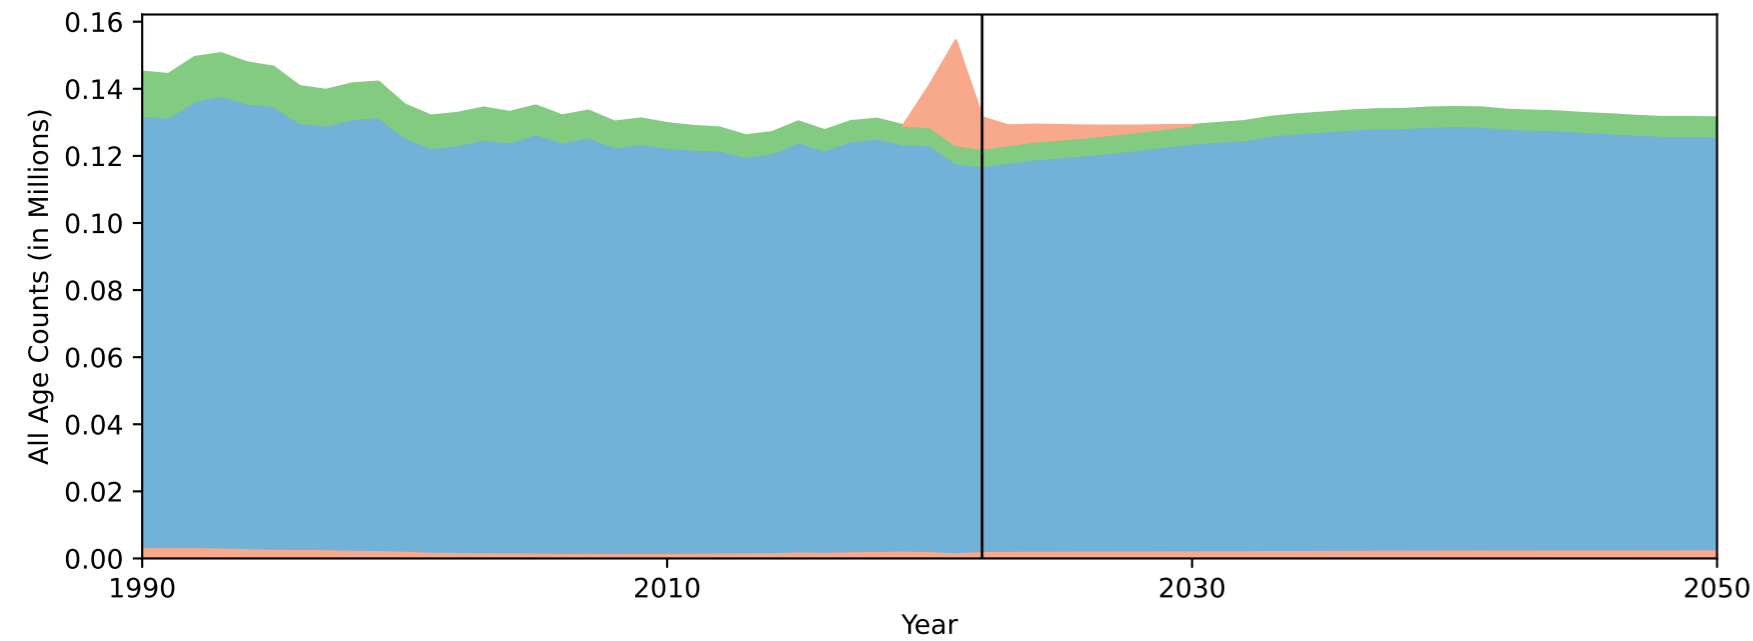

Level 2

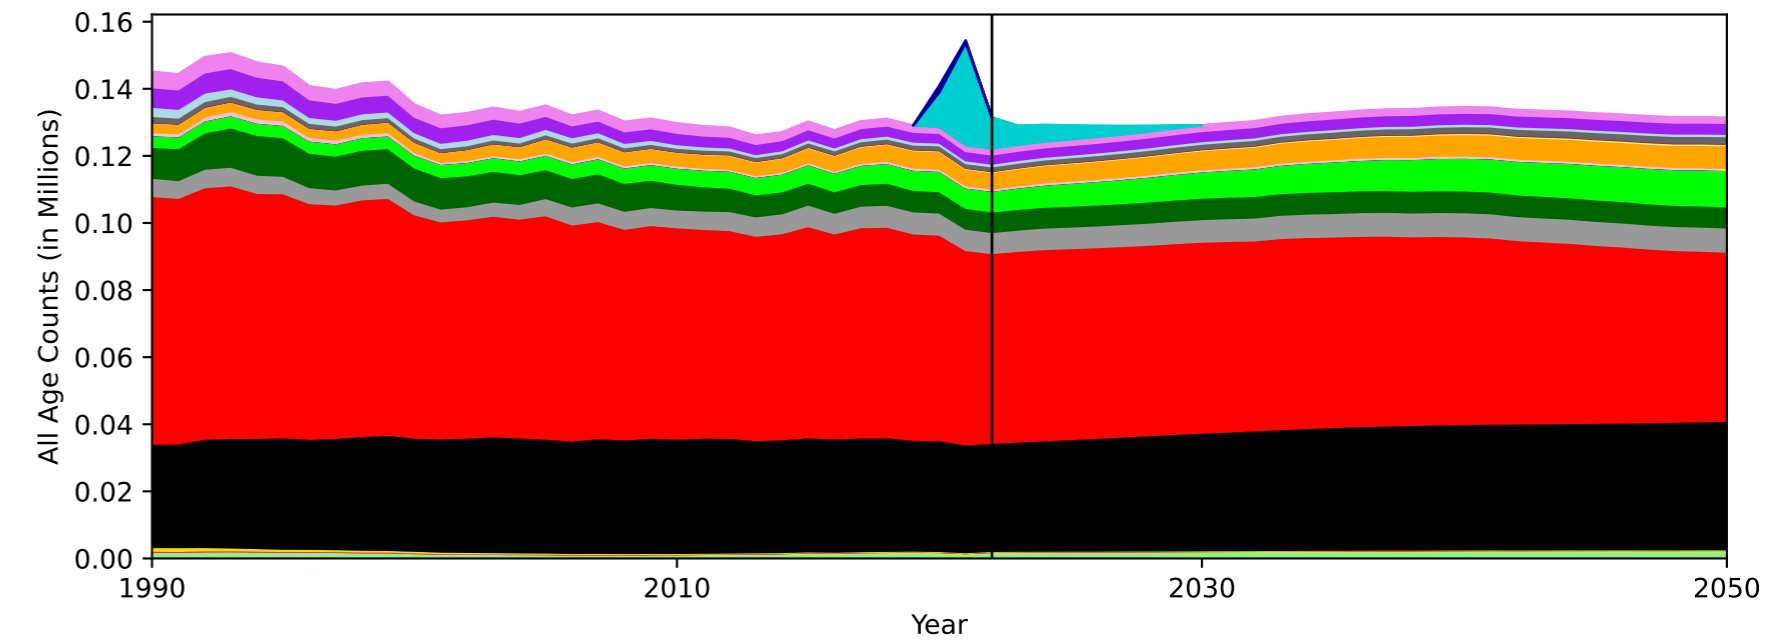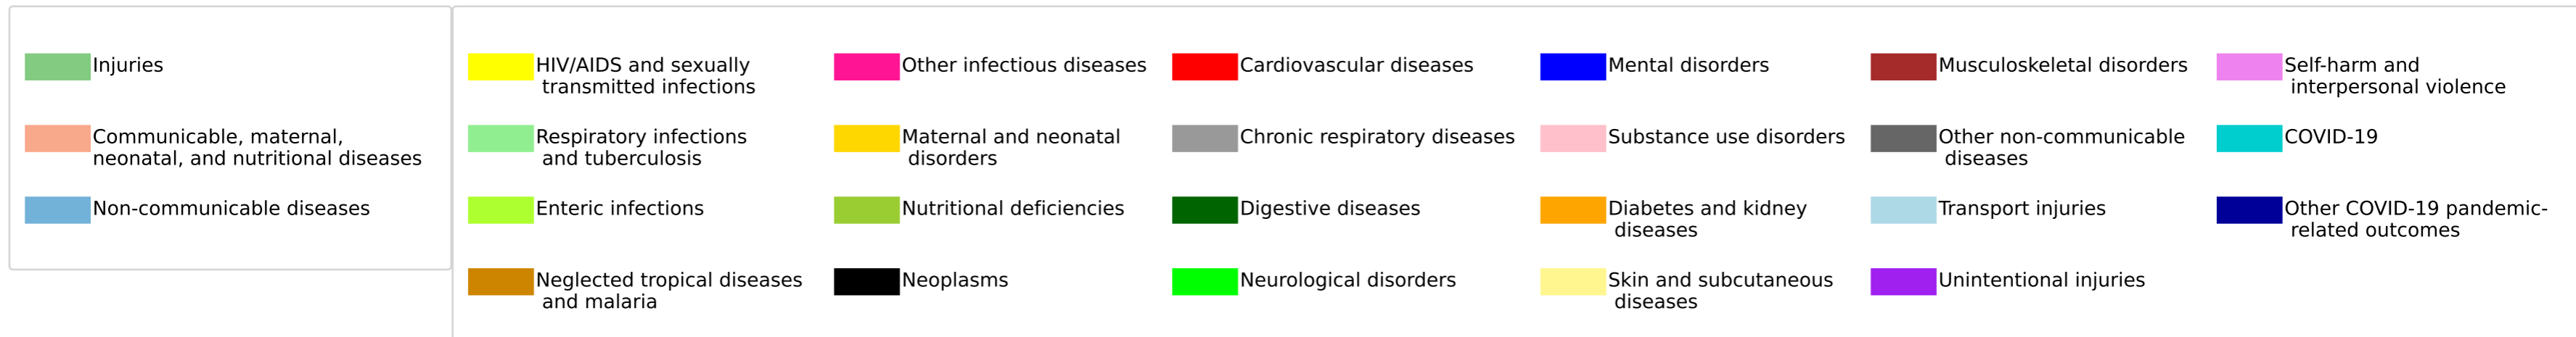

# Montenegro

Level 1

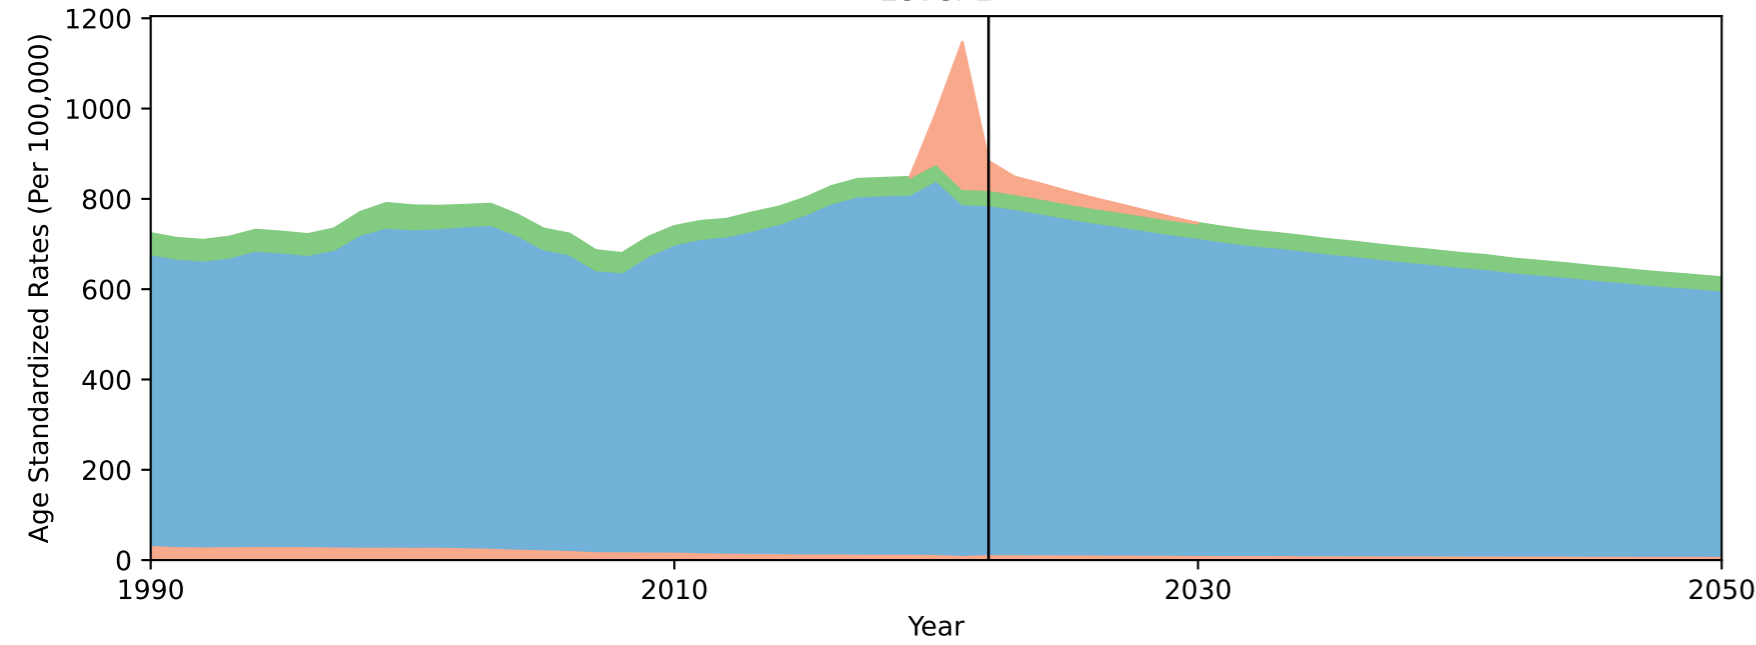

Level 2

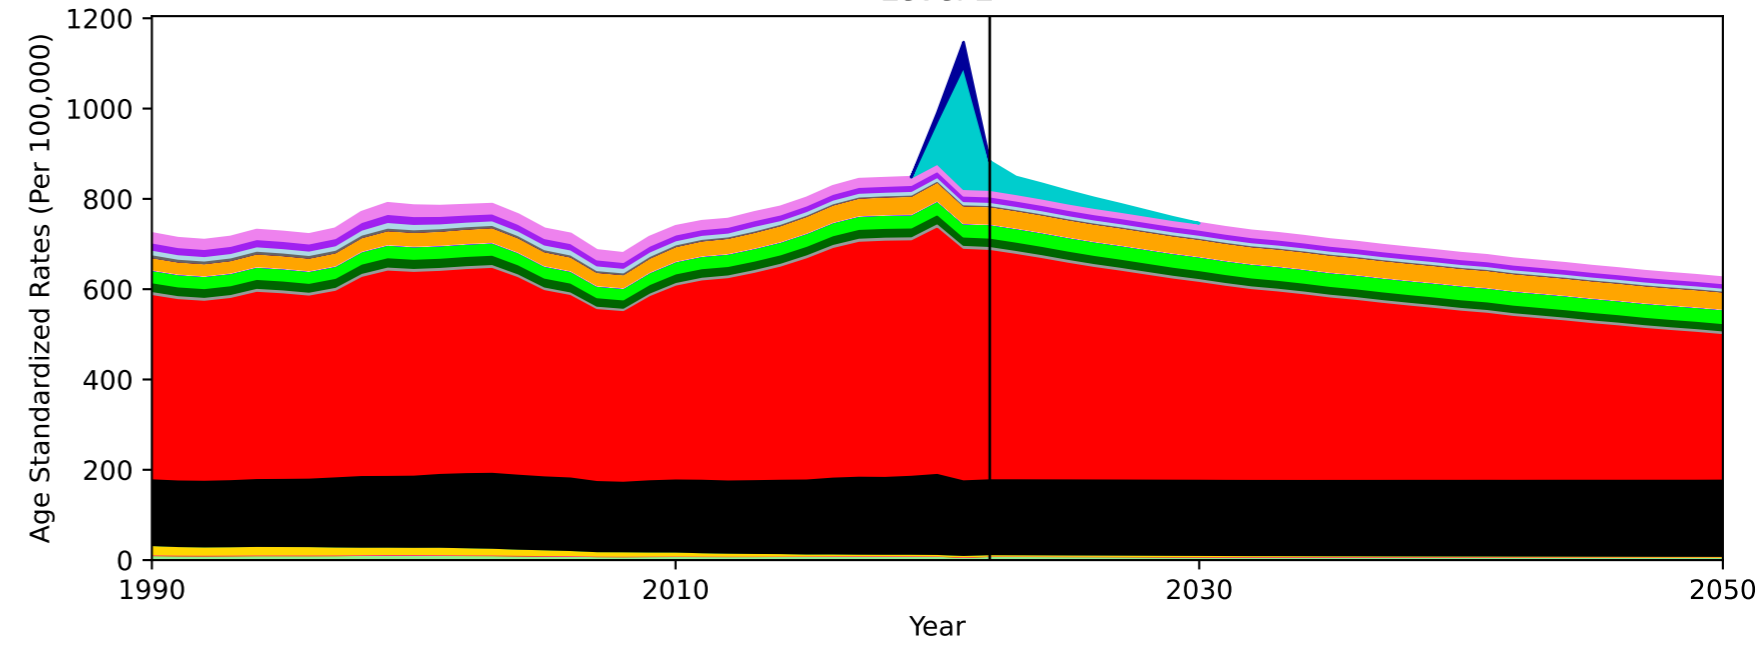

Level 1

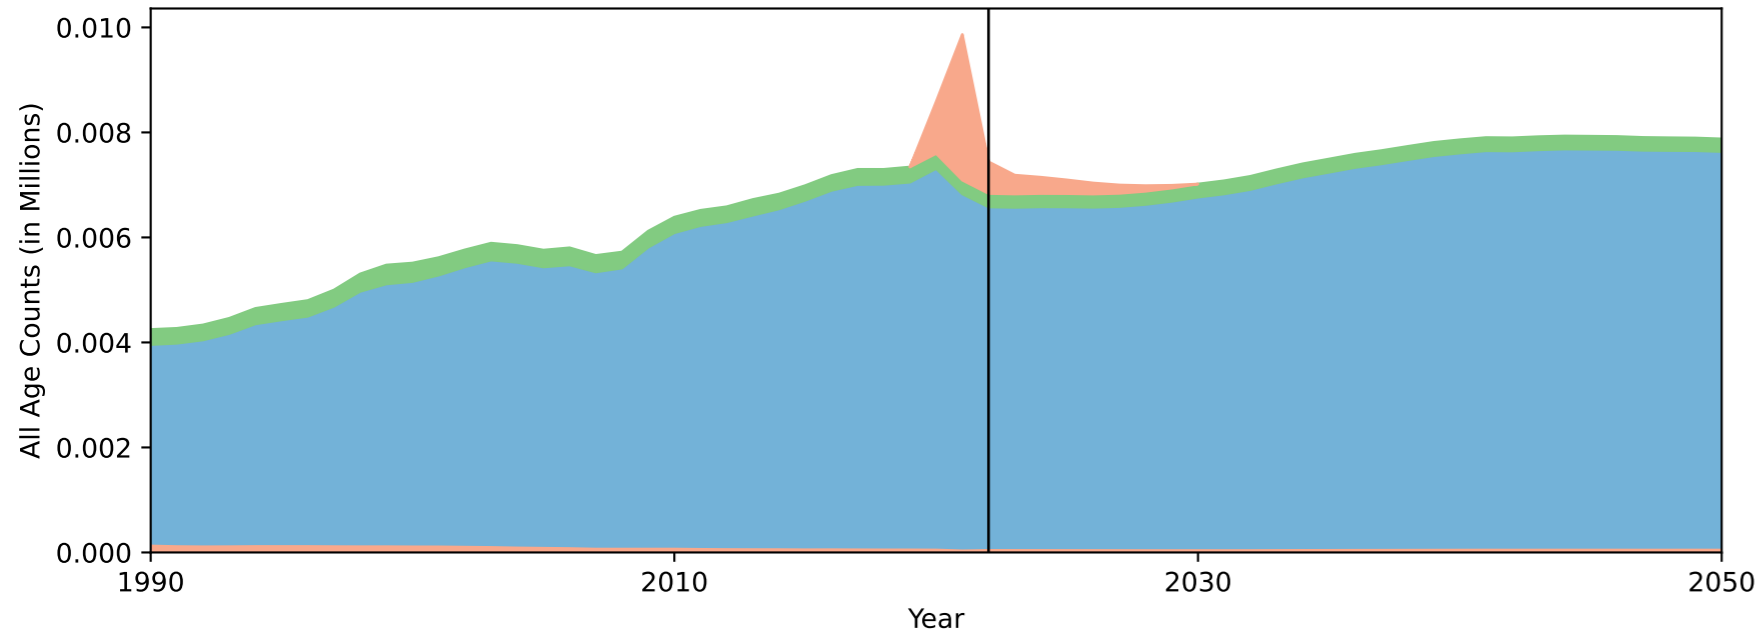

Level 2

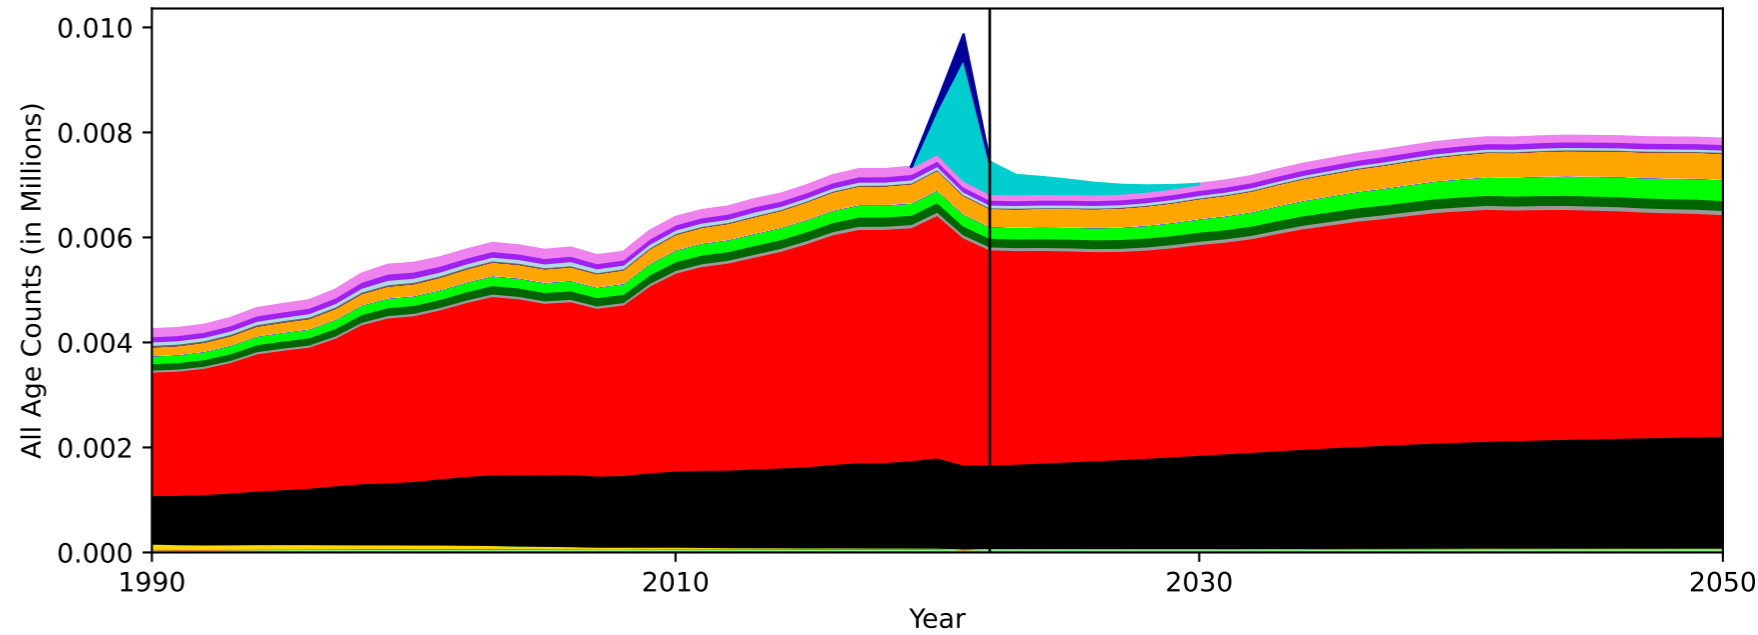

# North Macedonia

Supplemental Results Figure S5. Age-standardised death rates and all age death counts and by Level 1 and Level 2 causes, 1990–2050

494

Level 1

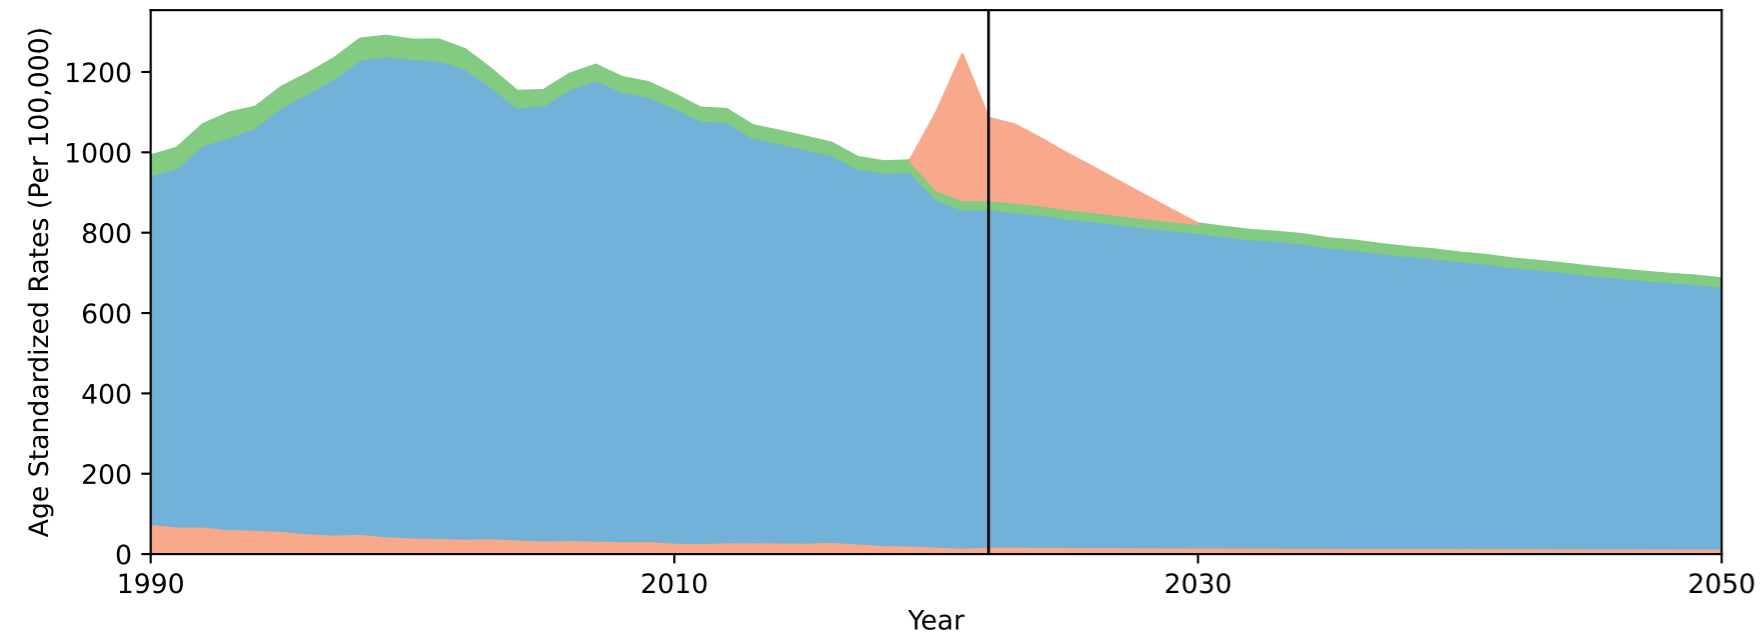

Level 2

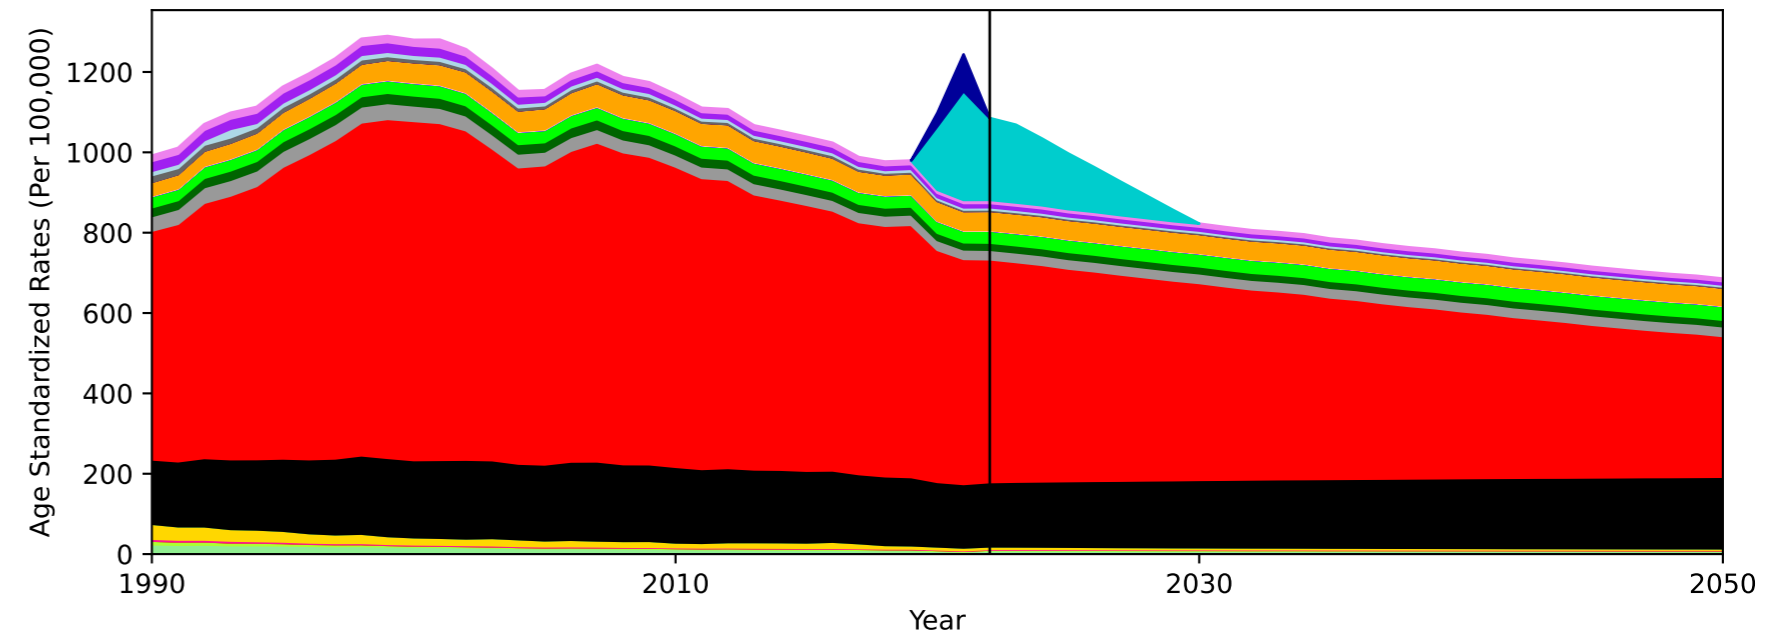

Level 1

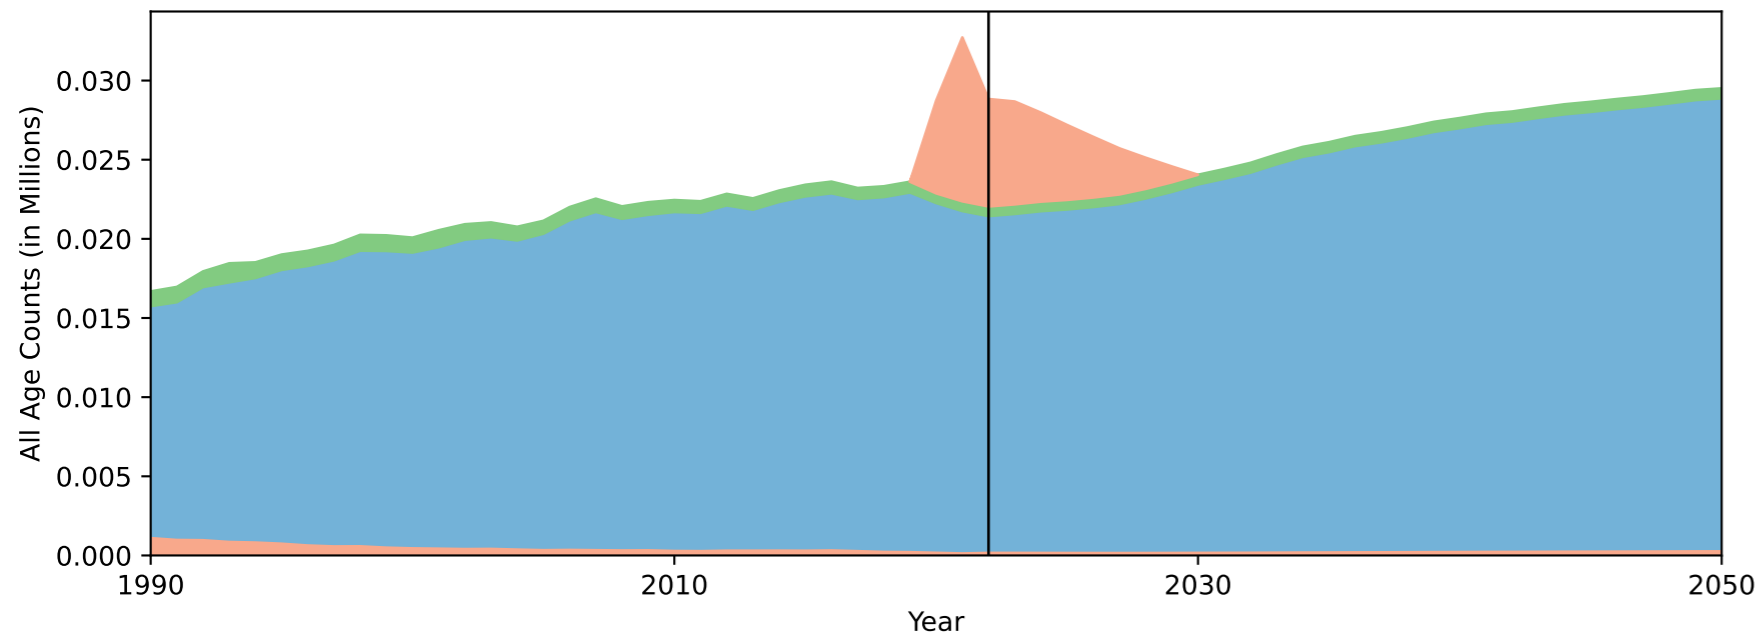

Level 2

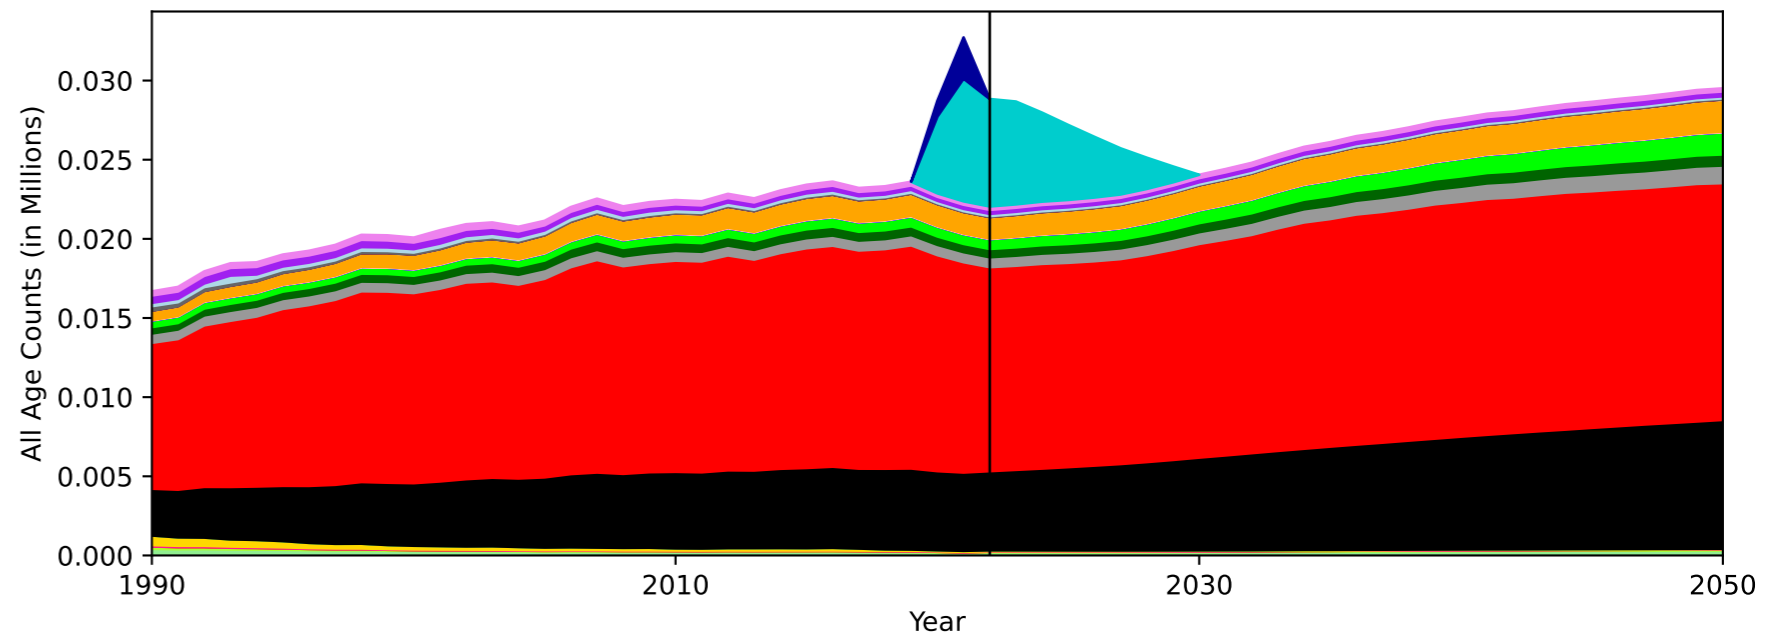

Level 1

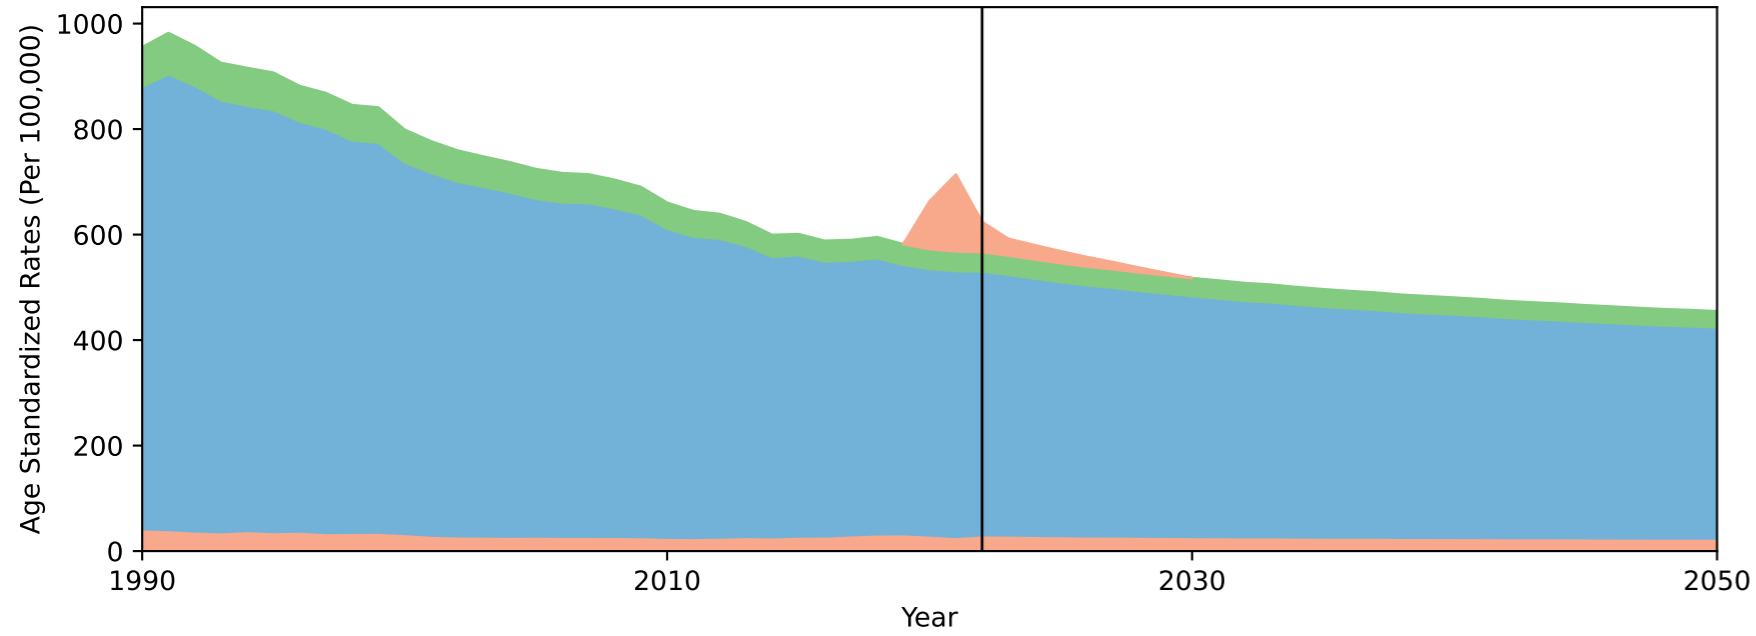

Level 2

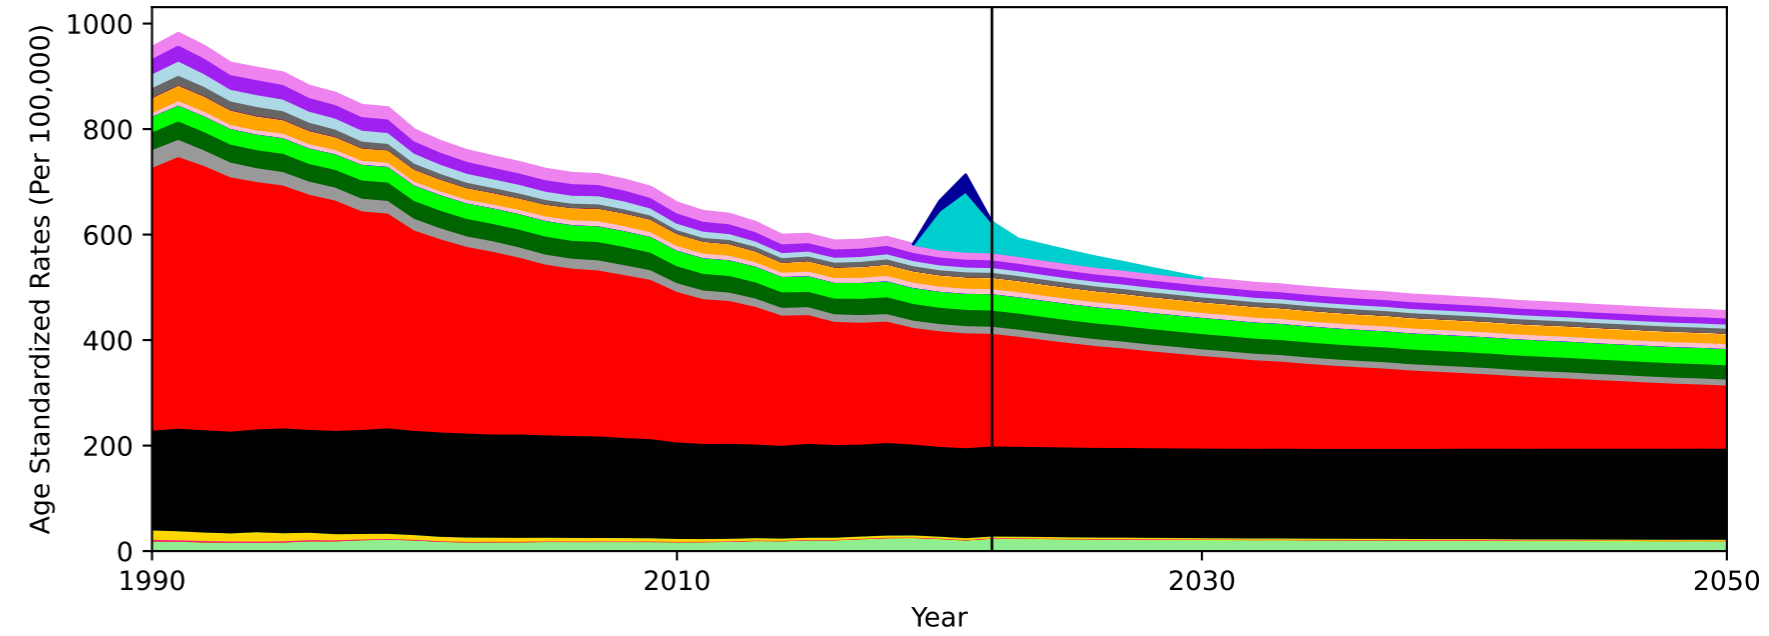

Level 1

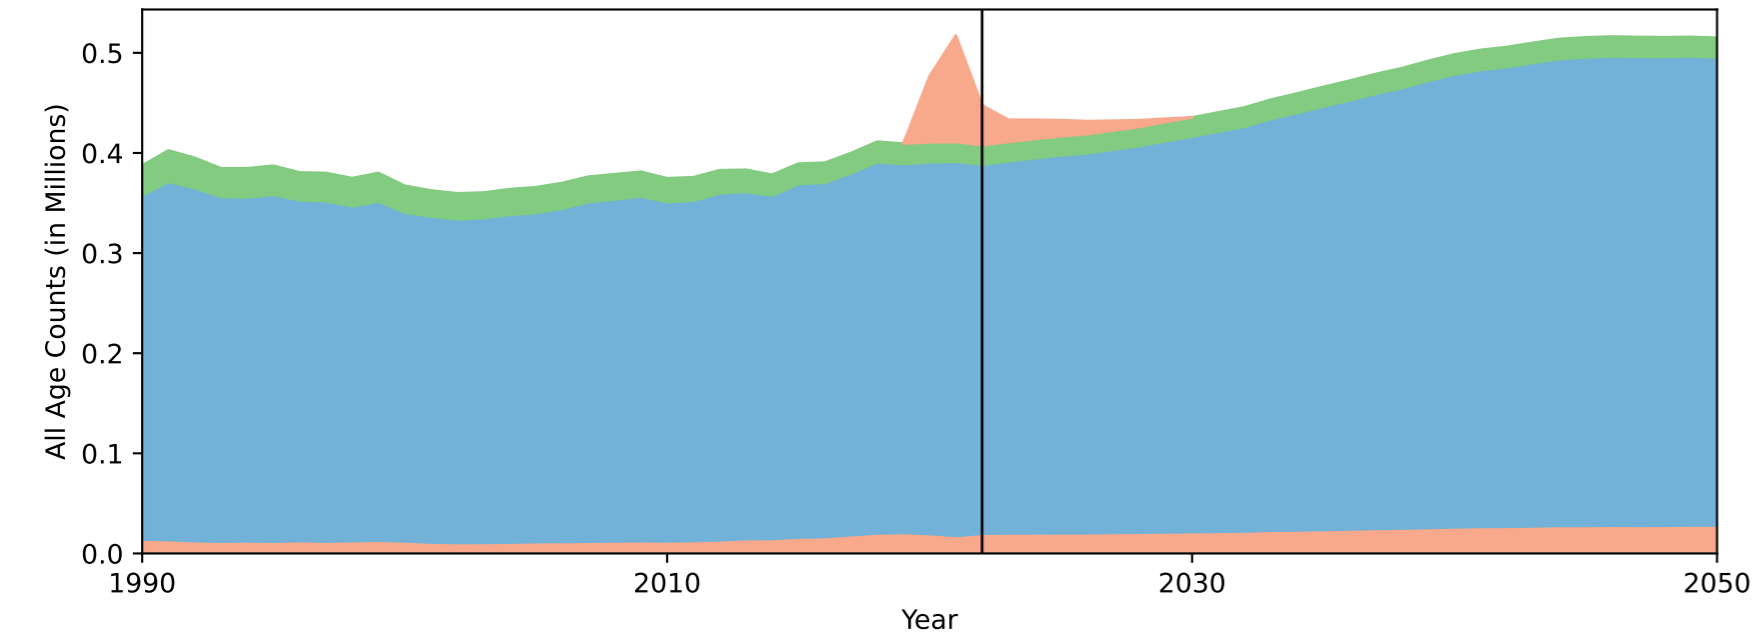

Level 2

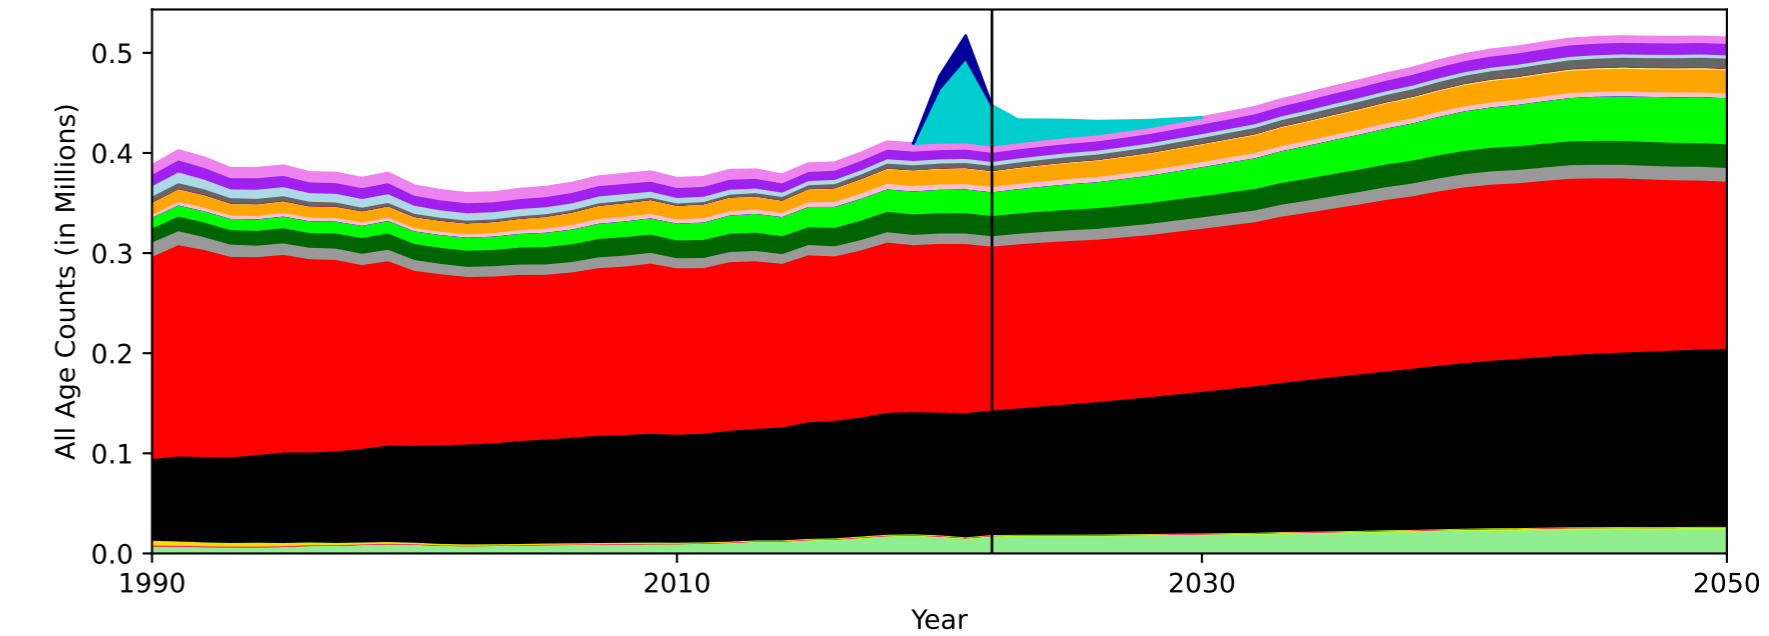



# Romania

Level 1

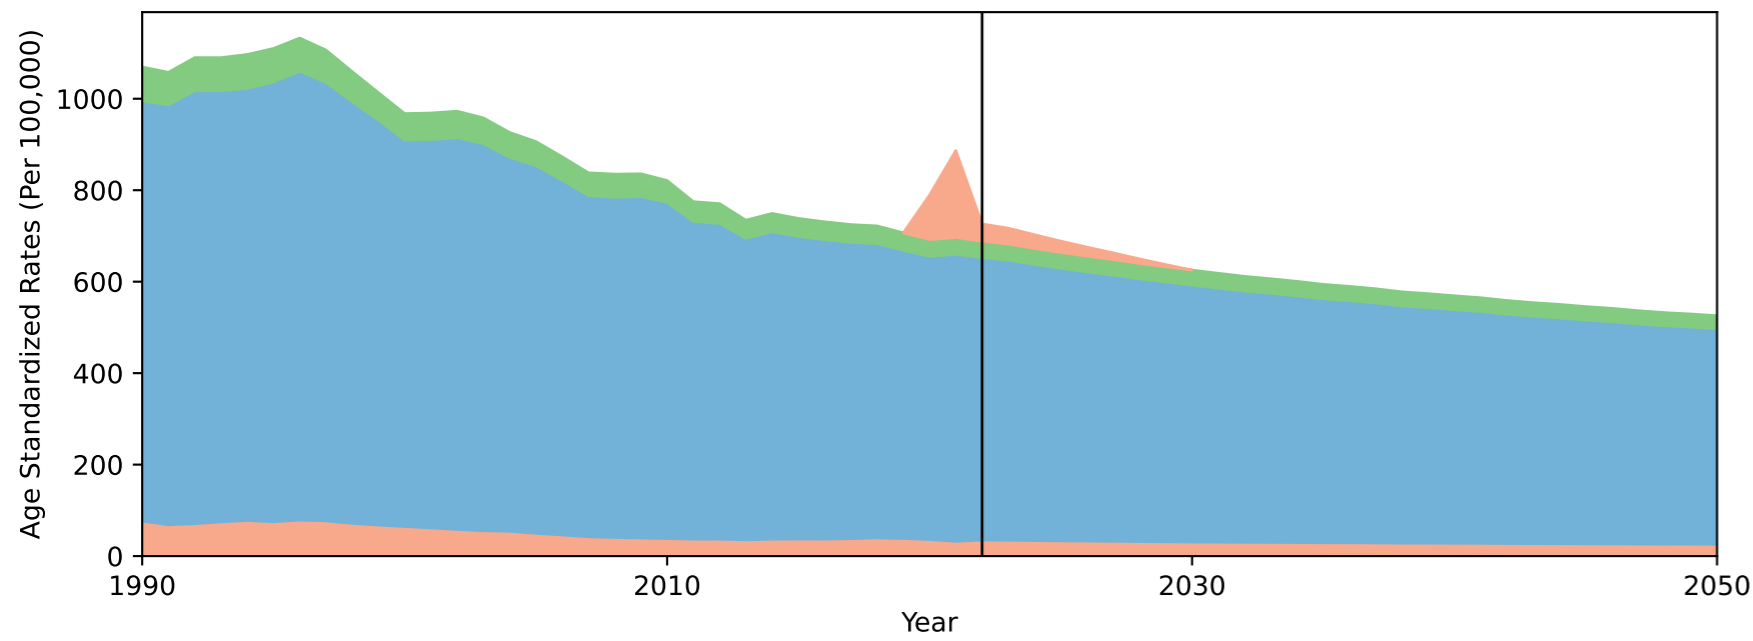

Level 2

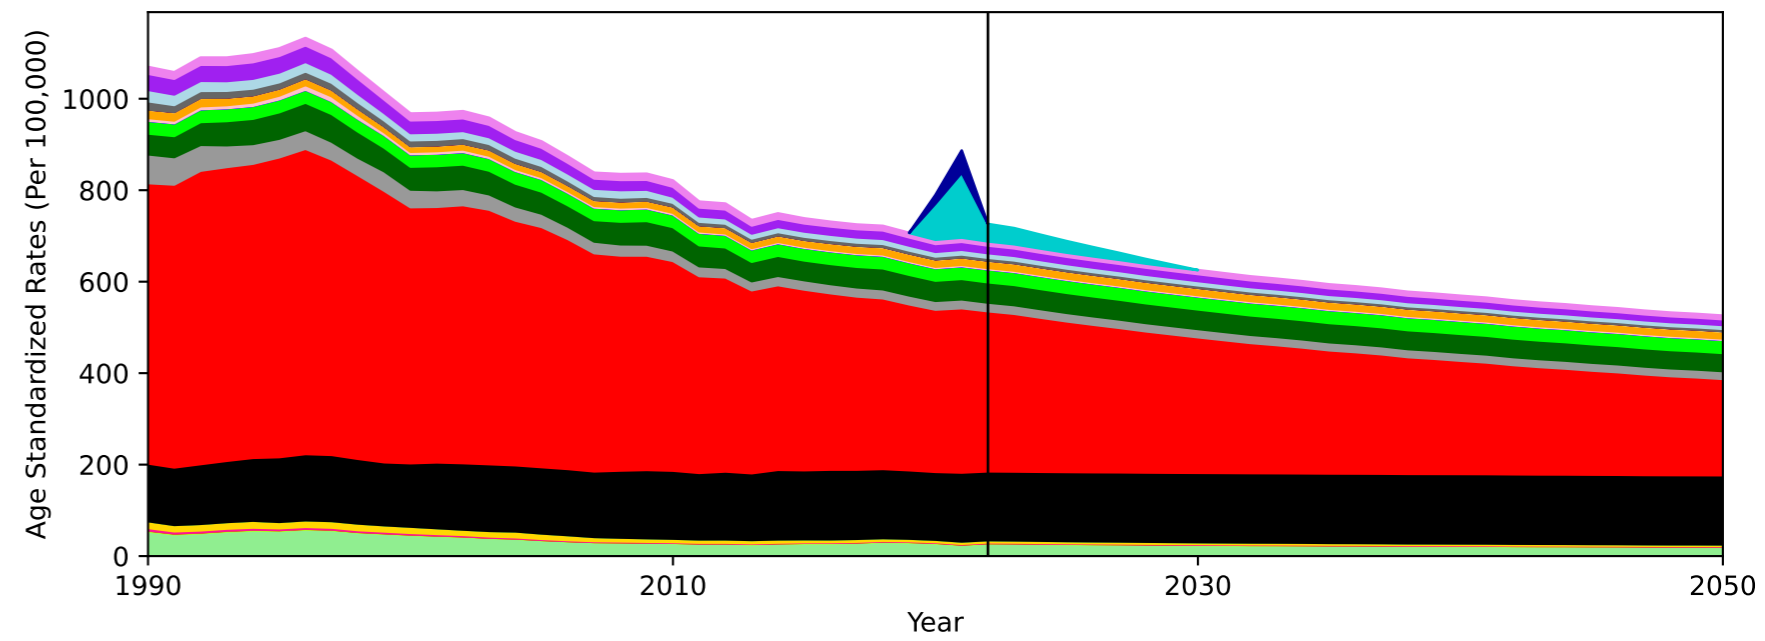

Level 1

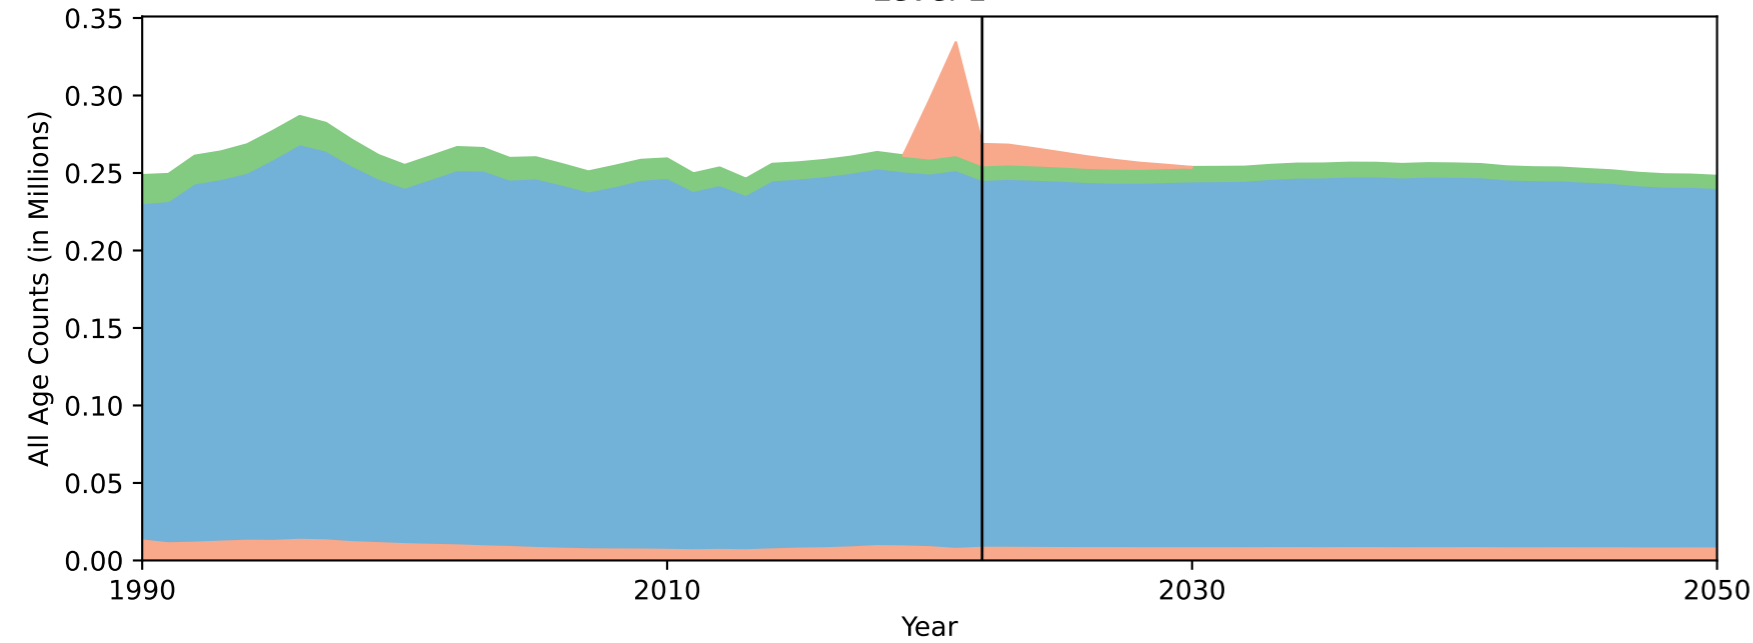

Level 2

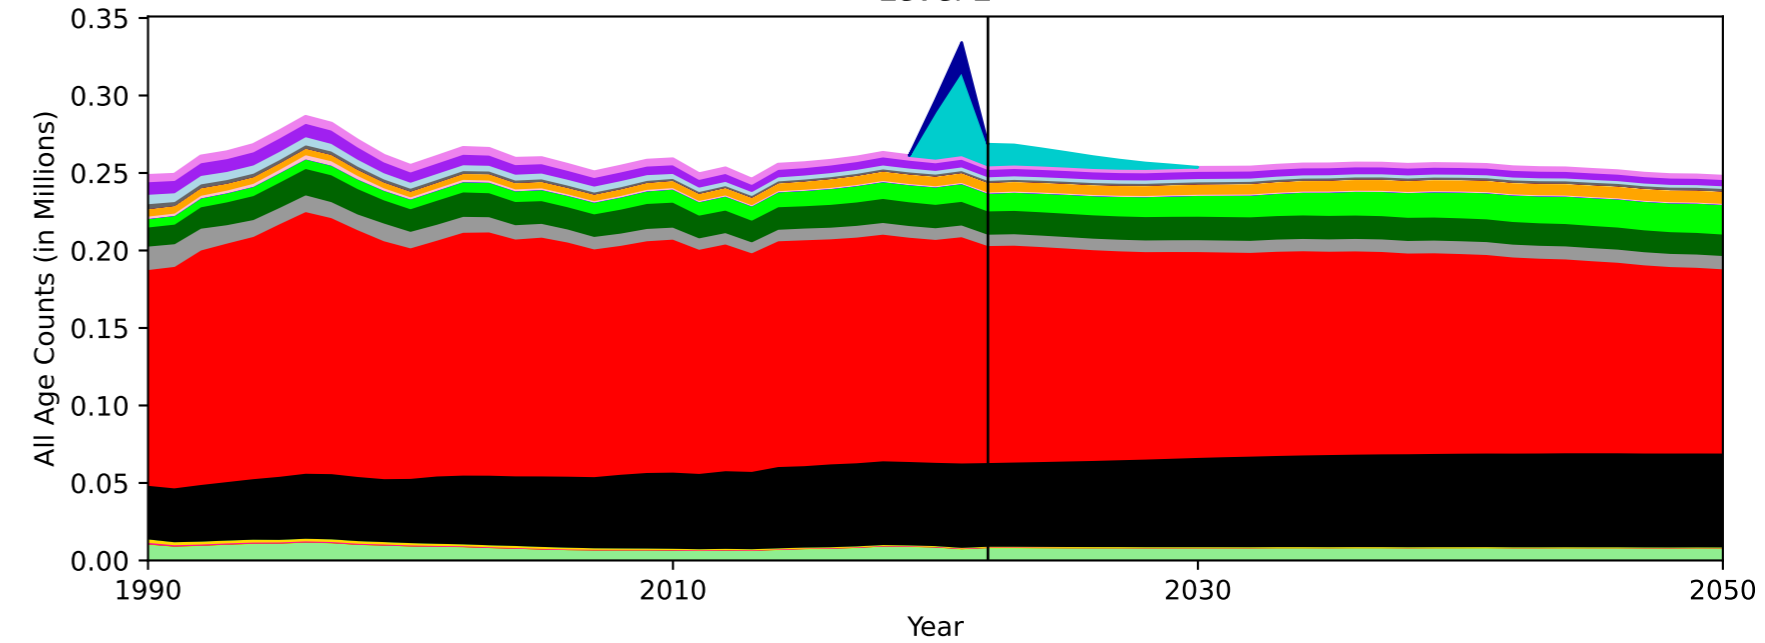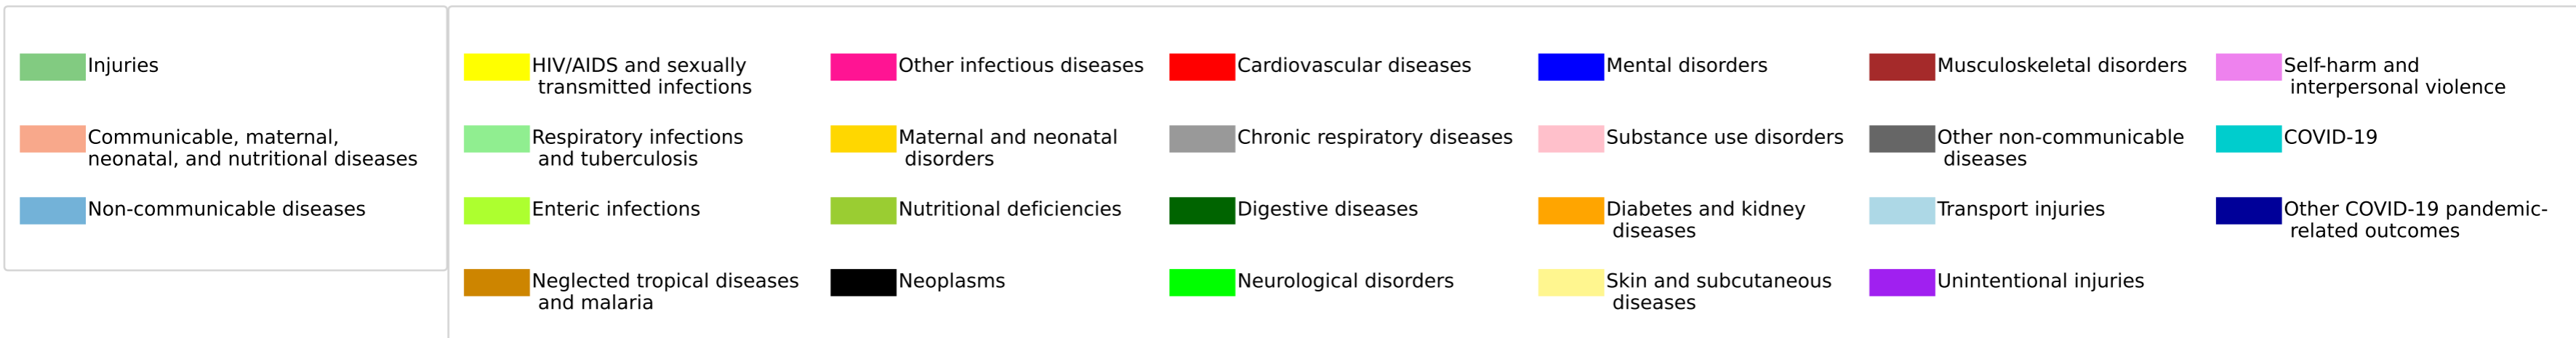

# Serbia

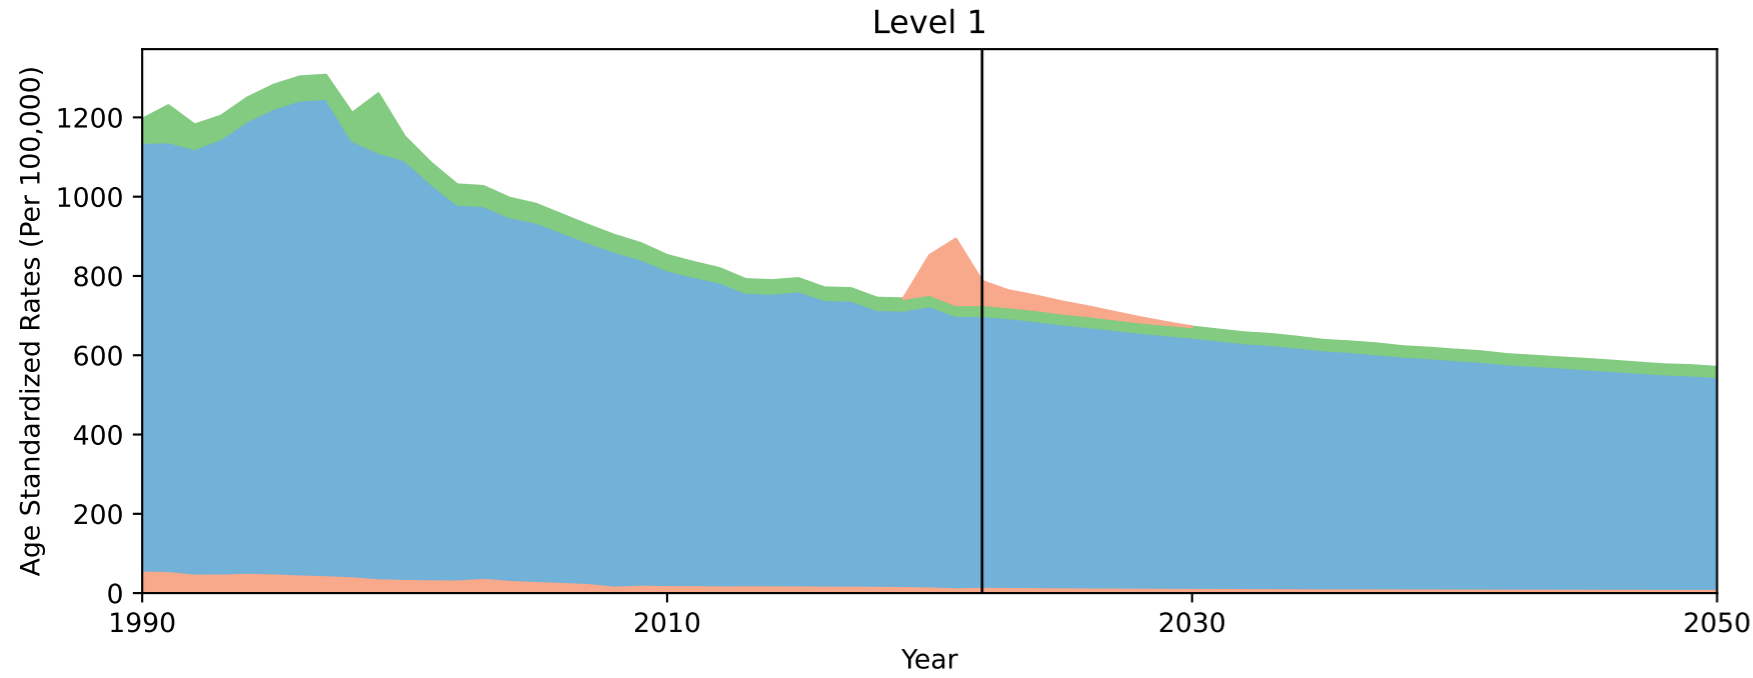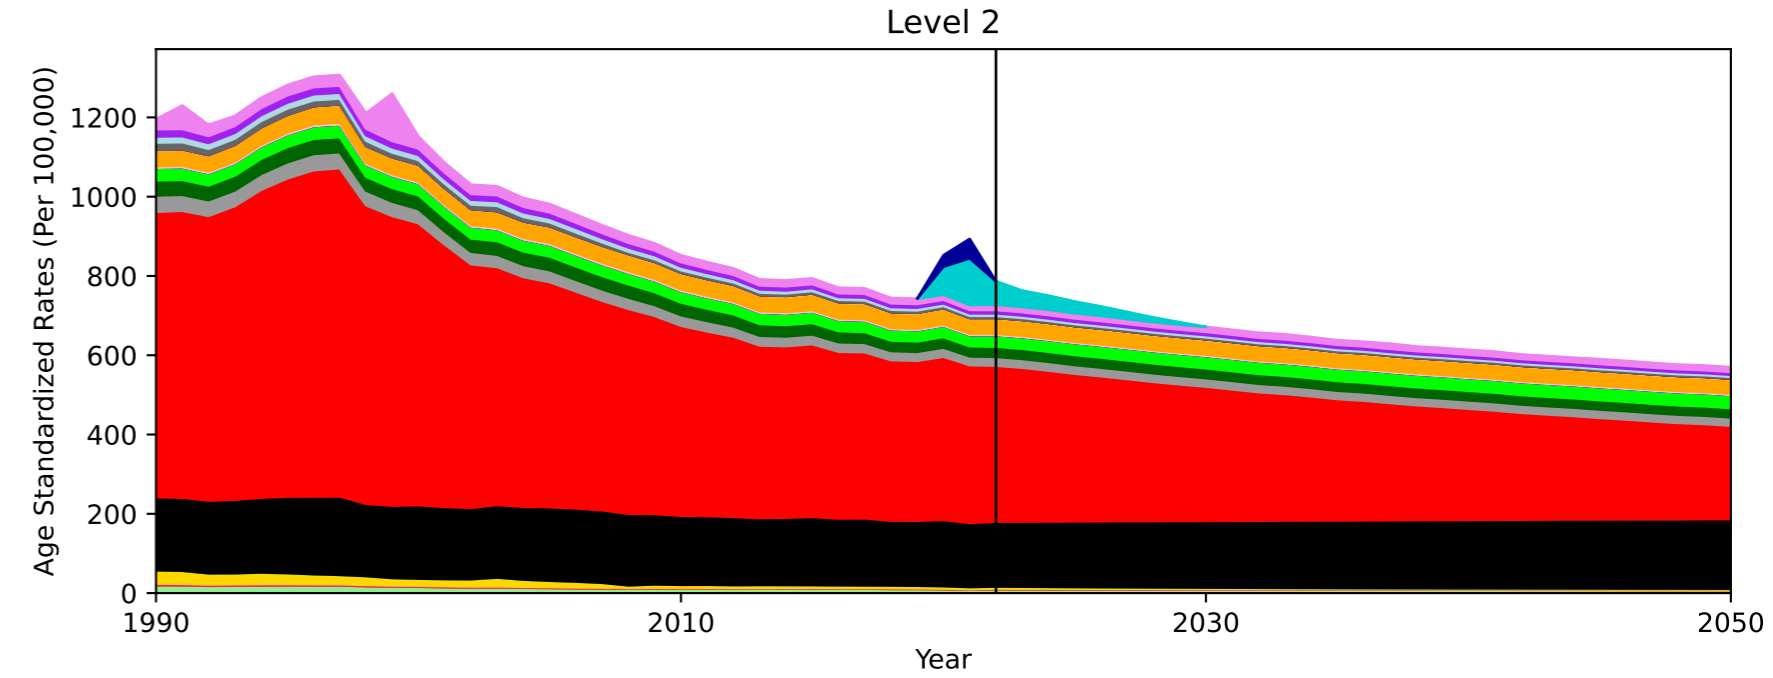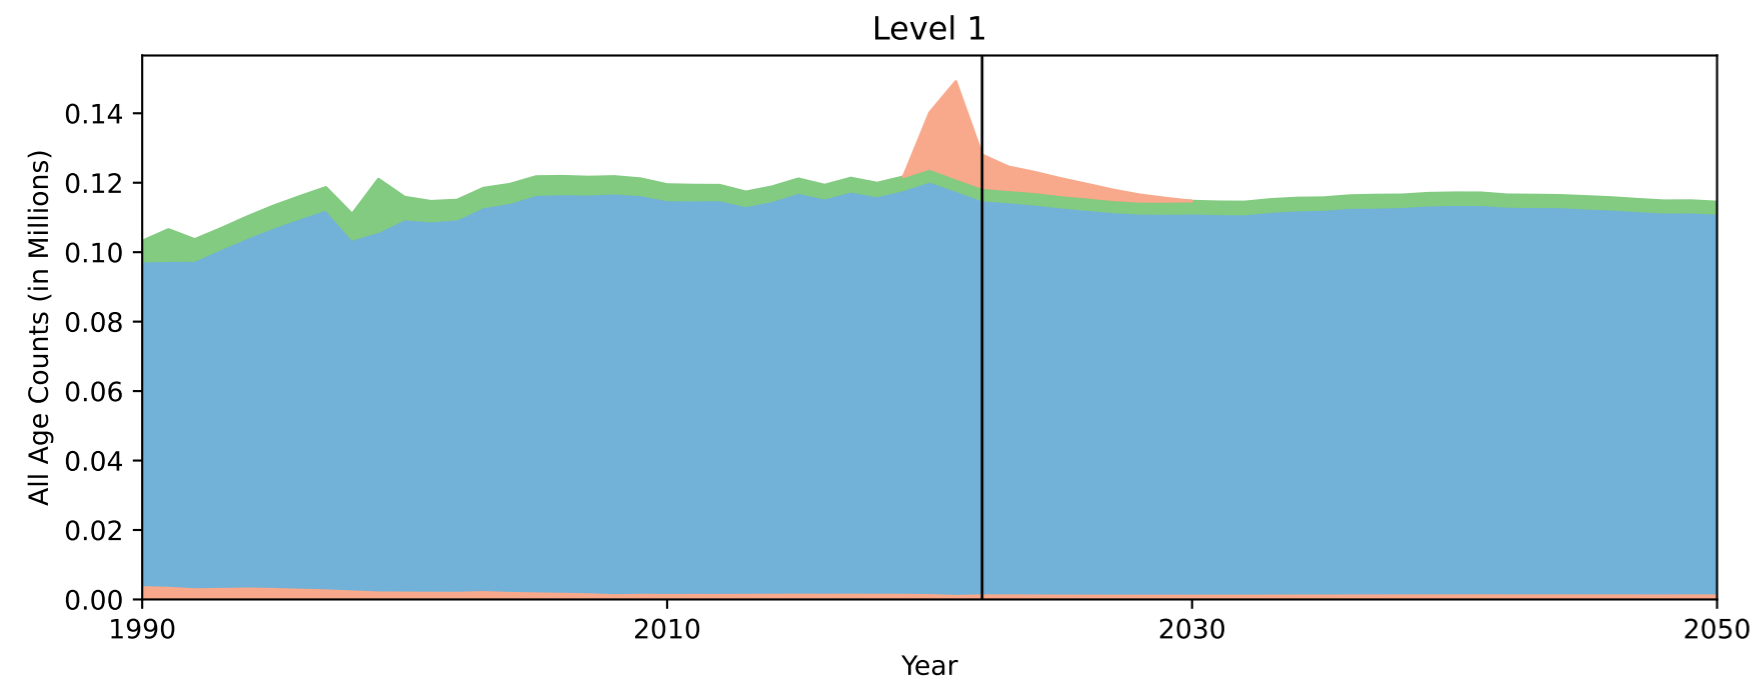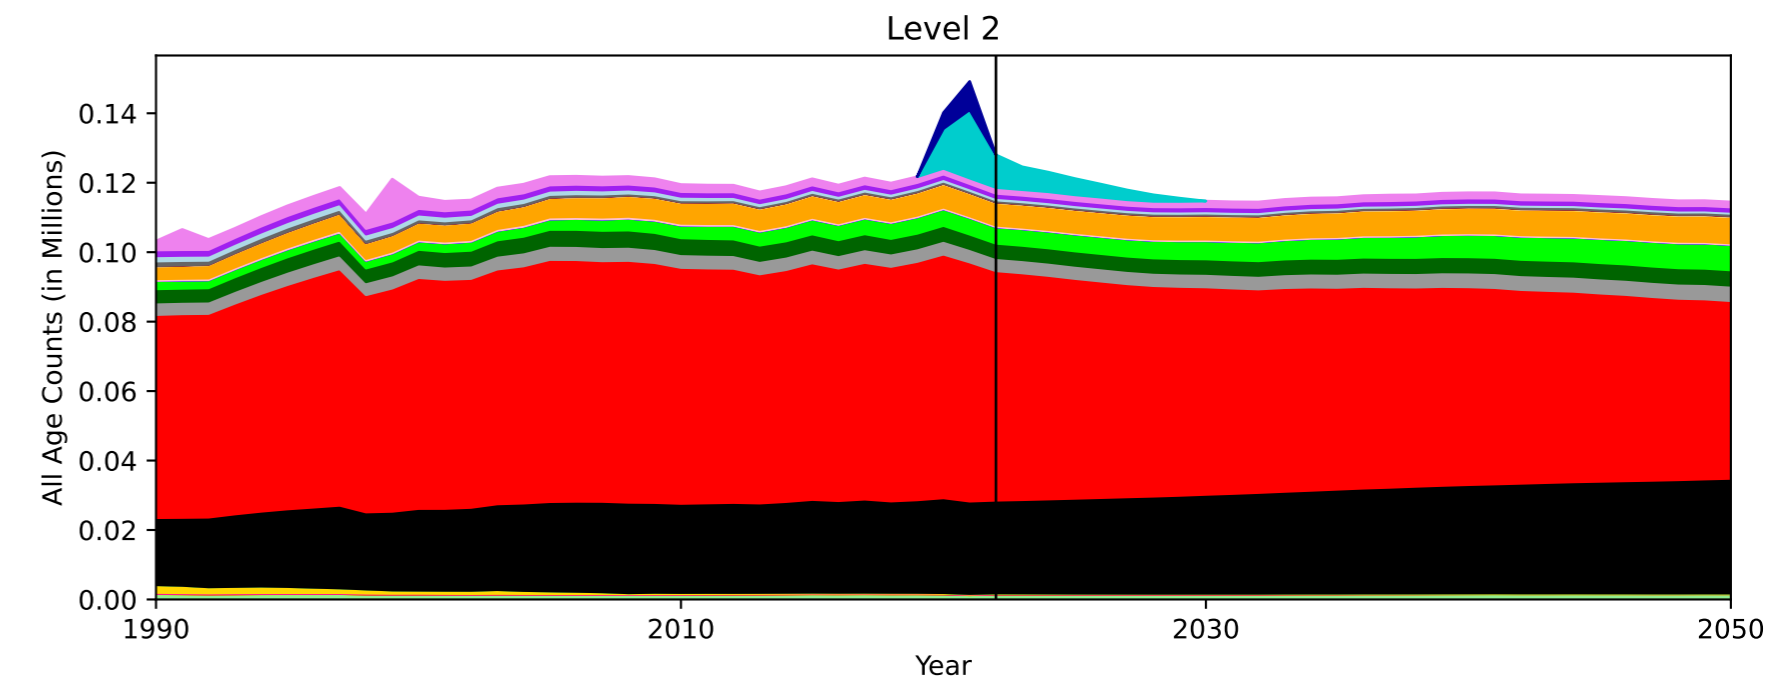

# Slovakia

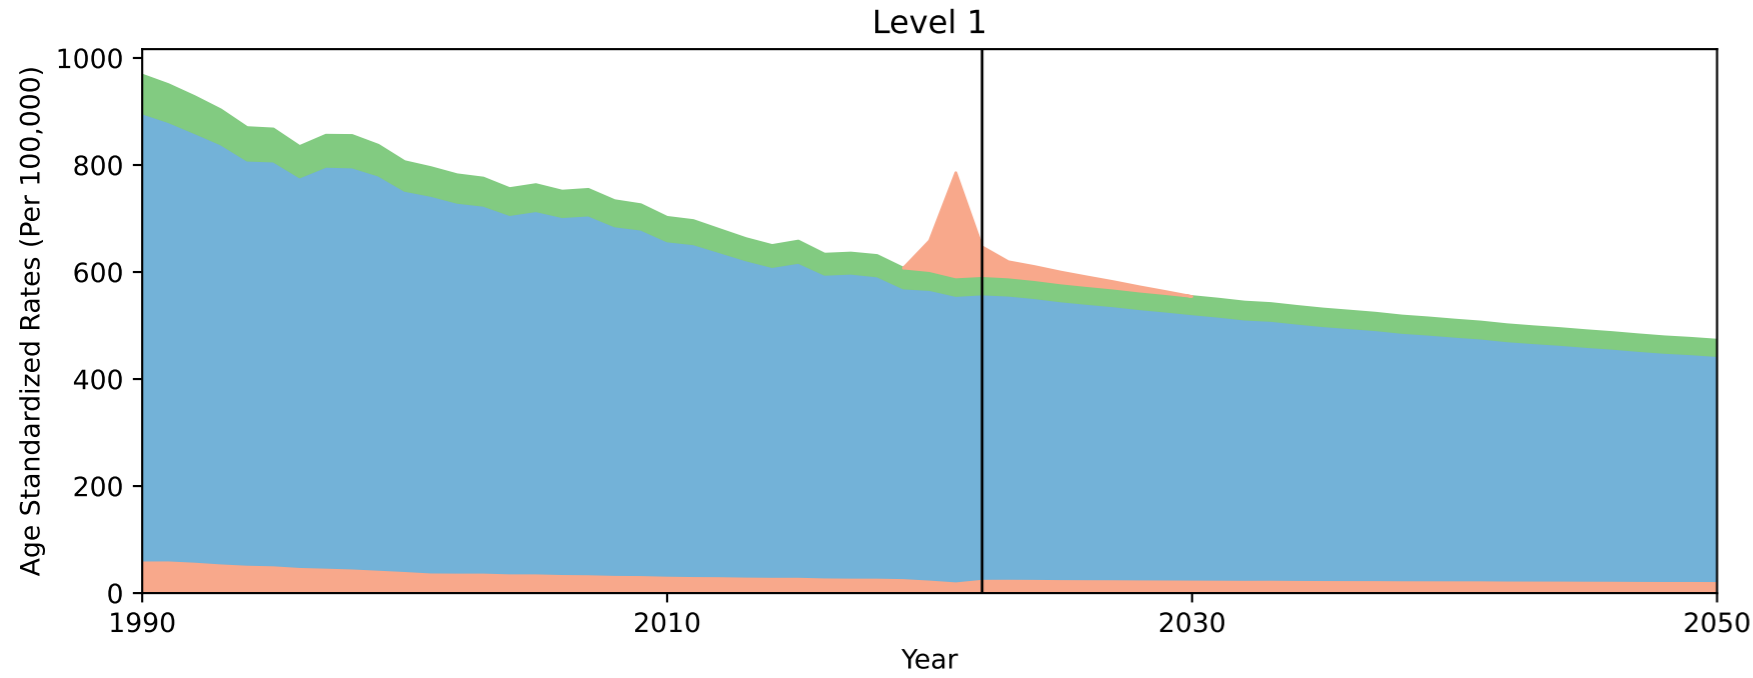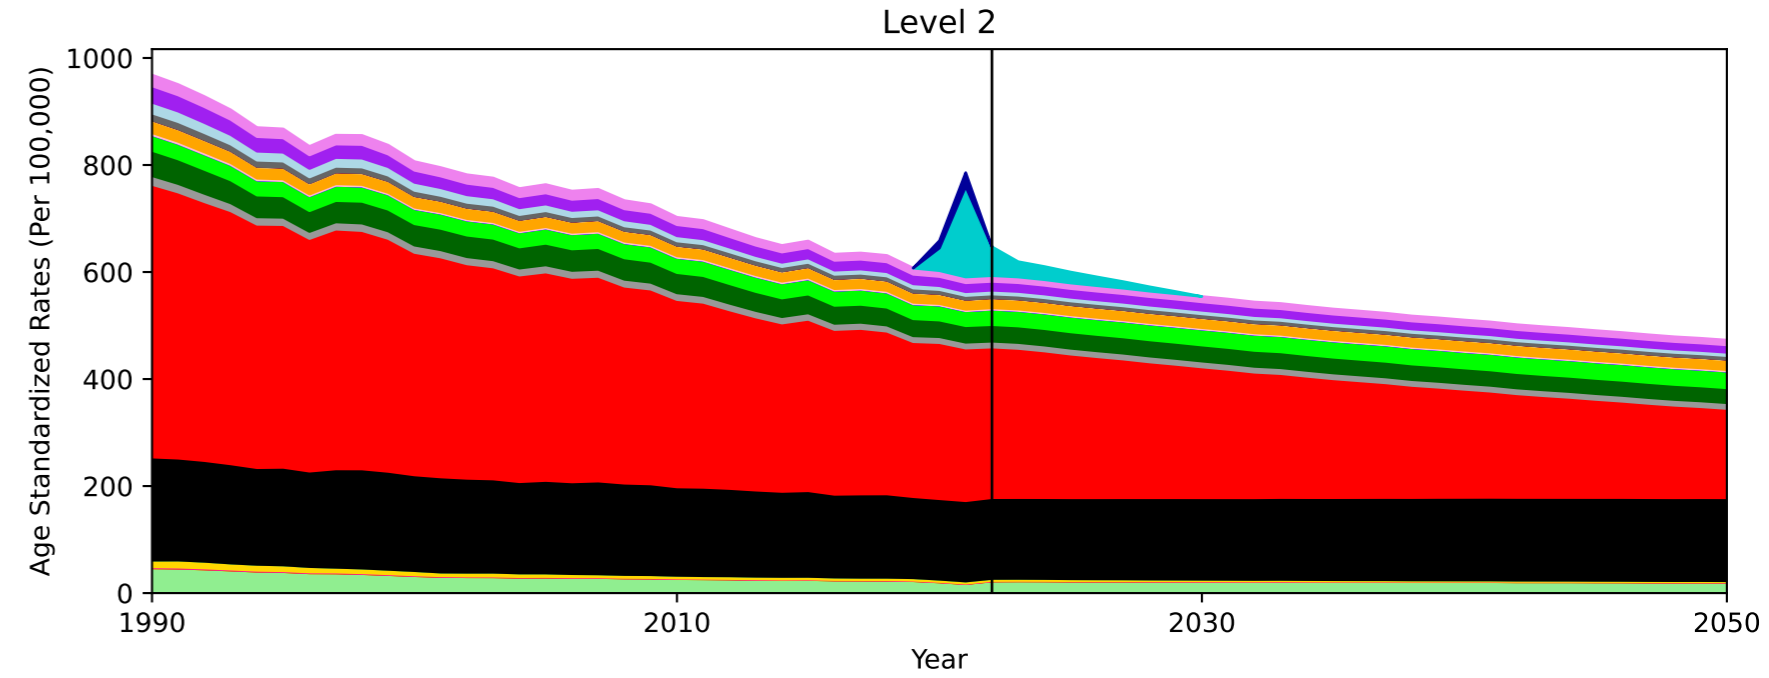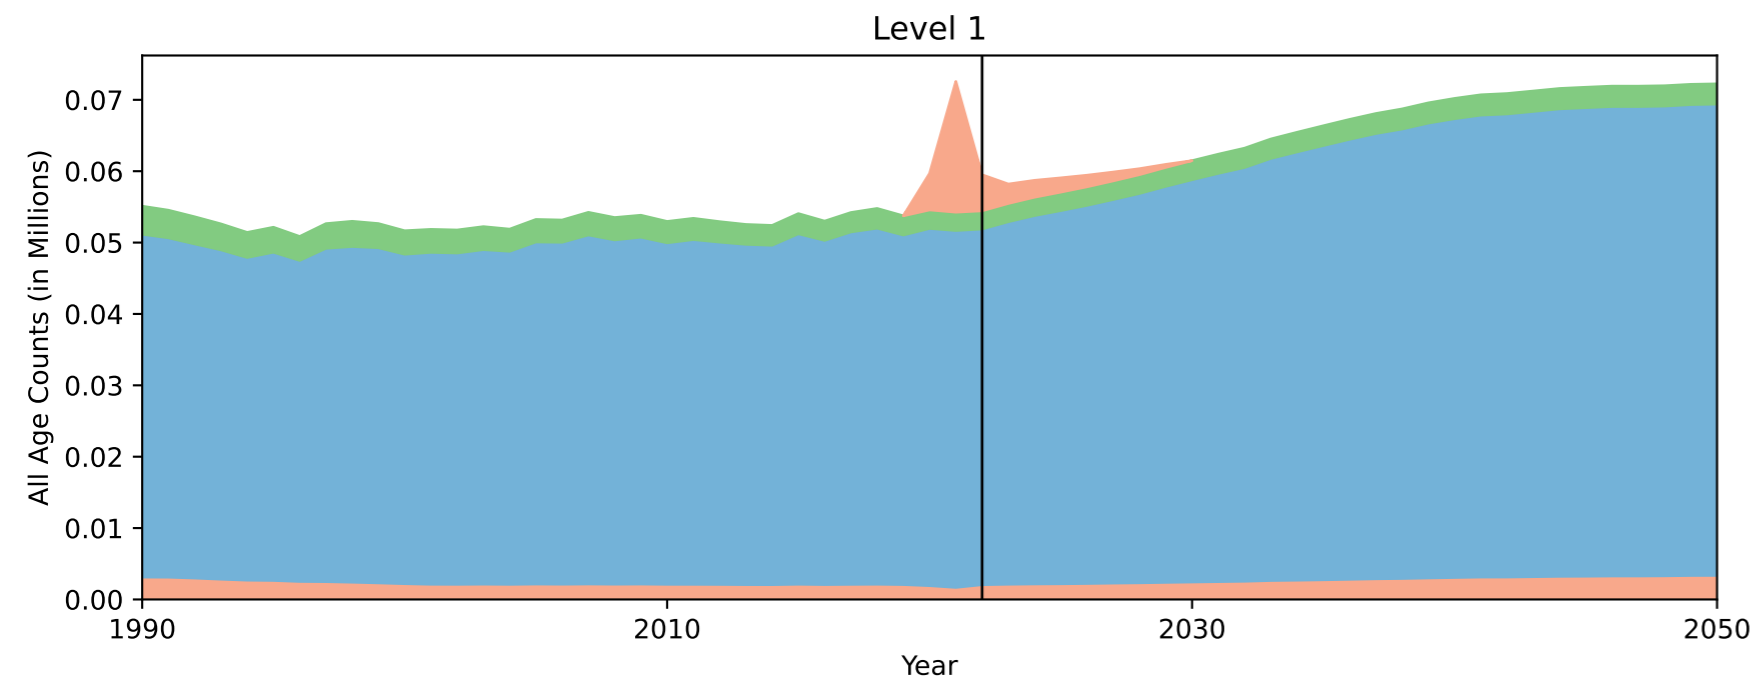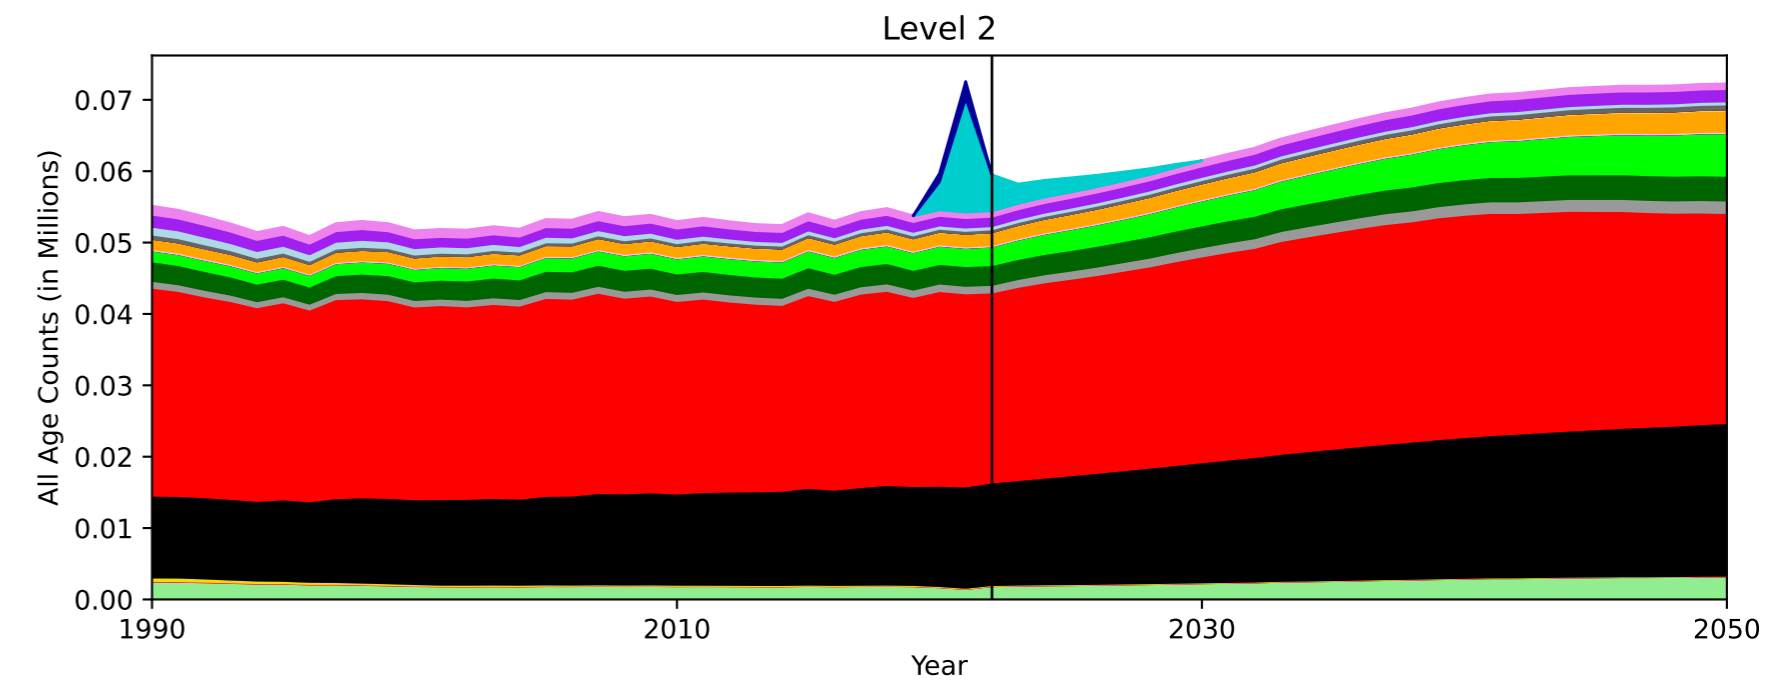

# Slovenia

Level 1

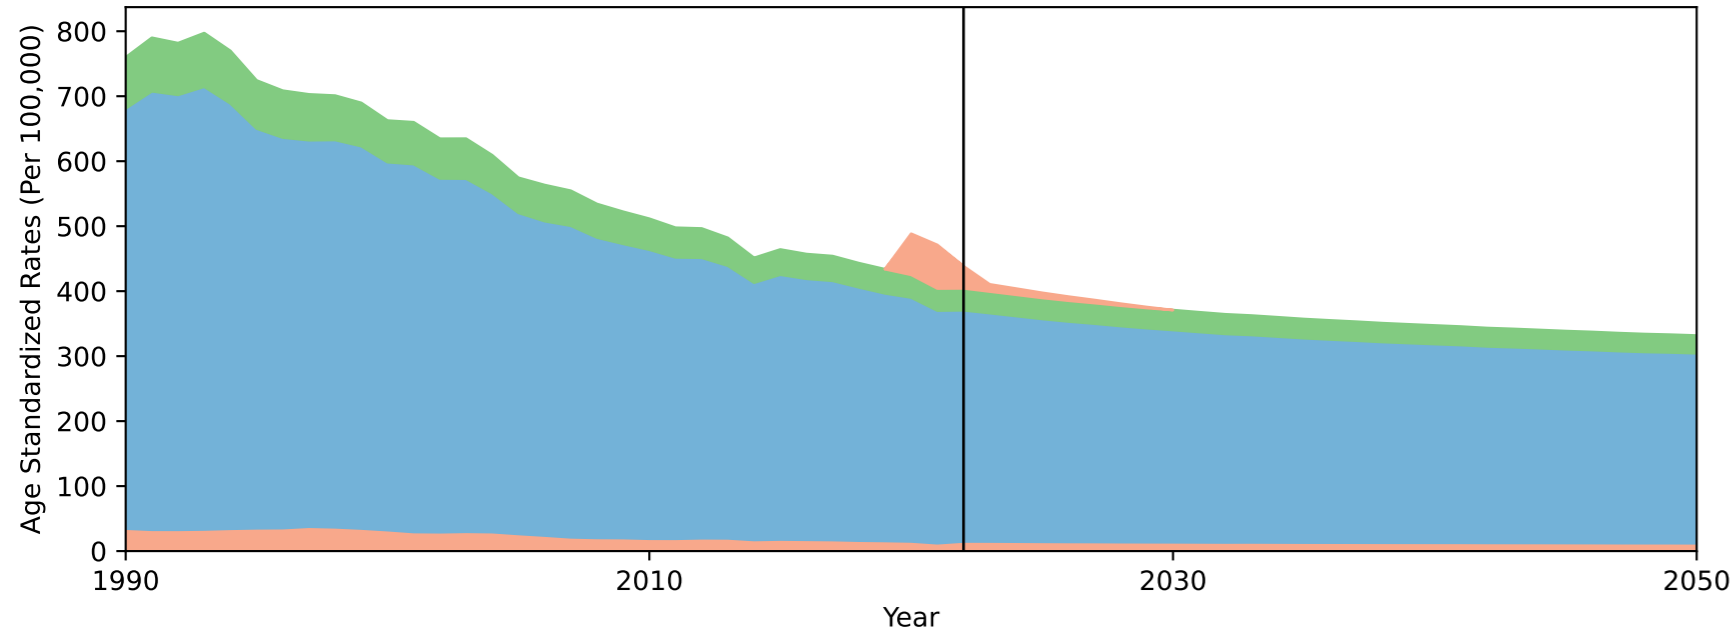

Level 2

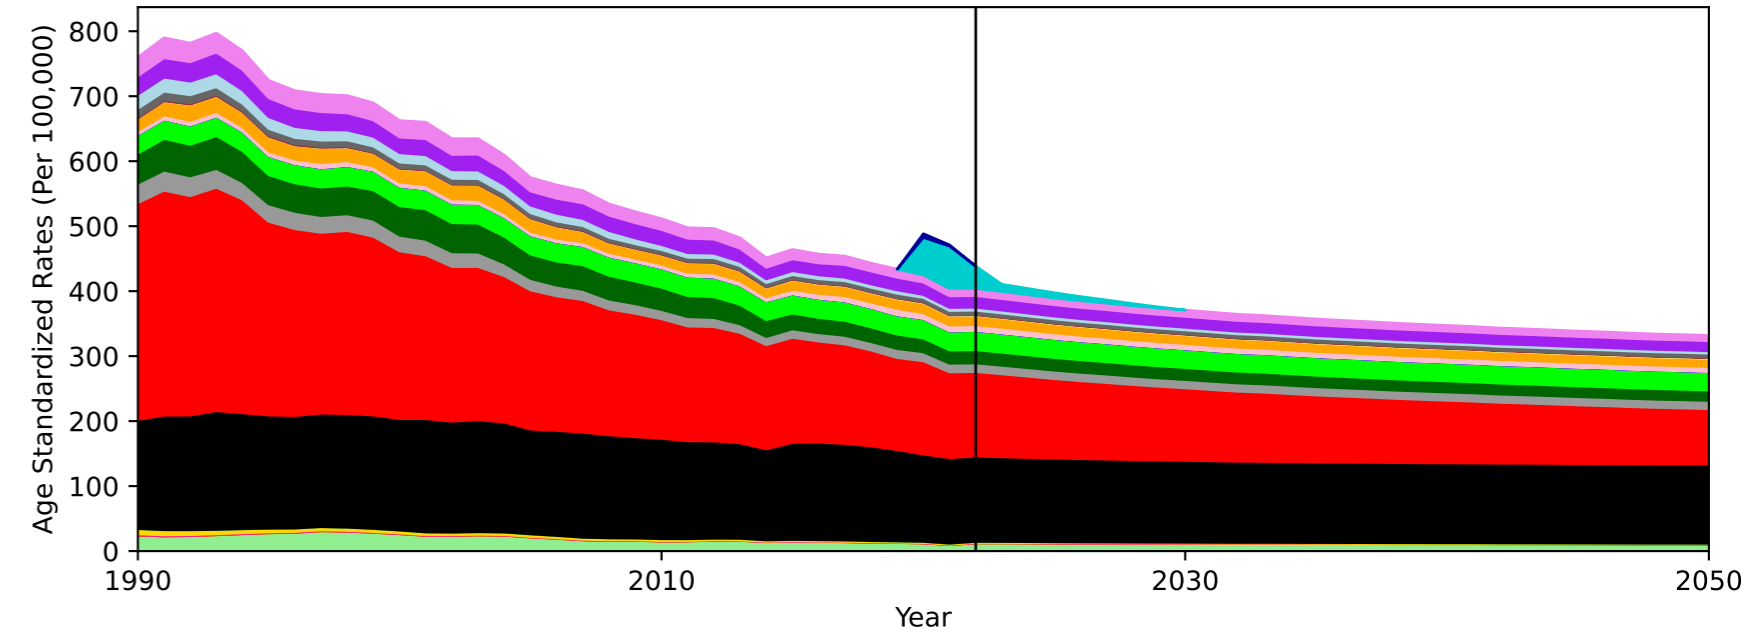

Level 1

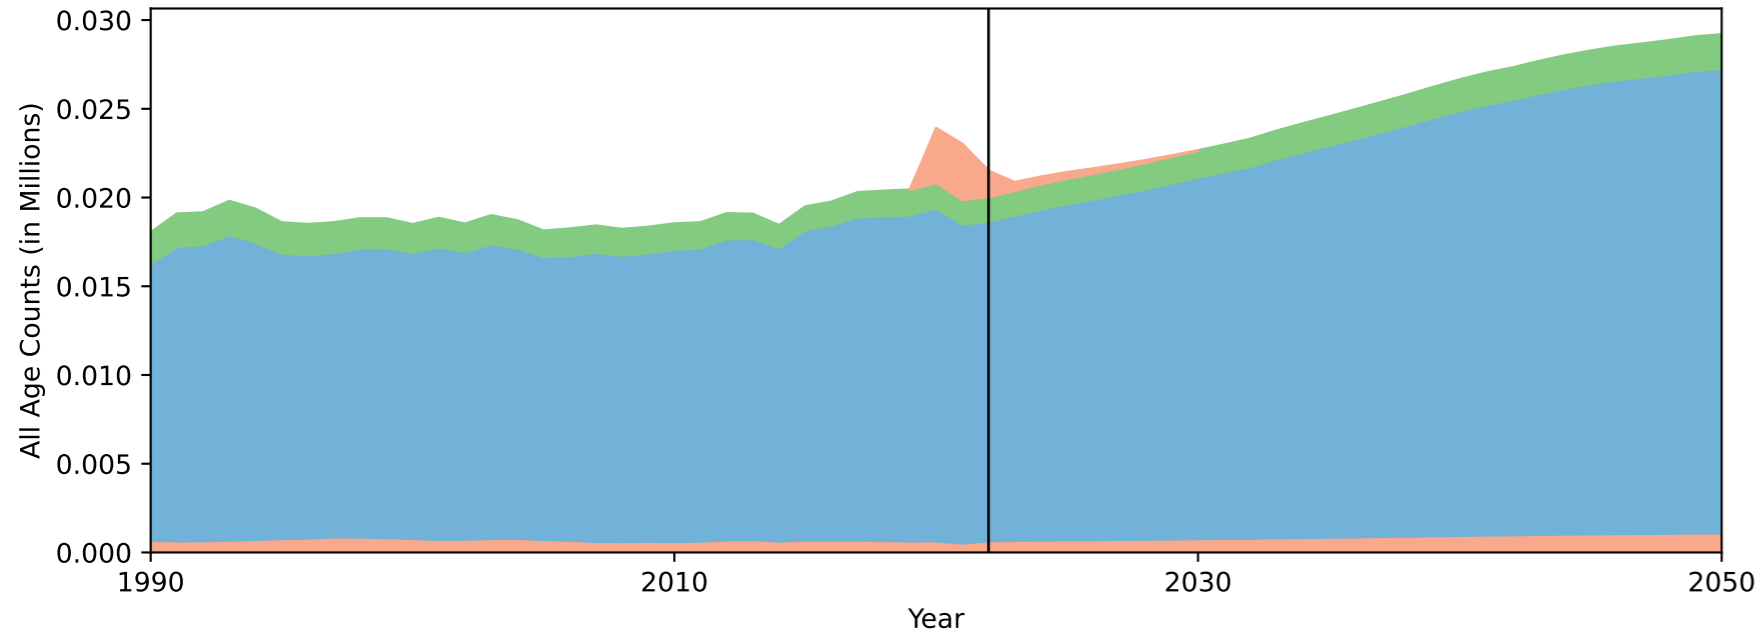

Level 2

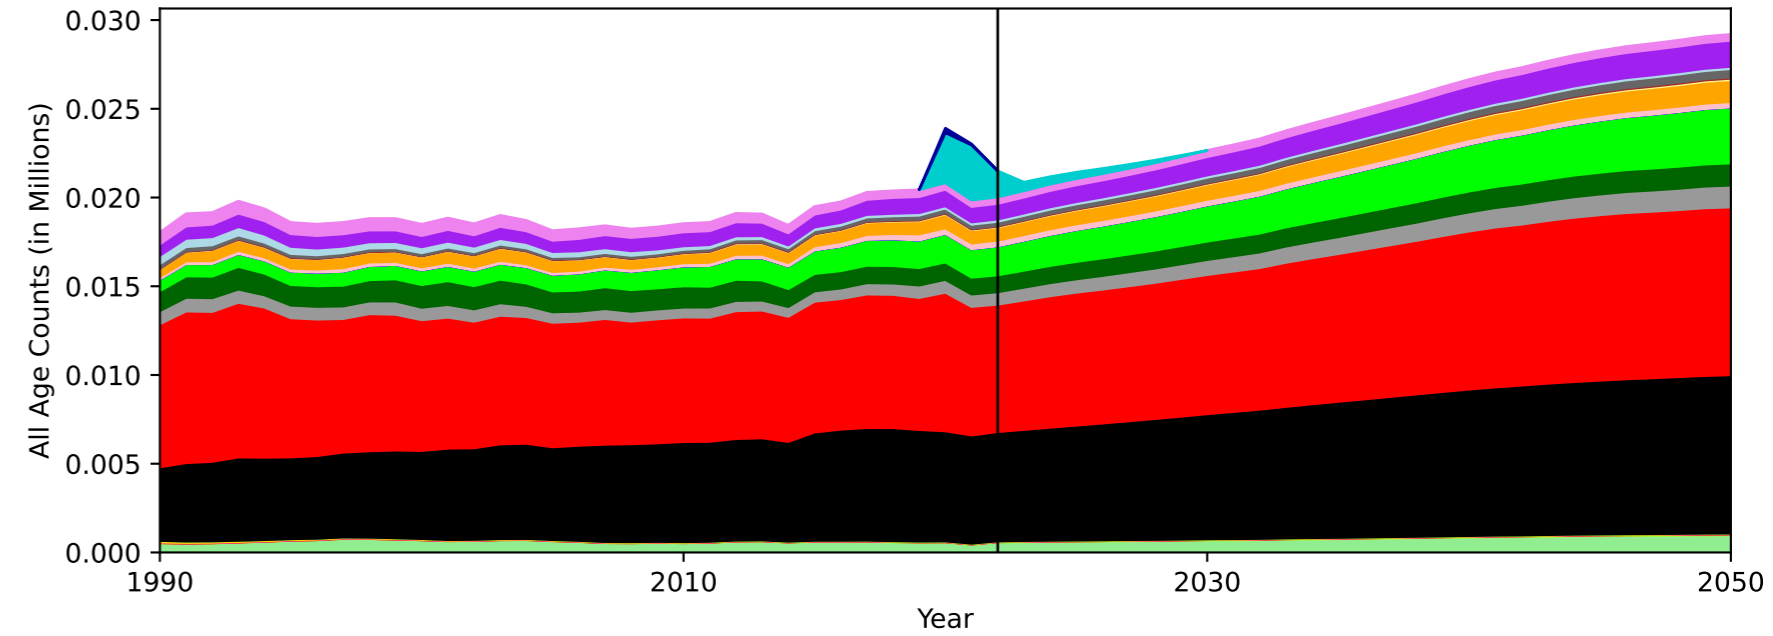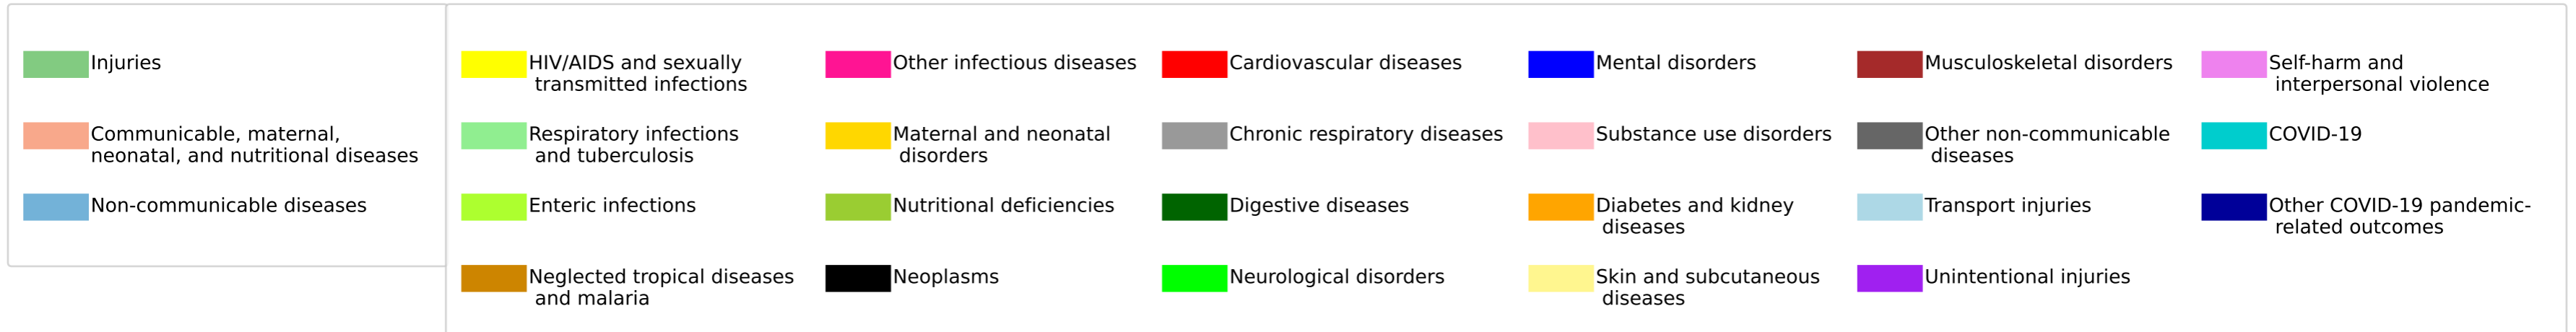

# Belarus

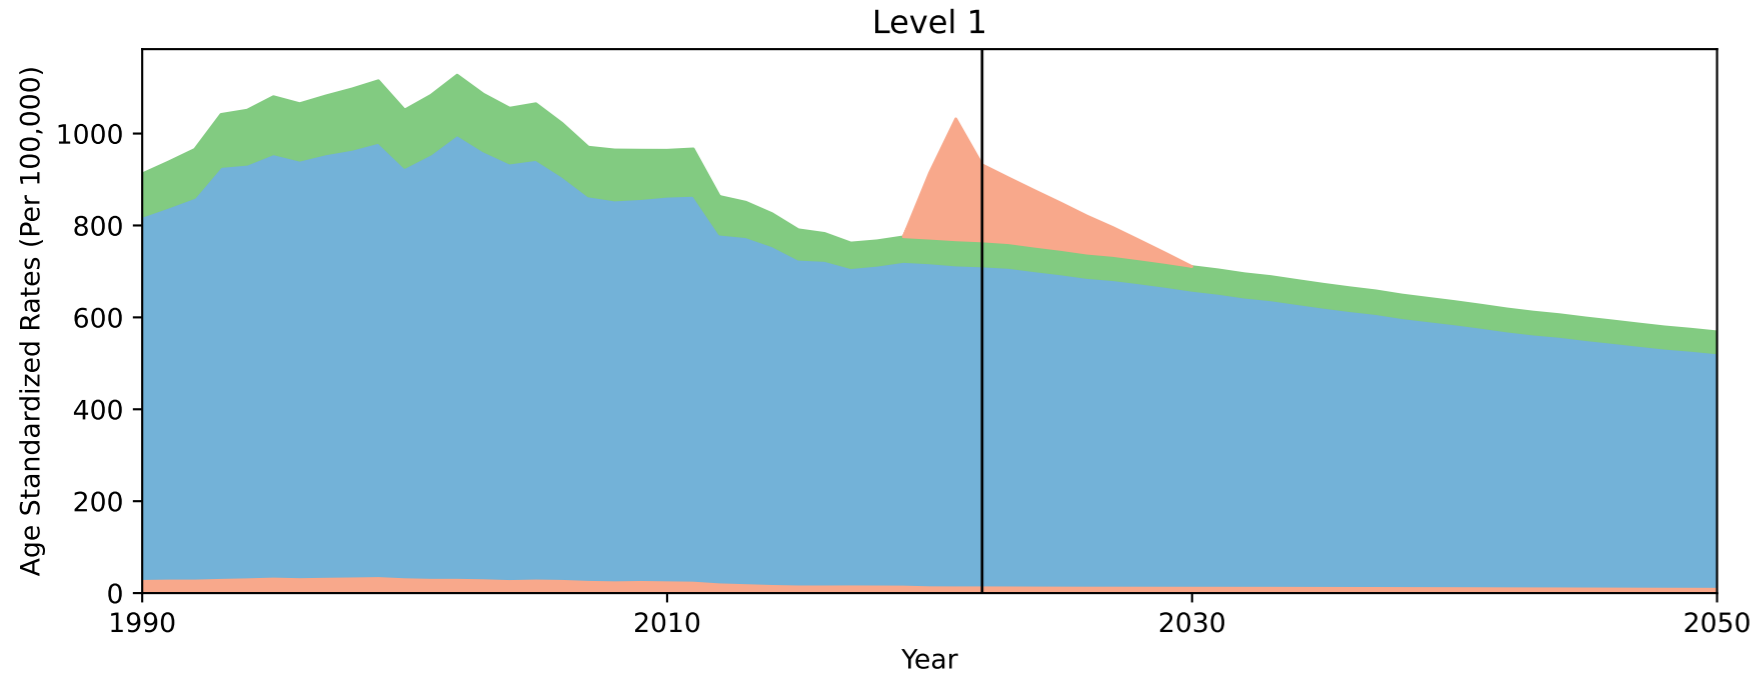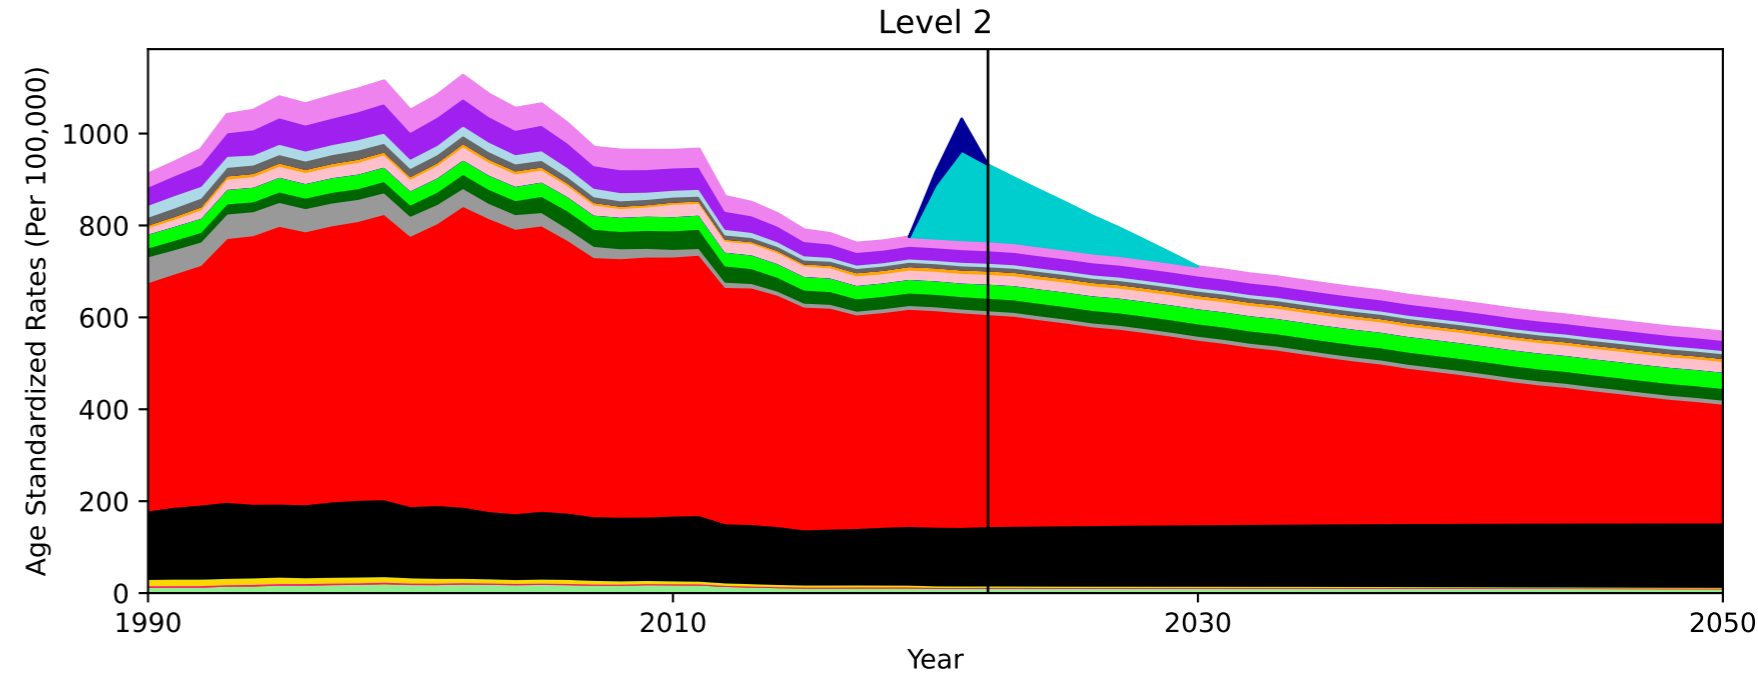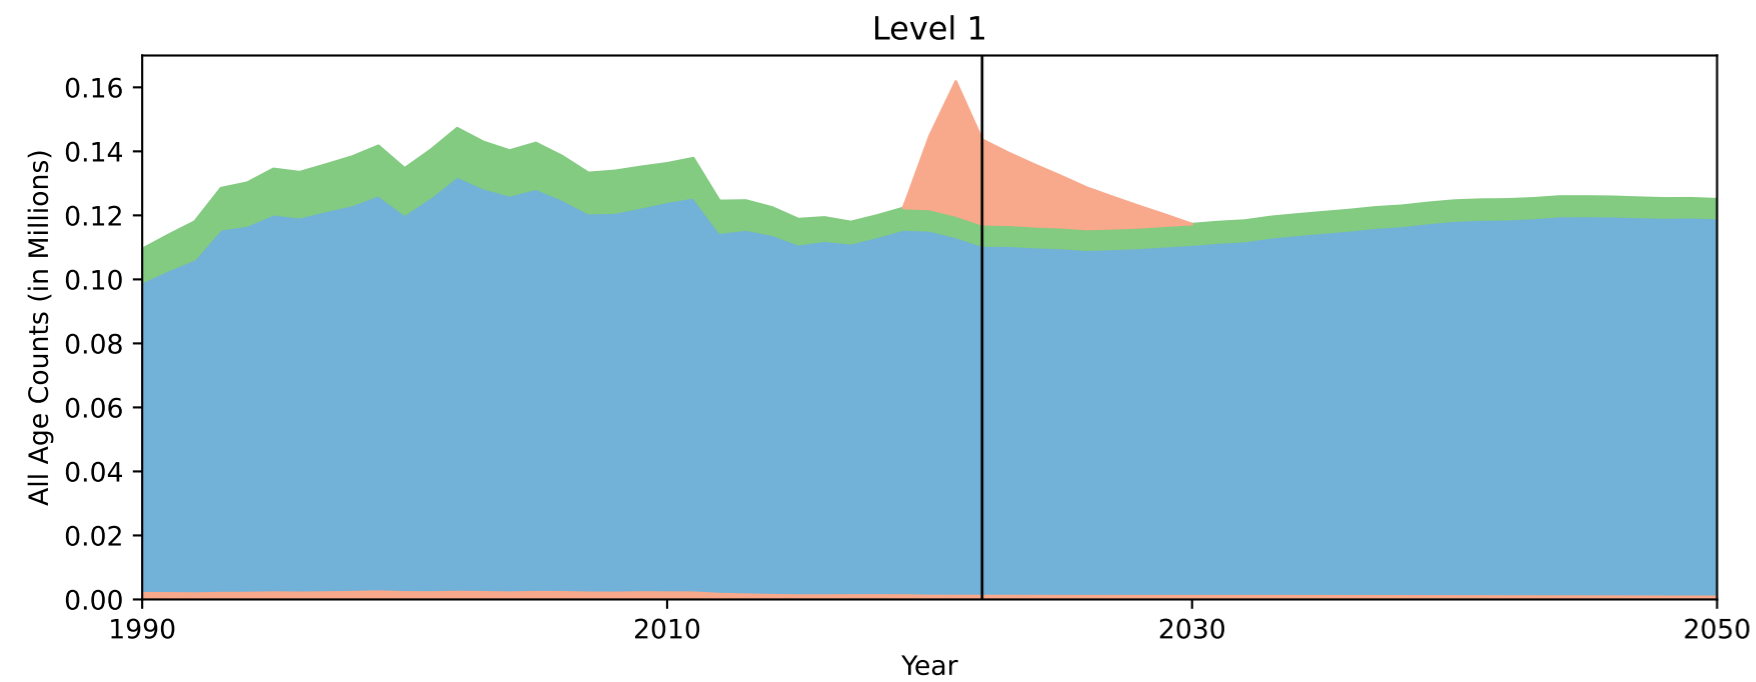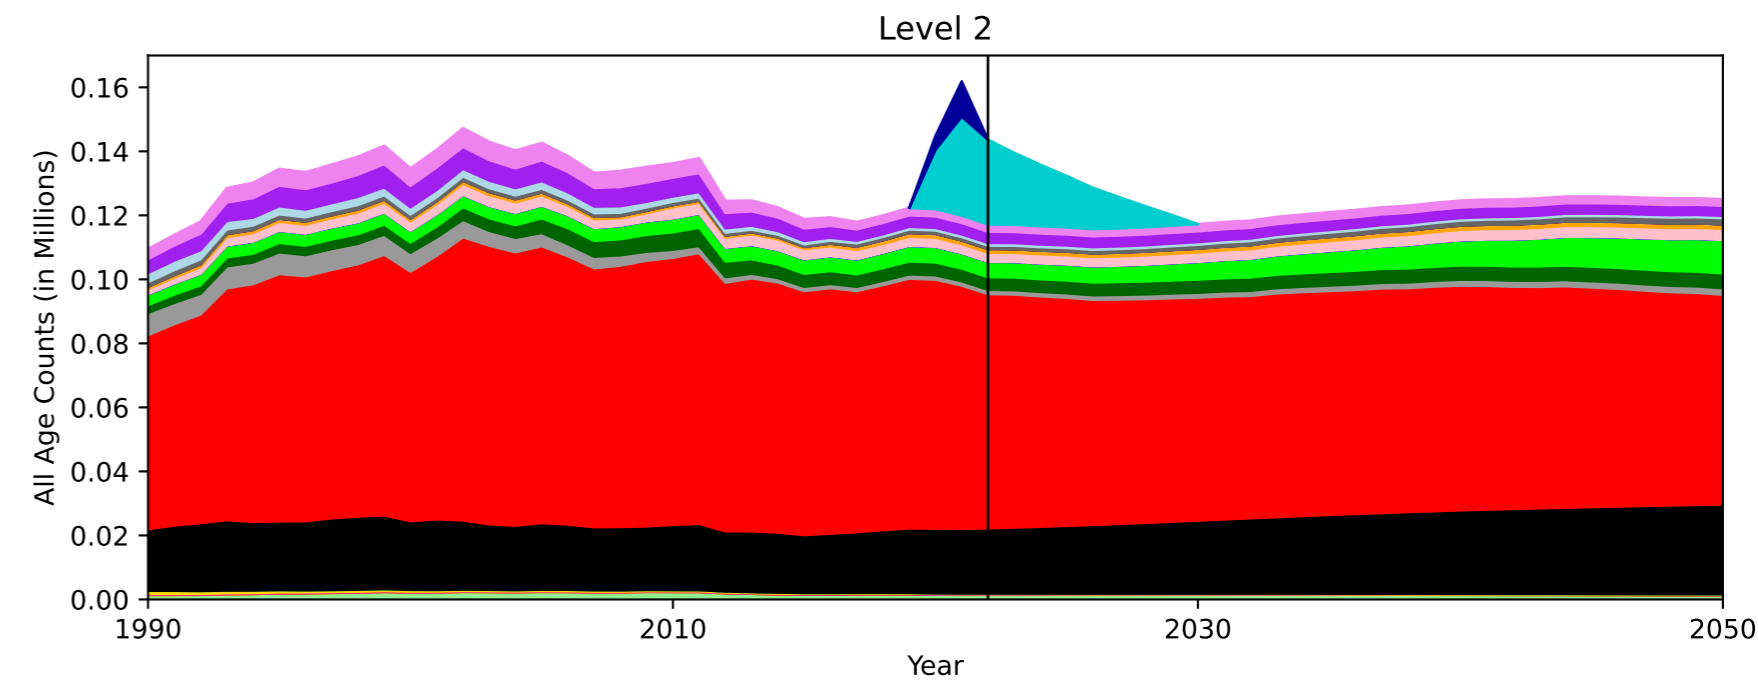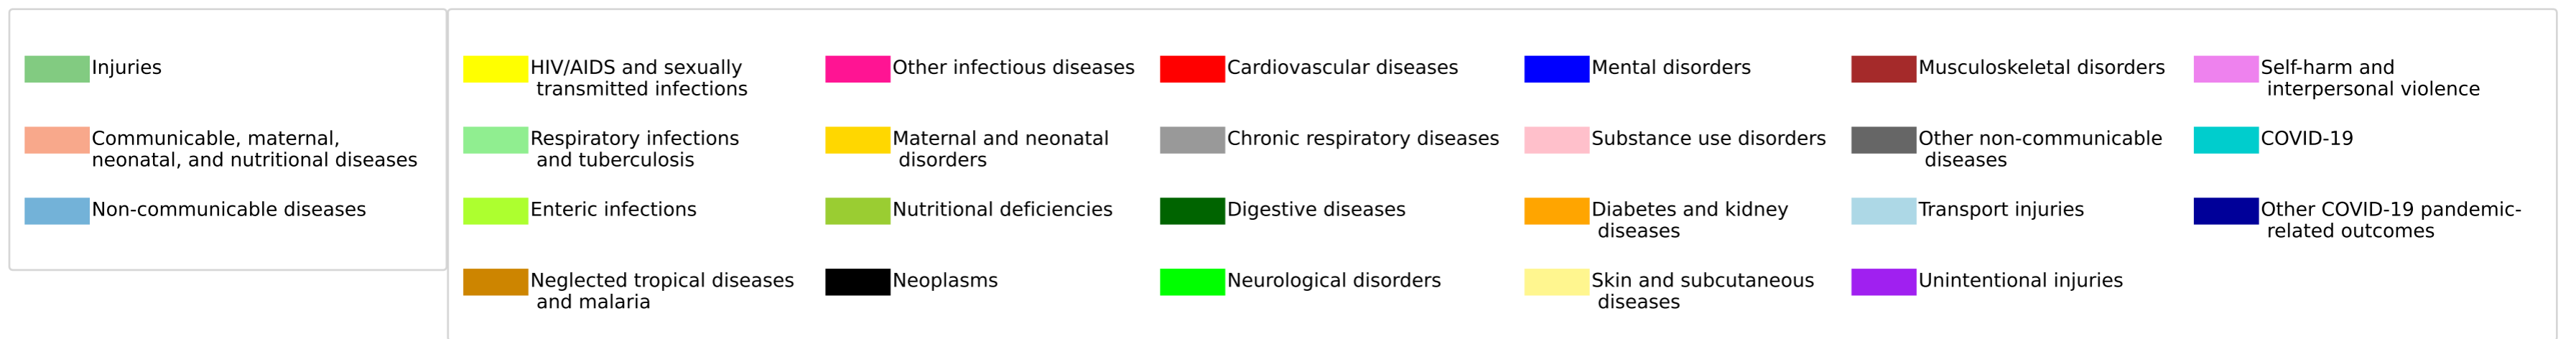

Level 1

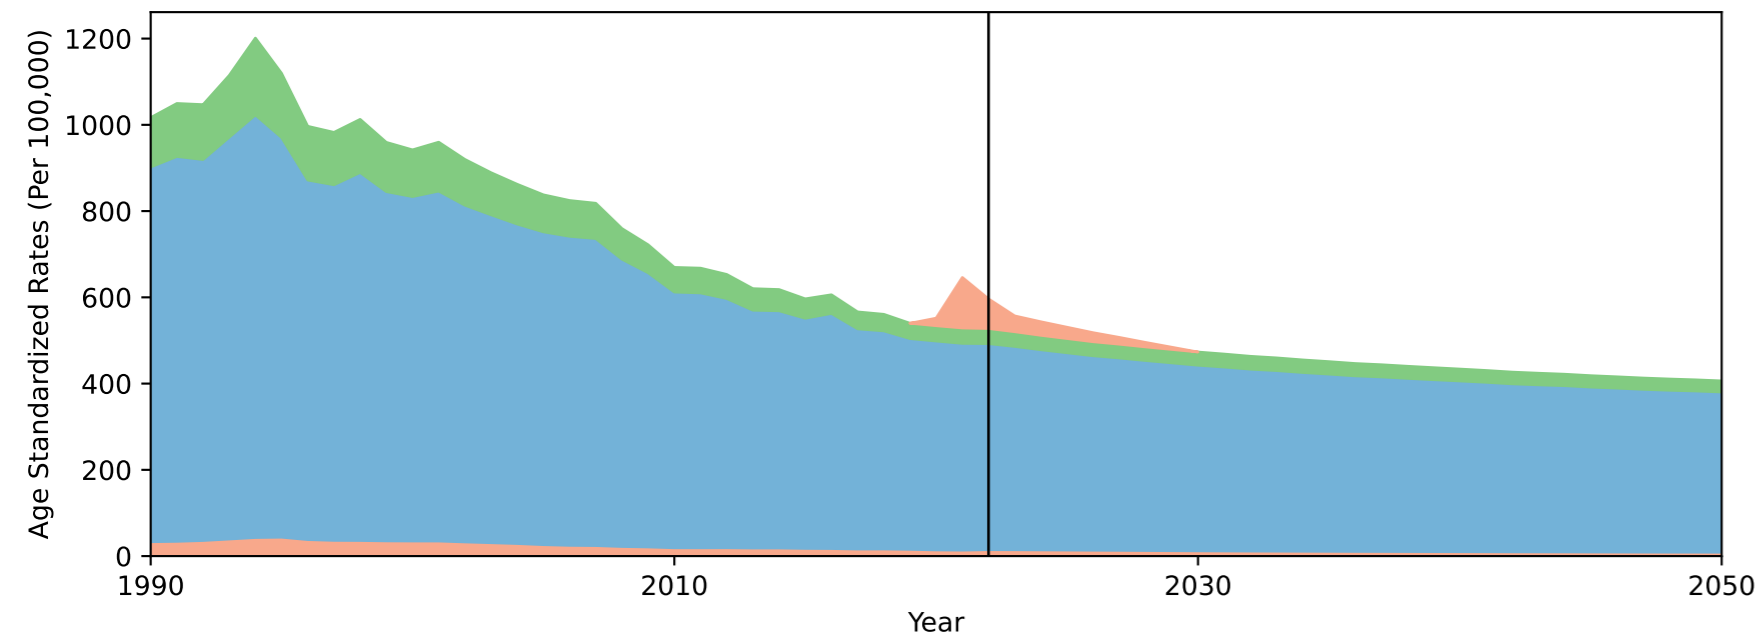

Level 2

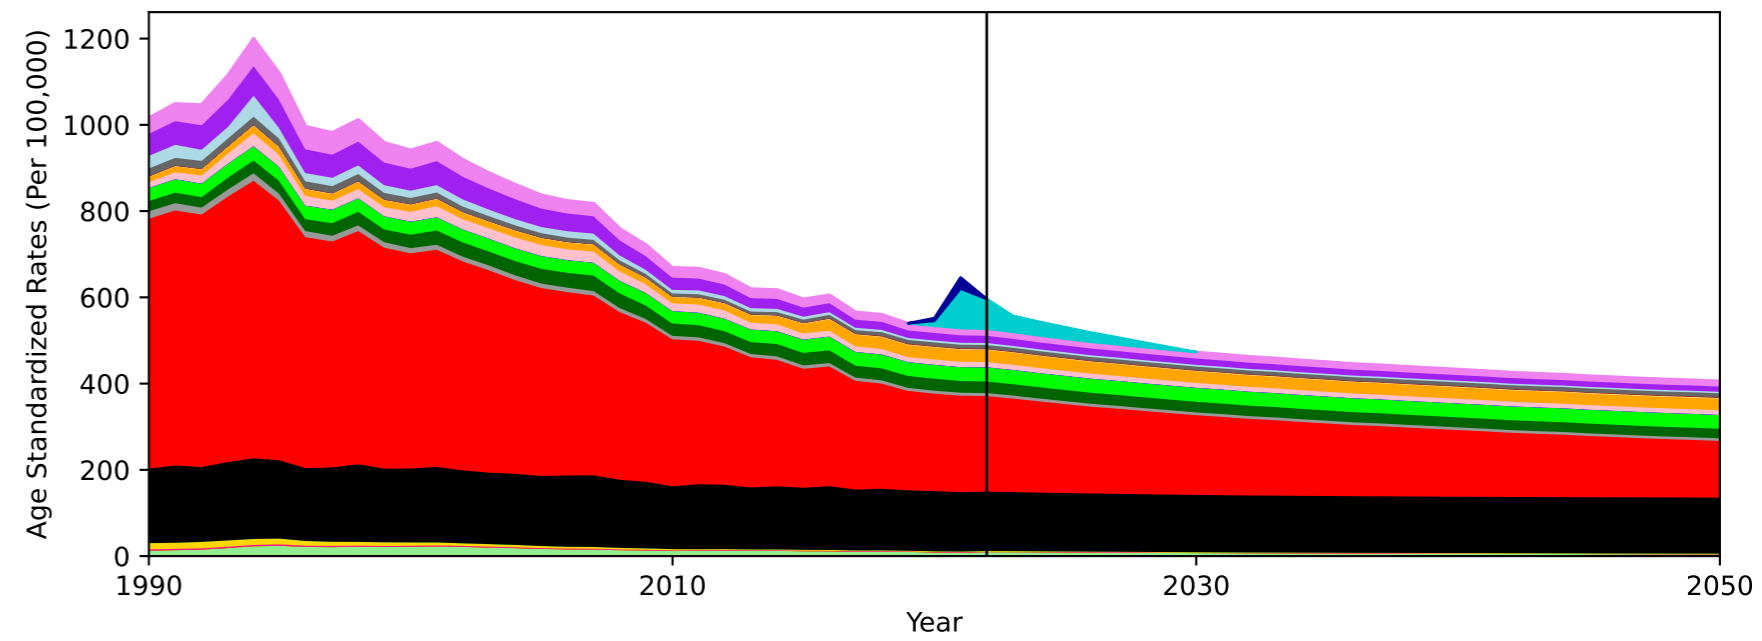

Level 1

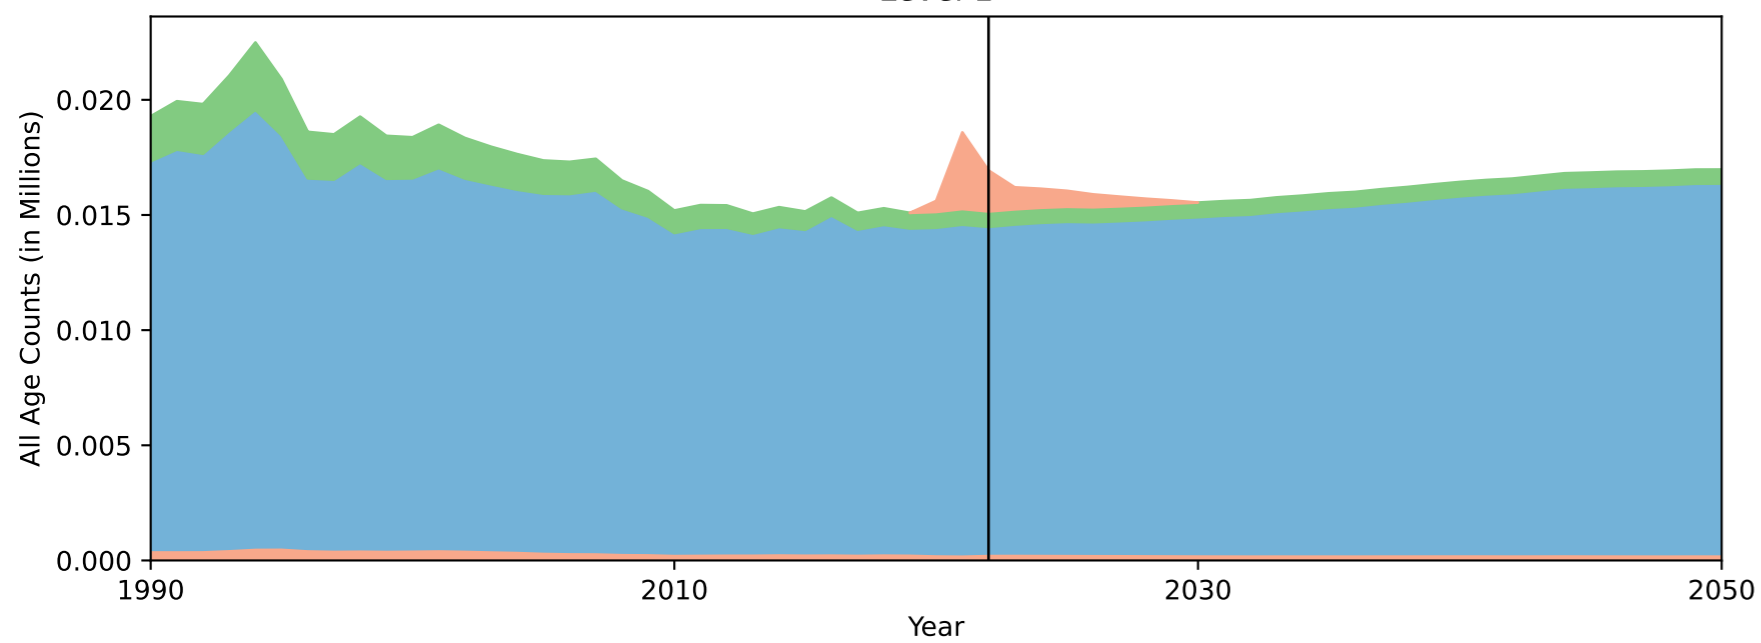

Level 2

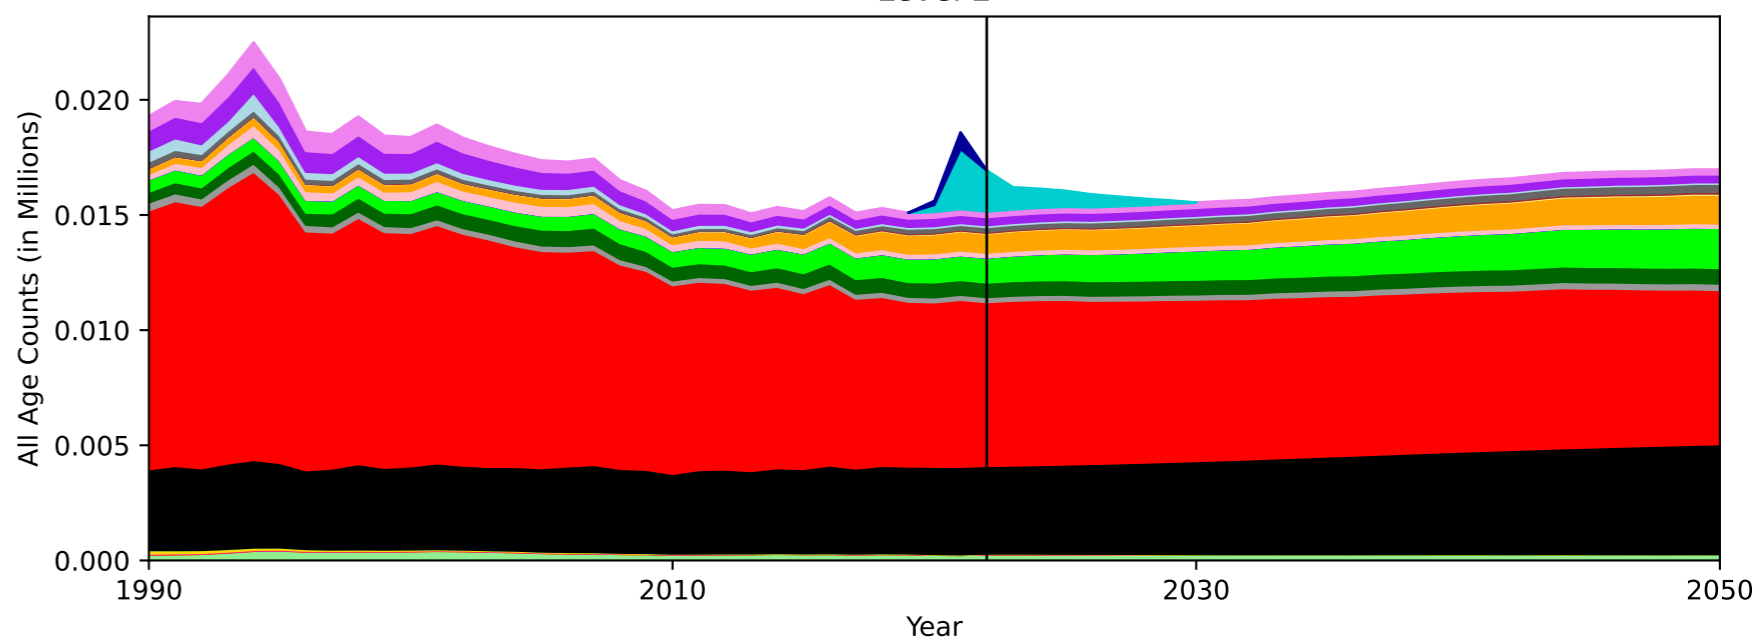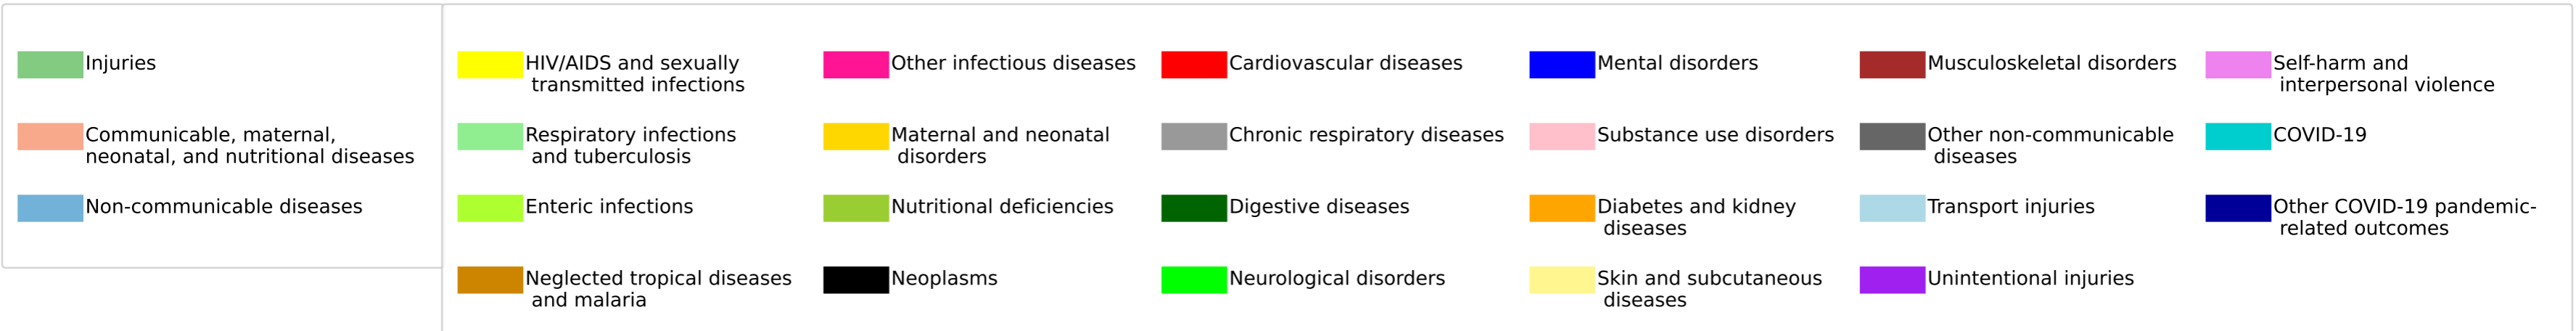

# Latvia

Level 1

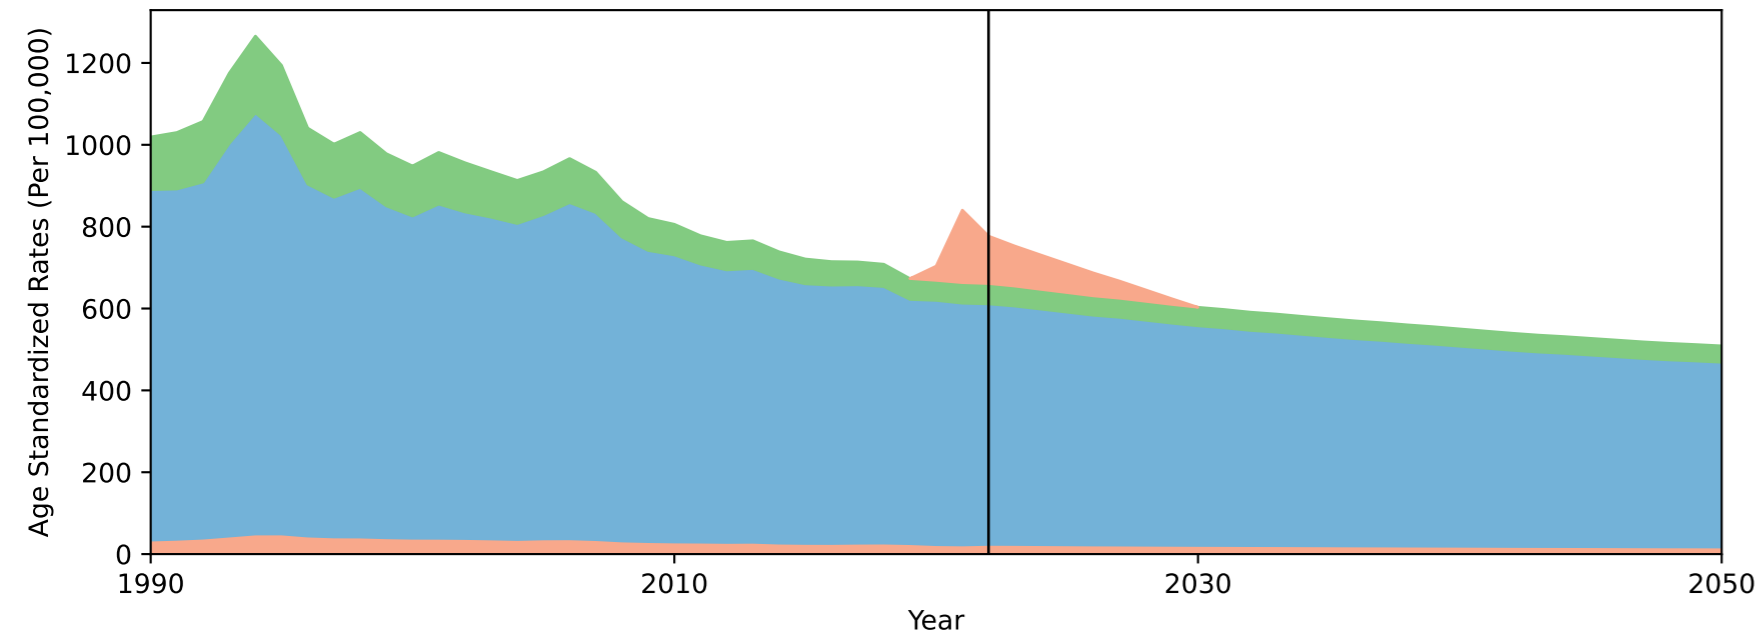

Level 2

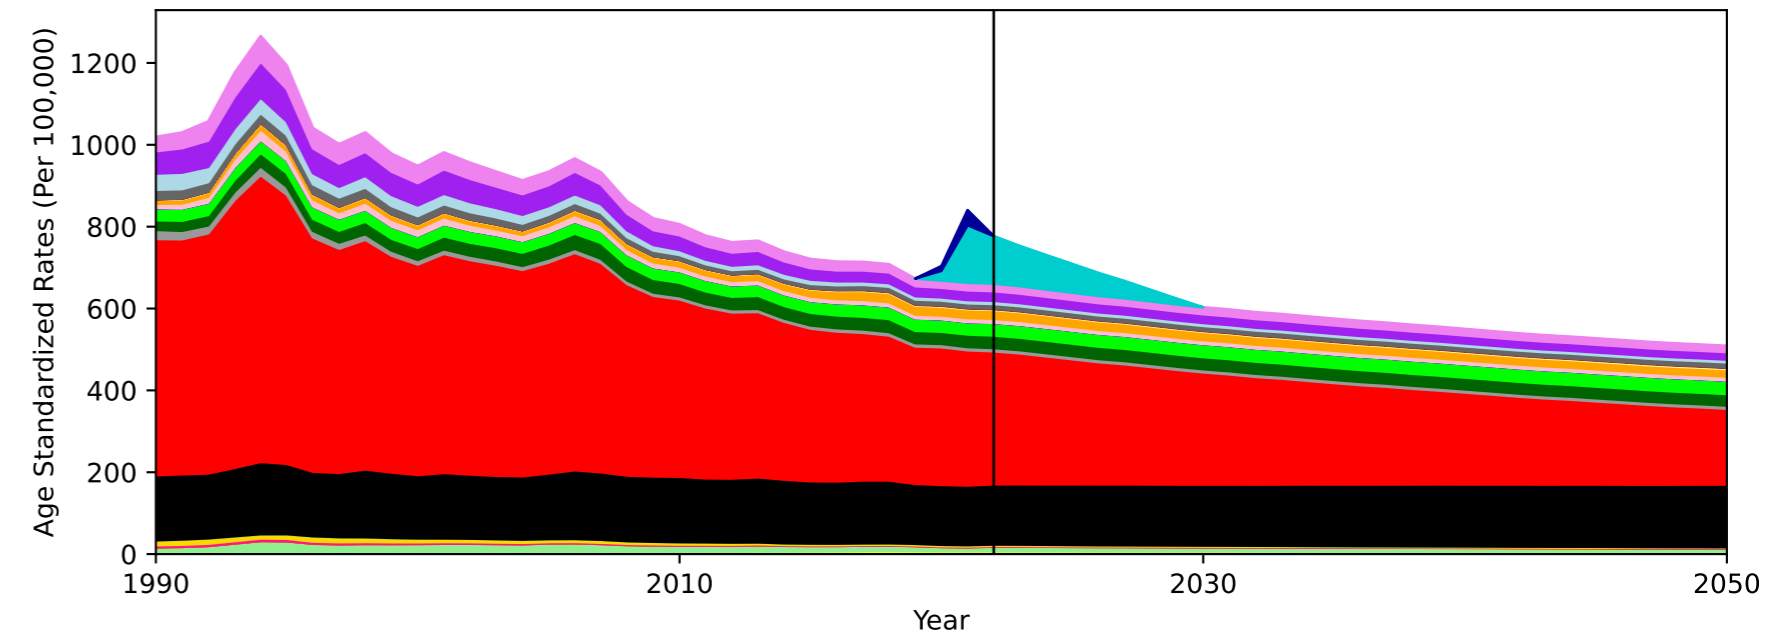

Level 1

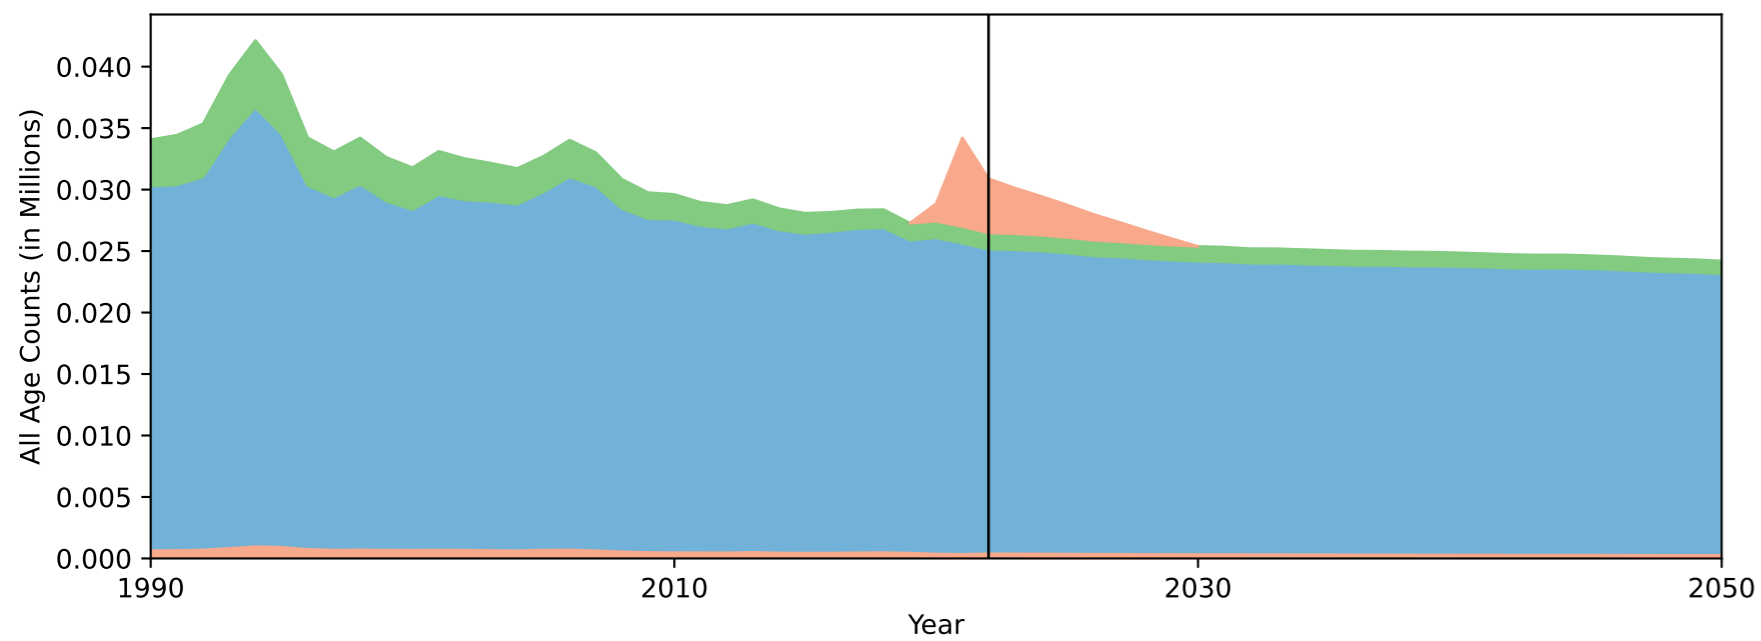

Level 2

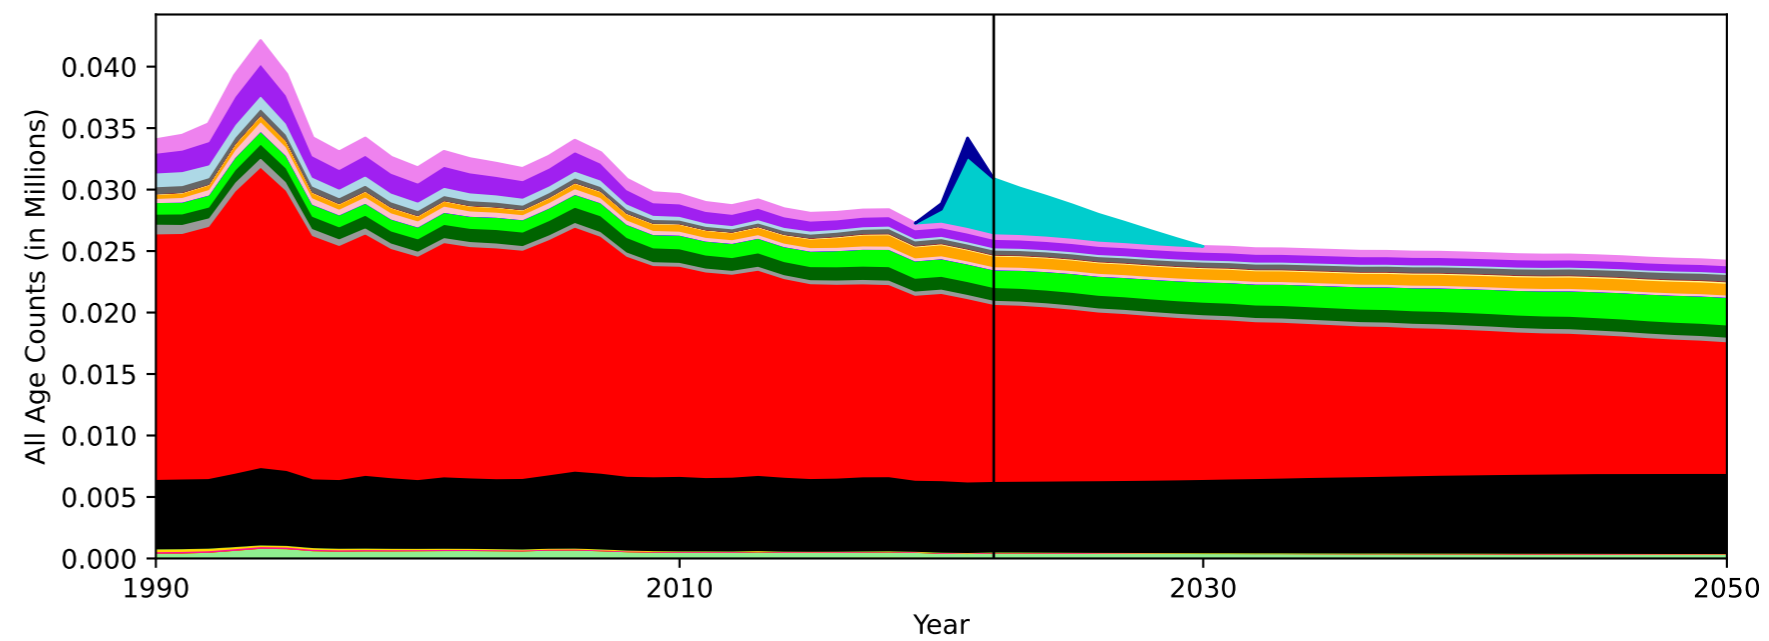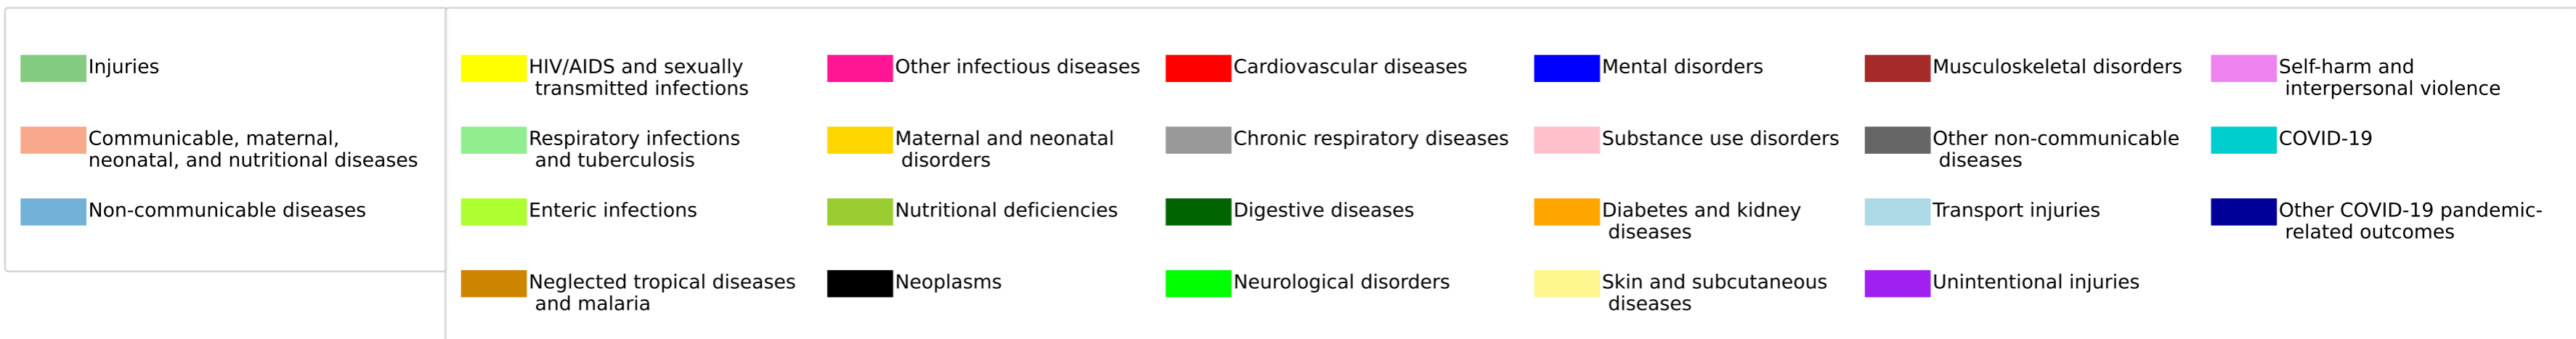

# Lithuania

Level 1

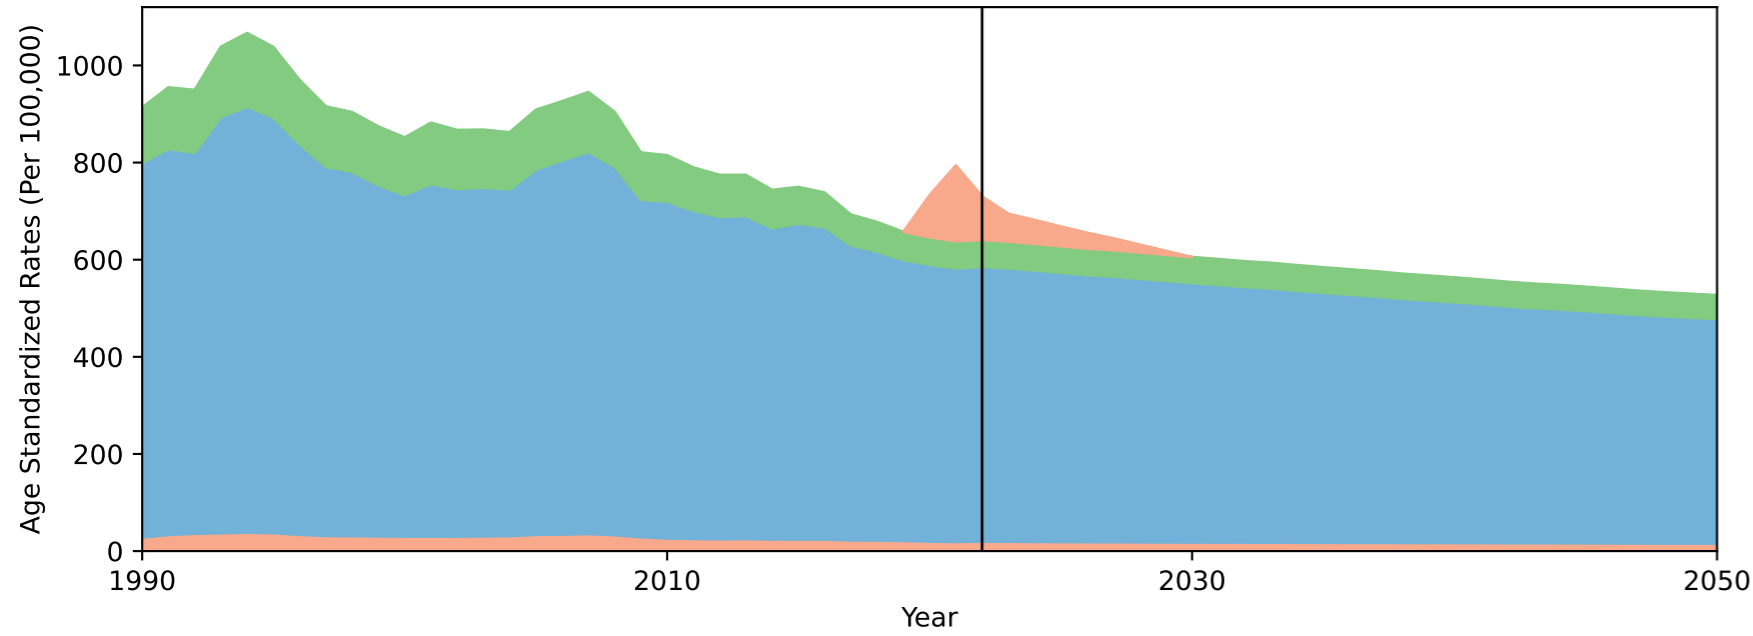

Level 2

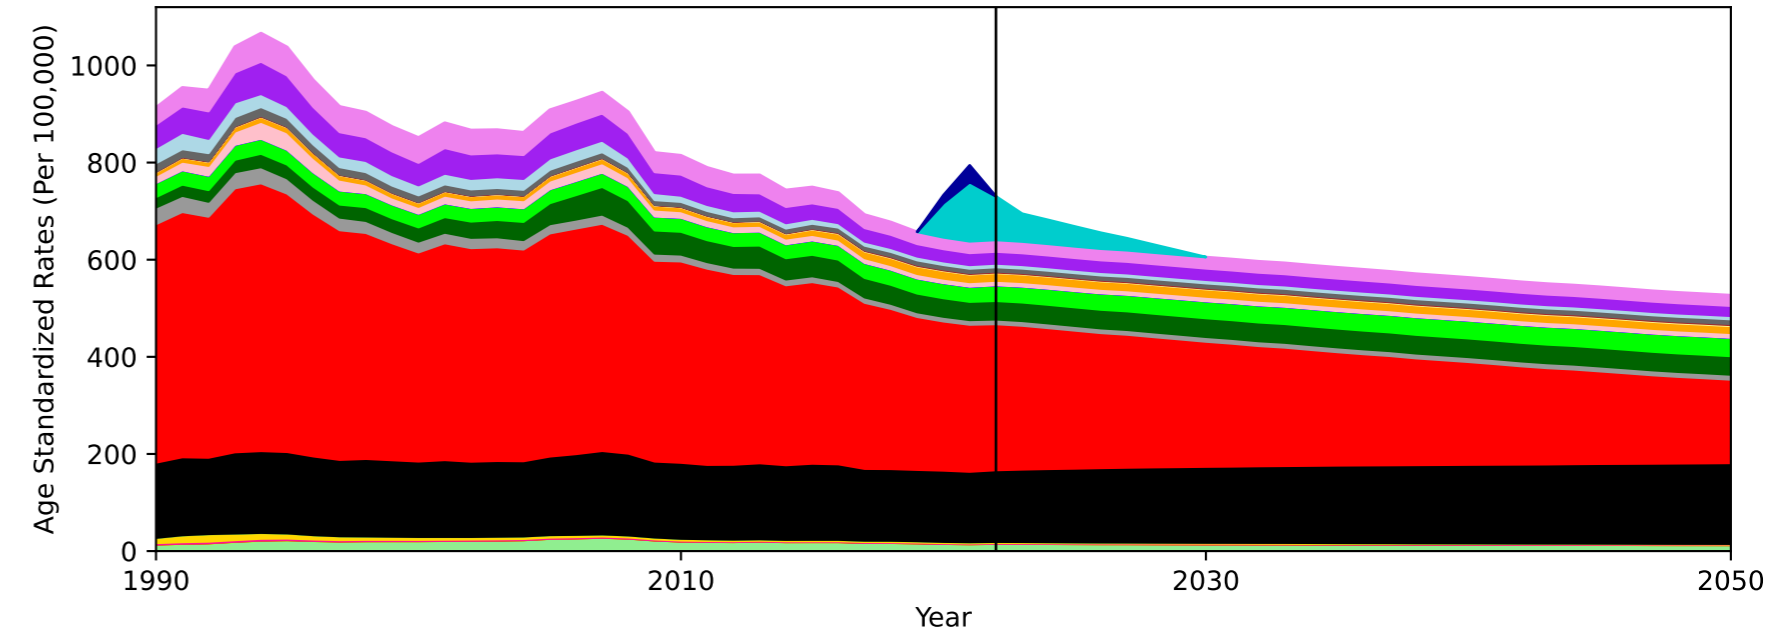

Level 1

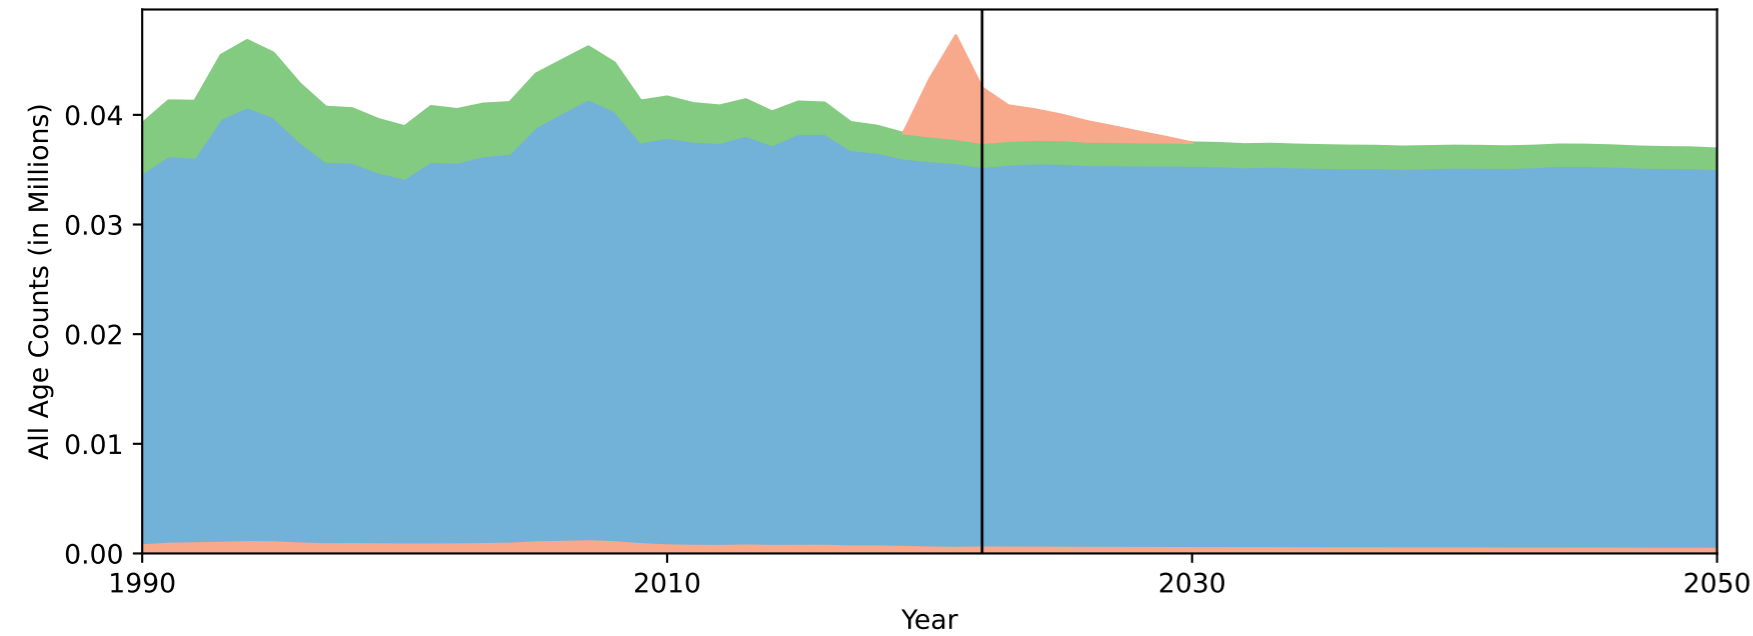

Level 2

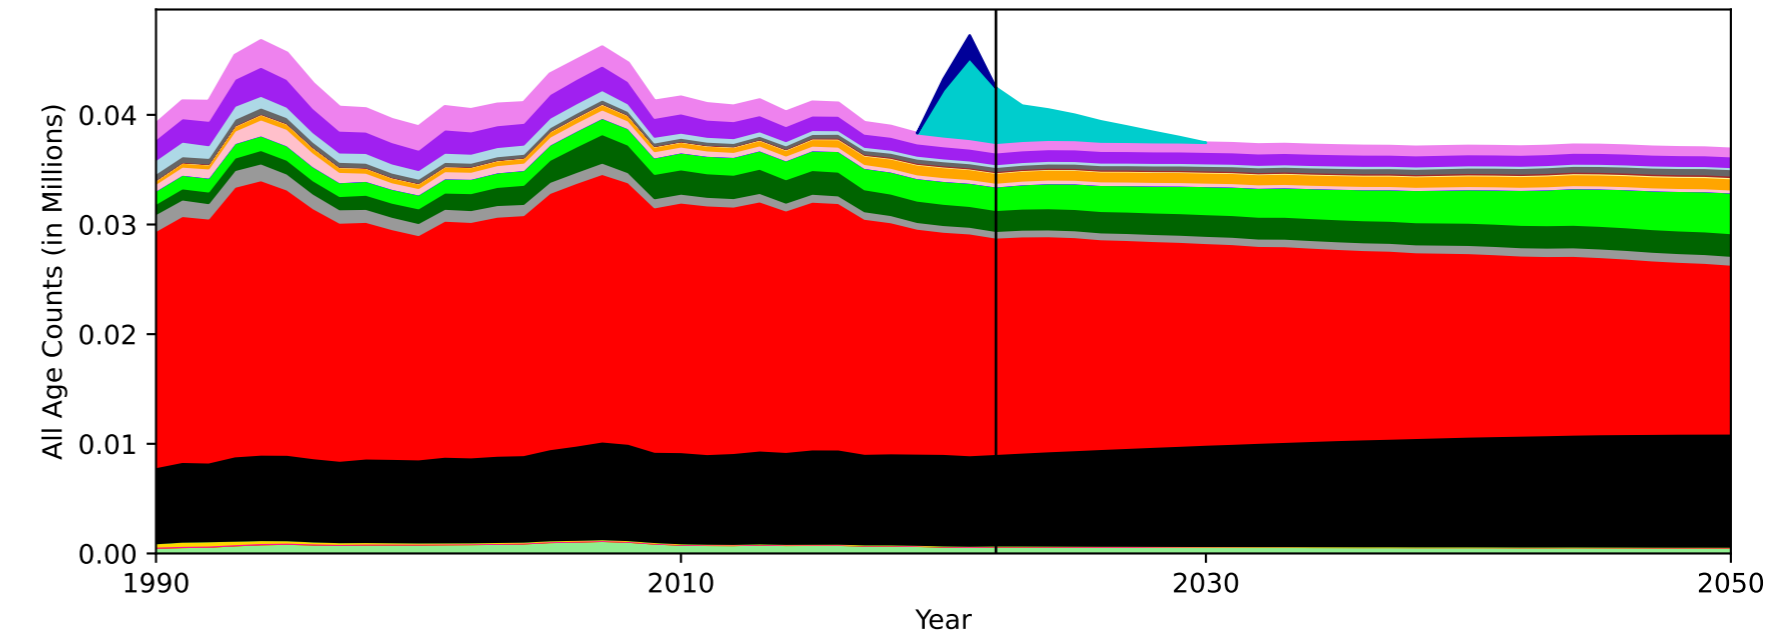



# Moldova

Level 1

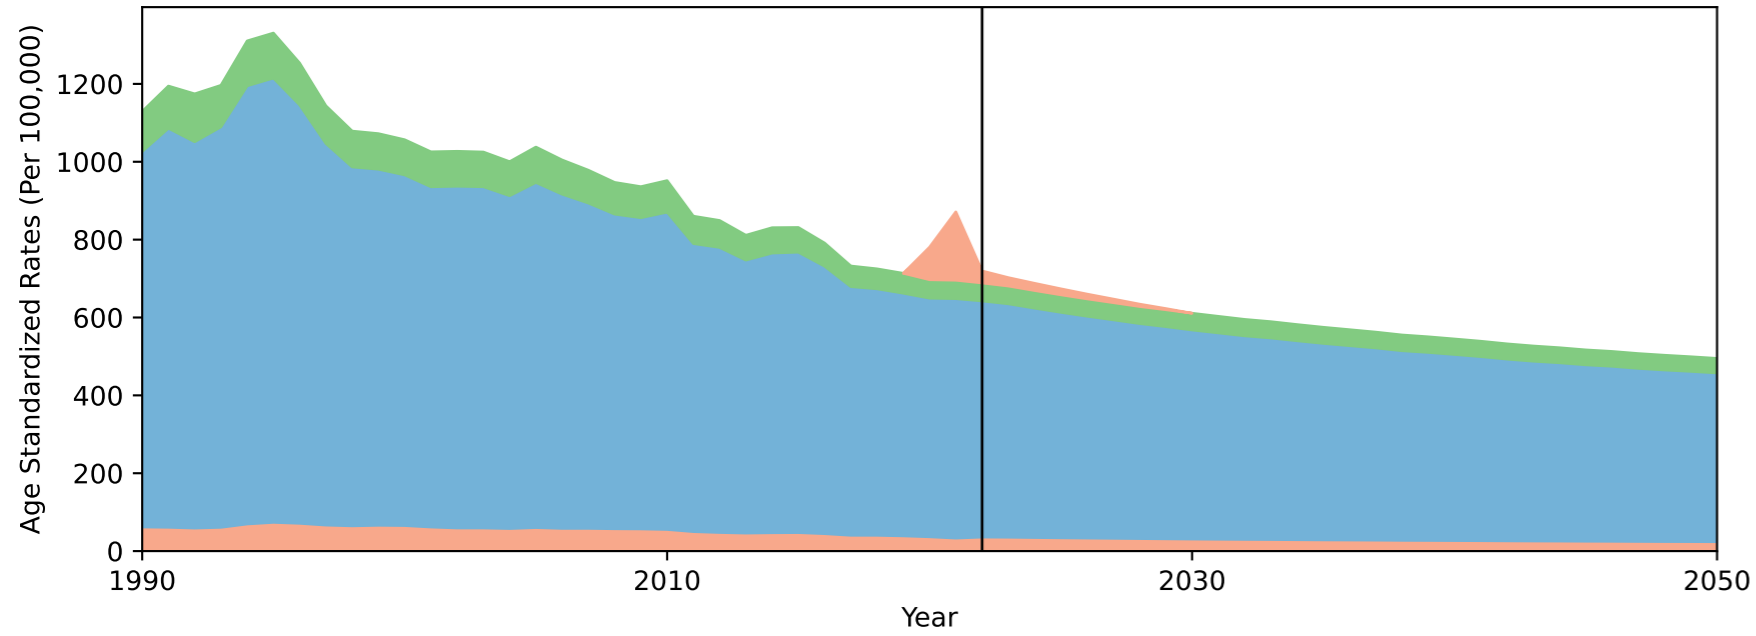

Level 2

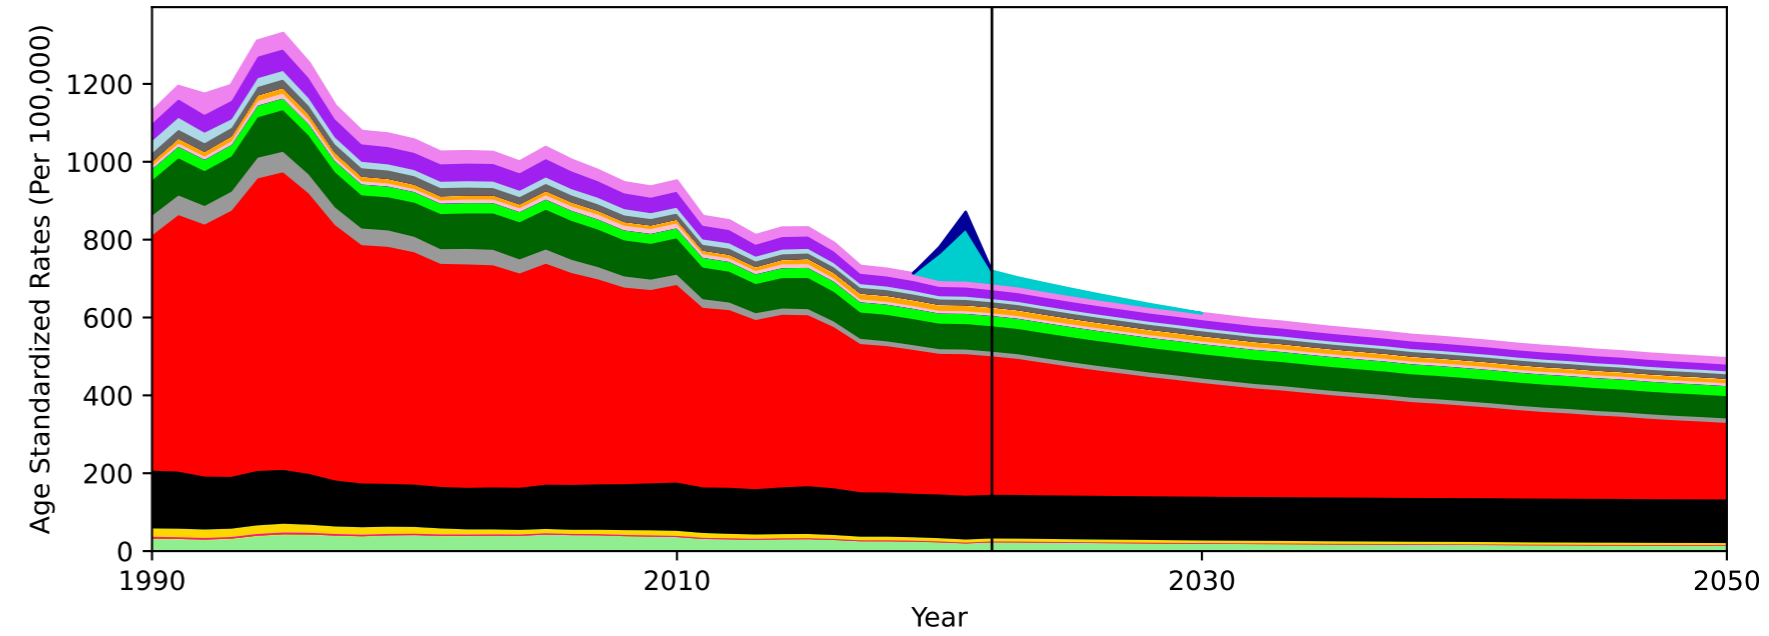

Level 1

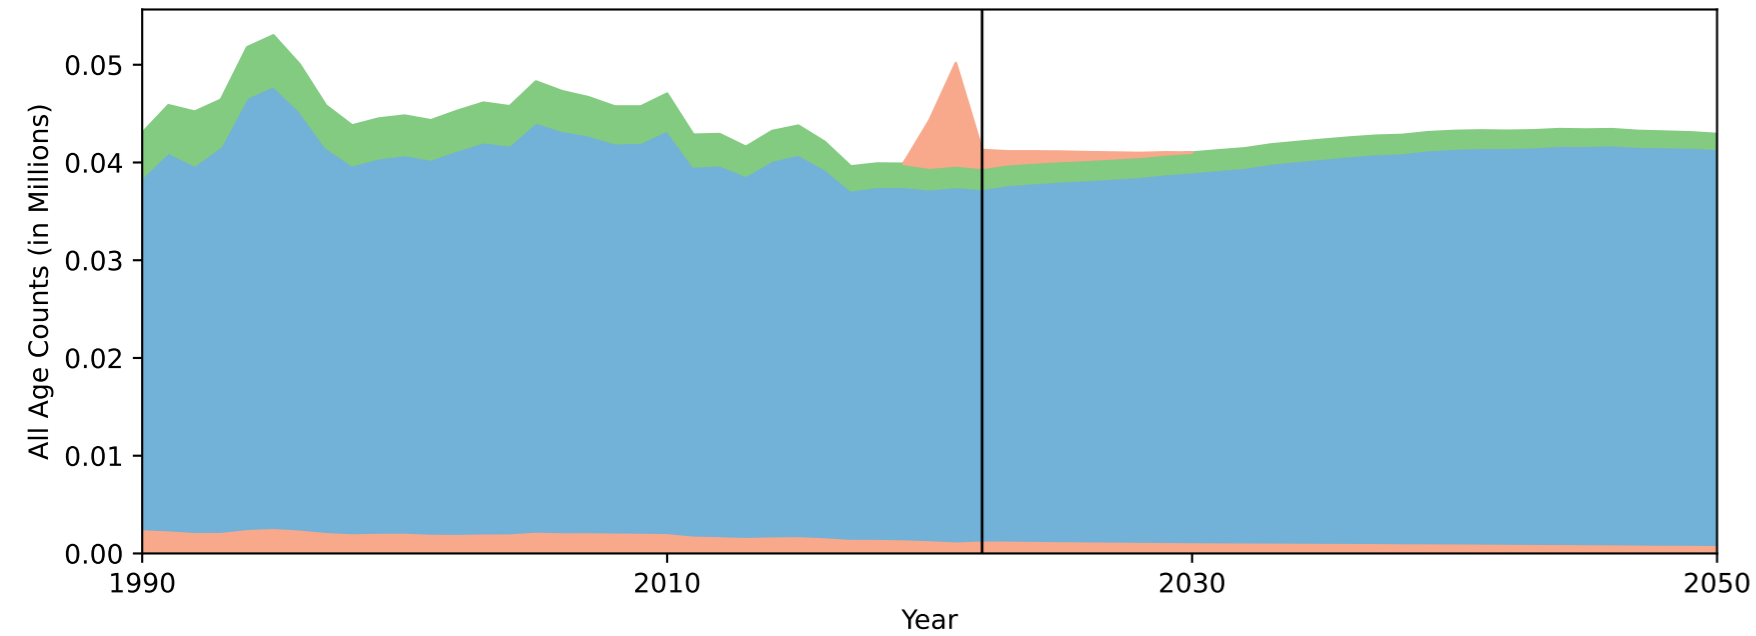

Level 2

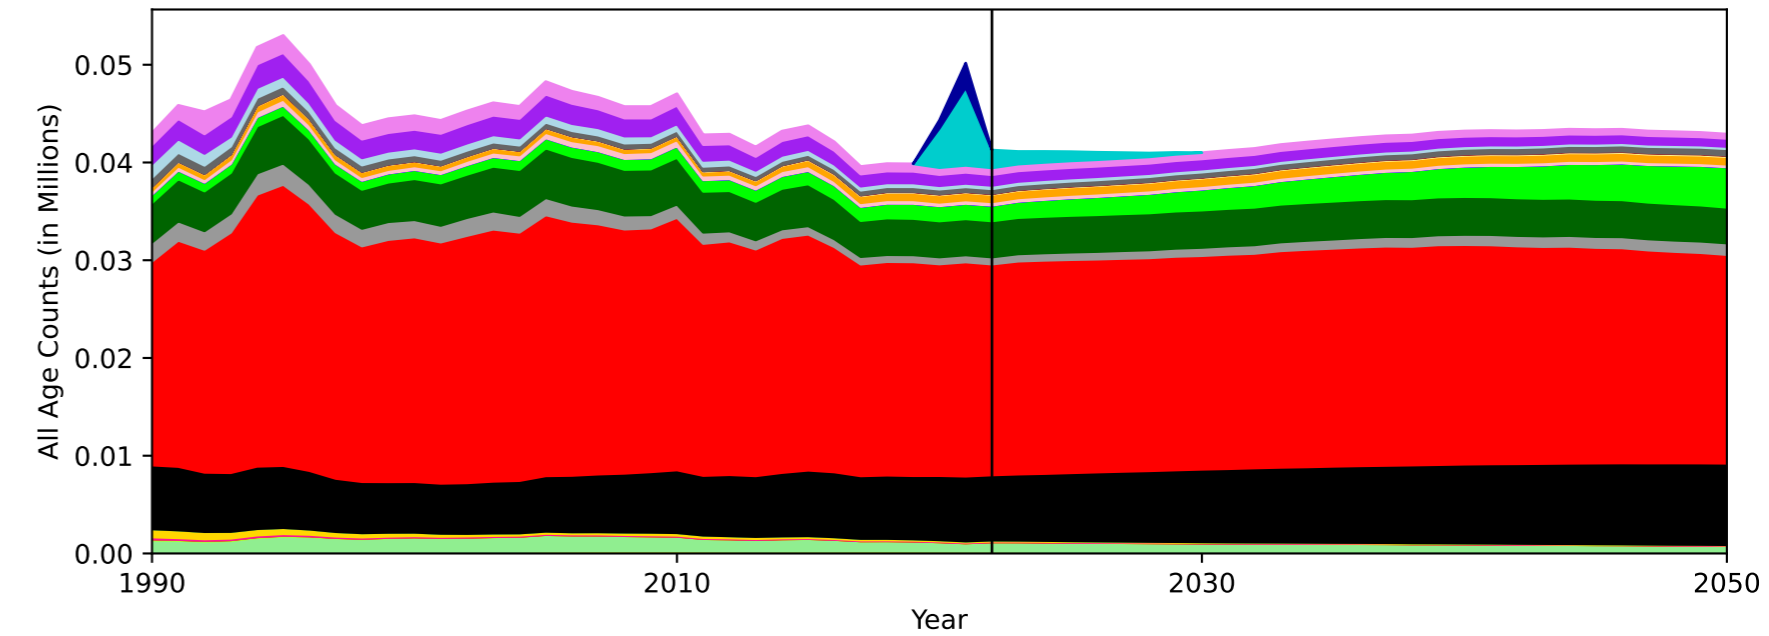

Level 1

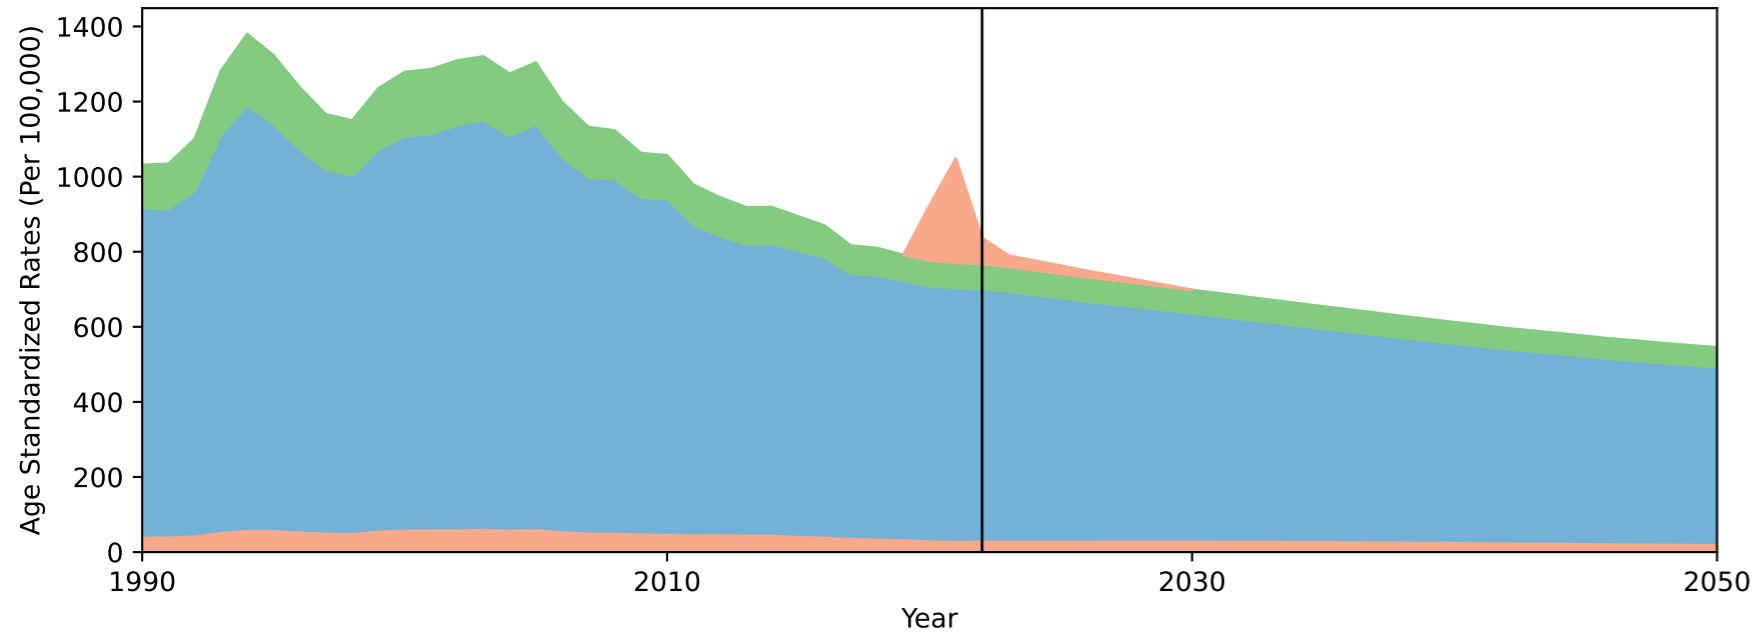

Level 2

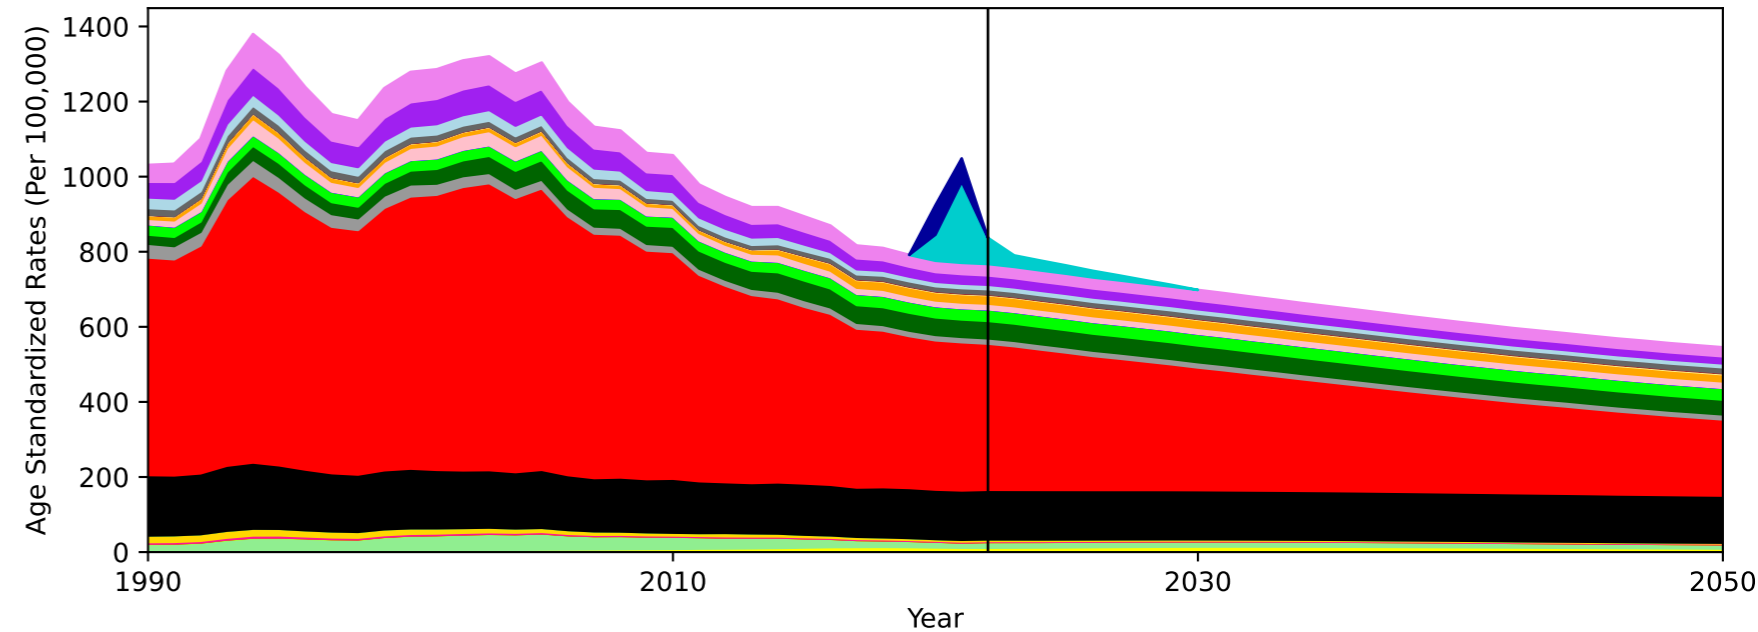

Level 1

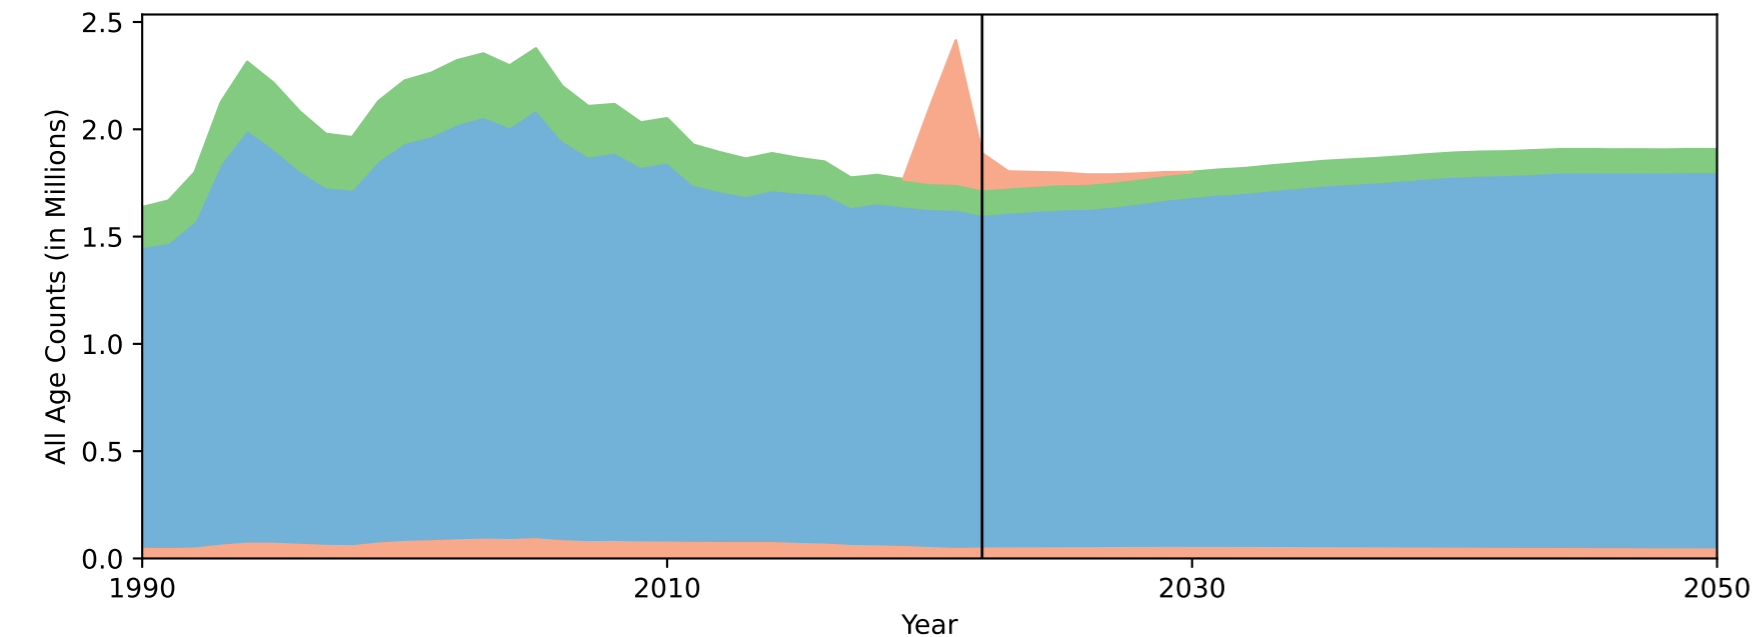

Level 2

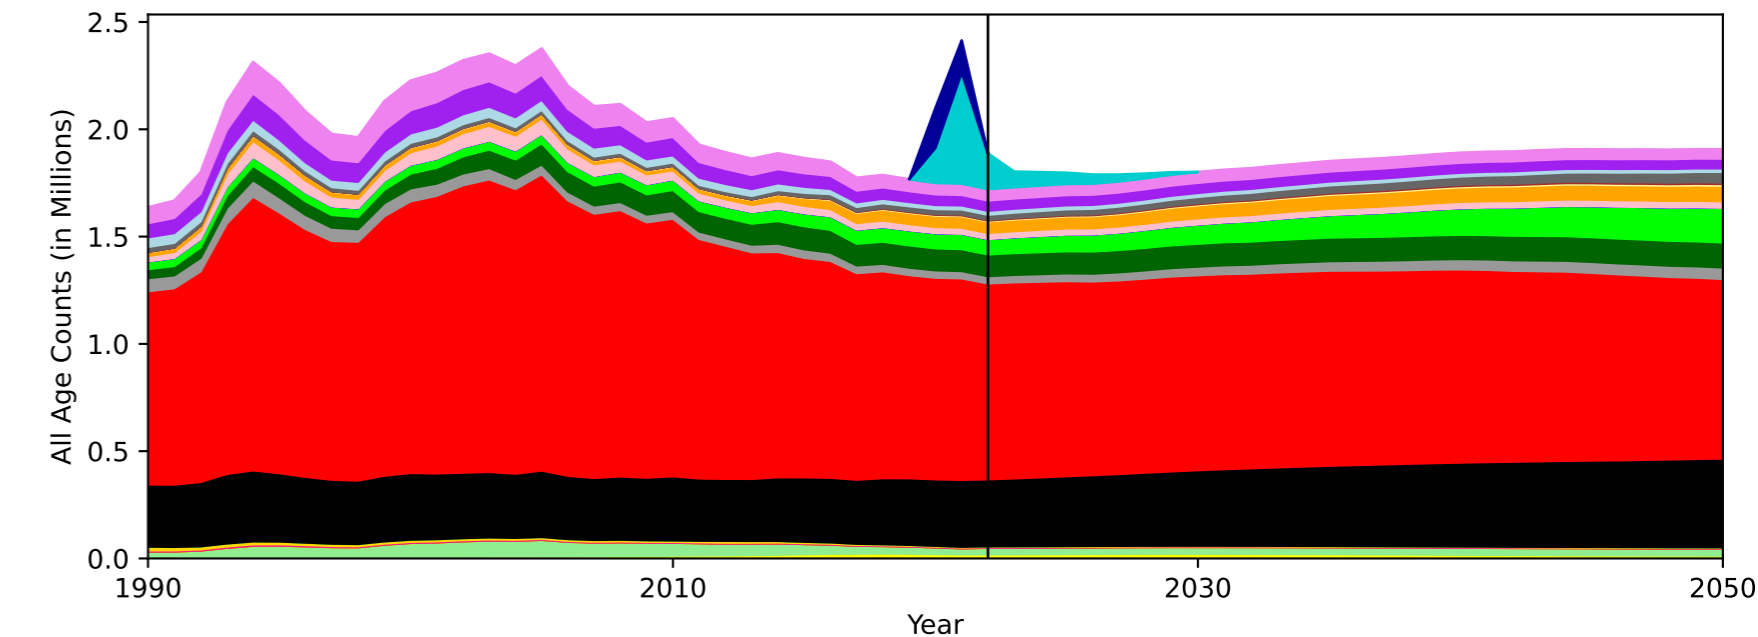

# Ukraine

Level 1

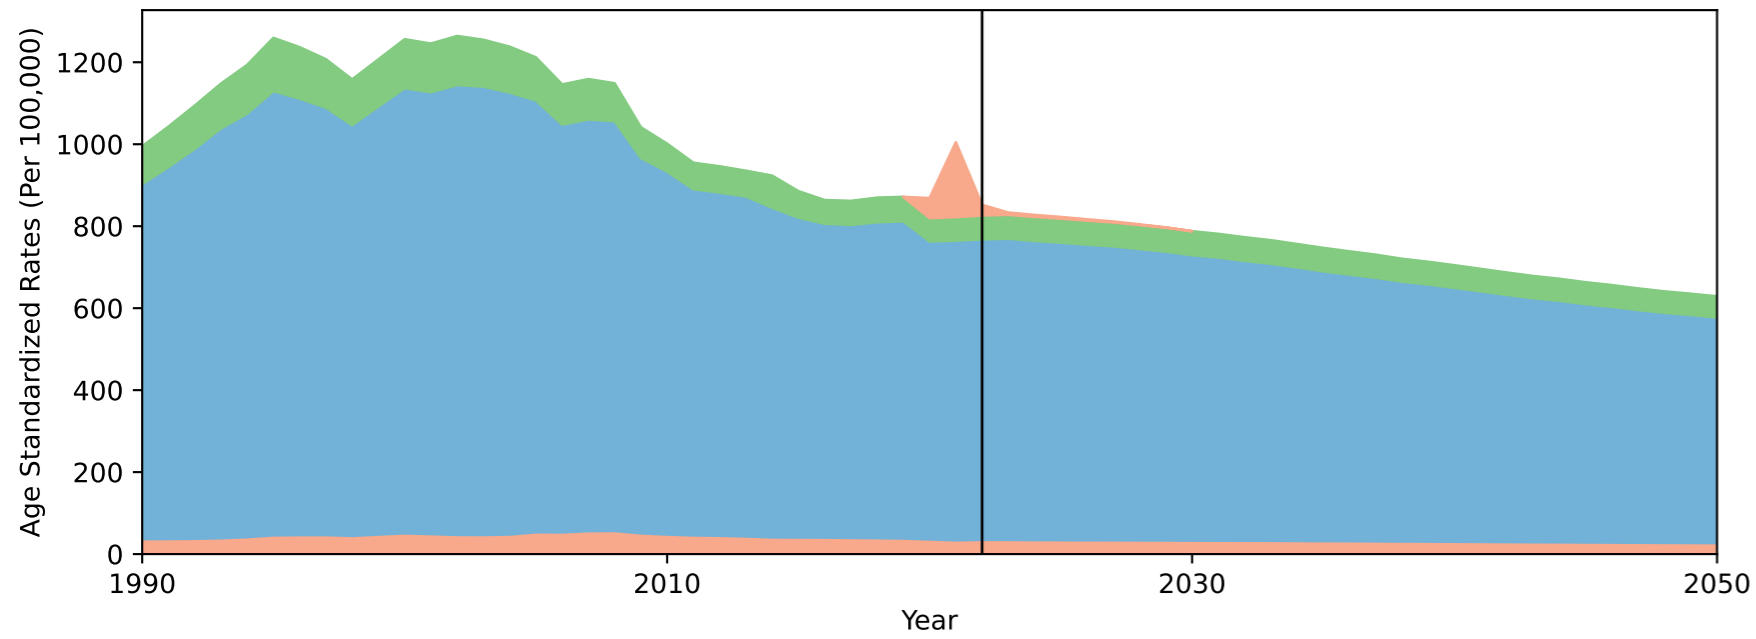

Level 2

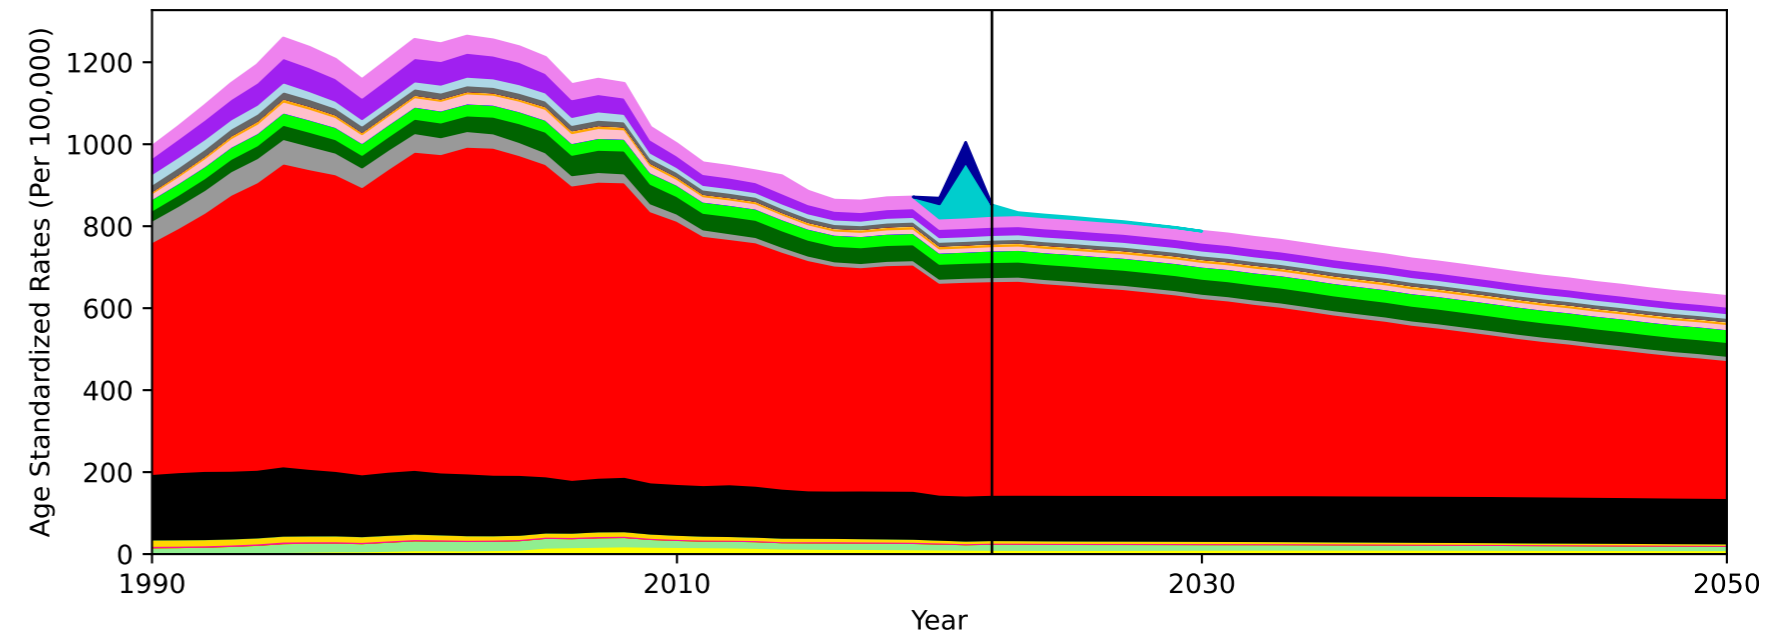

Level 1

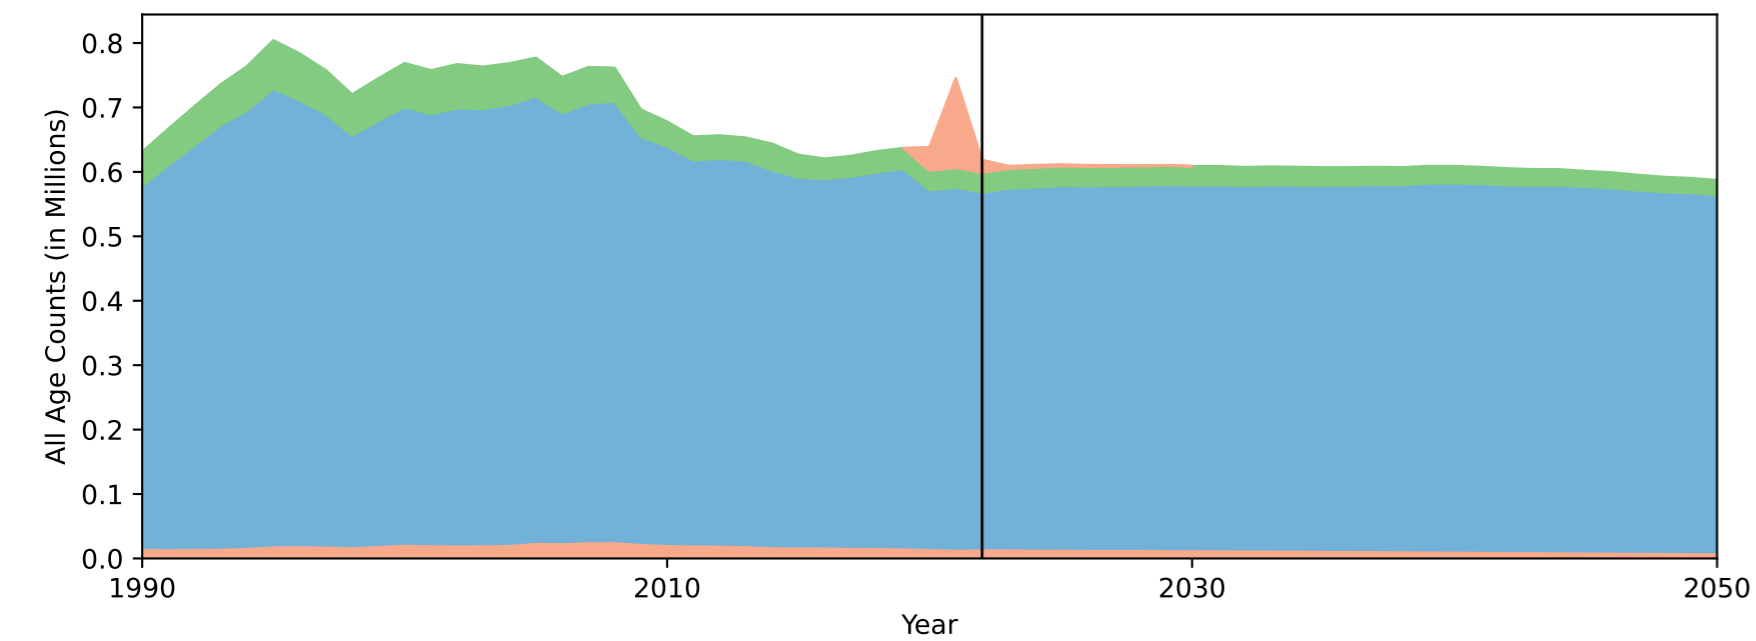

Level 2

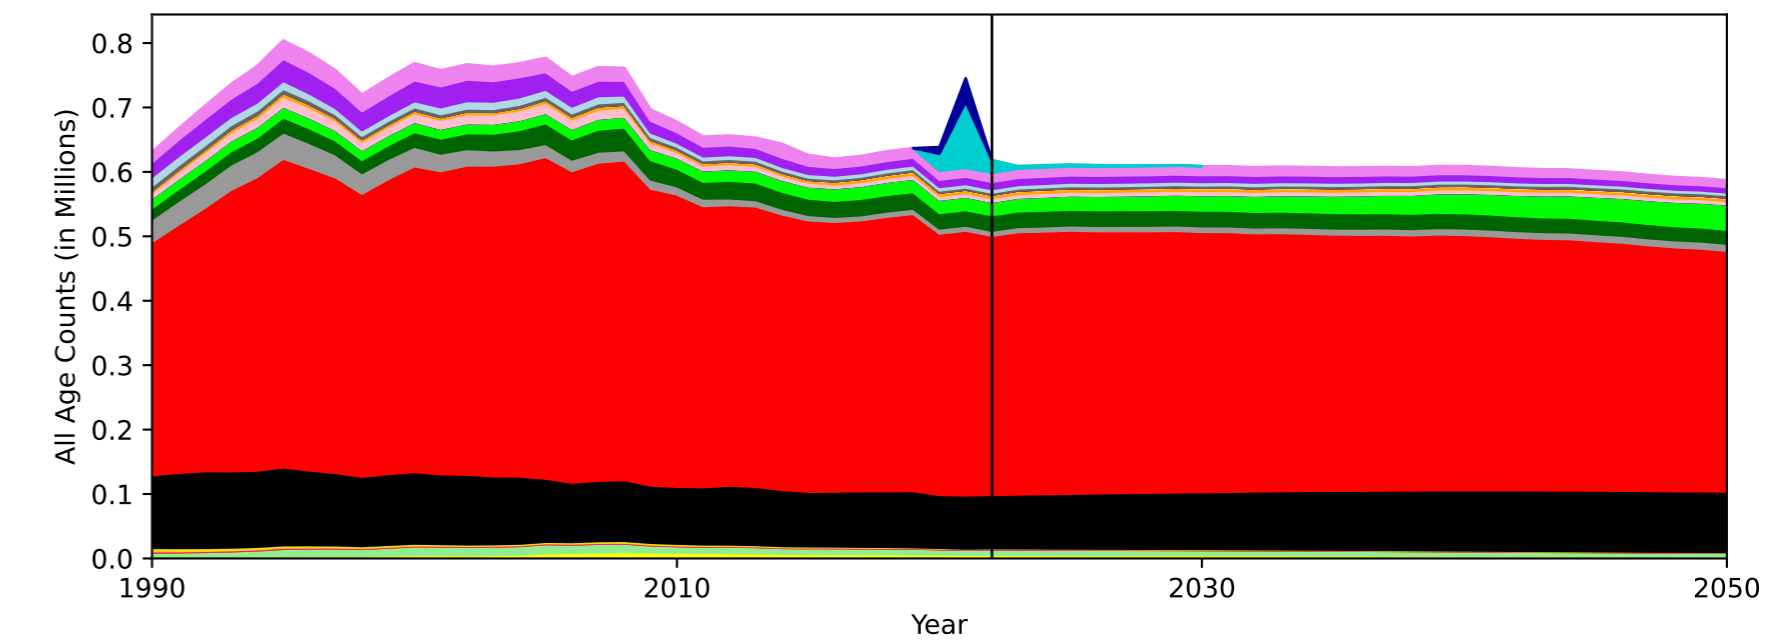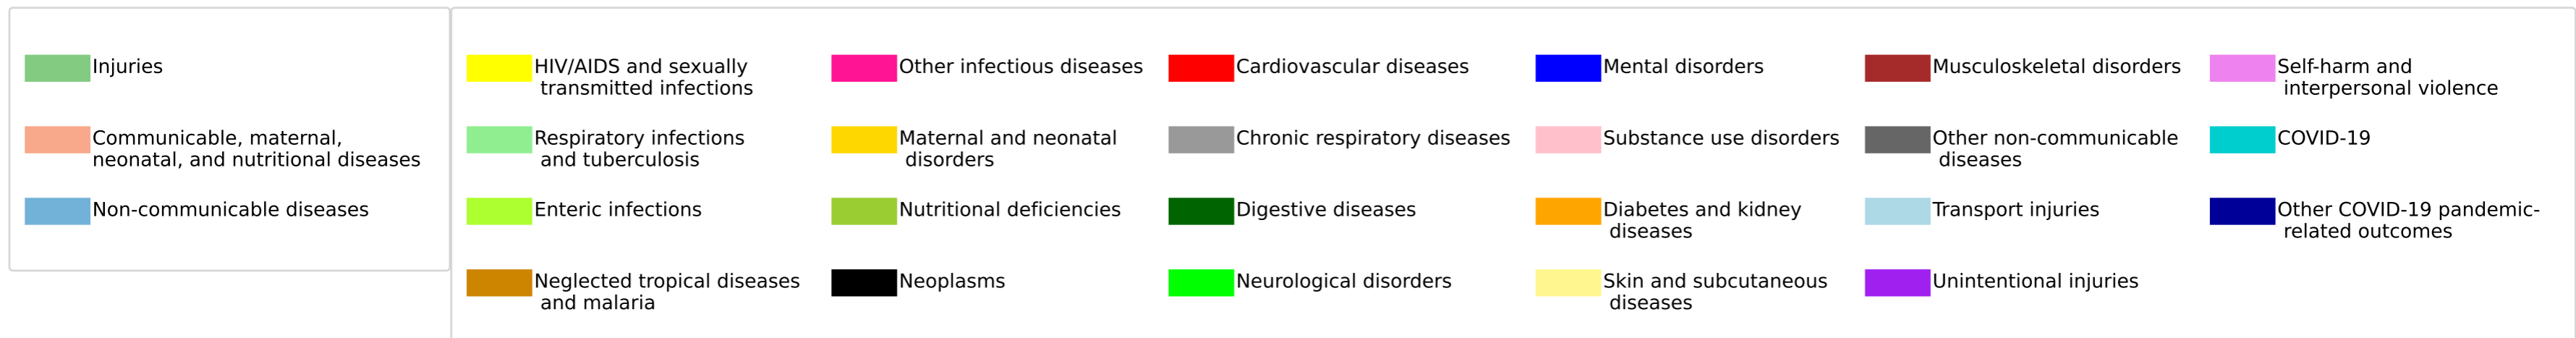

# Australia

Level 1

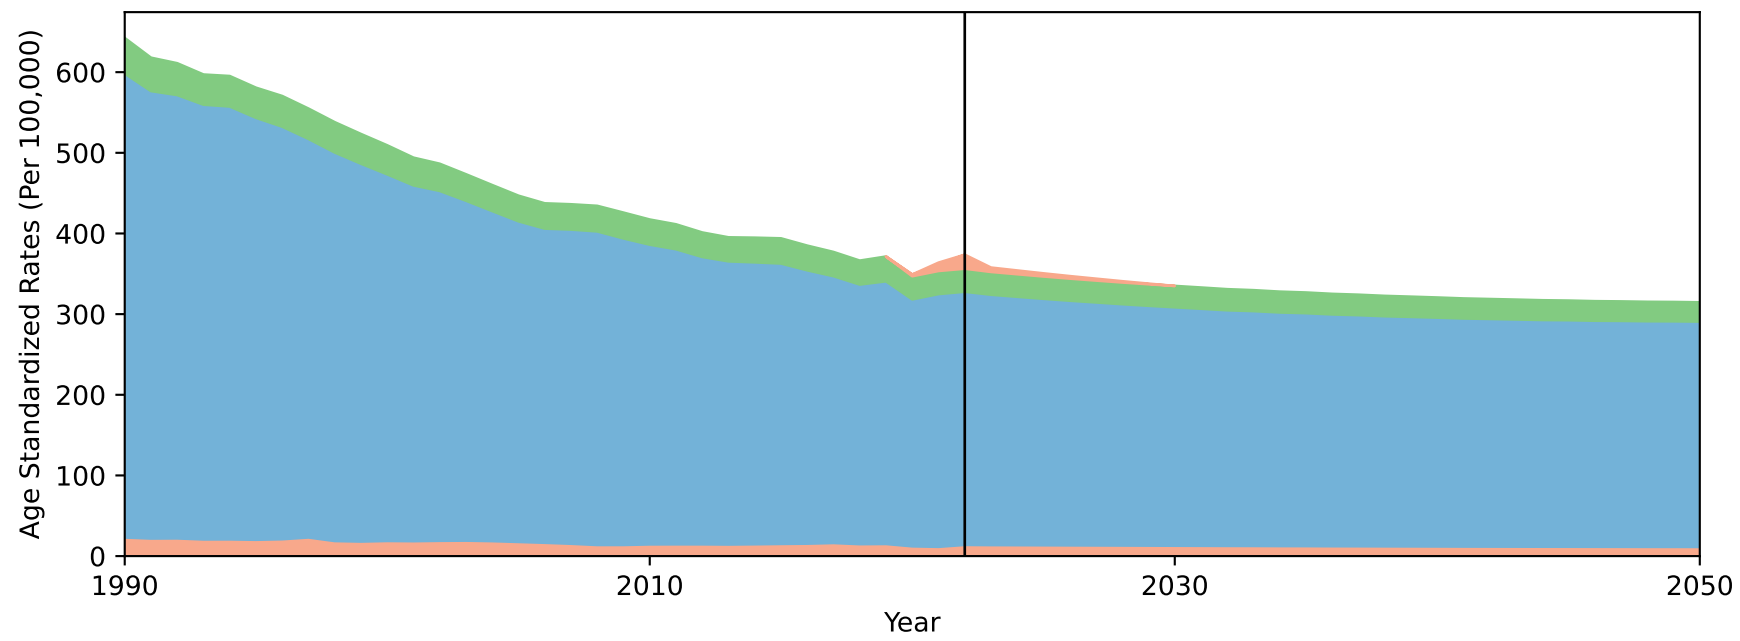

Level 2

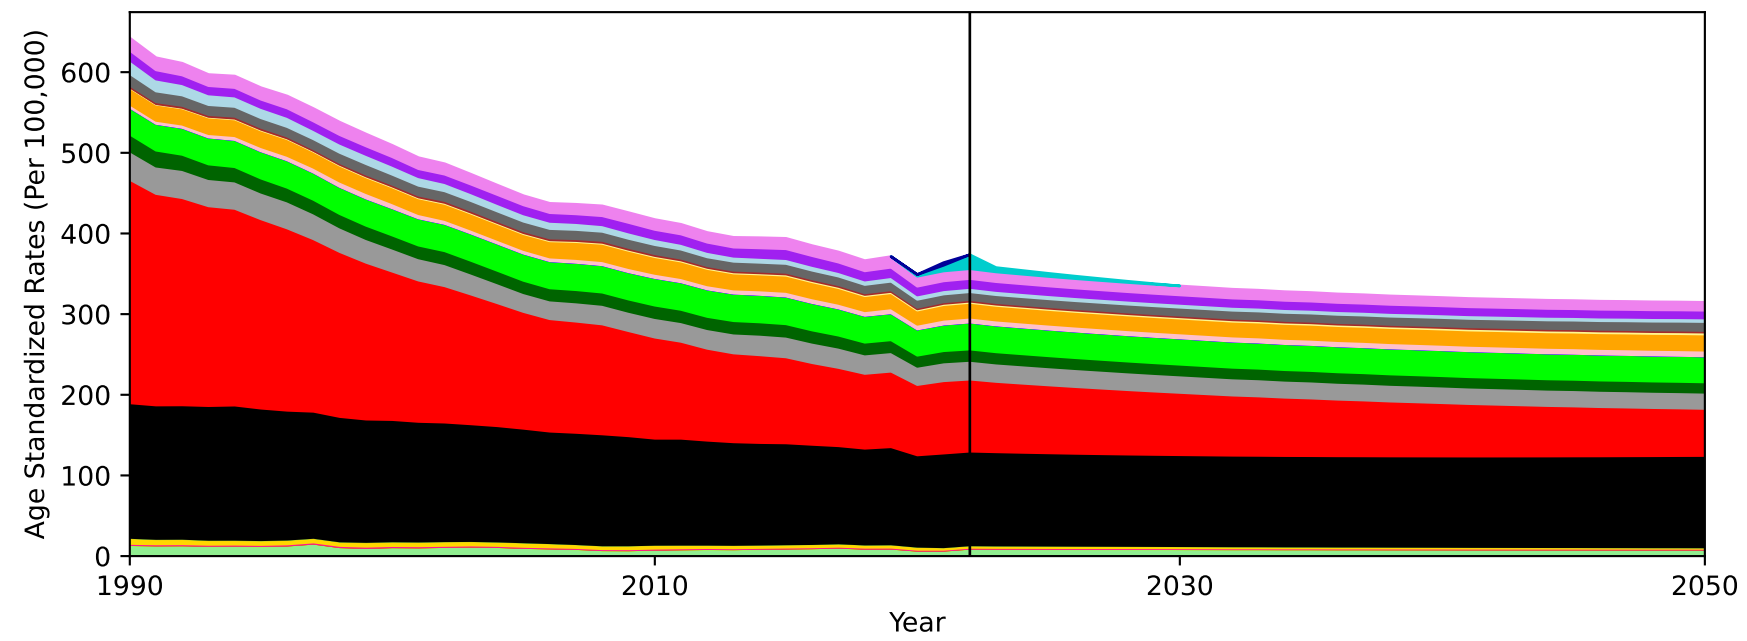

Level 1

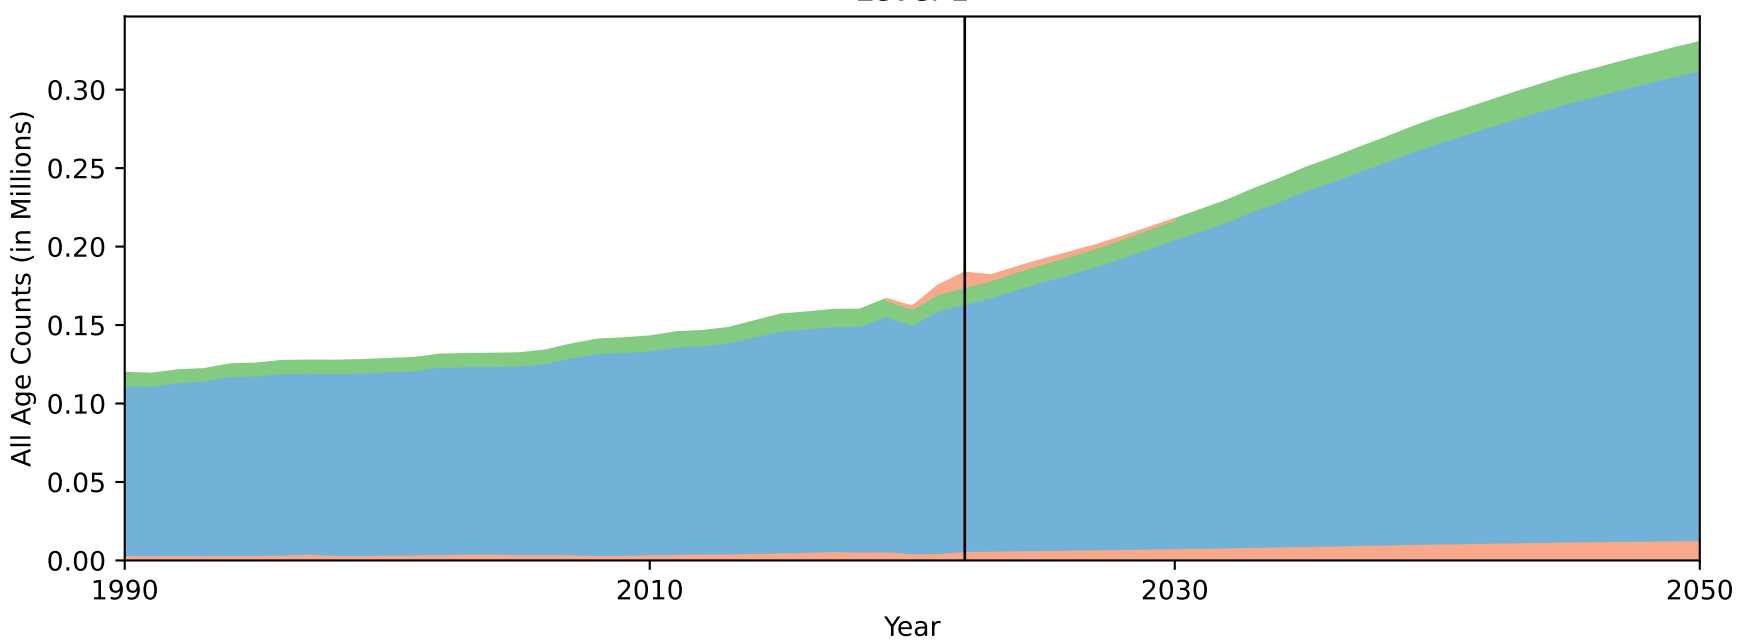

Level 2

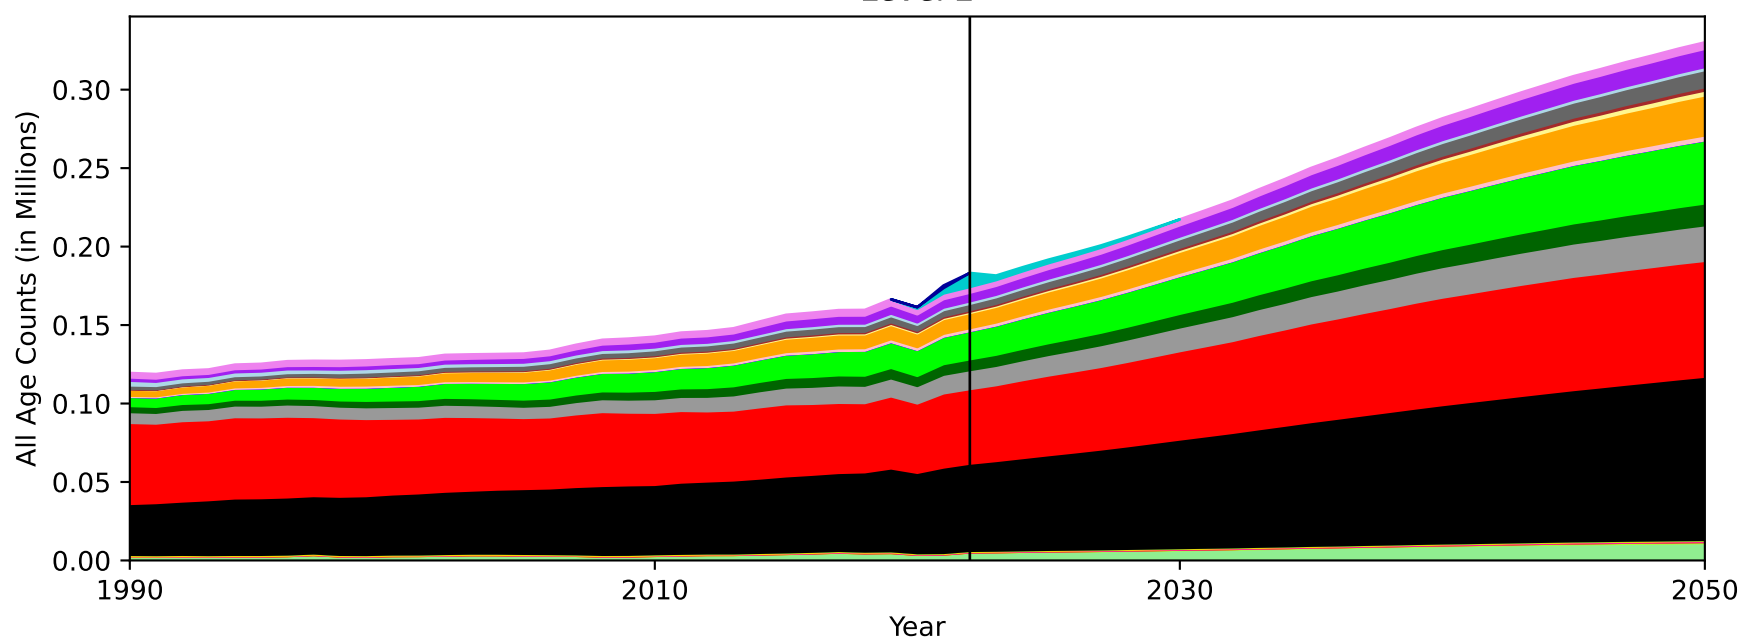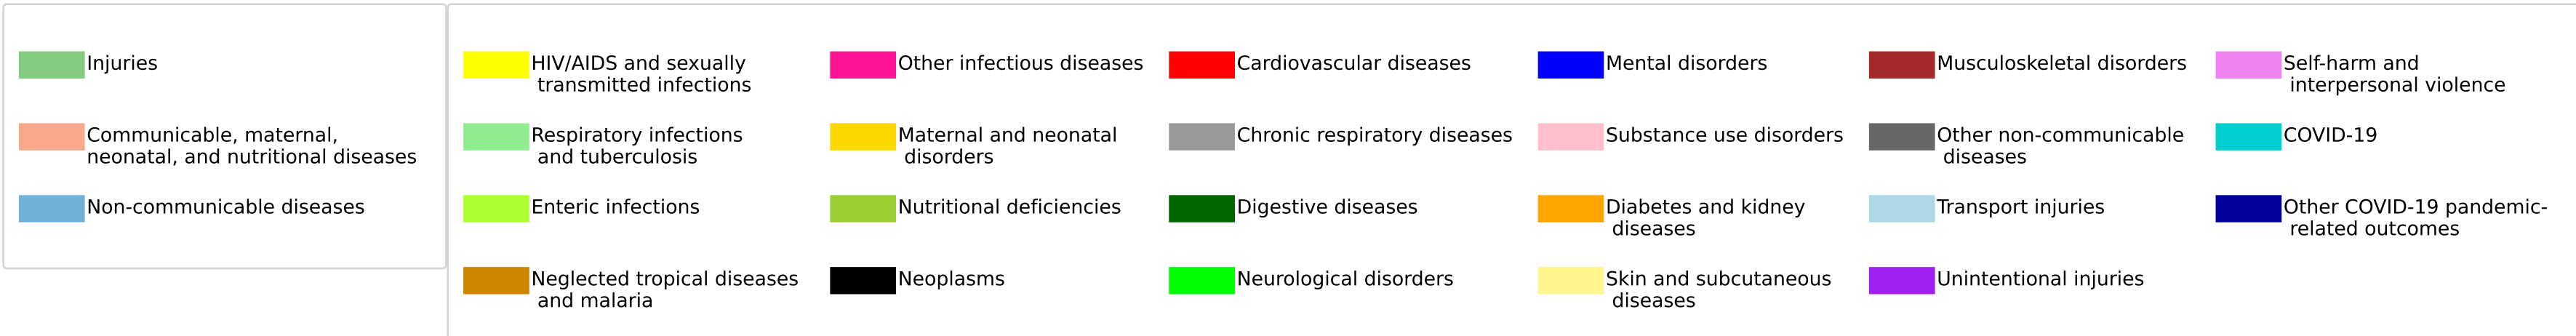

# New Zealand

Level 1

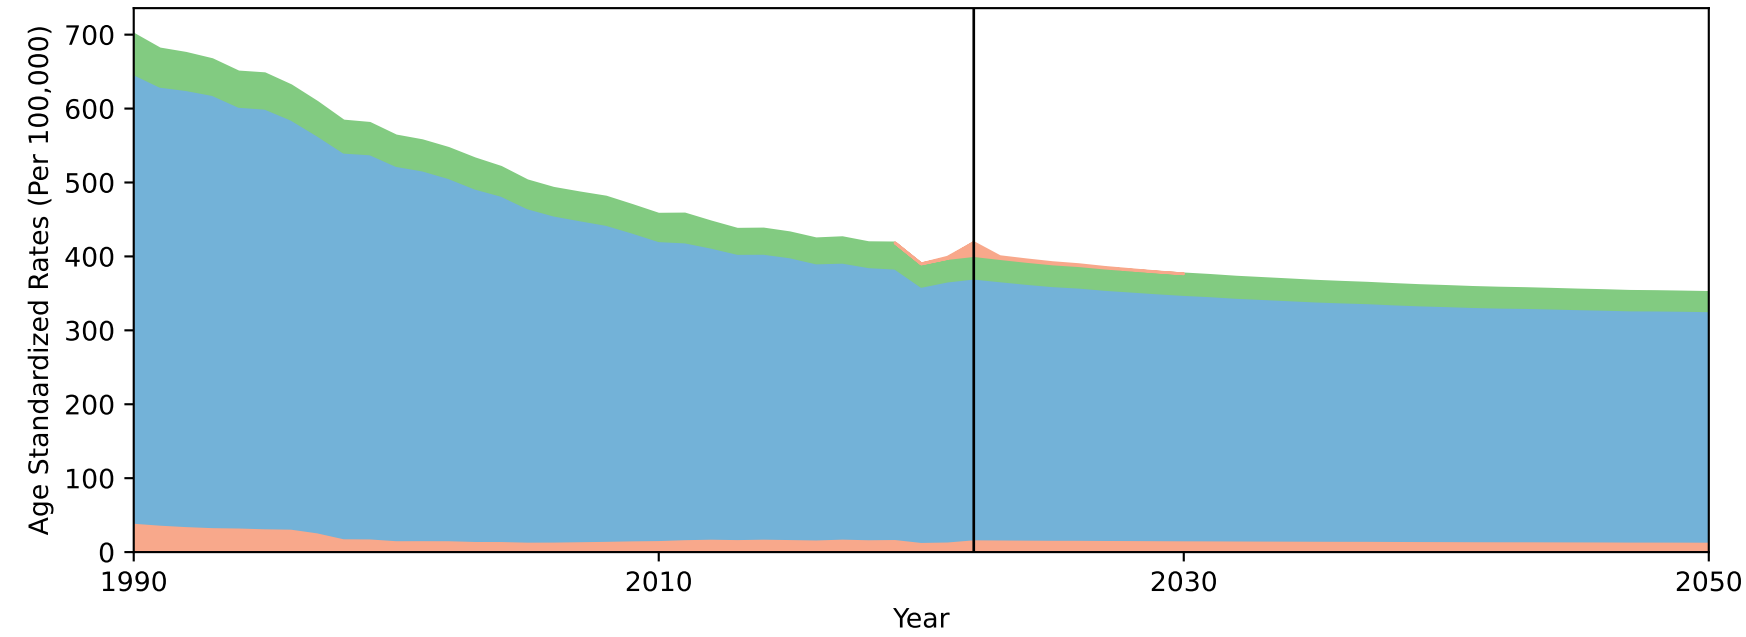

Level 2

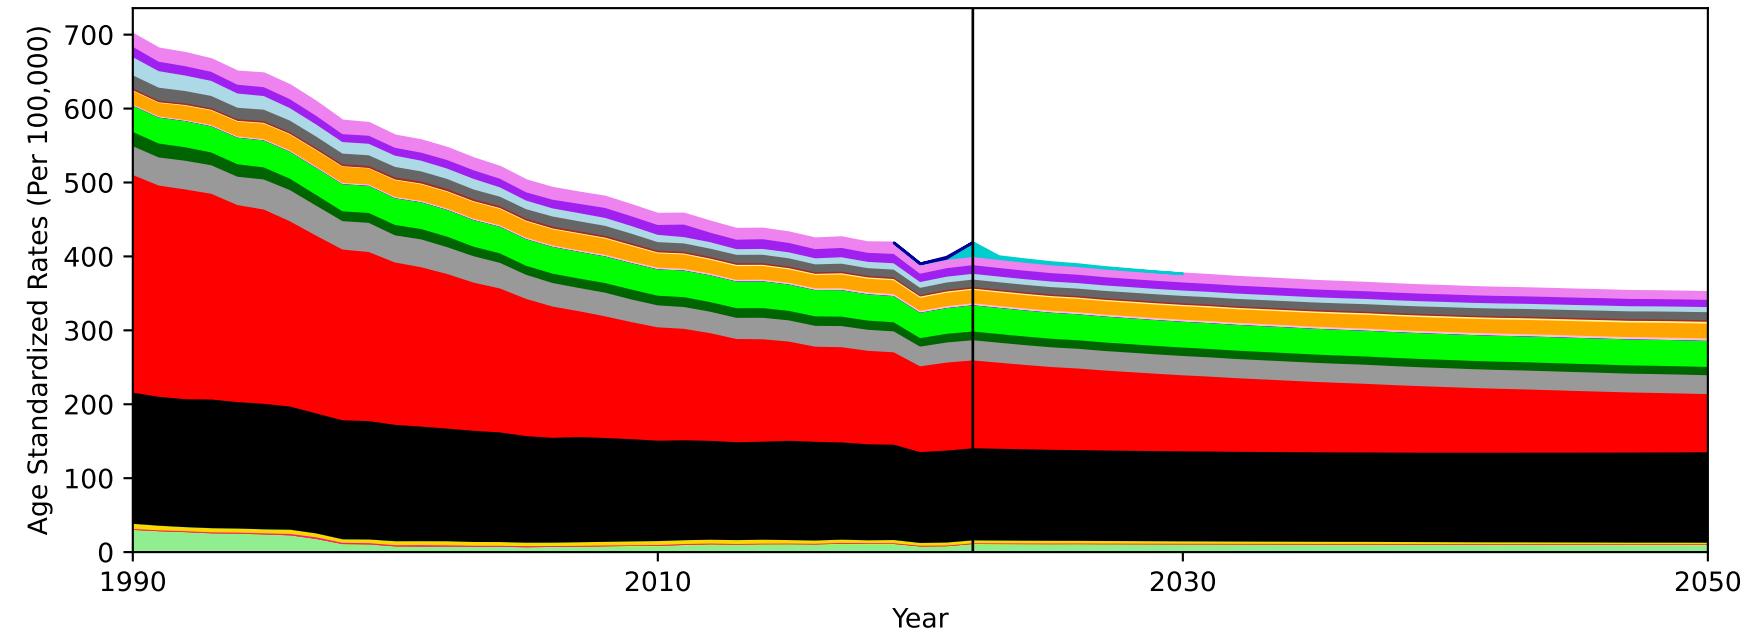

Level 1

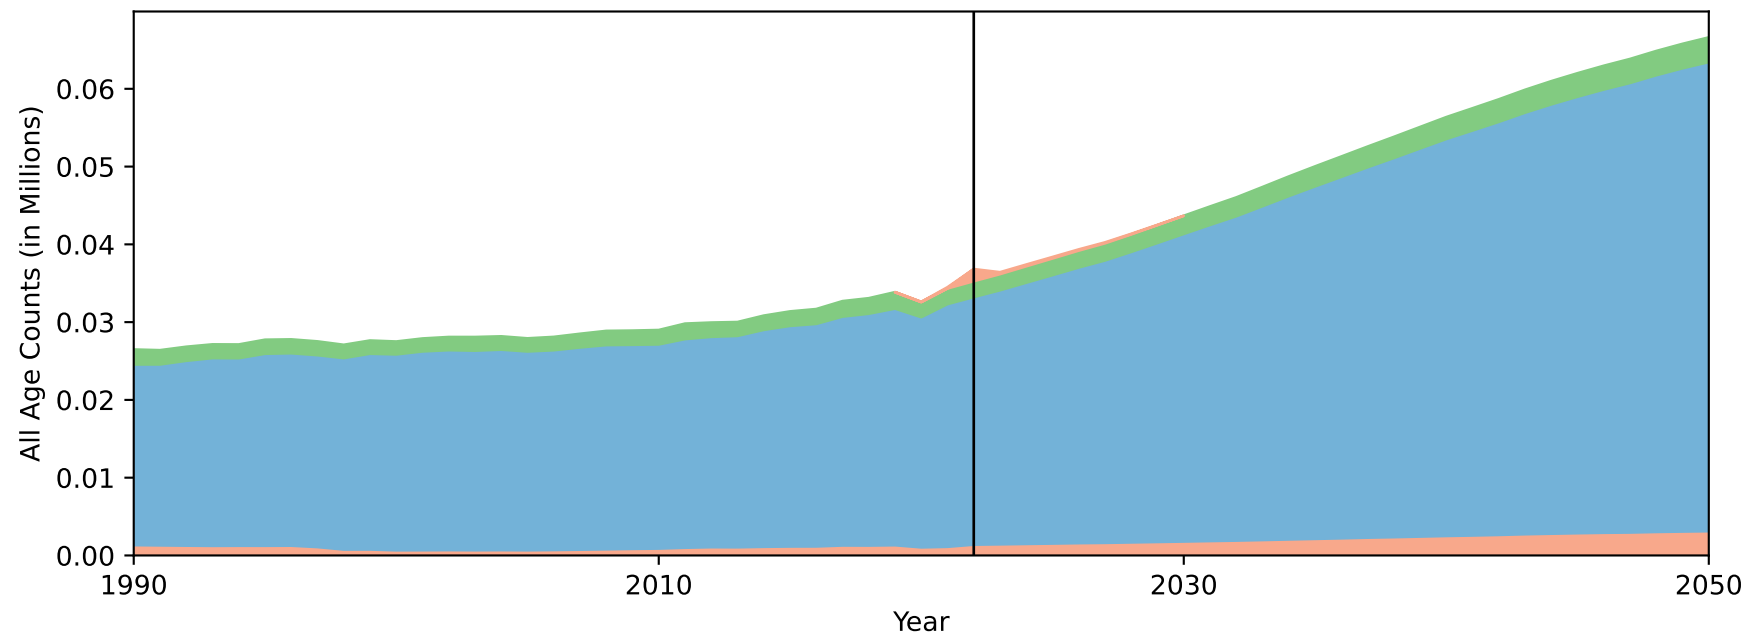

Level 2

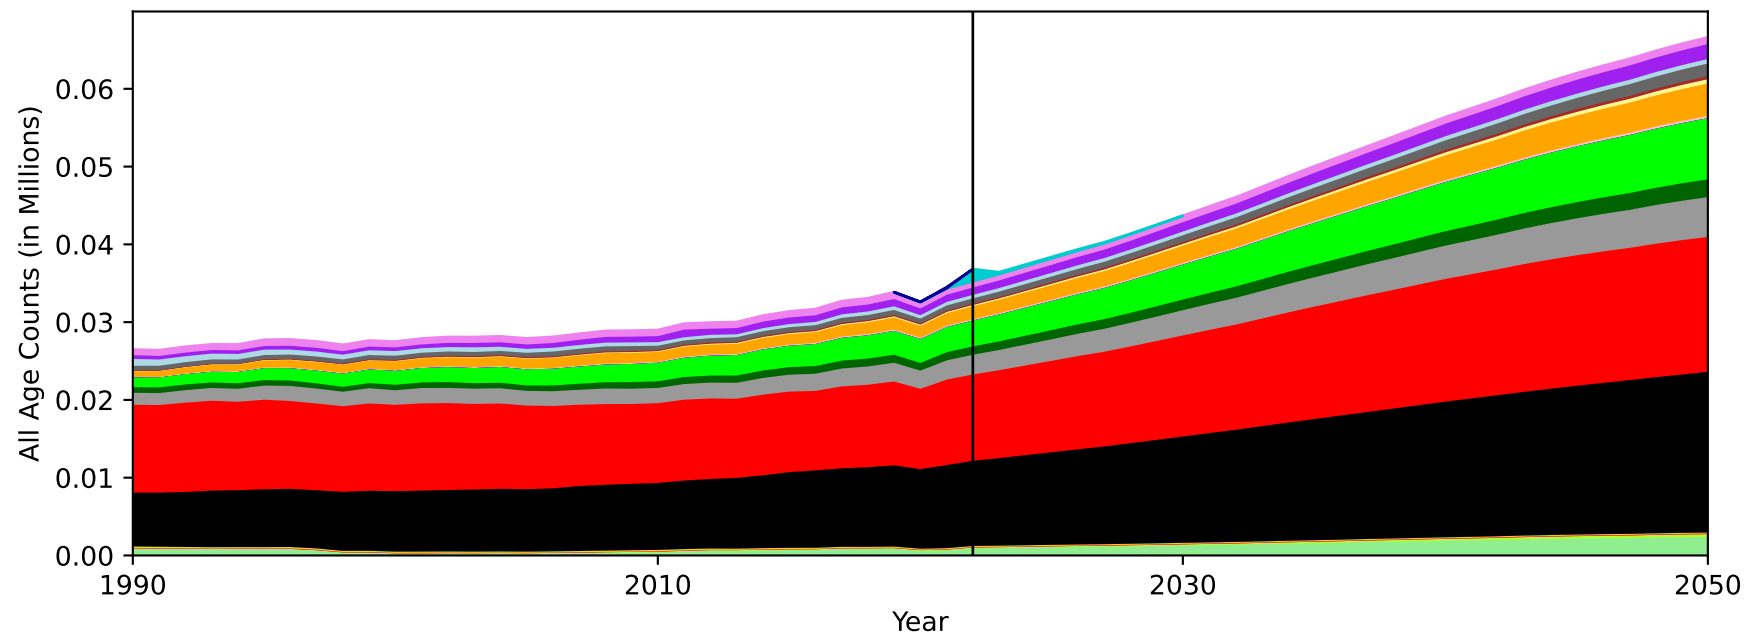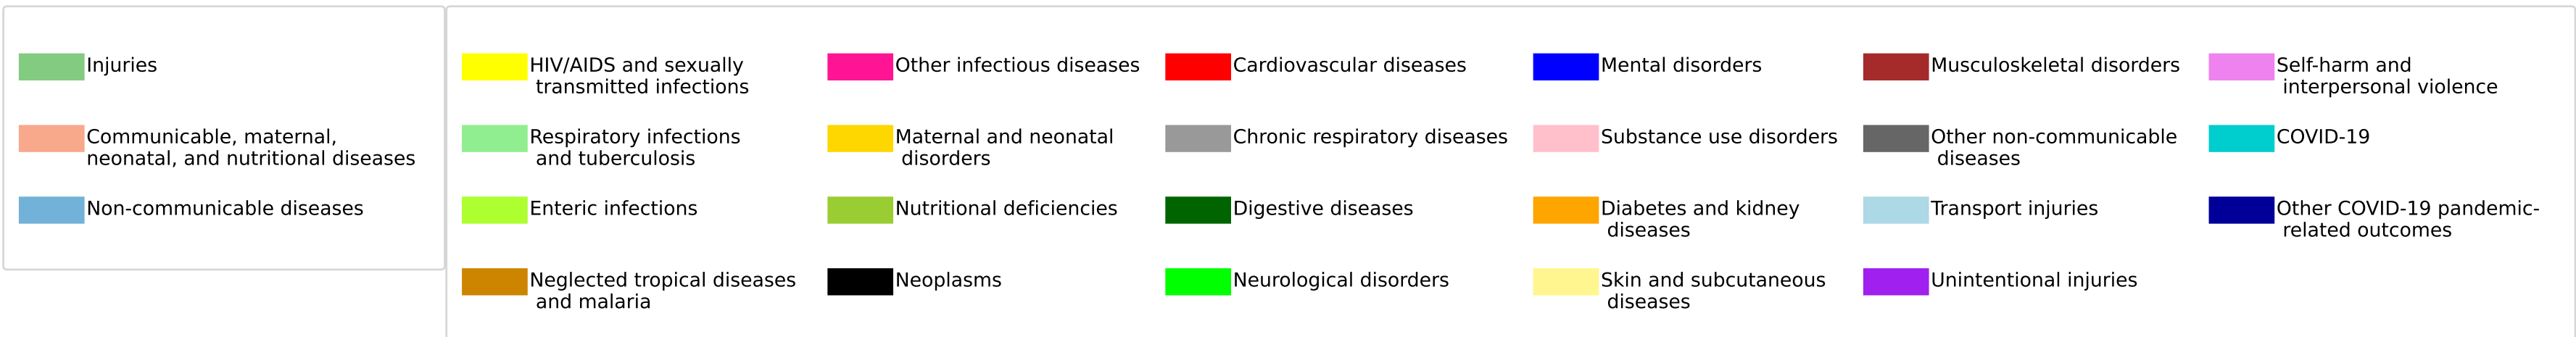

Level 1

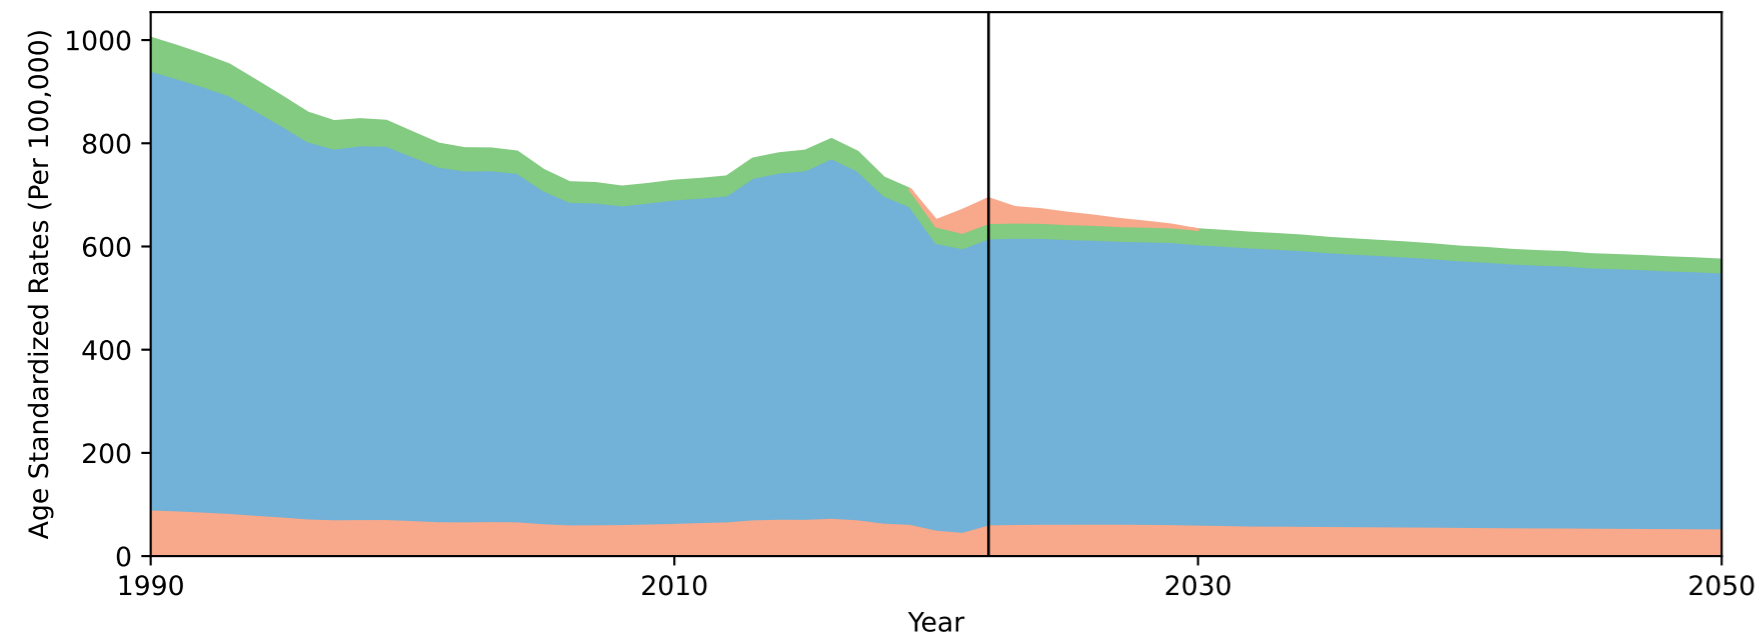

Level 2

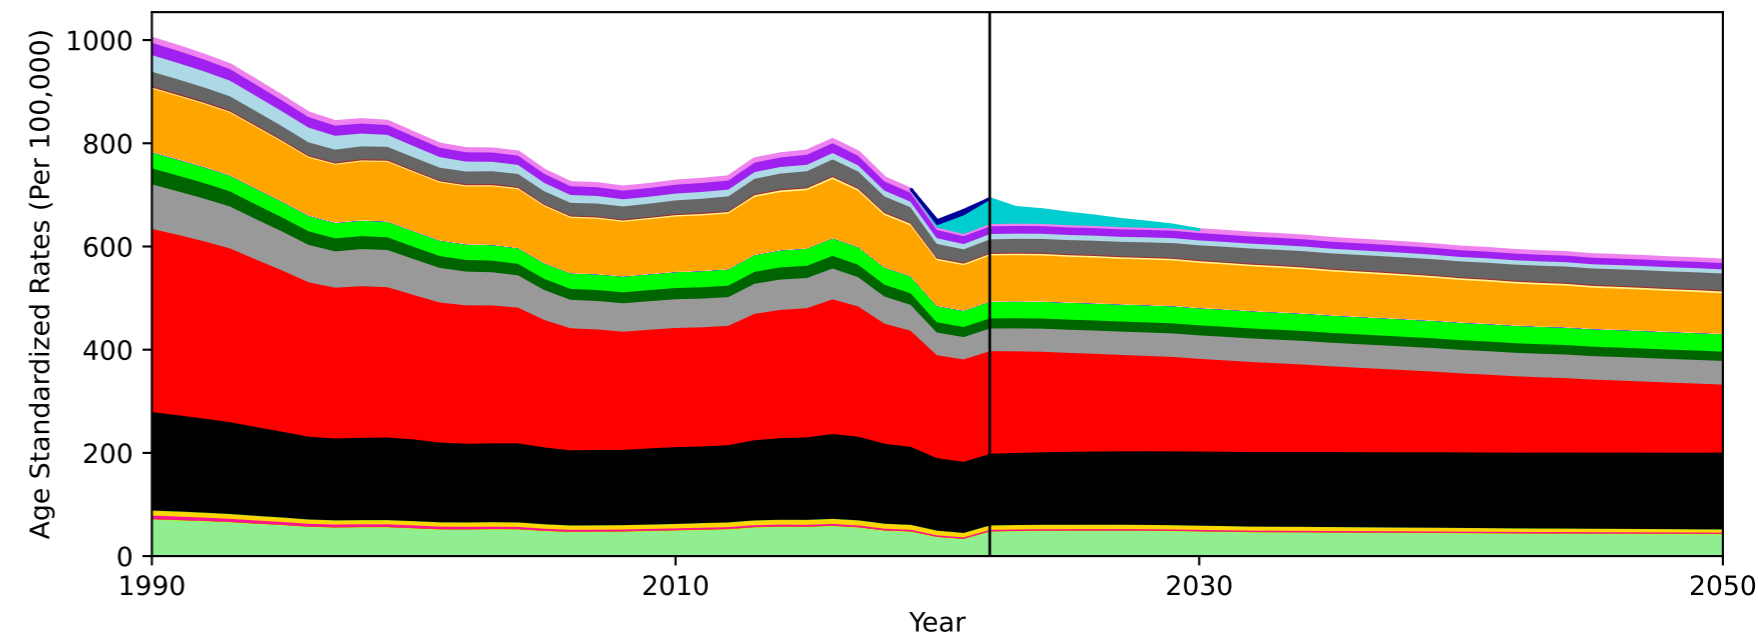

Level 1

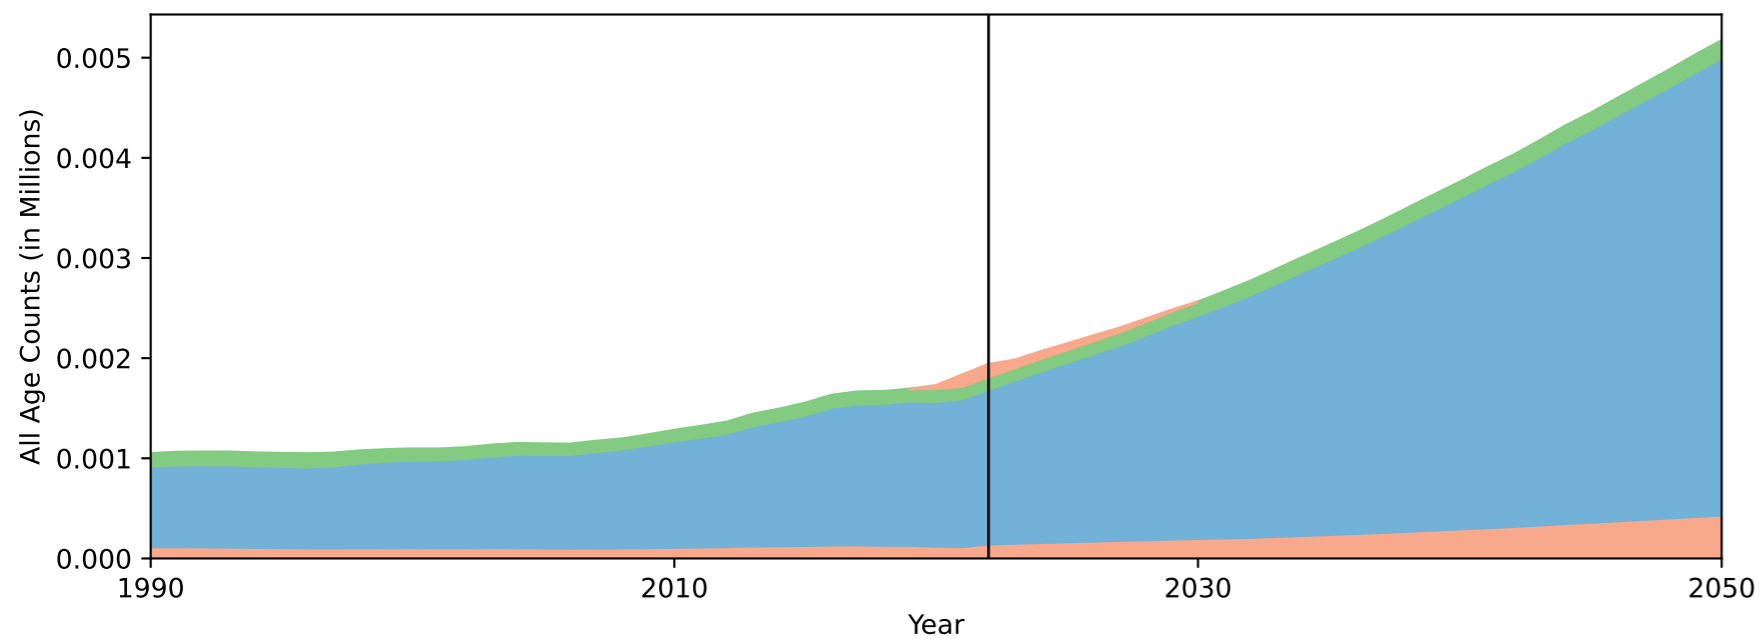

Level 2

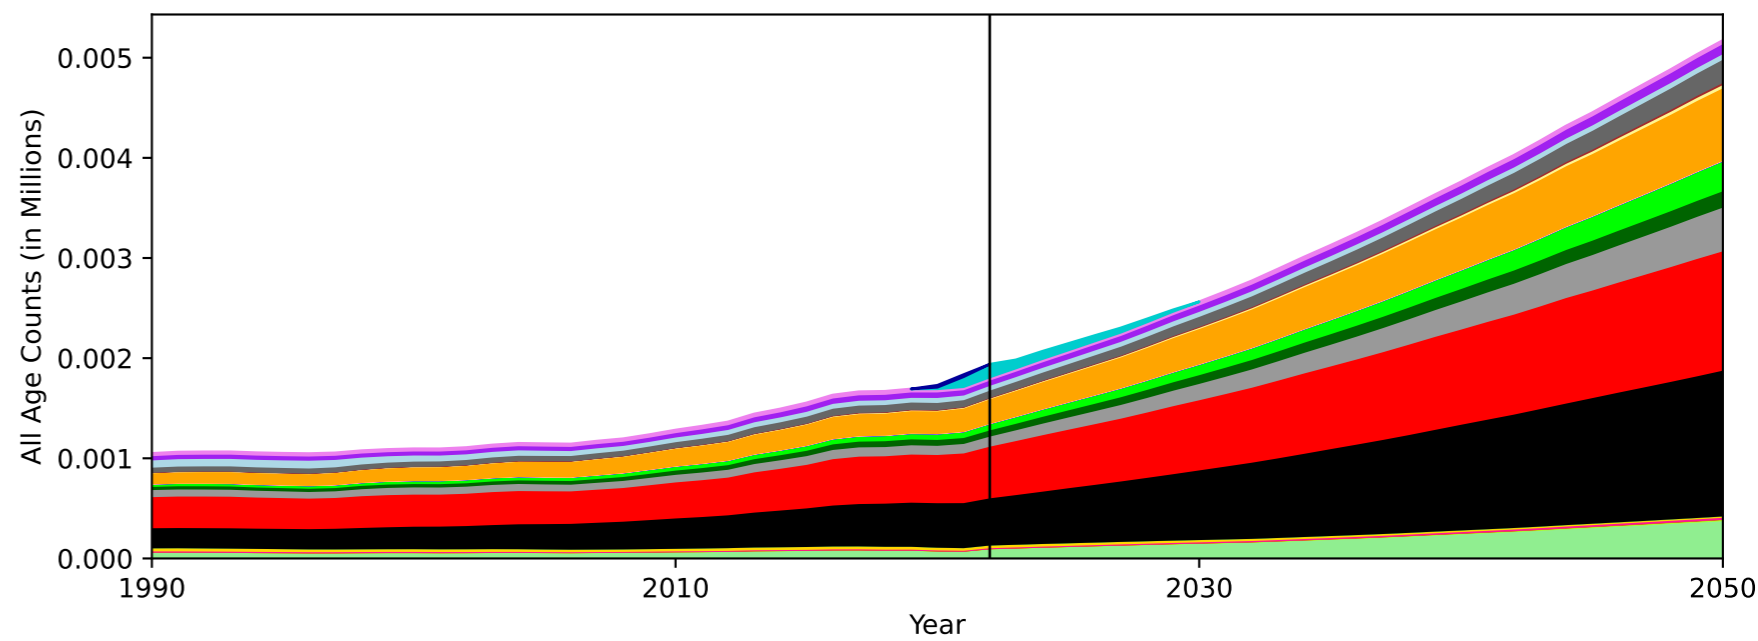

Level 1

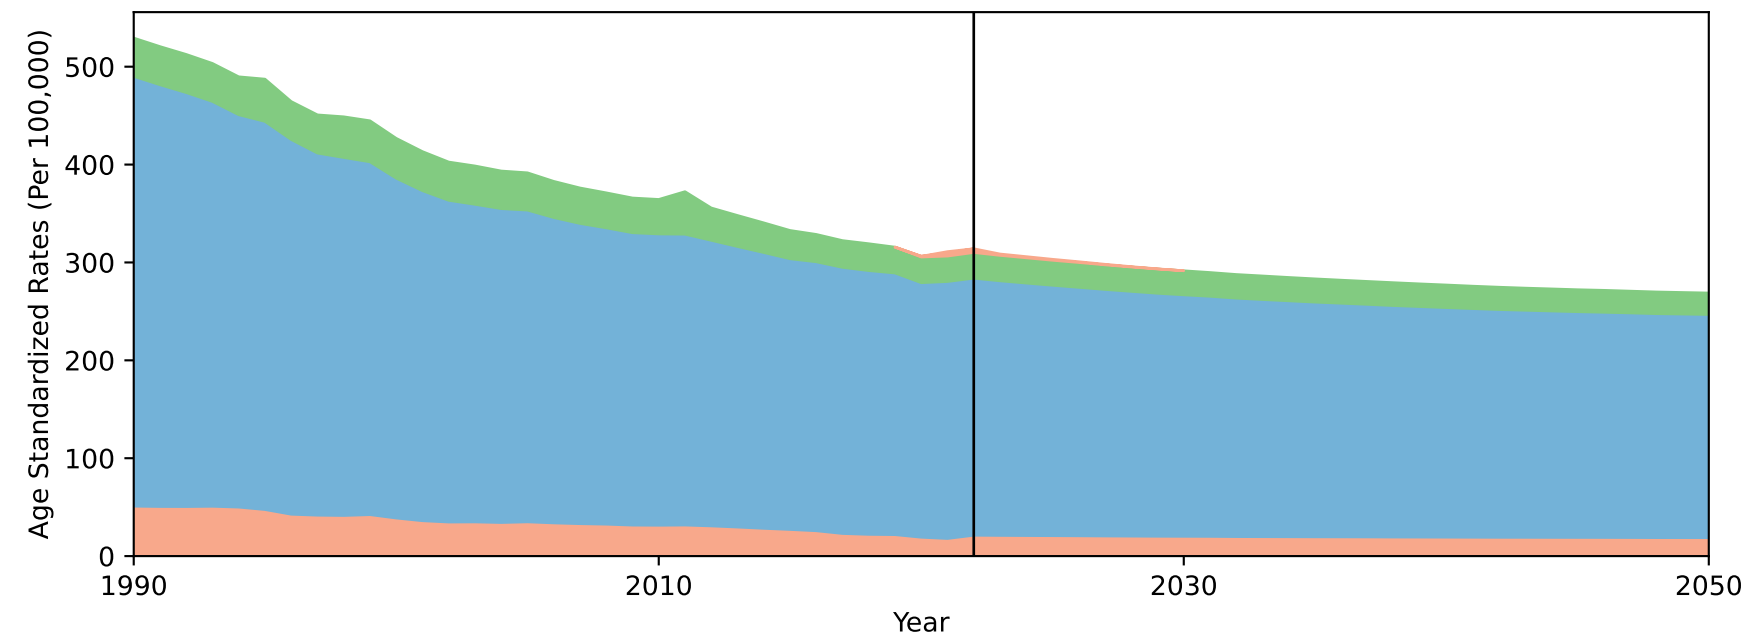

Level 2

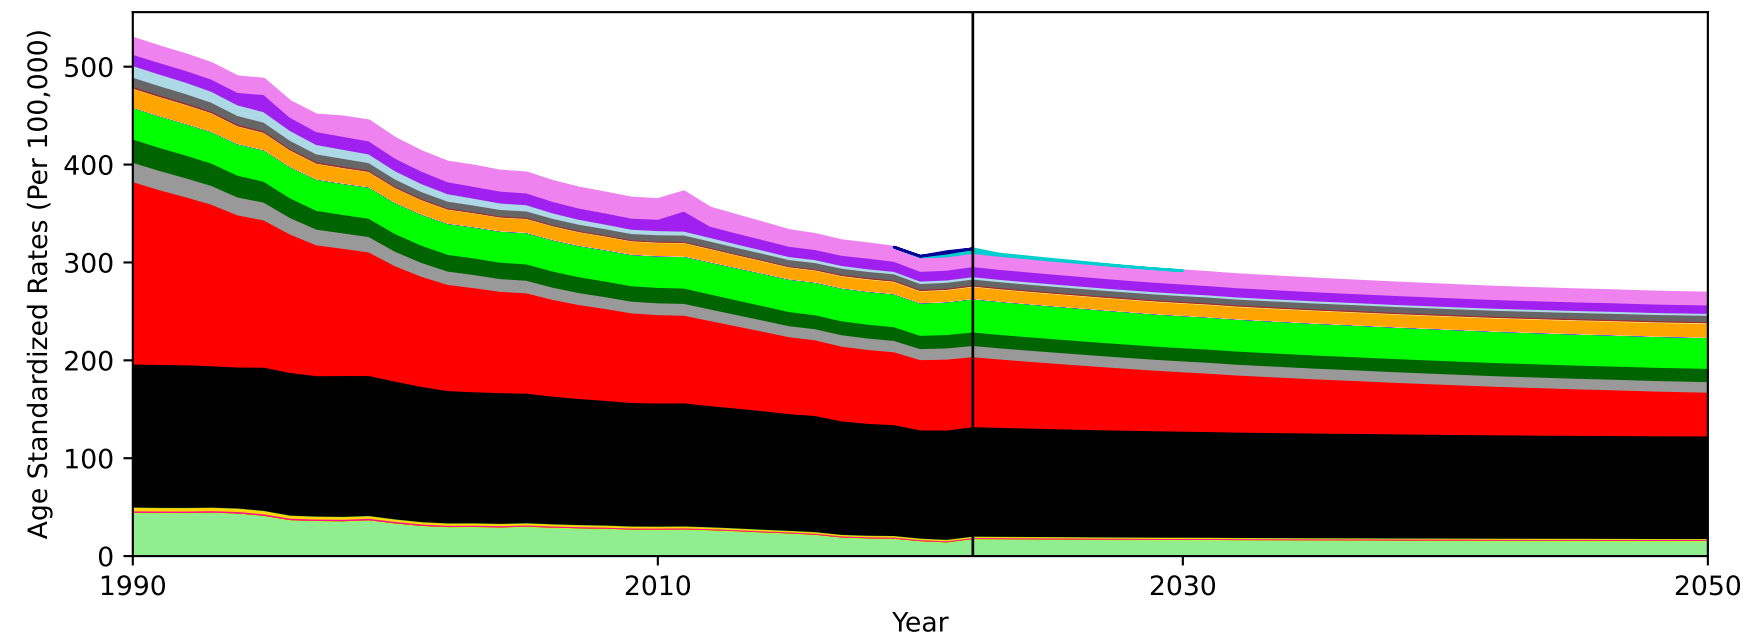

Level 1

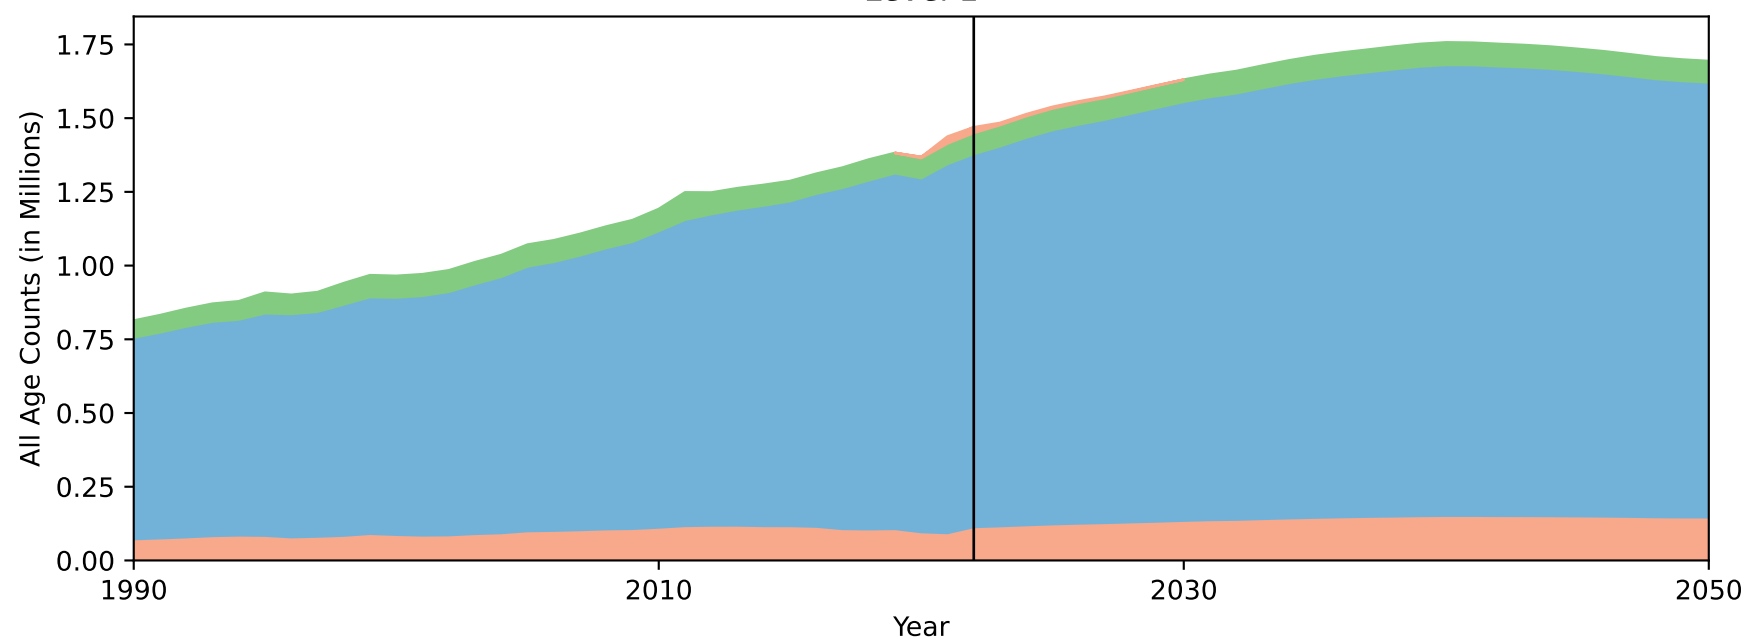

Level 2

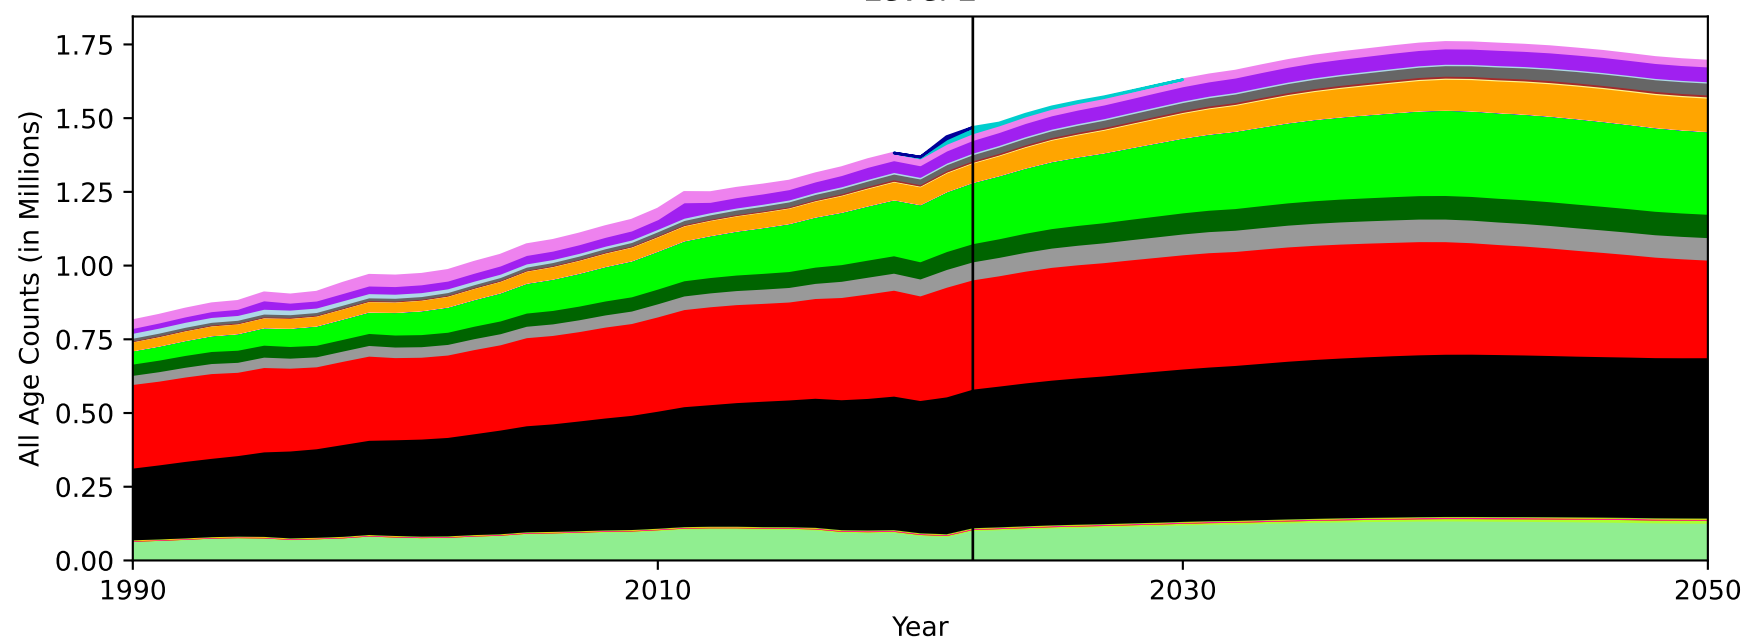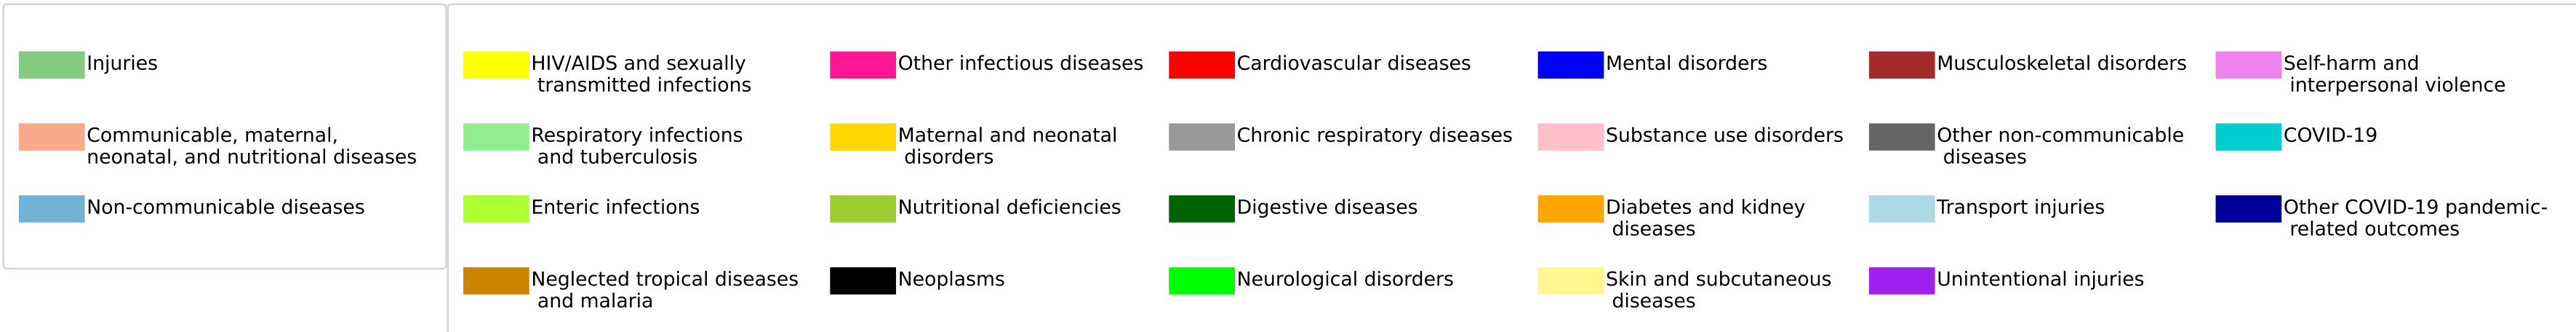

# South Korea

Level 1

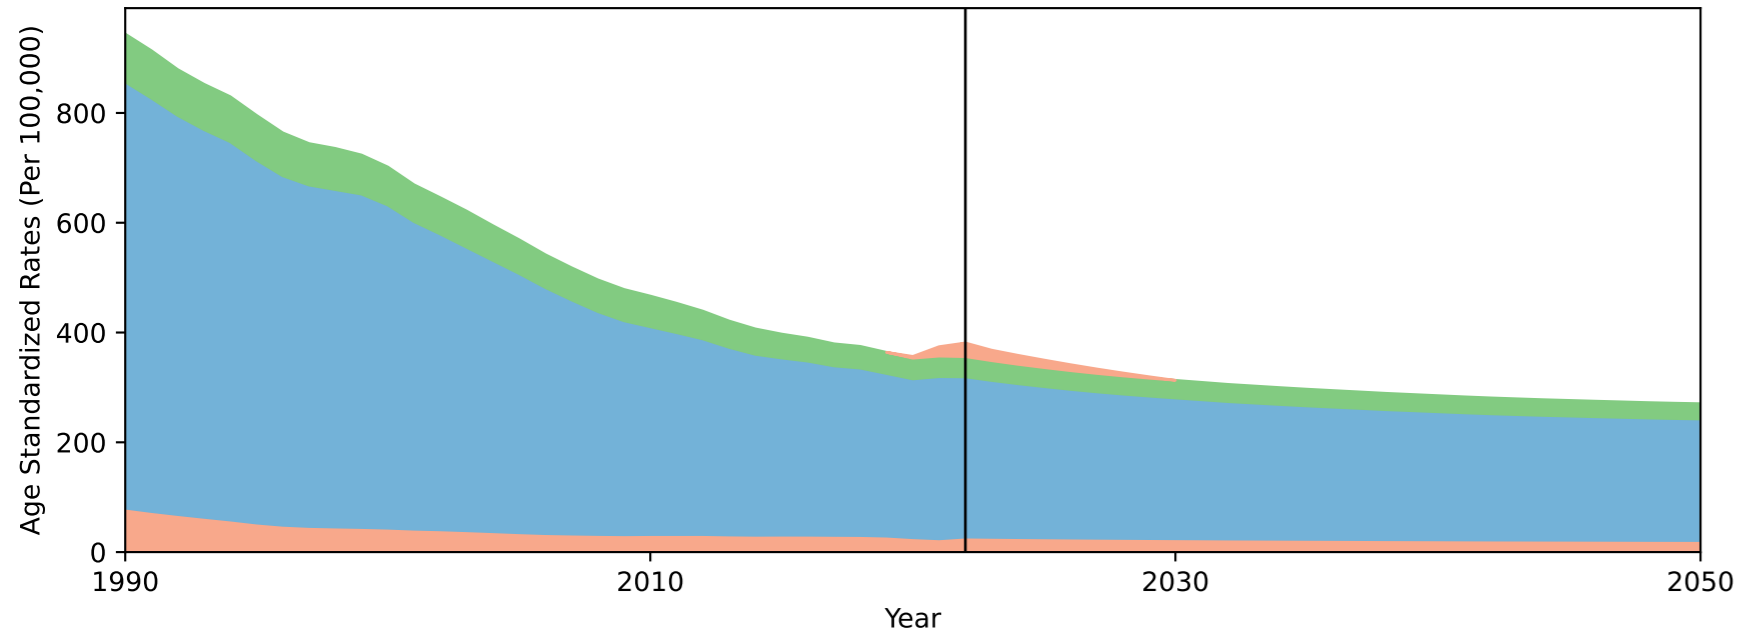

Level 2

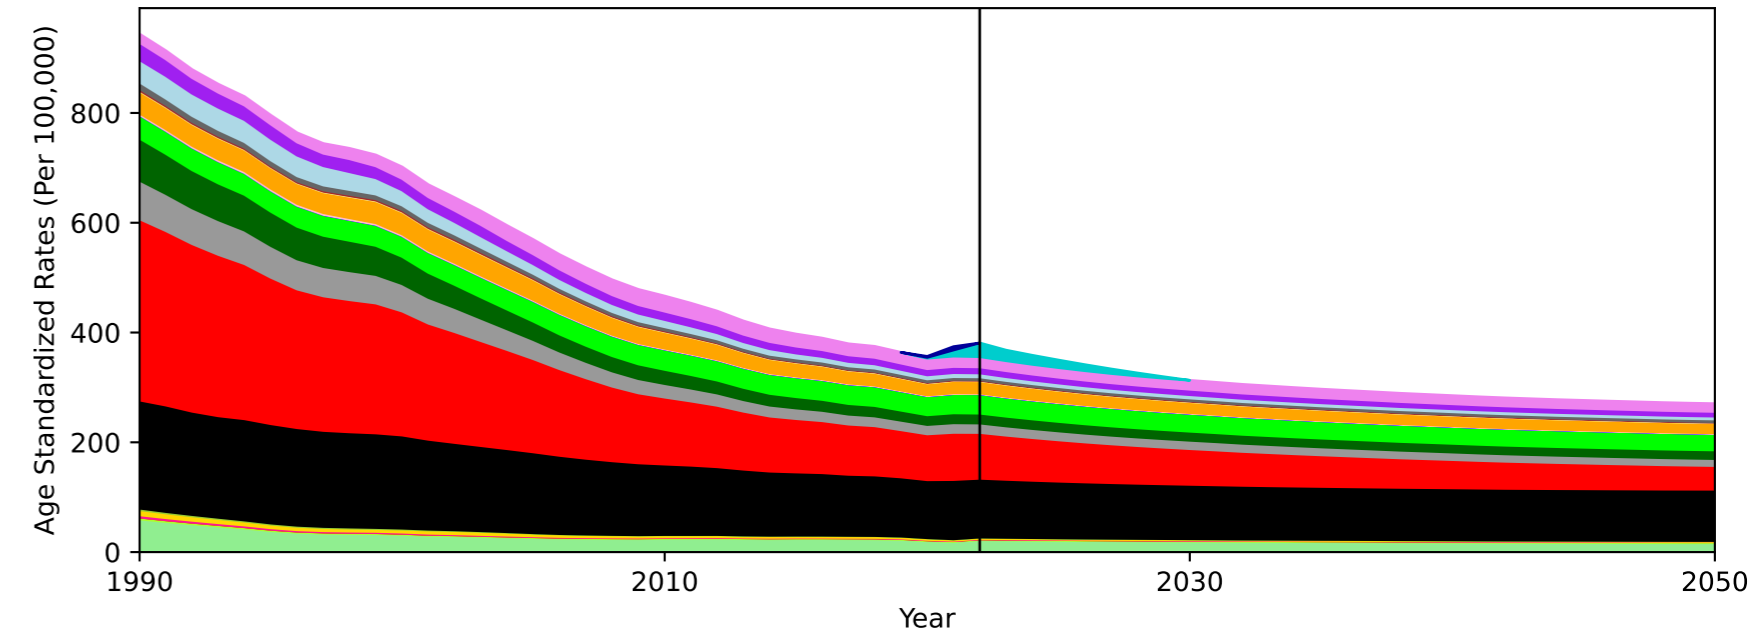

Level 1

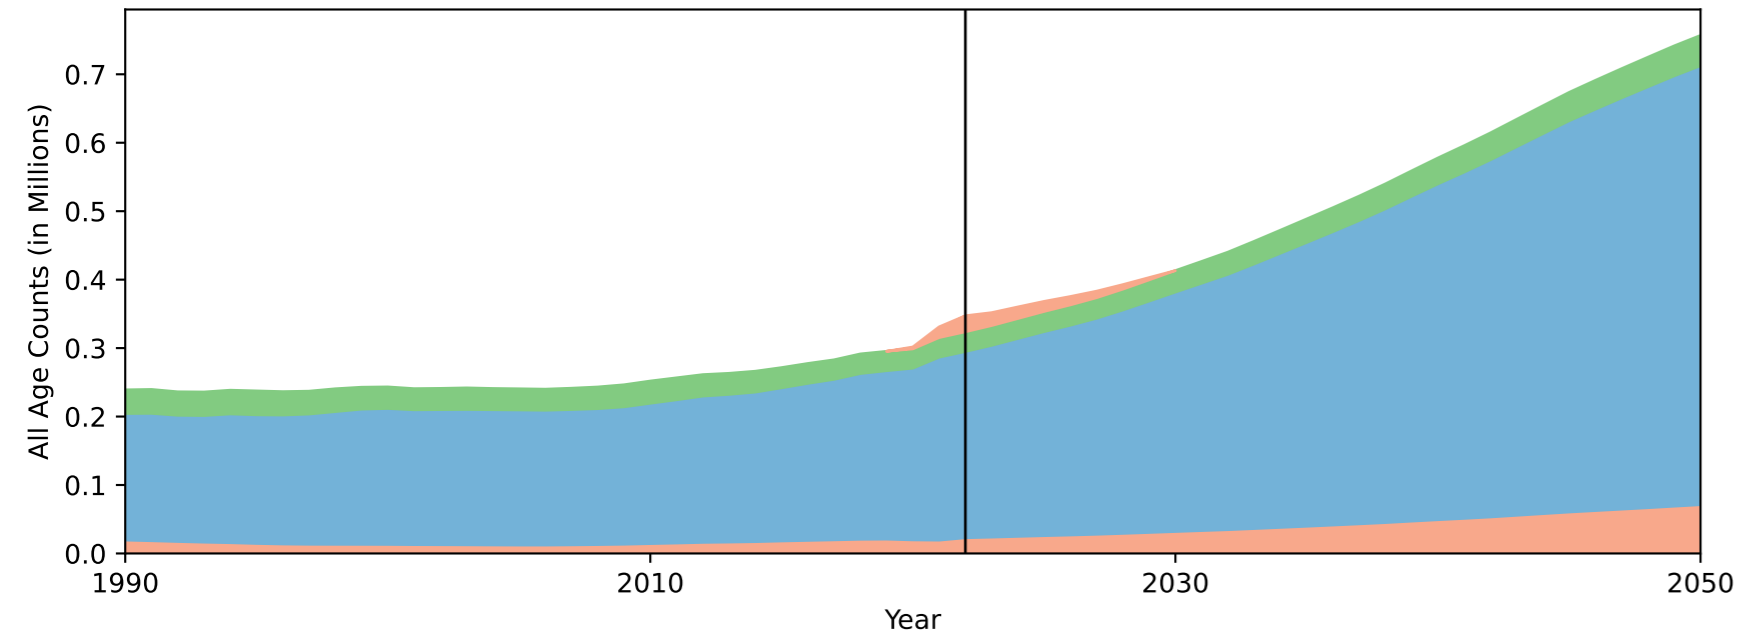

Level 2

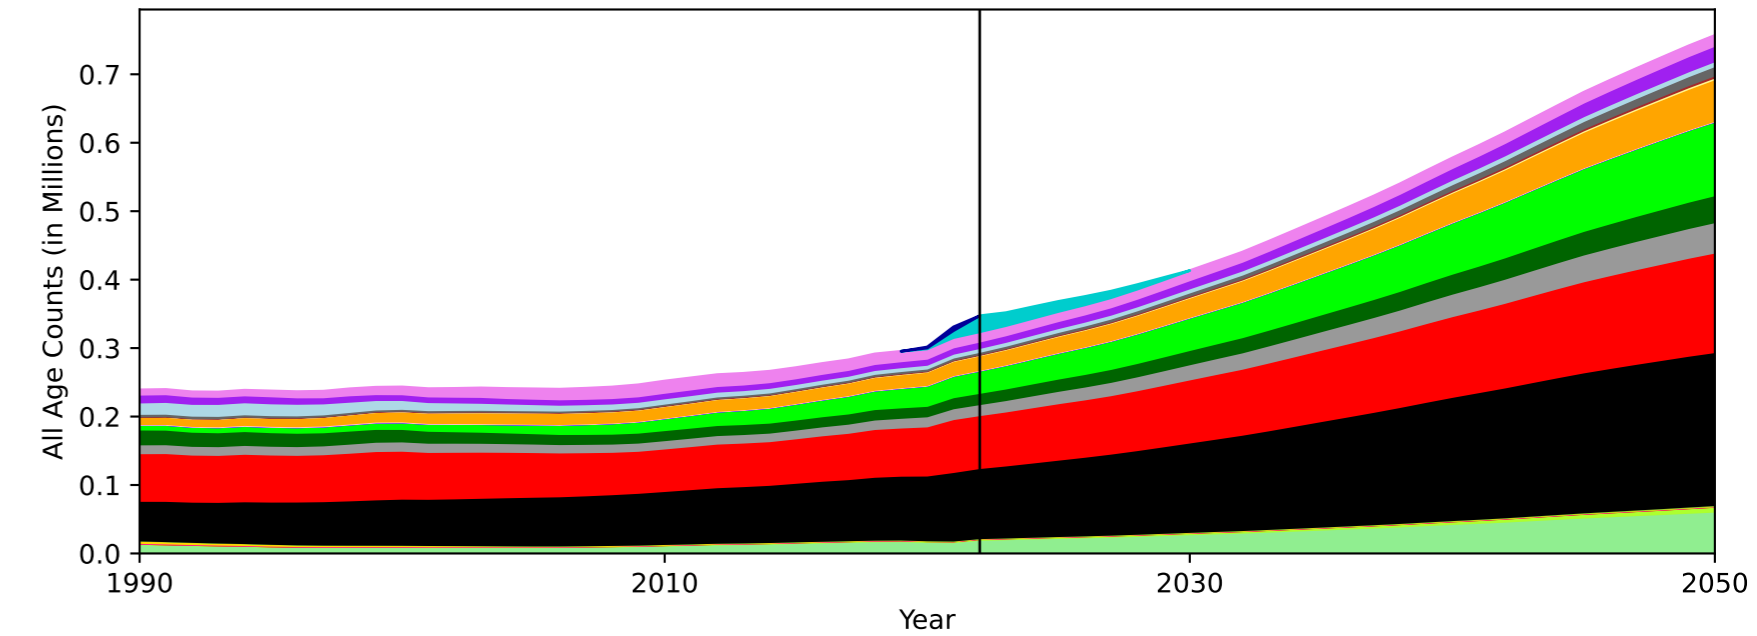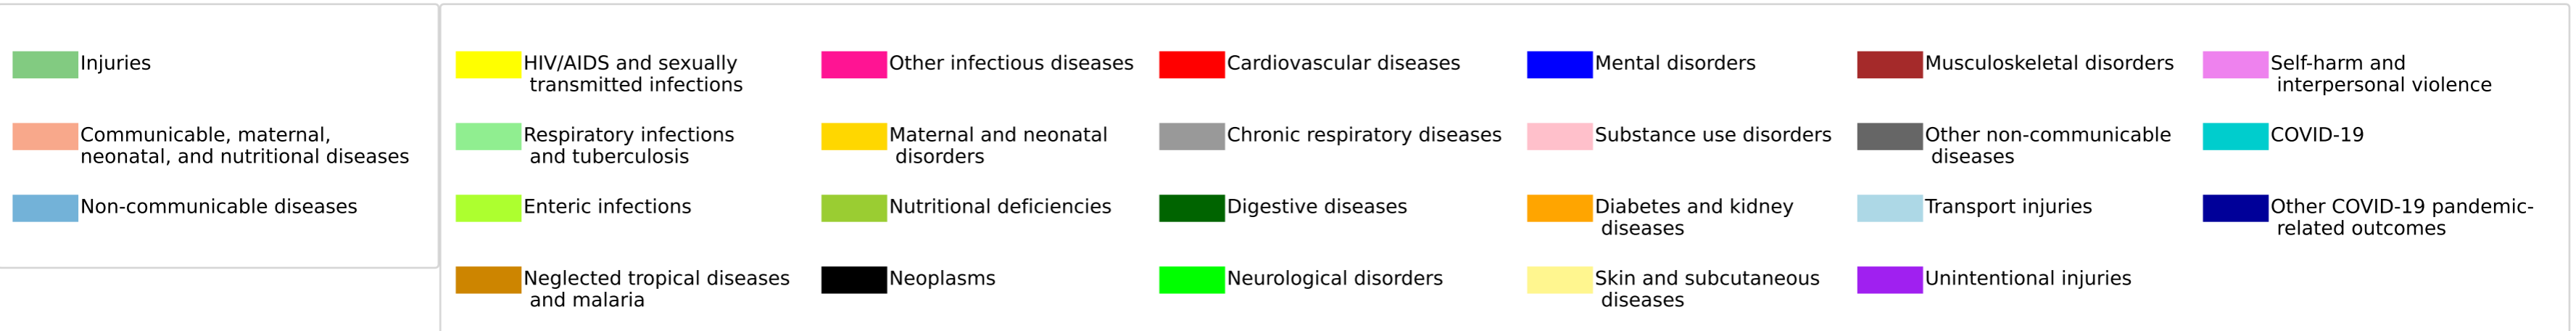



# Singapore

Level 1

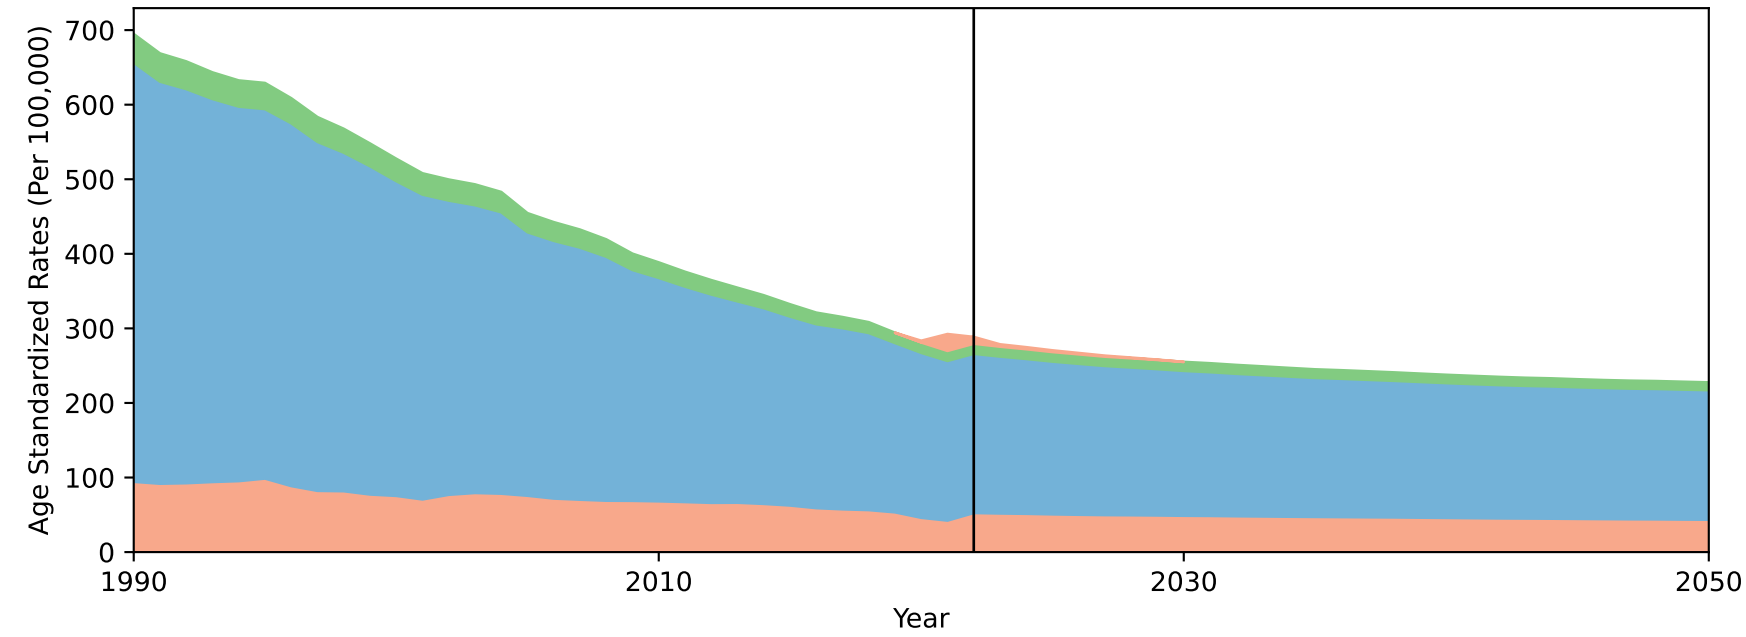

Level 2

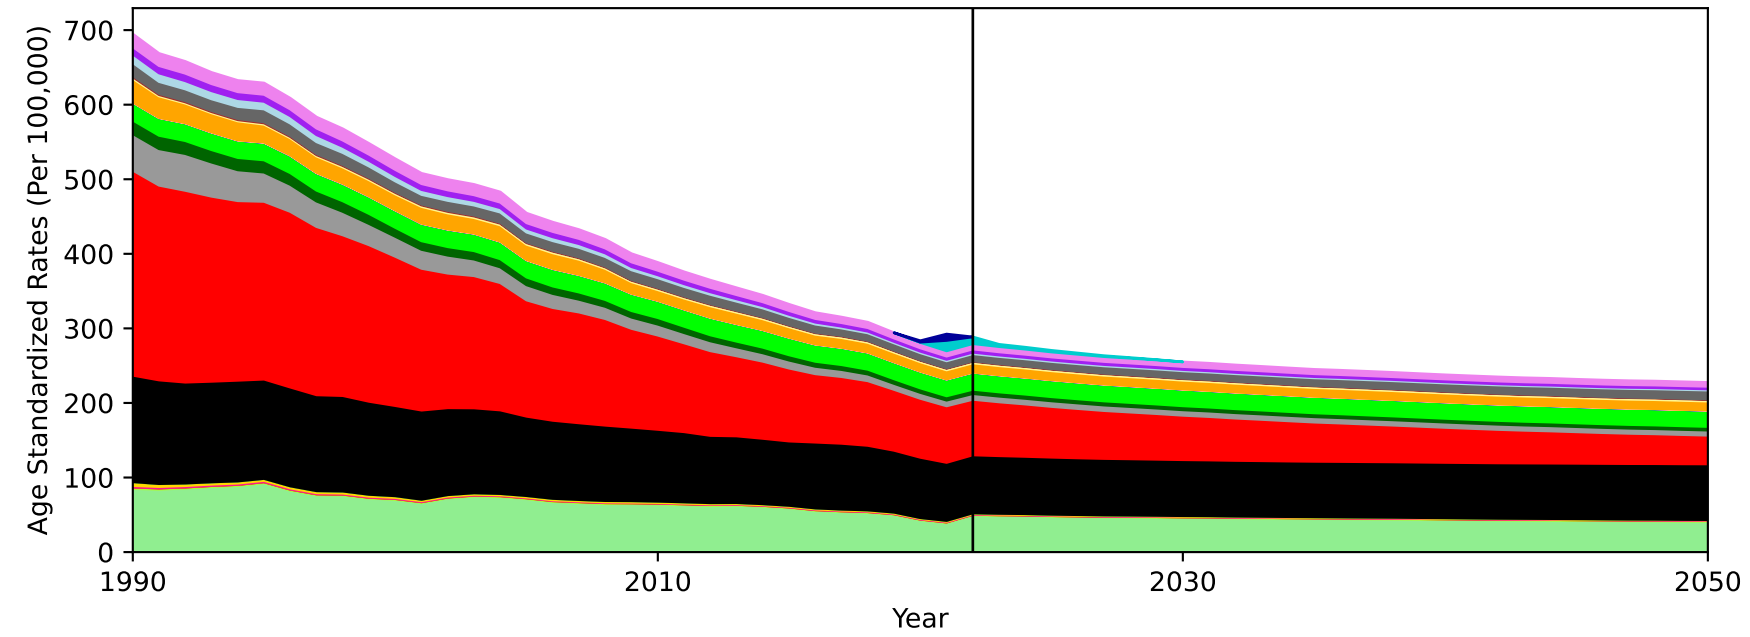

Level 1

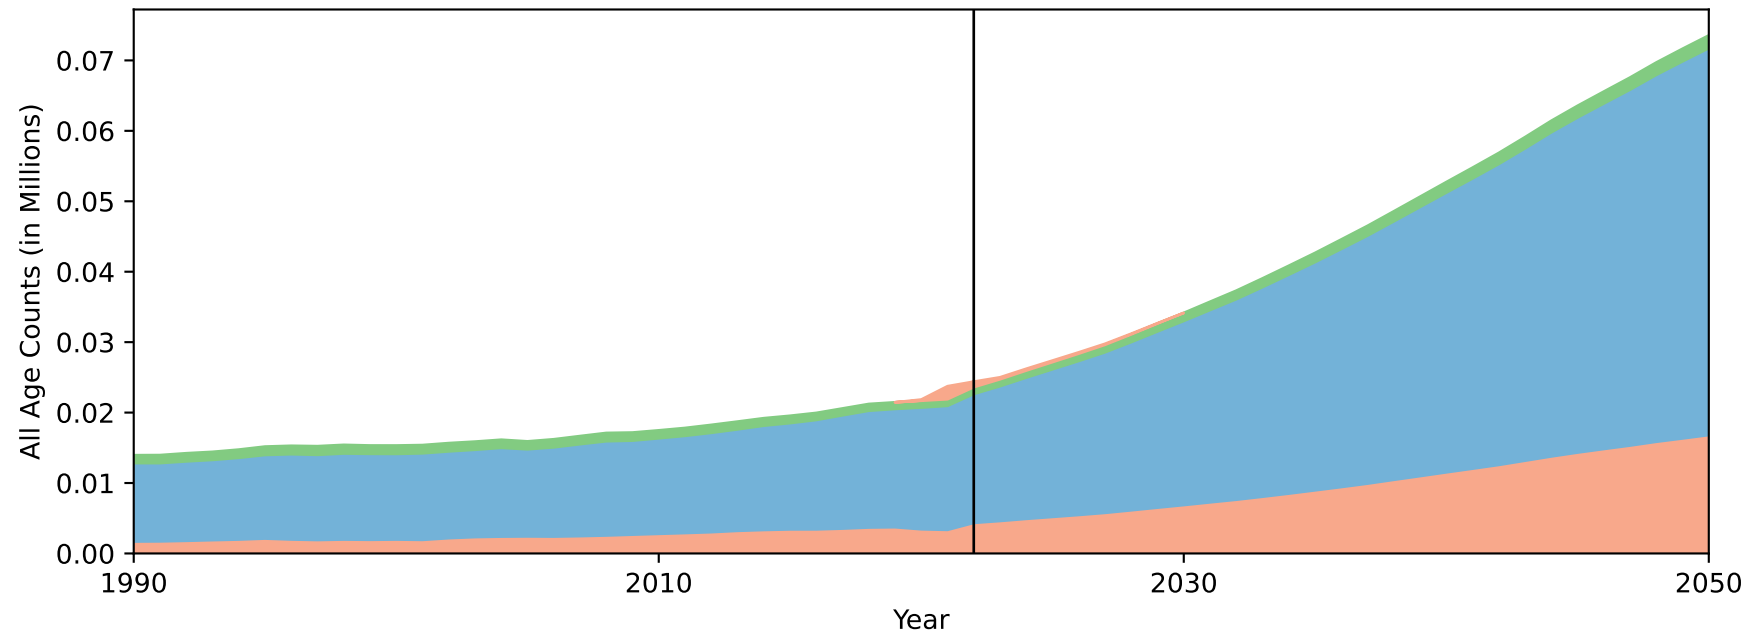

Level 2

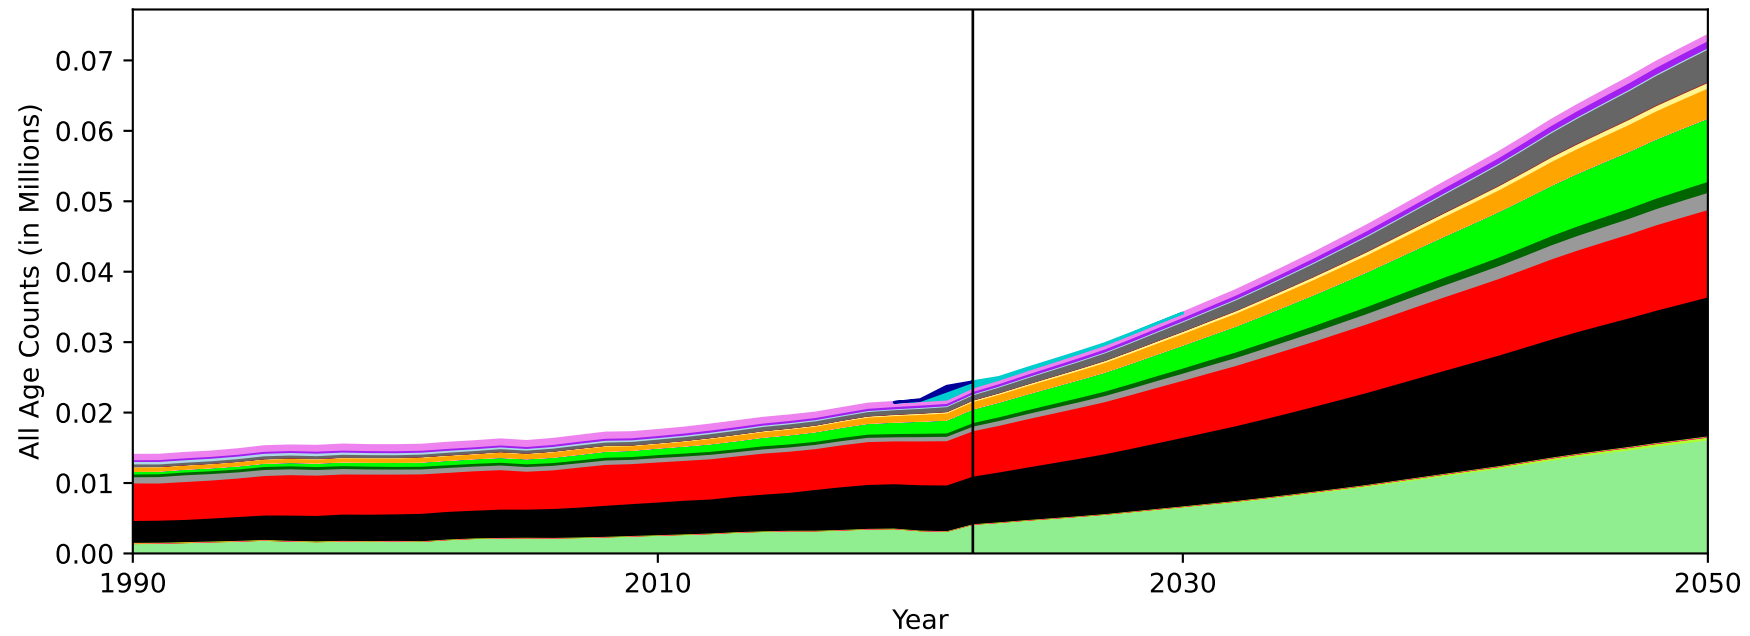

# Canada

Level 1

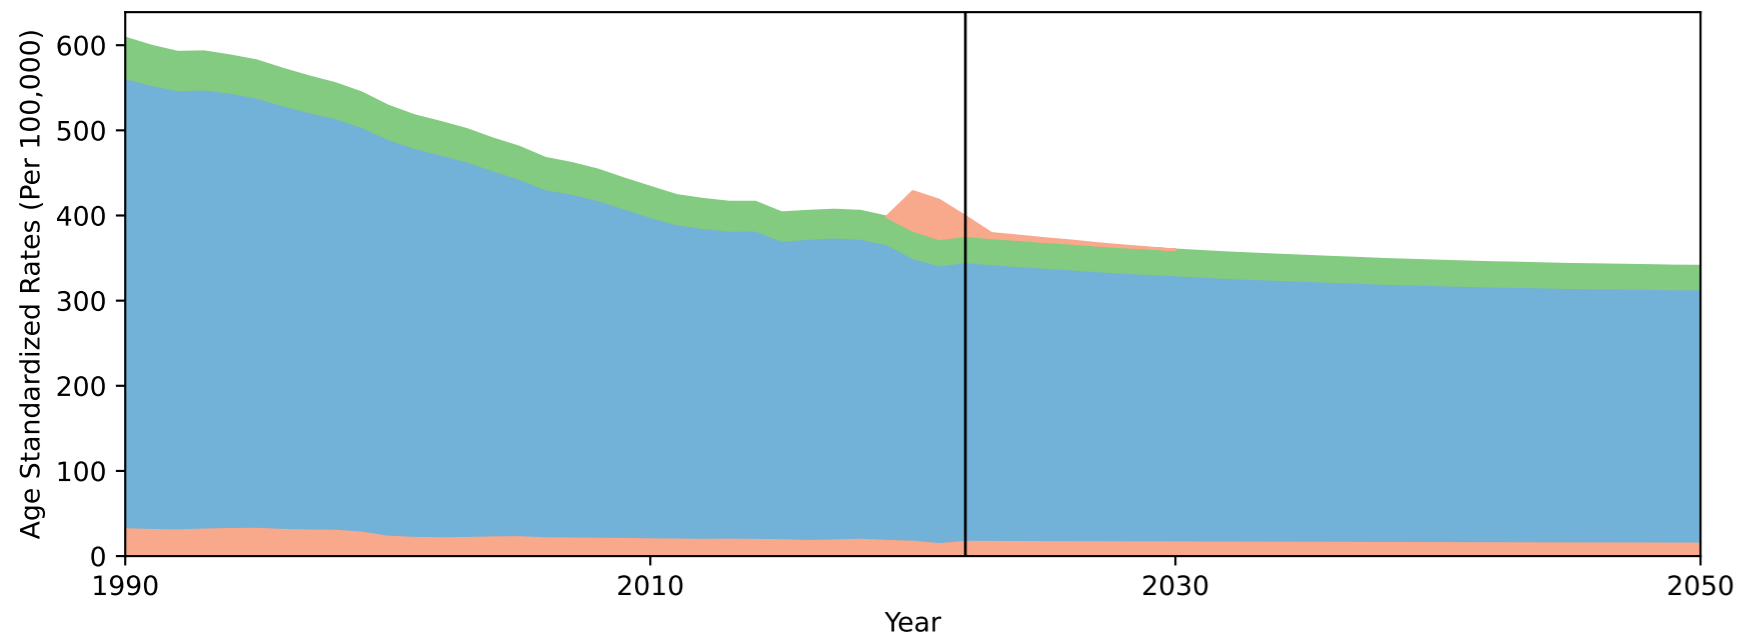

Level 2

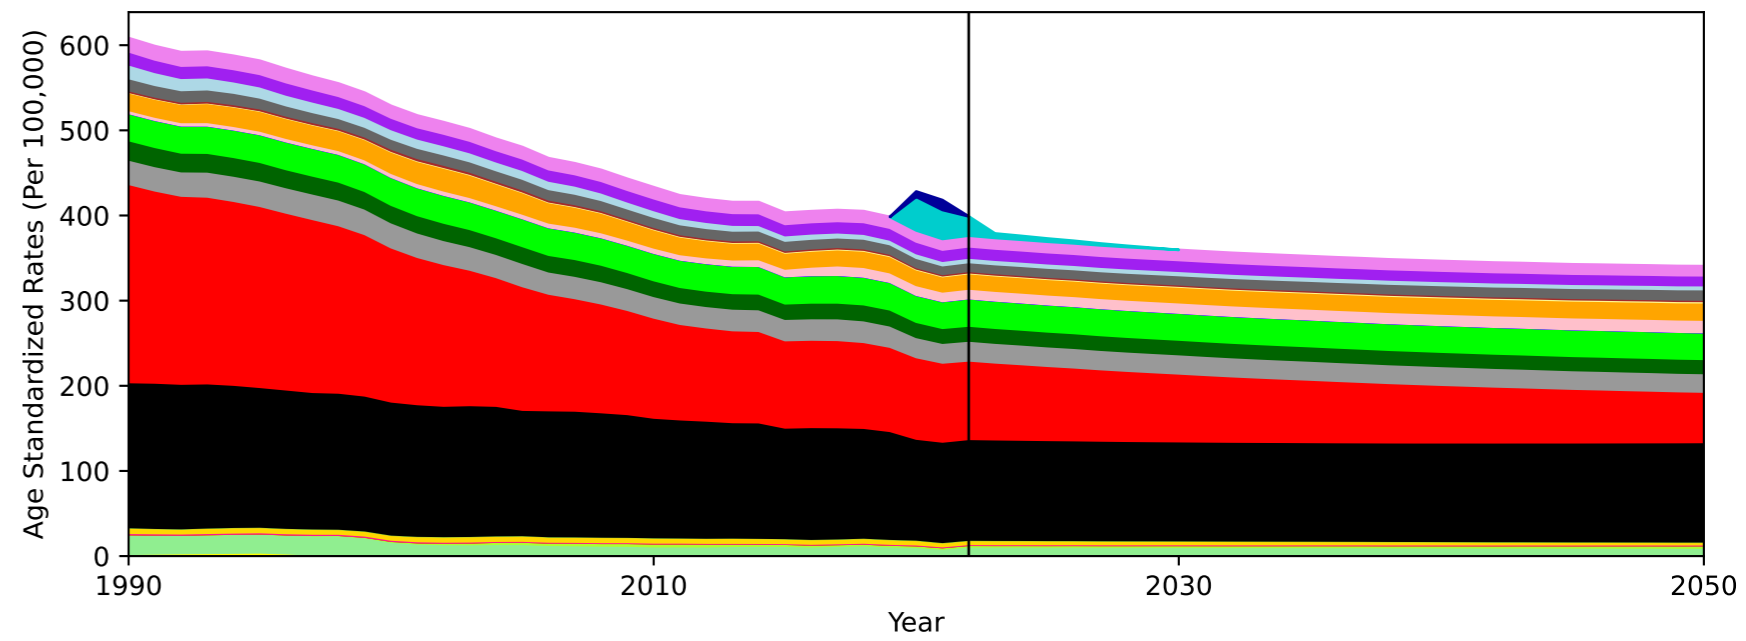

Level 1

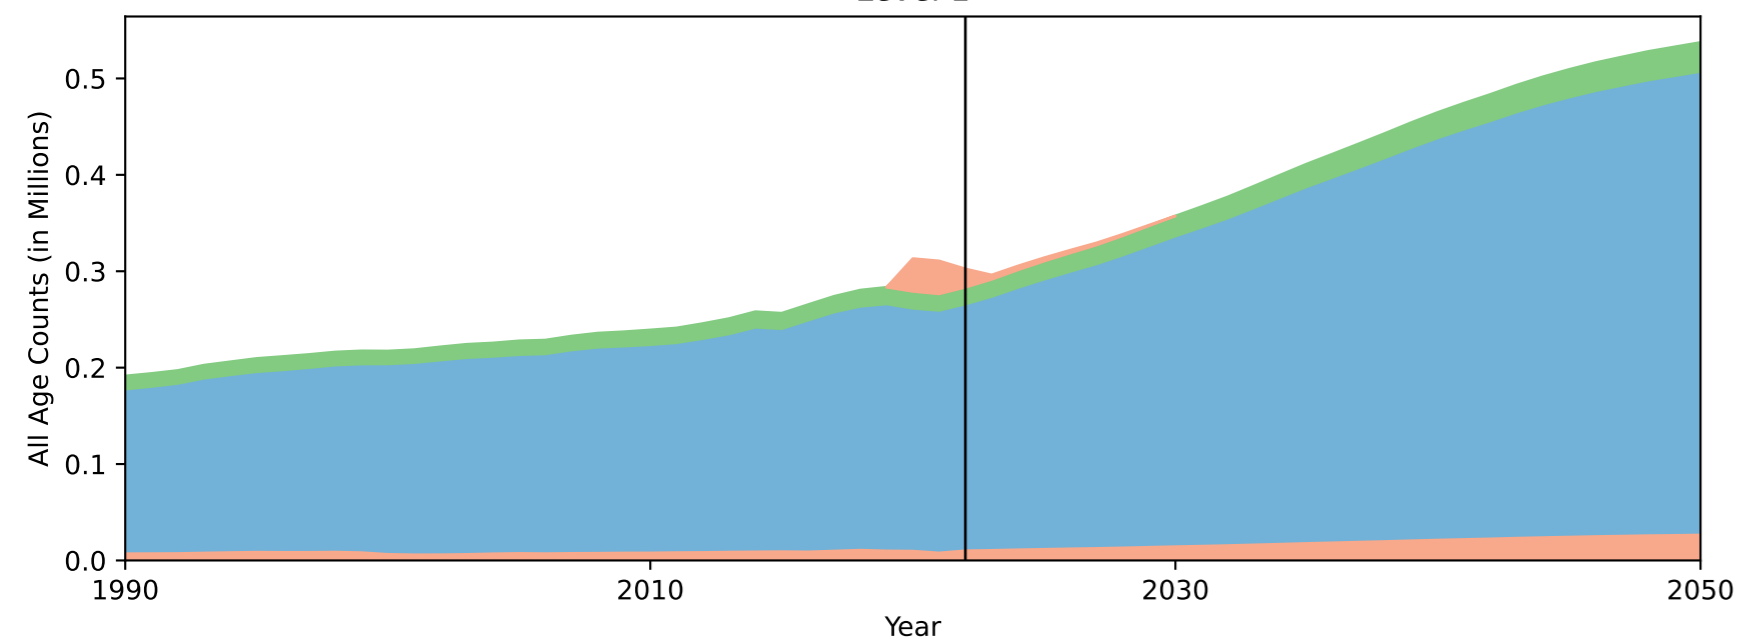

Level 2

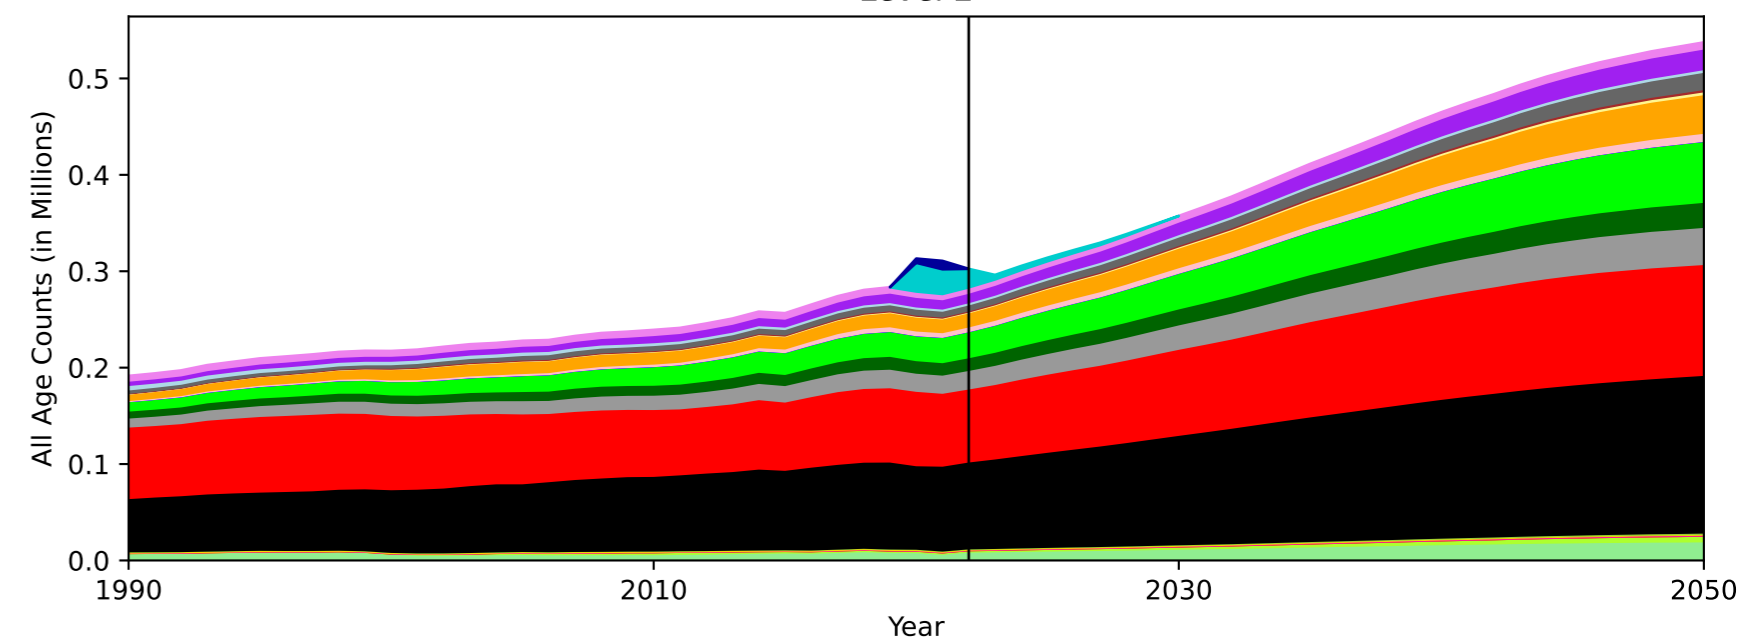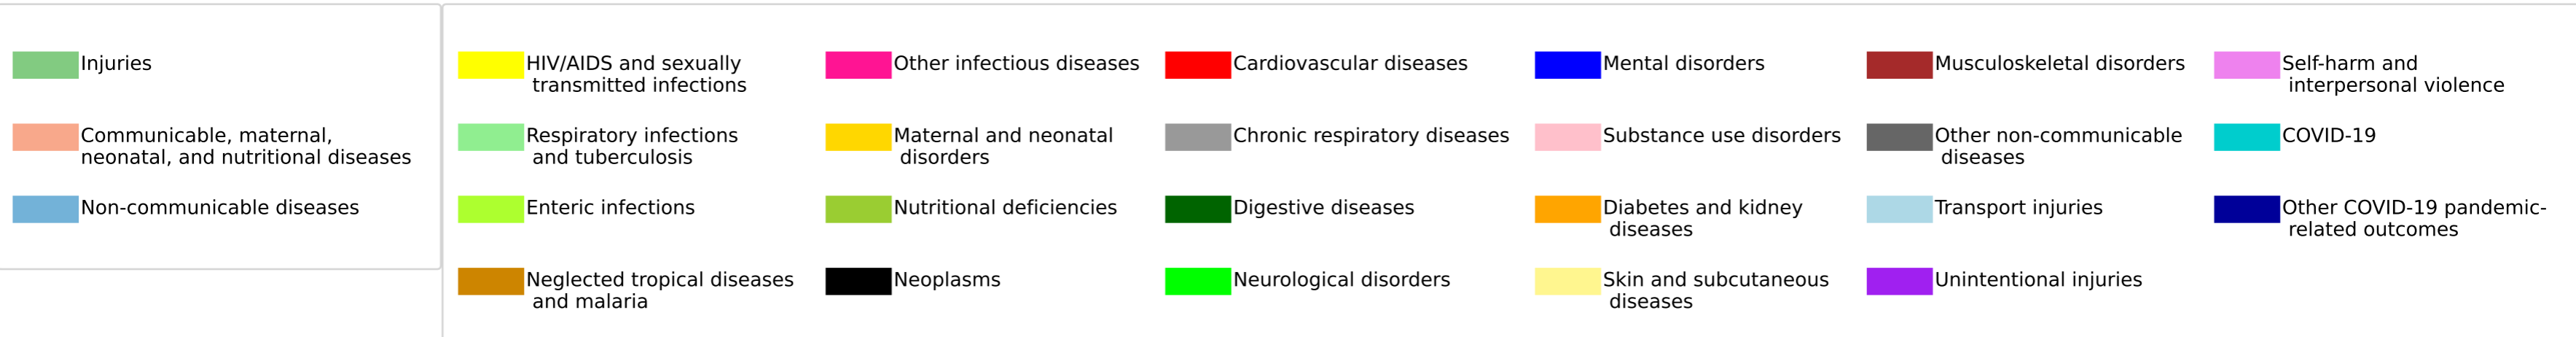

# Greenland

Level 1

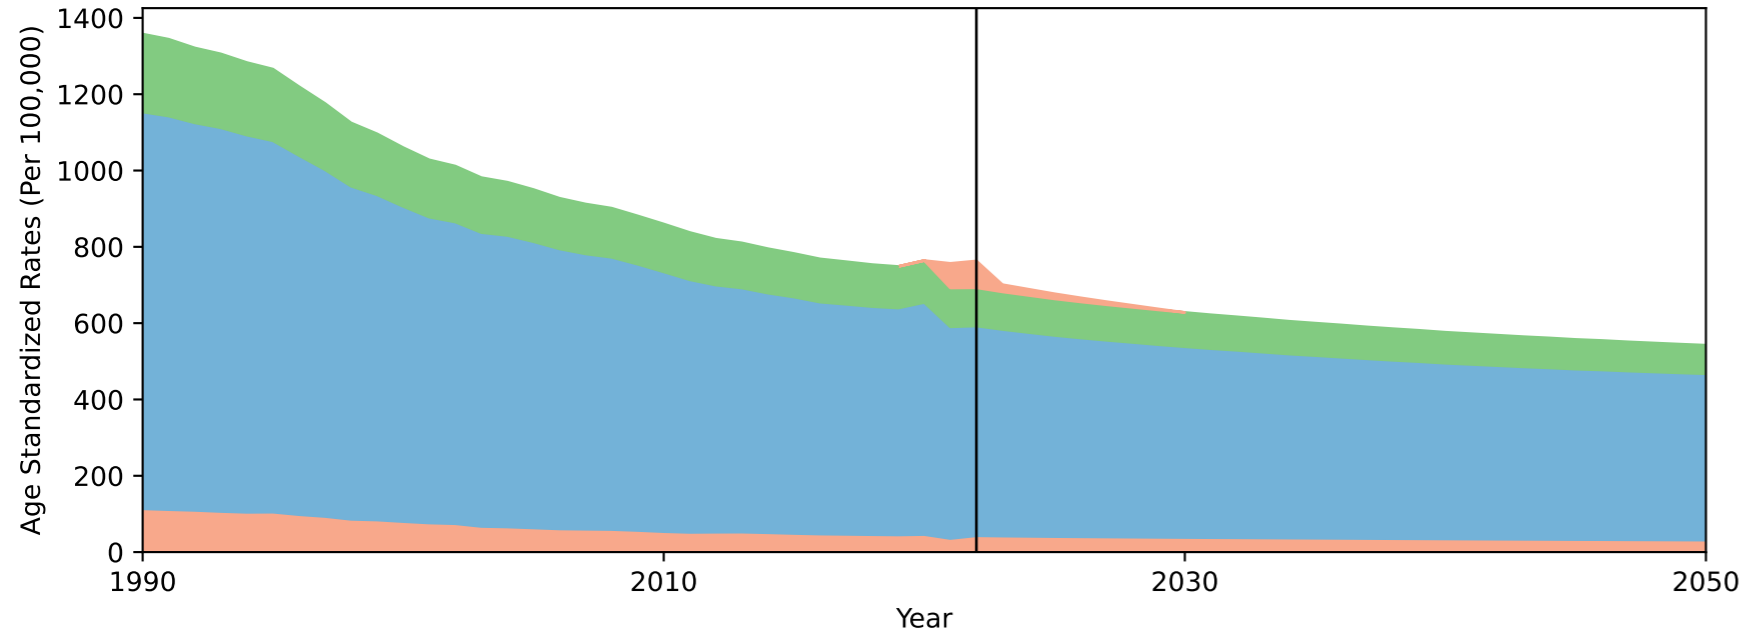

Level 2

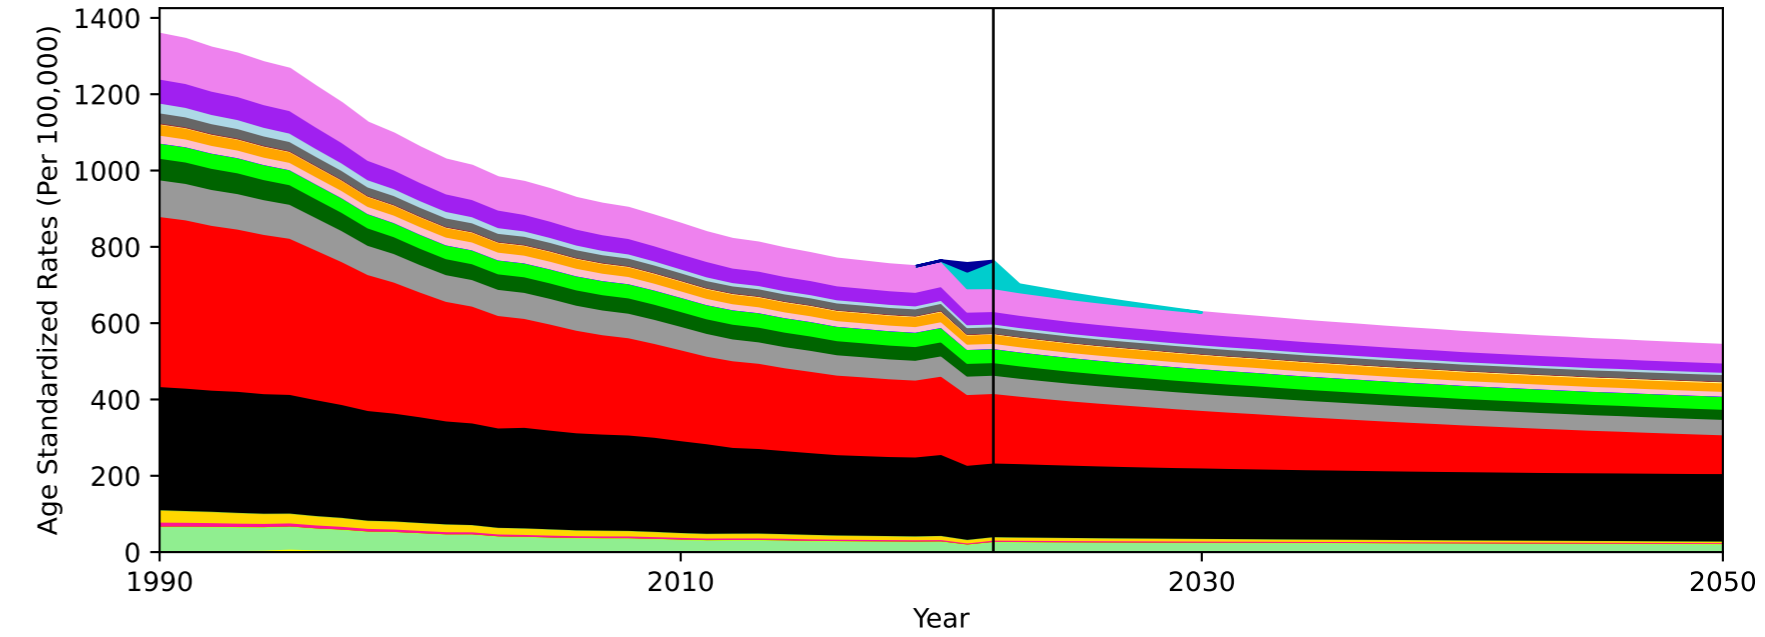

Level 1

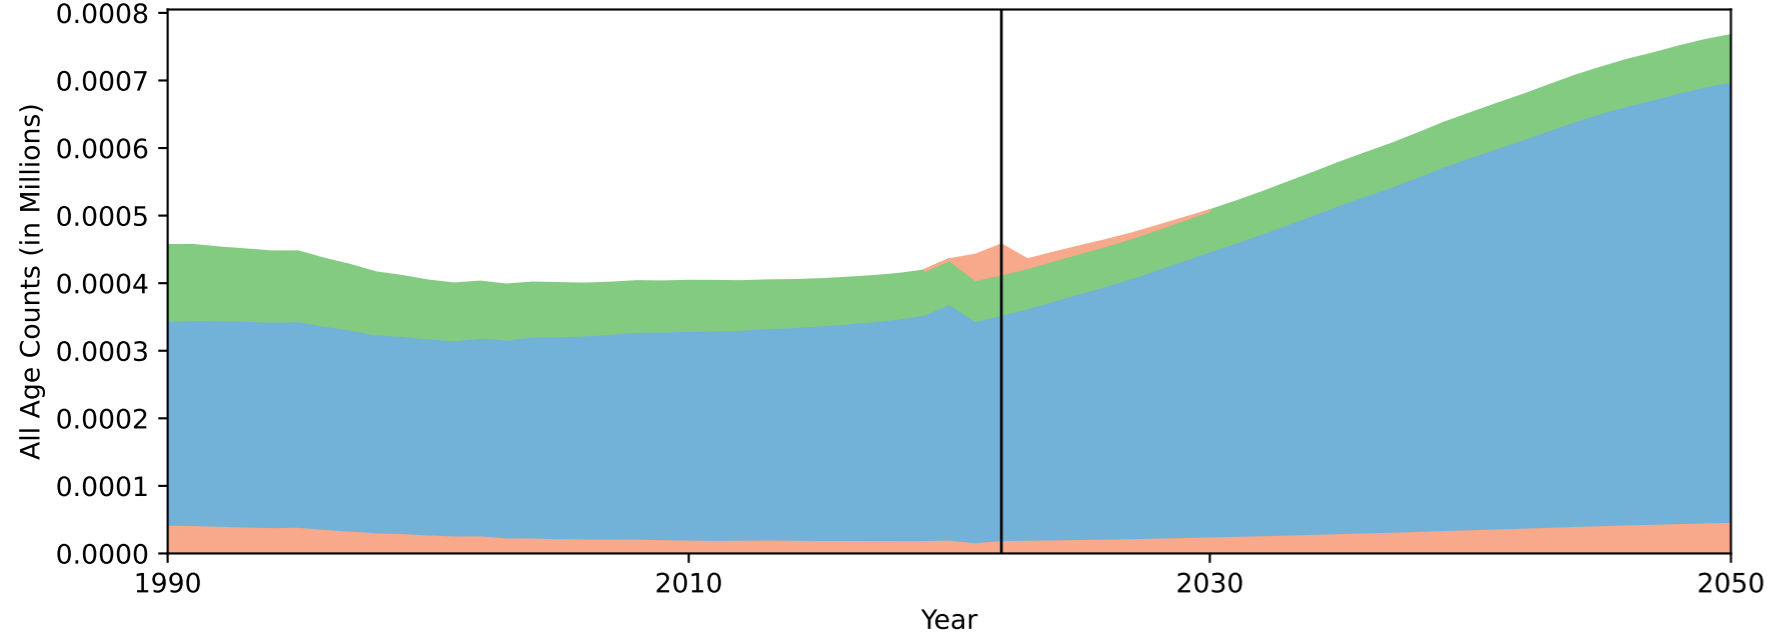

Level 2

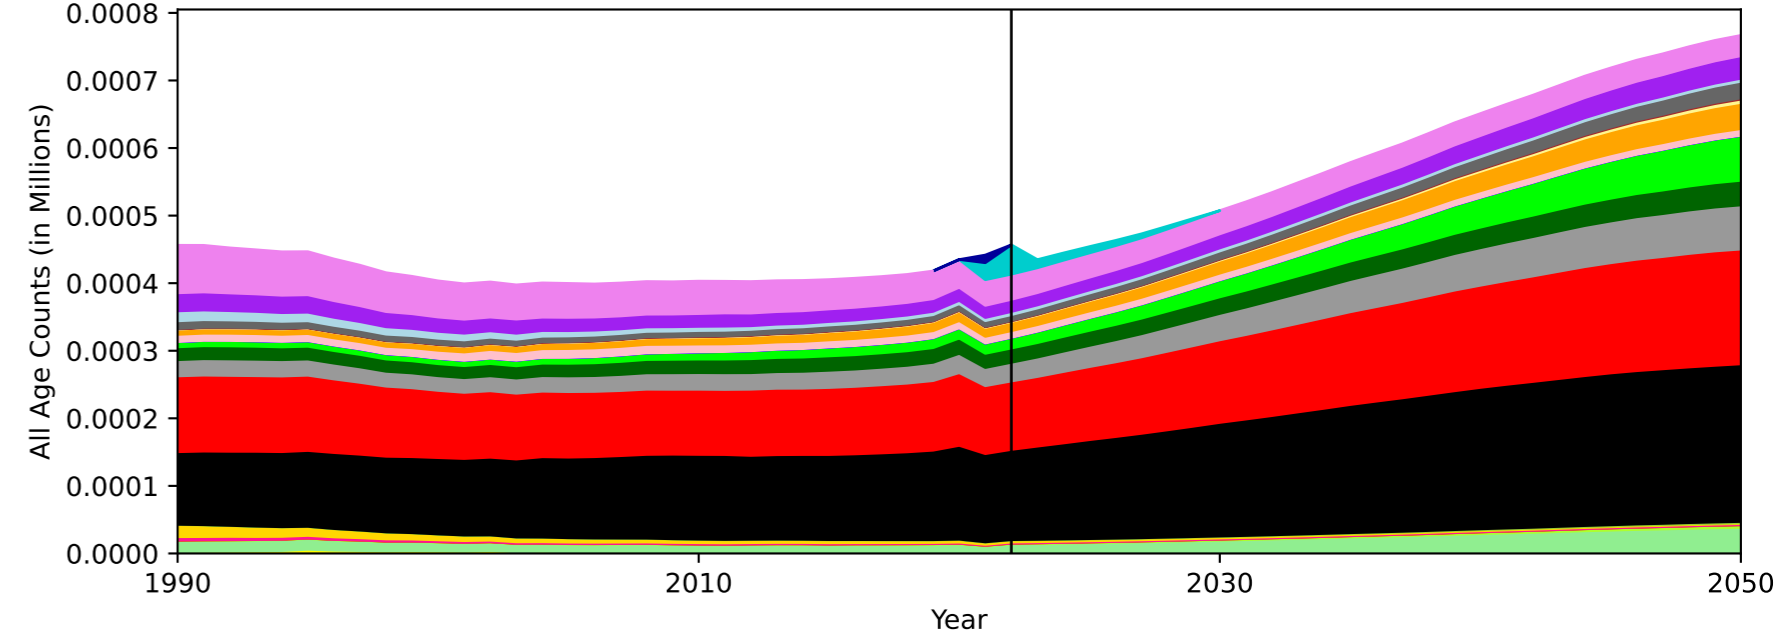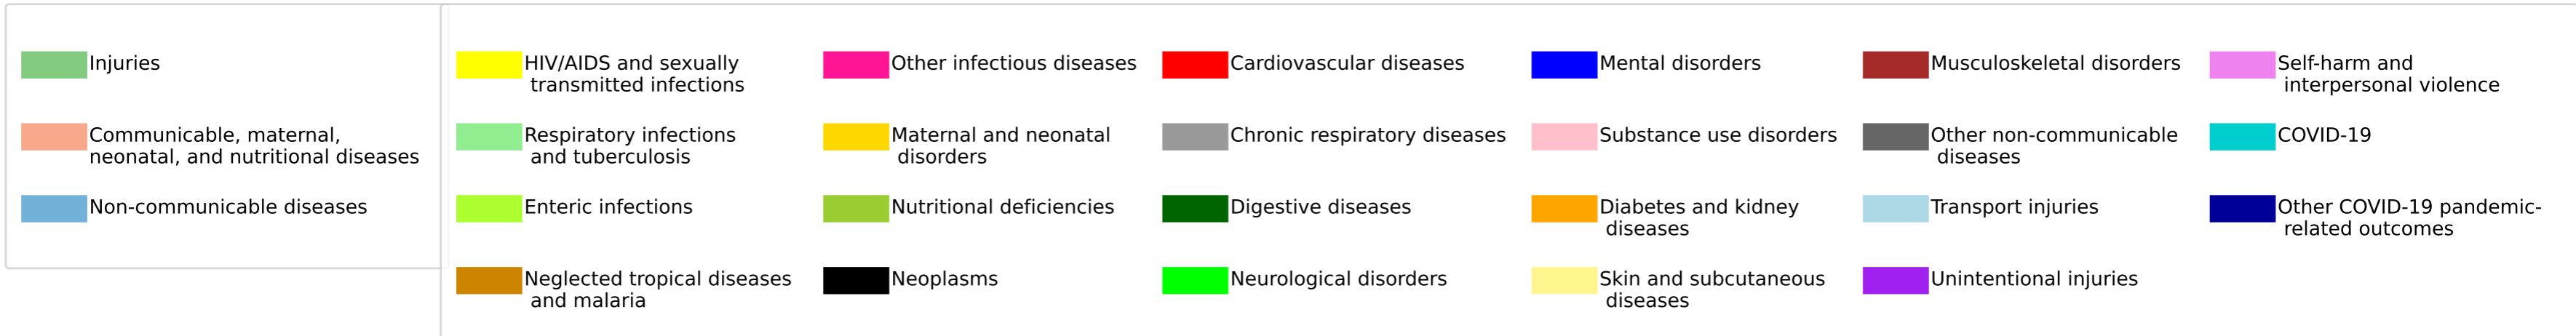

# USA

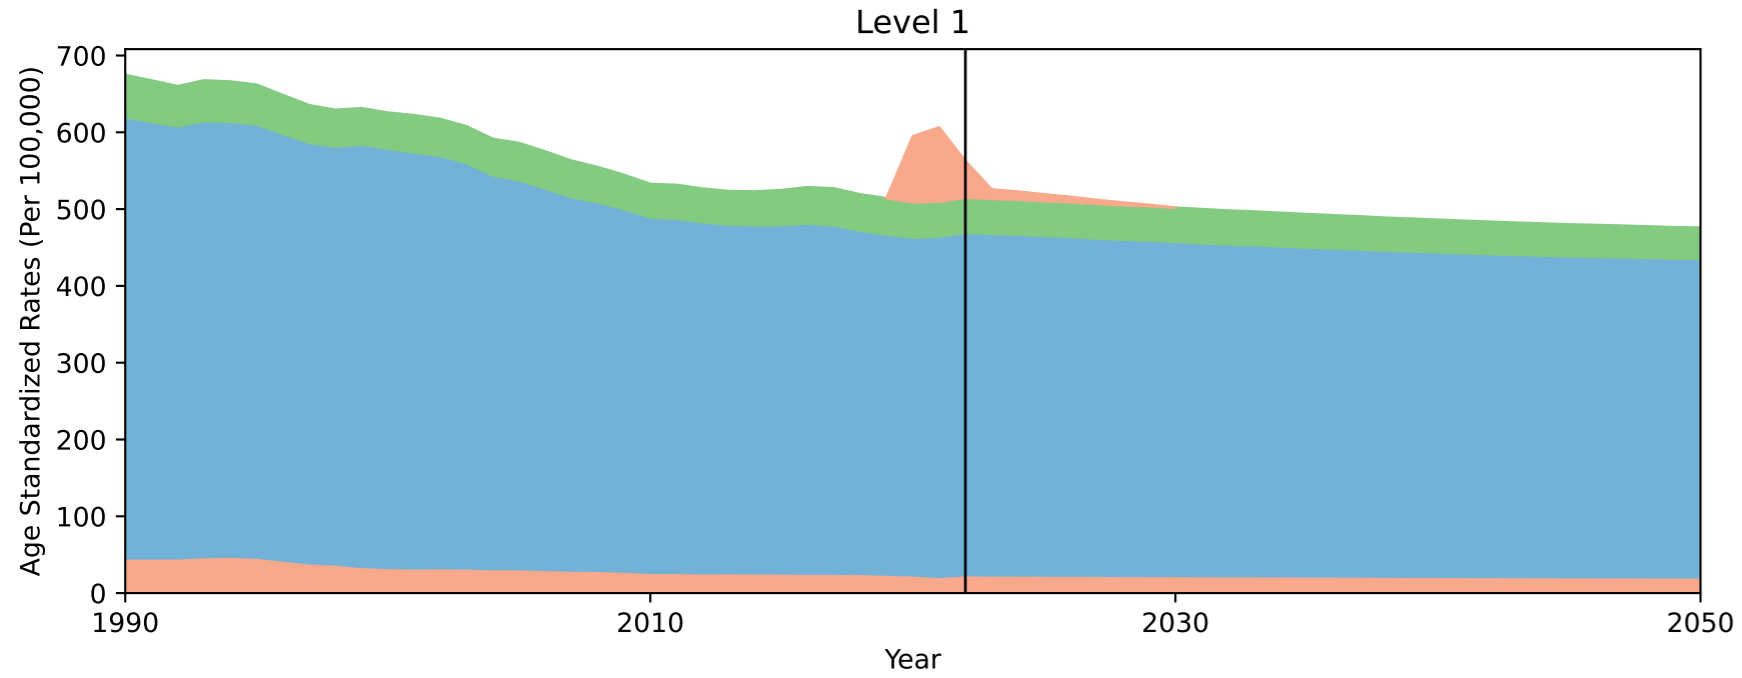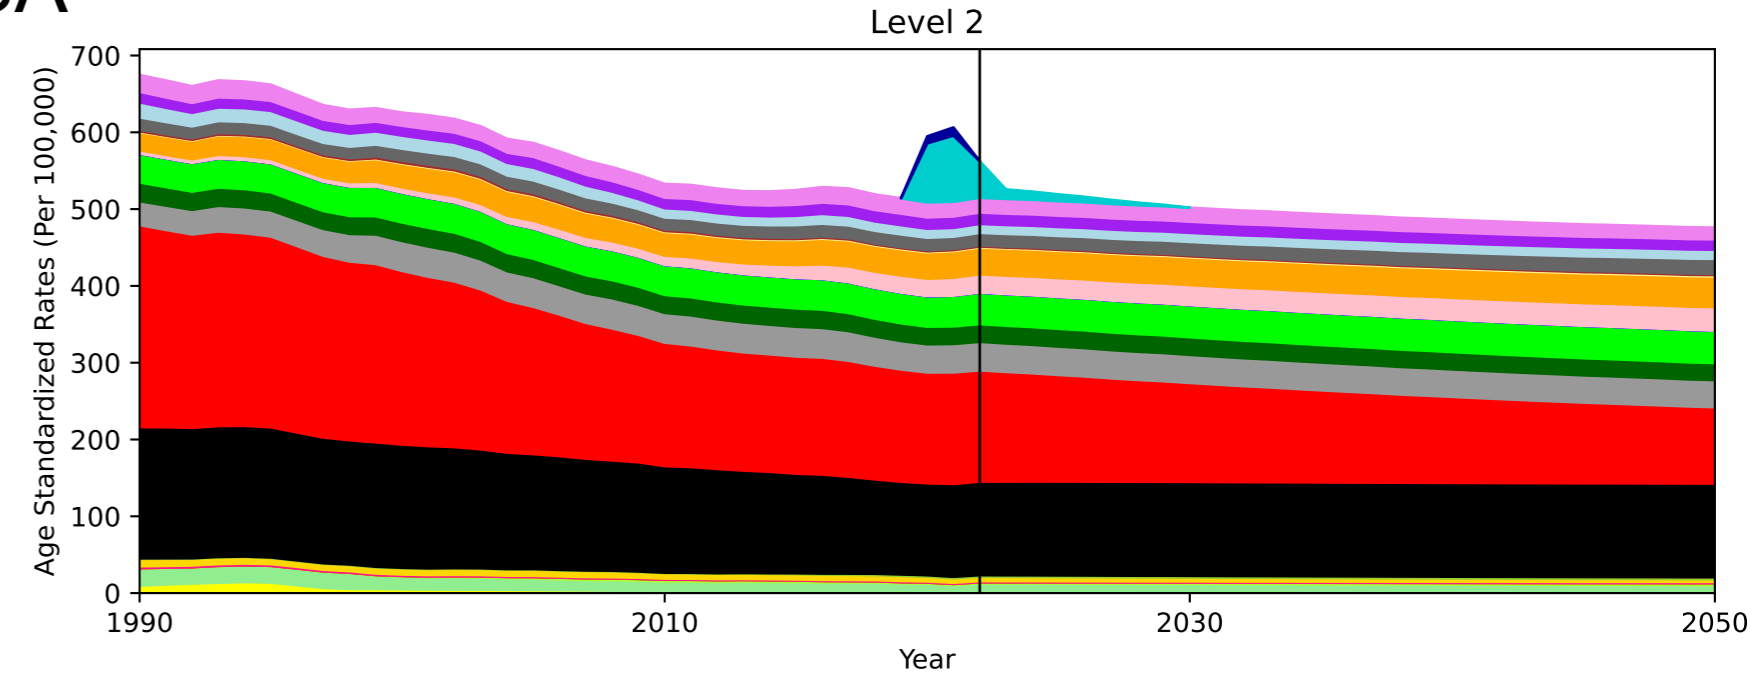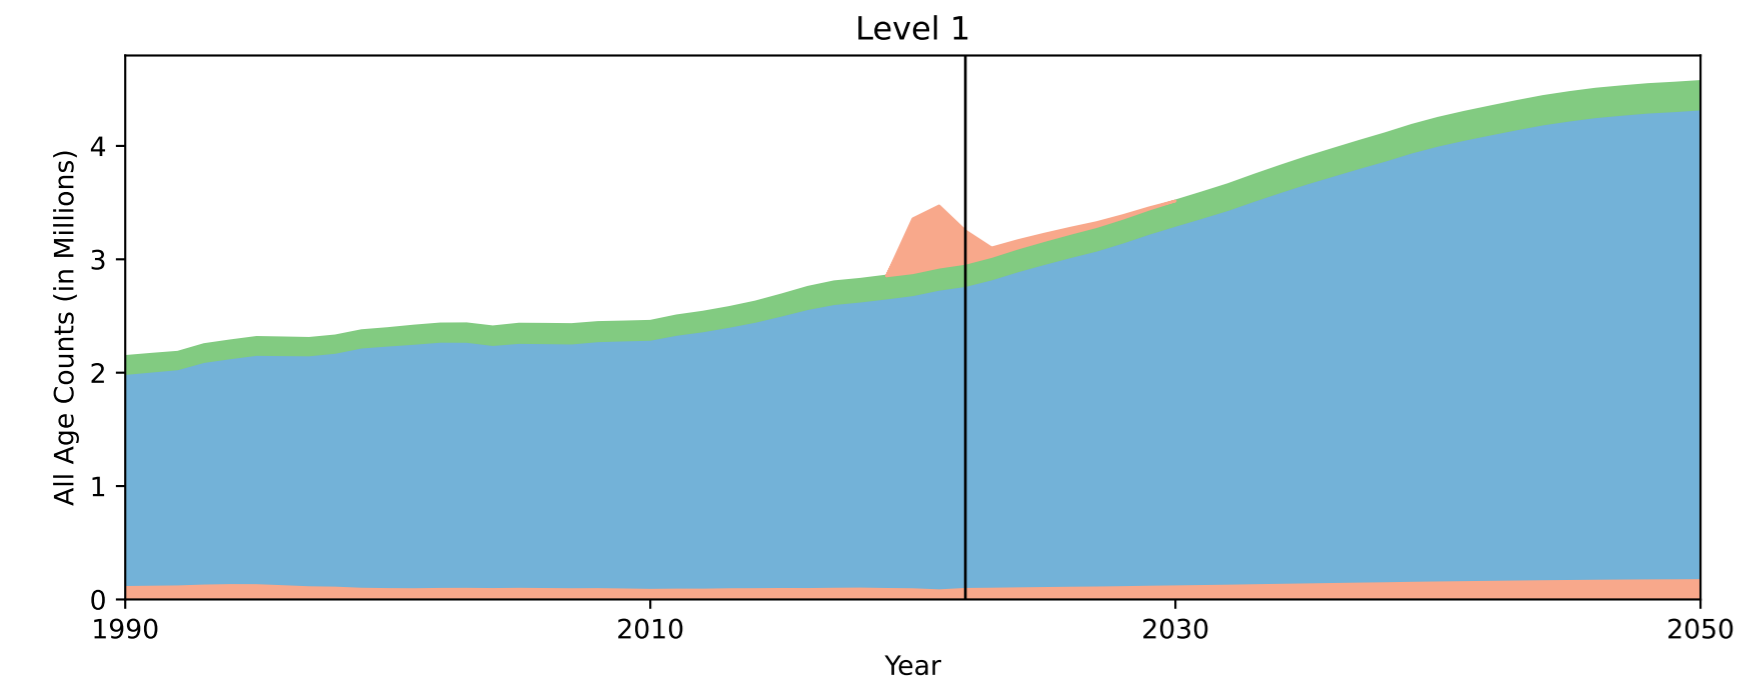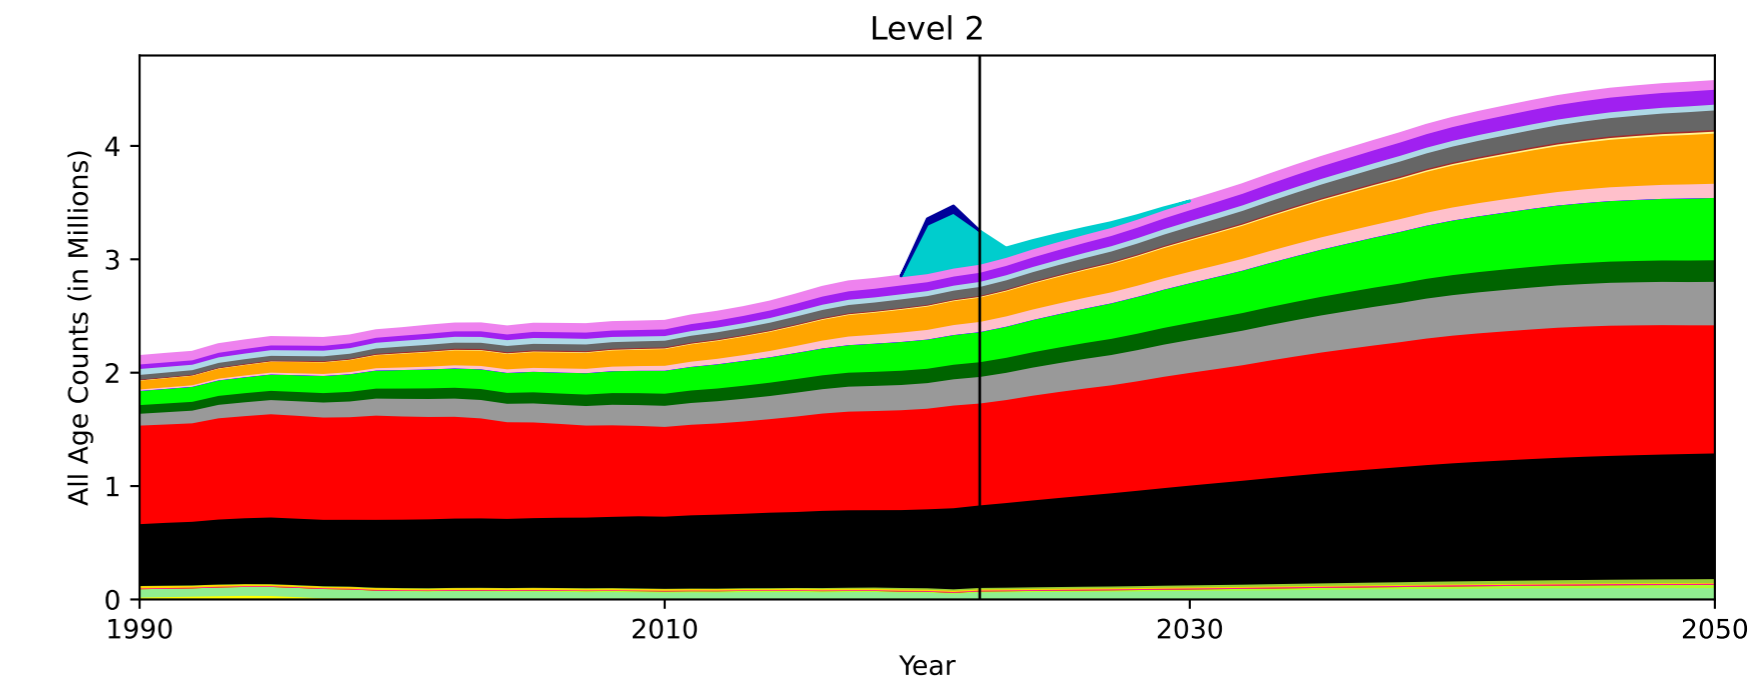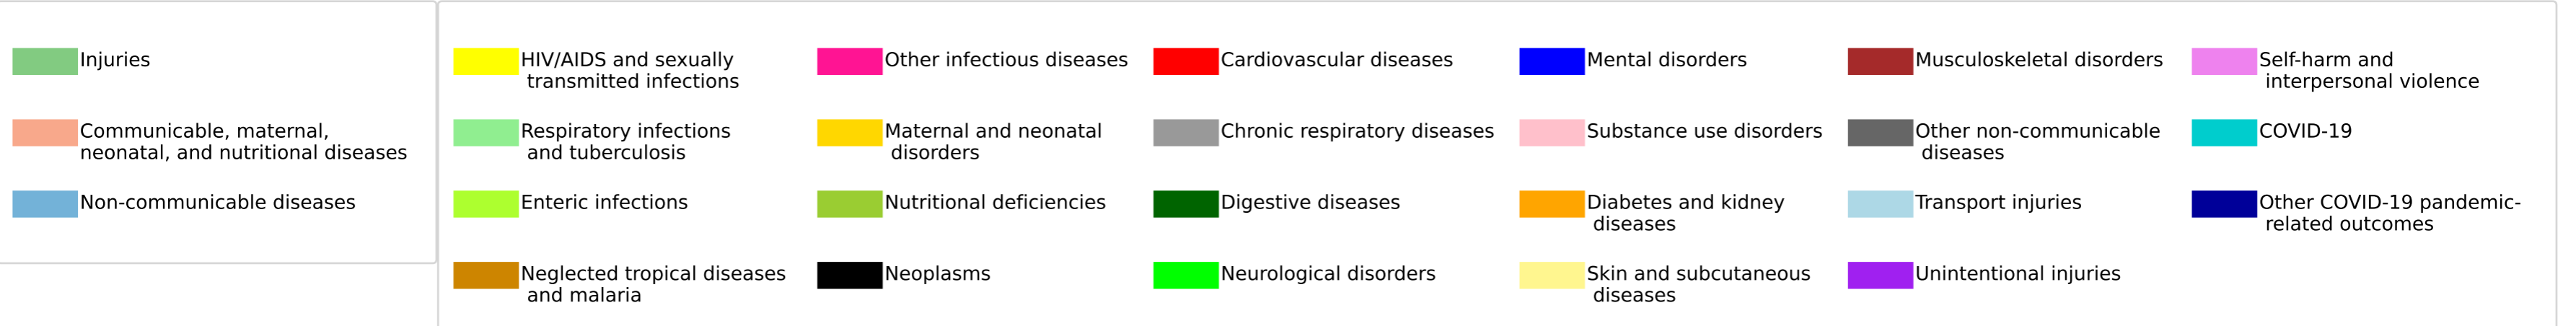

Level 1

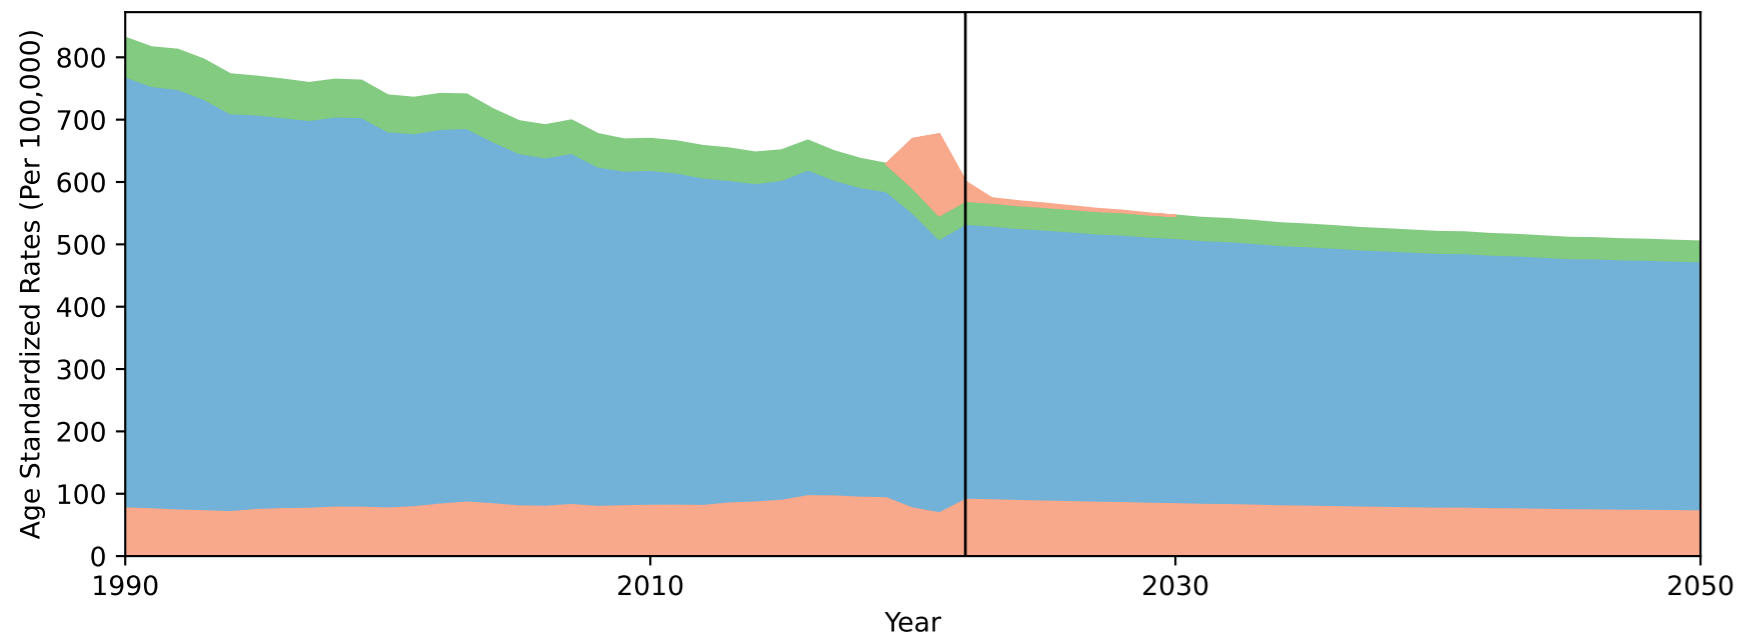

Level 2

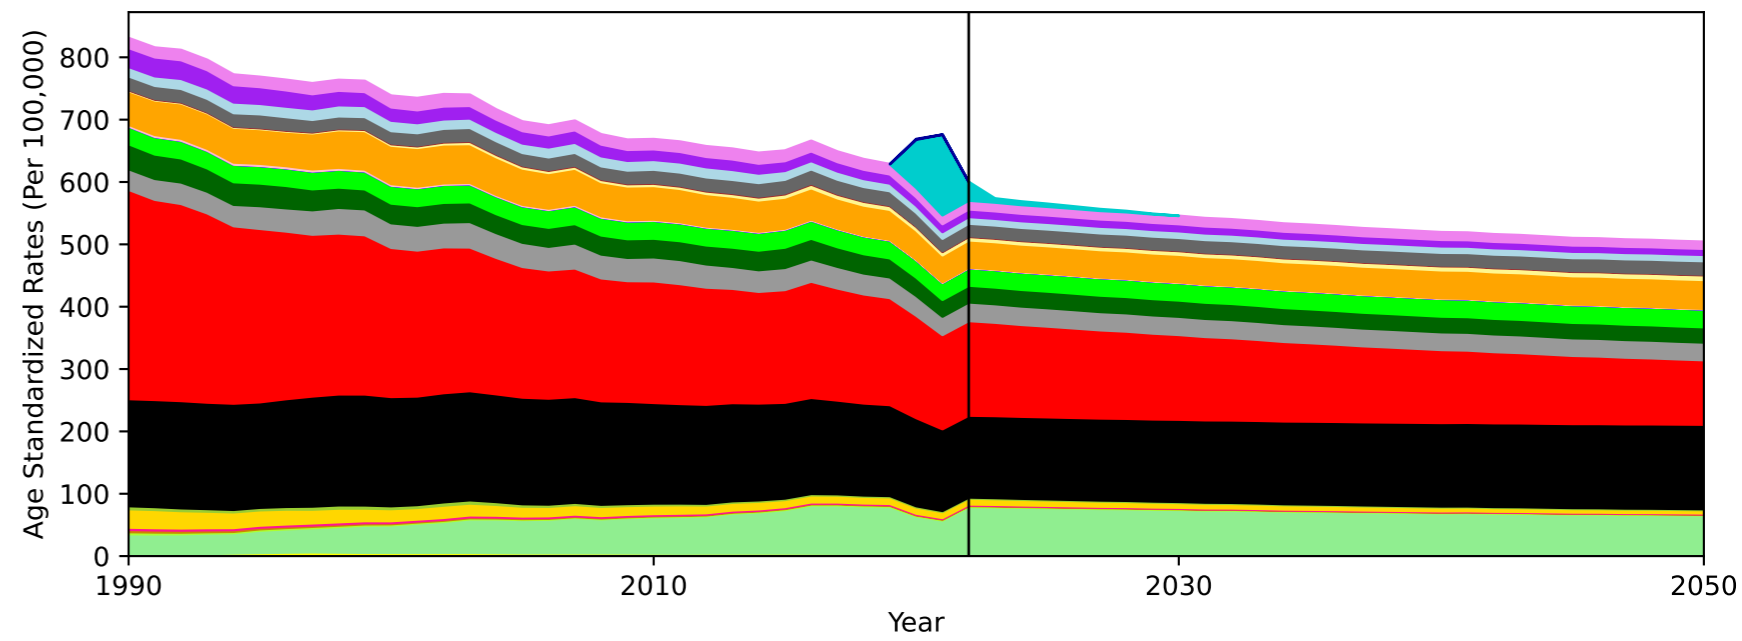

Level 1

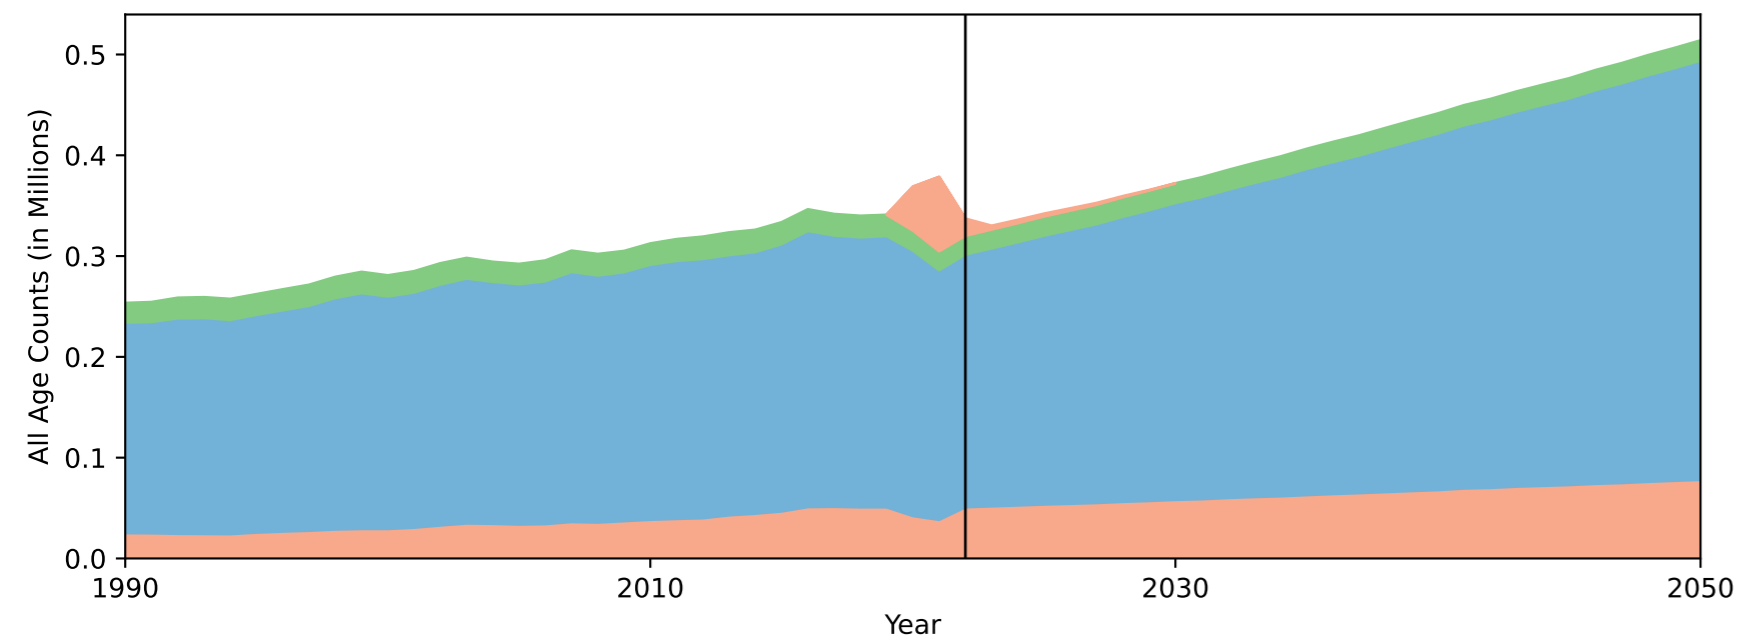

Level 2

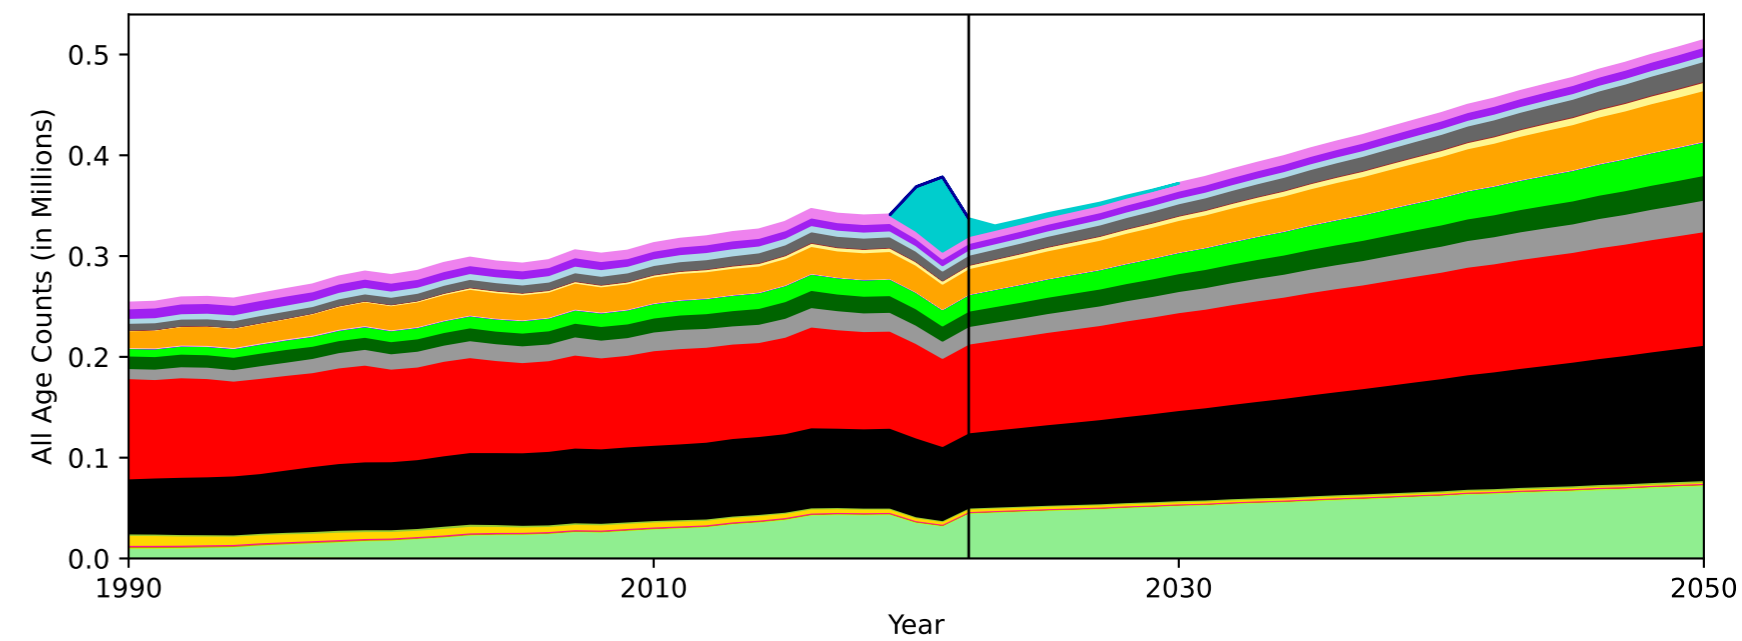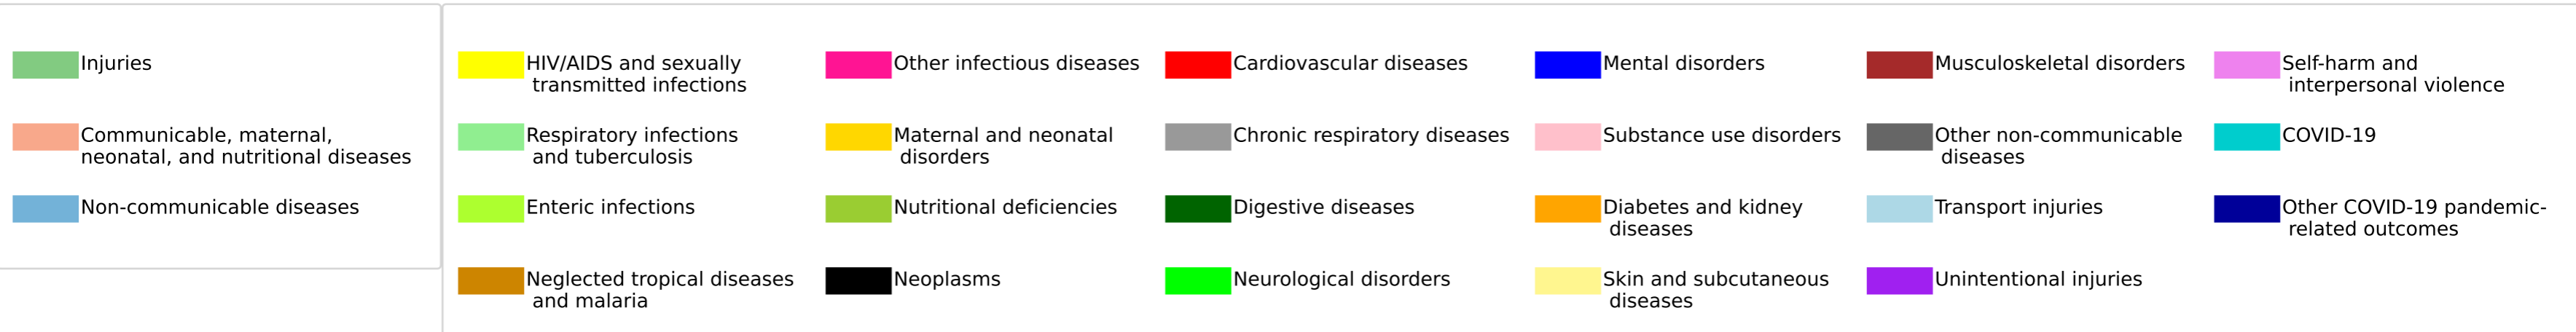

Level 1

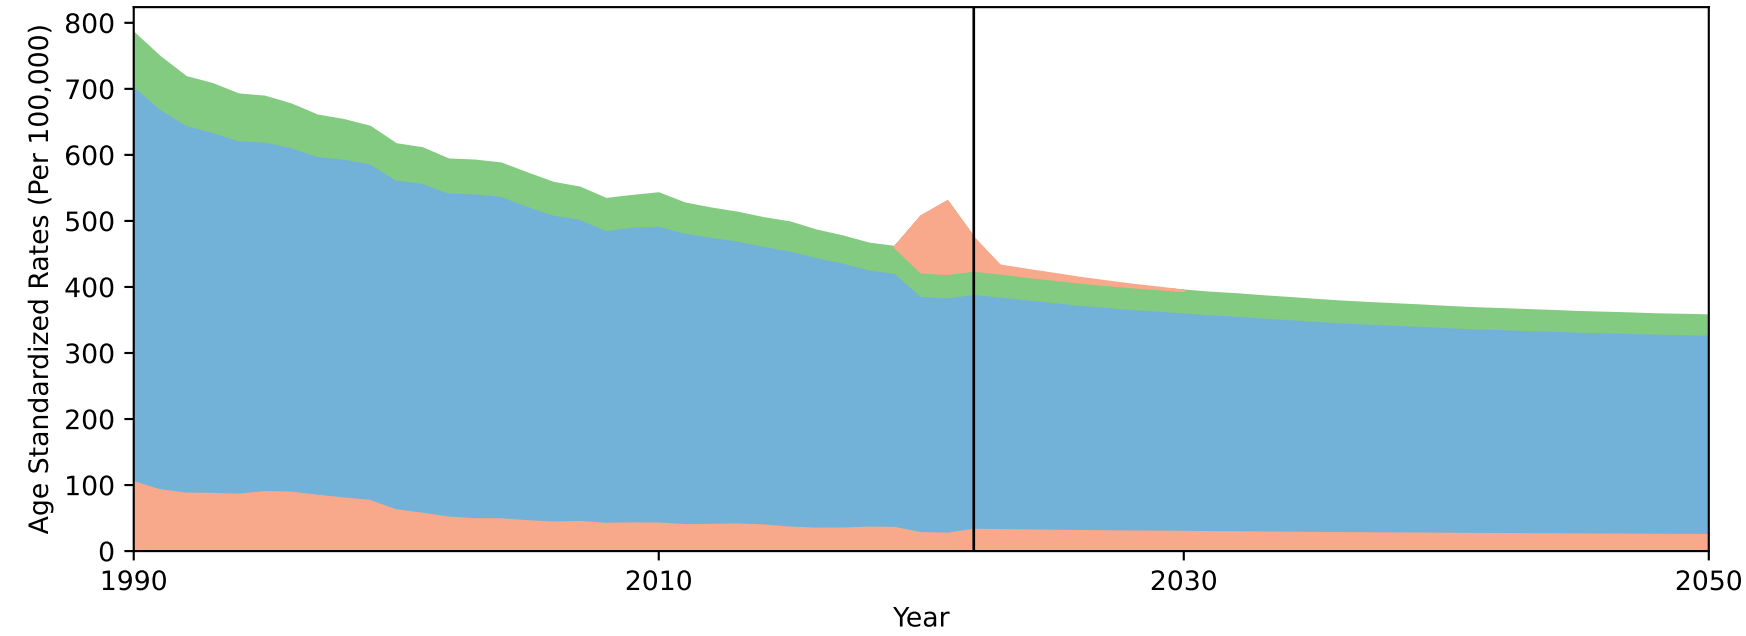

Level 2

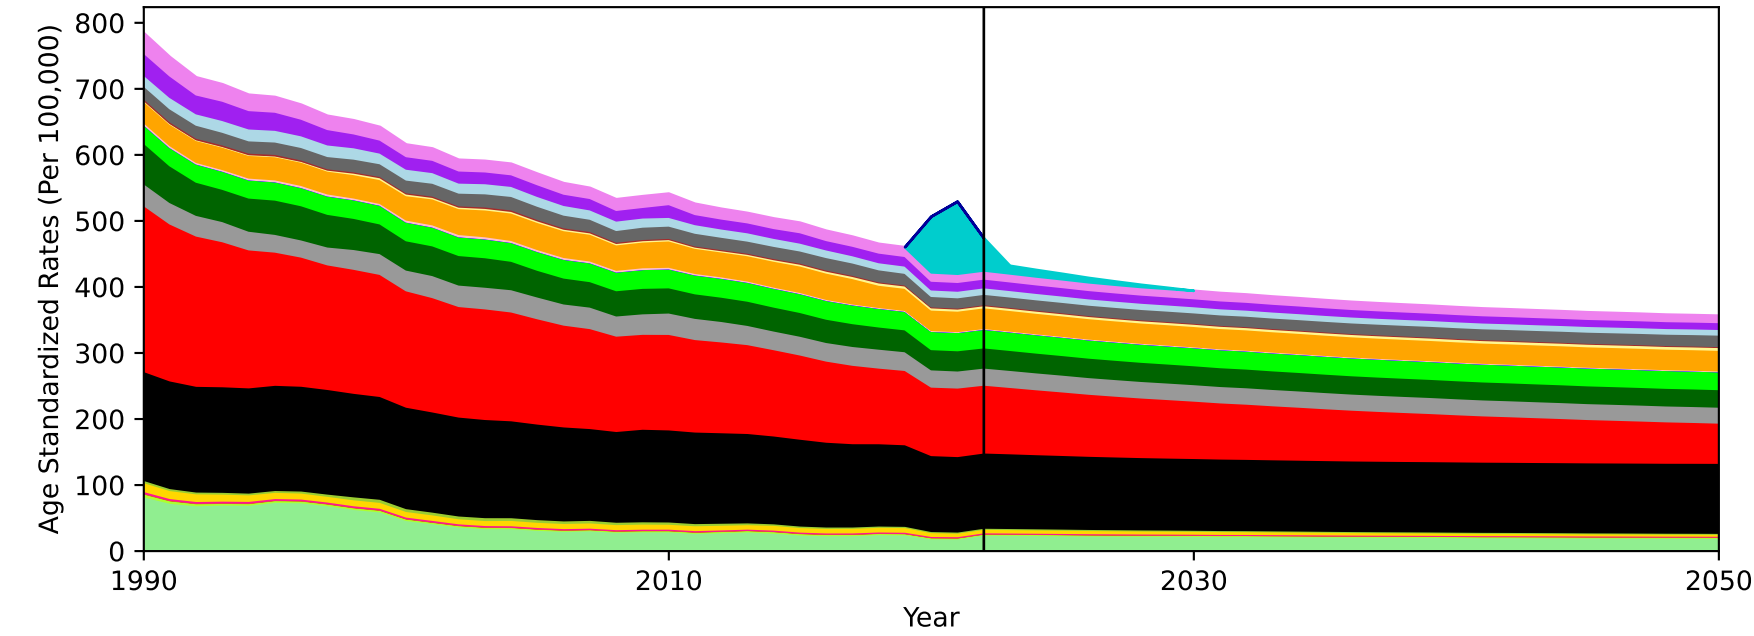

Level 1

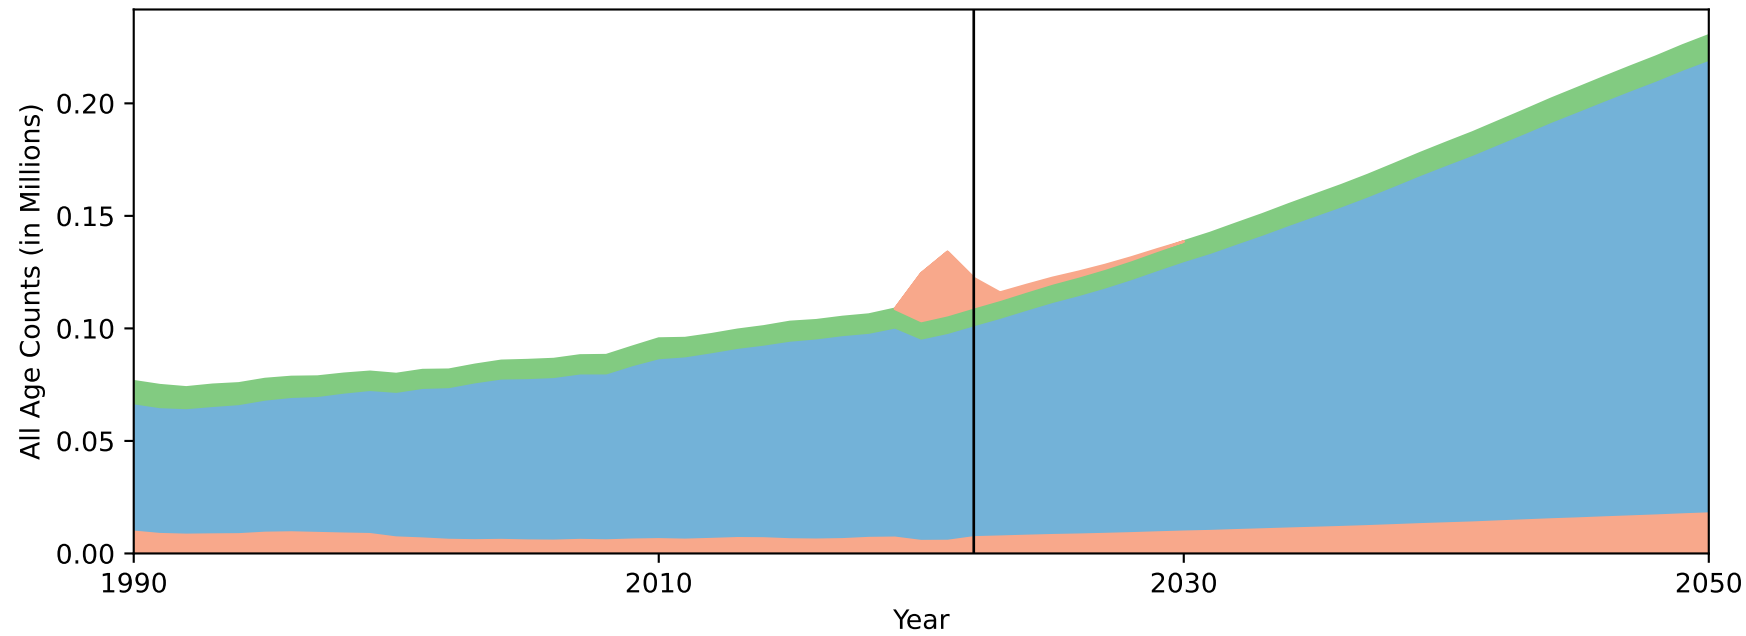

Level 2

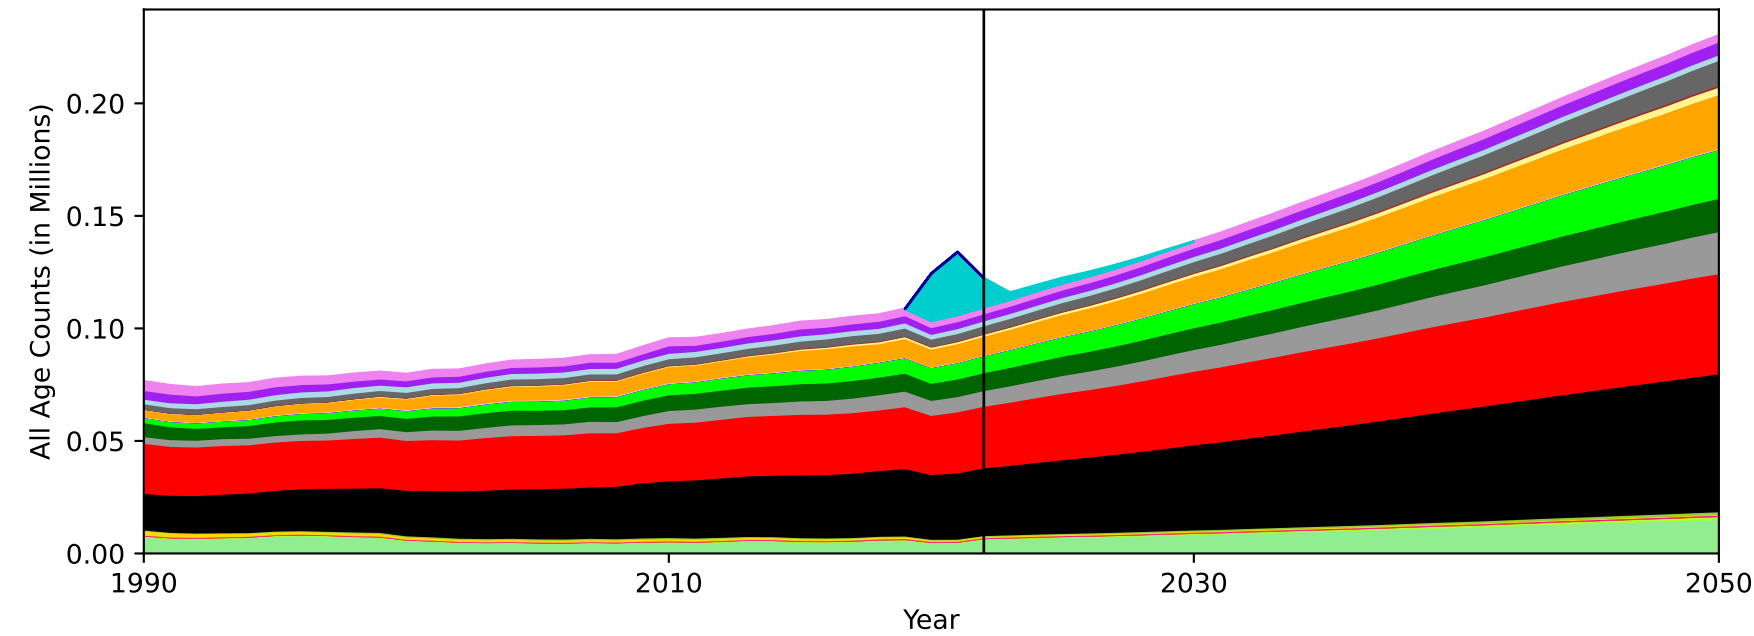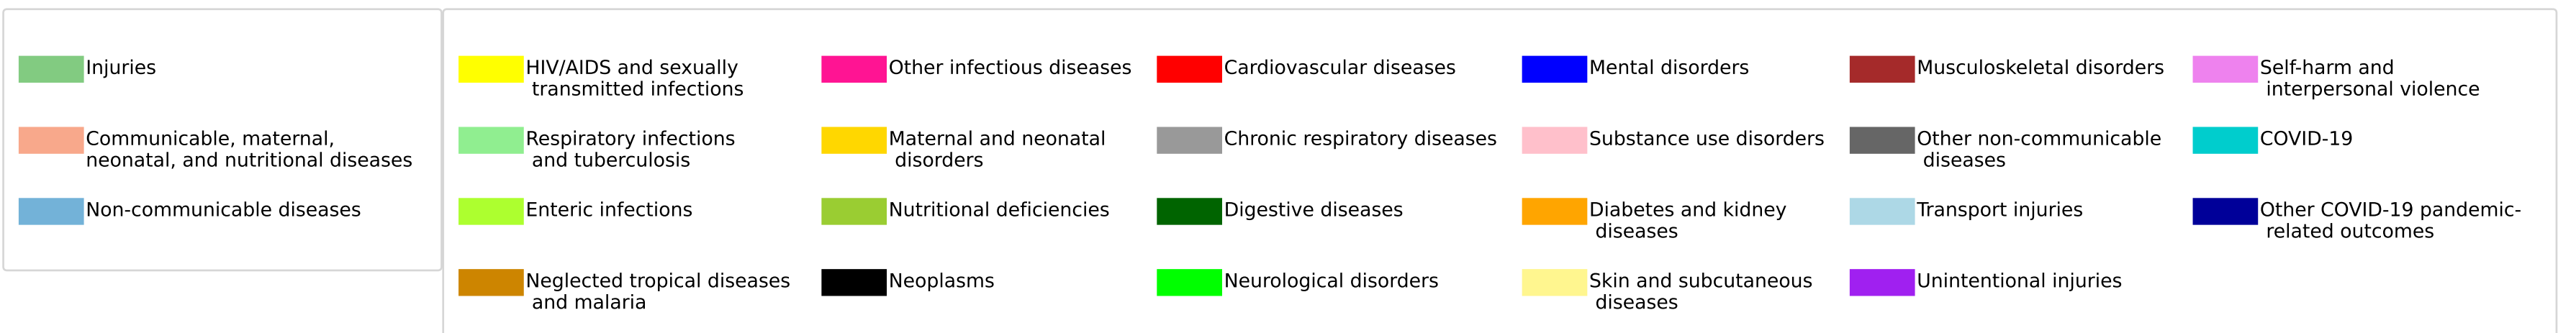

# Uruguay

Level 1

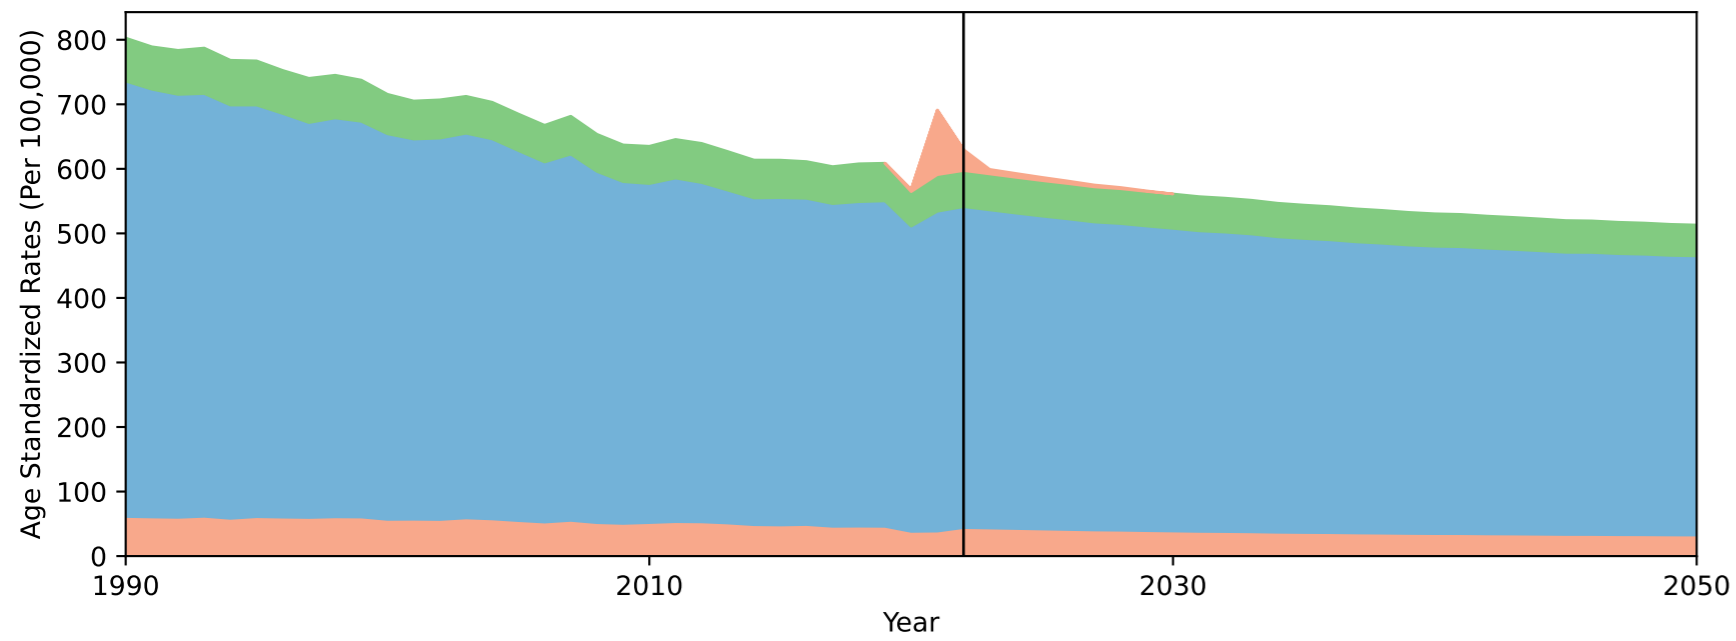

Level 2

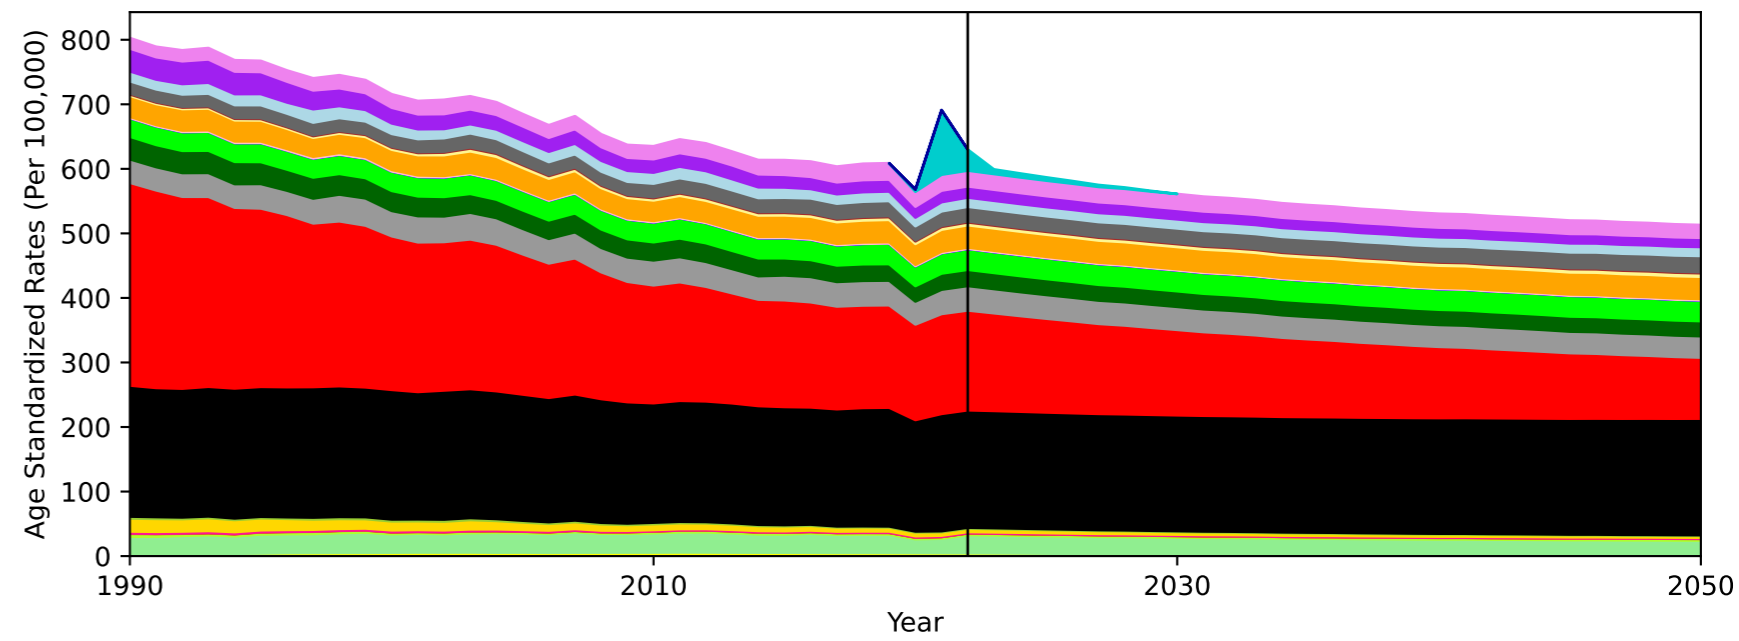

Level 1

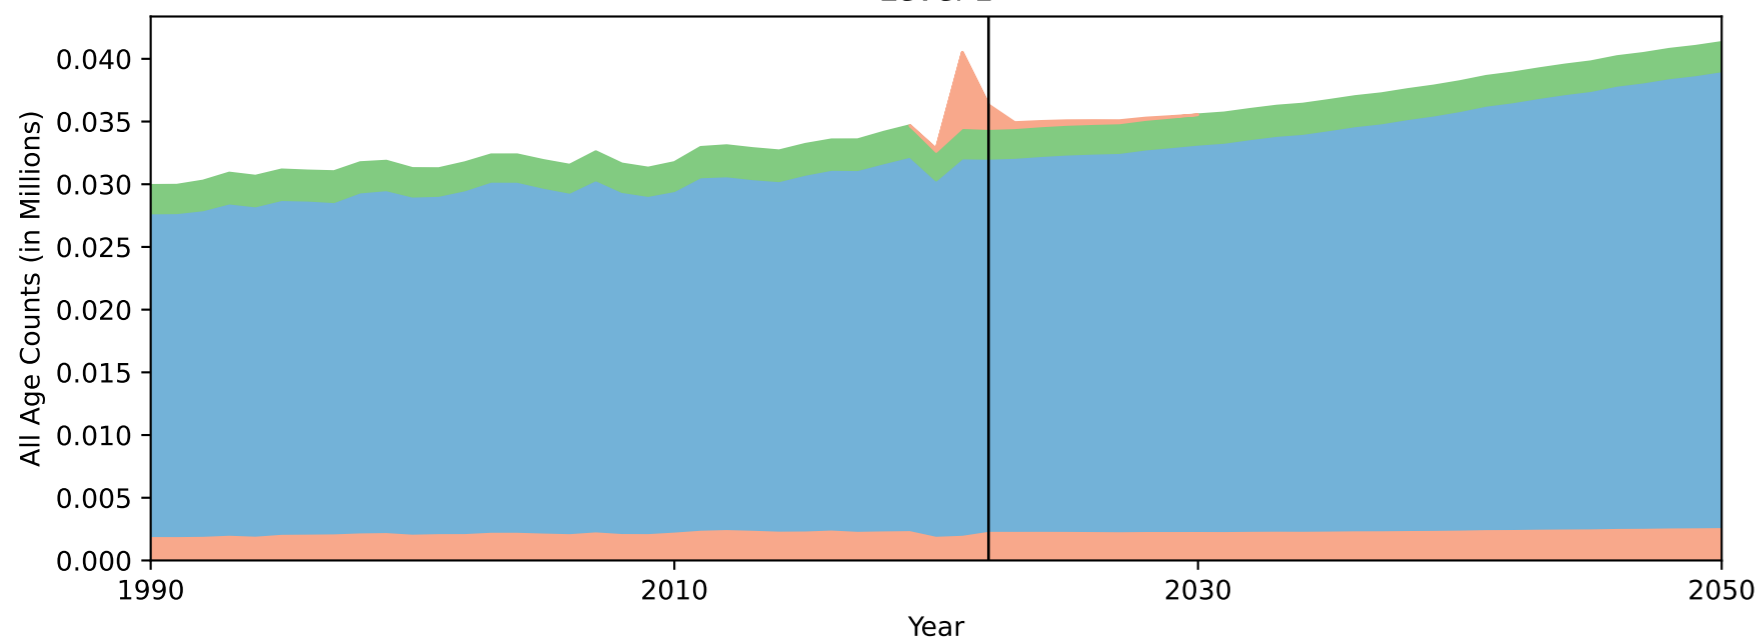

Level 2

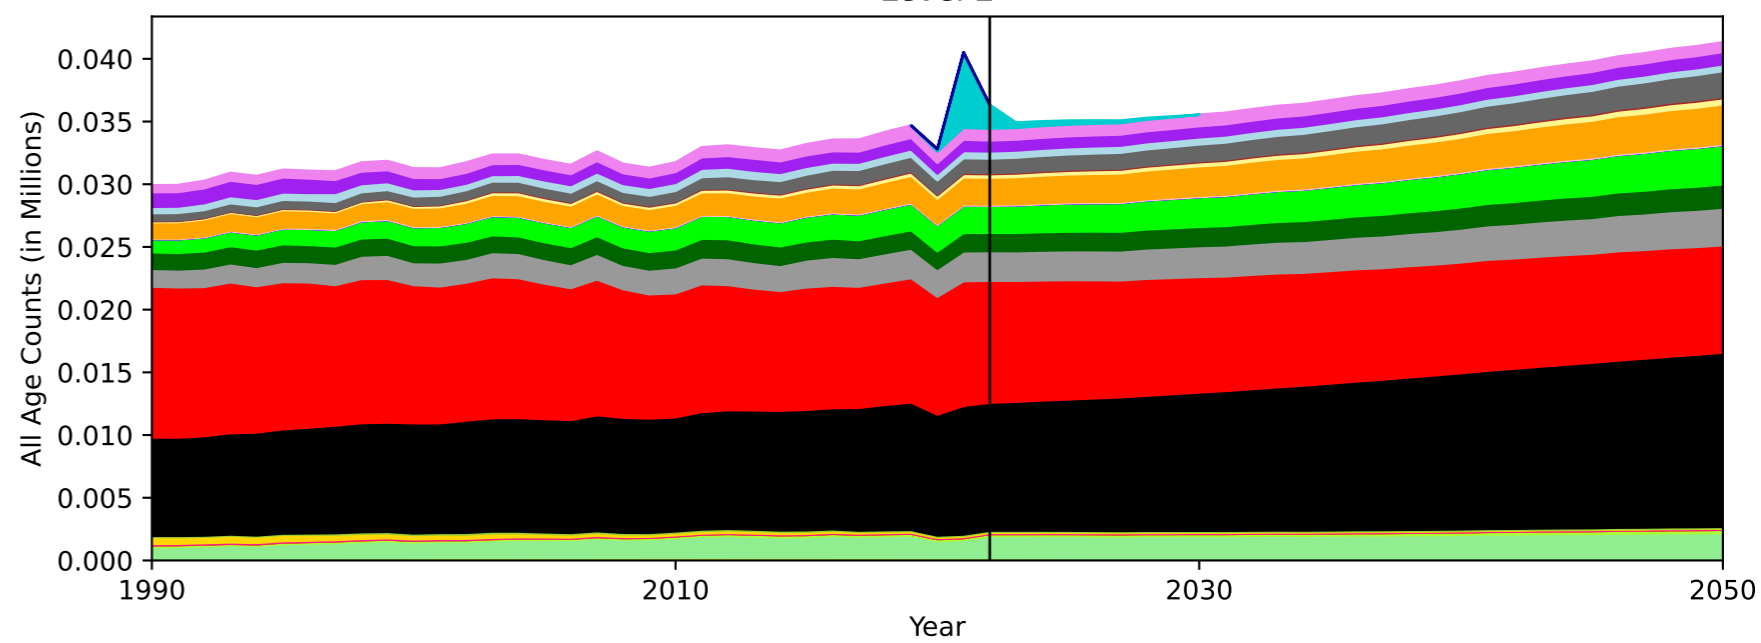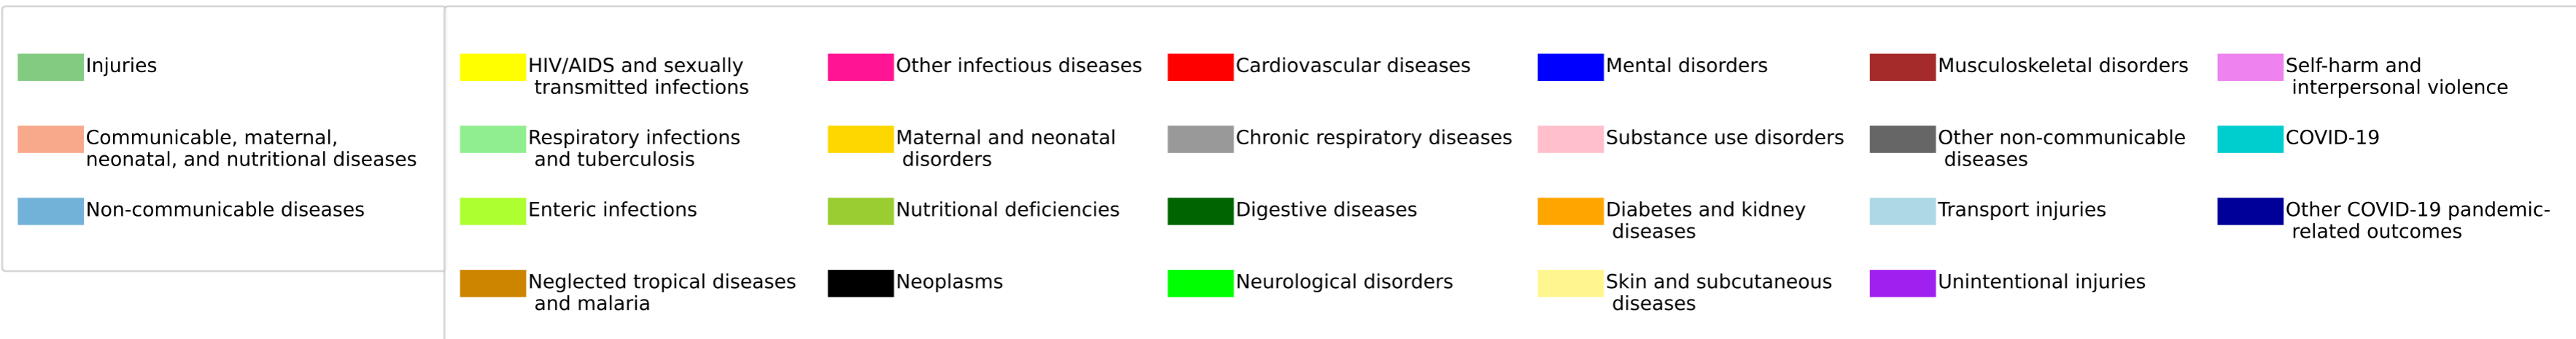

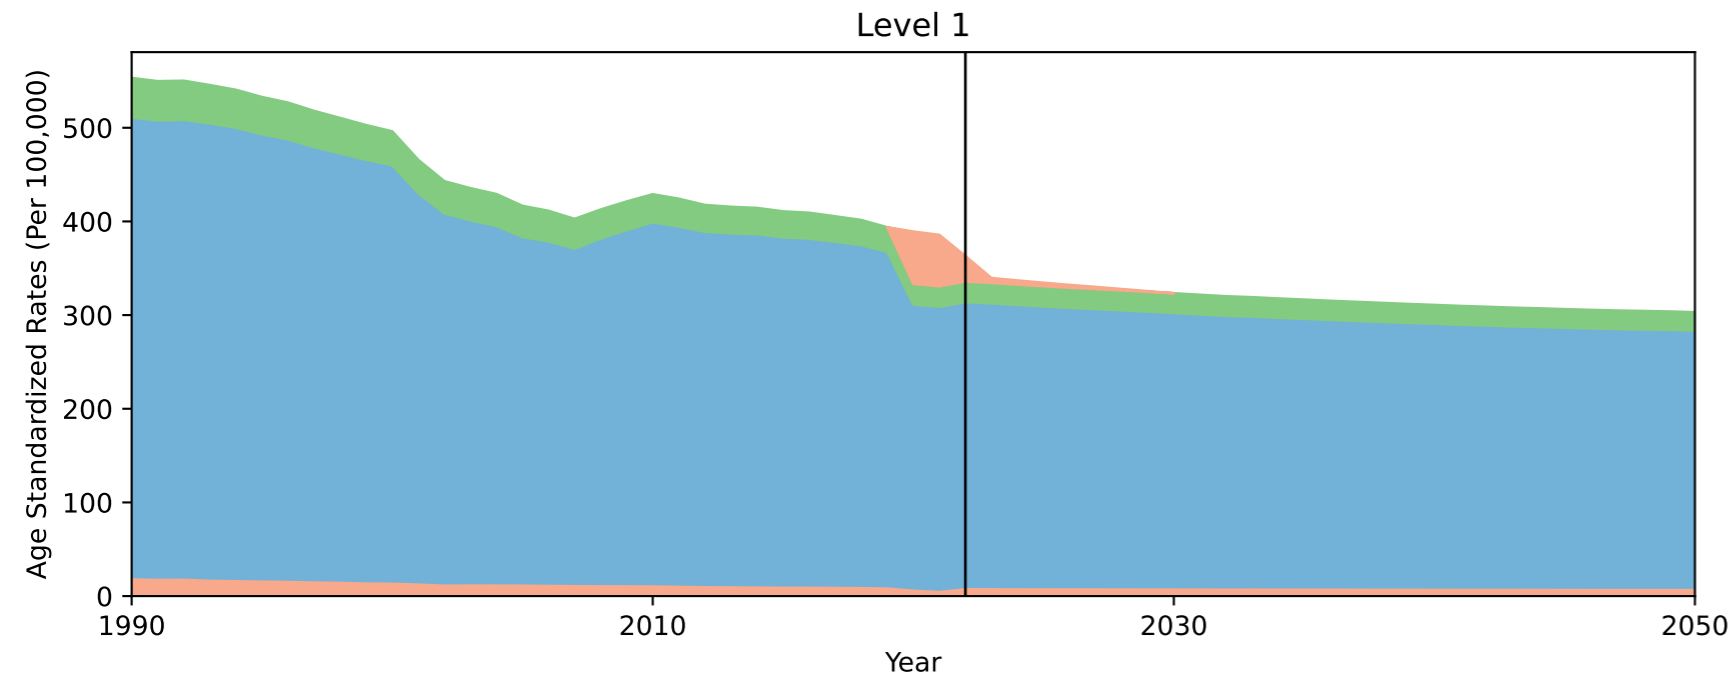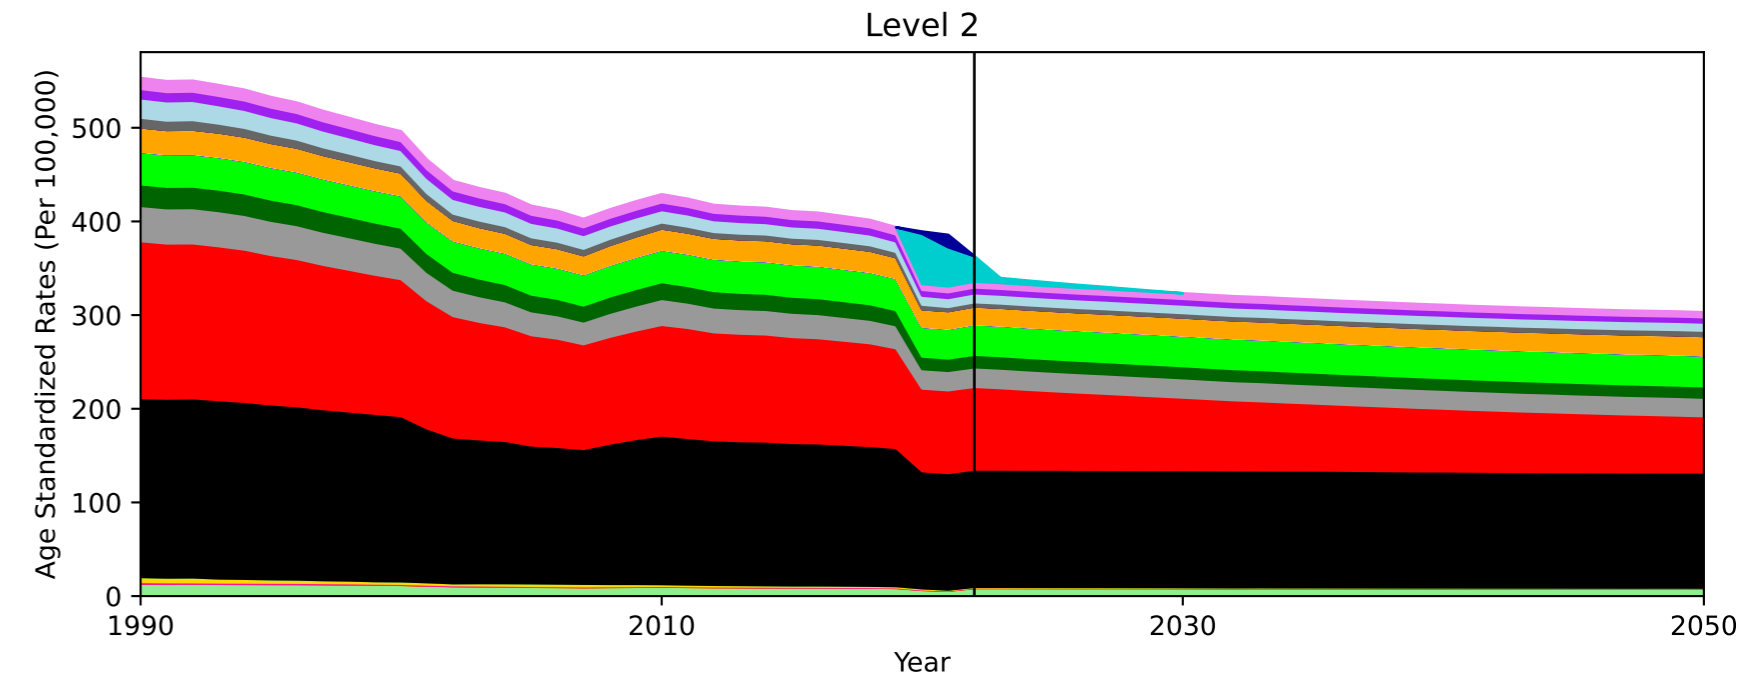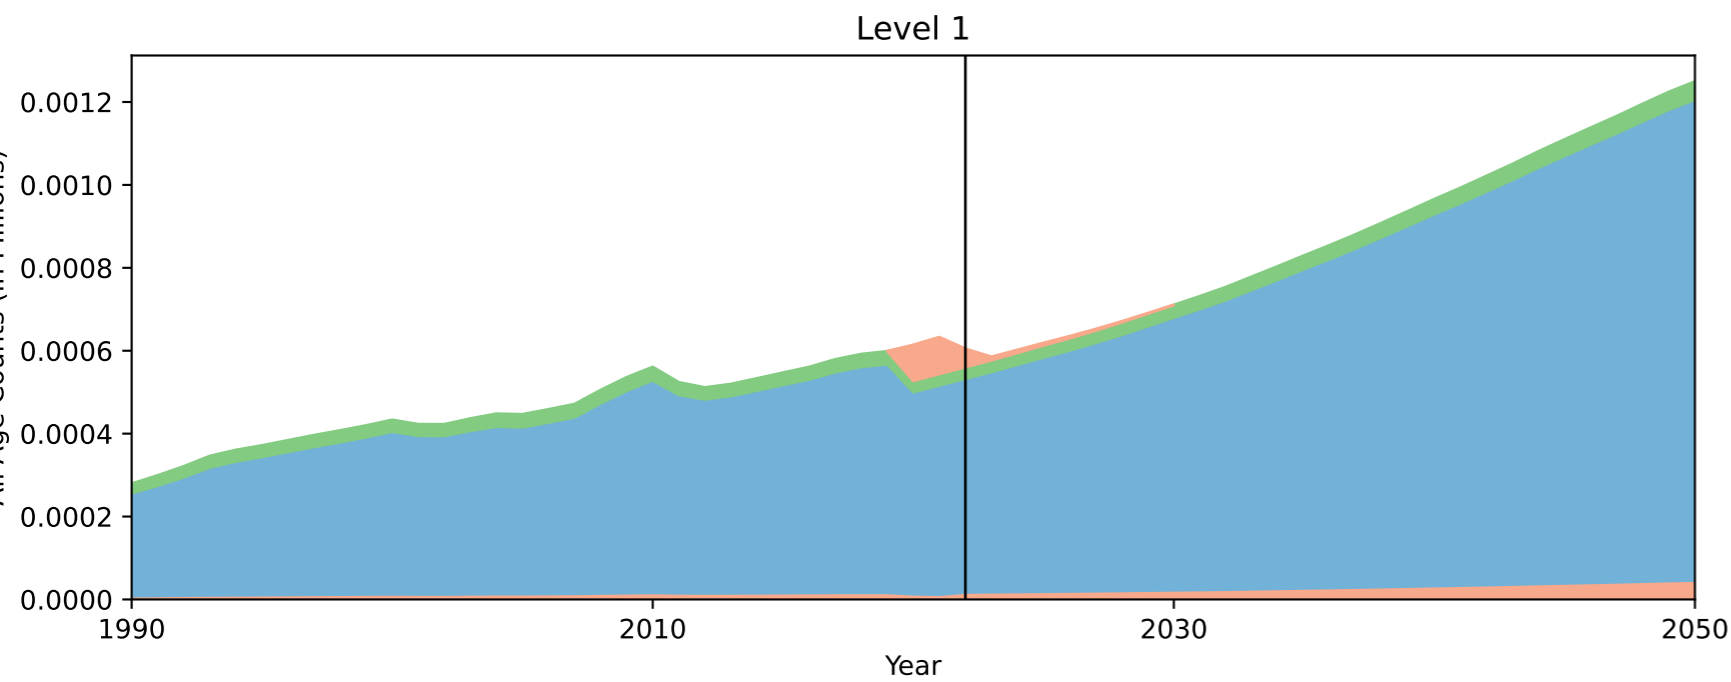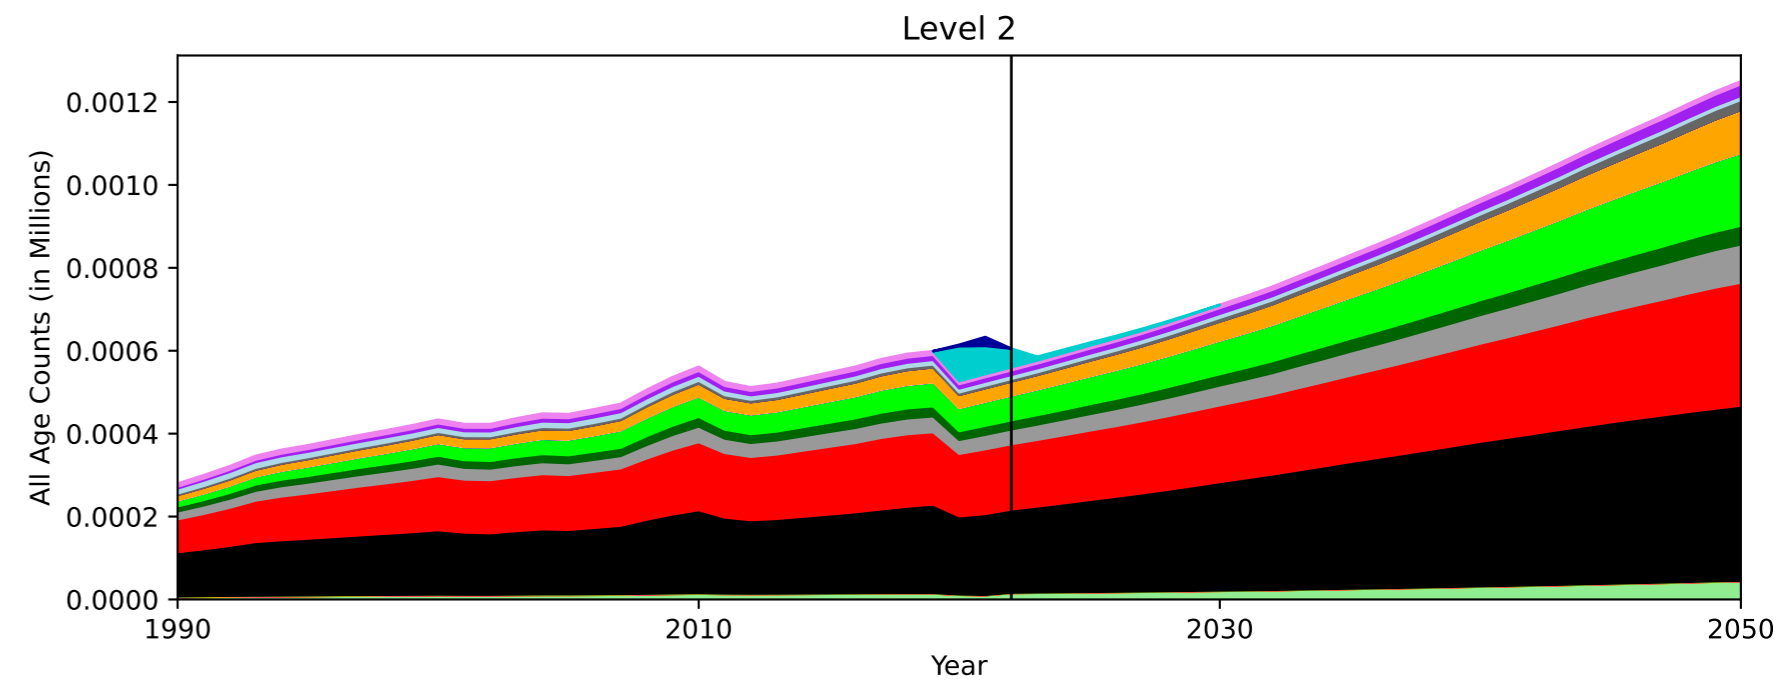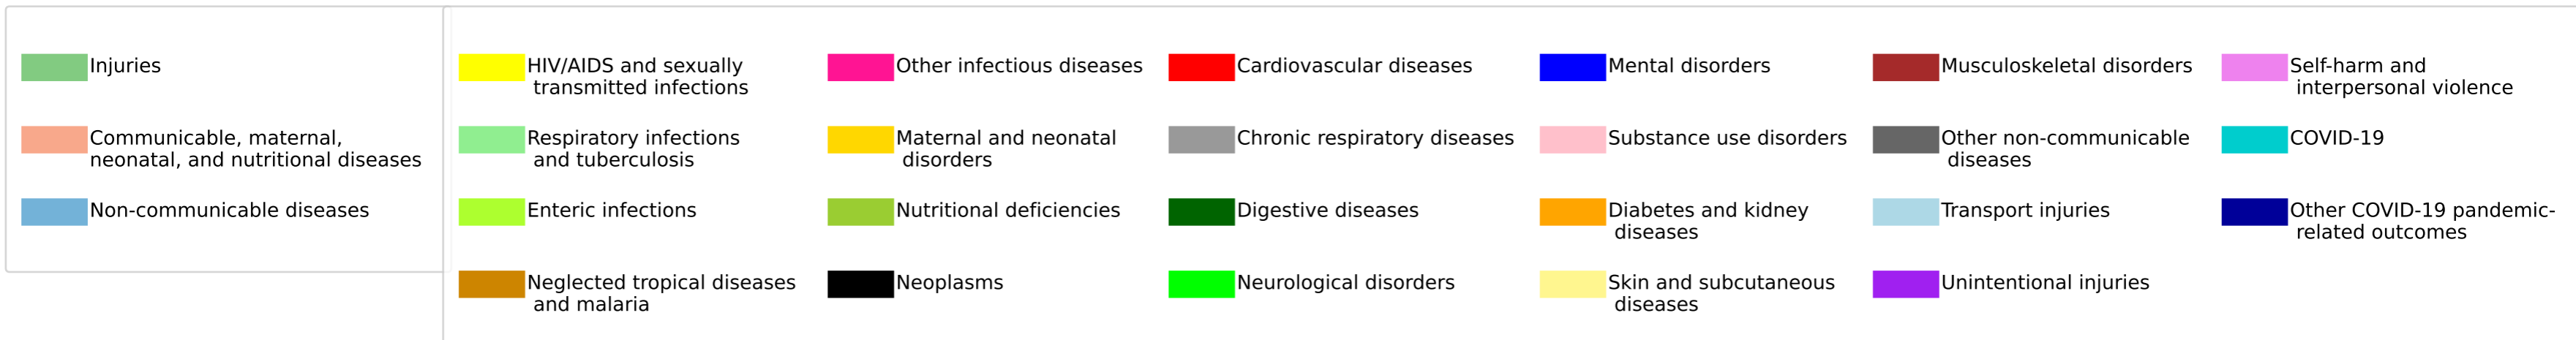



Level 1

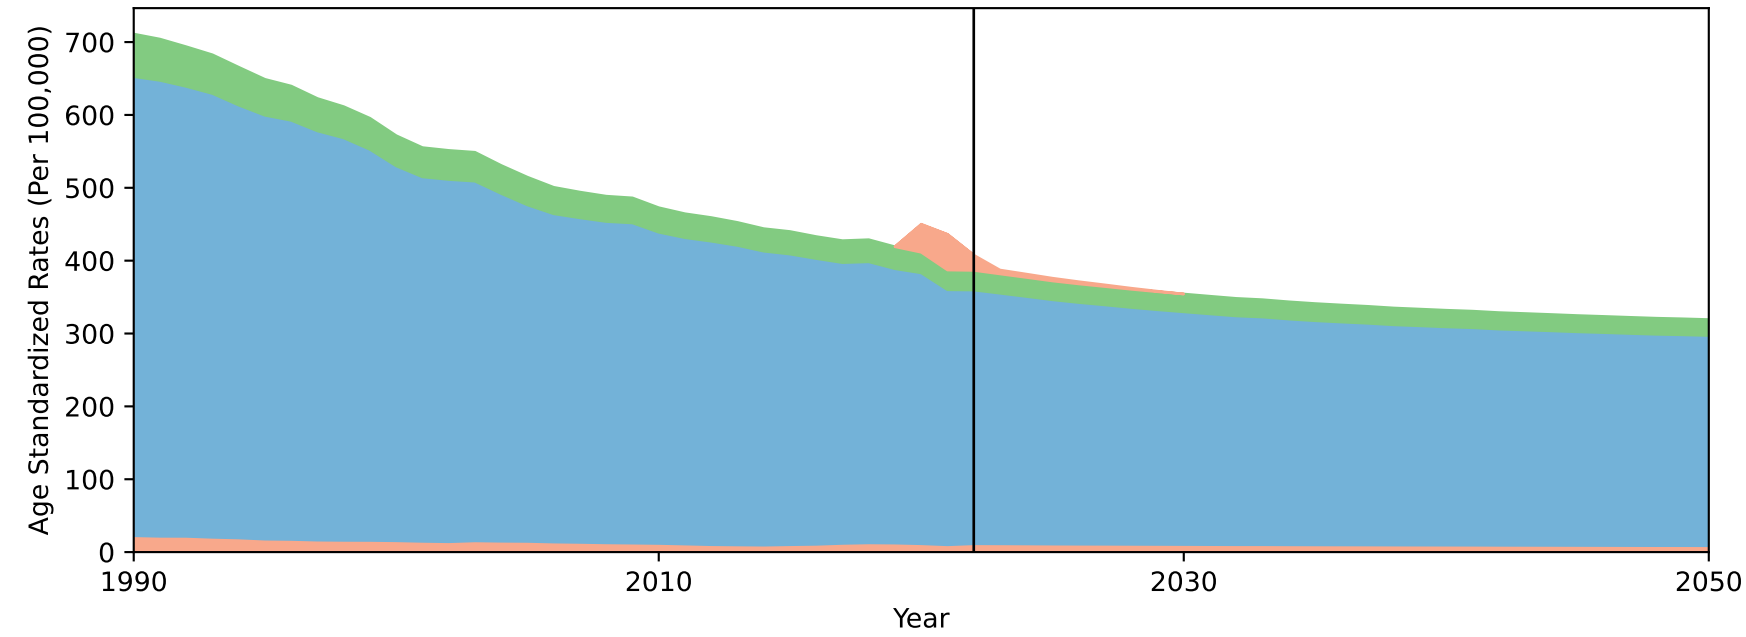

Level 2

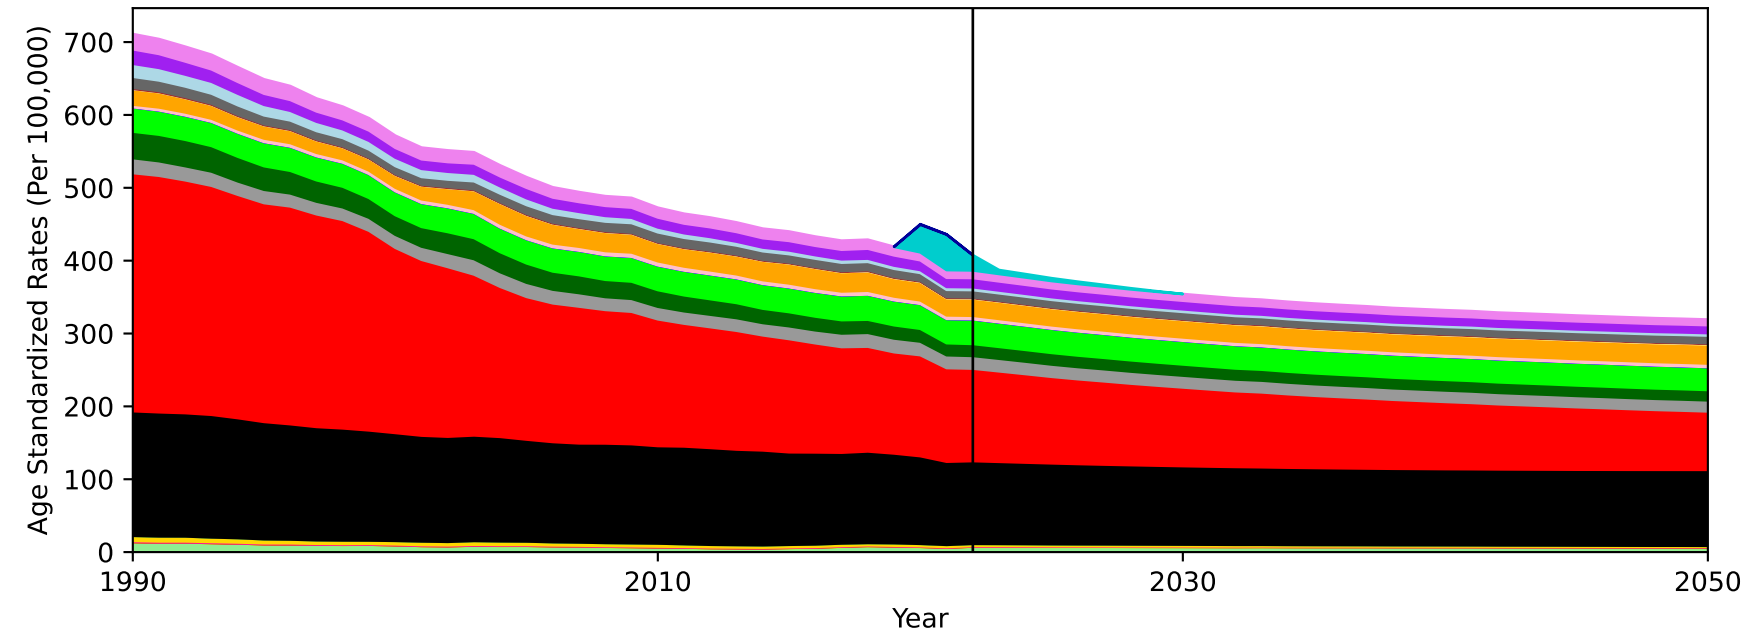

Level 1

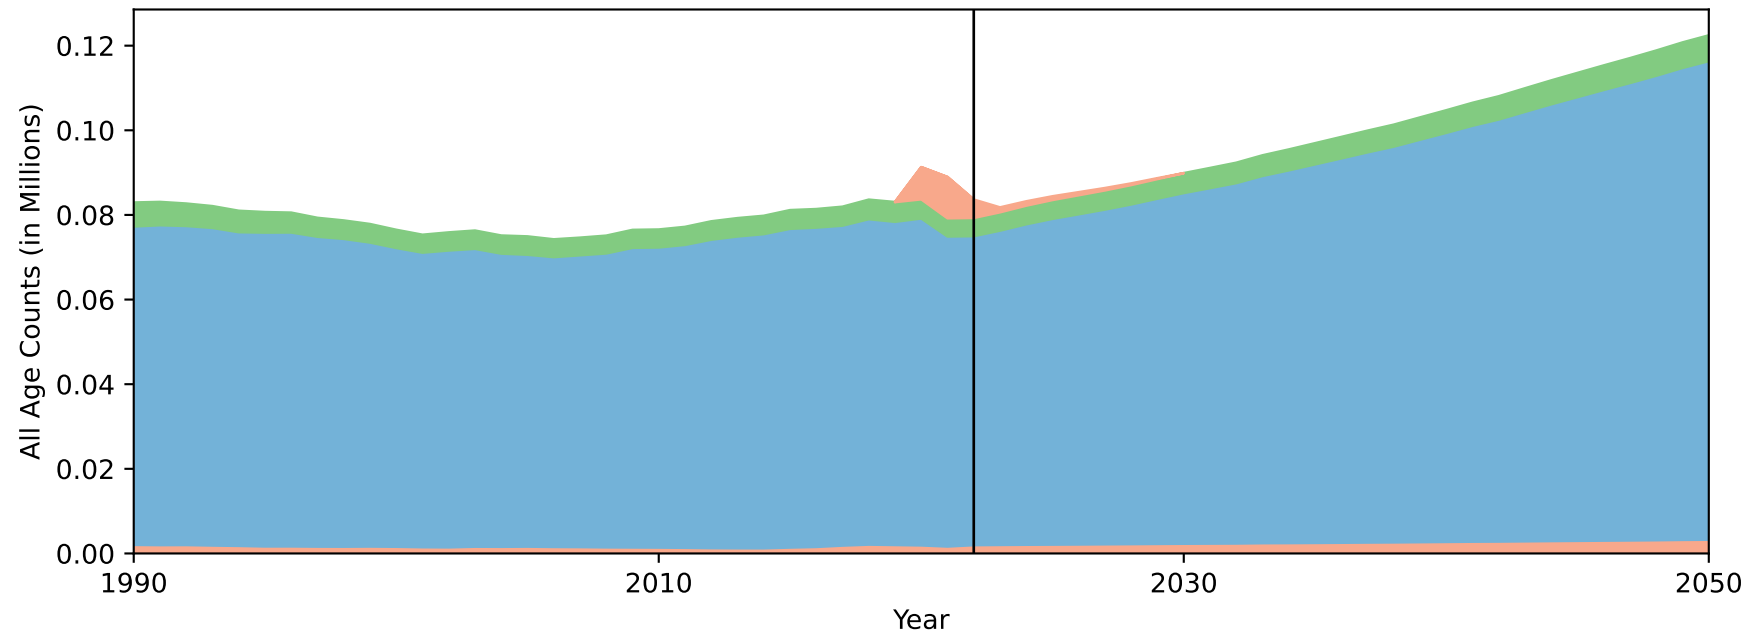

Level 2

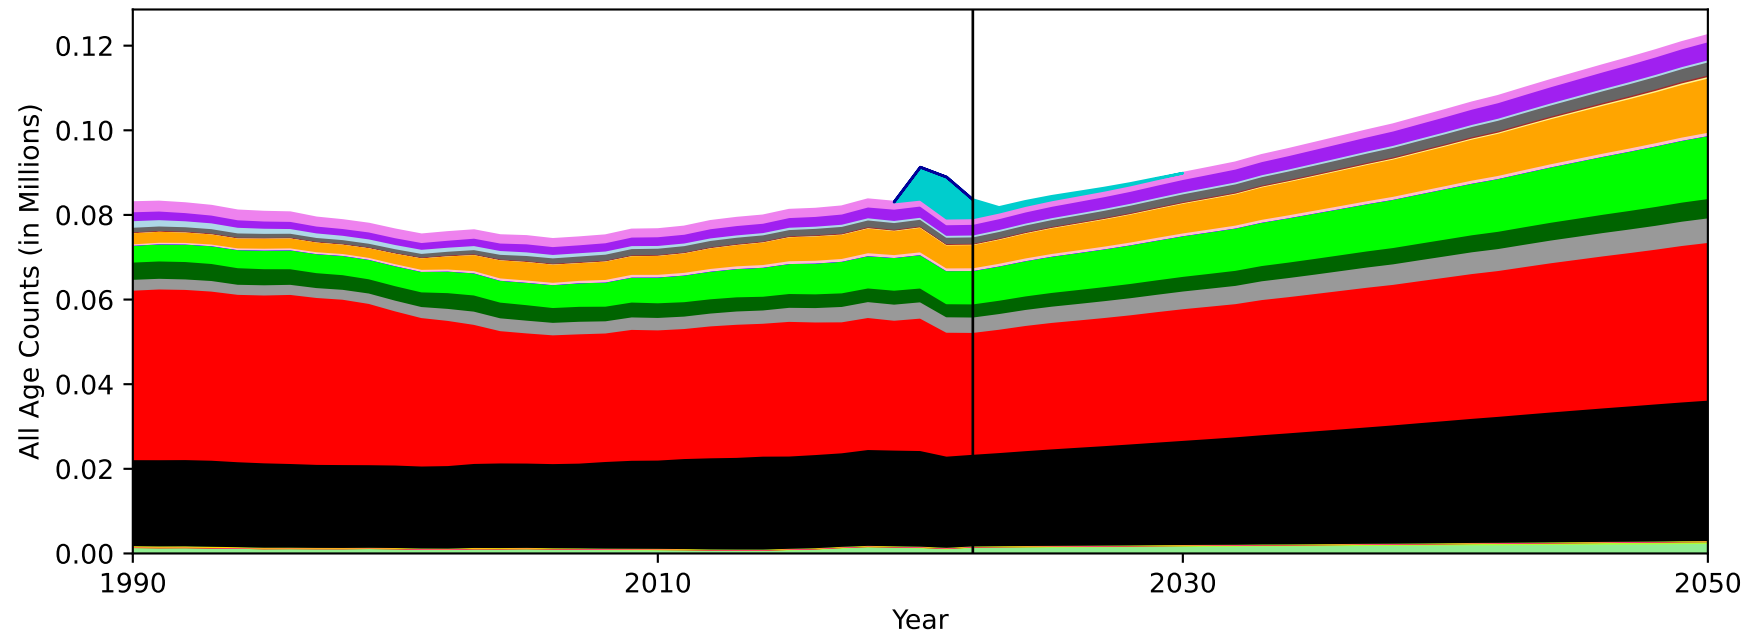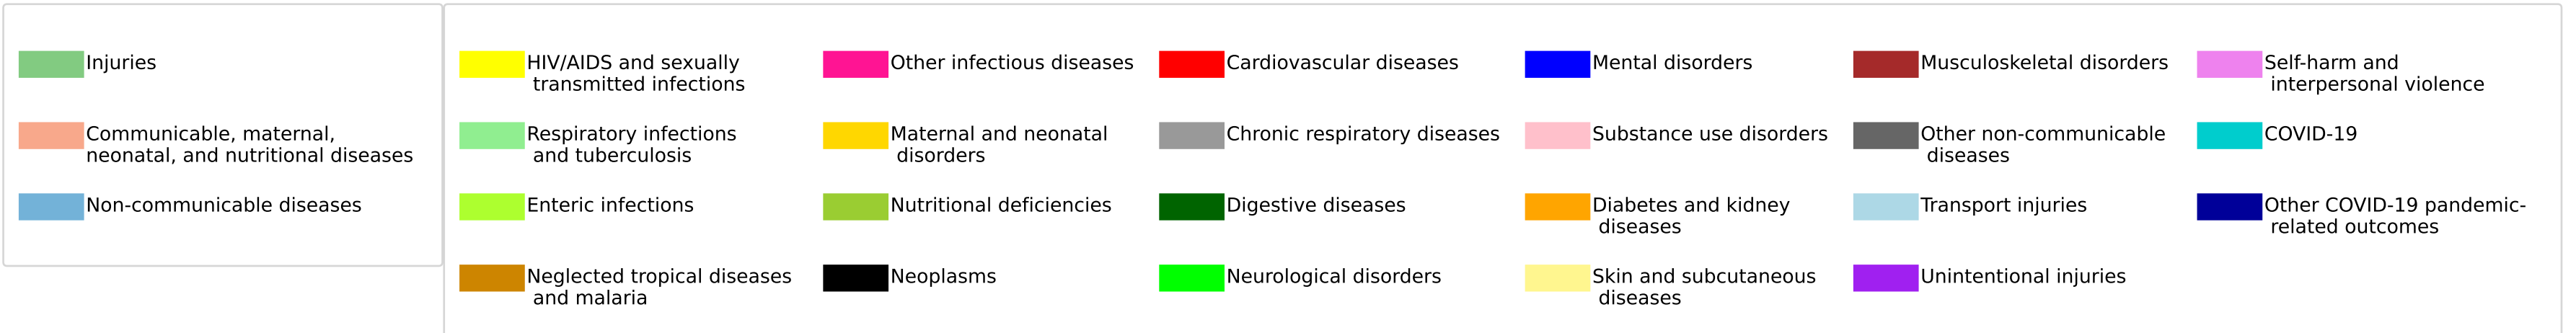

# Belgium

Level 1

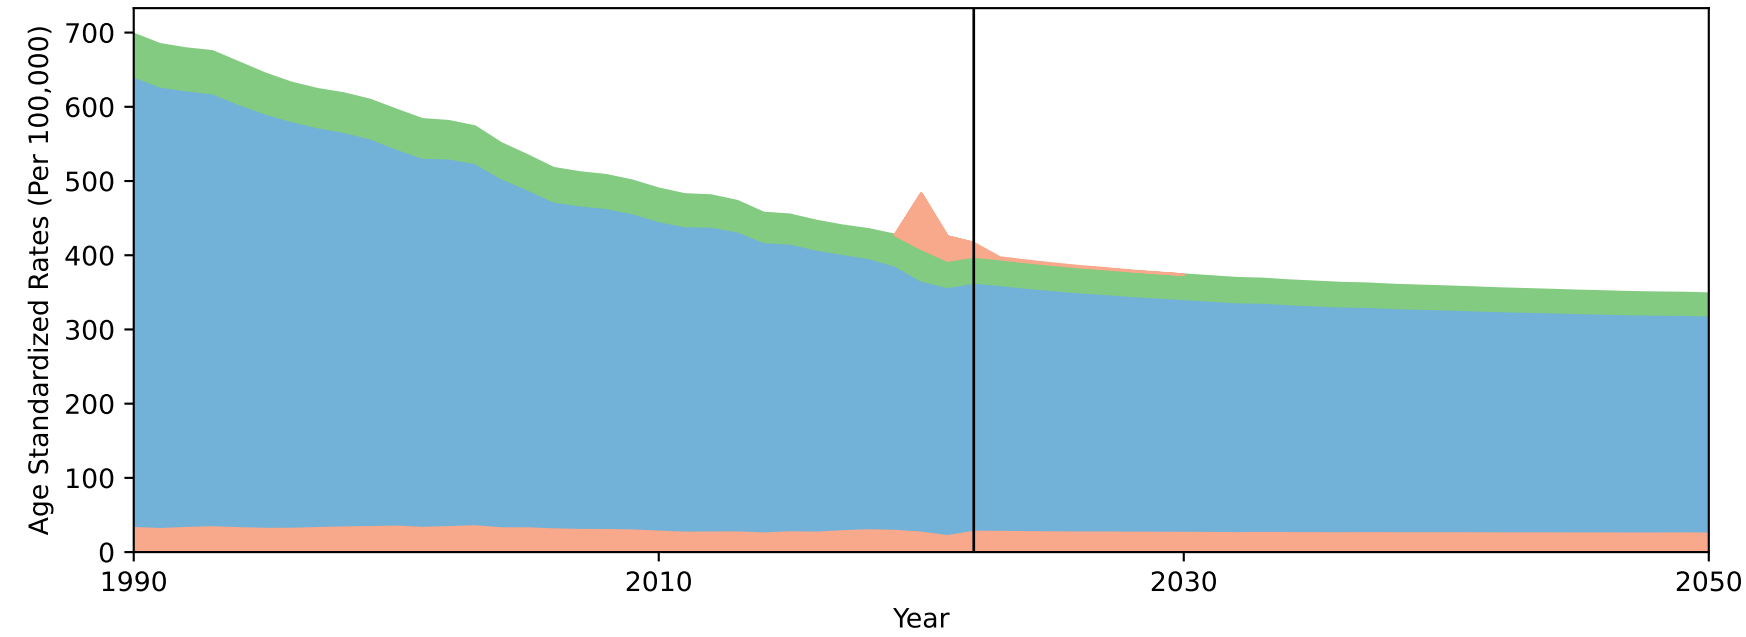

Level 2

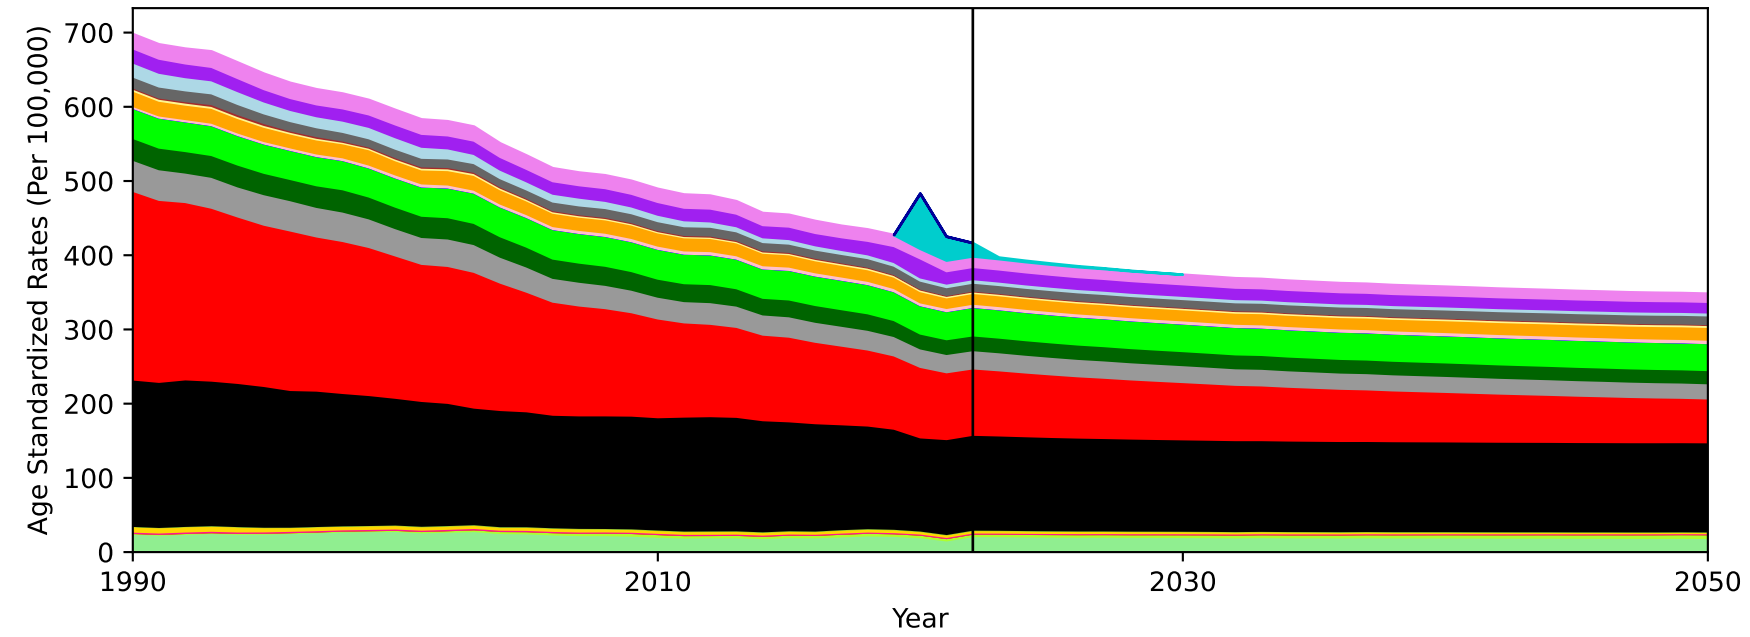

Level 1

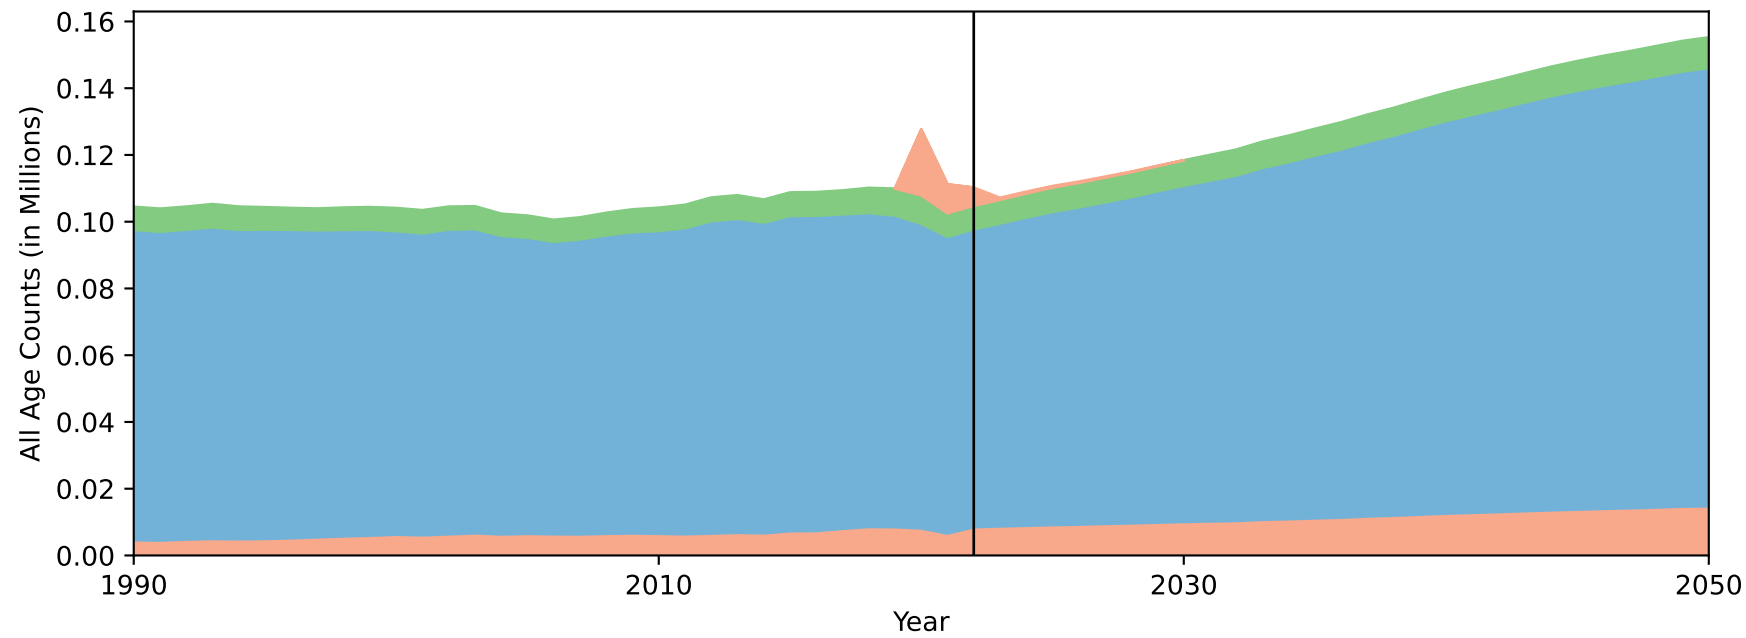

Level 2

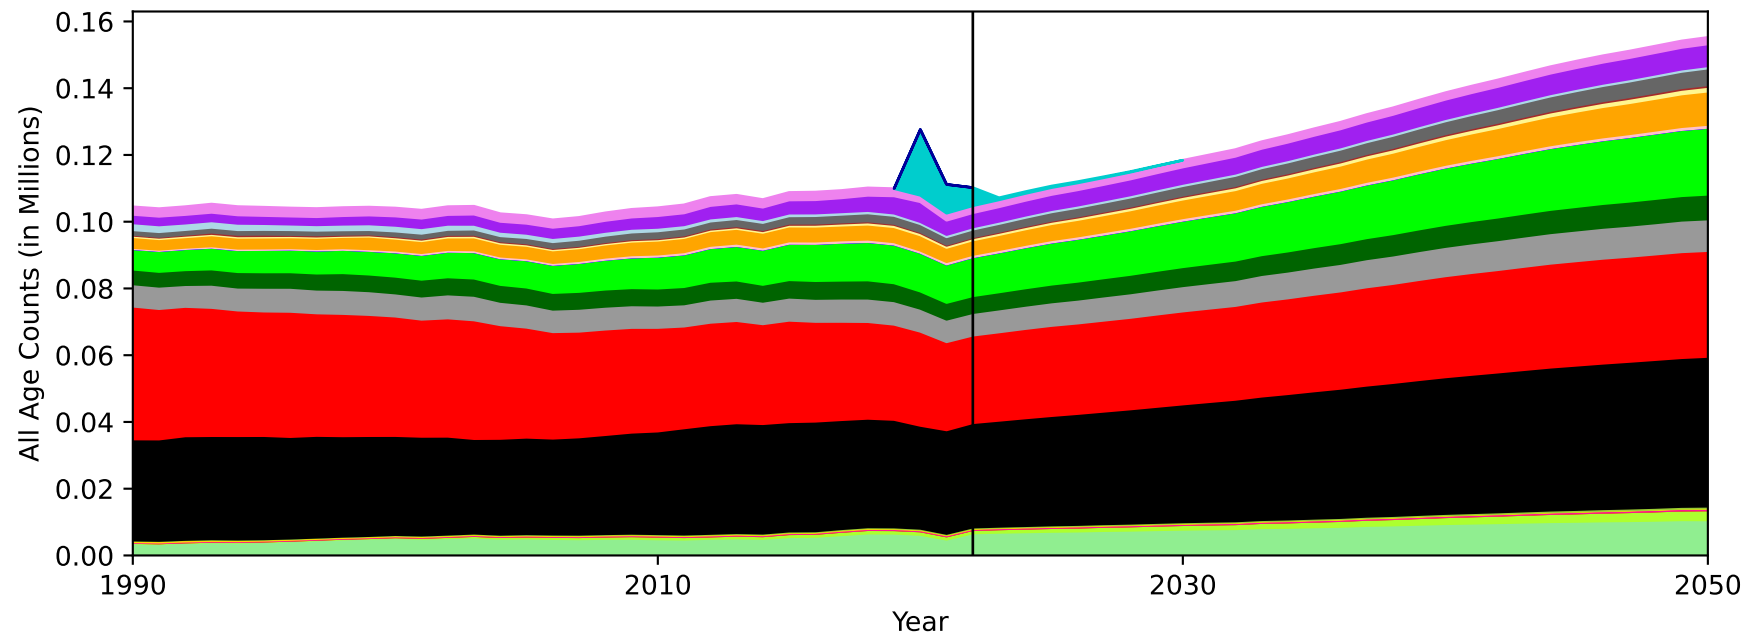

# Cyprus

Level 1

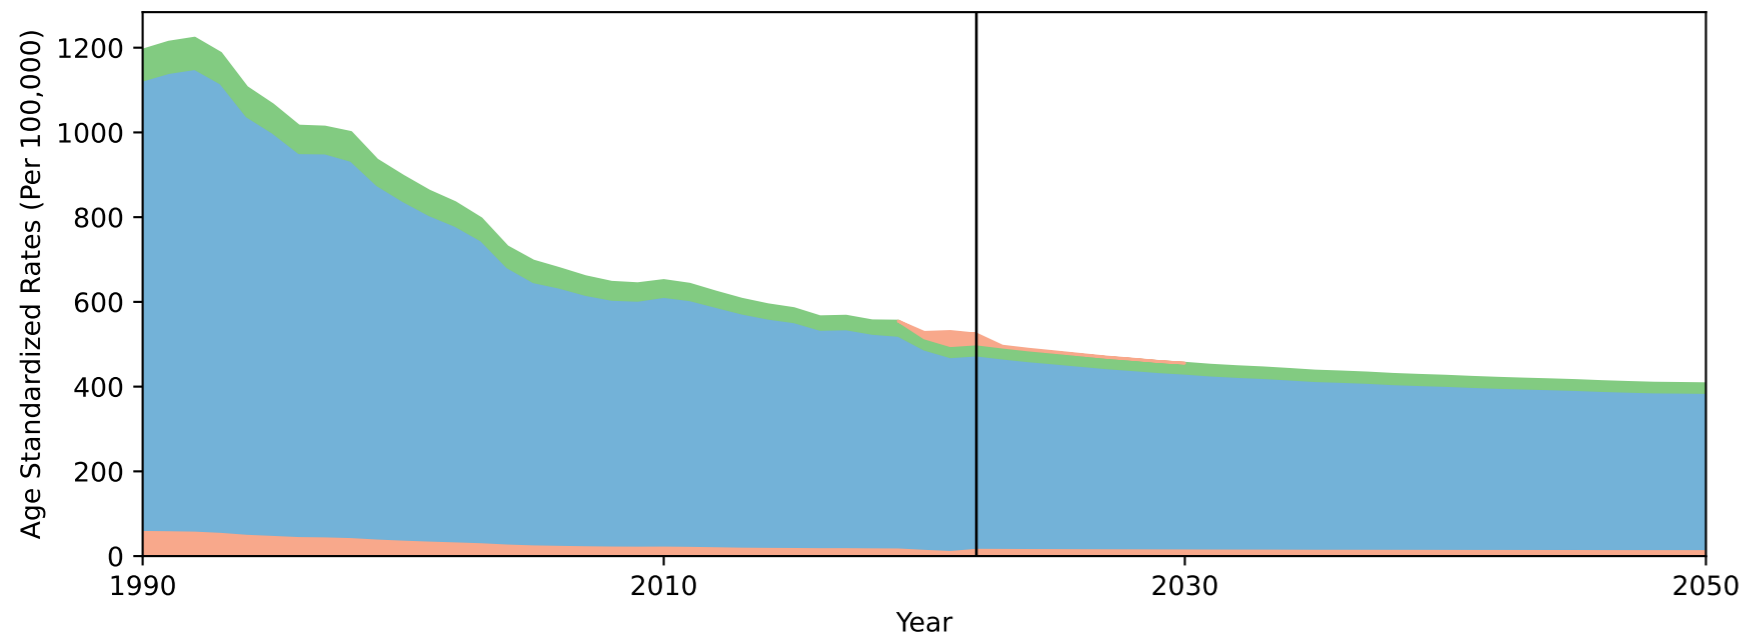

Level 2

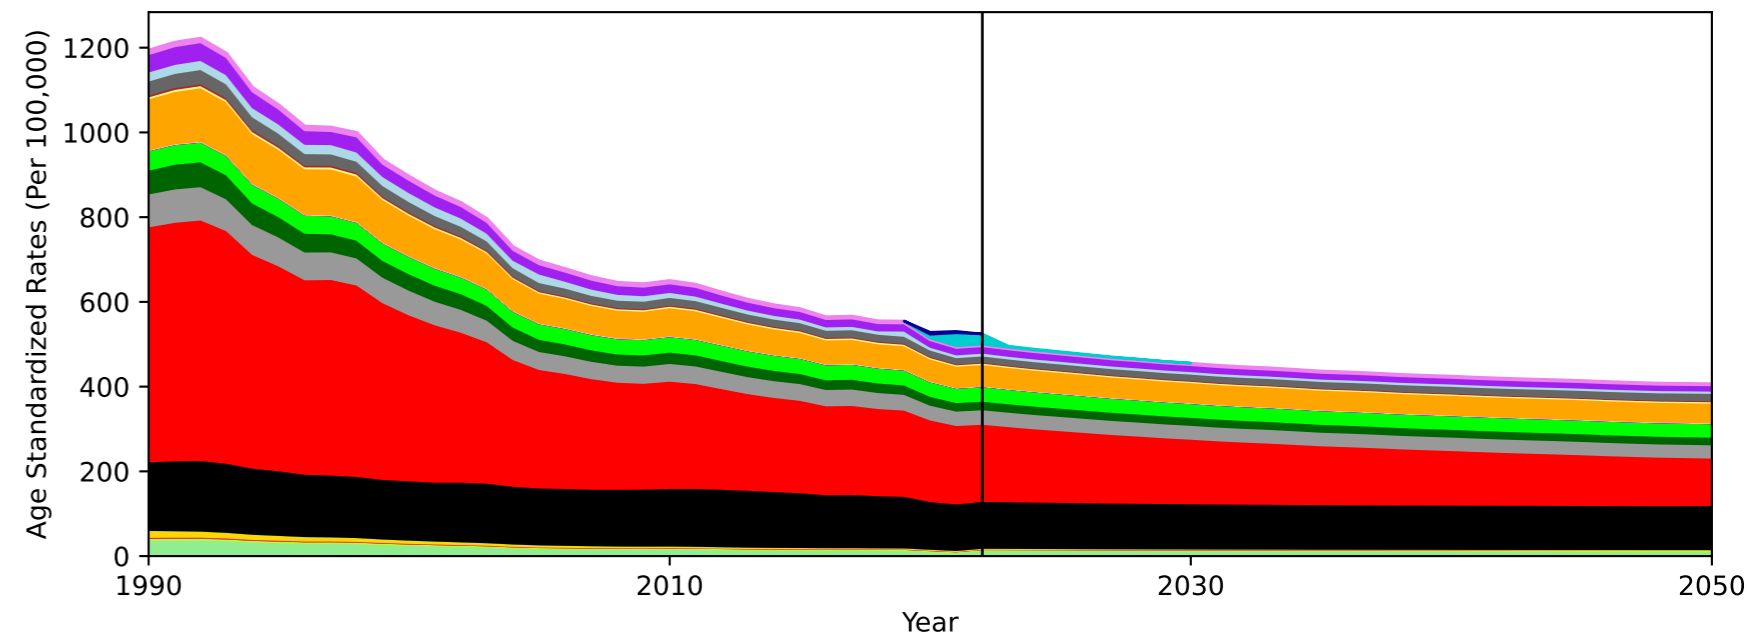

Level 1

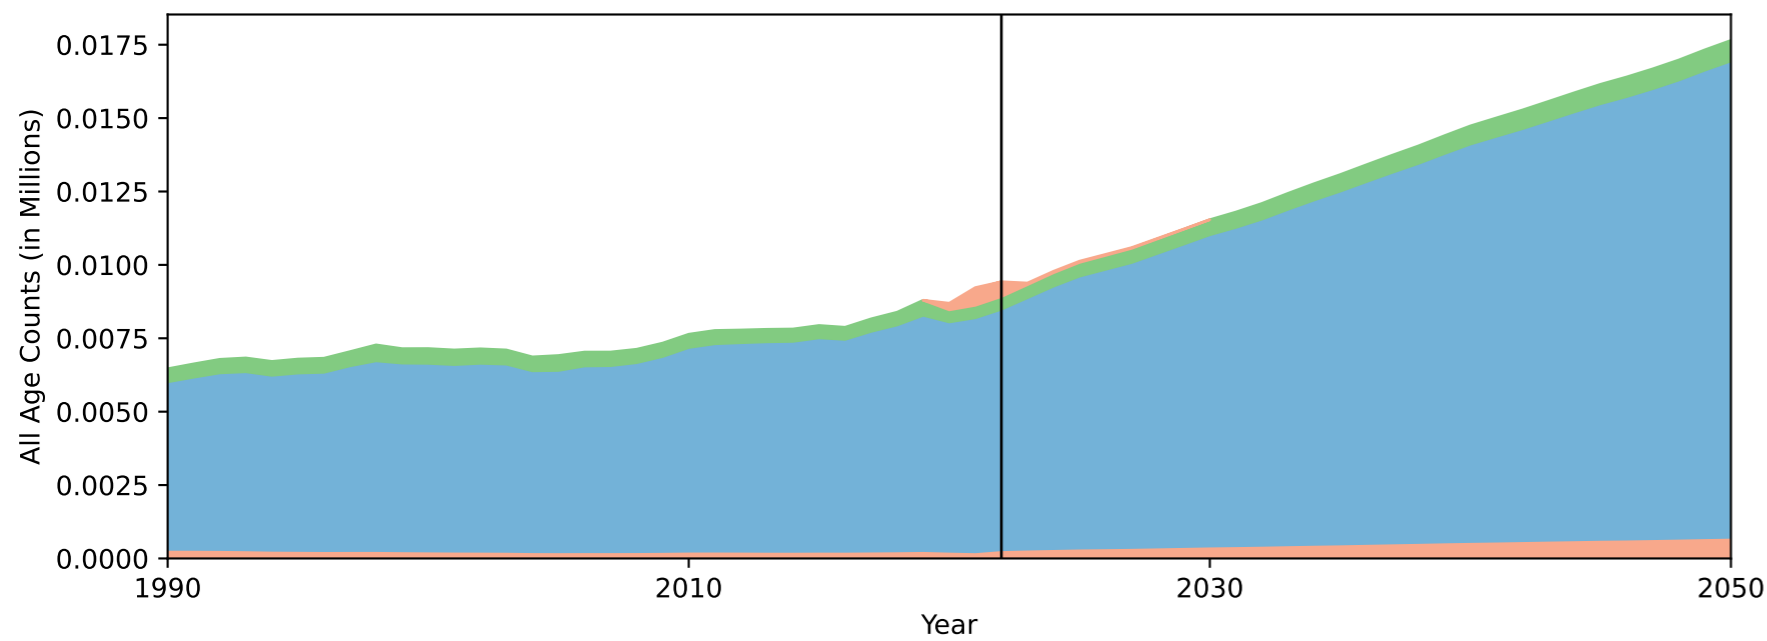

Level 2

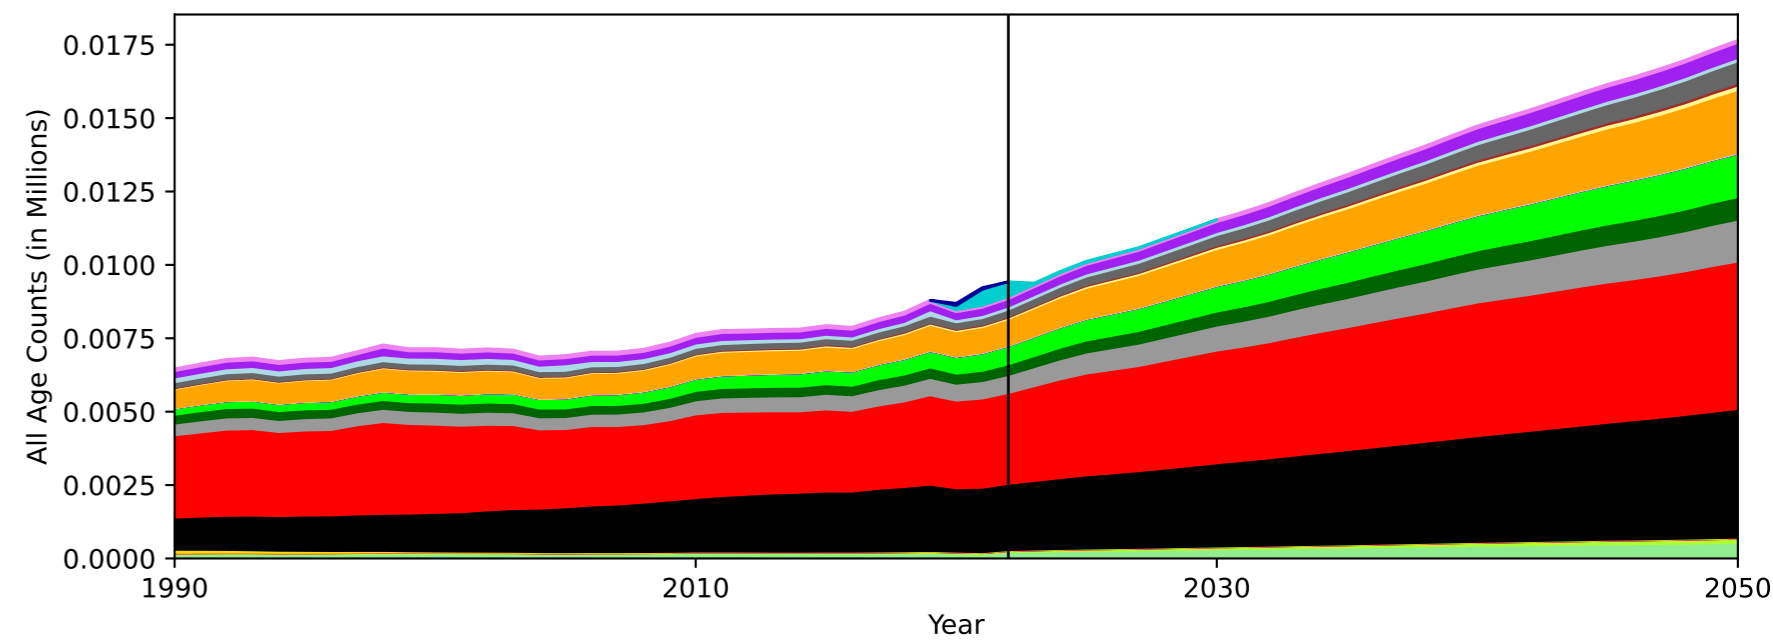

# Denmark

Level 1

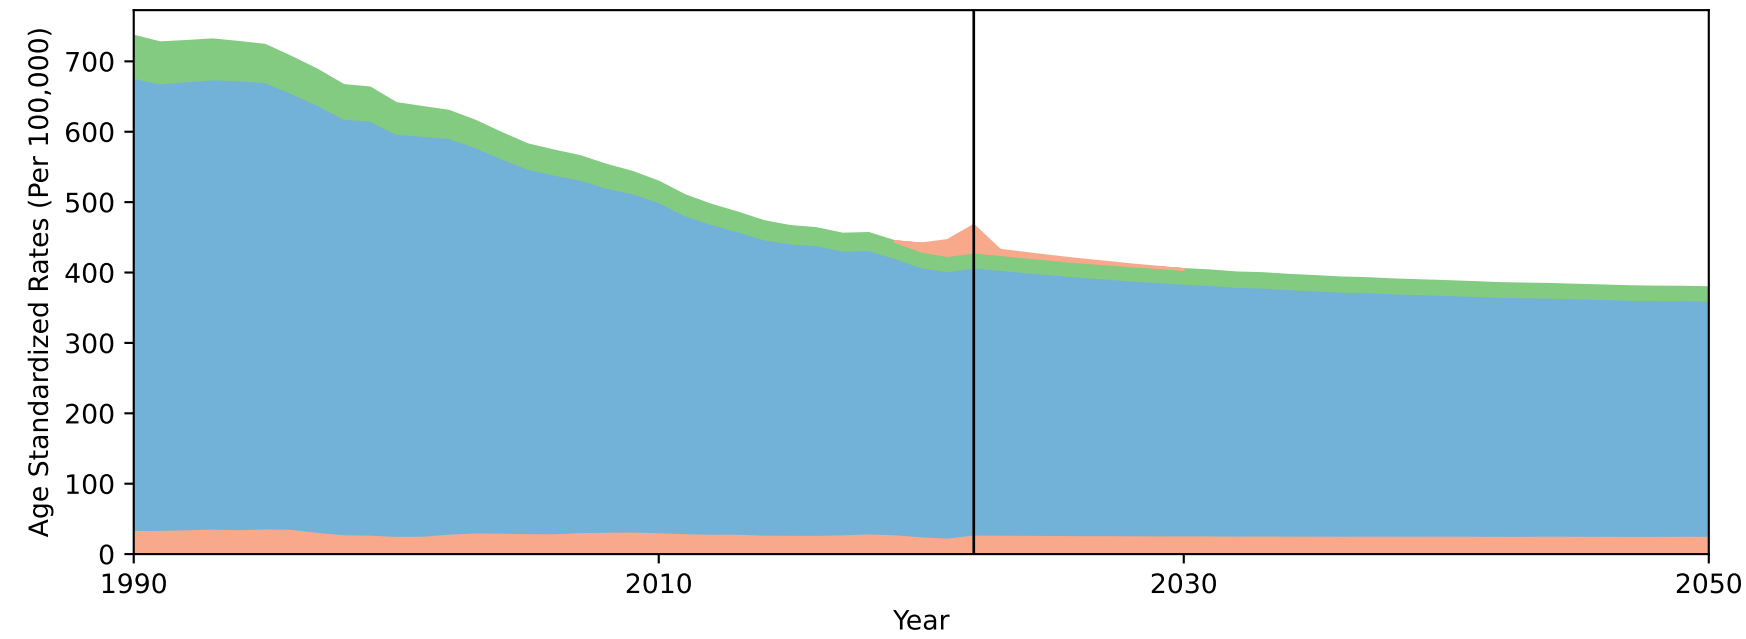

Level 2

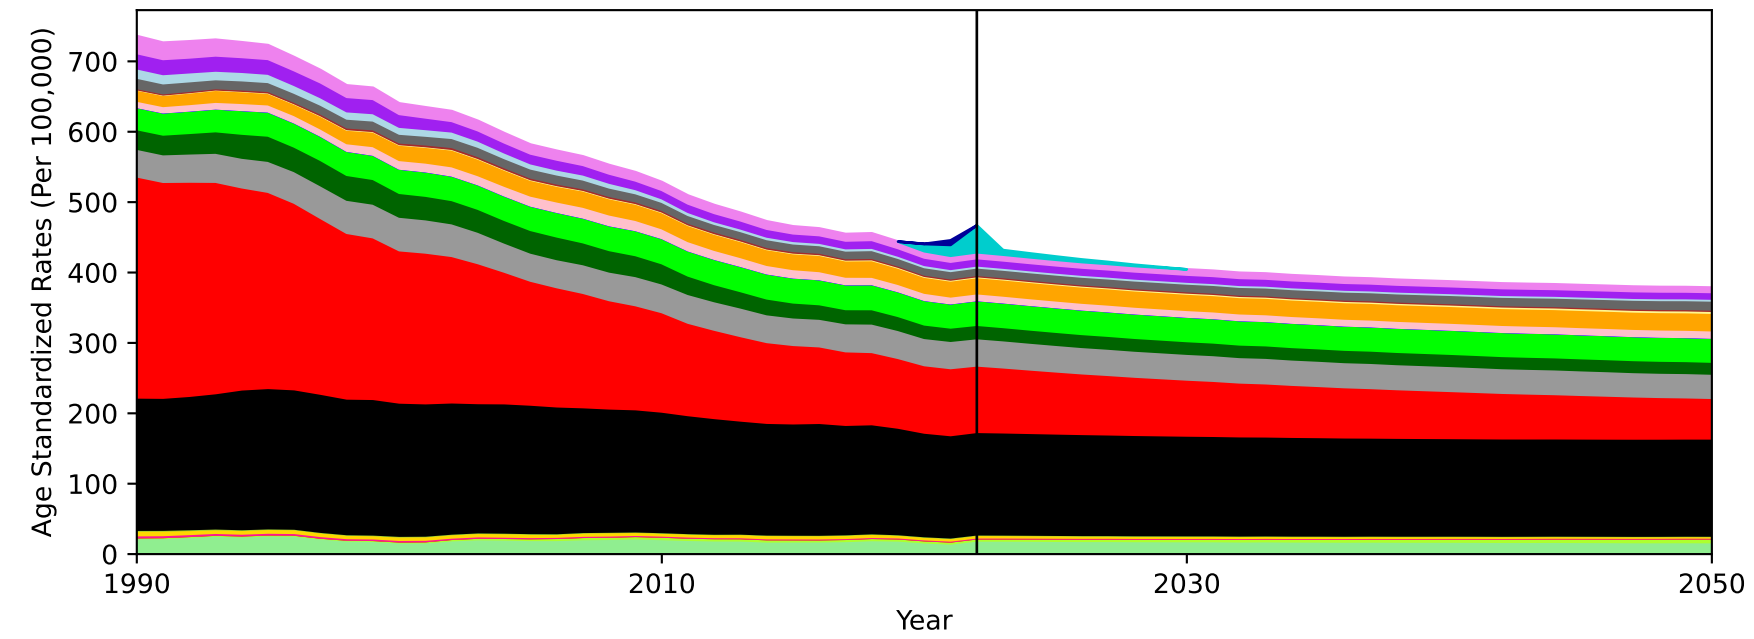

Level 1

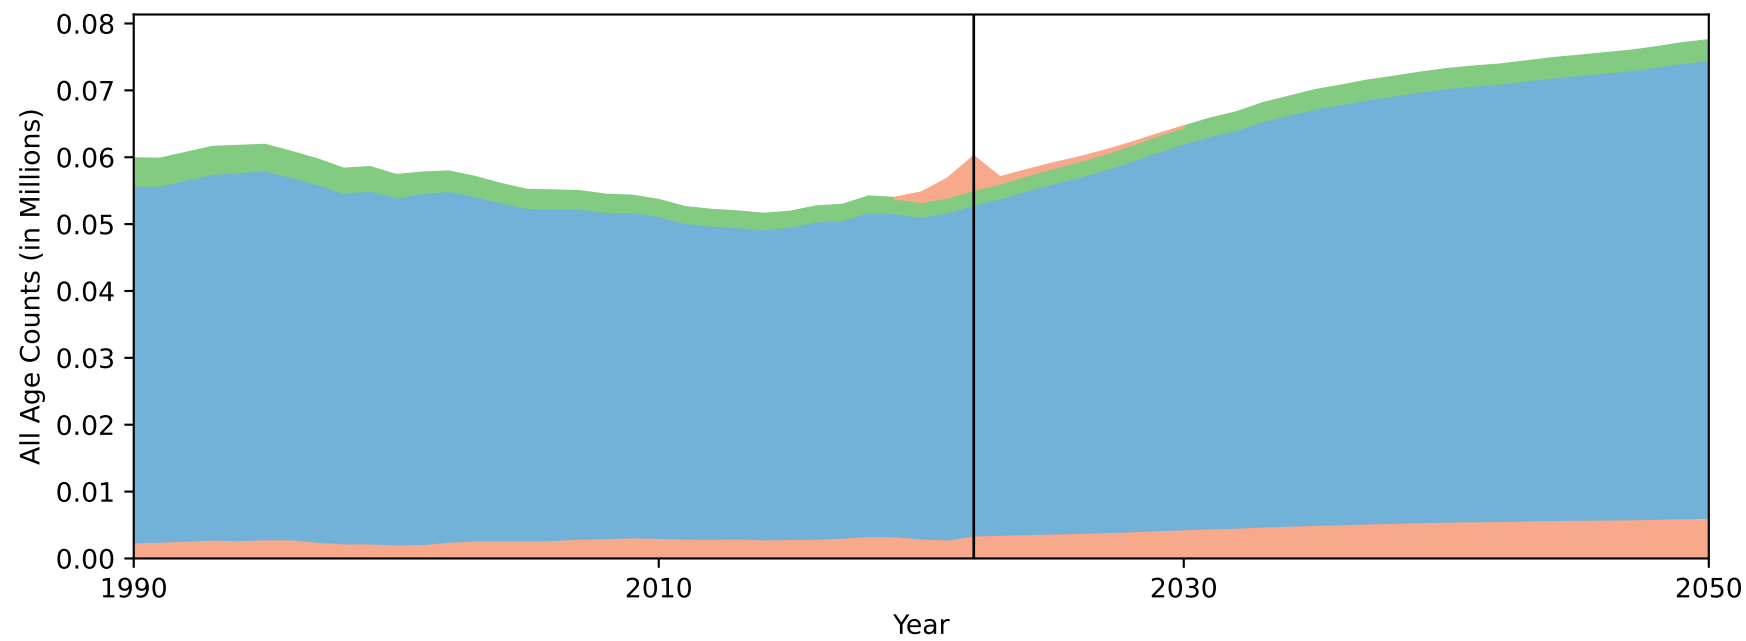

Level 2

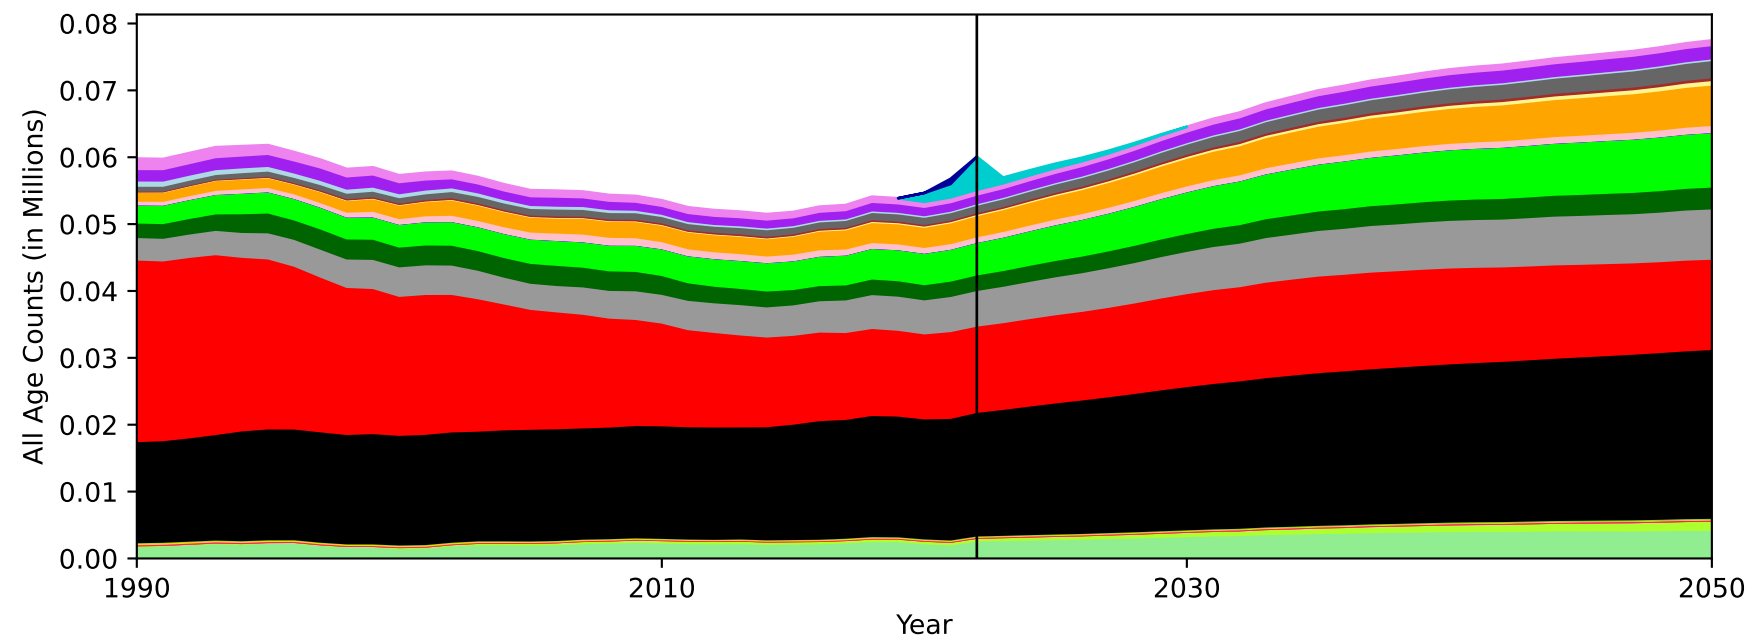

Level 1

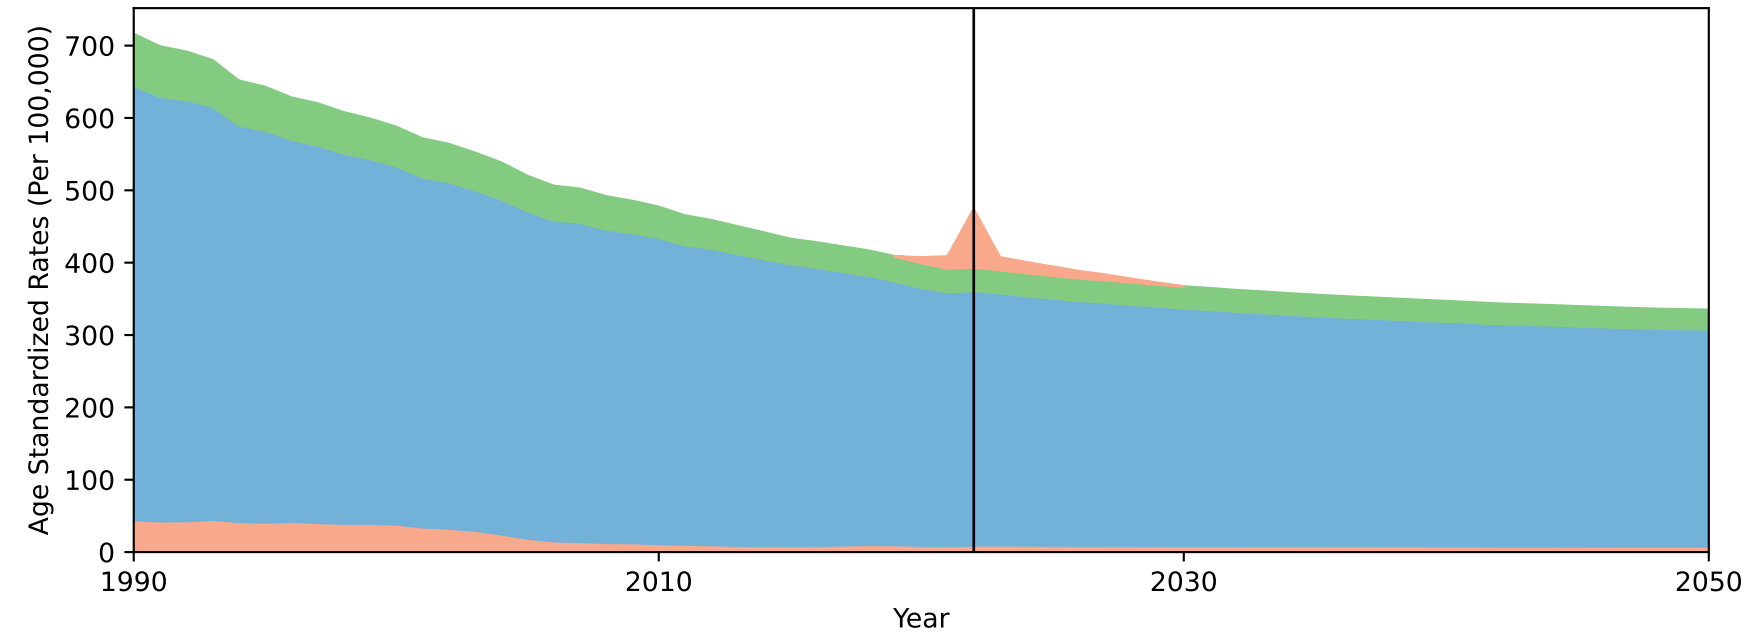

Level 2

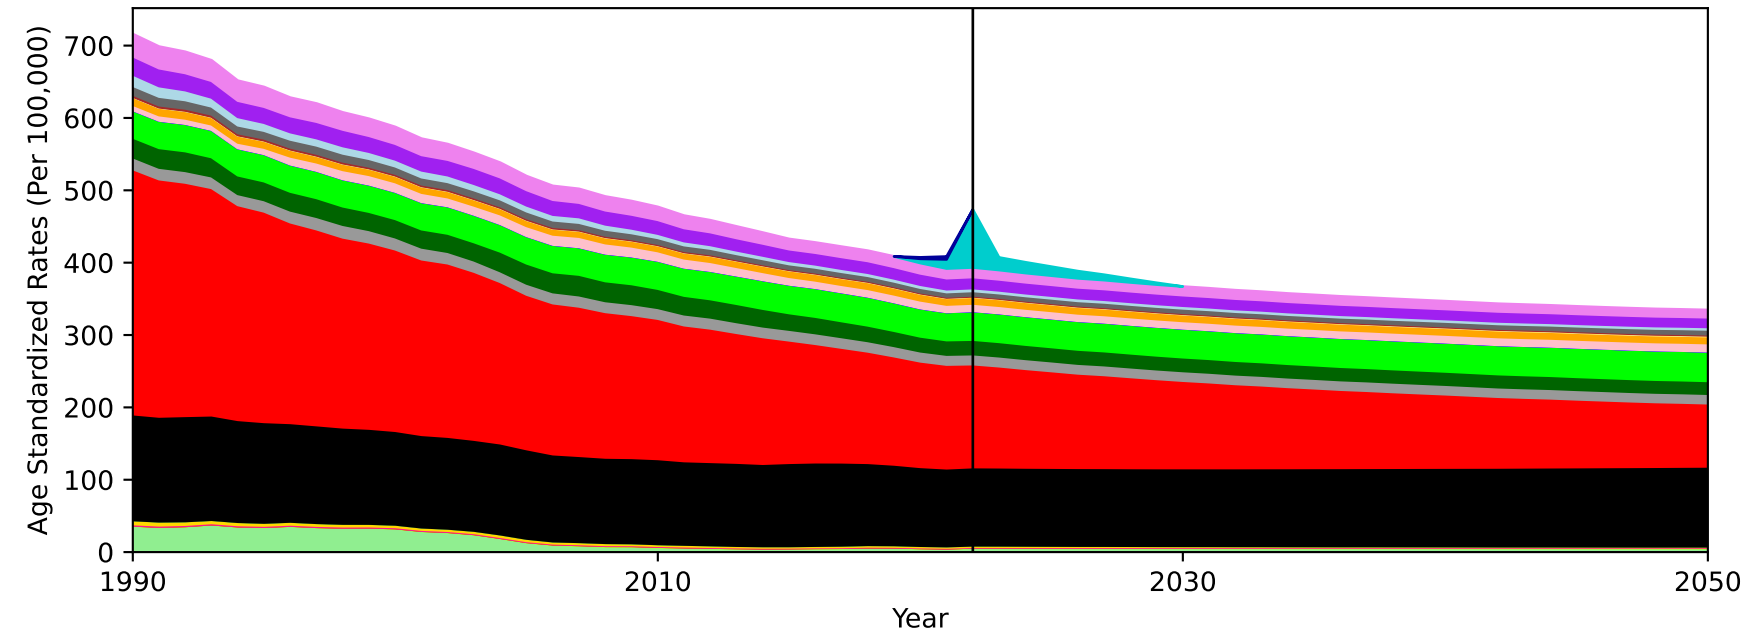

Level 1

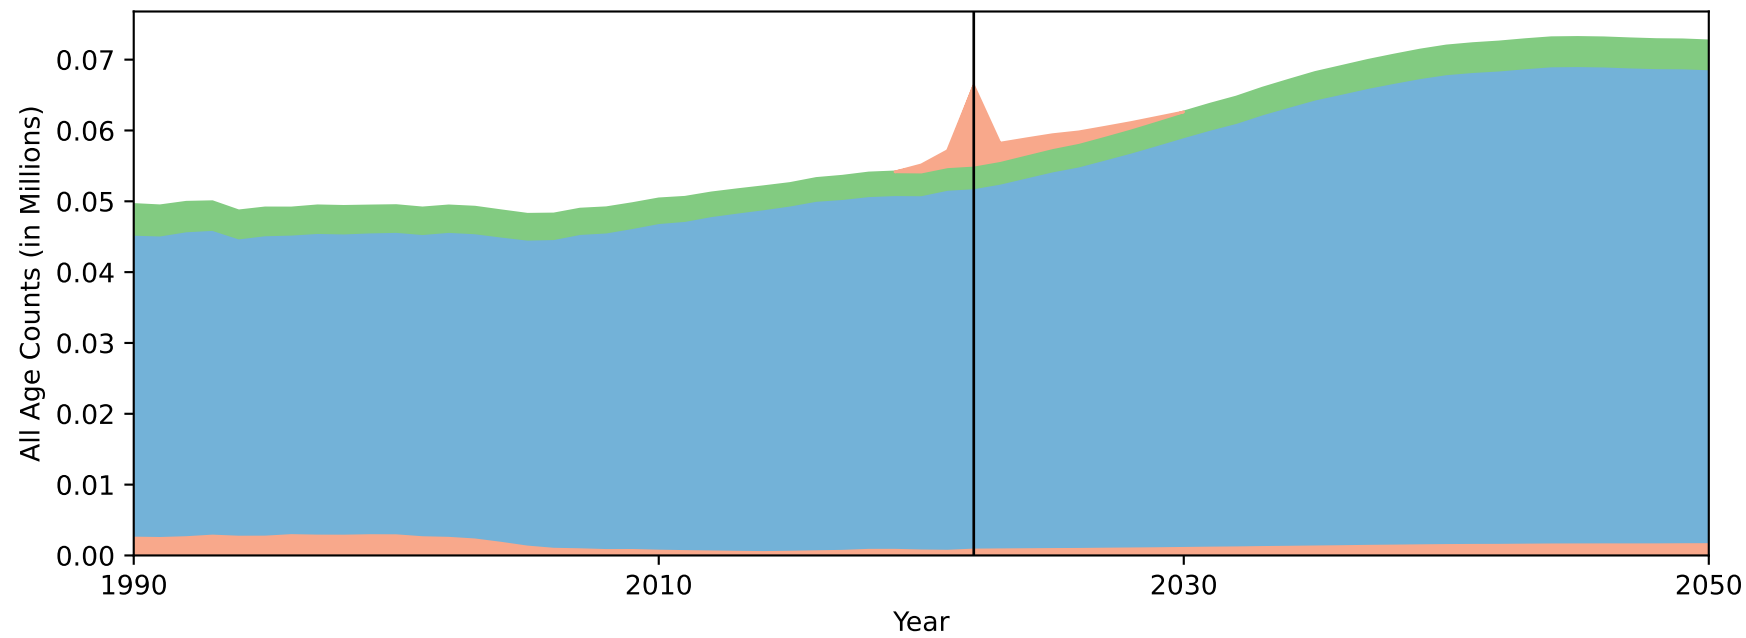

Level 2

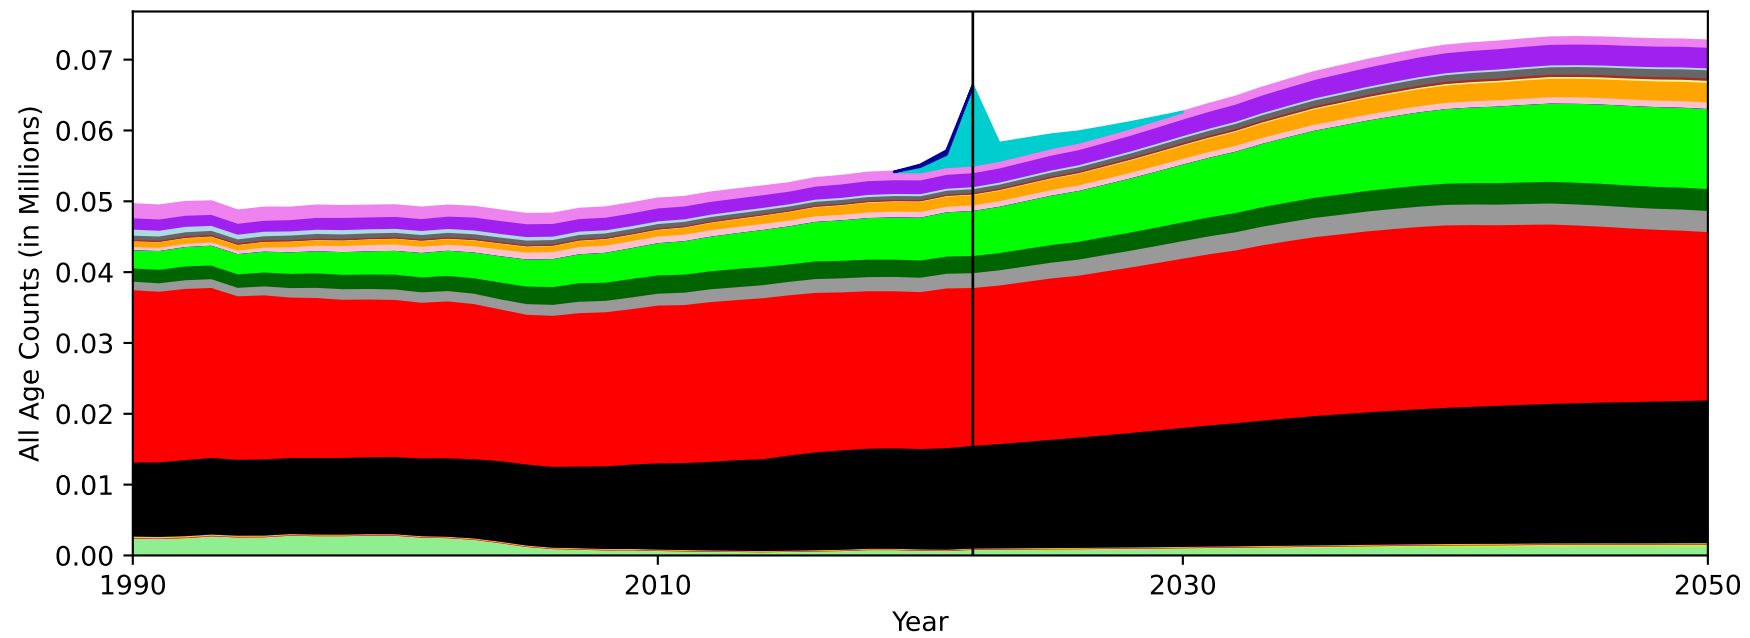

Level 1

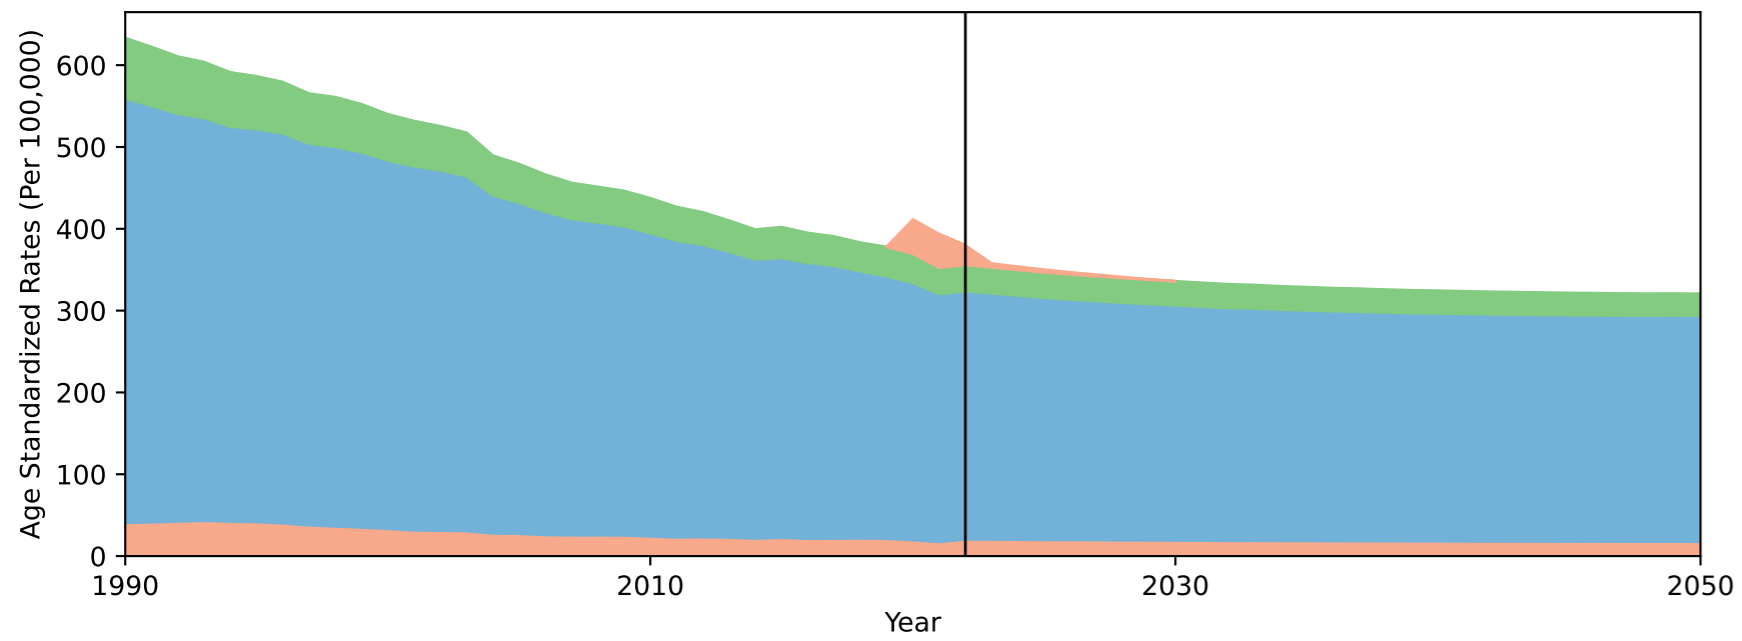

Level 2

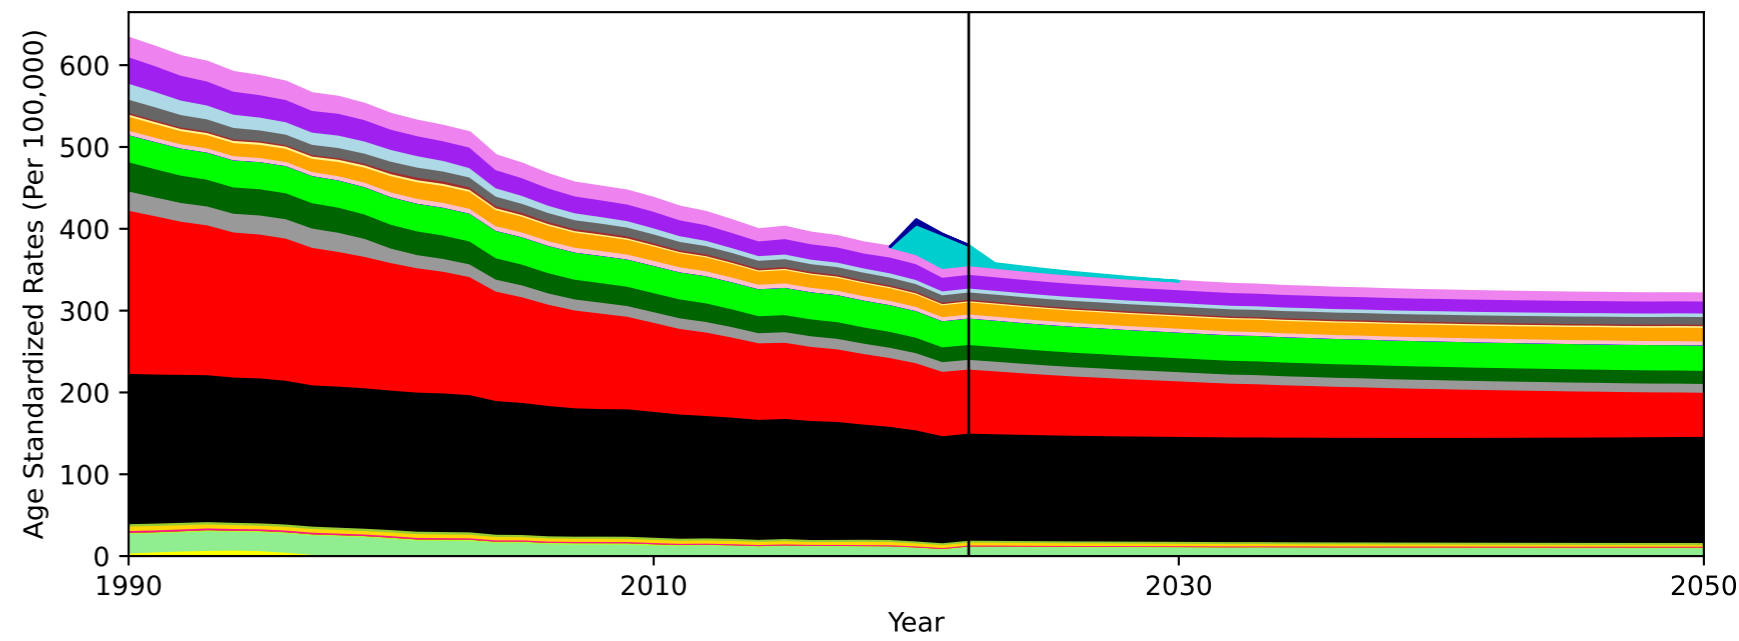

Level 1

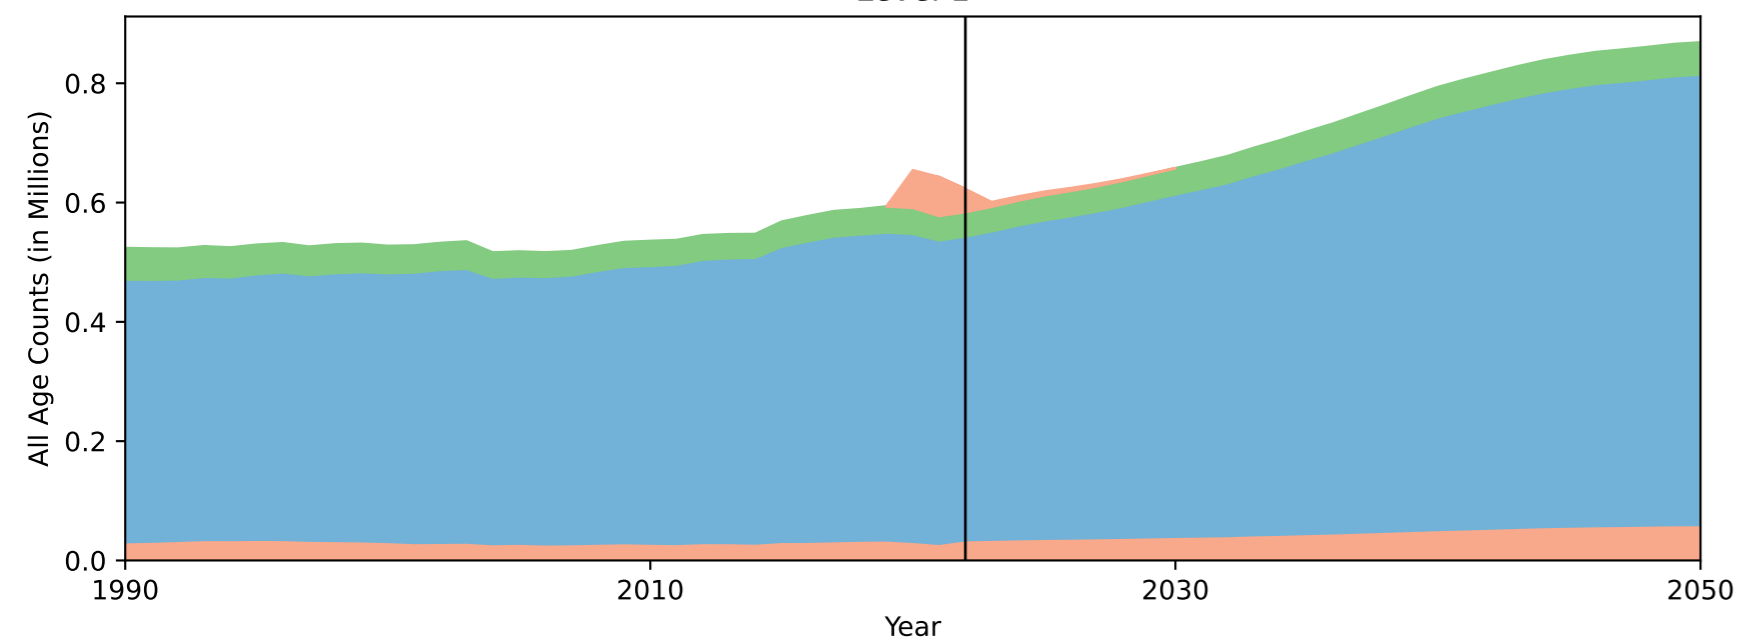

Level 2

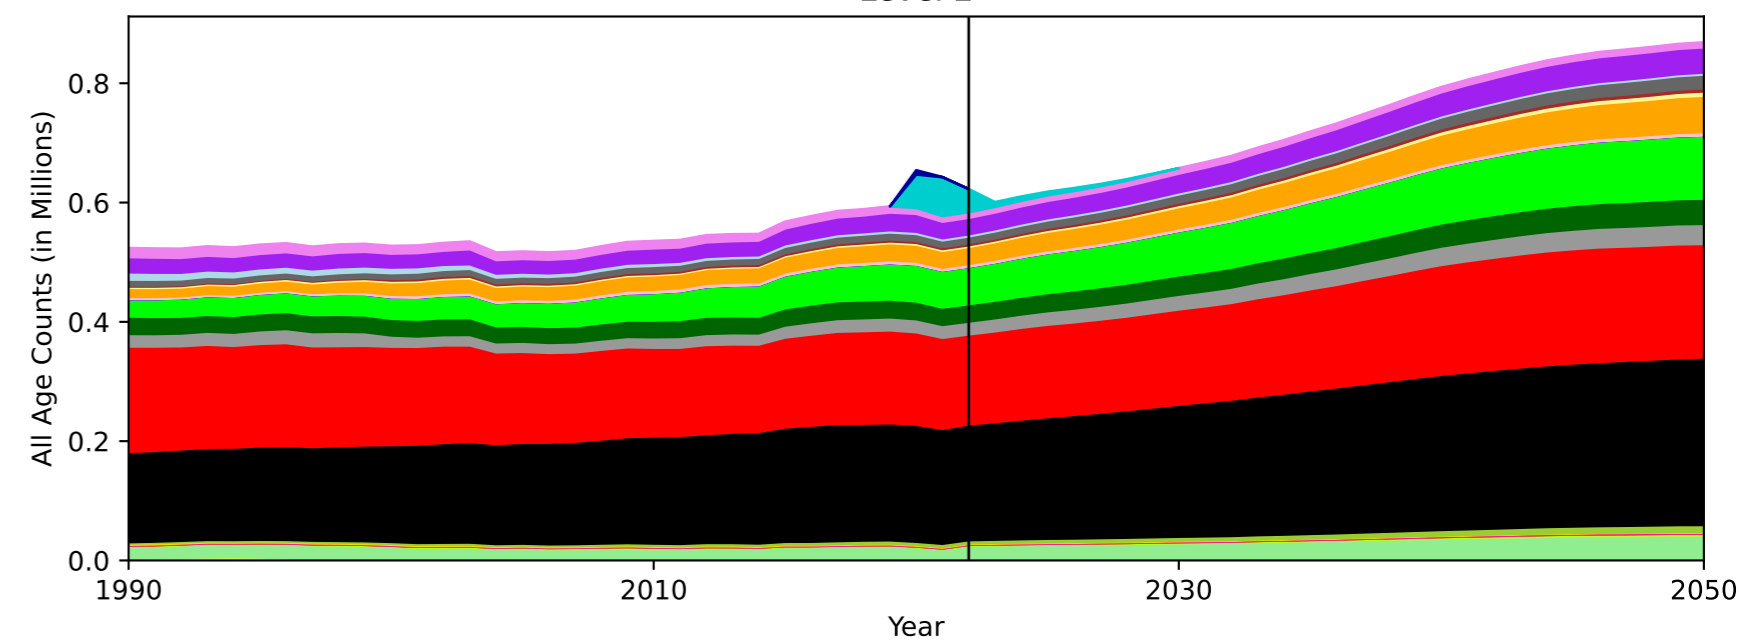

# Germany

Level 1

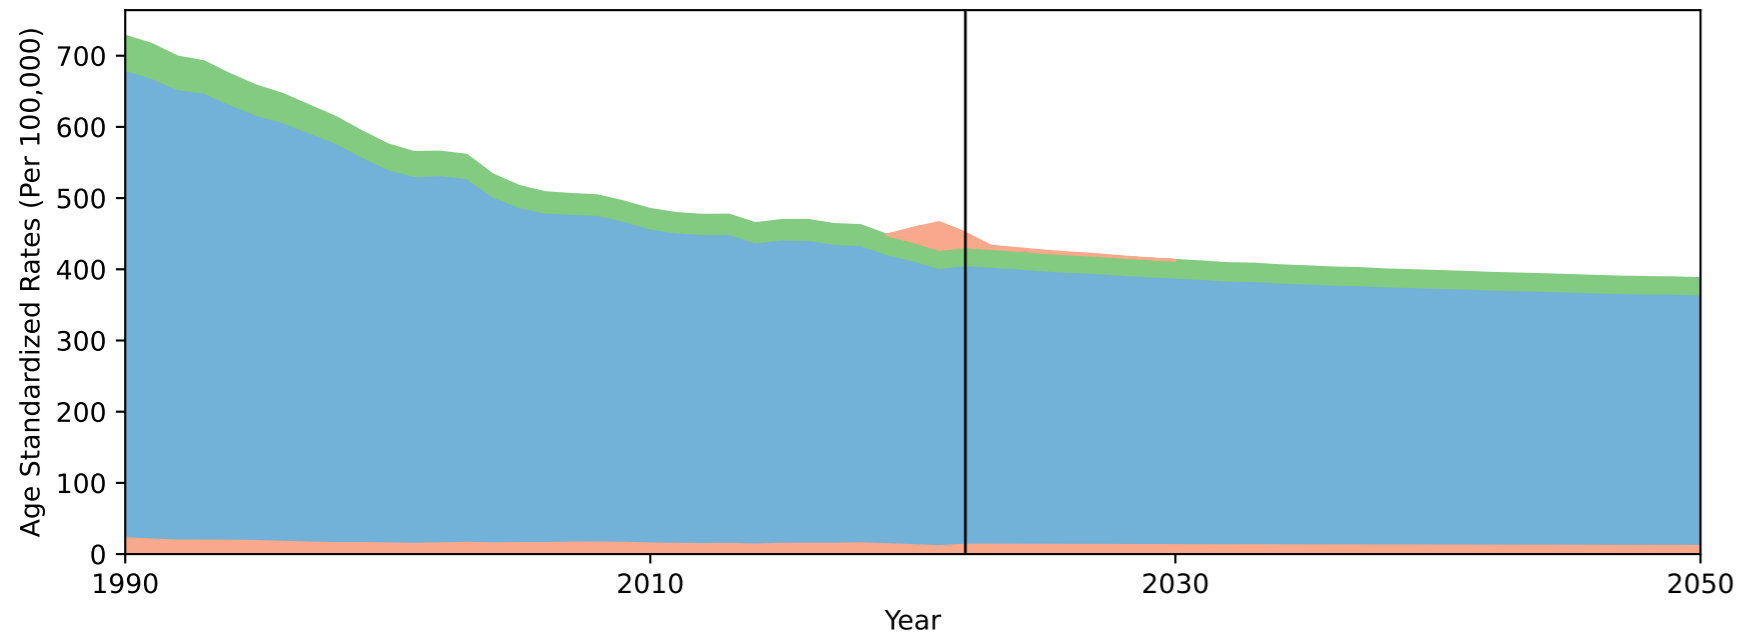

Level 2

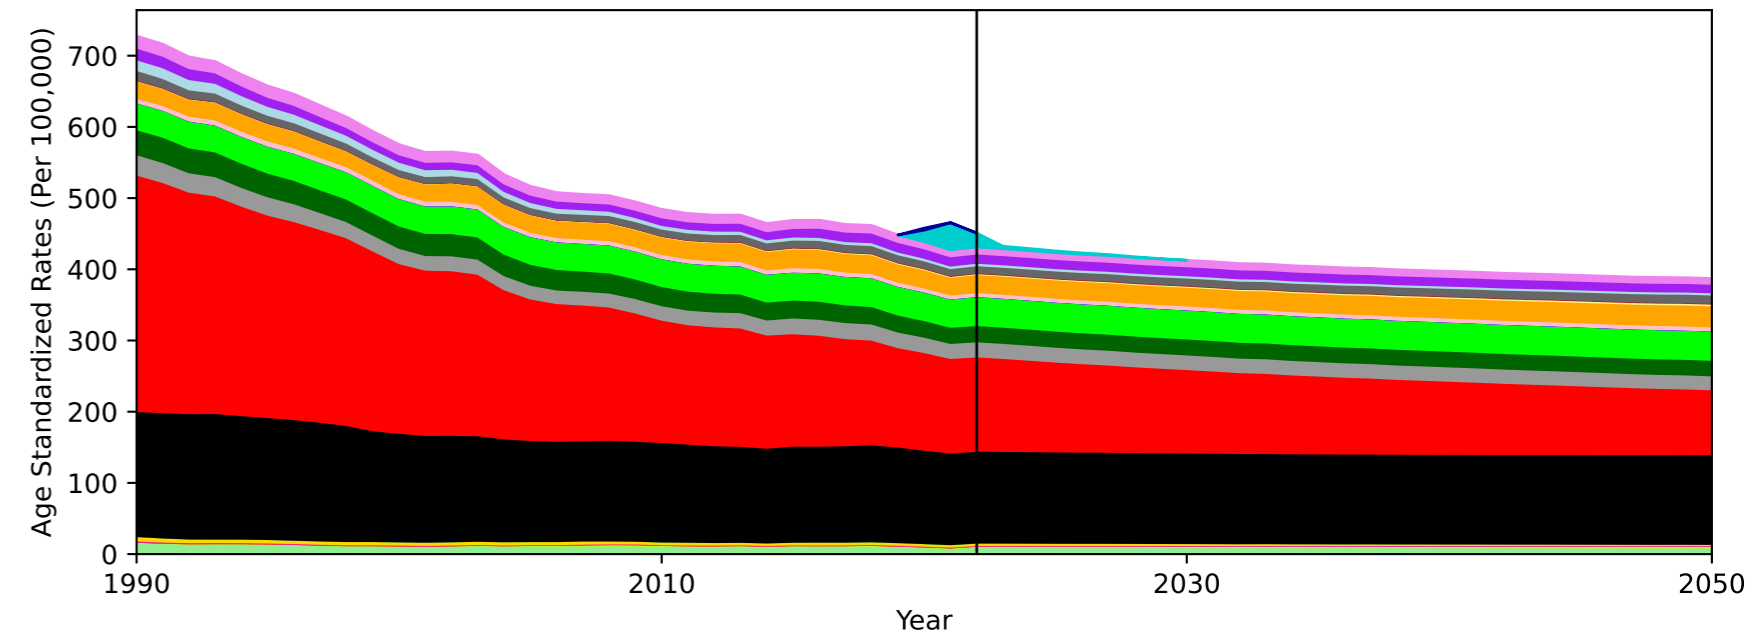

Level 1

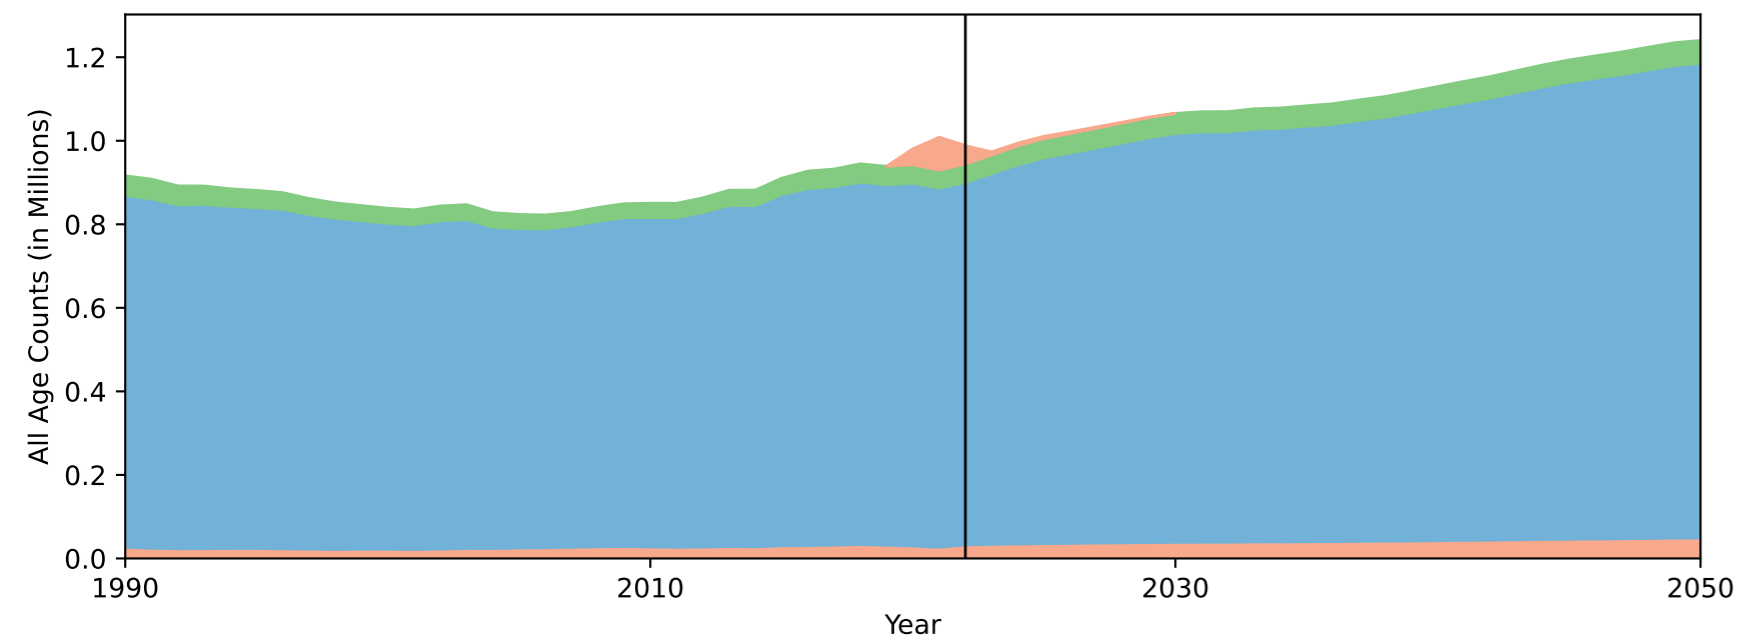

Level 2

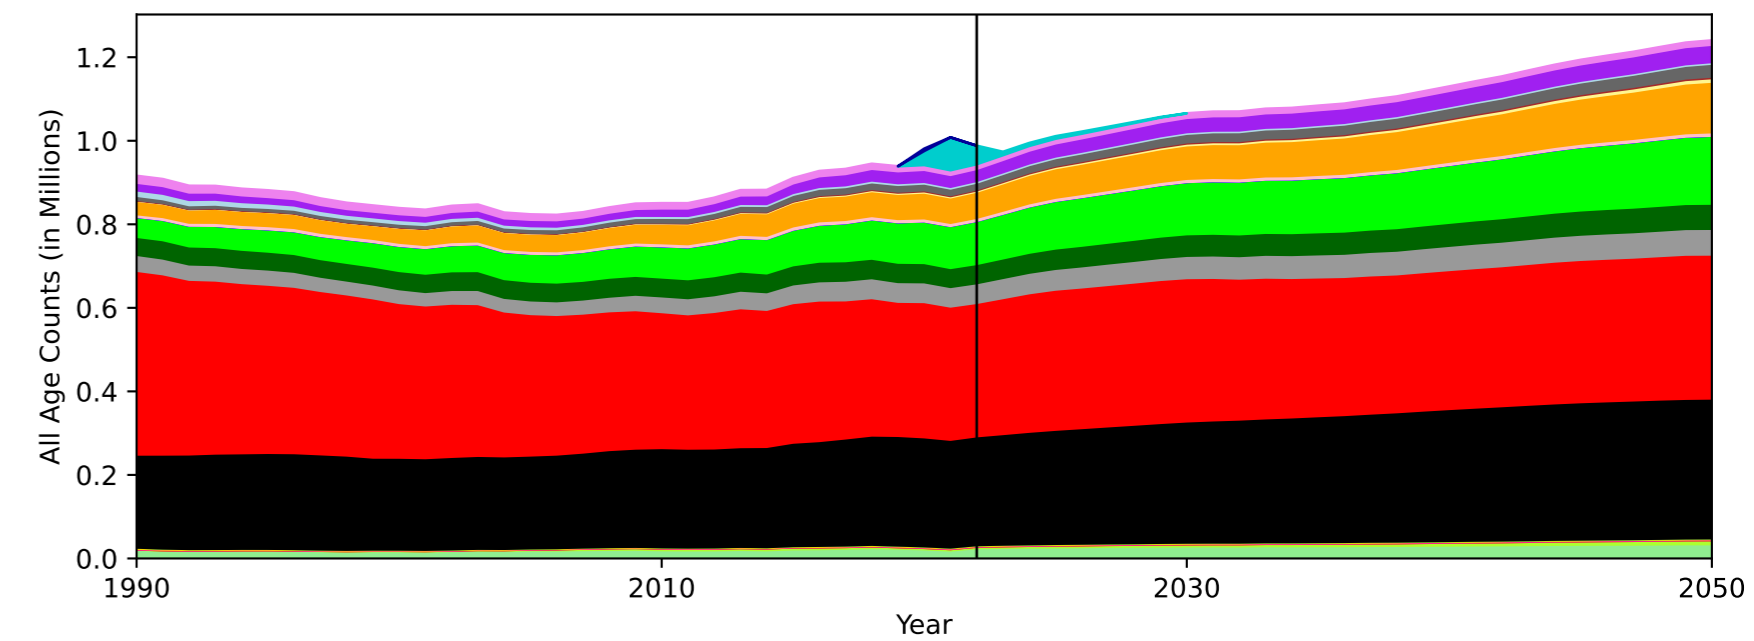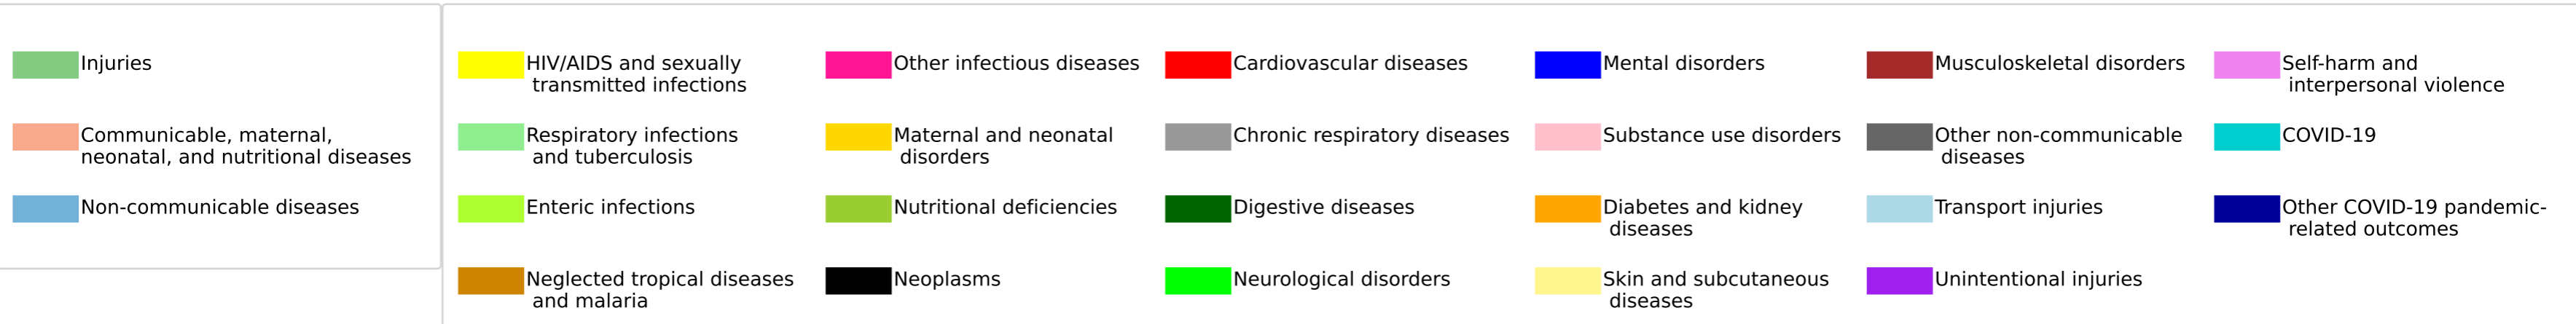

# Greece

Level 1

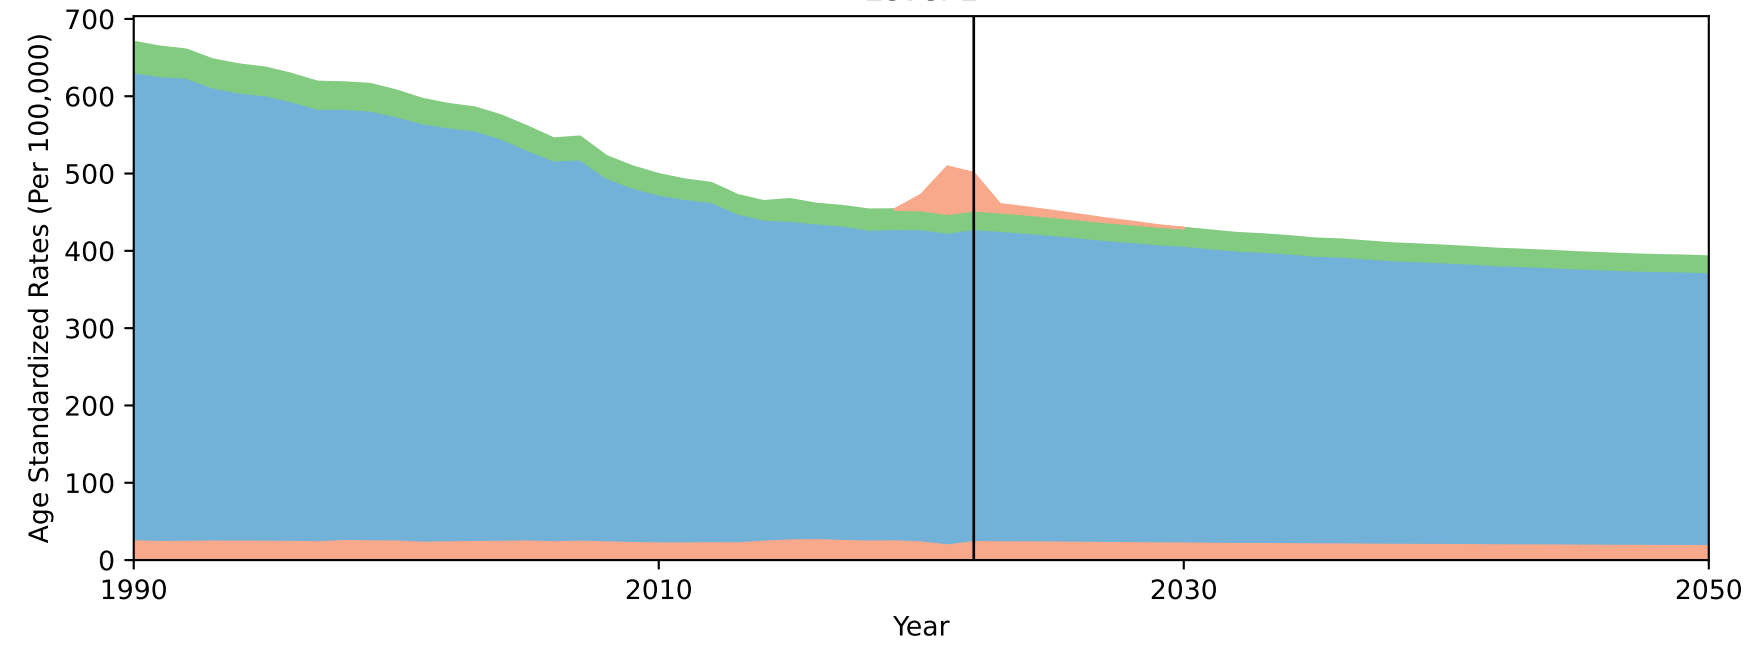

Level 2

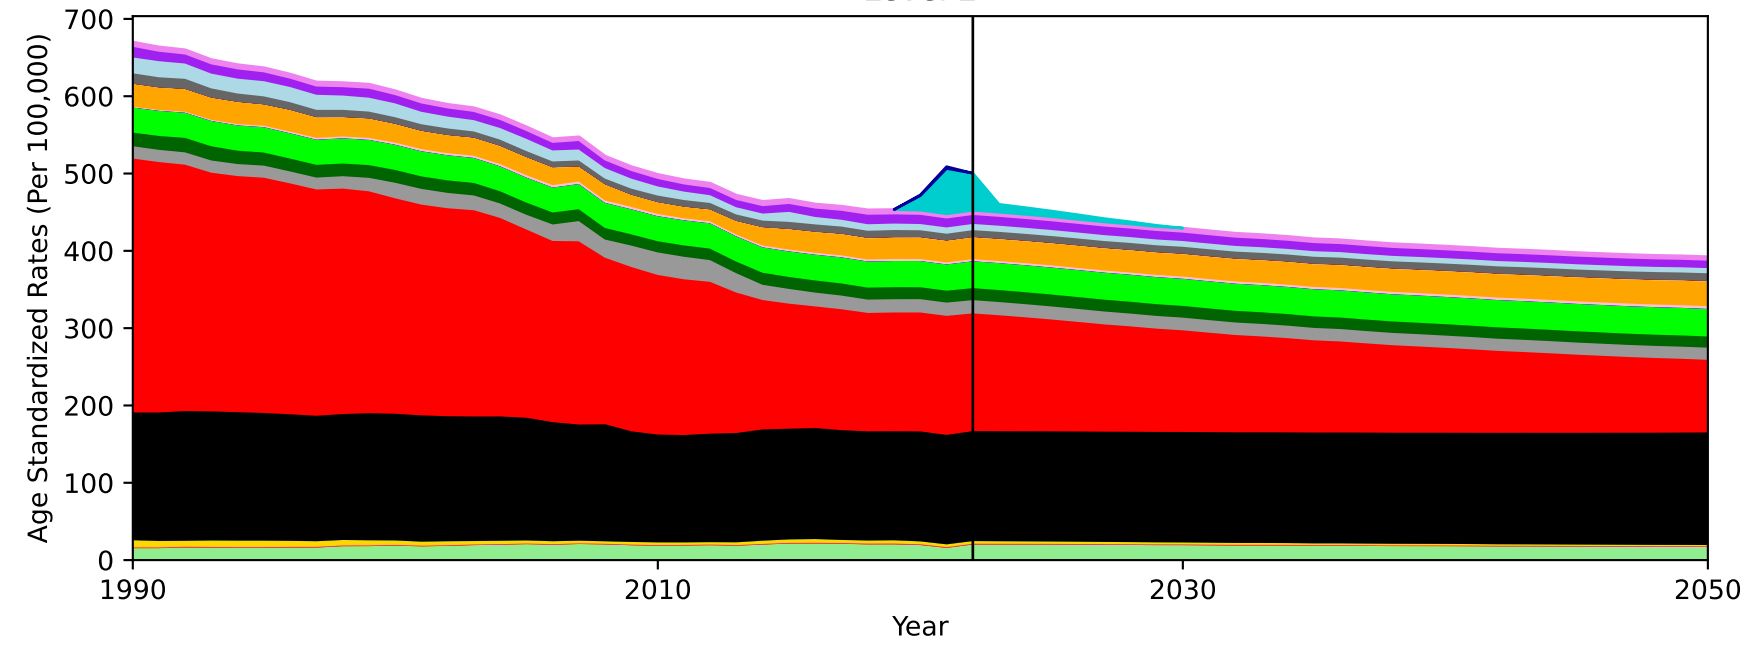

Level 1

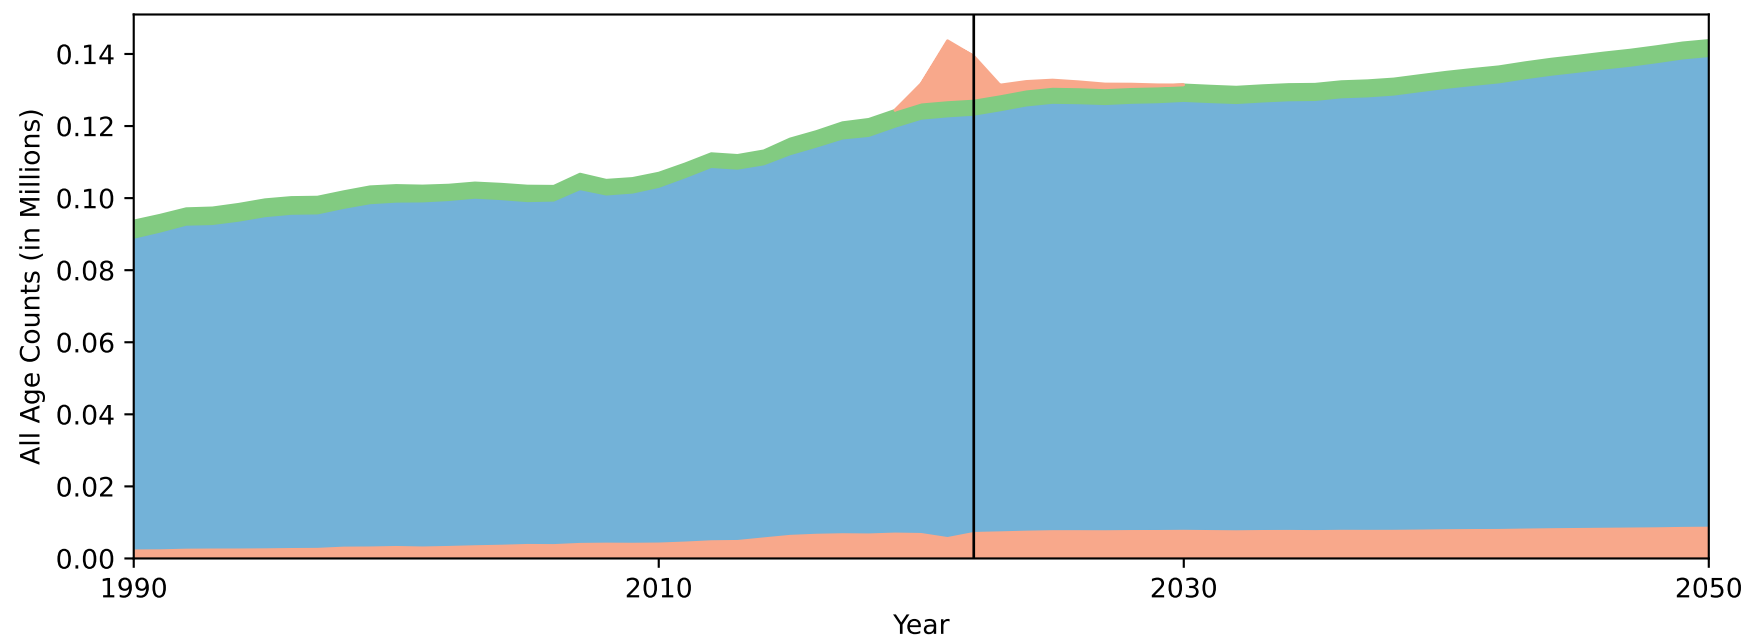

Level 2

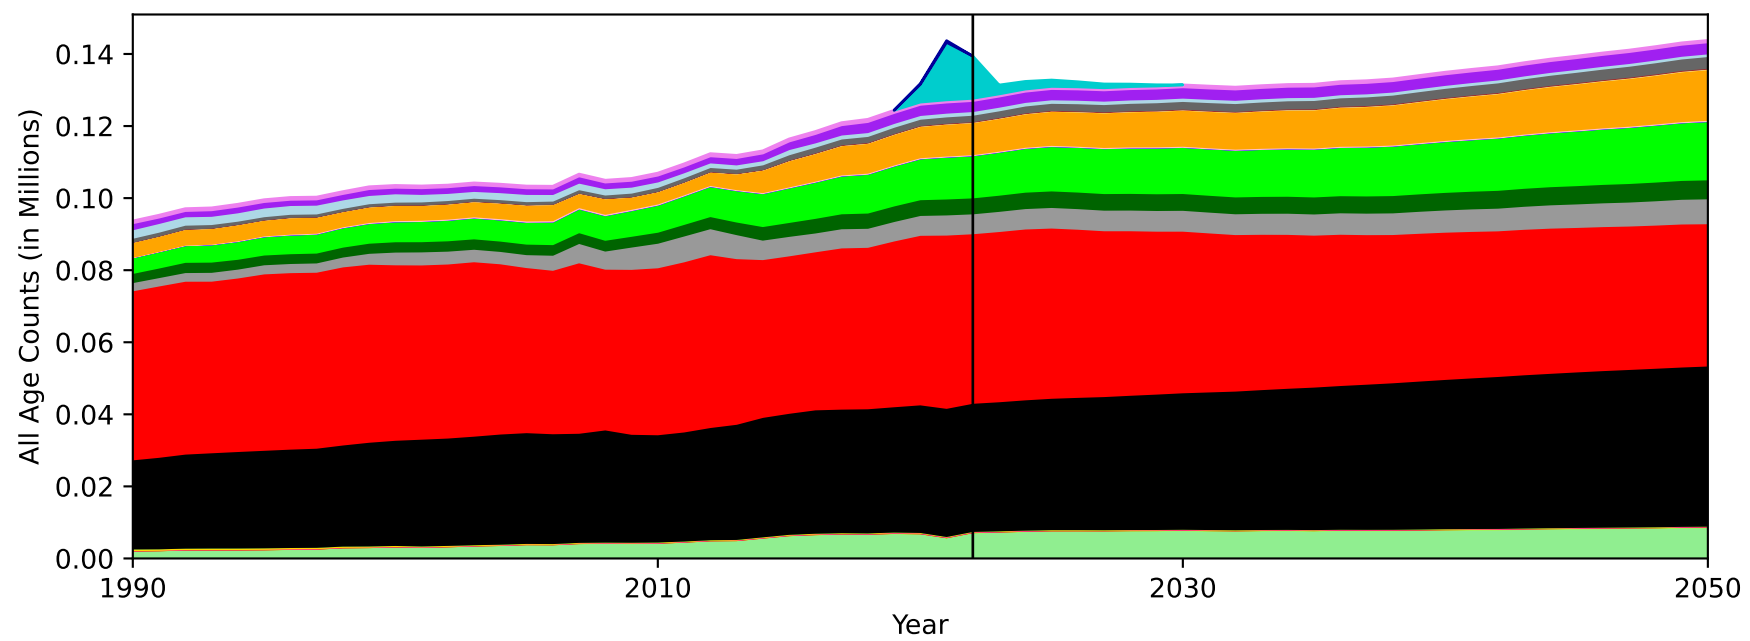



Level 1

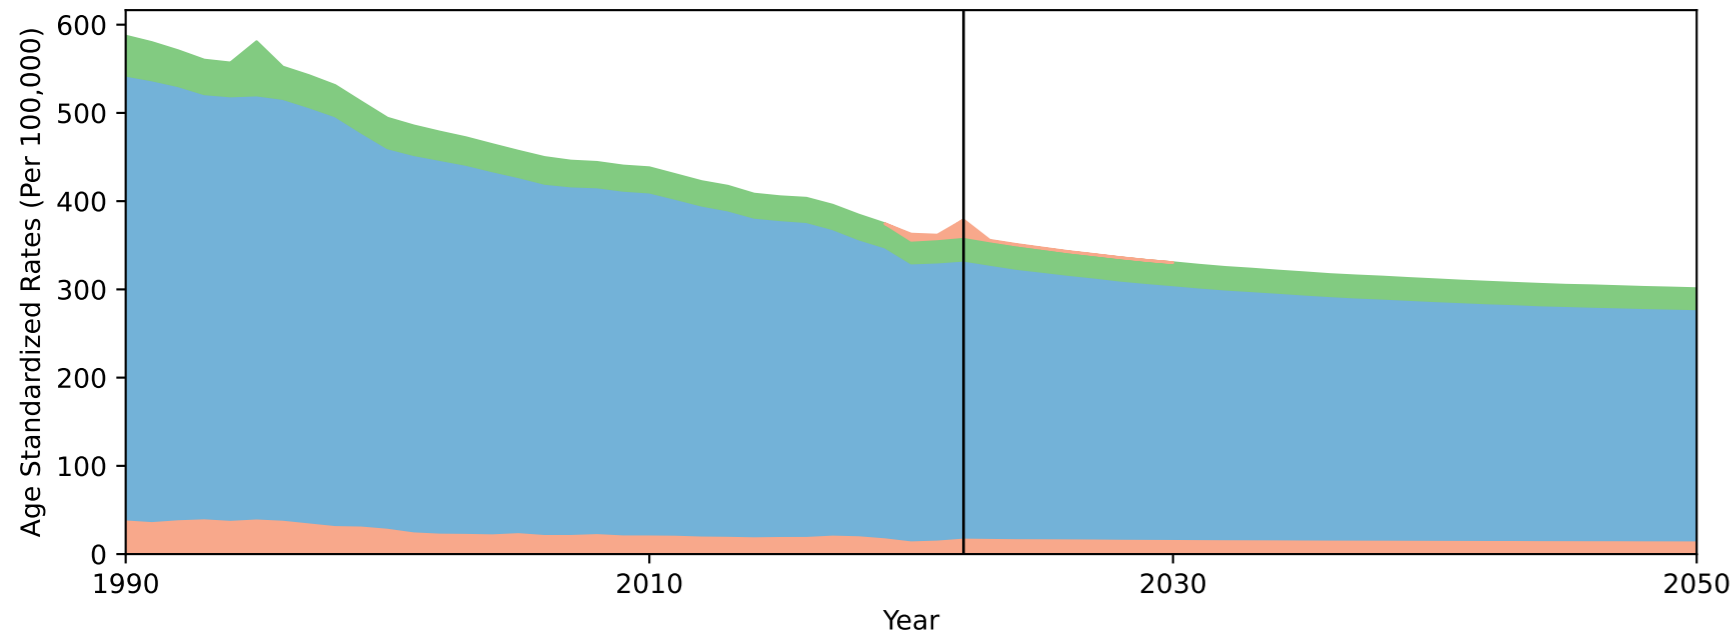

Level 2

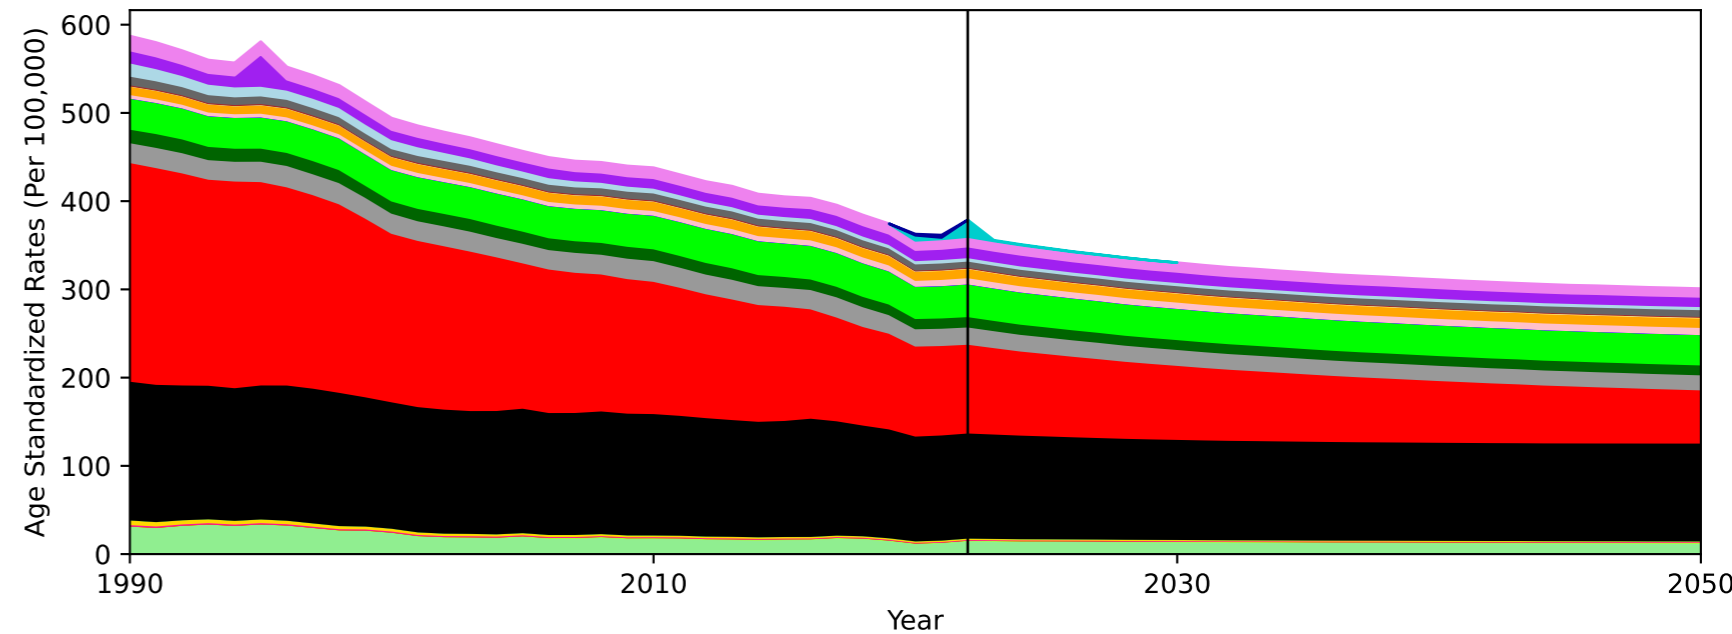

Level 1

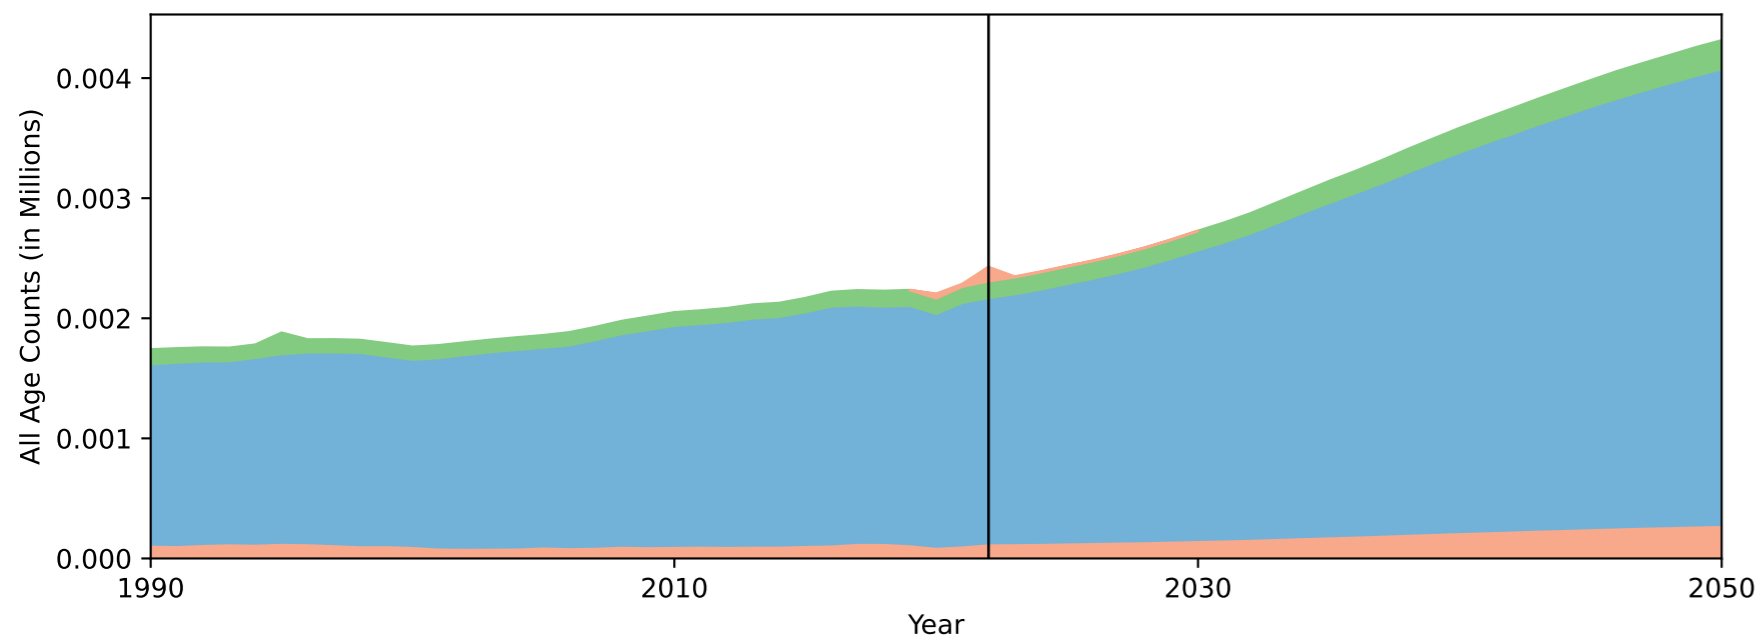

Level 2

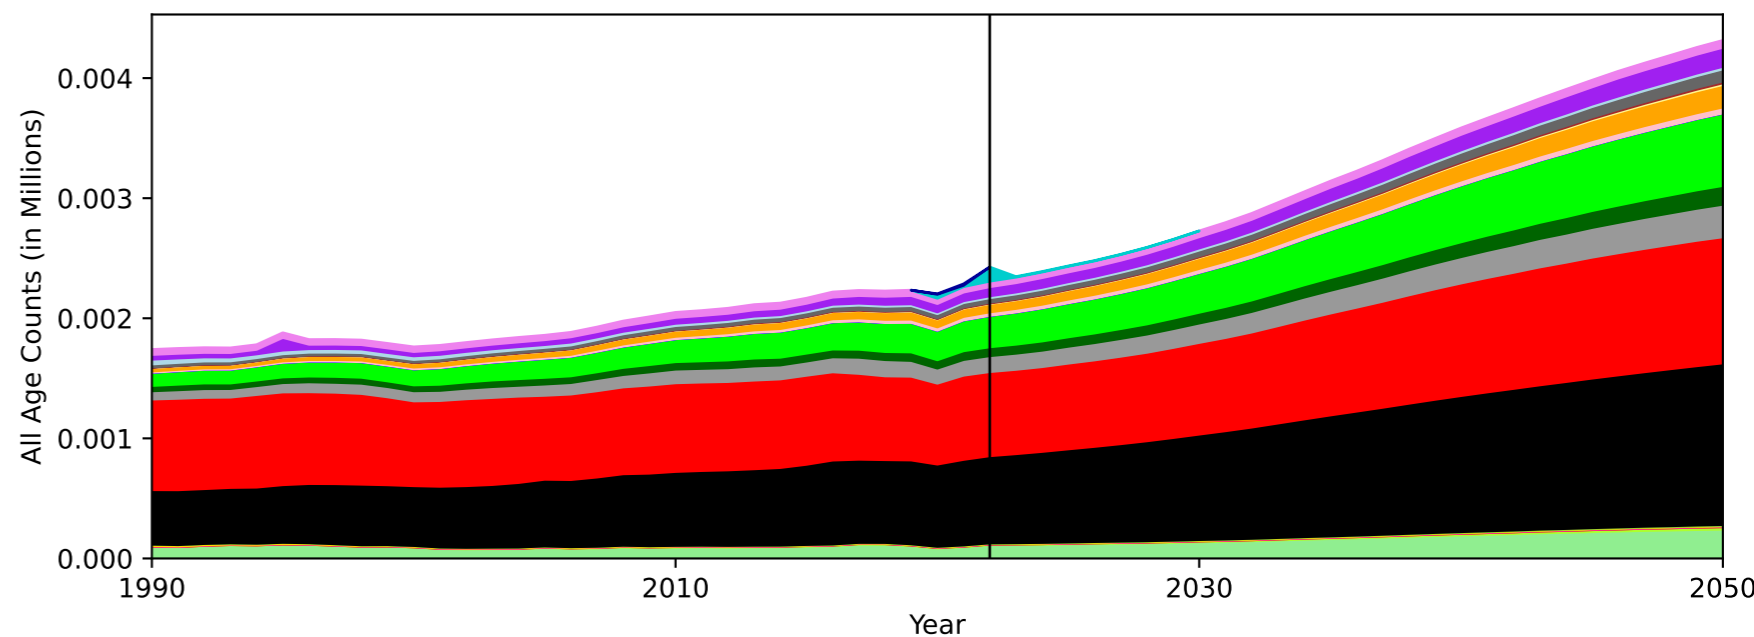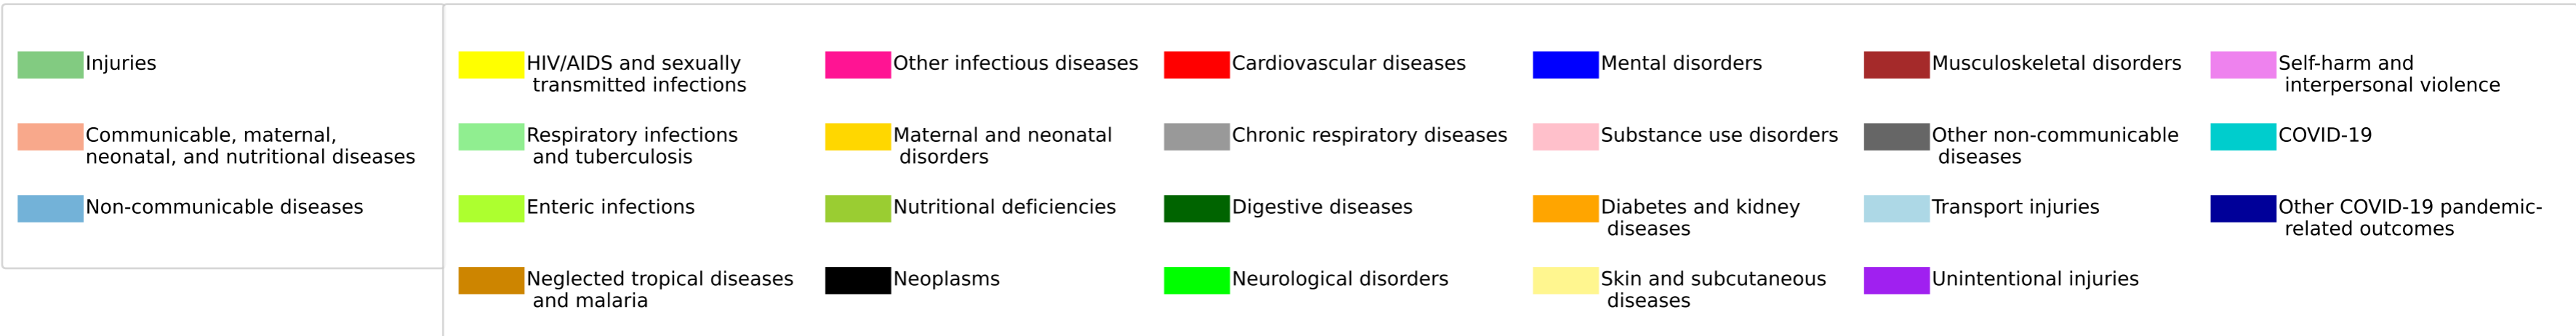

Level 1

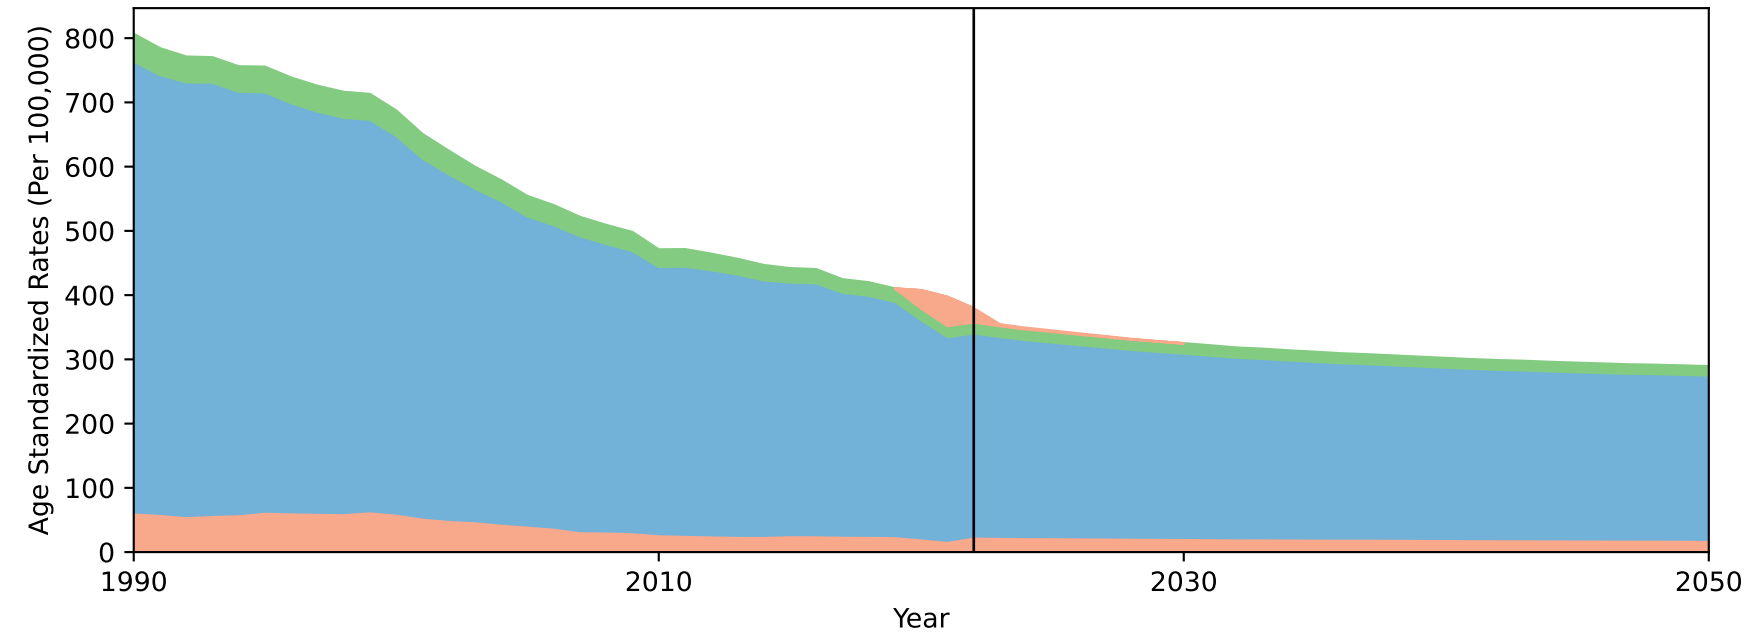

Level 2

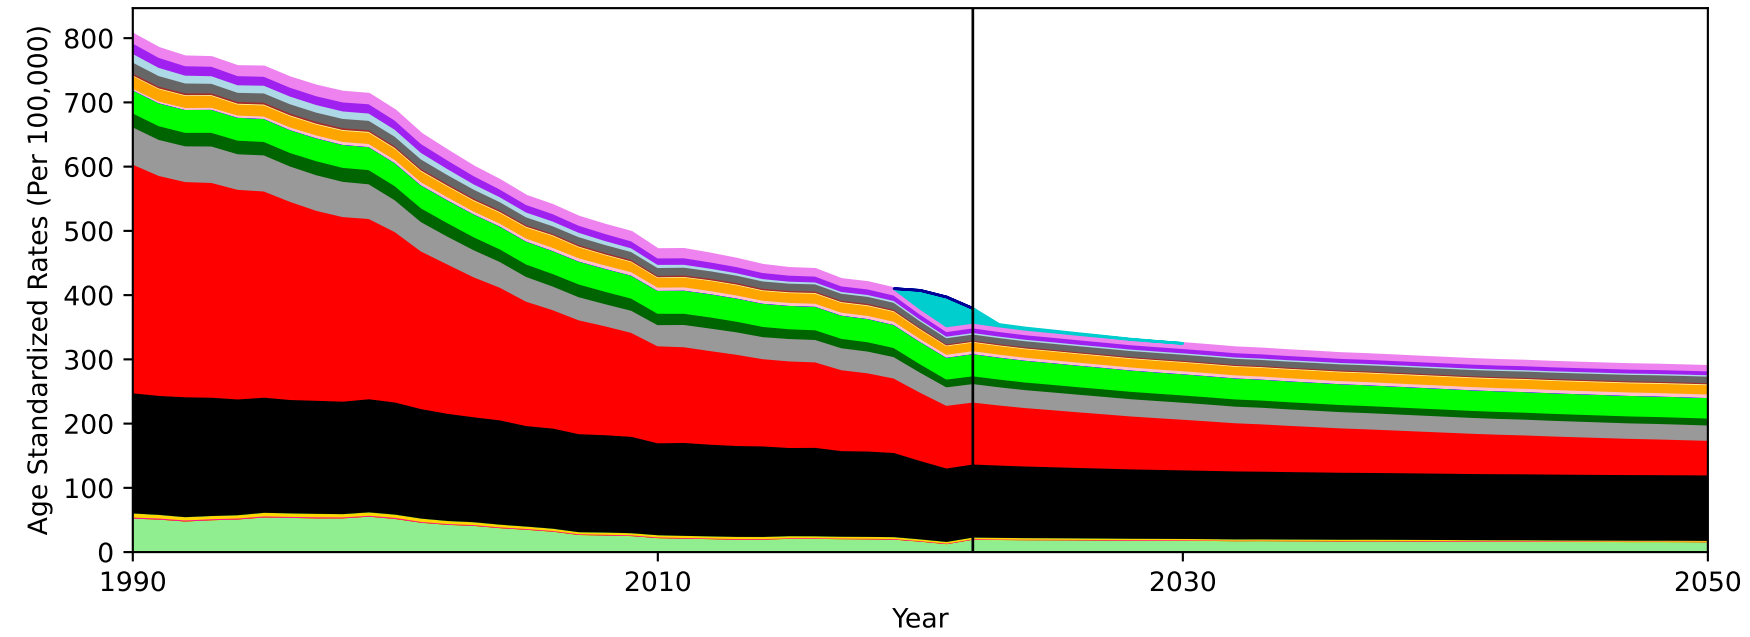

Level 1

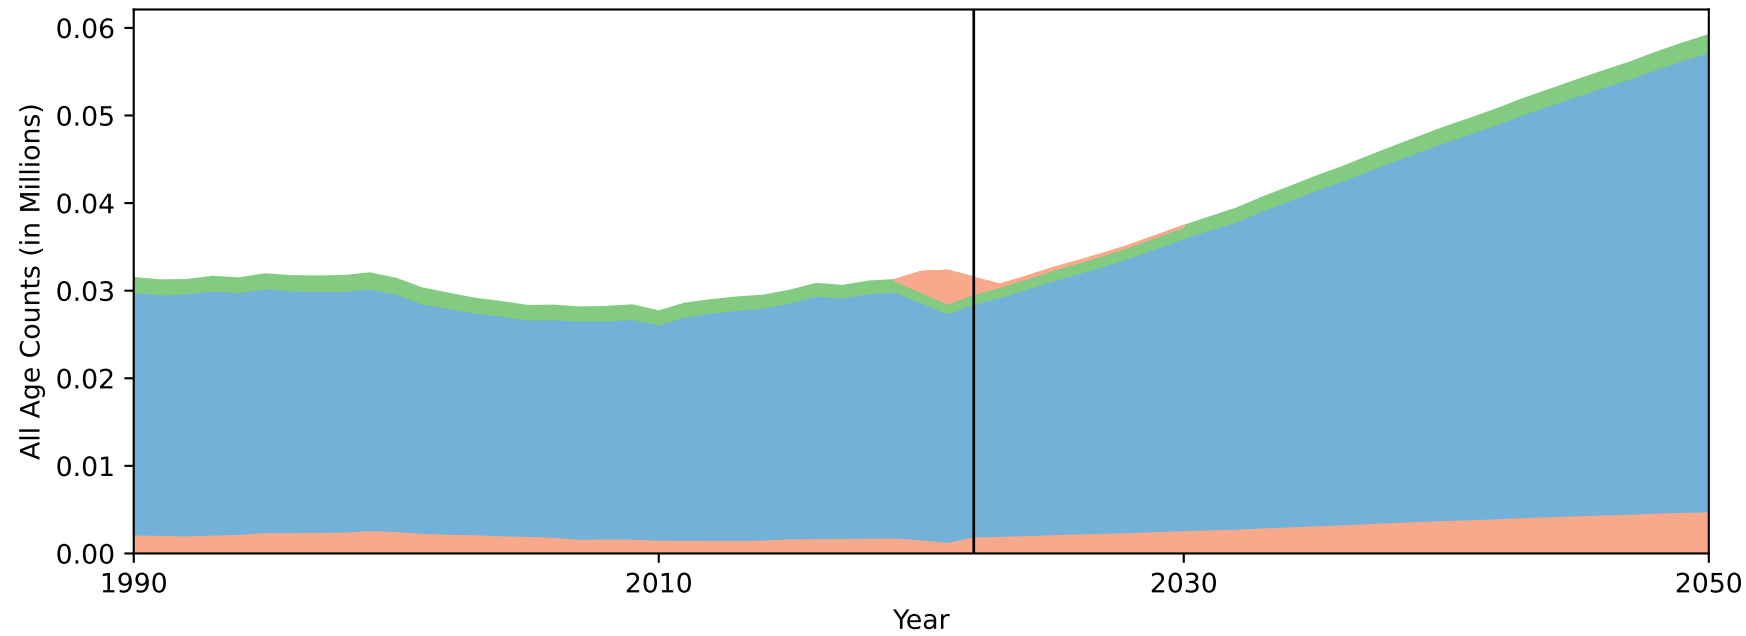

Level 2

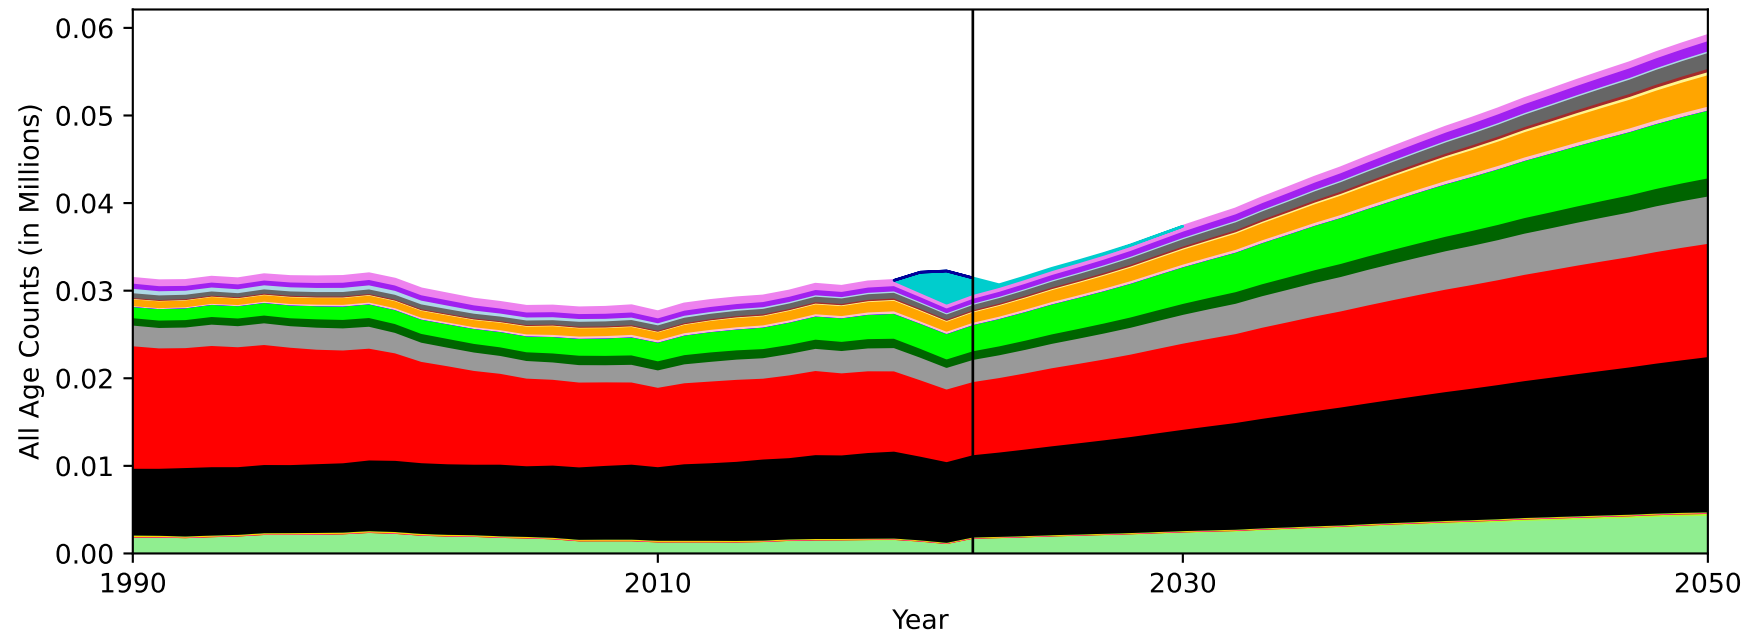

Level 1

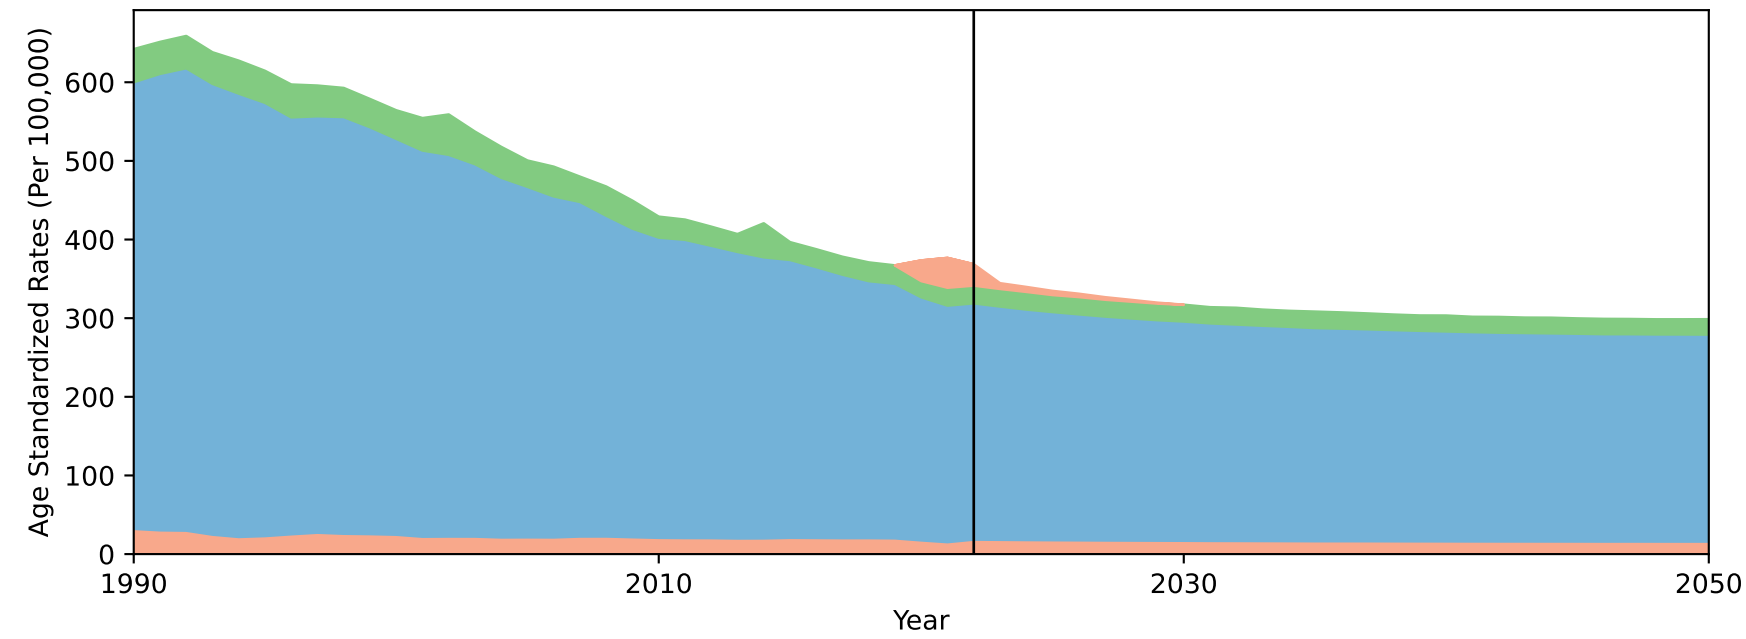

Level 2

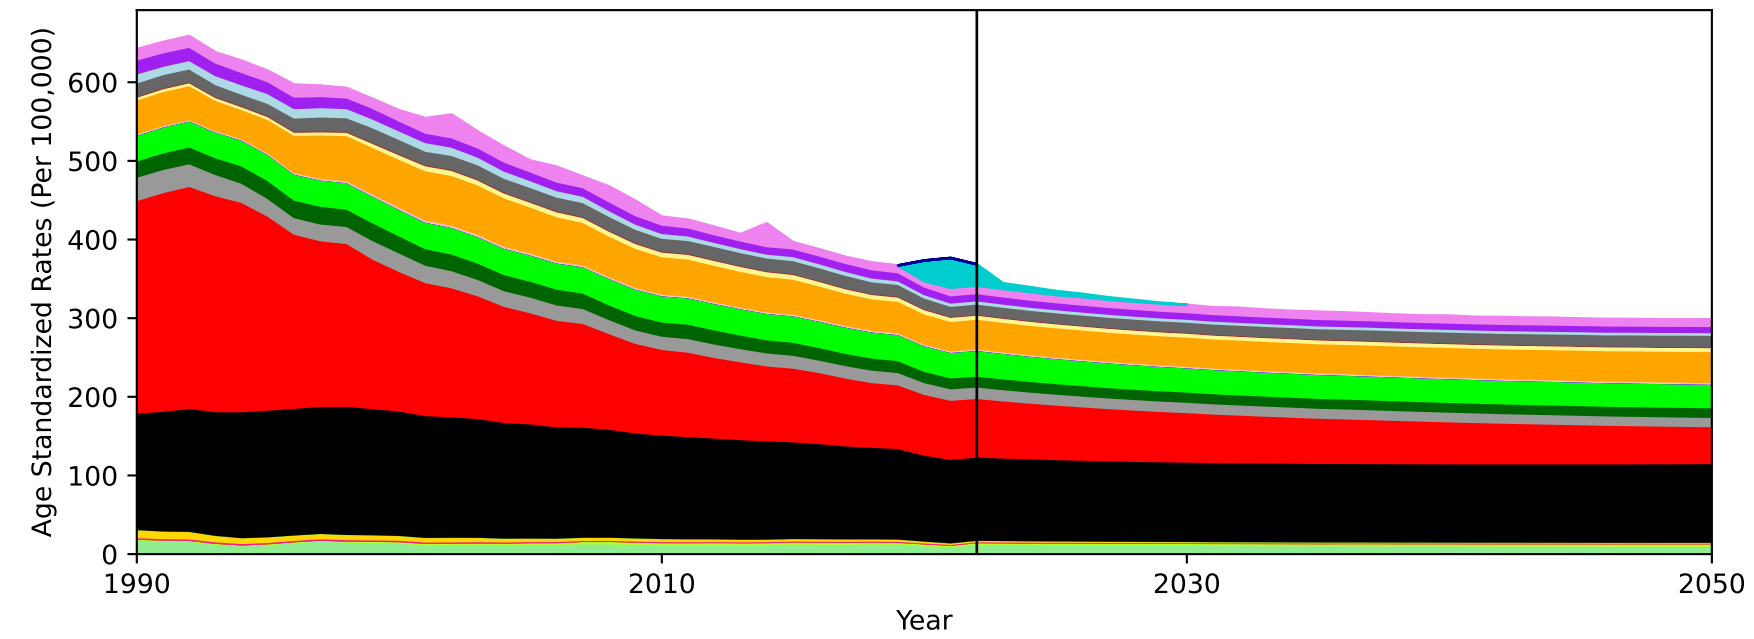

Level 1

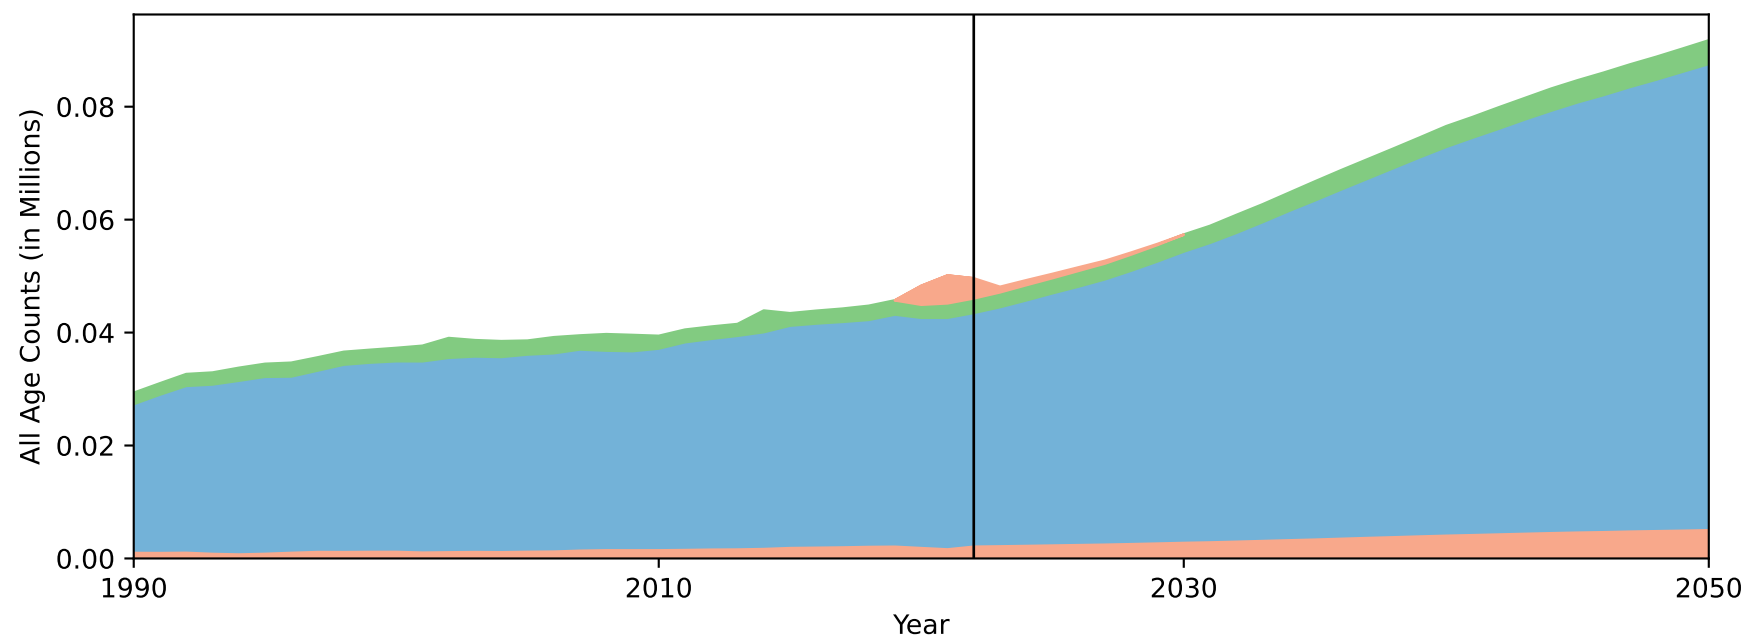

Level 2

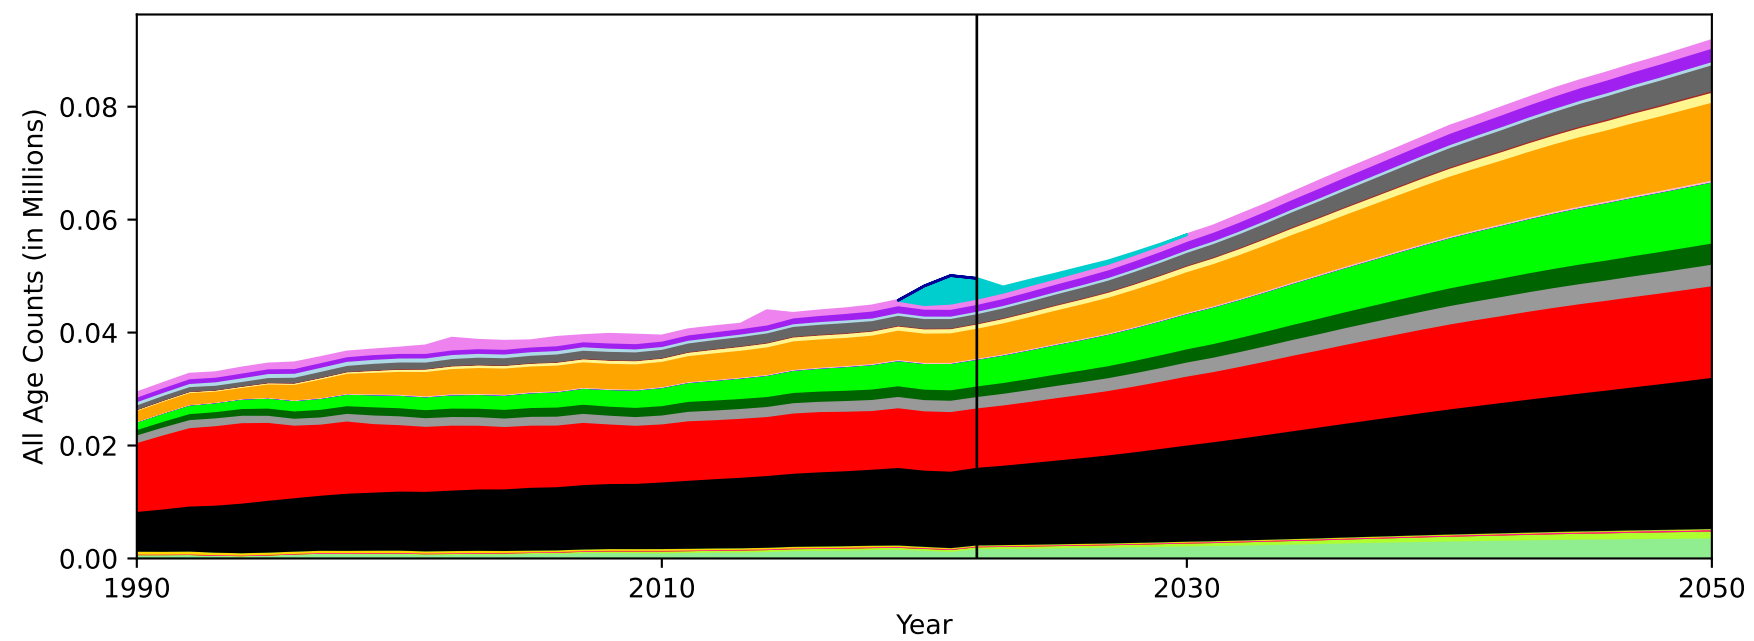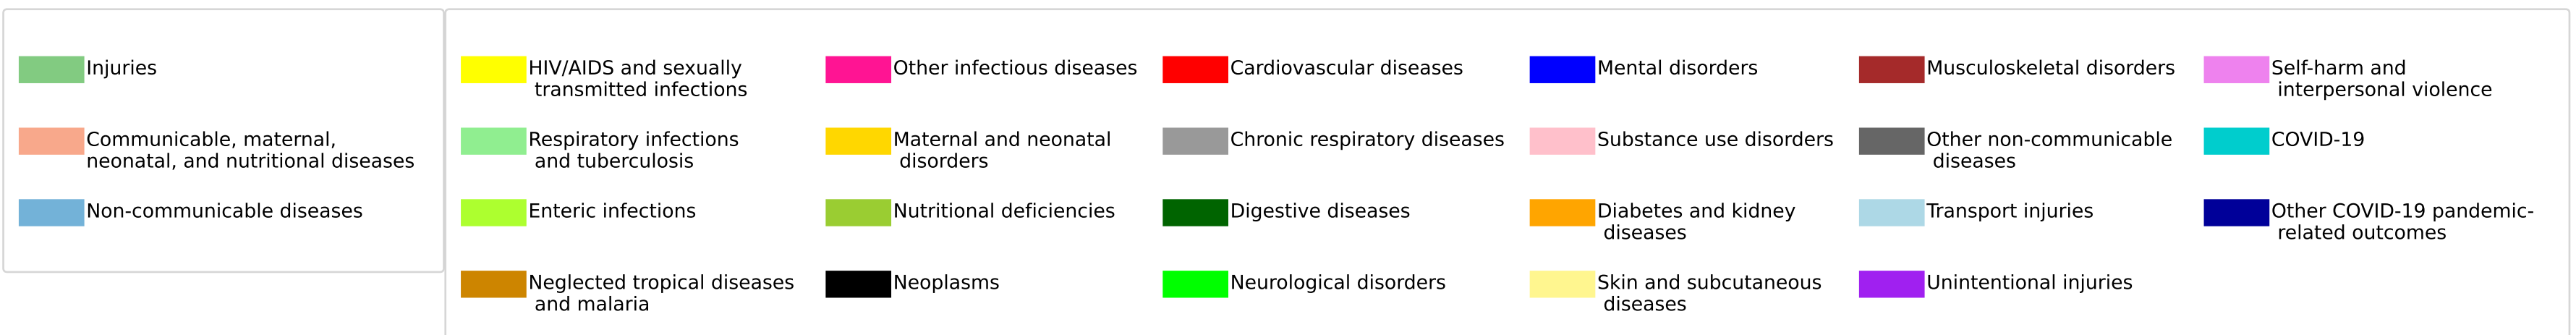

# Italy

Level 1

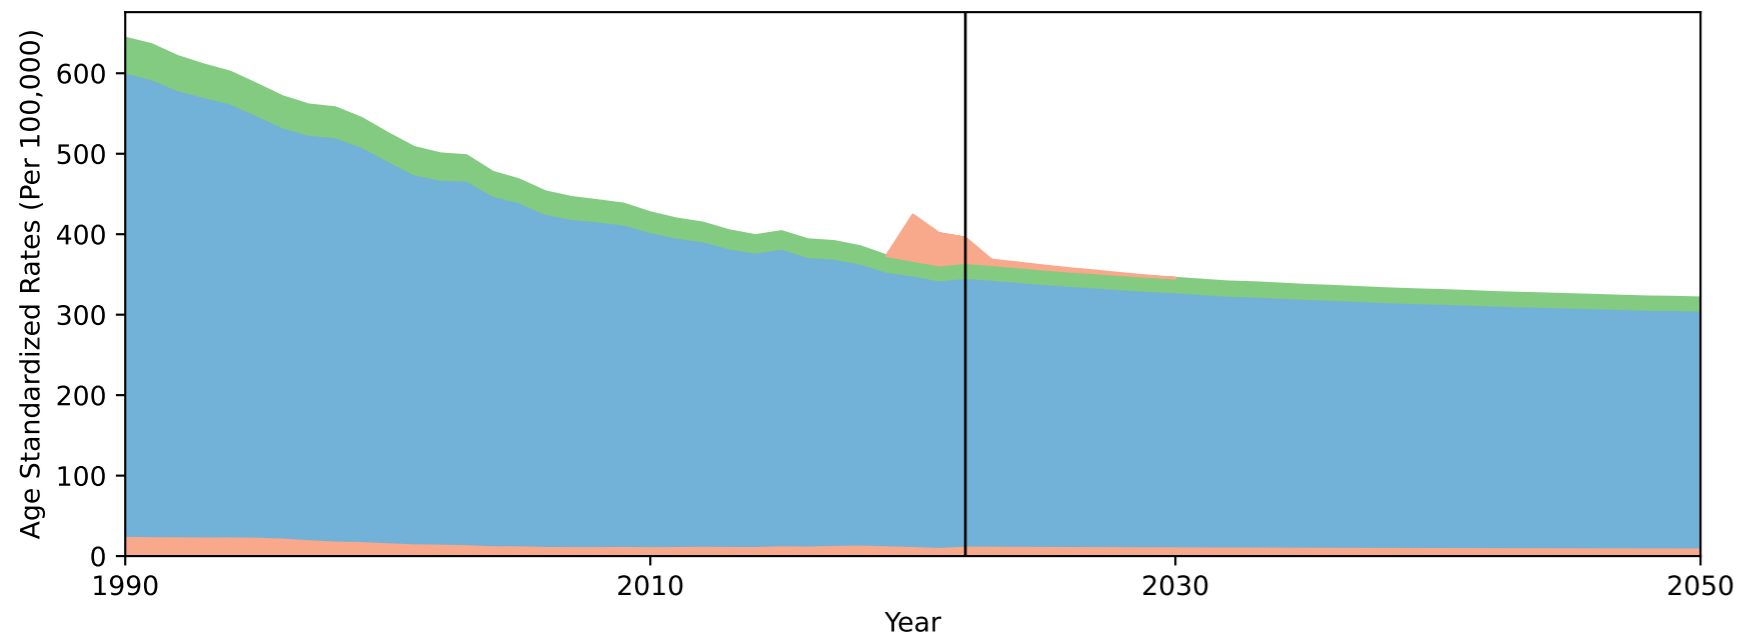

Level 2

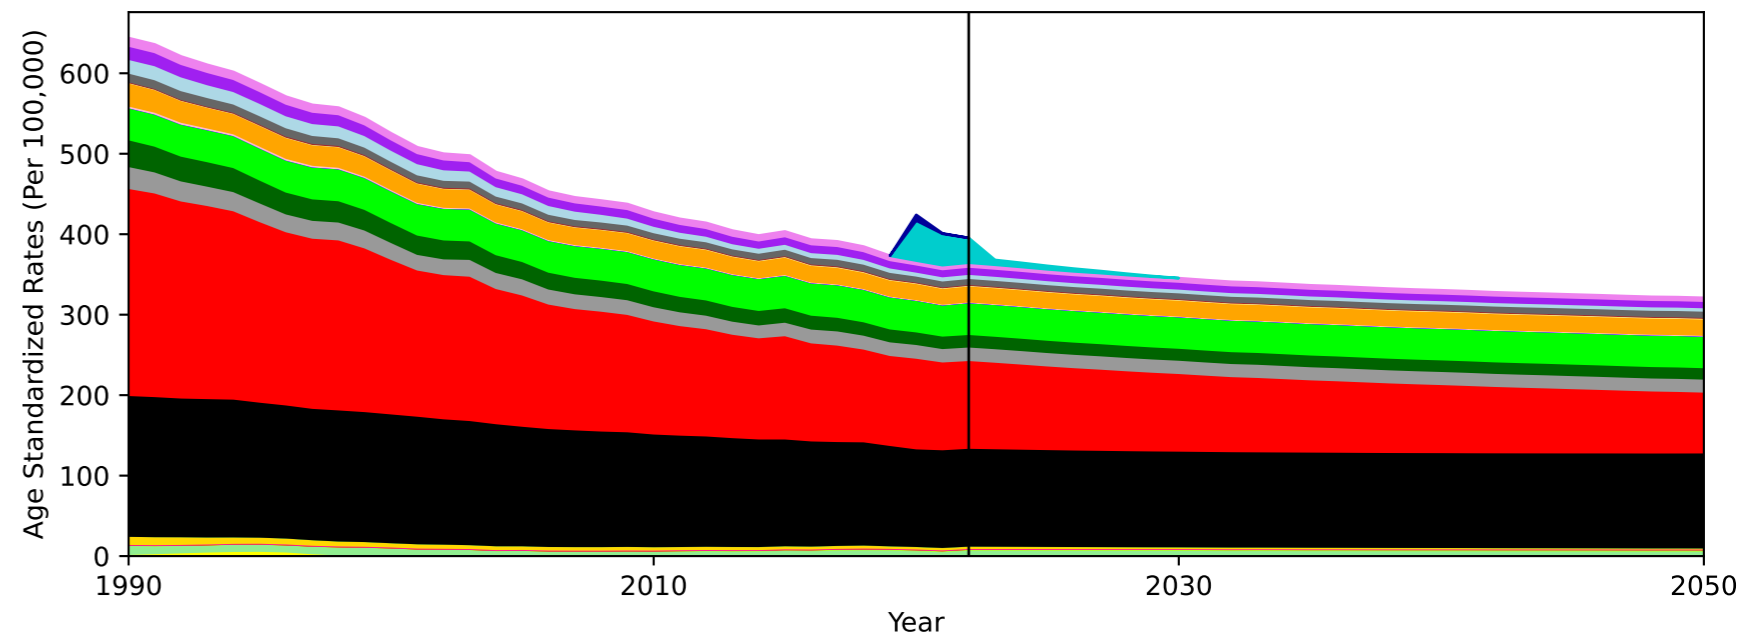

Level 1

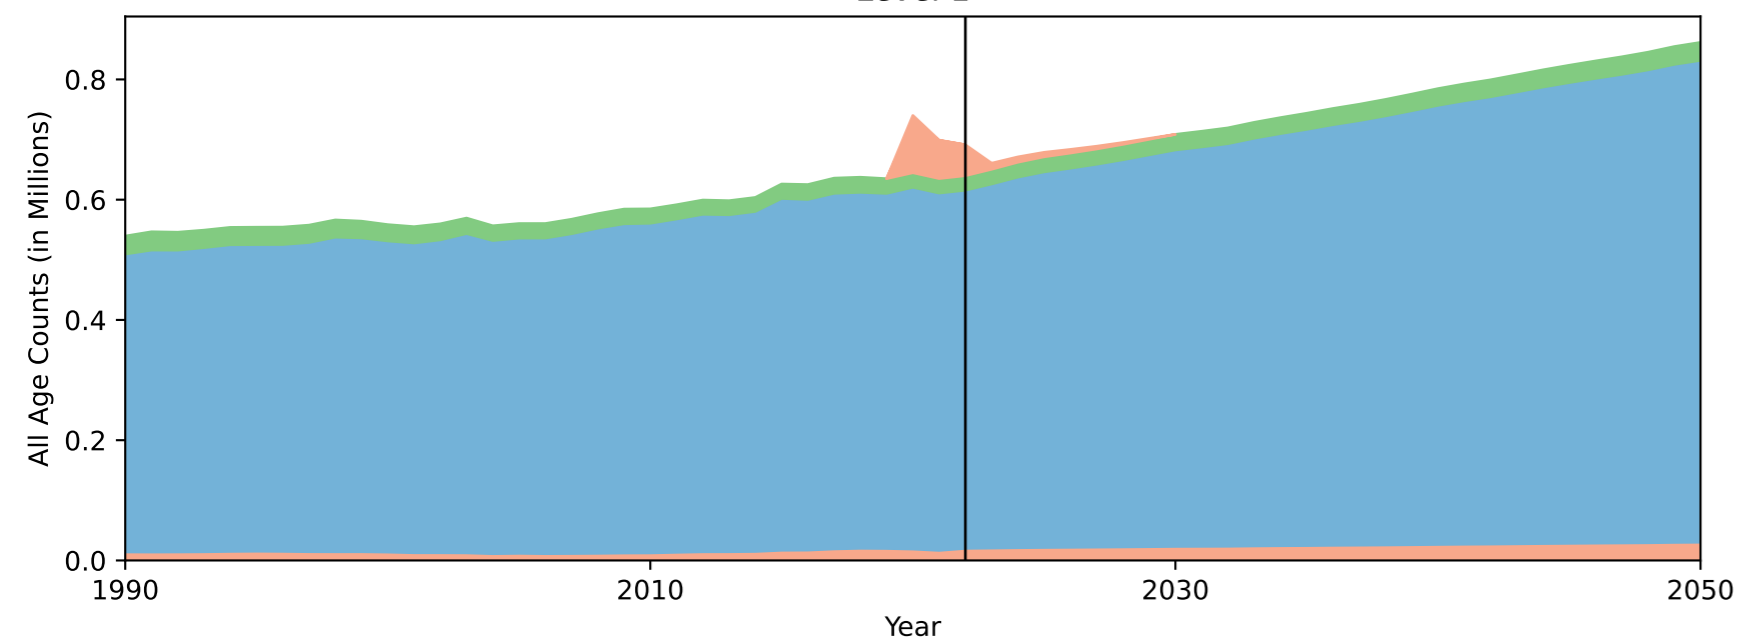

Level 2

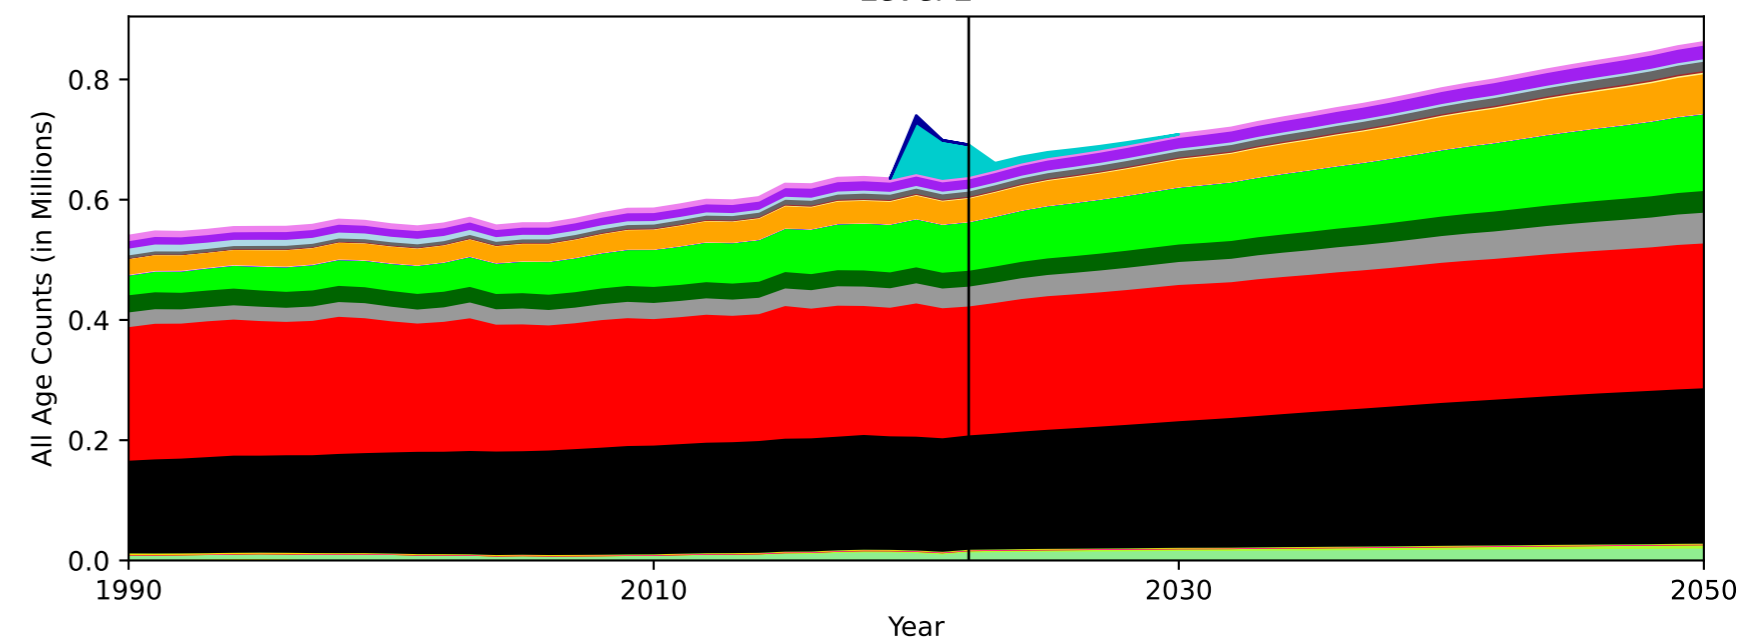

# Luxembourg

Level 1

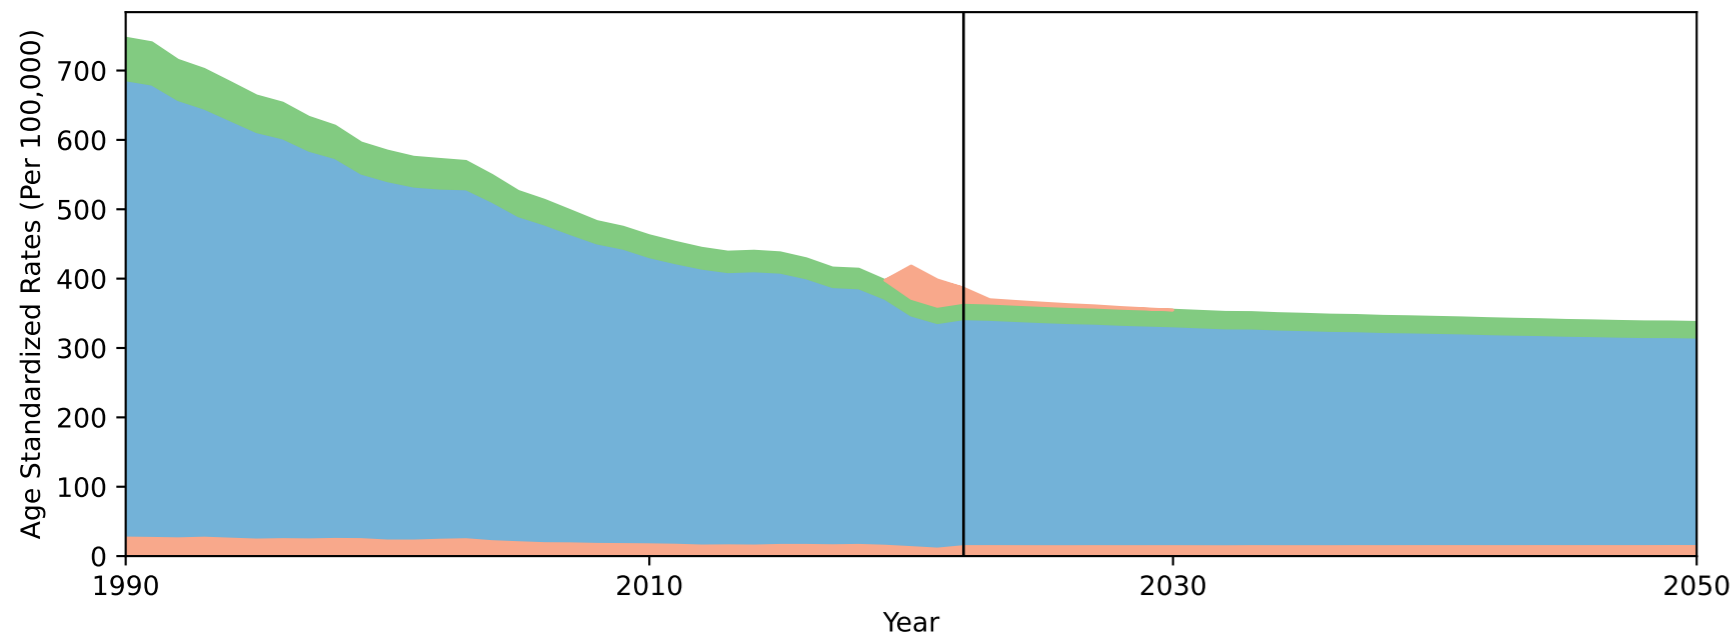

Level 2

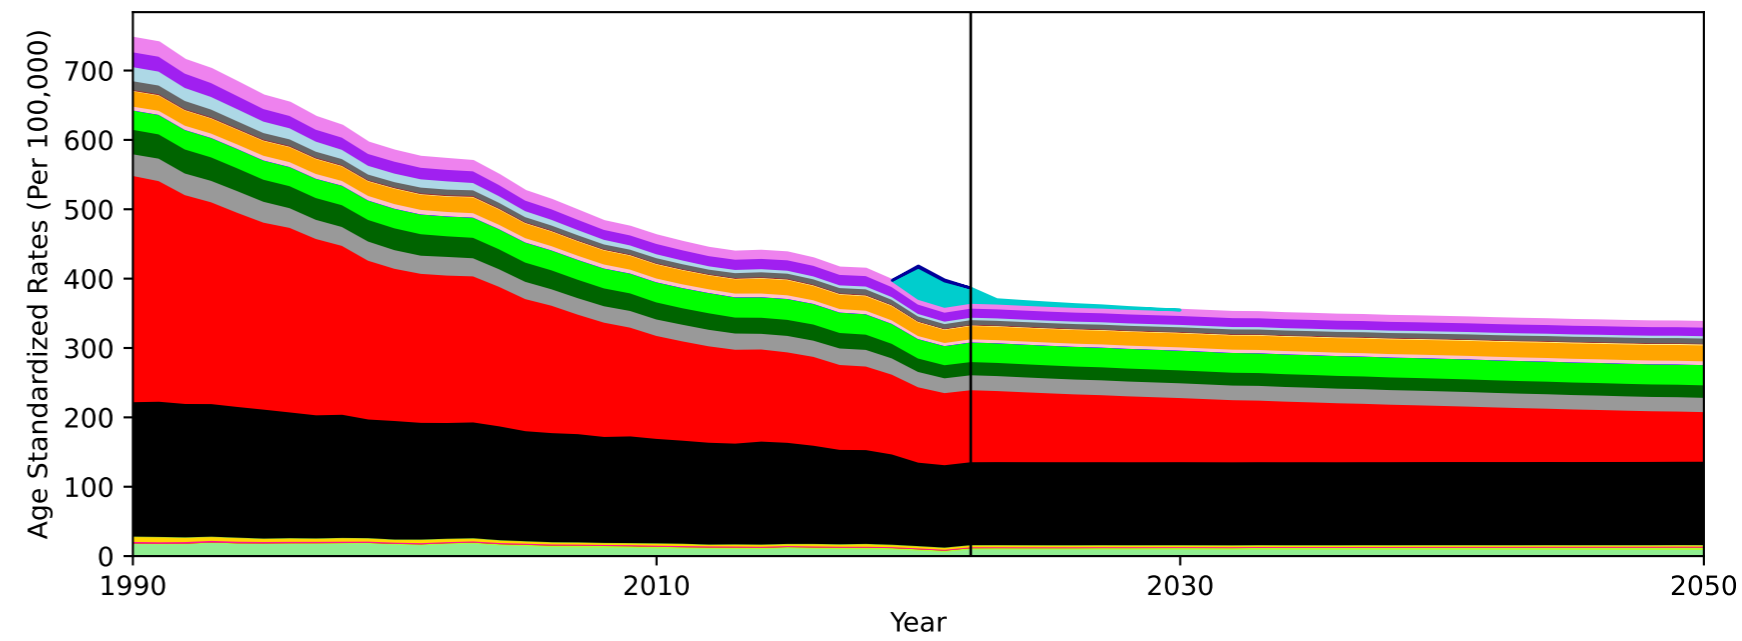

Level 1

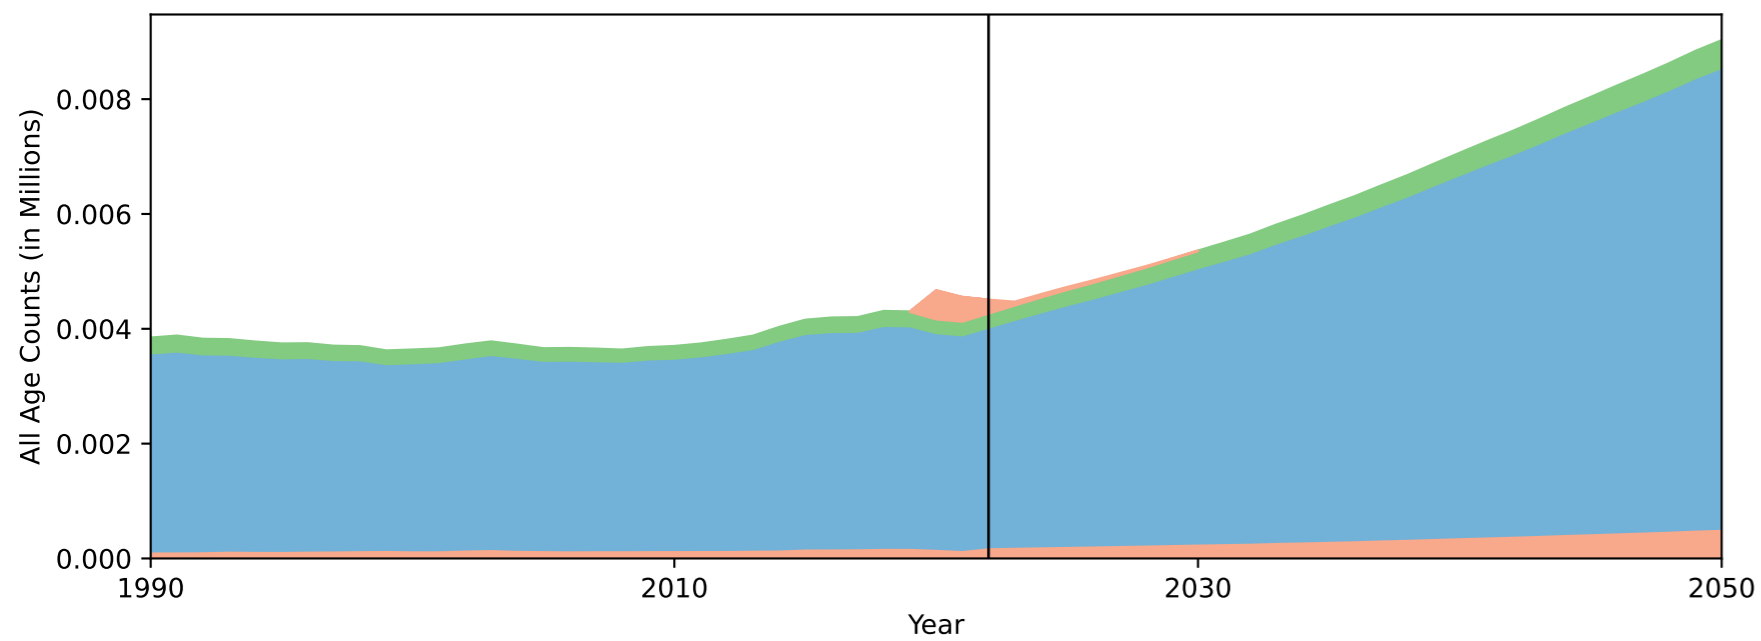

Level 2

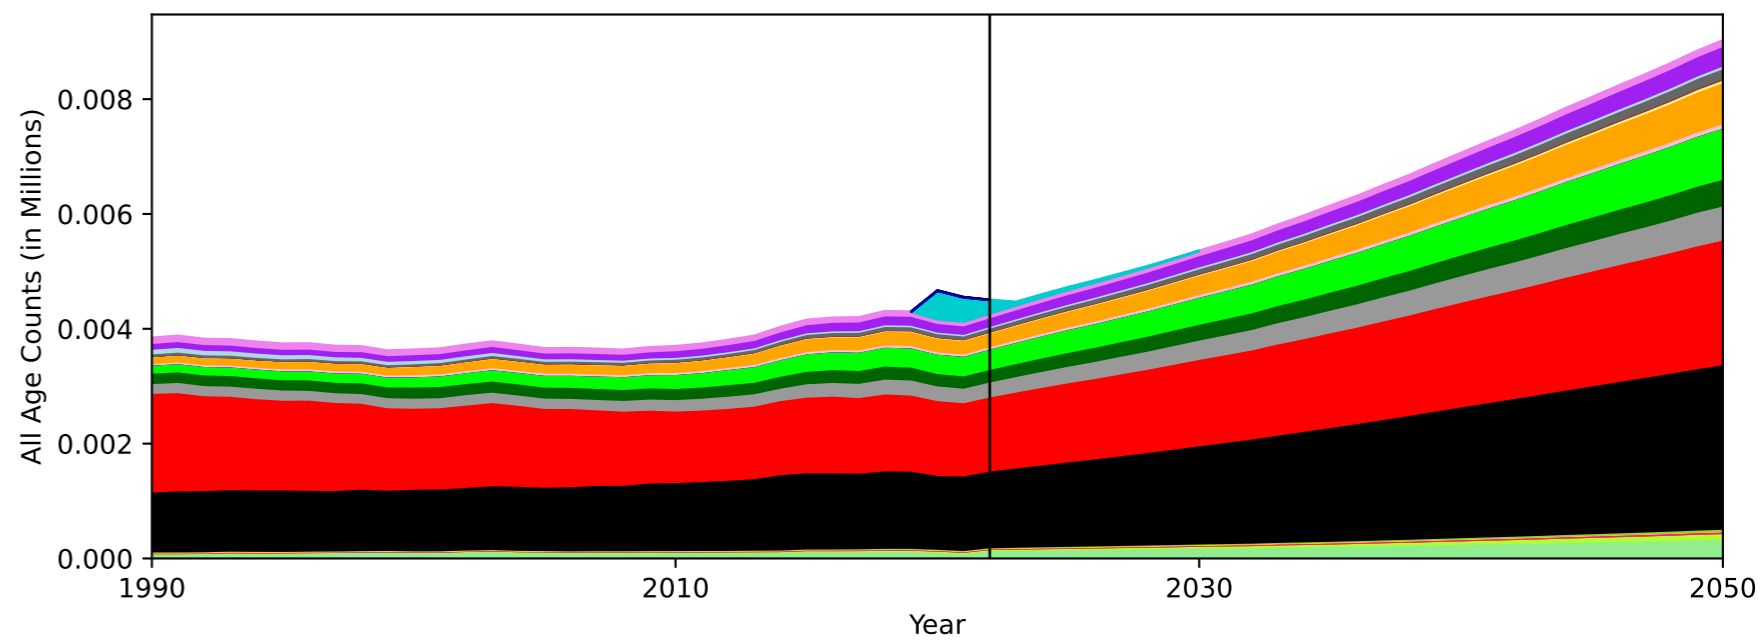

Level 1

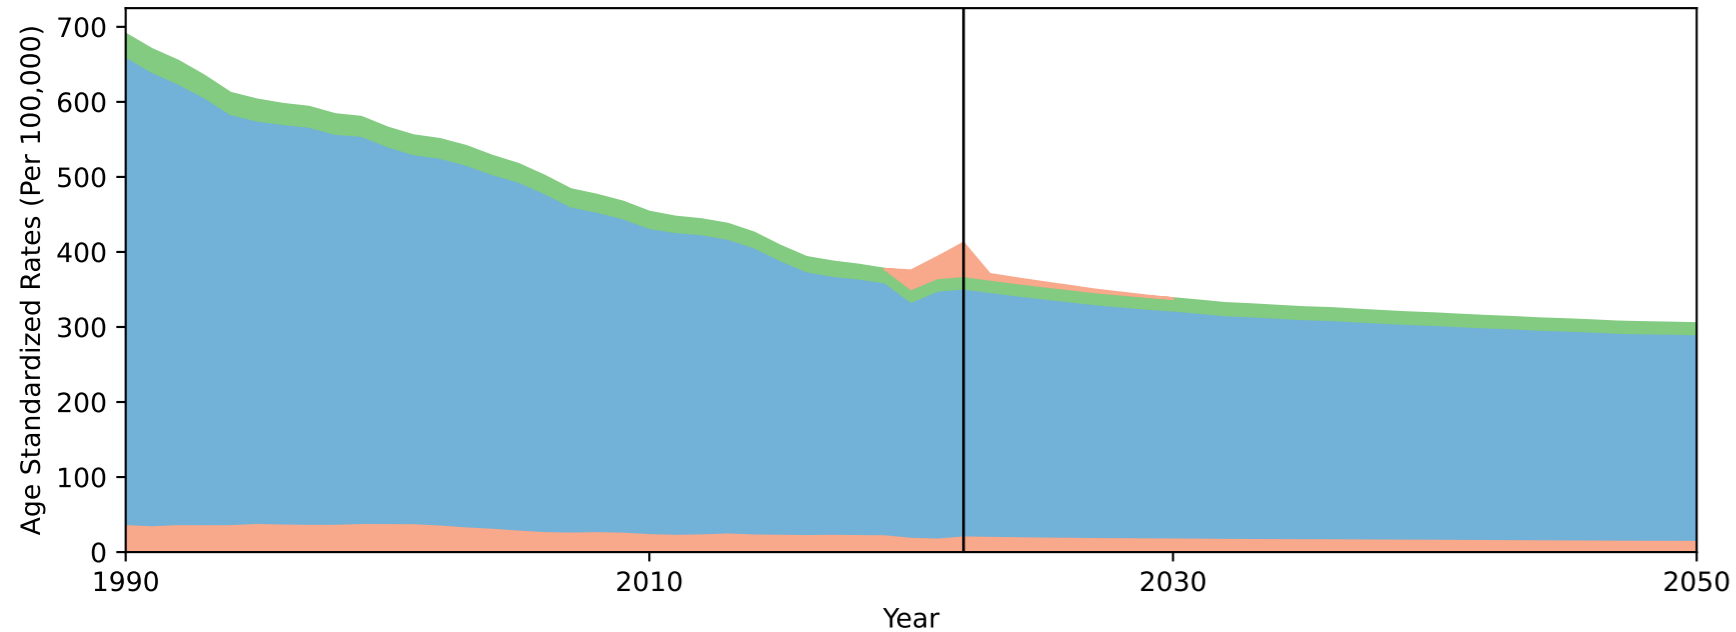

Level 2

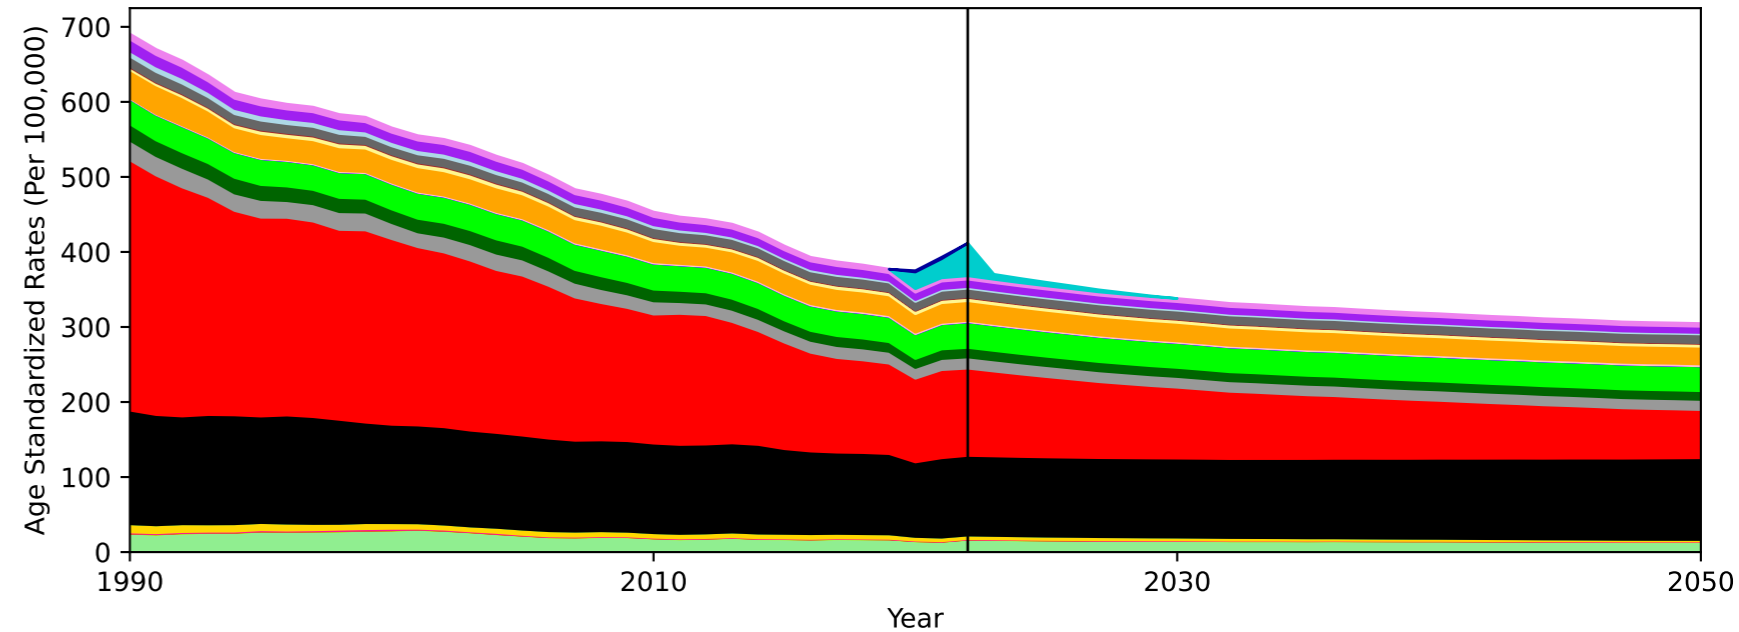

Level 1

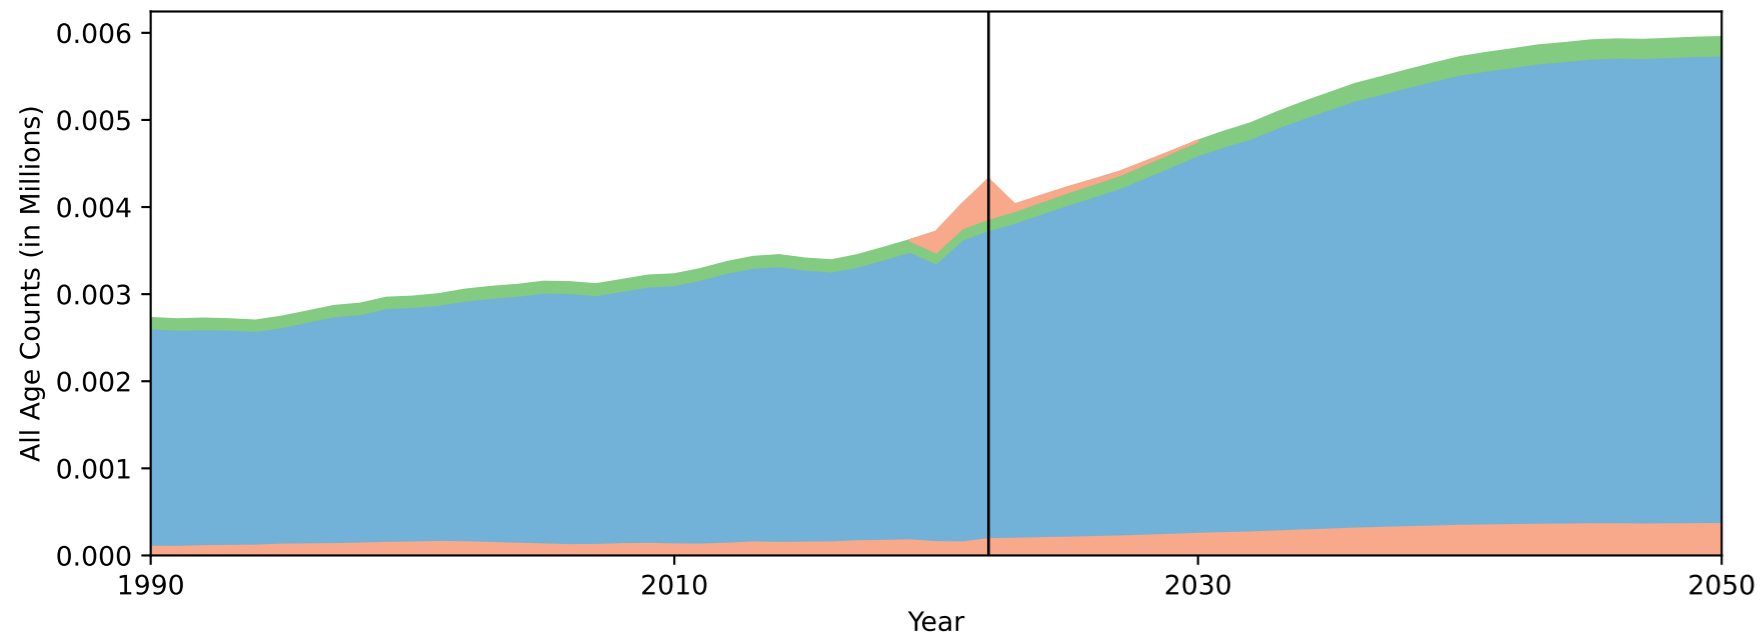

Level 2

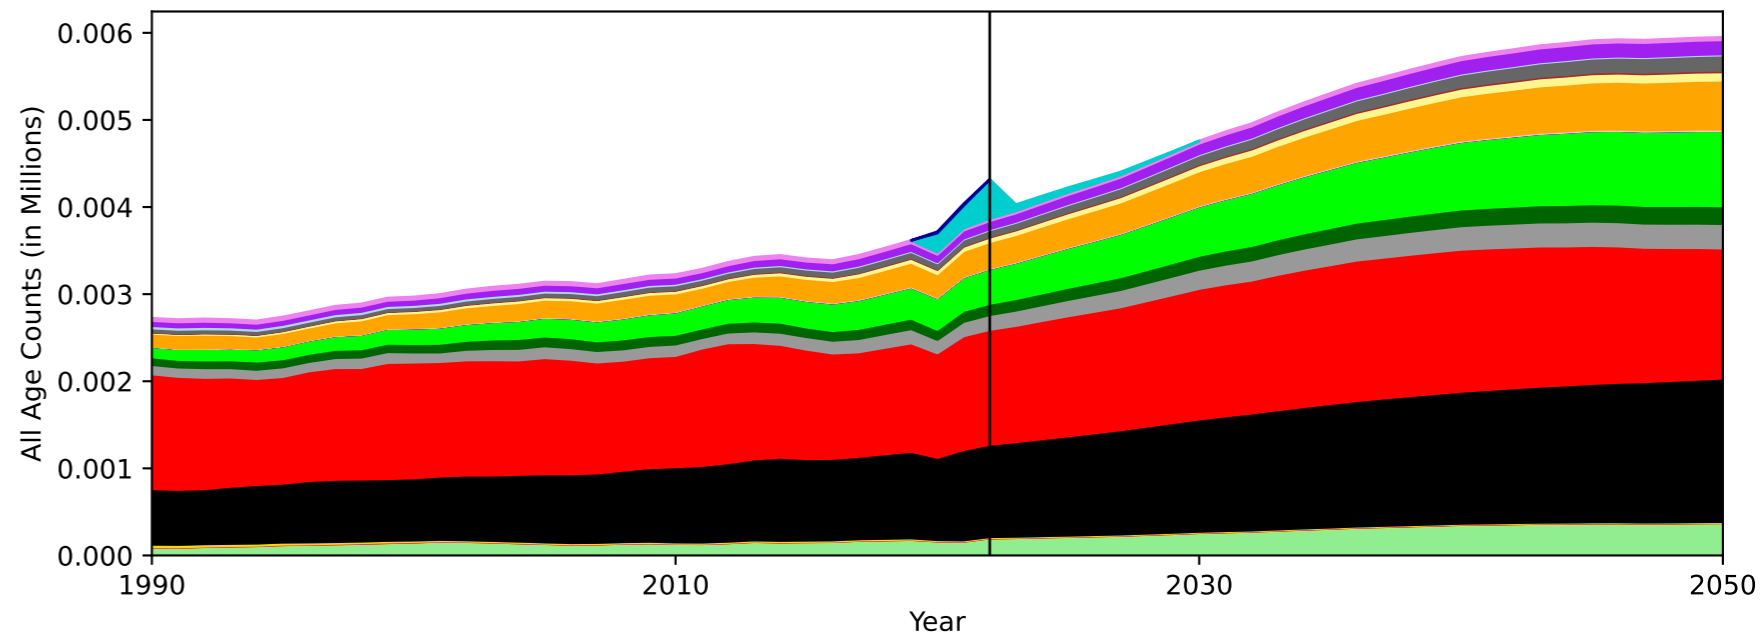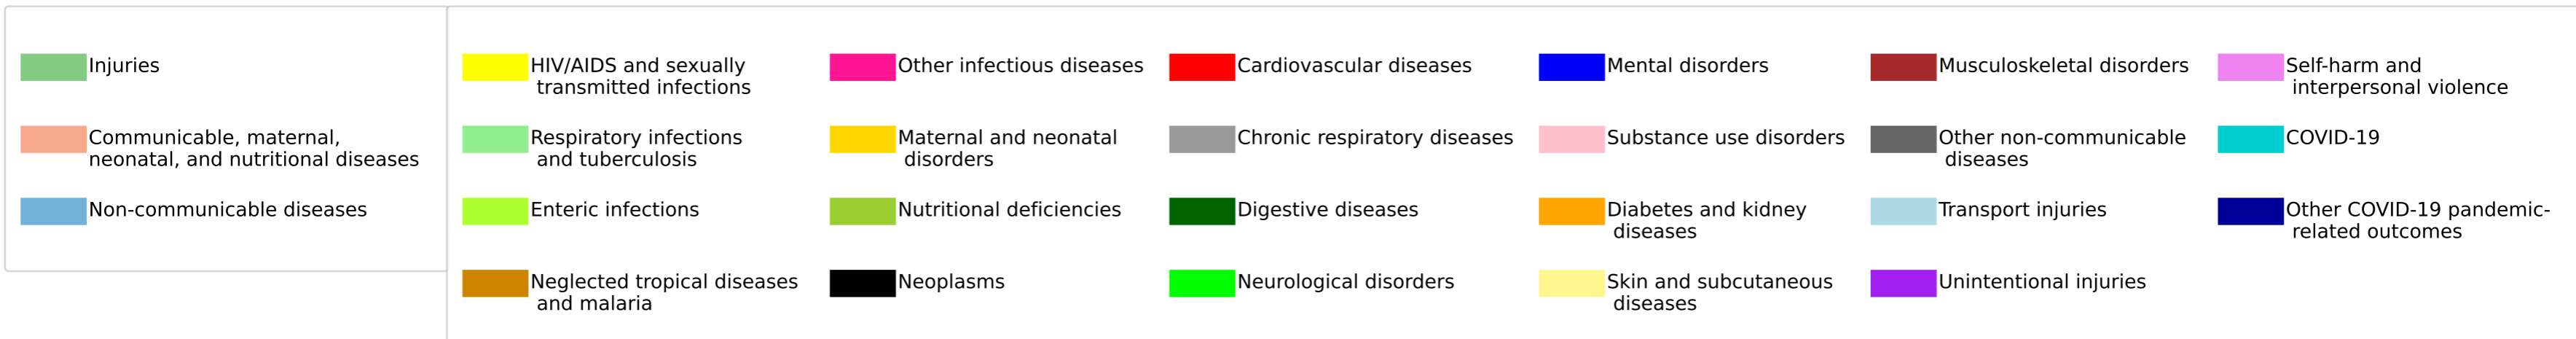

# Monaco

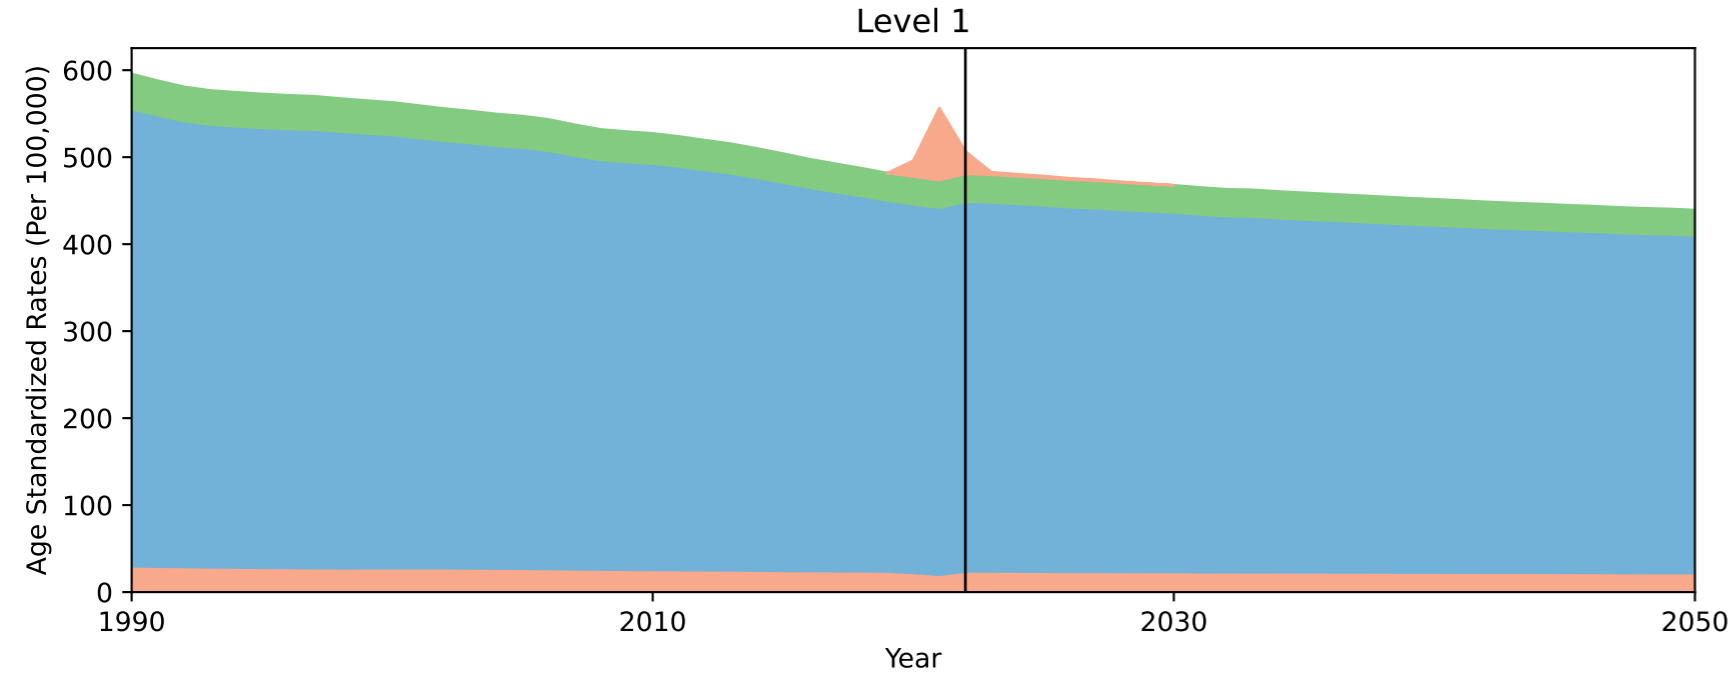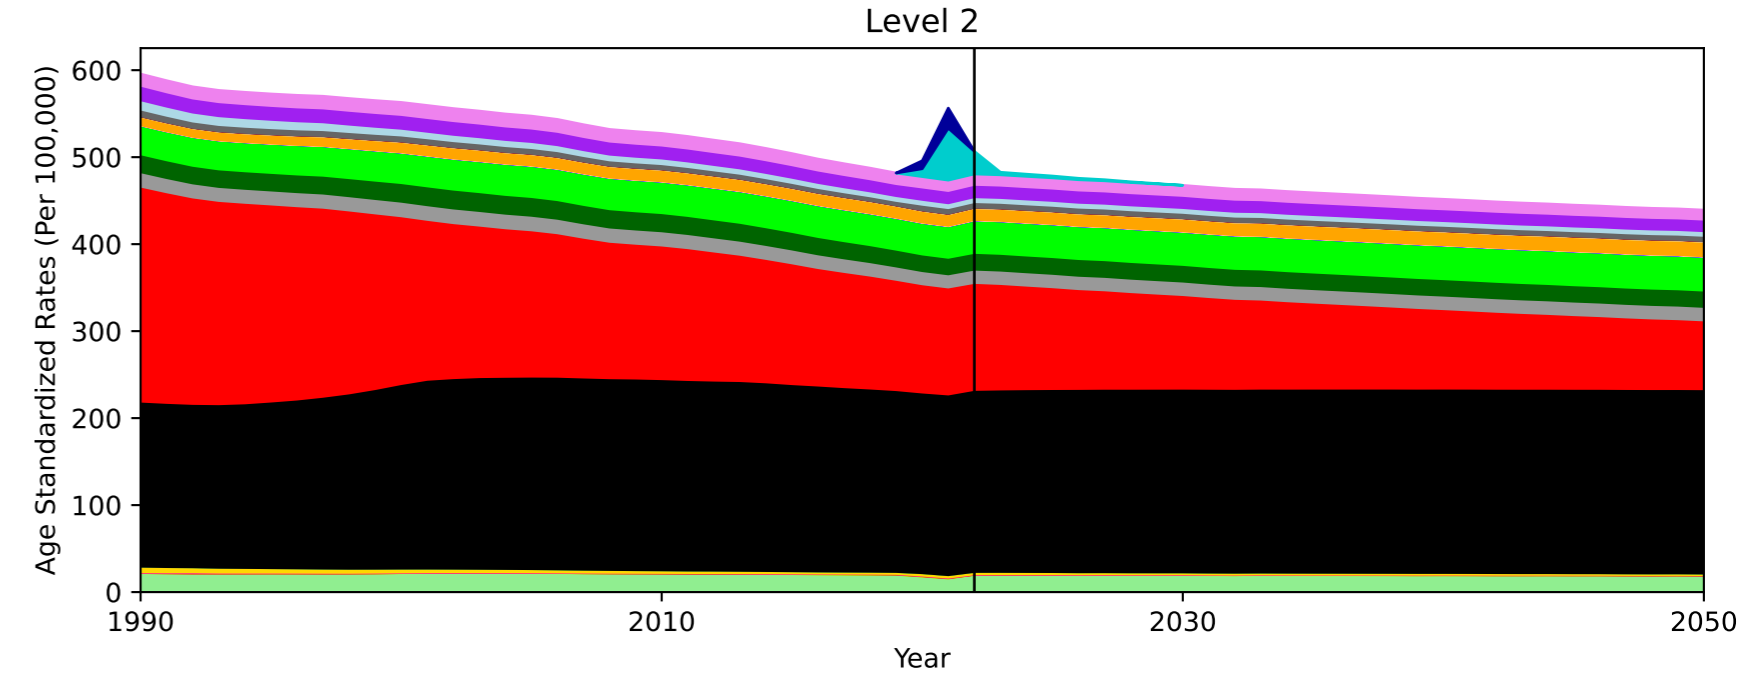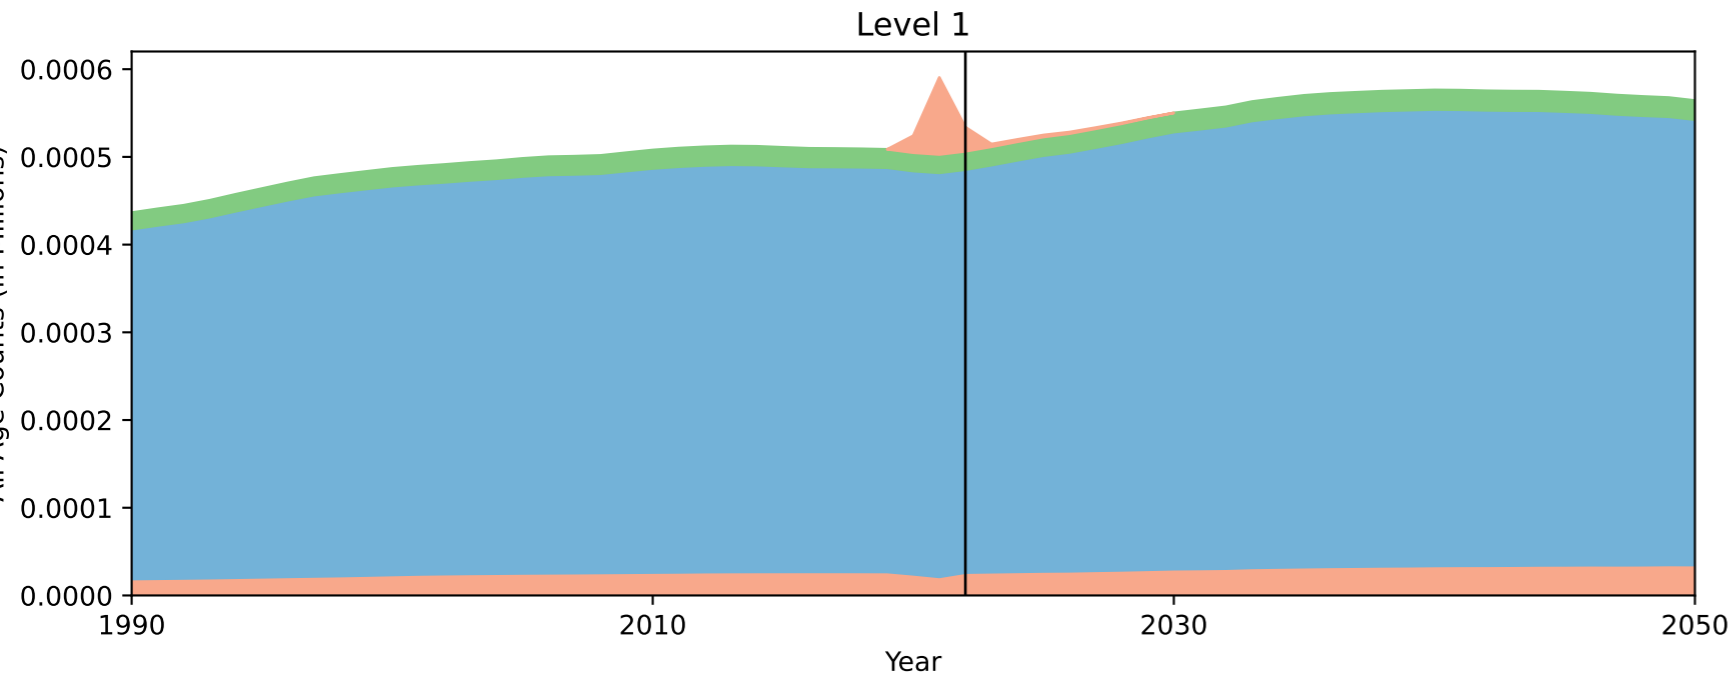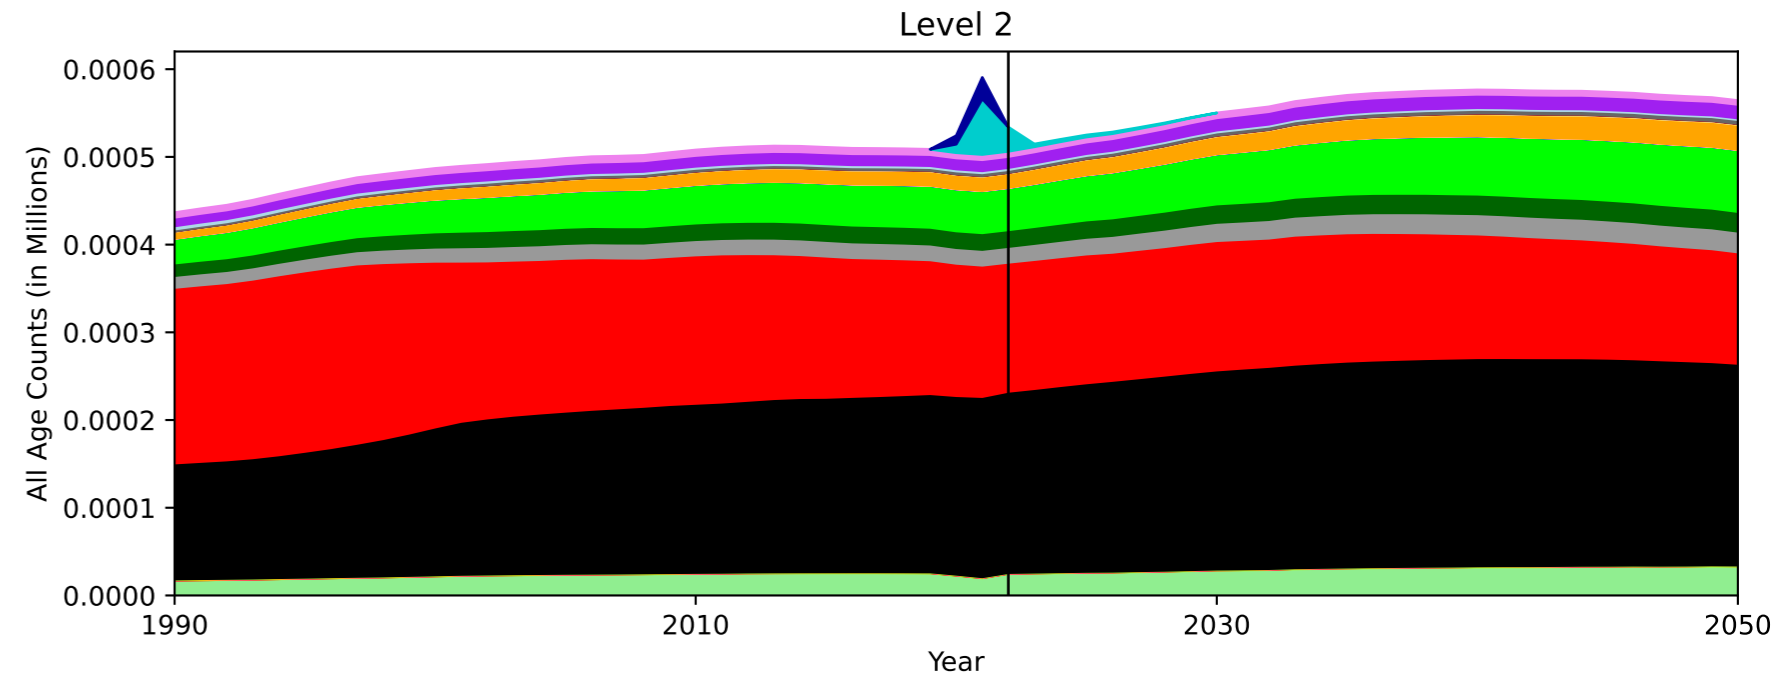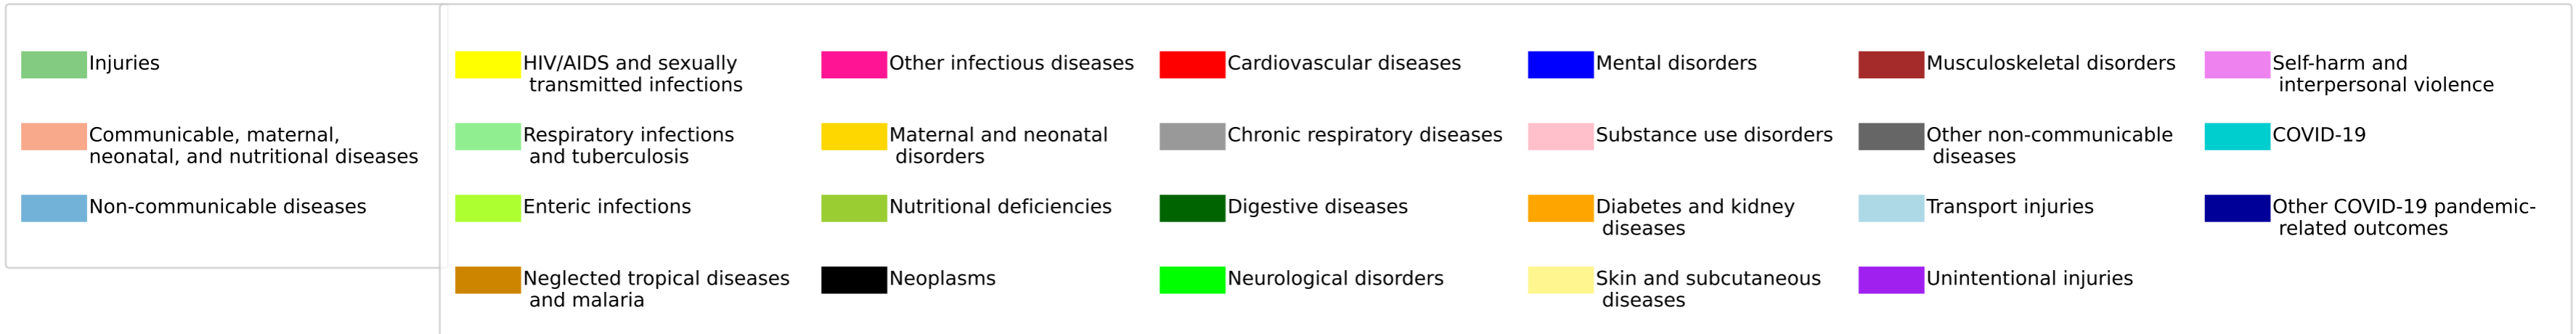

# Netherlands

Level 1

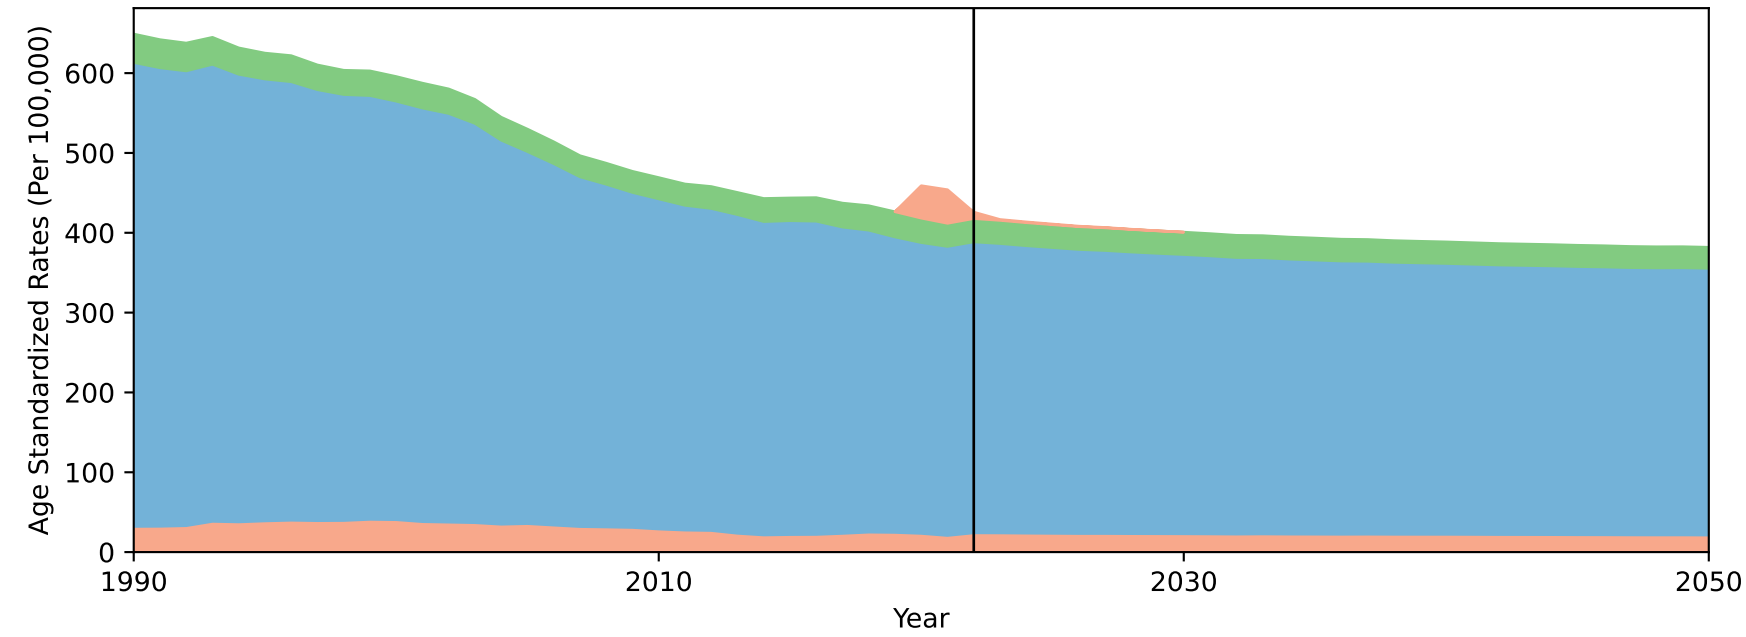

Level 2

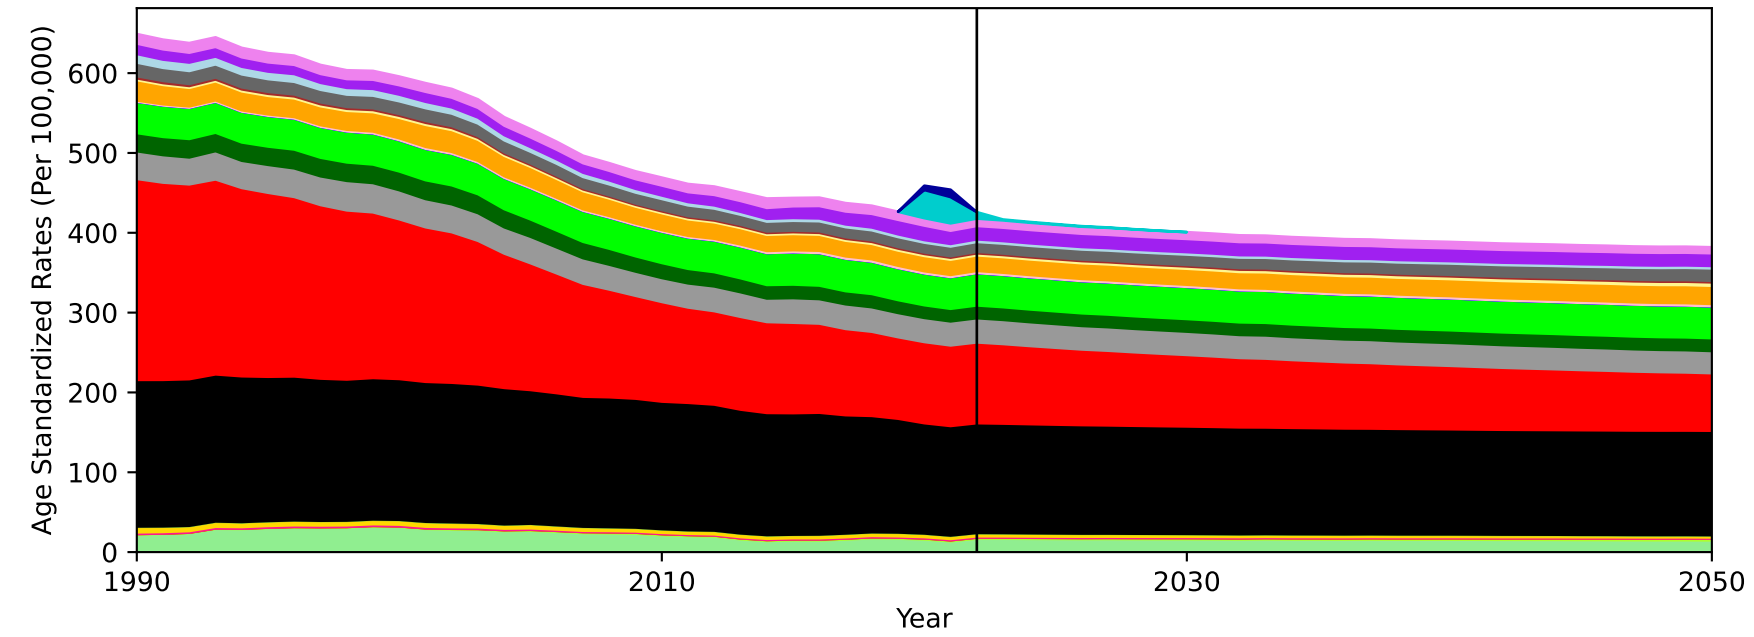

Level 1

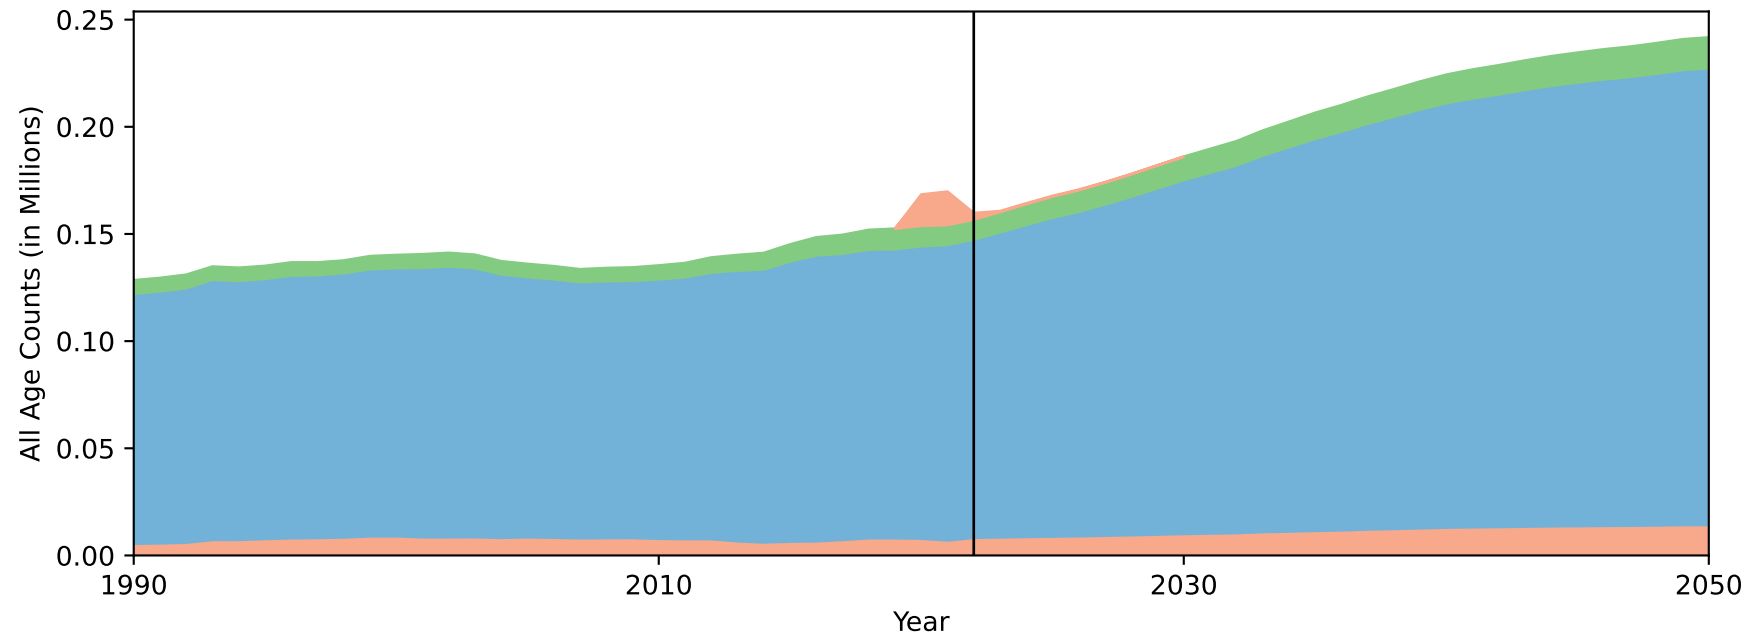

Level 2

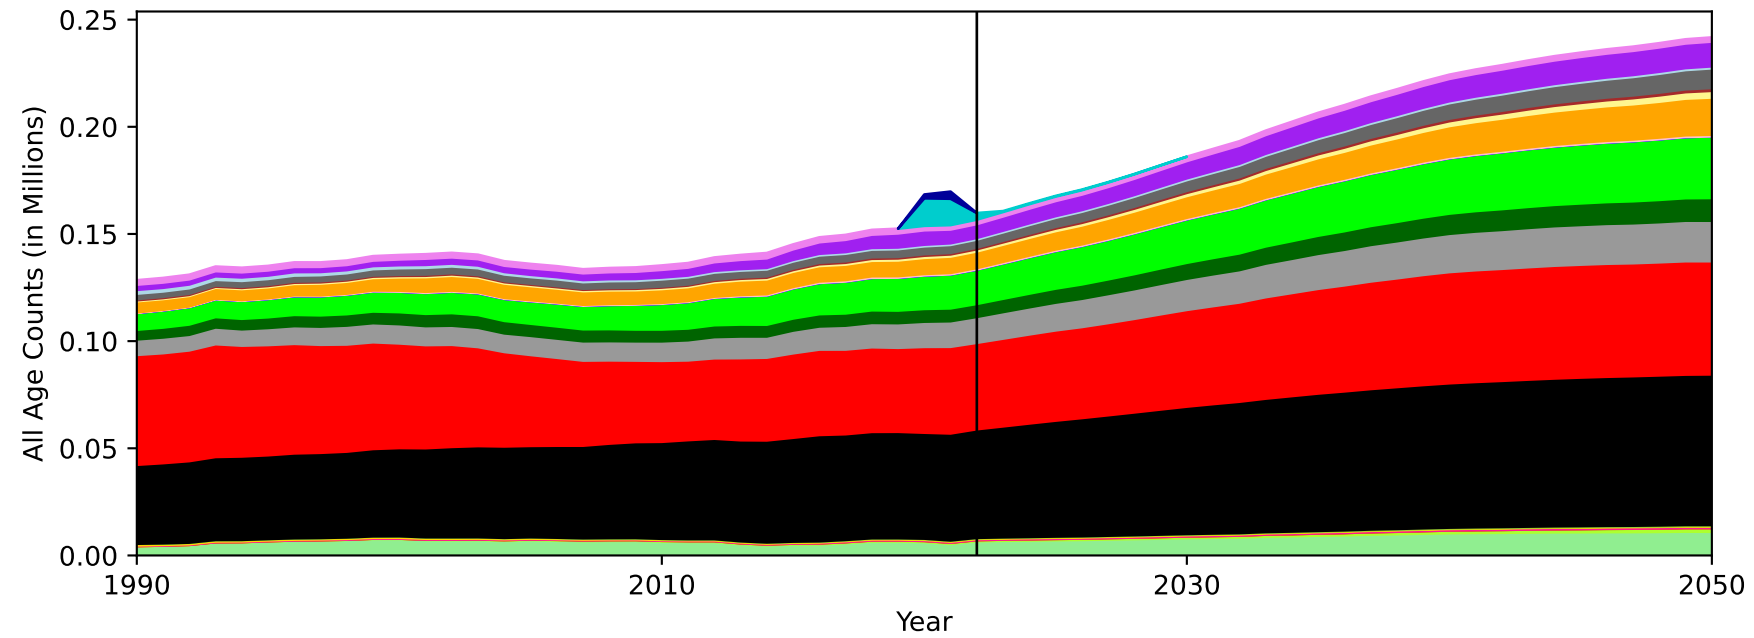



# Norway

Level 1

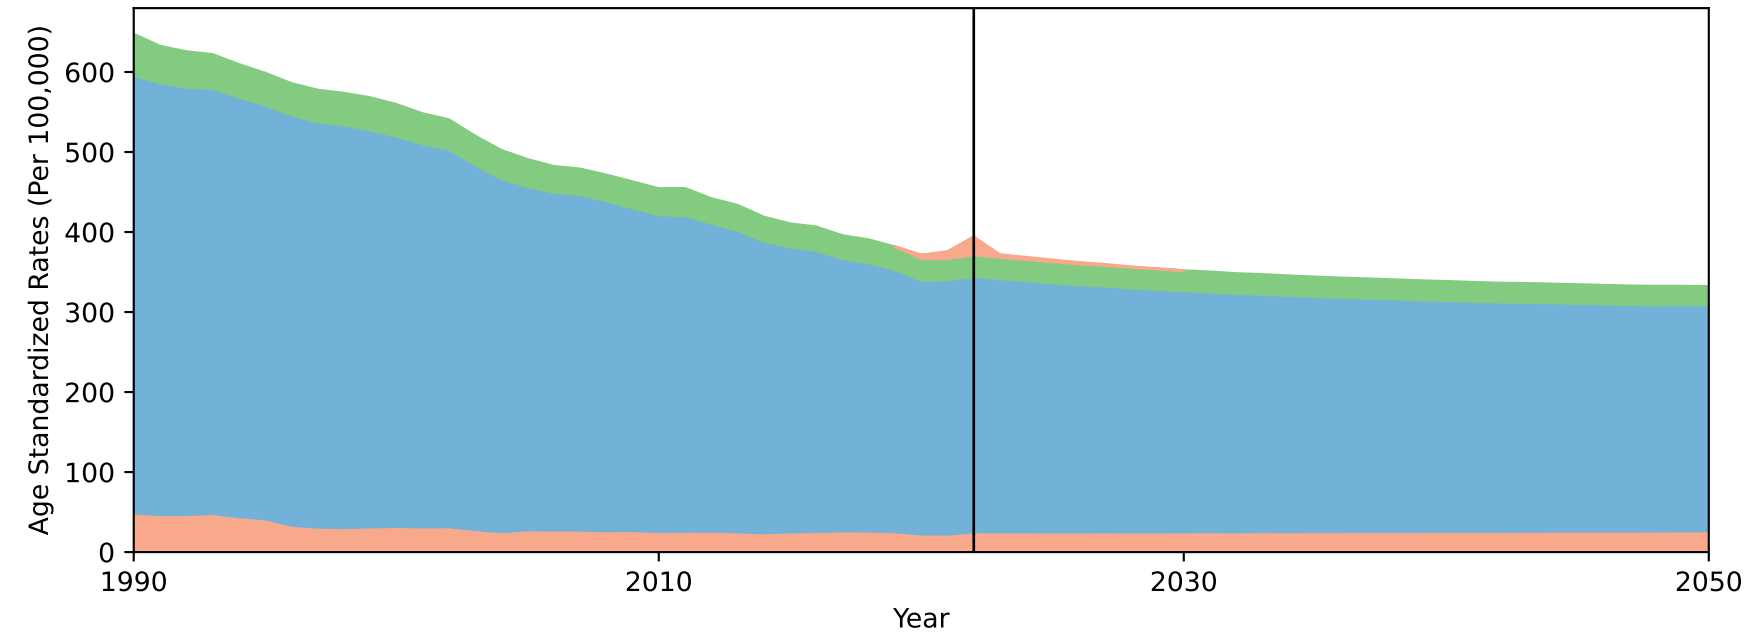

Level 2

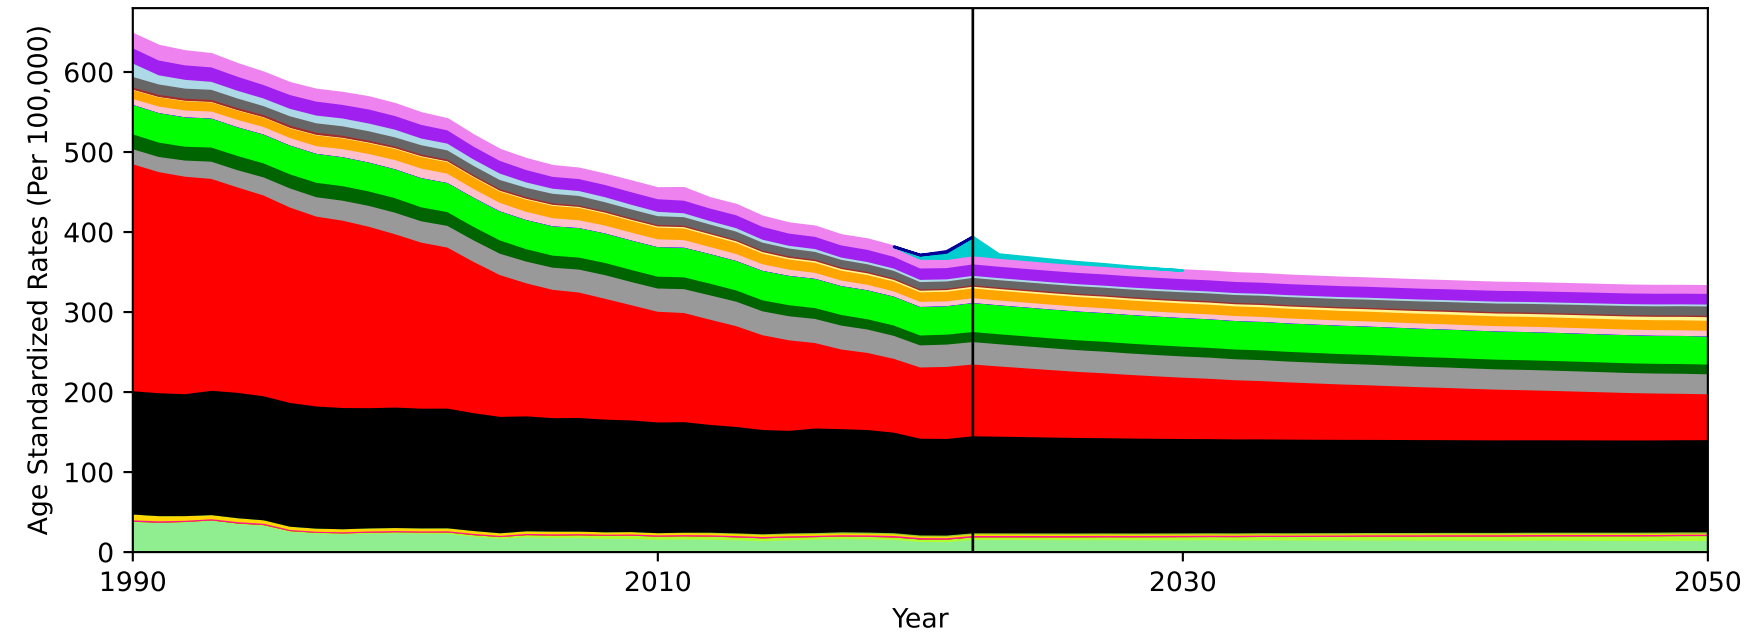

Level 1

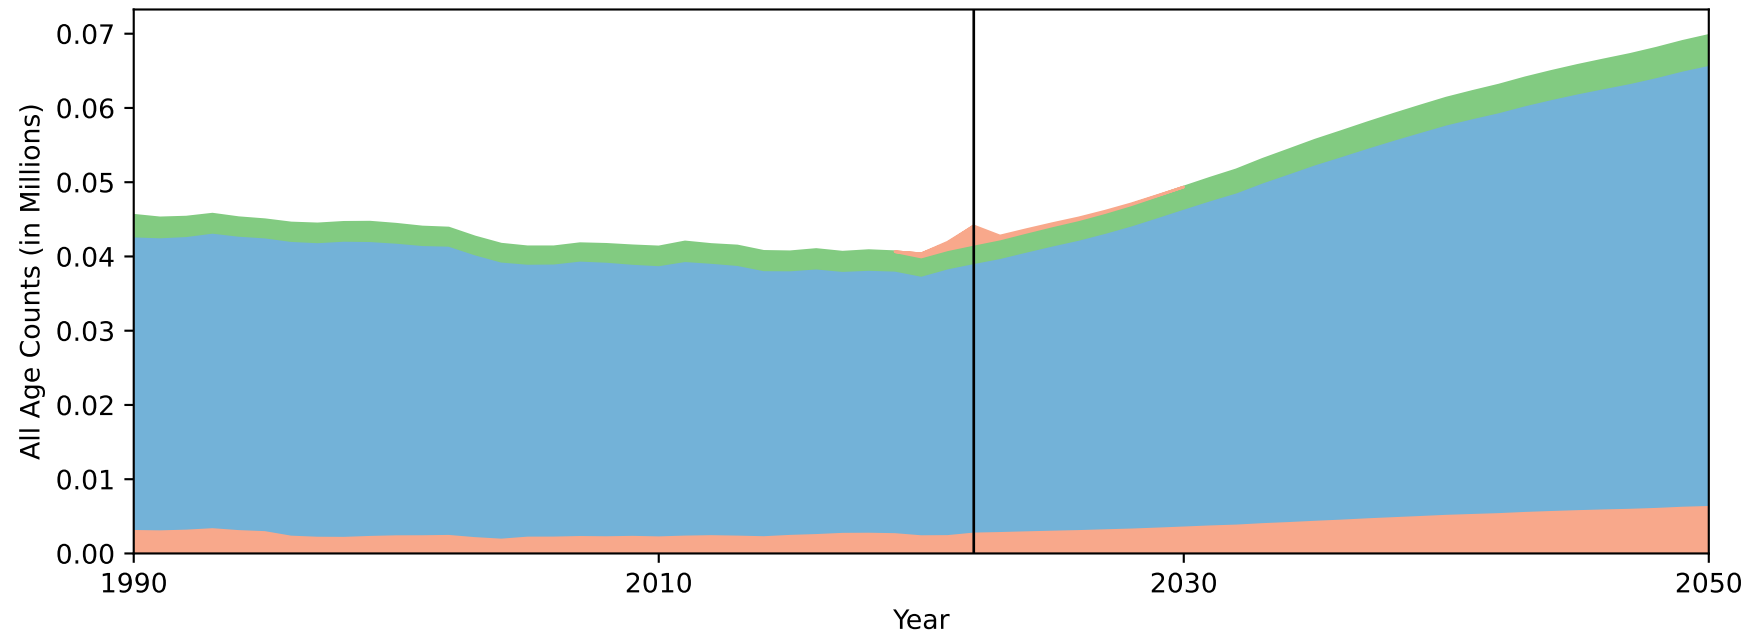

Level 2

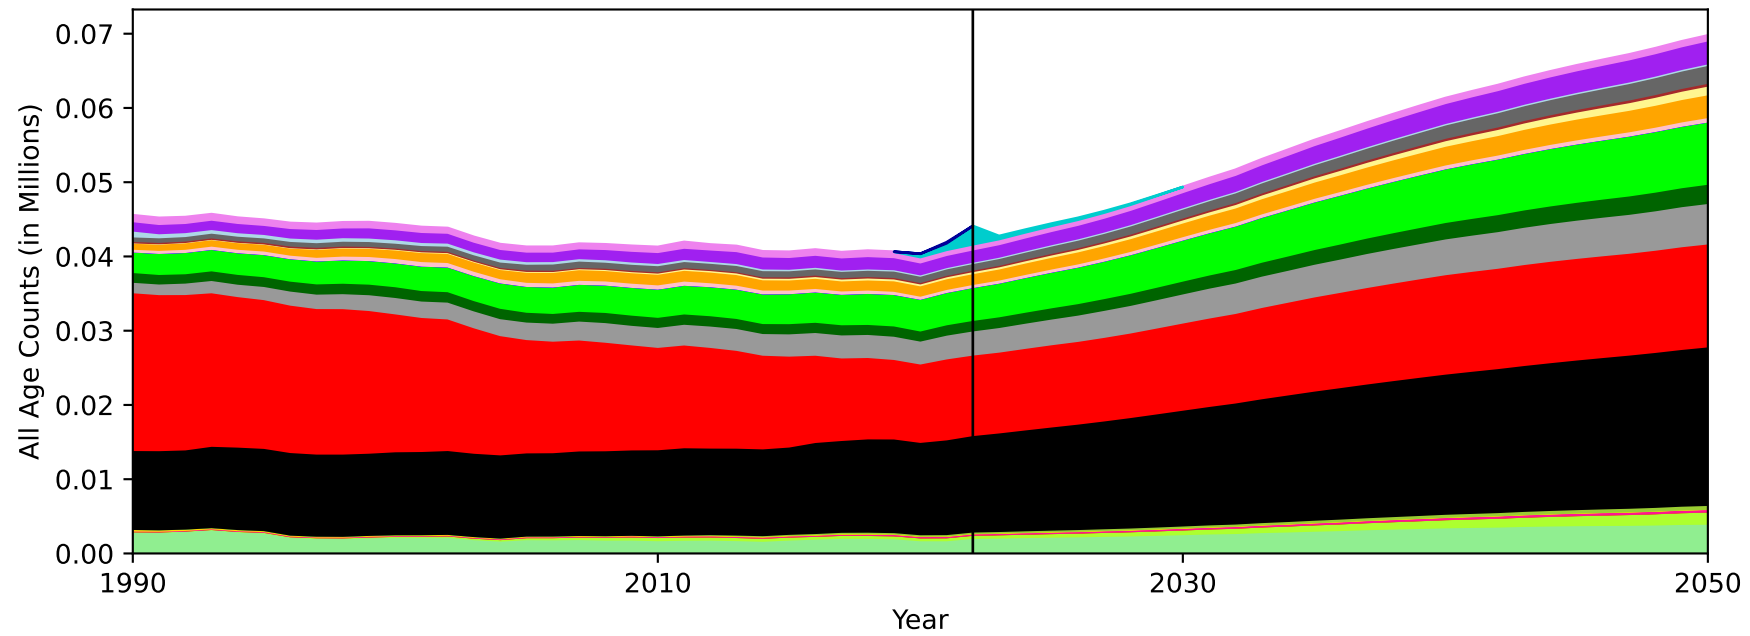

# Portugal

Level 1

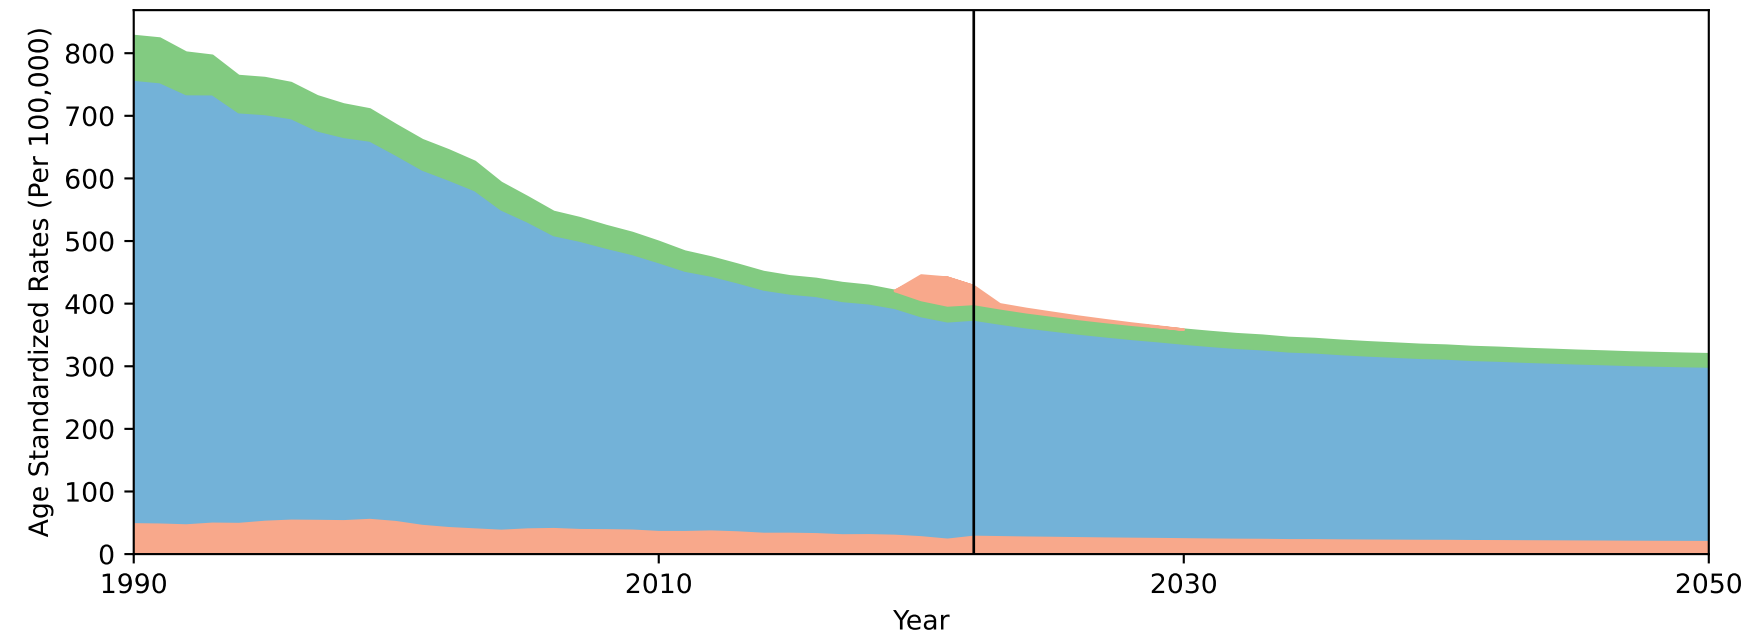

Level 2

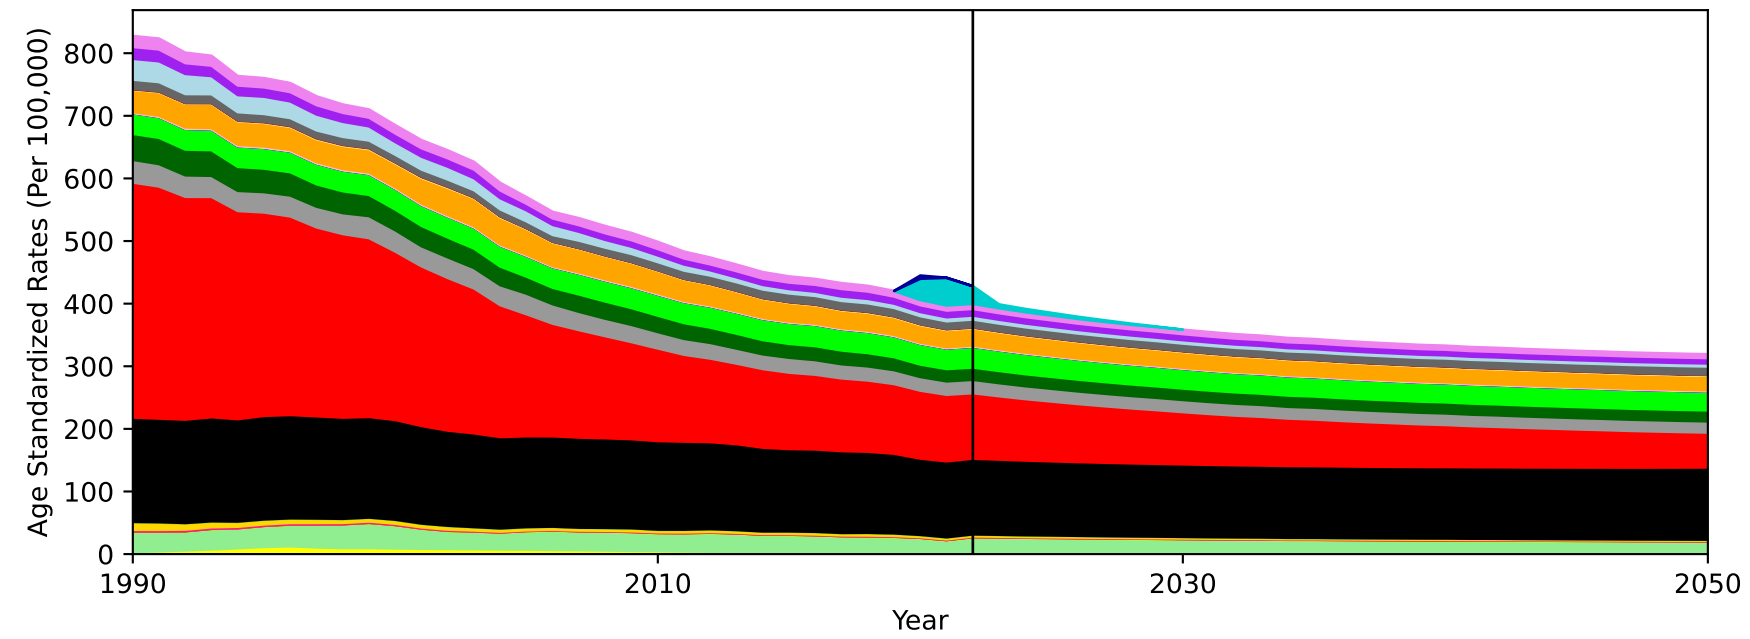

Level 1

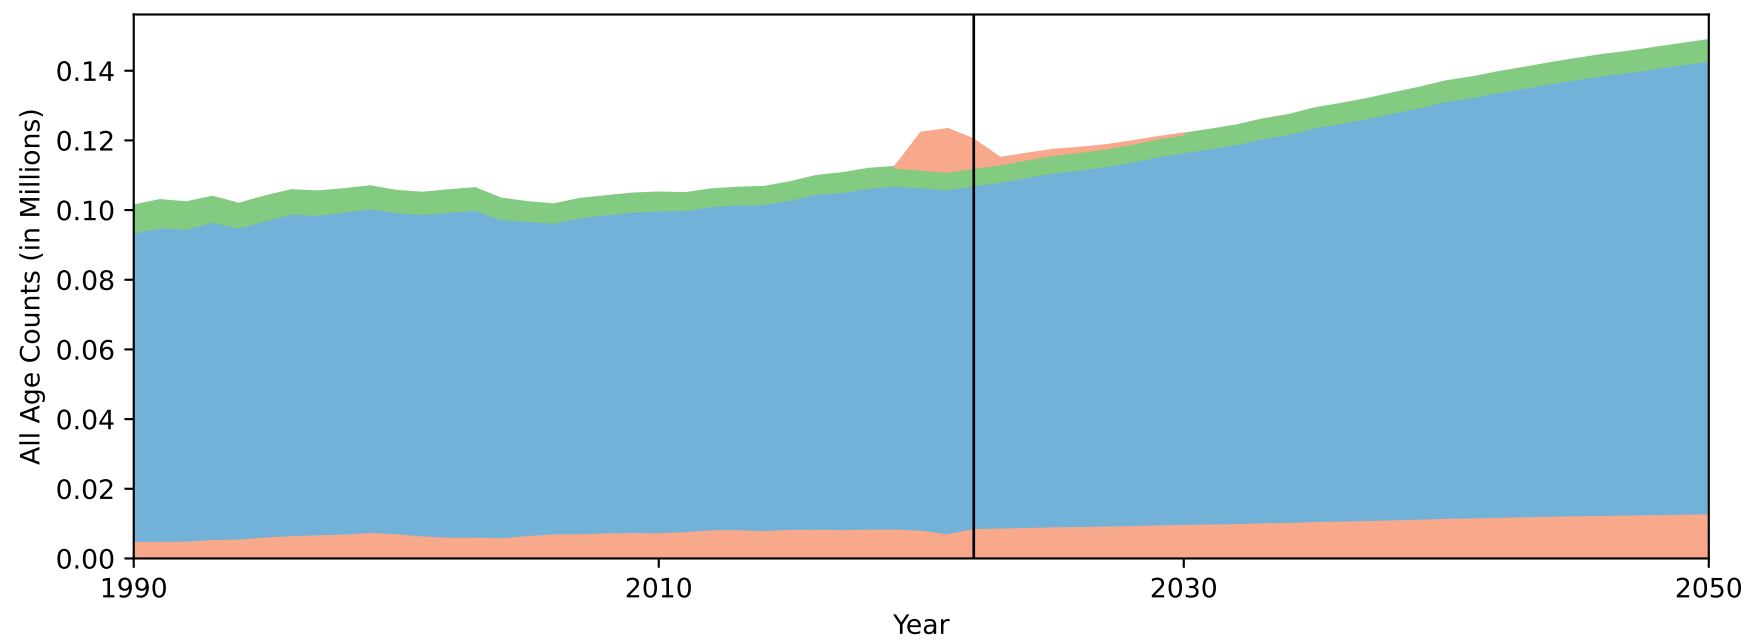

Level 2

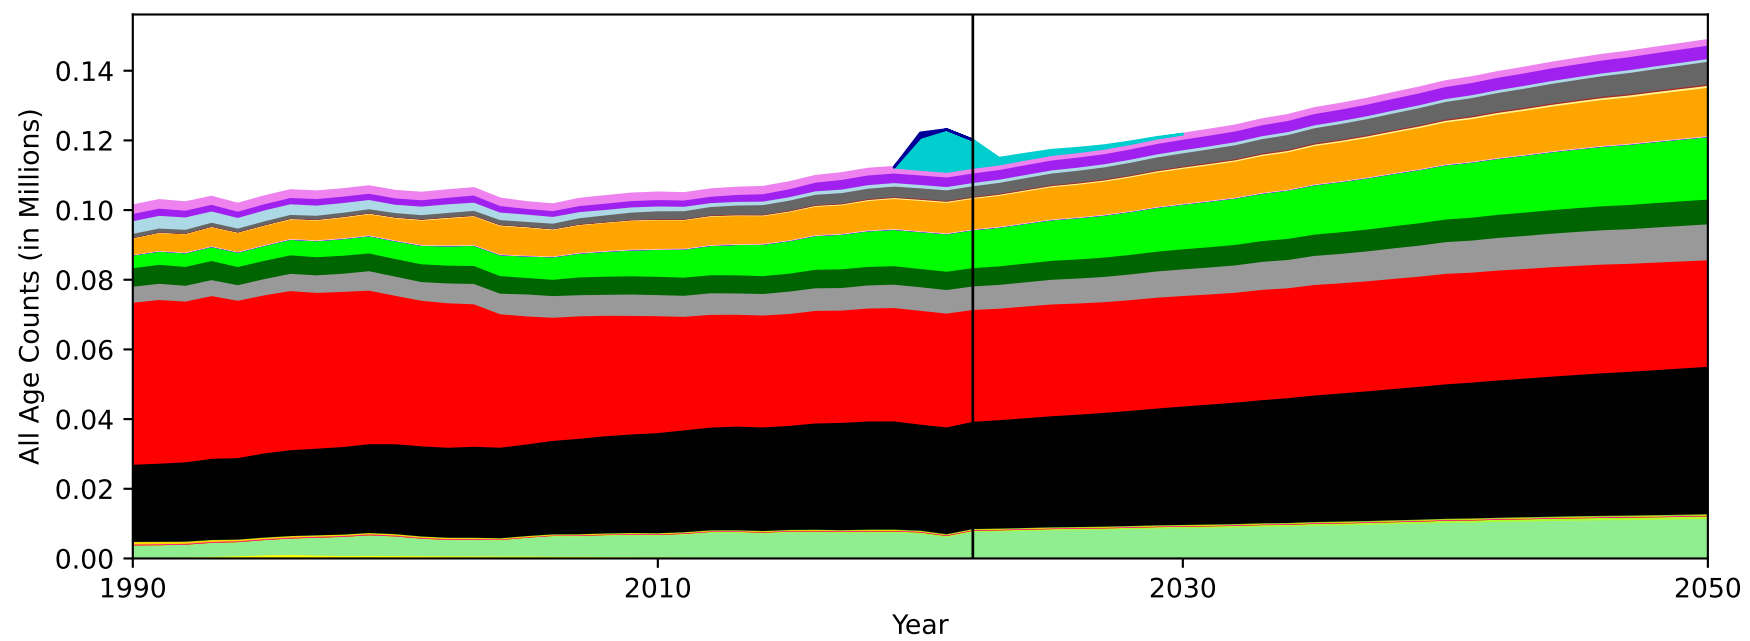

# San Marino

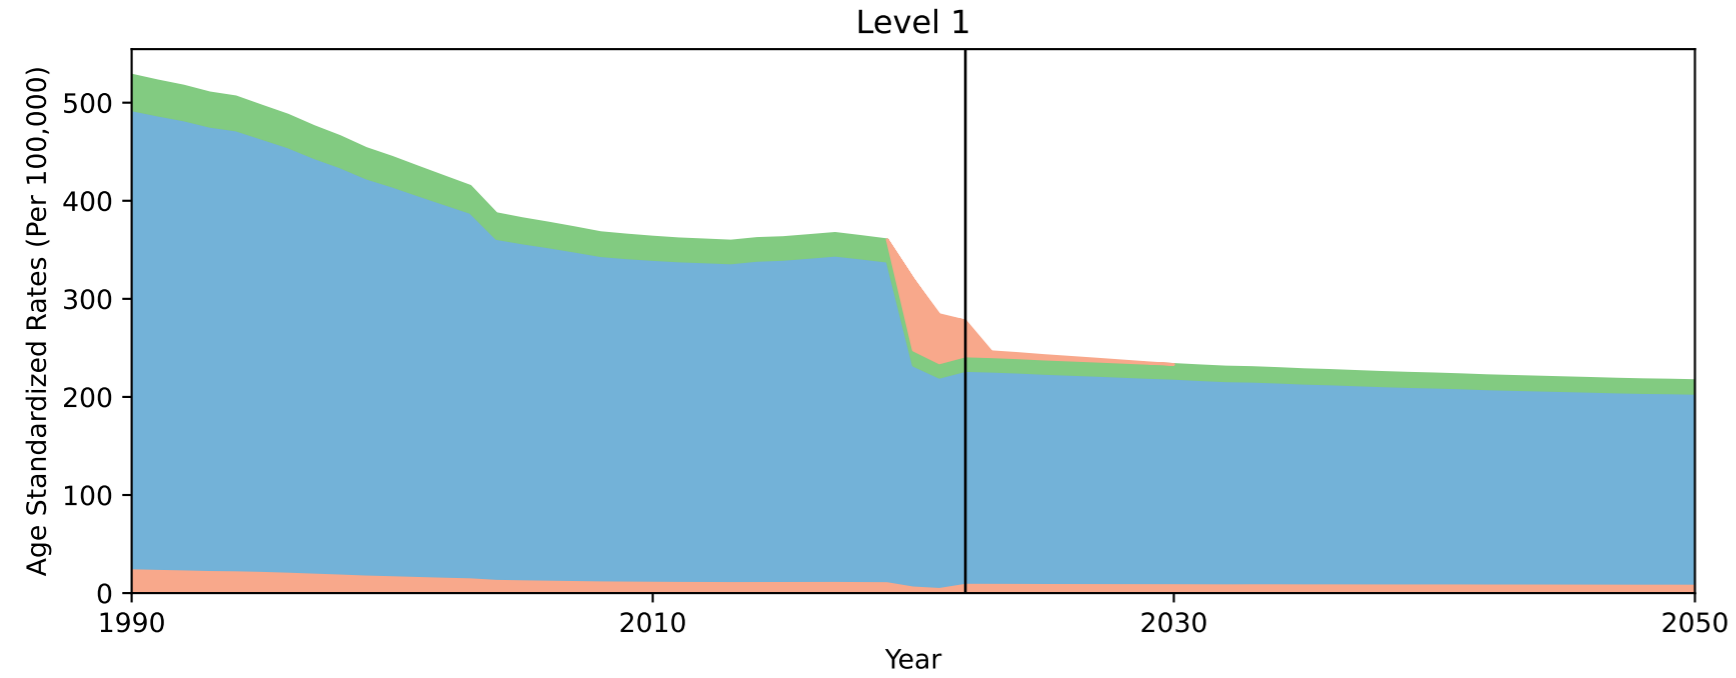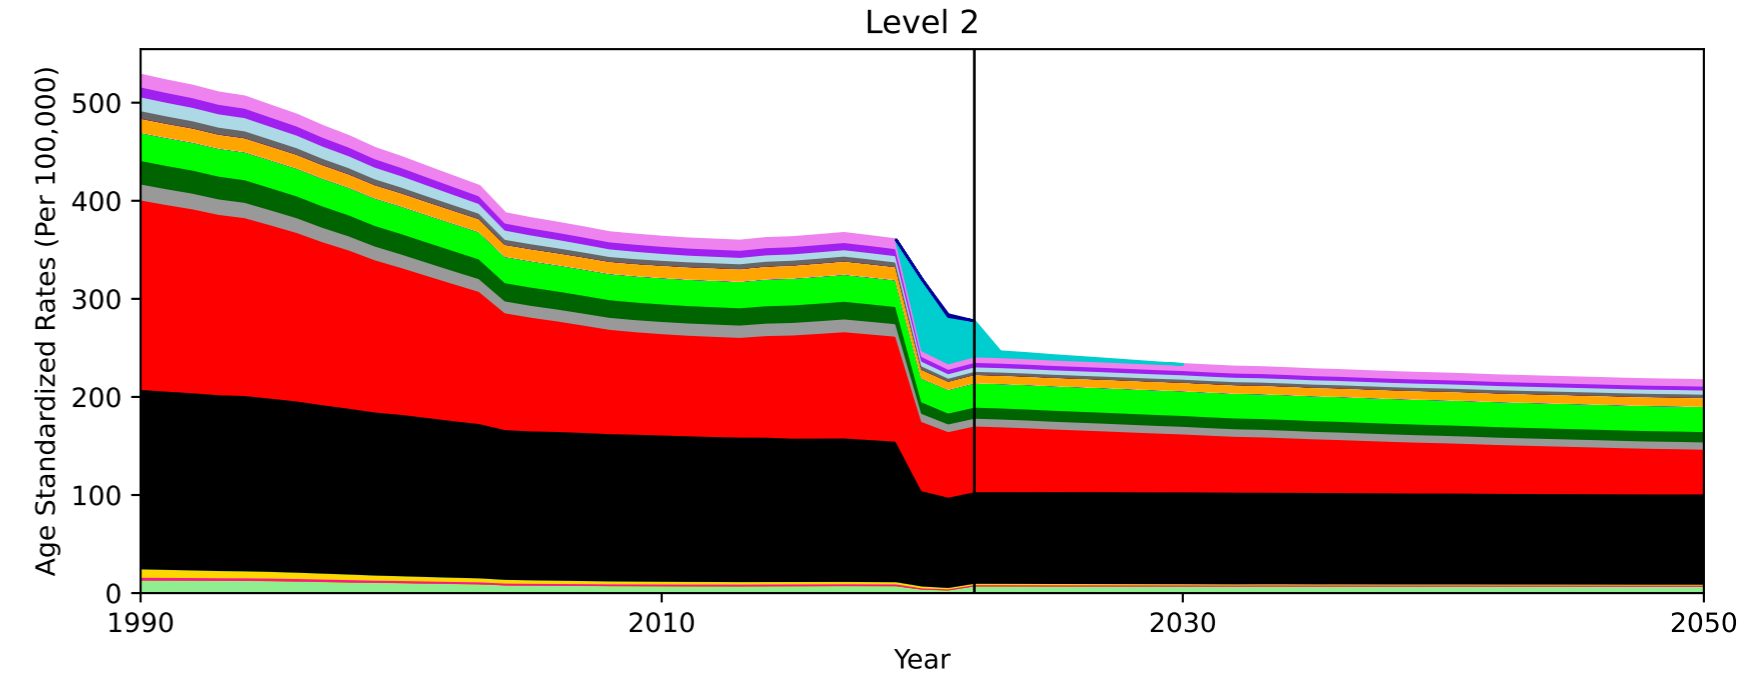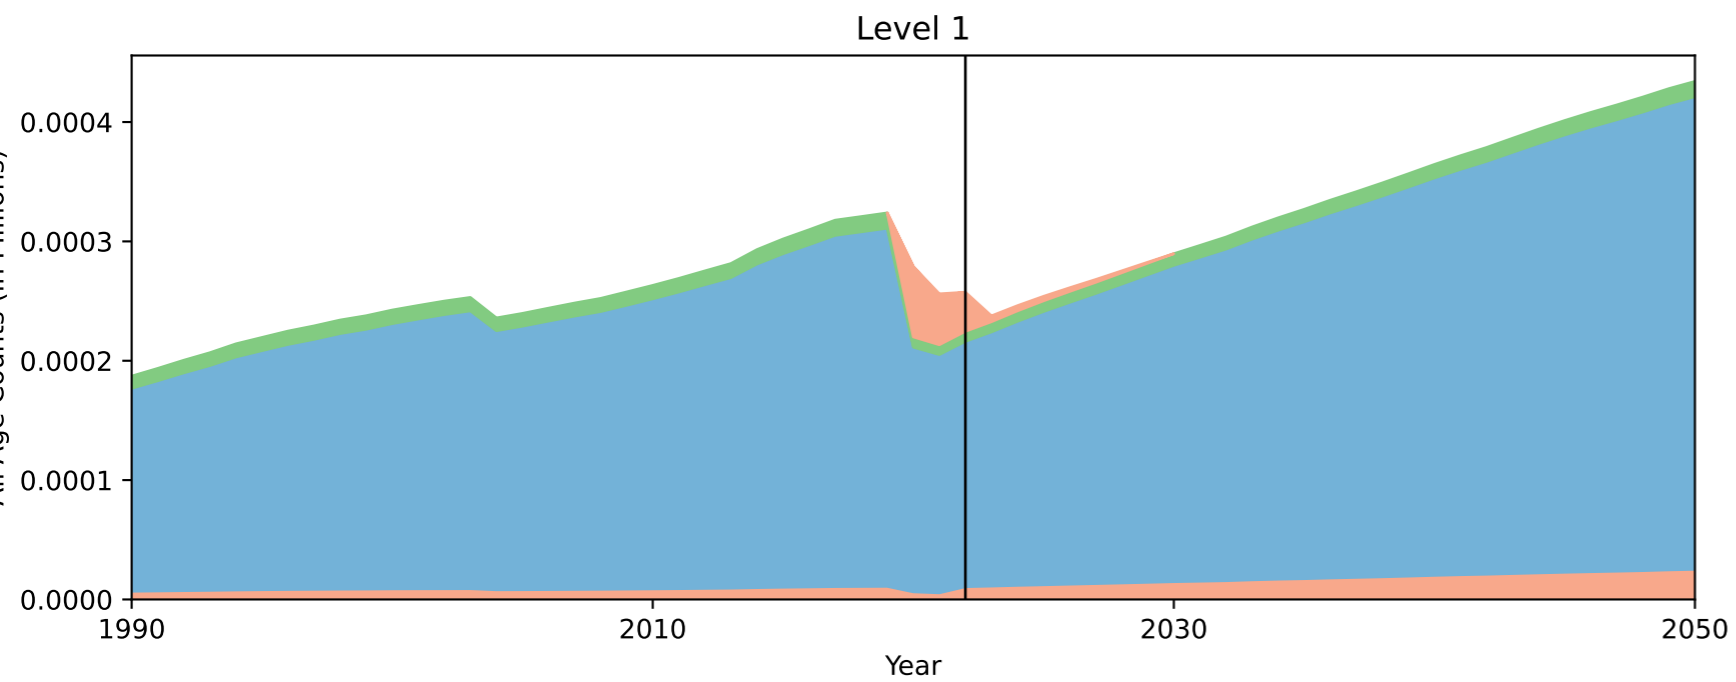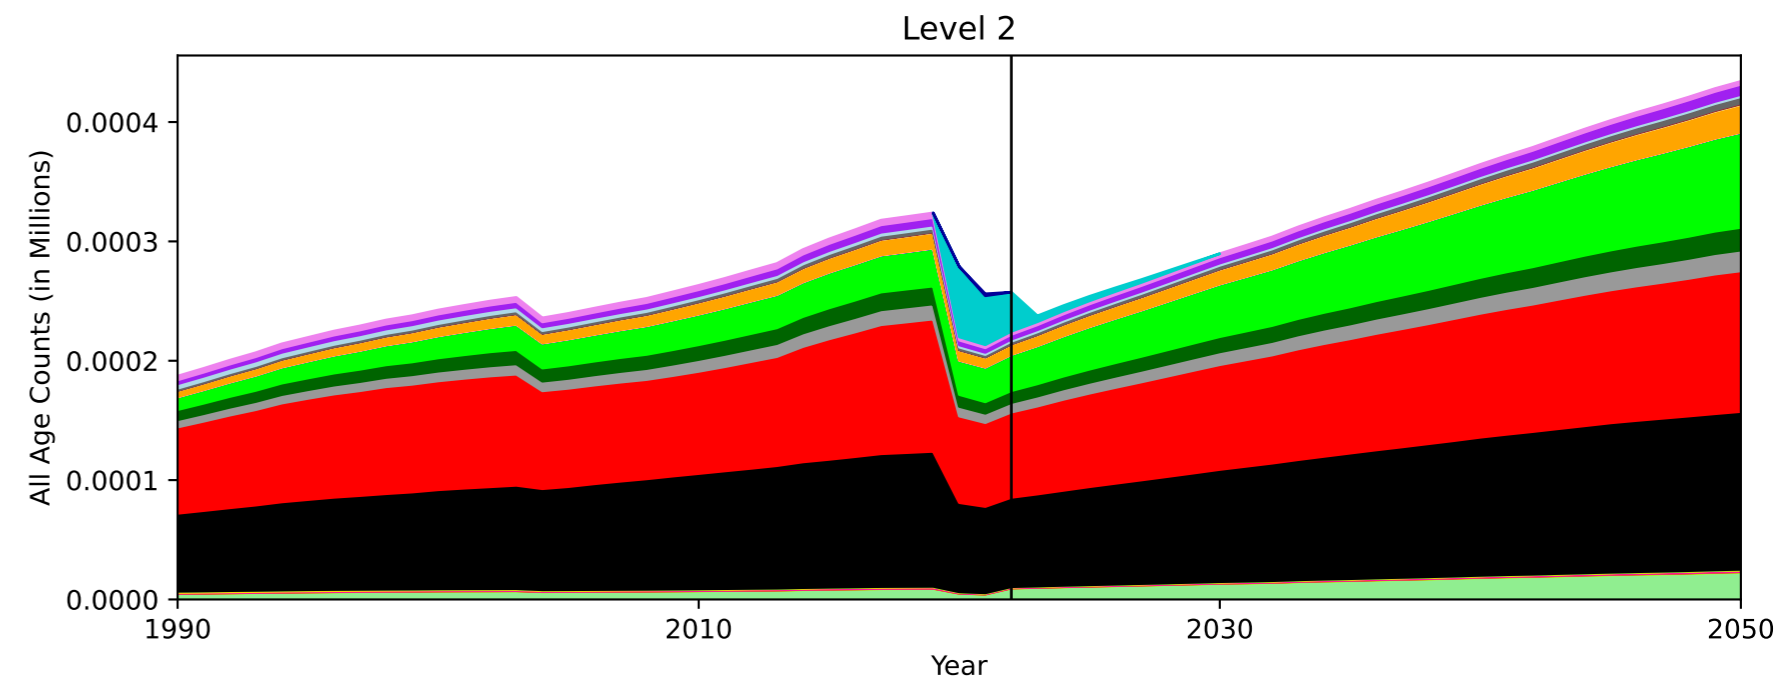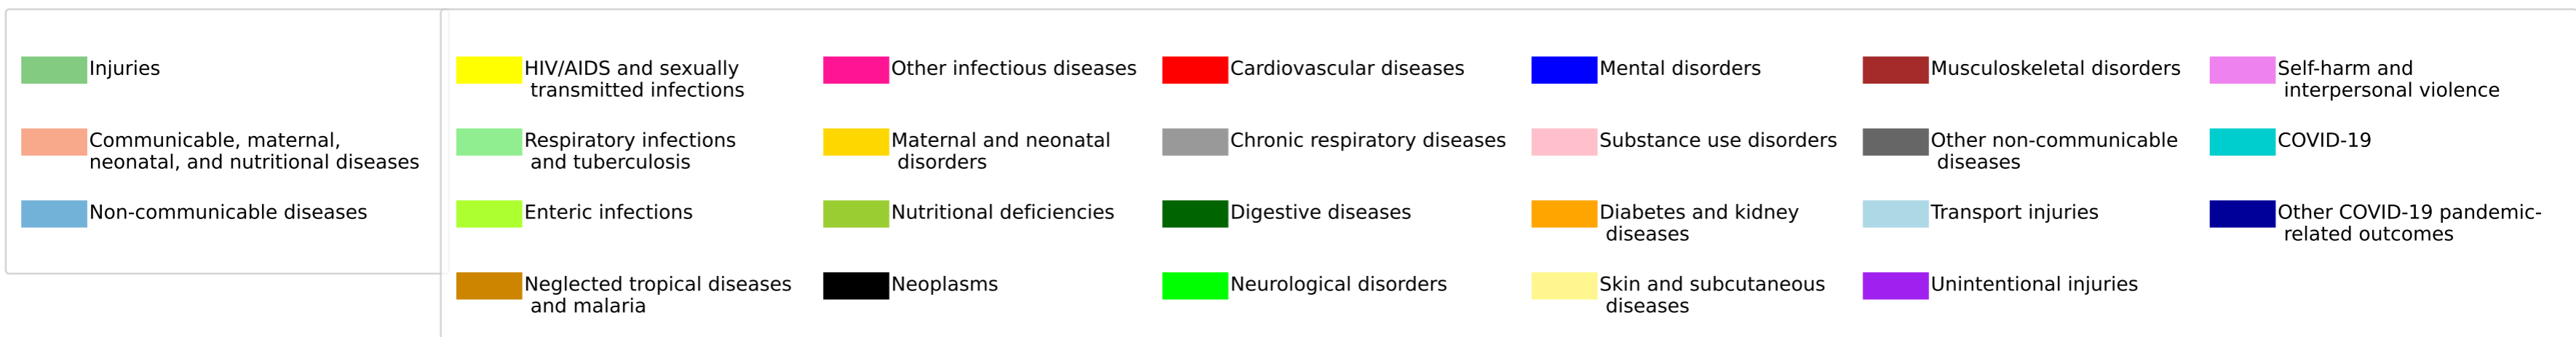

# Spain

Level 1

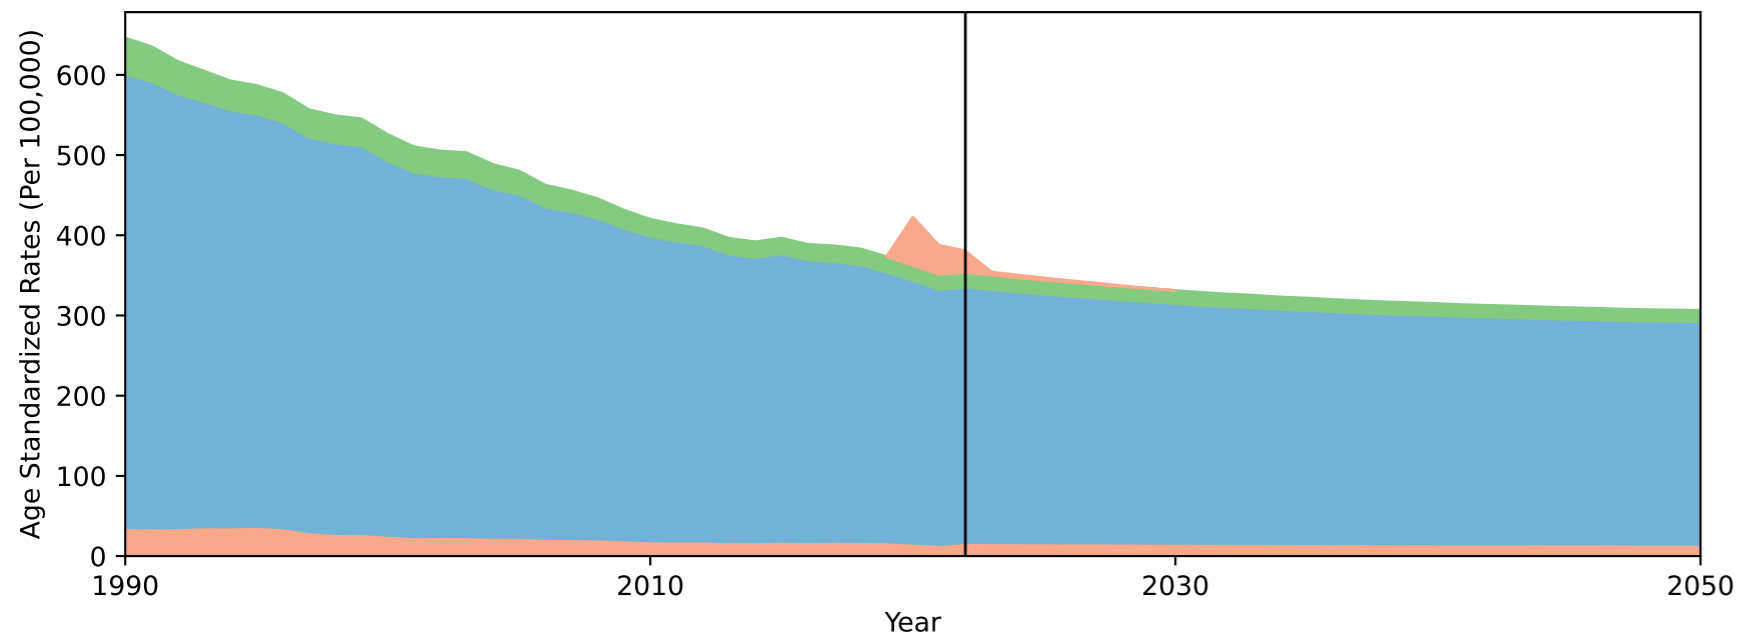

Level 2

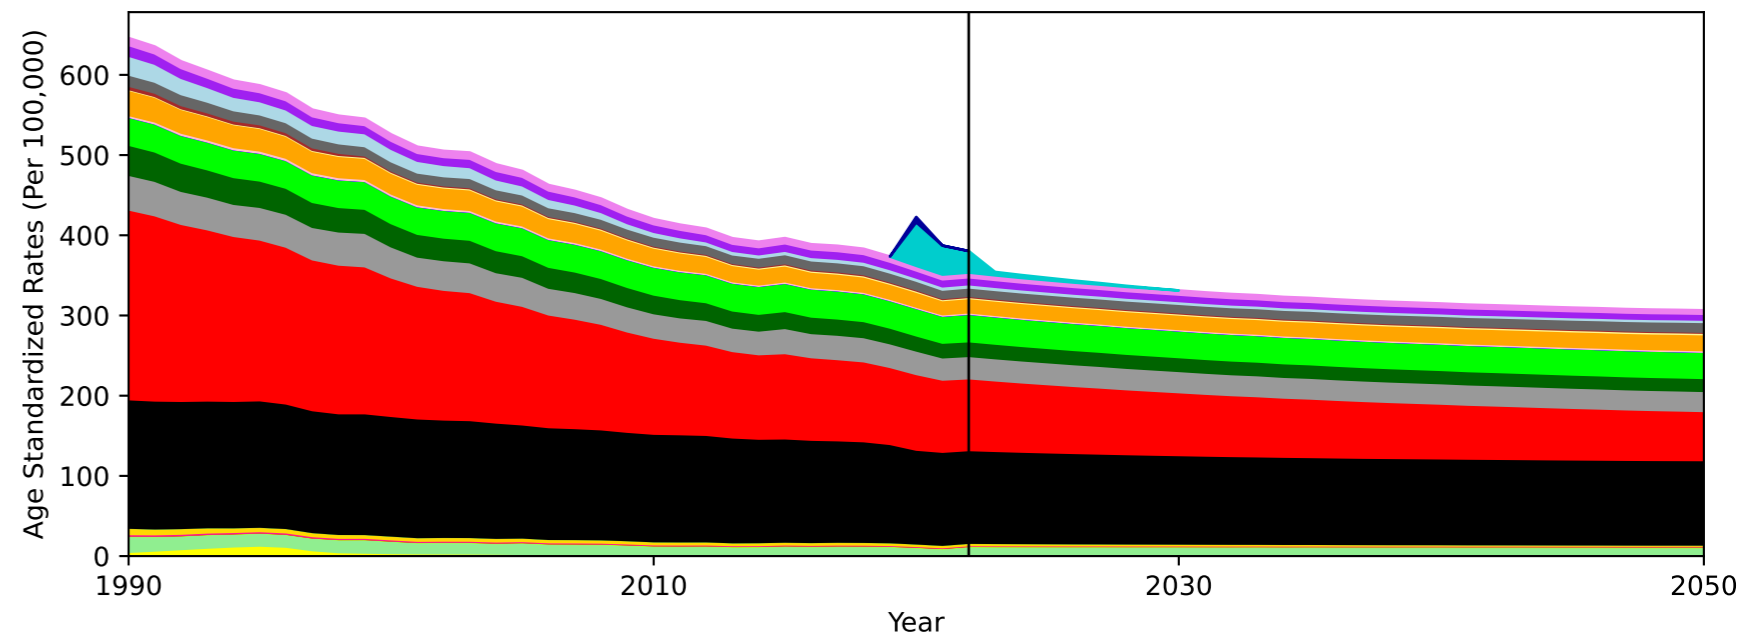

Level 1

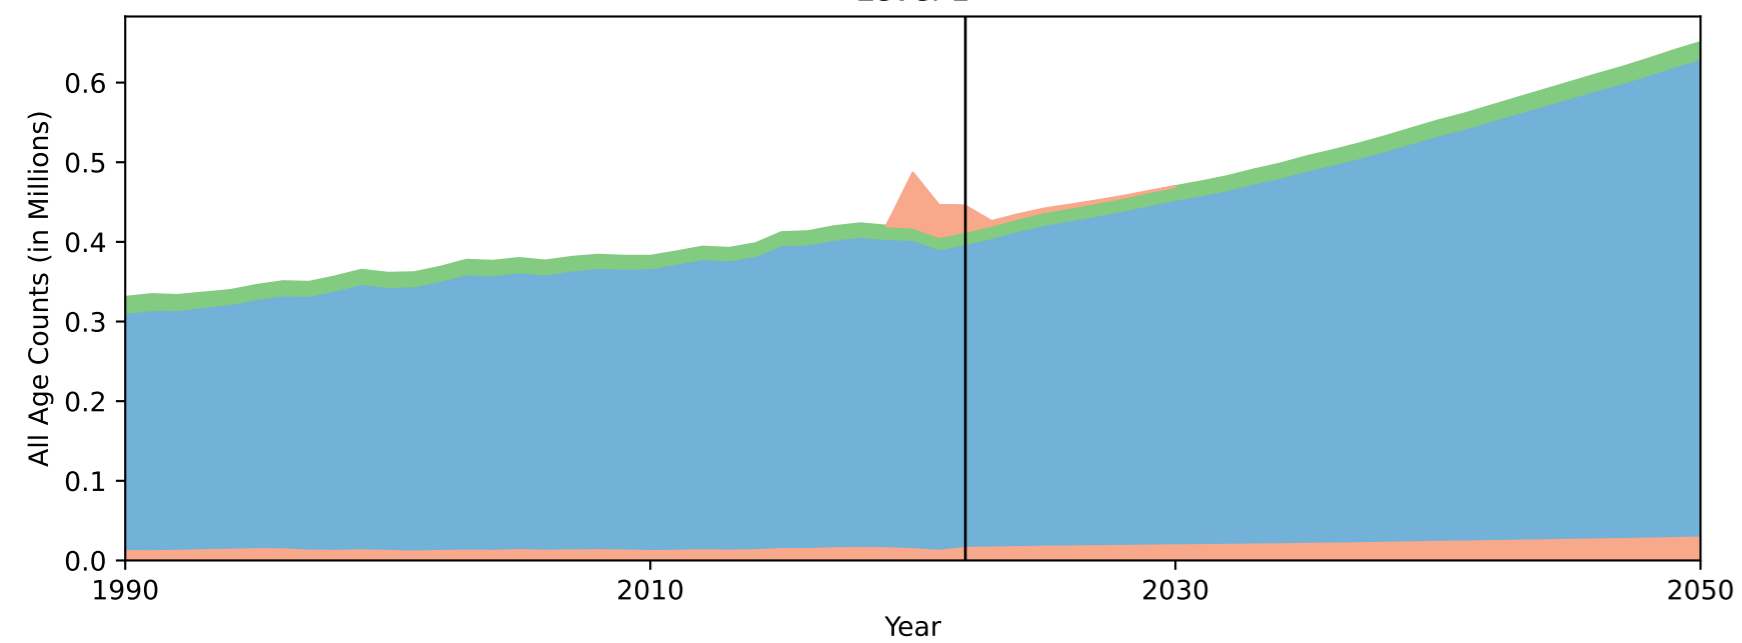

Level 2

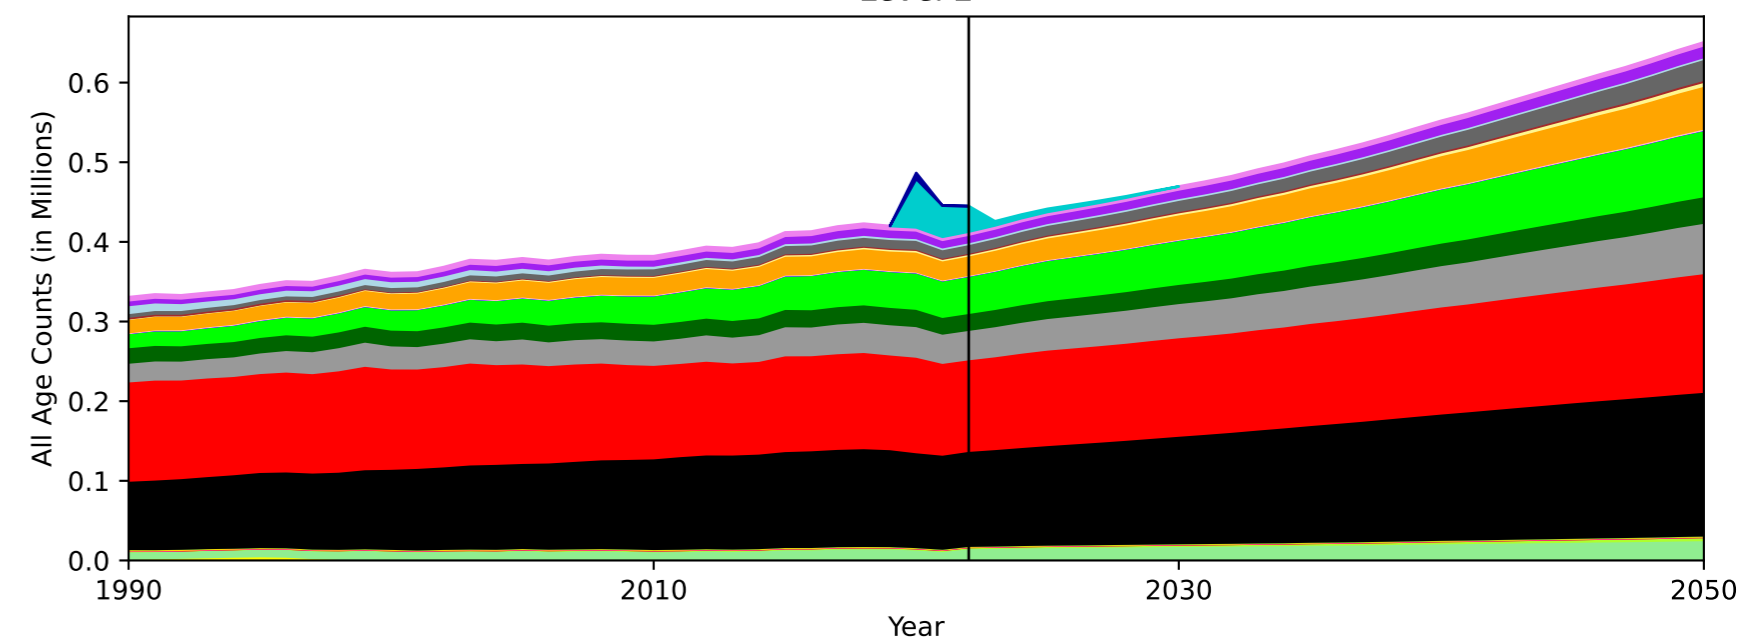

# Sweden

Level 1

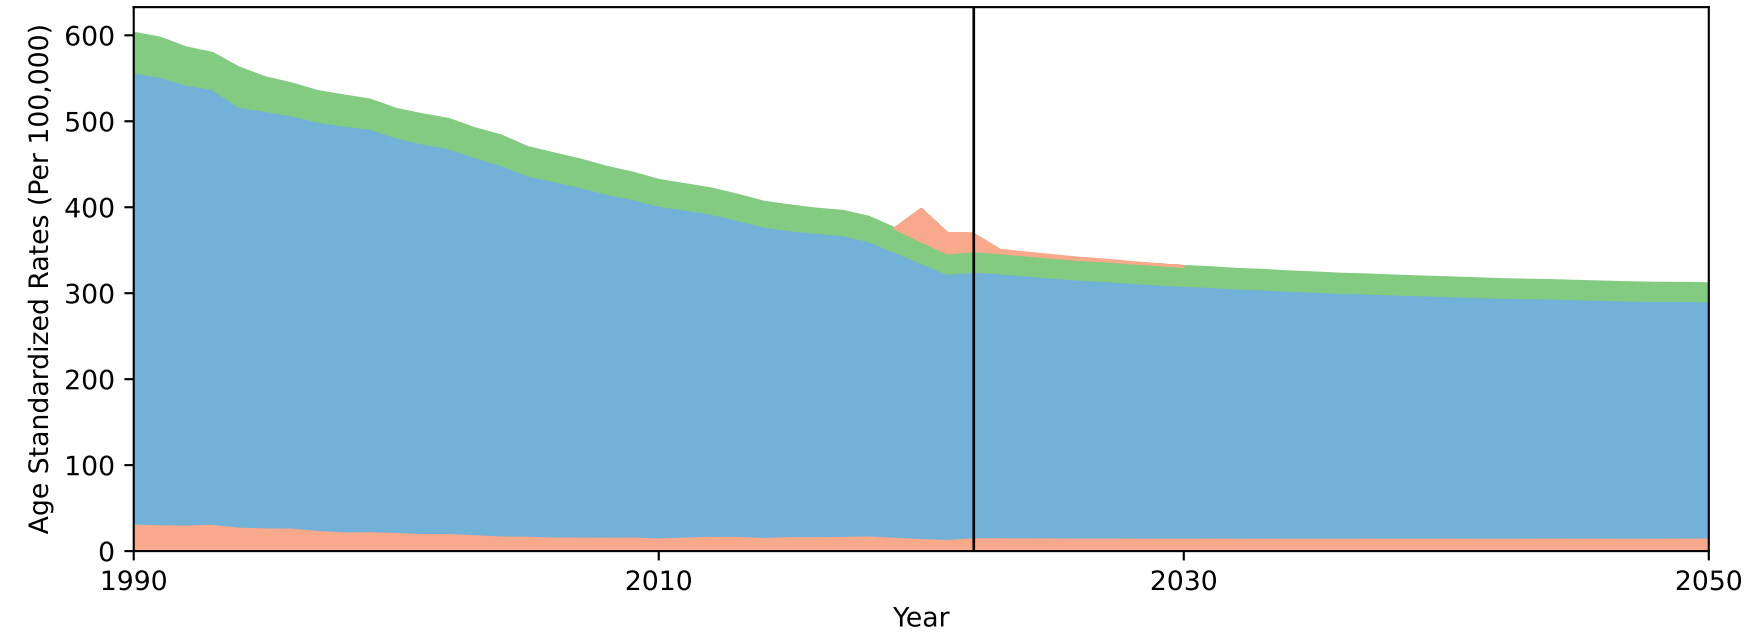

Level 2

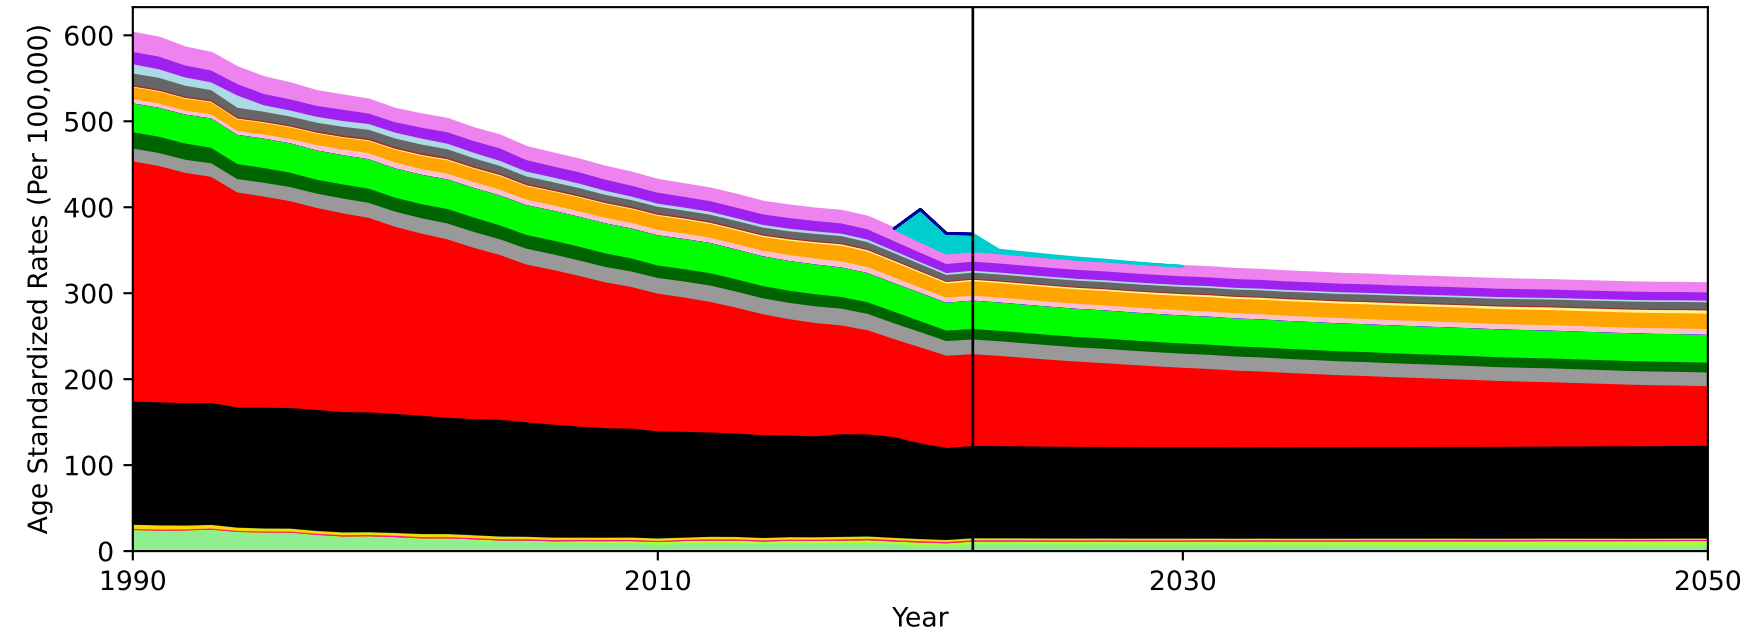

Level 1

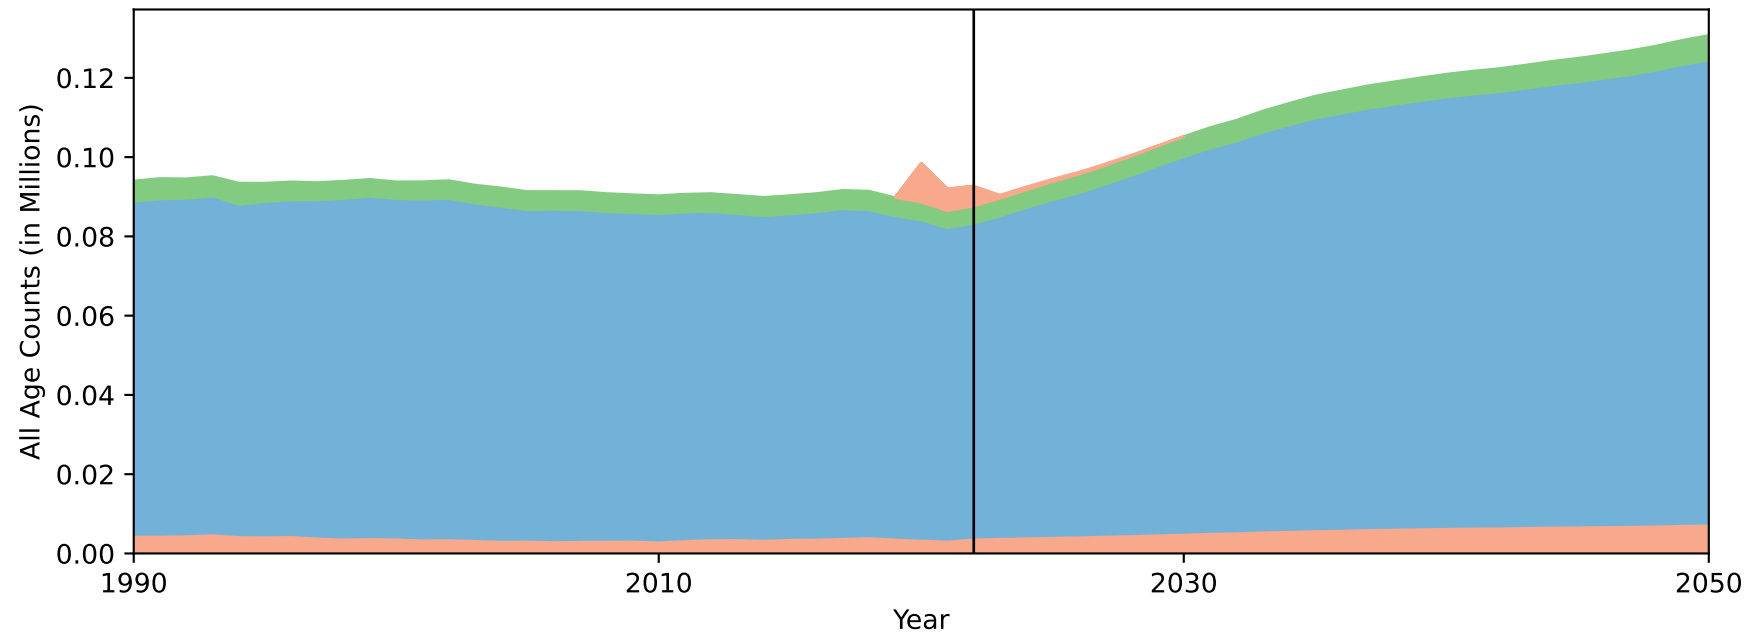

Level 2

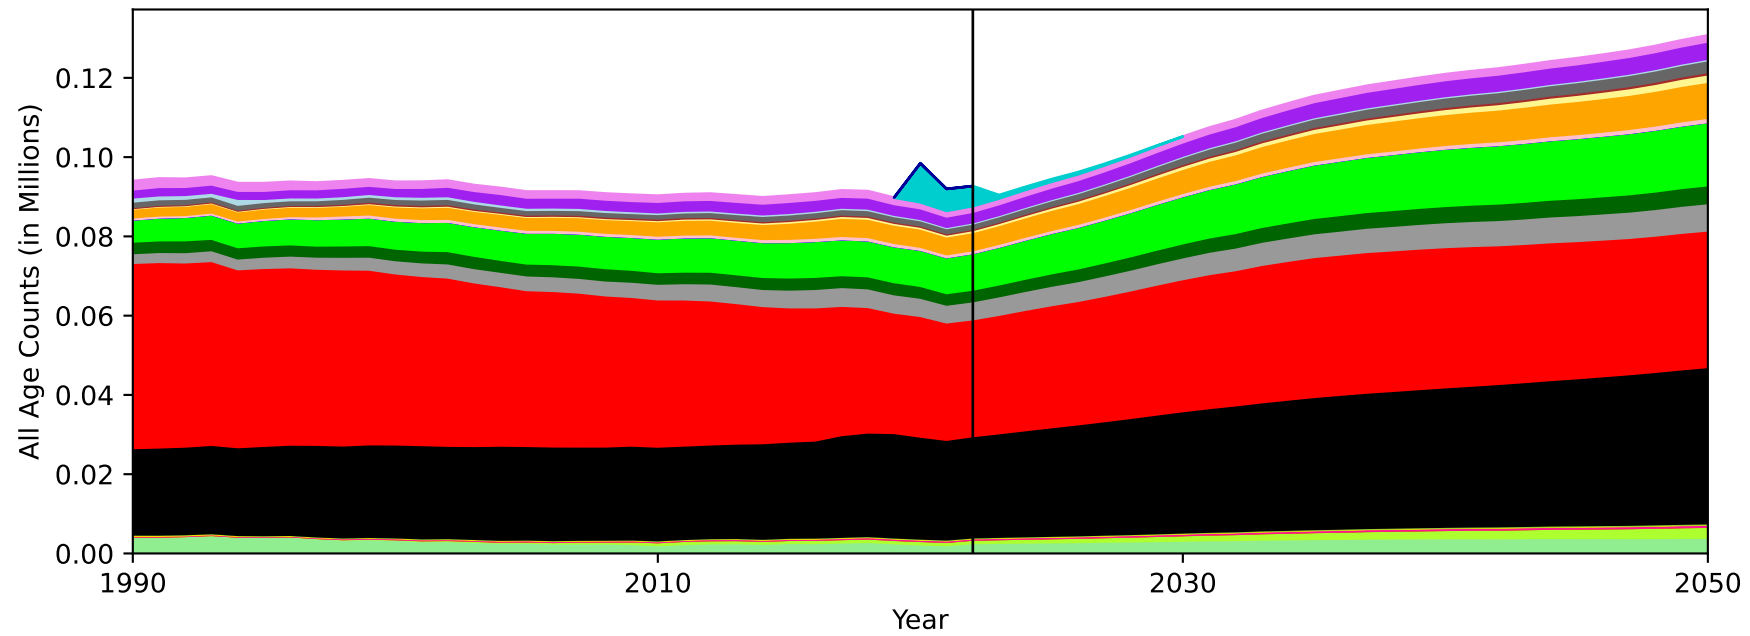

# Switzerland

Level 1

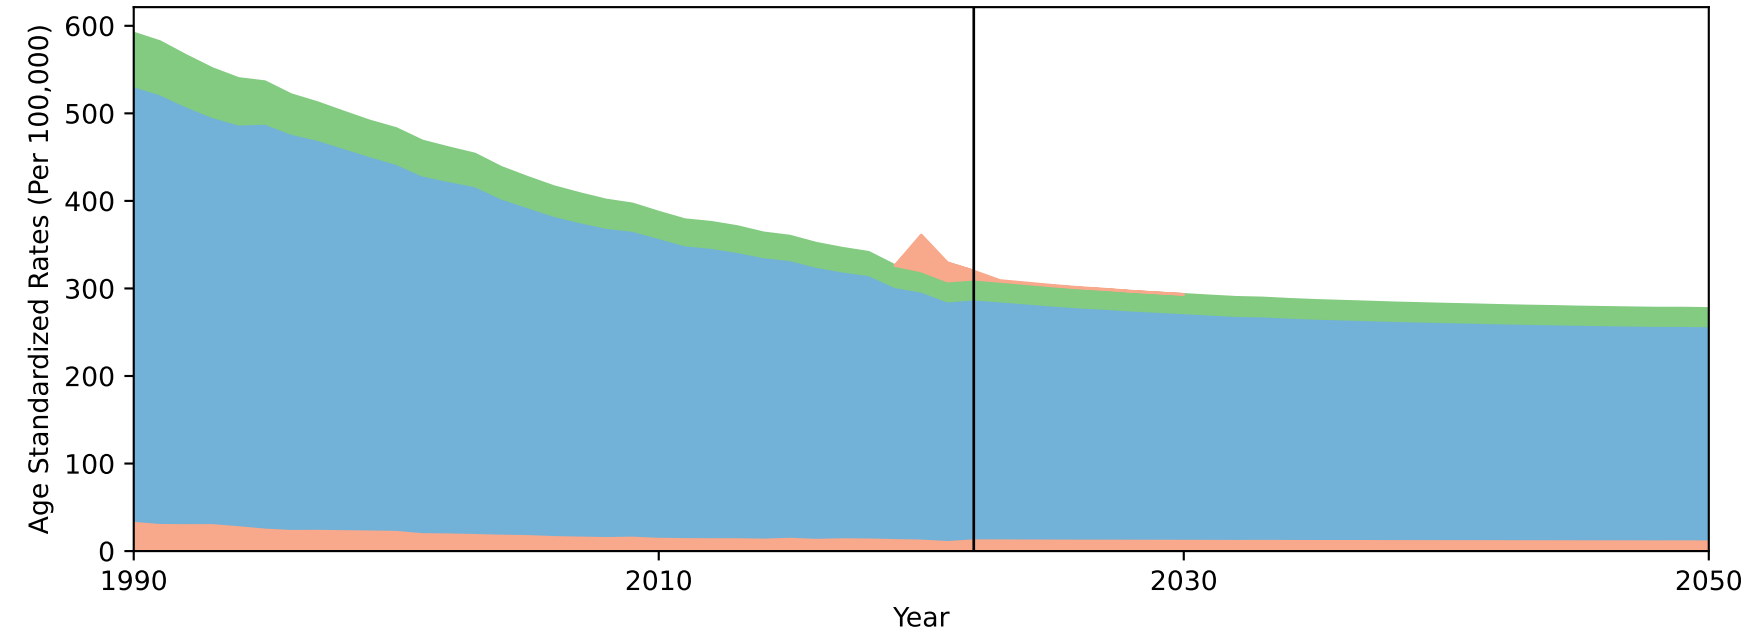

Level 2

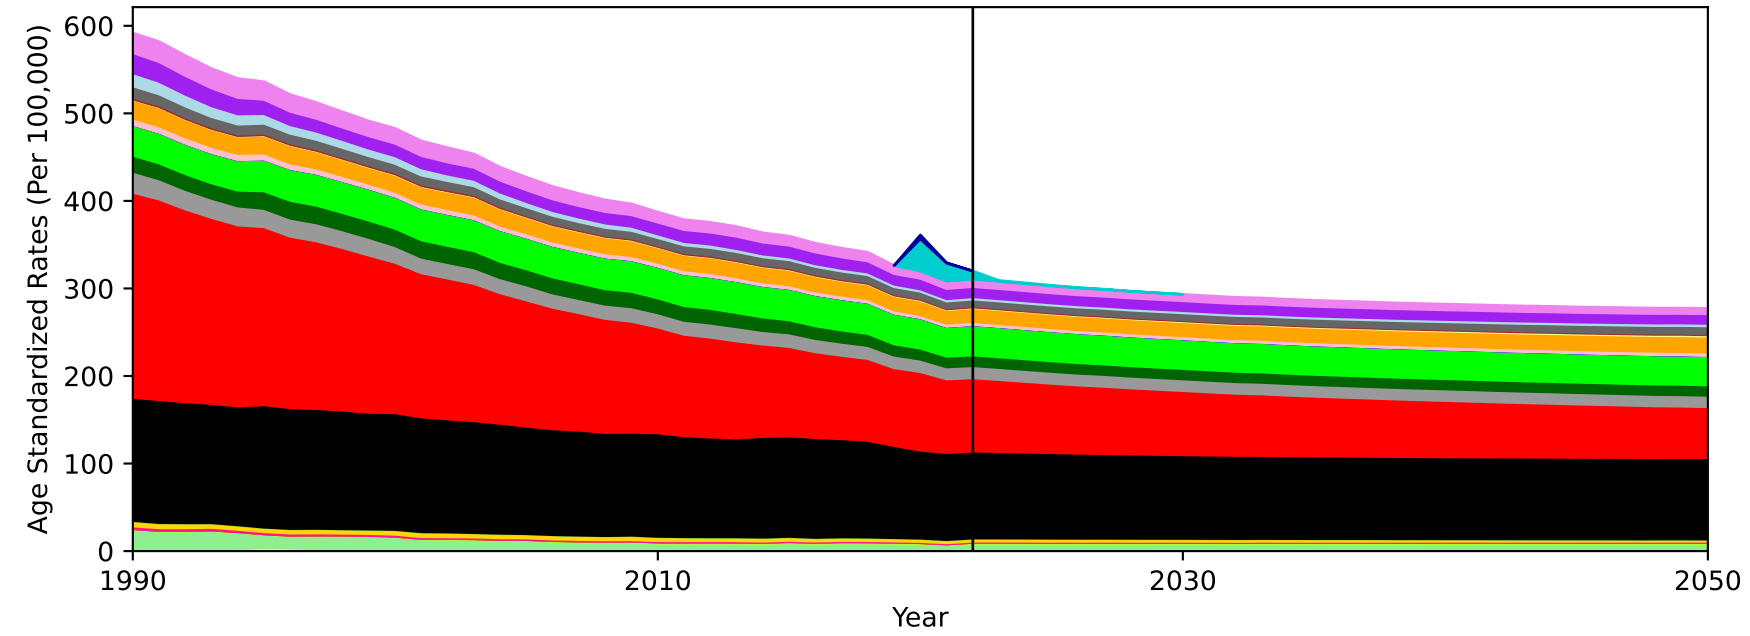

Level 1

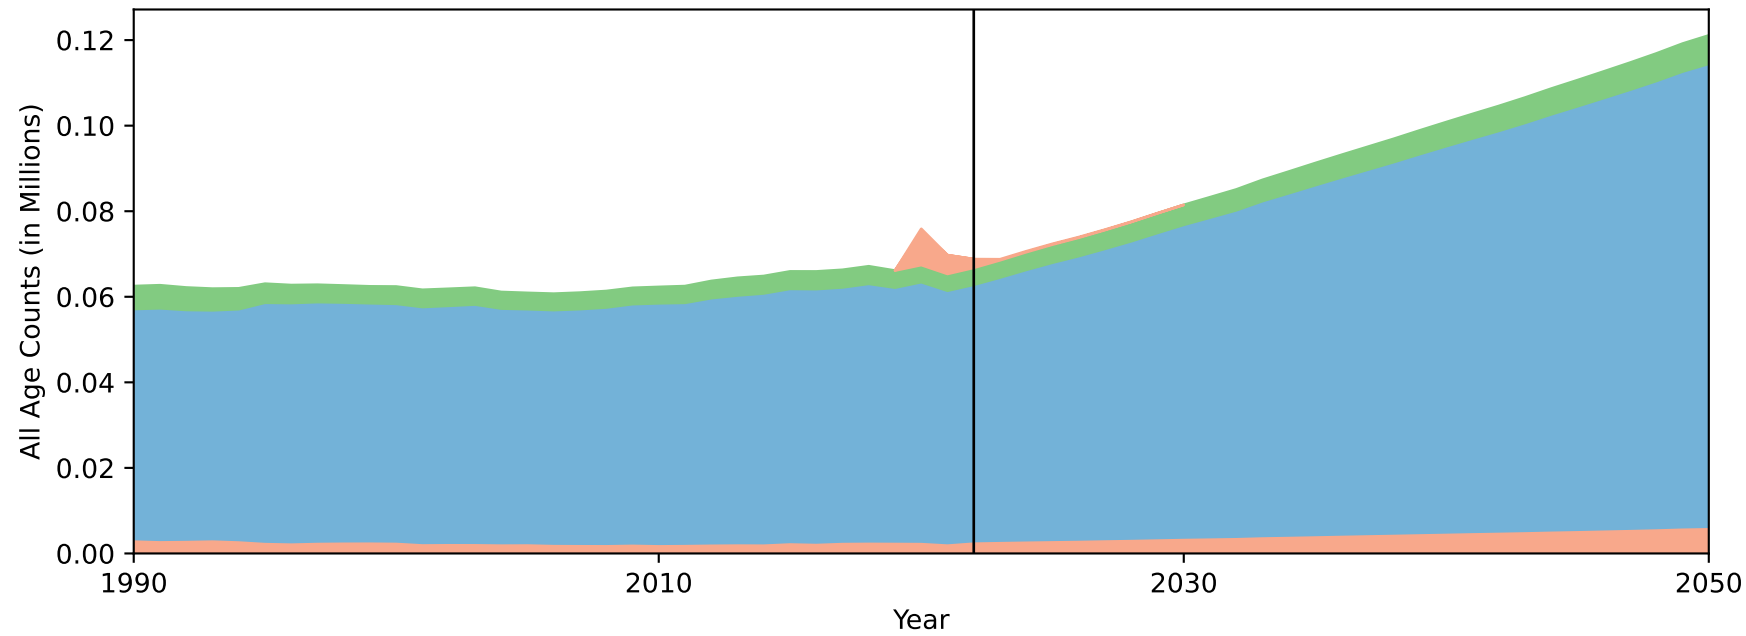

Level 2

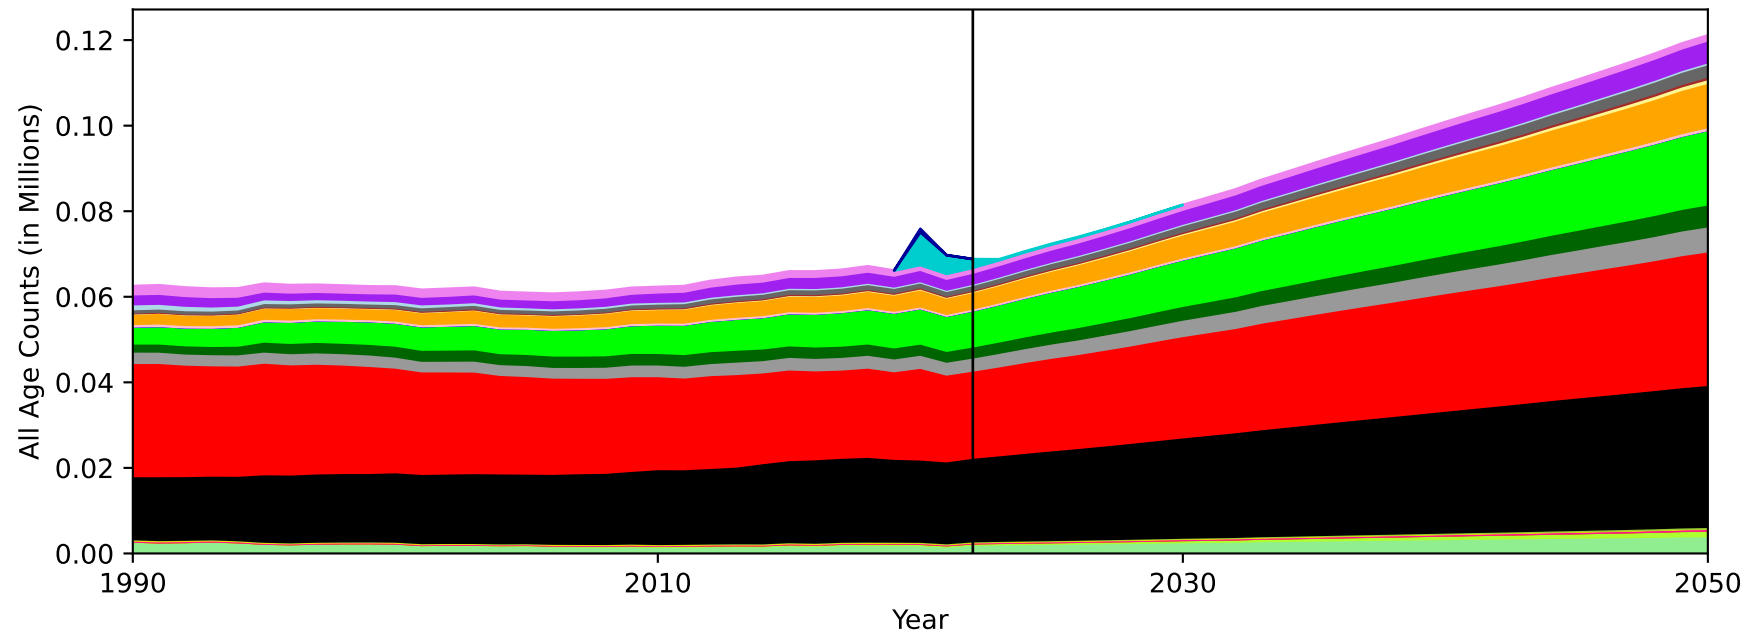

Level 1

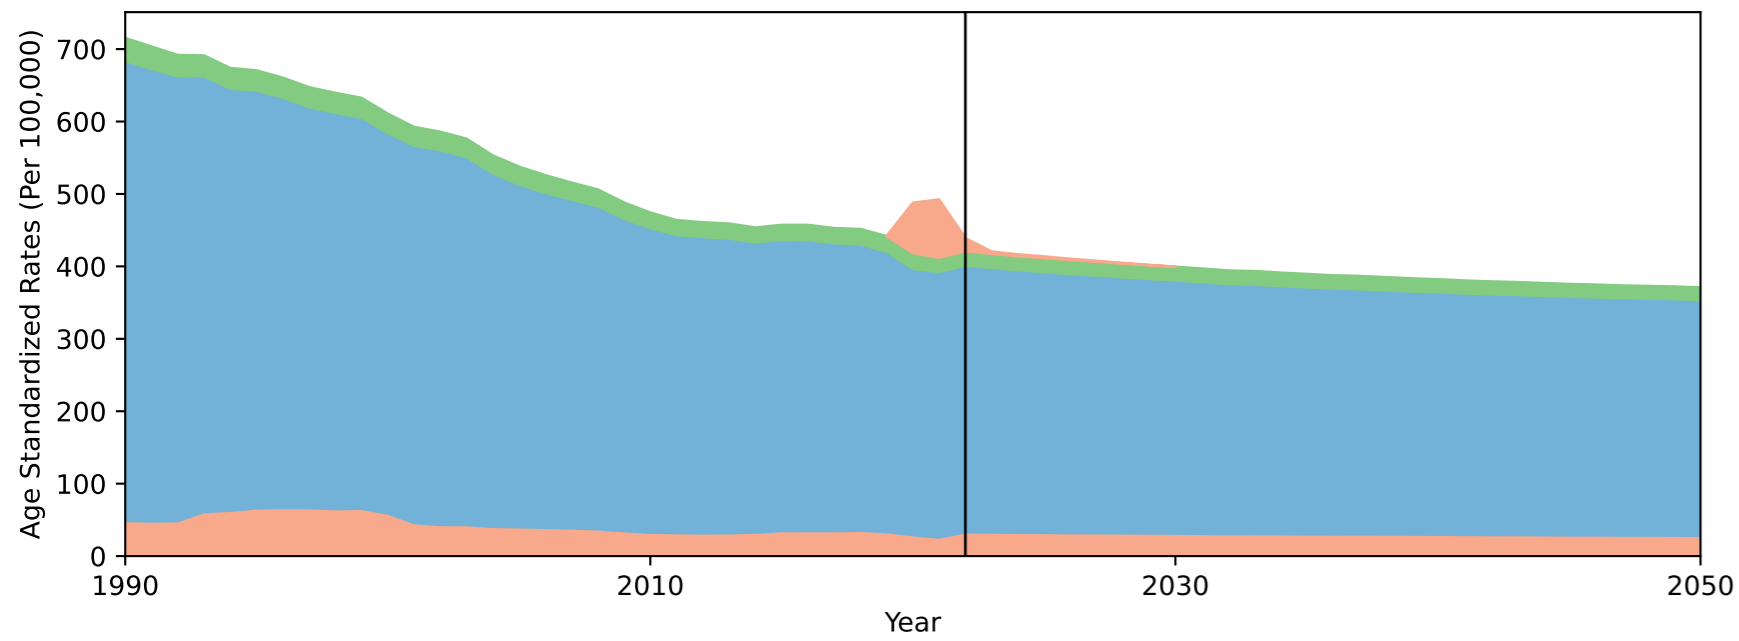

UK

Level 2

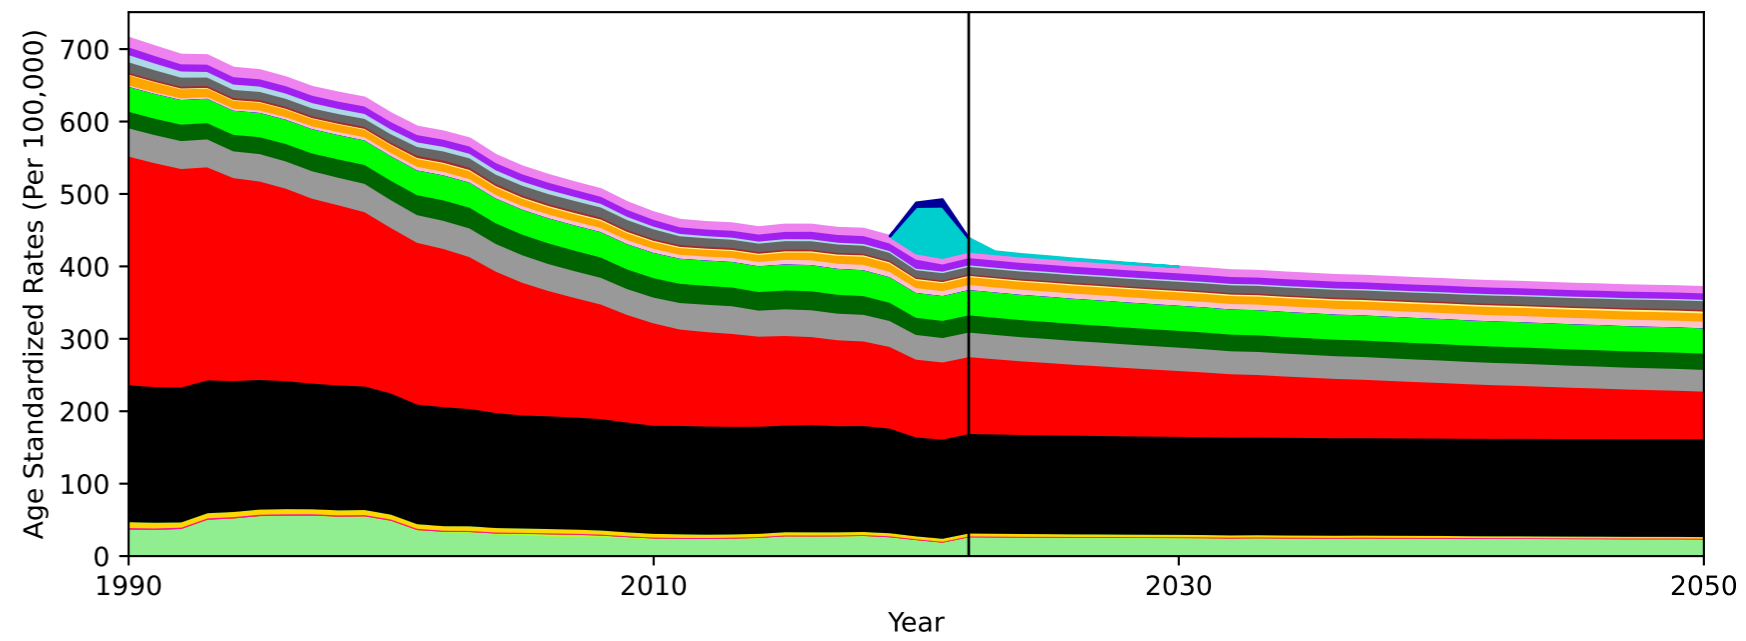

Level 1

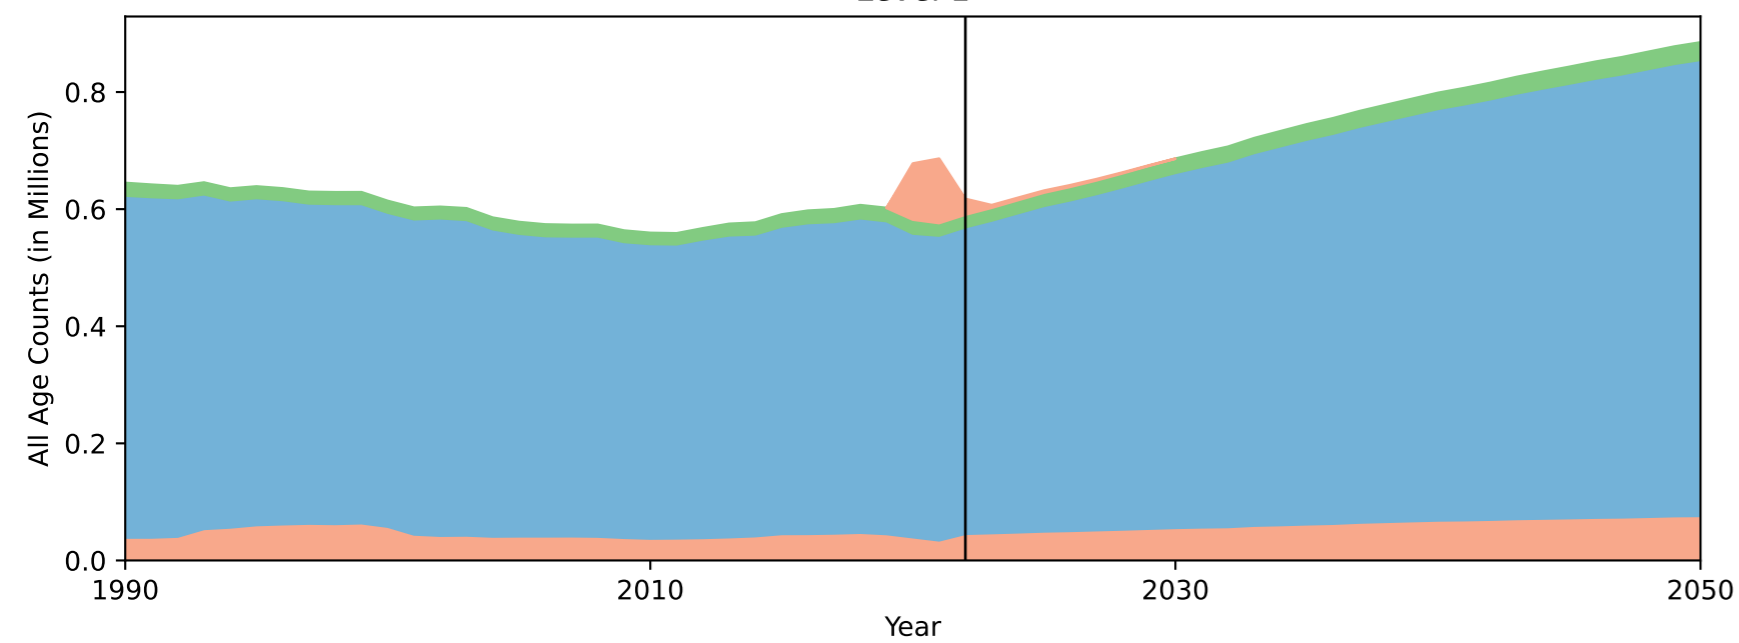

Level 2

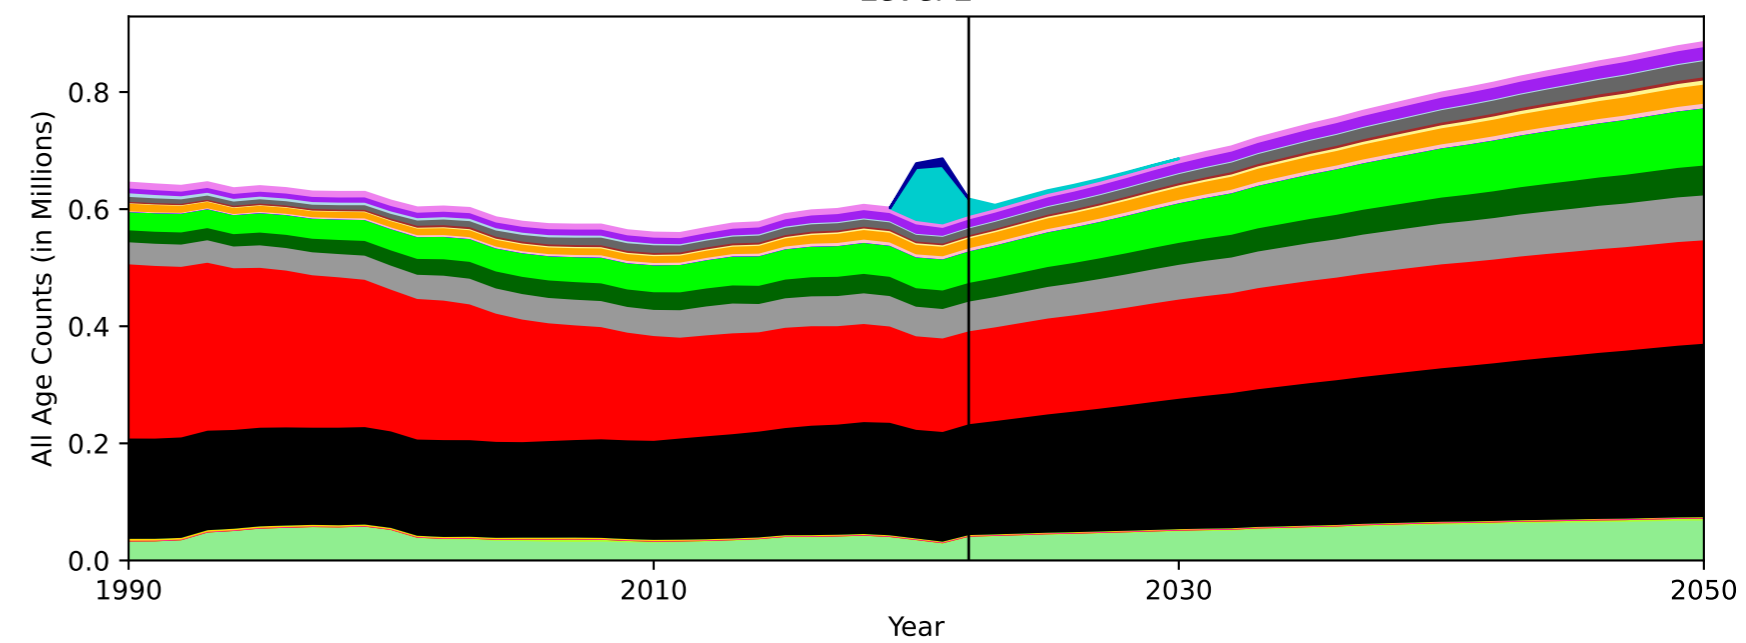

# Bolivia

Level 1

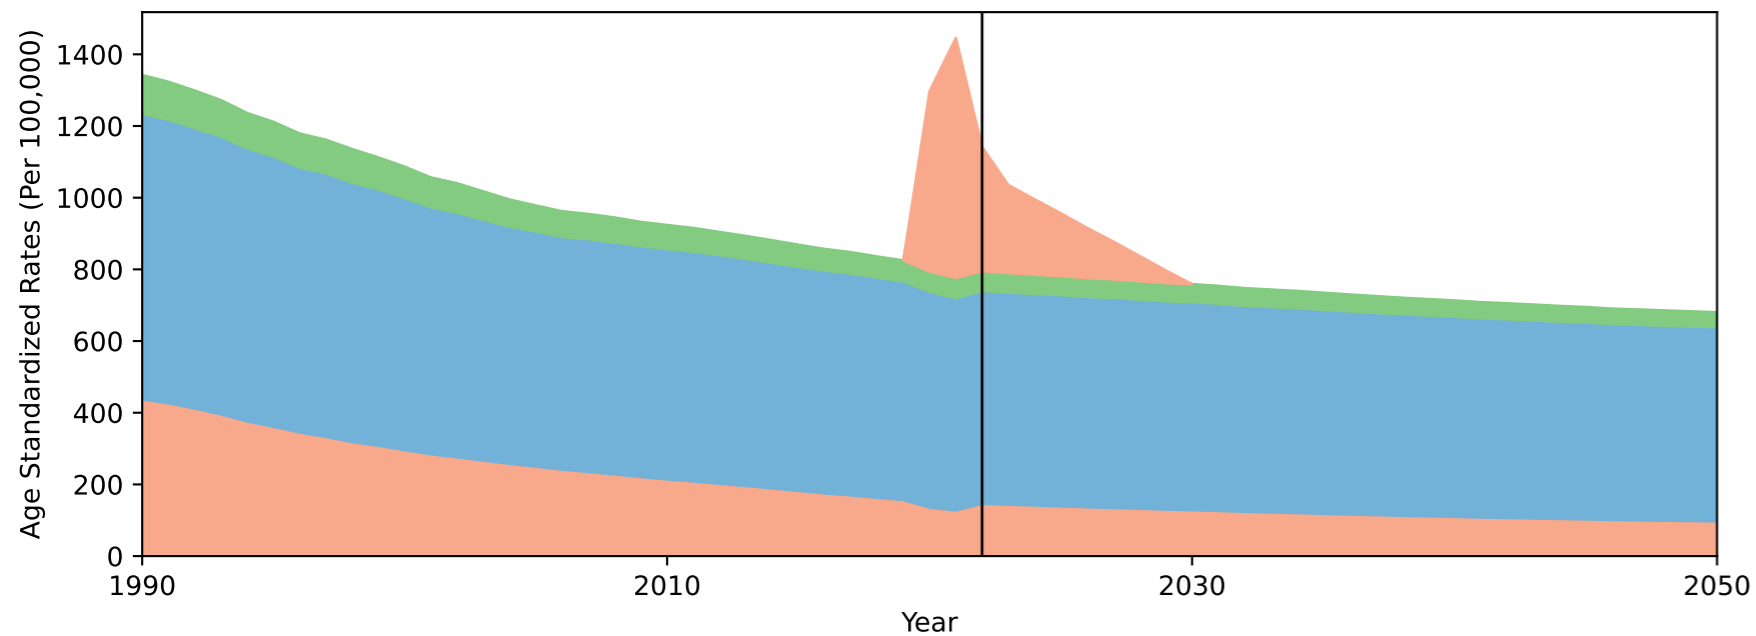

Level 2

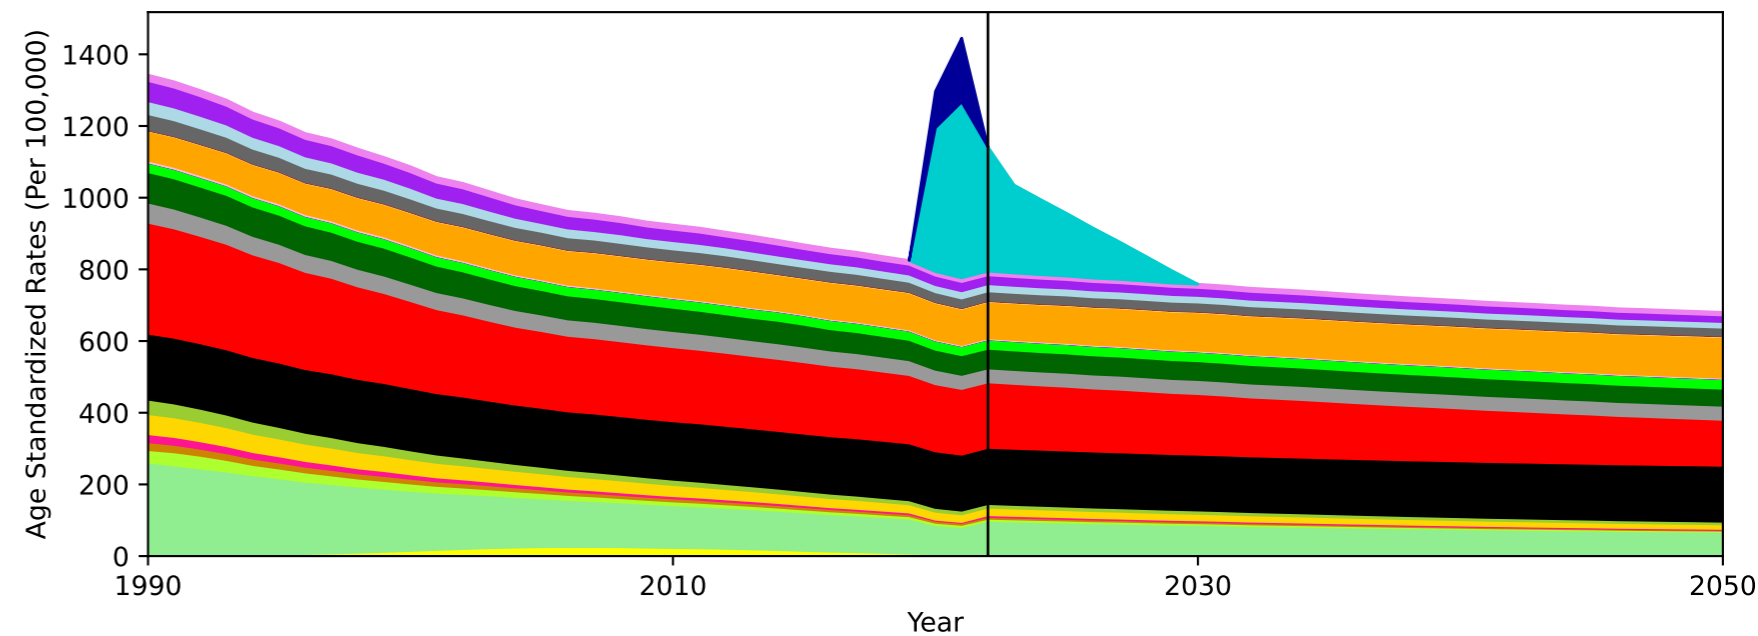

Level 1

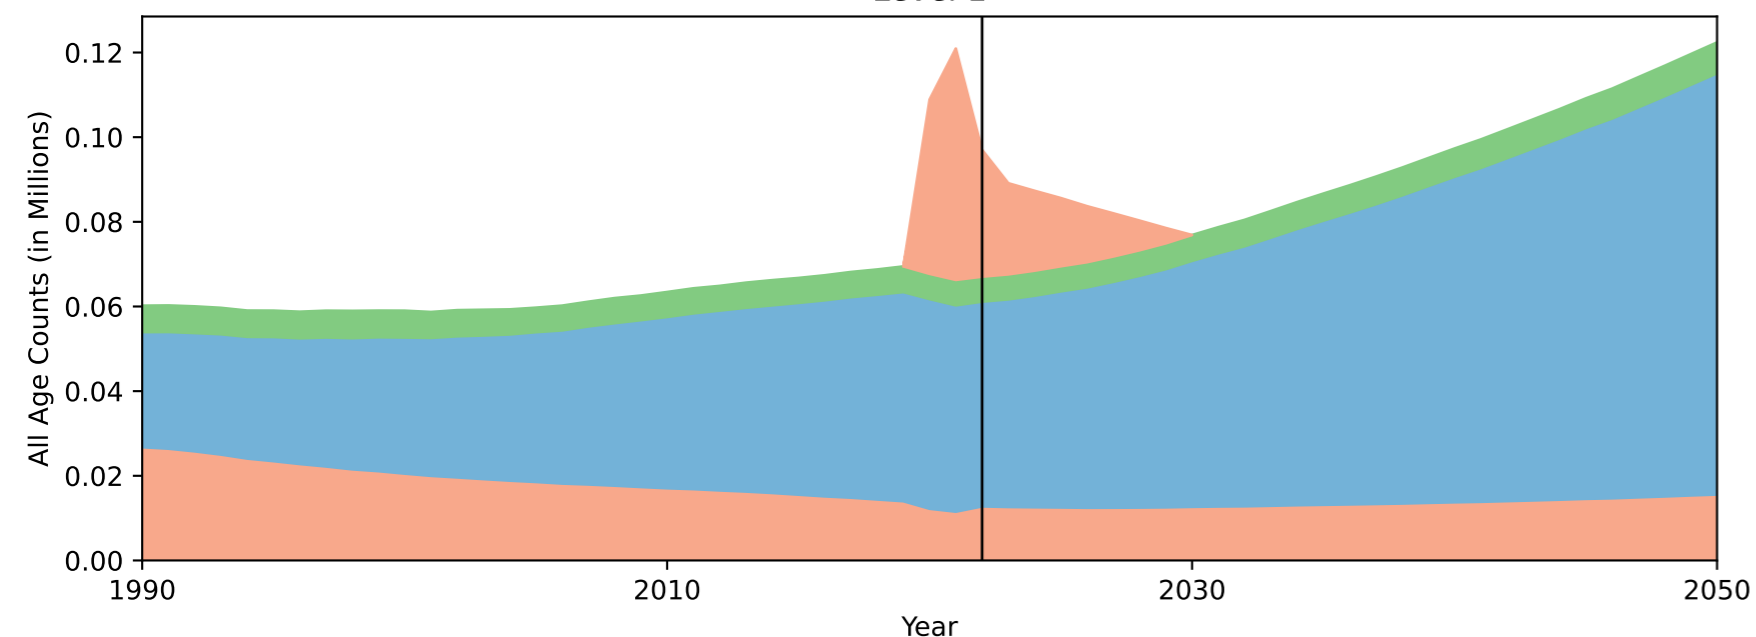

Level 2

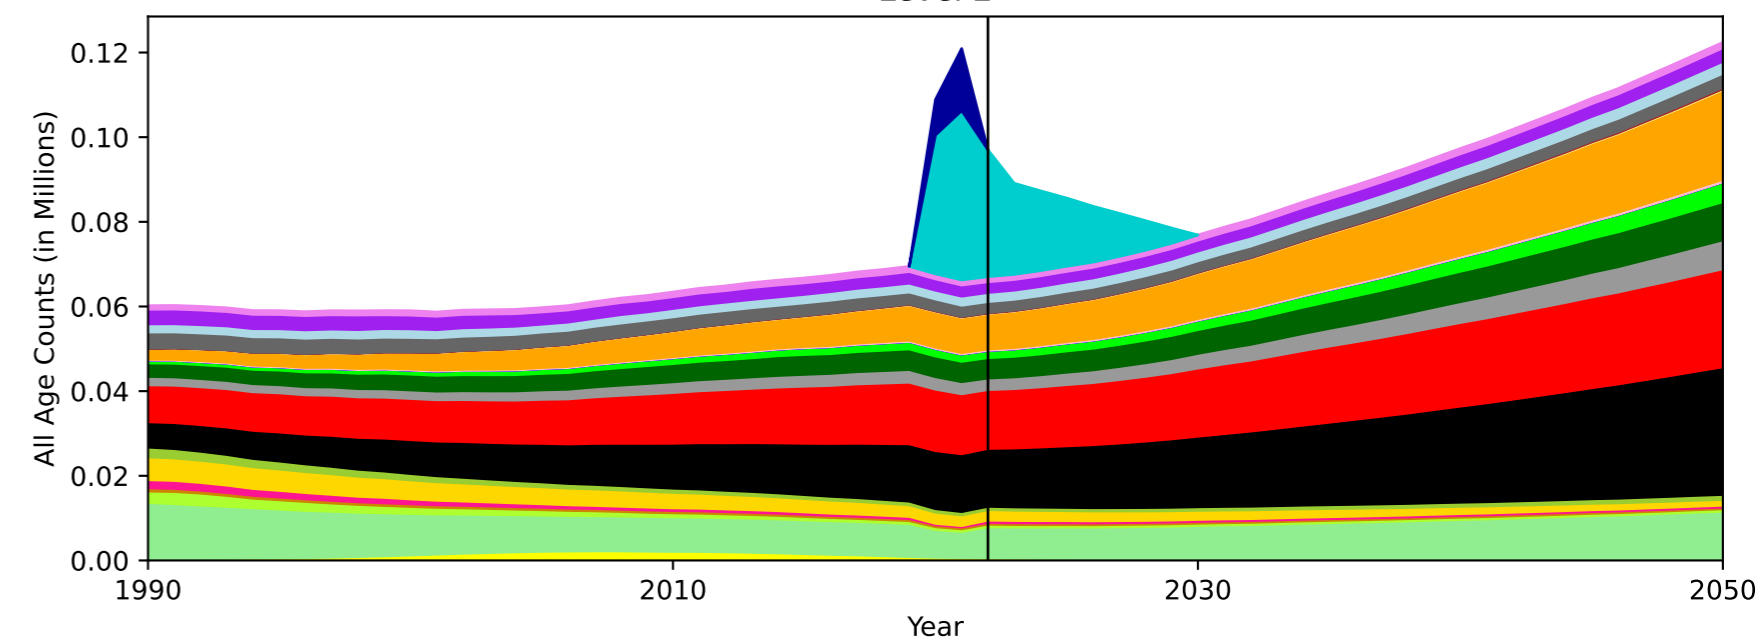



Level 1

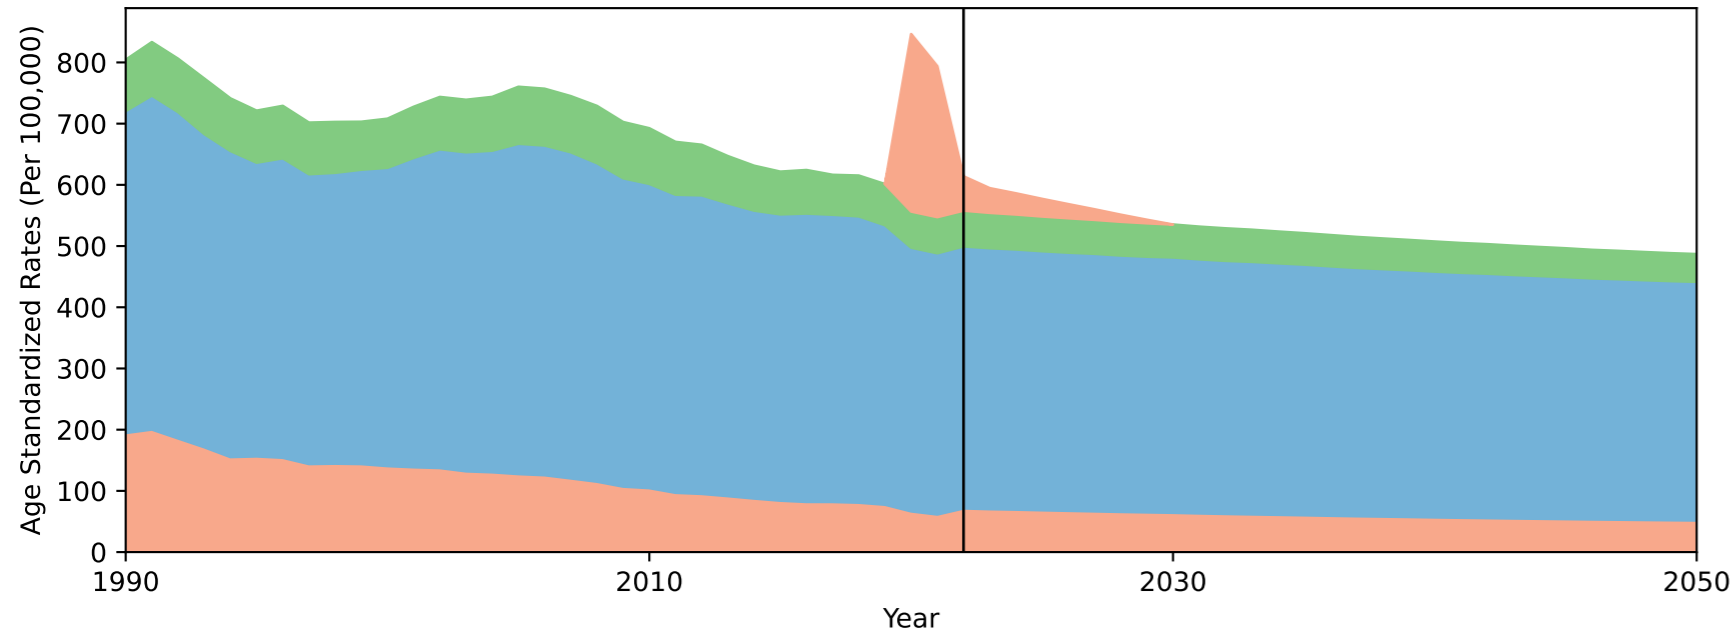

Level 2

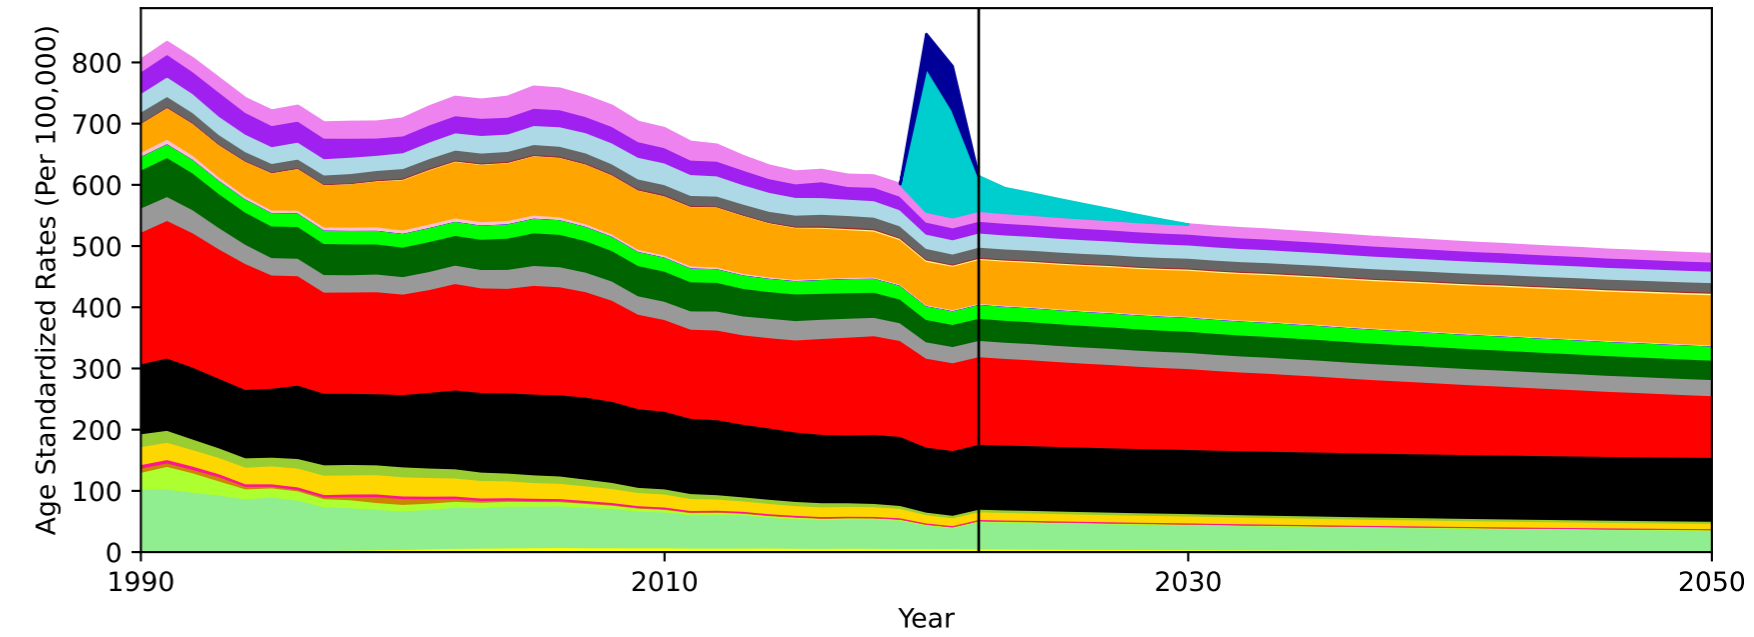

Level 1

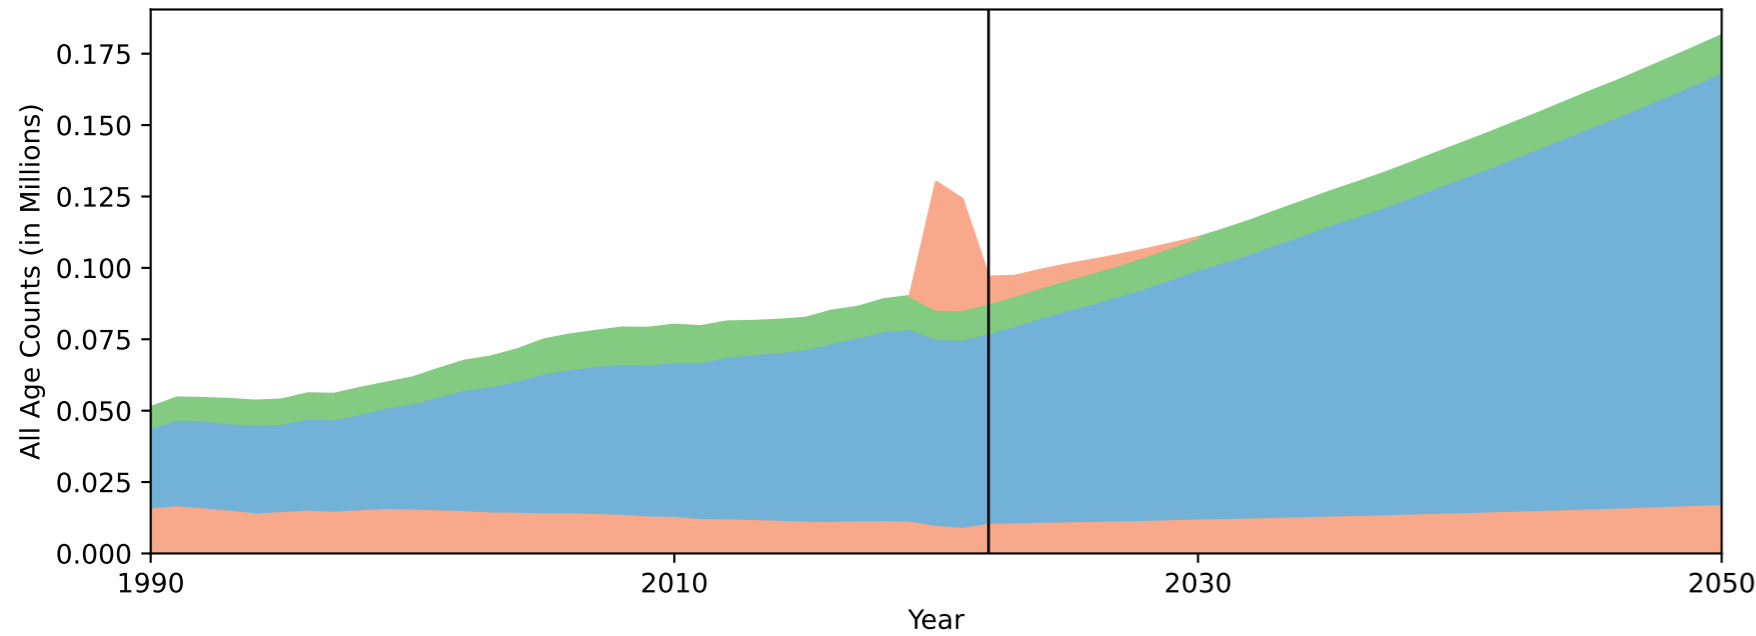

Level 2

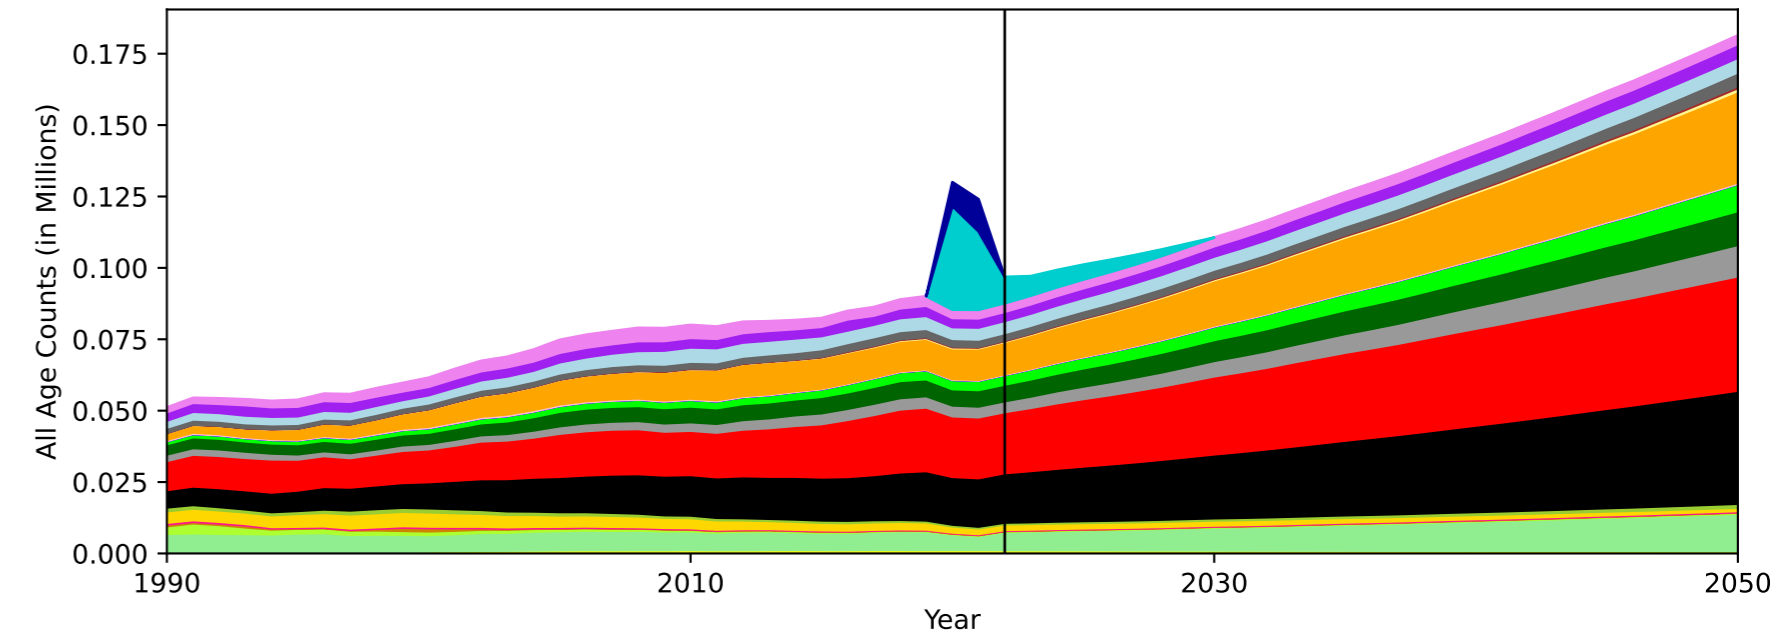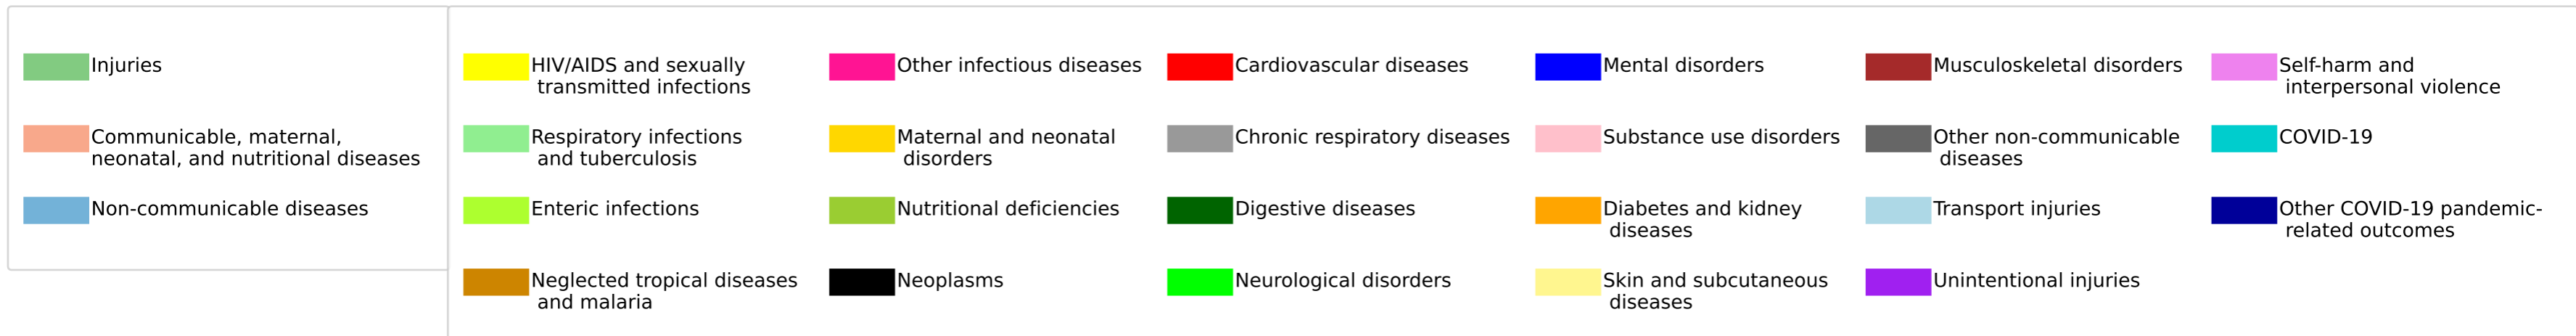

Level 1

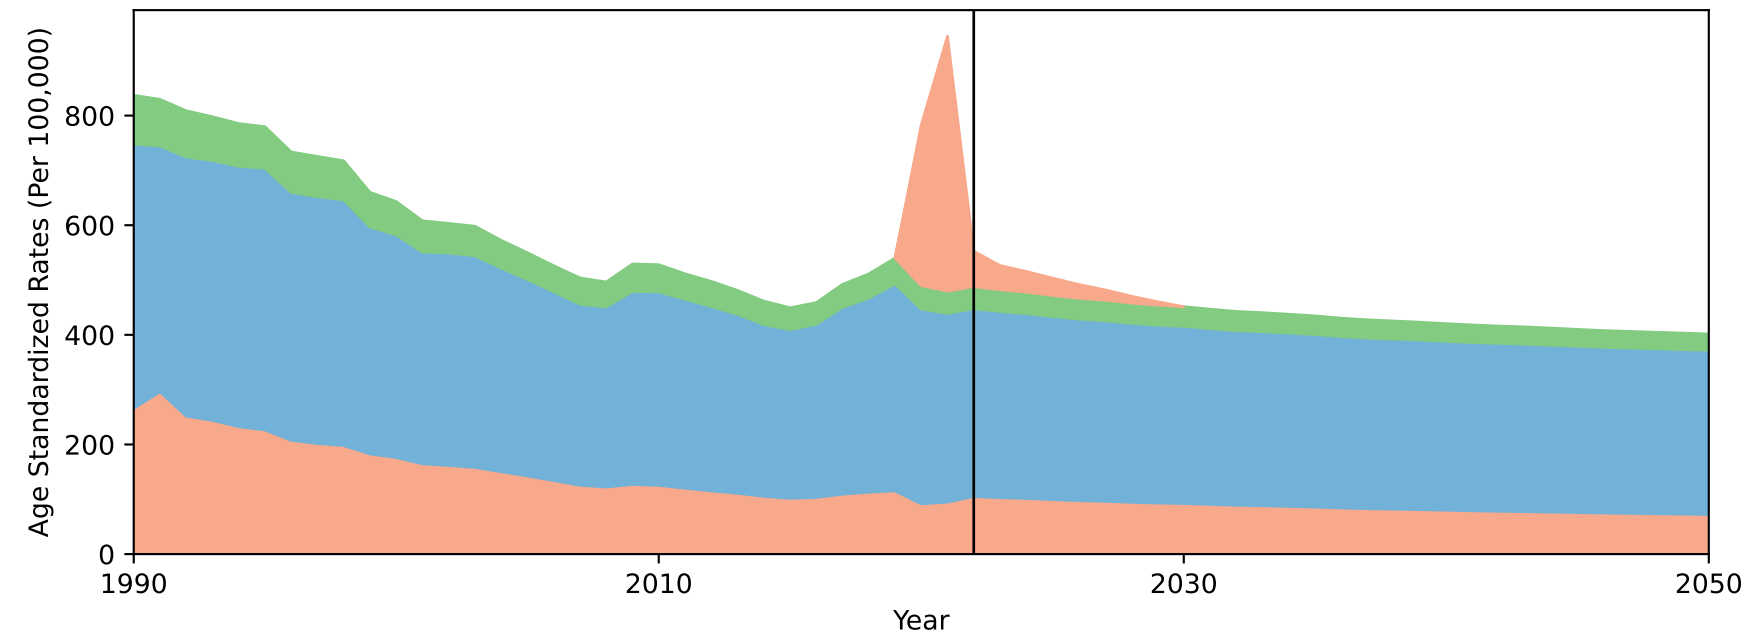

Level 2

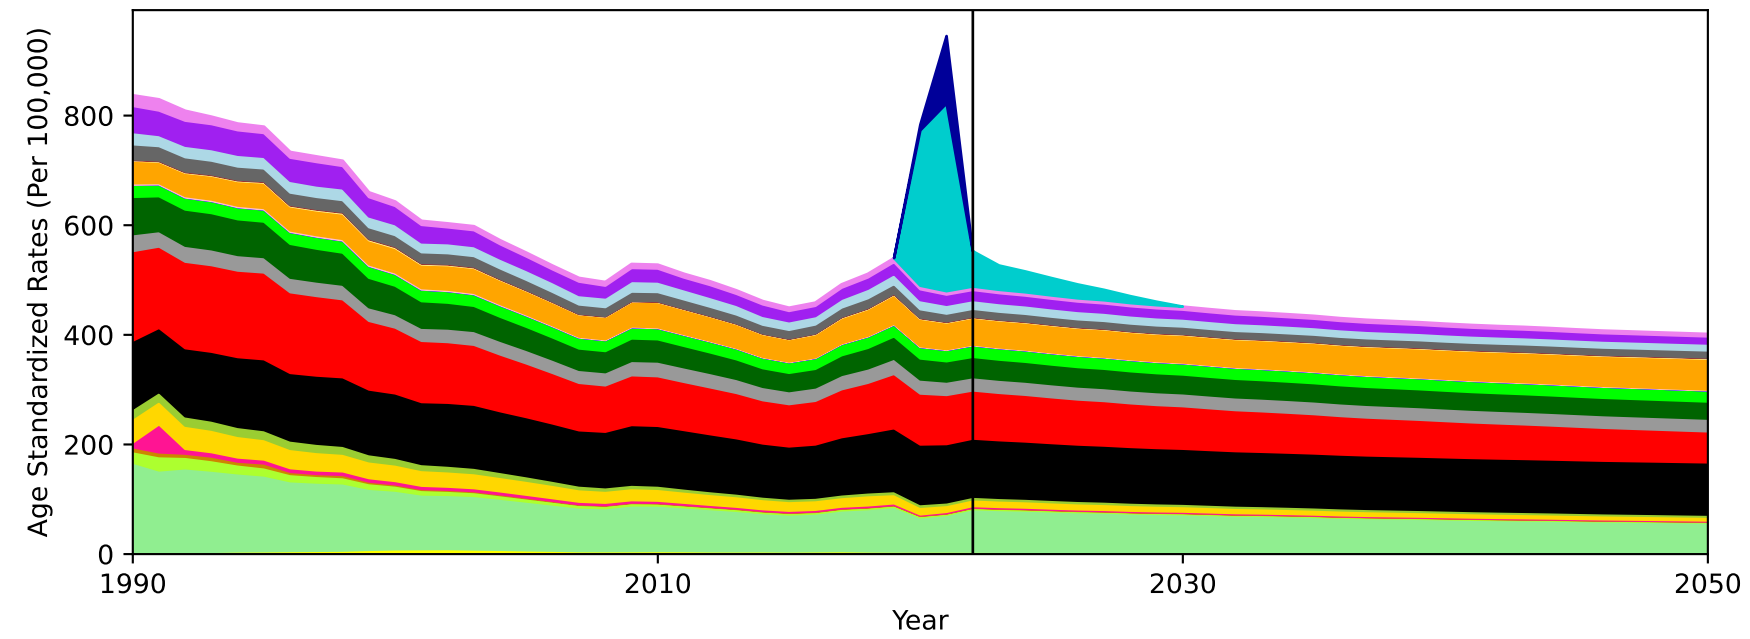

Level 1

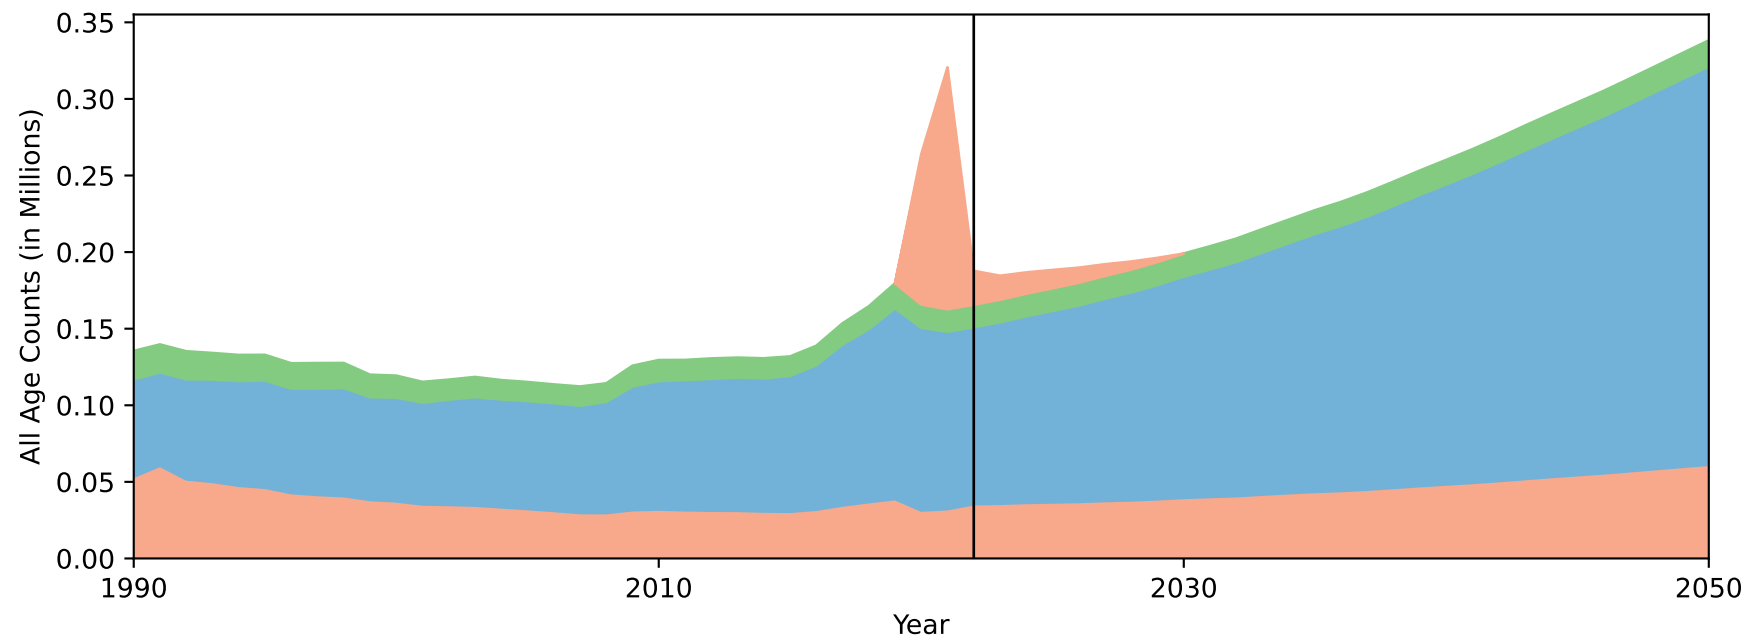

Level 2

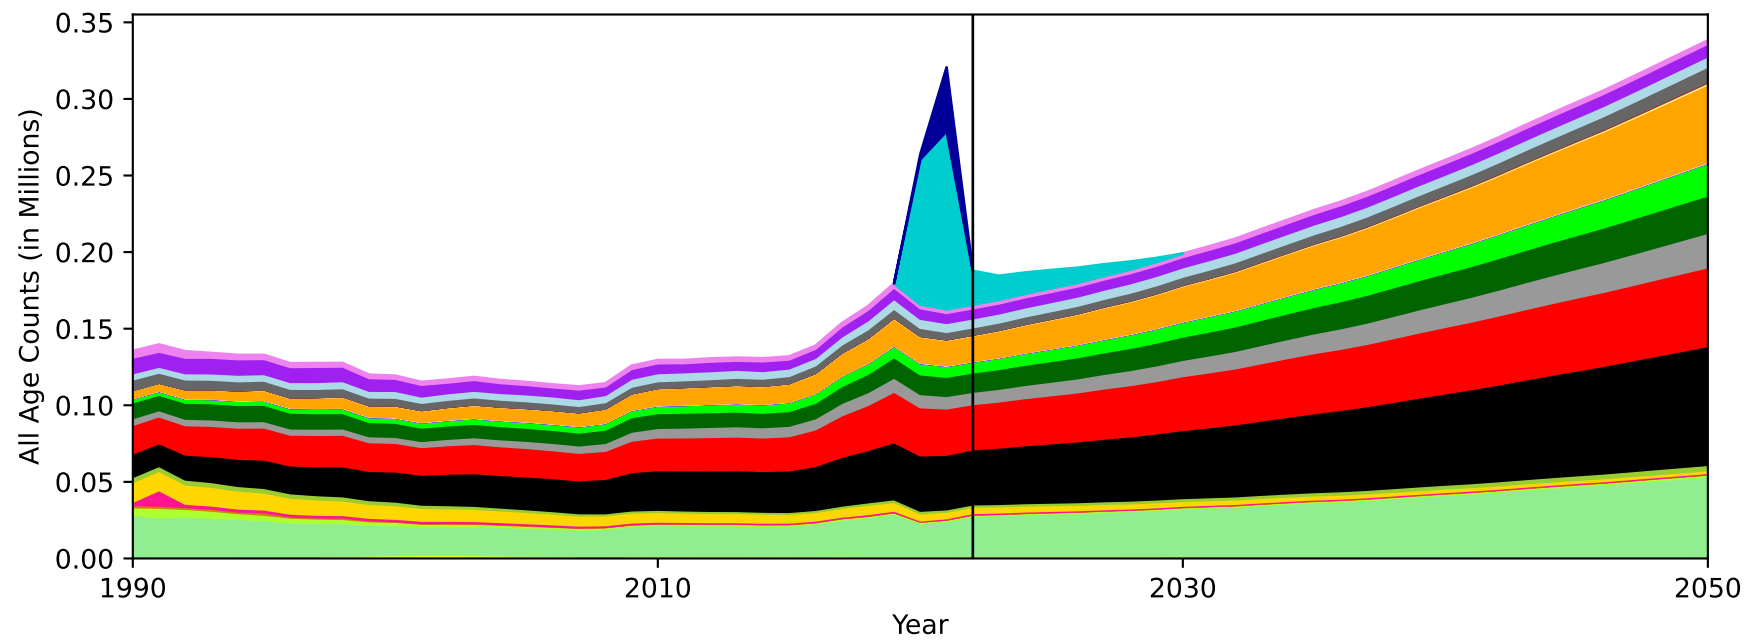

# Antigua And Barbuda

Supplemental Results Figure S5. Age-standardised death rates and all age death counts and by Level 1 and Level 2 causes, 1990–2050

546

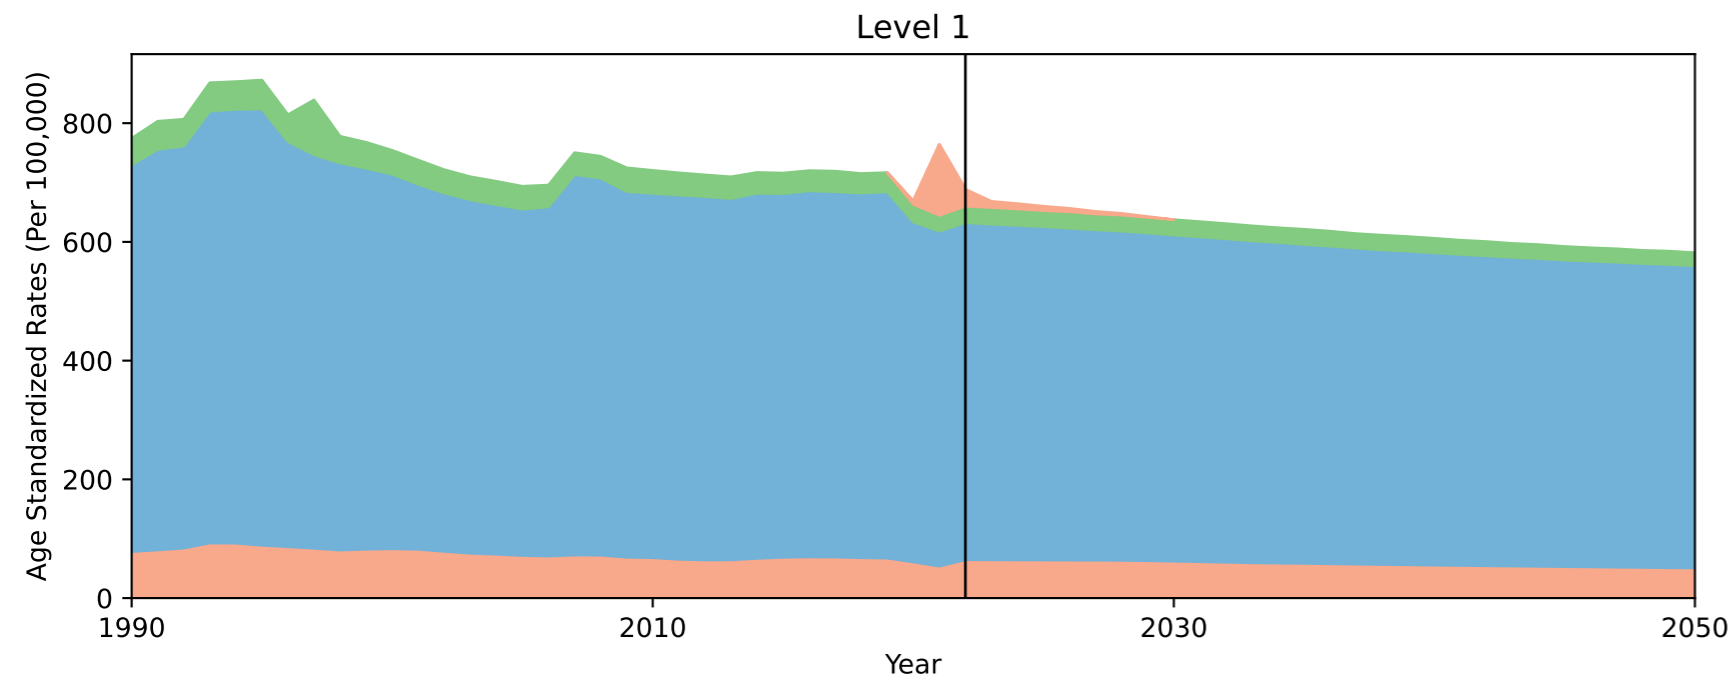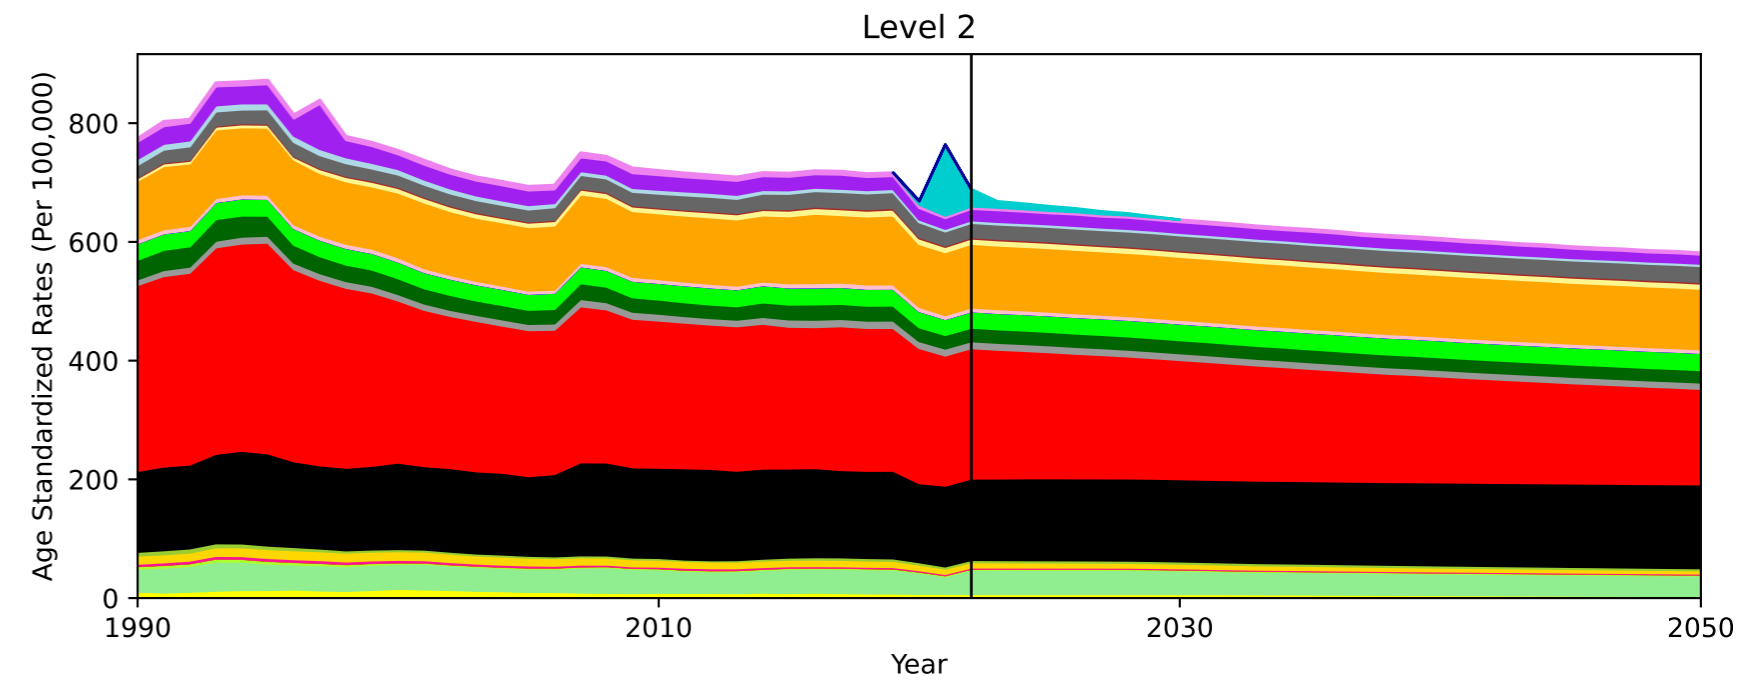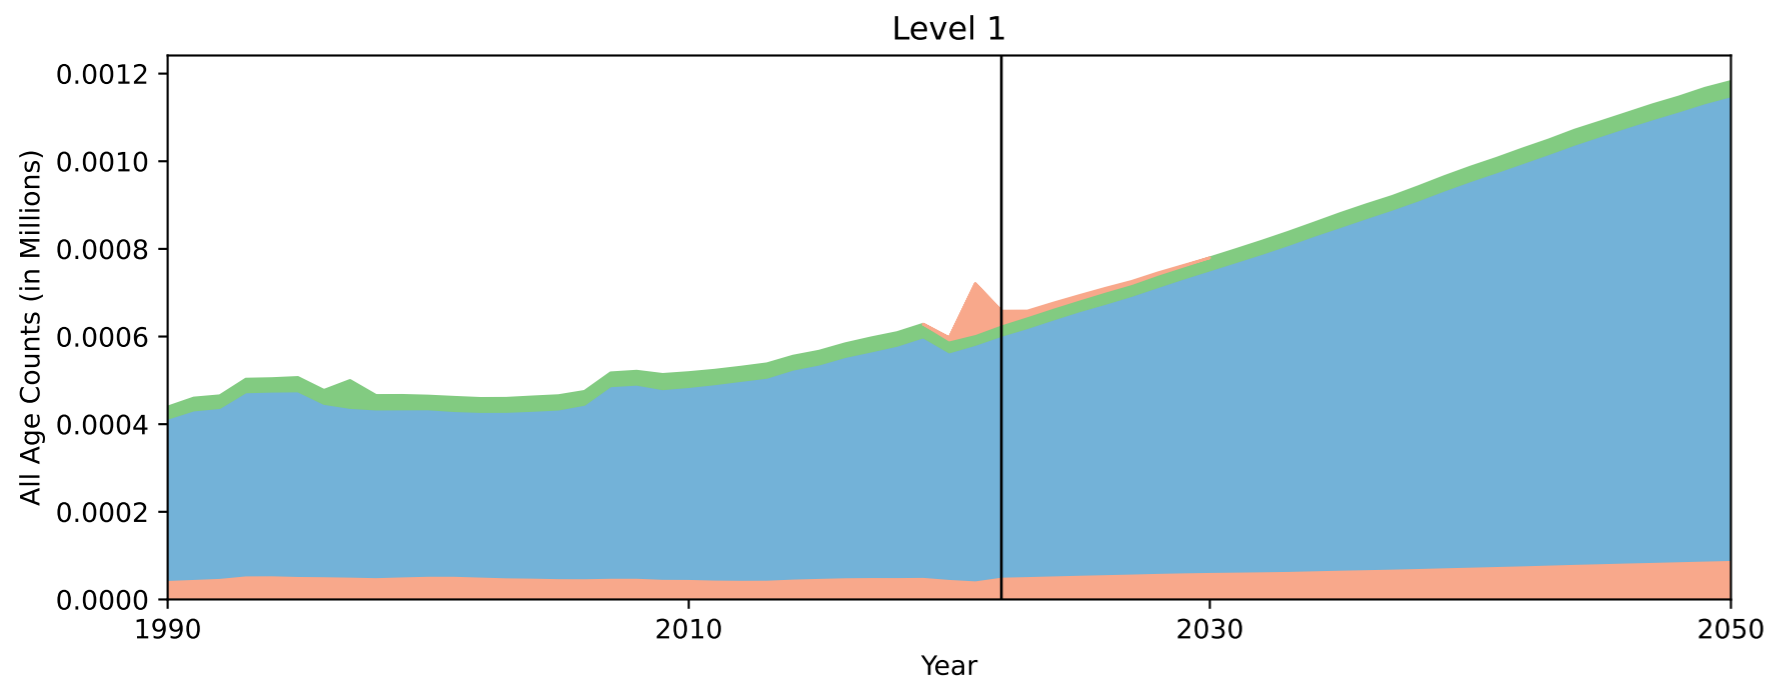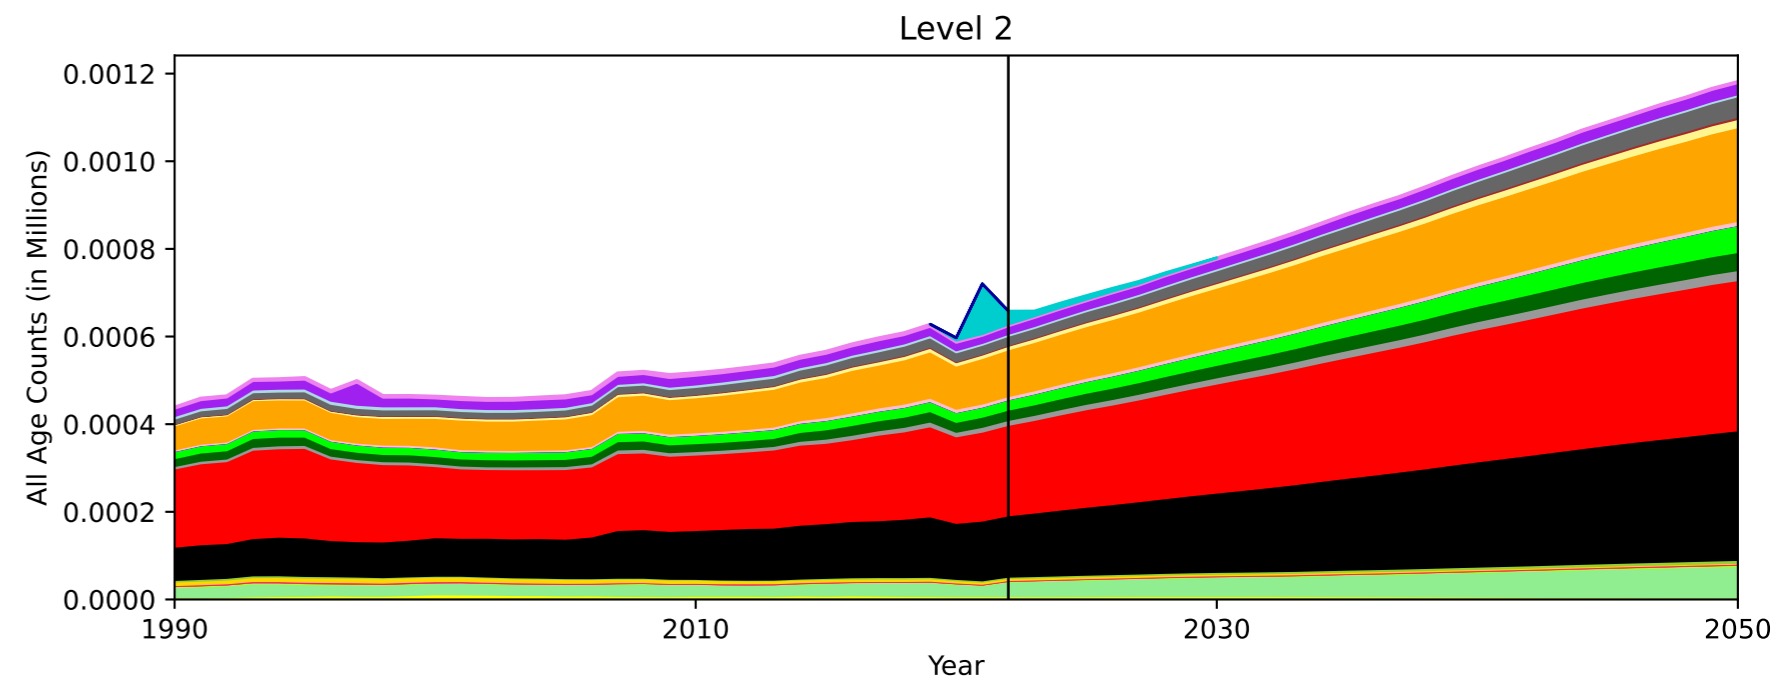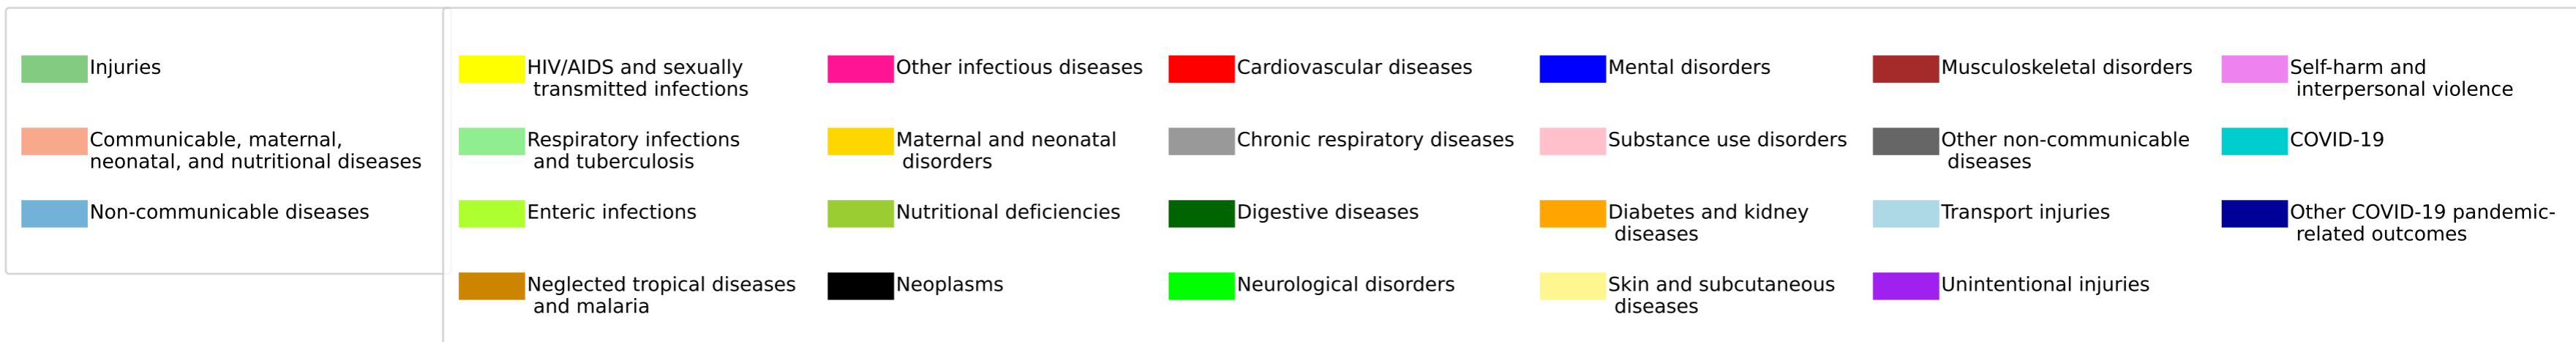

# The Bahamas

Level 1

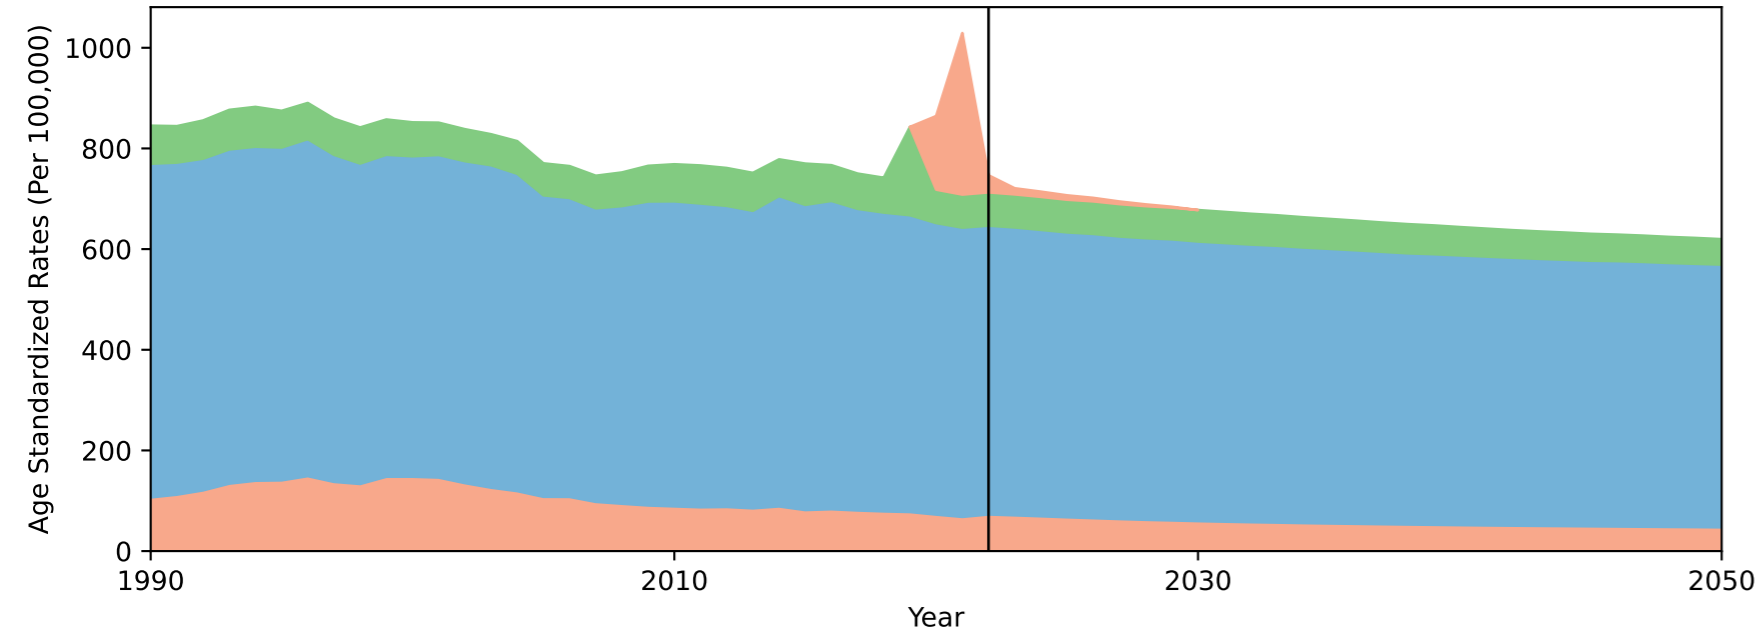

Level 2

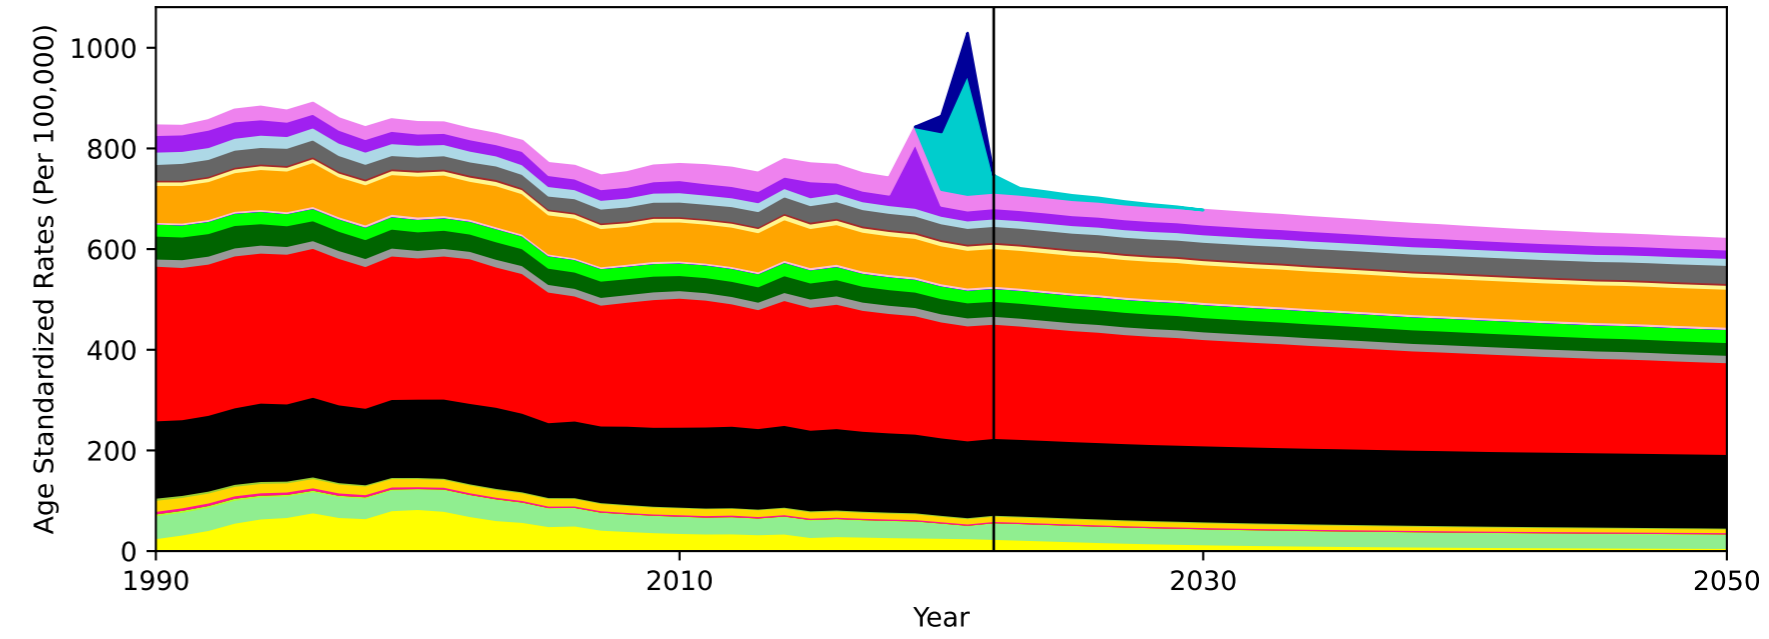

Level 1

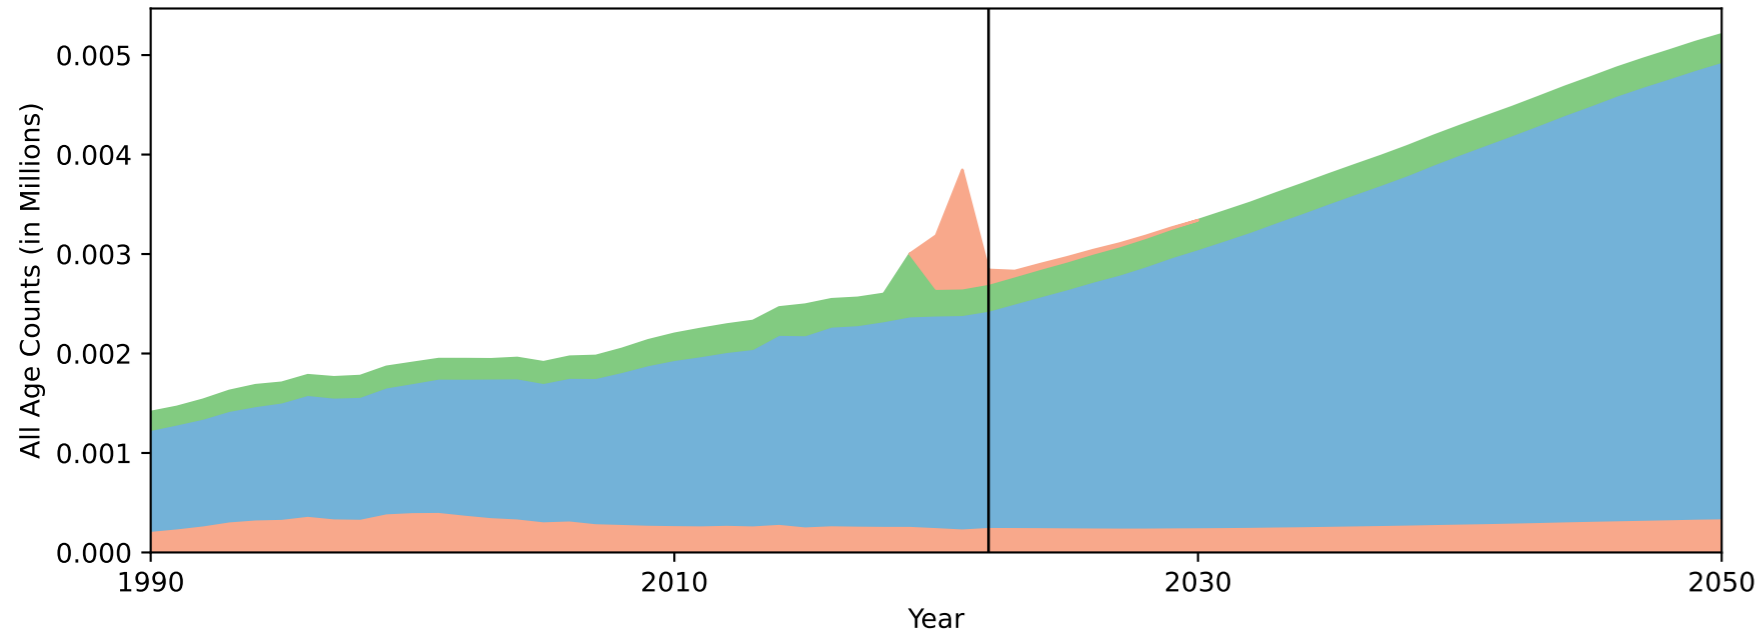

Level 2

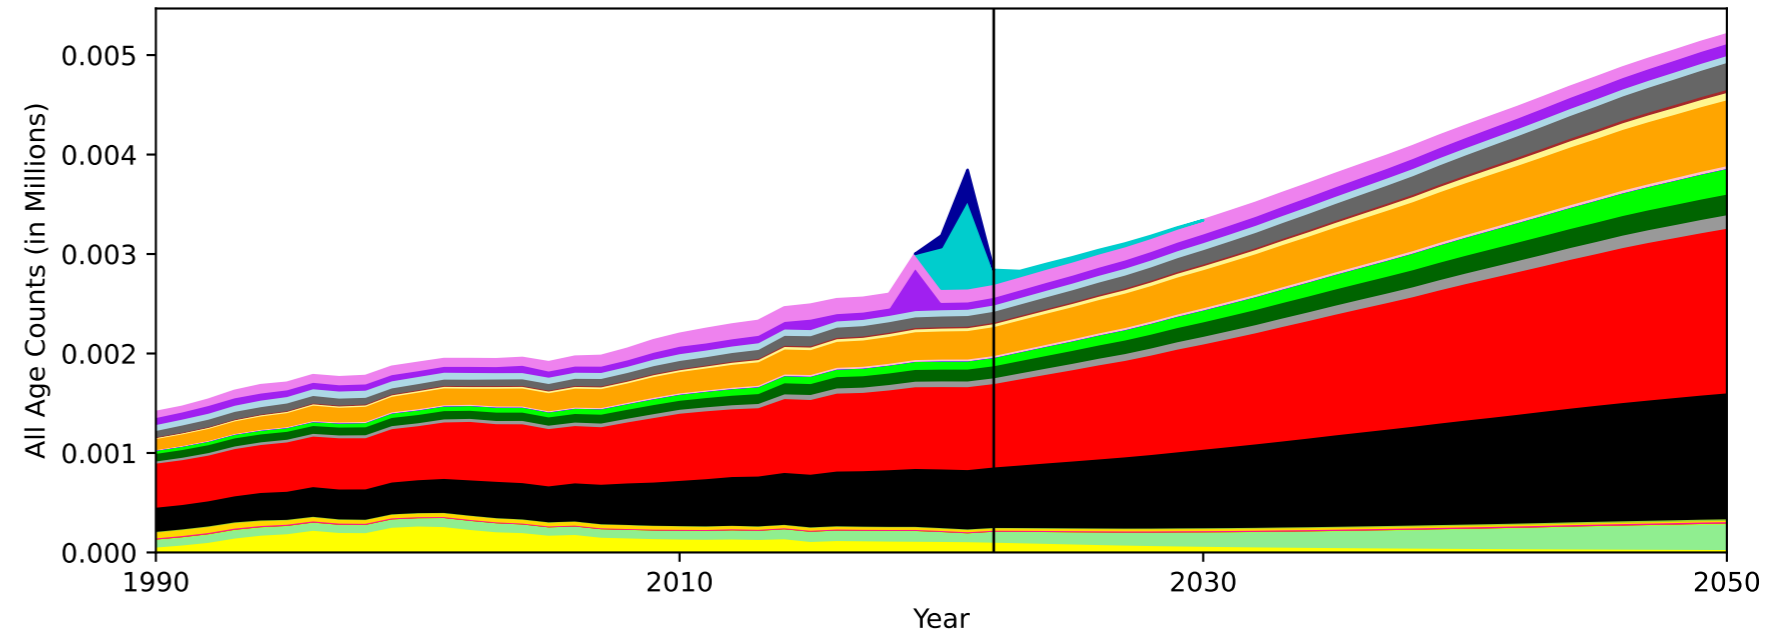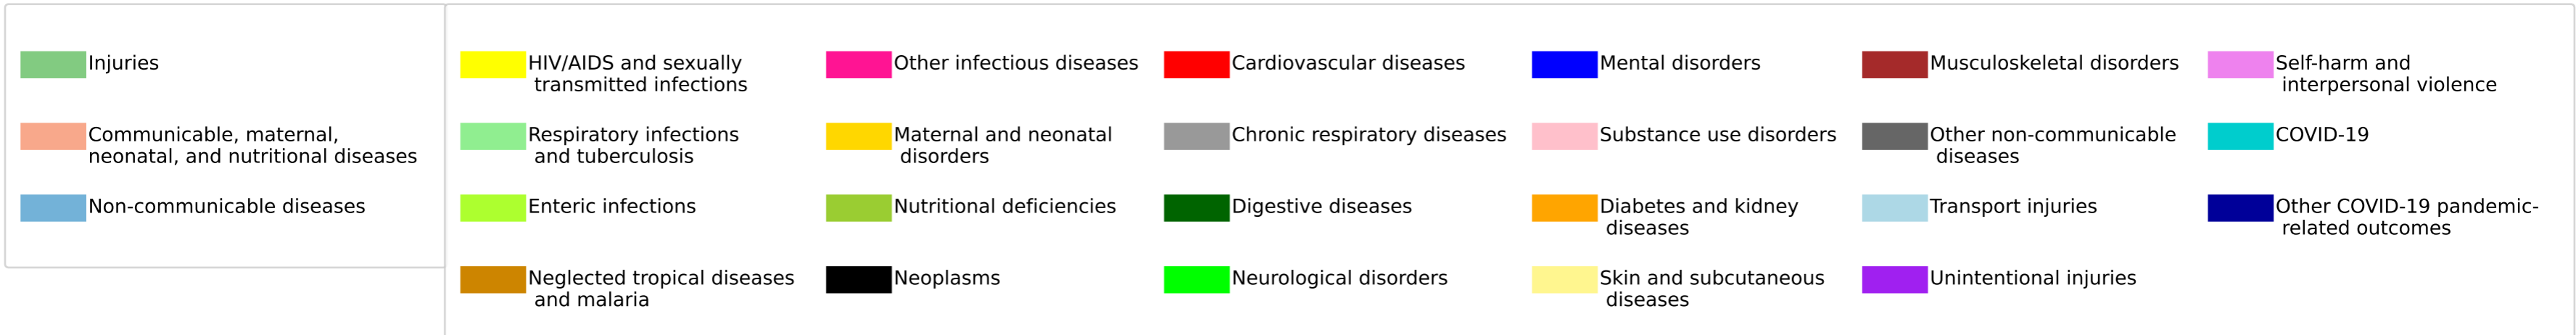

# Barbados

Supplemental Results Figure S5. Age-standardised death rates and all age death counts and by Level 1 and Level 2 causes, 1990–2050

548

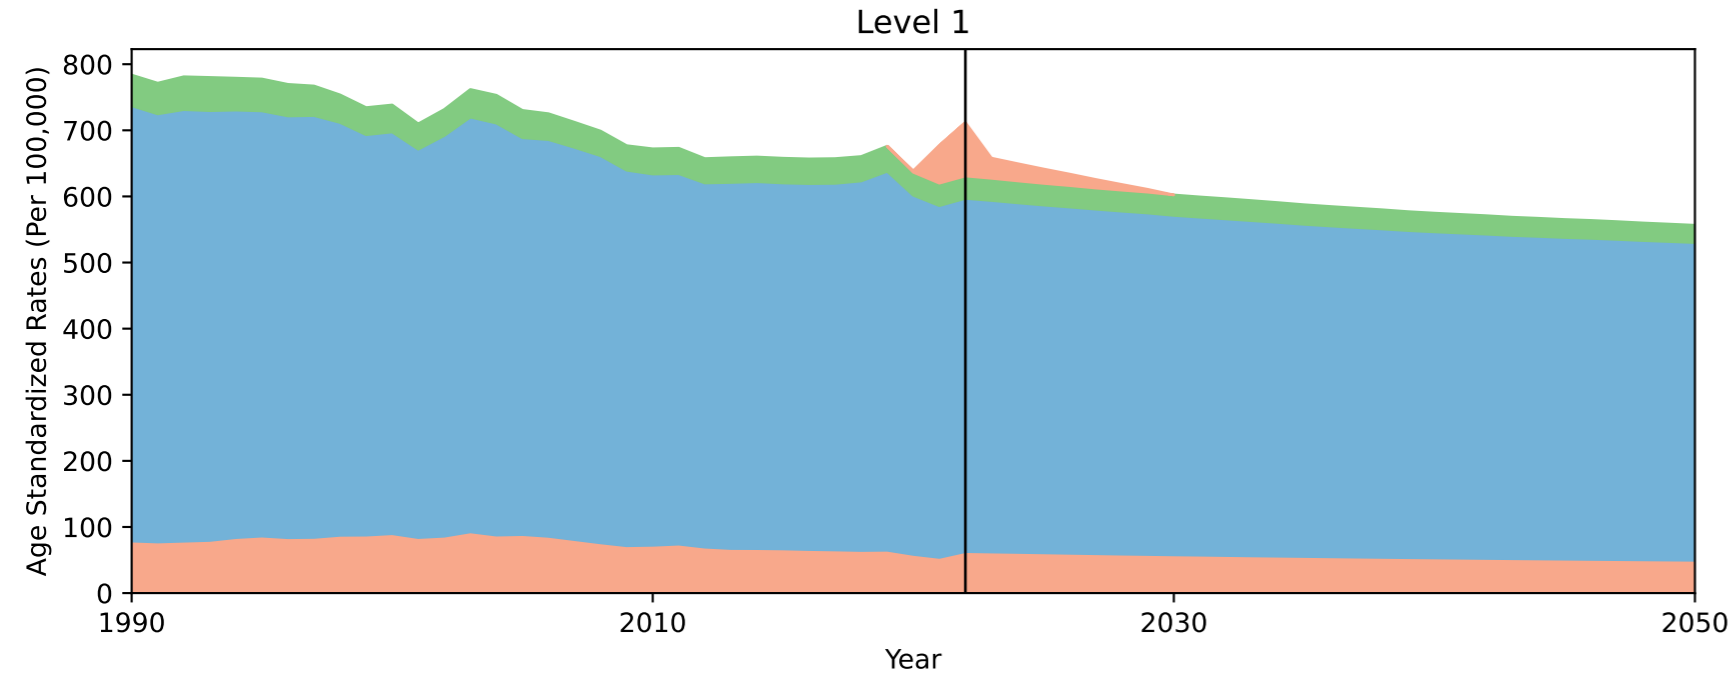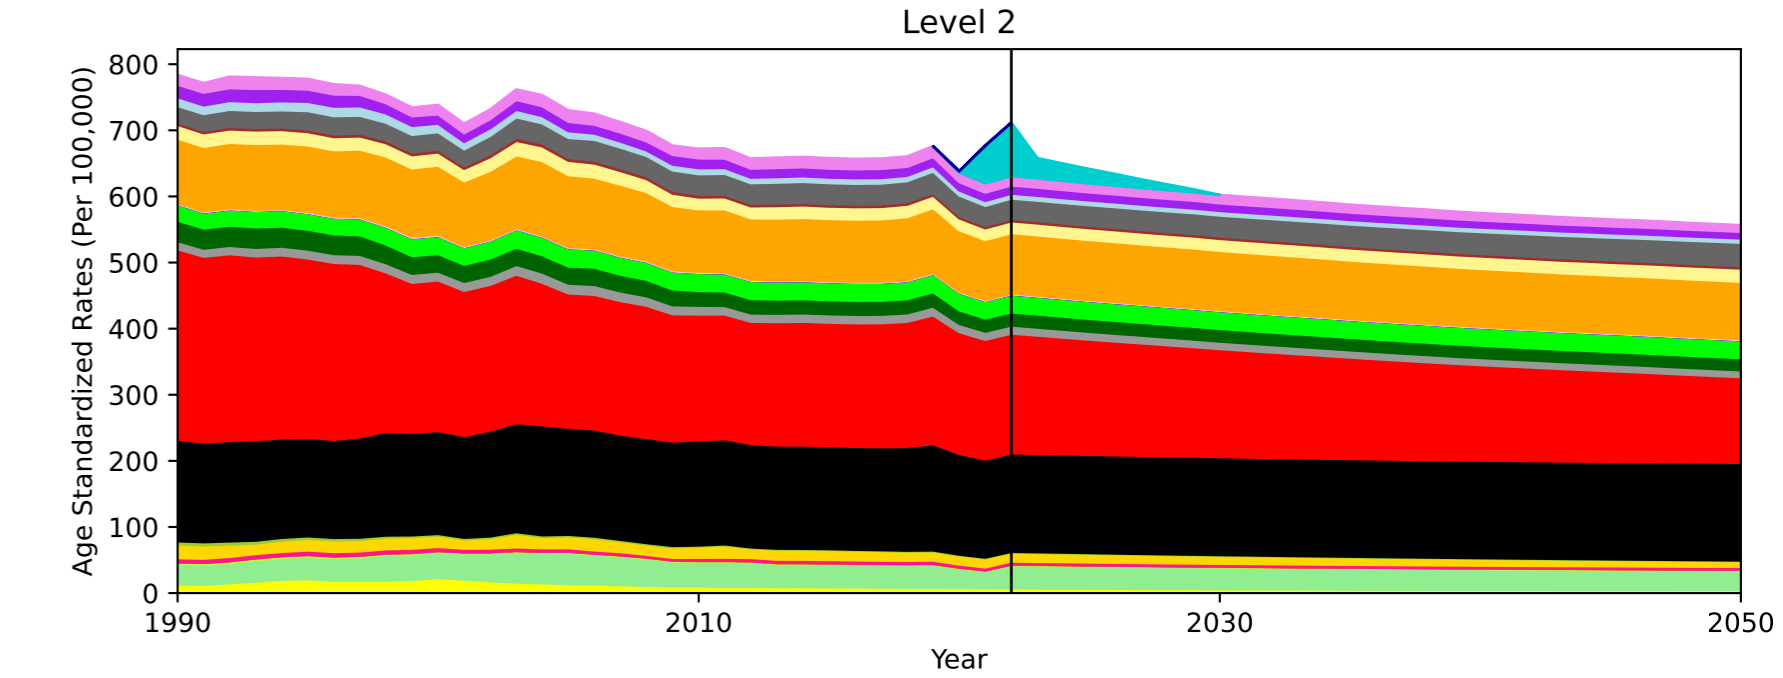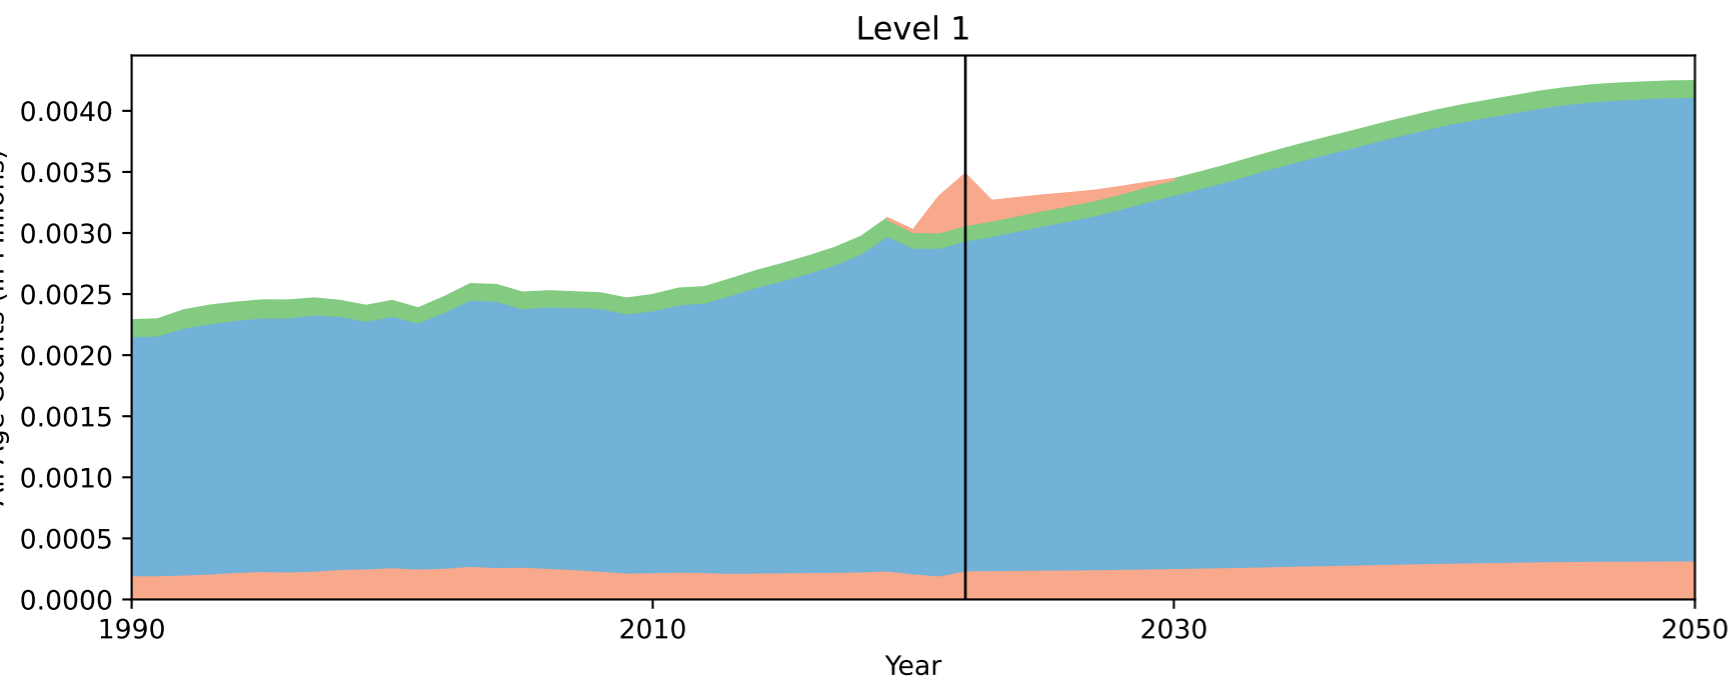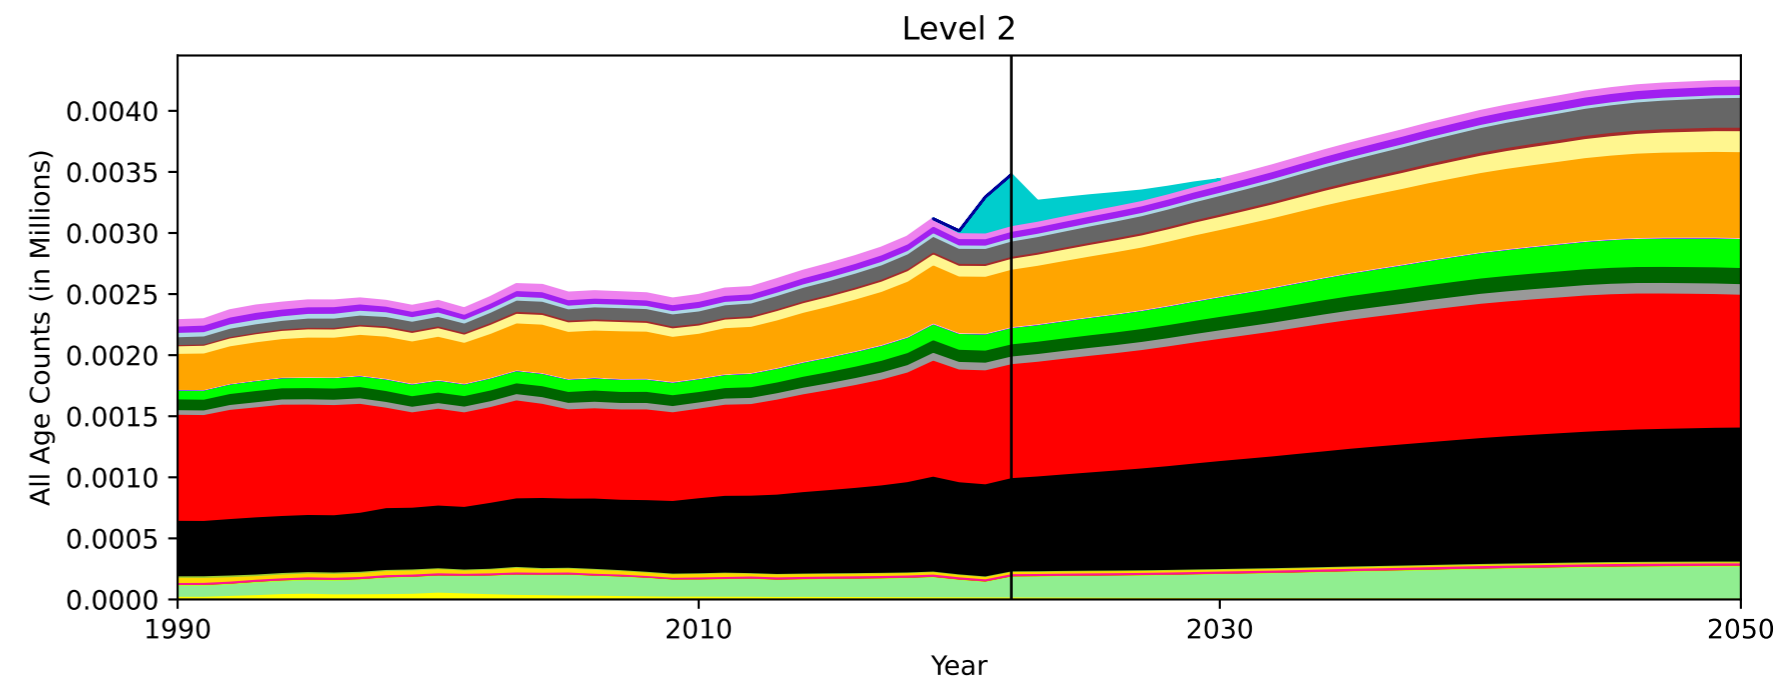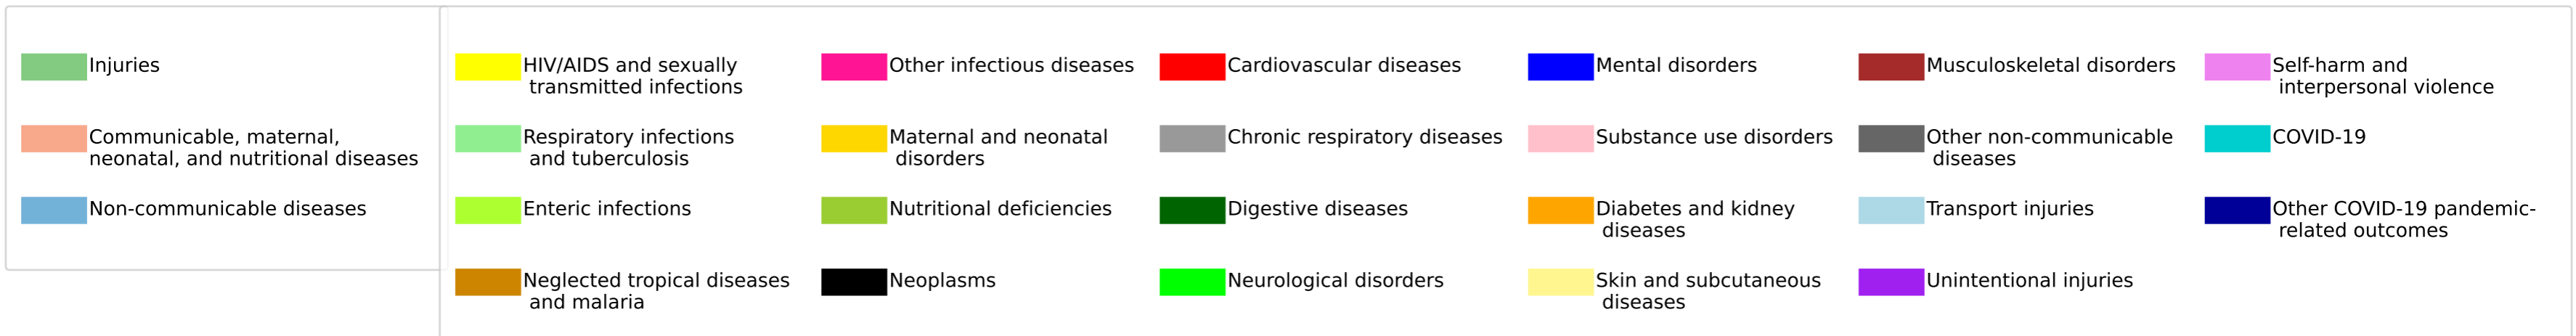

# Belize

Level 1

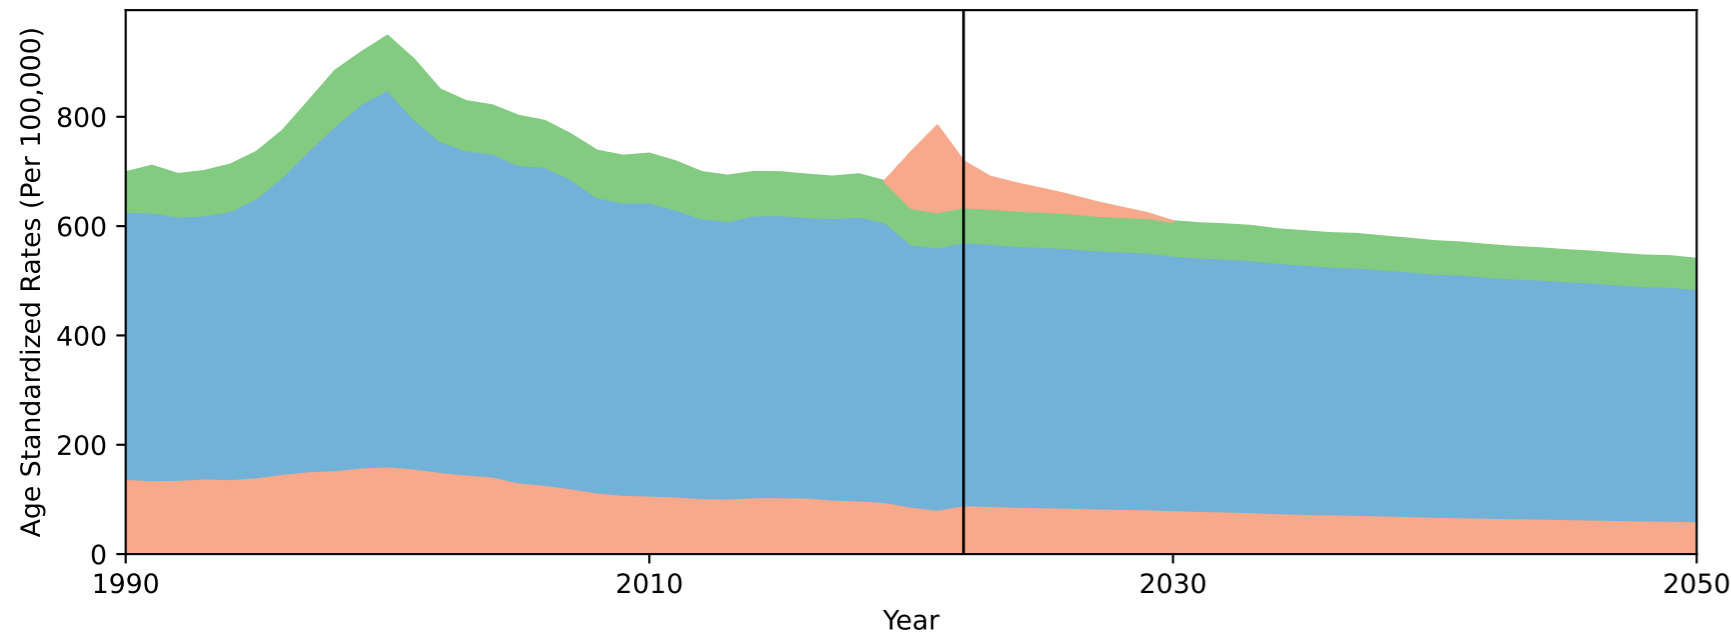

Level 2

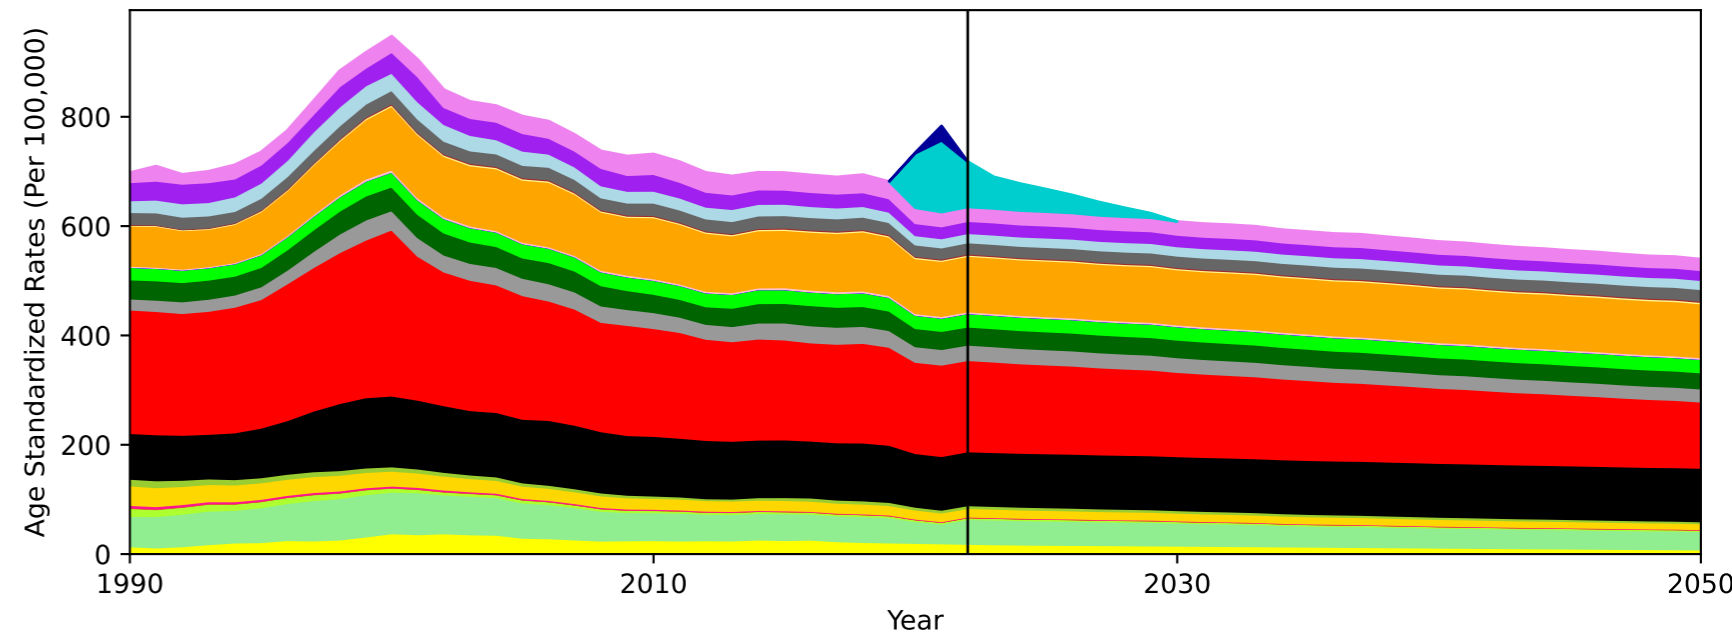

Level 1

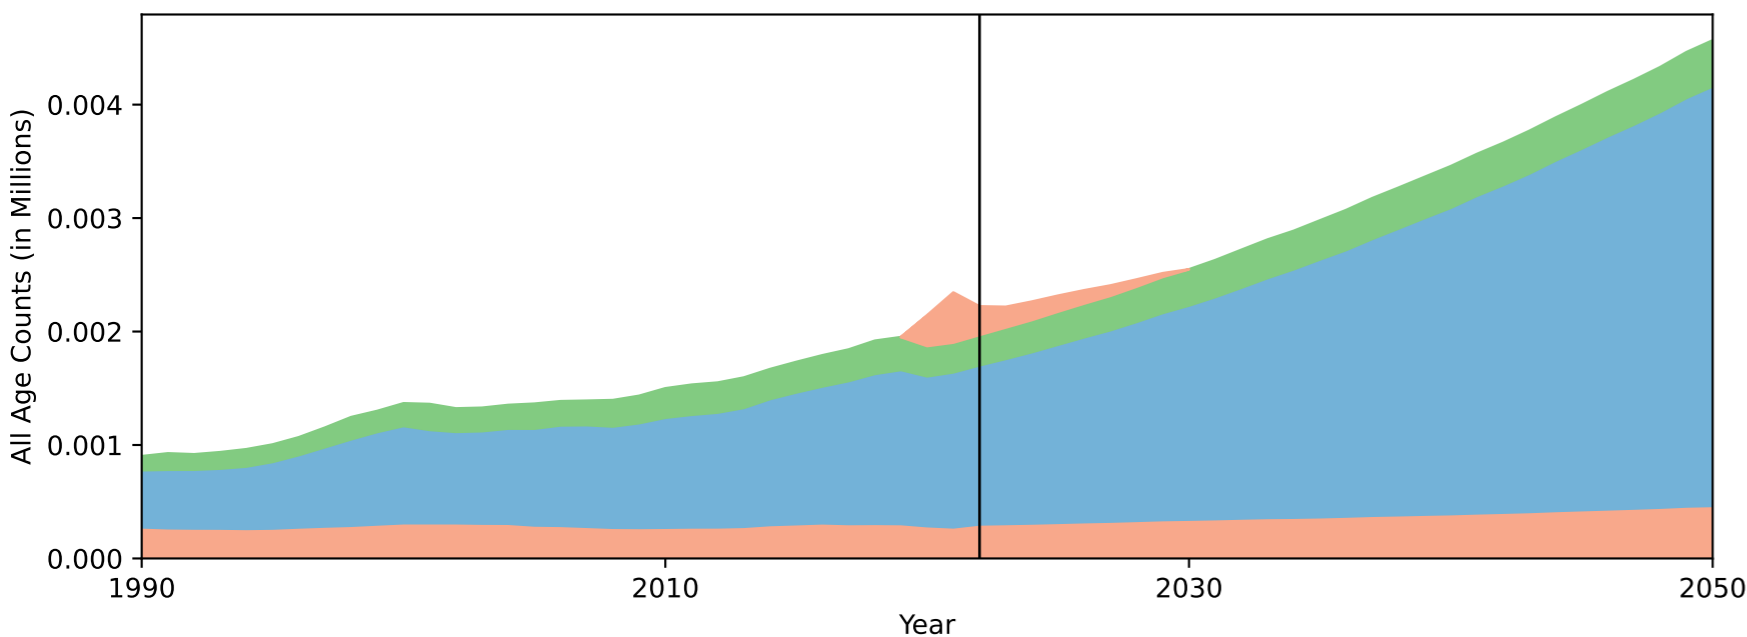

Level 2

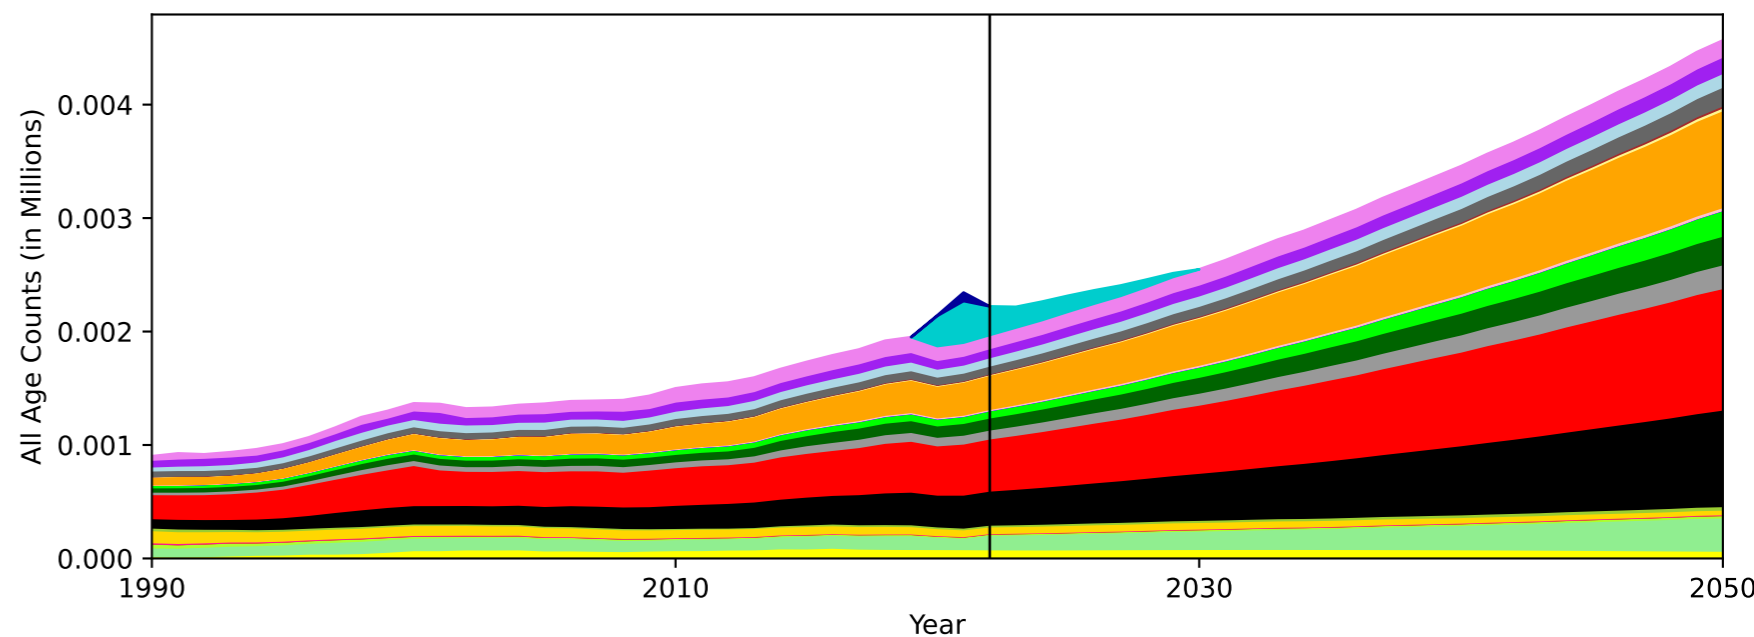

# Bermuda

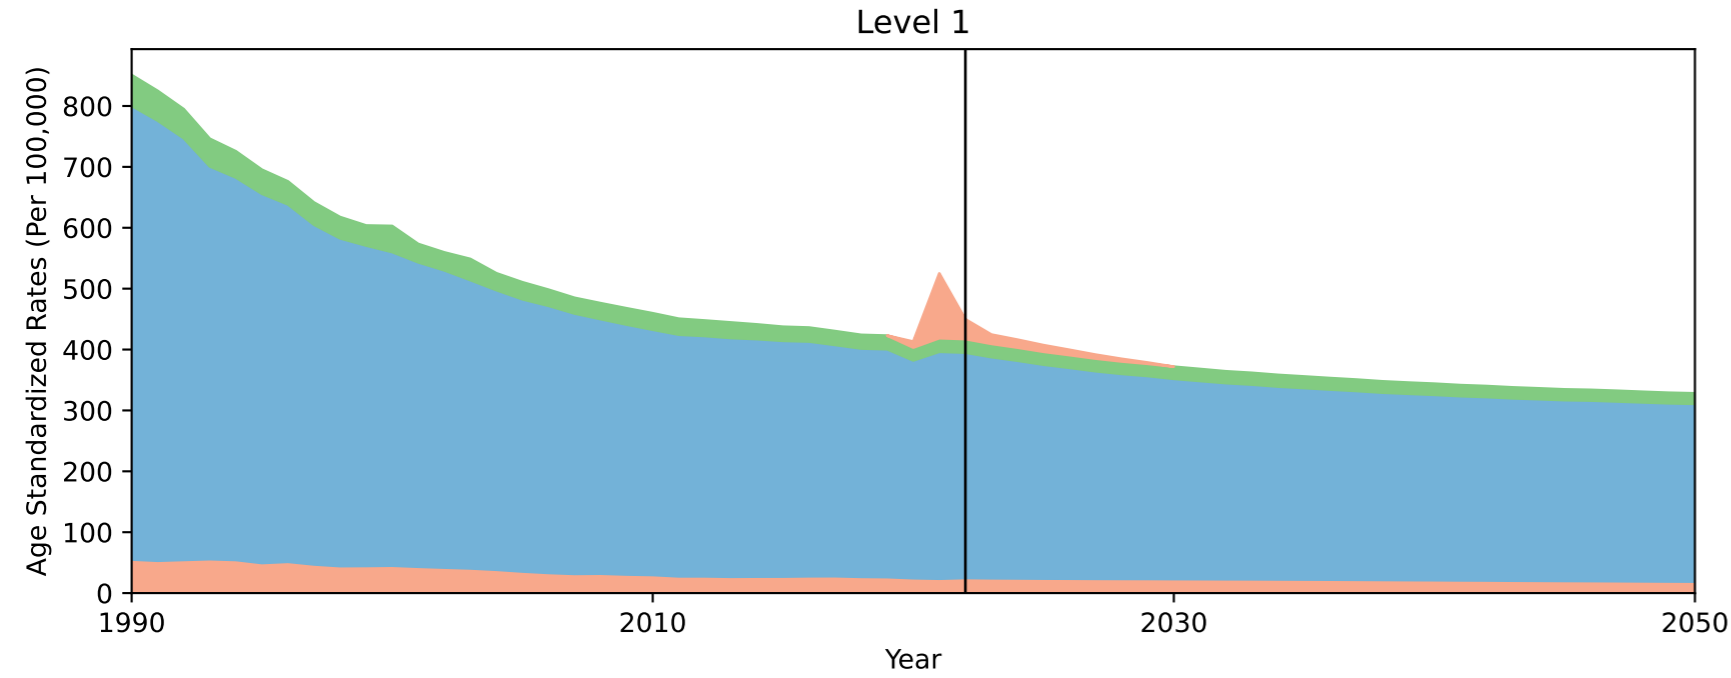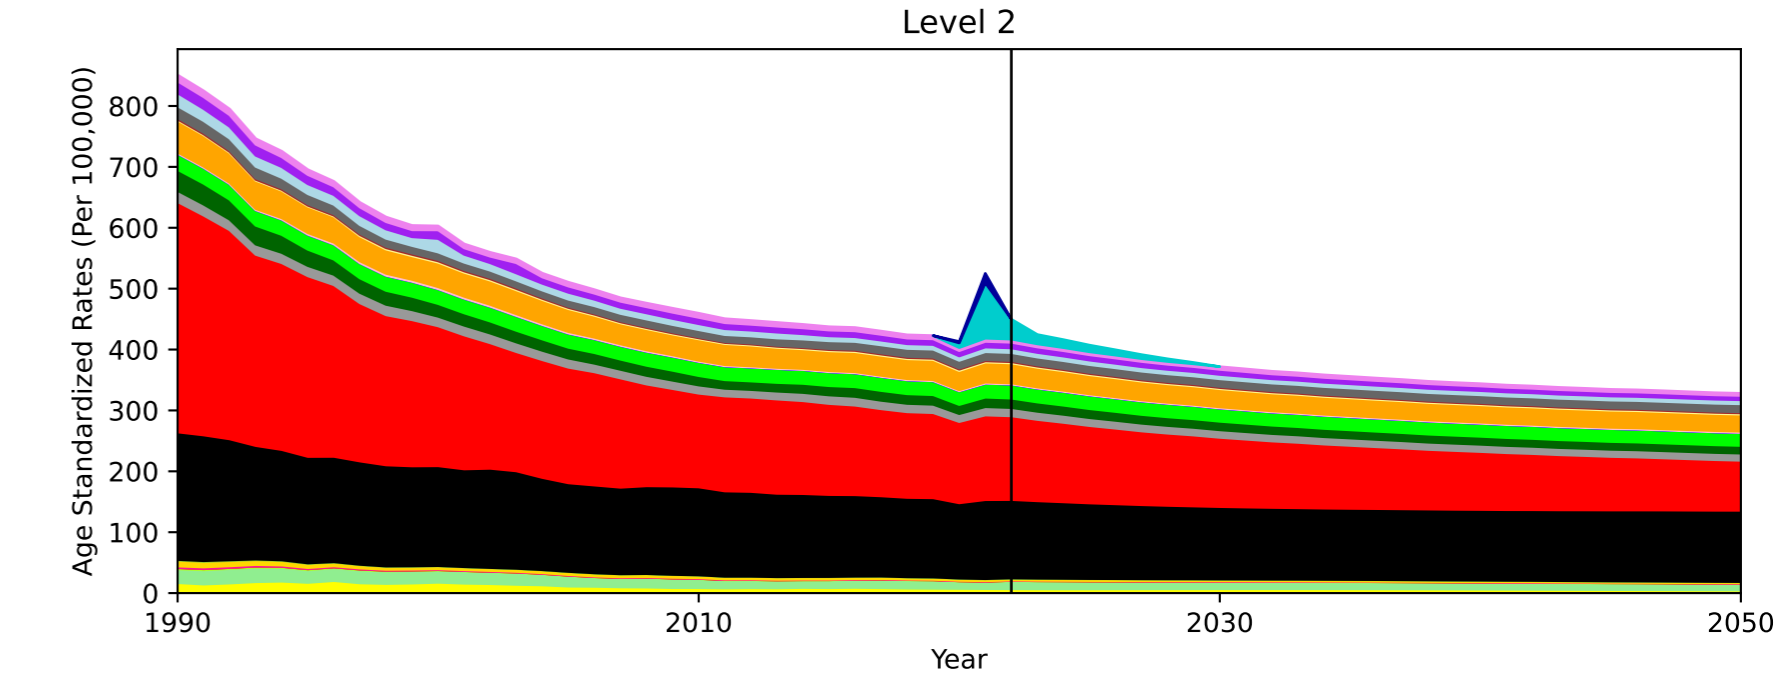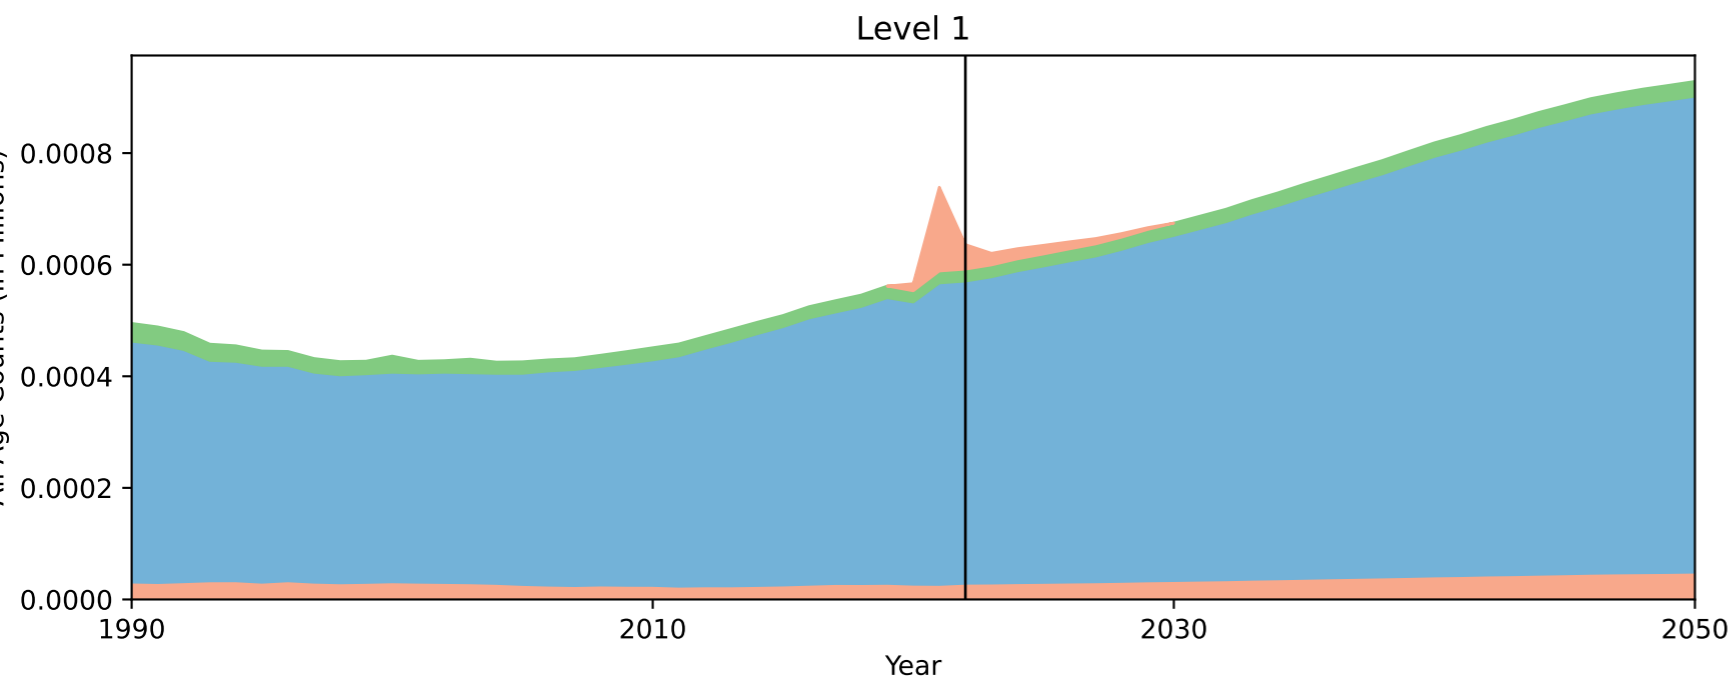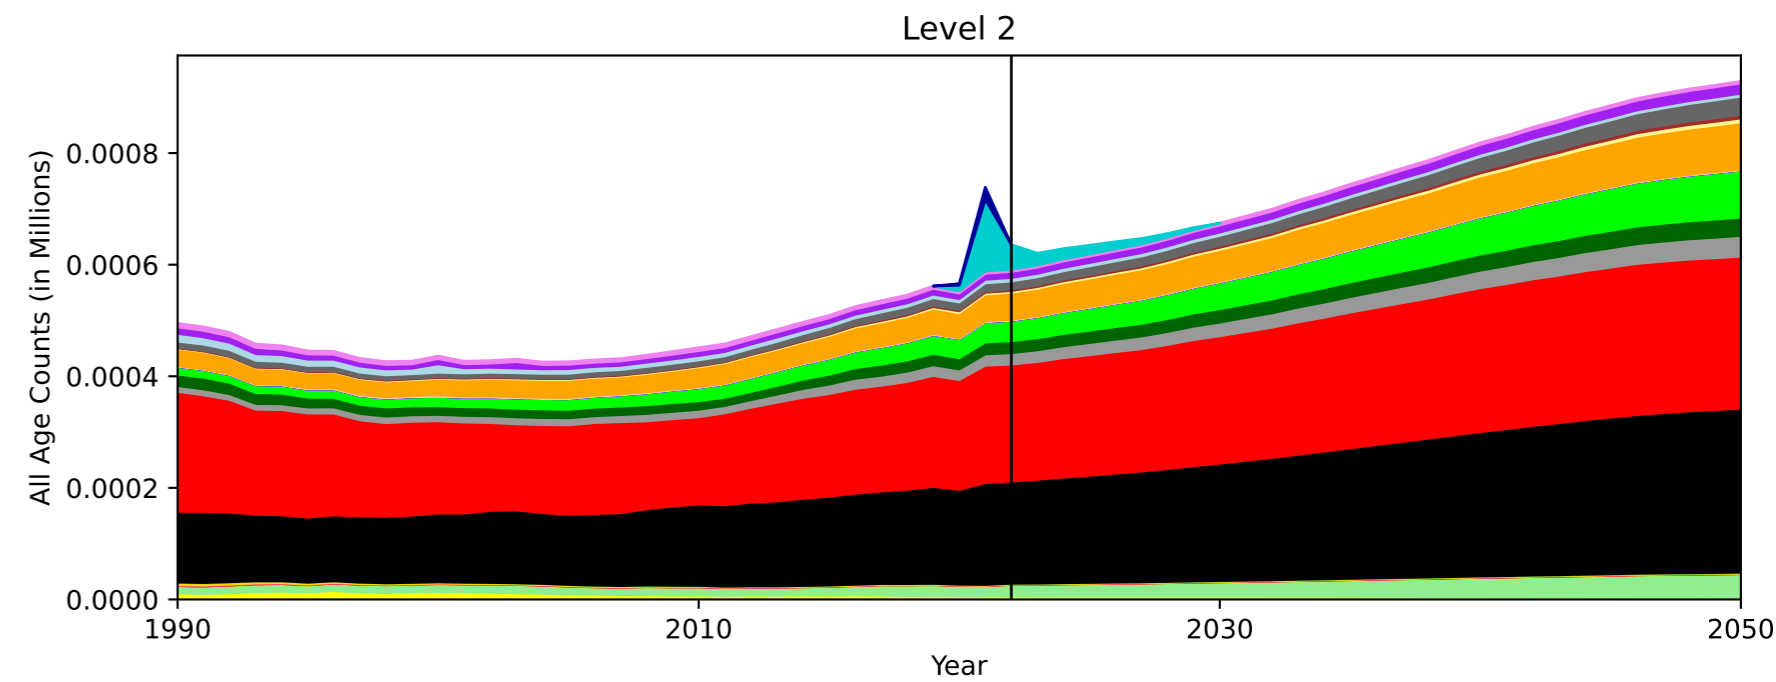

Level 1

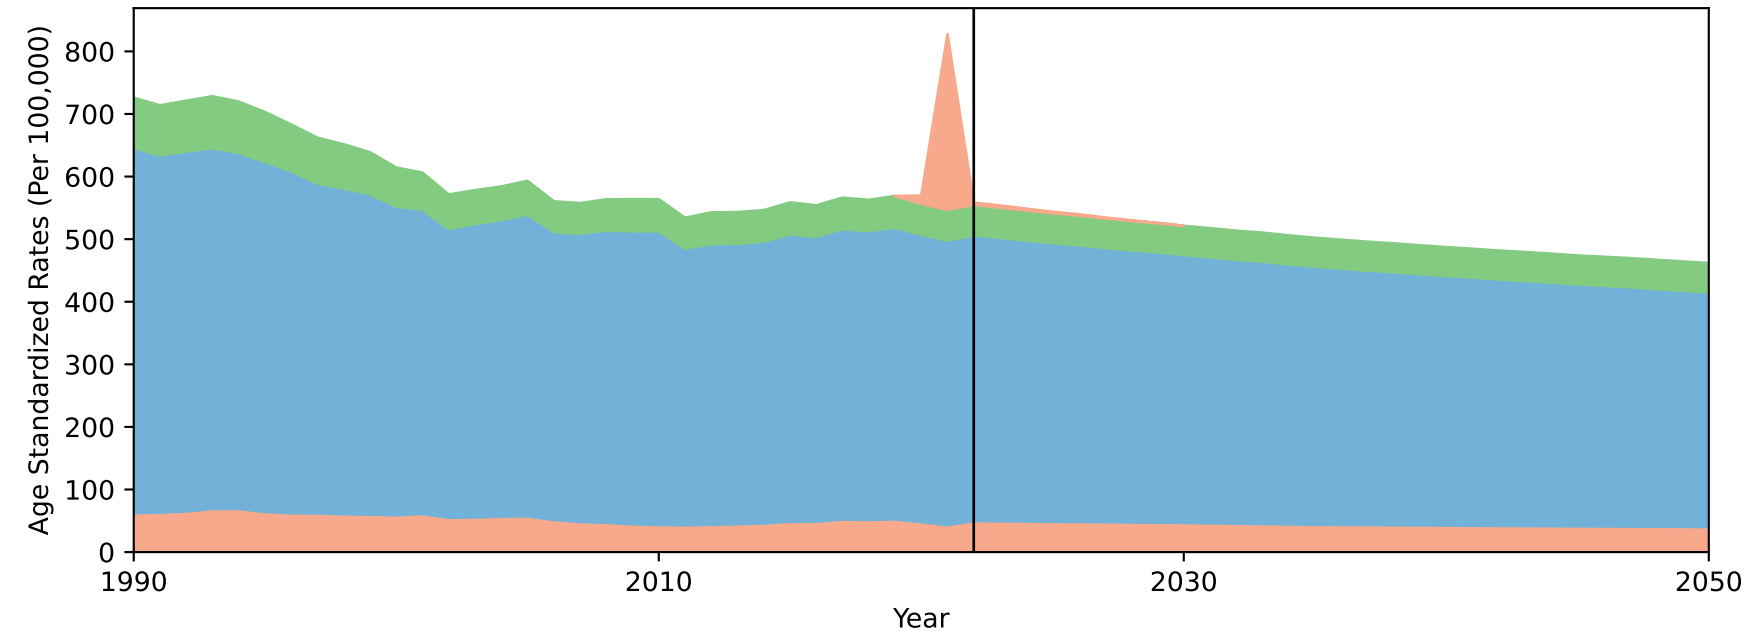

Level 2

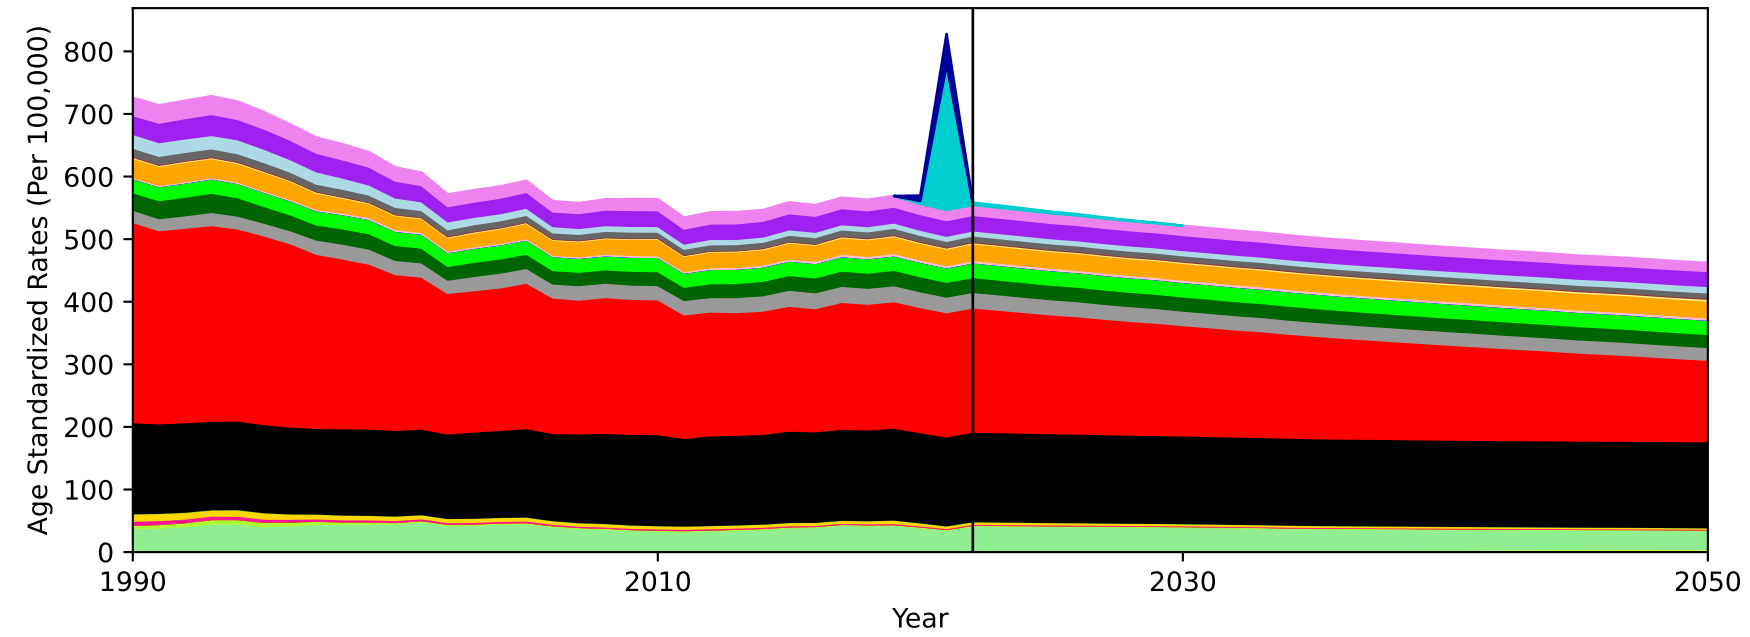

Level 1

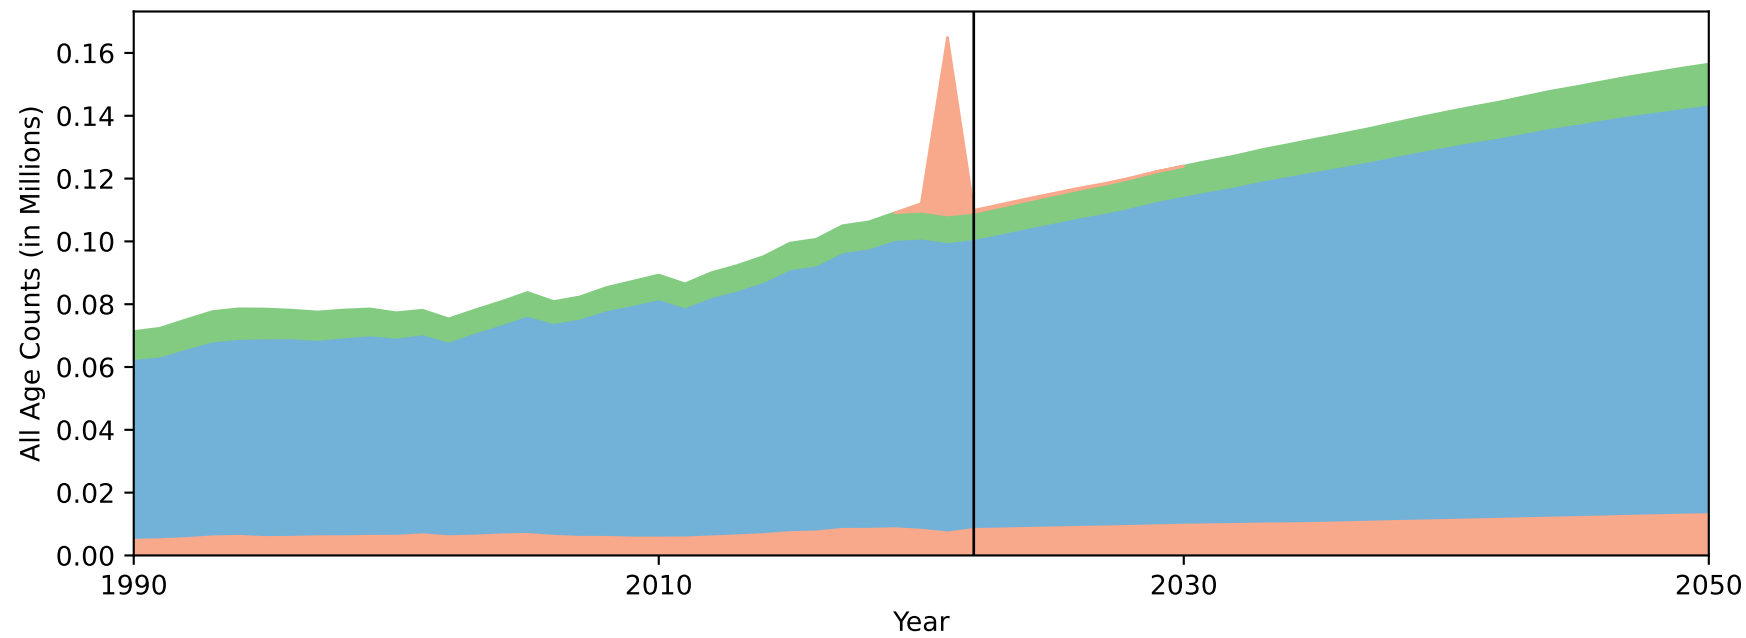

Level 2

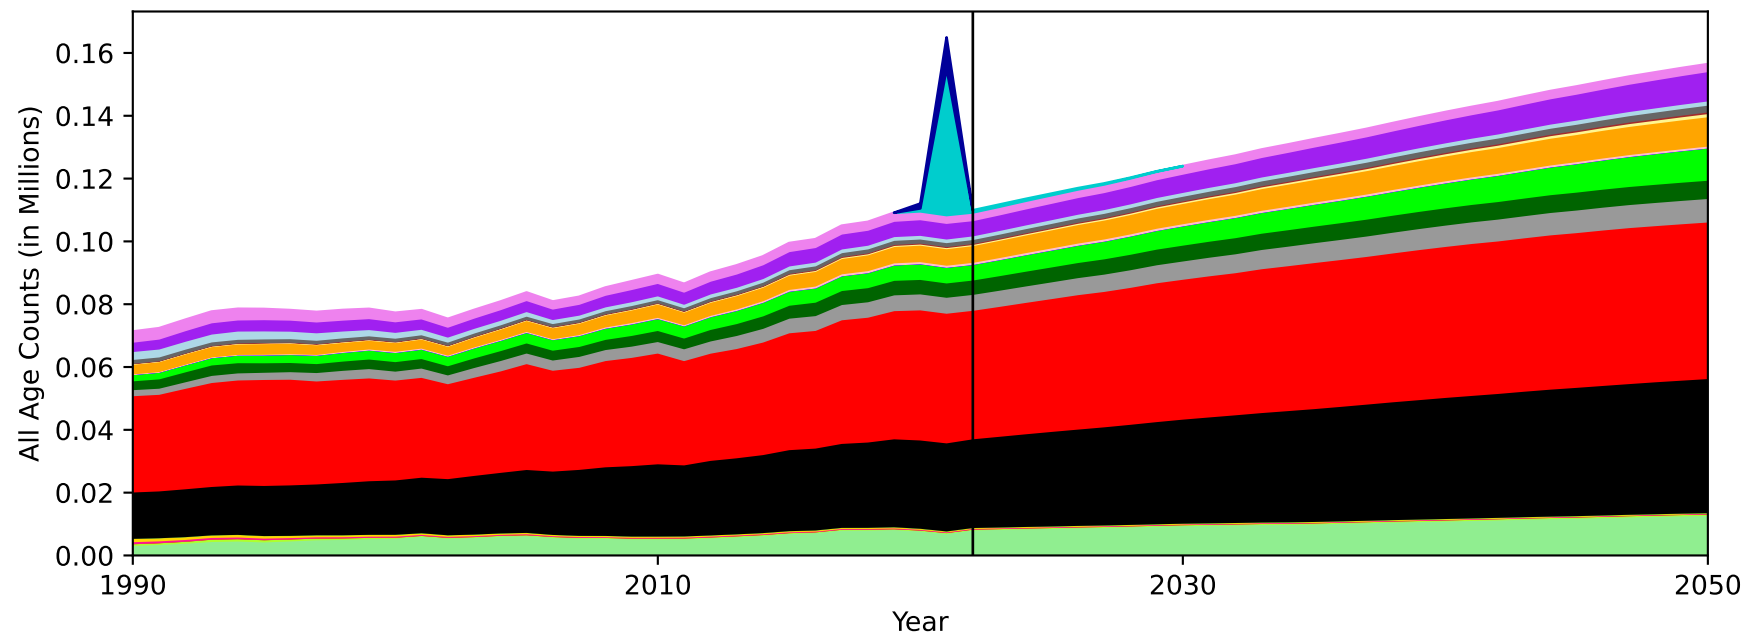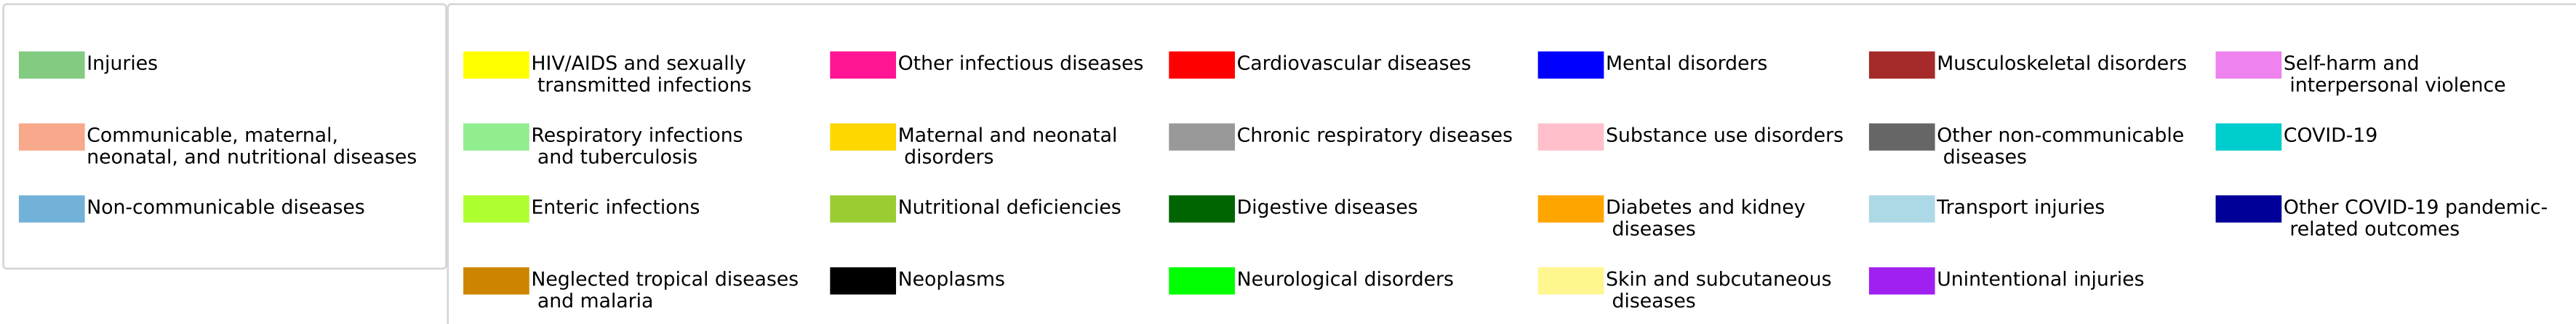



# Dominica

Level 1

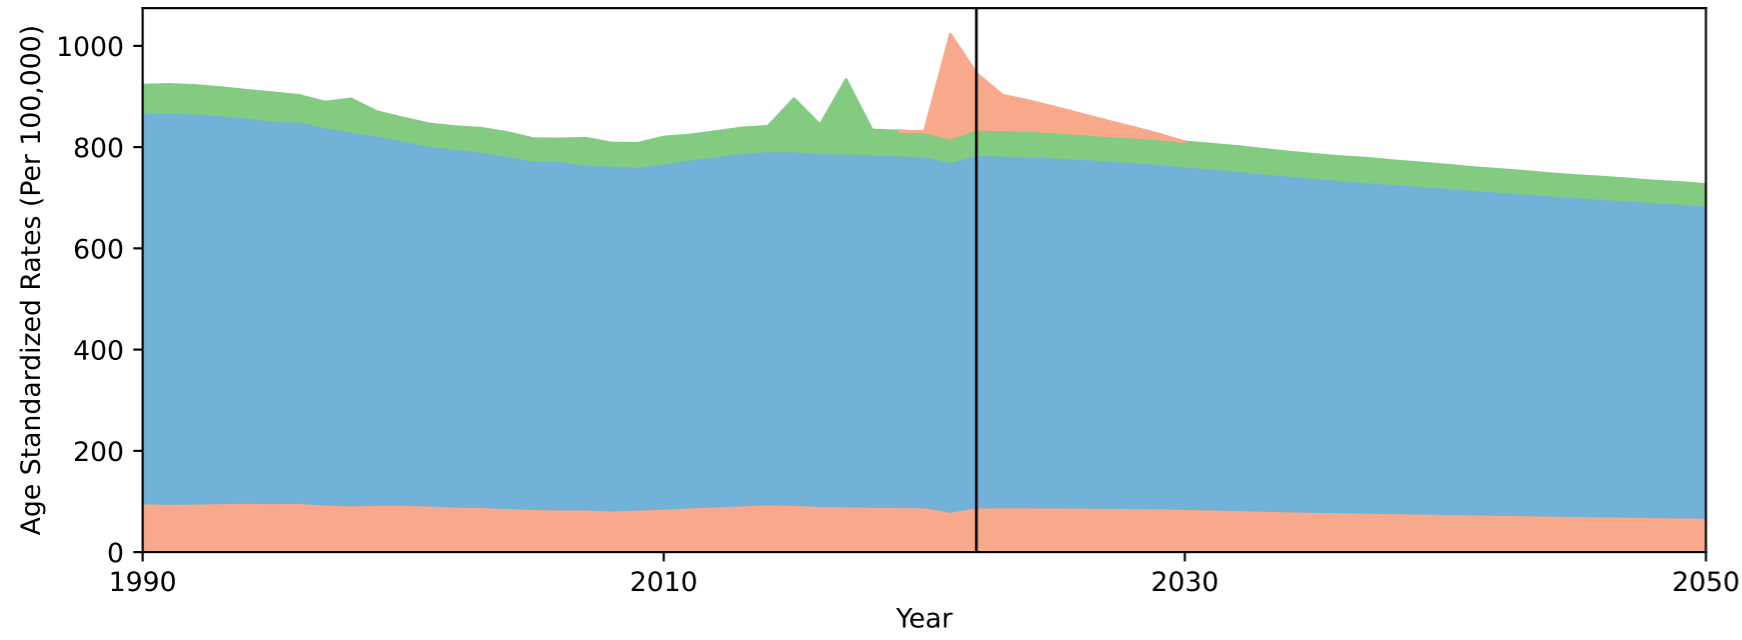

Level 2

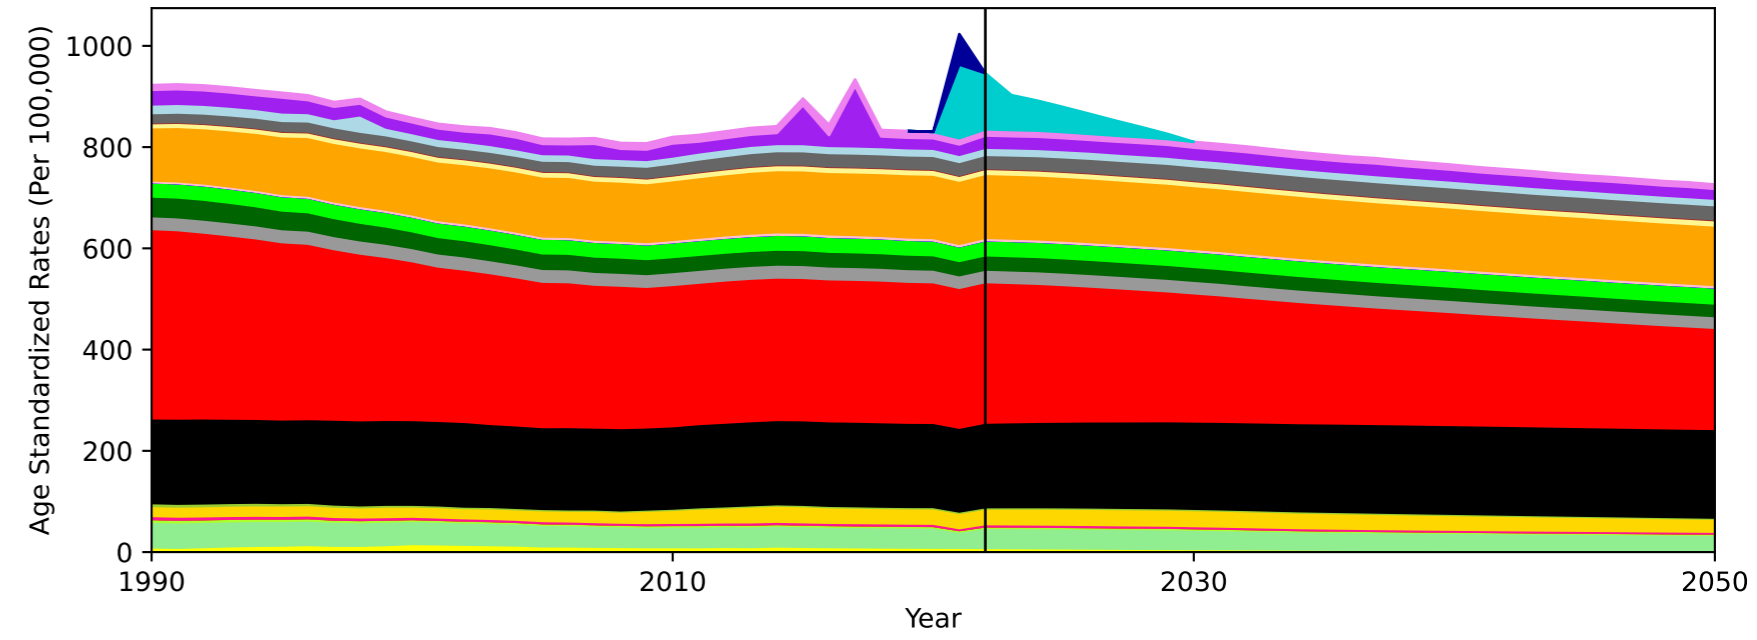

Level 1

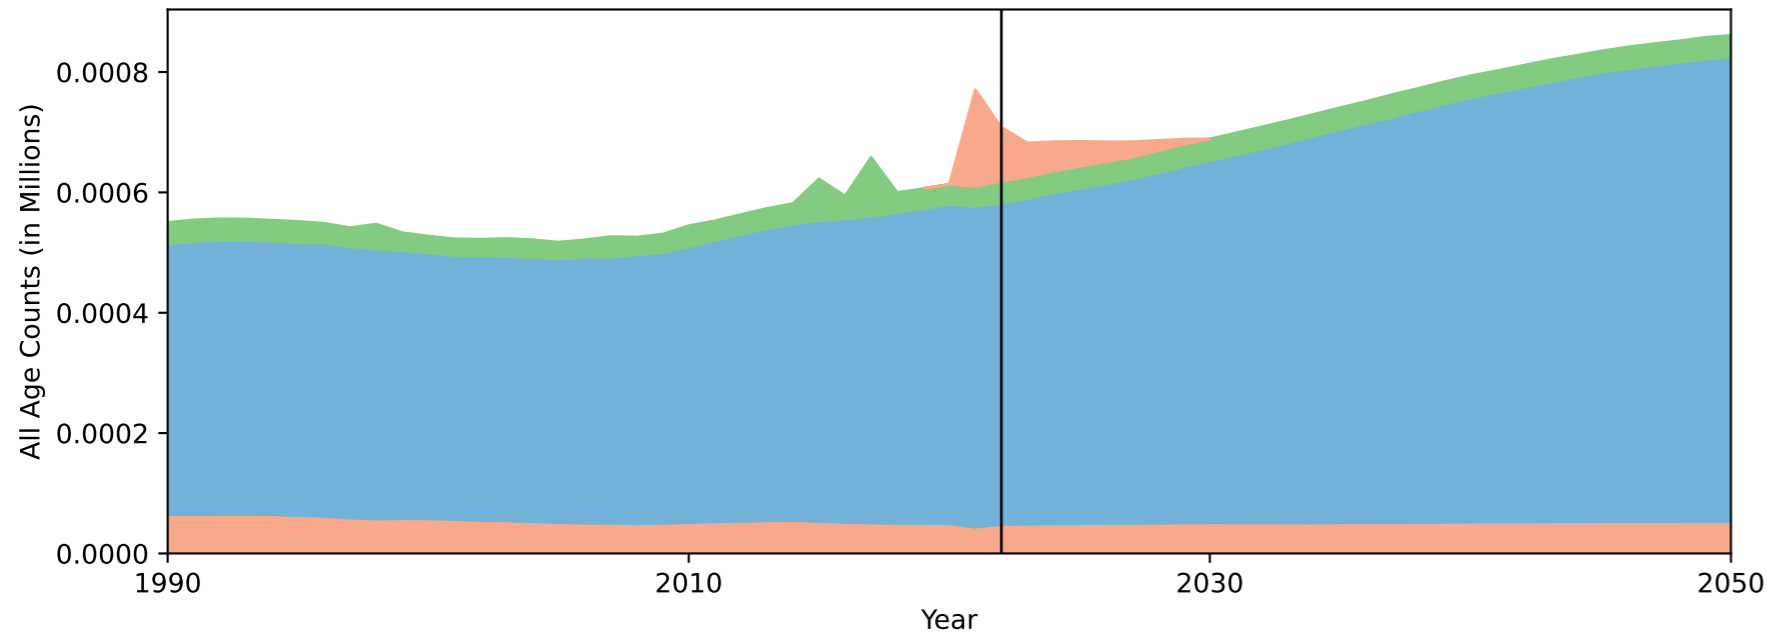

Level 2

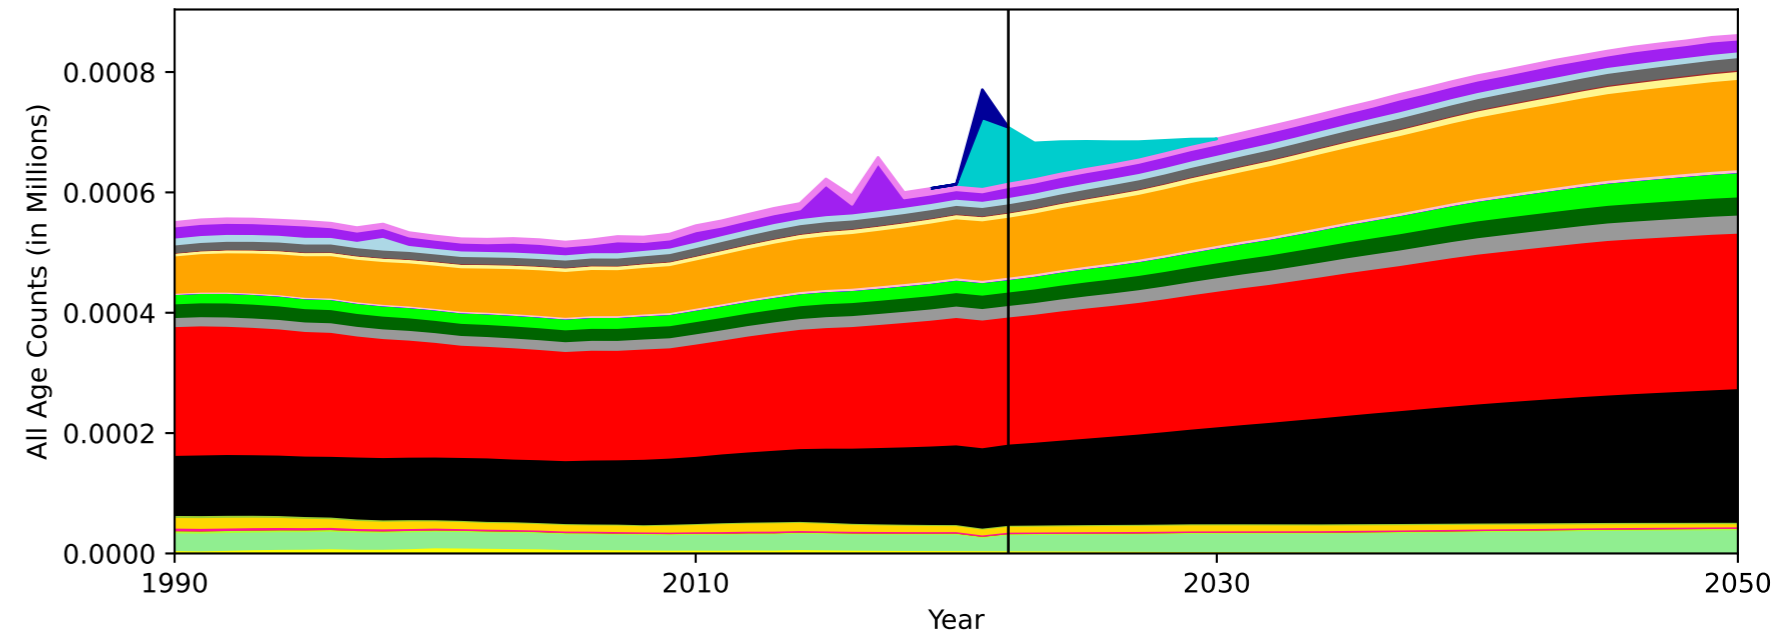

Level 1

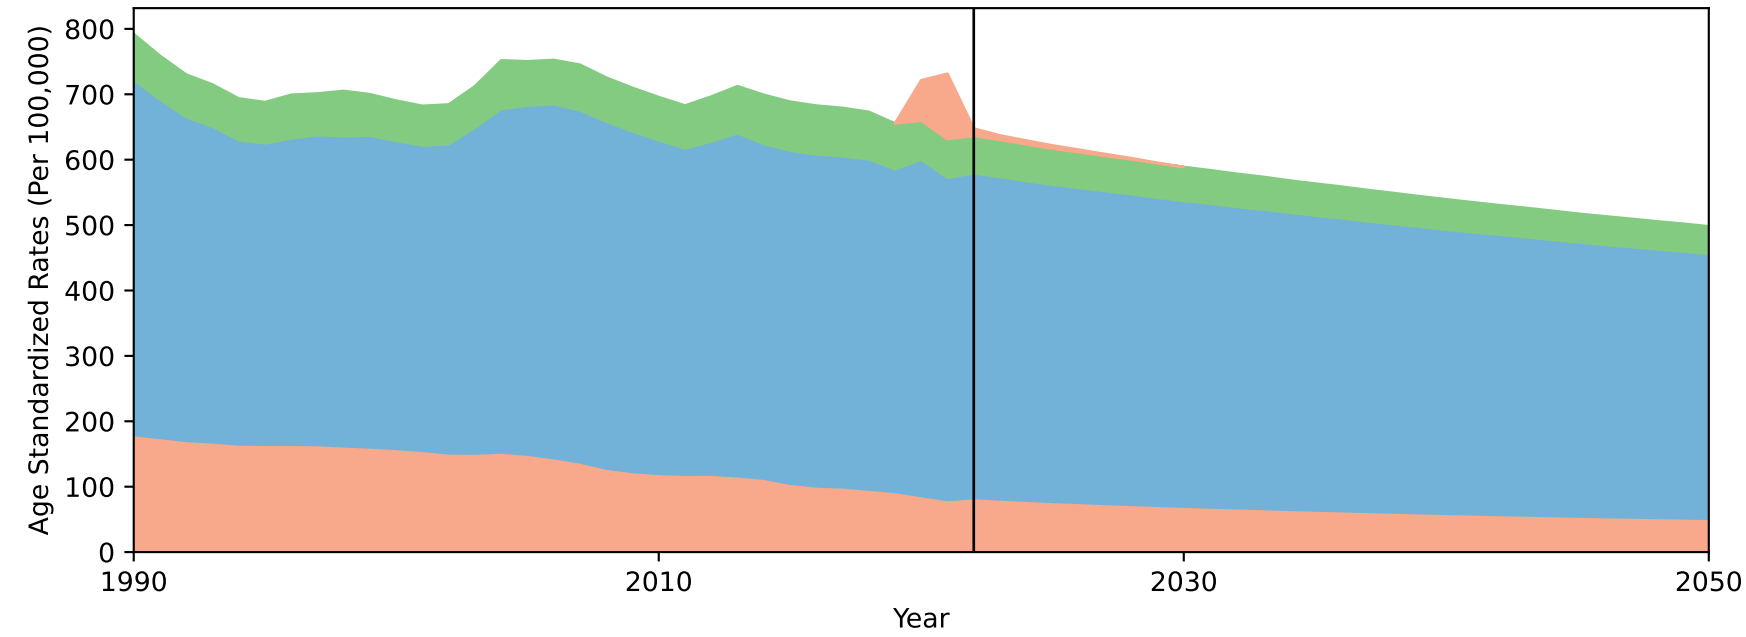

Level 2

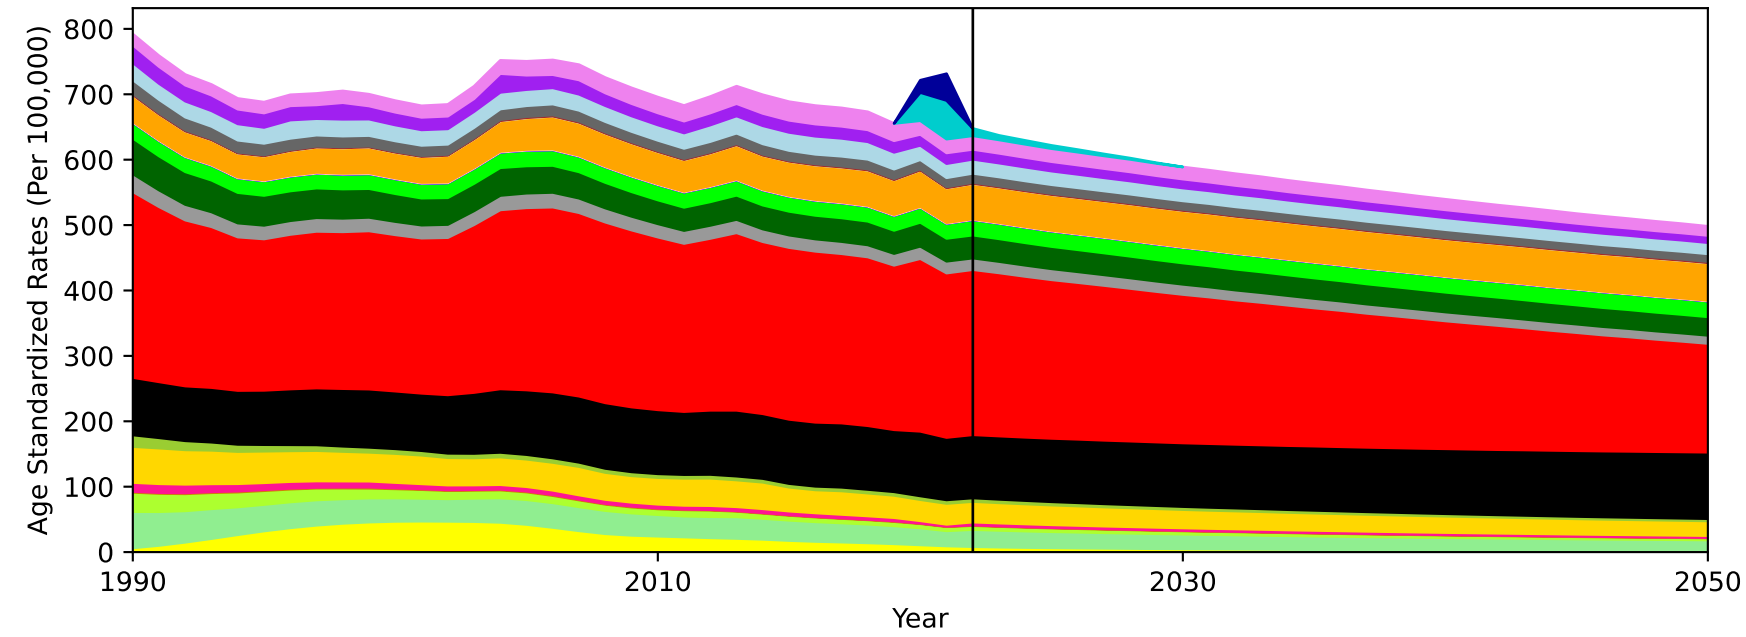

Level 1

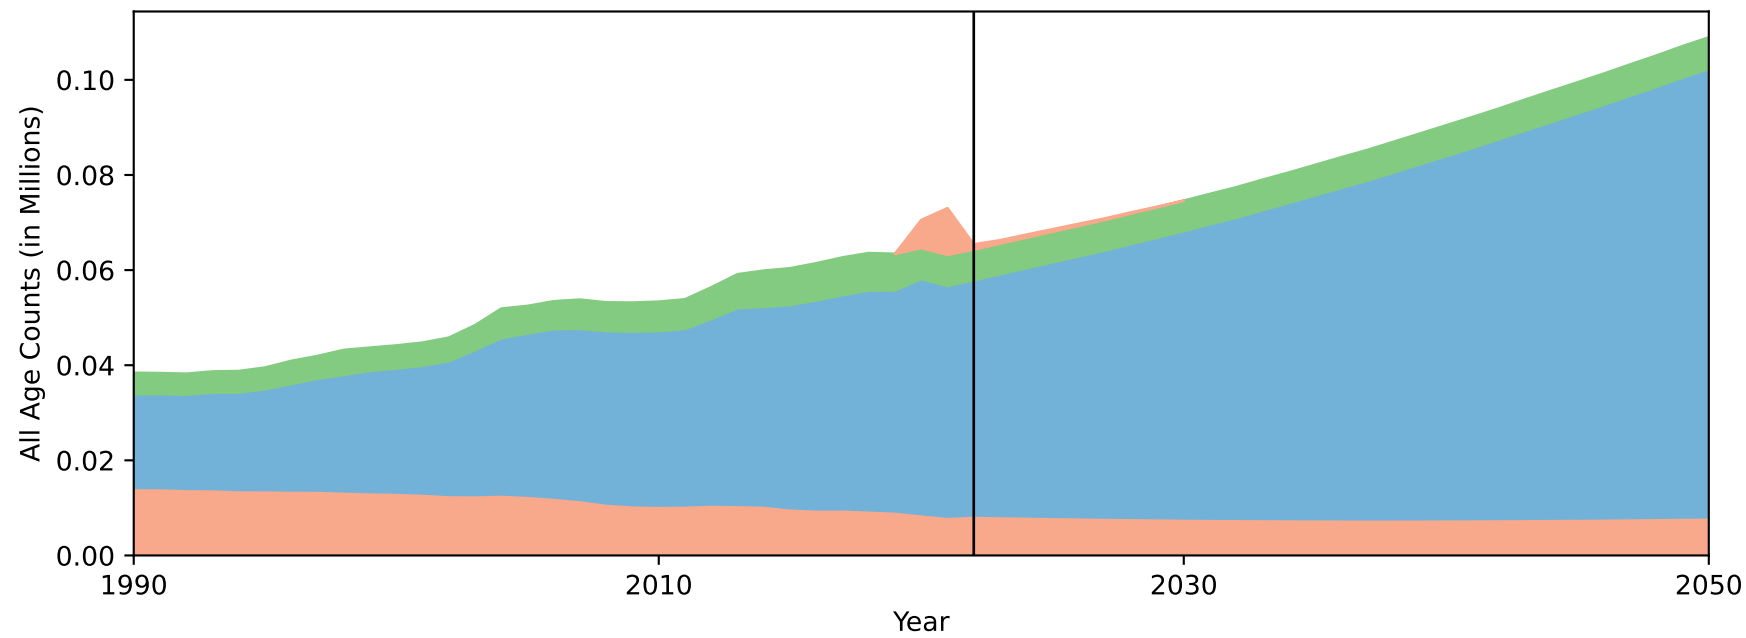

Level 2

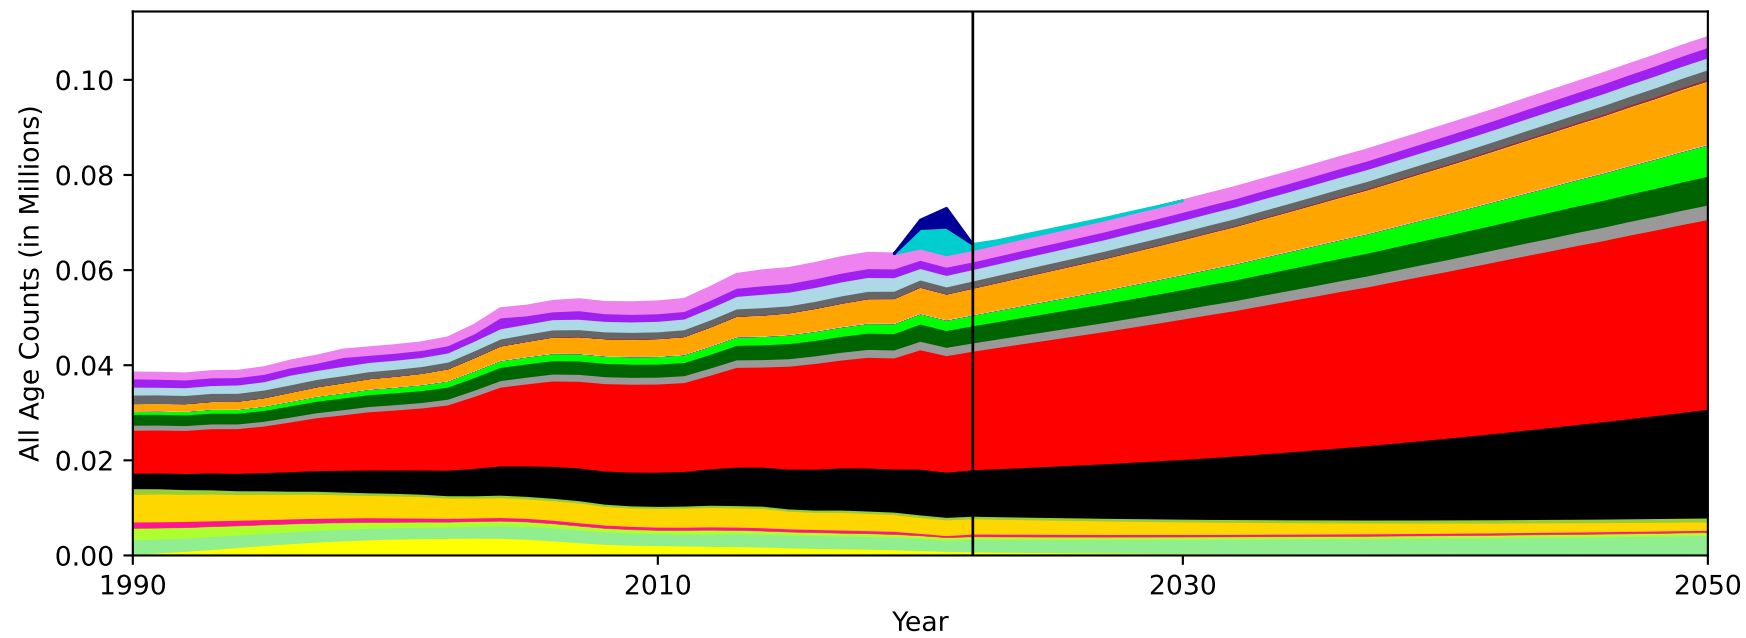

# Grenada

Level 1

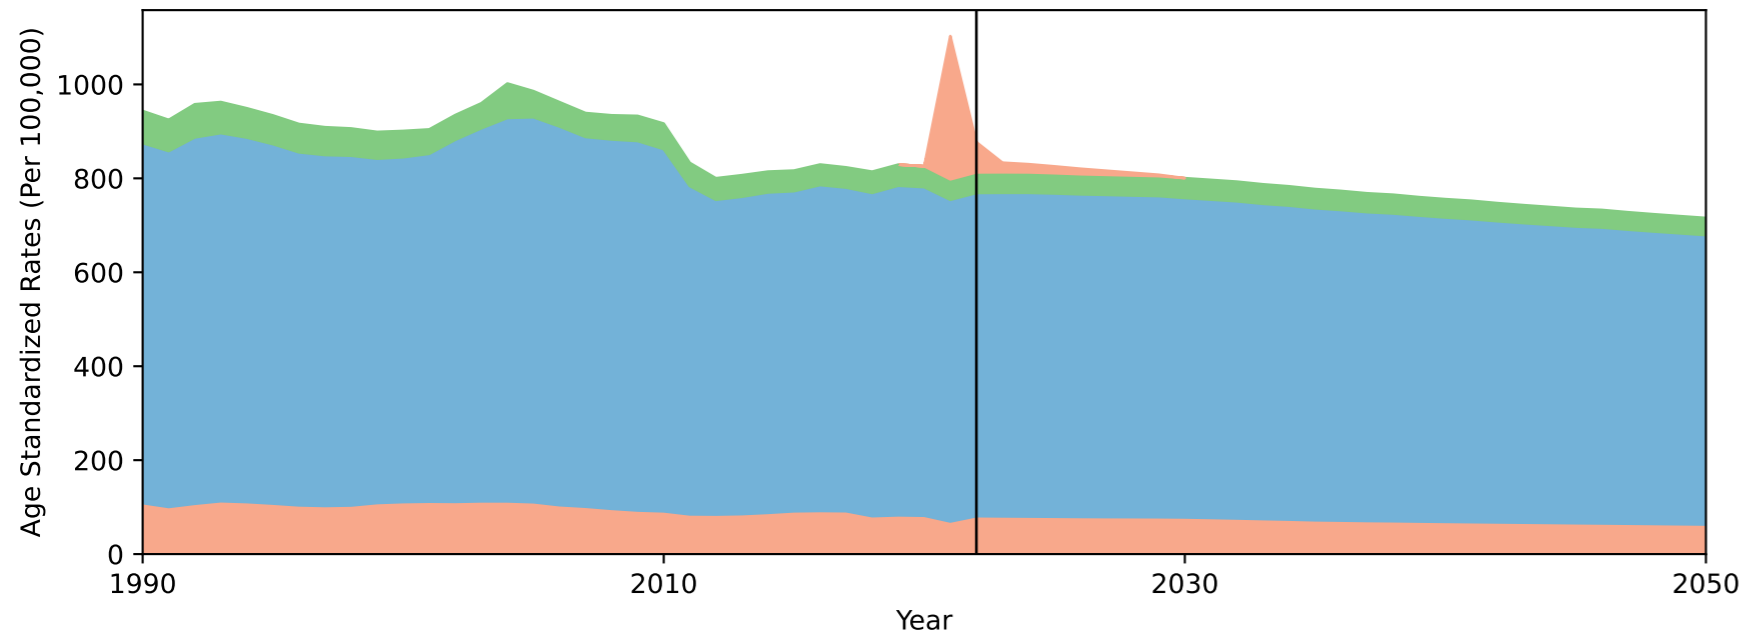

Level 2

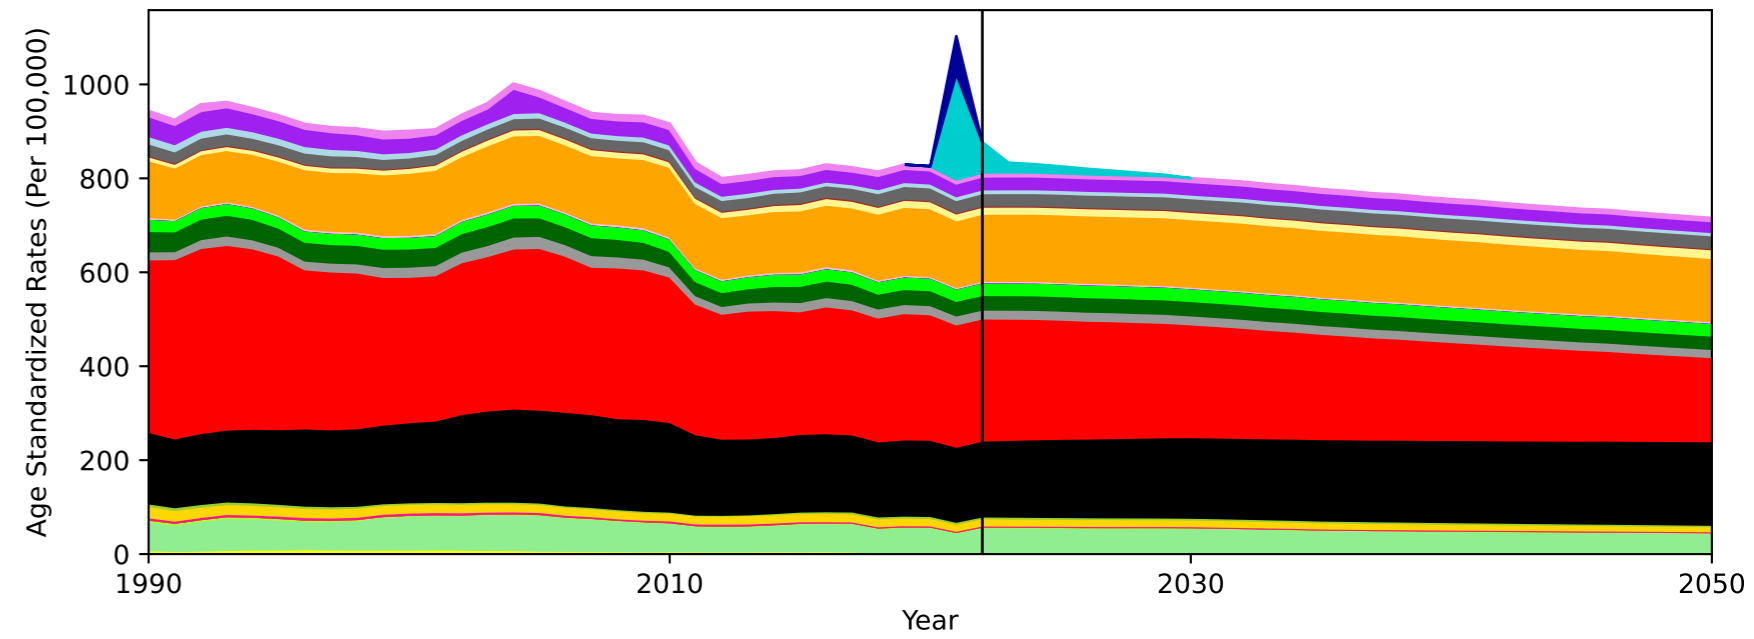

Level 1

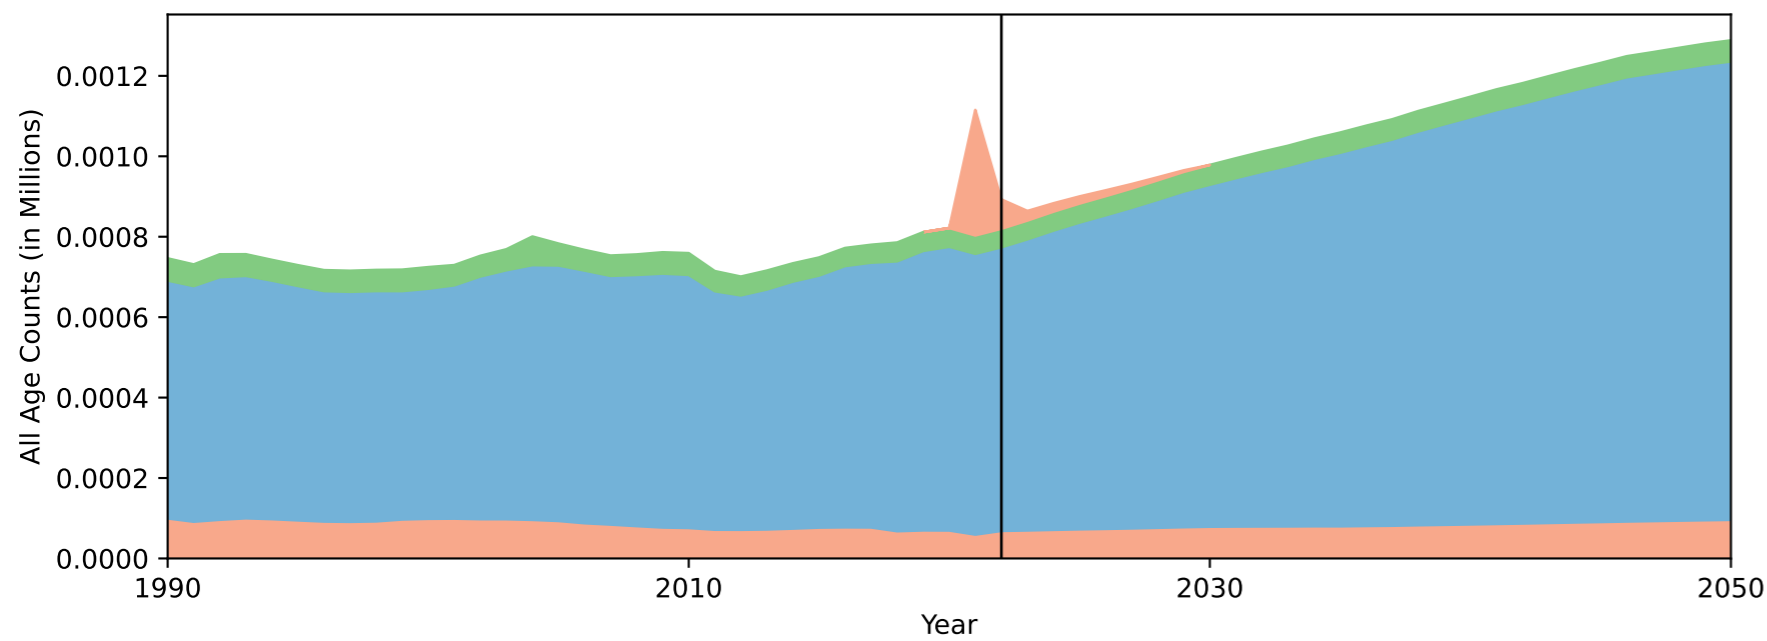

Level 2

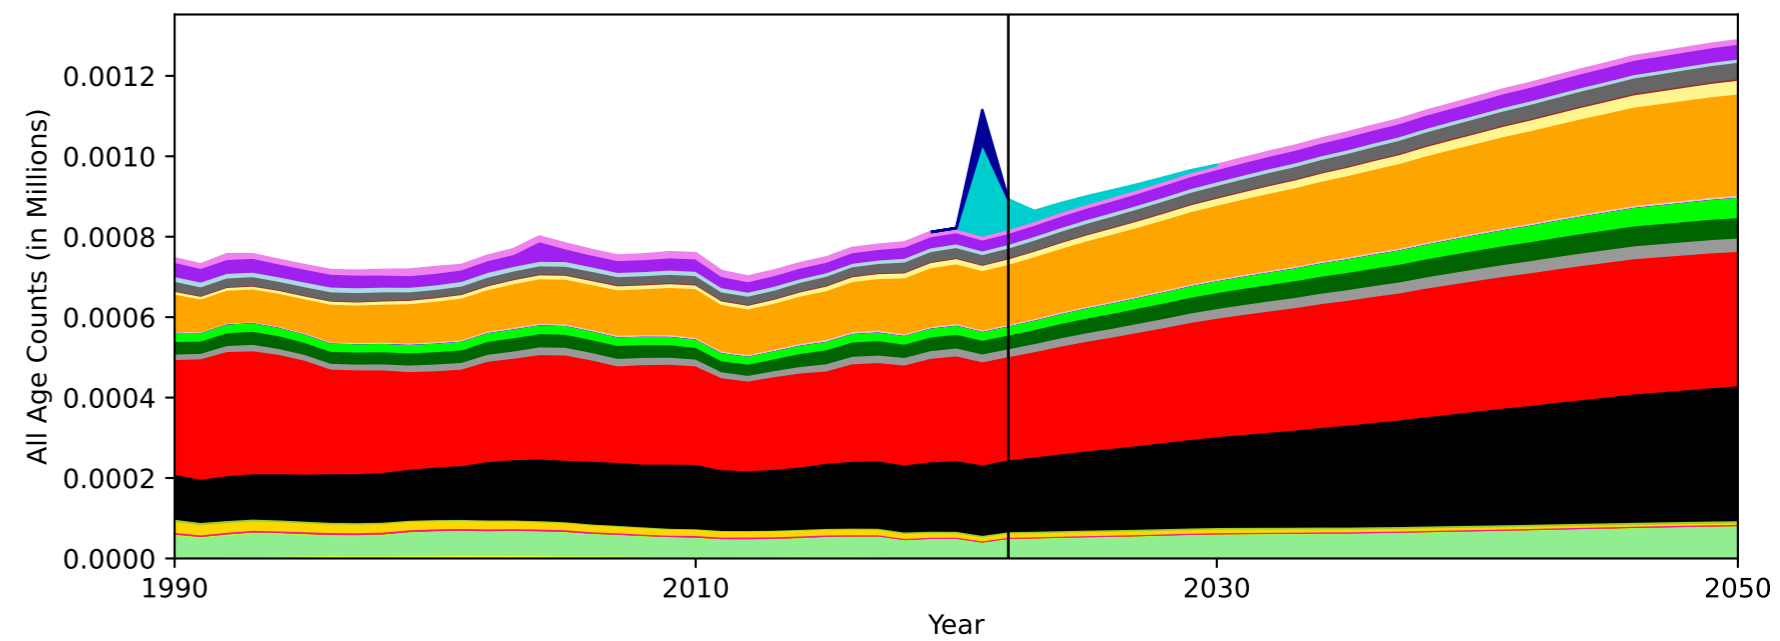

# Guyana

Level 1

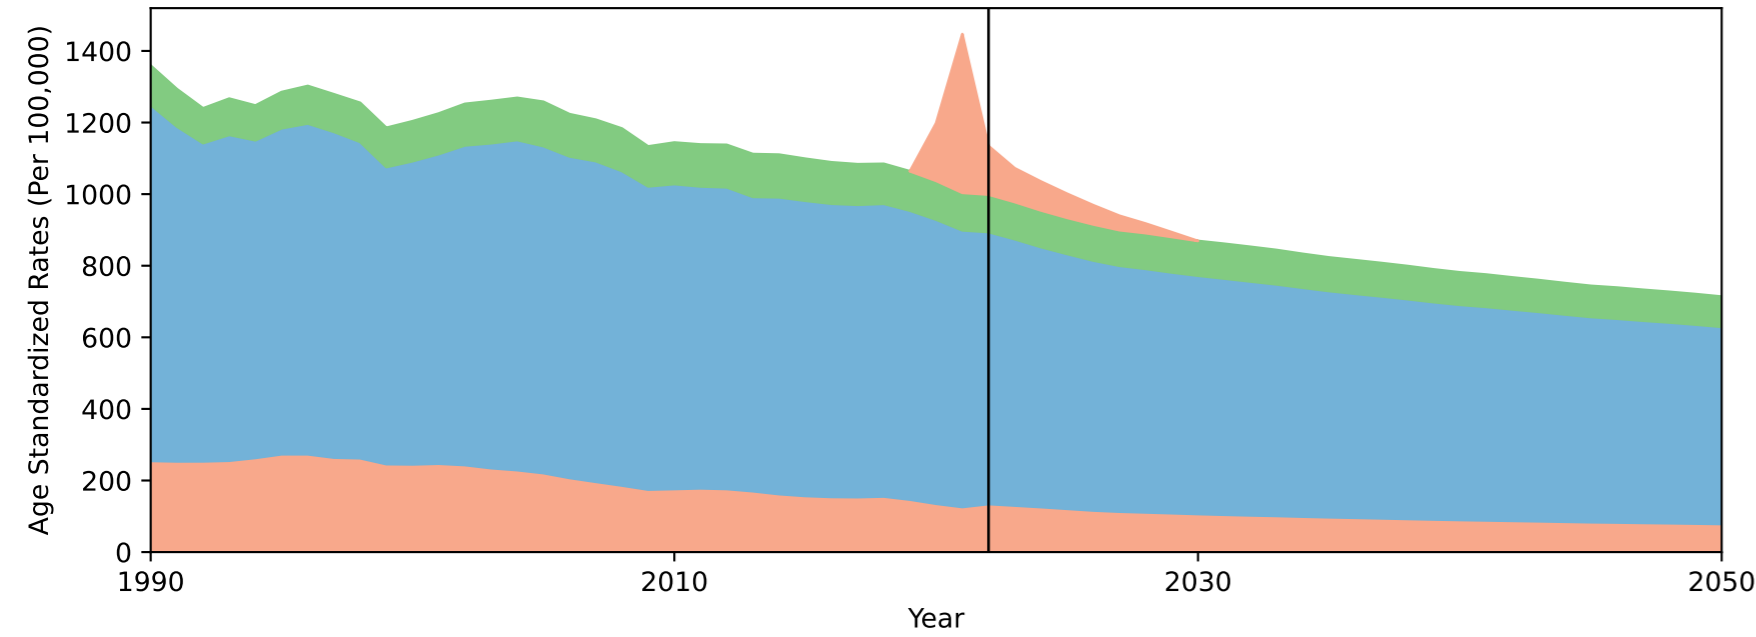

Level 2

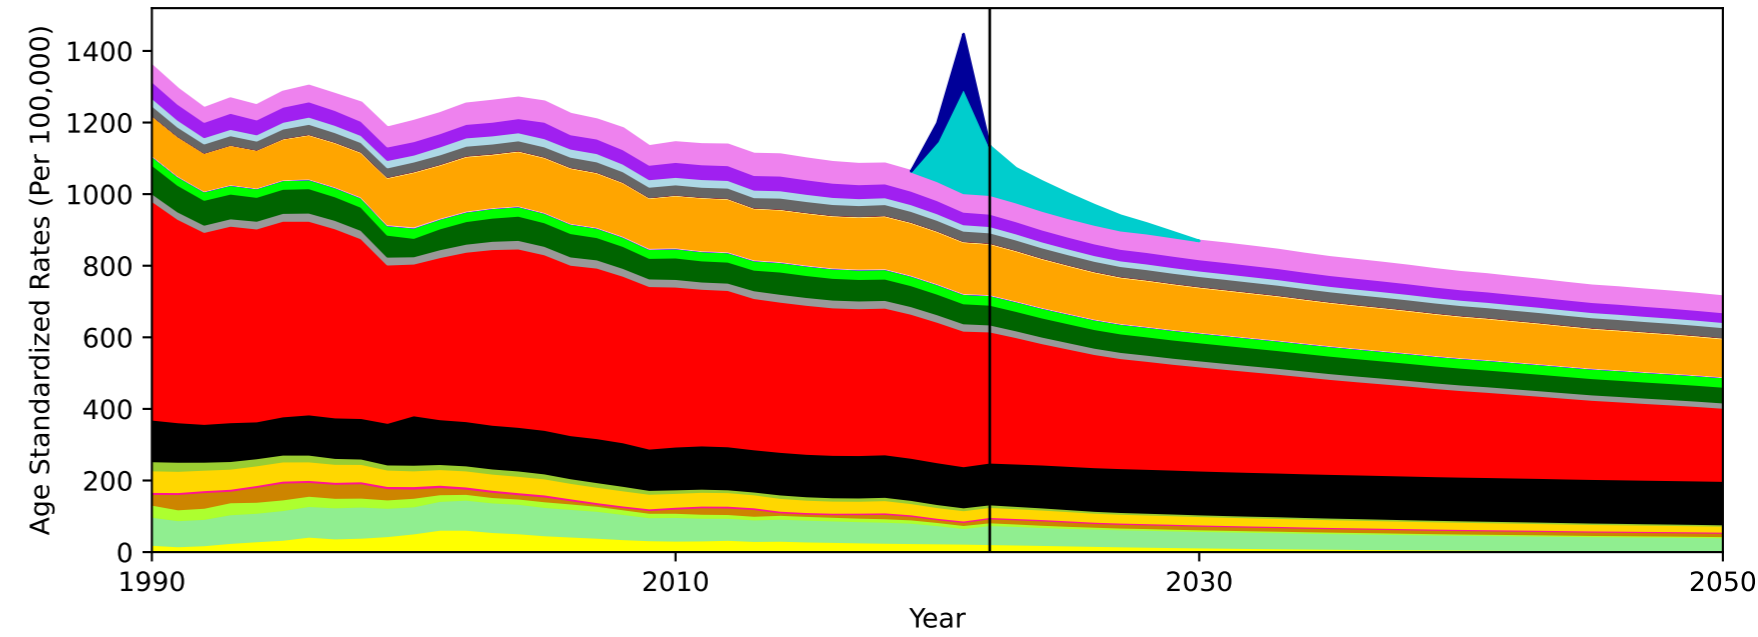

Level 1

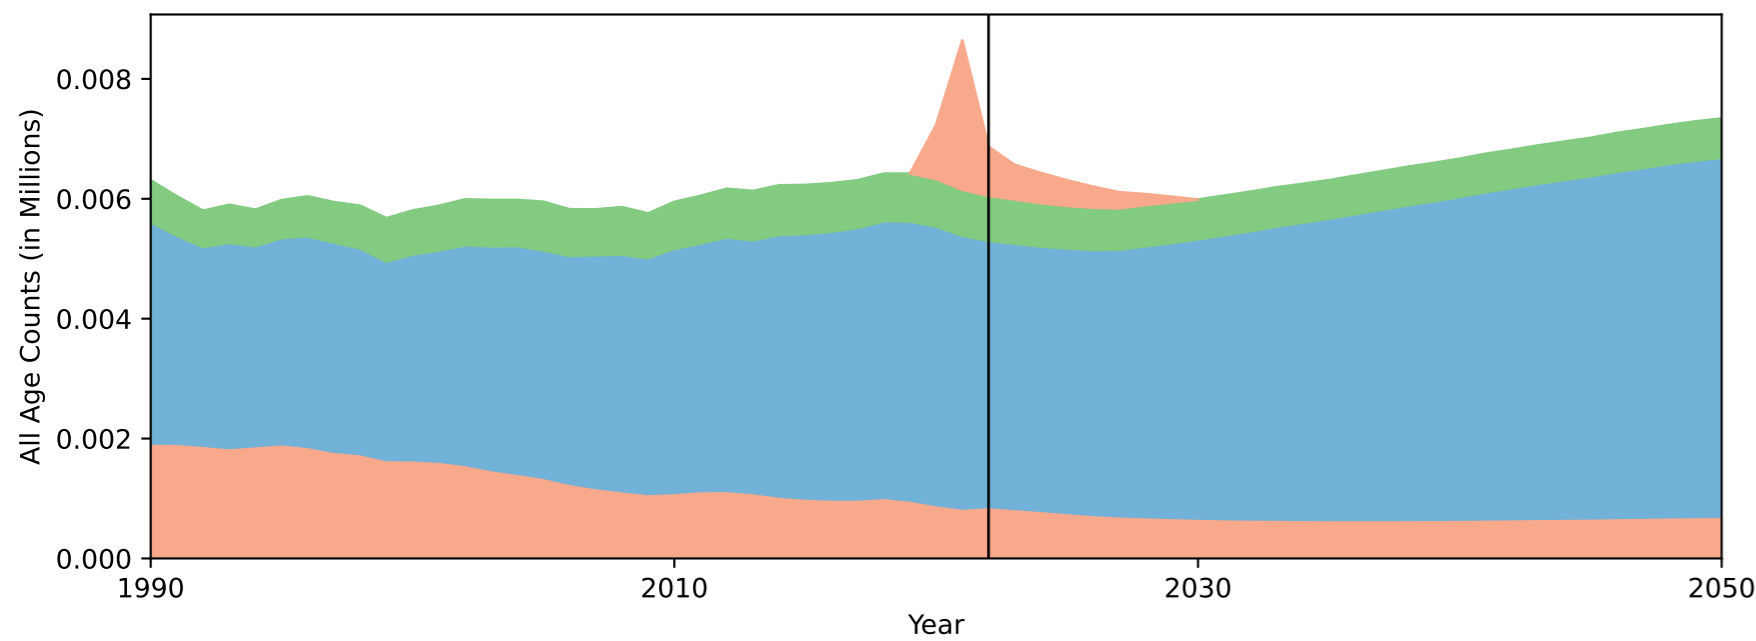

Level 2

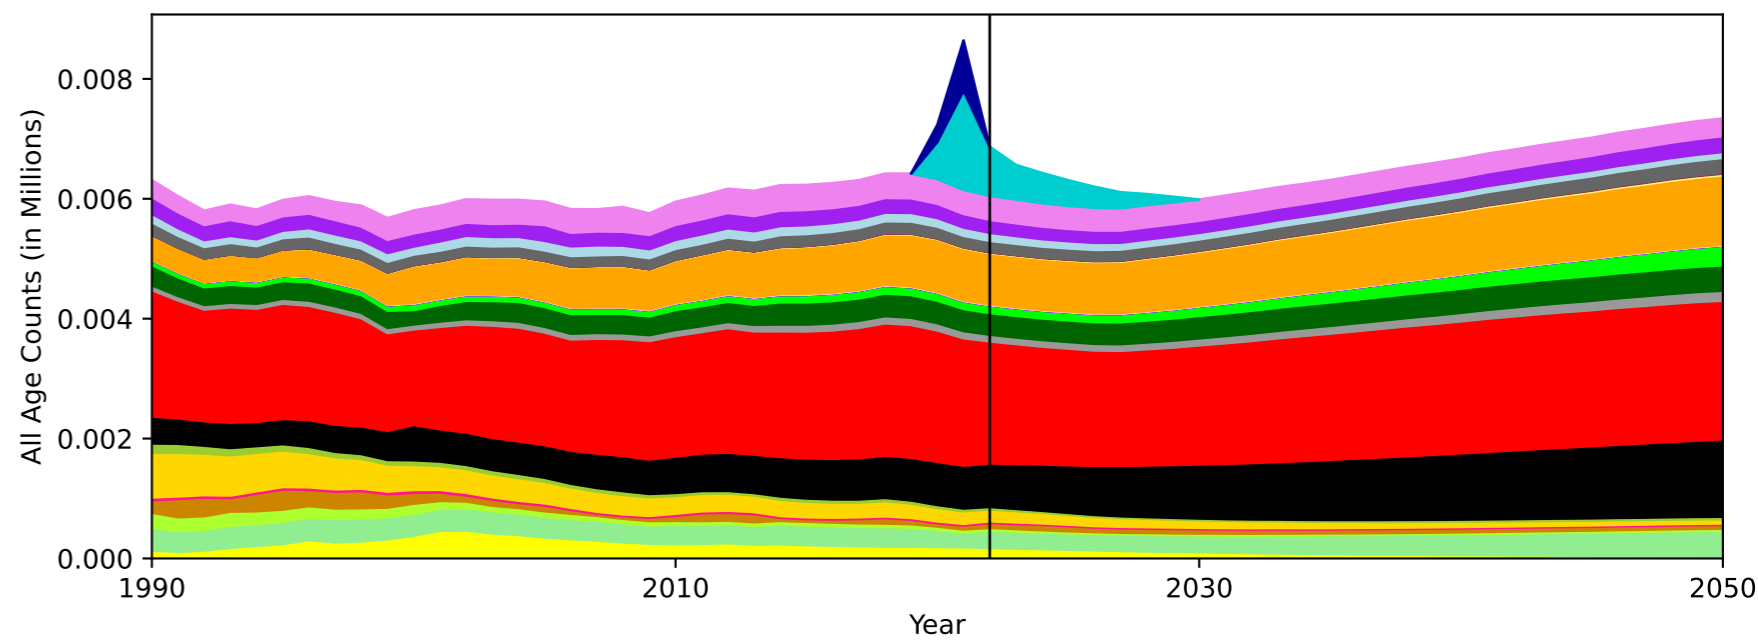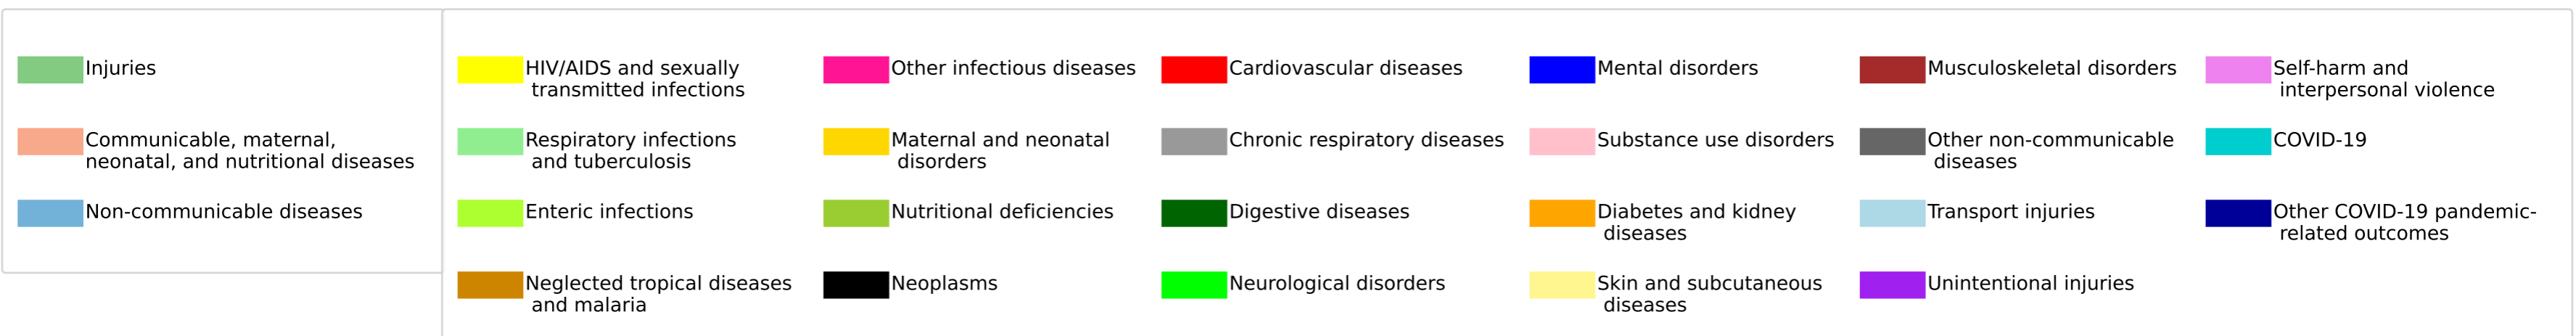

Level 1

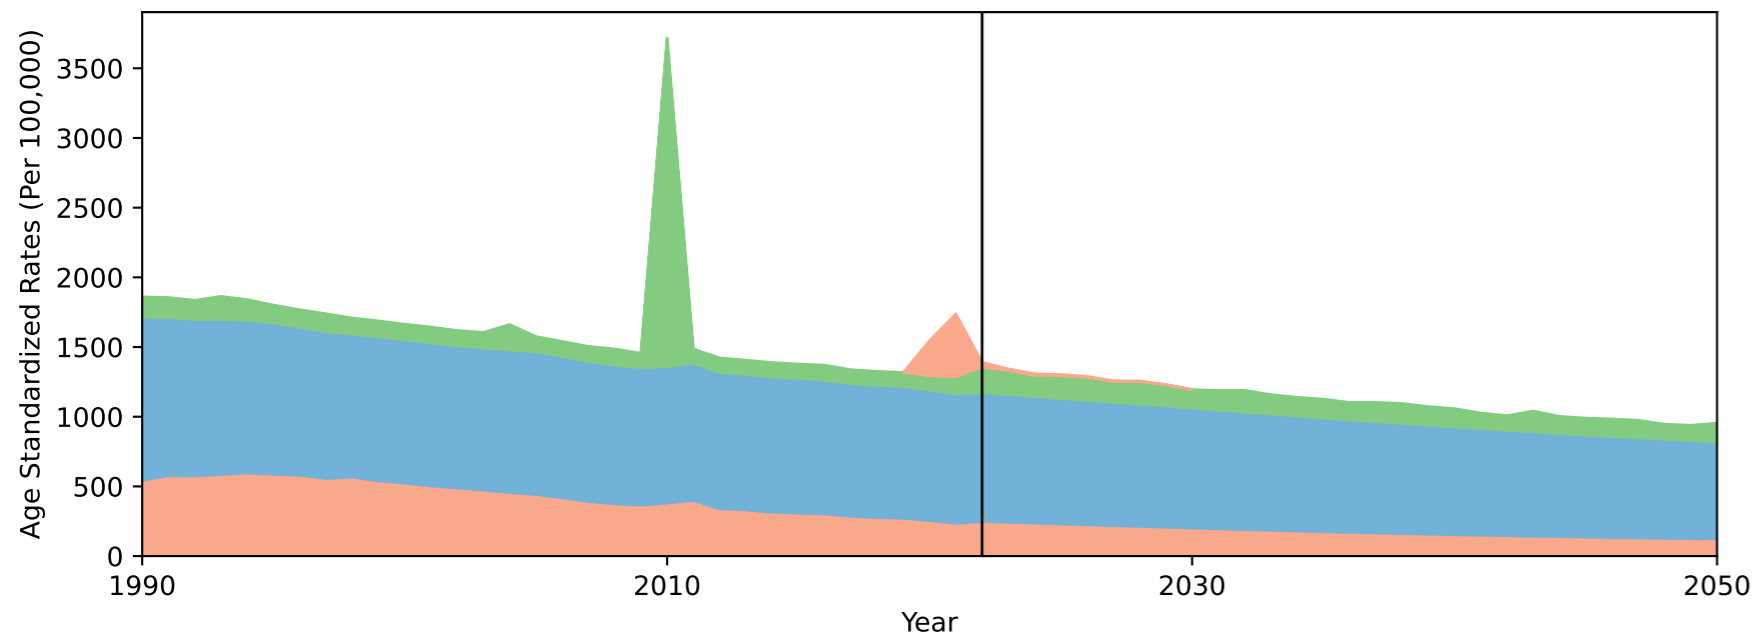

Level 2

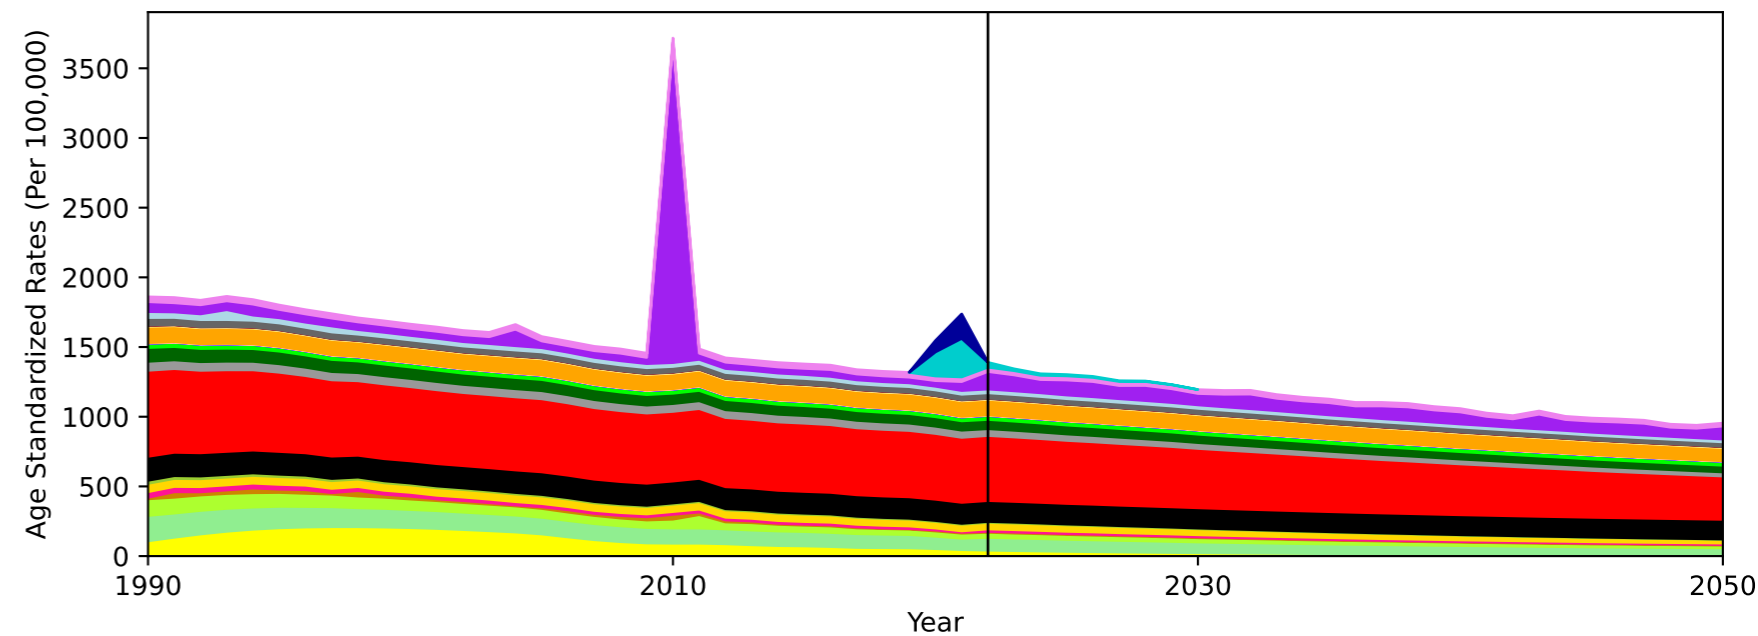

Level 1

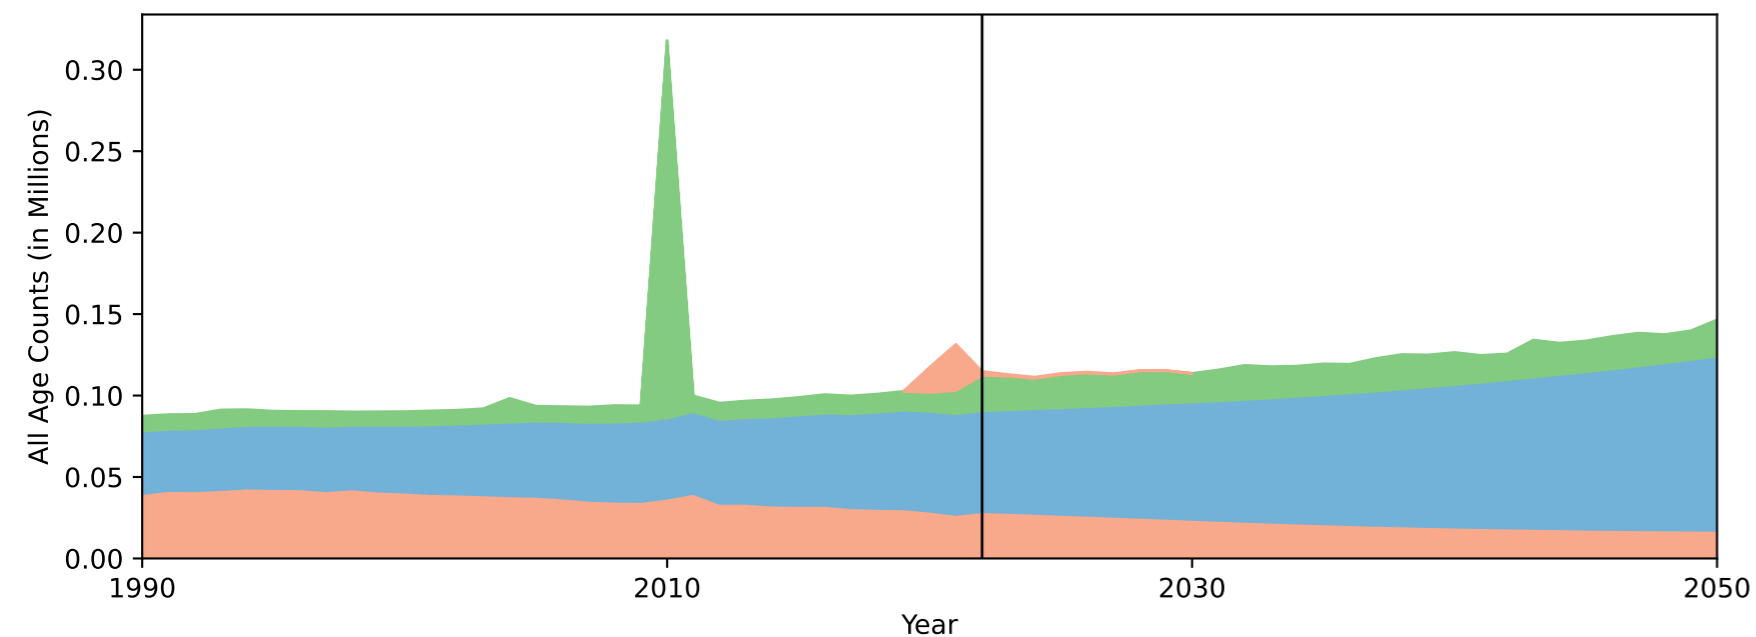

Level 2

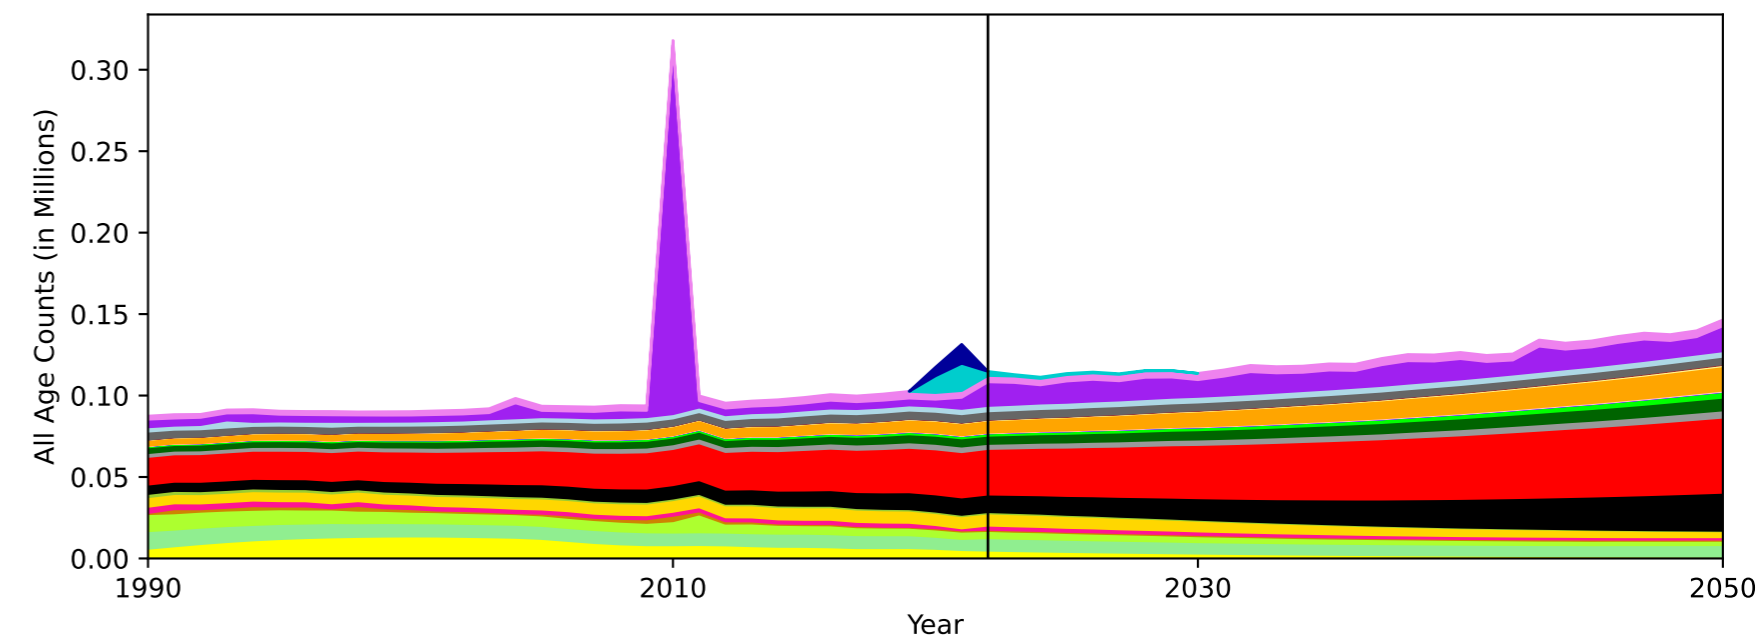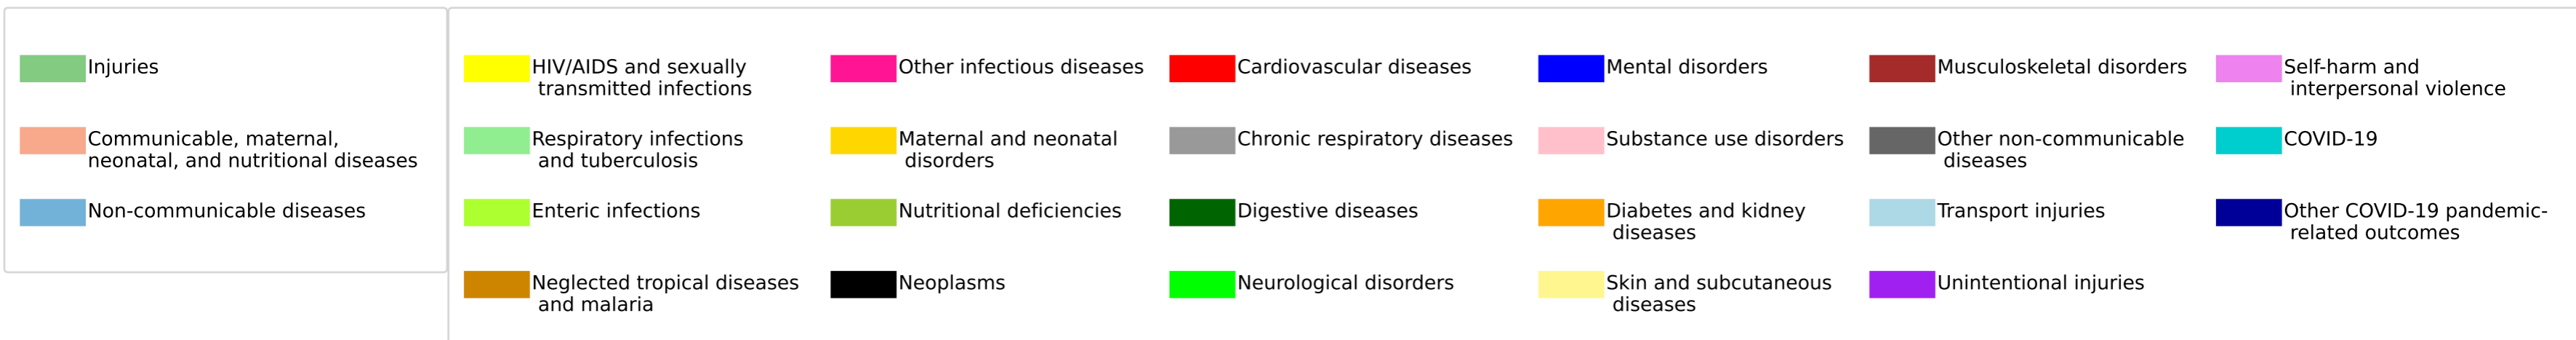

Level 1

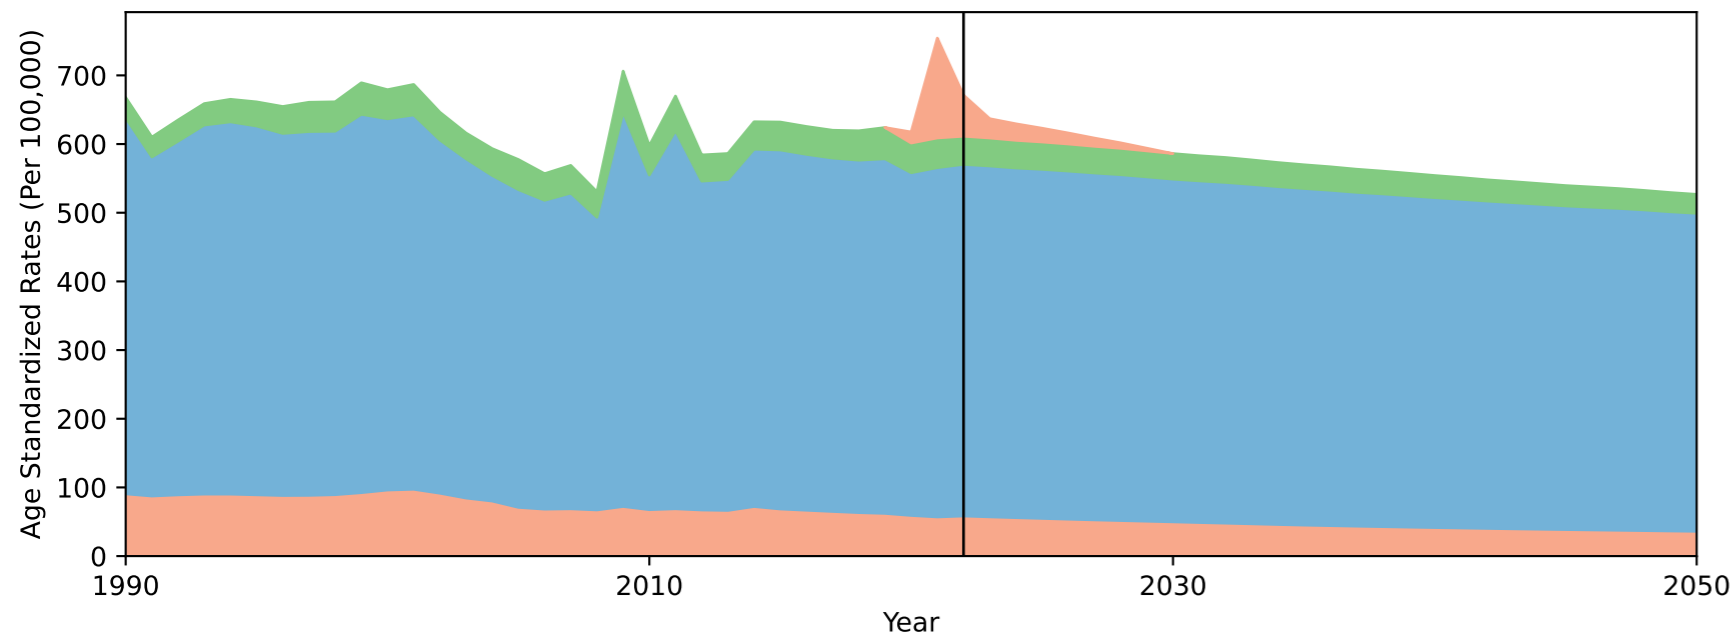

Level 2

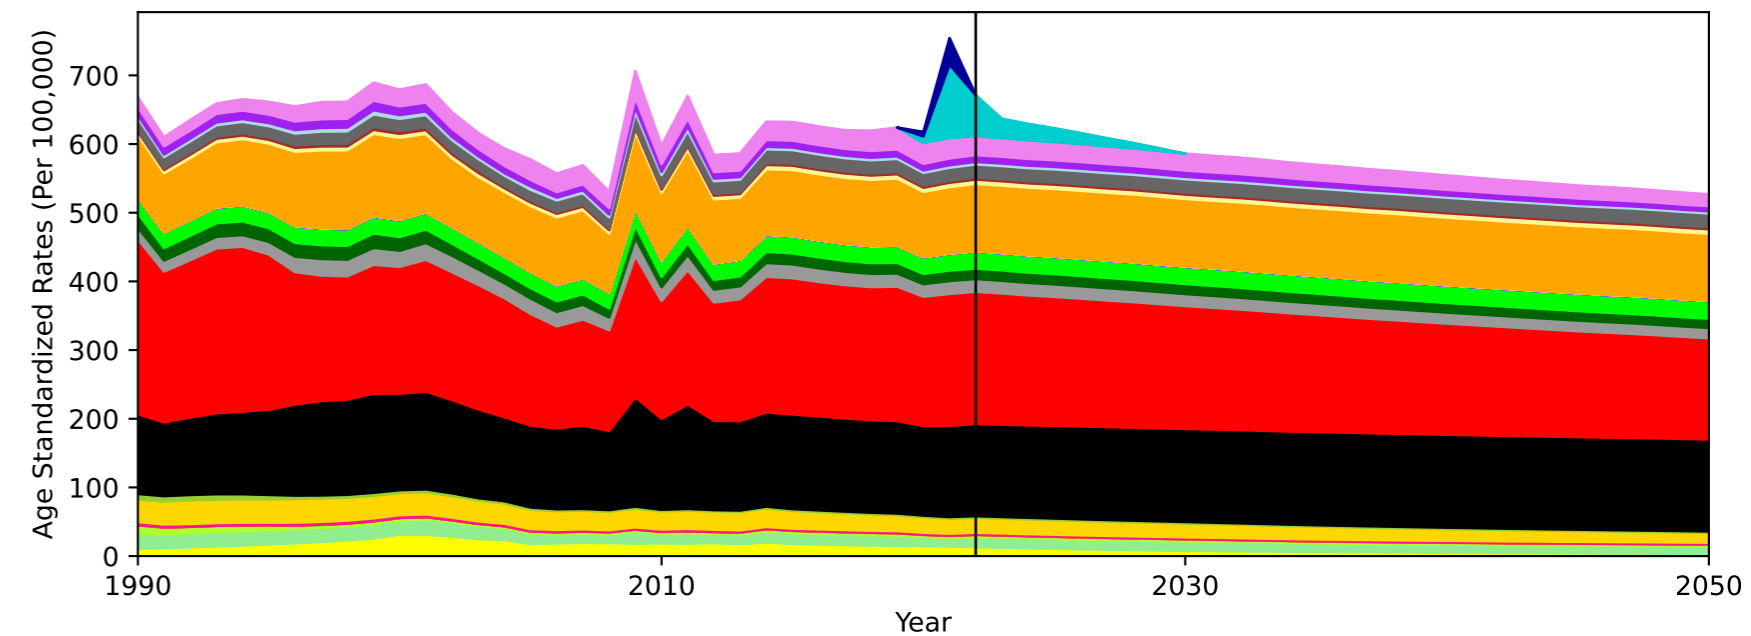

Level 1

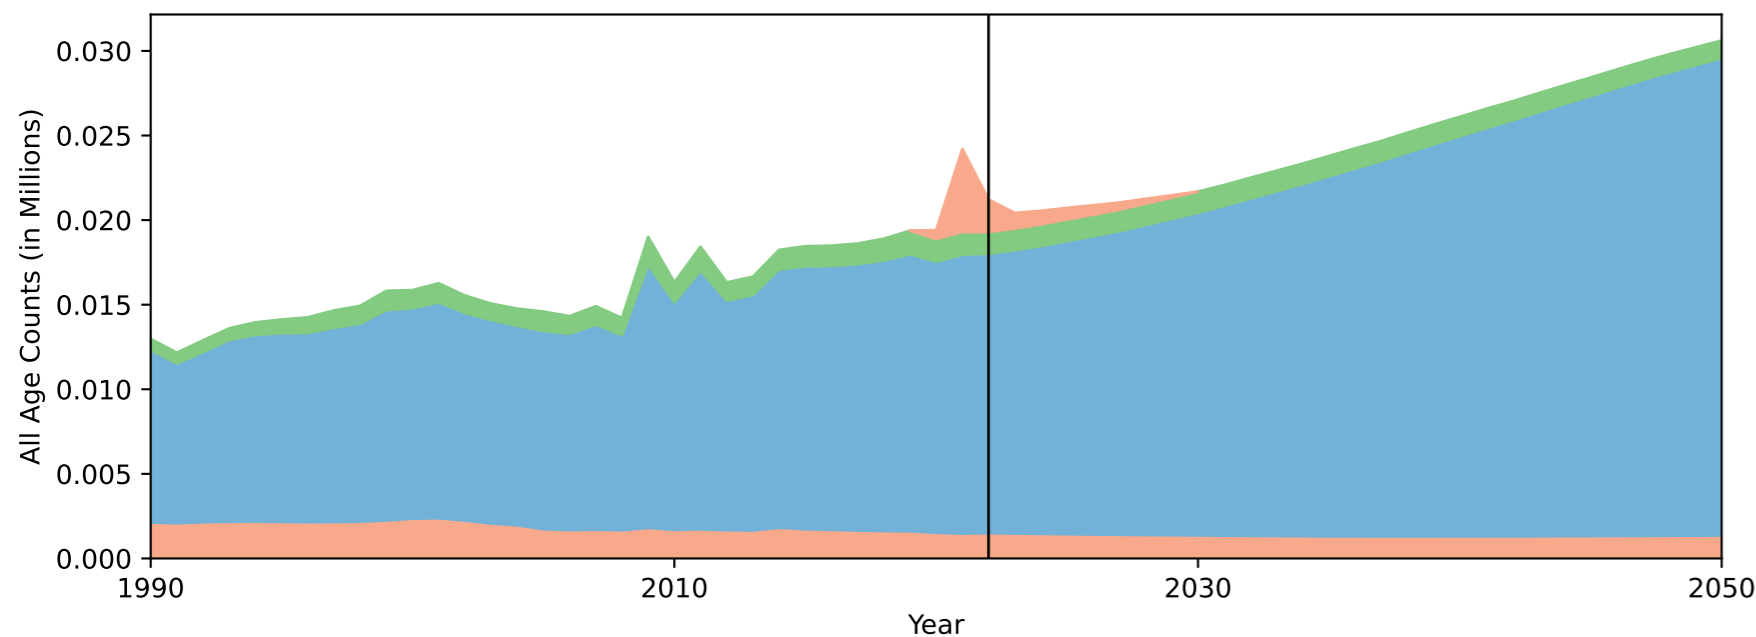

Level 2

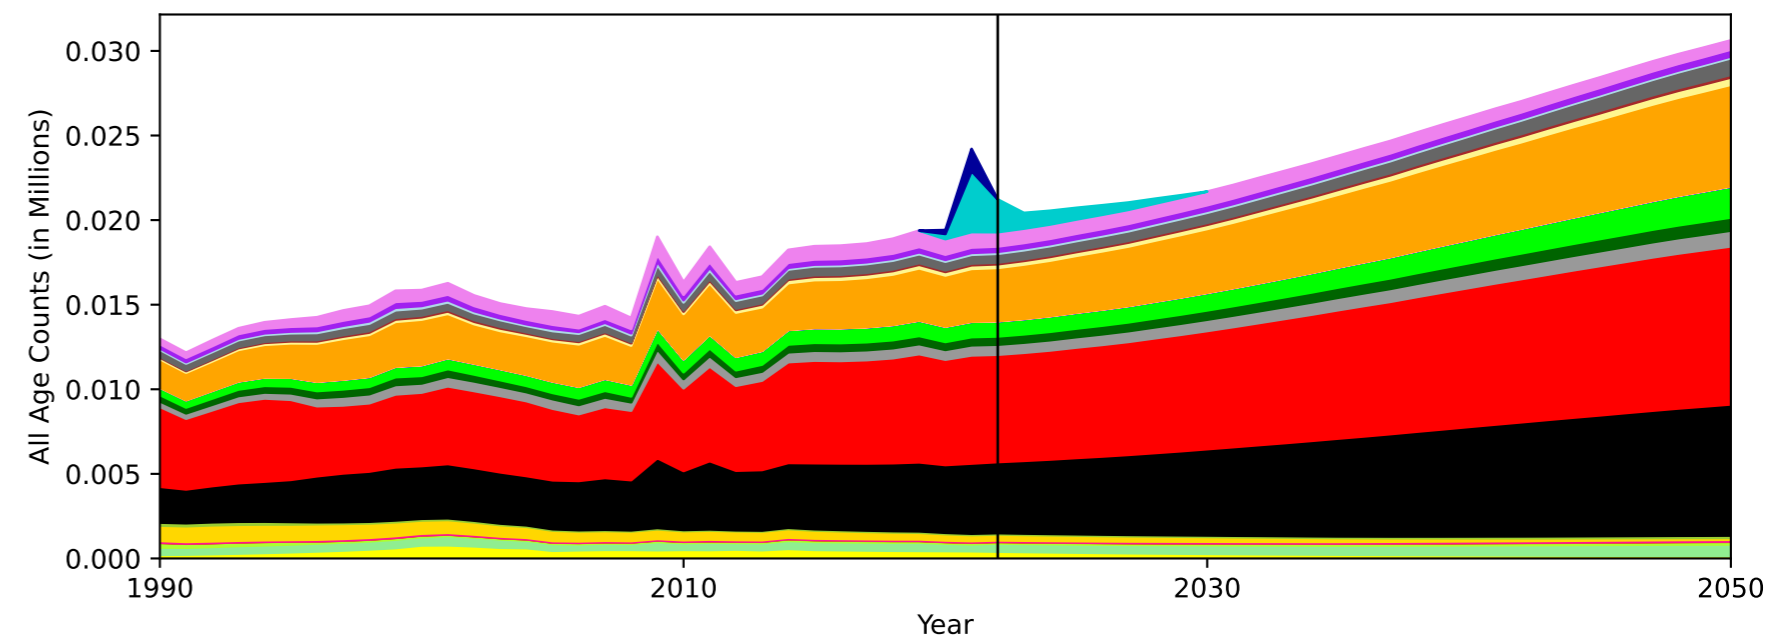

# Puerto Rico

Level 1

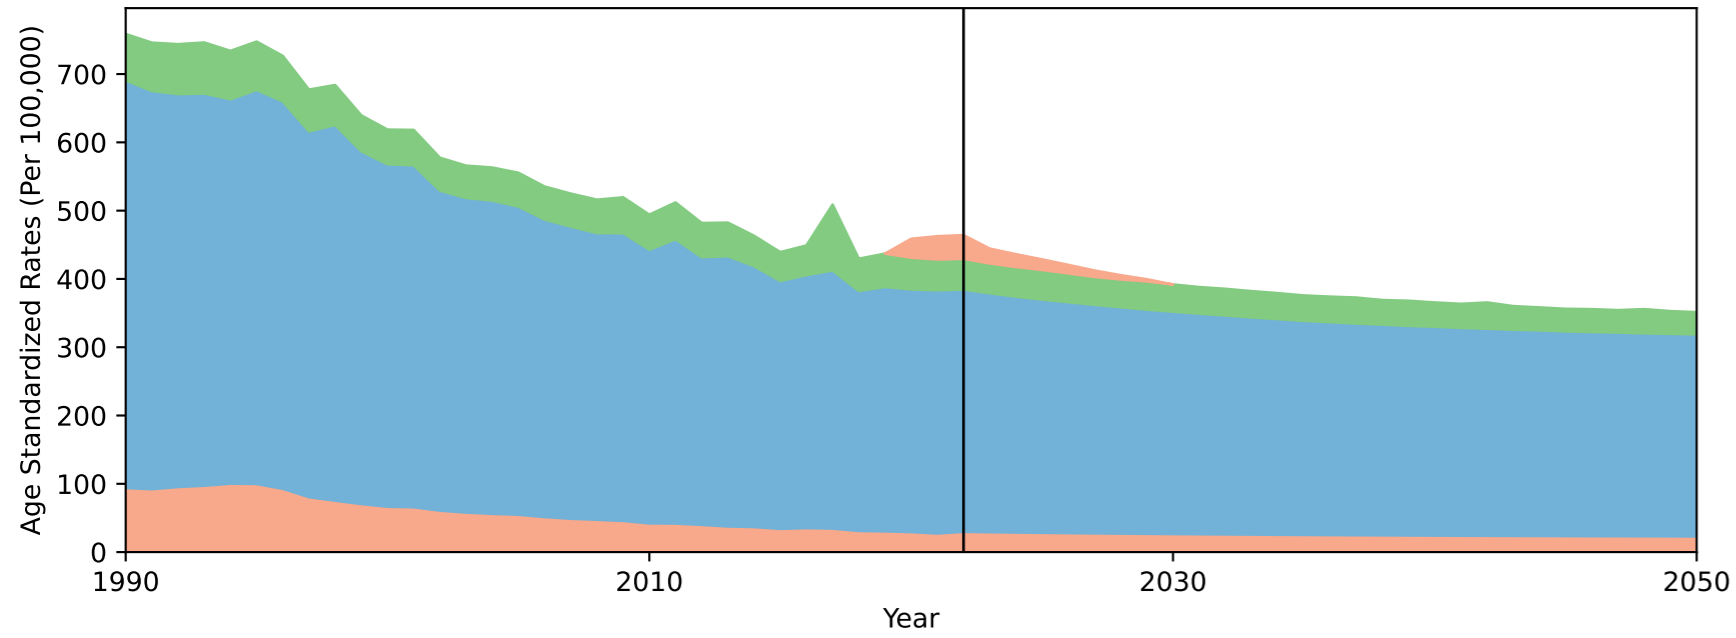

Level 2

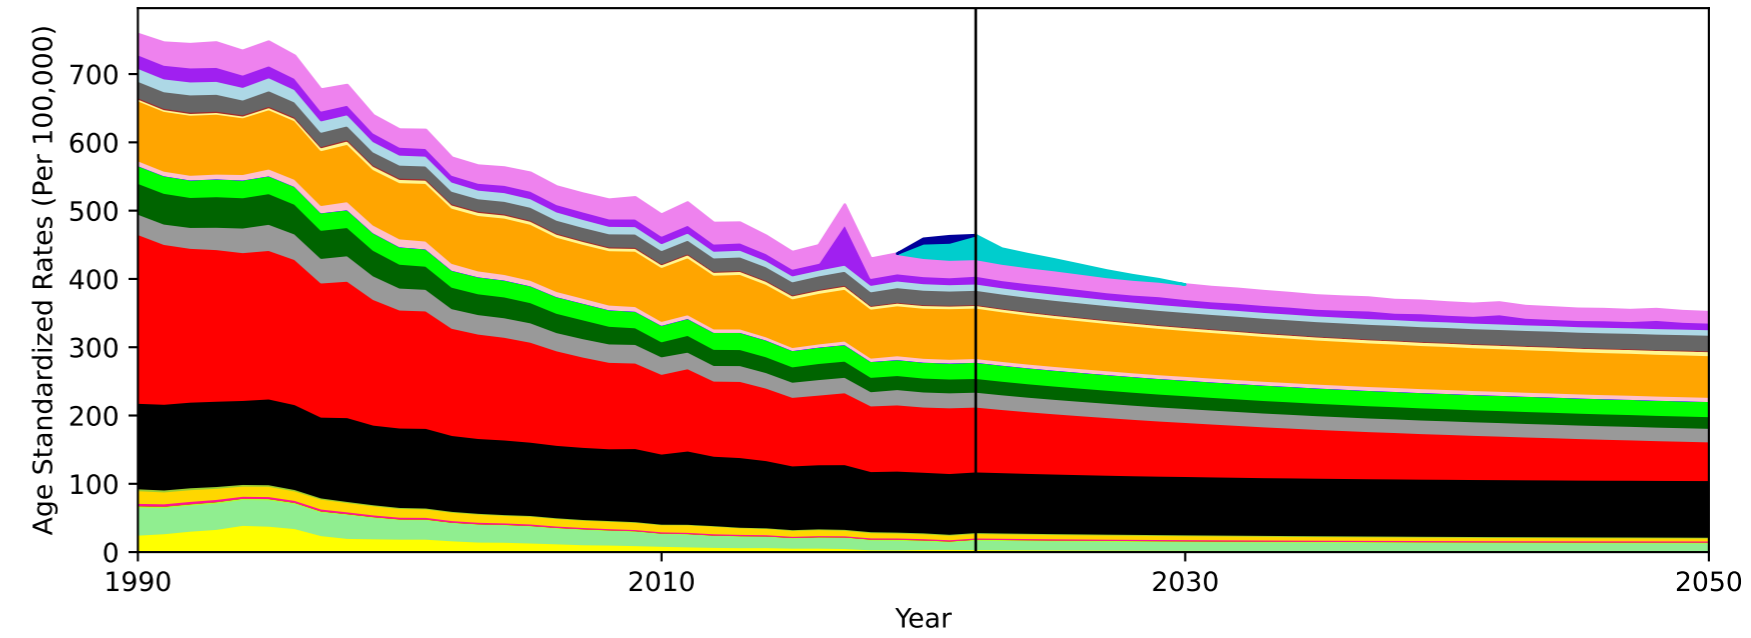

Level 1

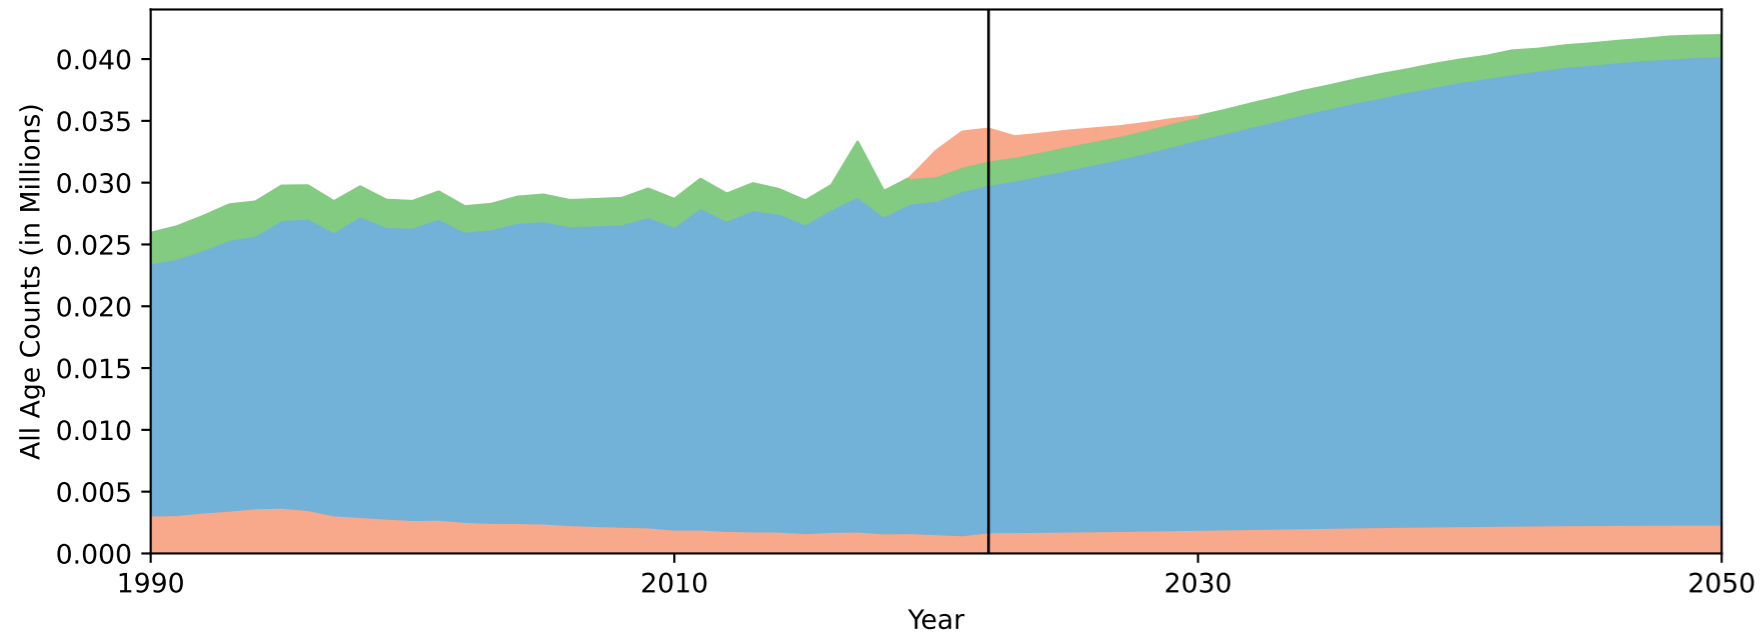

Level 2

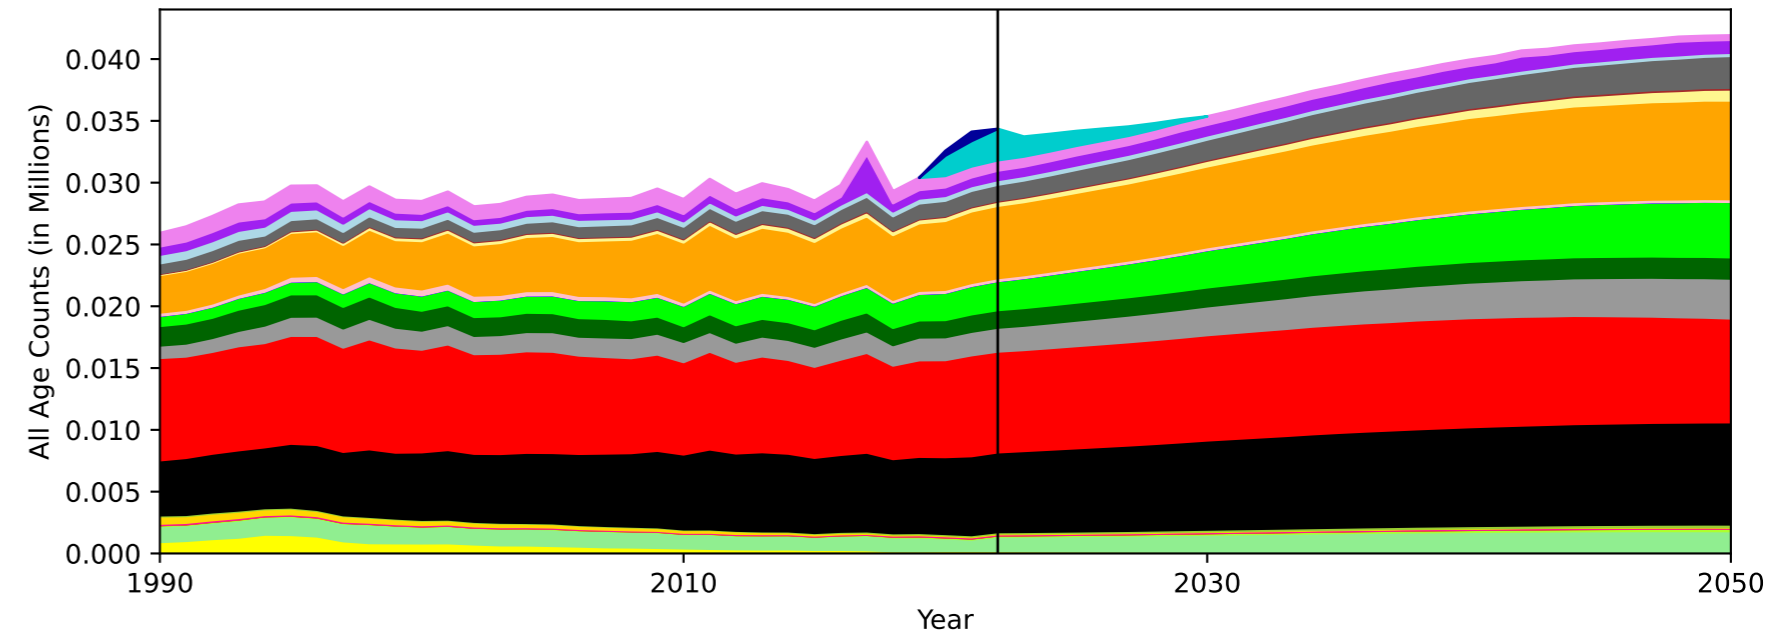

# Saint Kitts And Nevis

Supplemental Results Figure S5. Age-standardised death rates and all age death counts and by Level 1 and Level 2 causes, 1990–2050

559

Level 1

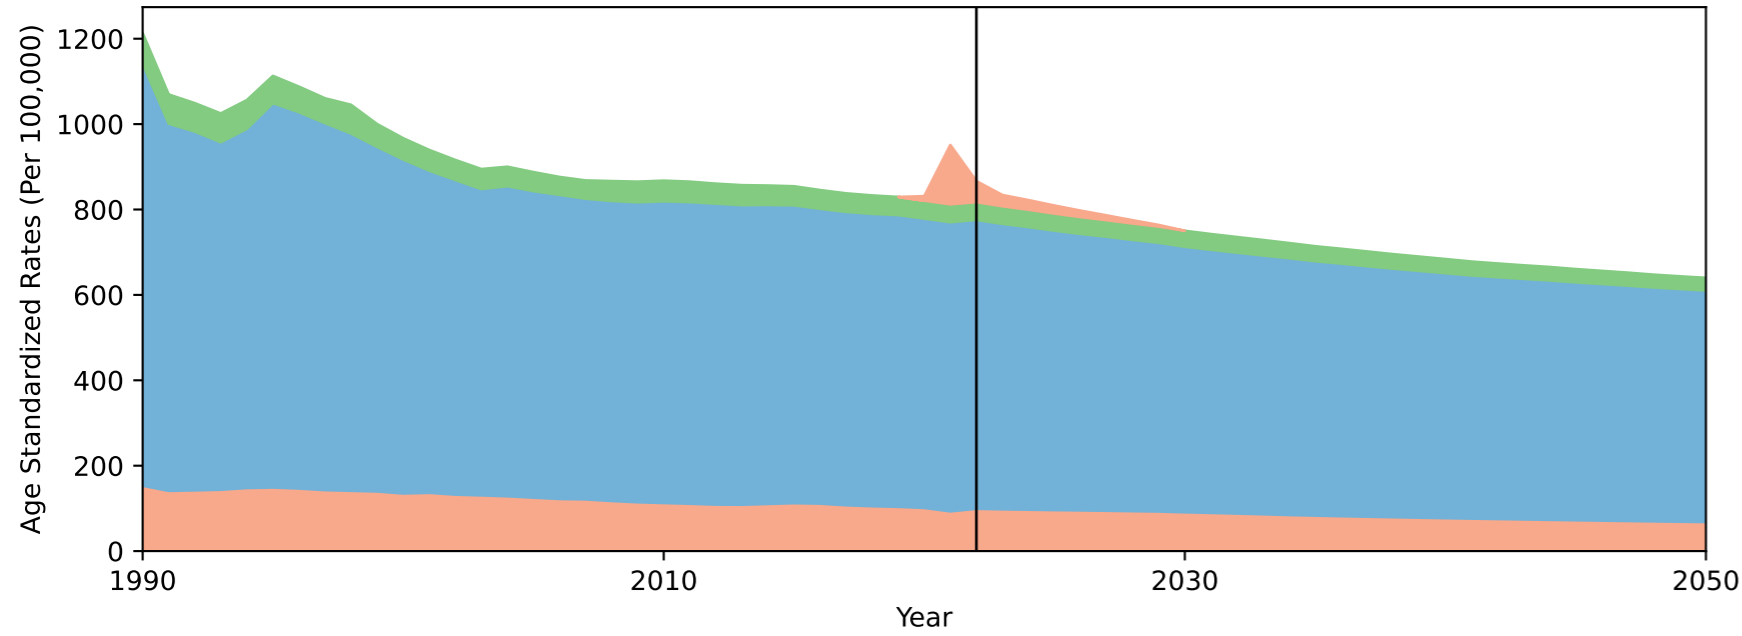

Level 2

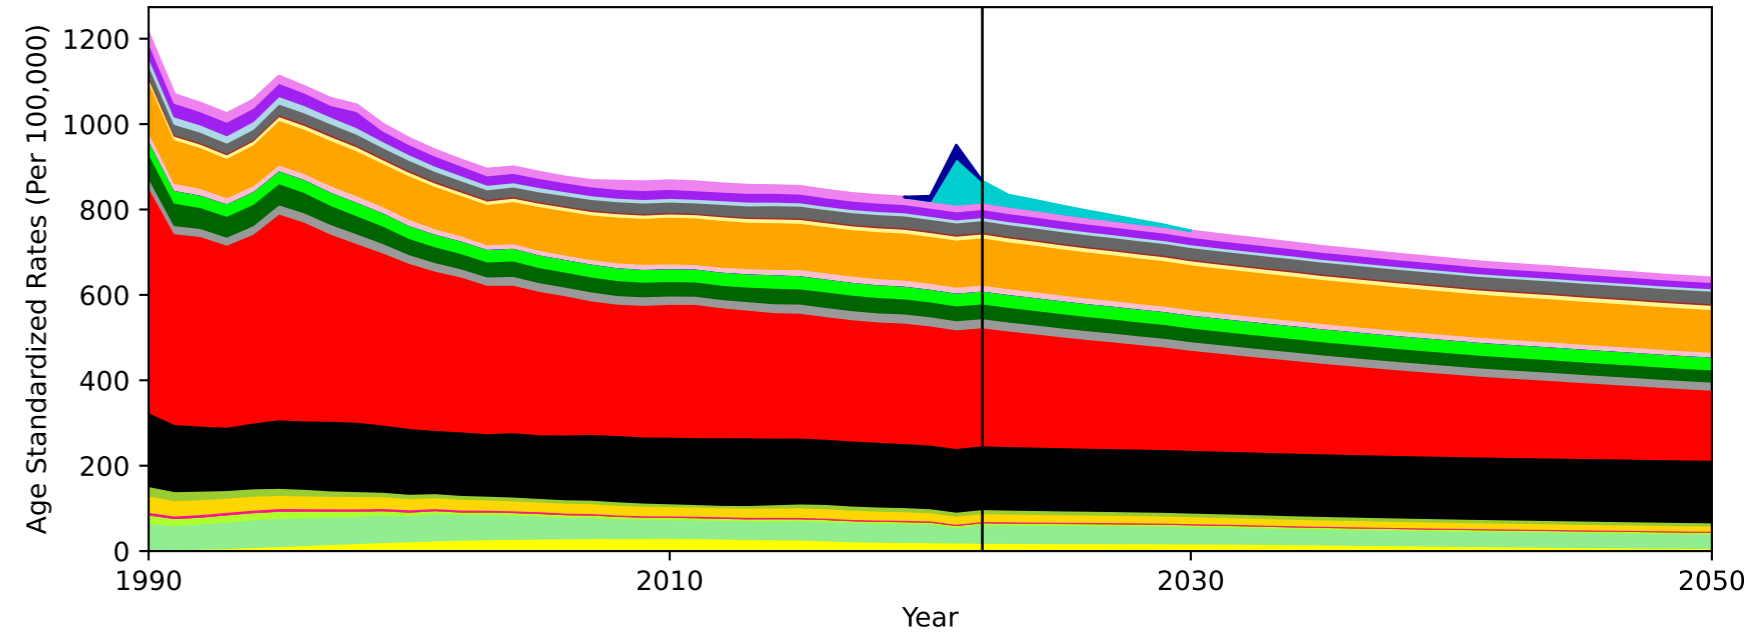

Level 1

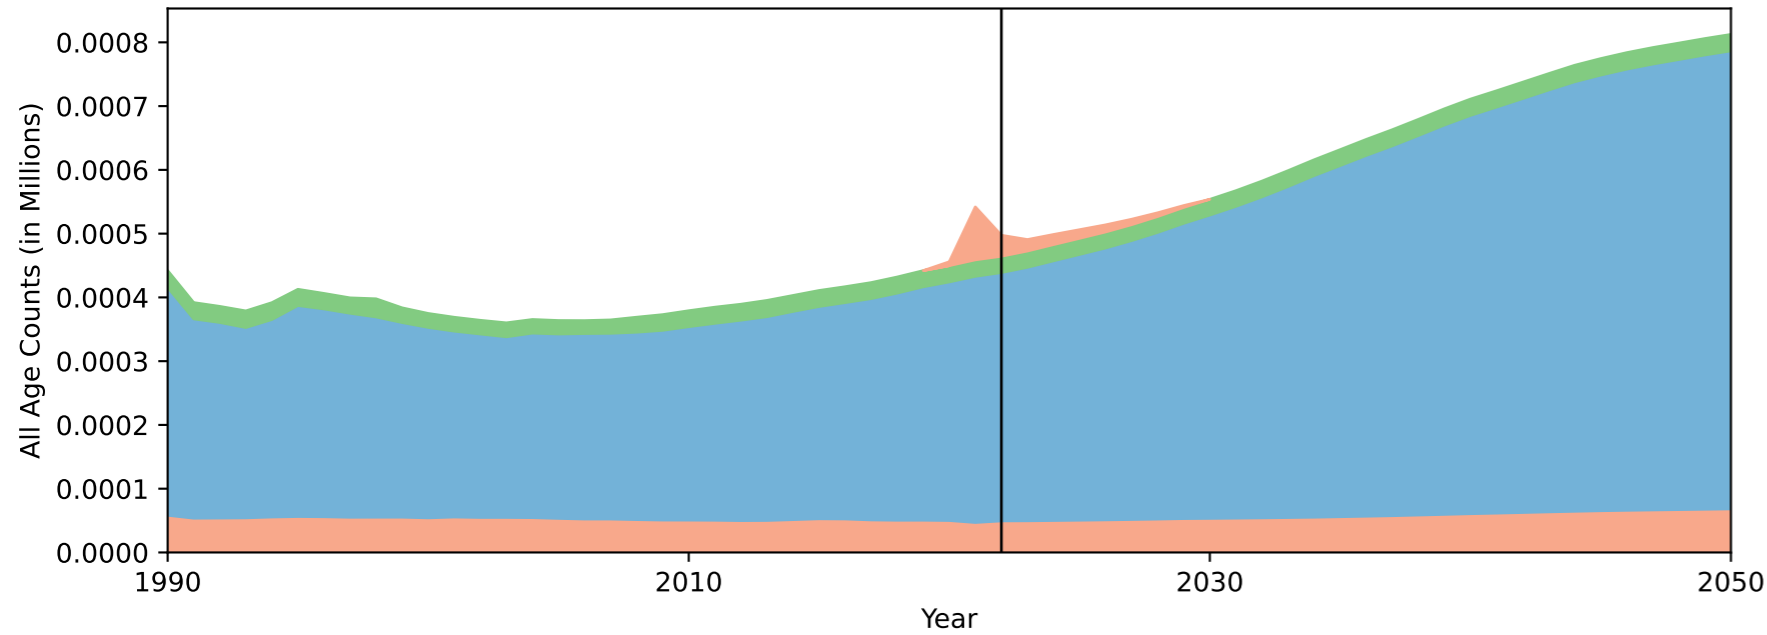

Level 2

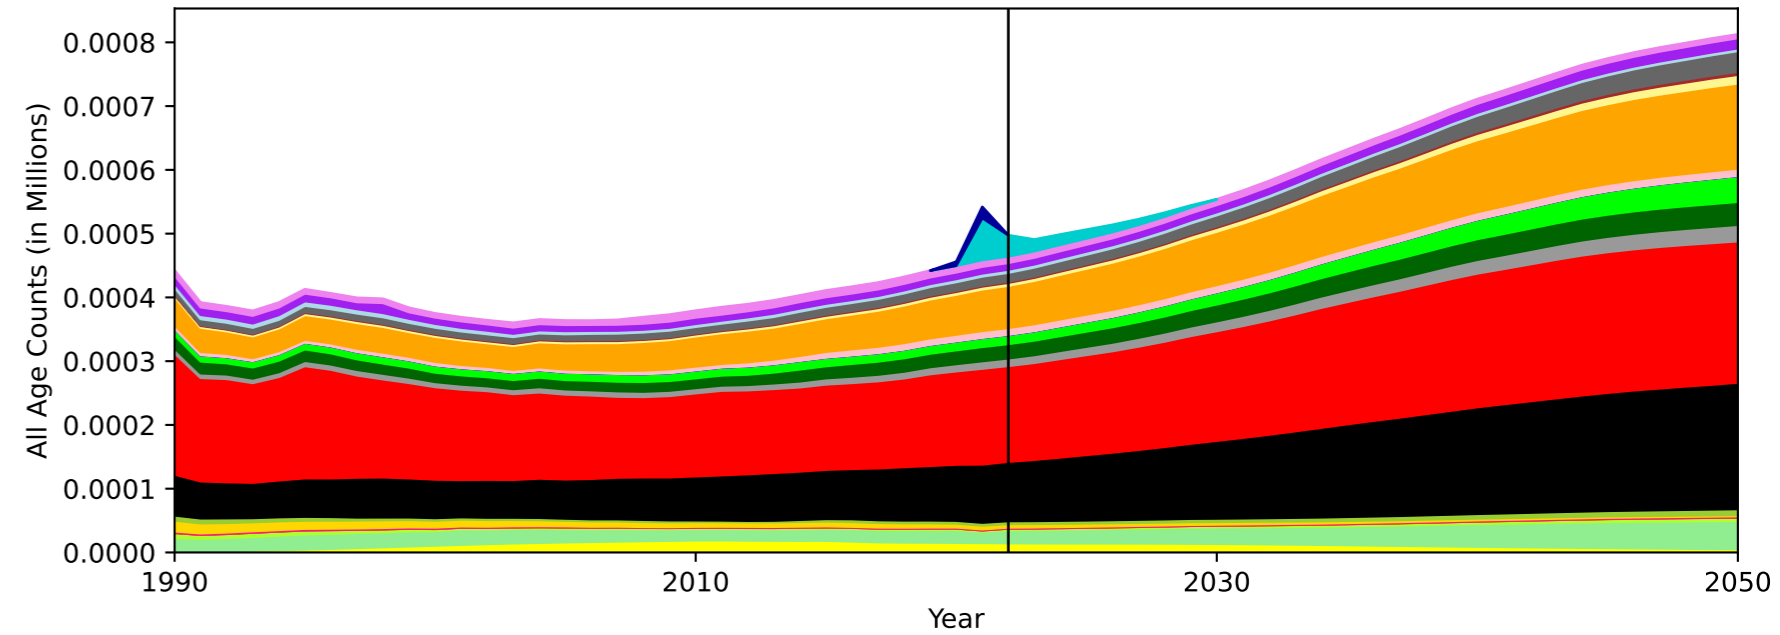



# Saint Lucia

Level 1

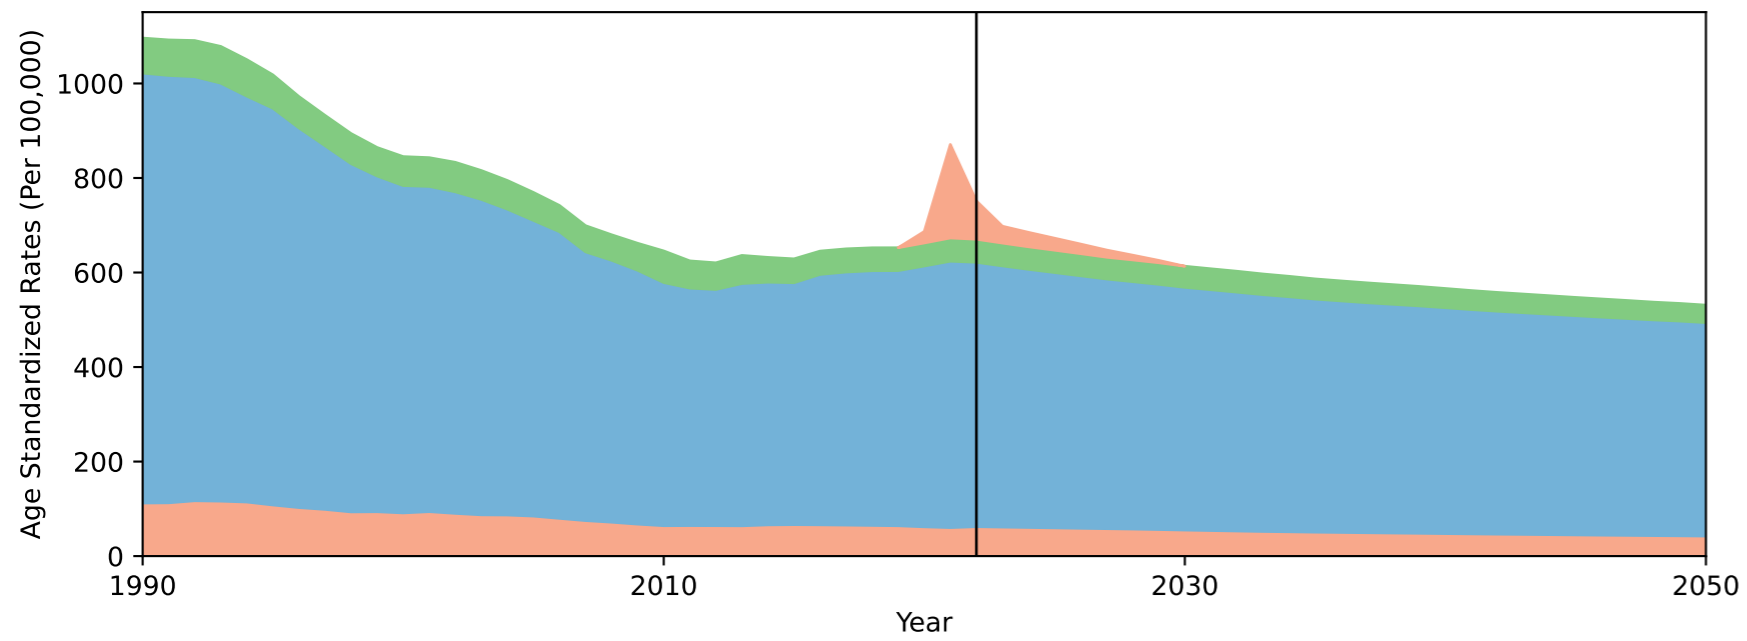

Level 2

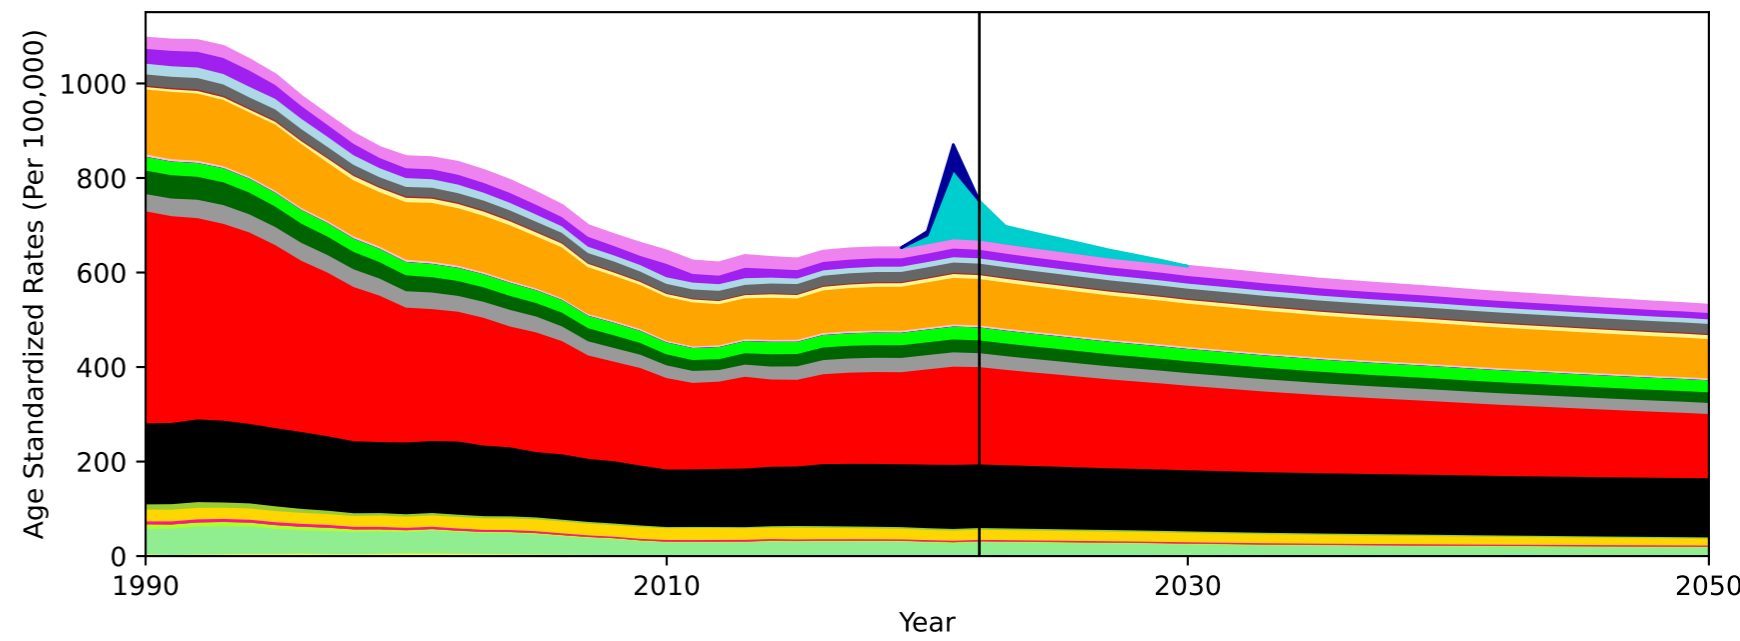

Level 1

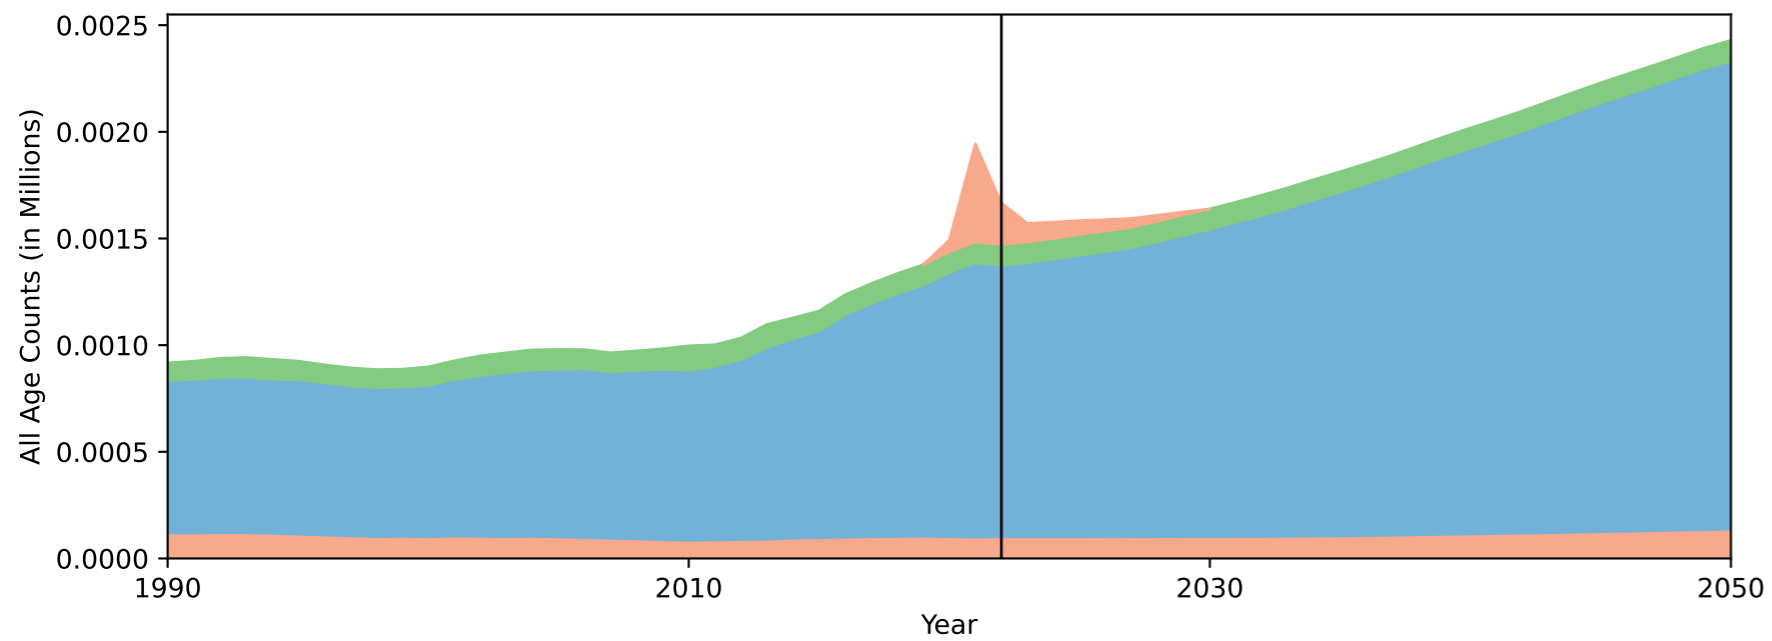

Level 2

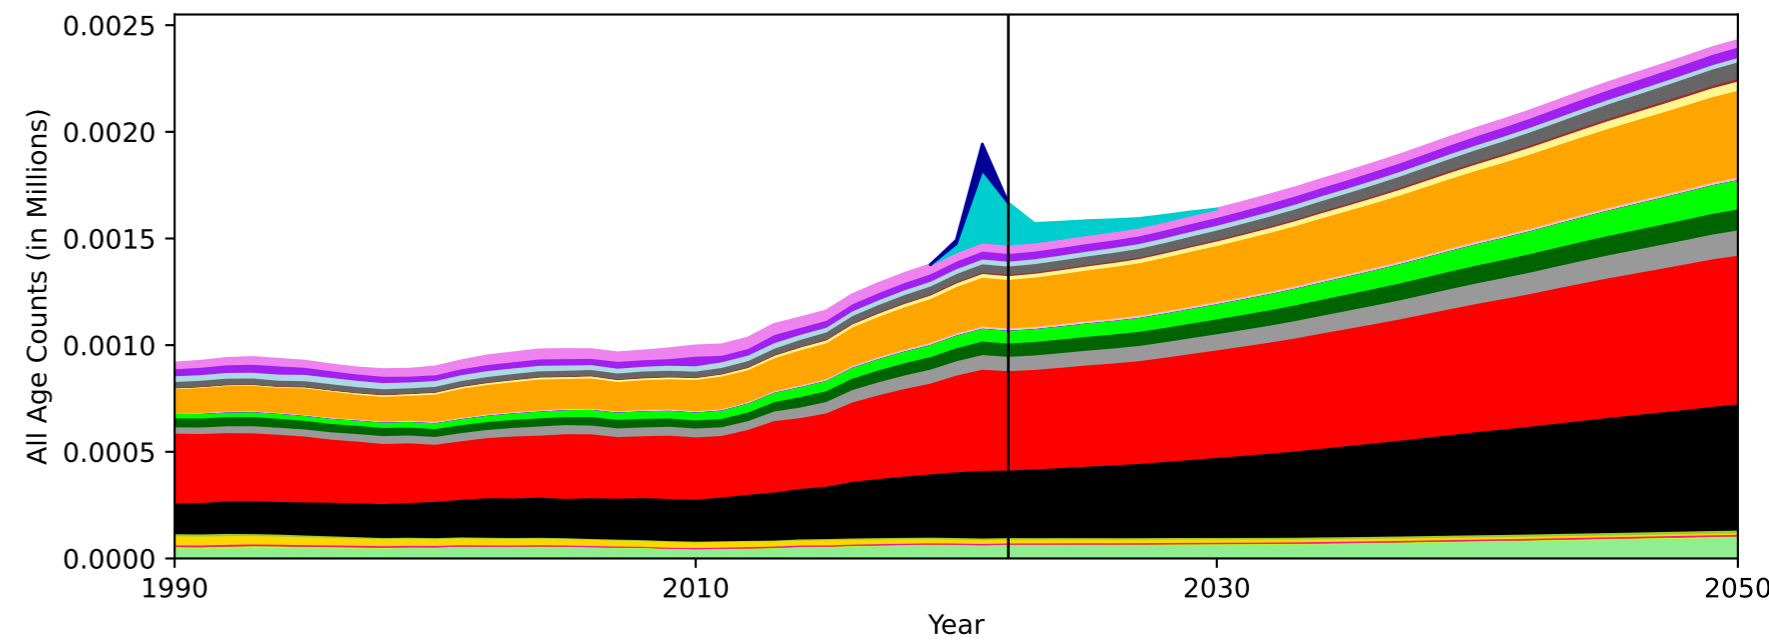

# Saint Vincent And The Grenadines

Level 1

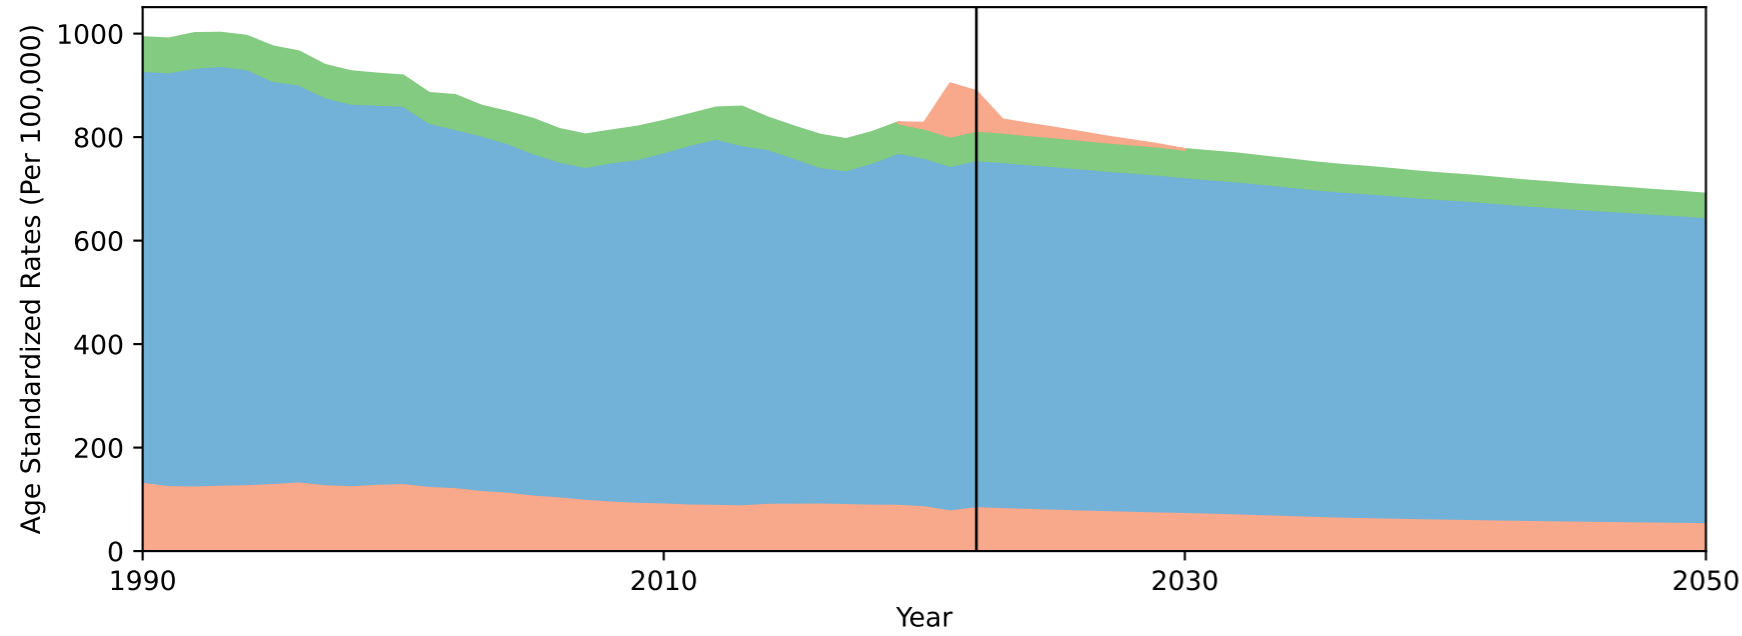

Level 2

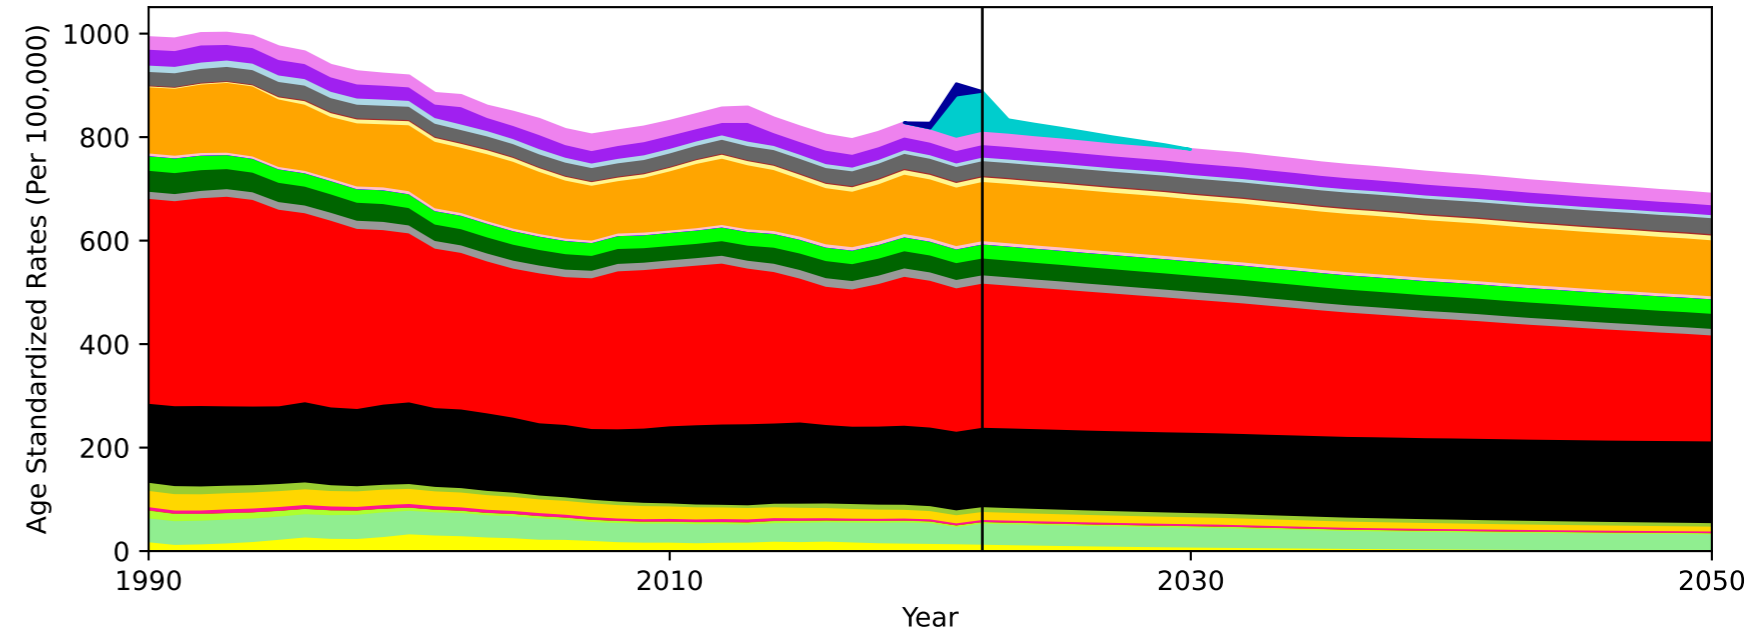

Level 1

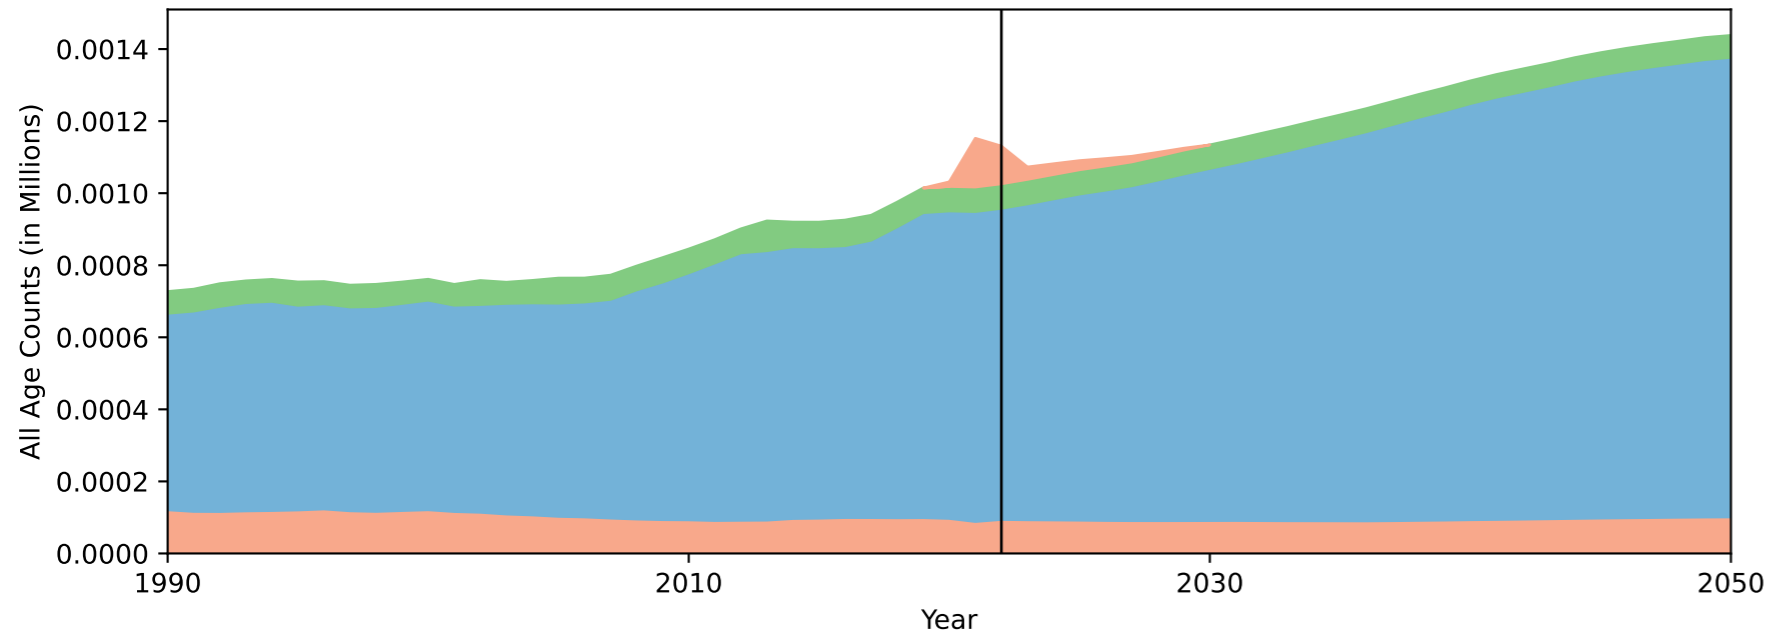

Level 2

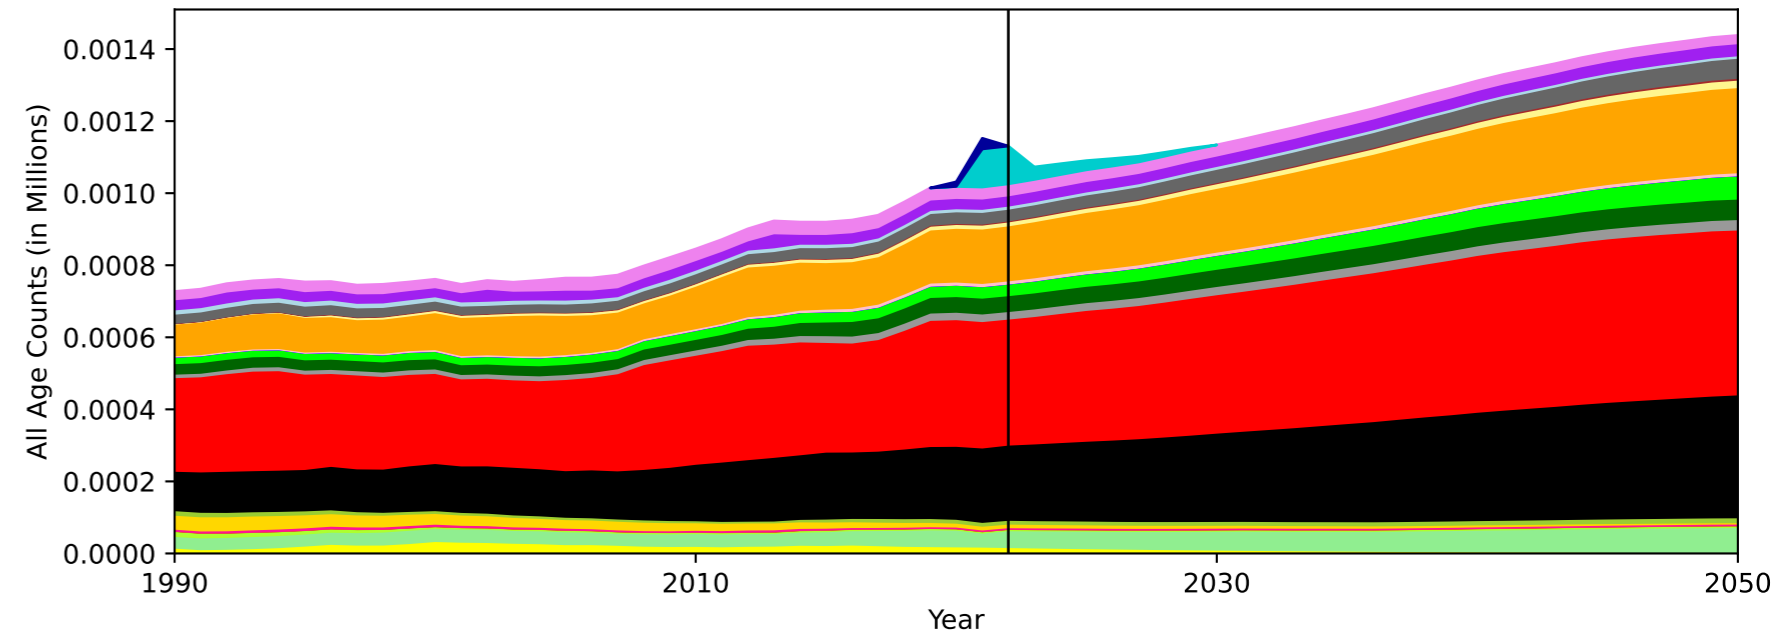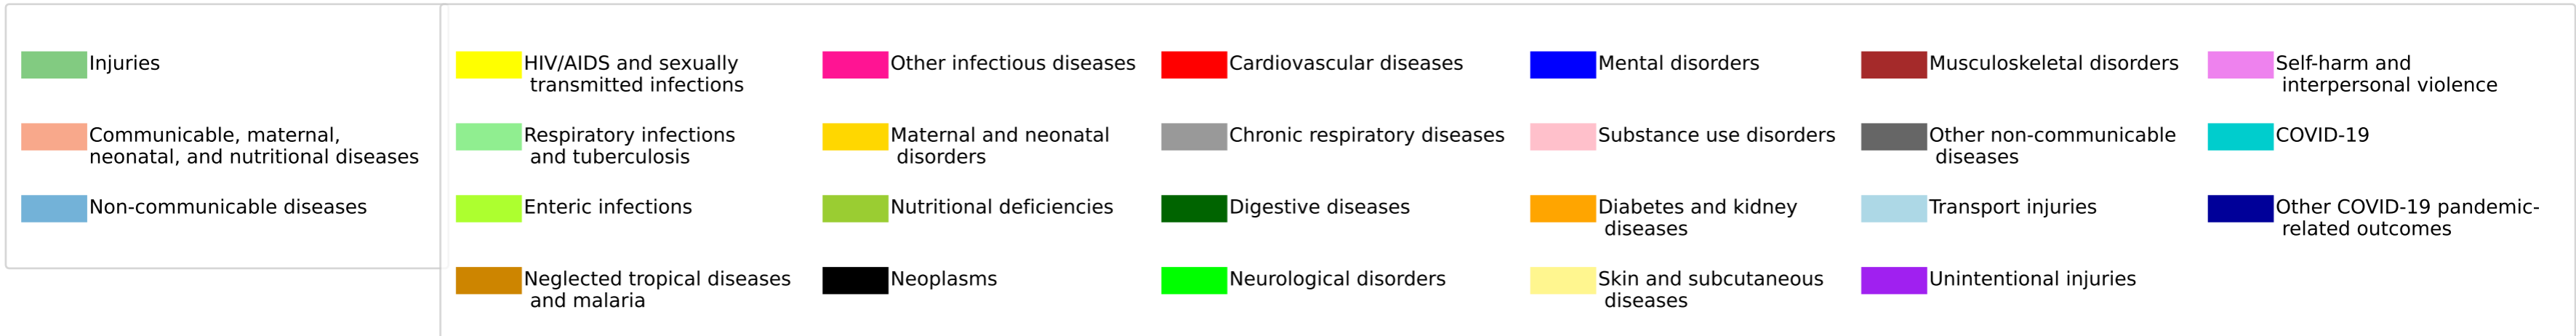

# Suriname

Level 1

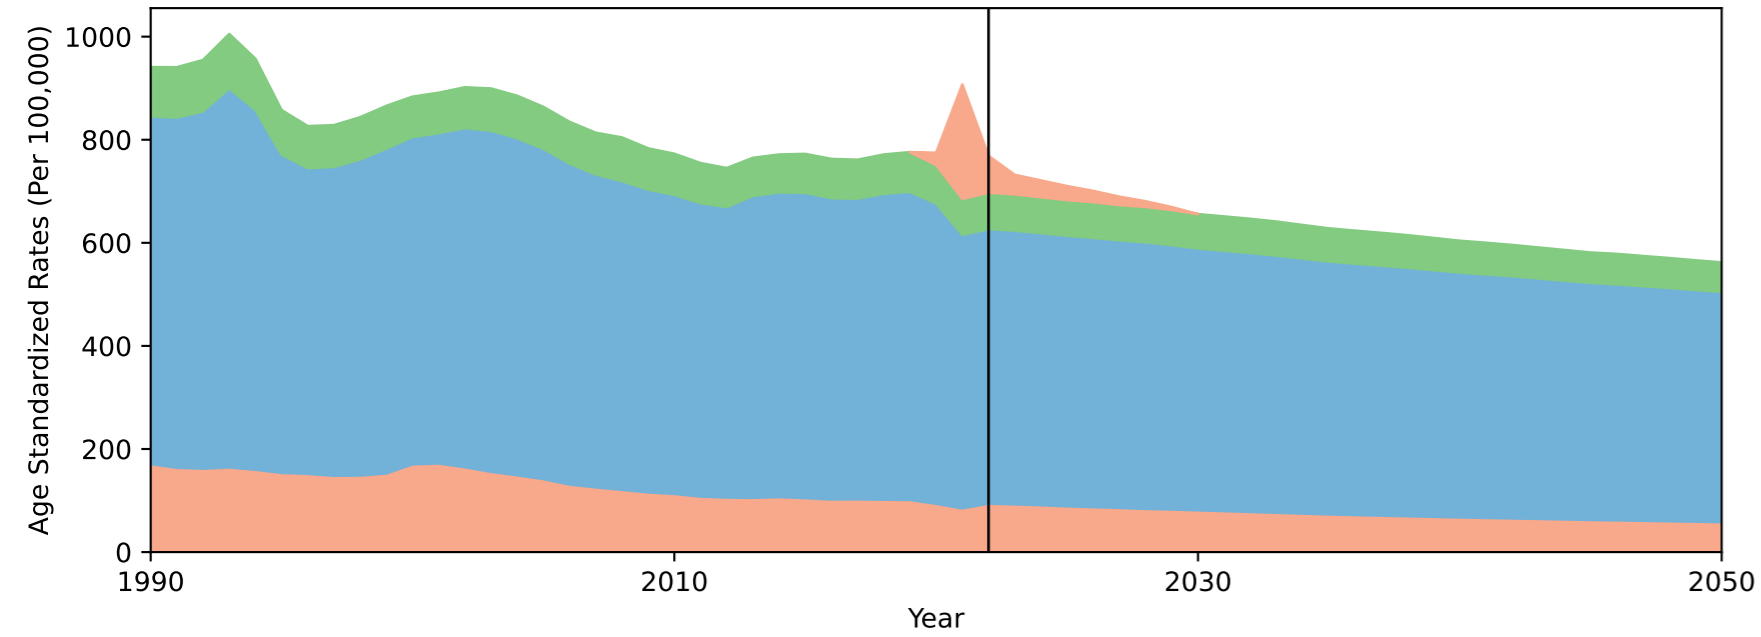

Level 2

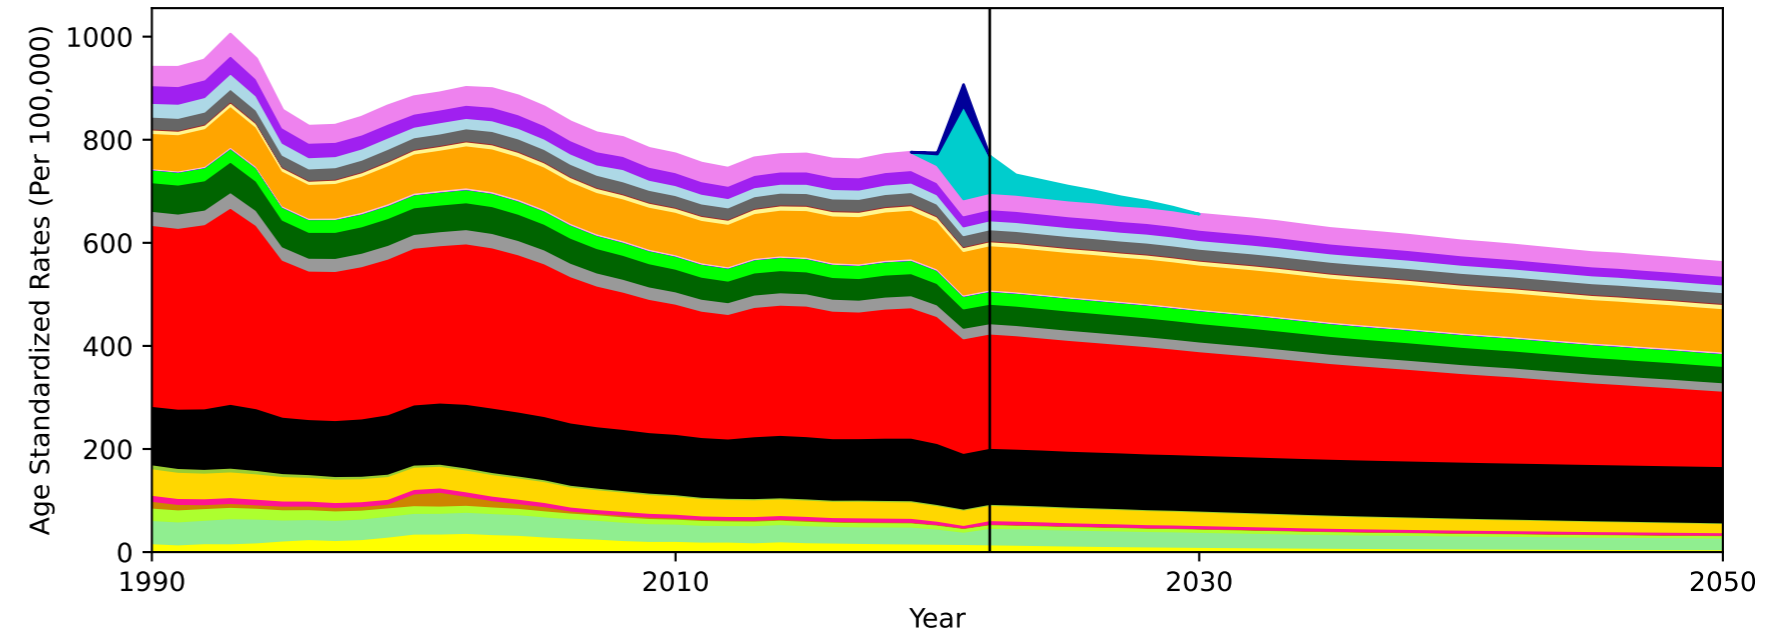

Level 1

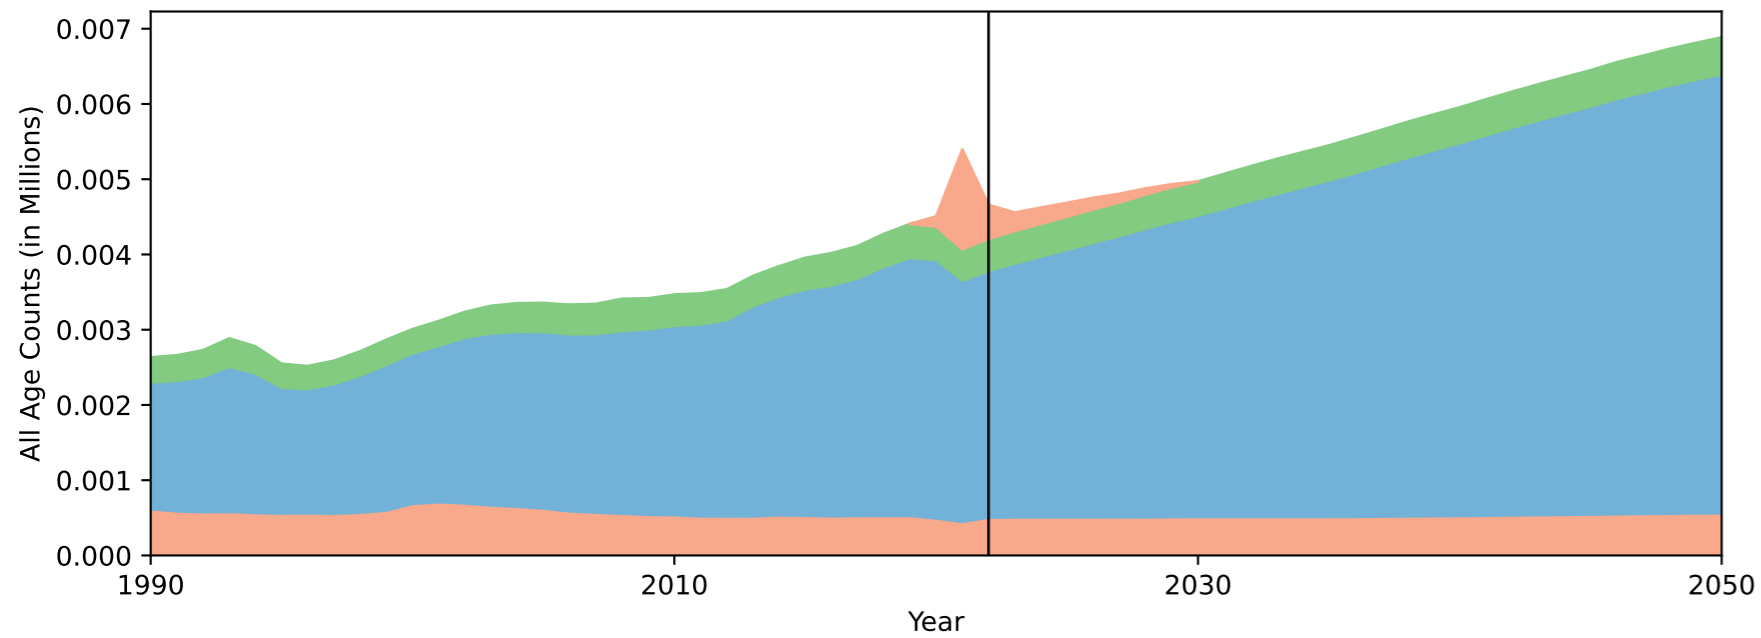

Level 2

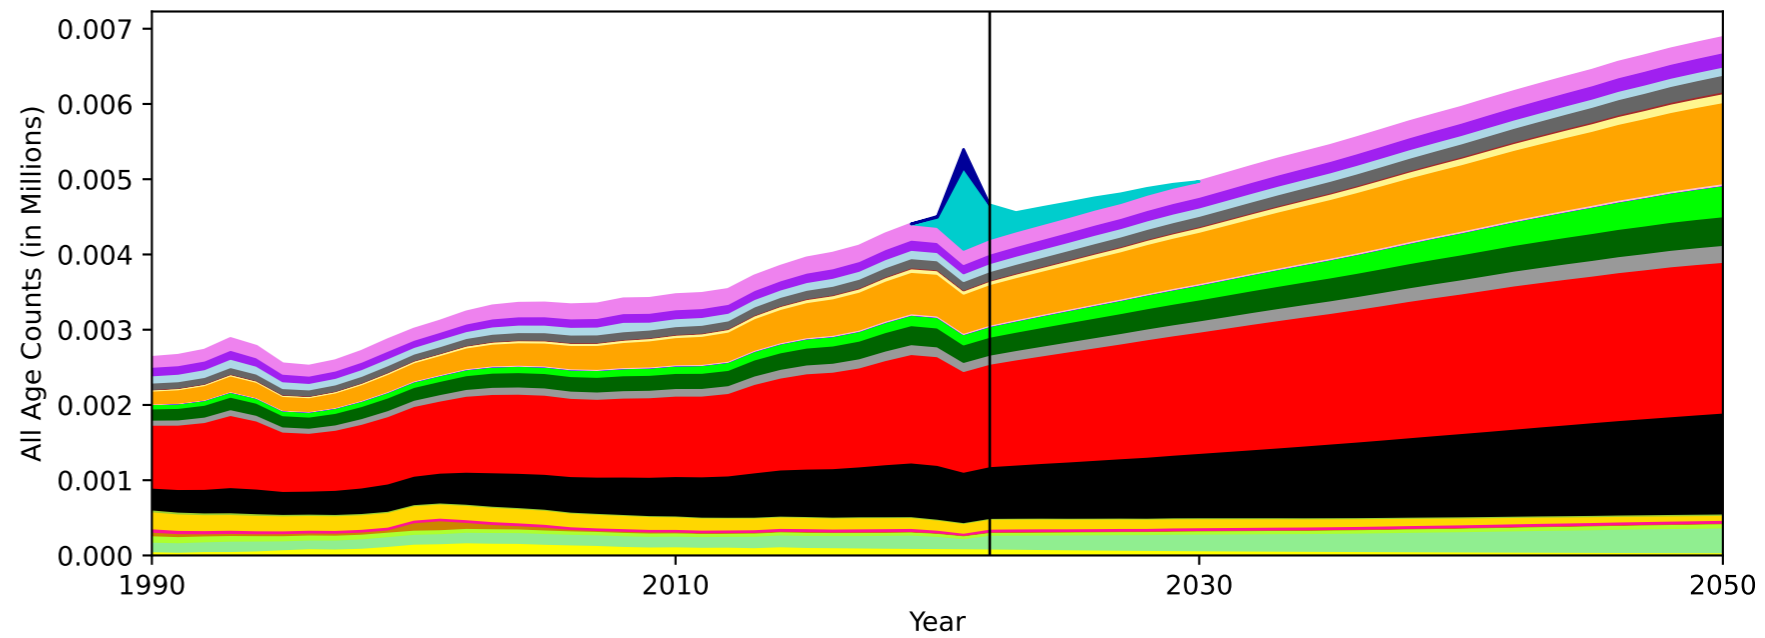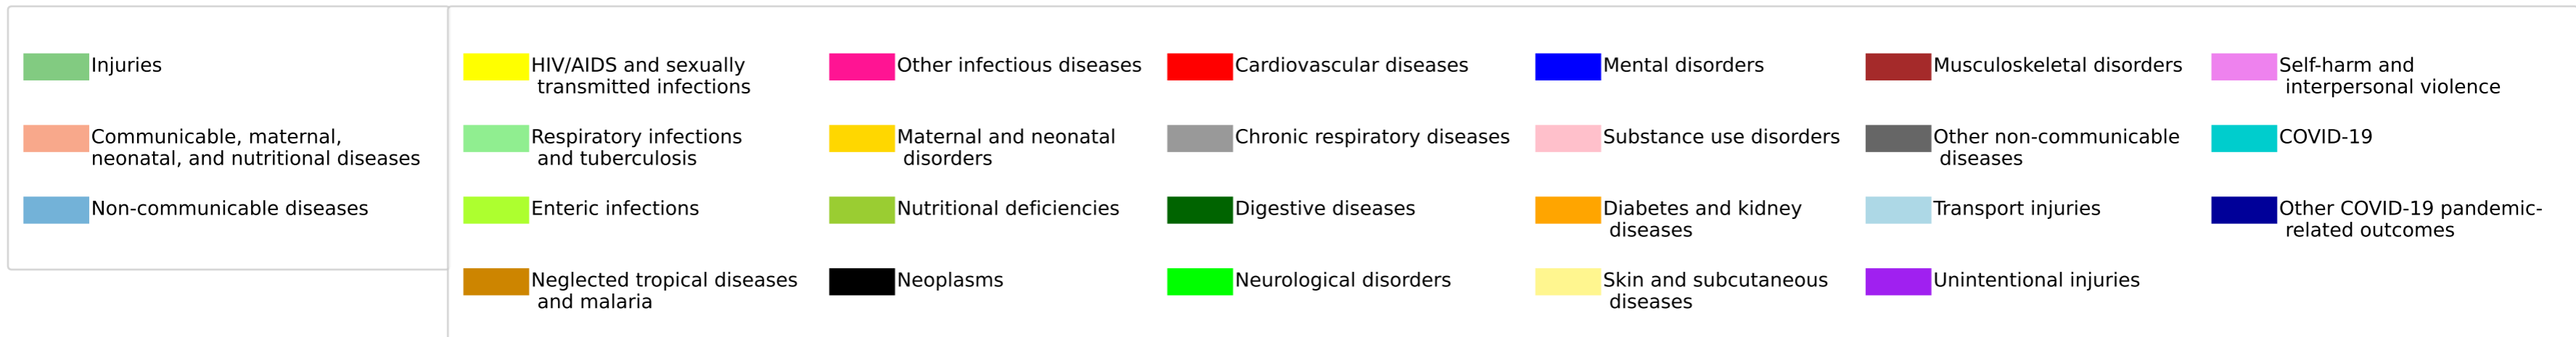

# Trinidad And Tobago

Supplemental Results Figure S5. Age-standardised death rates and all age death counts and by Level 1 and Level 2 causes, 1990–2050

563

Level 1

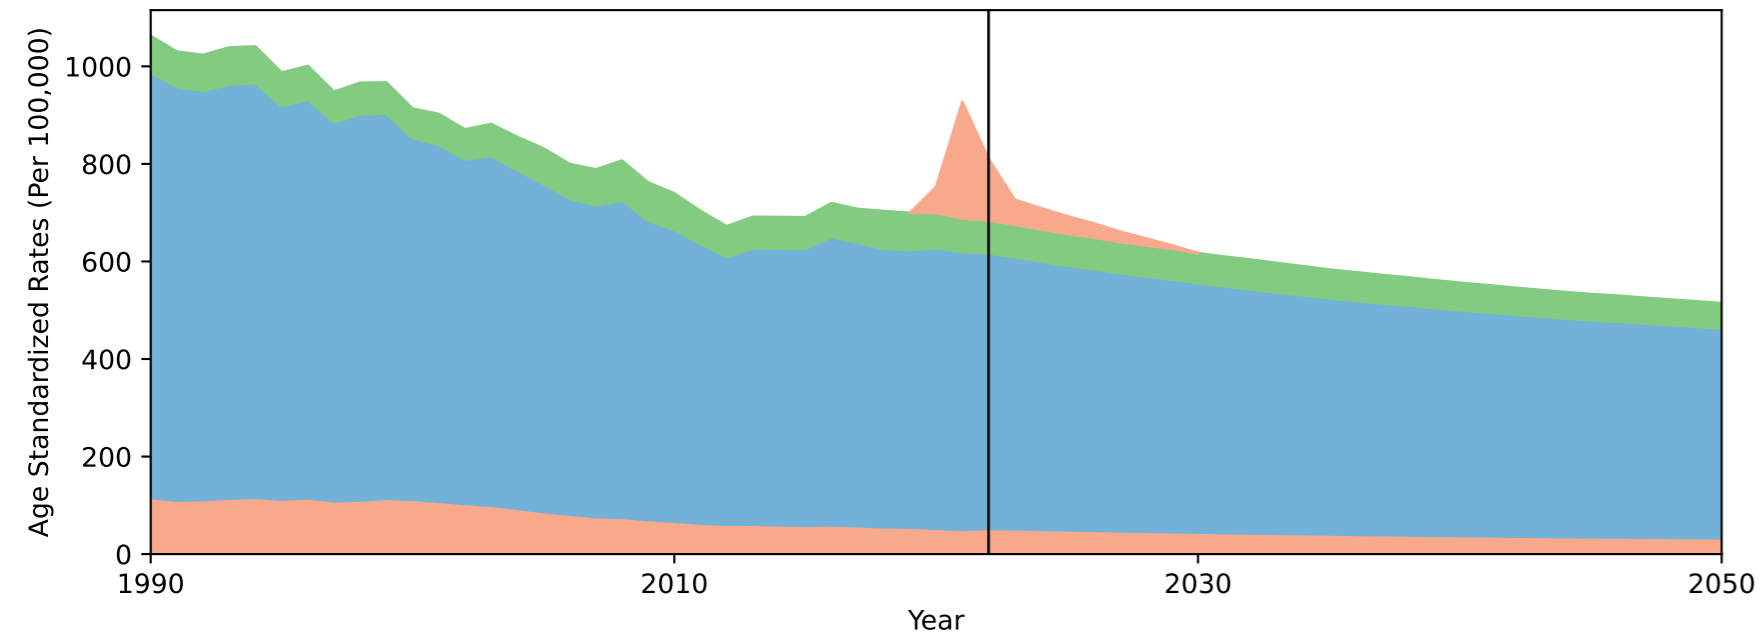

Level 2

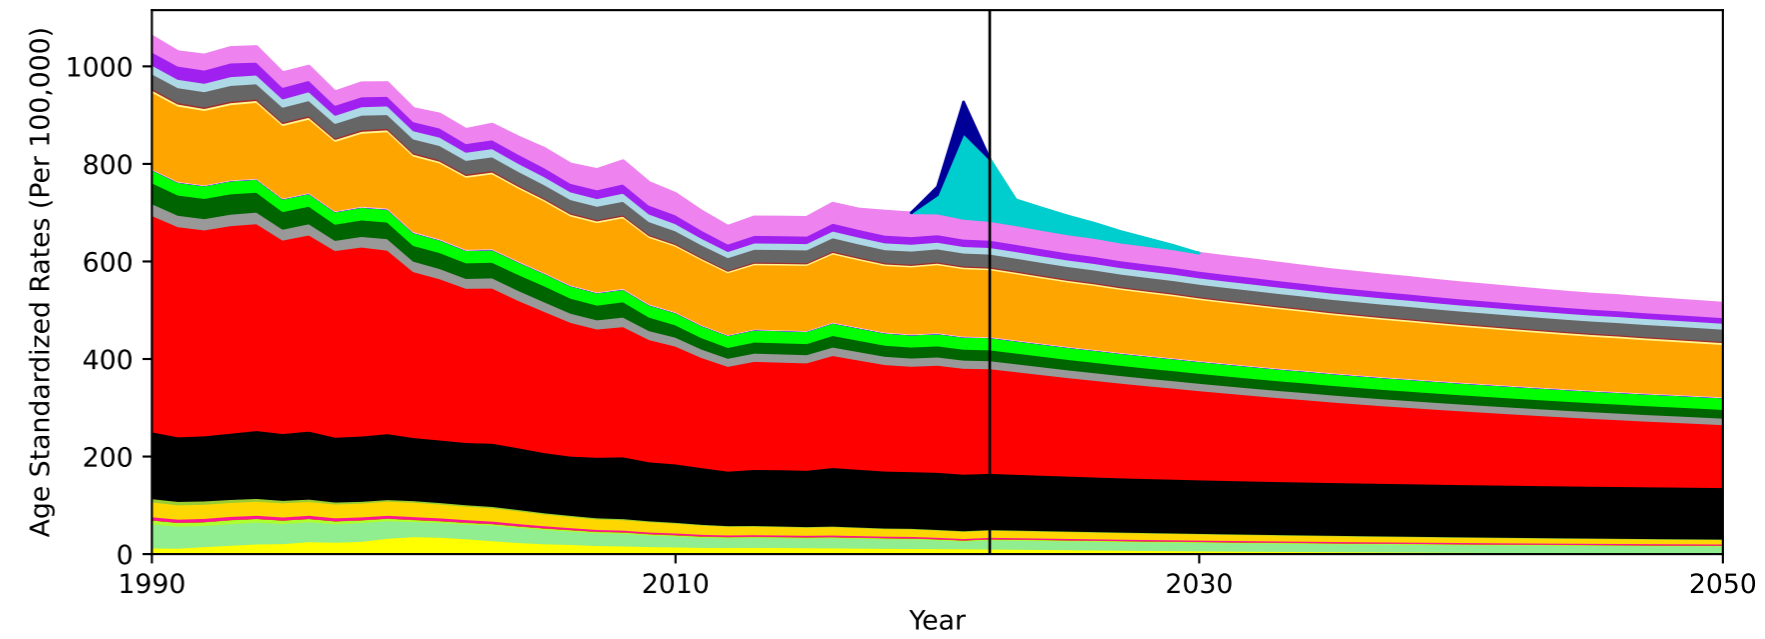

Level 1

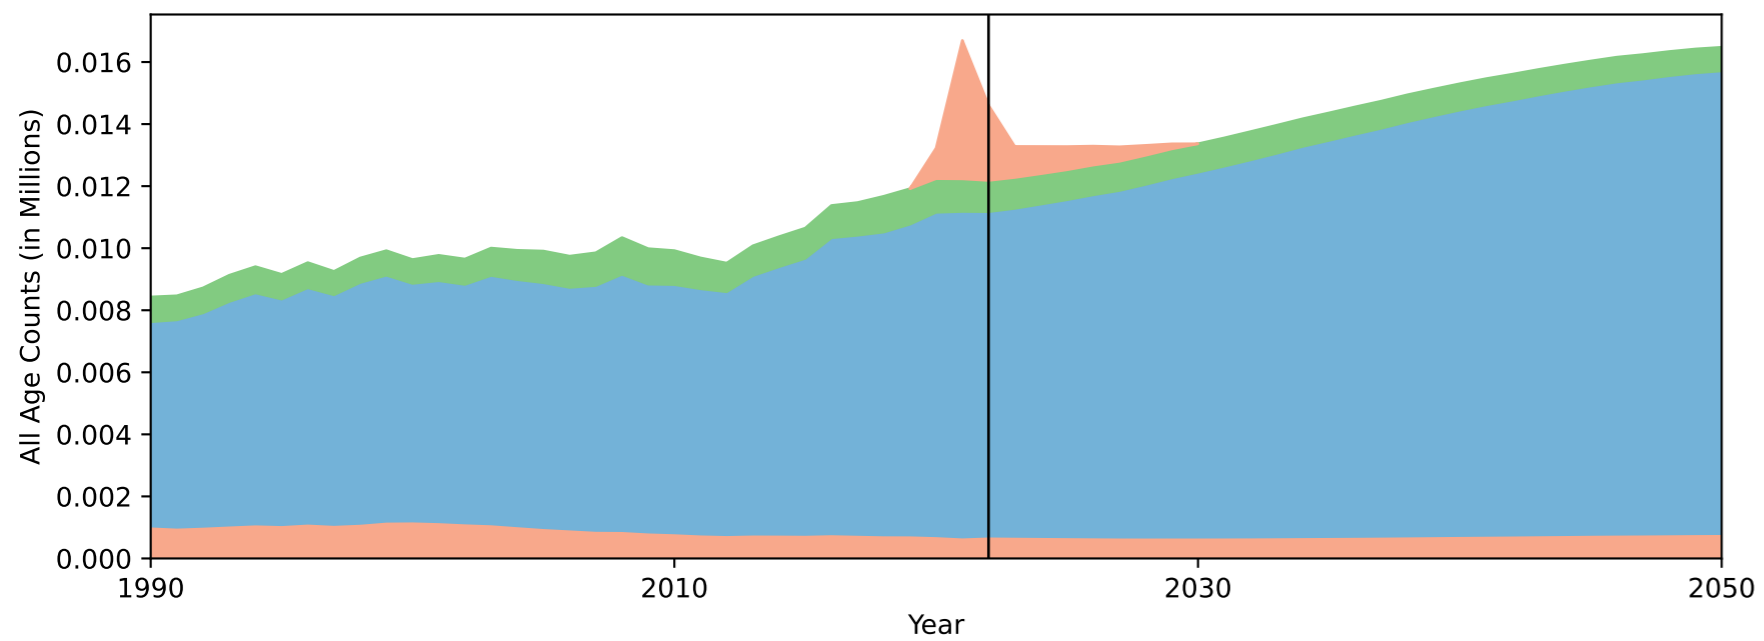

Level 2

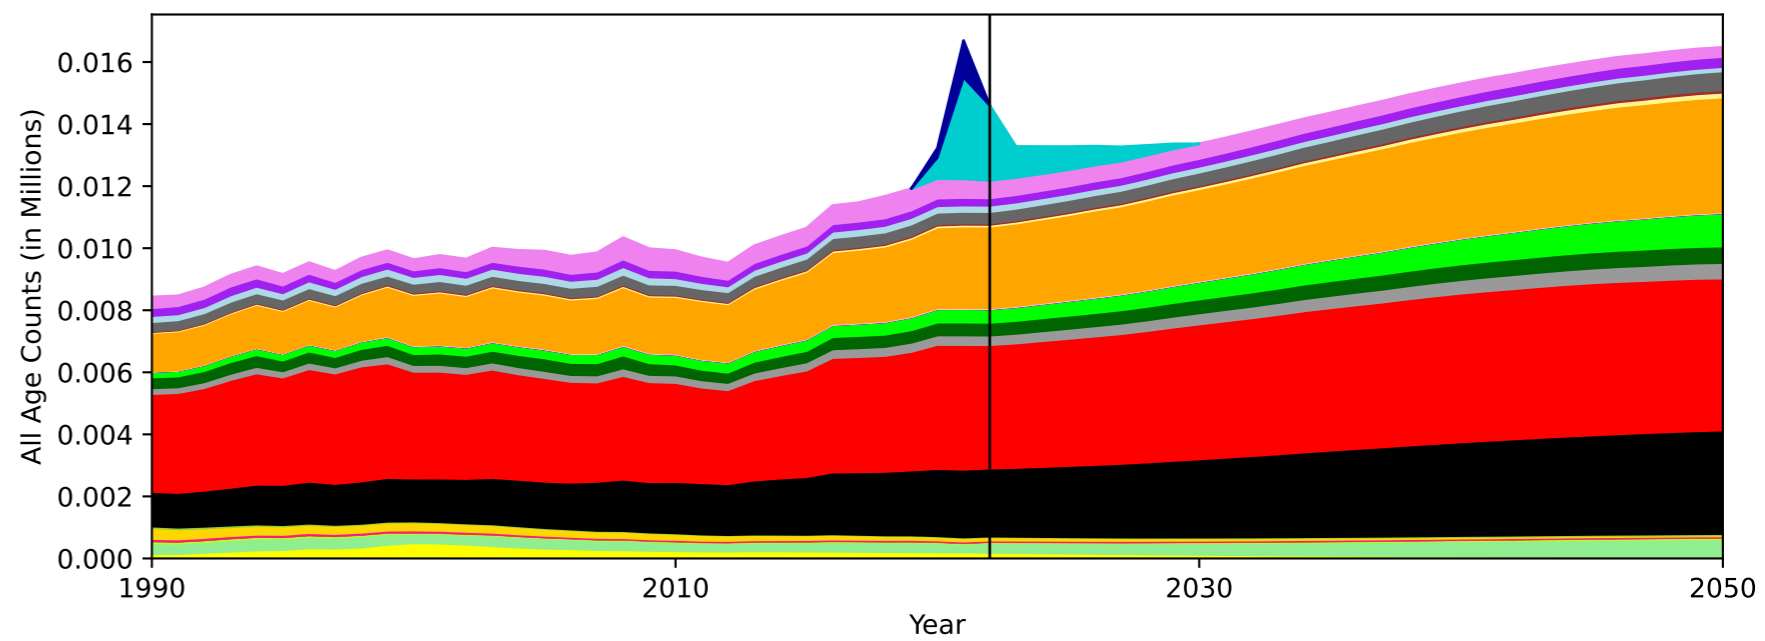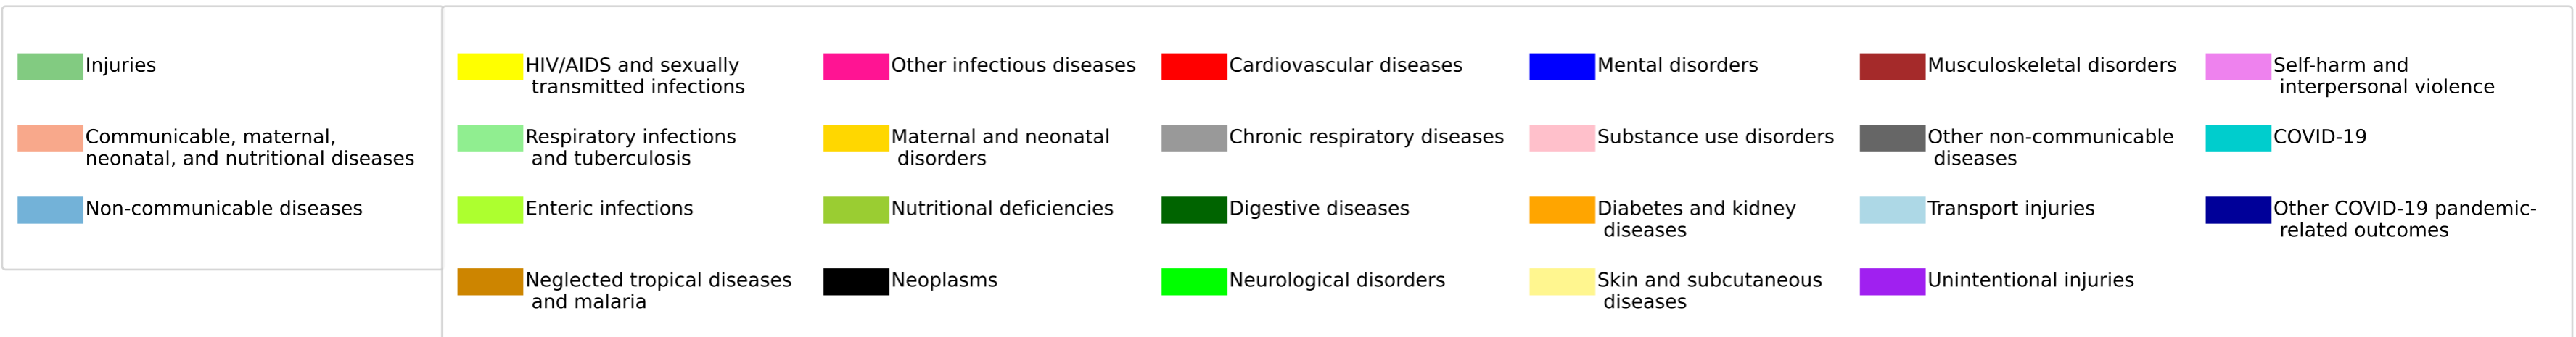

# Virgin Islands

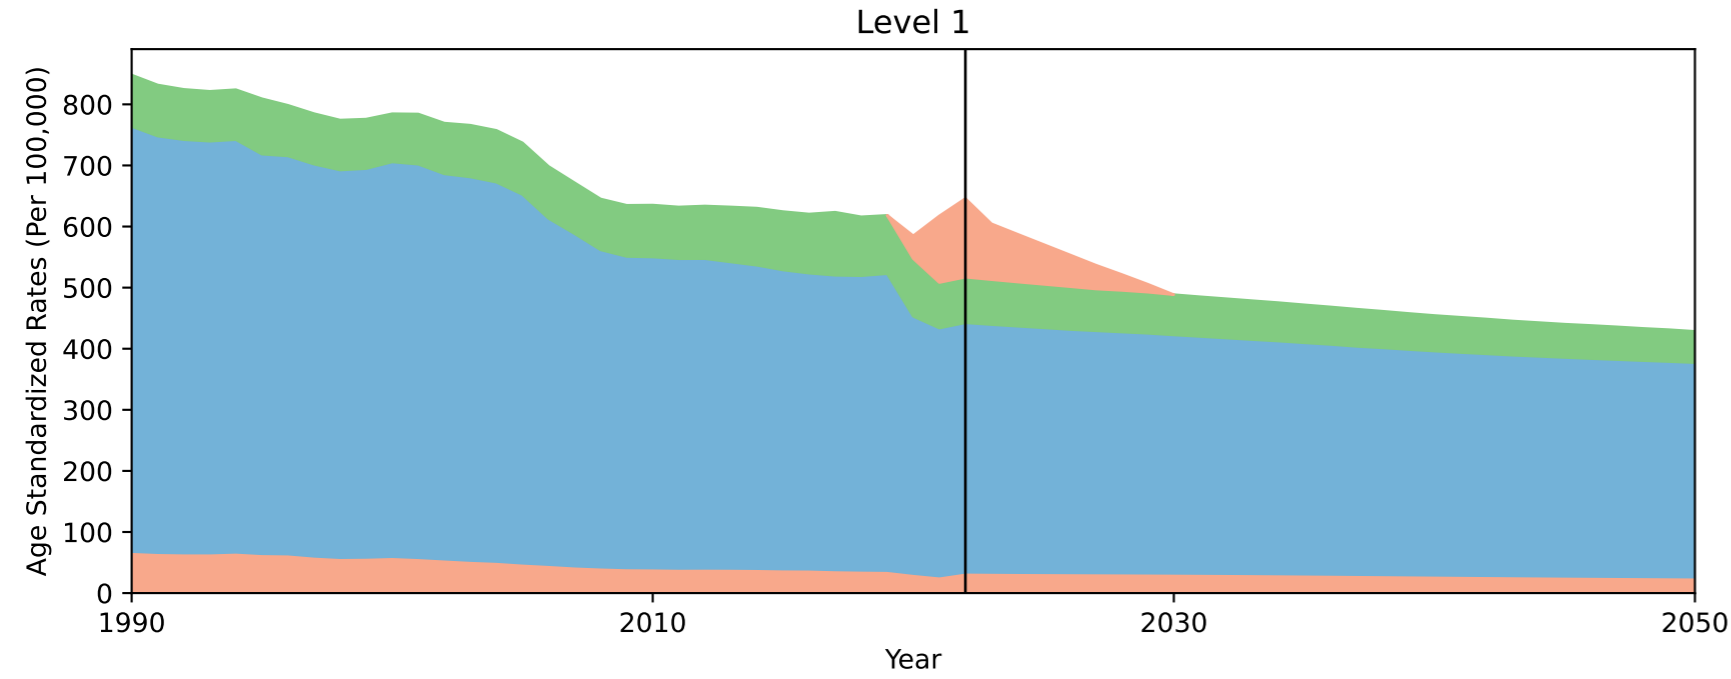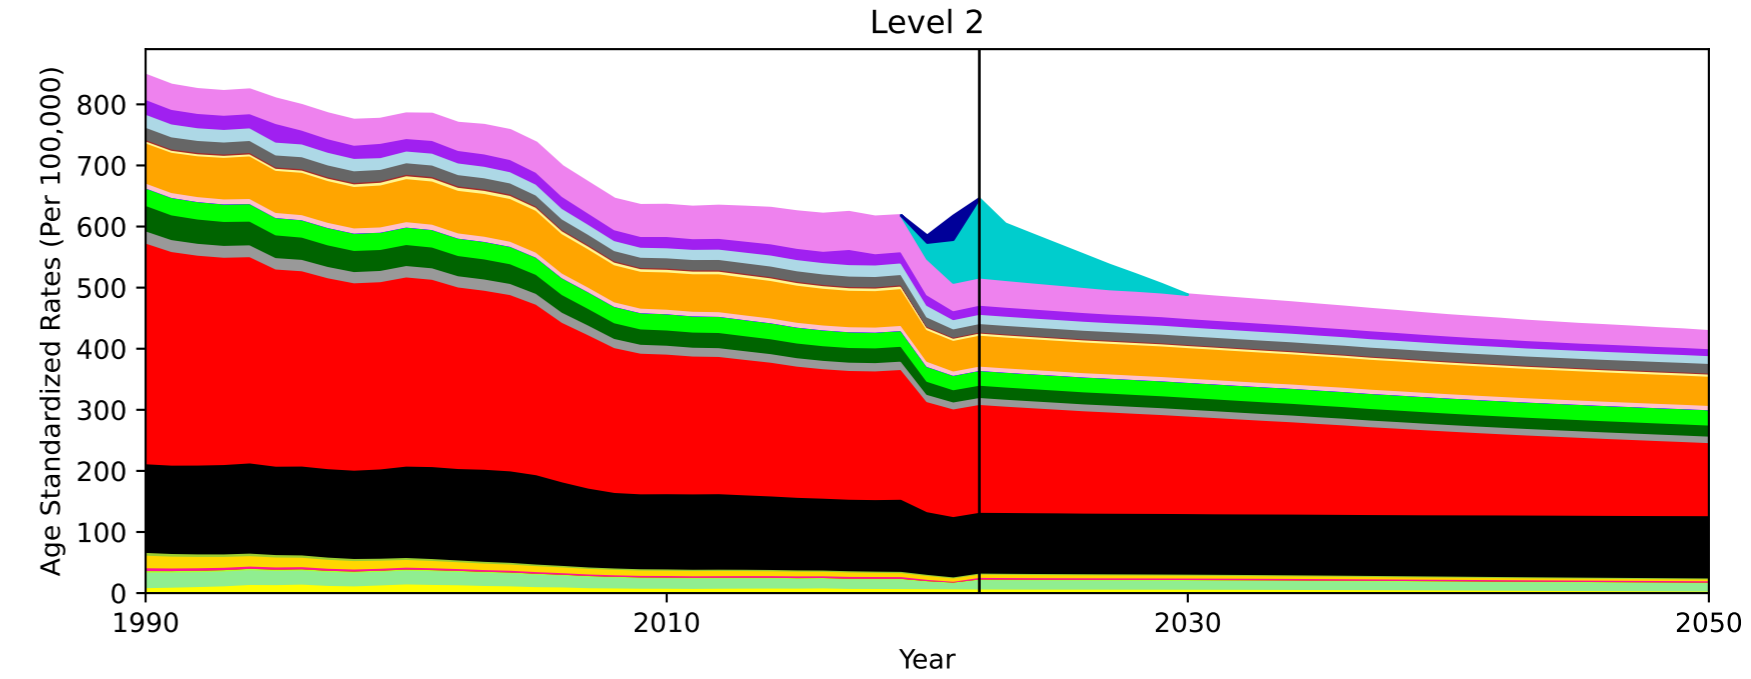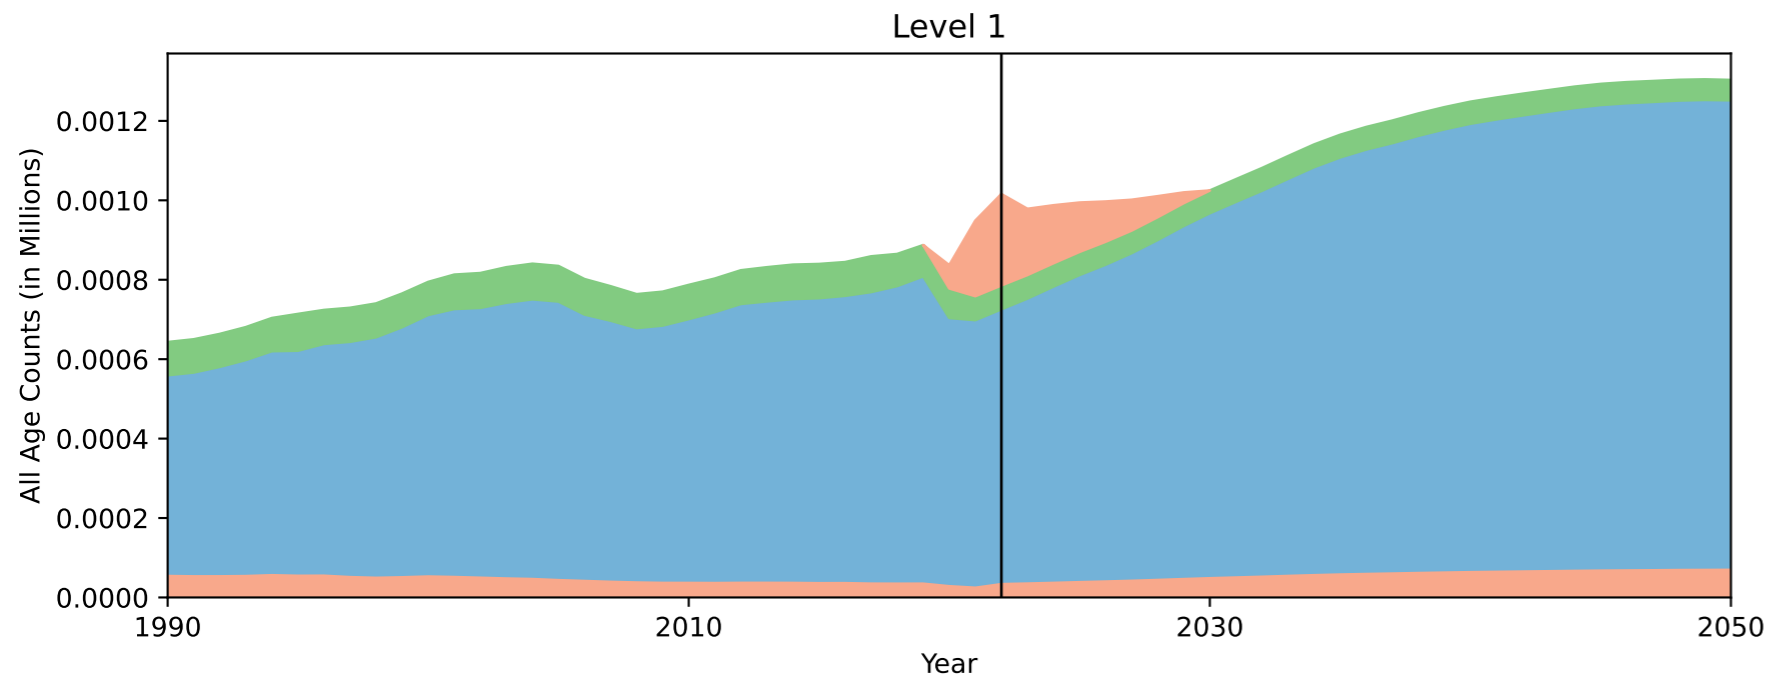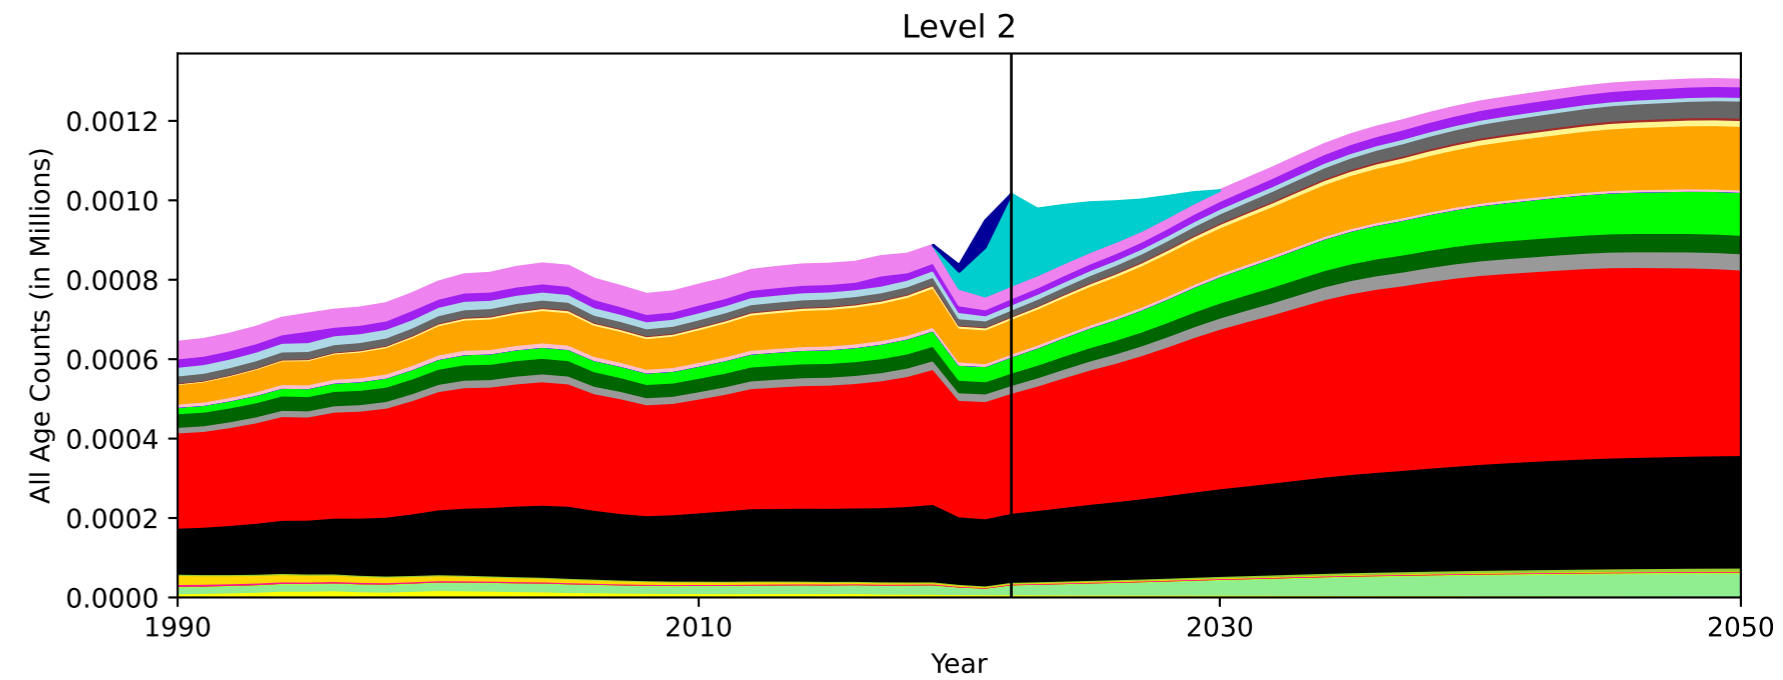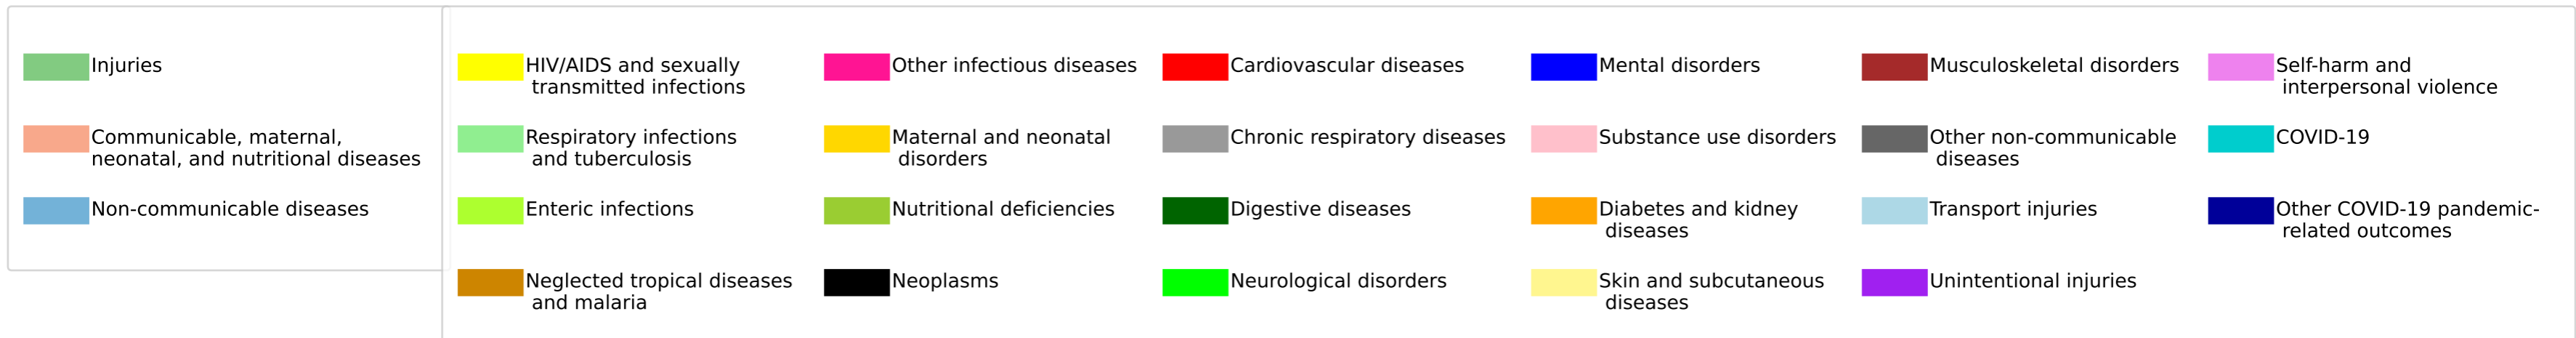

Level 1

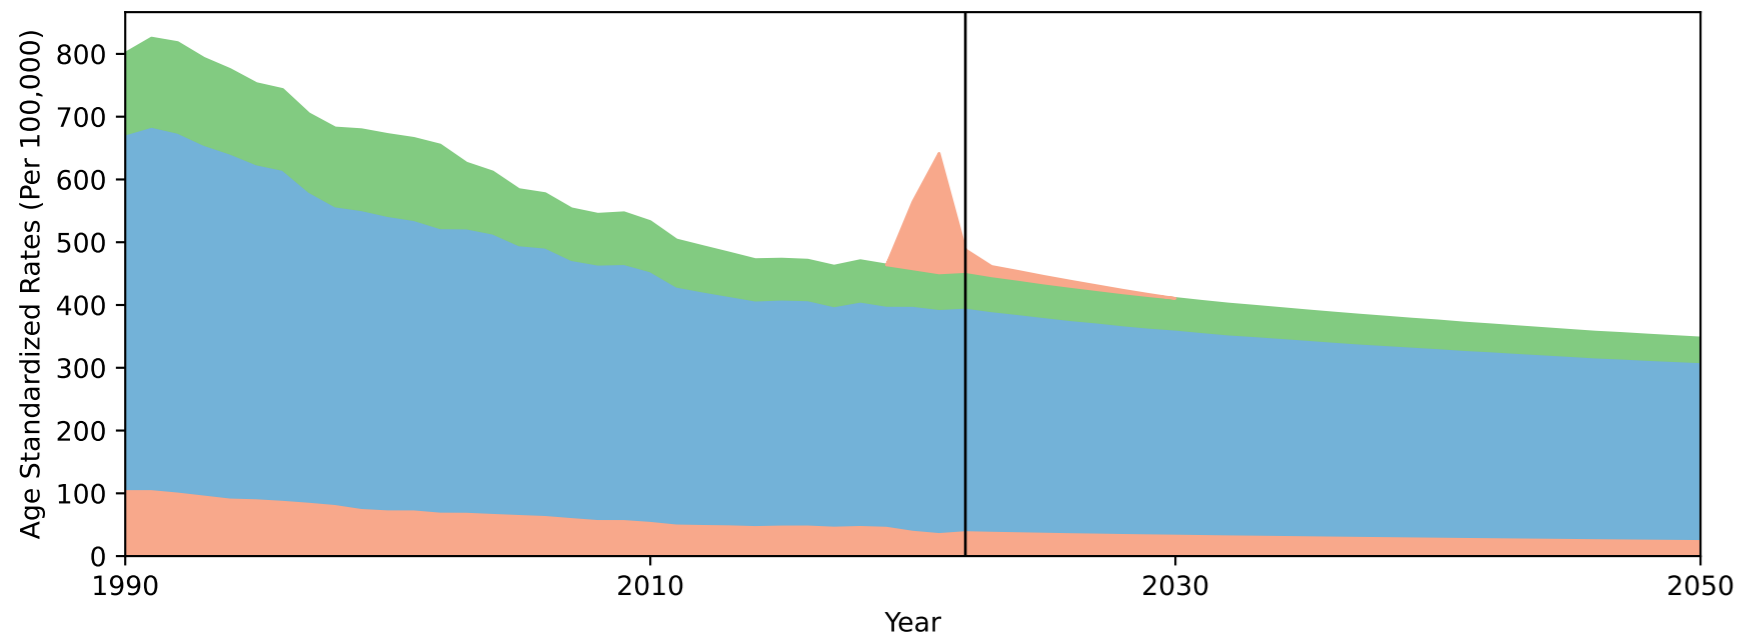

Level 2

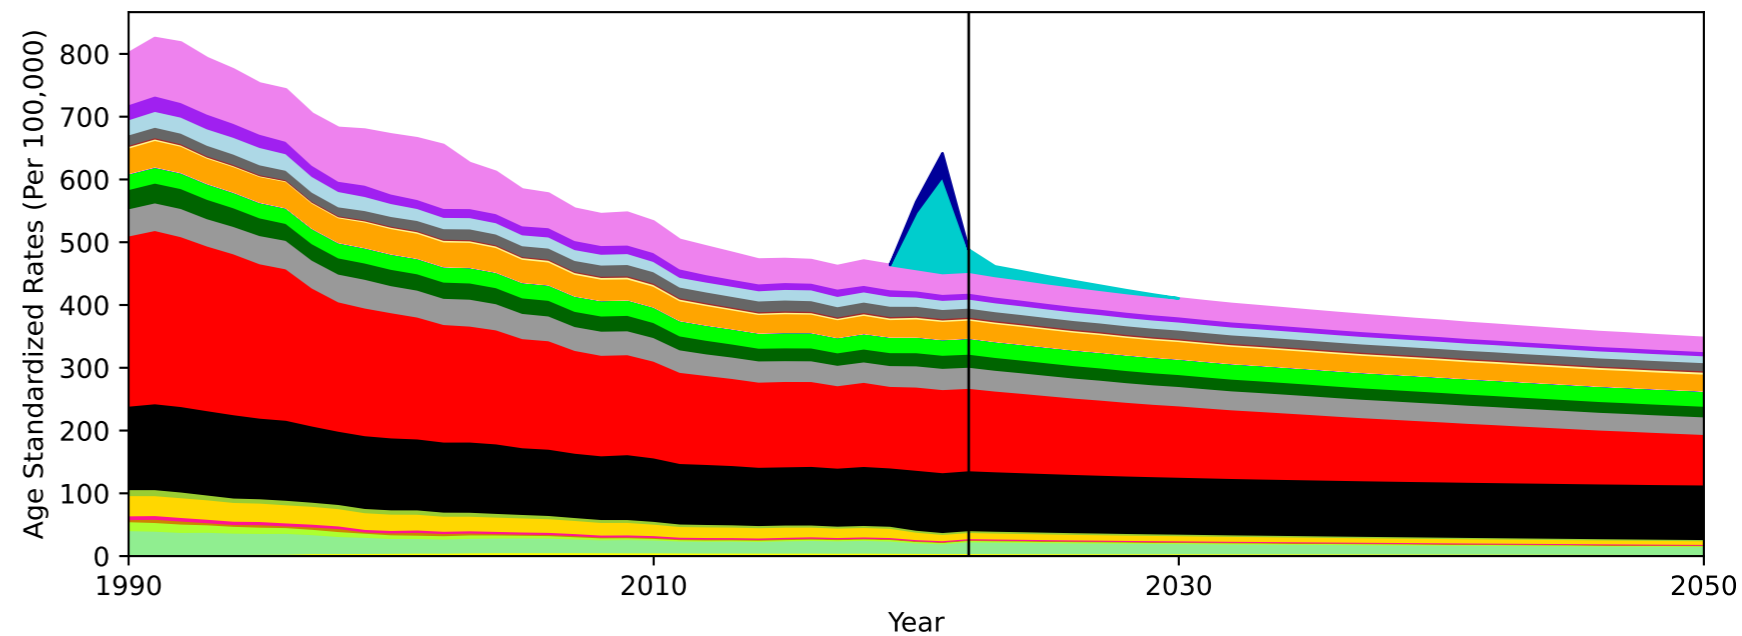

Level 1

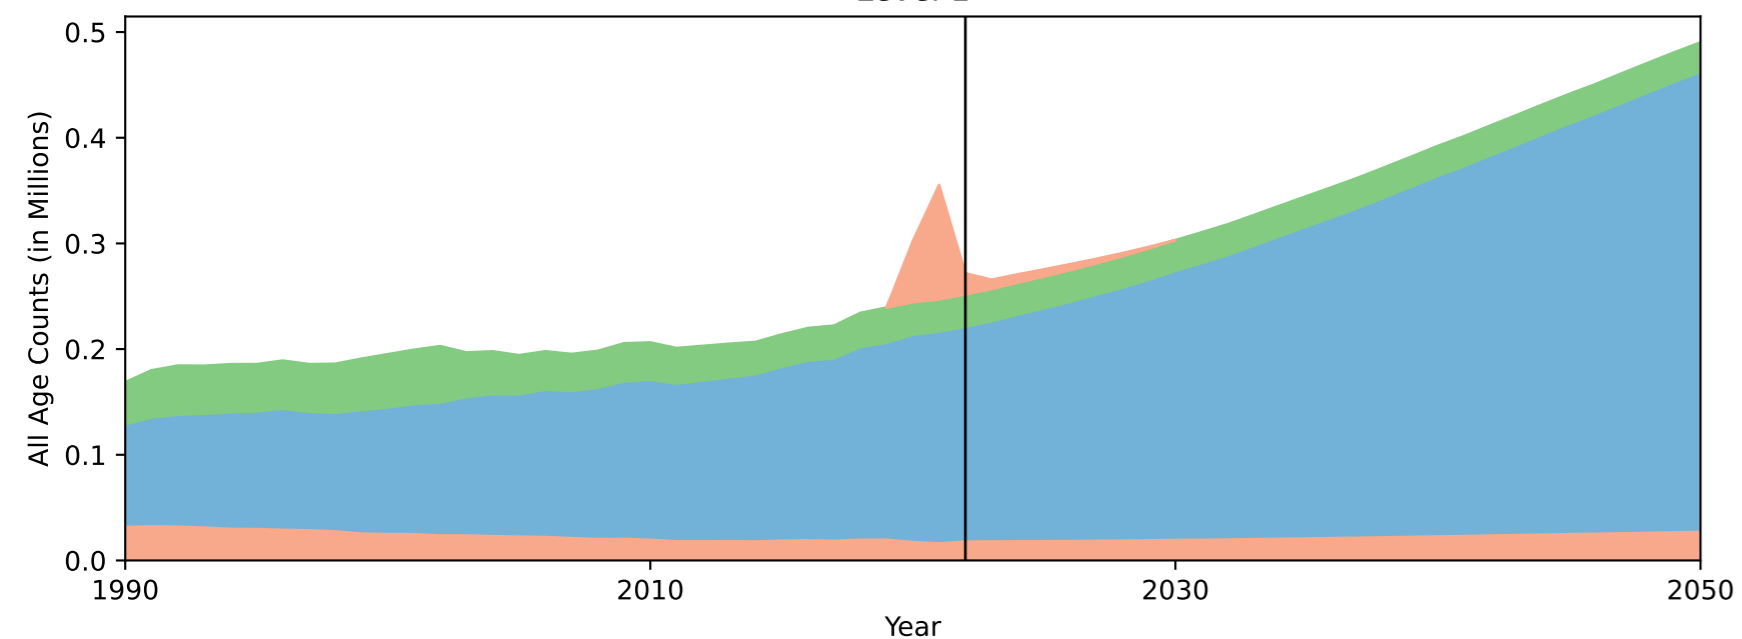

Level 2

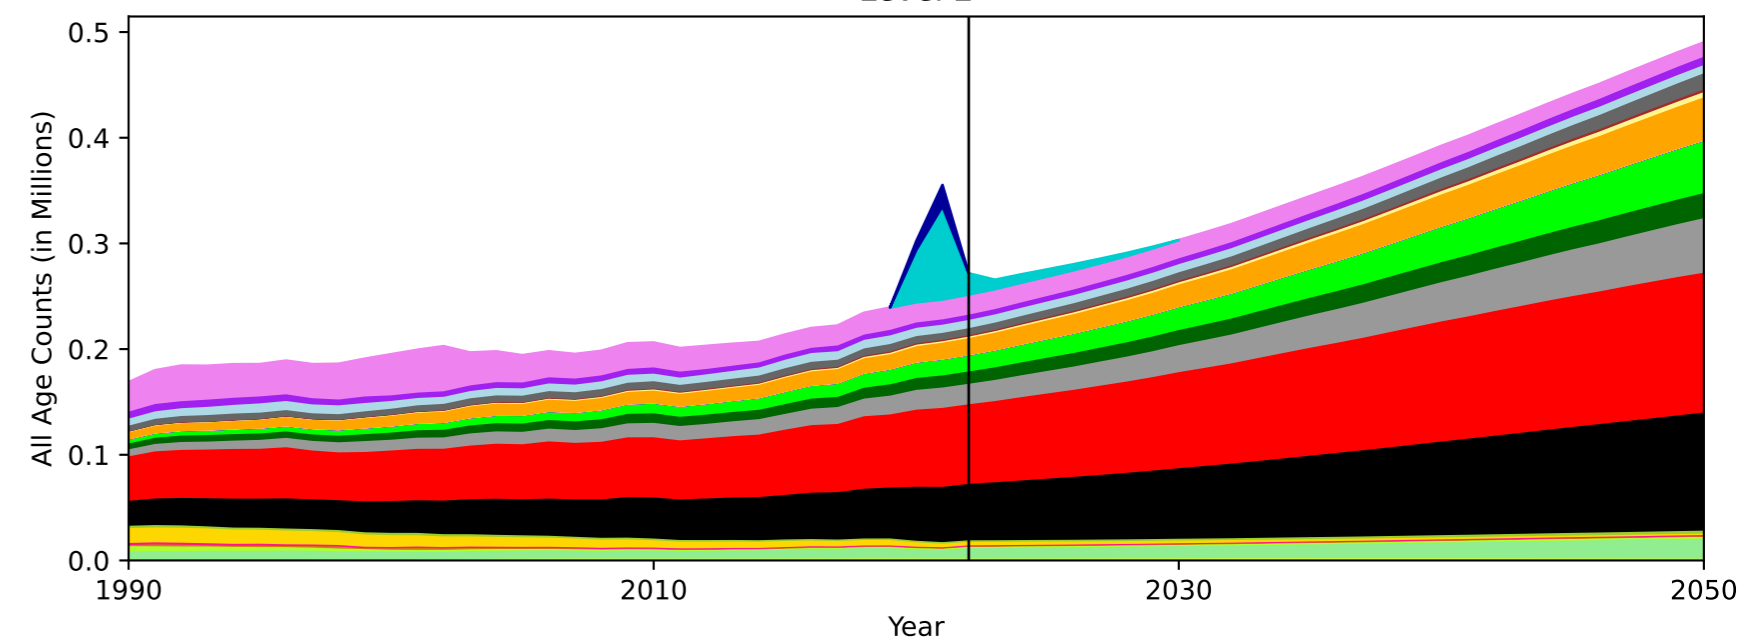

Level 1

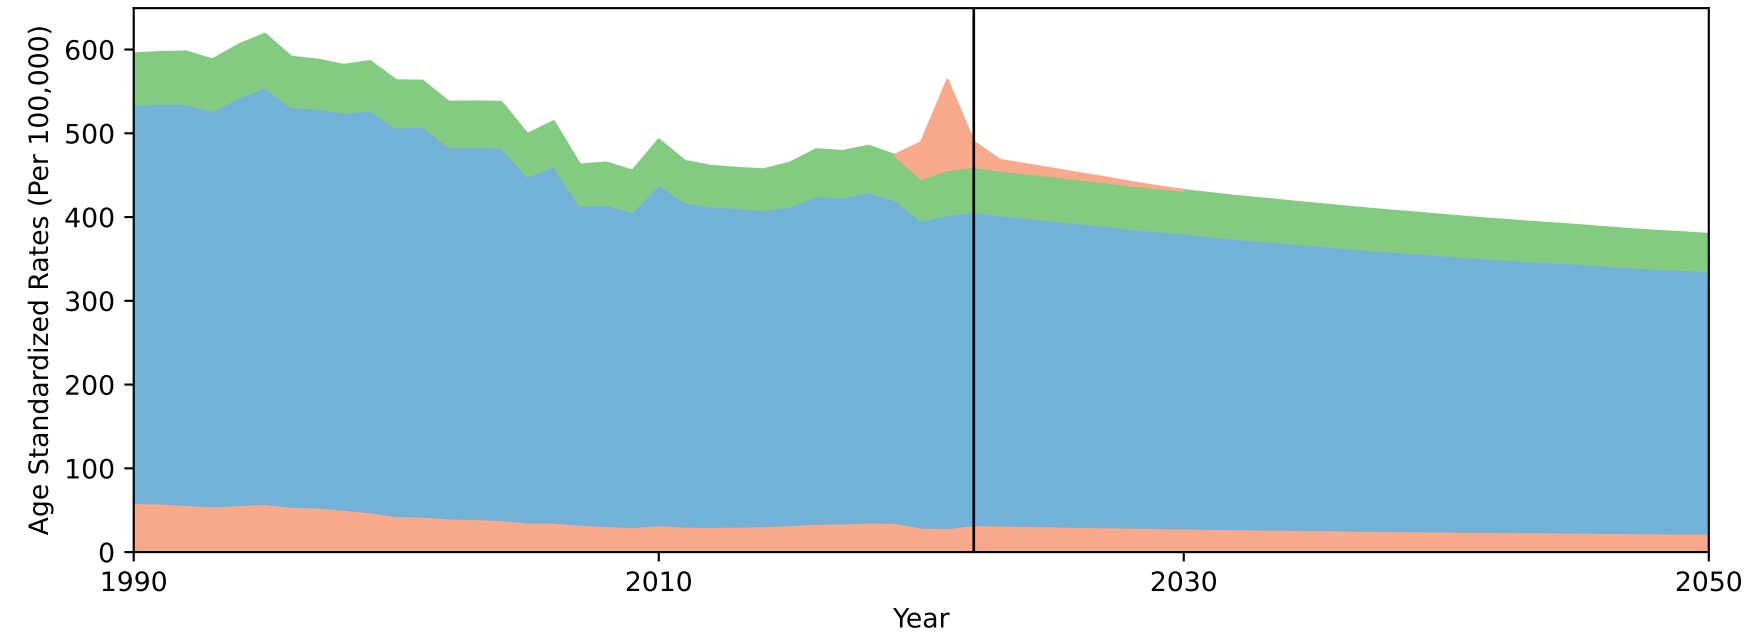

Level 2

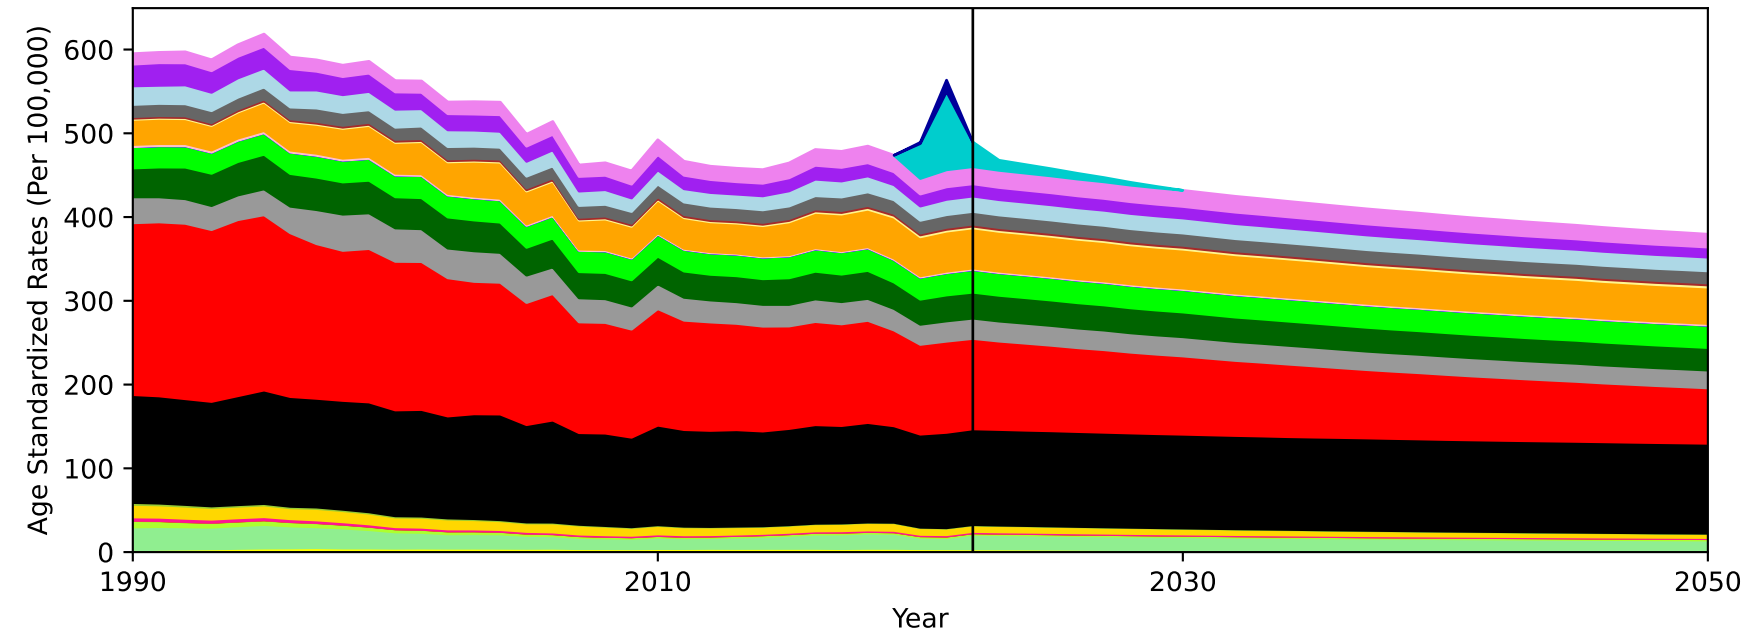

Level 1

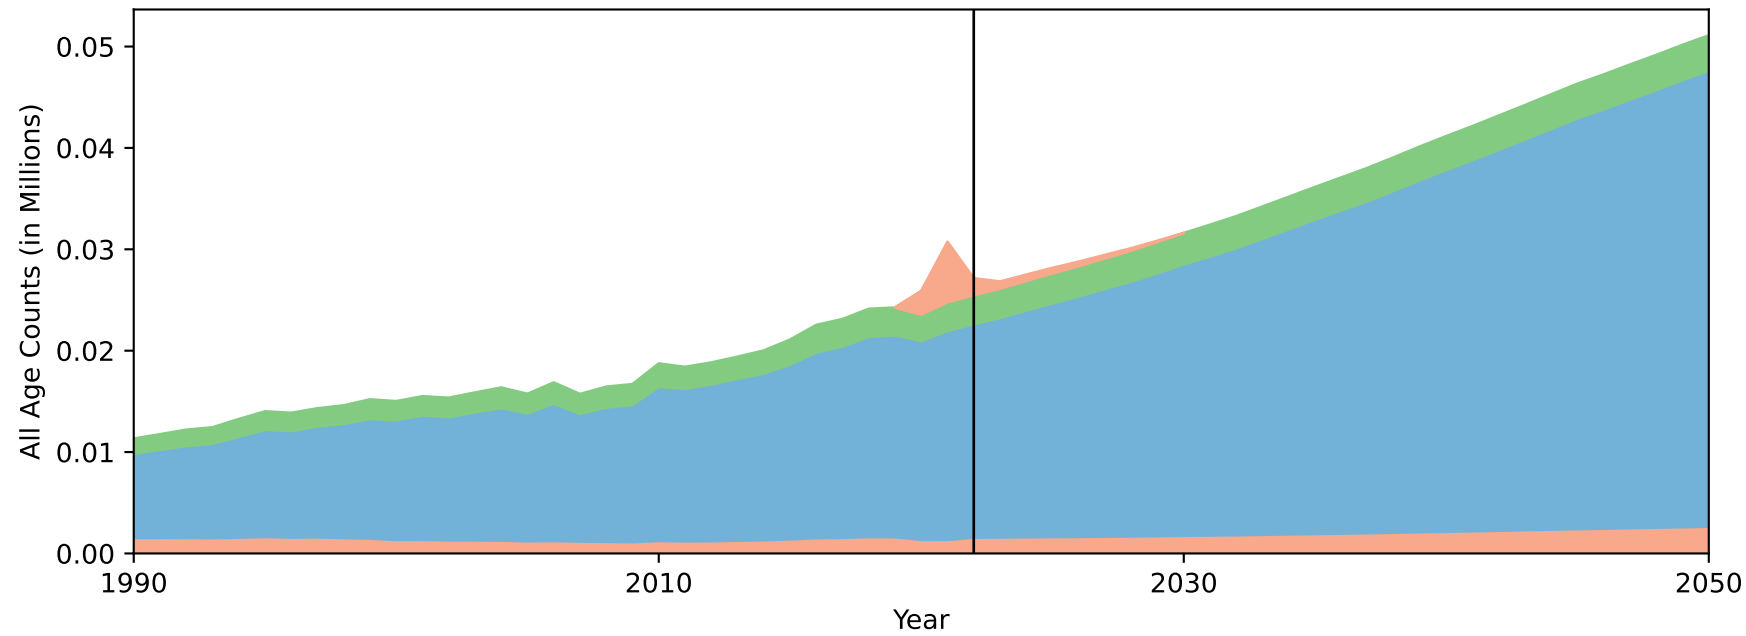

Level 2

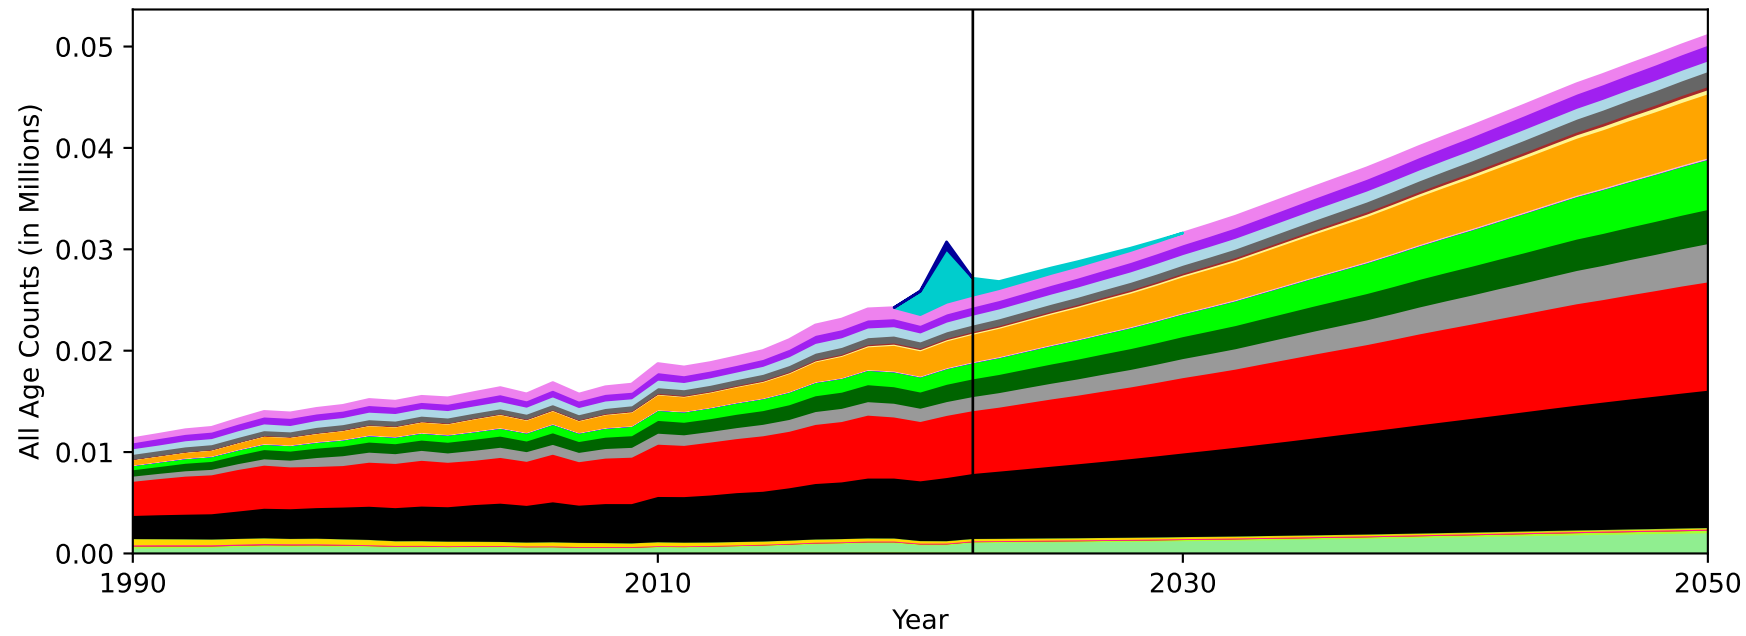

Level 1

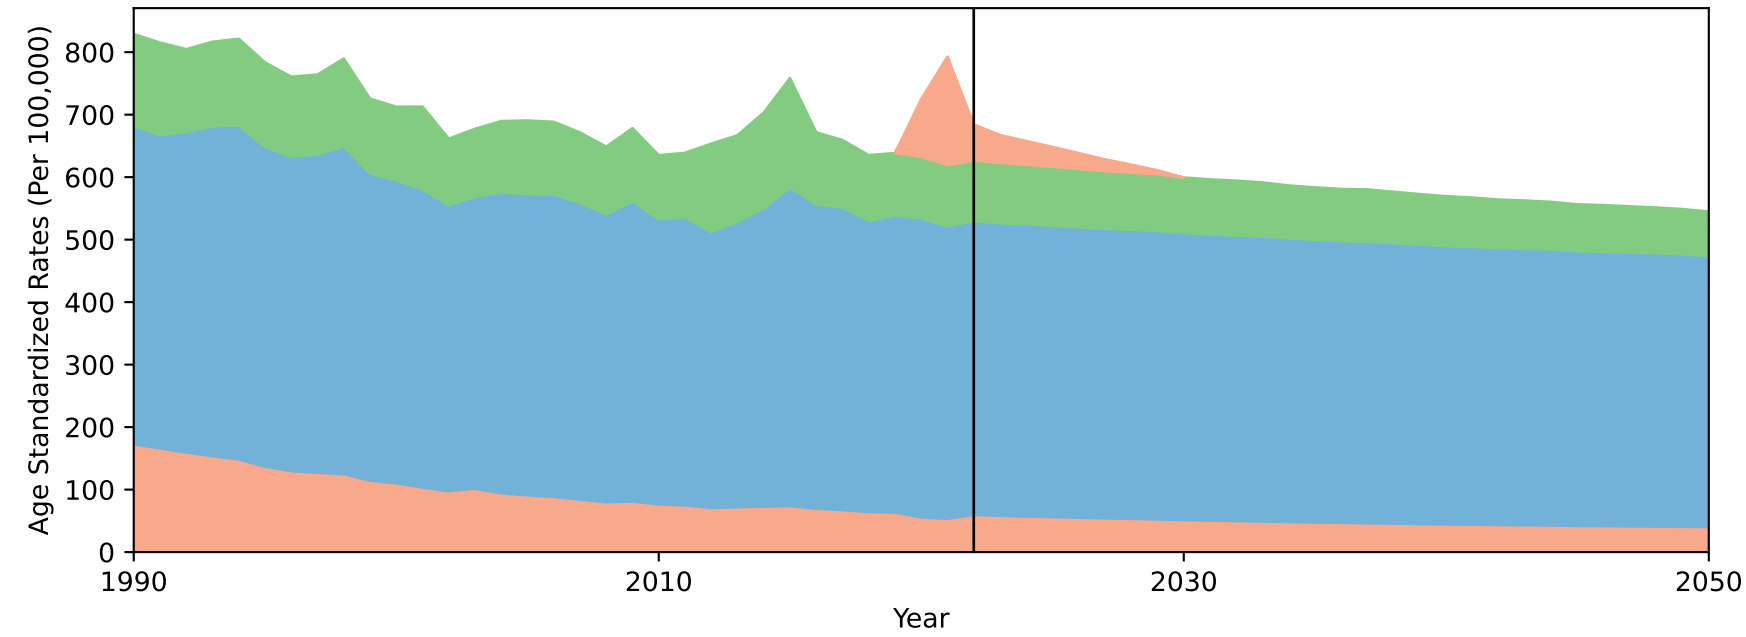

Level 2

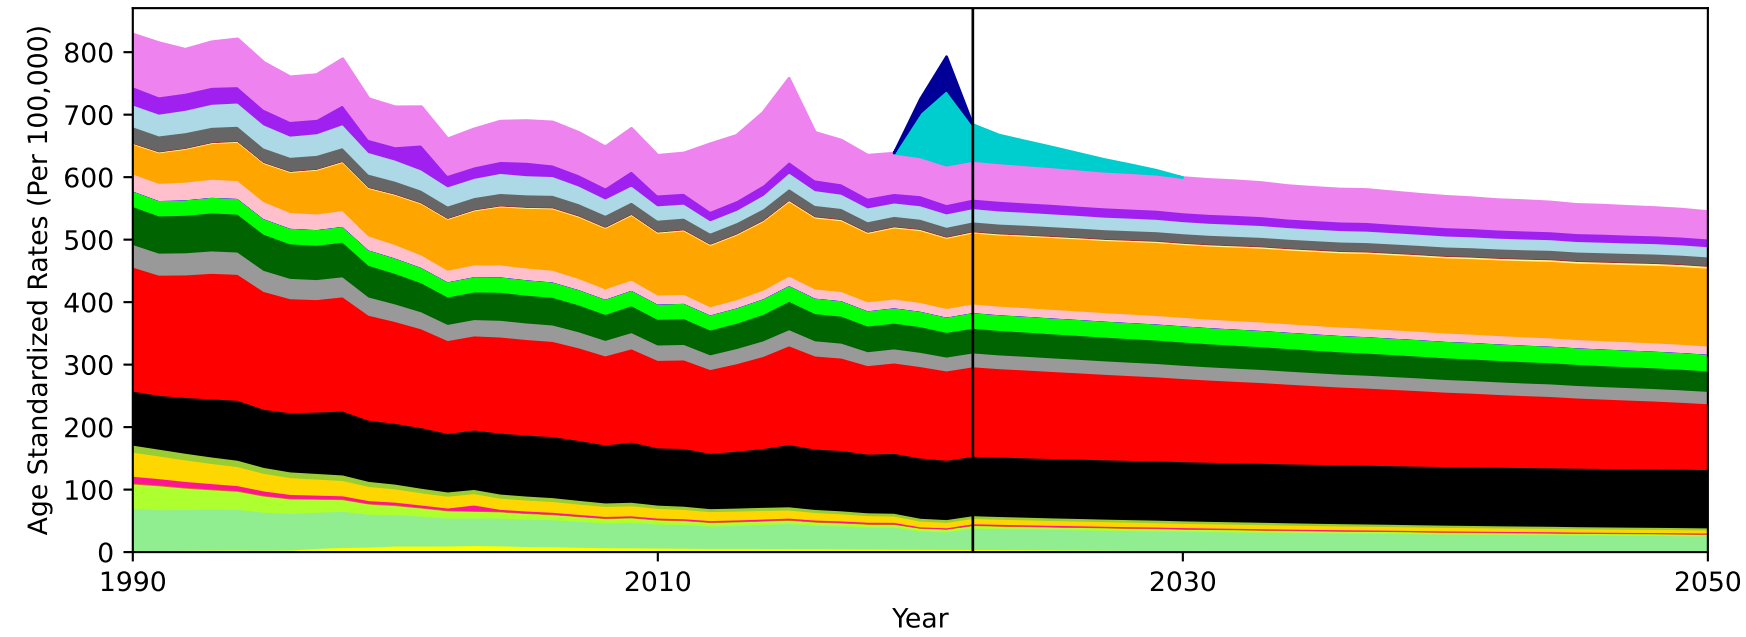

Level 1

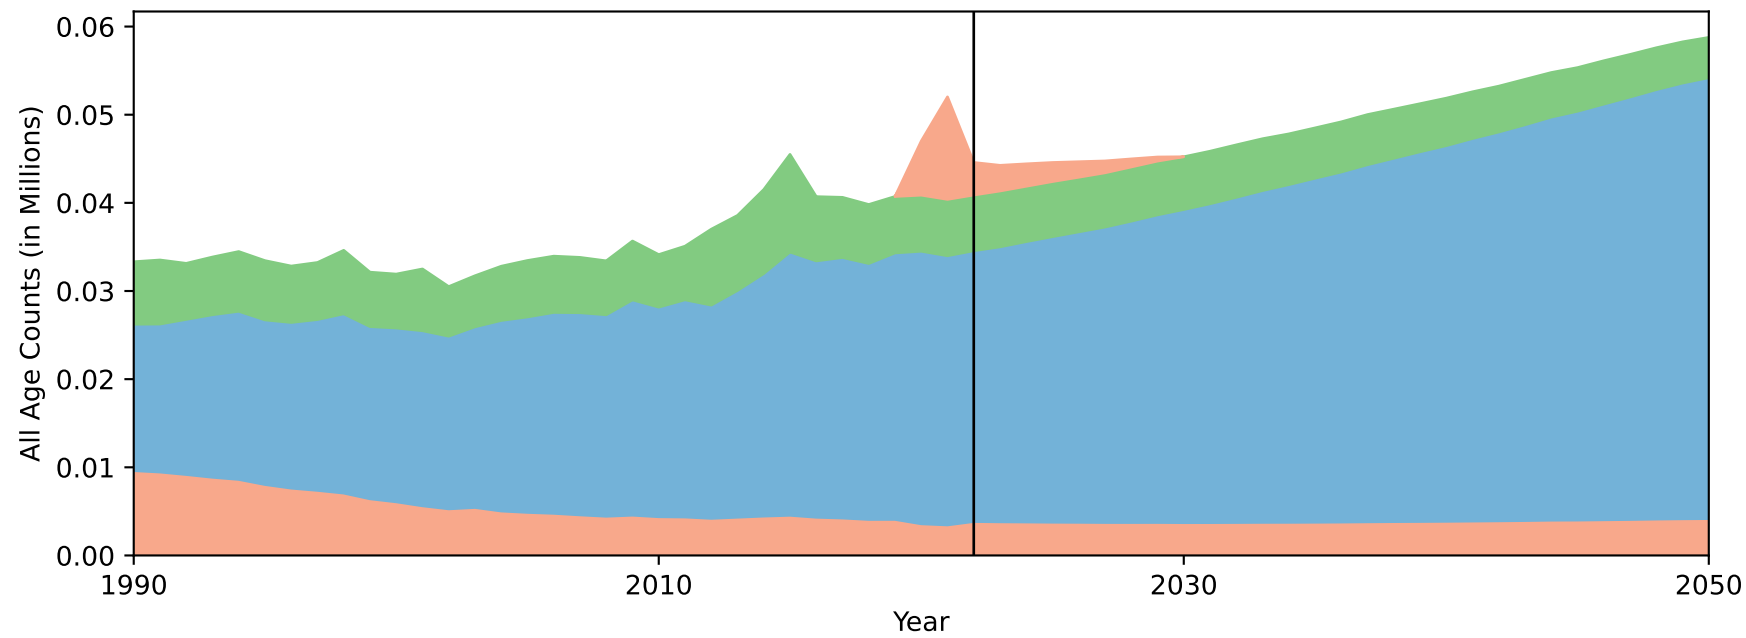

Level 2

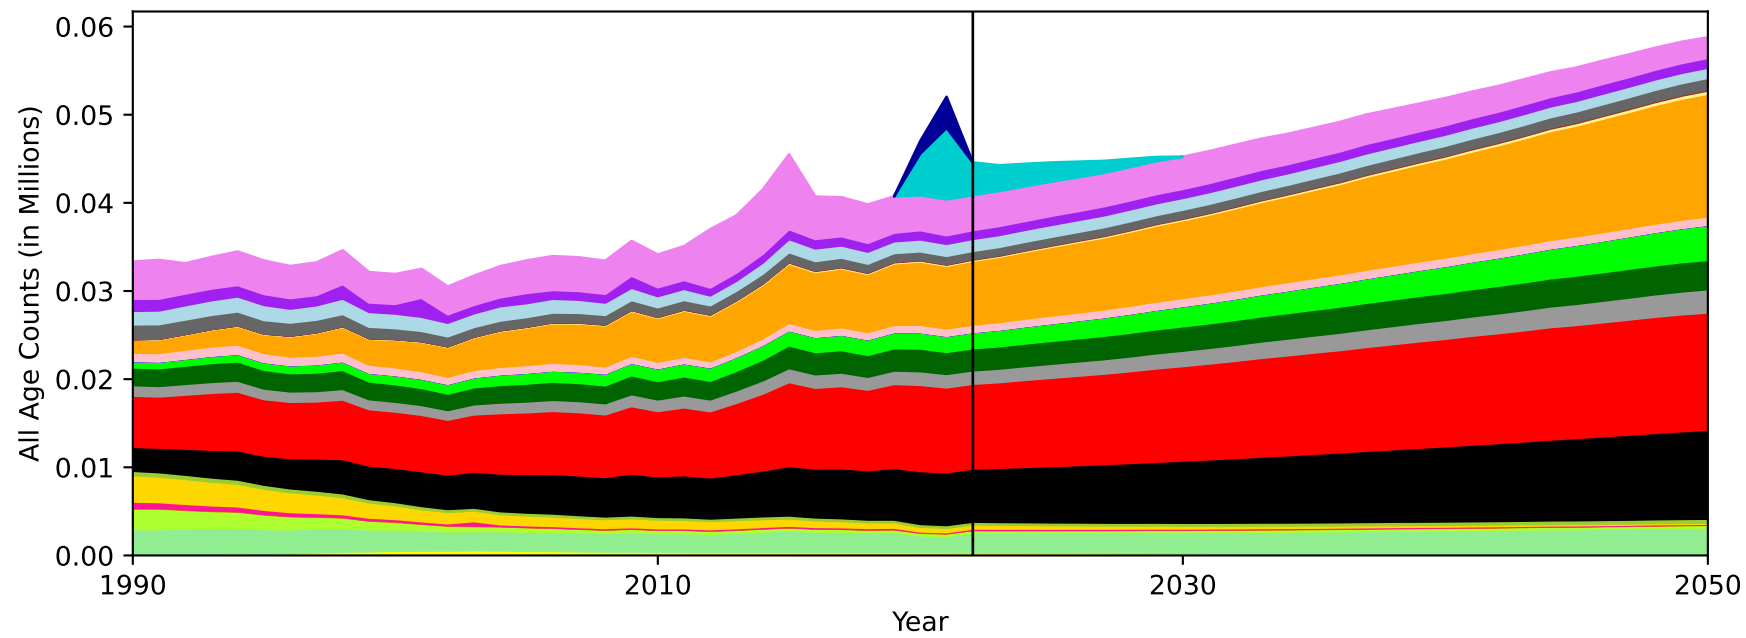



# Guatemala

Supplemental Results Figure S5. Age-standardised death rates and all age death counts and by Level 1 and Level 2 causes, 1990–2050

568

Level 1

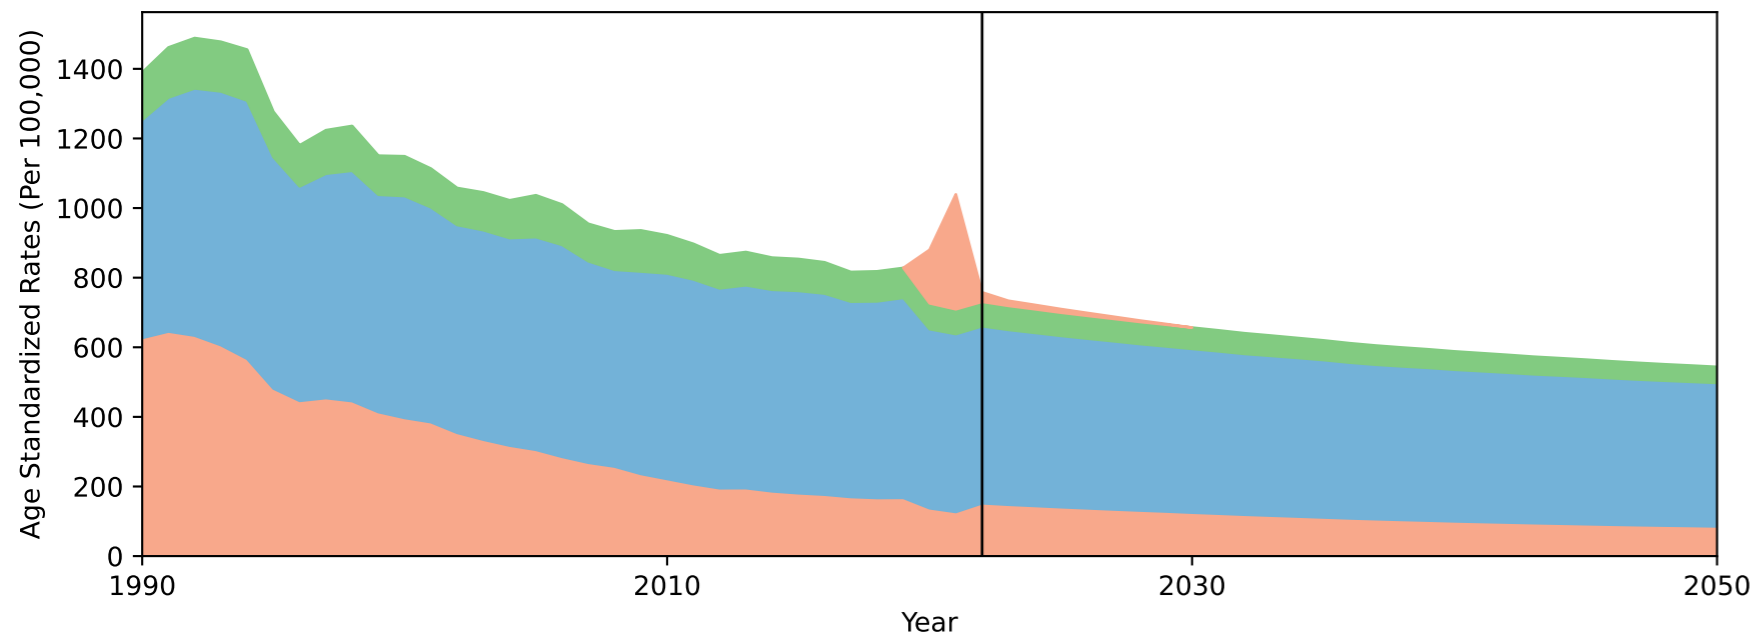

Level 2

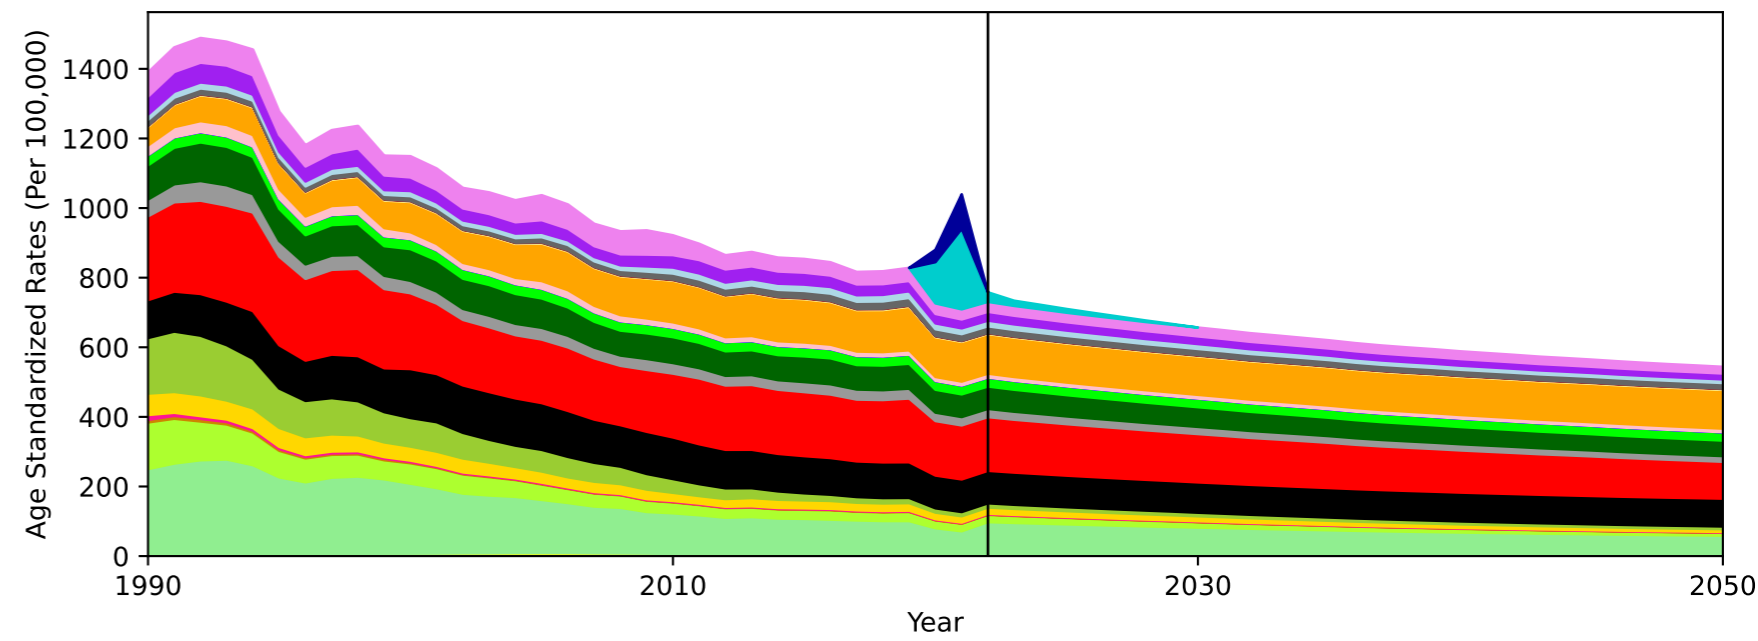

Level 1

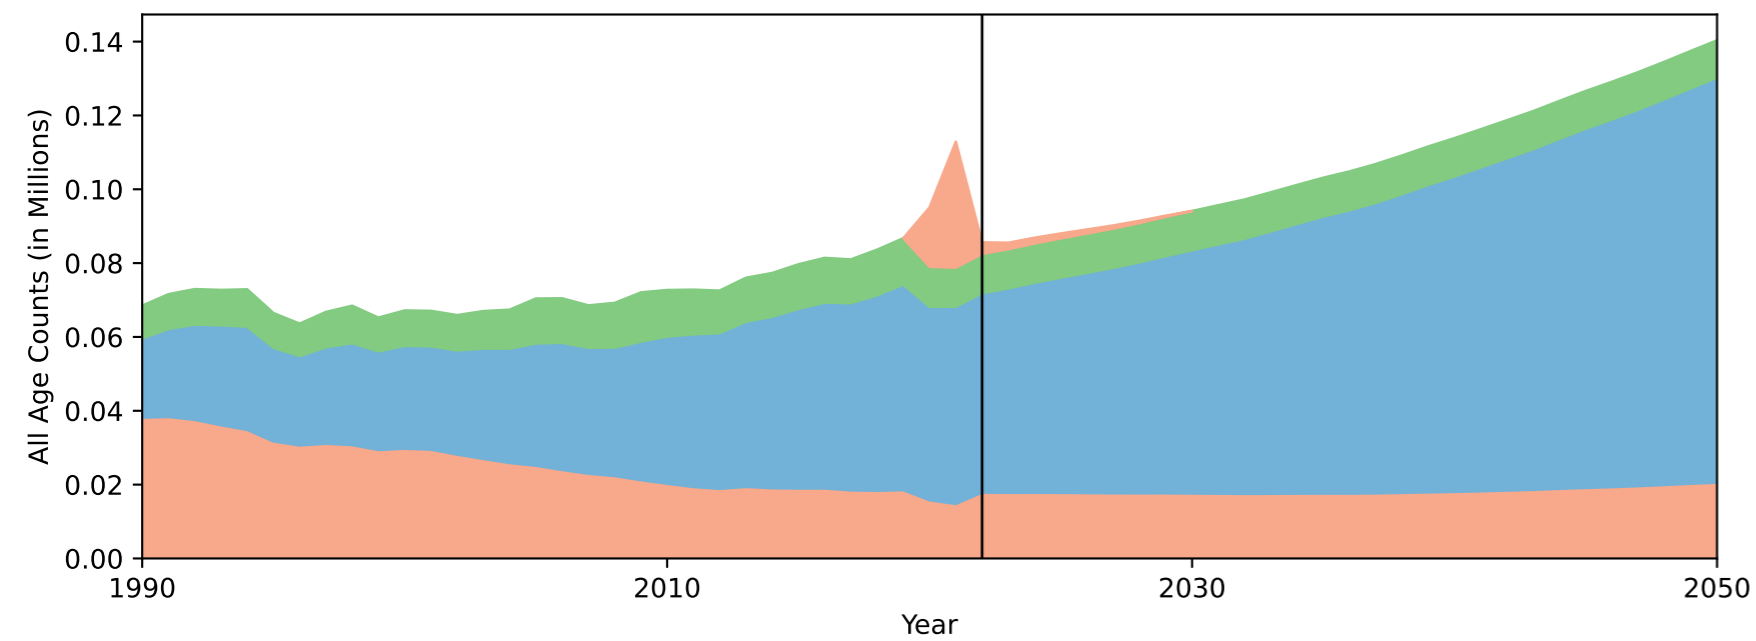

Level 2

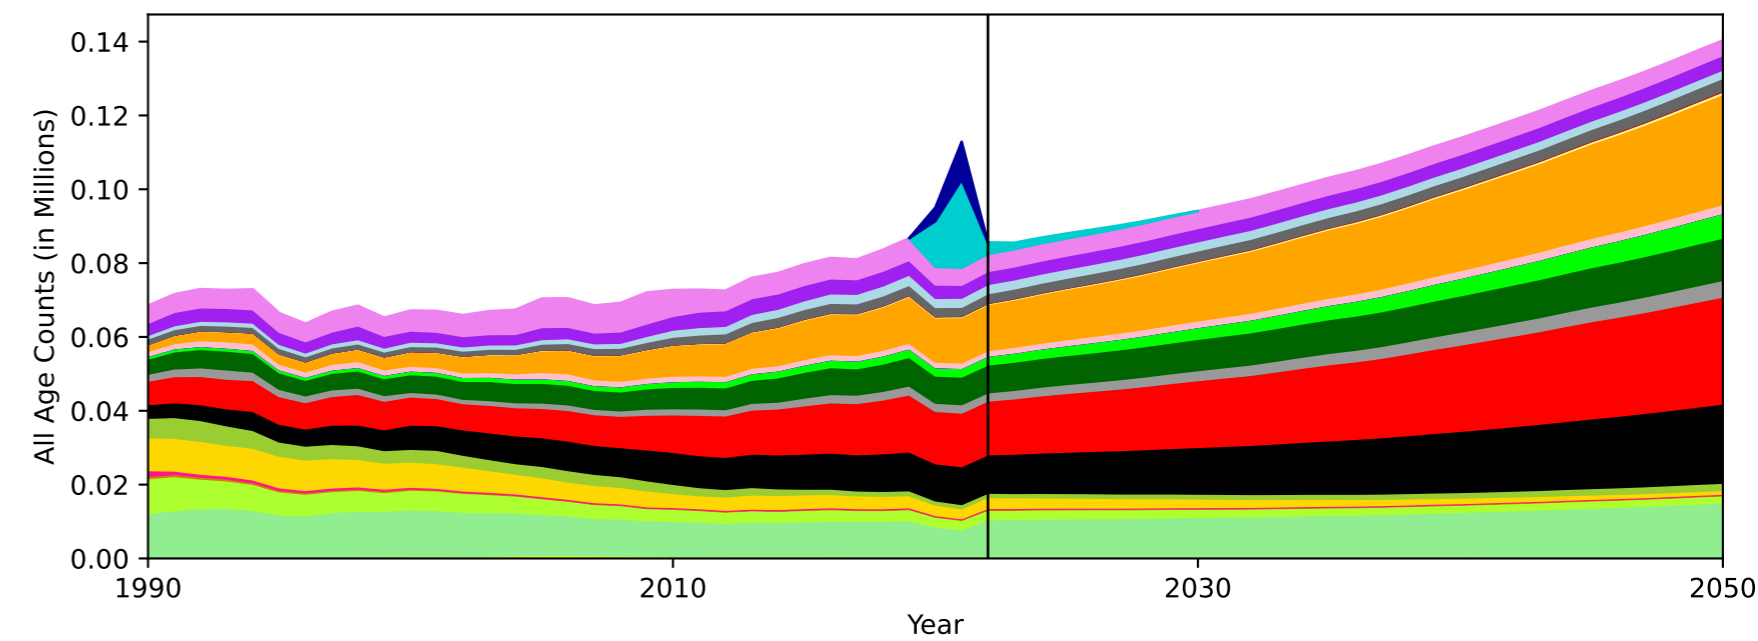

# Honduras

Level 1

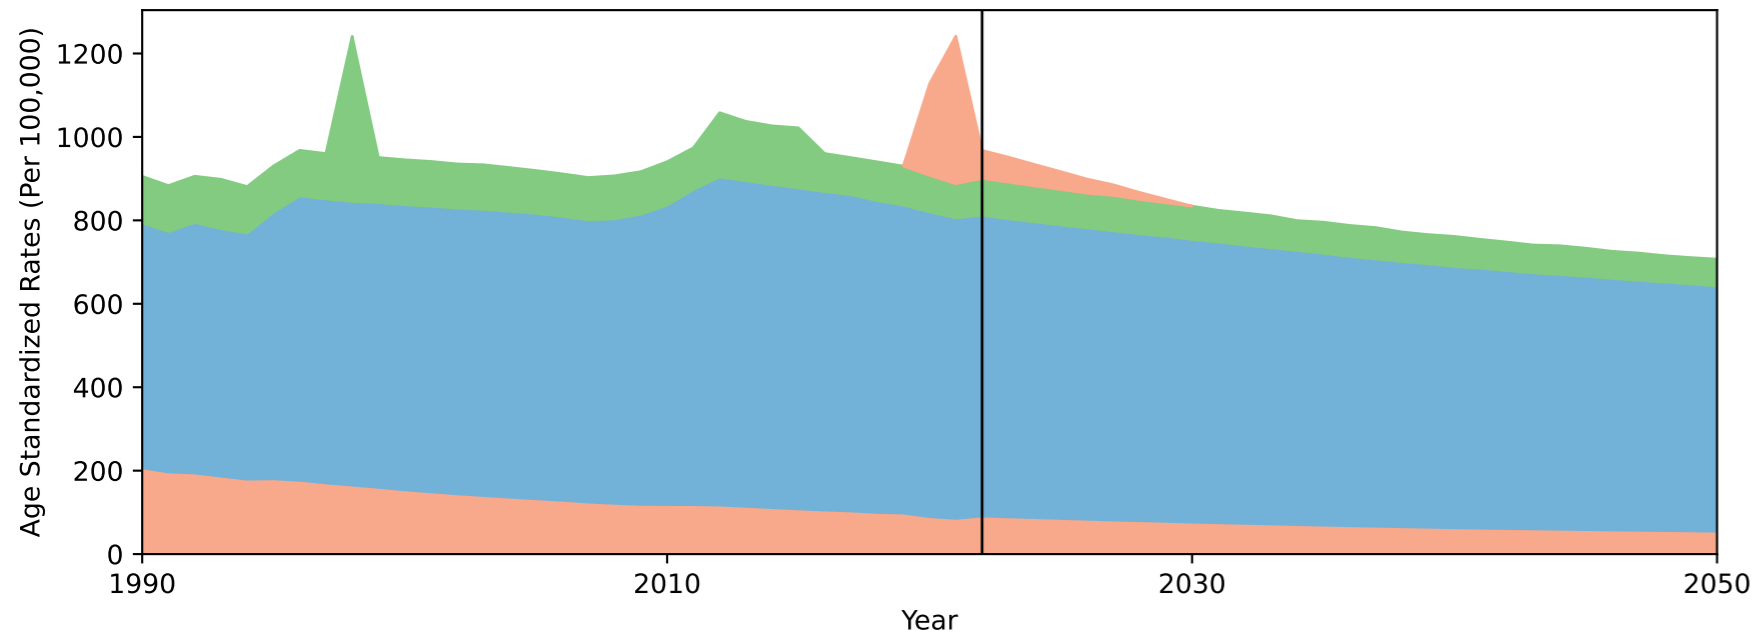

Level 2

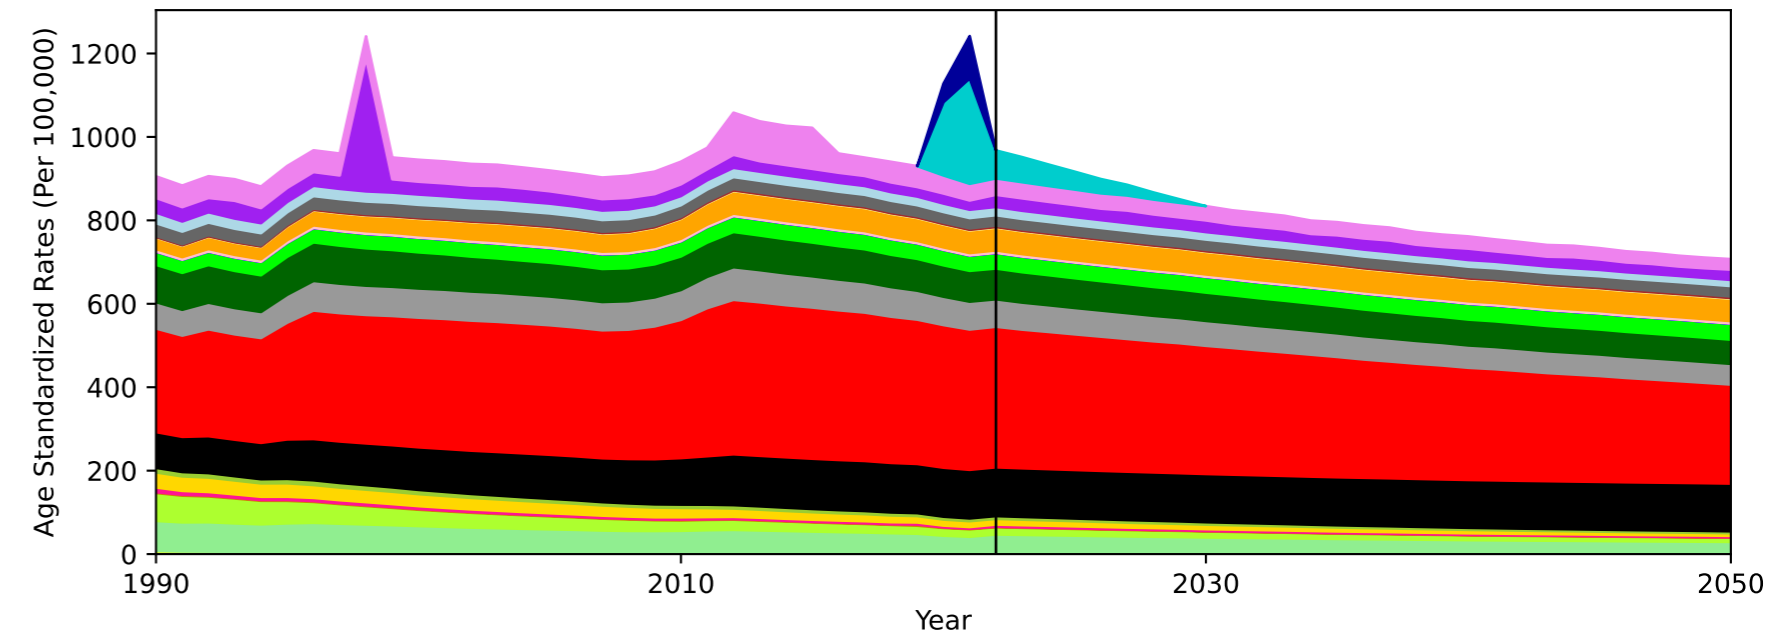

Level 1

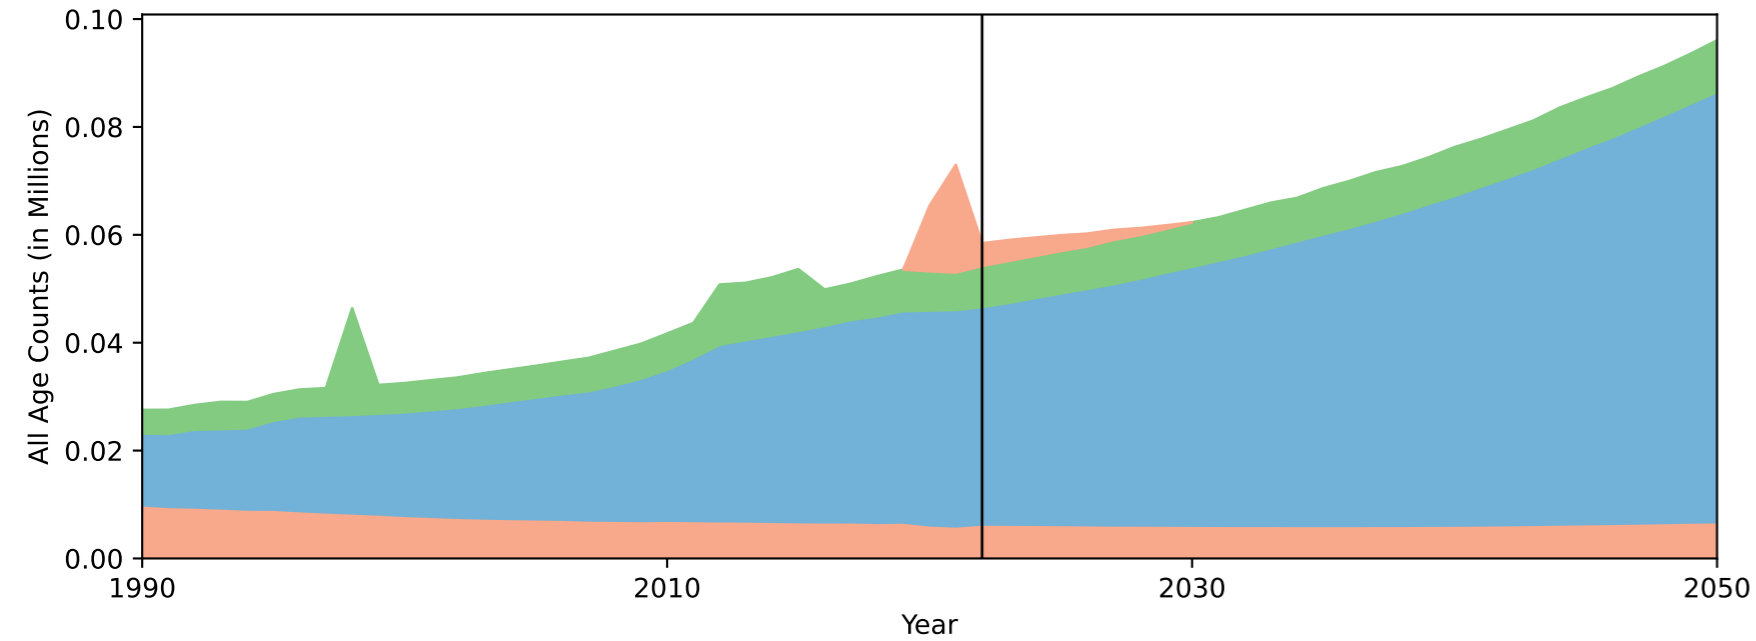

Level 2

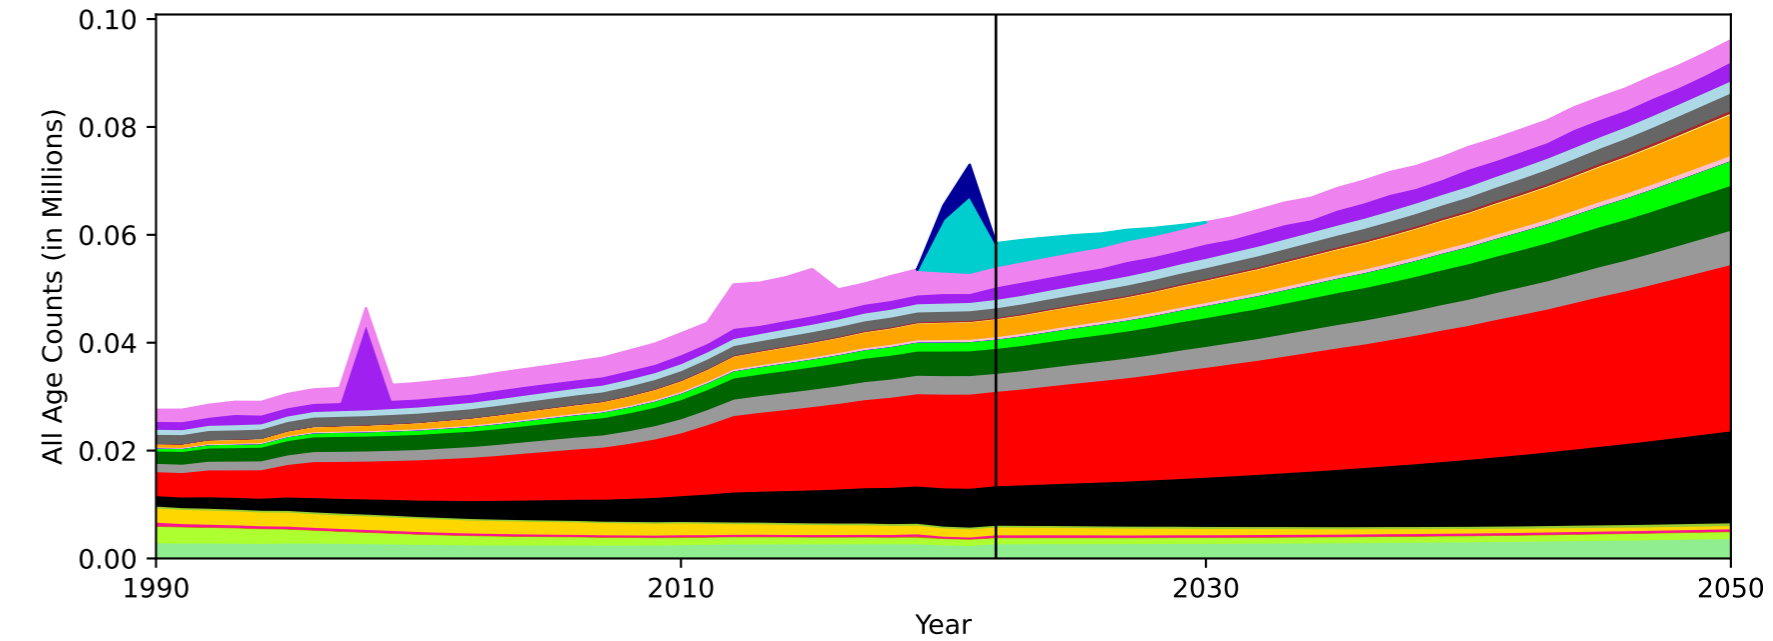

# Mexico

Level 1

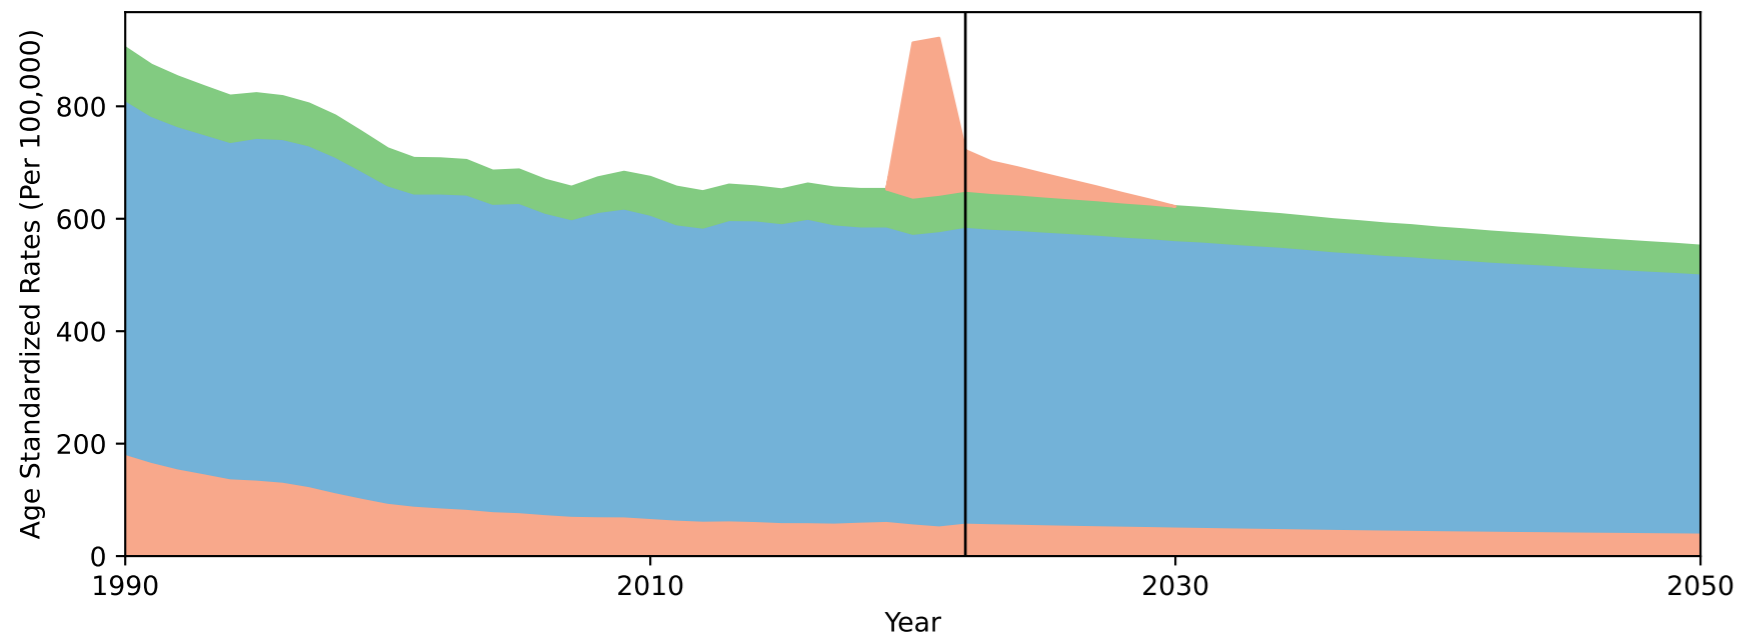

Level 2

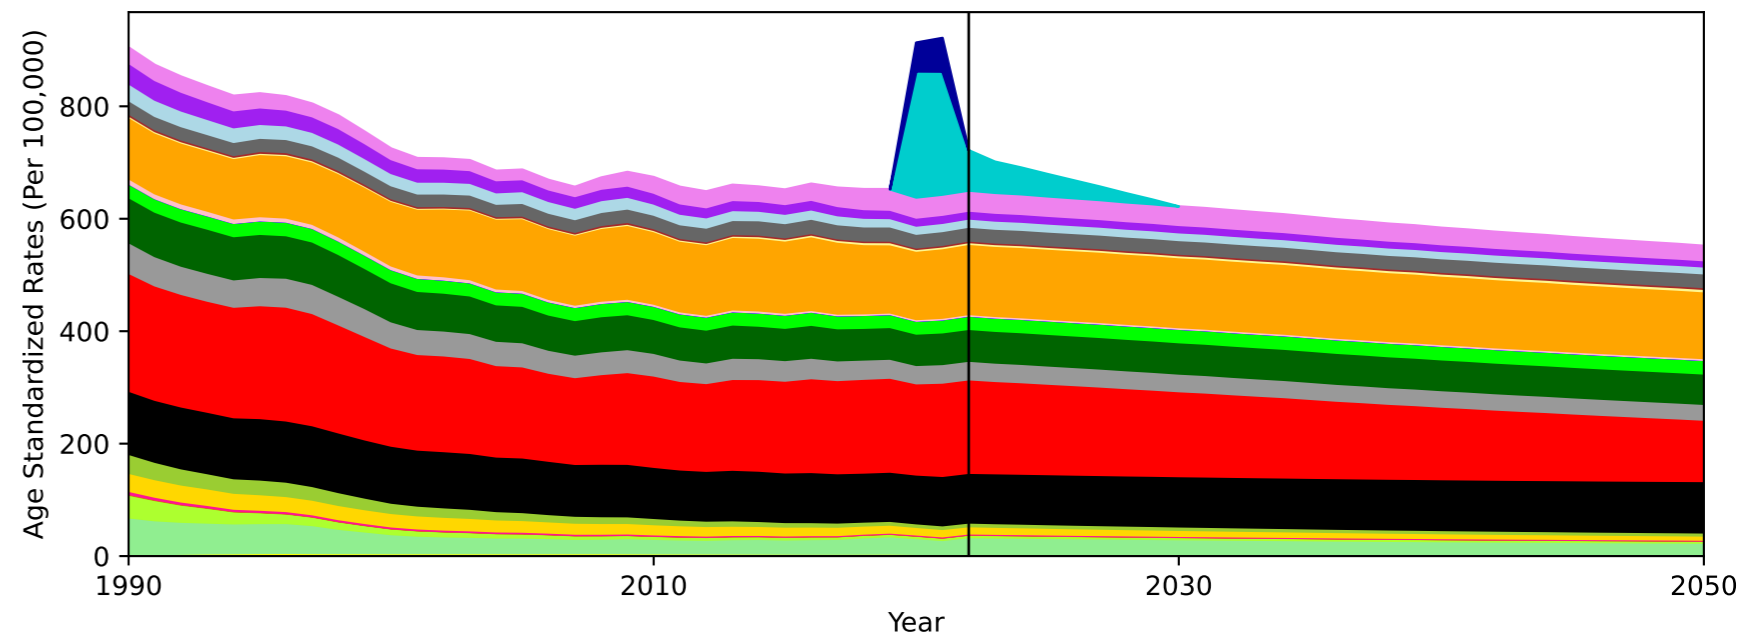

Level 1

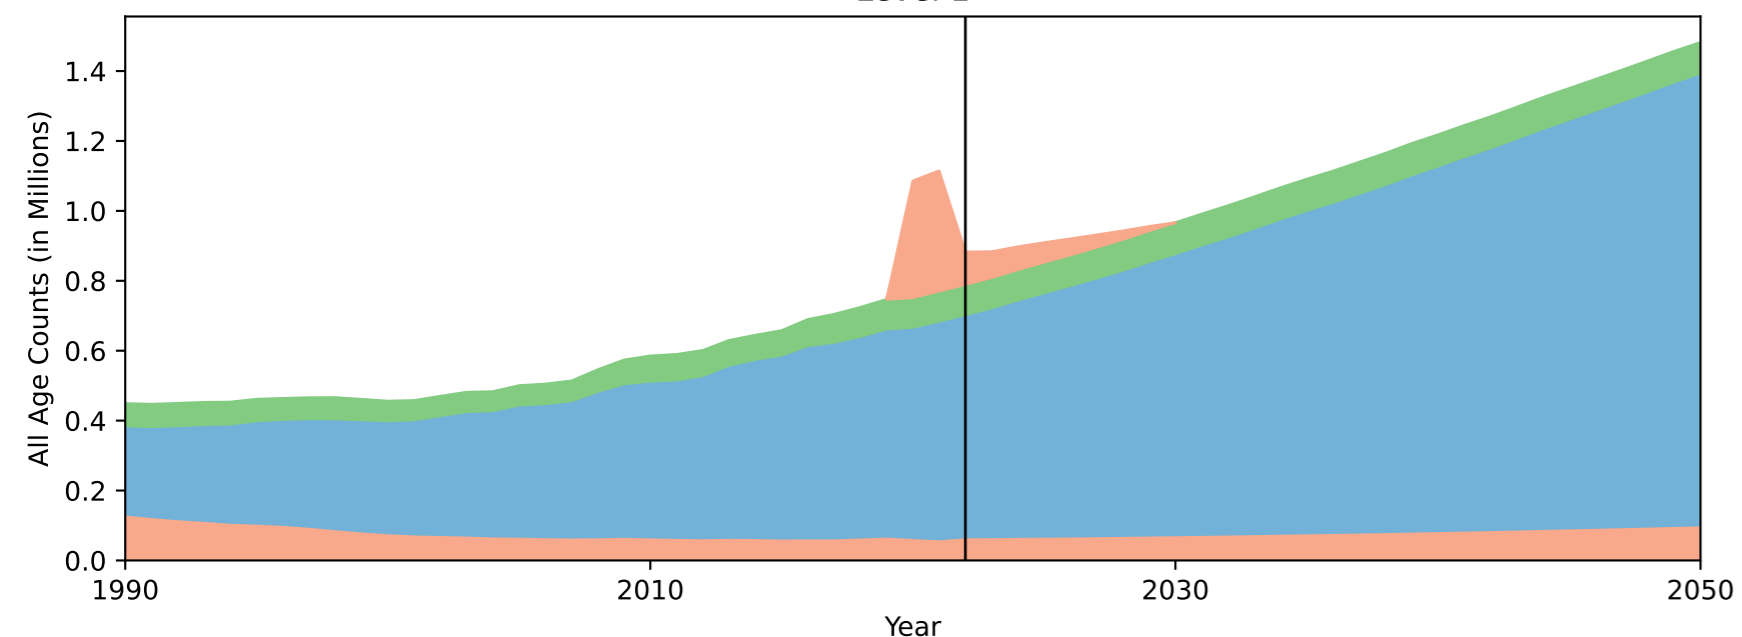

Level 2

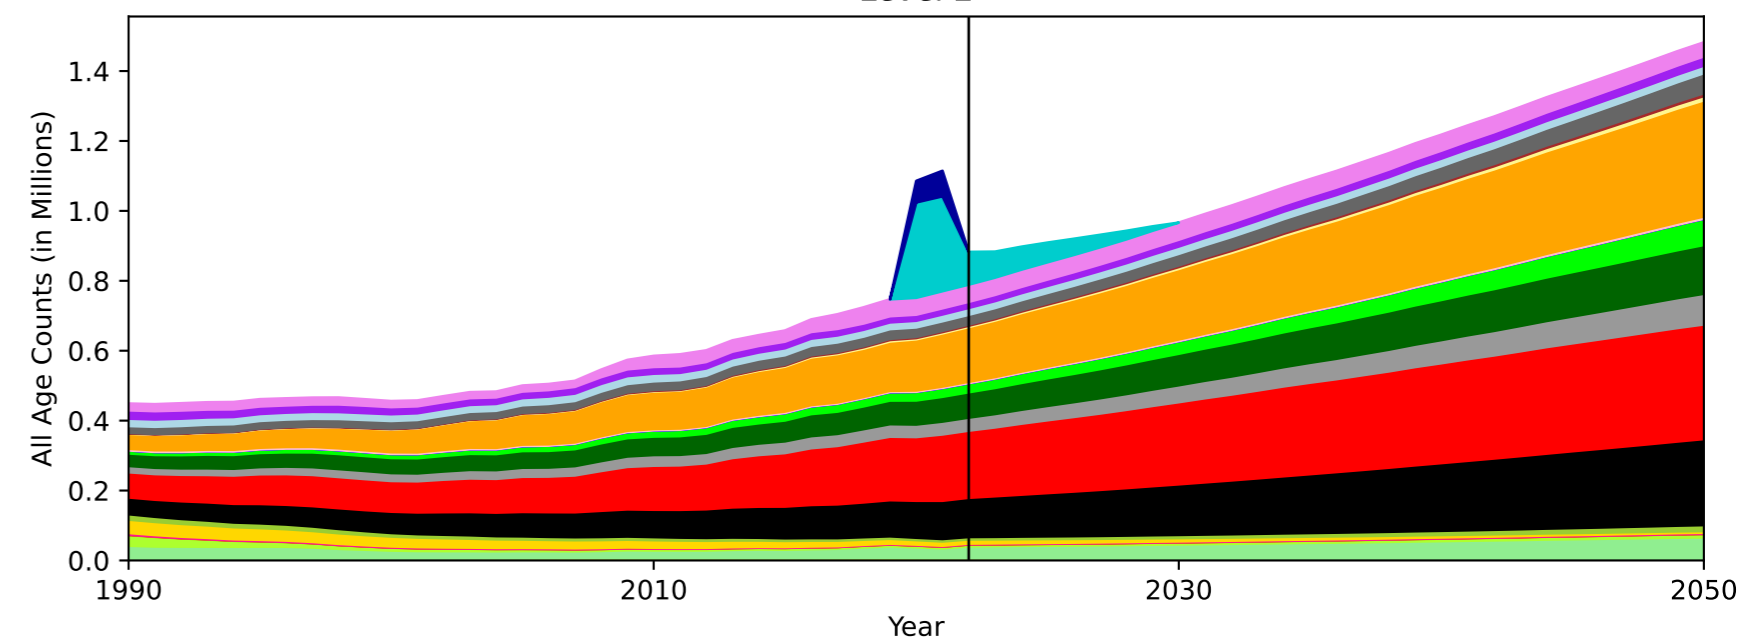

# Nicaragua

Level 1

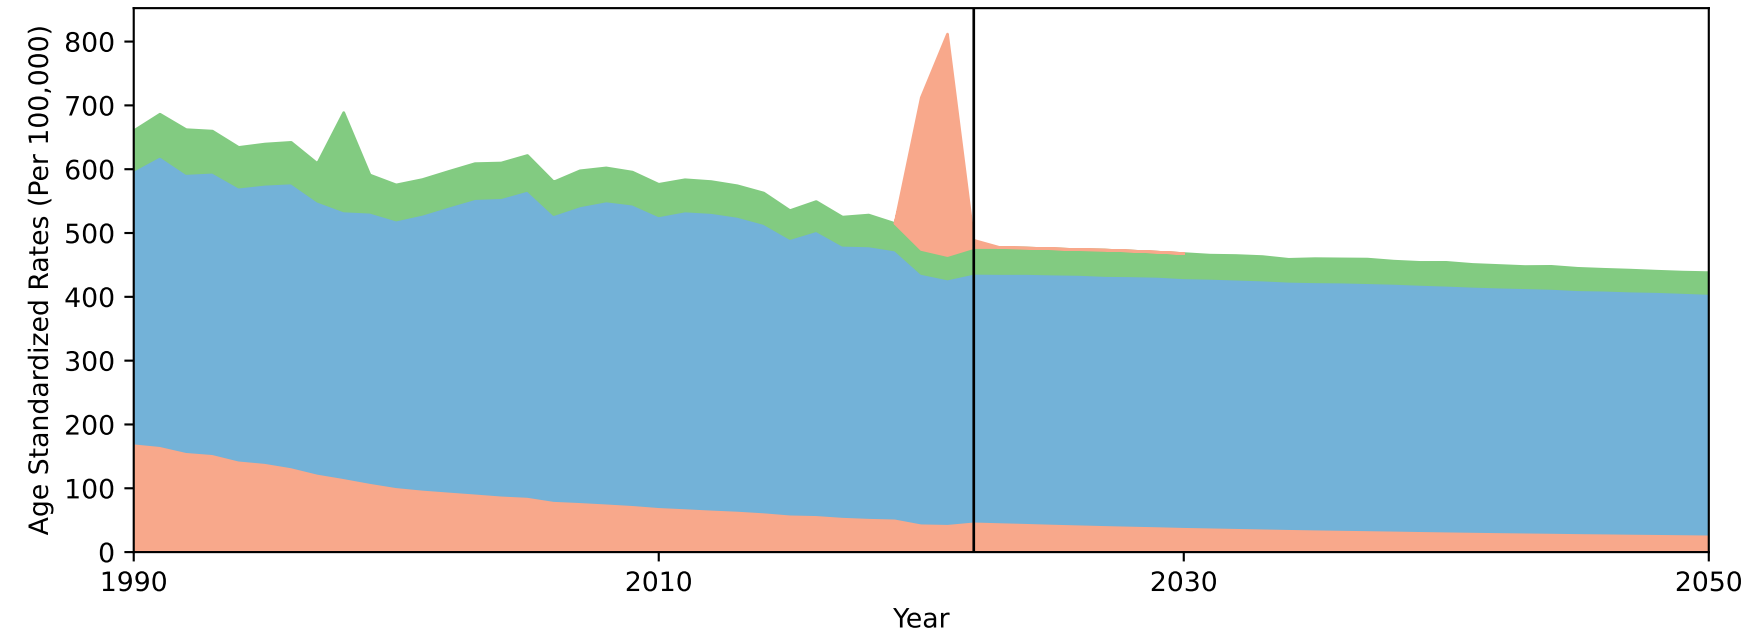

Level 2

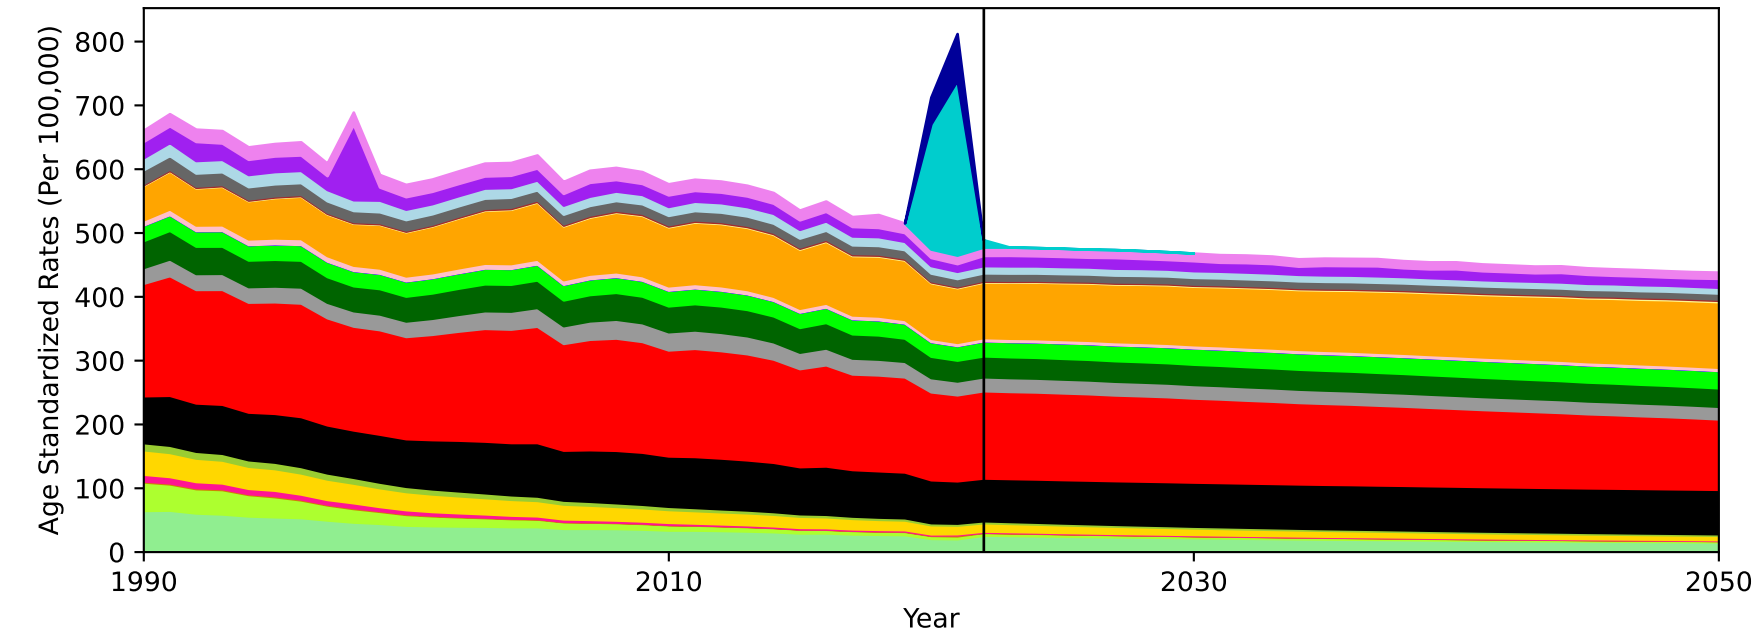

Level 1

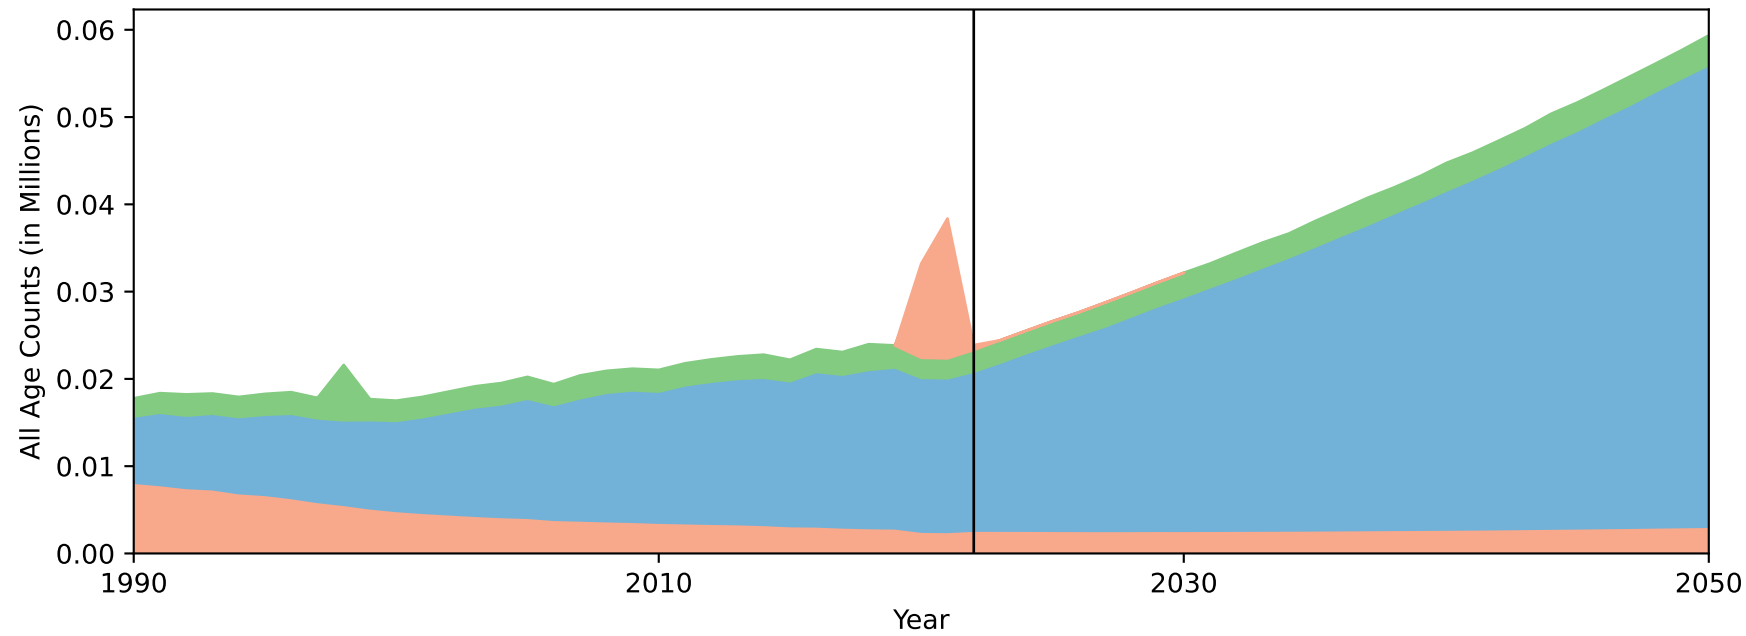

Level 2

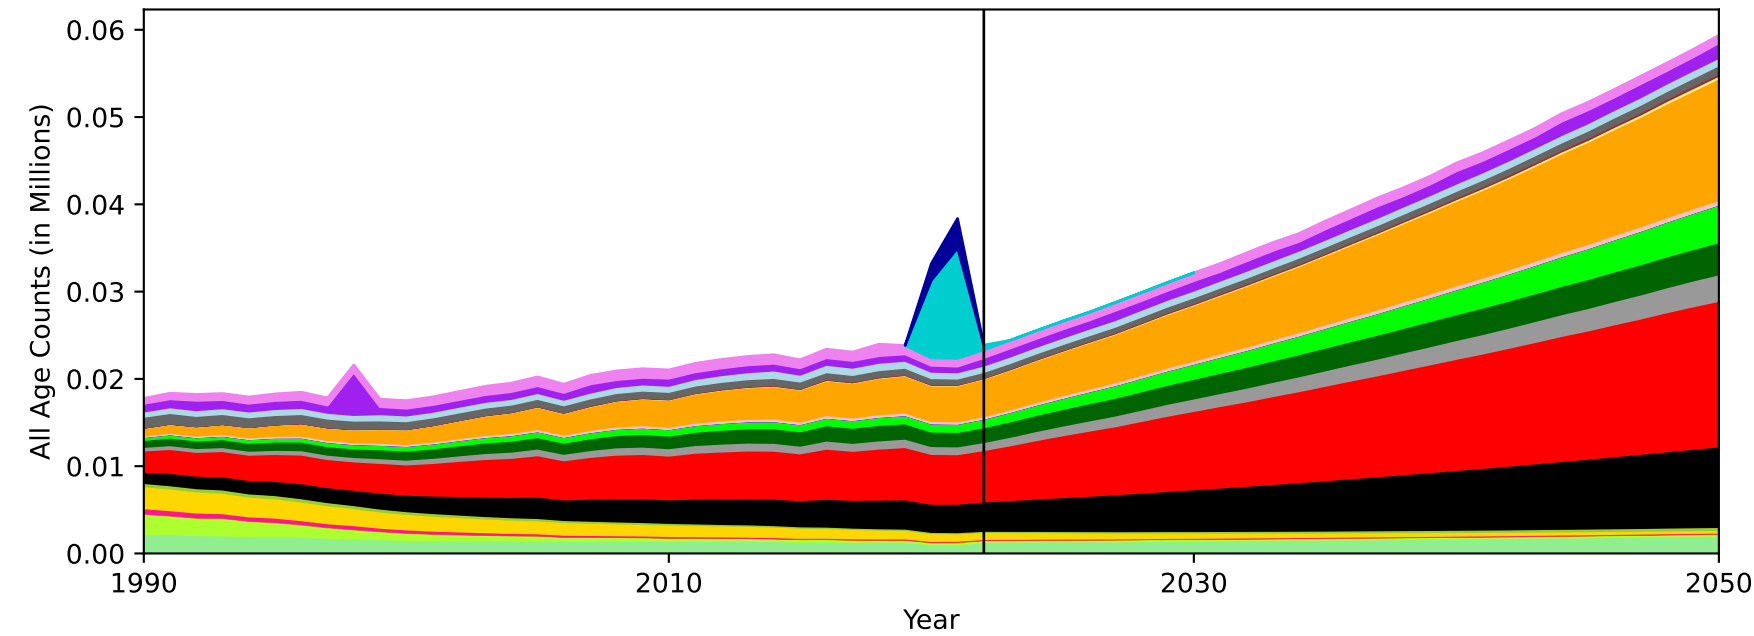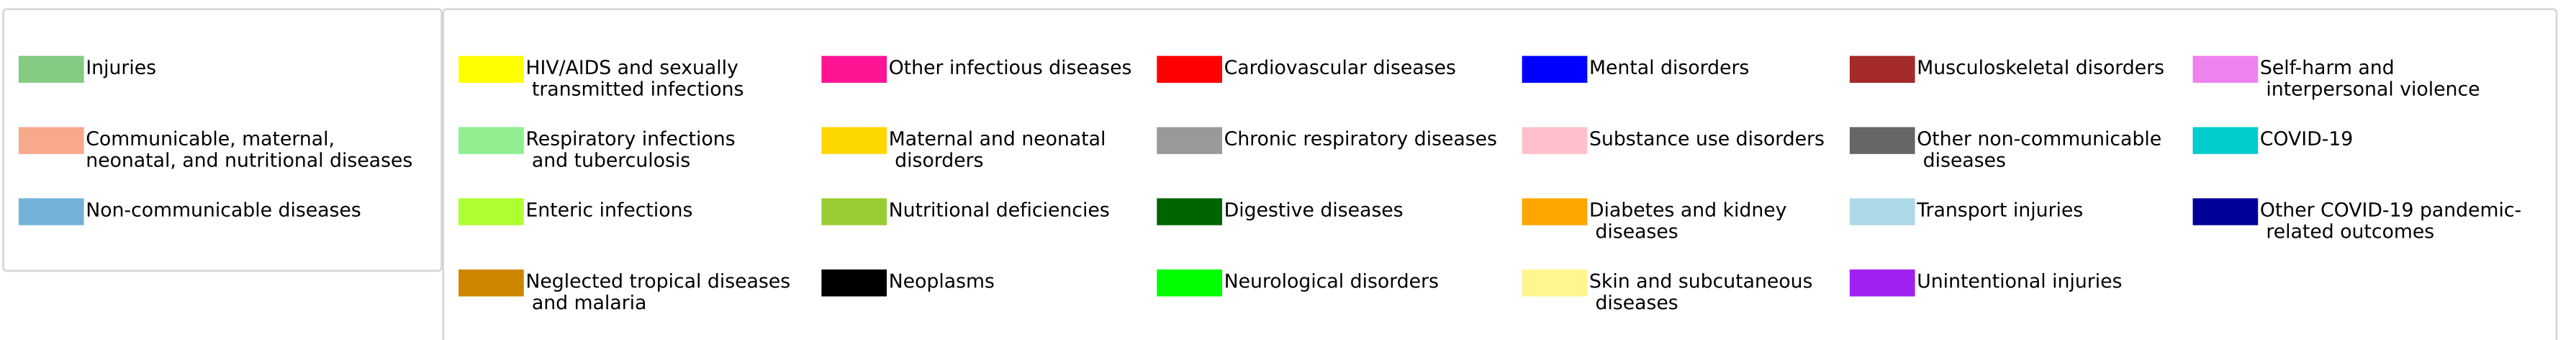

# Panama

Level 1

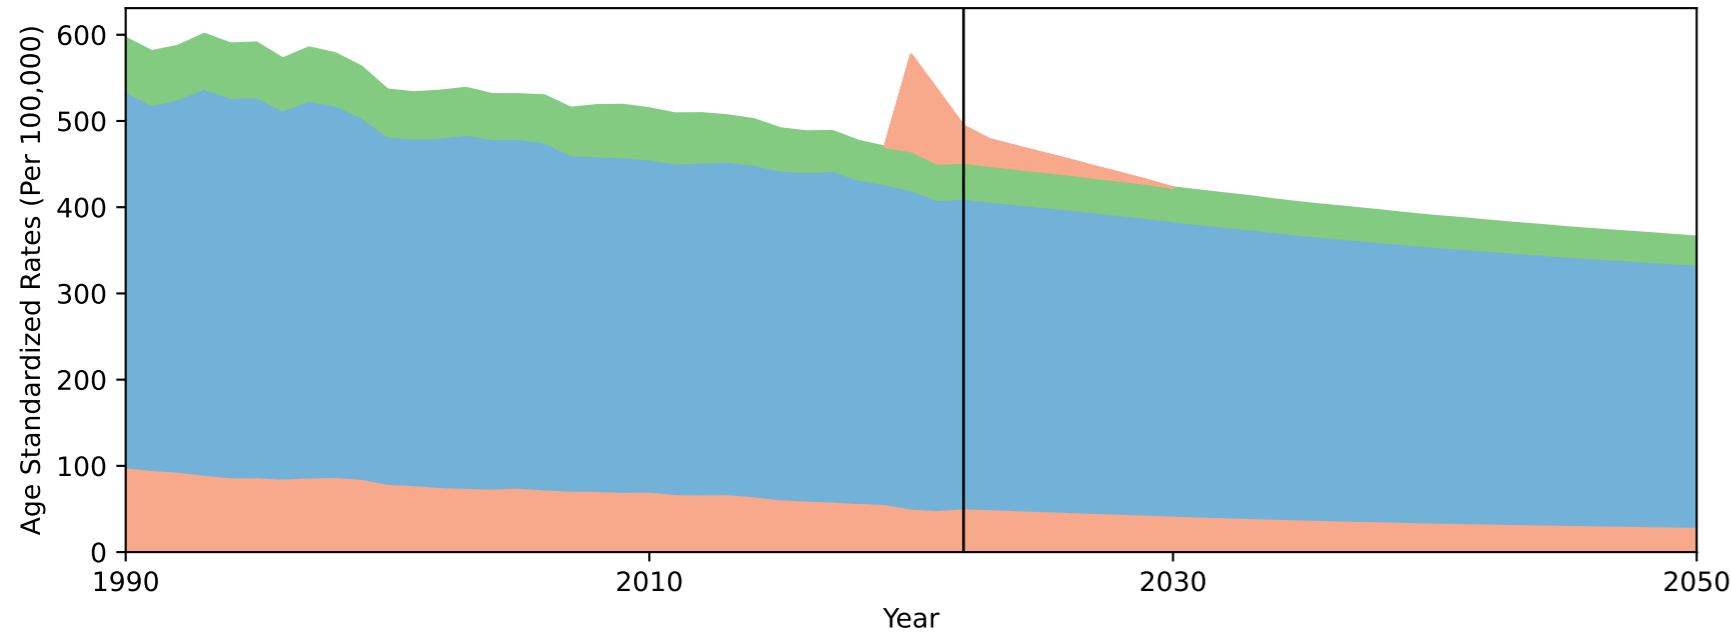

Level 2

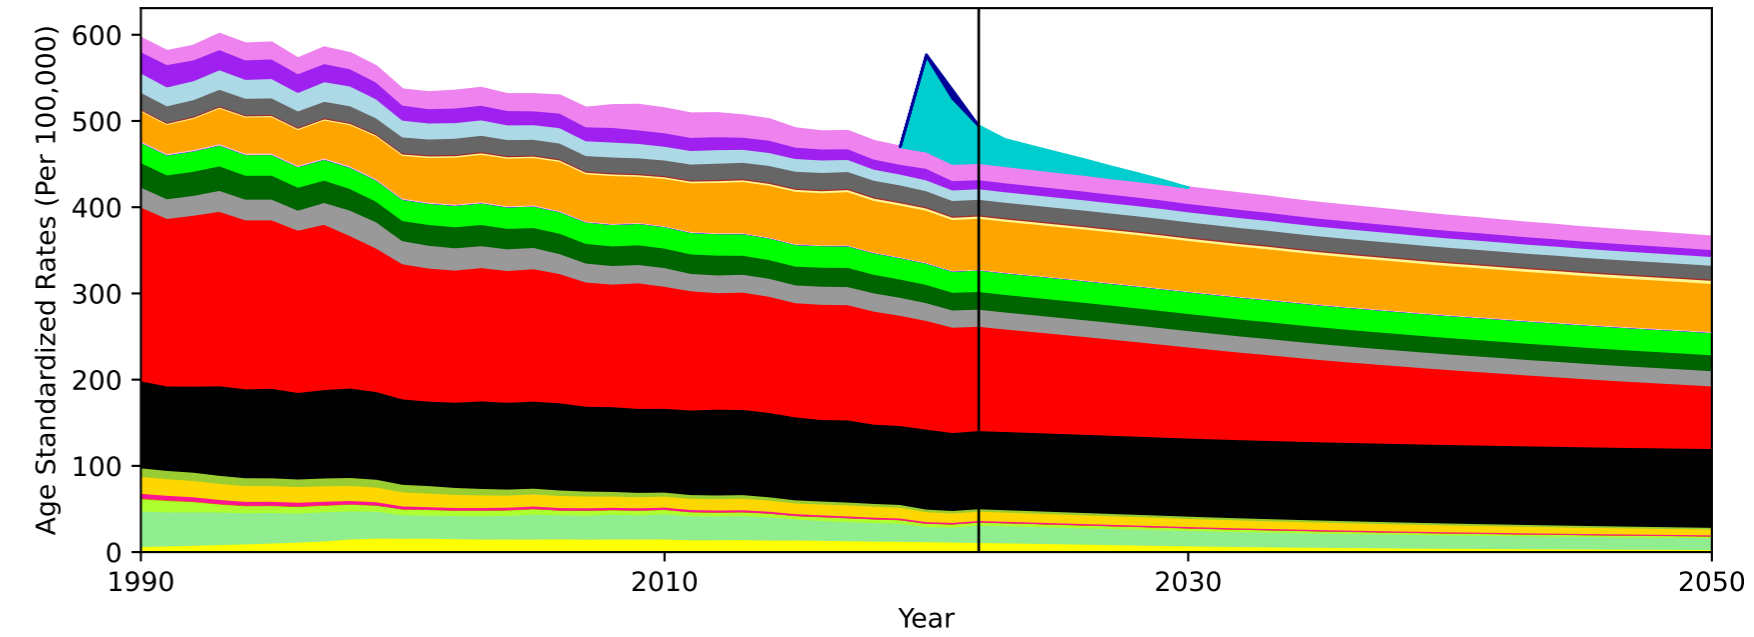

Level 1

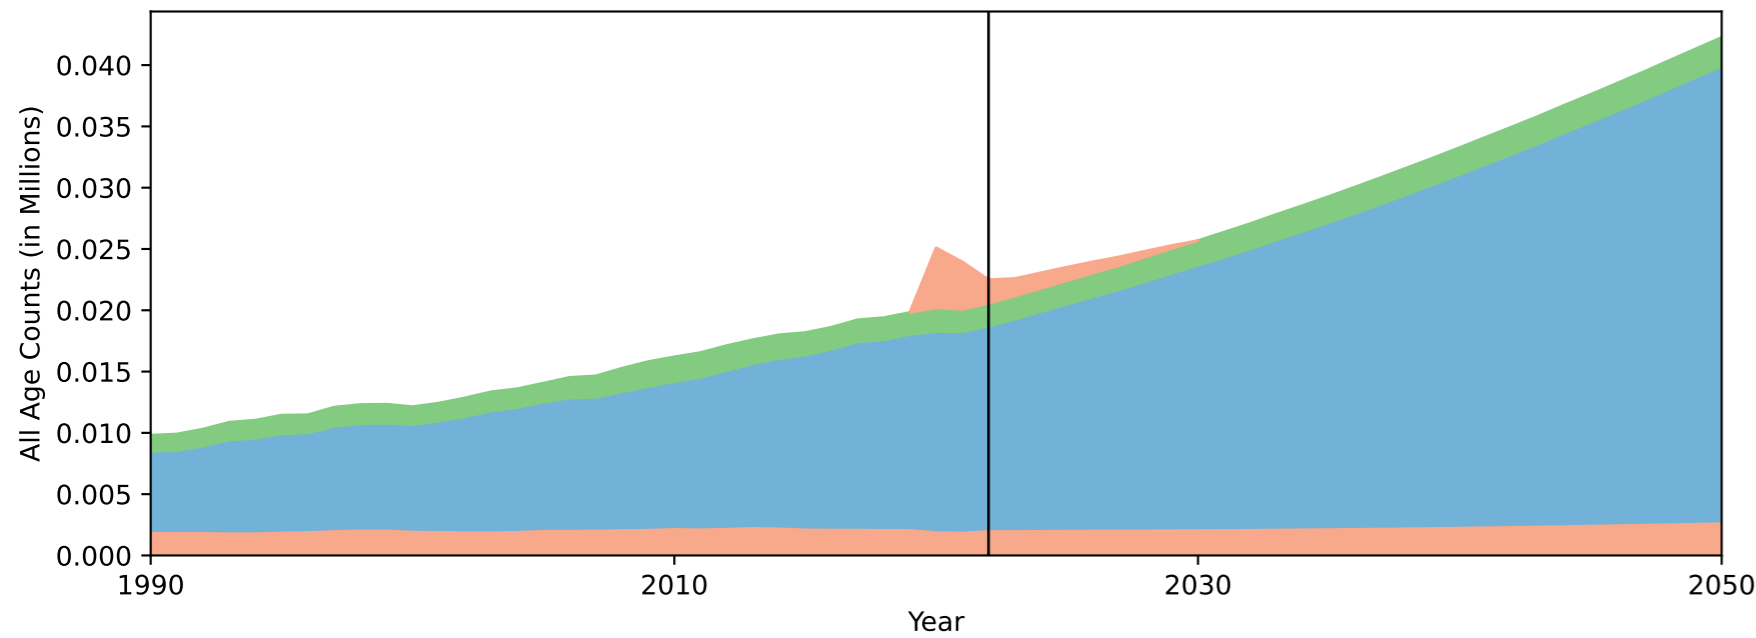

Level 2

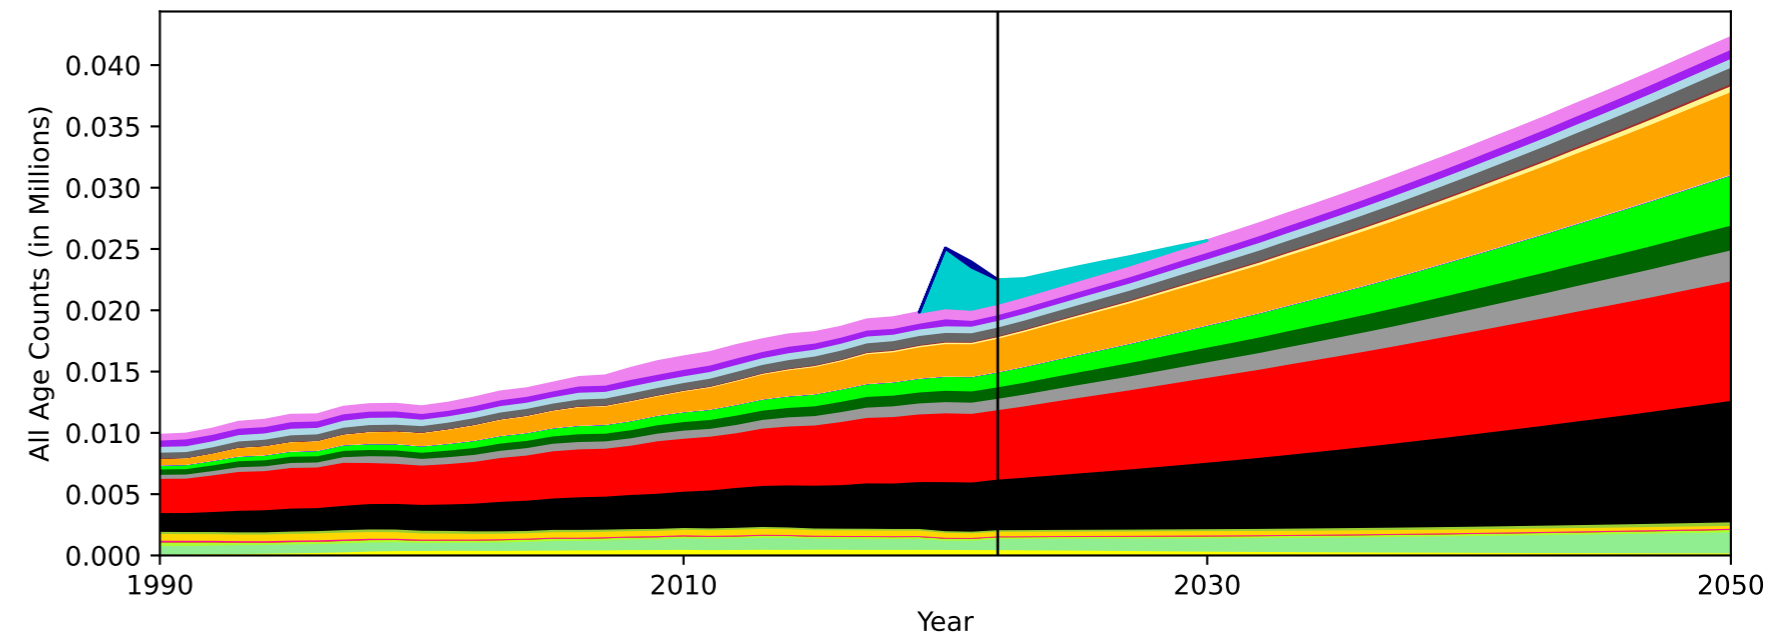

# Venezuela

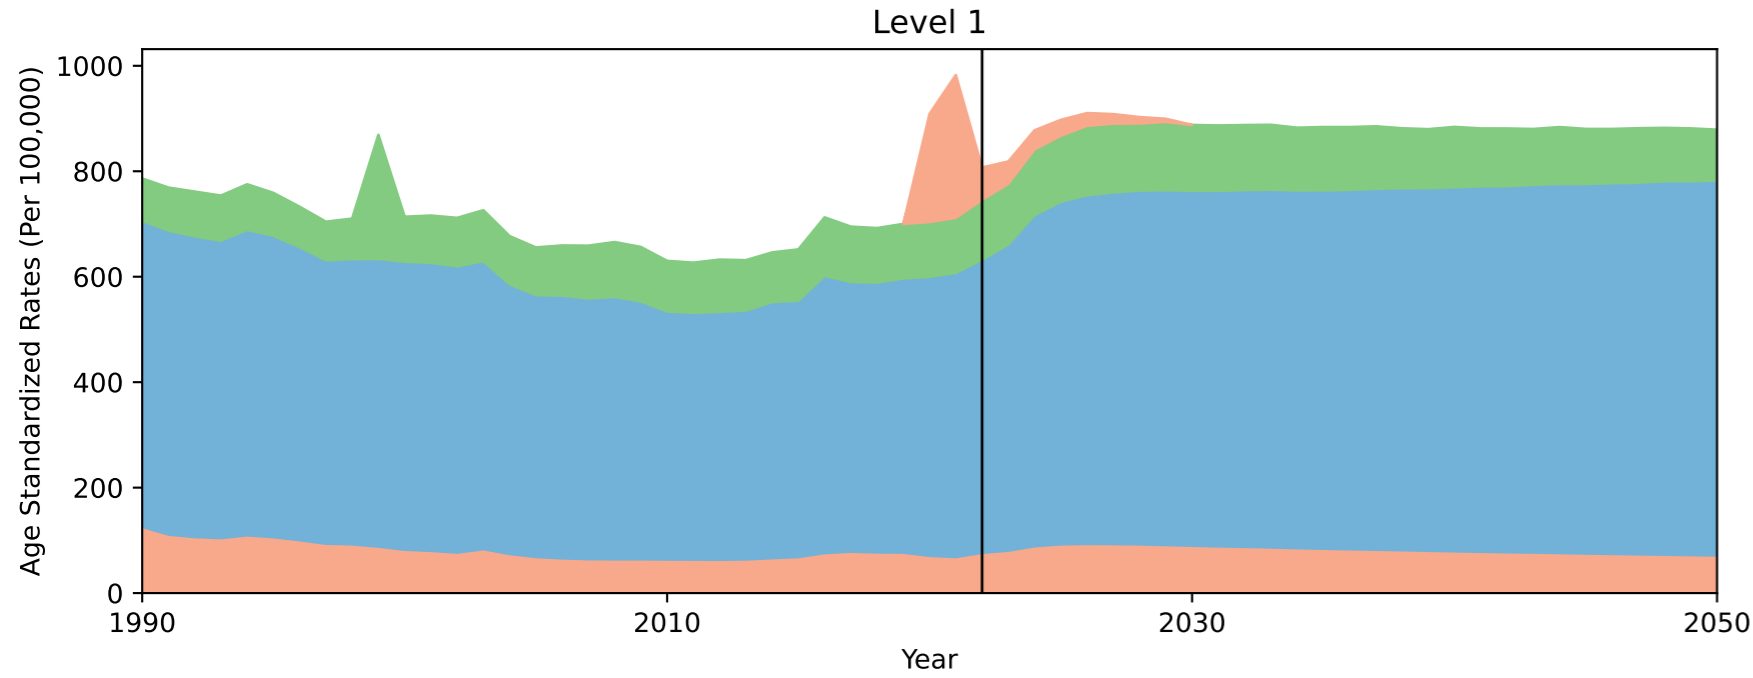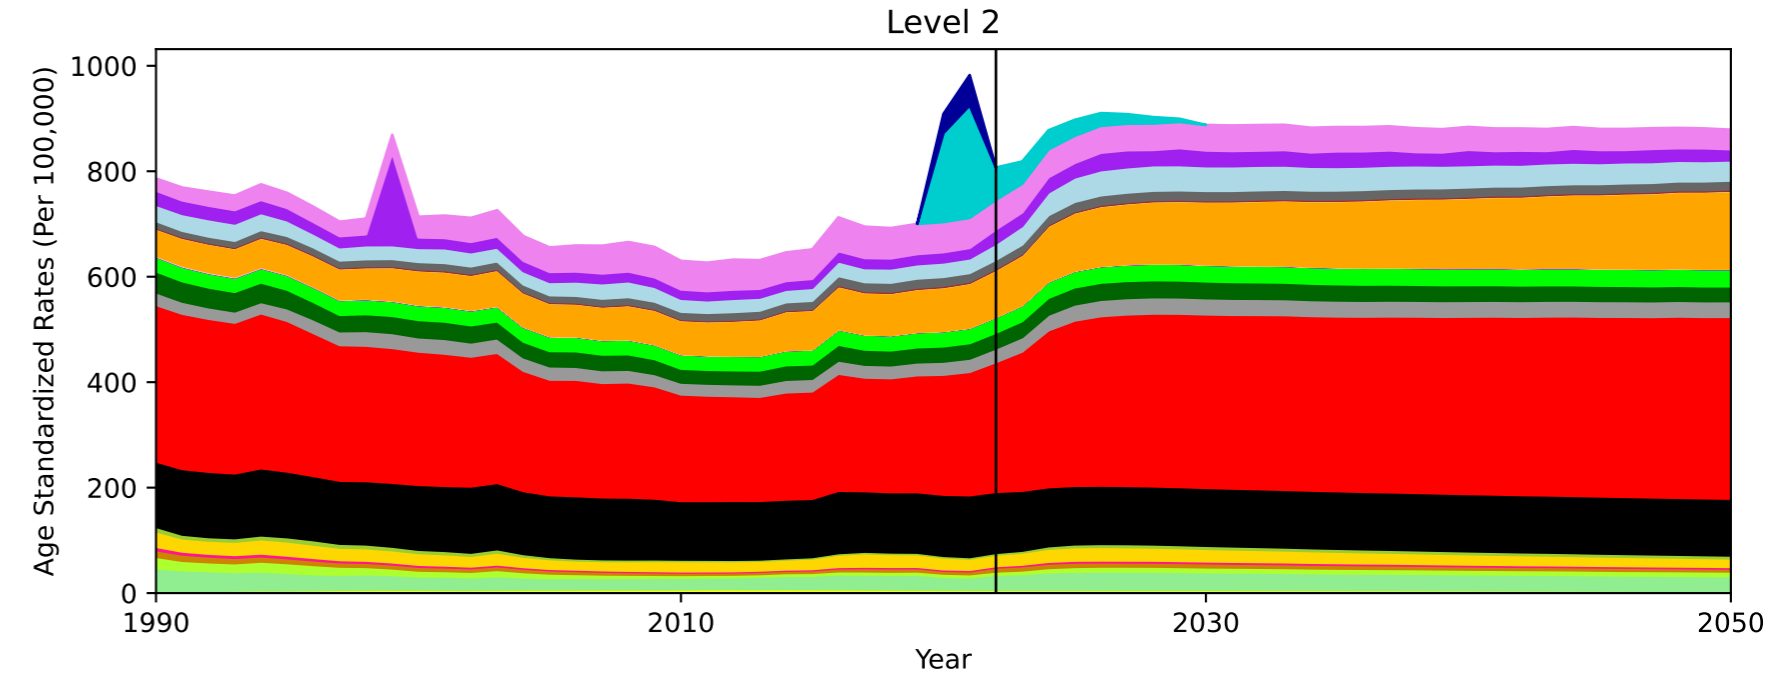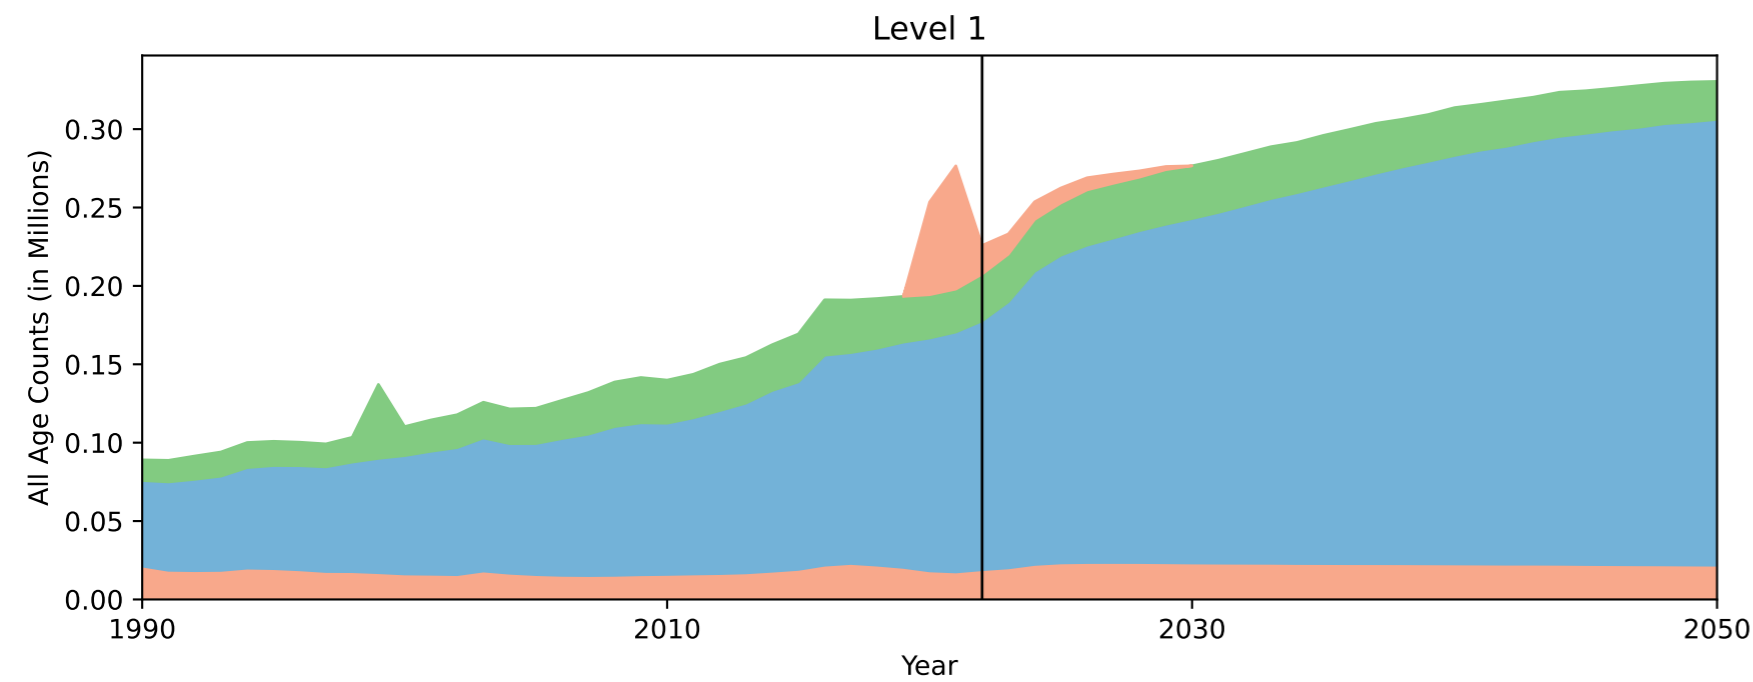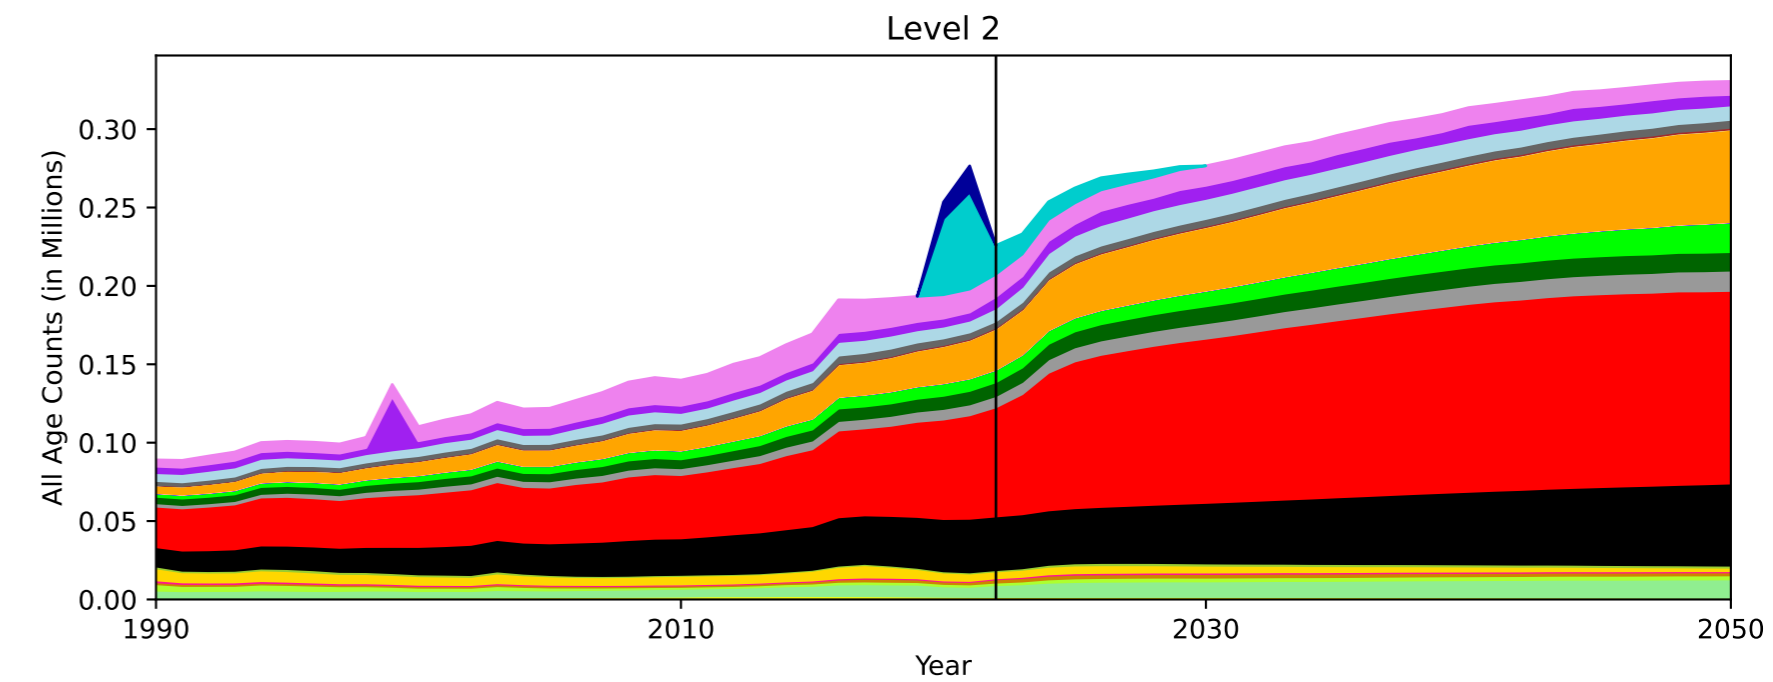

# Brazil

Level 1

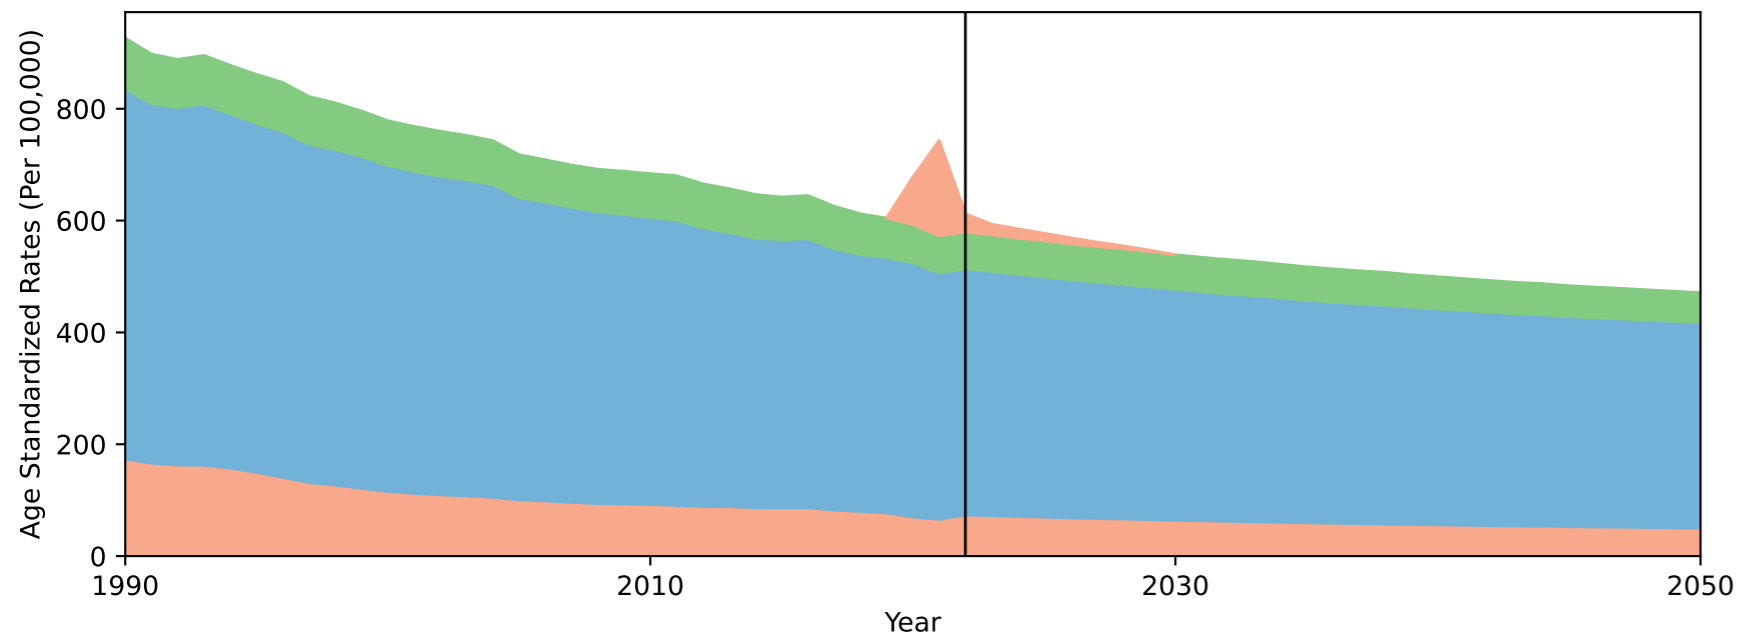

Level 2

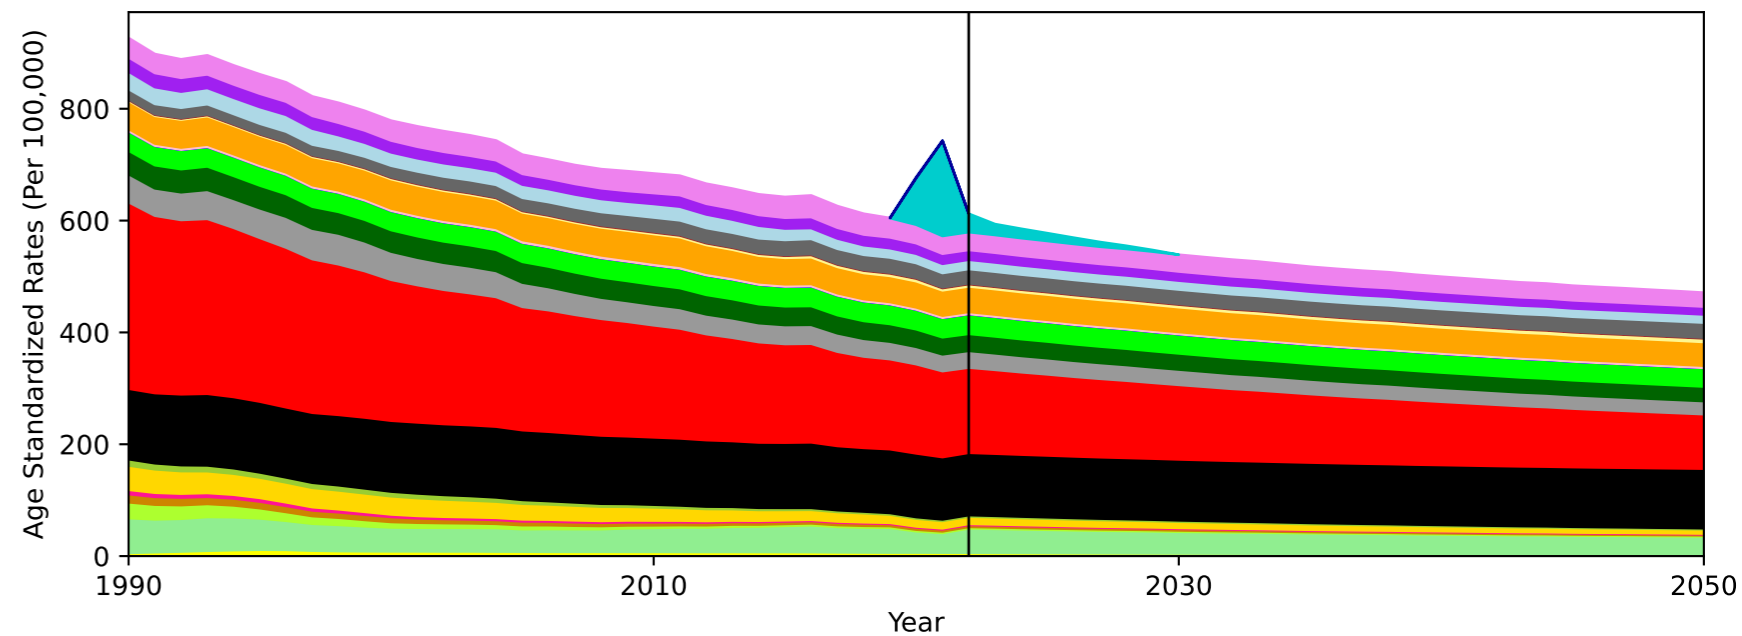

Level 1

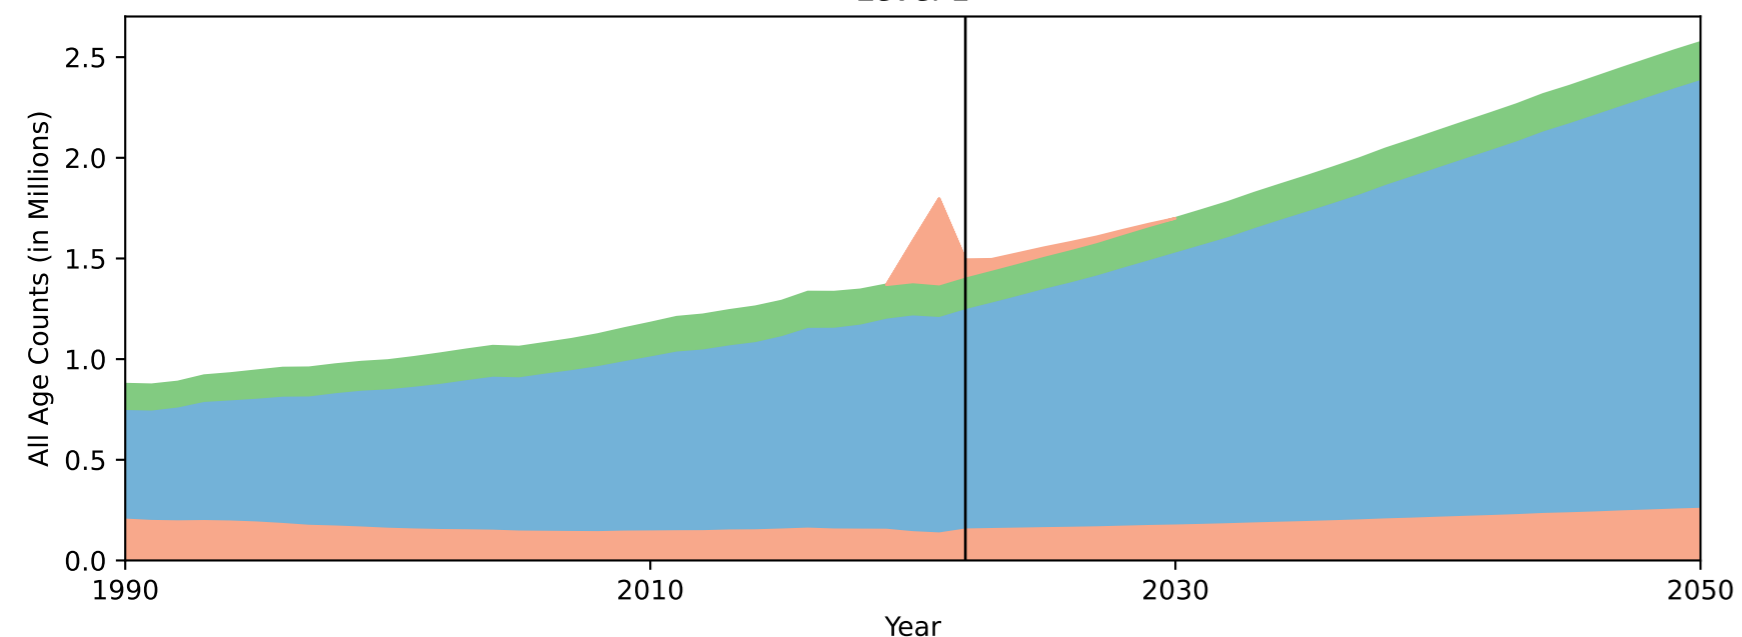

Level 2

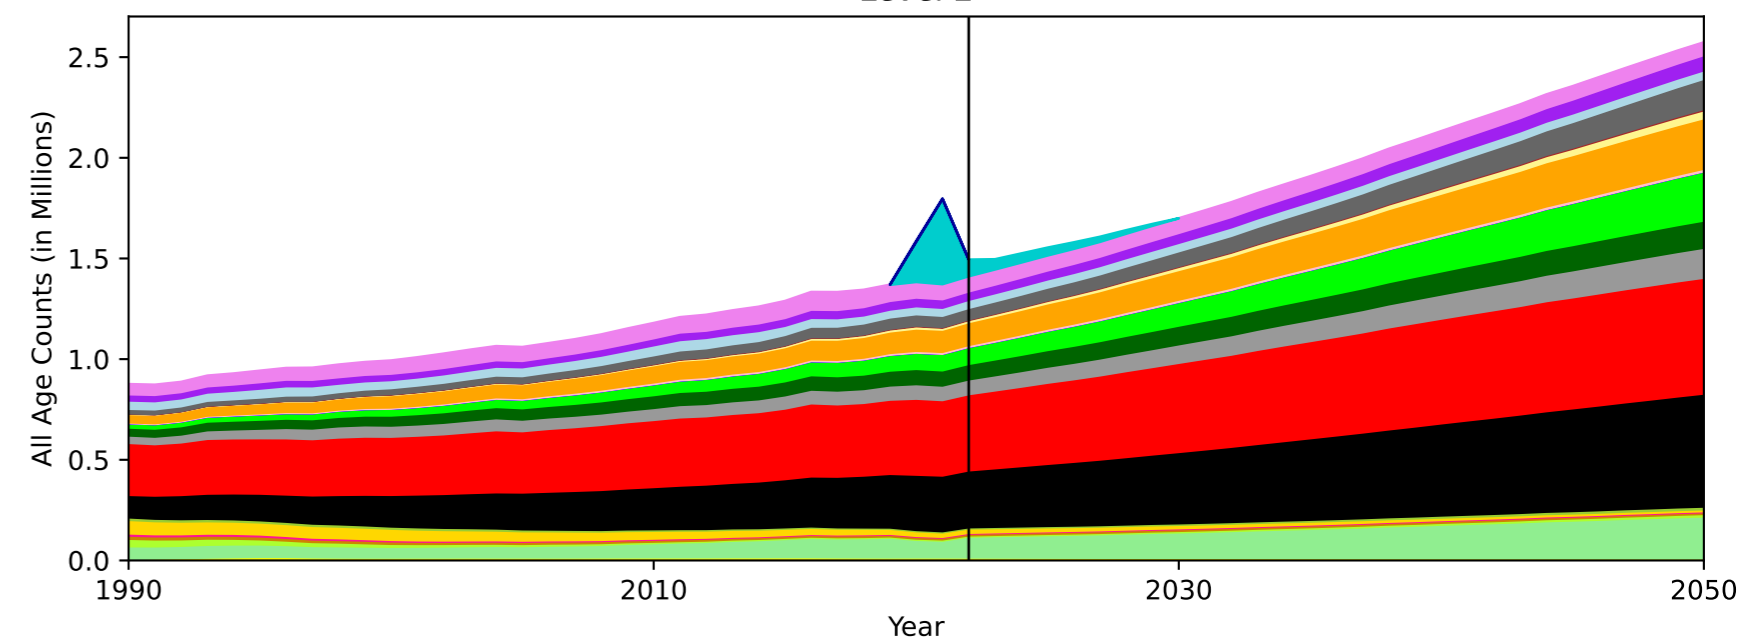

# Paraguay

Level 1

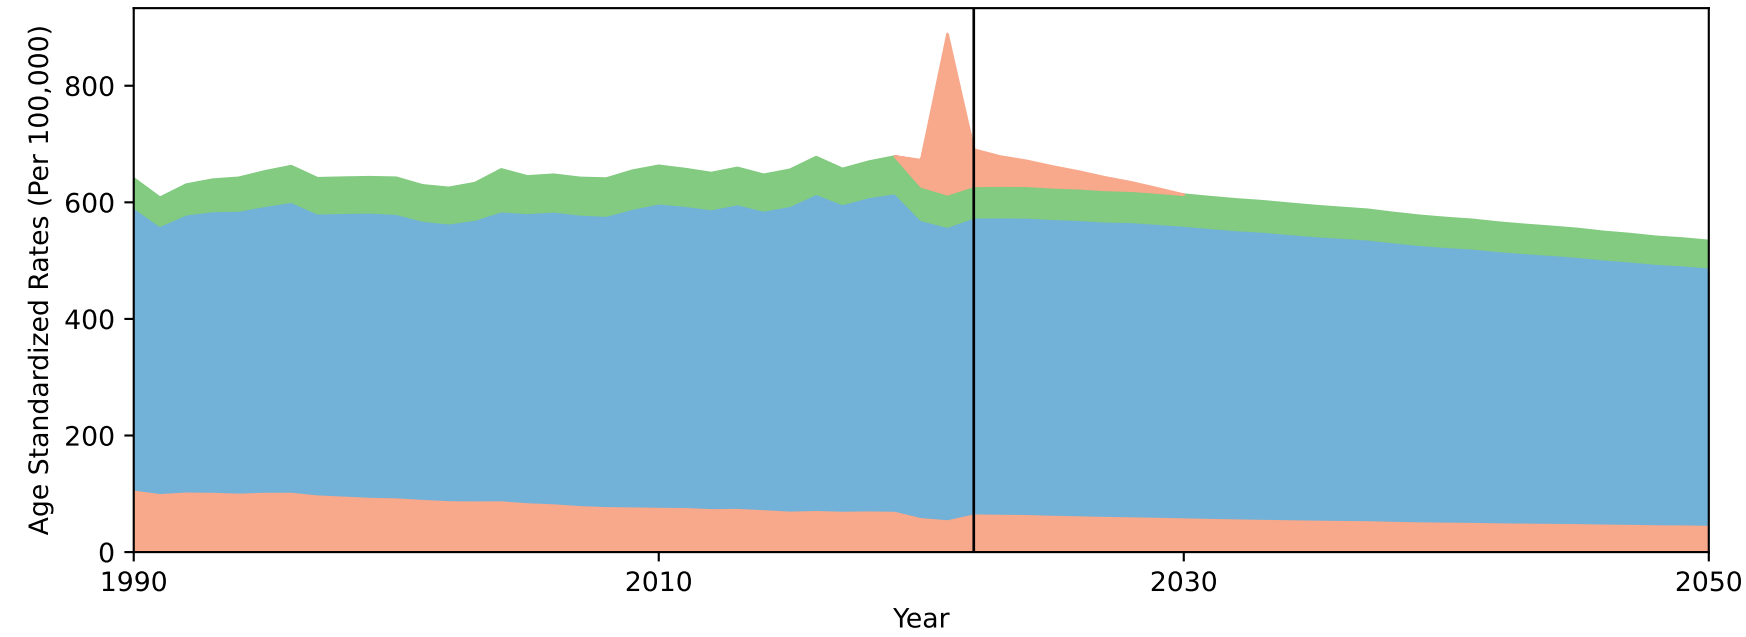

Level 2

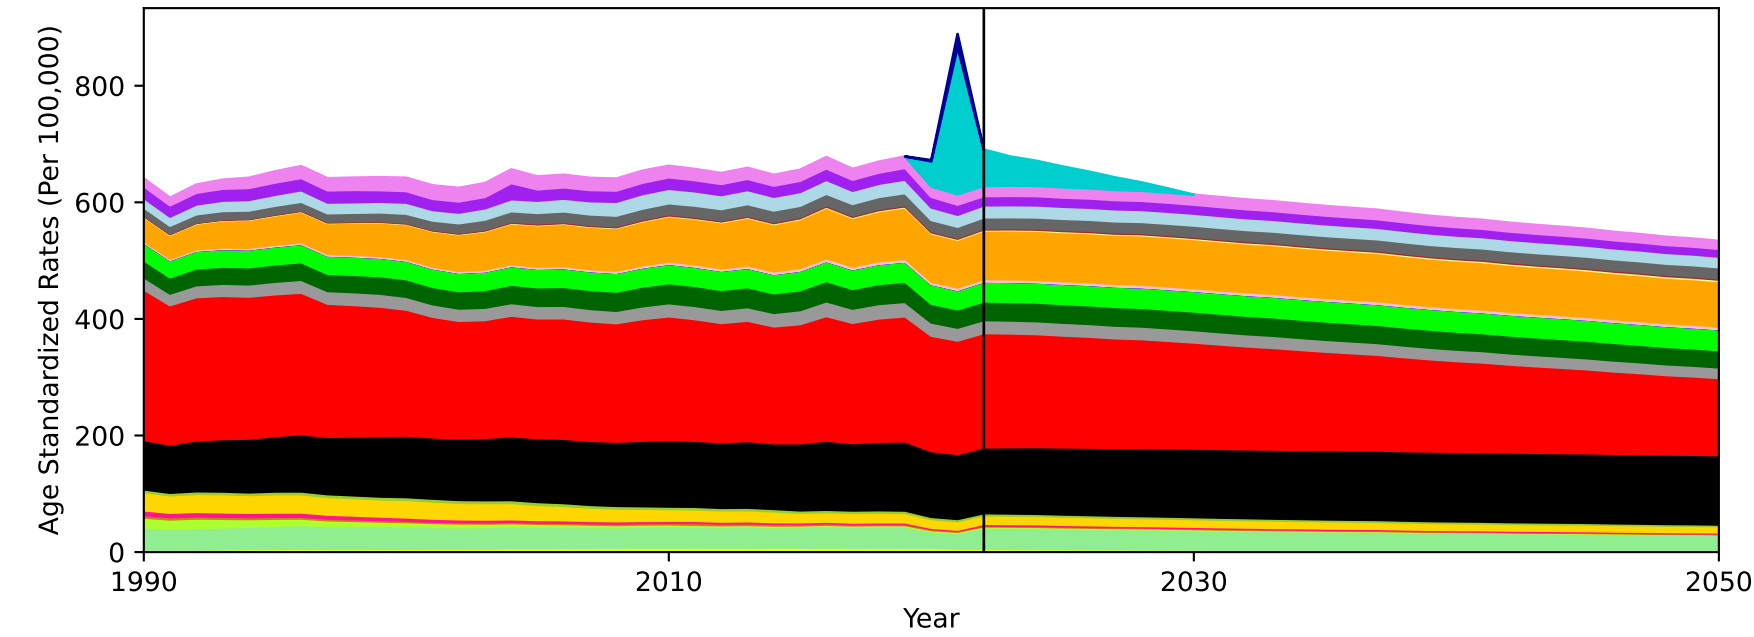

Level 1

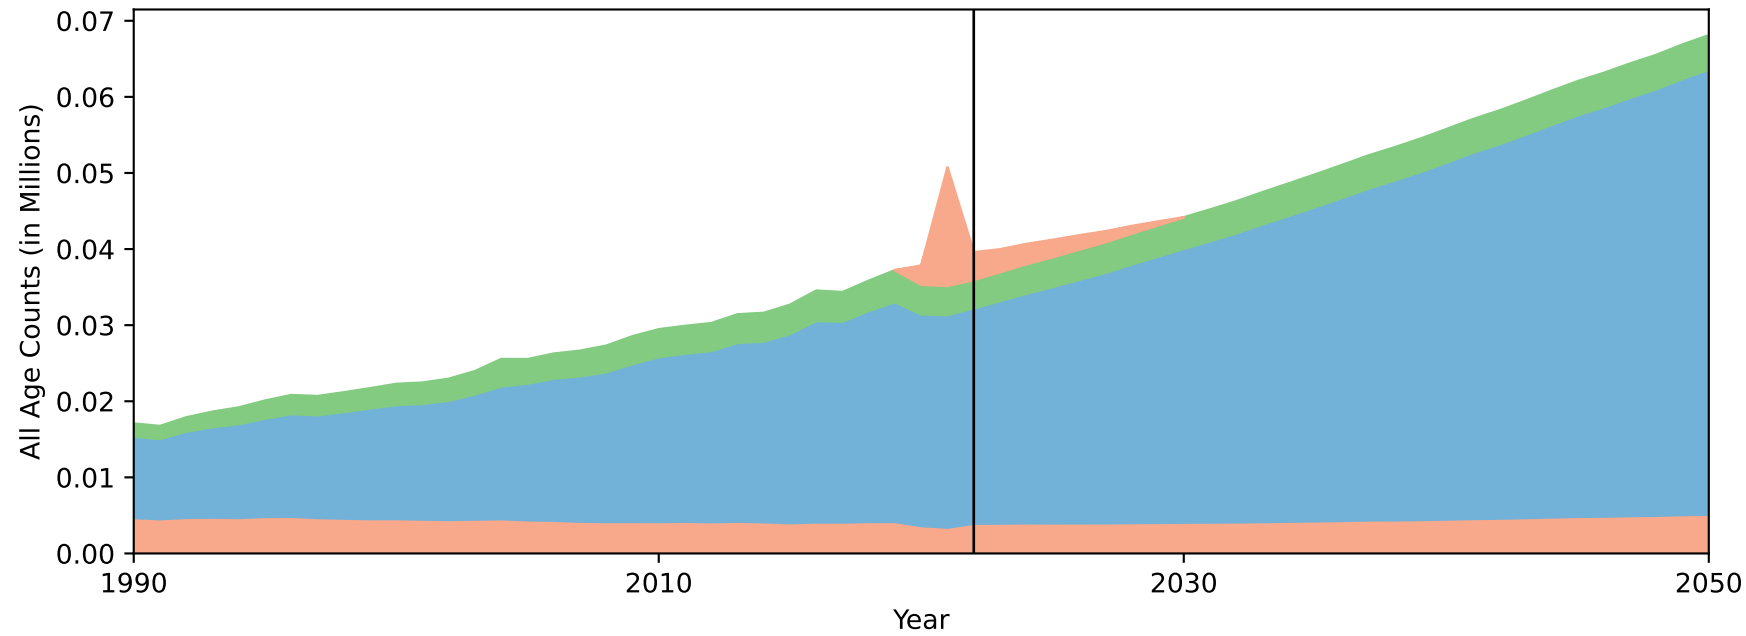

Level 2

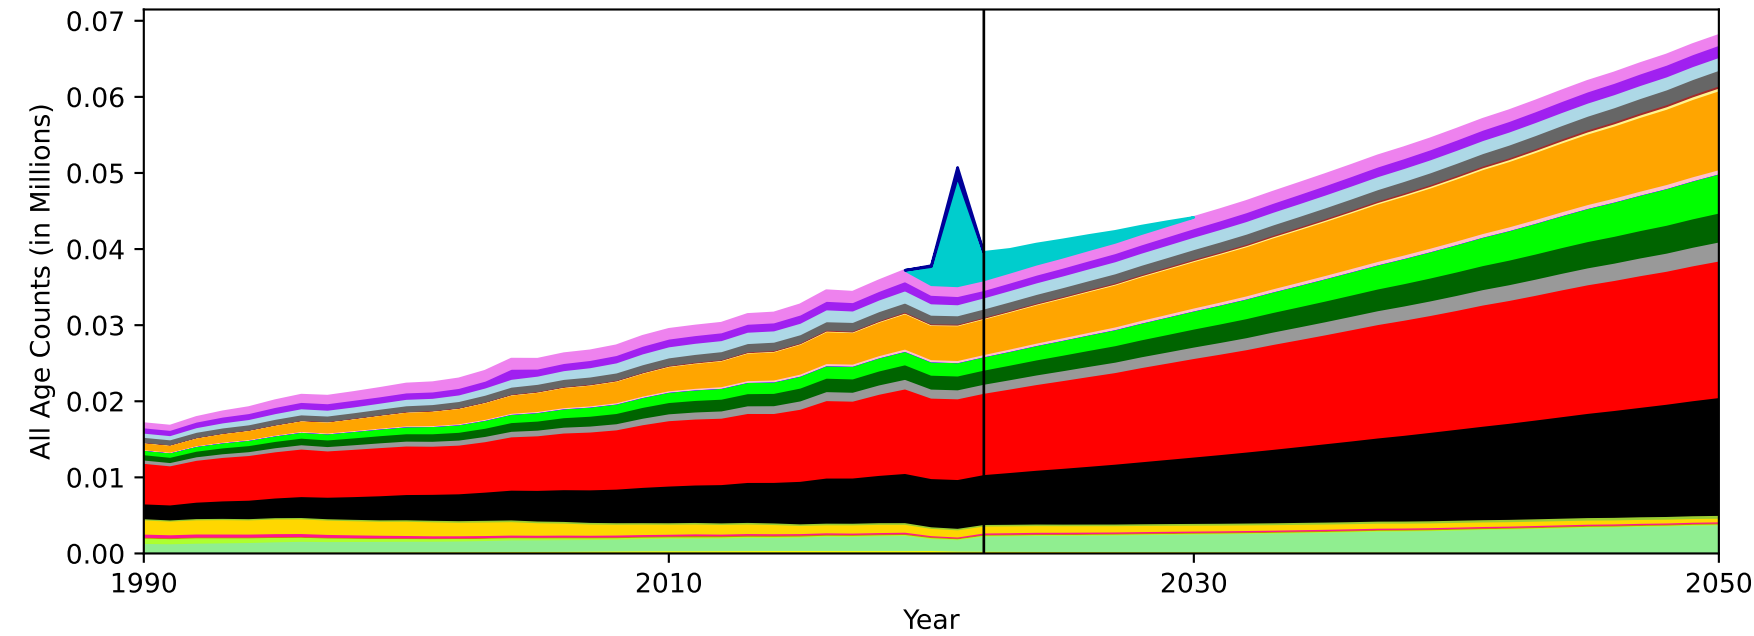



# Afghanistan

Level 1

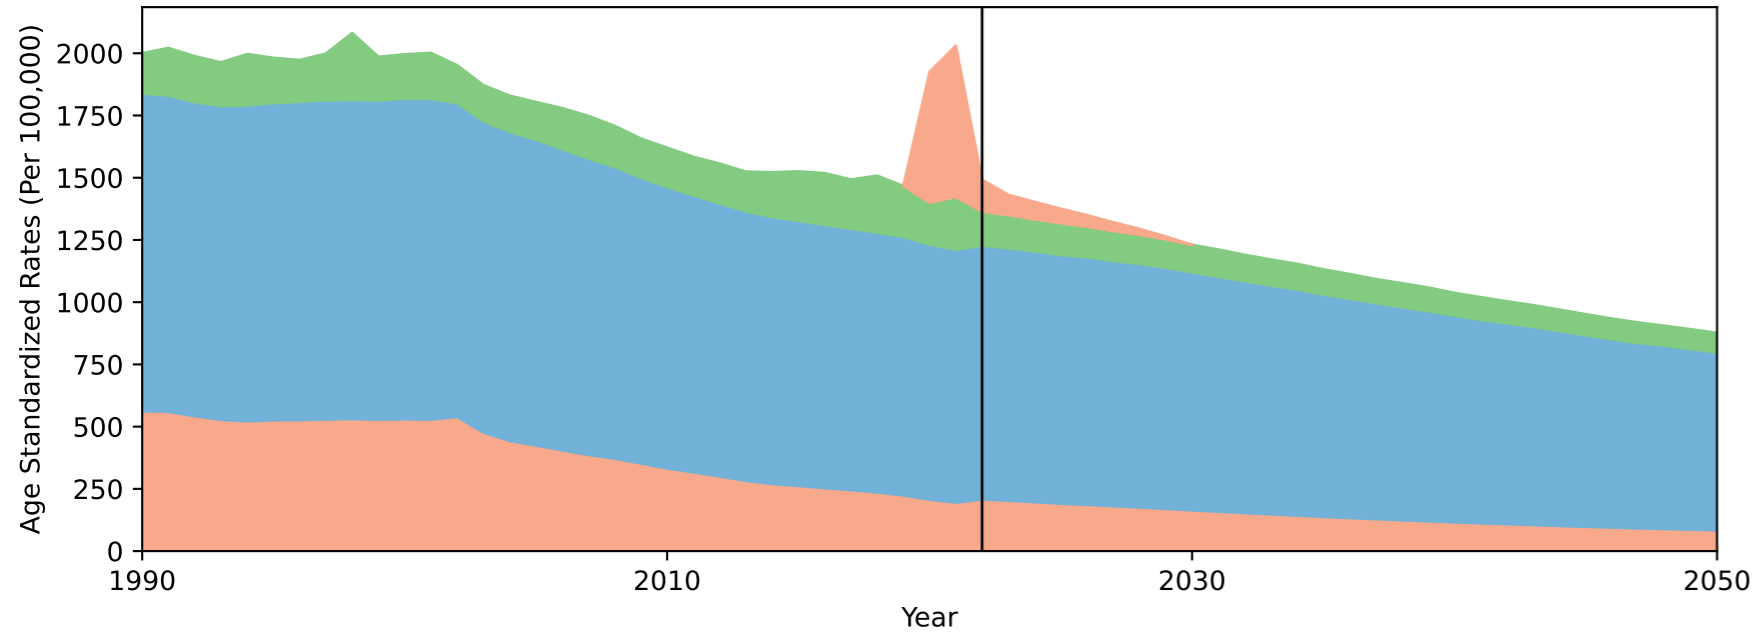

Level 2

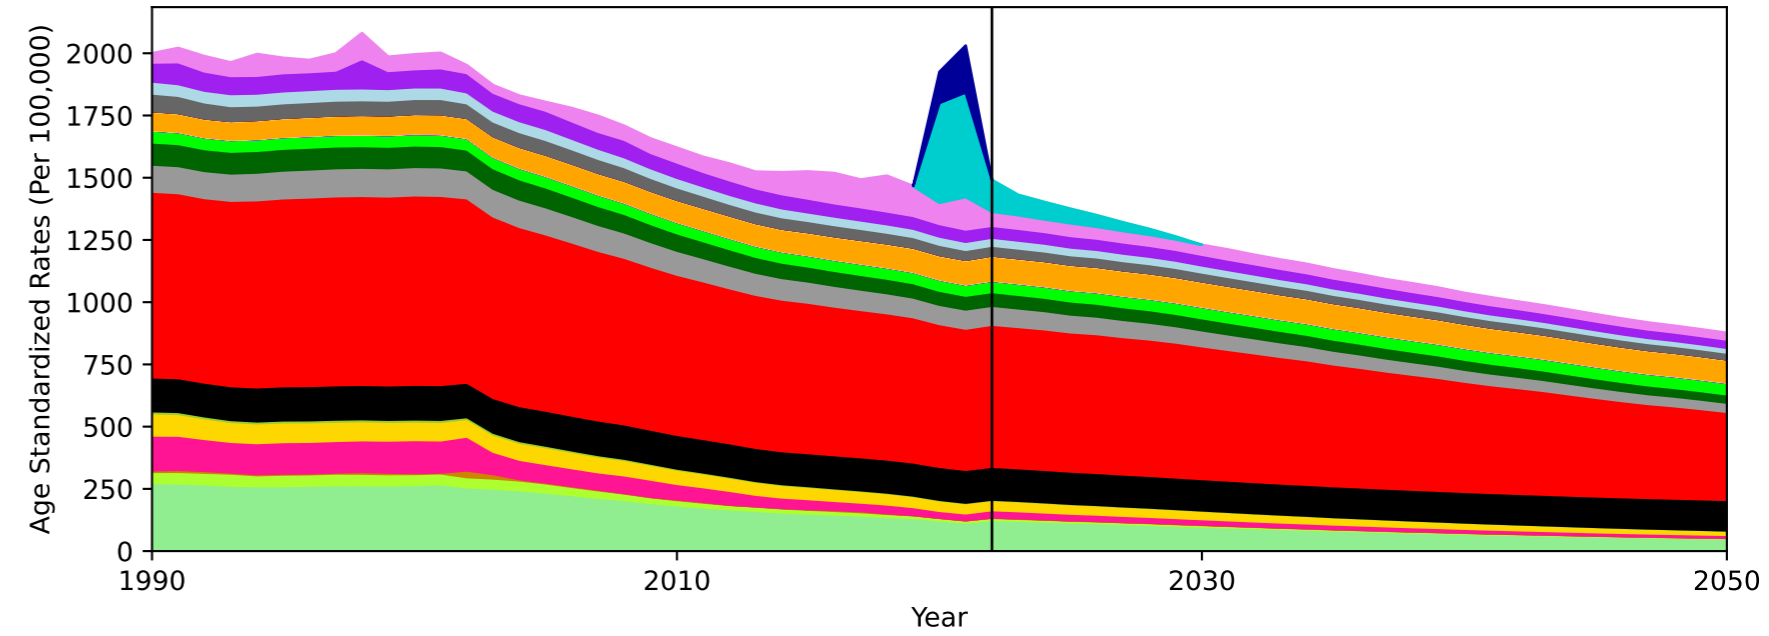

Level 1

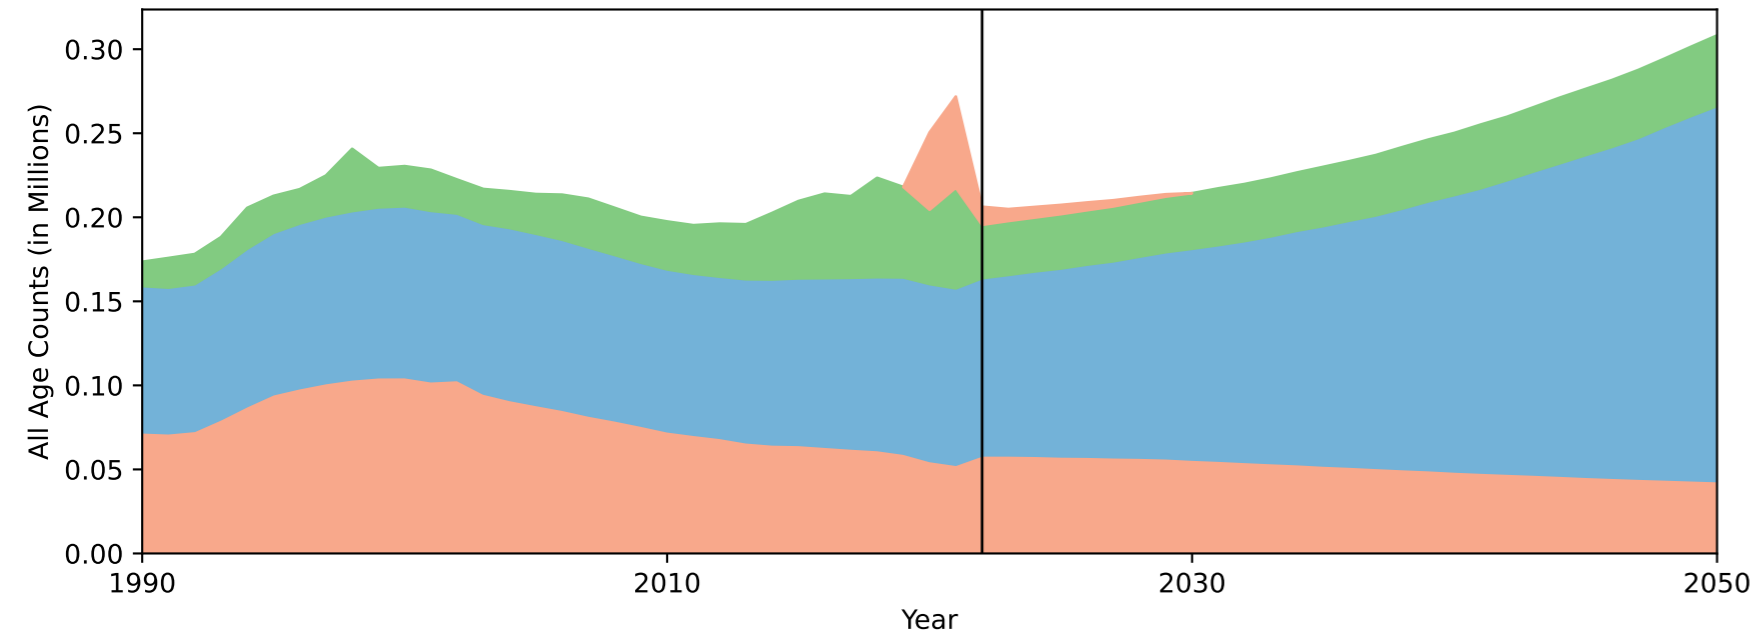

Level 2

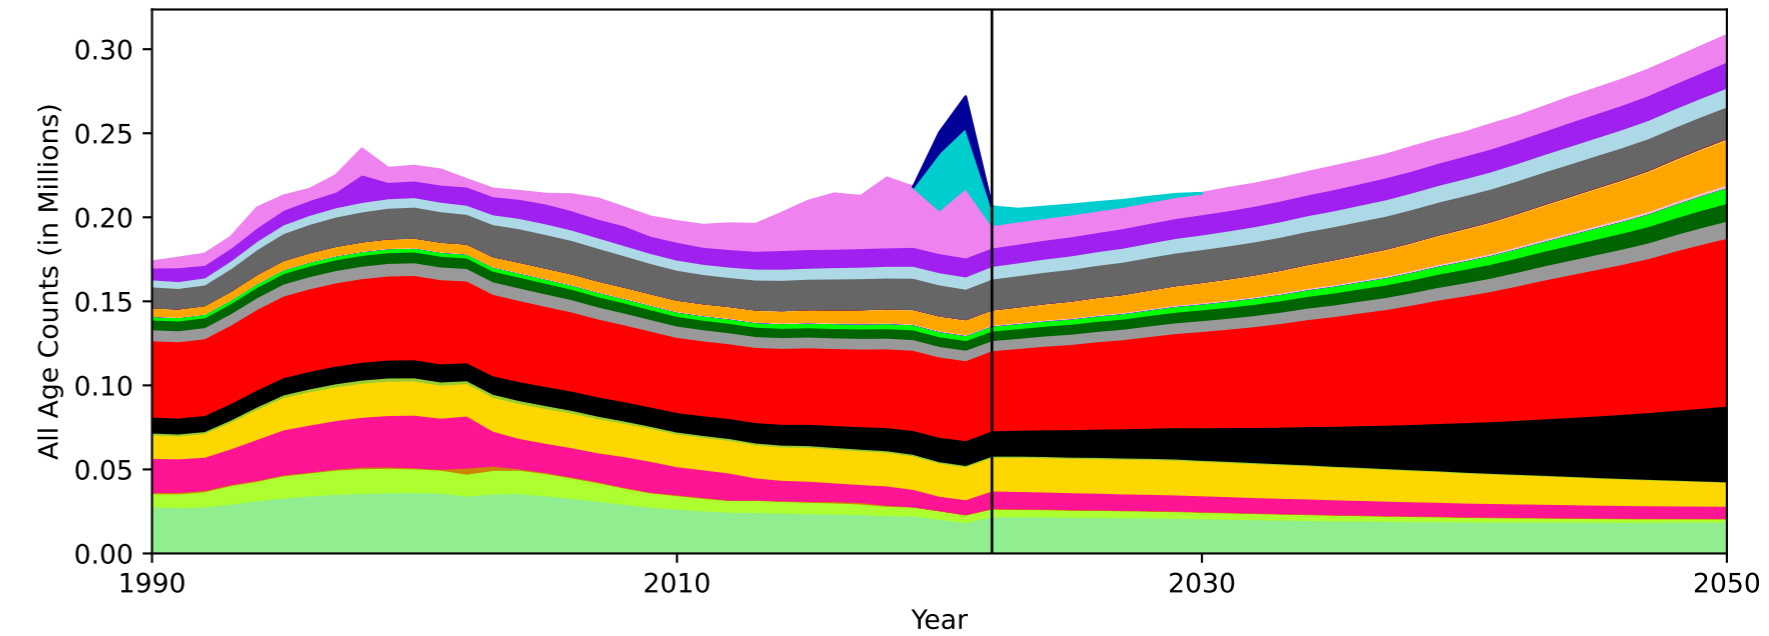

# Algeria

Level 1

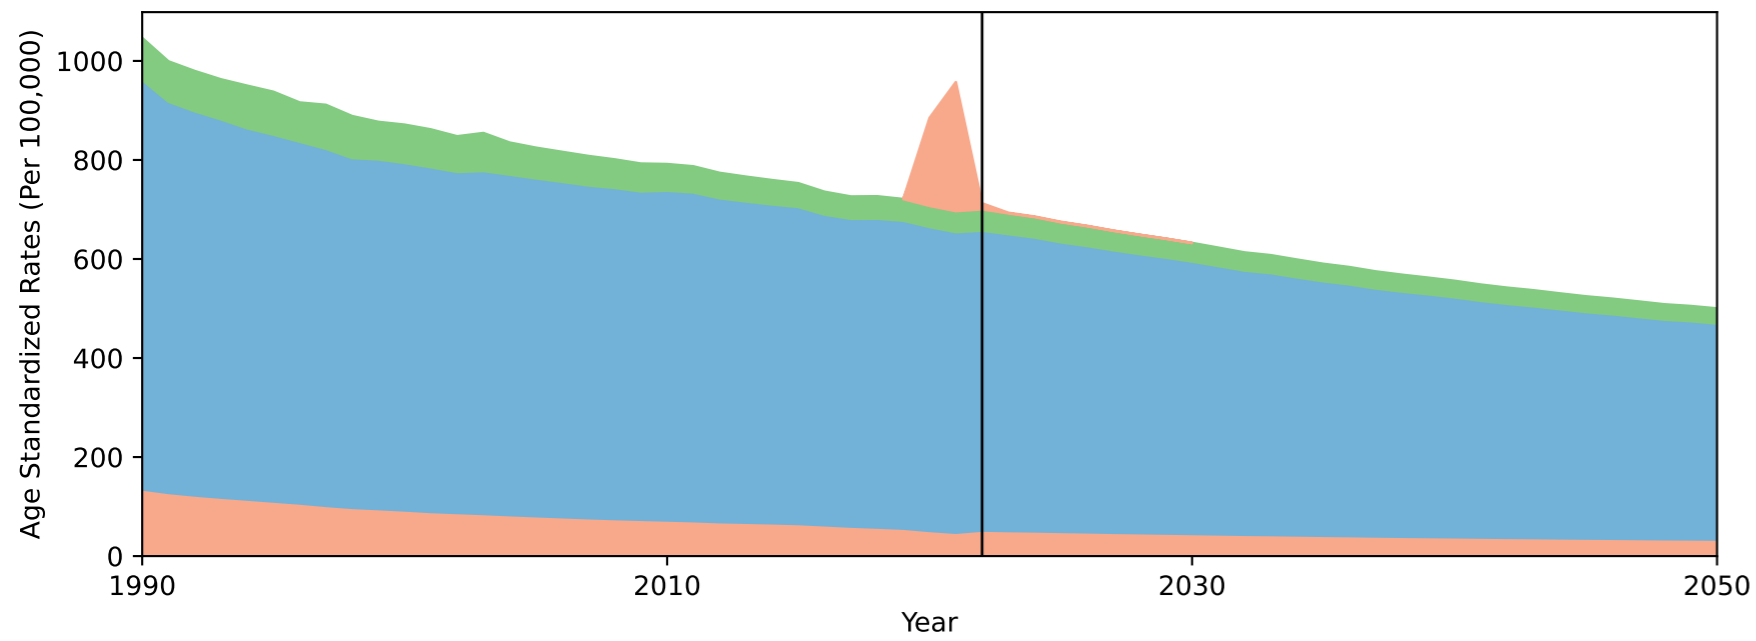

Level 2

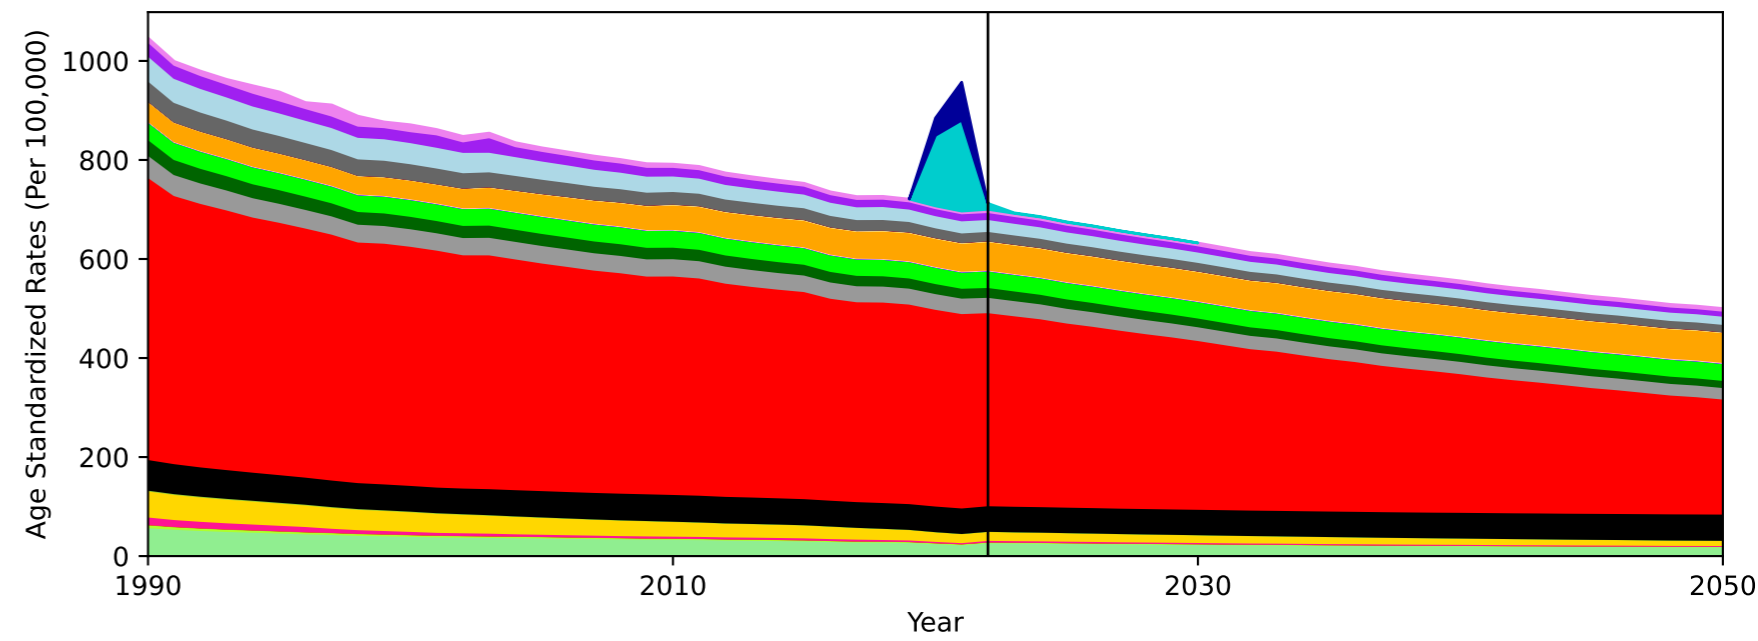

Level 1

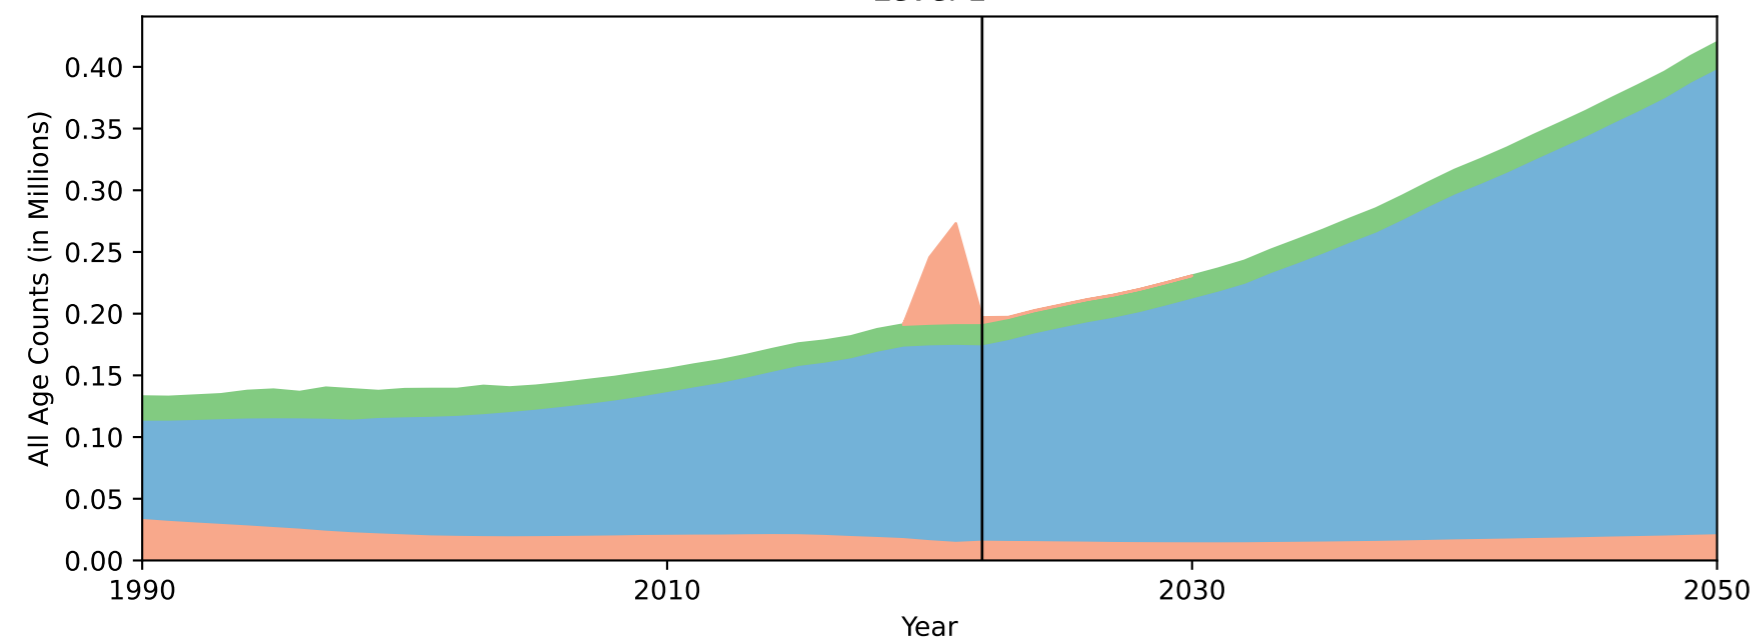

Level 2

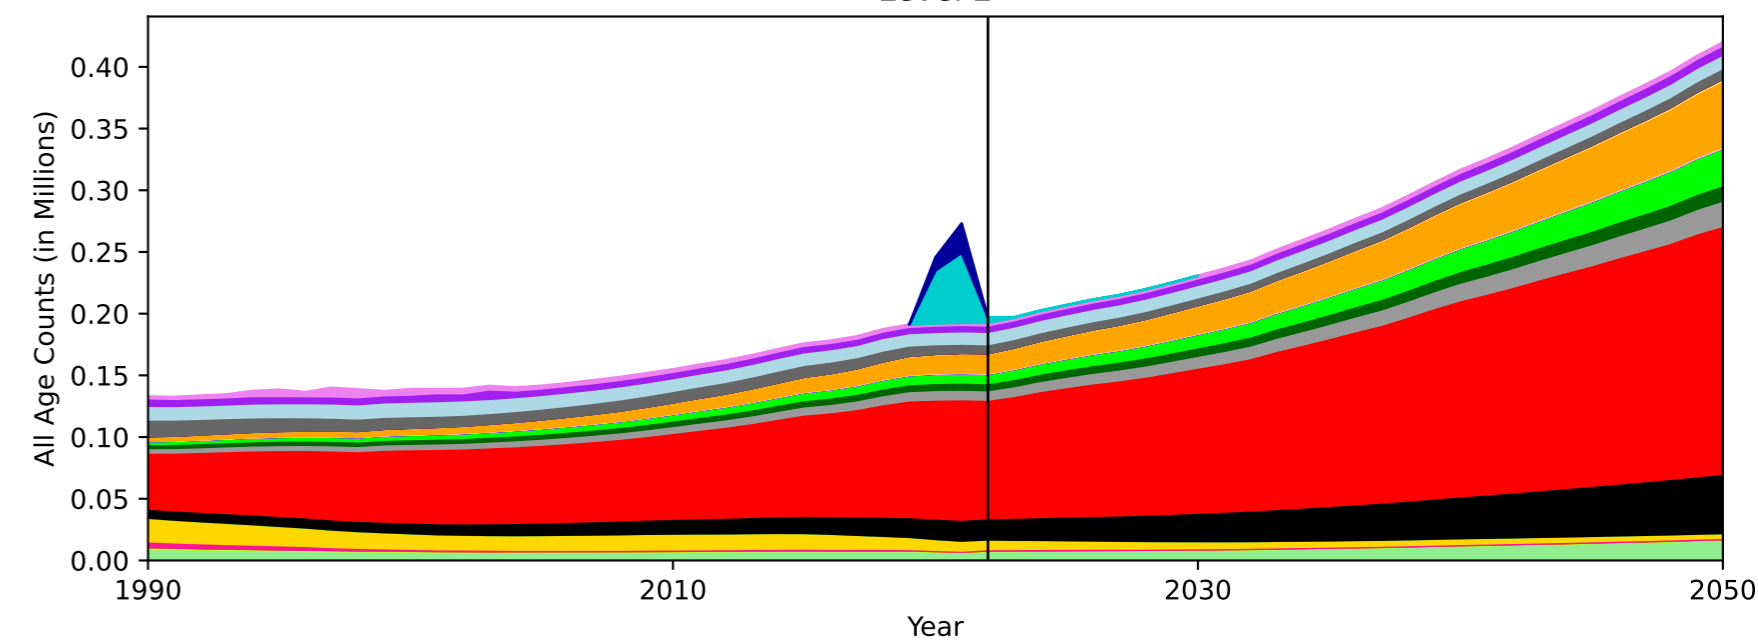

# Bahrain

Level 1

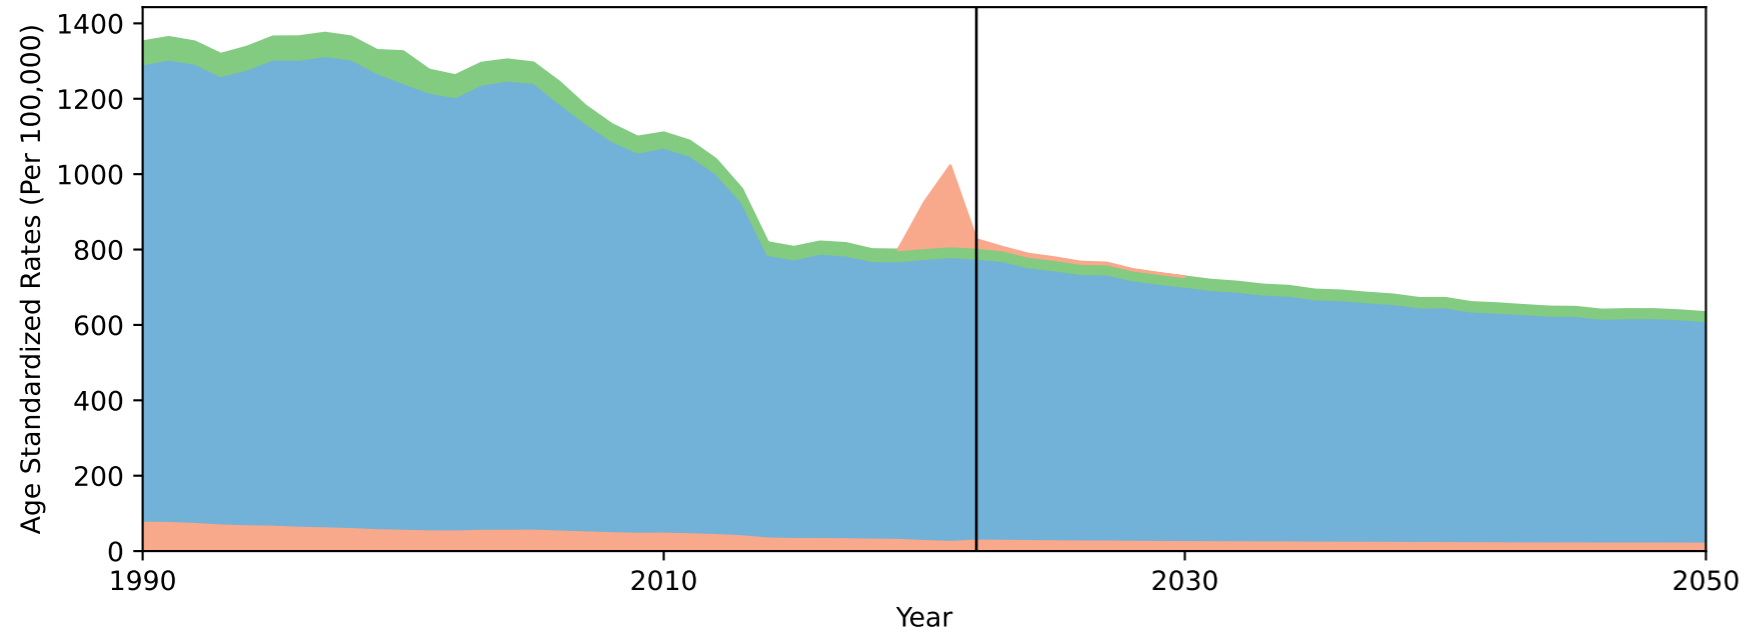

Level 2

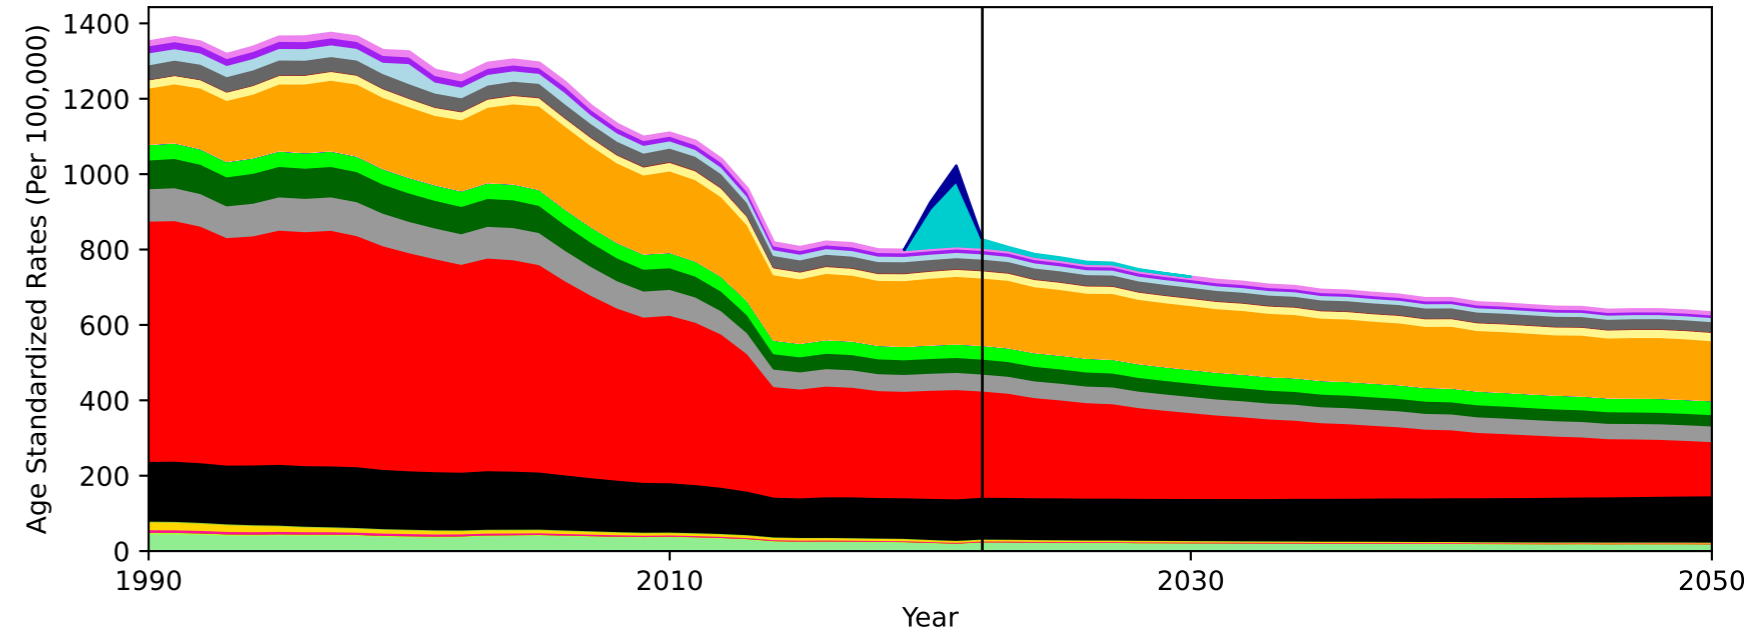

Level 1

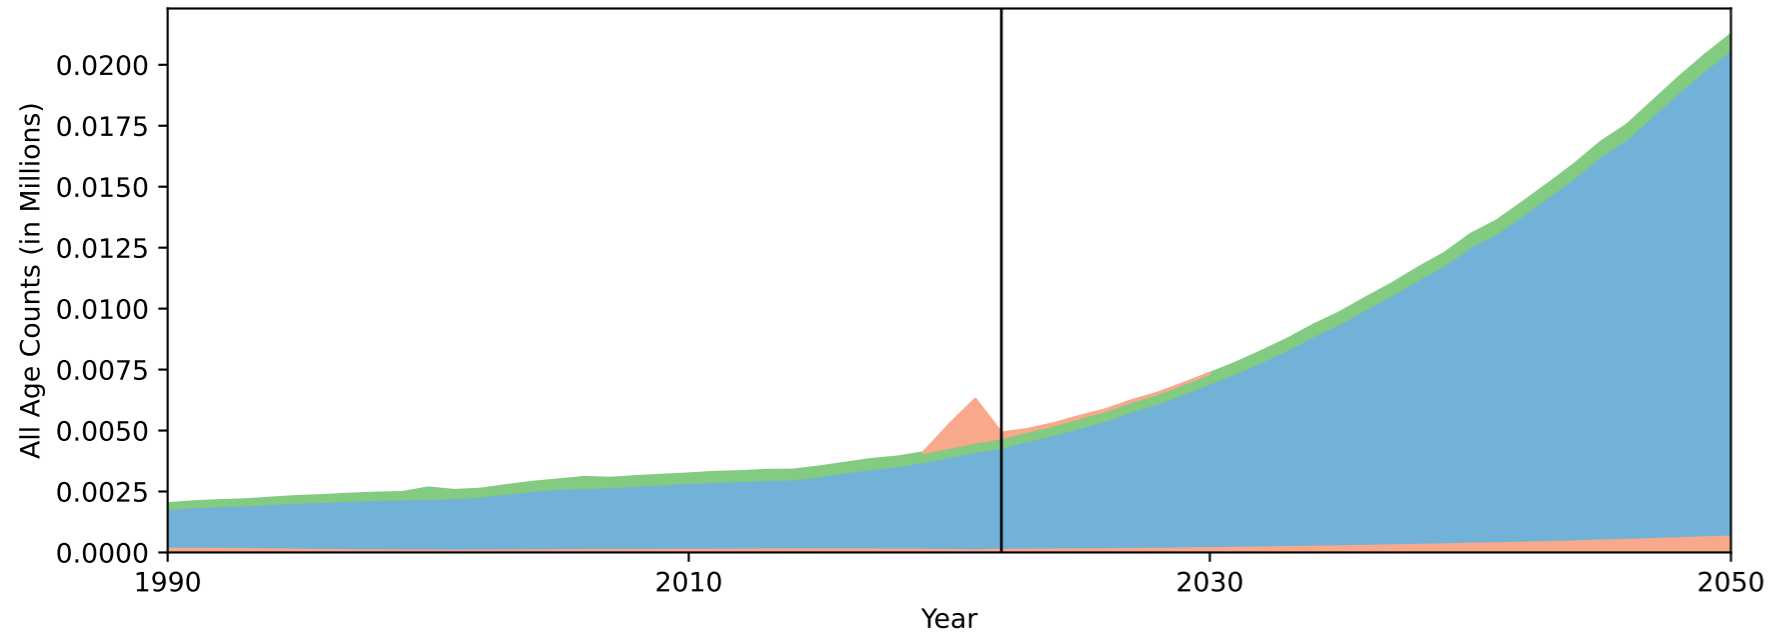

Level 2

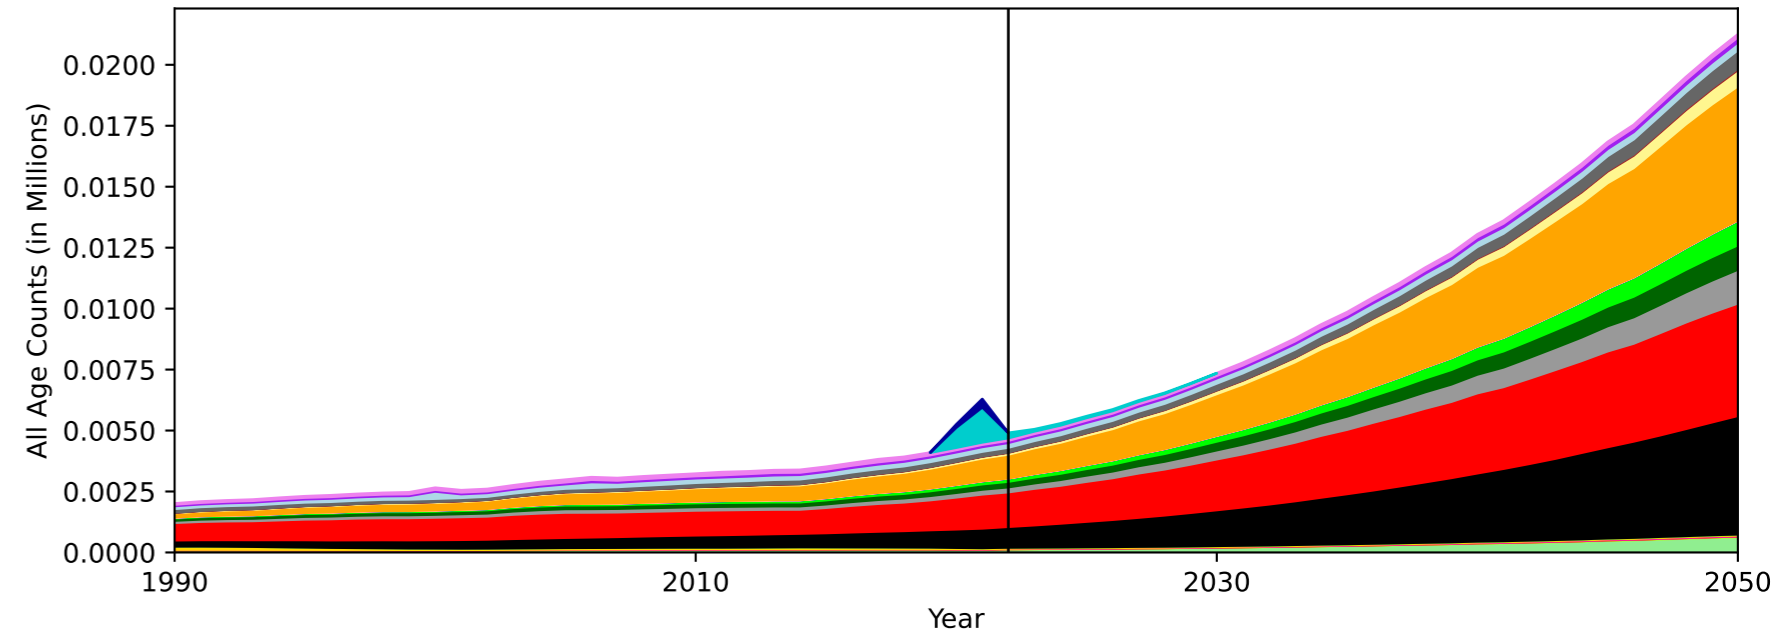

Level 1

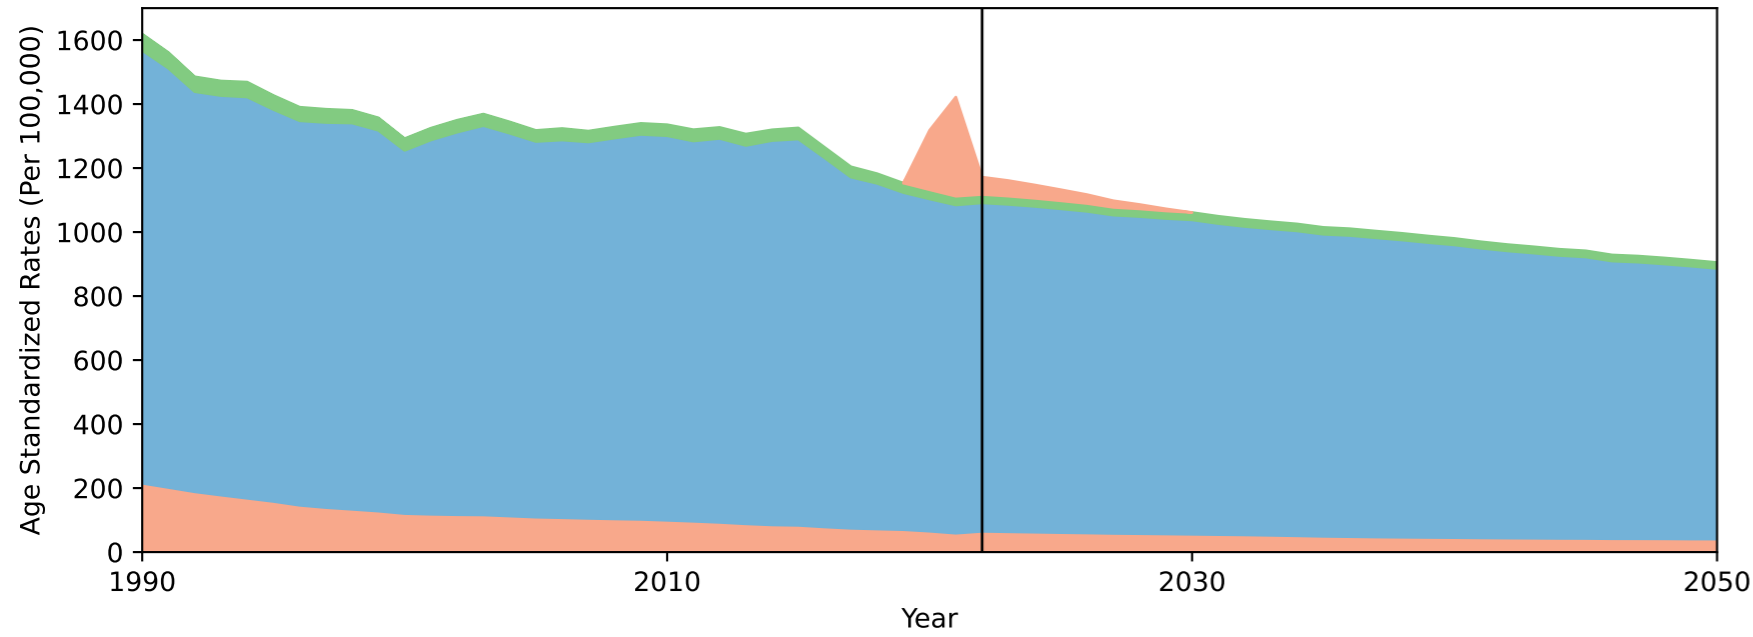

Level 2

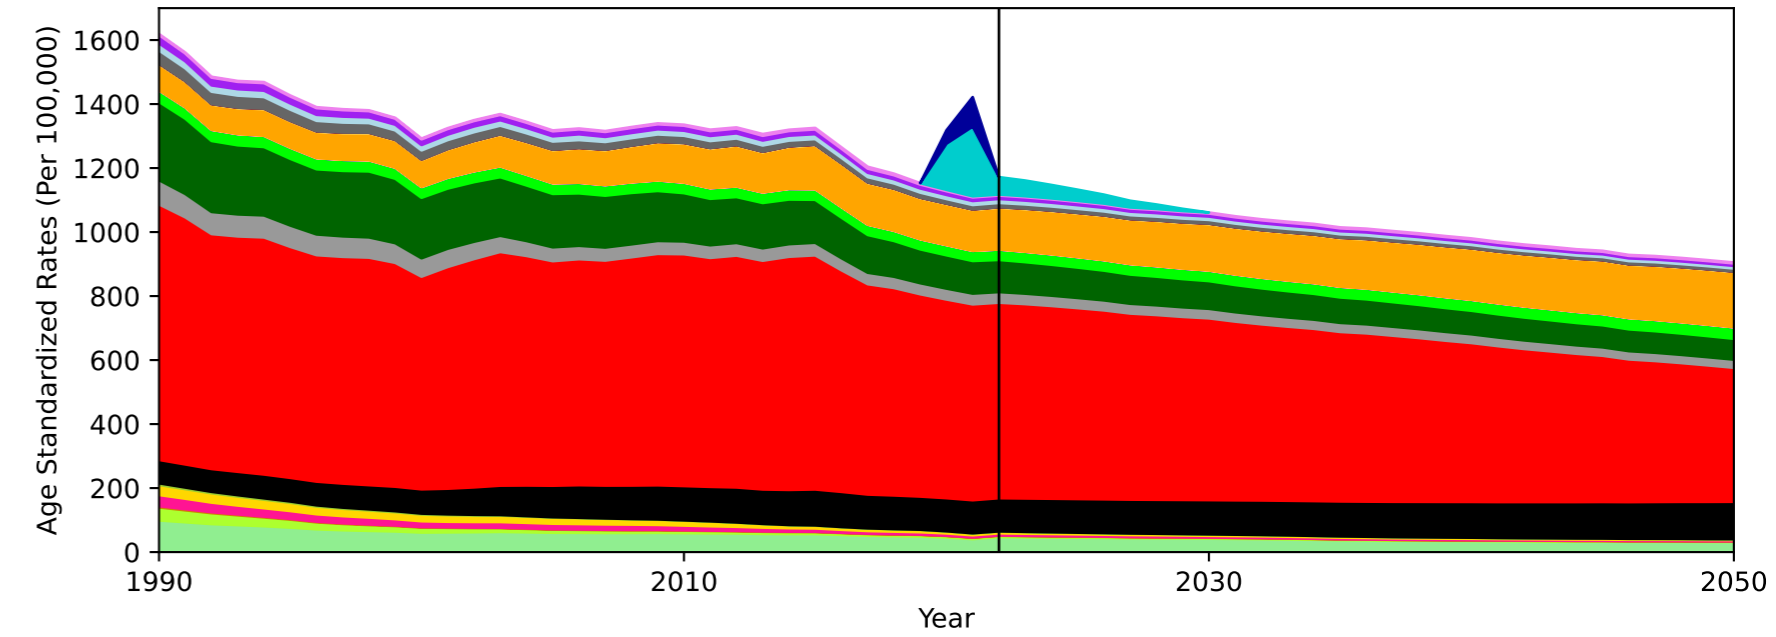

Level 1

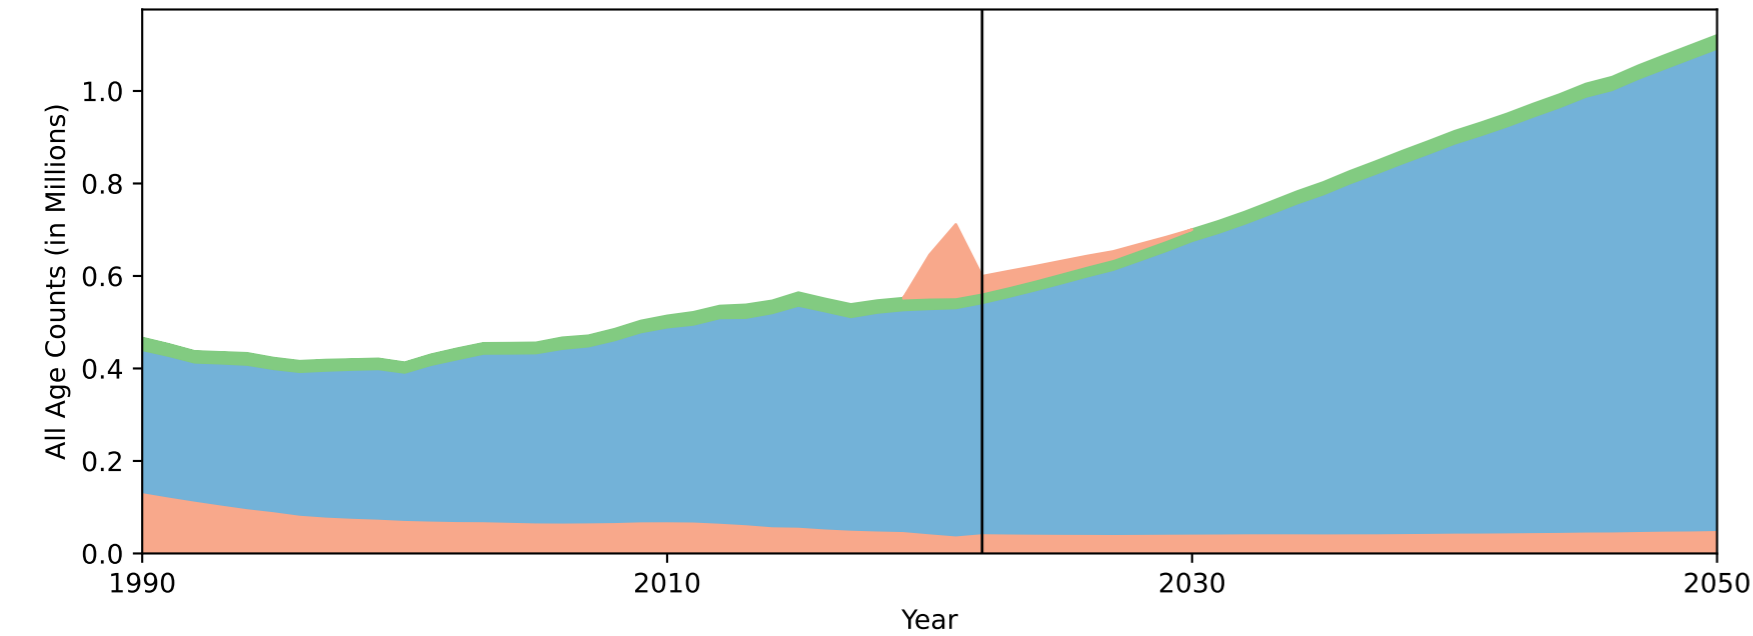

Level 2

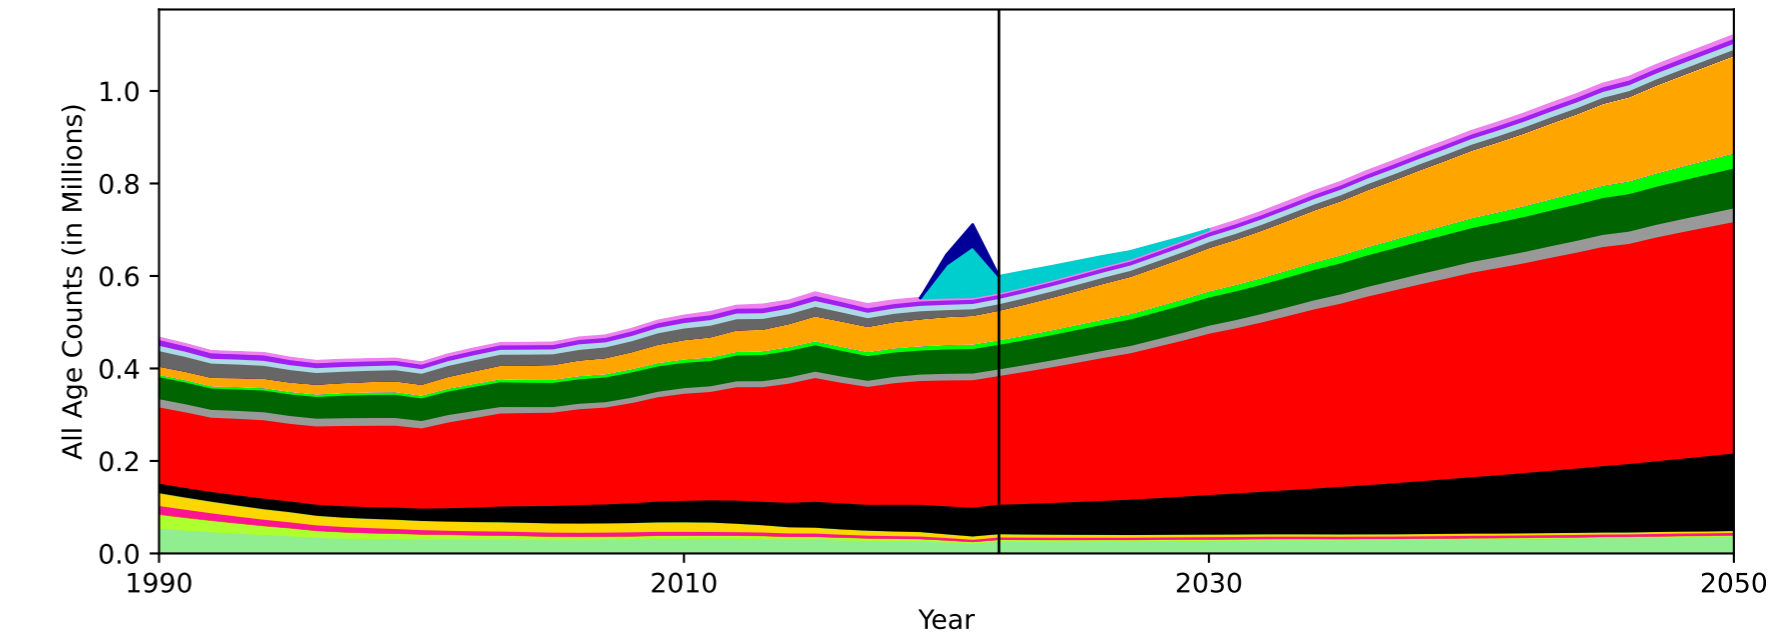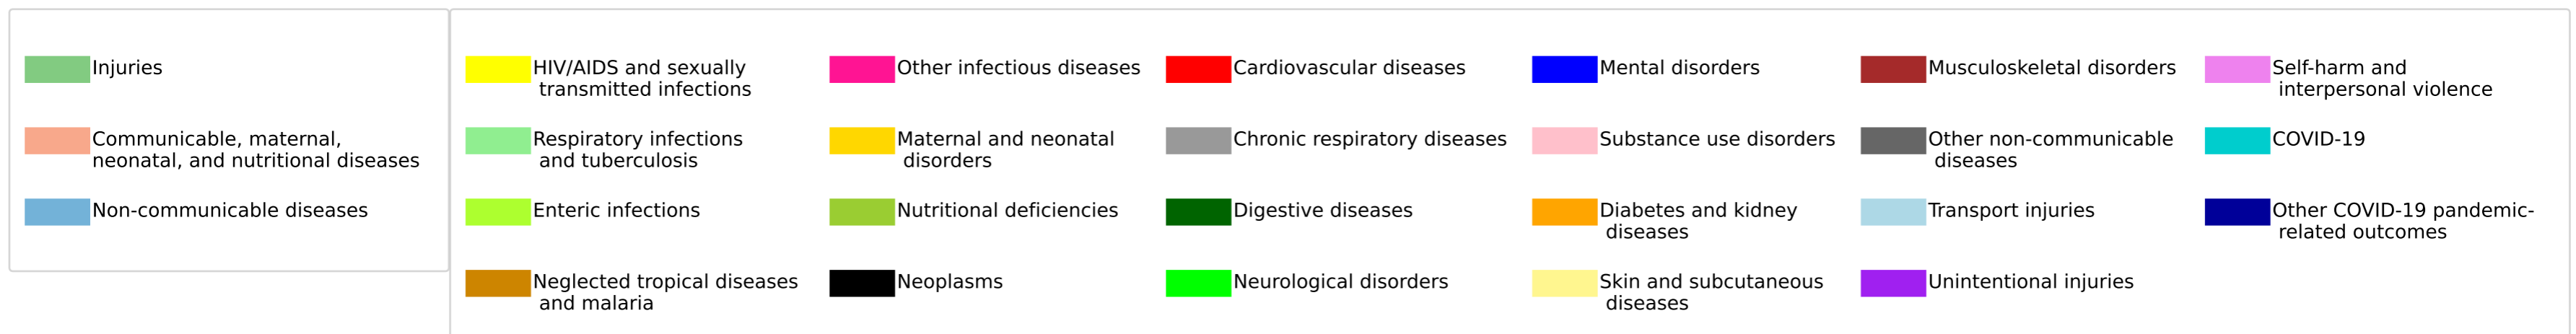

Level 1

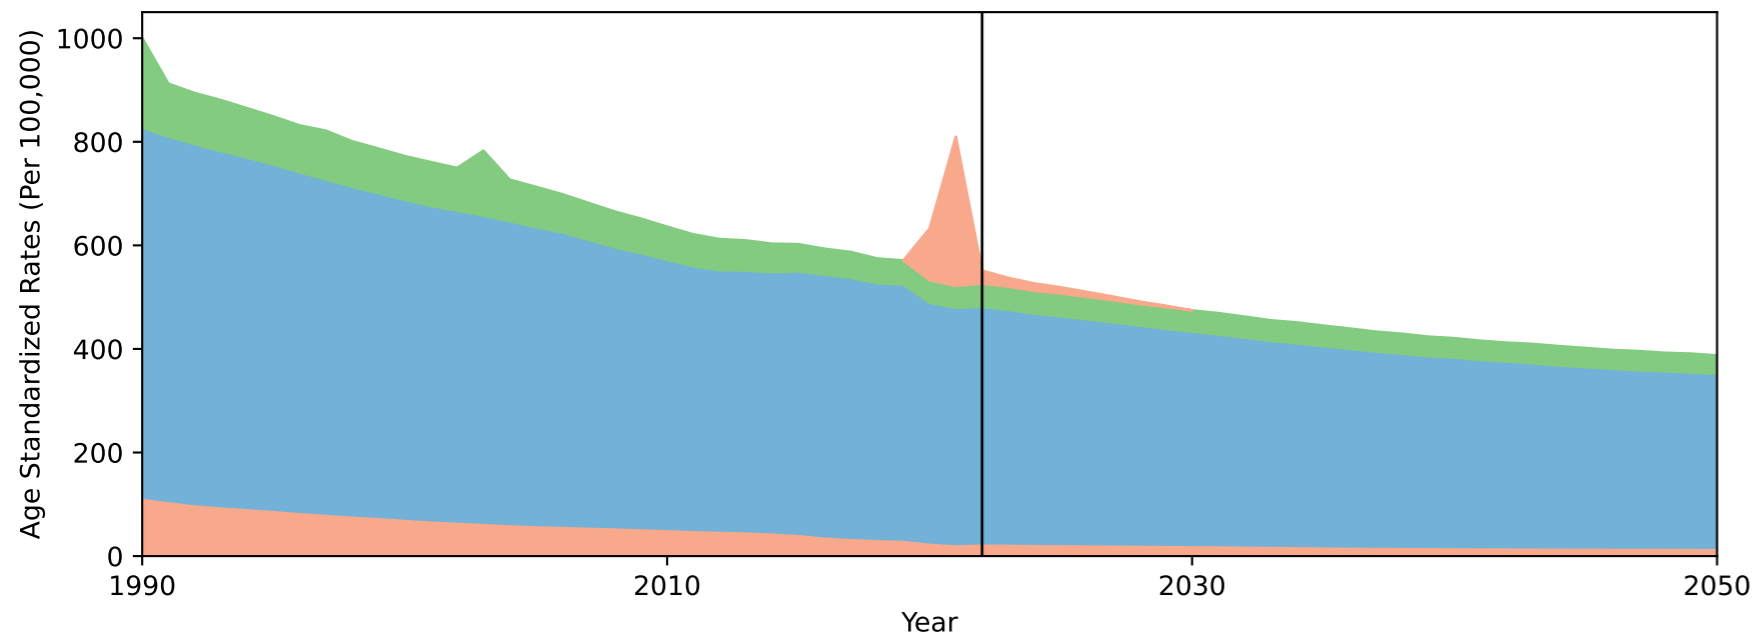

Level 2

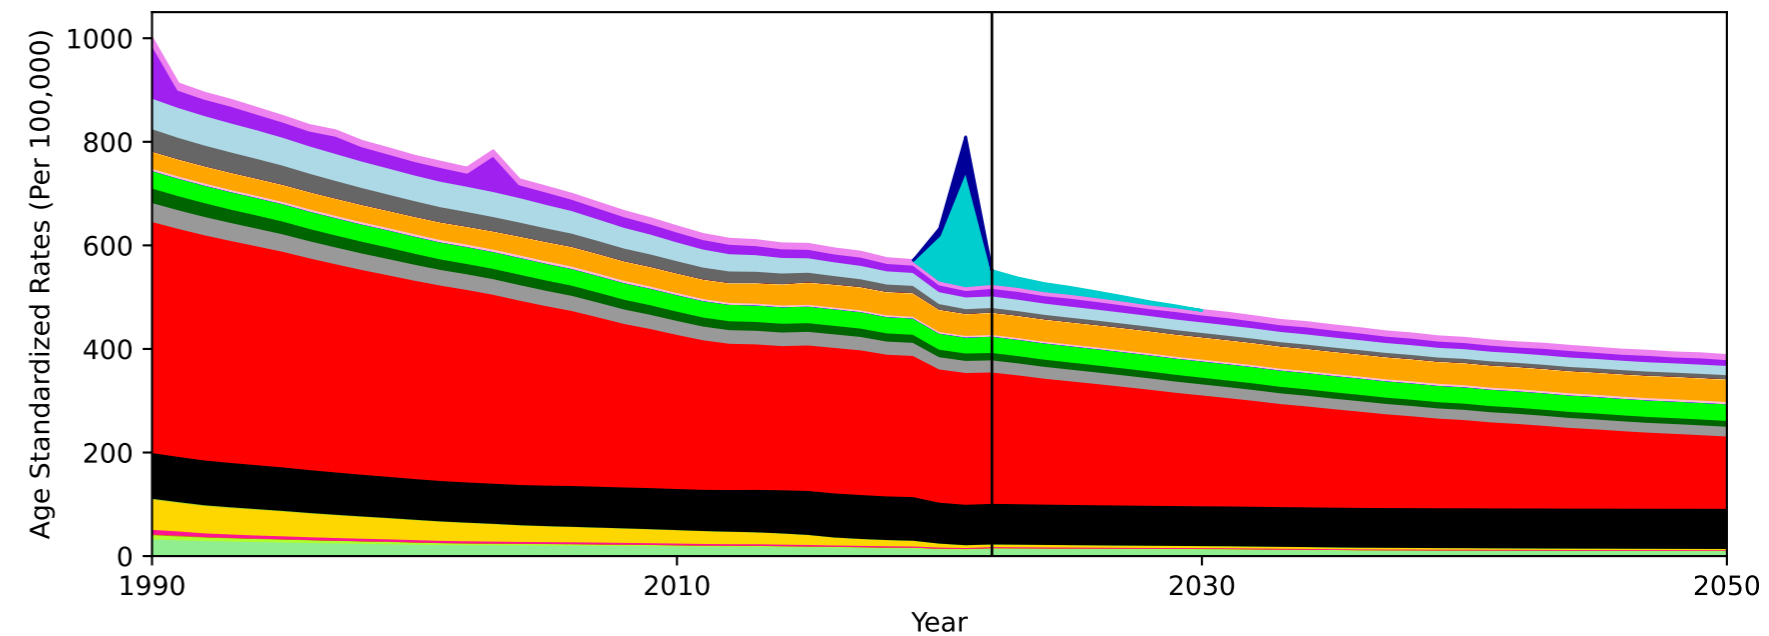

Level 1

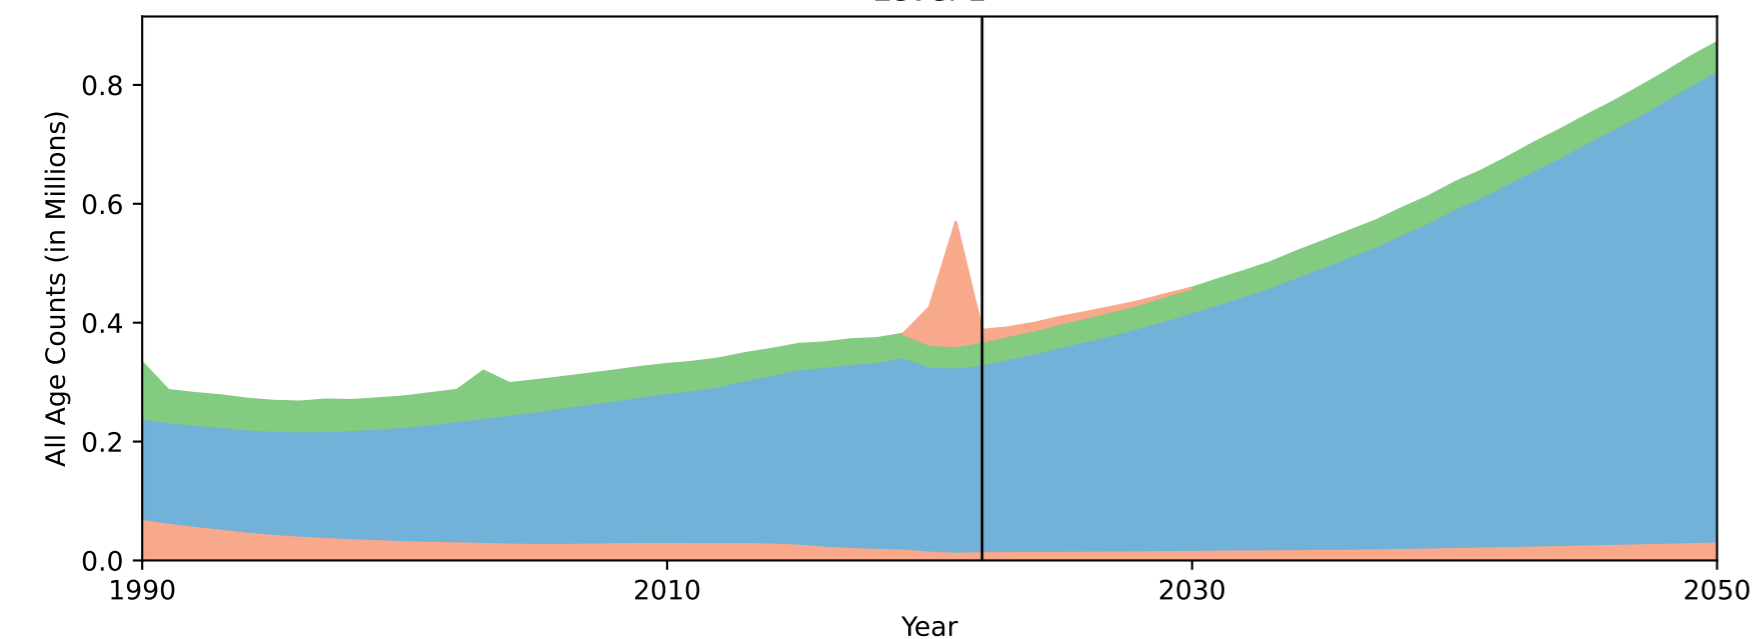

Level 2

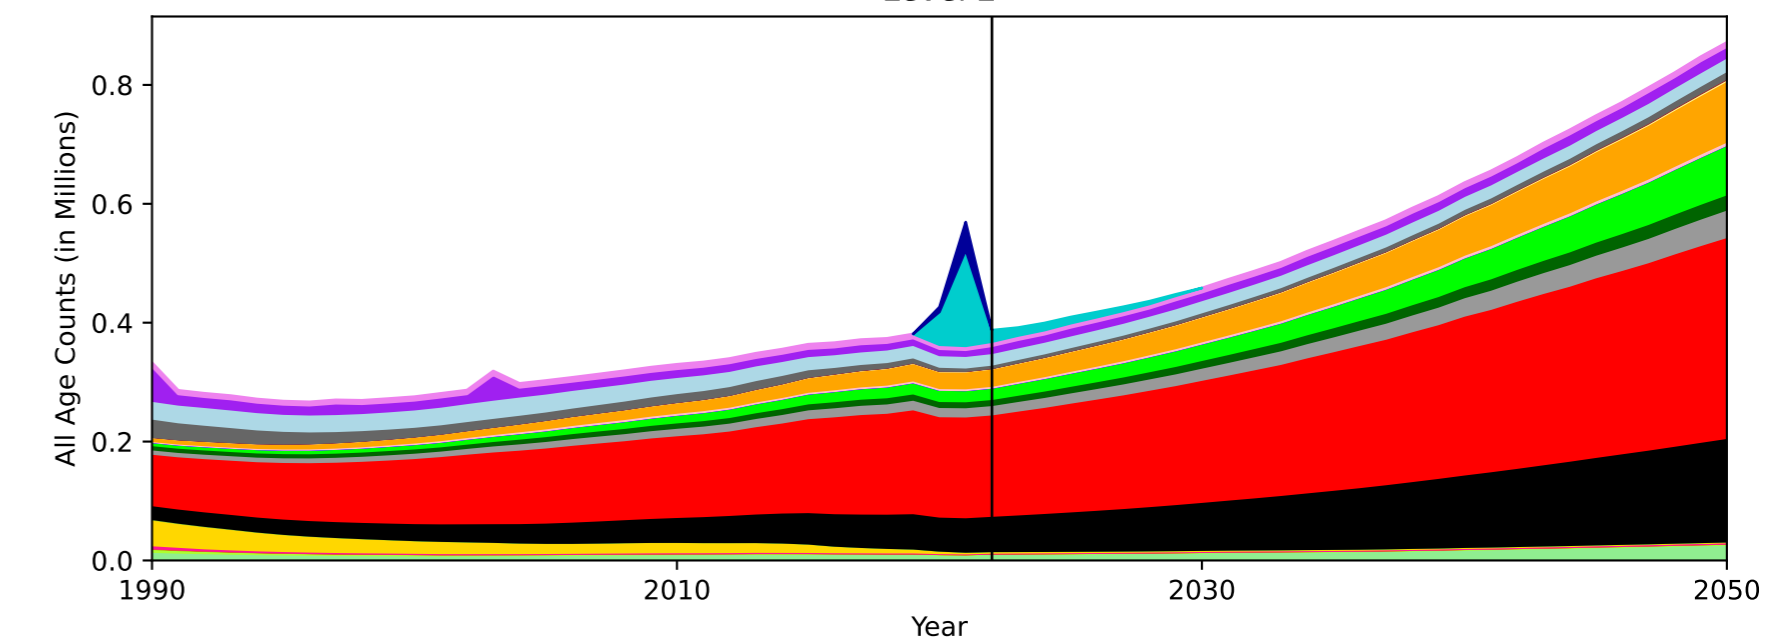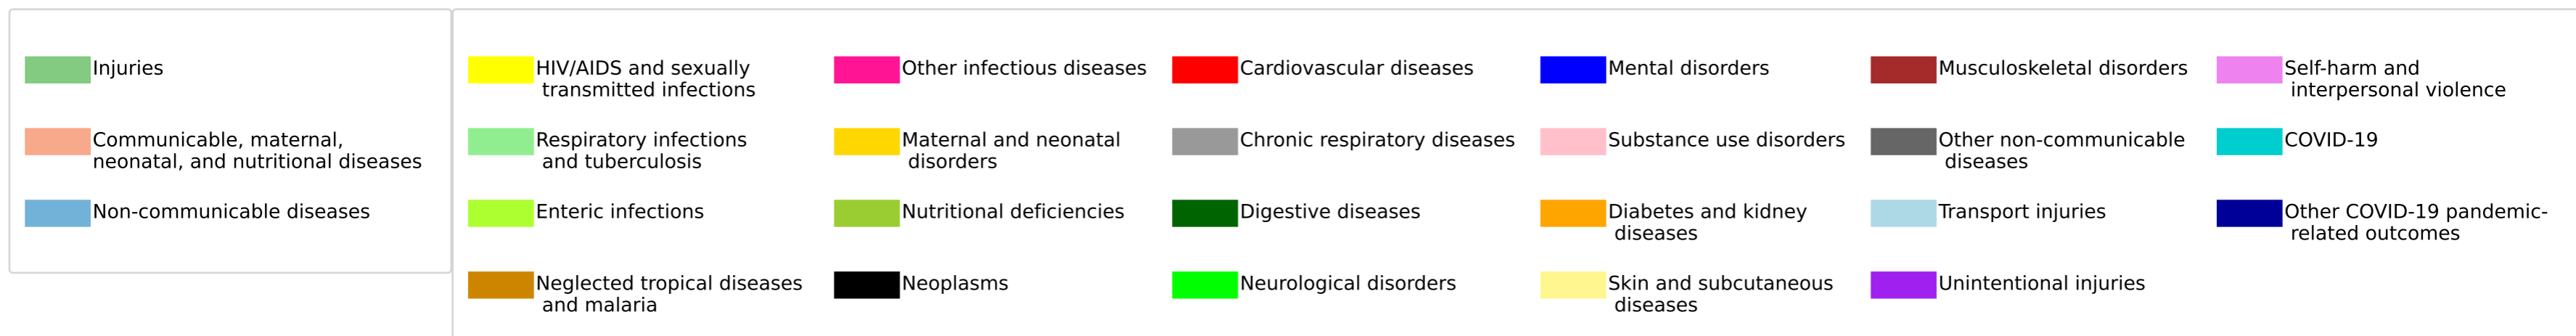

Level 1

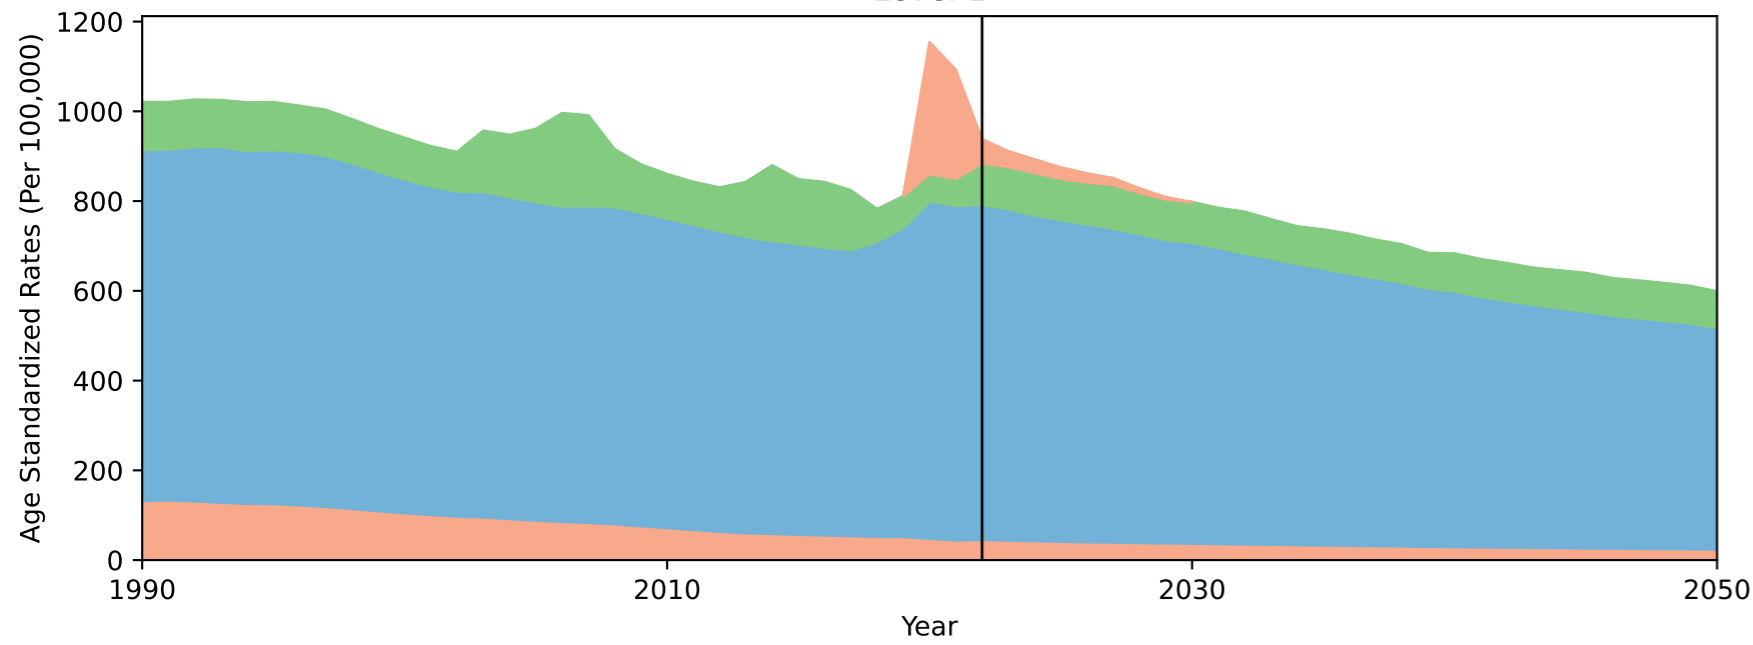

Level 2

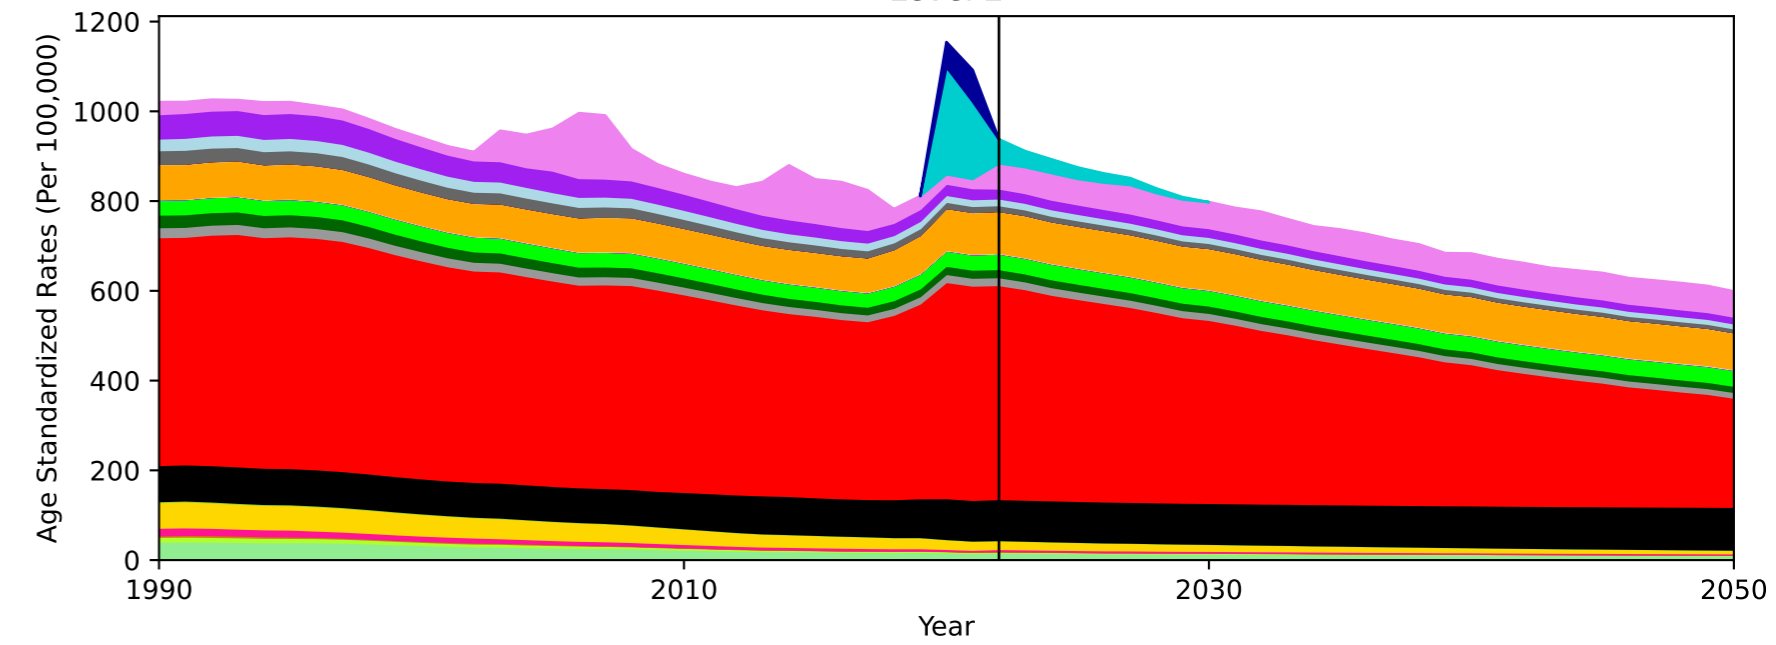

Level 1

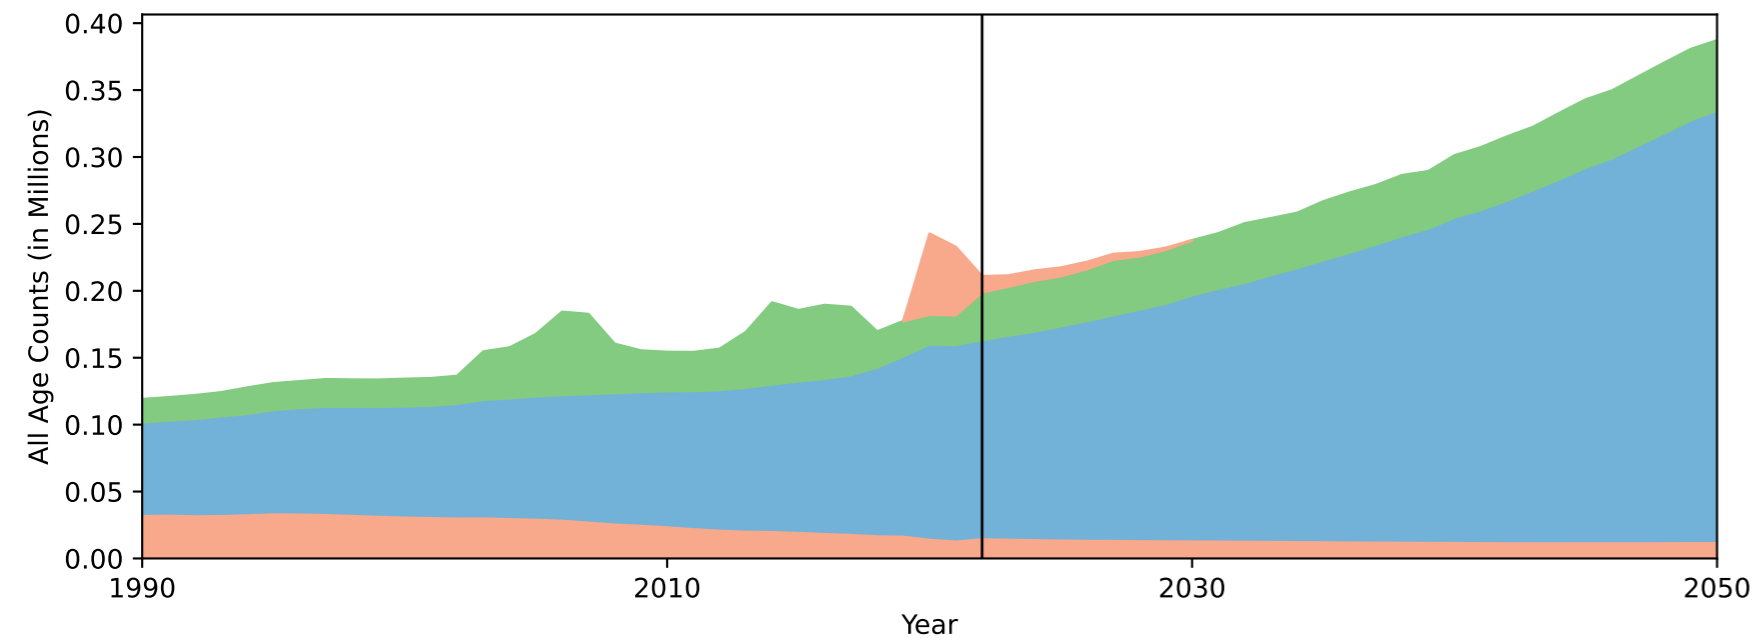

Level 2

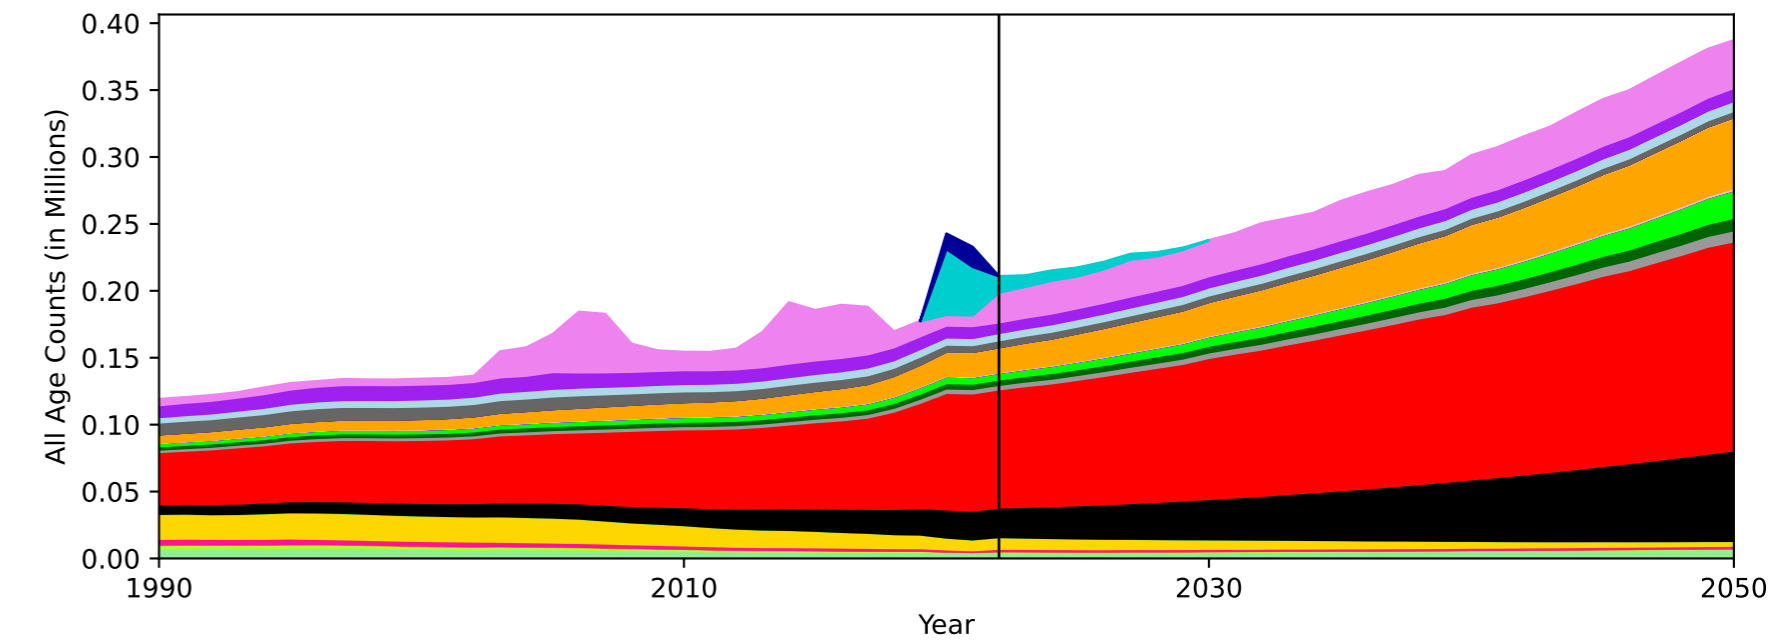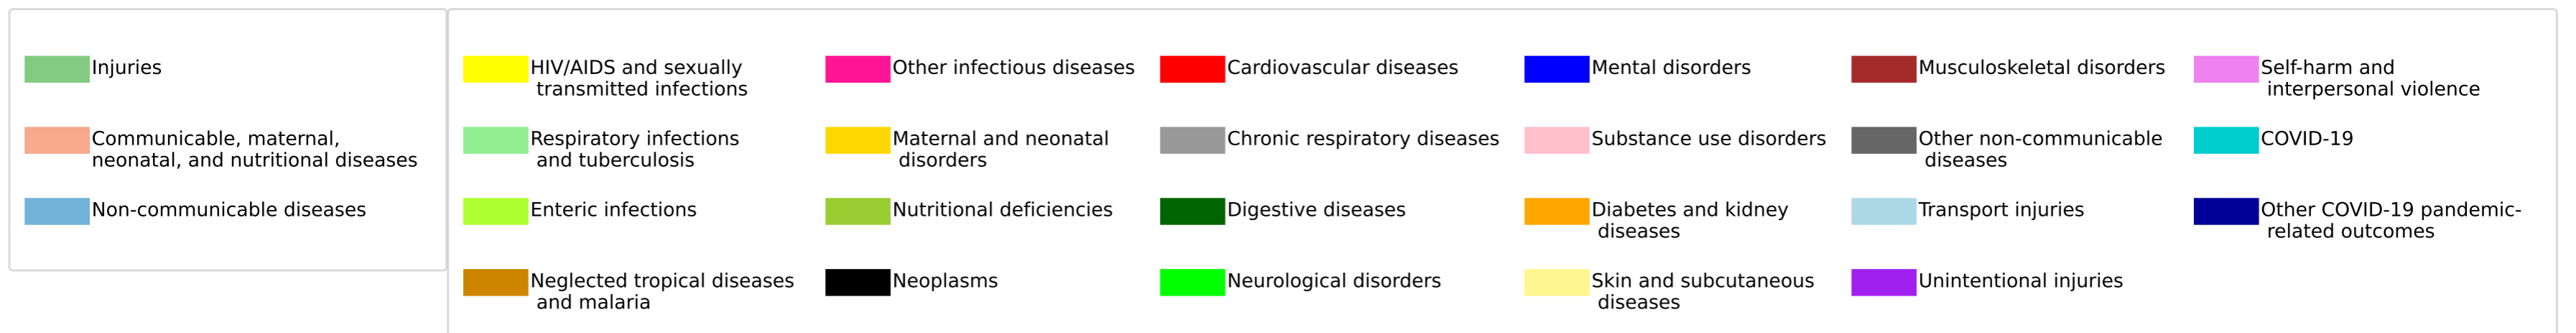

Level 1

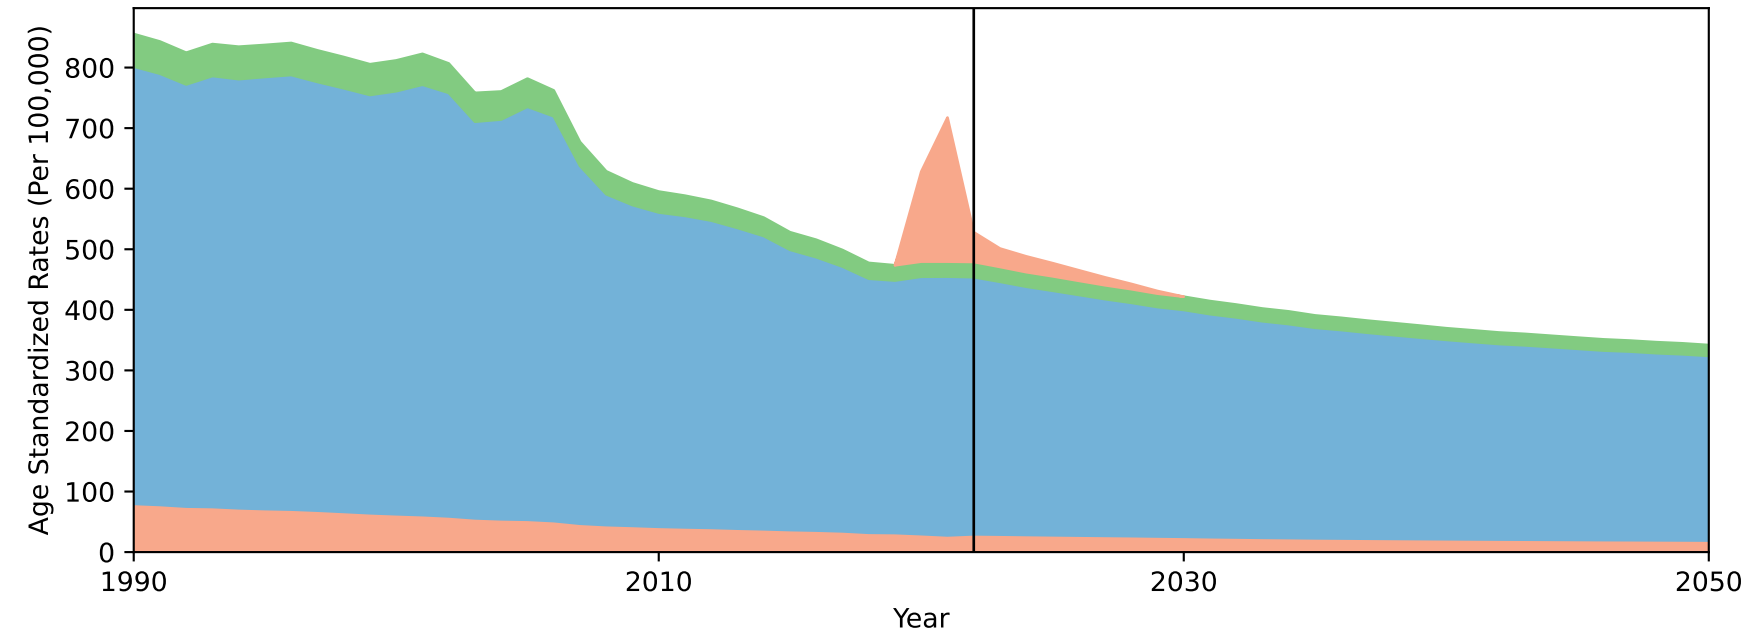

Level 2

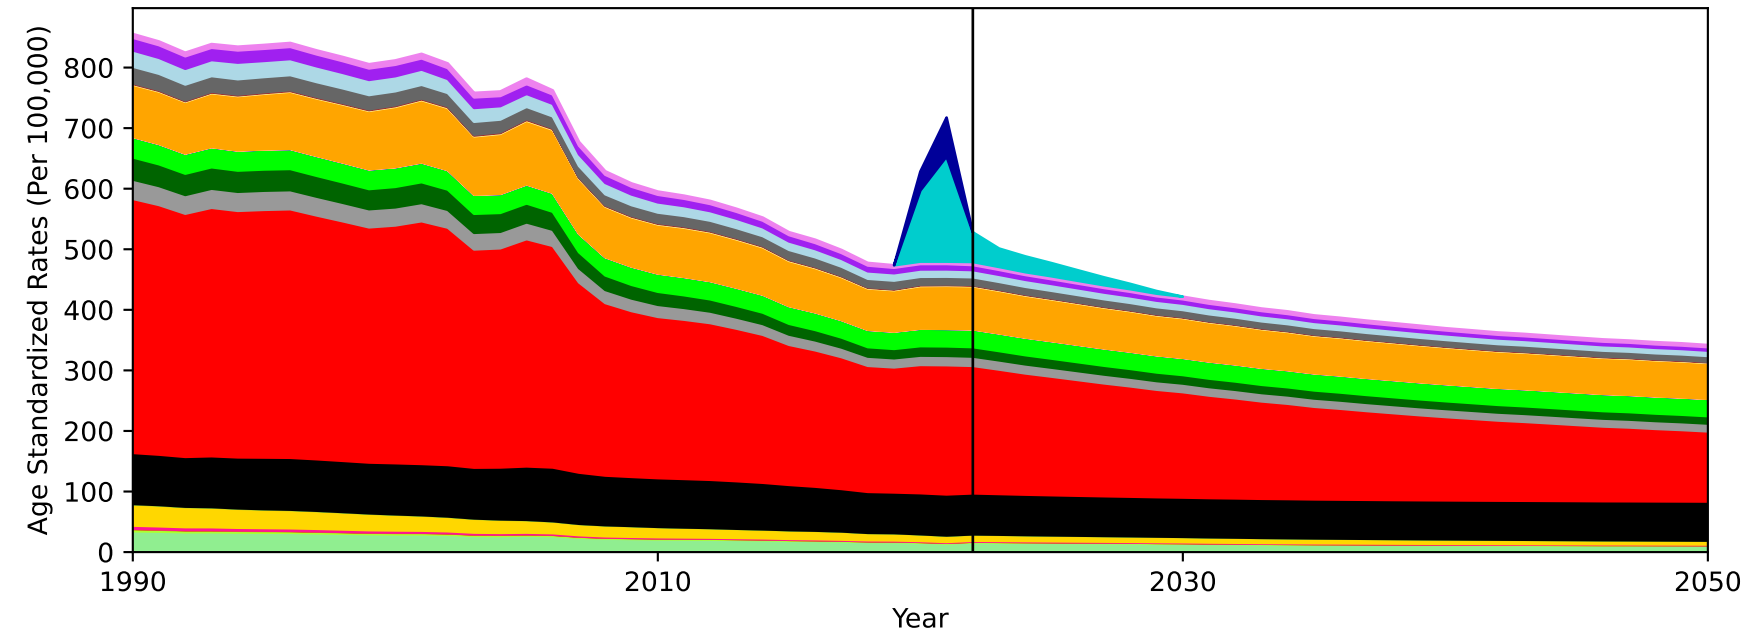

Level 1

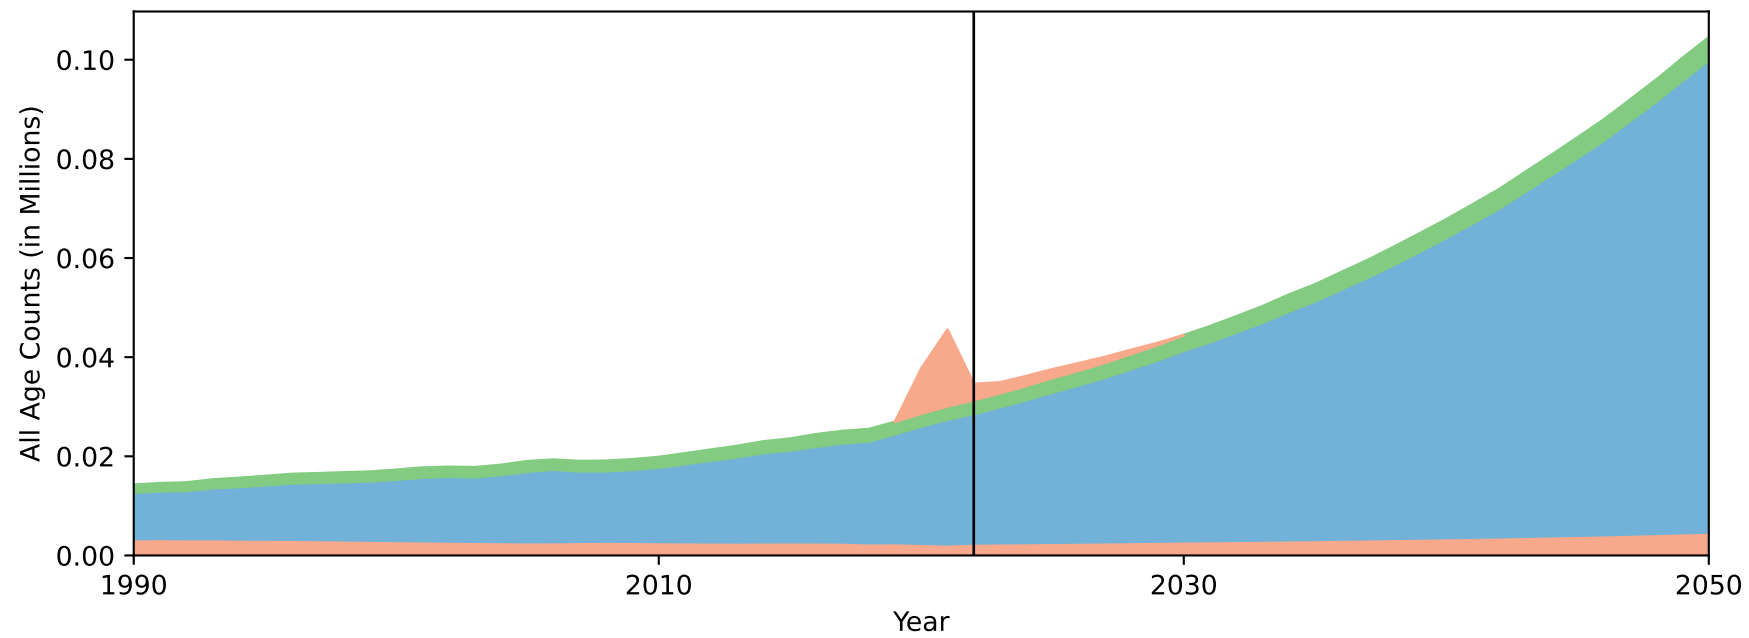

Level 2

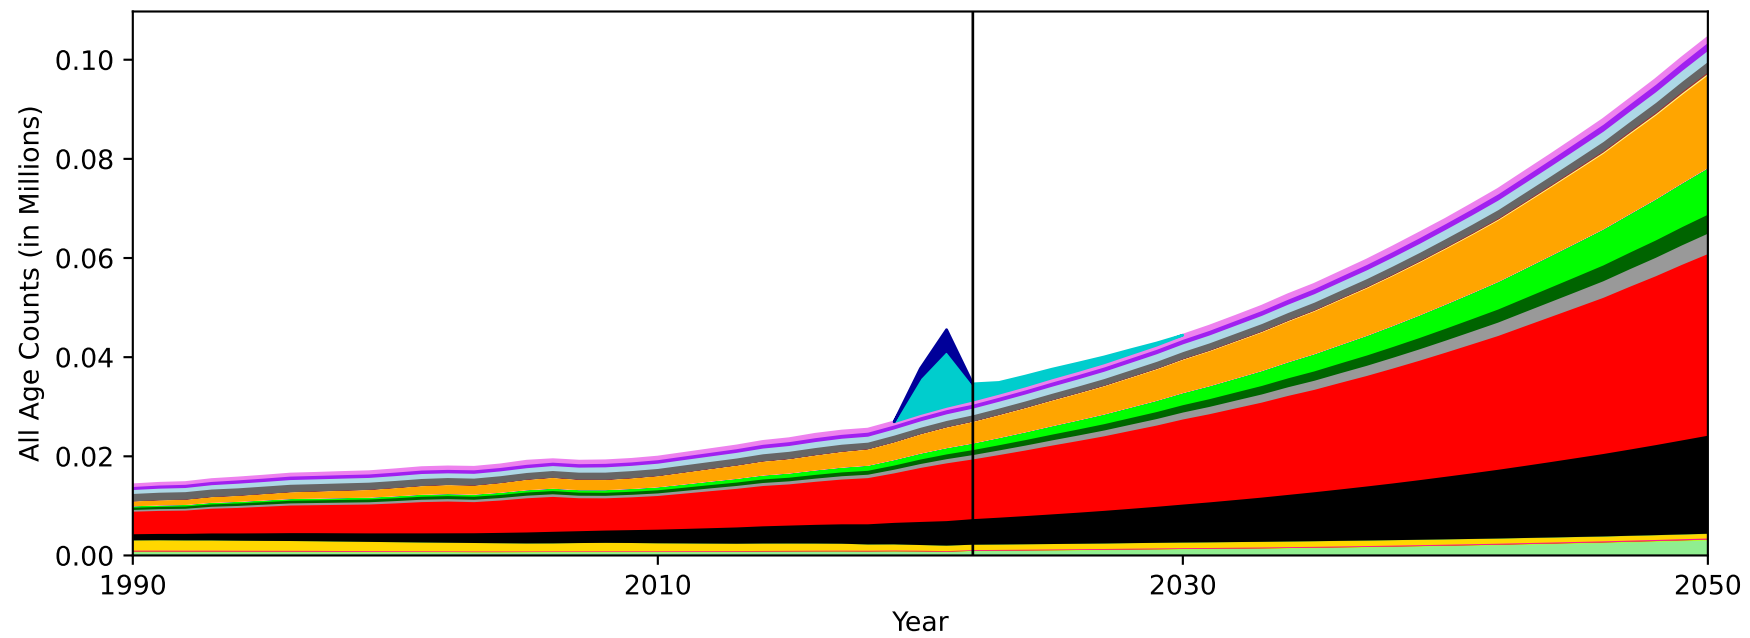

Level 1

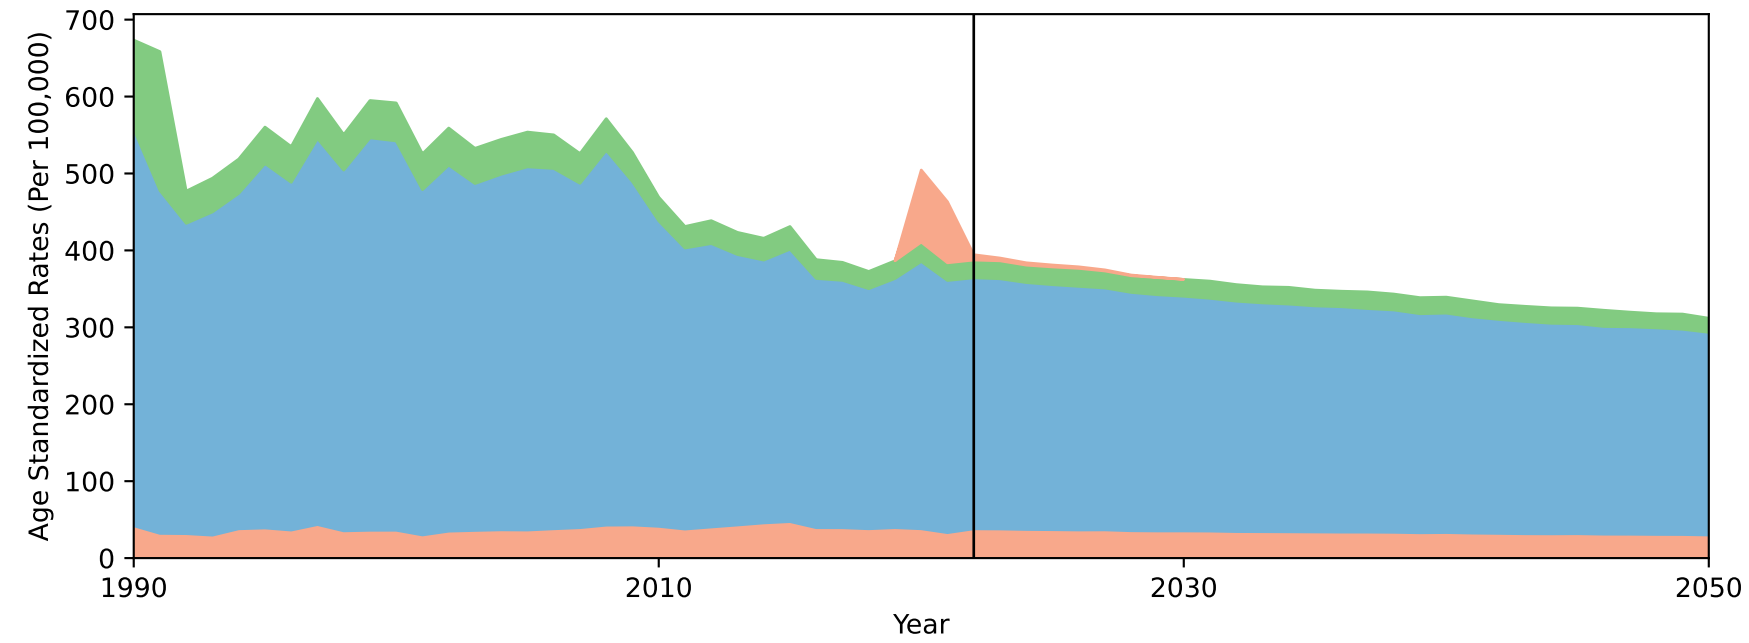

Level 2

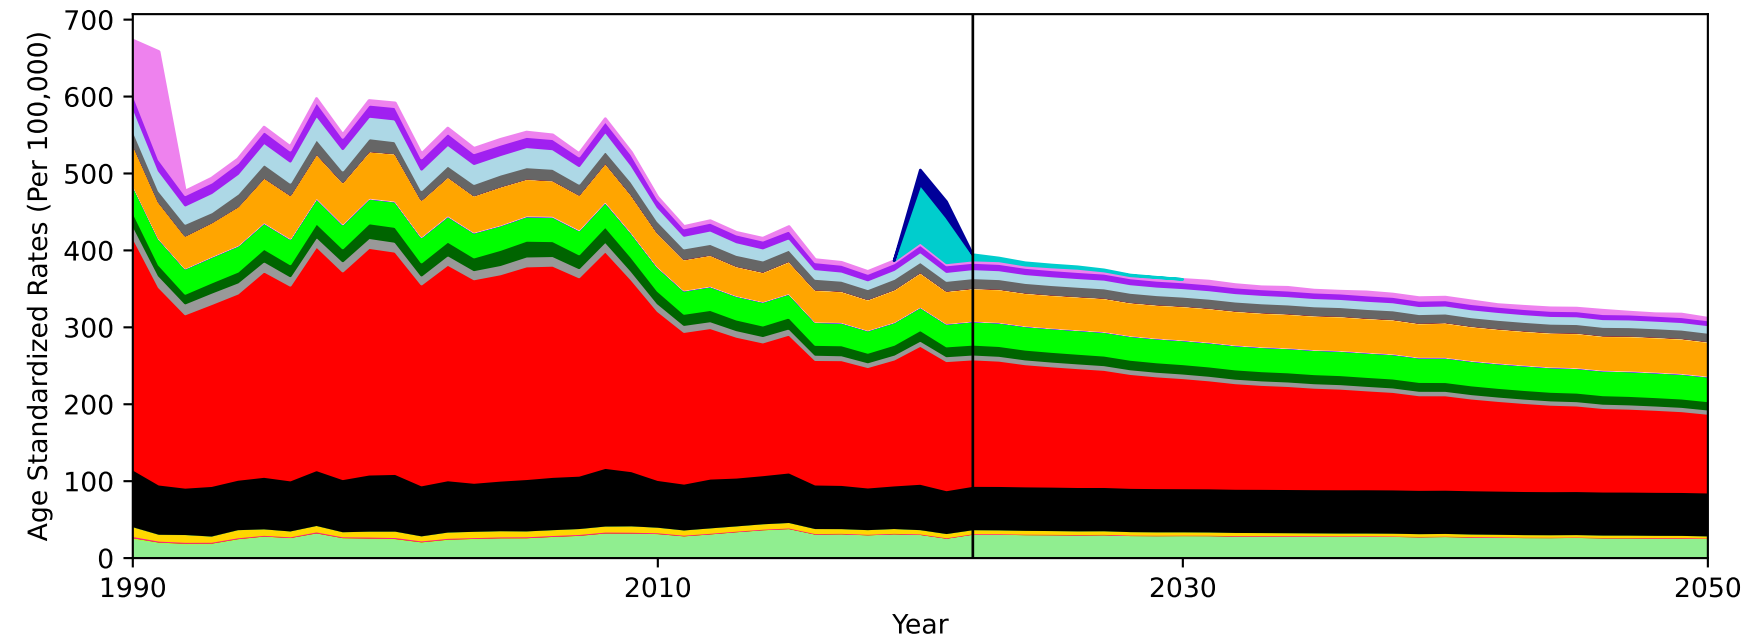

Level 1

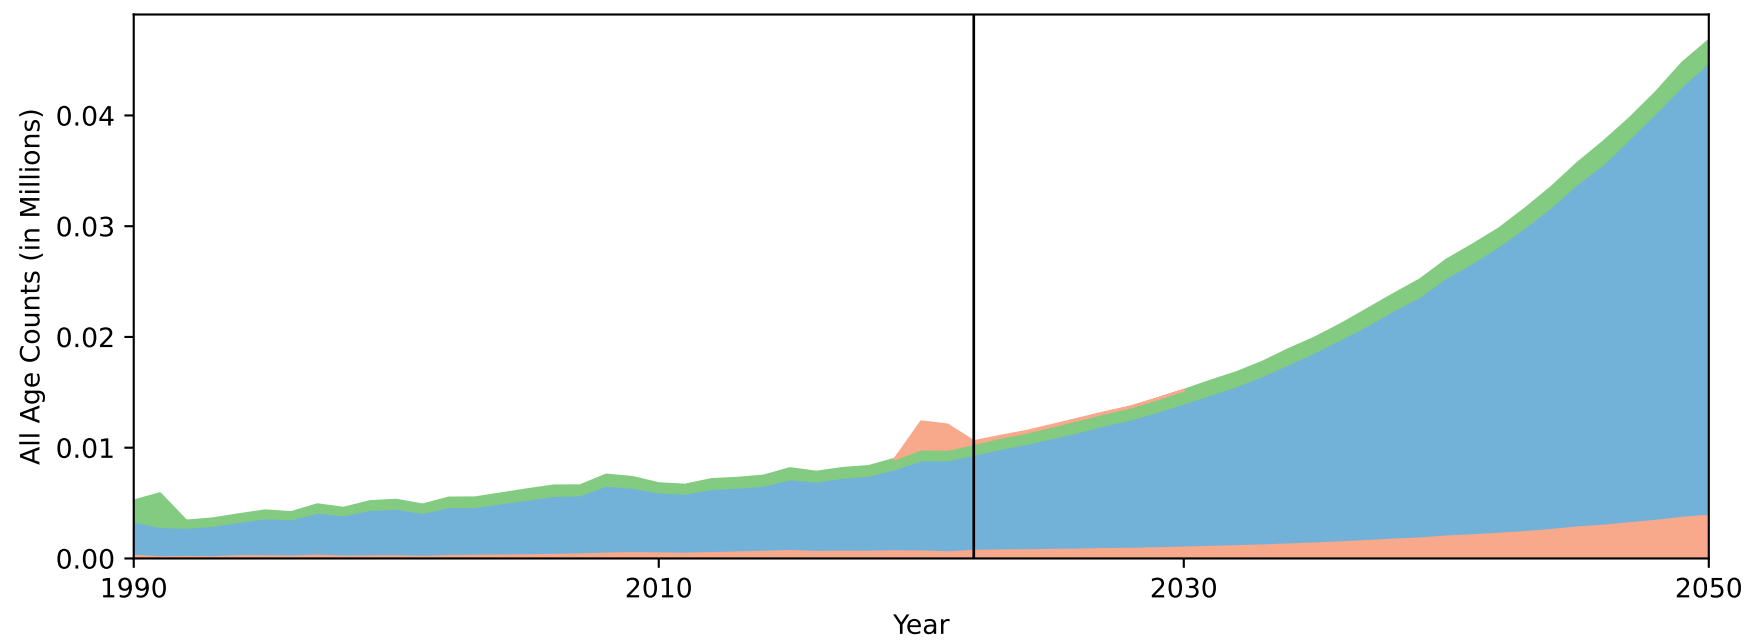

Level 2

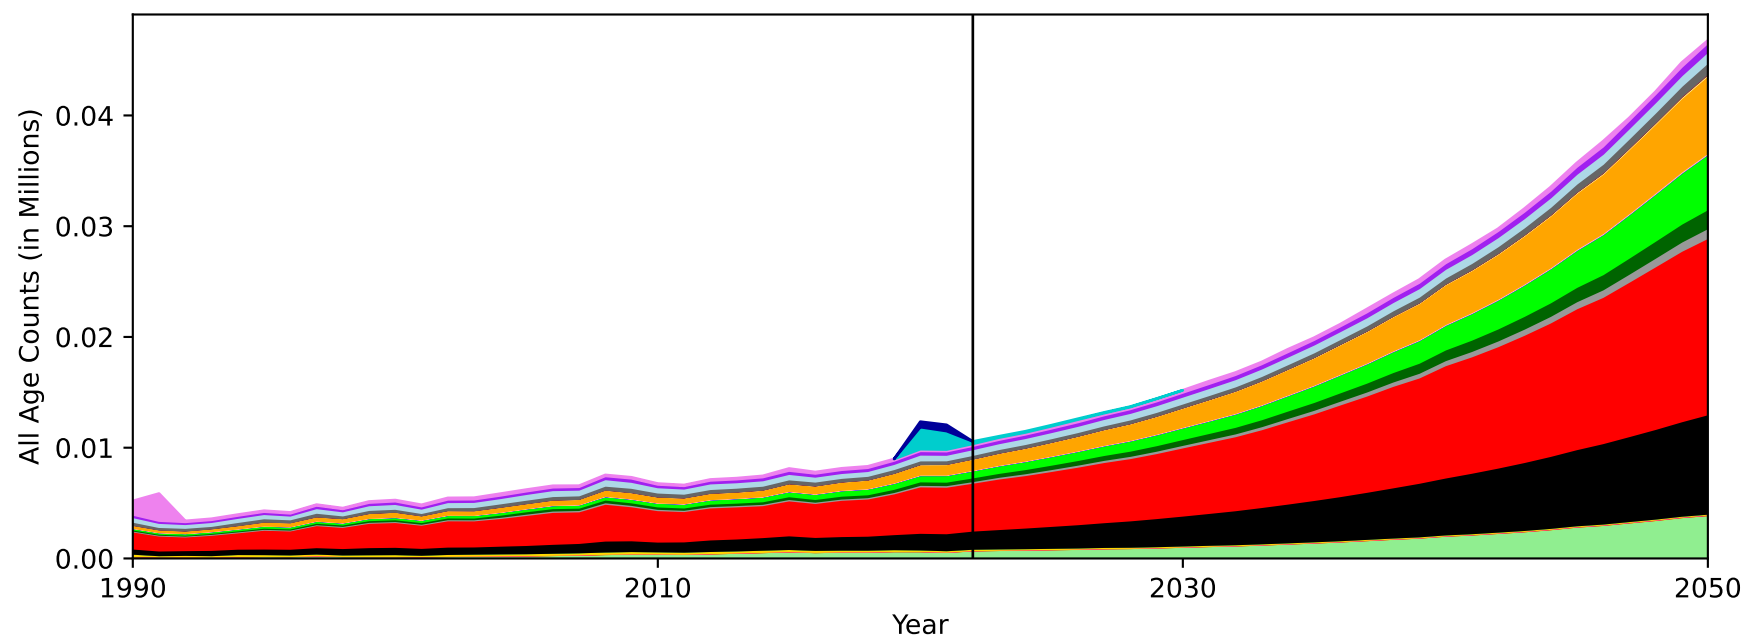



# Lebanon

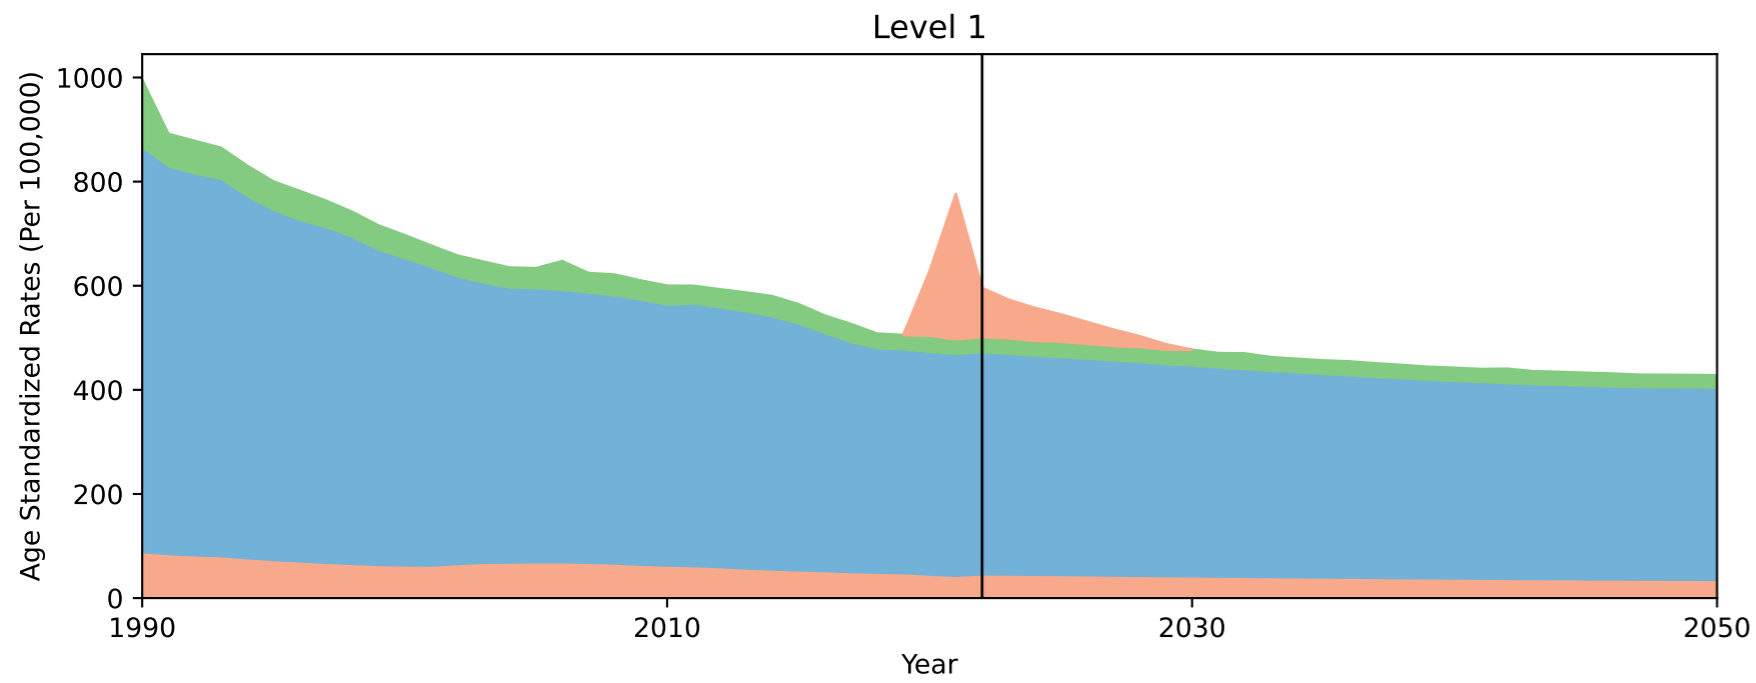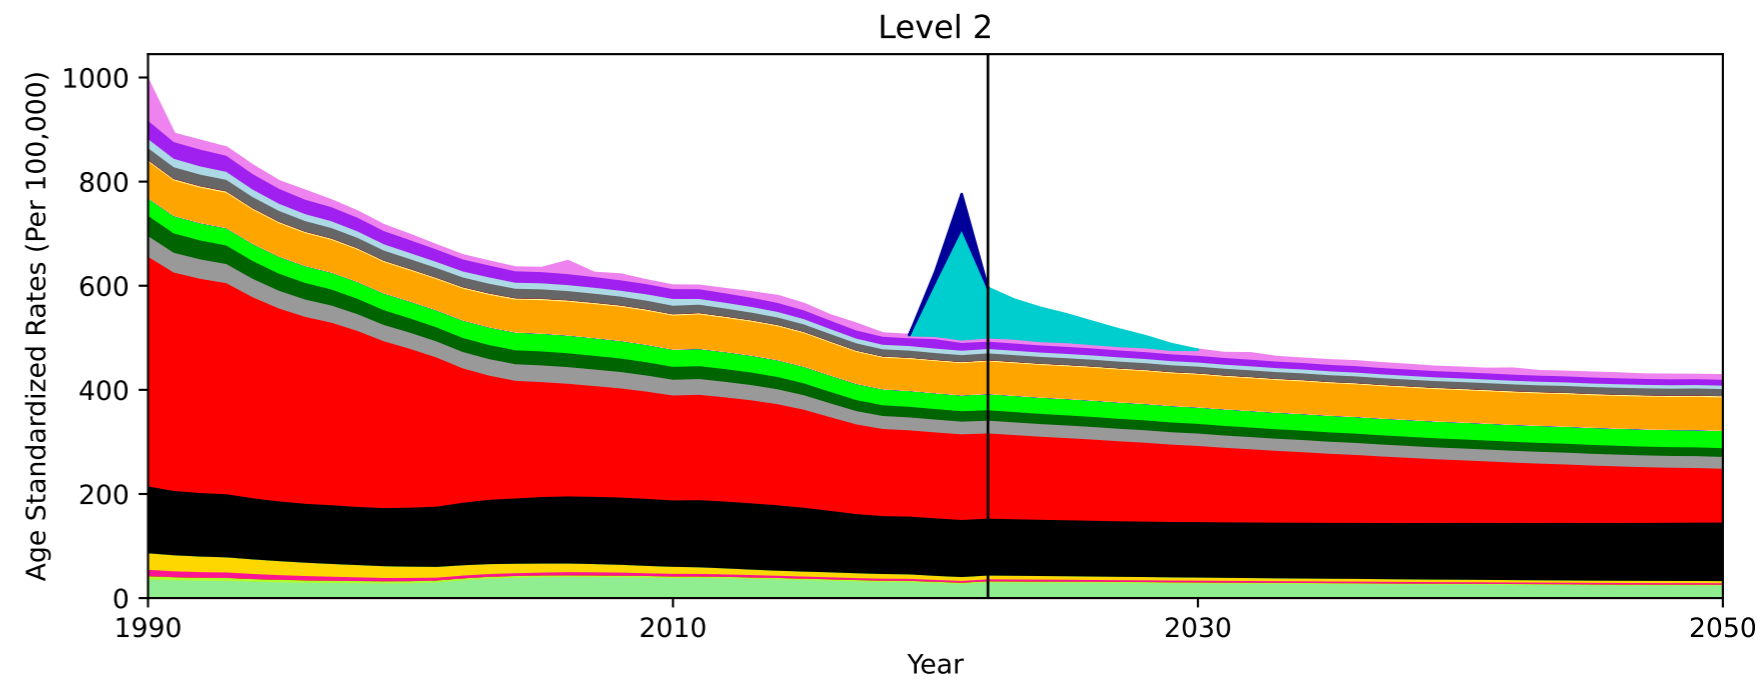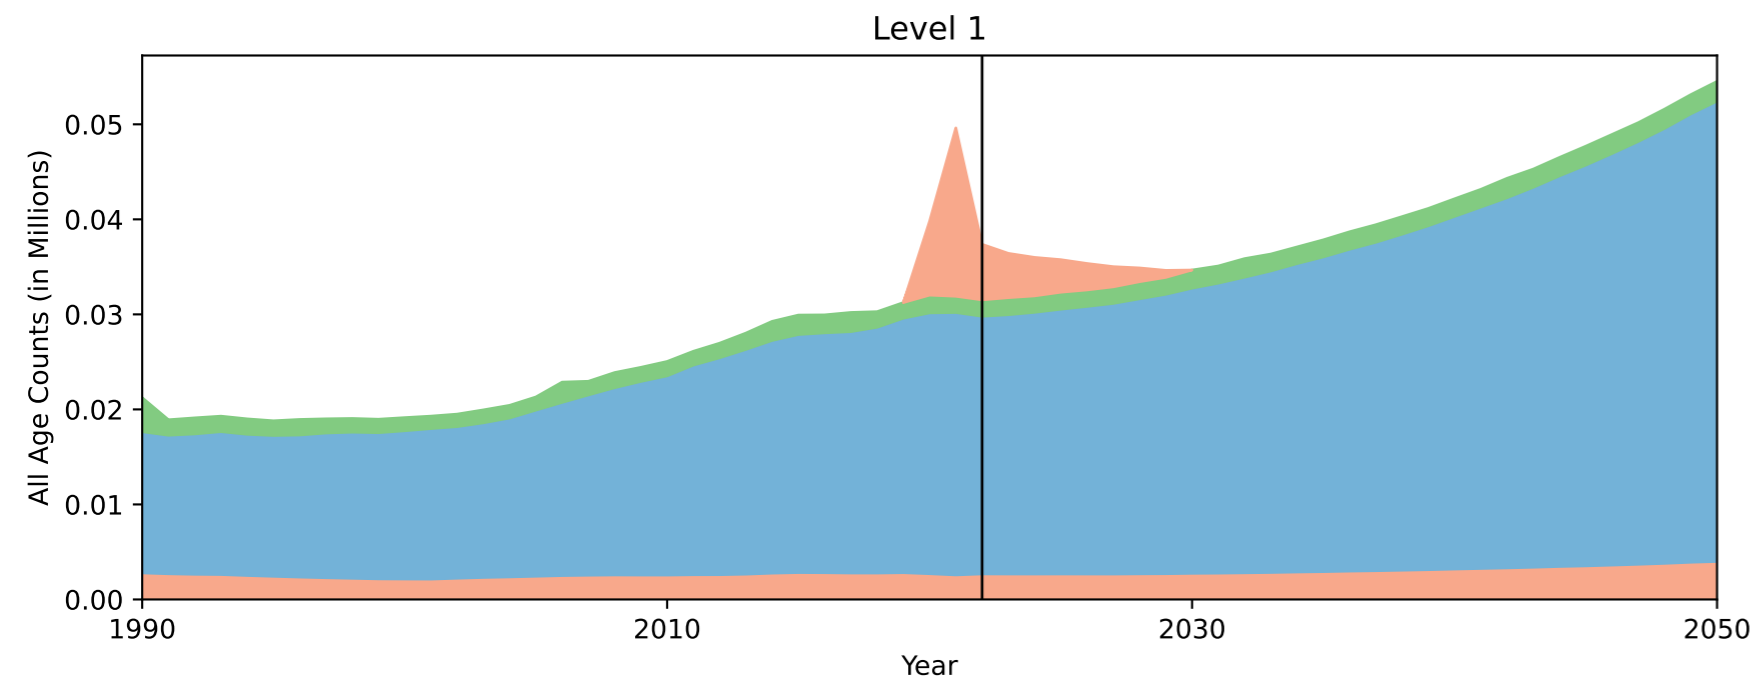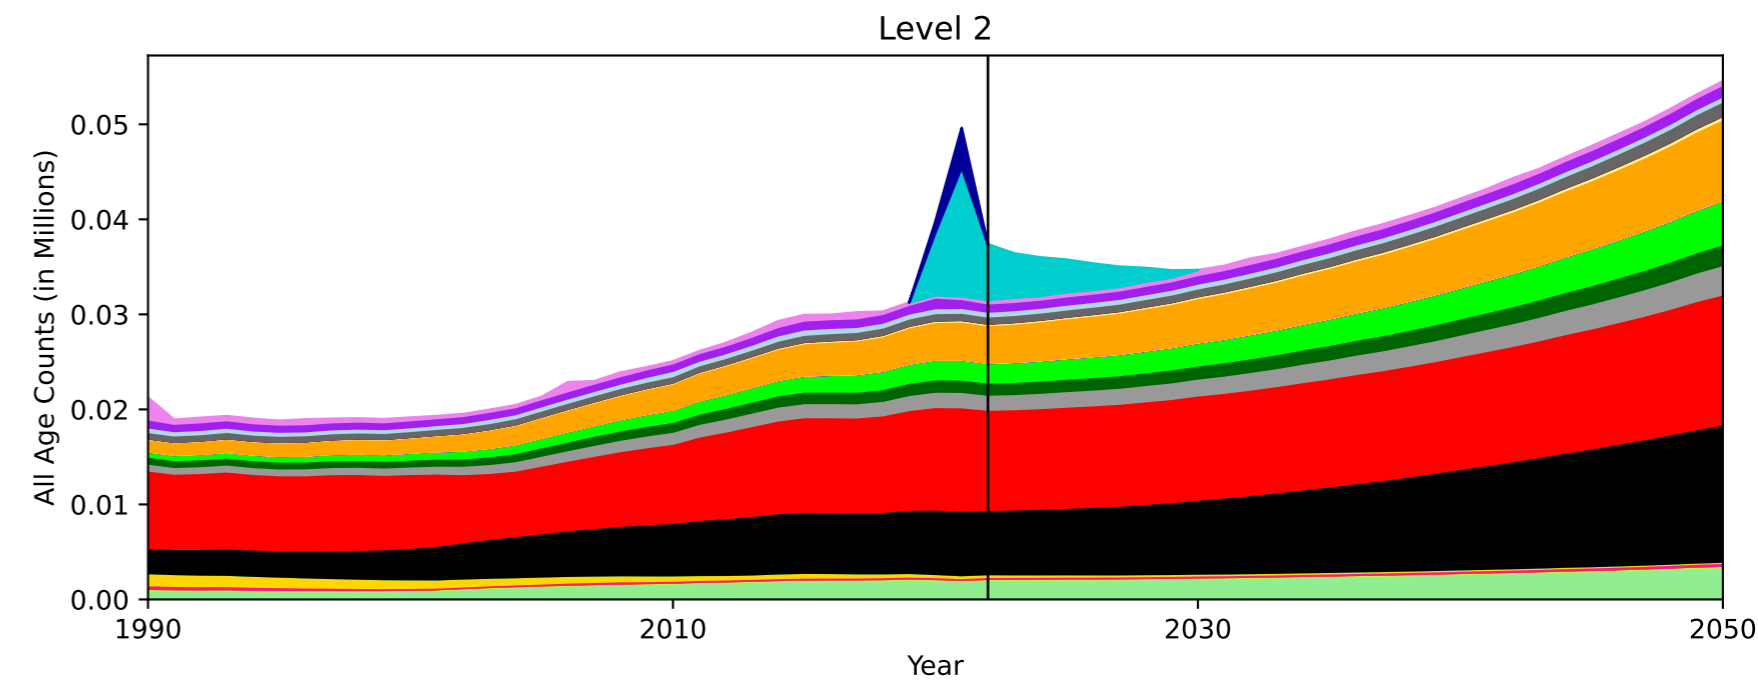

# Libya

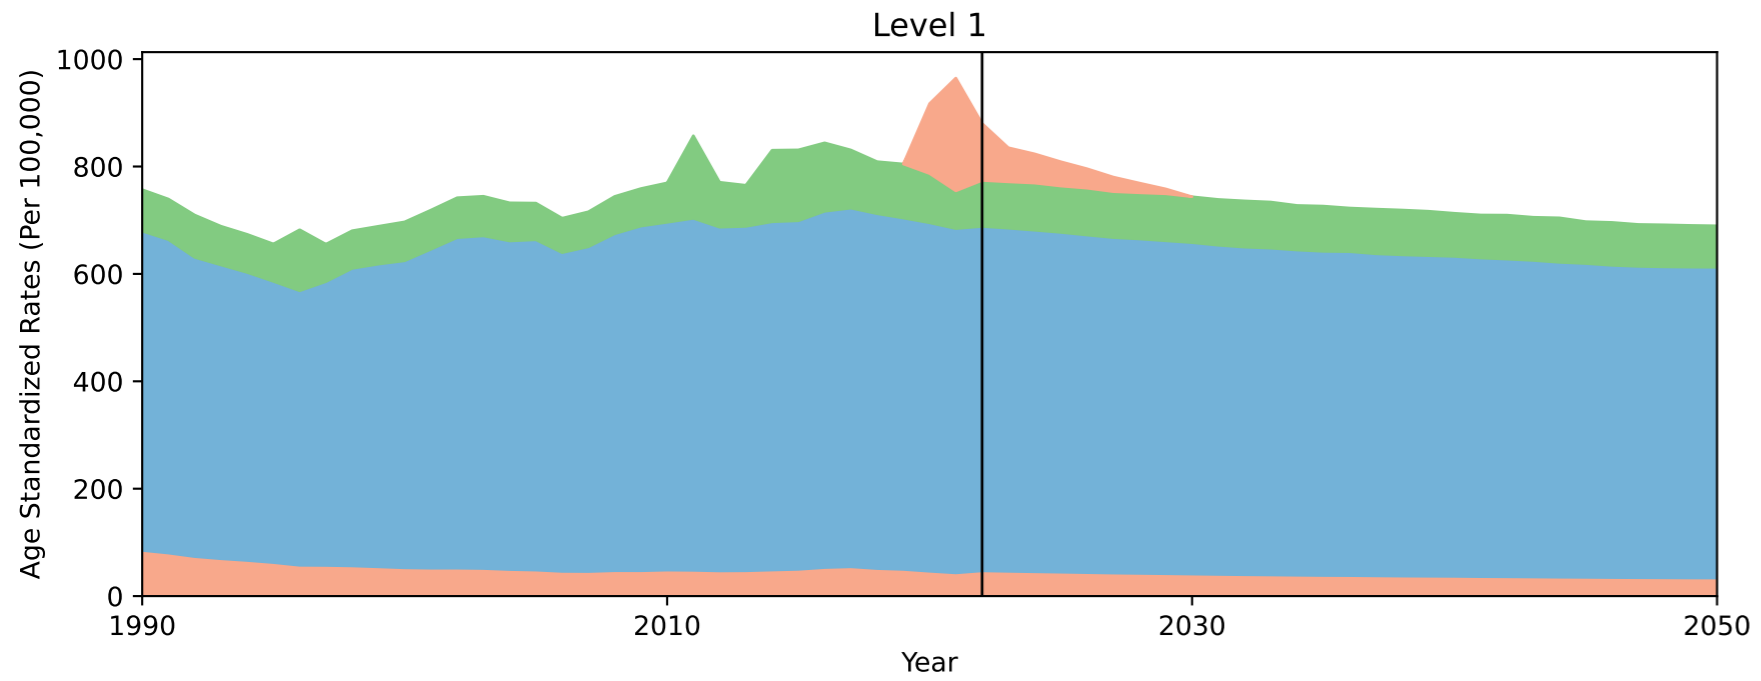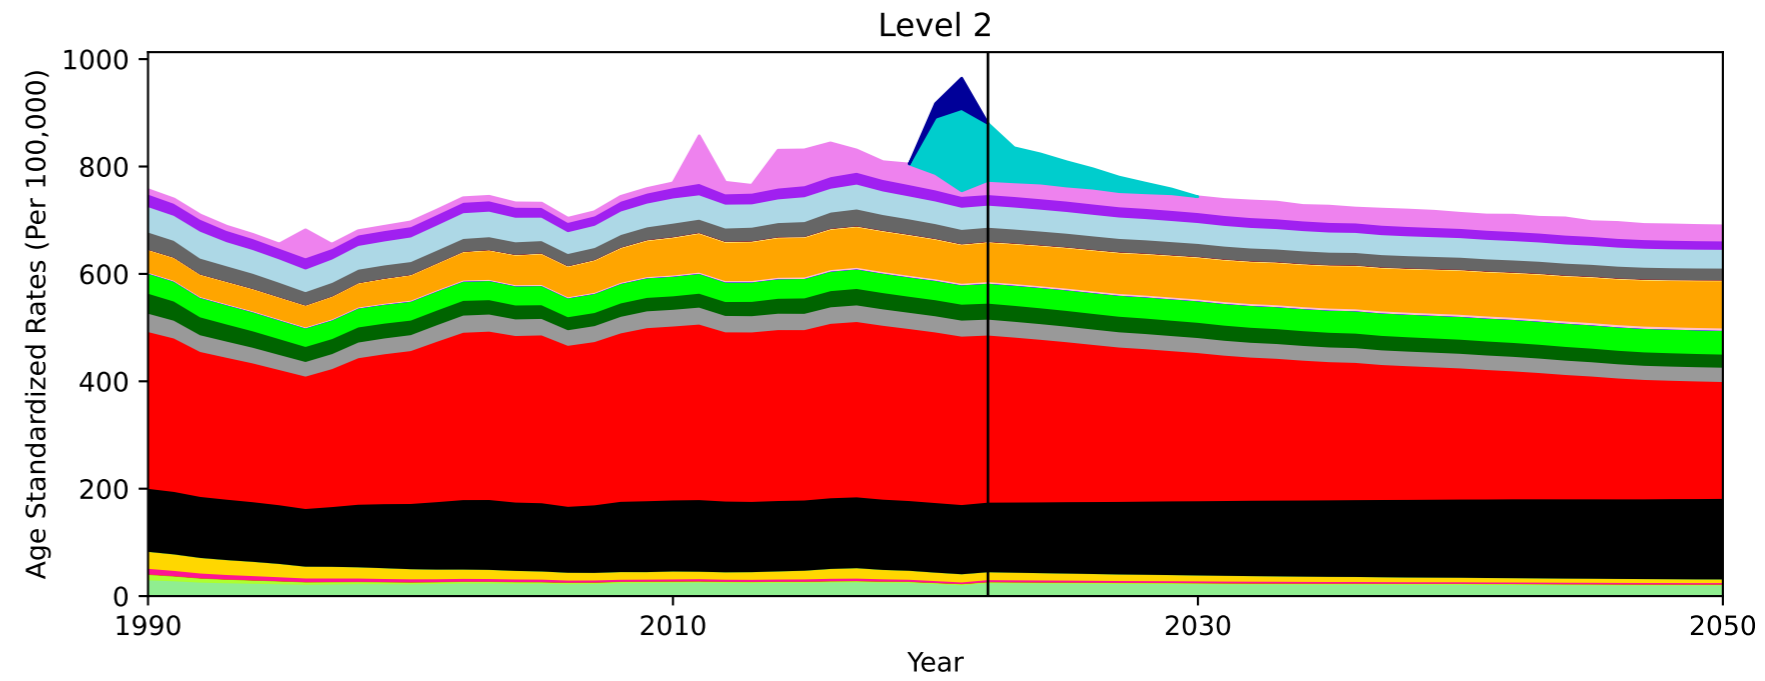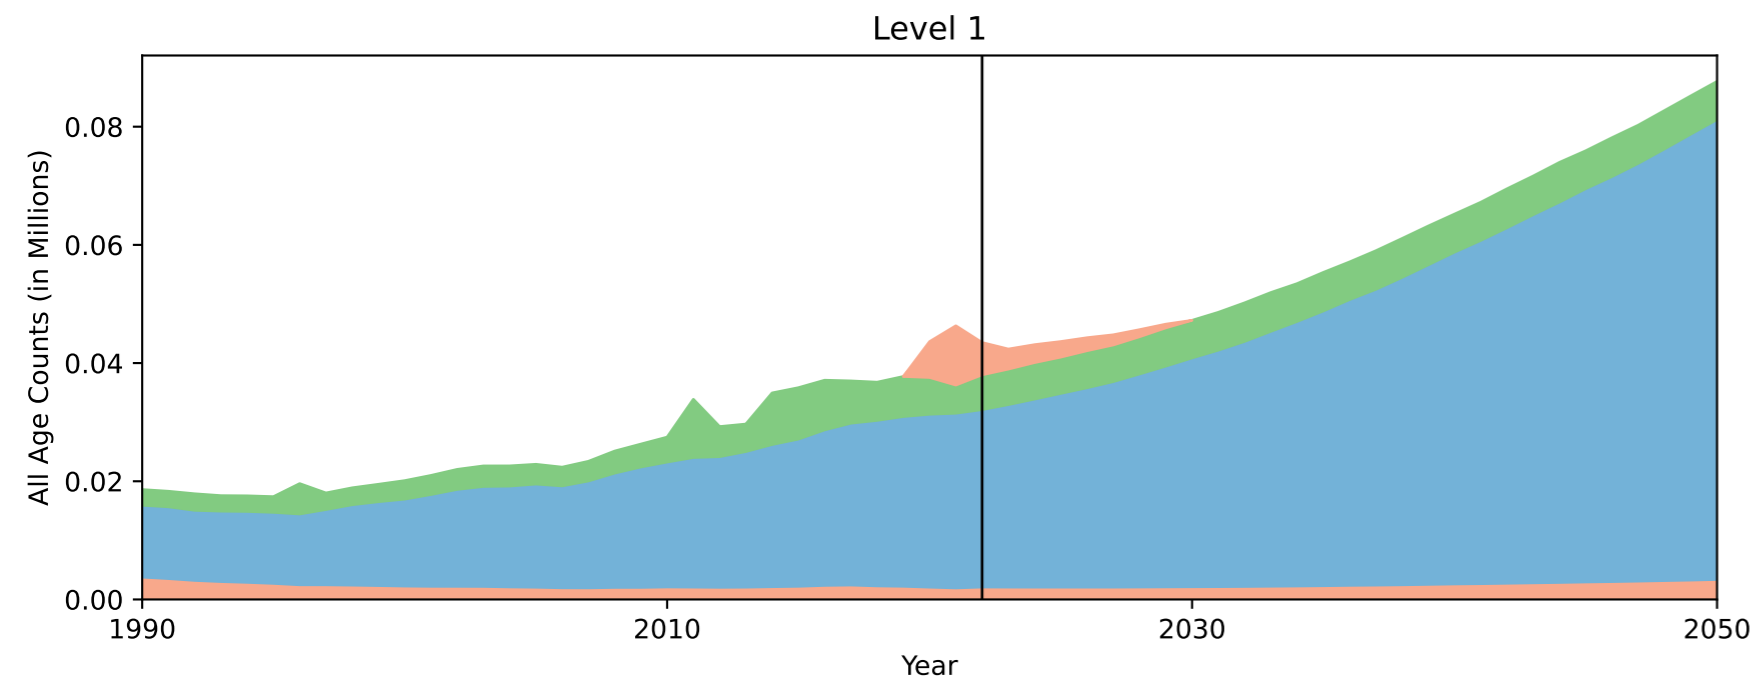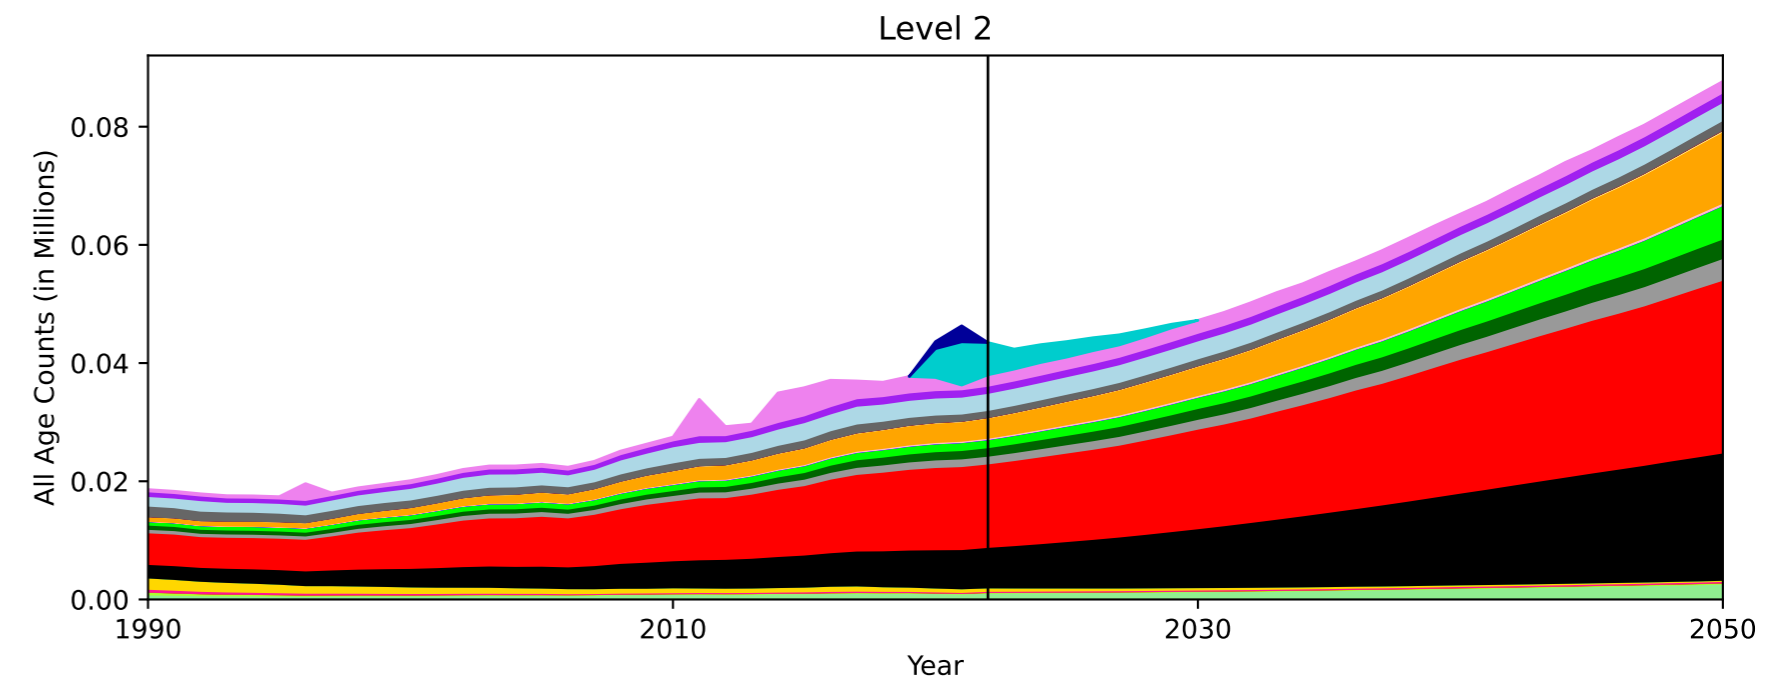

# Morocco

Level 1

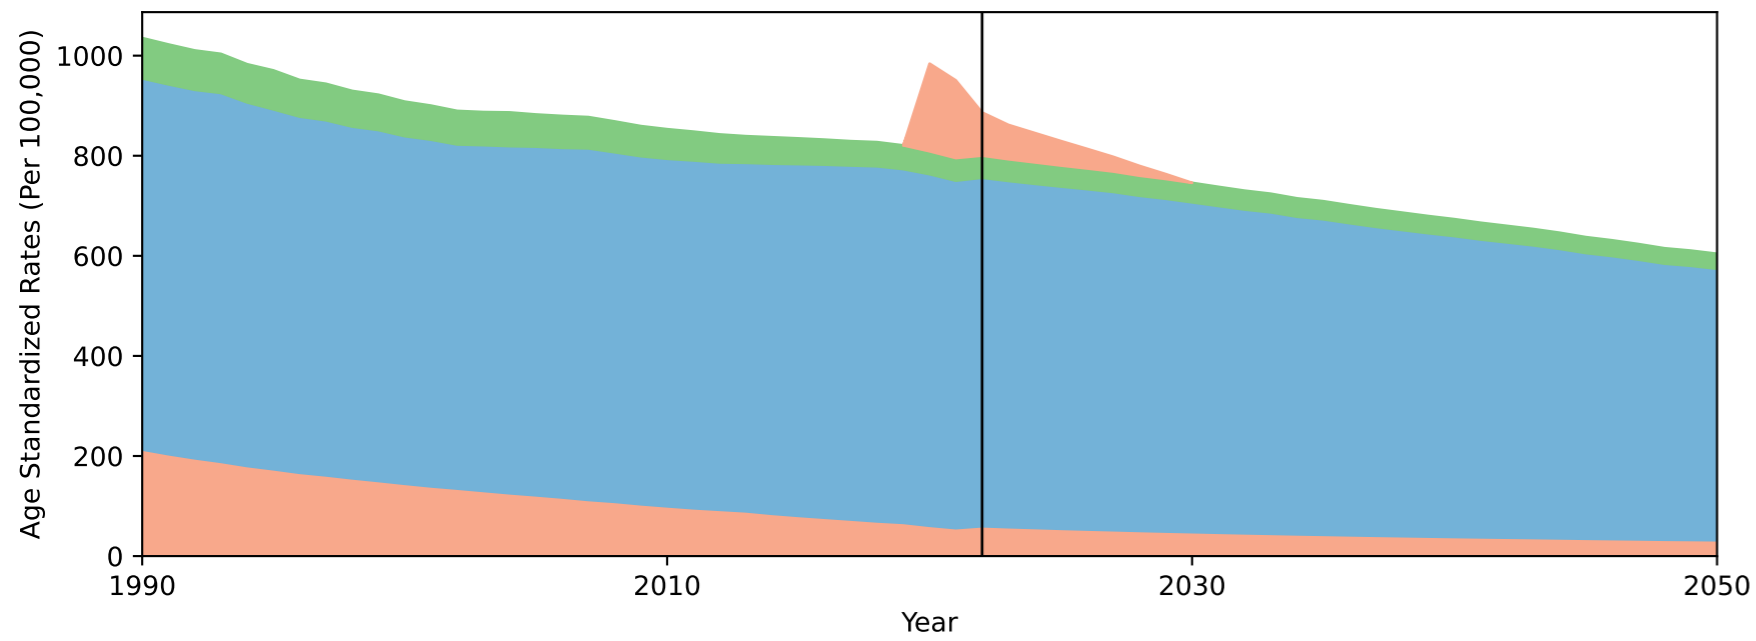

Level 2

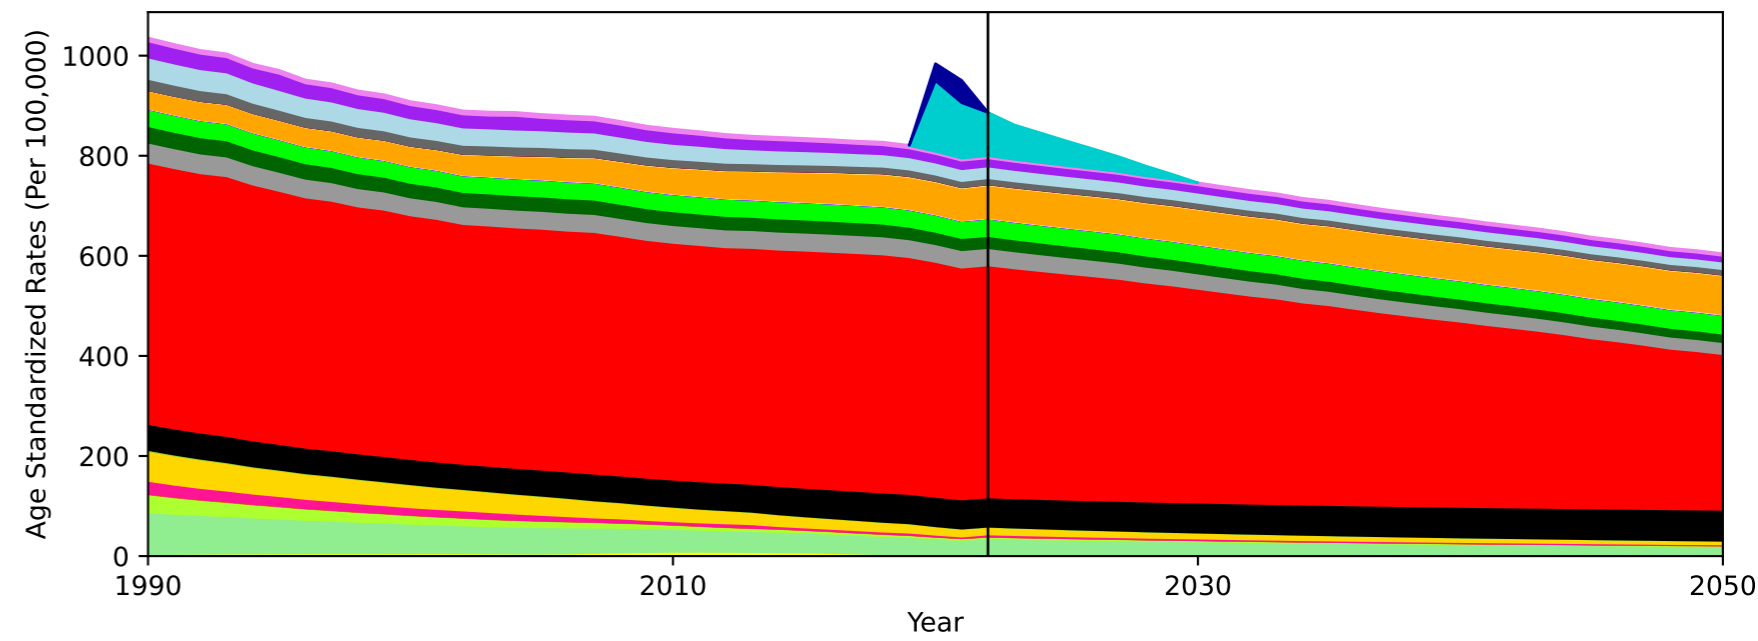

Level 1

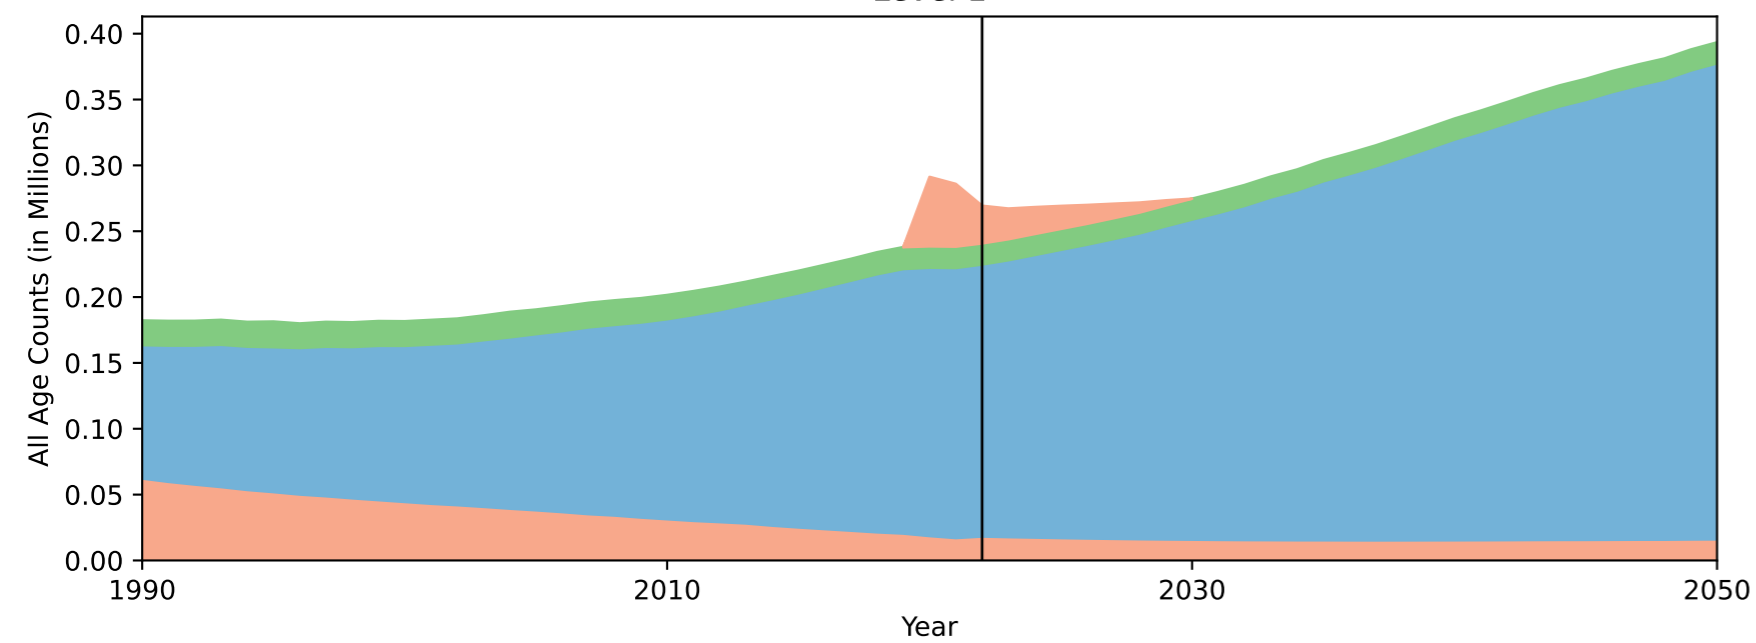

Level 2

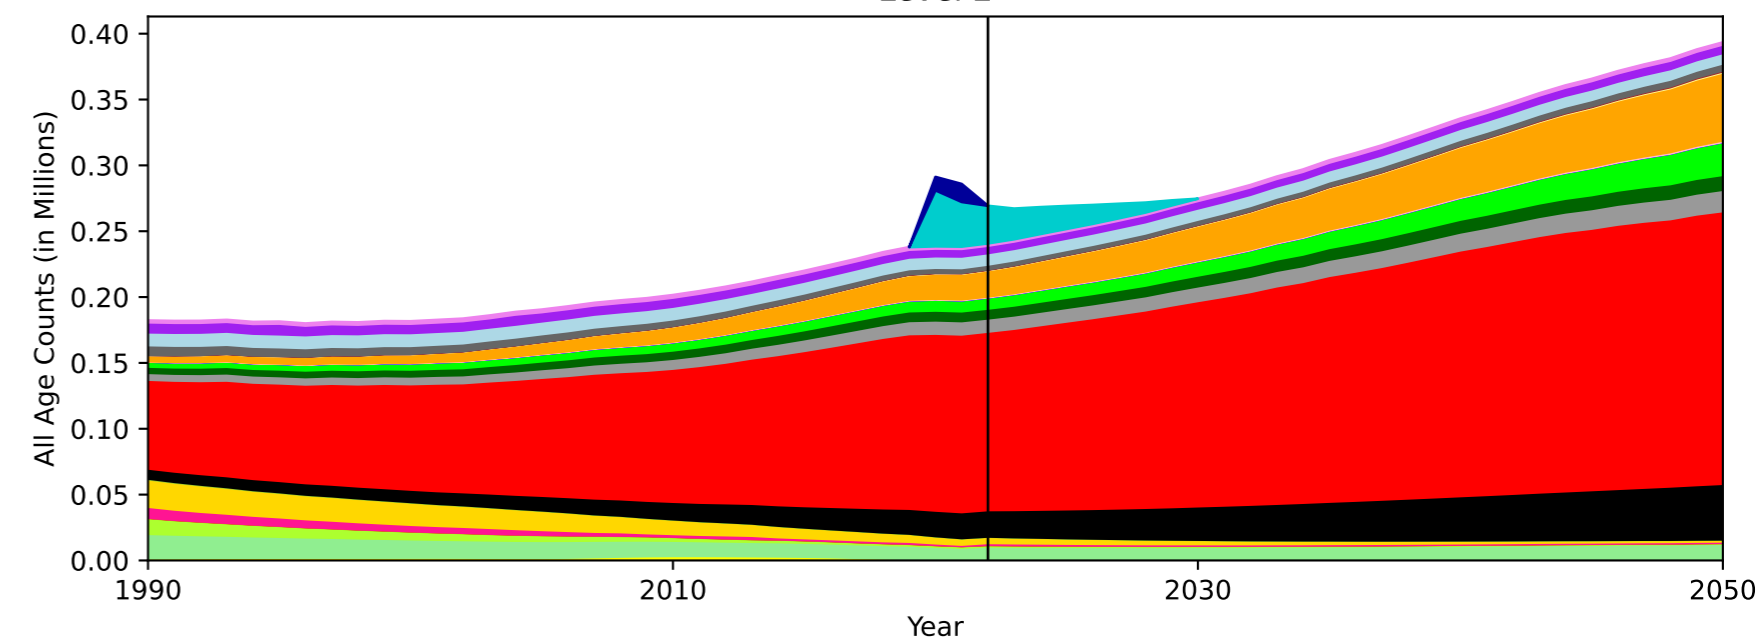

# Oman

Level 1

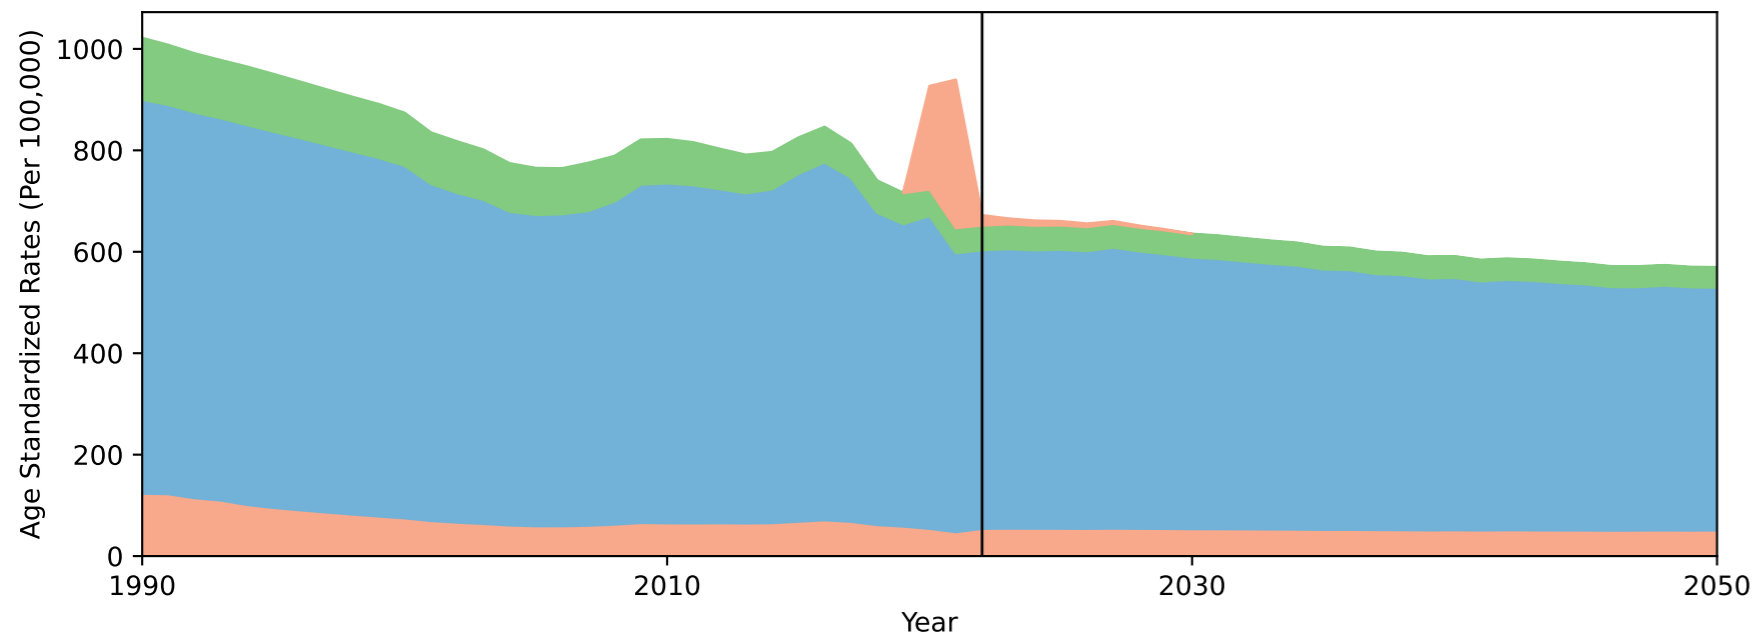

Level 2

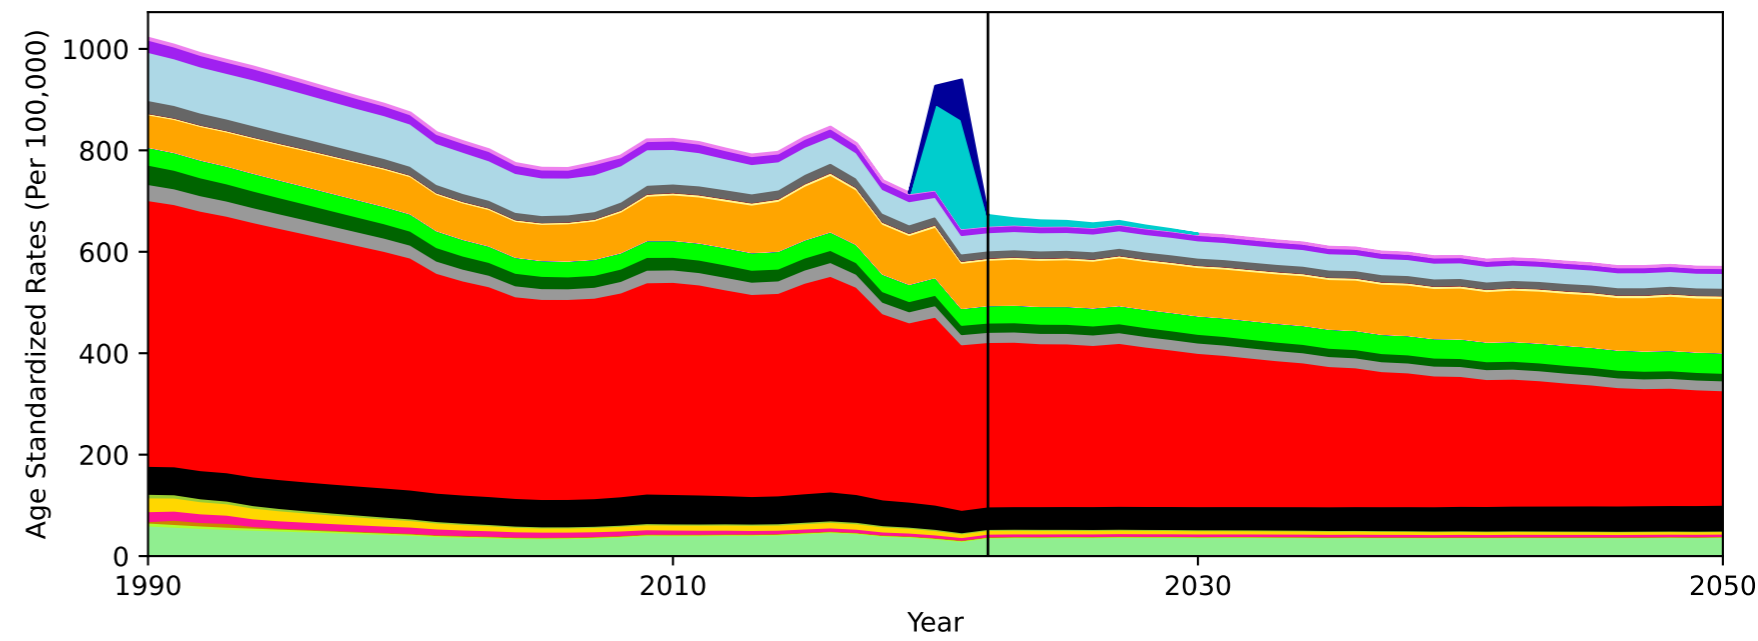

Level 1

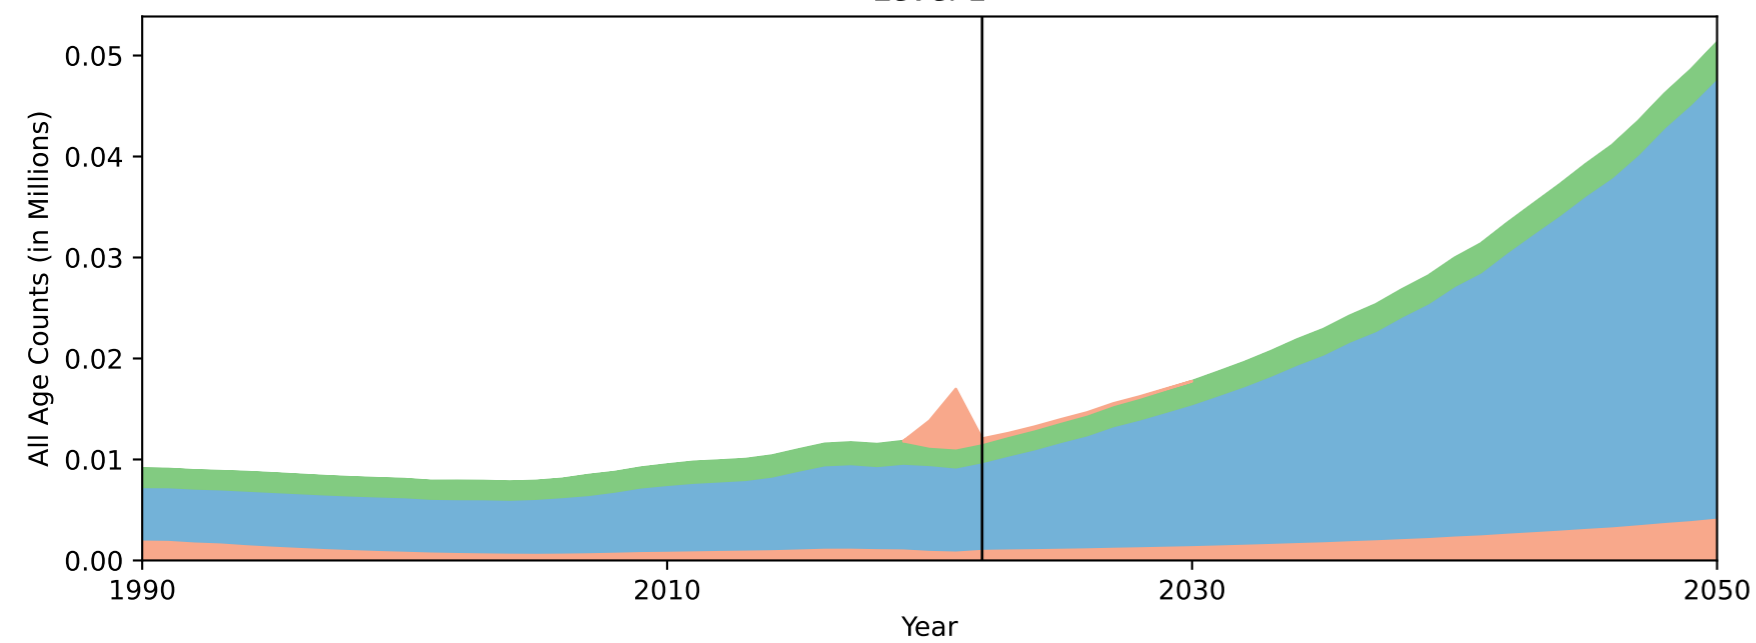

Level 2

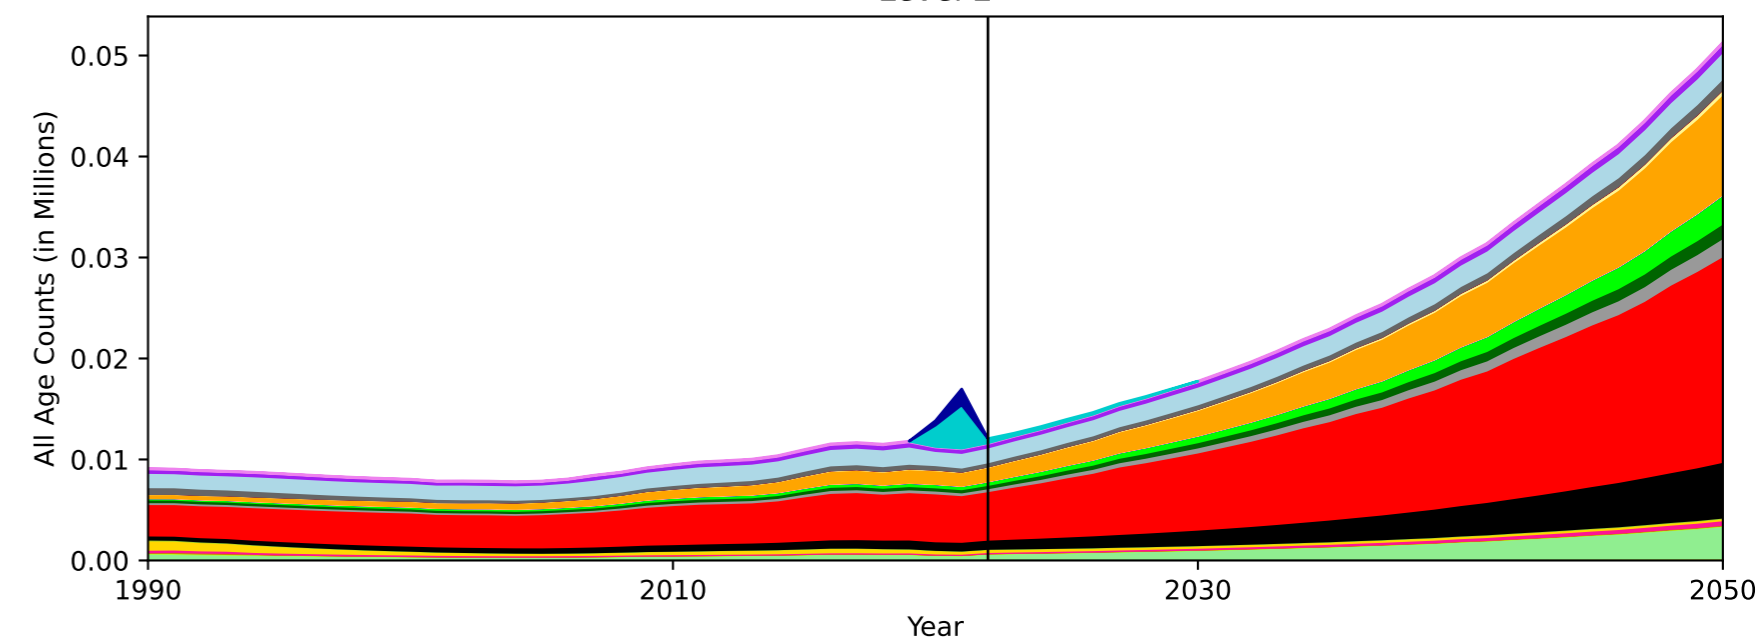

Level 1

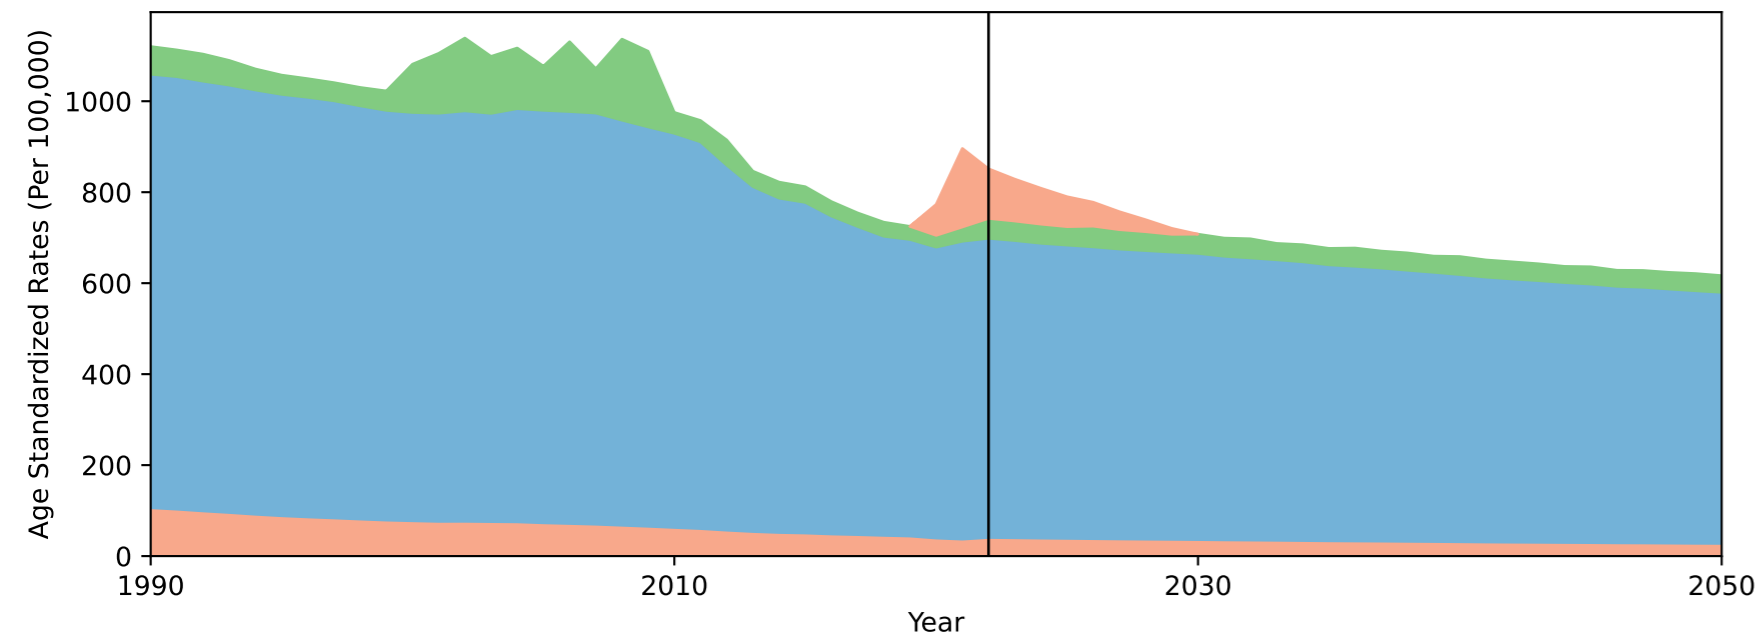

Level 2

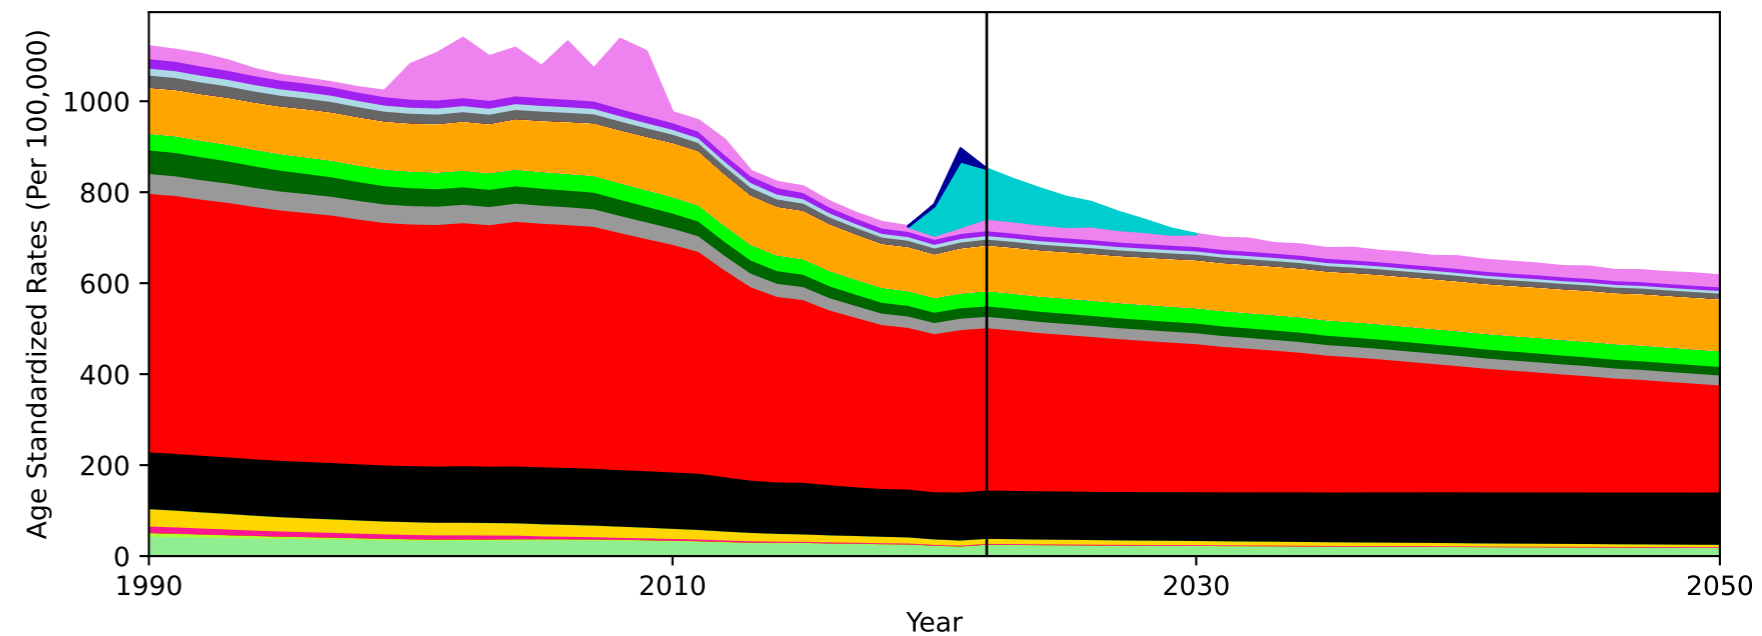

Level 1

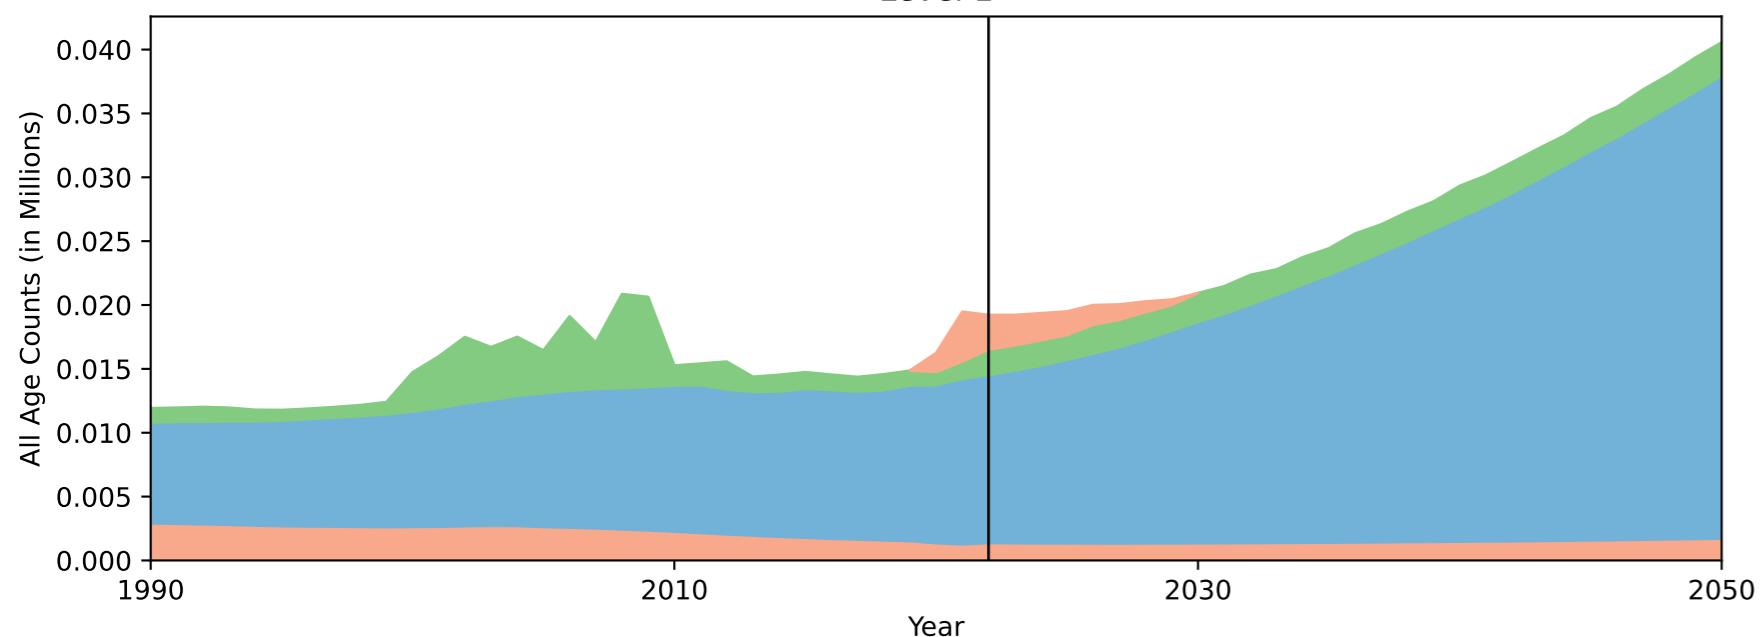

Level 2

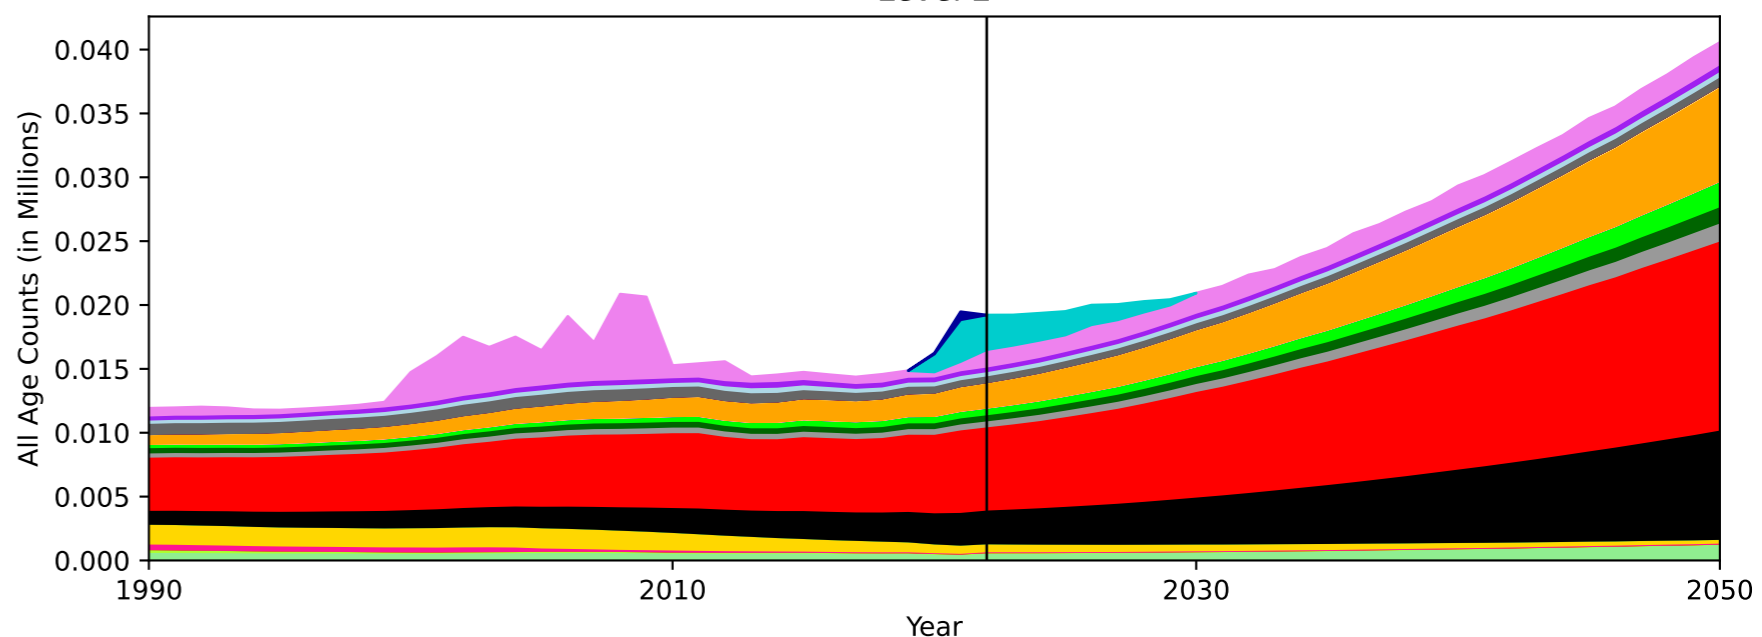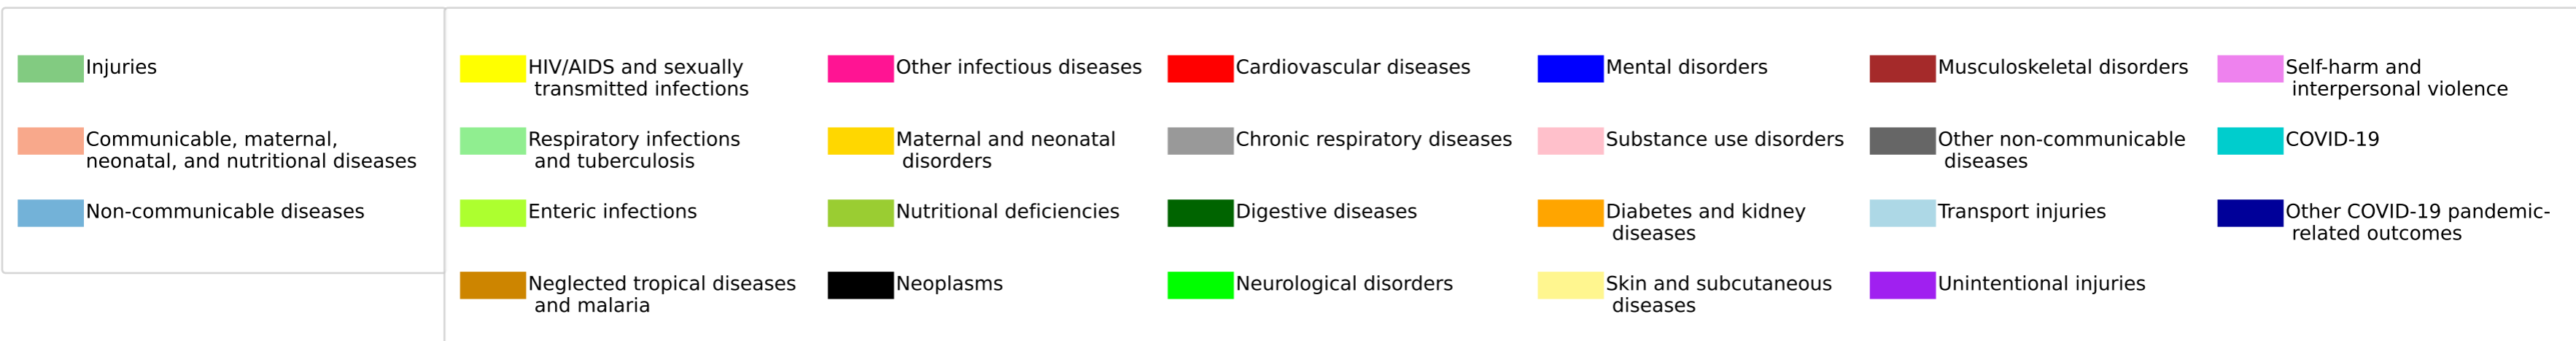

Level 1

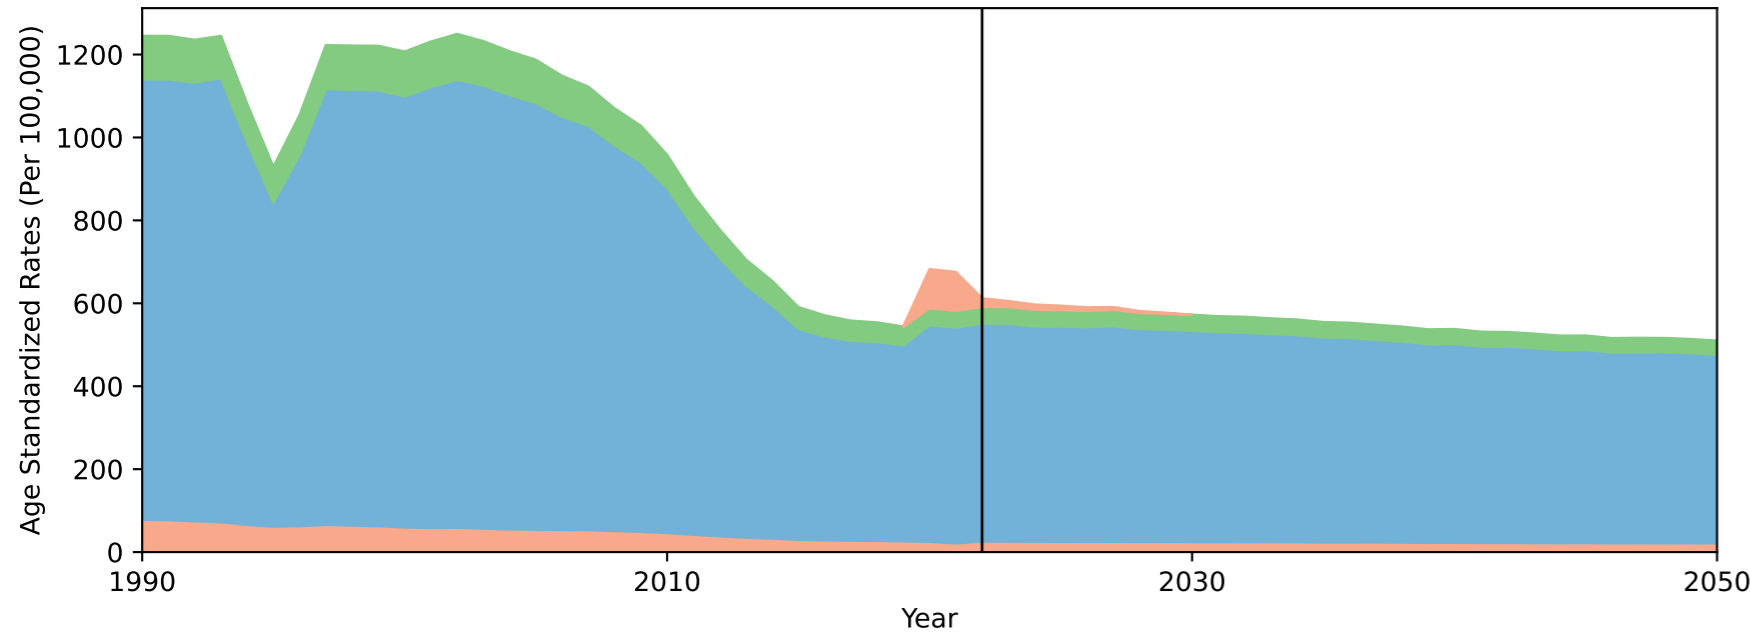

Level 2

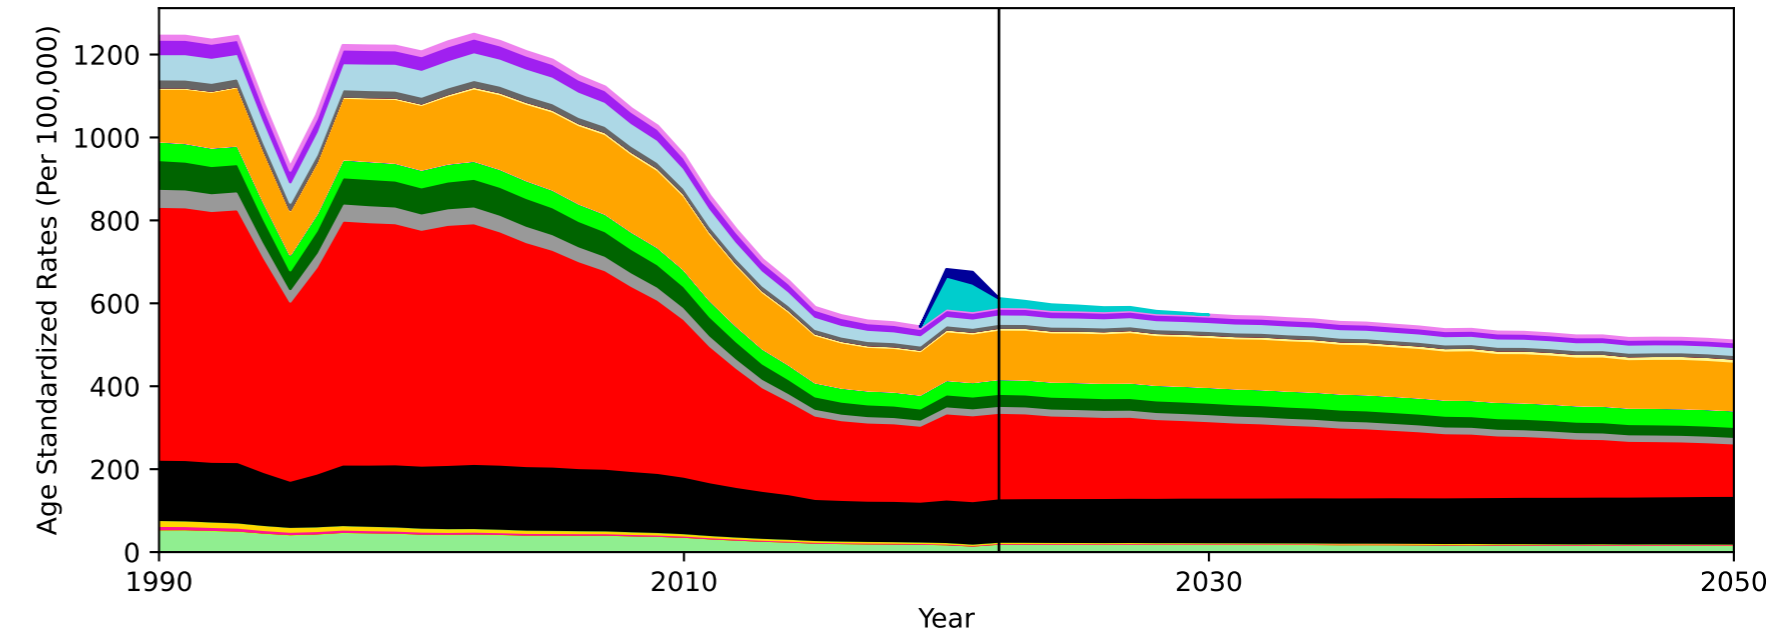

Level 1

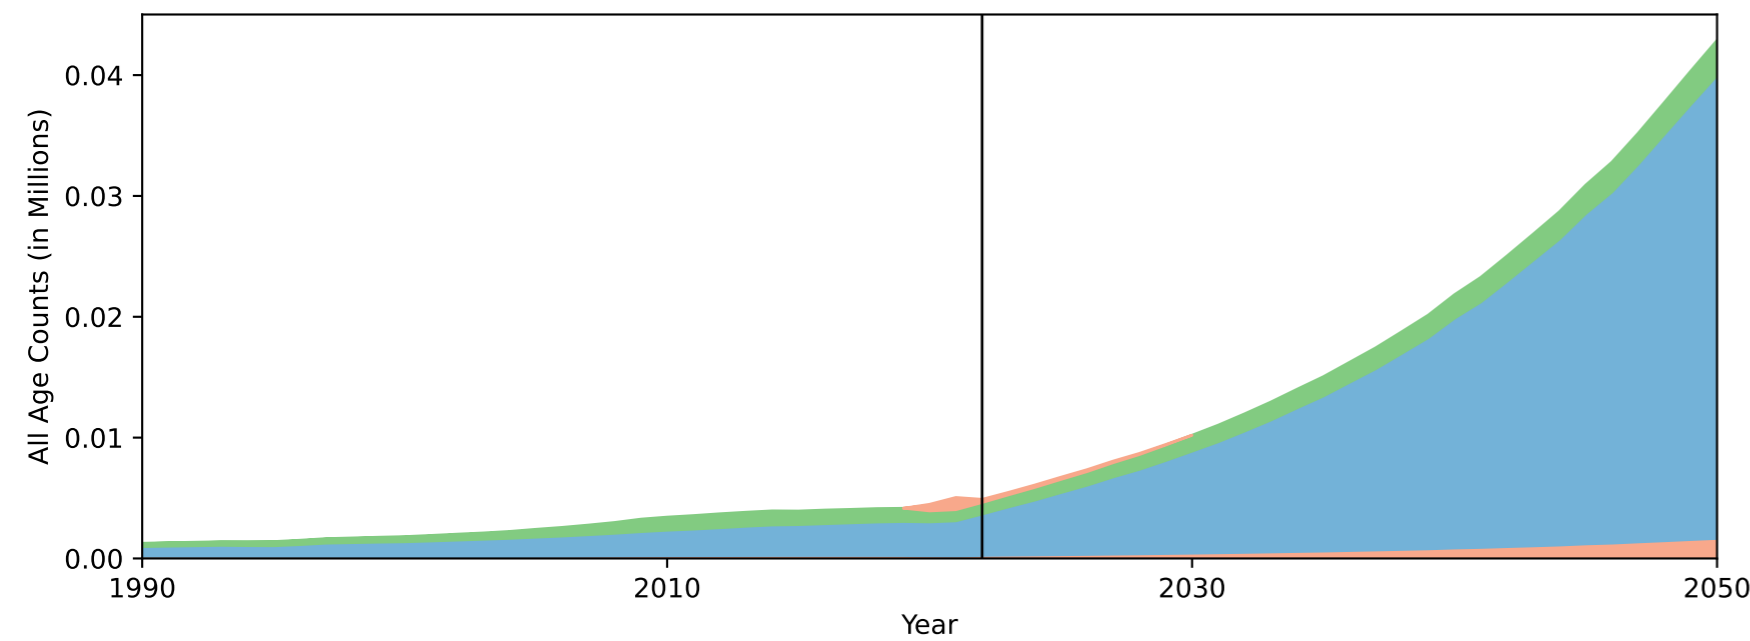

Level 2

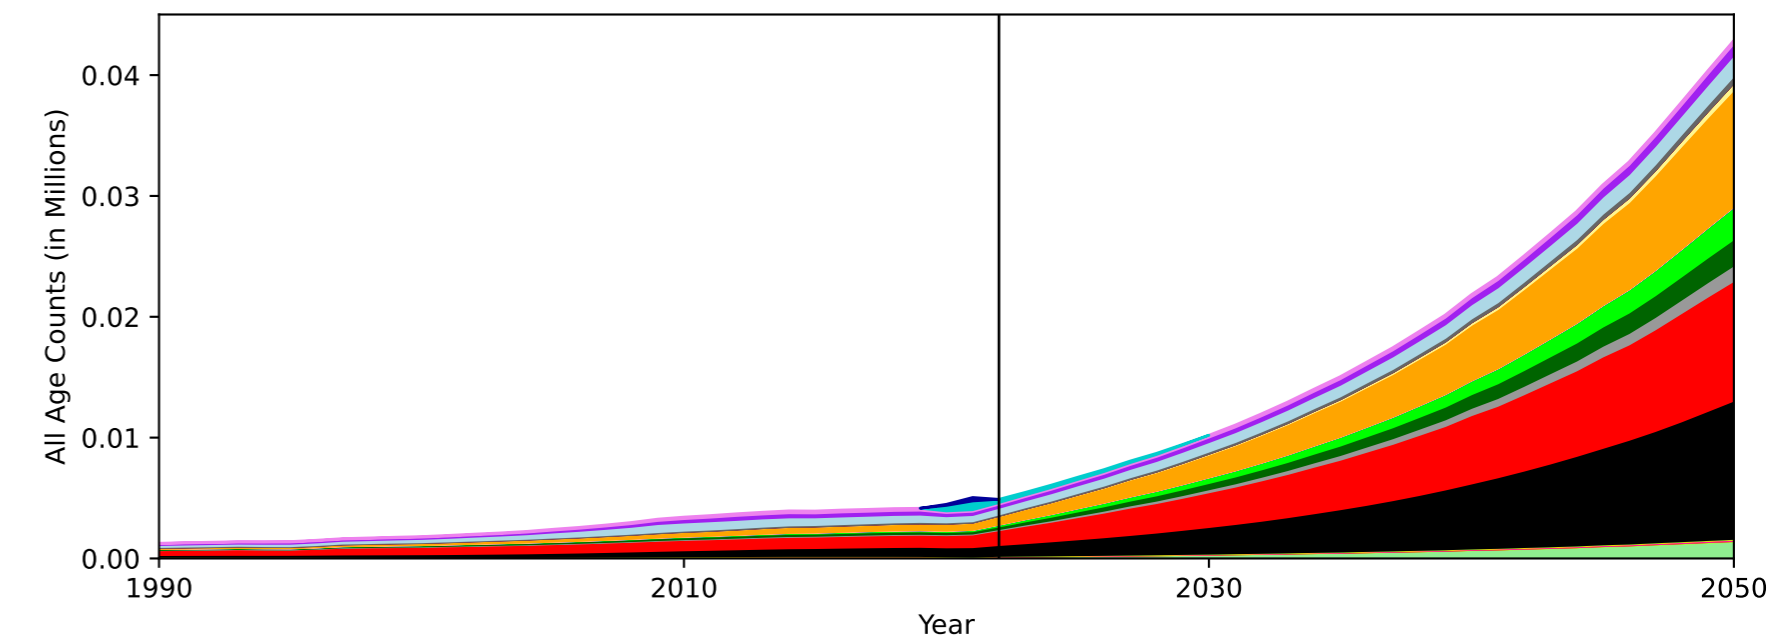

# Saudi Arabia

Supplemental Results Figure S5. Age-standardised death rates and all age death counts and by Level 1 and Level 2 causes, 1990–2050

590

Level 1

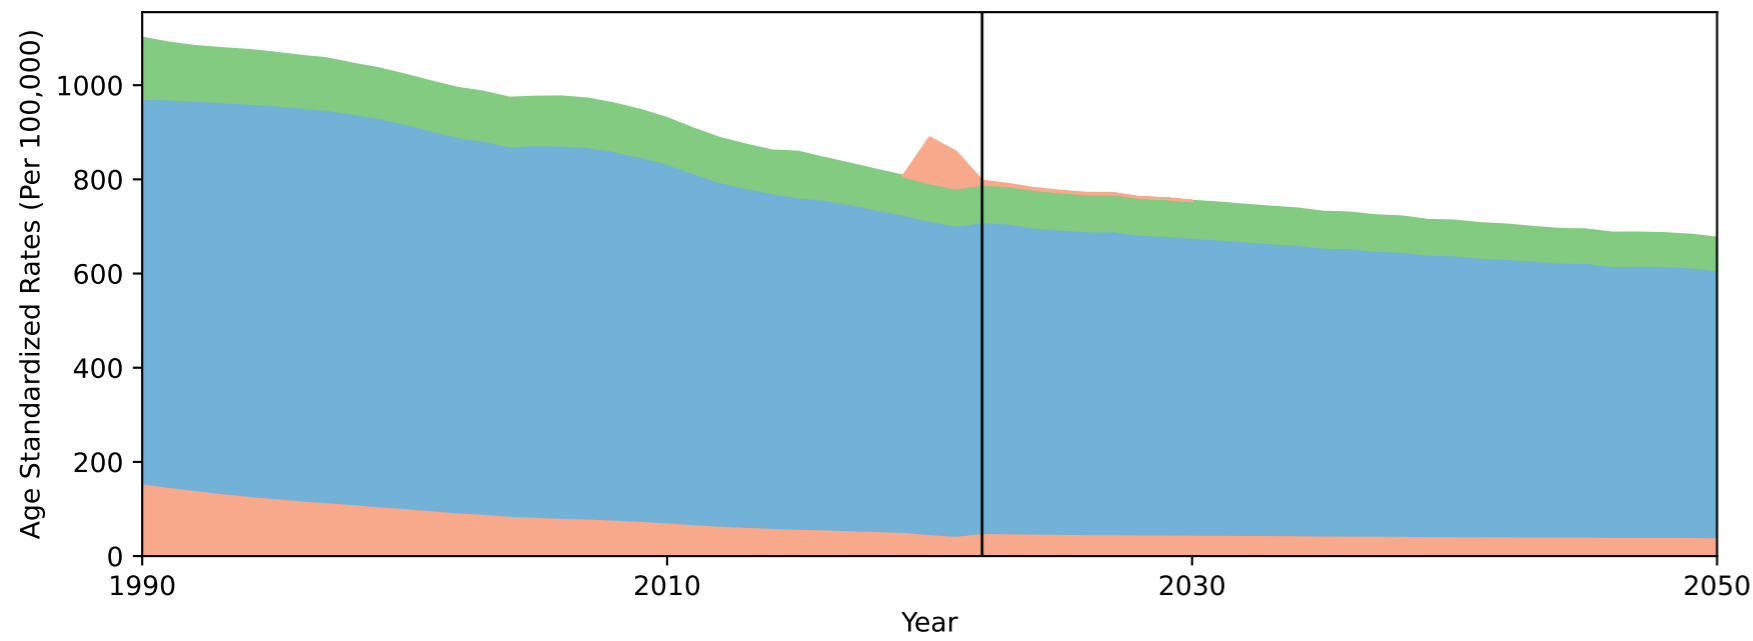

Level 2

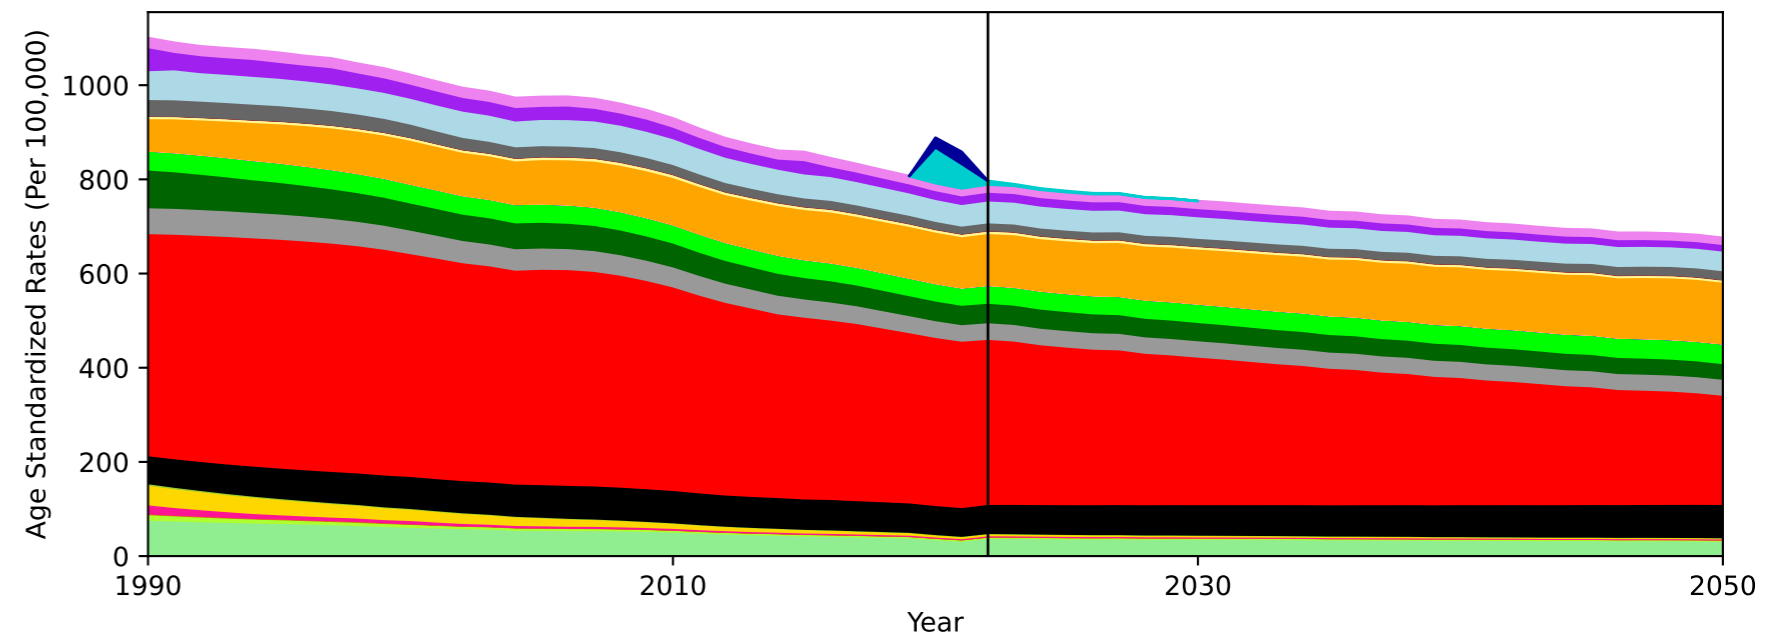

Level 1

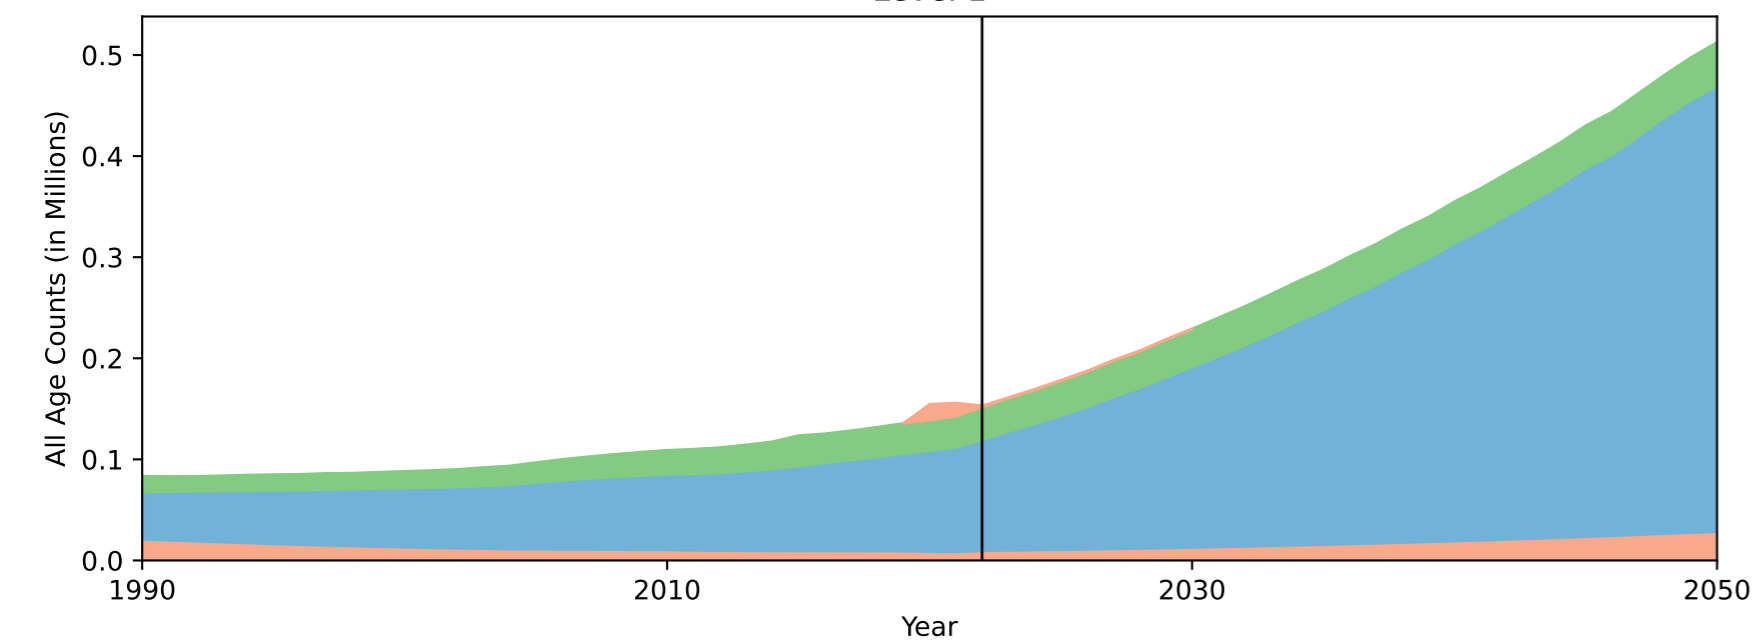

Level 2

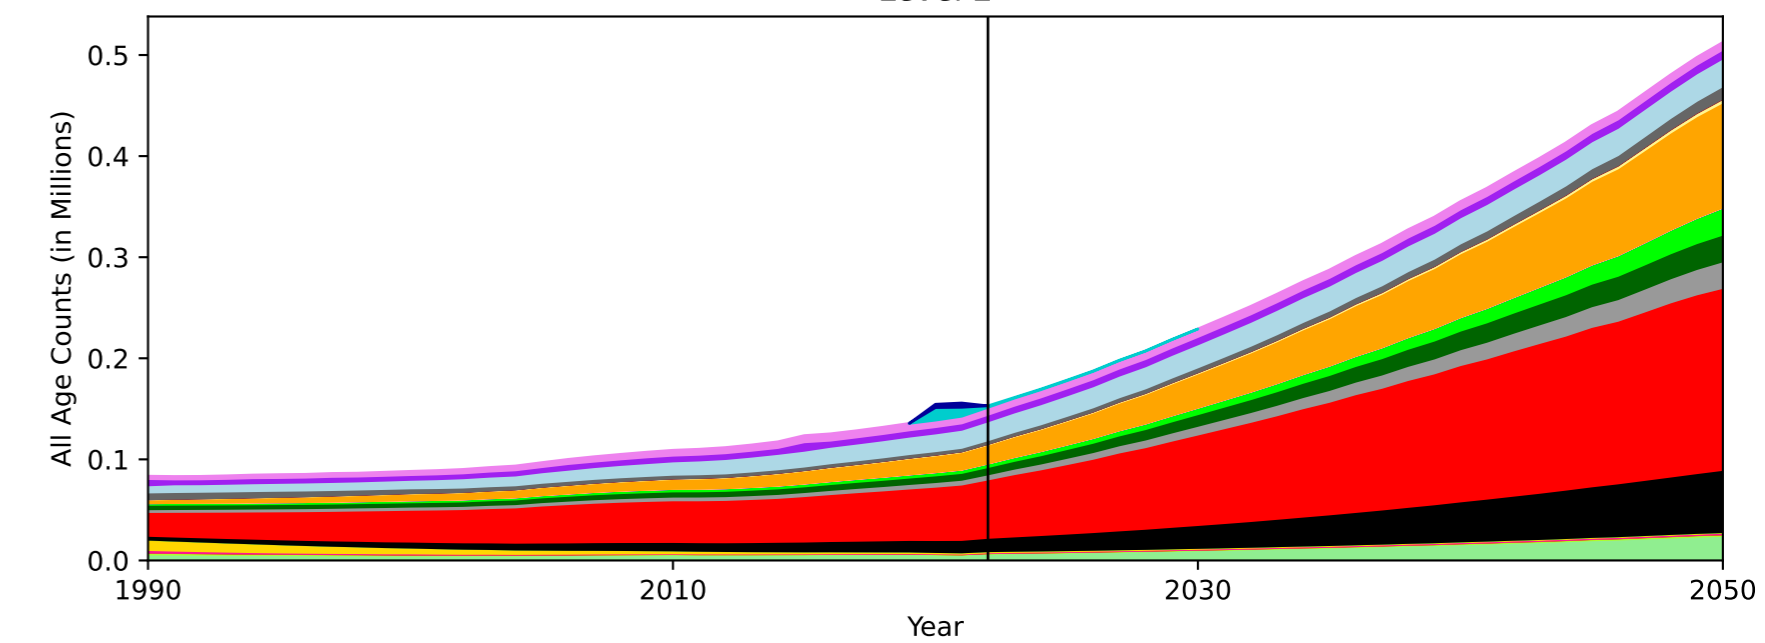

# Sudan

Level 1

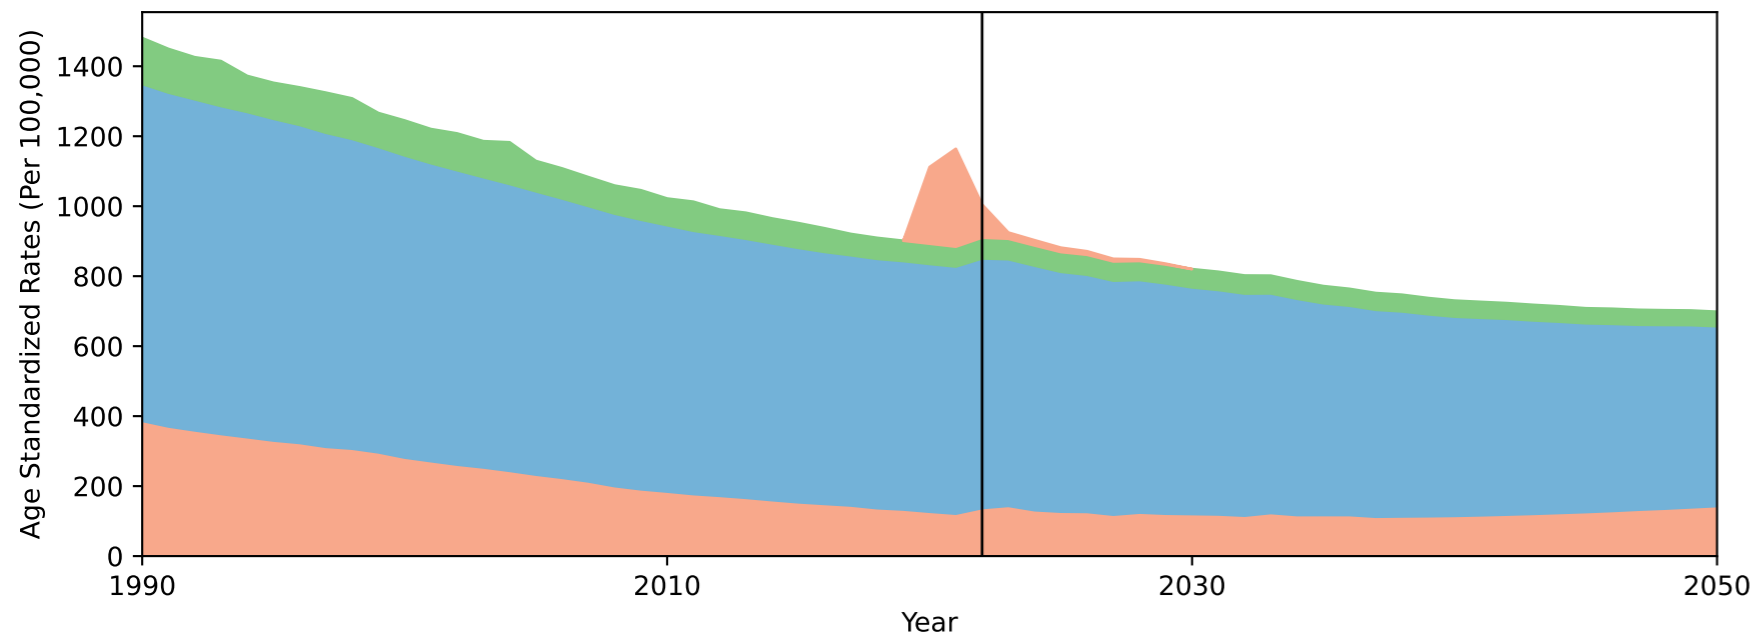

Level 2

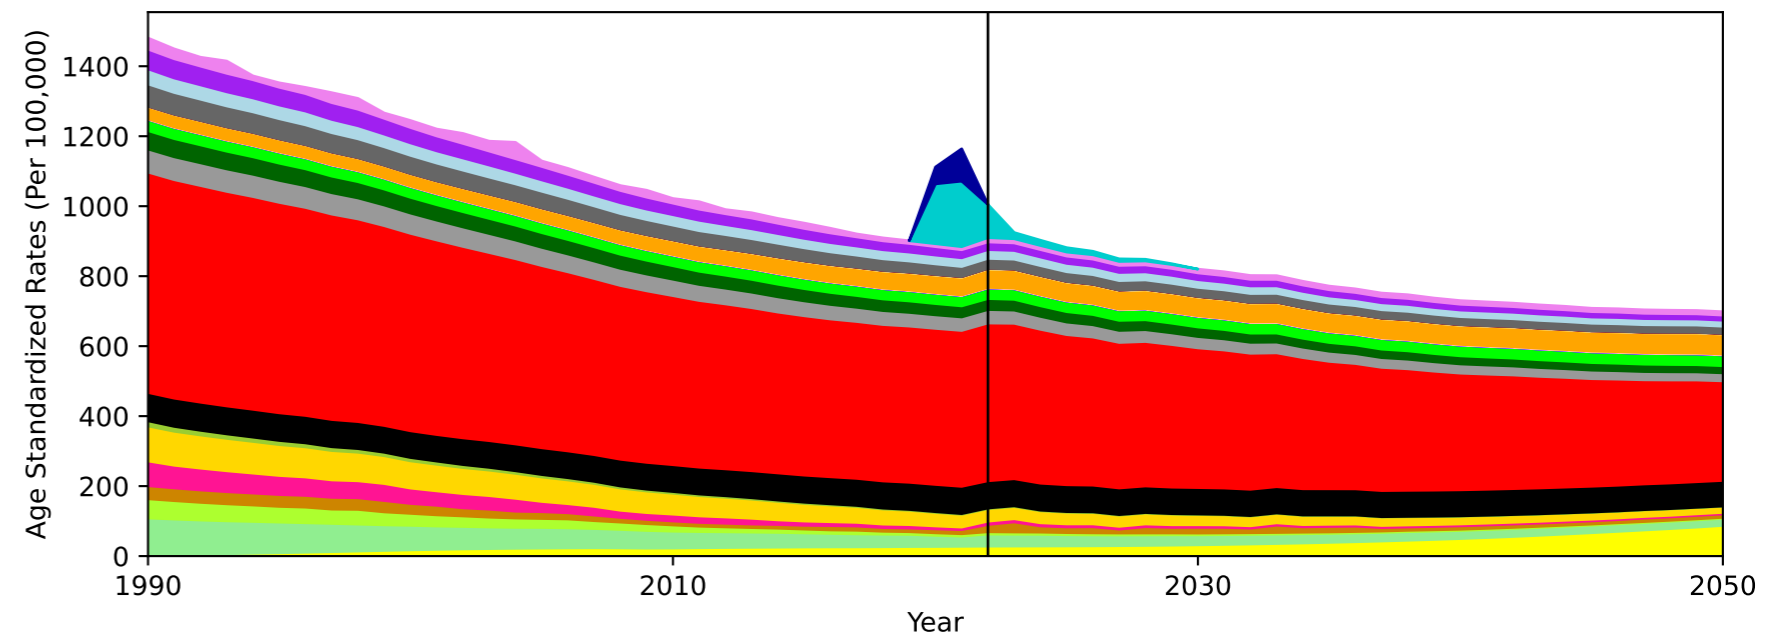

Level 1

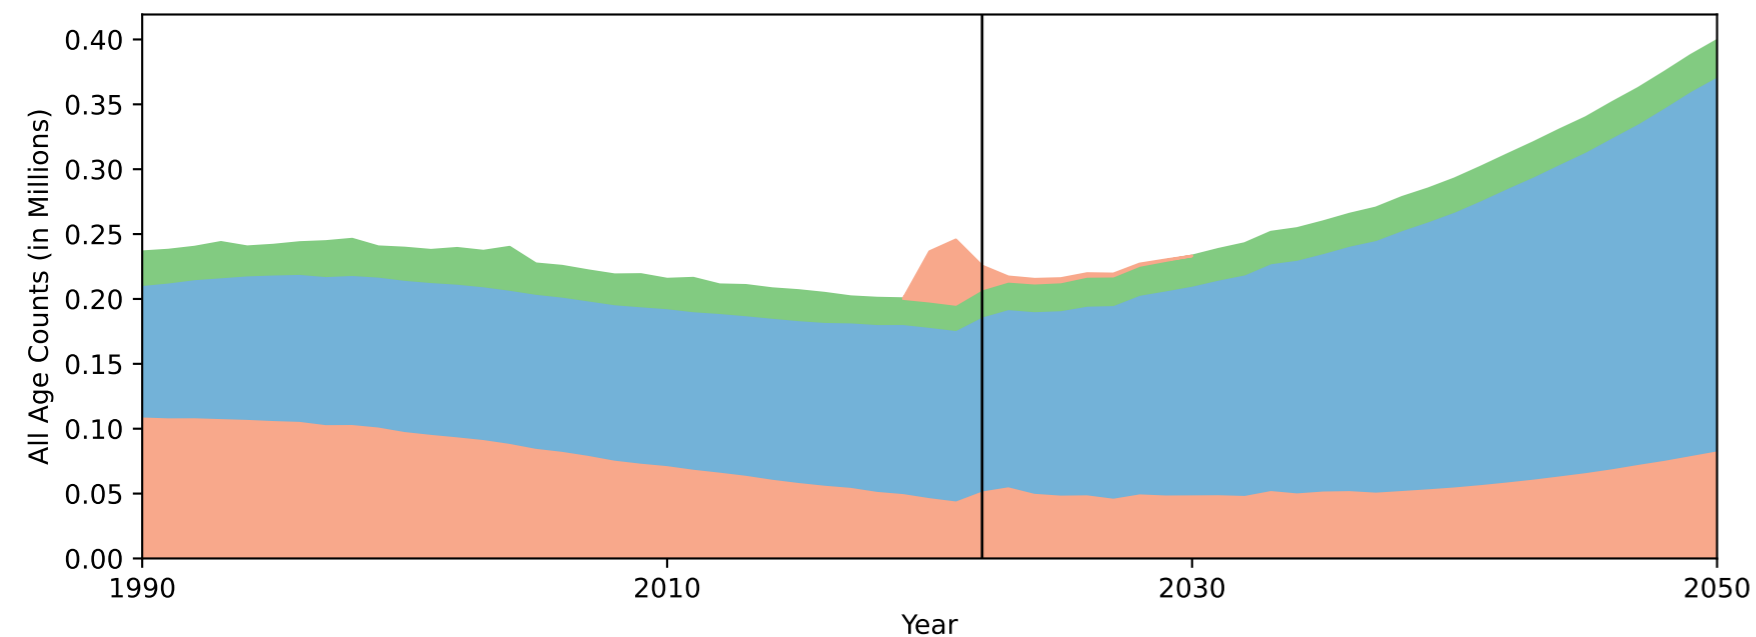

Level 2

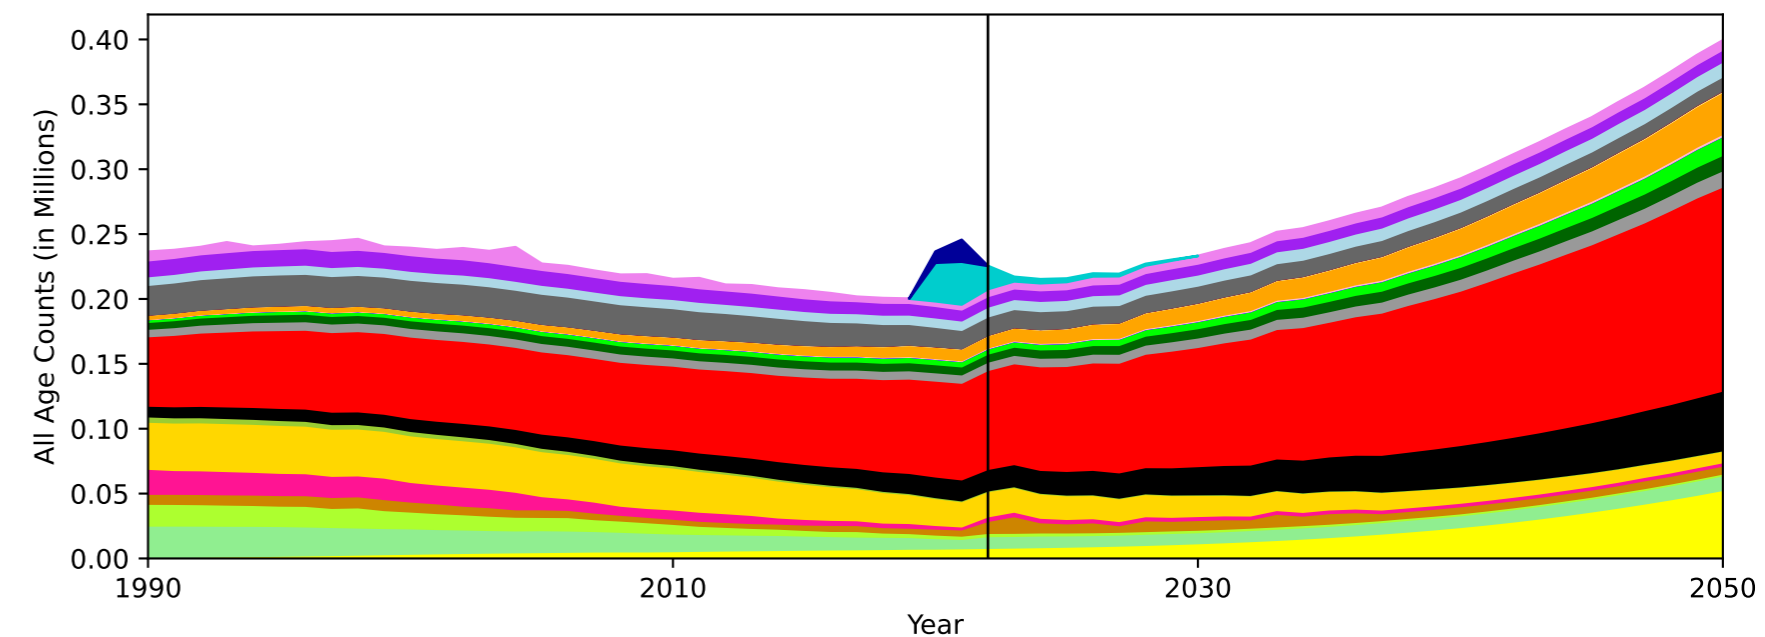



# Syria

Level 1

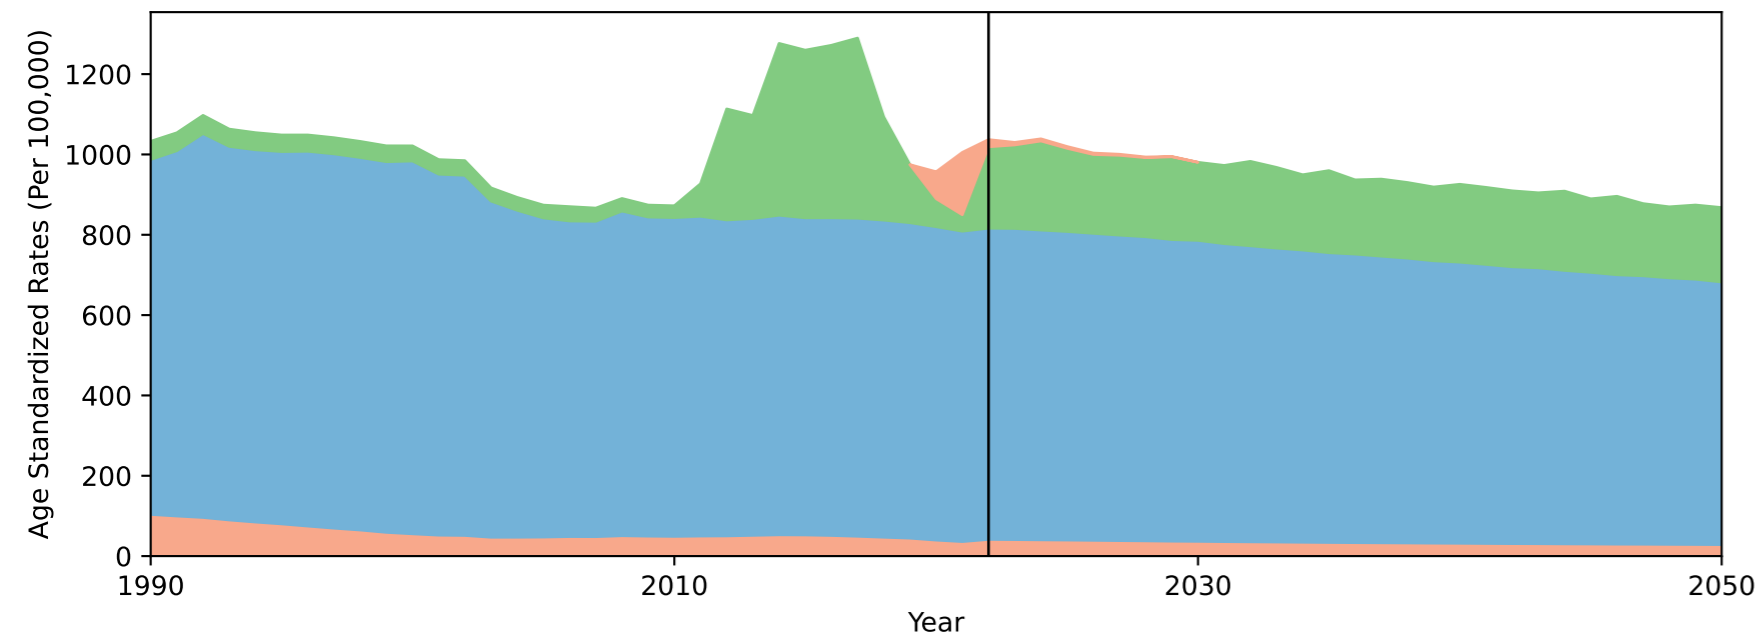

Level 2

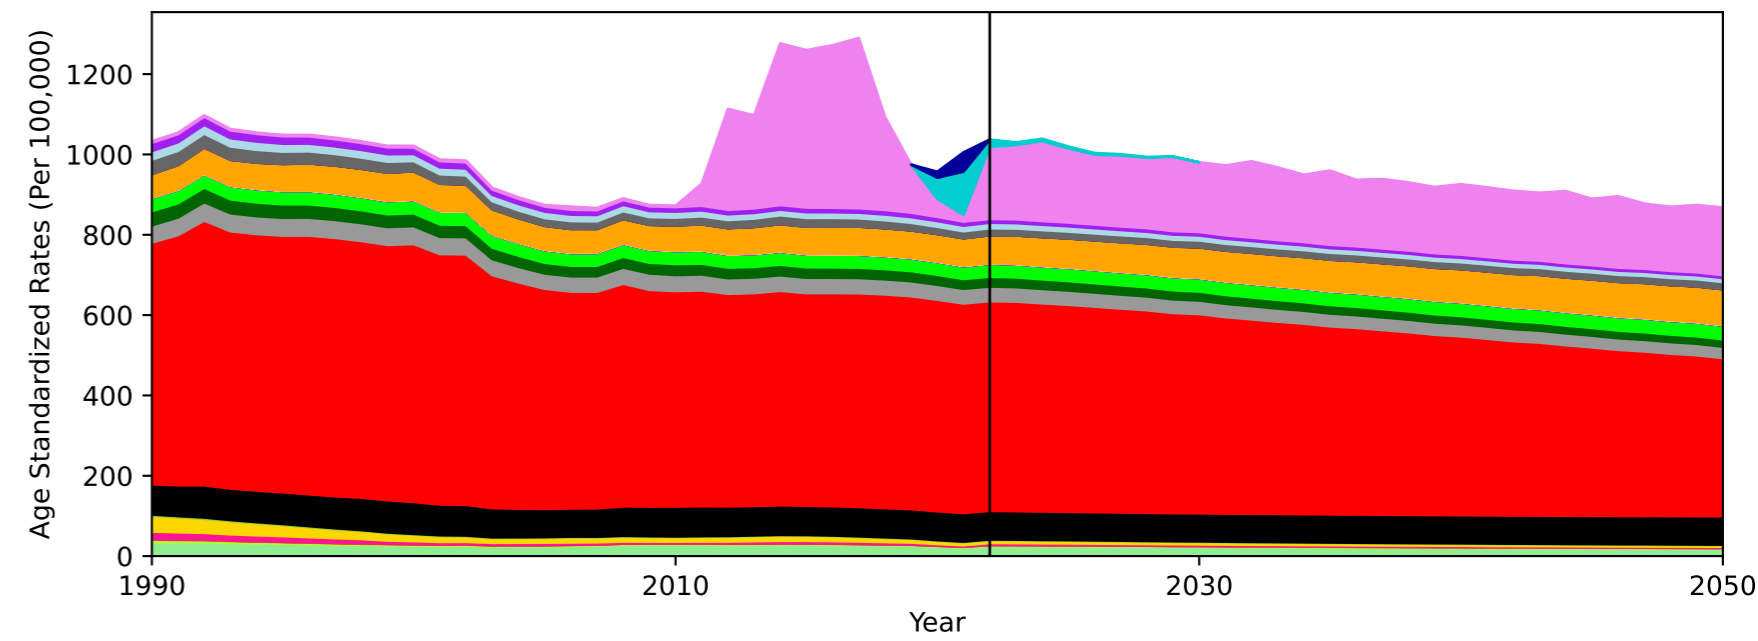

Level 1

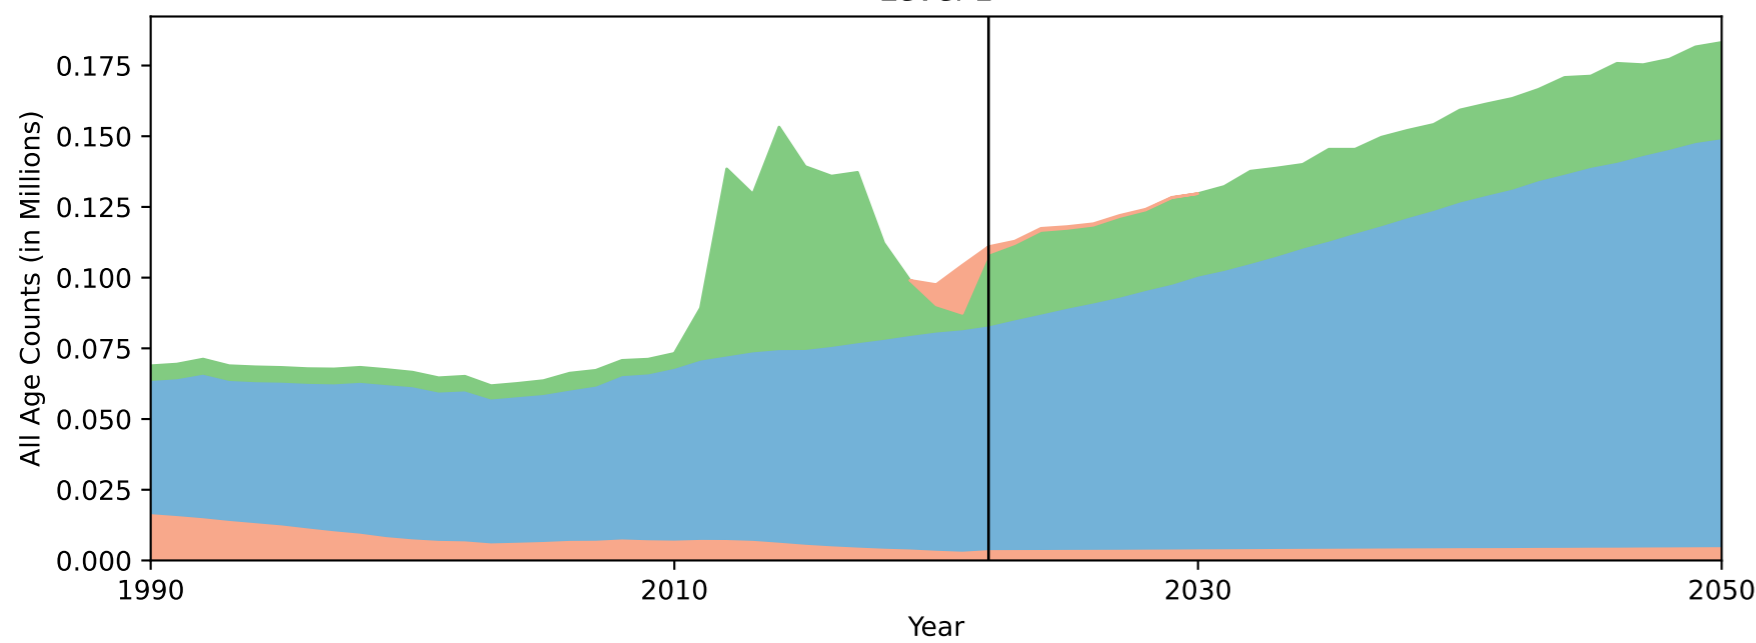

Level 2

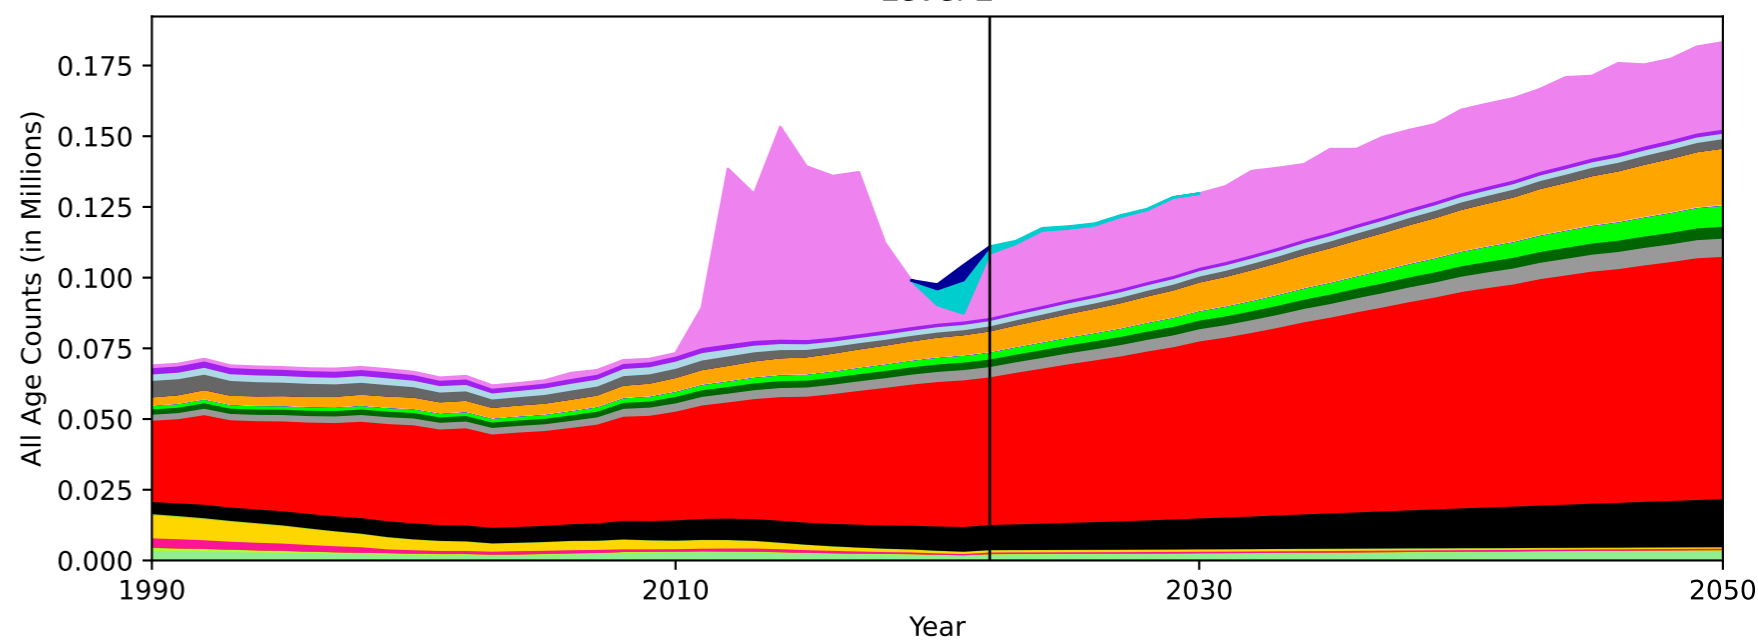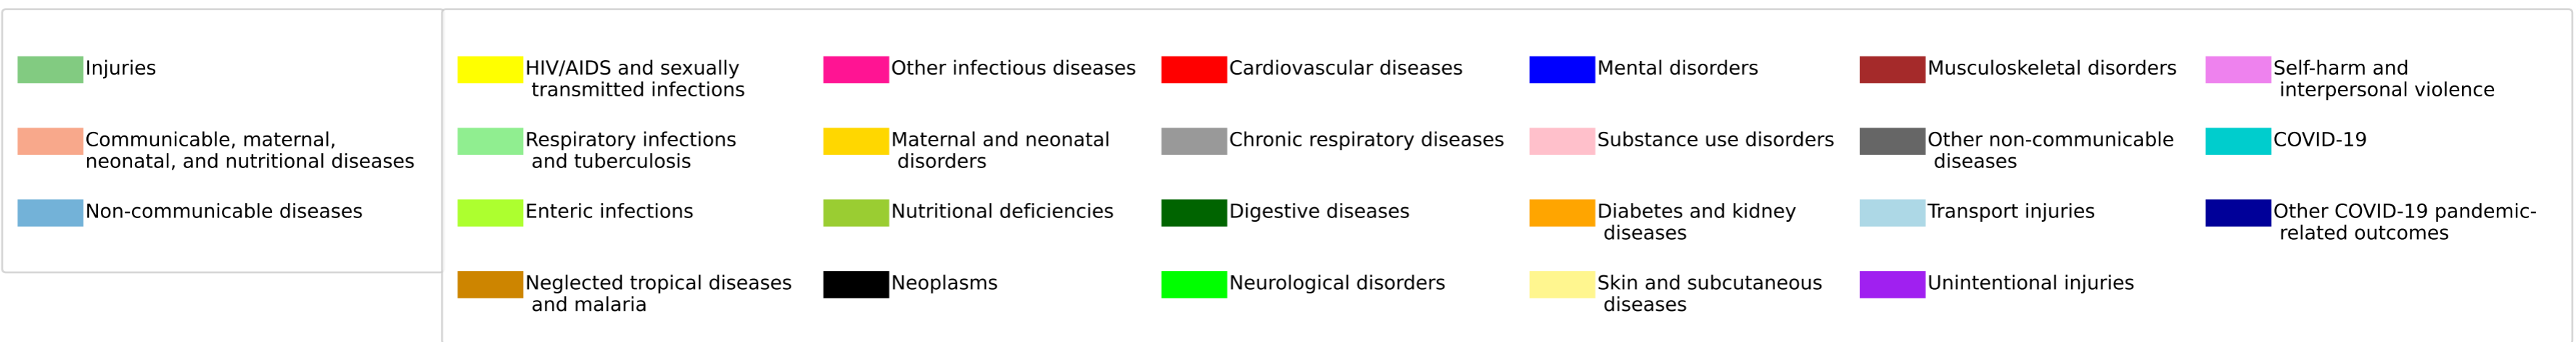

# Tunisia

Level 1

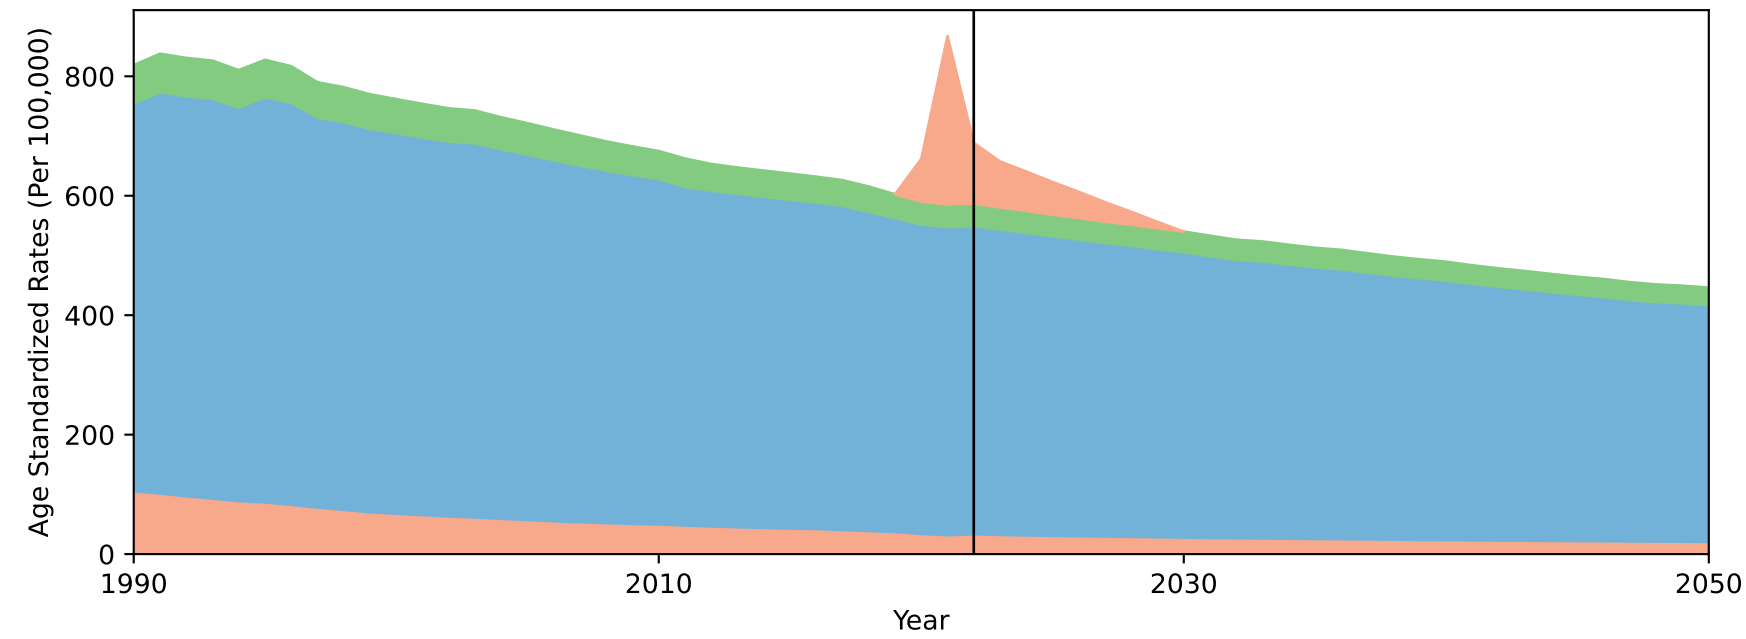

Level 2

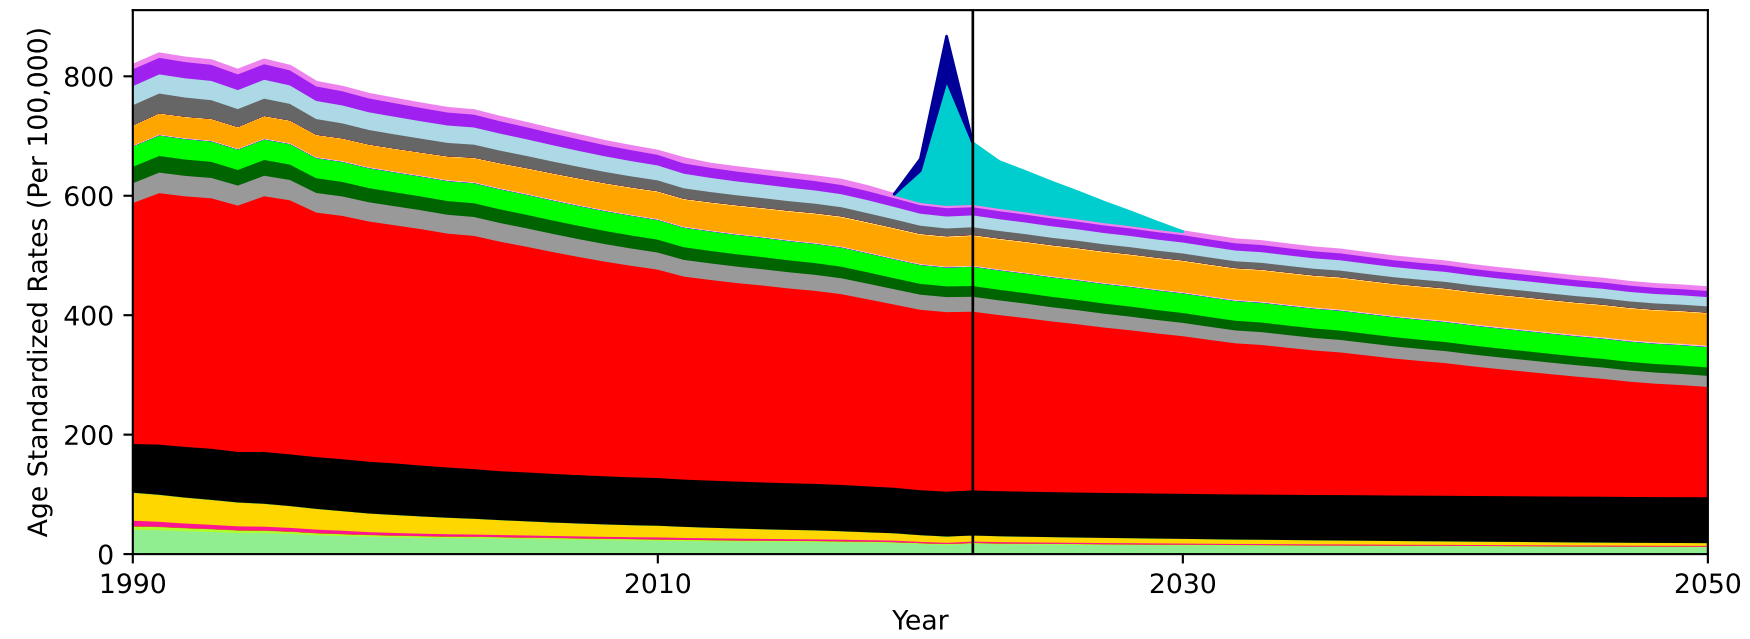

Level 1

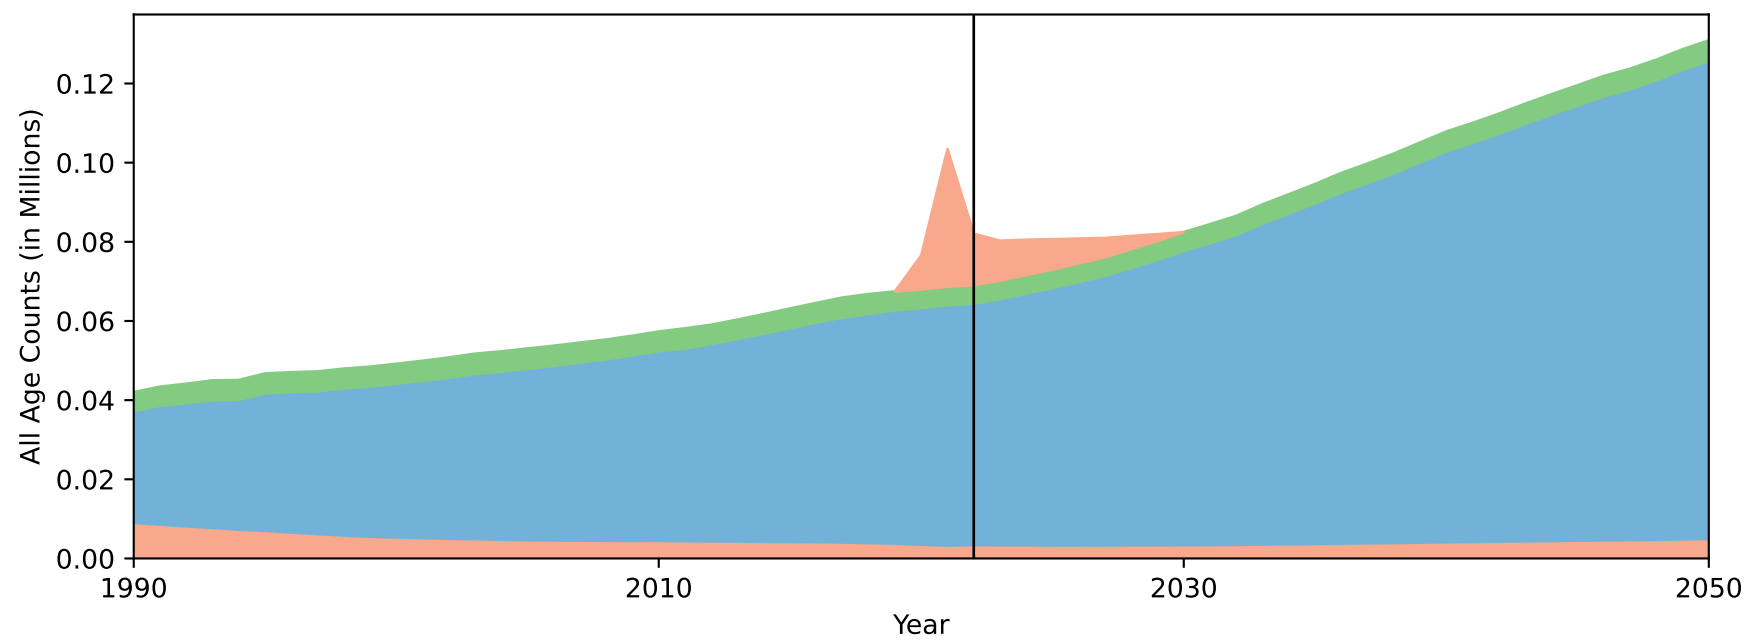

Level 2

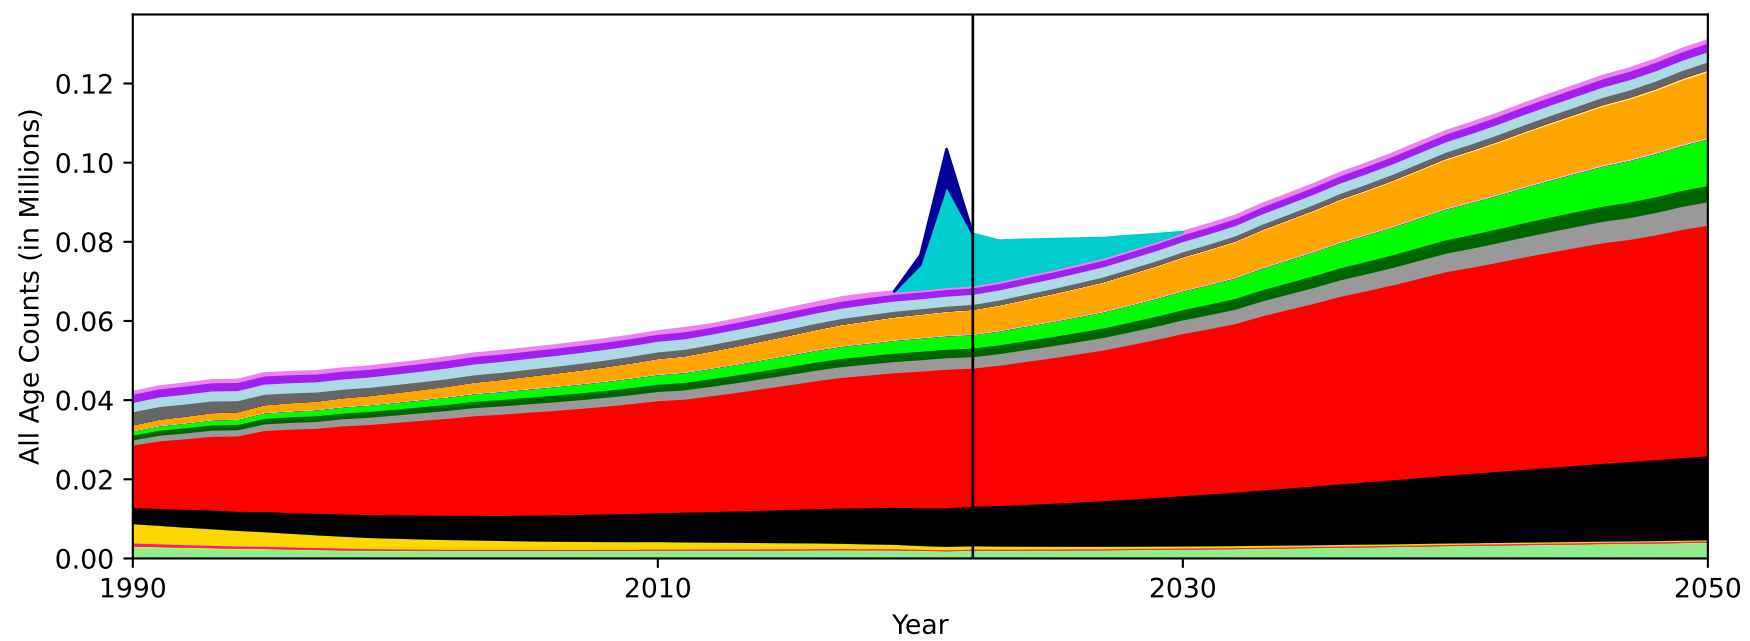

Level 1

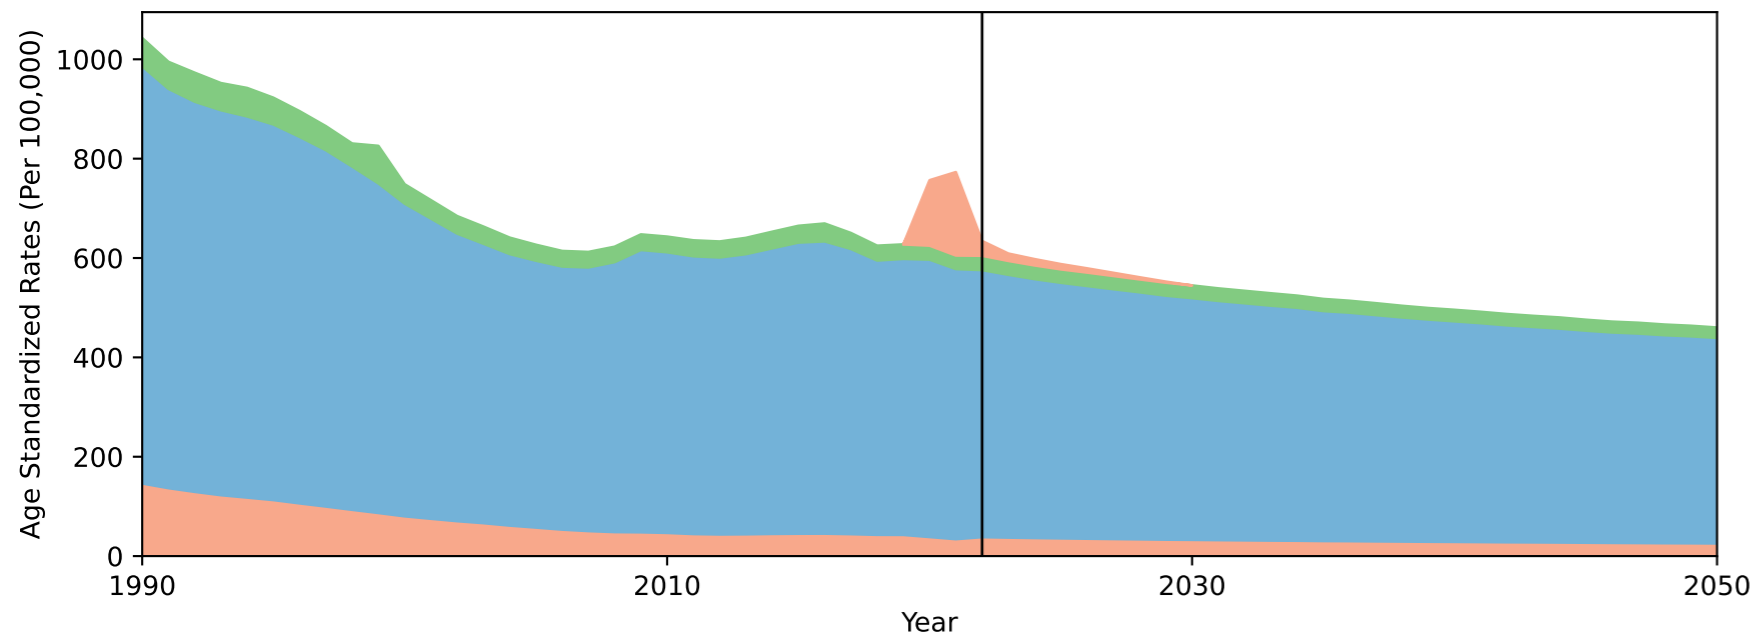

Level 2

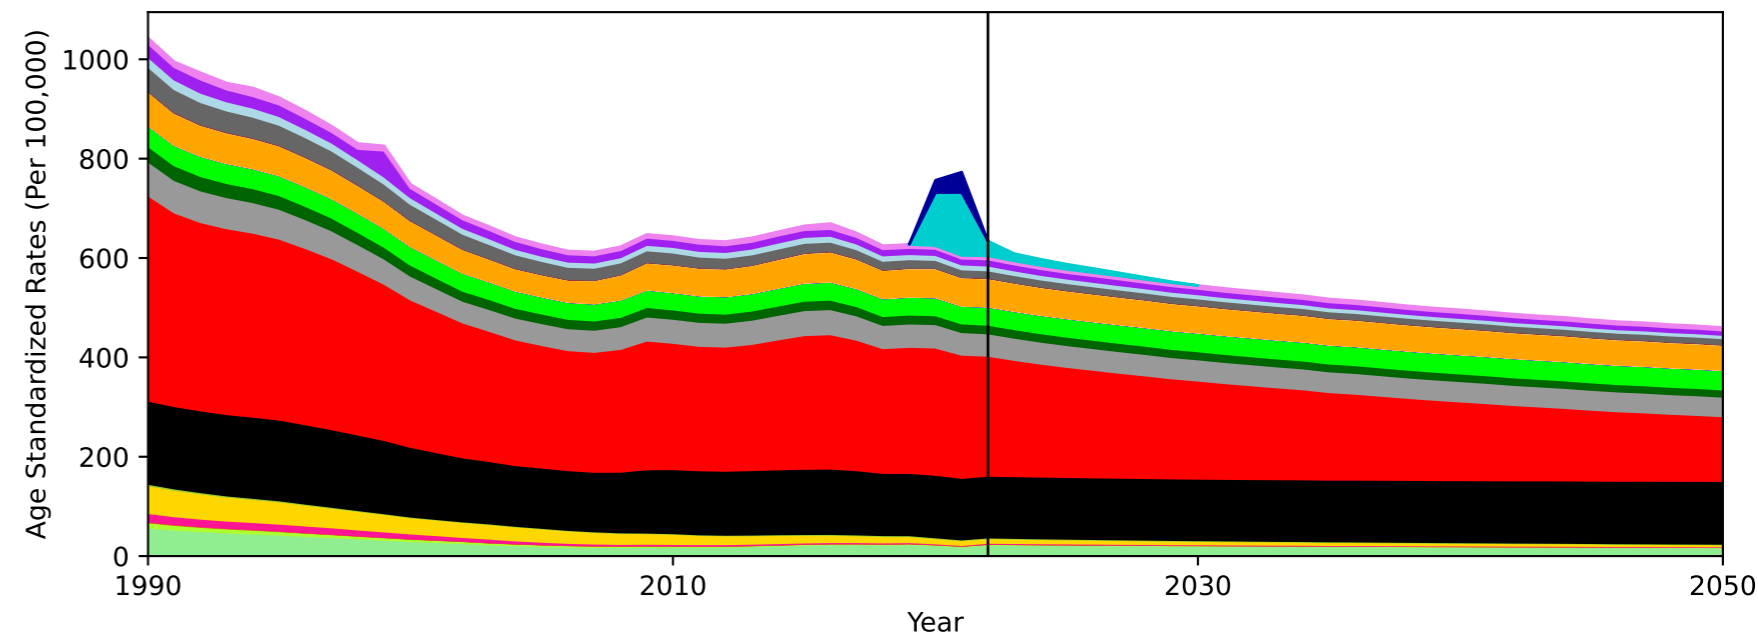

Level 1

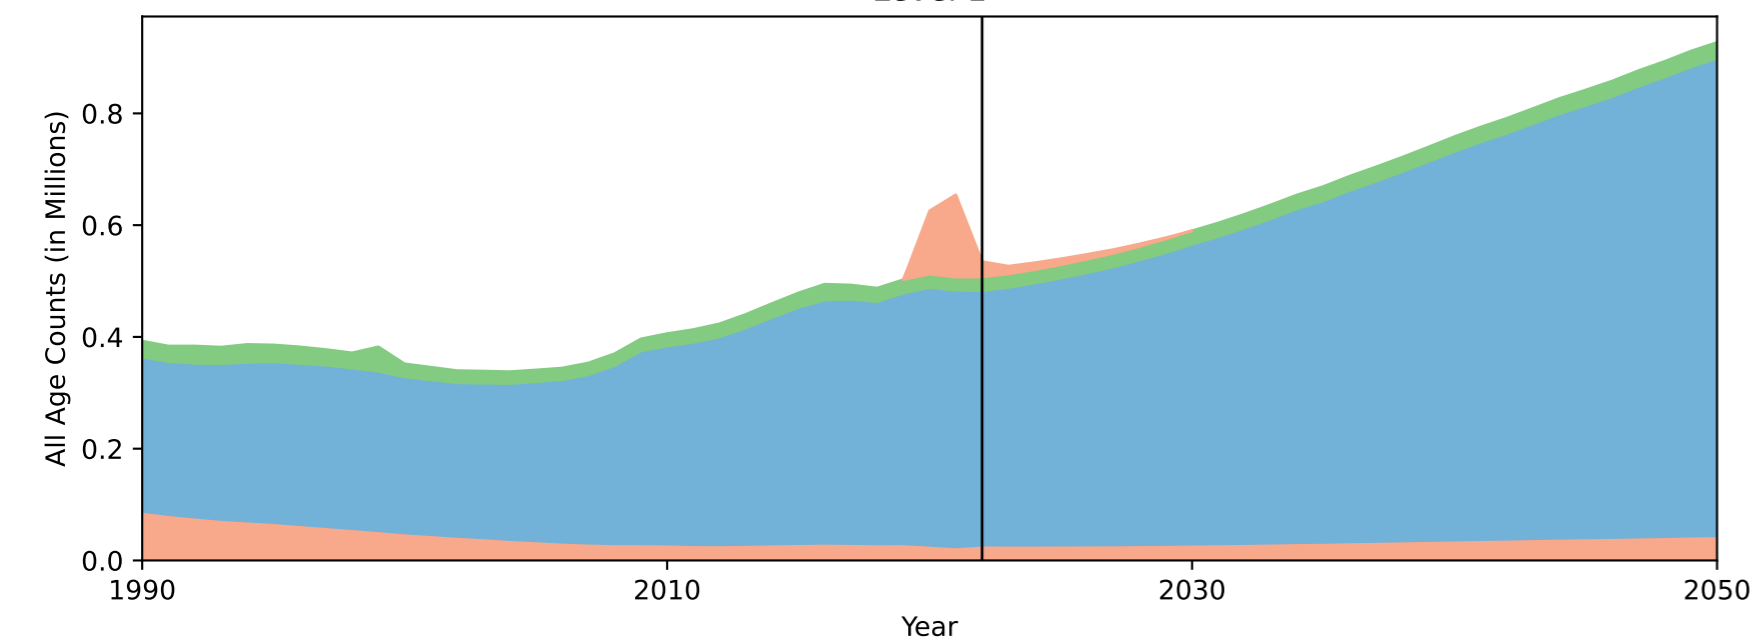

Level 2

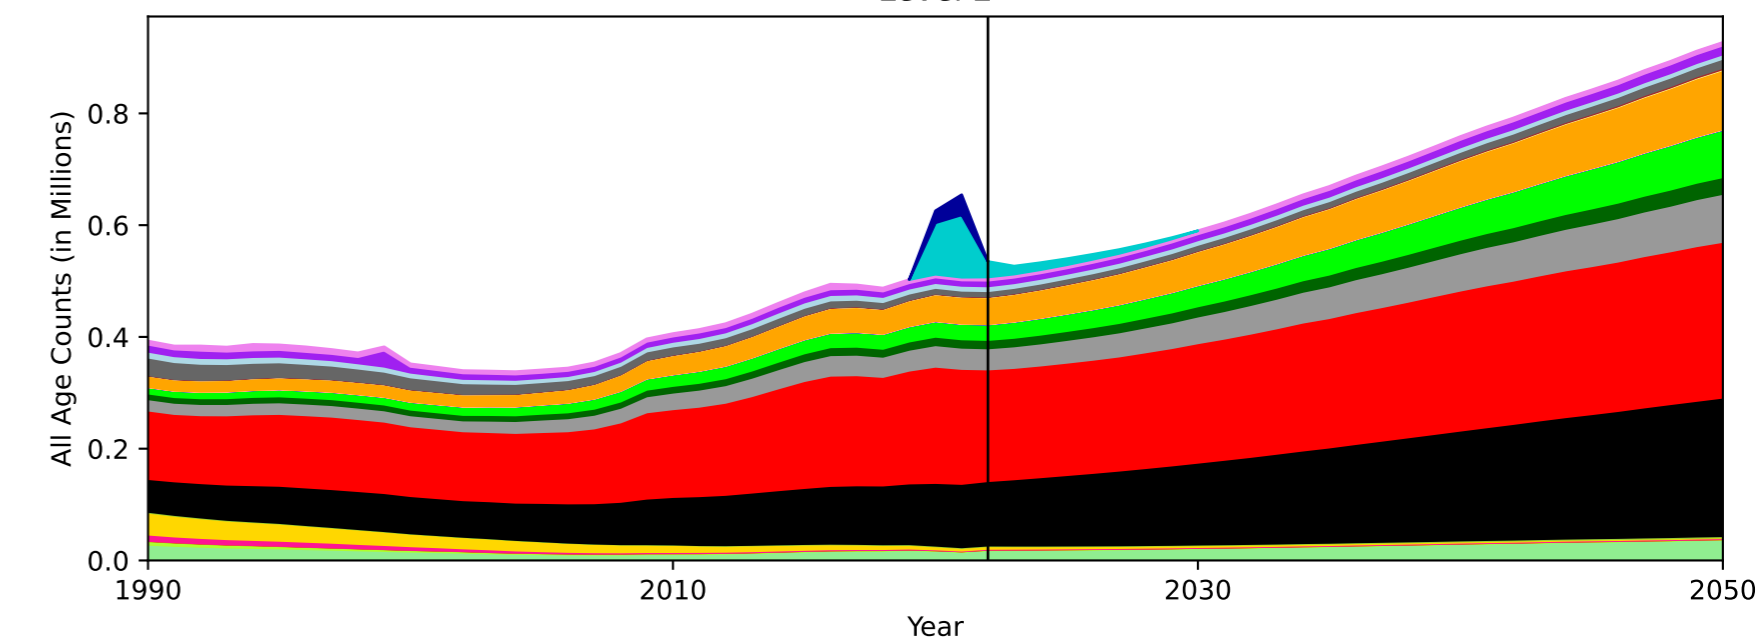

# United Arab Emirates

Supplemental Results Figure S5. Age-standardised death rates and all age death counts and by Level 1 and Level 2 causes, 1990–2050

595

Level 1

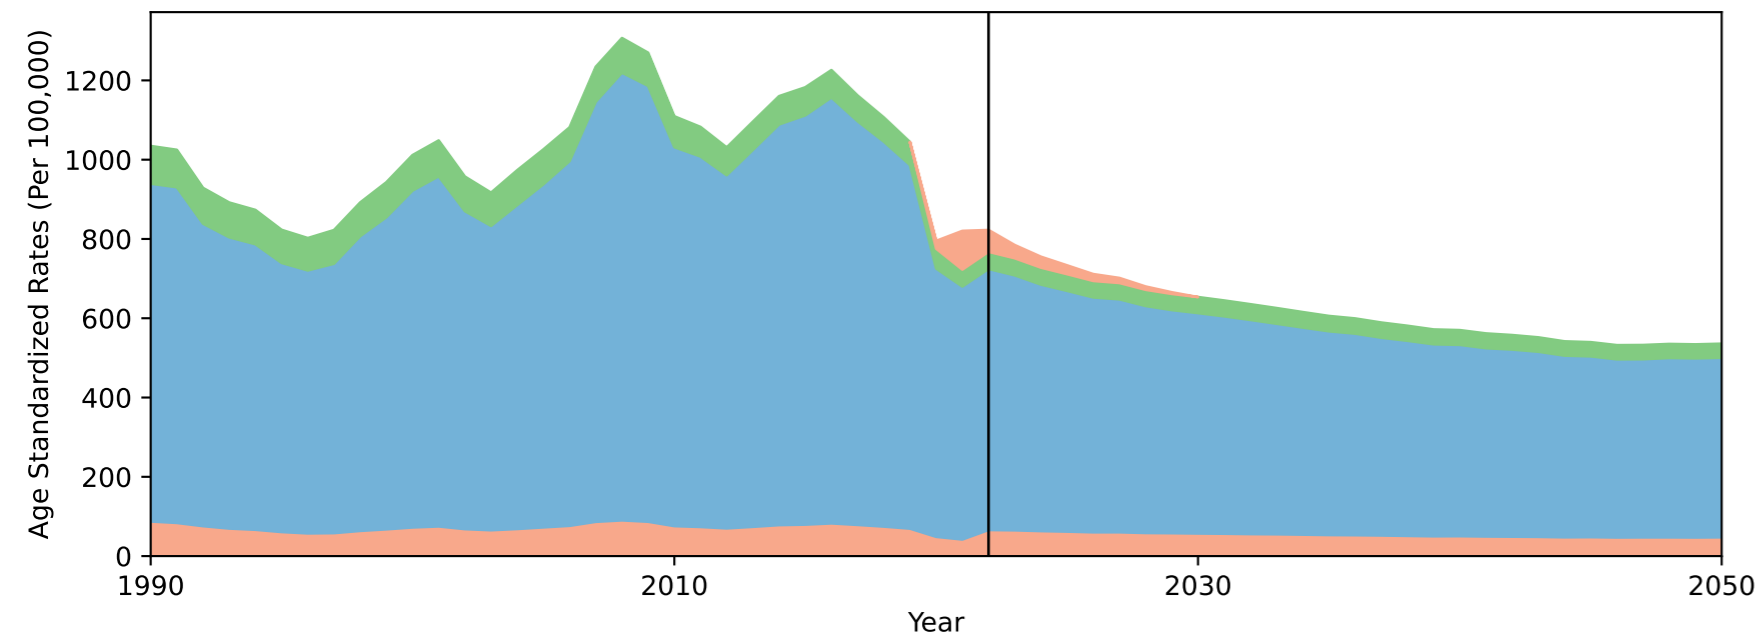

Level 2

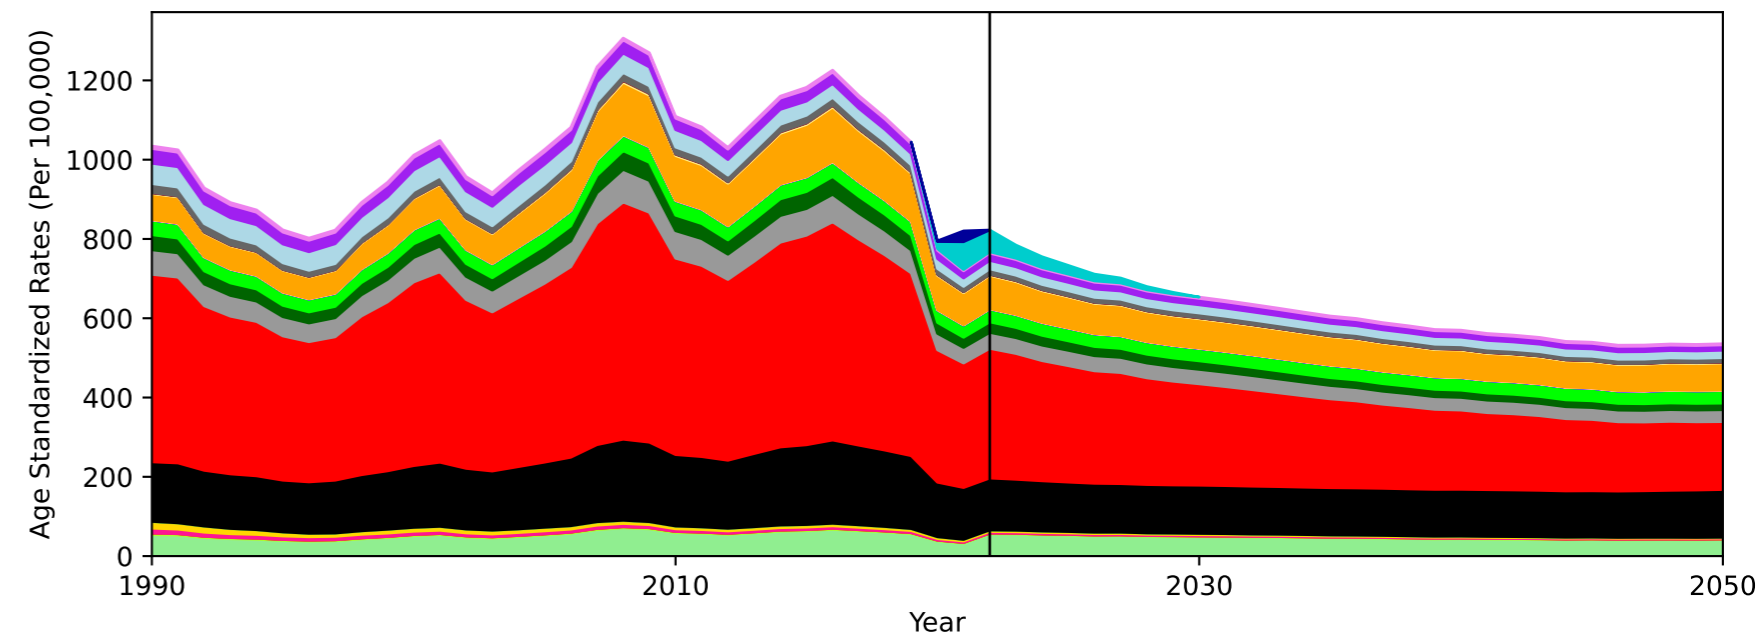

Level 1

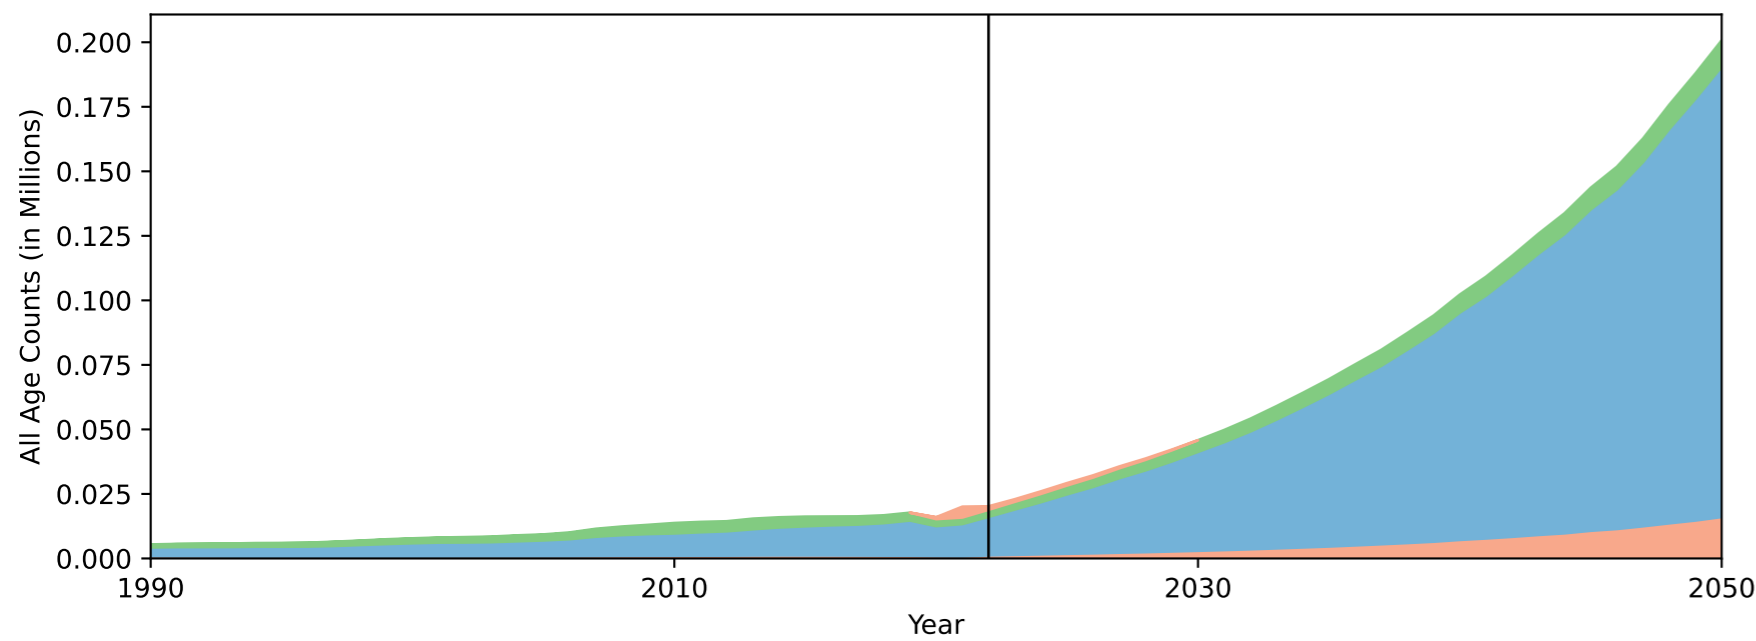

Level 2

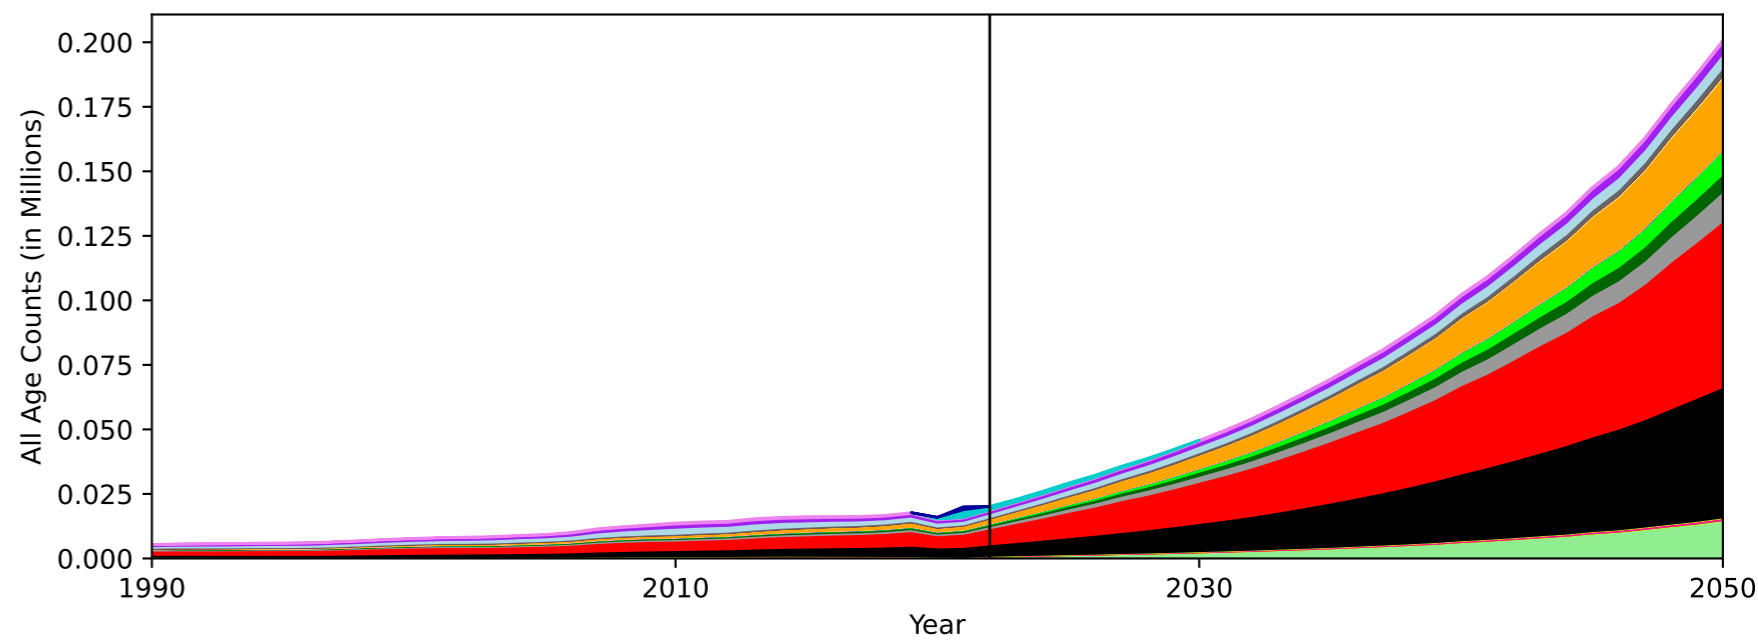

# Yemen

Level 1

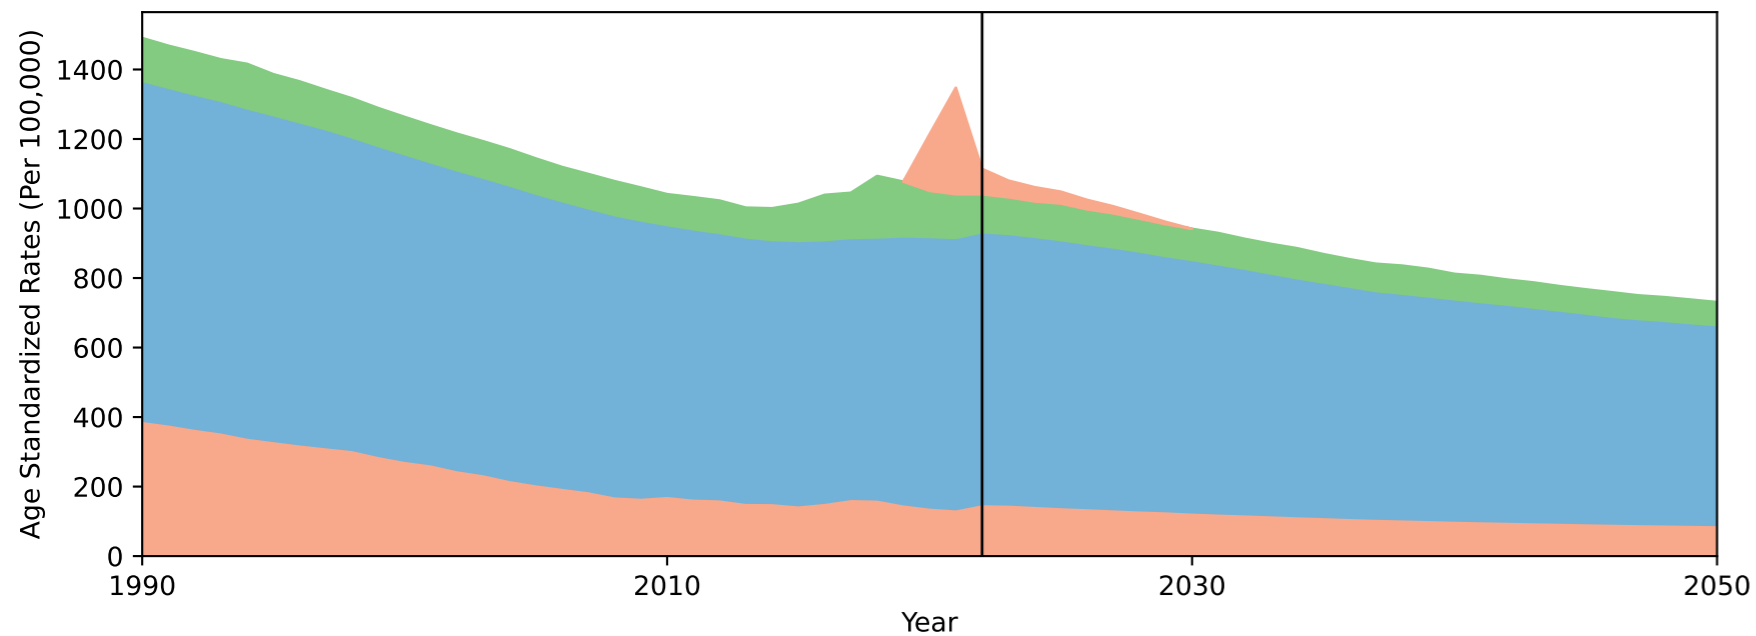

Level 2

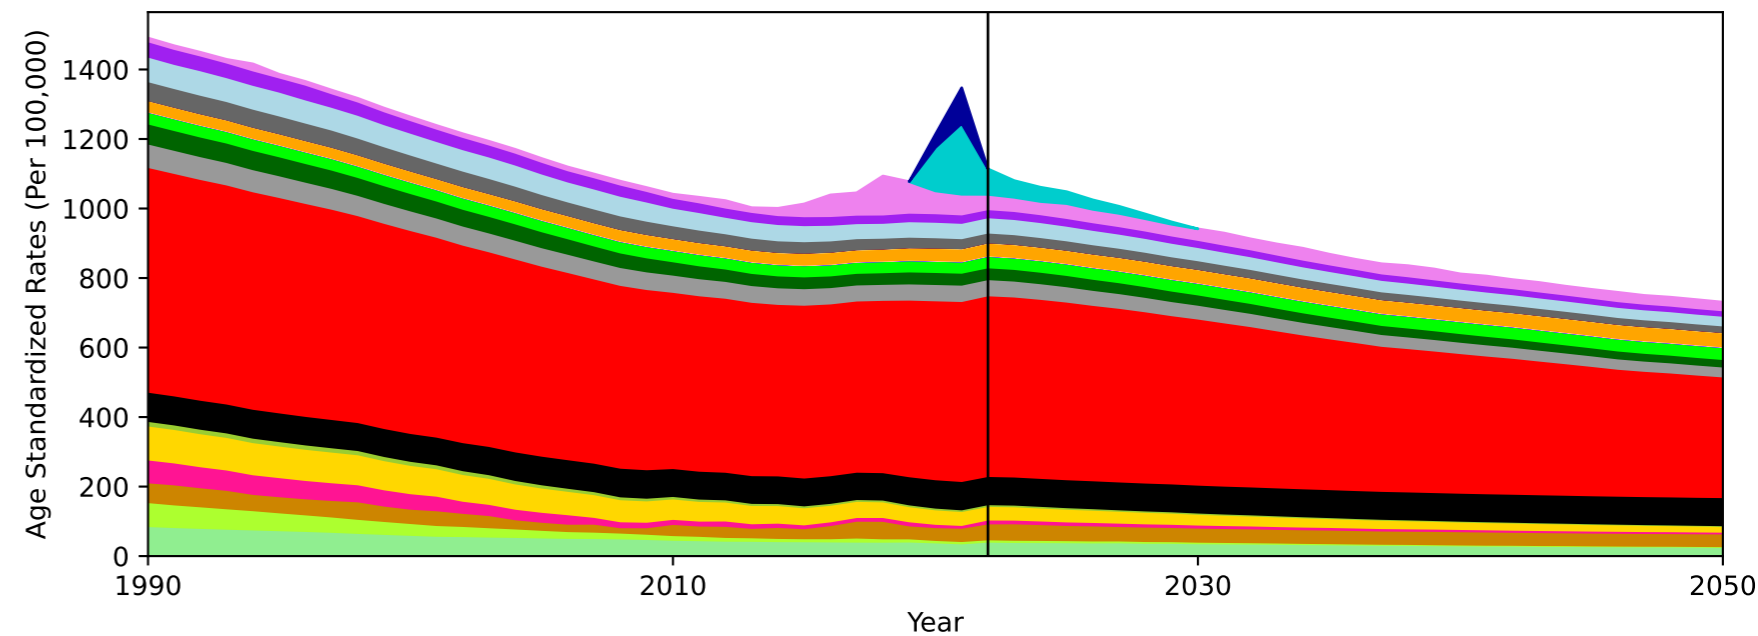

Level 1

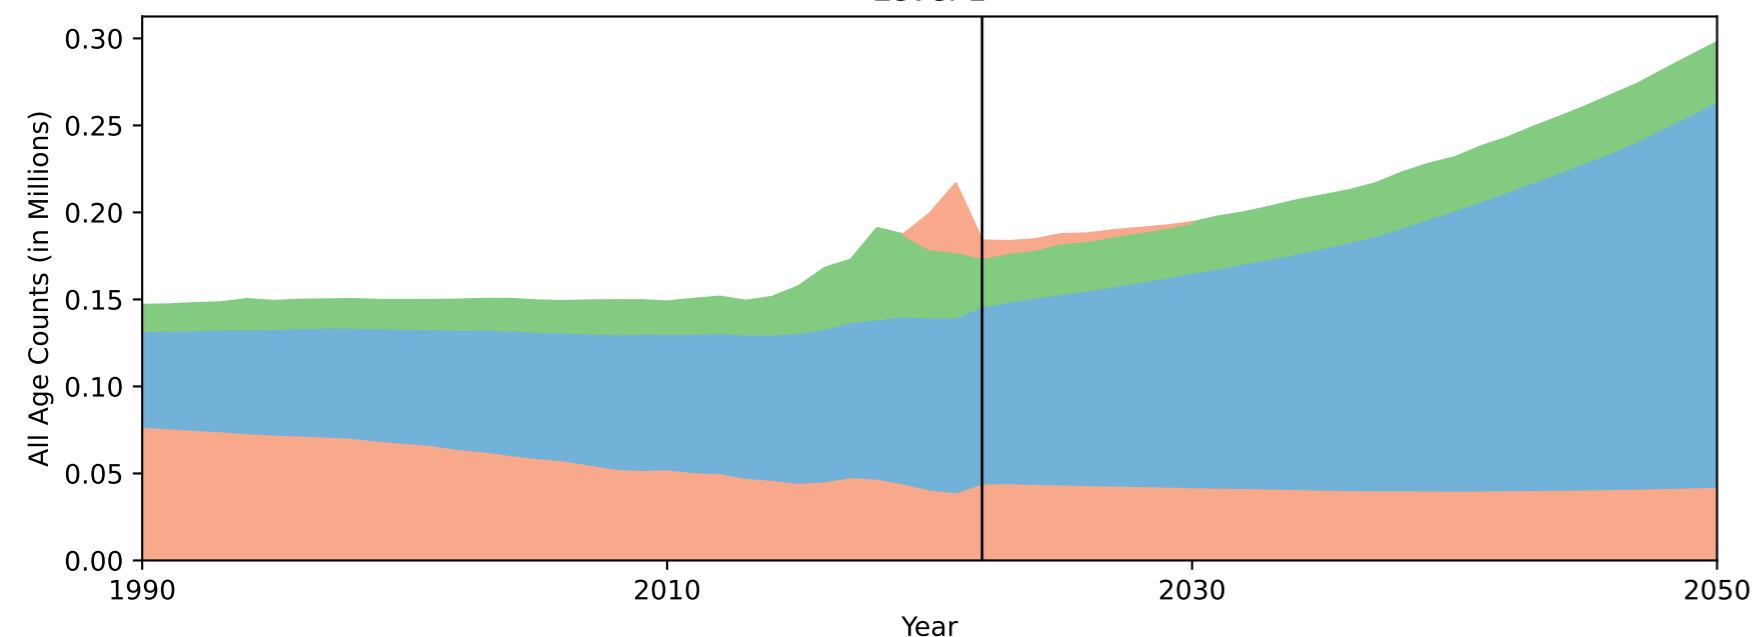

Level 2

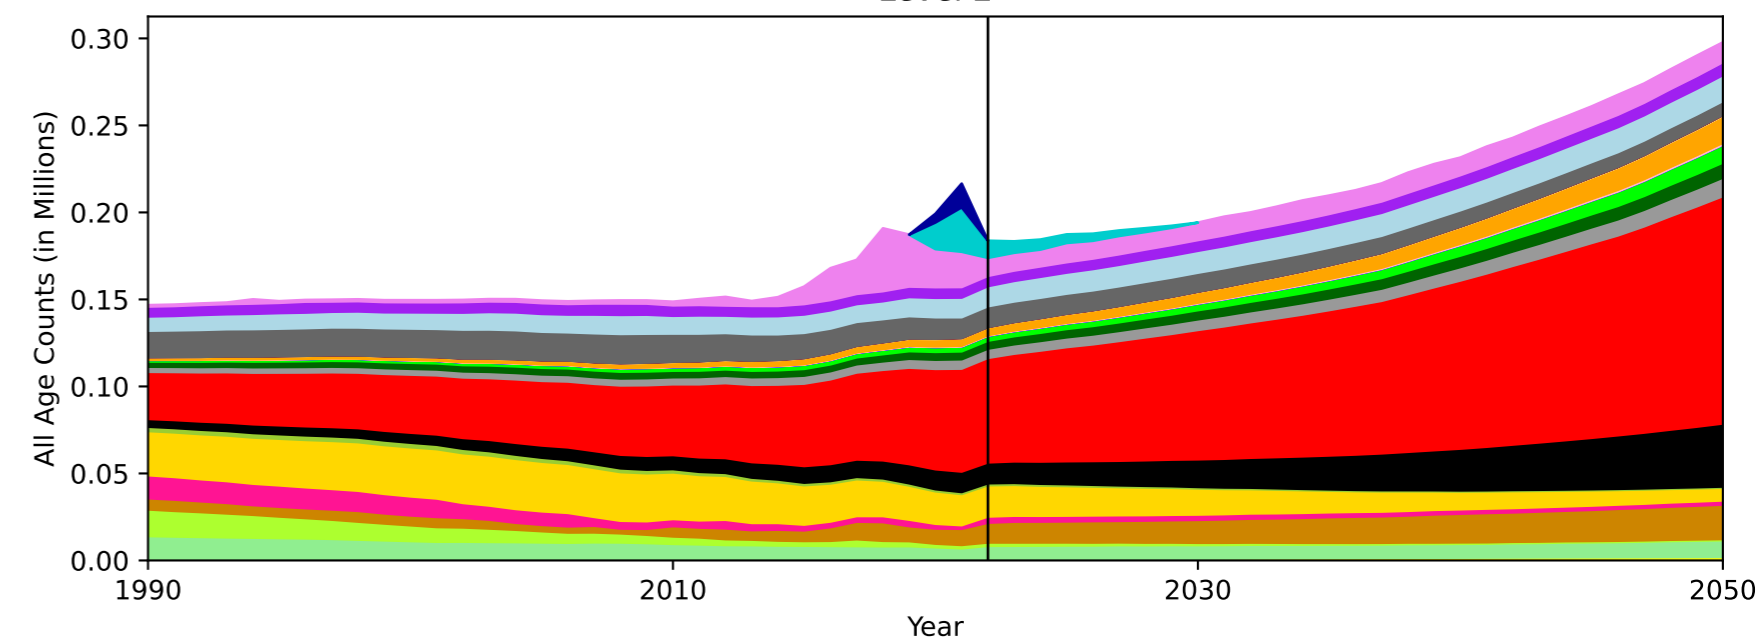

# Bangladesh

Level 1

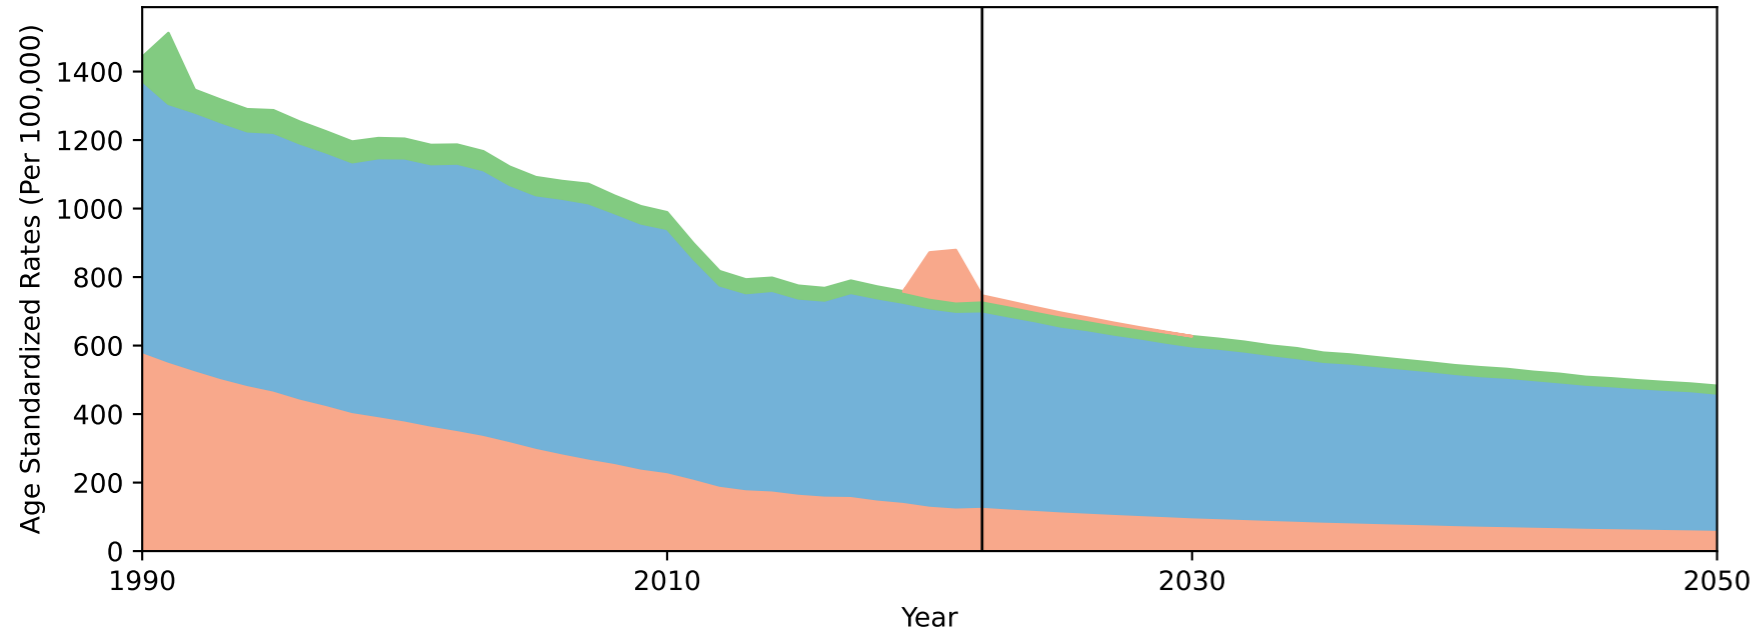

Level 2

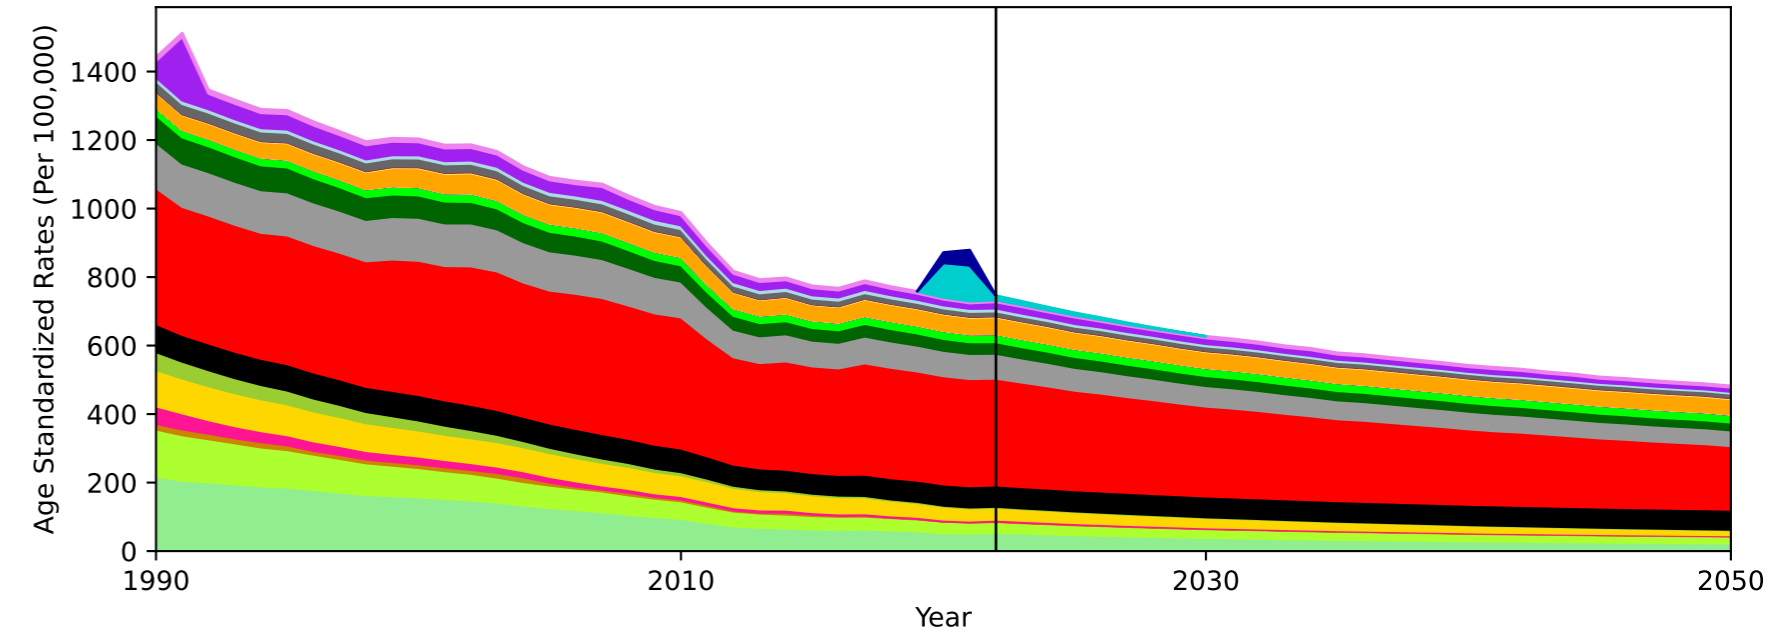

Level 1

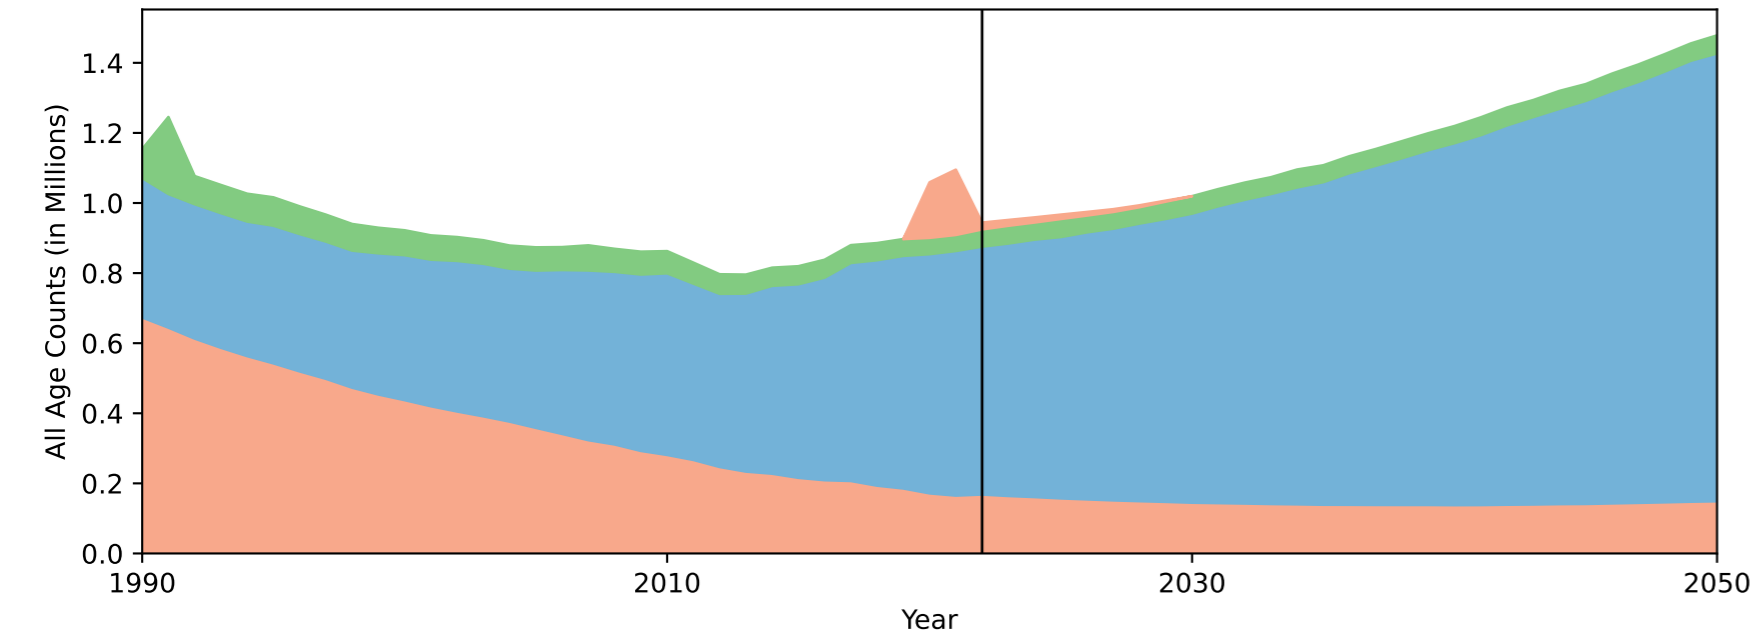

Level 2

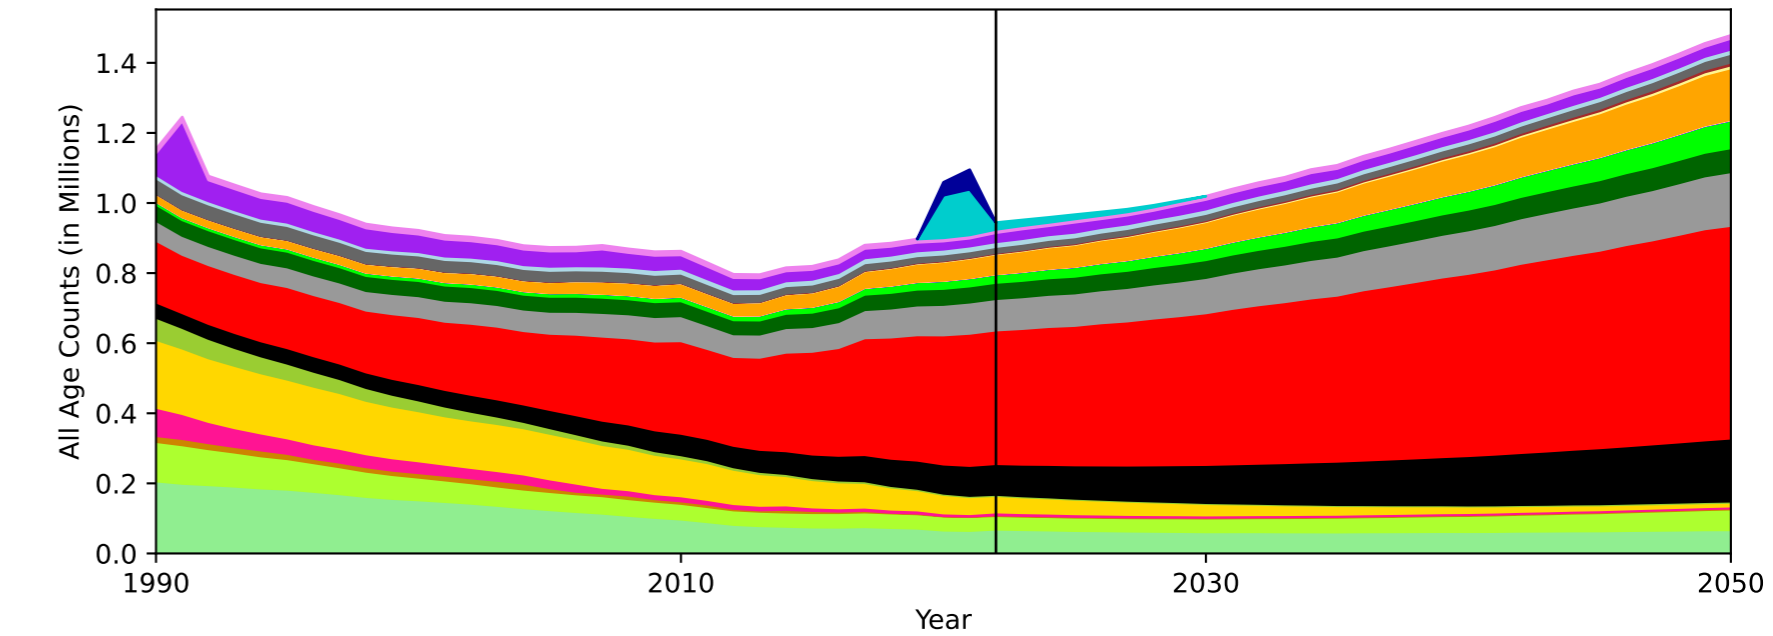

Level 1

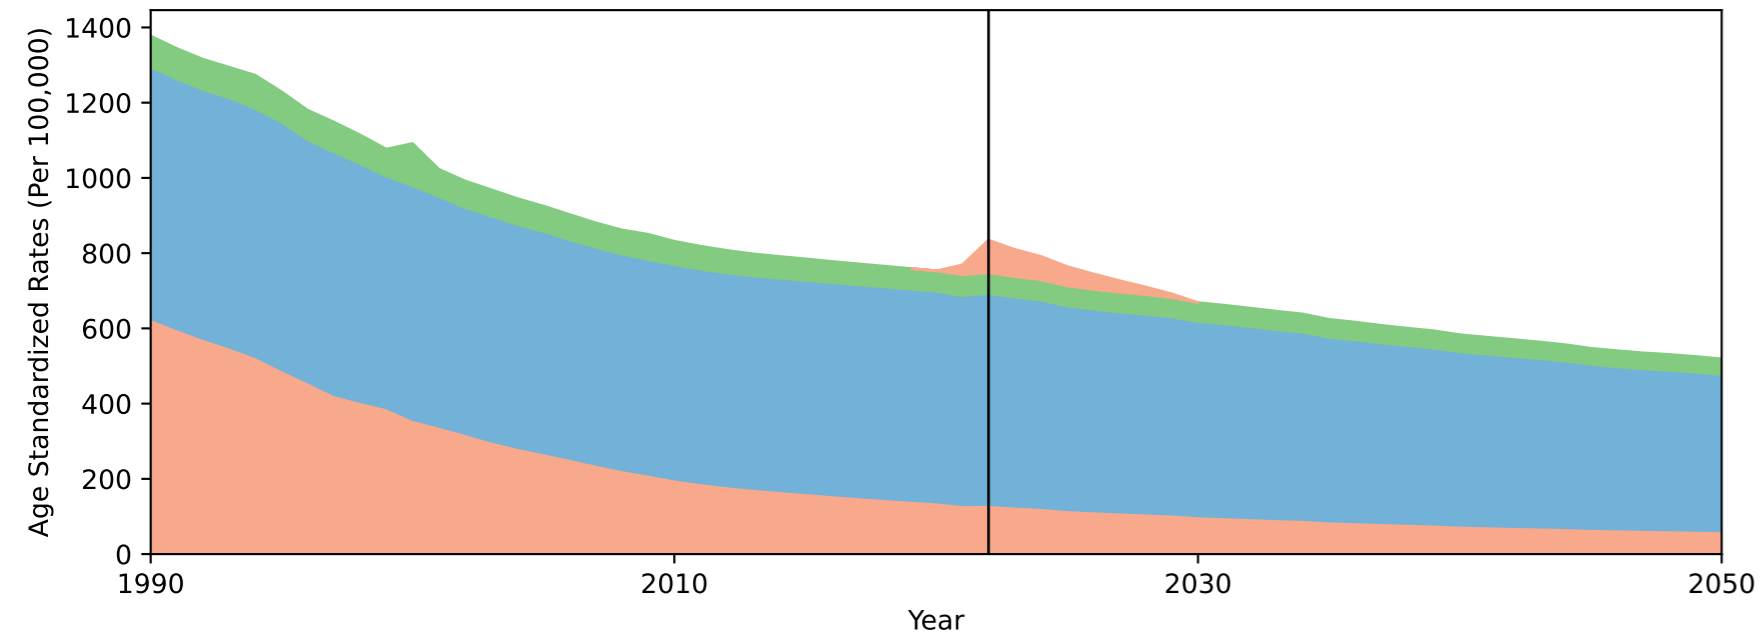

Level 2

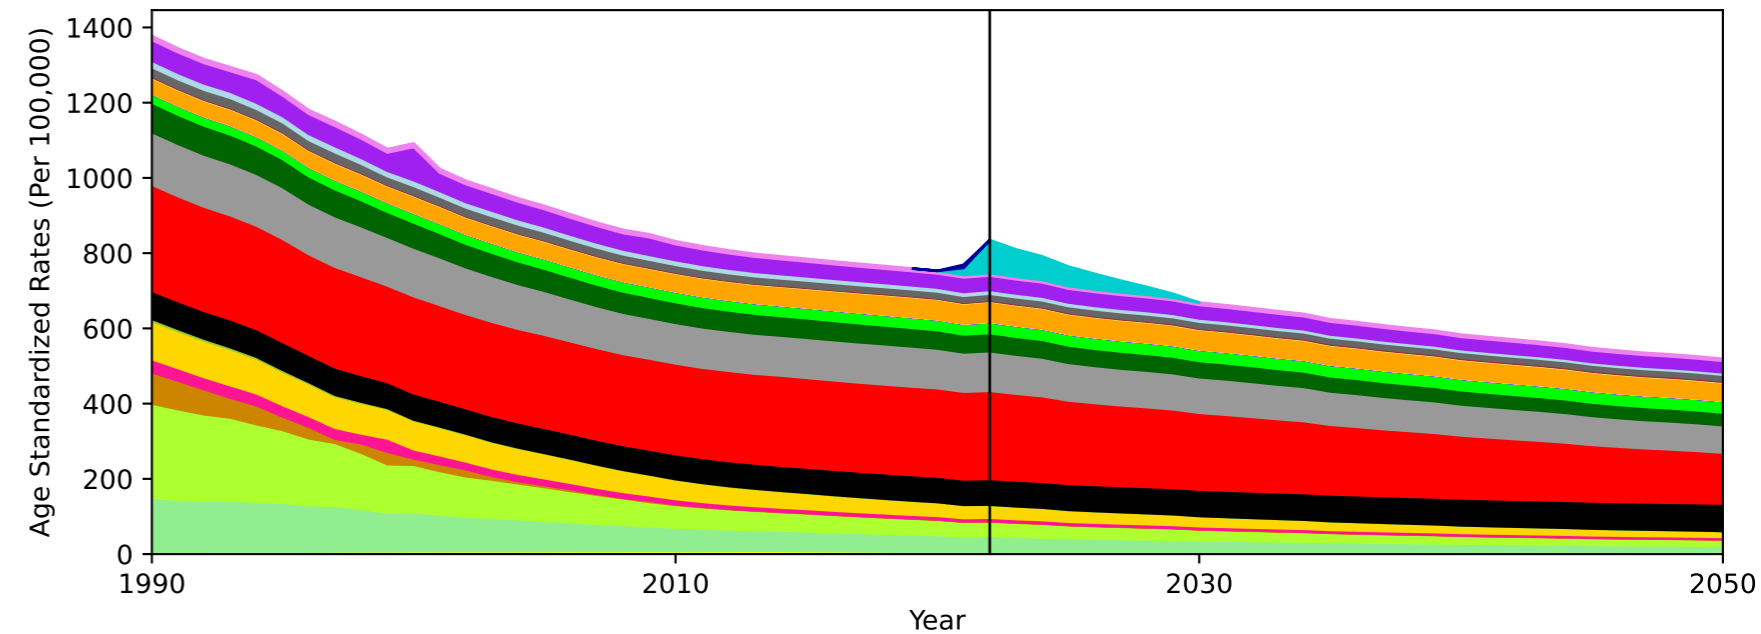

Level 1

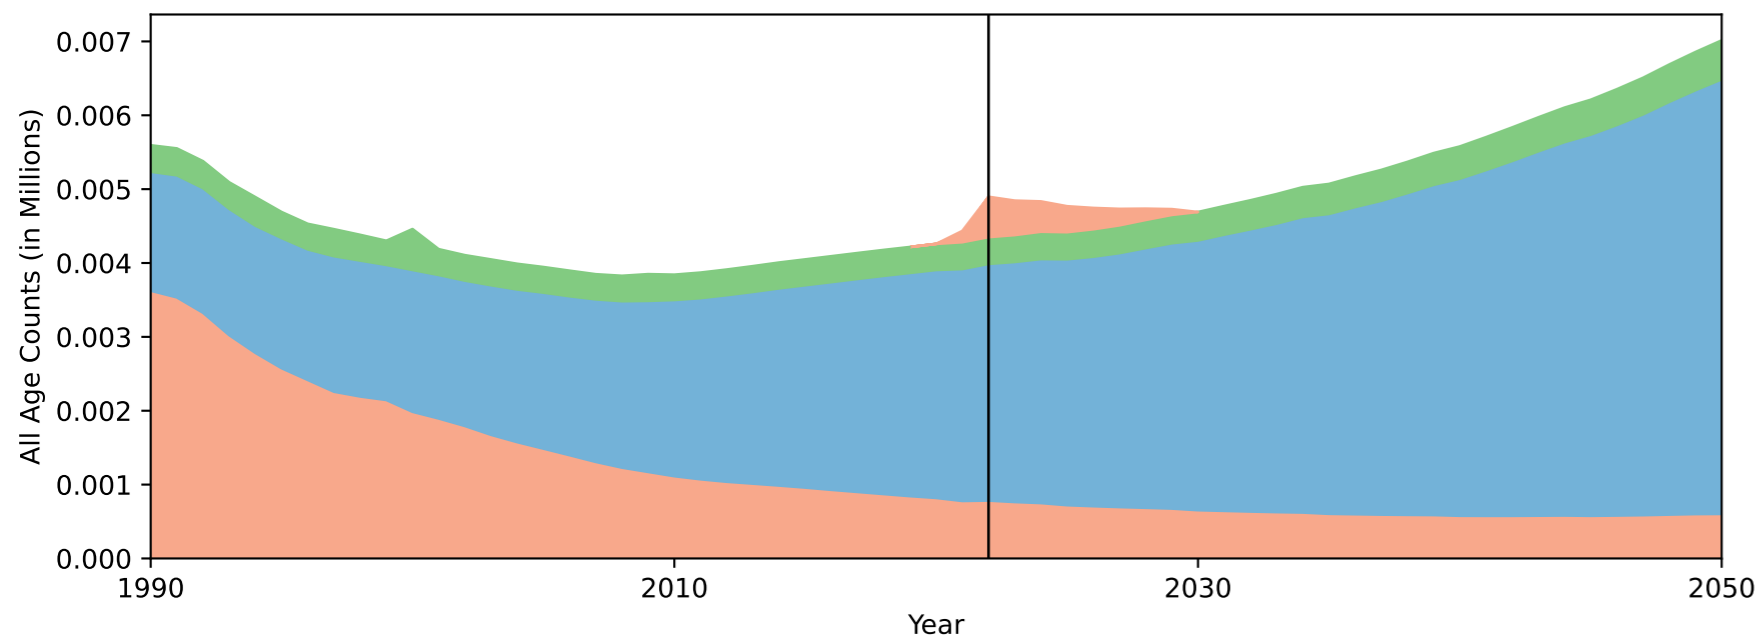

Level 2

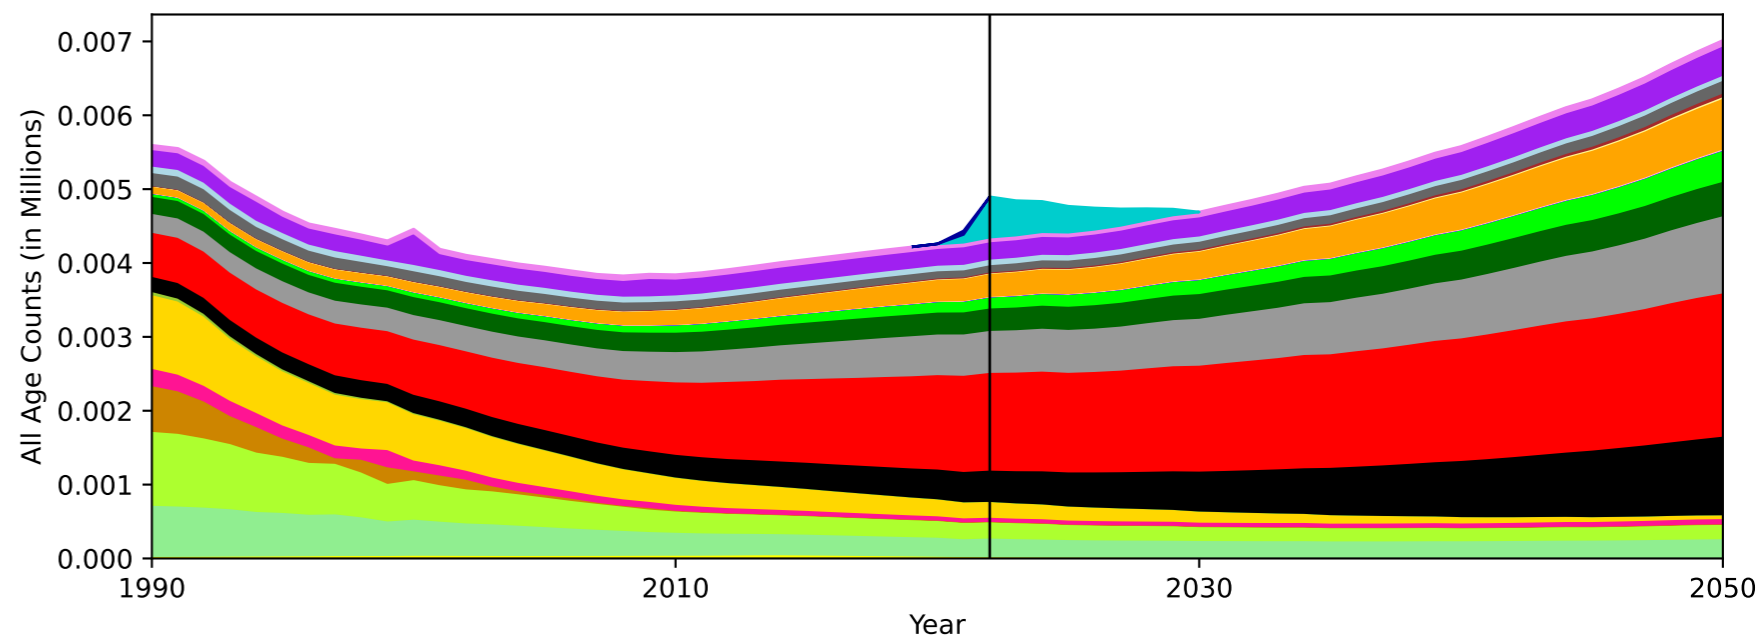

Level 1

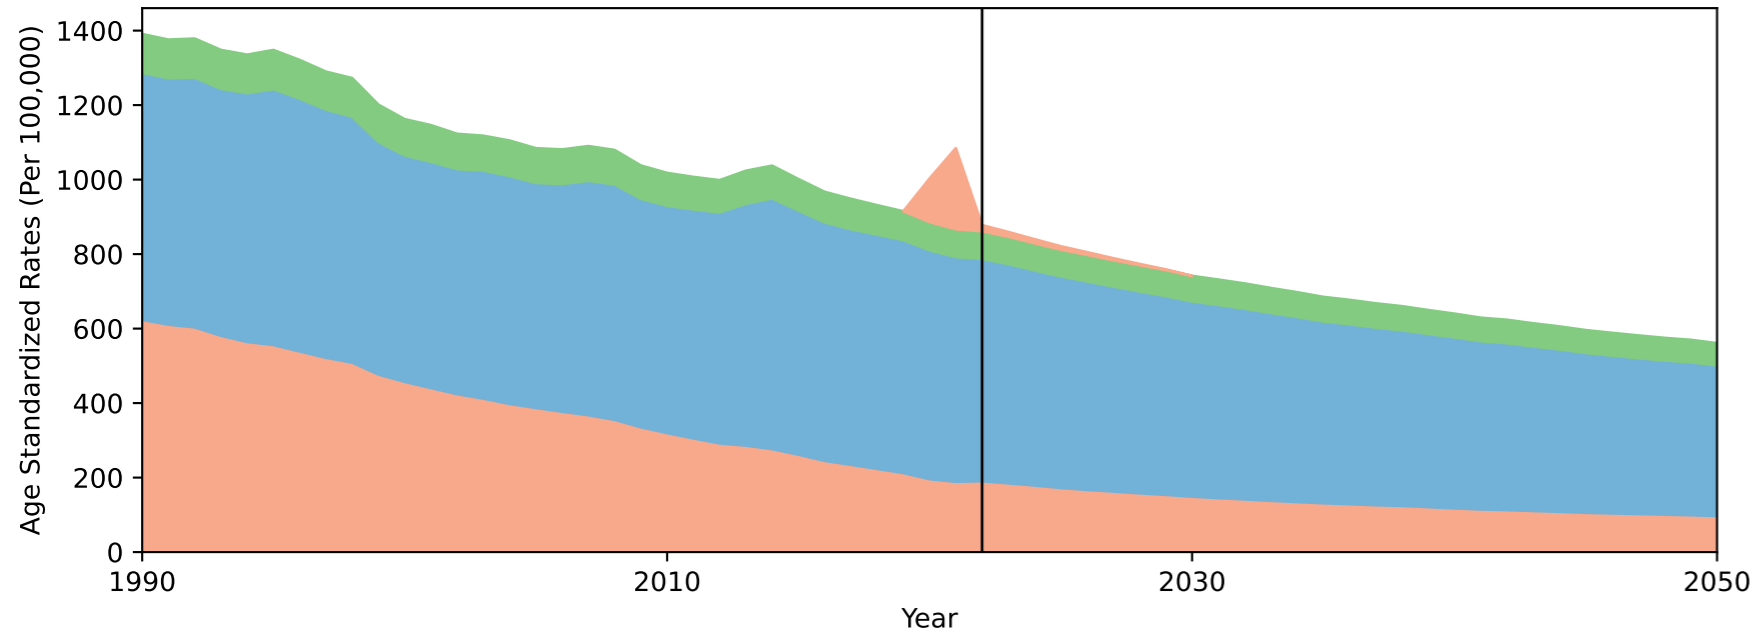

Level 2

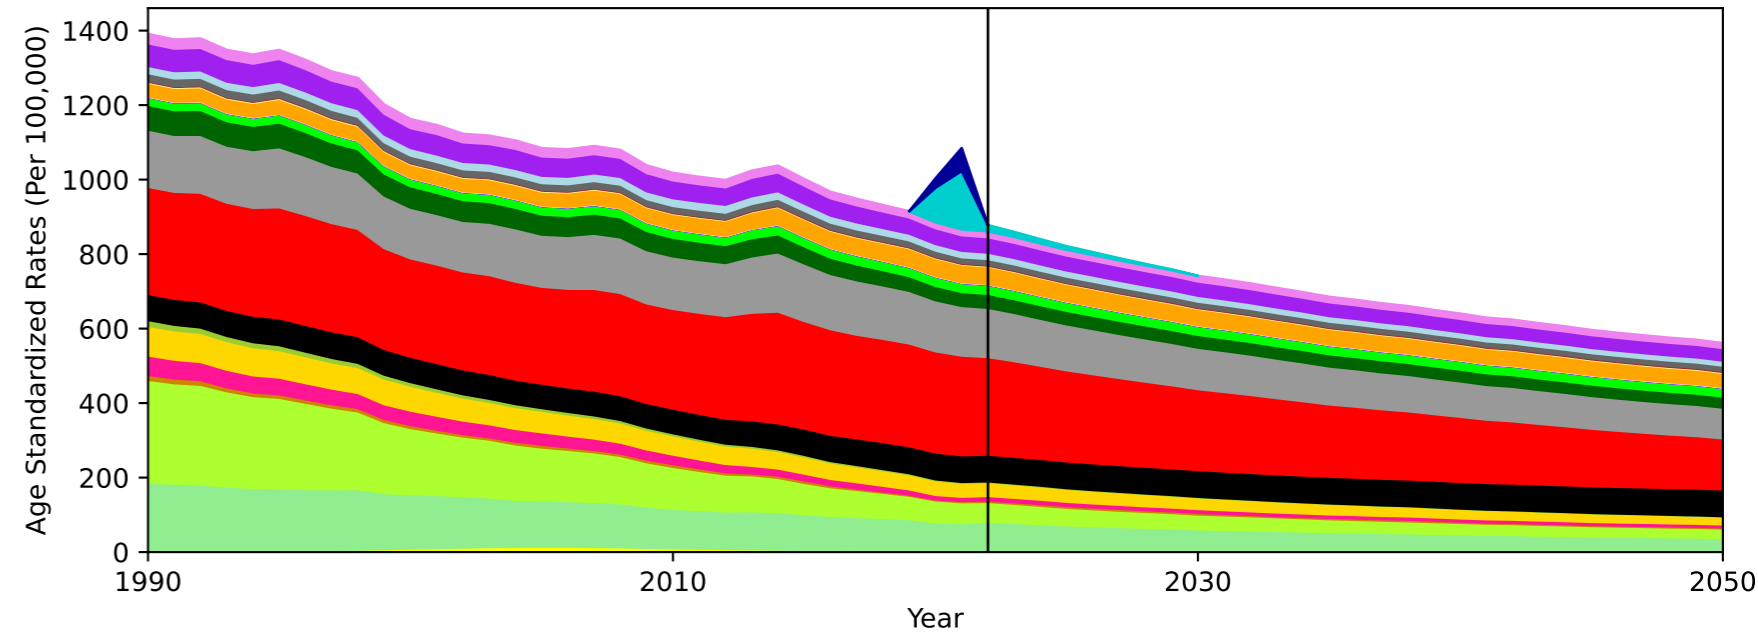

Level 1

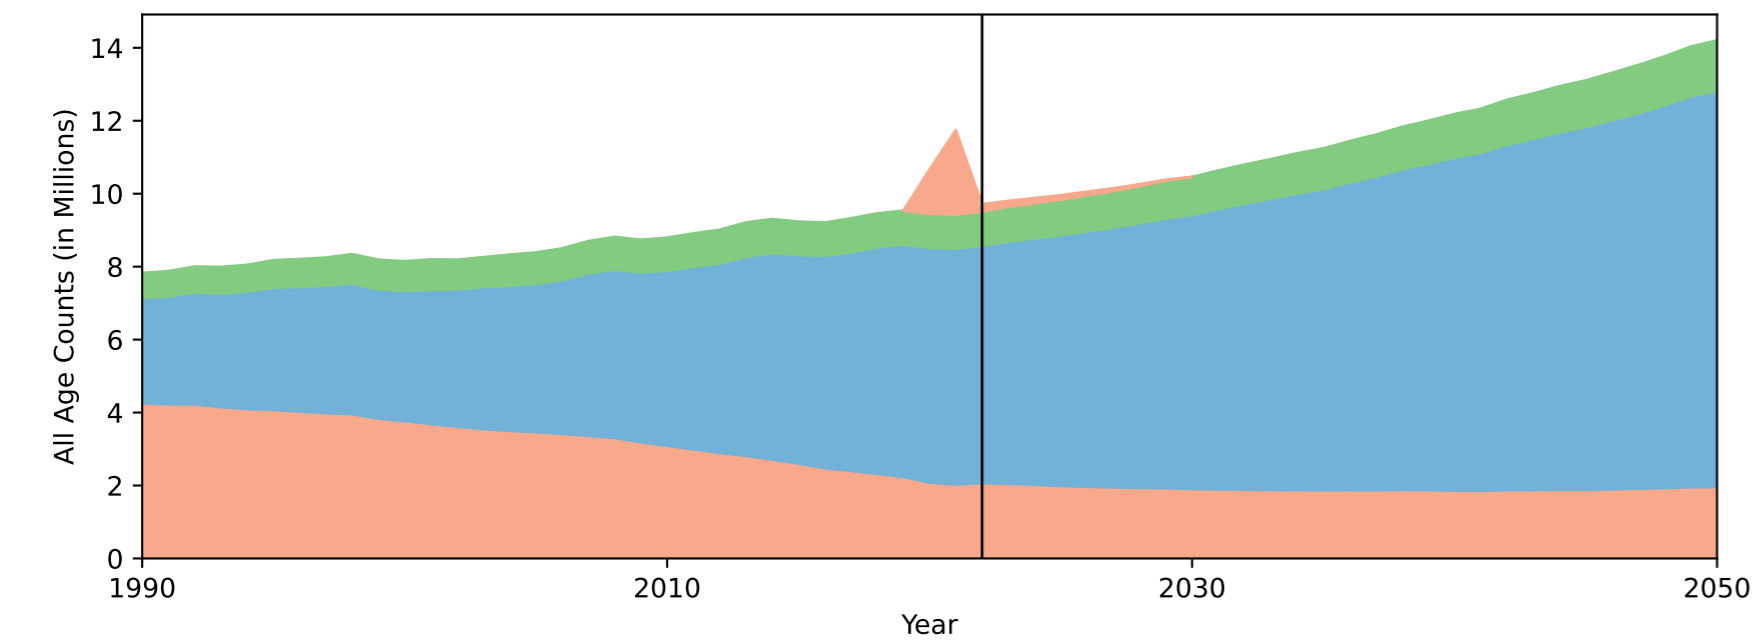

Level 2

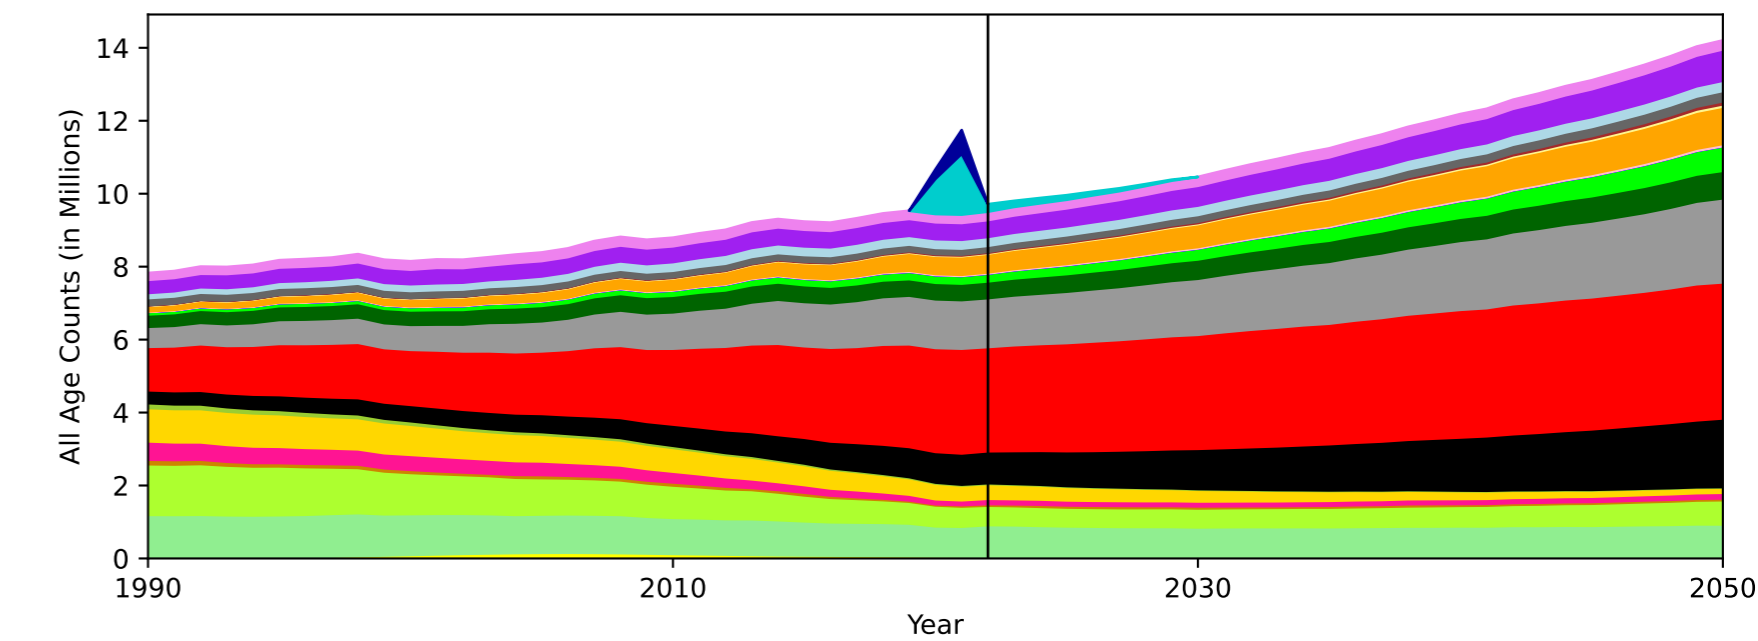



# Nepal

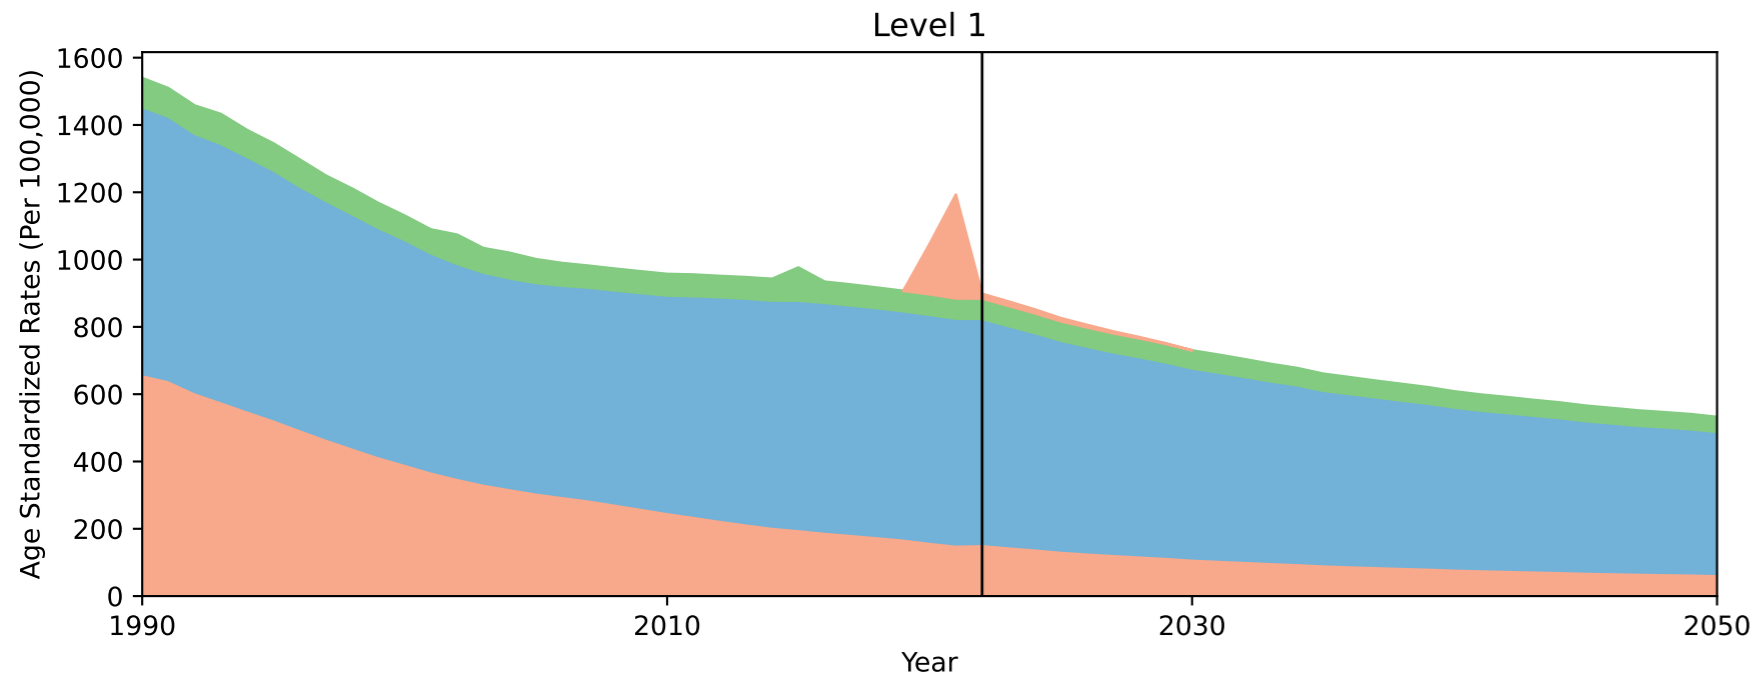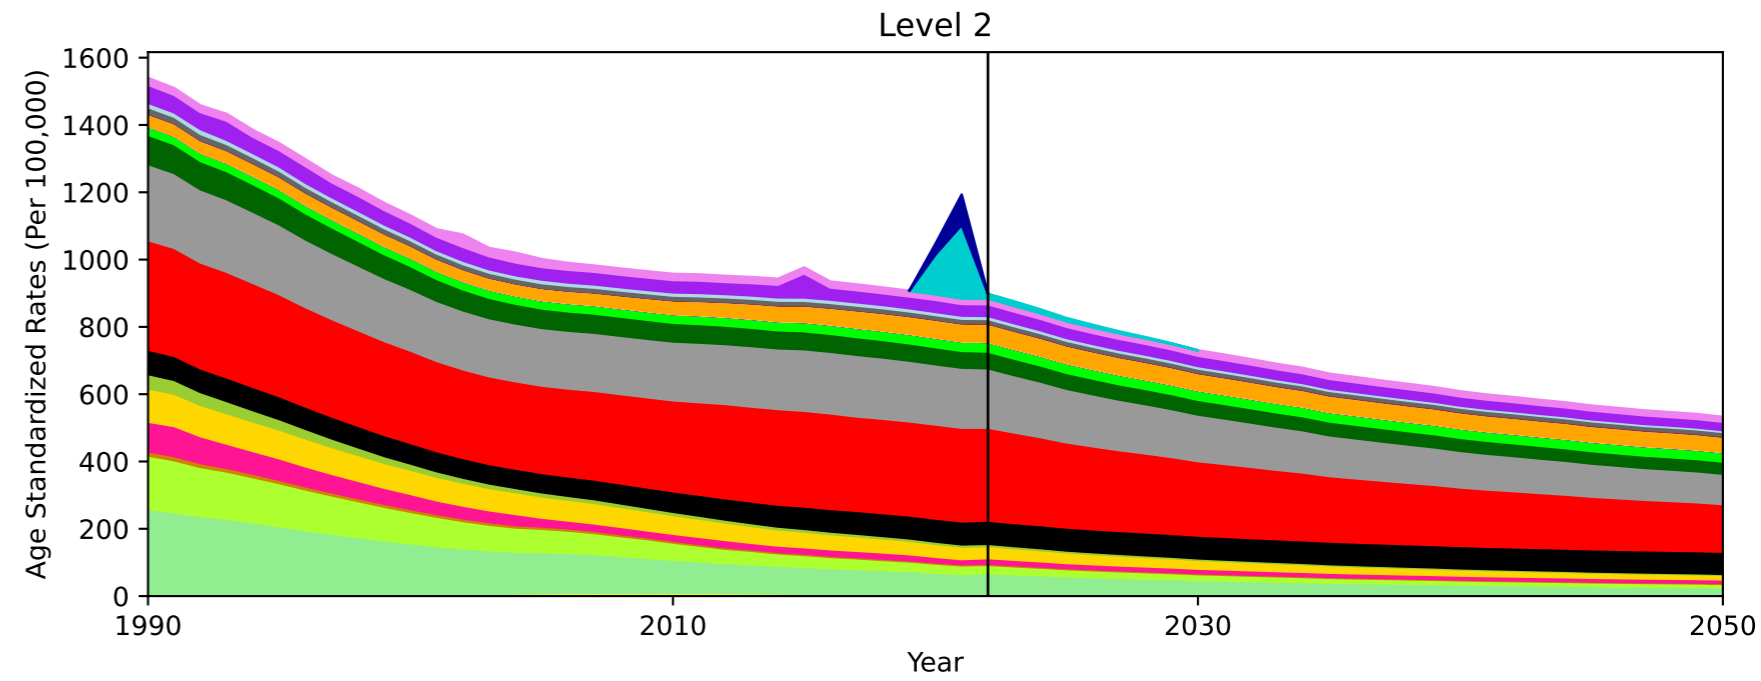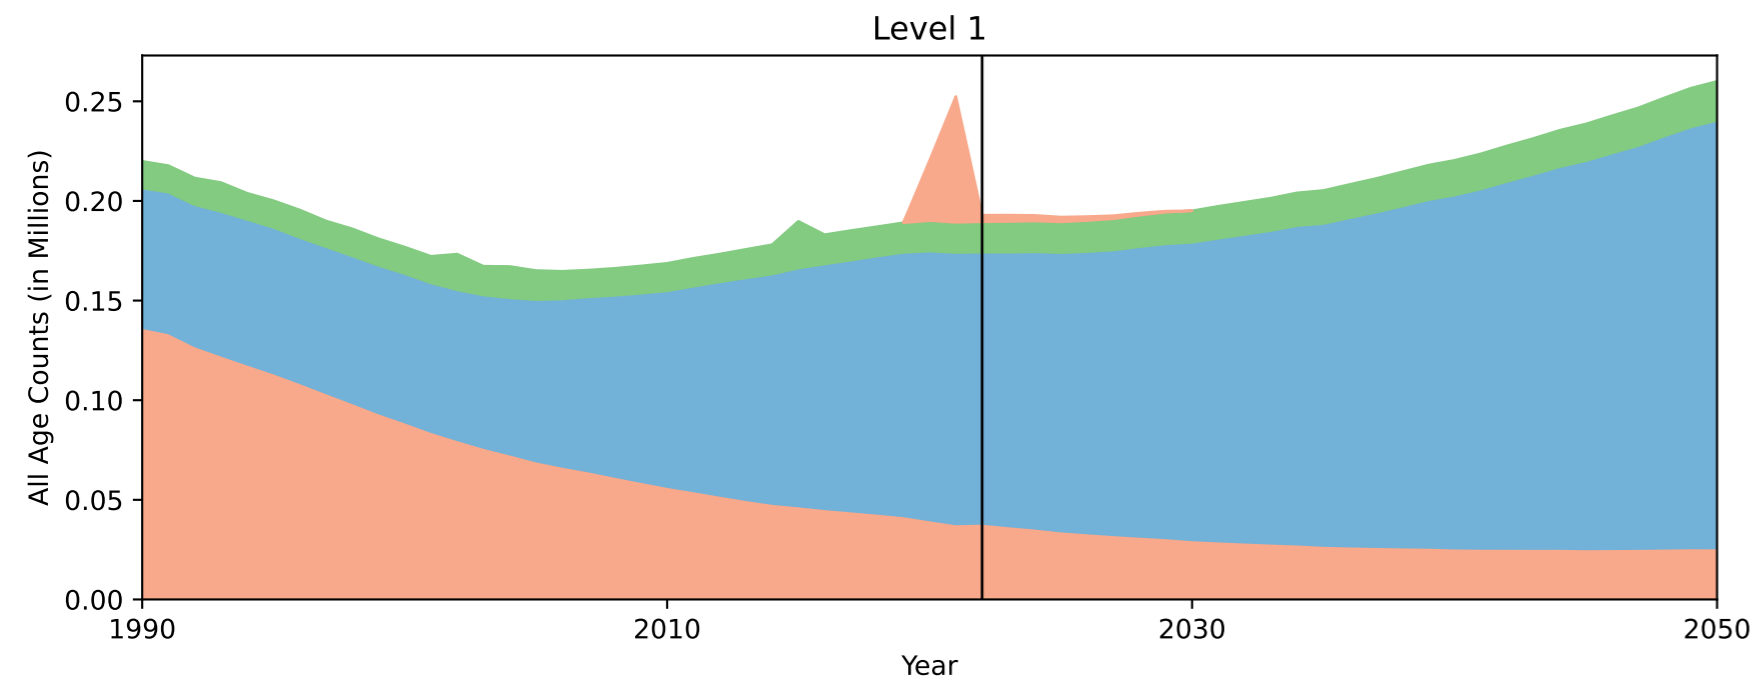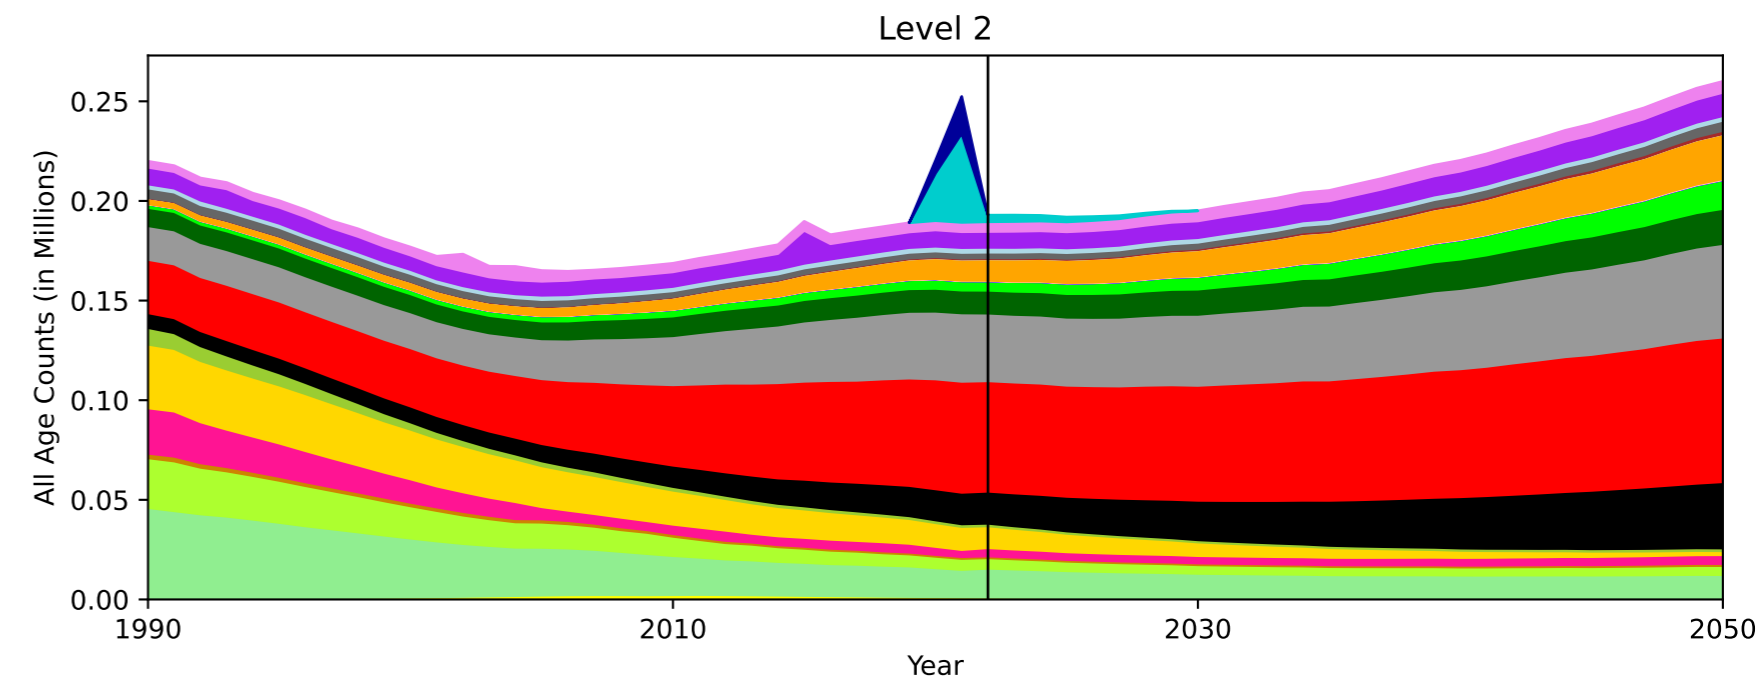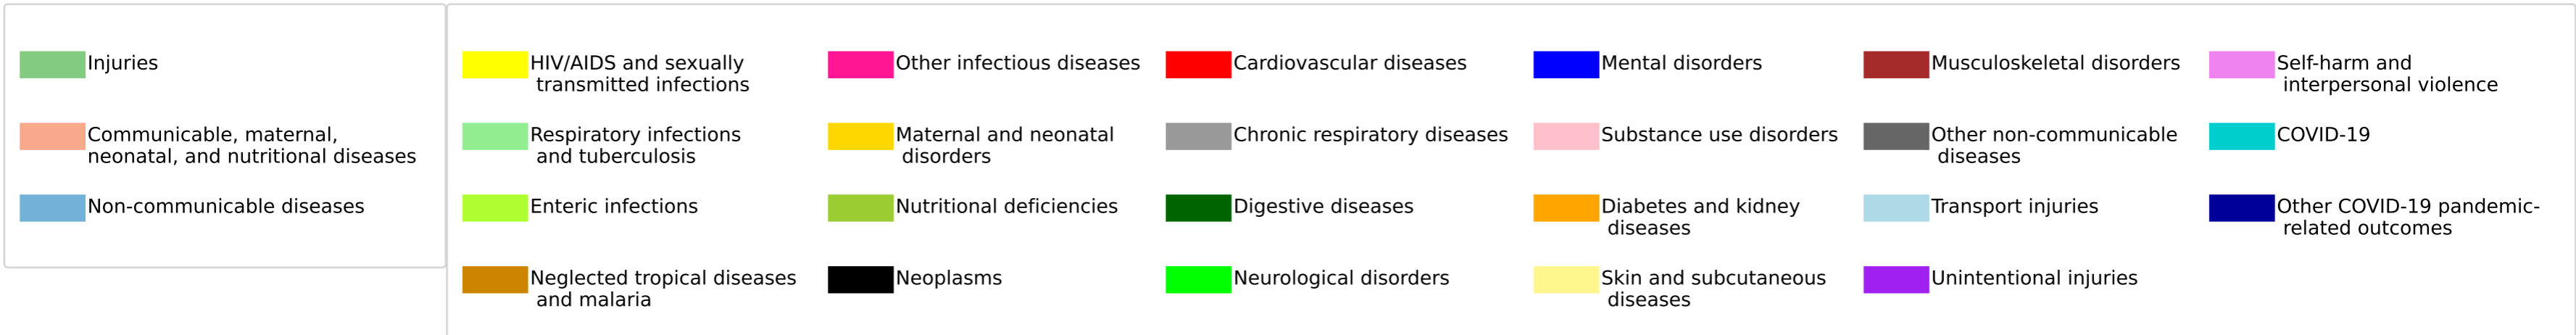

# Pakistan

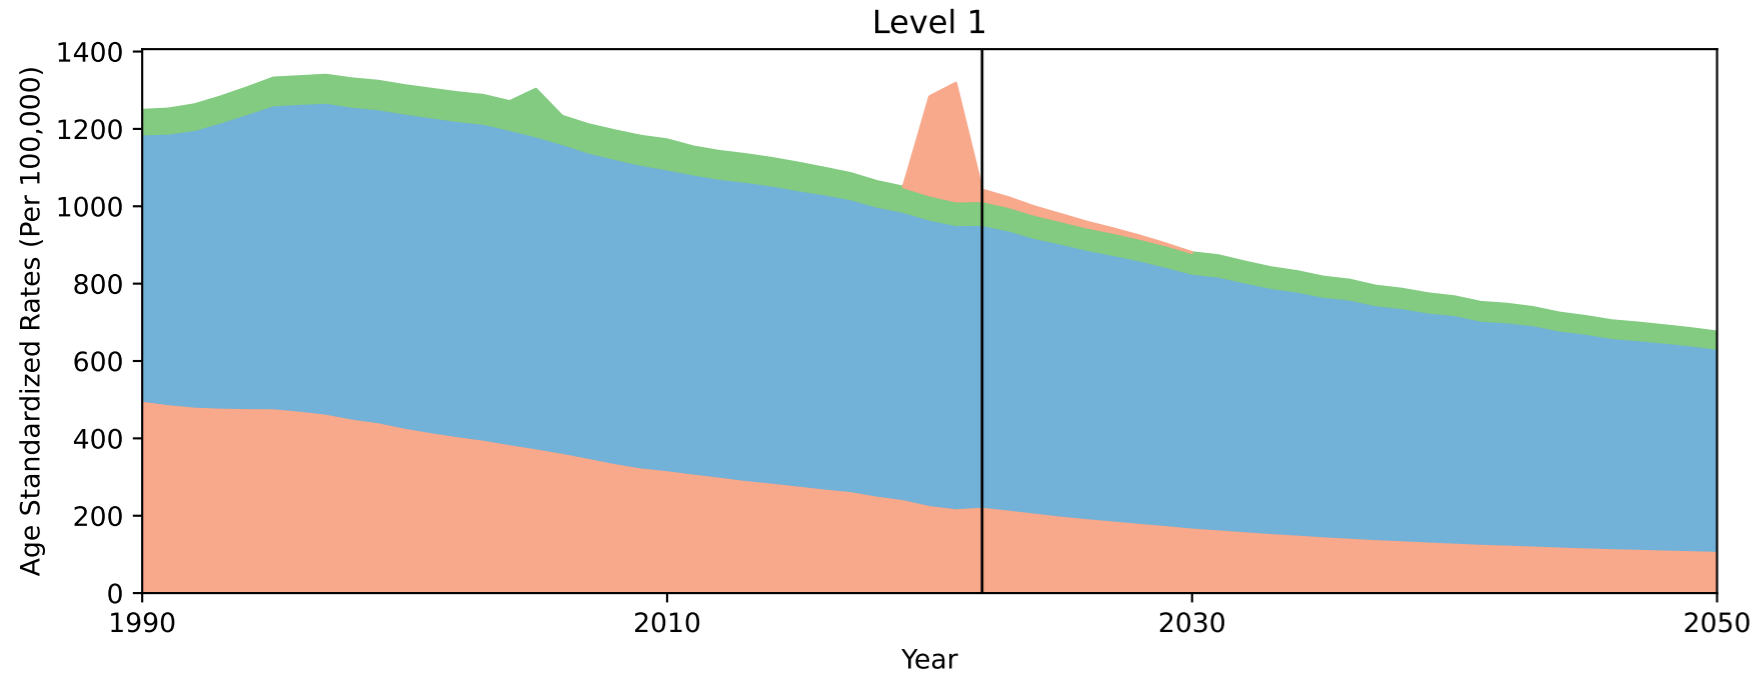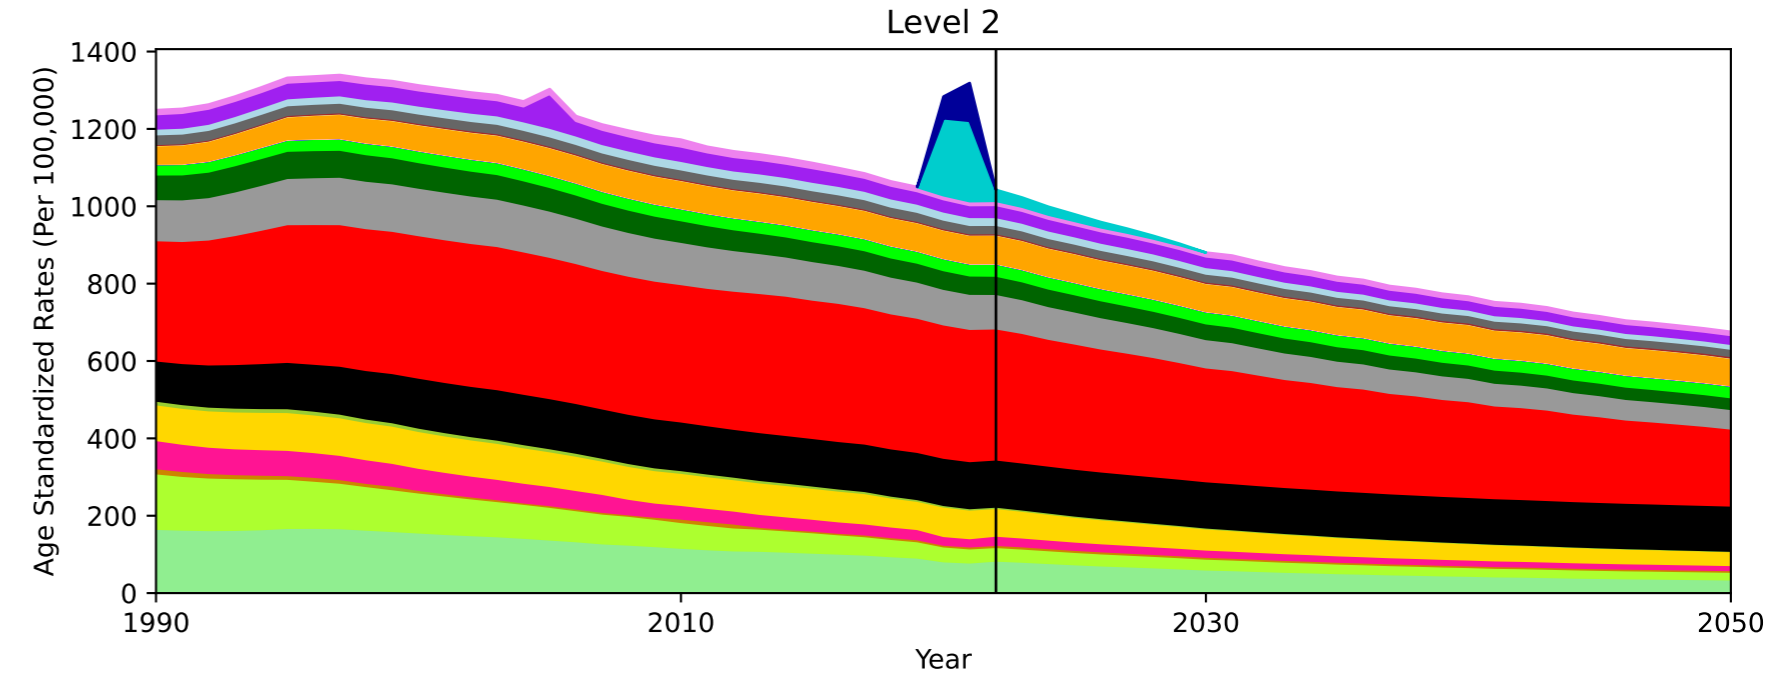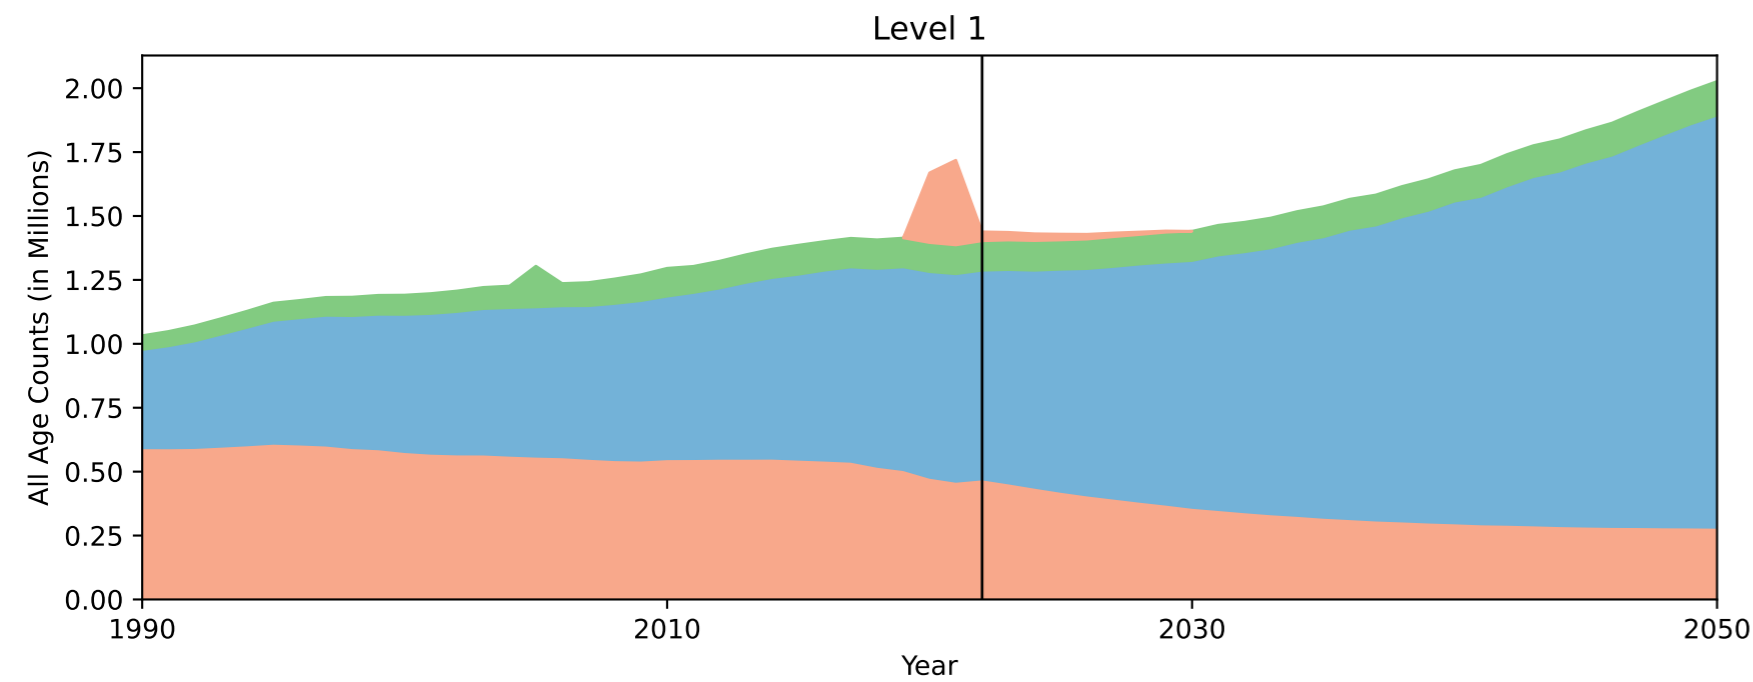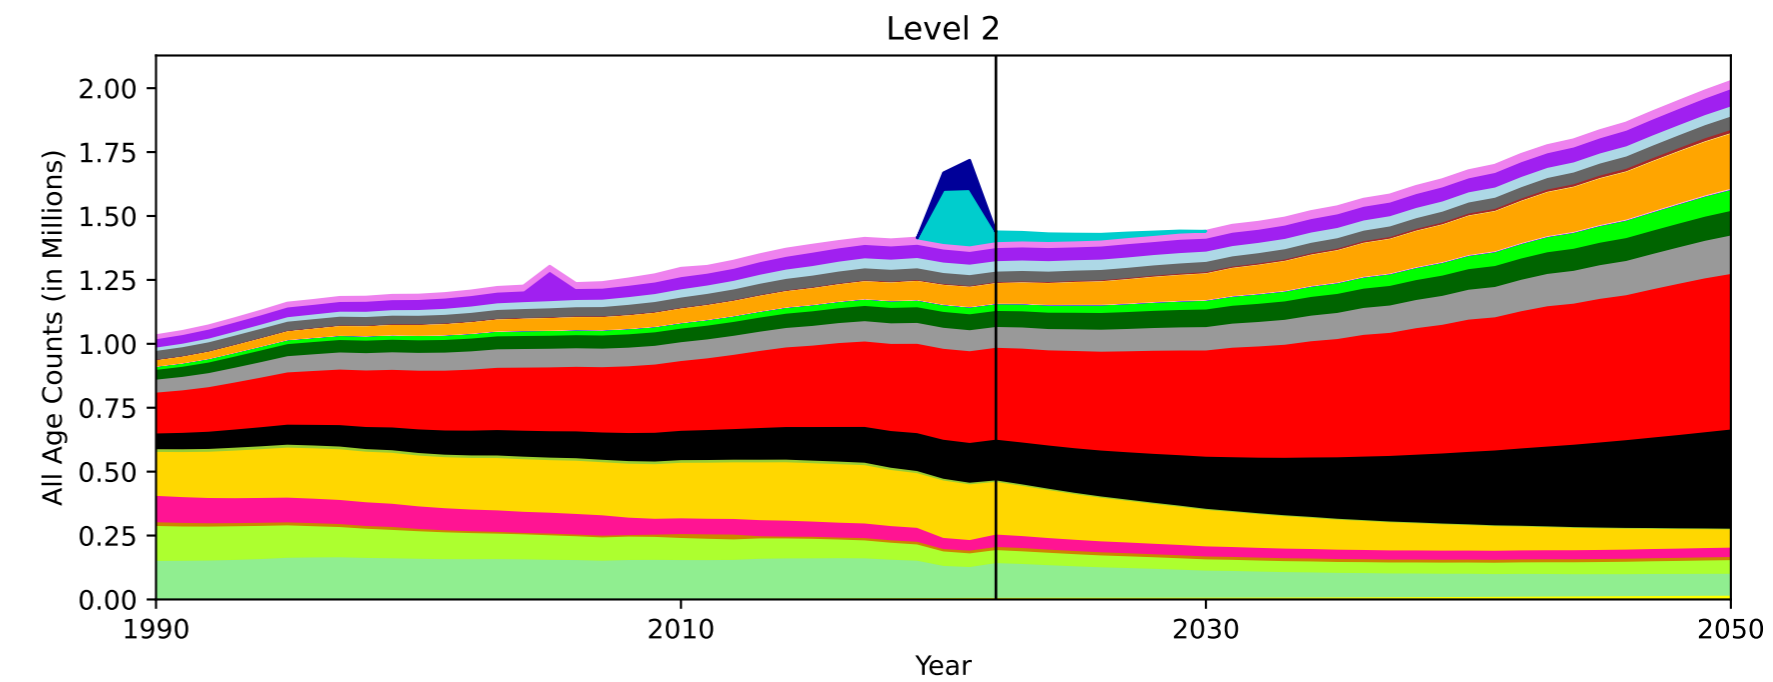

Level 1

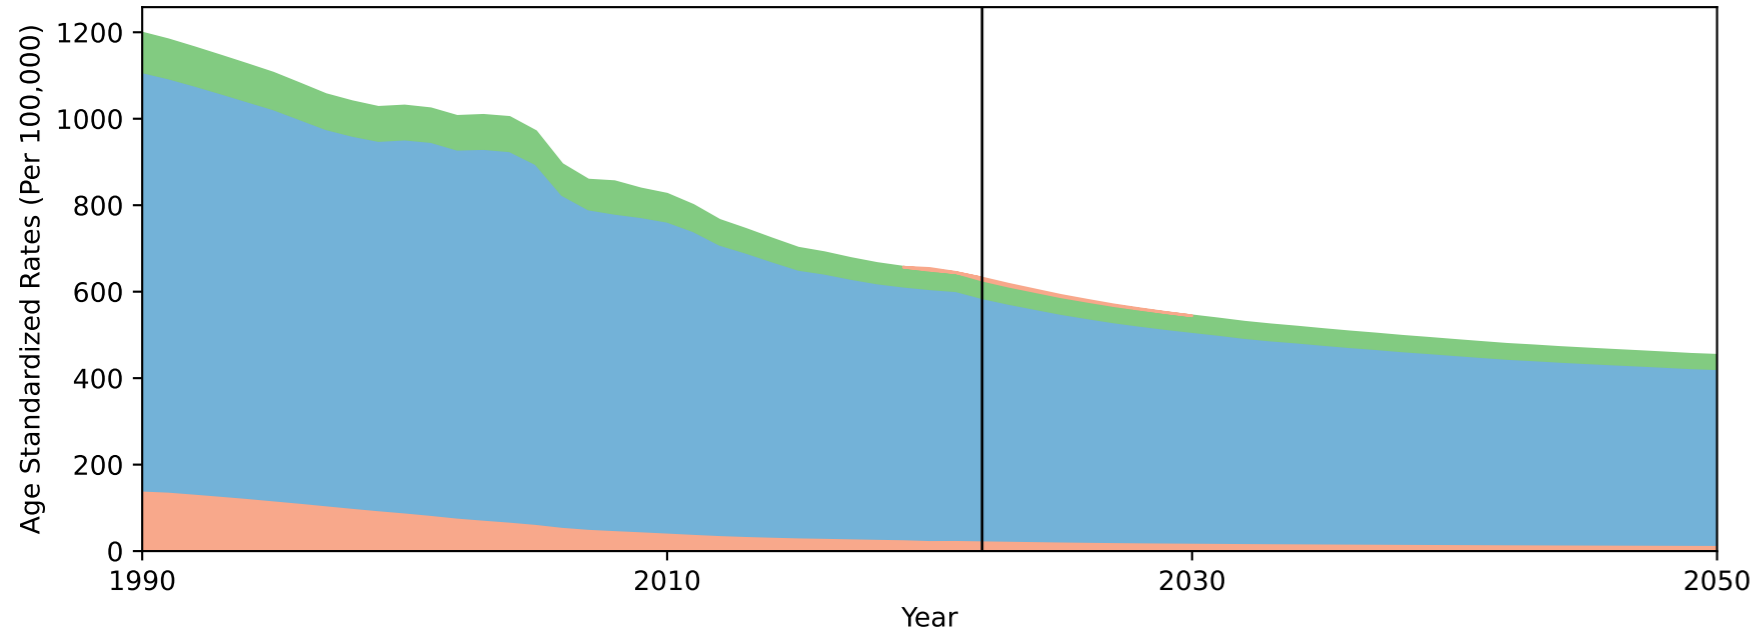

Level 2

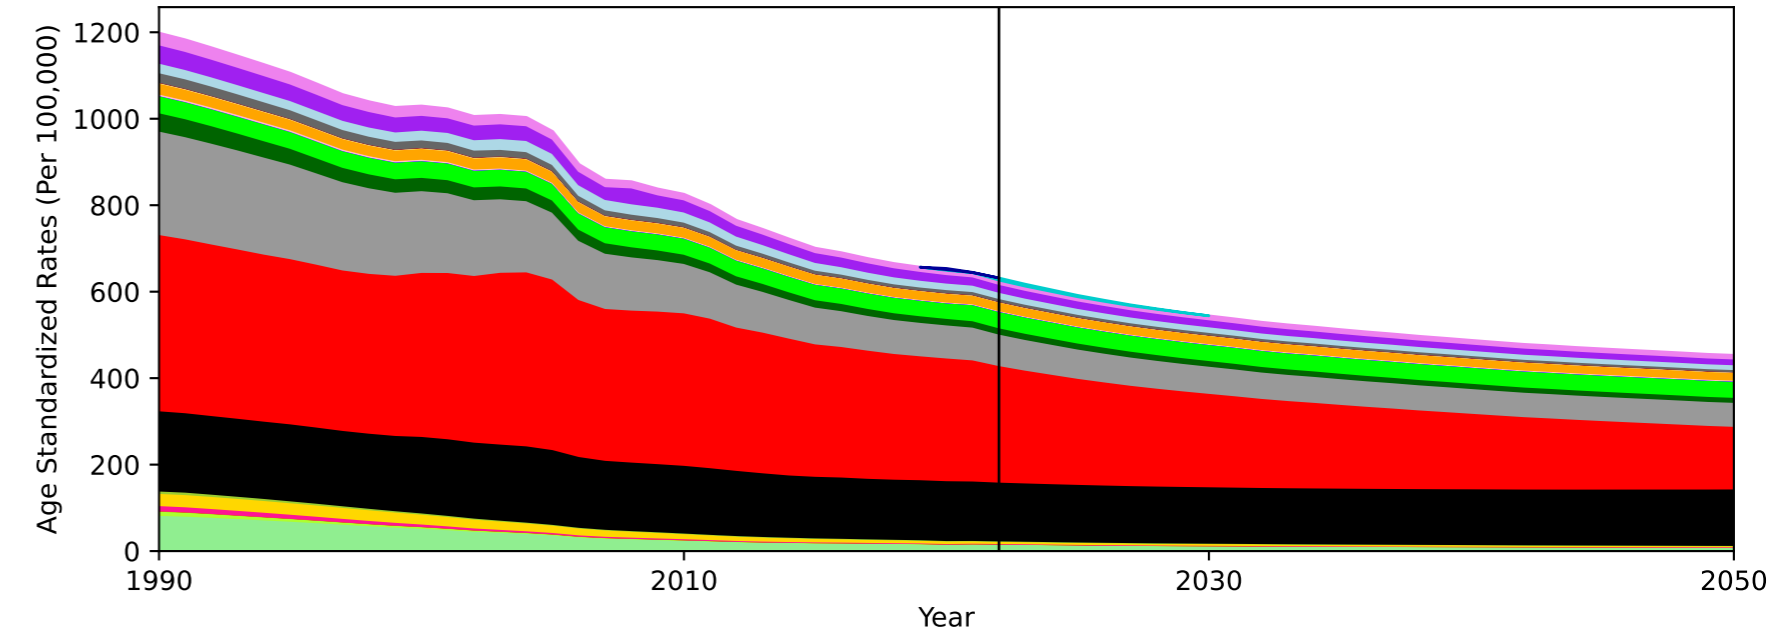

Level 1

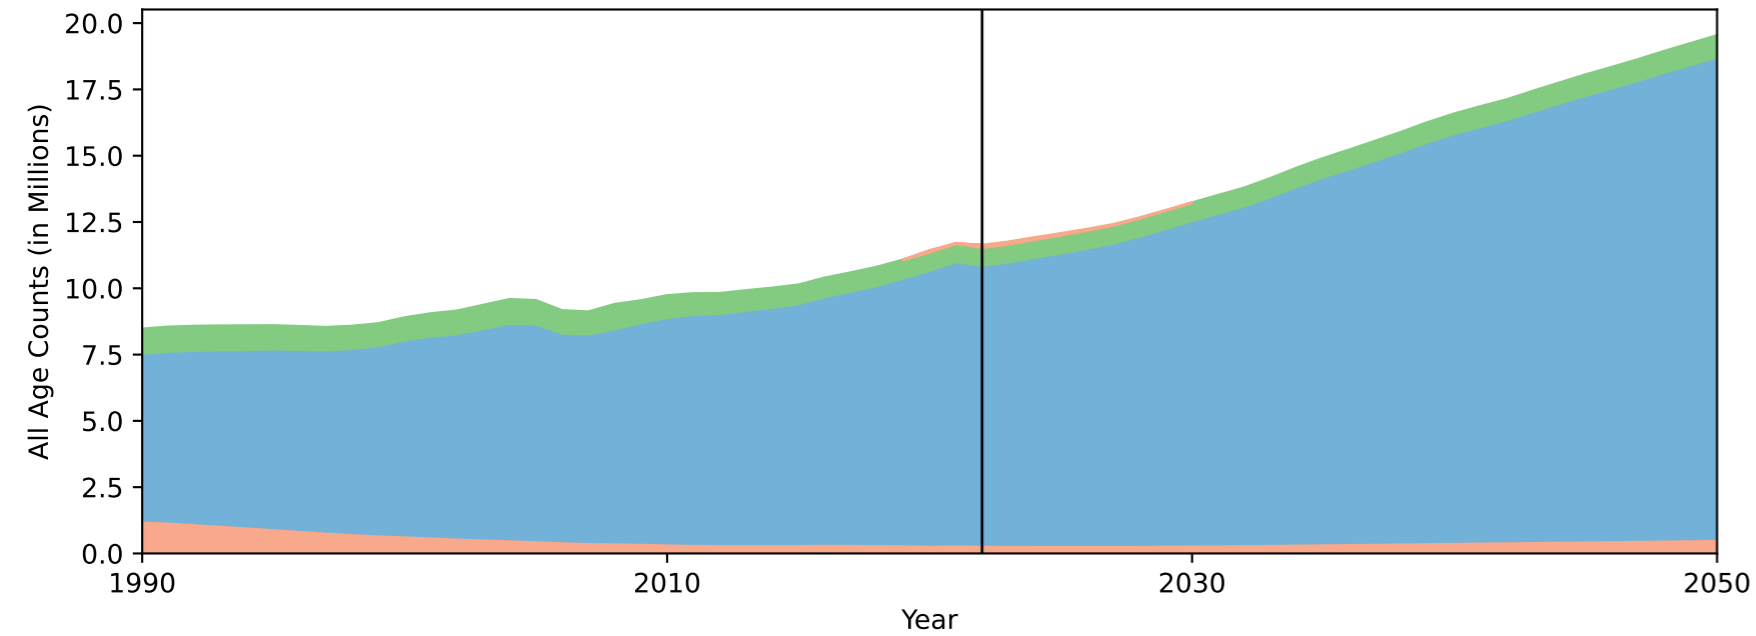

Level 2

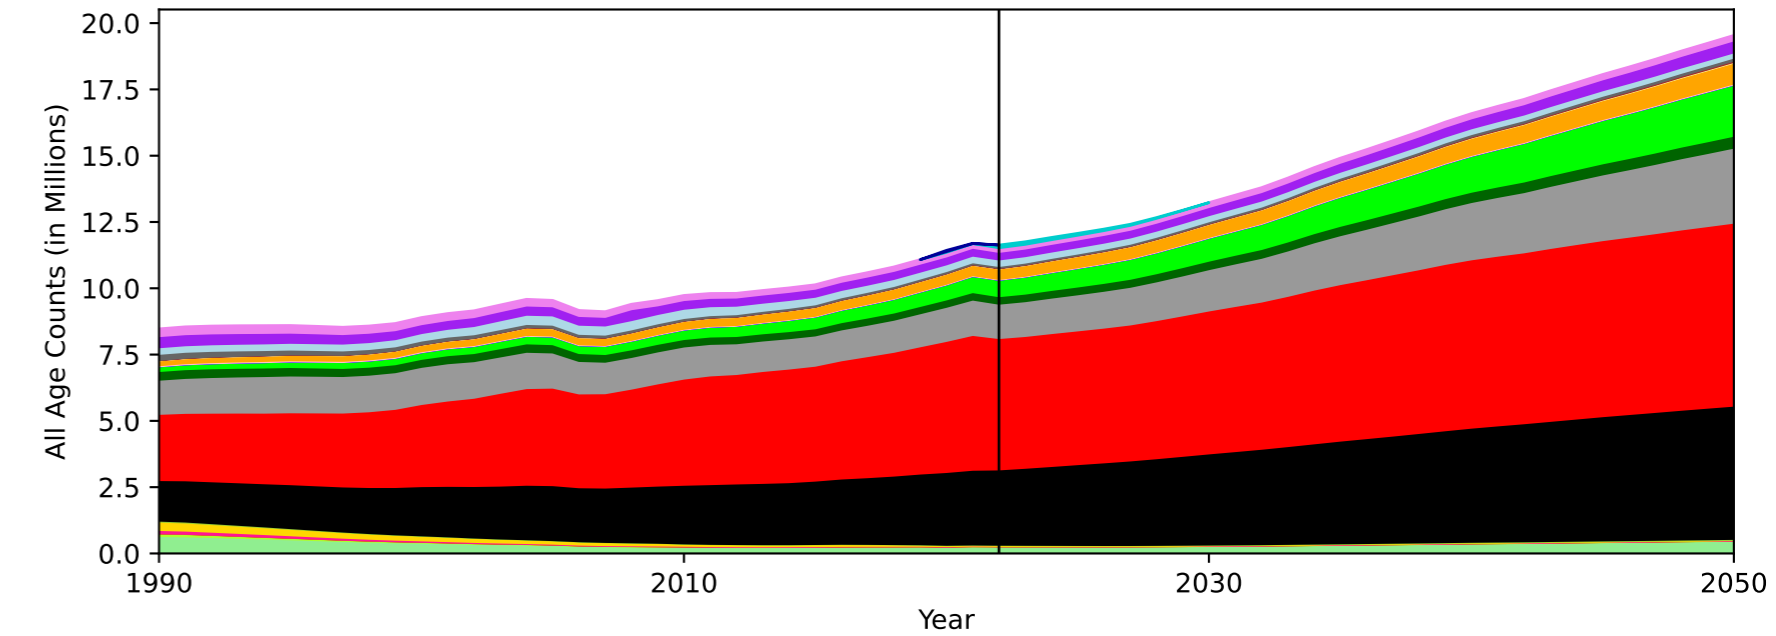

# North Korea

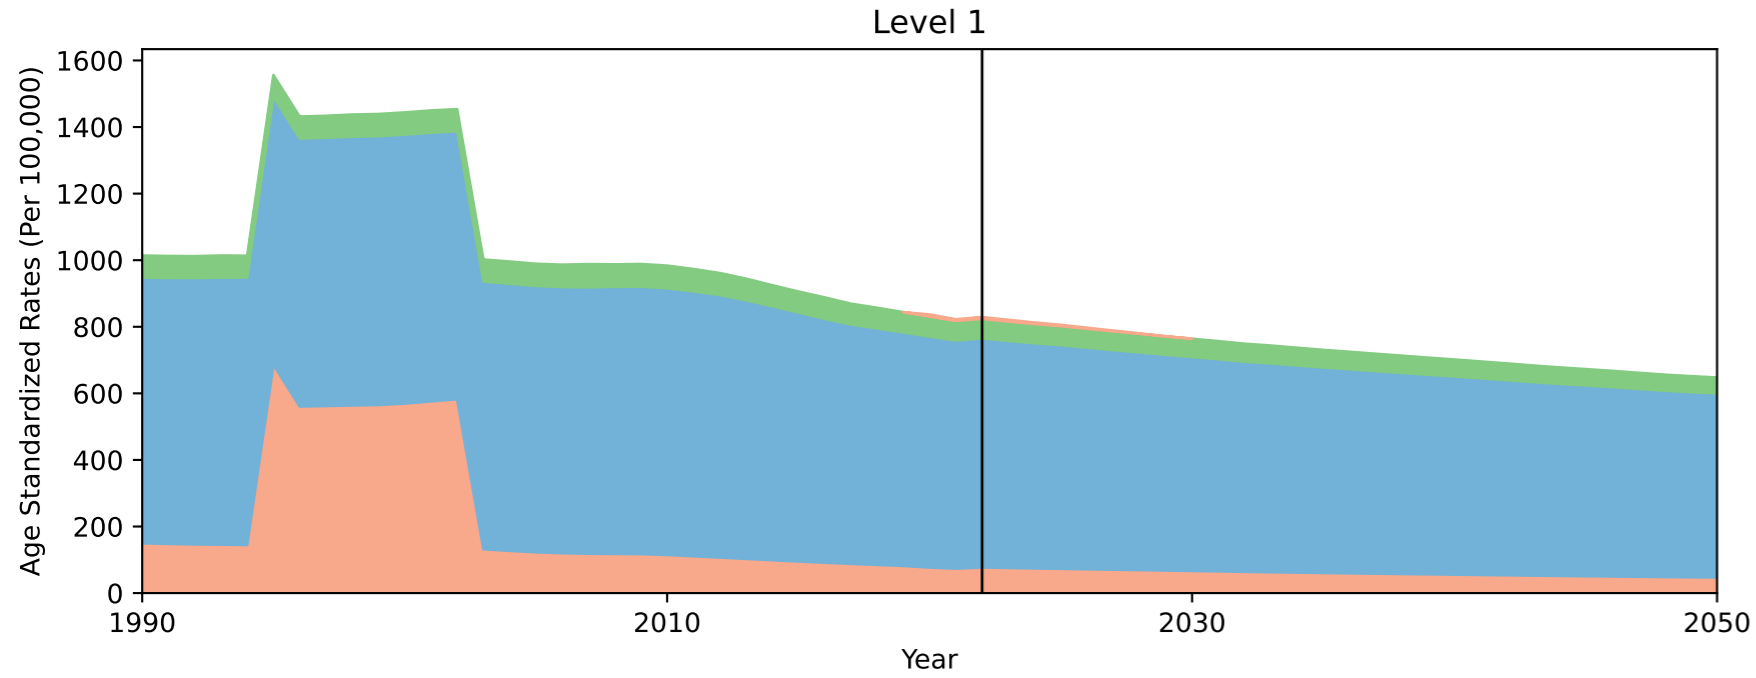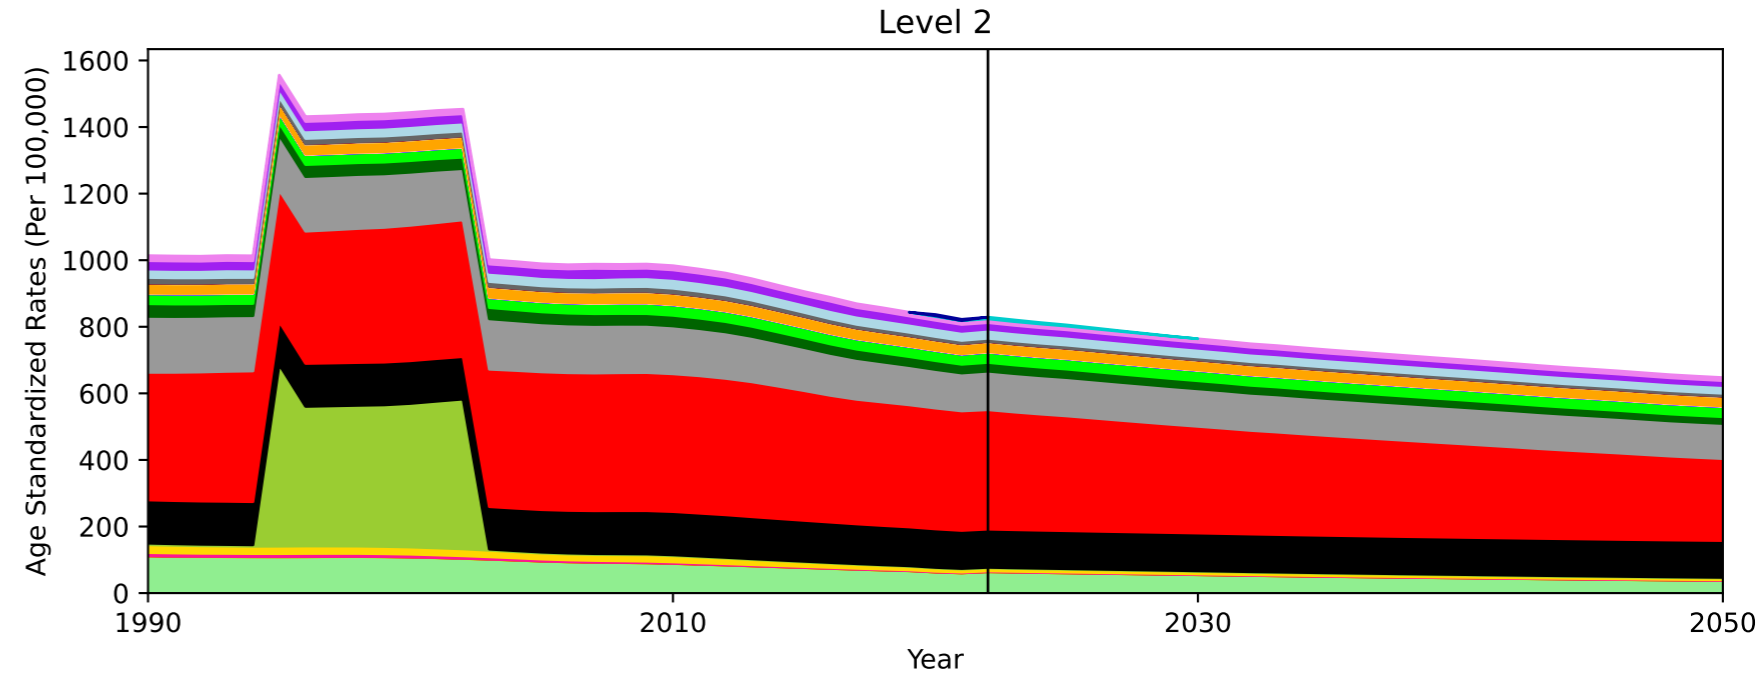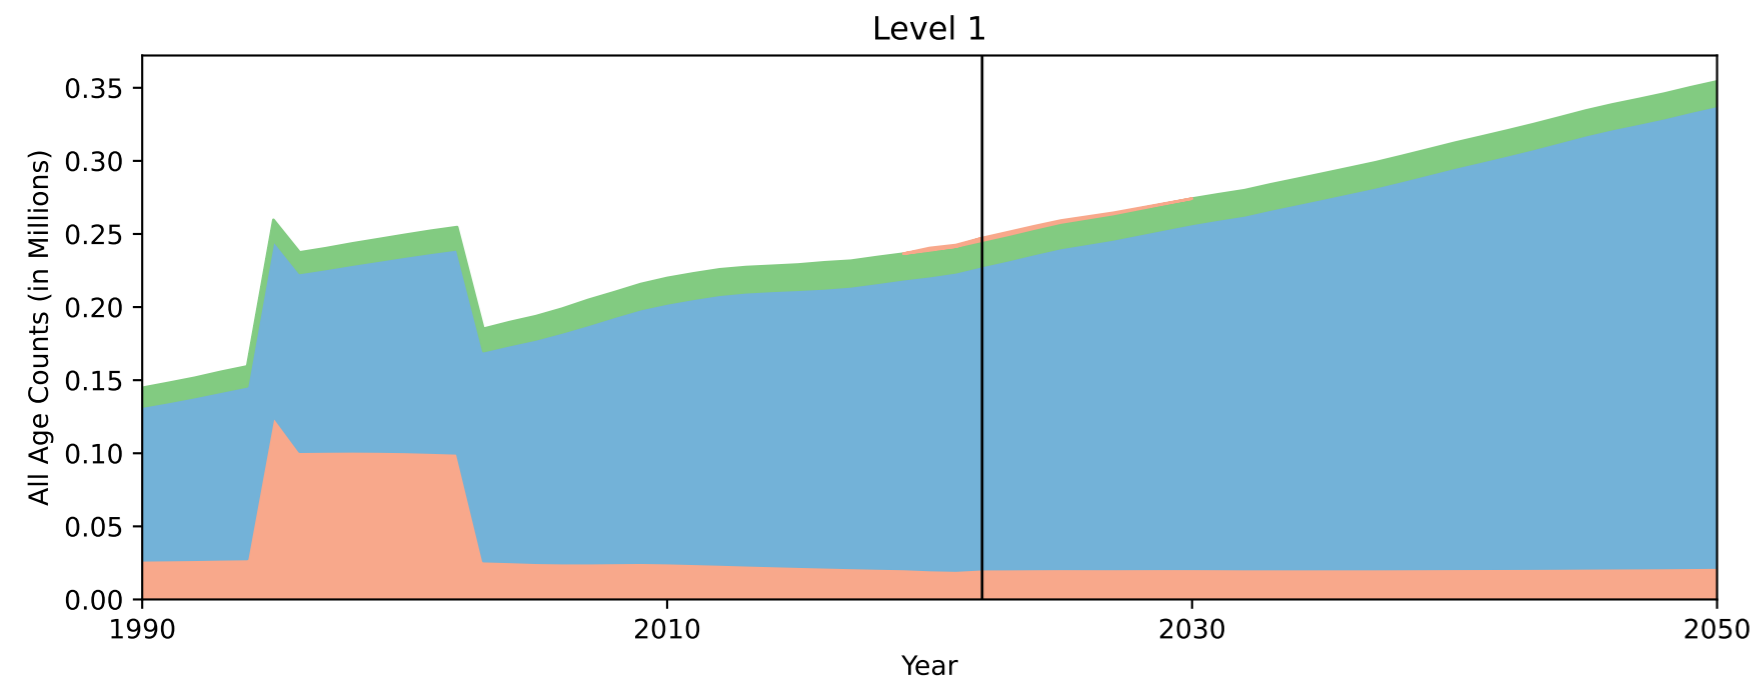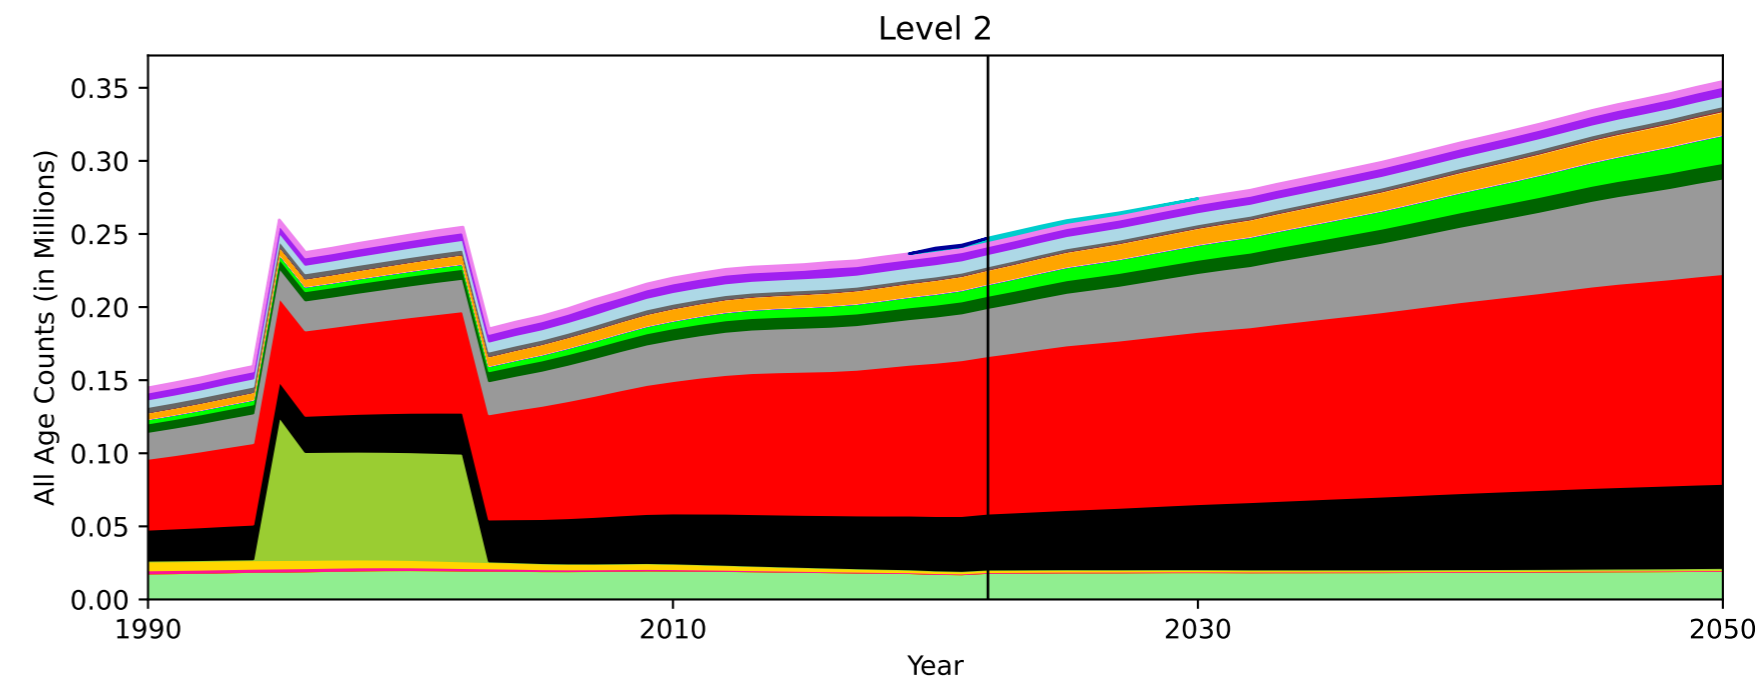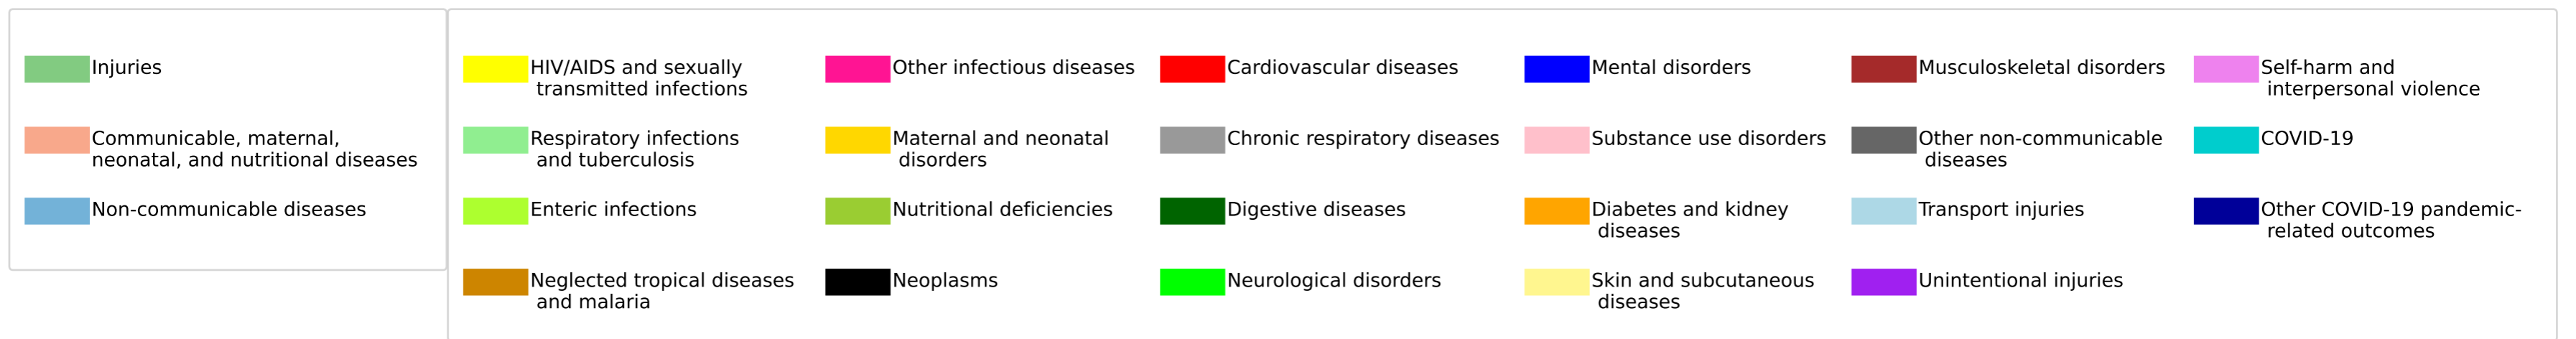

# Taiwan (Province Of China)

Level 1

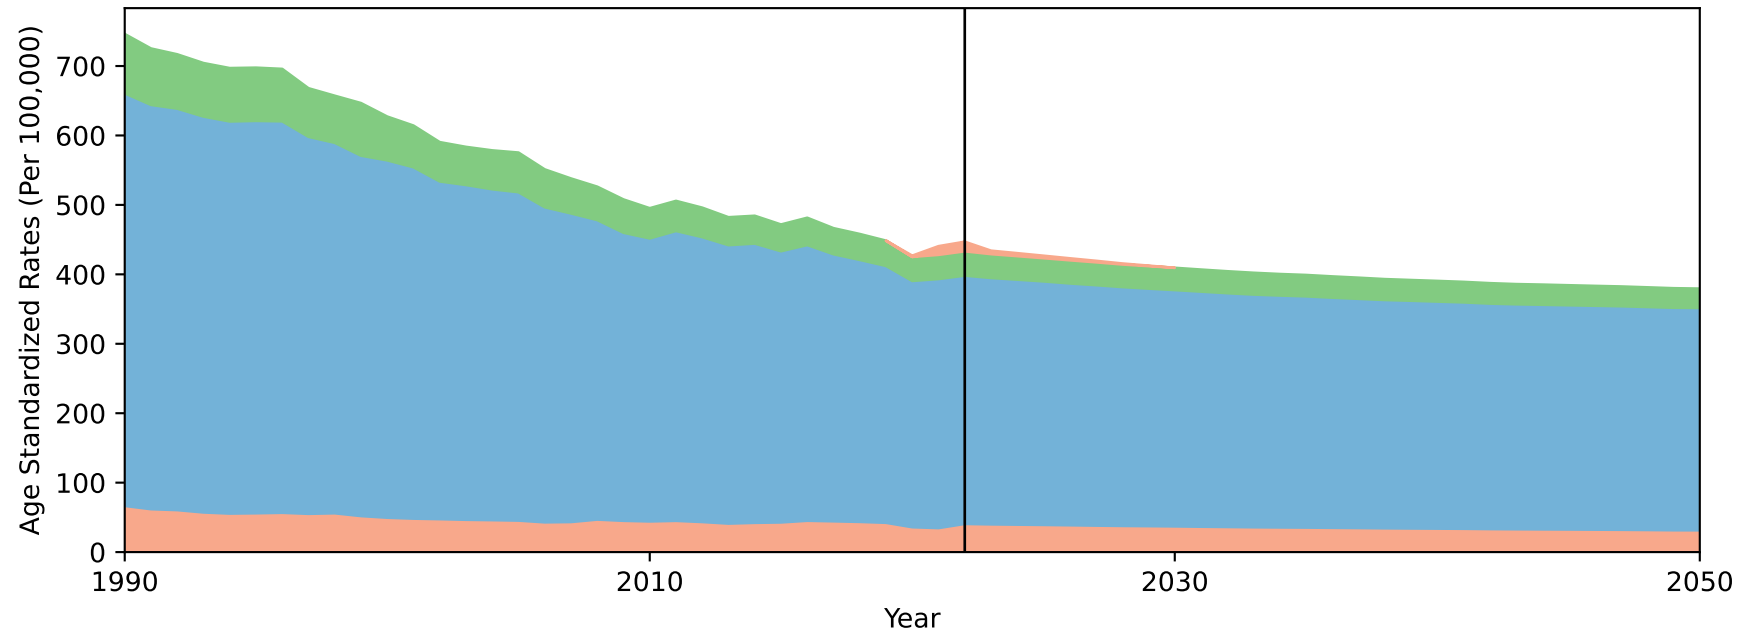

Level 2

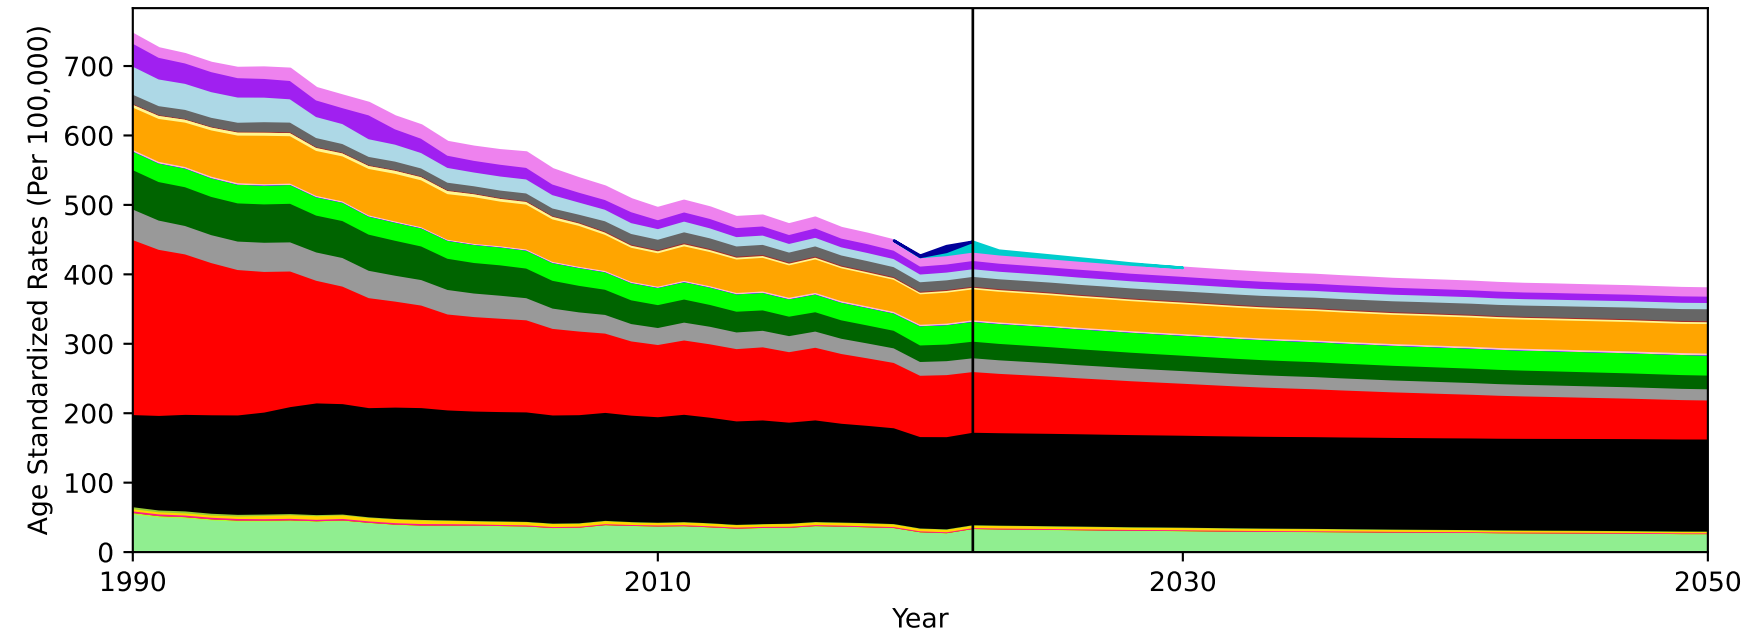

Level 1

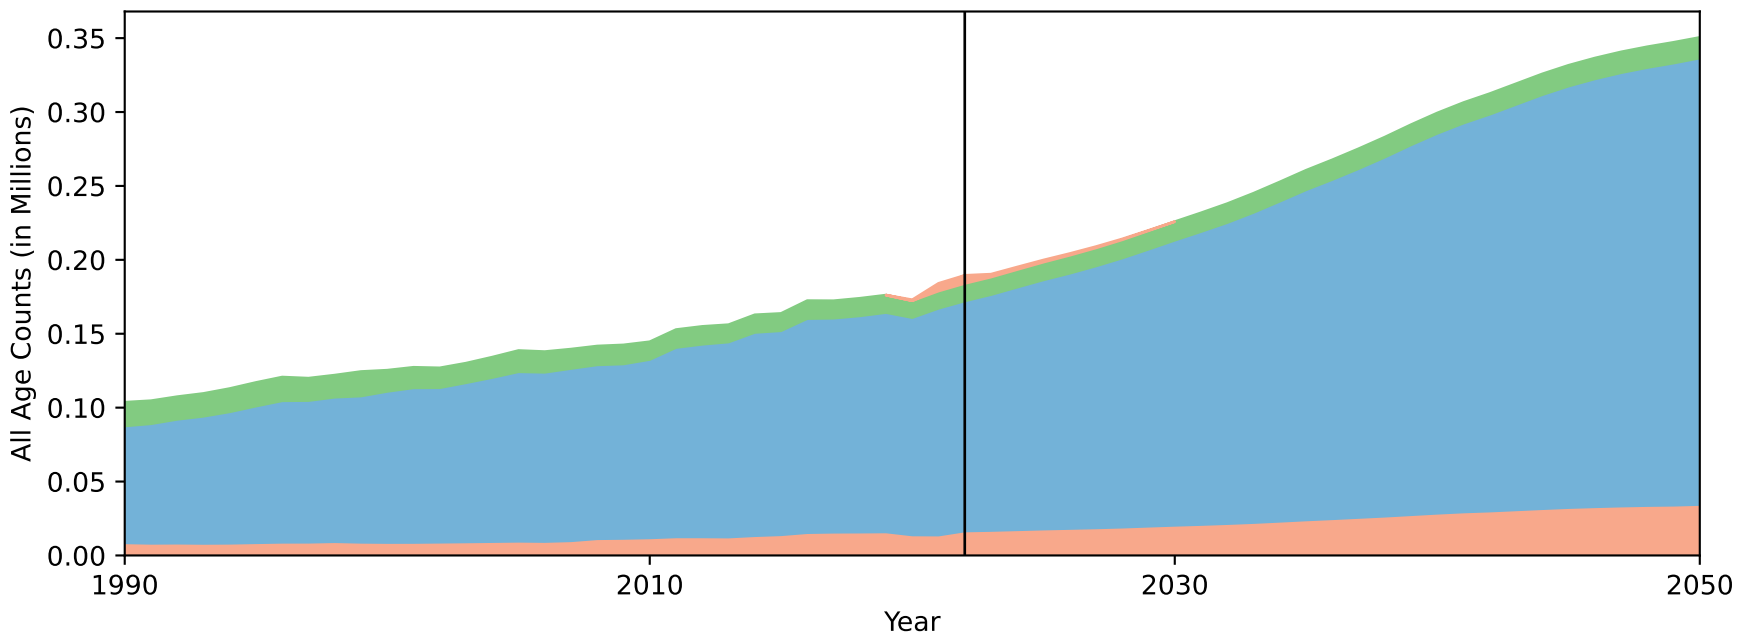

Level 2

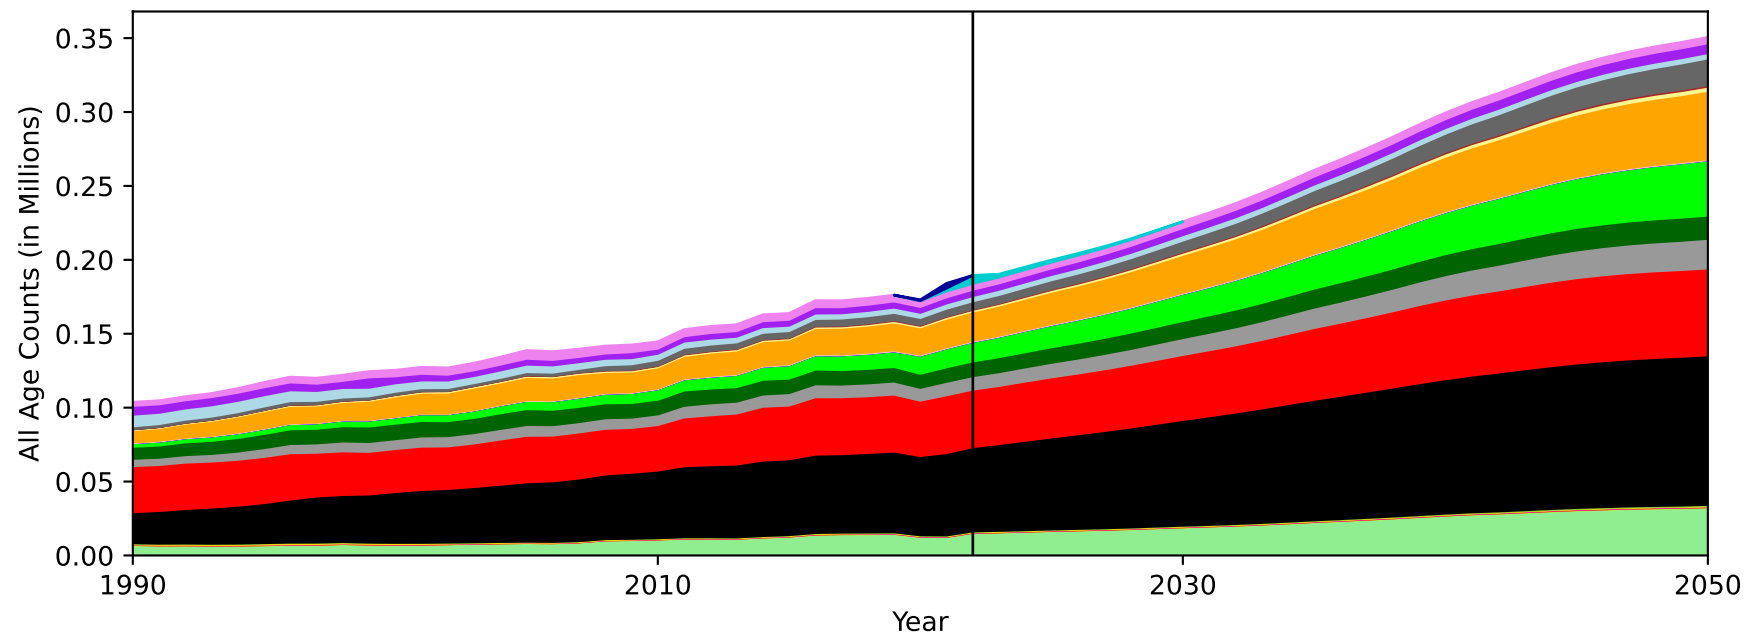

# American Samoa

Supplemental Results Figure S5. Age-standardised death rates and all age death counts and by Level 1 and Level 2 causes, 1990–2050

605

Level 1

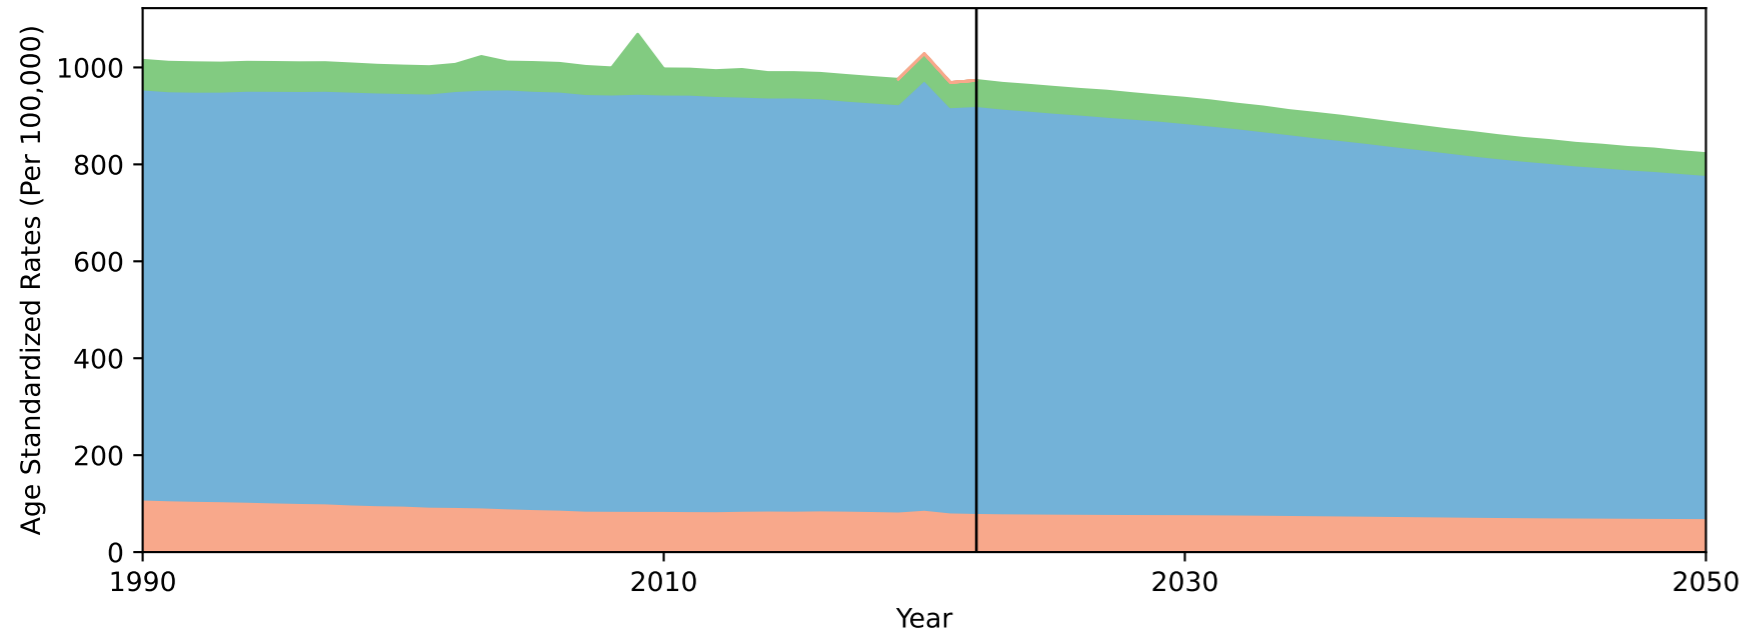

Level 2

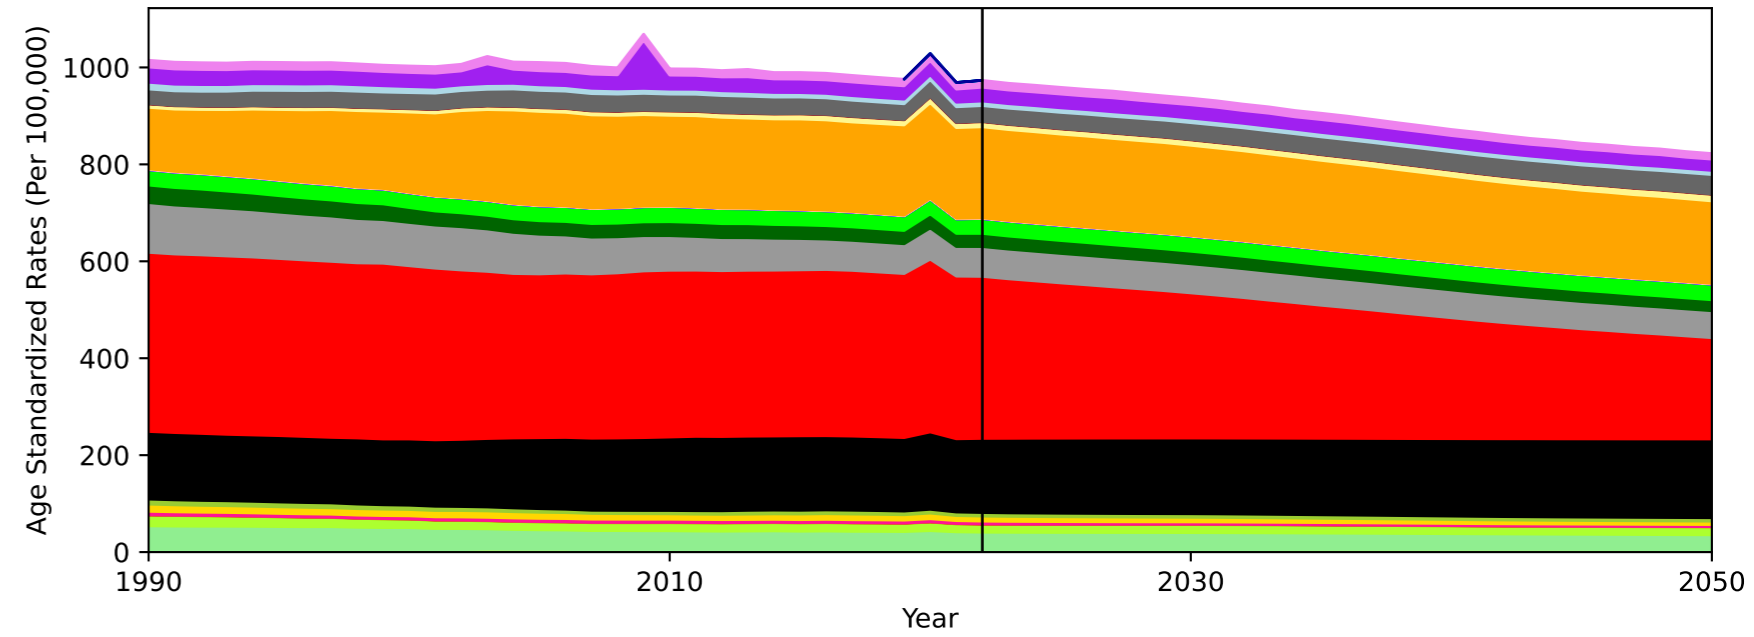

Level 1

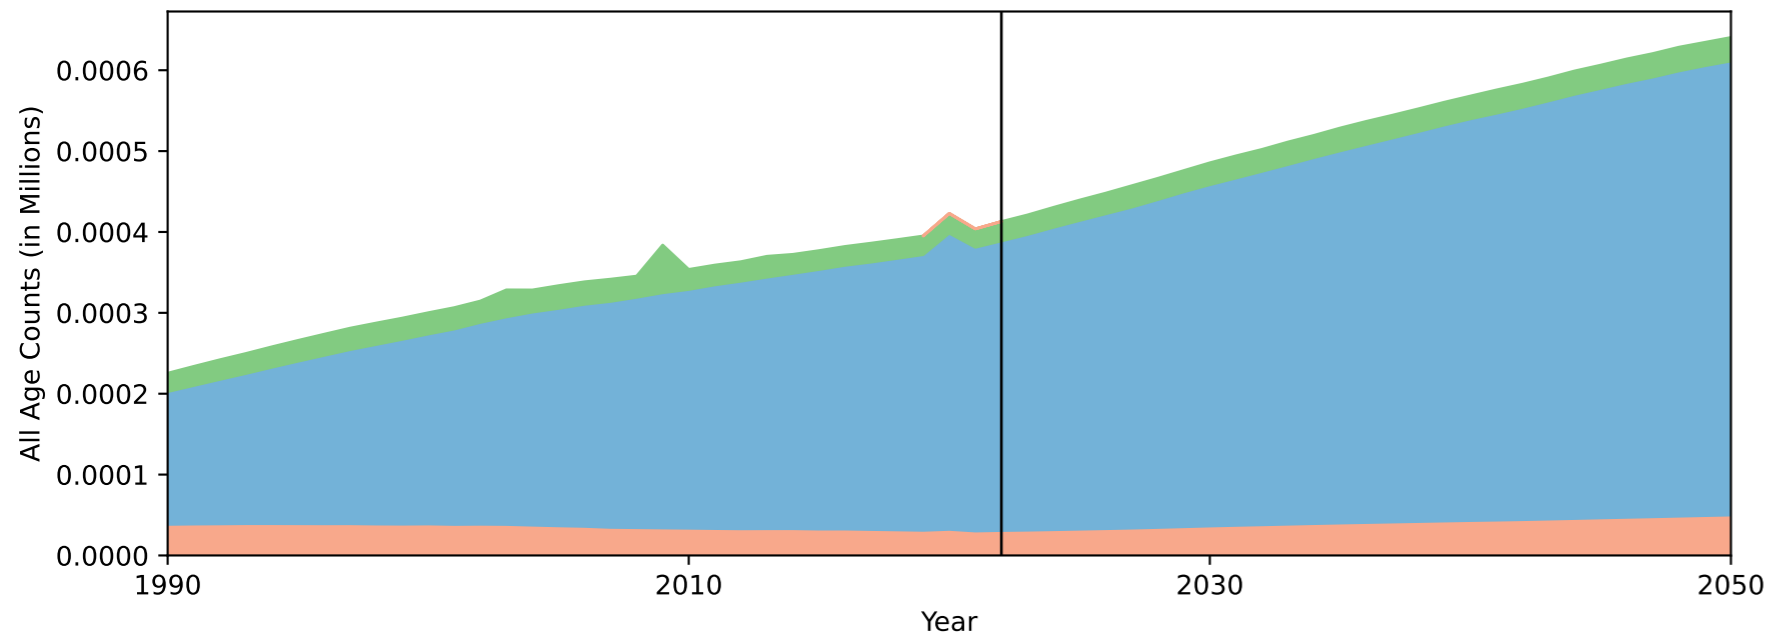

Level 2

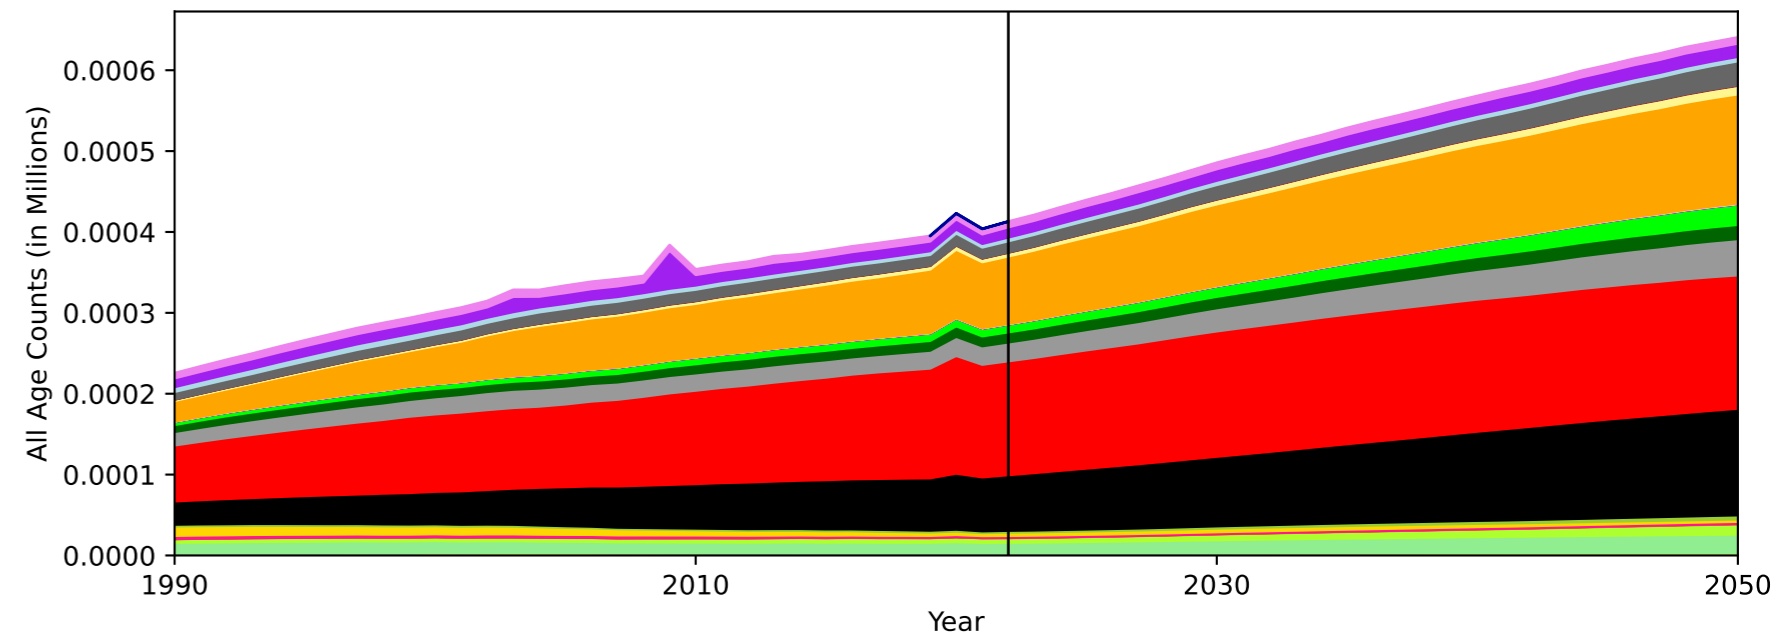

# Cook Islands

Supplemental Results Figure S5. Age-standardised death rates and all age death counts and by Level 1 and Level 2 causes, 1990–2050

606

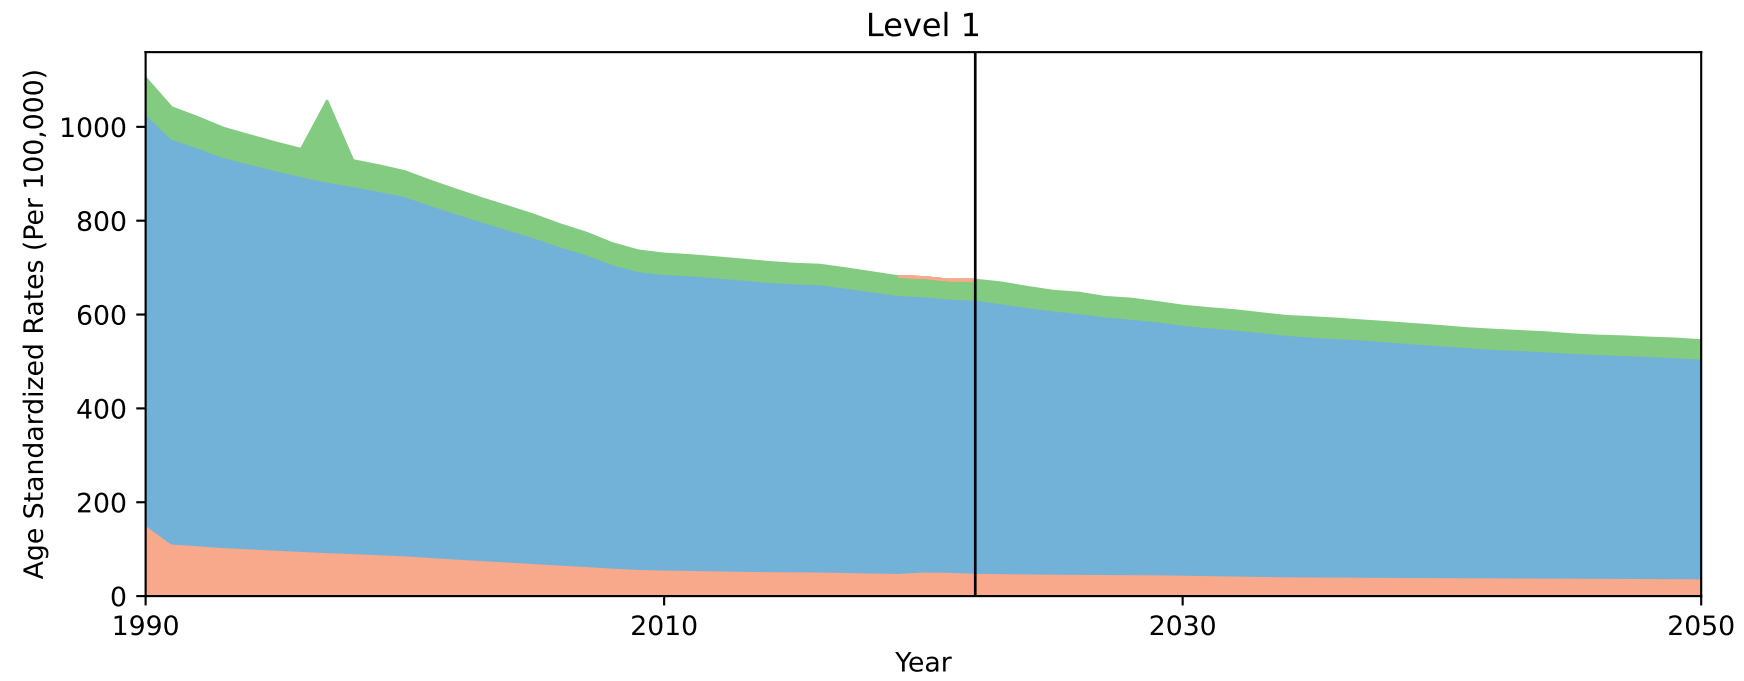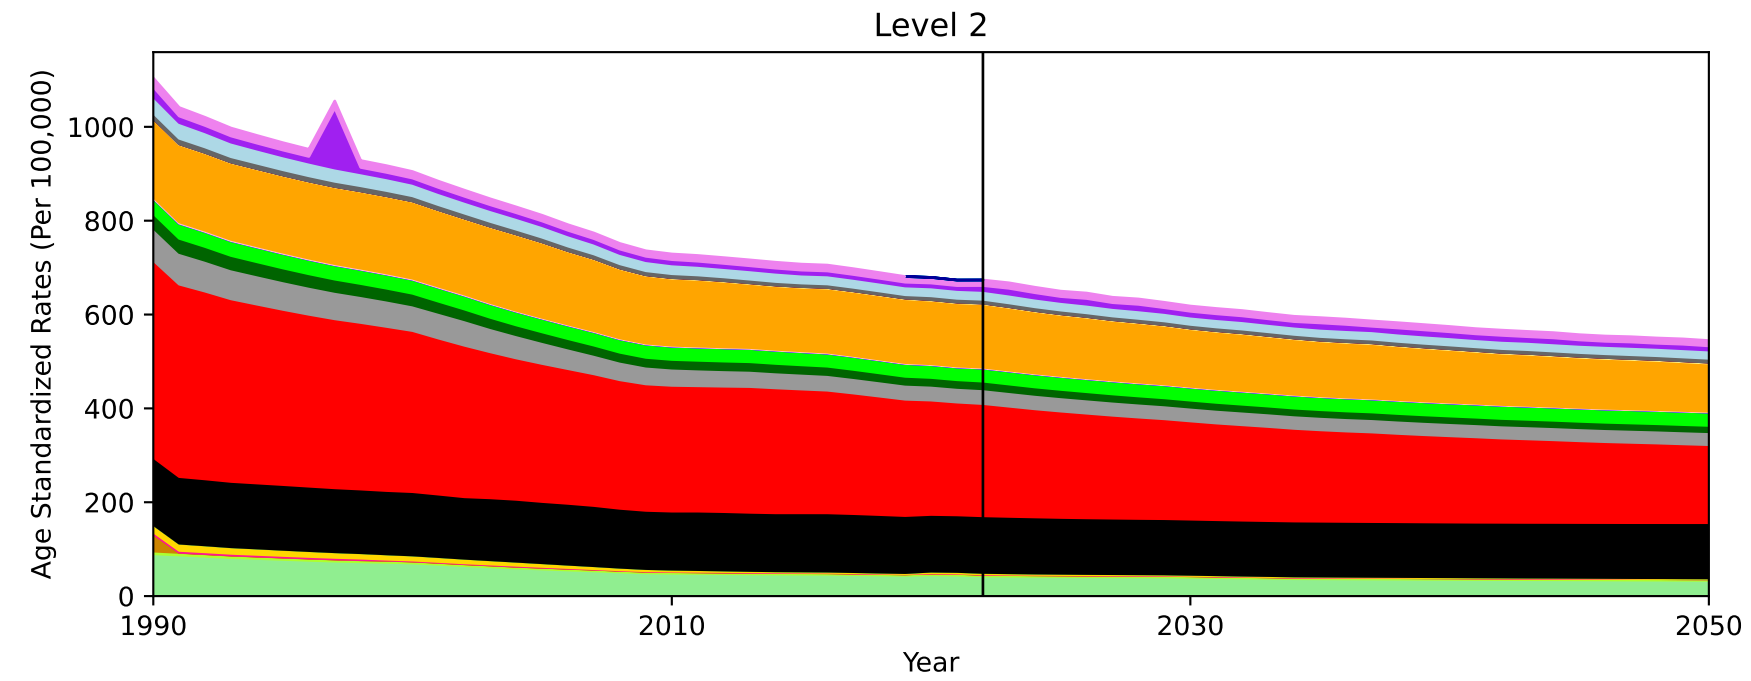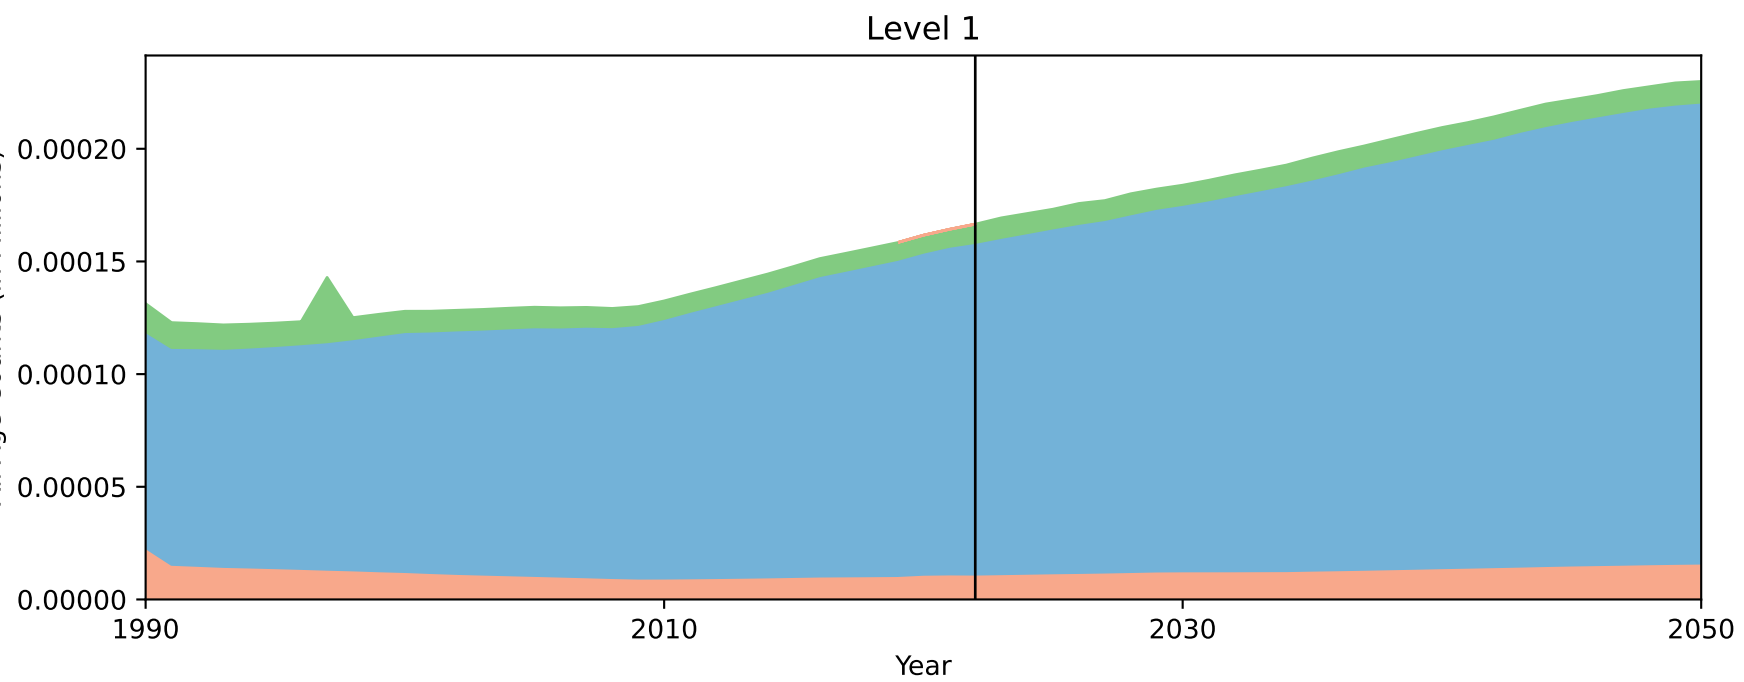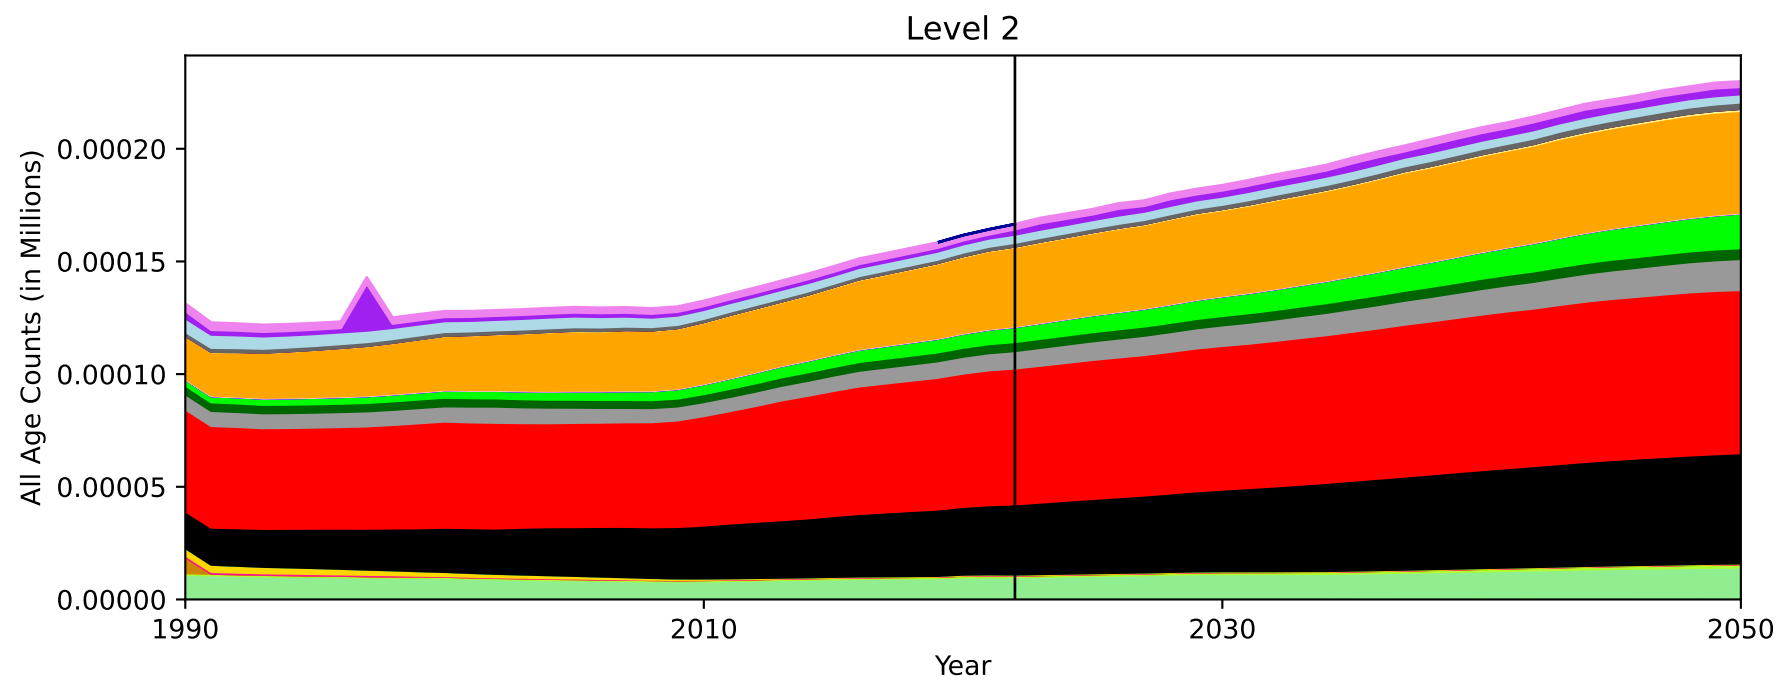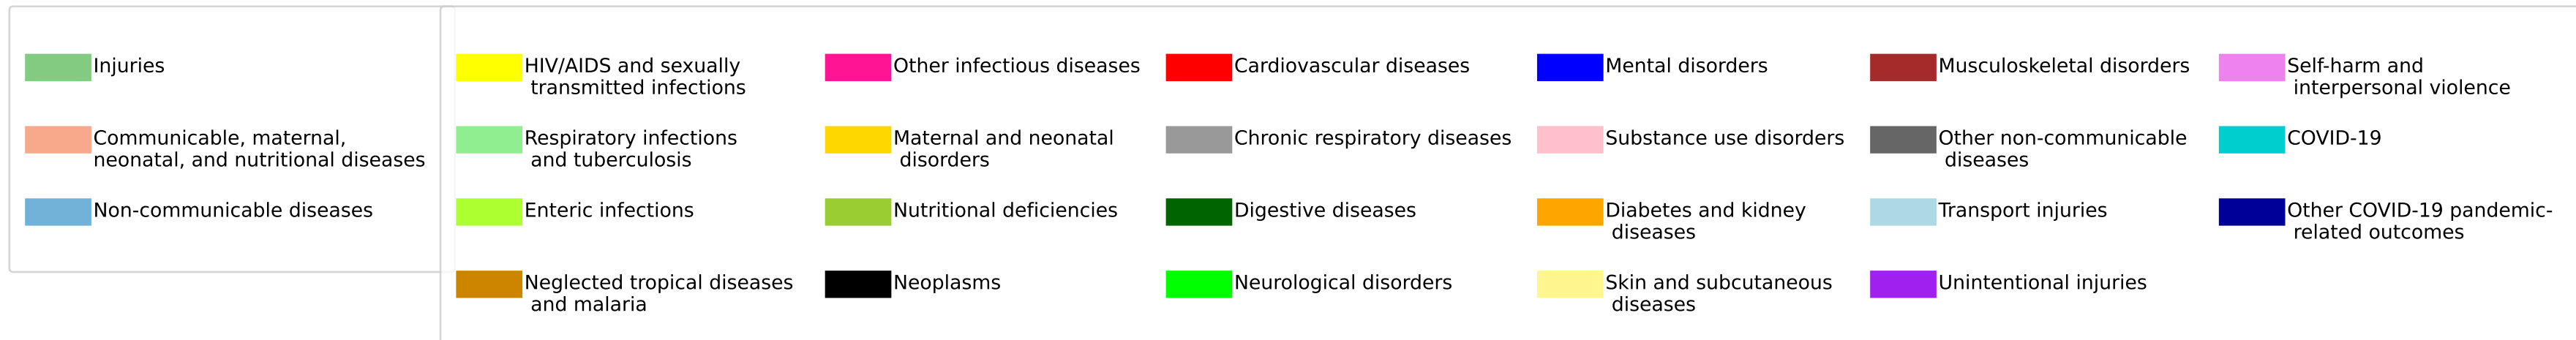

Level 1

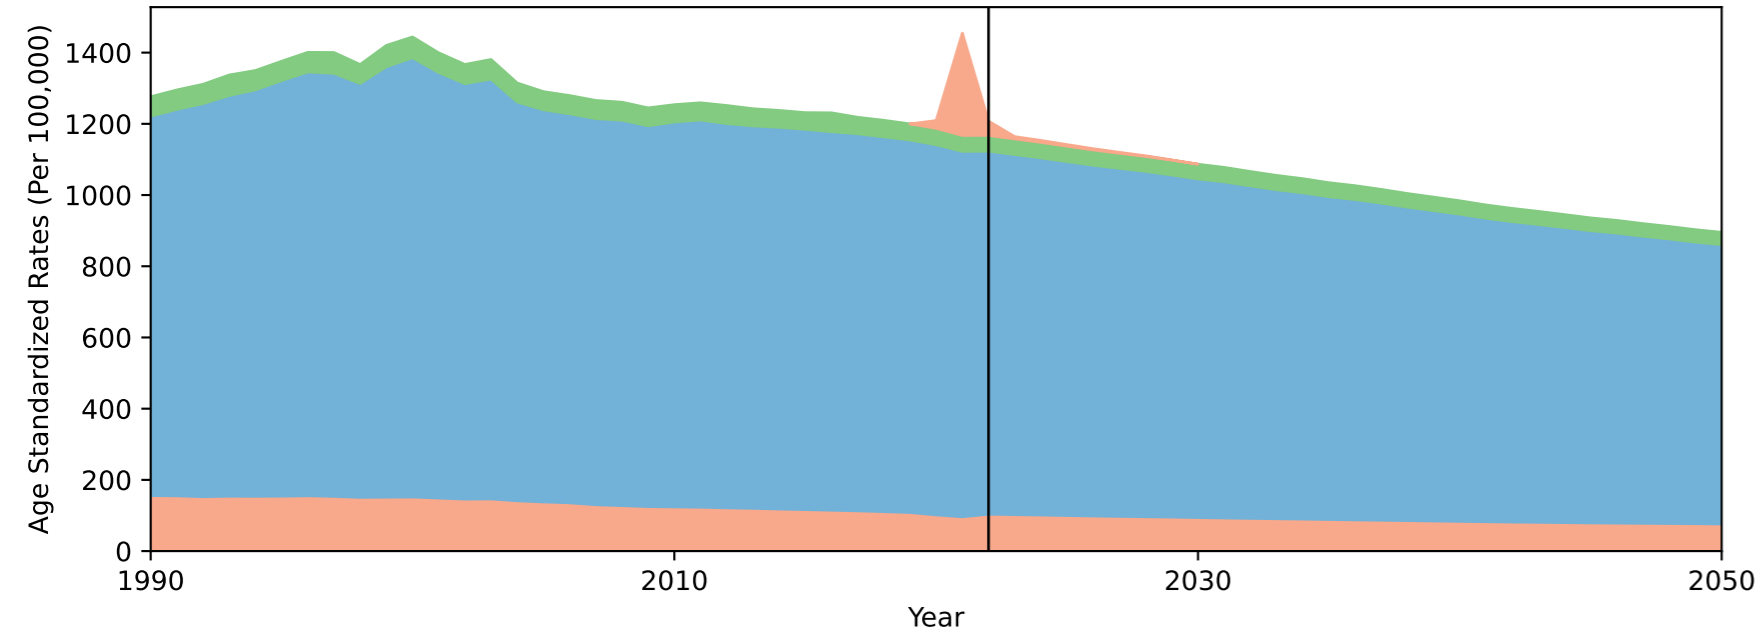

Level 2

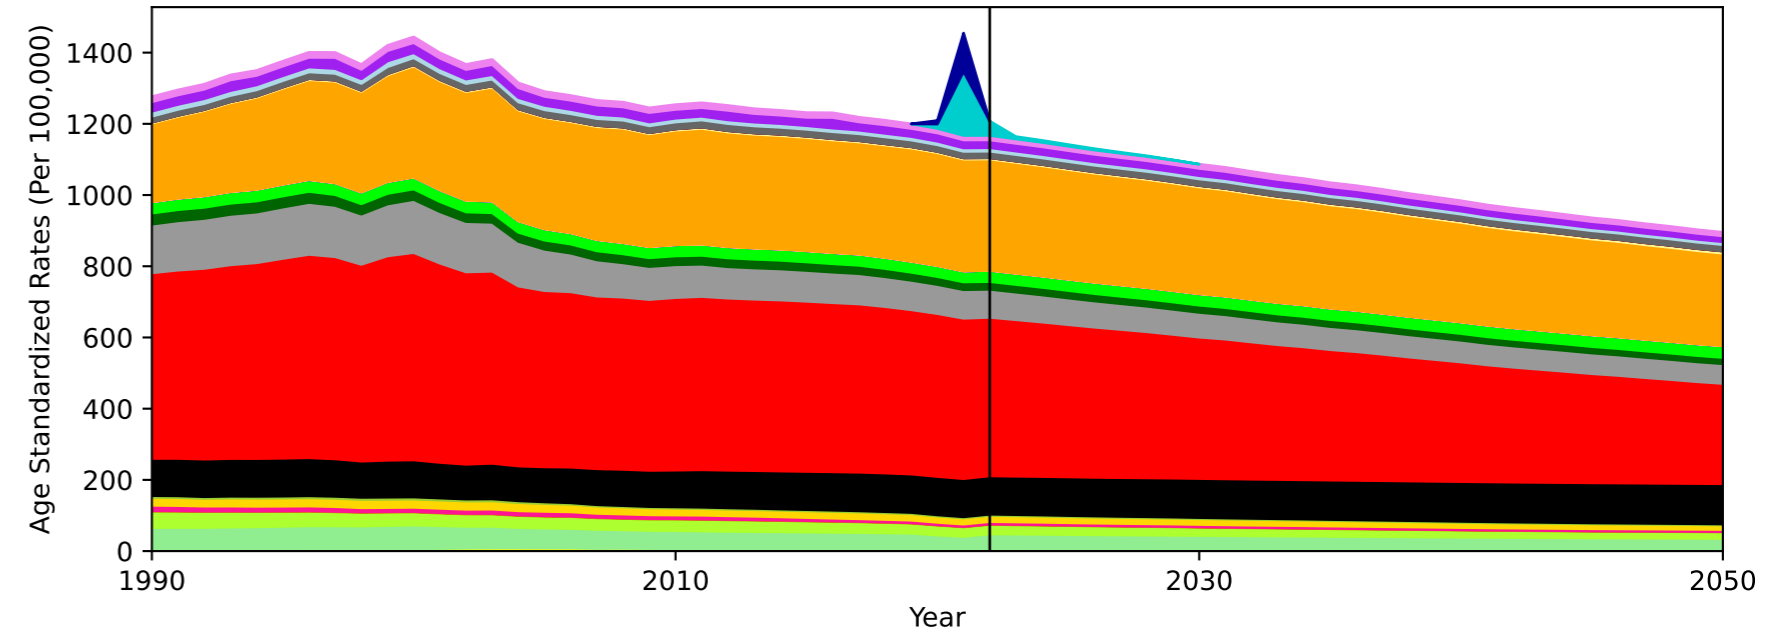

Level 1

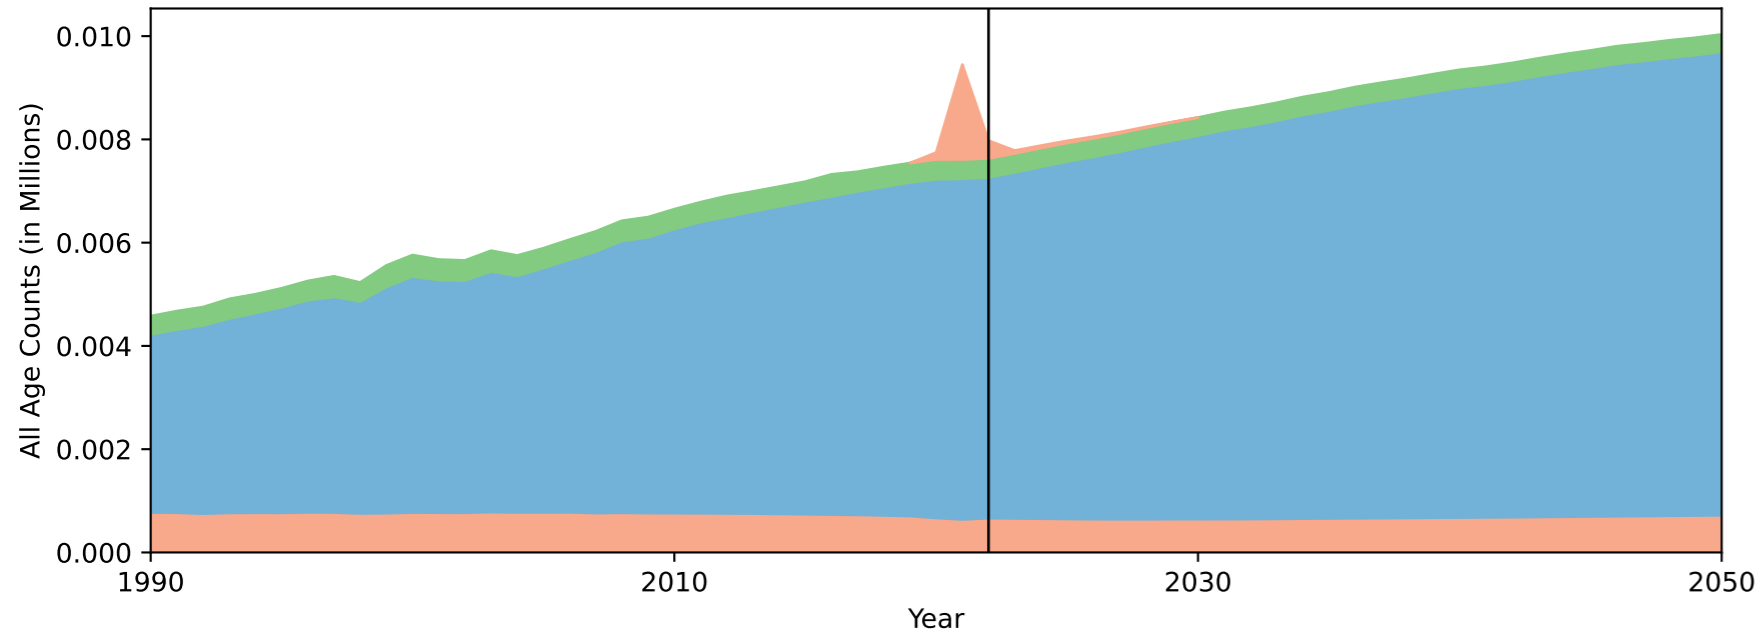

Level 2

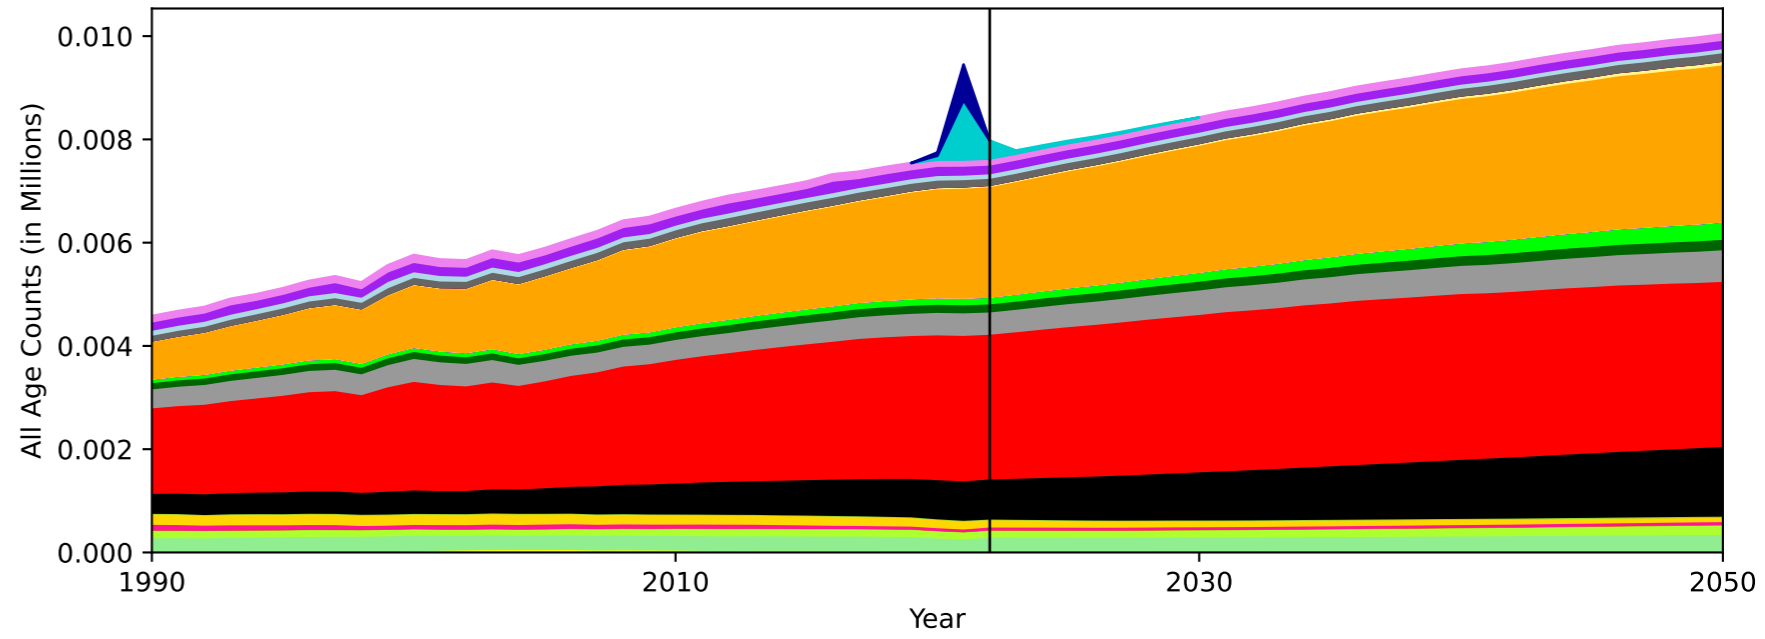



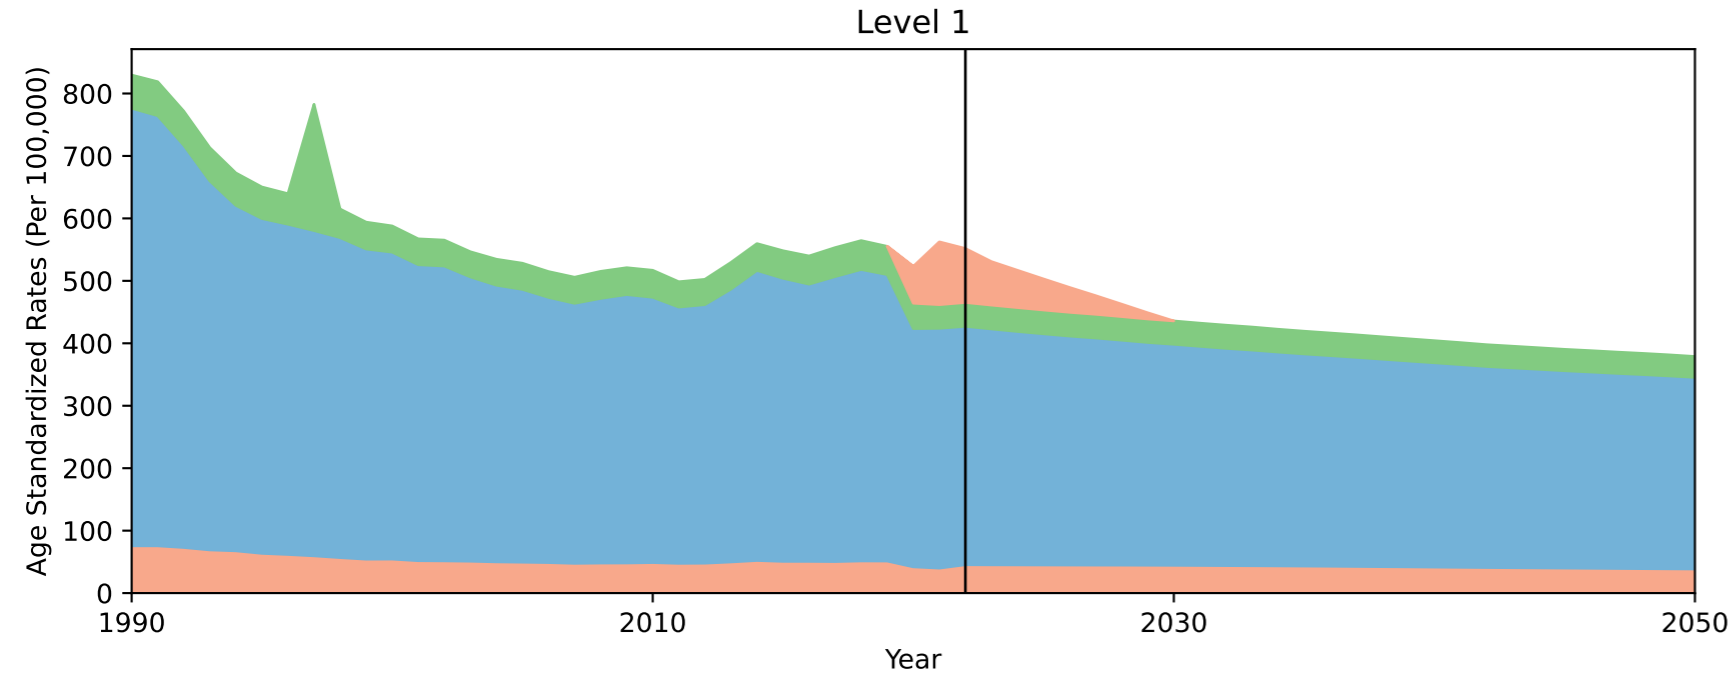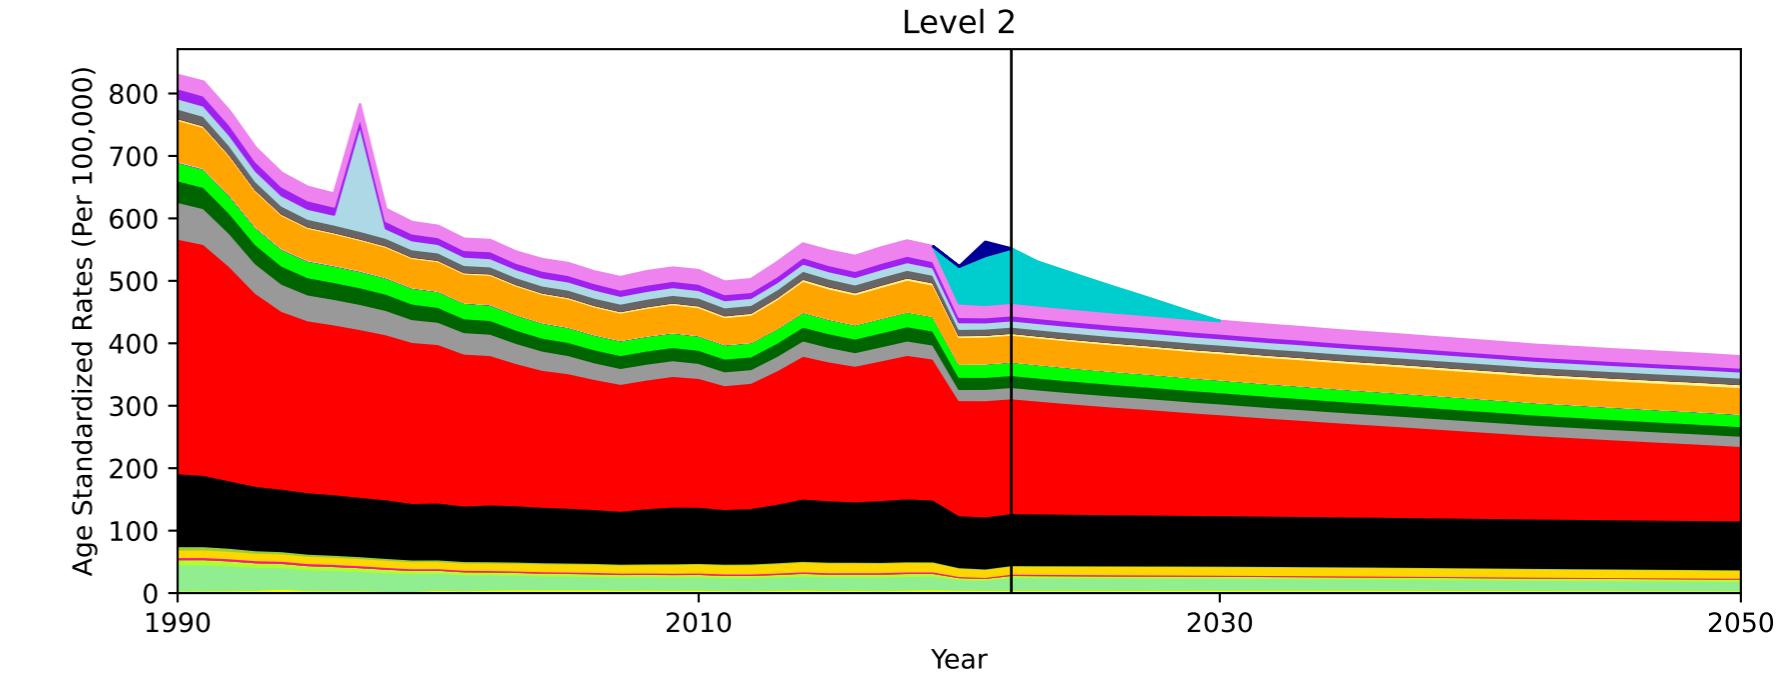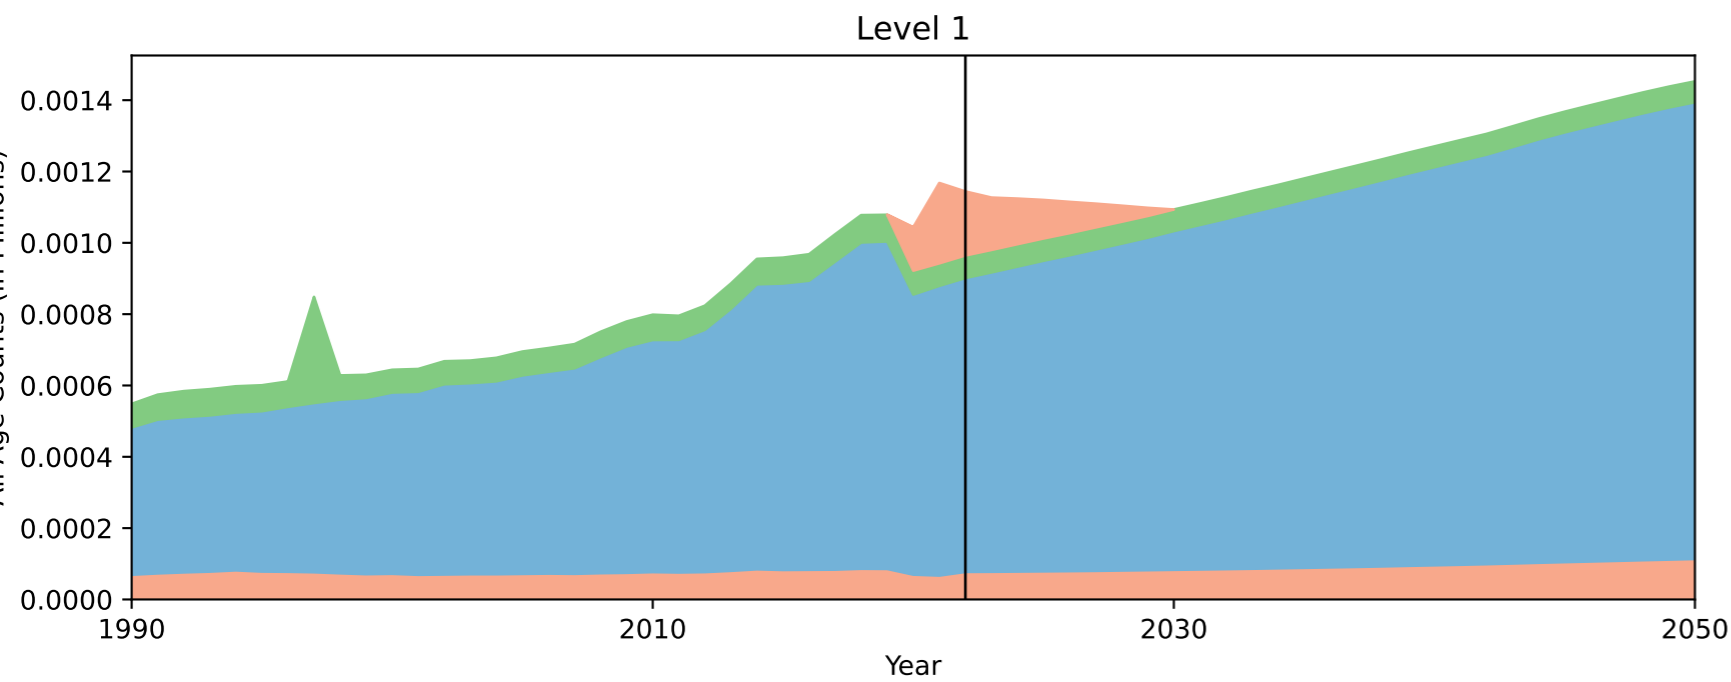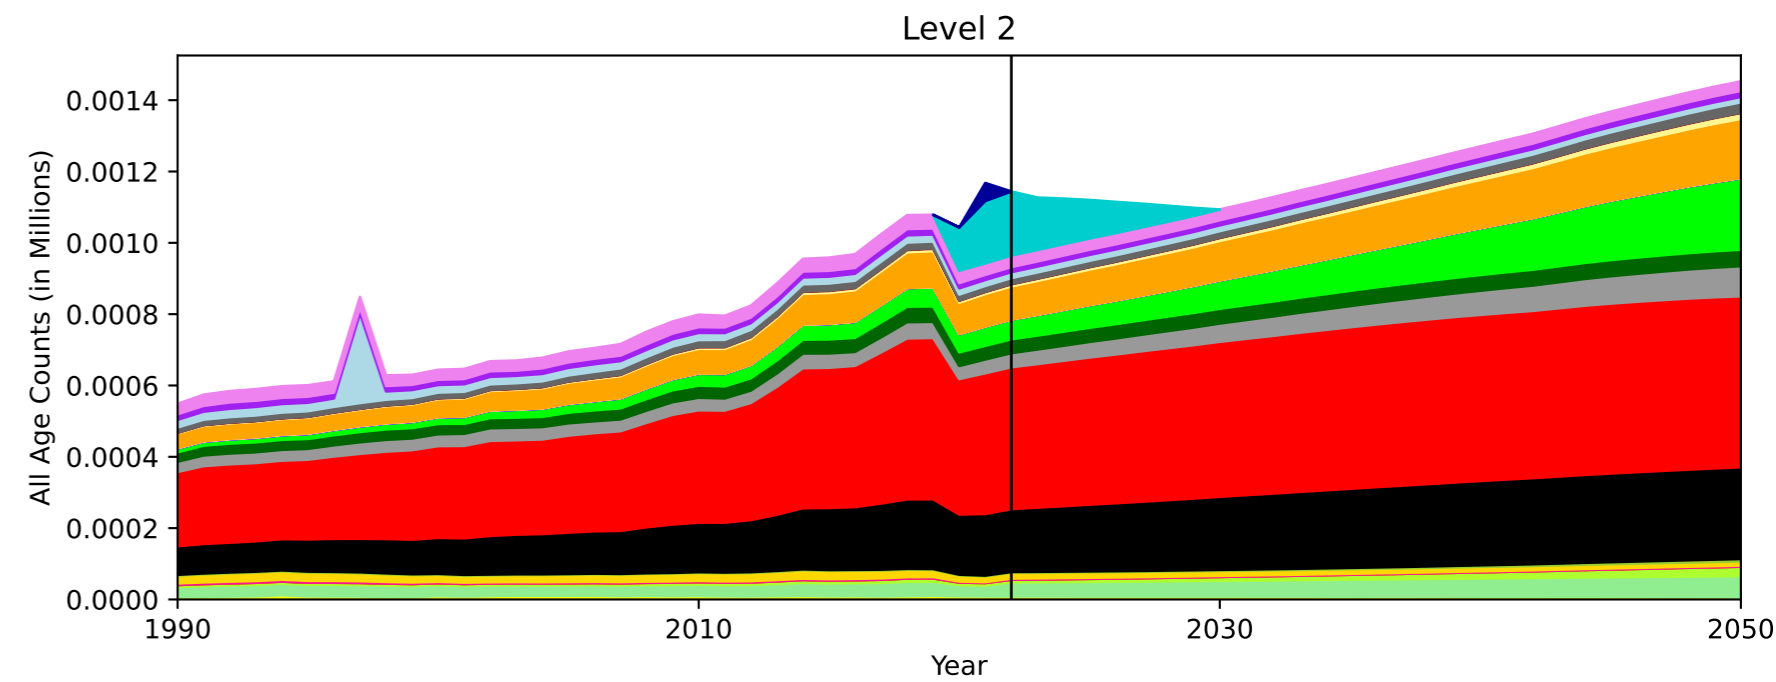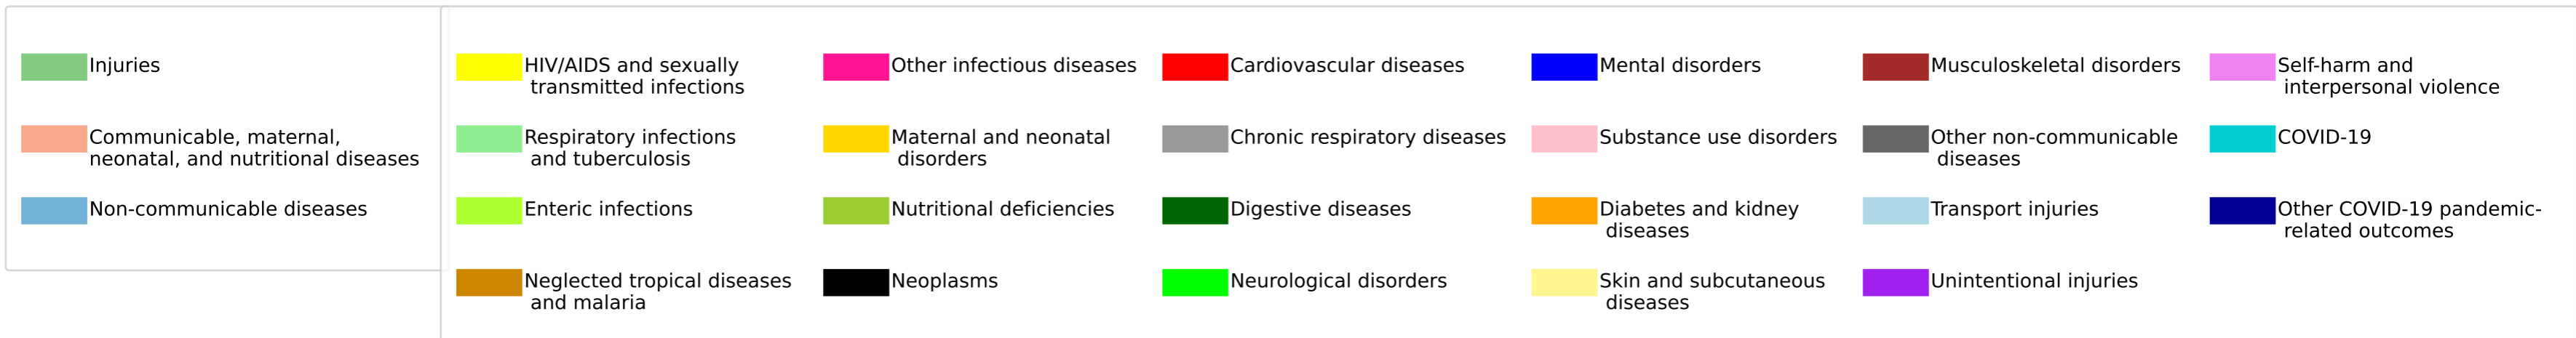

Level 1

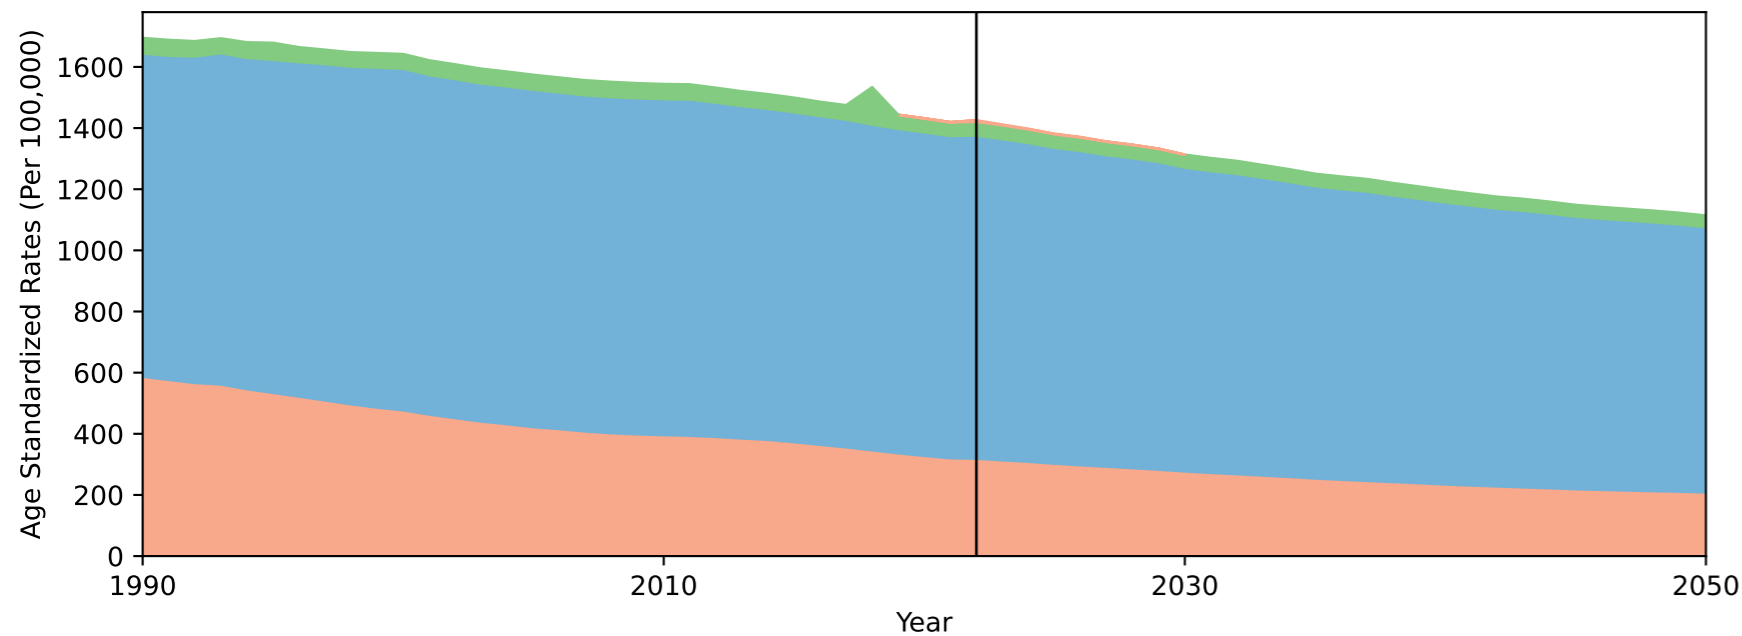

Level 2

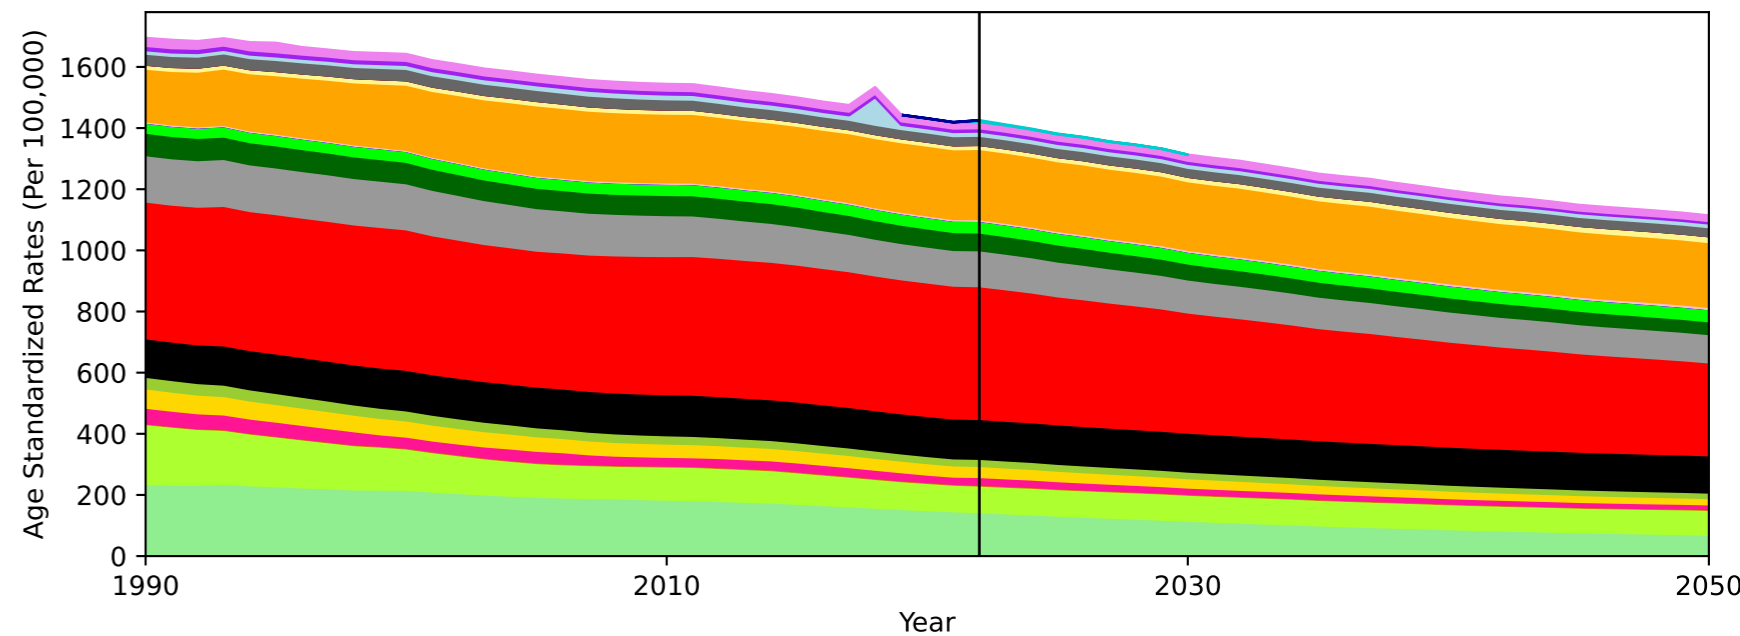

Level 1

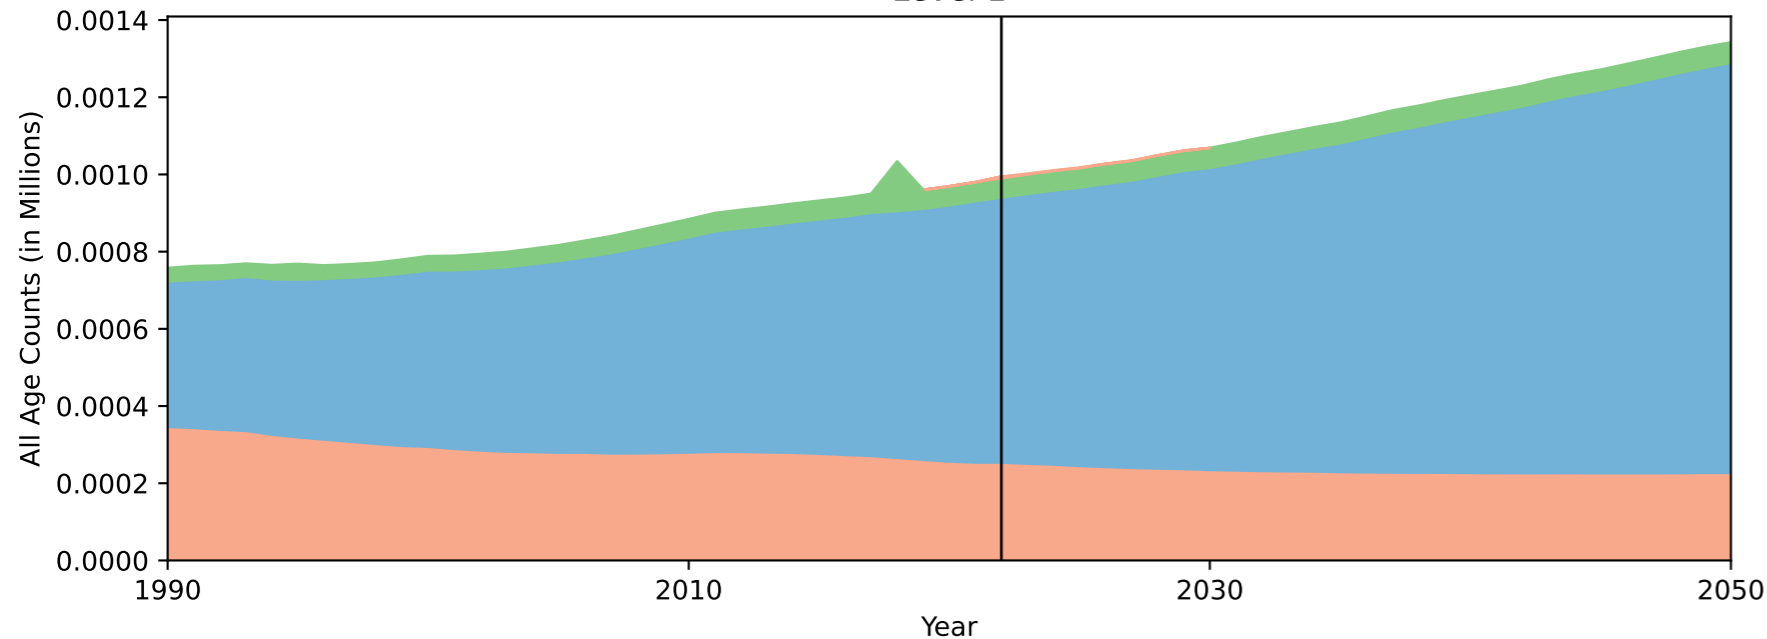

Level 2

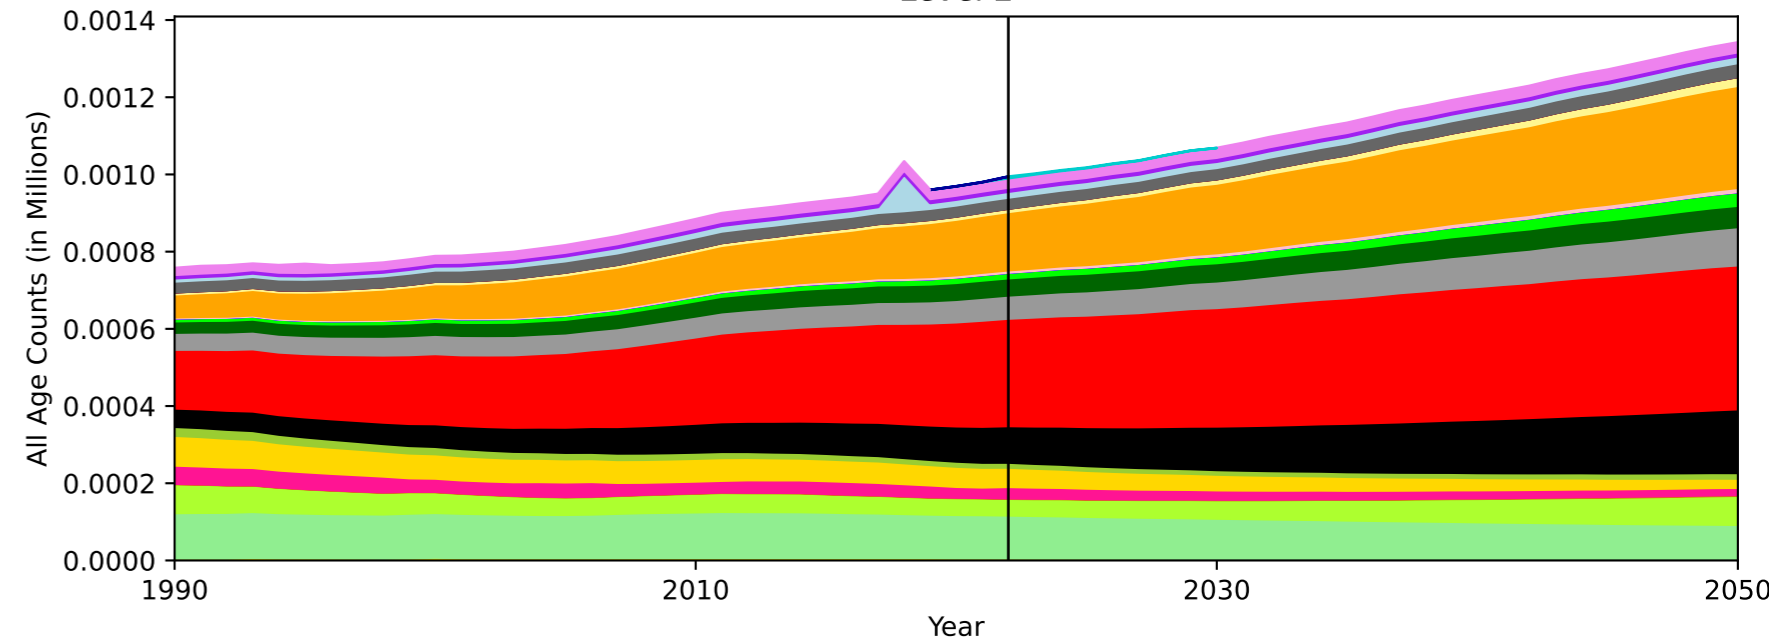

# Marshall Islands

Level 1

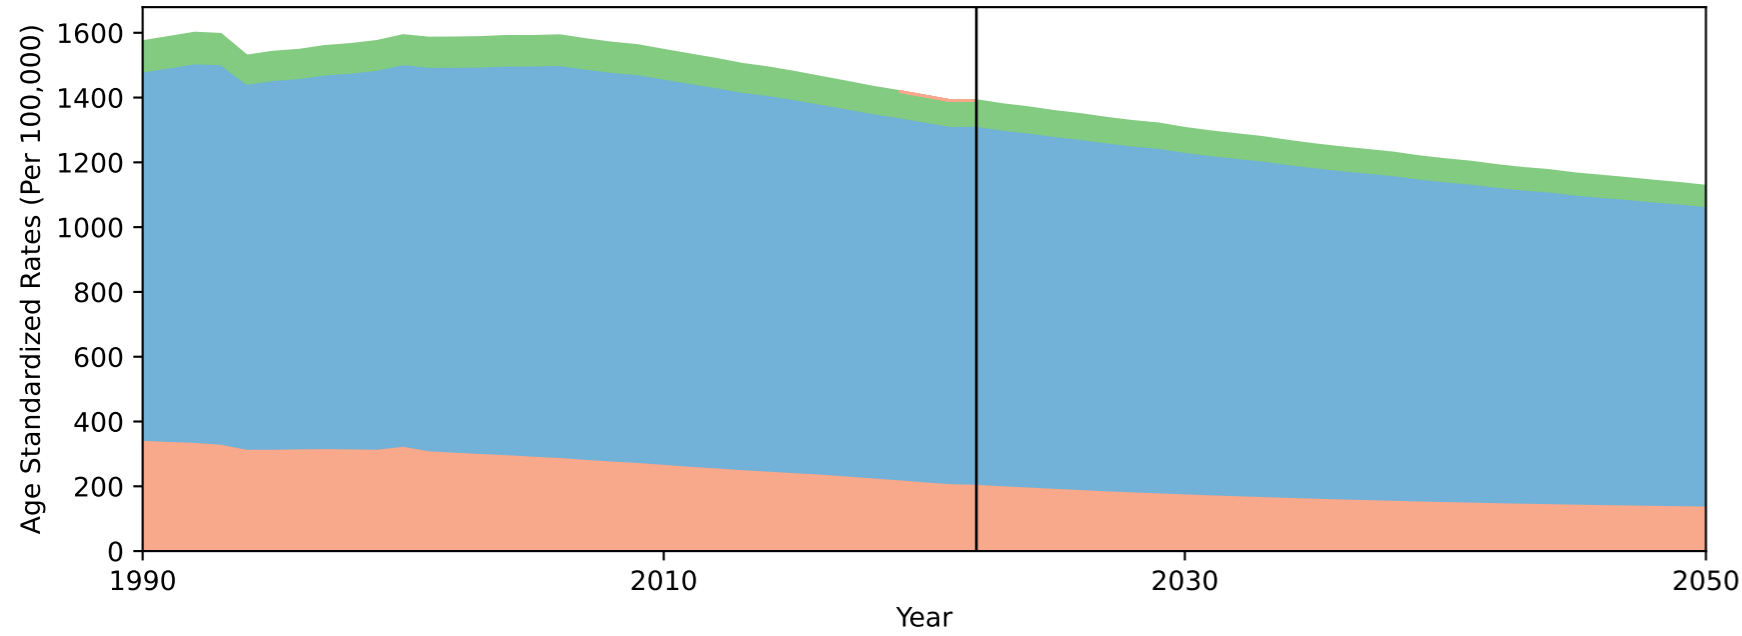

Level 2

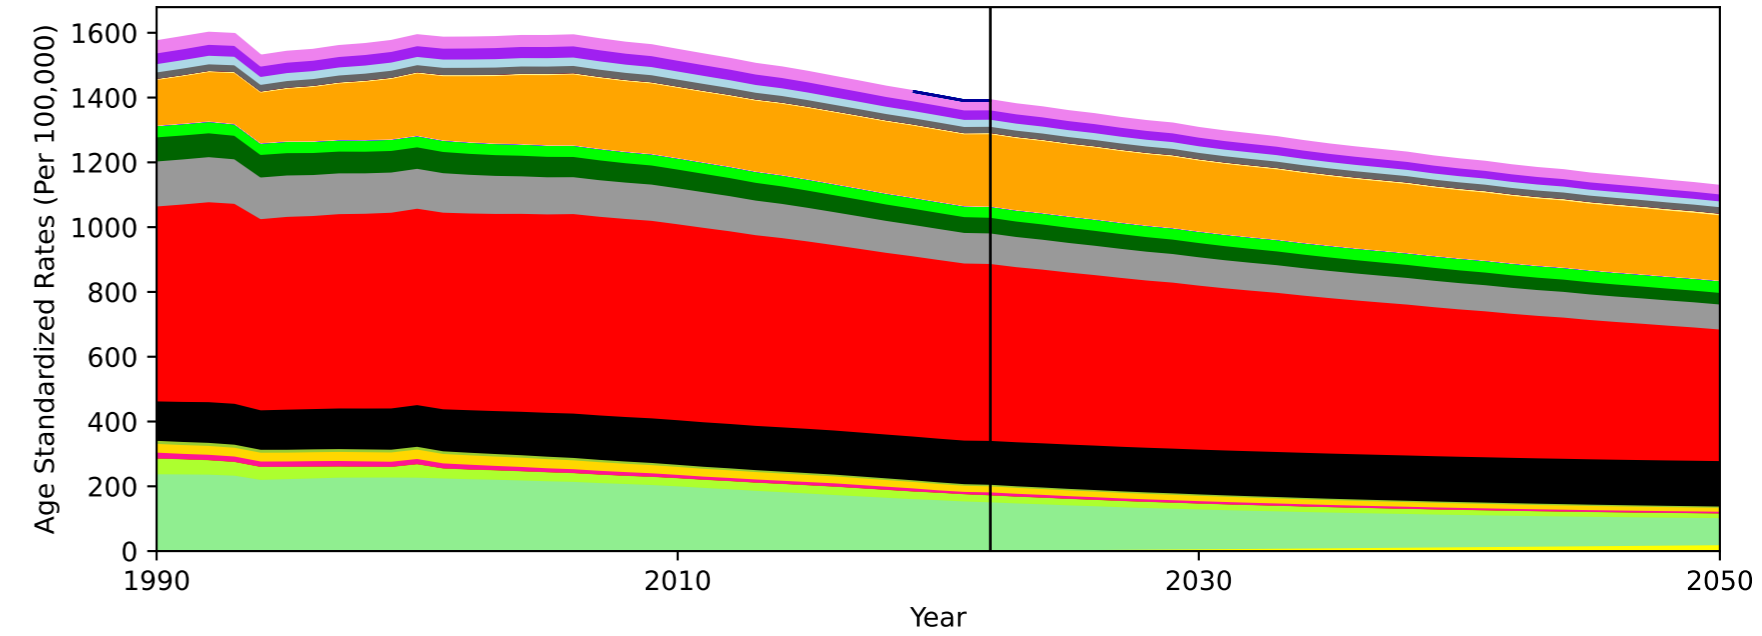

Level 1

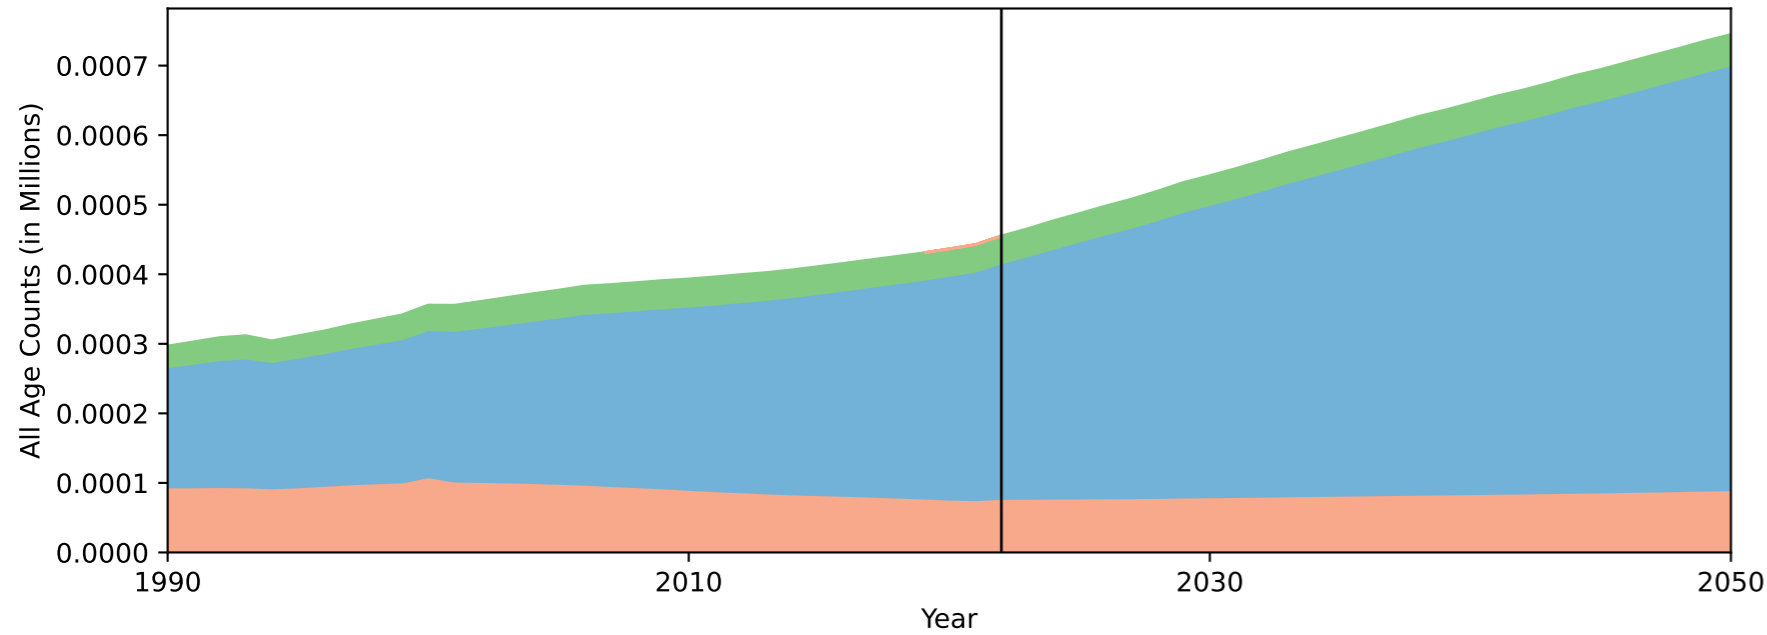

Level 2

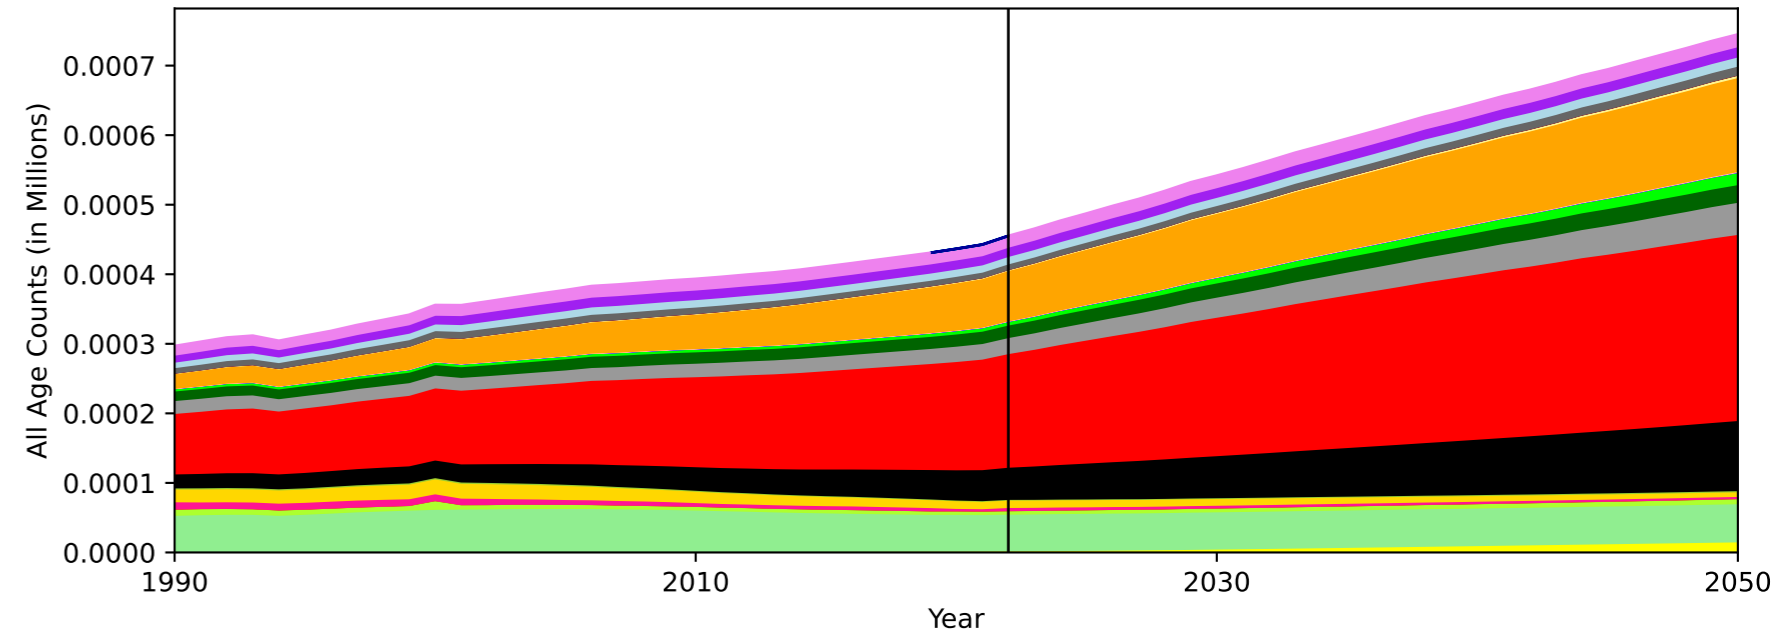

# Federated States Of Micronesia

Level 1

Level 2

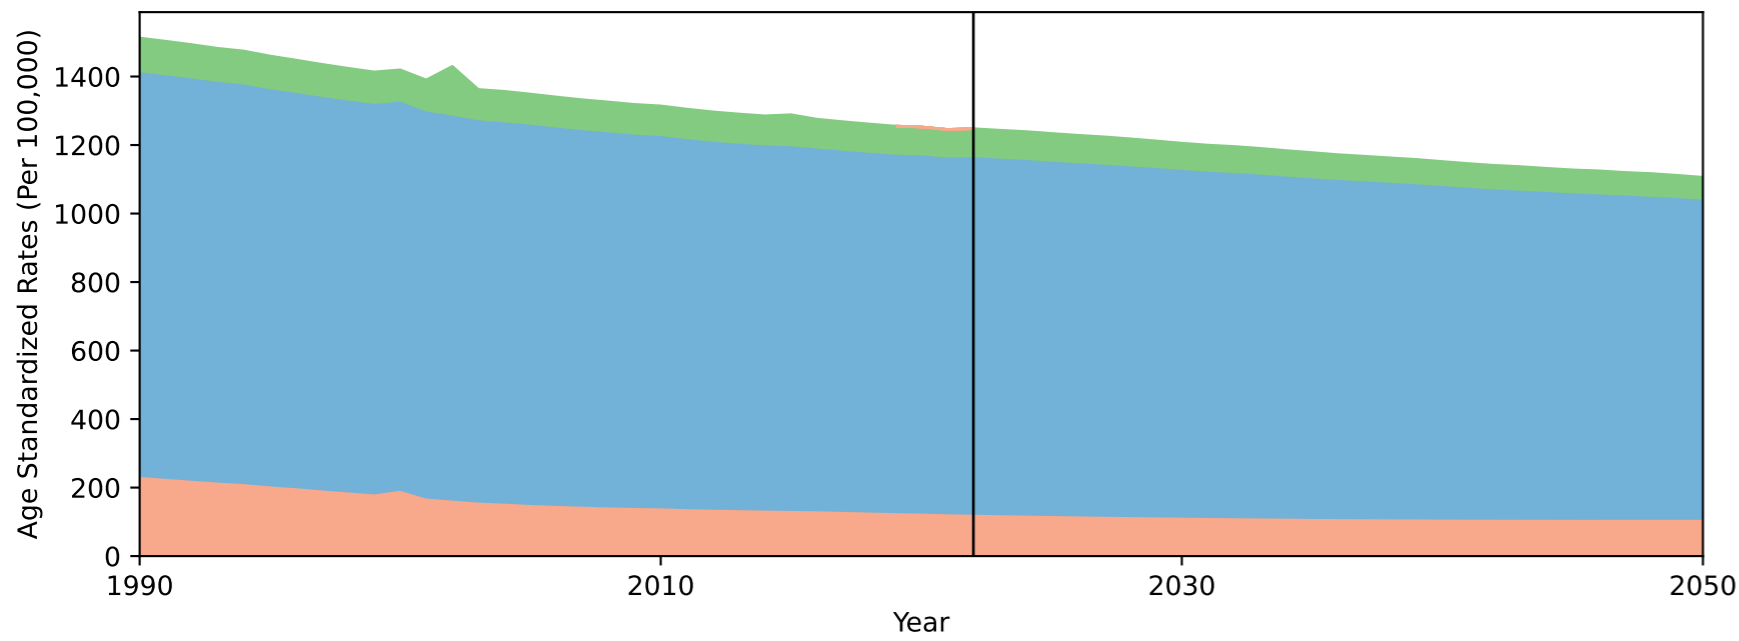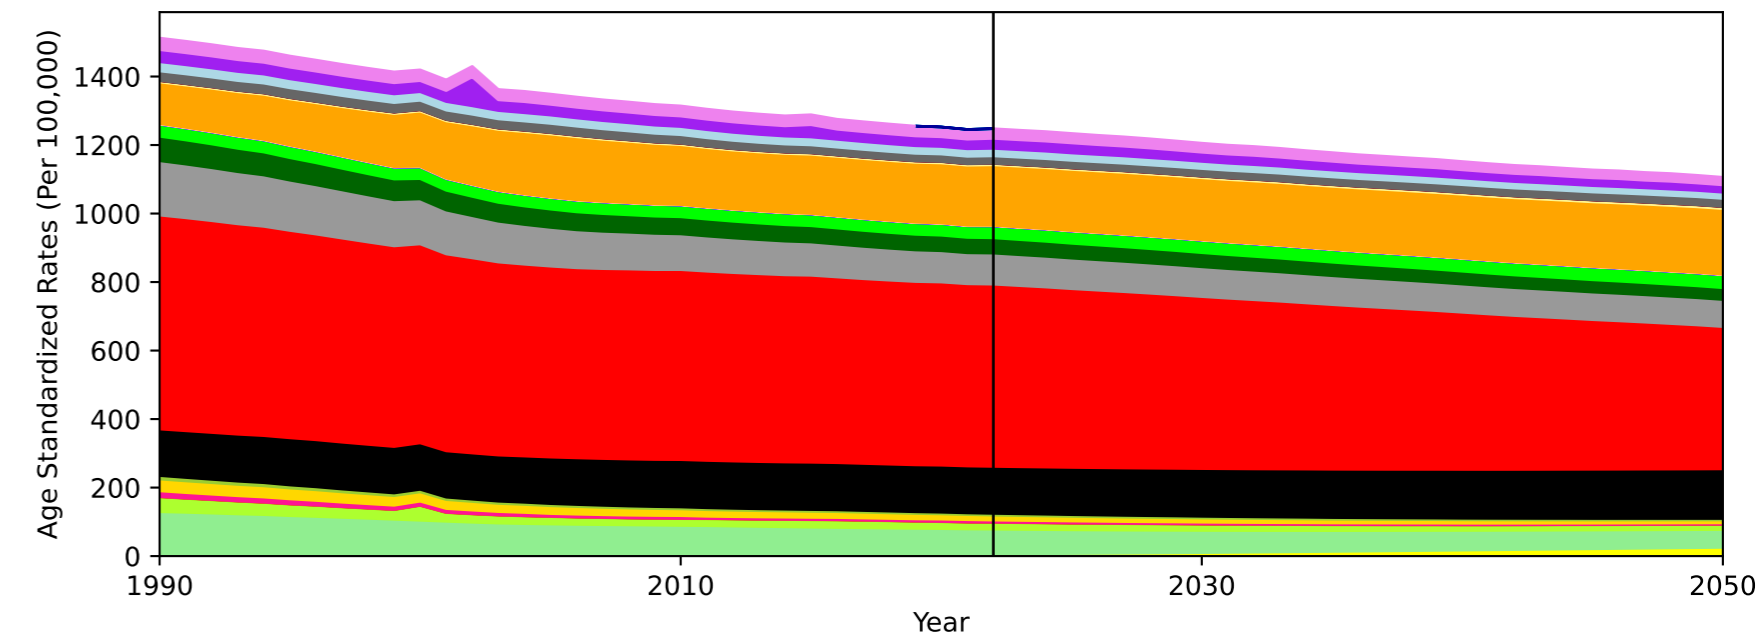

Level 1

Level 2

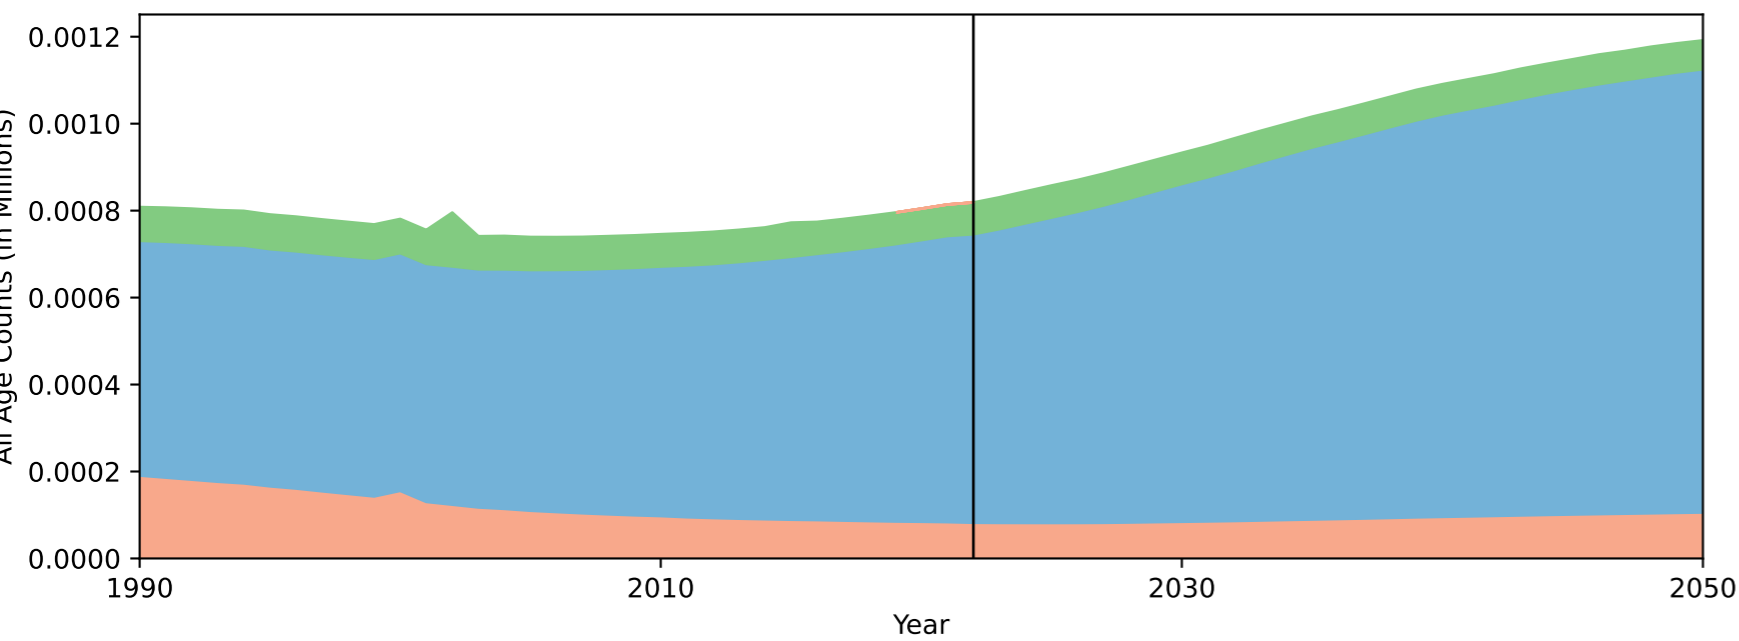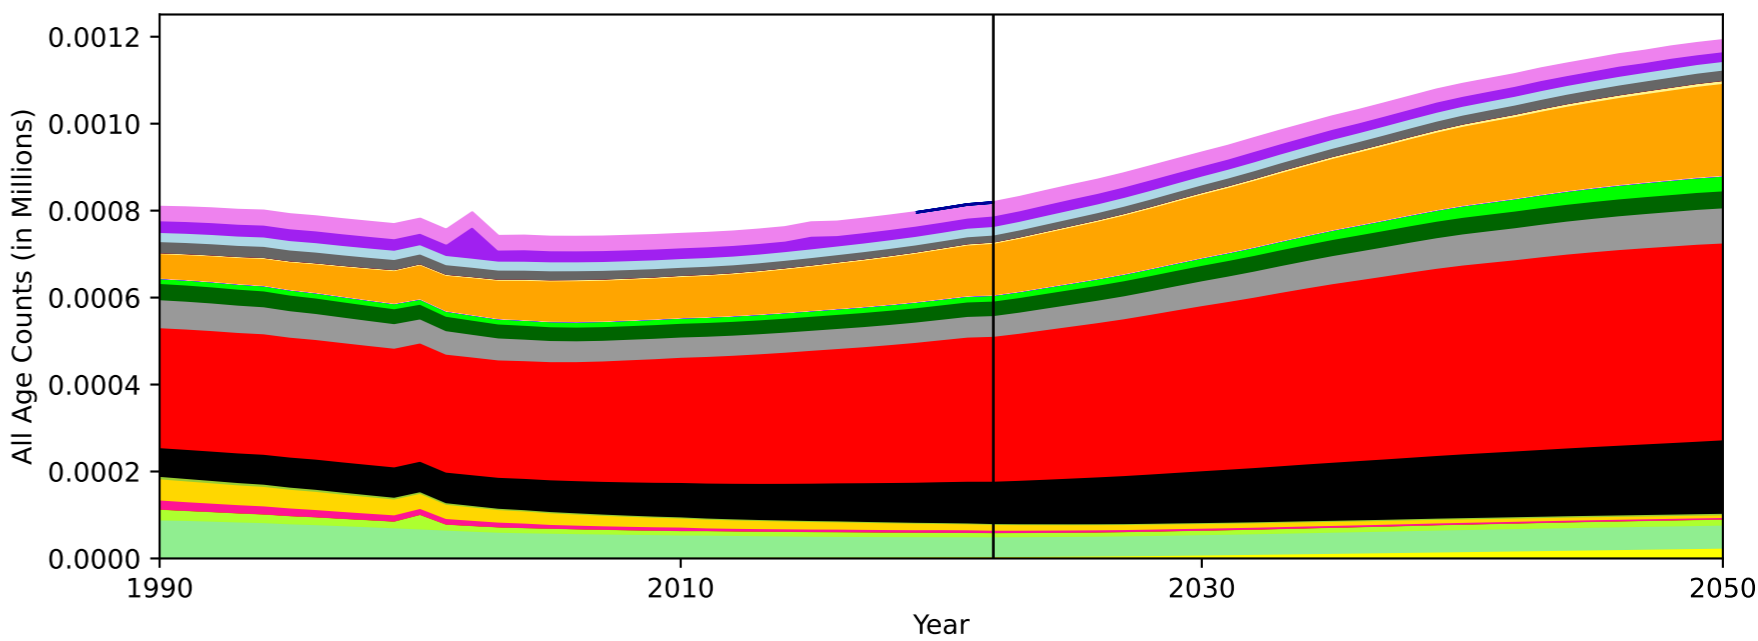

# Nauru

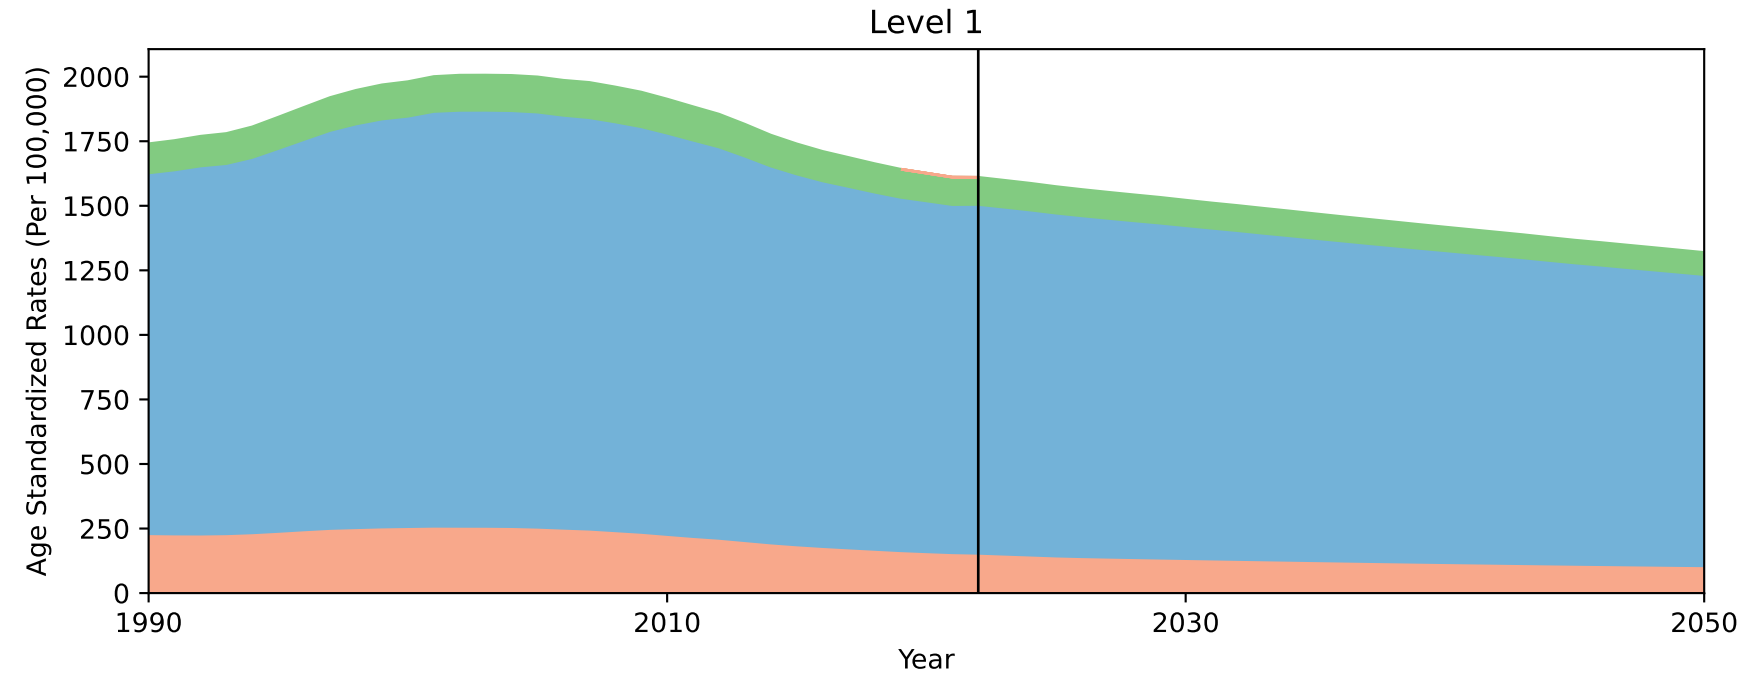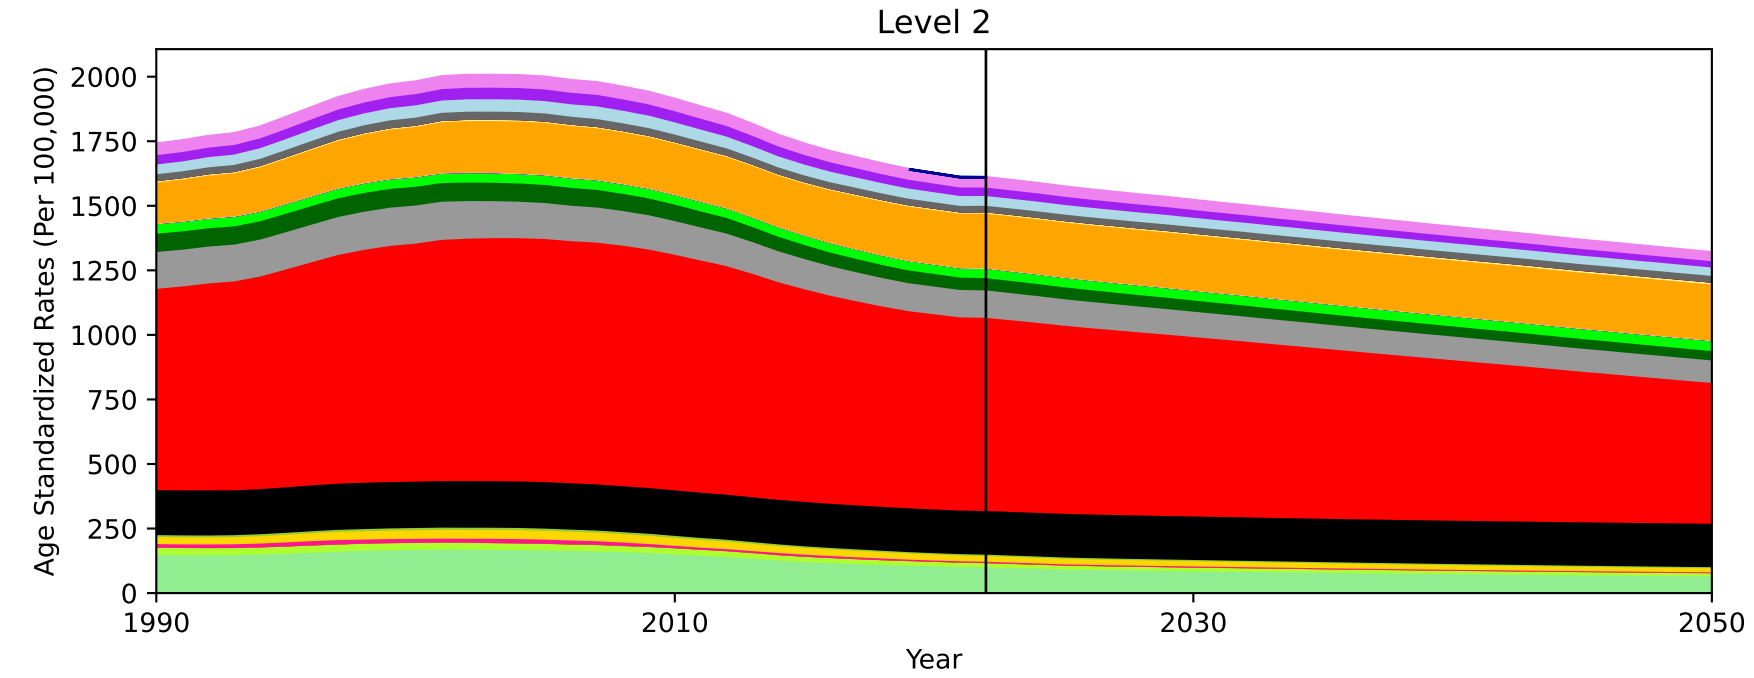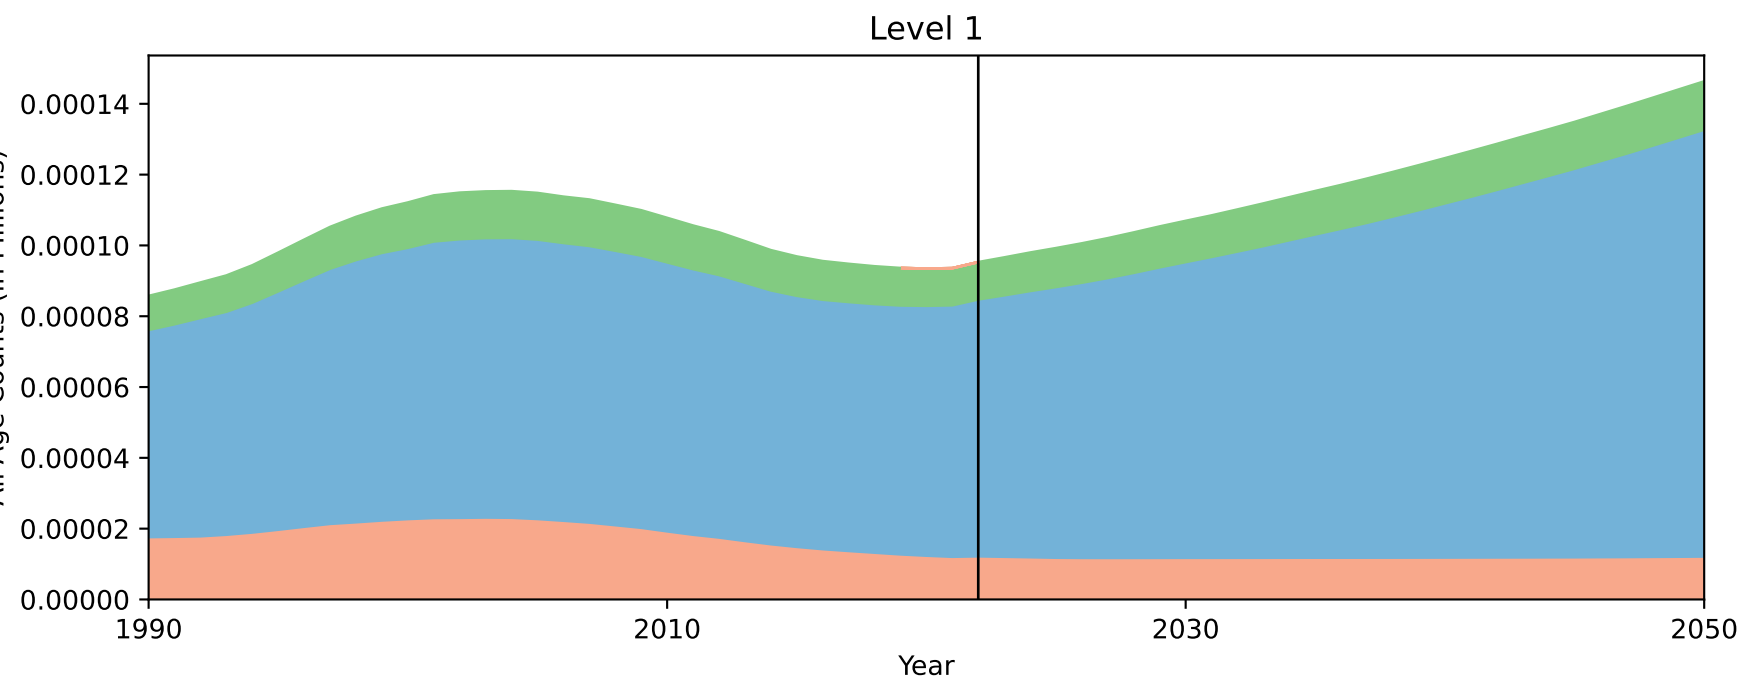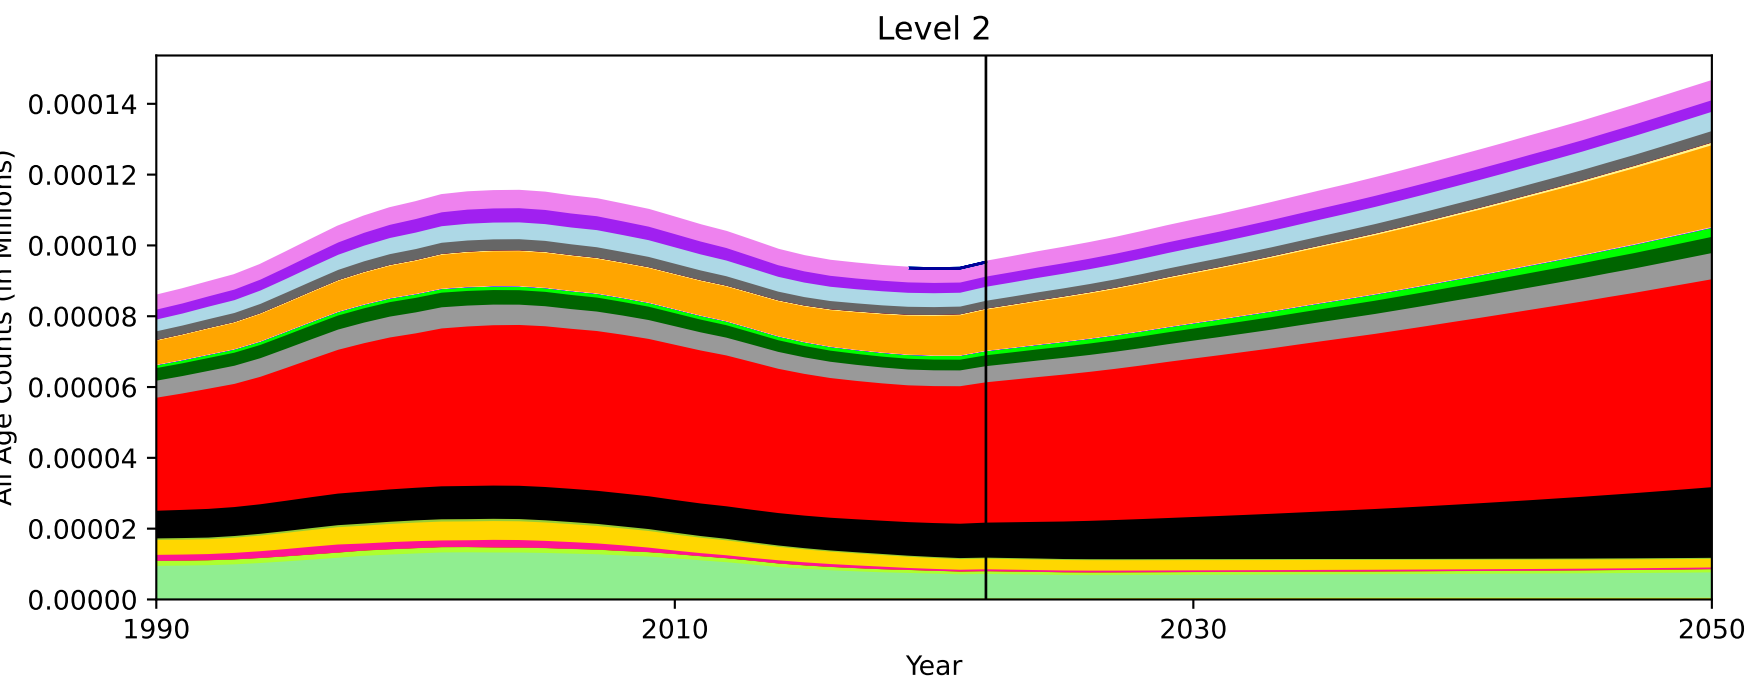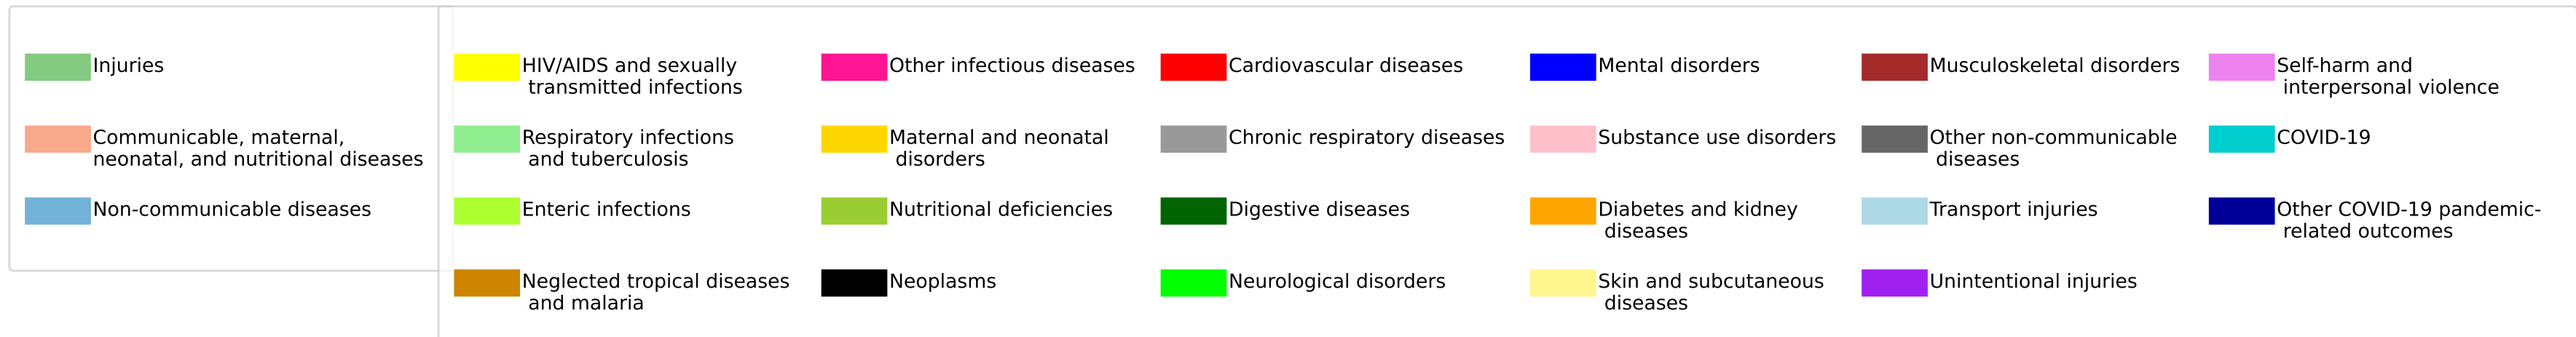

Level 1

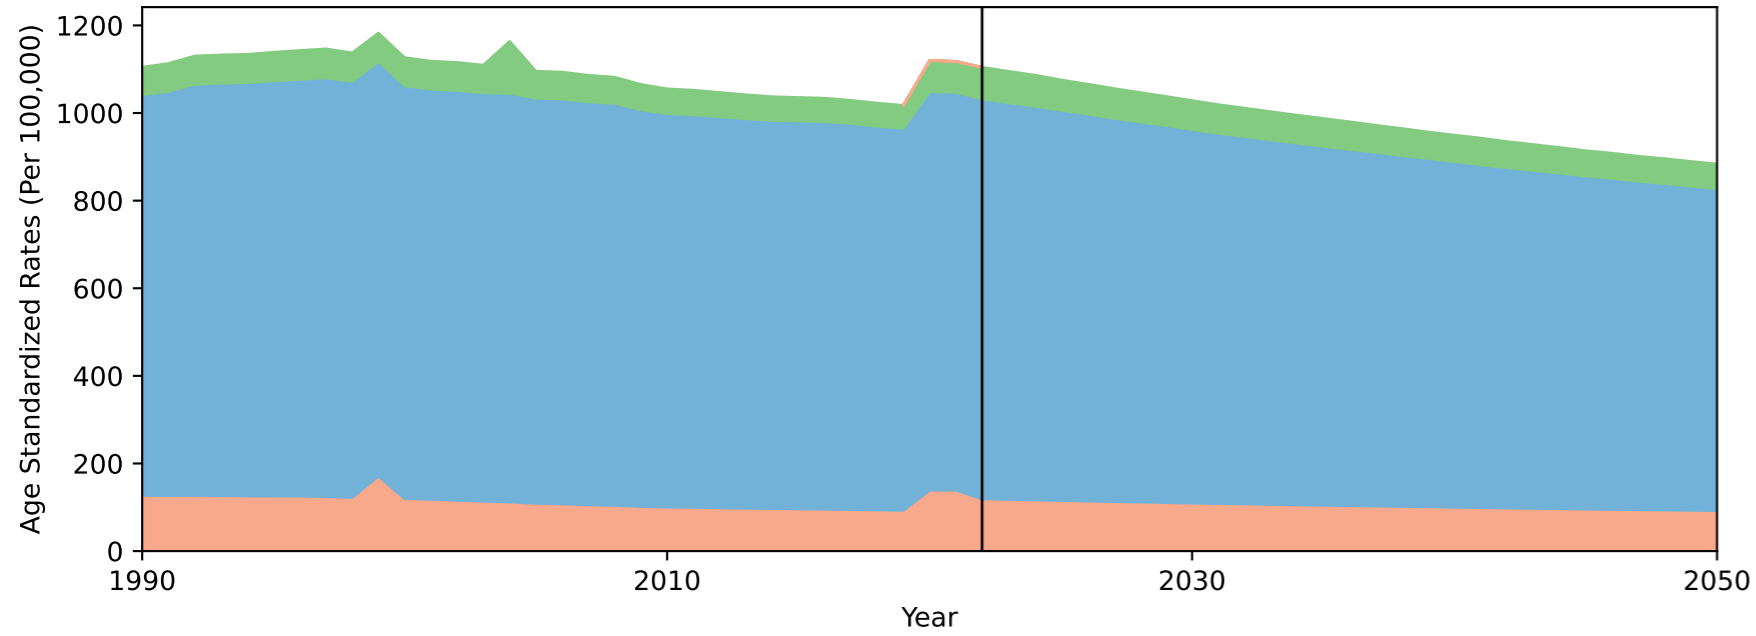

Level 2

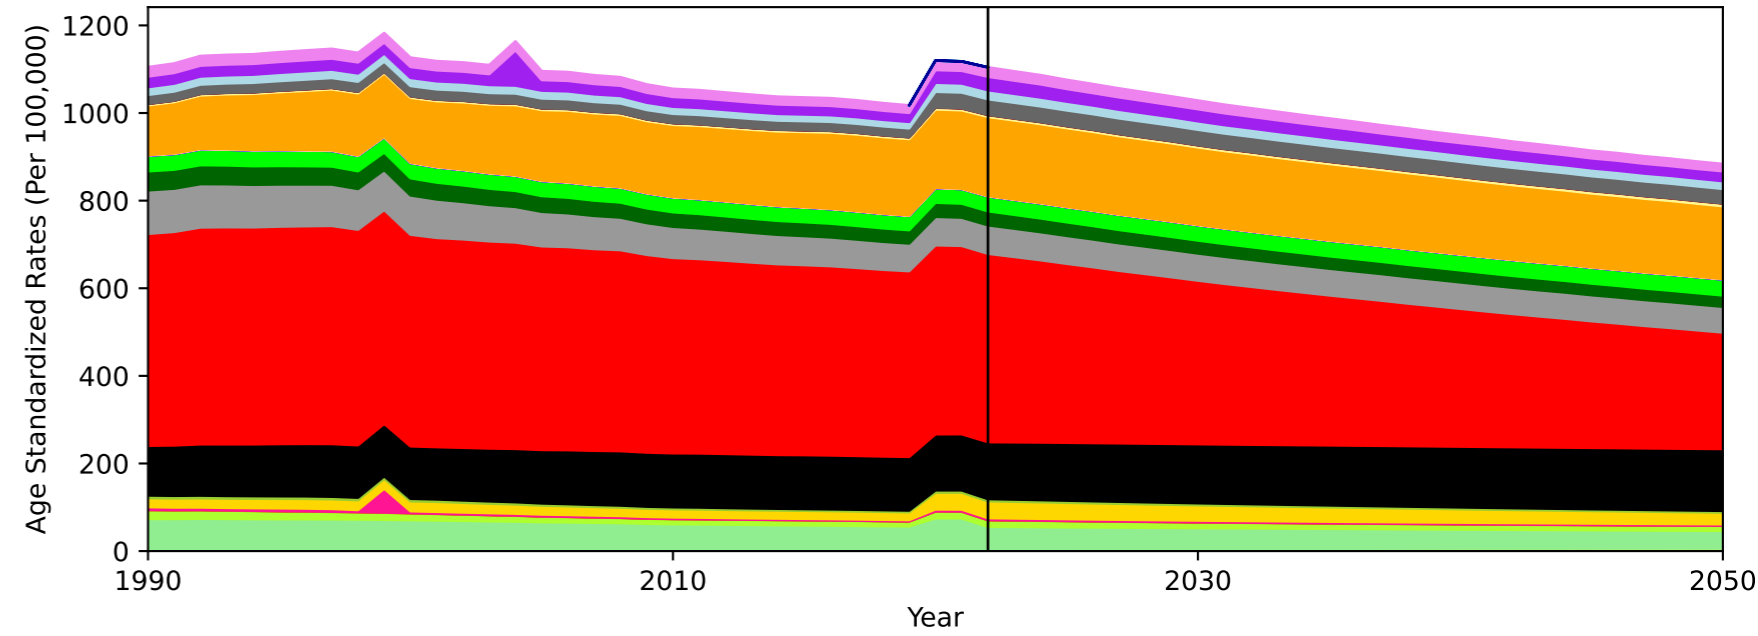

Level 1

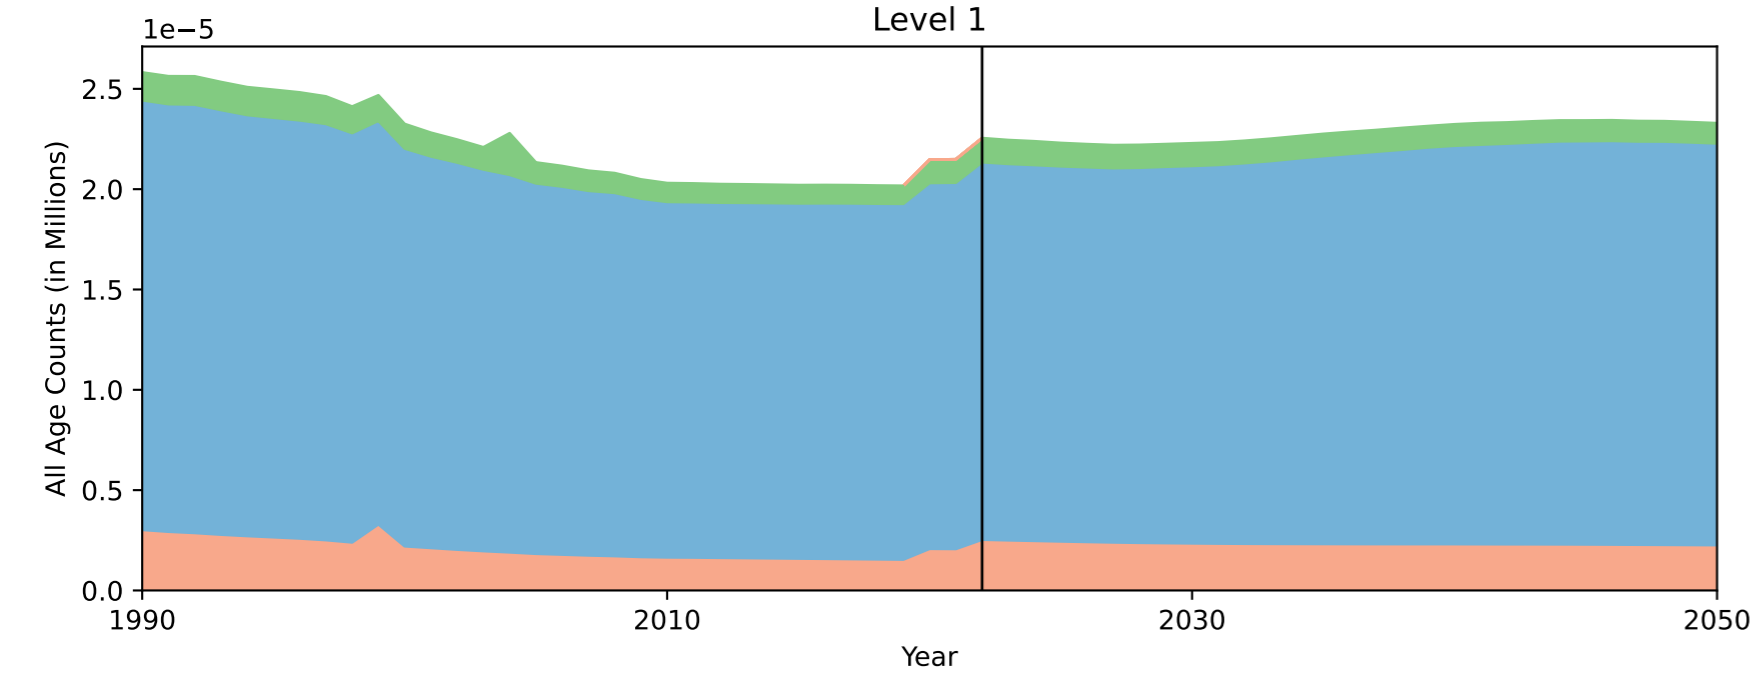

Level 2

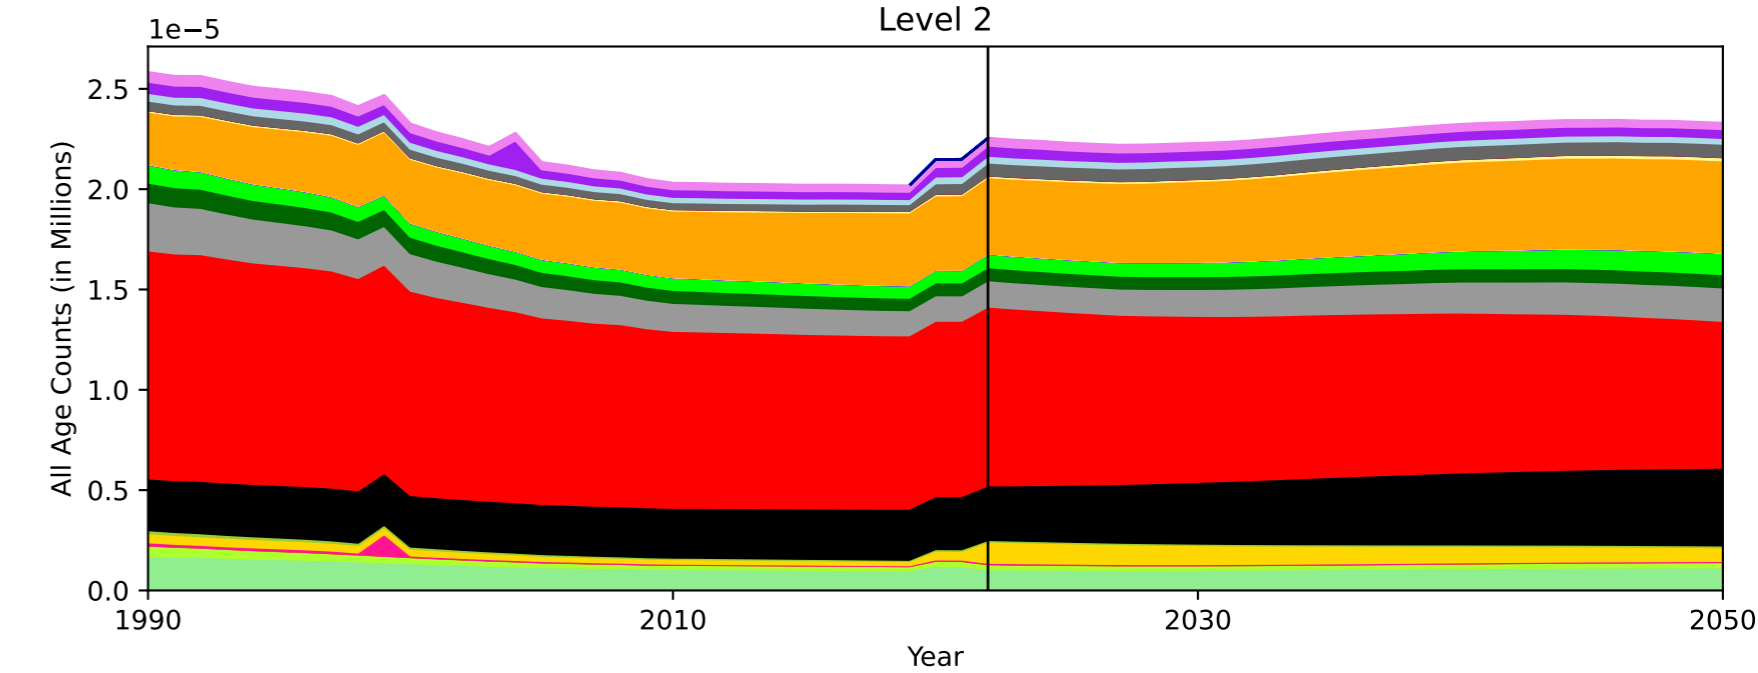

# Northern Mariana Islands

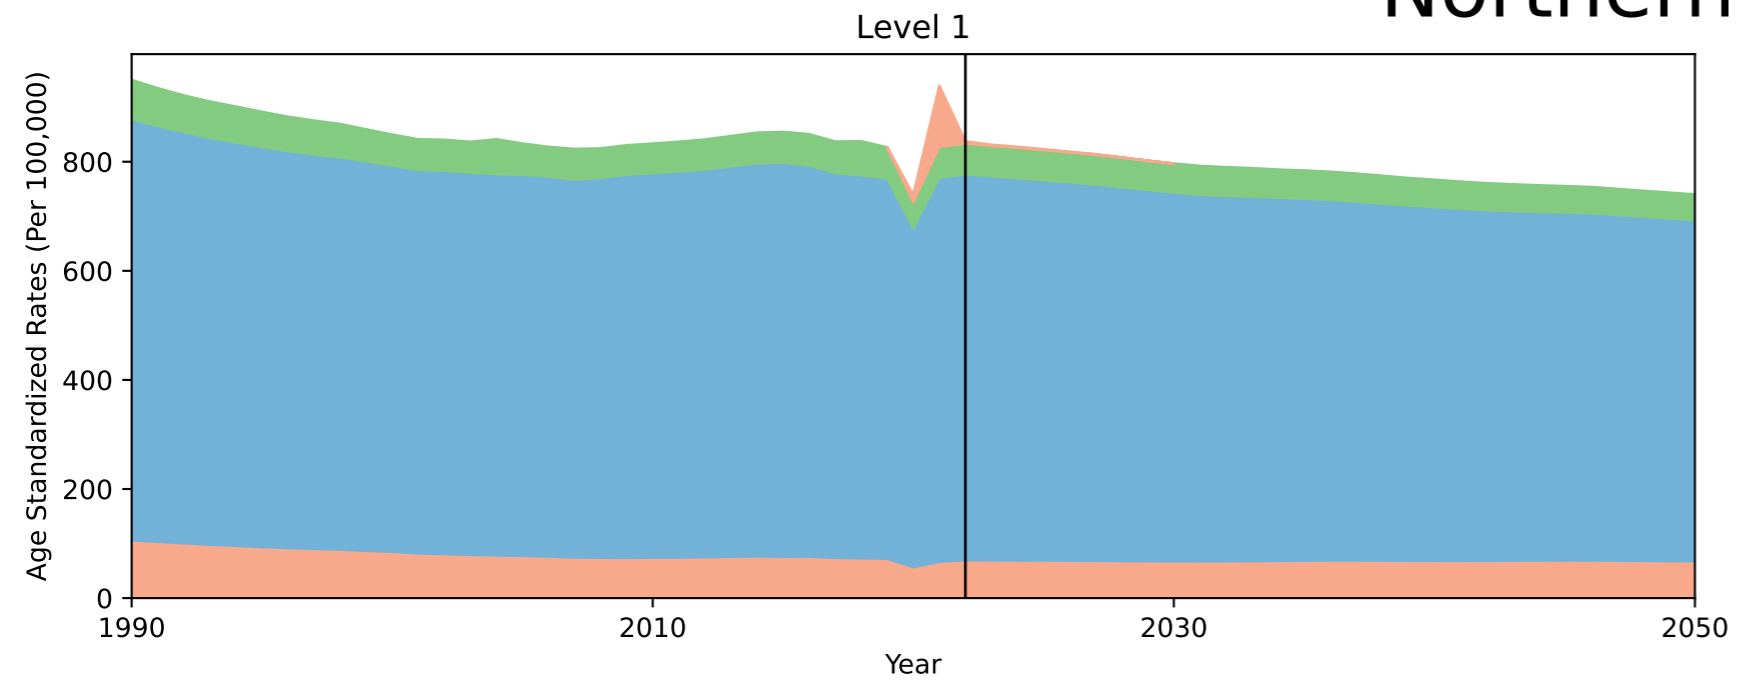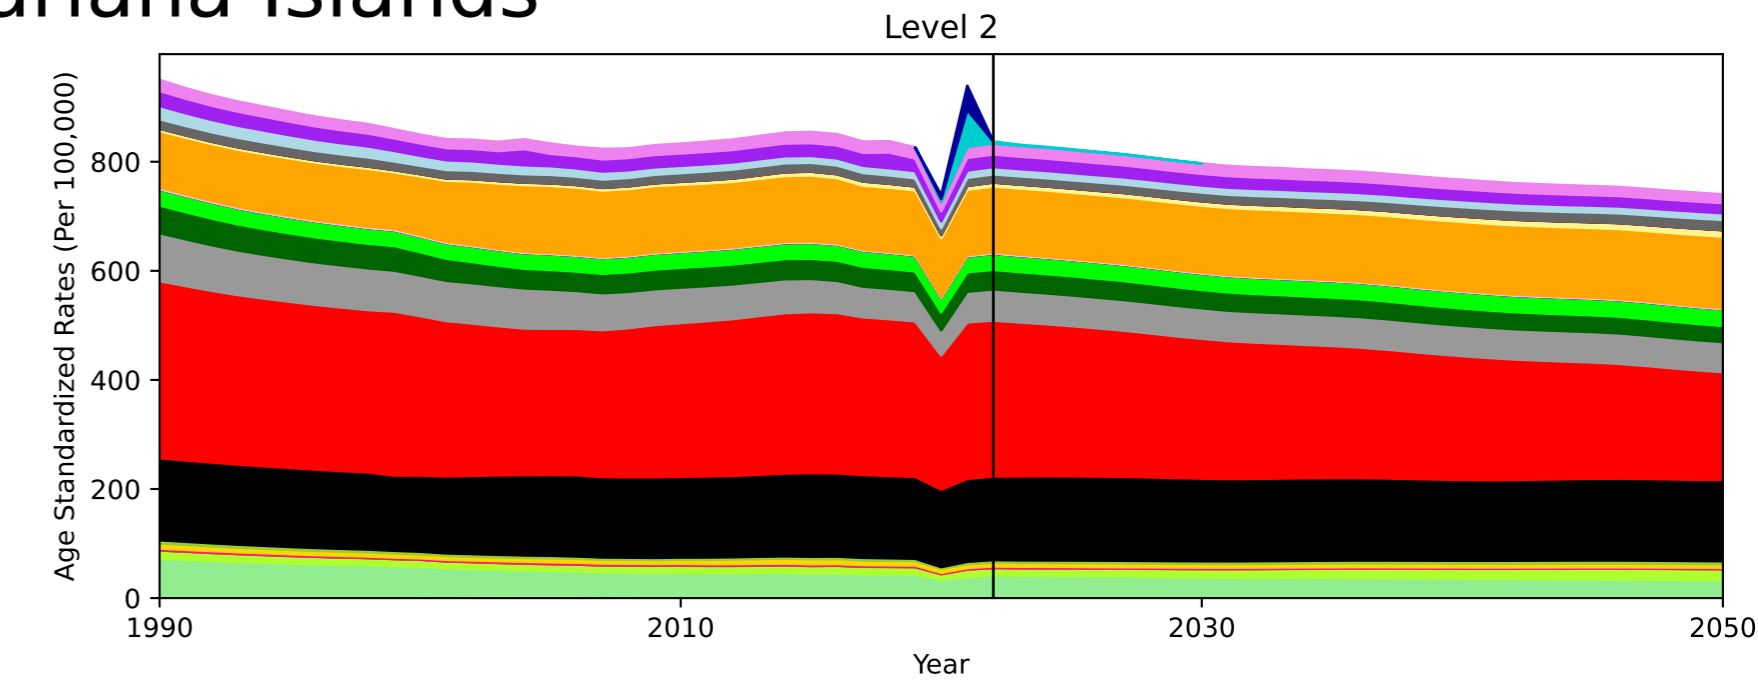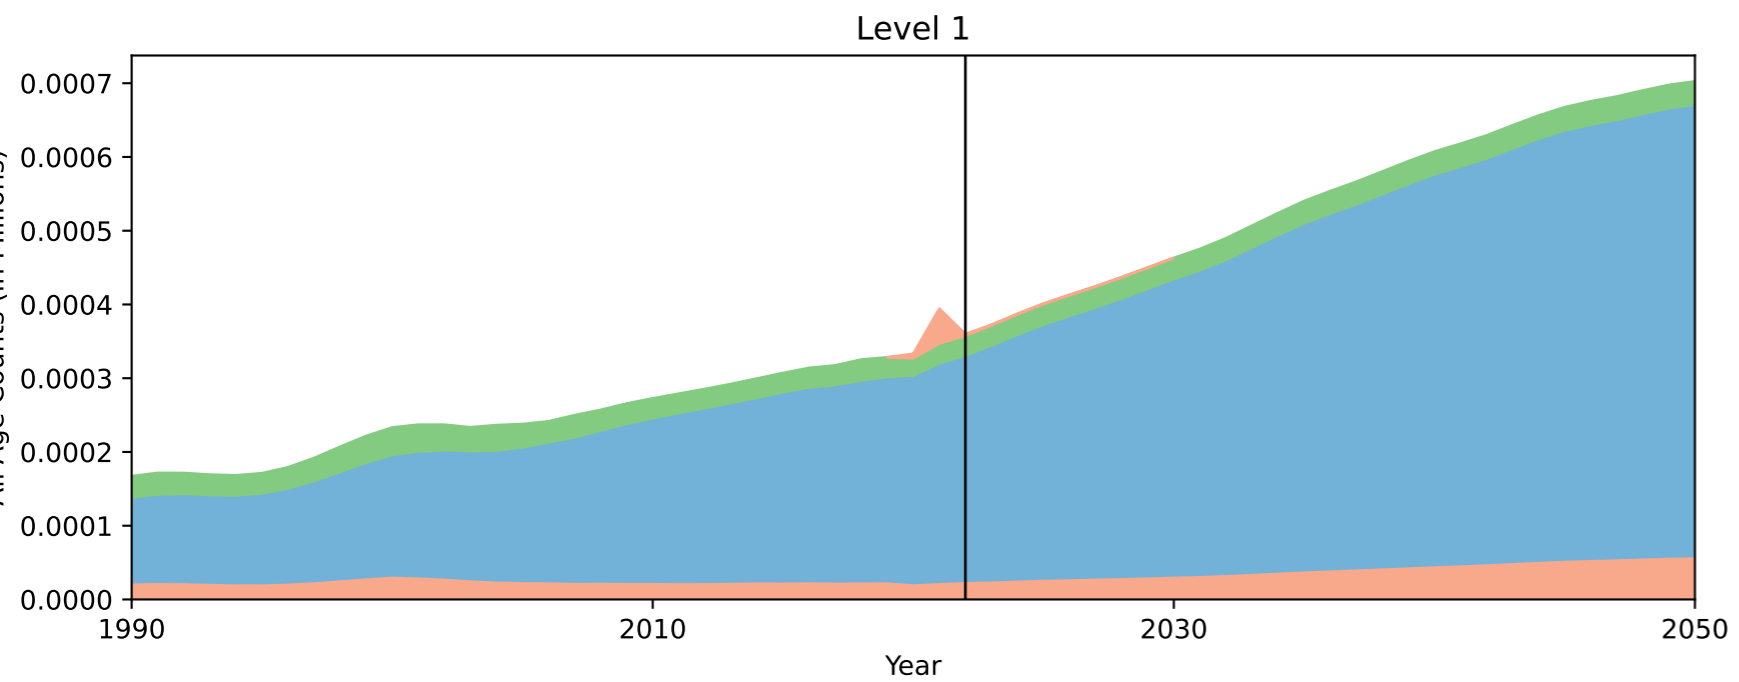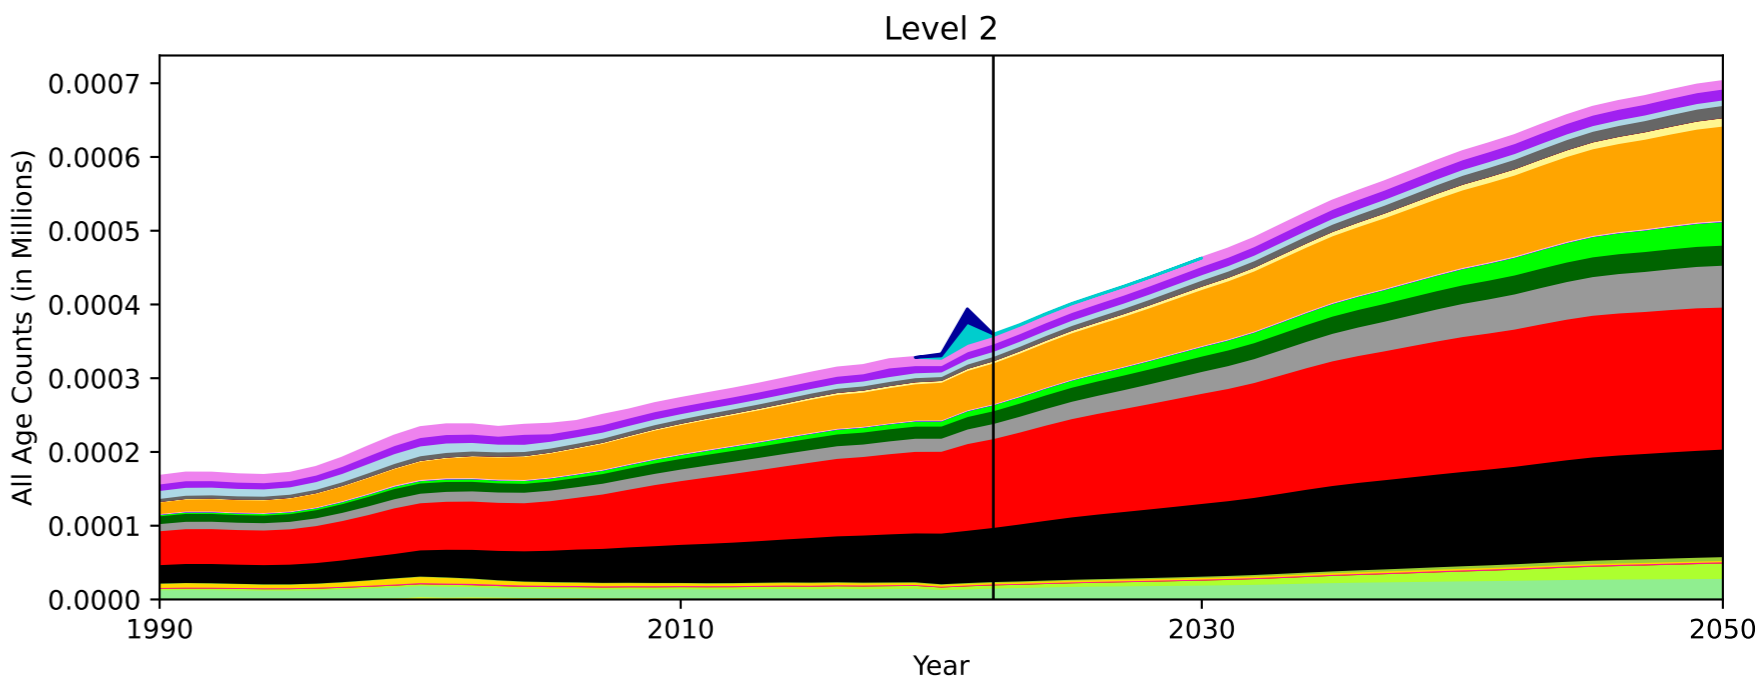

# Palau

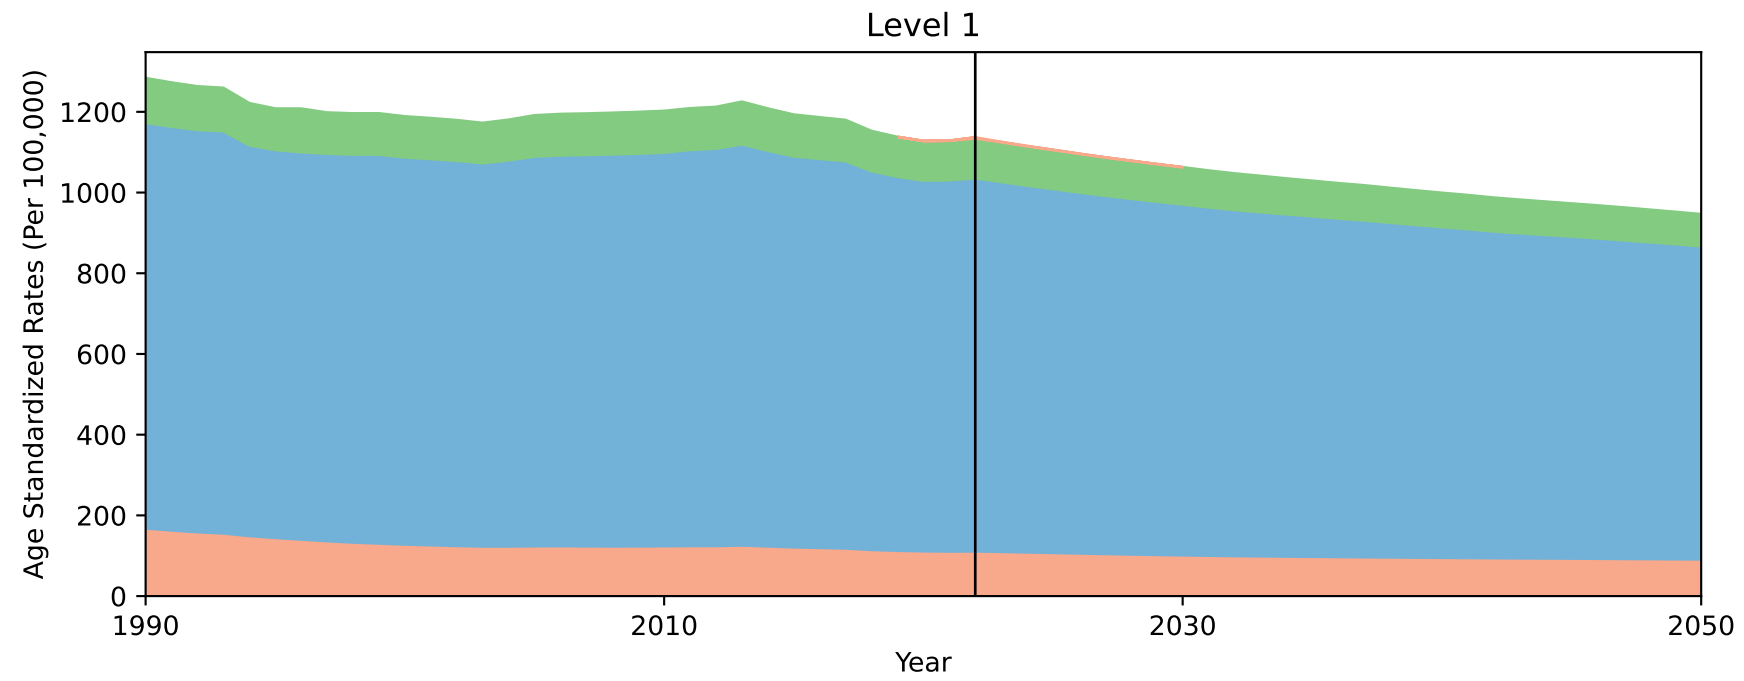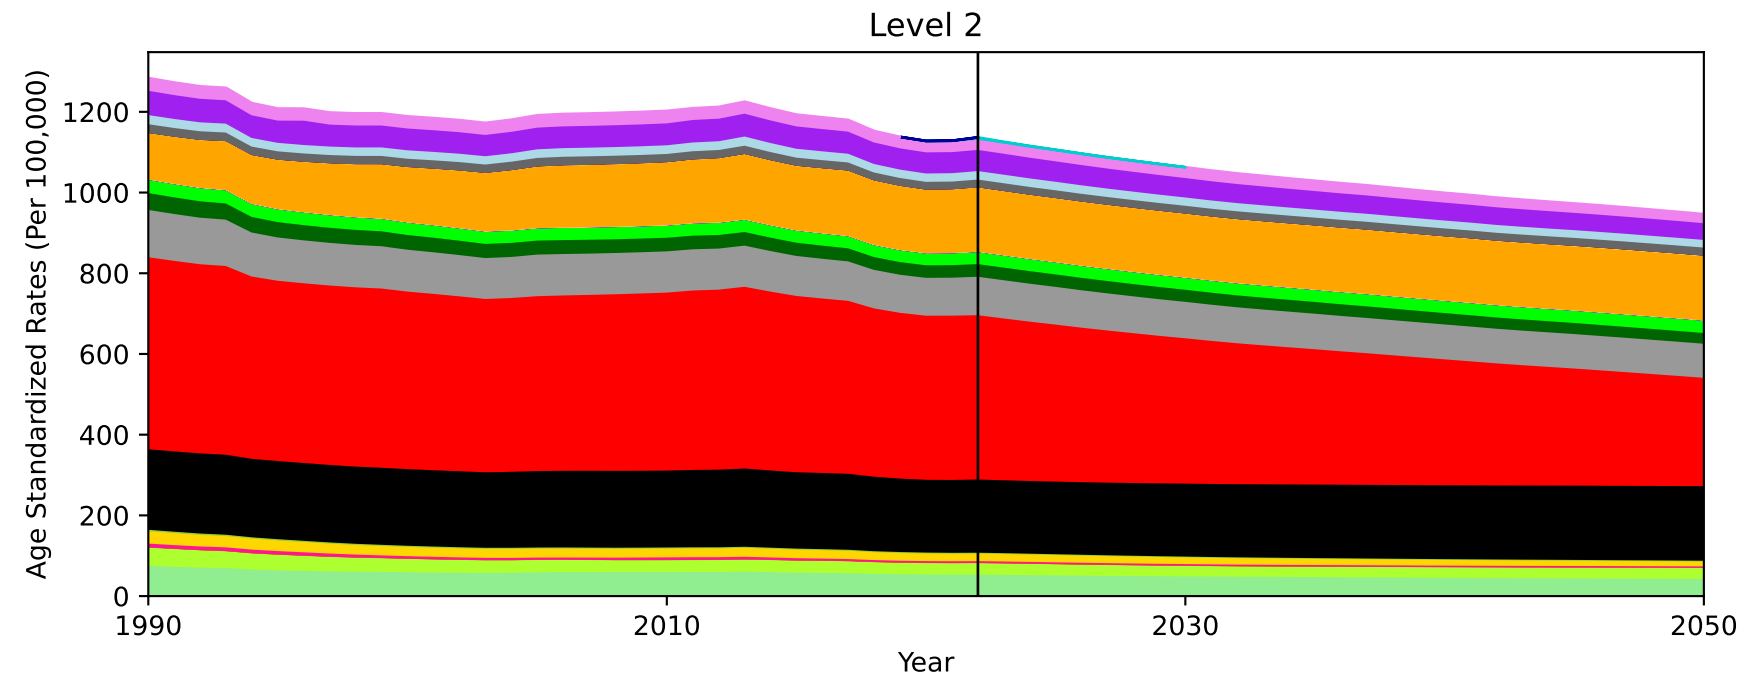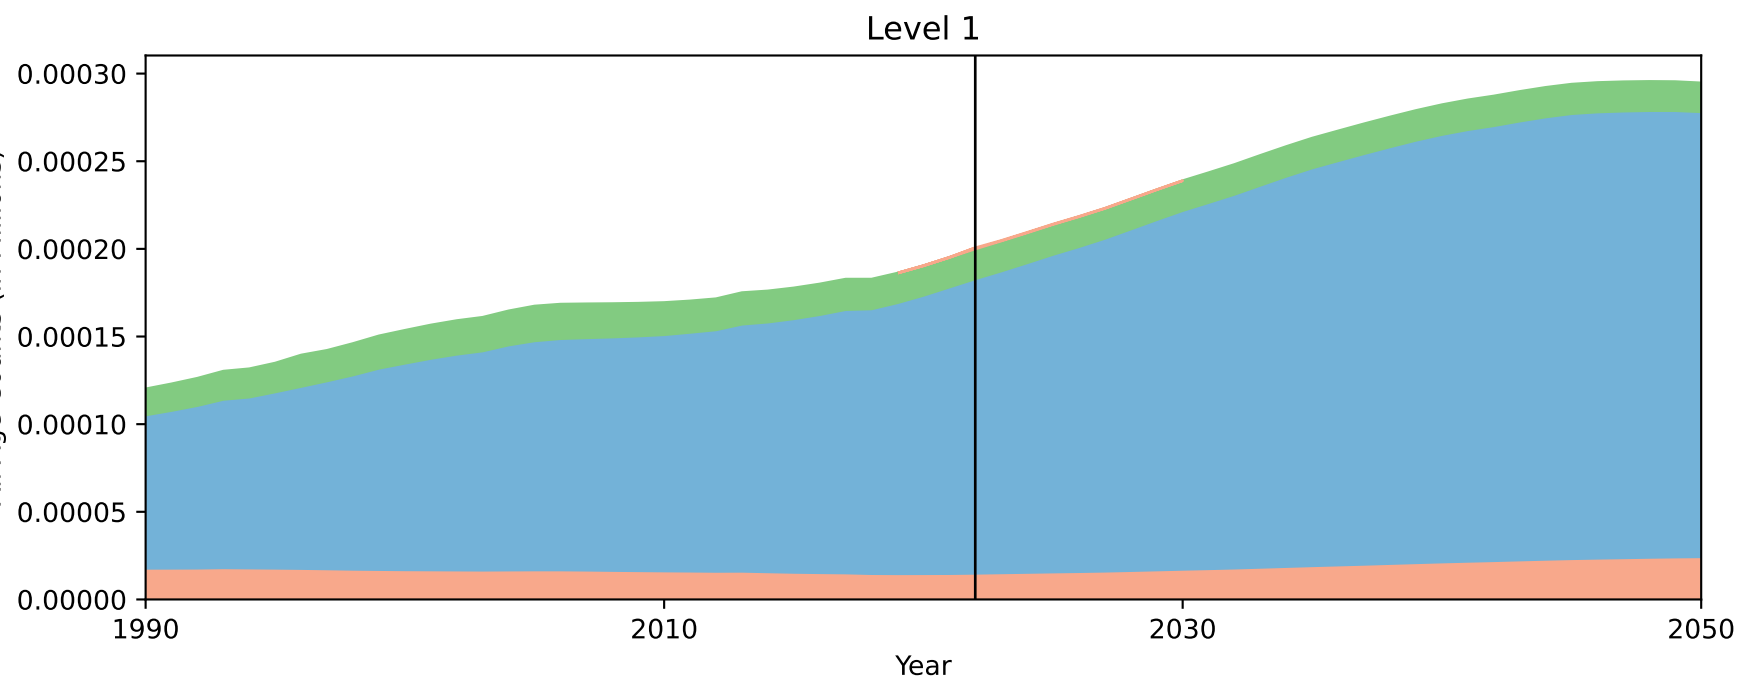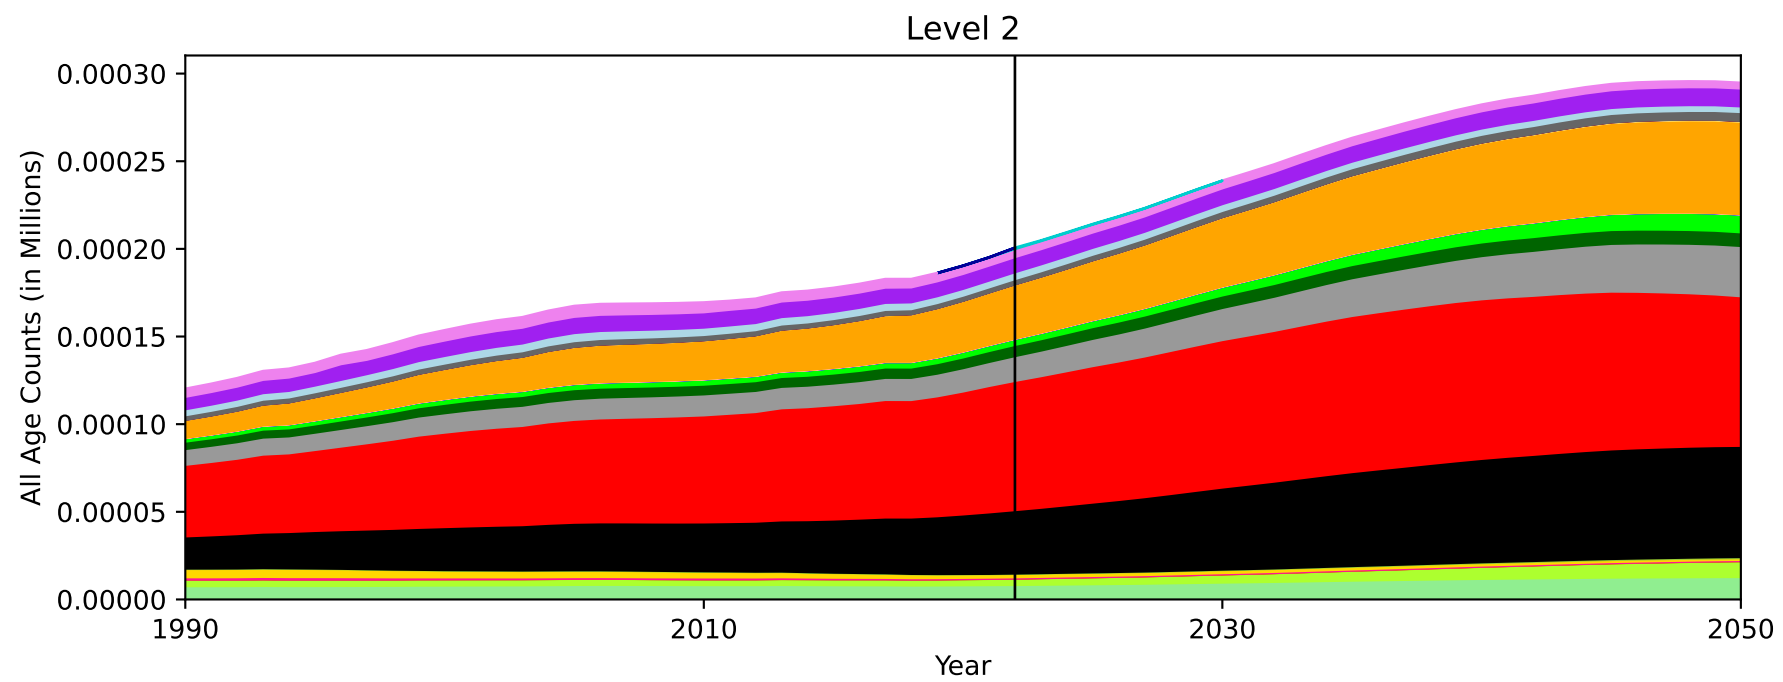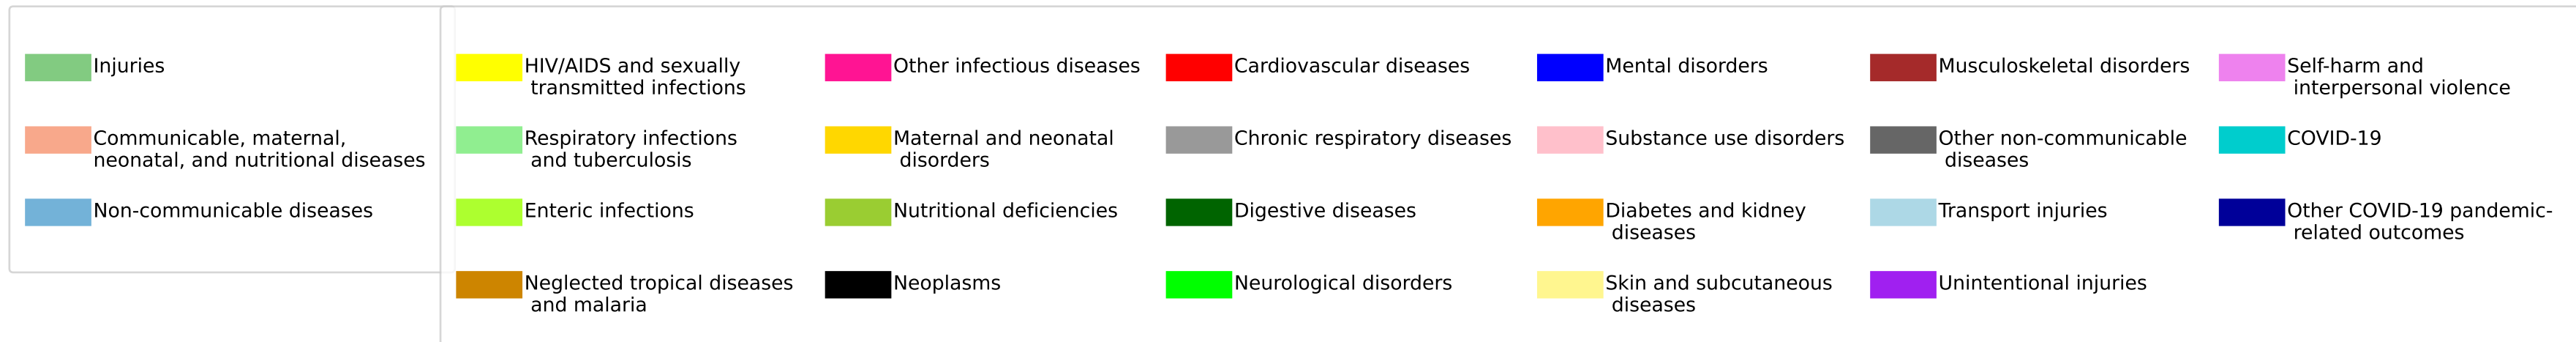



# Papua New Guinea

Supplemental Results Figure S5. Age-standardised death rates and all age death counts and by Level 1 and Level 2 causes, 1990–2050

616

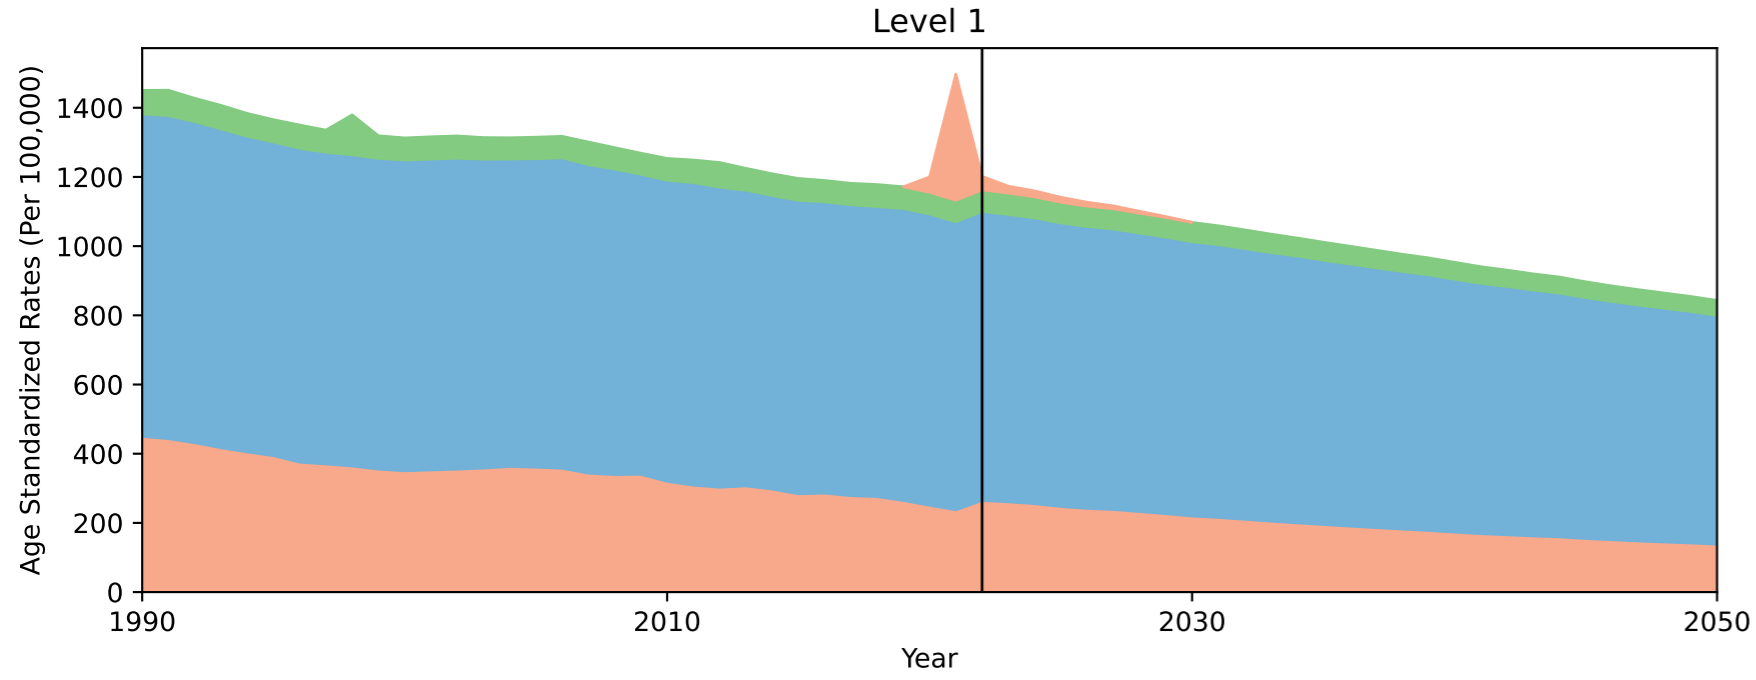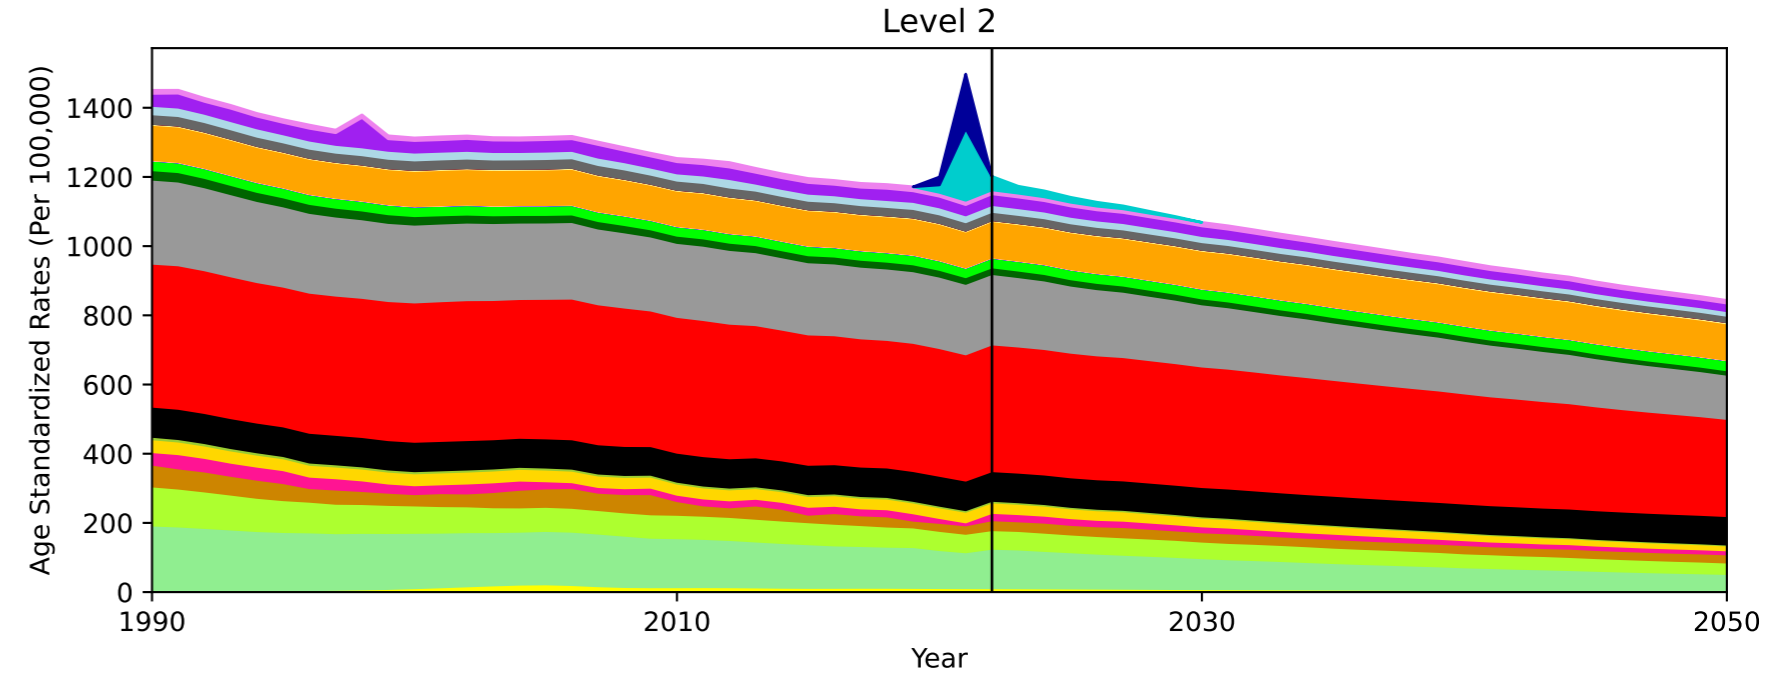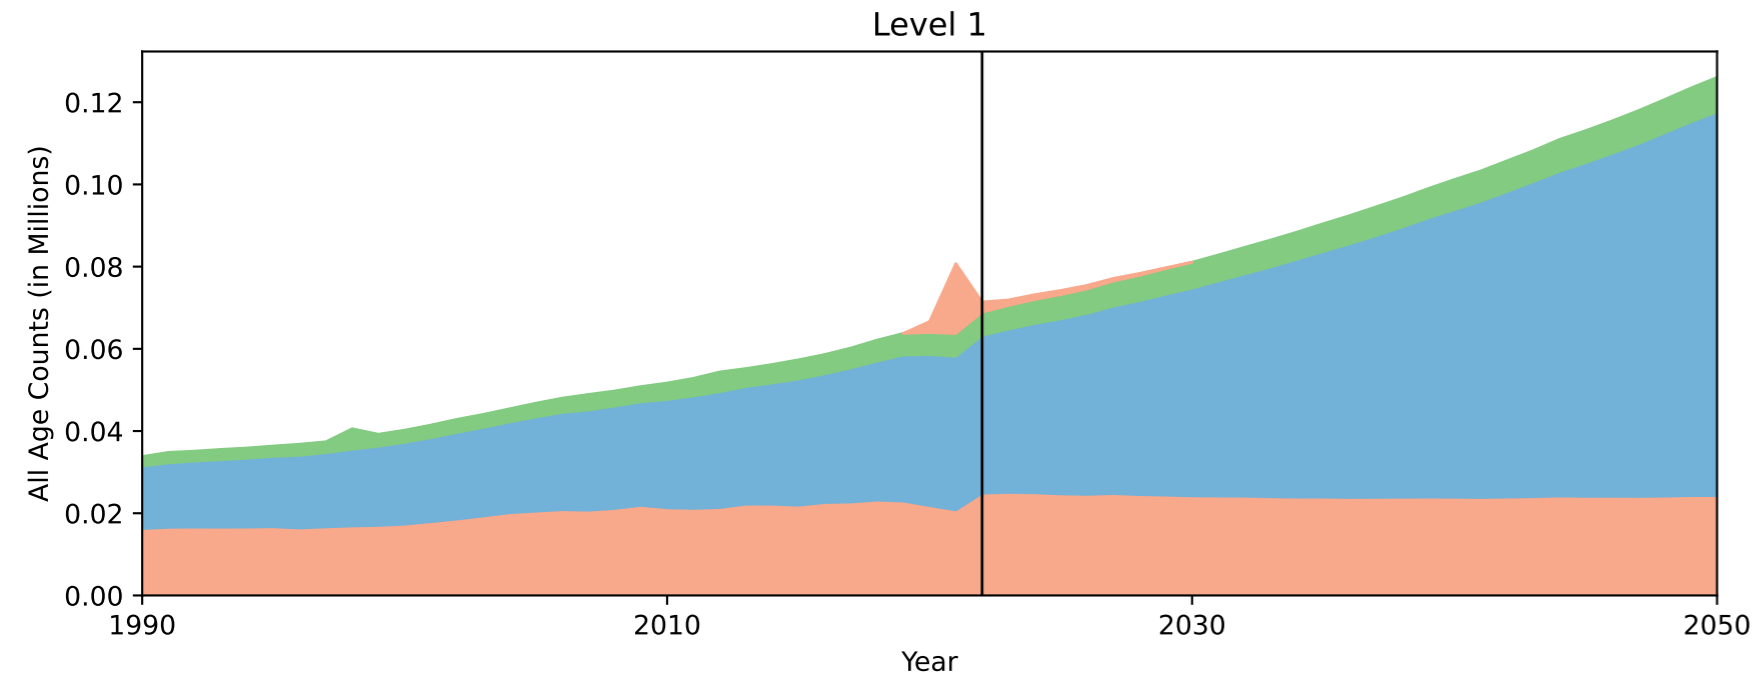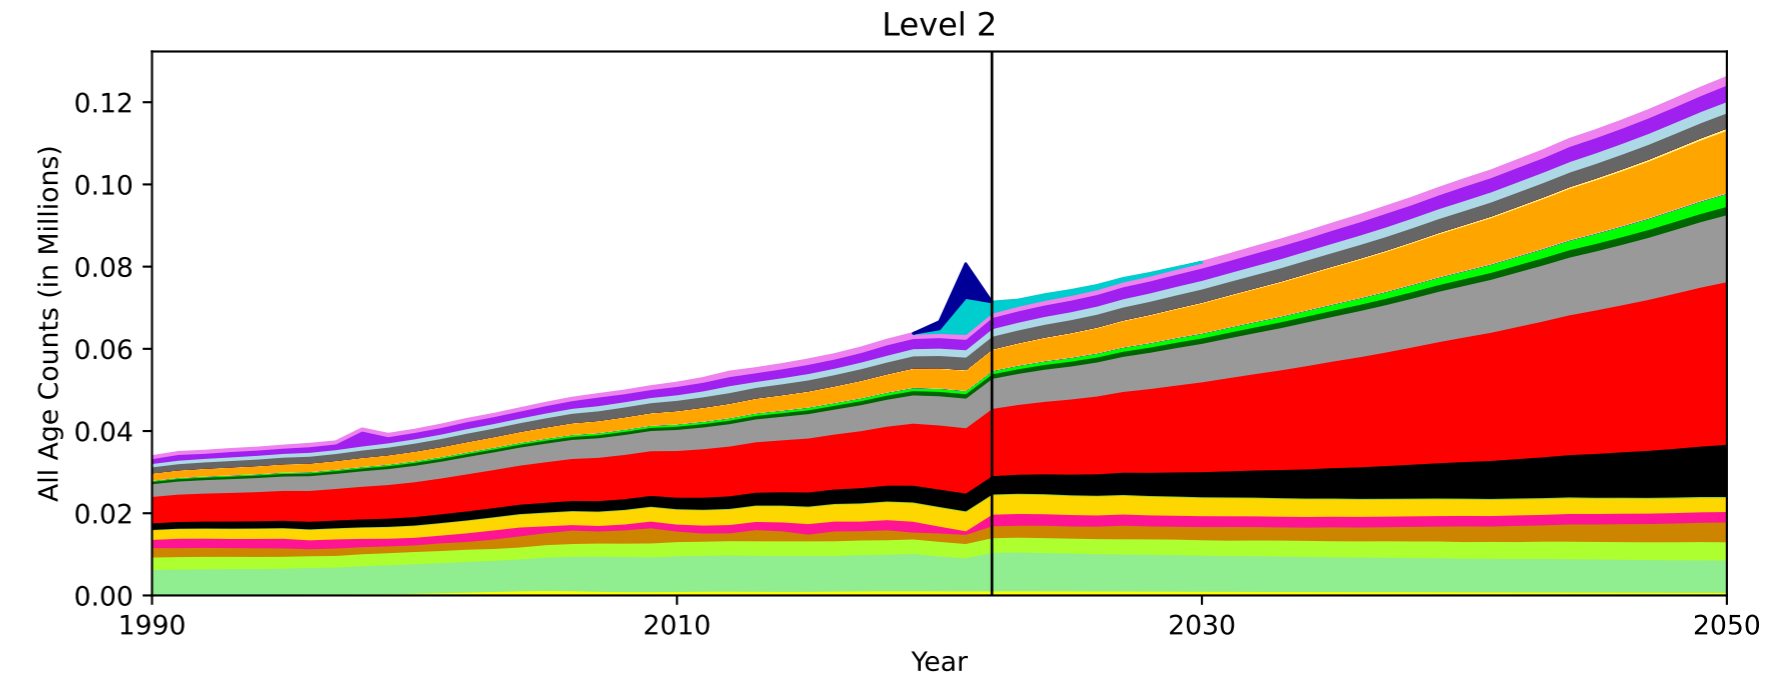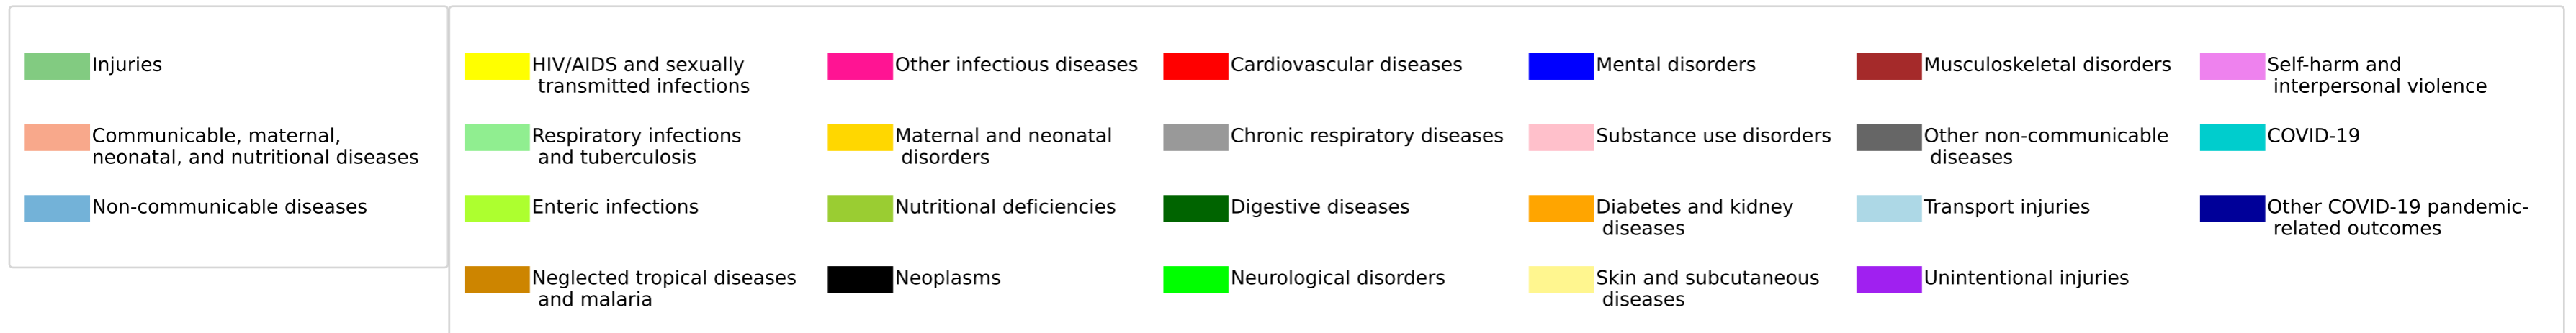

Level 1

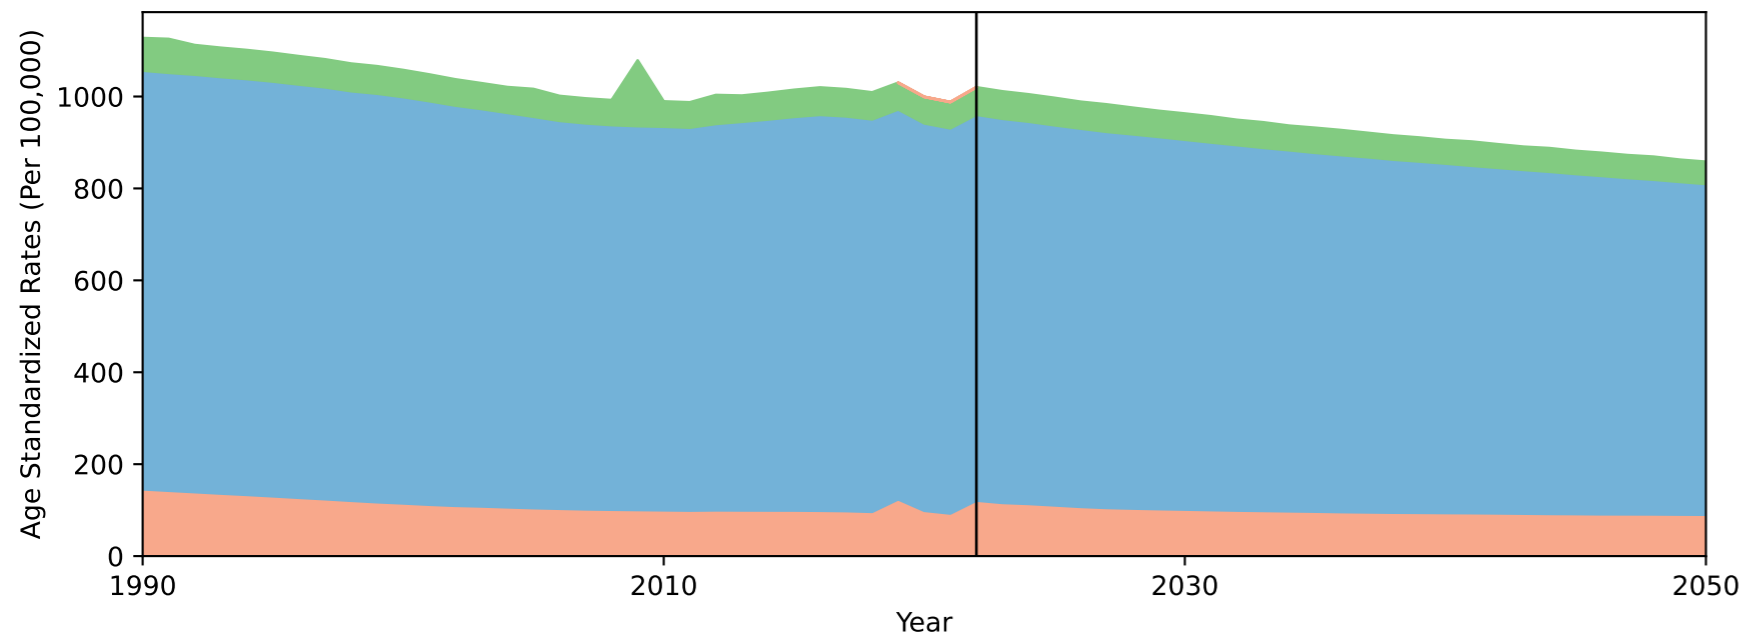

Level 2

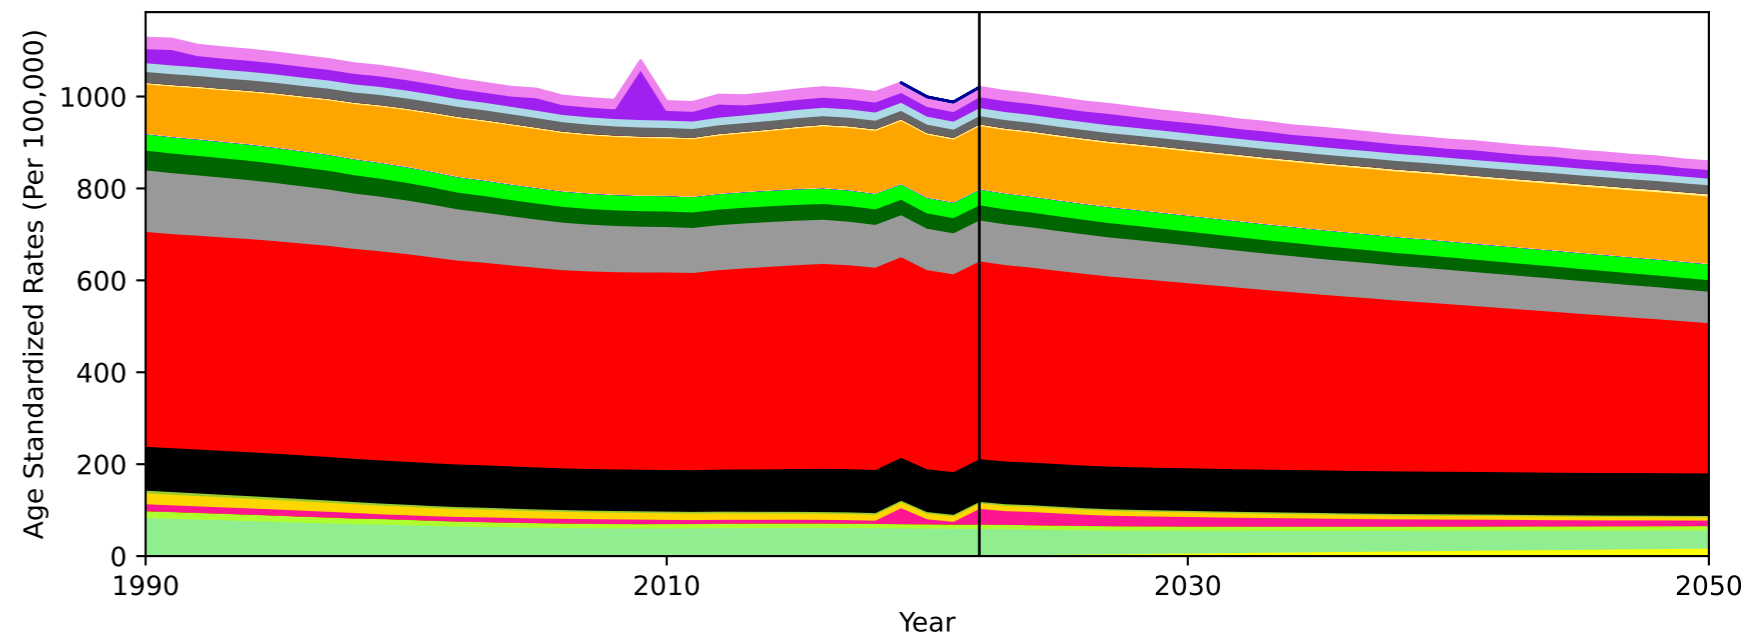

Level 1

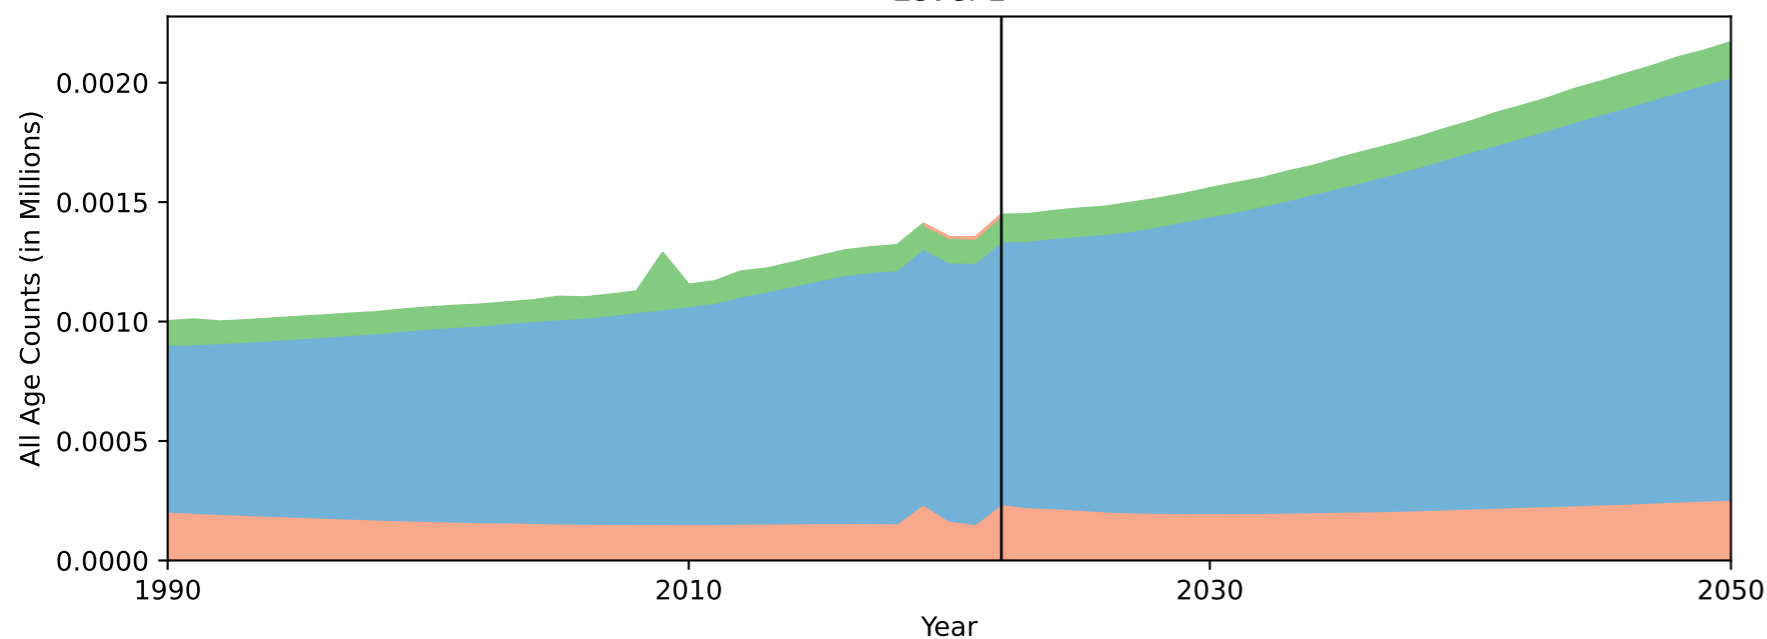

Level 2

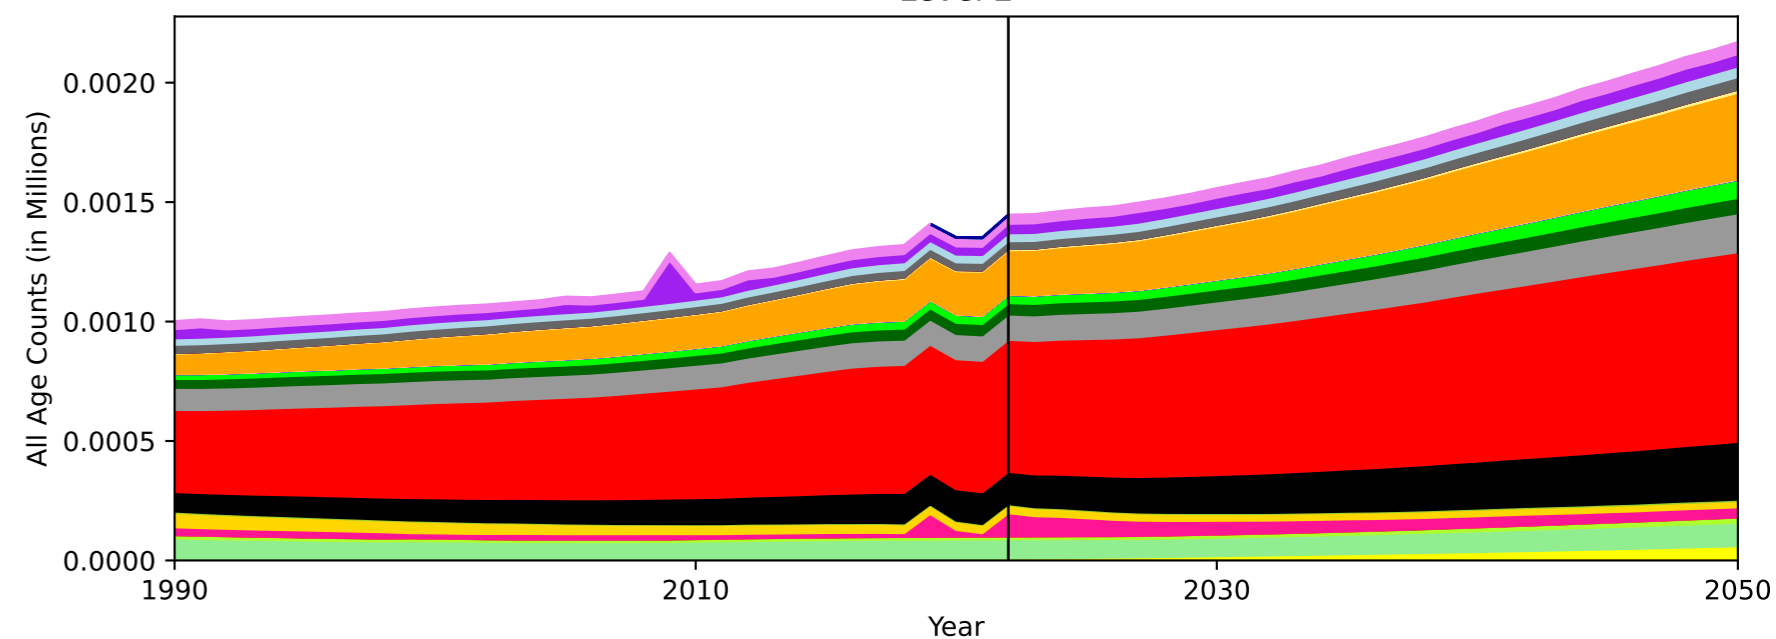

# Solomon Islands

Supplemental Results Figure S5. Age-standardised death rates and all age death counts and by Level 1 and Level 2 causes, 1990–2050

618

Level 1

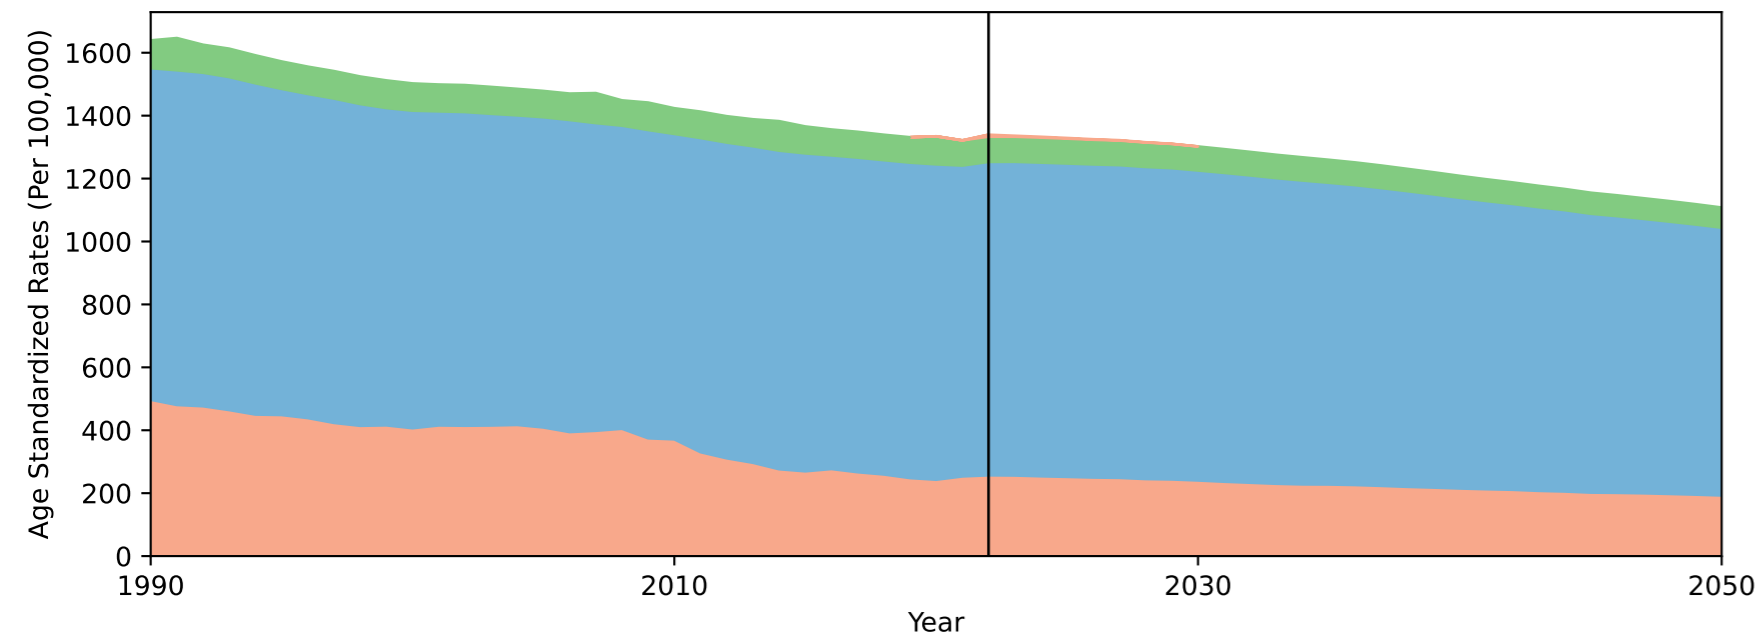

Level 2

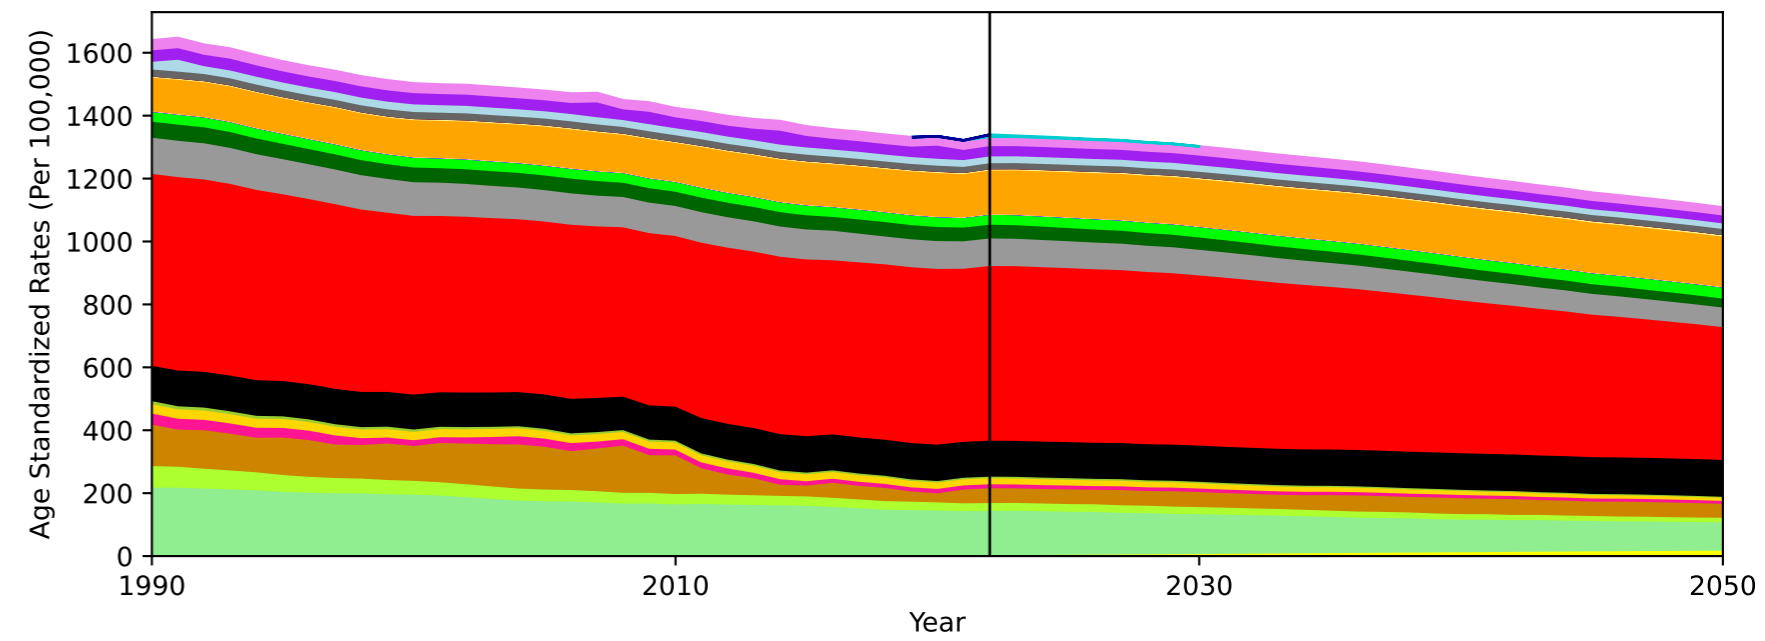

Level 1

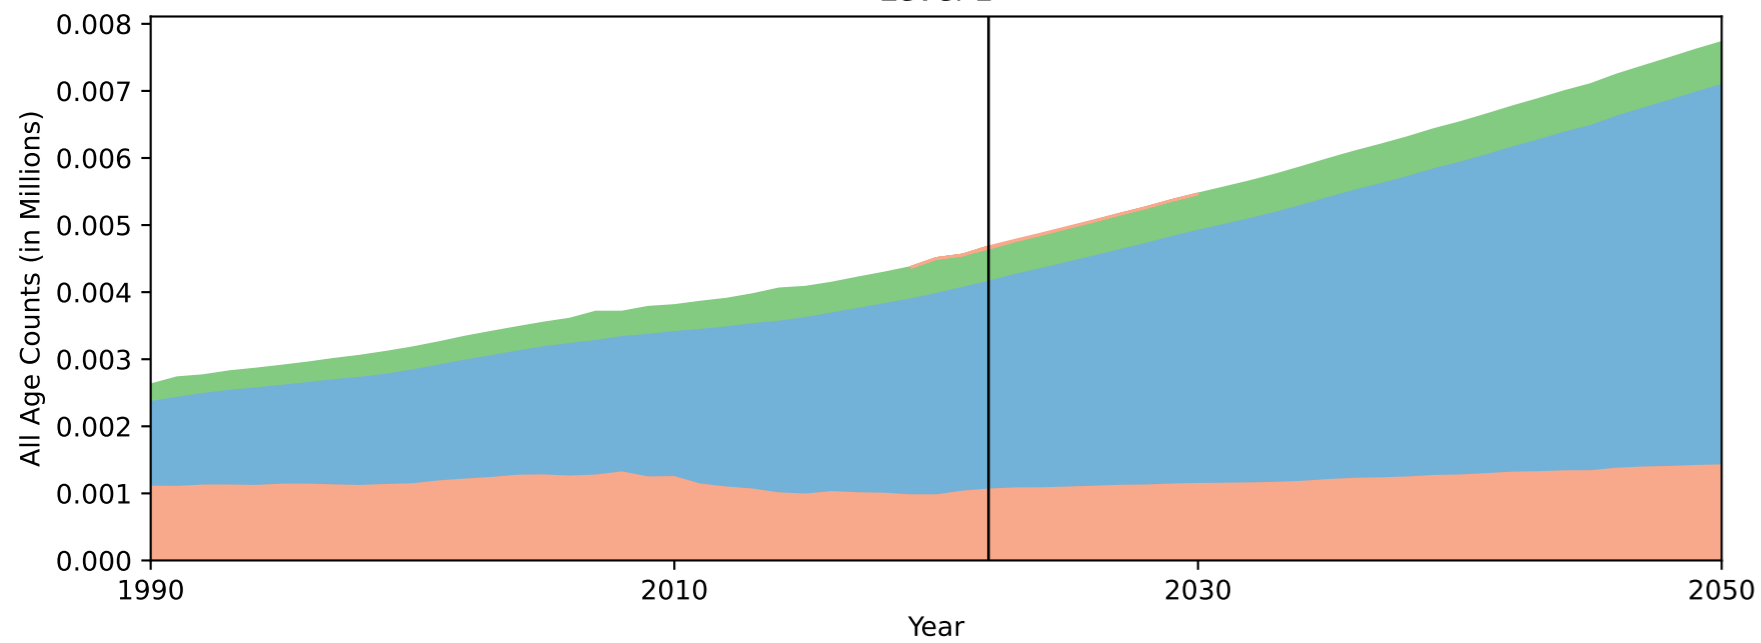

Level 2

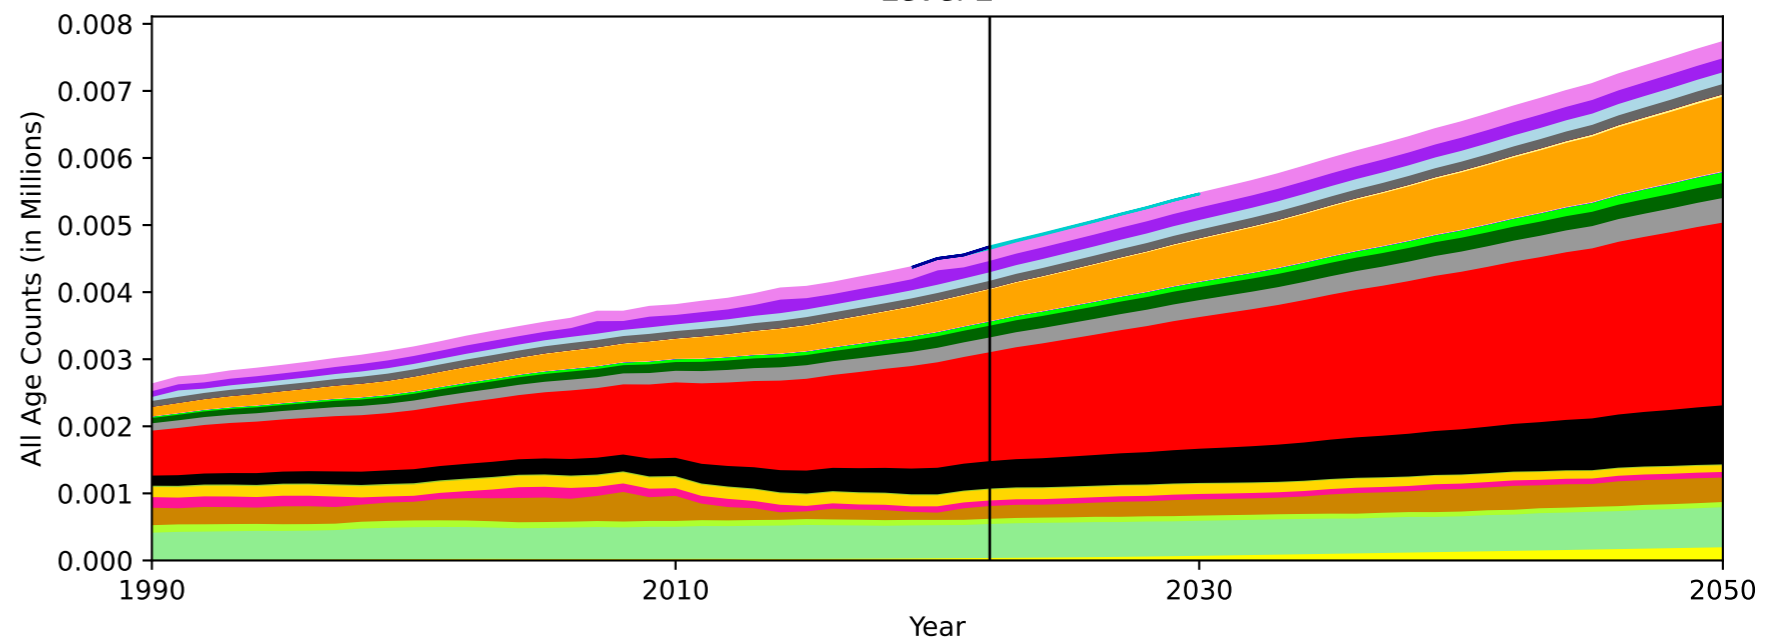

# Tokelau

Level 1

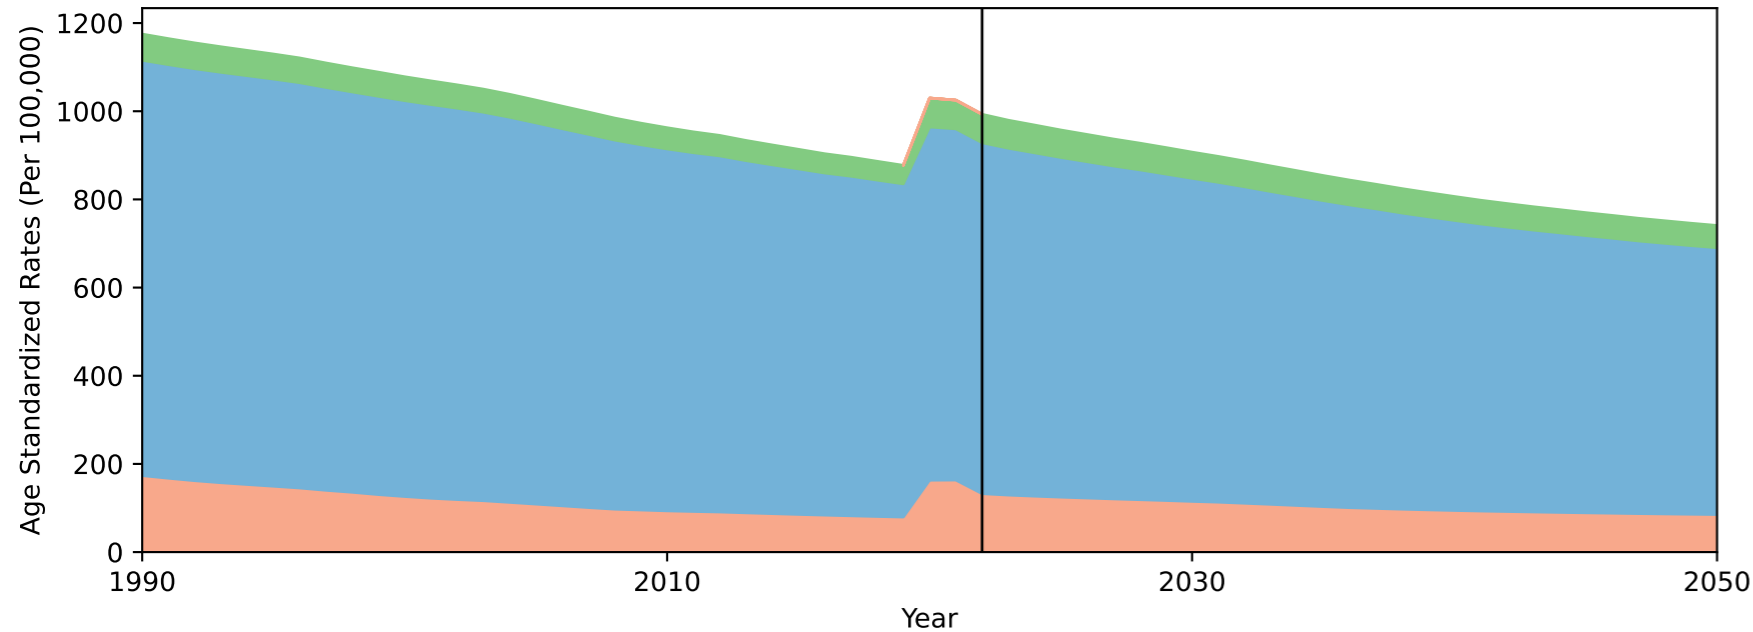

Level 2

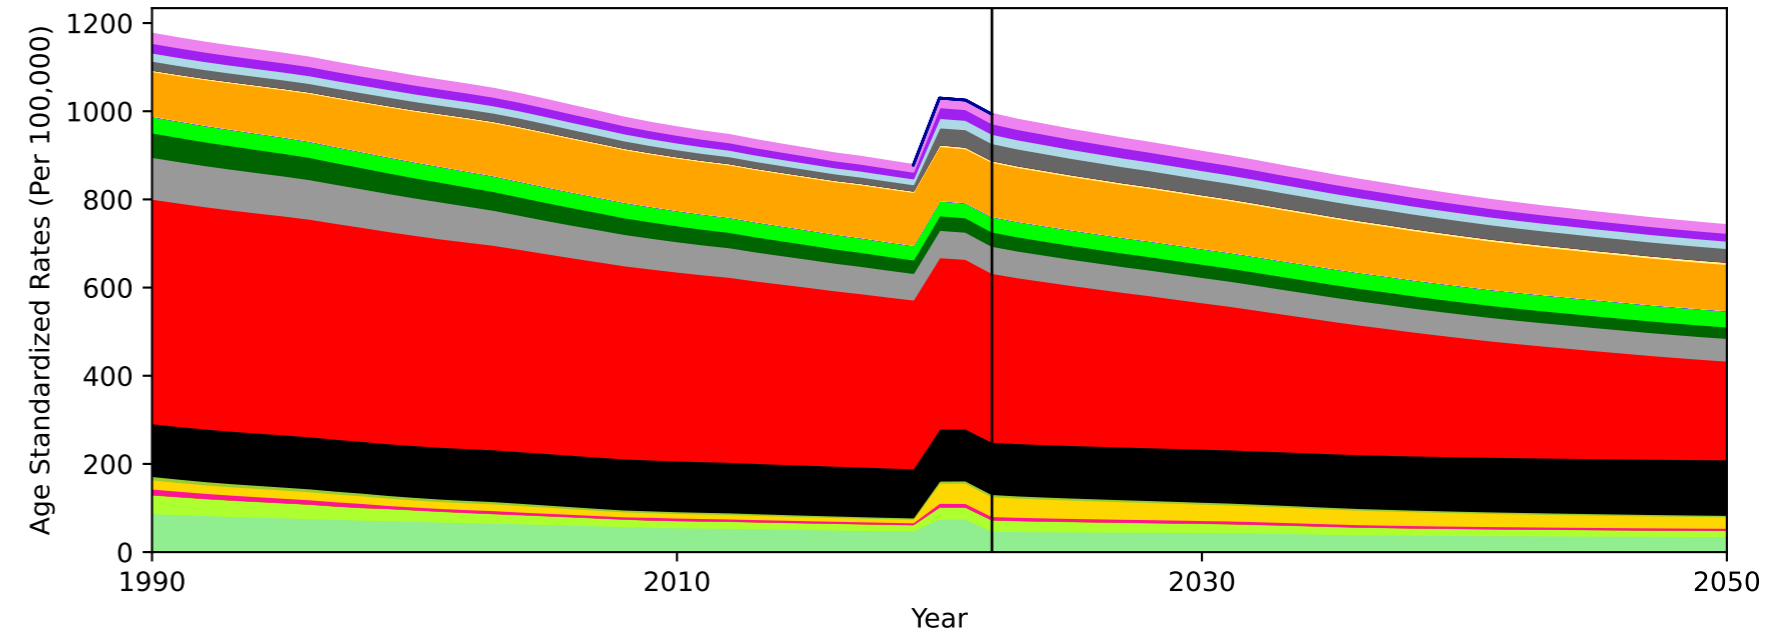

Level 1

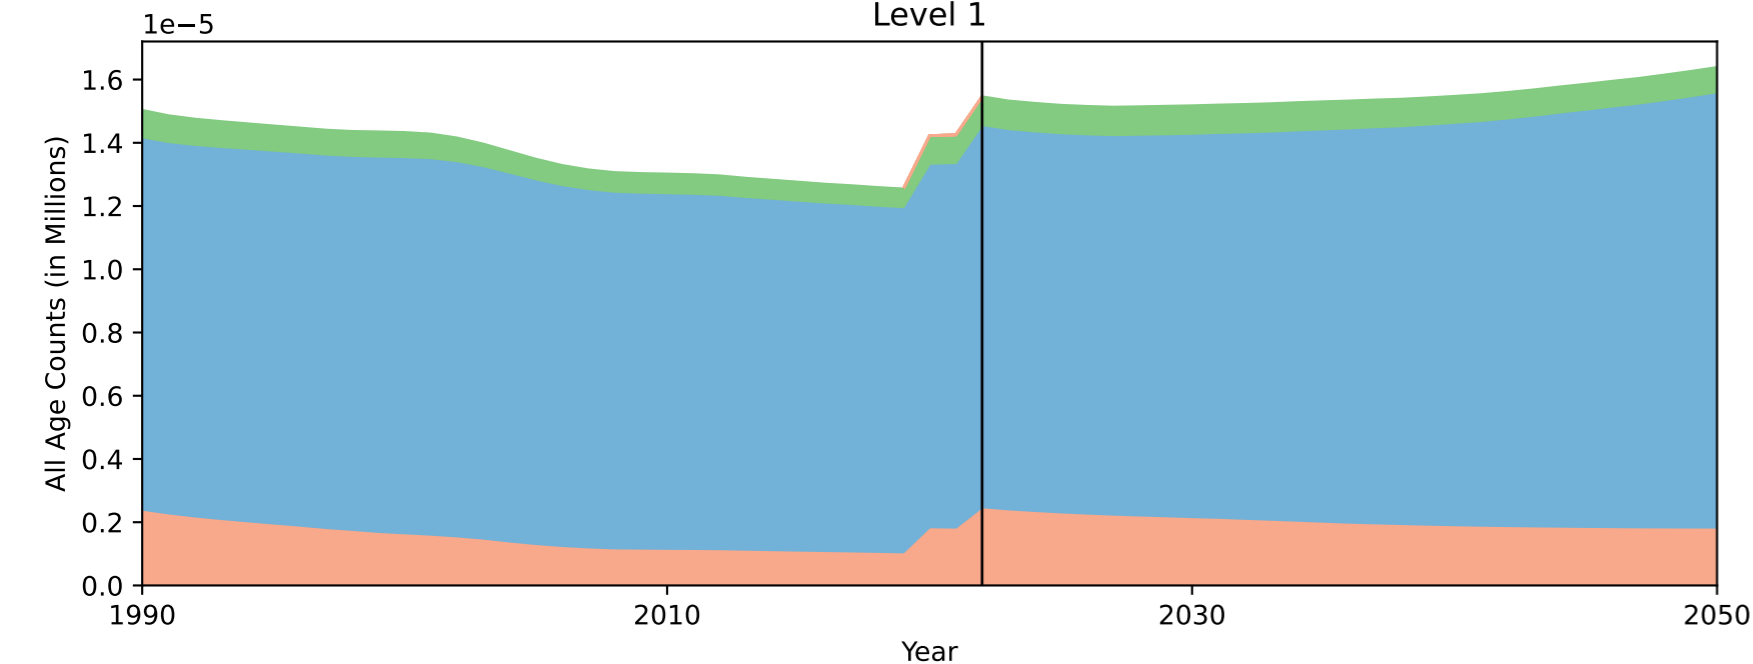

Level 2

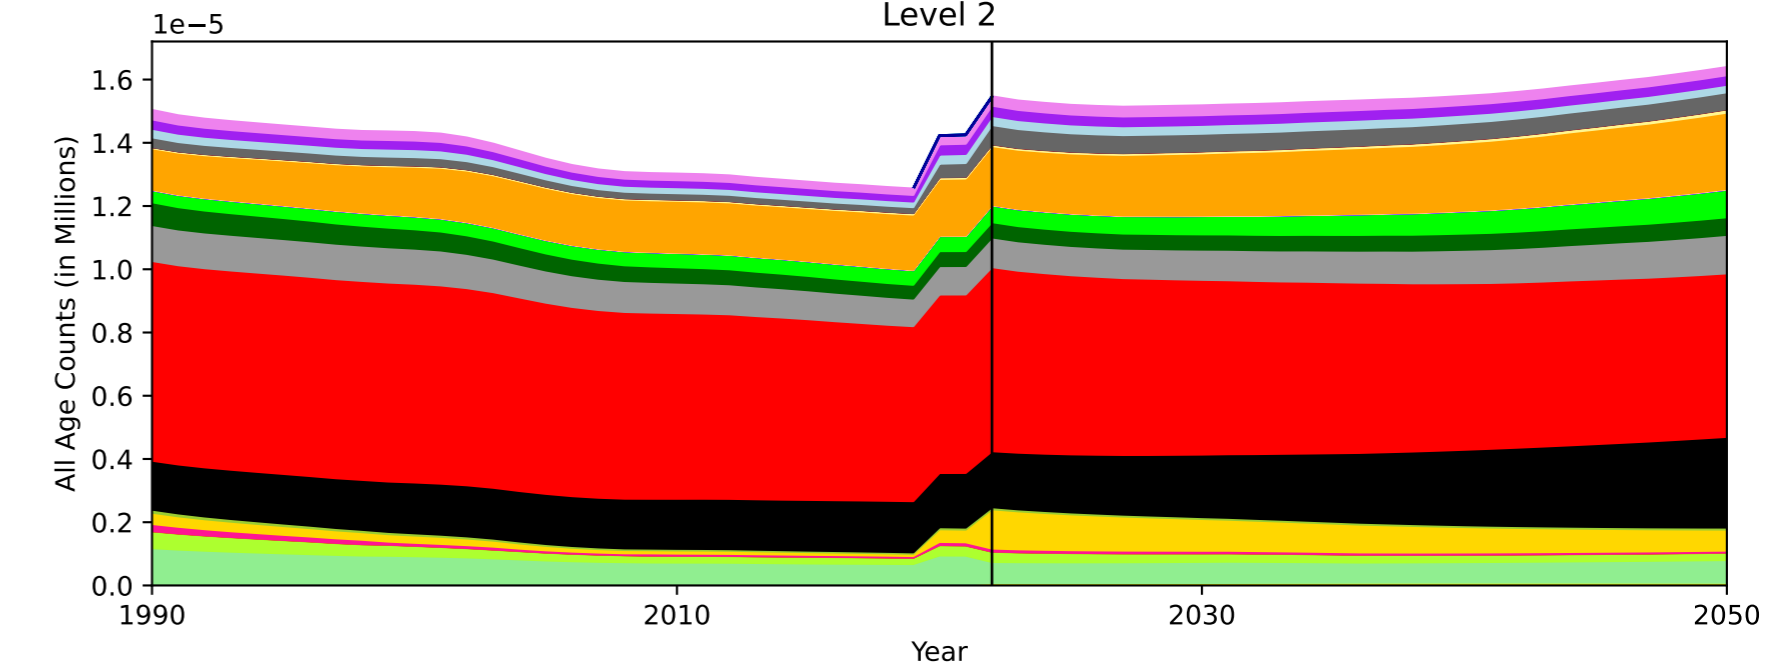

# Tonga

Level 1

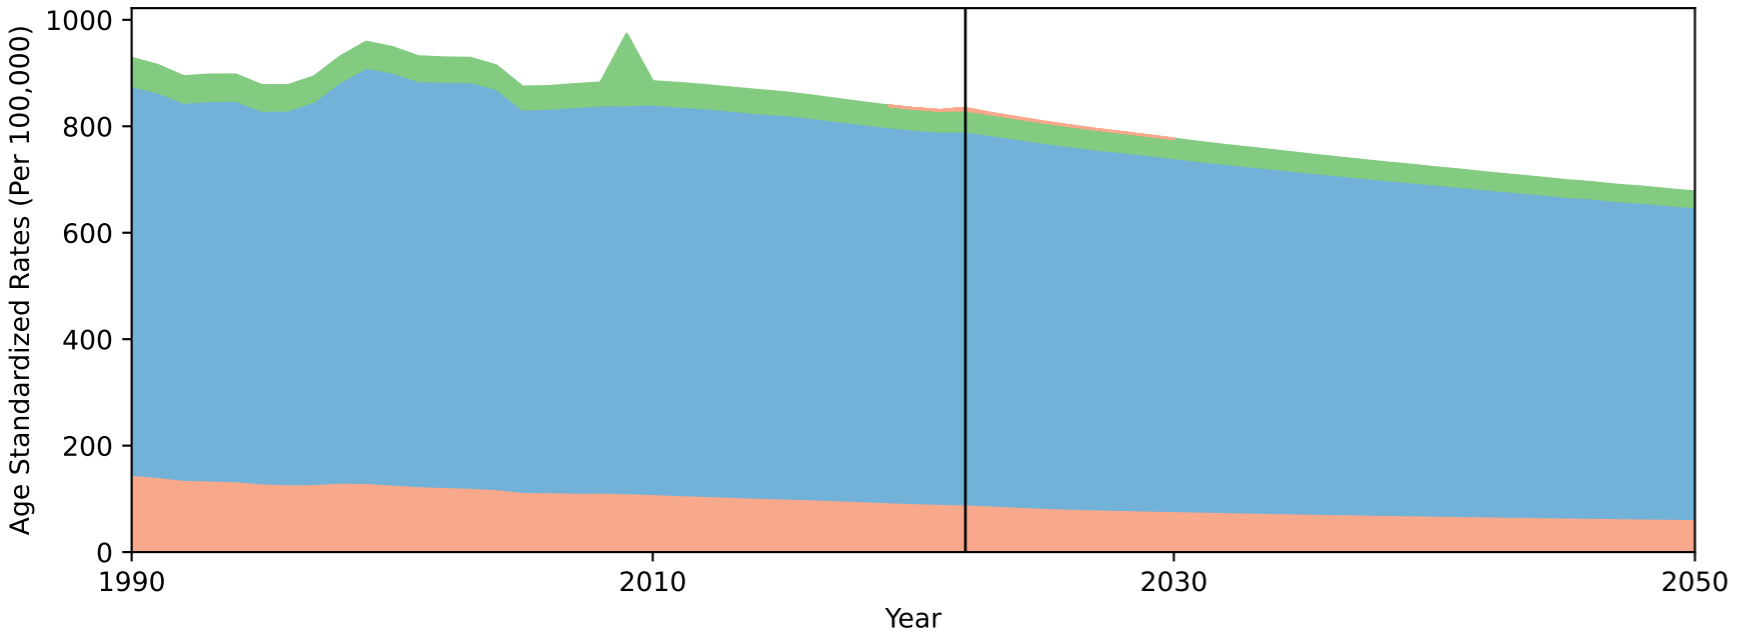

Level 2

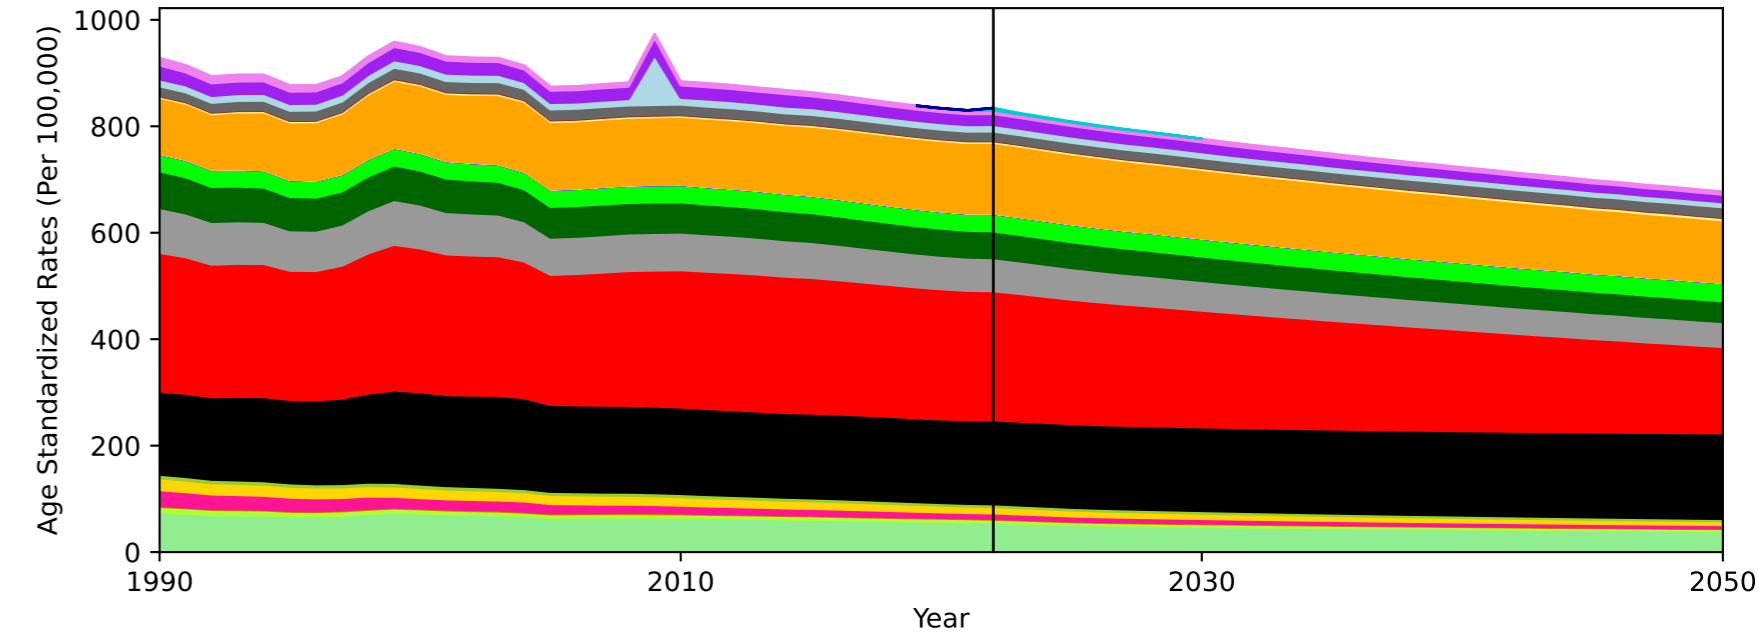

Level 1

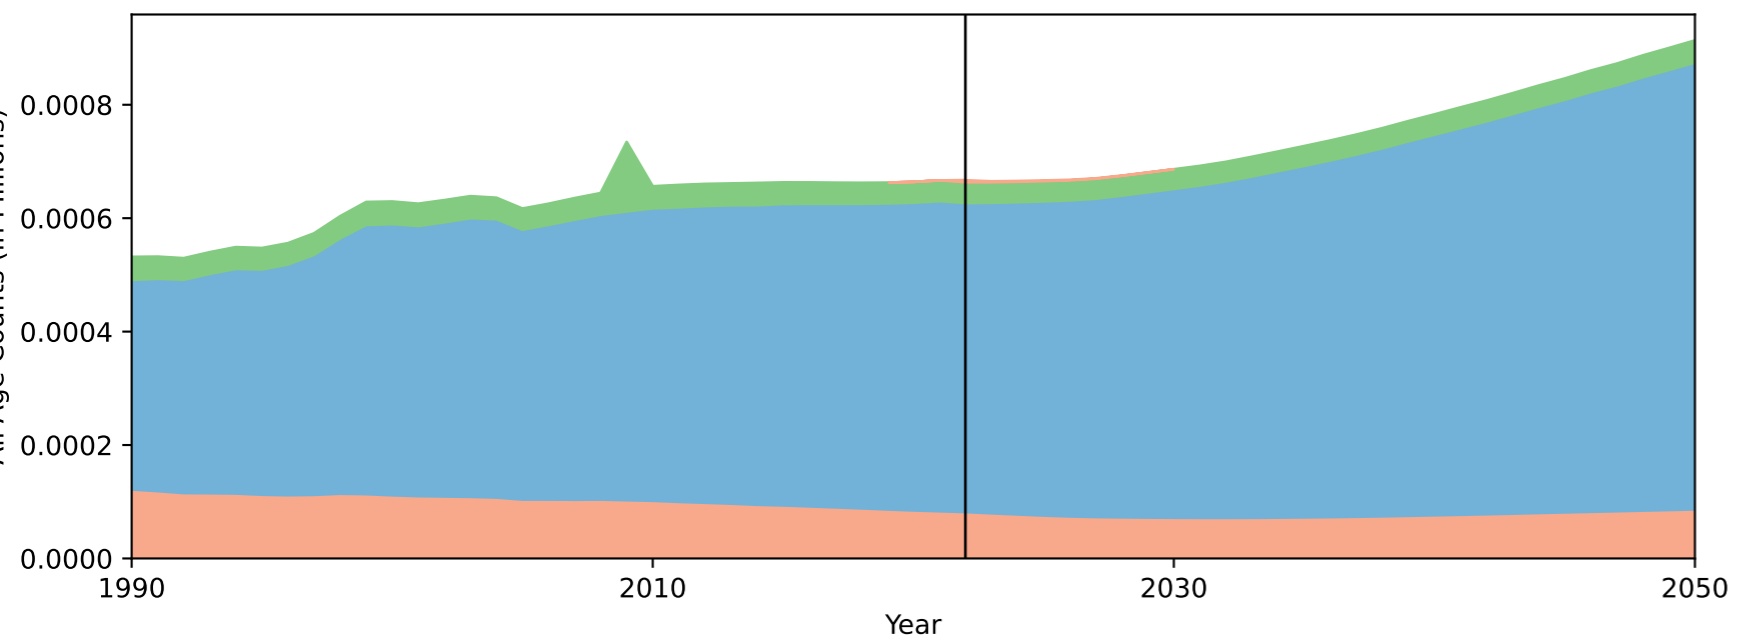

Level 2

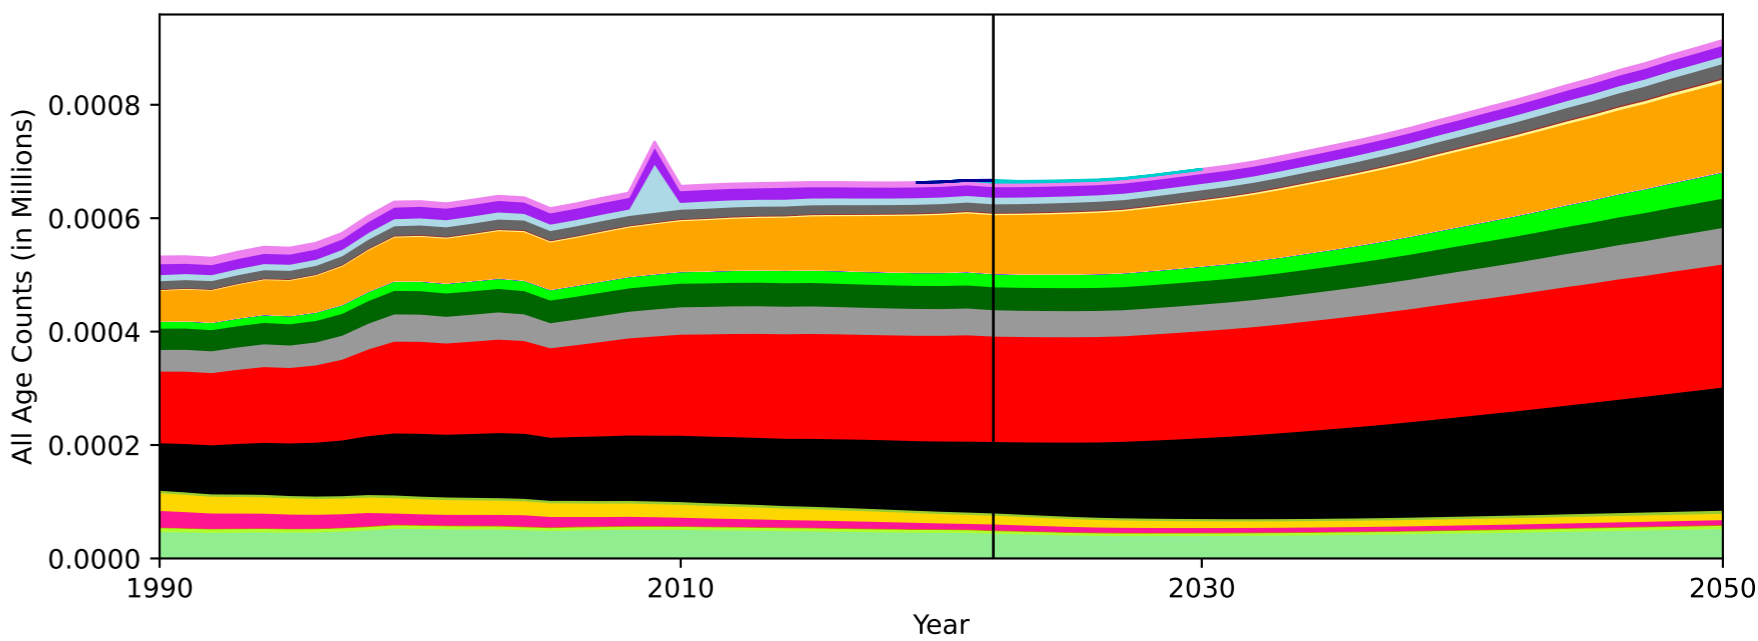

# Tuvalu

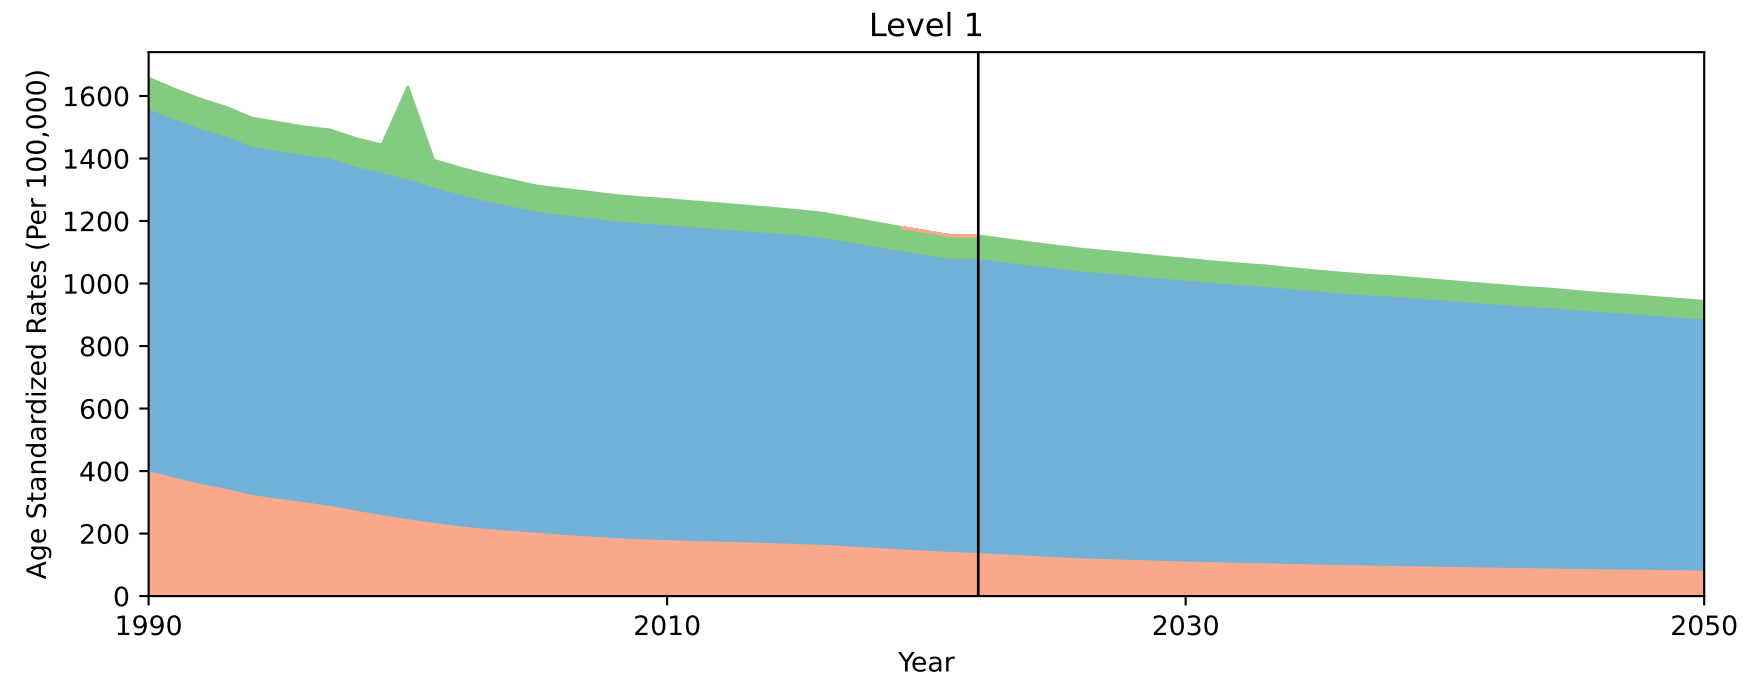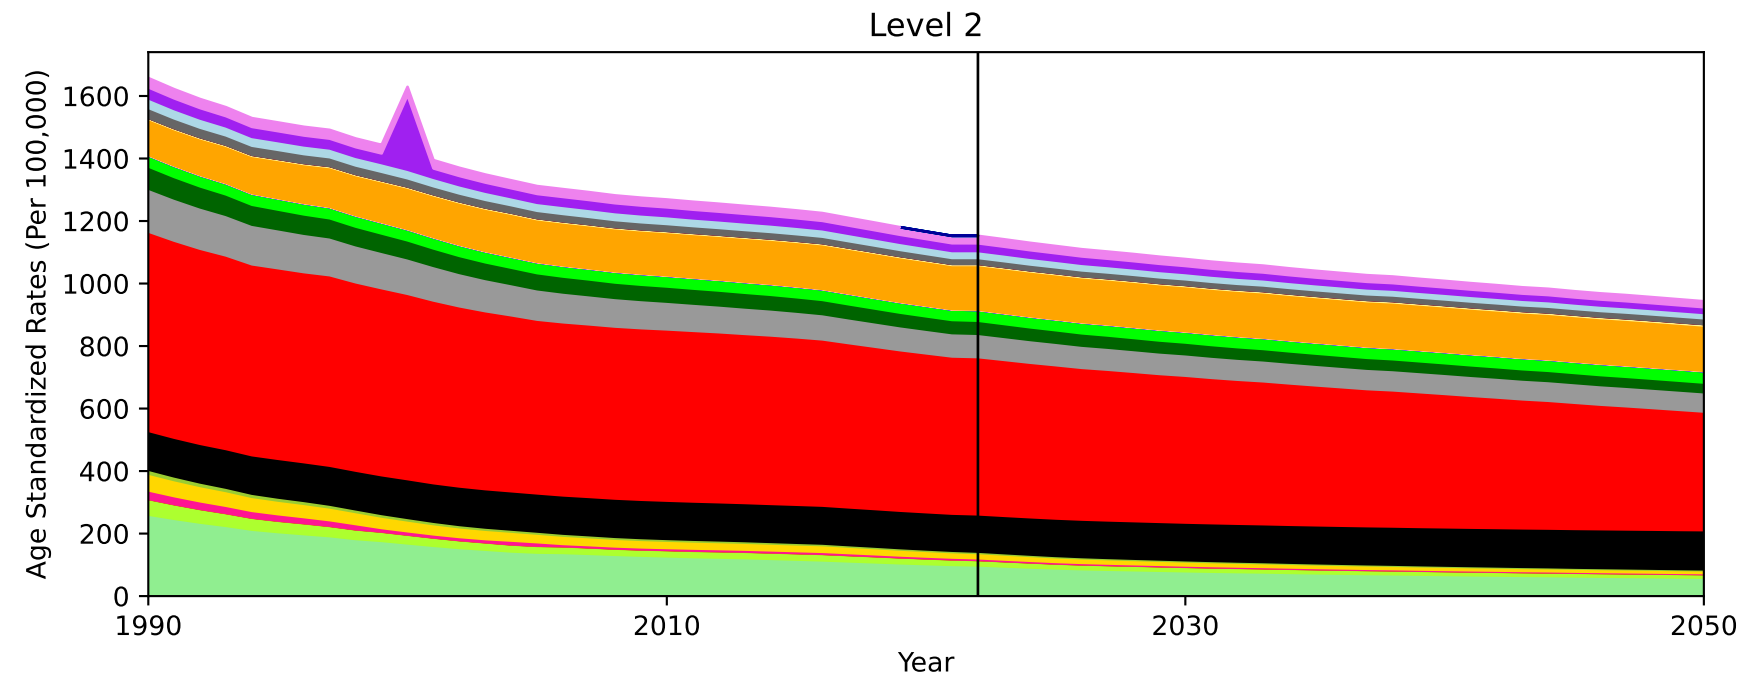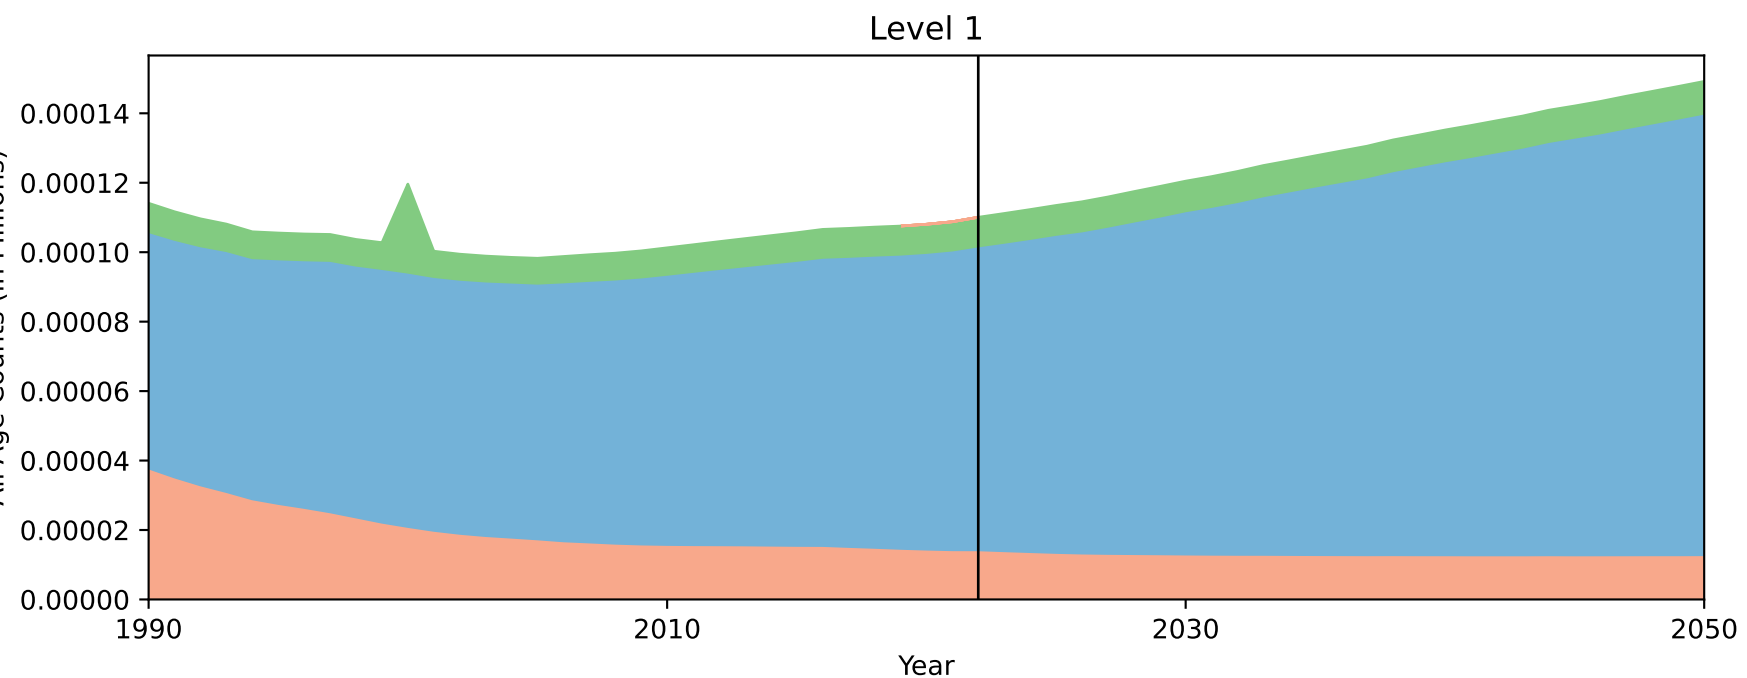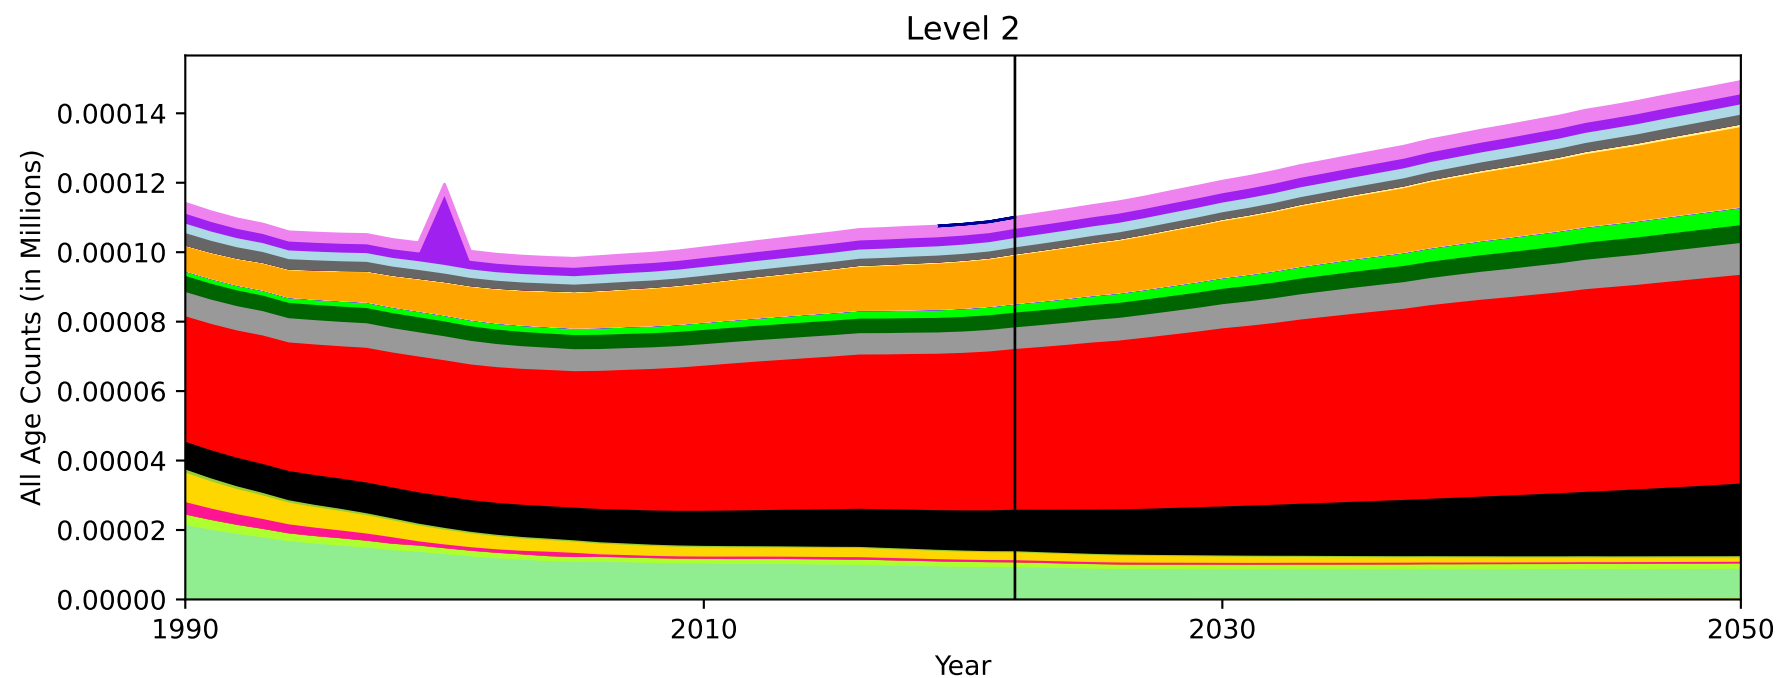

# Vanuatu

Level 1

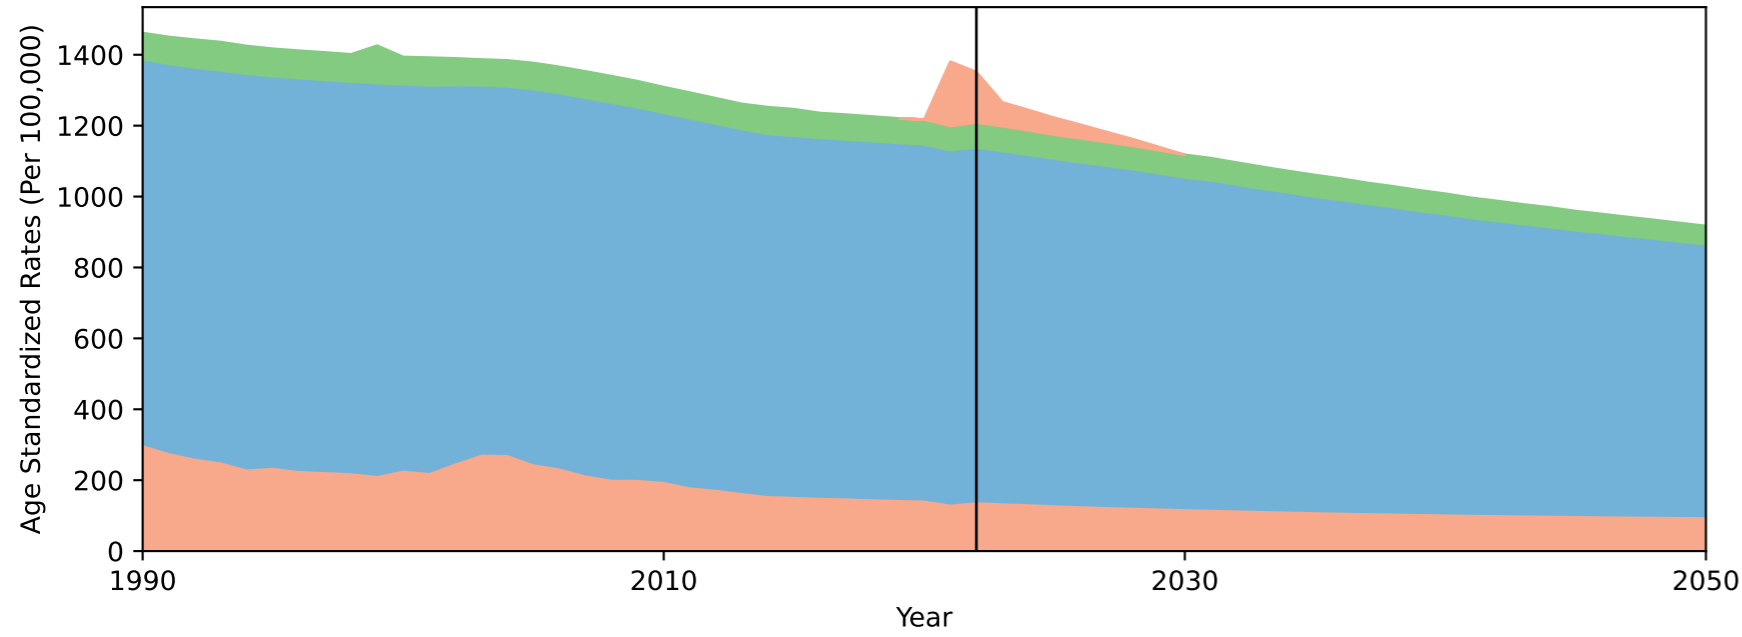

Level 2

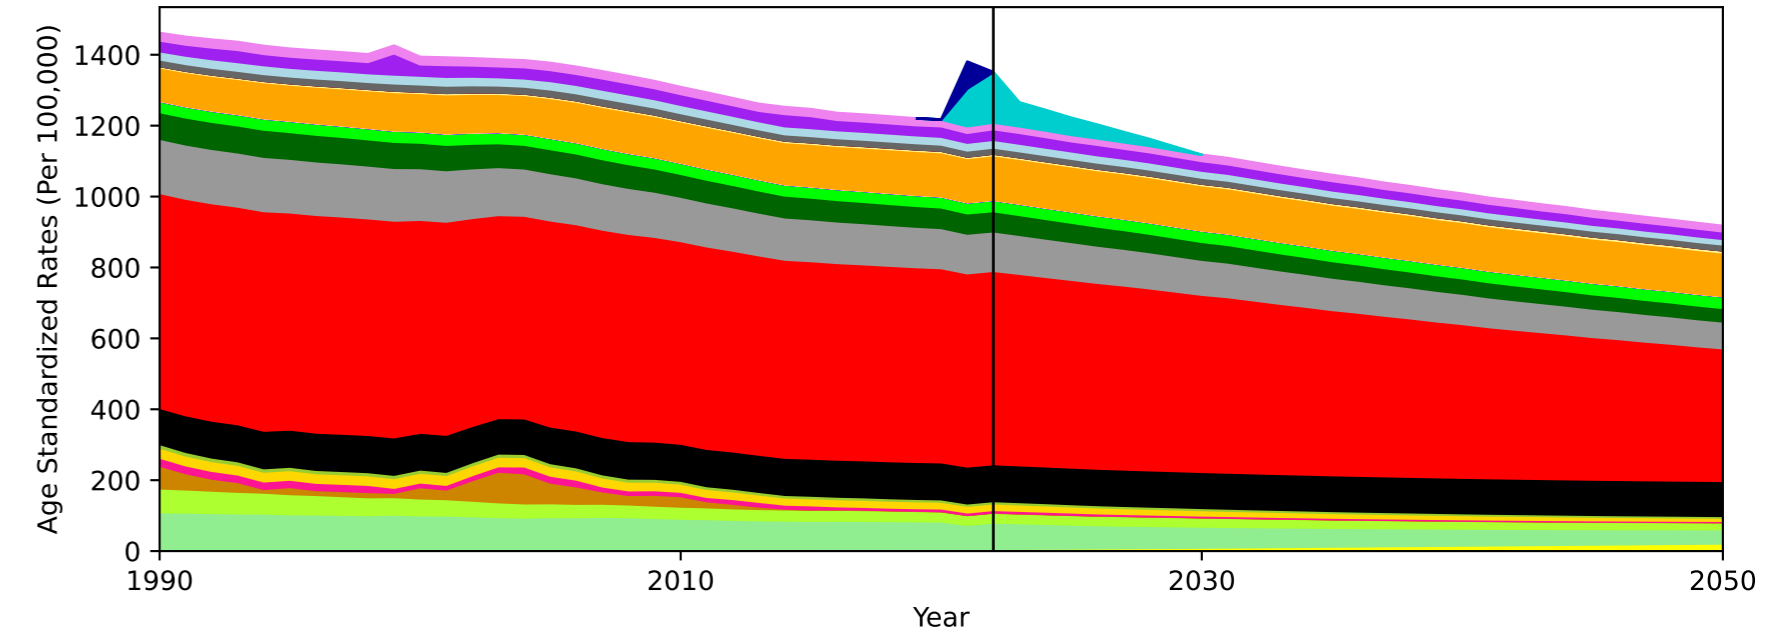

Level 1

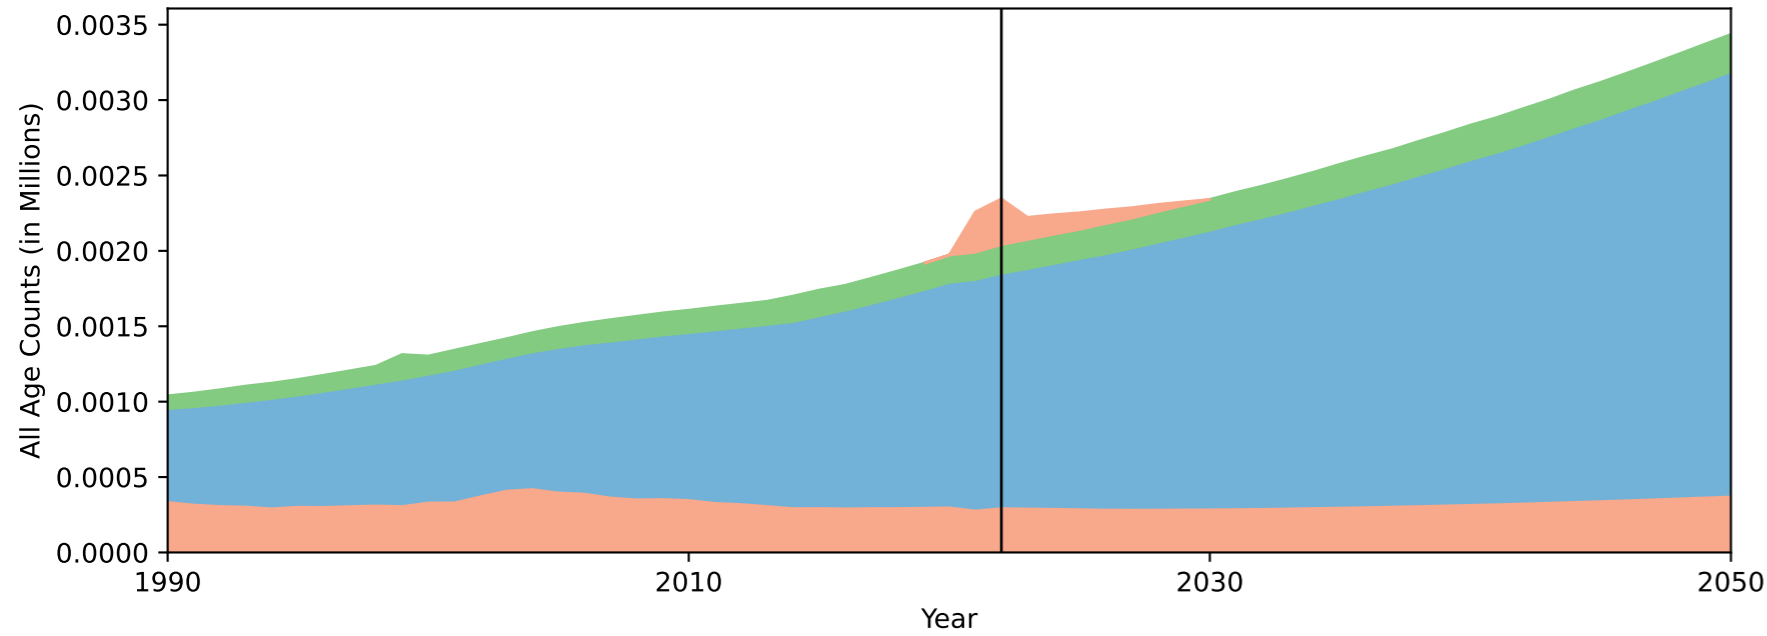

Level 2

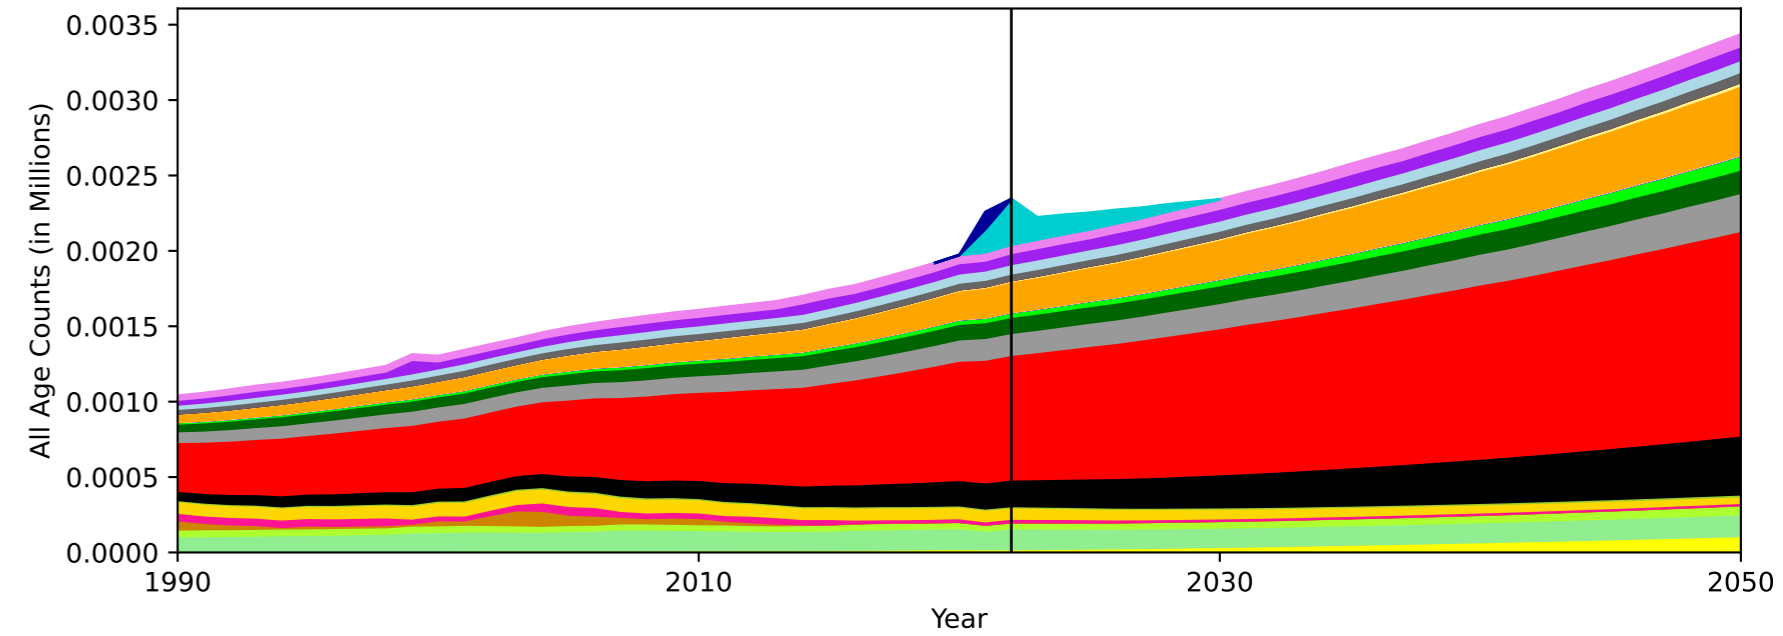

# Cambodia

Level 1

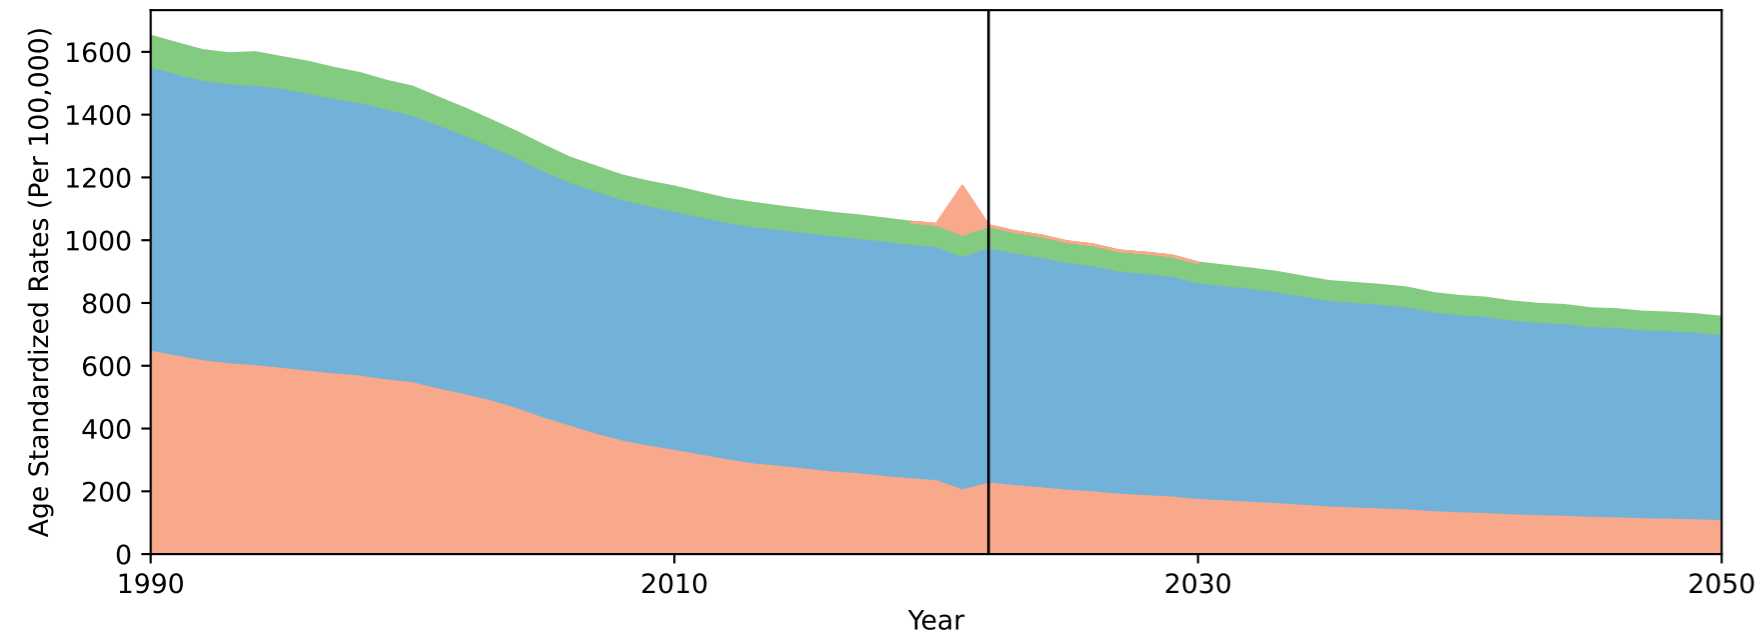

Level 2

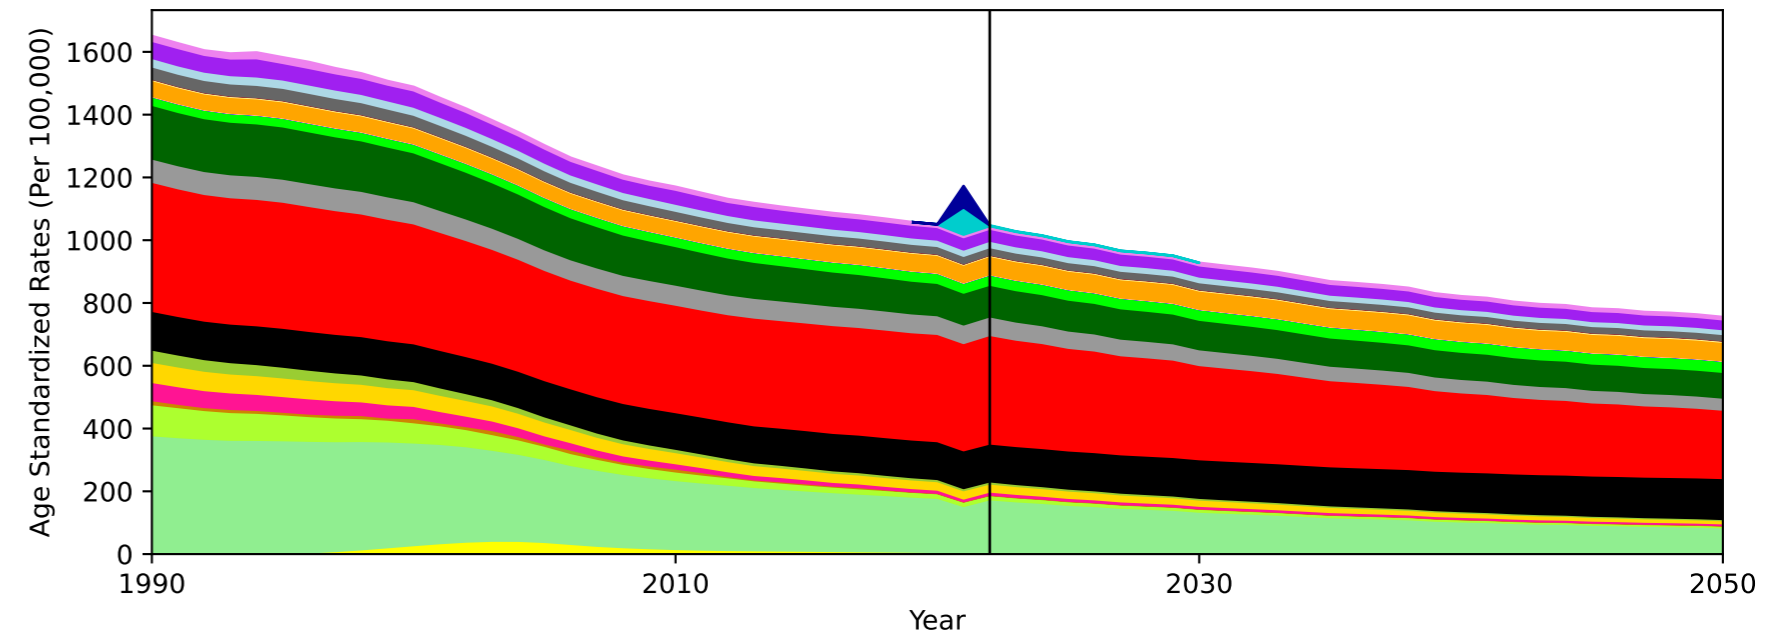

Level 1

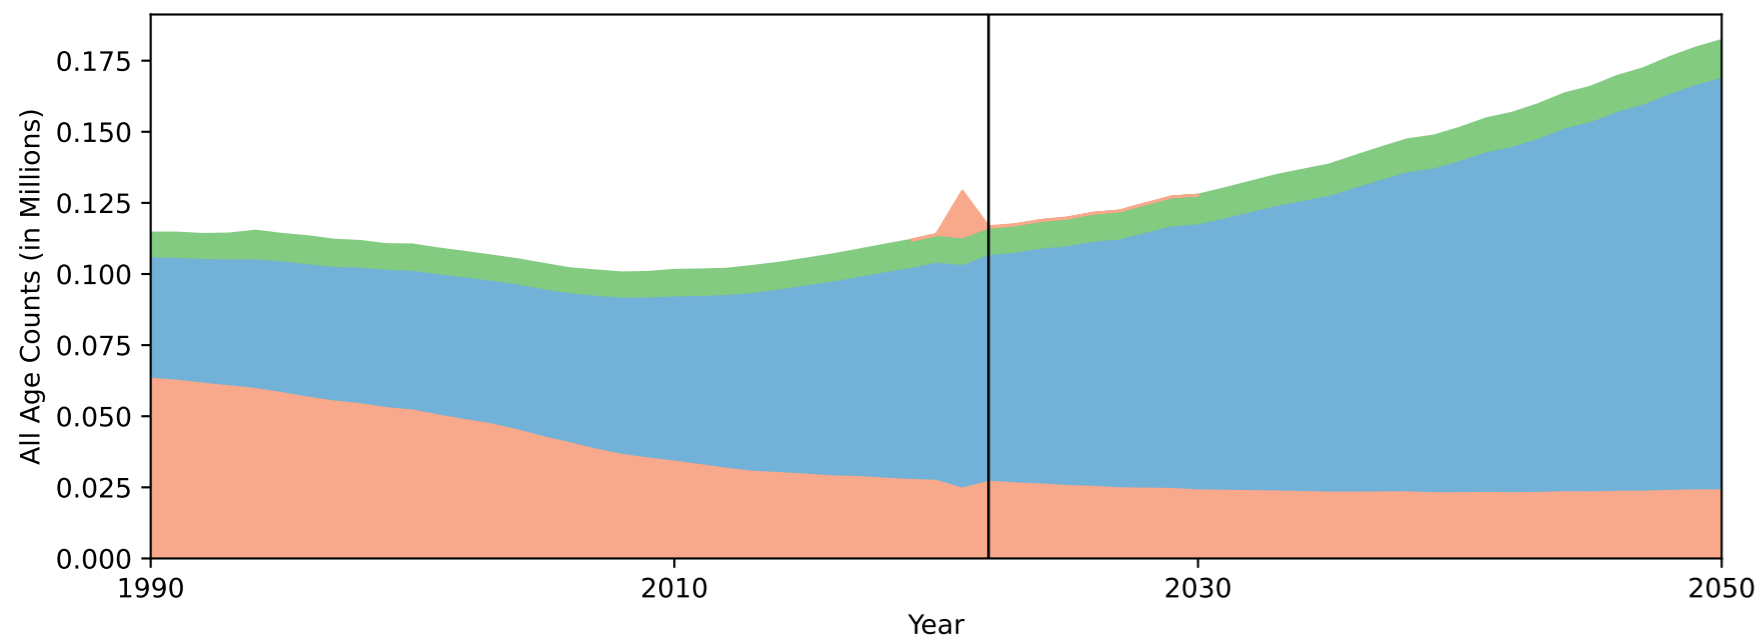

Level 2

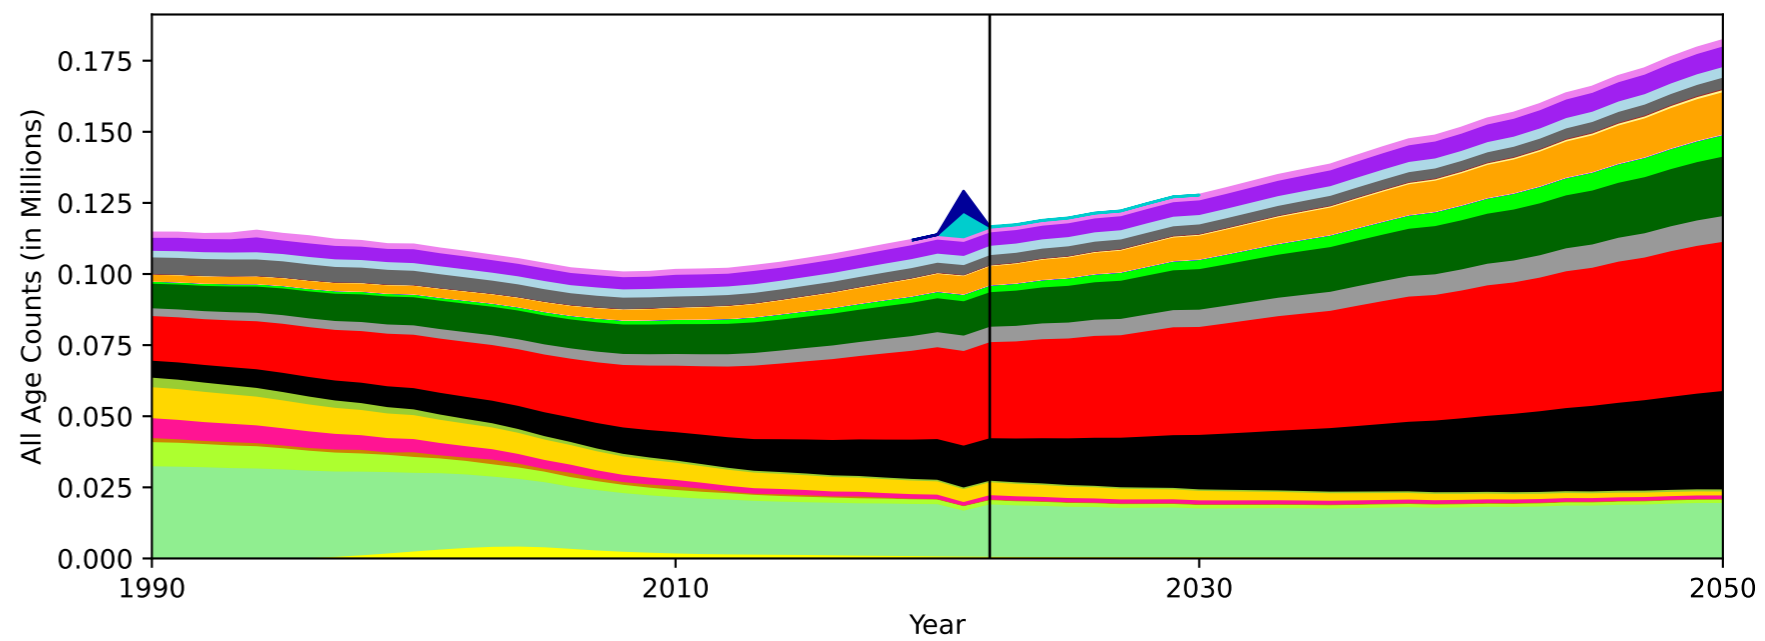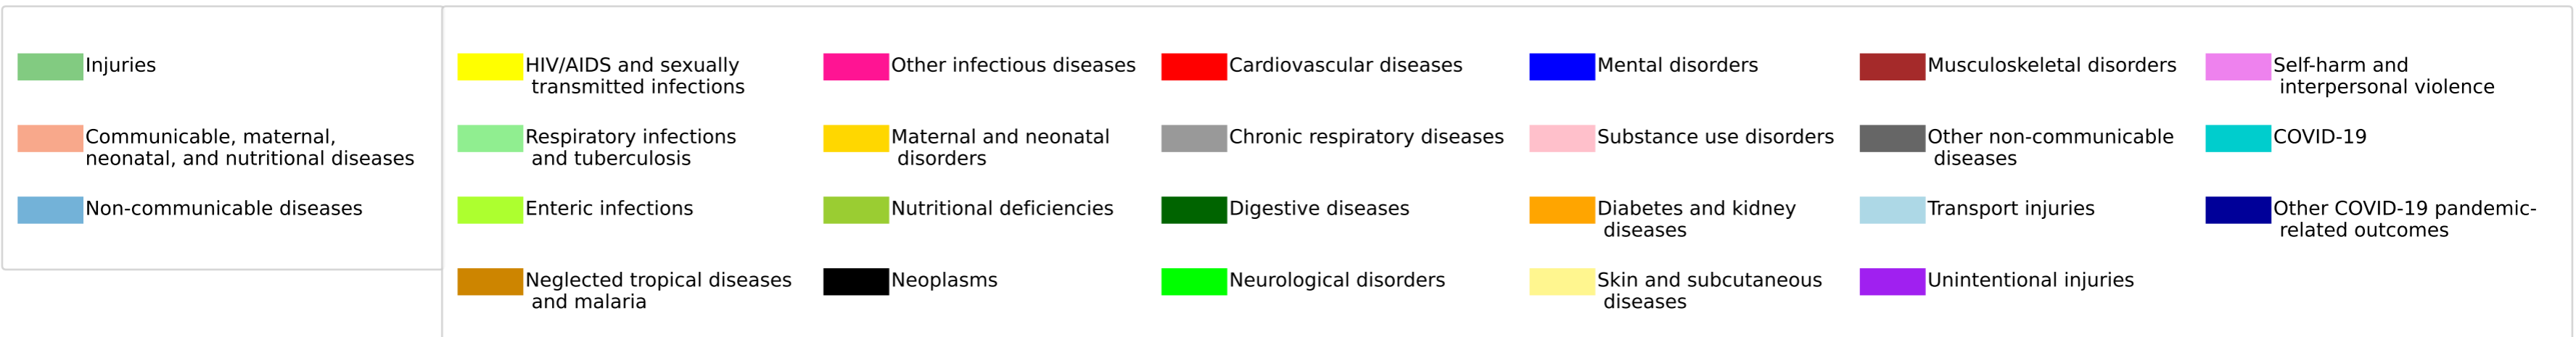



# Indonesia

Level 1

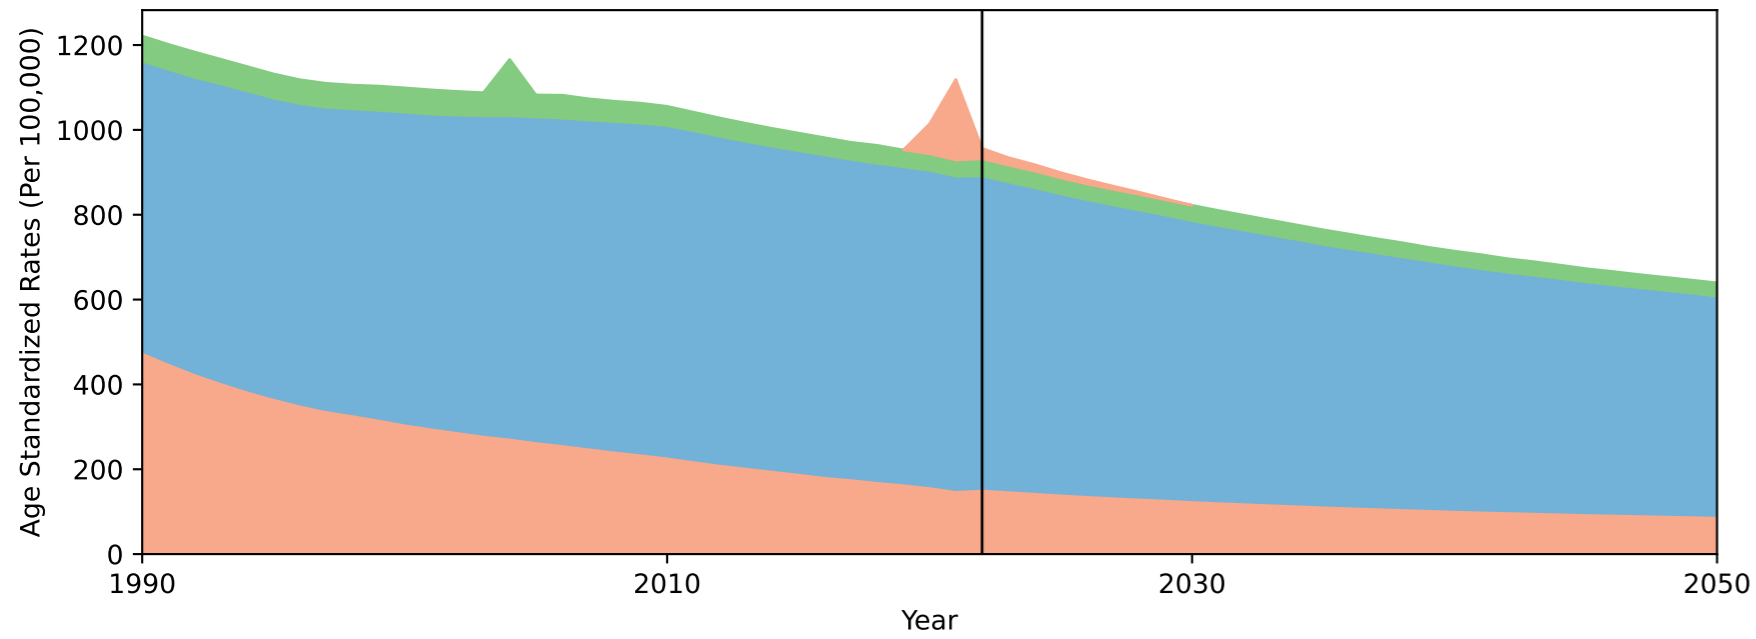

Level 2

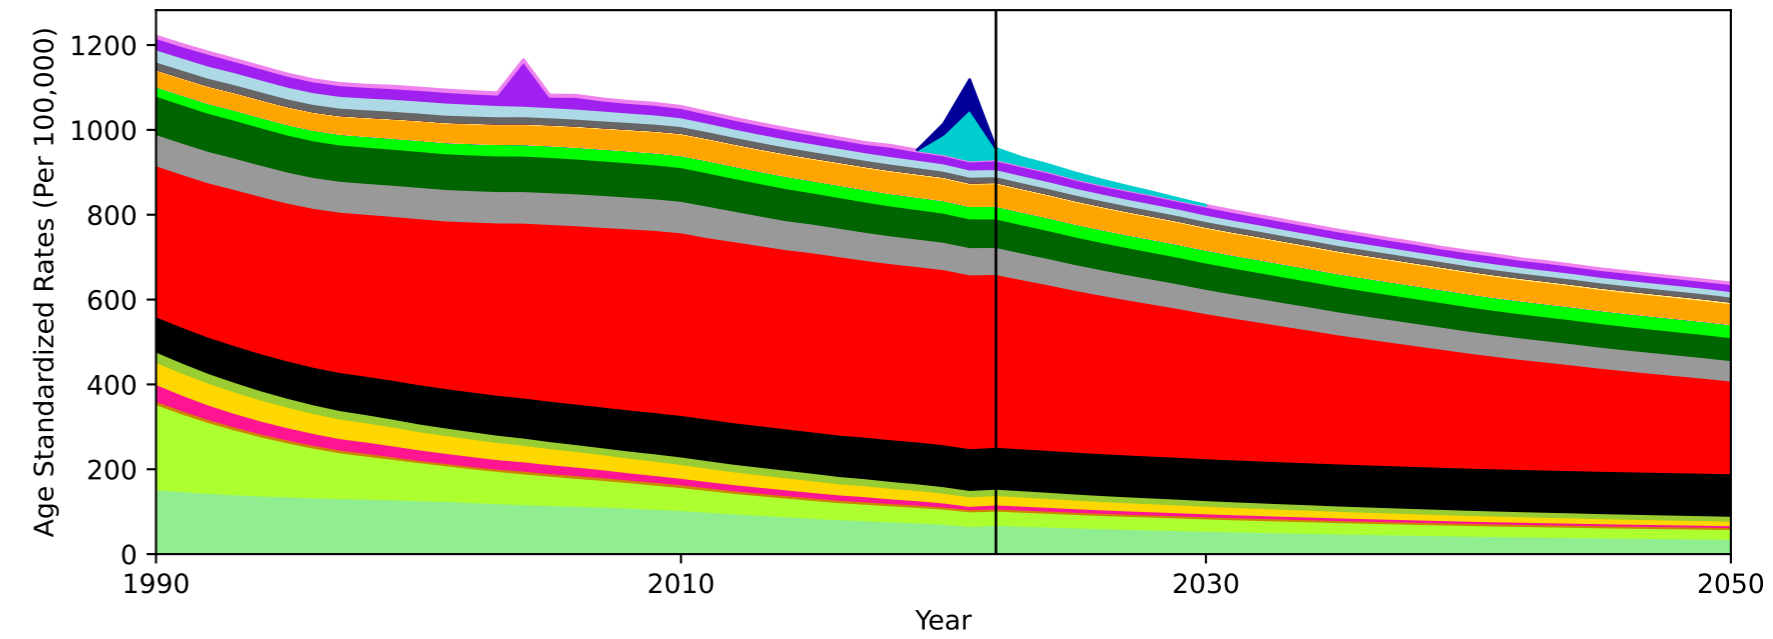

Level 1

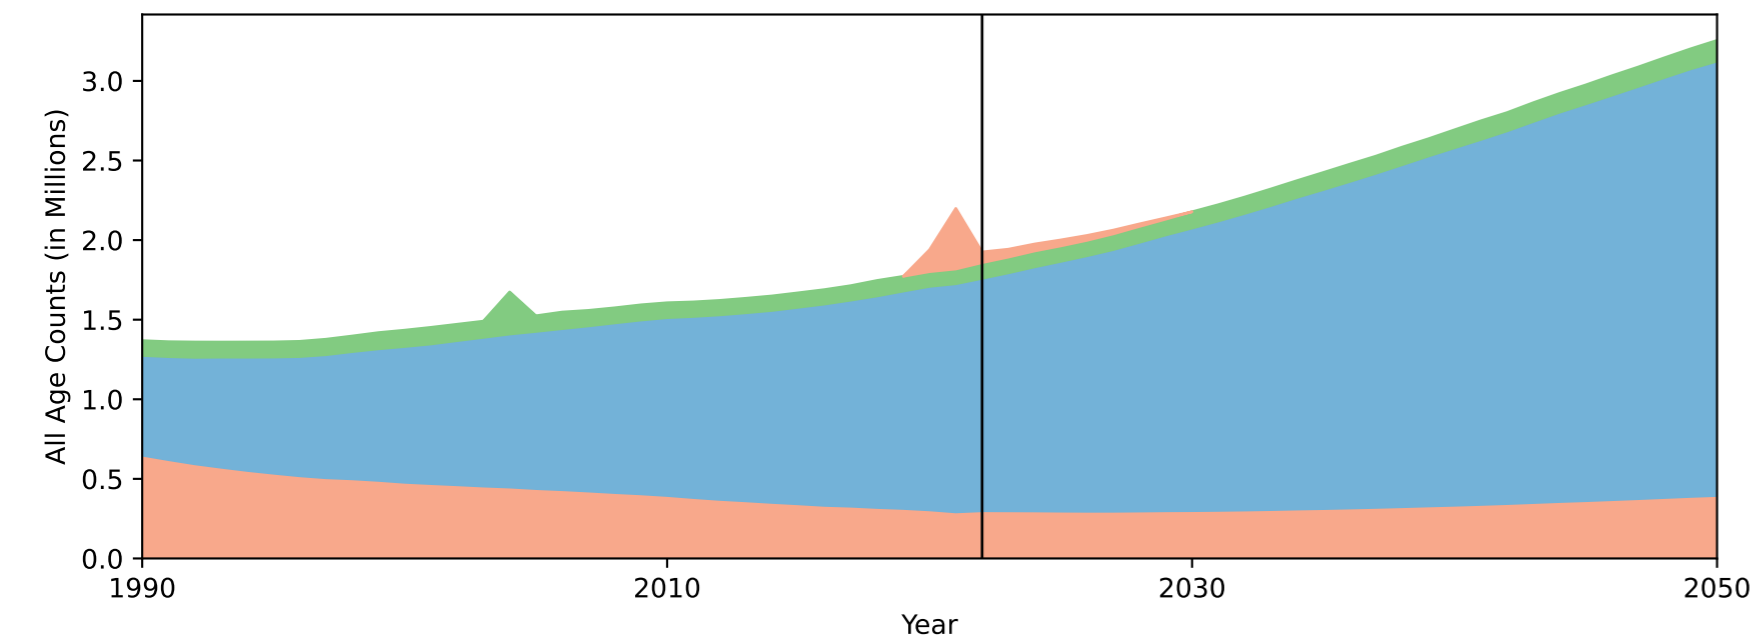

Level 2

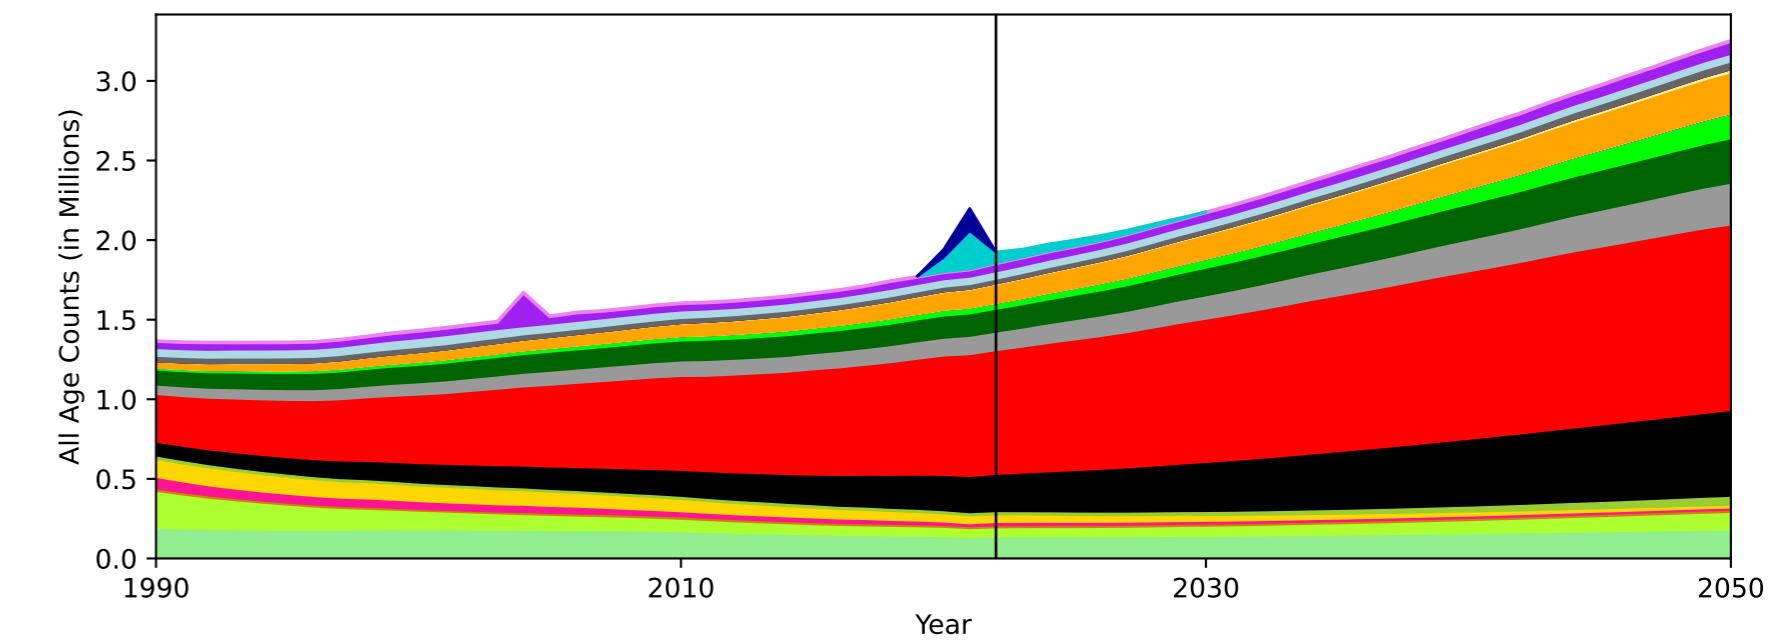

Level 1

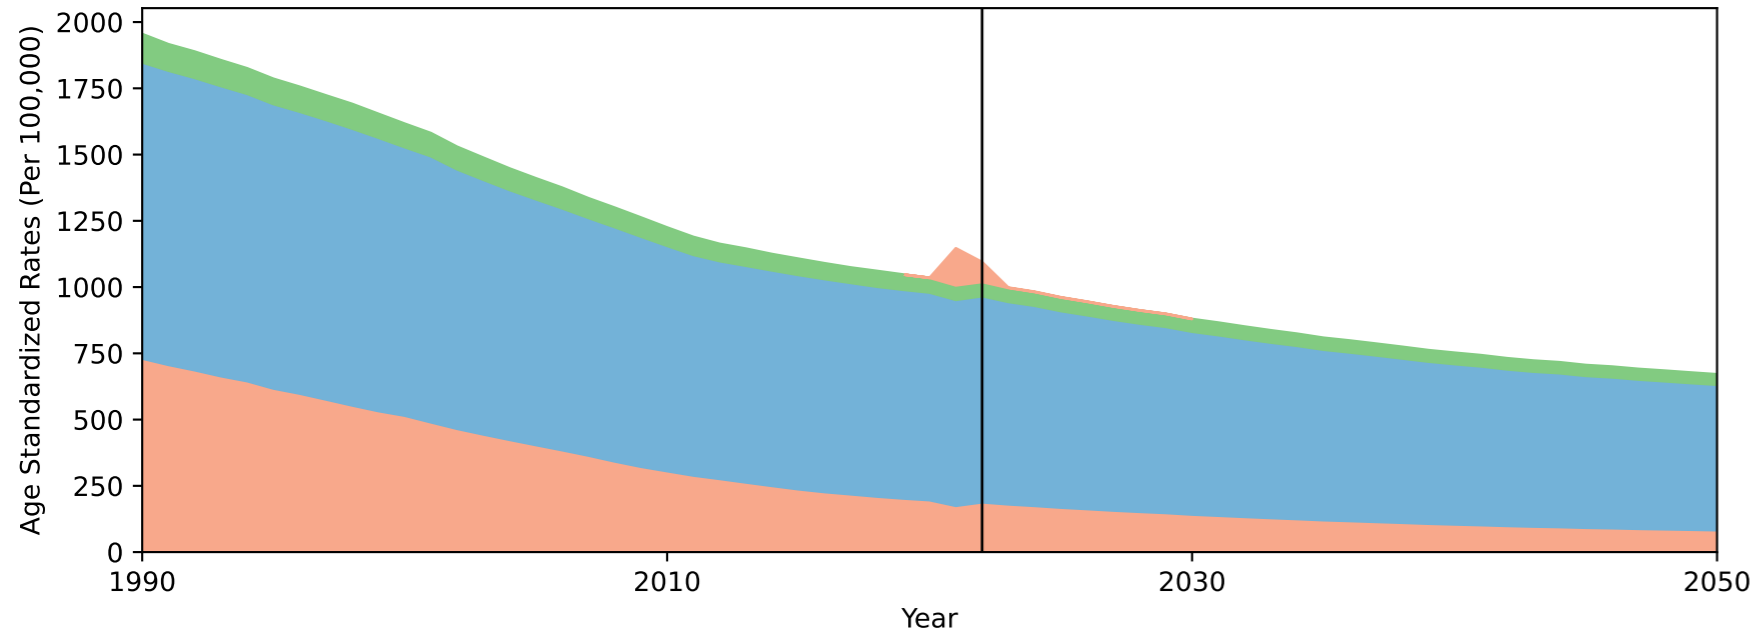

Level 2

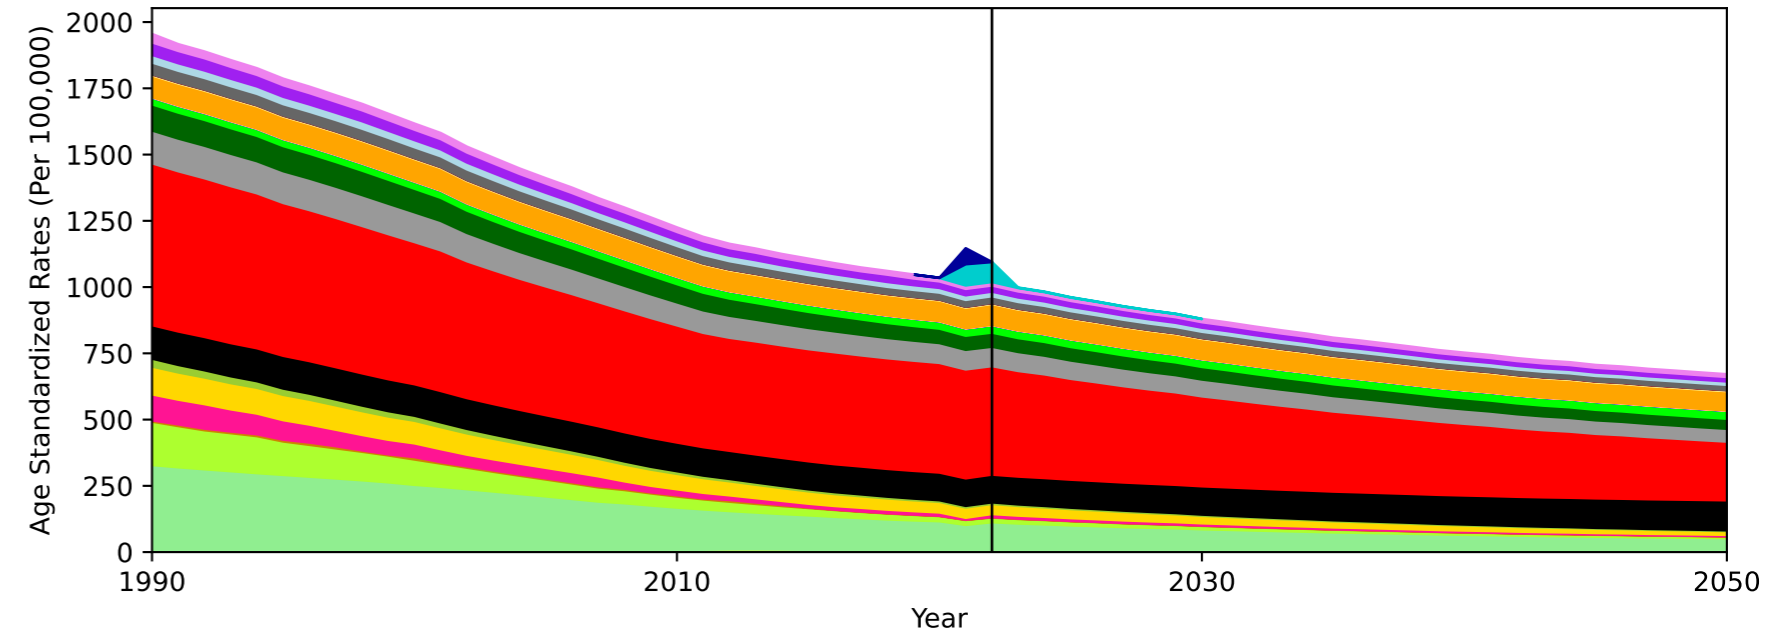

Level 1

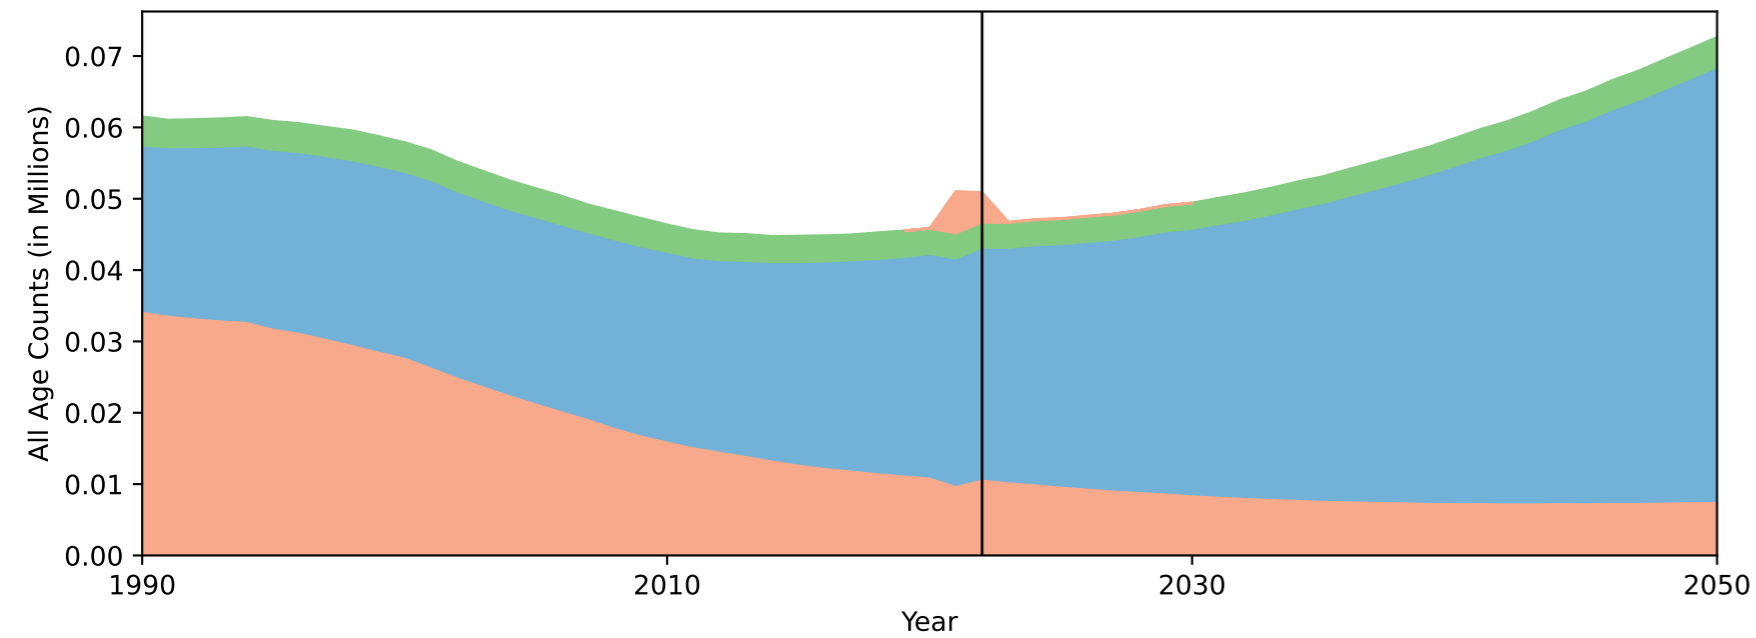

Level 2

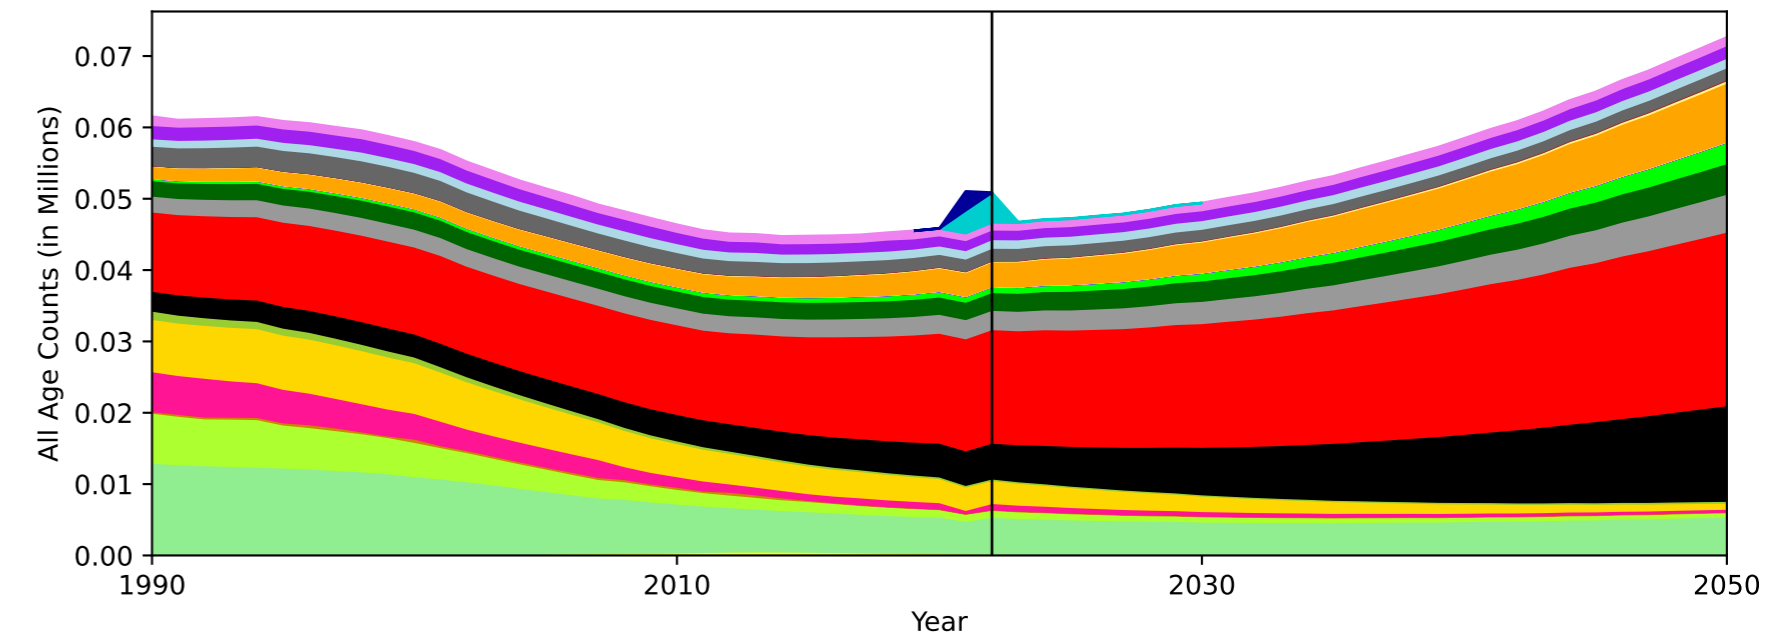

Level 1

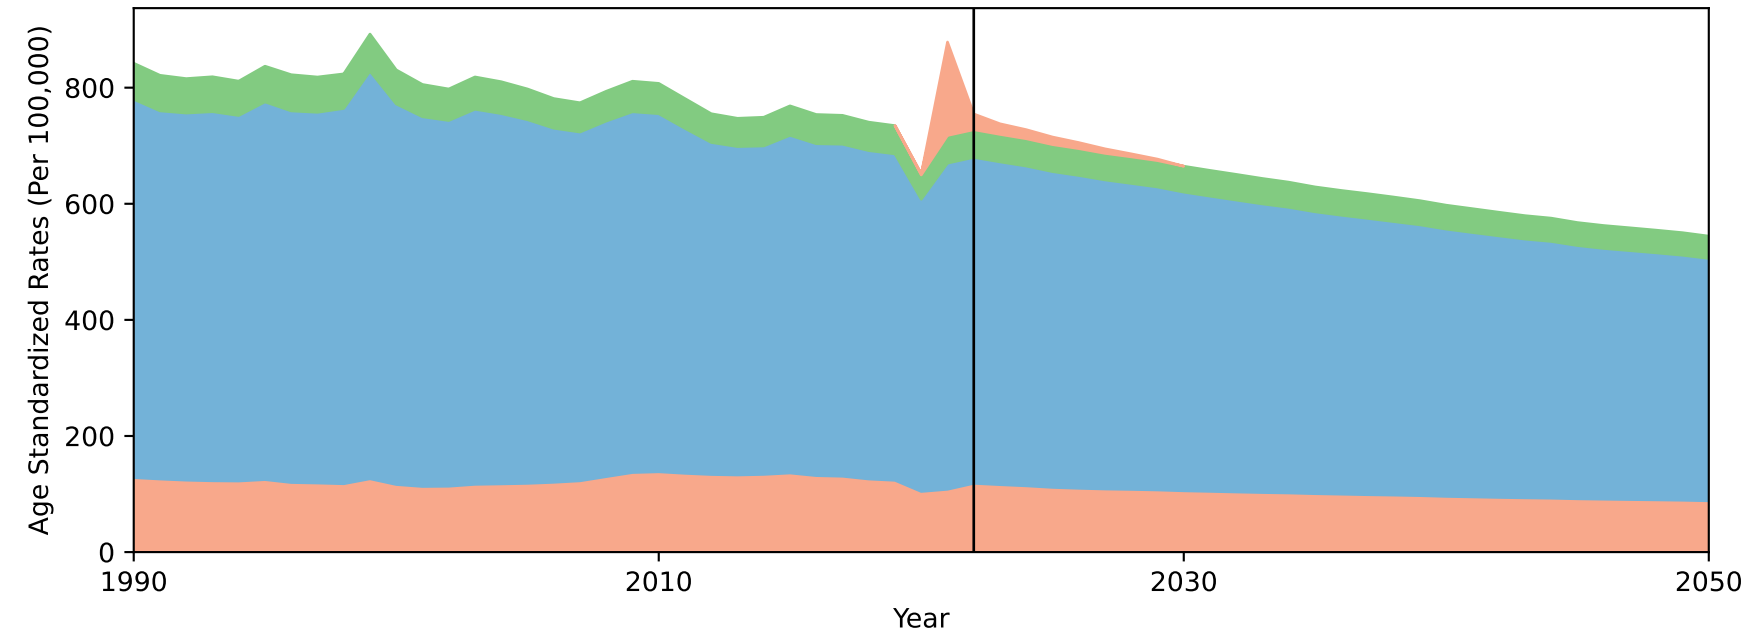

Level 2

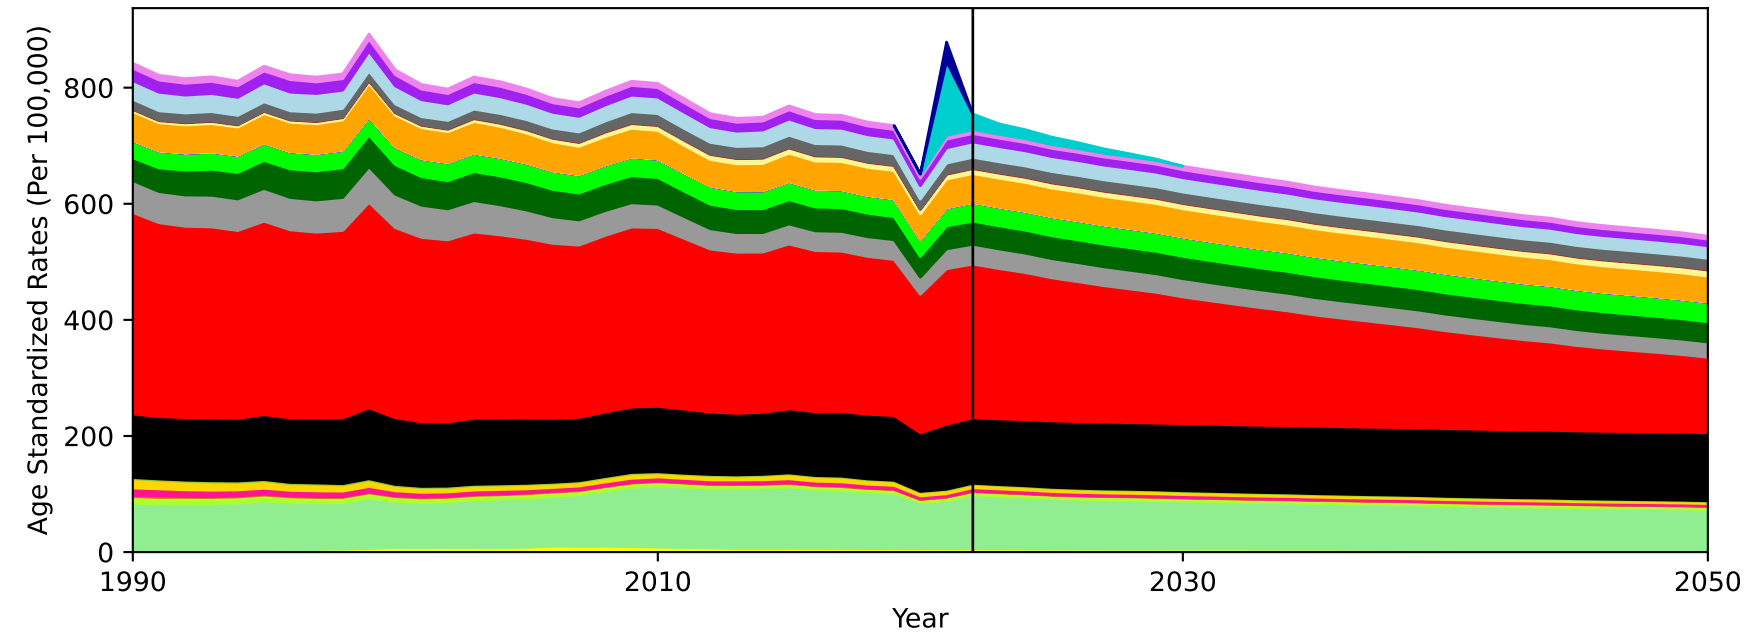

Level 1

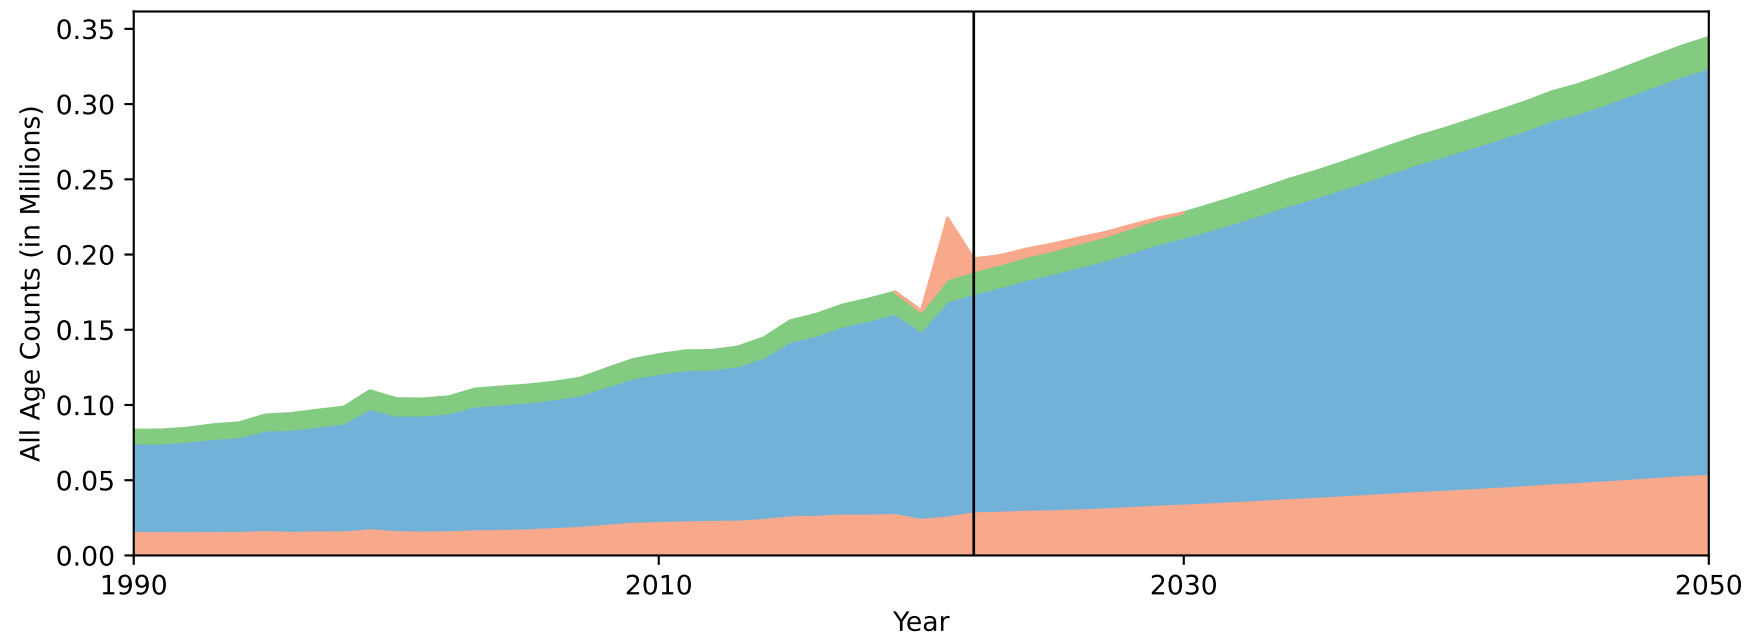

Level 2

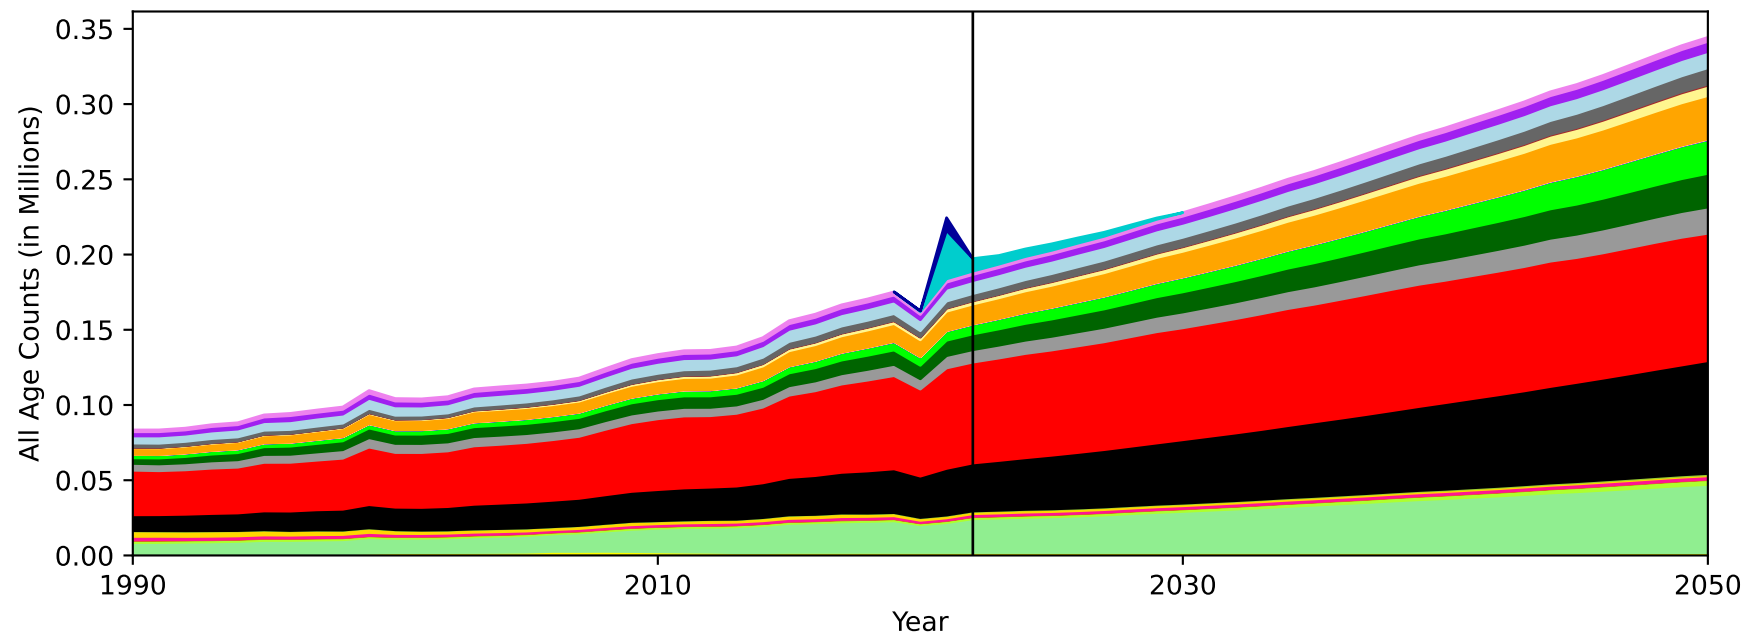

# Maldives

Level 1

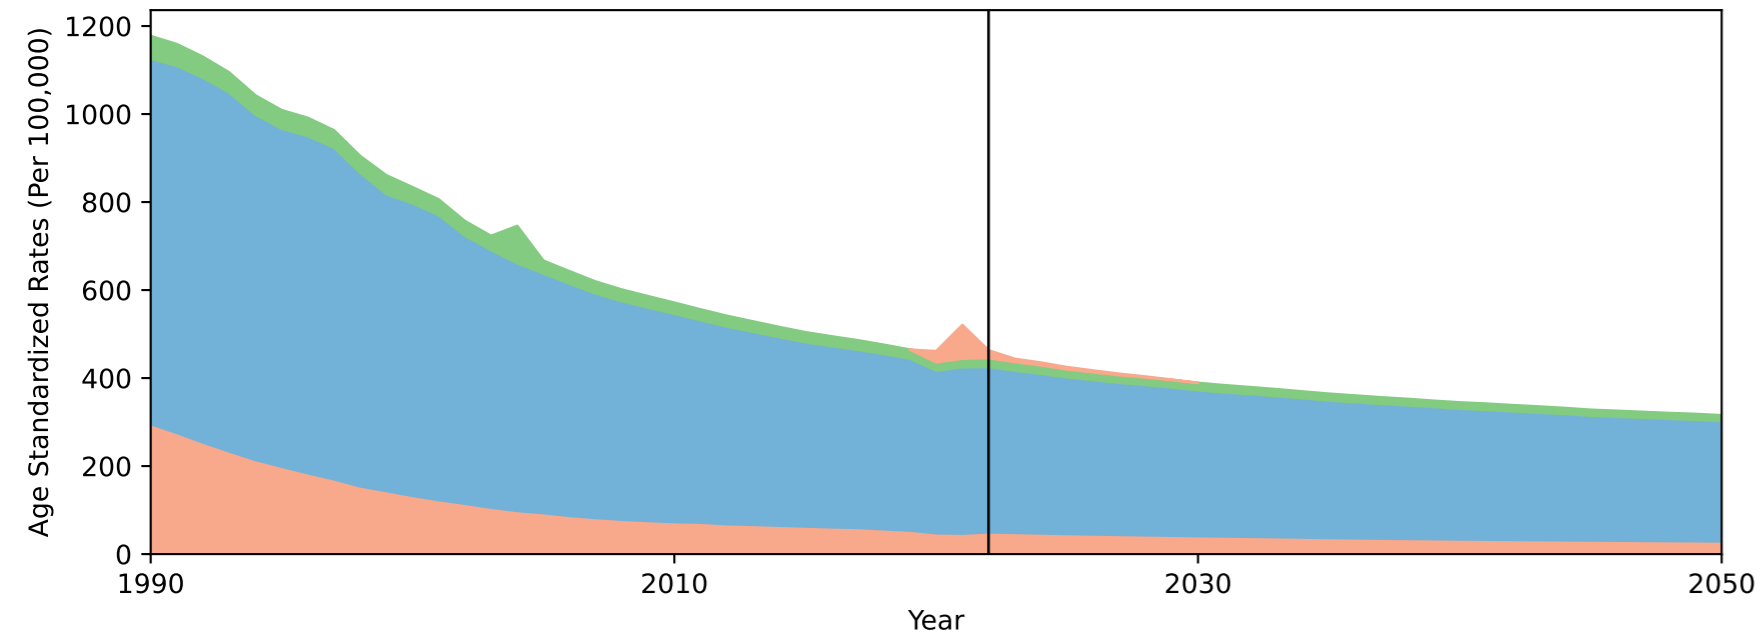

Level 2

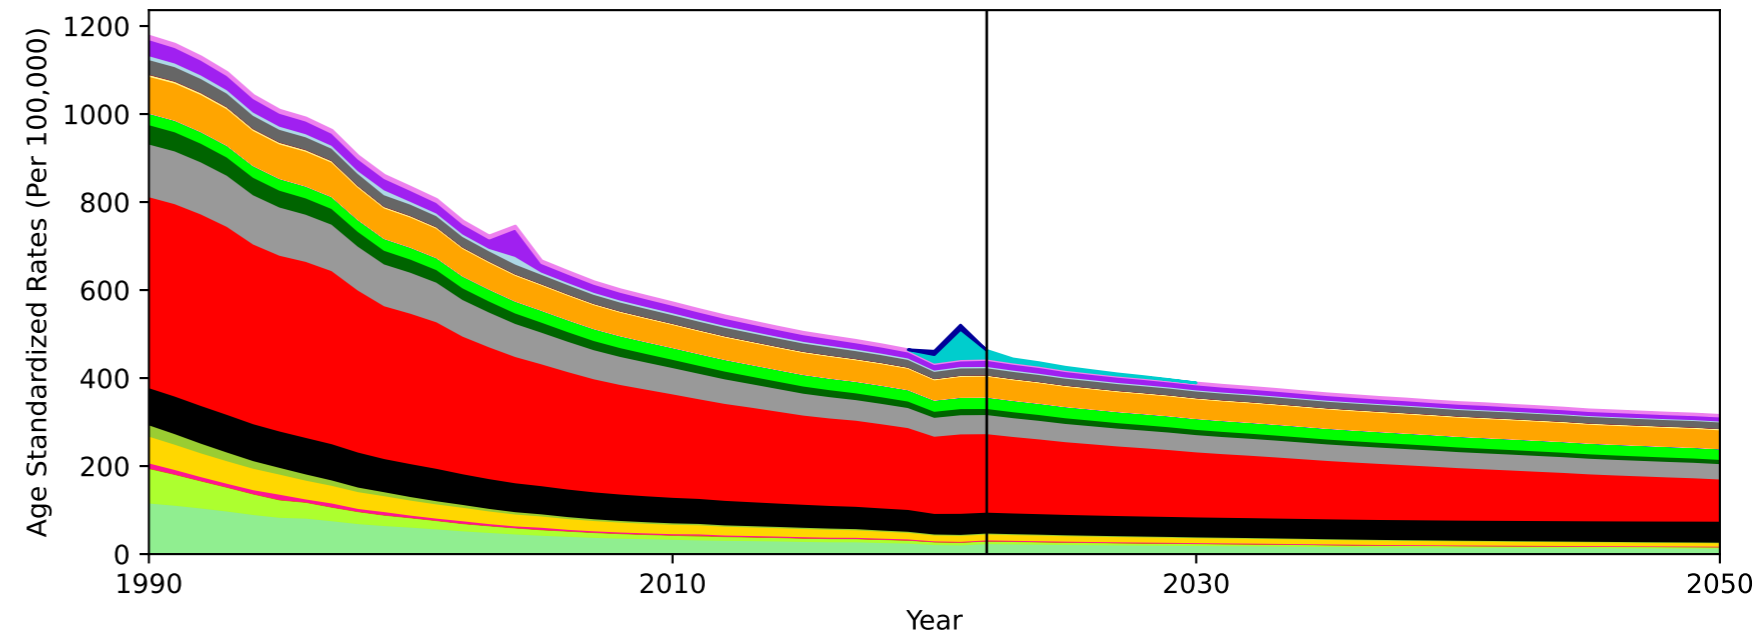

Level 1

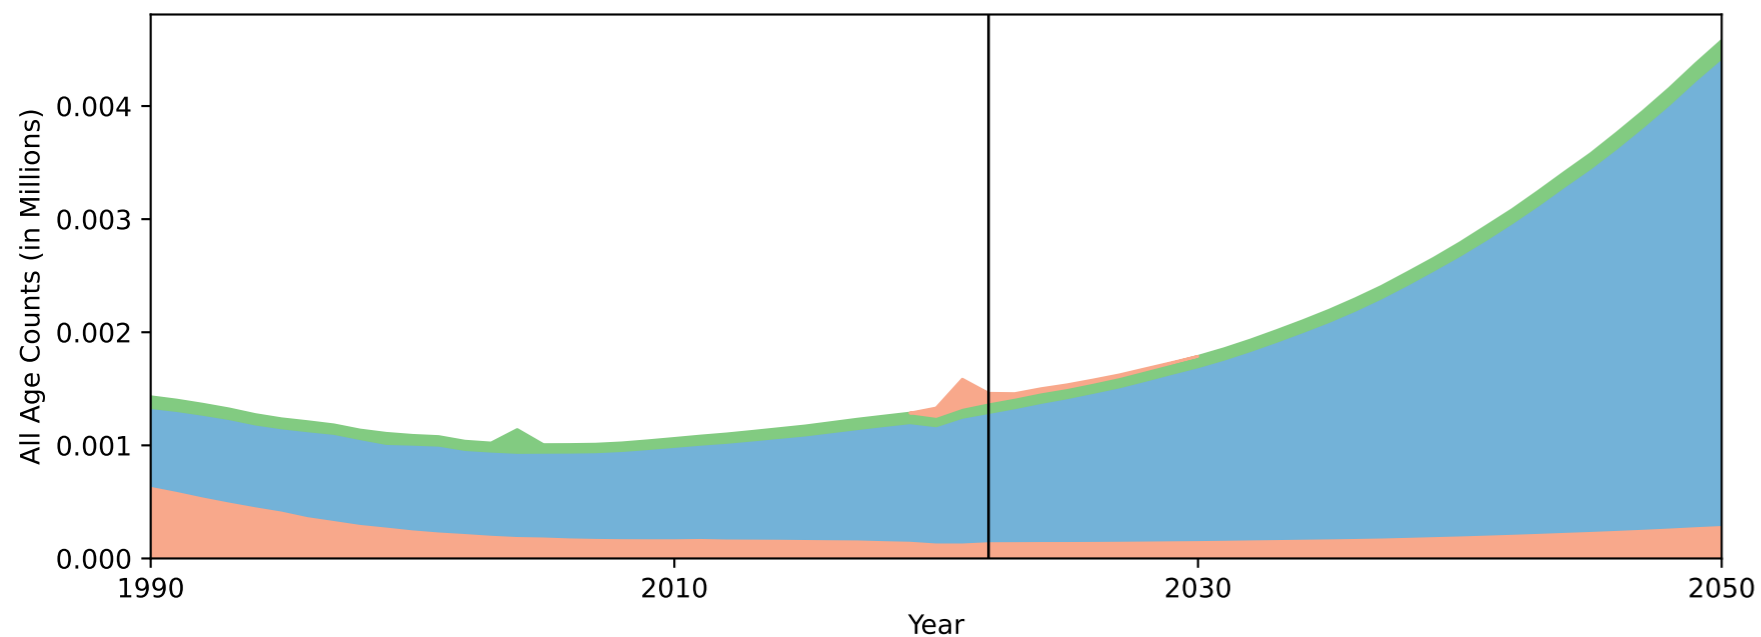

Level 2

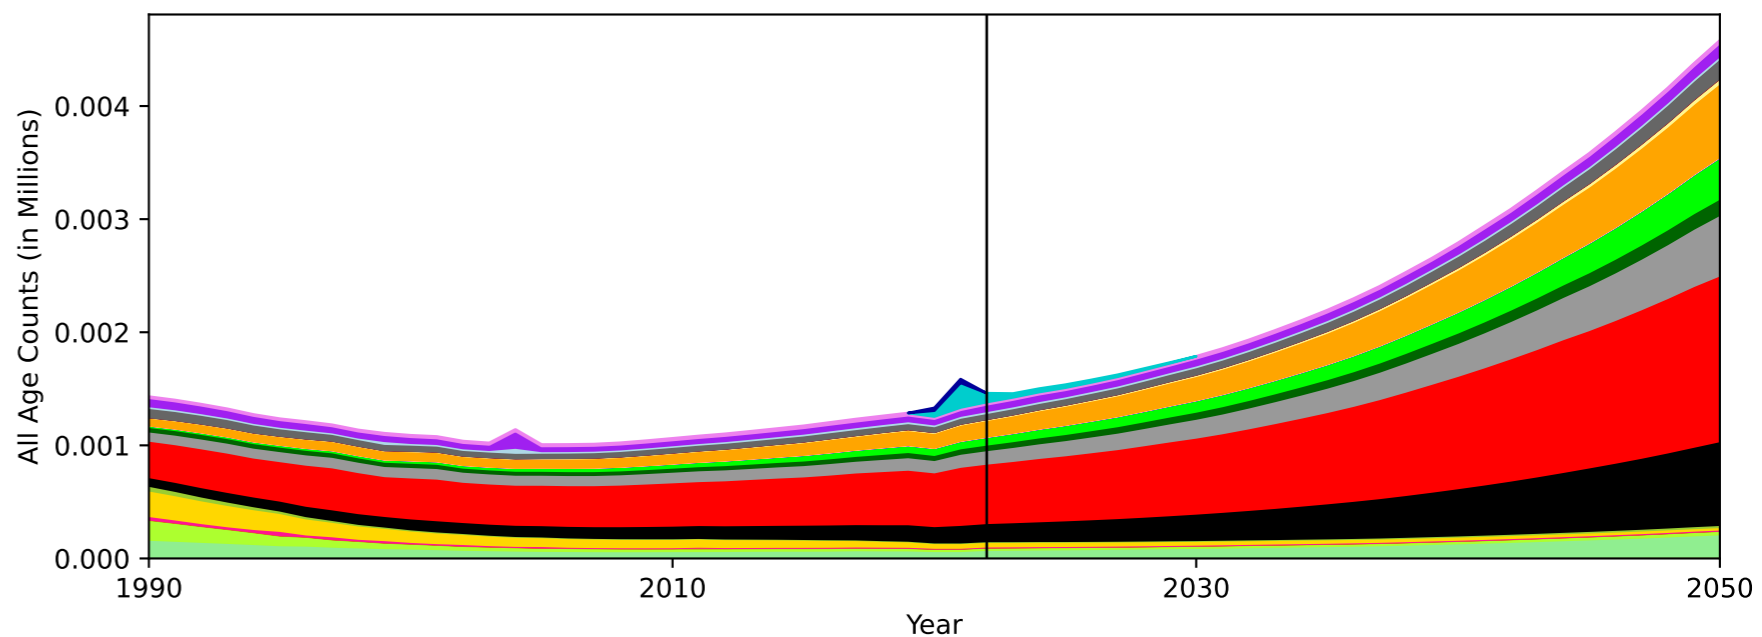

# Mauritius

Level 1

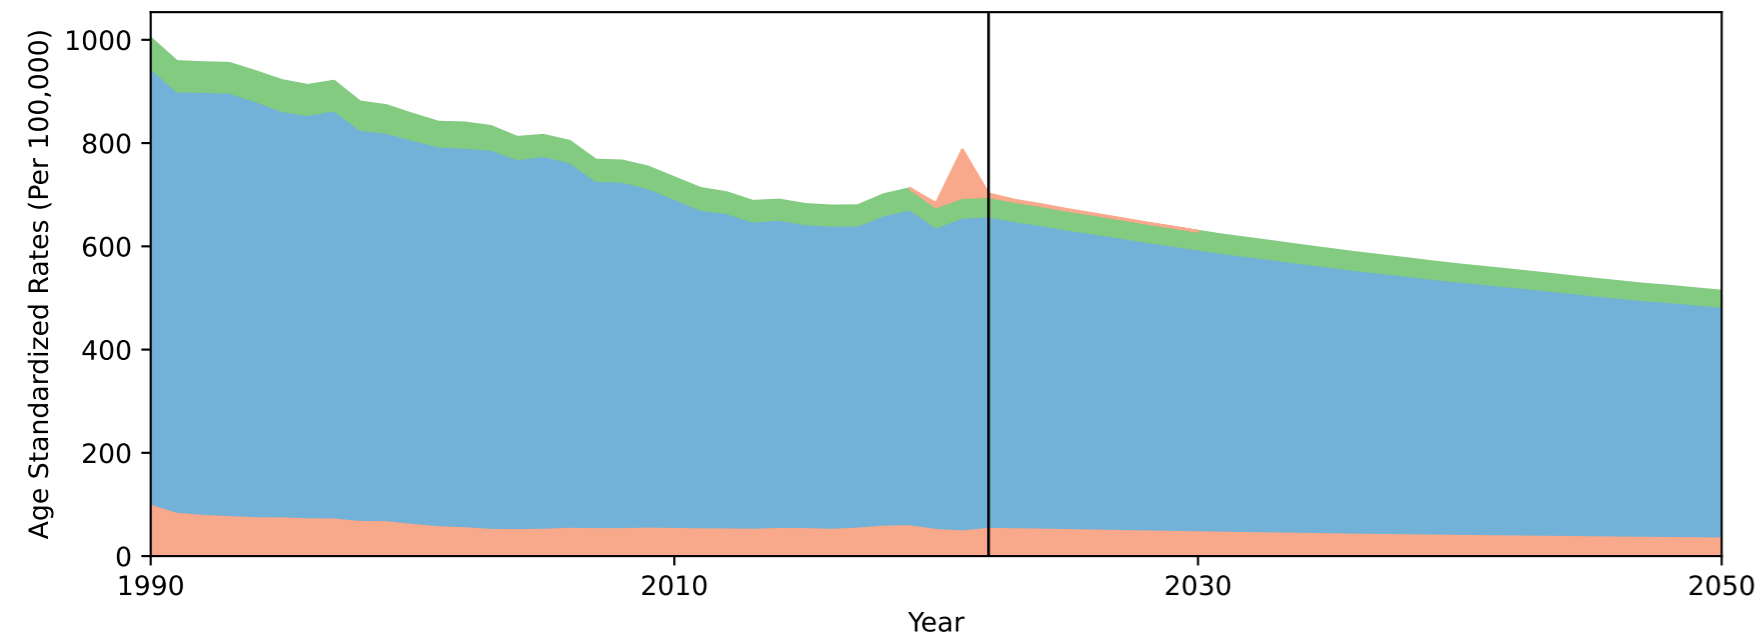

Level 2

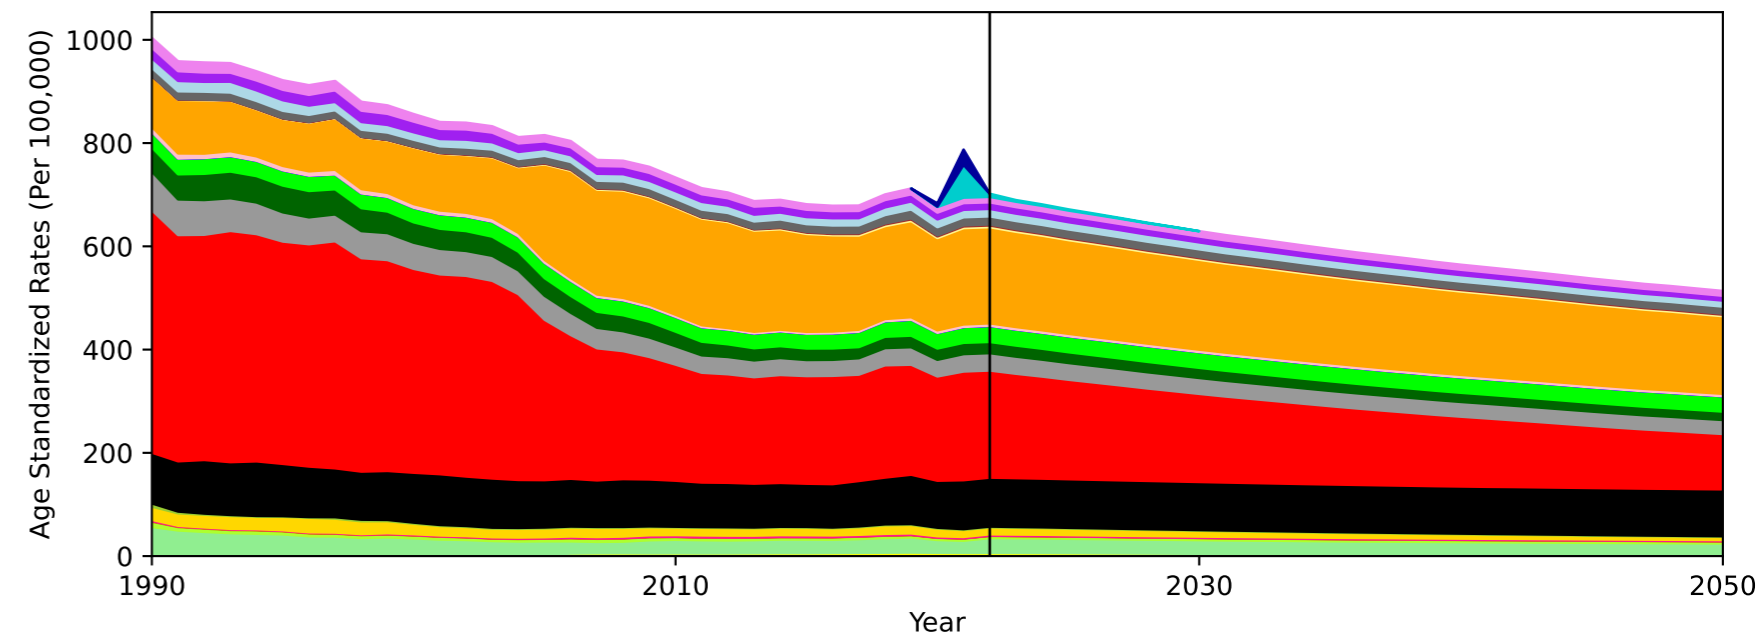

Level 1

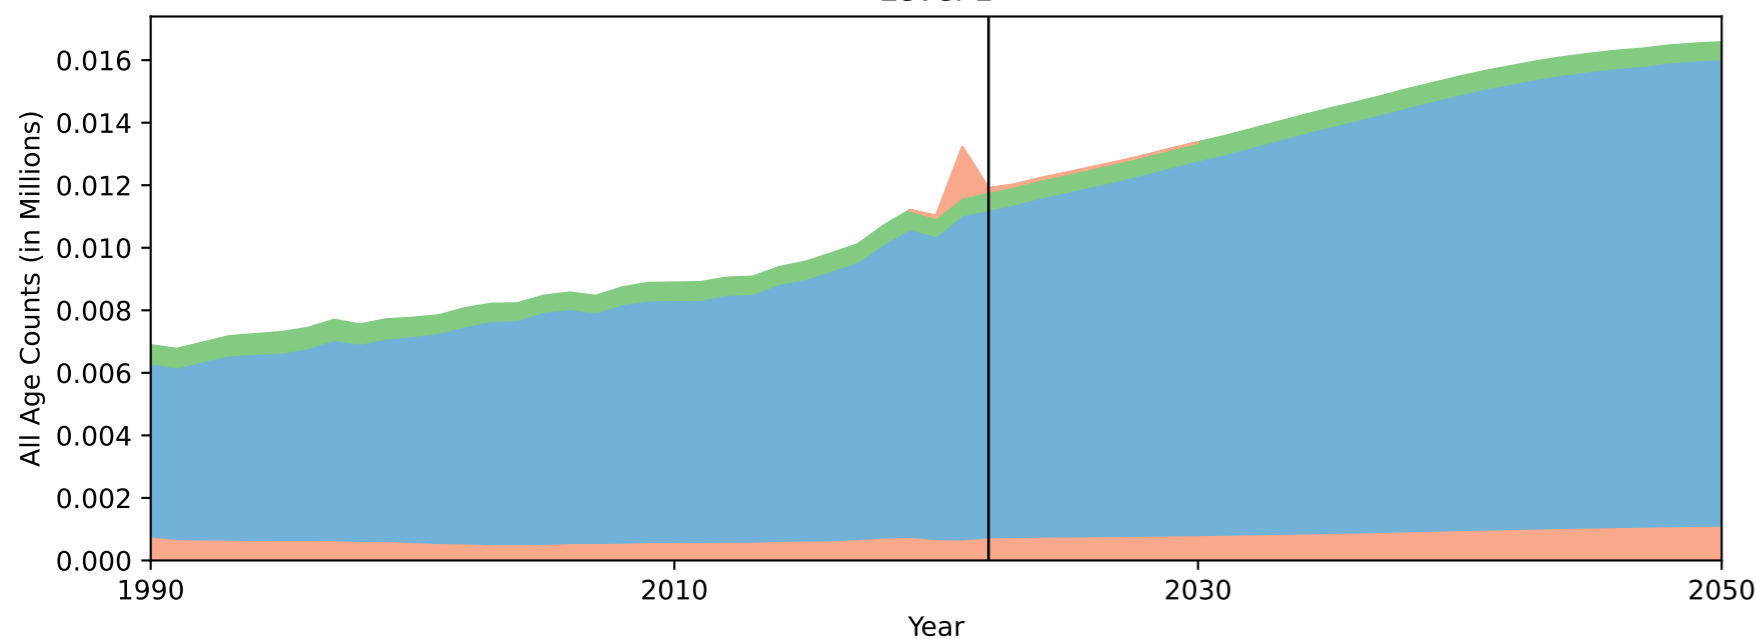

Level 2

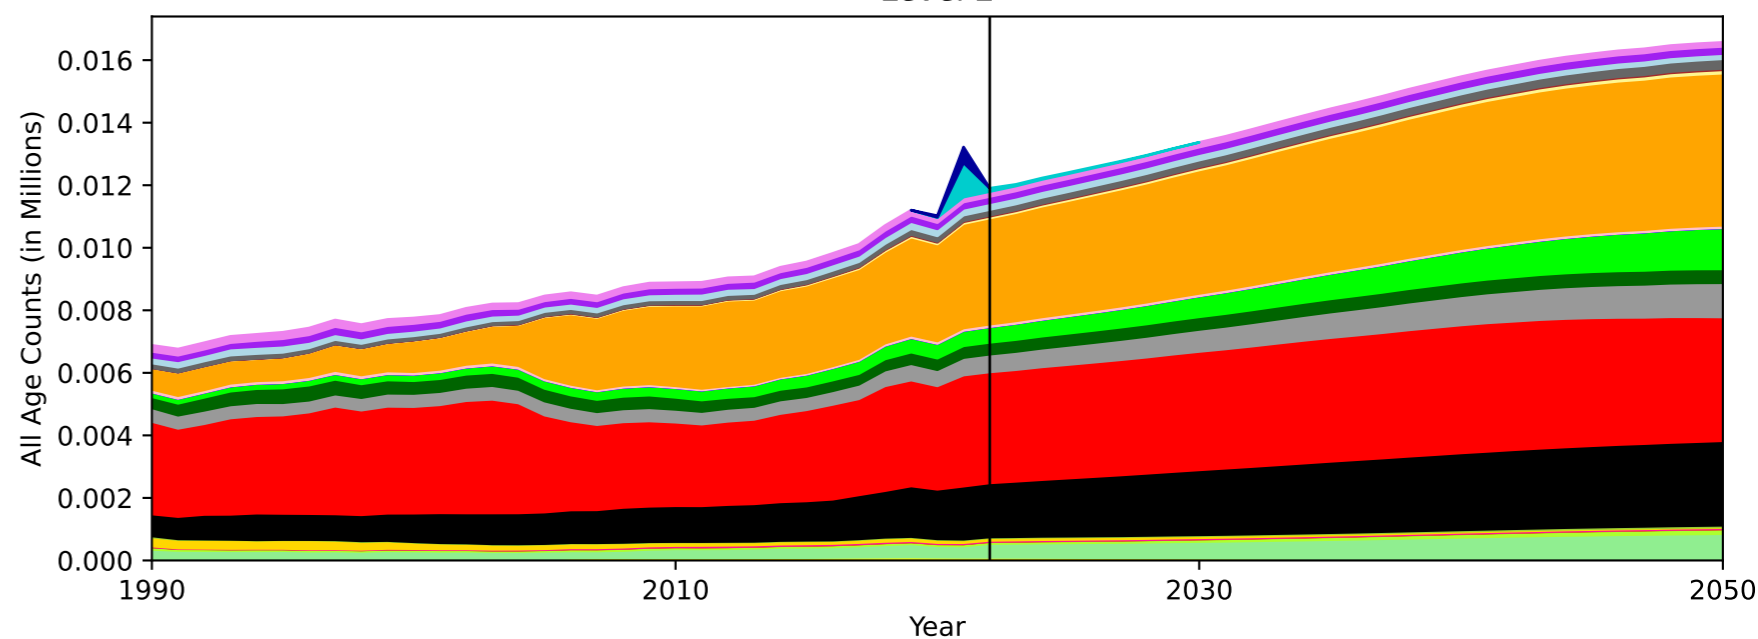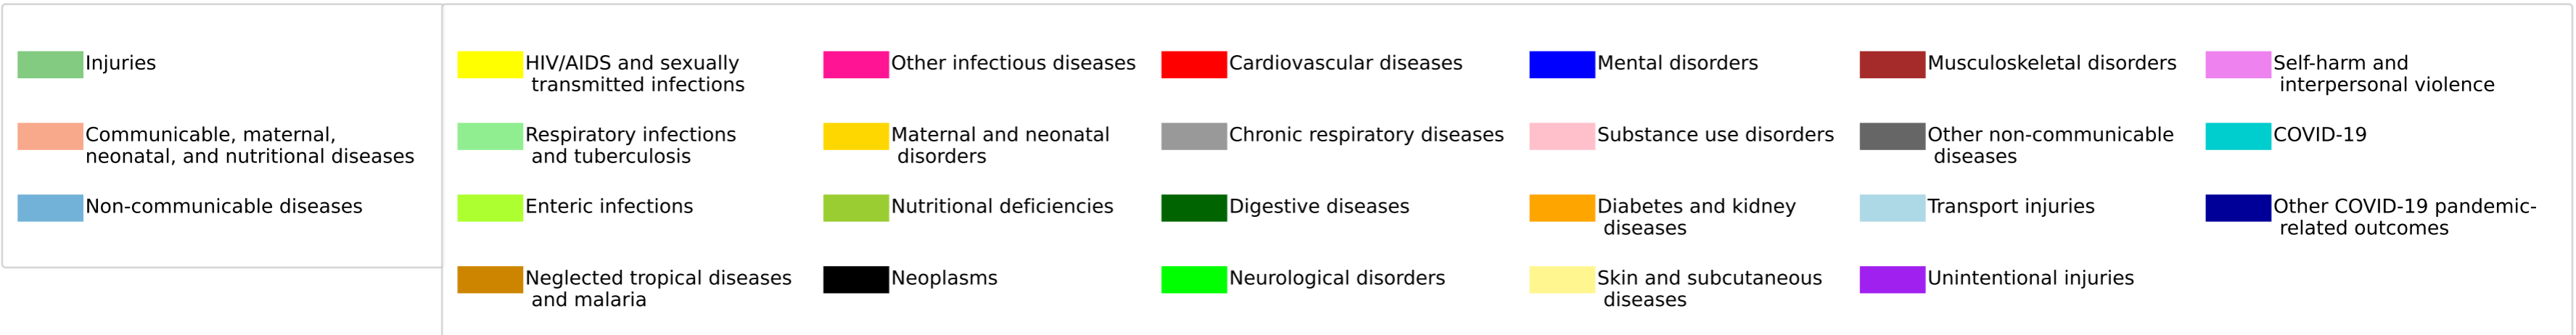

# Myanmar

Level 1

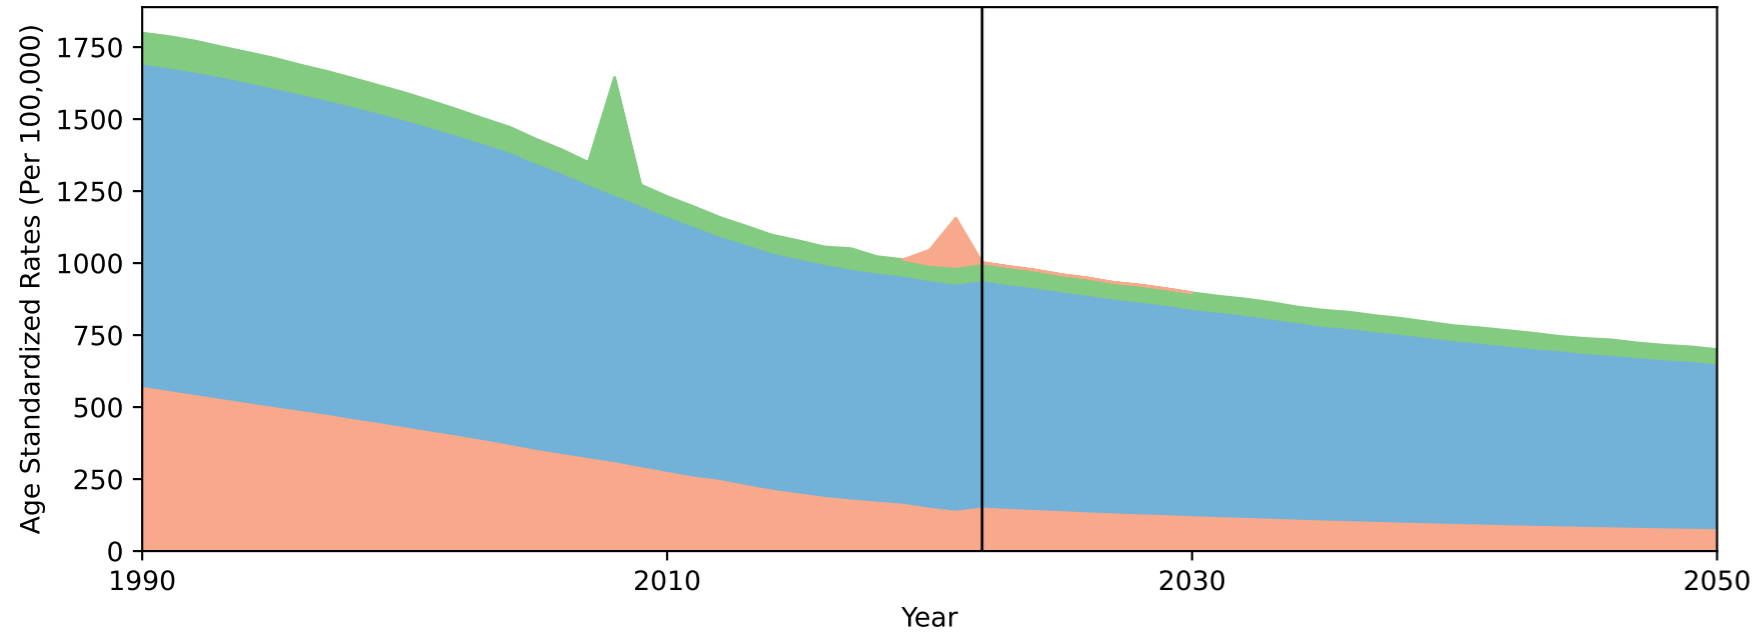

Level 2

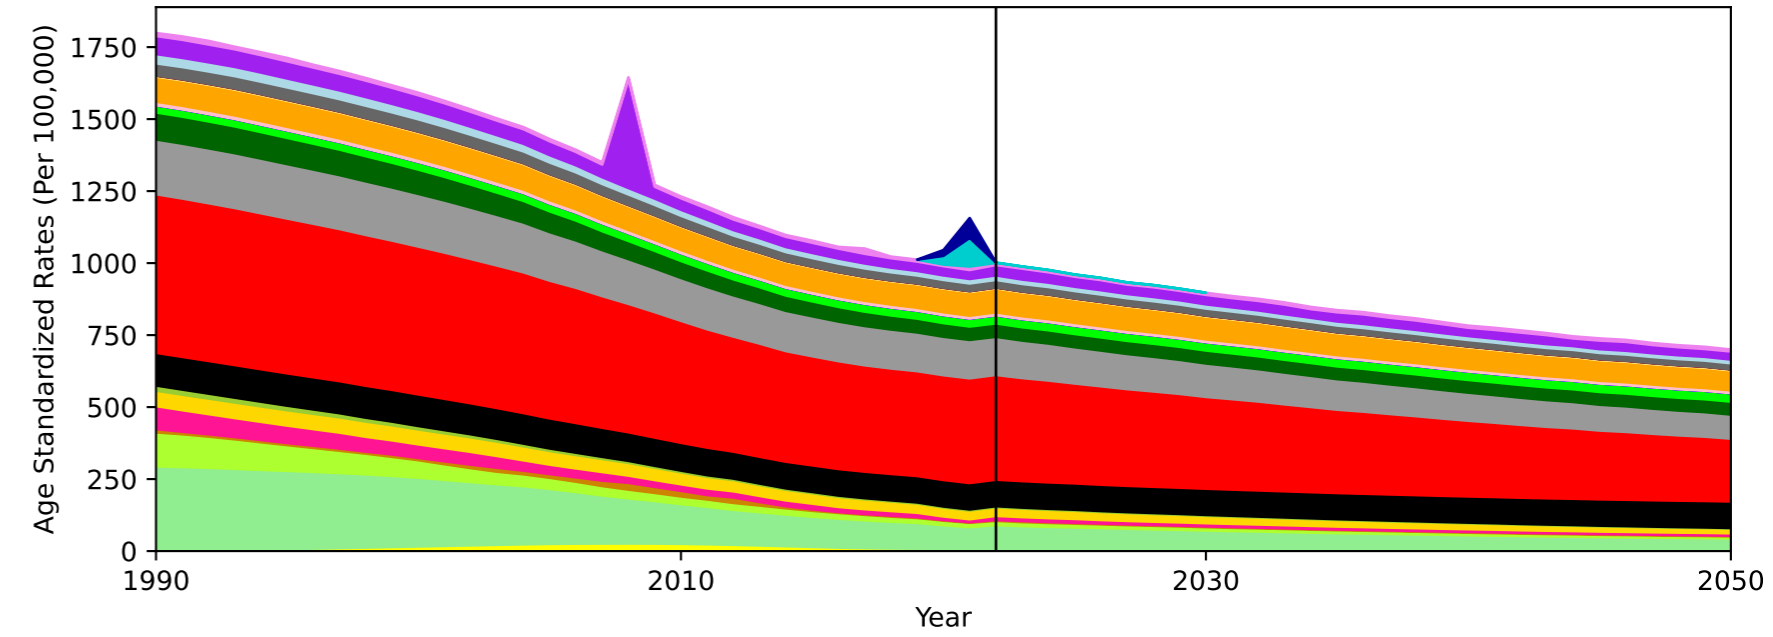

Level 1

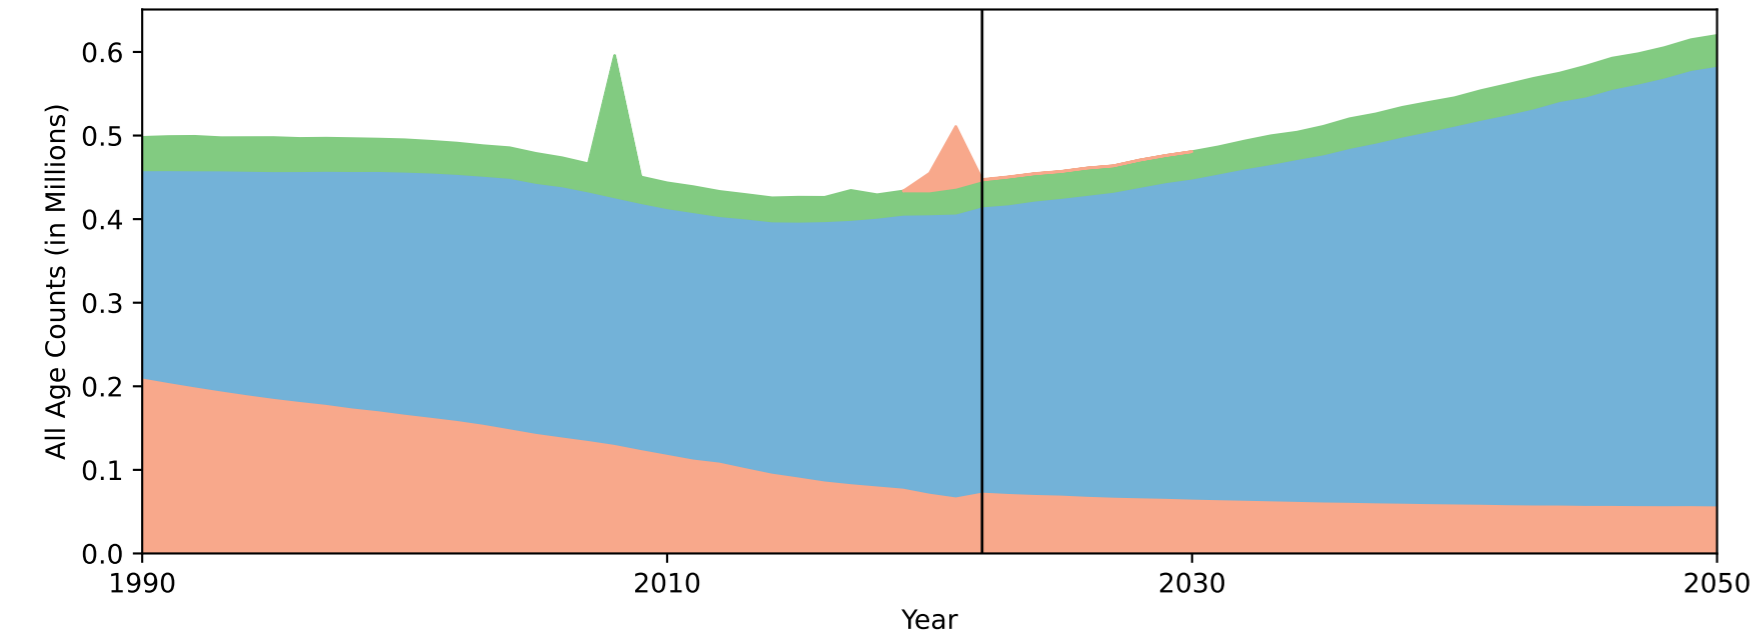

Level 2

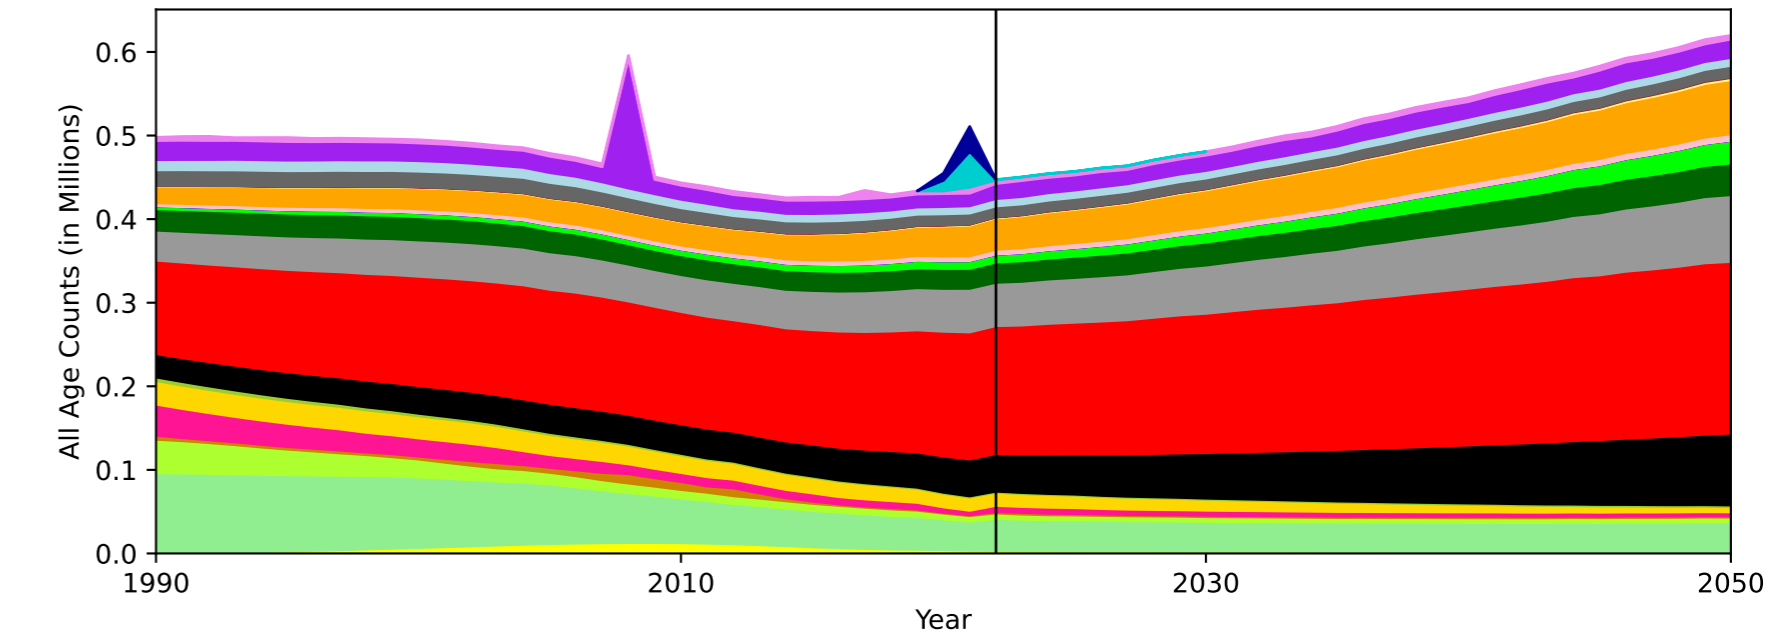

# Philippines

Supplemental Results Figure S5. Age-standardised death rates and all age death counts and by Level 1 and Level 2 causes, 1990–2050

630

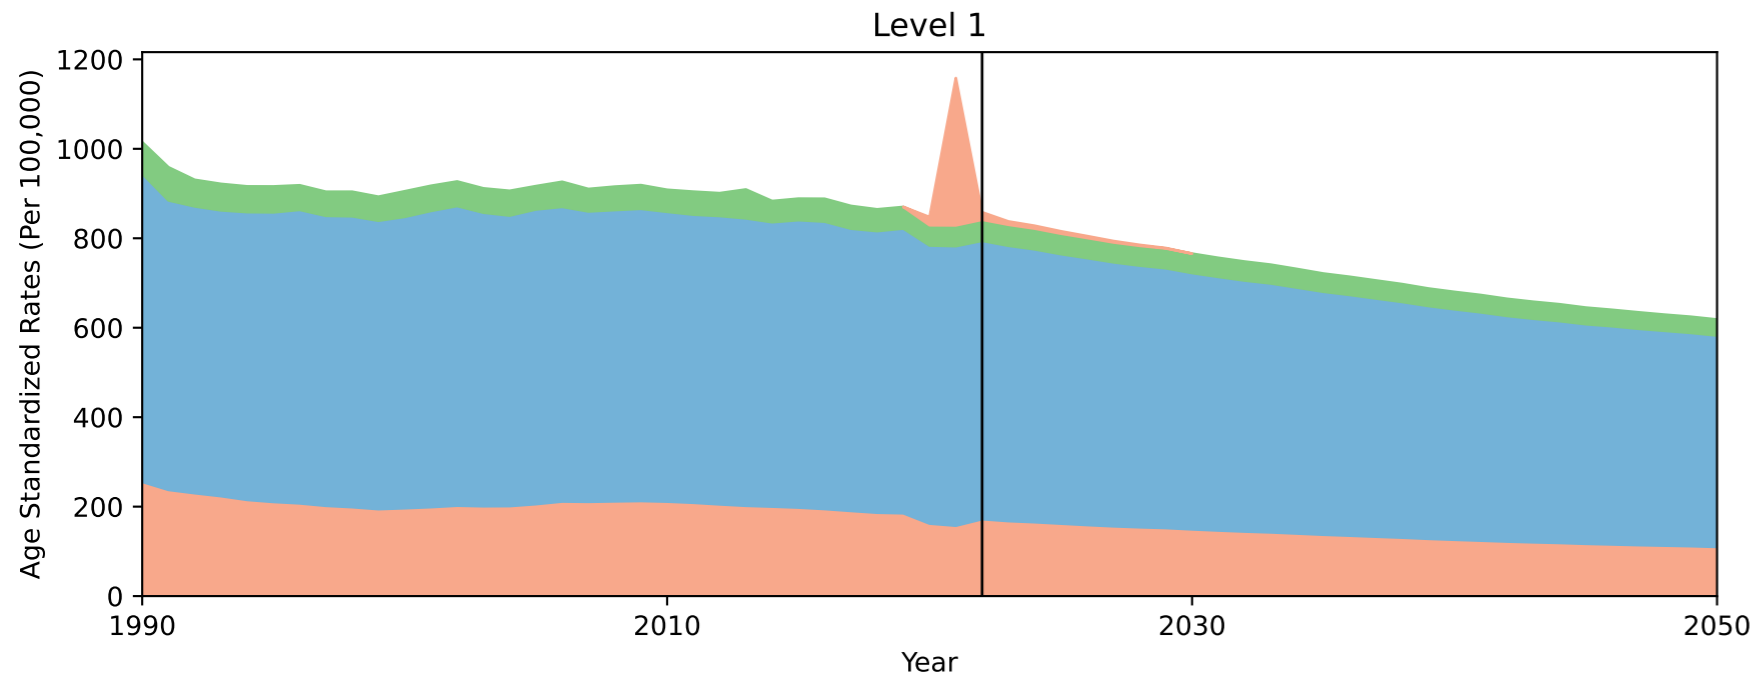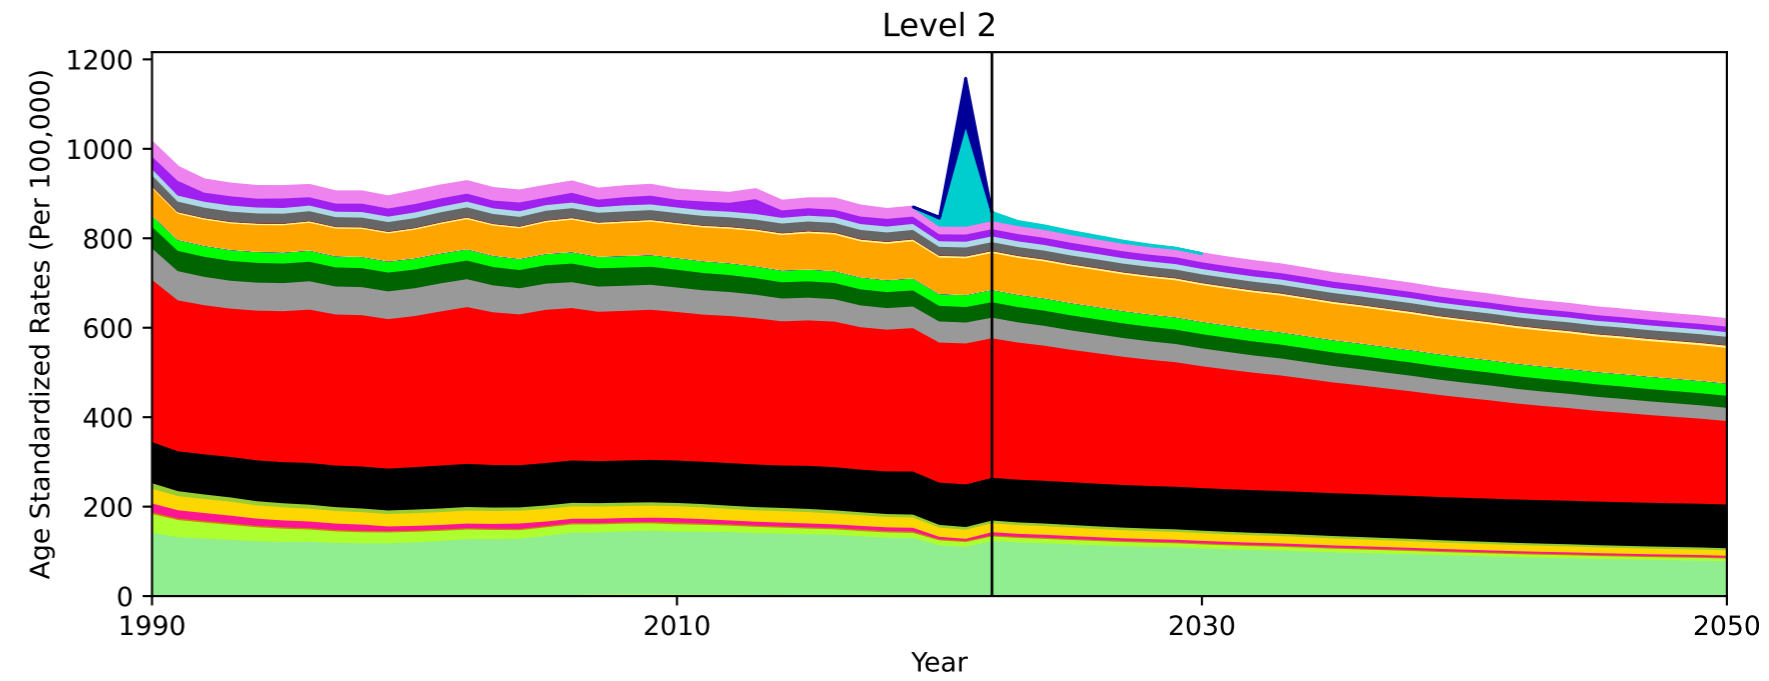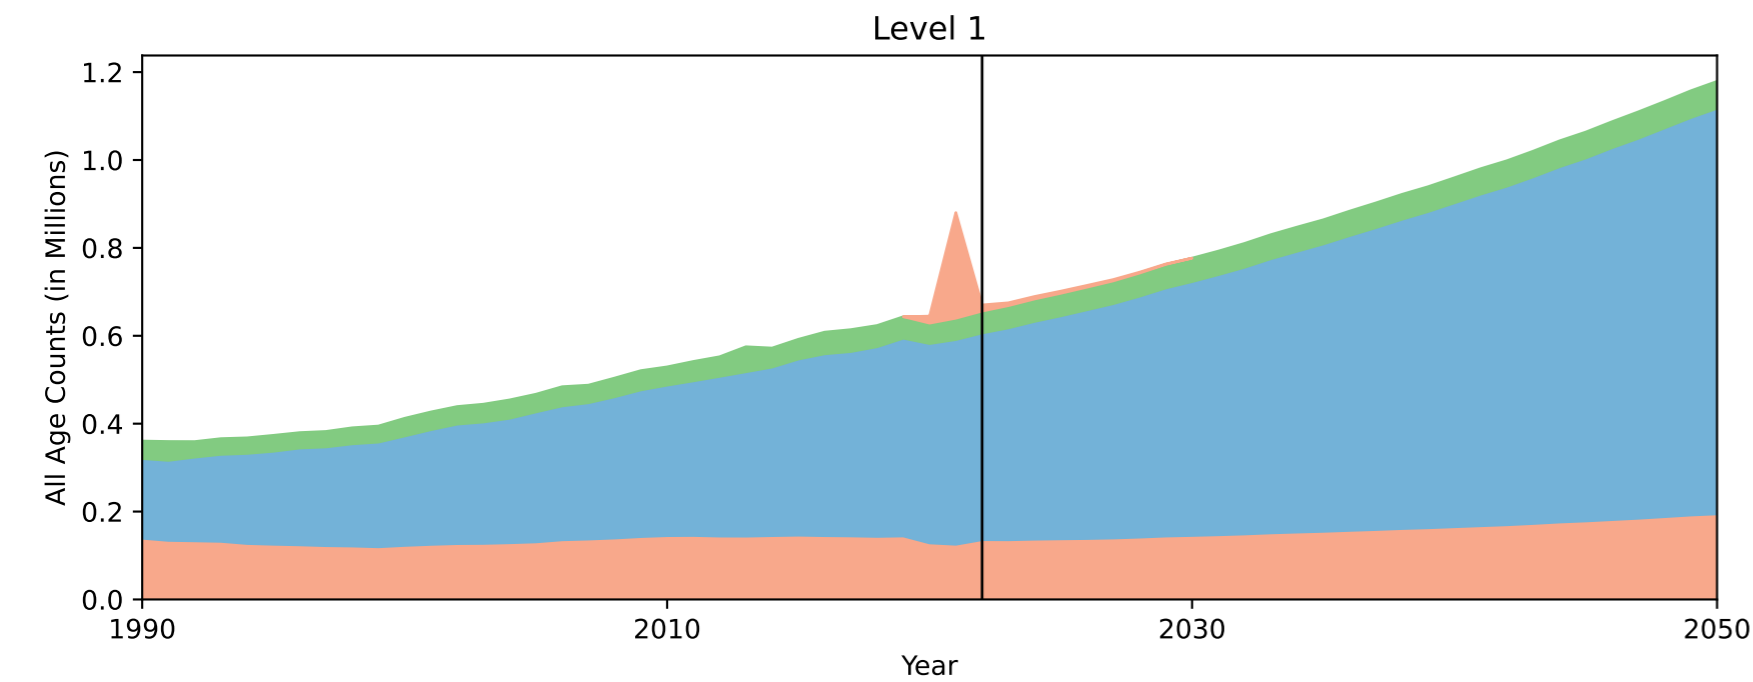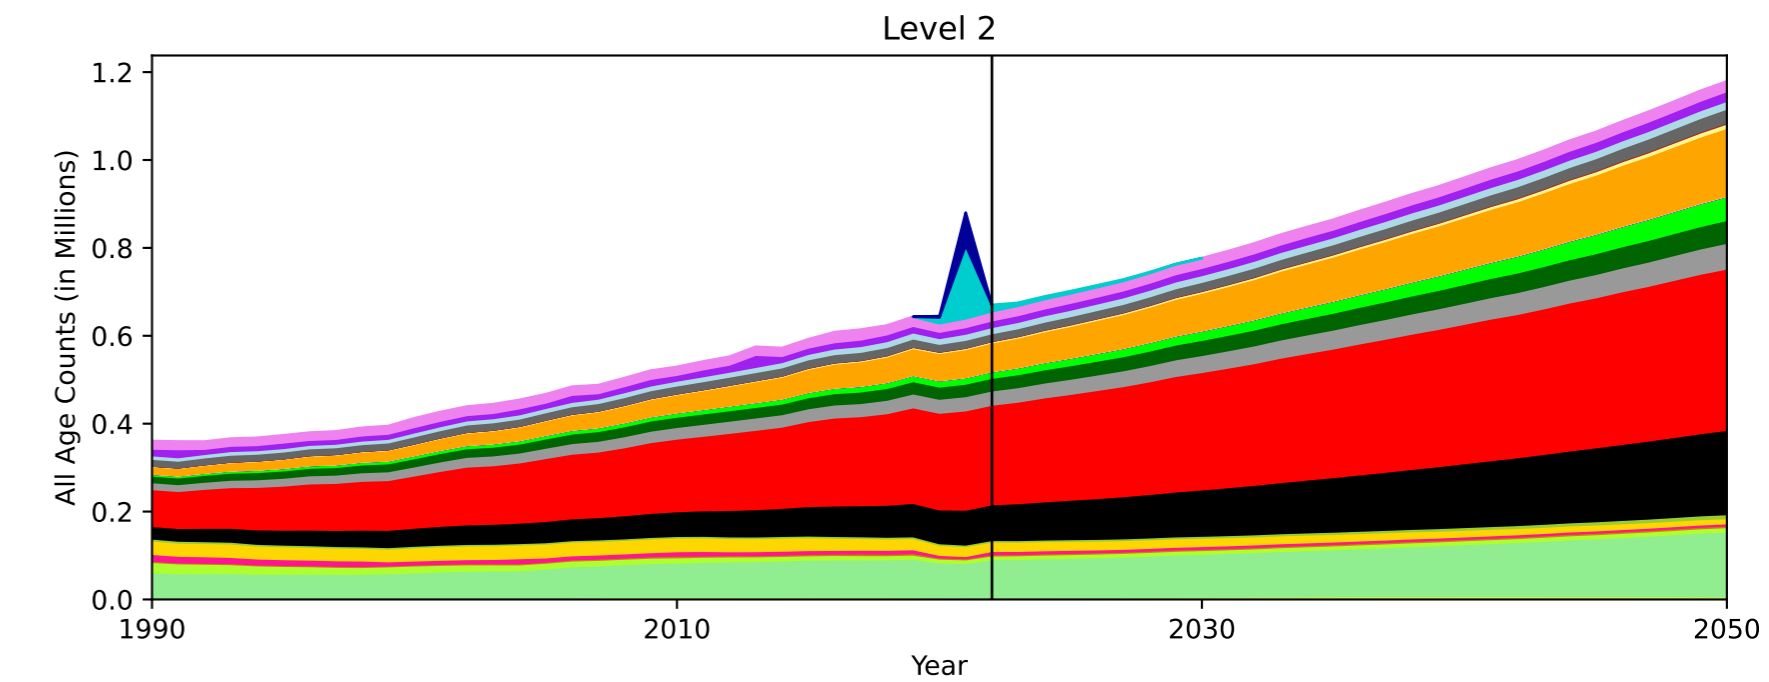

# Seychelles

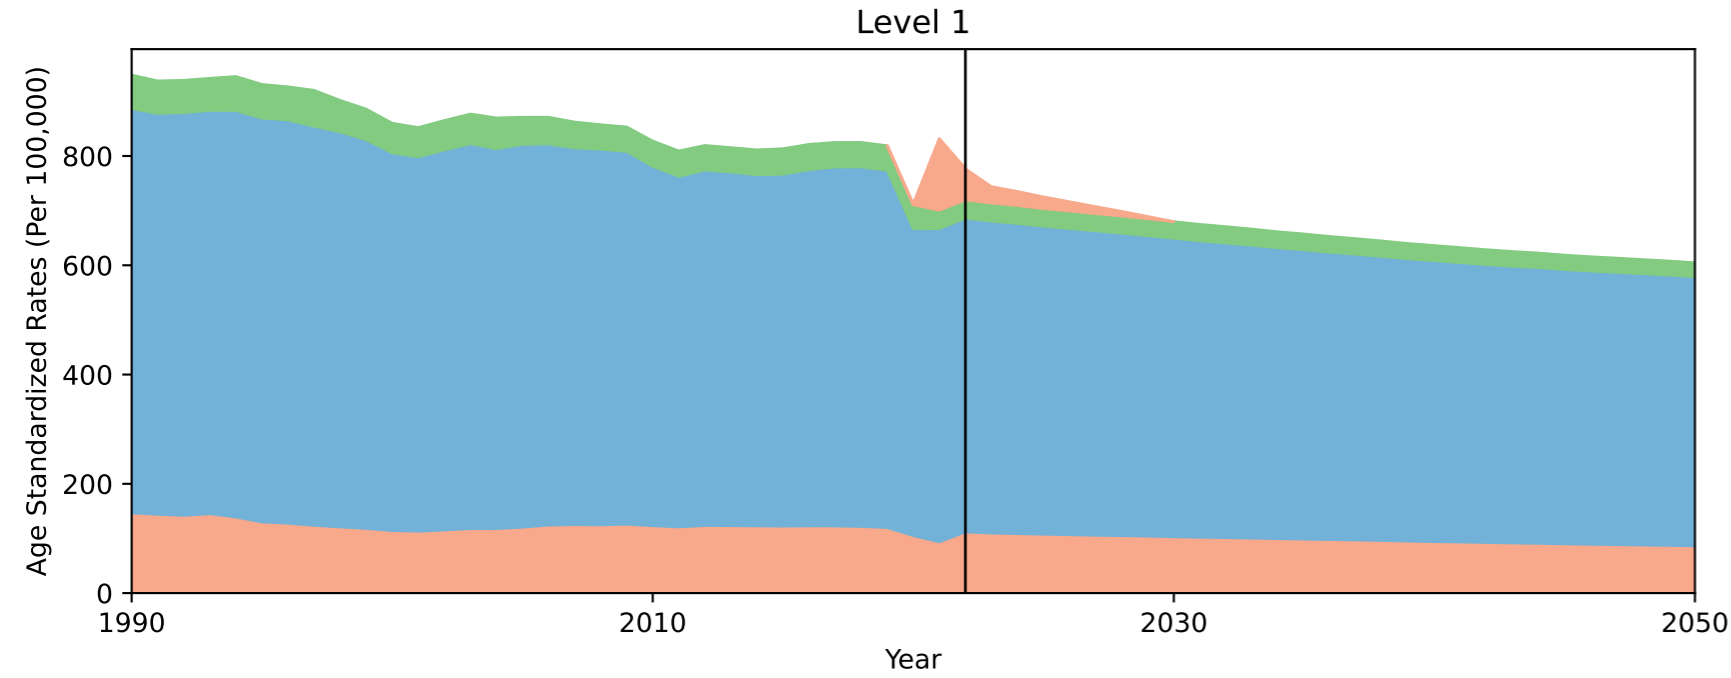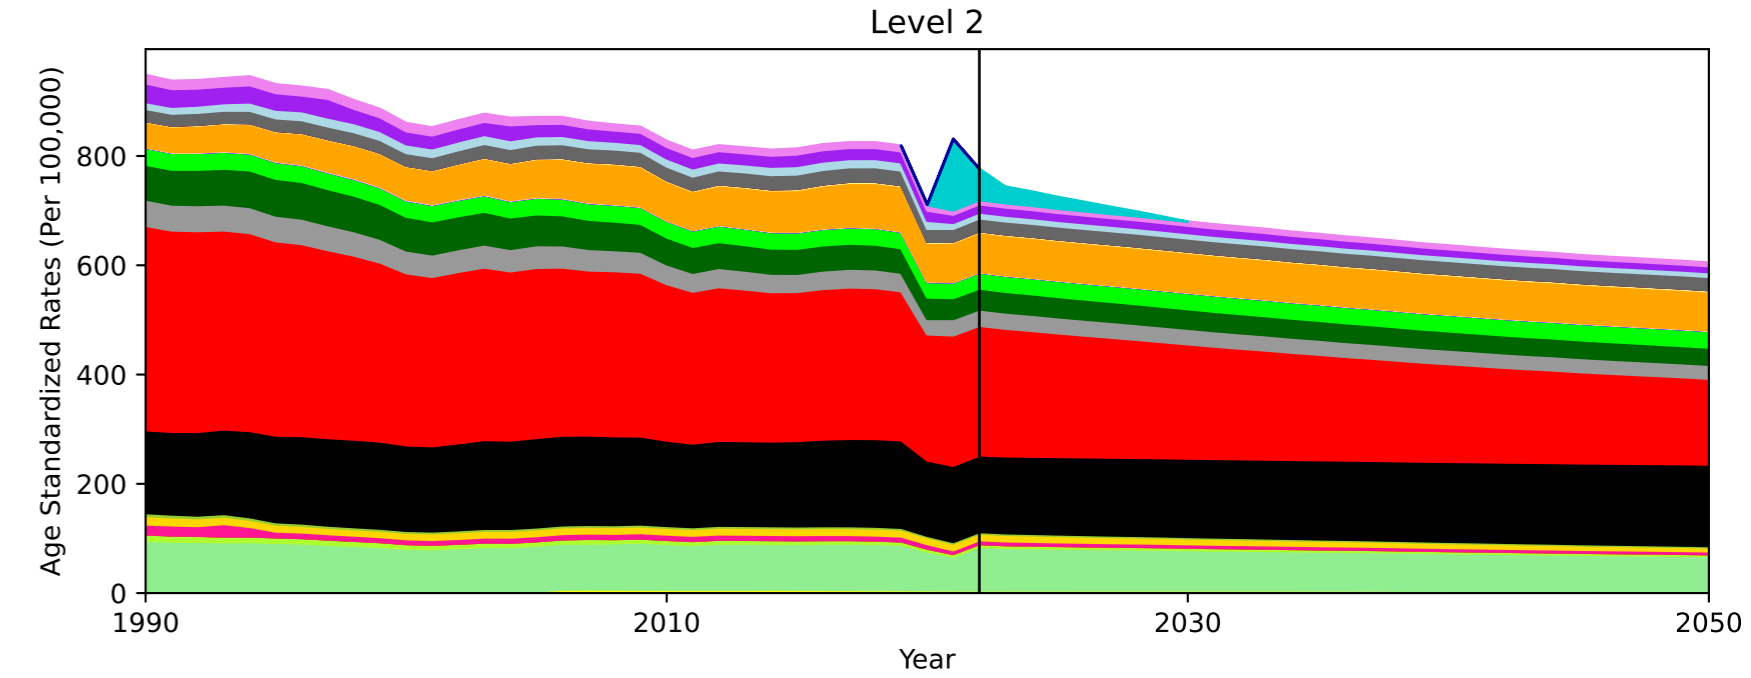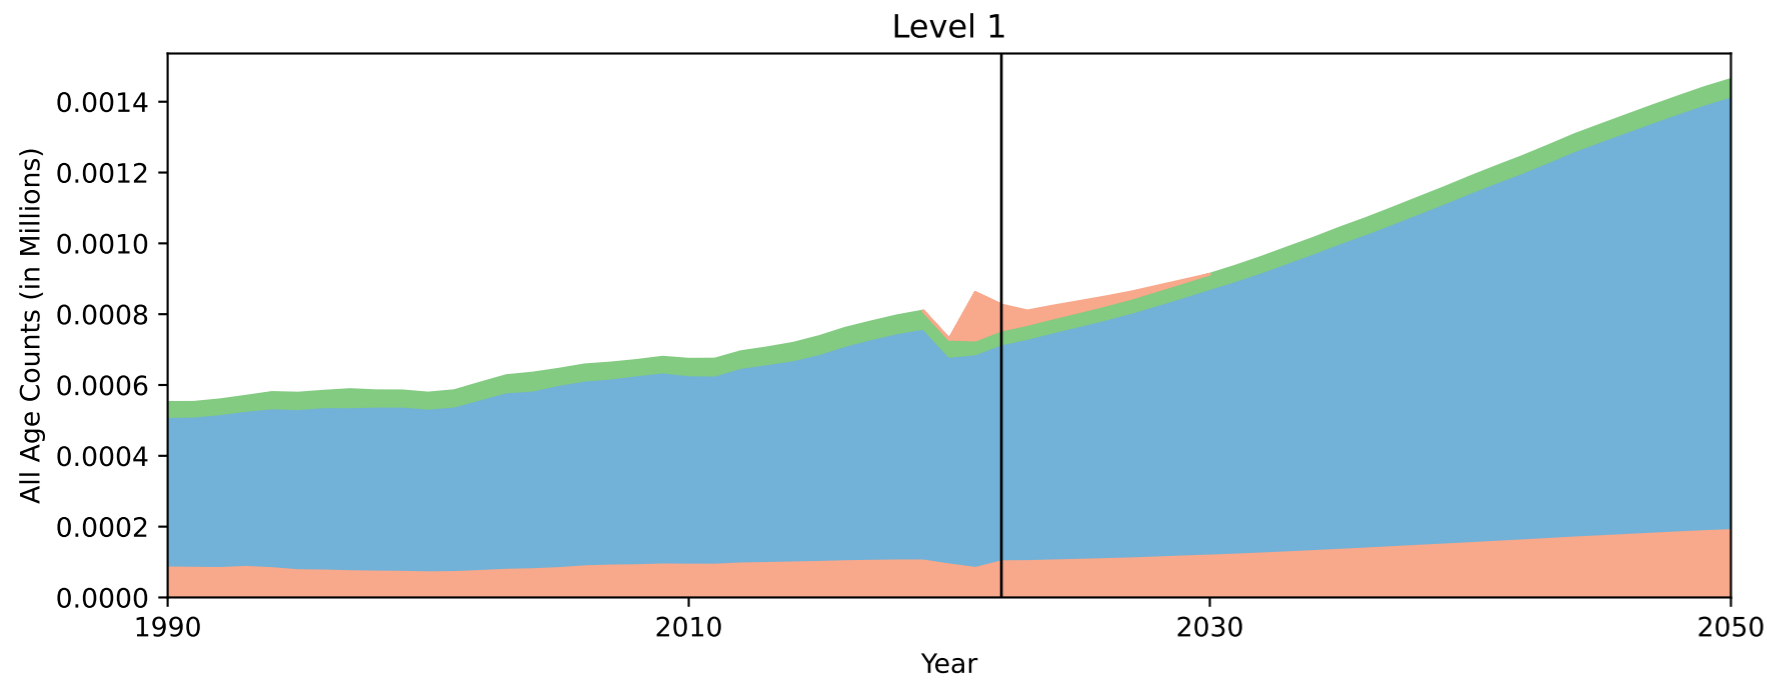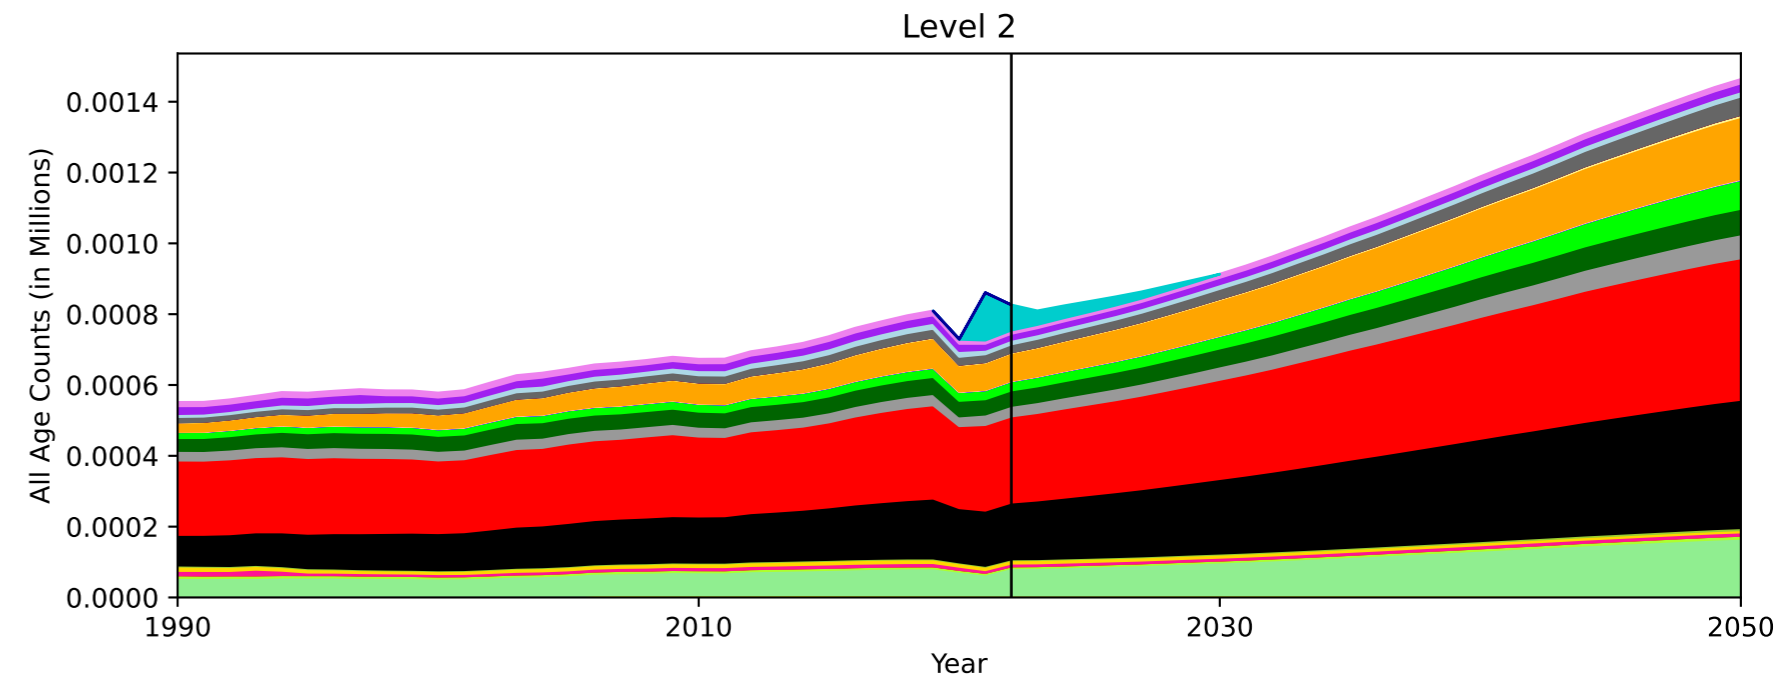



# Sri Lanka

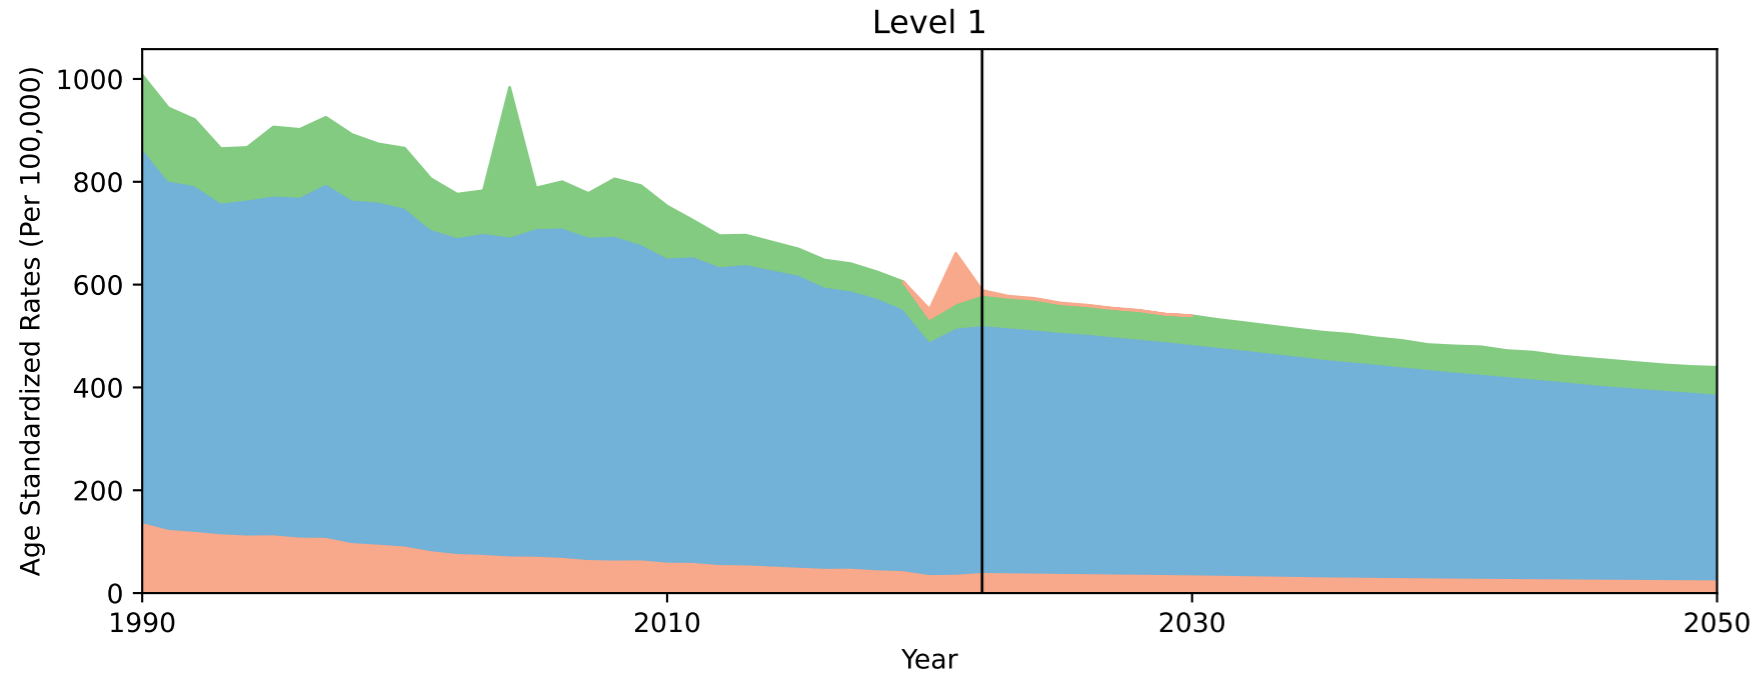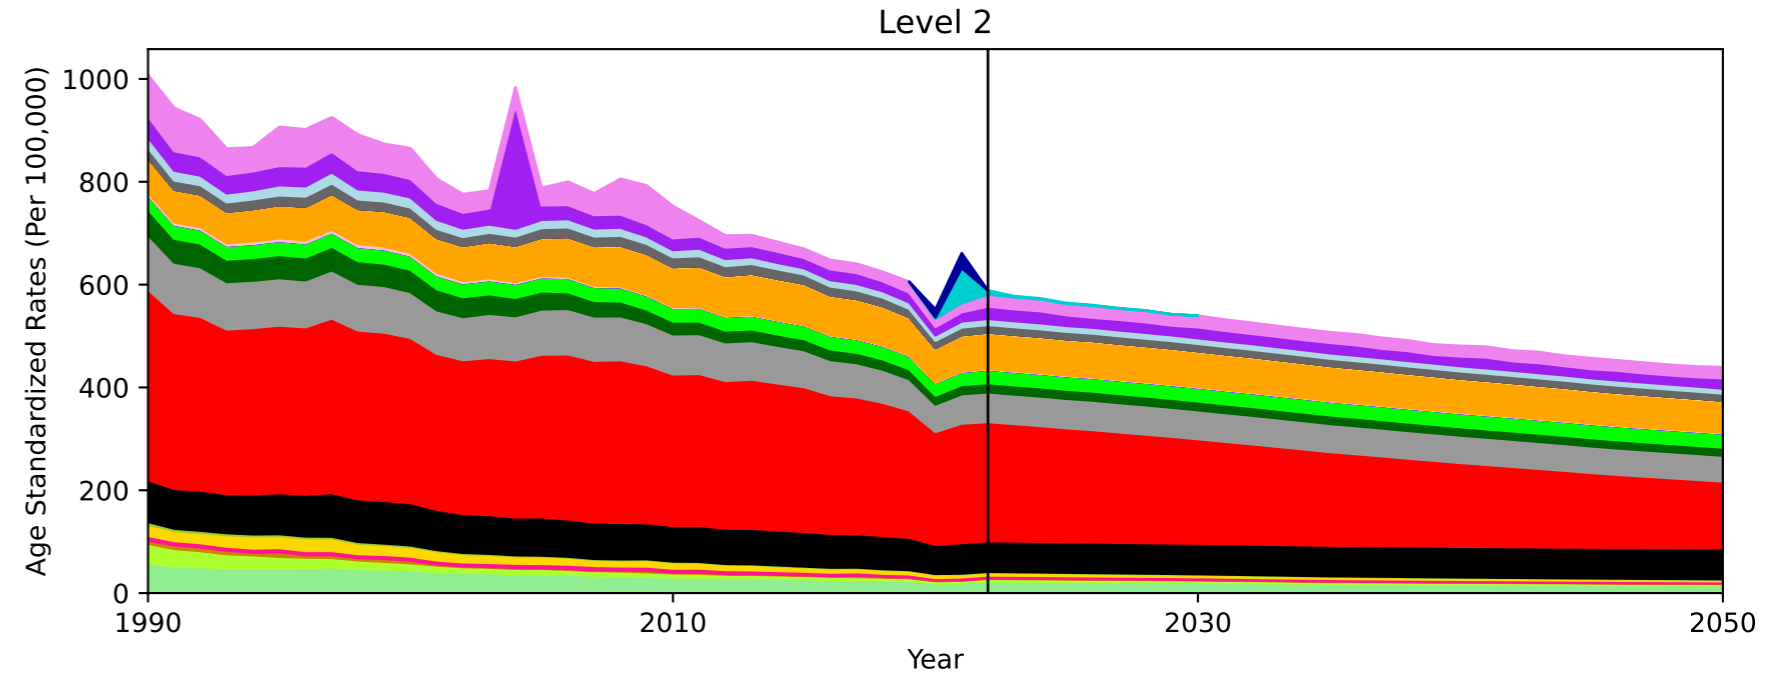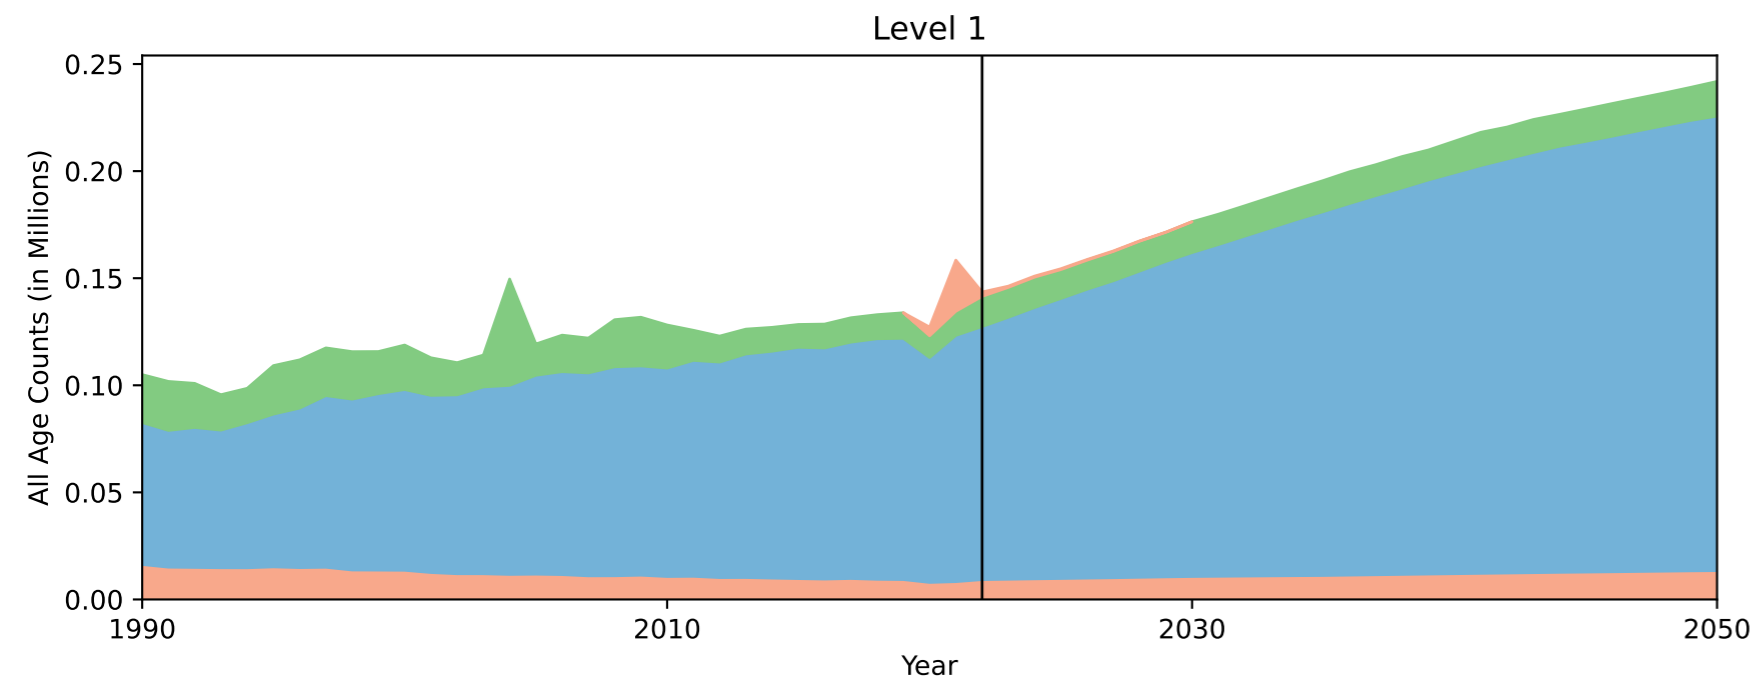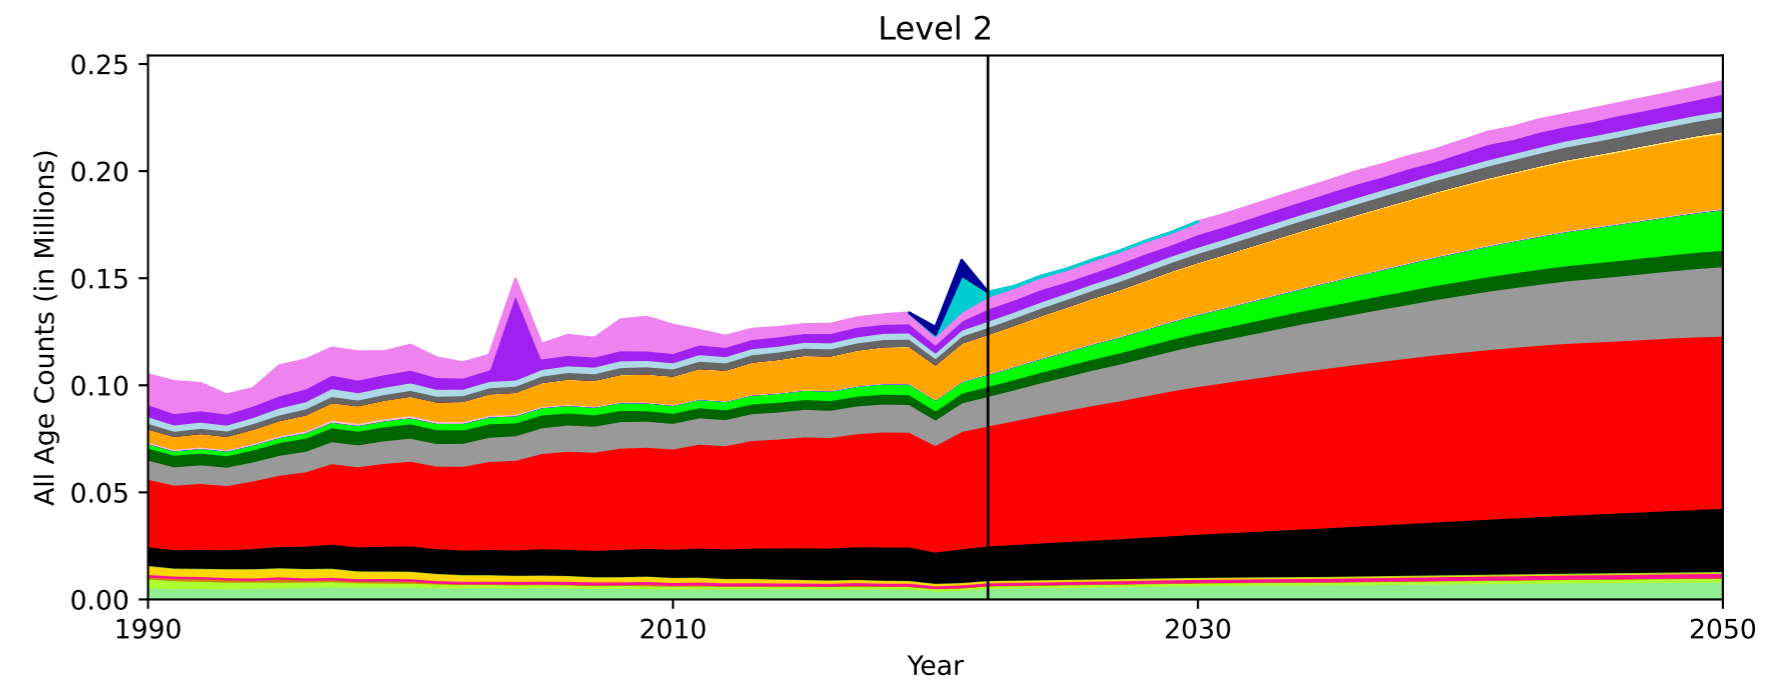

Level 1

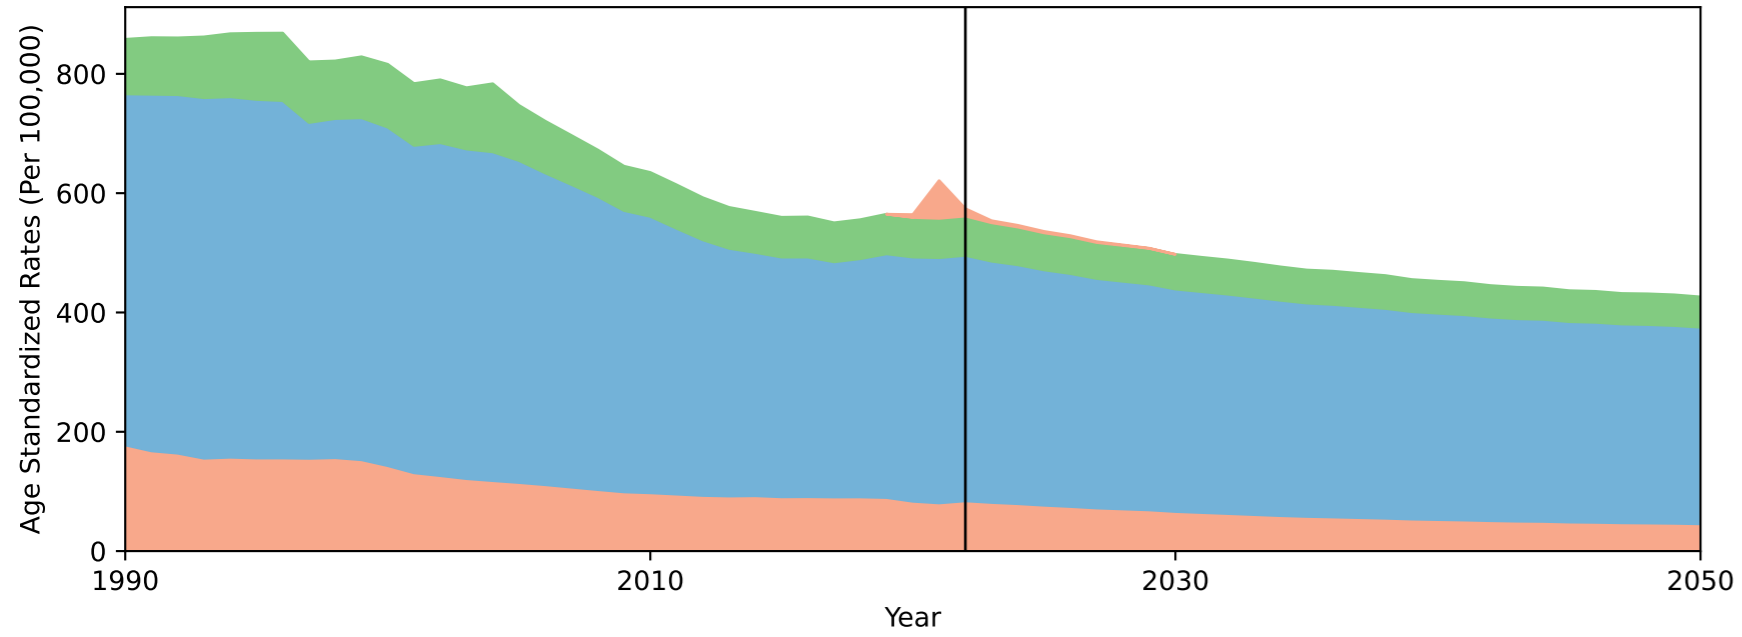

Level 2

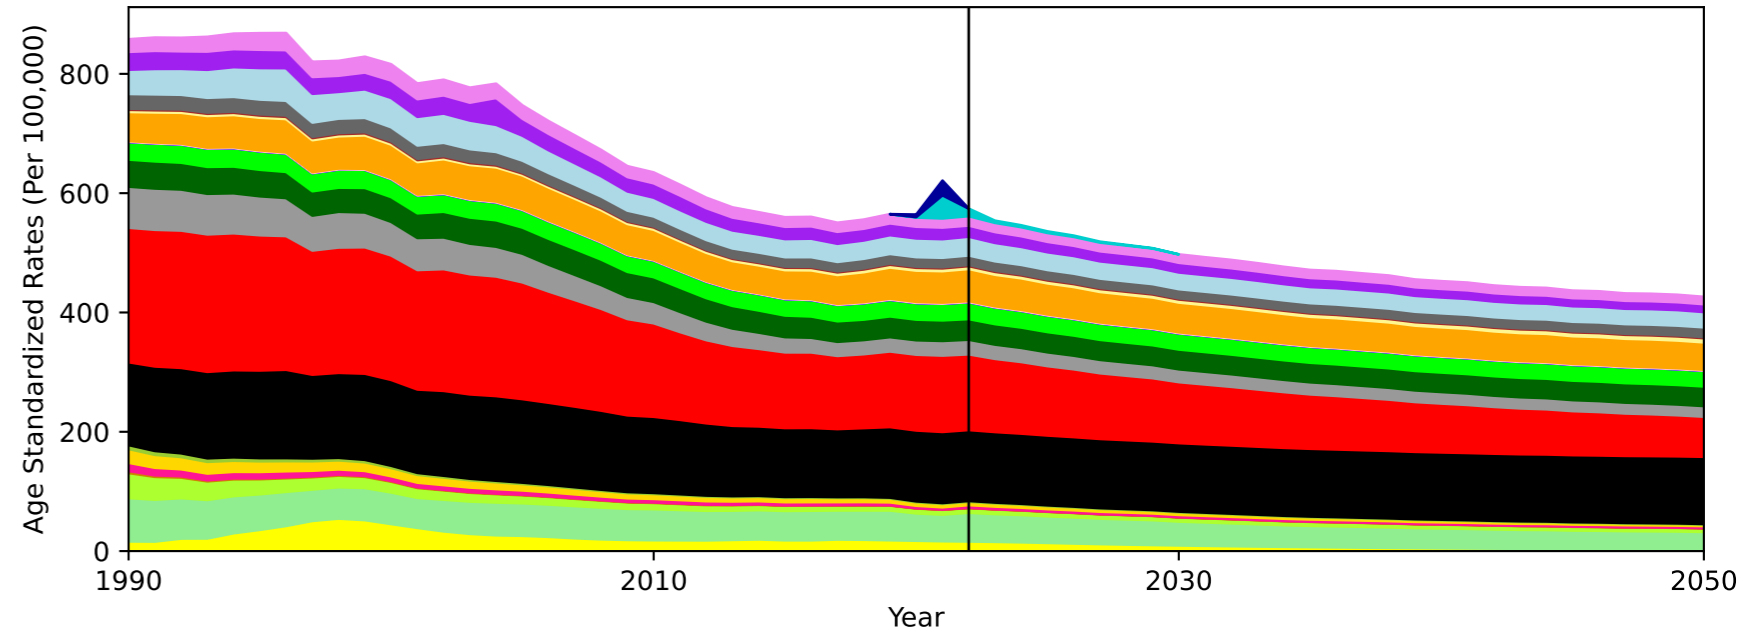

Level 1

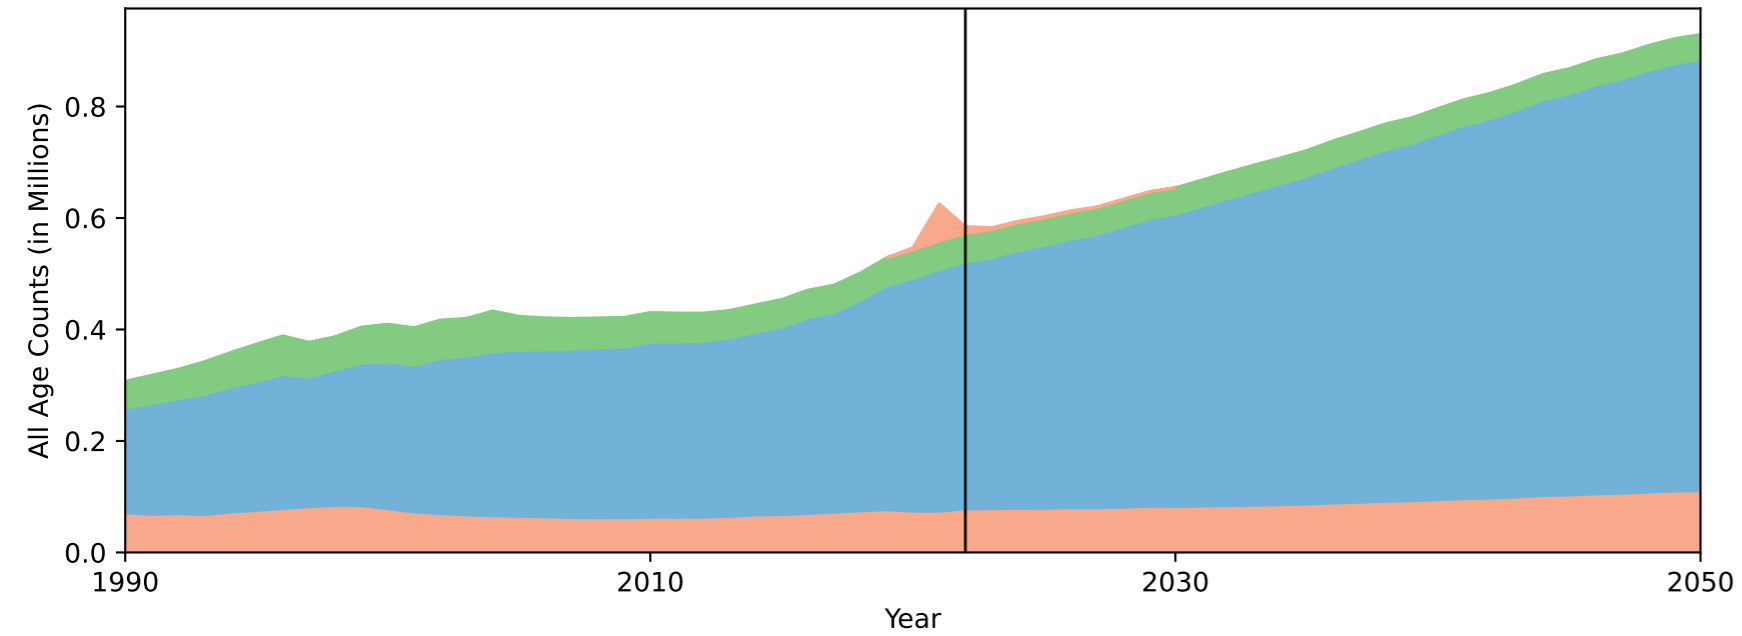

Level 2

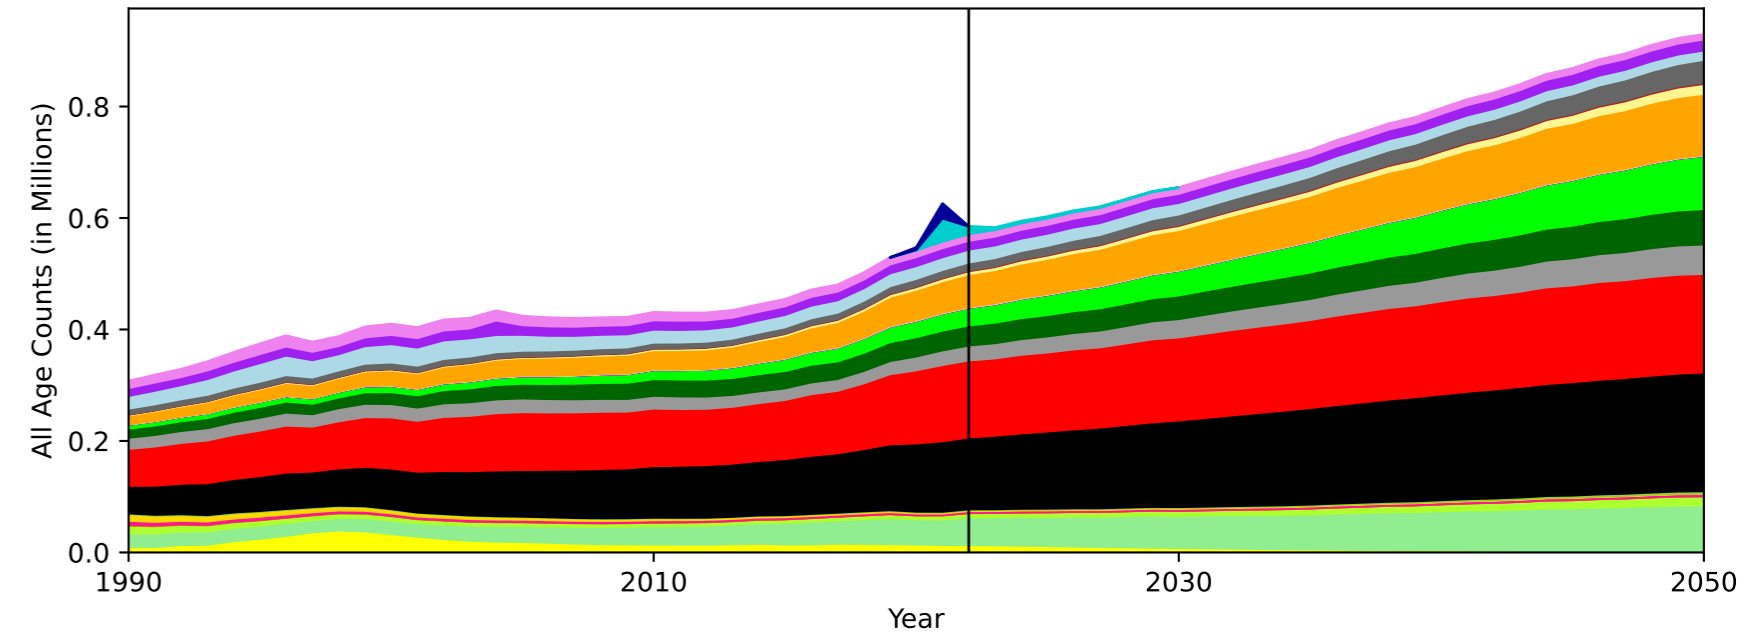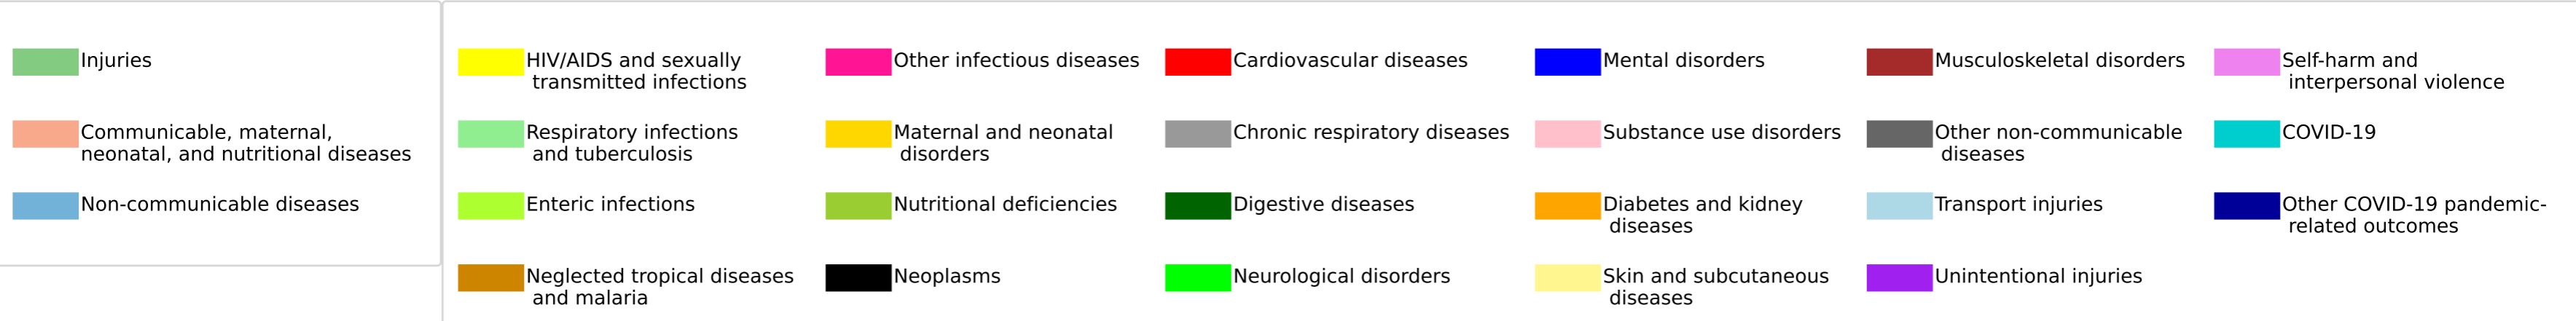

# Timor-Leste

Level 1

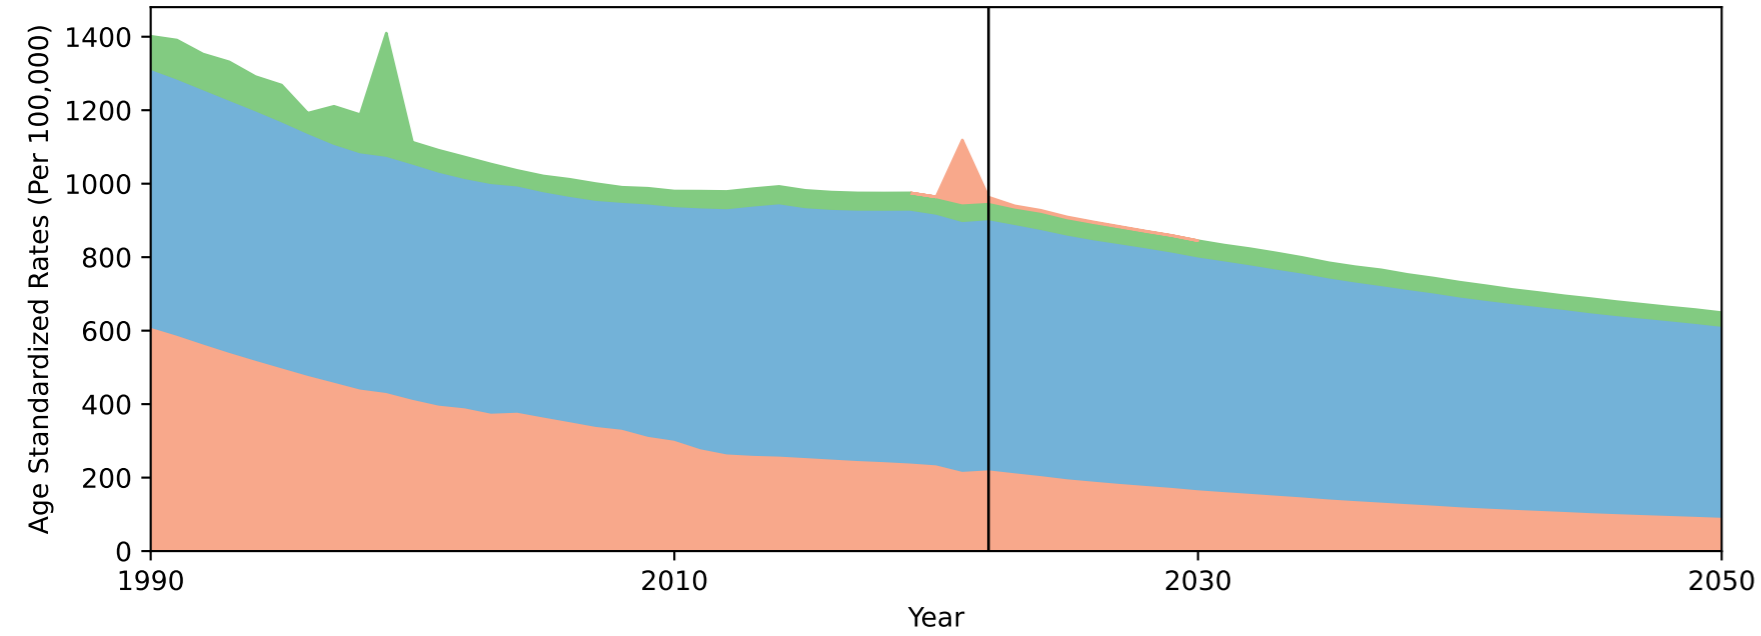

Level 2

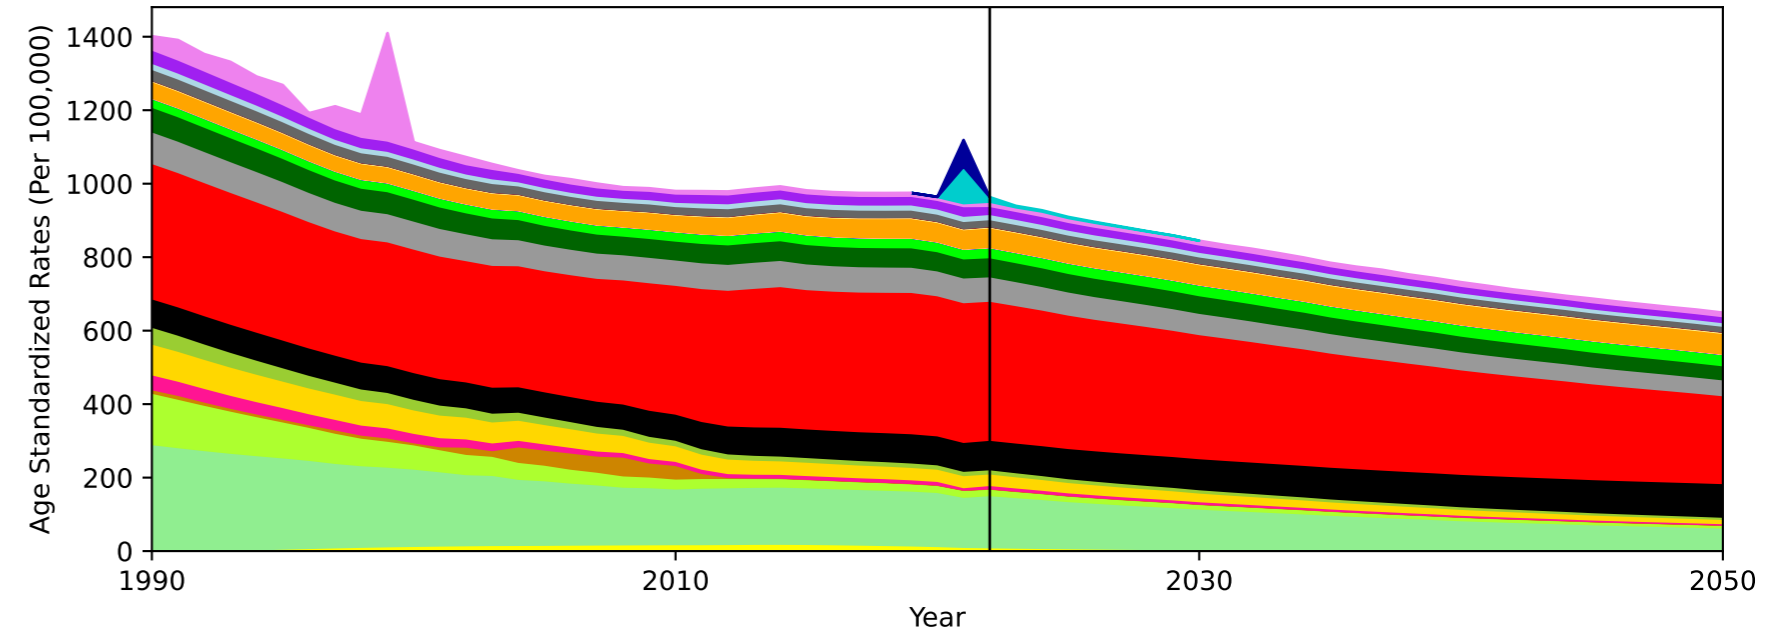

Level 1

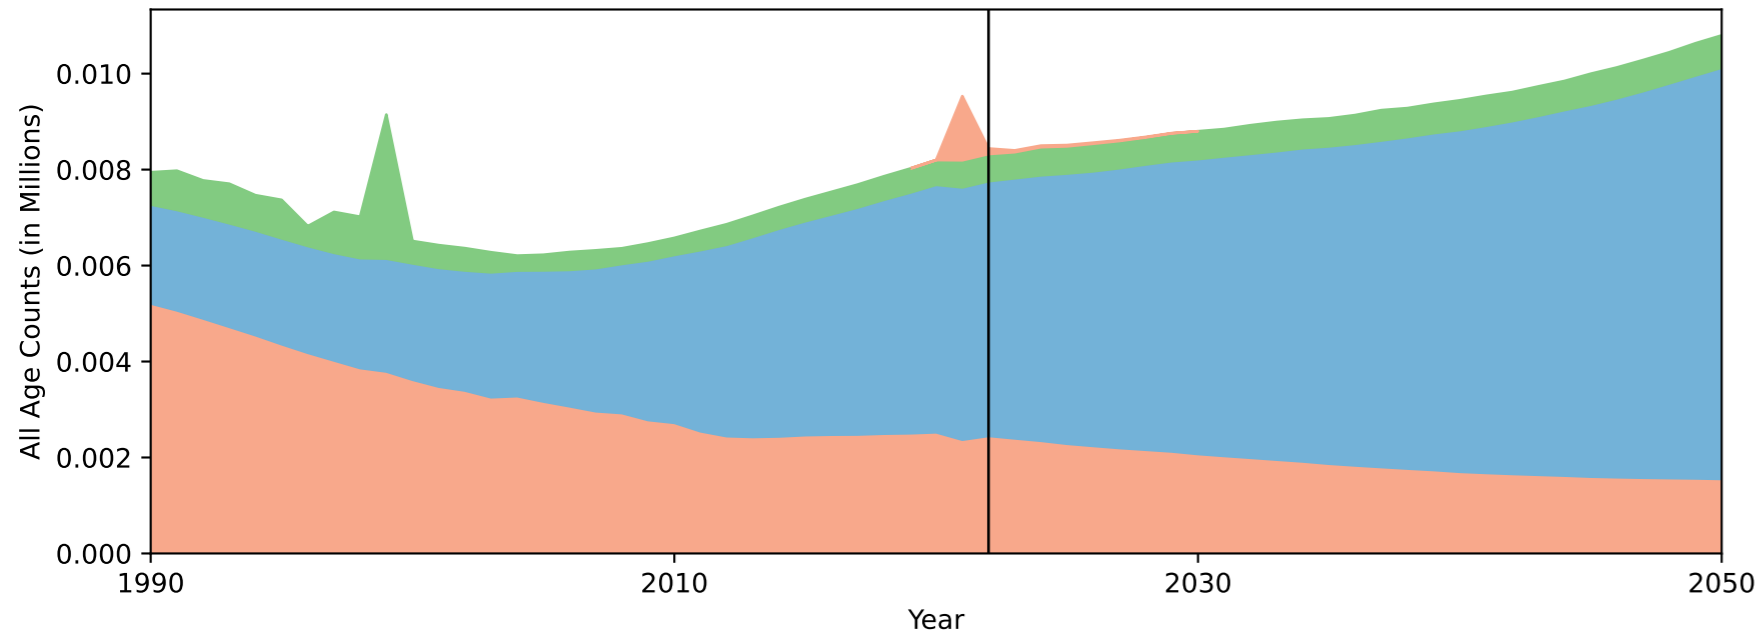

Level 2

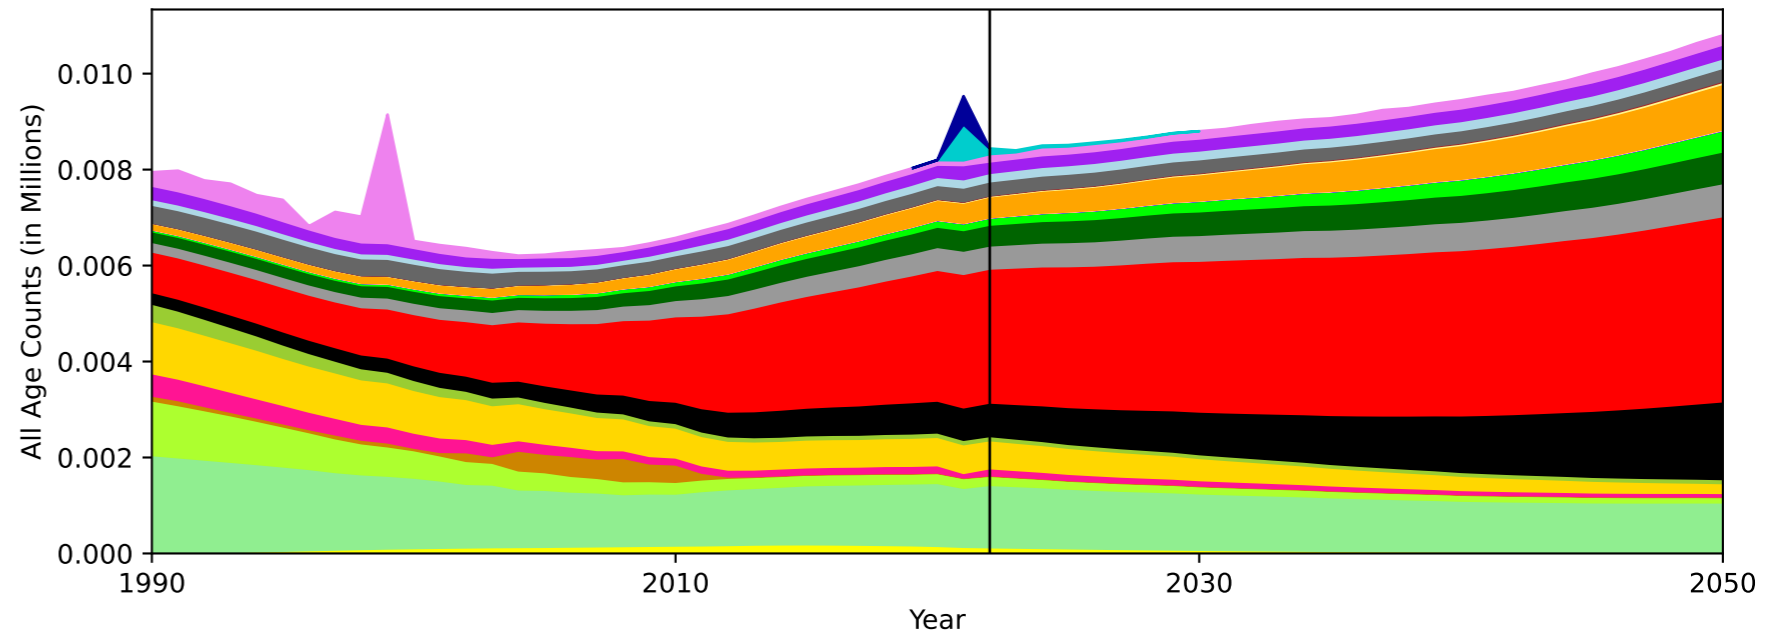

# Viet Nam

Level 1

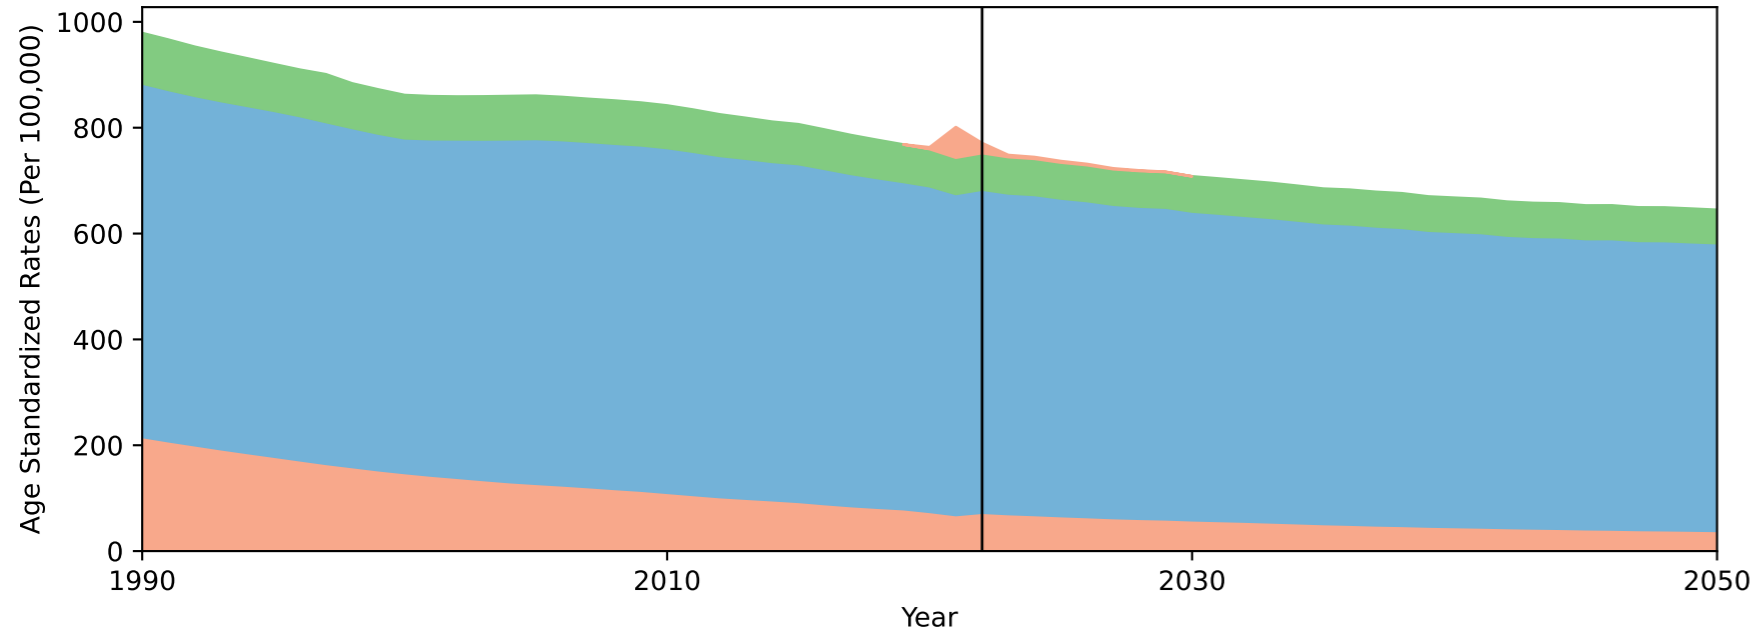

Level 2

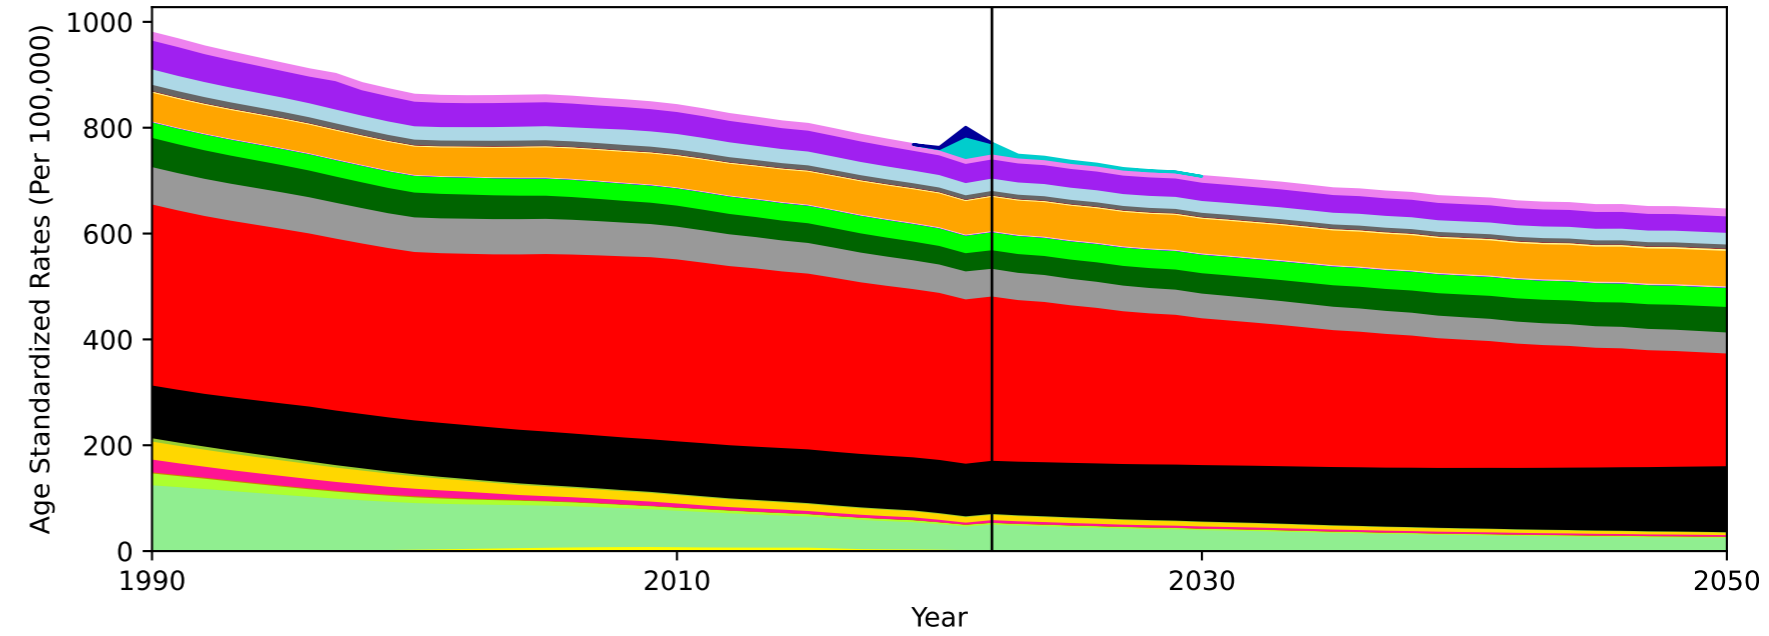

Level 1

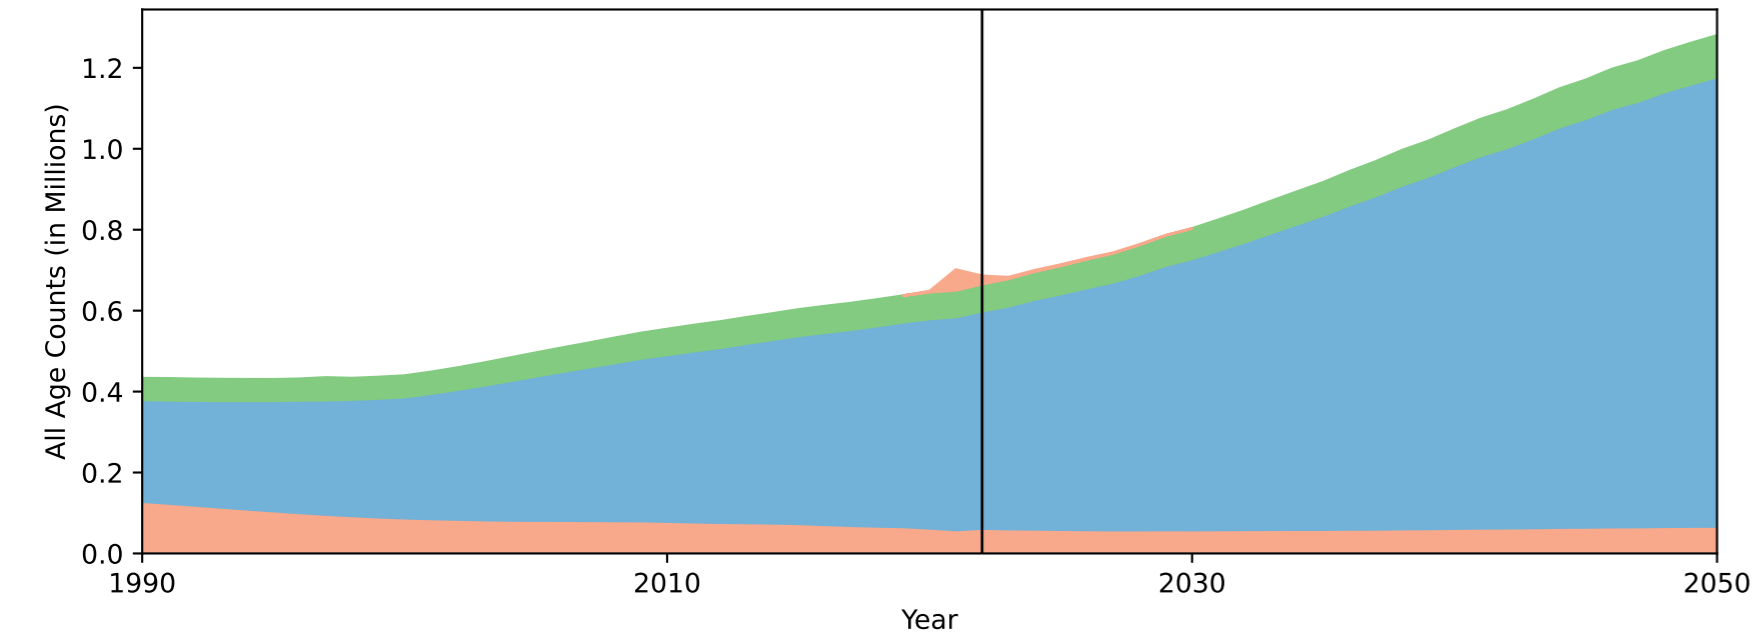

Level 2

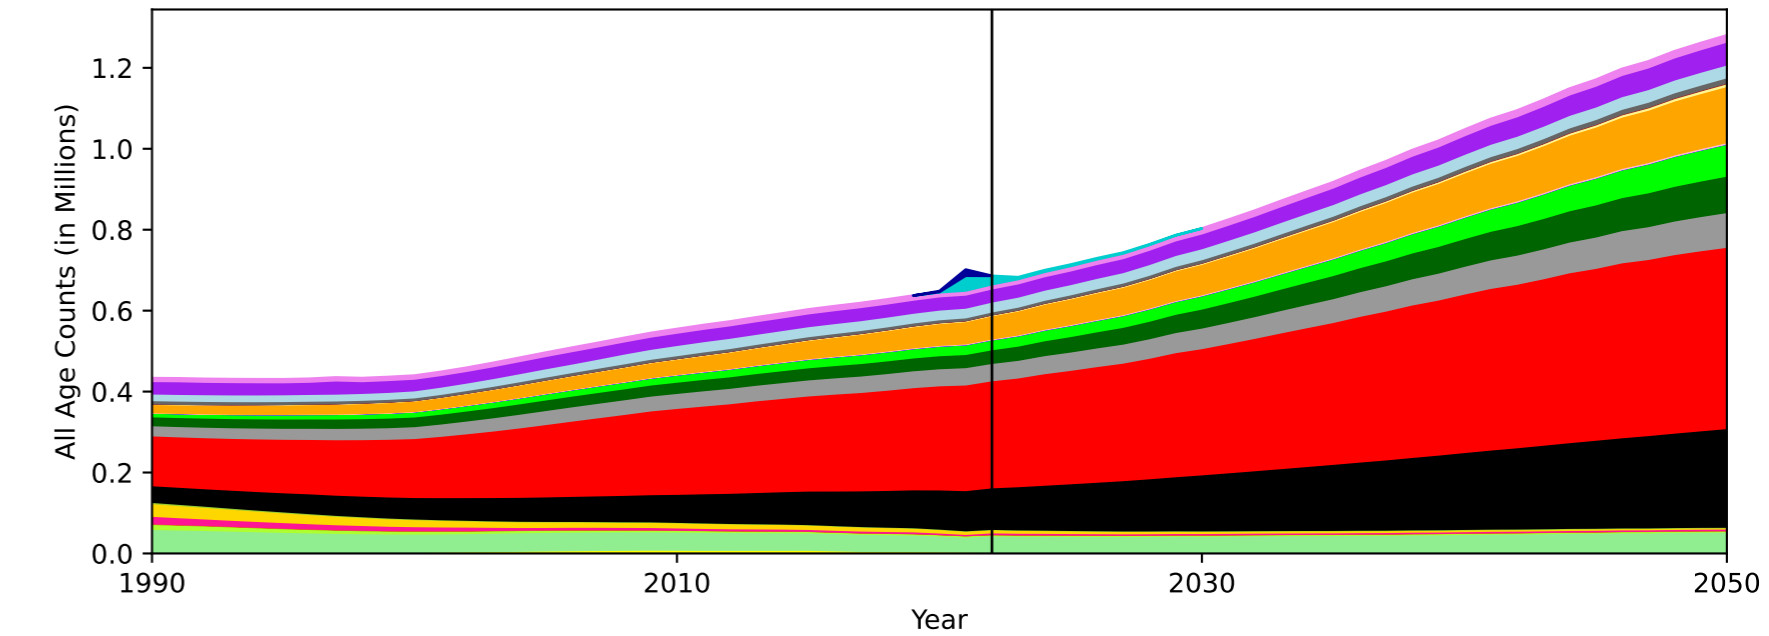

# Angola

Level 1

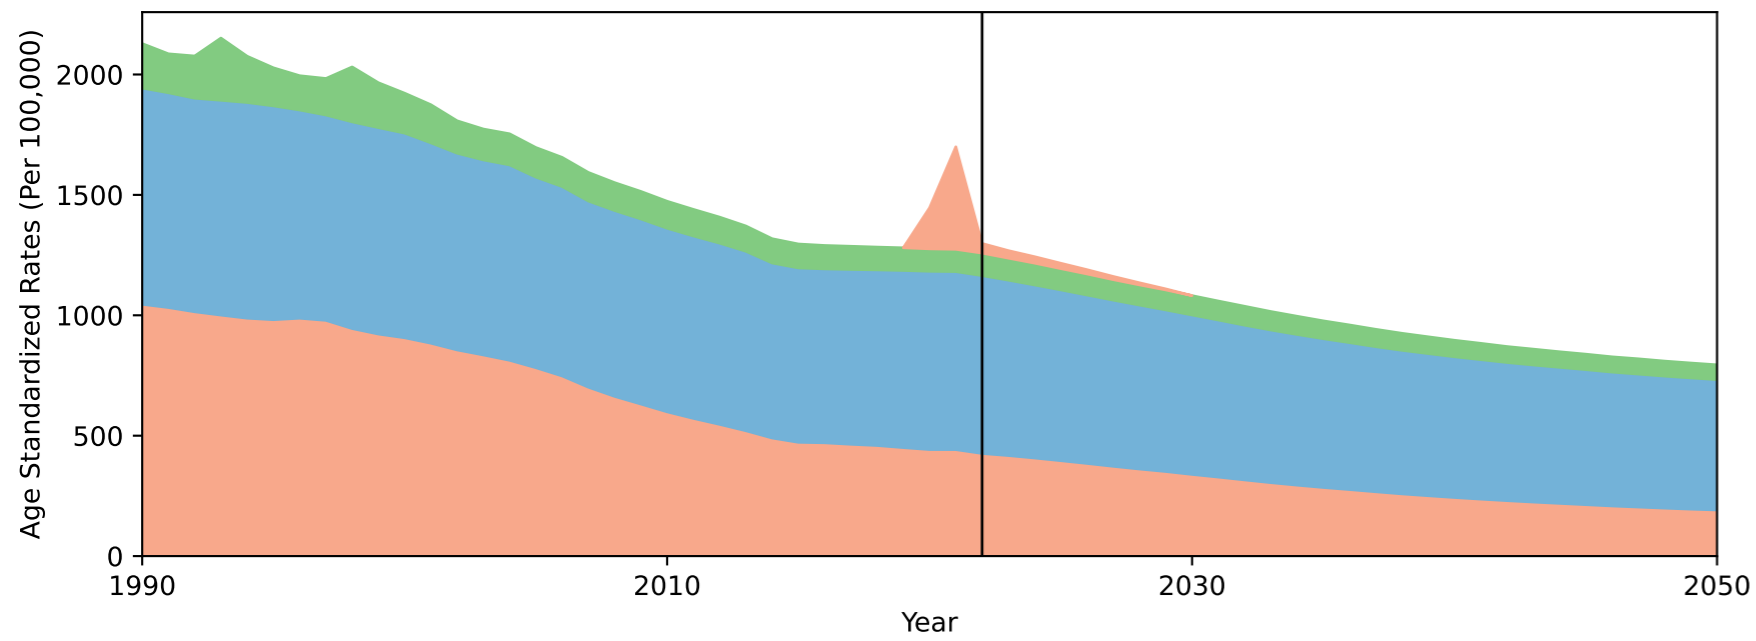

Level 2

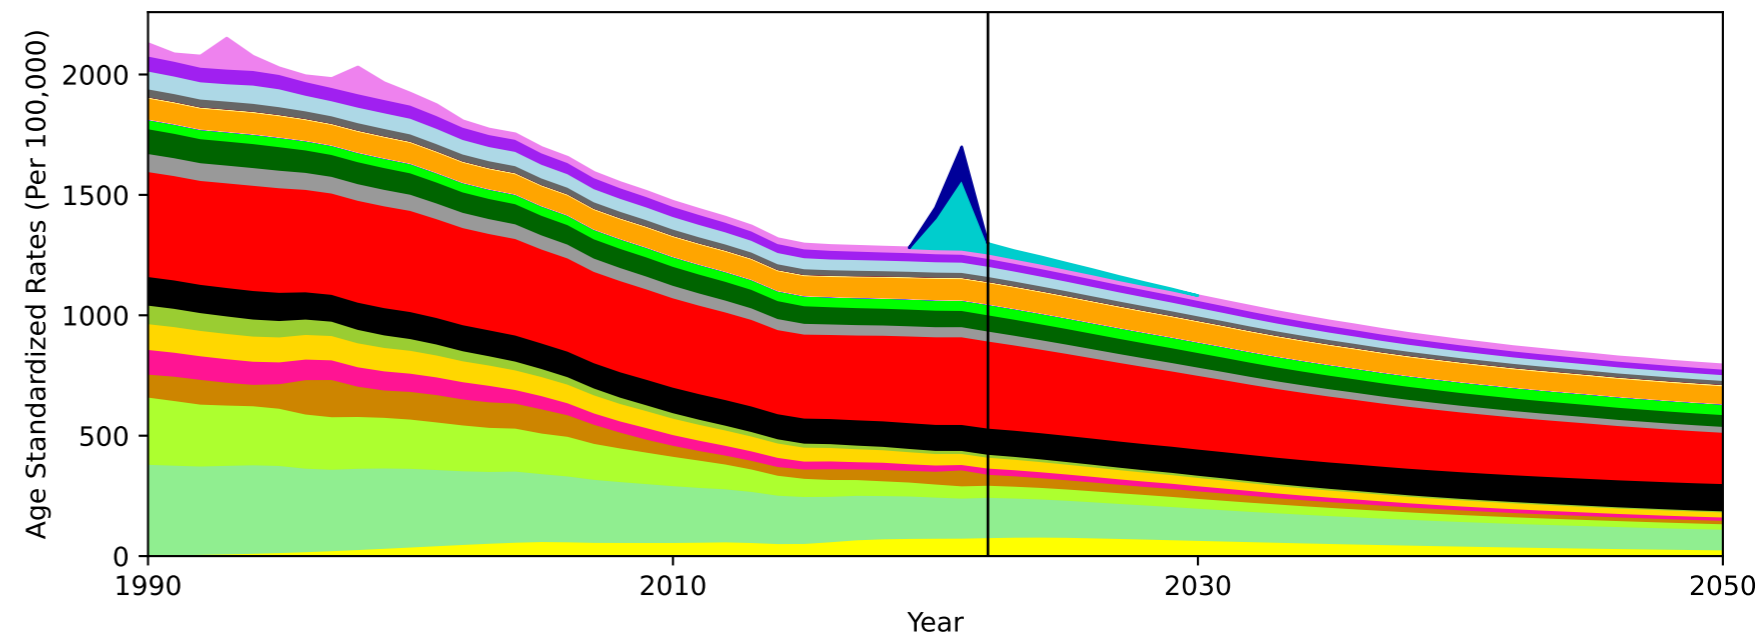

Level 1

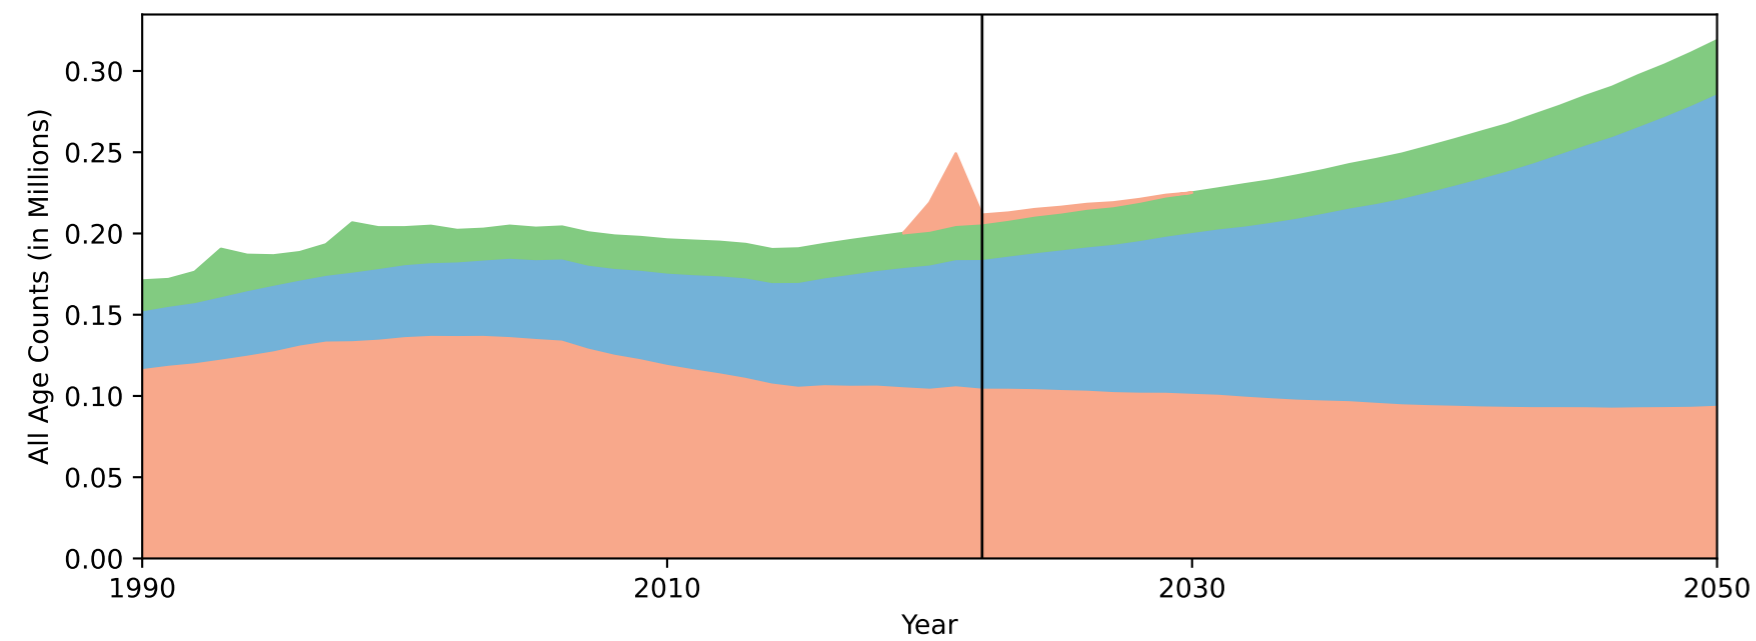

Level 2

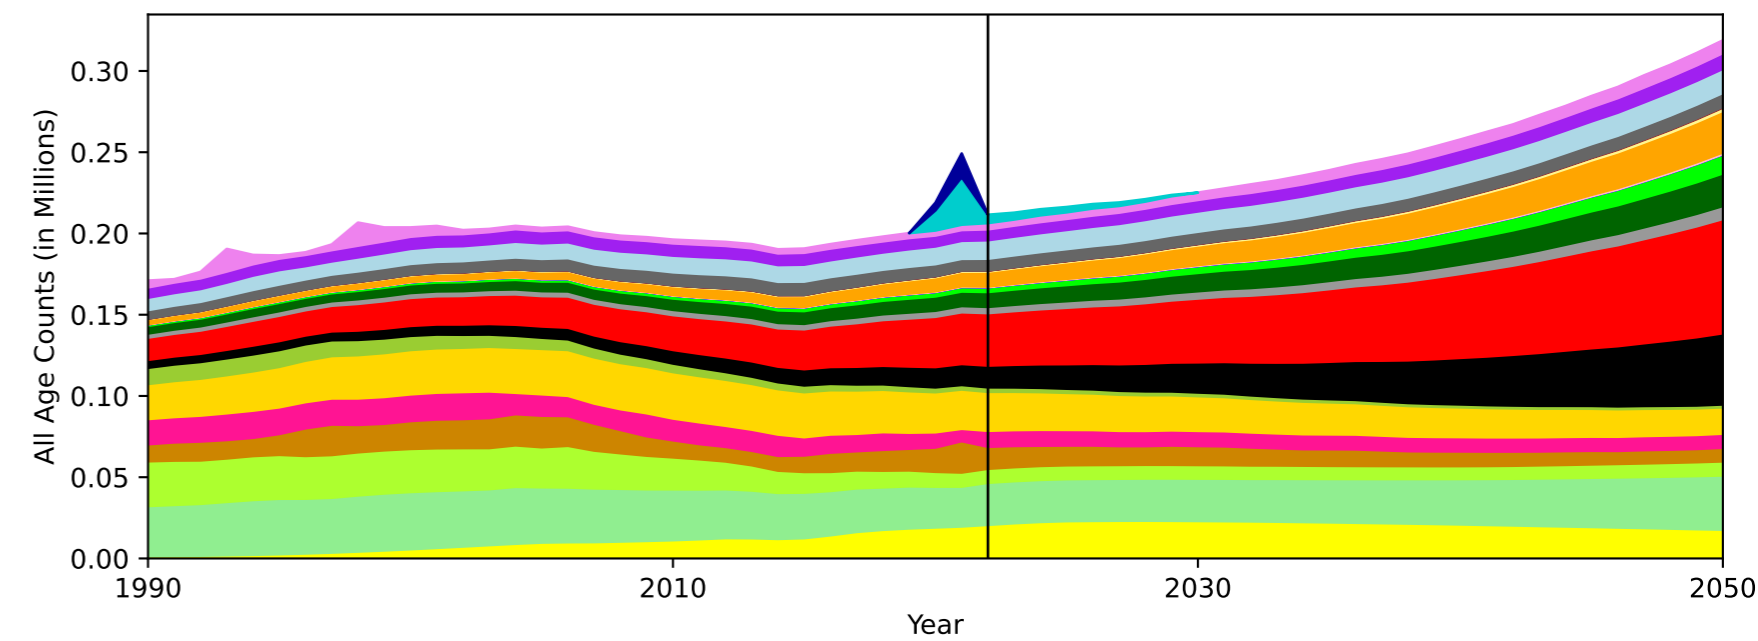

# Central African Republic

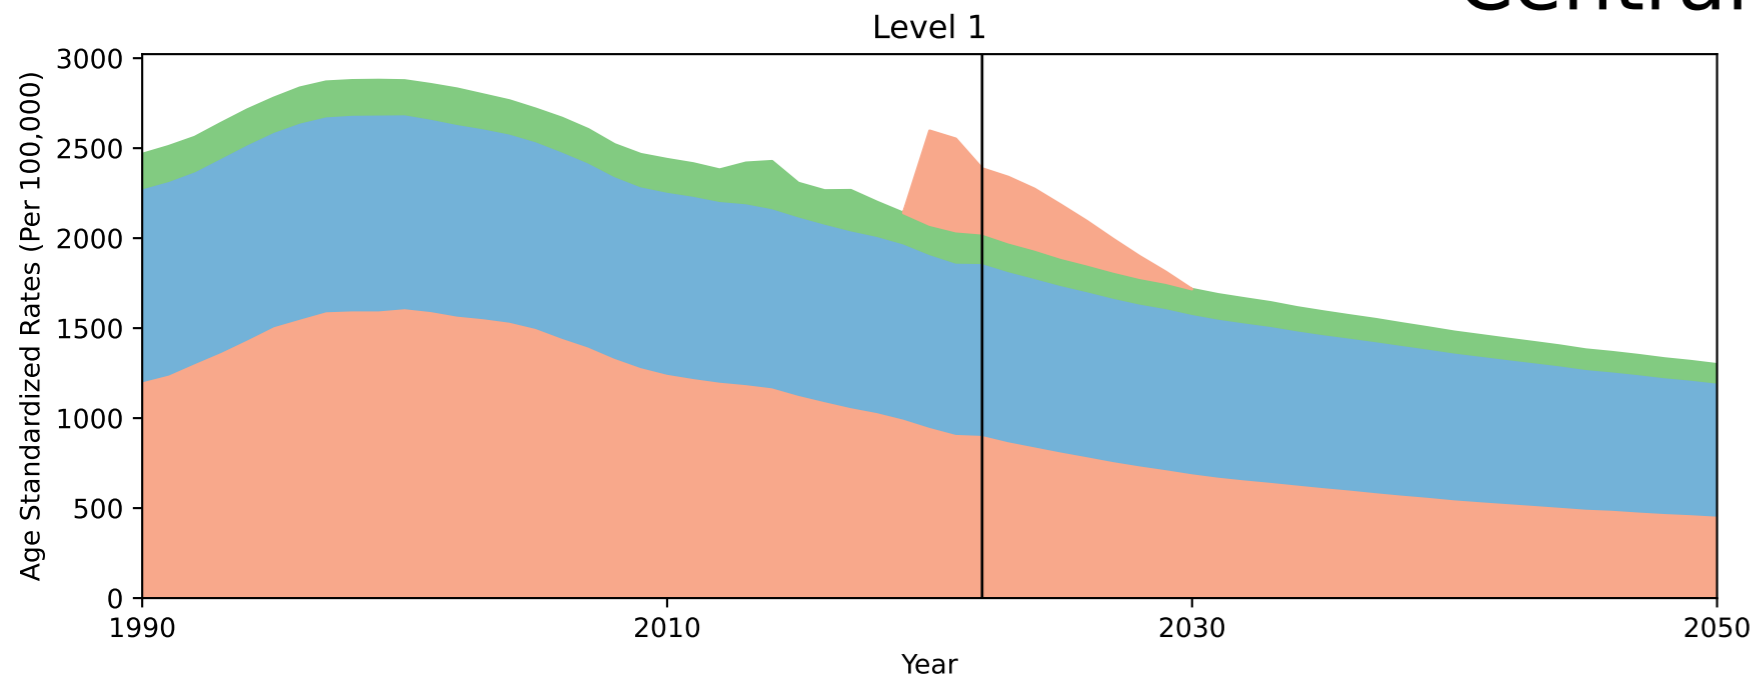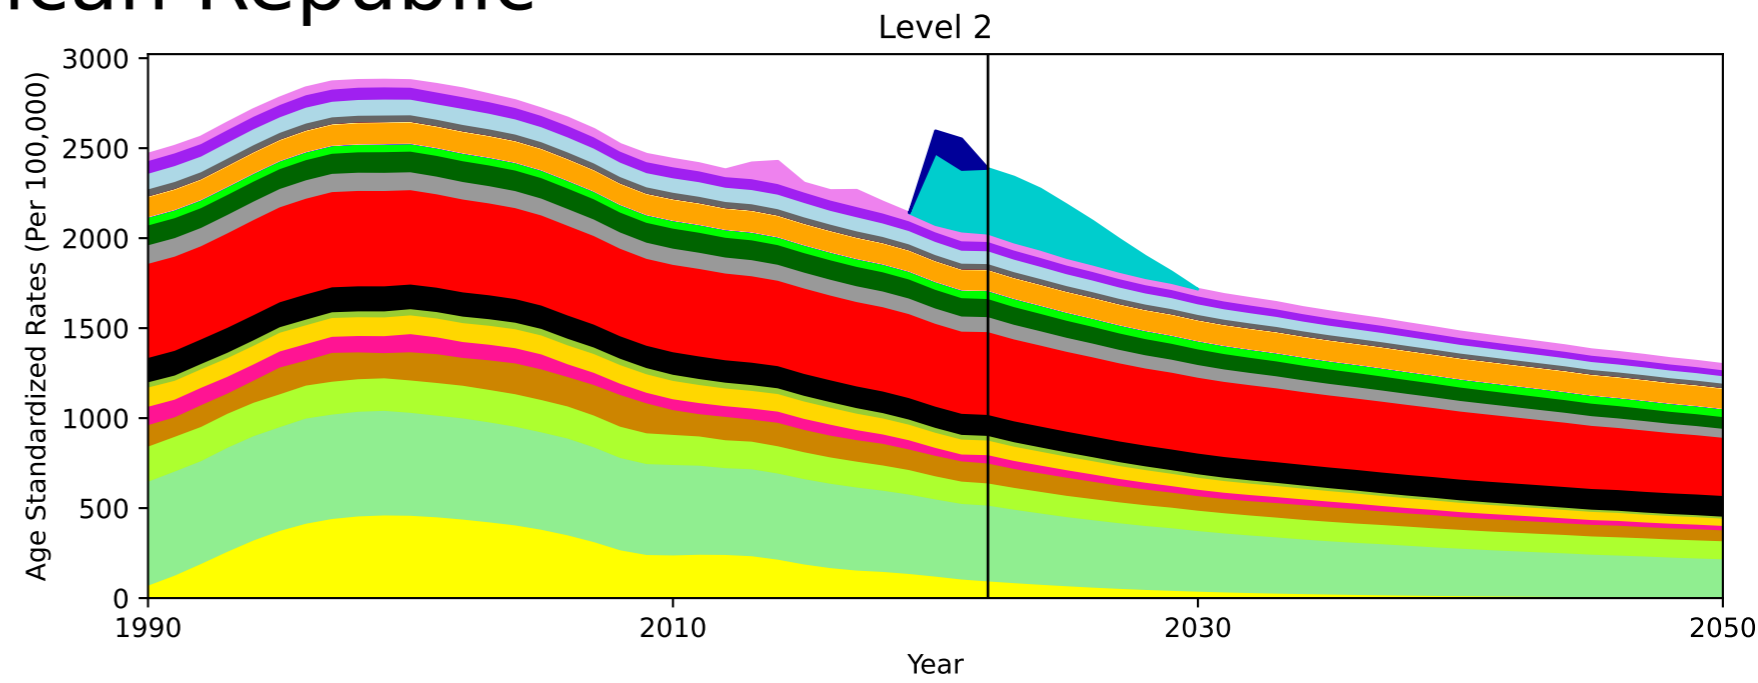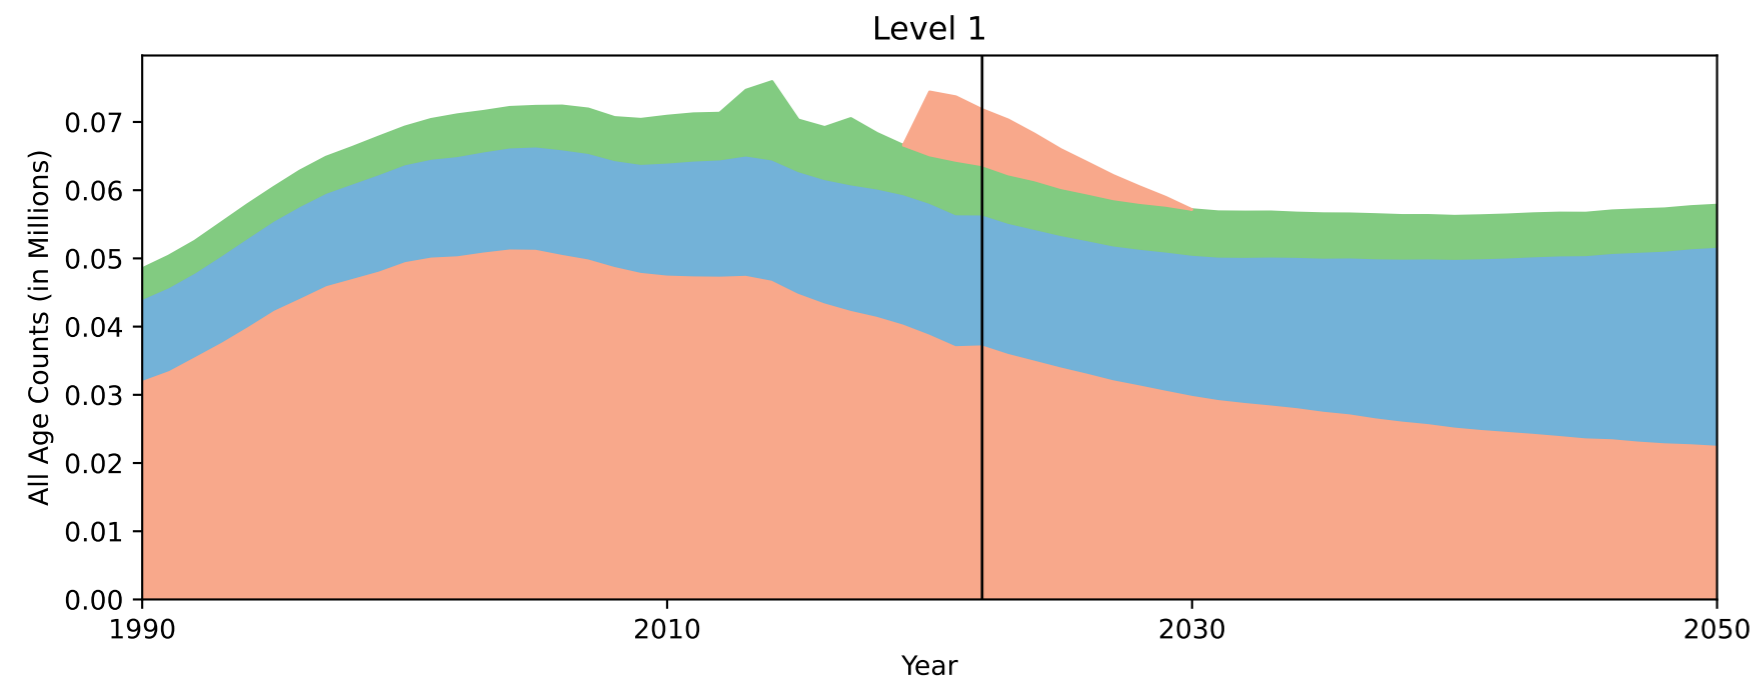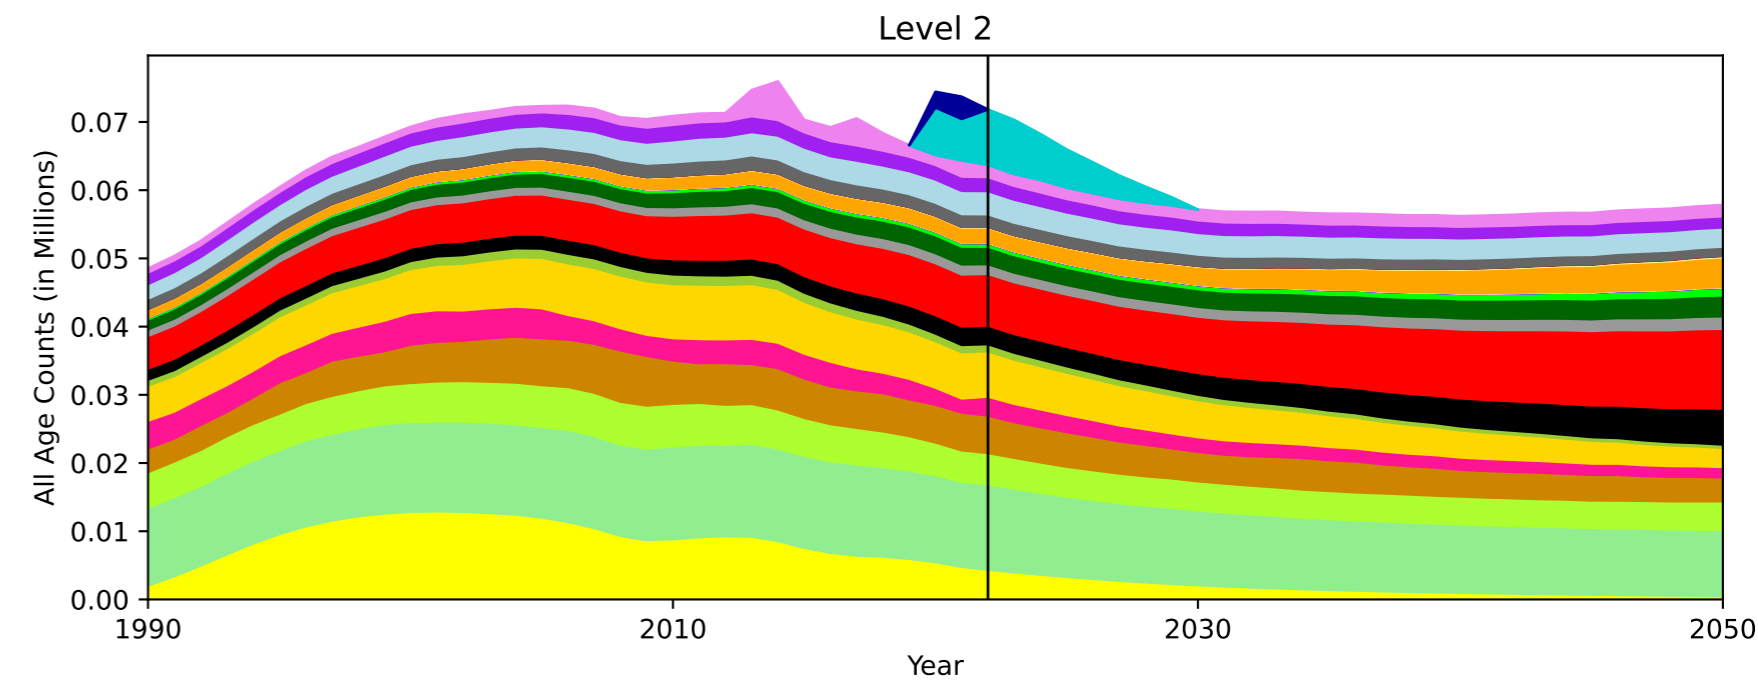

# Congo (Brazzaville)

Supplemental Results Figure S5. Age-standardised death rates and all age death counts and by Level 1 and Level 2 causes, 1990–2050

638

Level 1

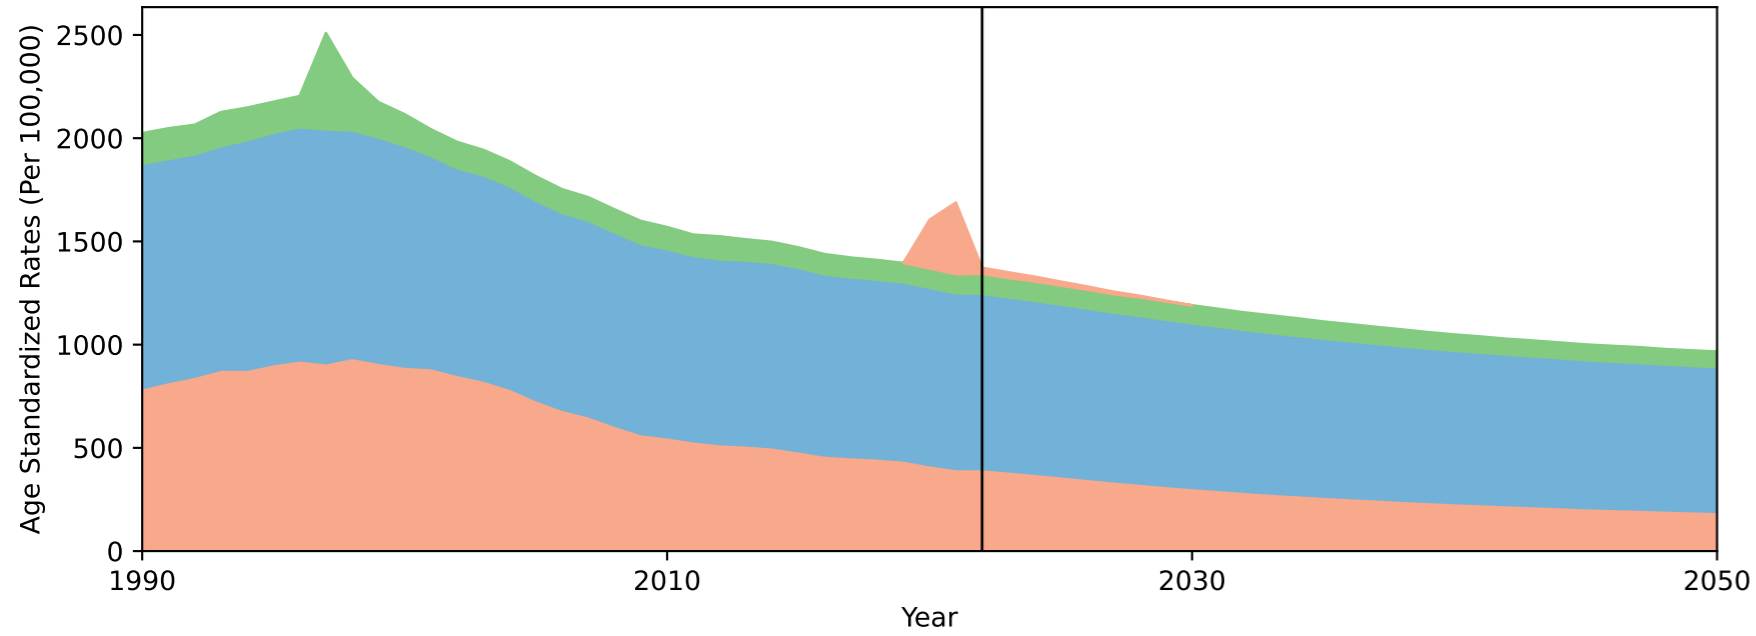

Level 2

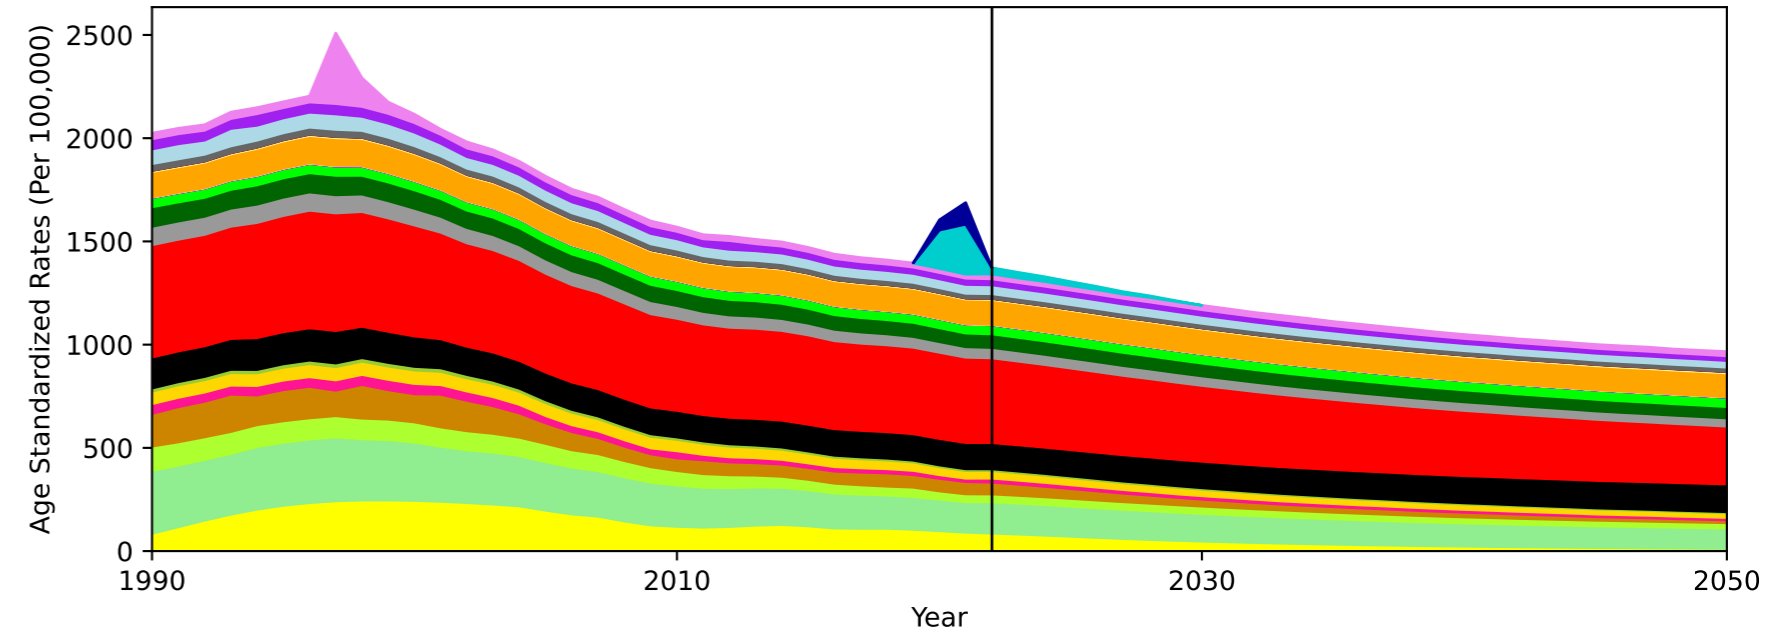

Level 1

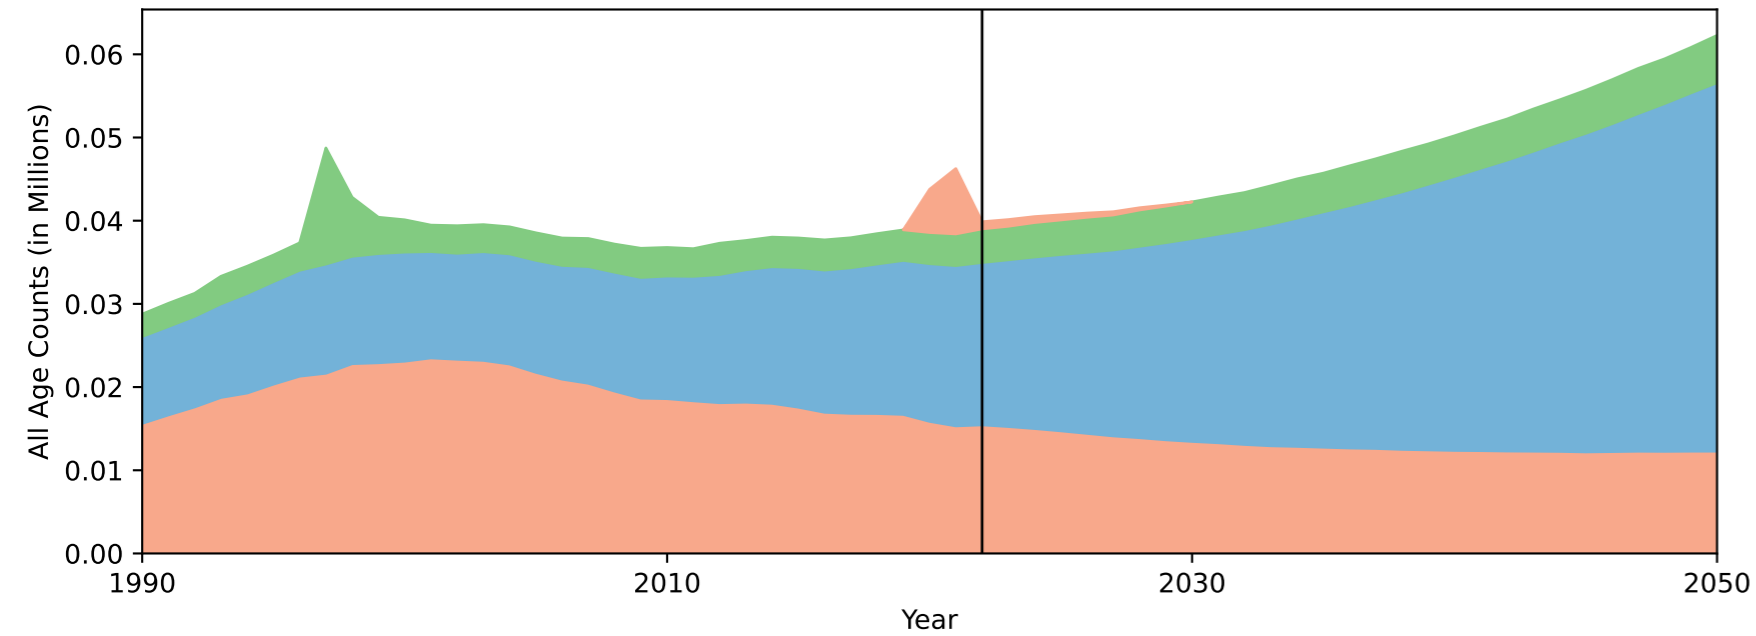

Level 2

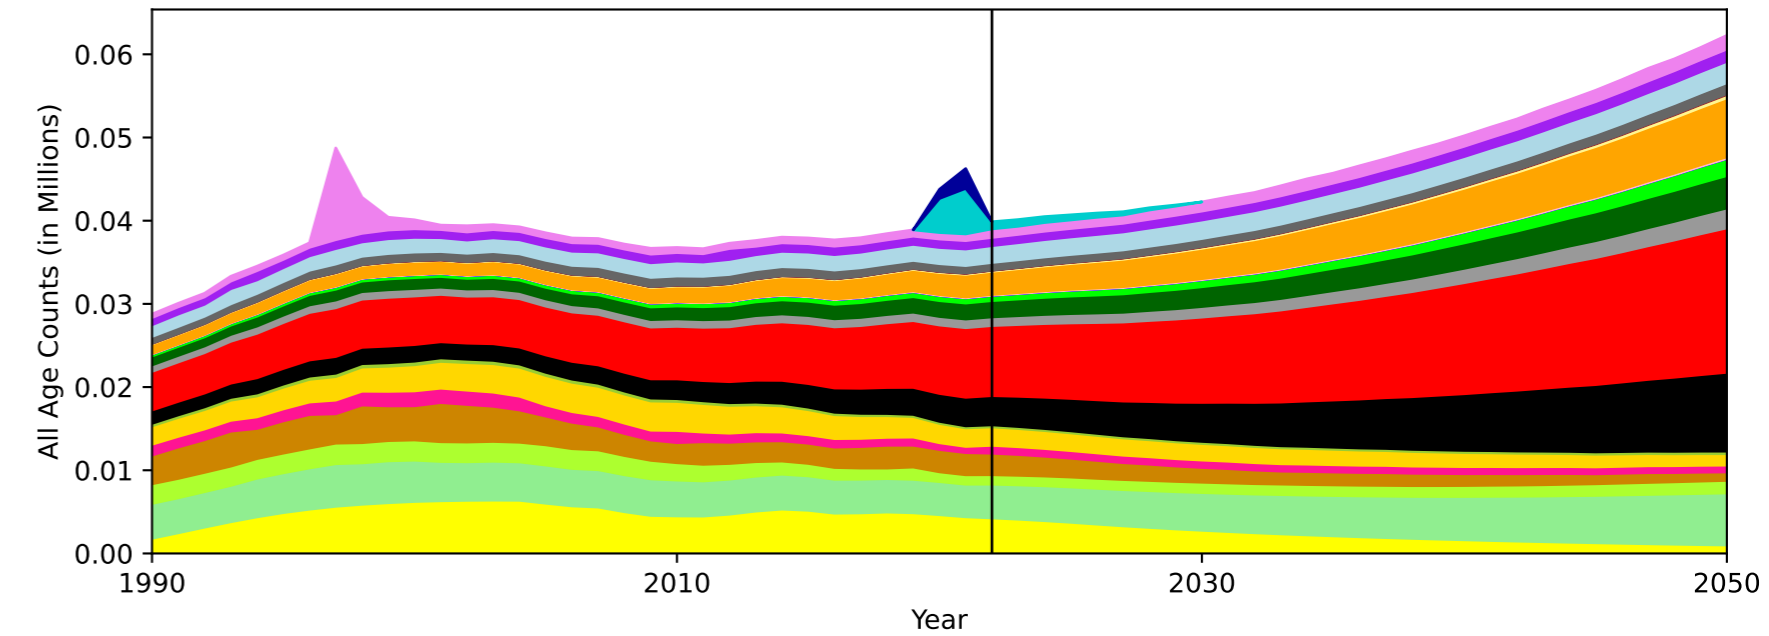

# DR Congo

Level 1

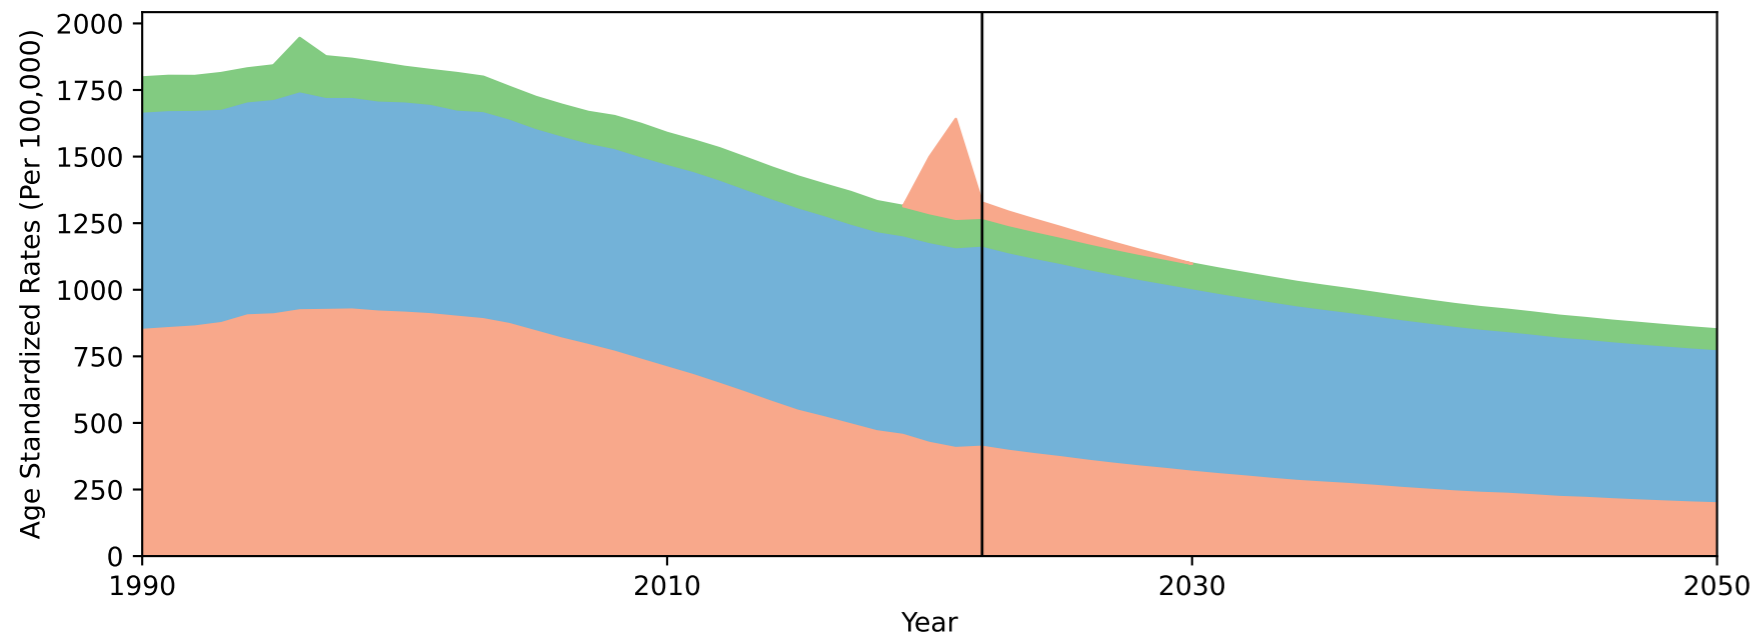

Level 2

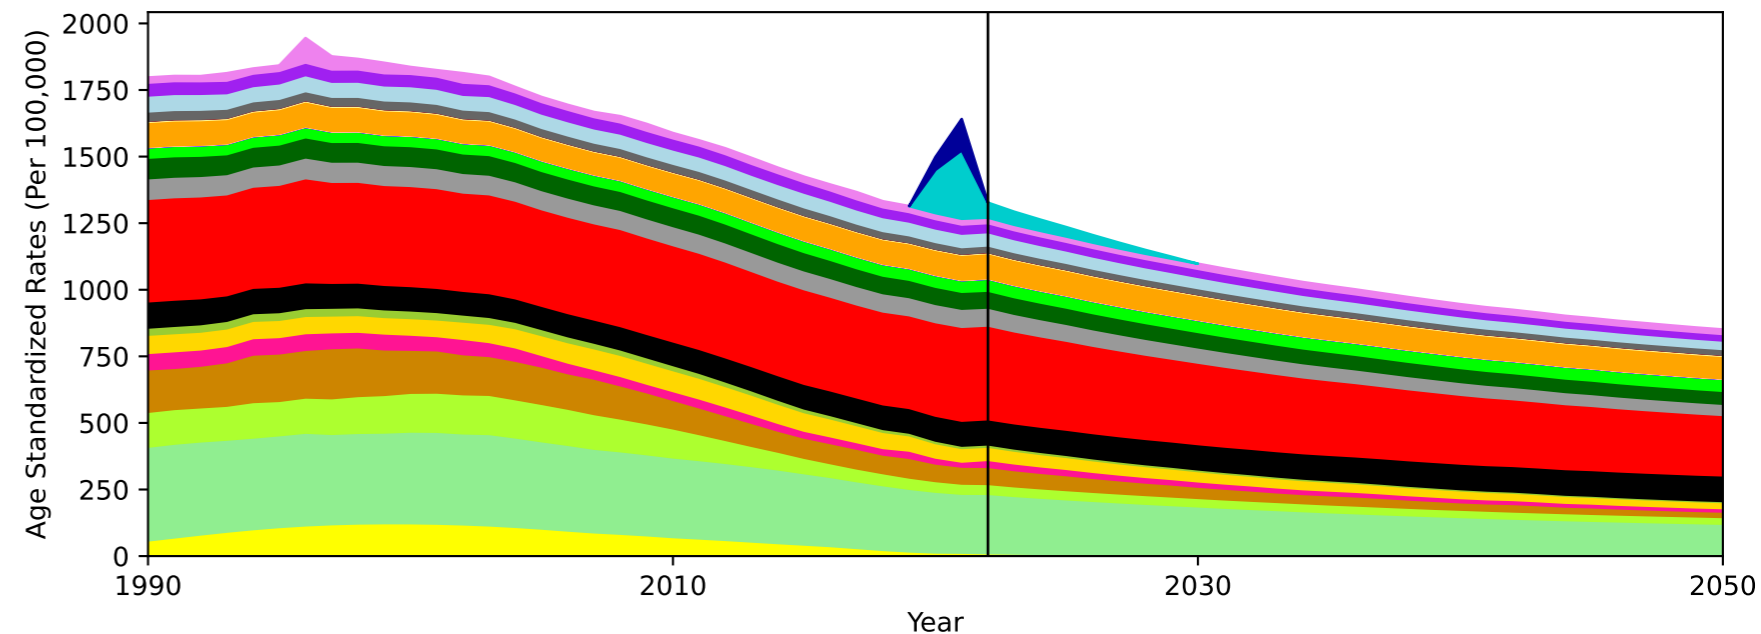

Level 1

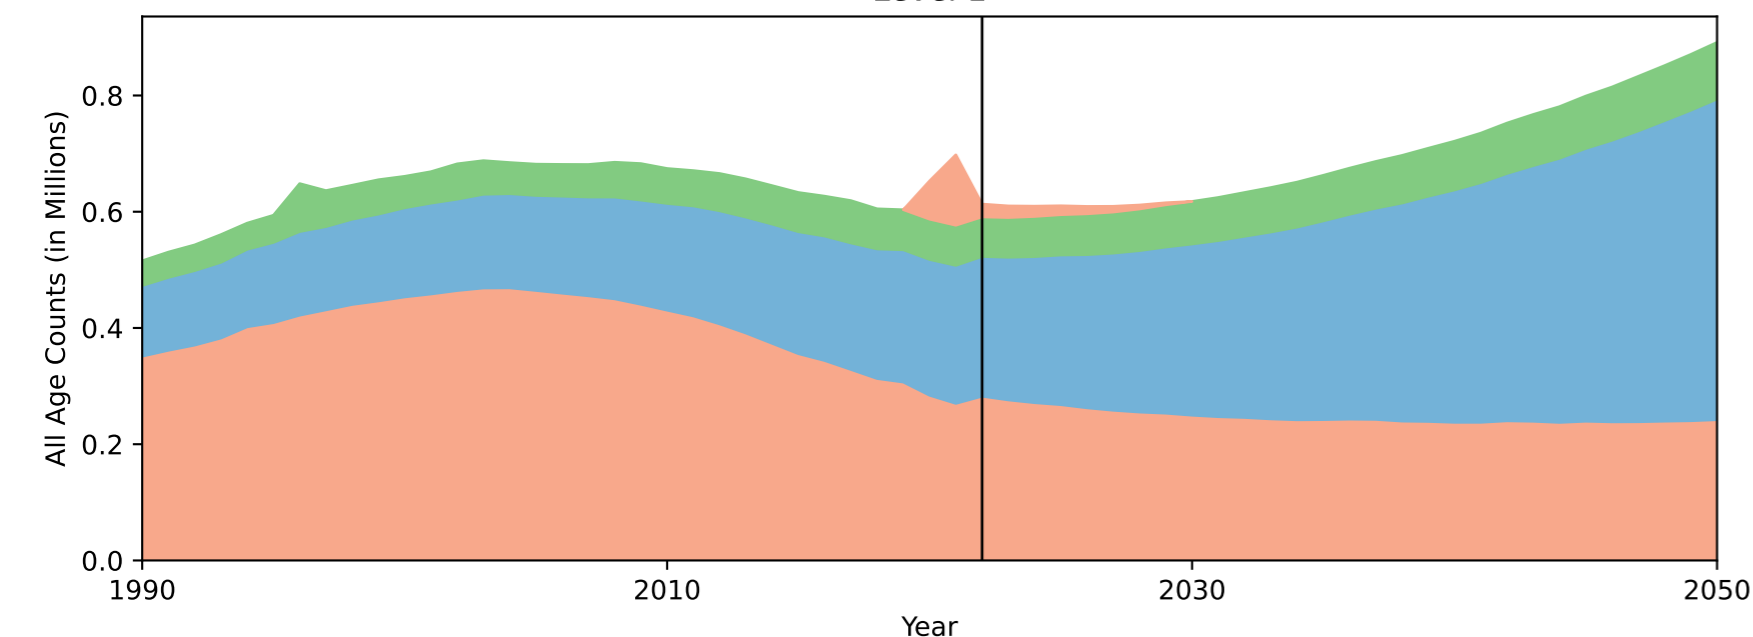

Level 2

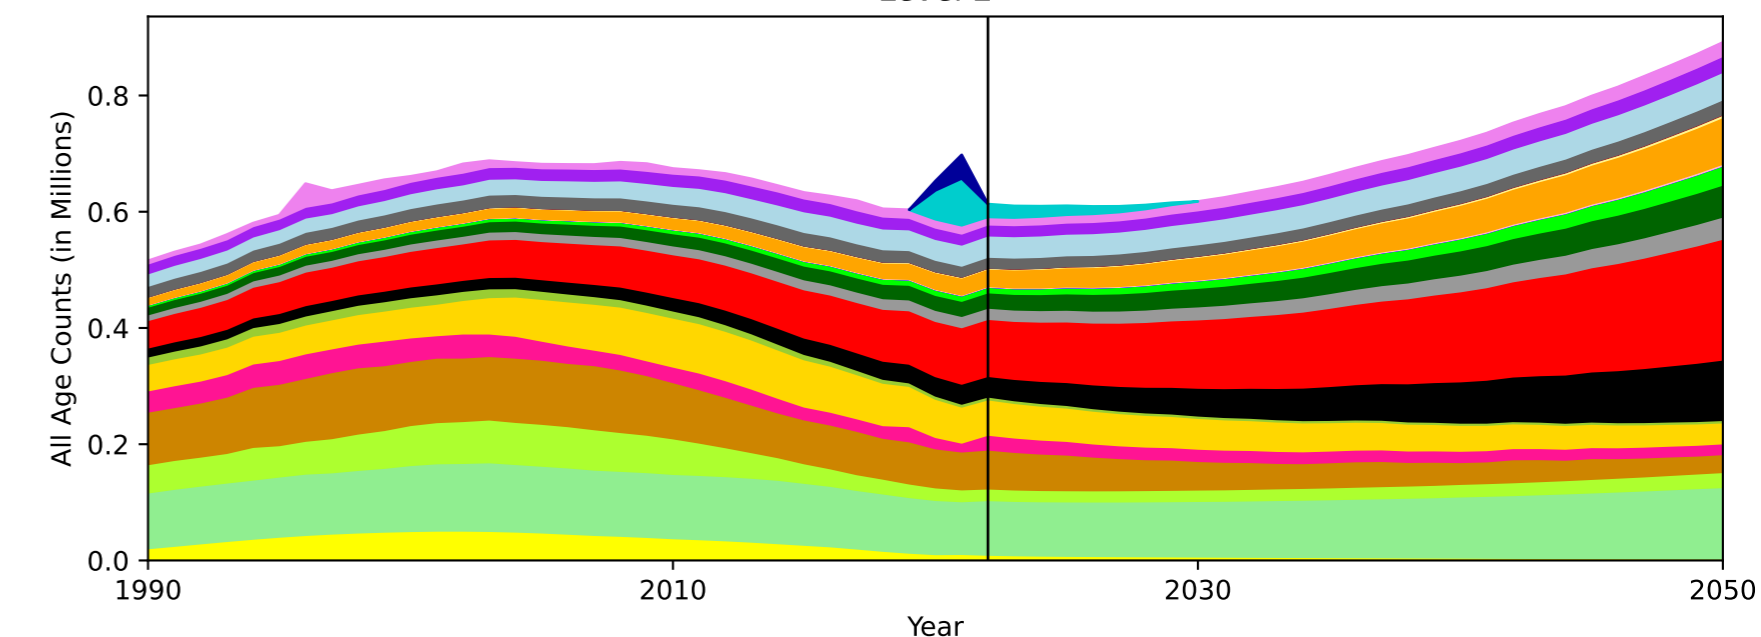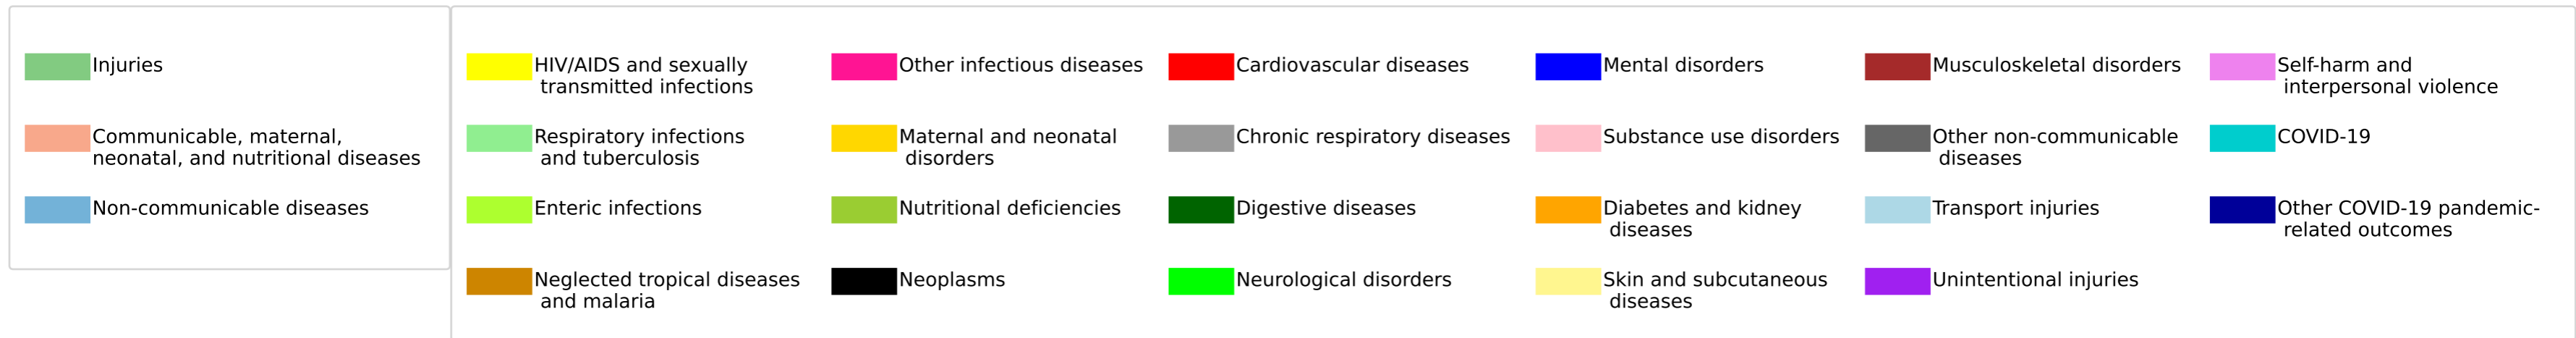



# Equatorial Guinea

Supplemental Results Figure S5. Age-standardised death rates and all age death counts and by Level 1 and Level 2 causes, 1990–2050

640

Level 1

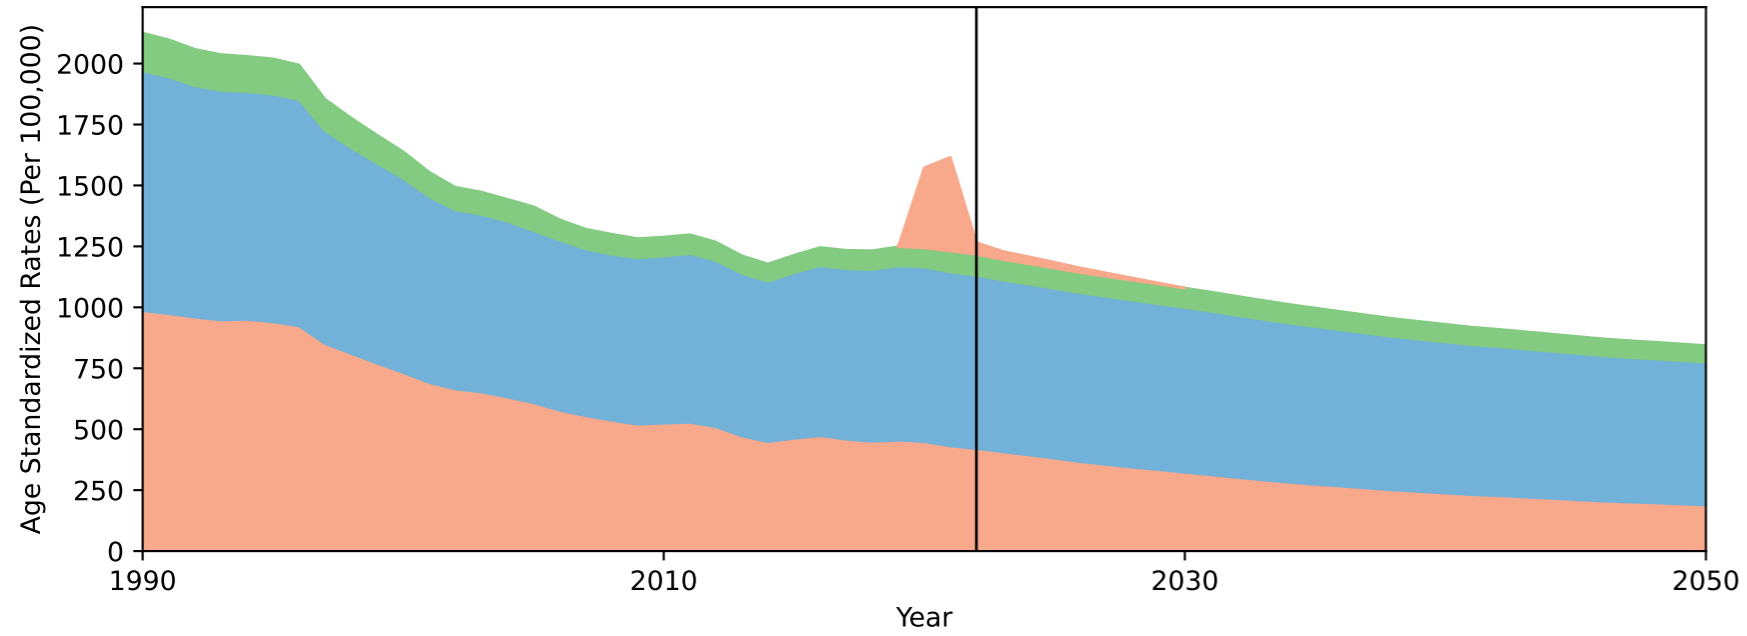

Level 2

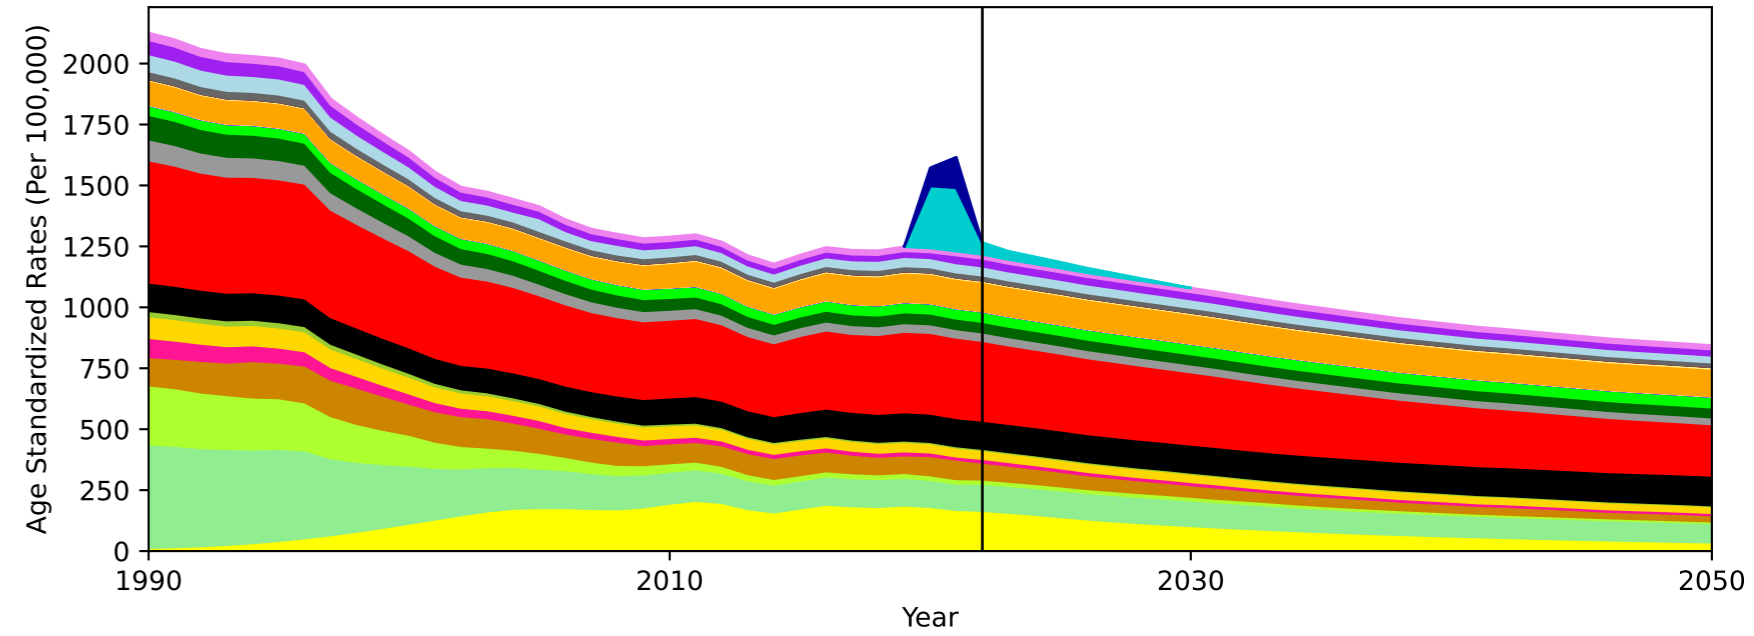

Level 1

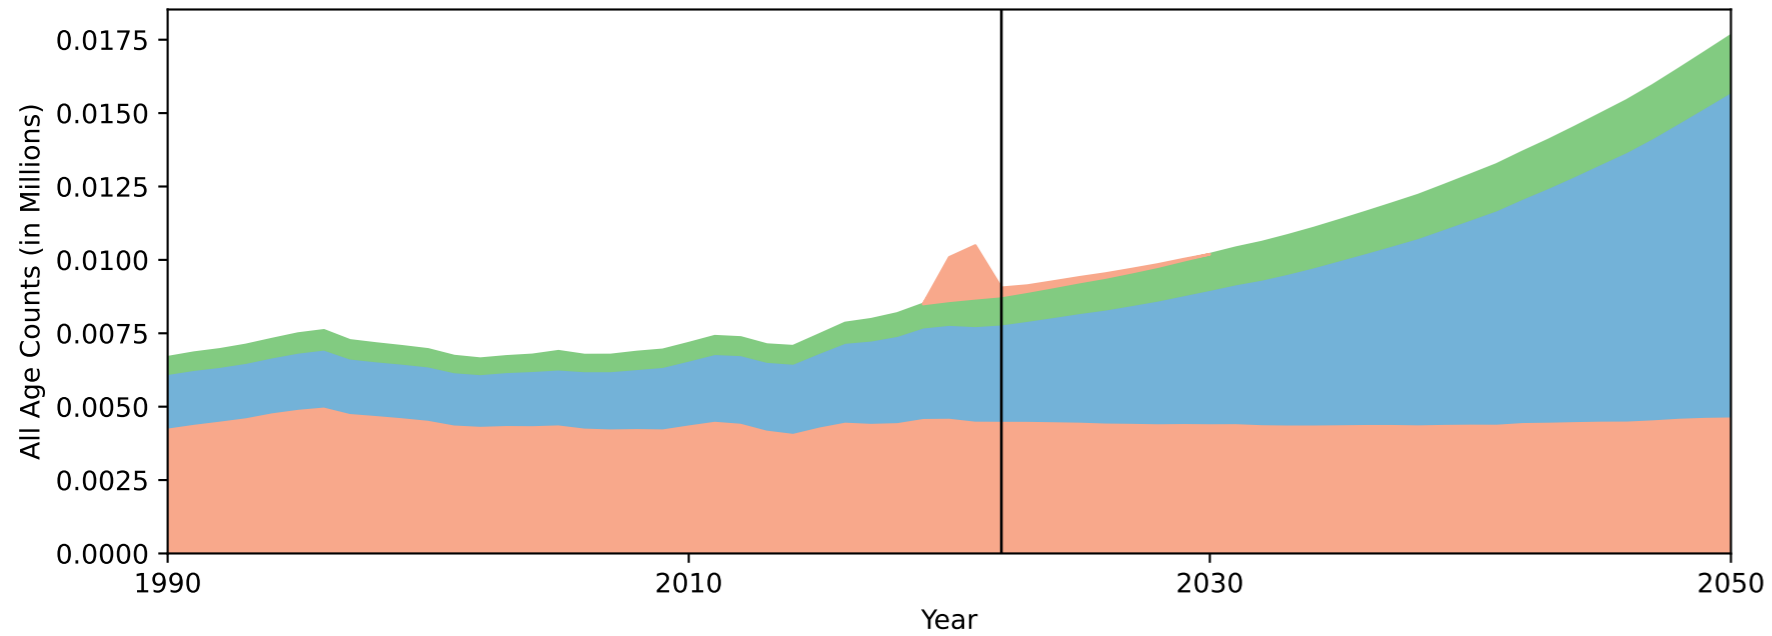

Level 2

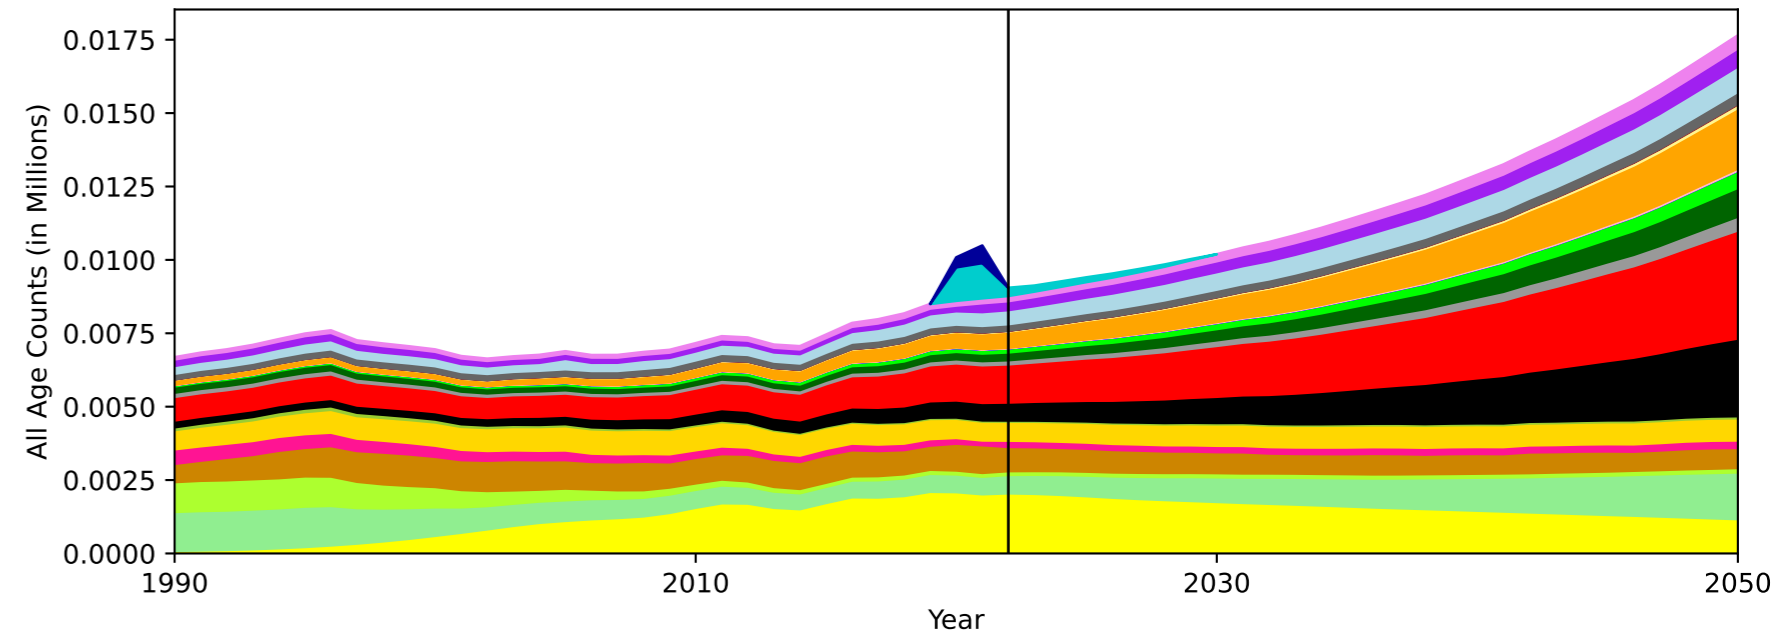

Level 1

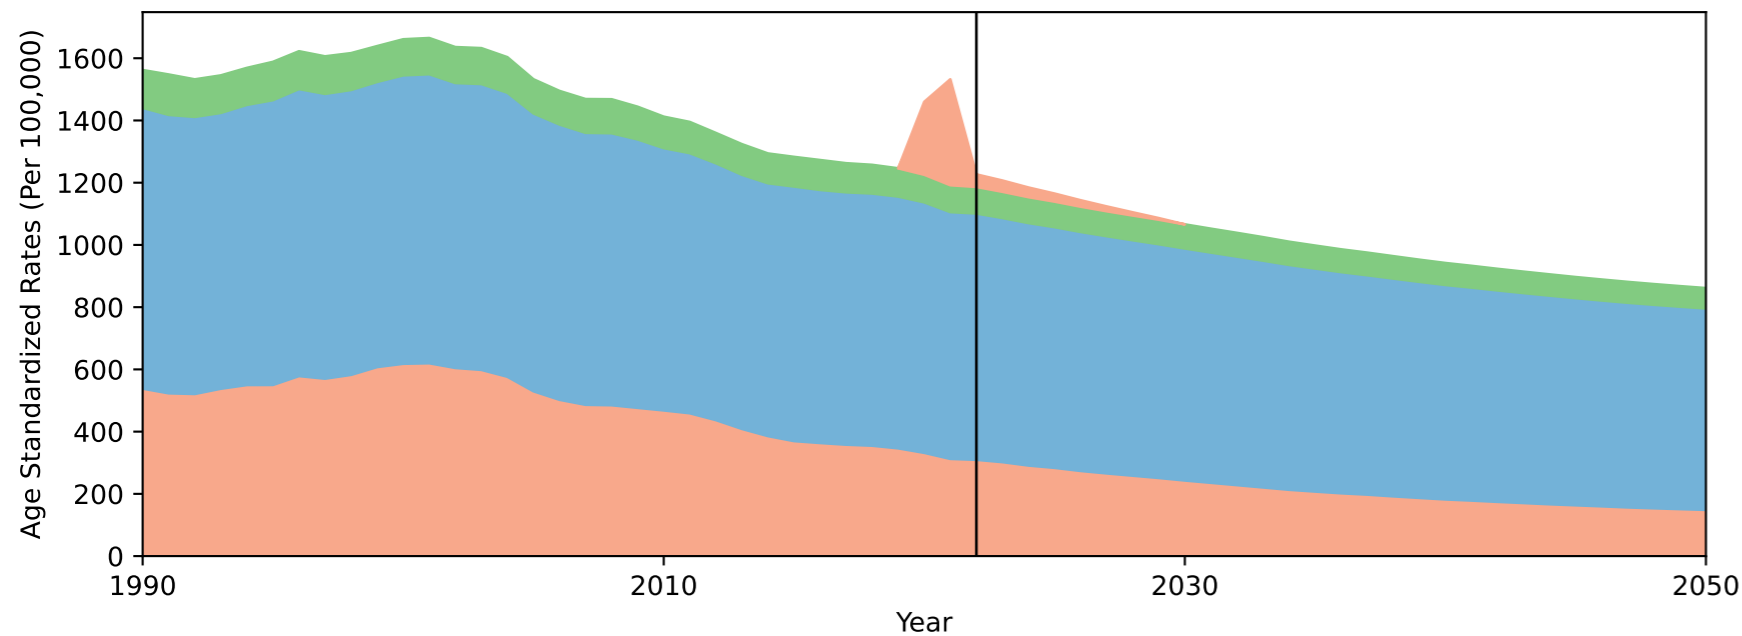

Level 2

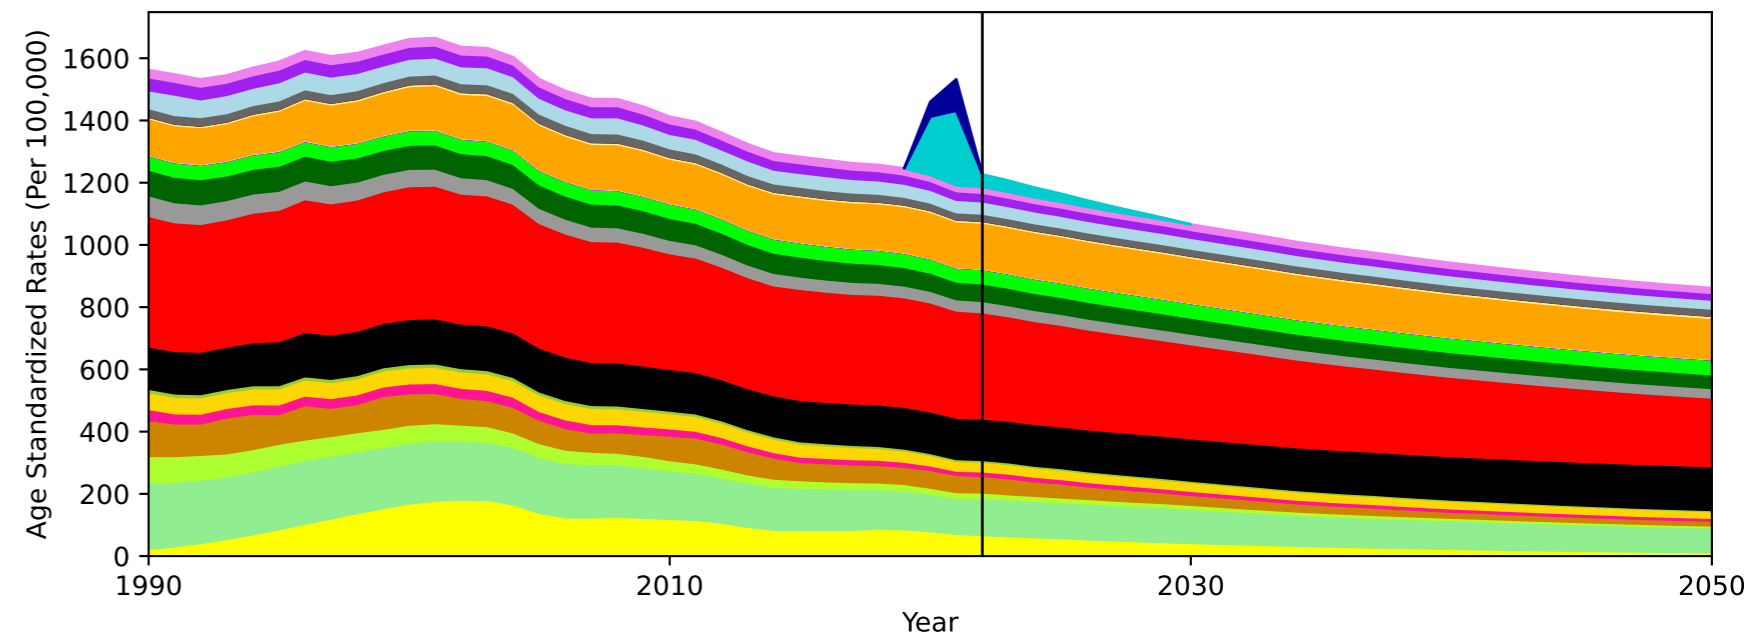

Level 1

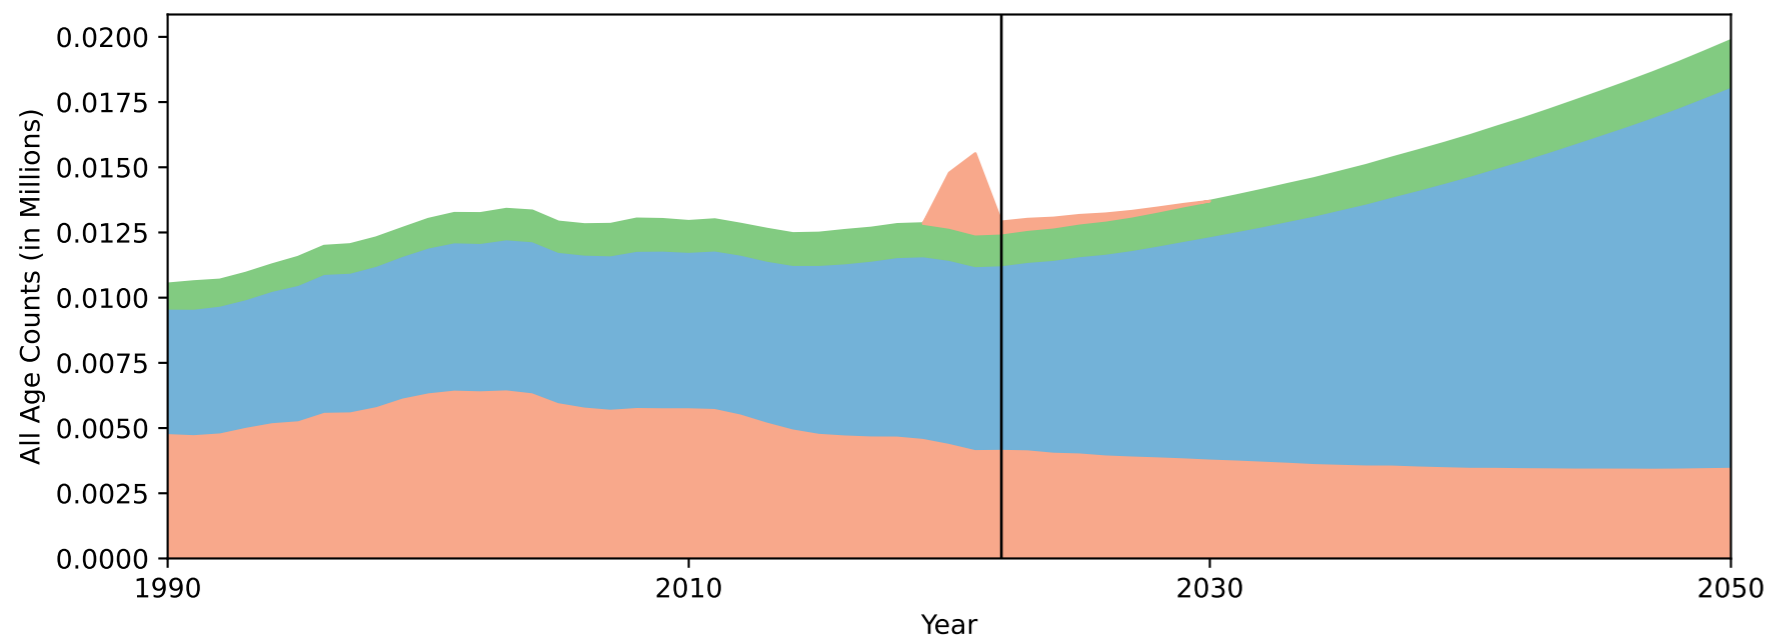

Level 2

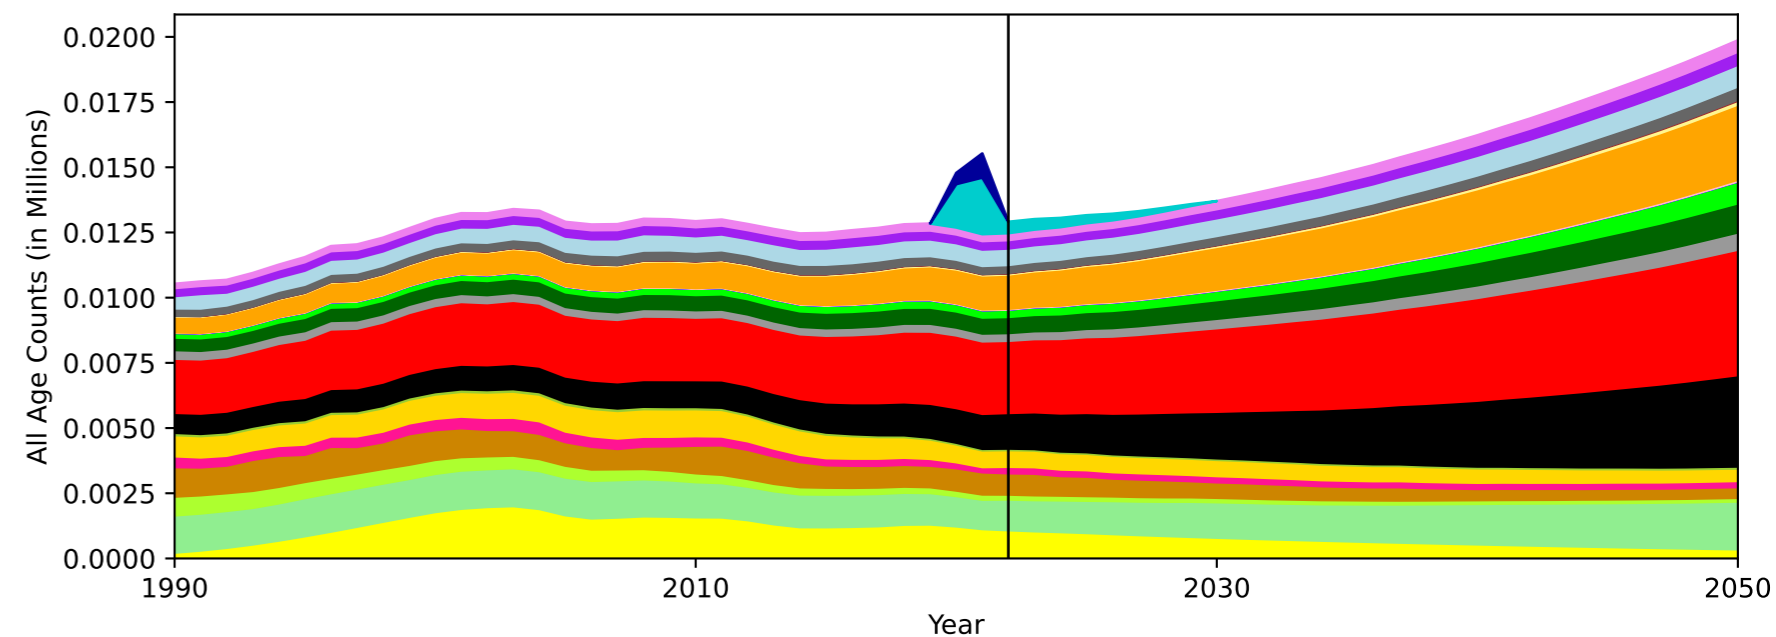

# Burundi

Level 1

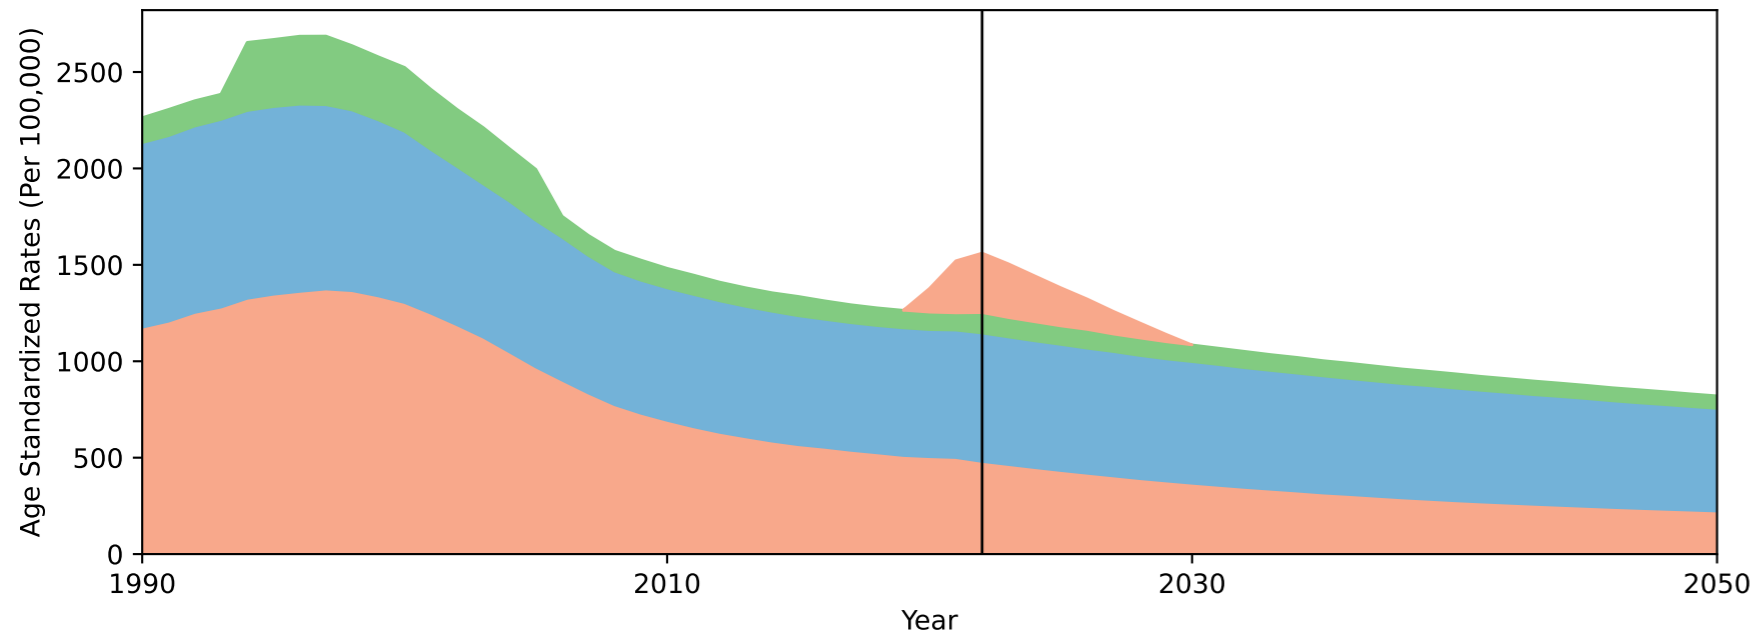

Level 2

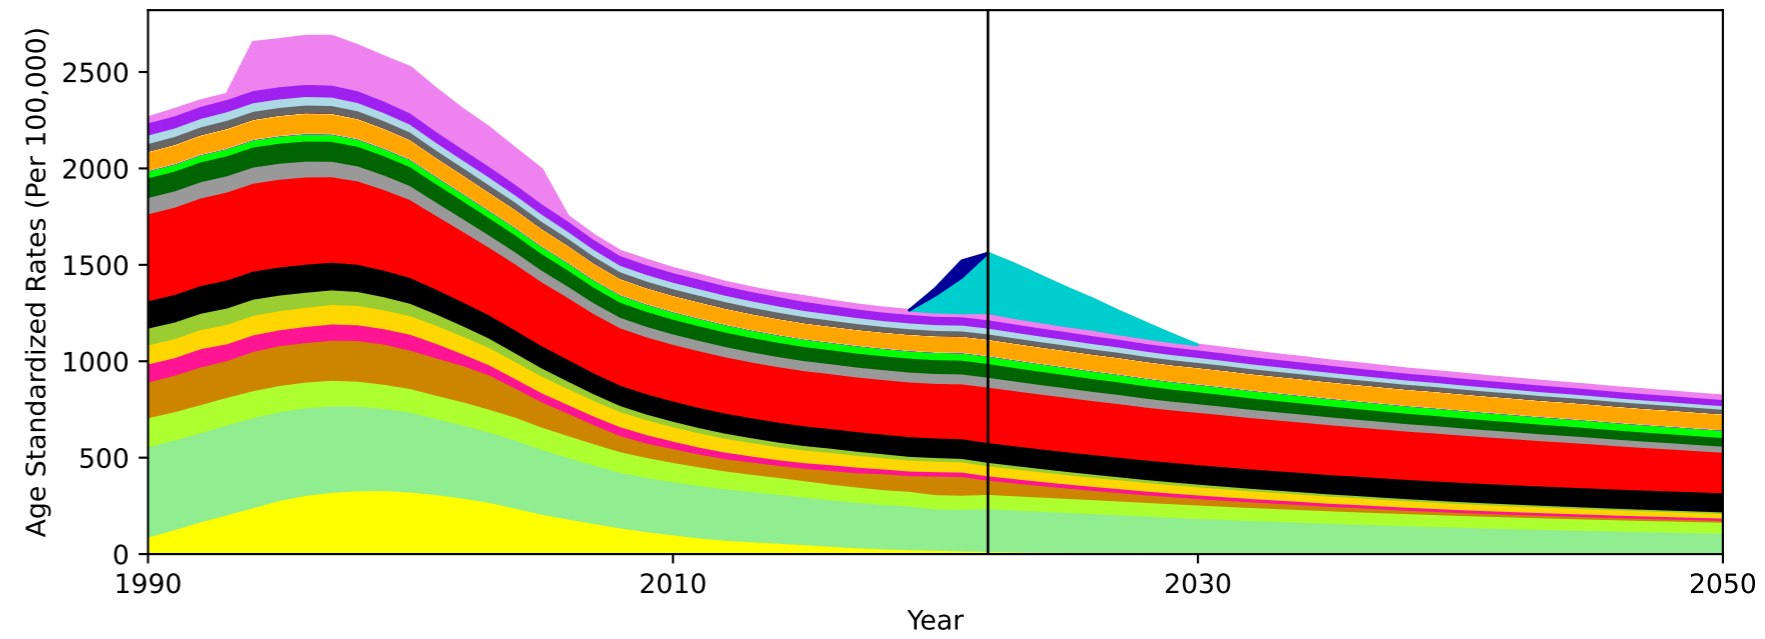

Level 1

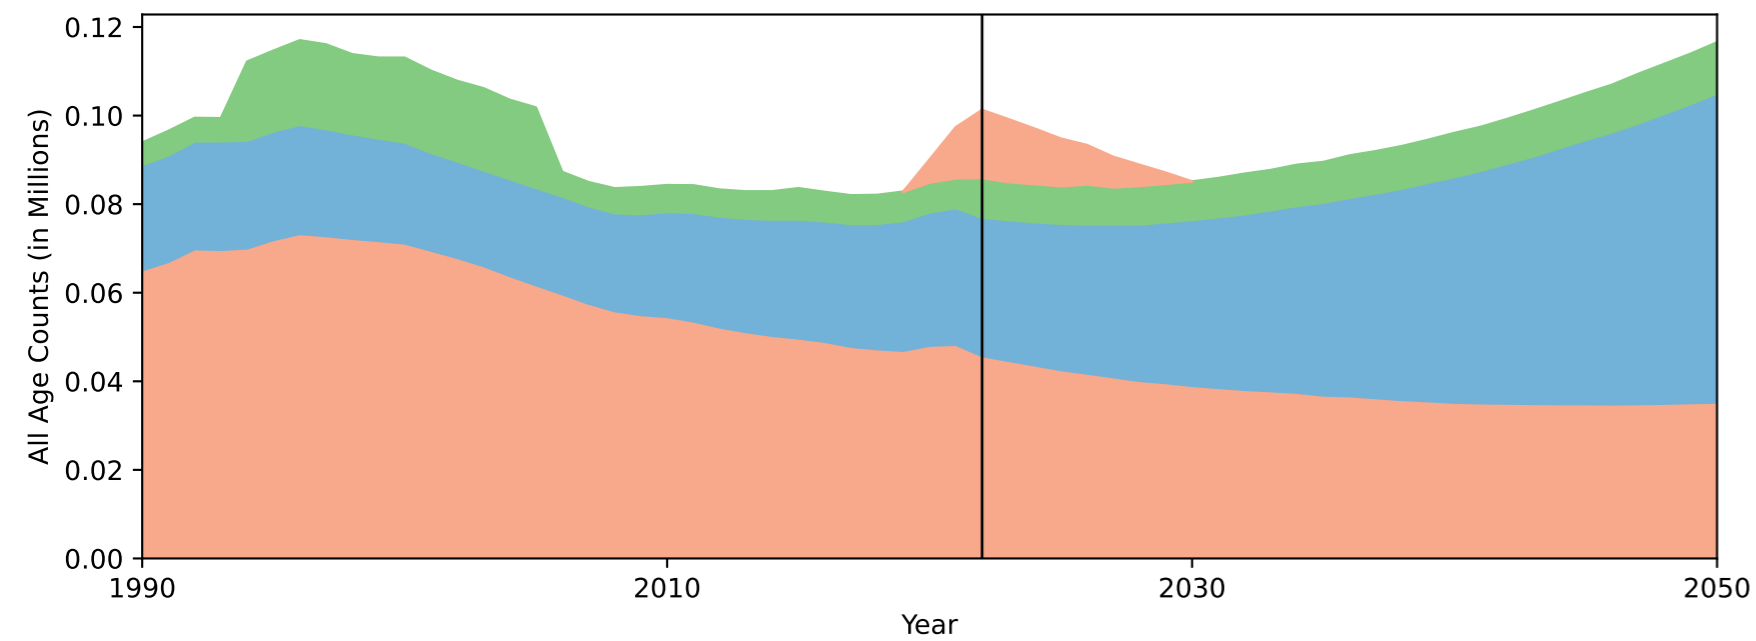

Level 2

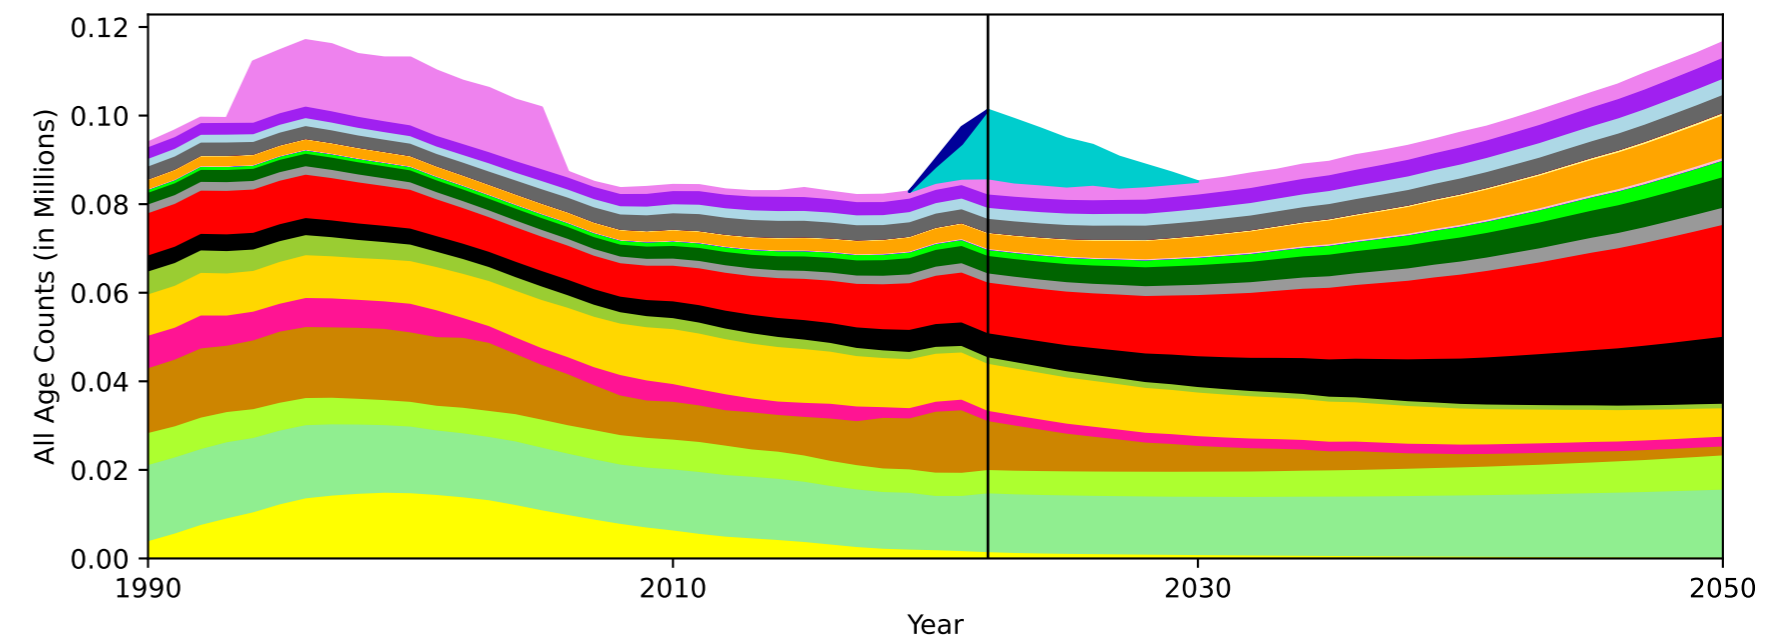

# Comoros

Level 1

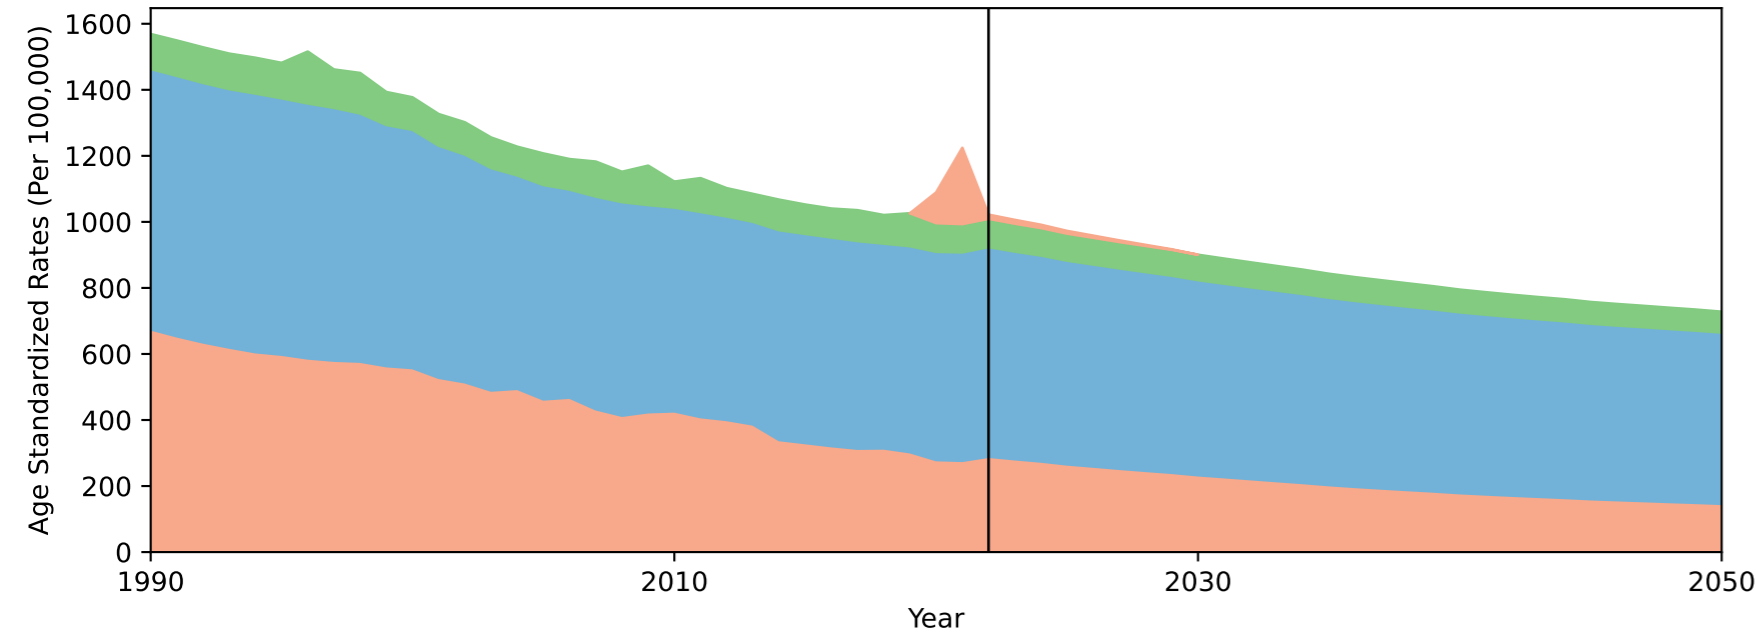

Level 2

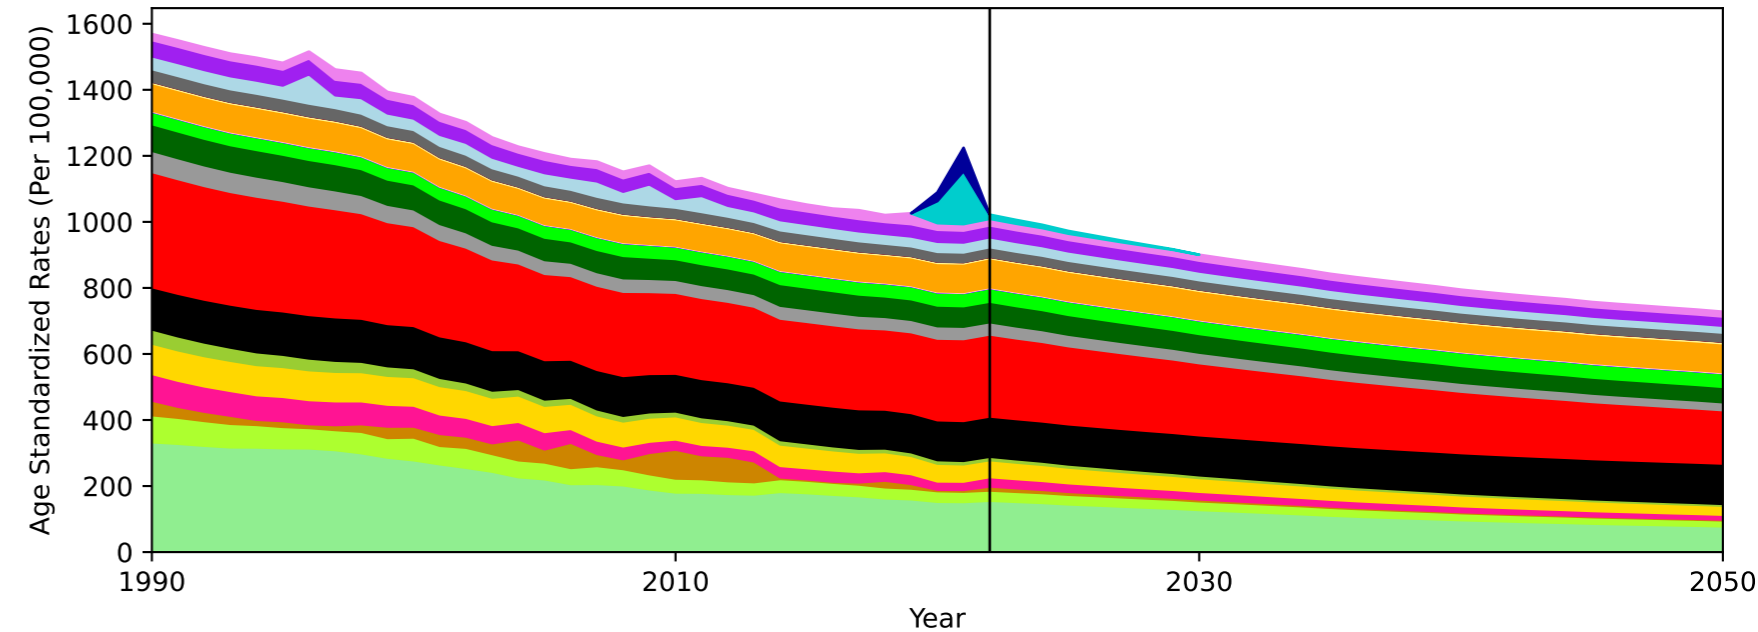

Level 1

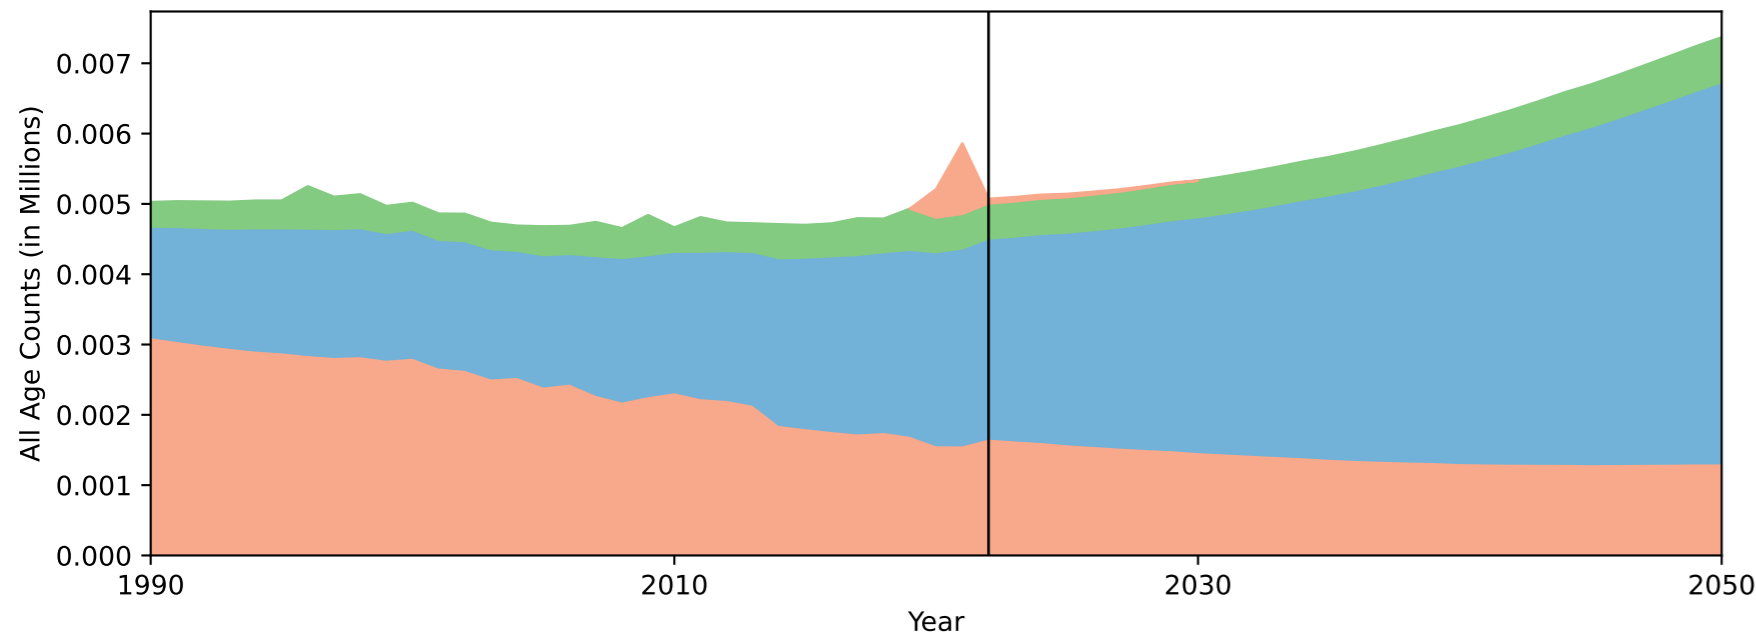

Level 2

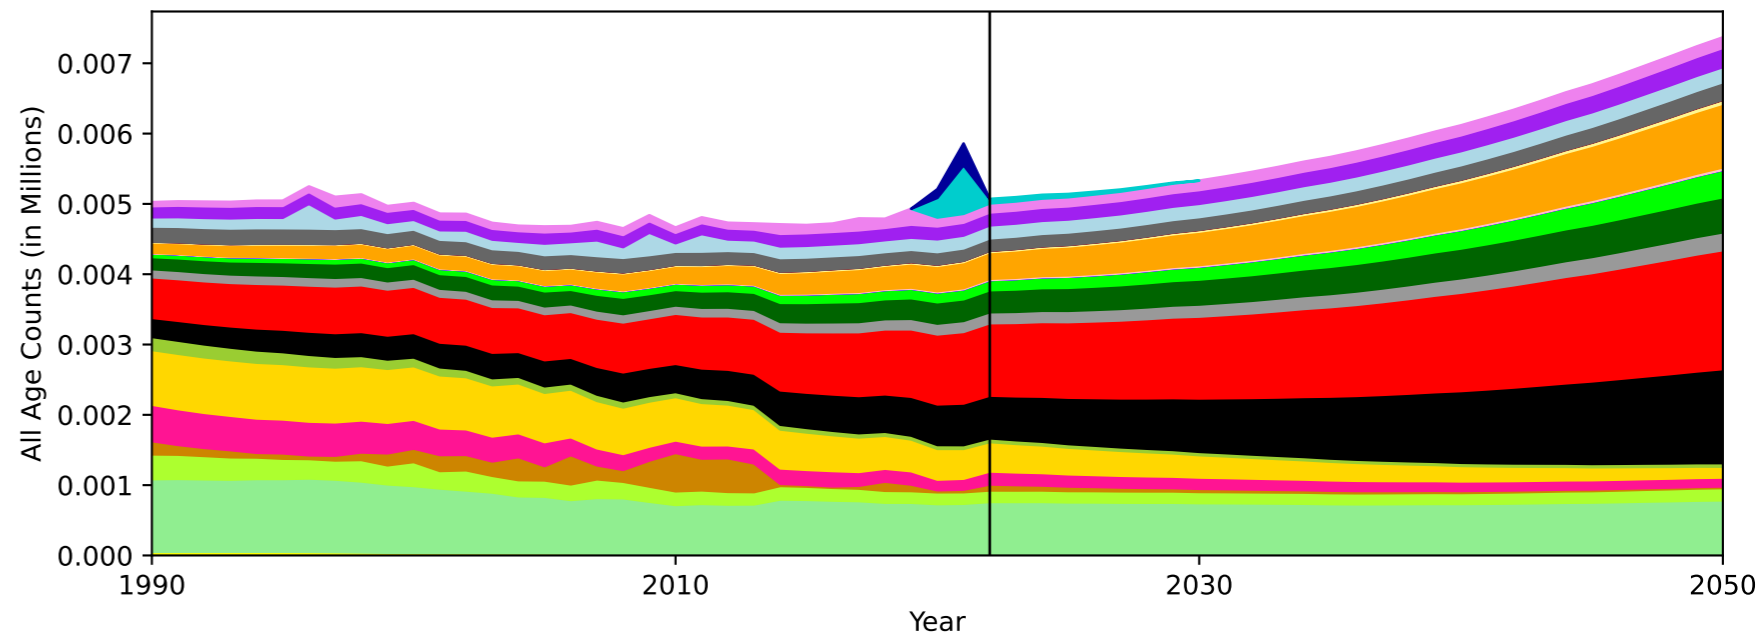

# Djibouti

Level 1

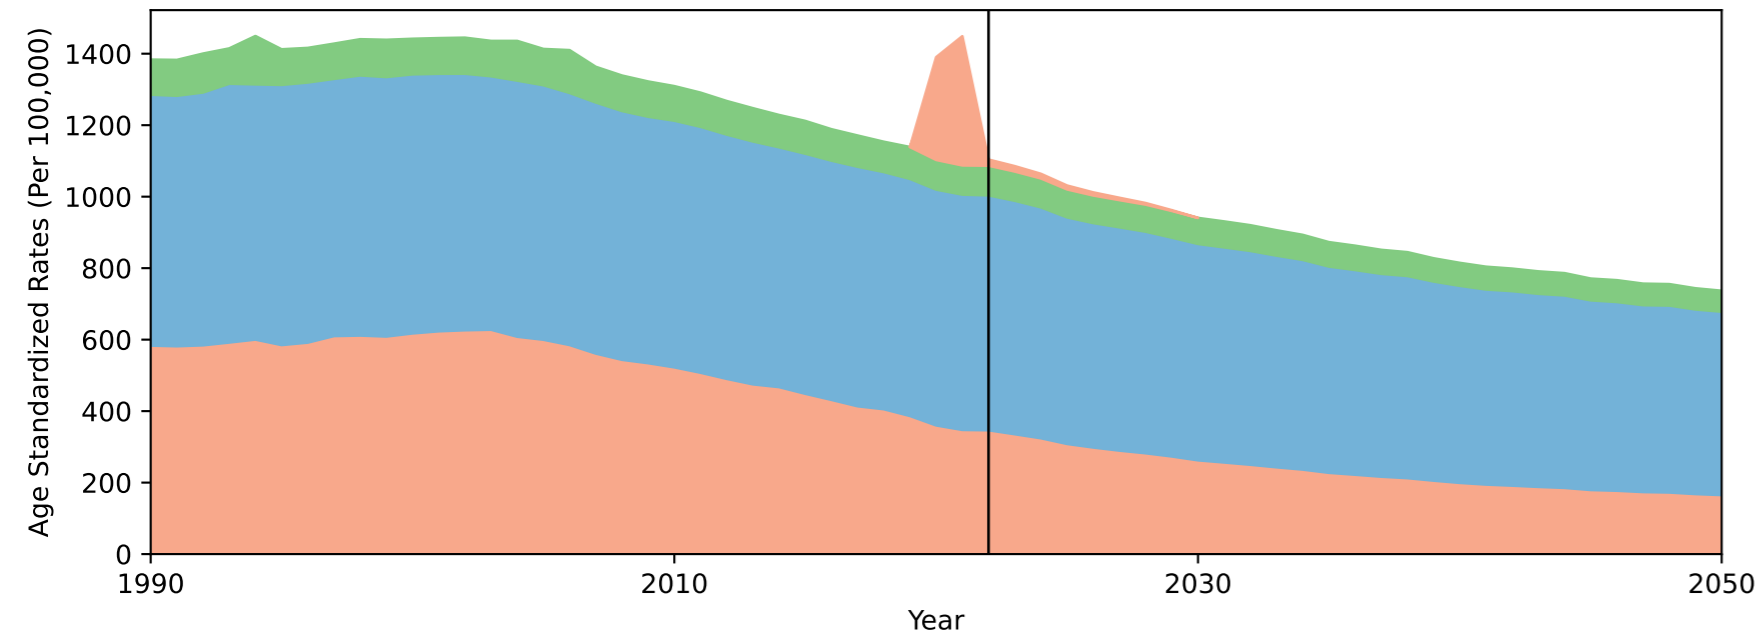

Level 2

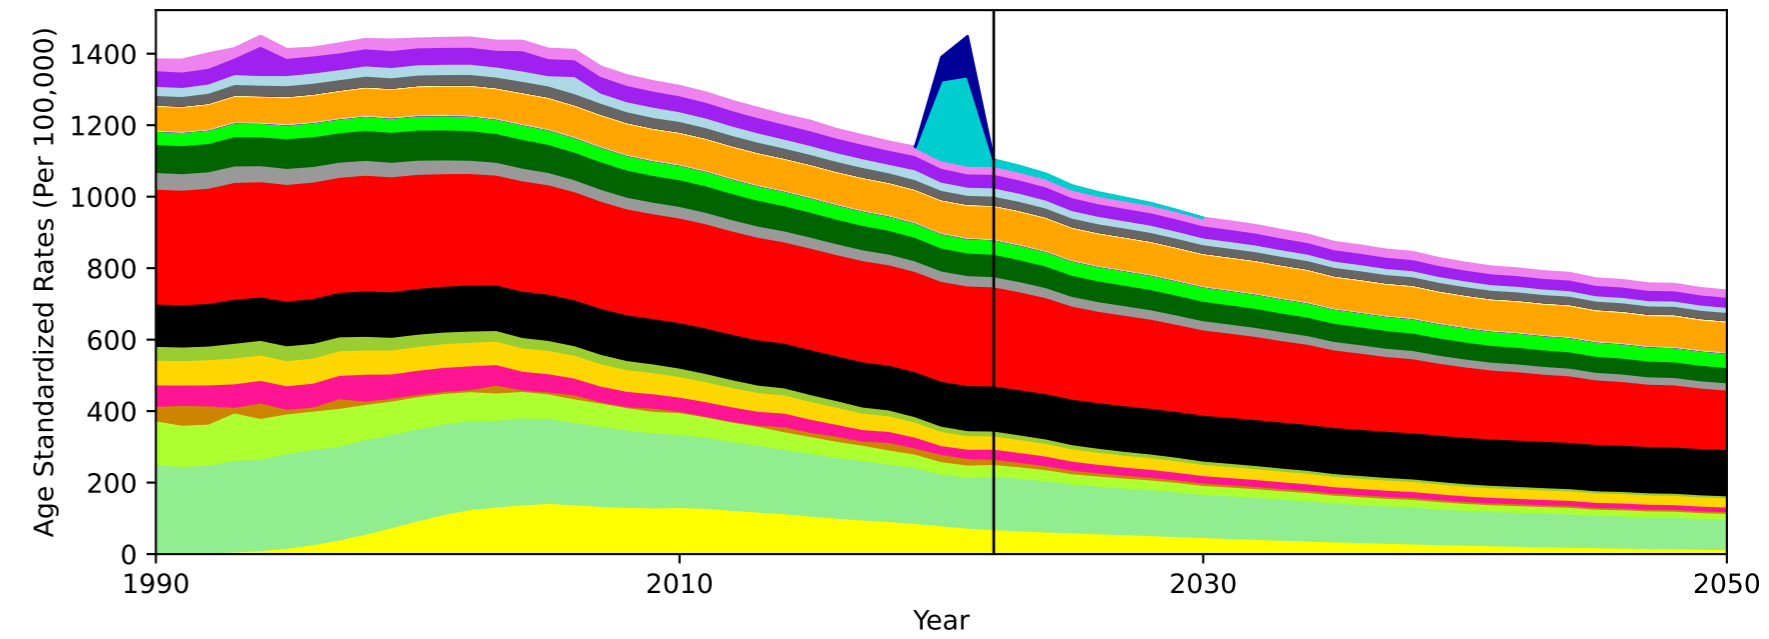

Level 1

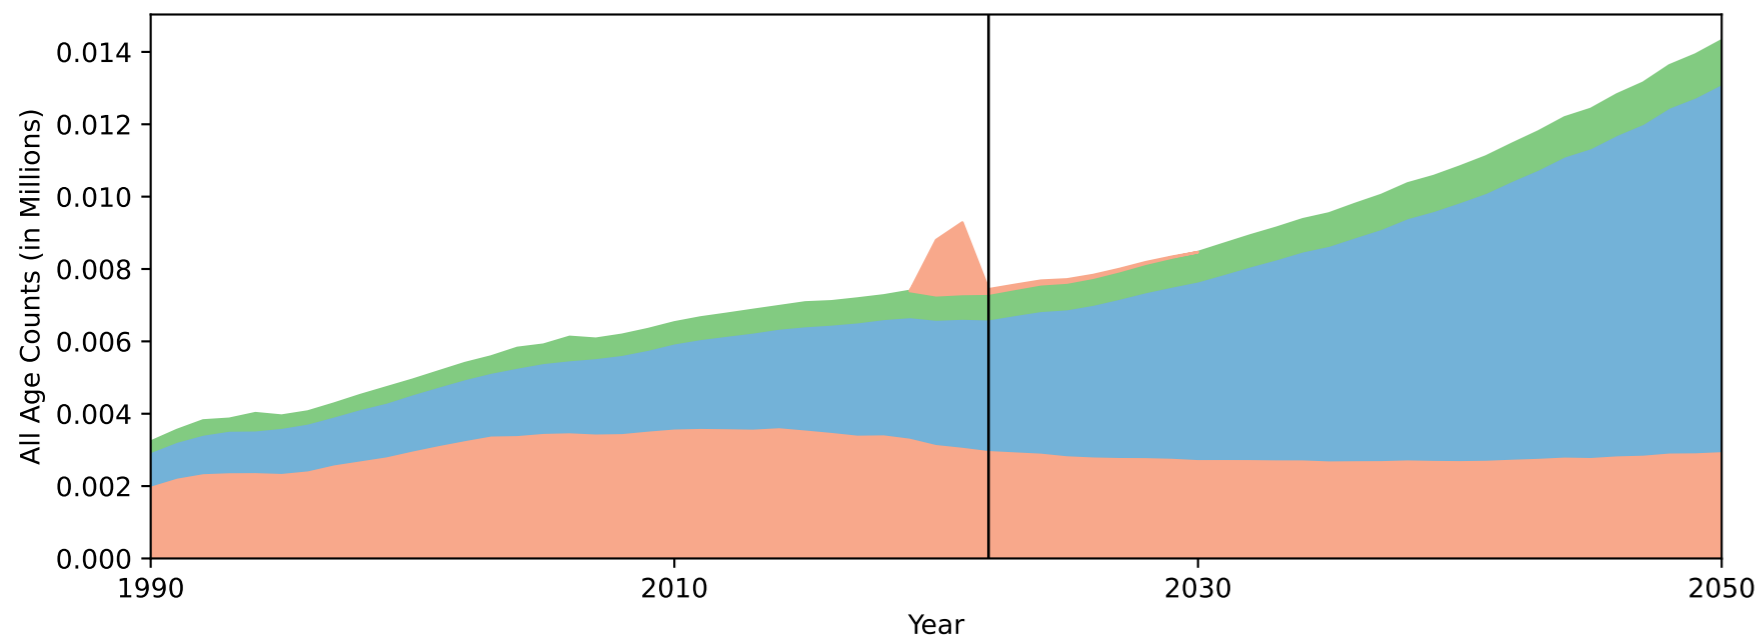

Level 2

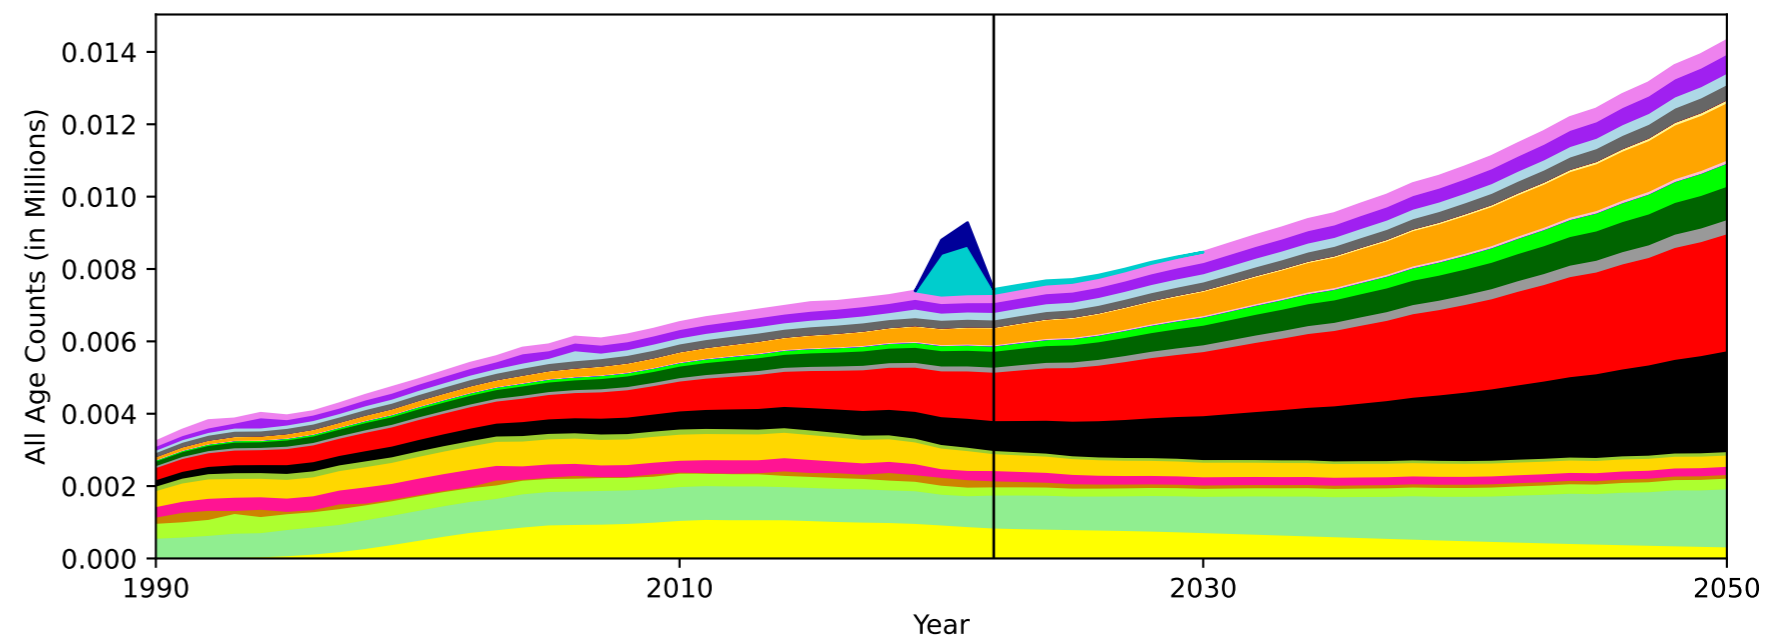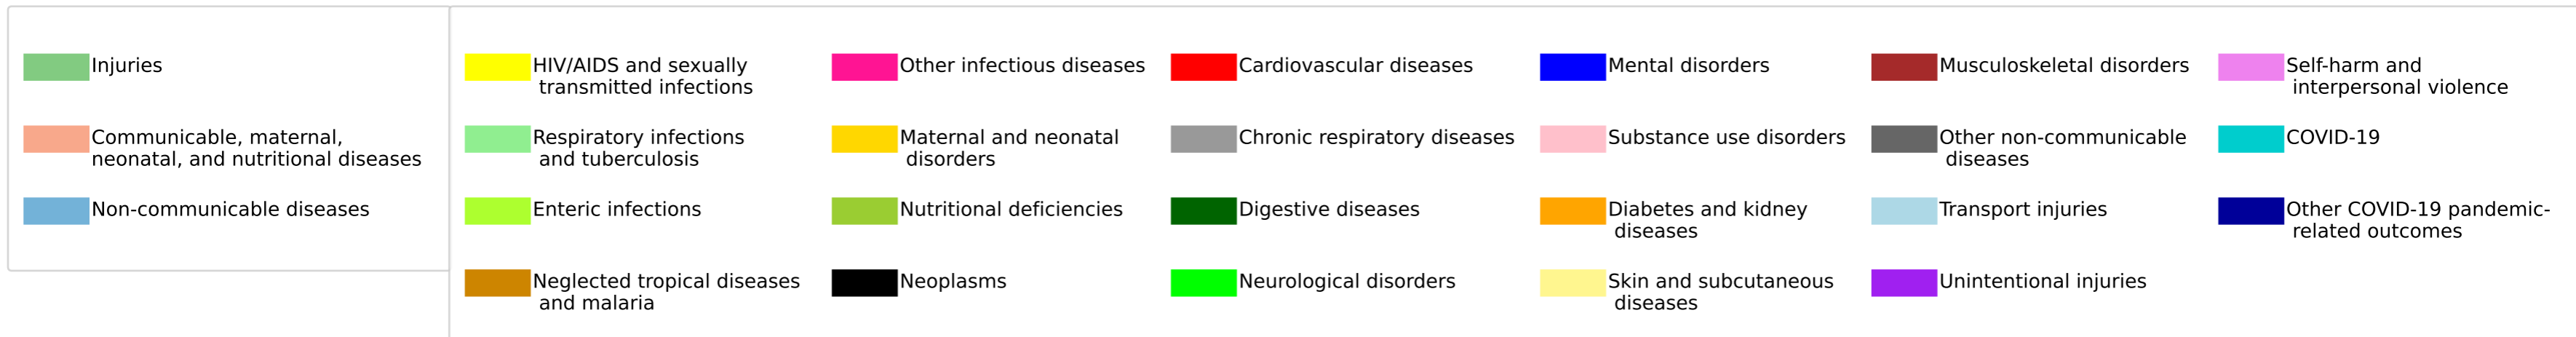

Level 1

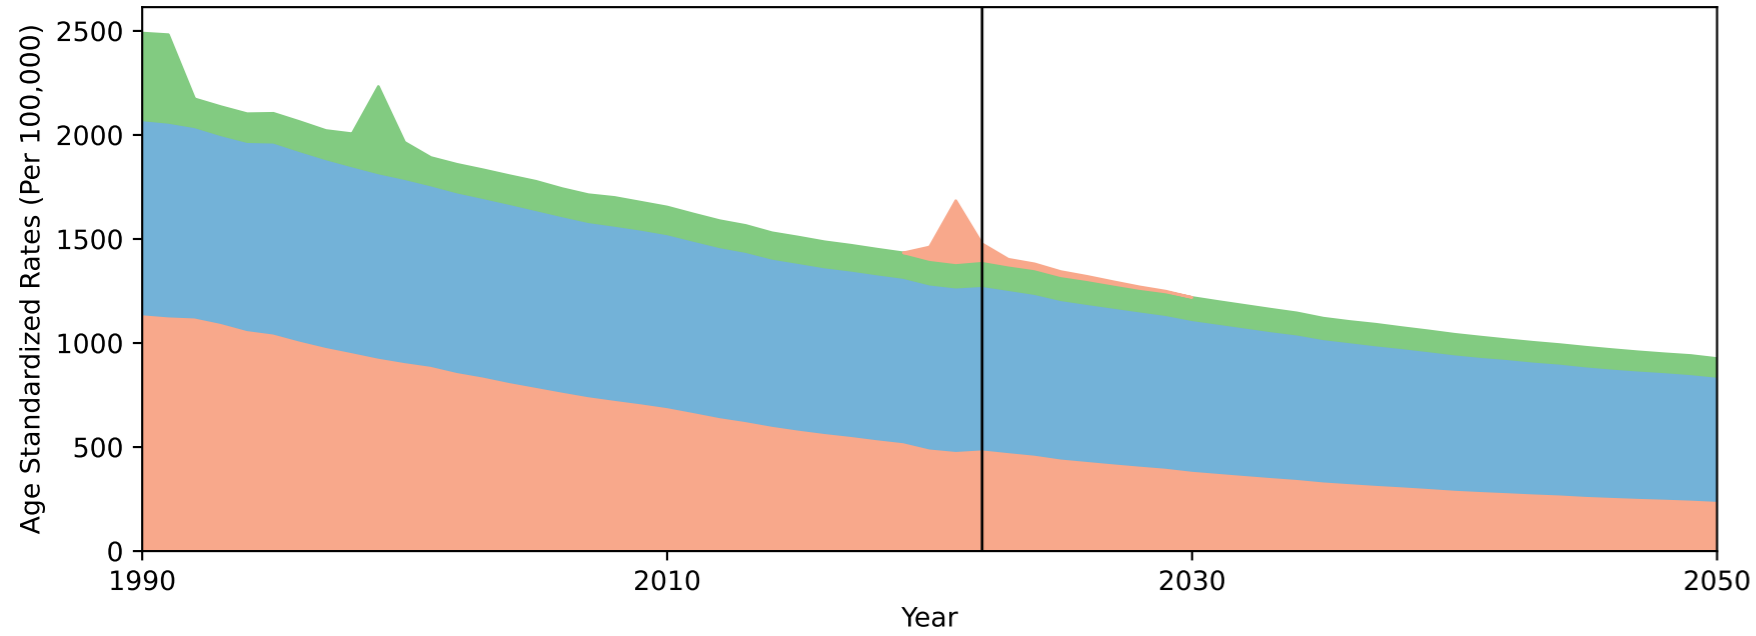

Level 2

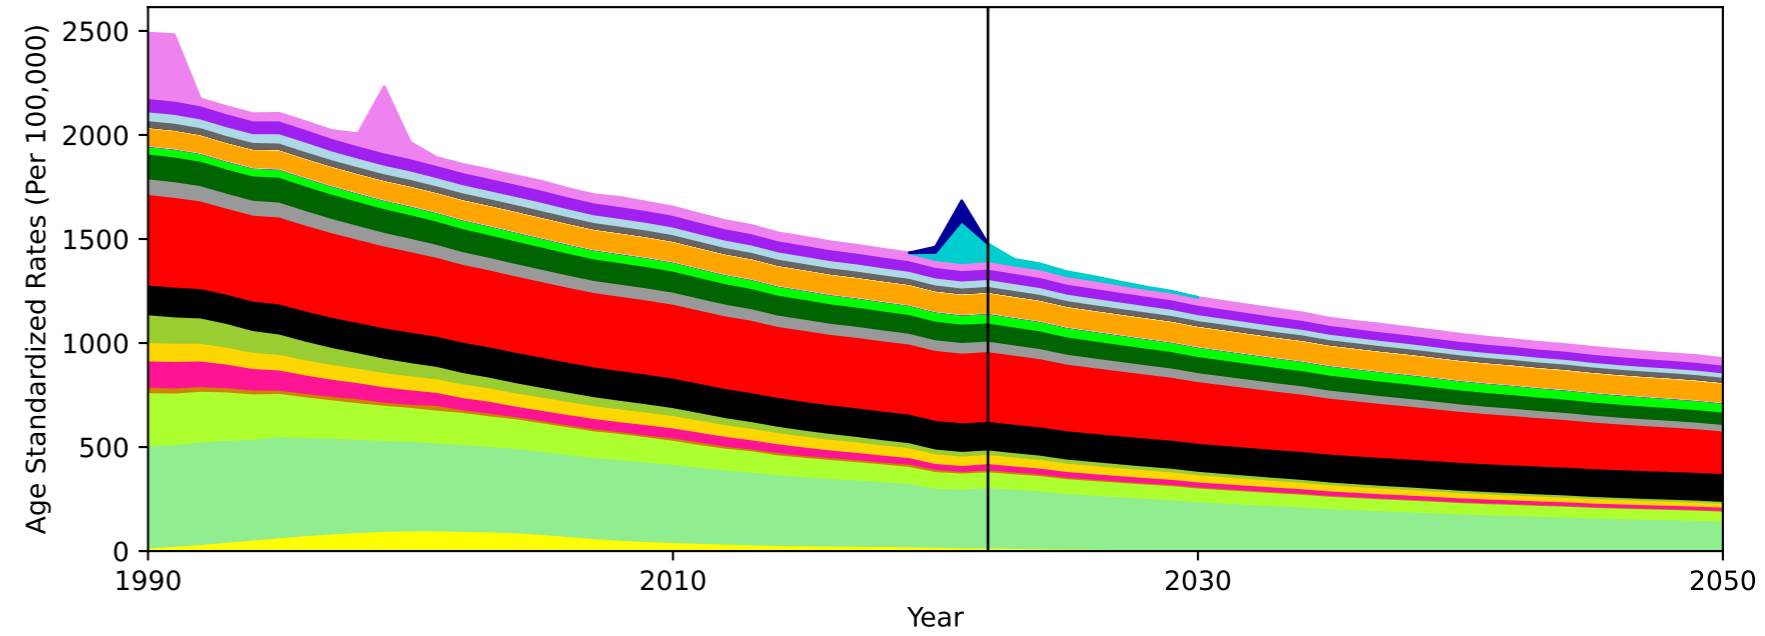

Level 1

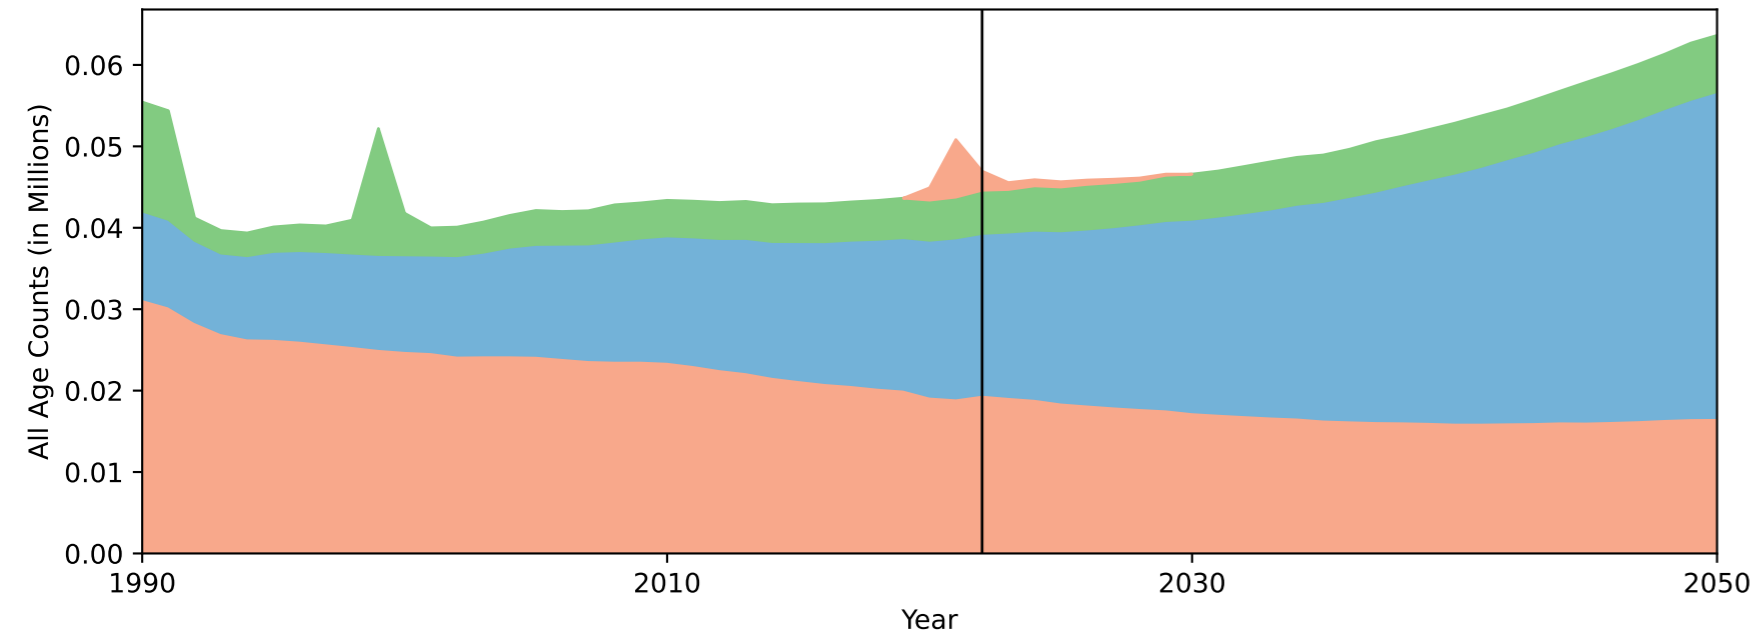

Level 2

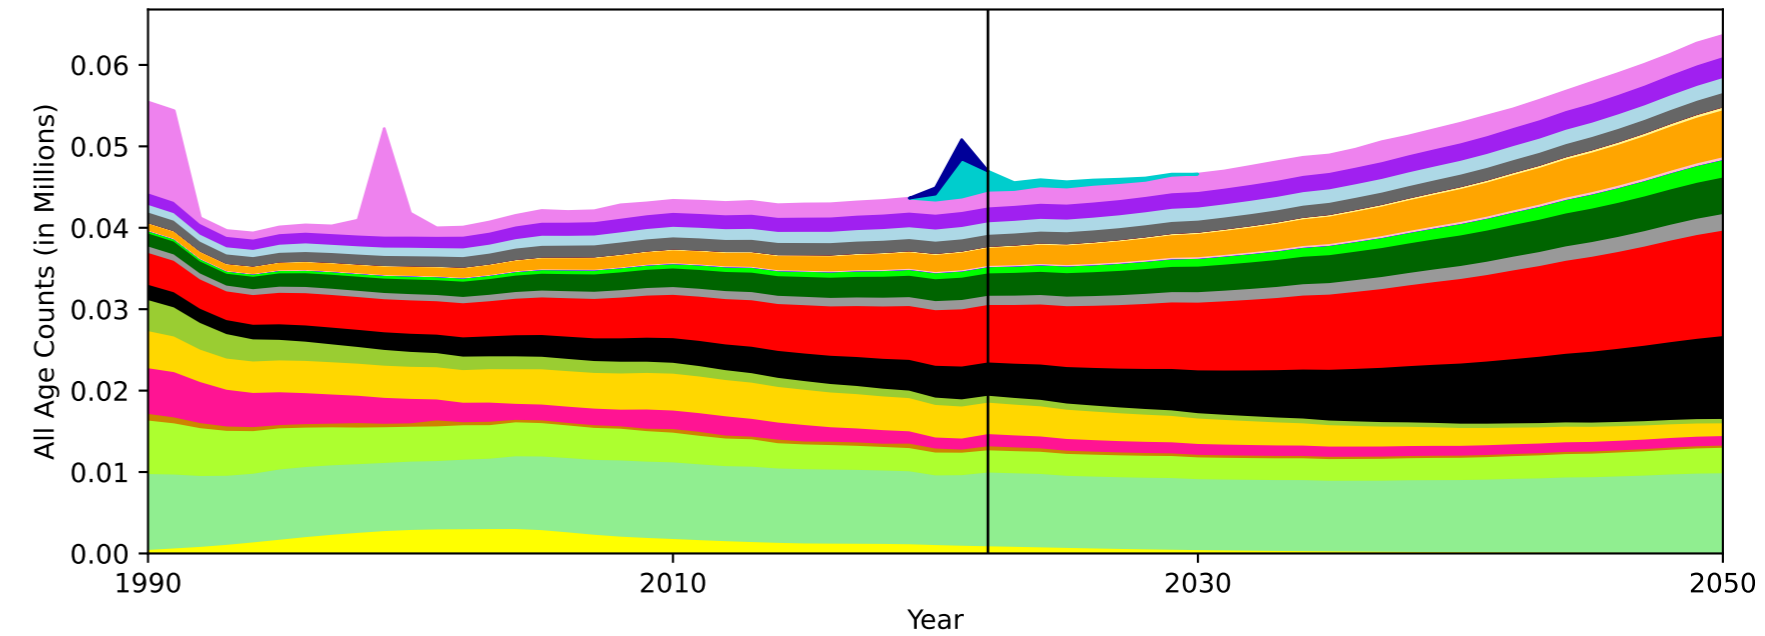

# Ethiopia

Level 1

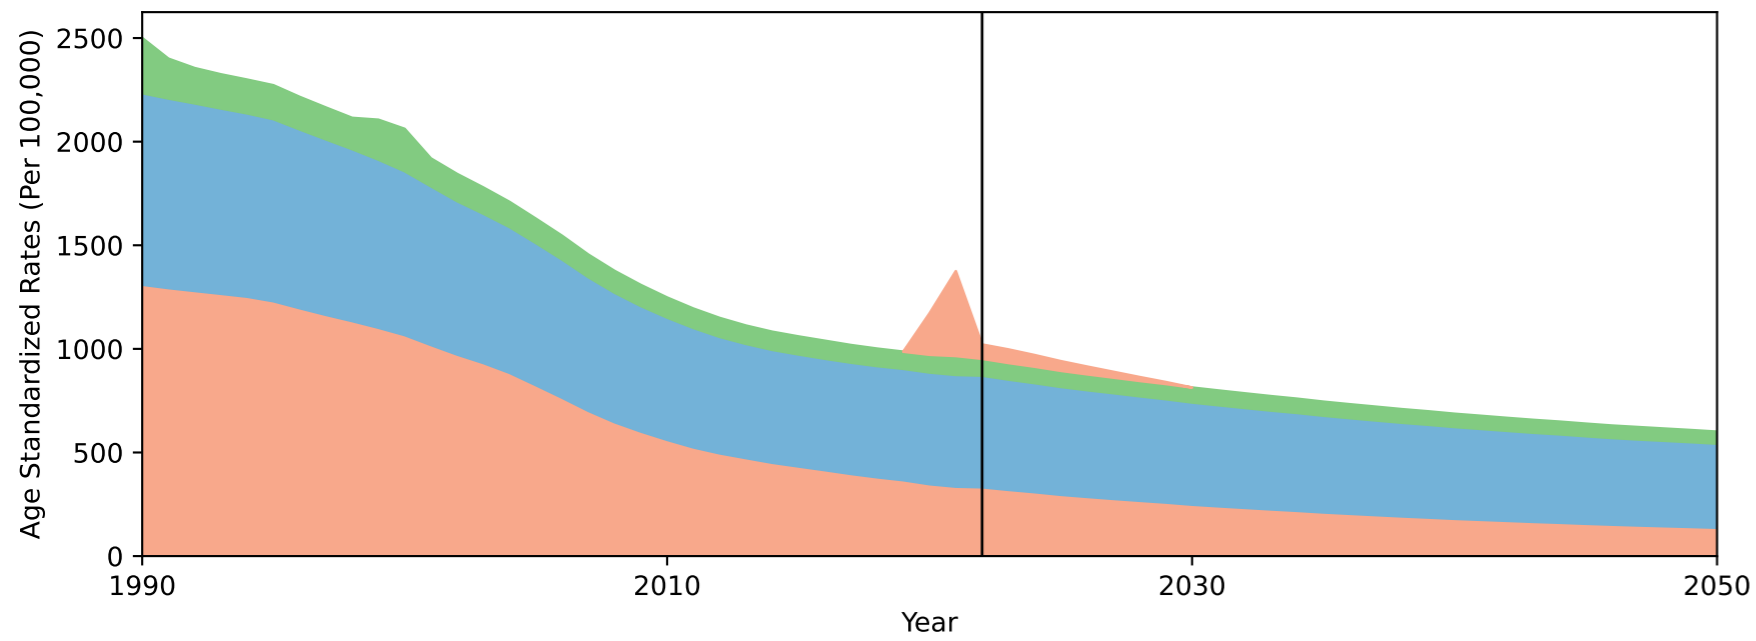

Level 2

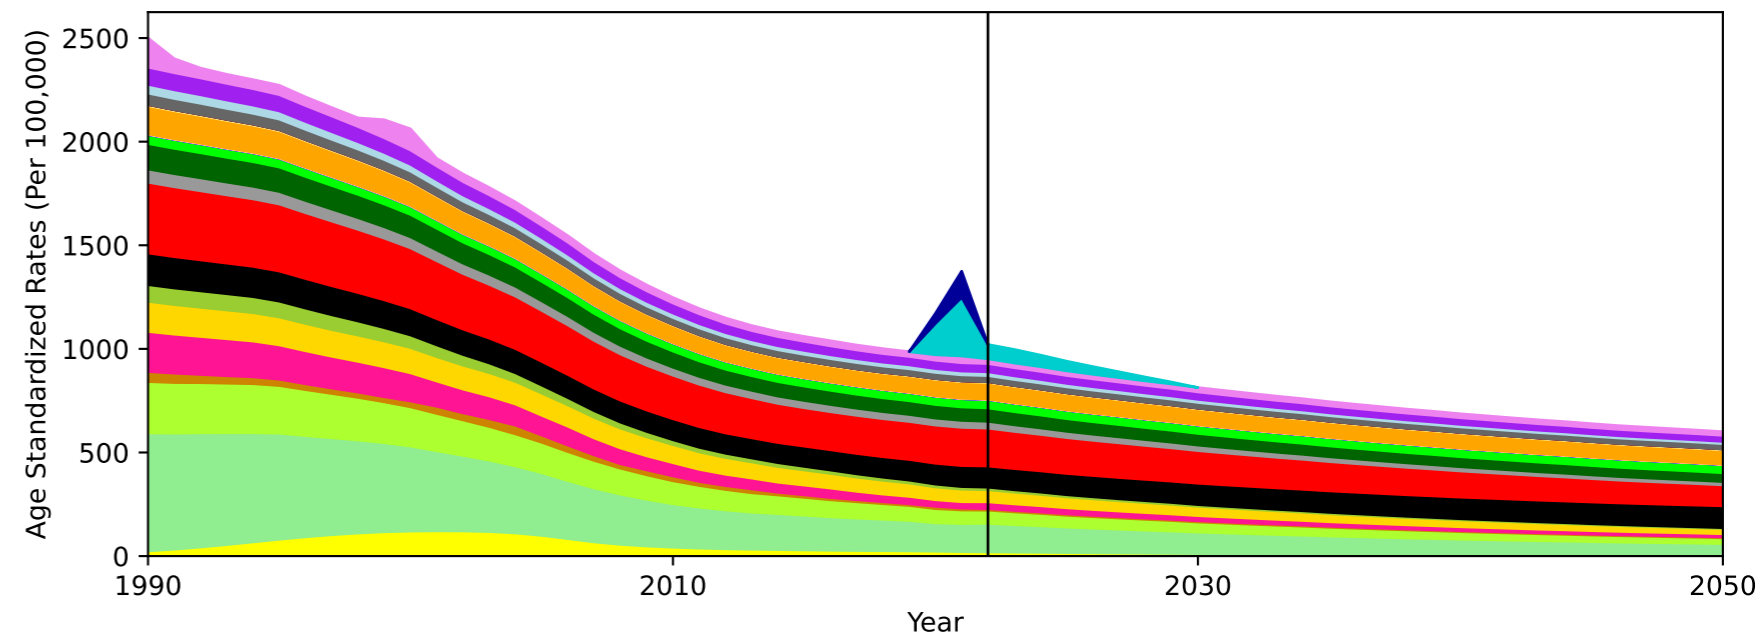

Level 1

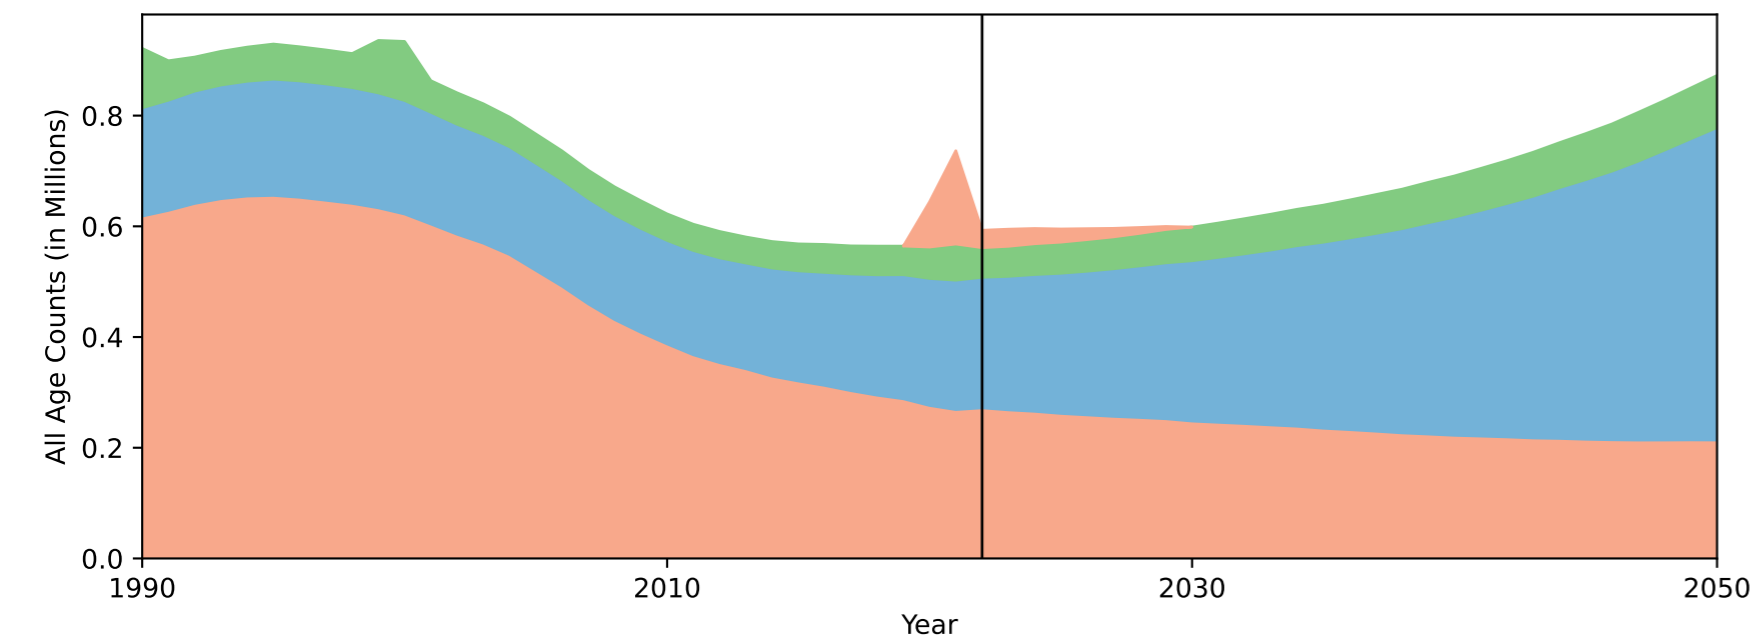

Level 2

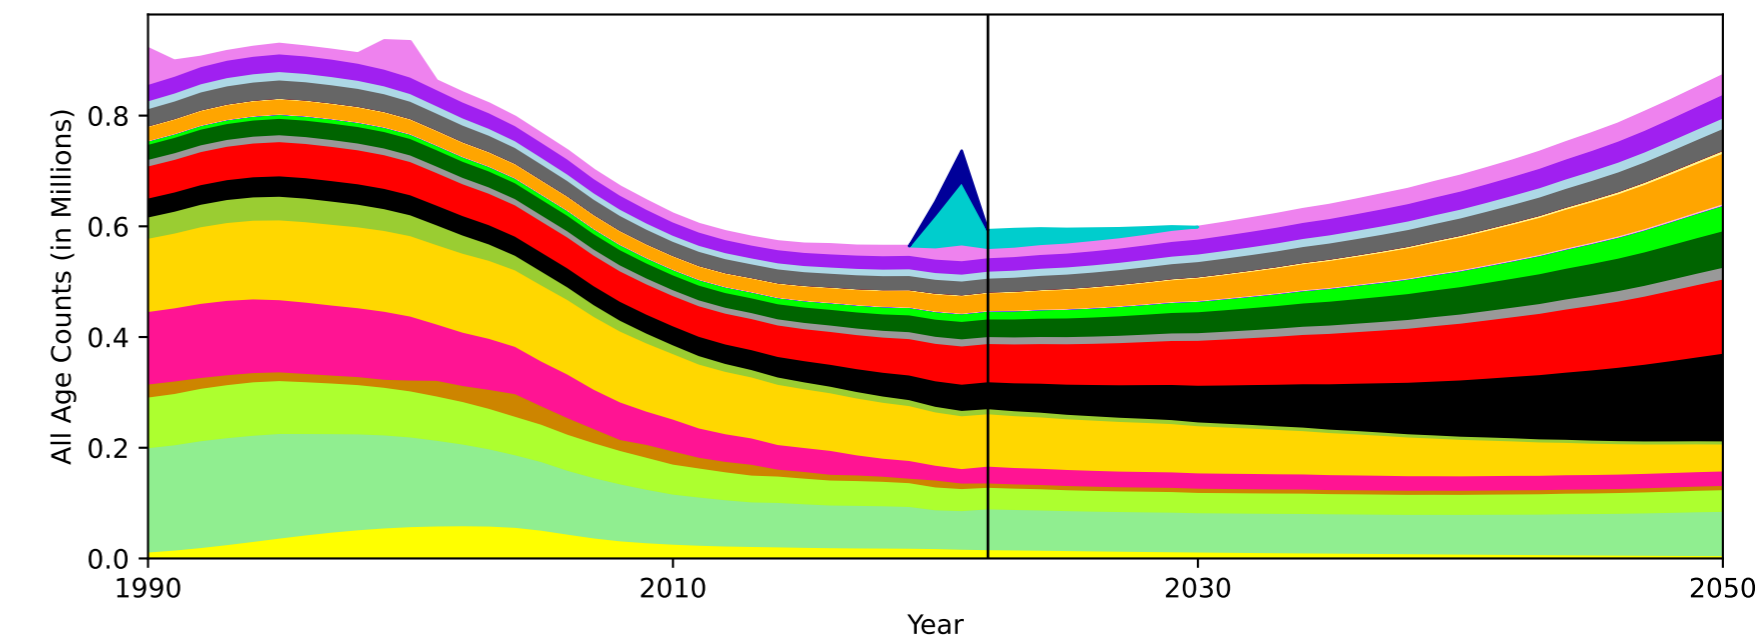

Level 1

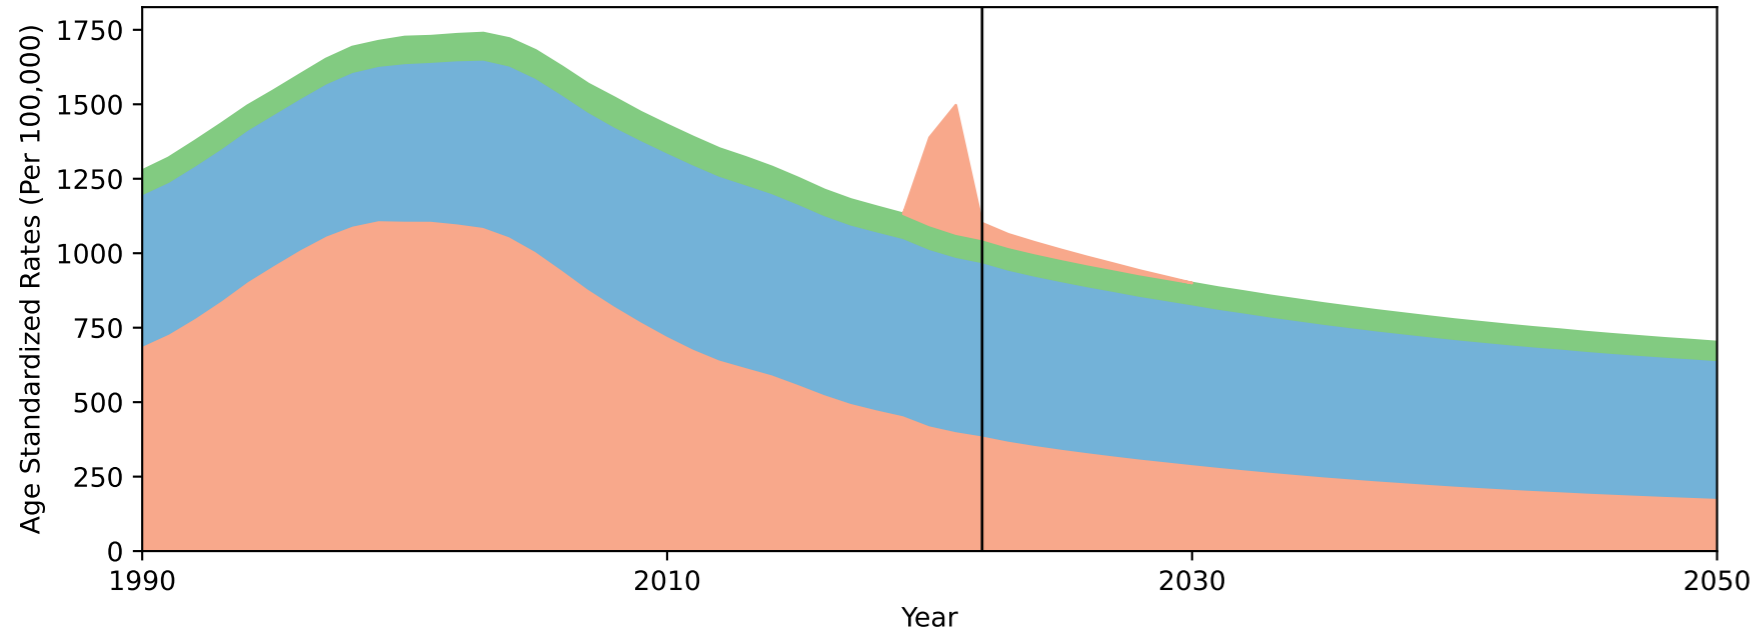

Level 2

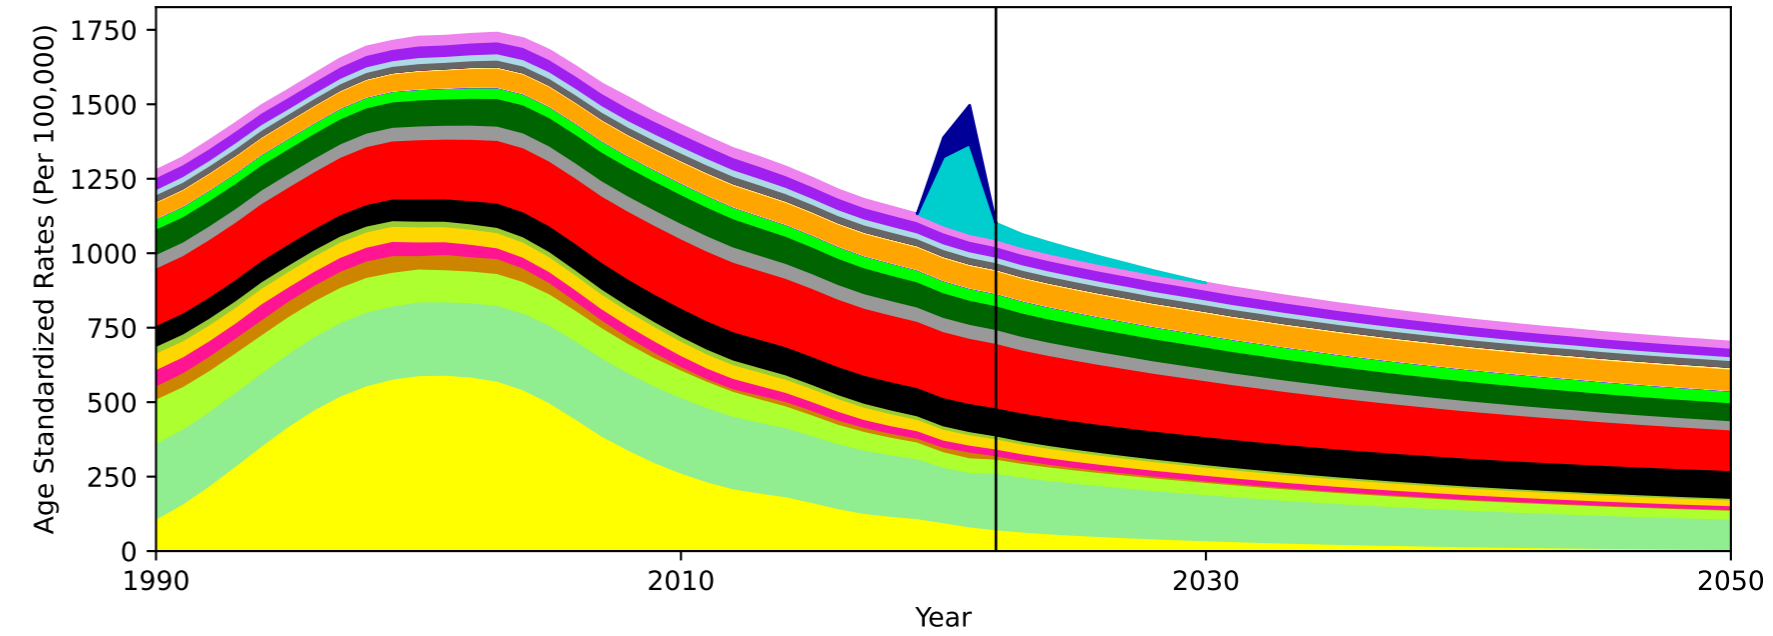

Level 1

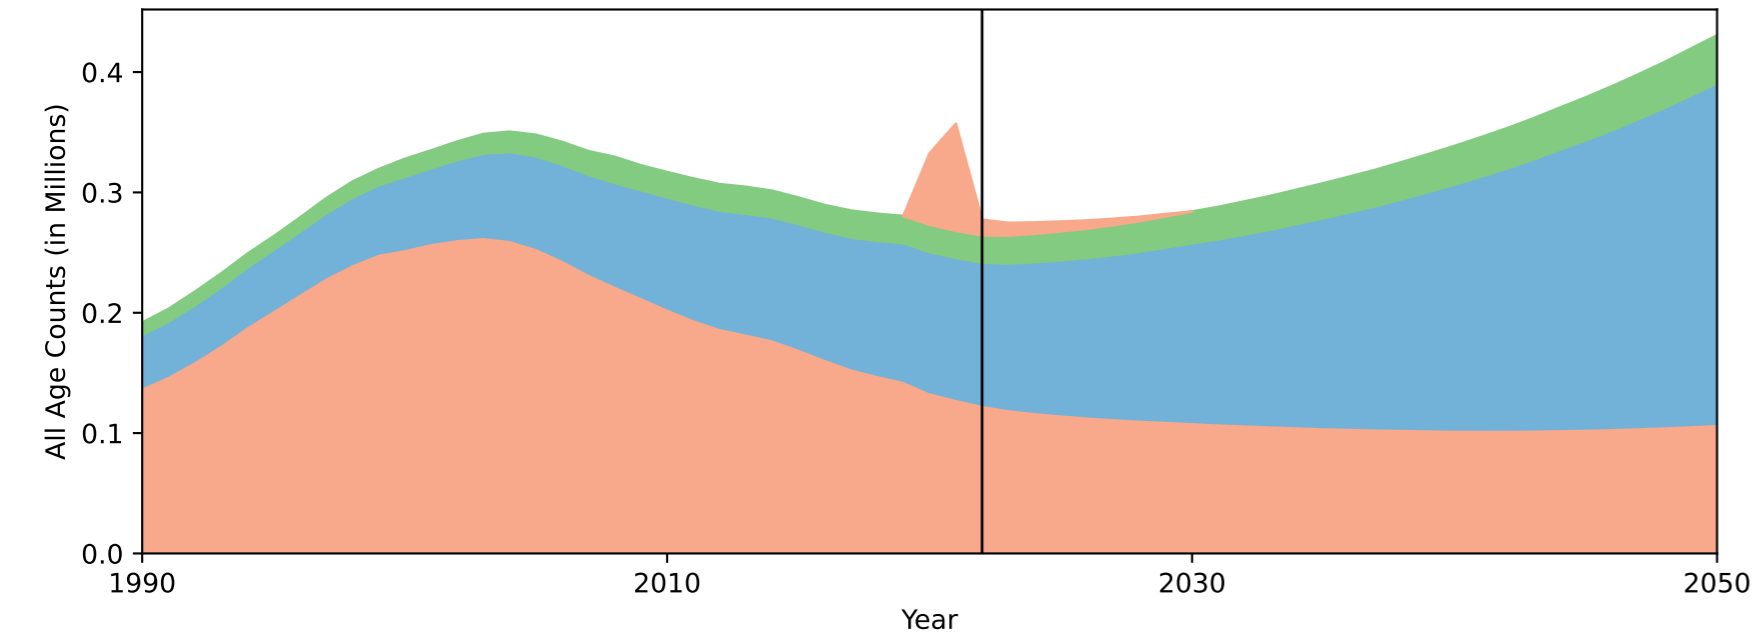

Level 2

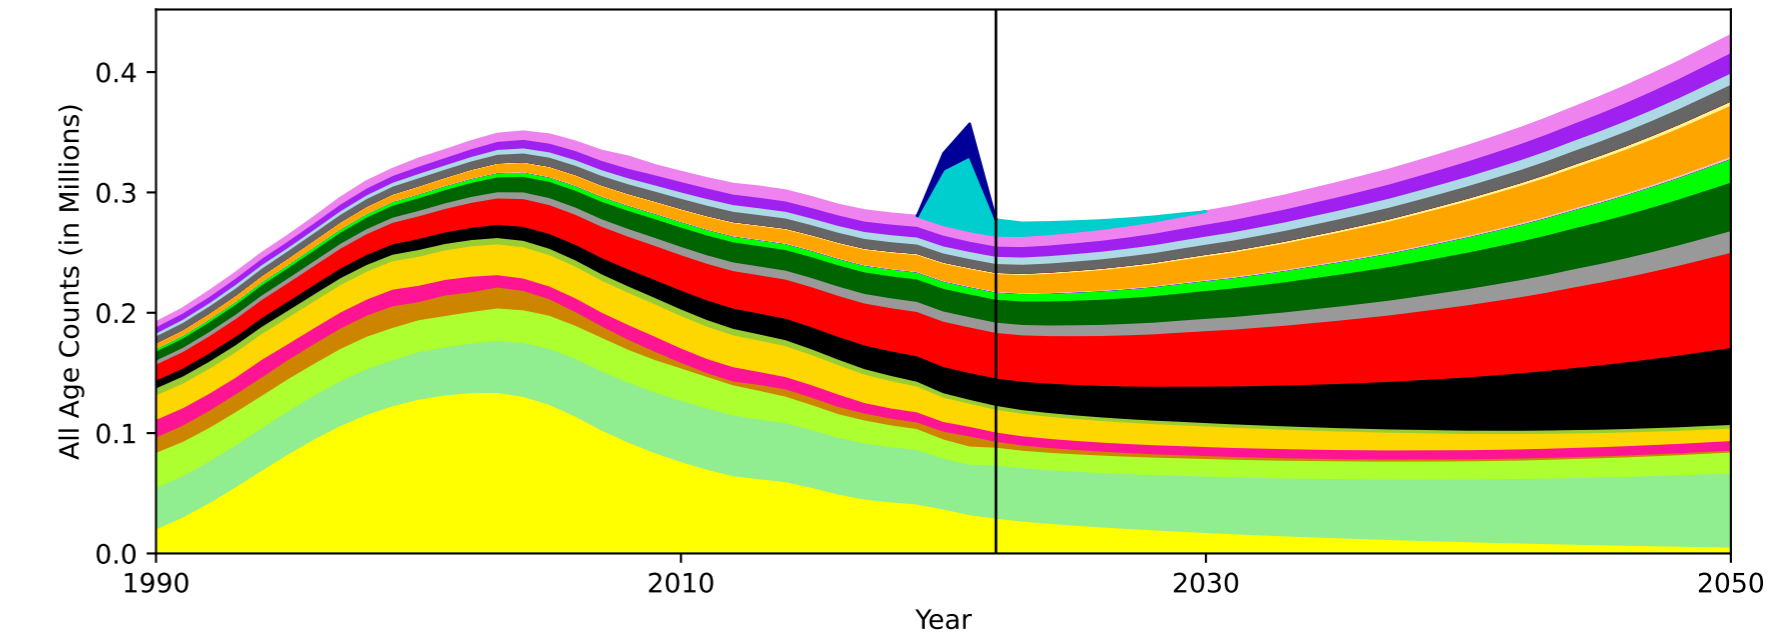



# Madagascar

Supplemental Results Figure S5. Age-standardised death rates and all age death counts and by Level 1 and Level 2 causes, 1990–2050

648

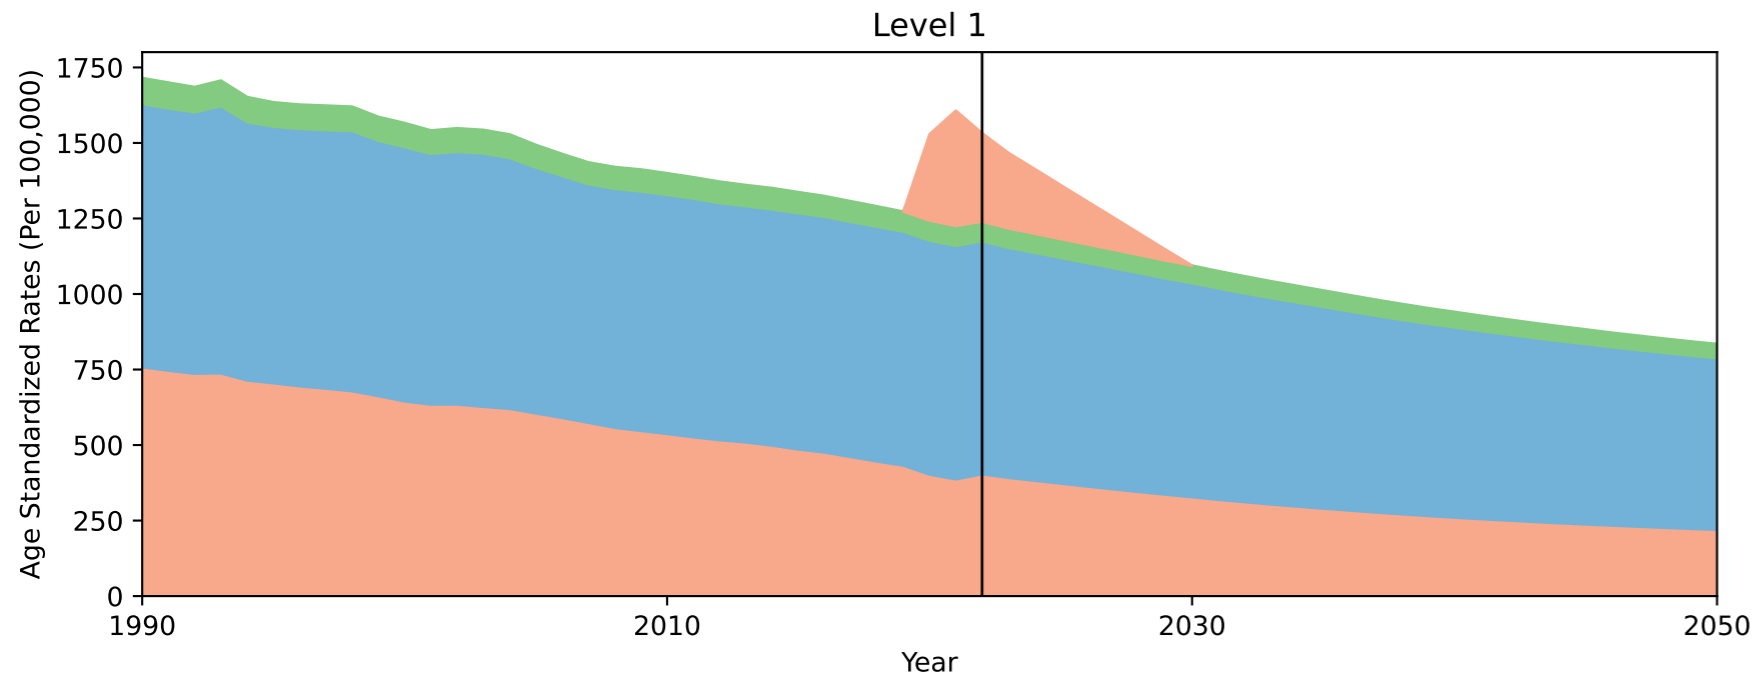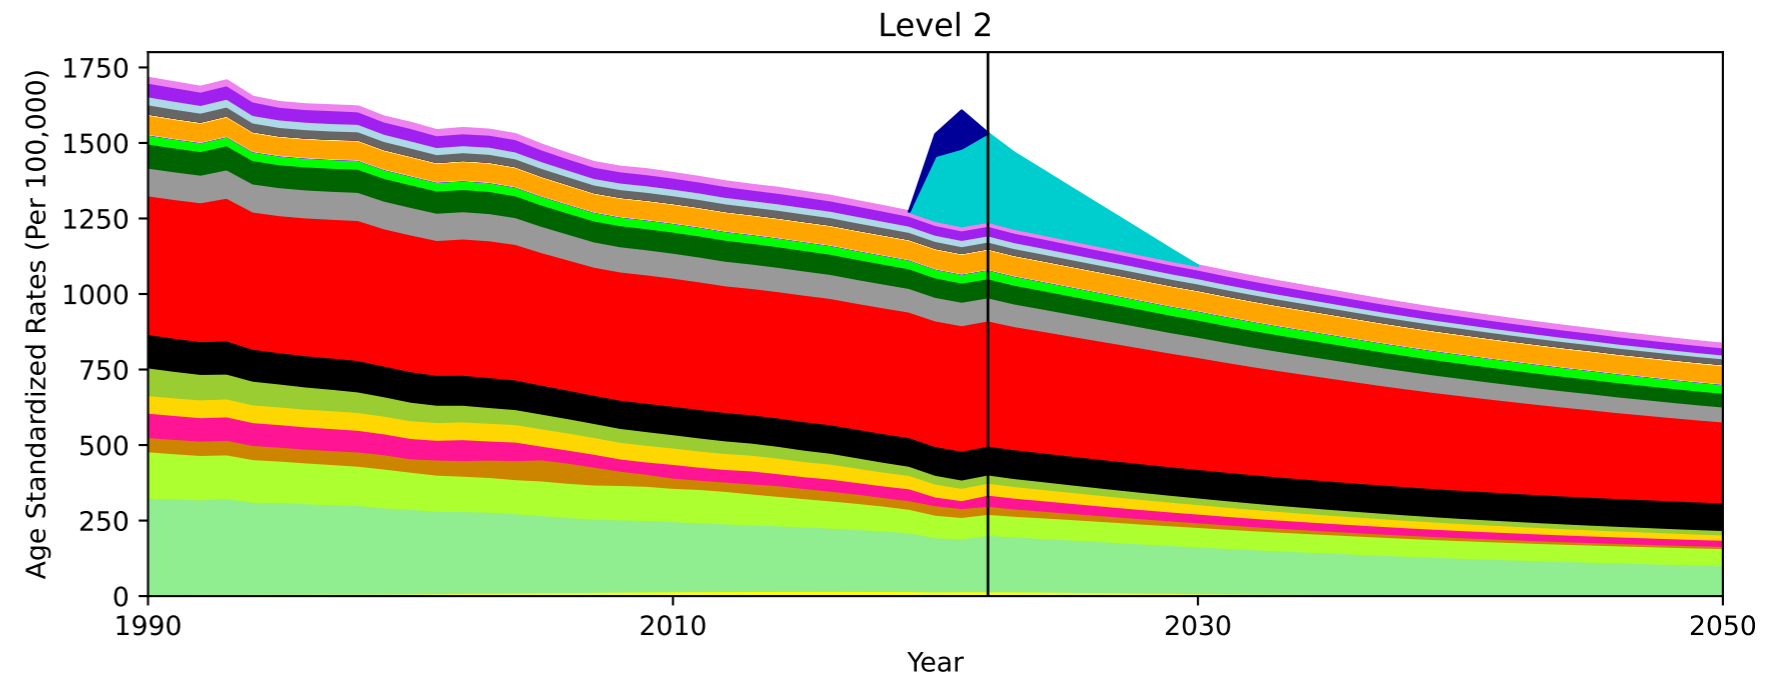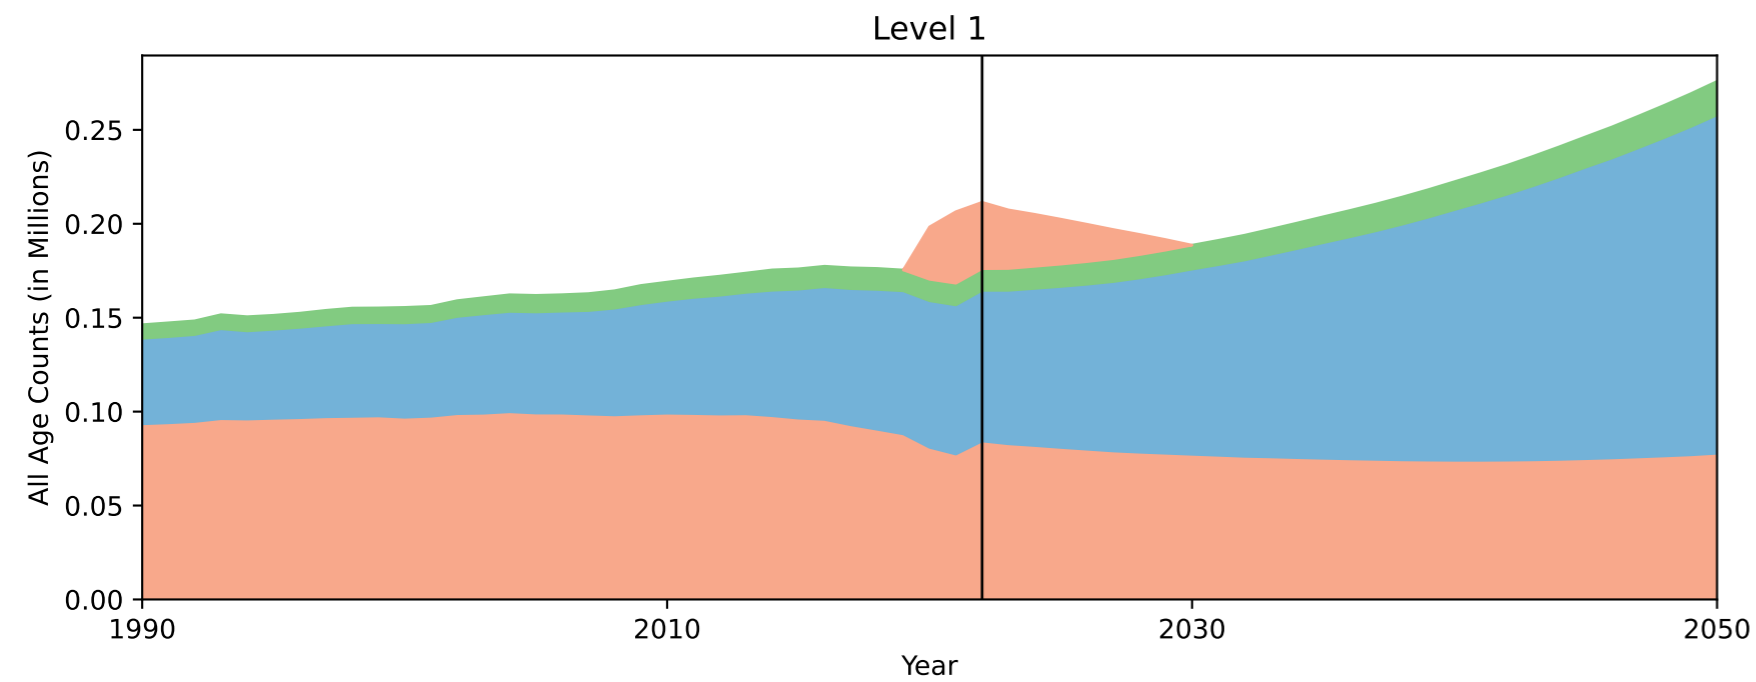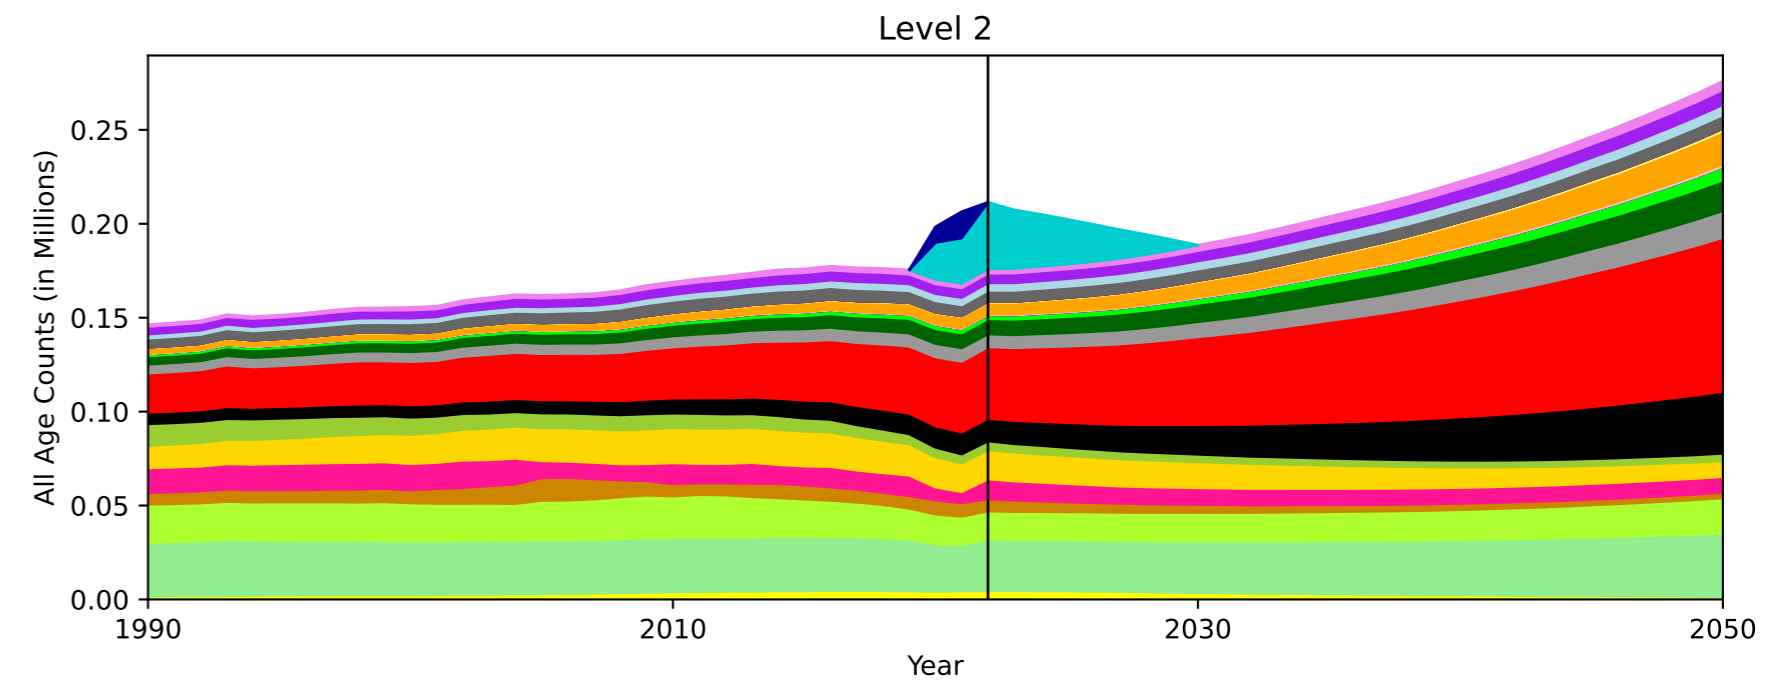

Level 1

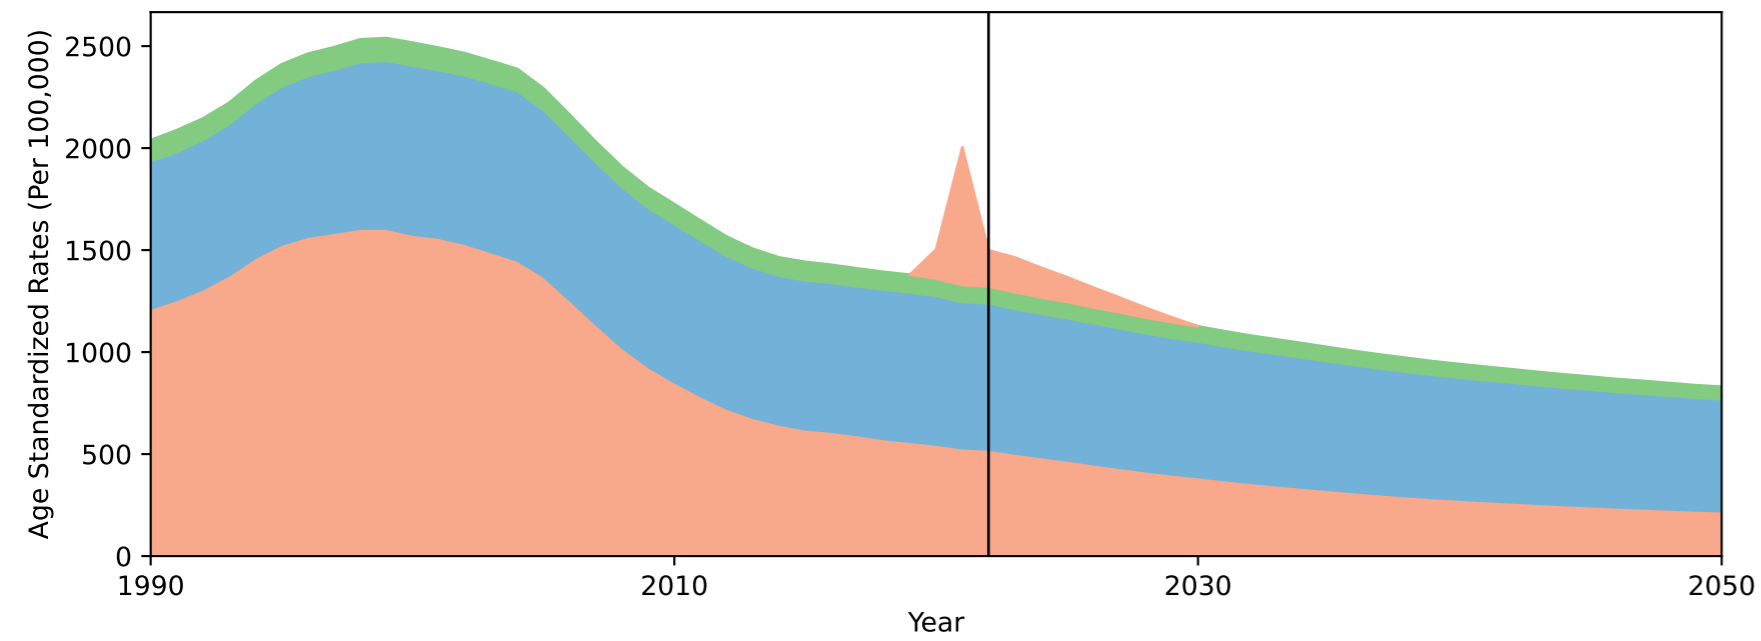

Level 2

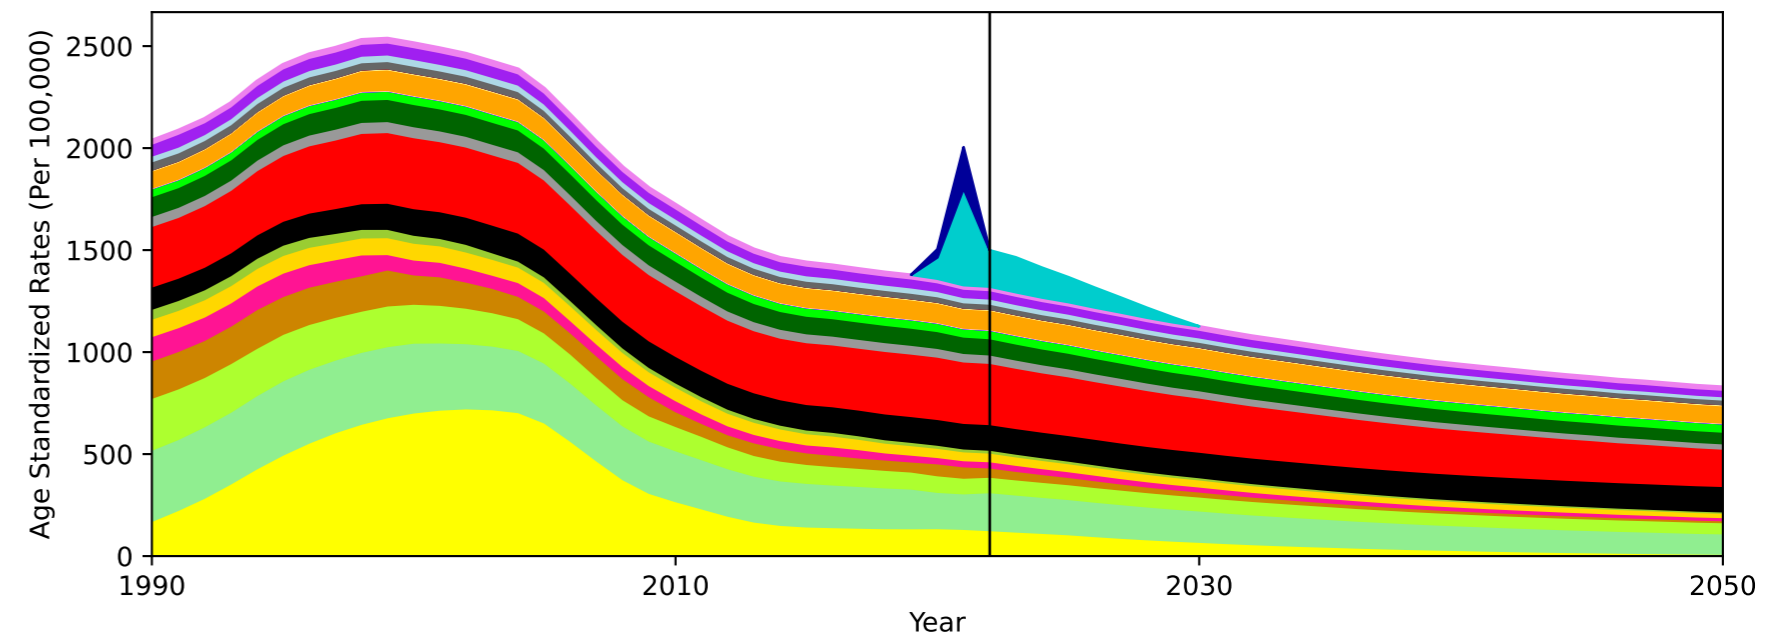

Level 1

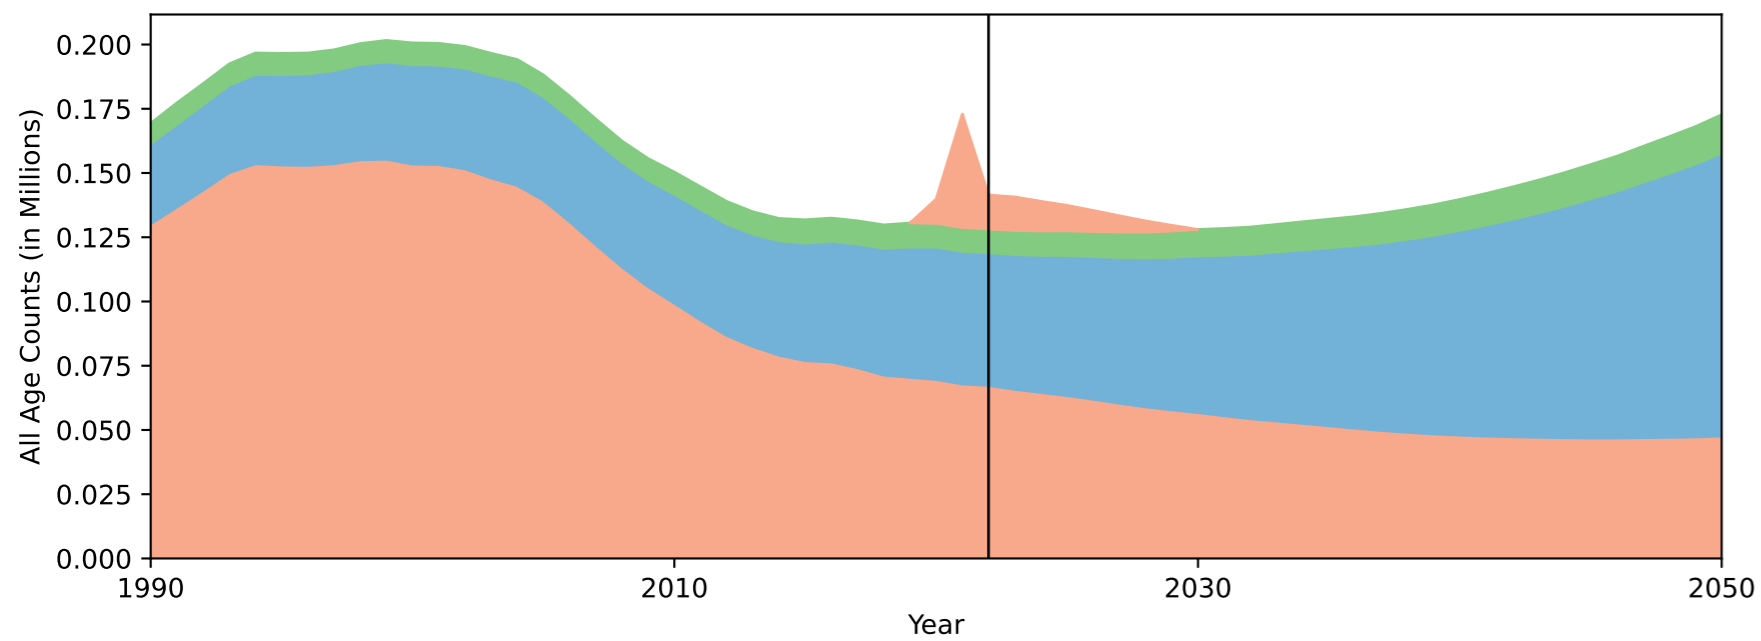

Level 2

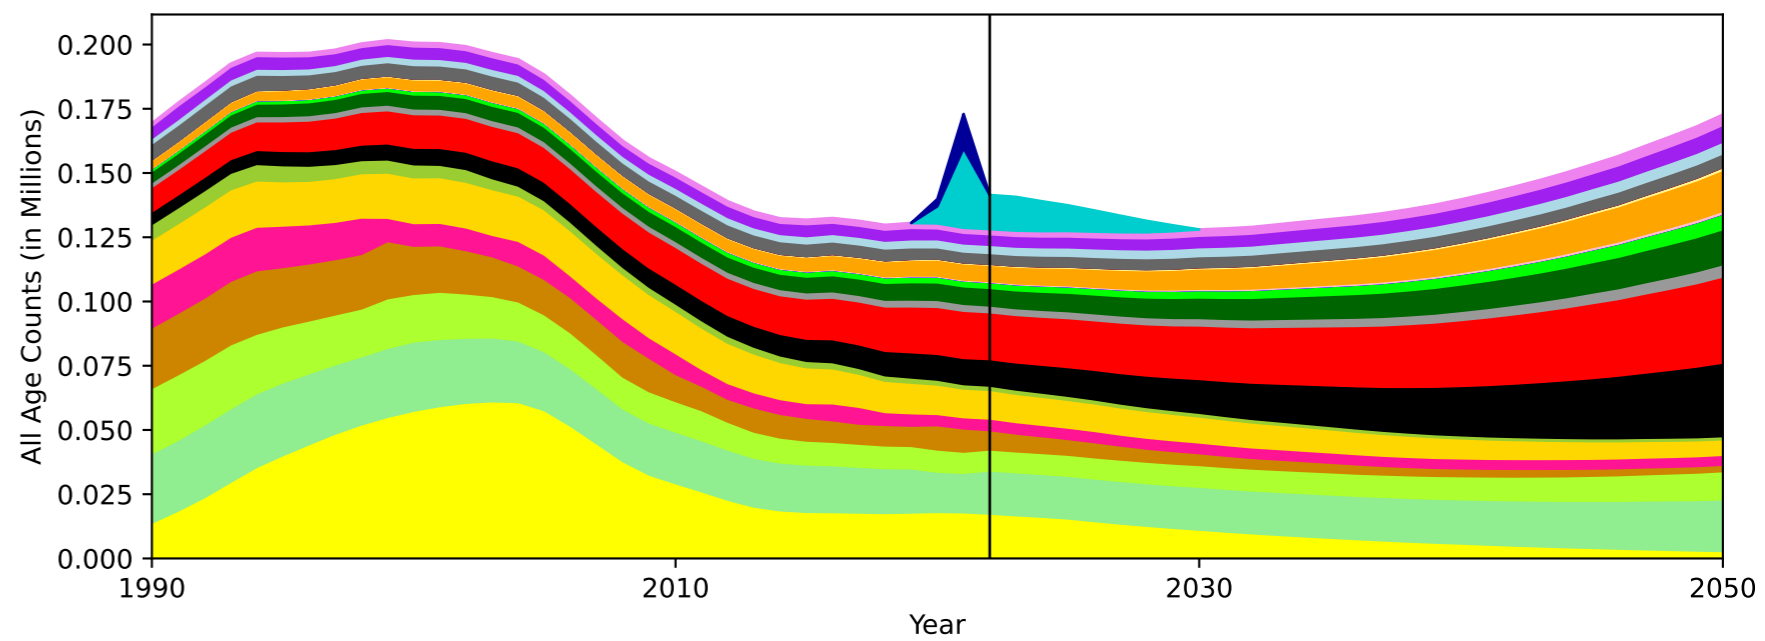

# Mozambique

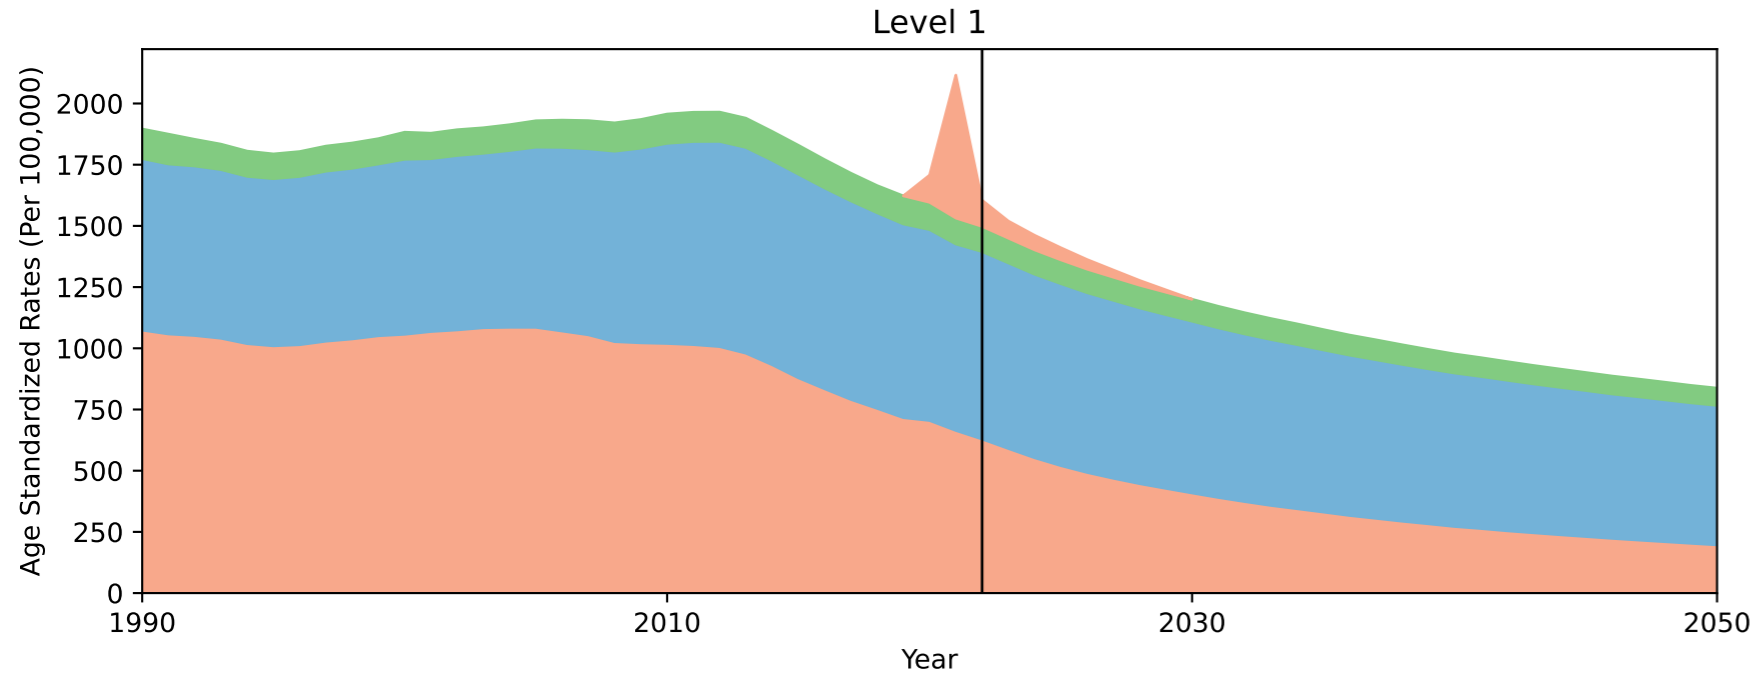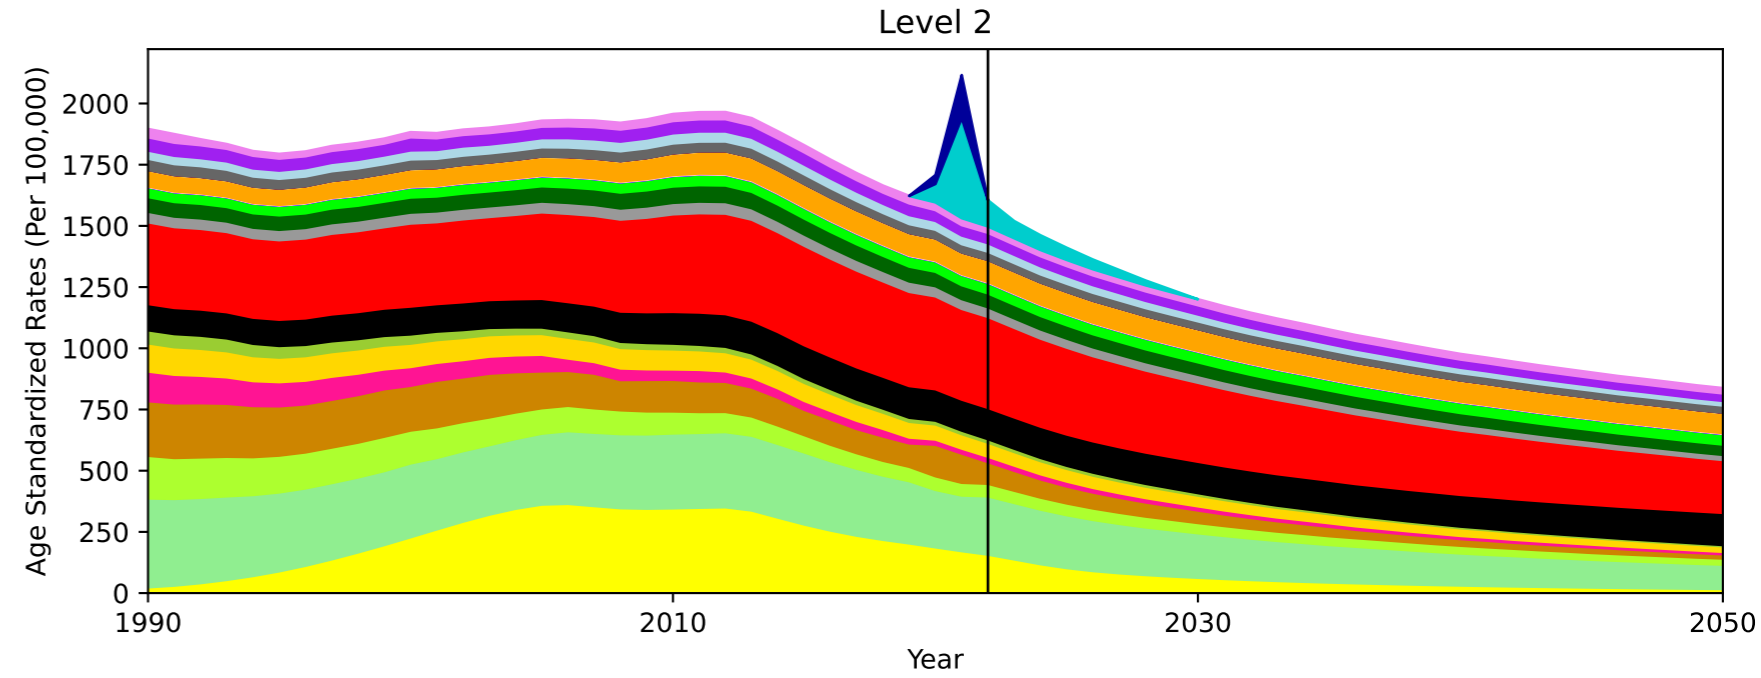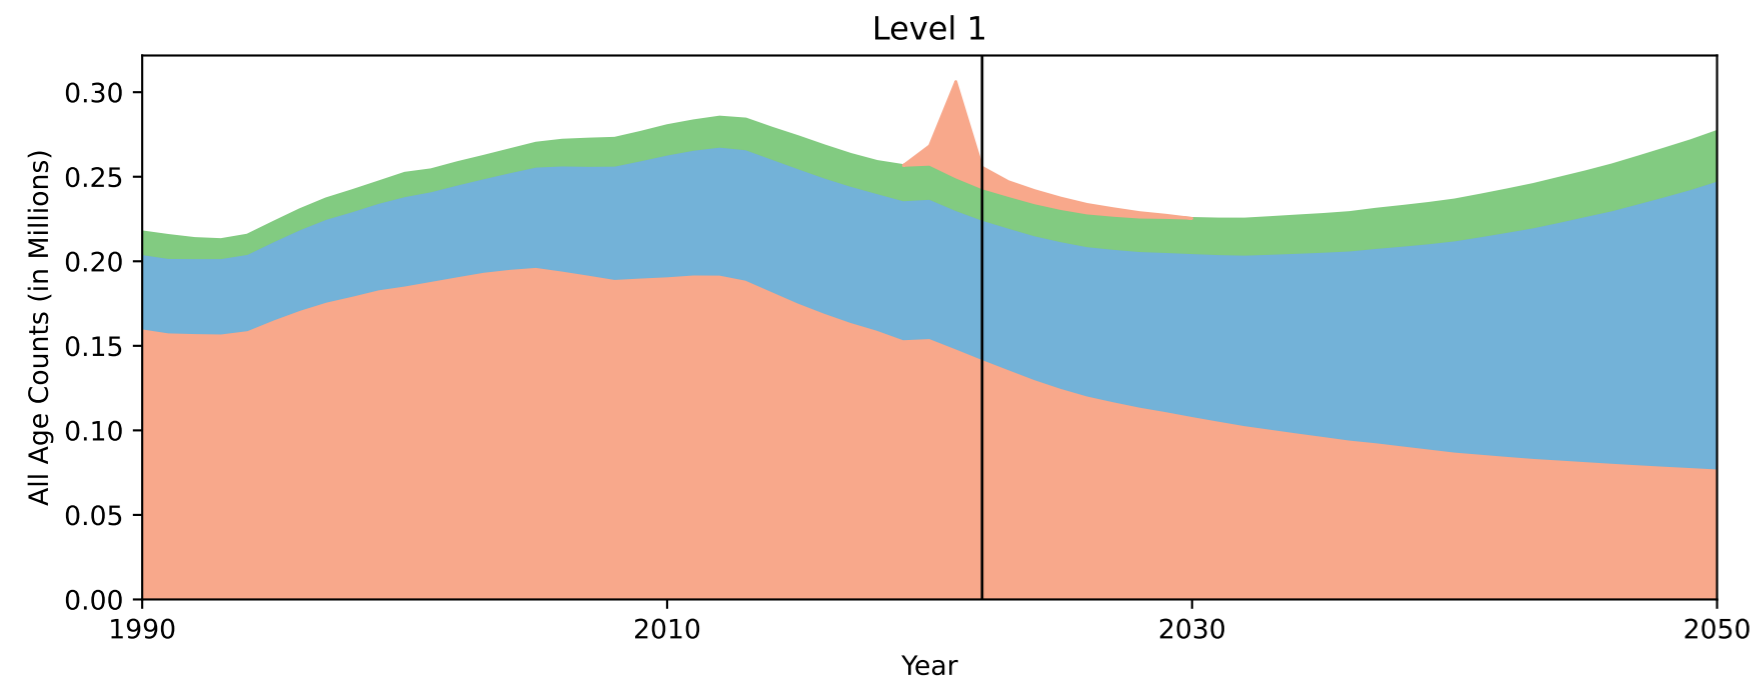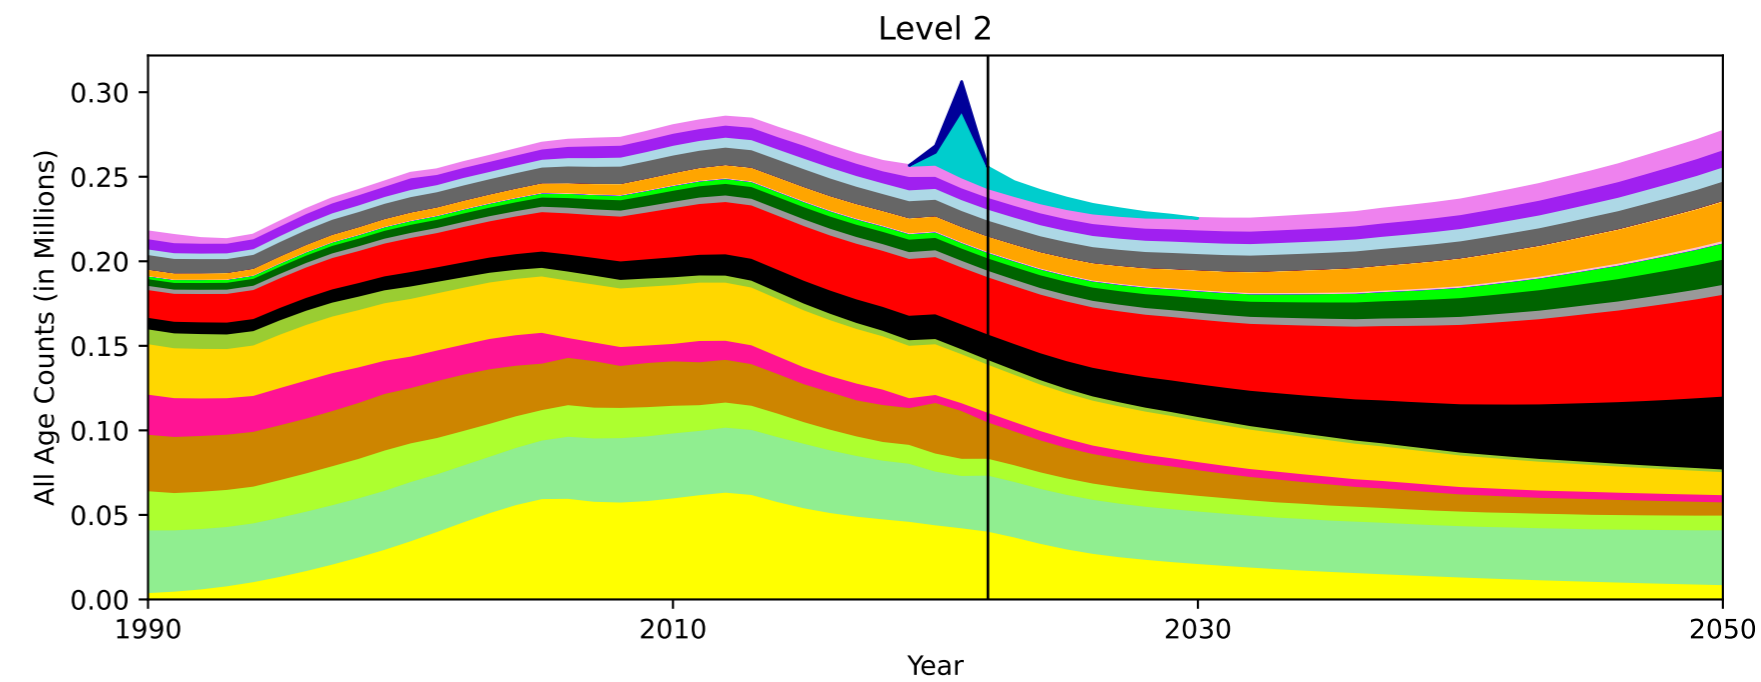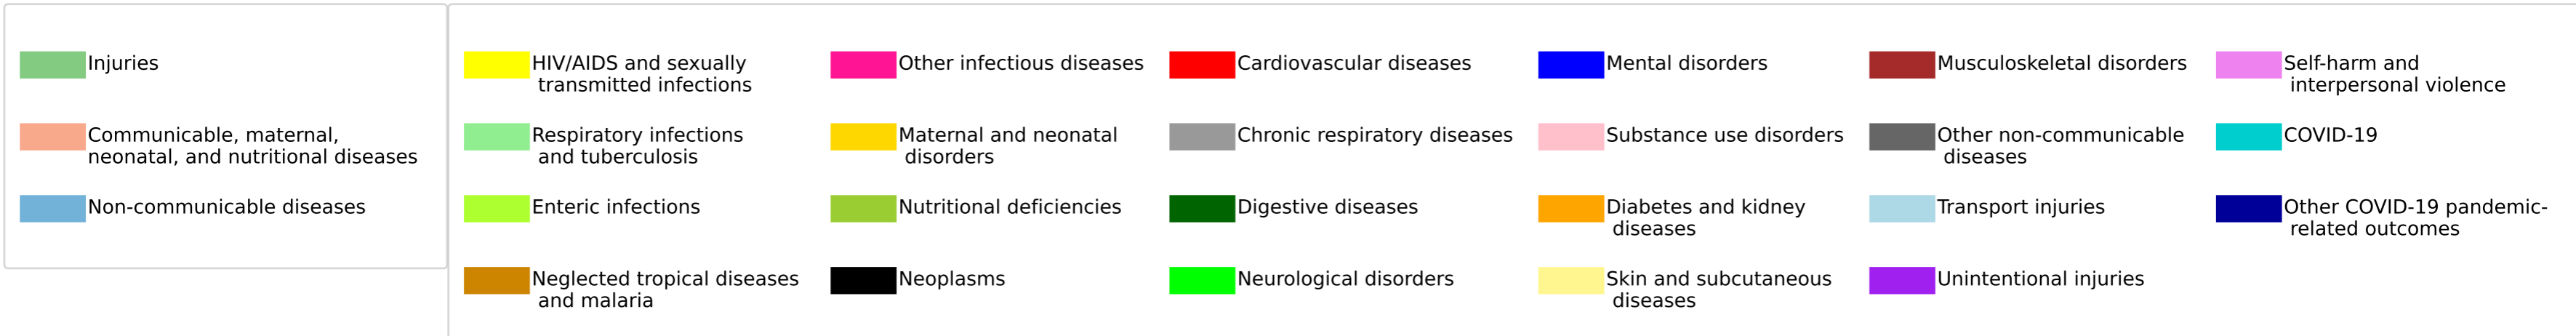

# Rwanda

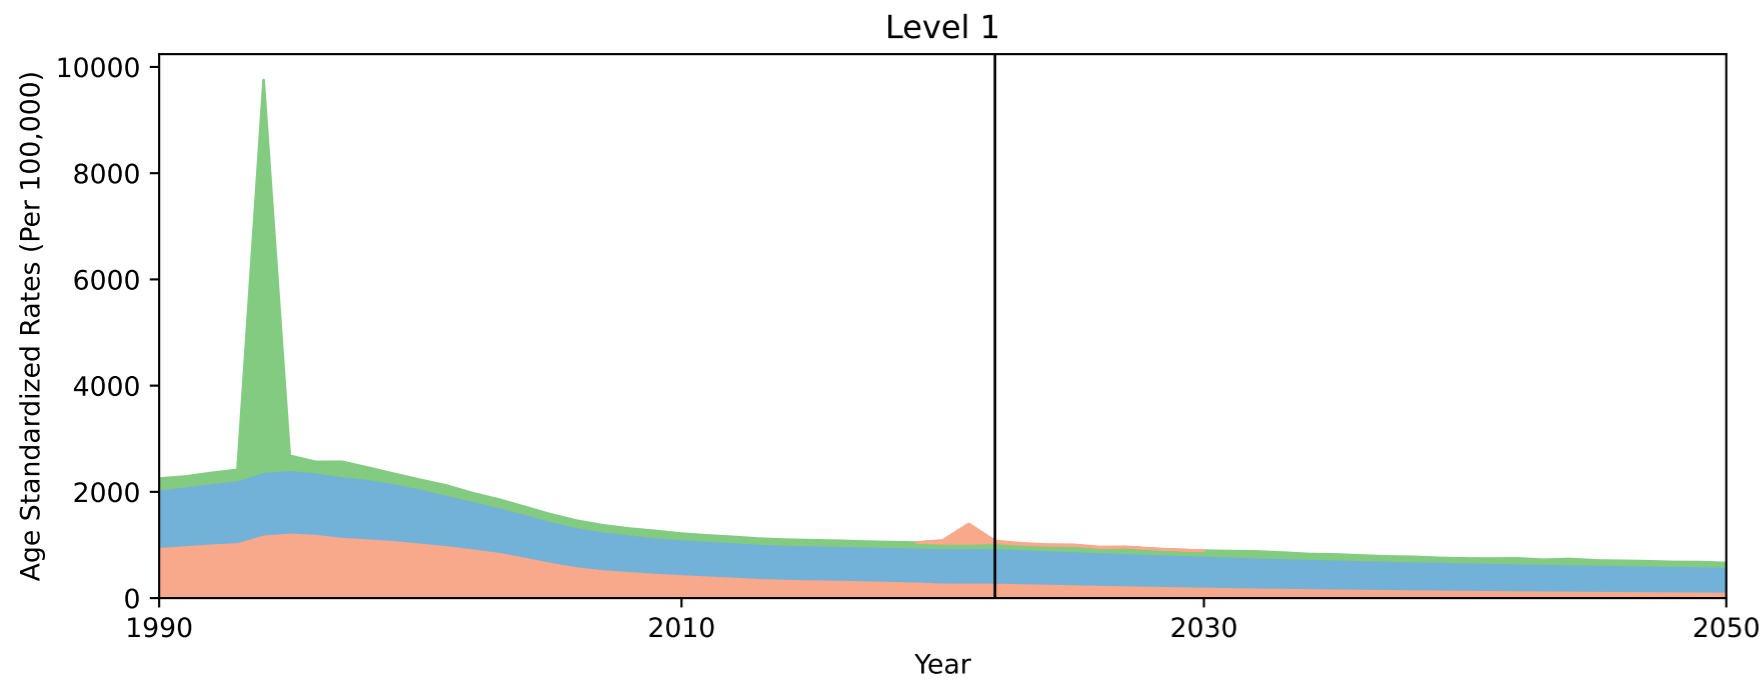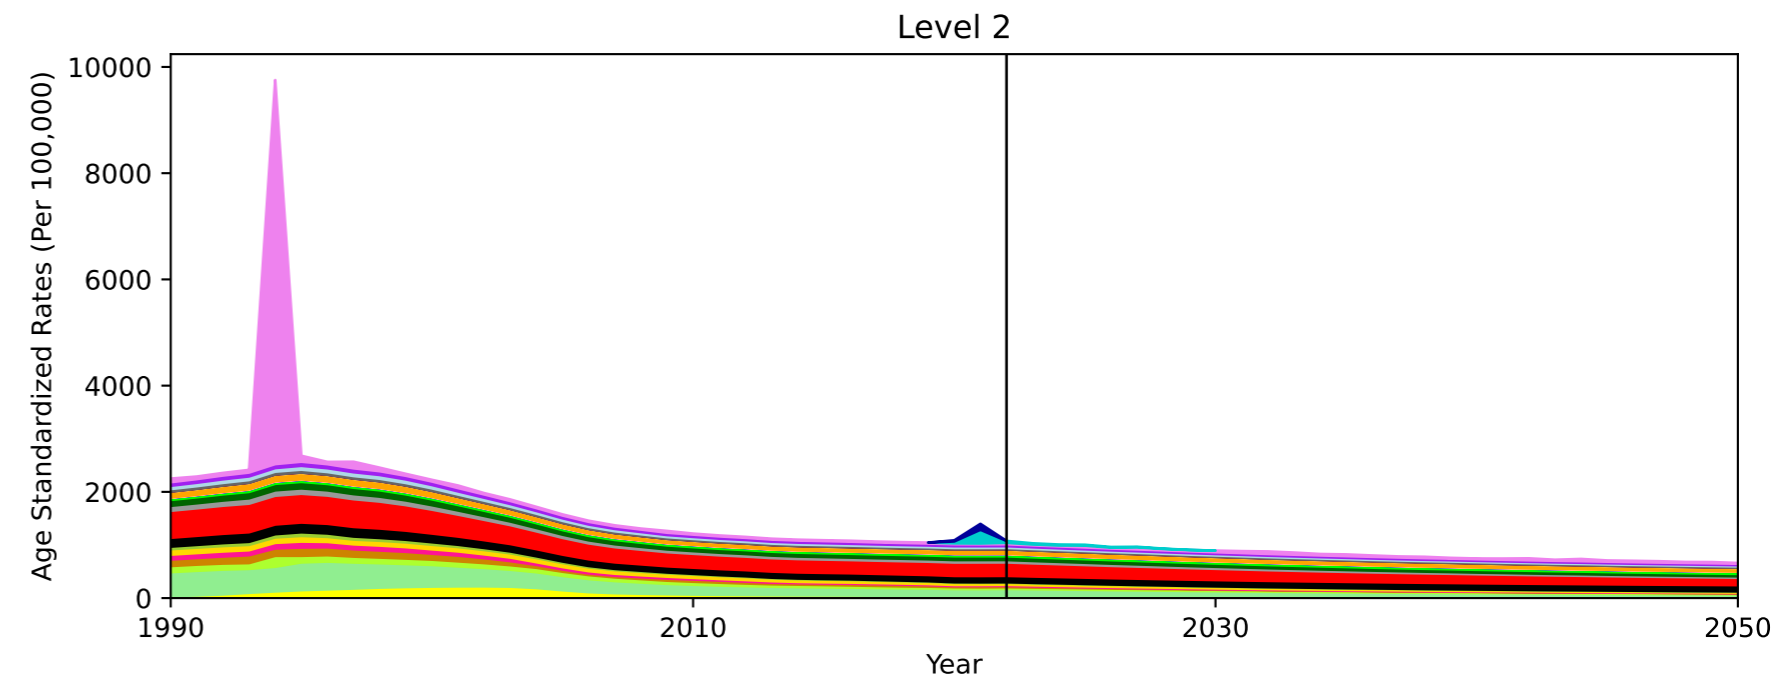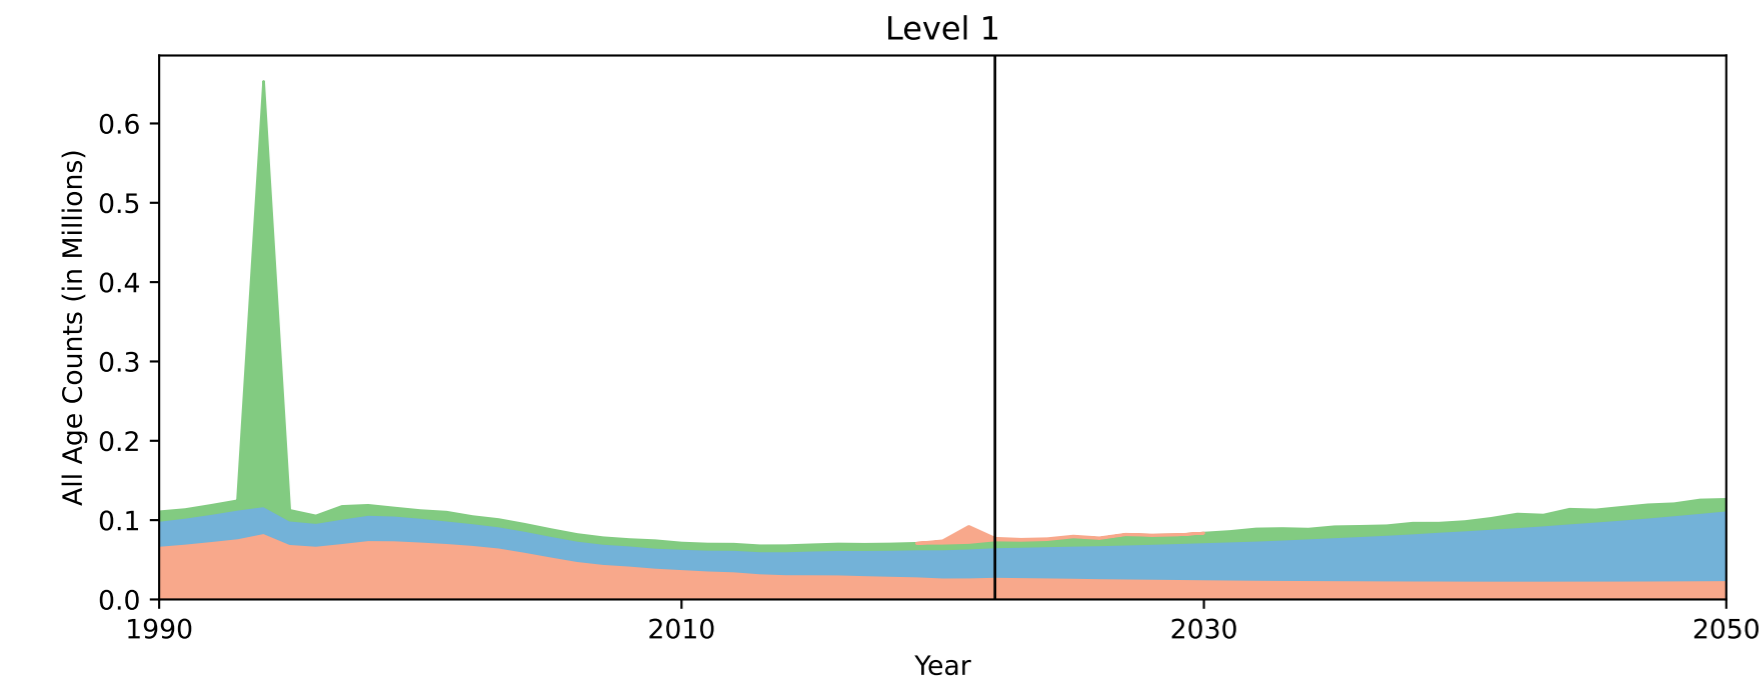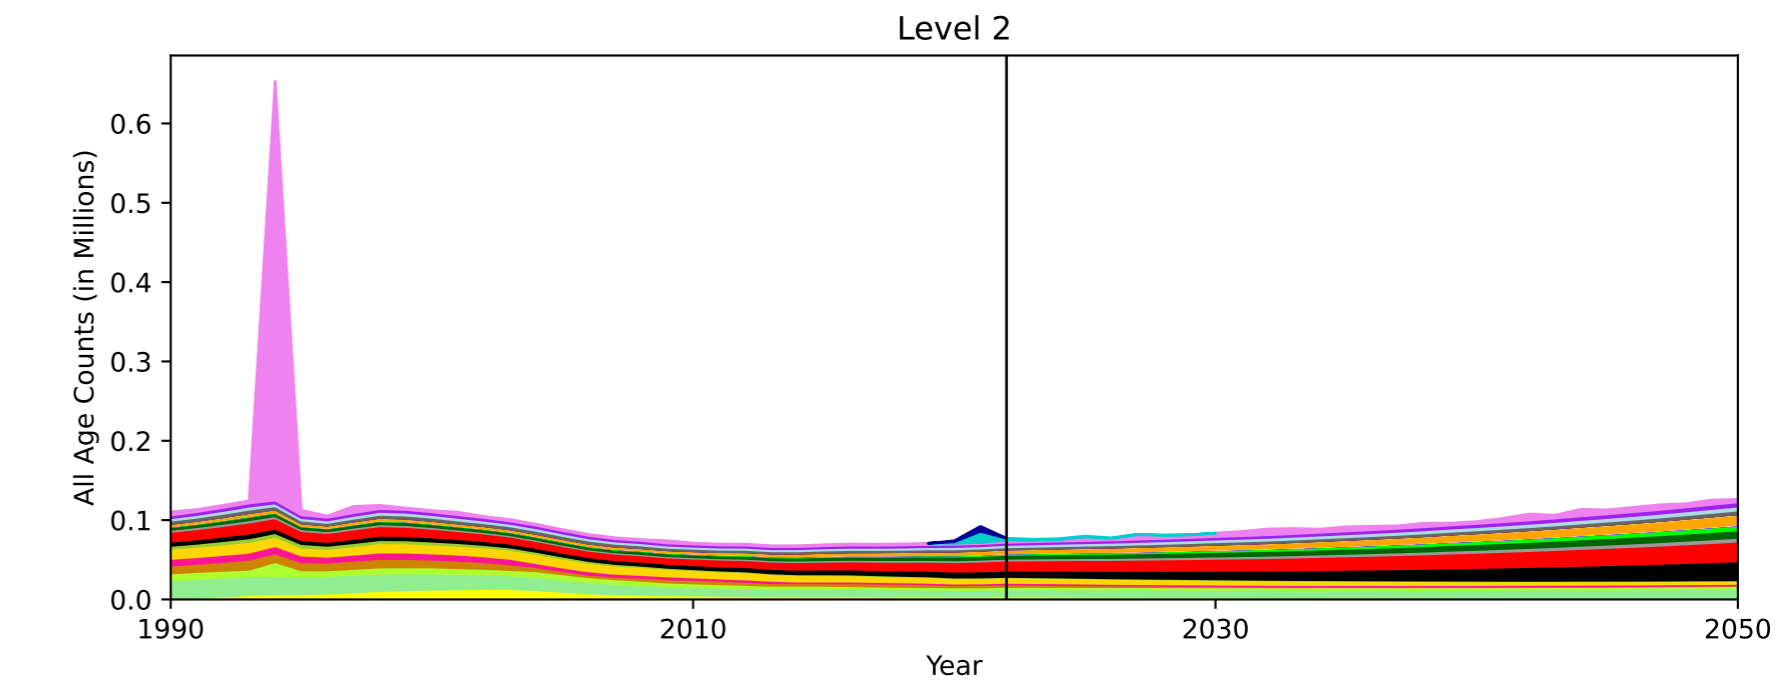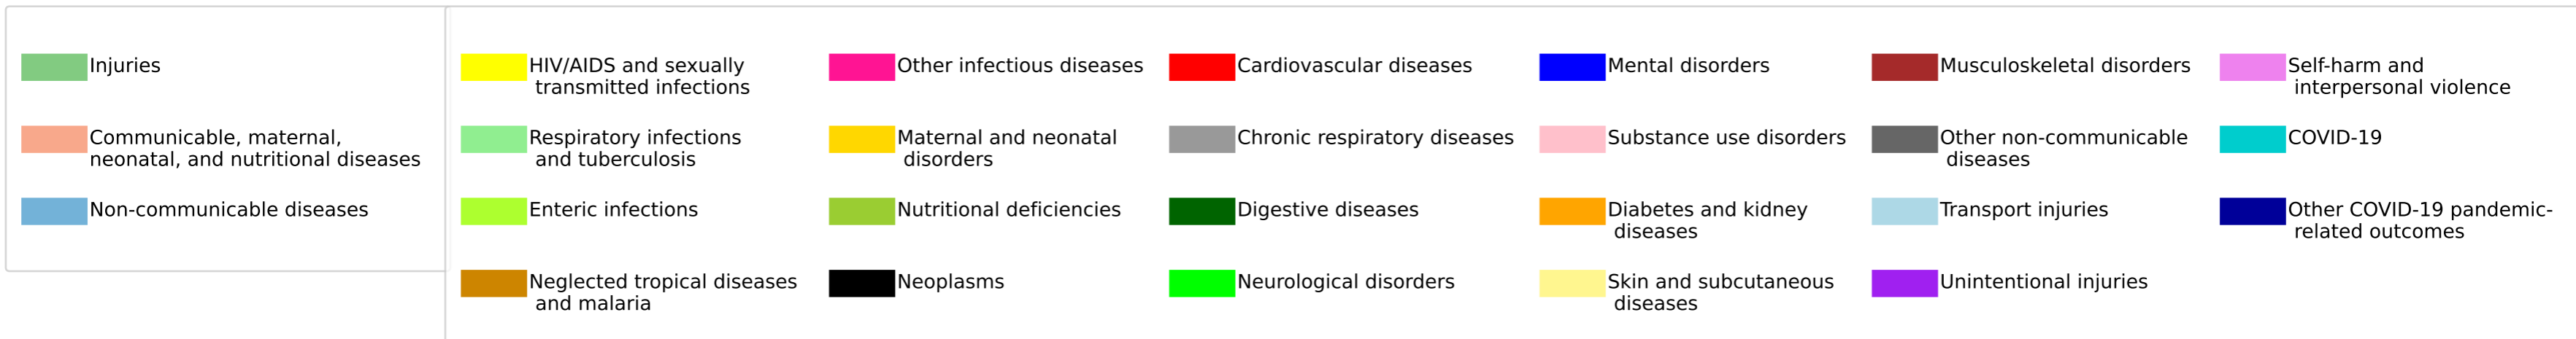

# Somalia

Level 1

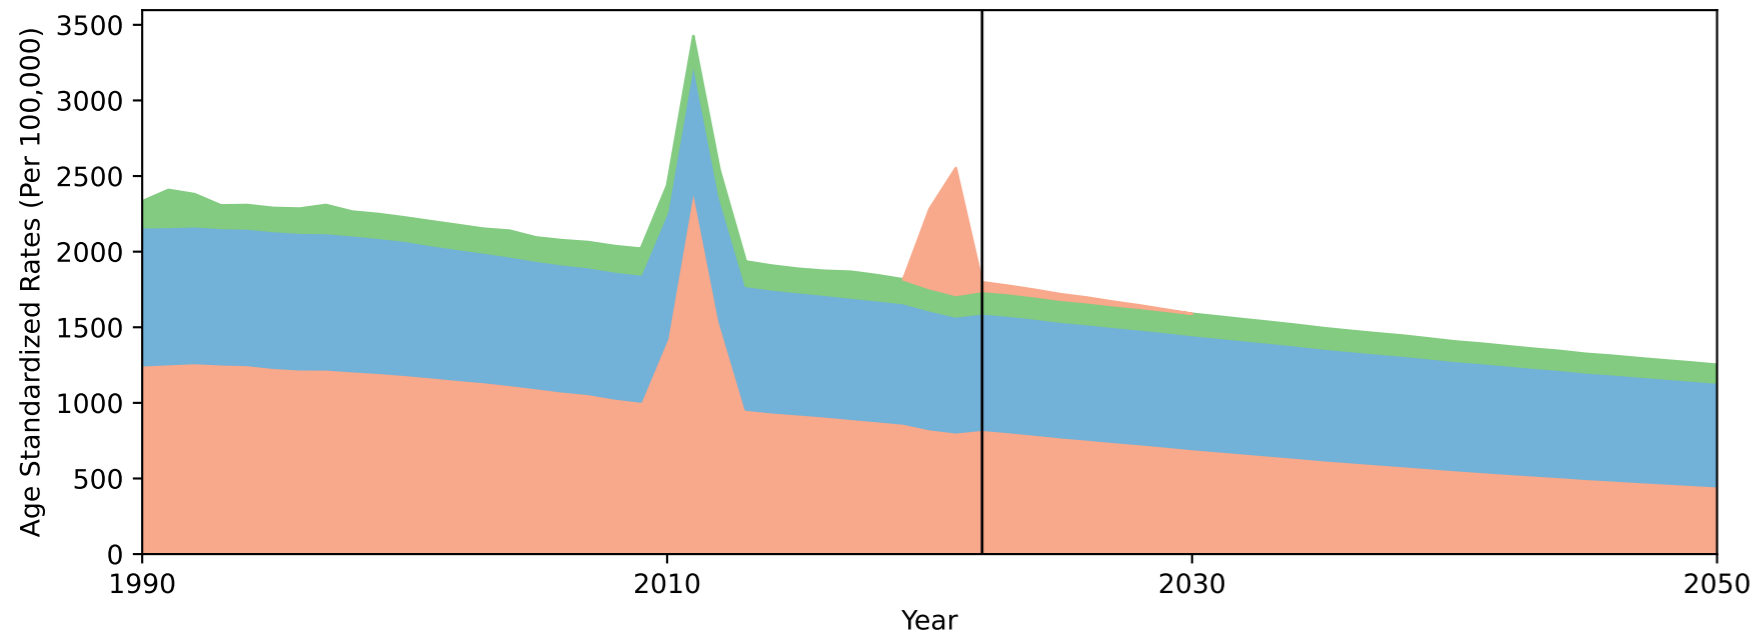

Level 2

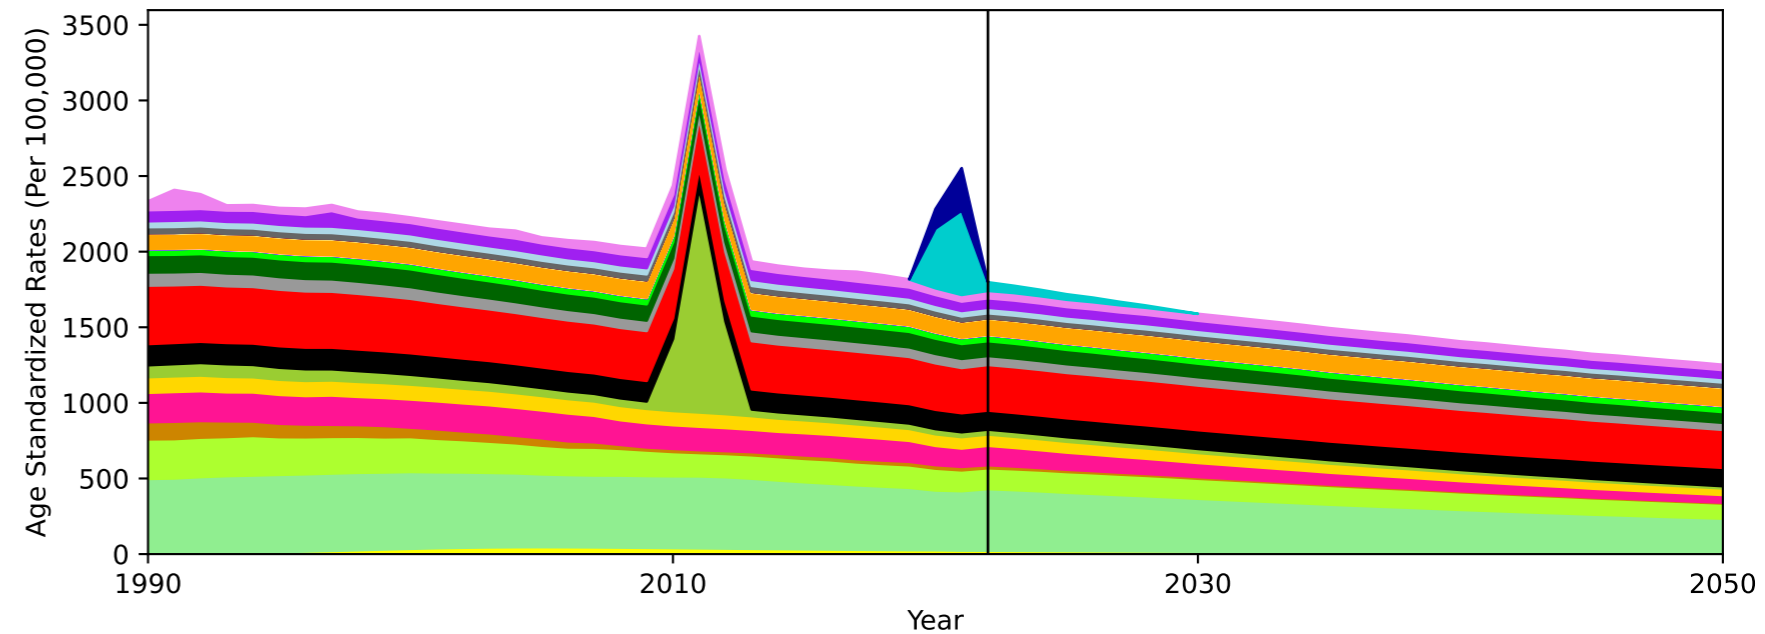

Level 1

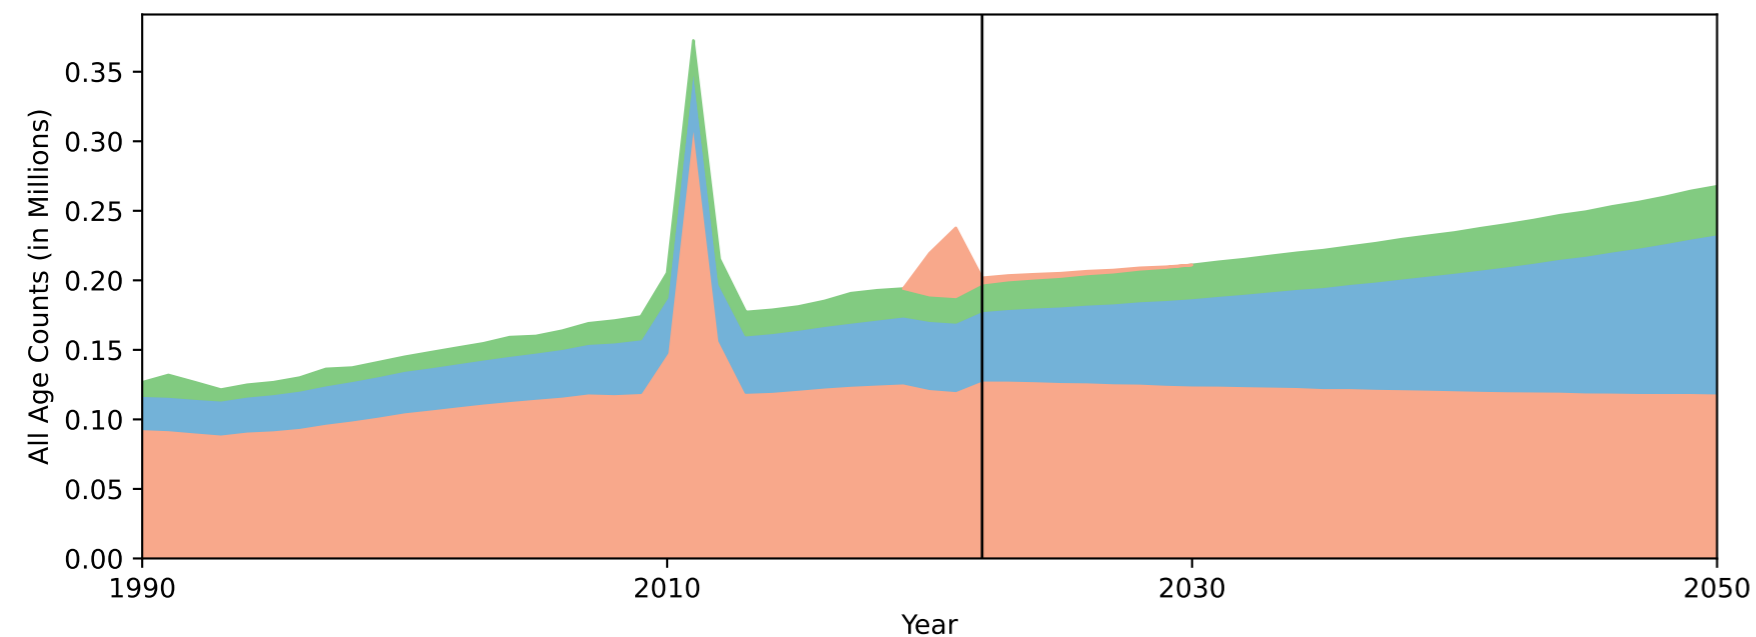

Level 2

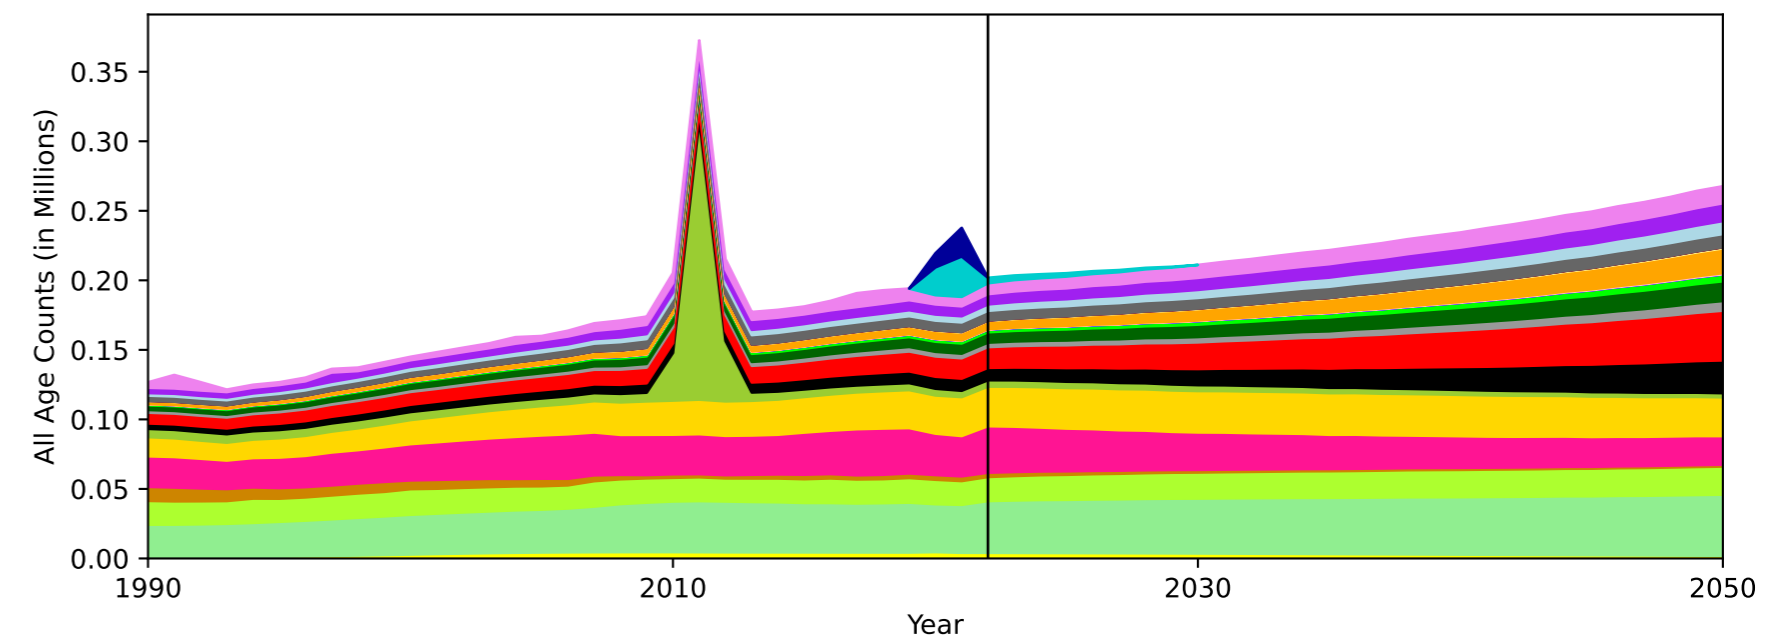

# South Sudan

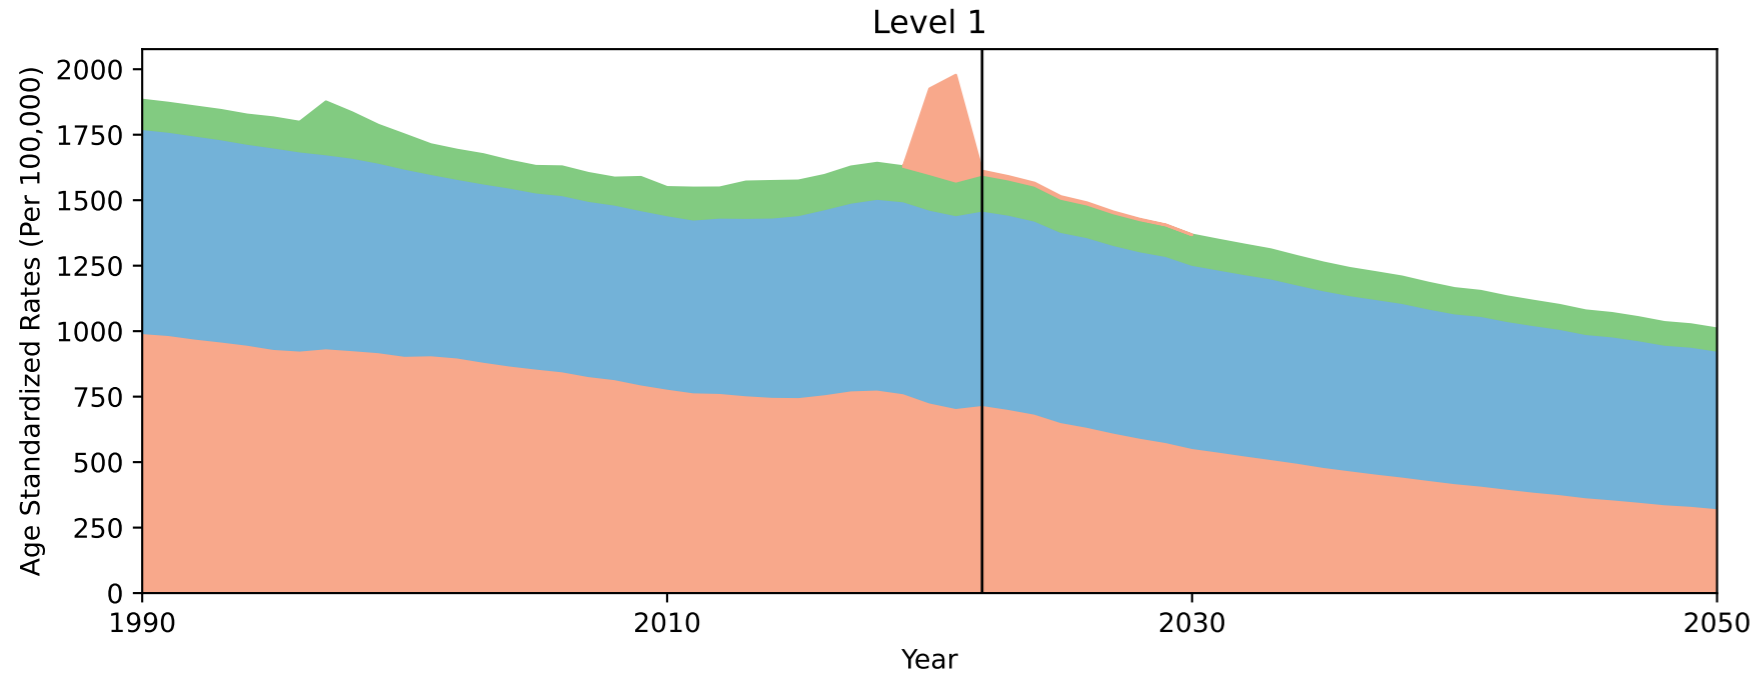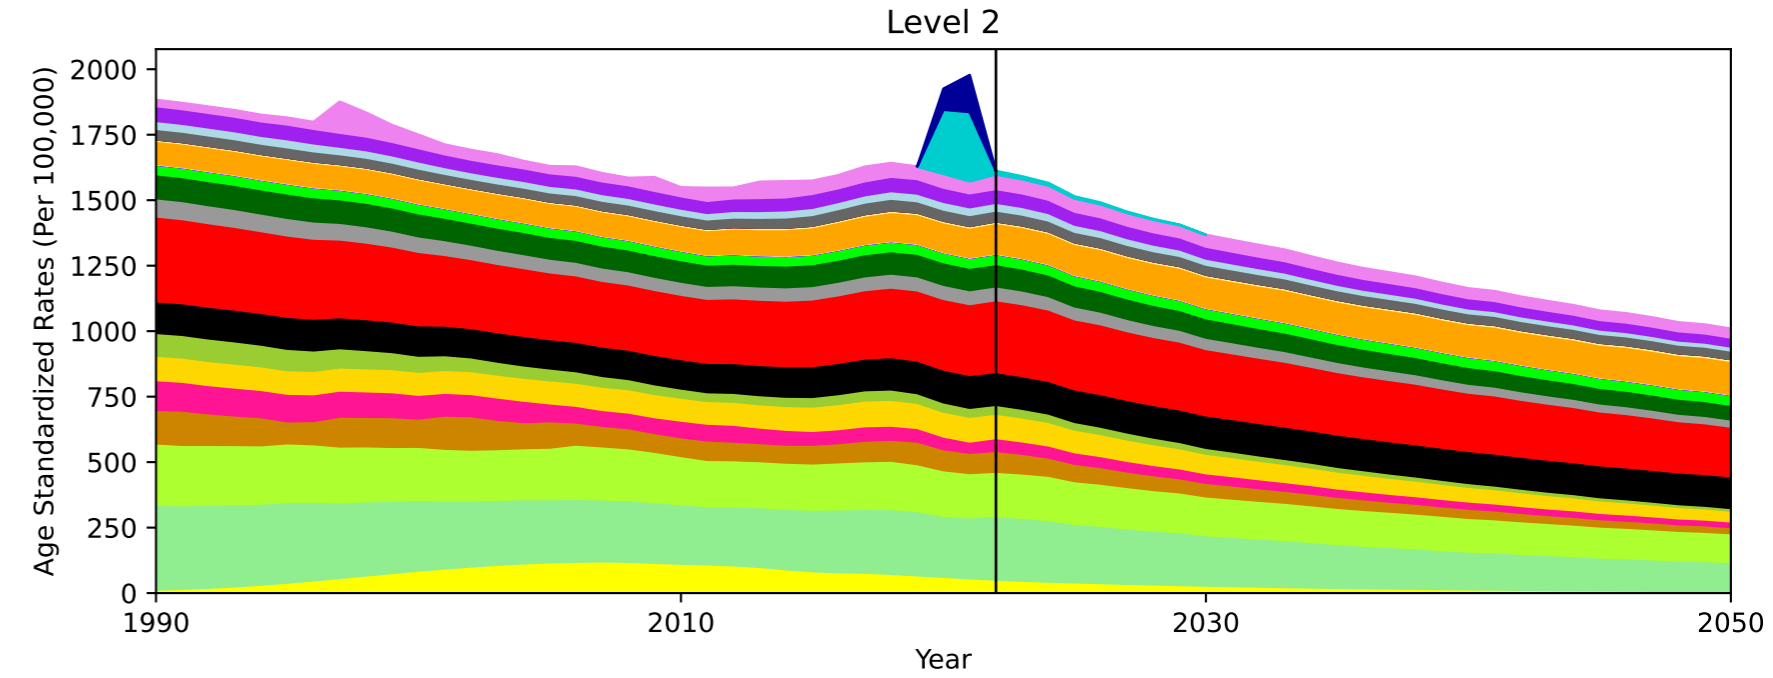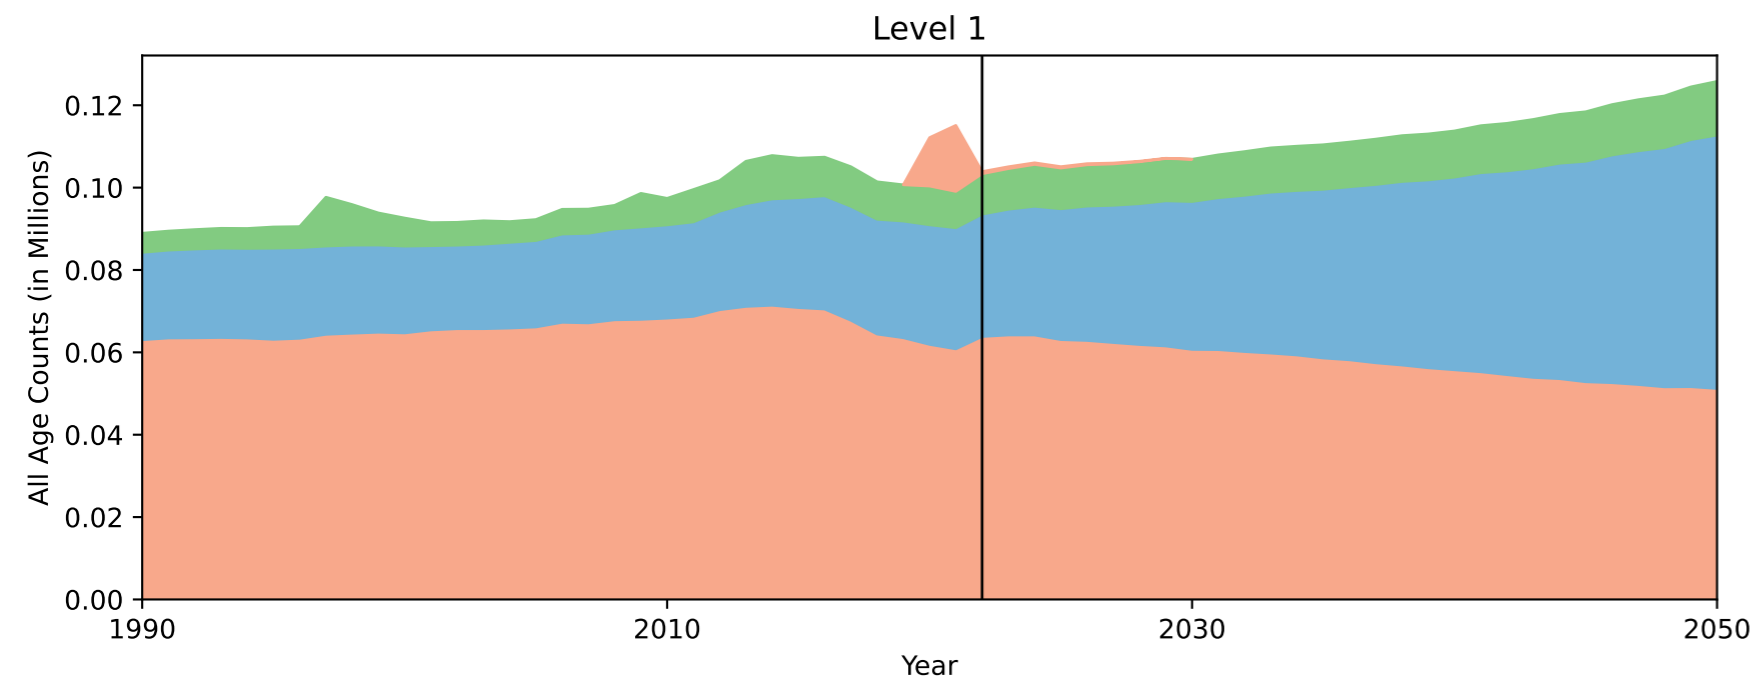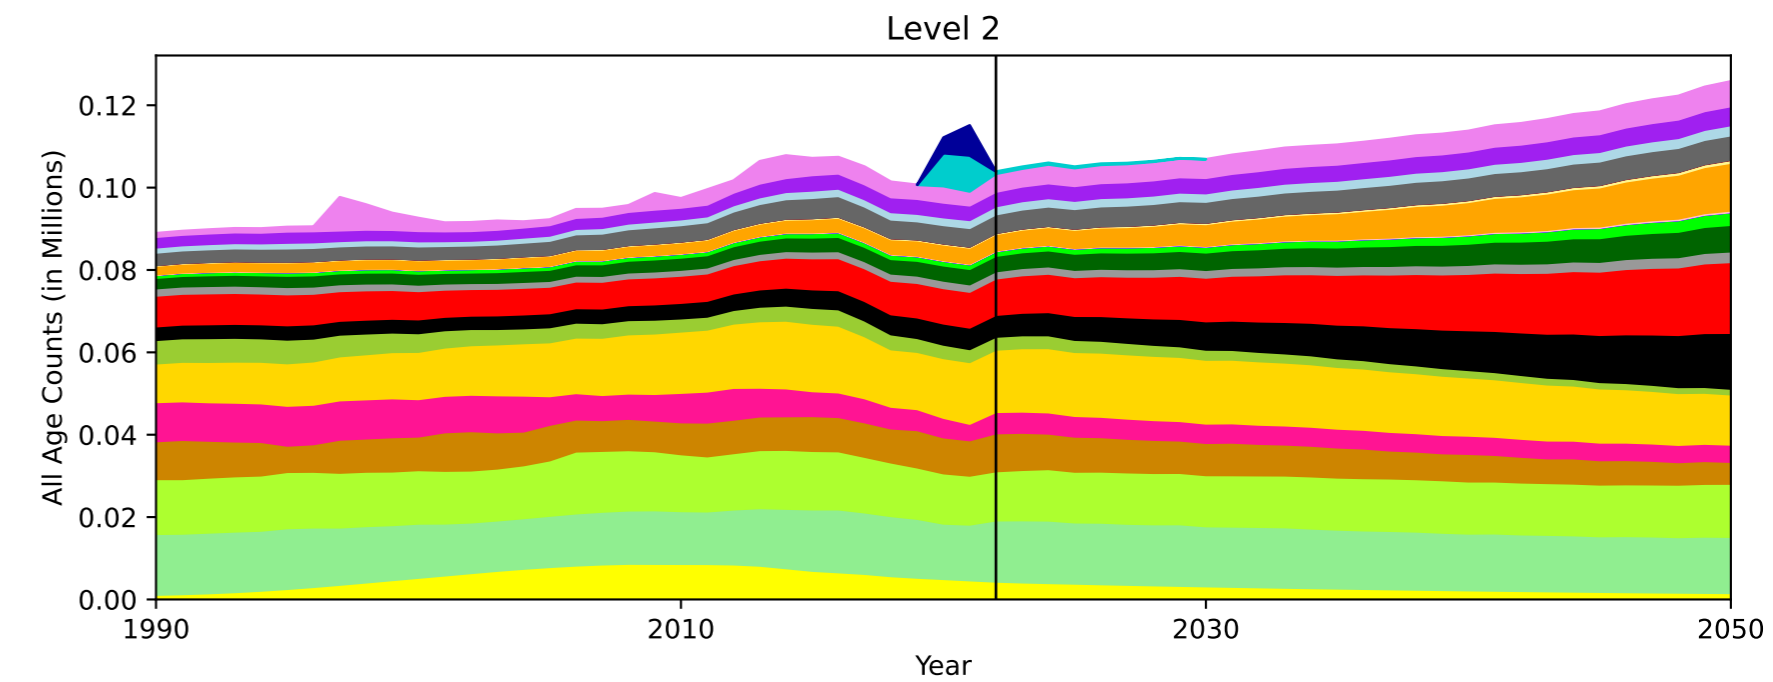

# Uganda

Level 1

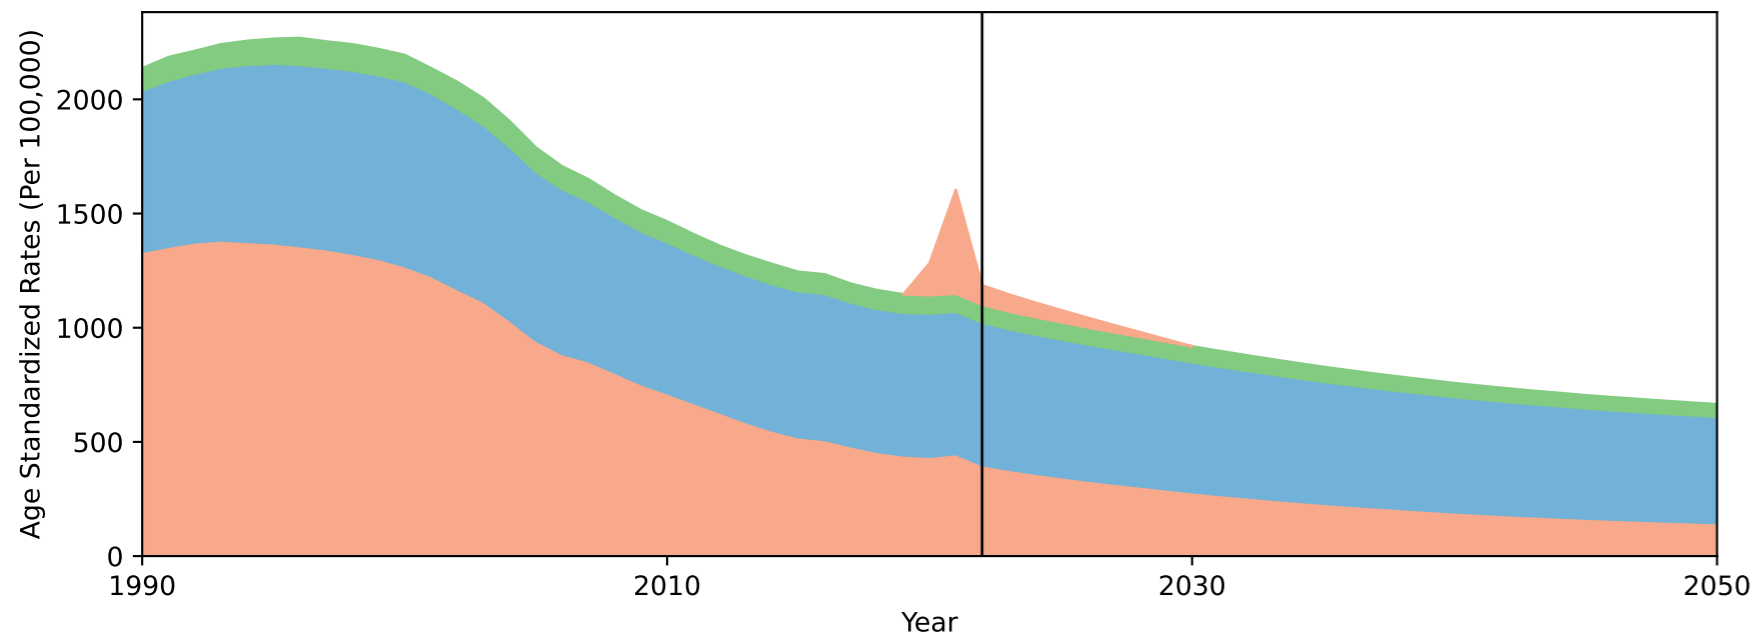

Level 2

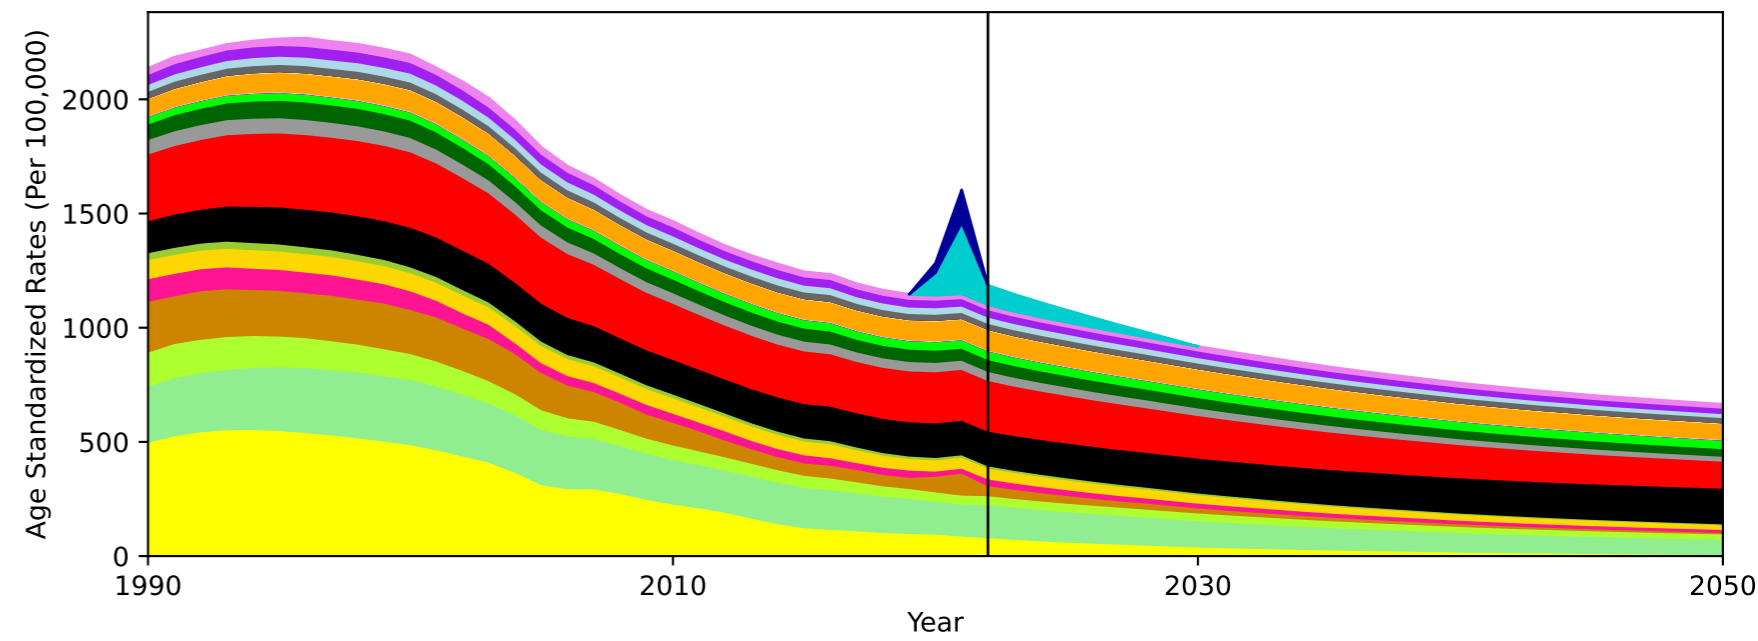

Level 1

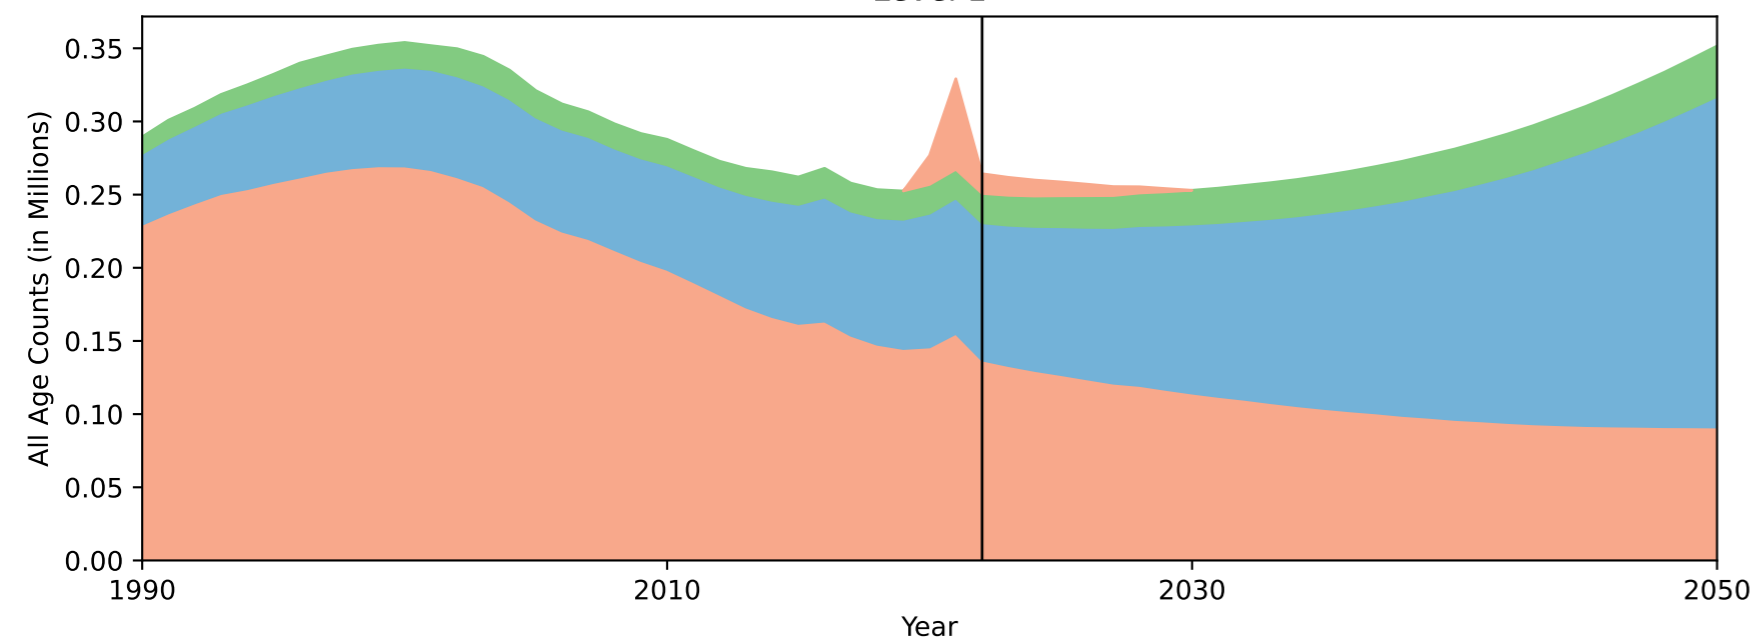

Level 2

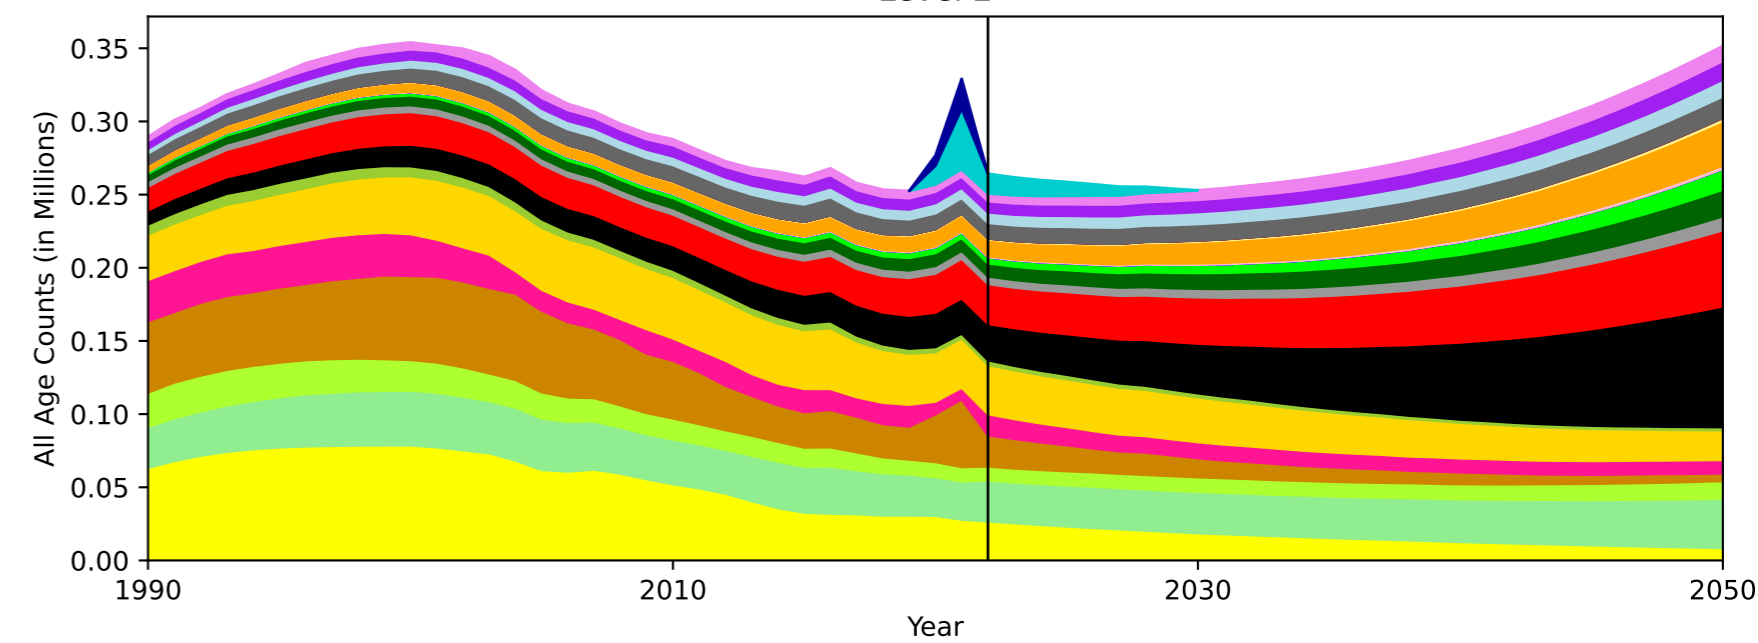

# Tanzania

Level 1

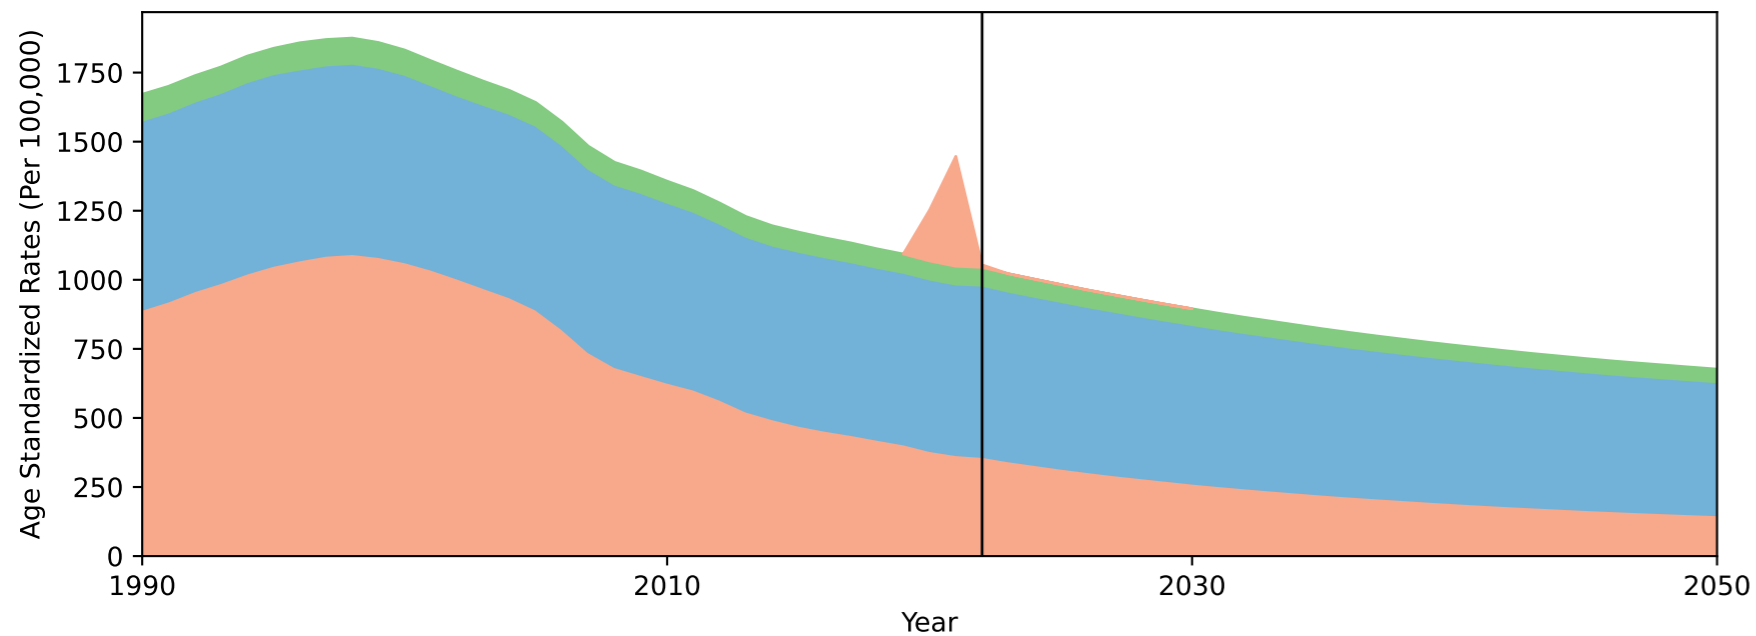

Level 2

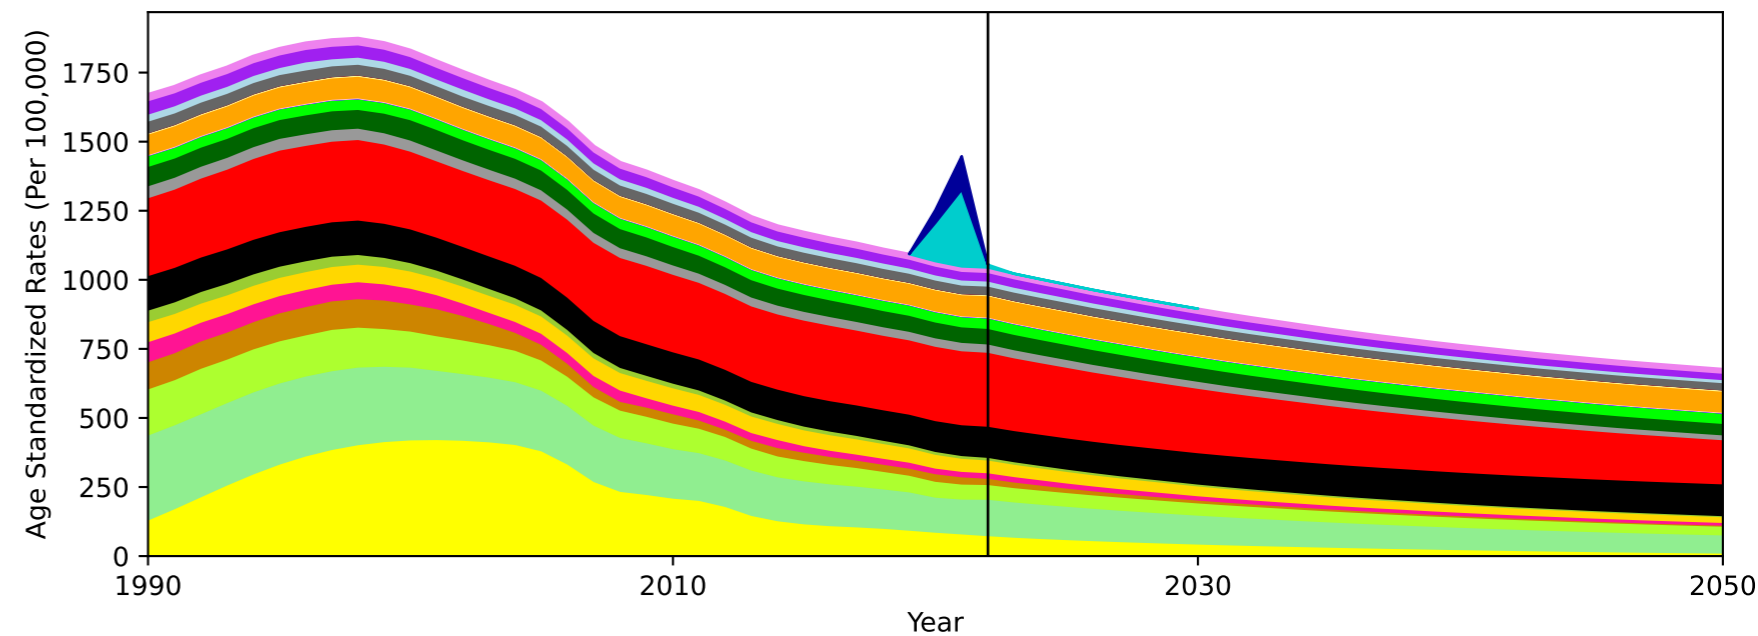

Level 1

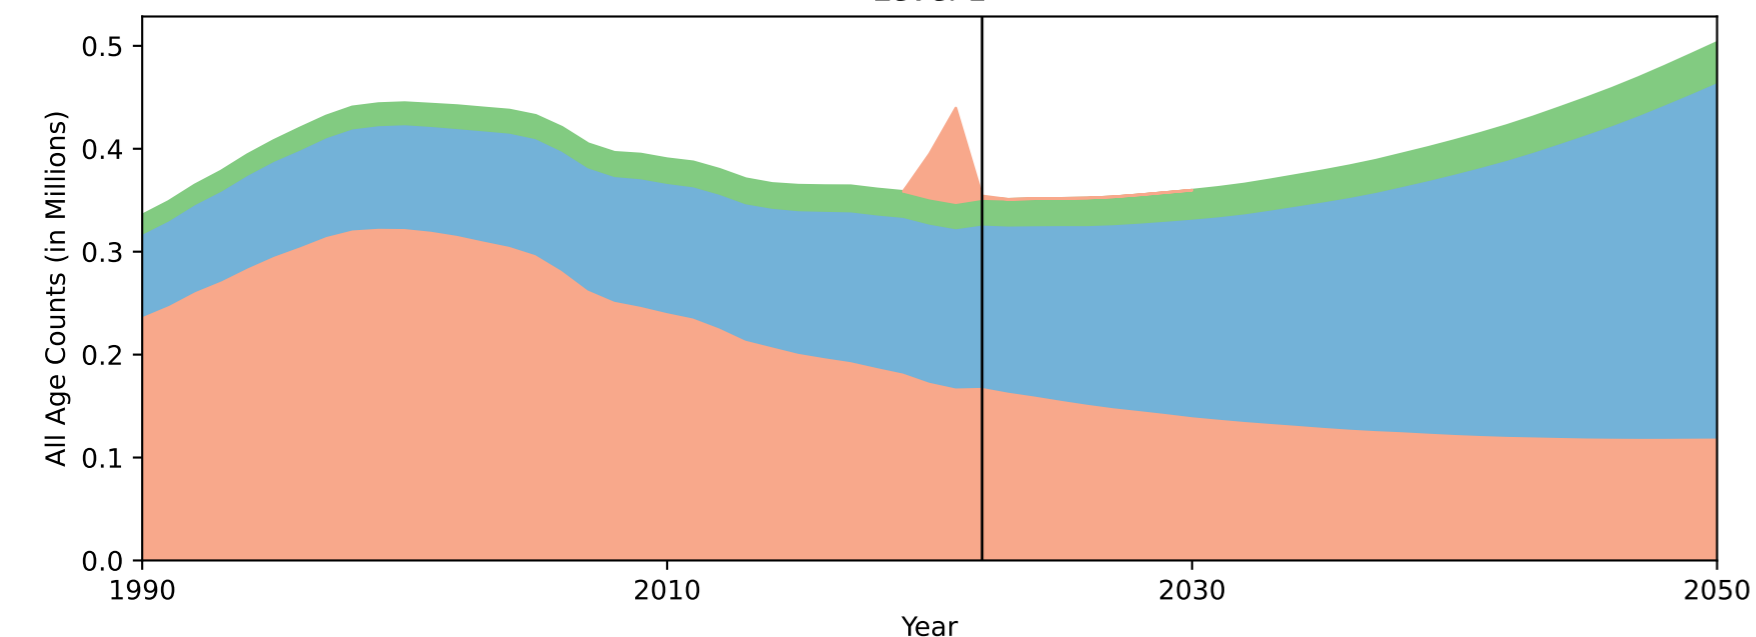

Level 2

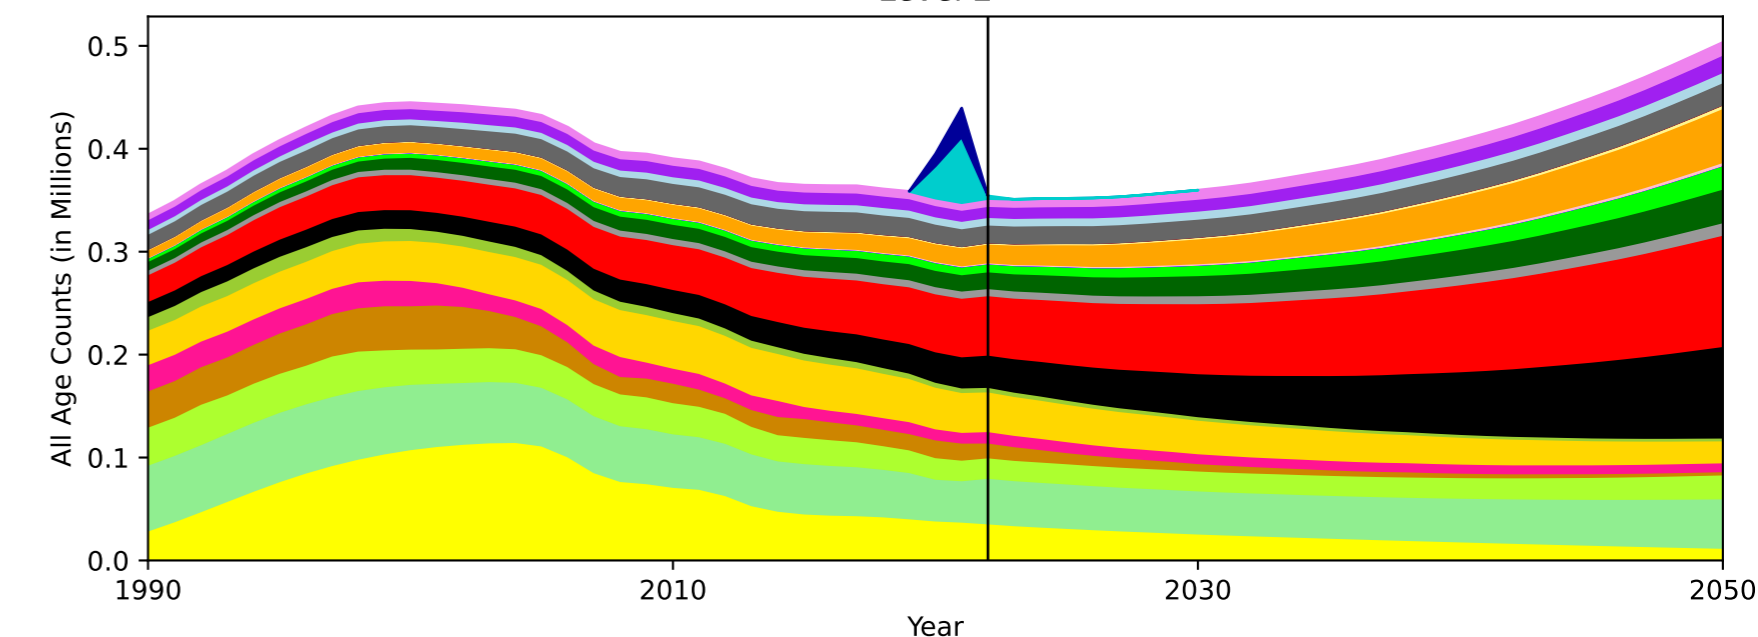



# Zambia

Level 1

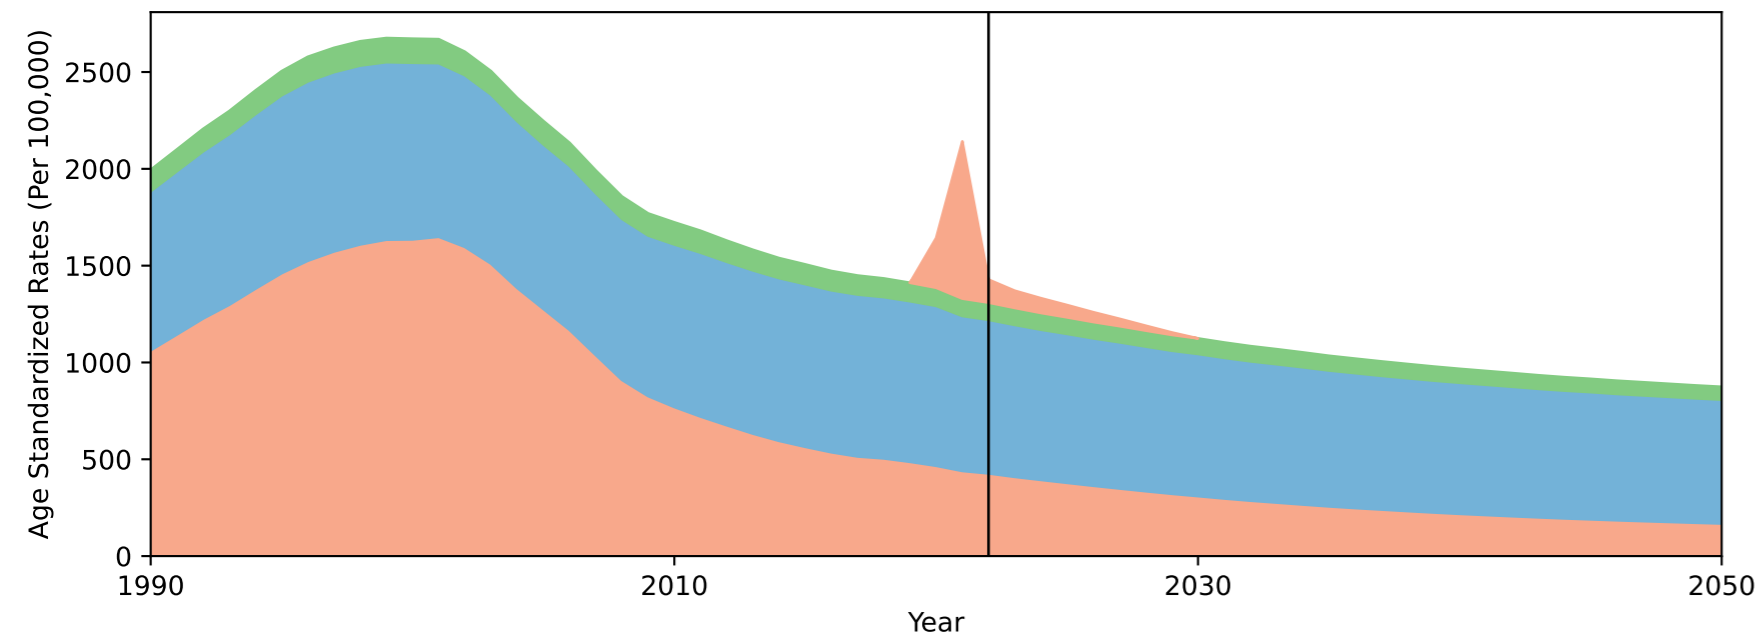

Level 2

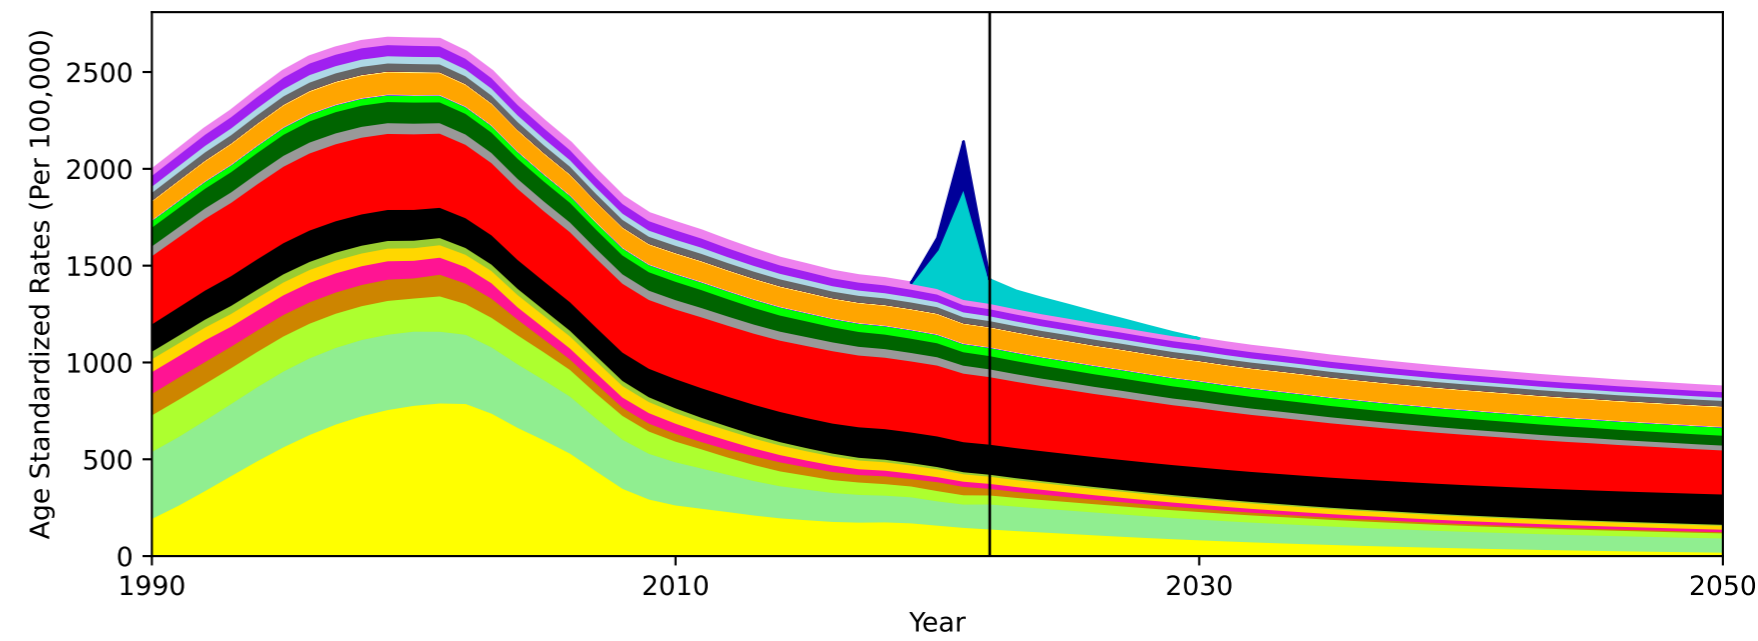

Level 1

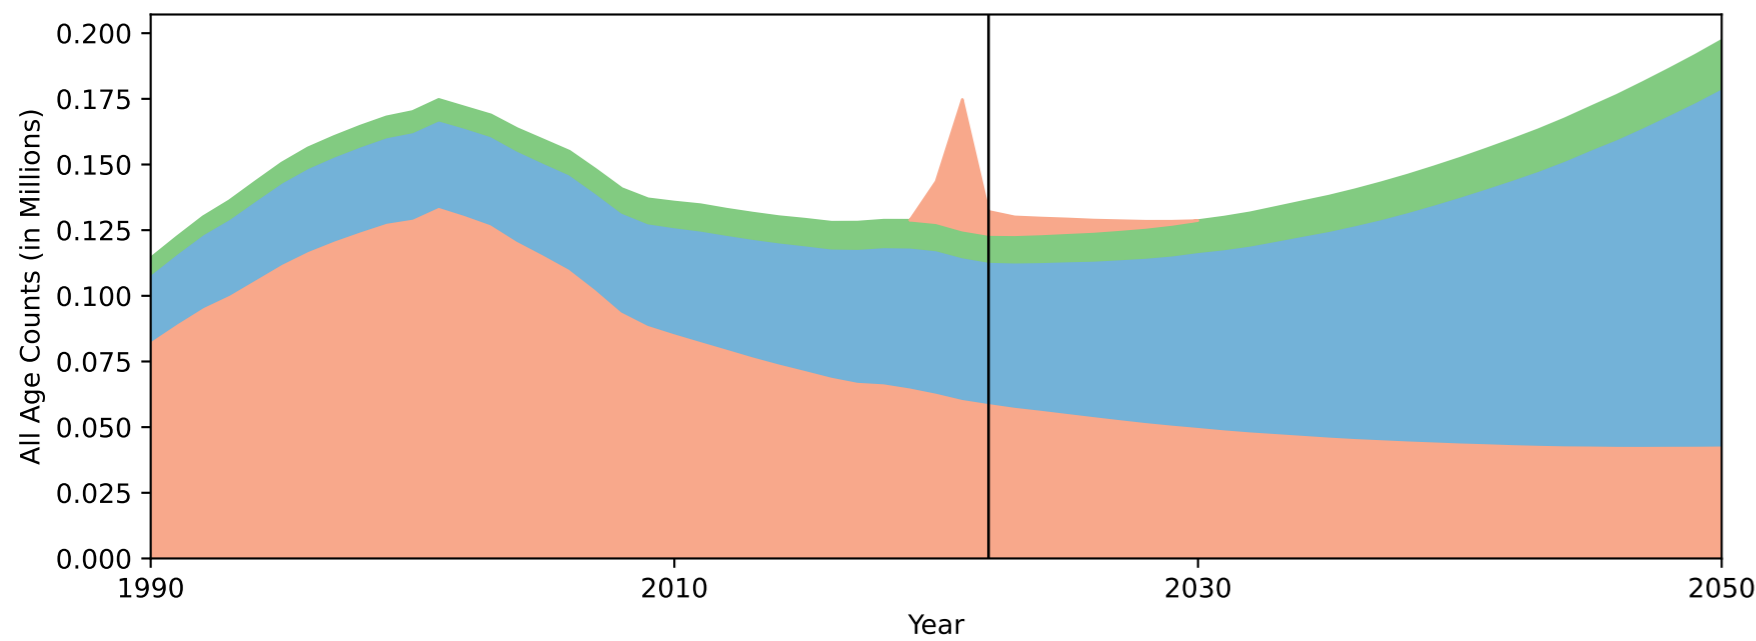

Level 2

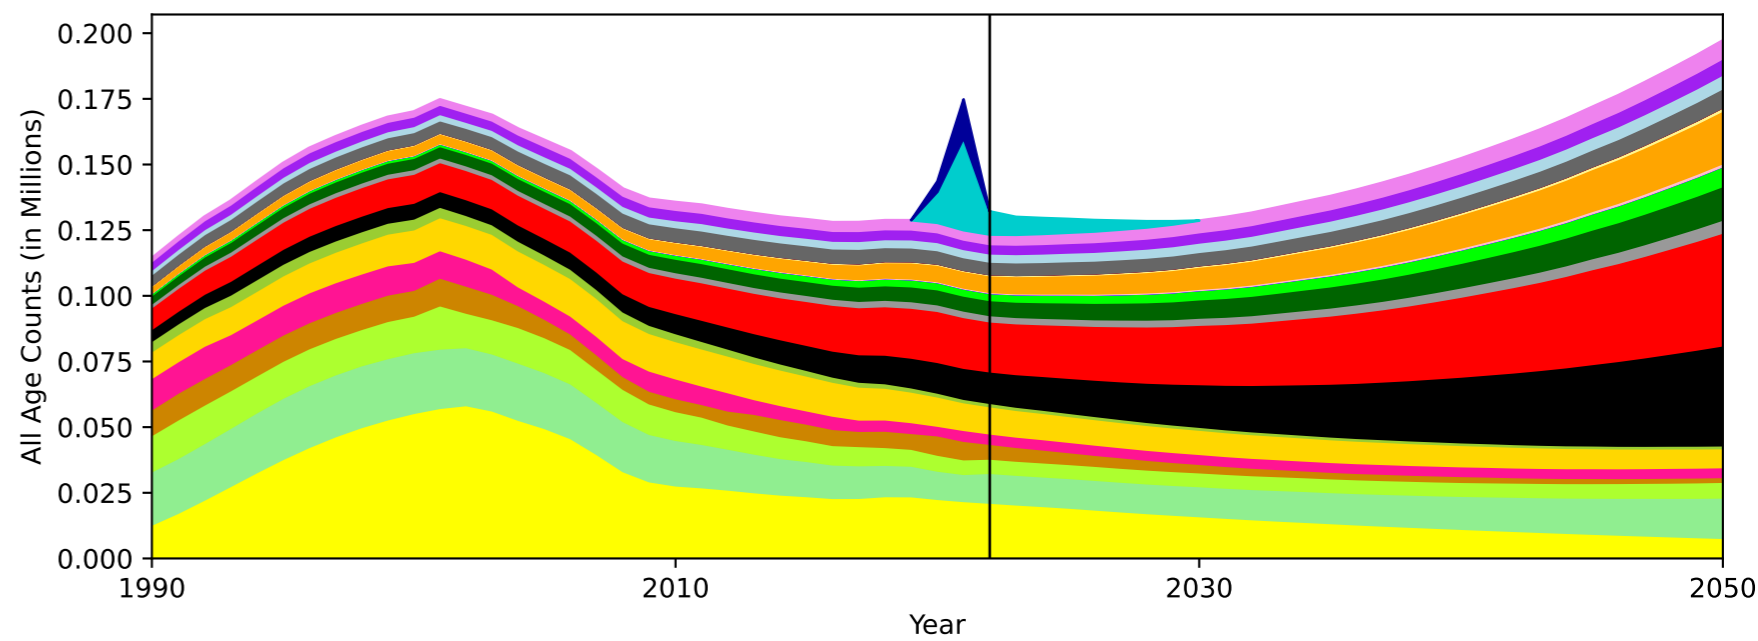

# Botswana

Level 1

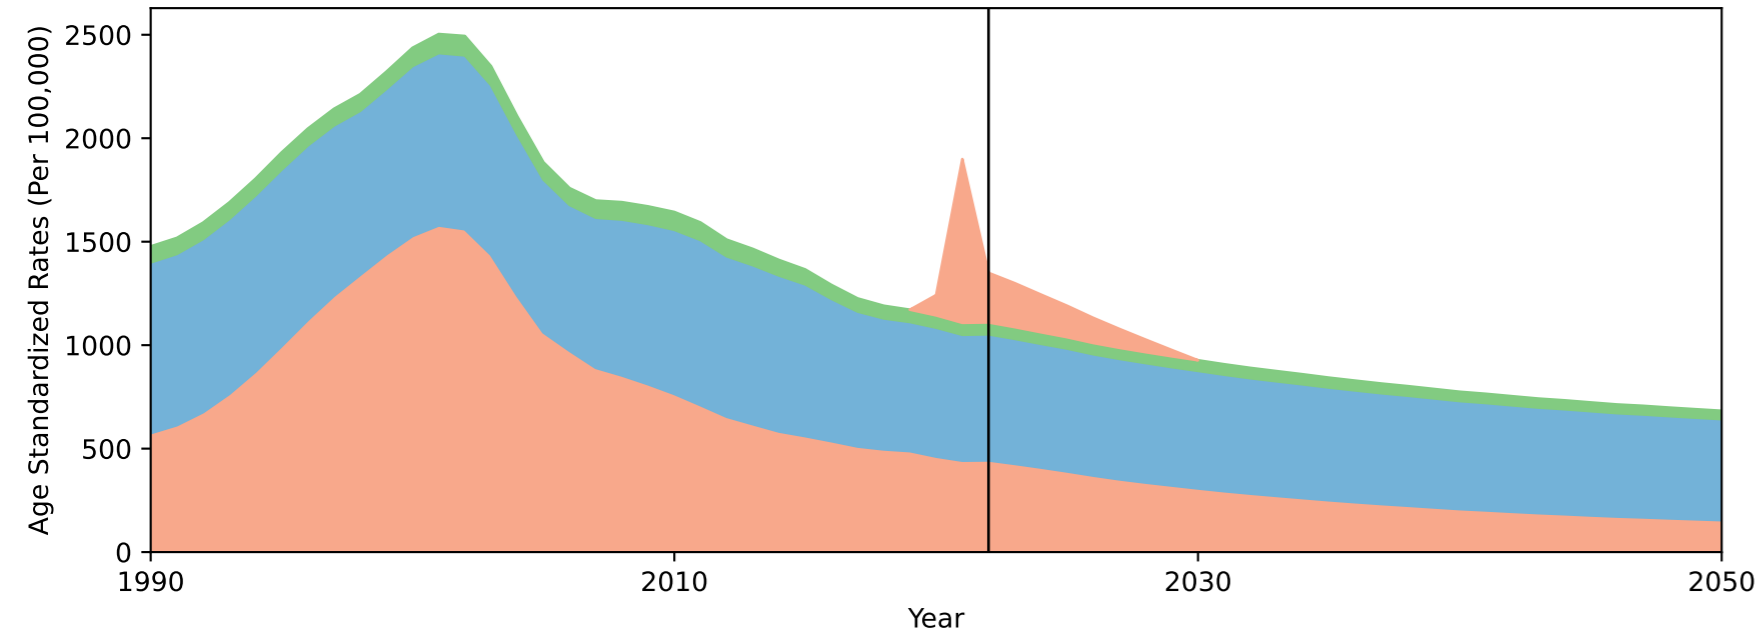

Level 2

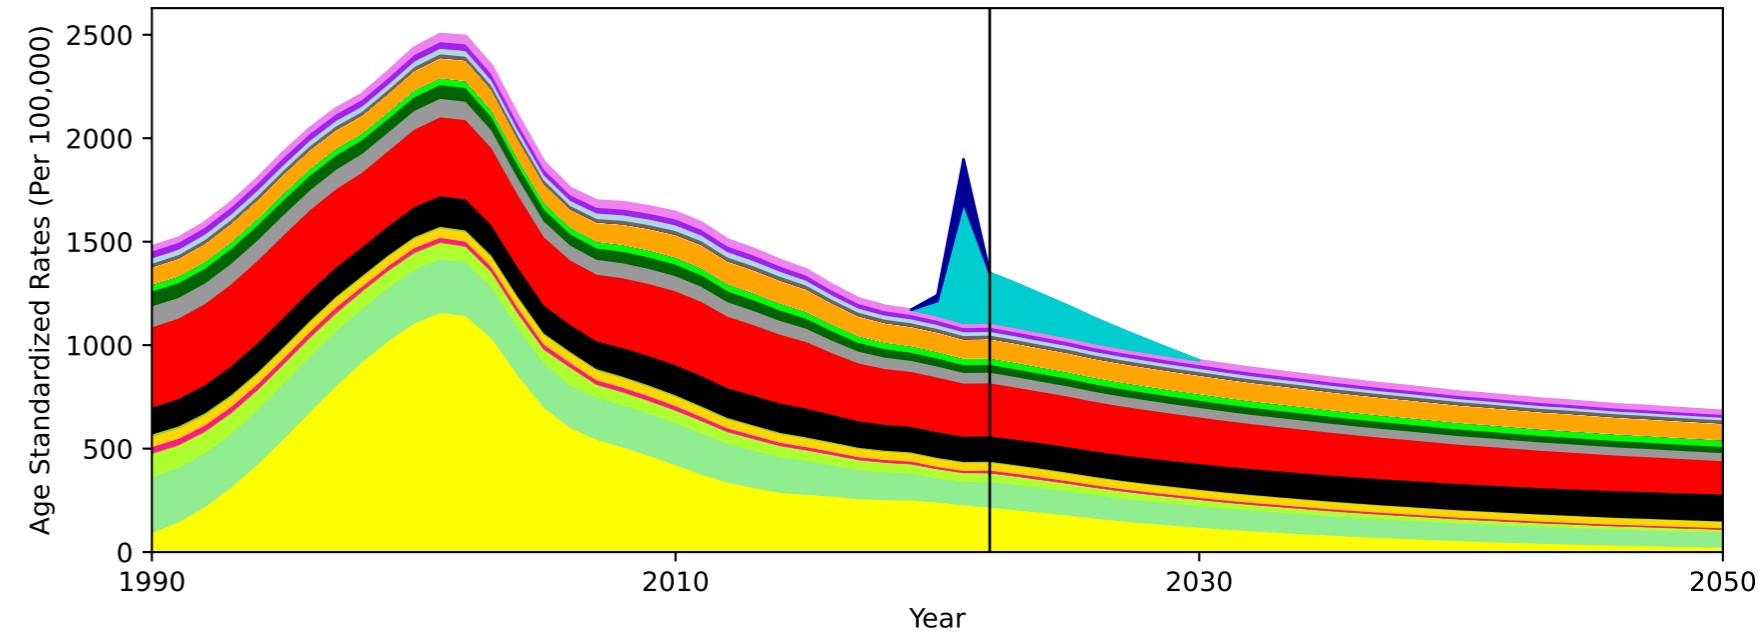

Level 1

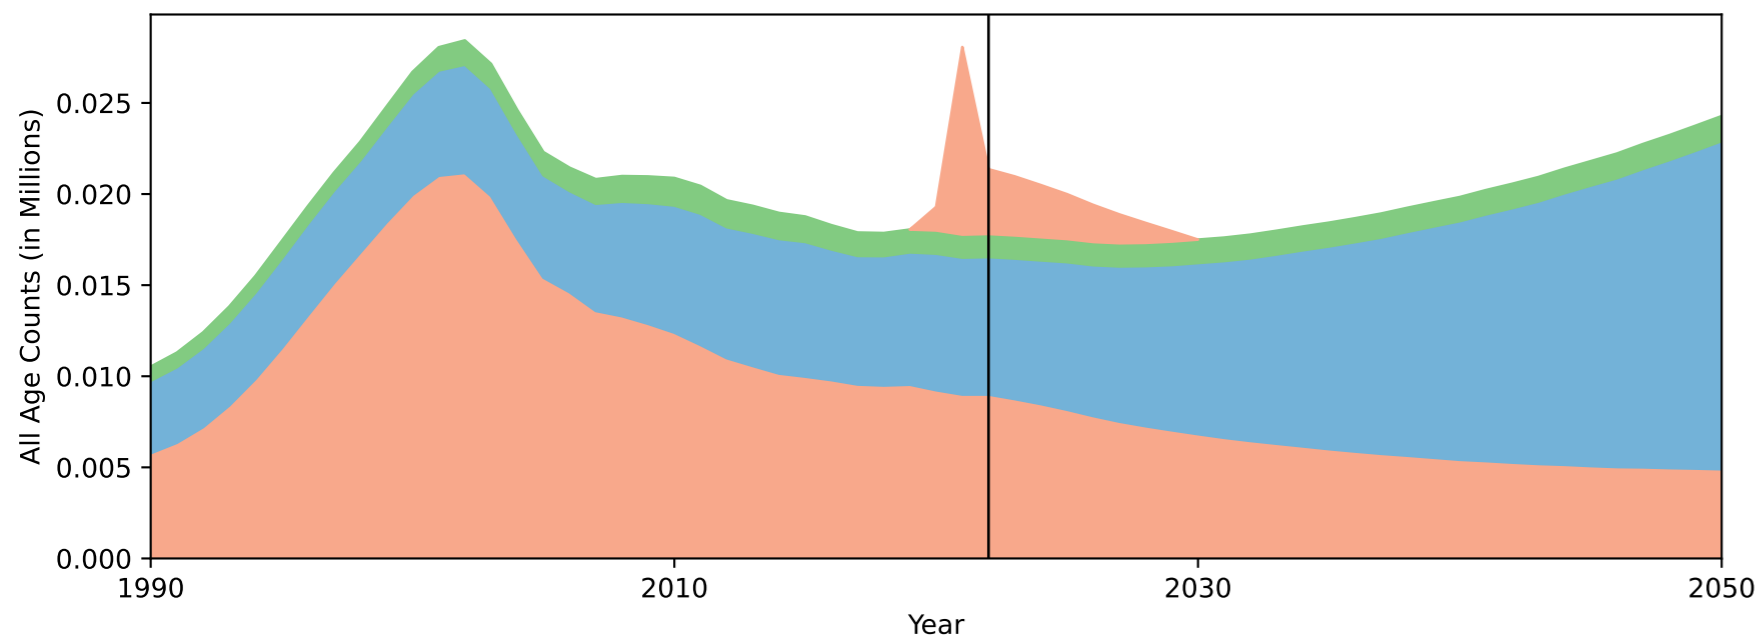

Level 2

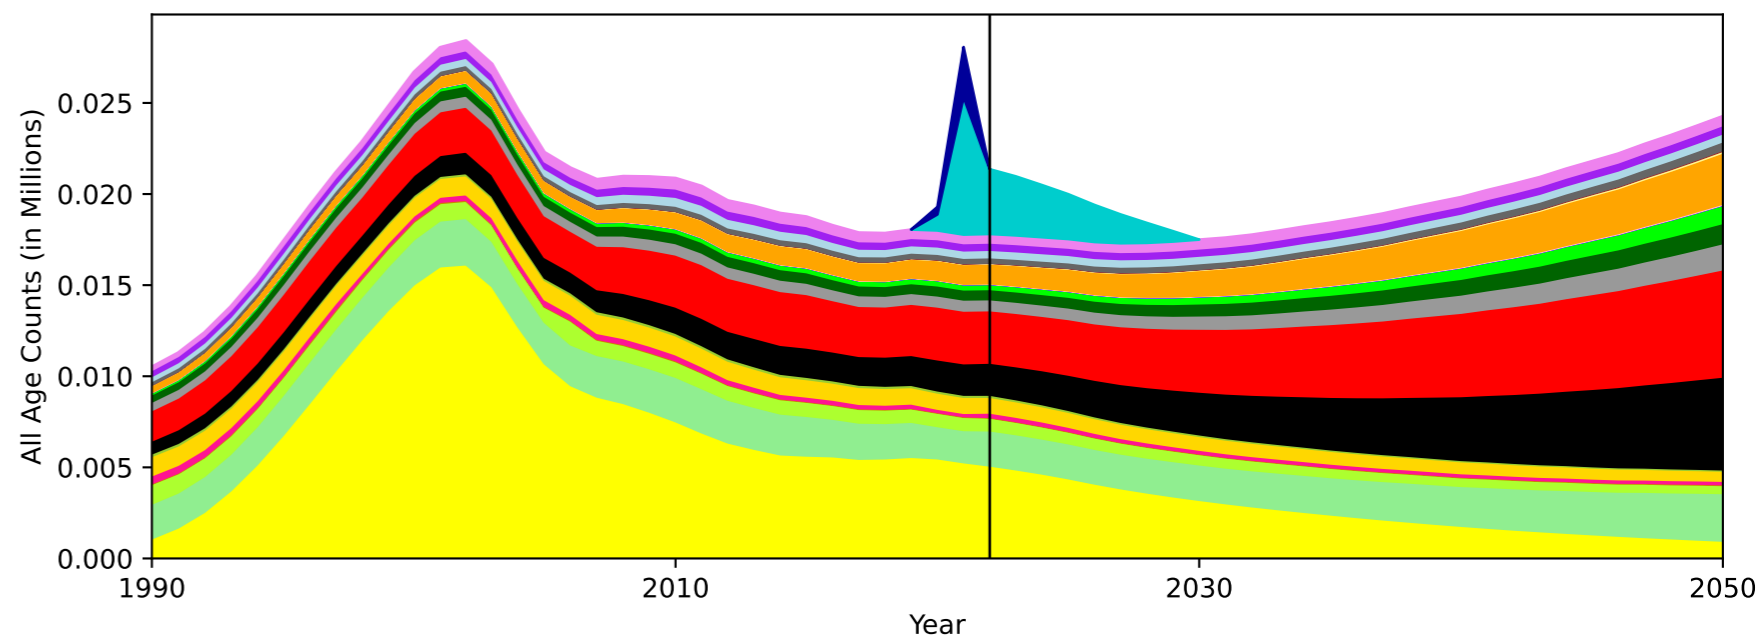

# Eswatini

Level 1

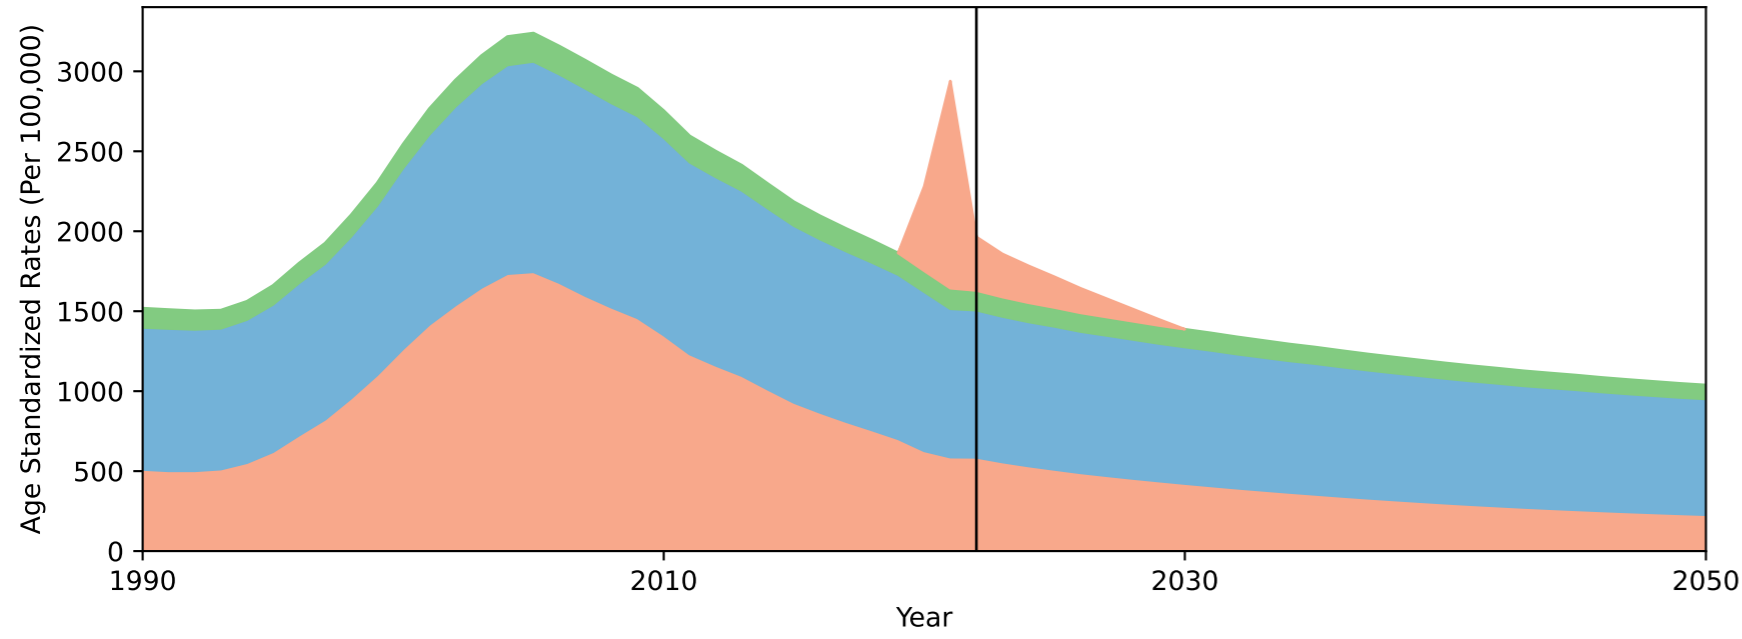

Level 2

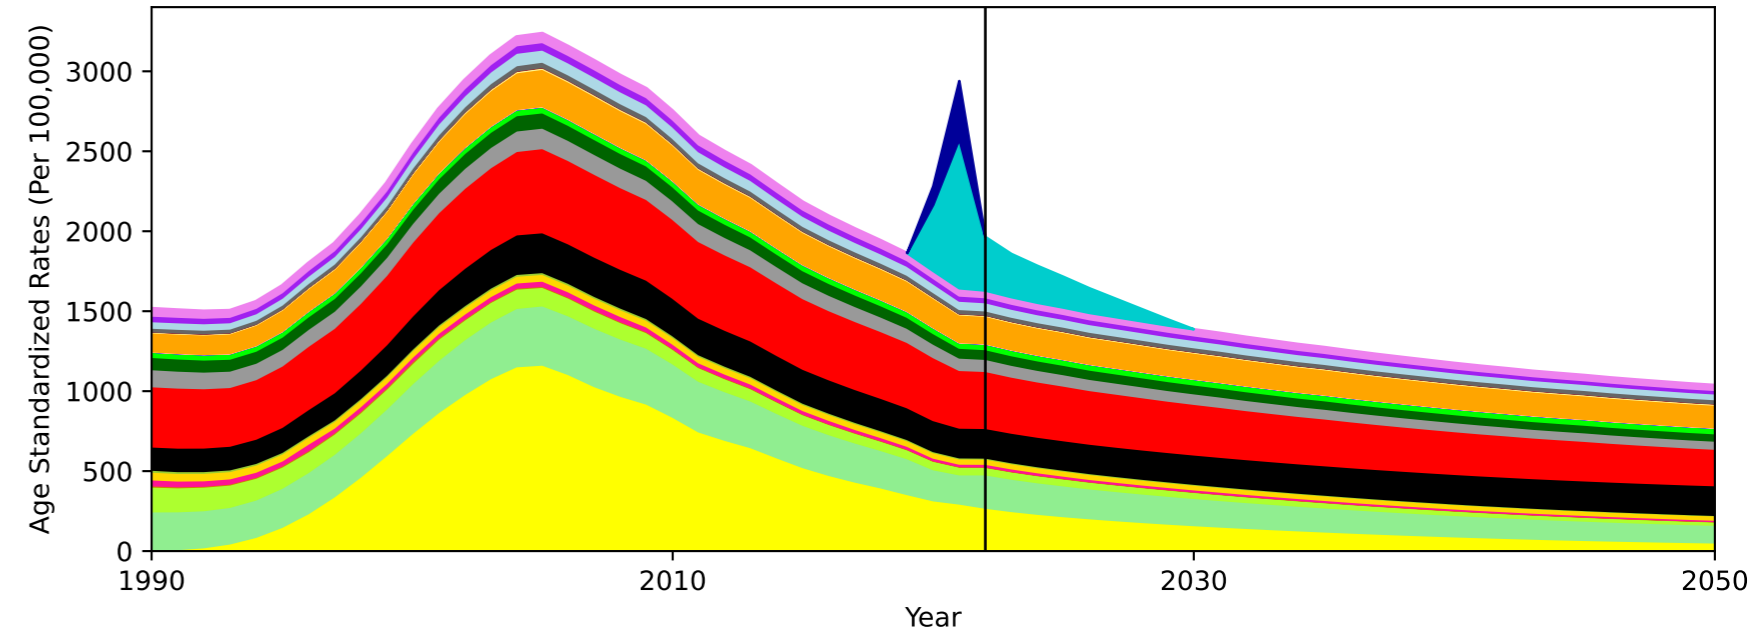

Level 1

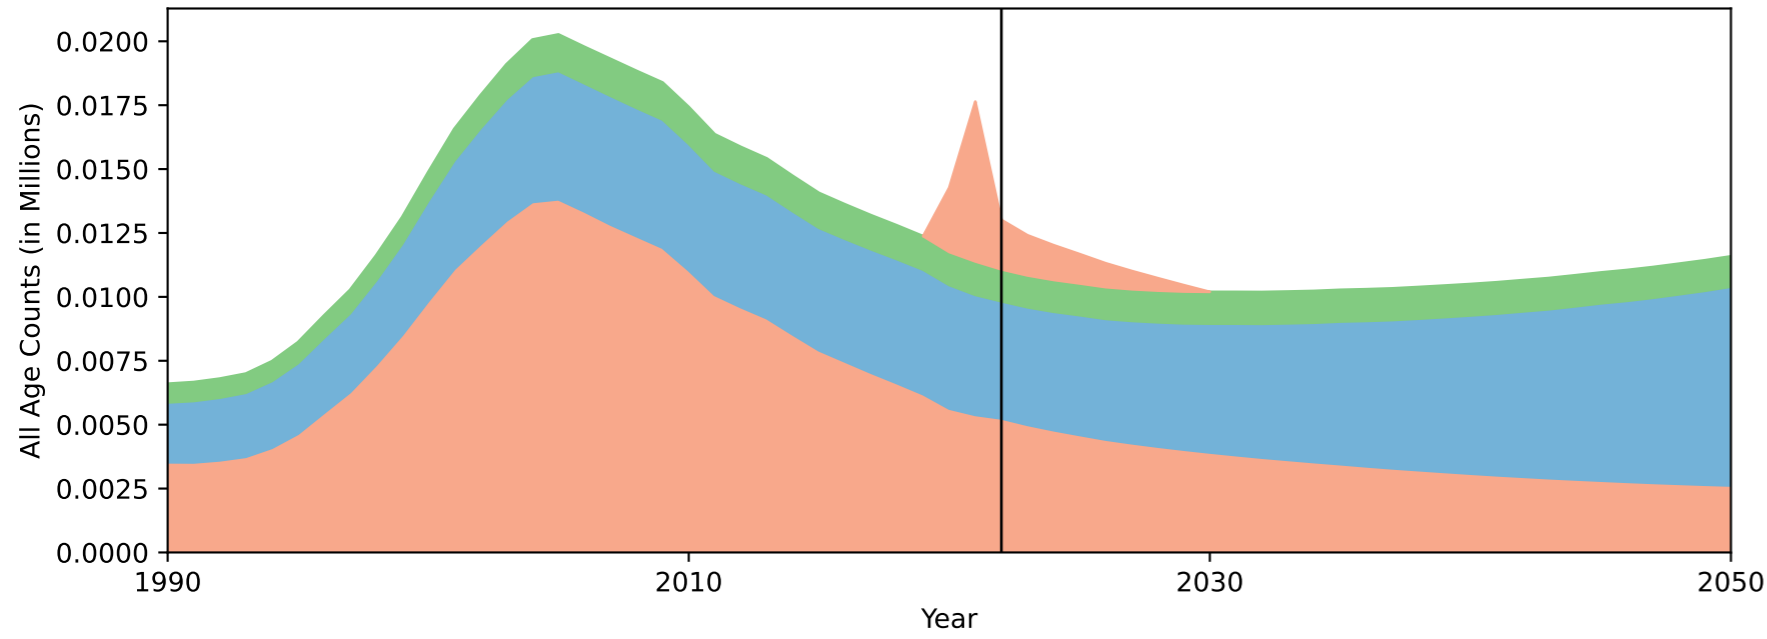

Level 2

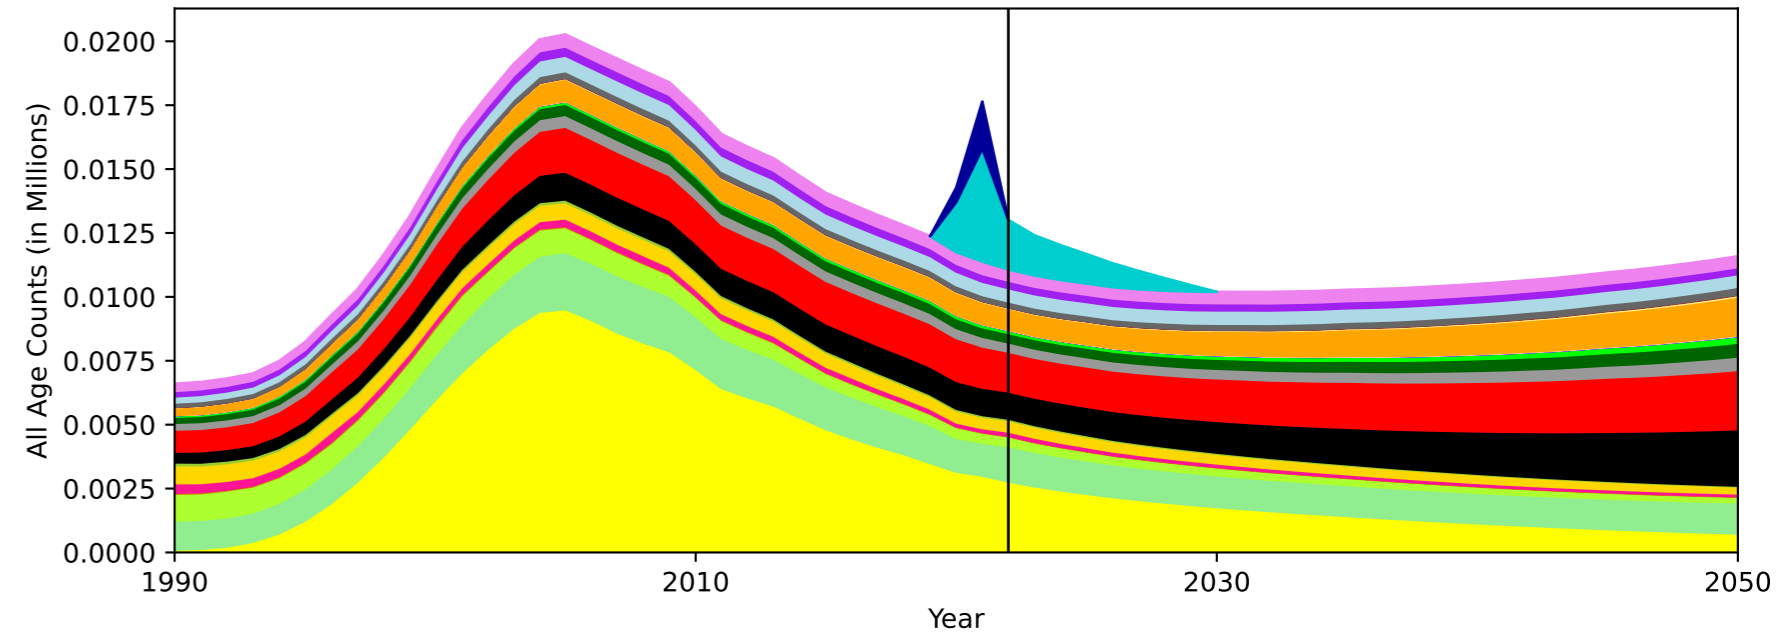

# Lesotho

Level 1

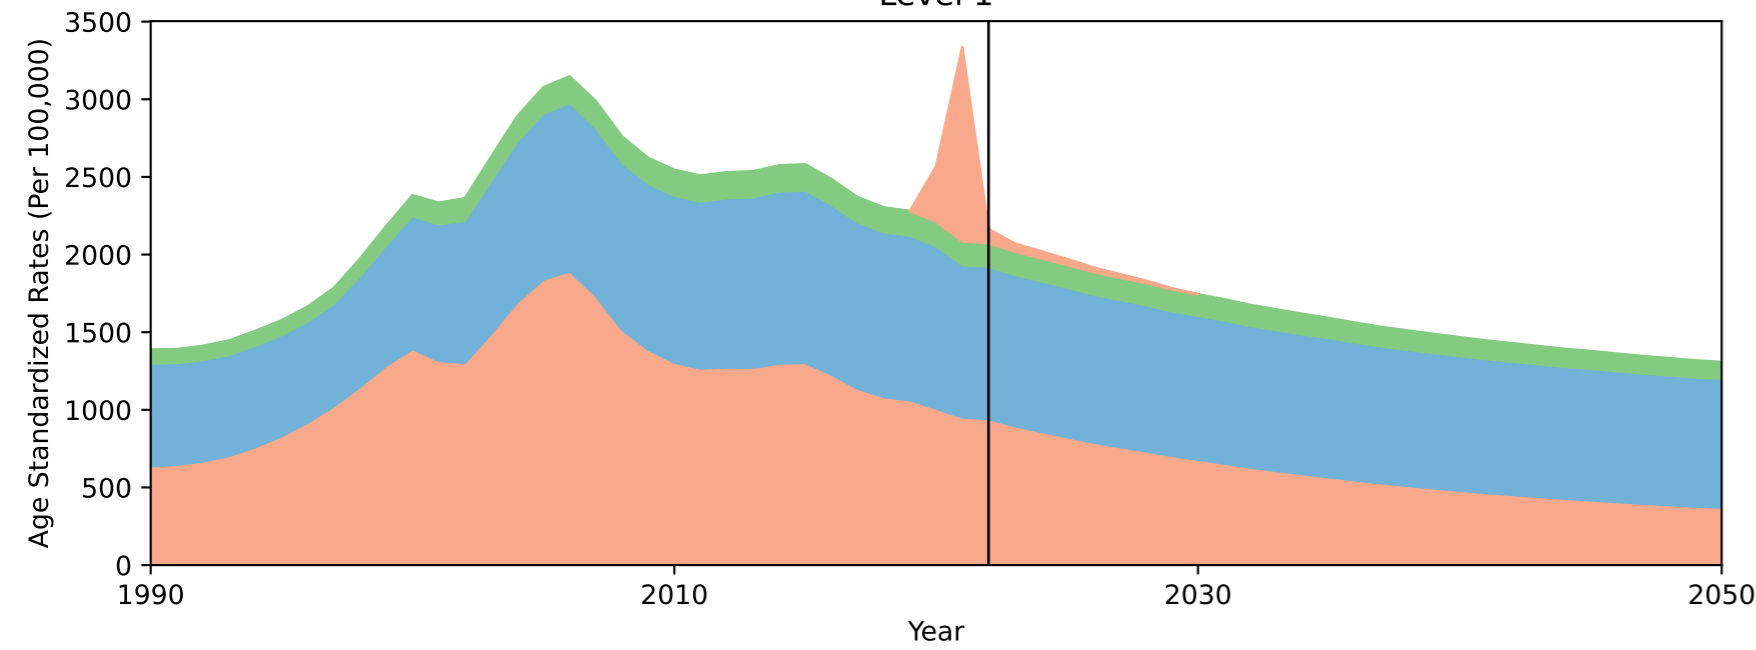

Level 2

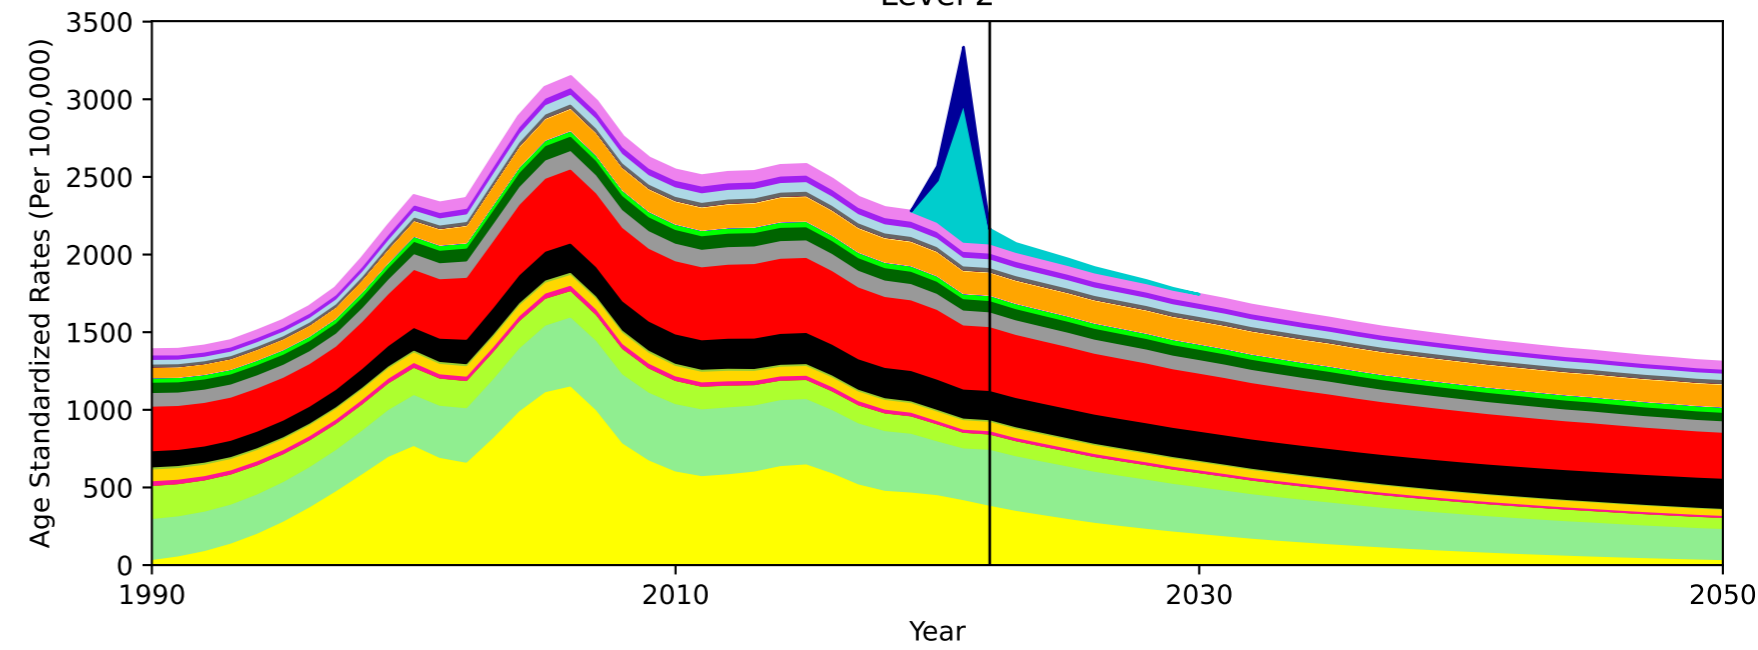

Level 1

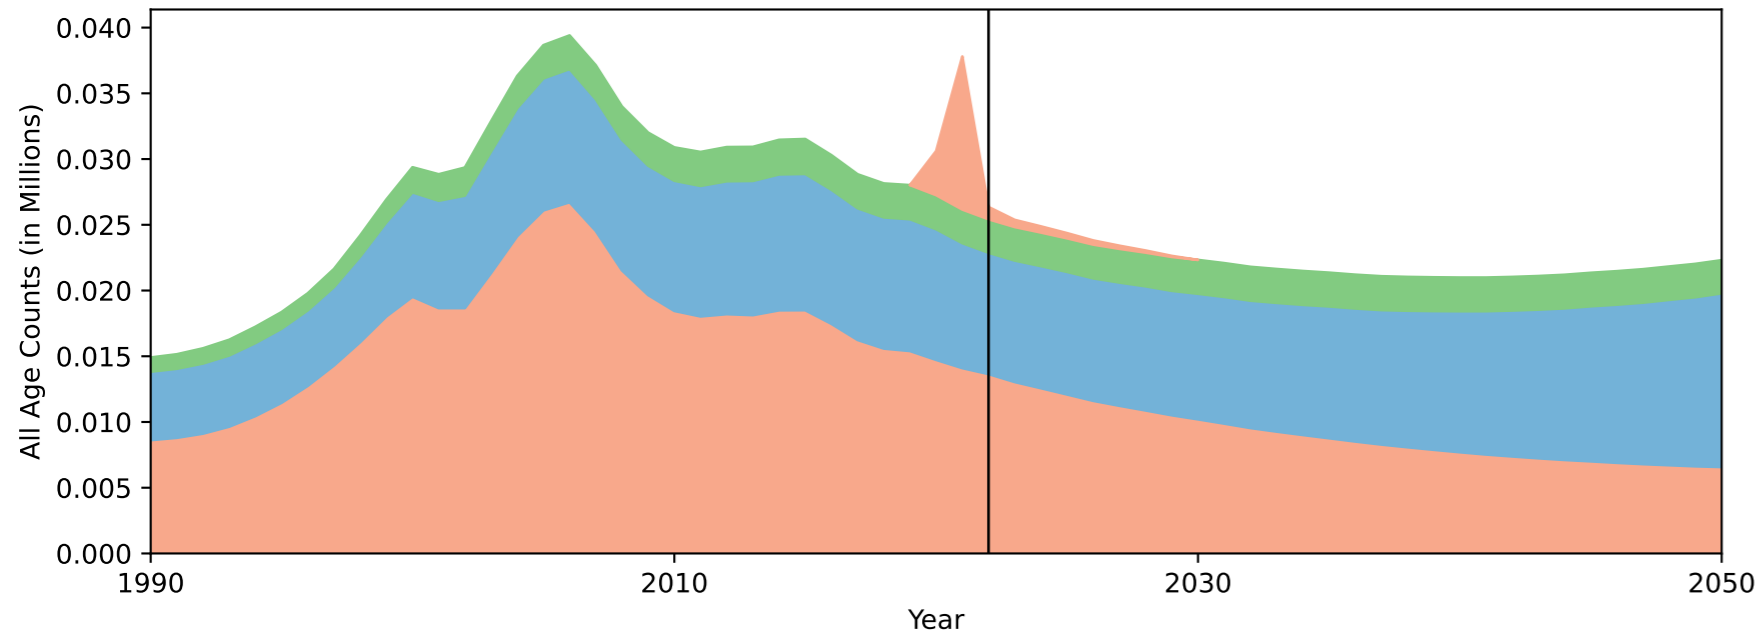

Level 2

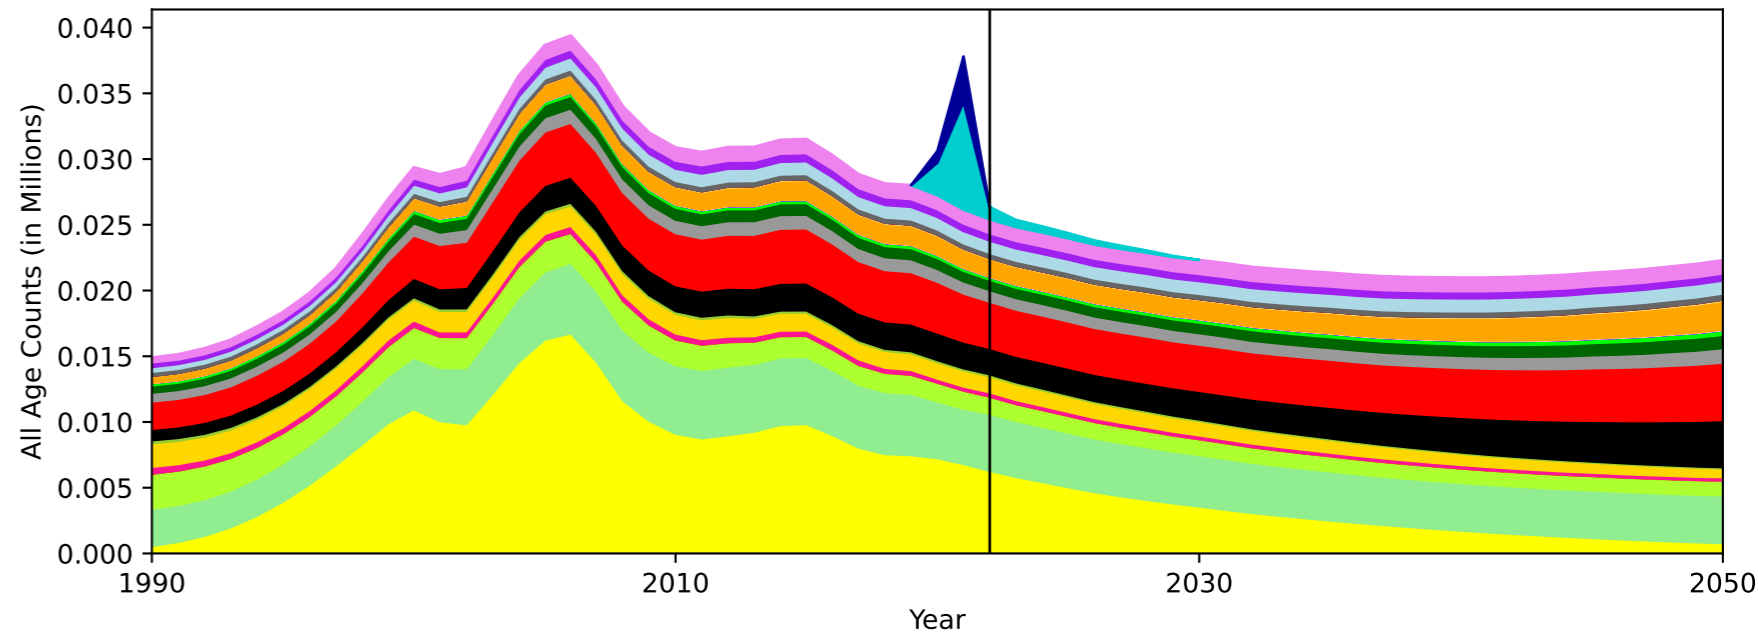

# Namibia

Level 1

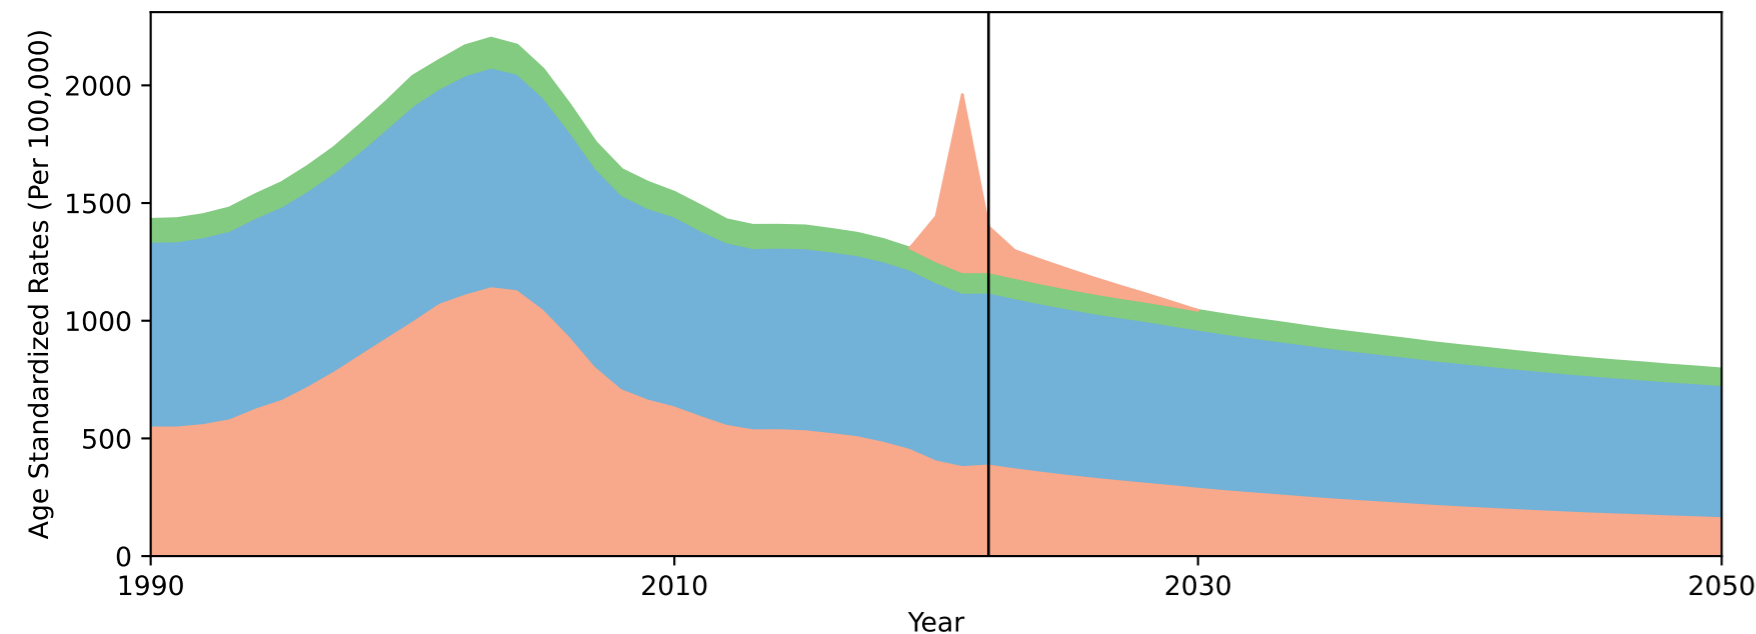

Level 2

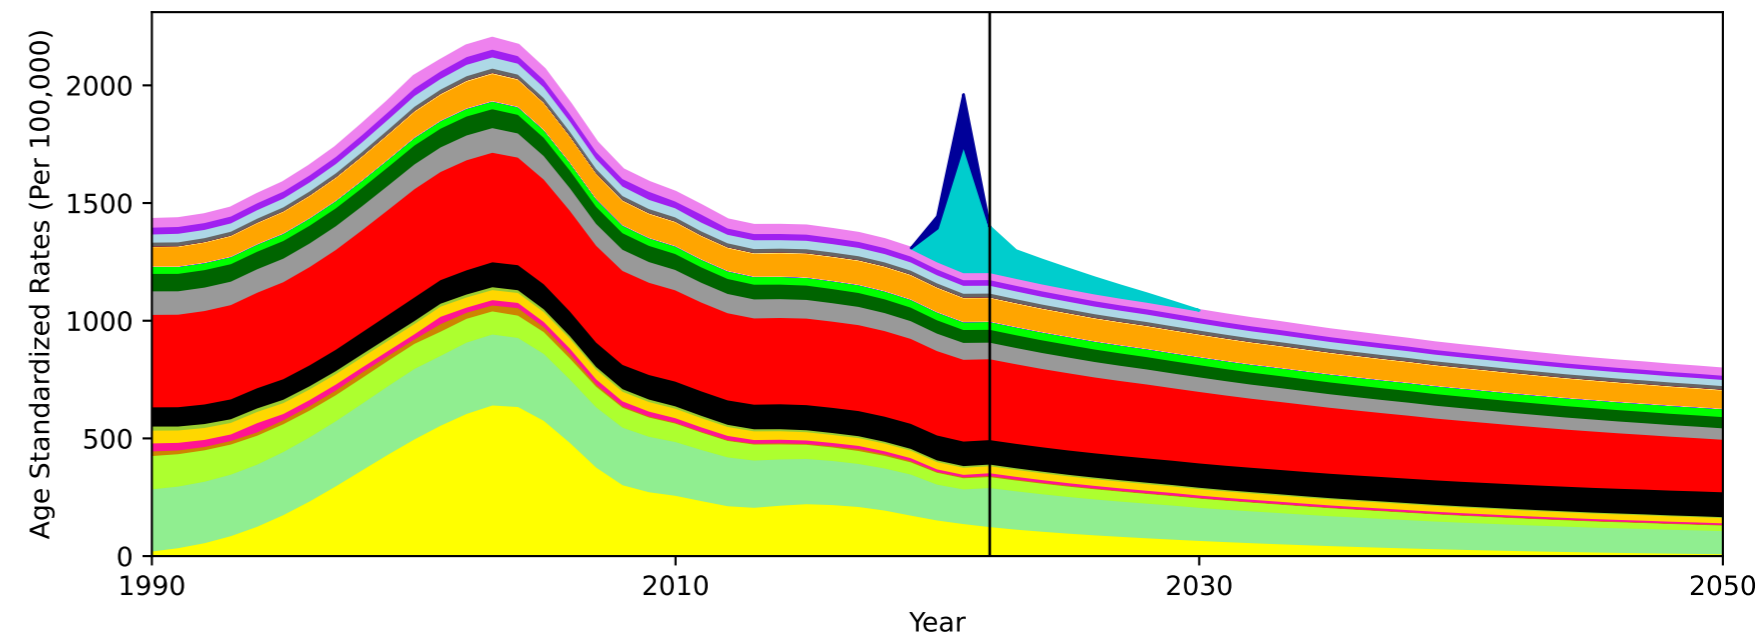

Level 1

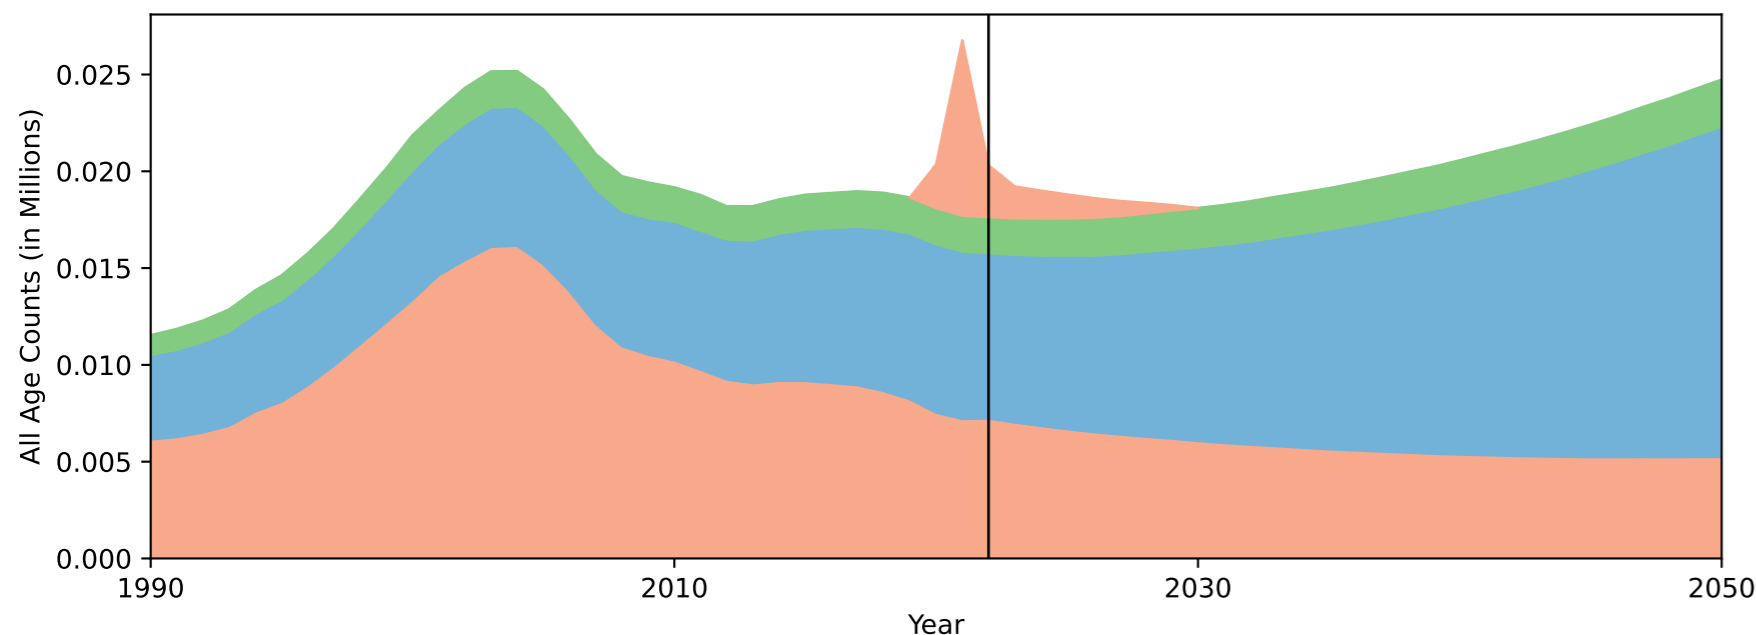

Level 2

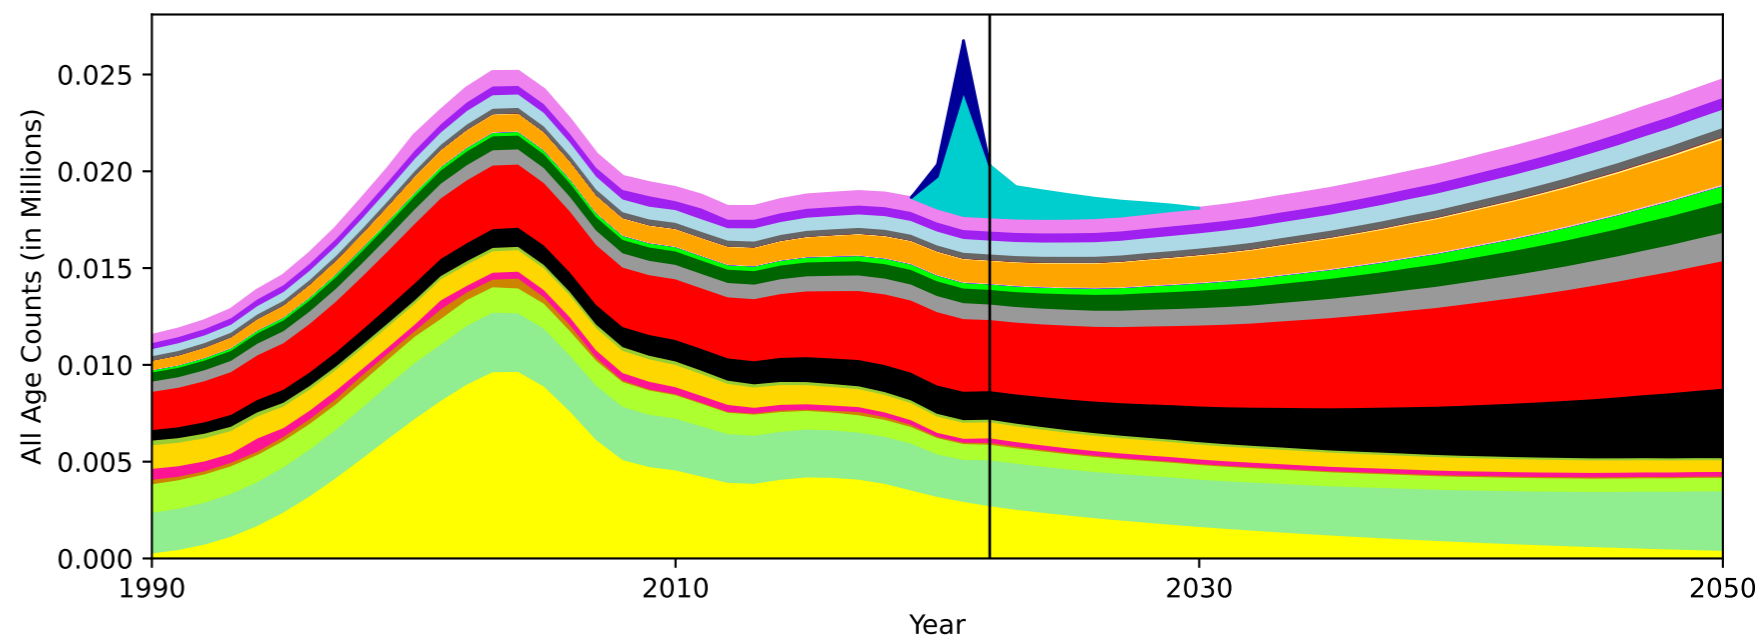

# South Africa

Level 1

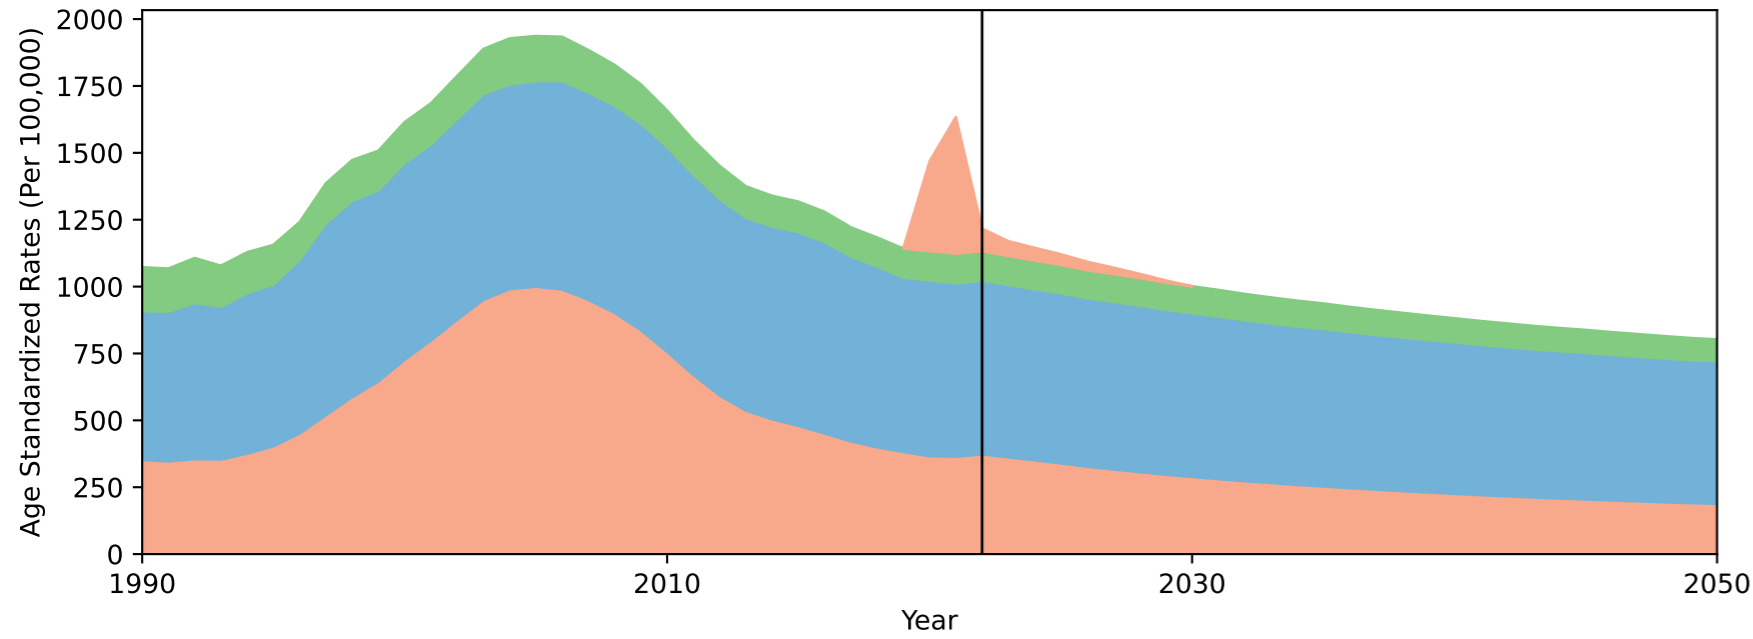

Level 2

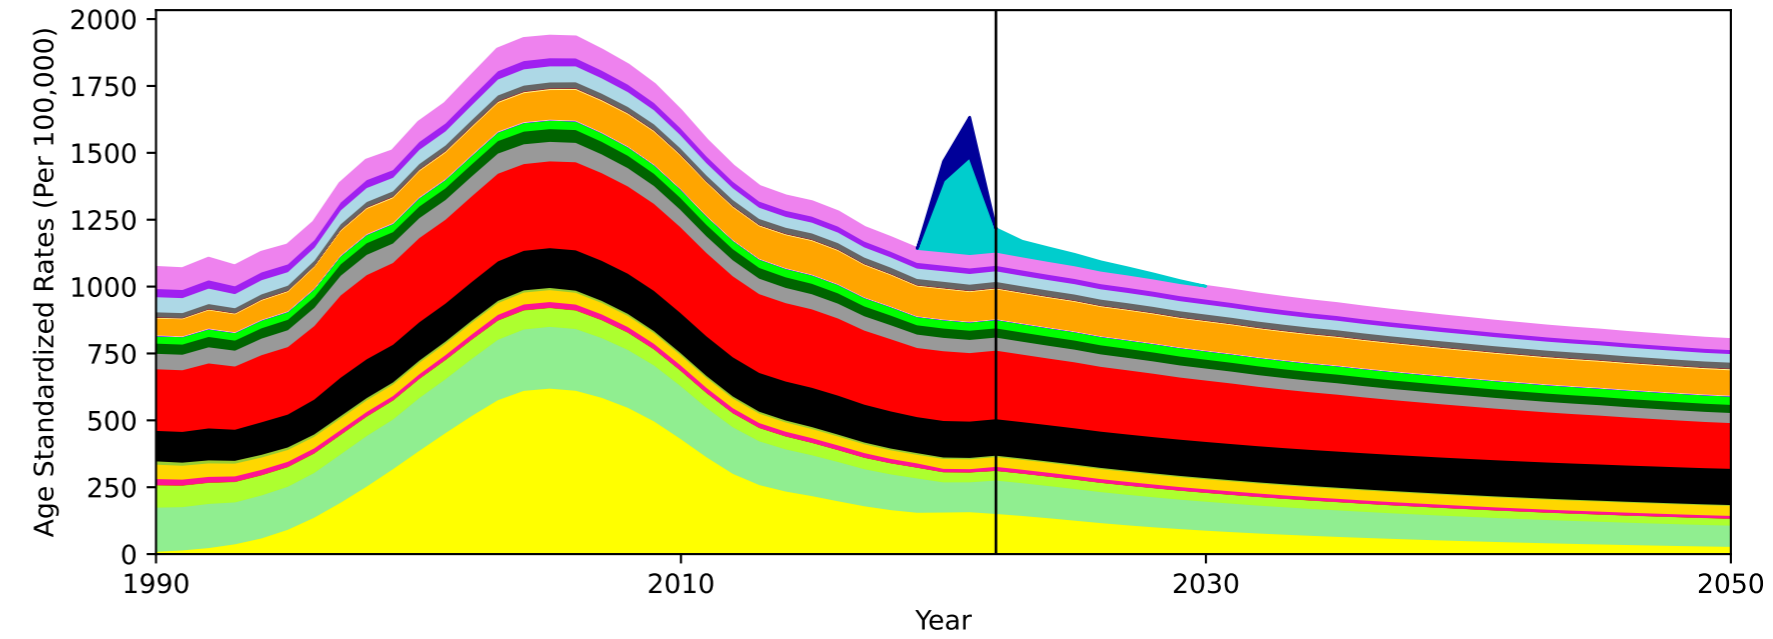

Level 1

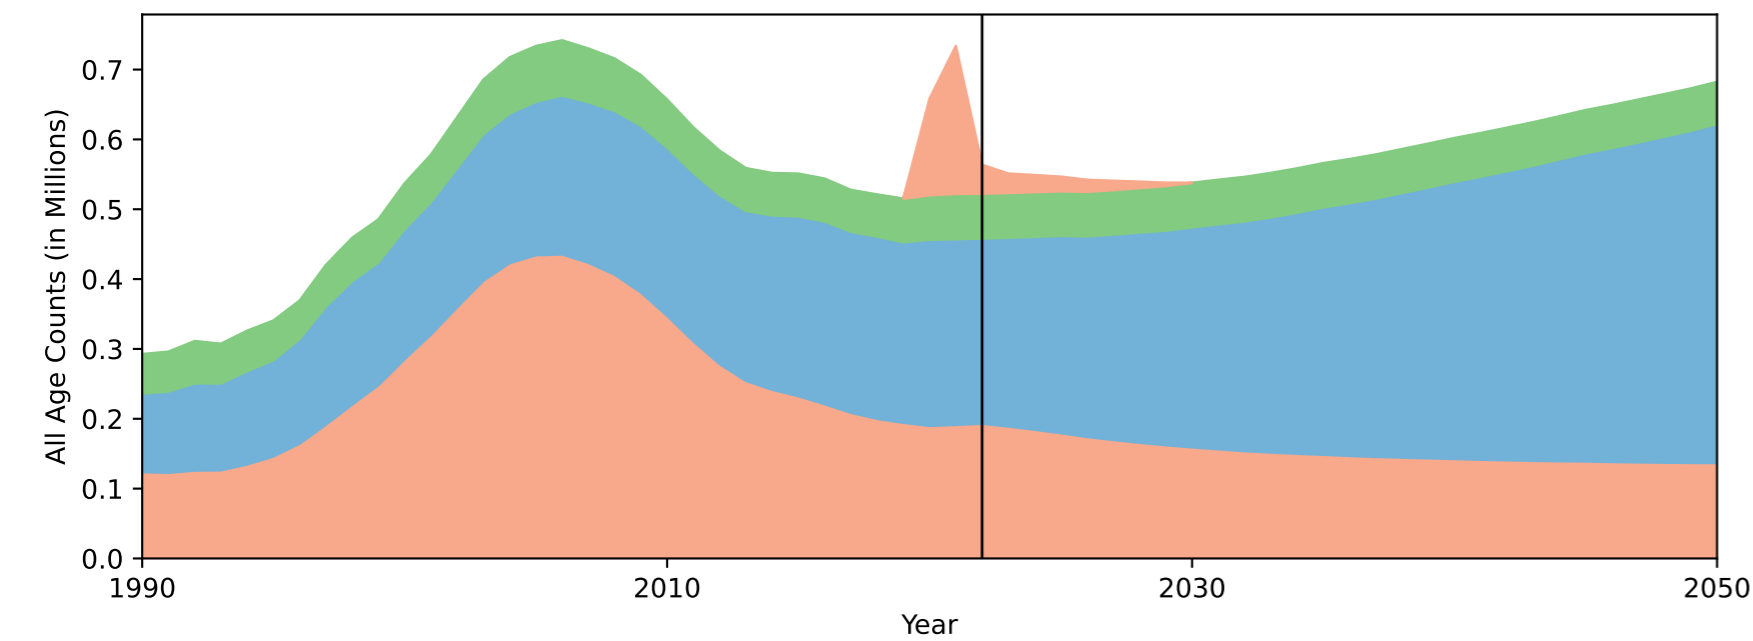

Level 2

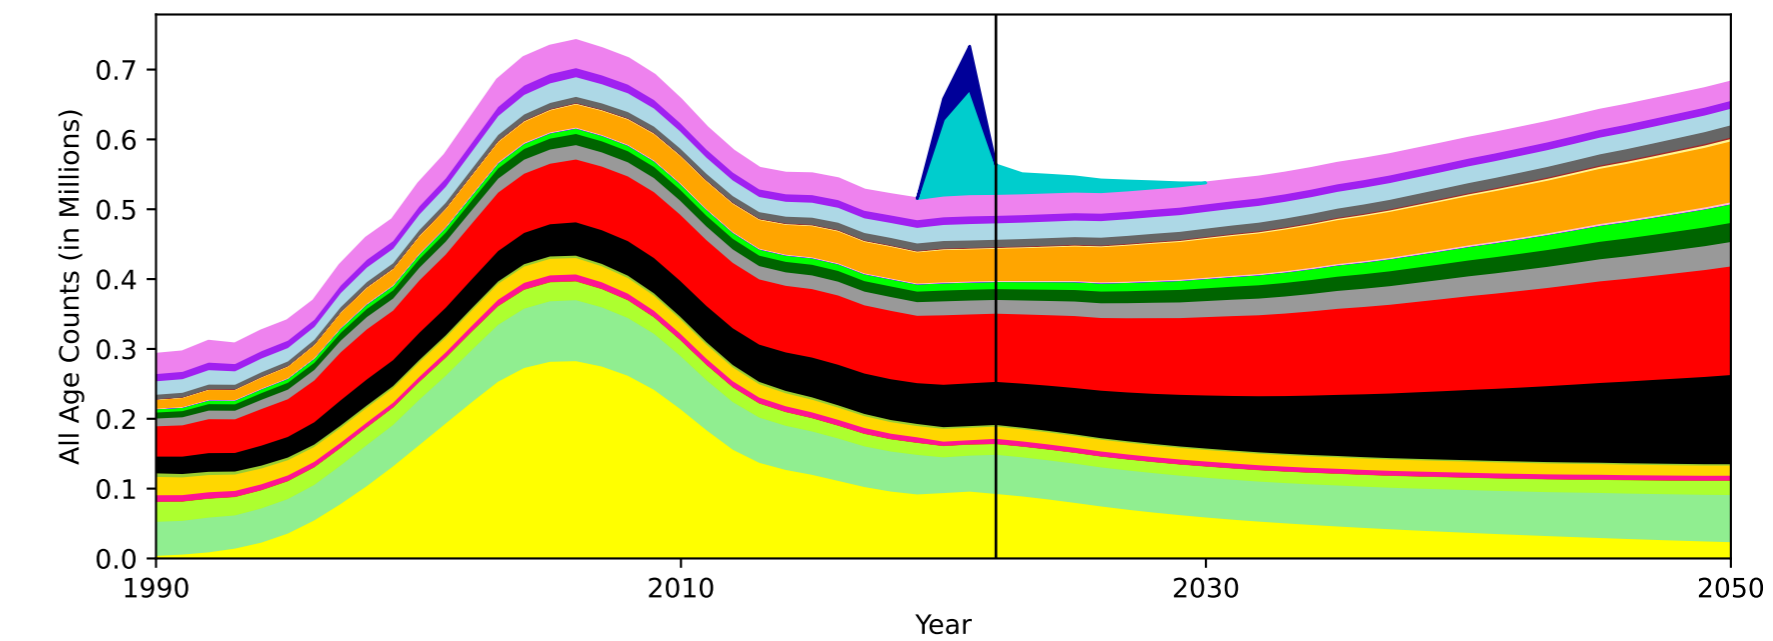

# Zimbabwe

Level 1

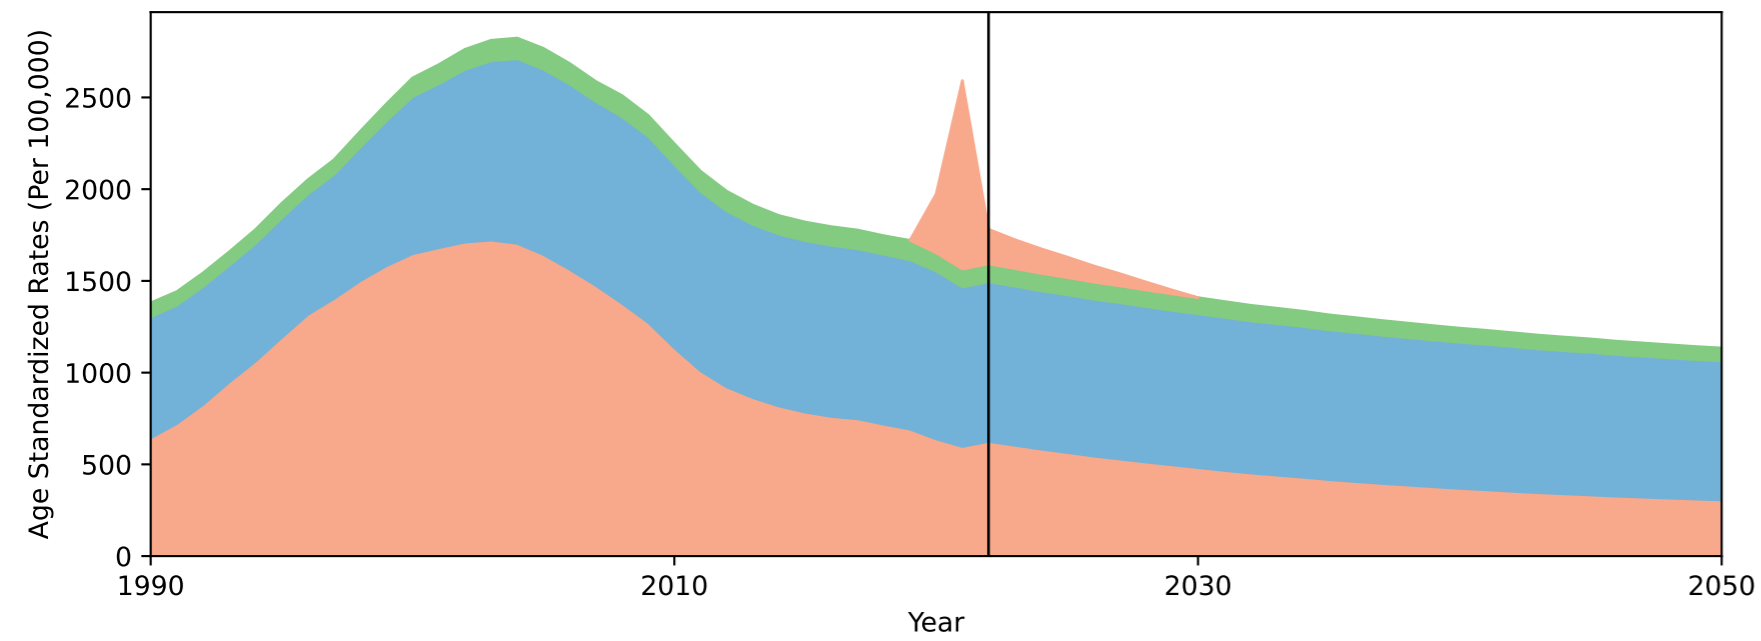

Level 2

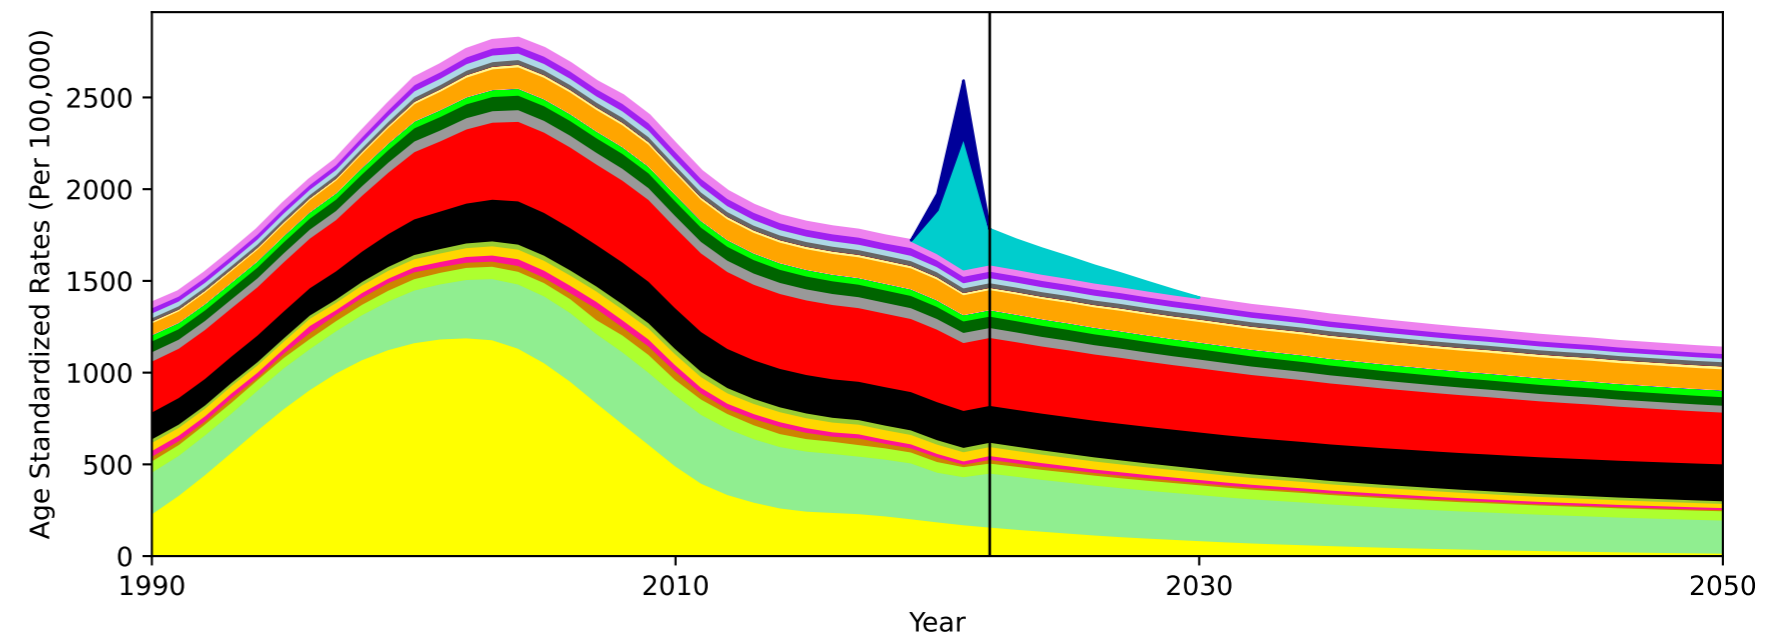

Level 1

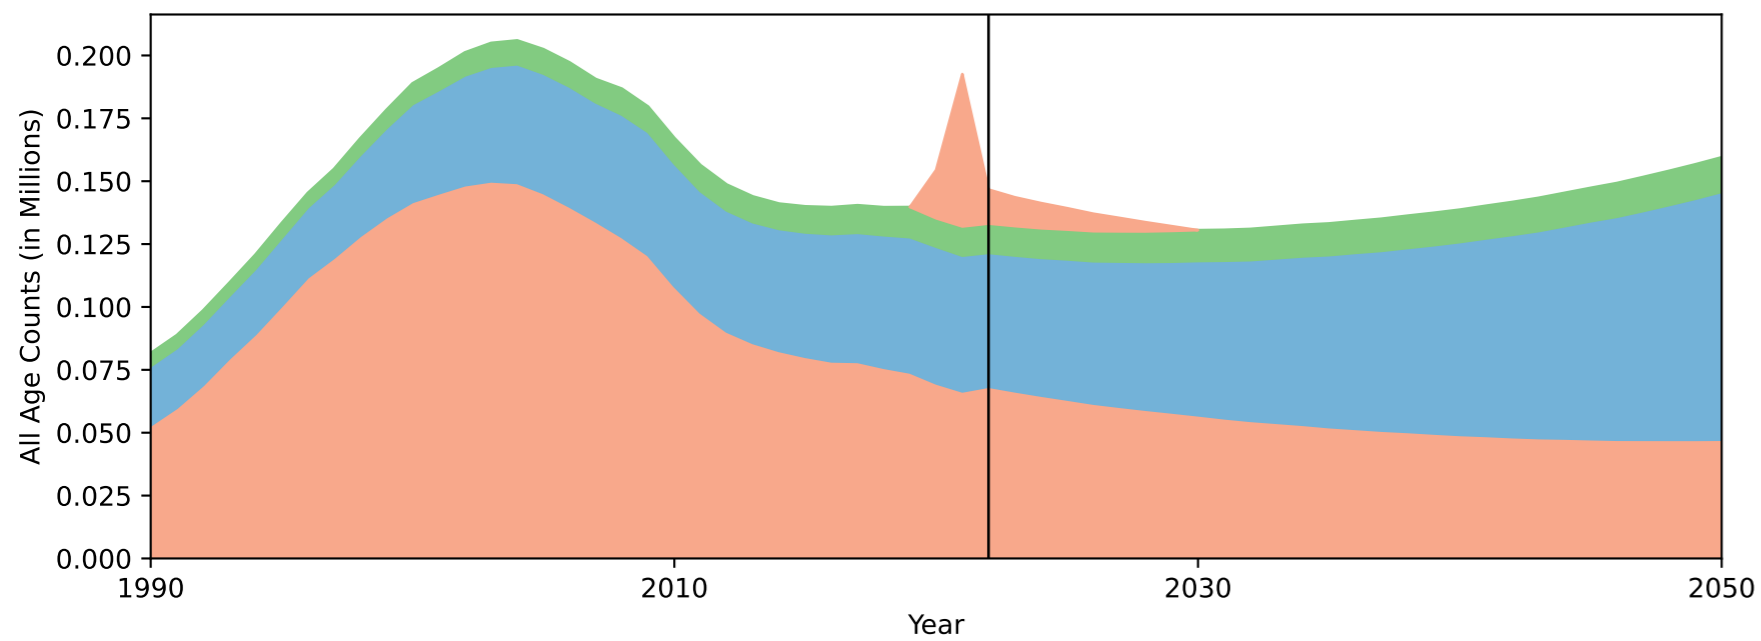

Level 2

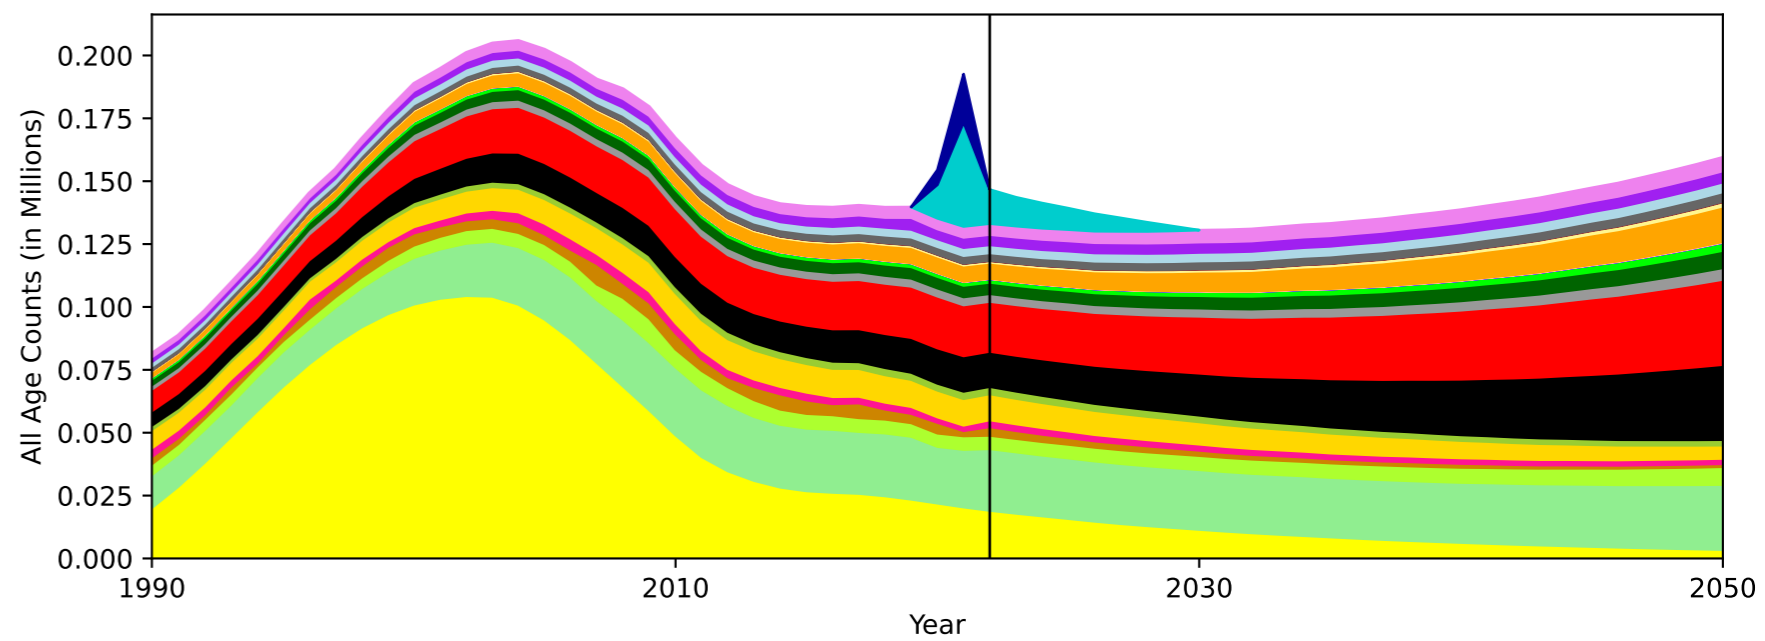

# Benin

Level 1

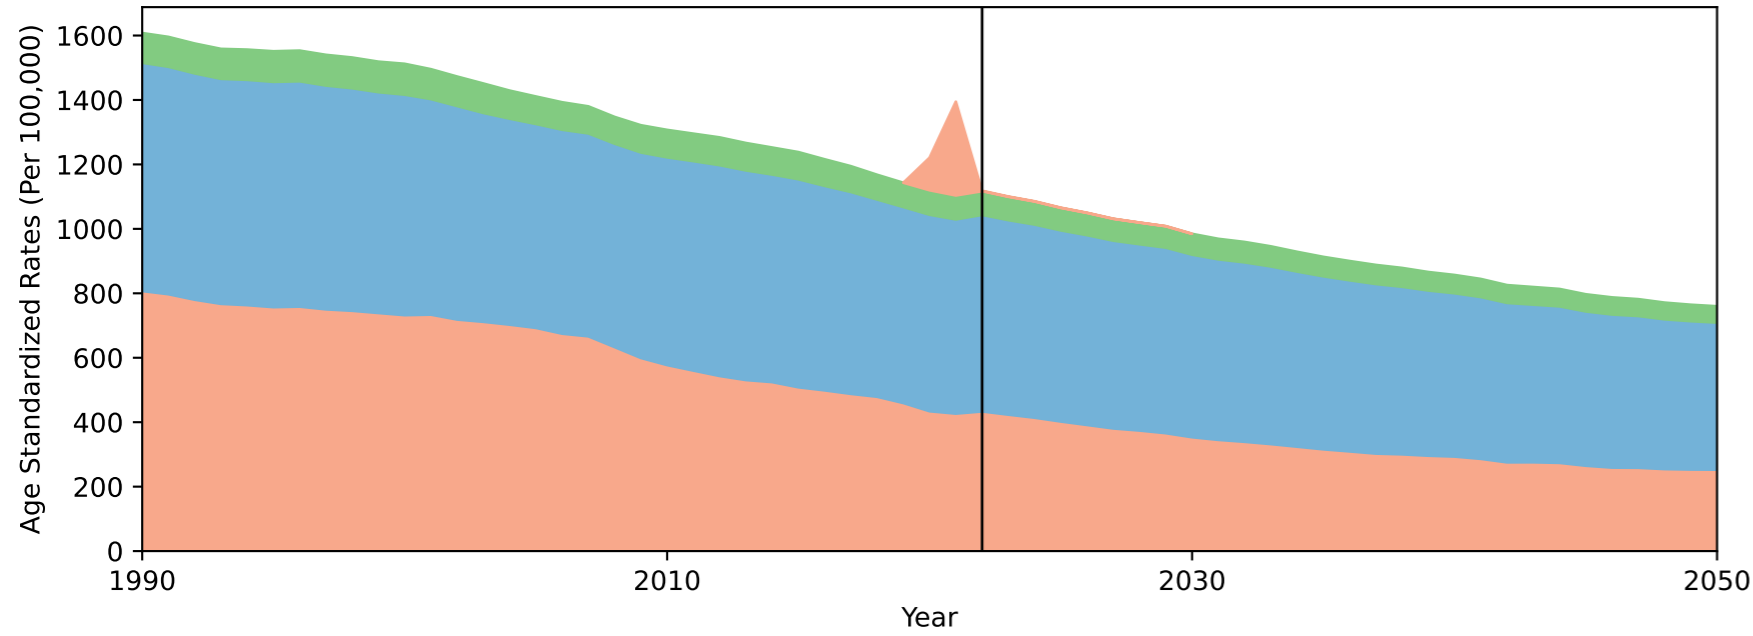

Level 2

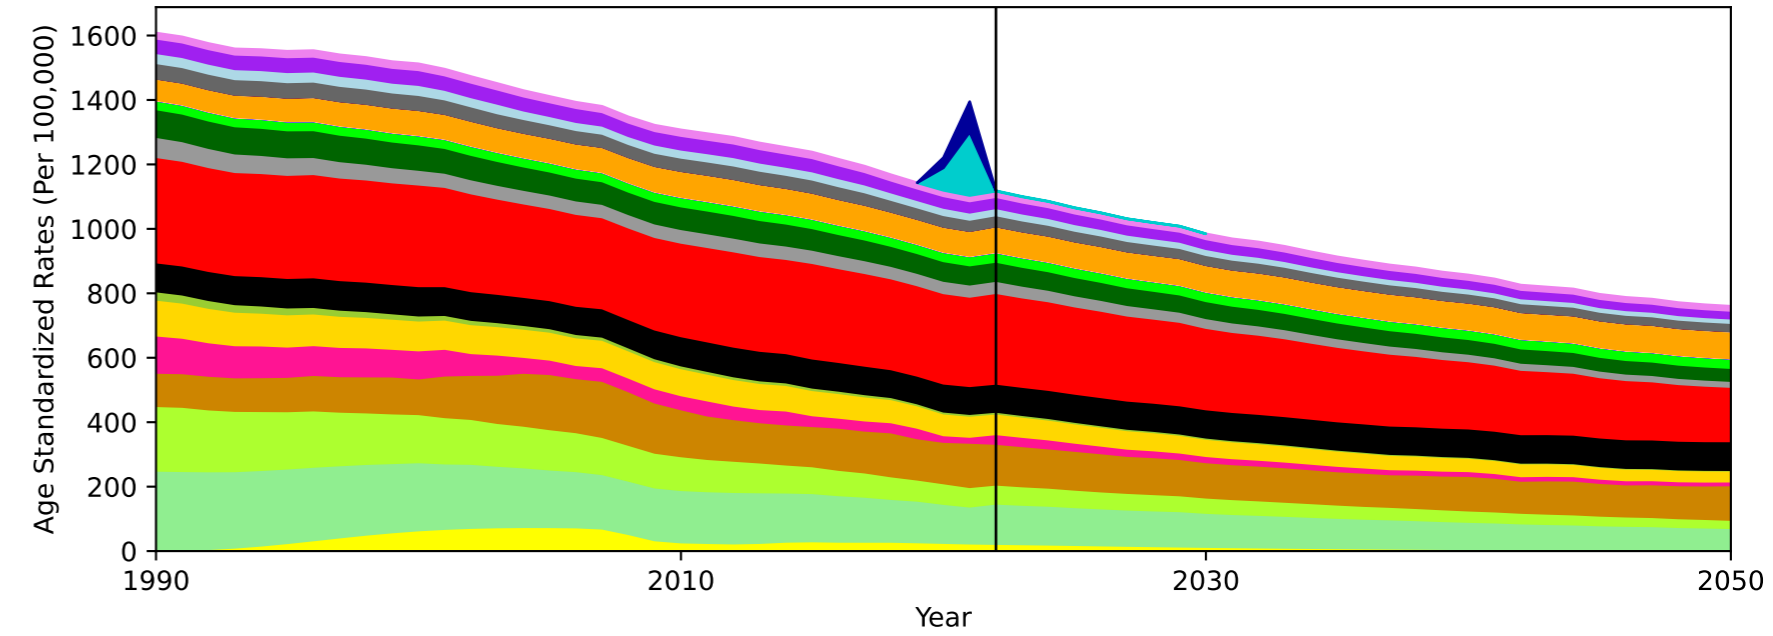

Level 1

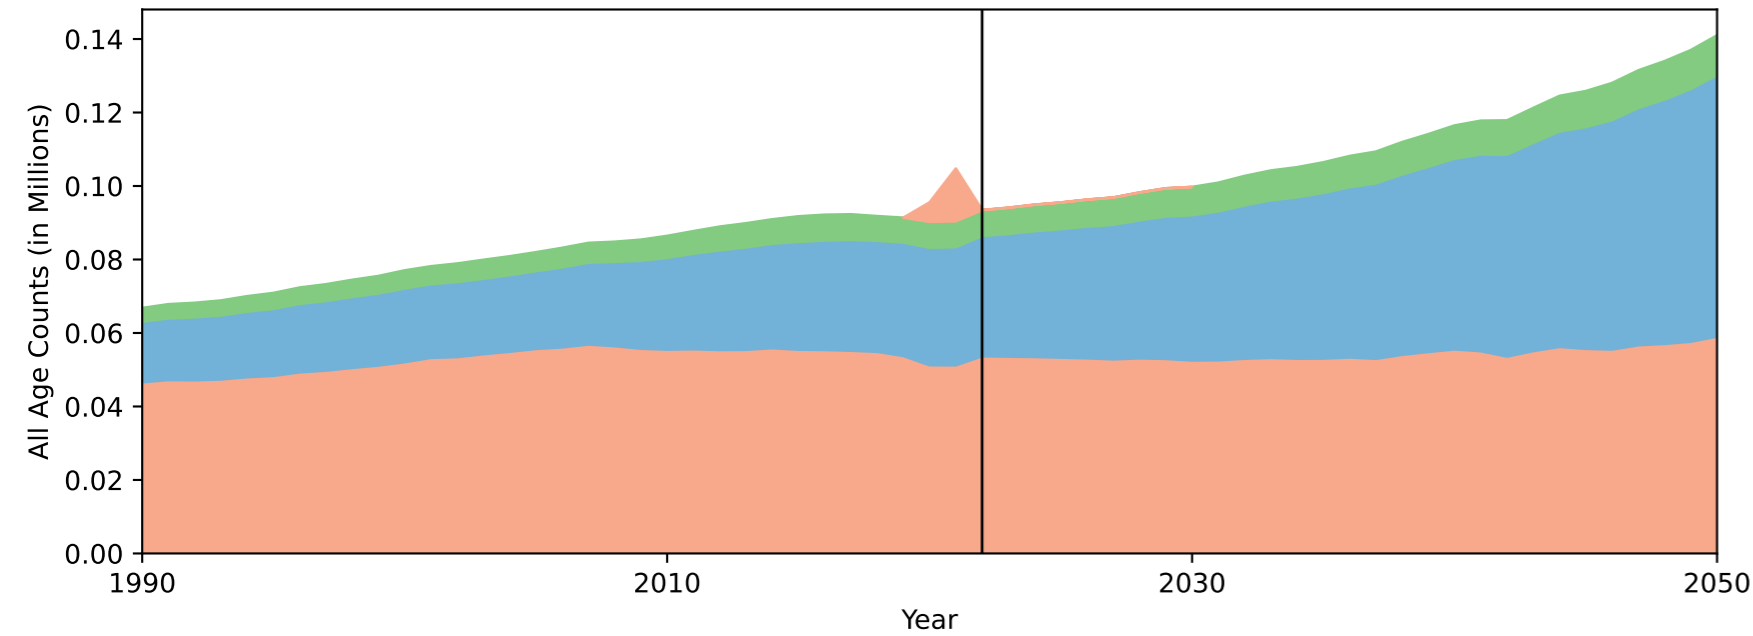

Level 2

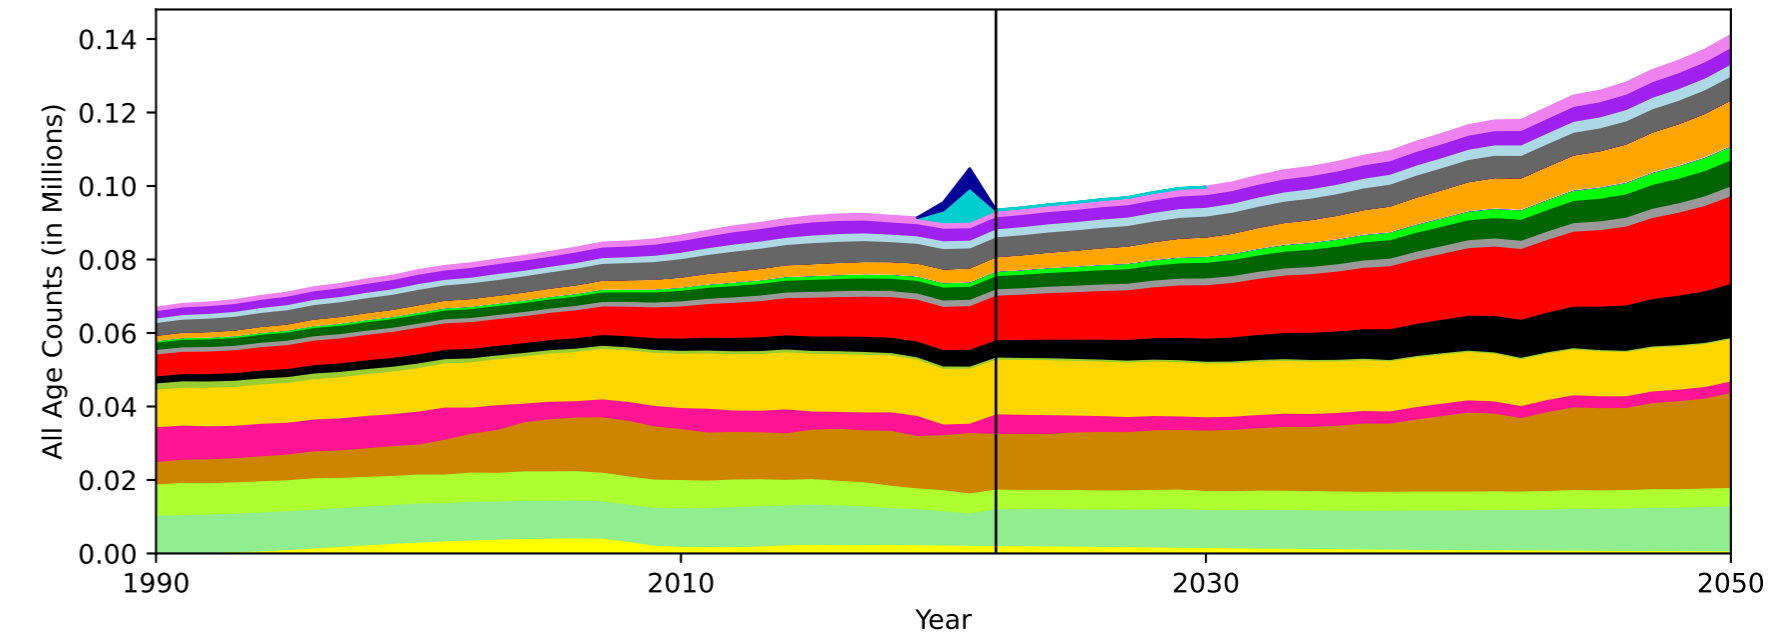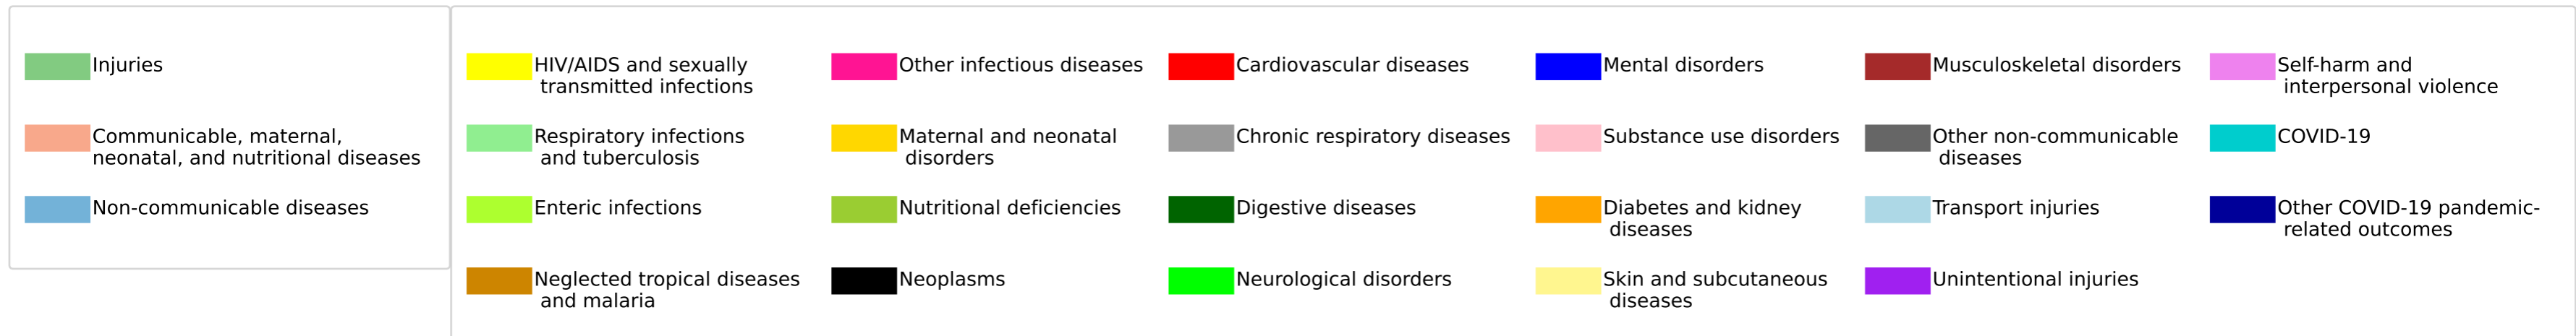



# Burkina Faso

Supplemental Results Figure S5. Age-standardised death rates and all age death counts and by Level 1 and Level 2 causes, 1990–2050

664

Level 1

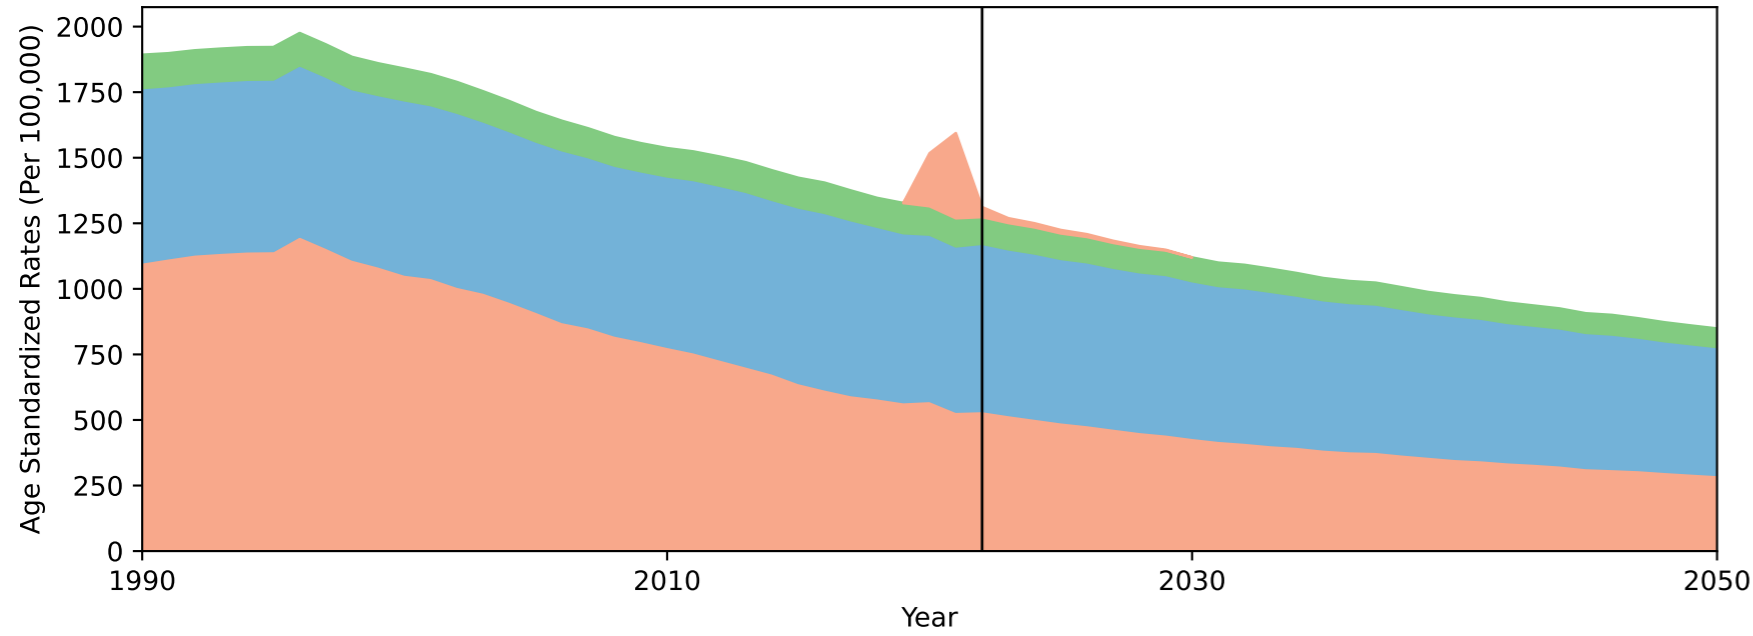

Level 2

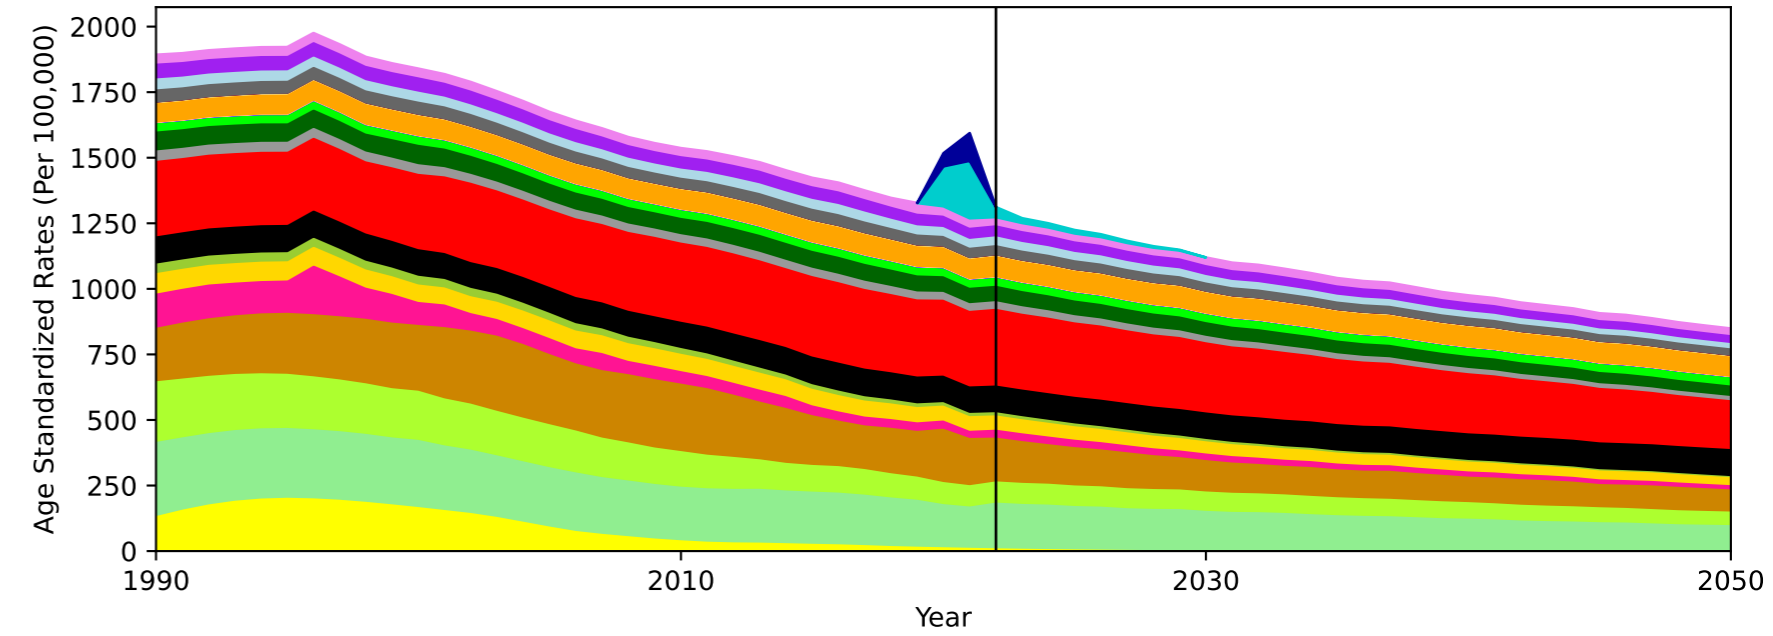

Level 1

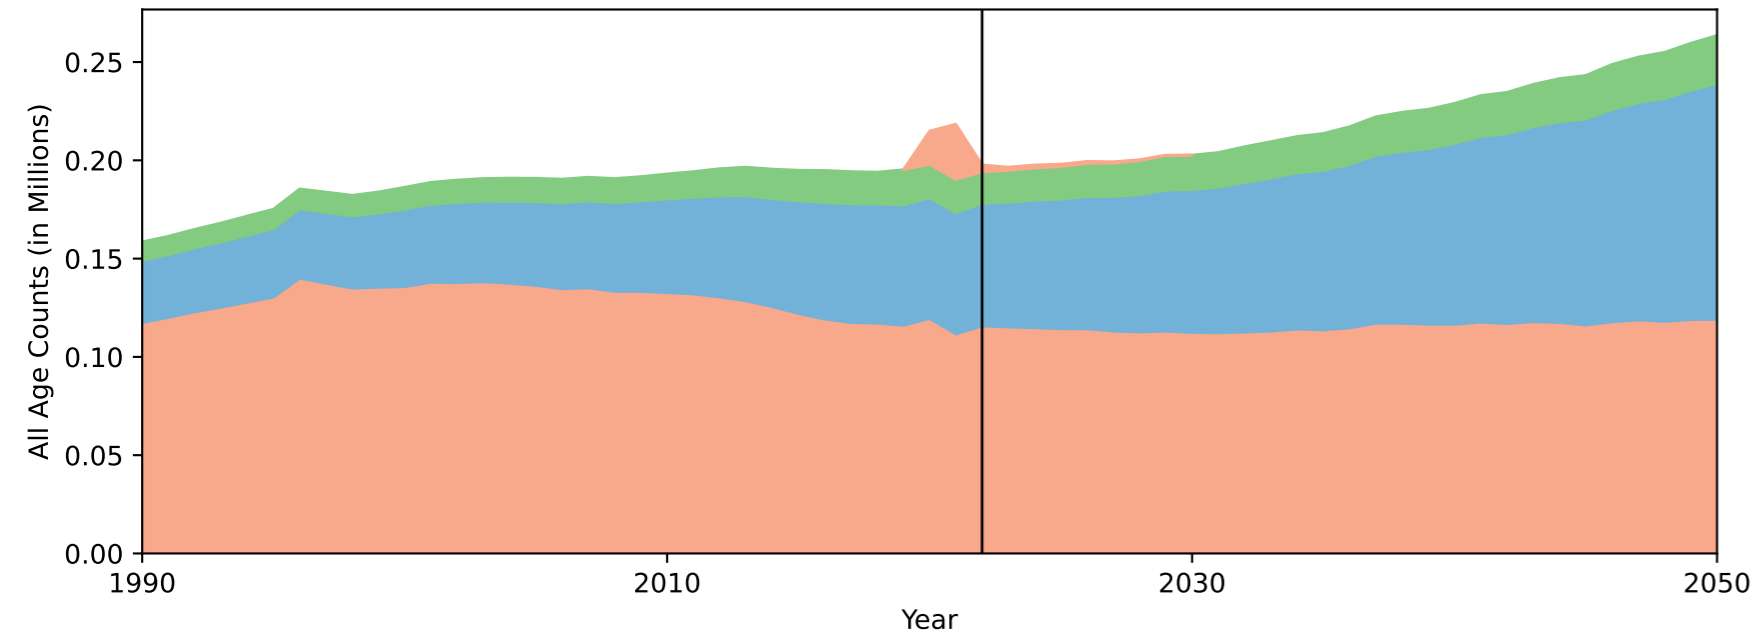

Level 2

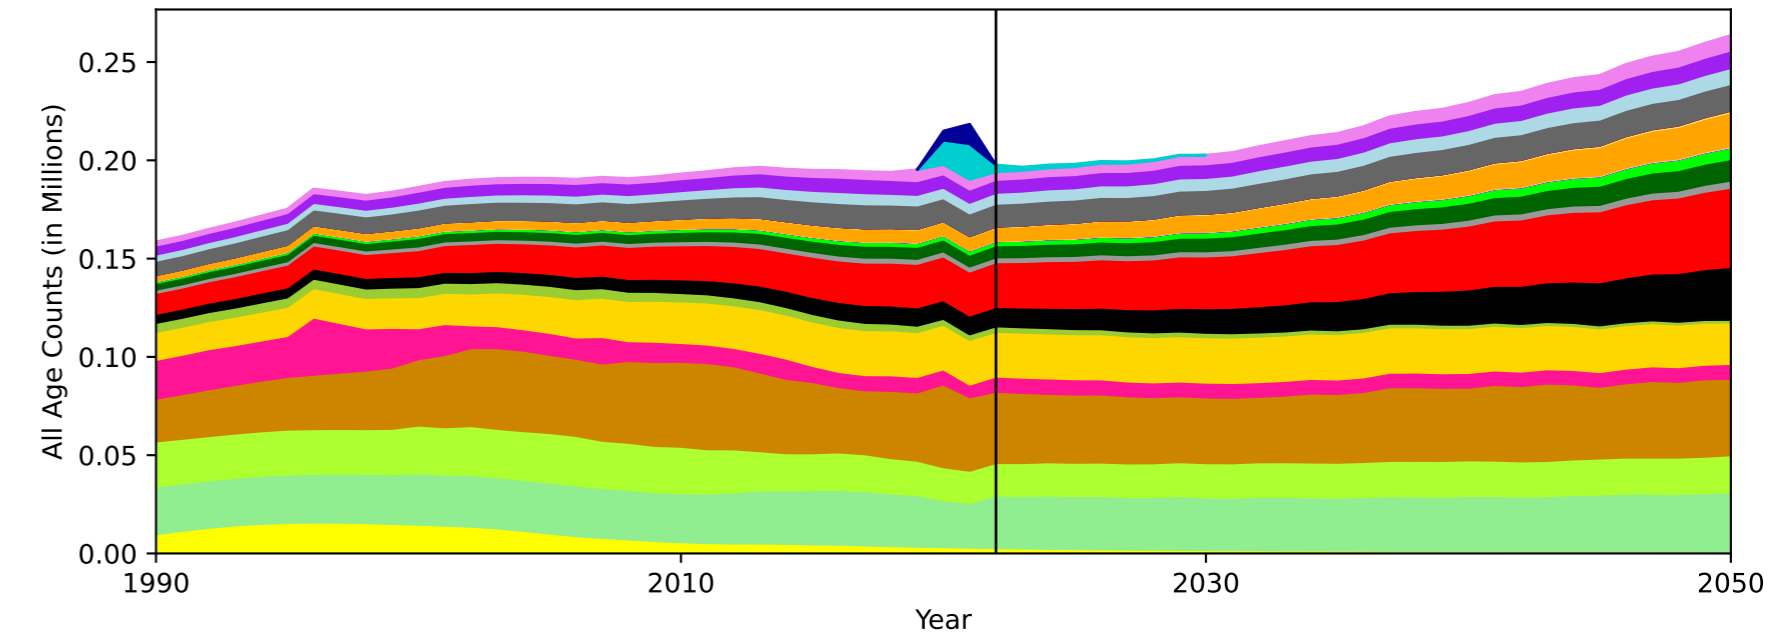

# Cabo Verde

Level 1

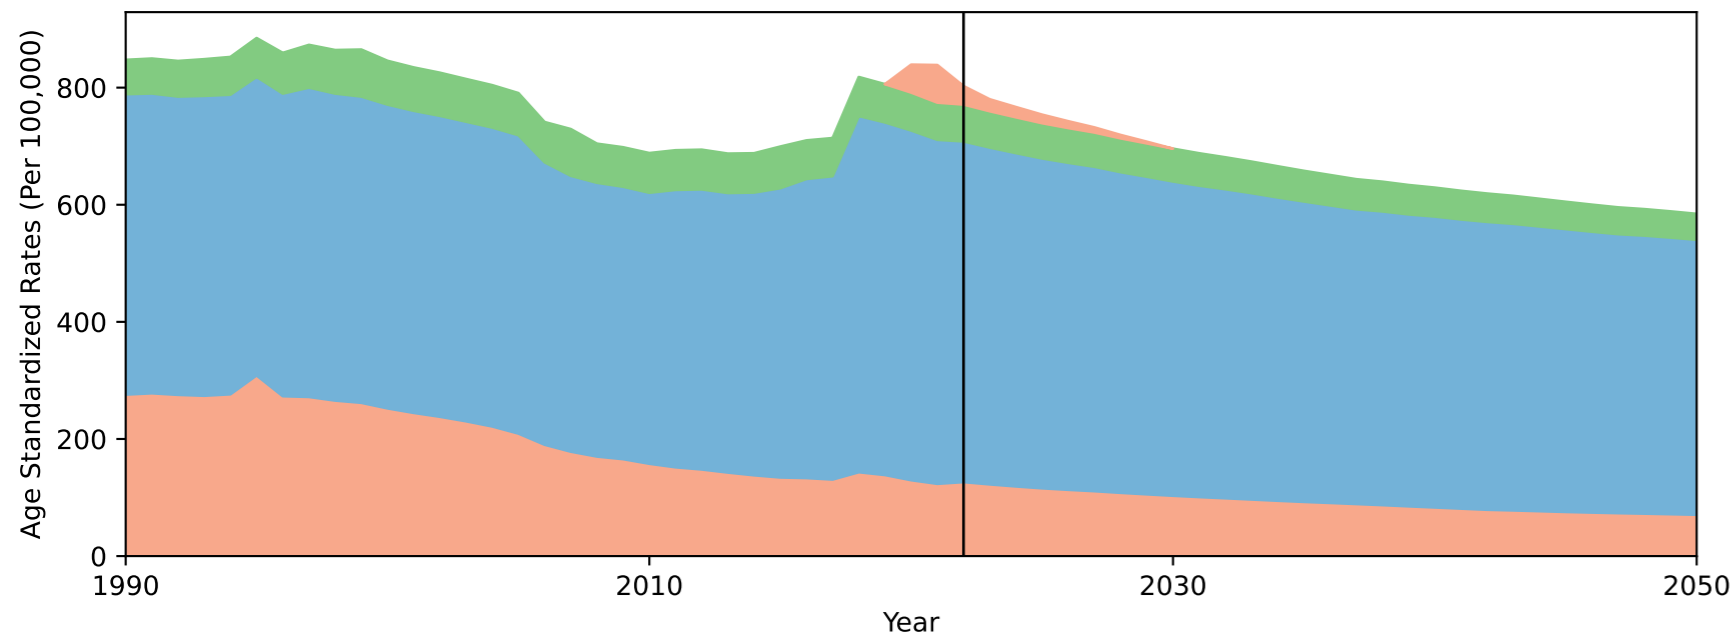

Level 2

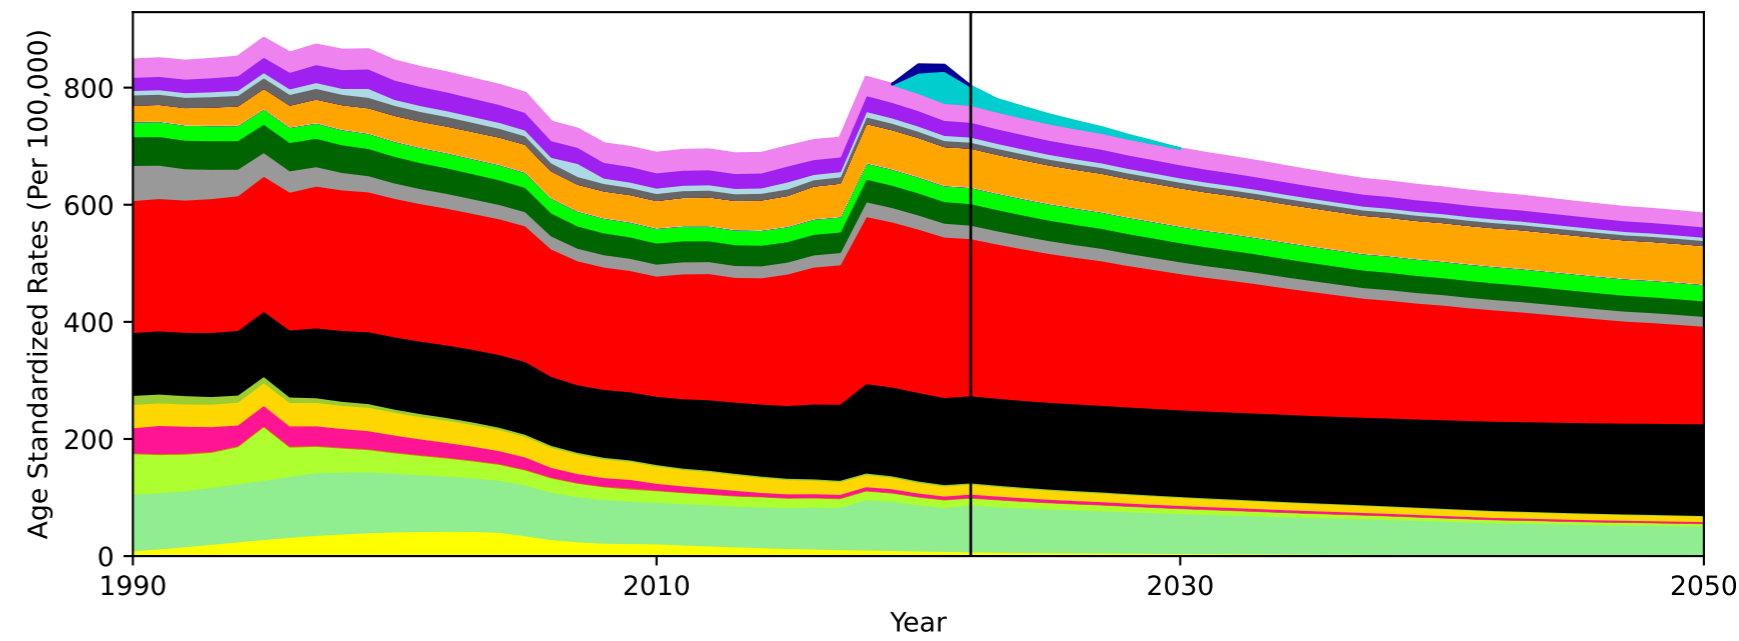

Level 1

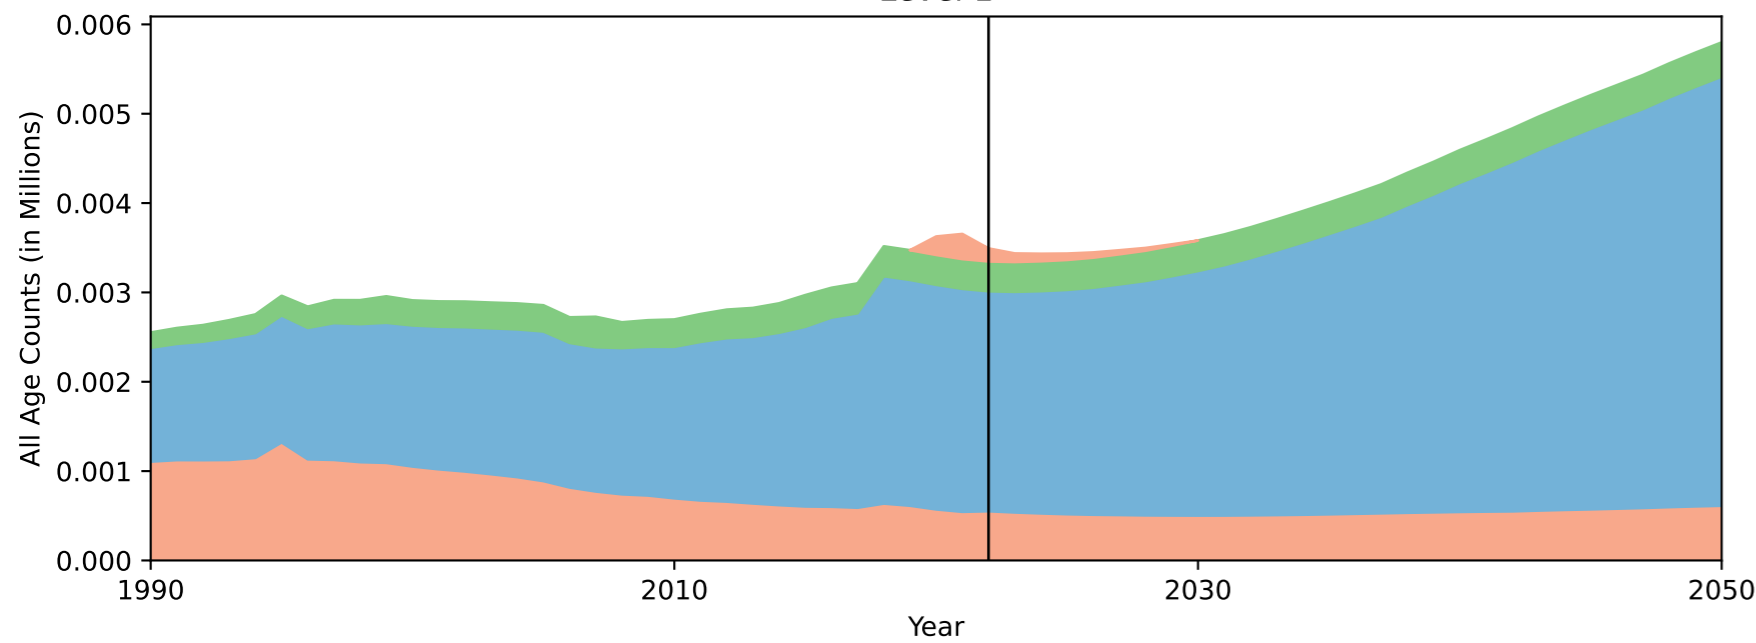

Level 2

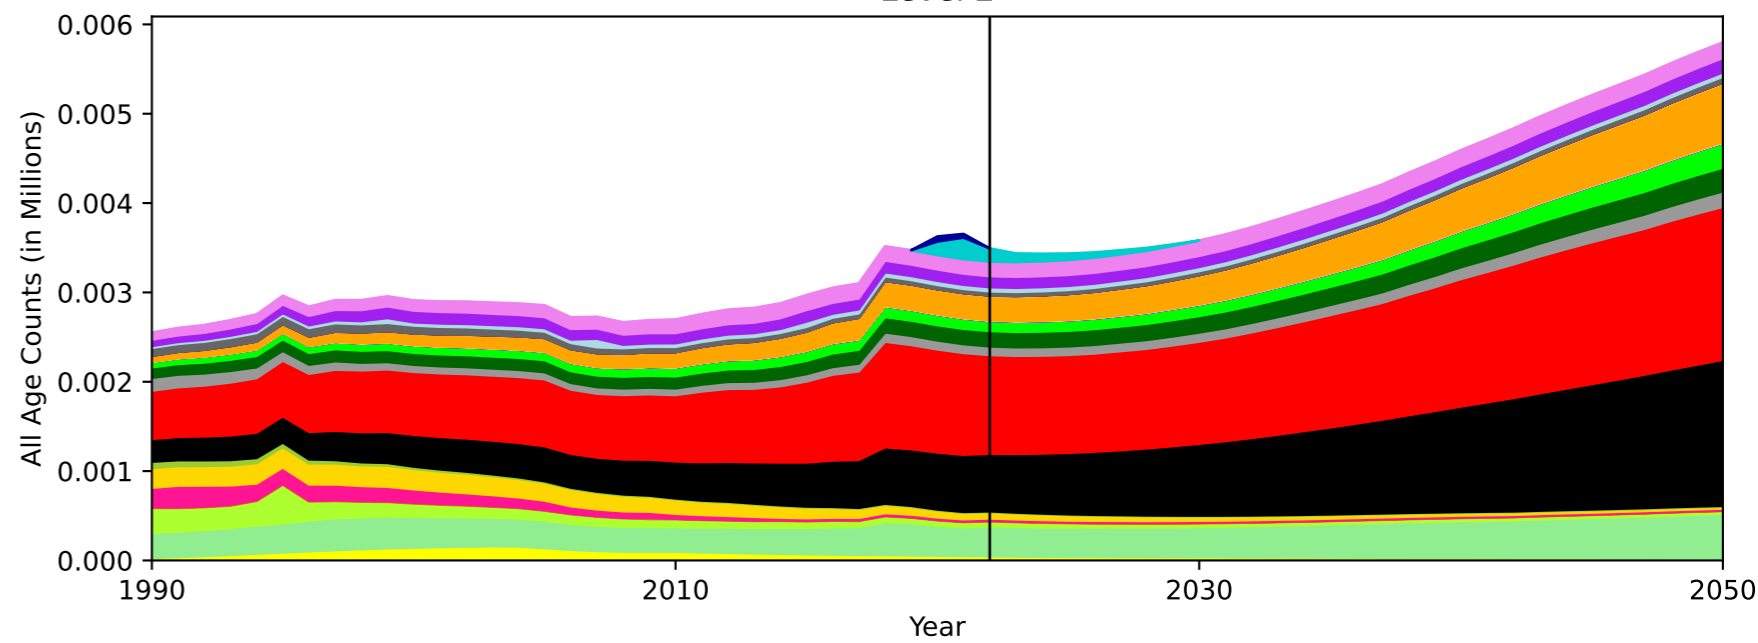

# Cameroon

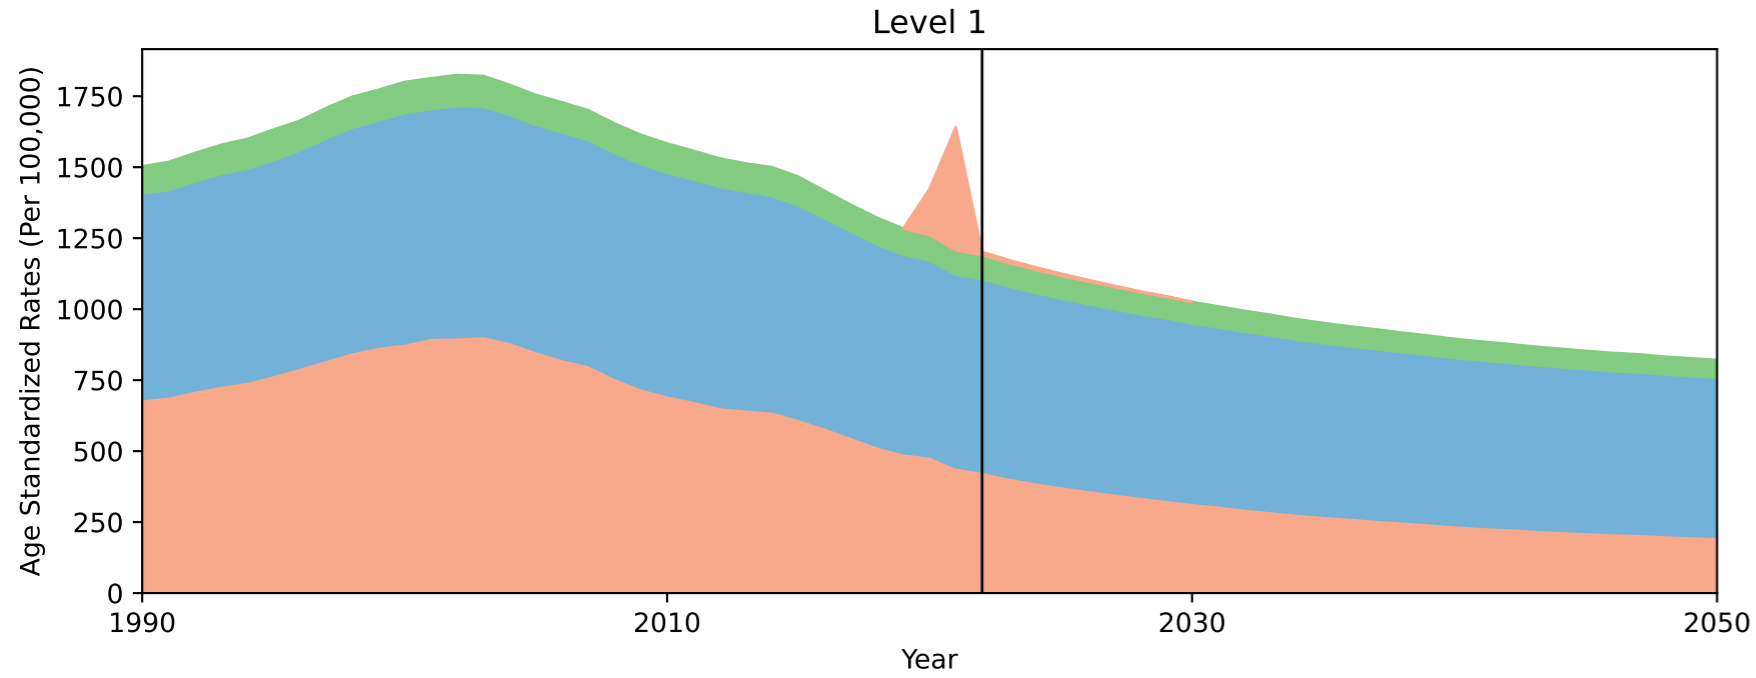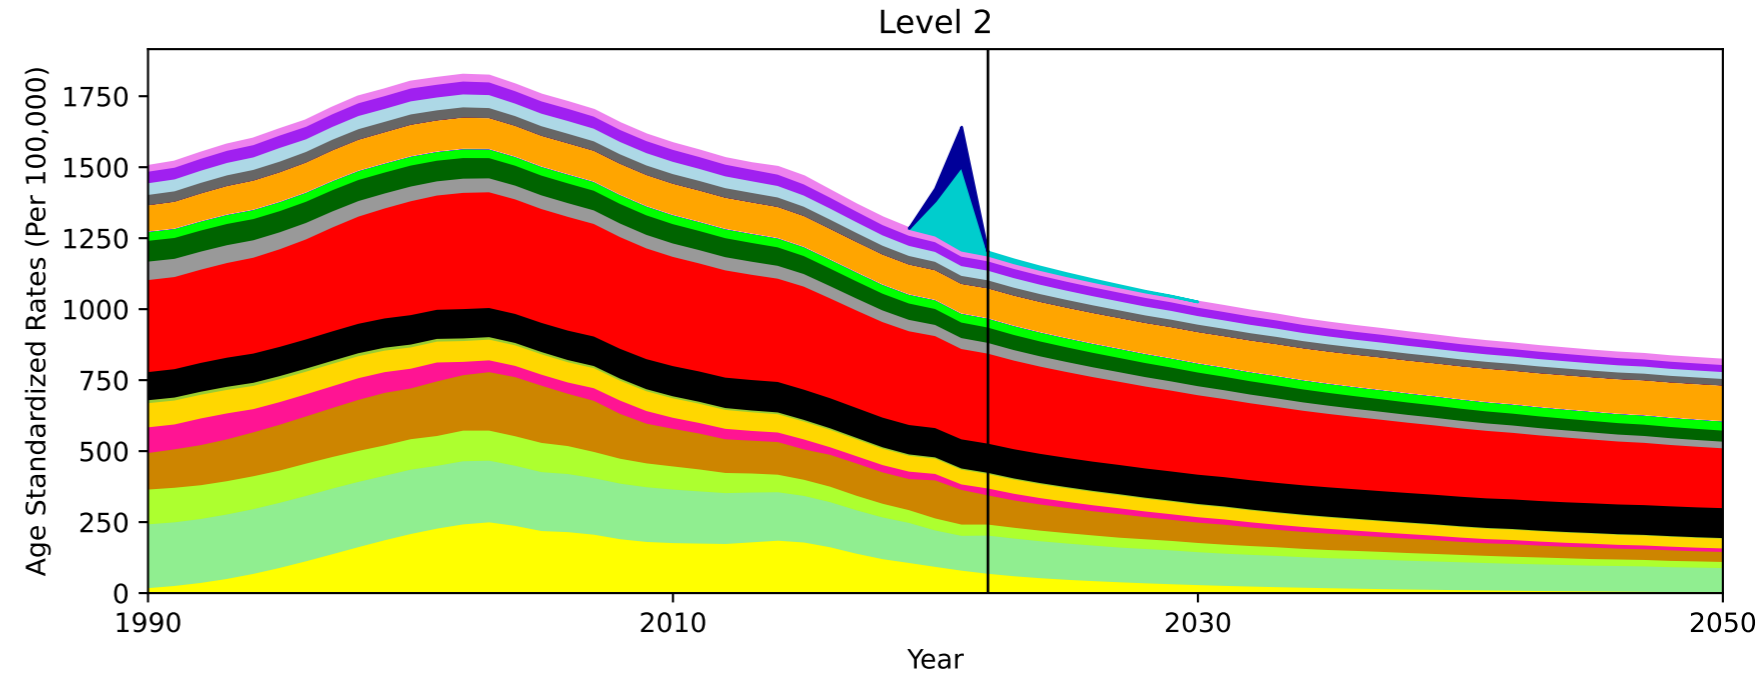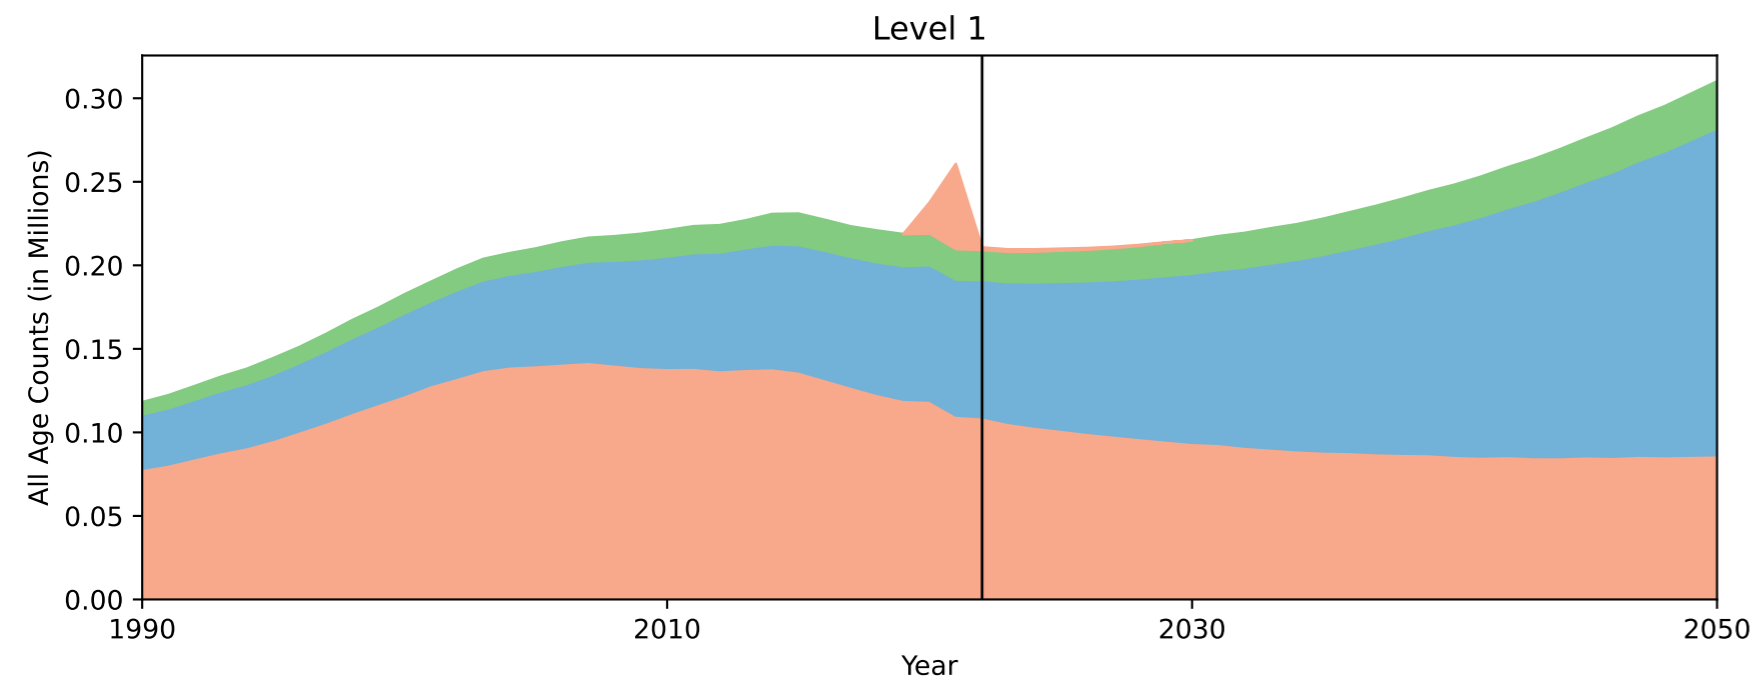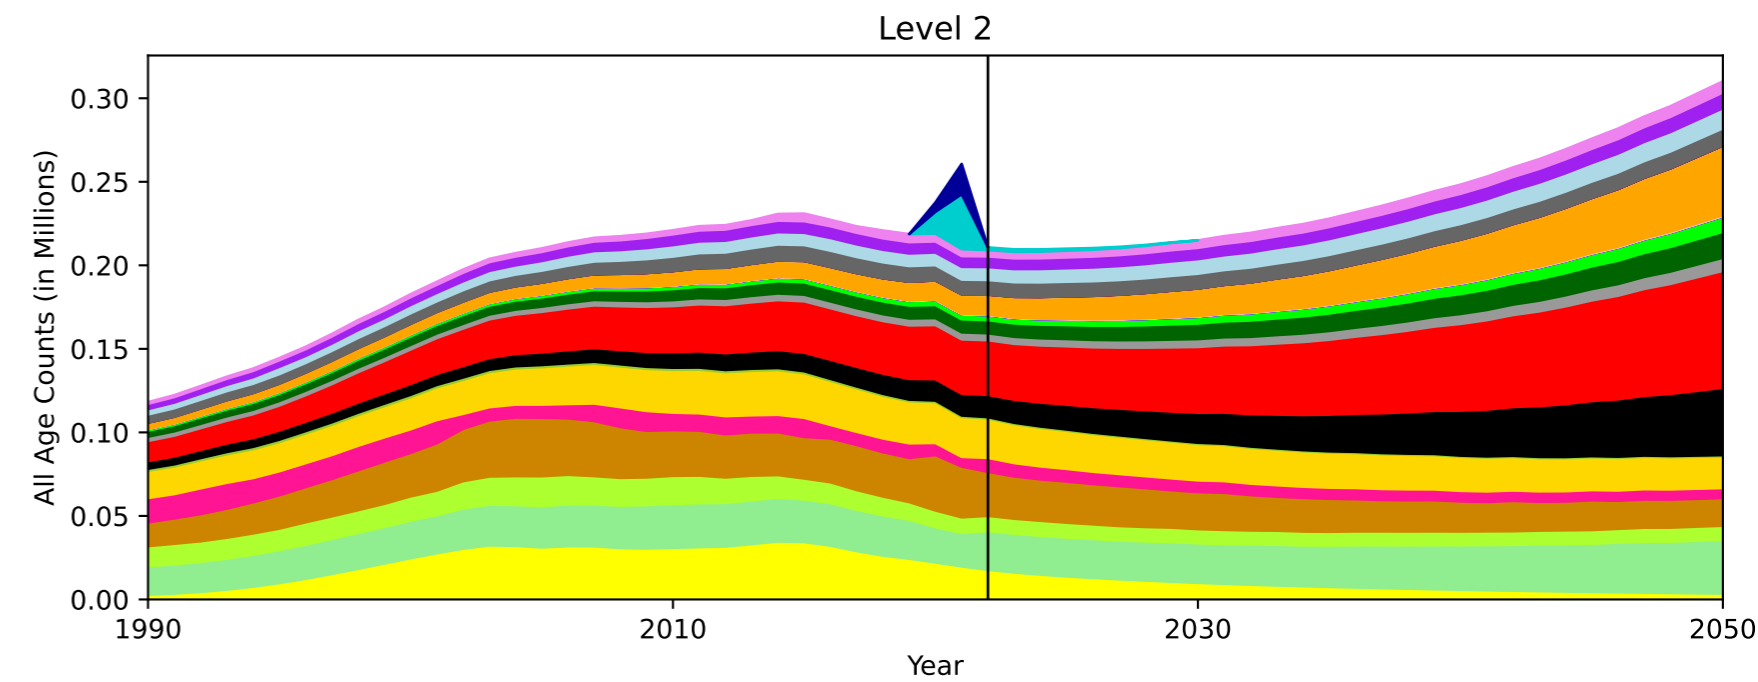

# Chad

Level 1

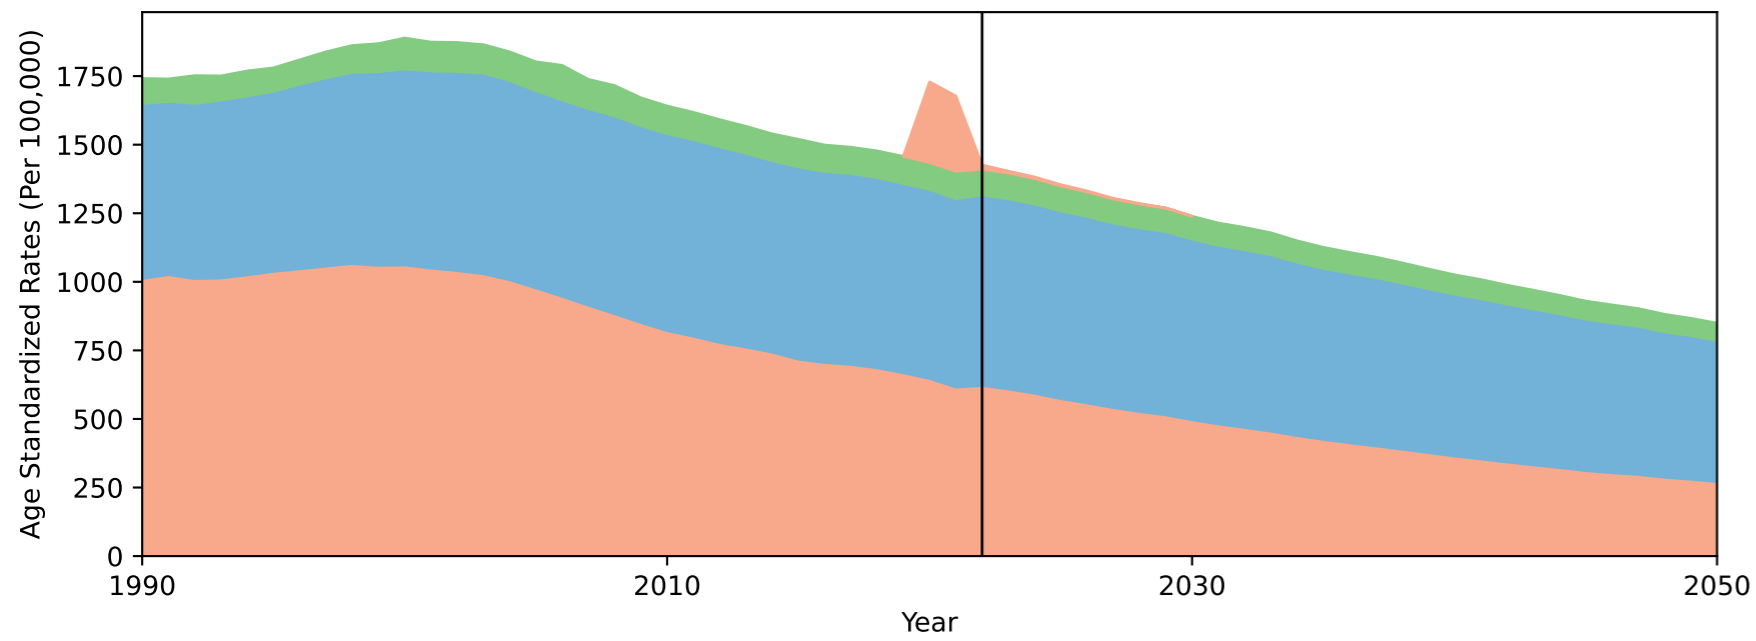

Level 2

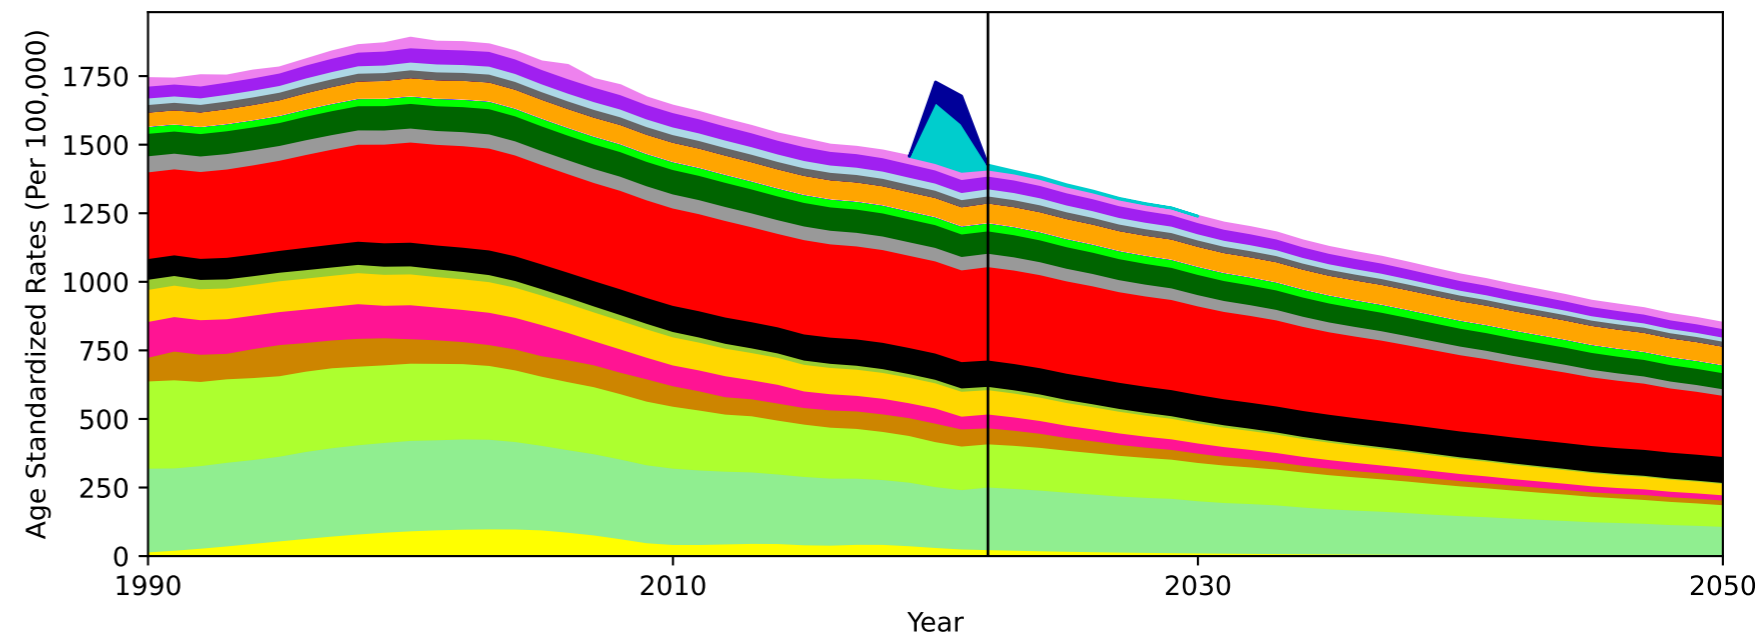

Level 1

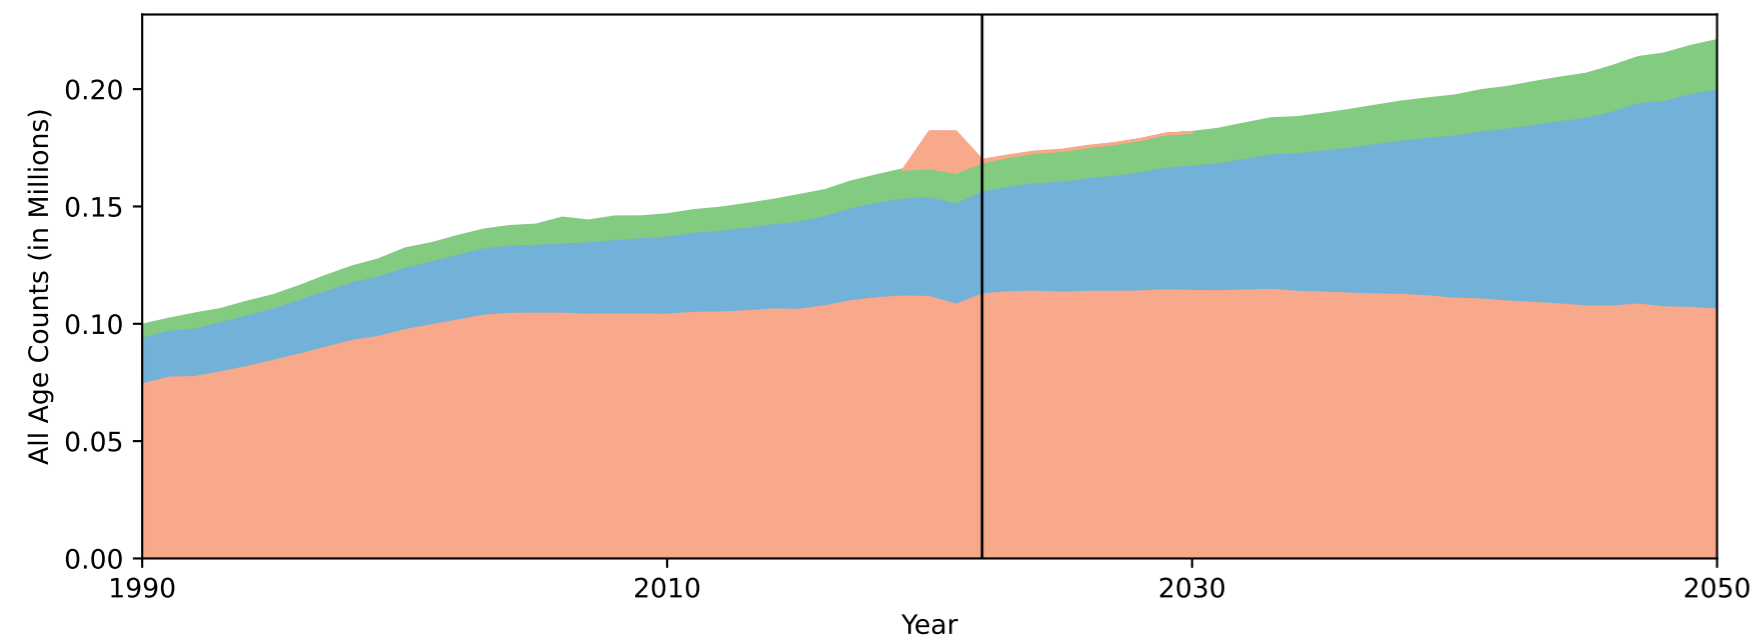

Level 2

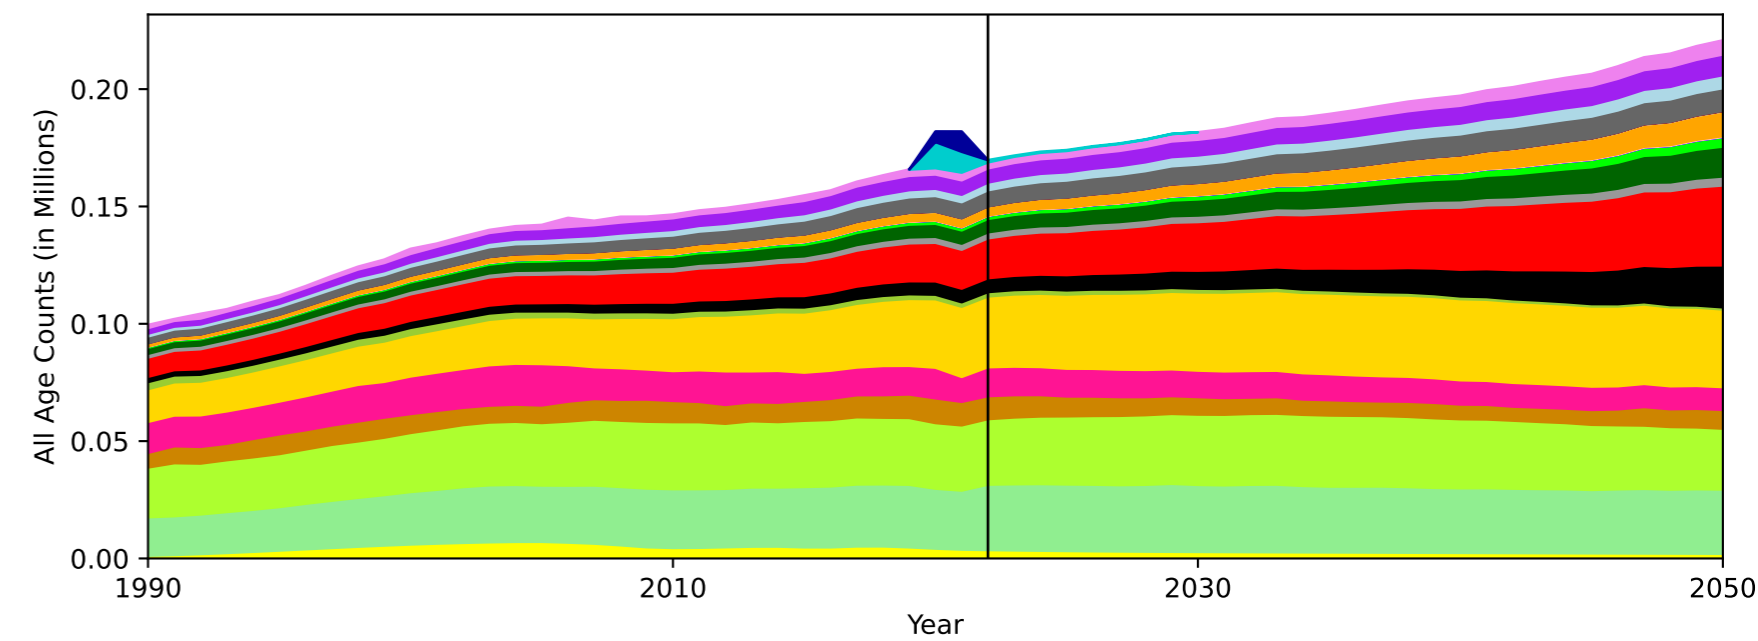

# Côte D'Ivoire

Supplemental Results Figure S5. Age-standardised death rates and all age death counts and by Level 1 and Level 2 causes, 1990–2050

668

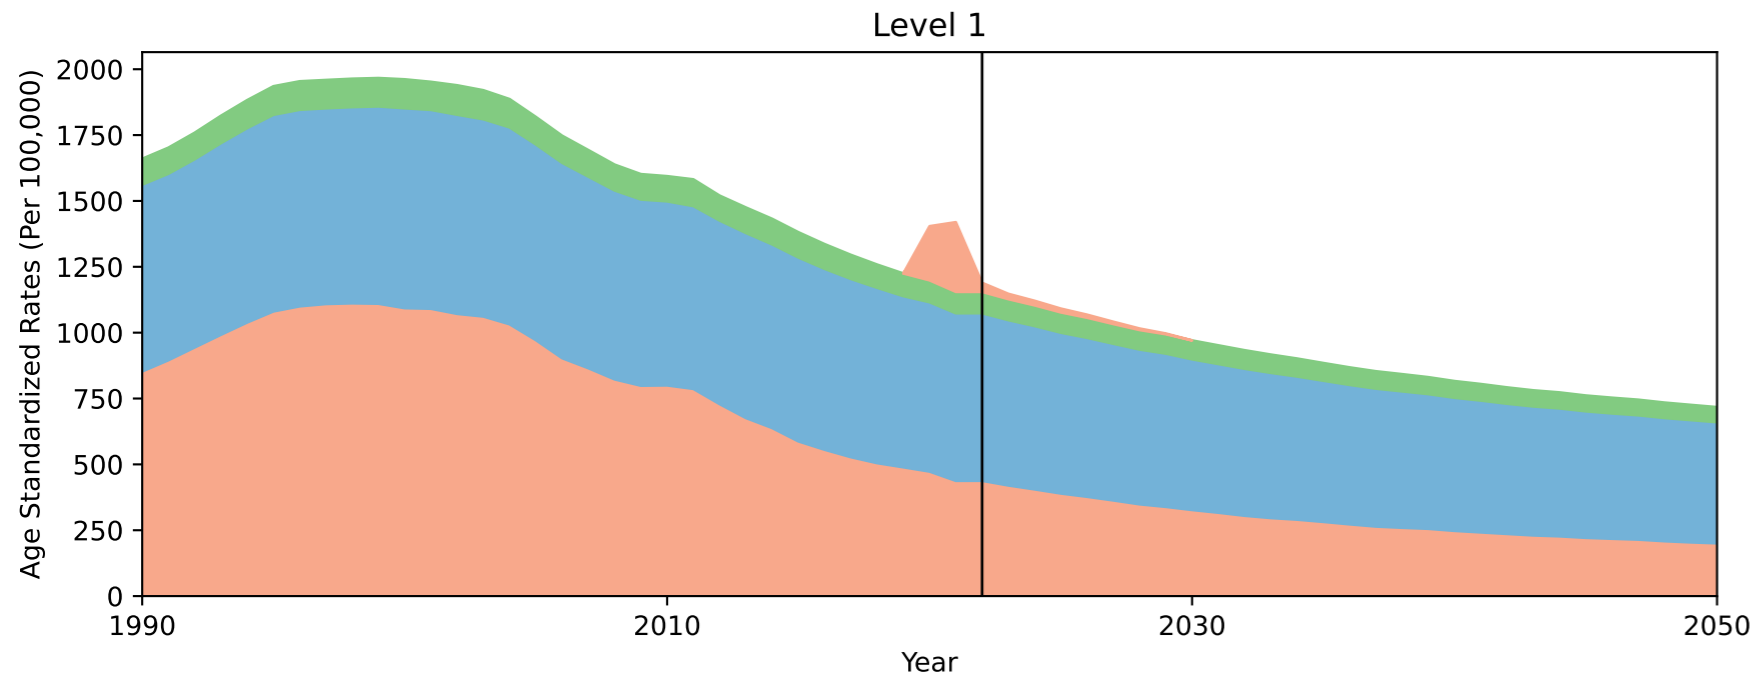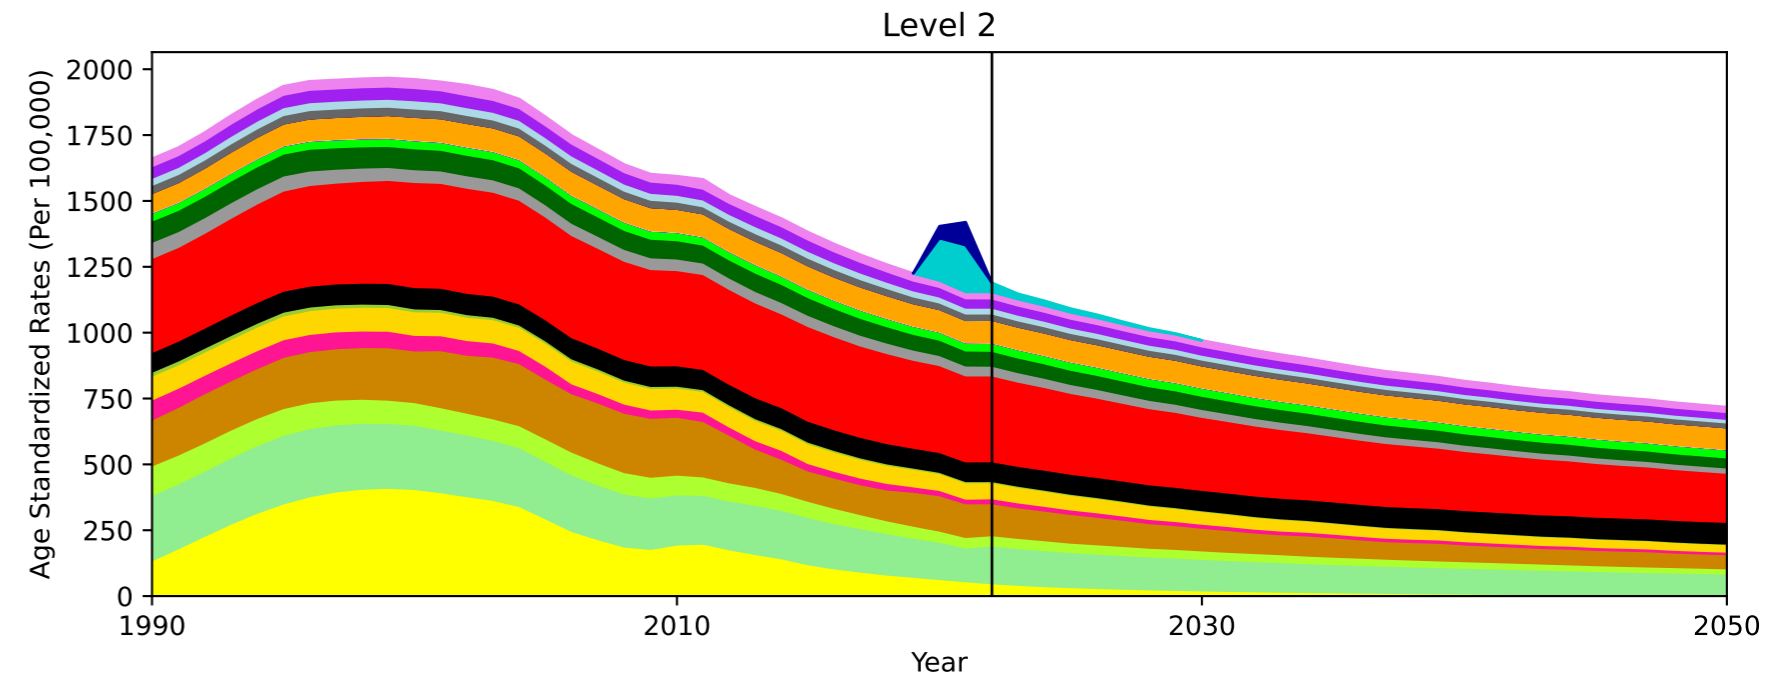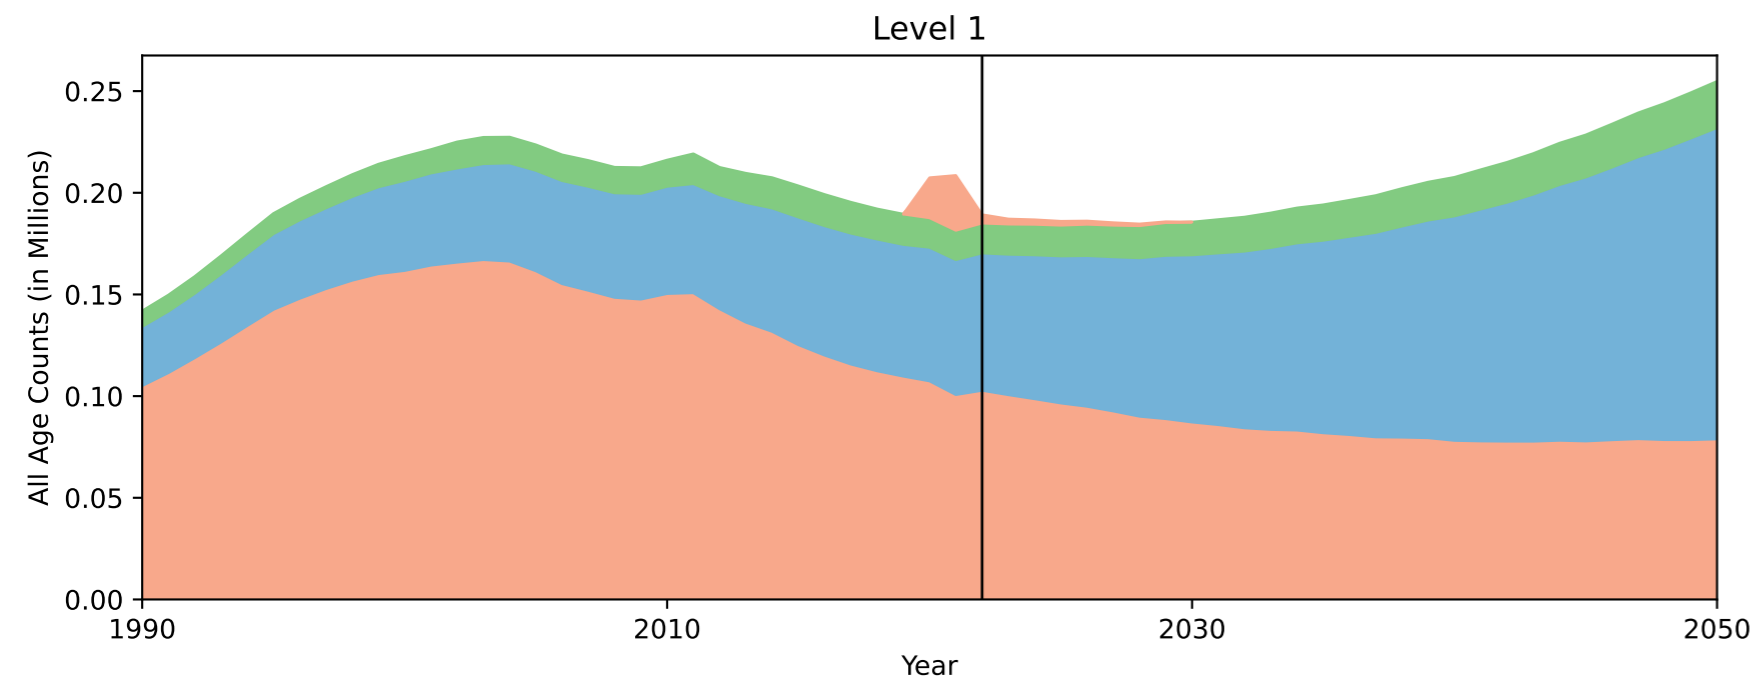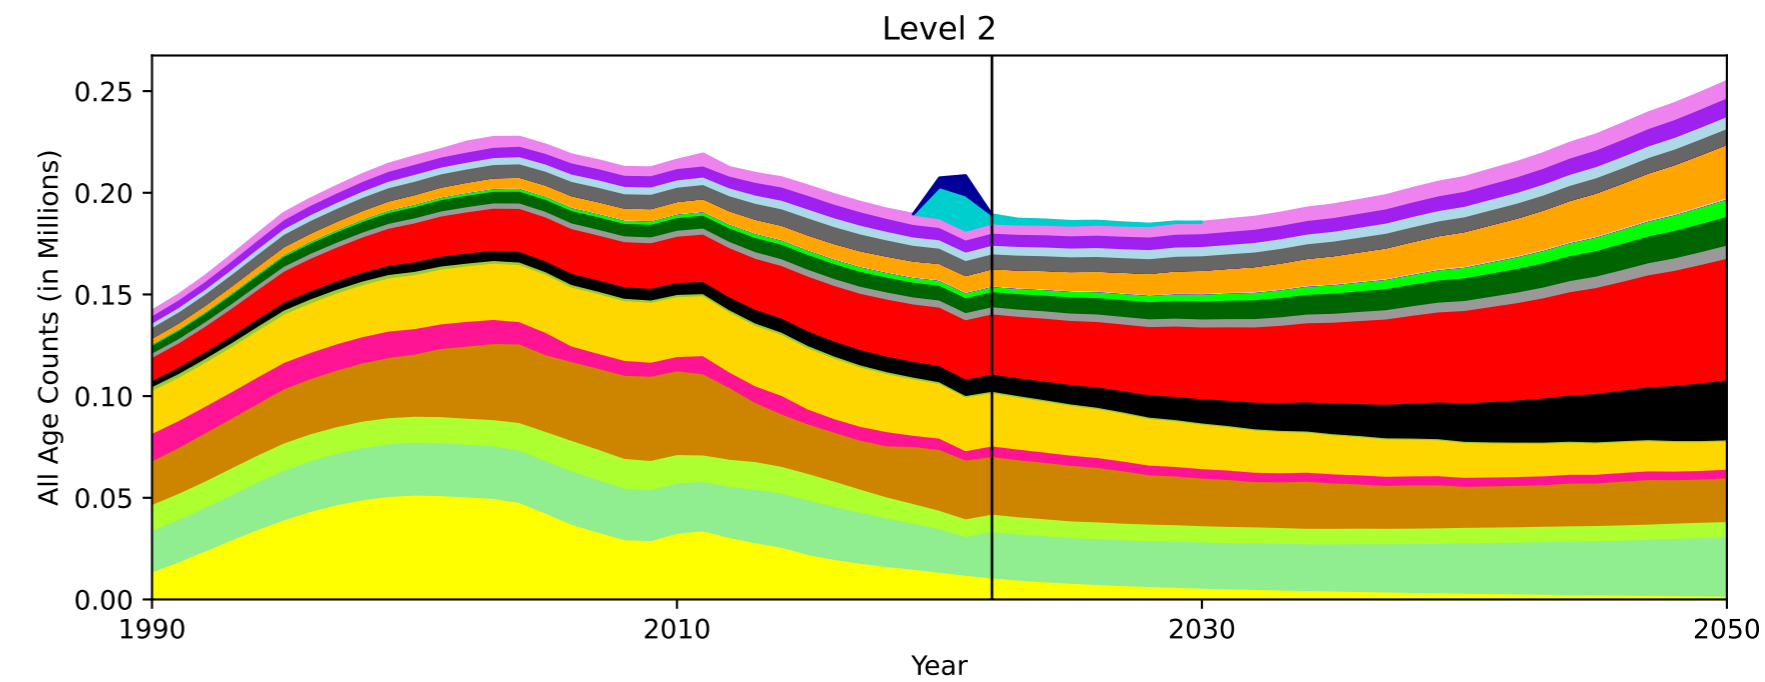

# The Gambia

Level 1

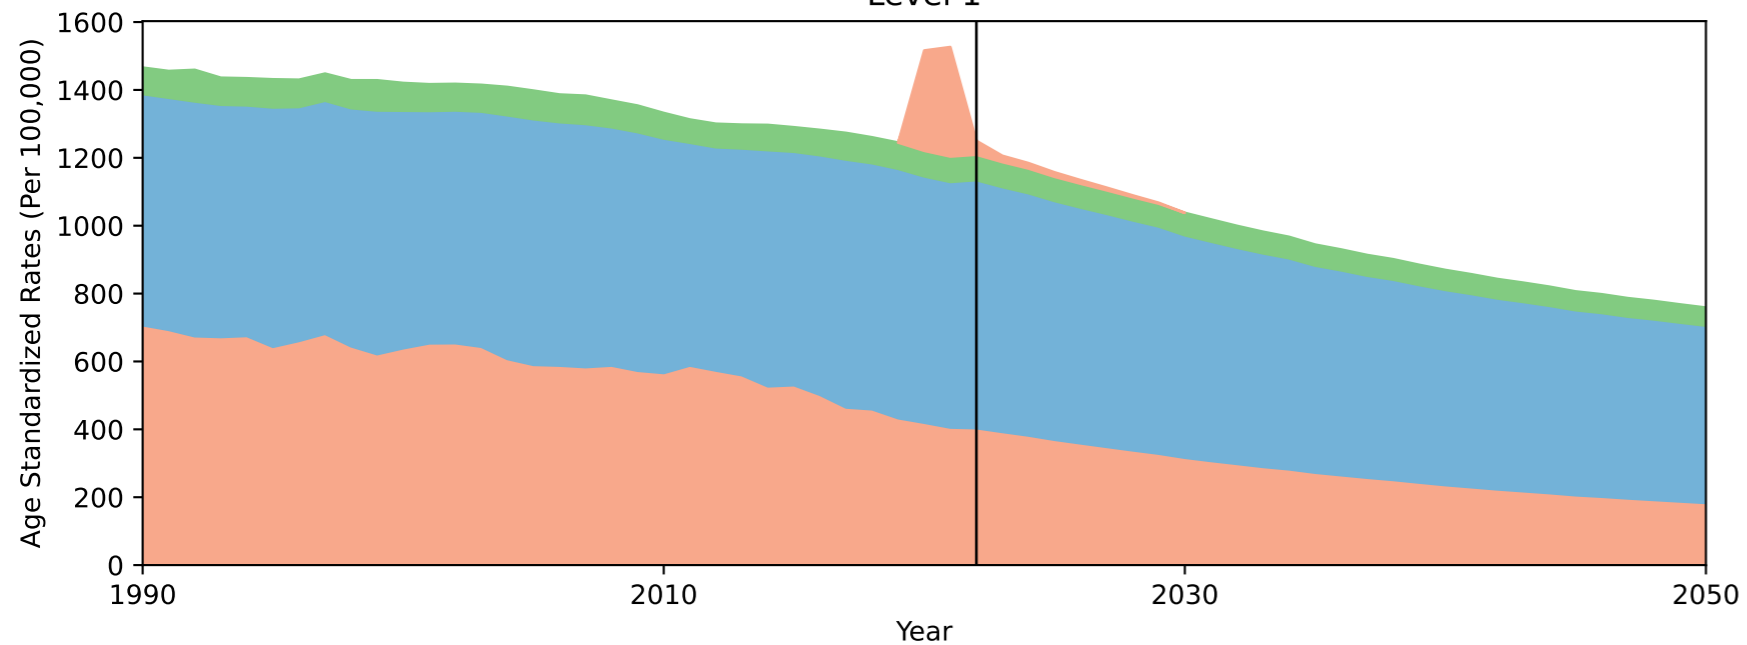

Level 2

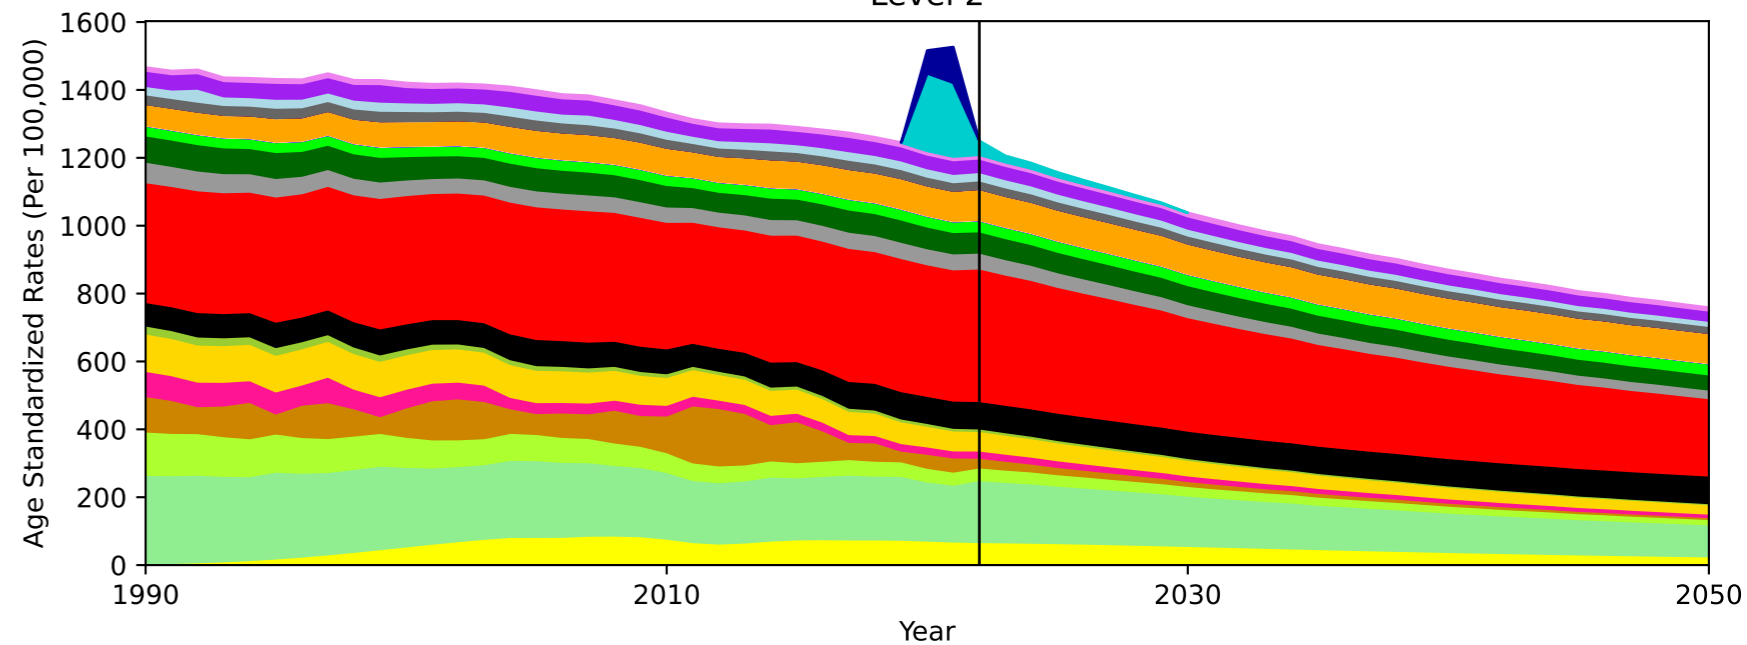

Level 1

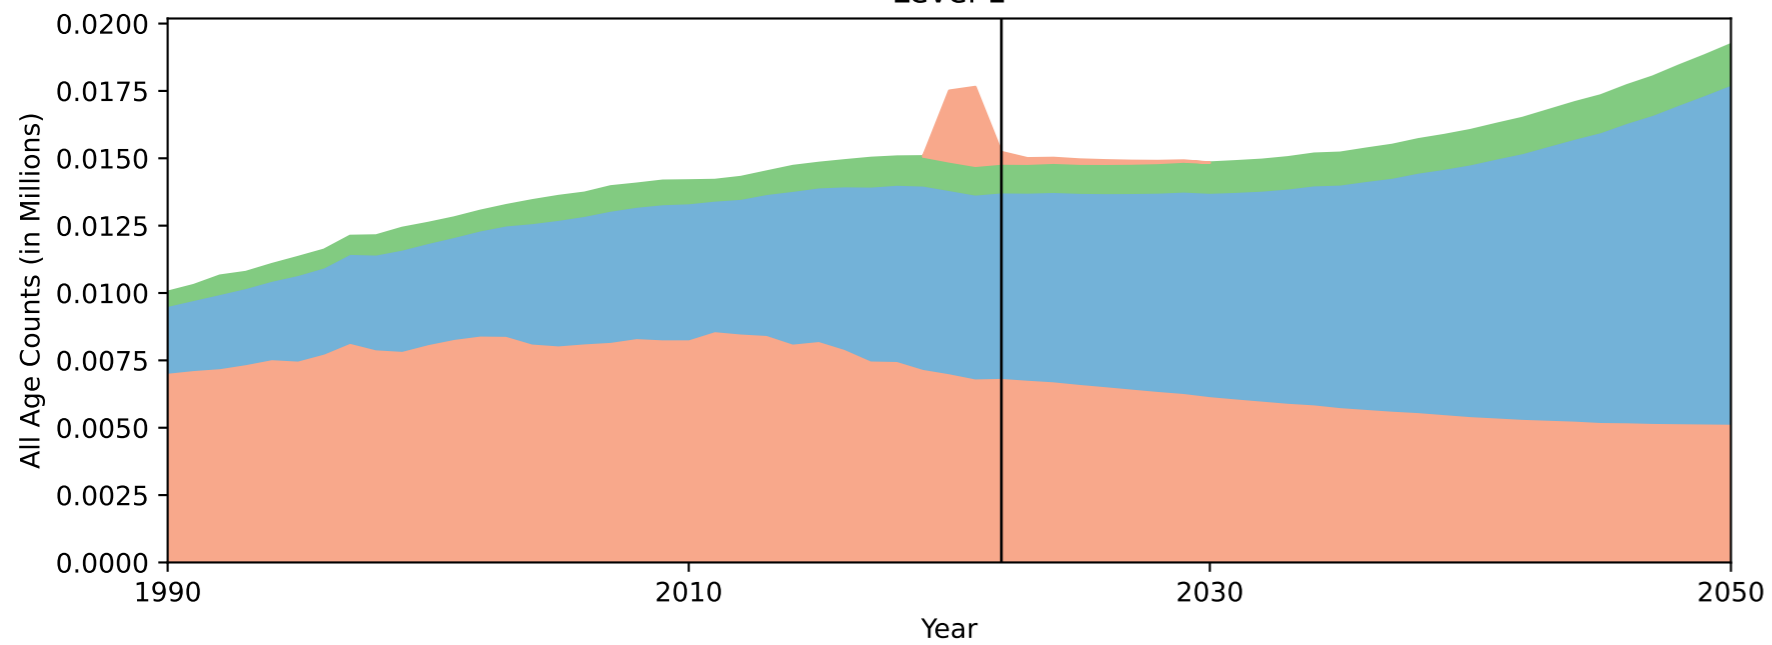

Level 2

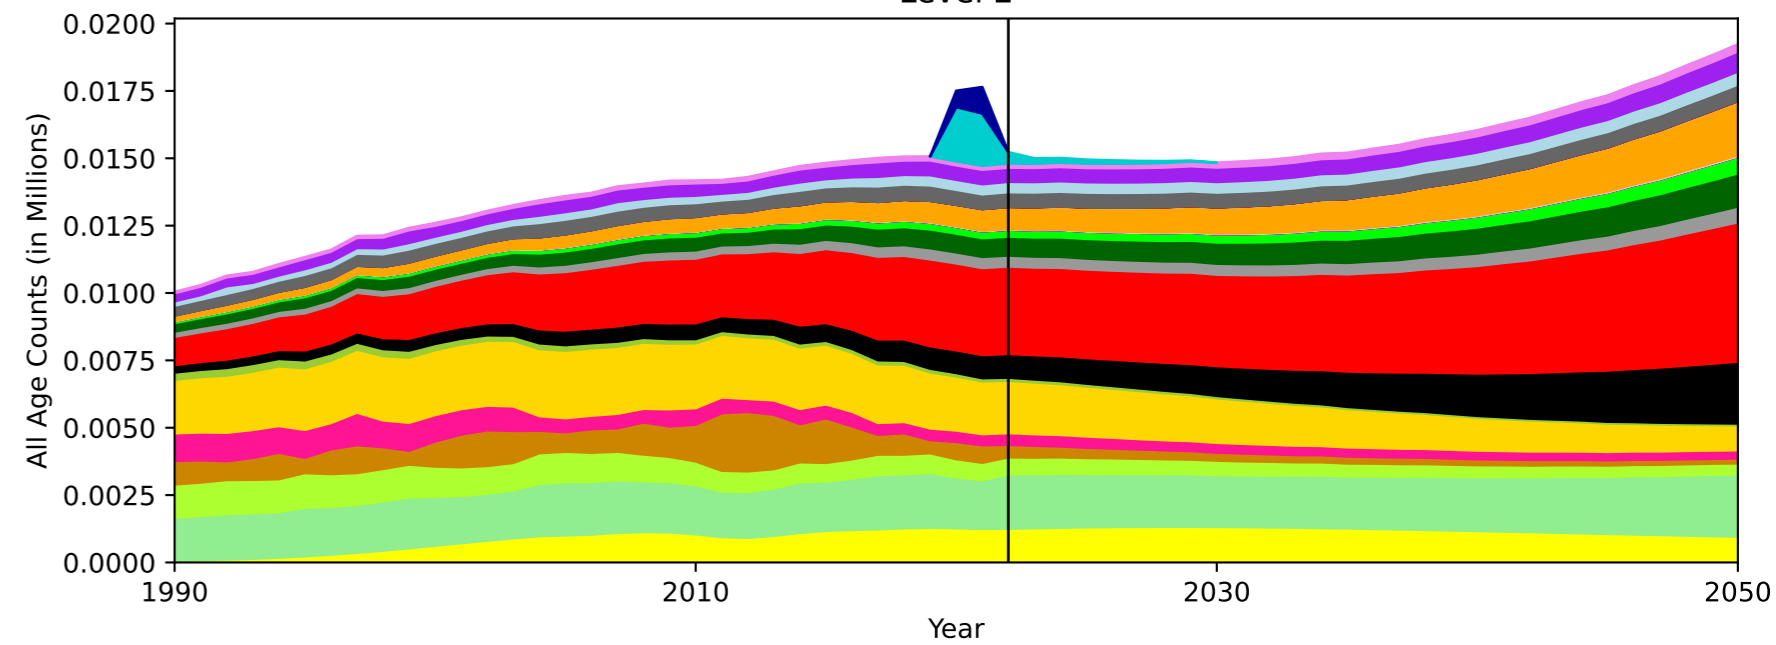

# Ghana

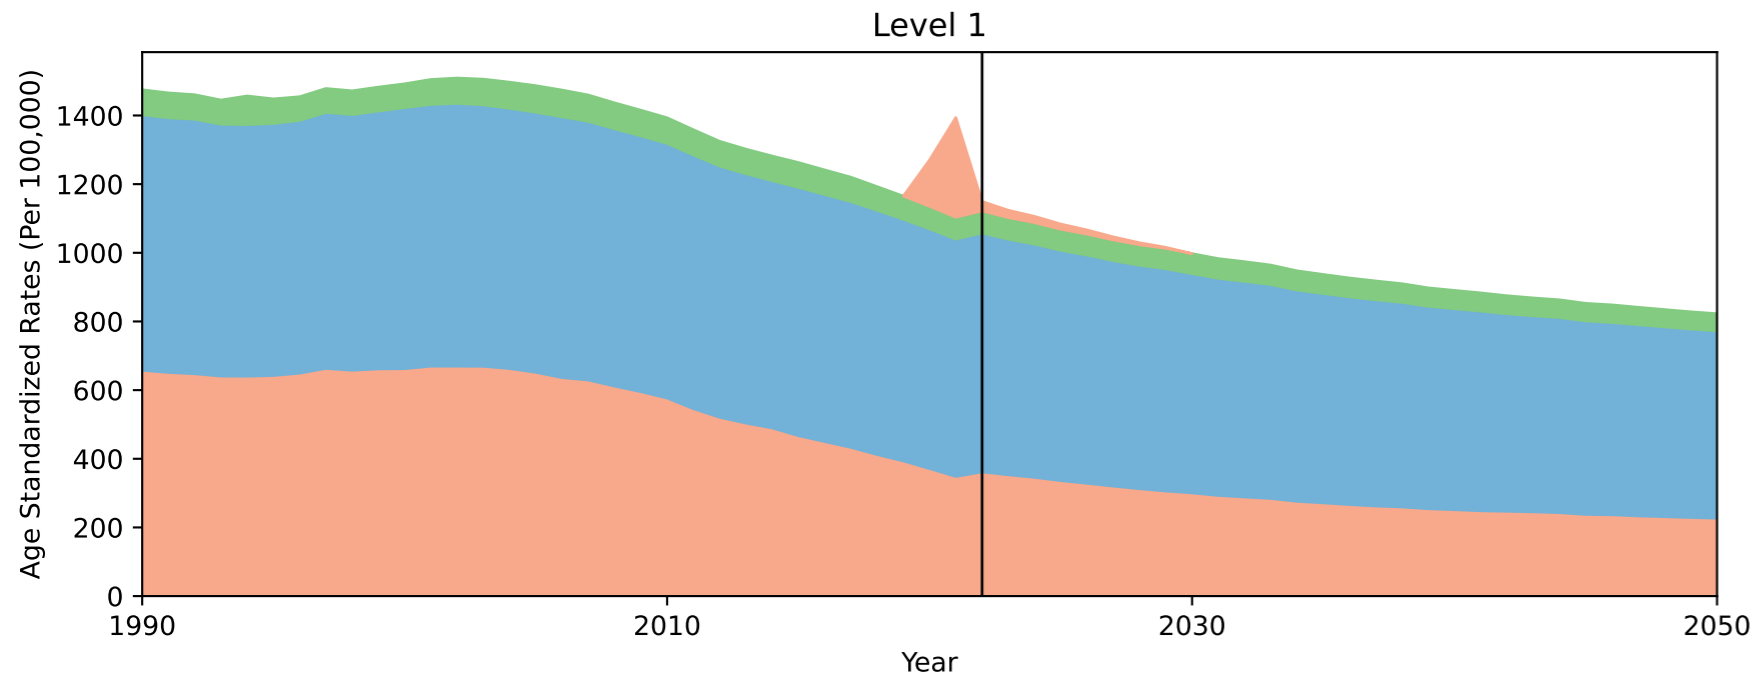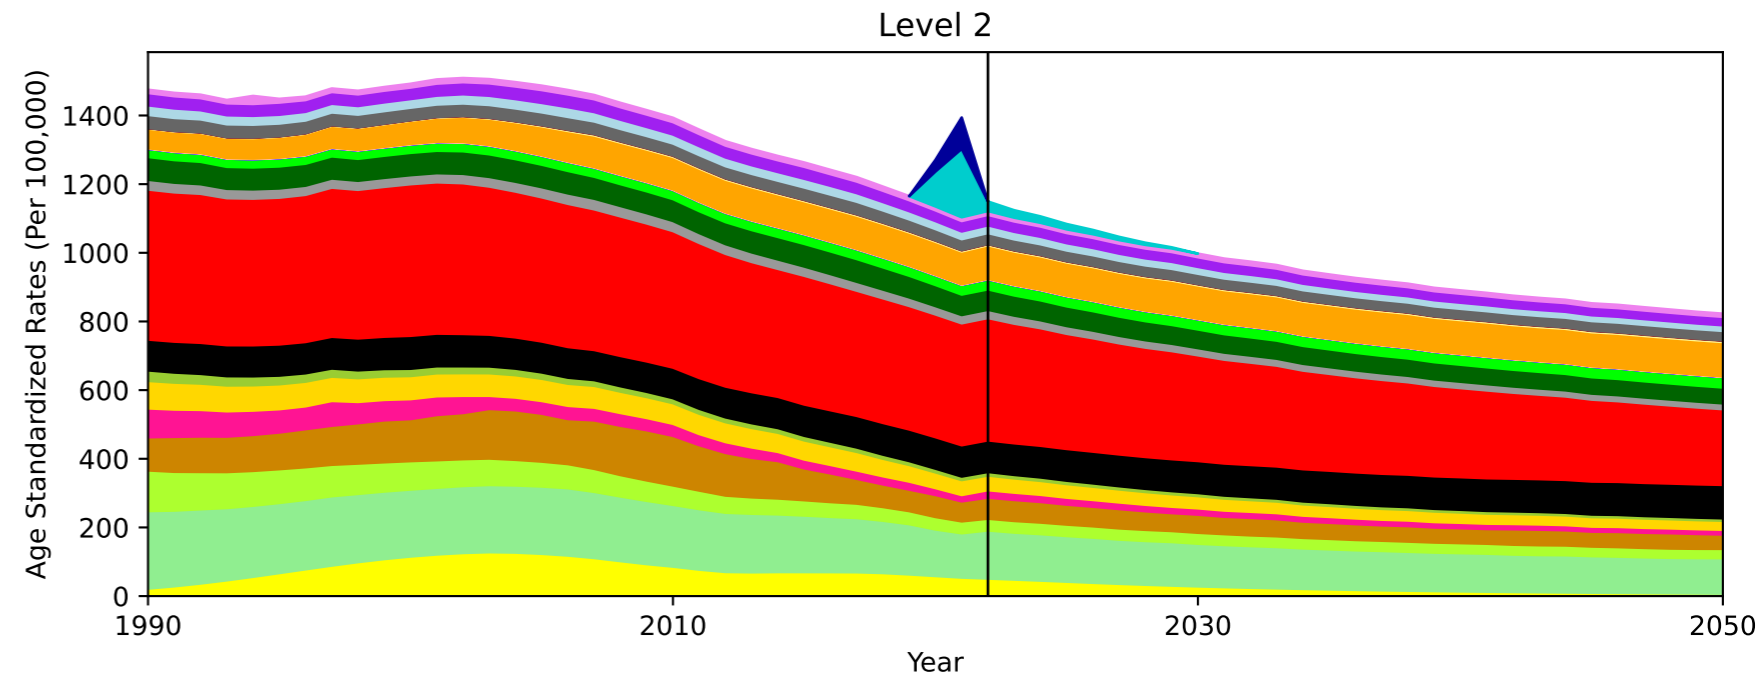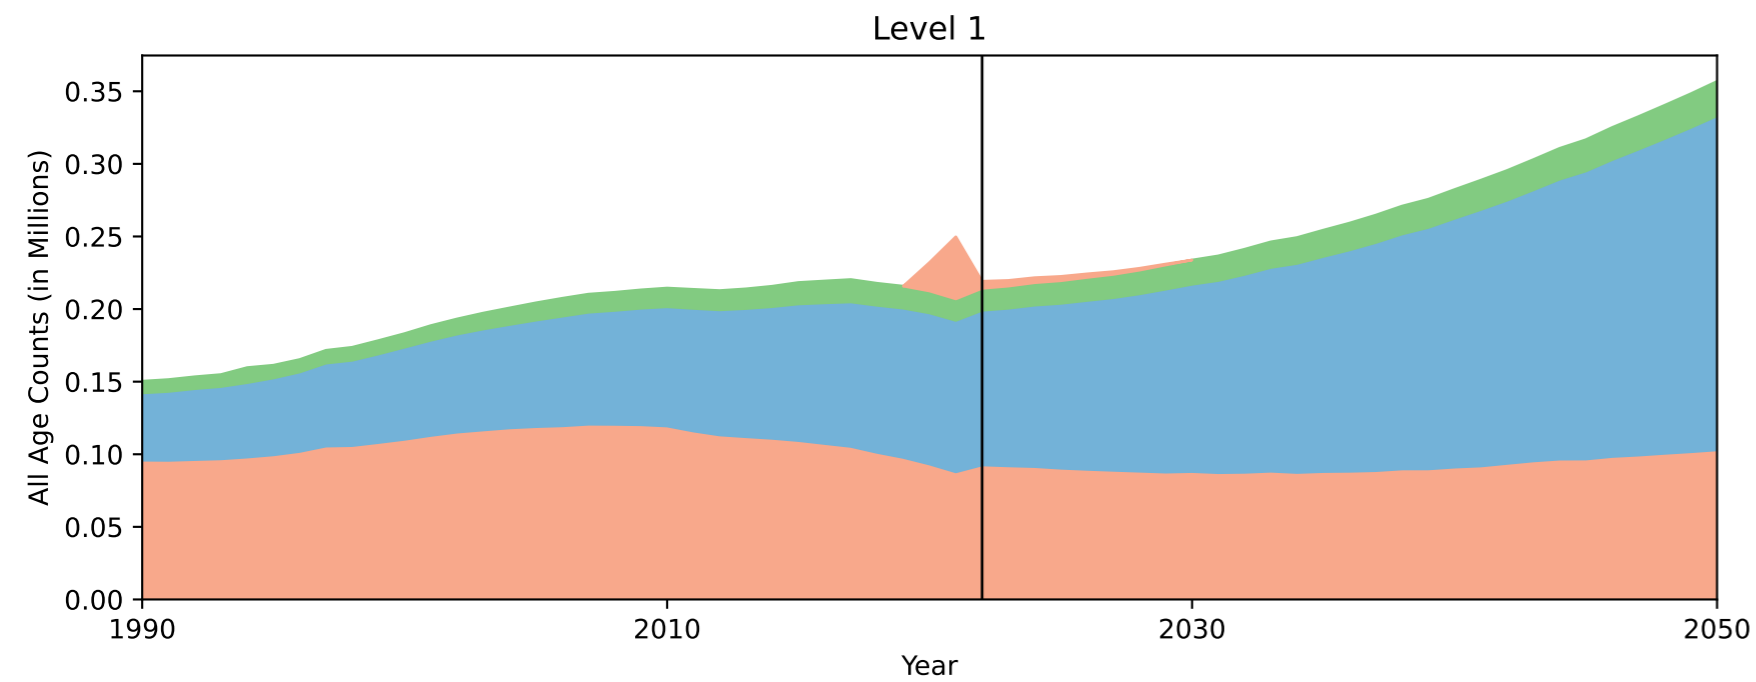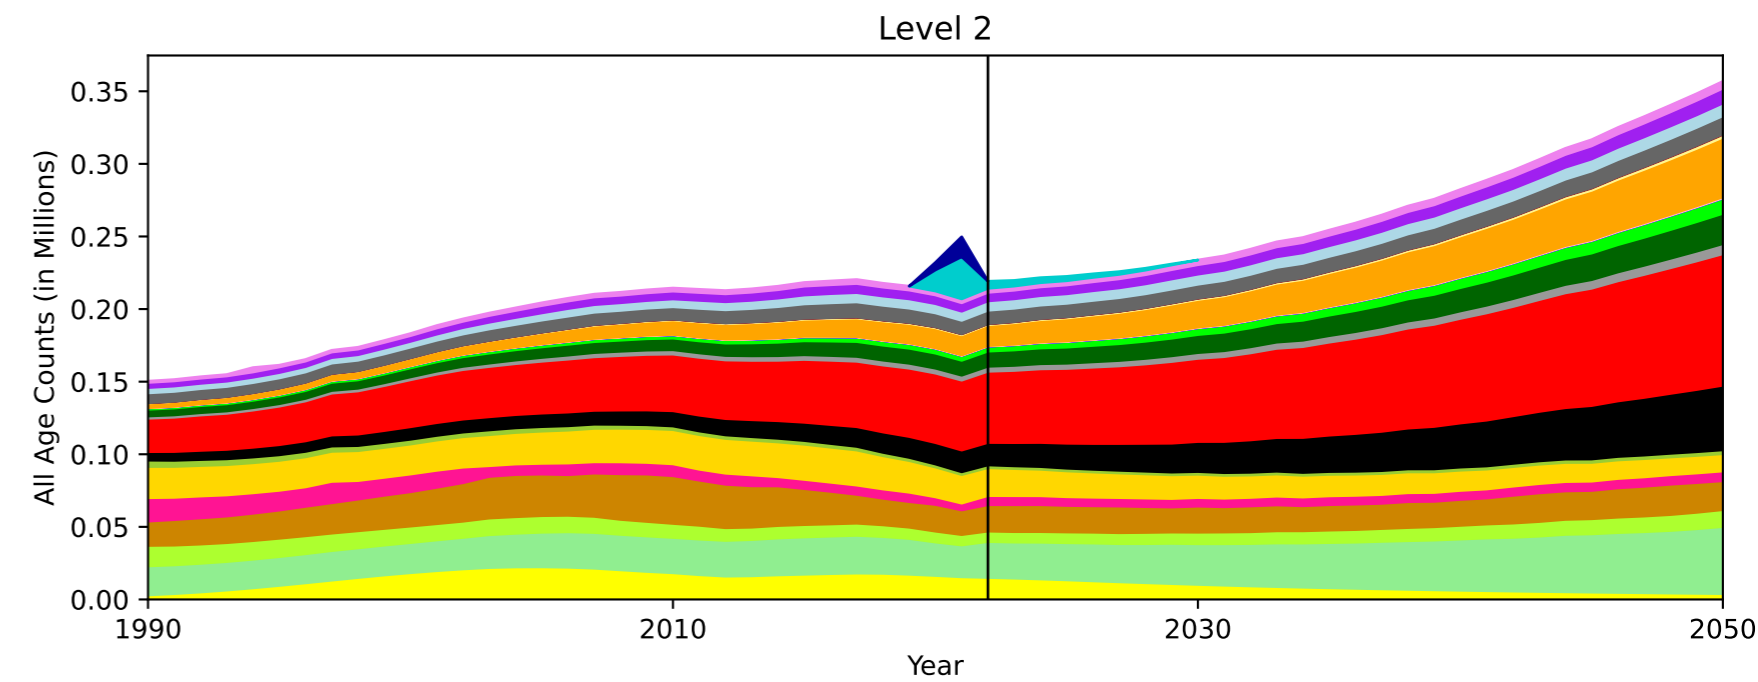

# Guinea

Level 1

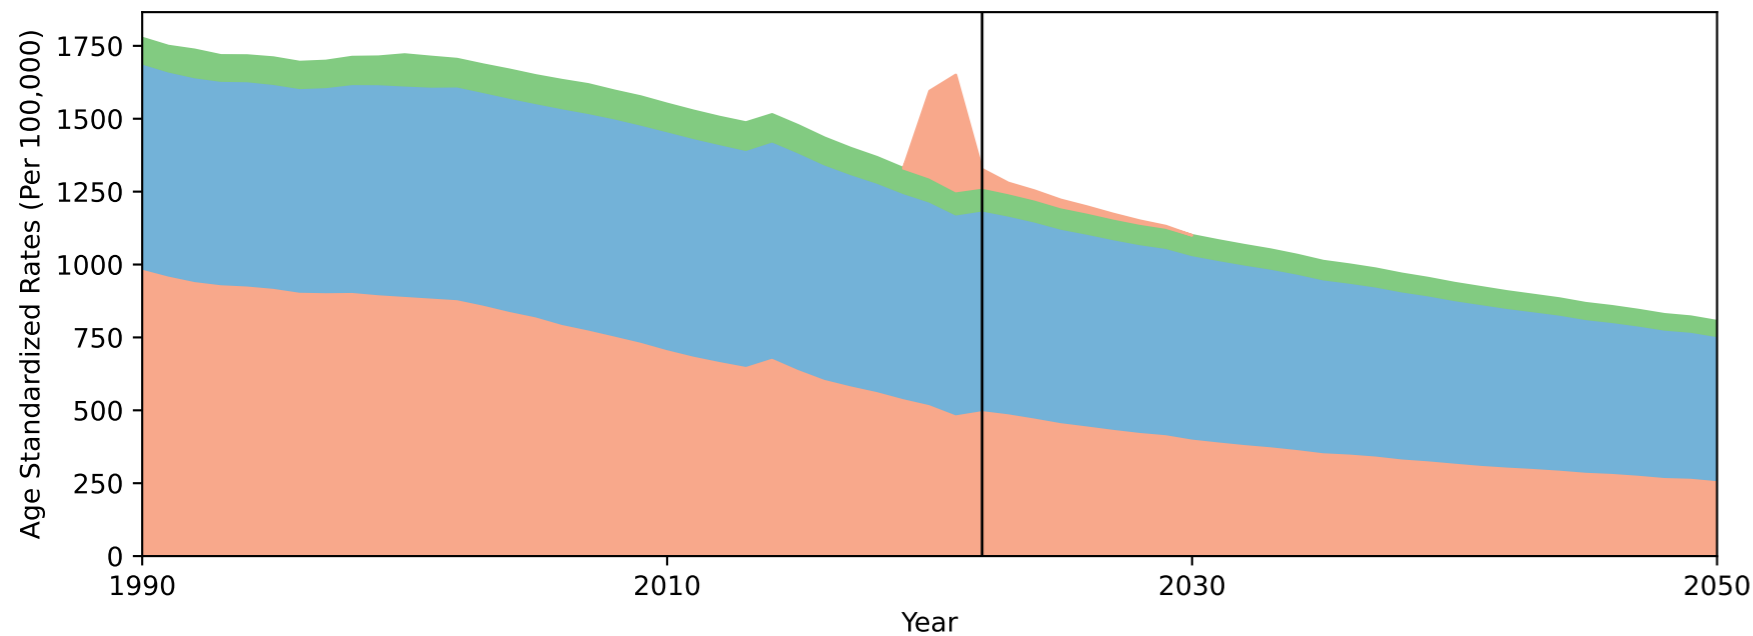

Level 2

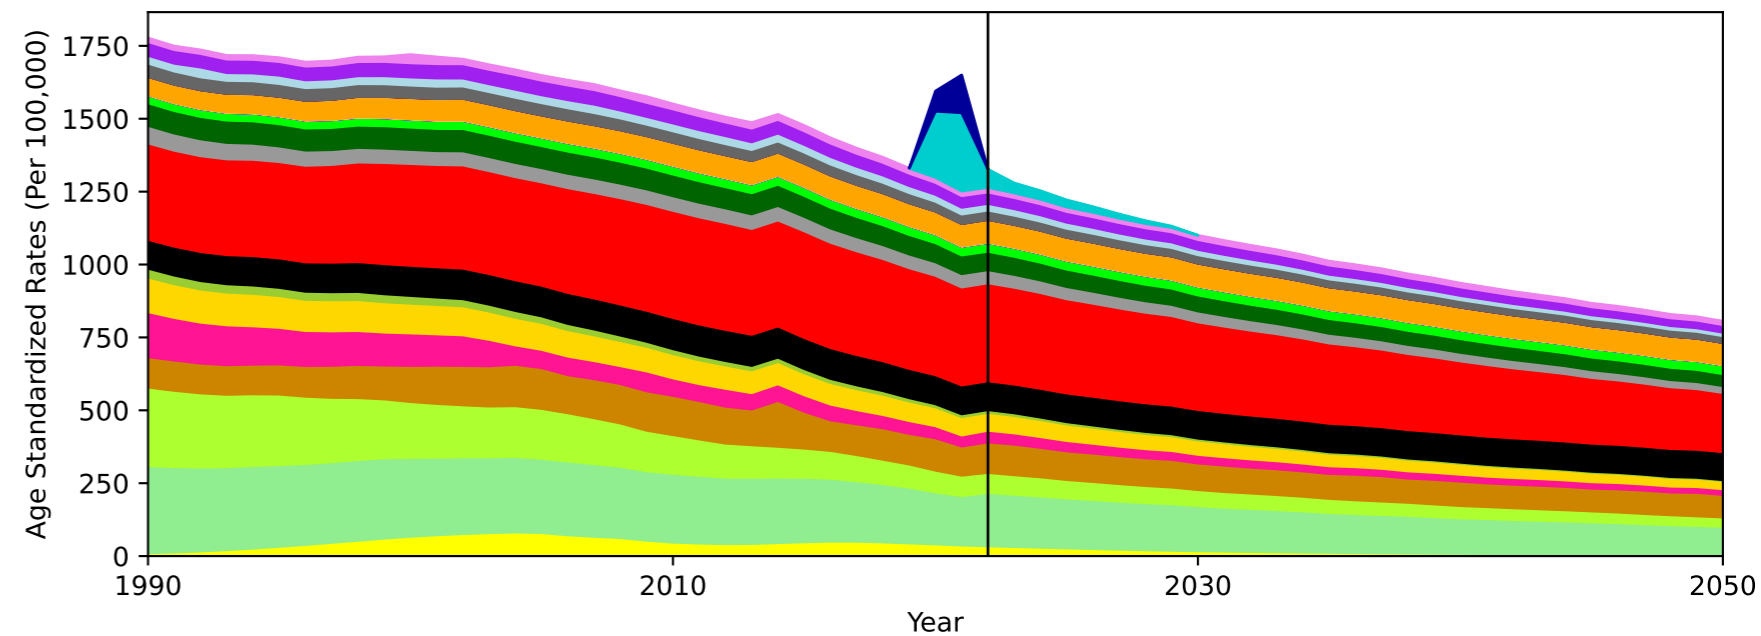

Level 1

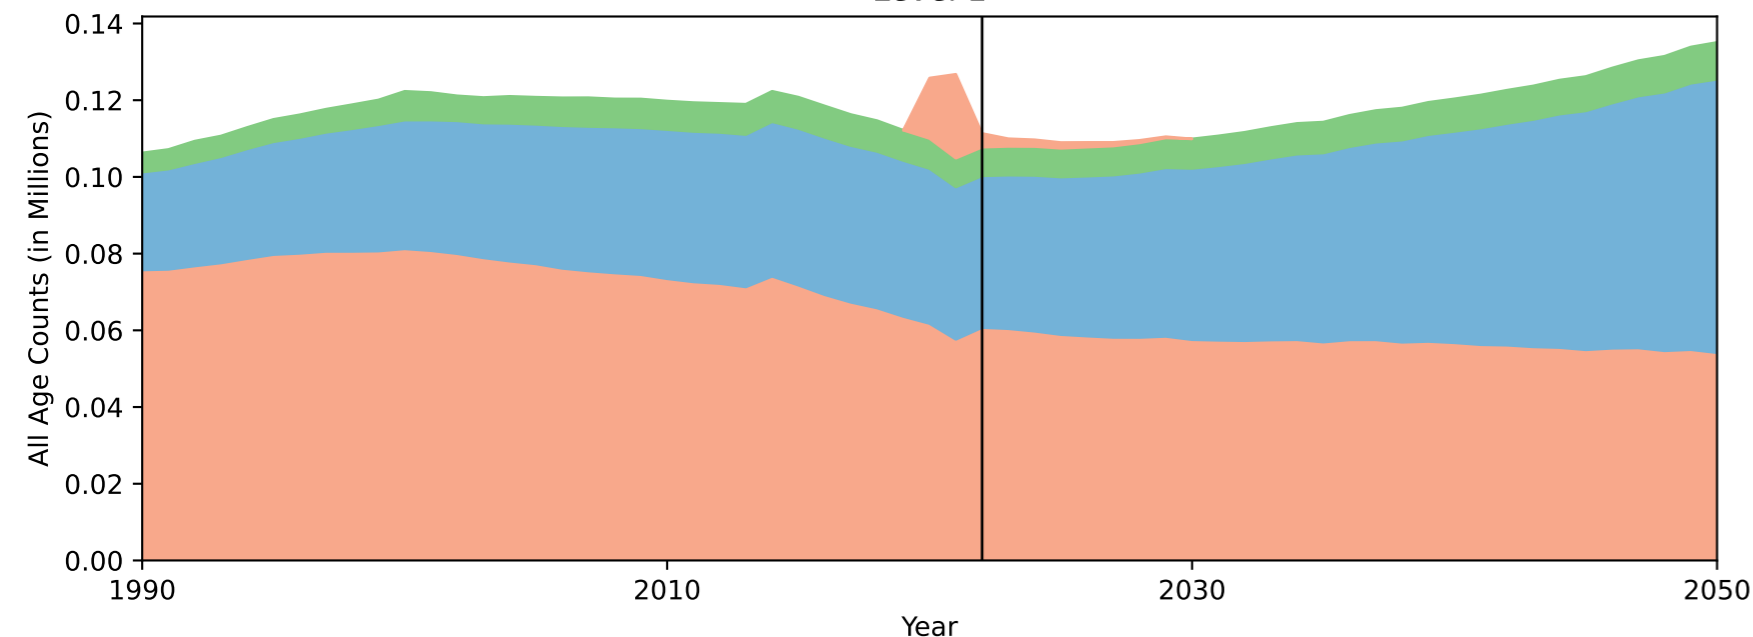

Level 2

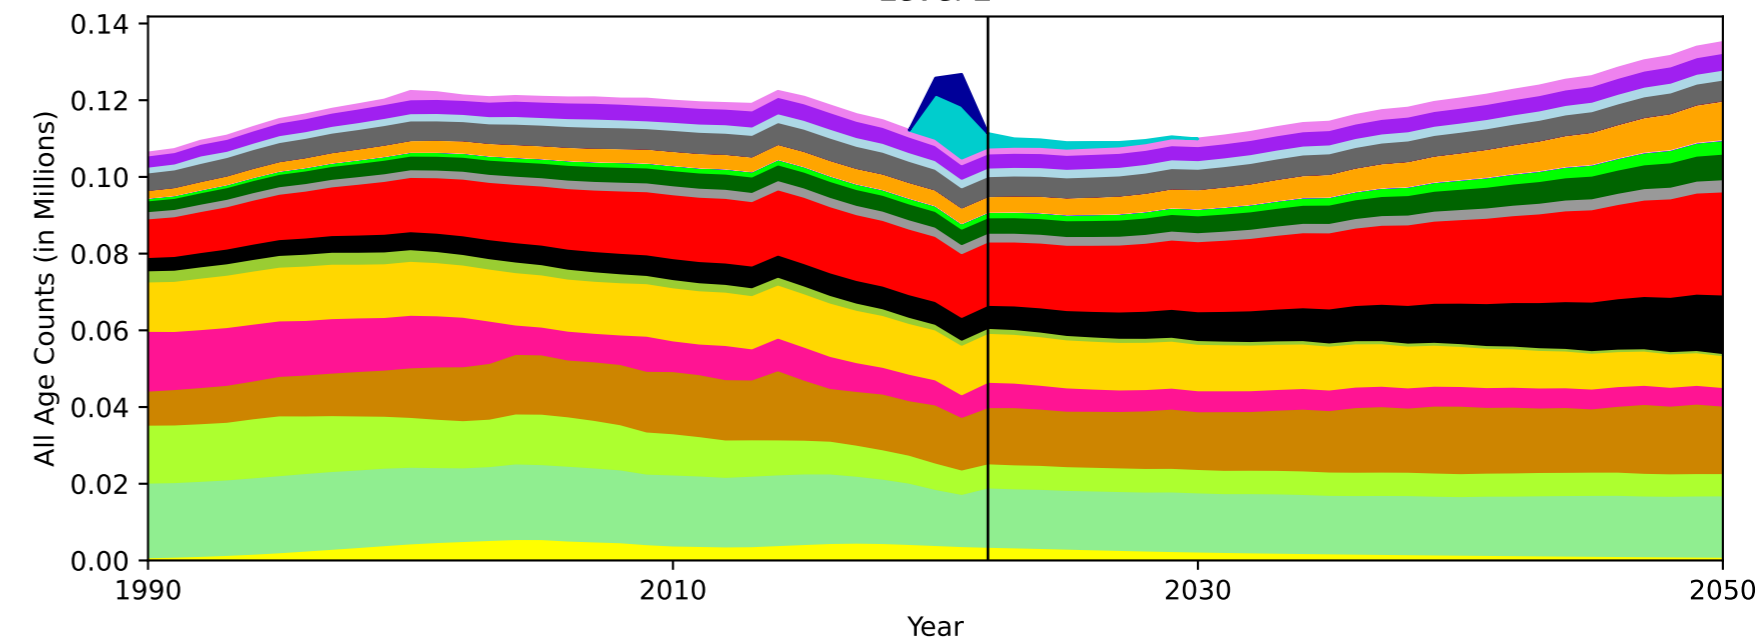



# Guinea-Bissau

Supplemental Results Figure S5. Age-standardised death rates and all age death counts and by Level 1 and Level 2 causes, 1990–2050

672

Level 1

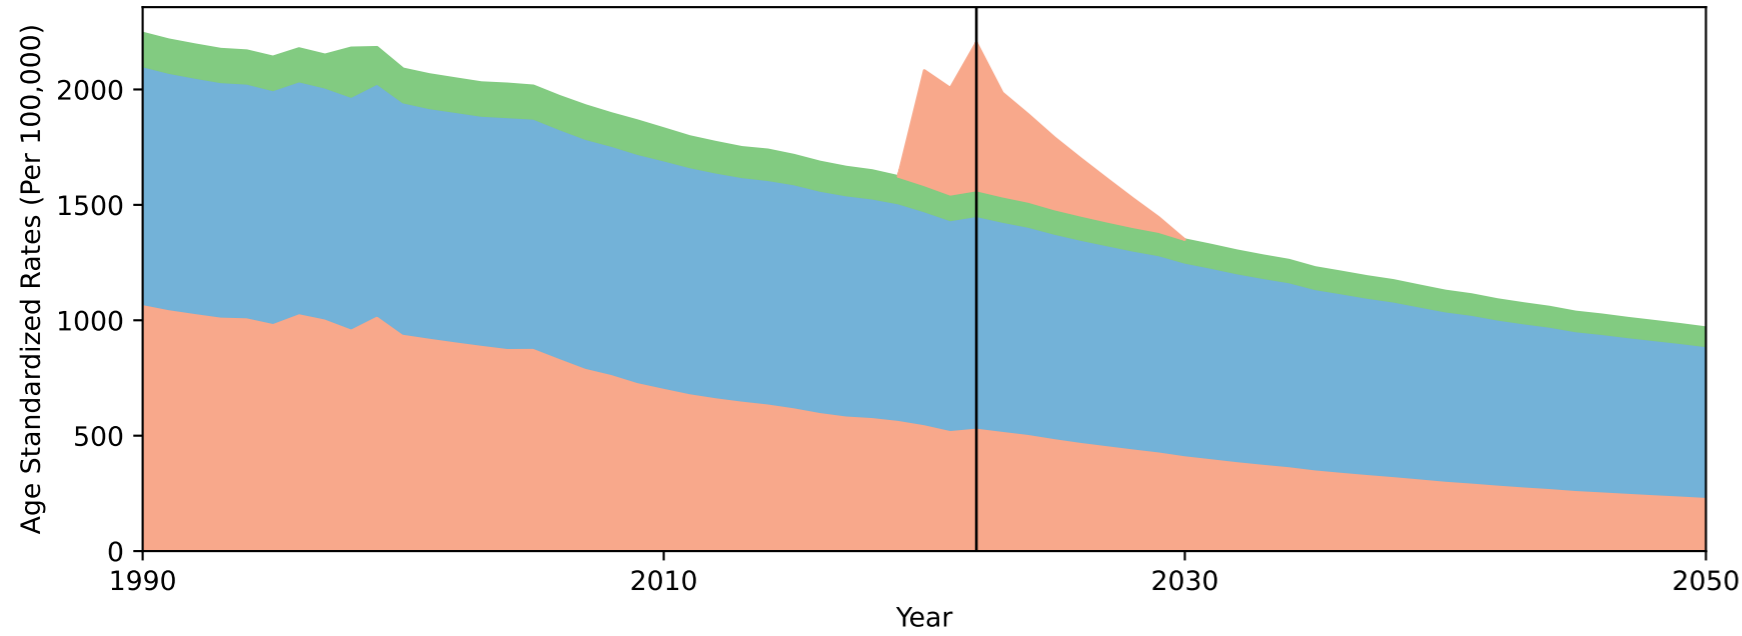

Level 2

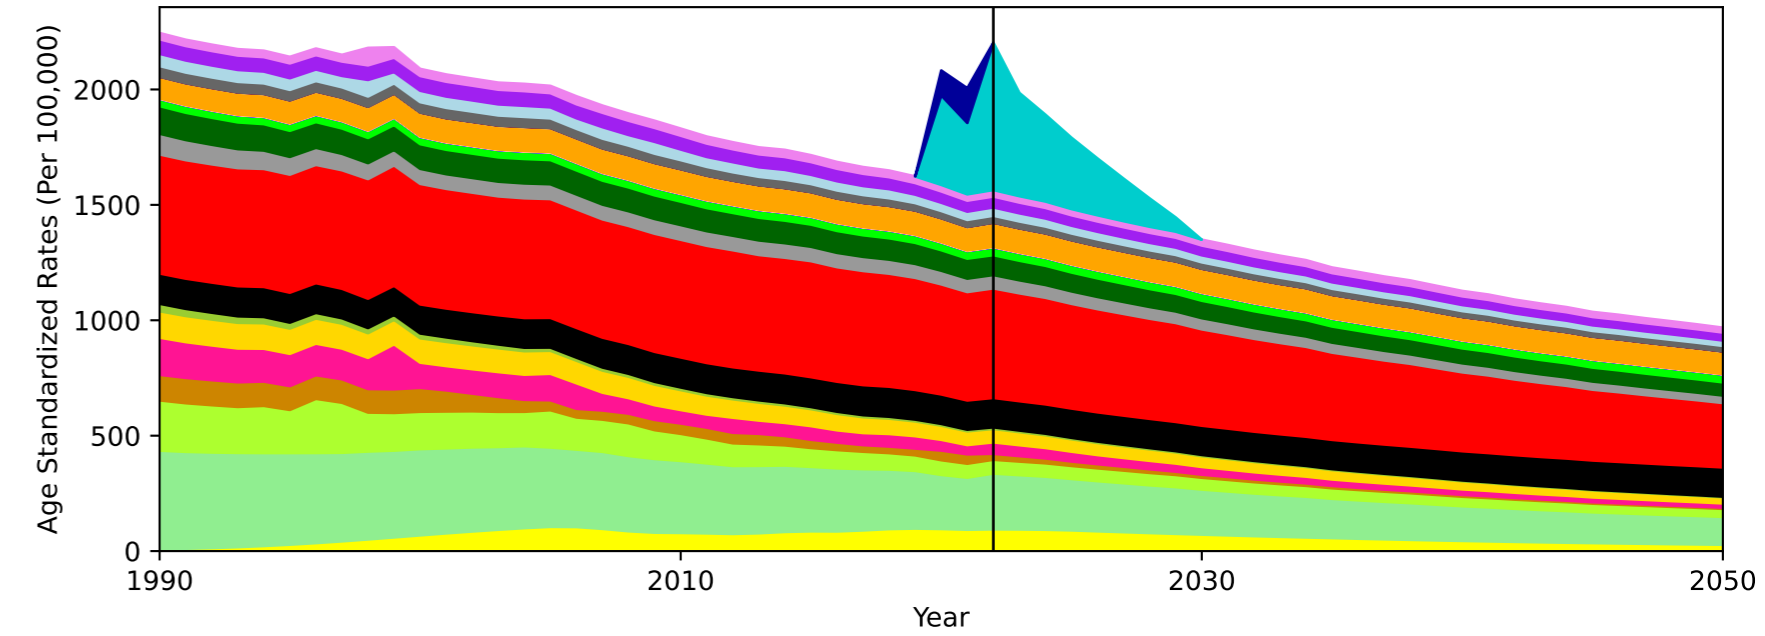

Level 1

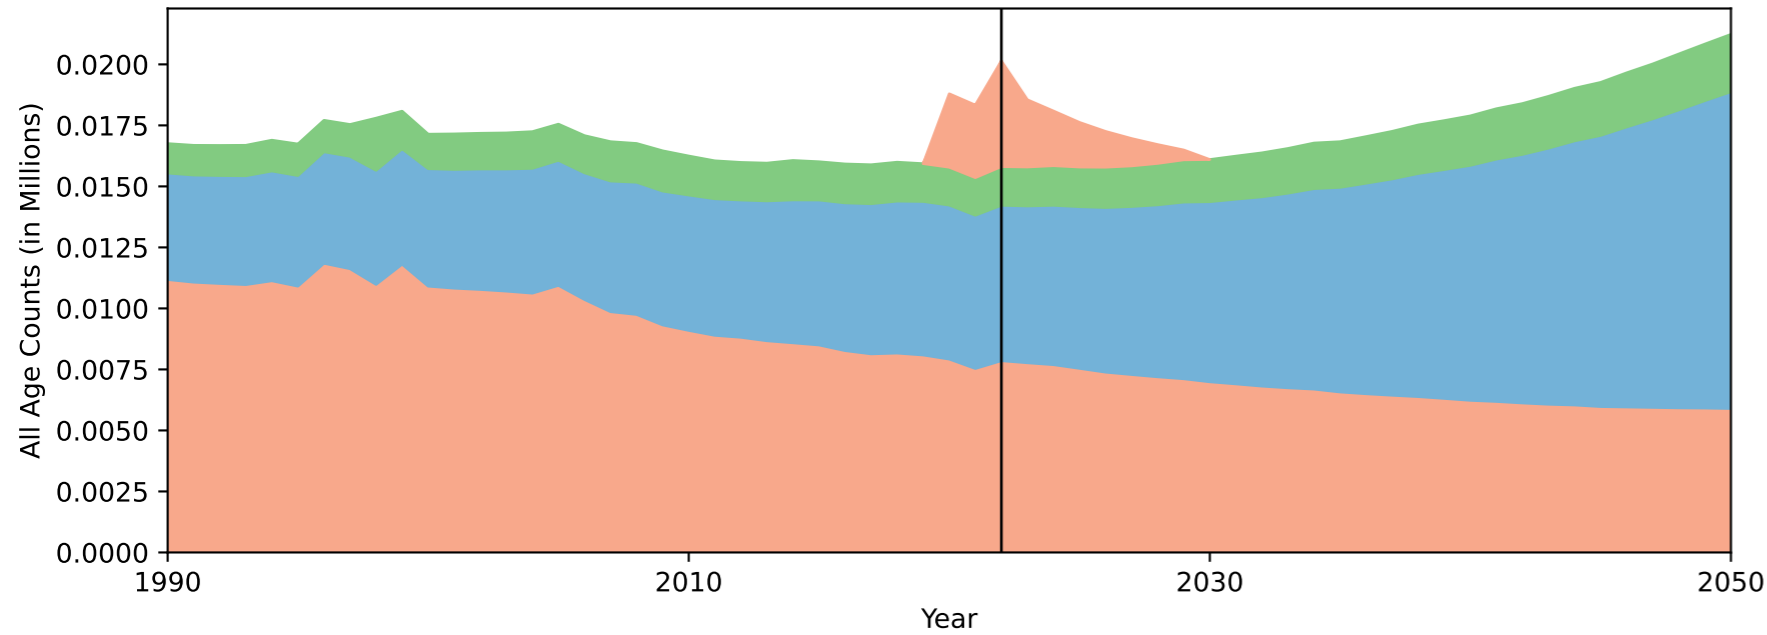

Level 2

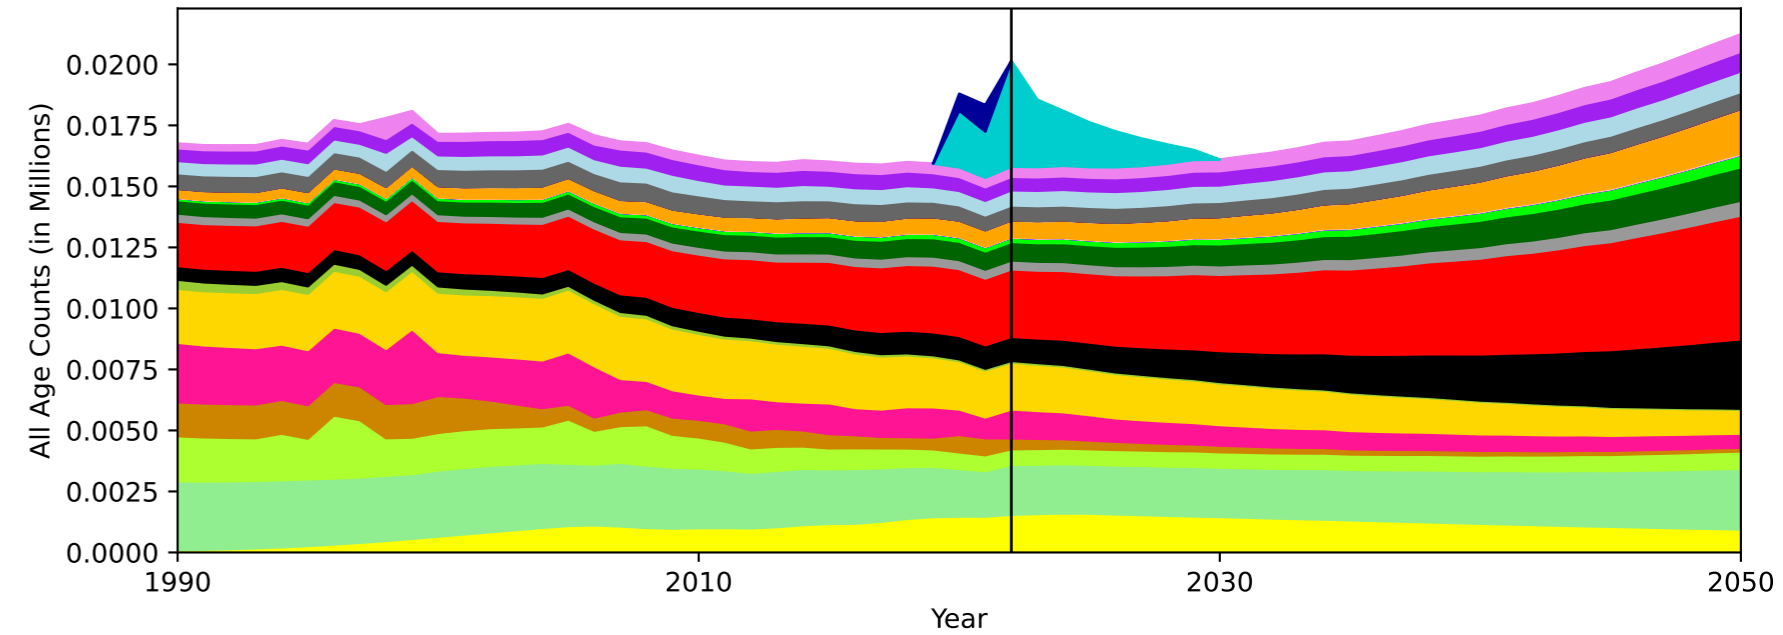

# Liberia

Level 1

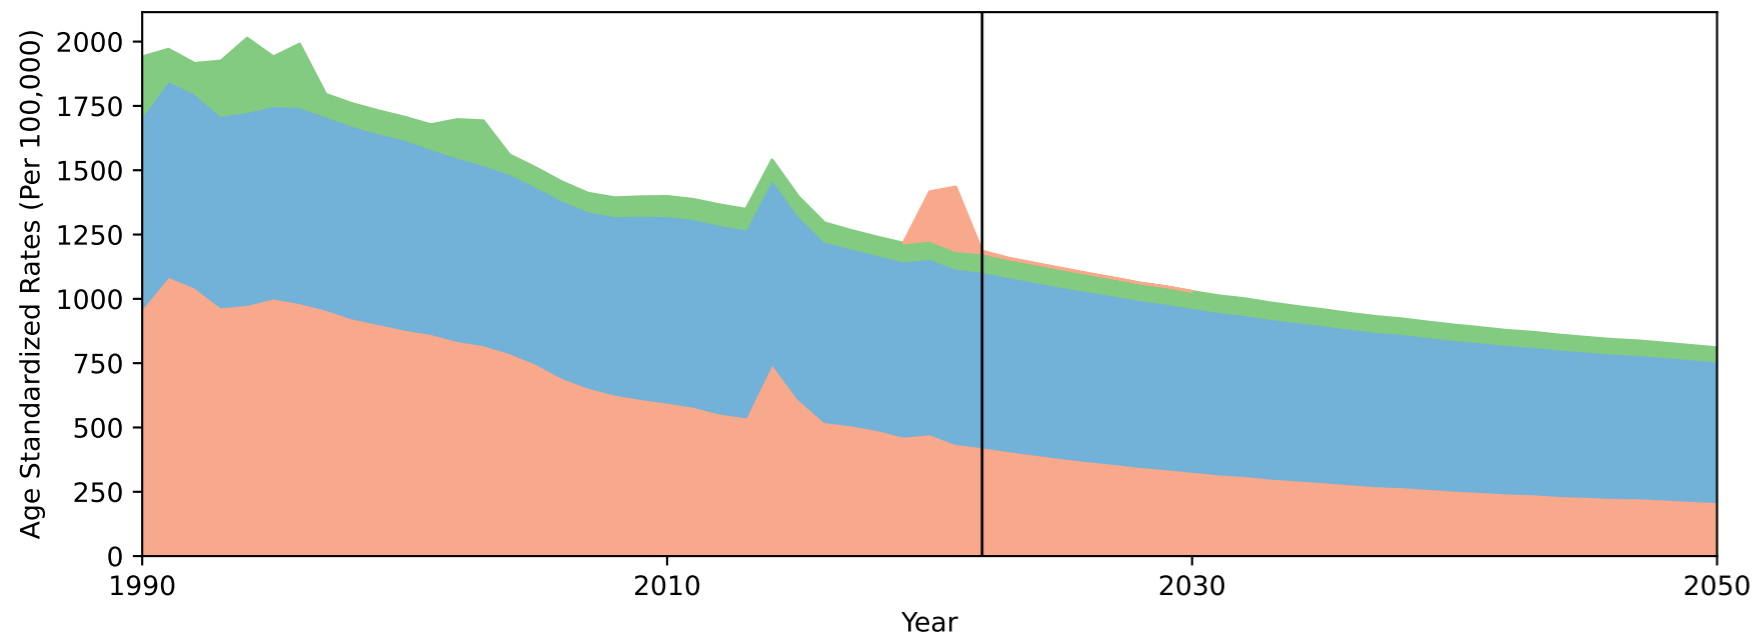

Level 2

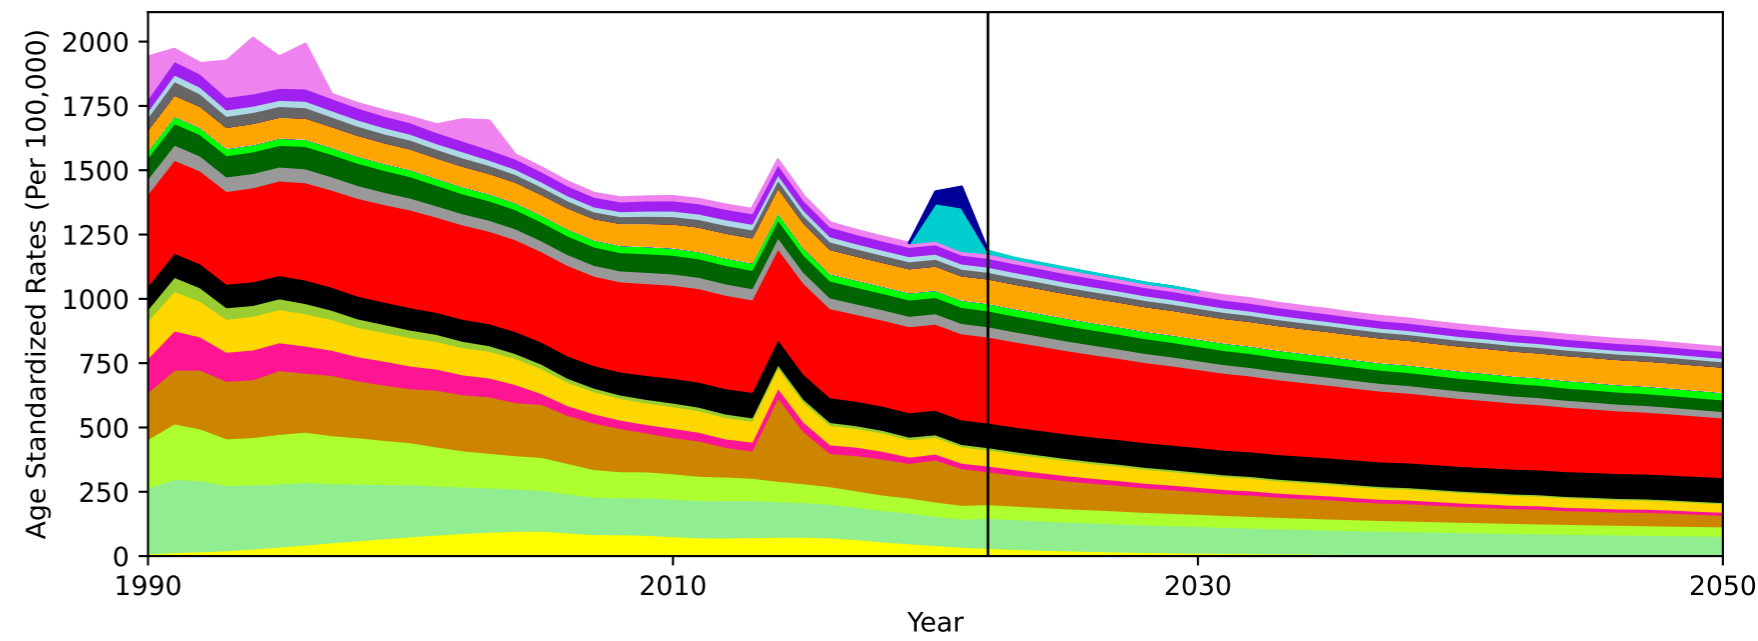

Level 1

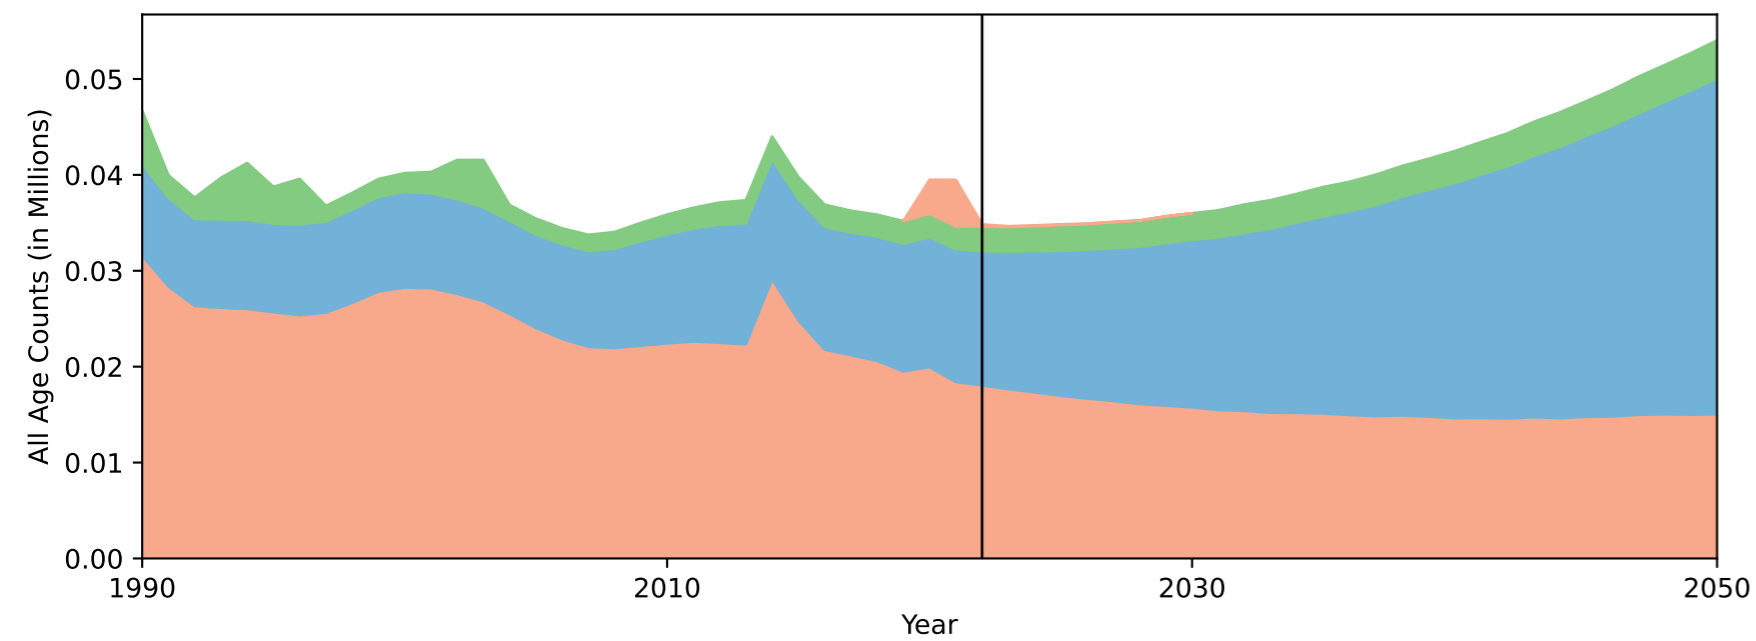

Level 2

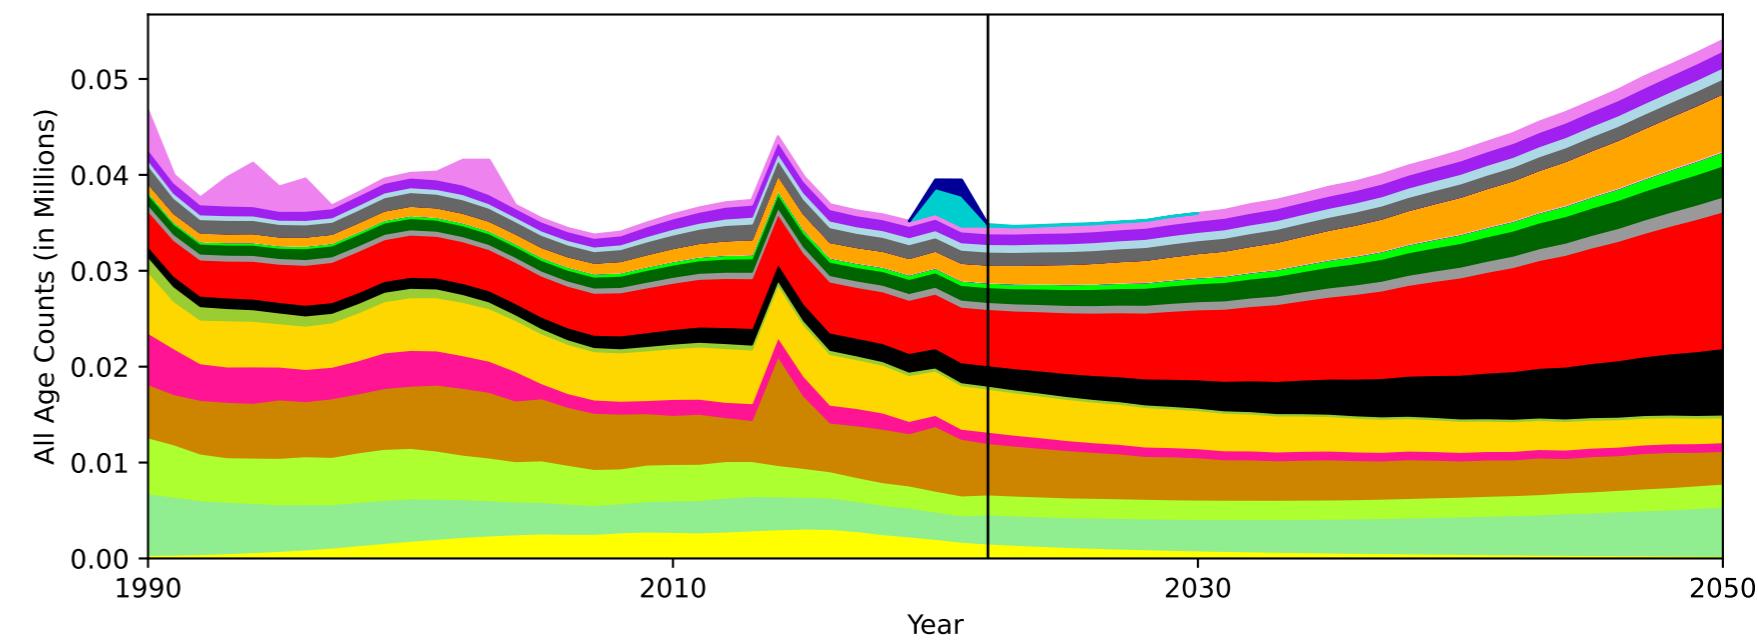

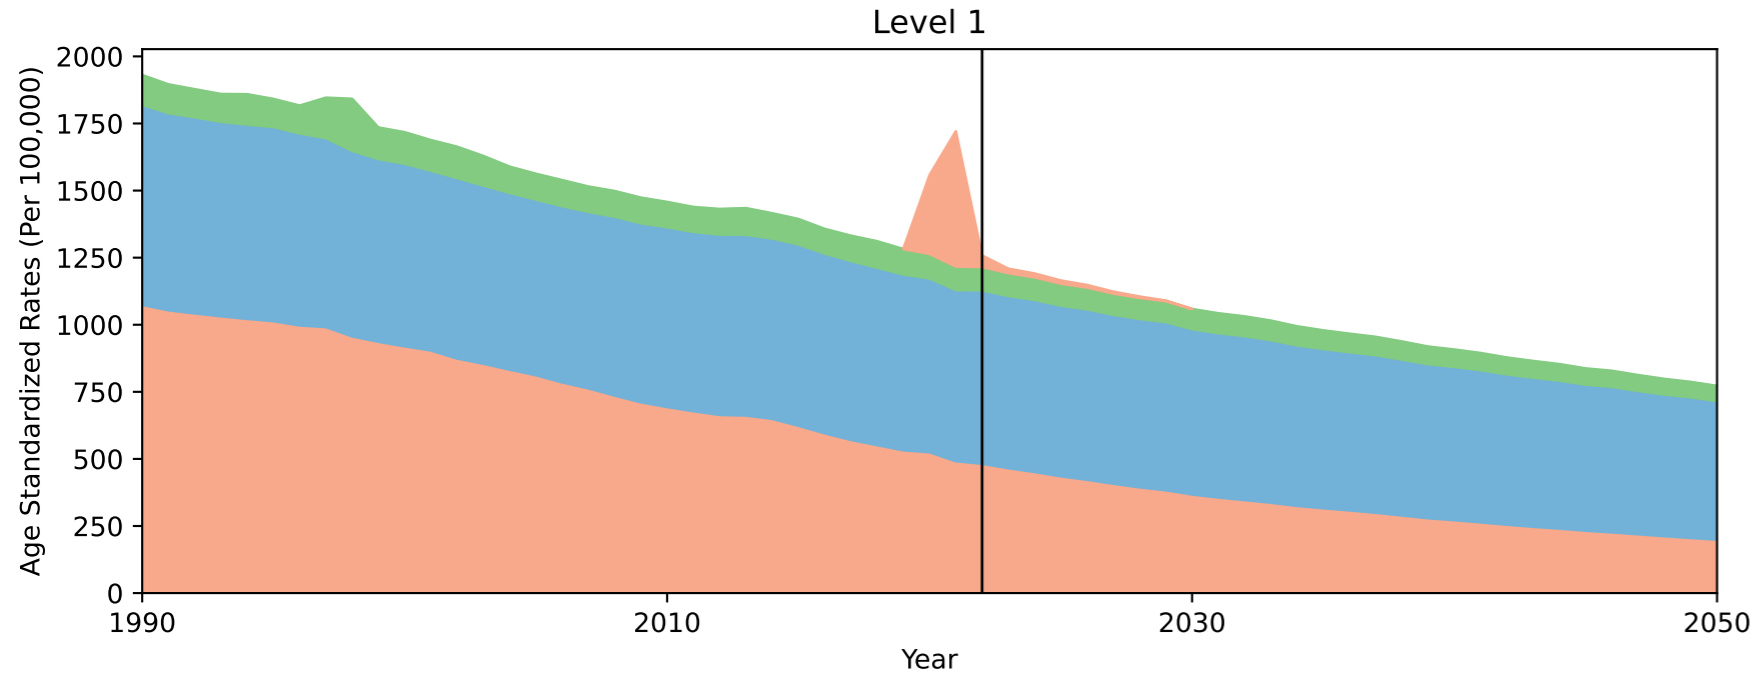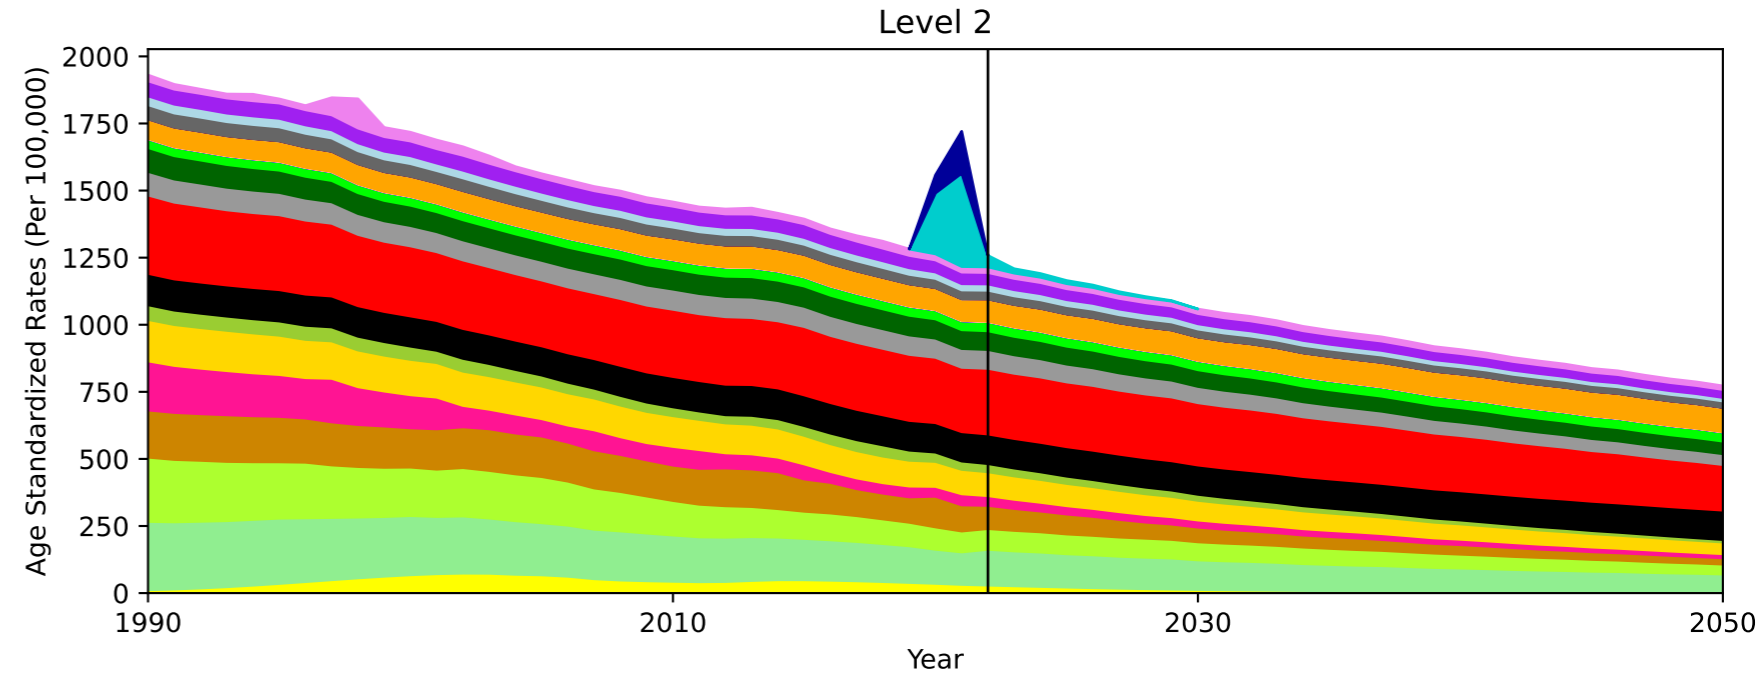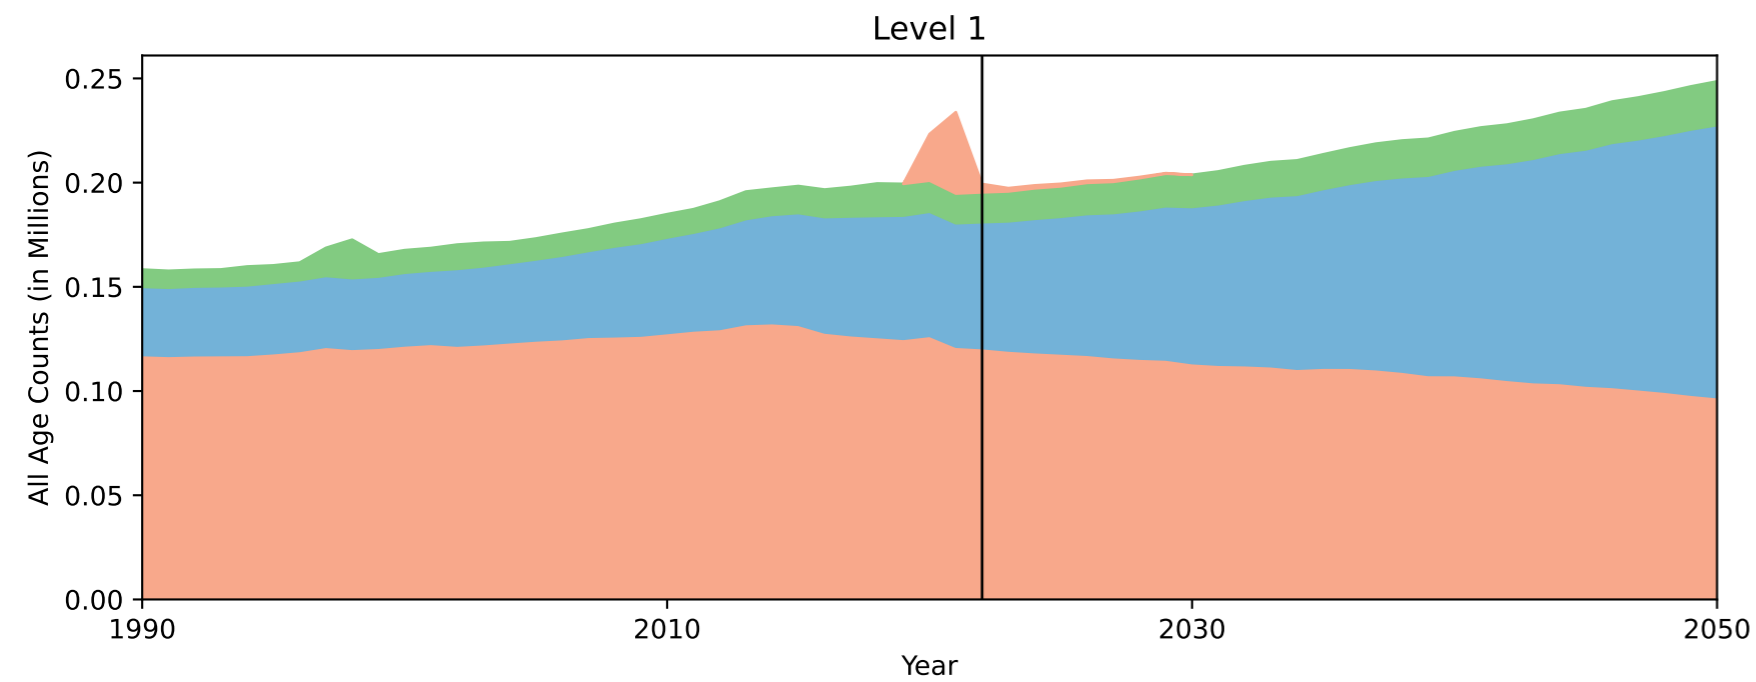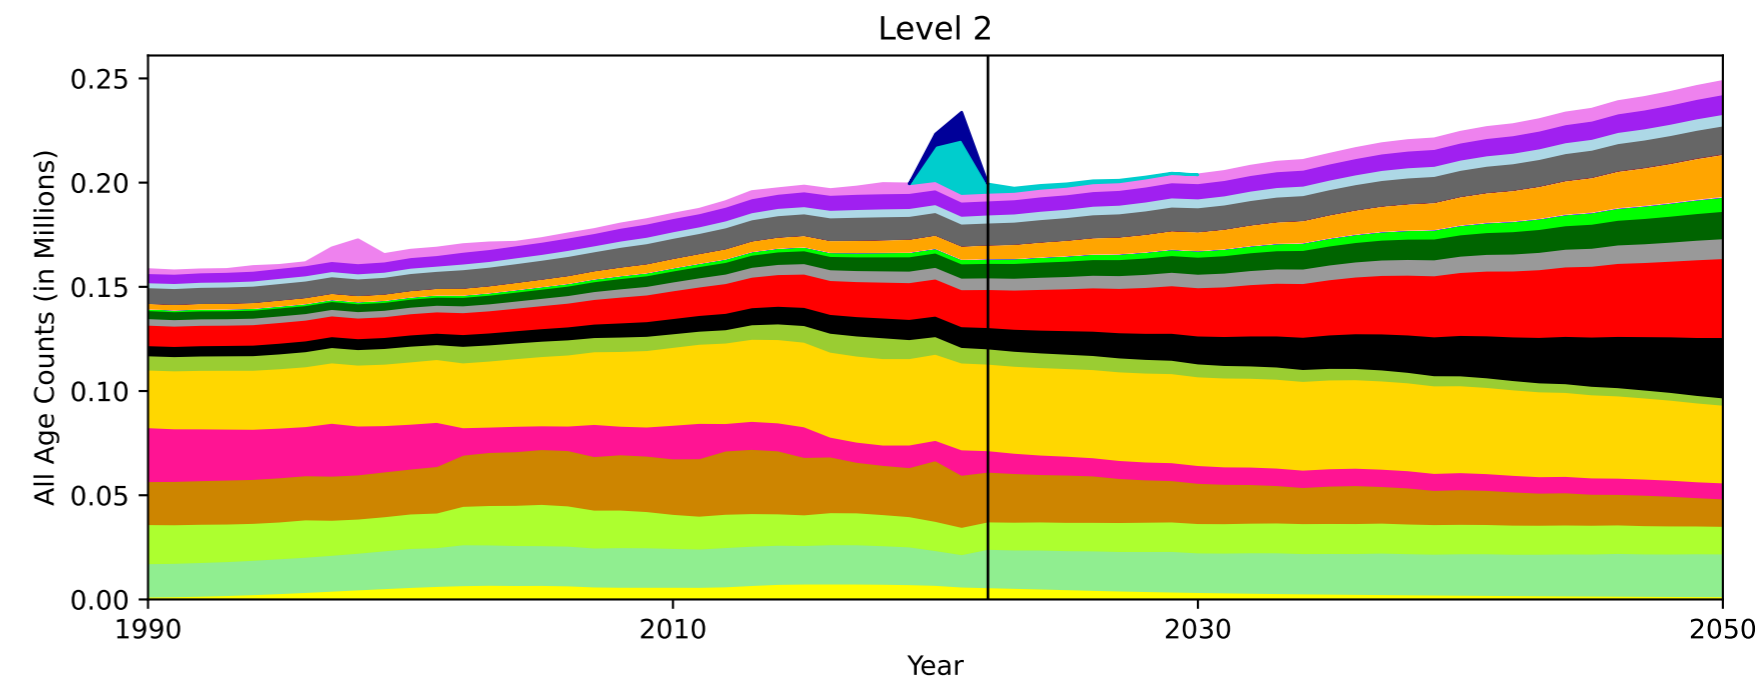

# Mauritania

Level 1

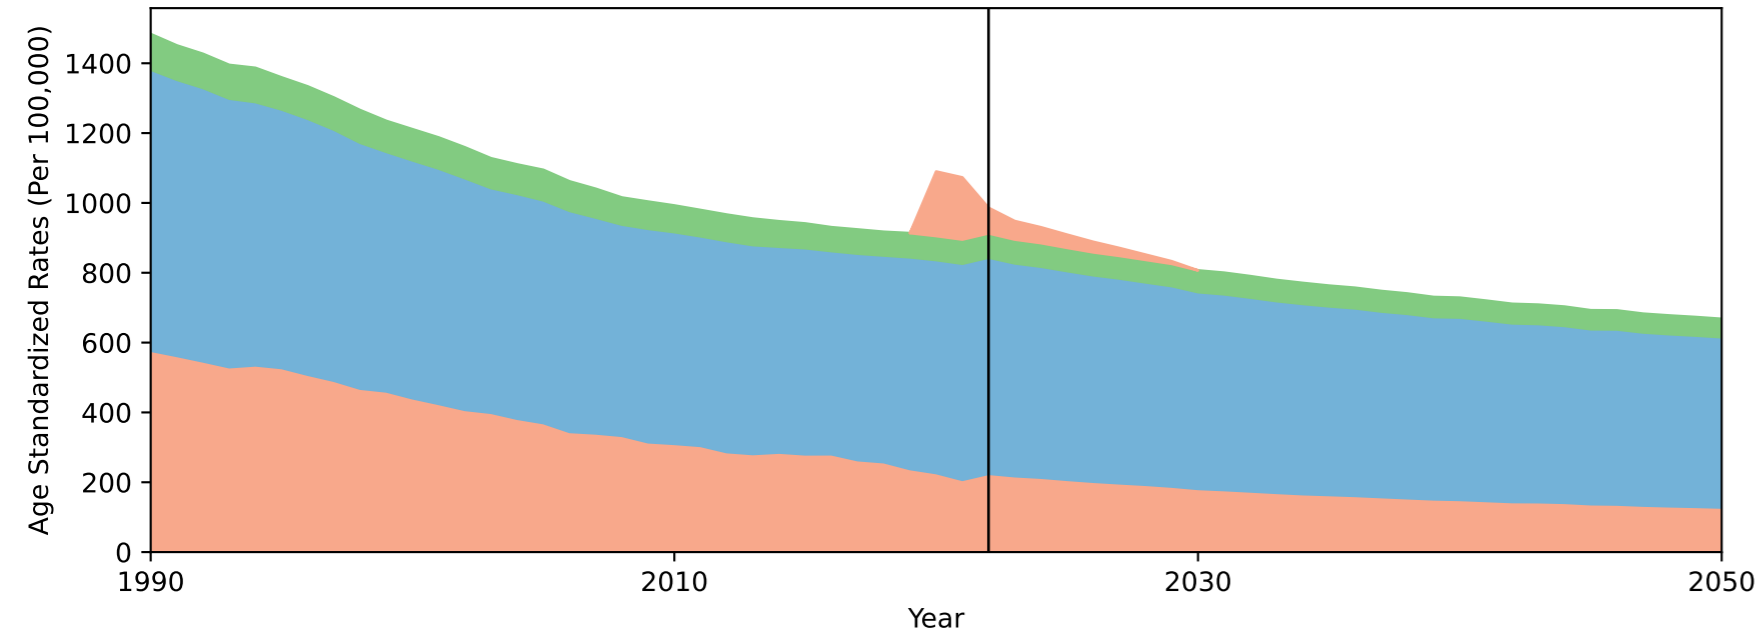

Level 2

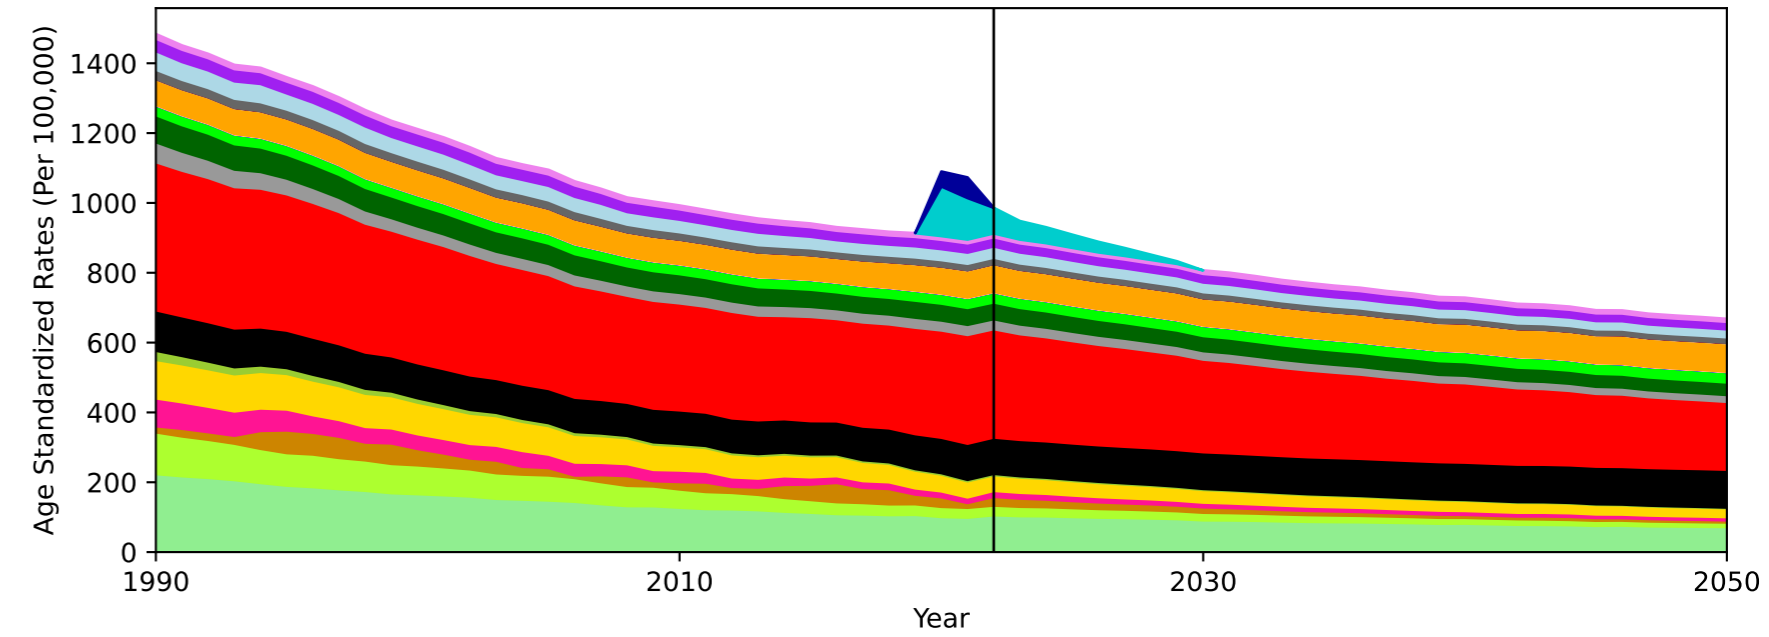

Level 1

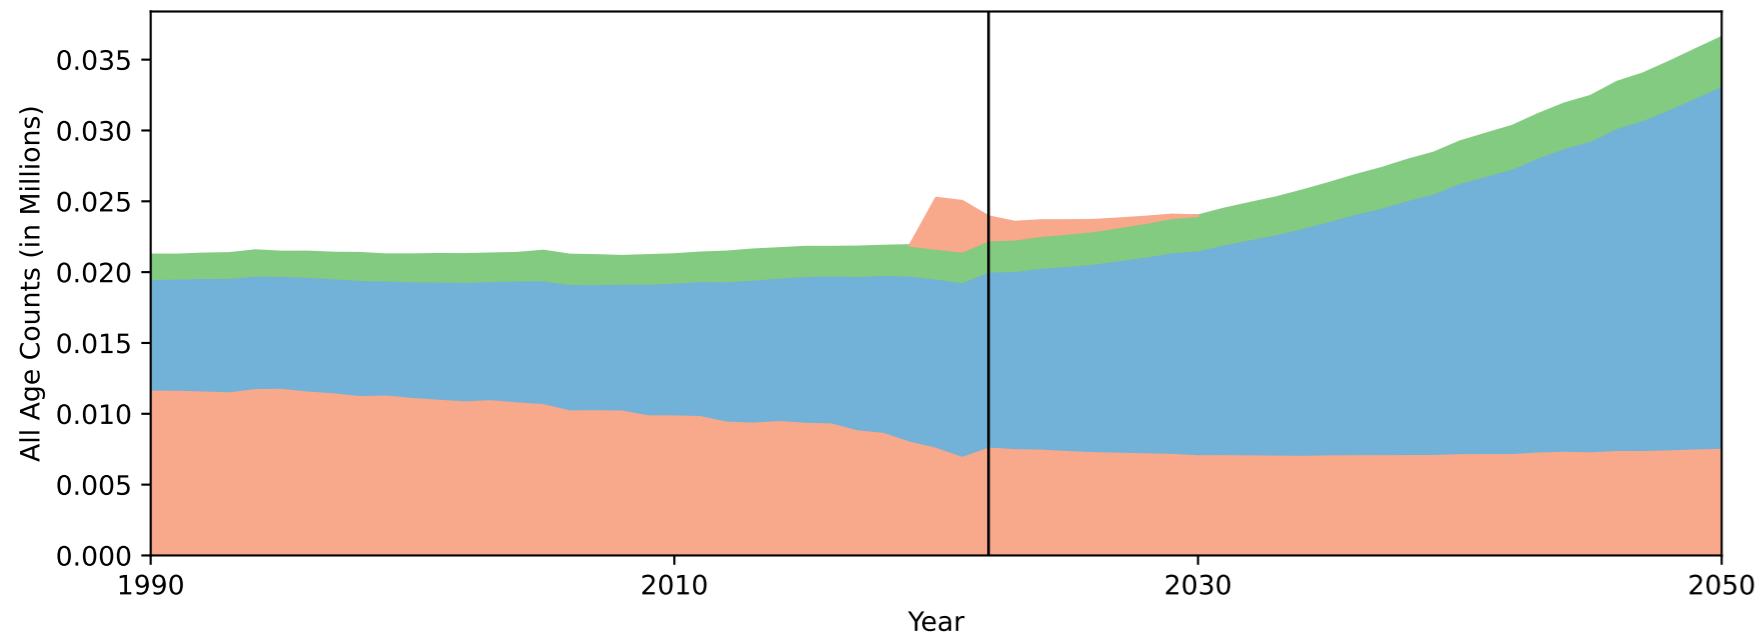

Level 2

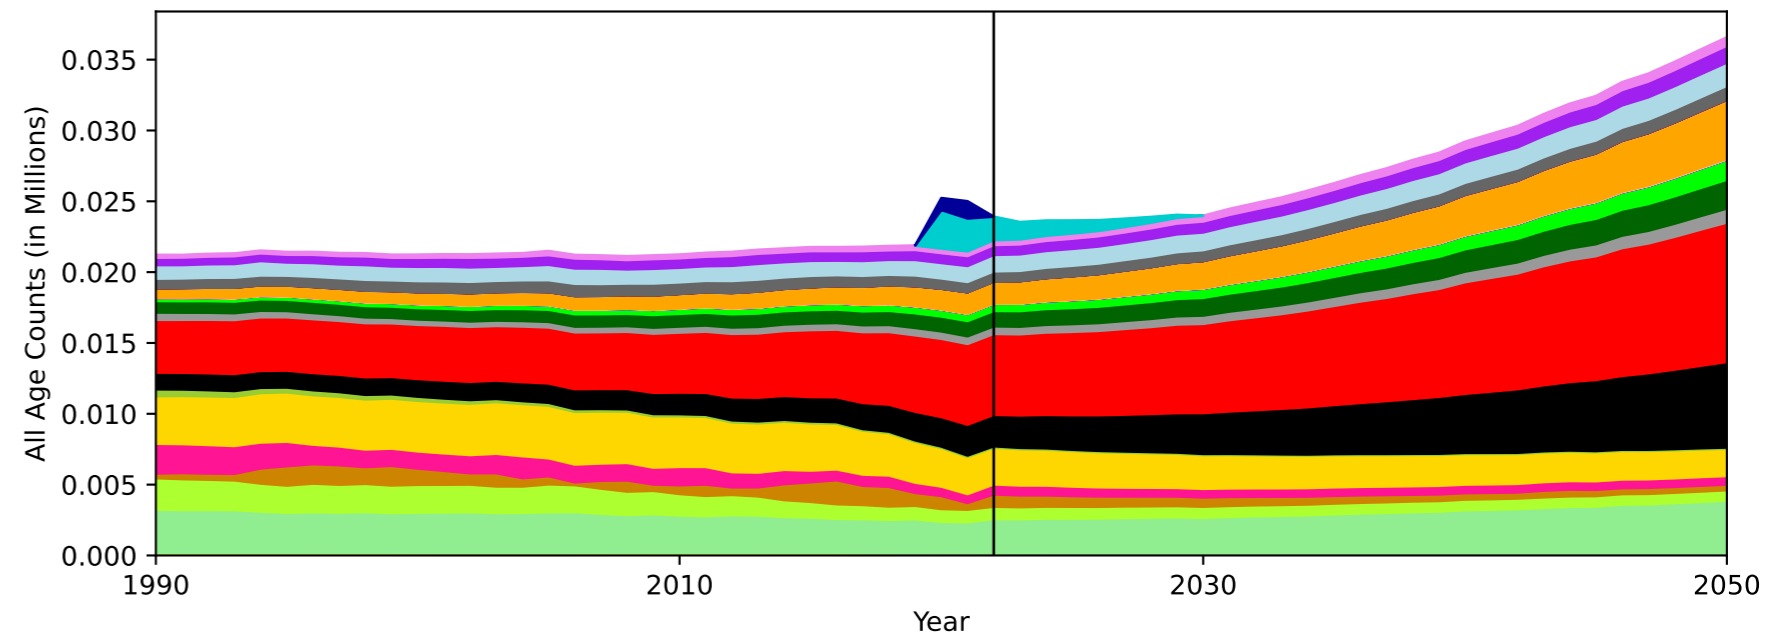

# Niger

Level 1

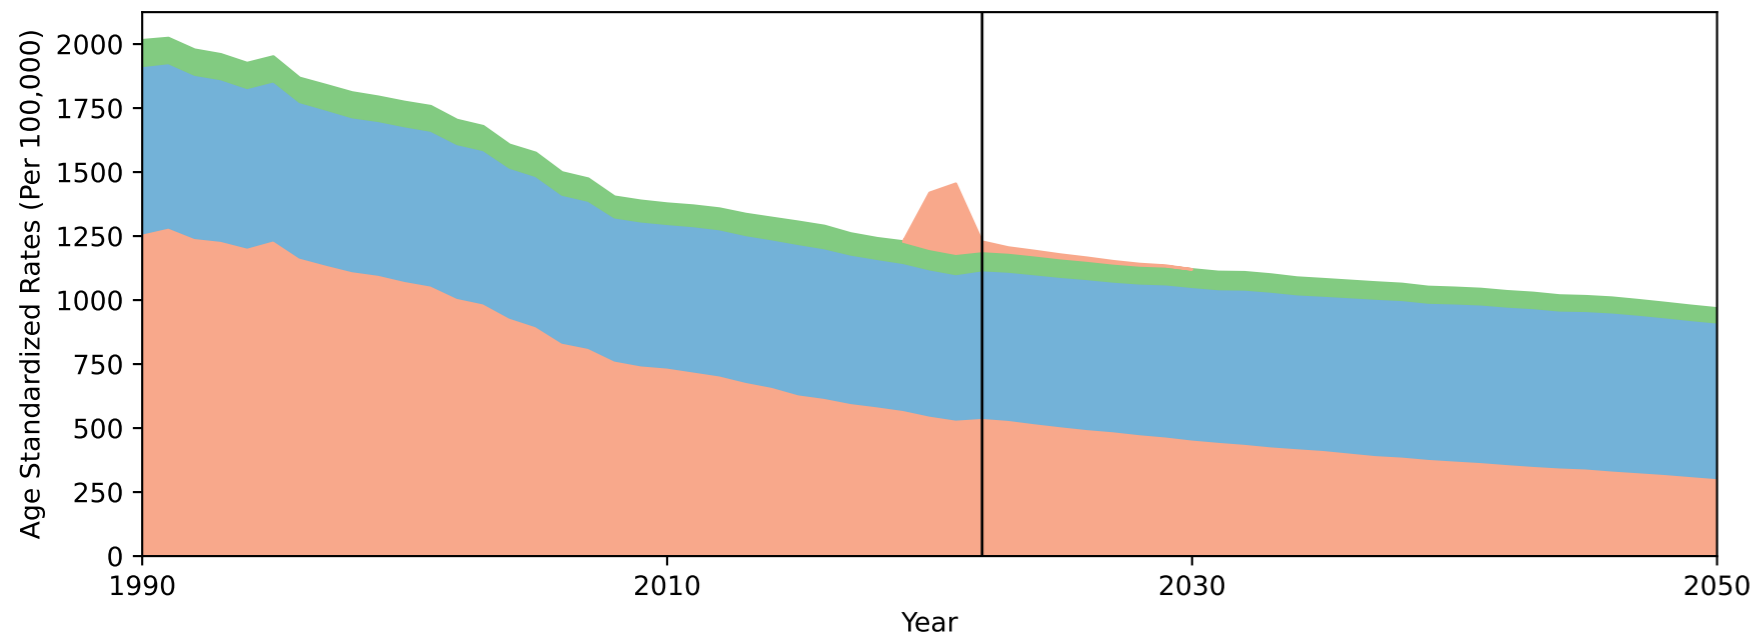

Level 2

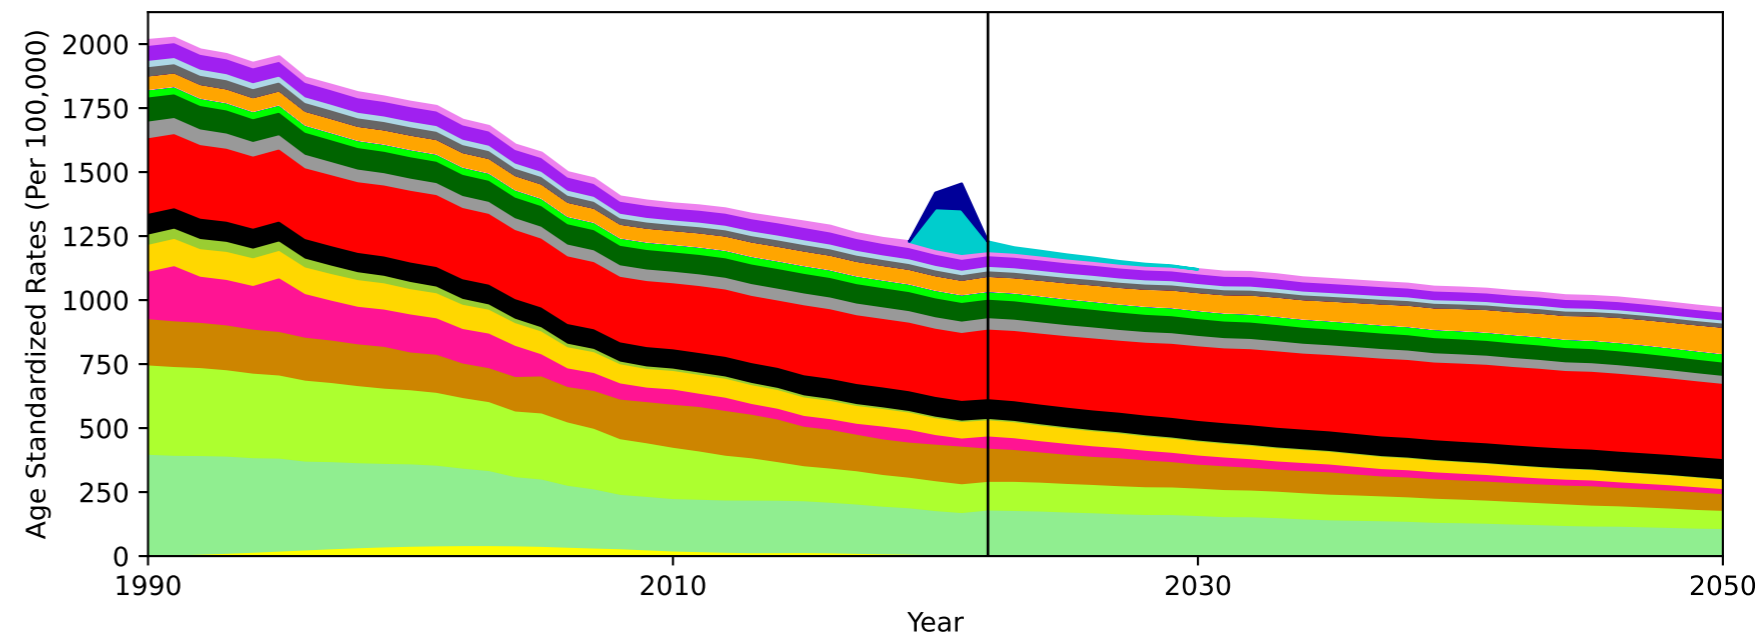

Level 1

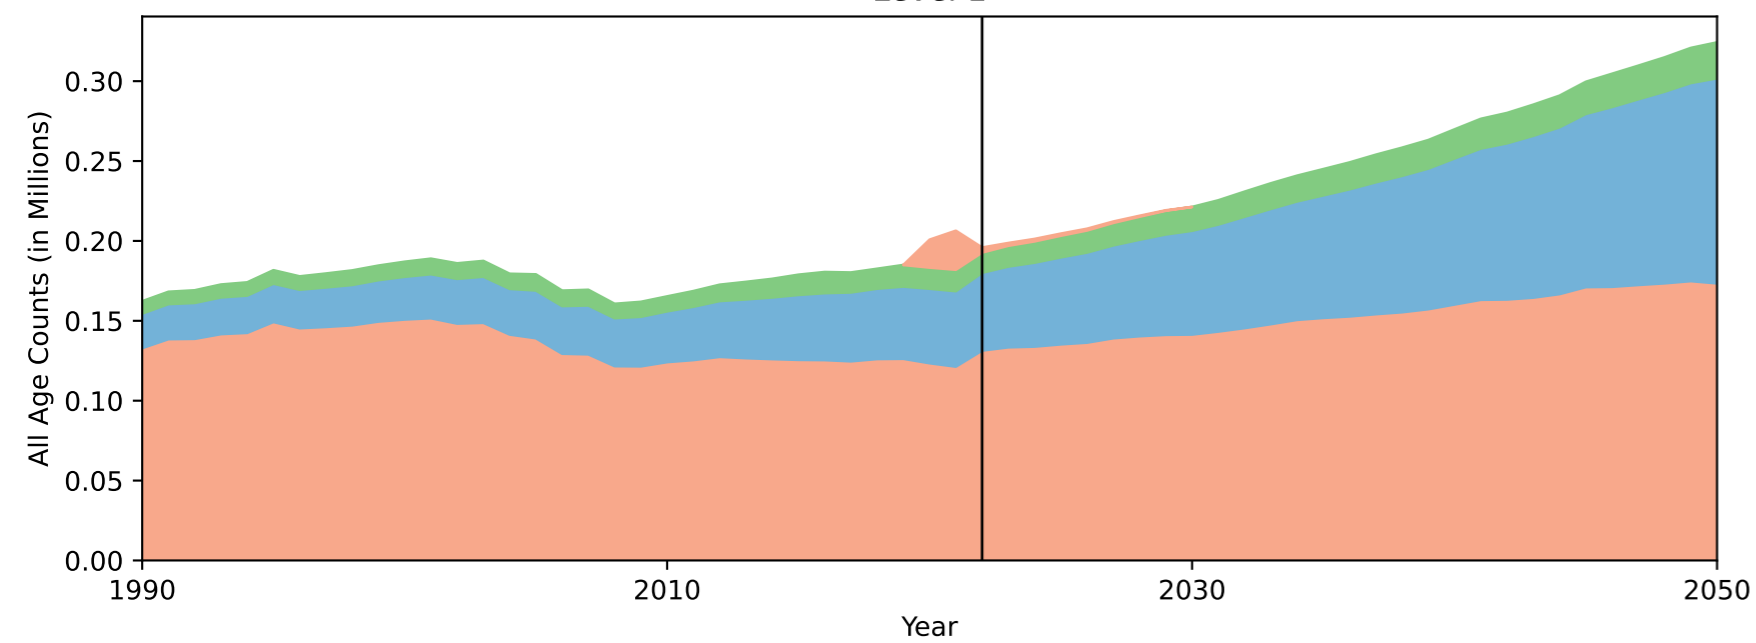

Level 2

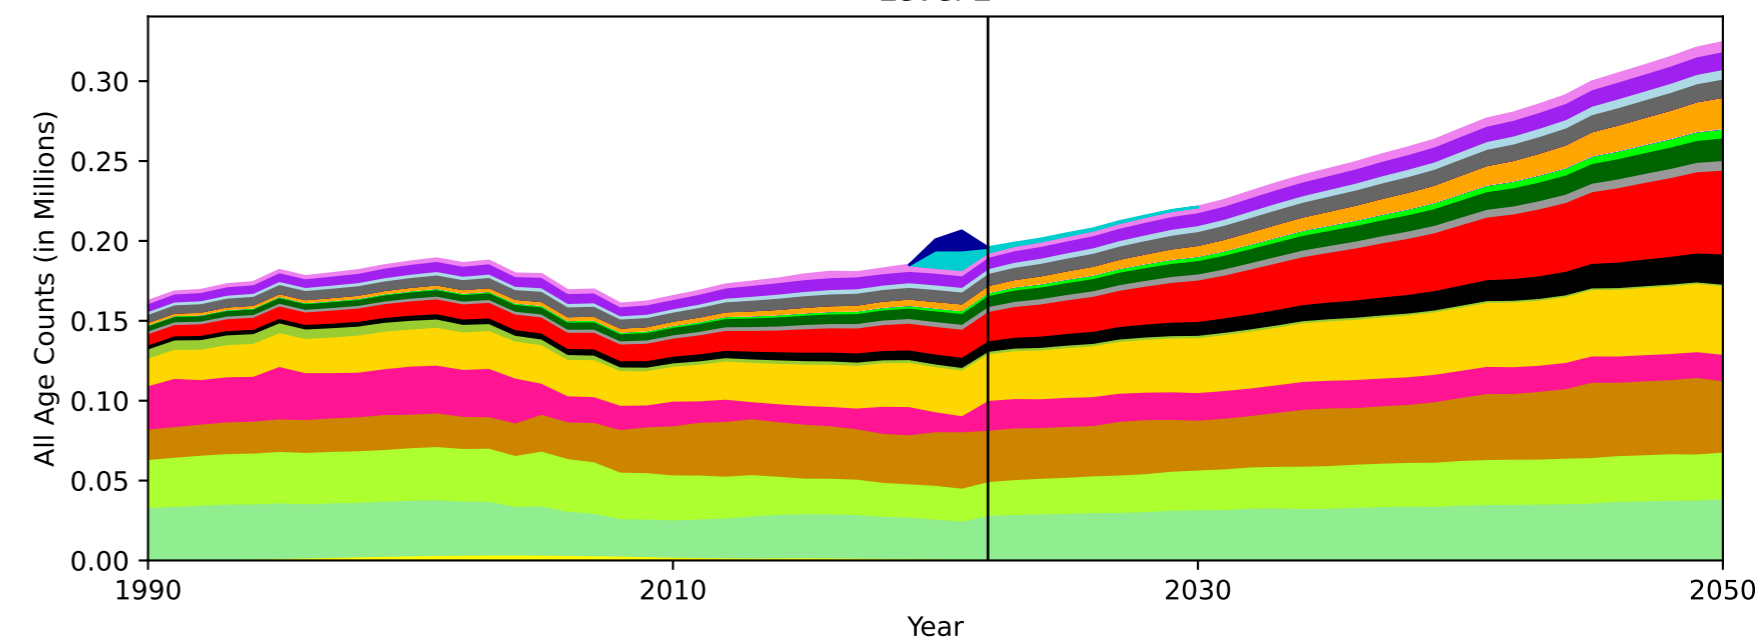

# Nigeria

Level 1

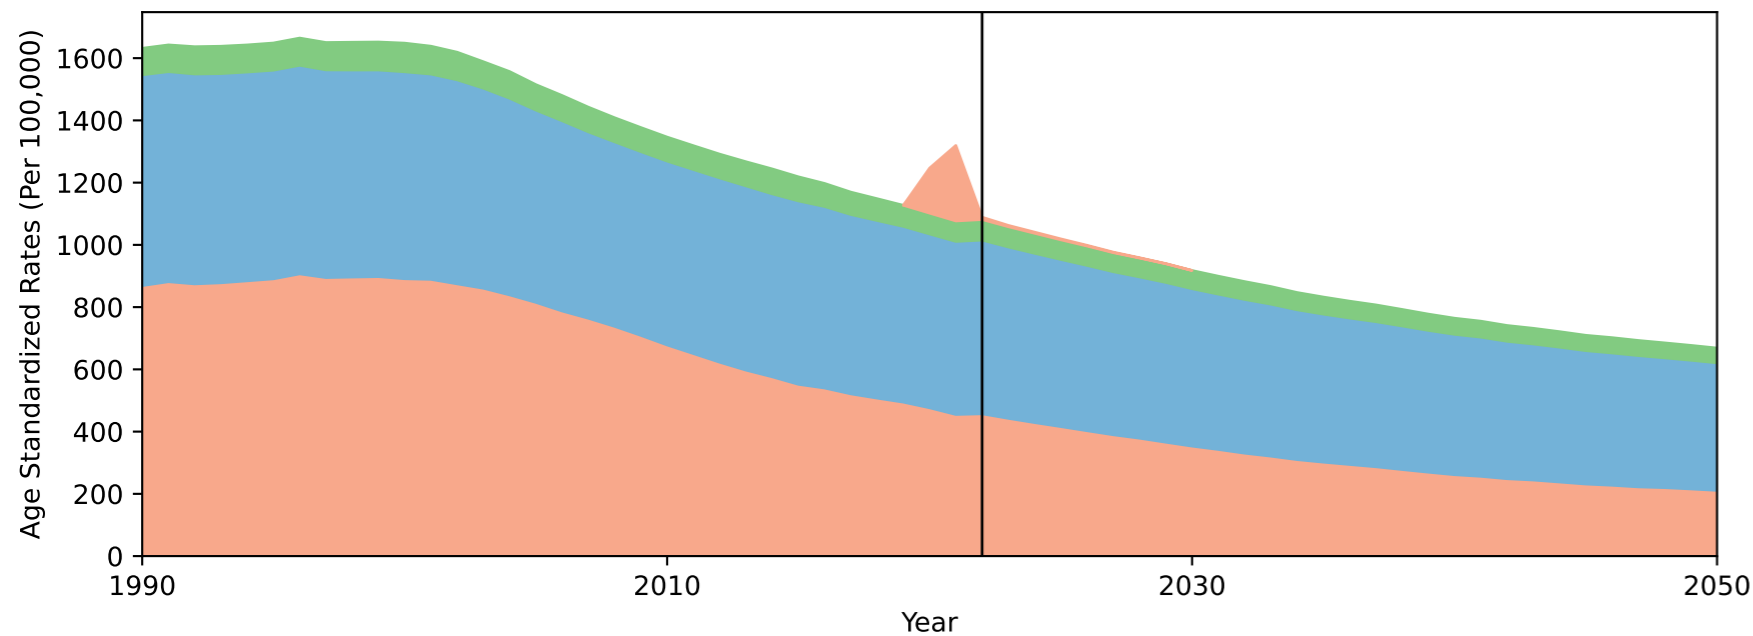

Level 2

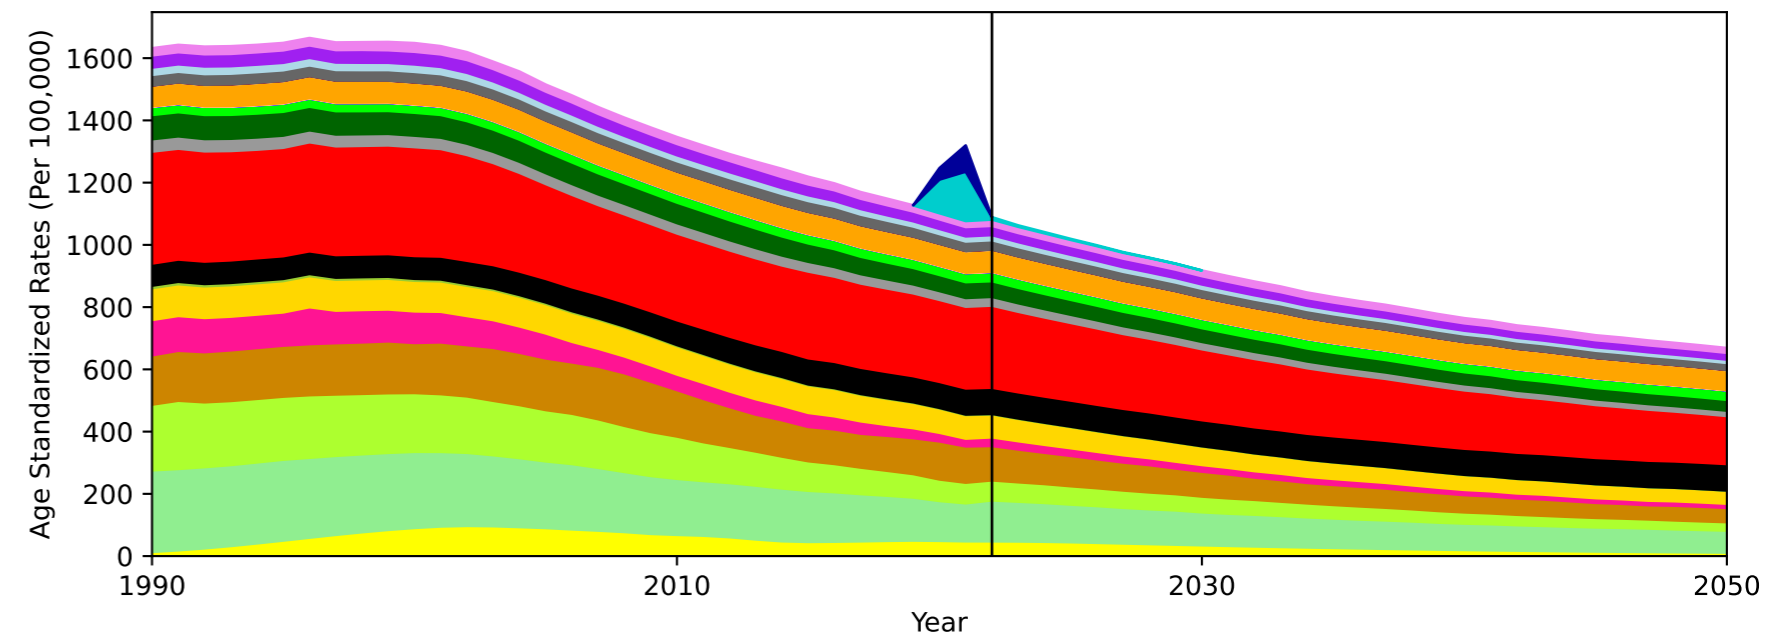

Level 1

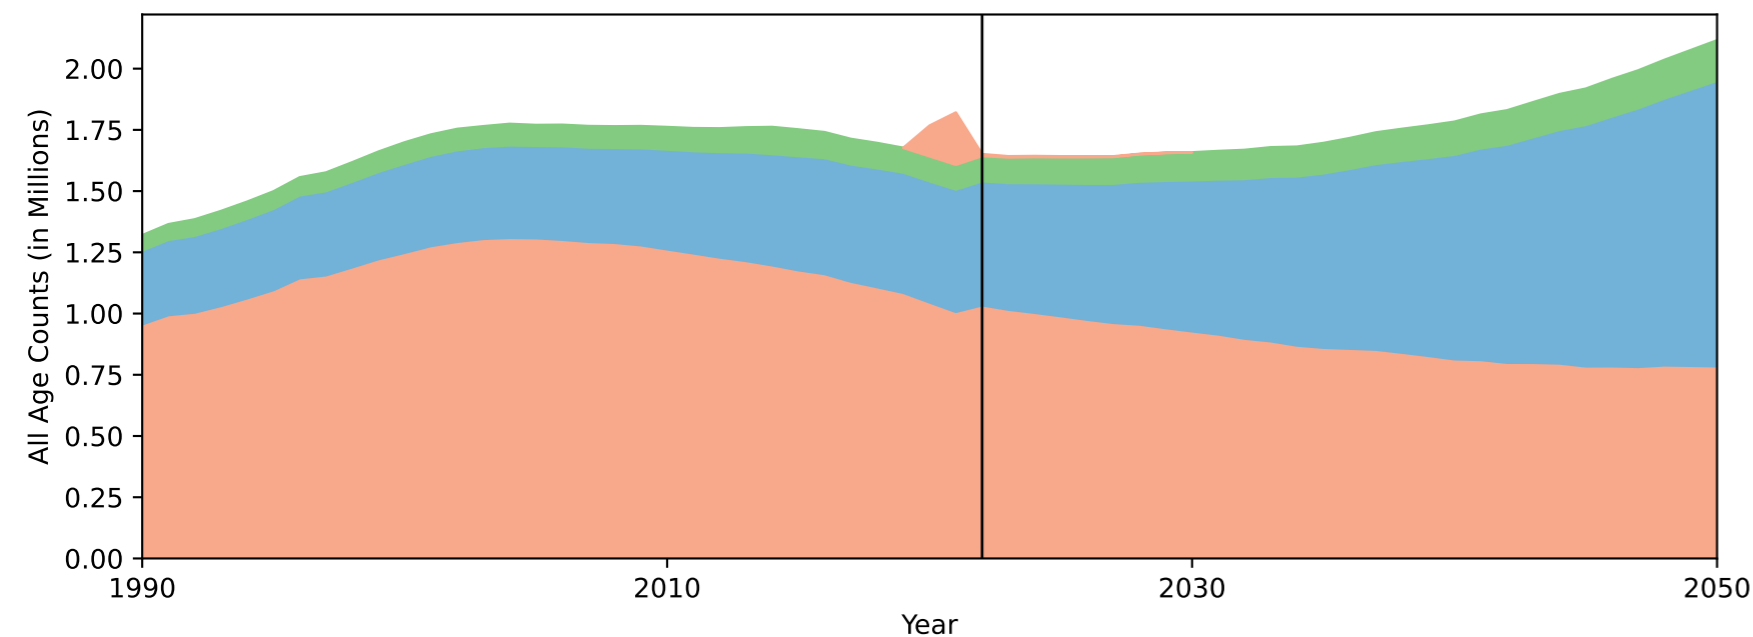

Level 2

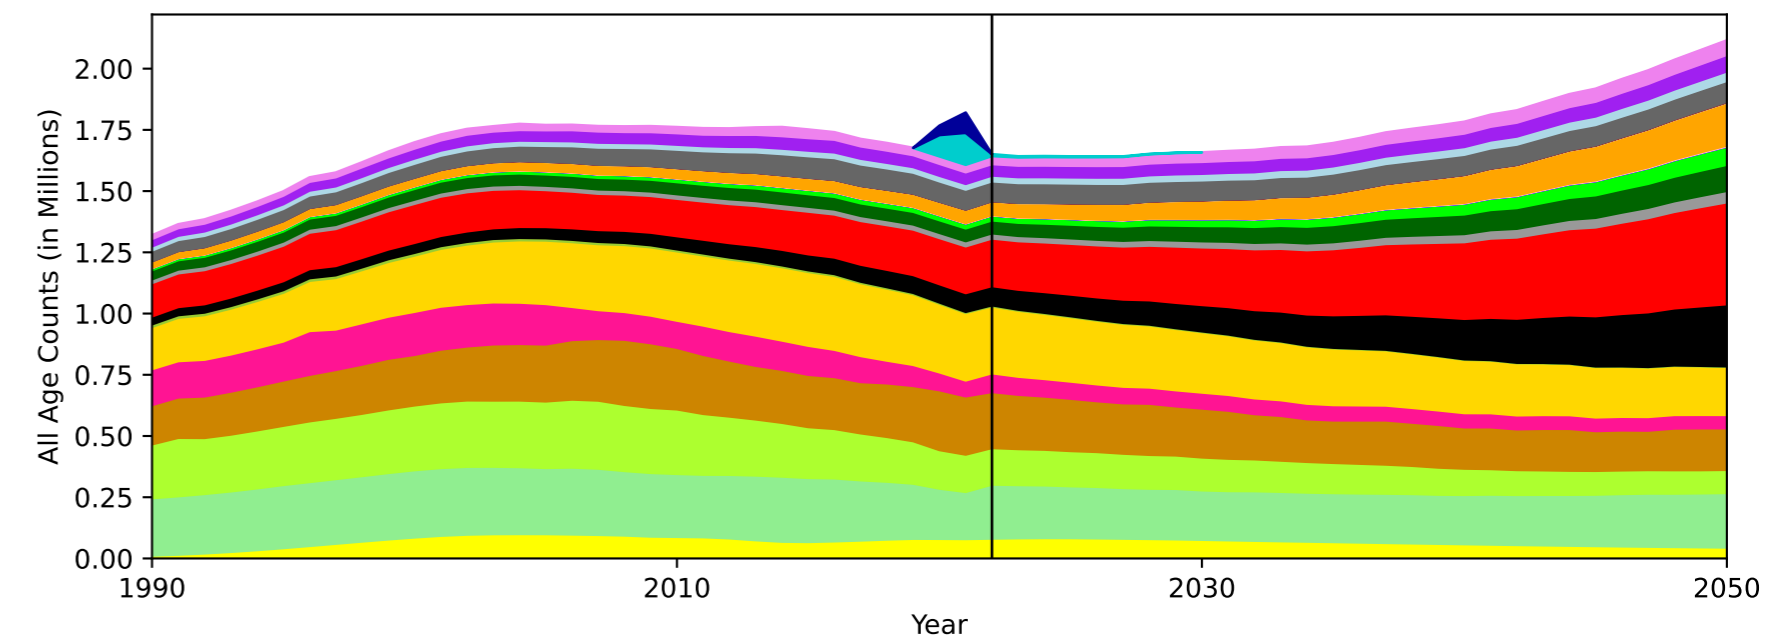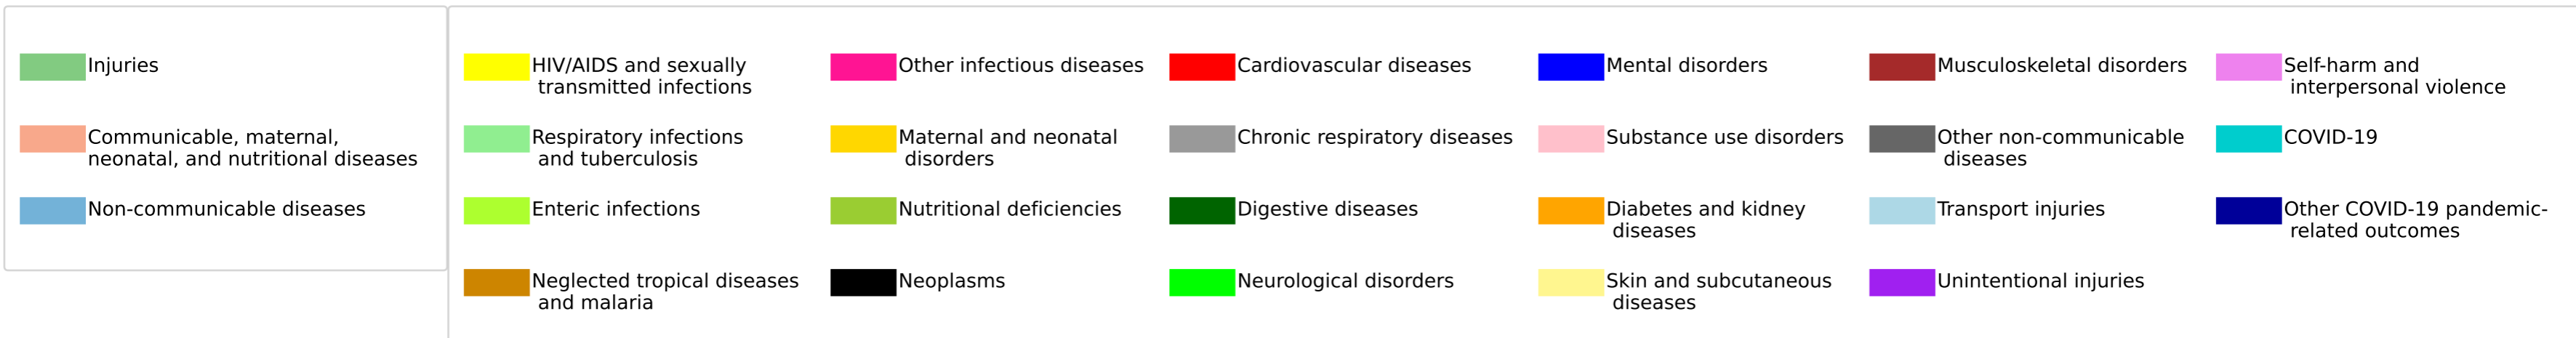

# São Tomé And Príncipe

Supplemental Results Figure S5. Age-standardised death rates and all age death counts and by Level 1 and Level 2 causes, 1990–2050

678

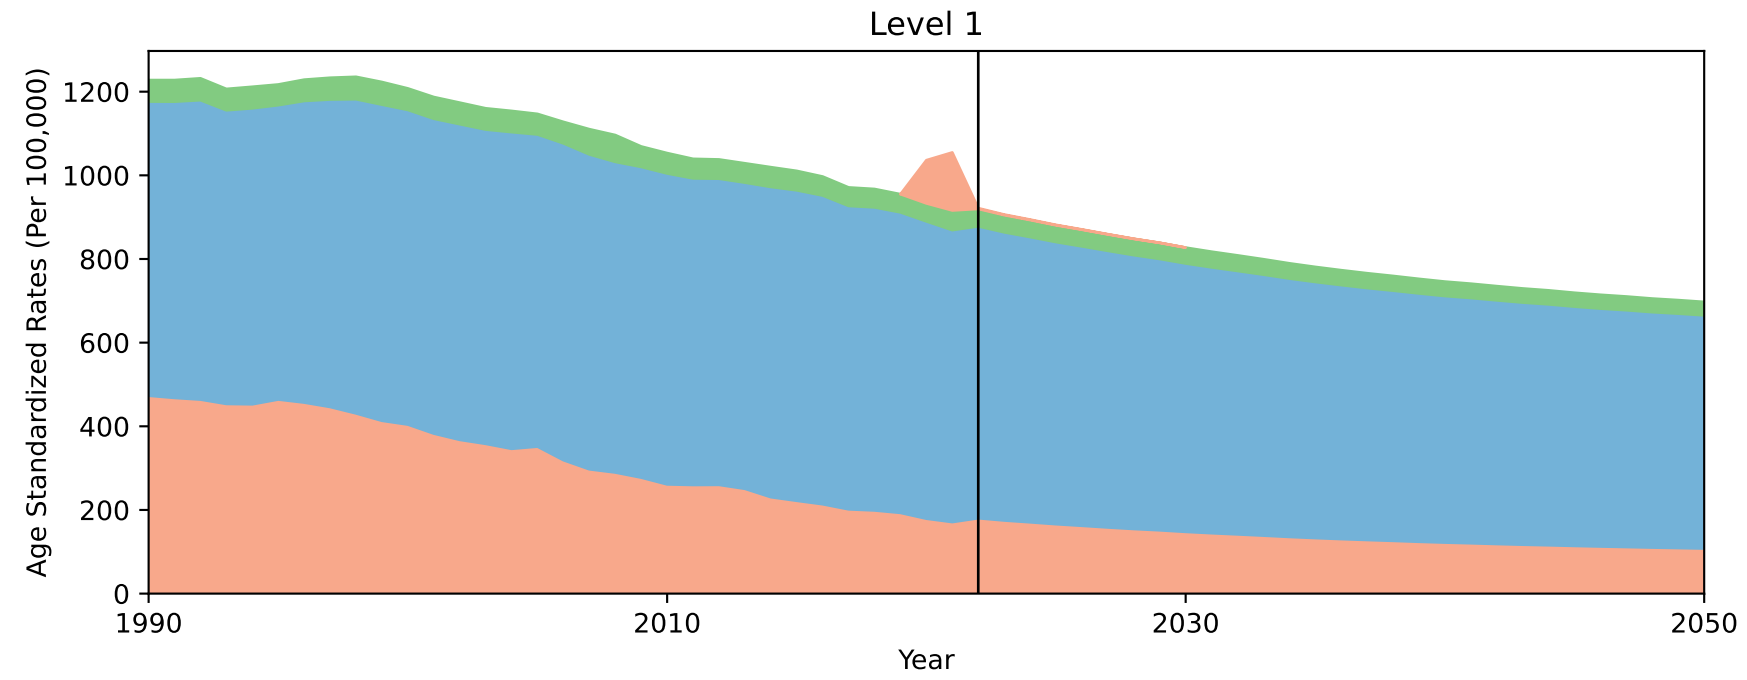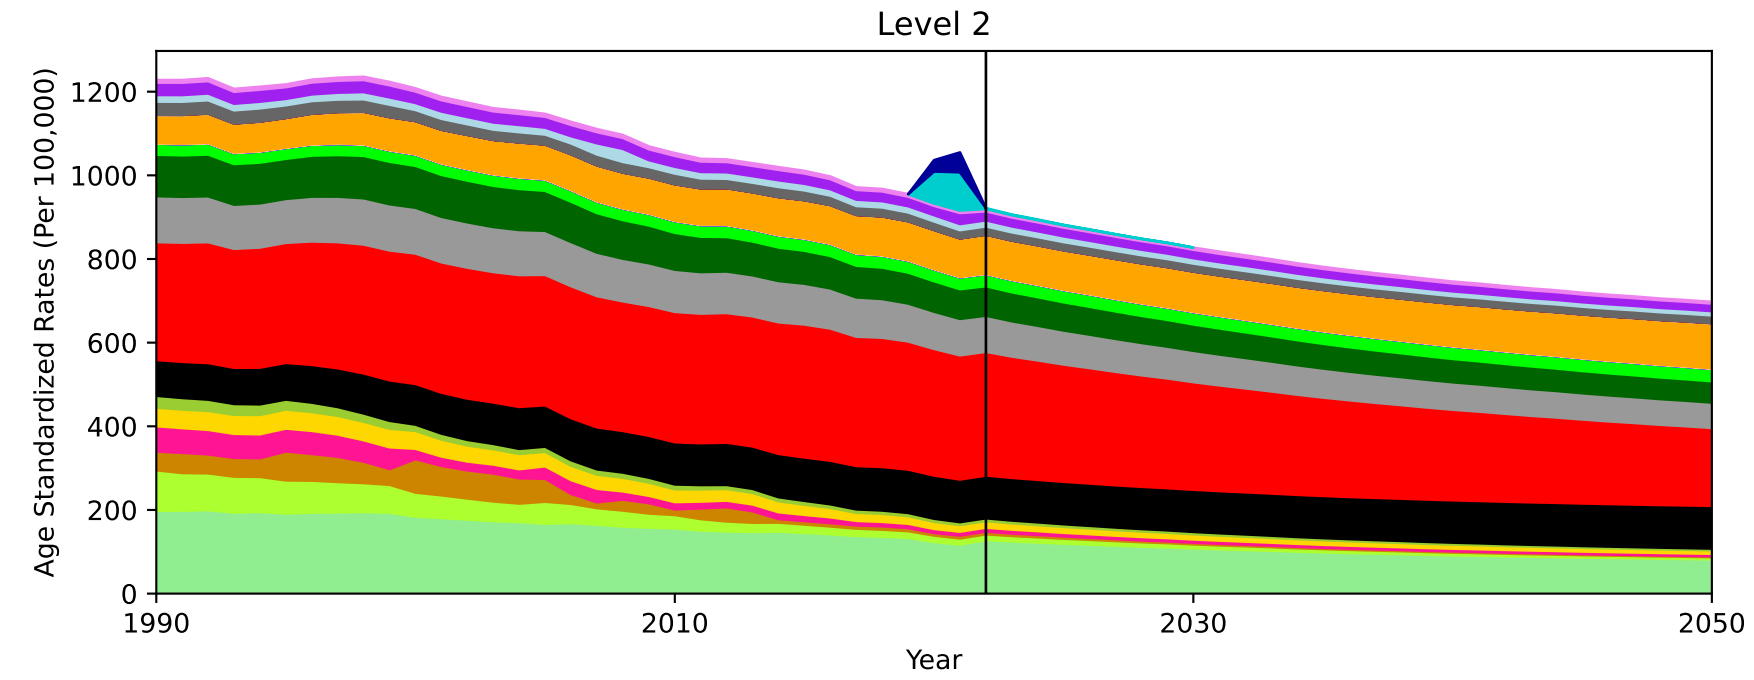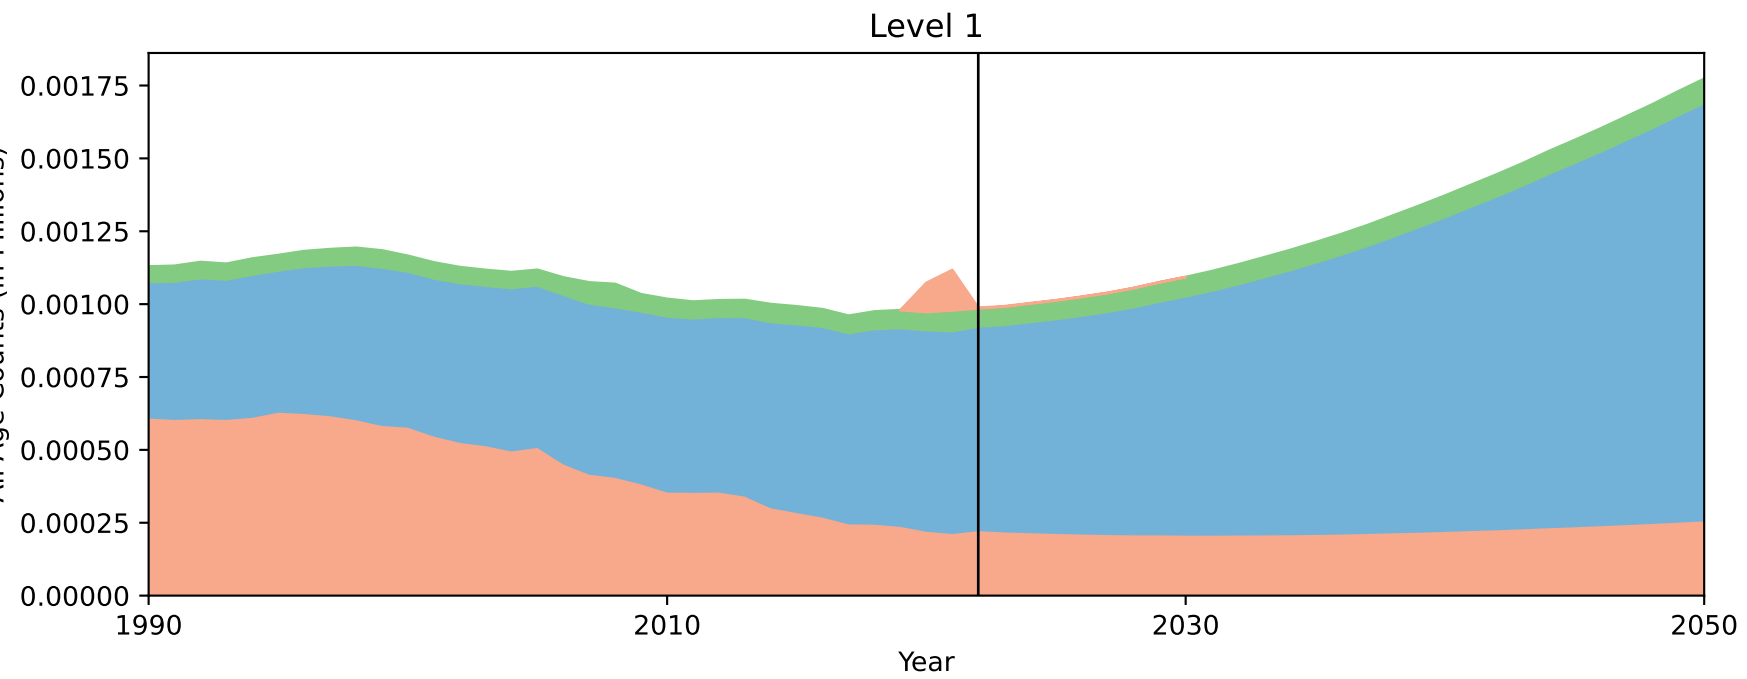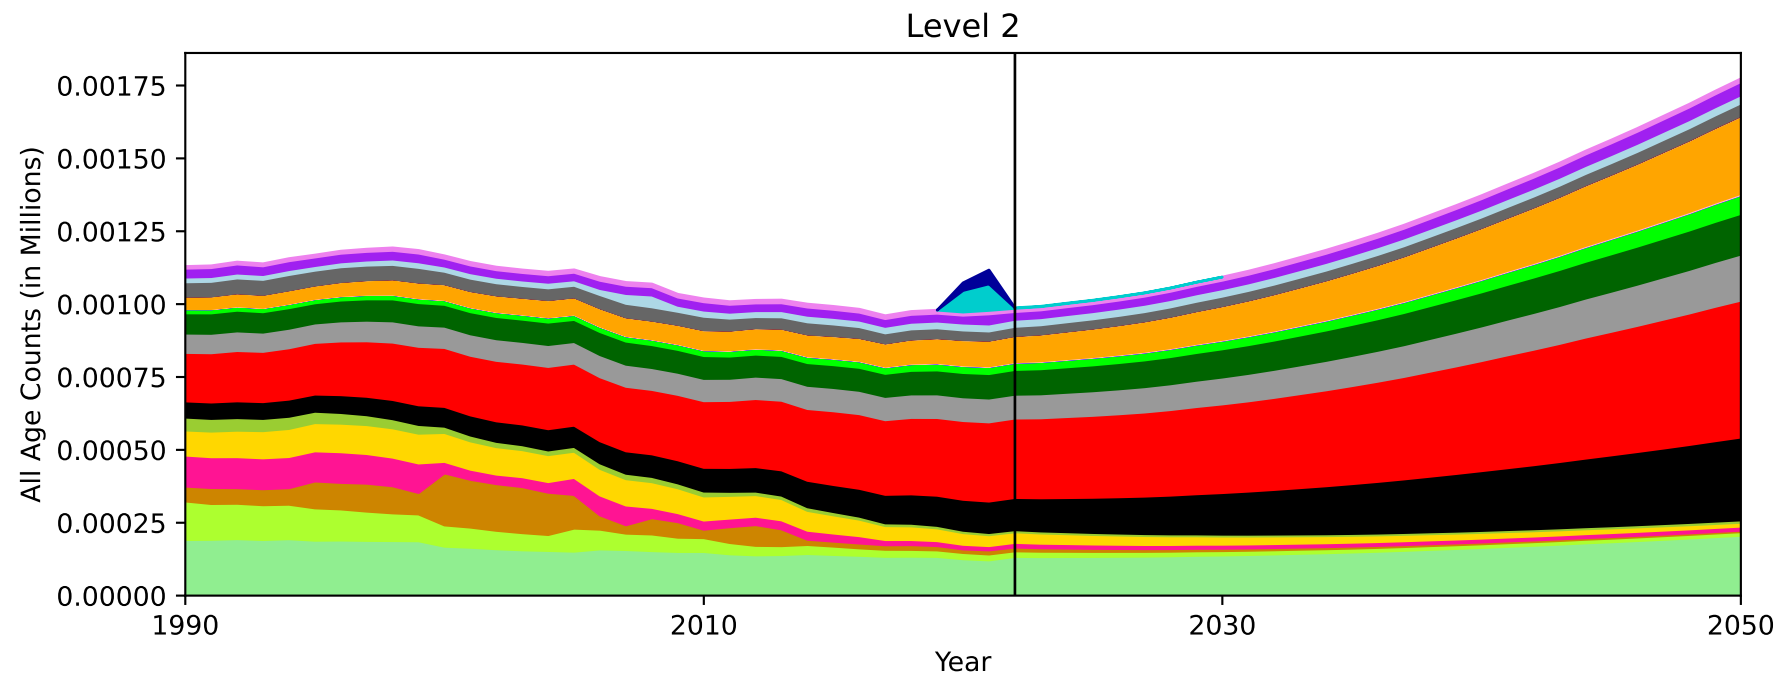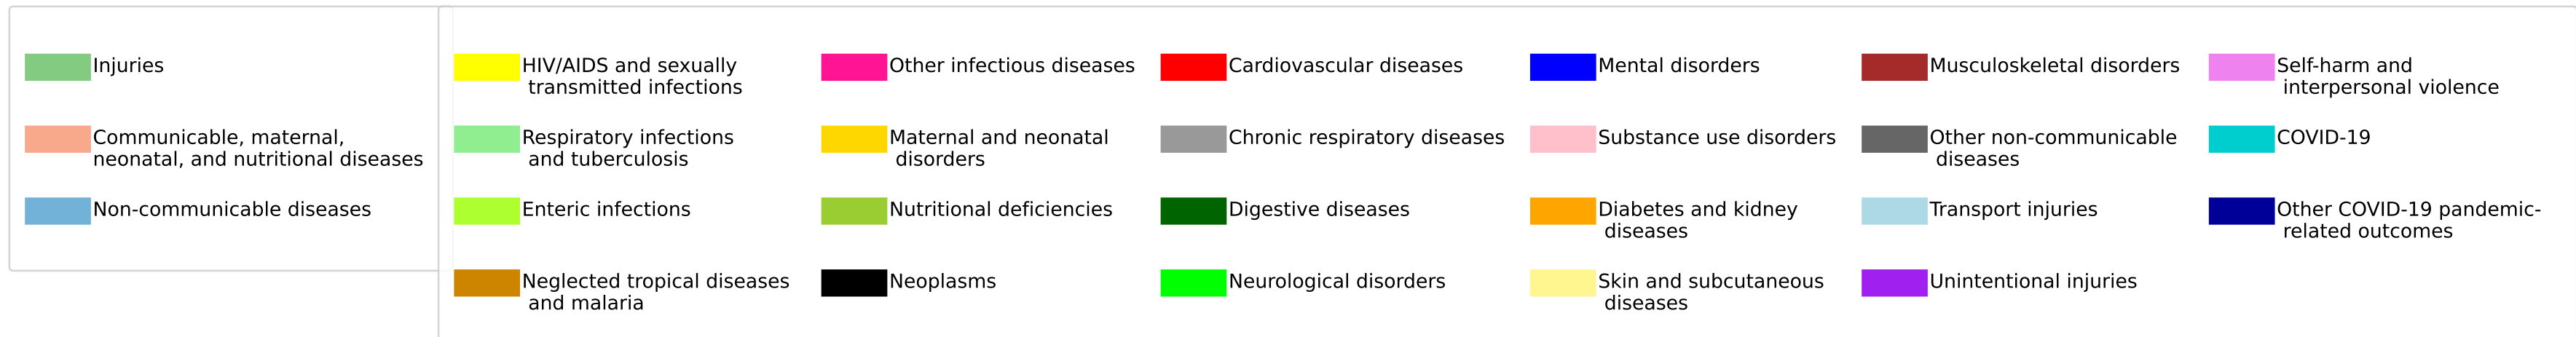

# Senegal

Level 1

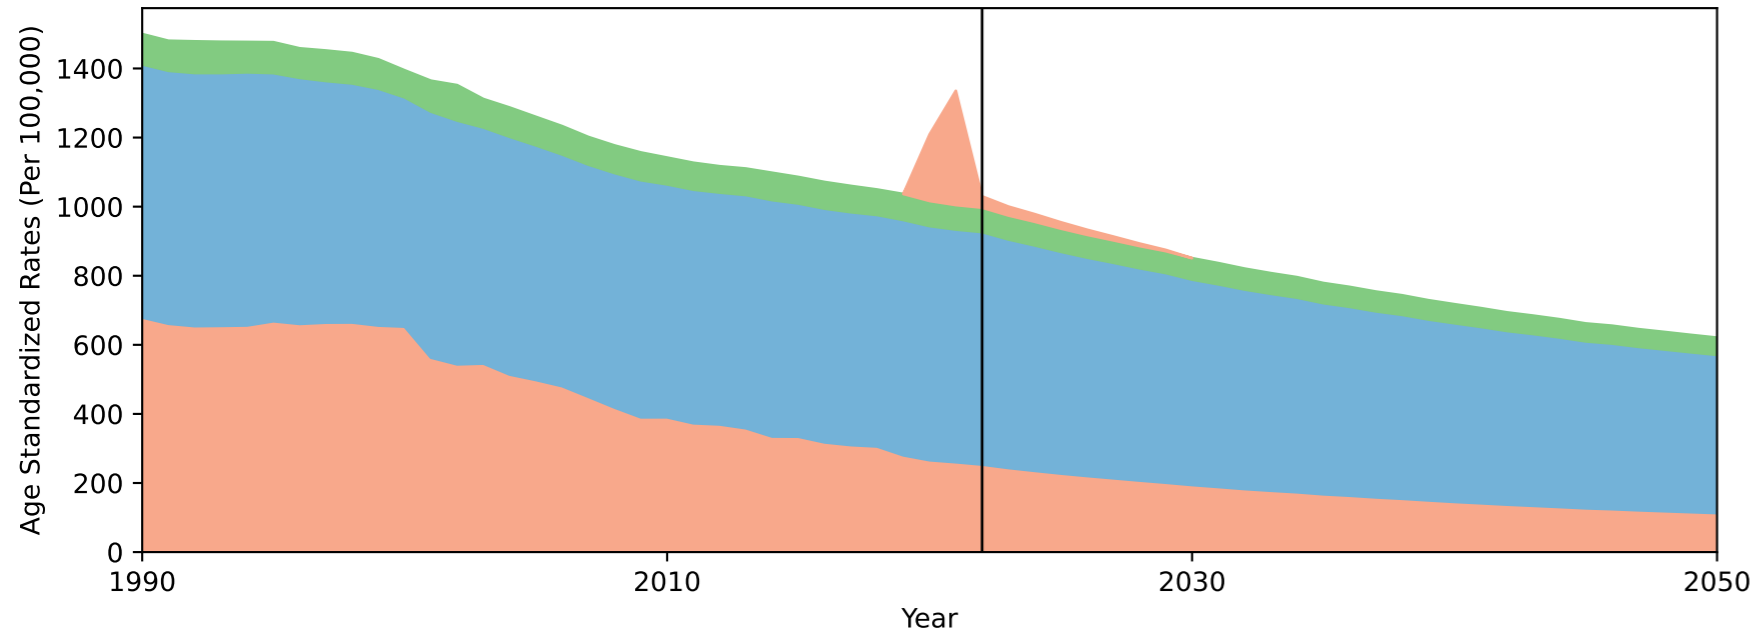

Level 2

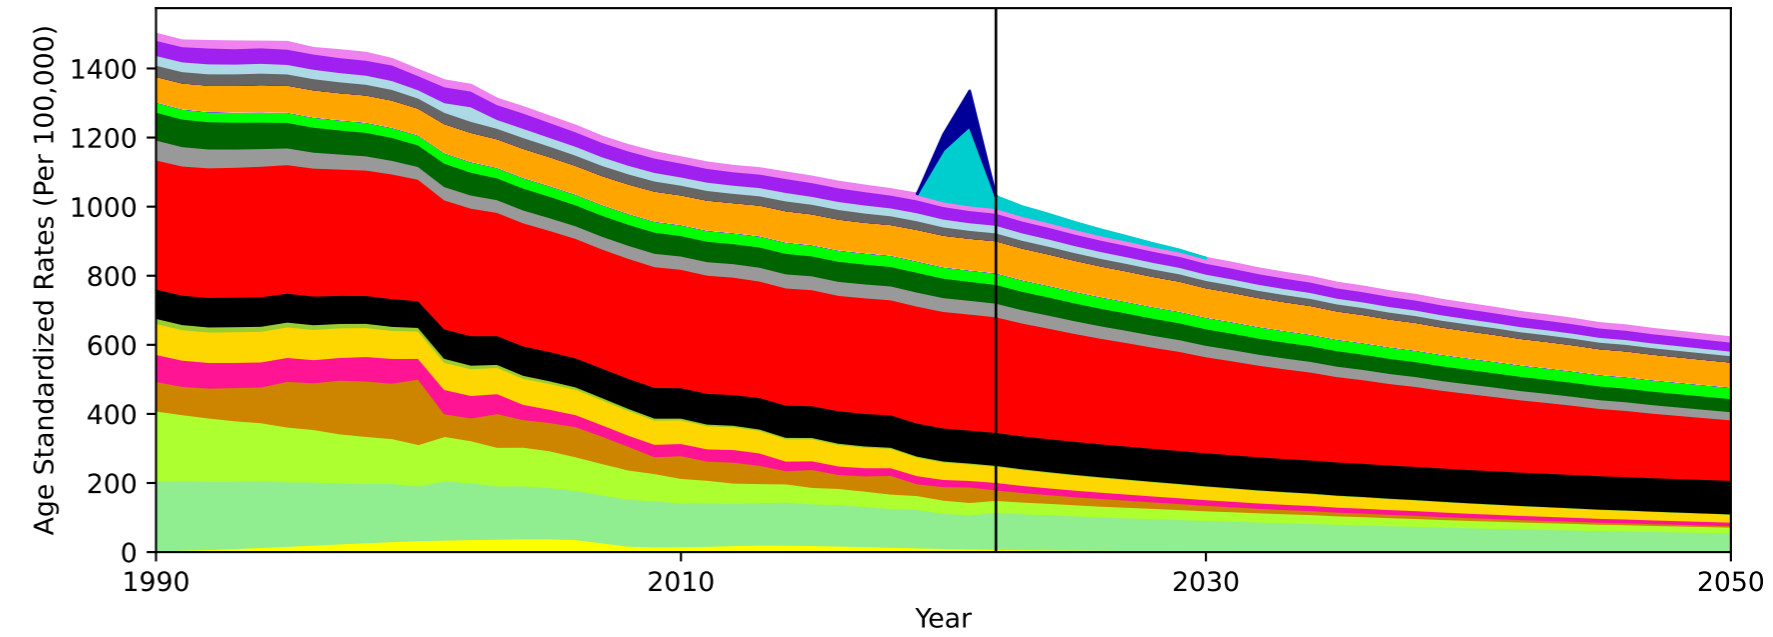

Level 1

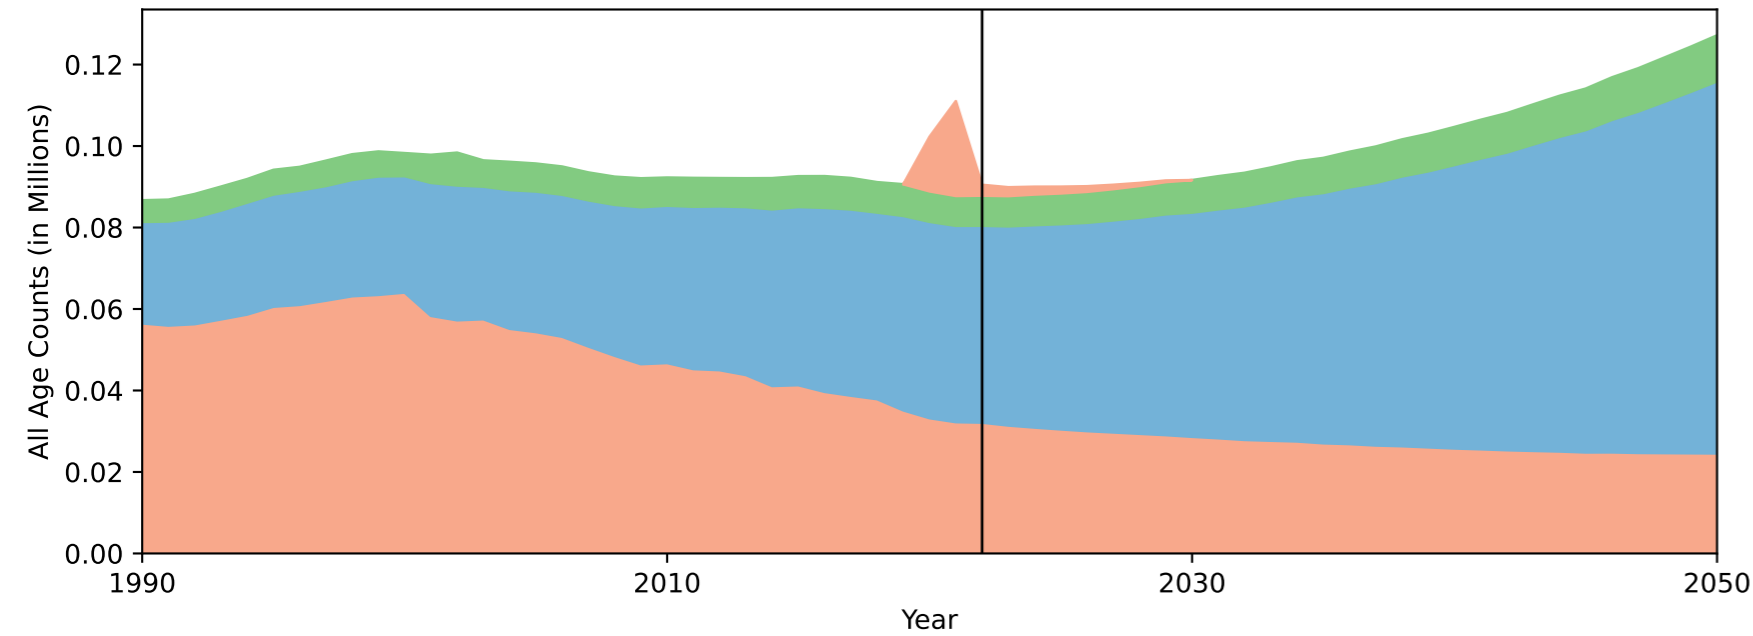

Level 2

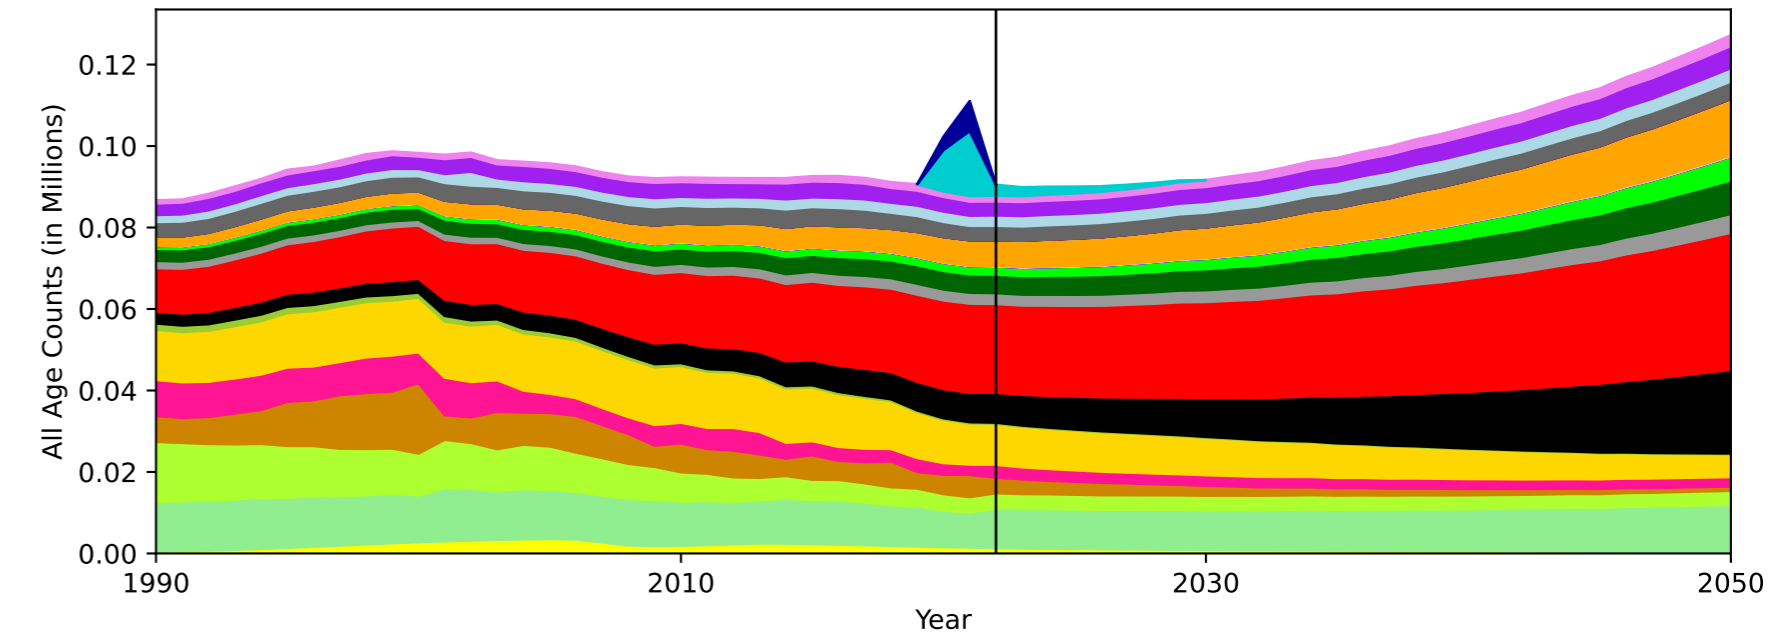



# Sierra Leone

Supplemental Results Figure S5. Age-standardised death rates and all age death counts and by Level 1 and Level 2 causes, 1990–2050

680

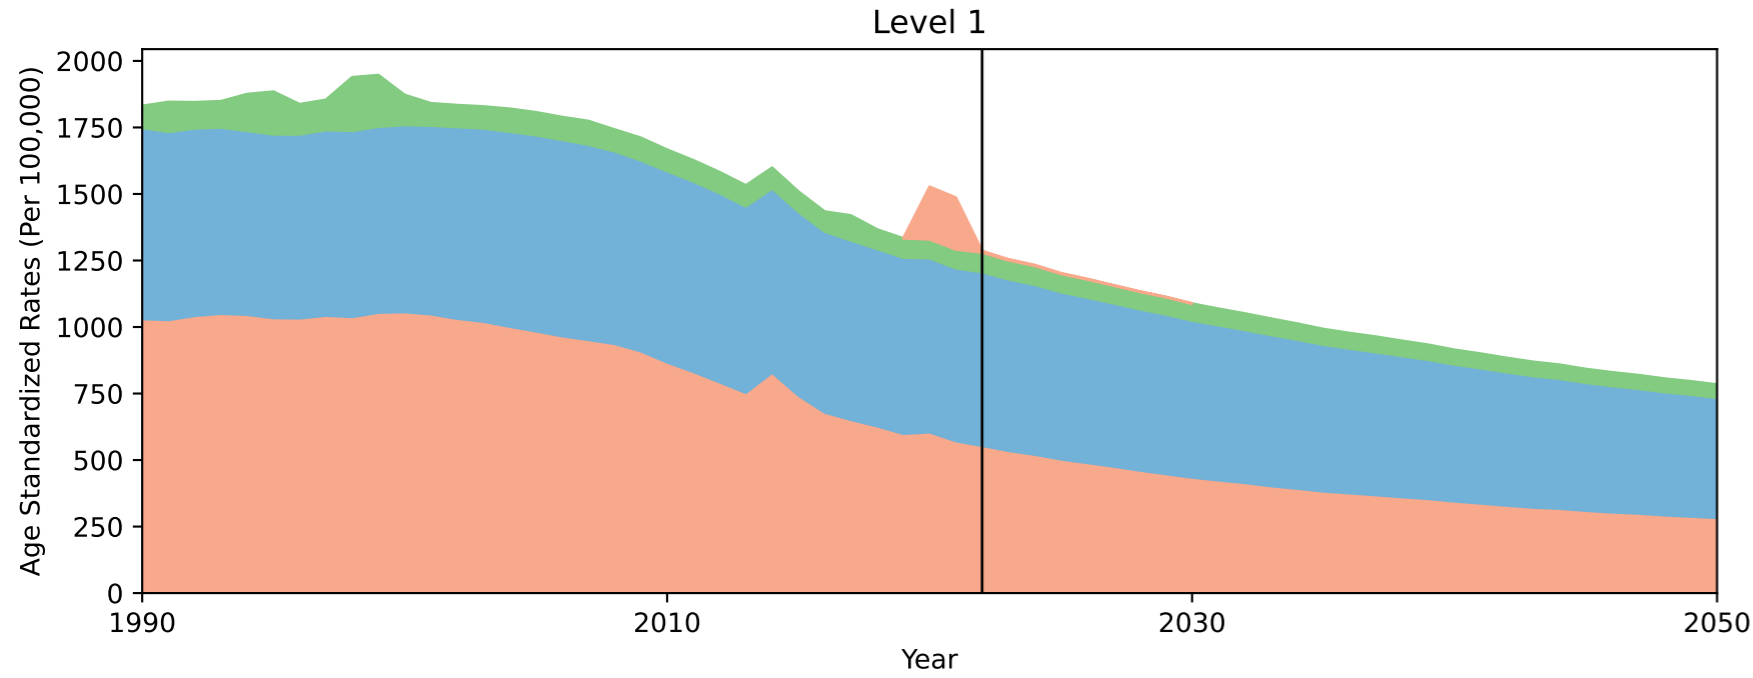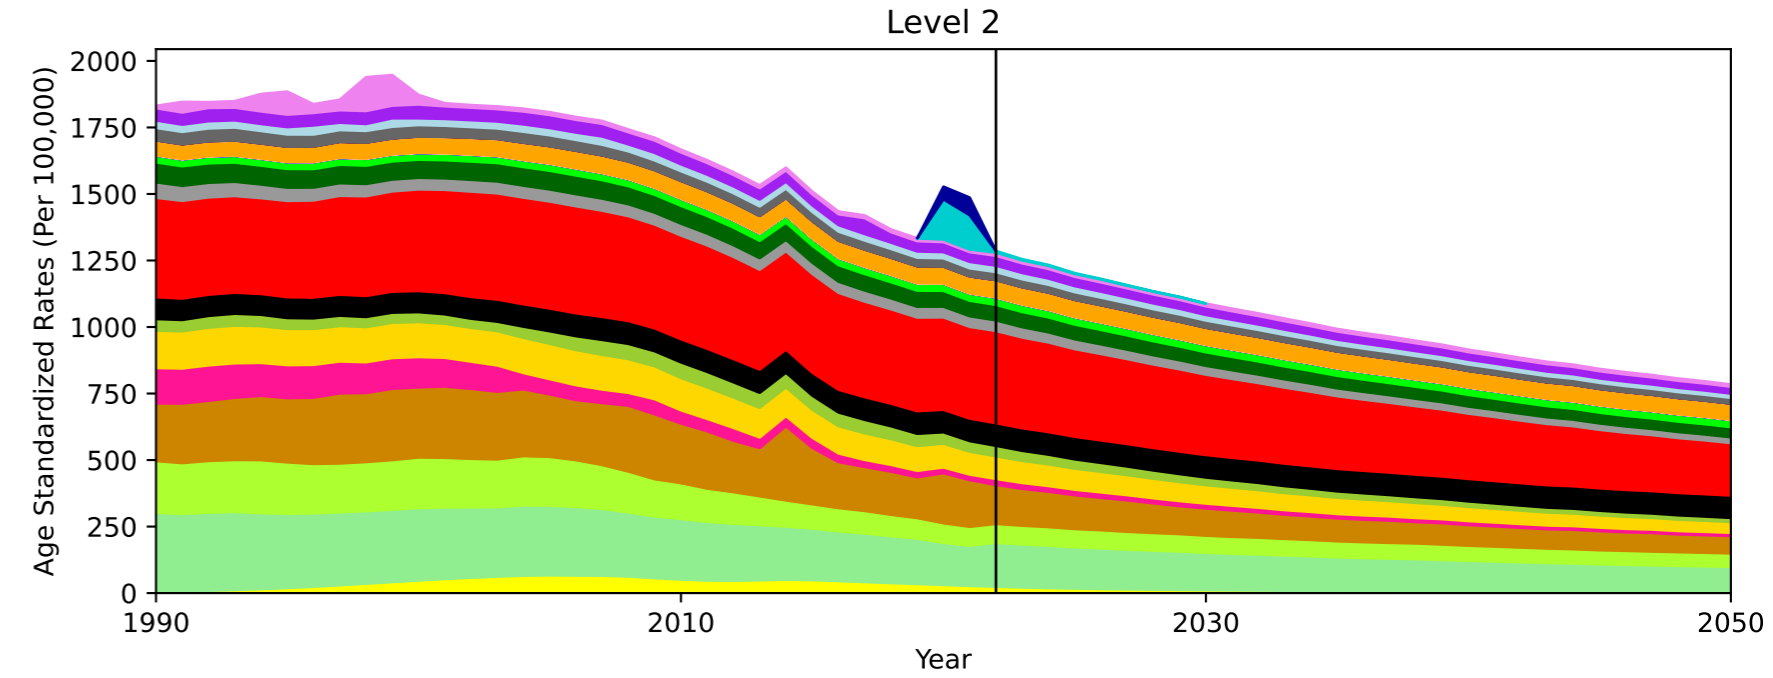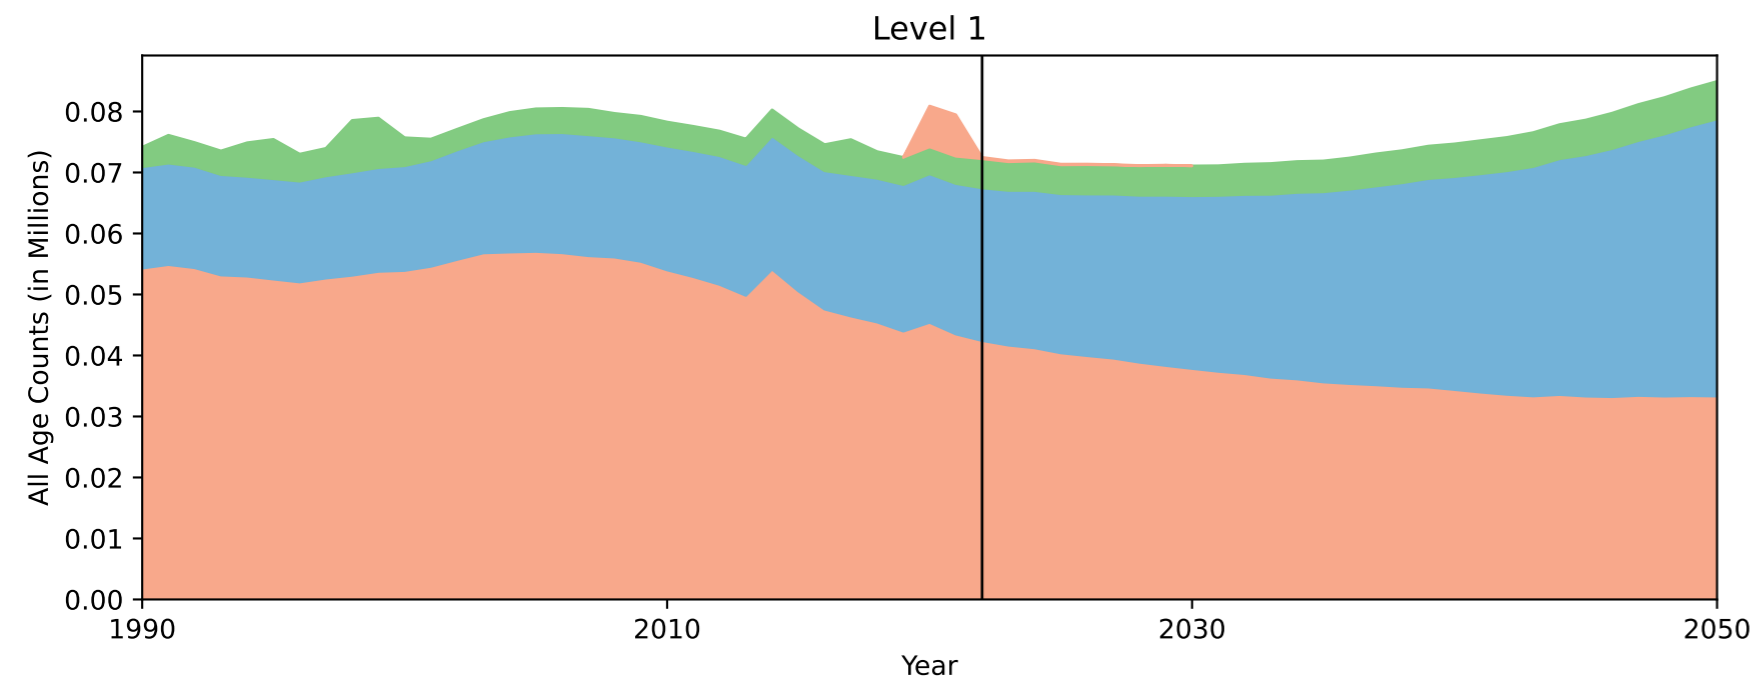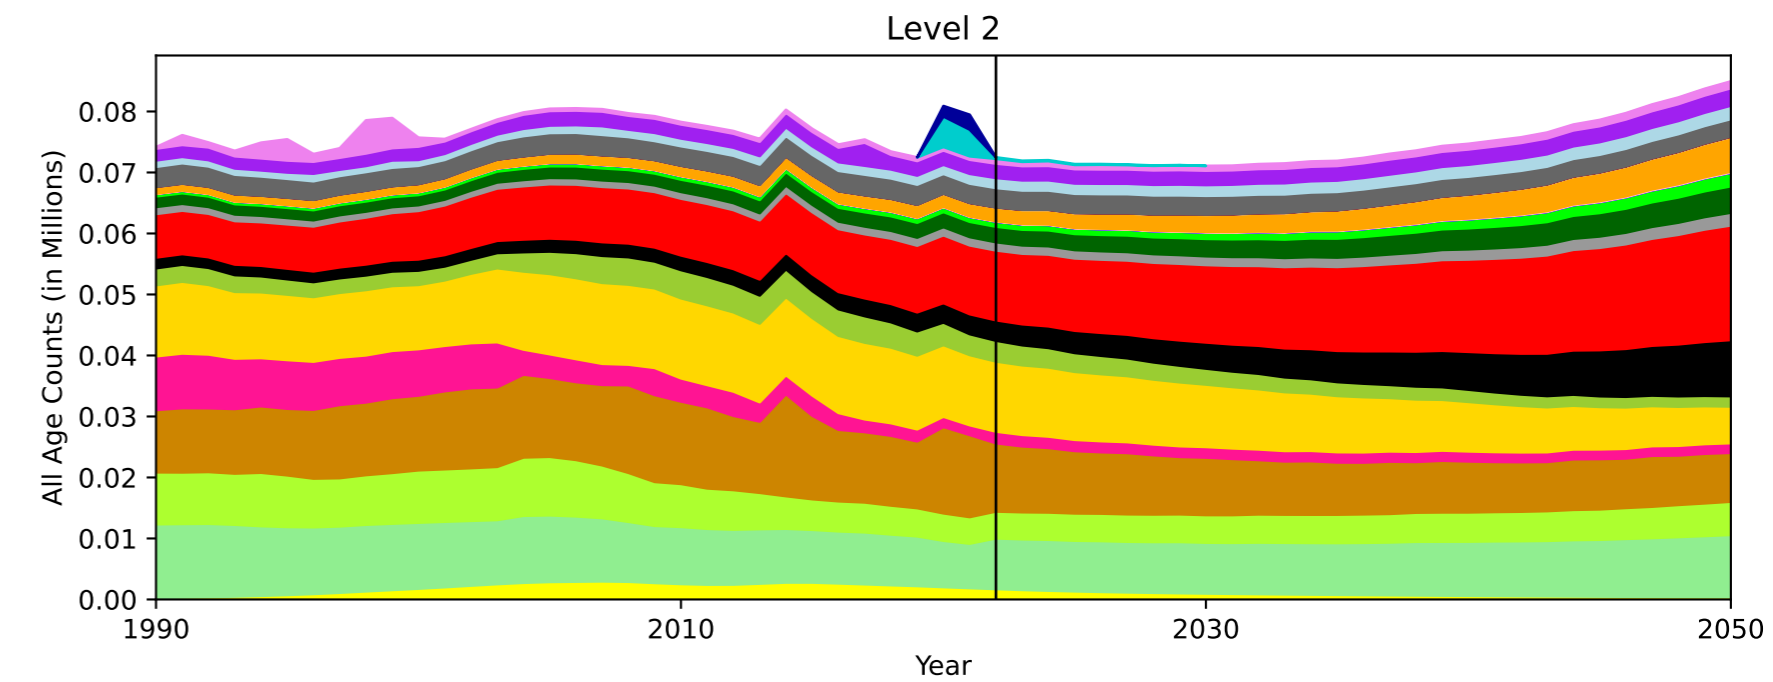

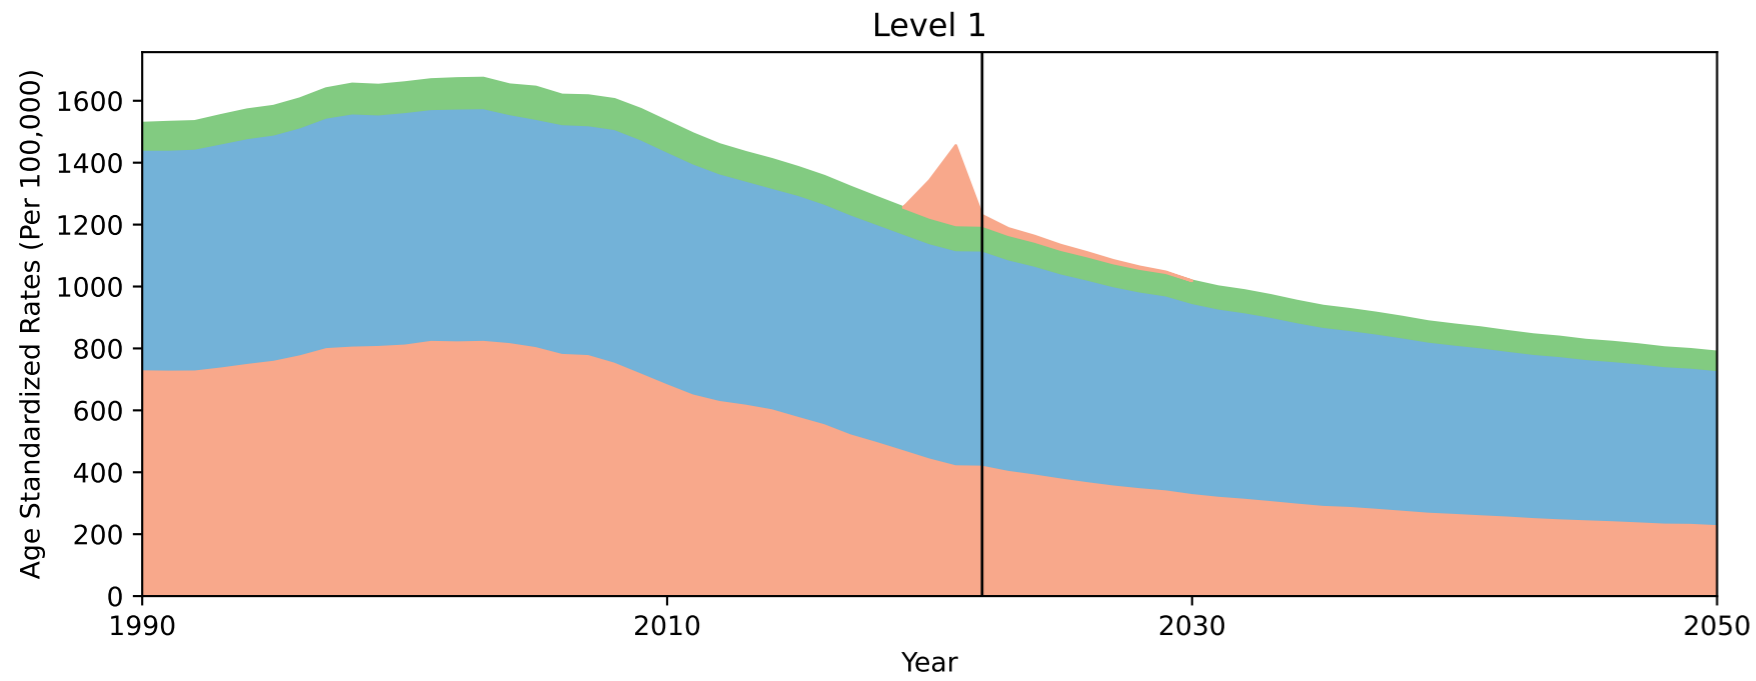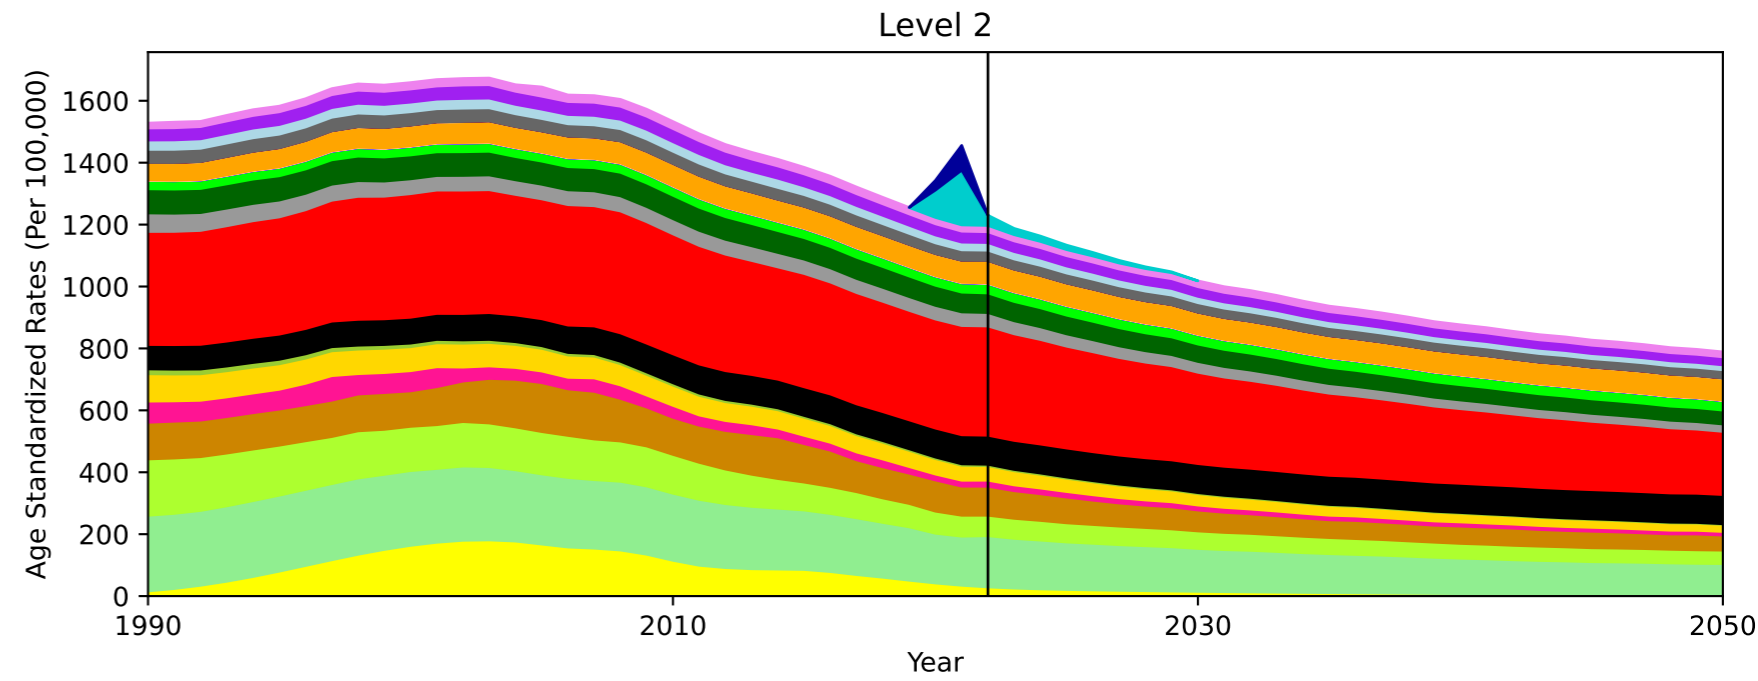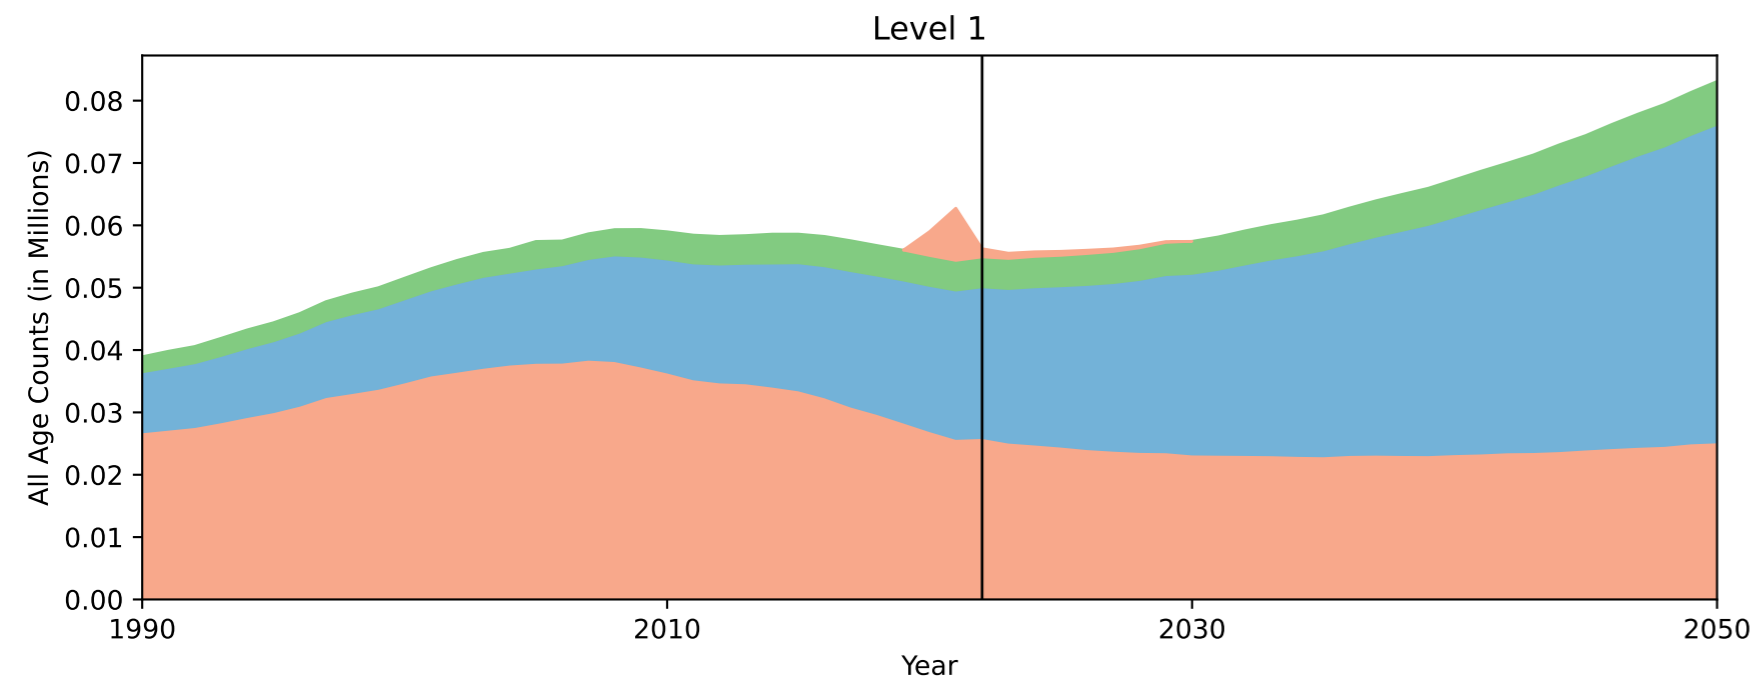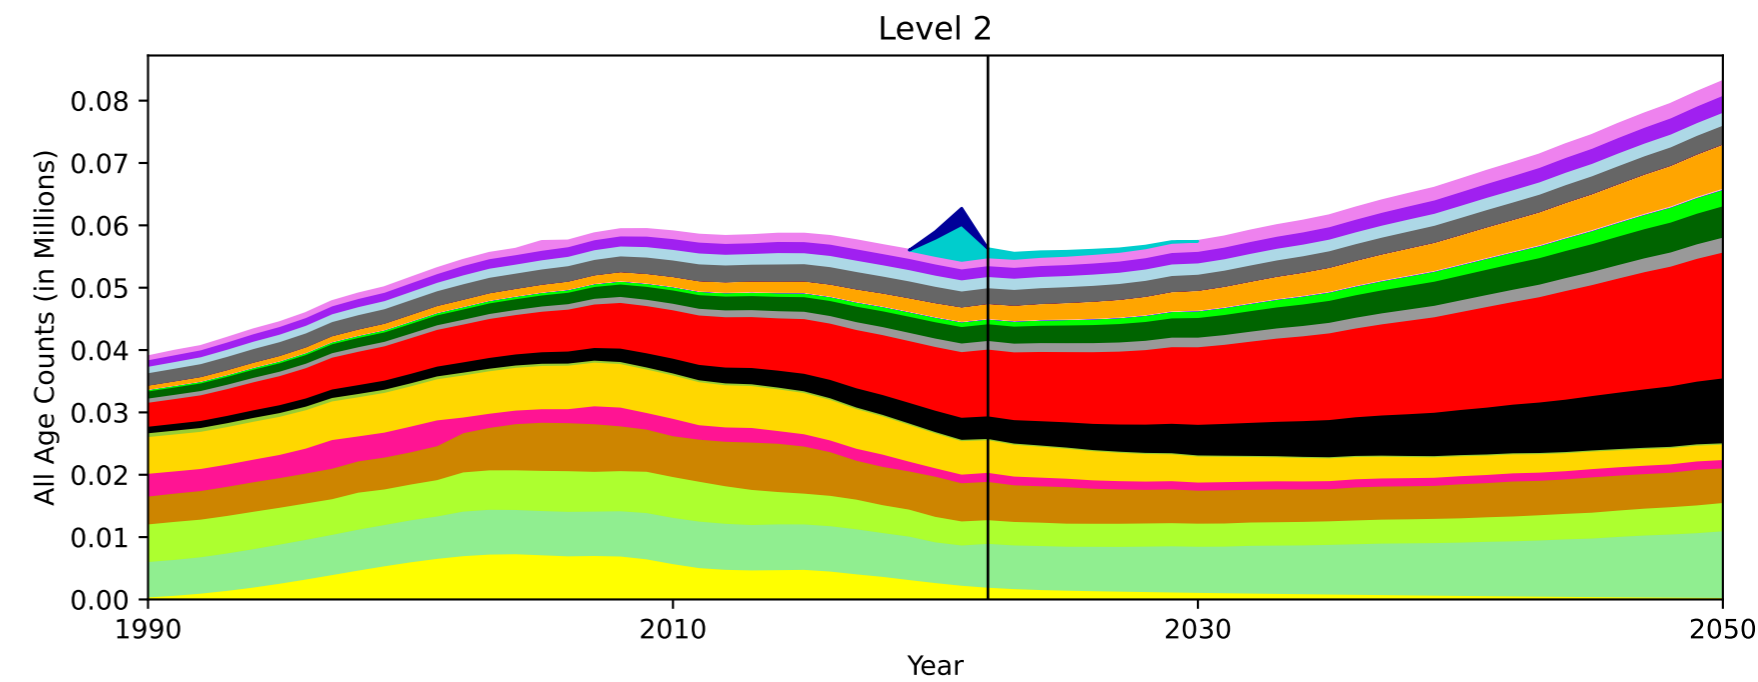

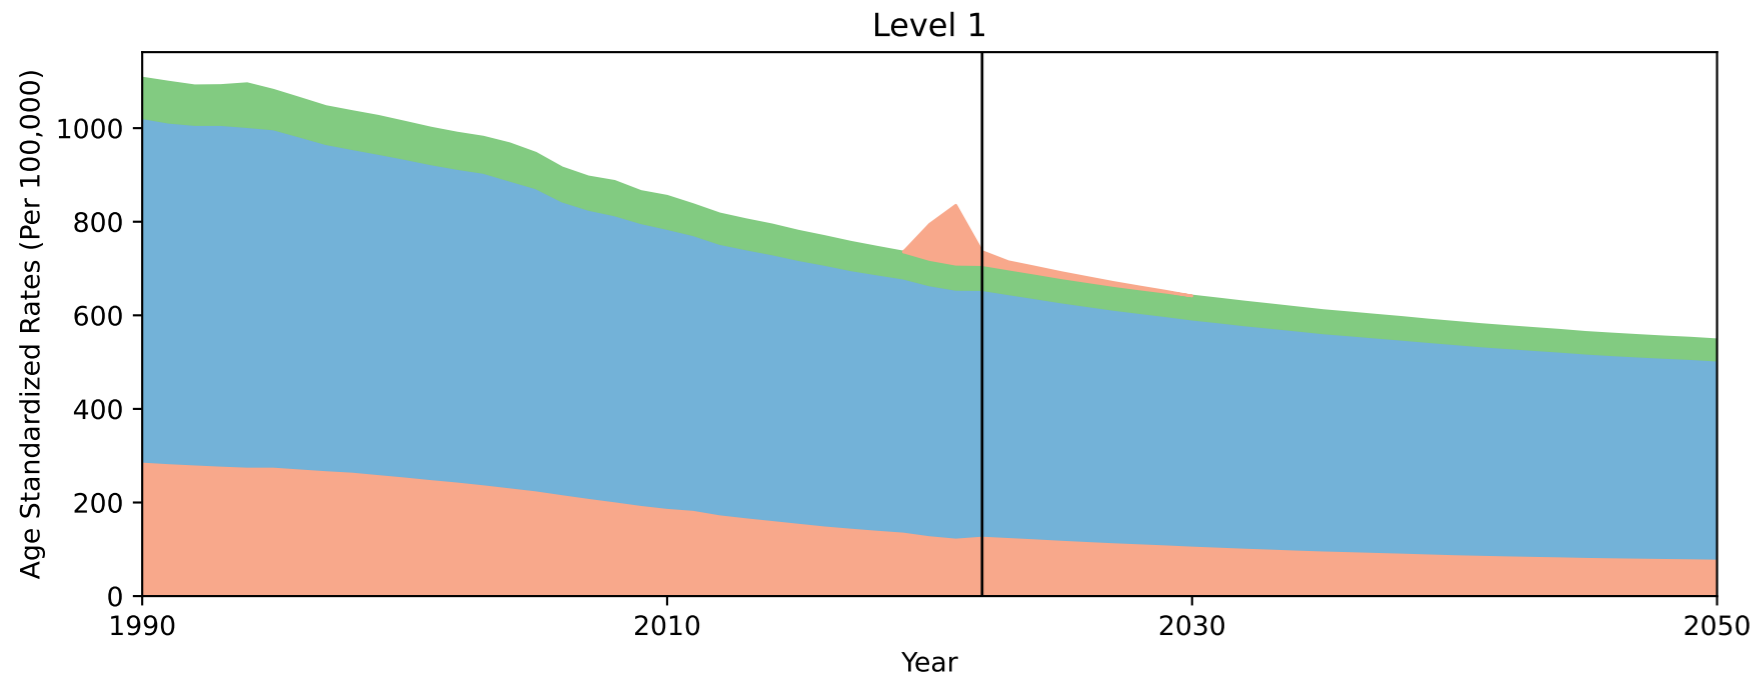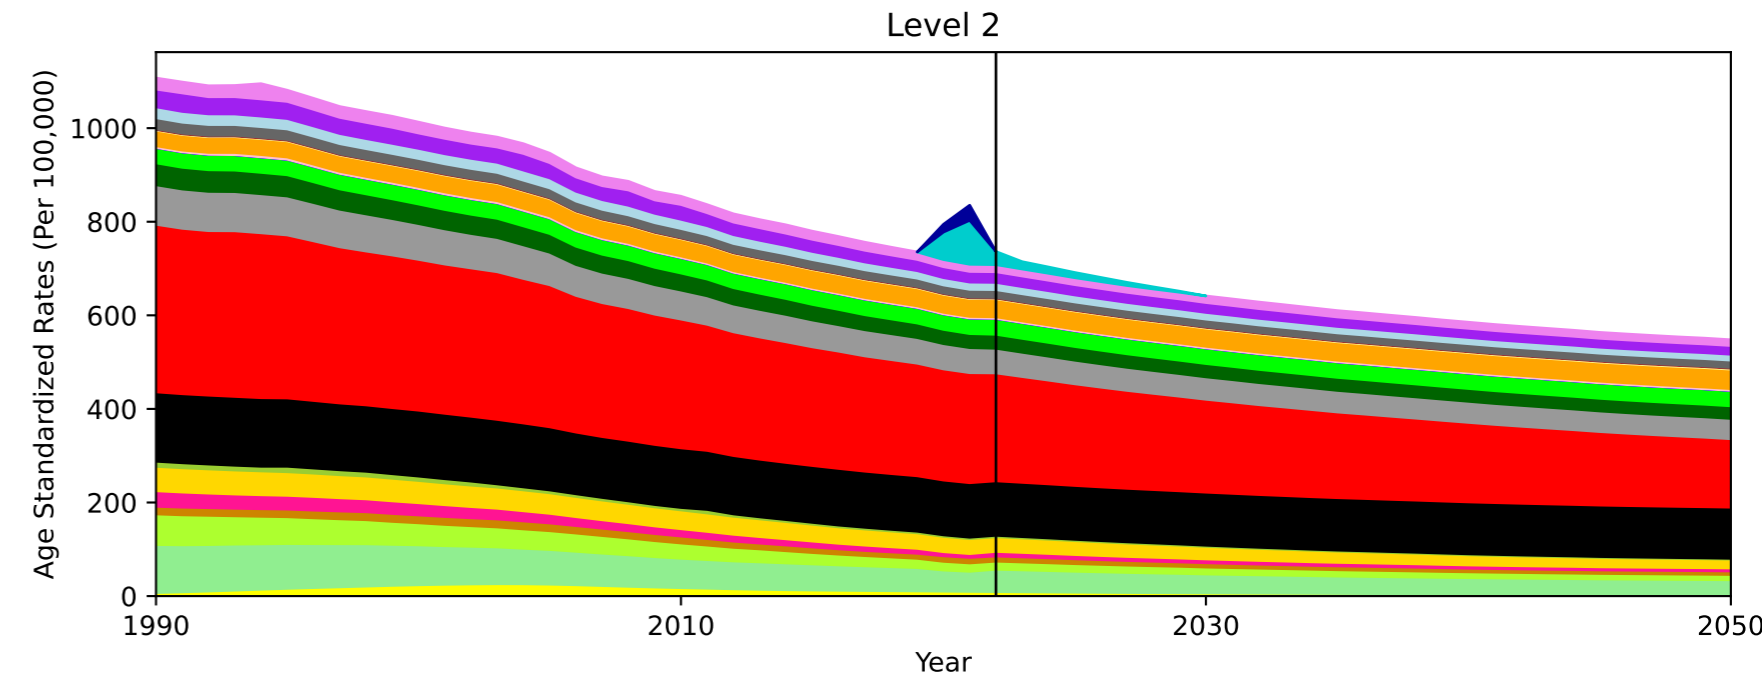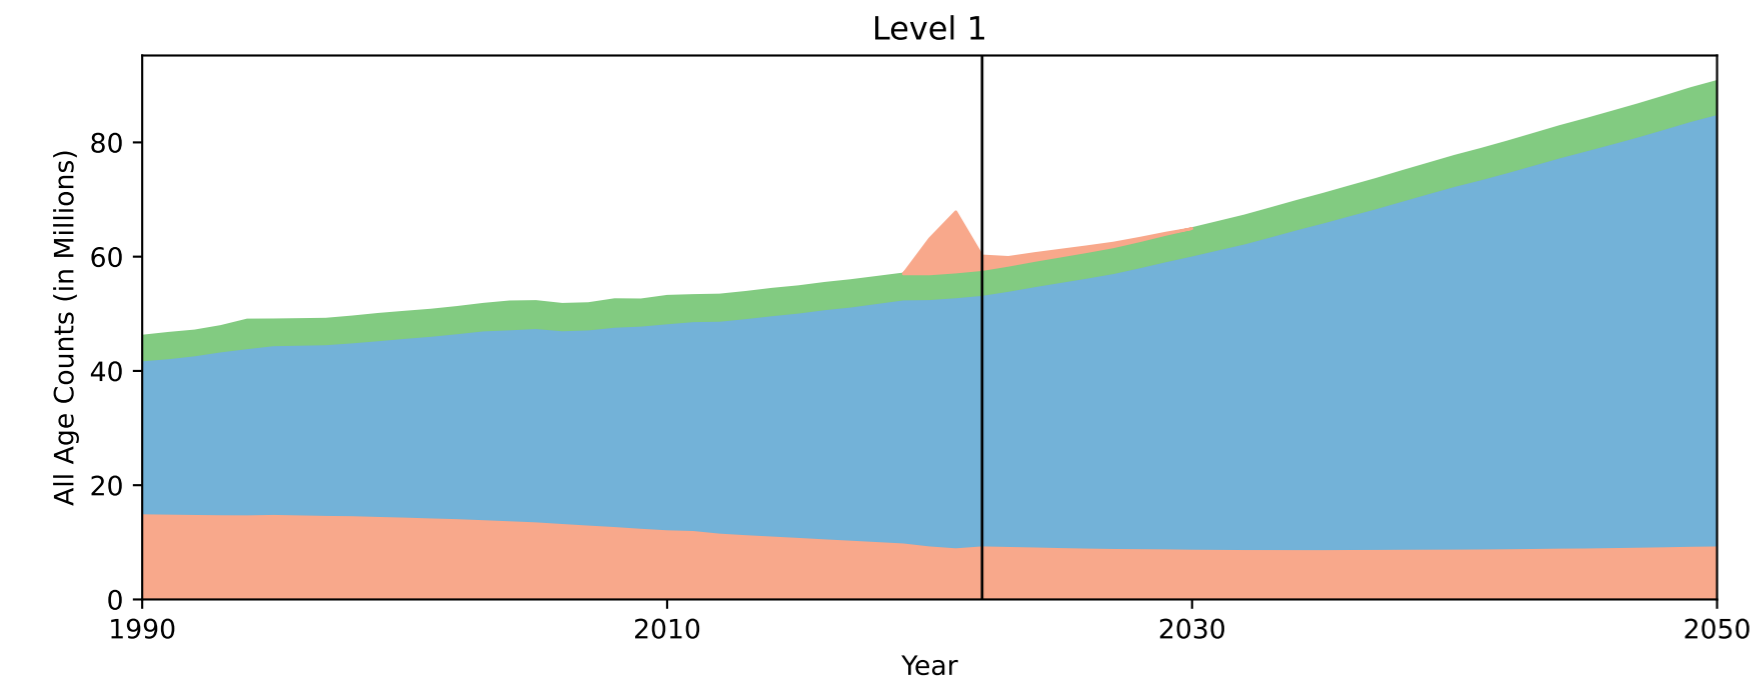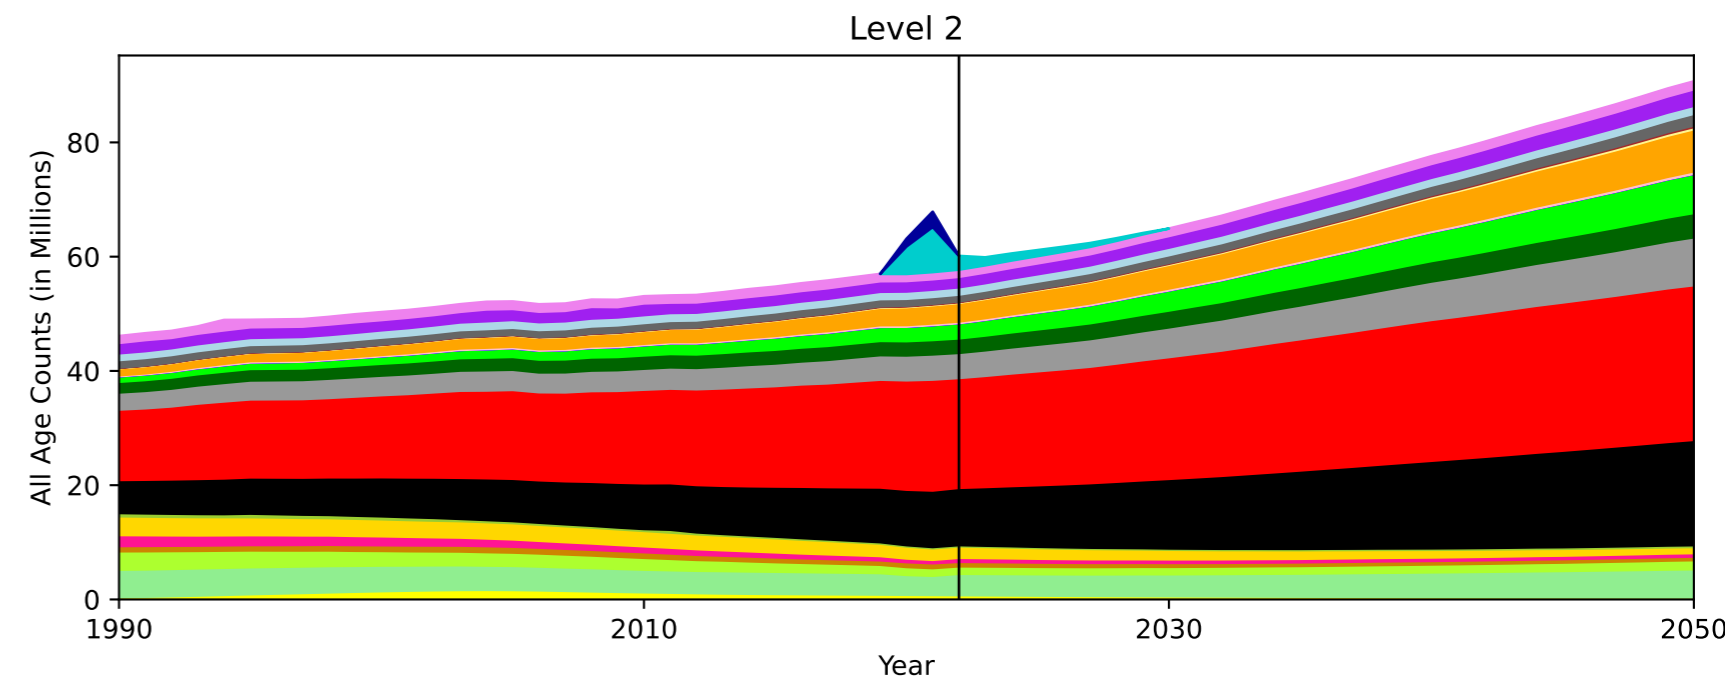

# Central Europe, Eastern Europe, And Central Asia

Level 1

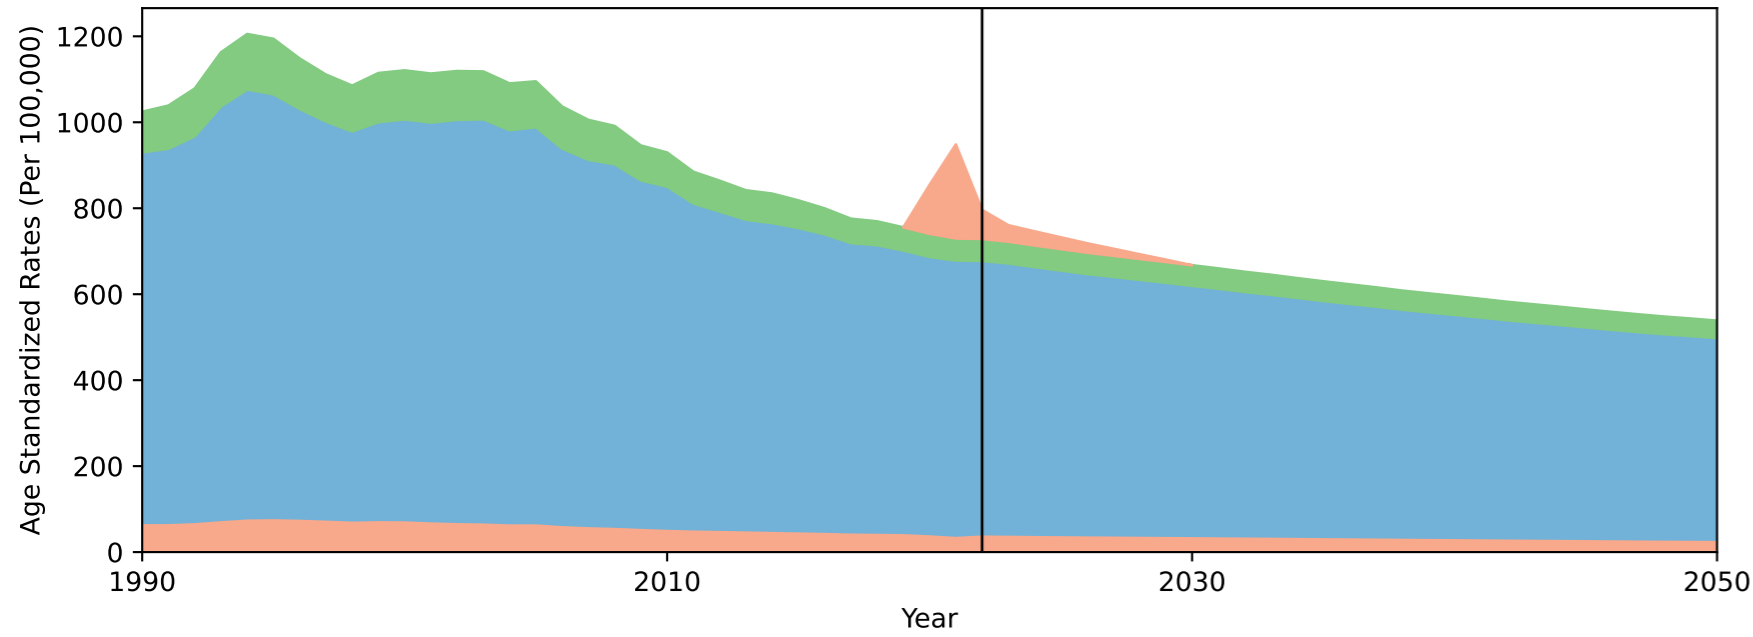

Level 2

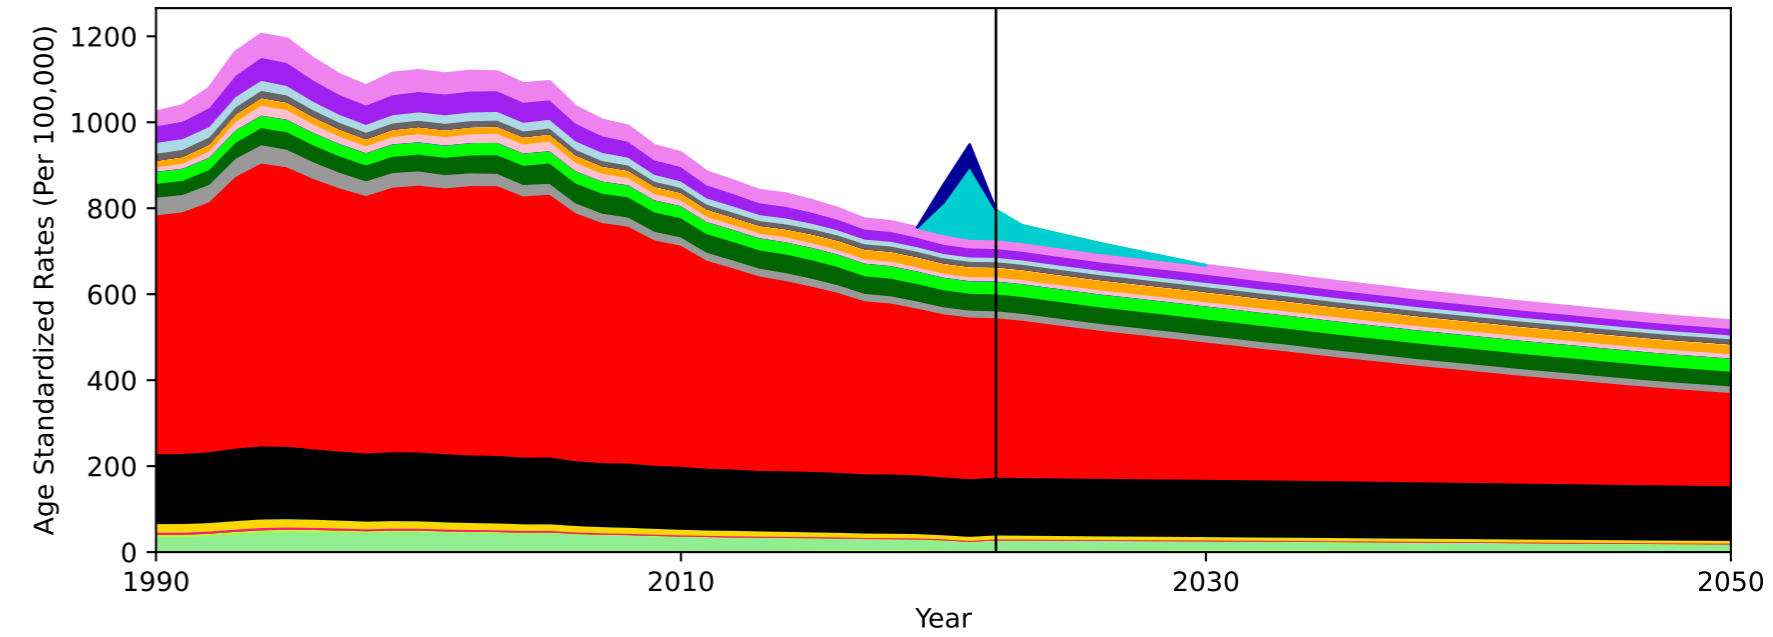

Level 1

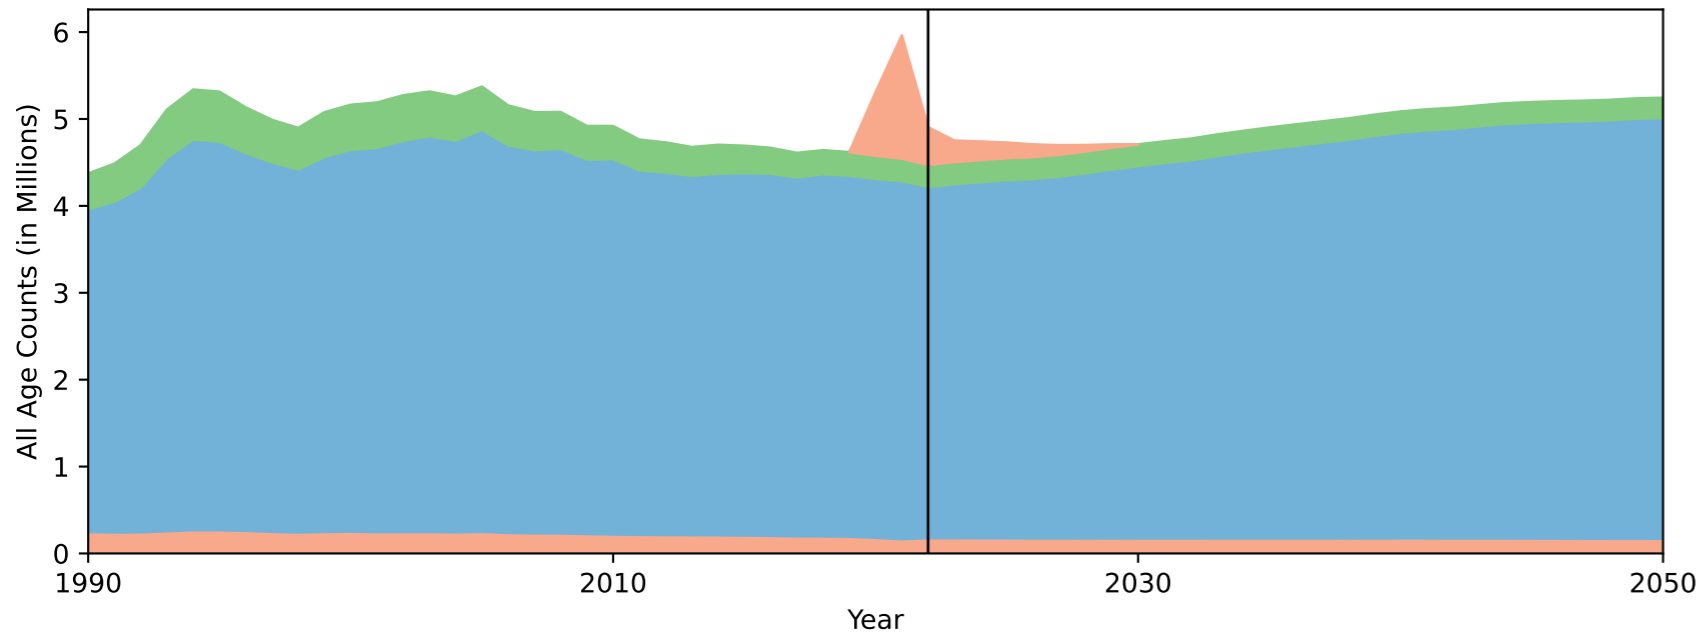

Level 2

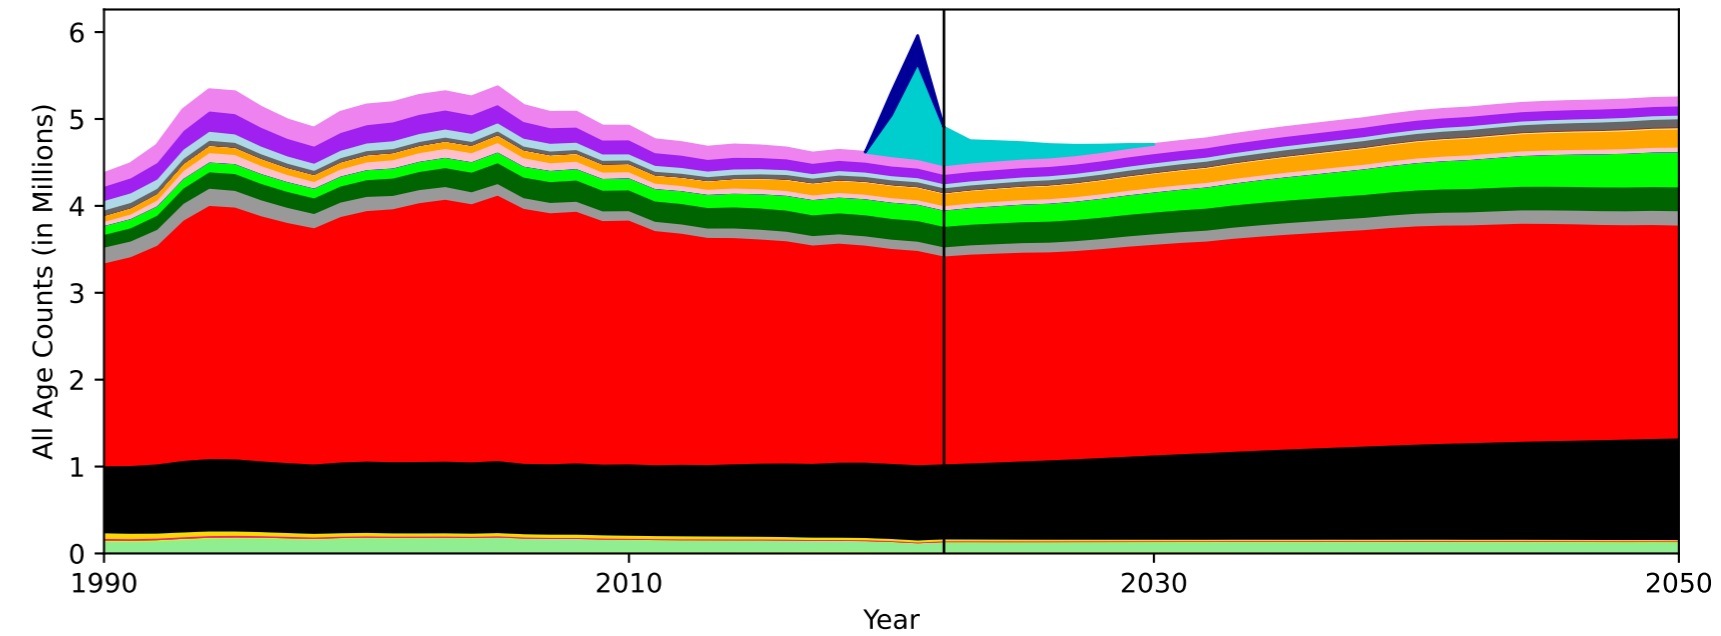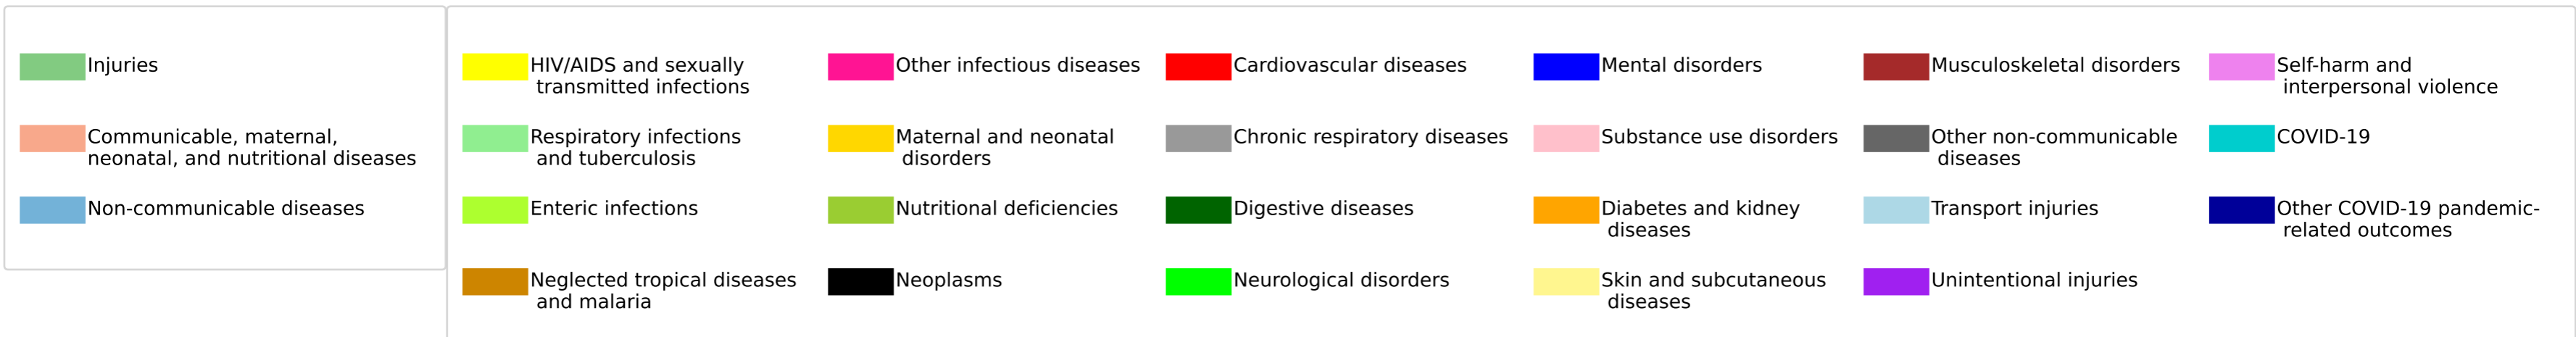

# High Income

Level 1

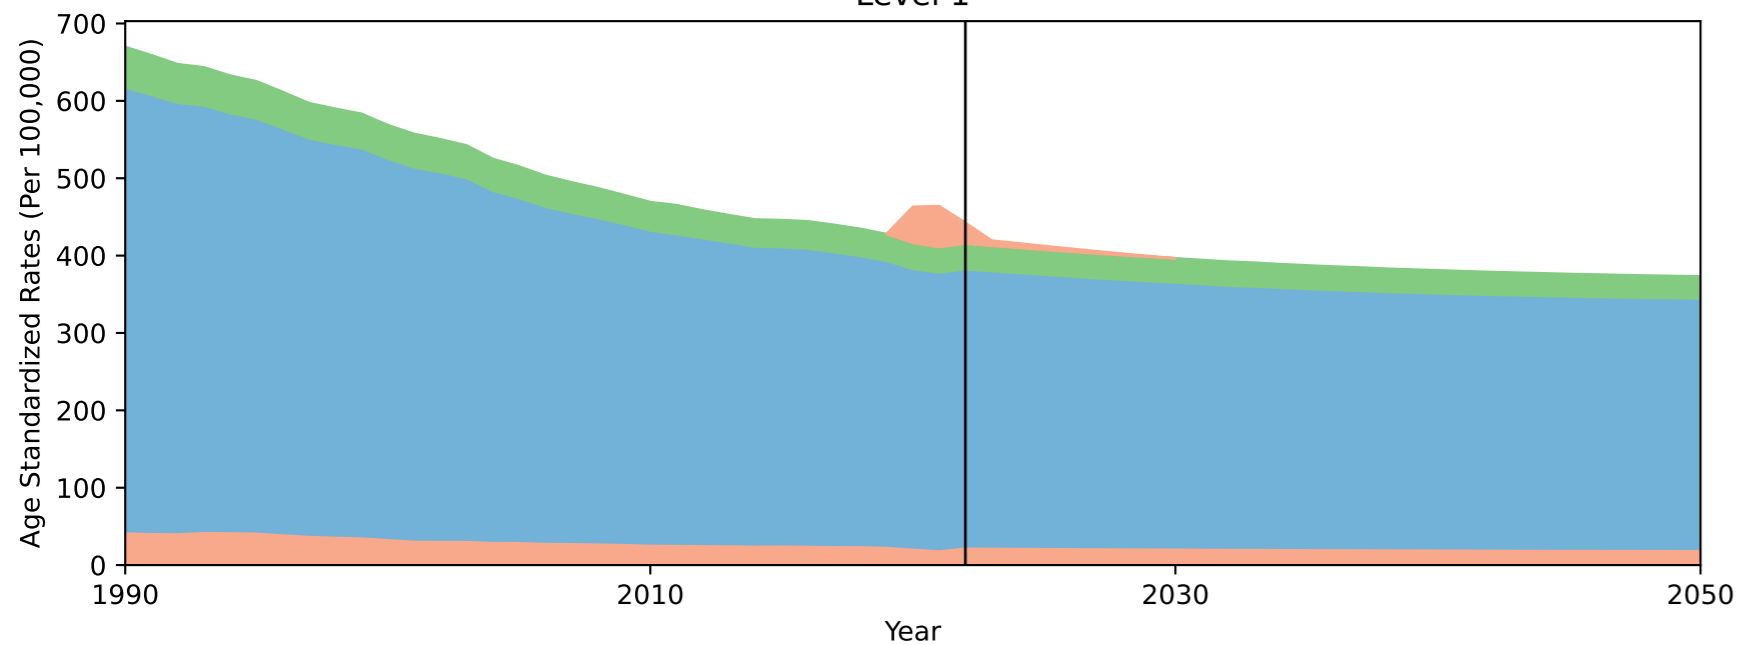

Level 2

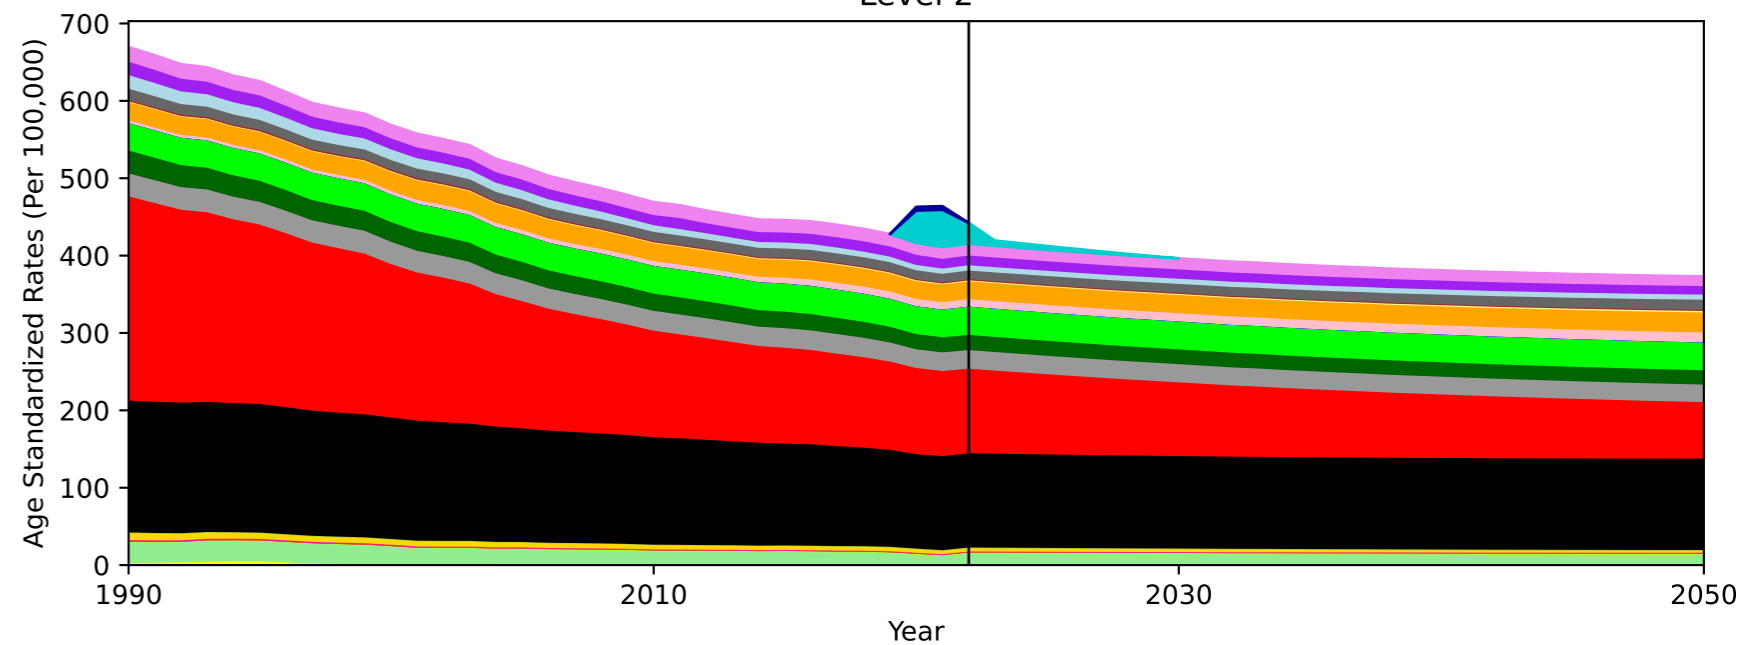

Level 1

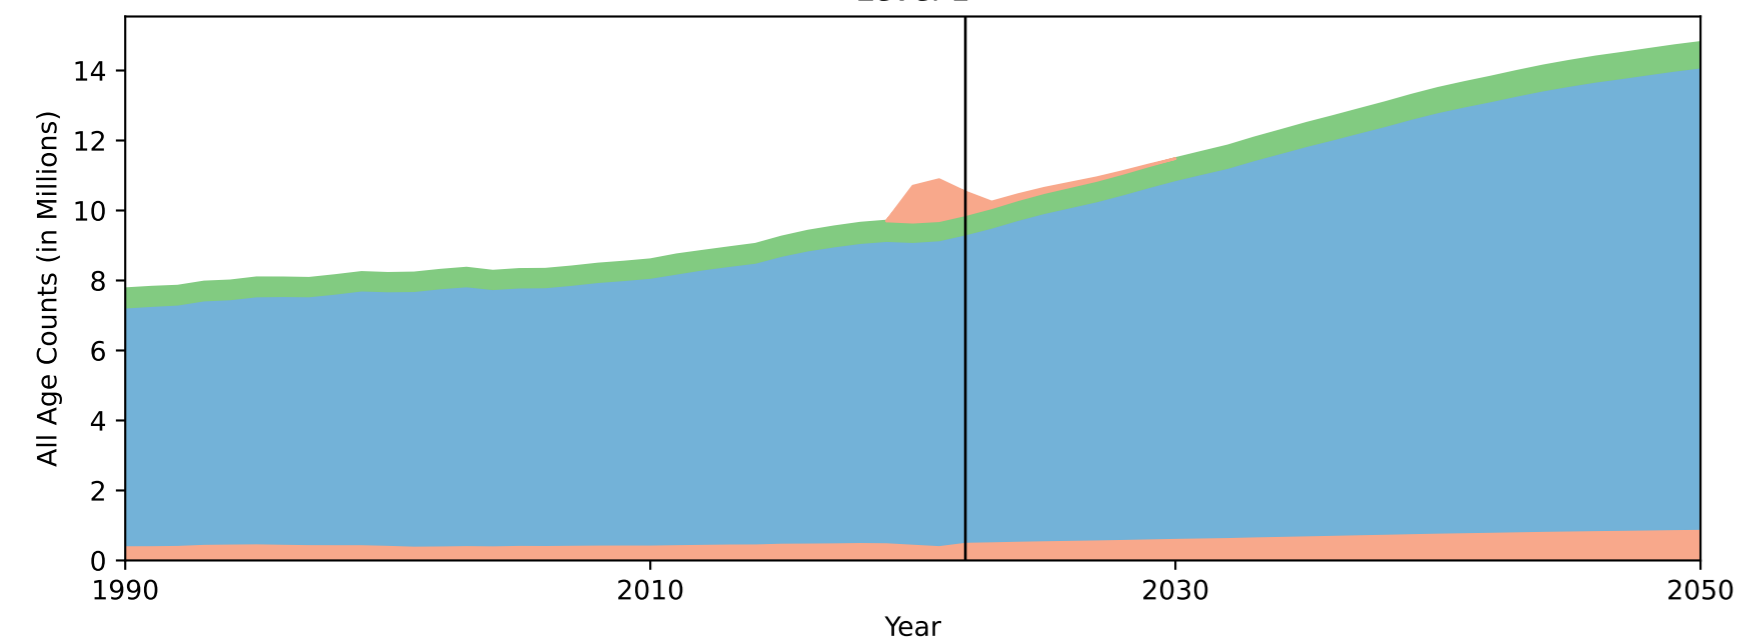

Level 2

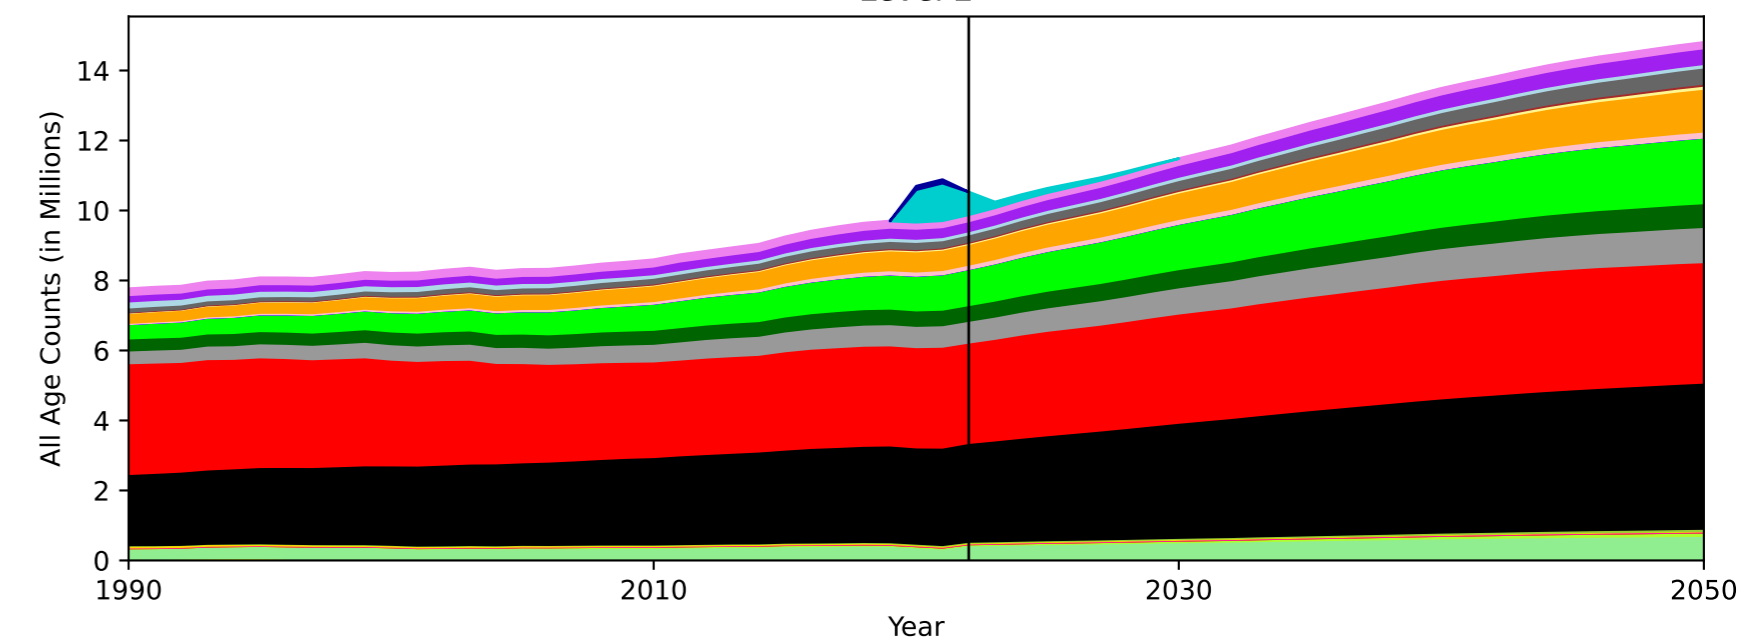

# Latin America And Caribbean

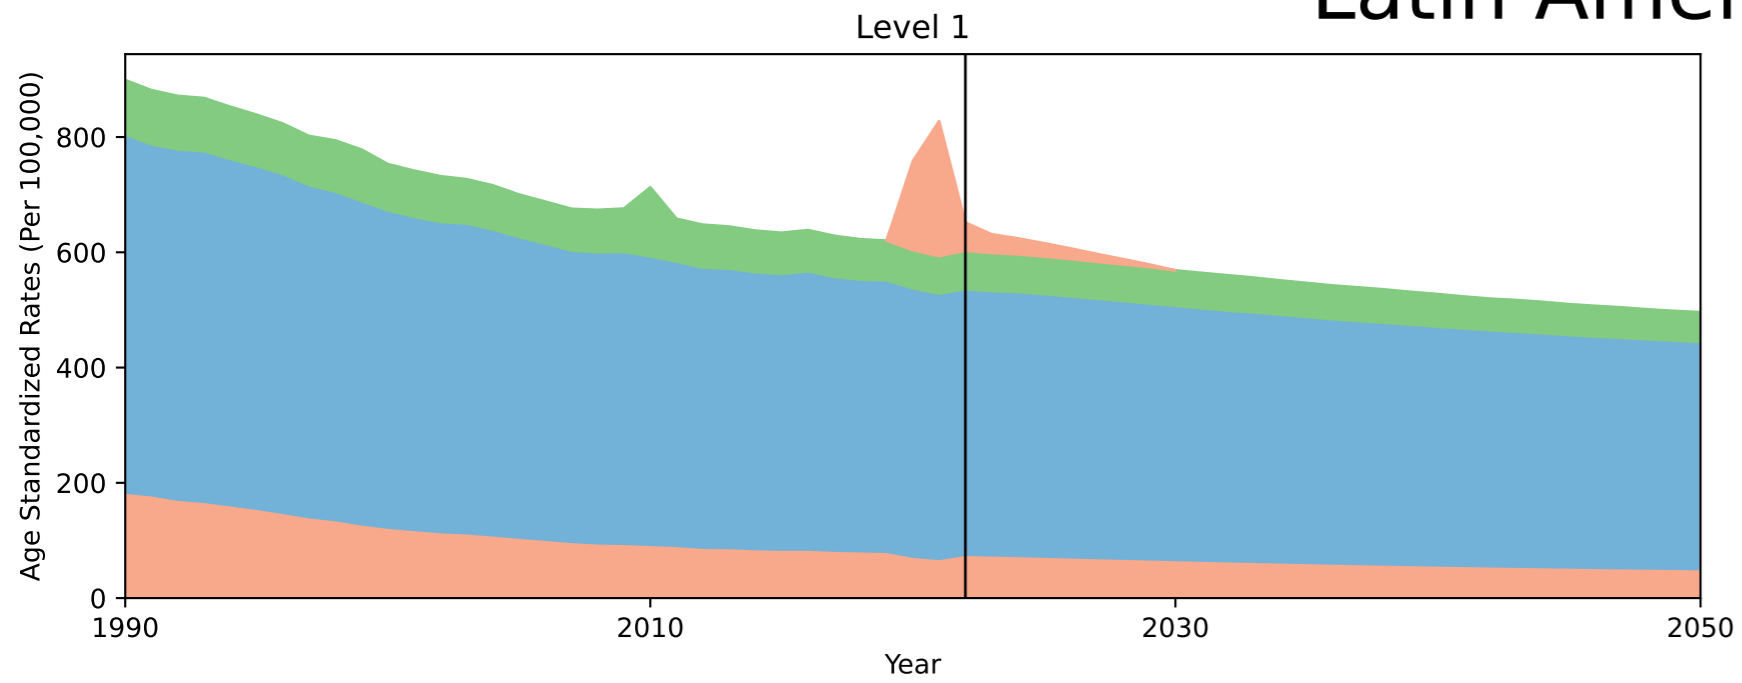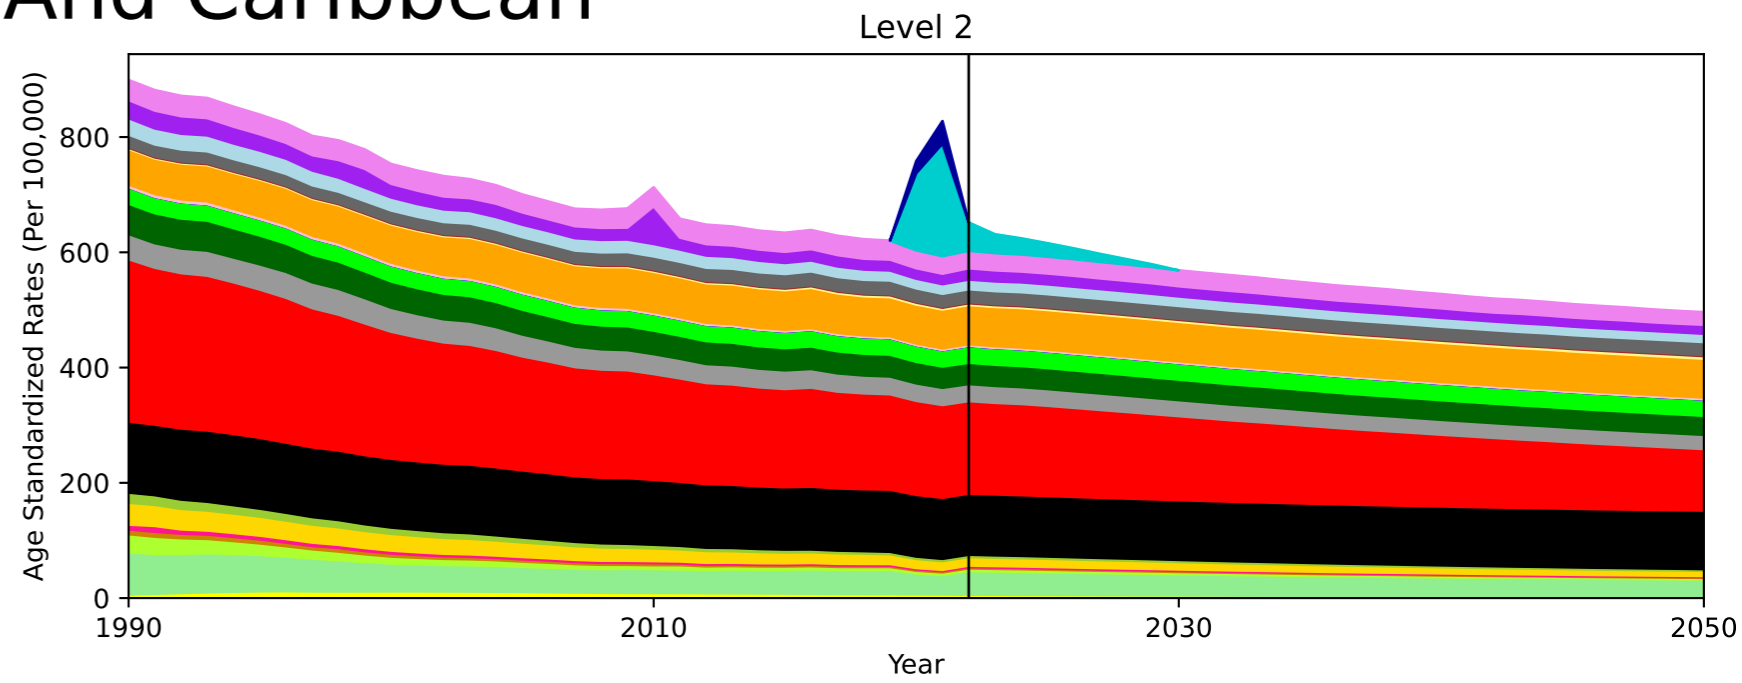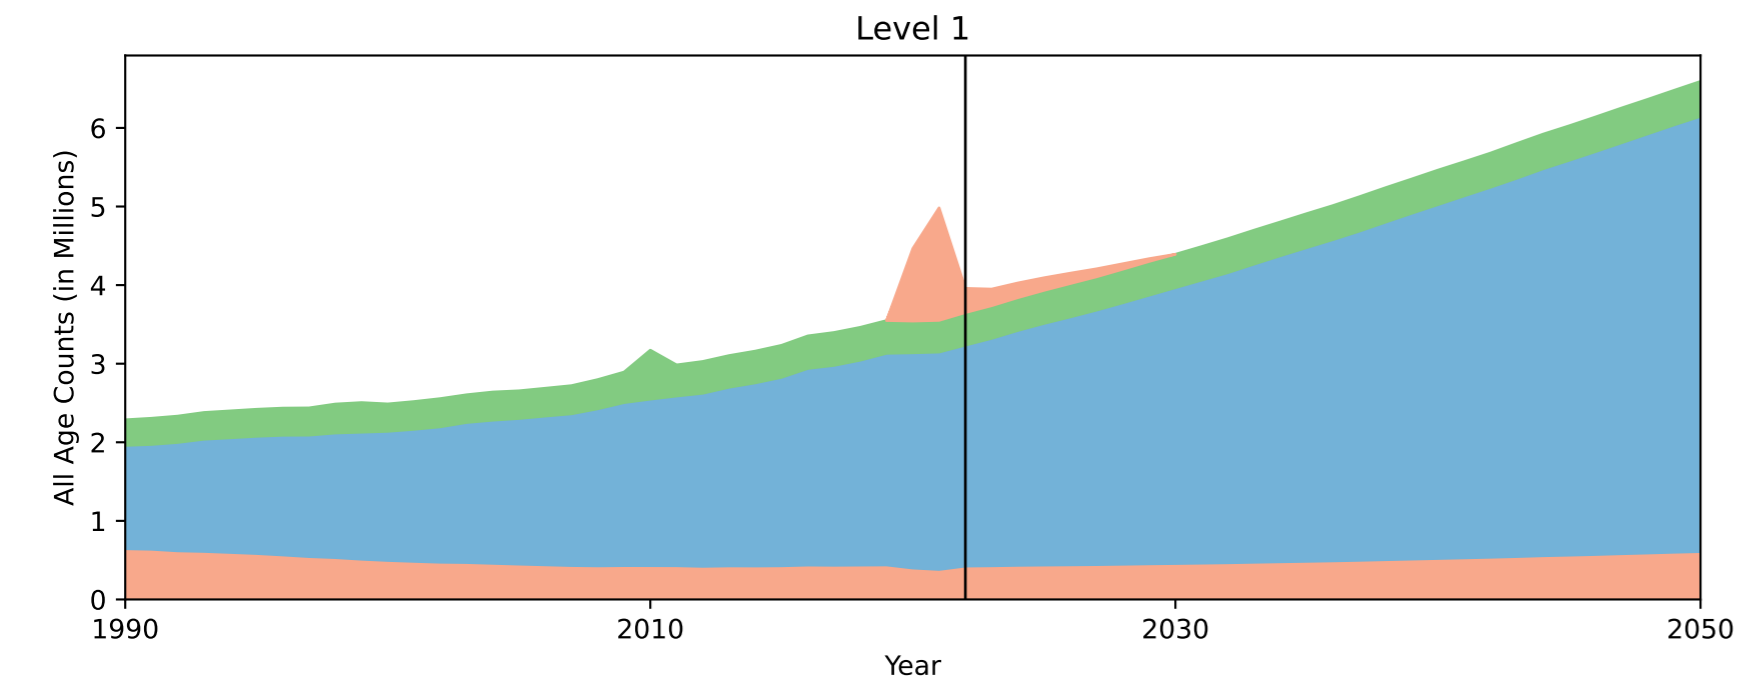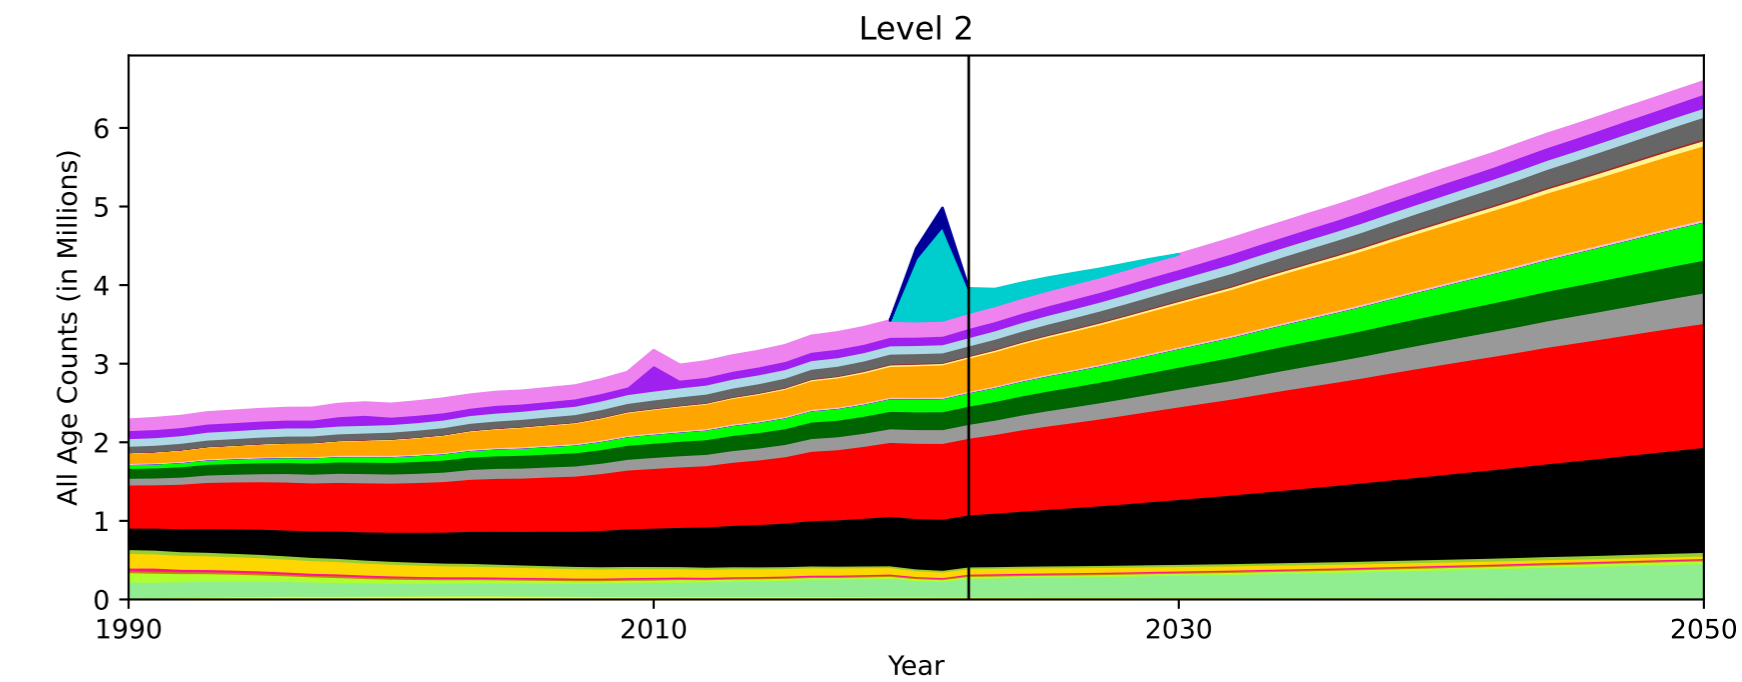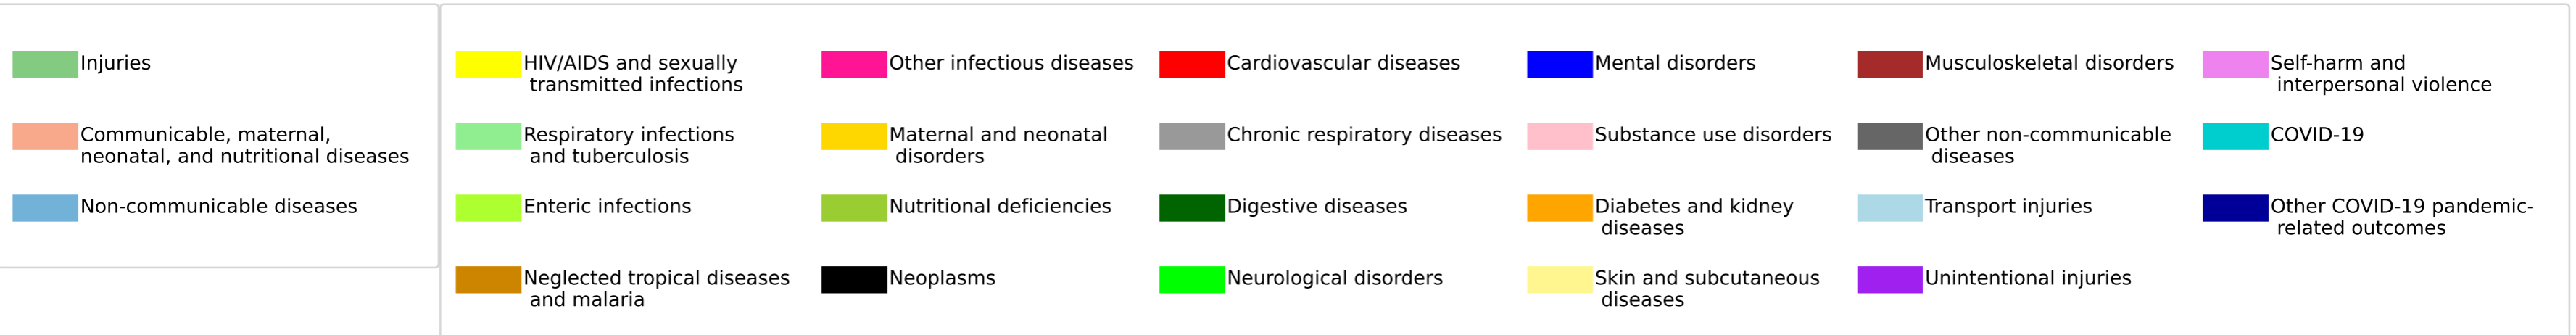

# North Africa And Middle East

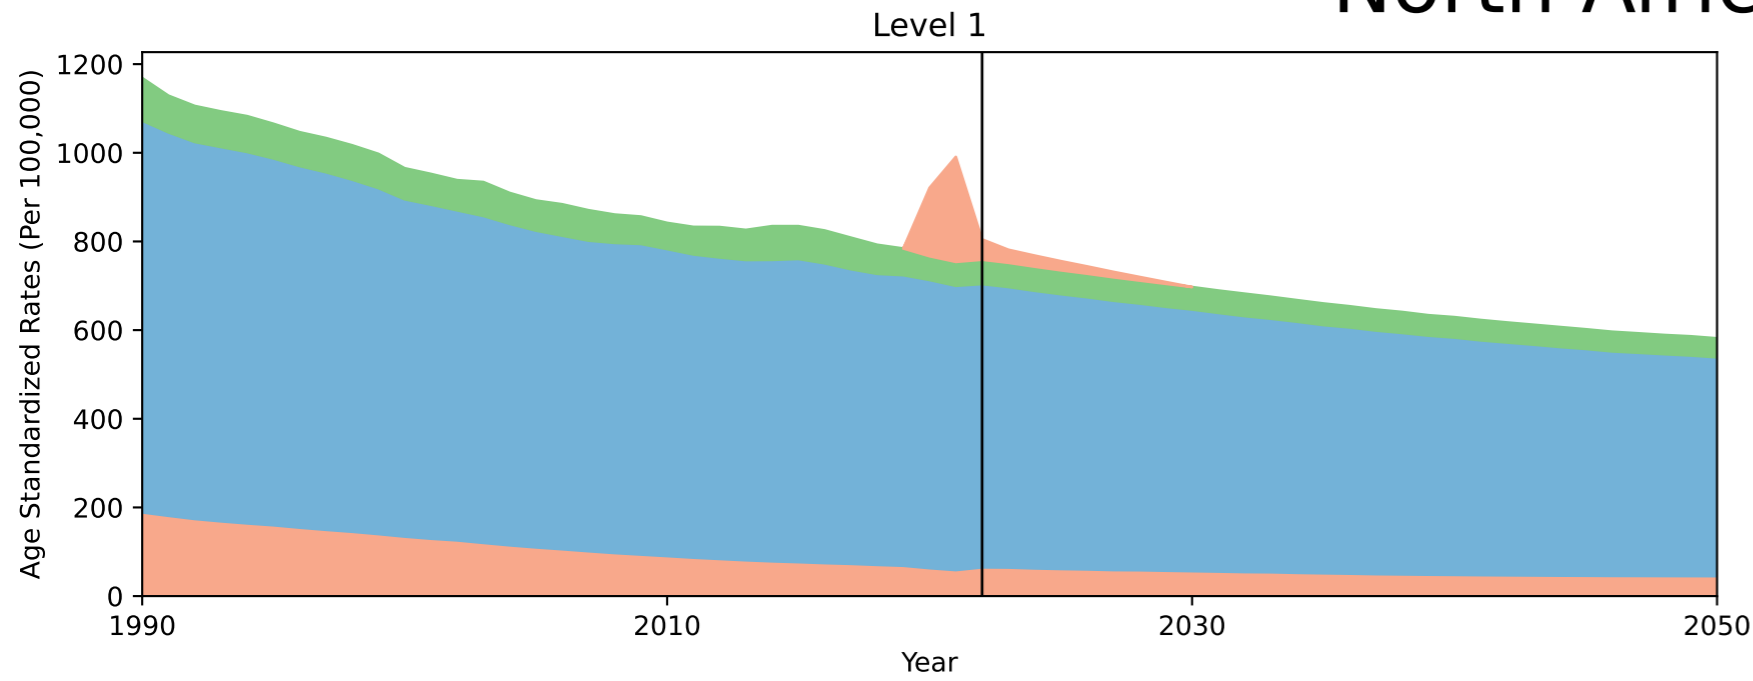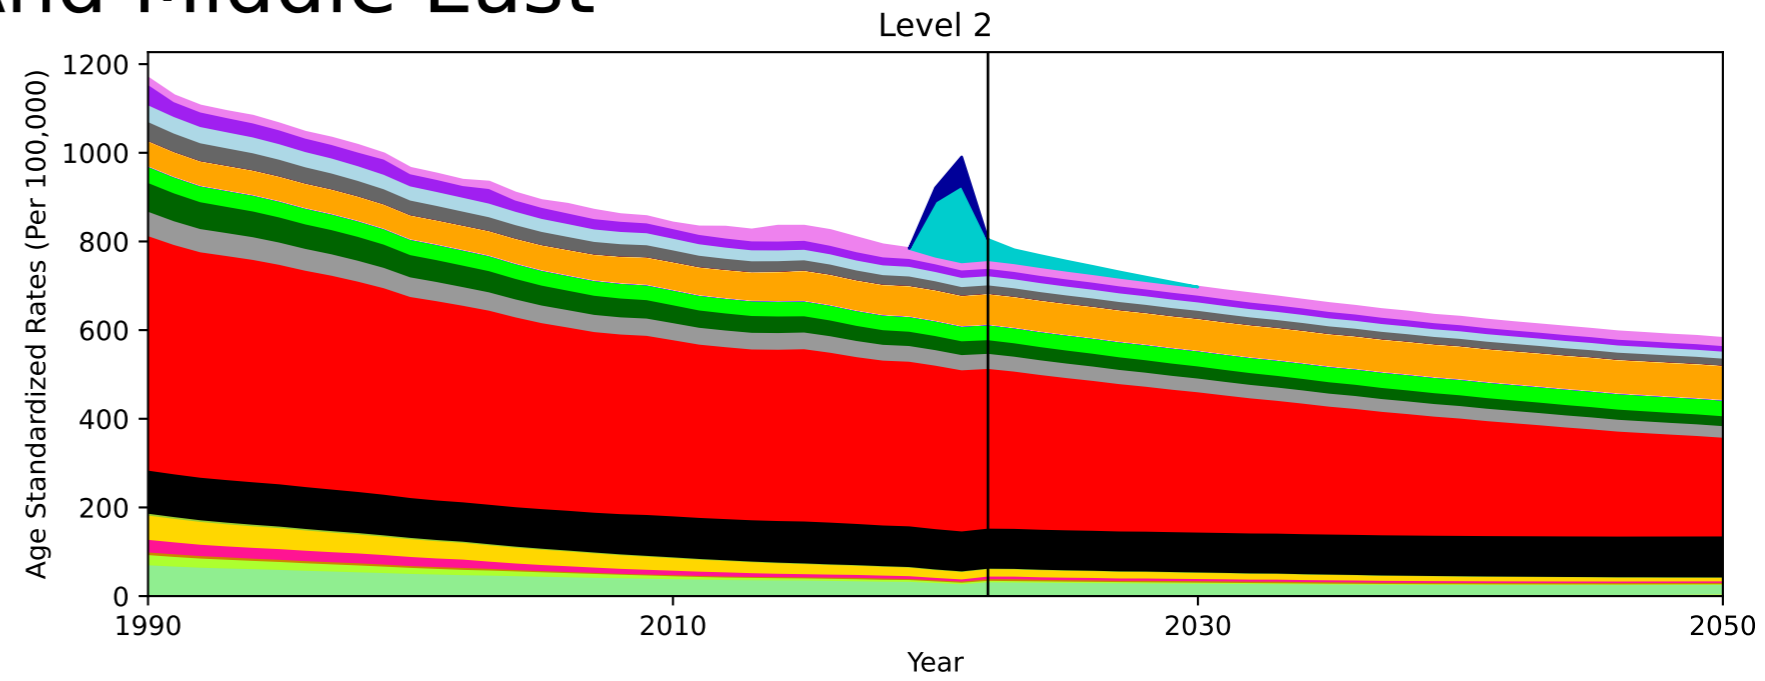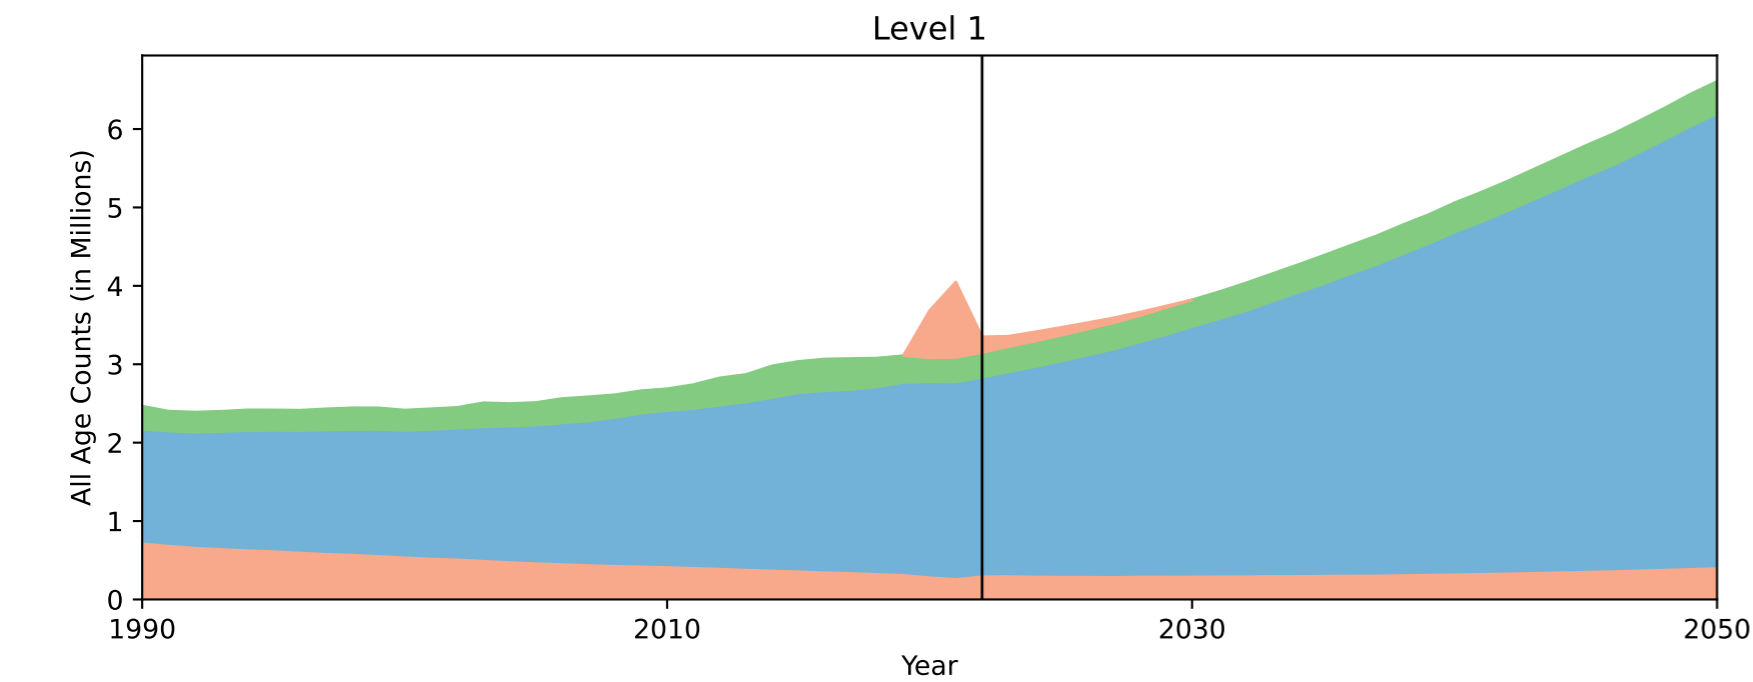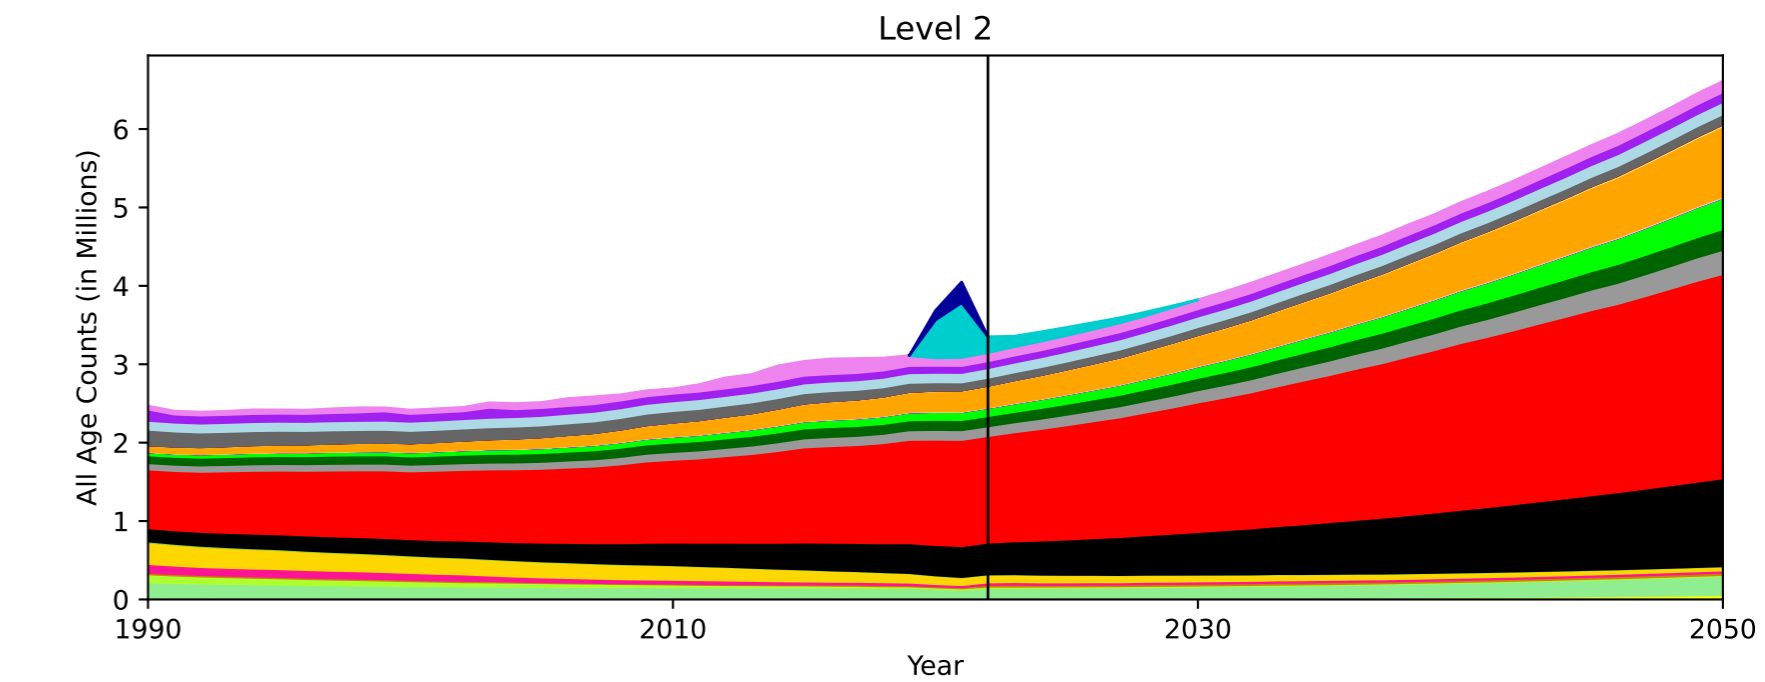

# South Asia

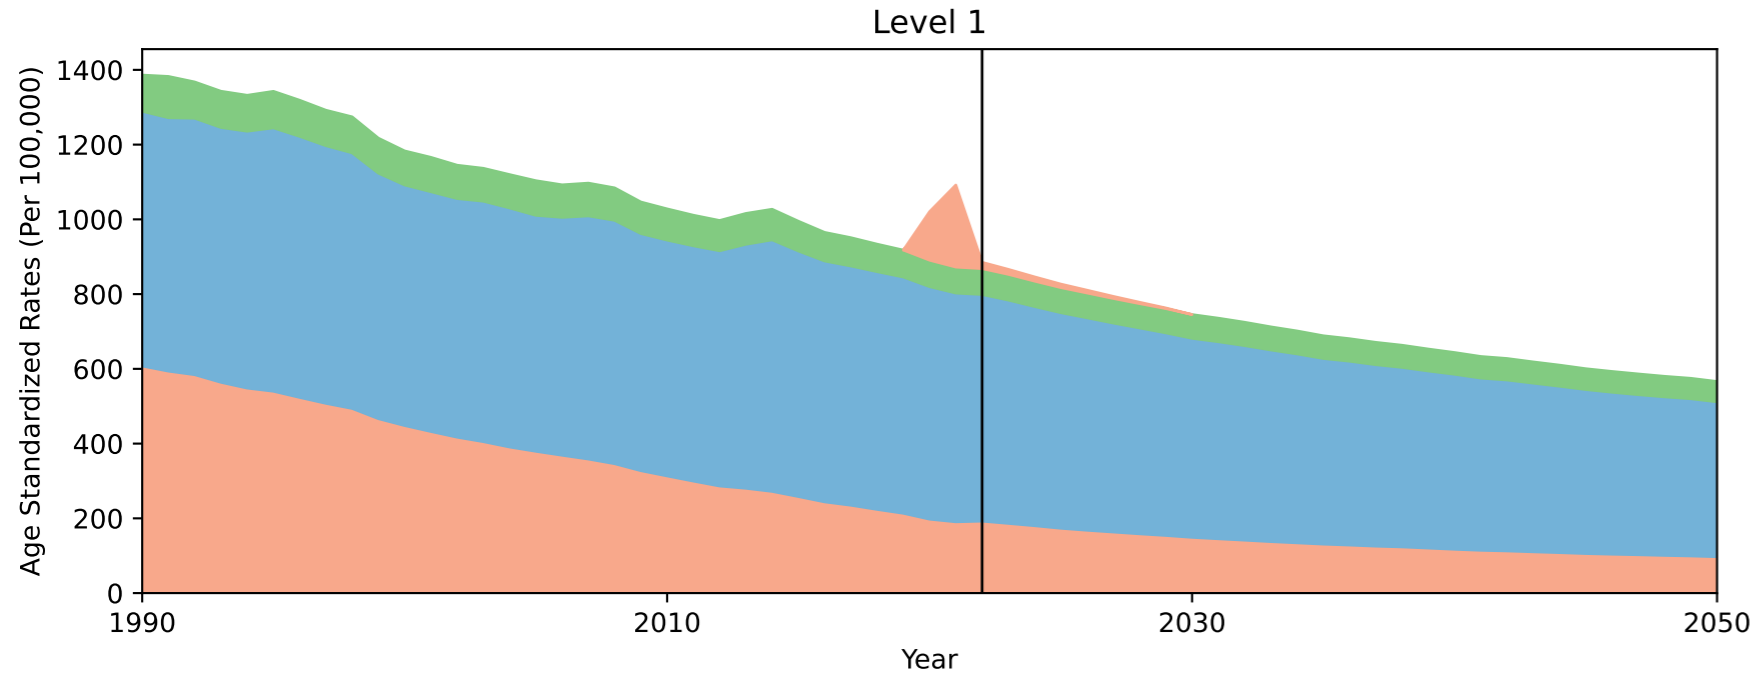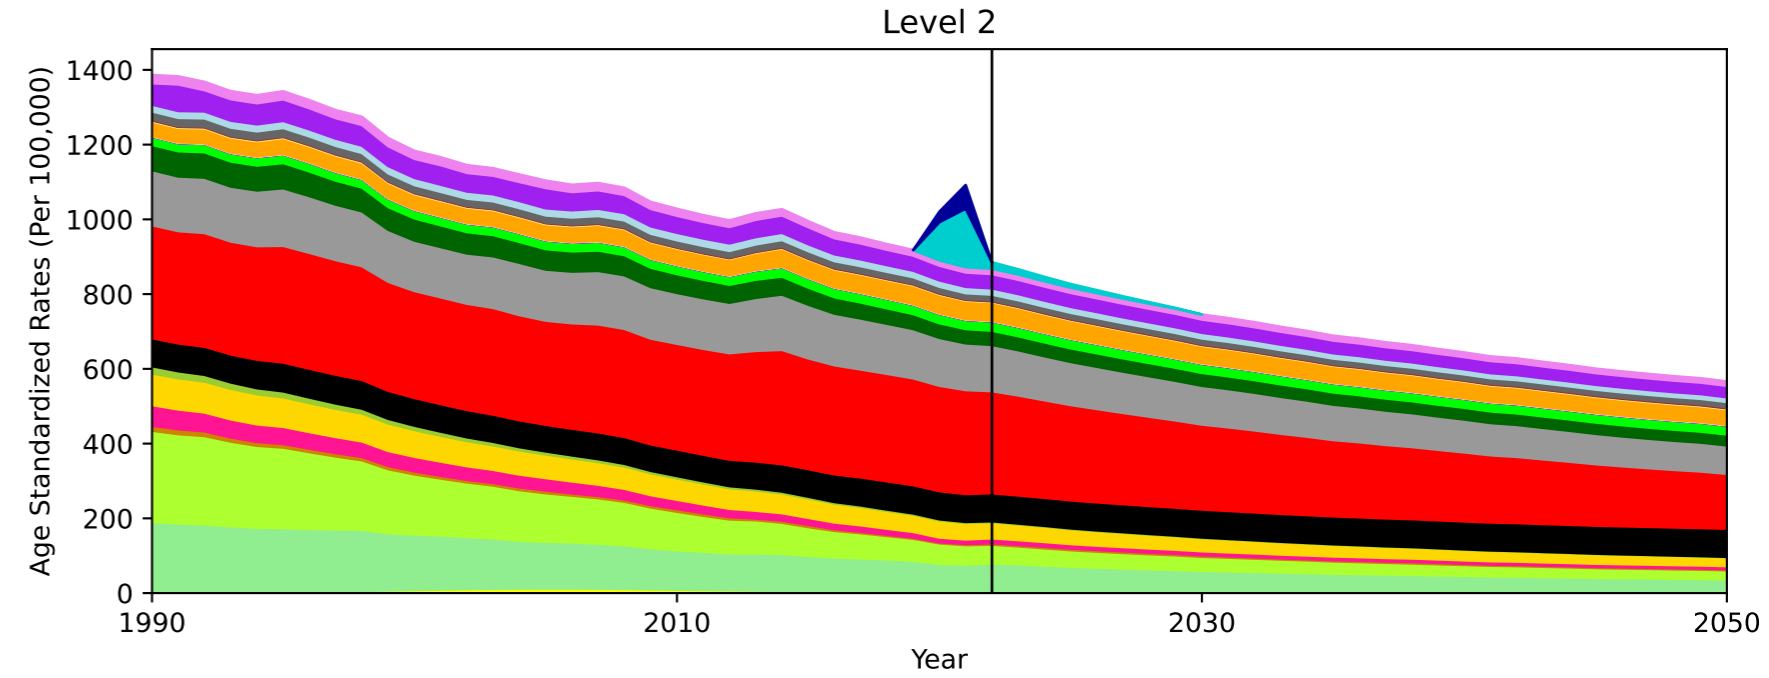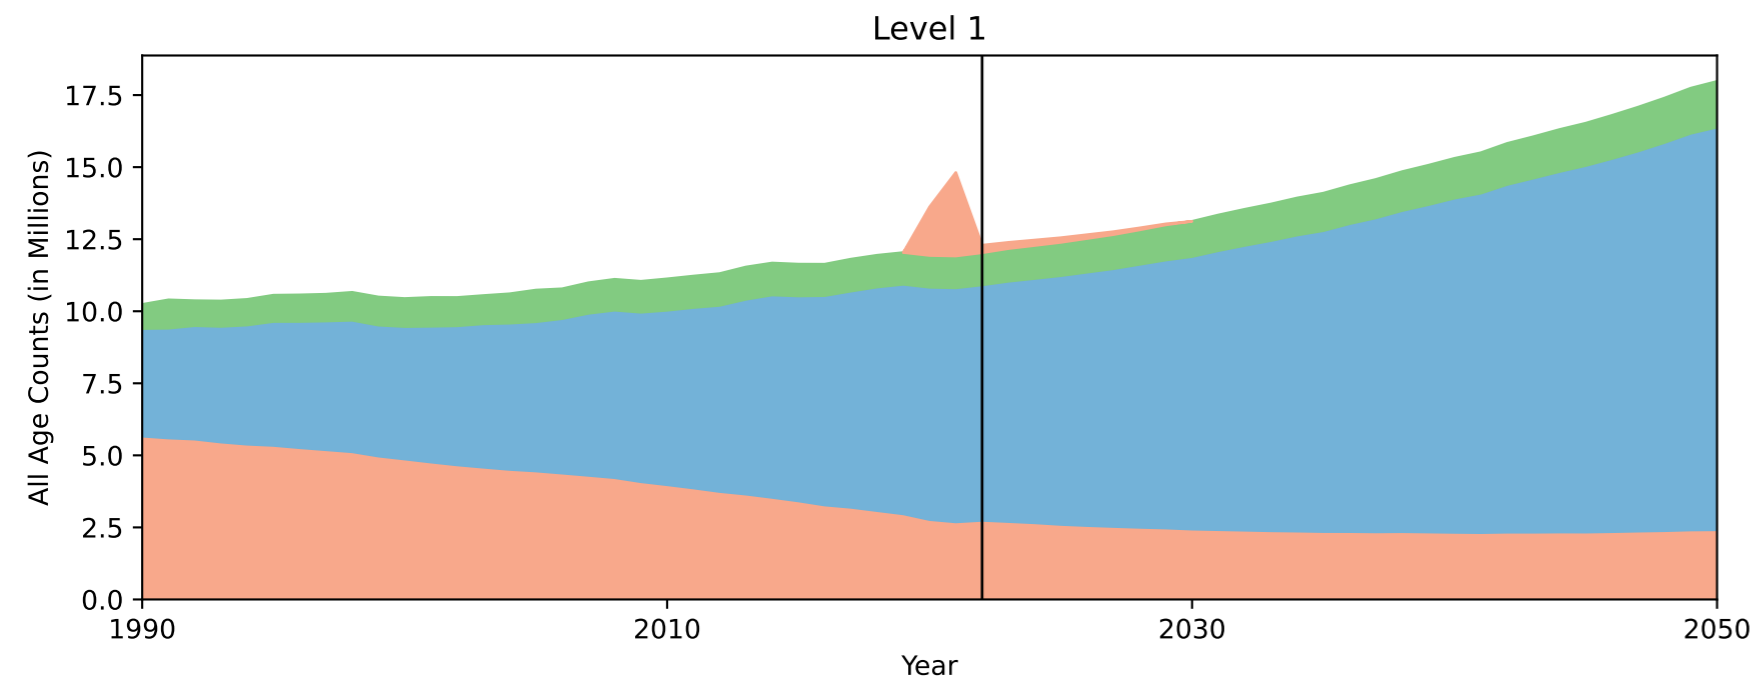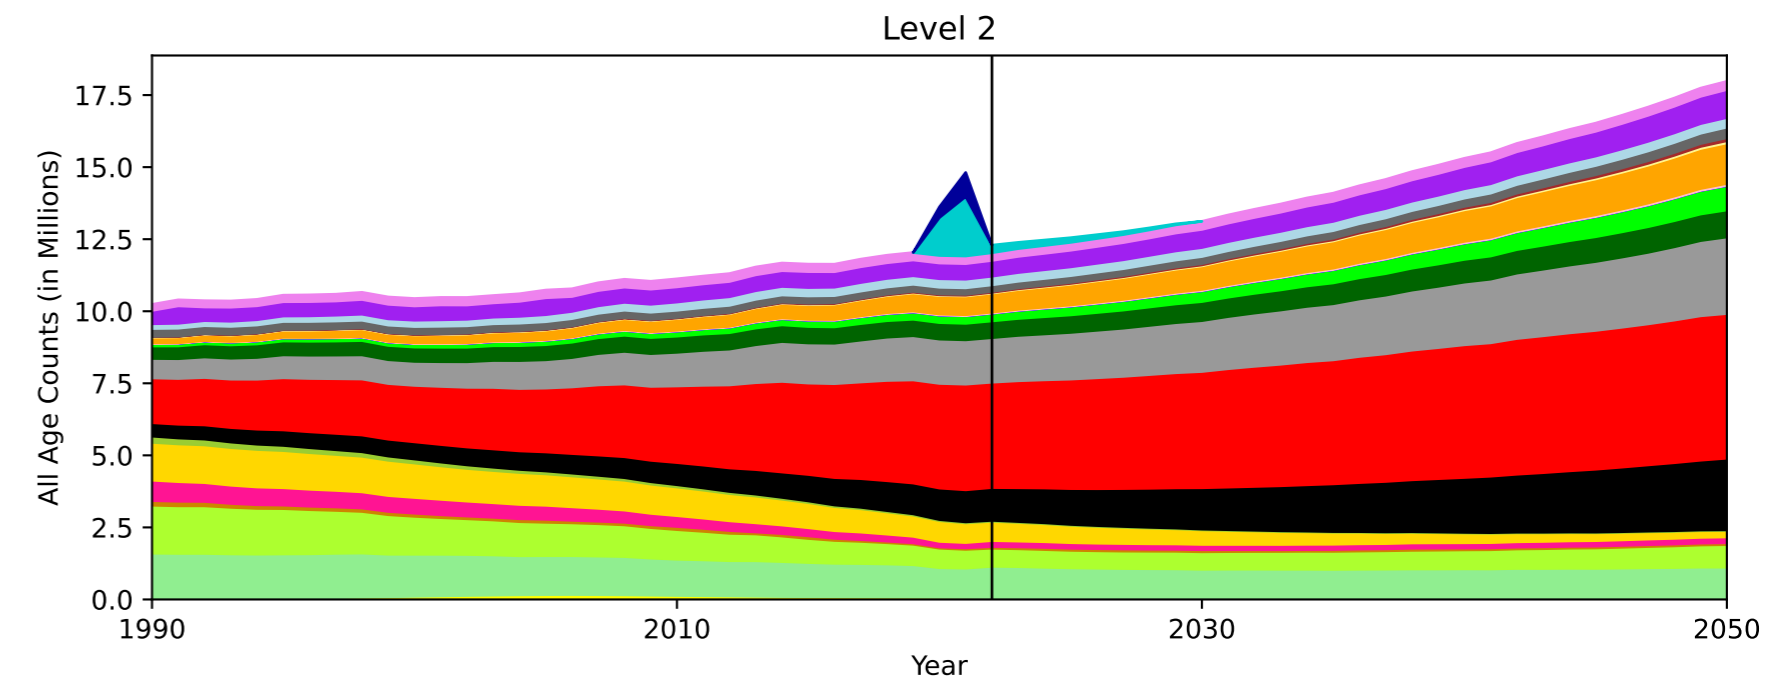



# Southeast Asia, East Asia, And Oceania

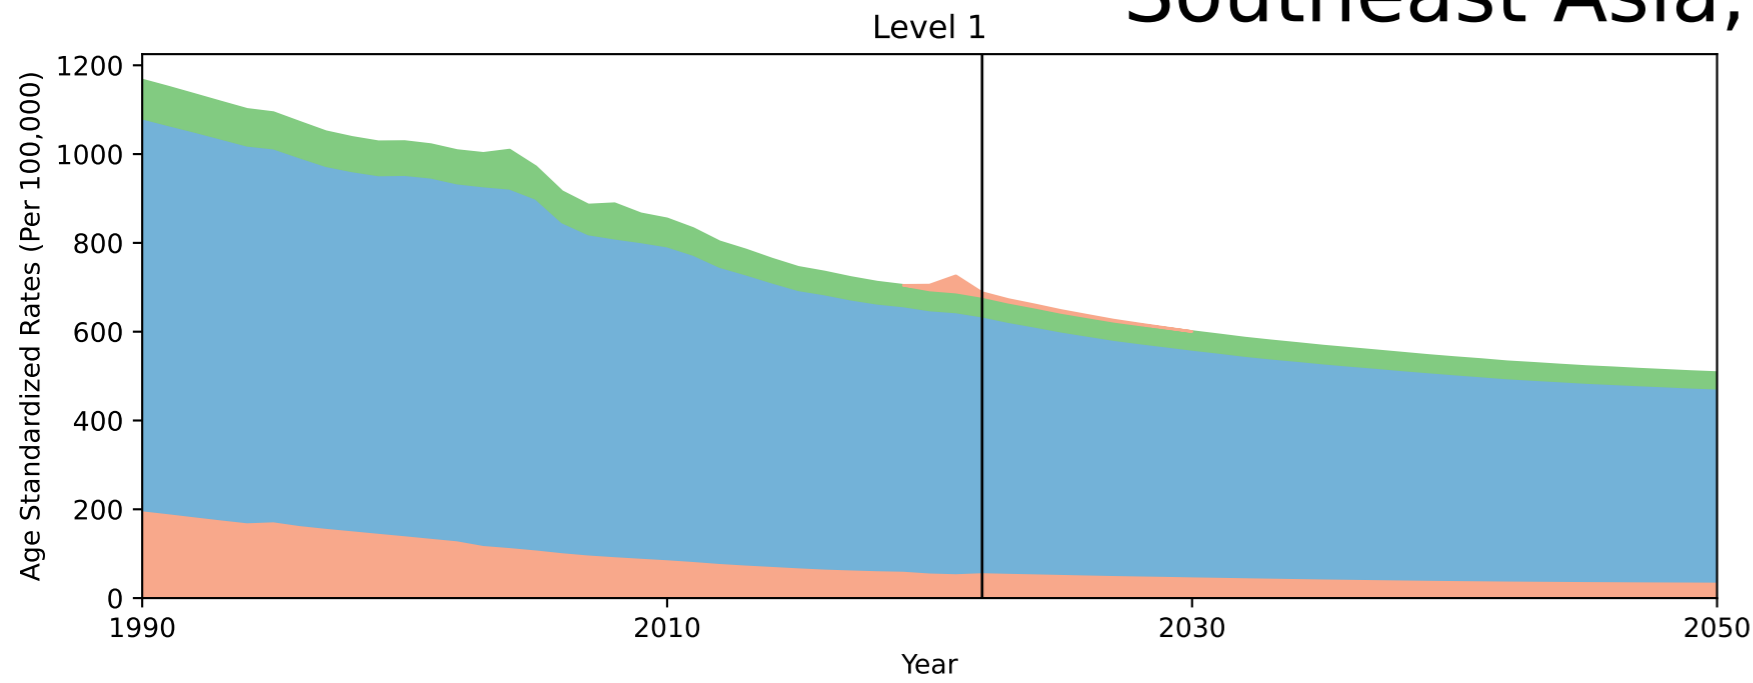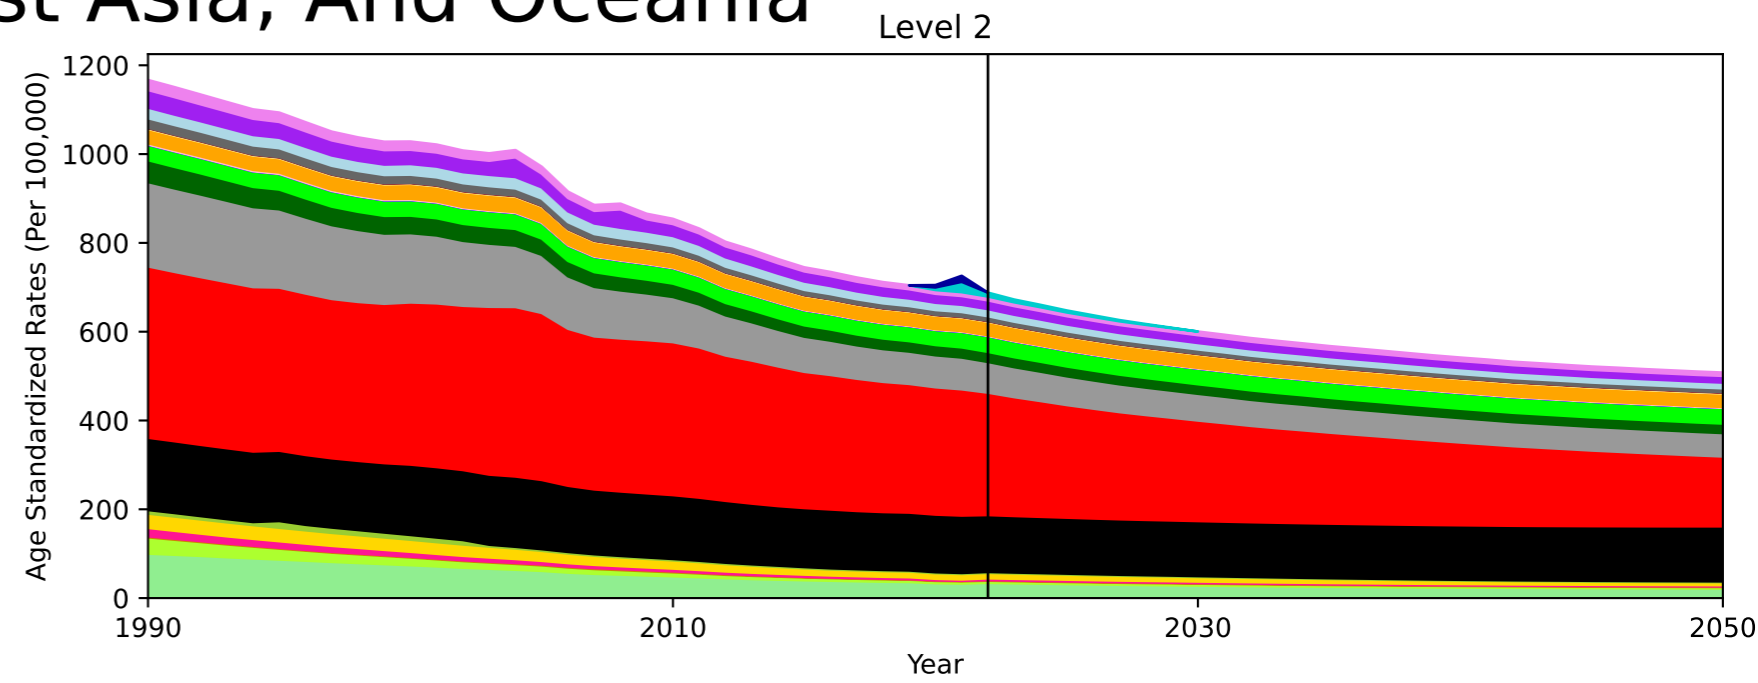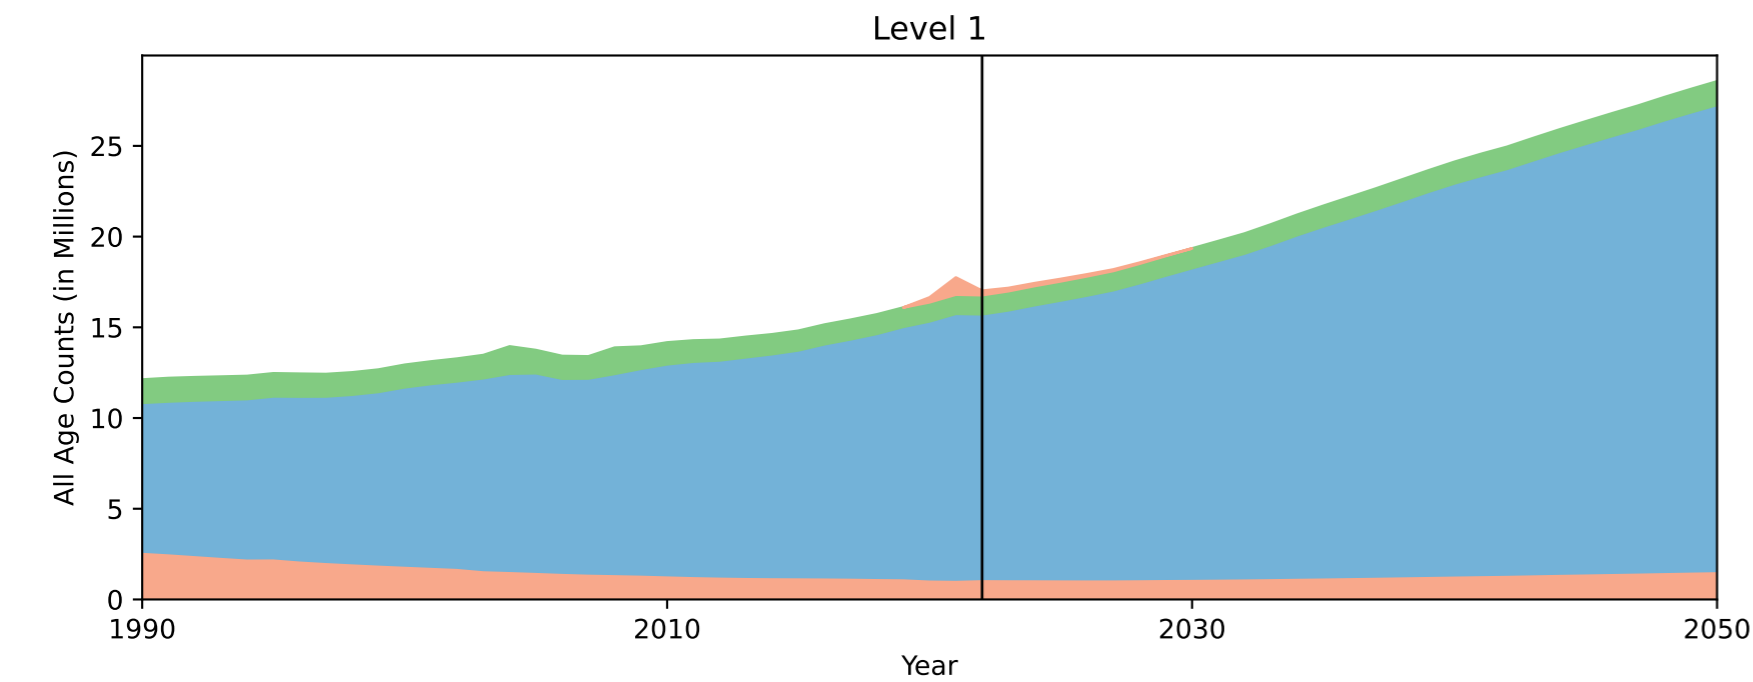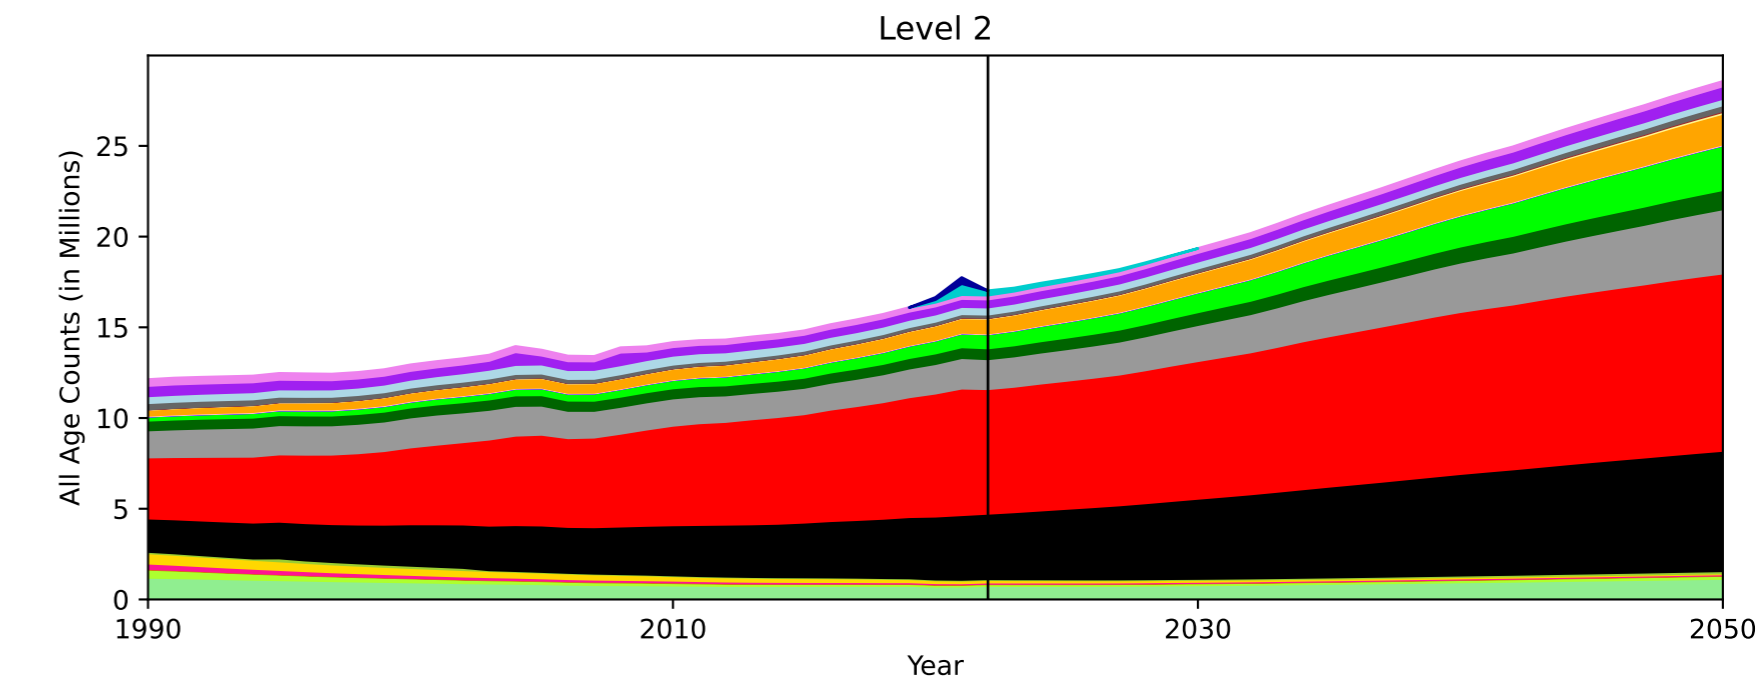

# Sub-Saharan Africa

Supplemental Results Figure S5. Age-standardised death rates and all age death counts and by Level 1 and Level 2 causes, 1990–2050

689

Level 1

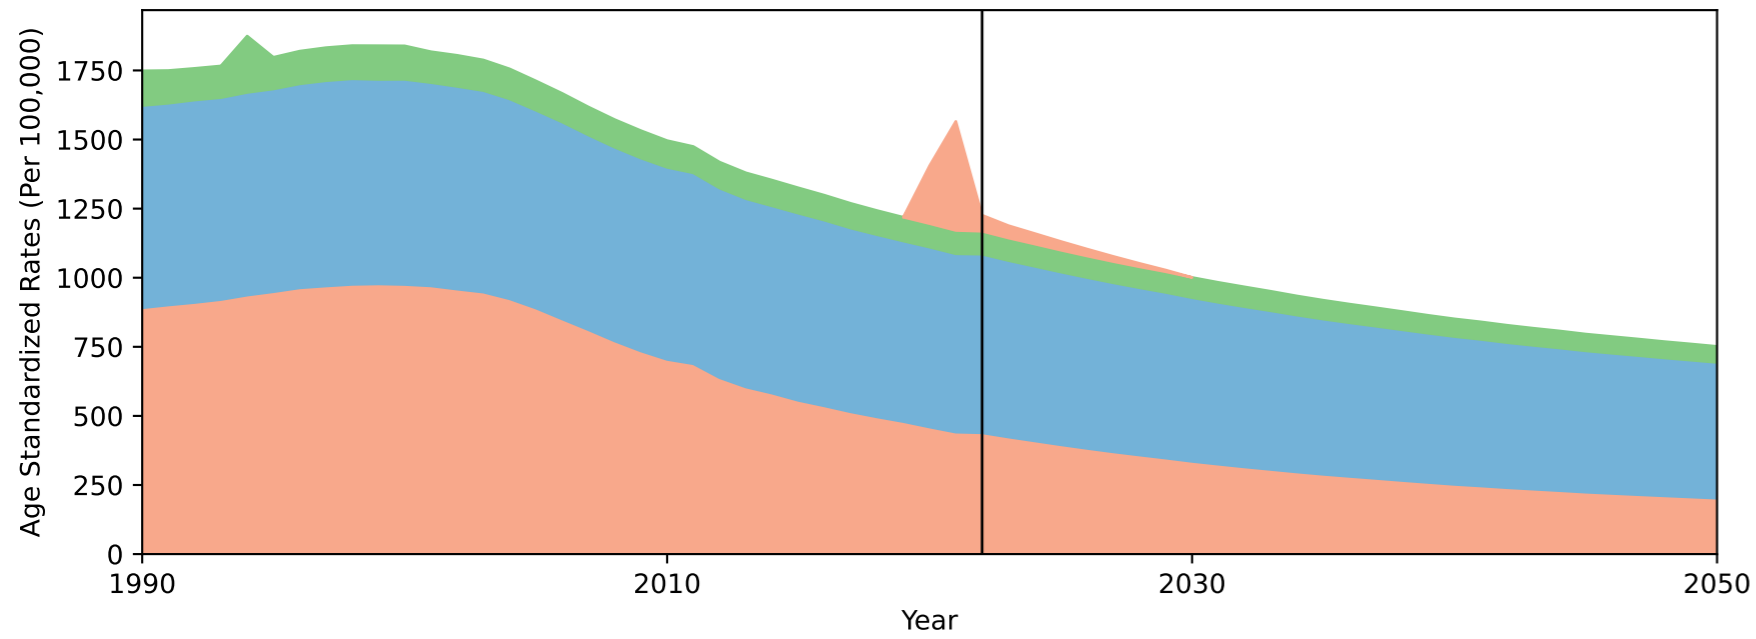

Level 2

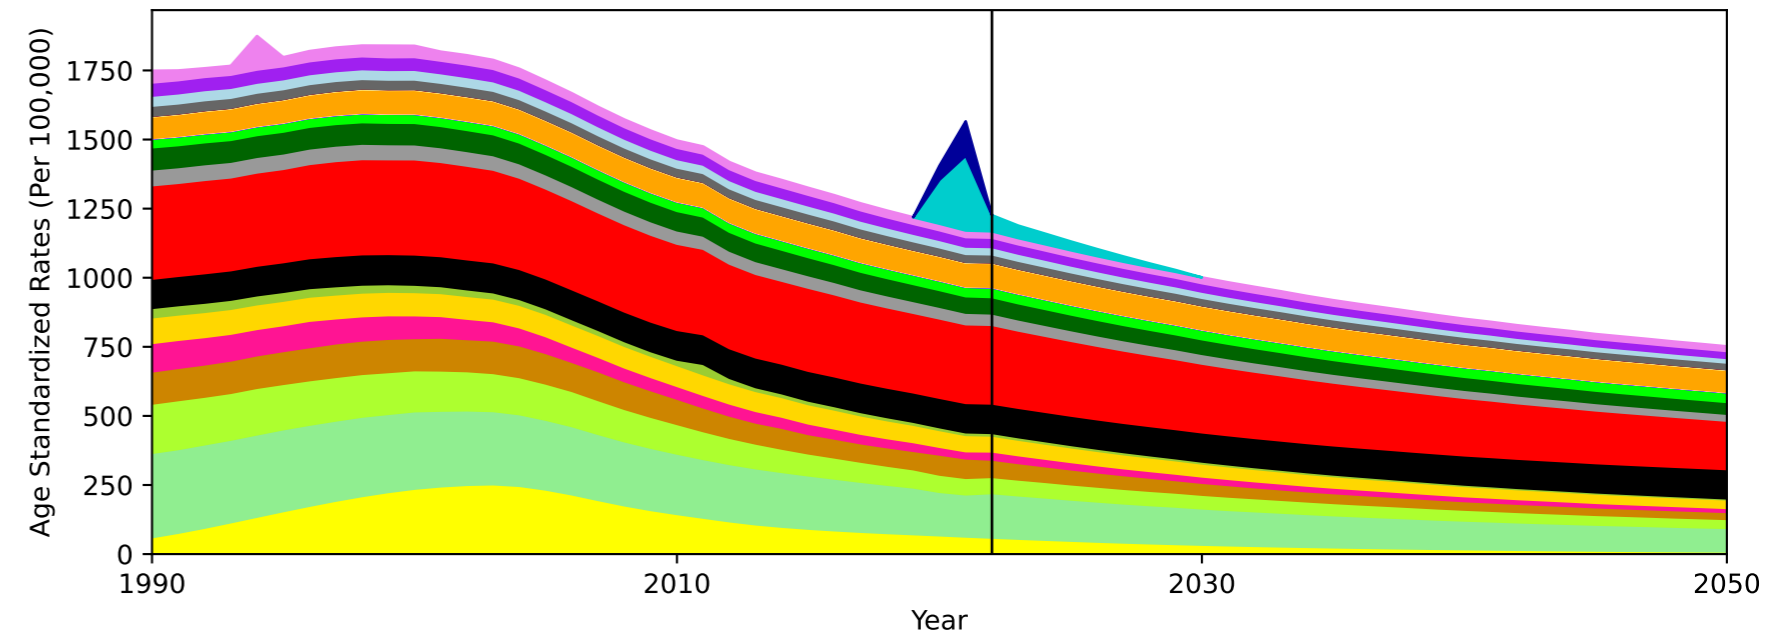

Level 1

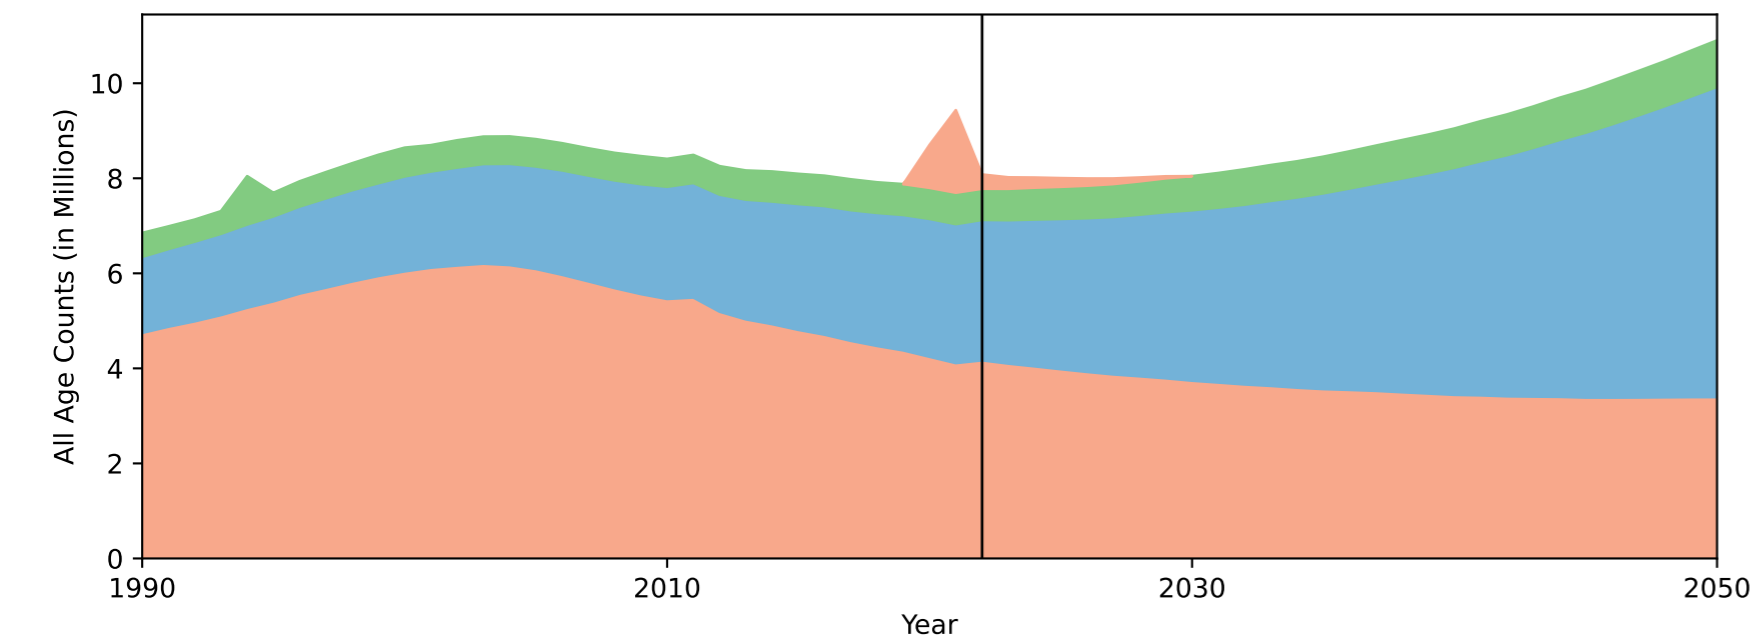

Level 2

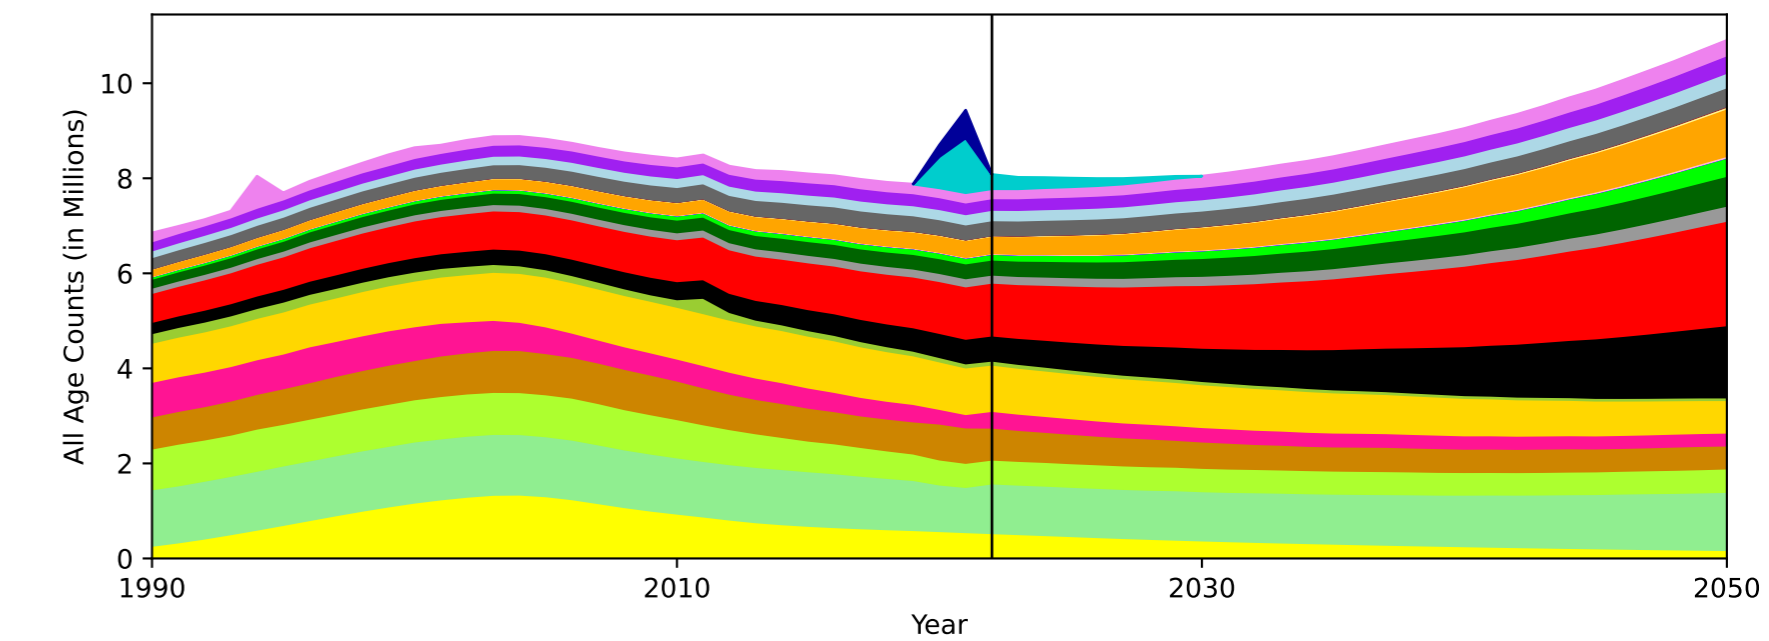

# Central Asia

Supplemental Results Figure S5. Age-standardised death rates and all age death counts and by Level 1 and Level 2 causes, 1990–2050

690

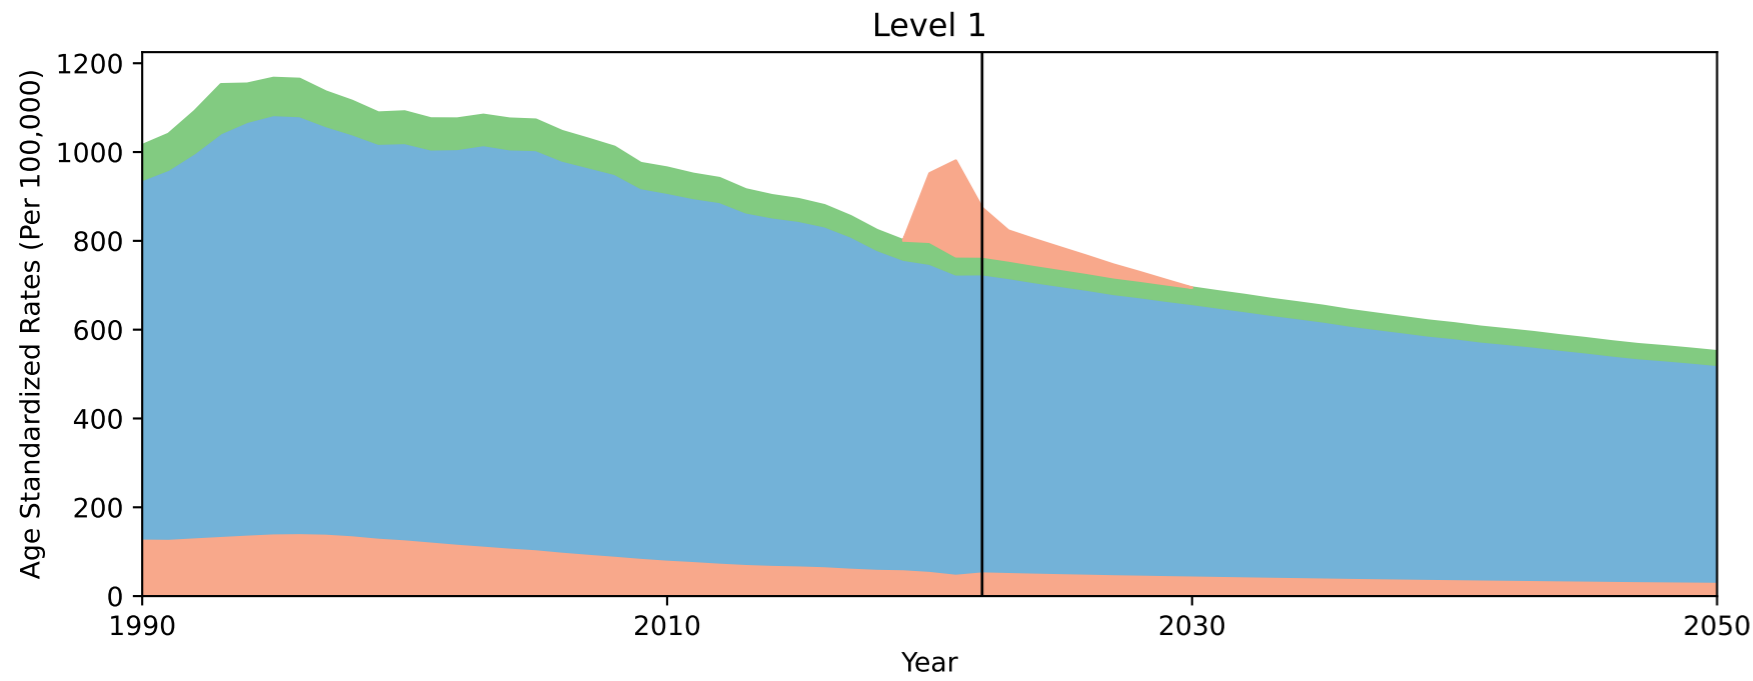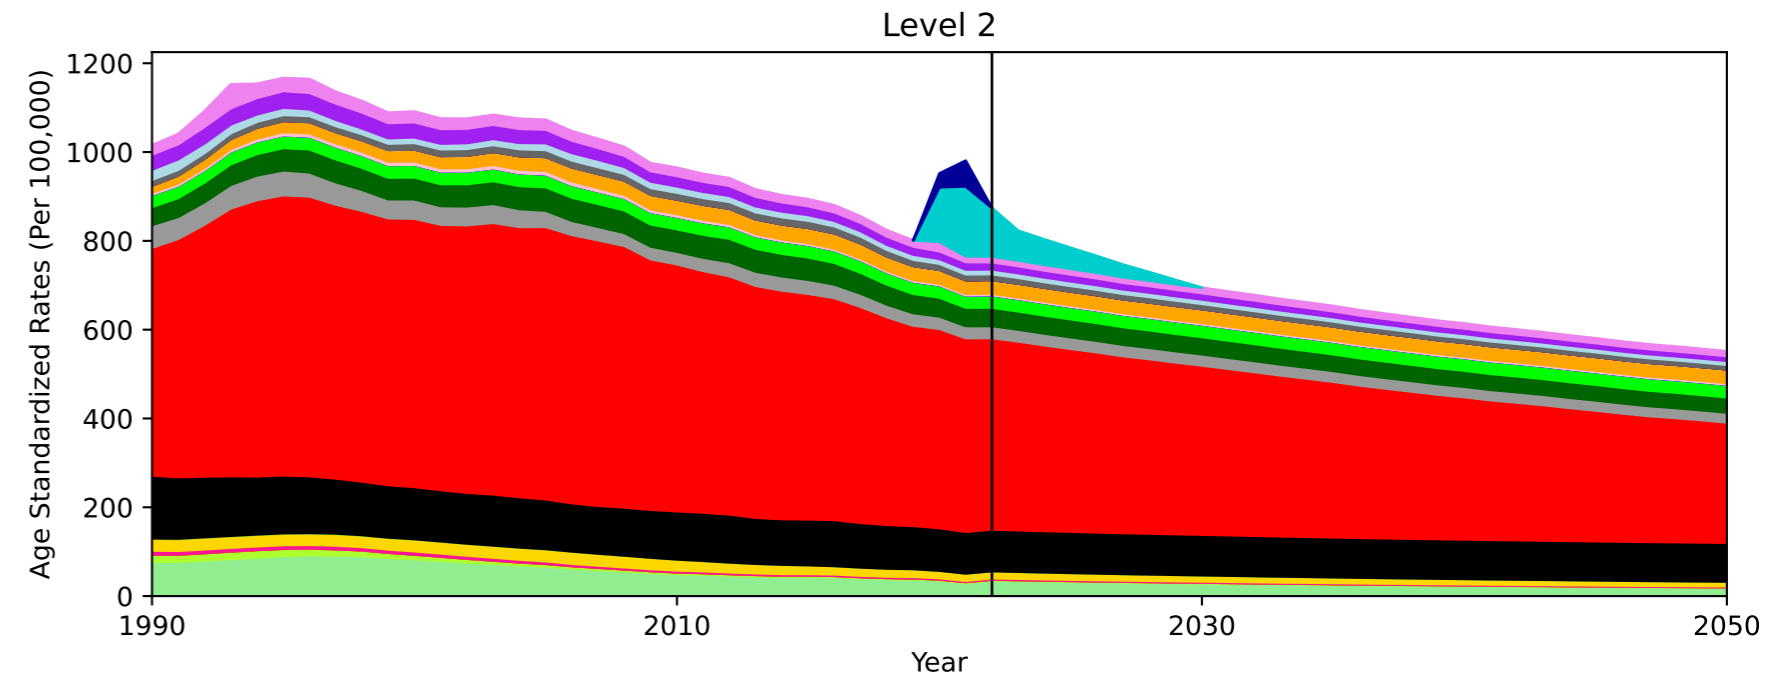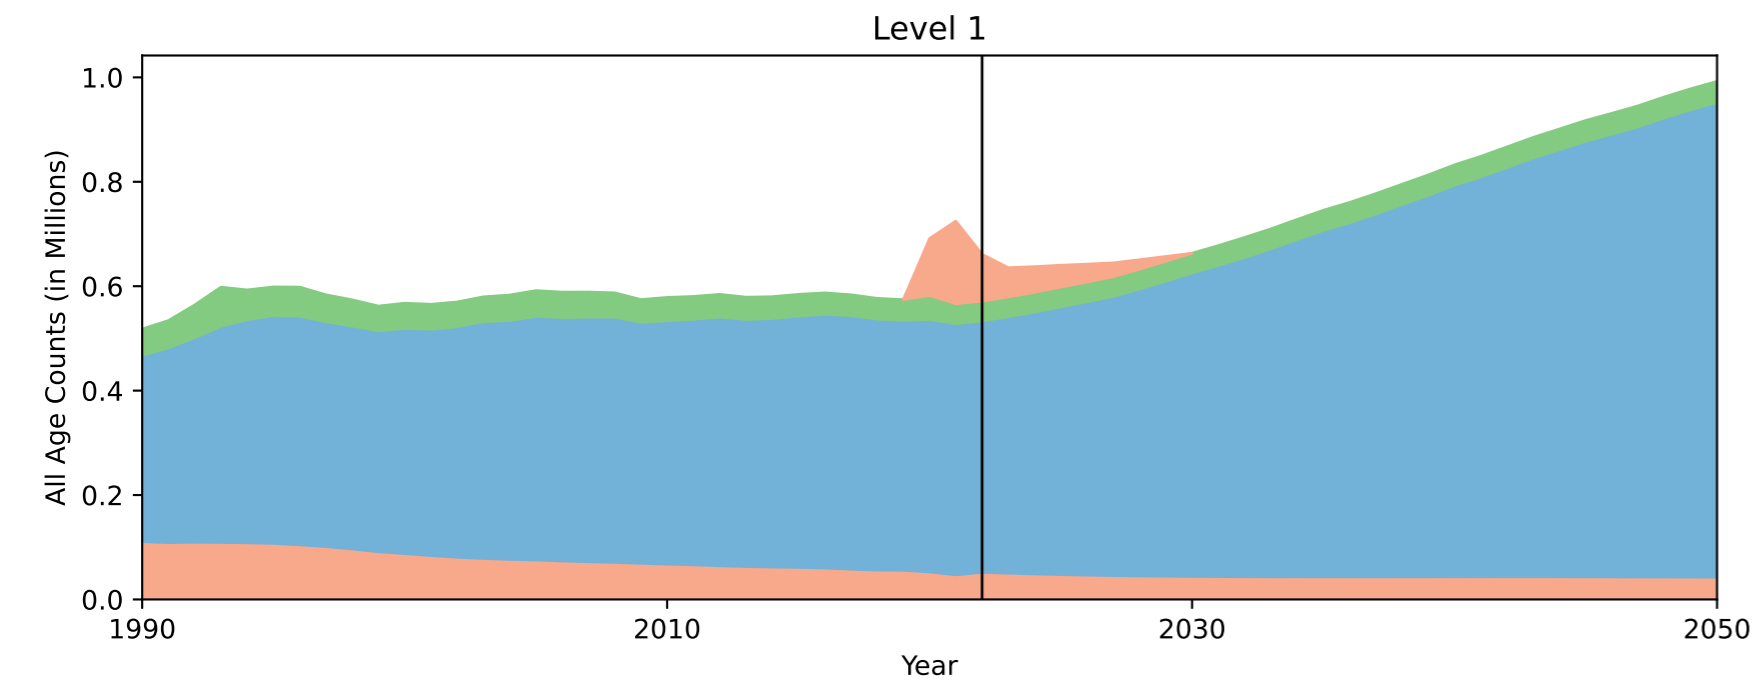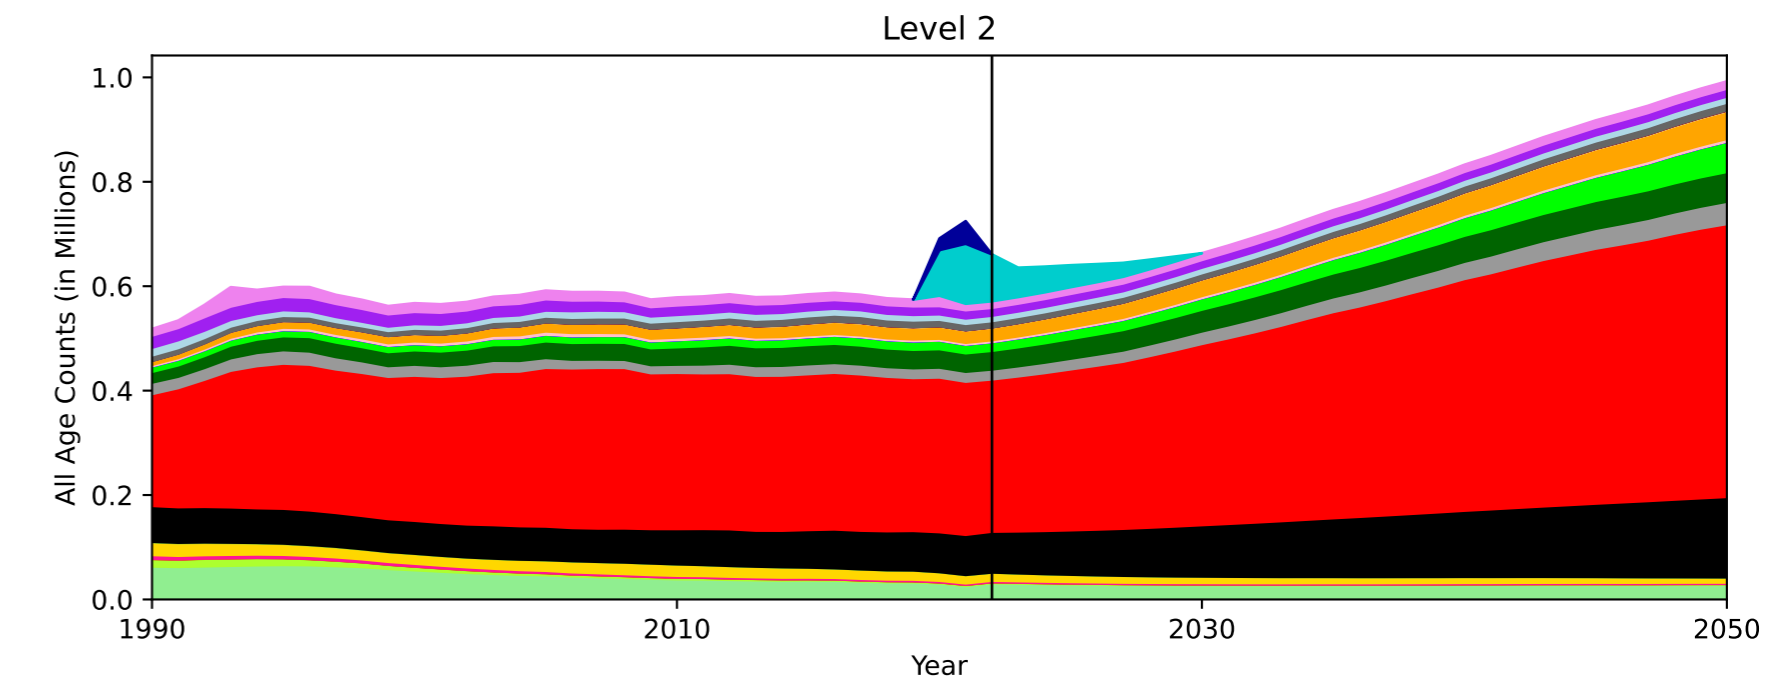

# Central Europe

Level 1

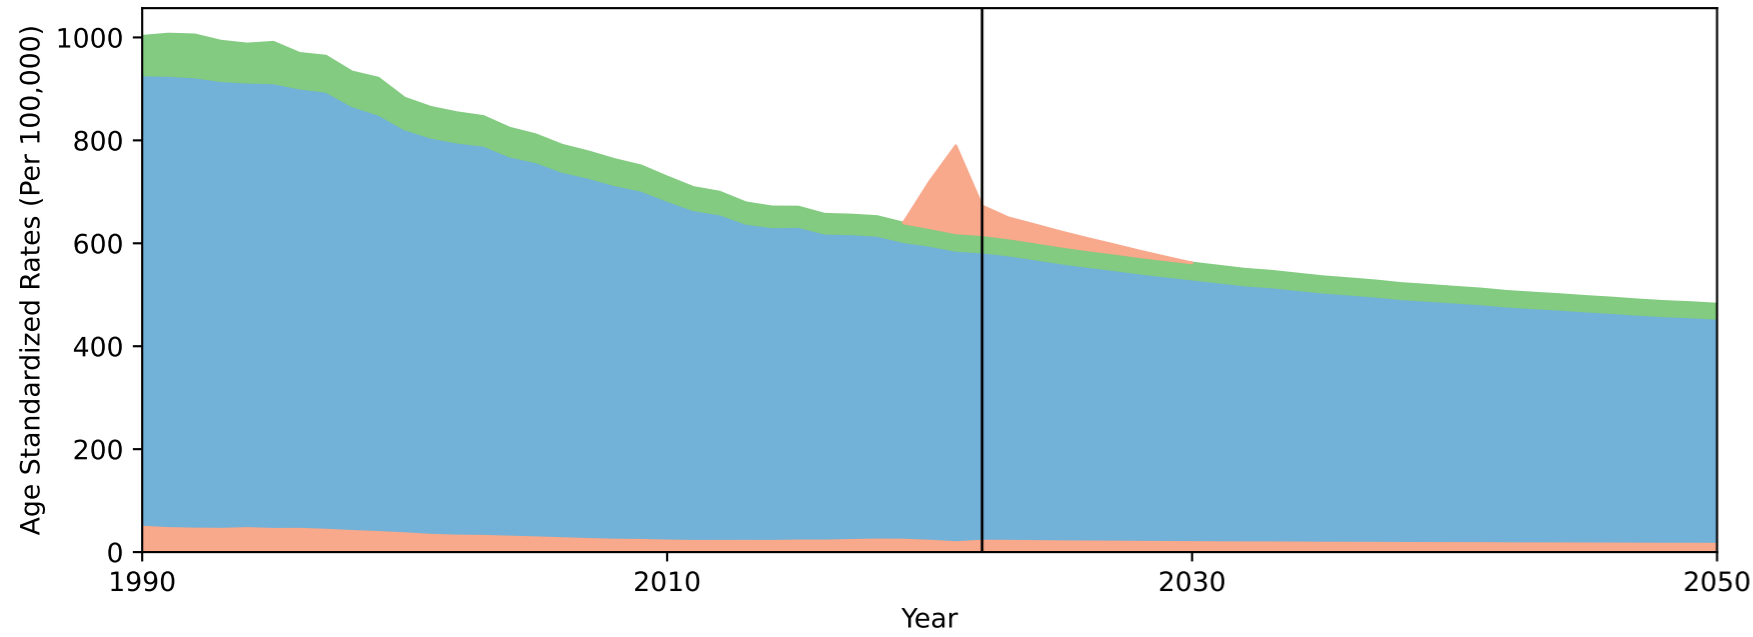

Level 2

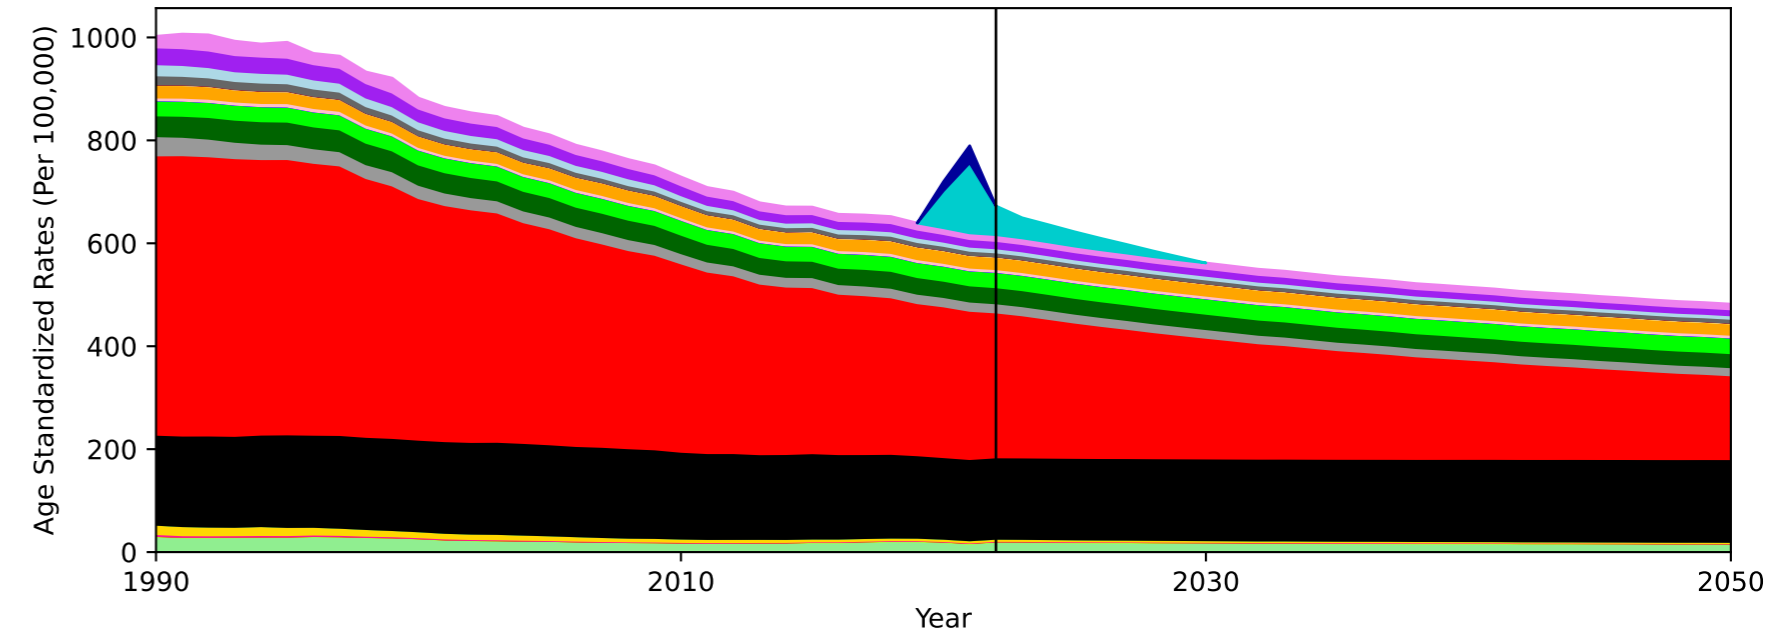

Level 1

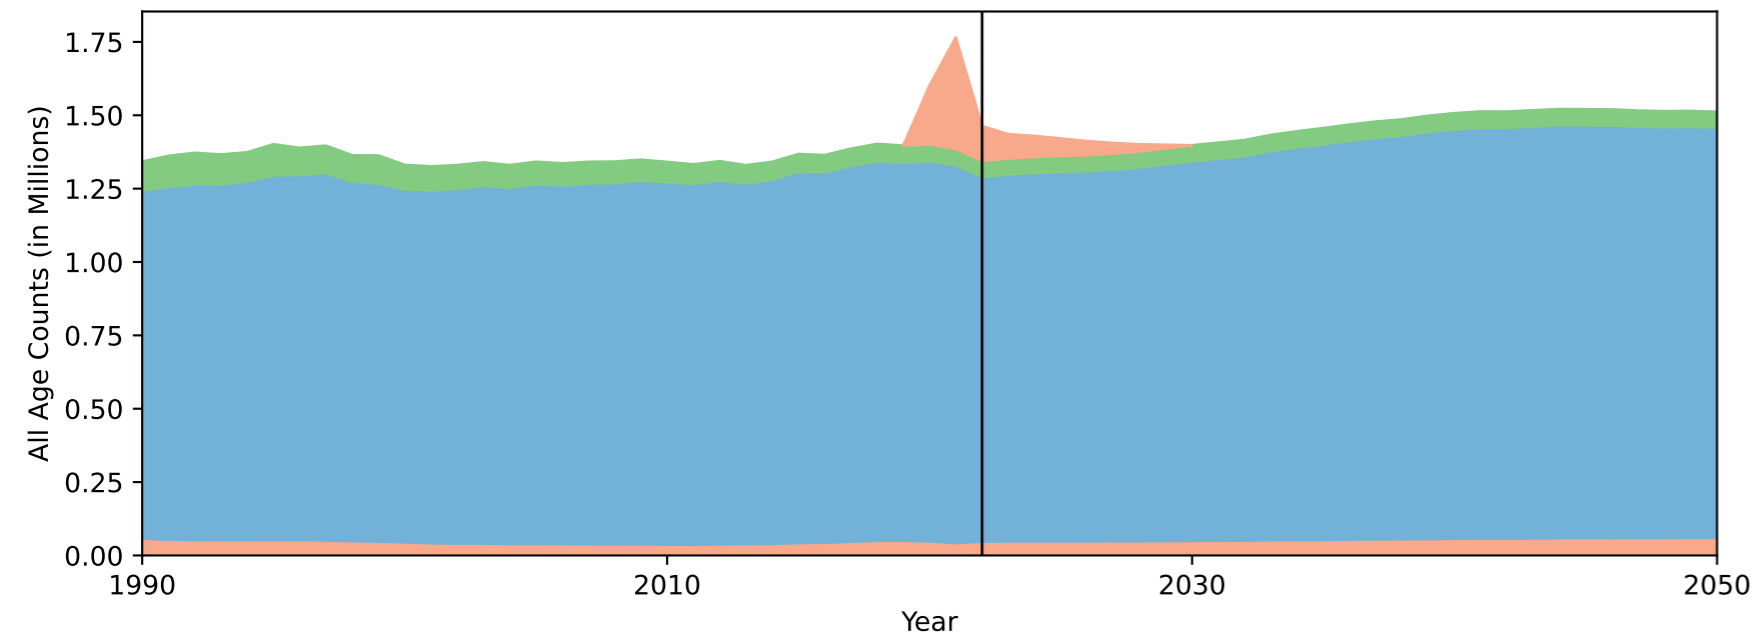

Level 2

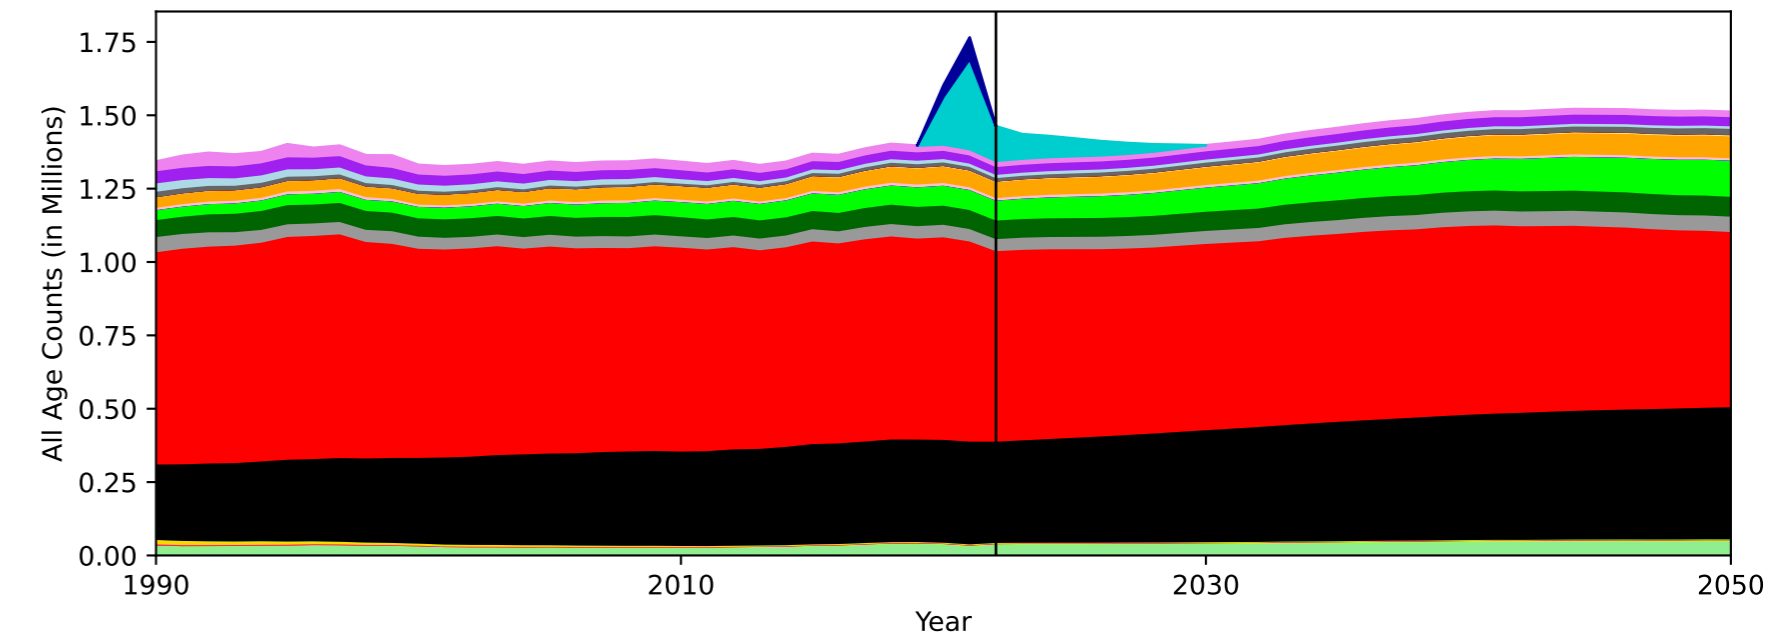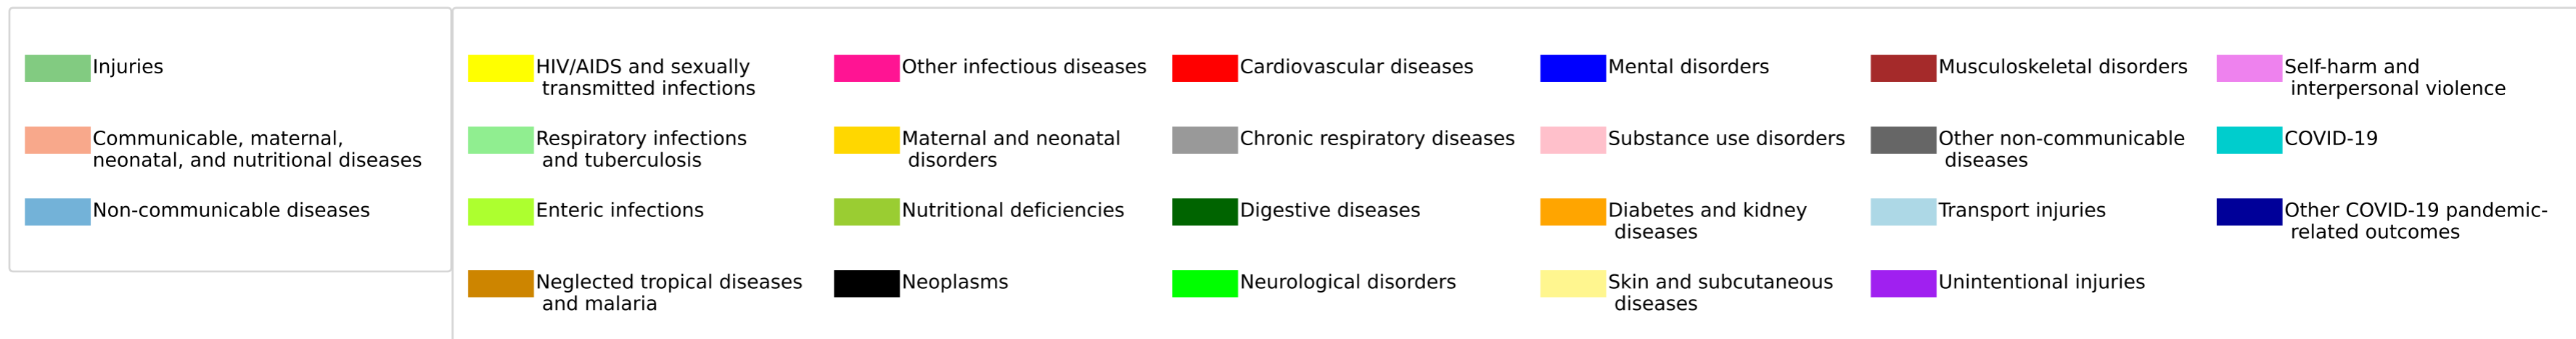

# Eastern Europe

Level 1

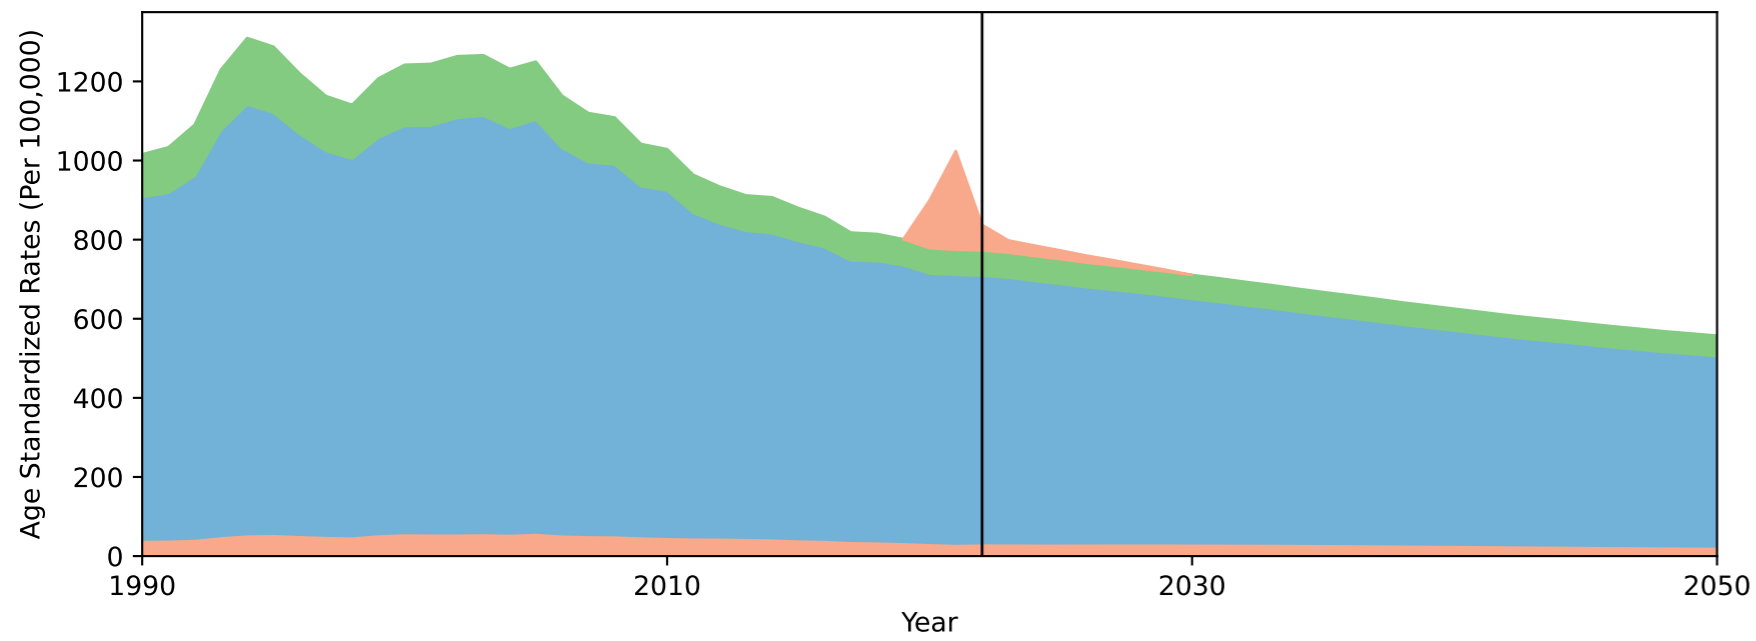

Level 2

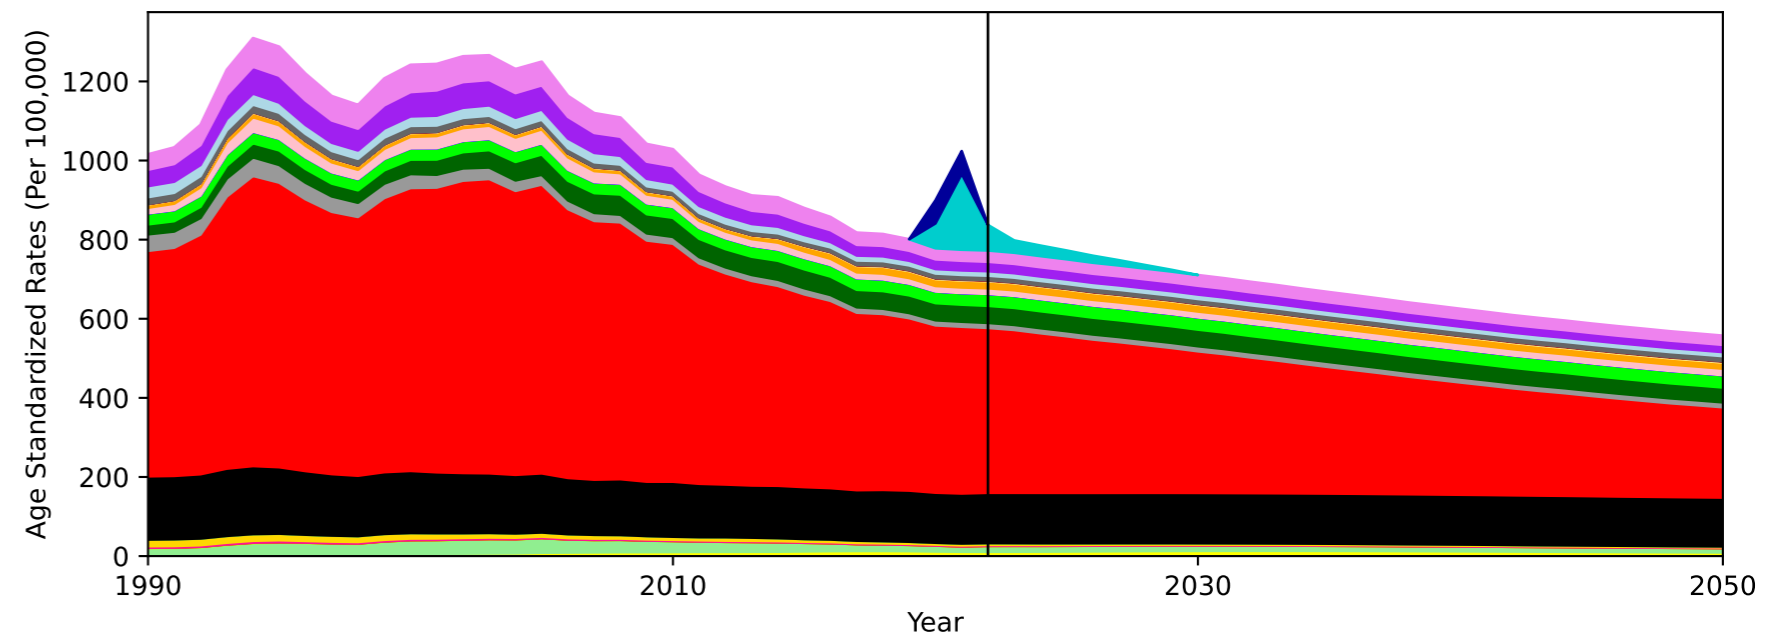

Level 1

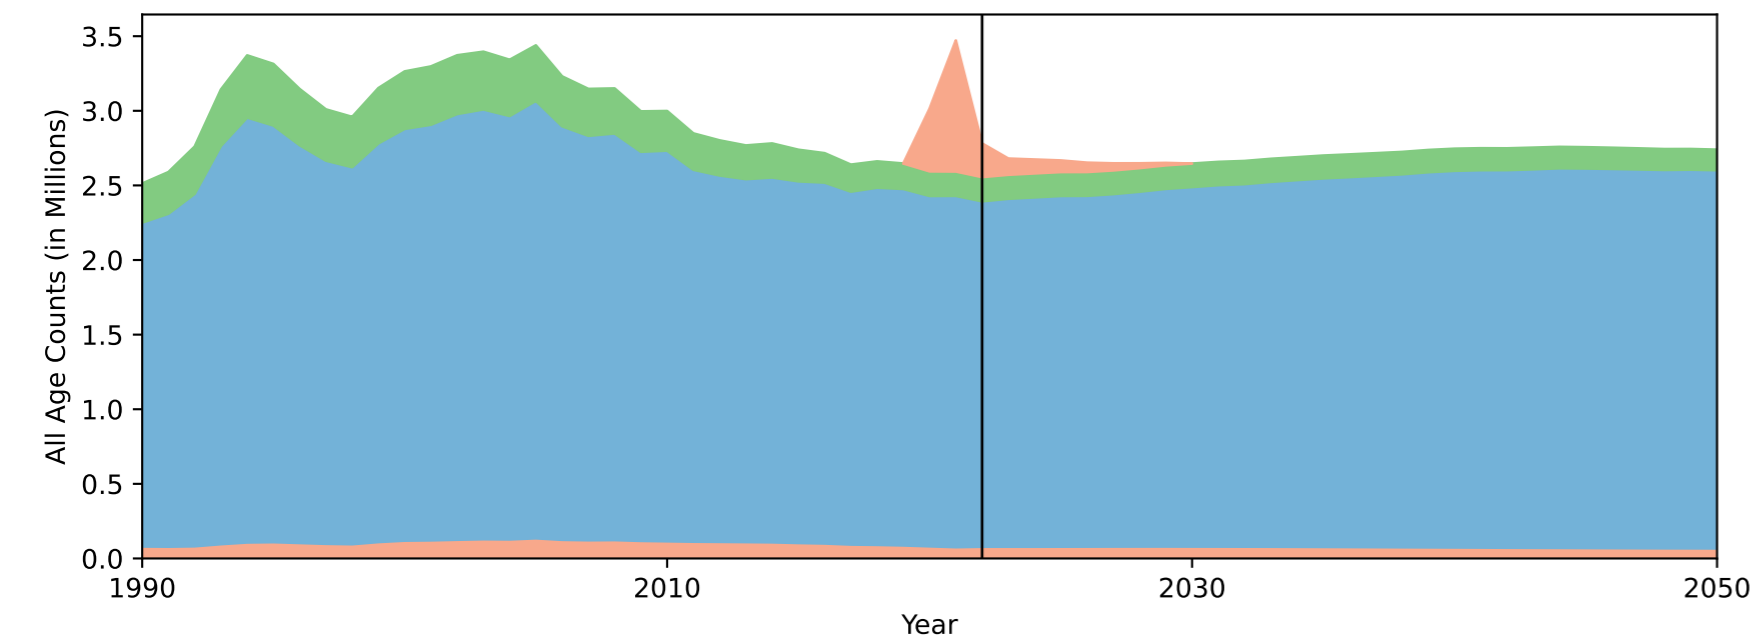

Level 2

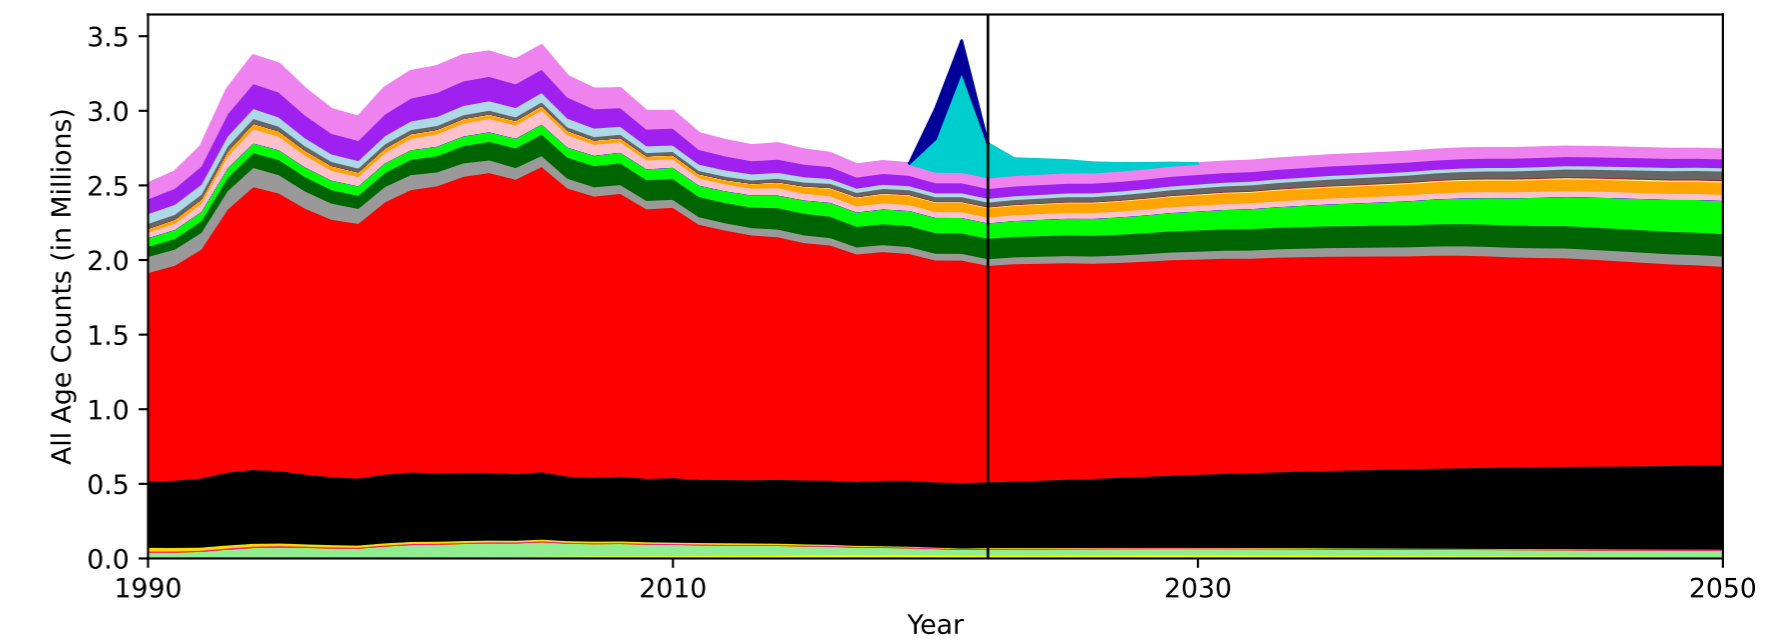

# Australasia

Level 1

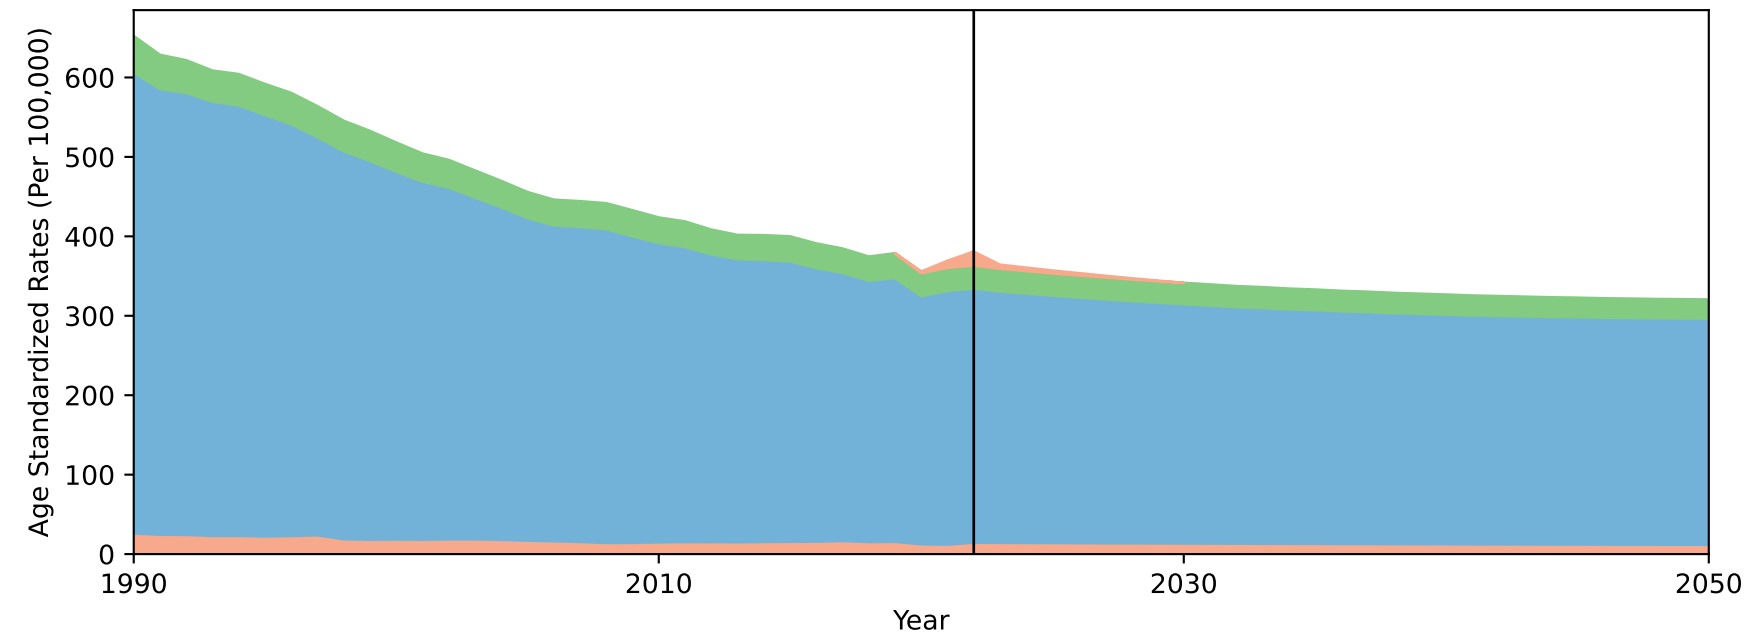

Level 2

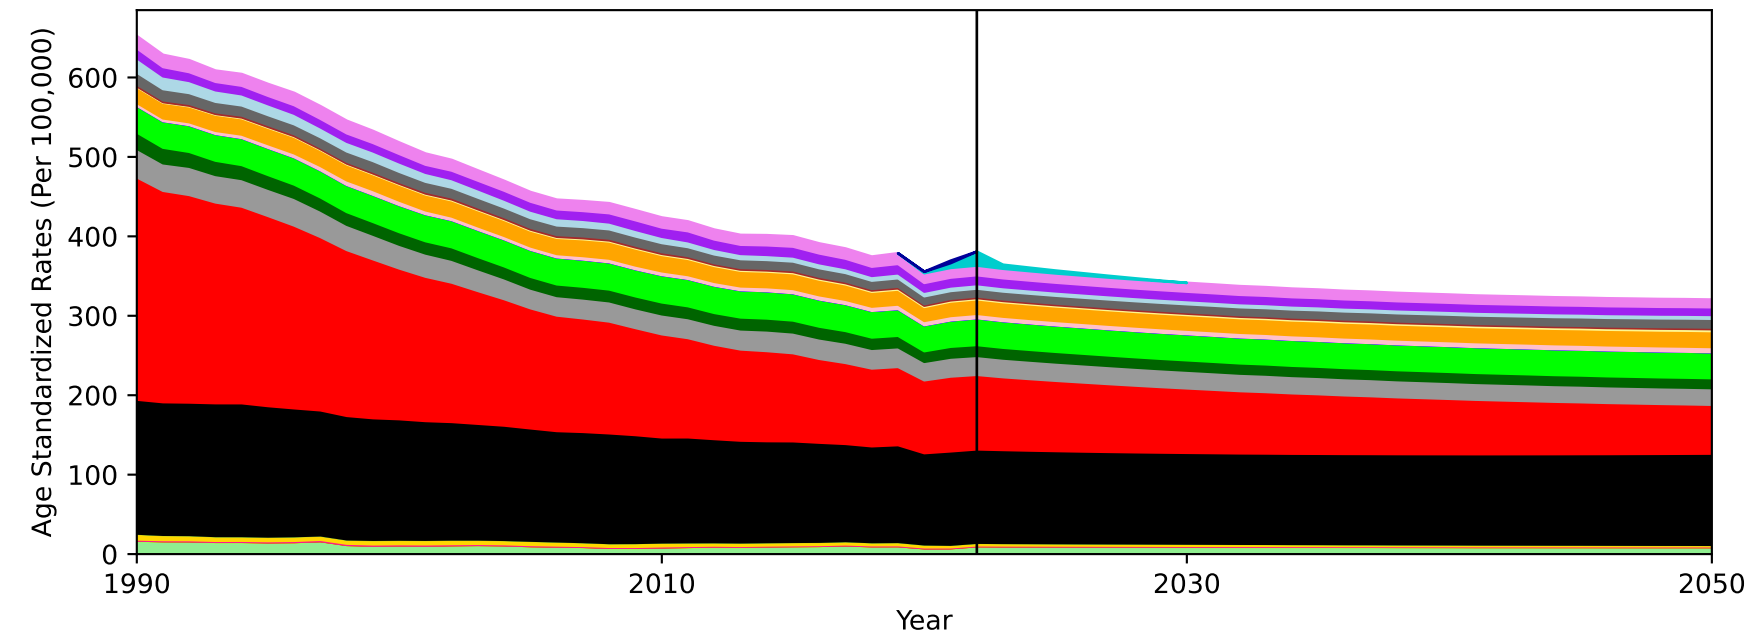

Level 1

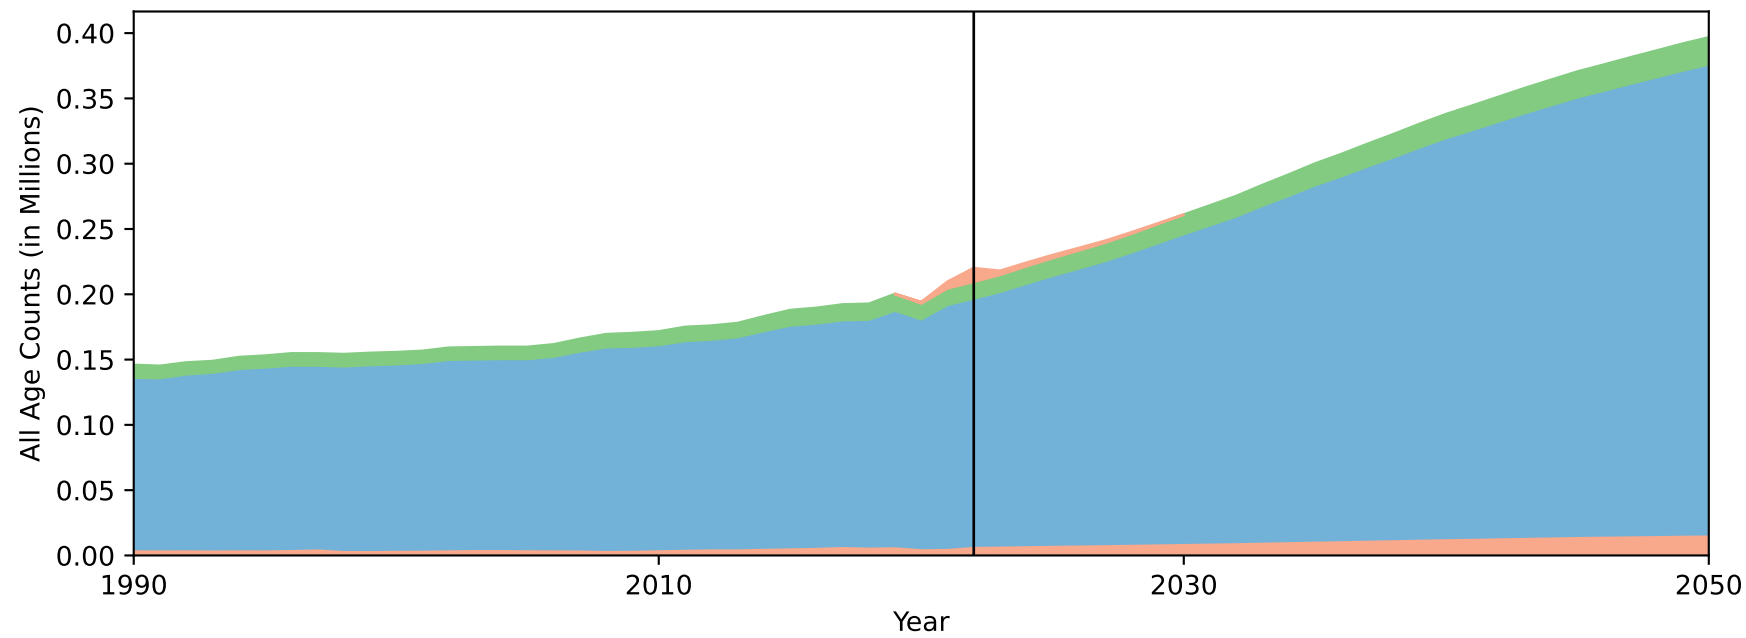

Level 2

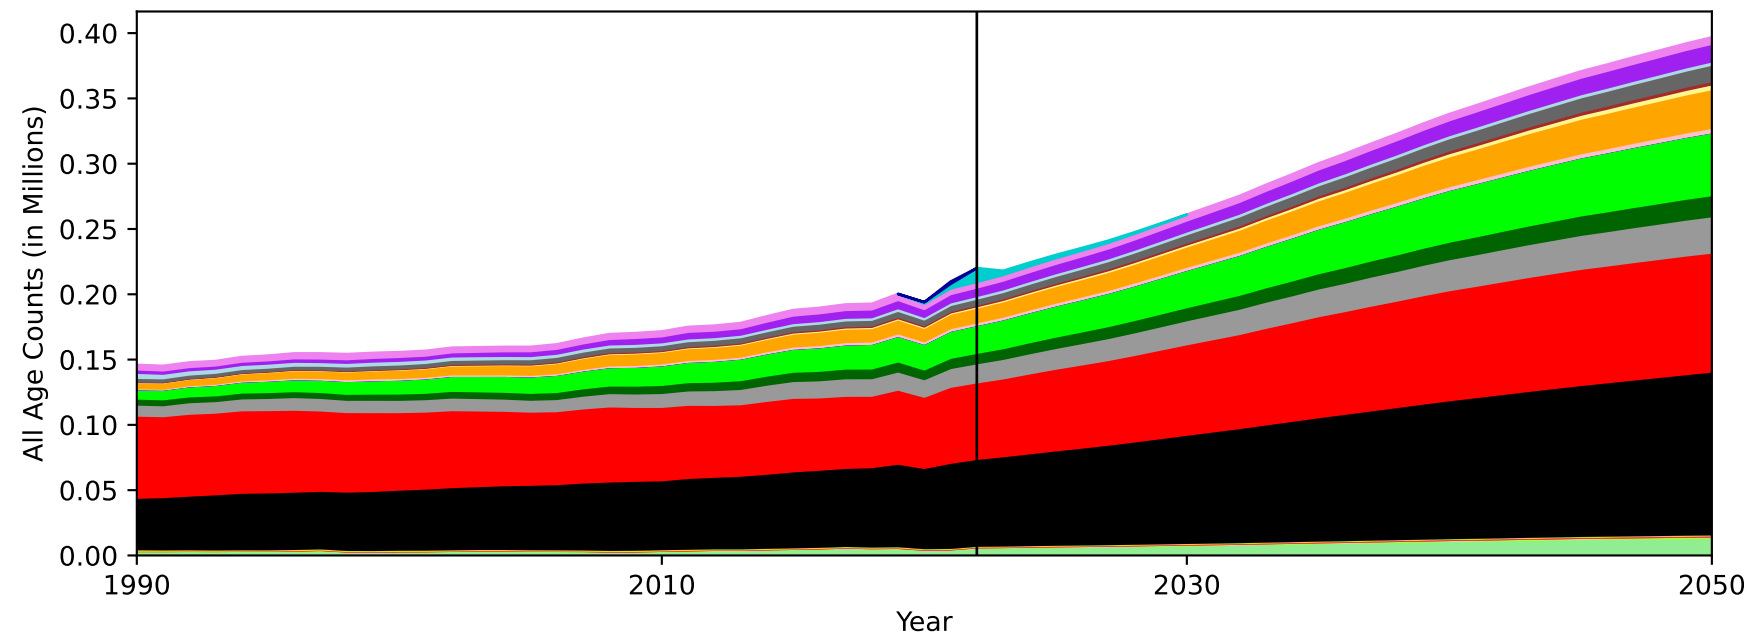

# High-Income Asia Pacific

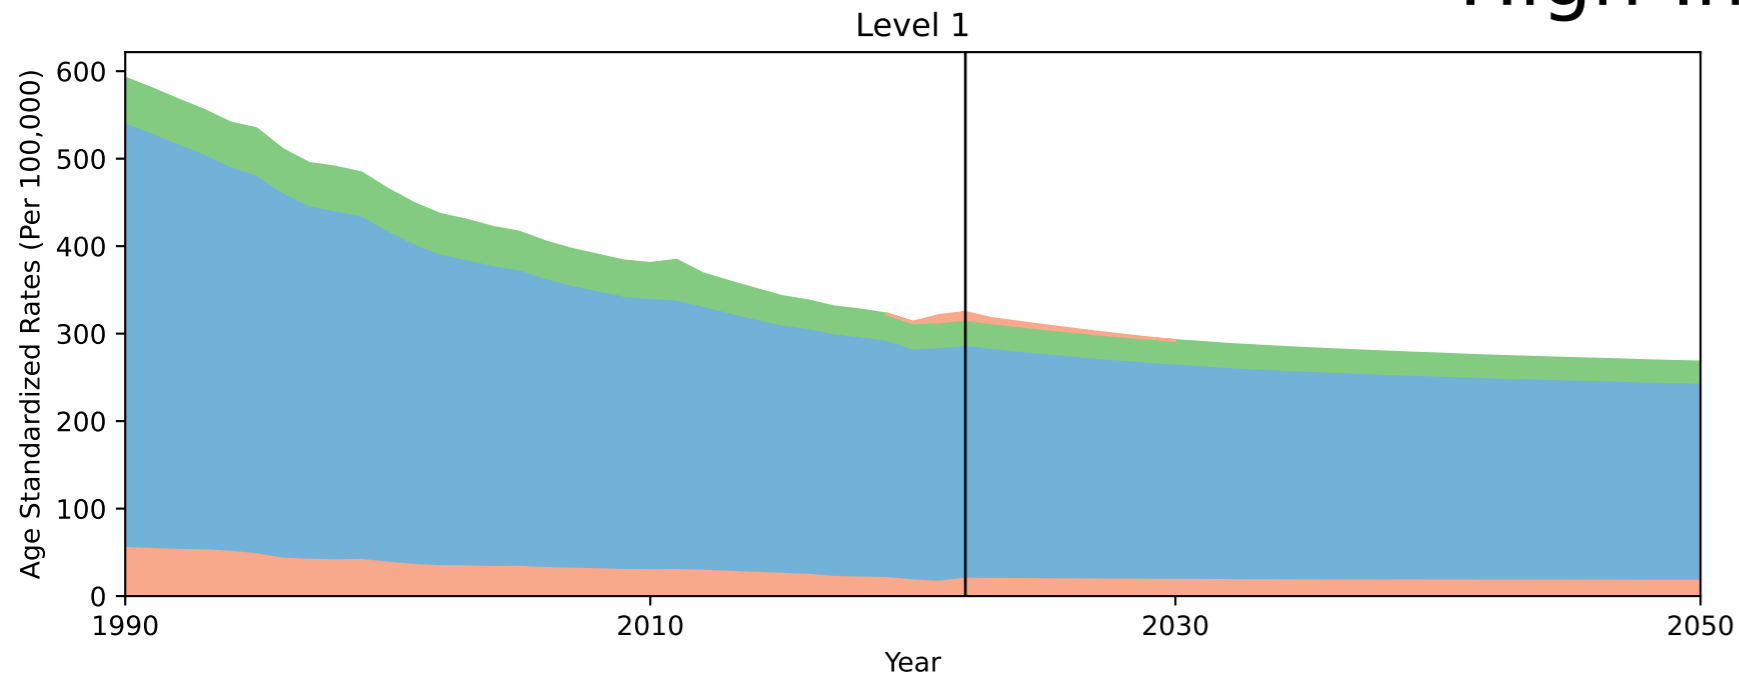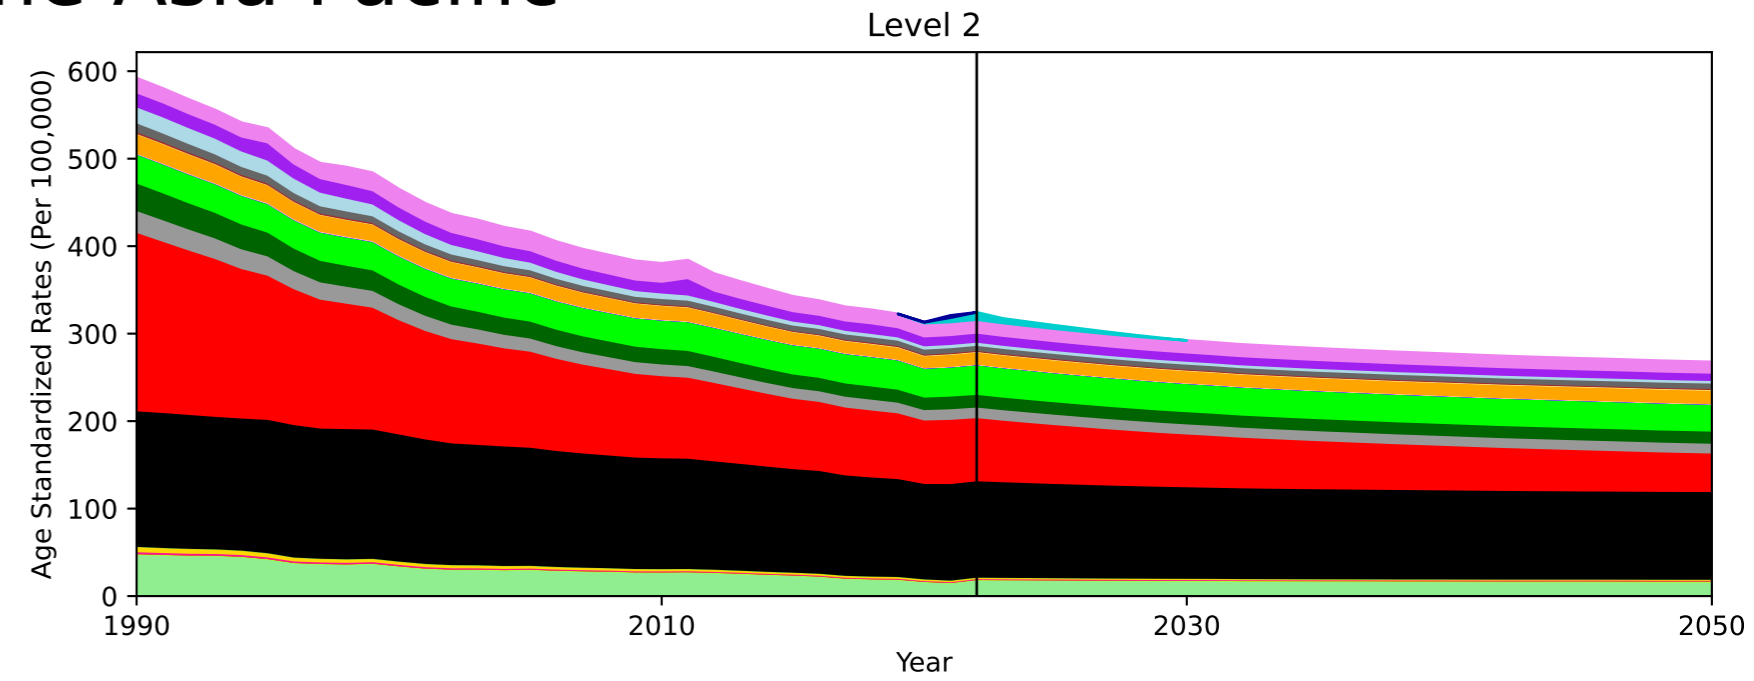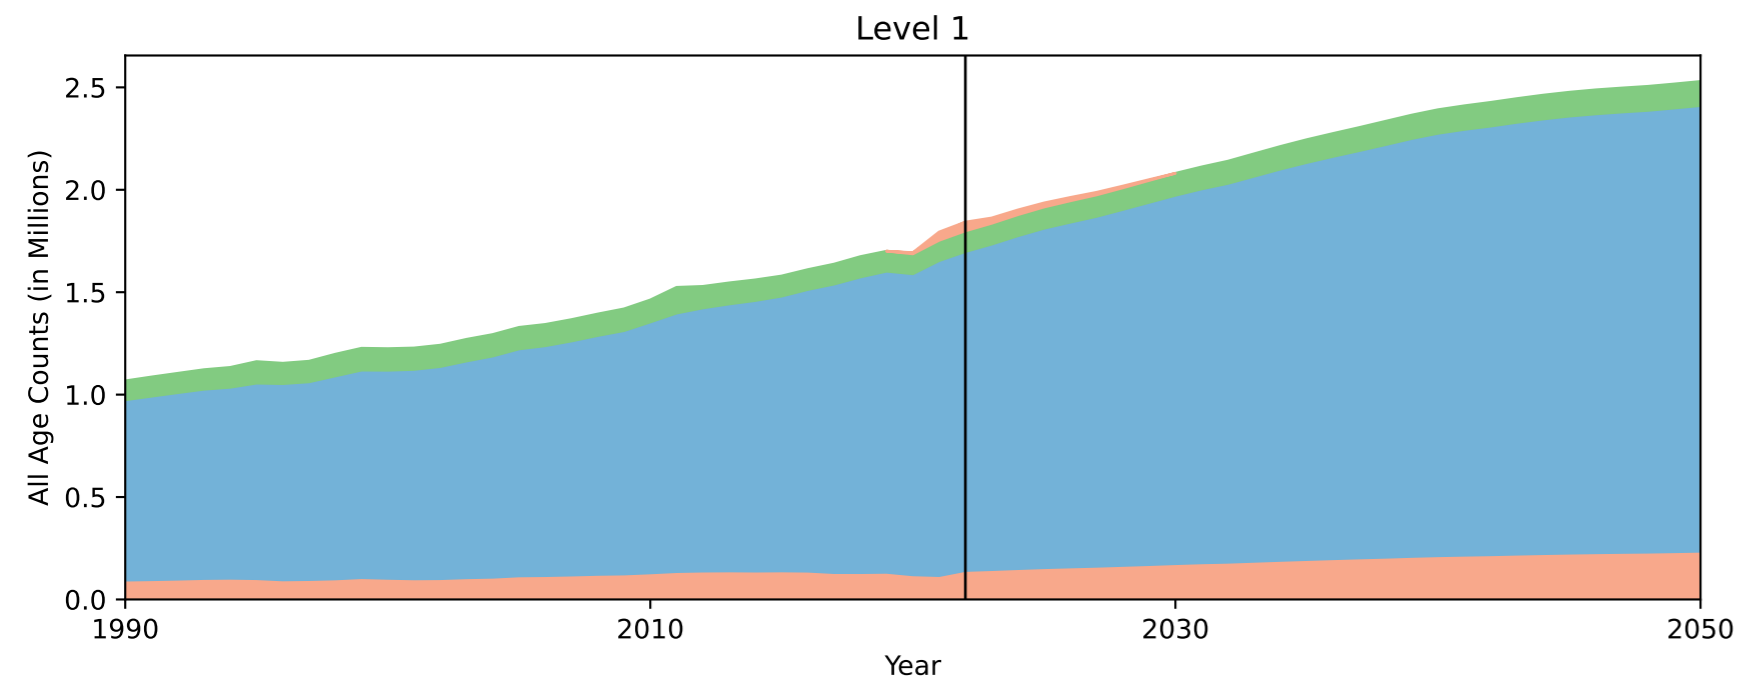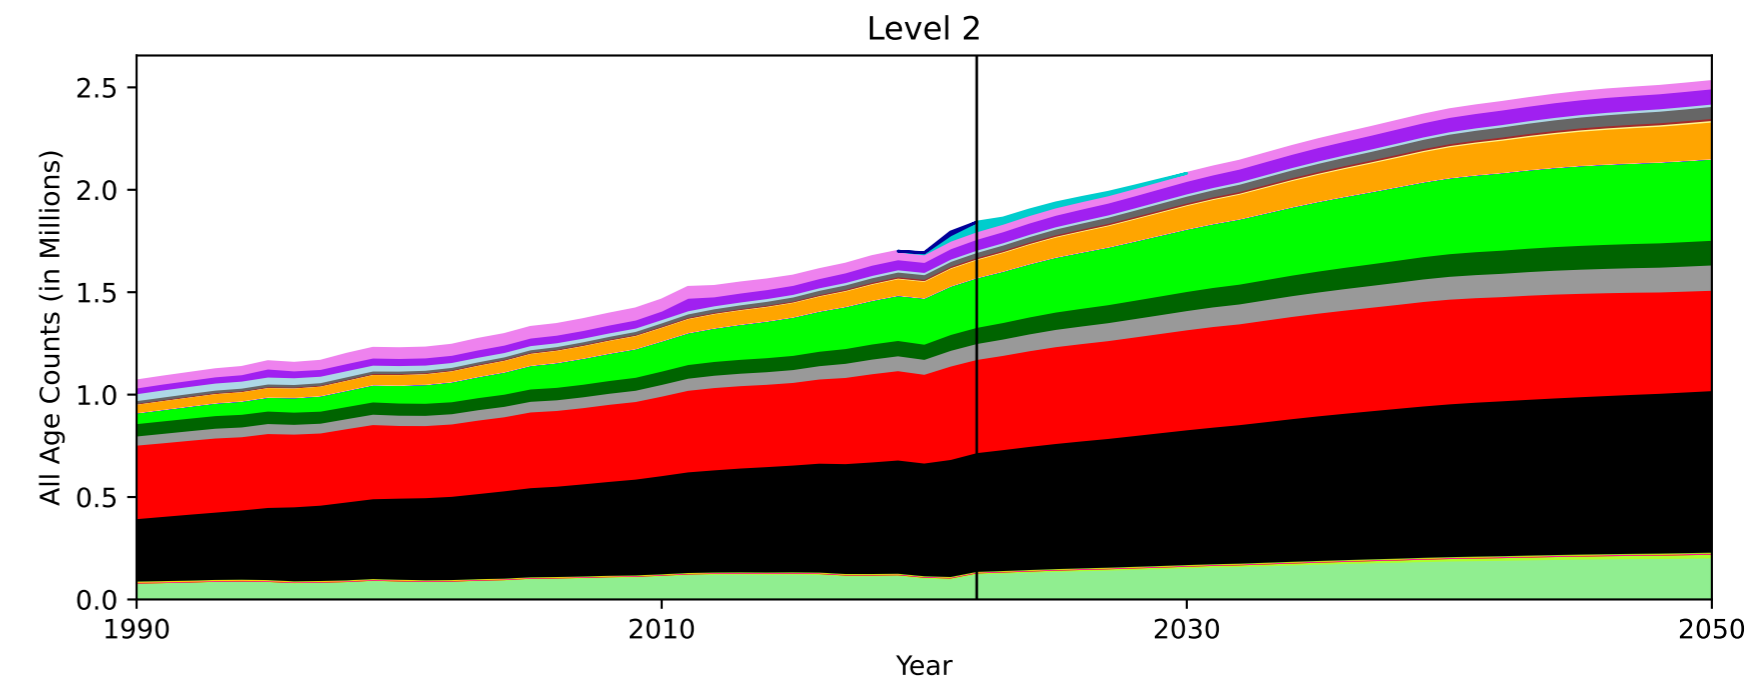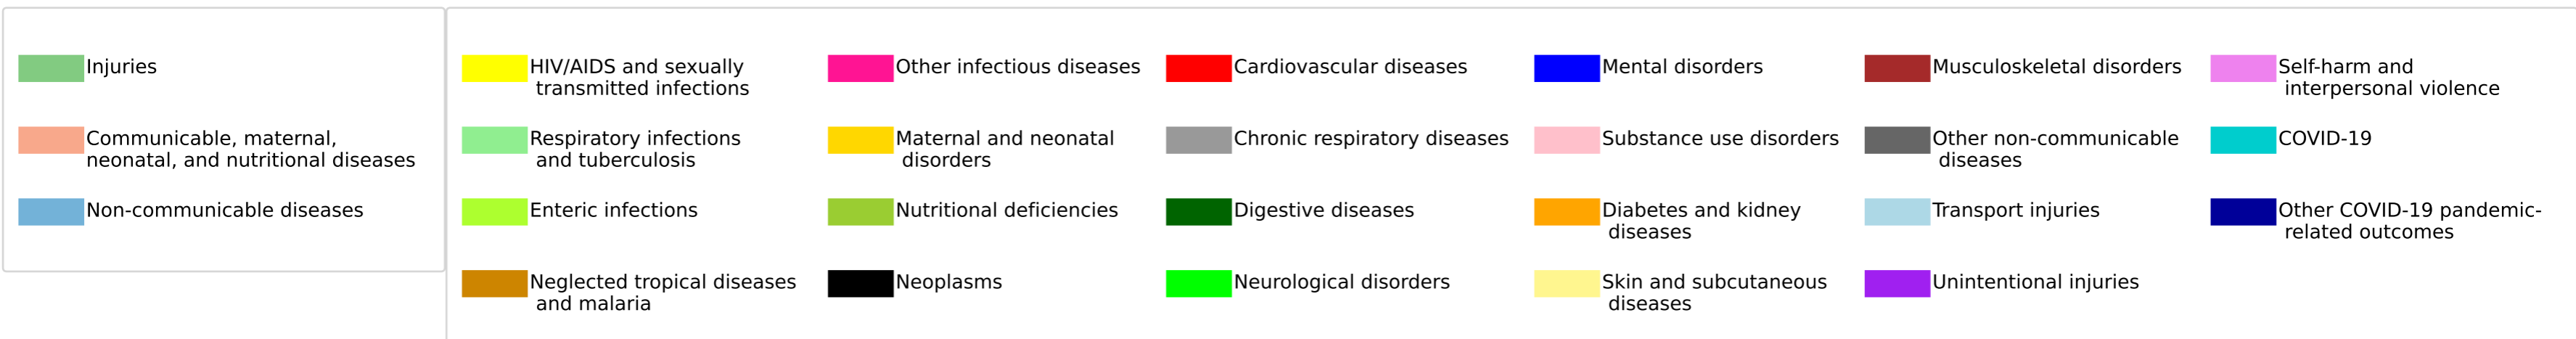

# High-Income North America

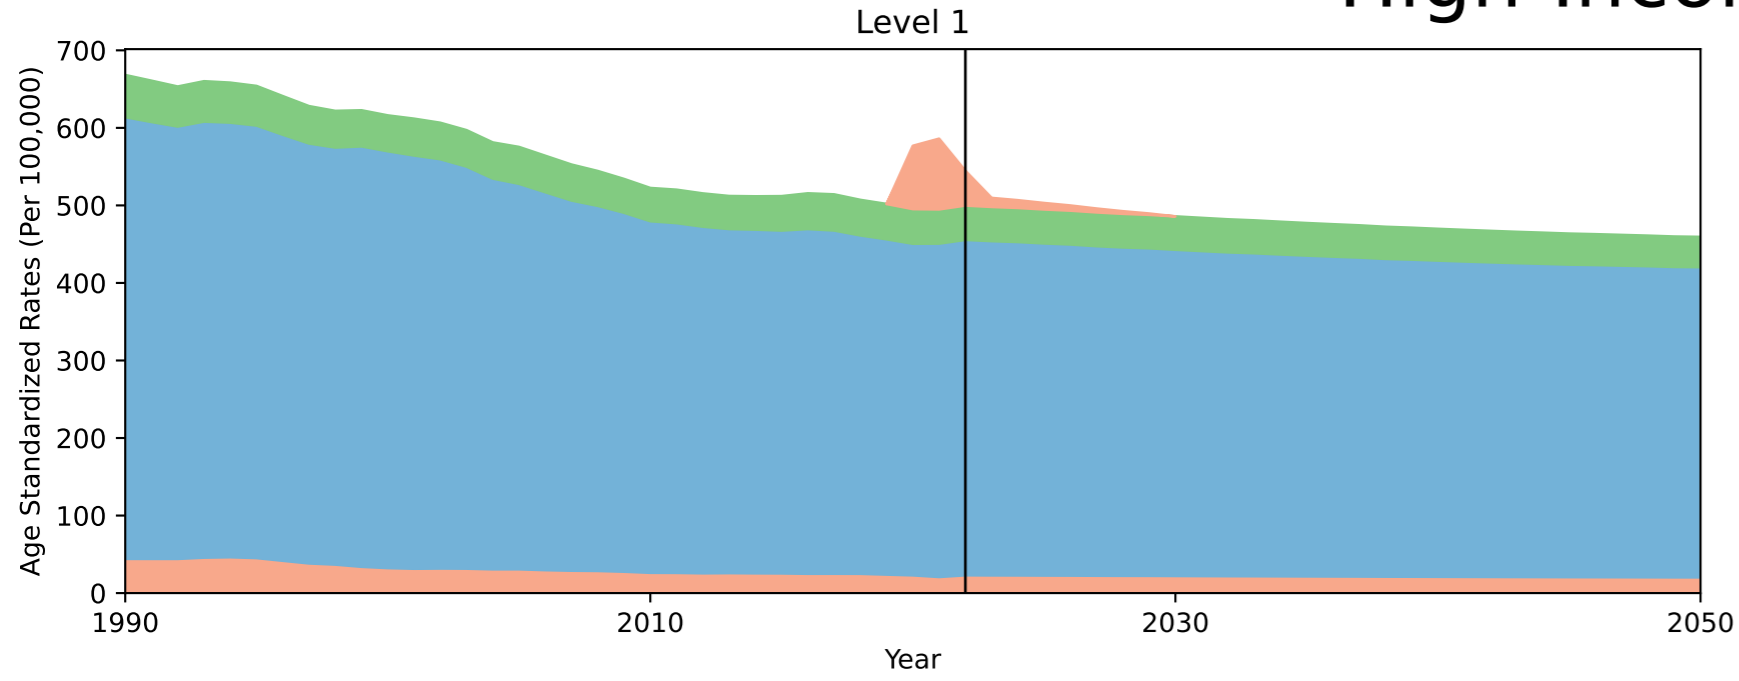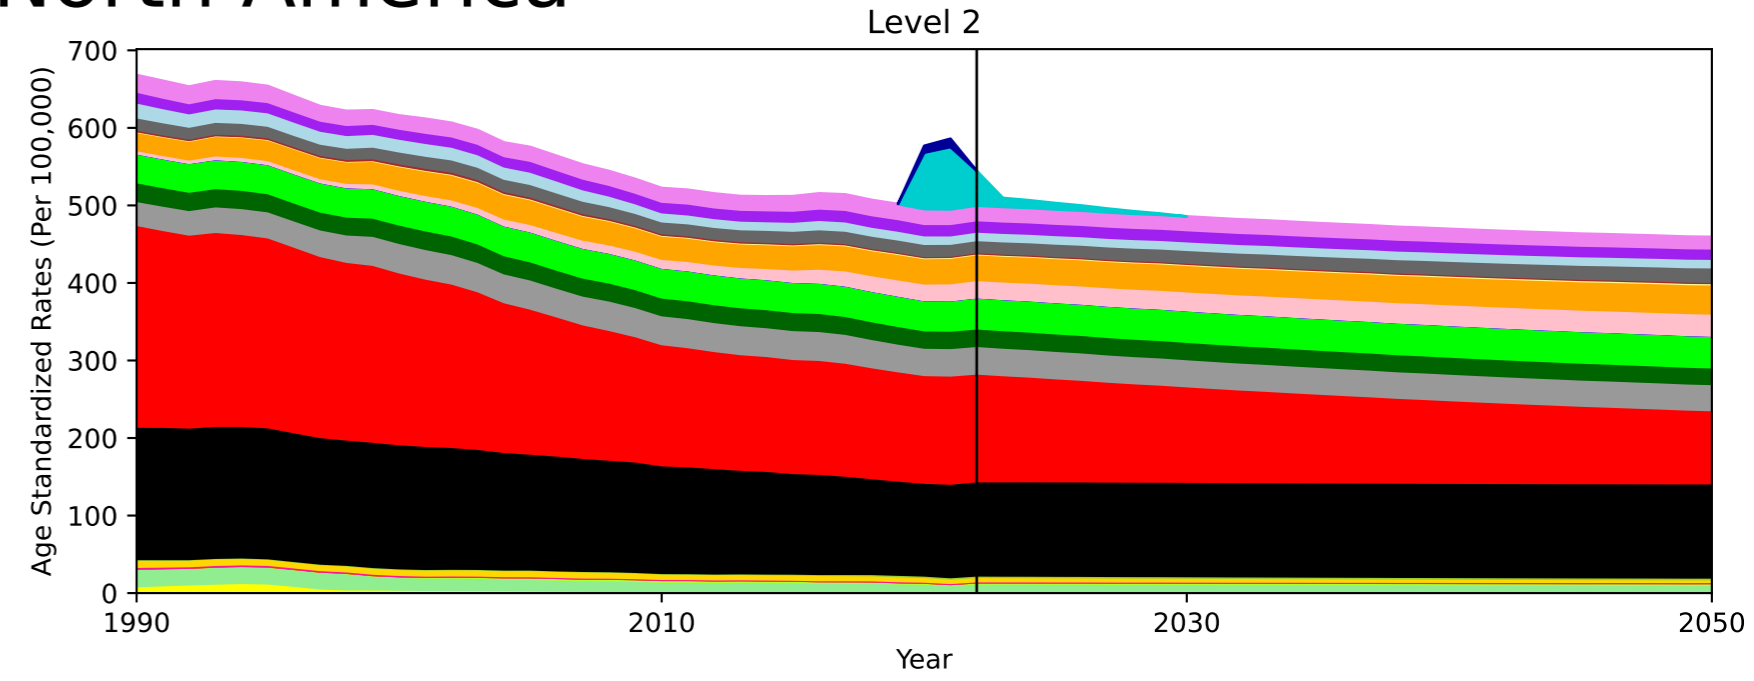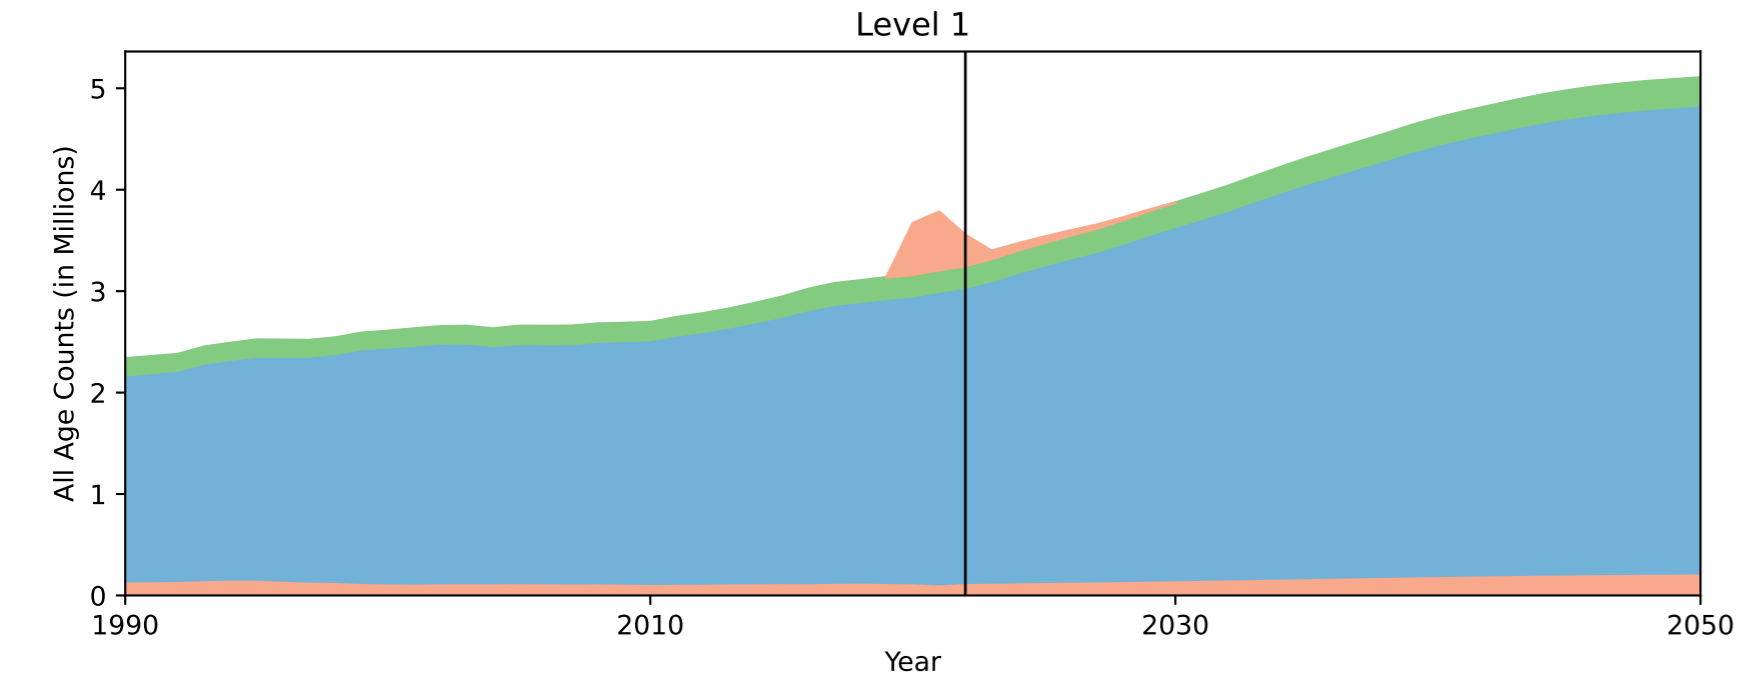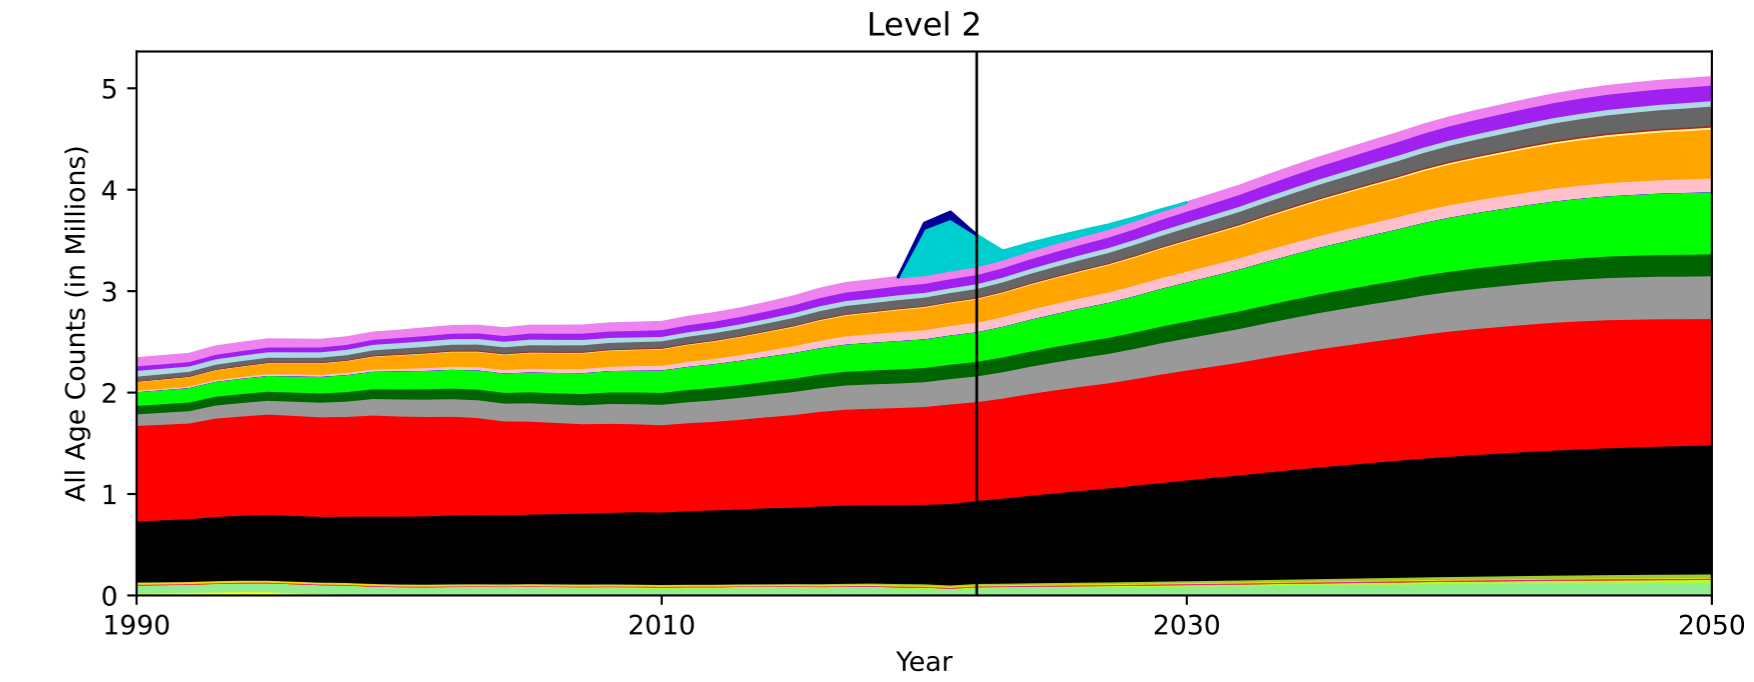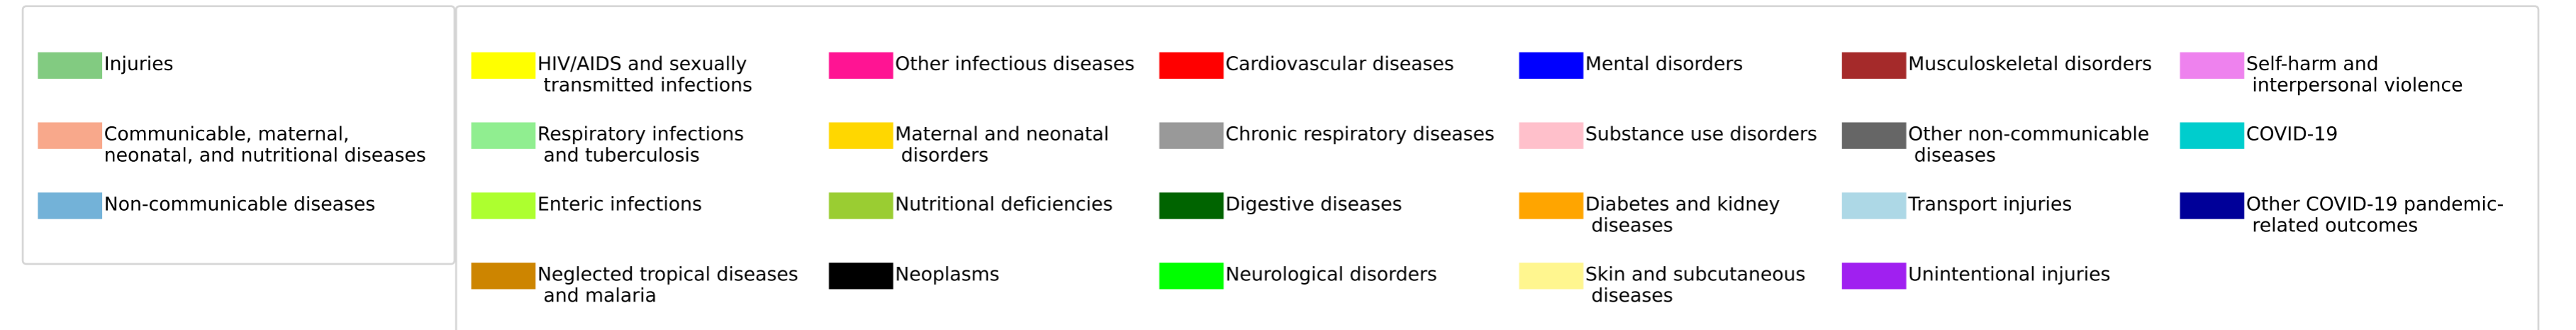



# Southern Latin America

Level 1

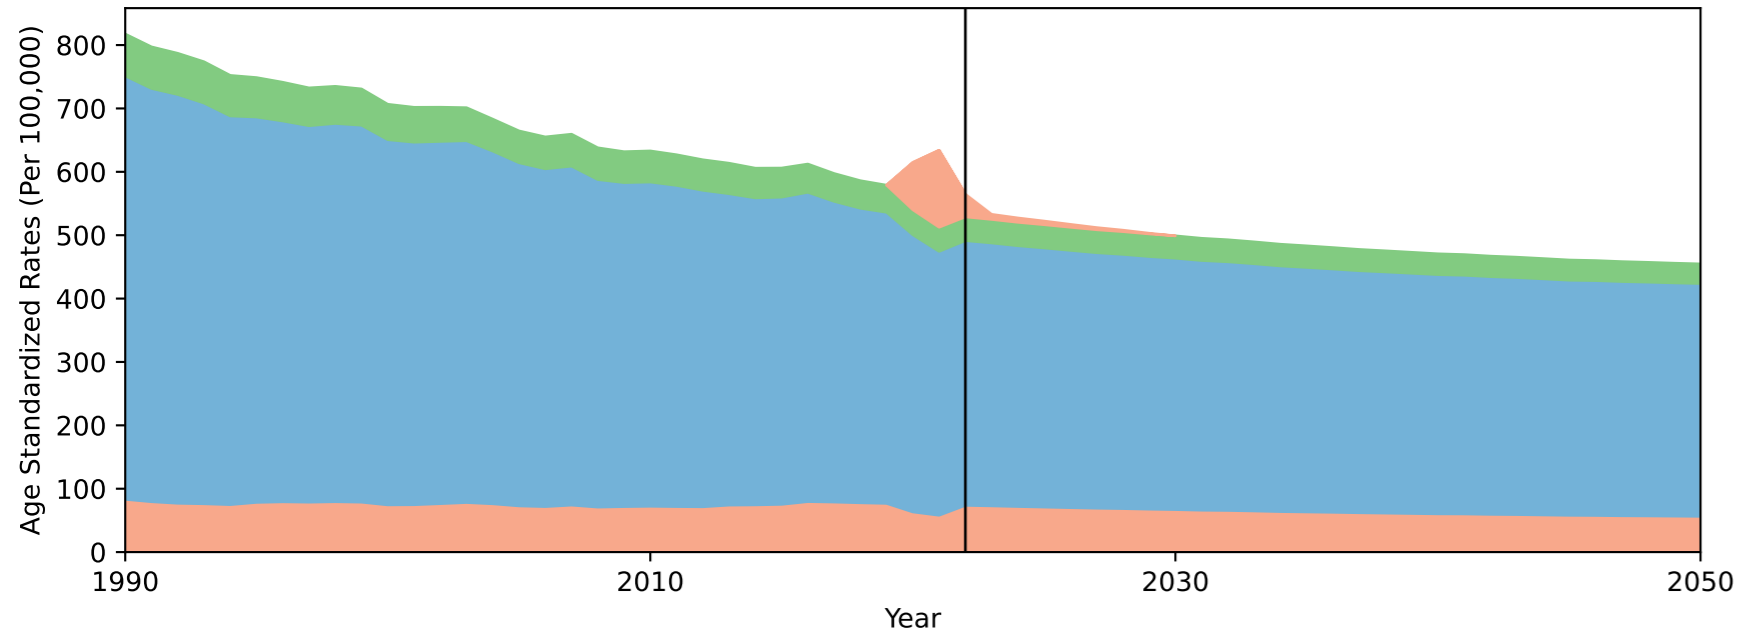

Level 2

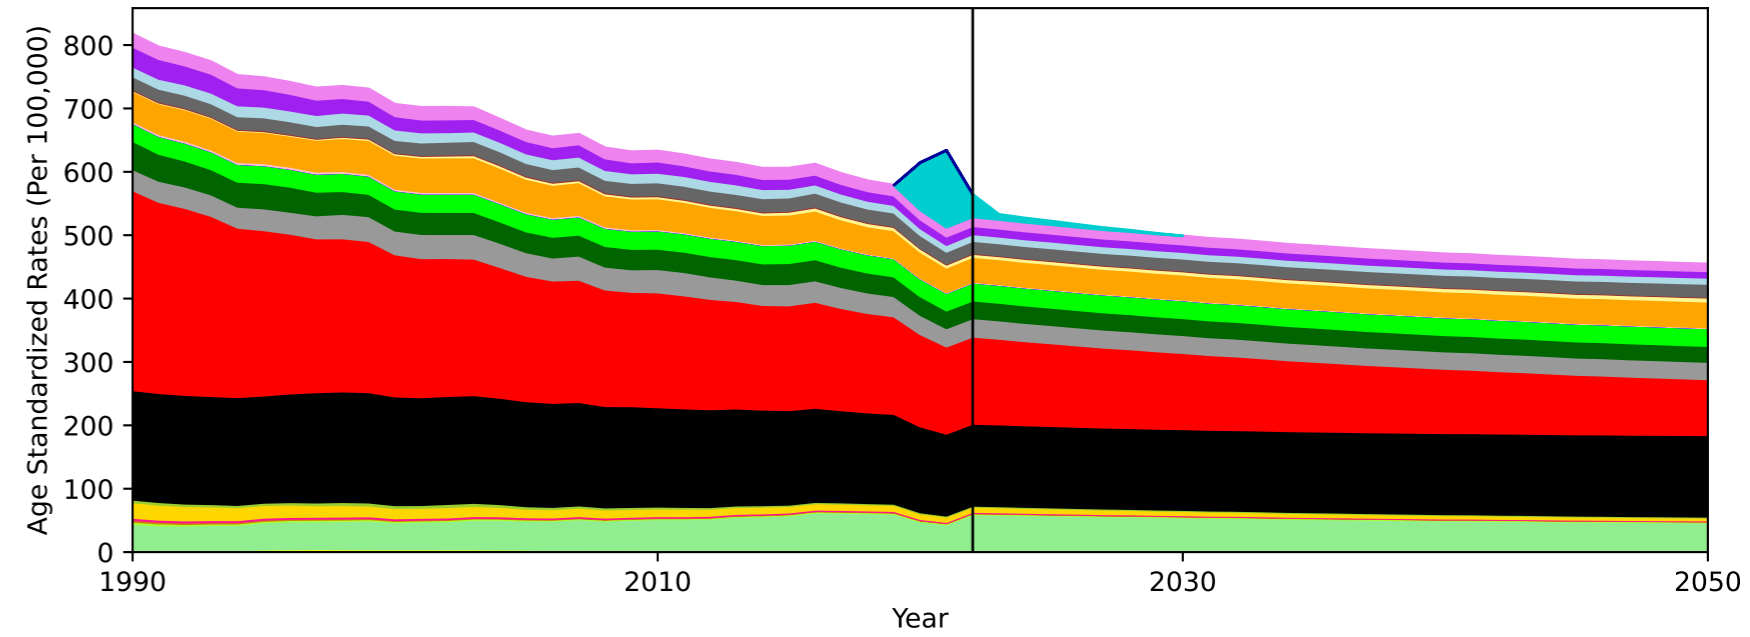

Level 1

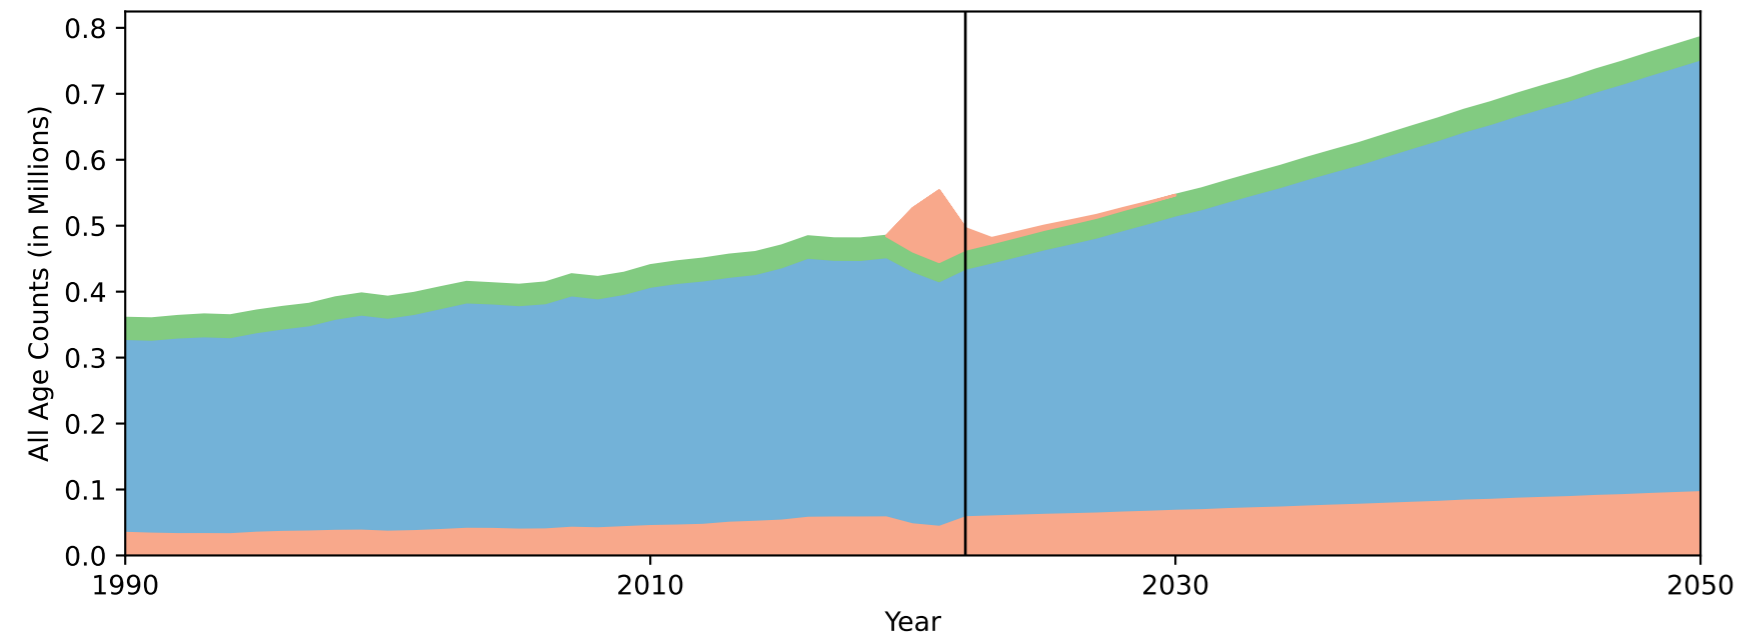

Level 2

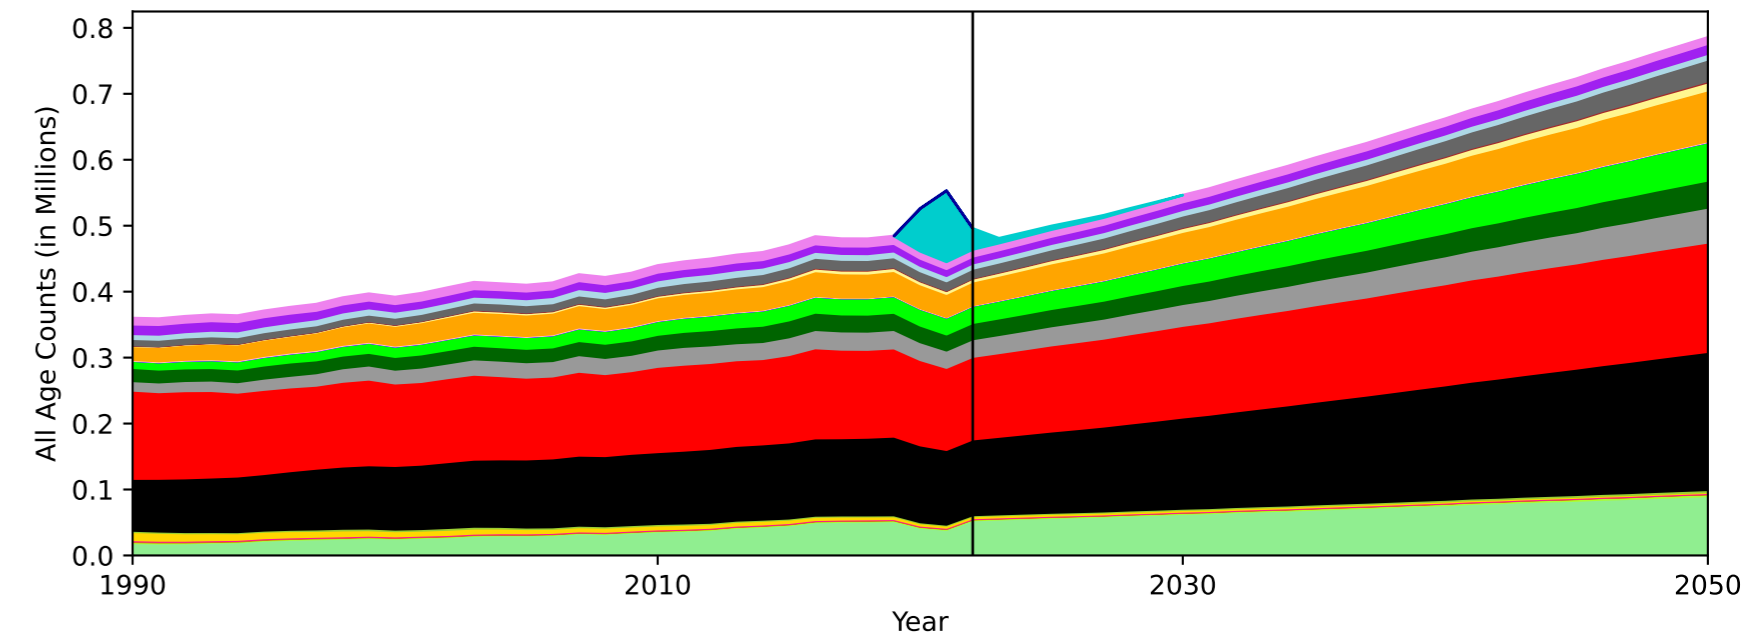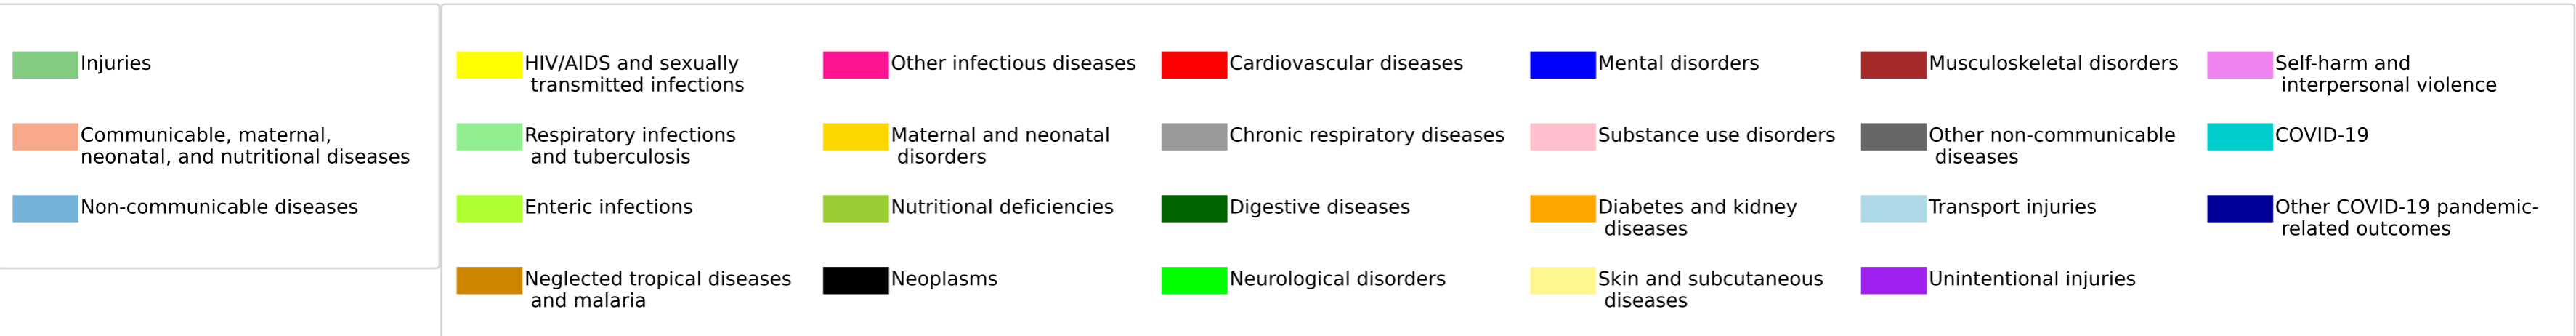

# Western Europe

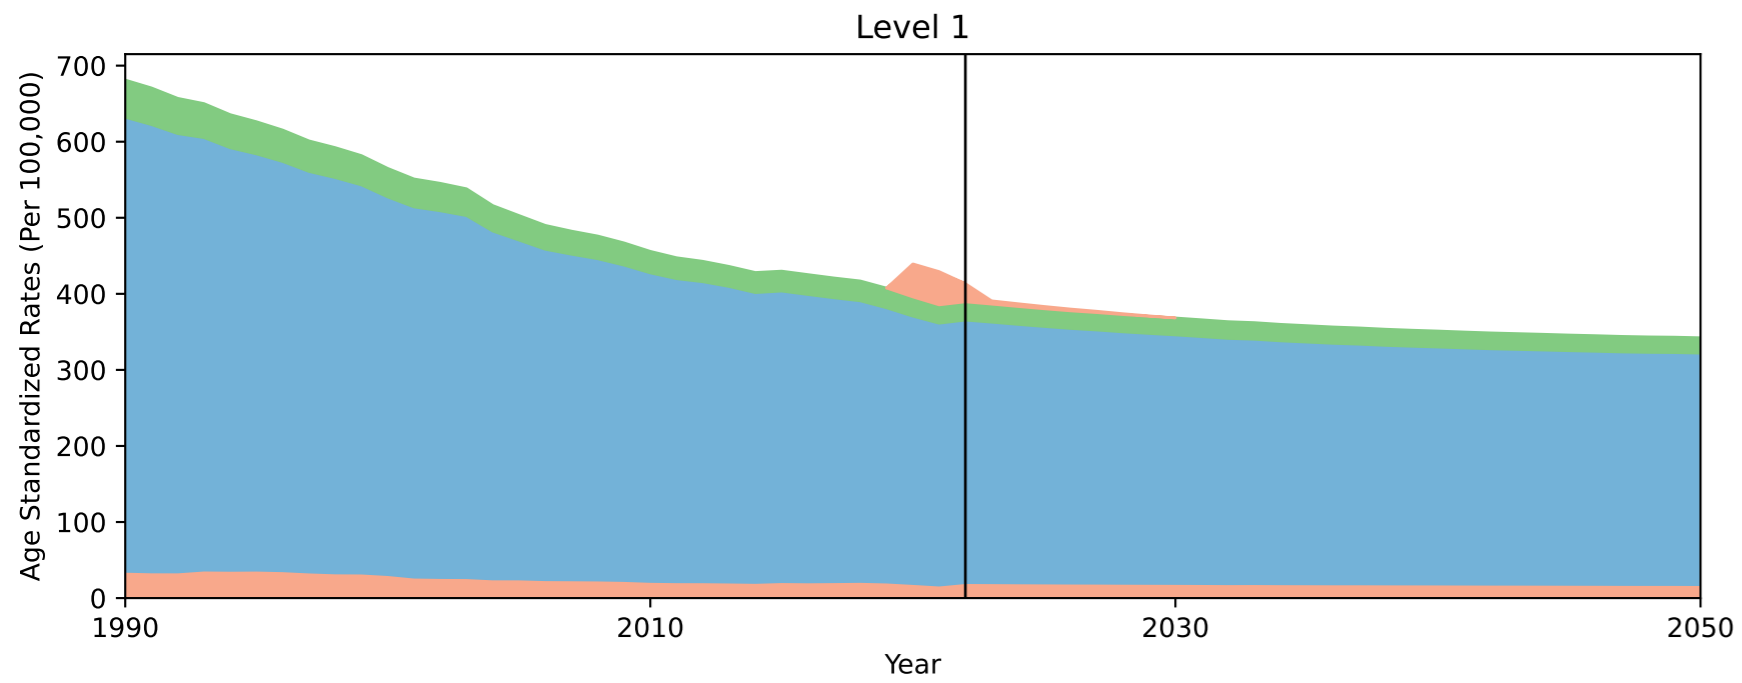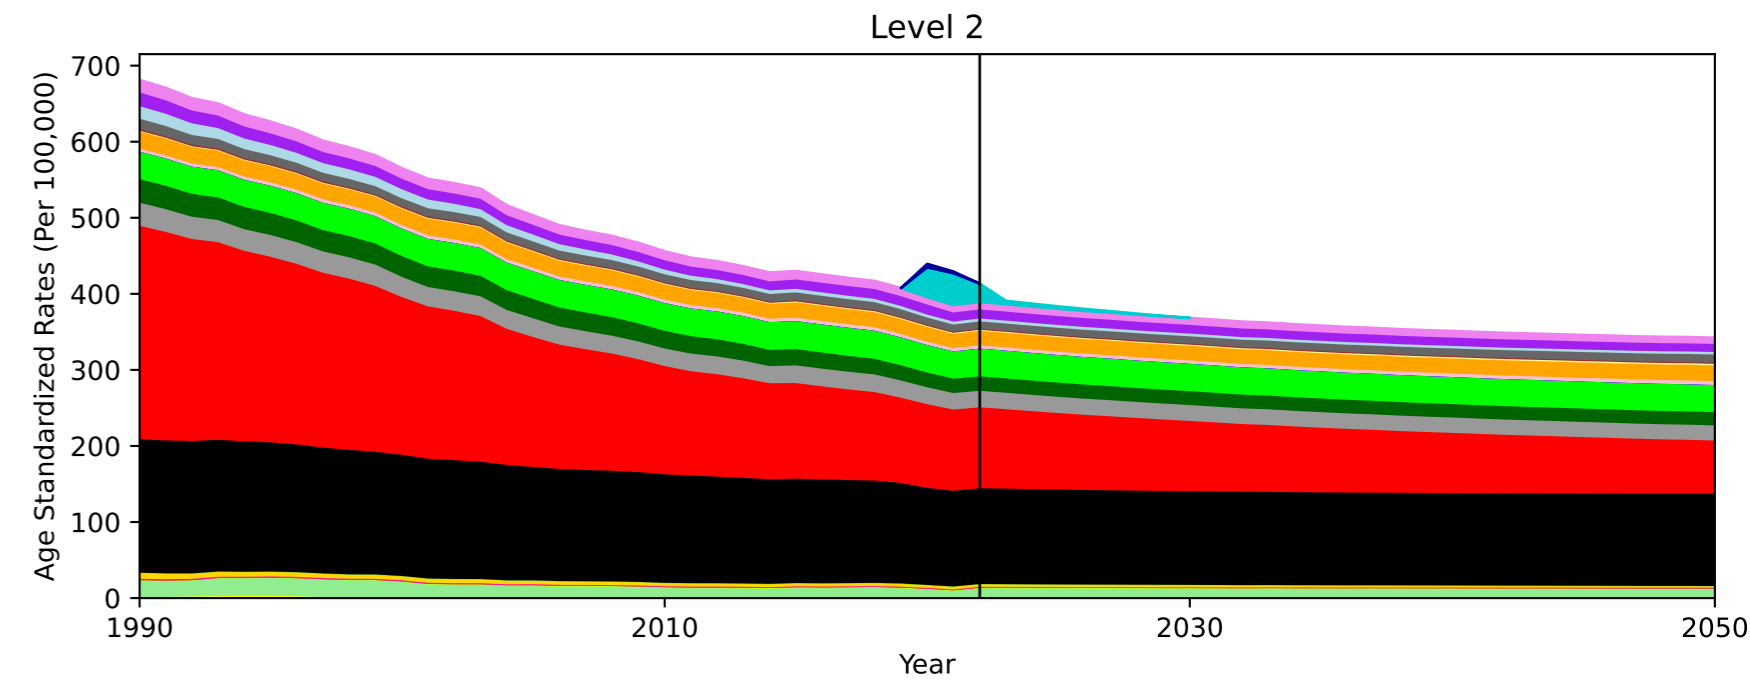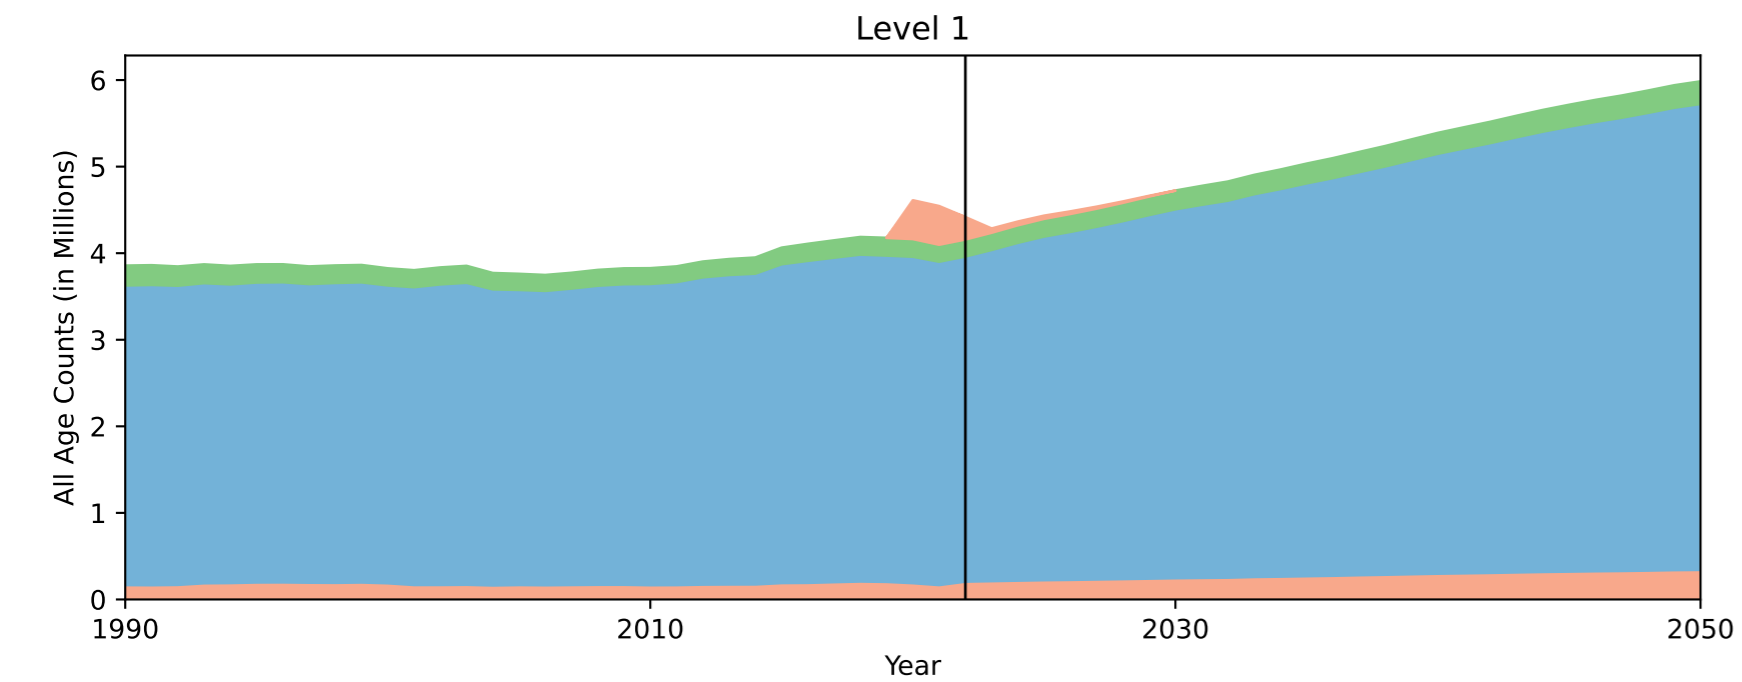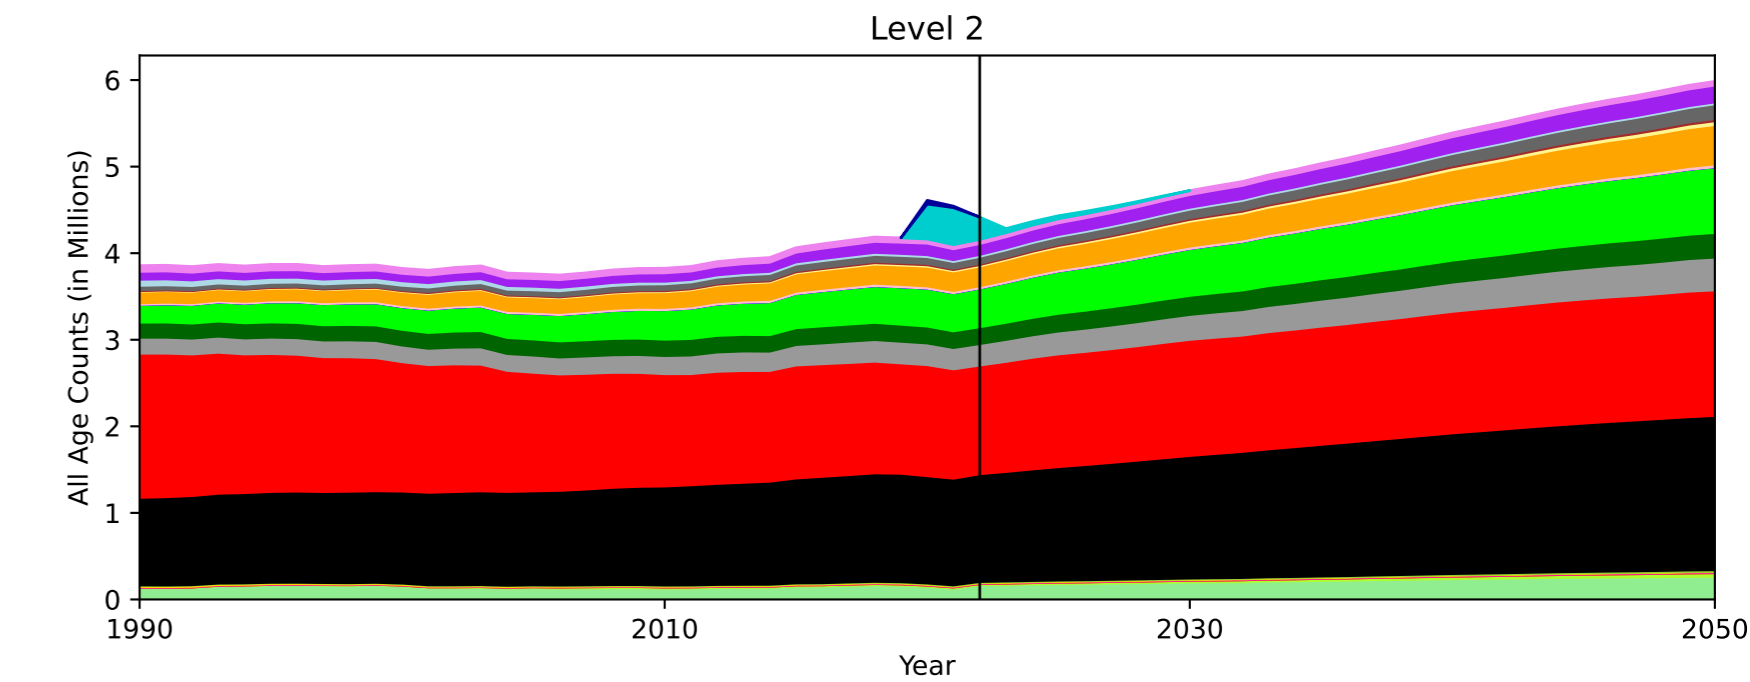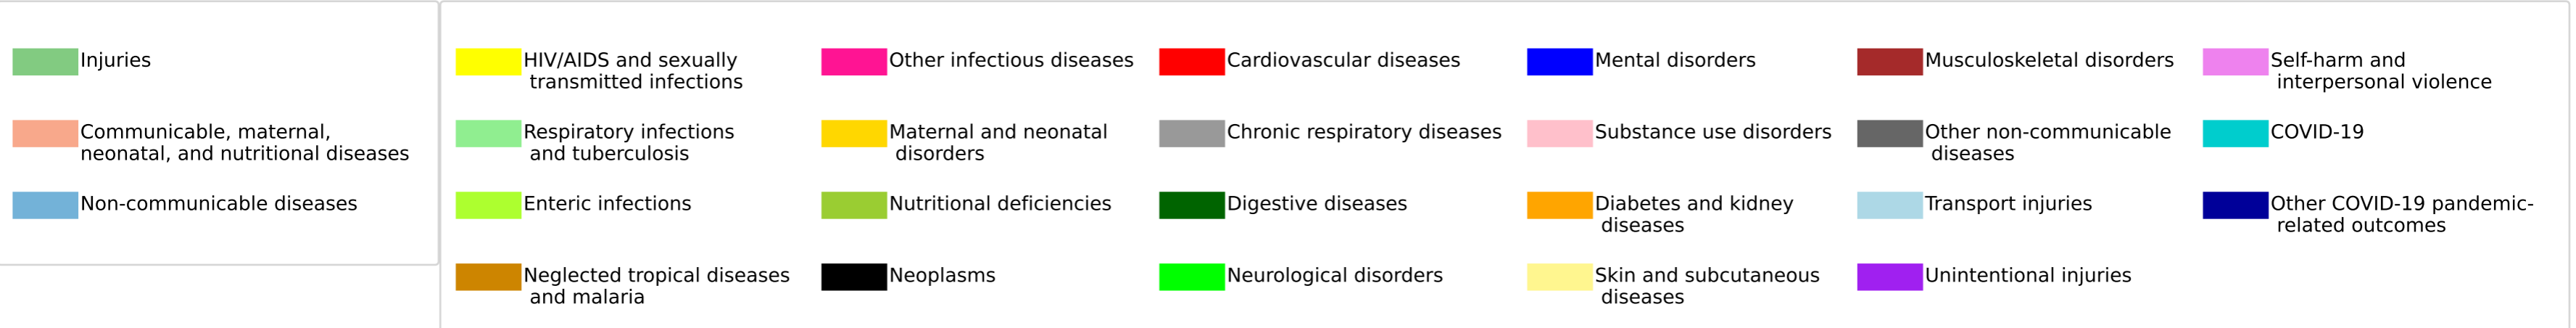

# Andean Latin America

Level 1

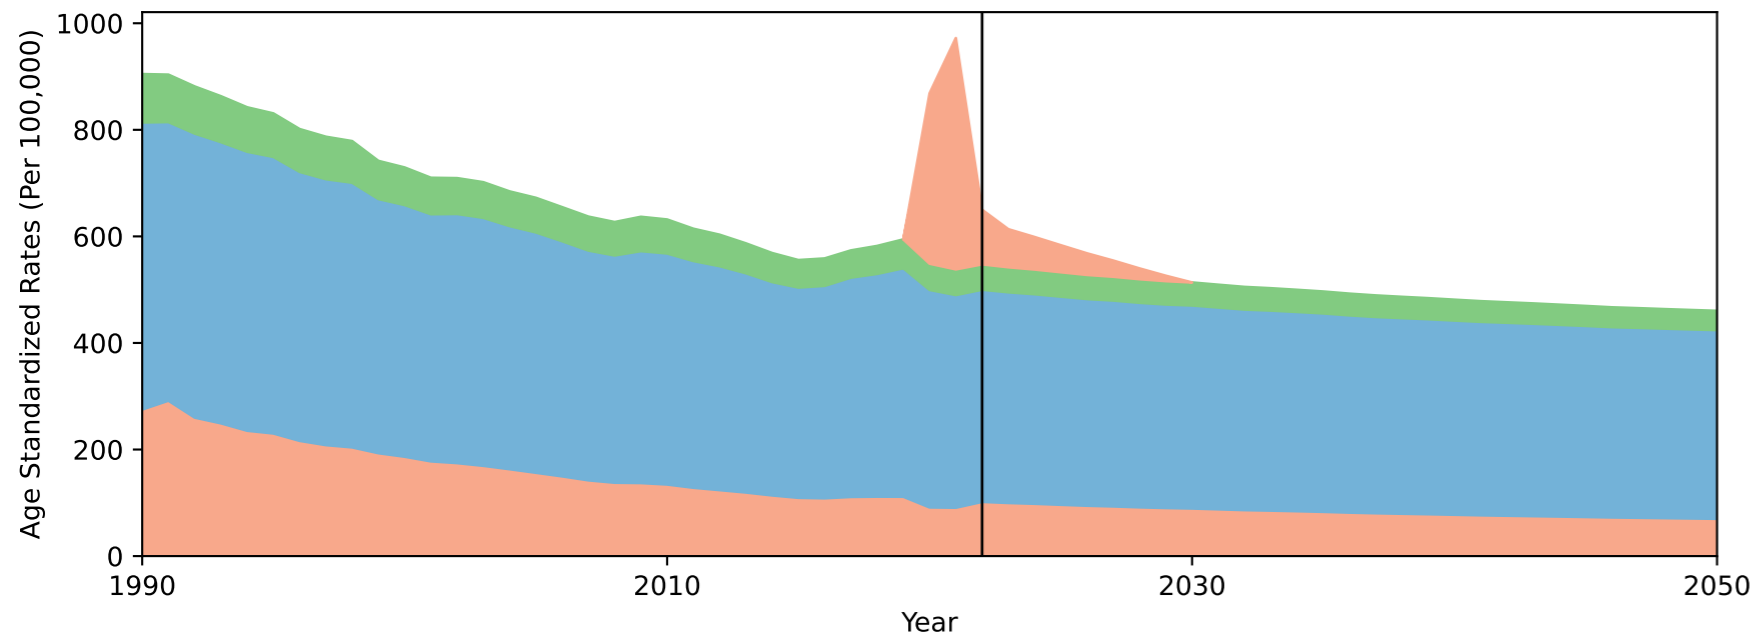

Level 2

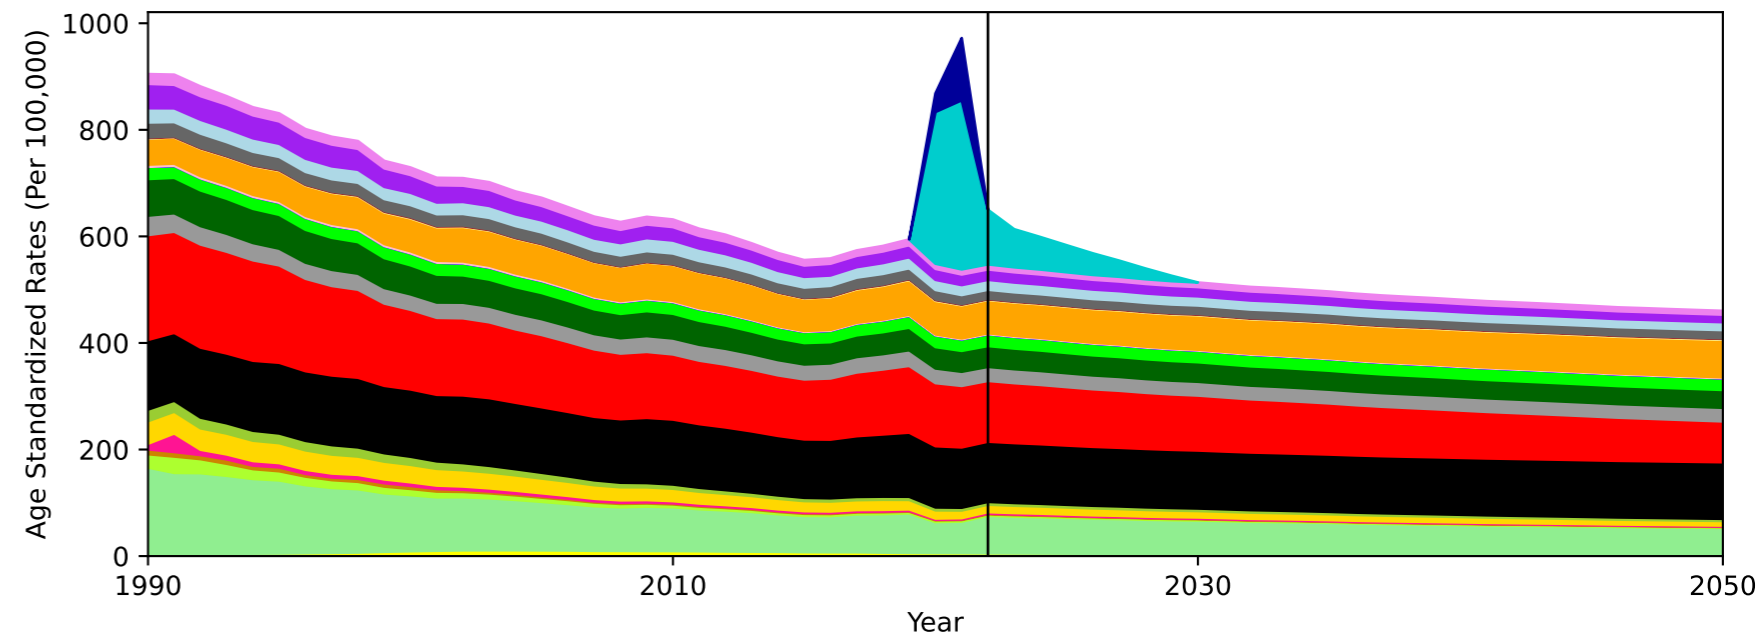

Level 1

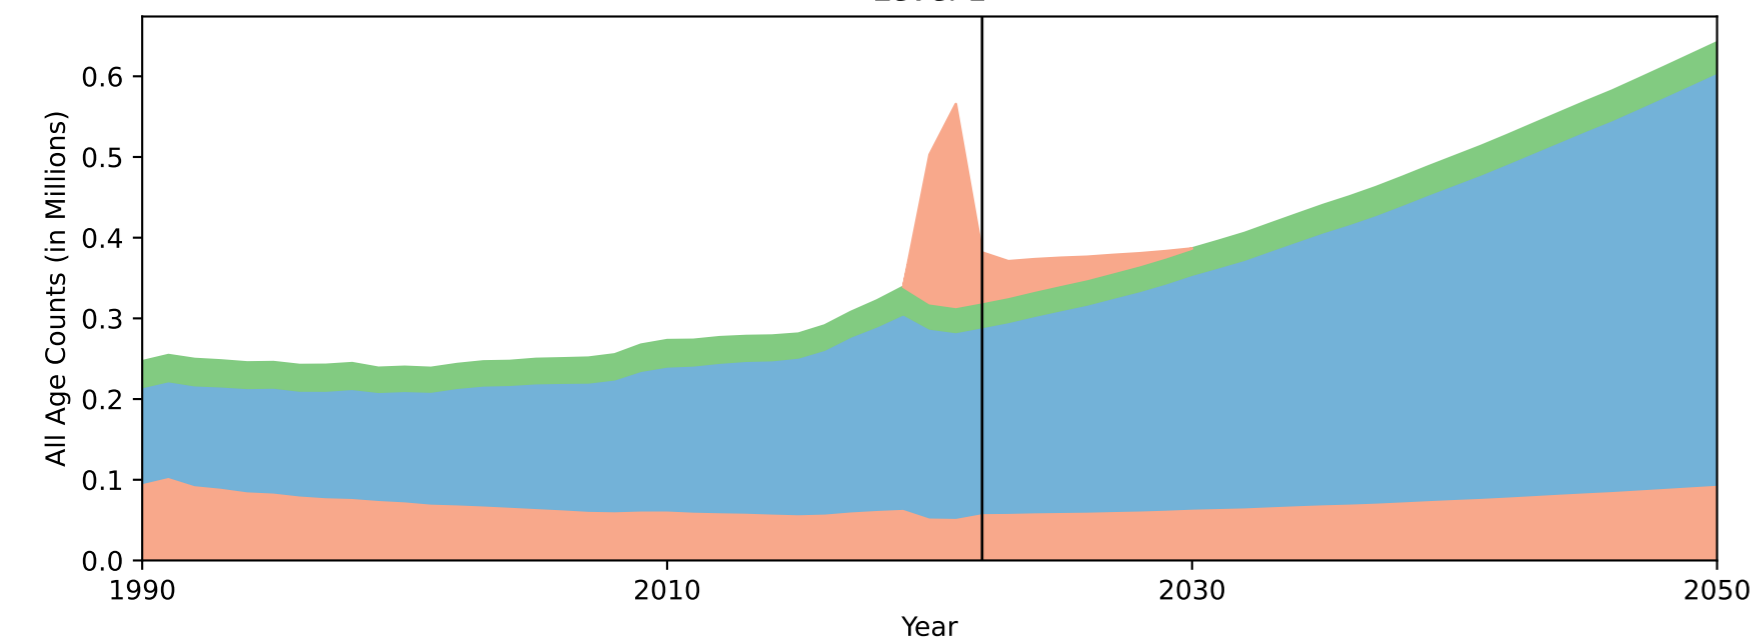

Level 2

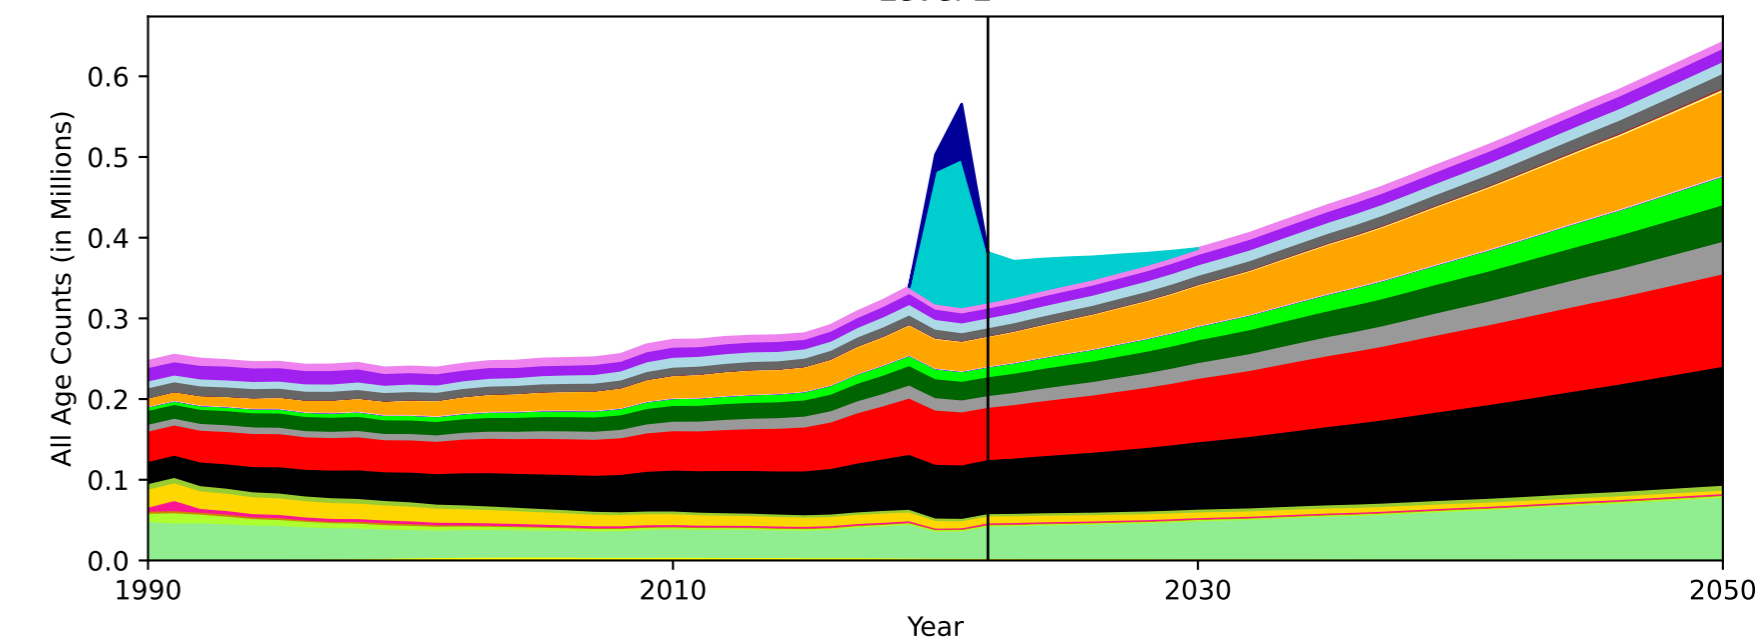

# Caribbean

Level 1

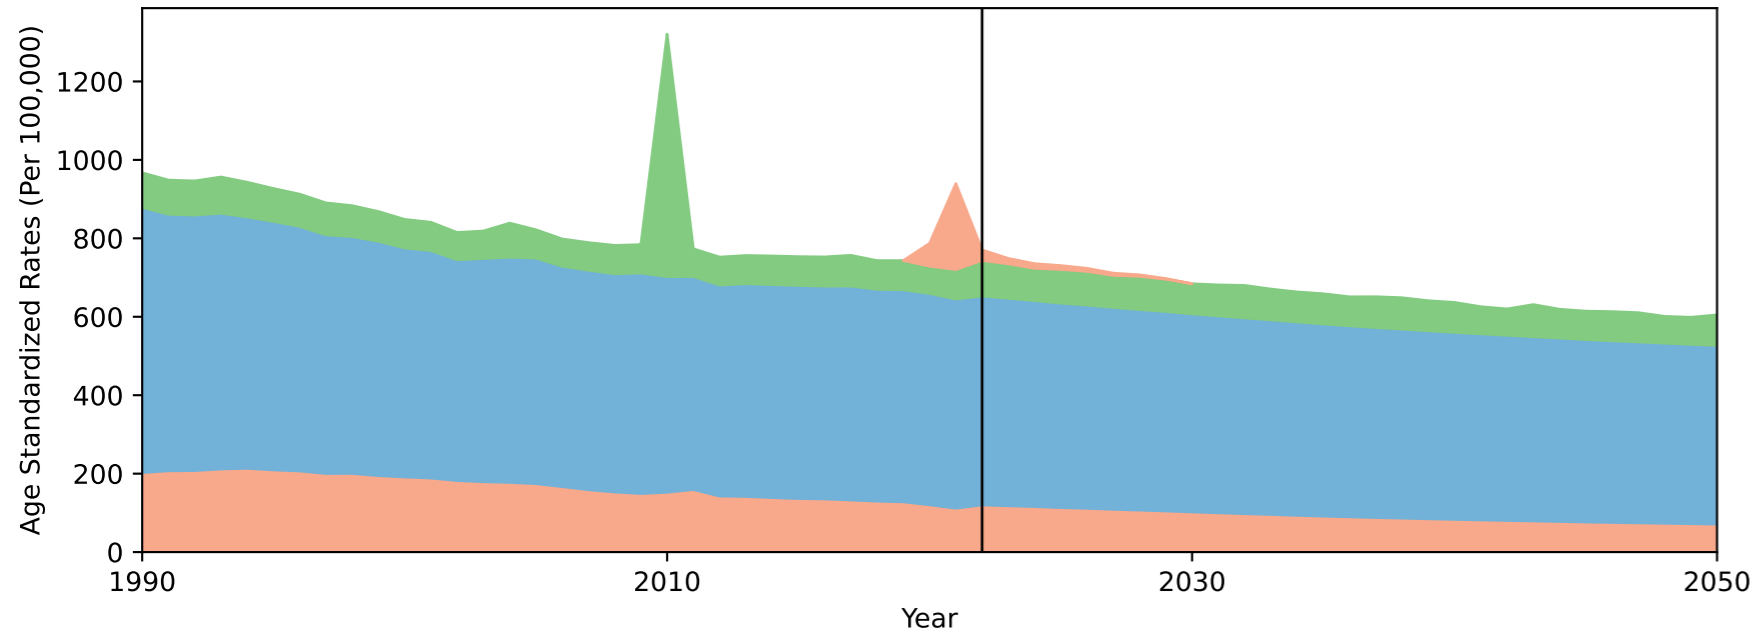

Level 2

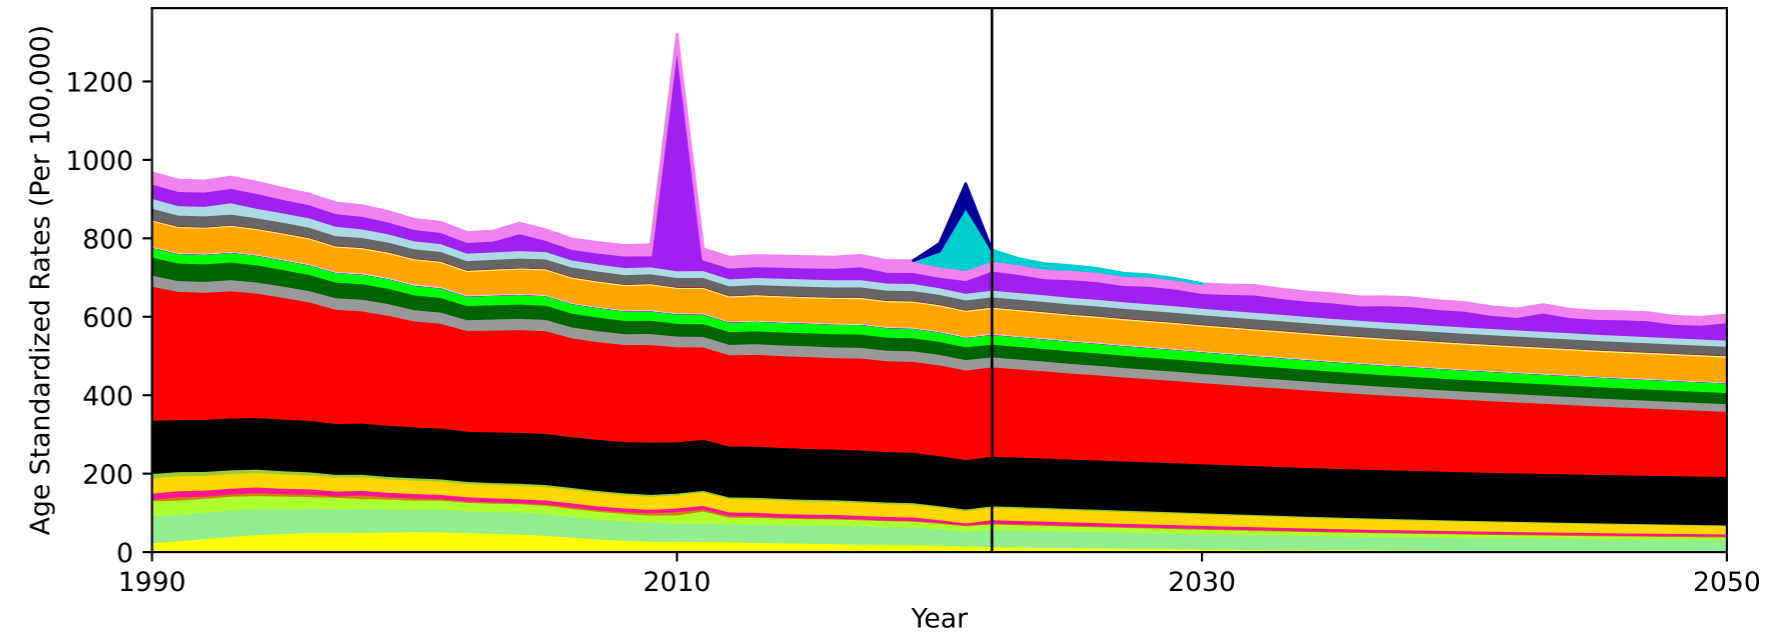

Level 1

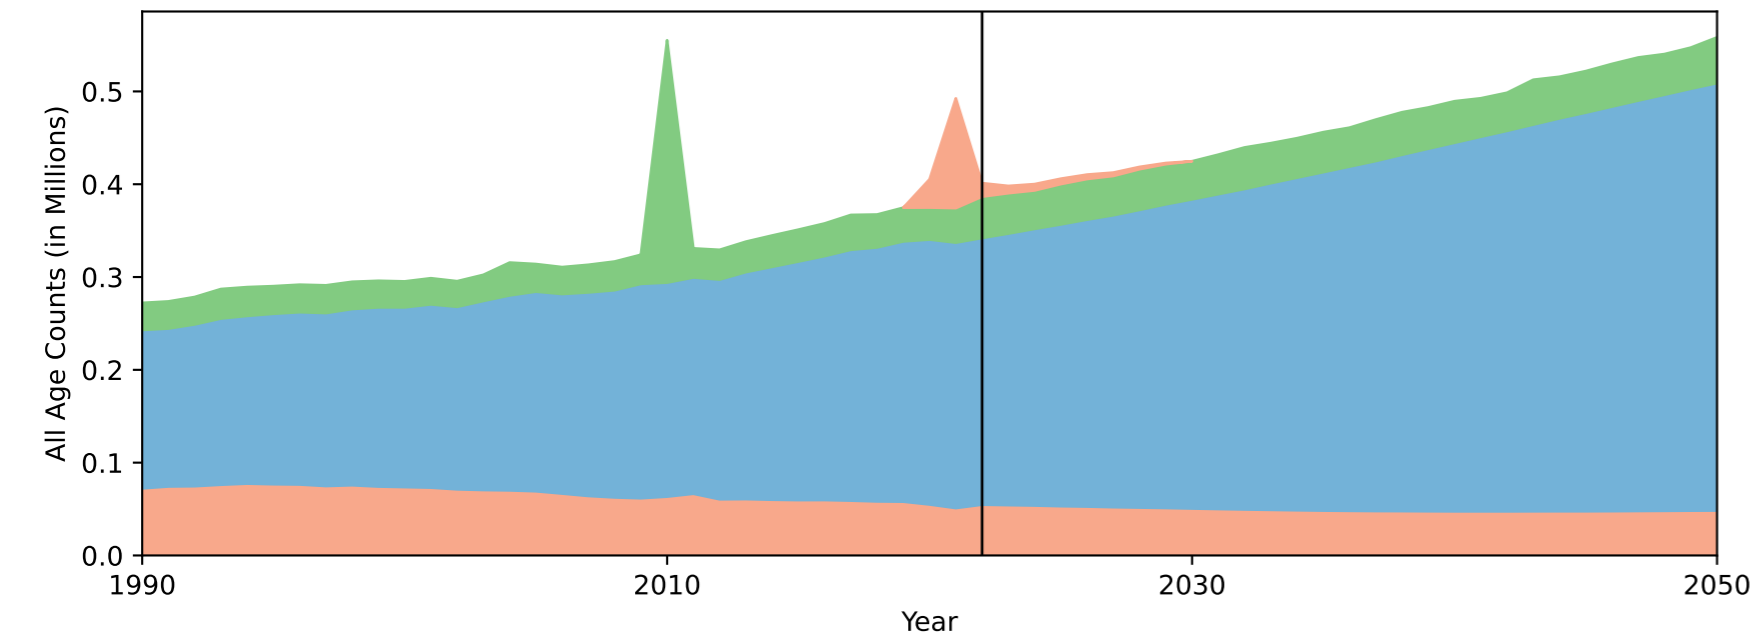

Level 2

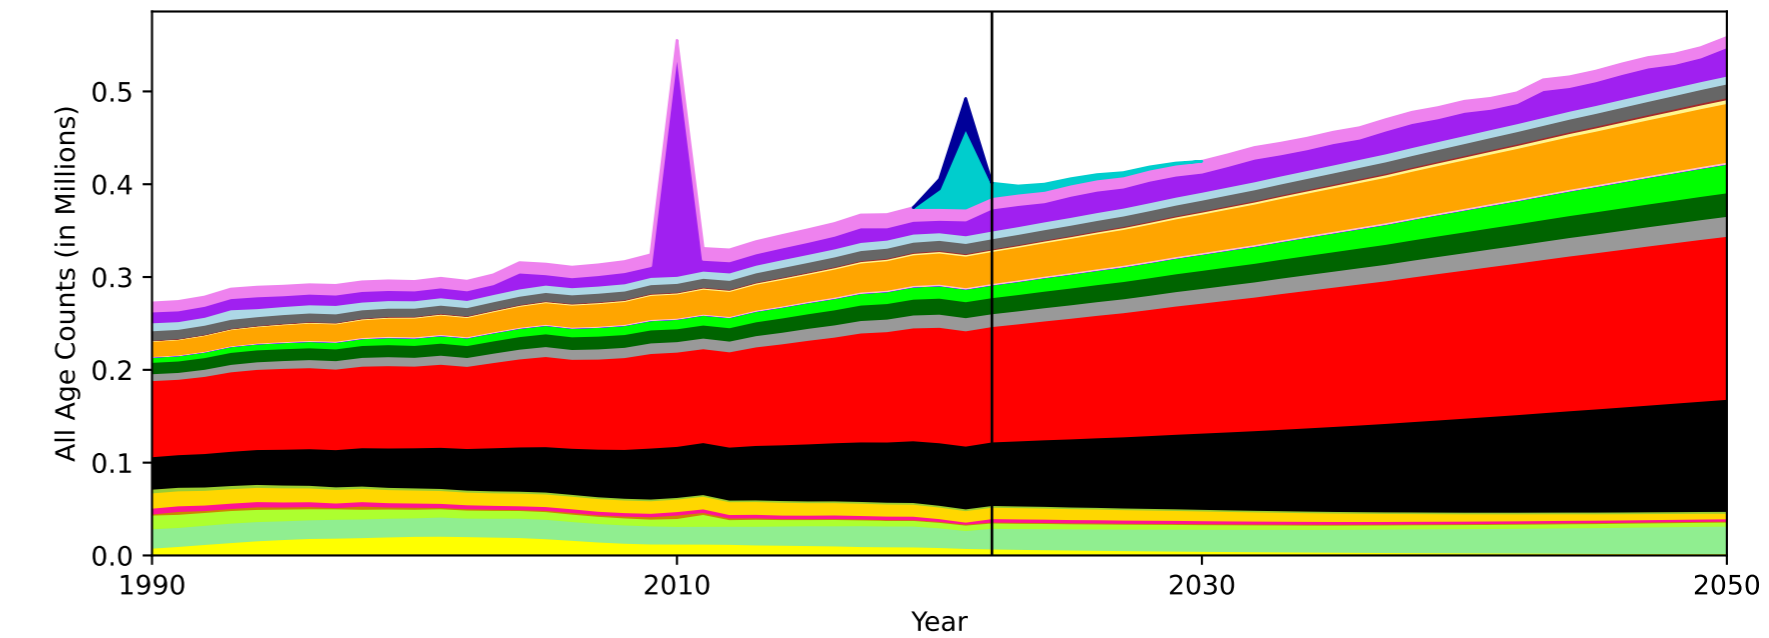

Level 1

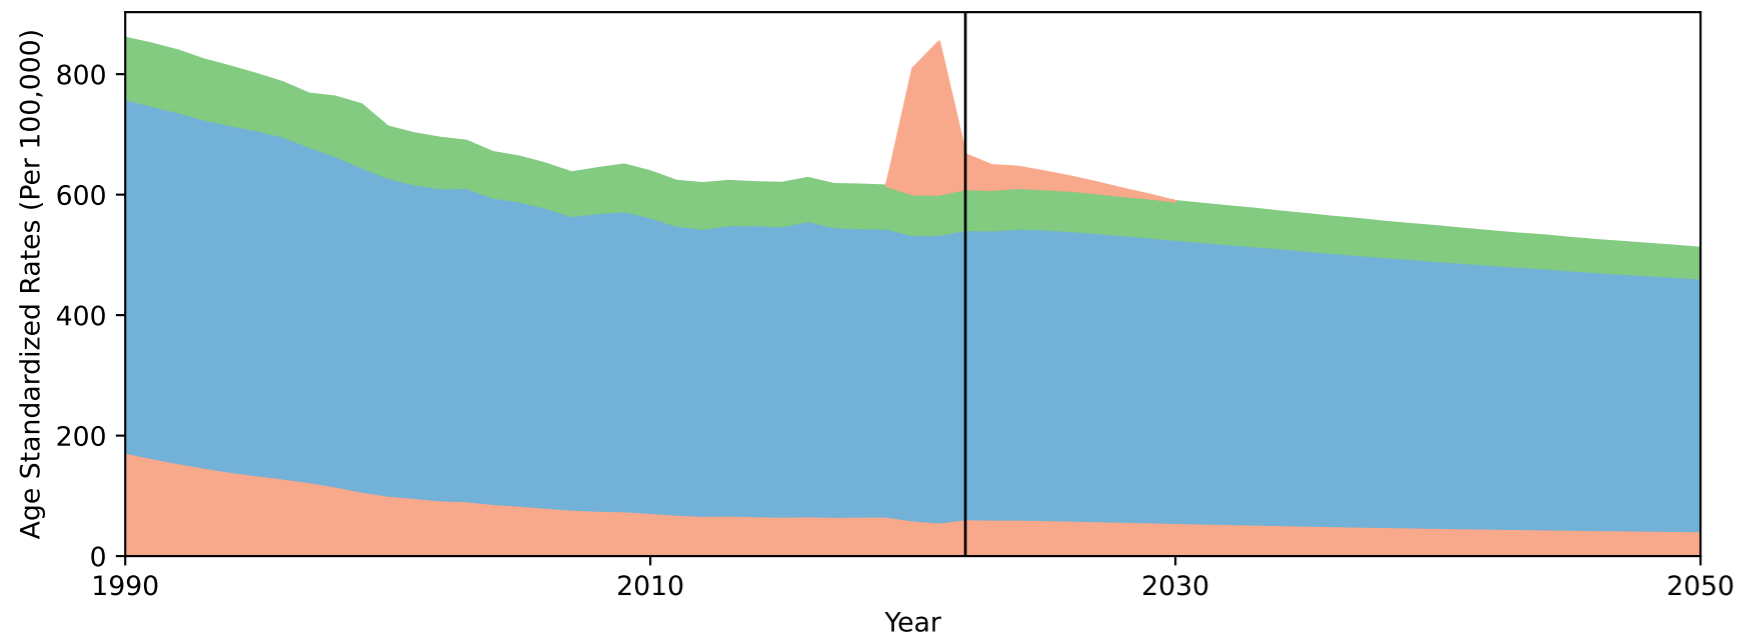

Level 2

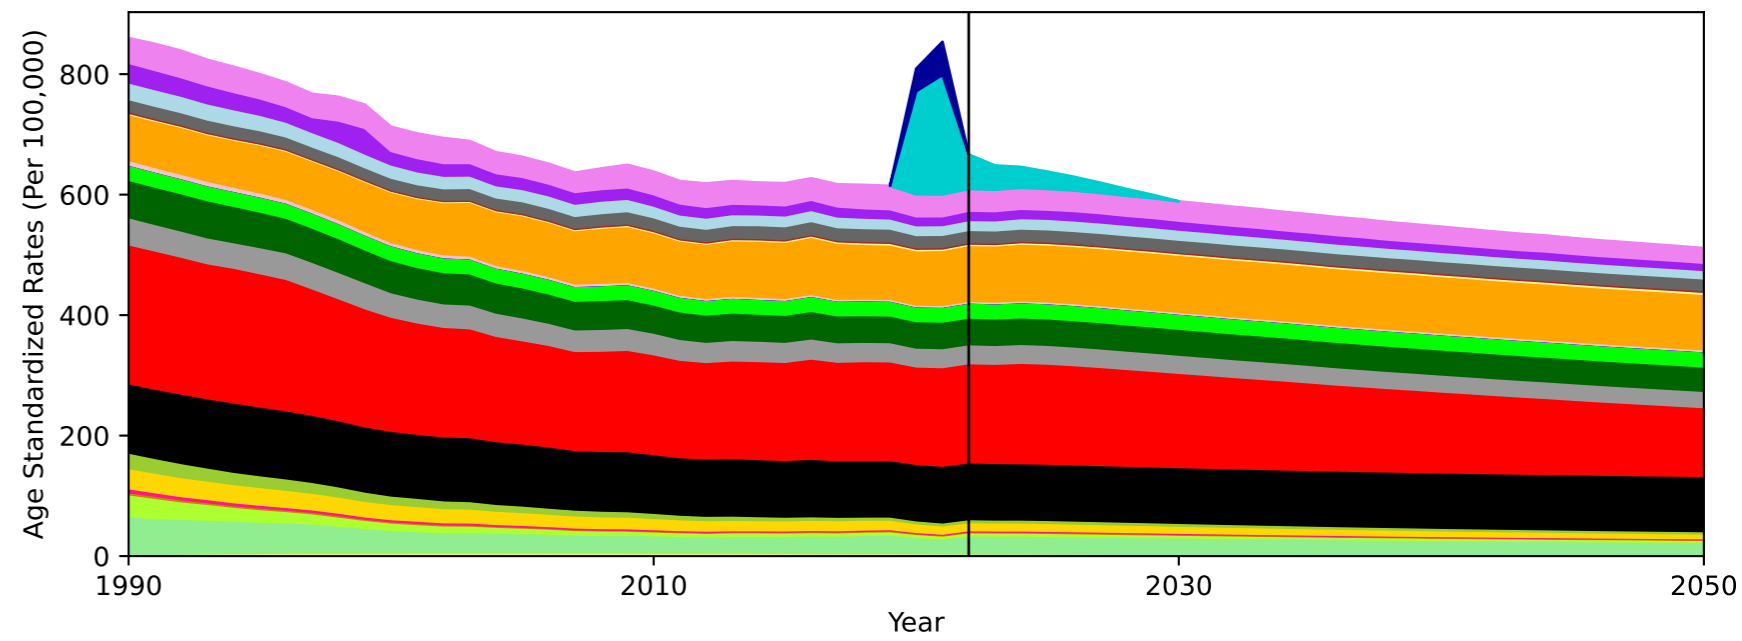

Level 1

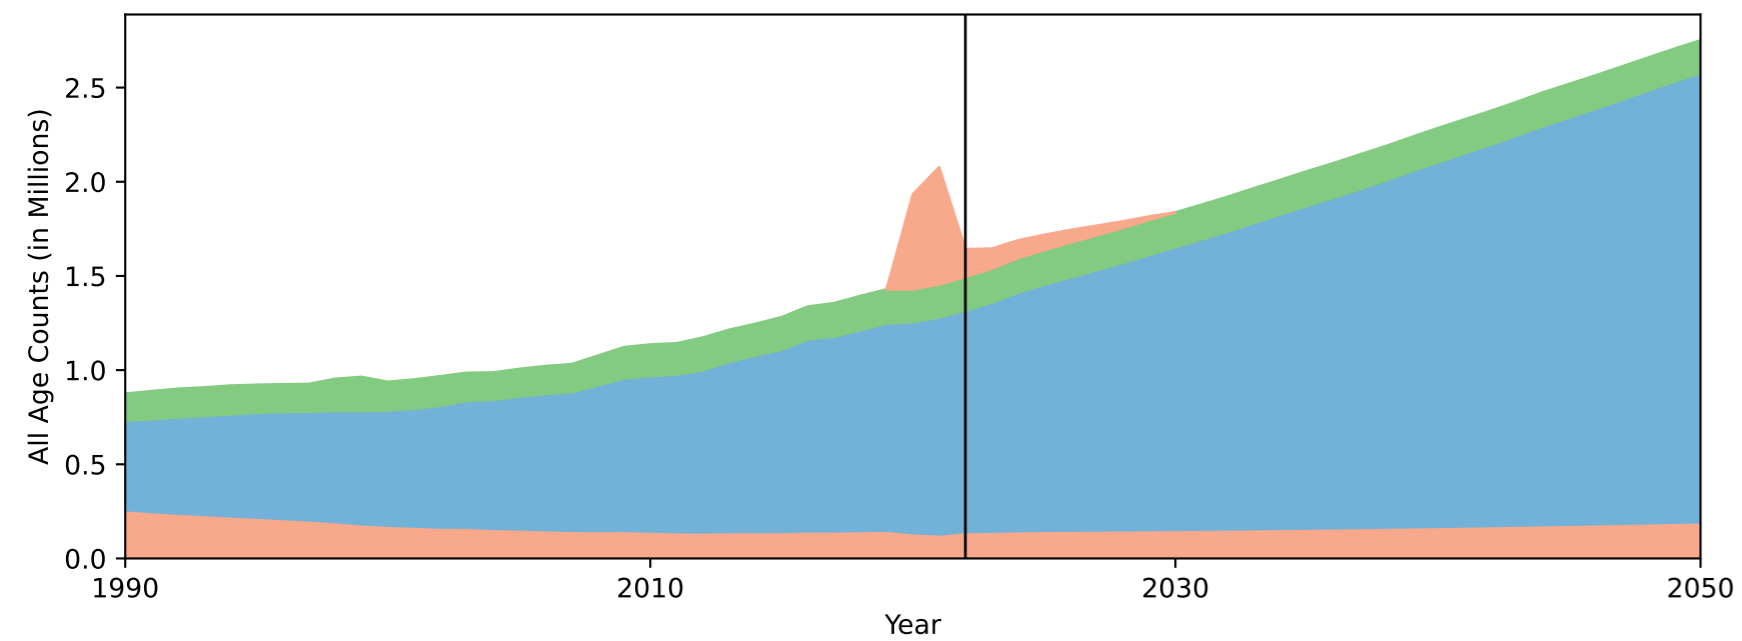

Level 2

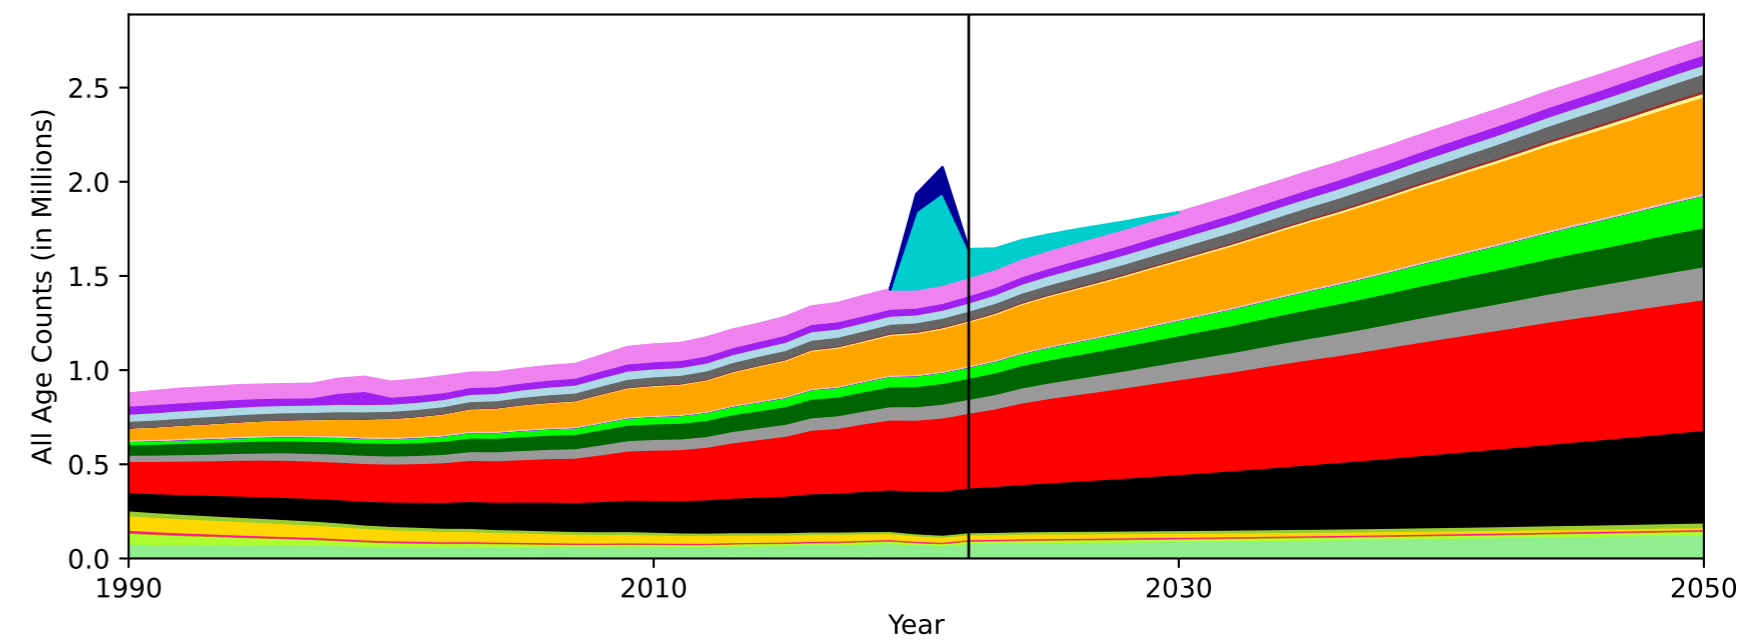

# Tropical Latin America

Level 1

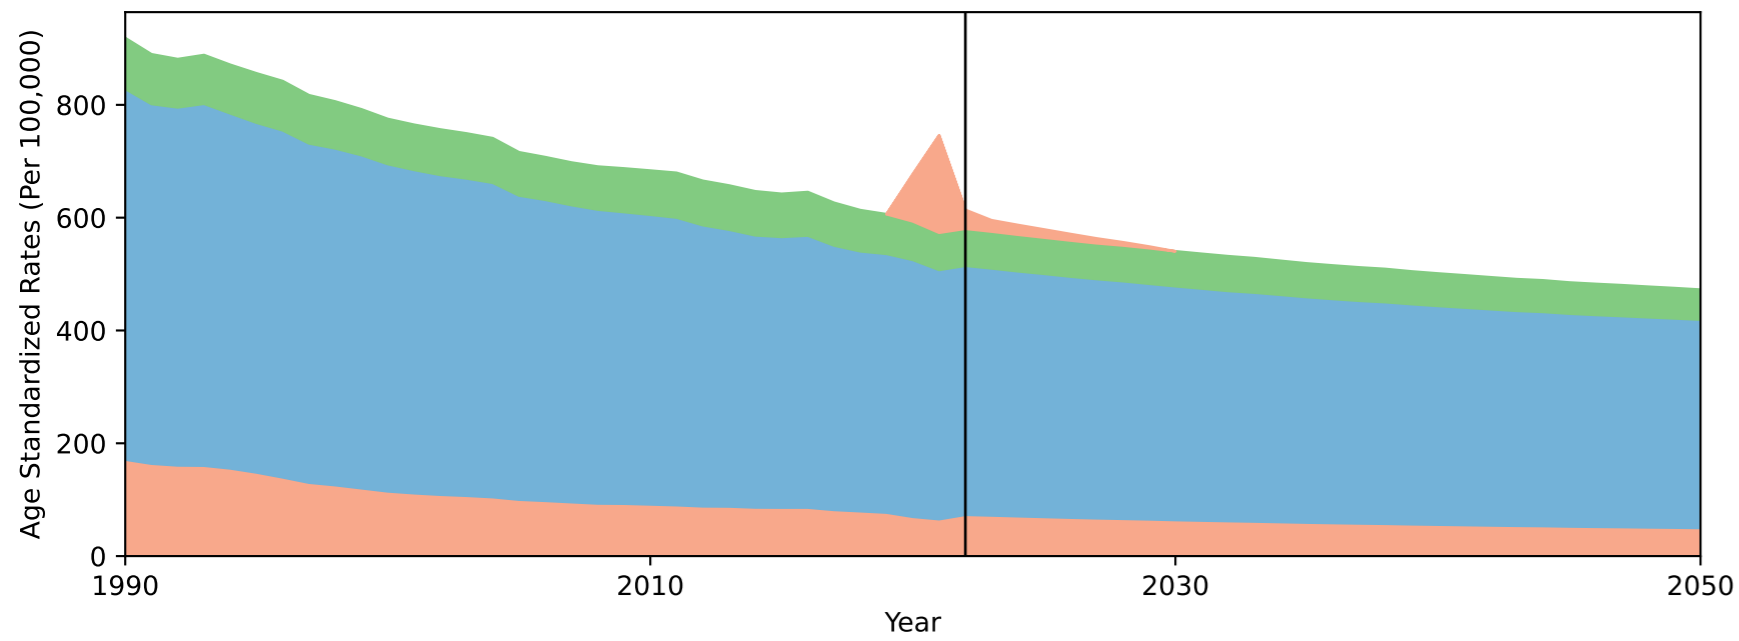

Level 2

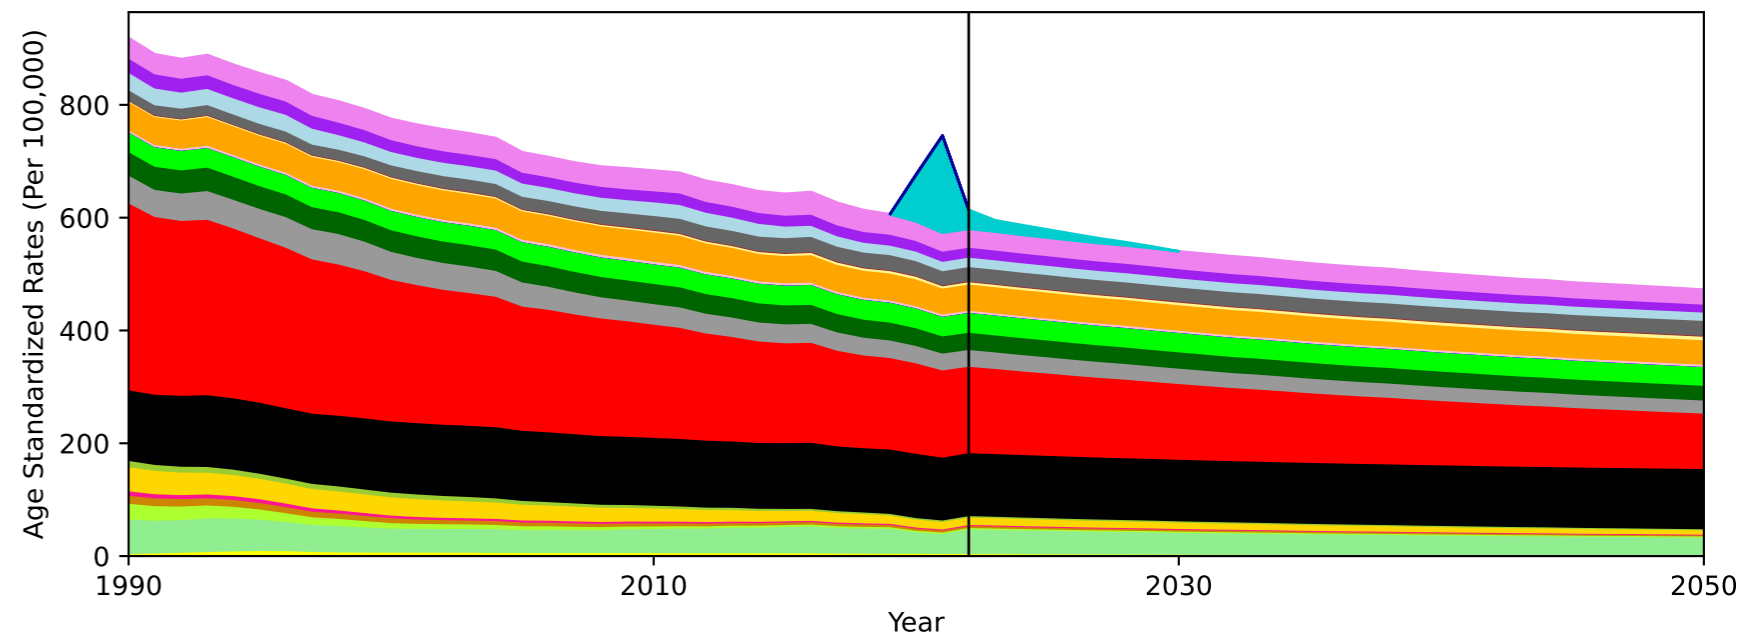

Level 1

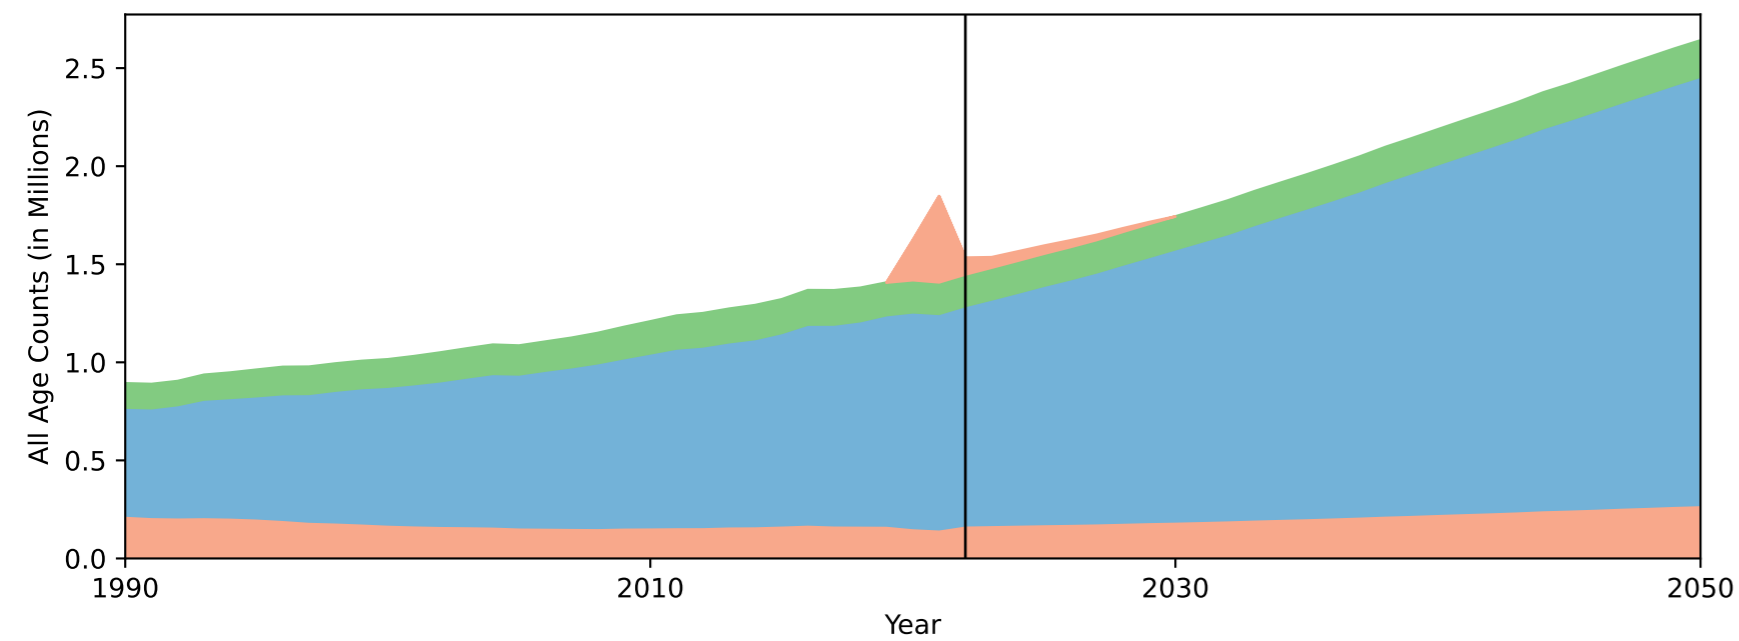

Level 2

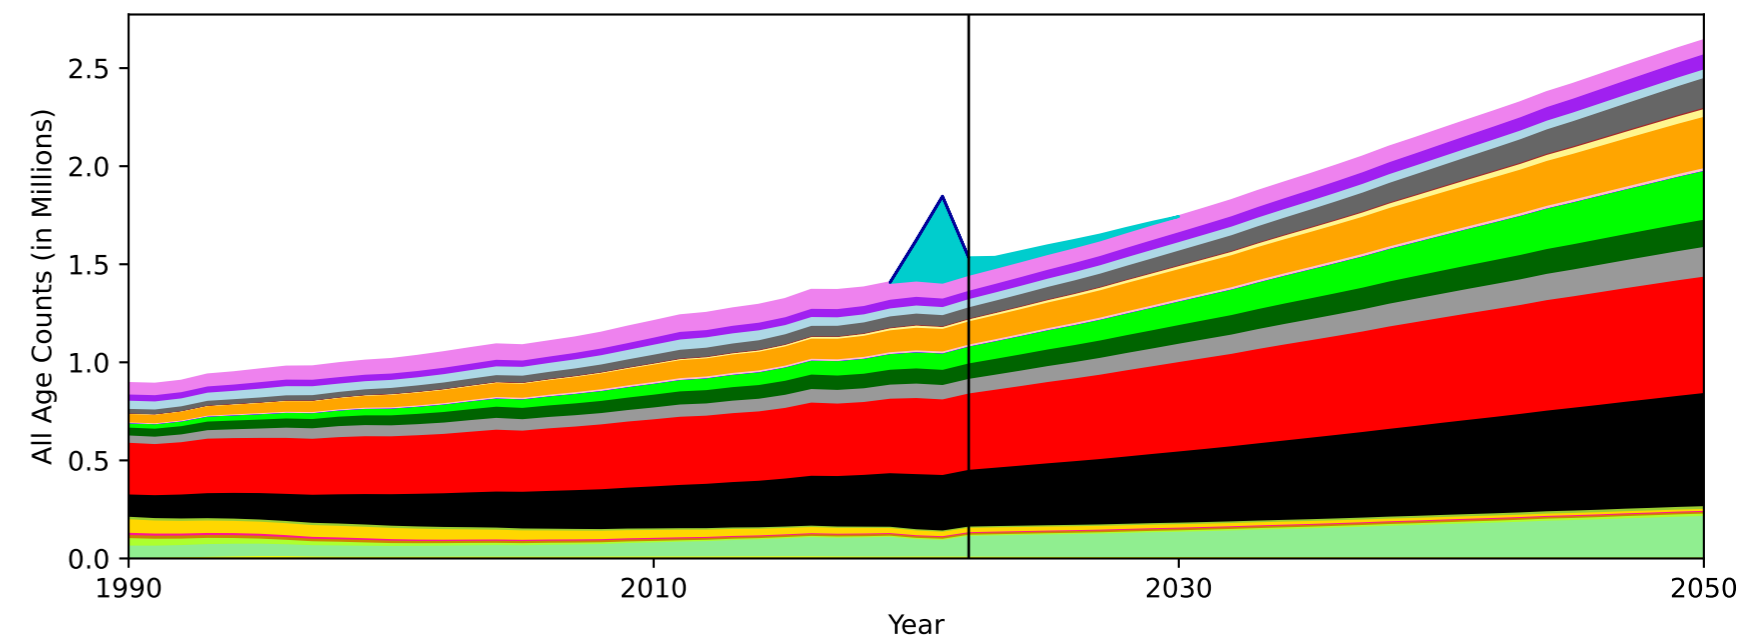

# North Africa And Middle East

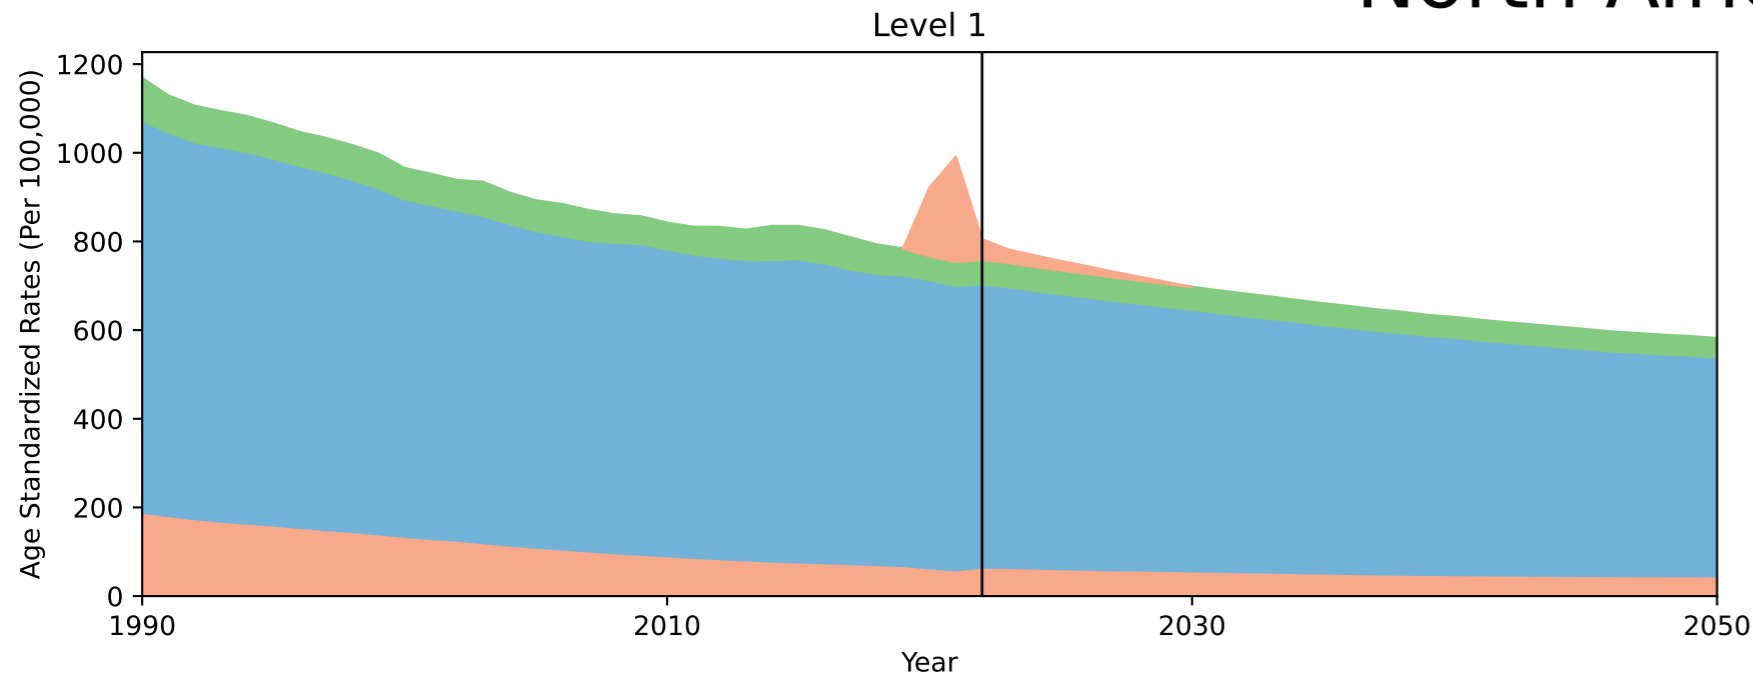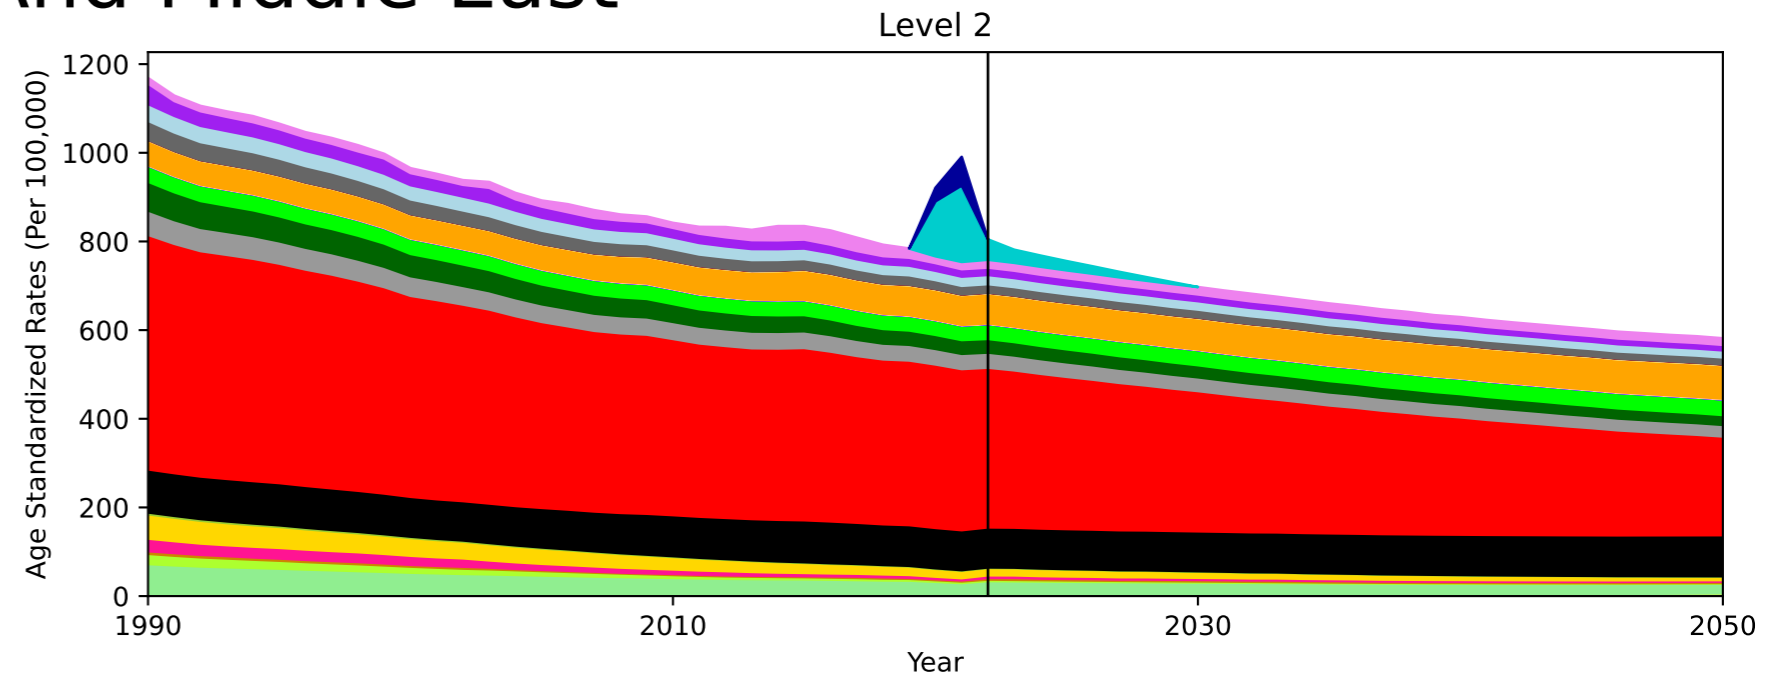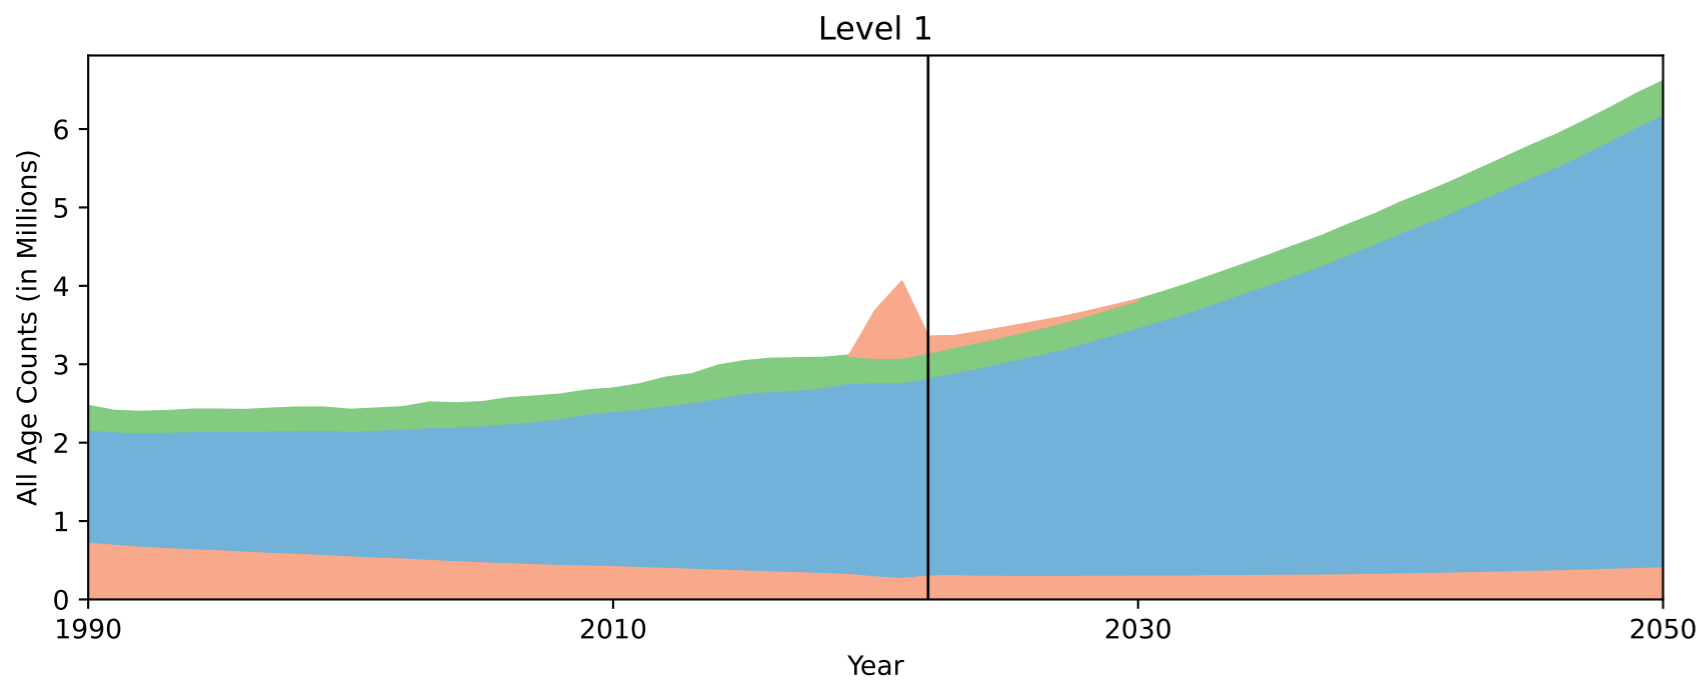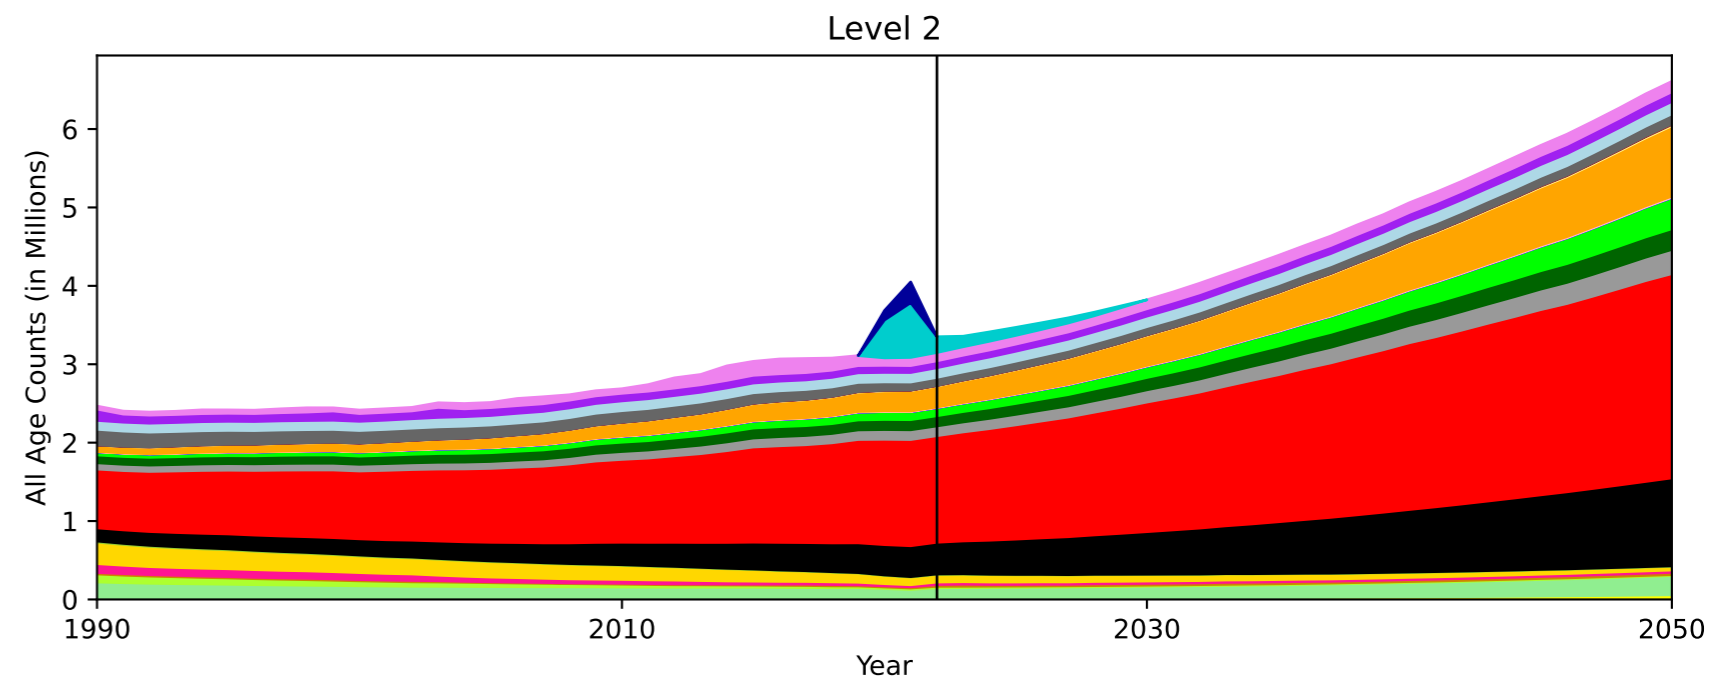

# South Asia

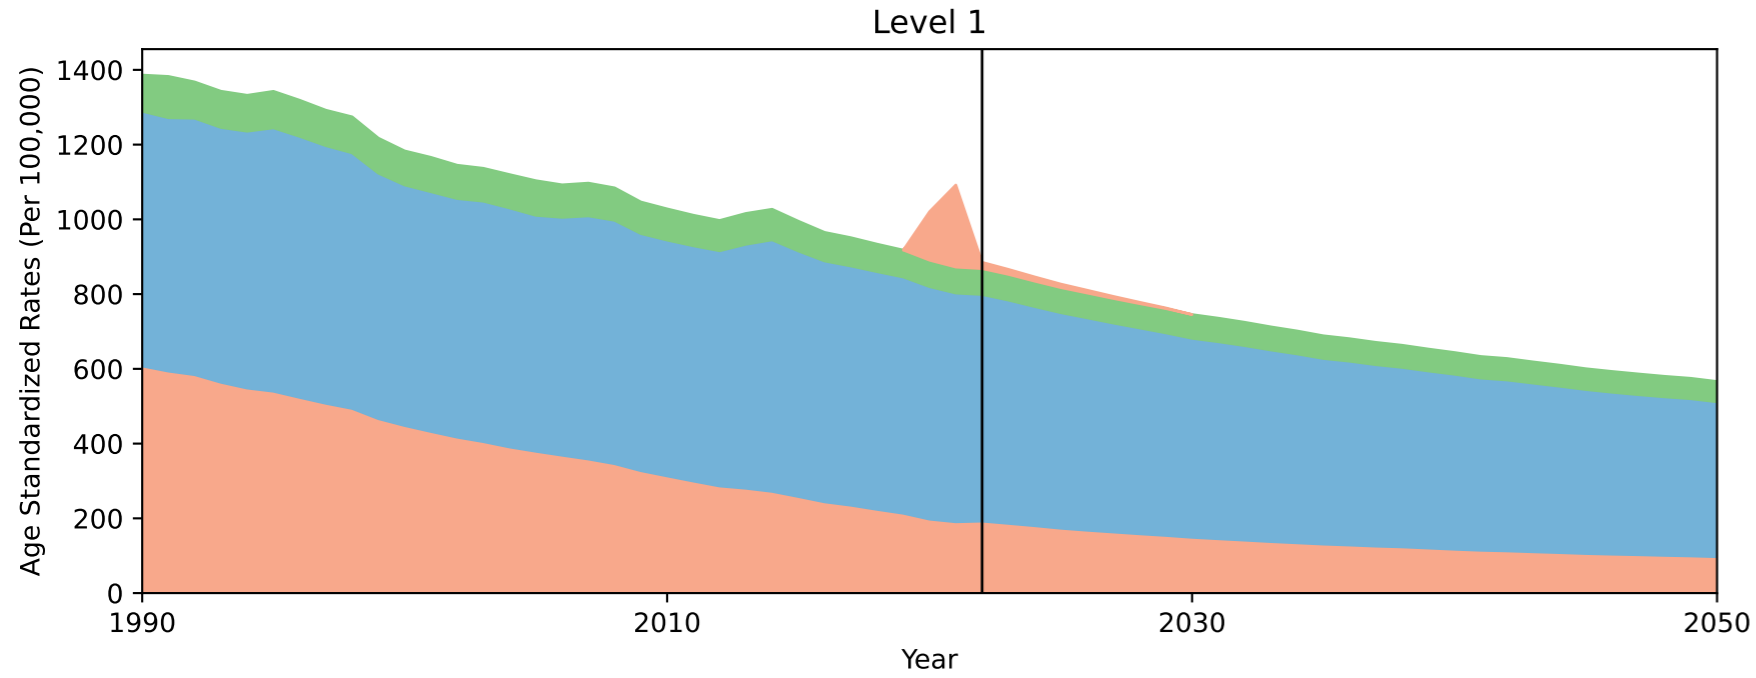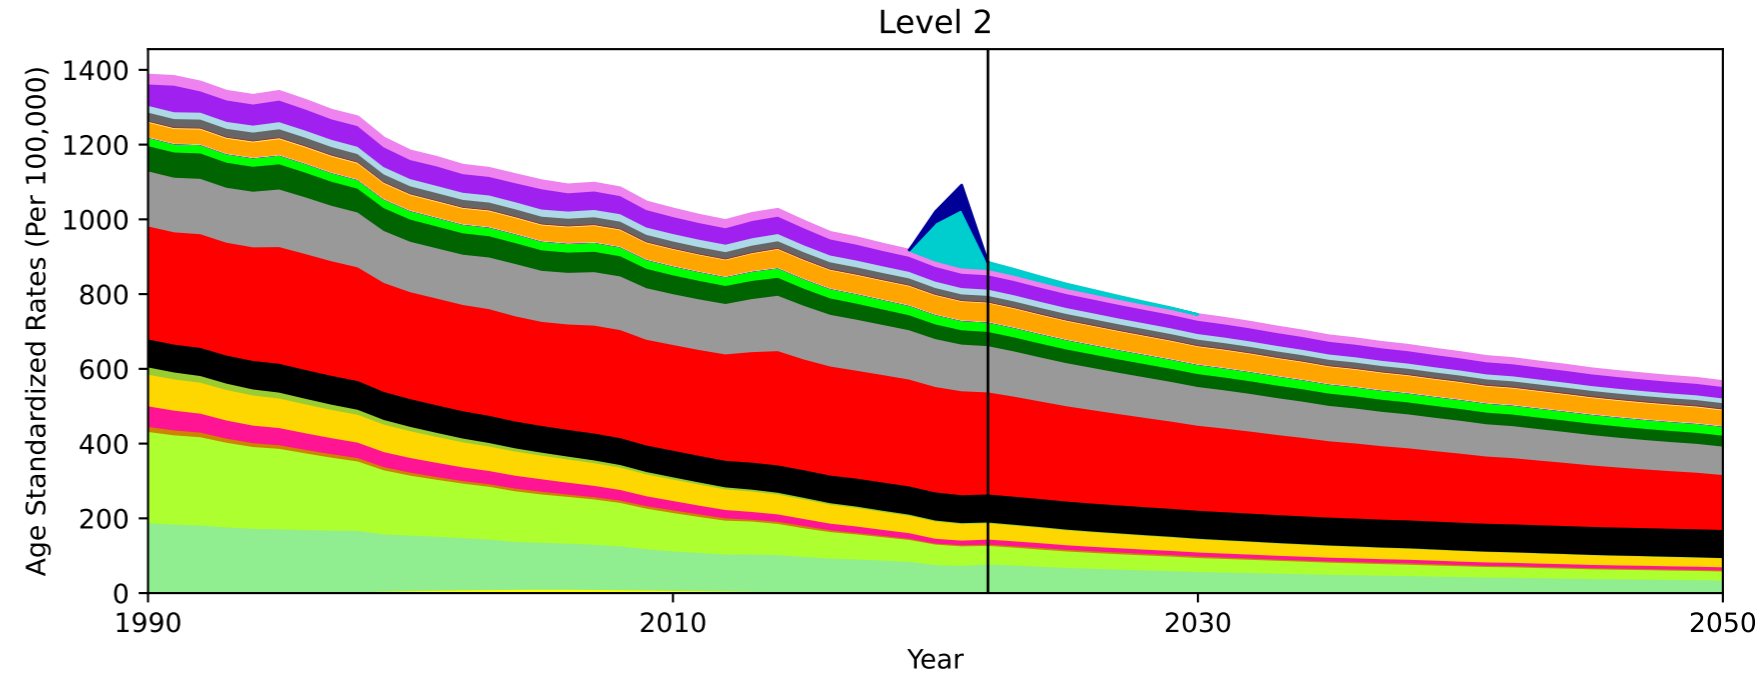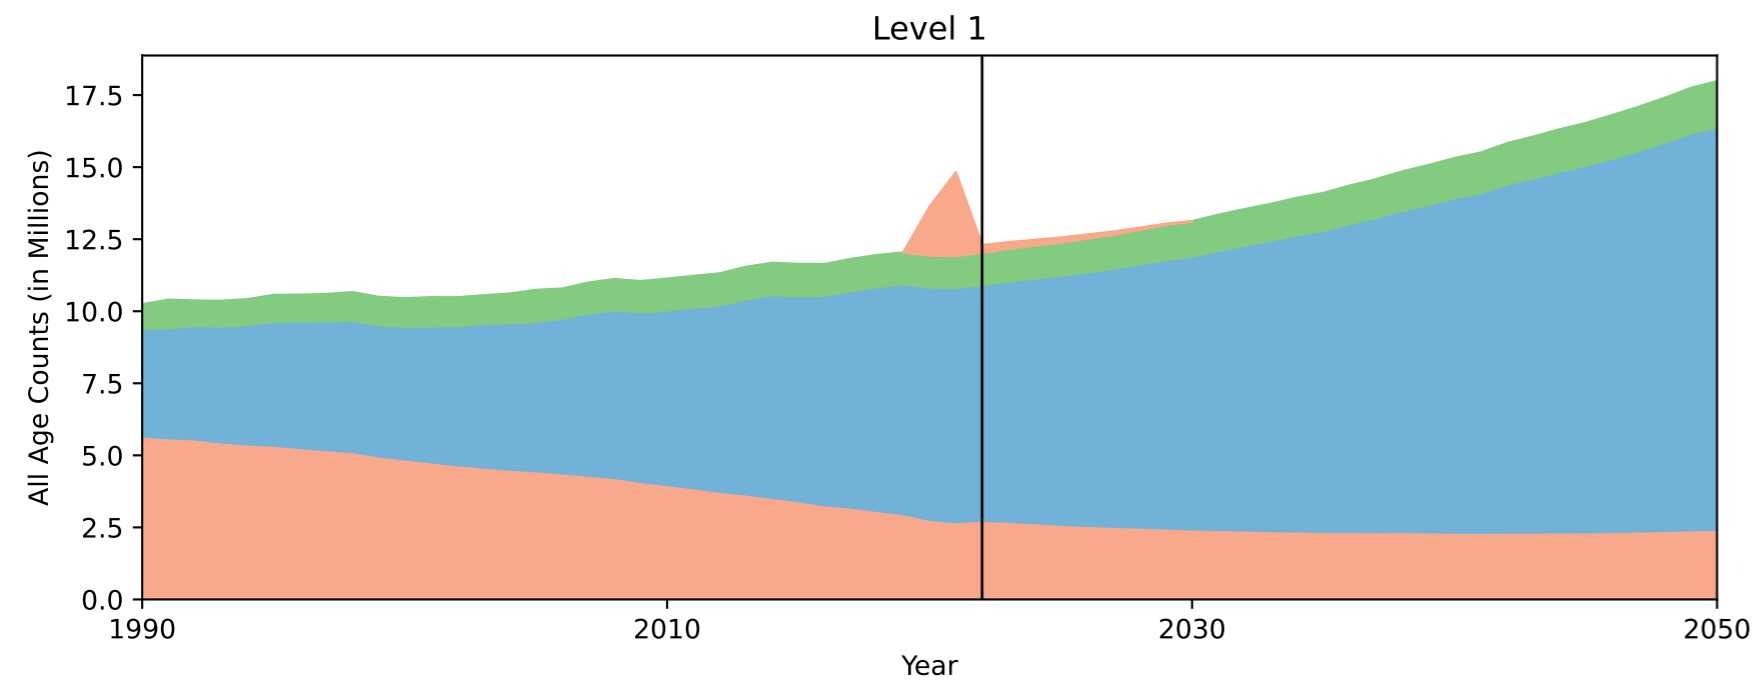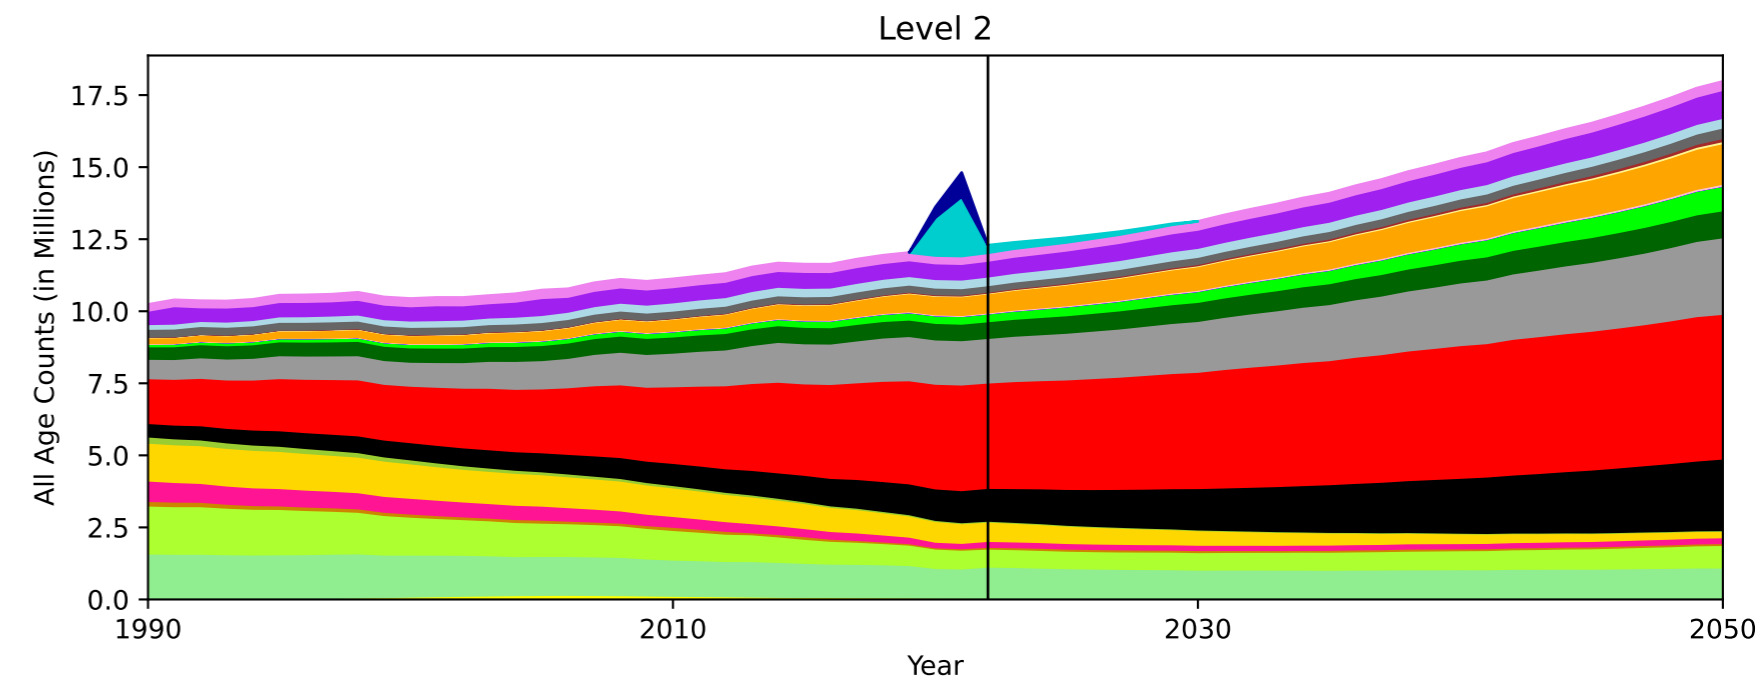



# East Asia

Level 1

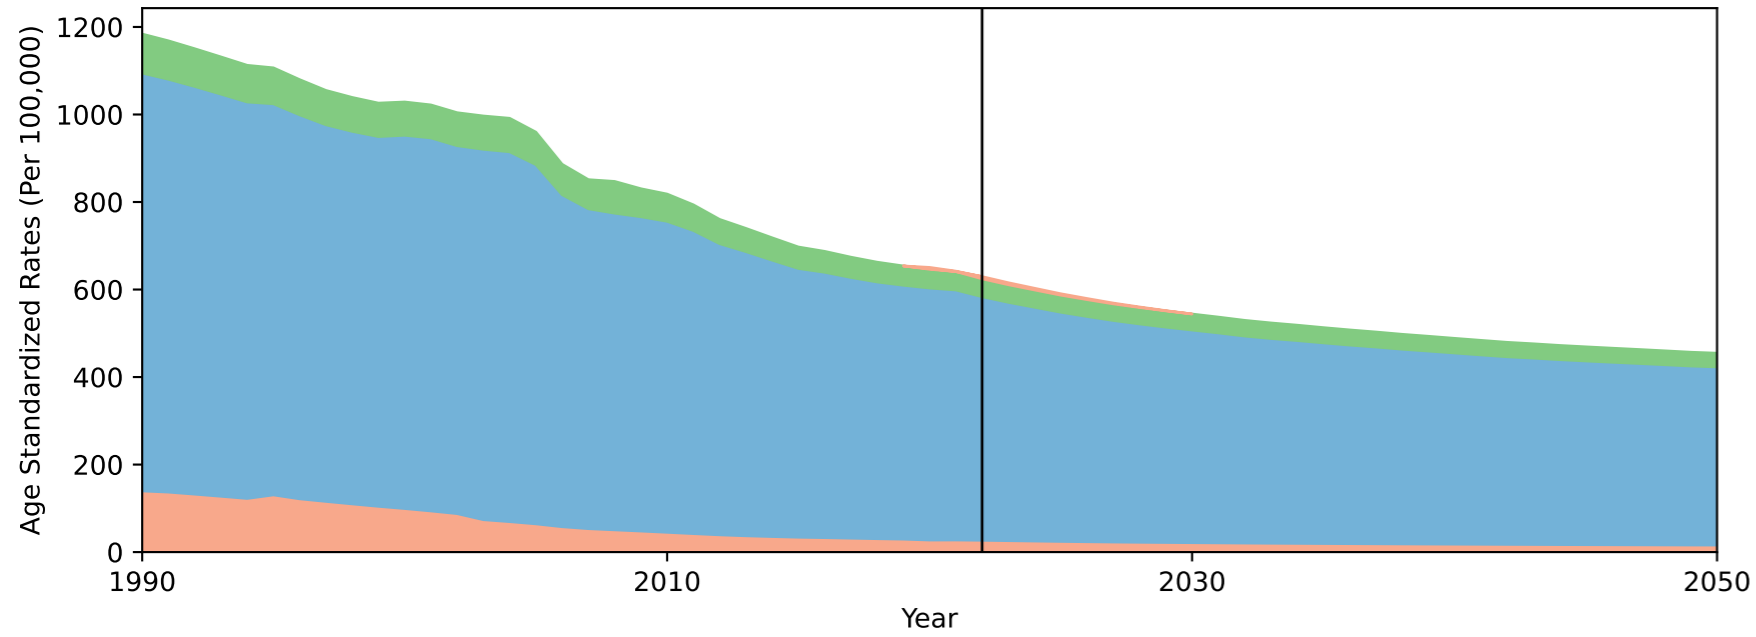

Level 2

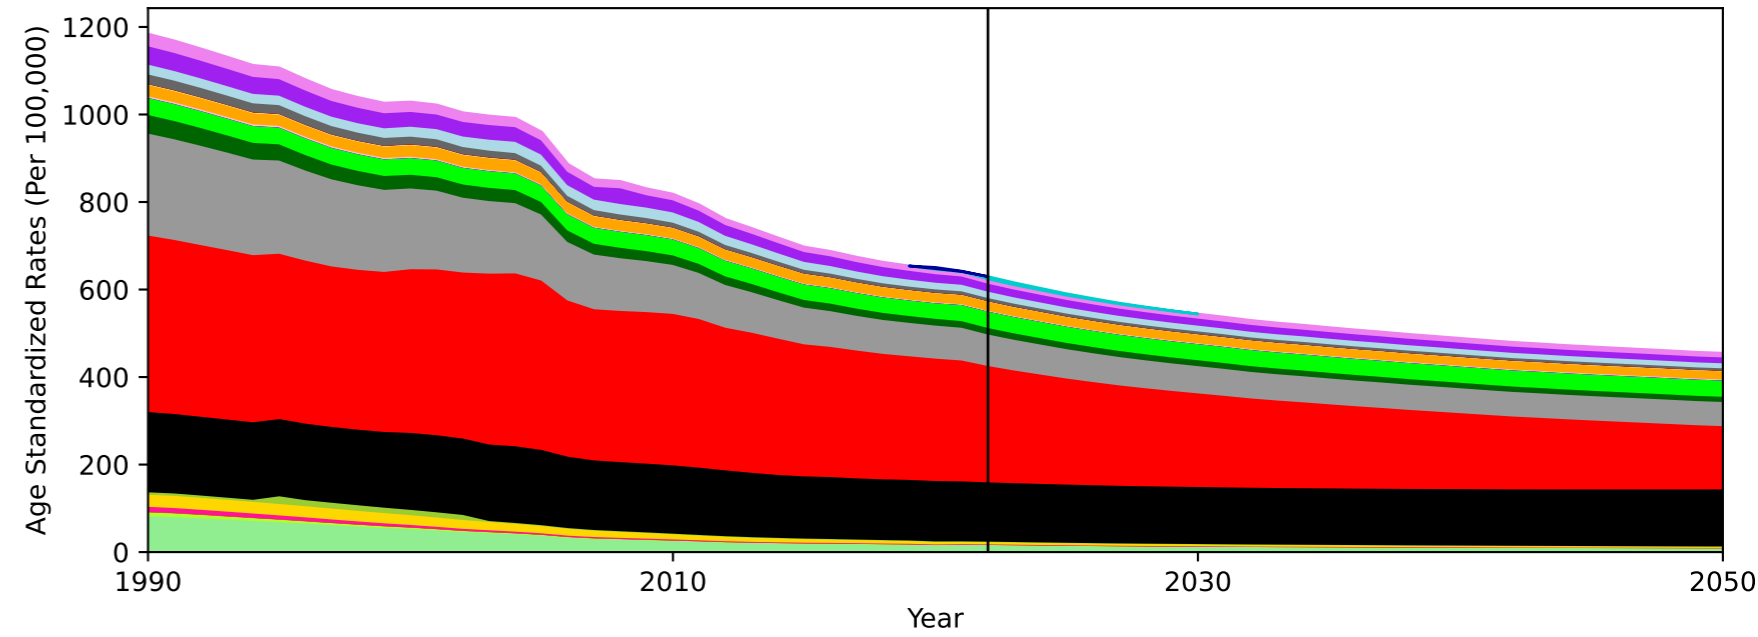

Level 1

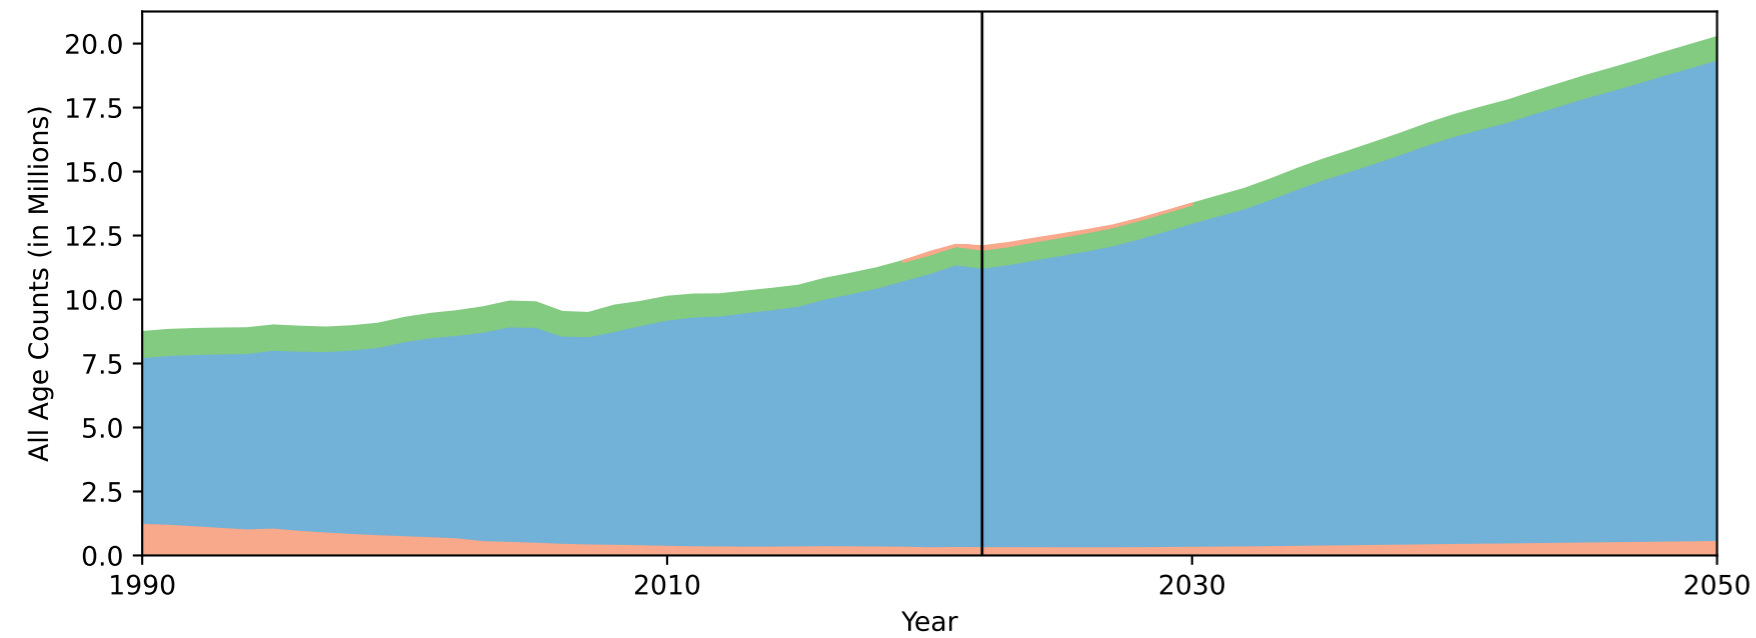

Level 2

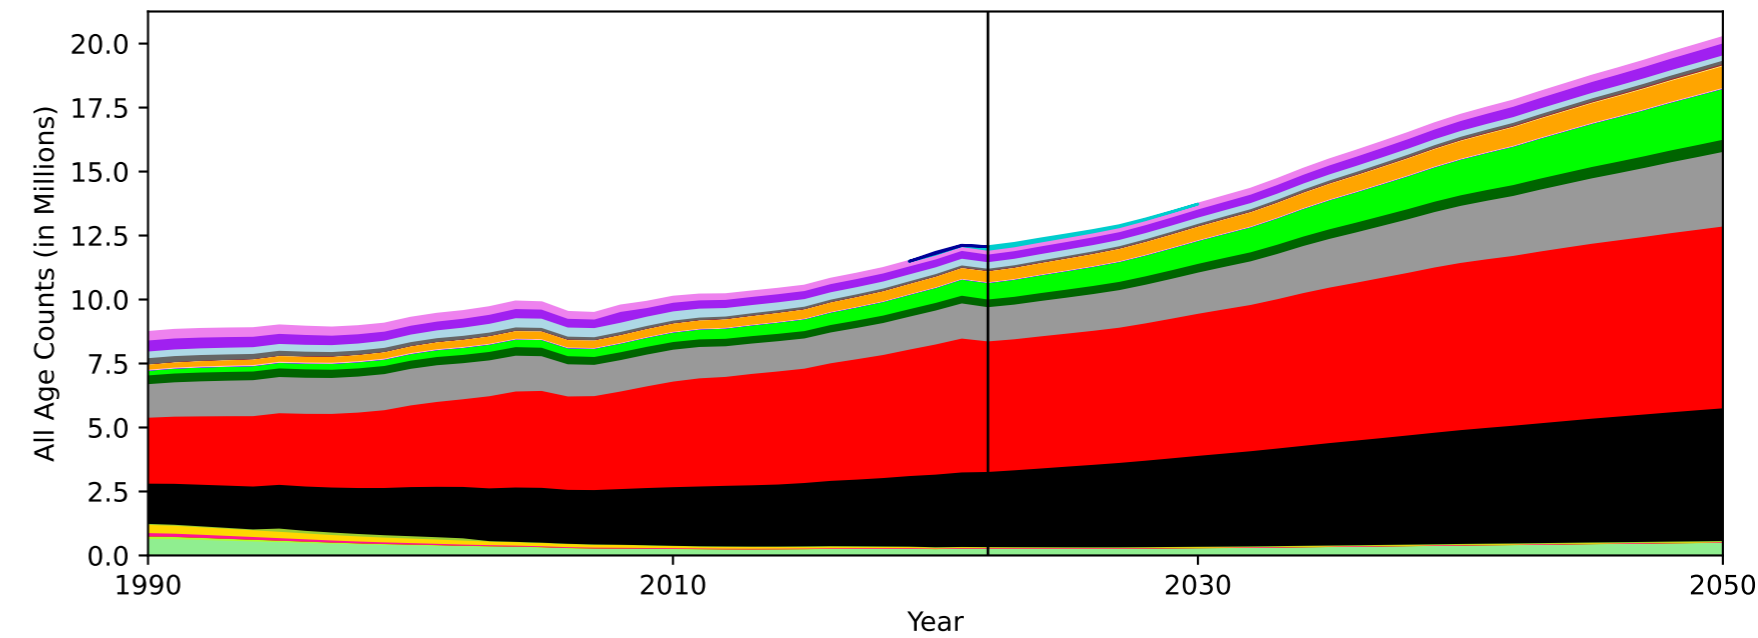

Level 1

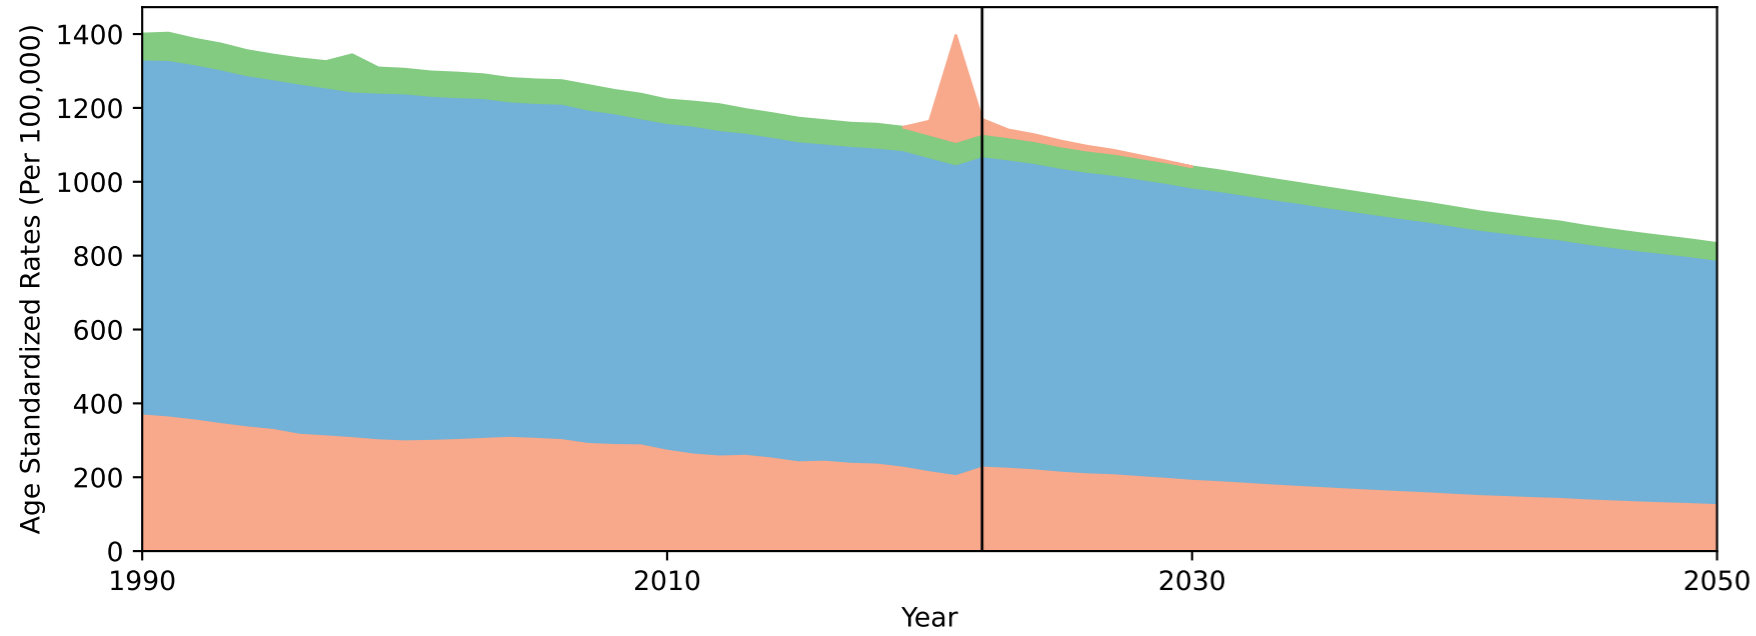

Level 2

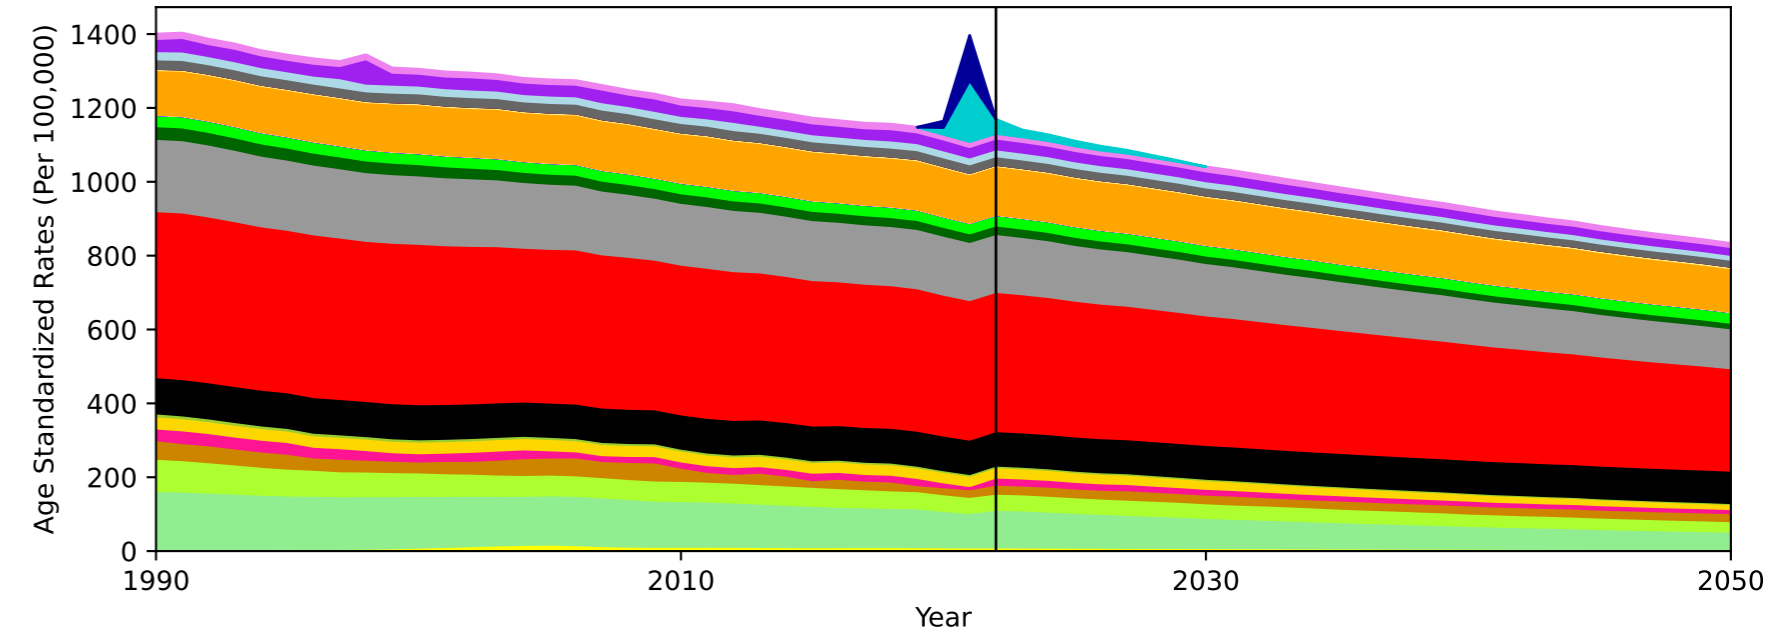

Level 1

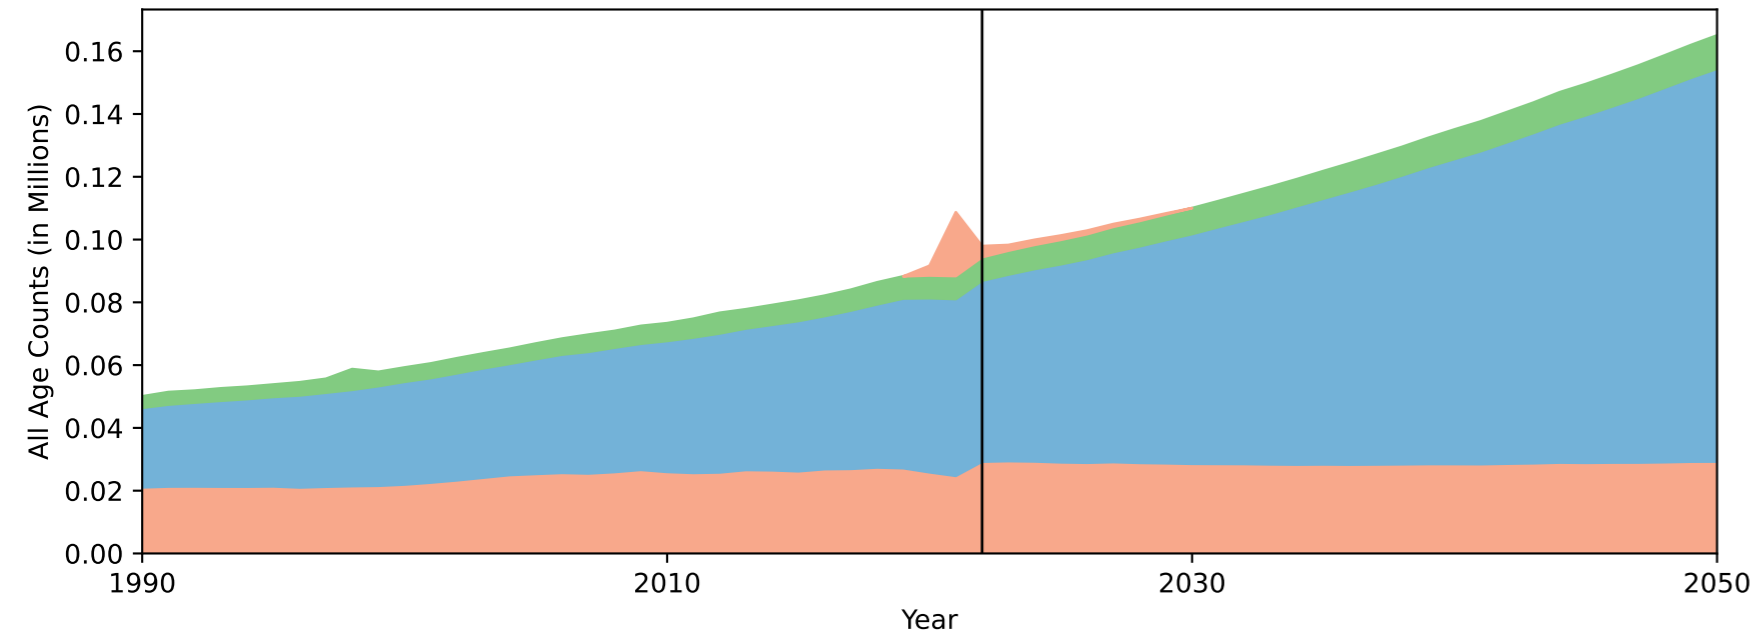

Level 2

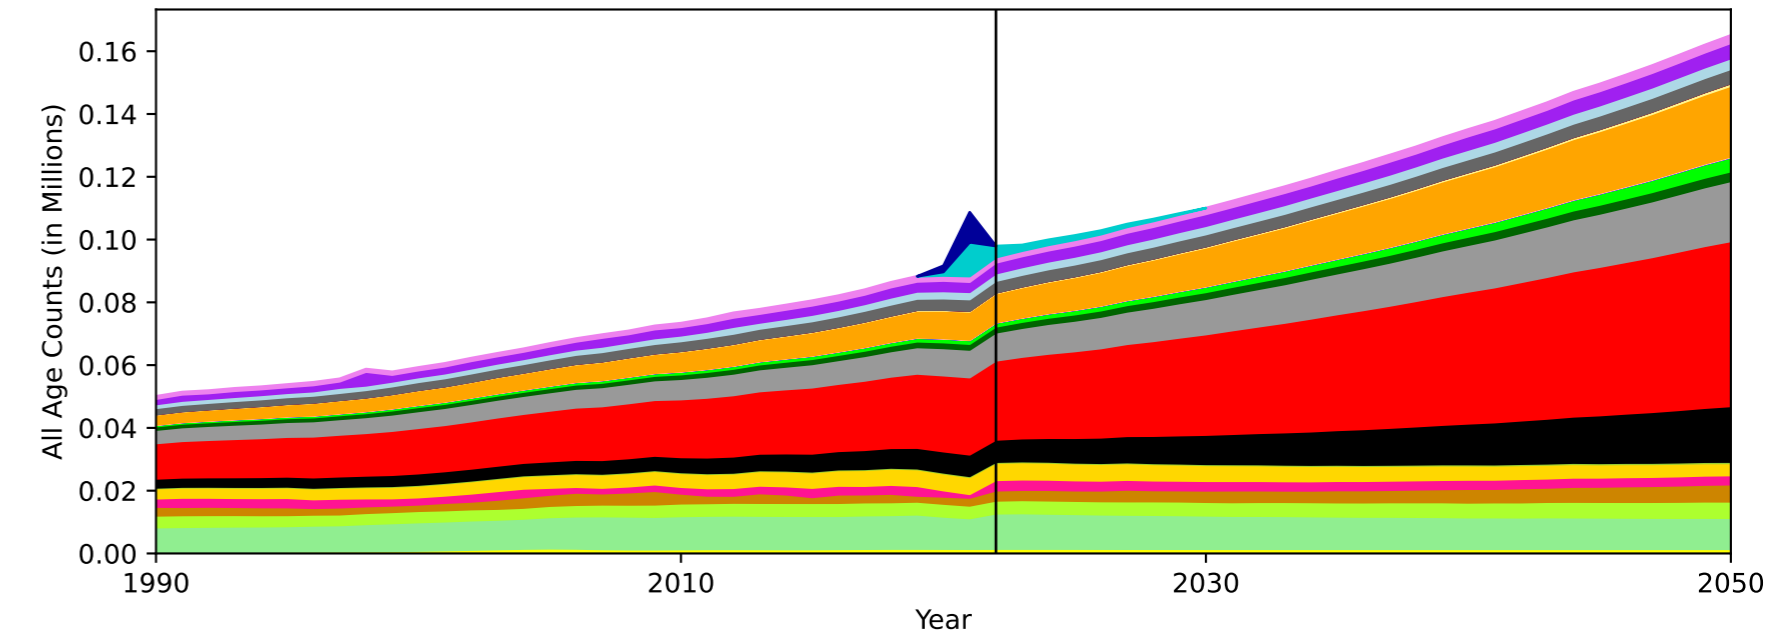

# Southeast Asia

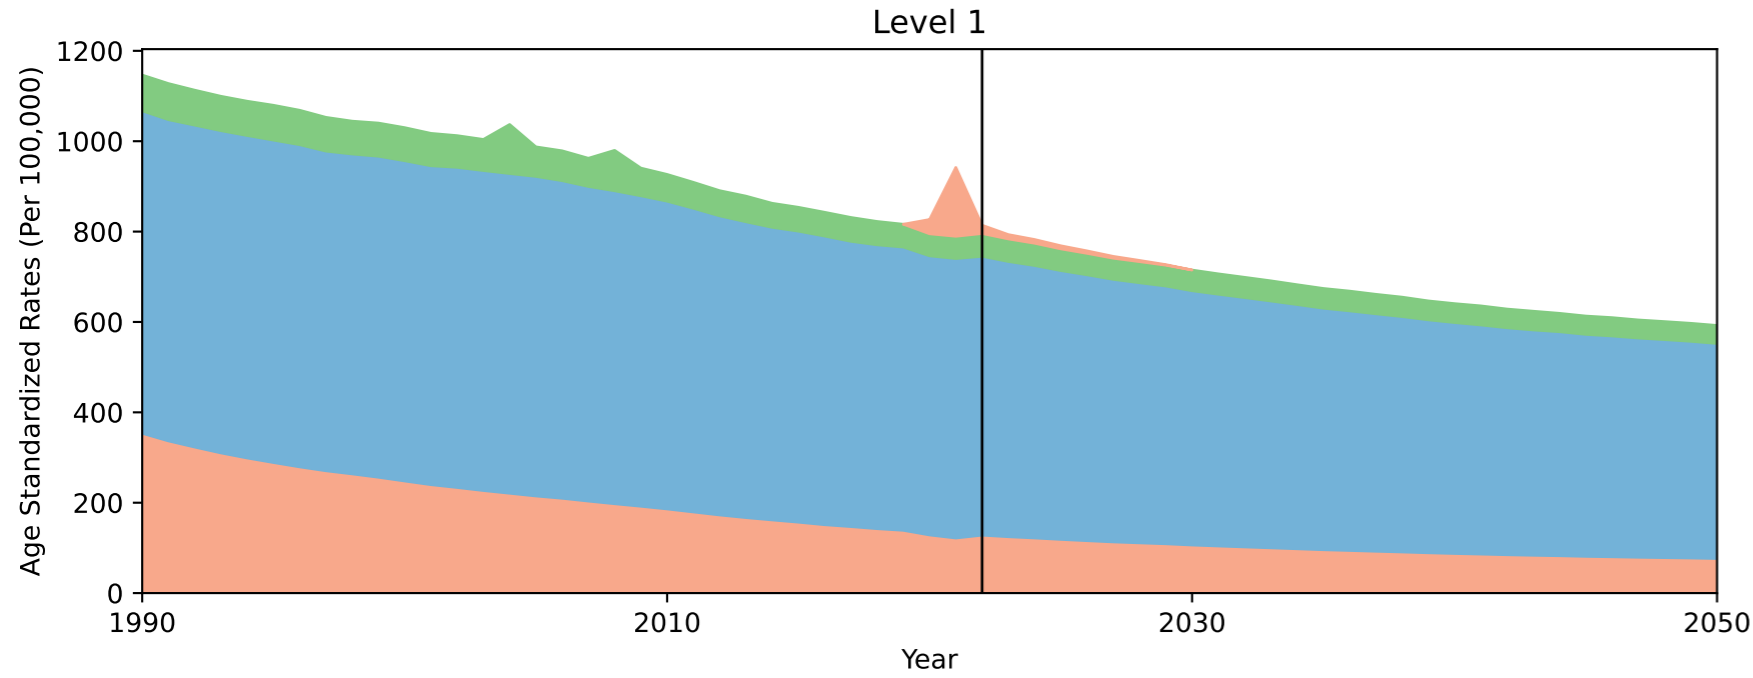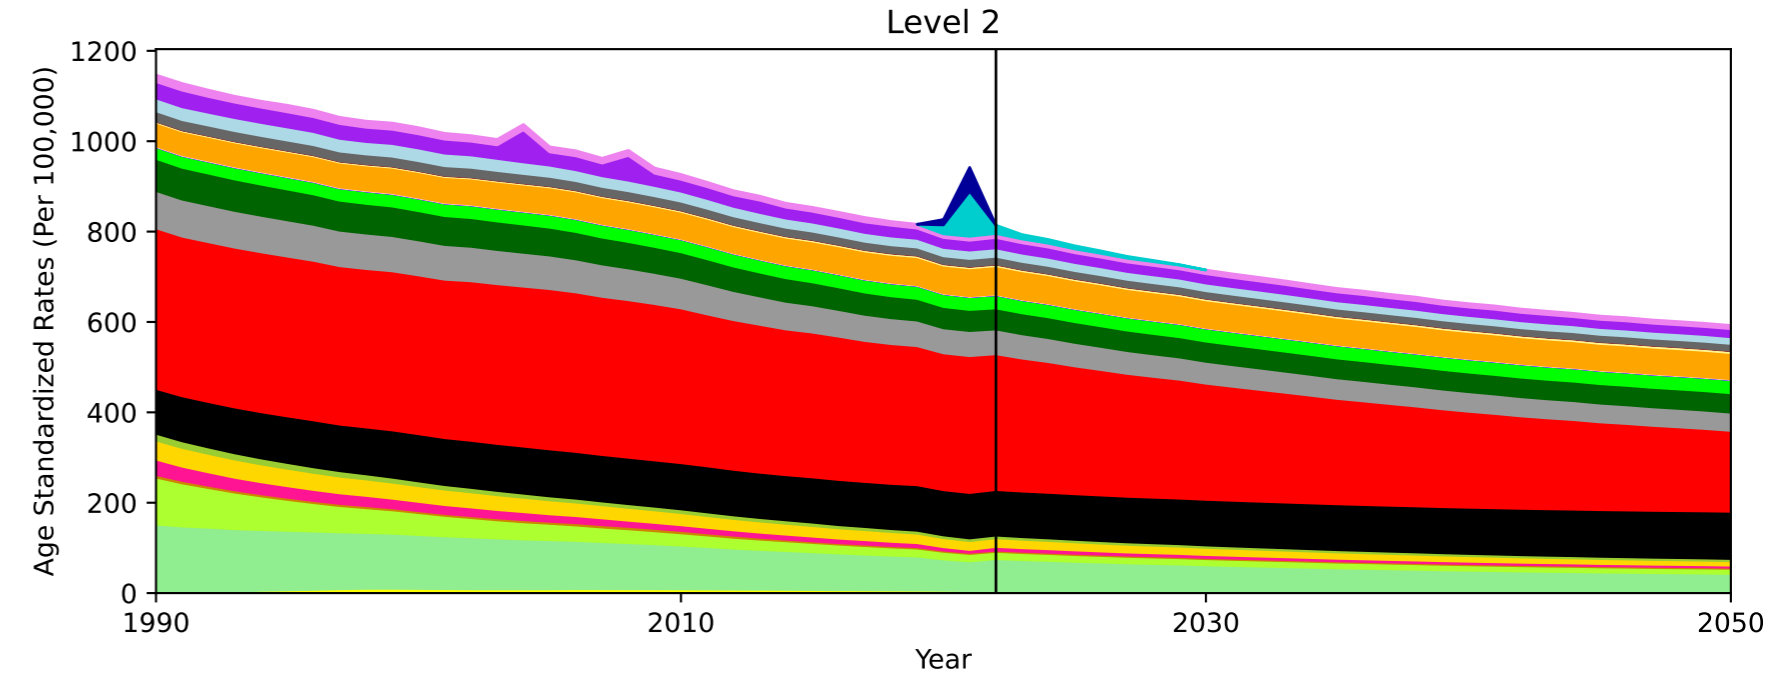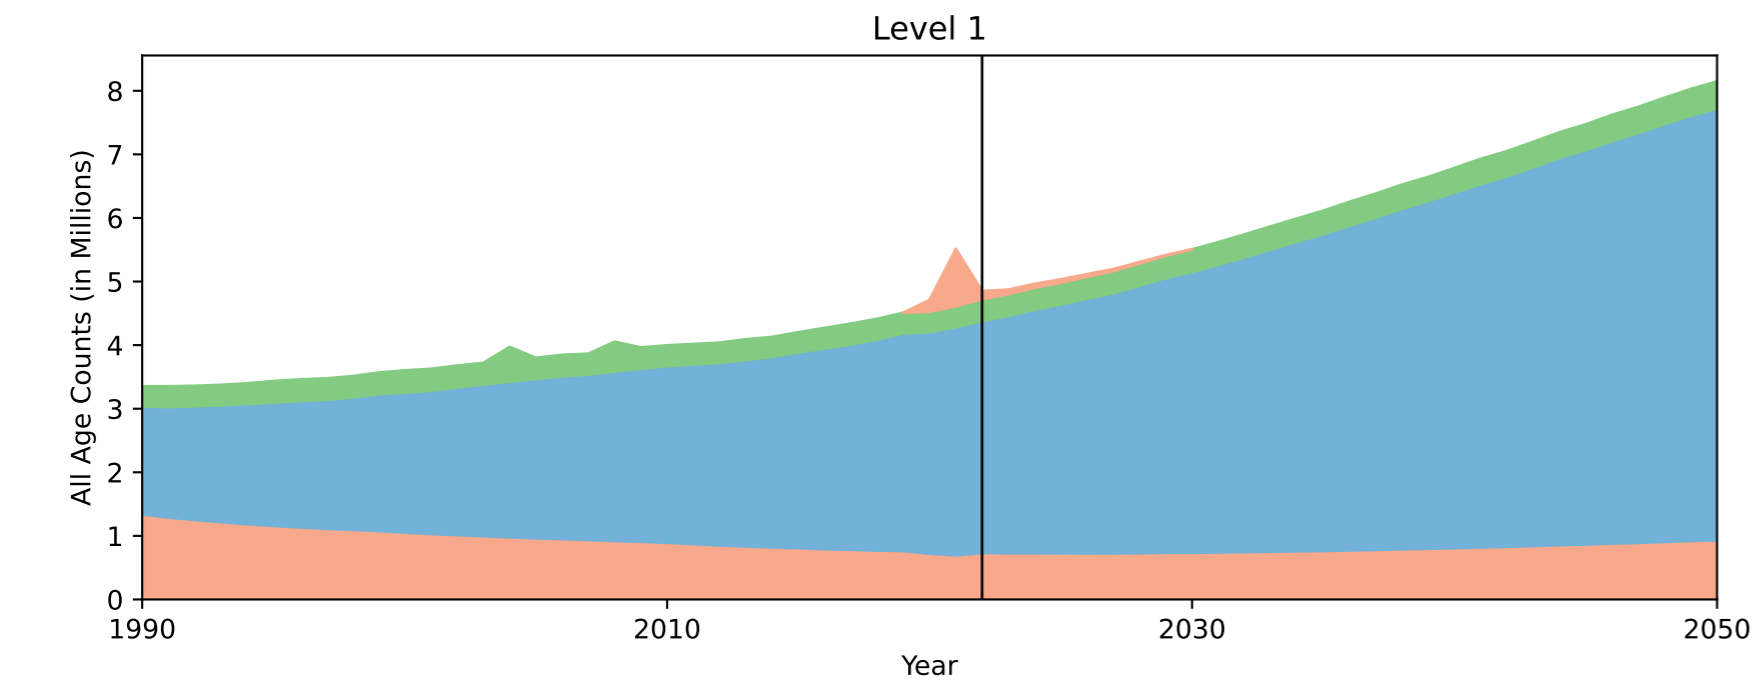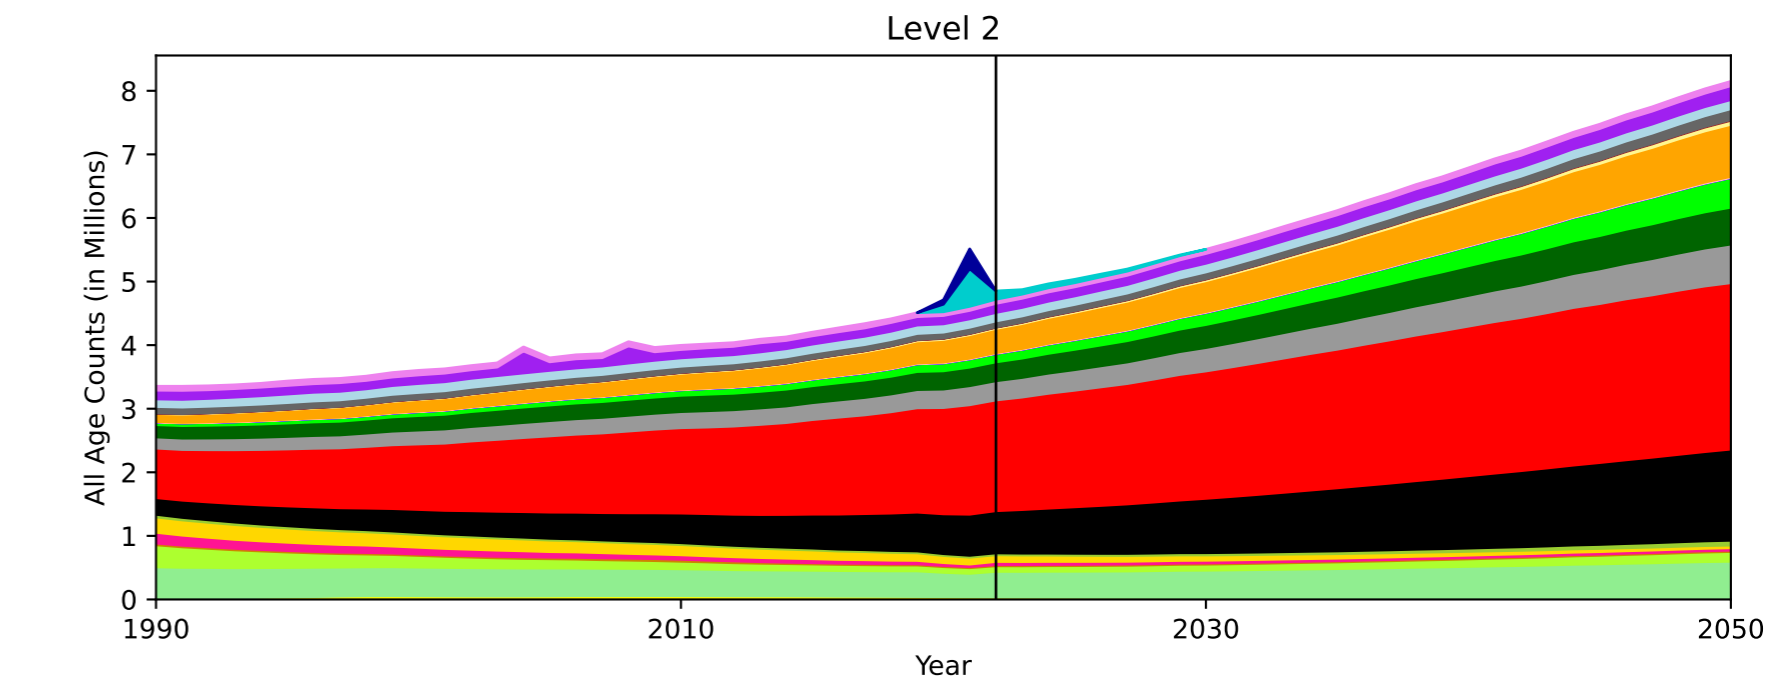

# Central Sub-Saharan Africa

Level 1

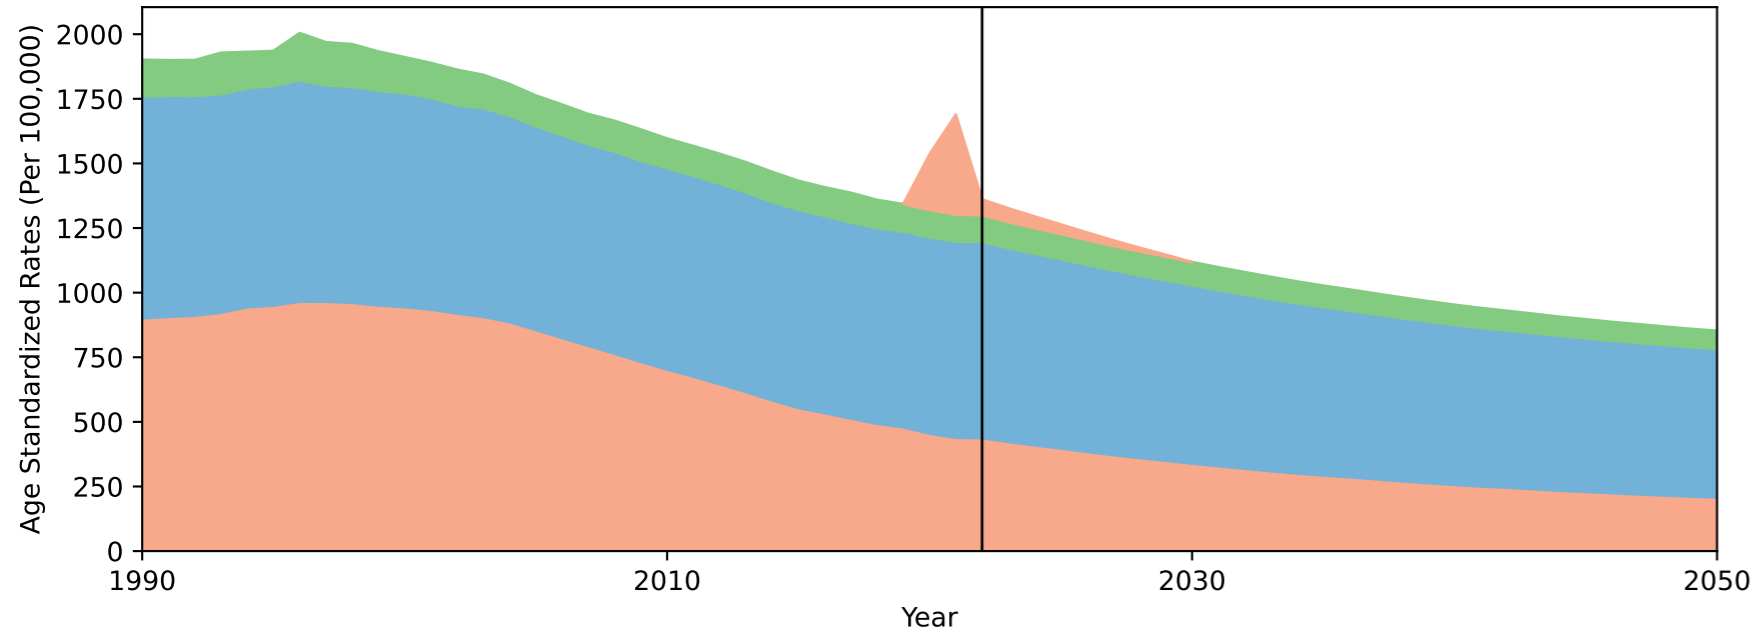

Level 2

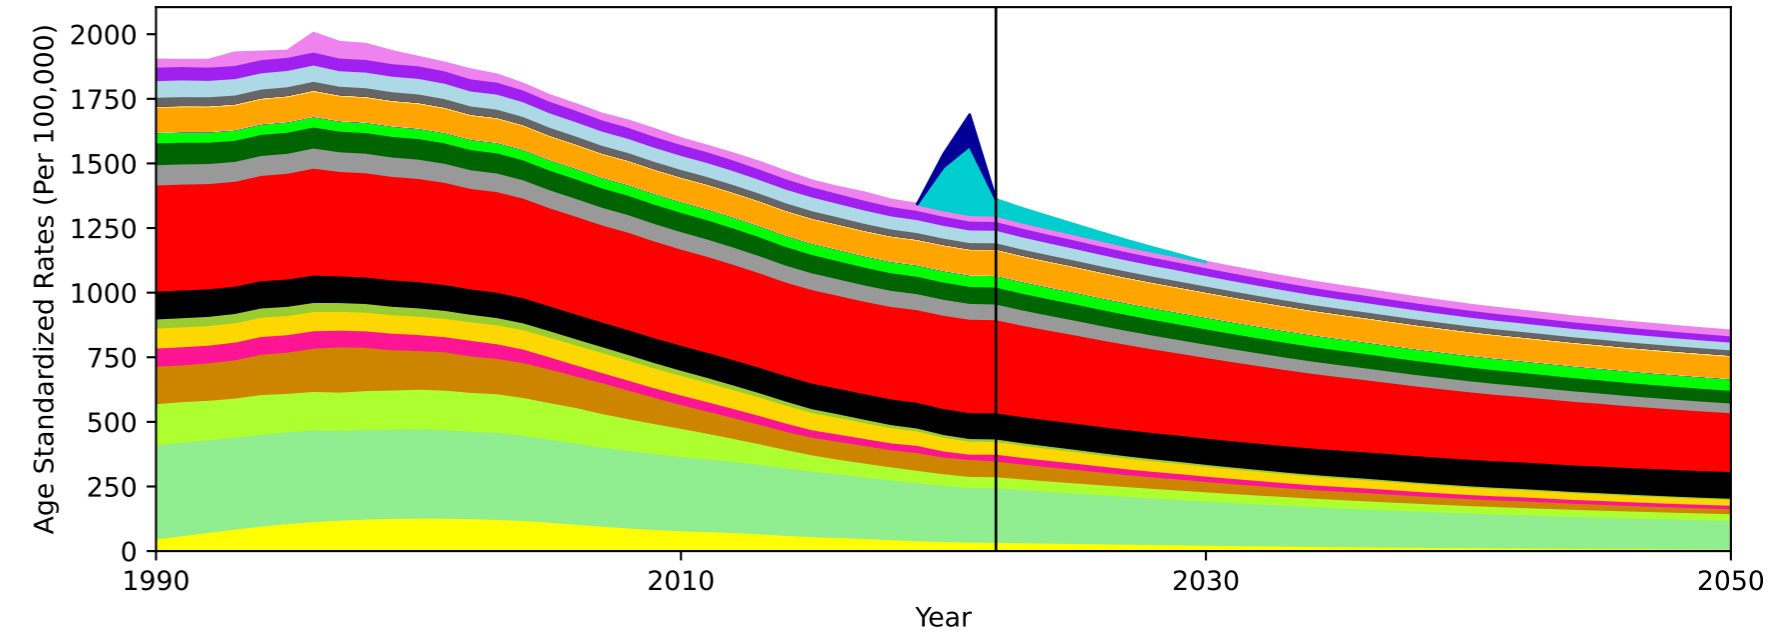

Level 1

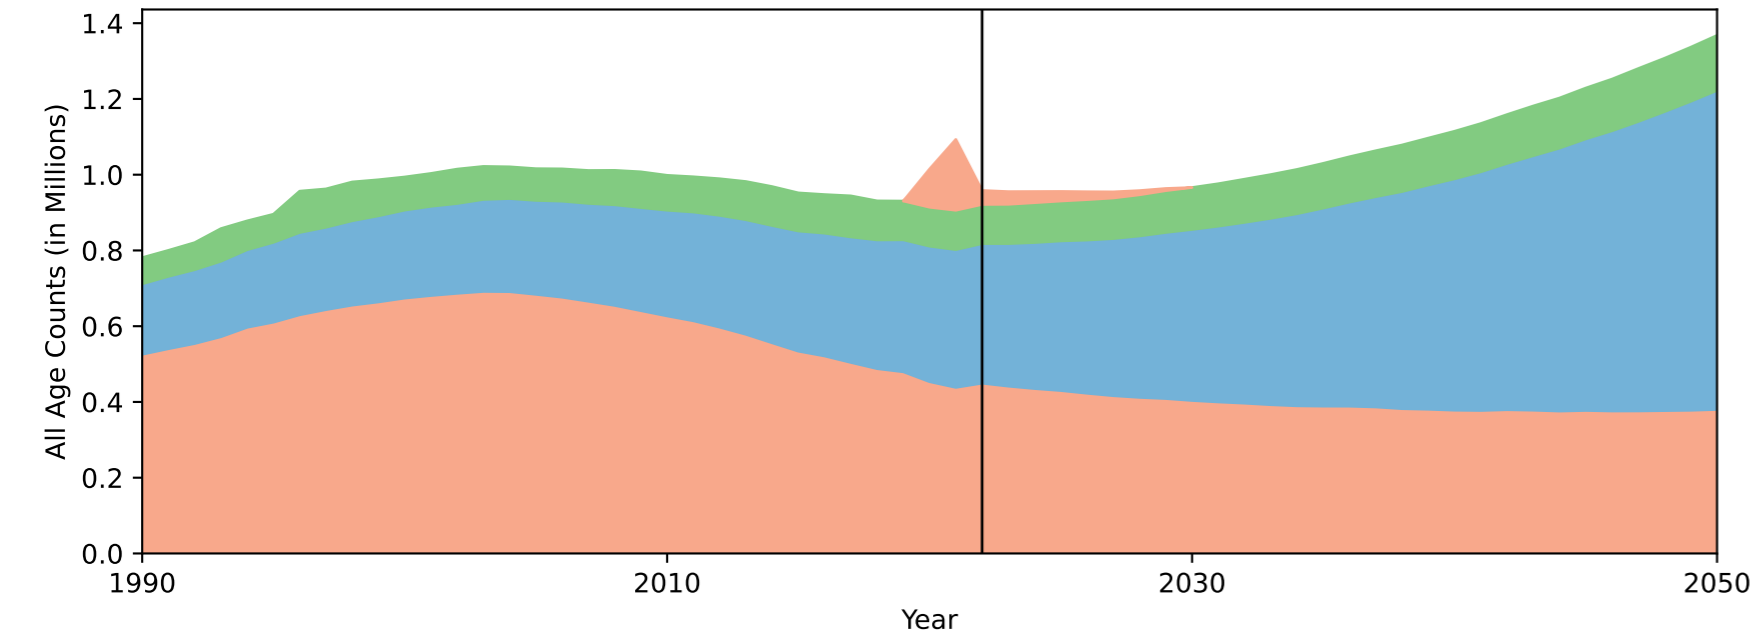

Level 2

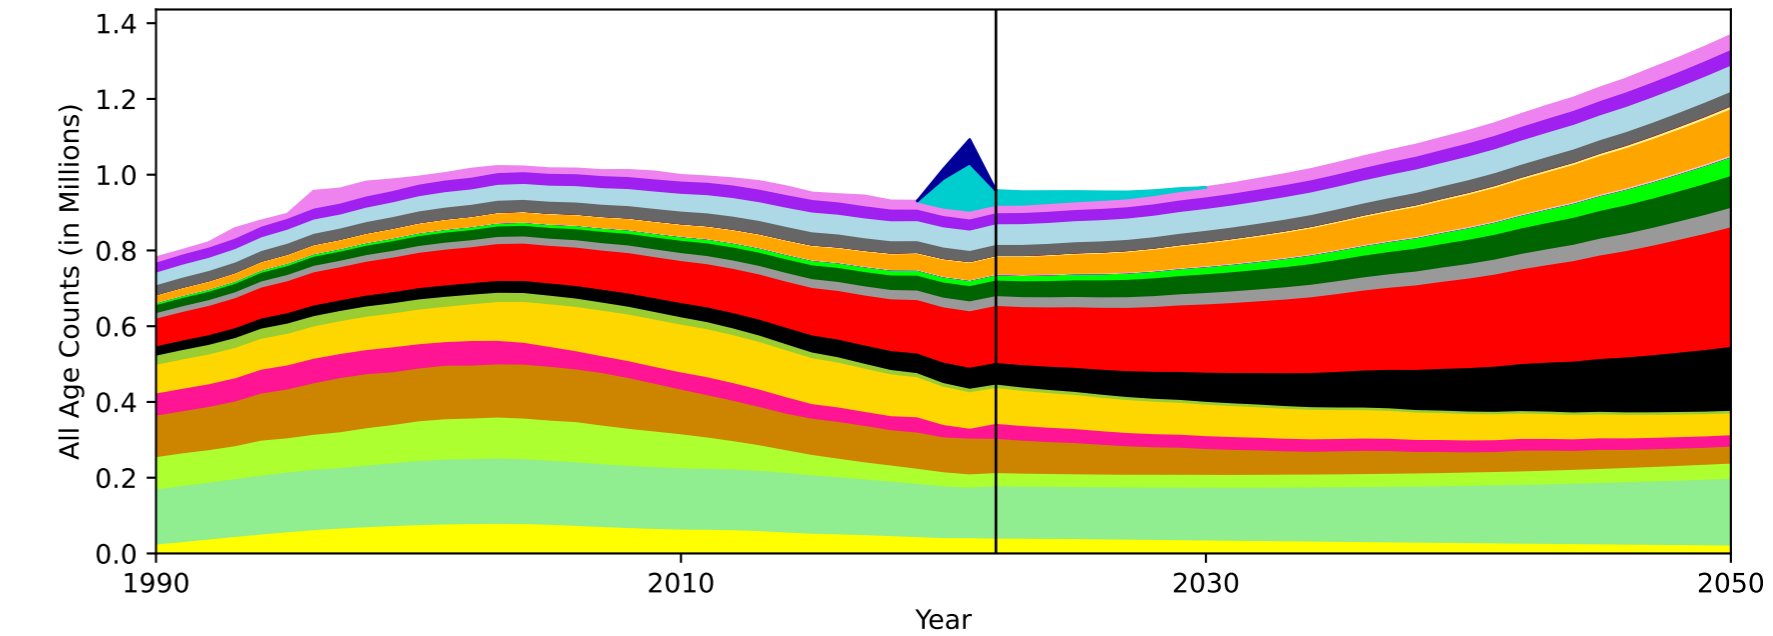

# Eastern Sub-Saharan Africa

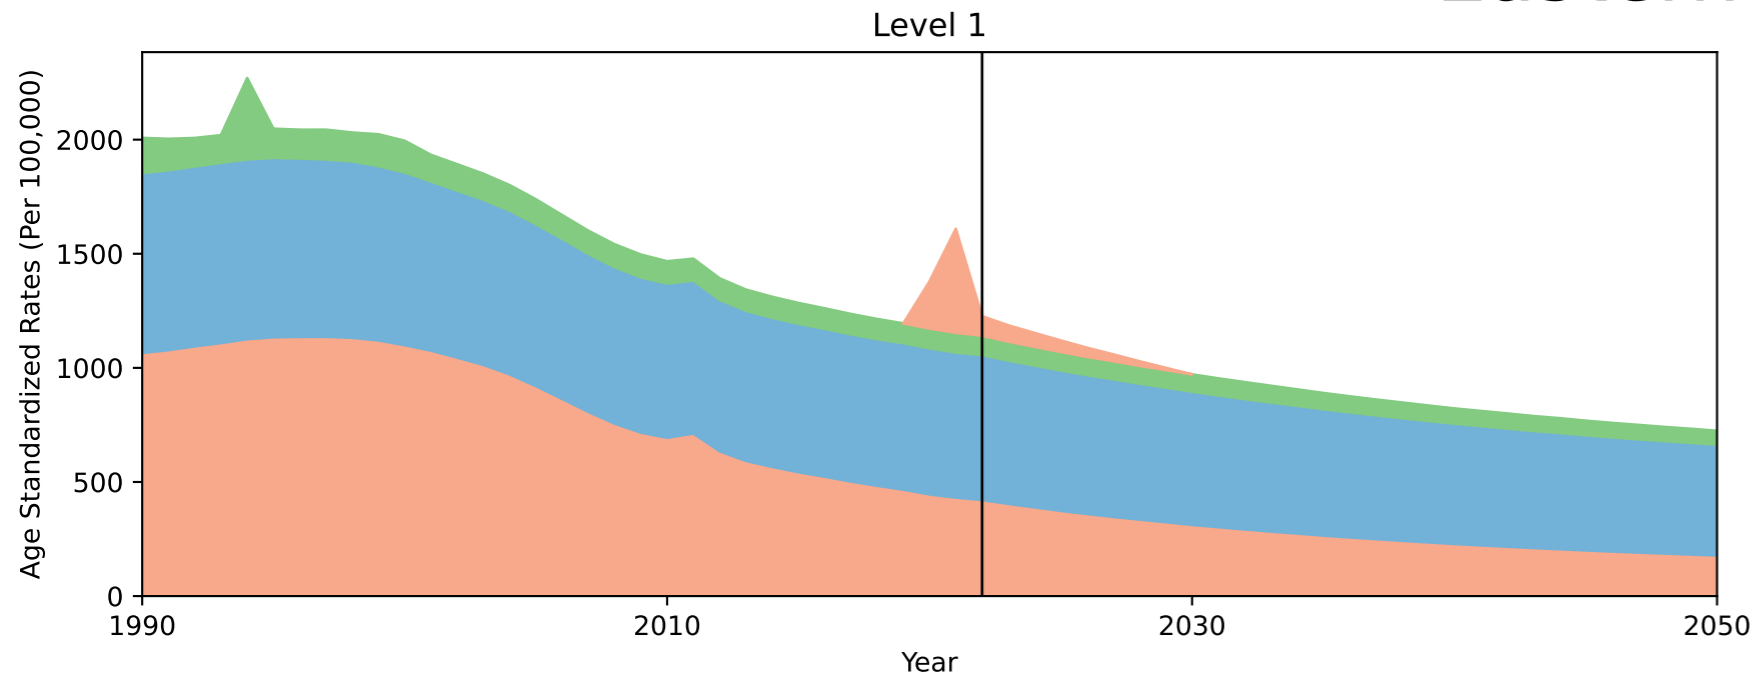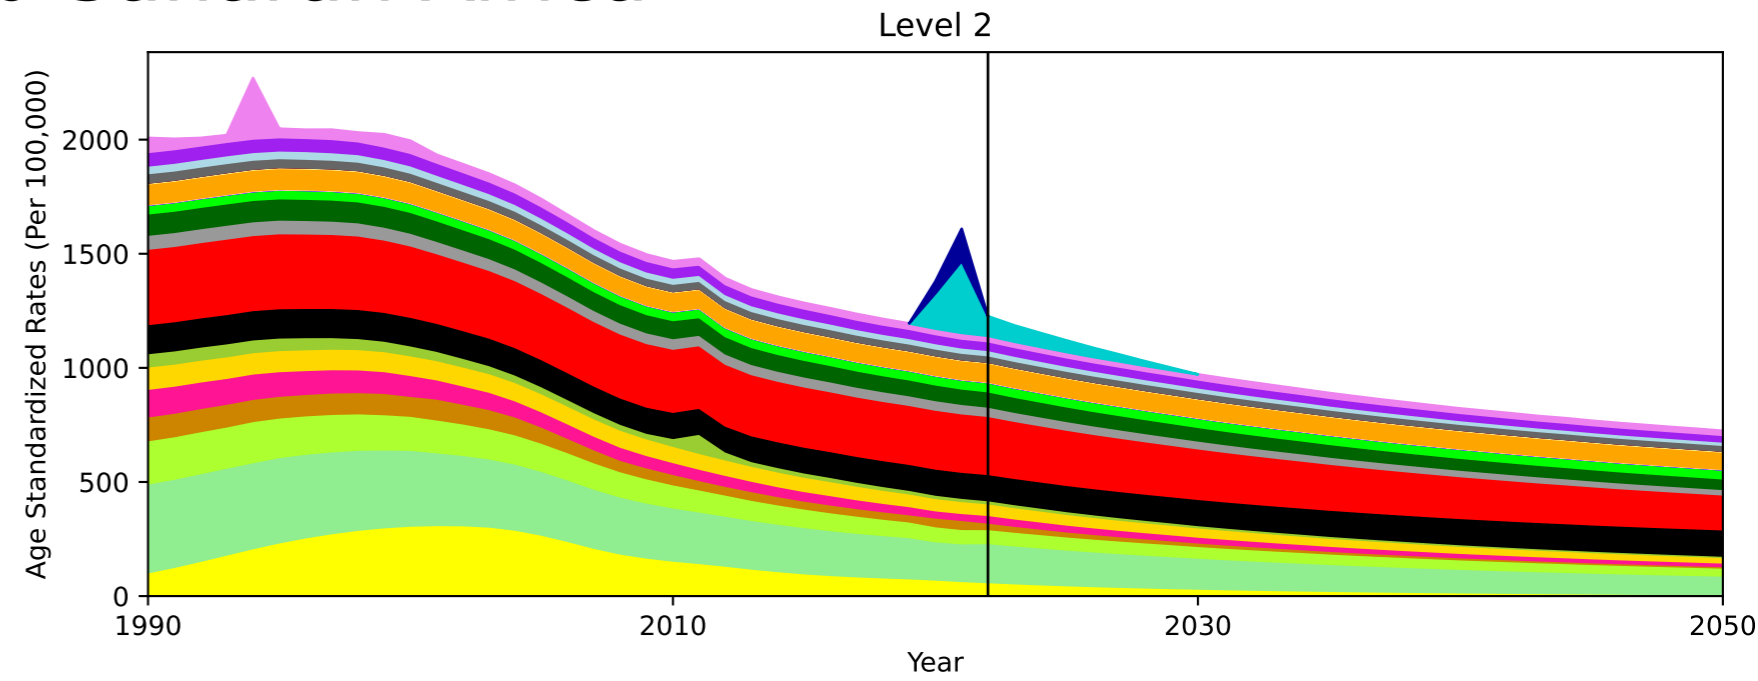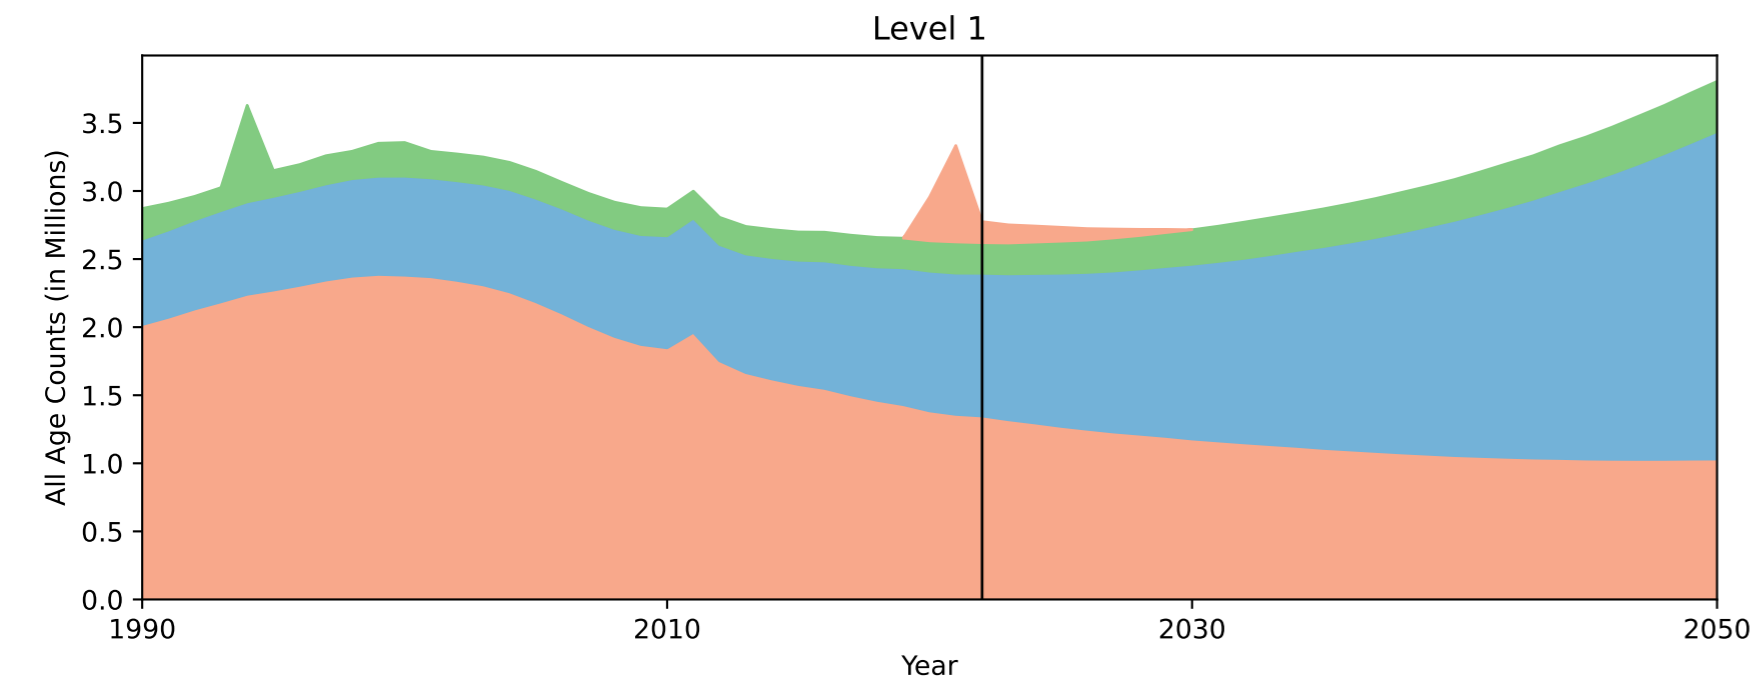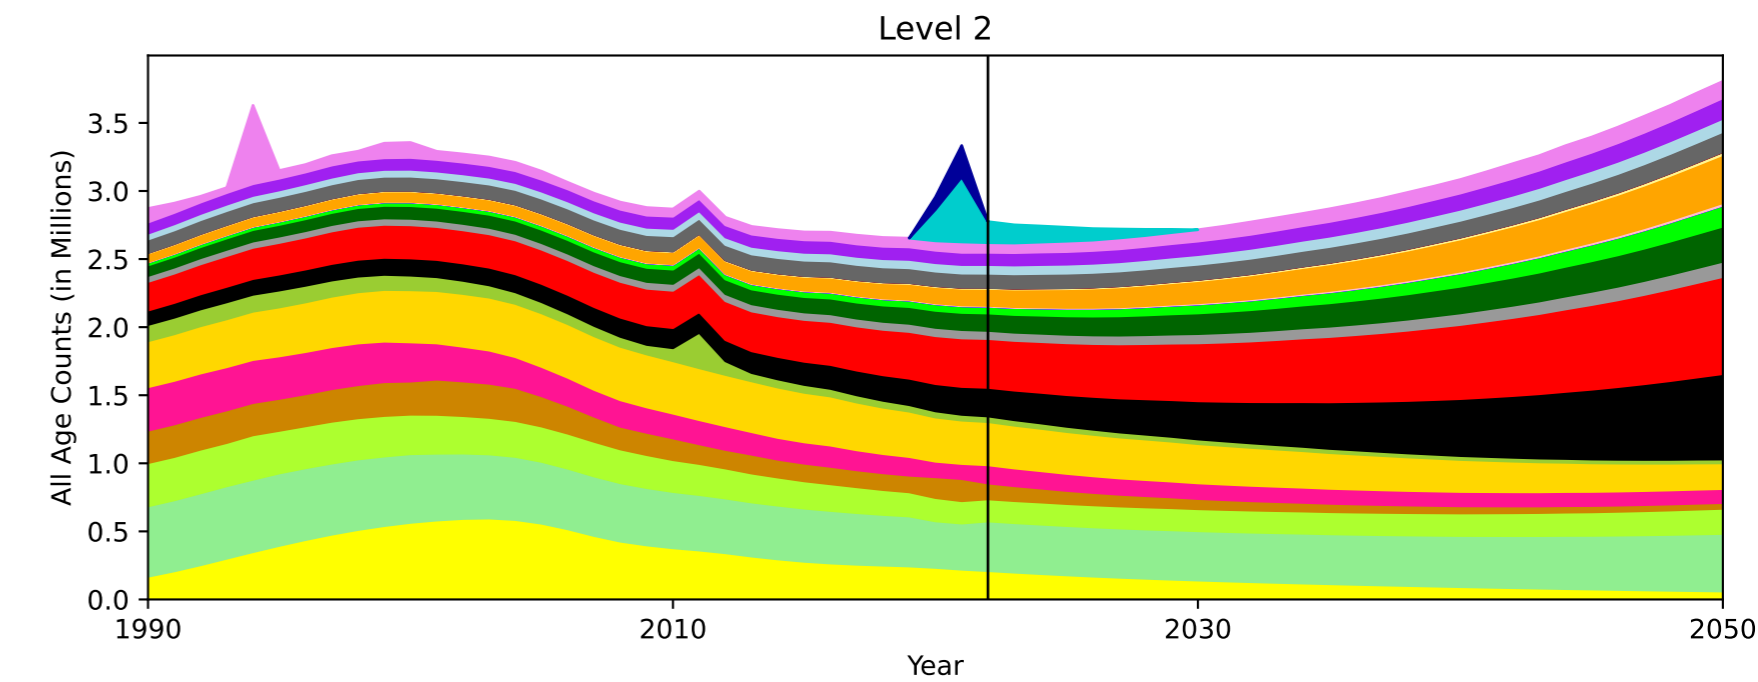

# Southern Sub-Saharan Africa

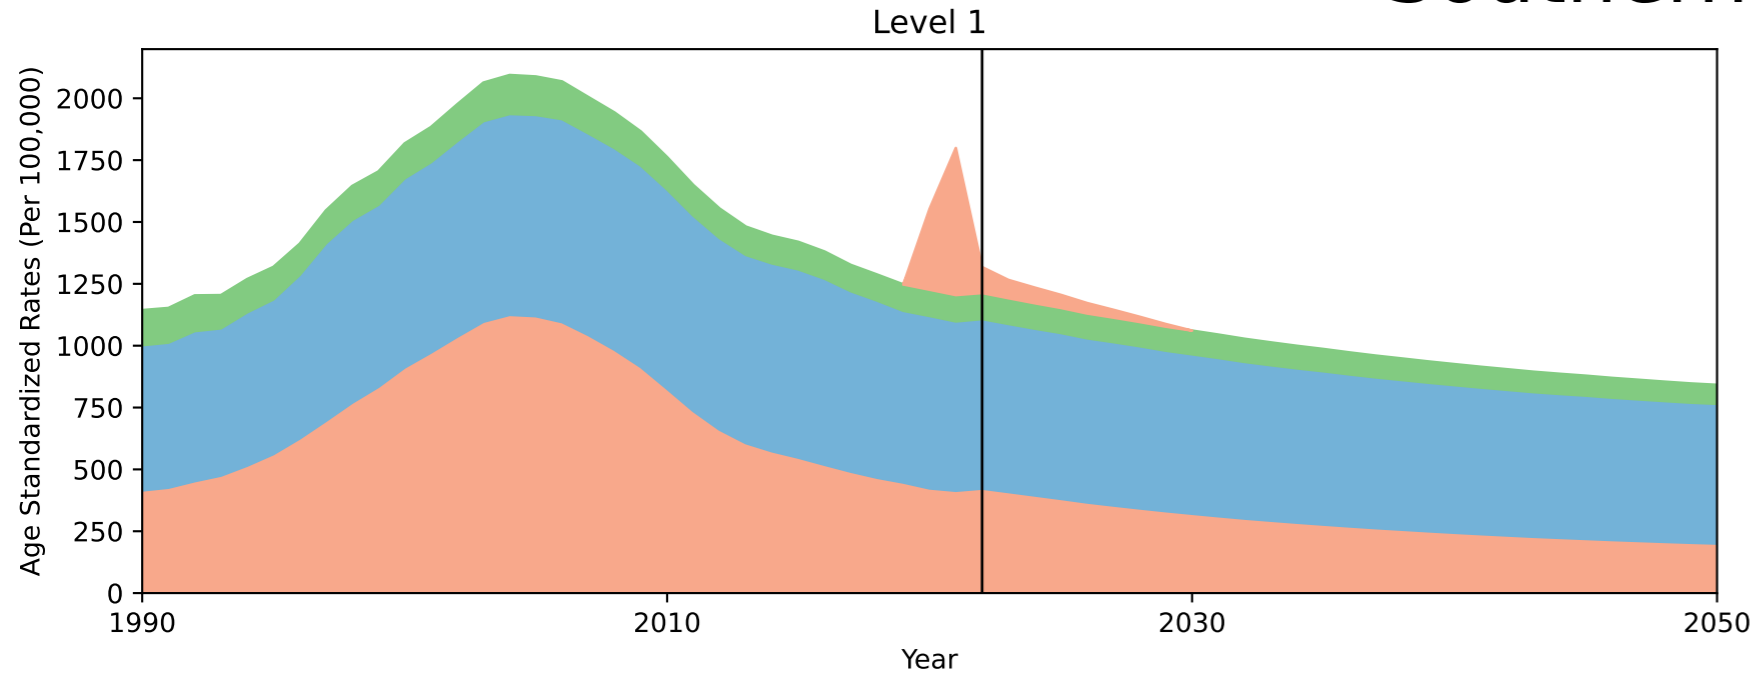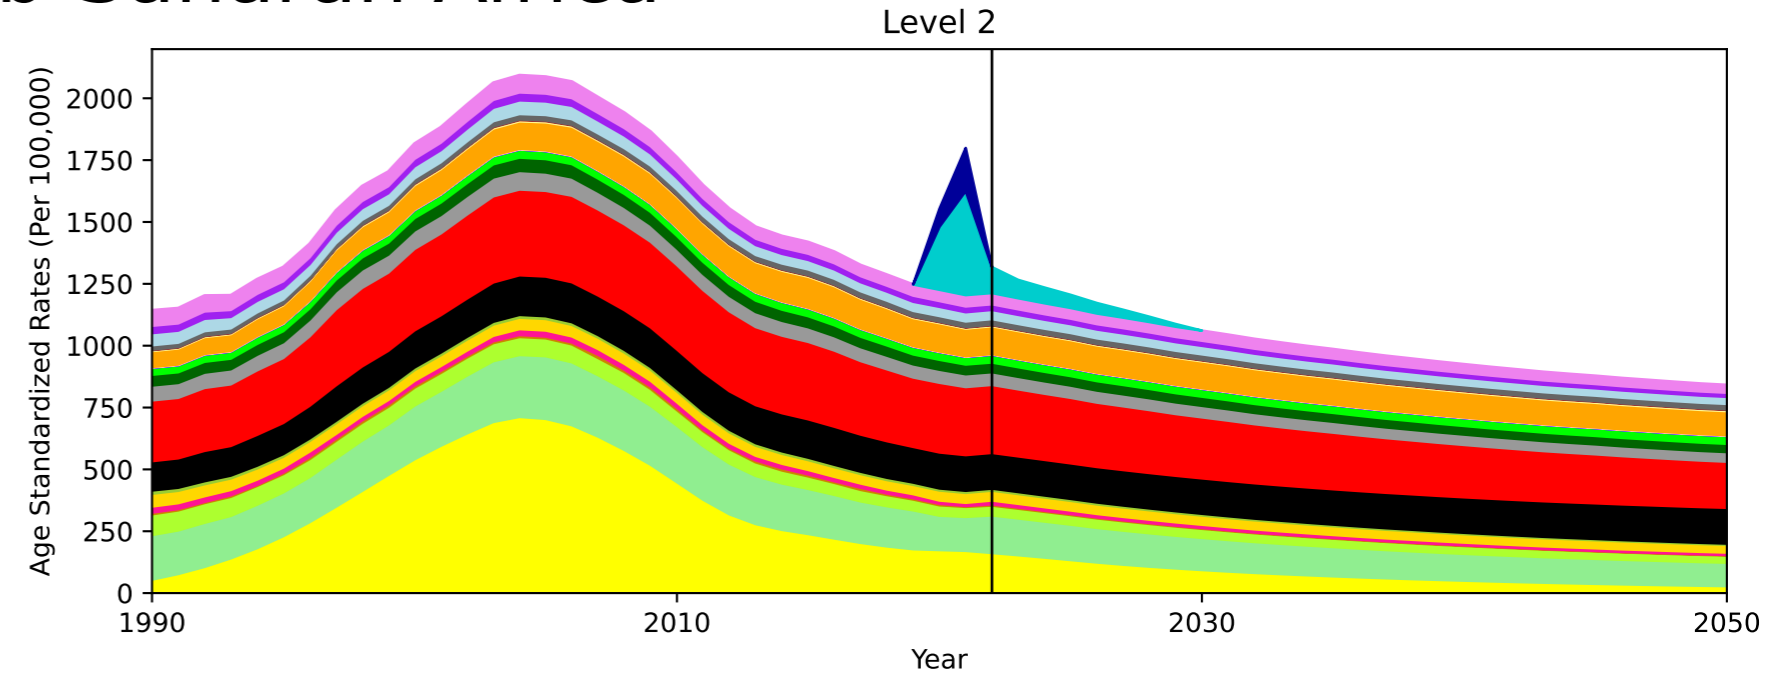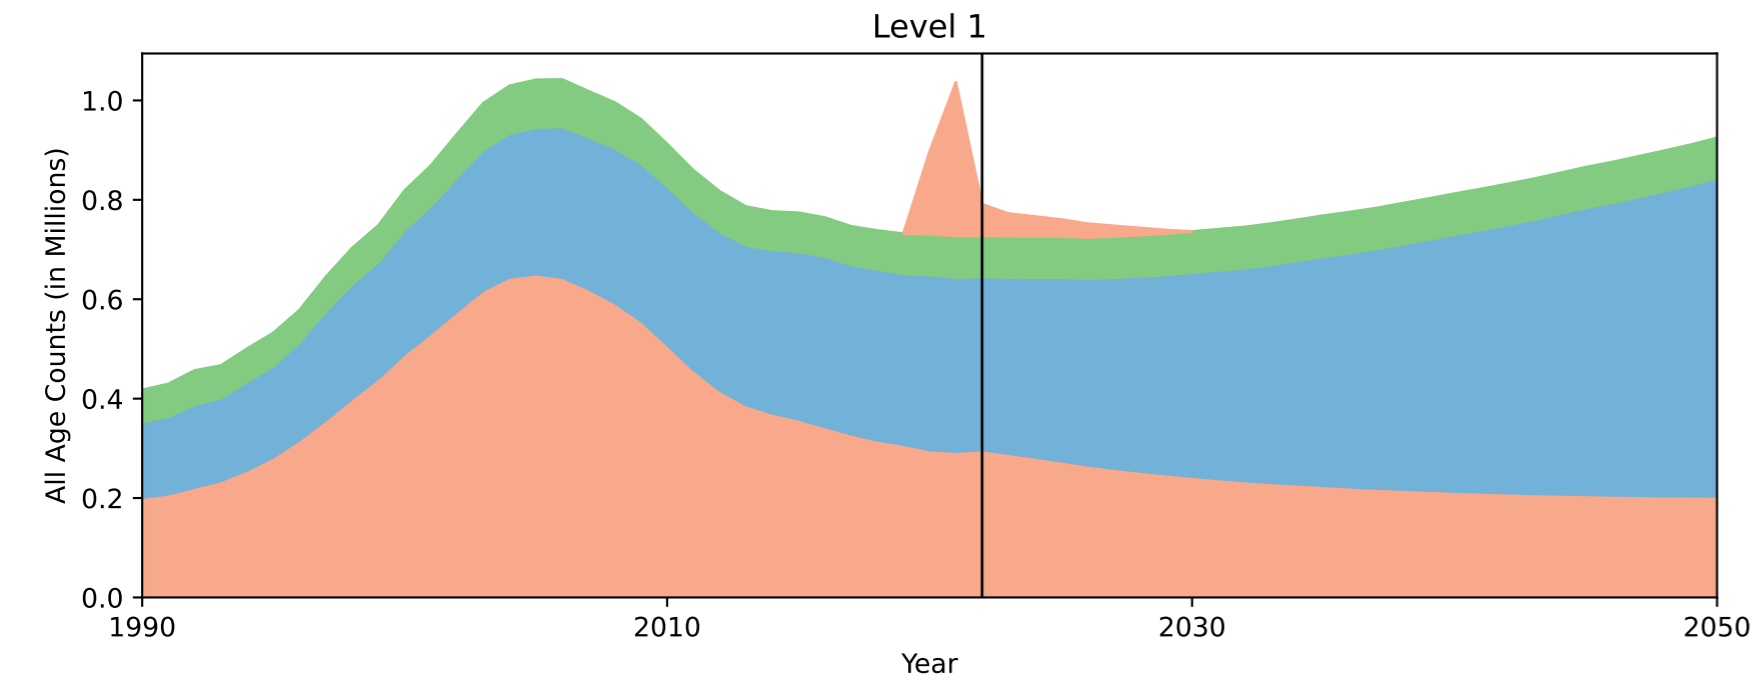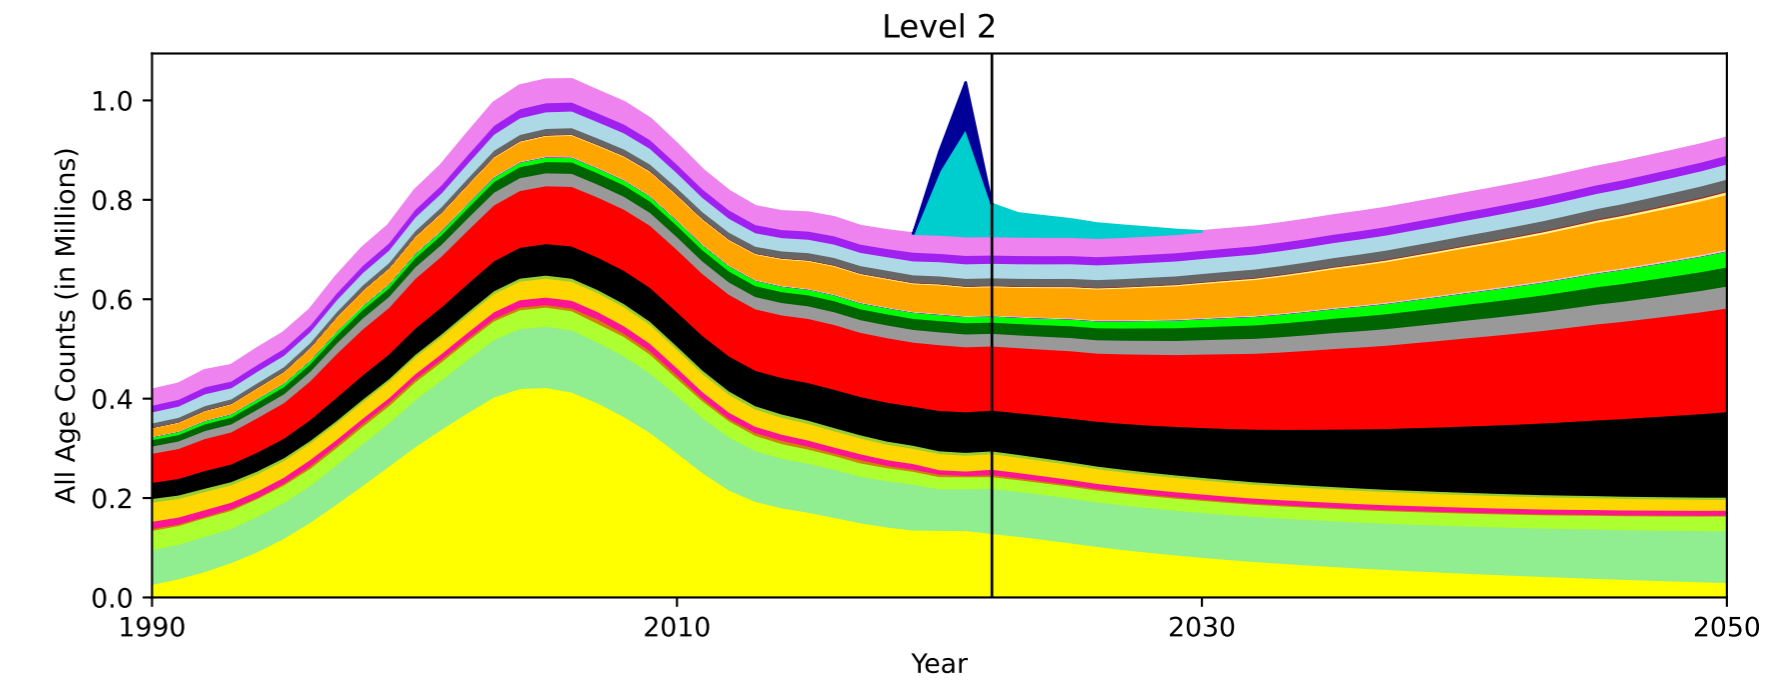

# Western Sub-Saharan Africa

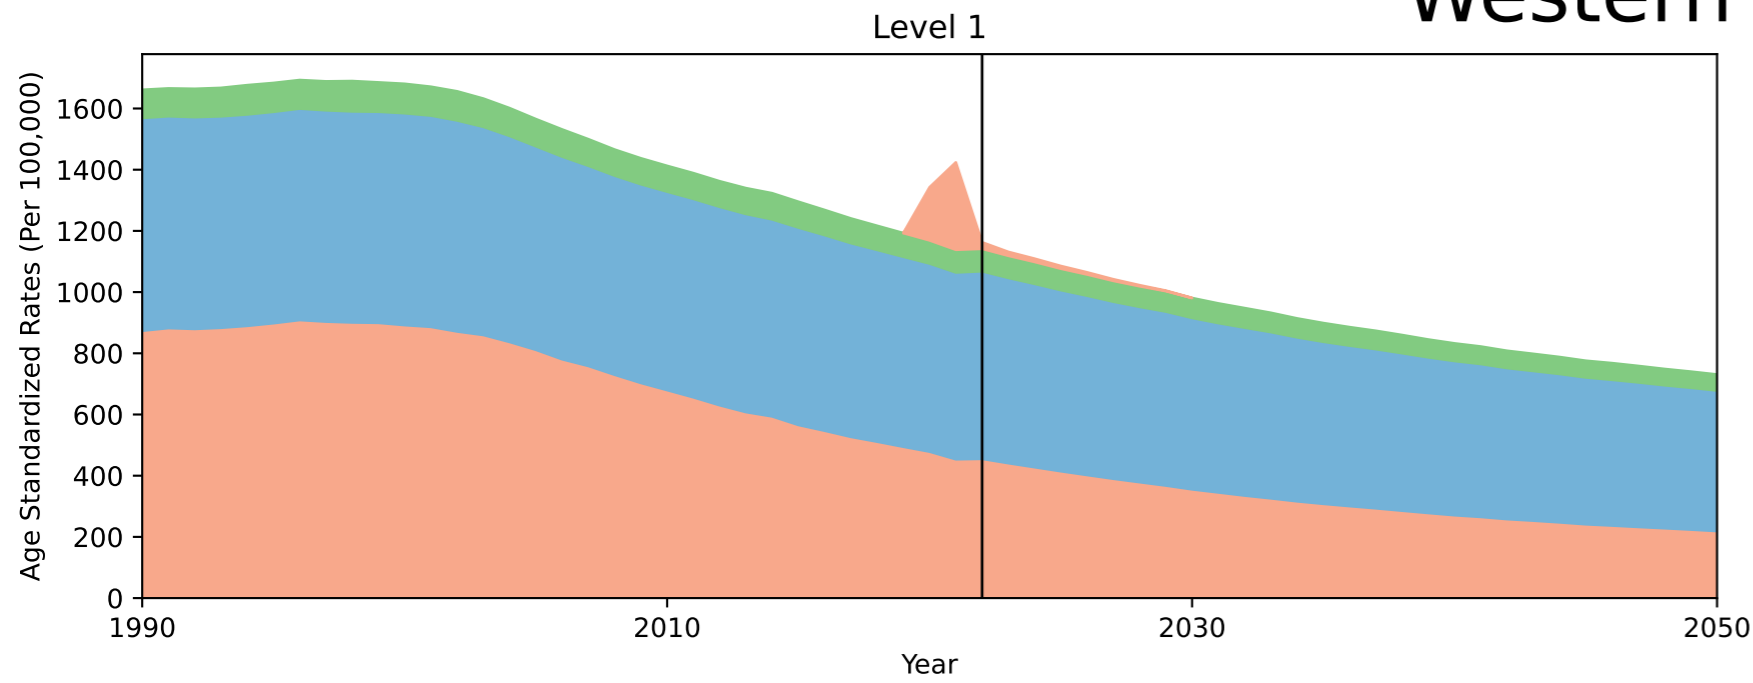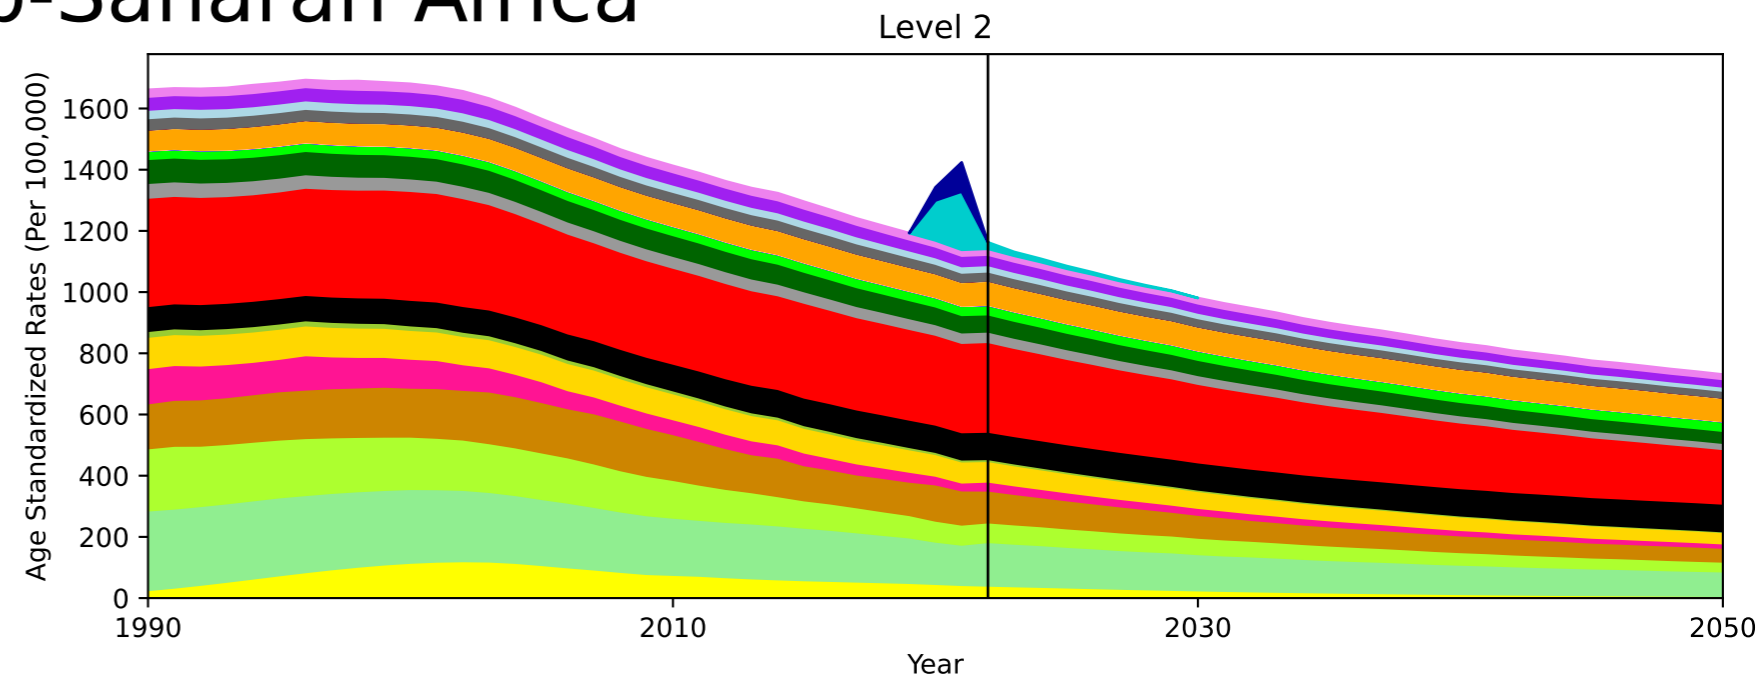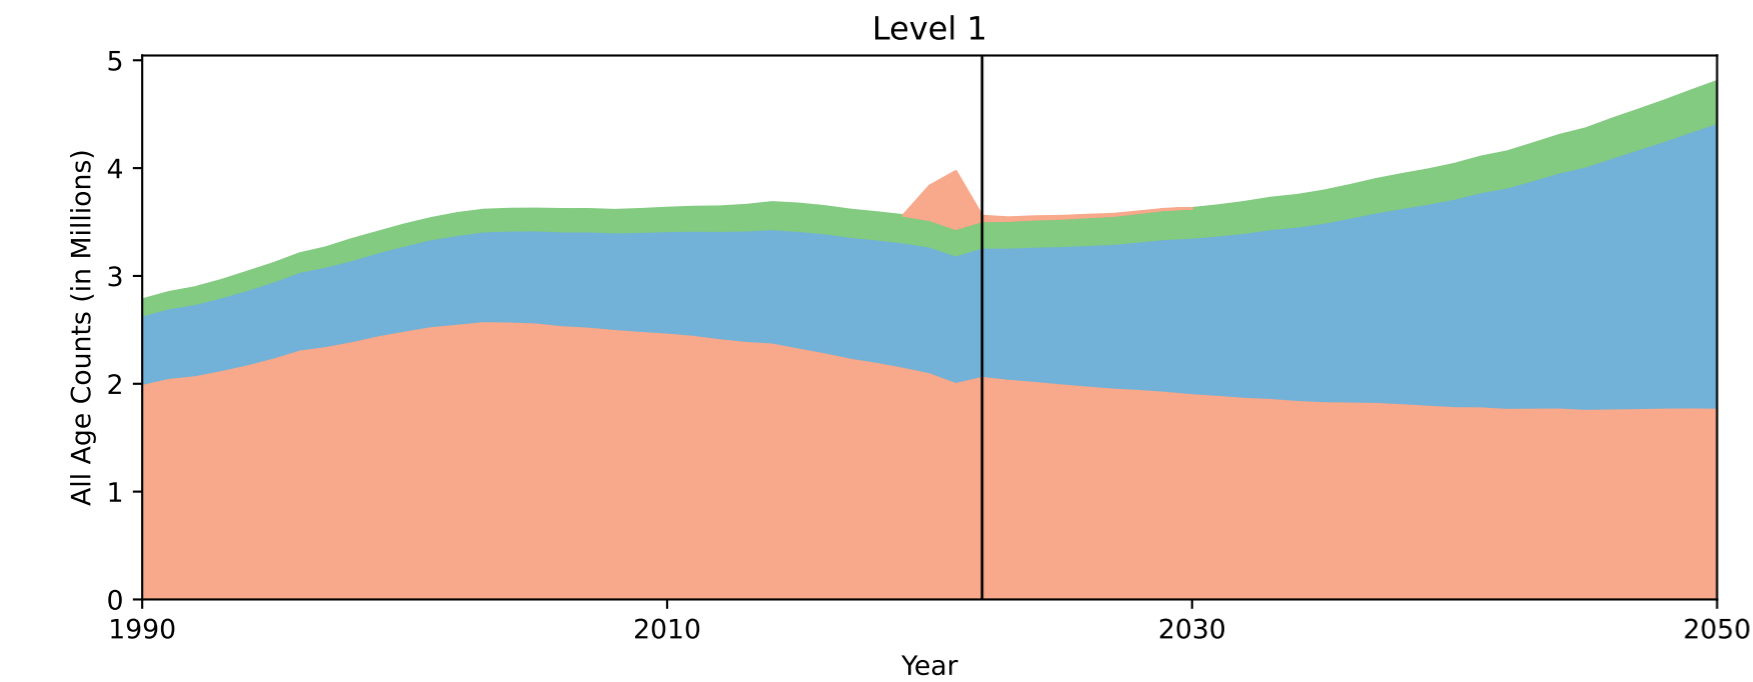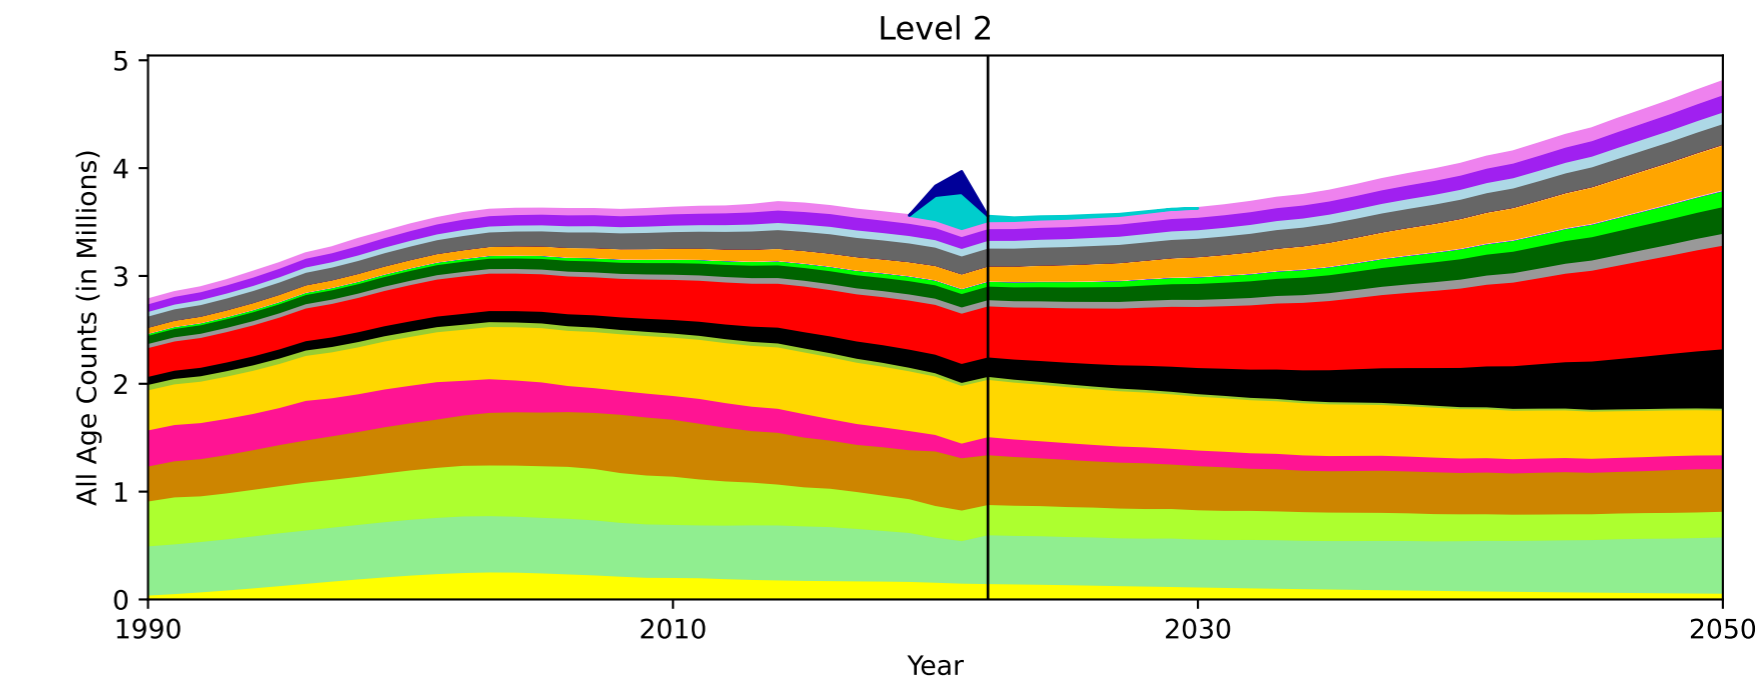

# Armenia

Supplemental Results Figure S6. Cause level 2 area plots for 4 burden measures for reference scenario by location, 1990-2050

711

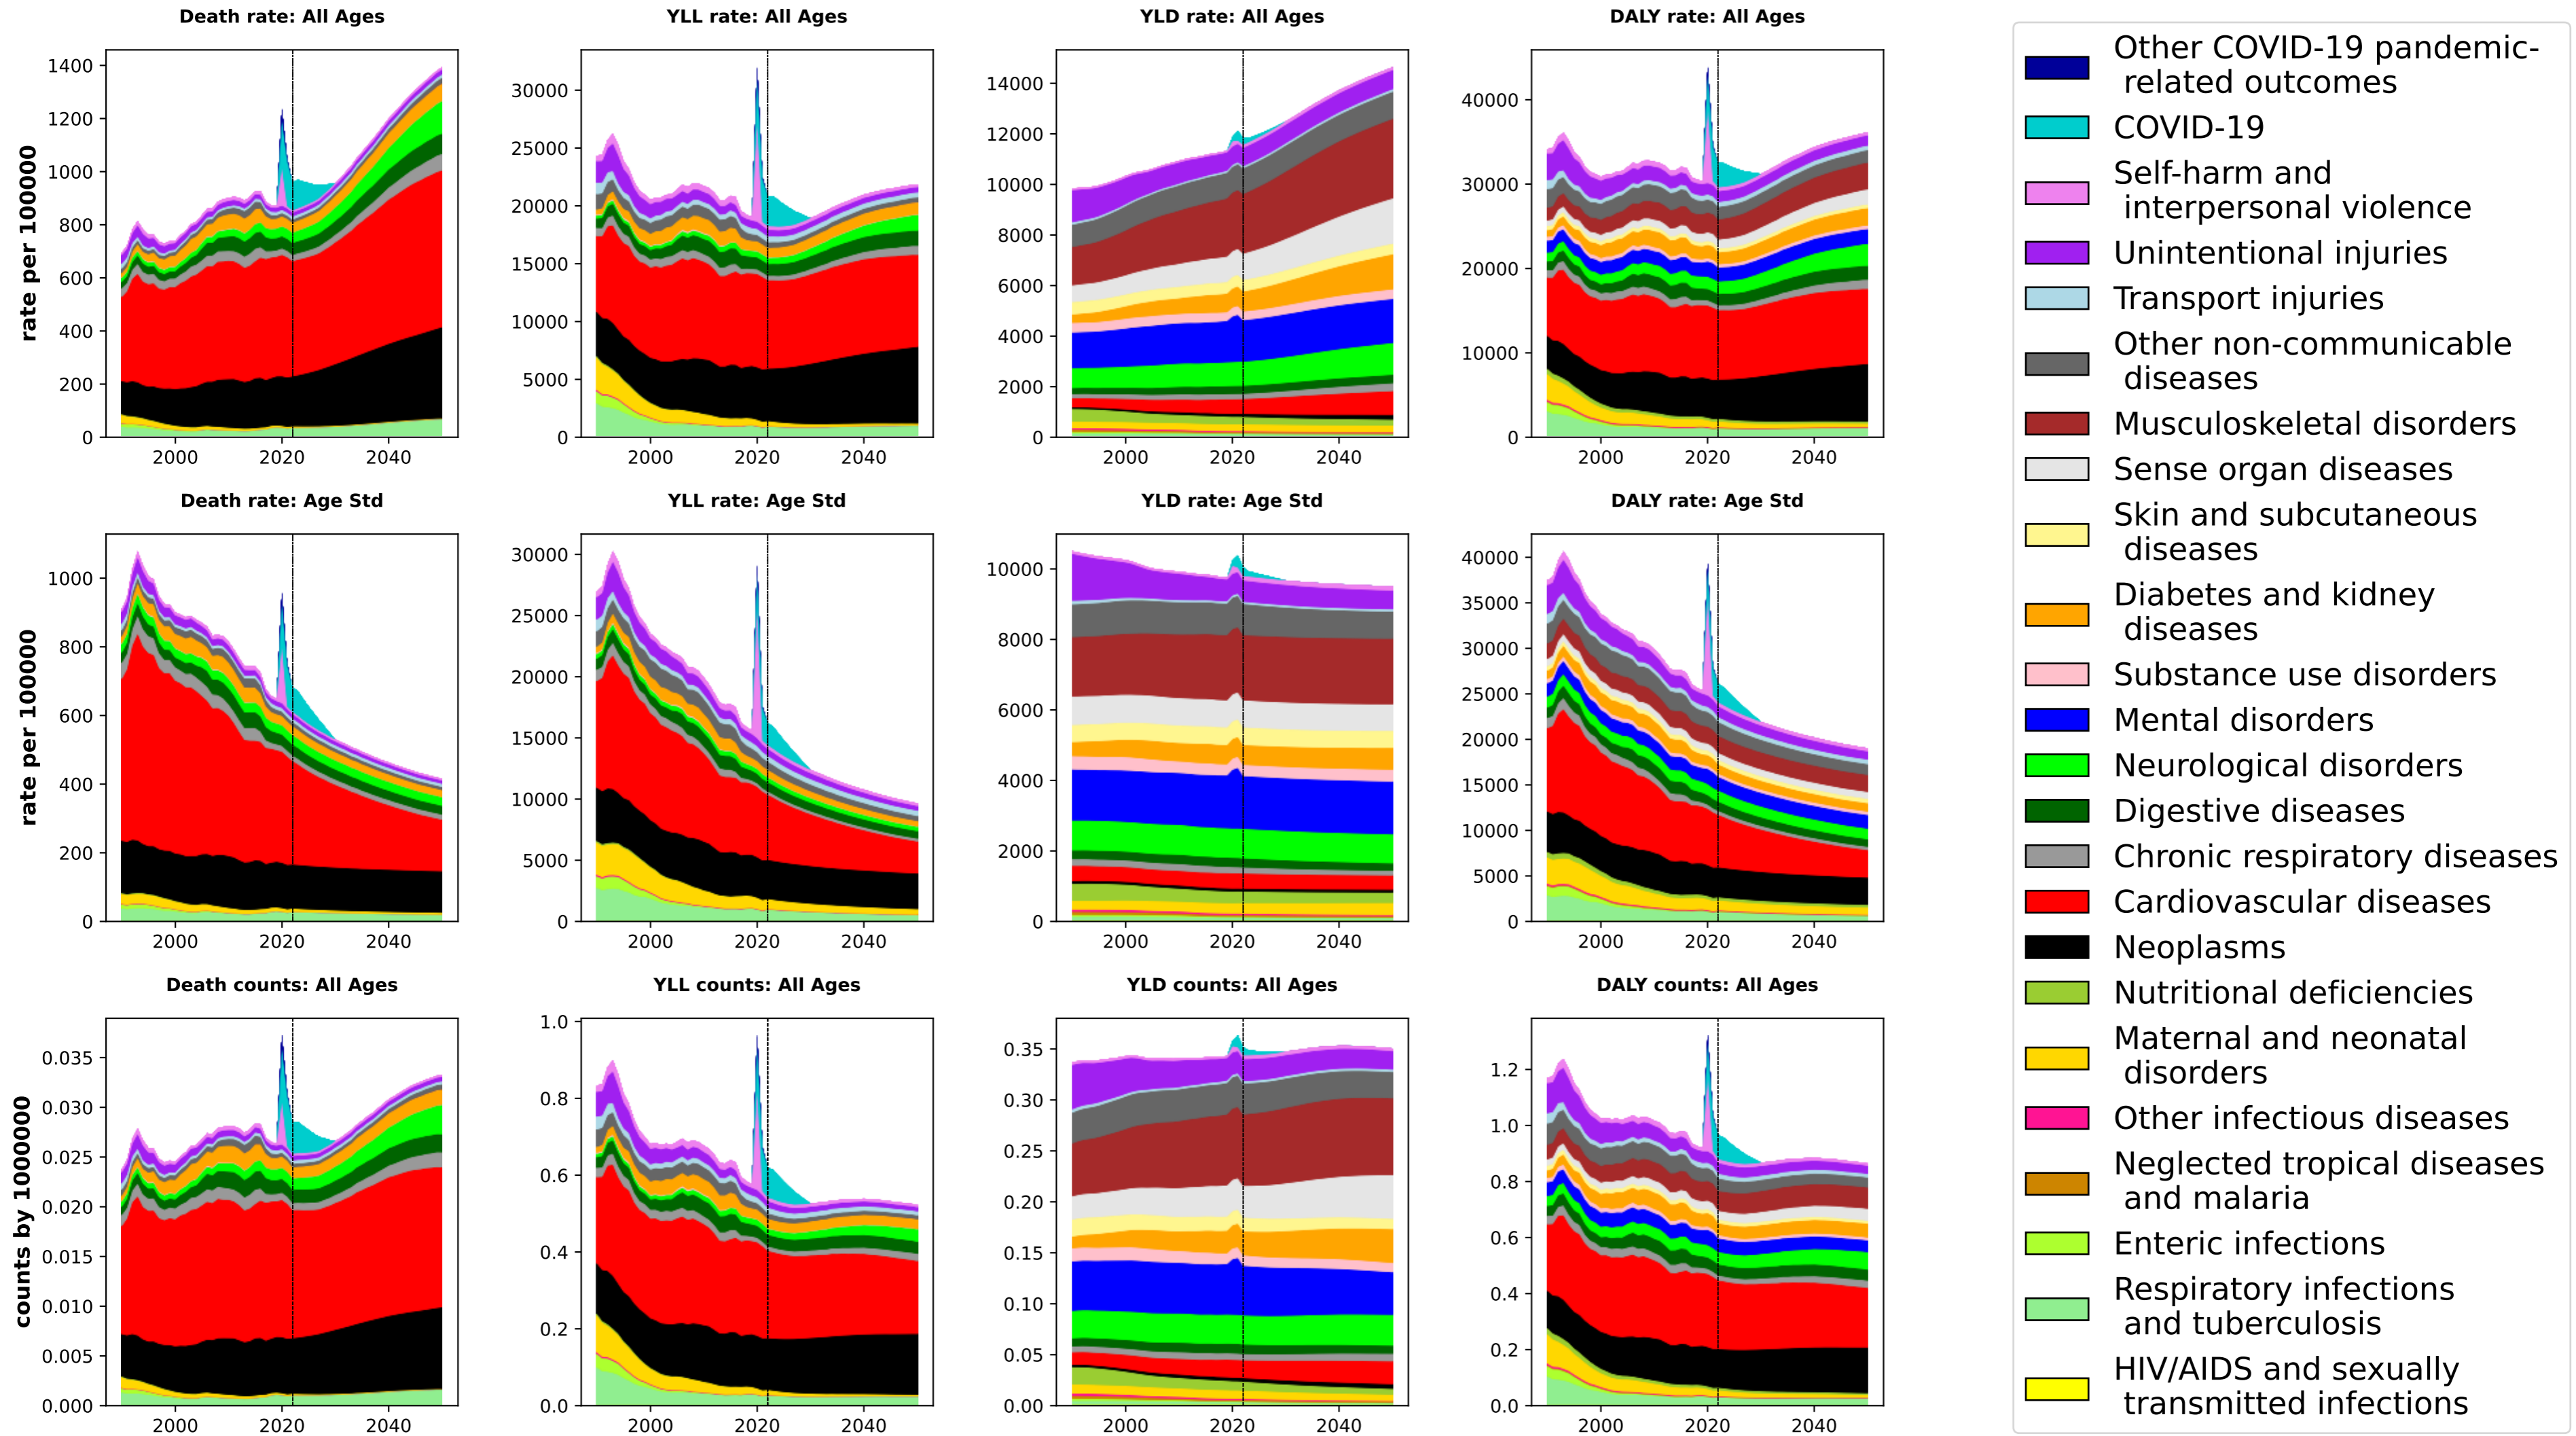



# Azerbaijan

Supplemental Results Figure S6. Cause level 2 area plots for 4 burden measures for reference scenario by location, 1990-2050

712

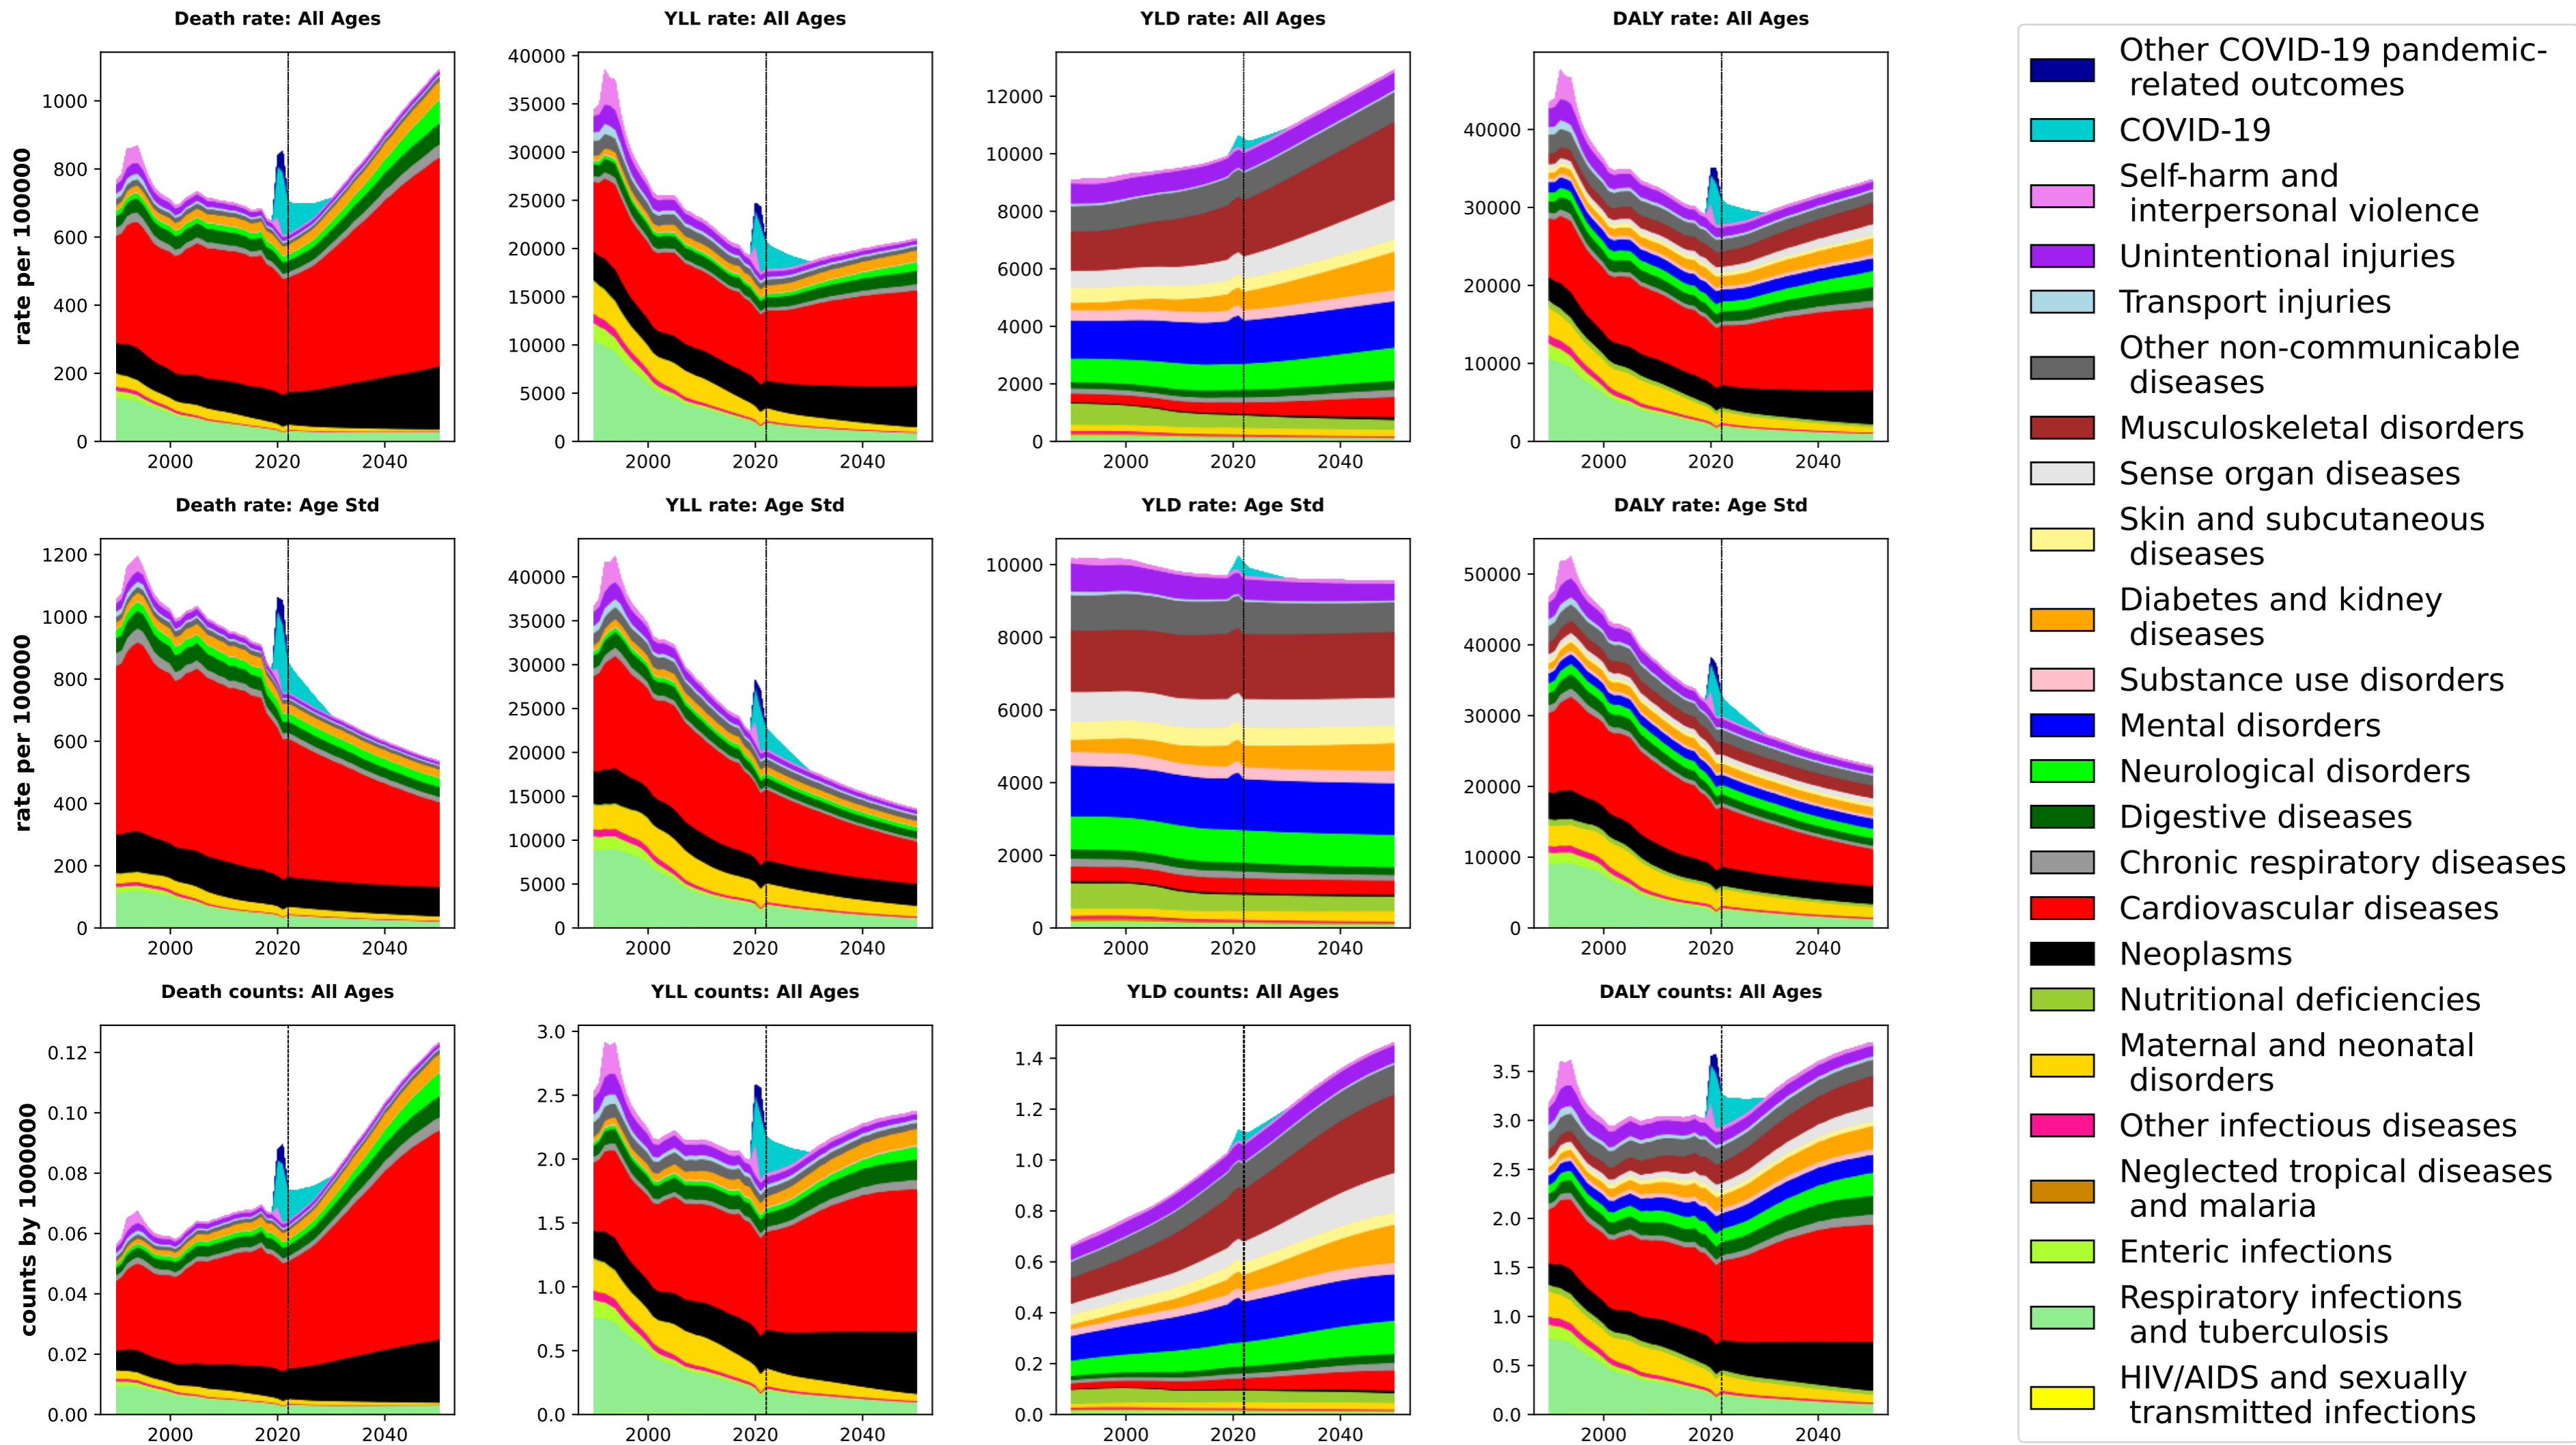

# Georgia

Supplemental Results Figure S6. Cause level 2 area plots for 4 burden measures for reference scenario by location, 1990-2050

713

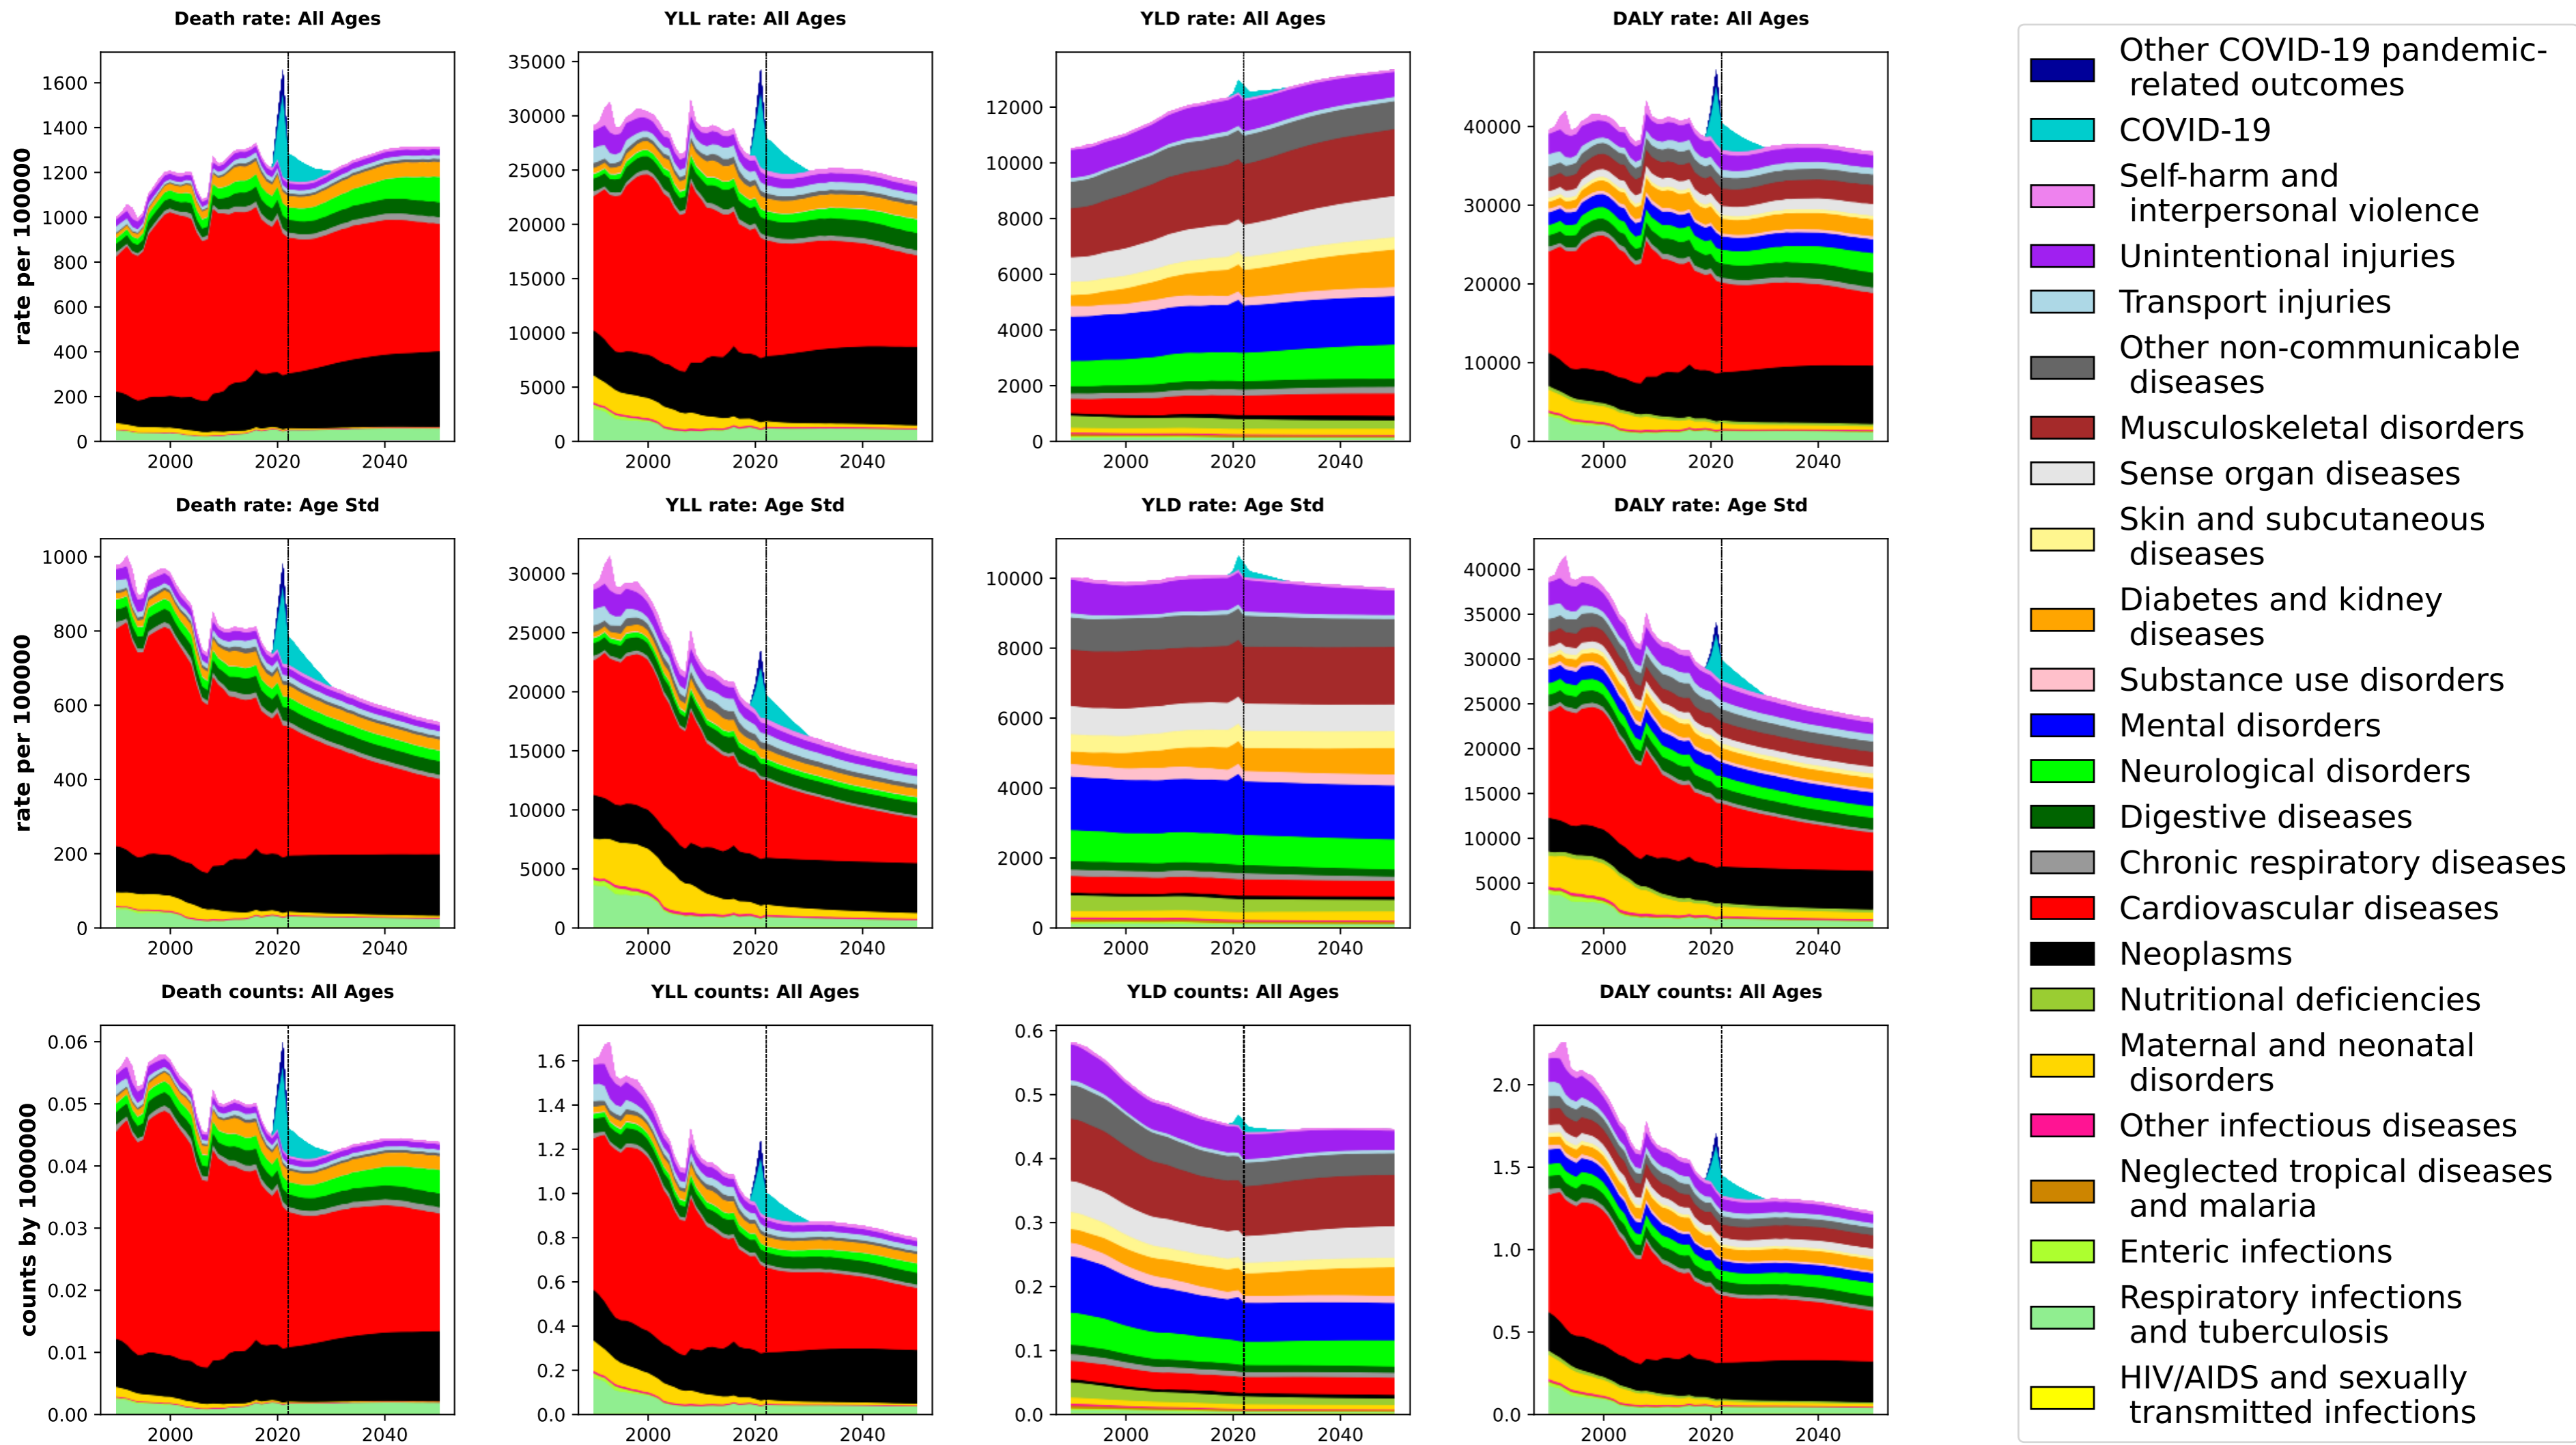

# Kazakhstan

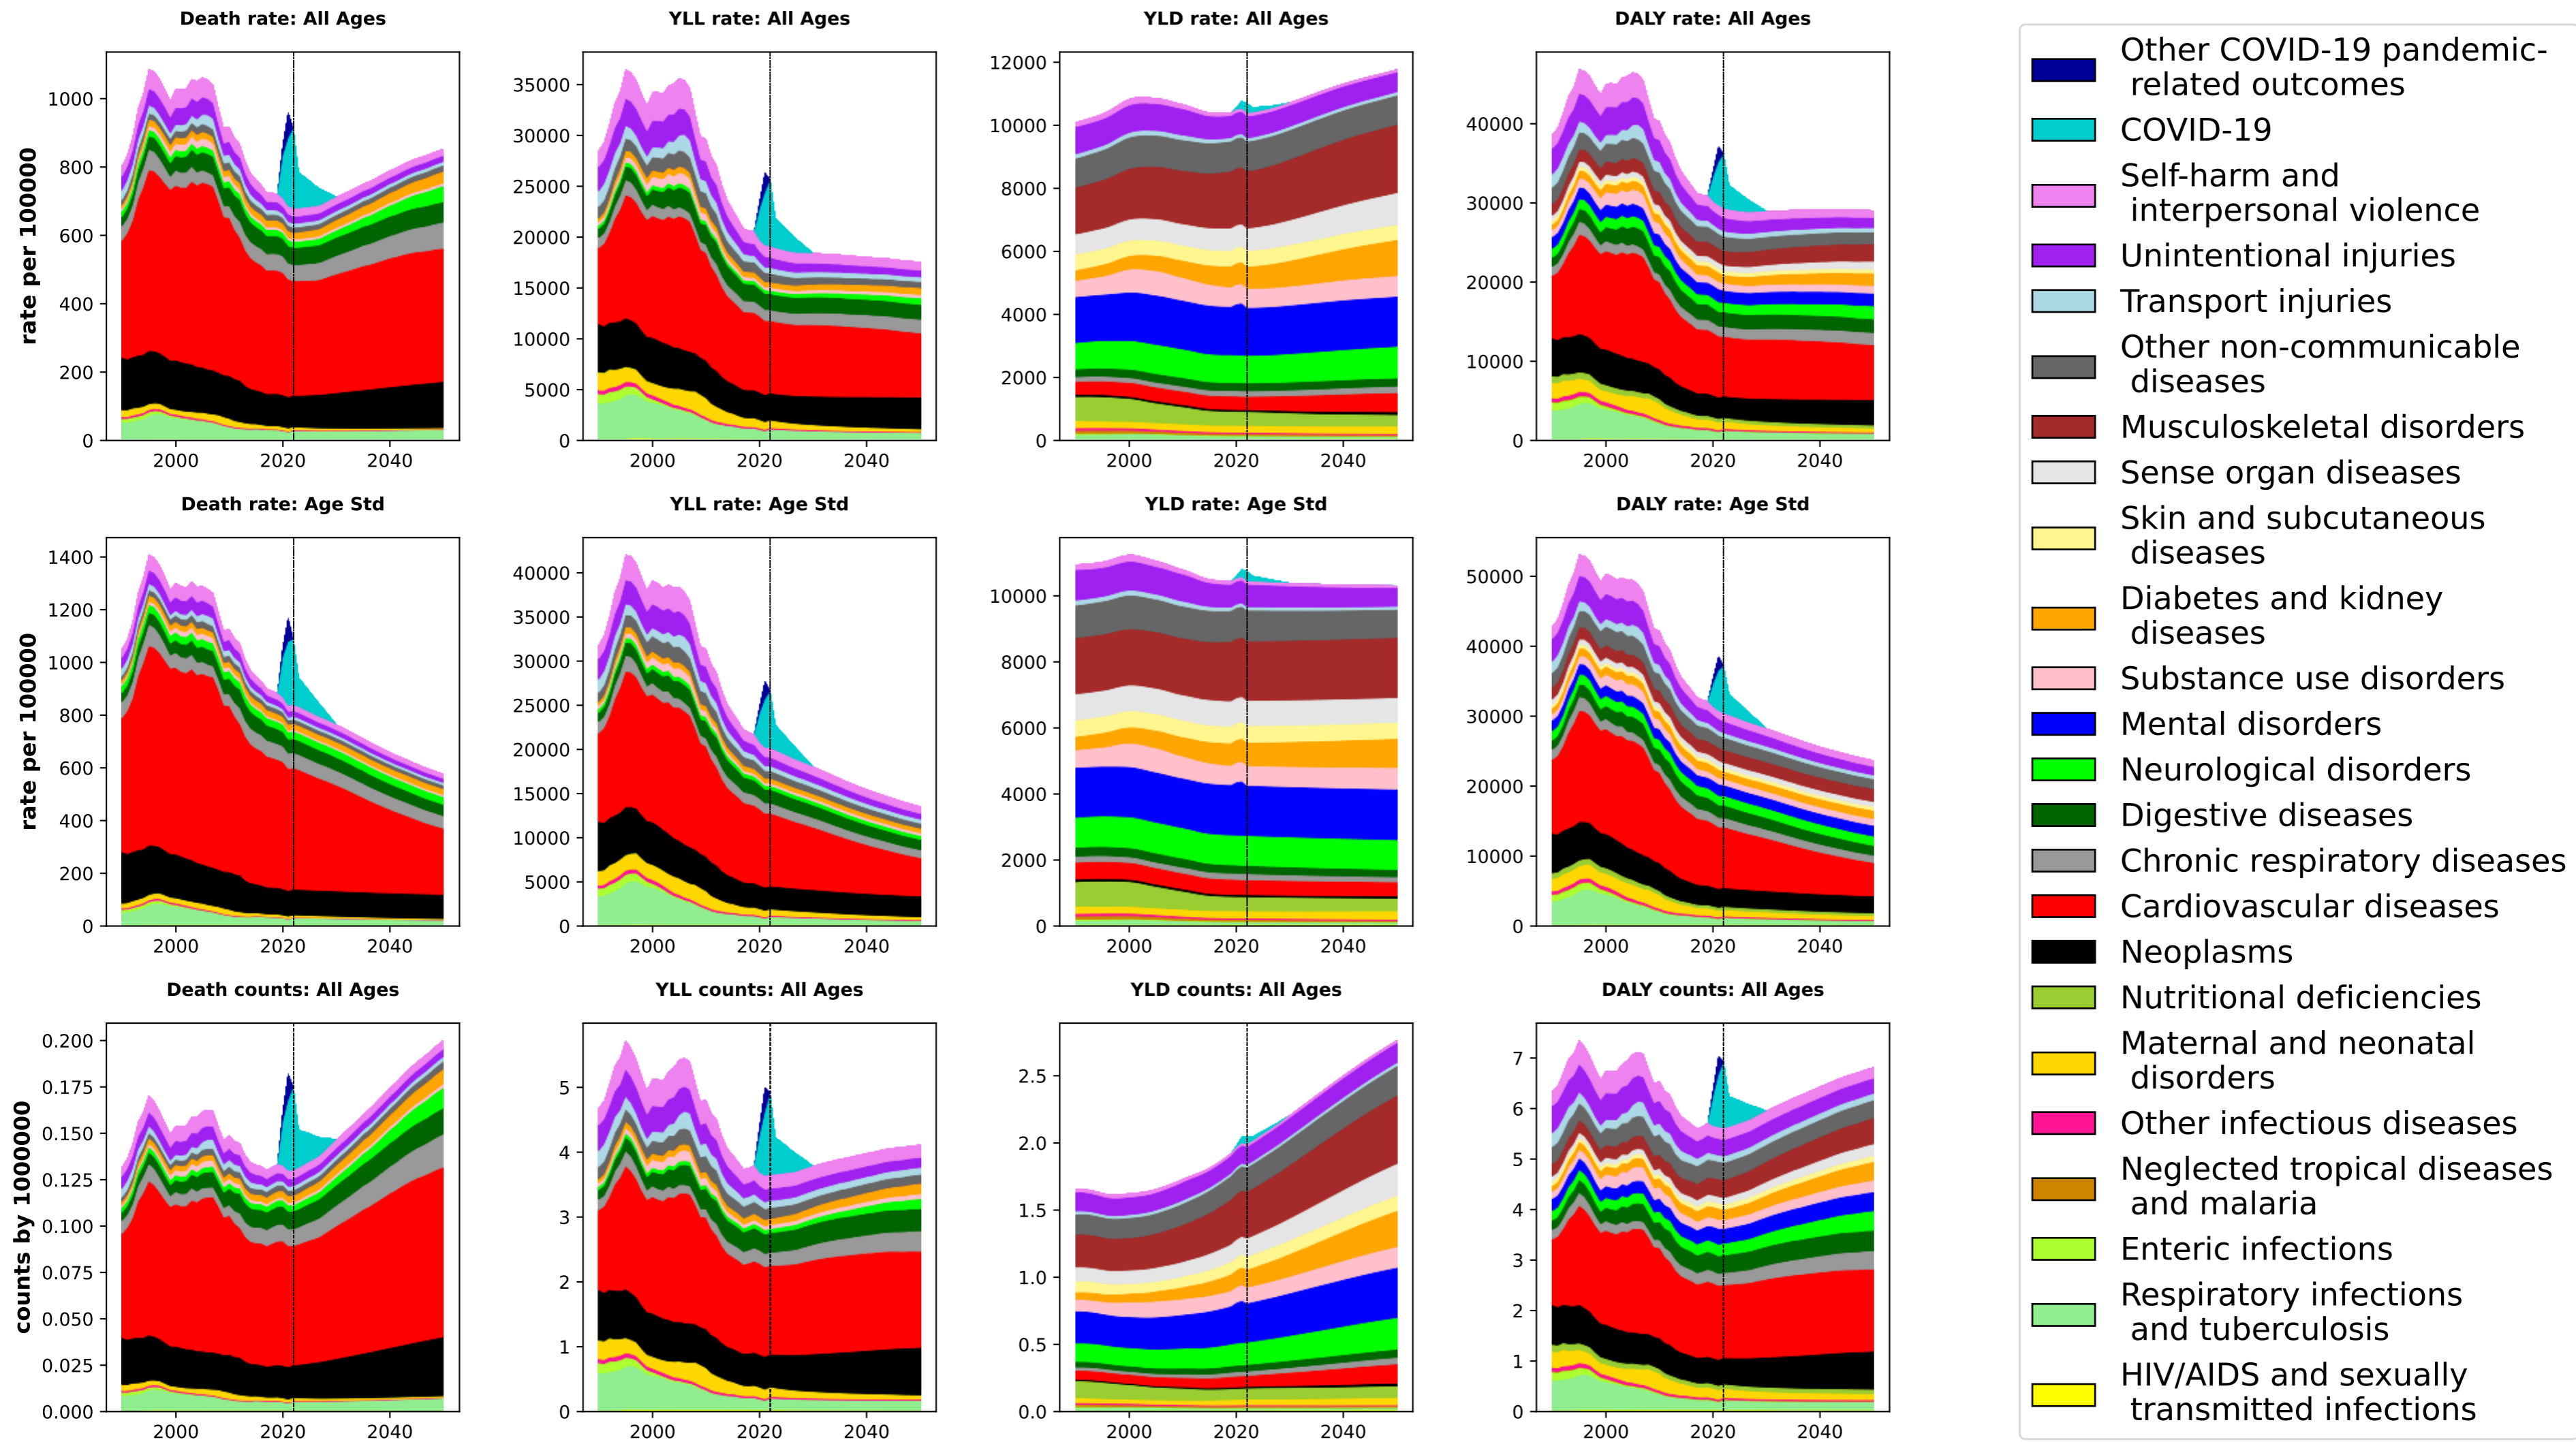

# Kyrgyzstan

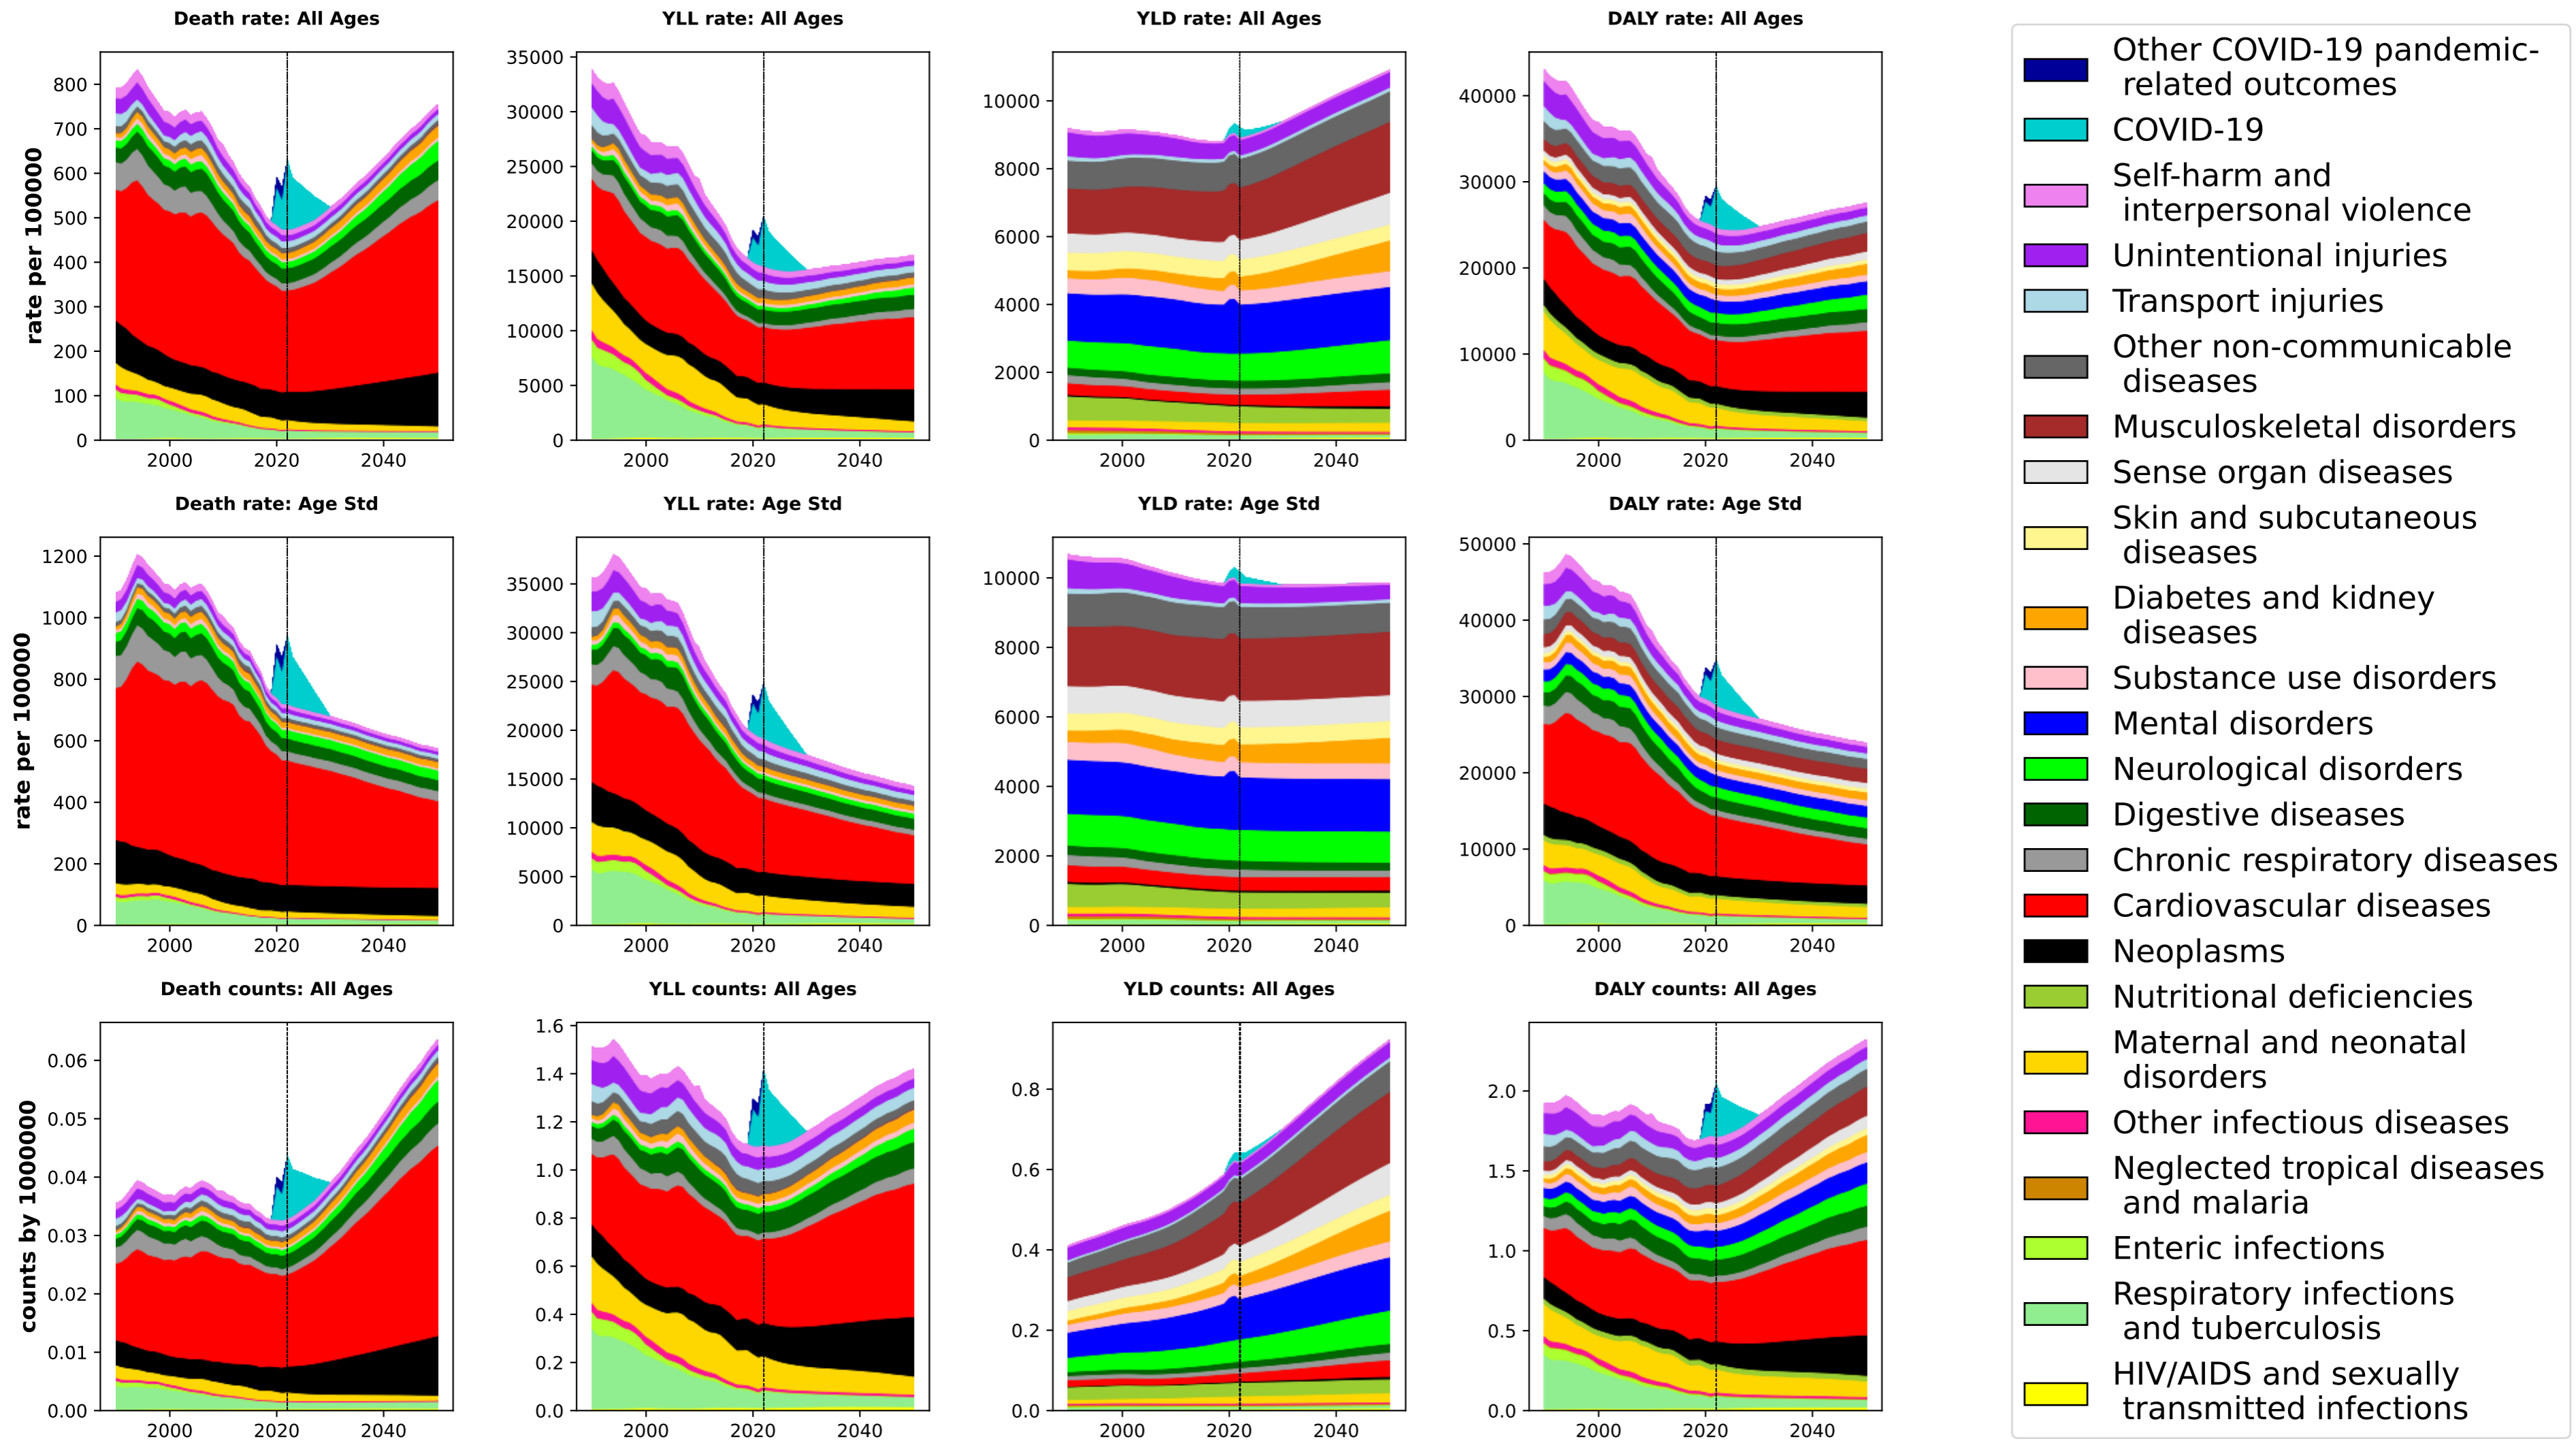

# Mongolia

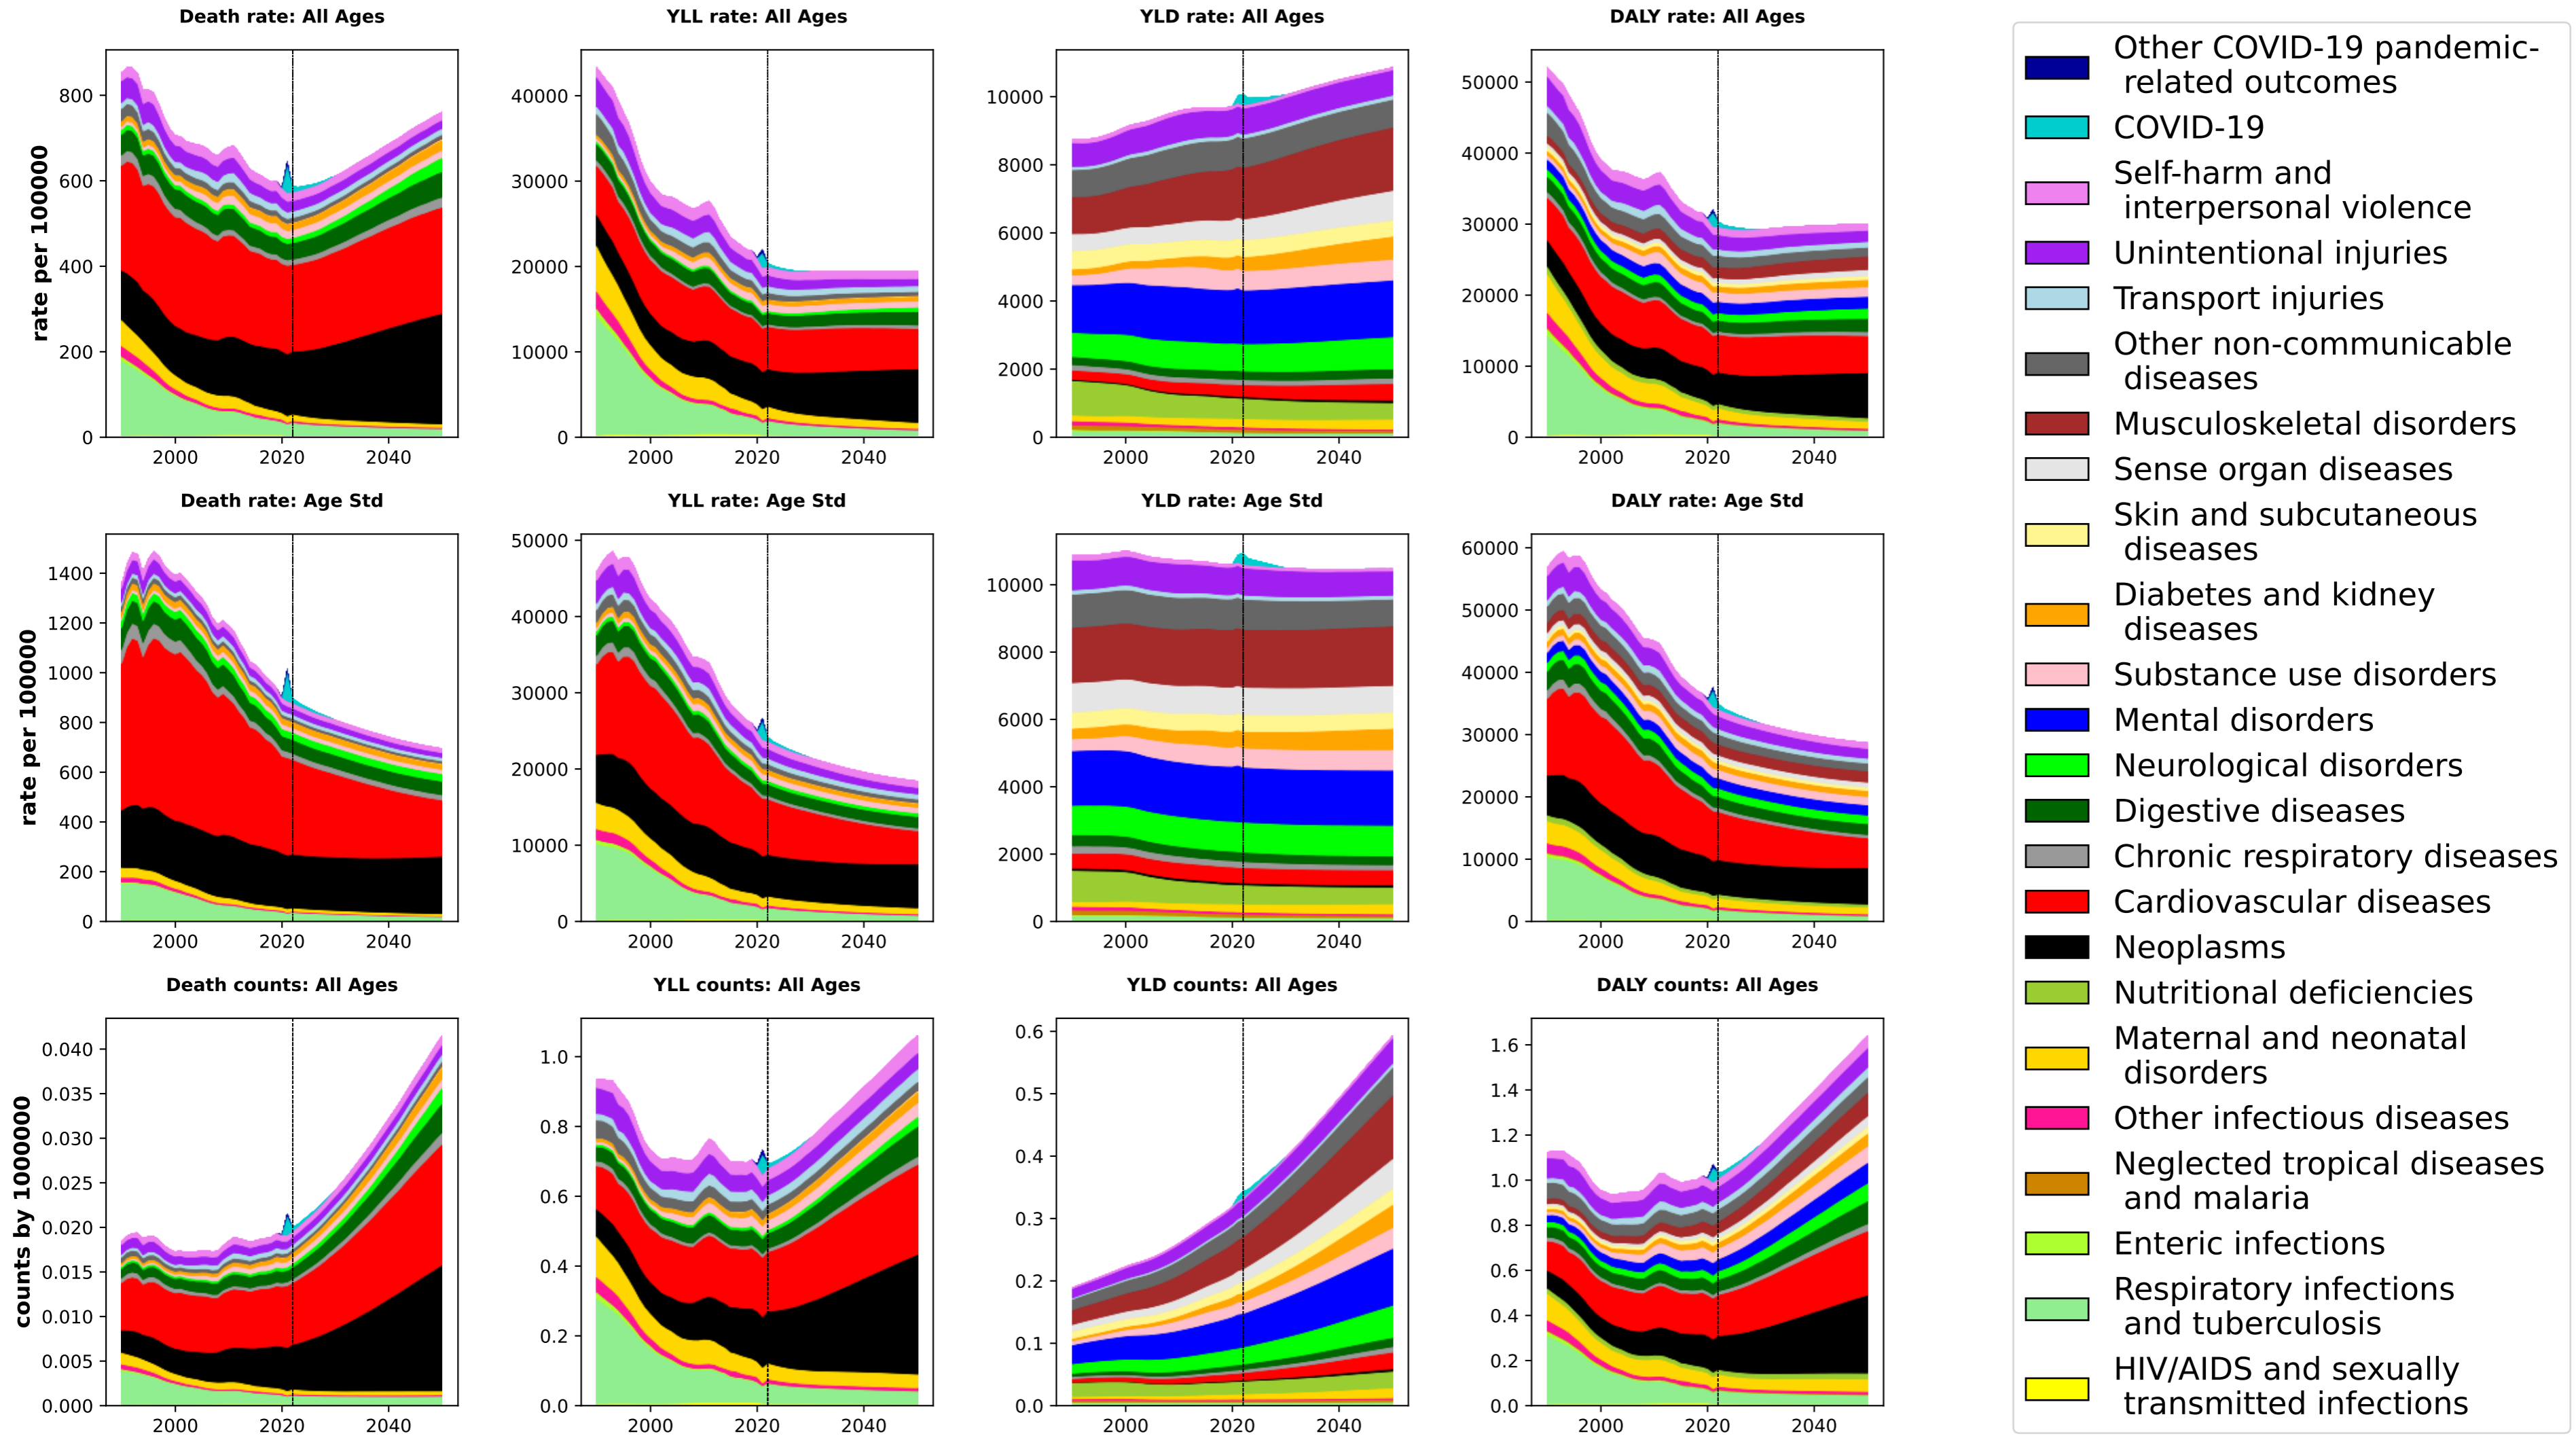

# Tajikistan

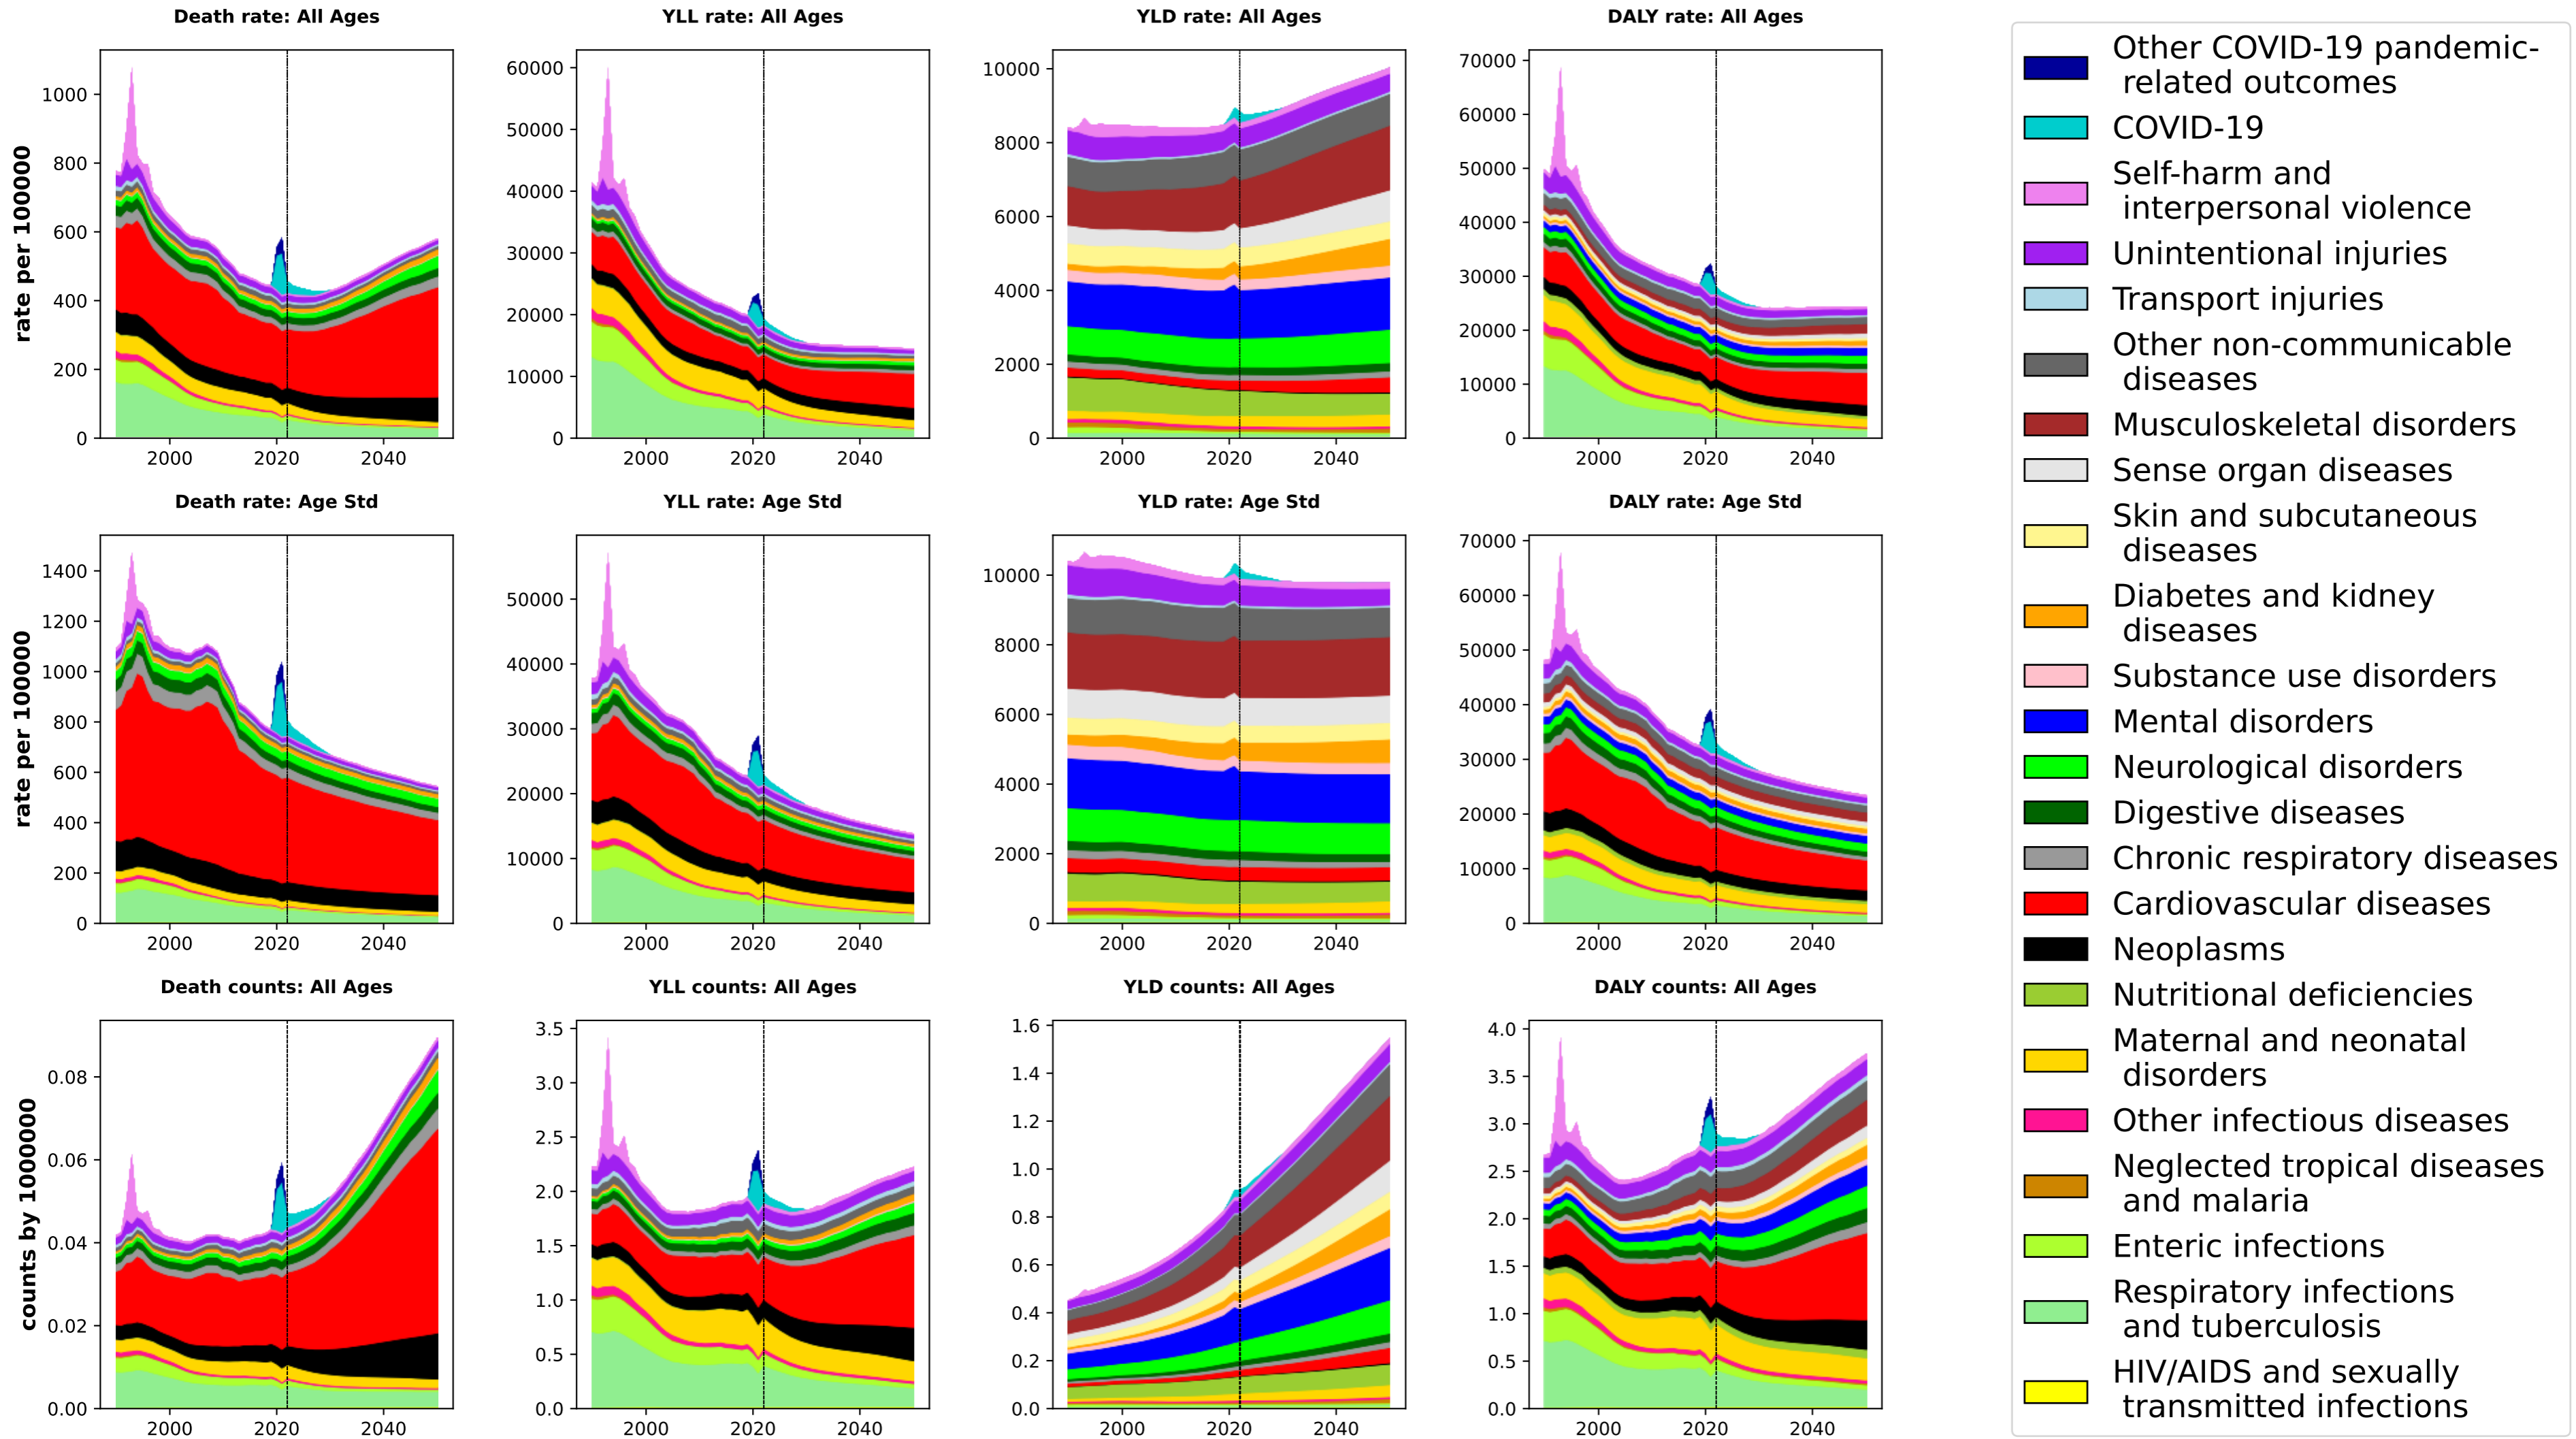

# Turkmenistan

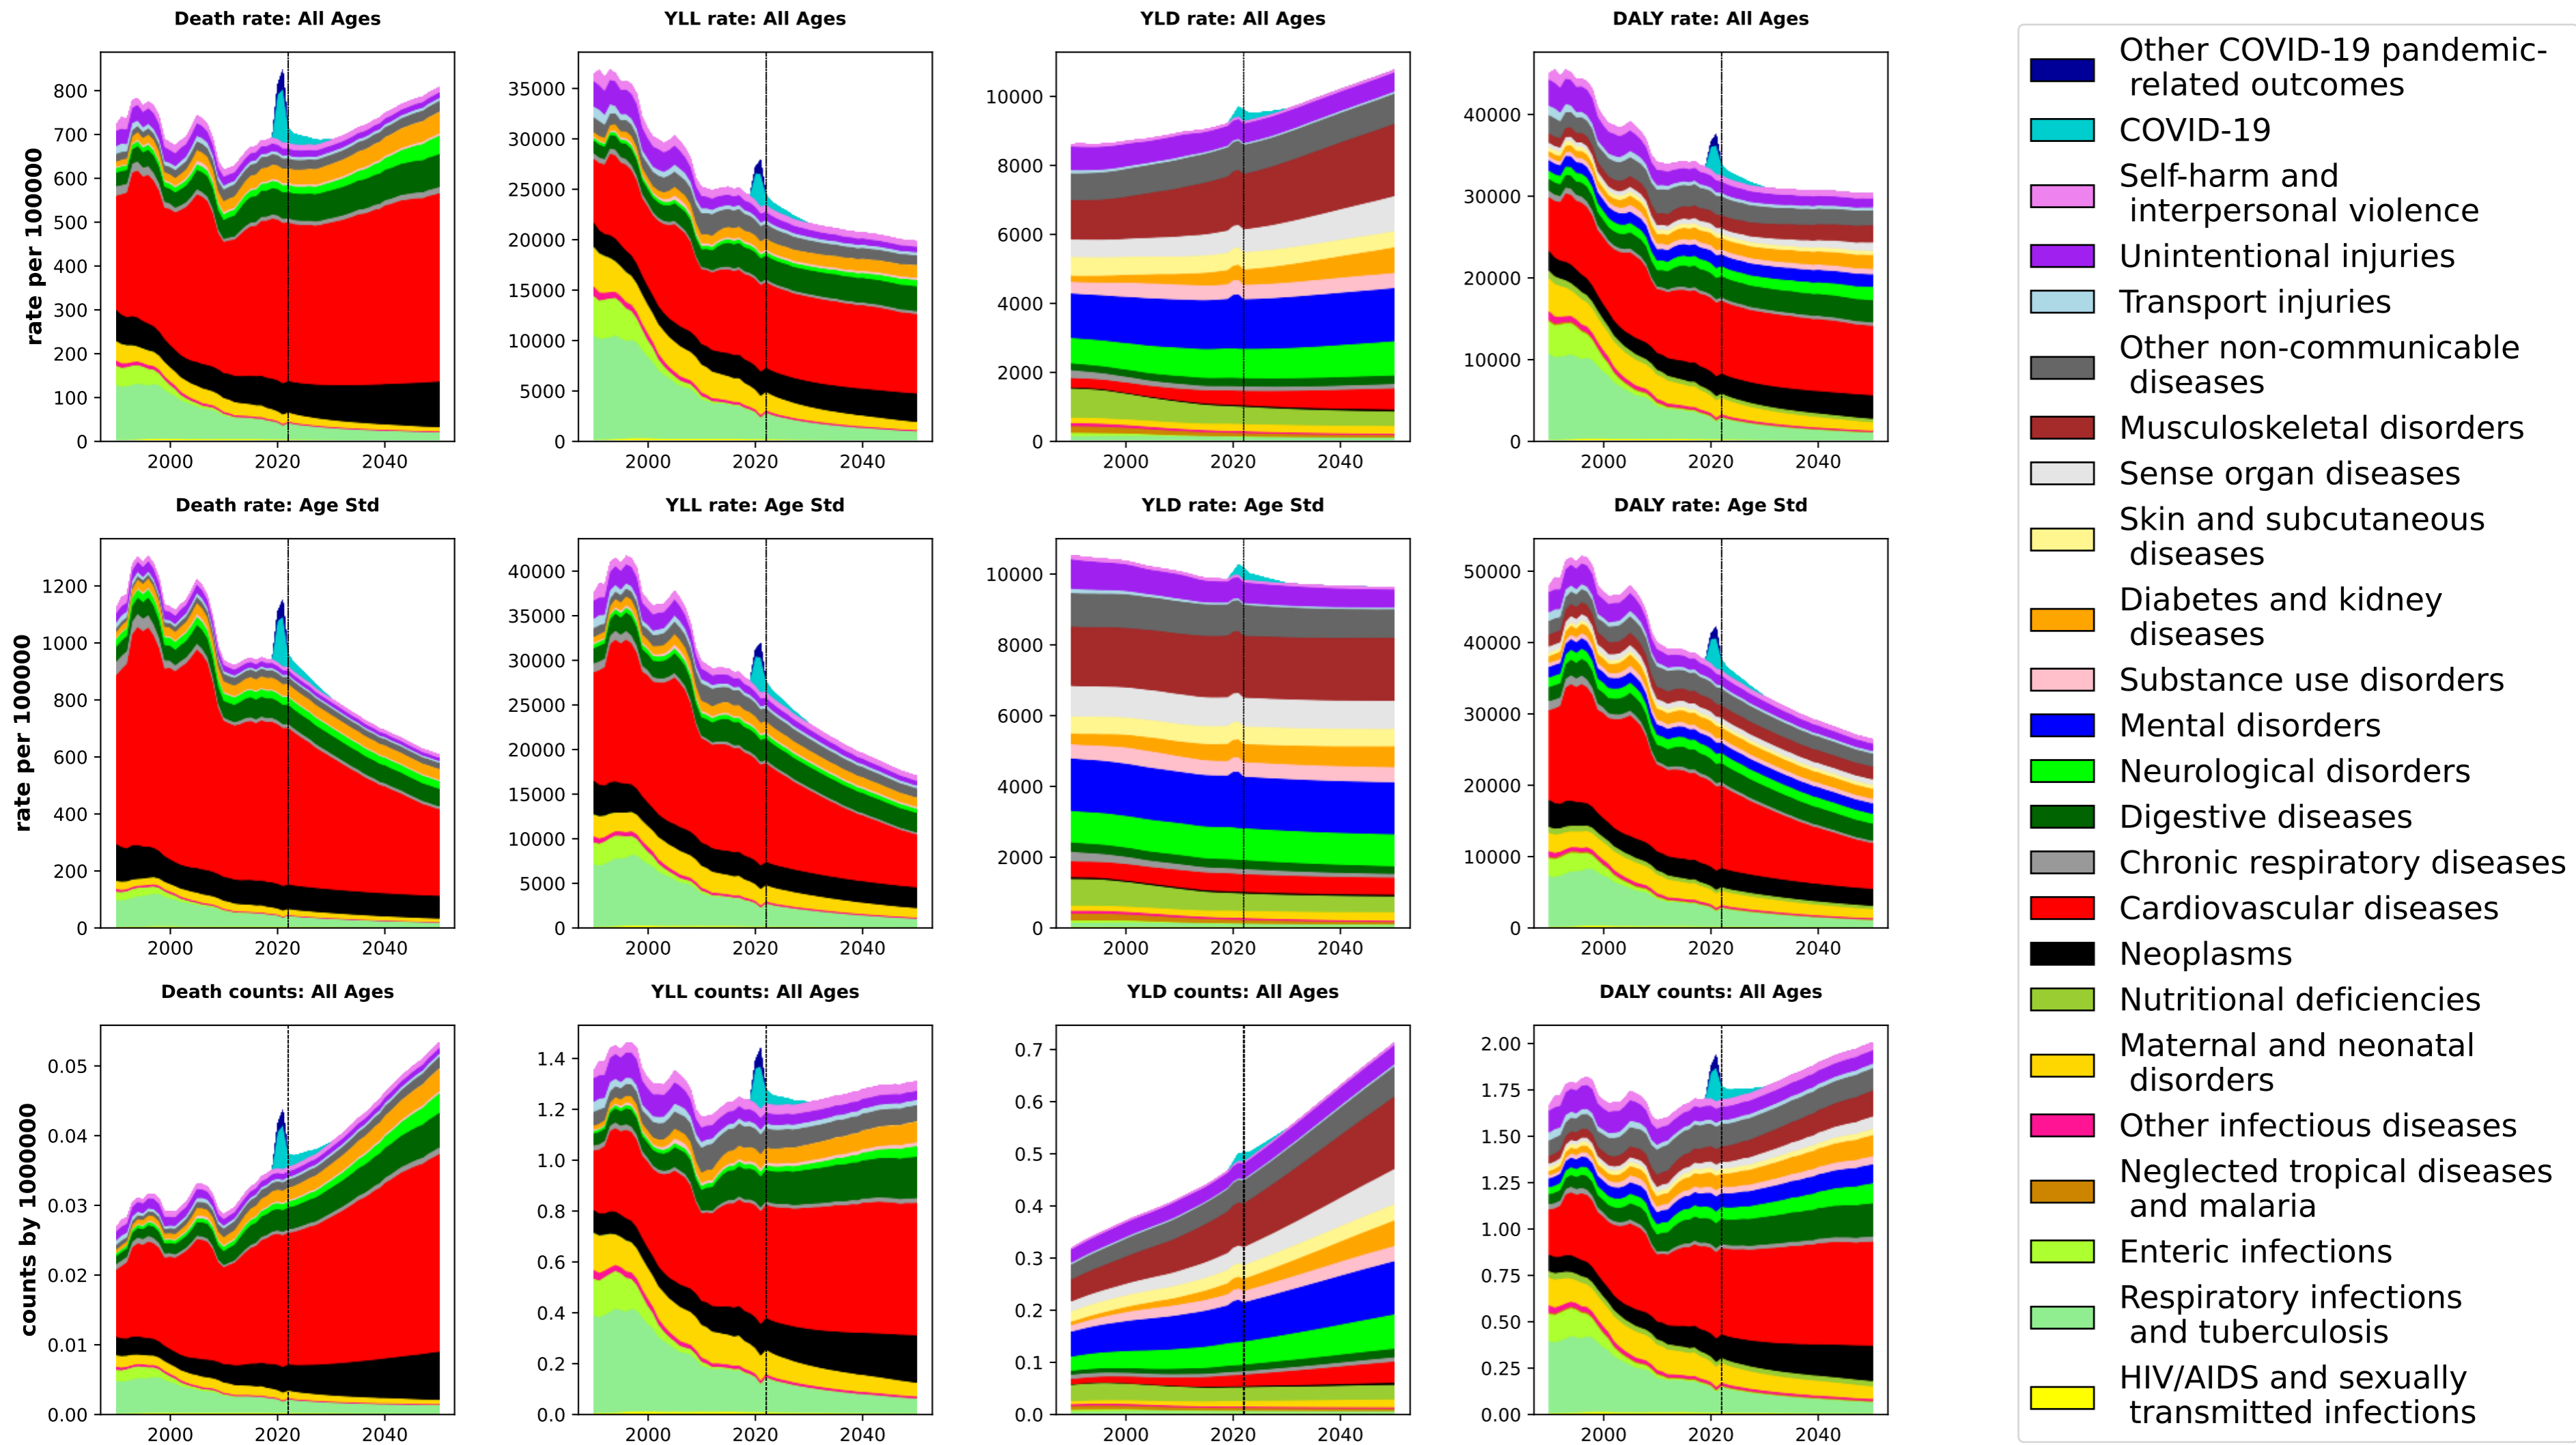

# Uzbekistan

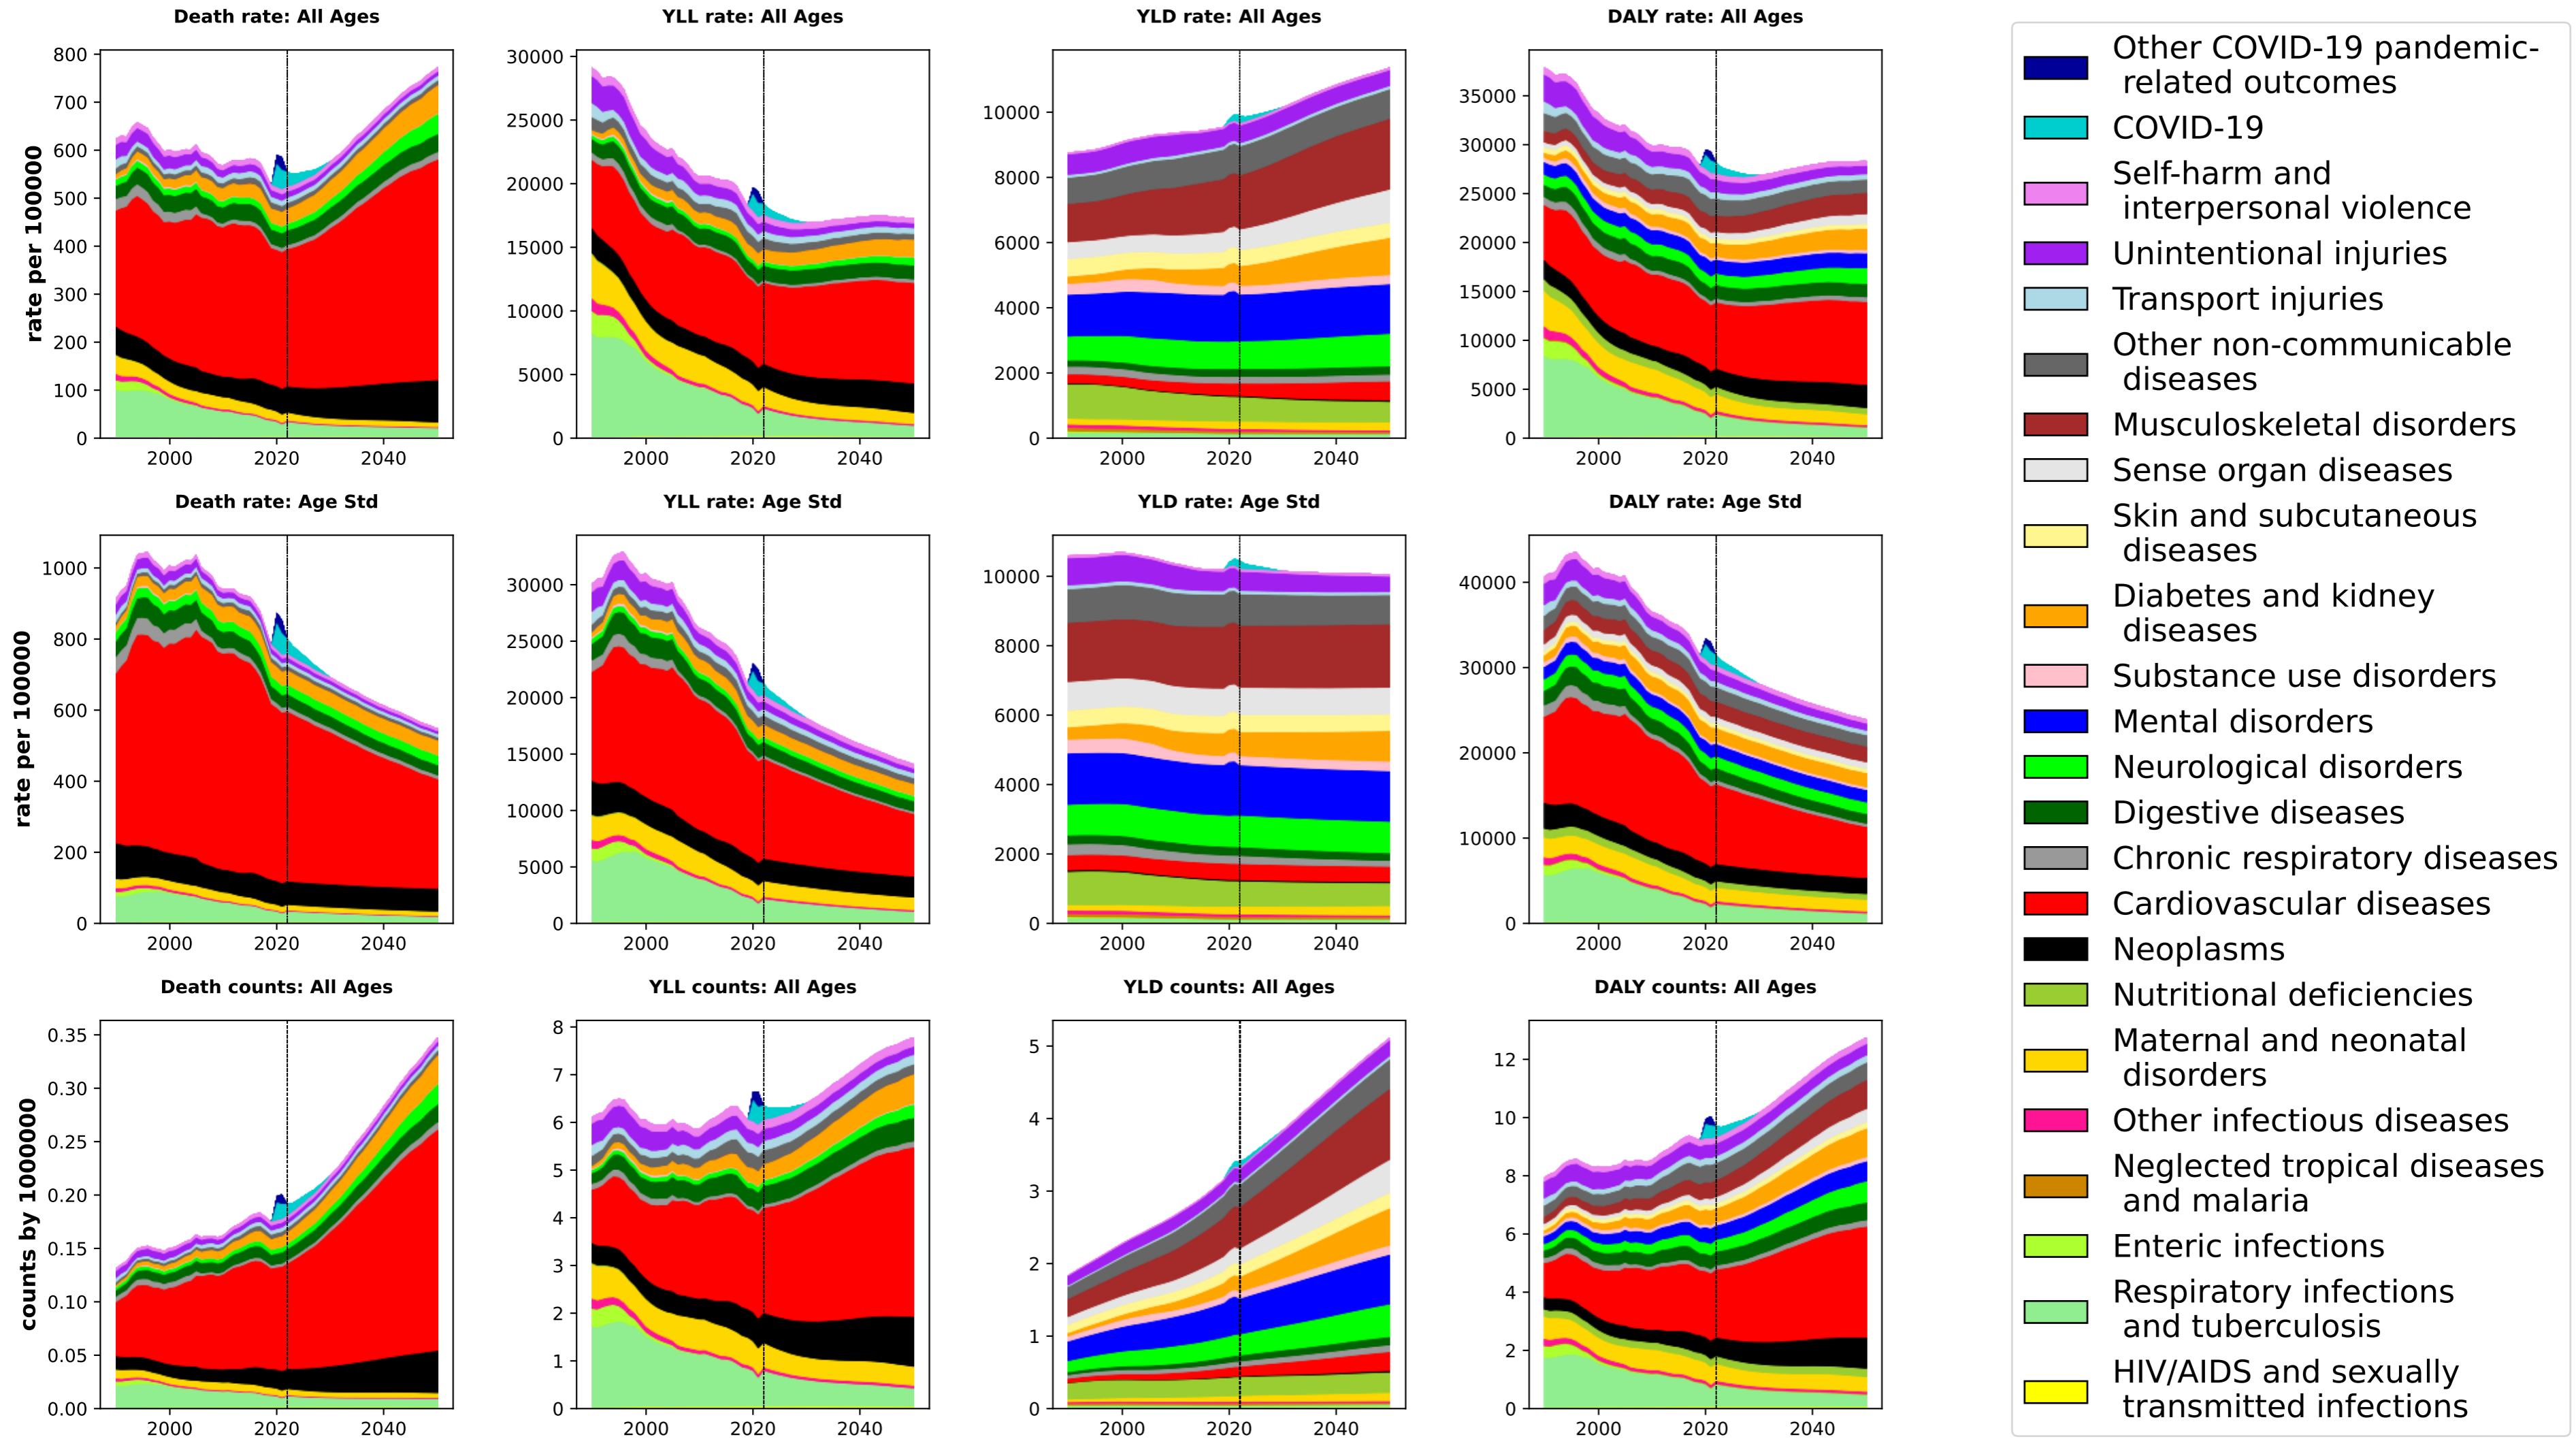



# Albania

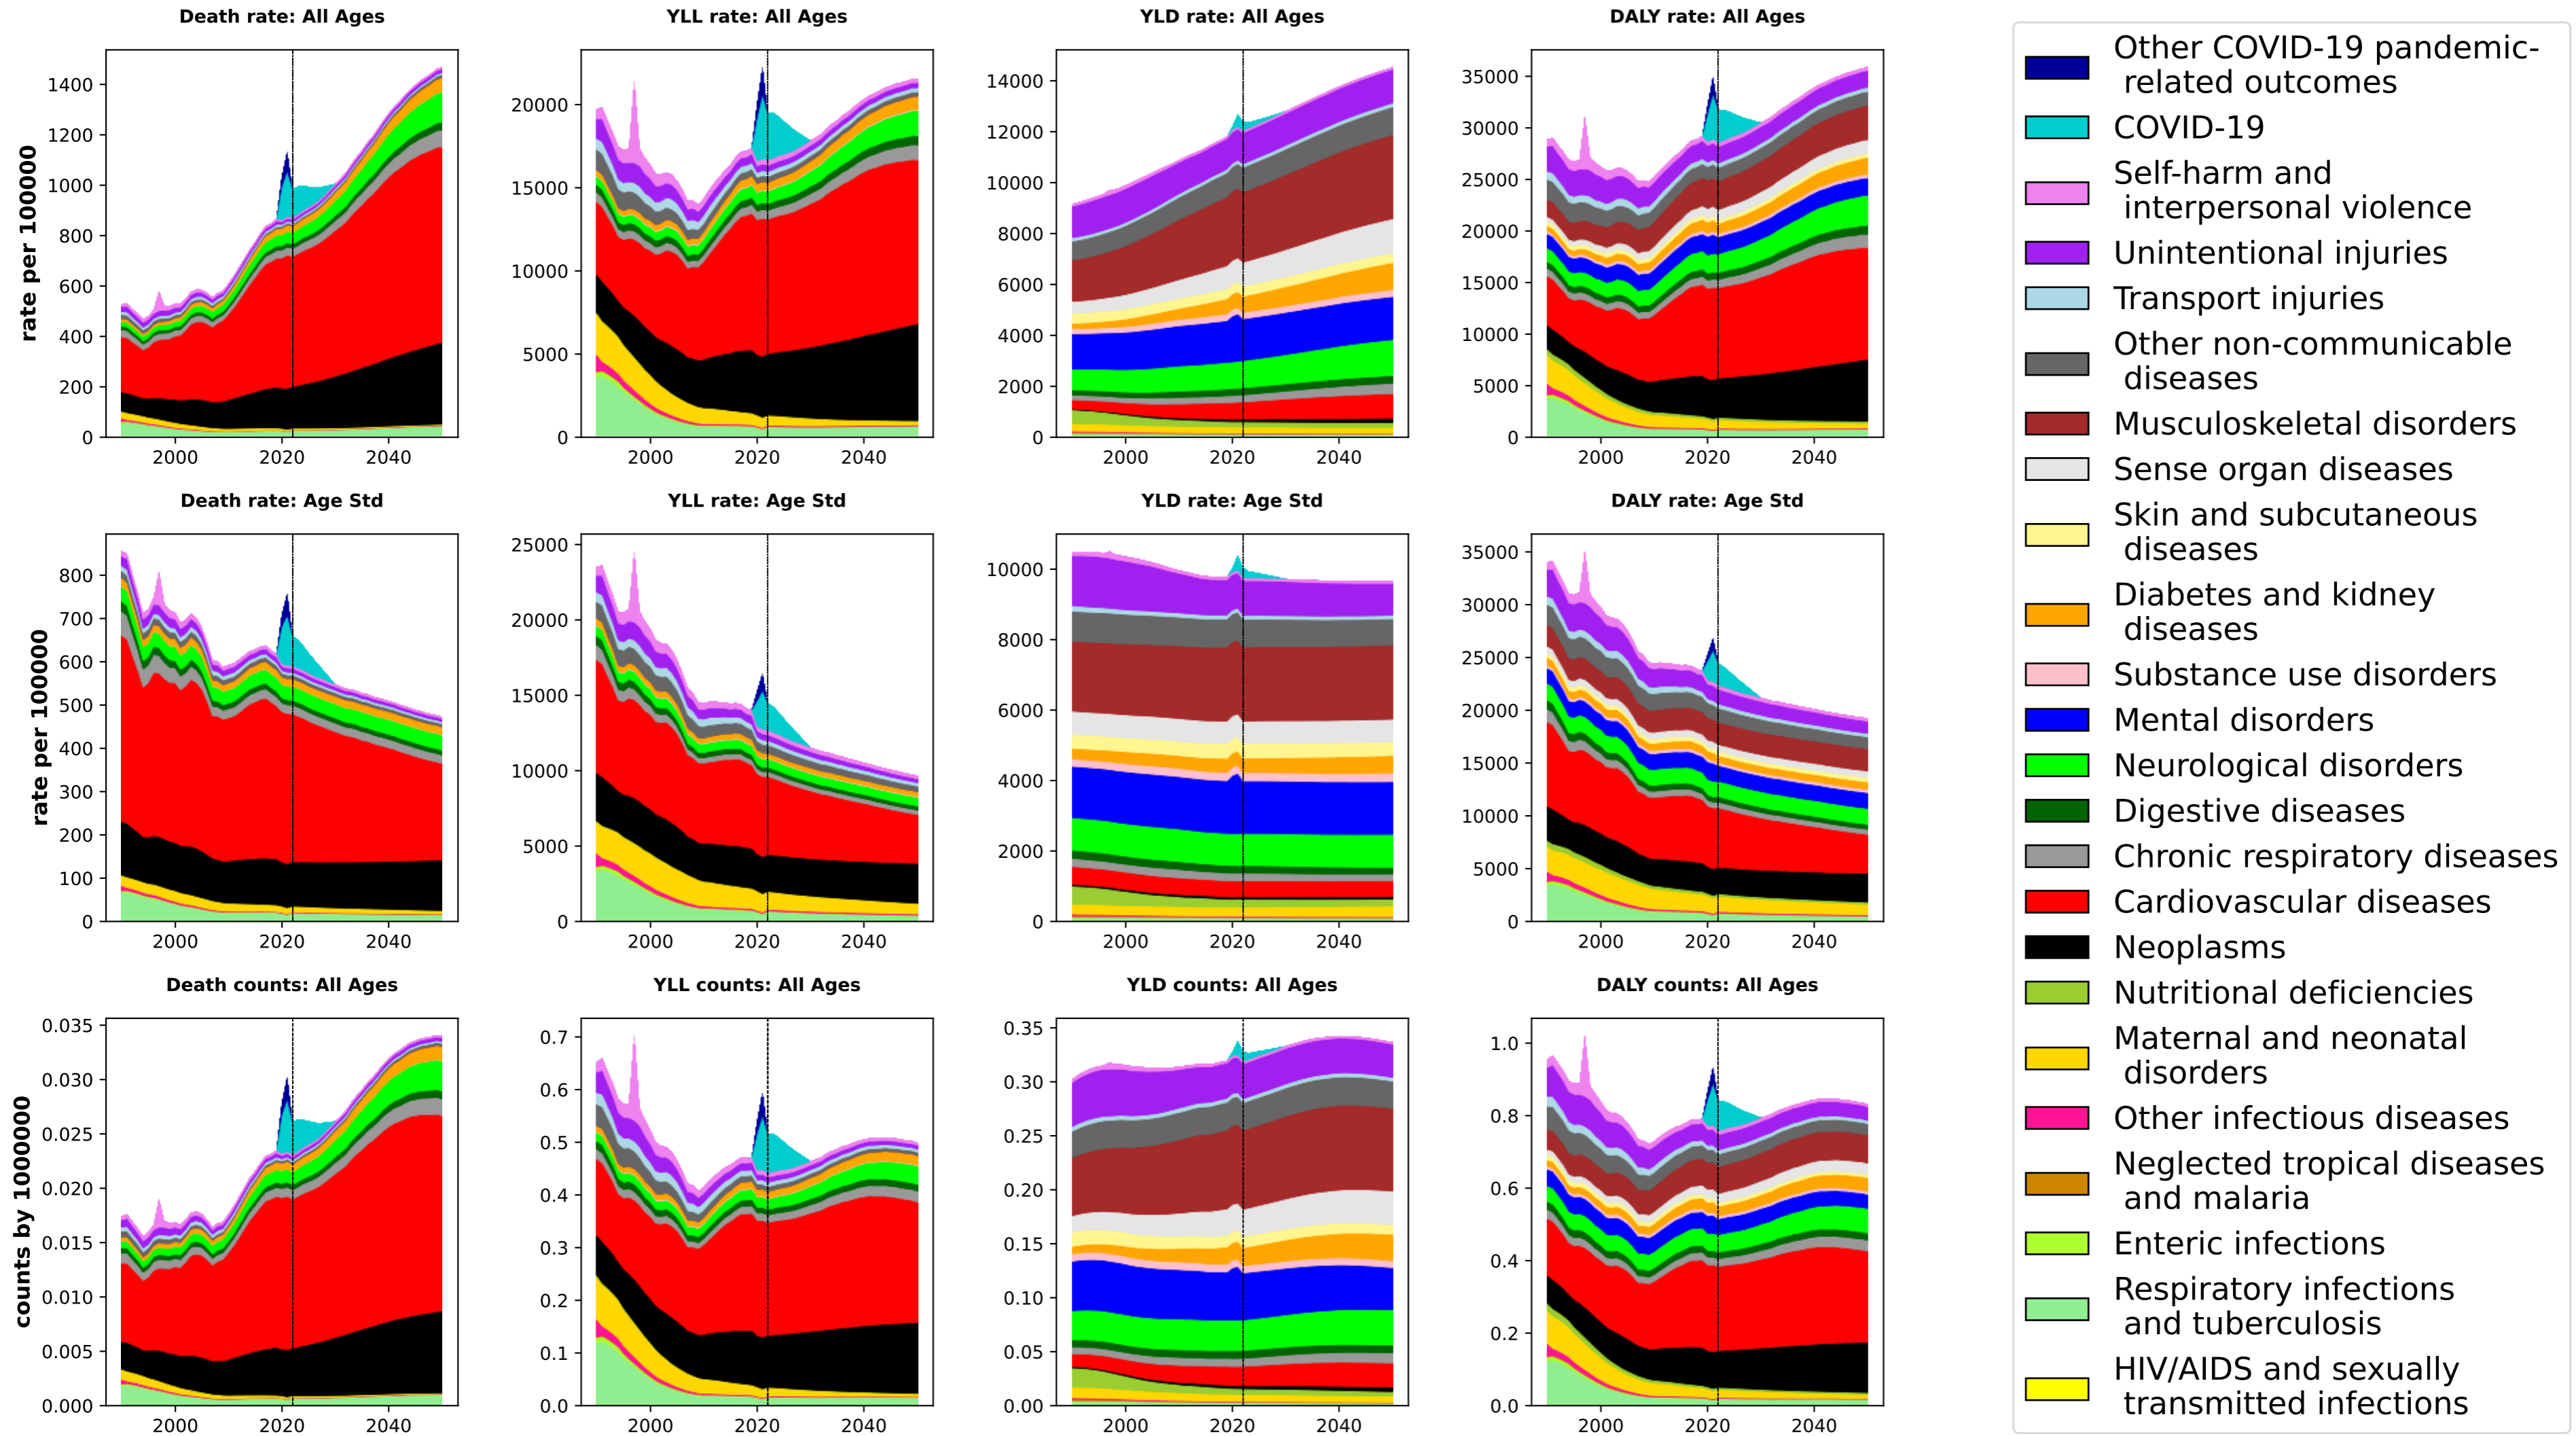

# Bosnia and Herzegovina

Supplemental Results Figure S6. Cause level 2 area plots for 4 burden measures for reference scenario by location, 1990-2050

721

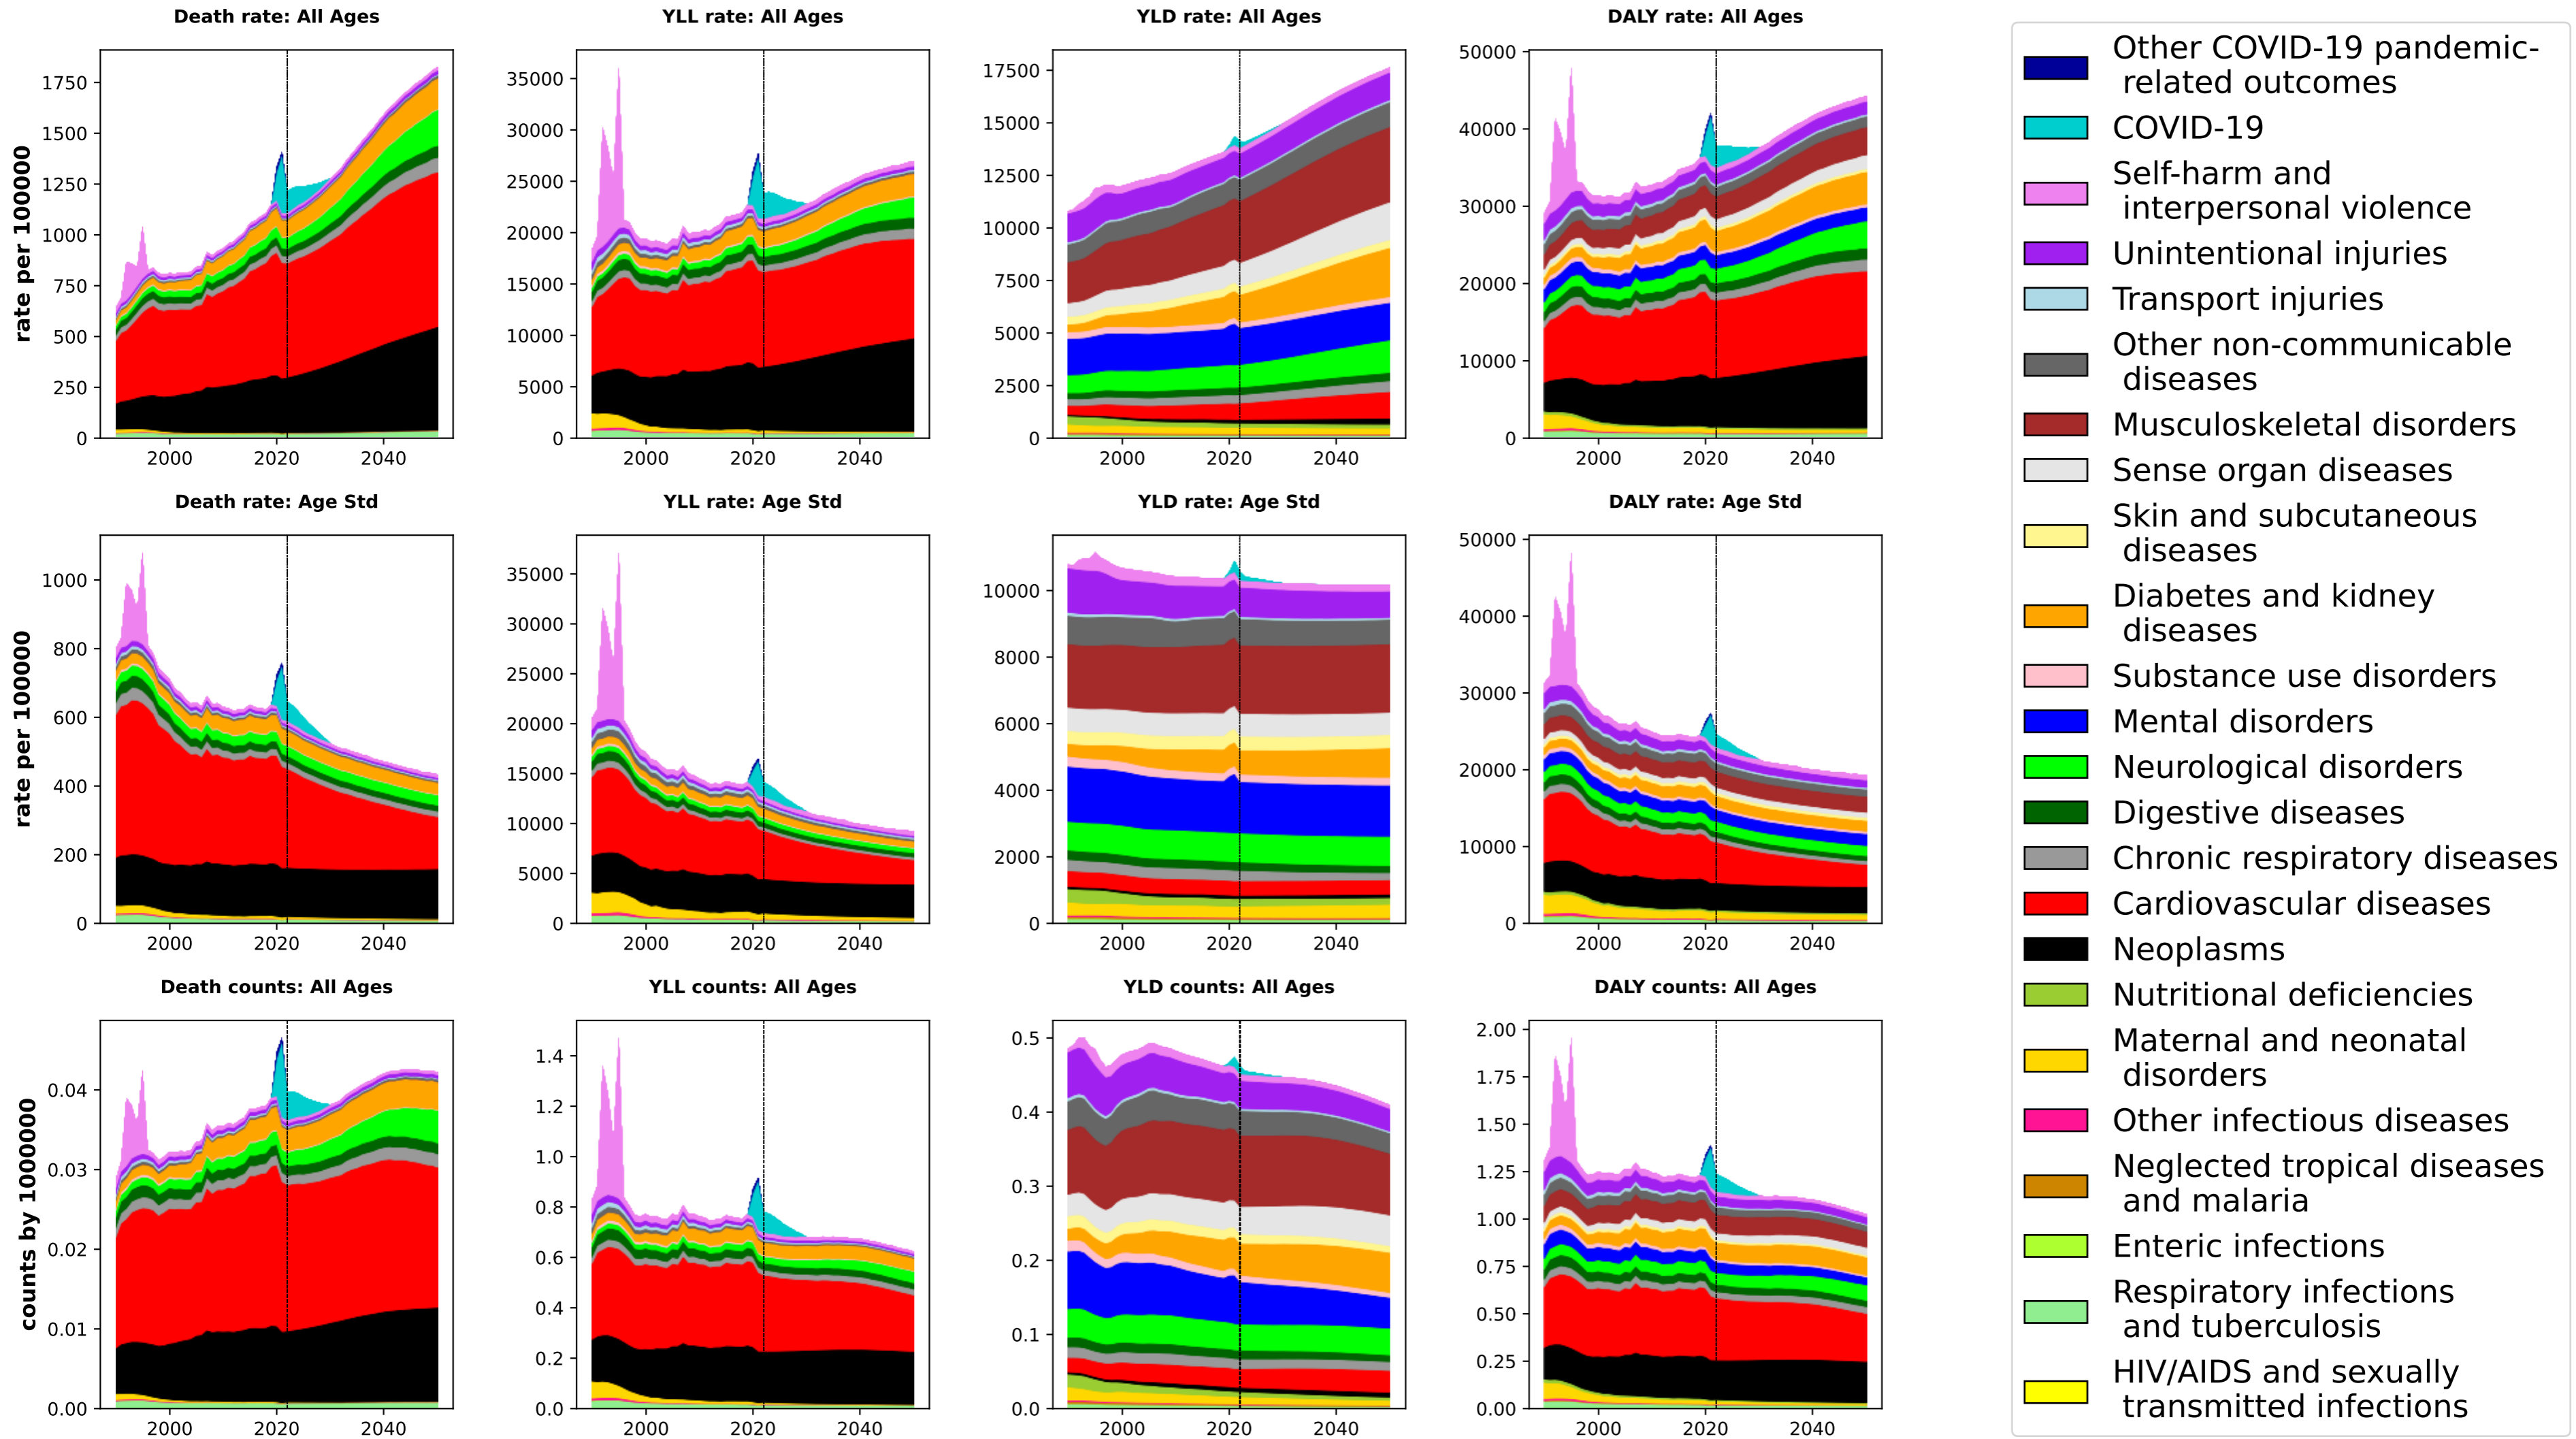

# Bulgaria

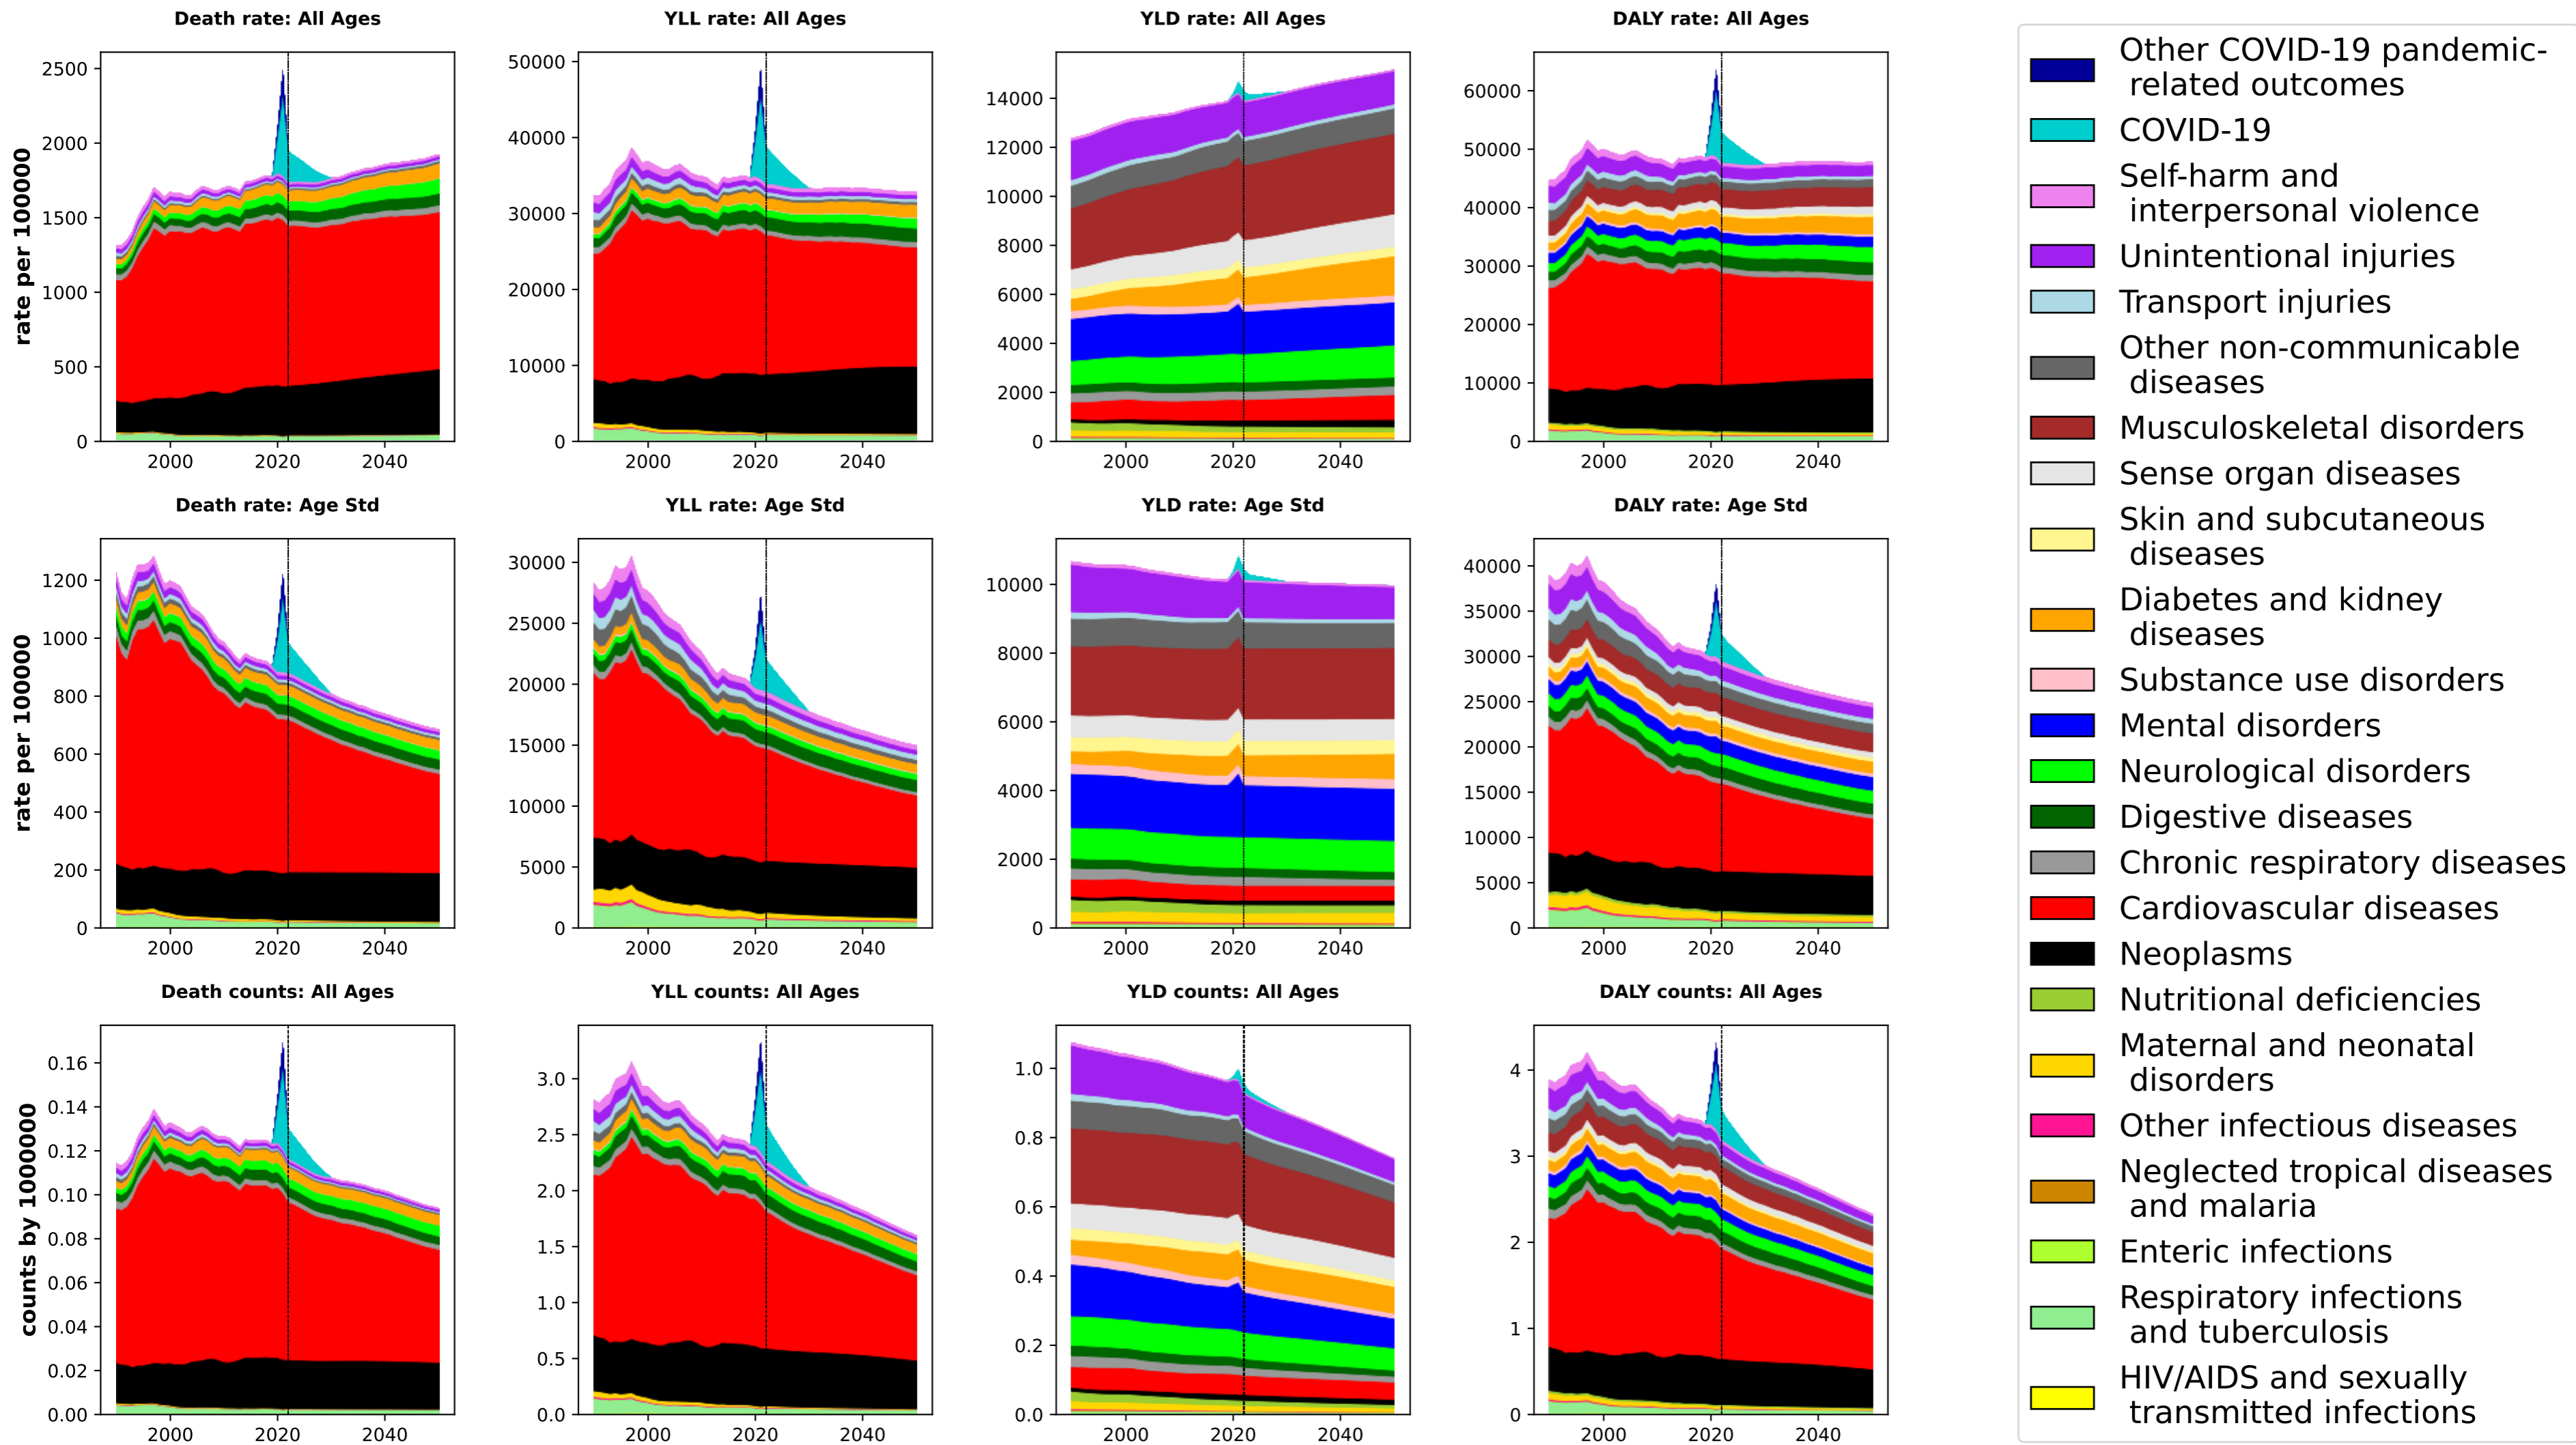

# Croatia

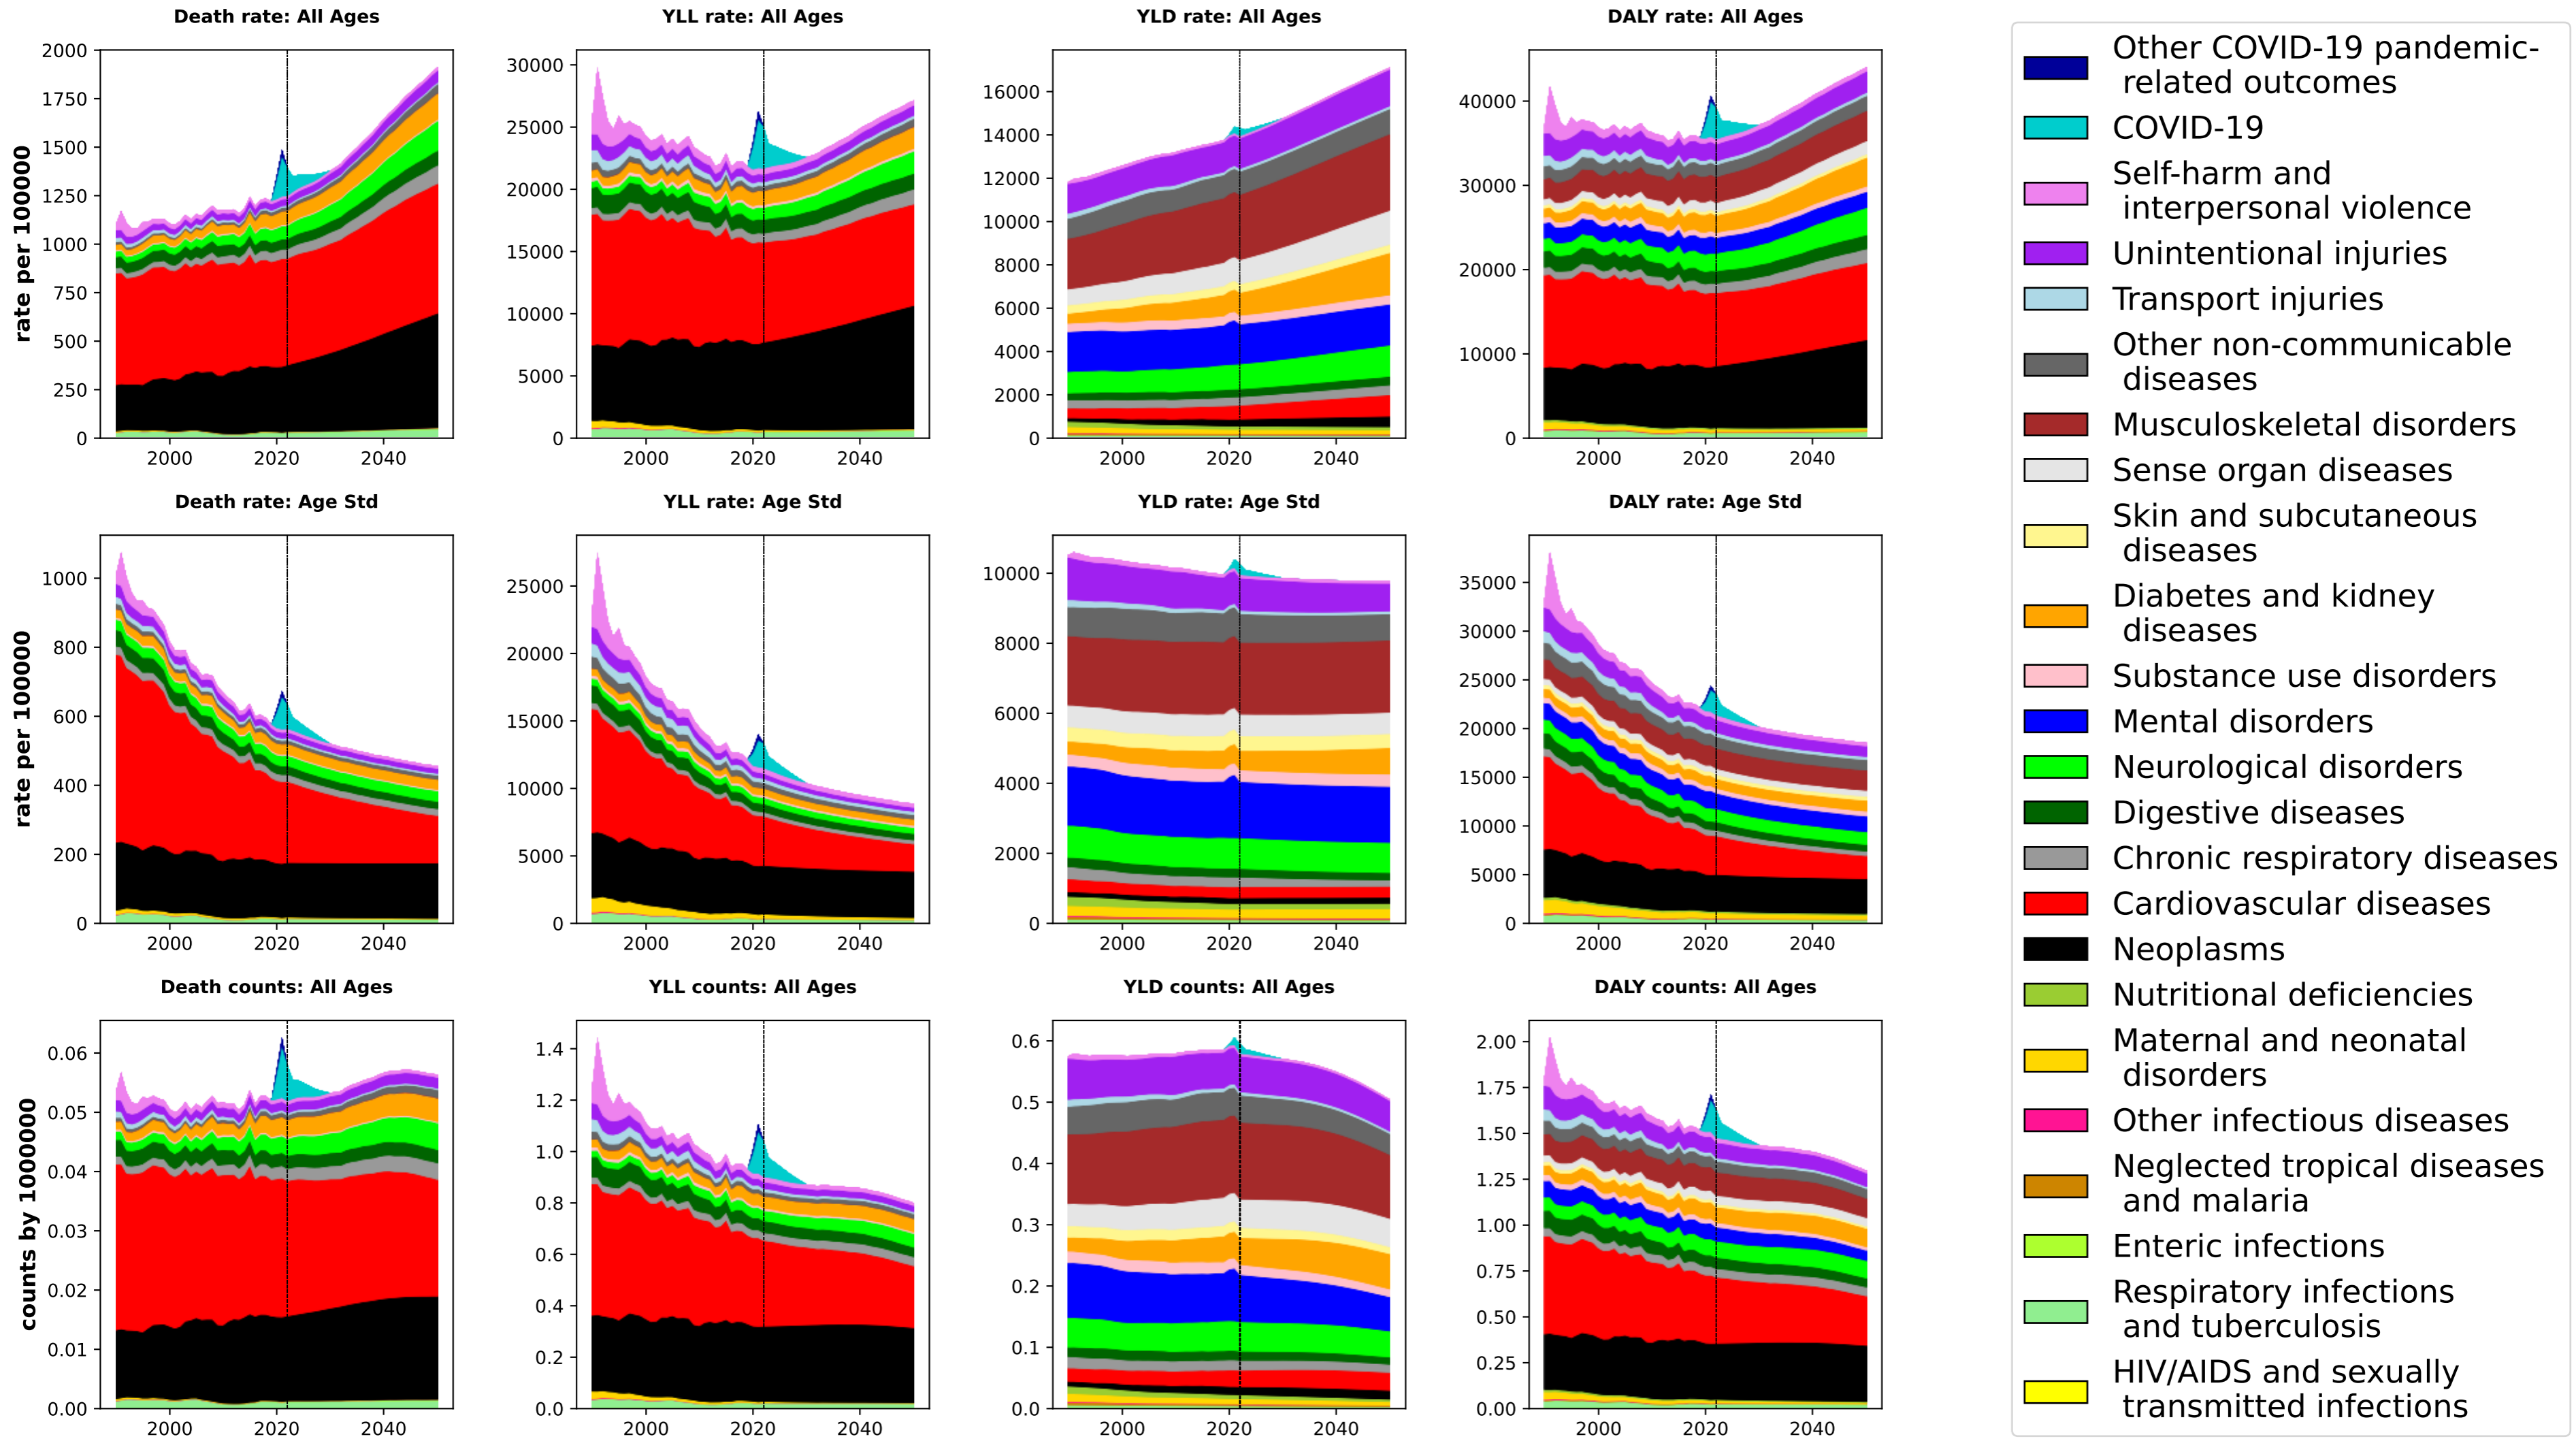

# Czechia

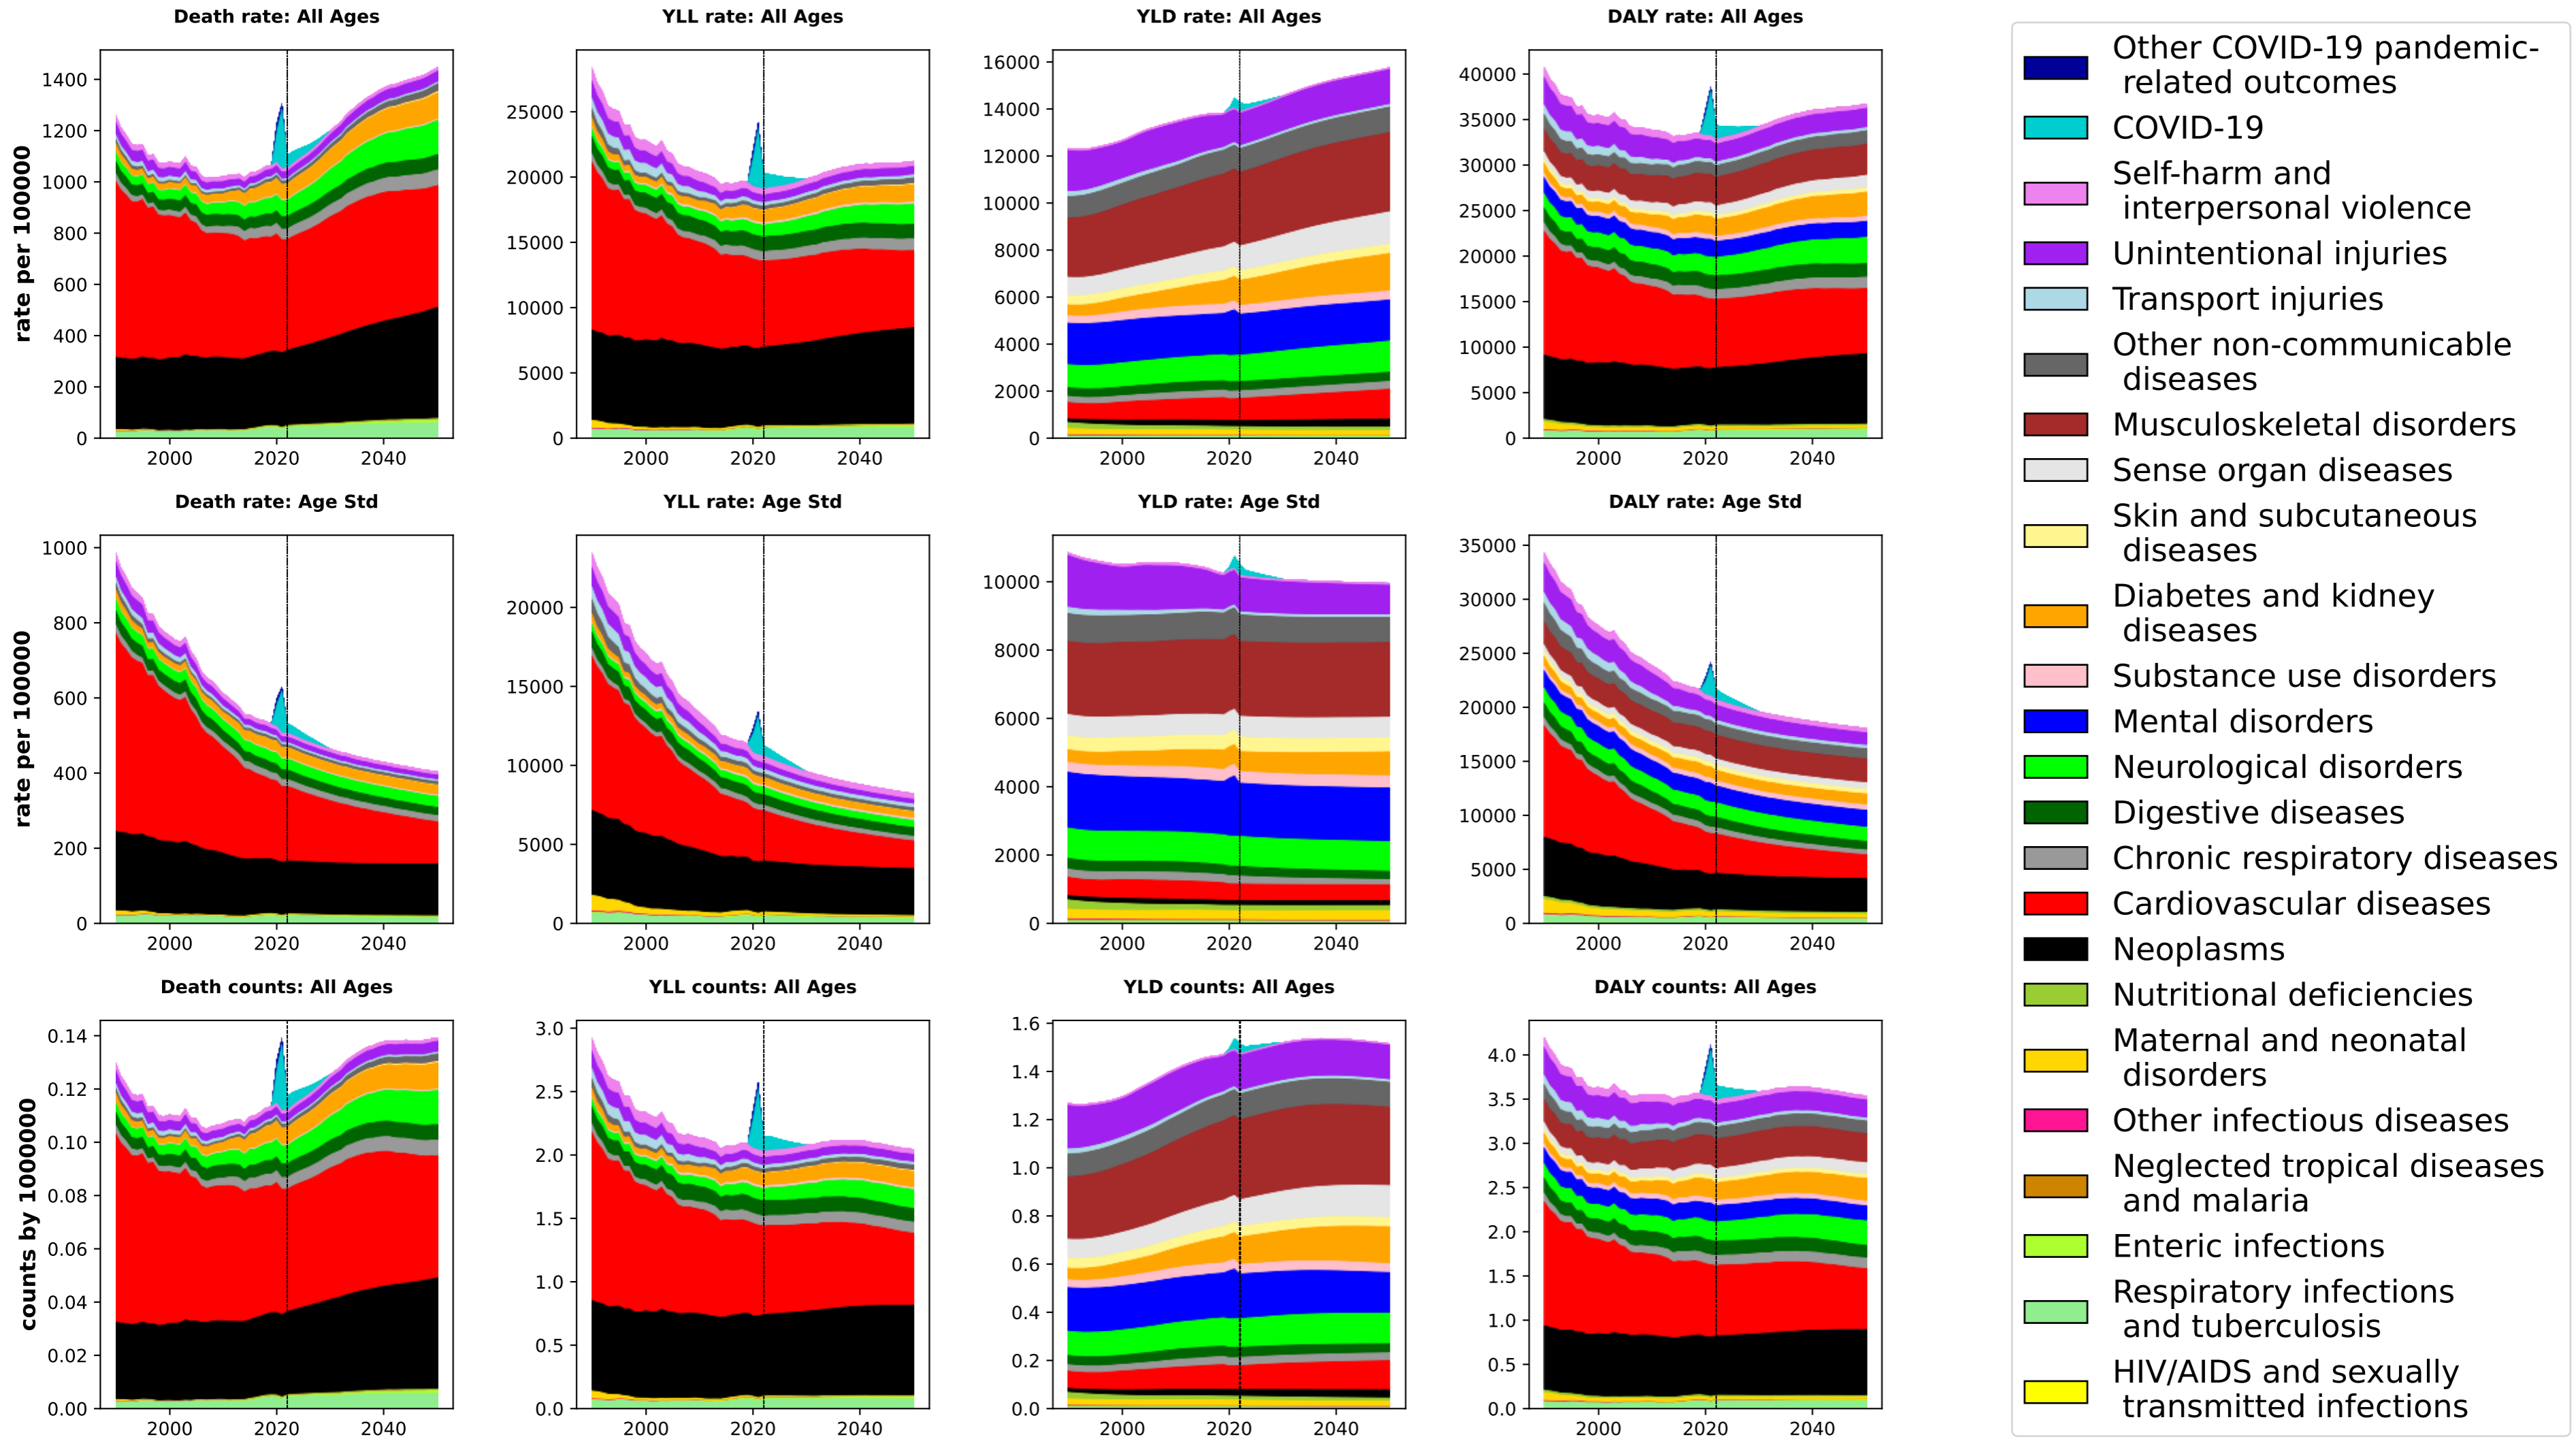

# Hungary

Supplemental Results Figure S6. Cause level 2 area plots for 4 burden measures for reference scenario by location, 1990-2050

725

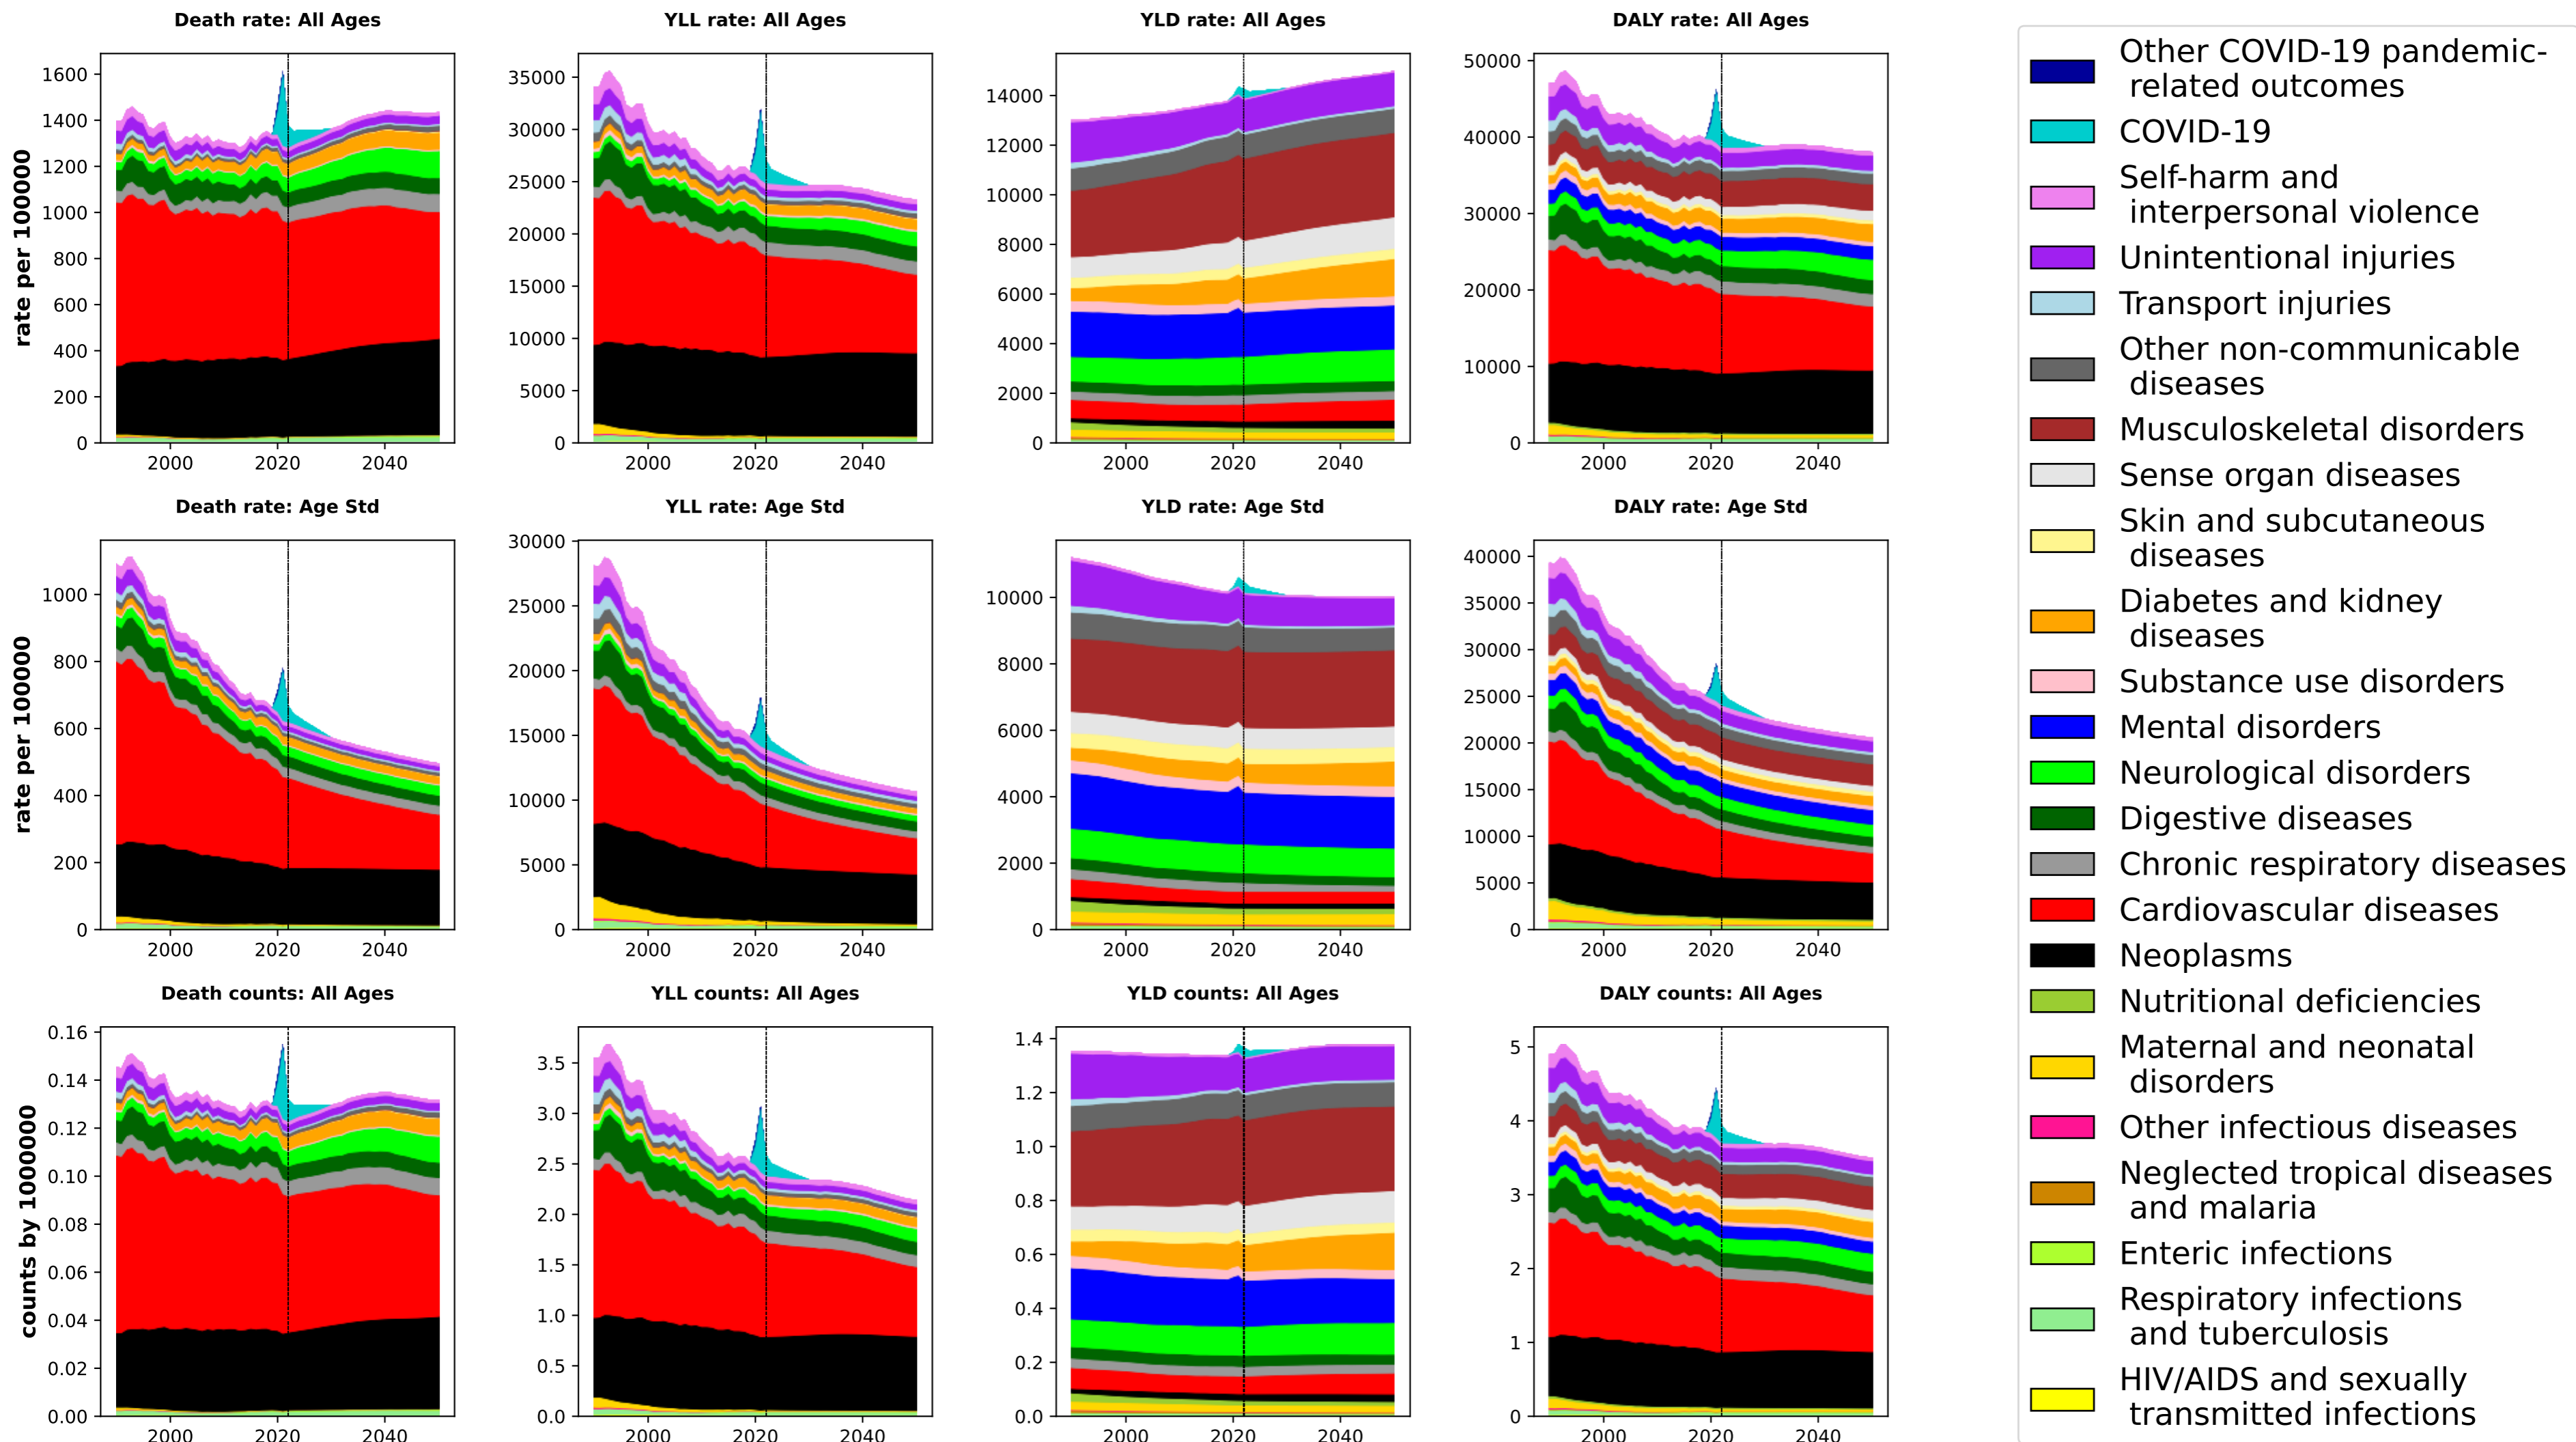

# Montenegro

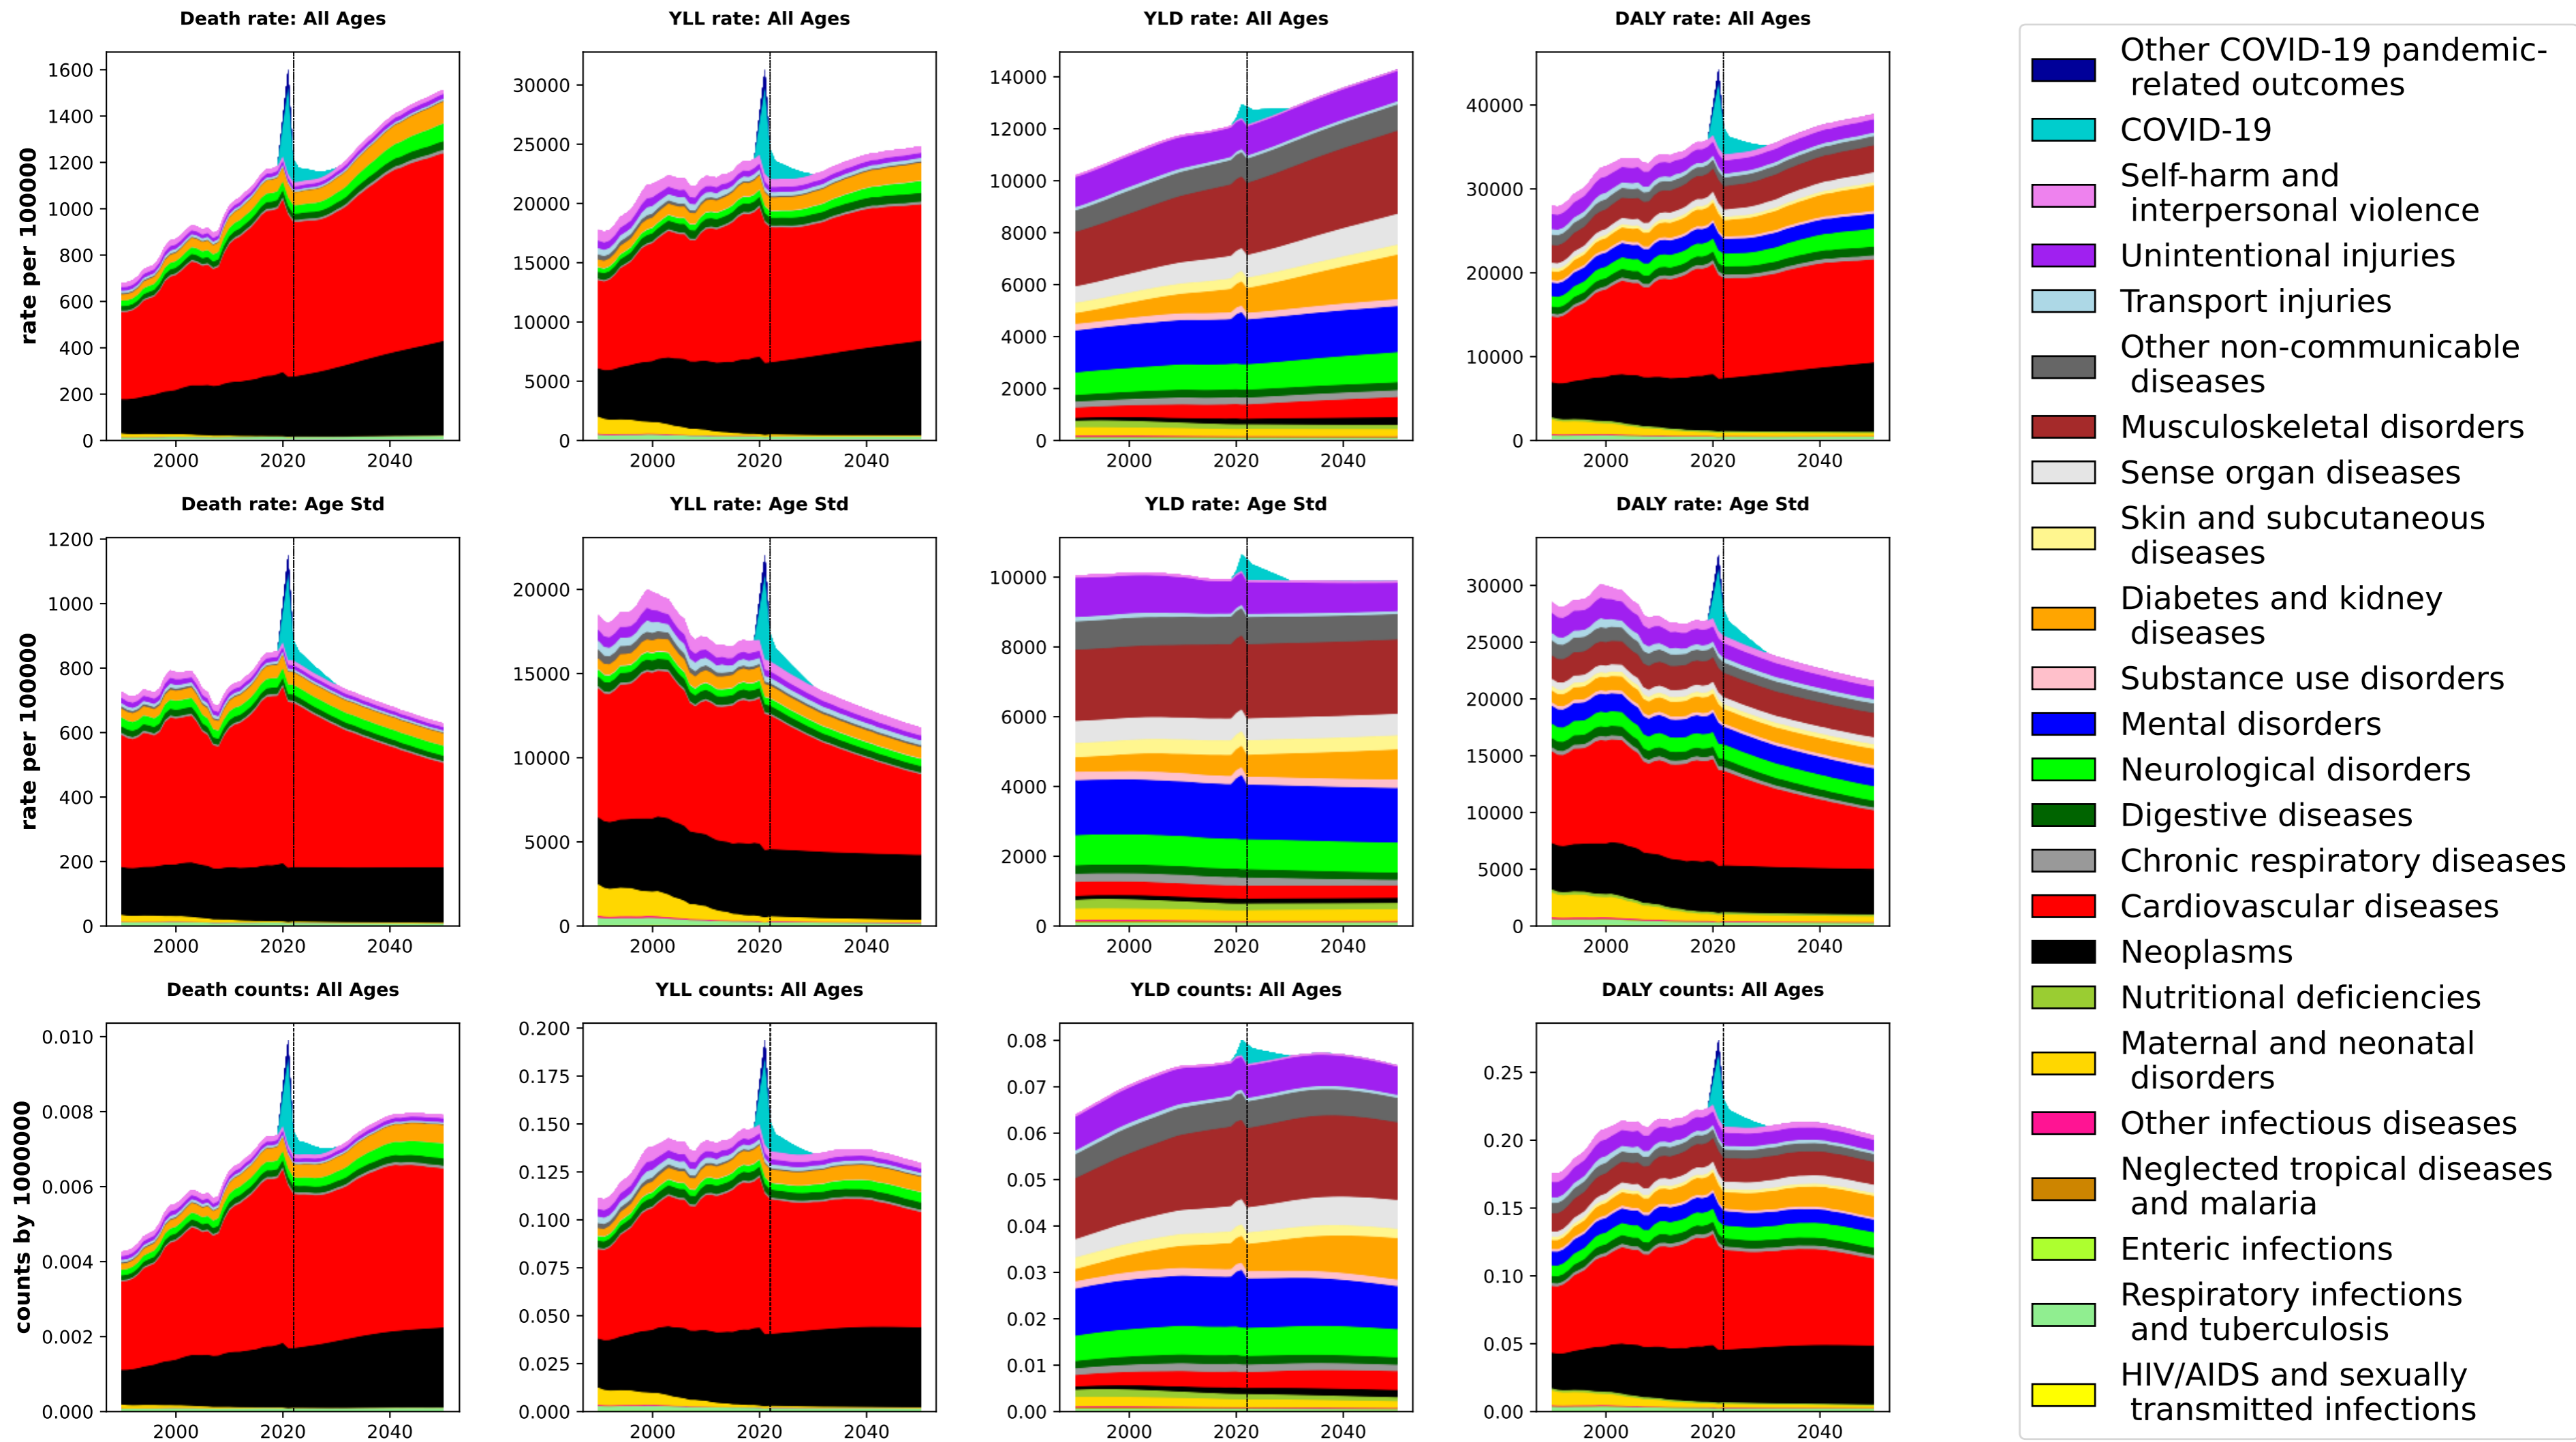

# North Macedonia

Supplemental Results Figure S6. Cause level 2 area plots for 4 burden measures for reference scenario by location, 1990-2050

727

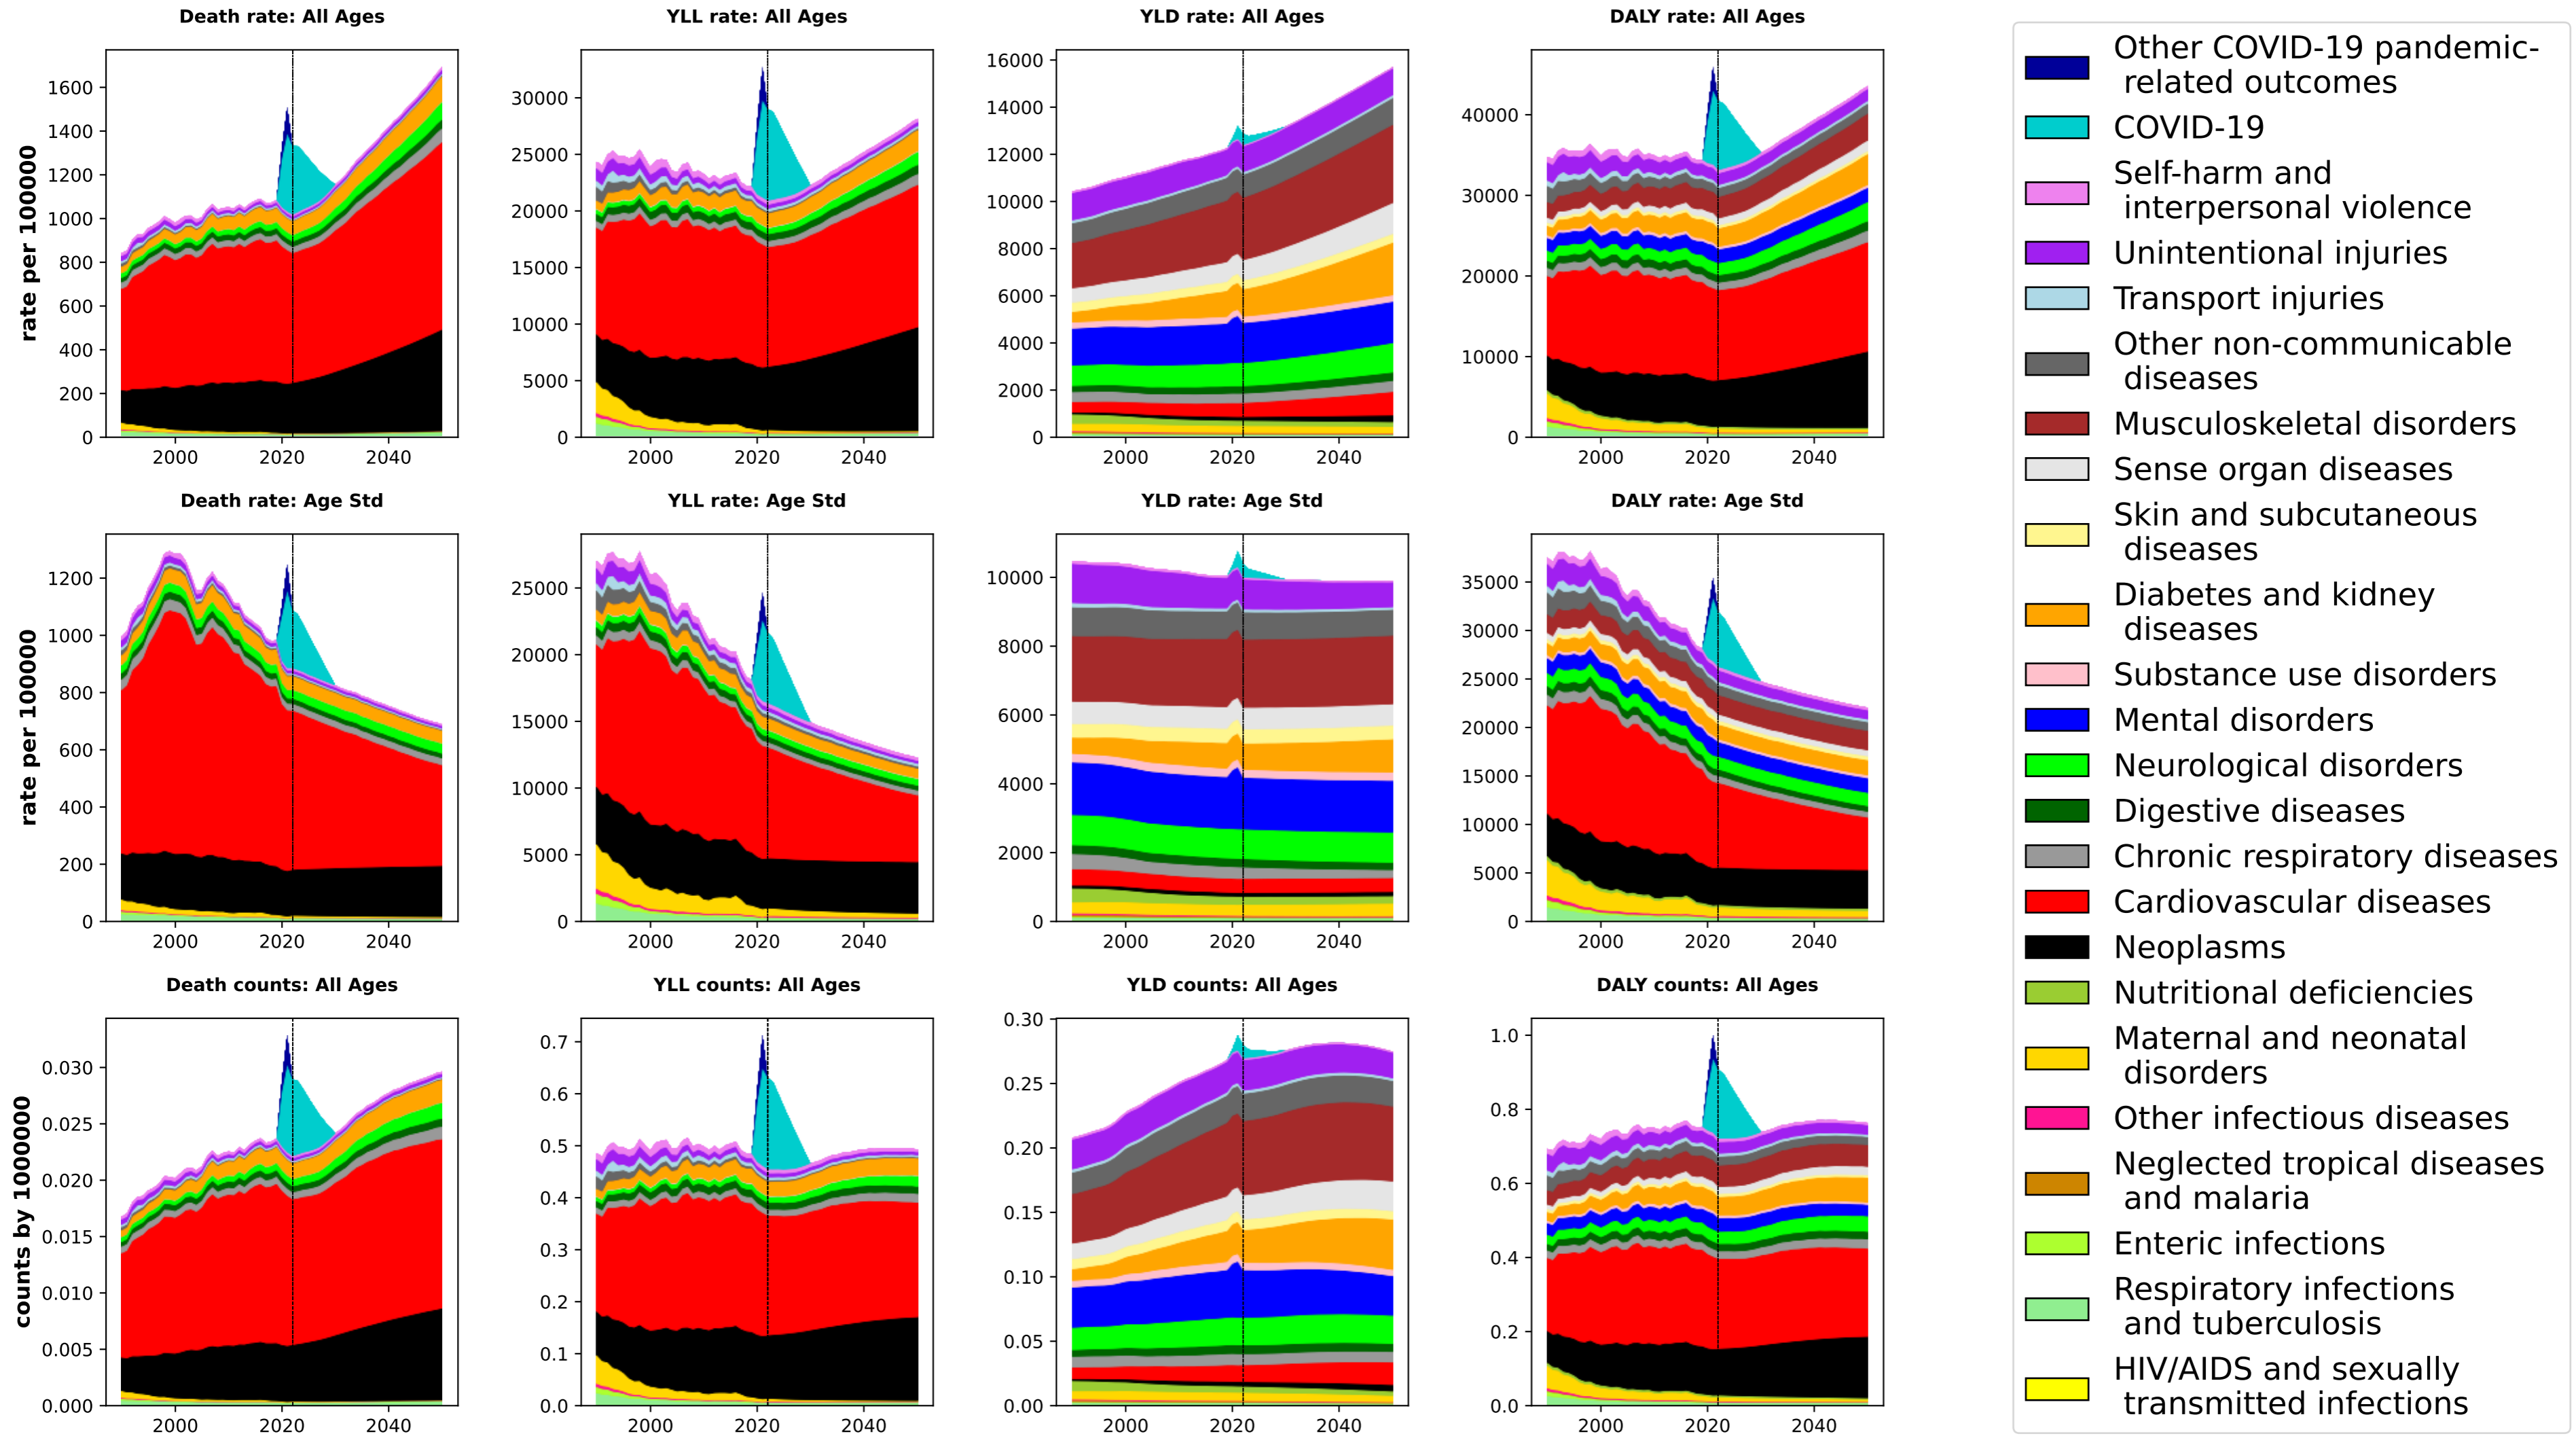



# Poland

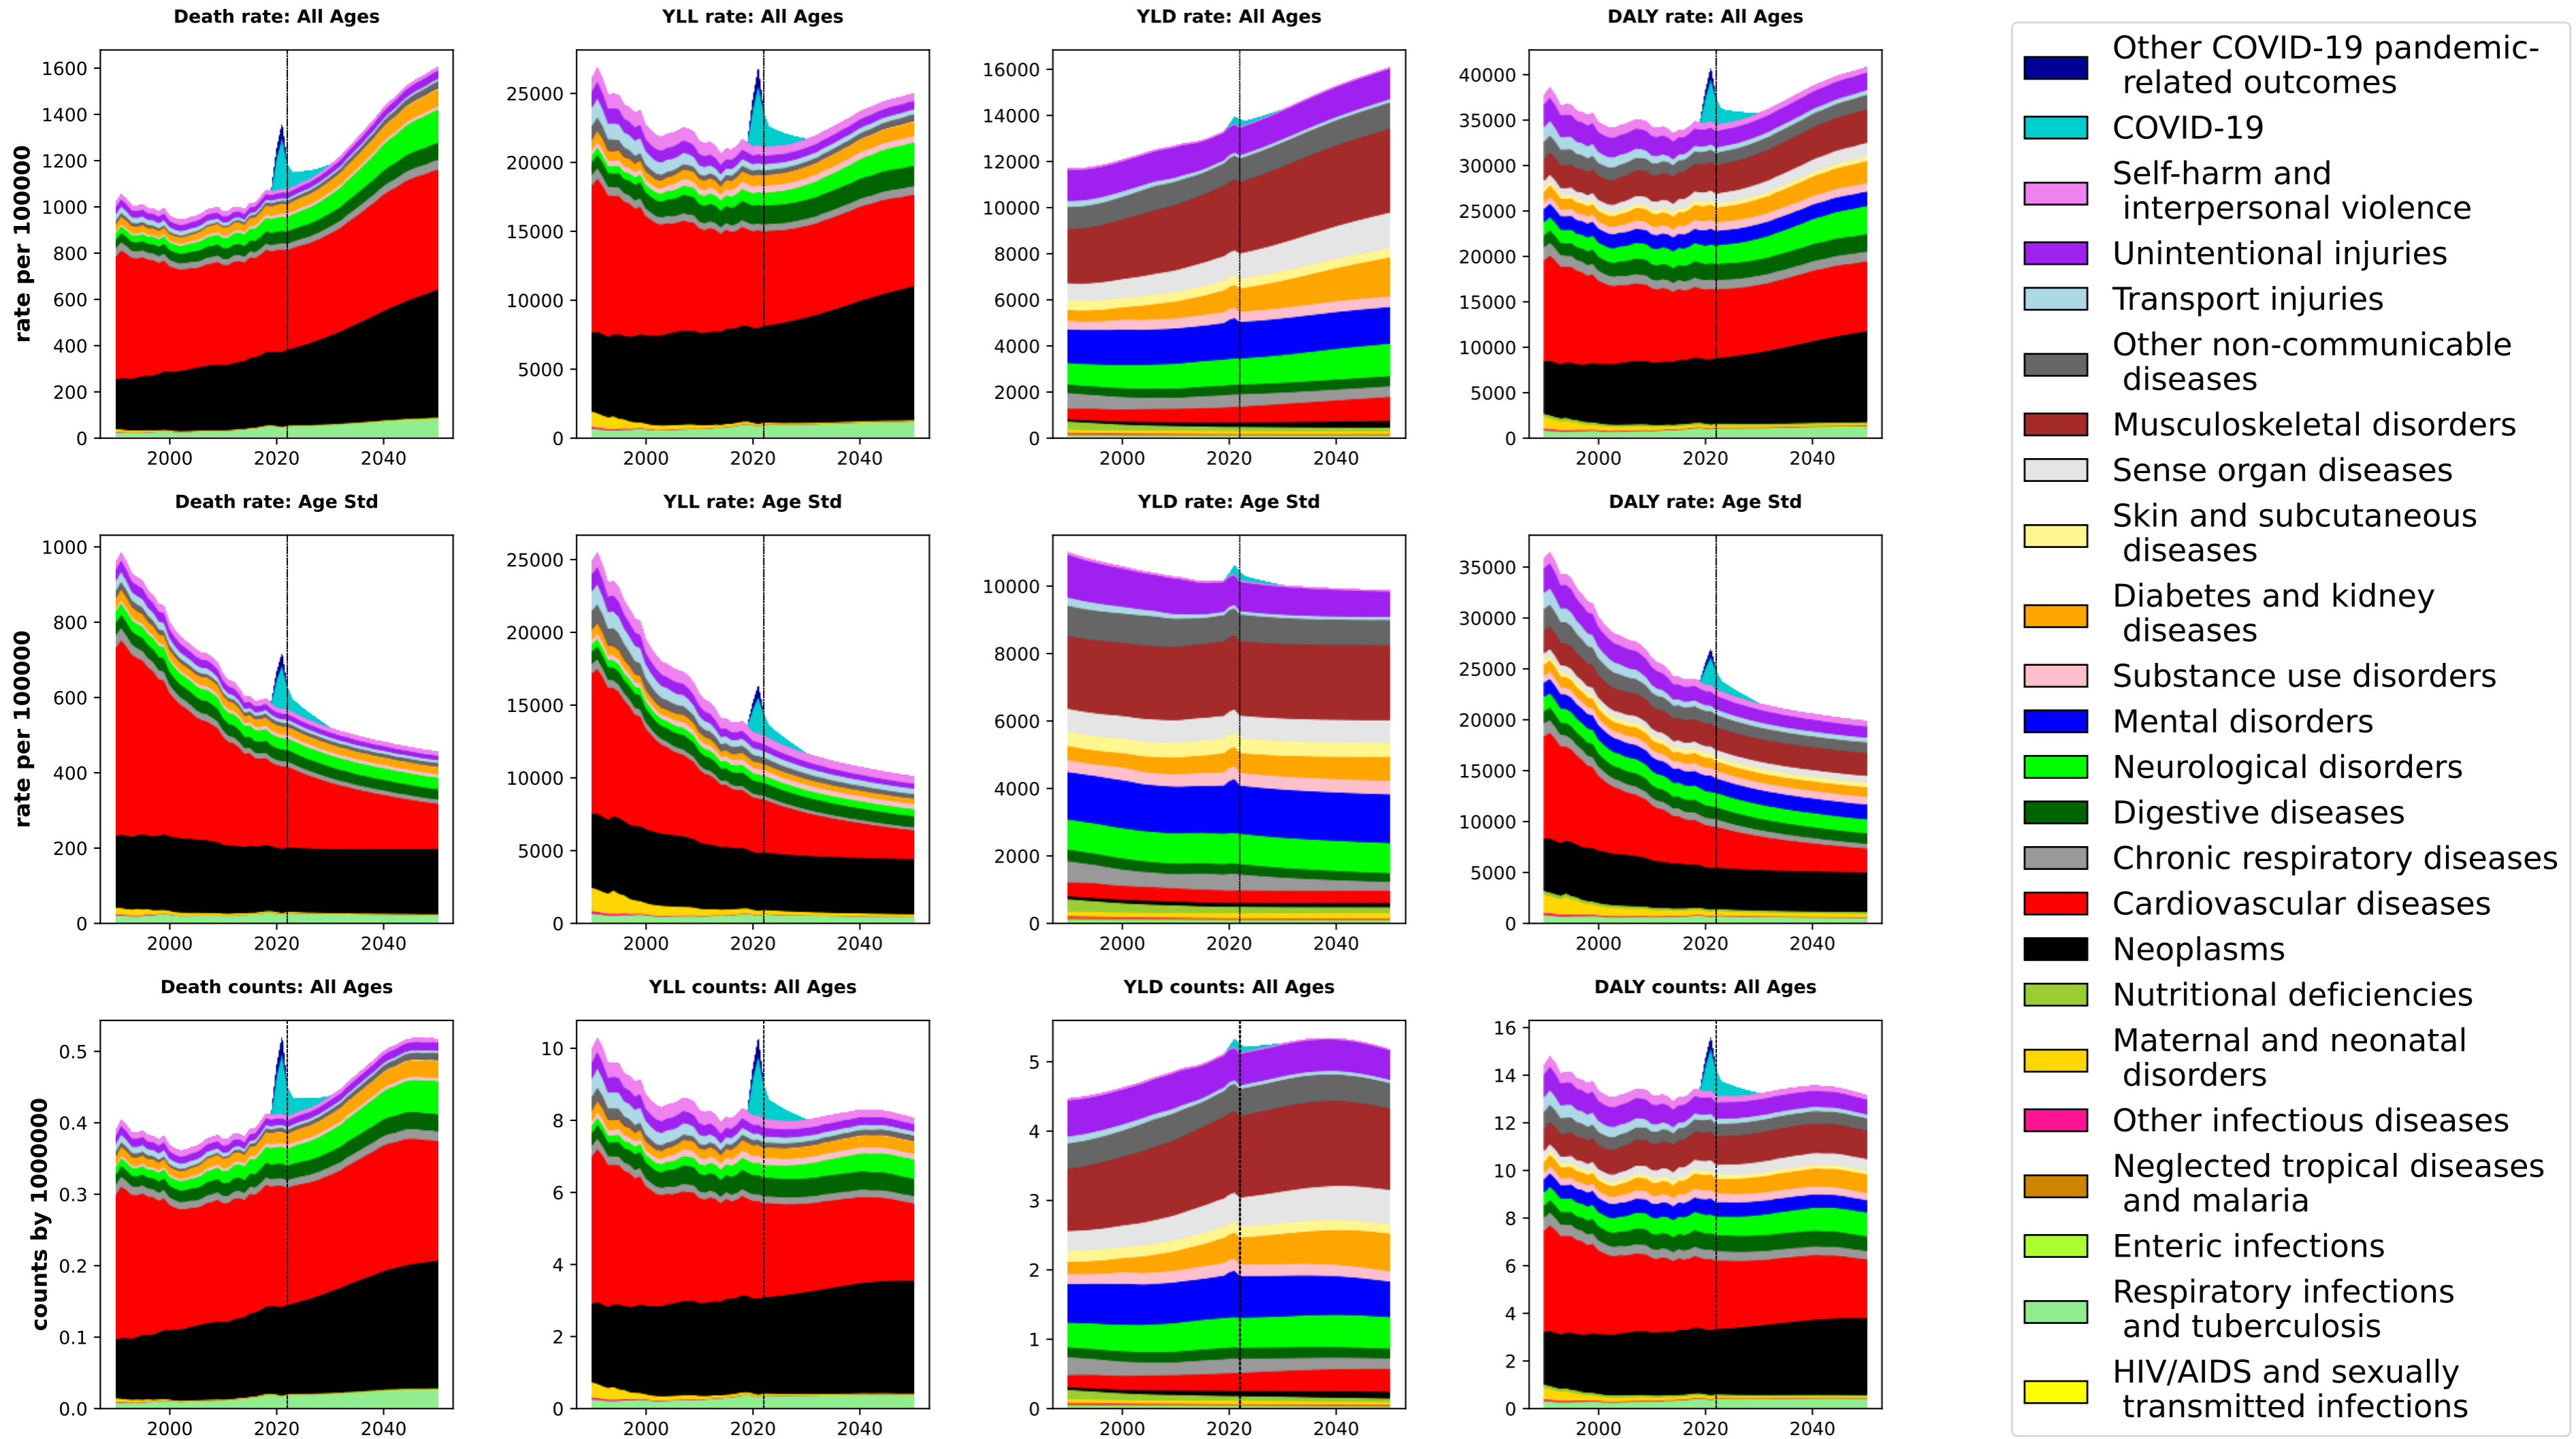

# Romania

Supplemental Results Figure S6. Cause level 2 area plots for 4 burden measures for reference scenario by location, 1990-2050

729

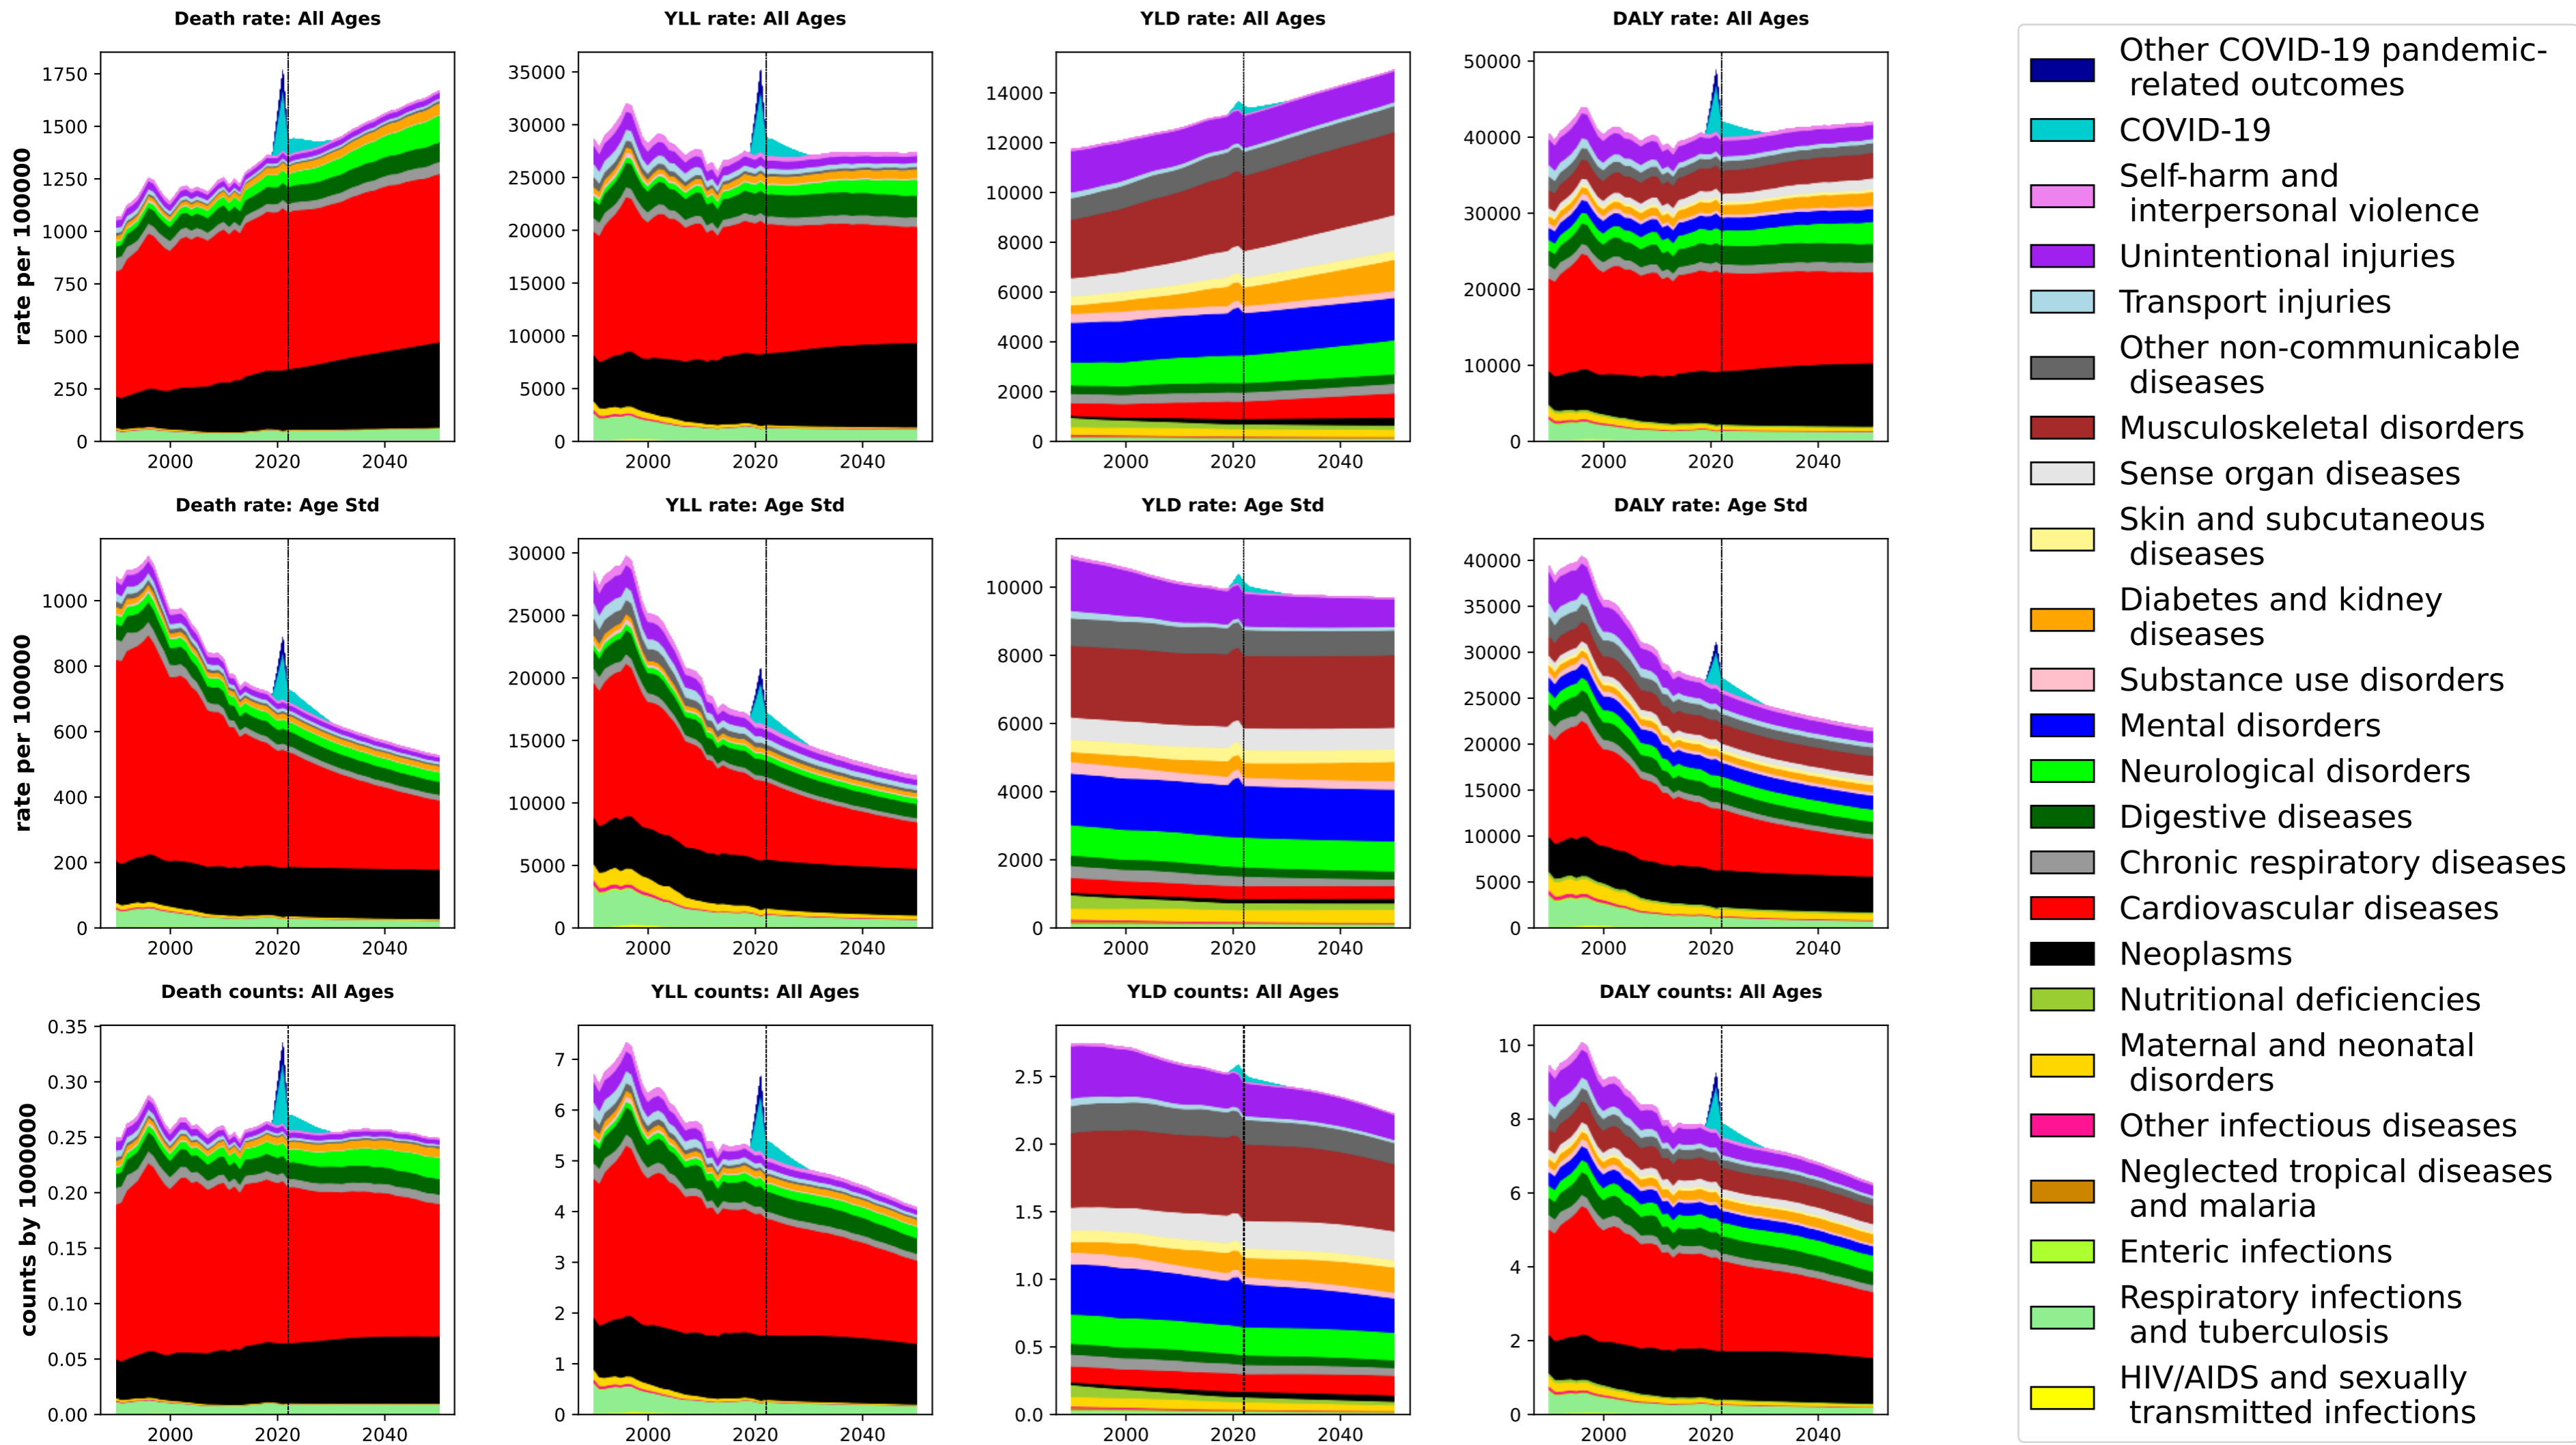



# Slovakia

Supplemental Results Figure S6. Cause level 2 area plots for 4 burden measures for reference scenario by location, 1990-2050

731

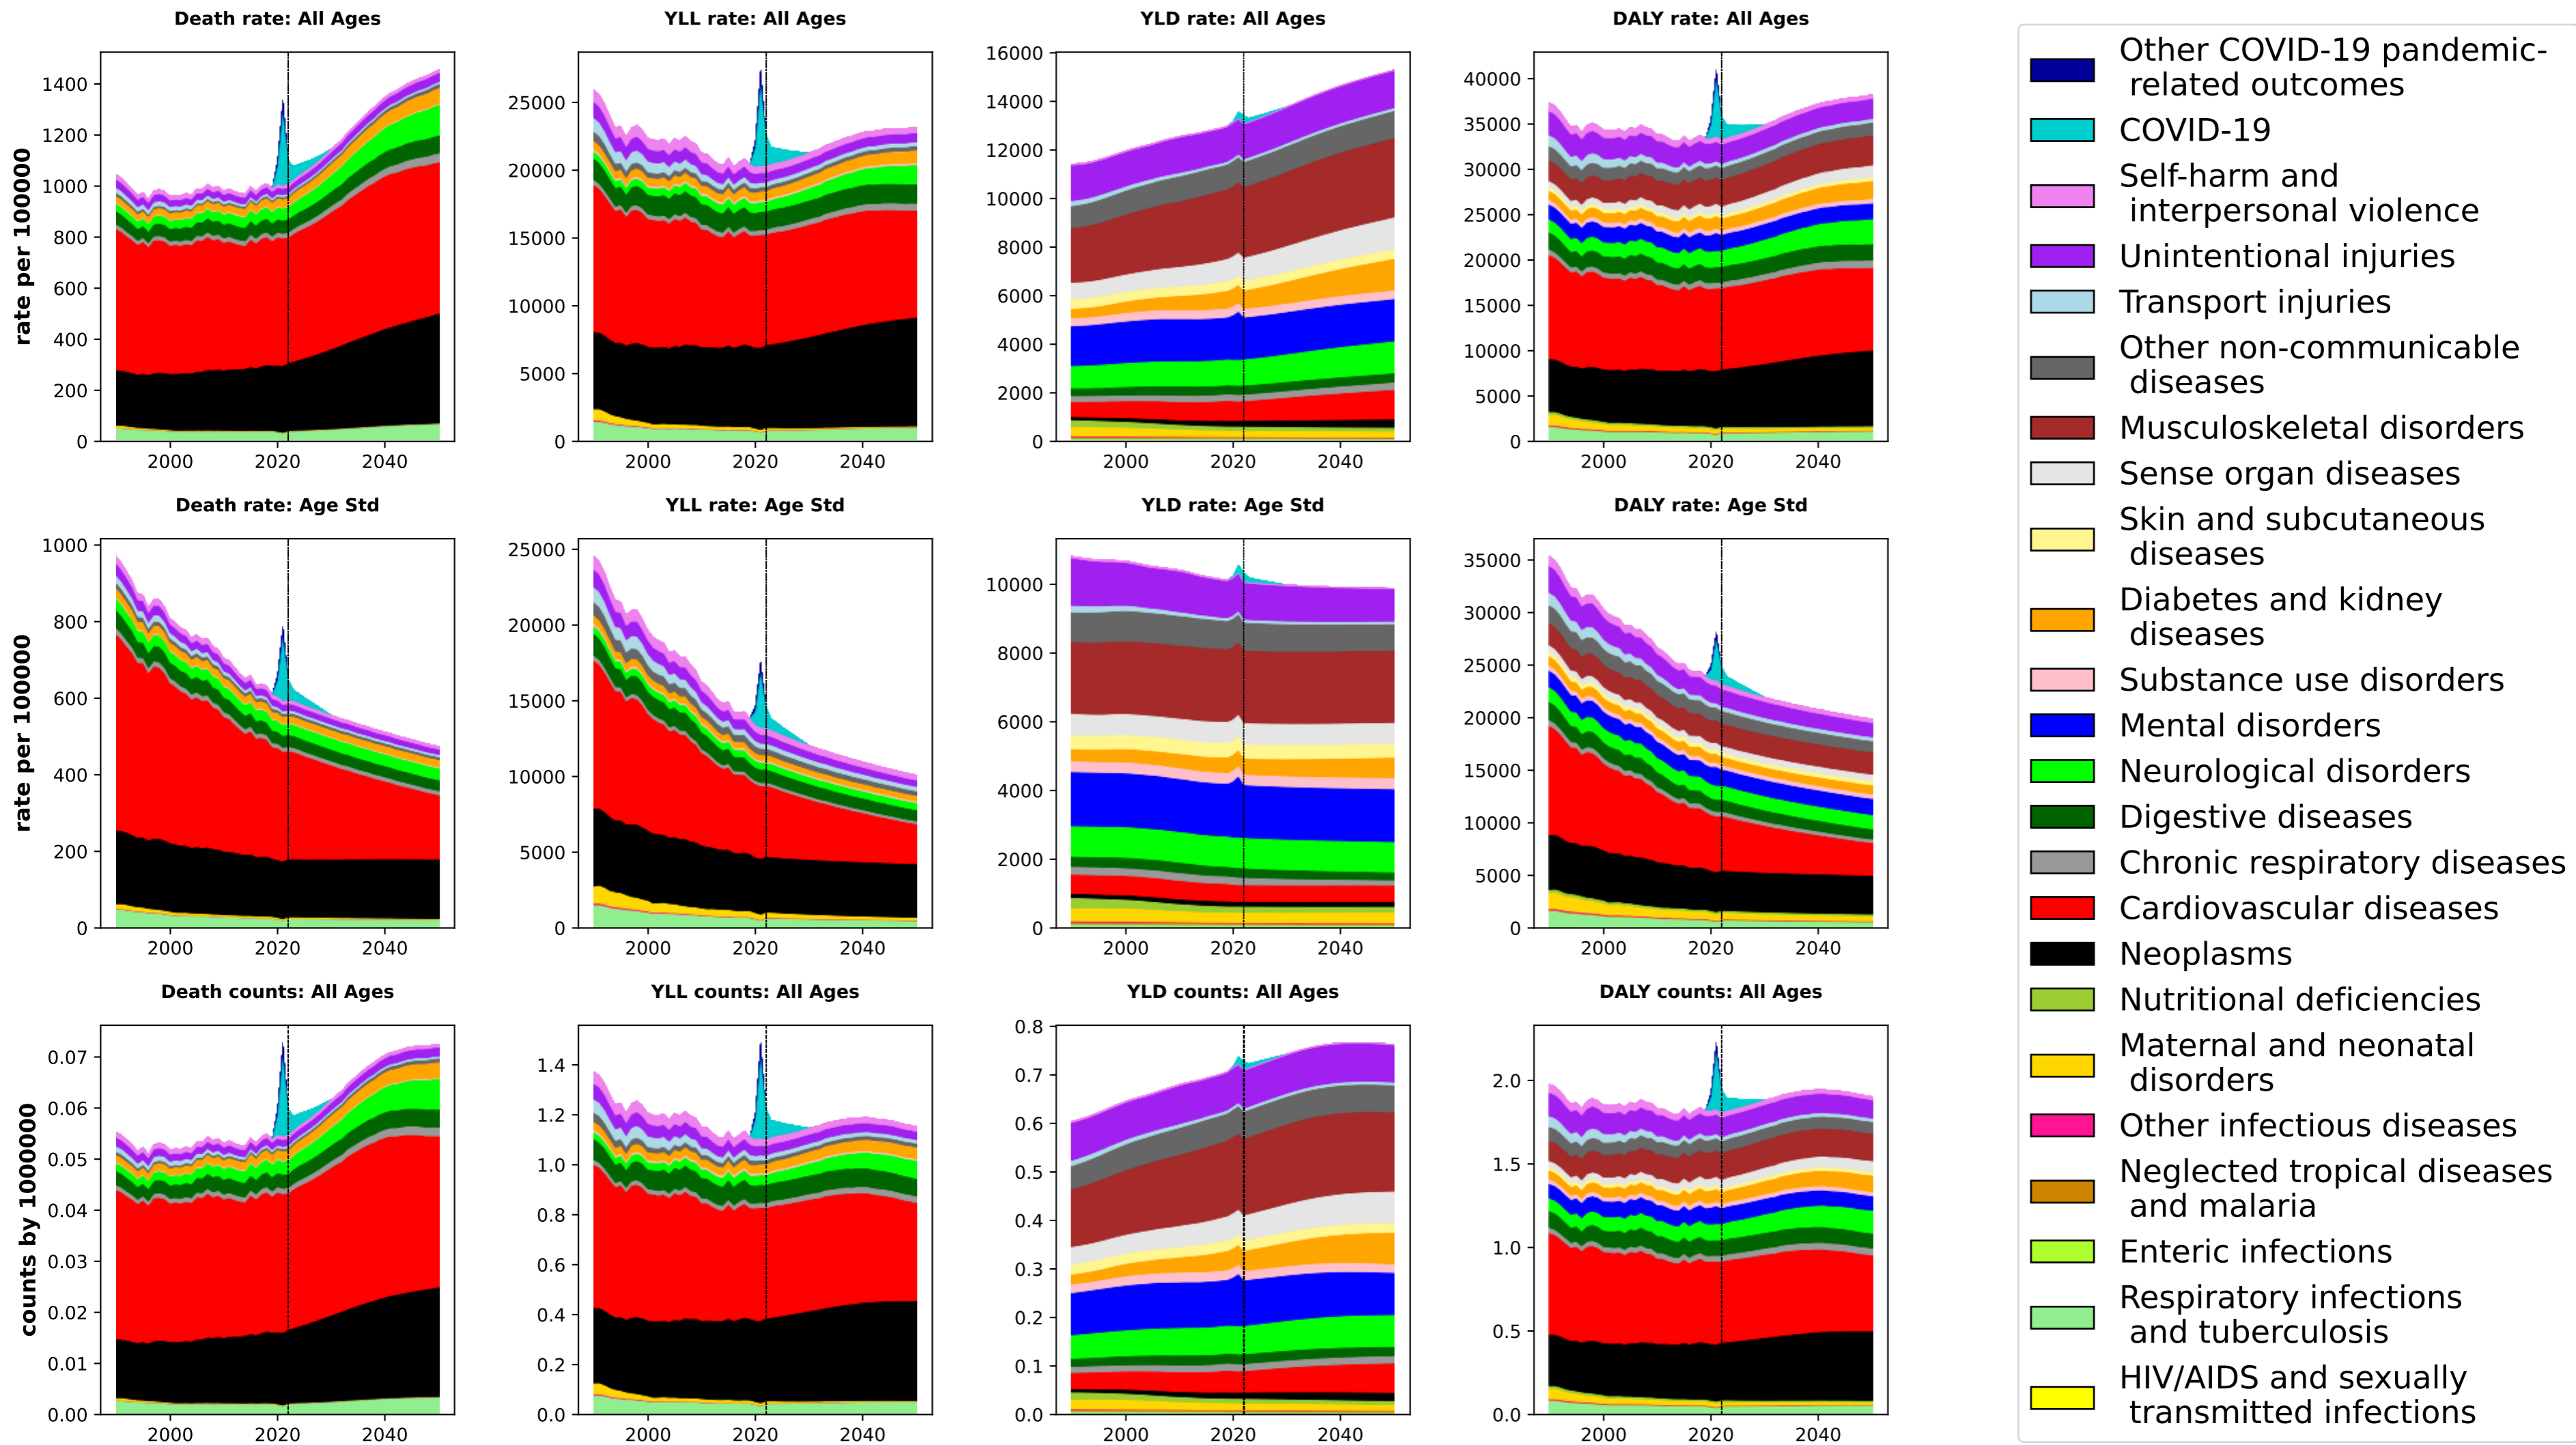

# Slovenia

Supplemental Results Figure S6. Cause level 2 area plots for 4 burden measures for reference scenario by location, 1990-2050

732

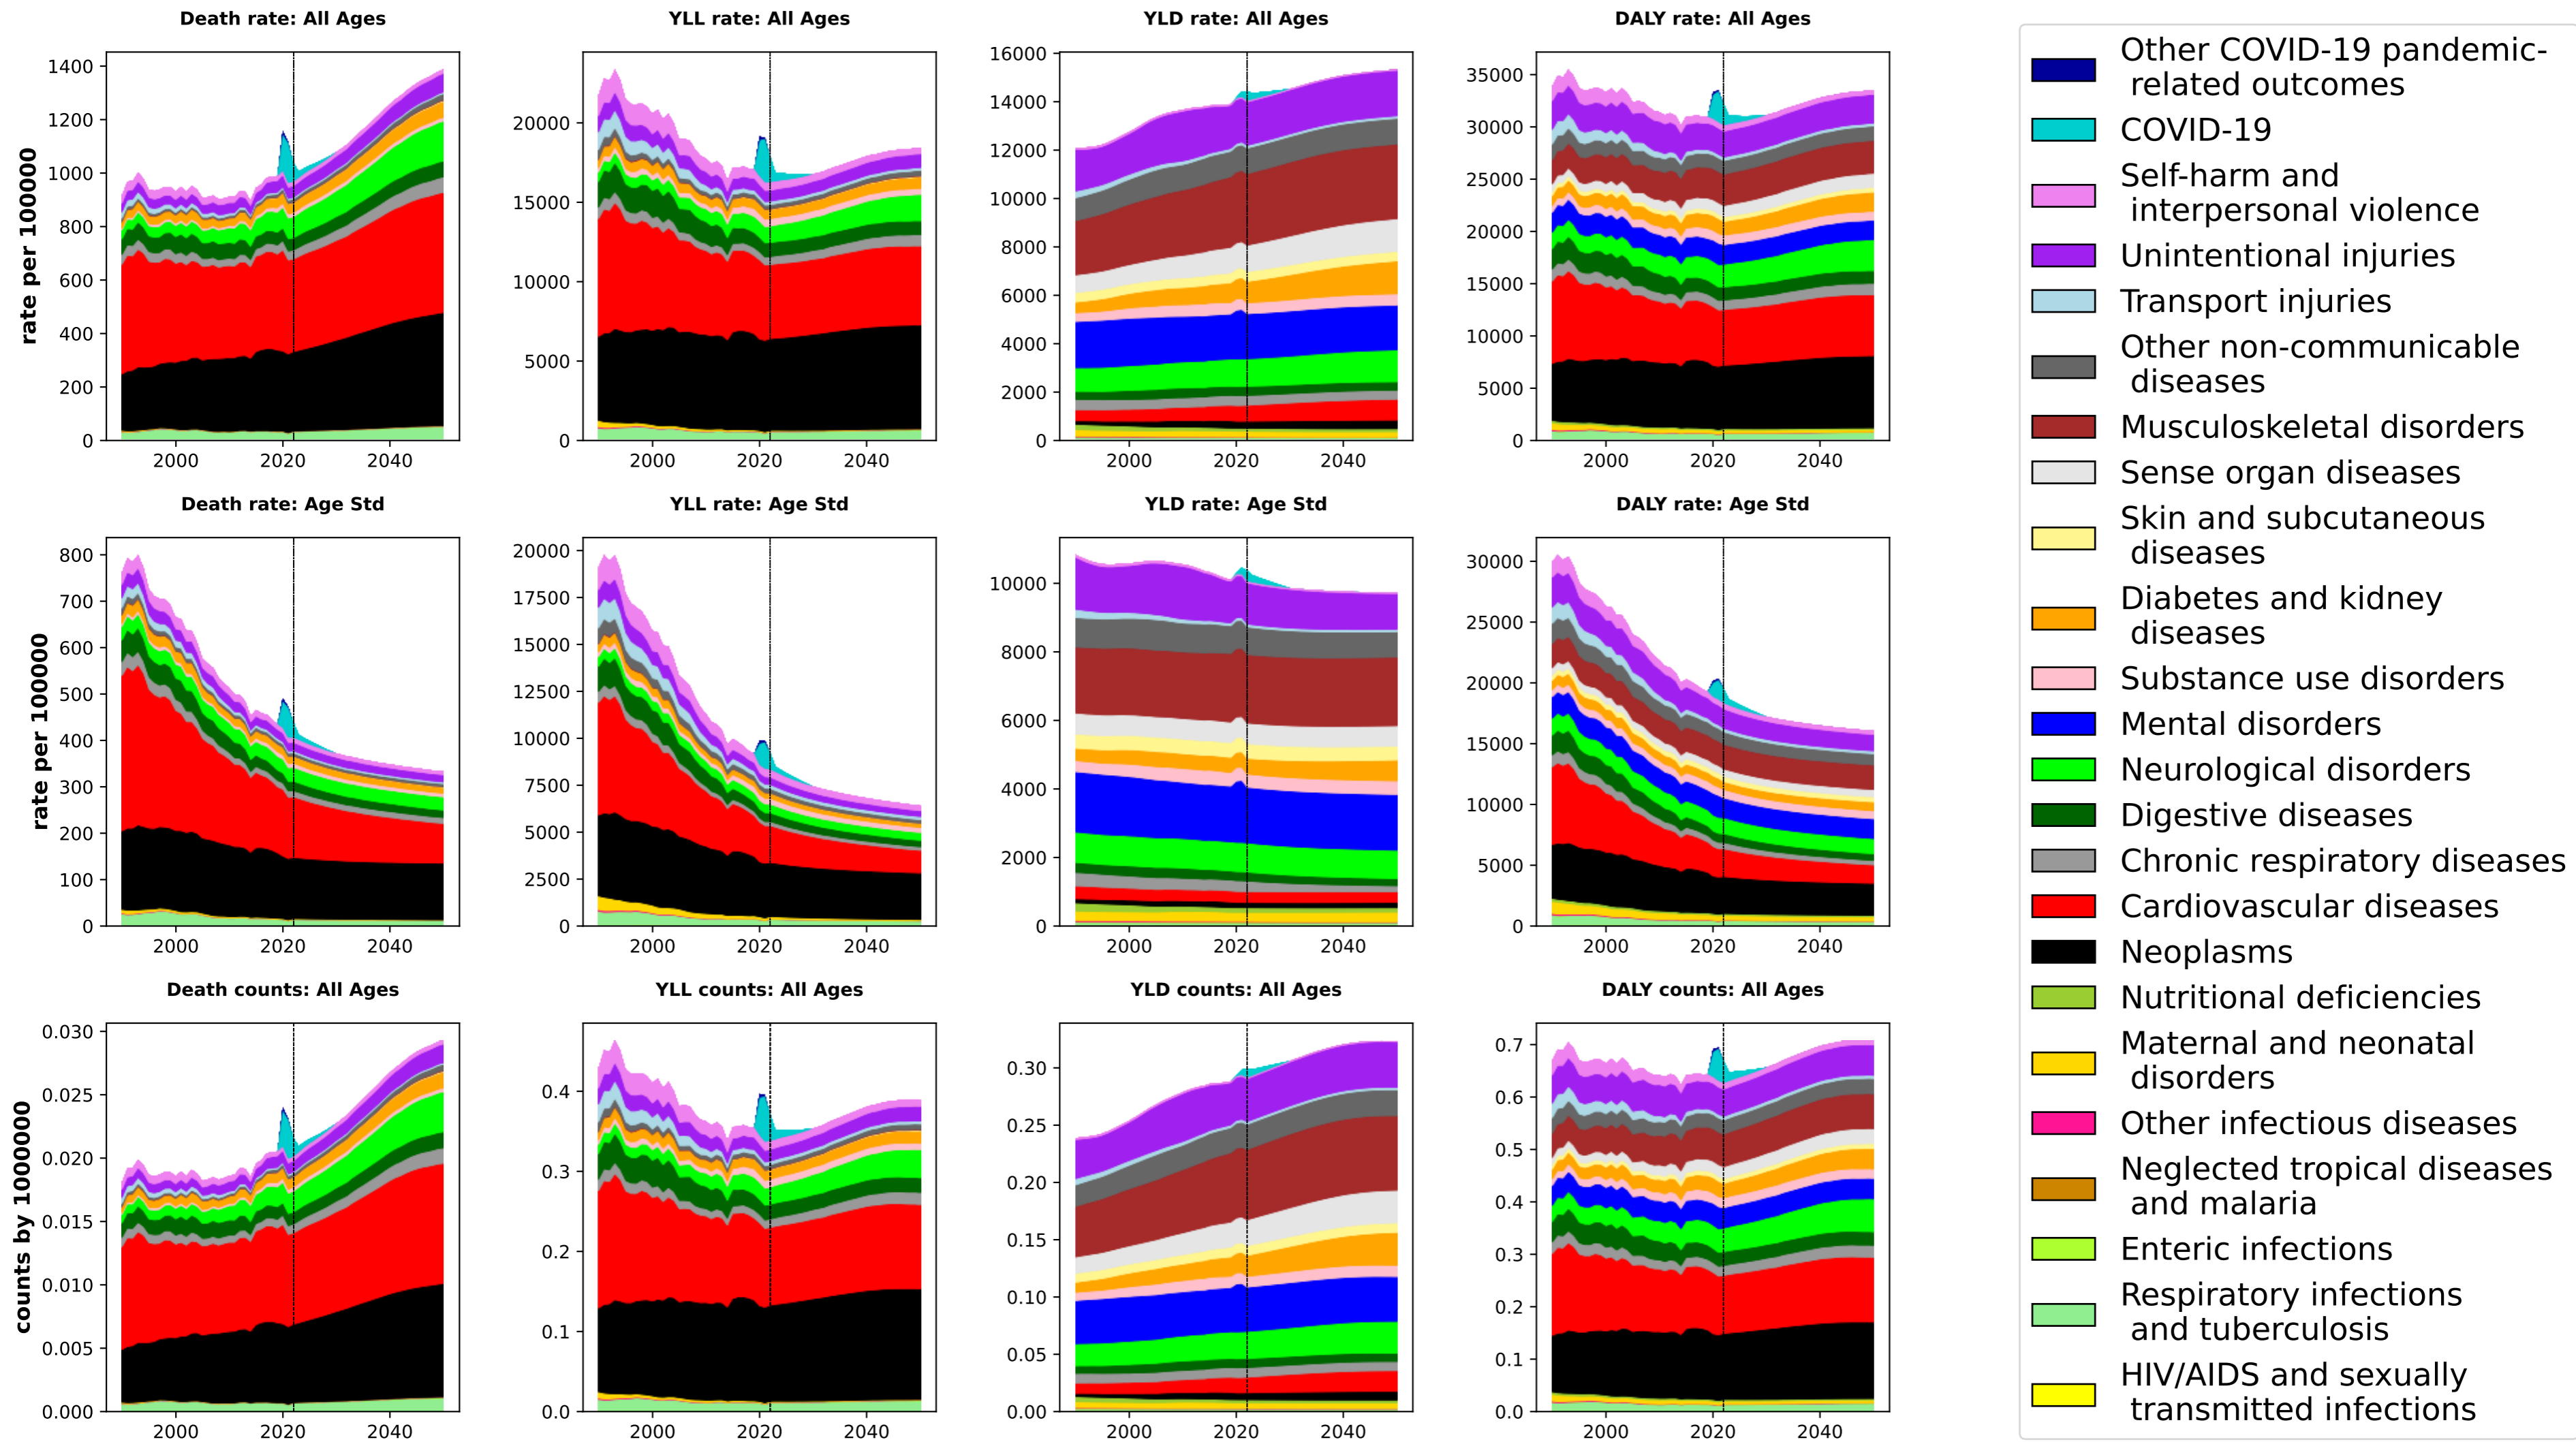

# Belarus

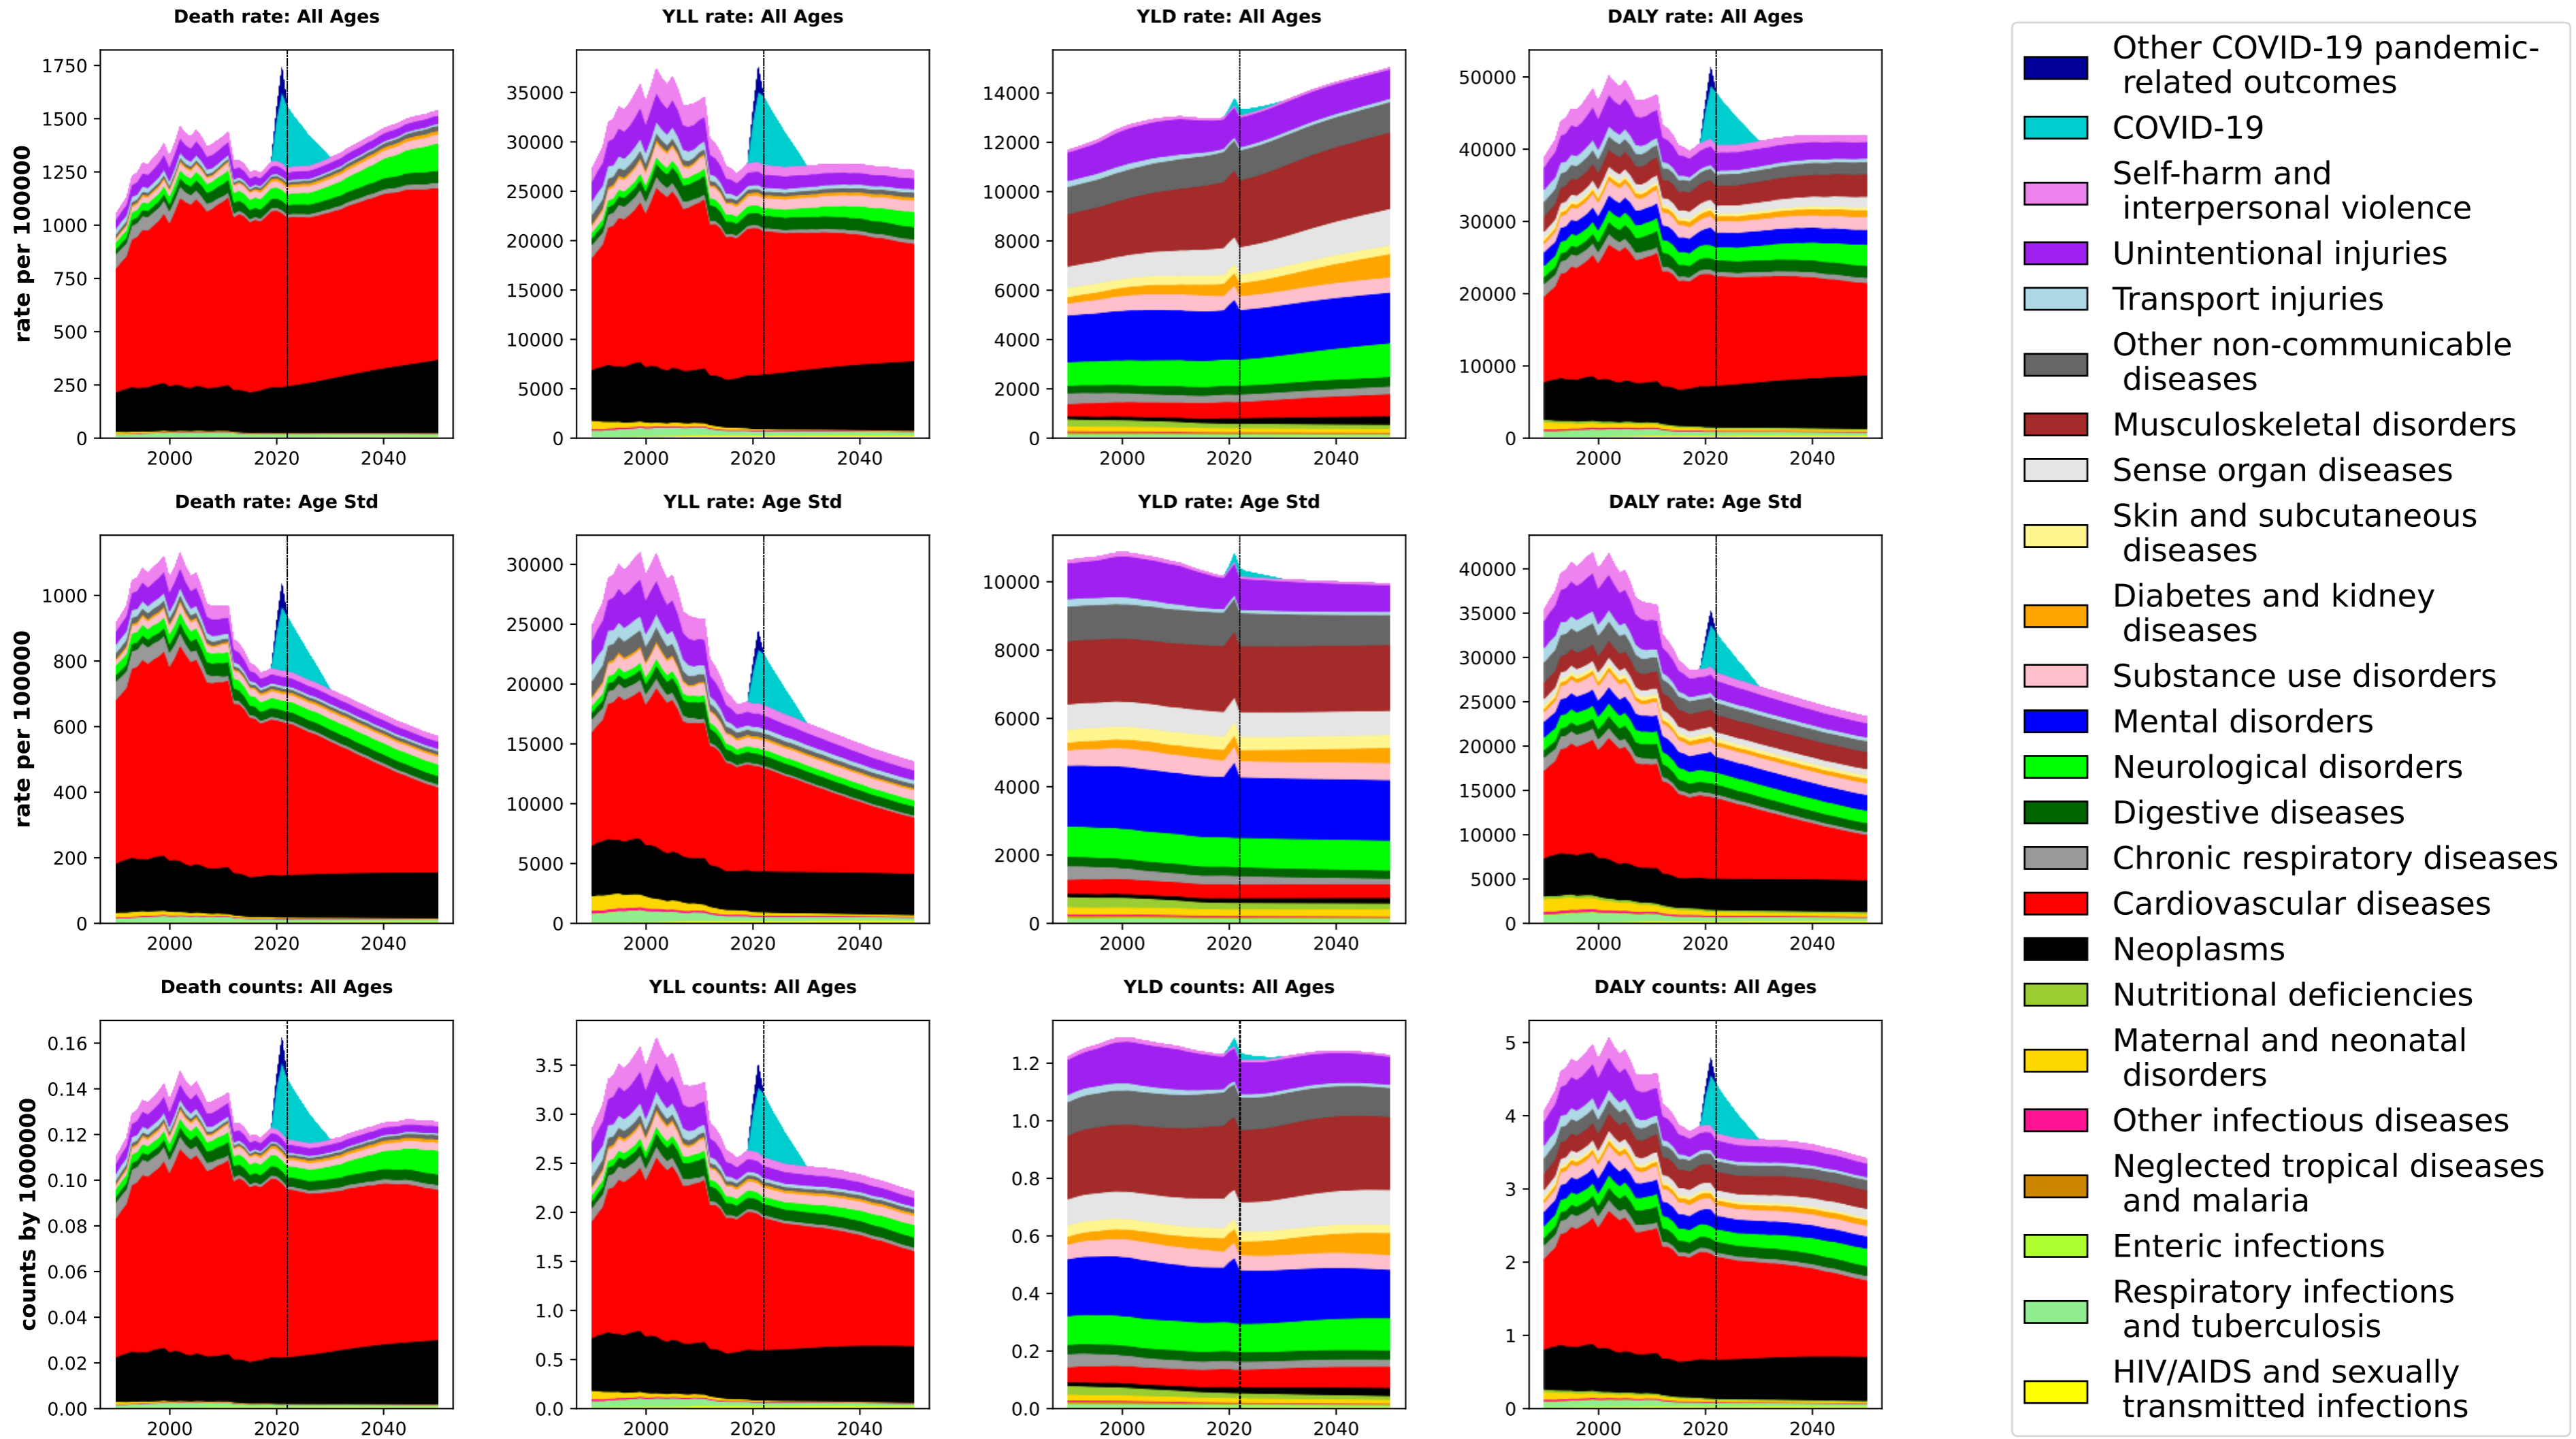

# Estonia

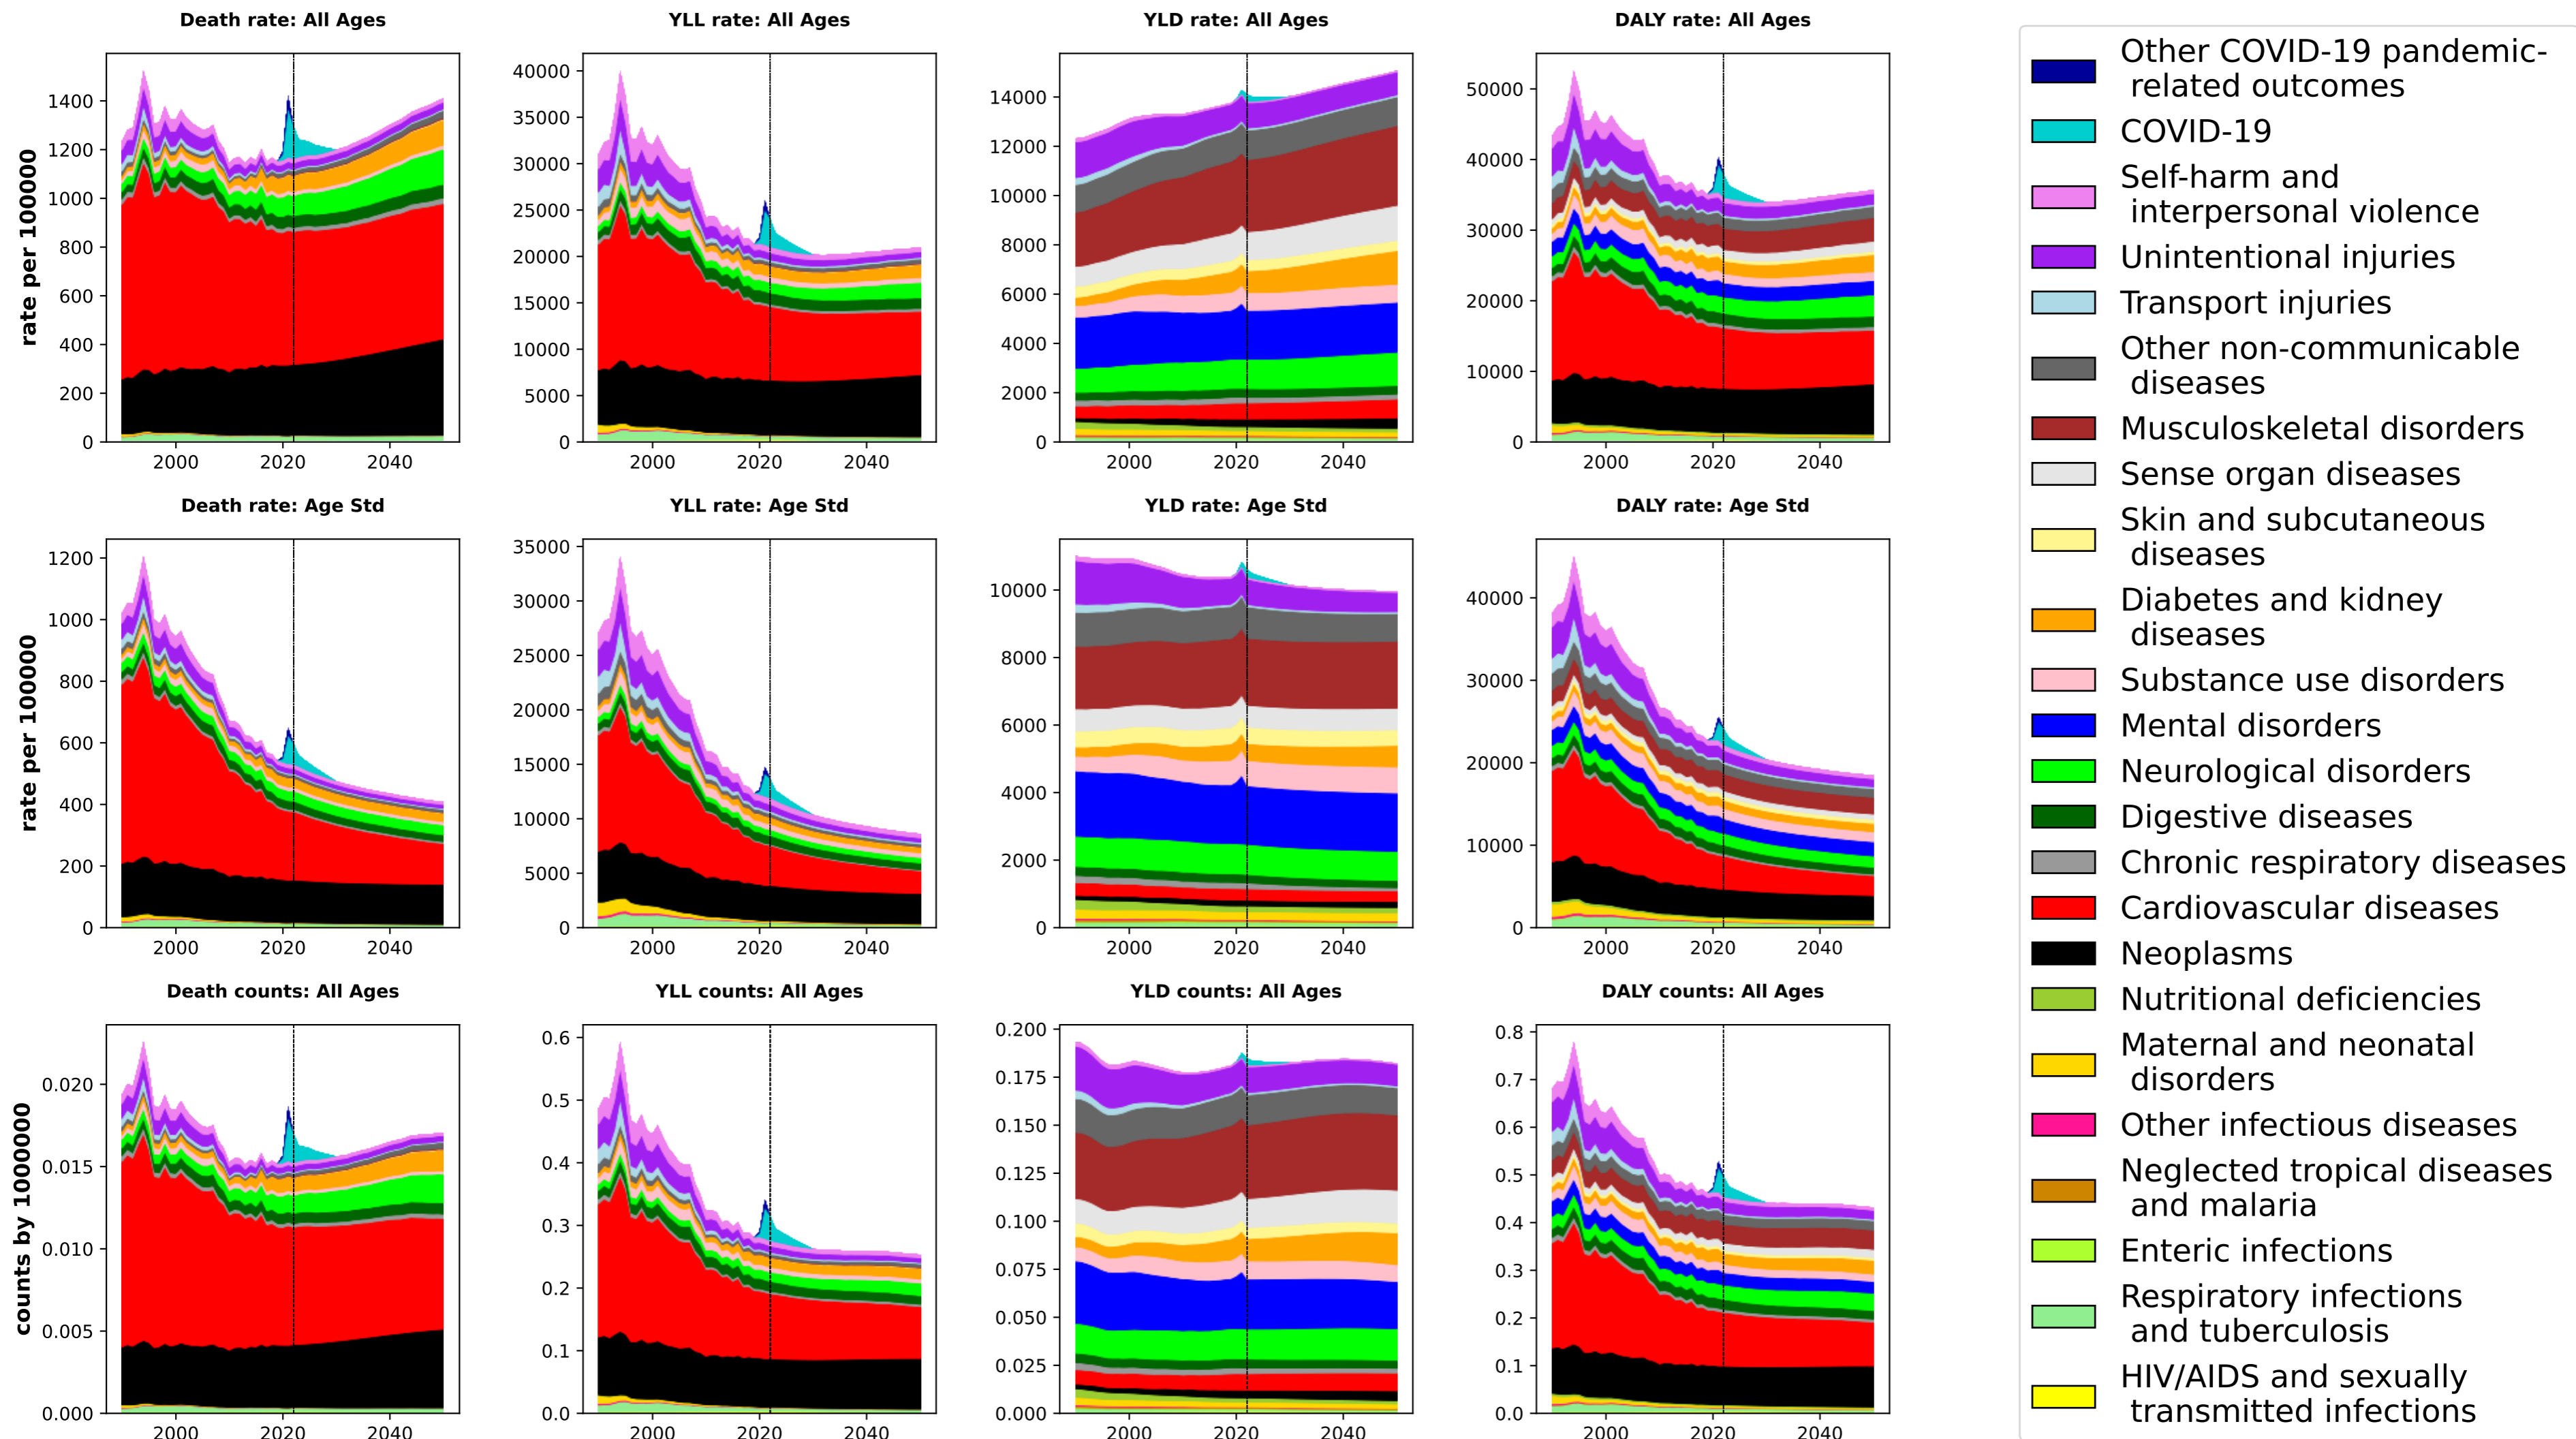

# Latvia

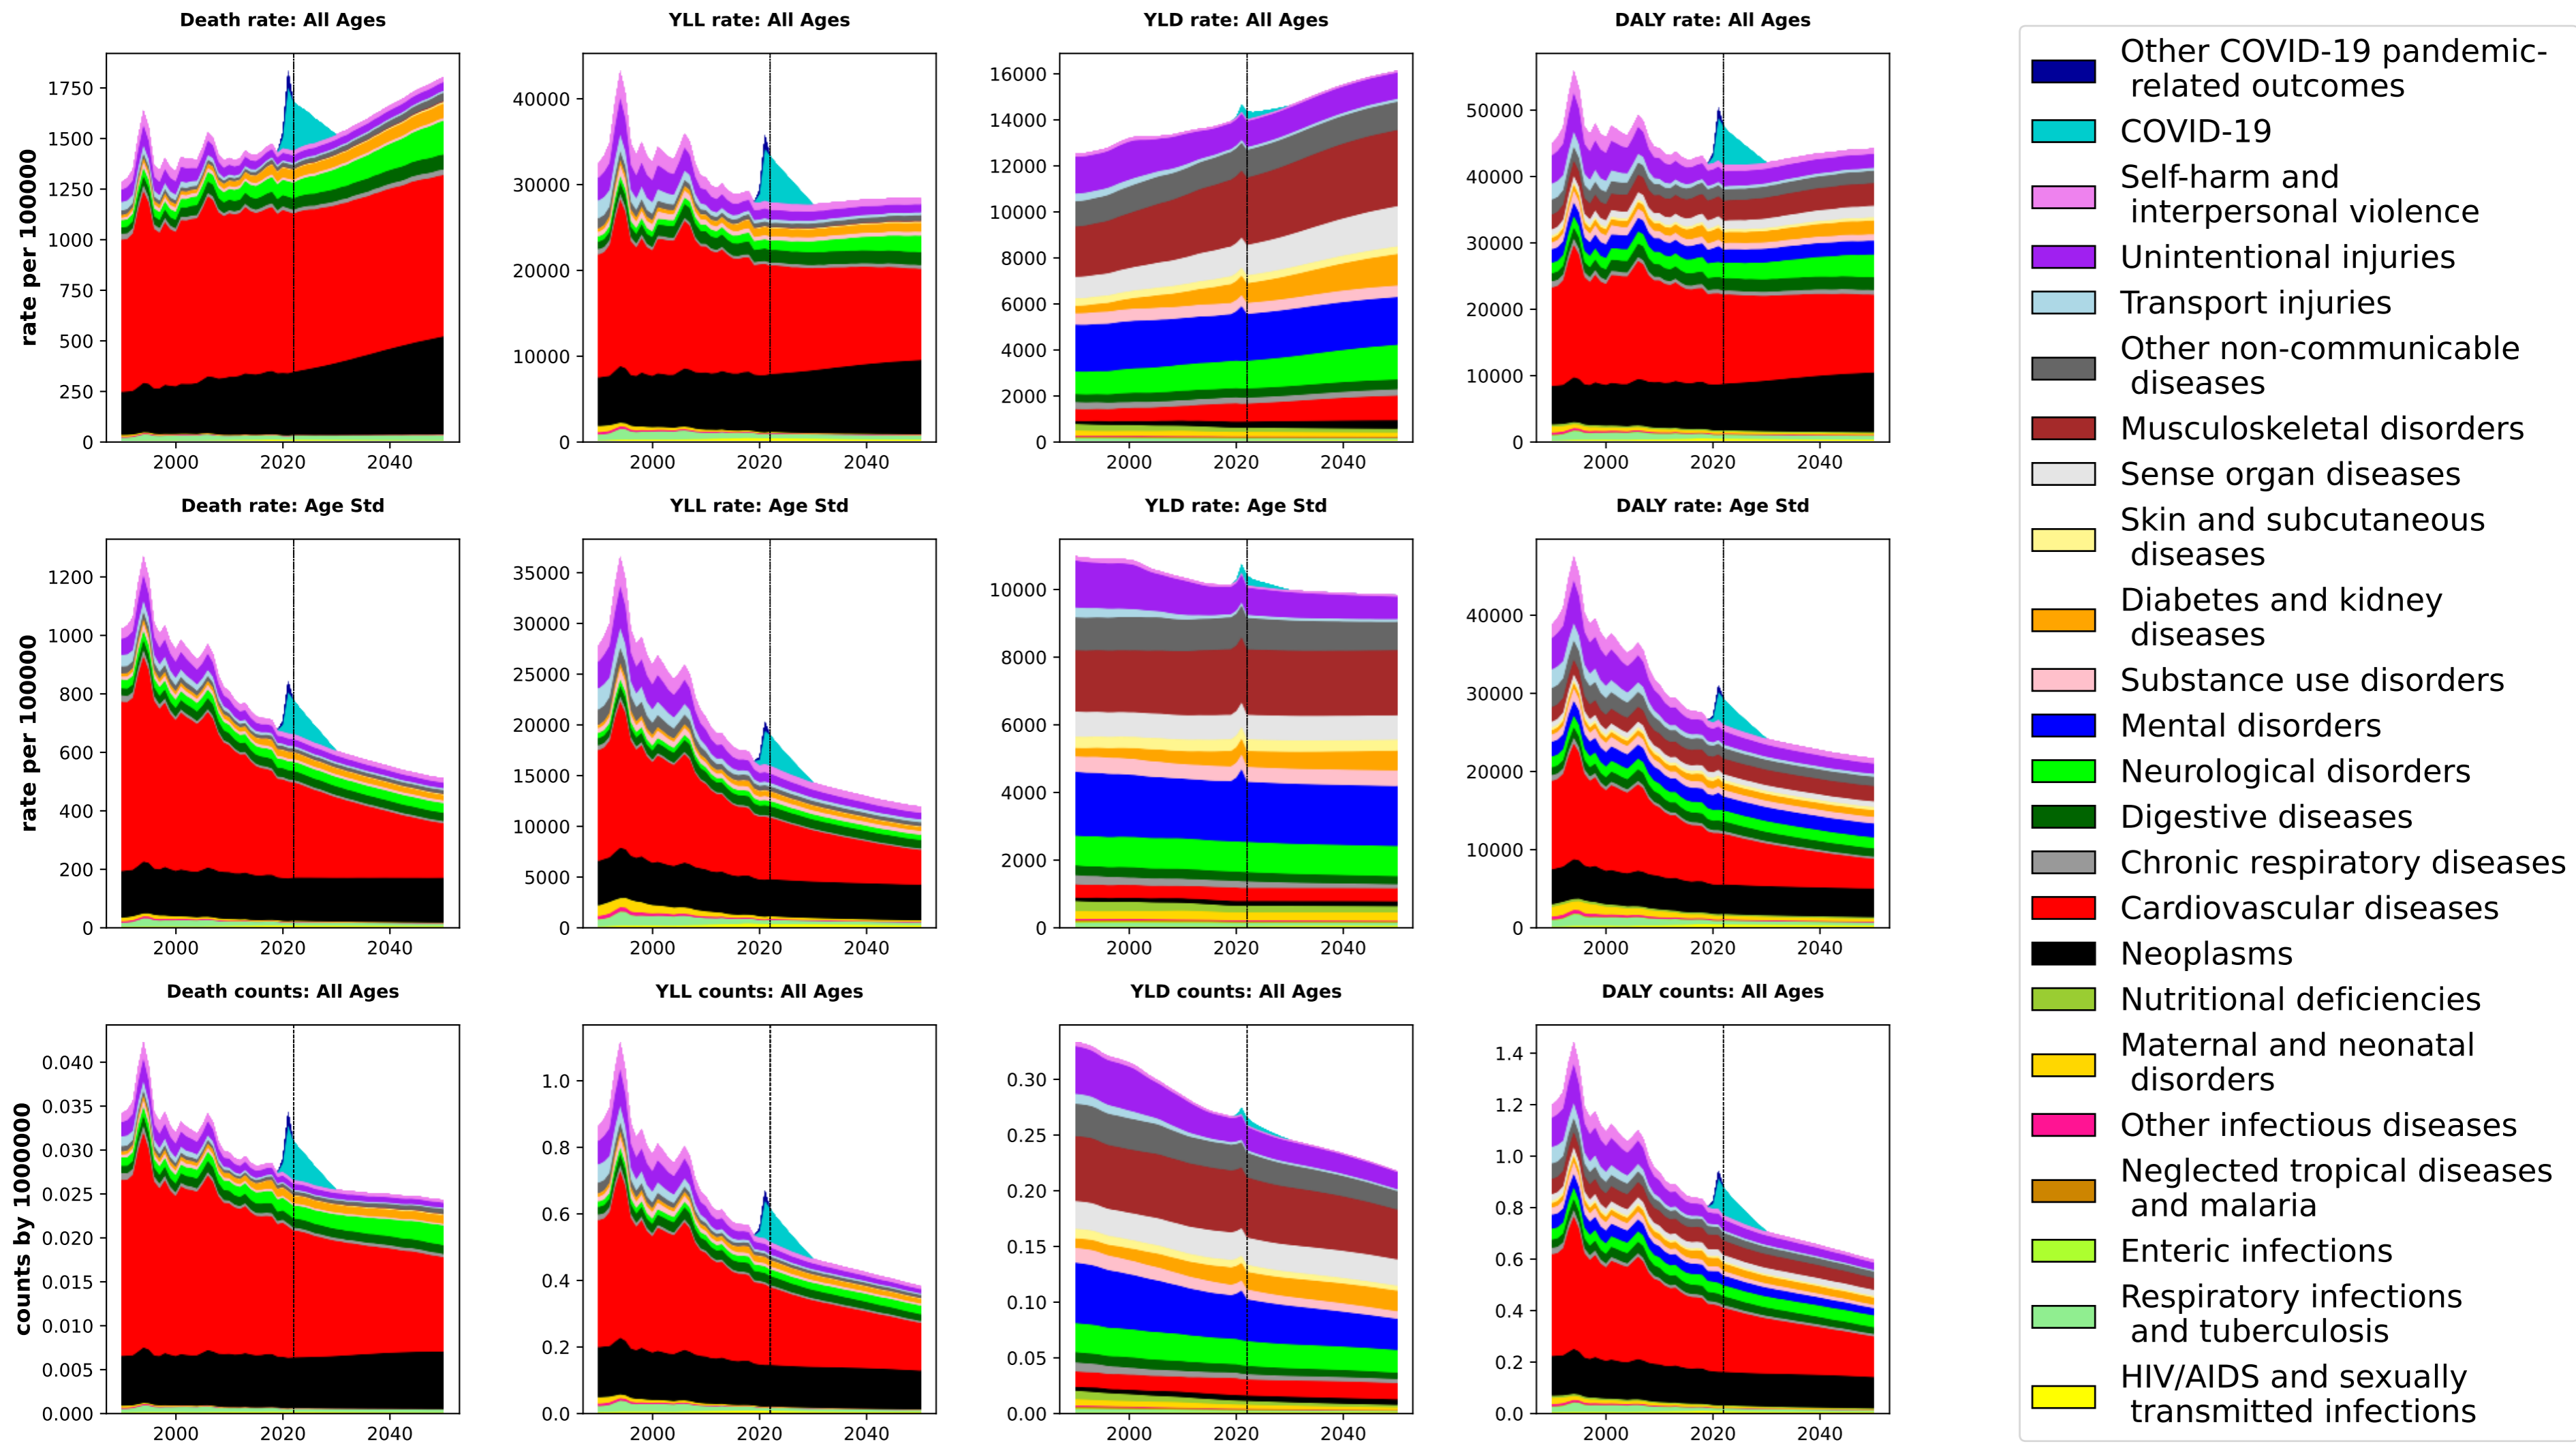



# Lithuania

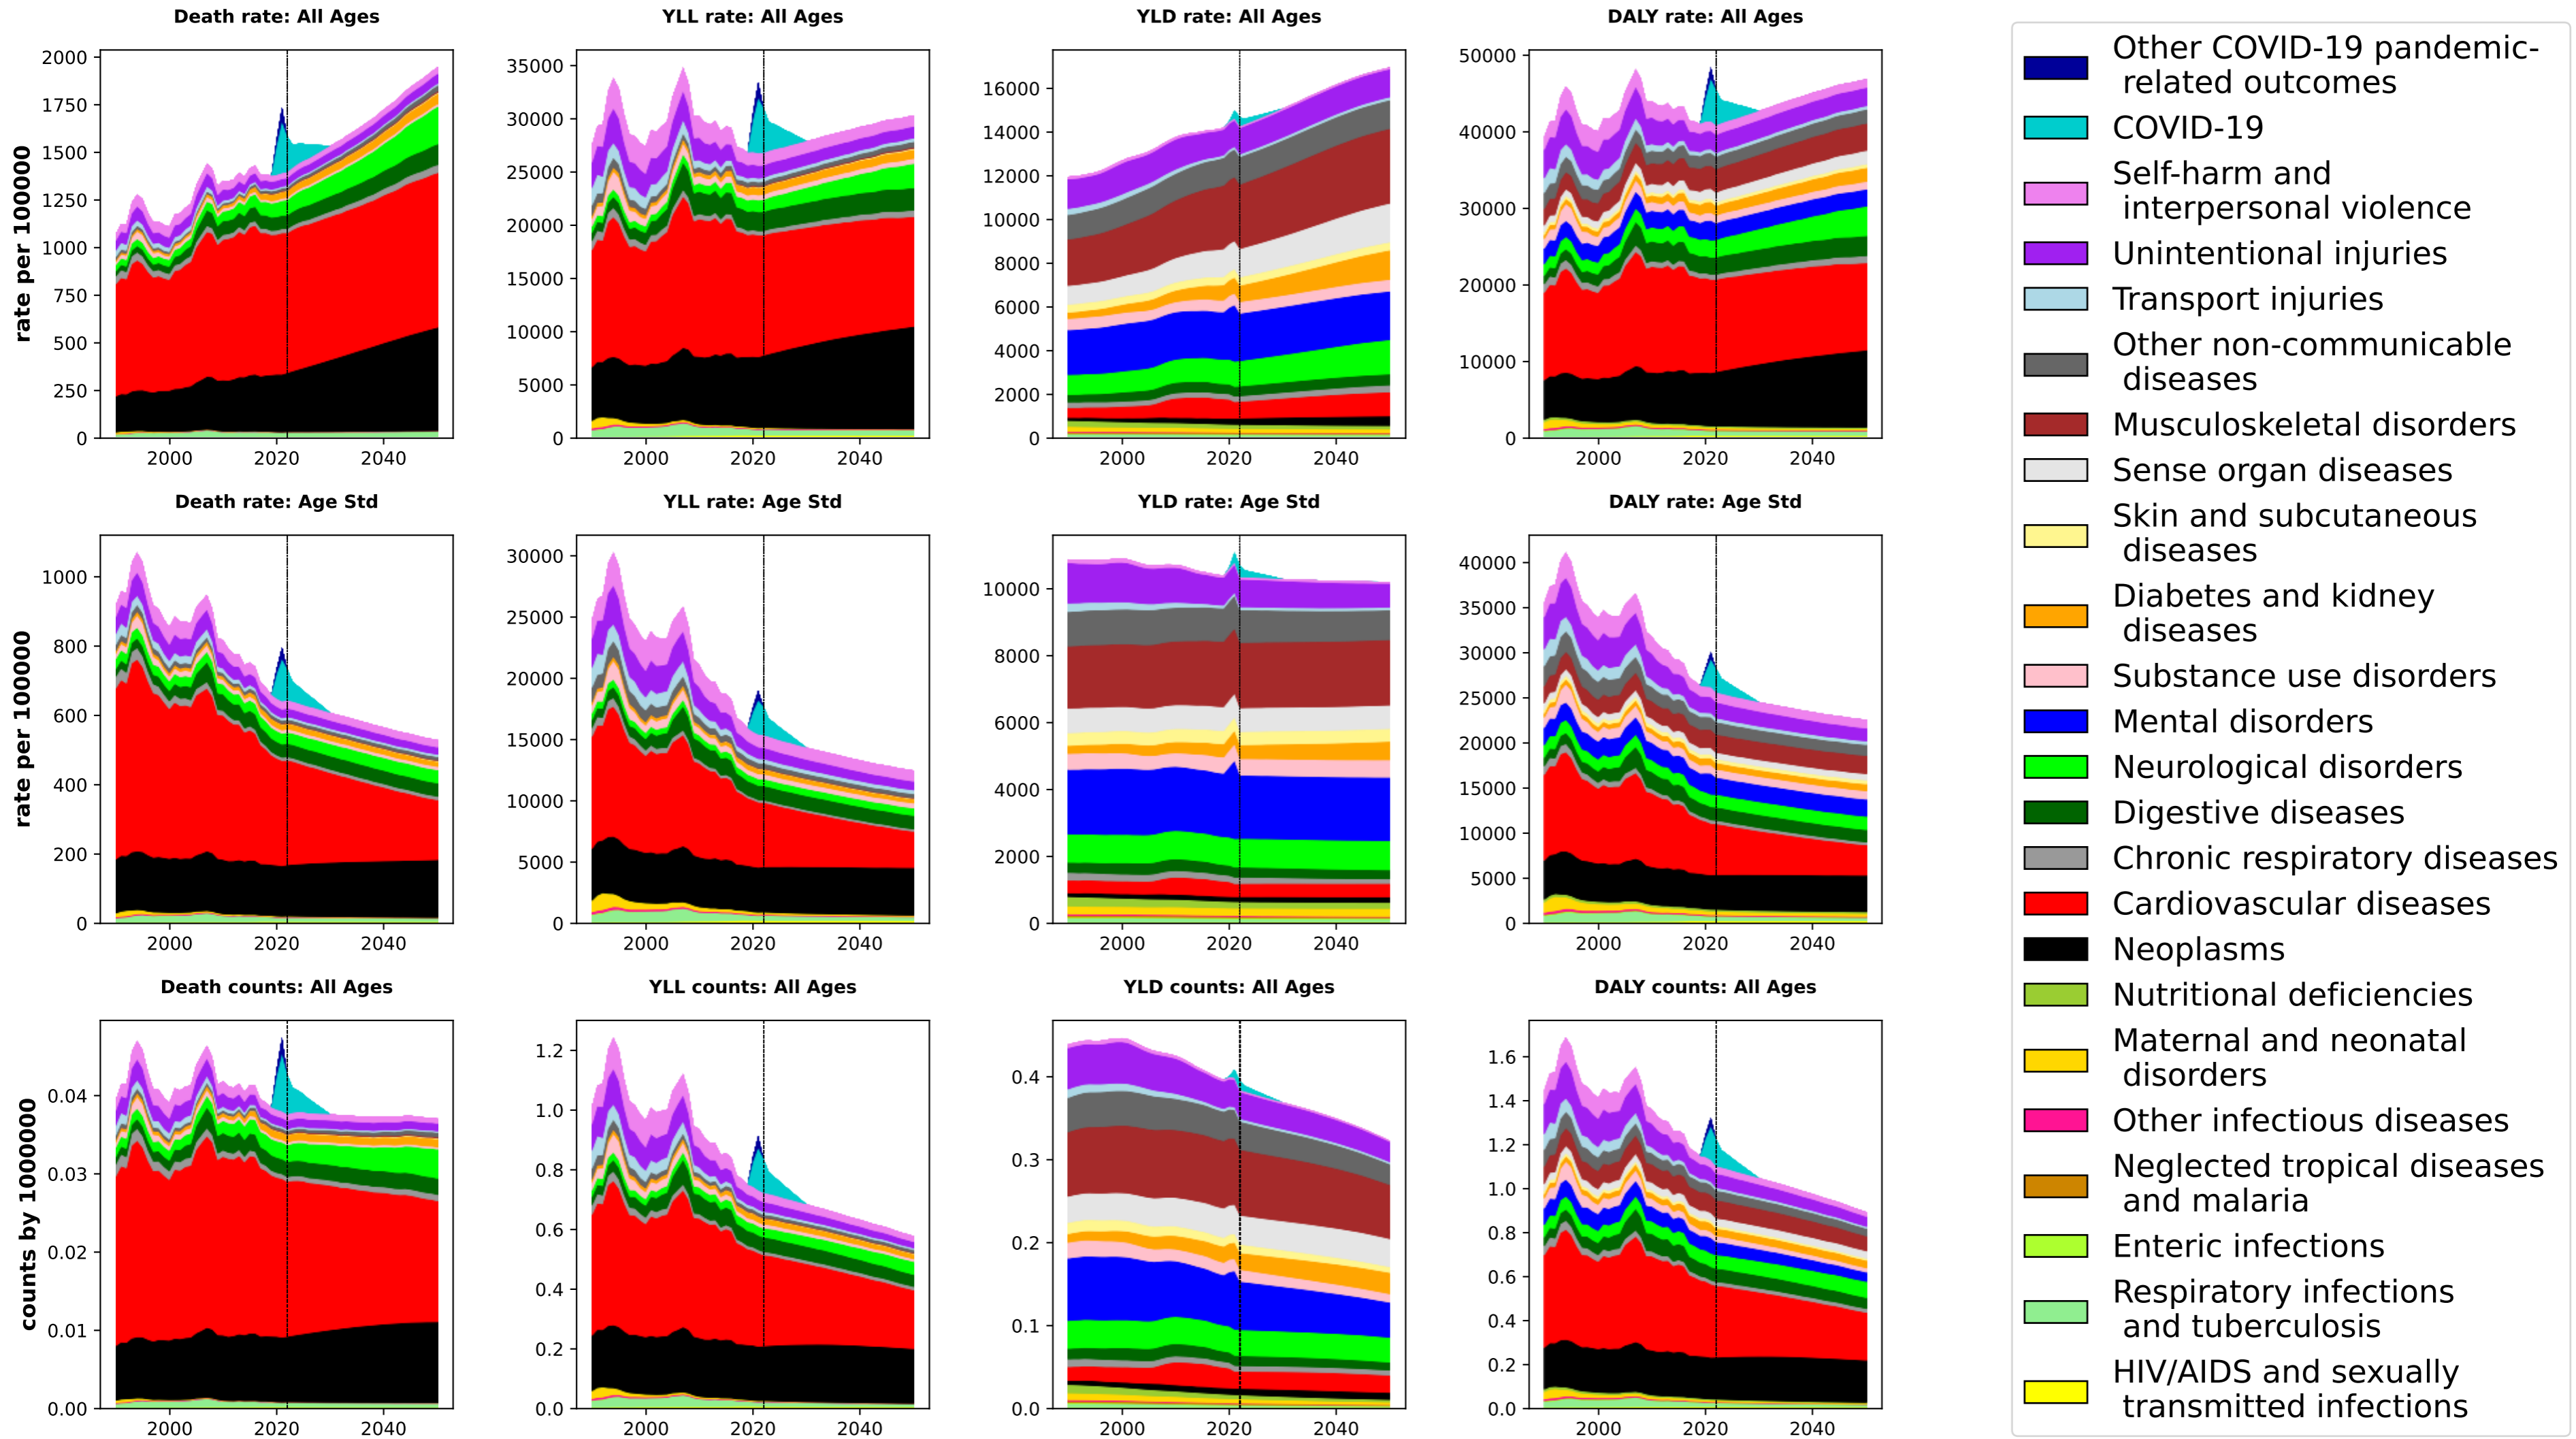

# Moldova

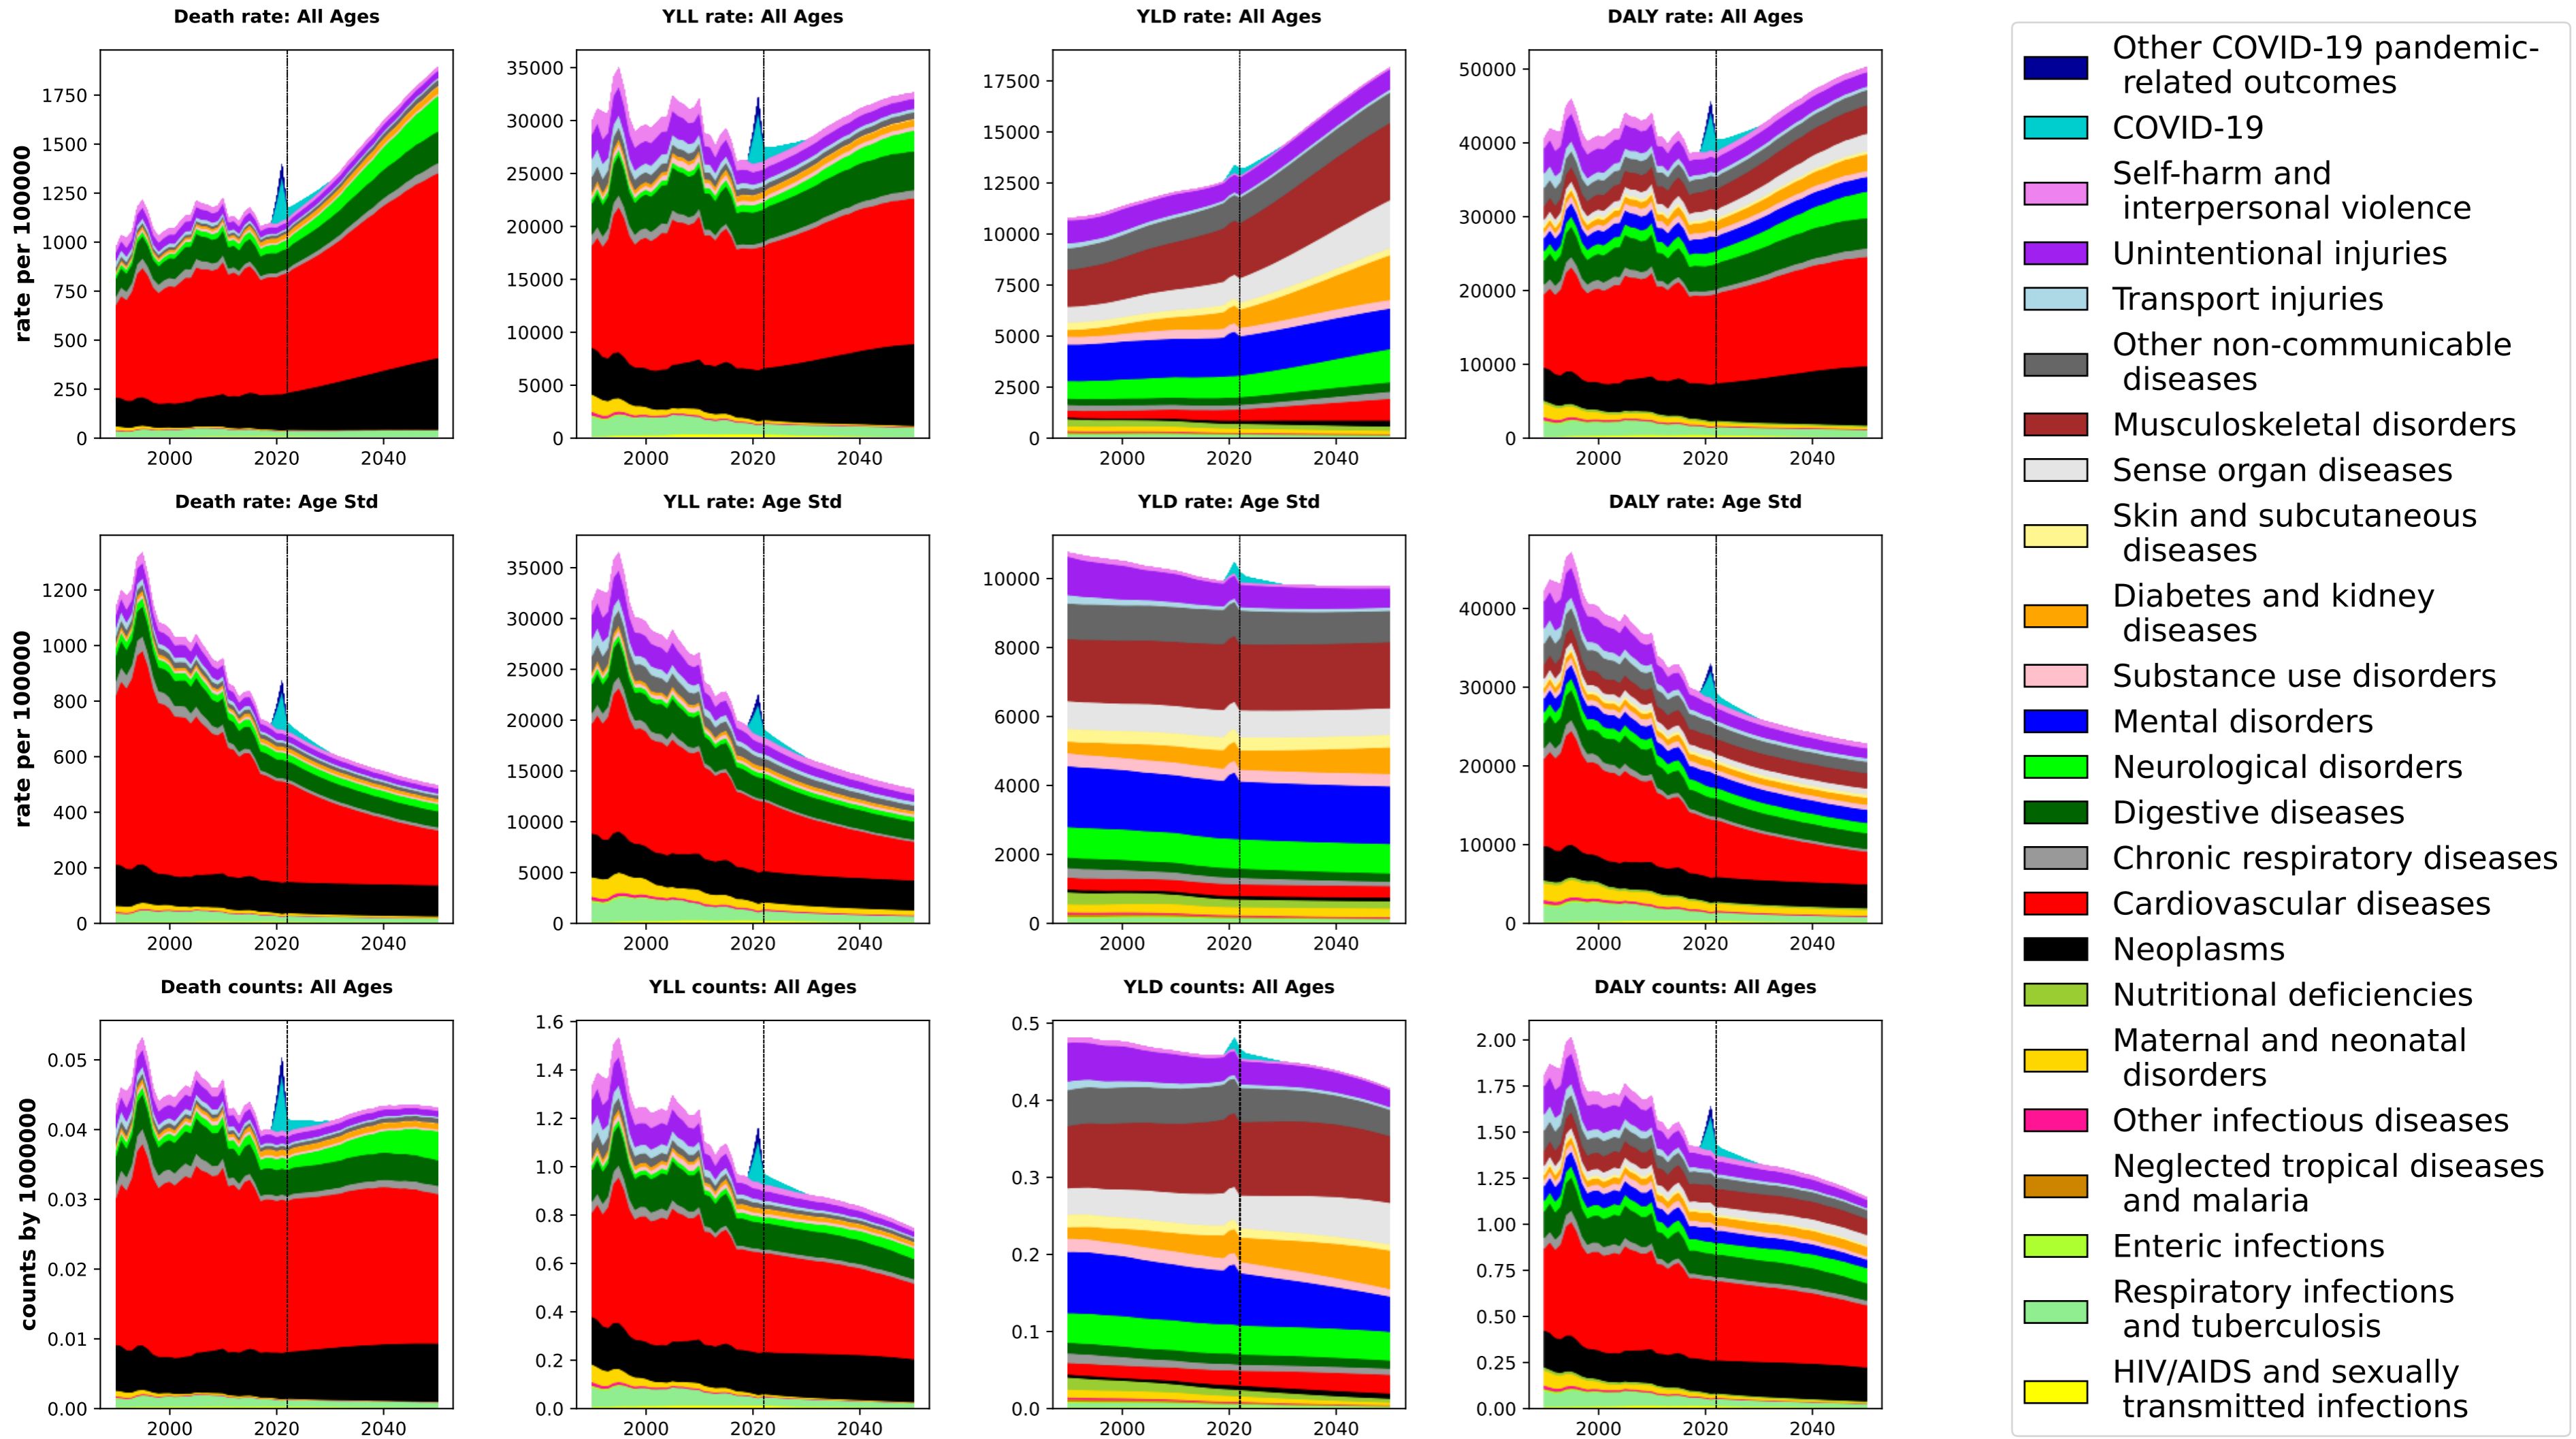

# Russia

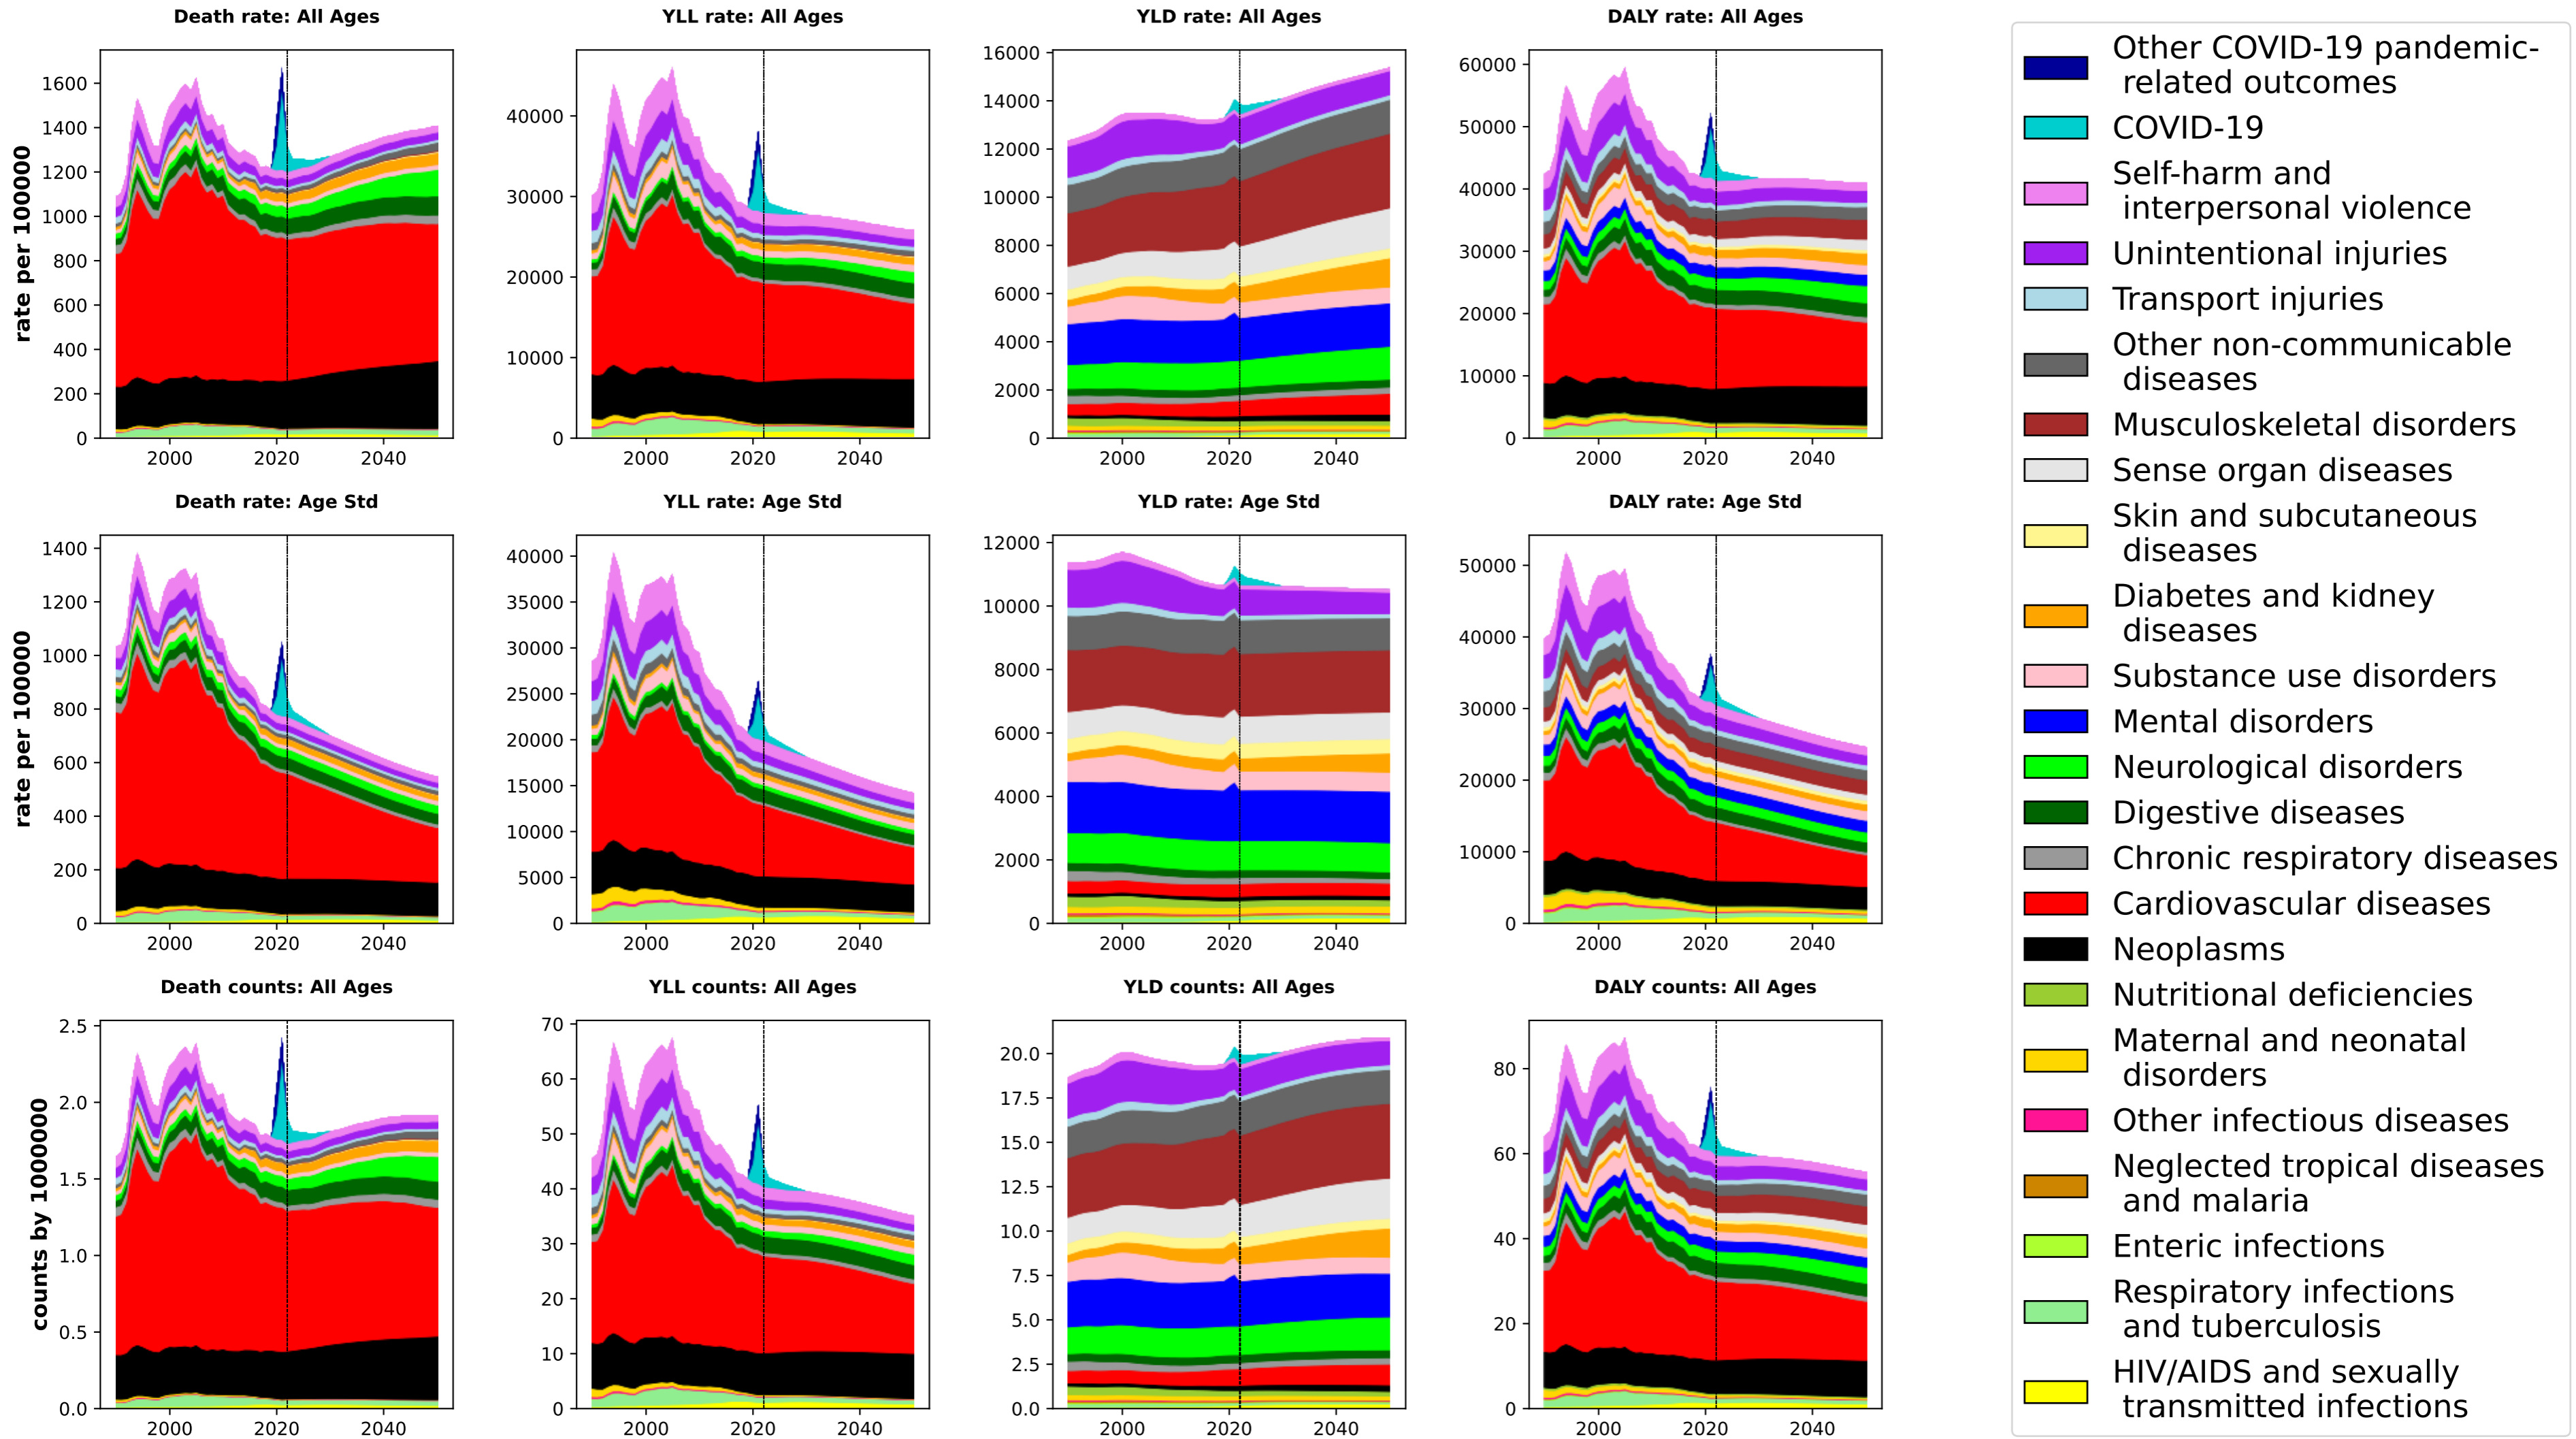

# Ukraine

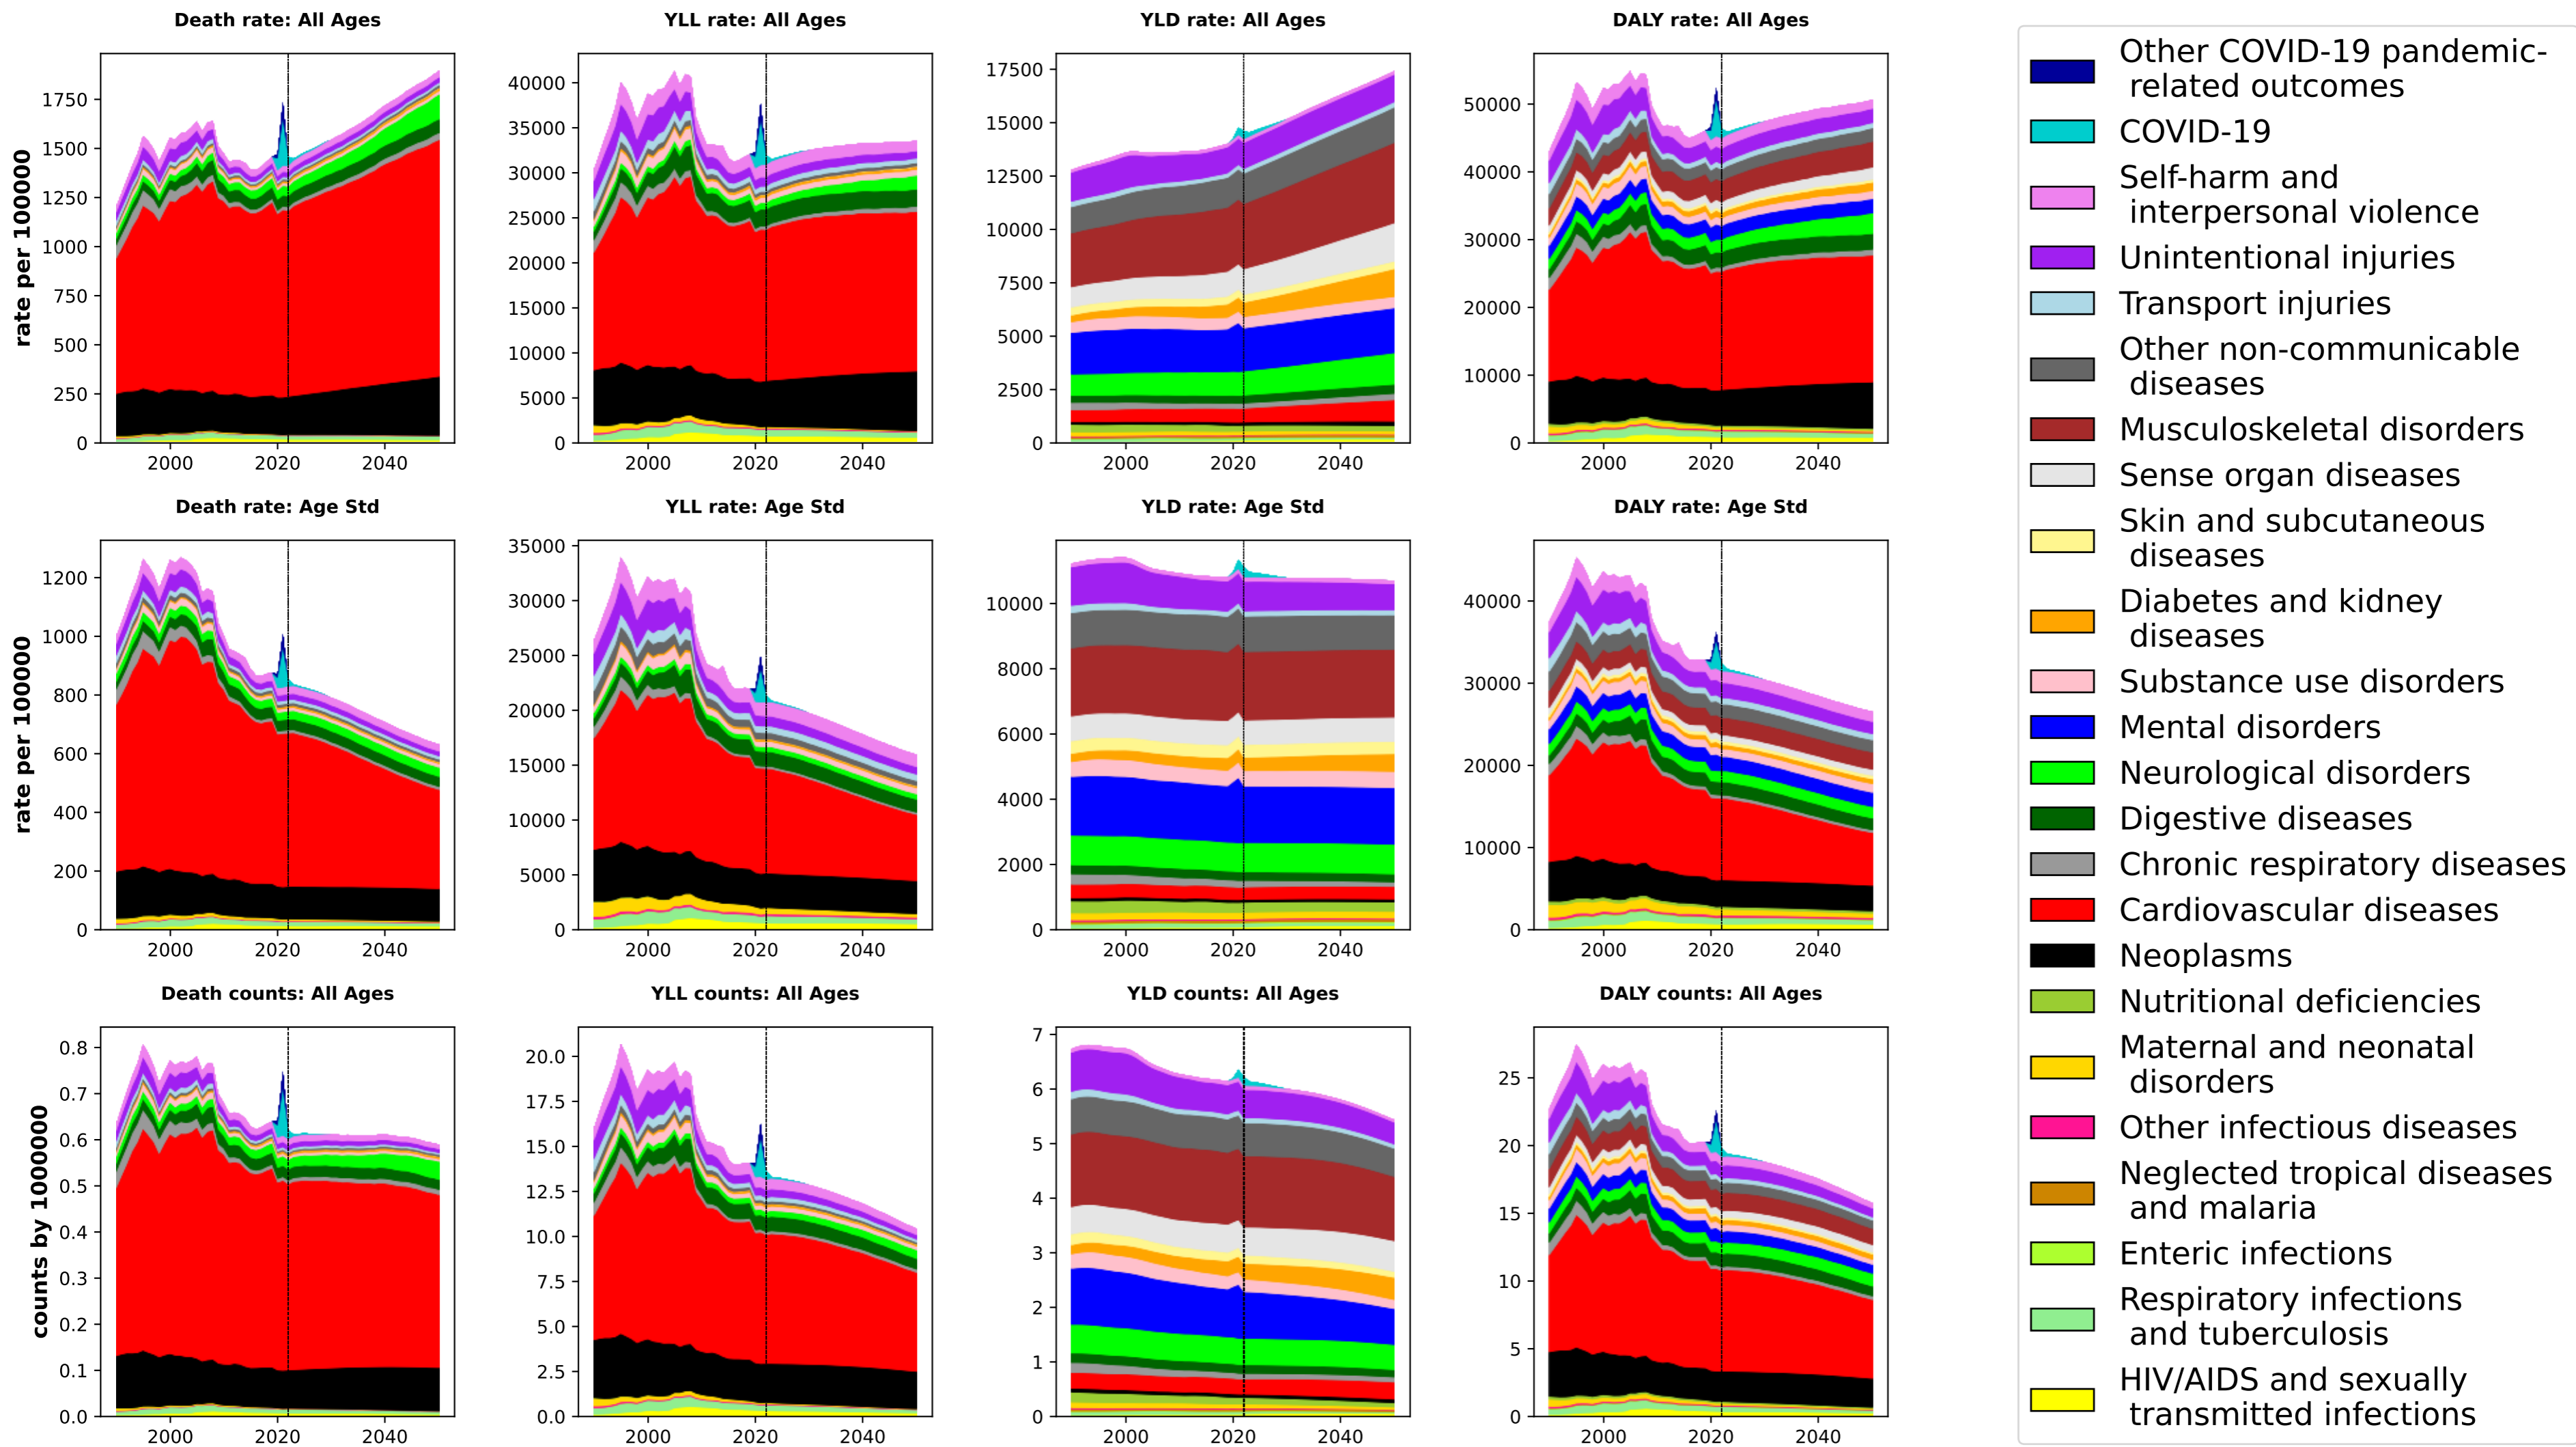

# Australia

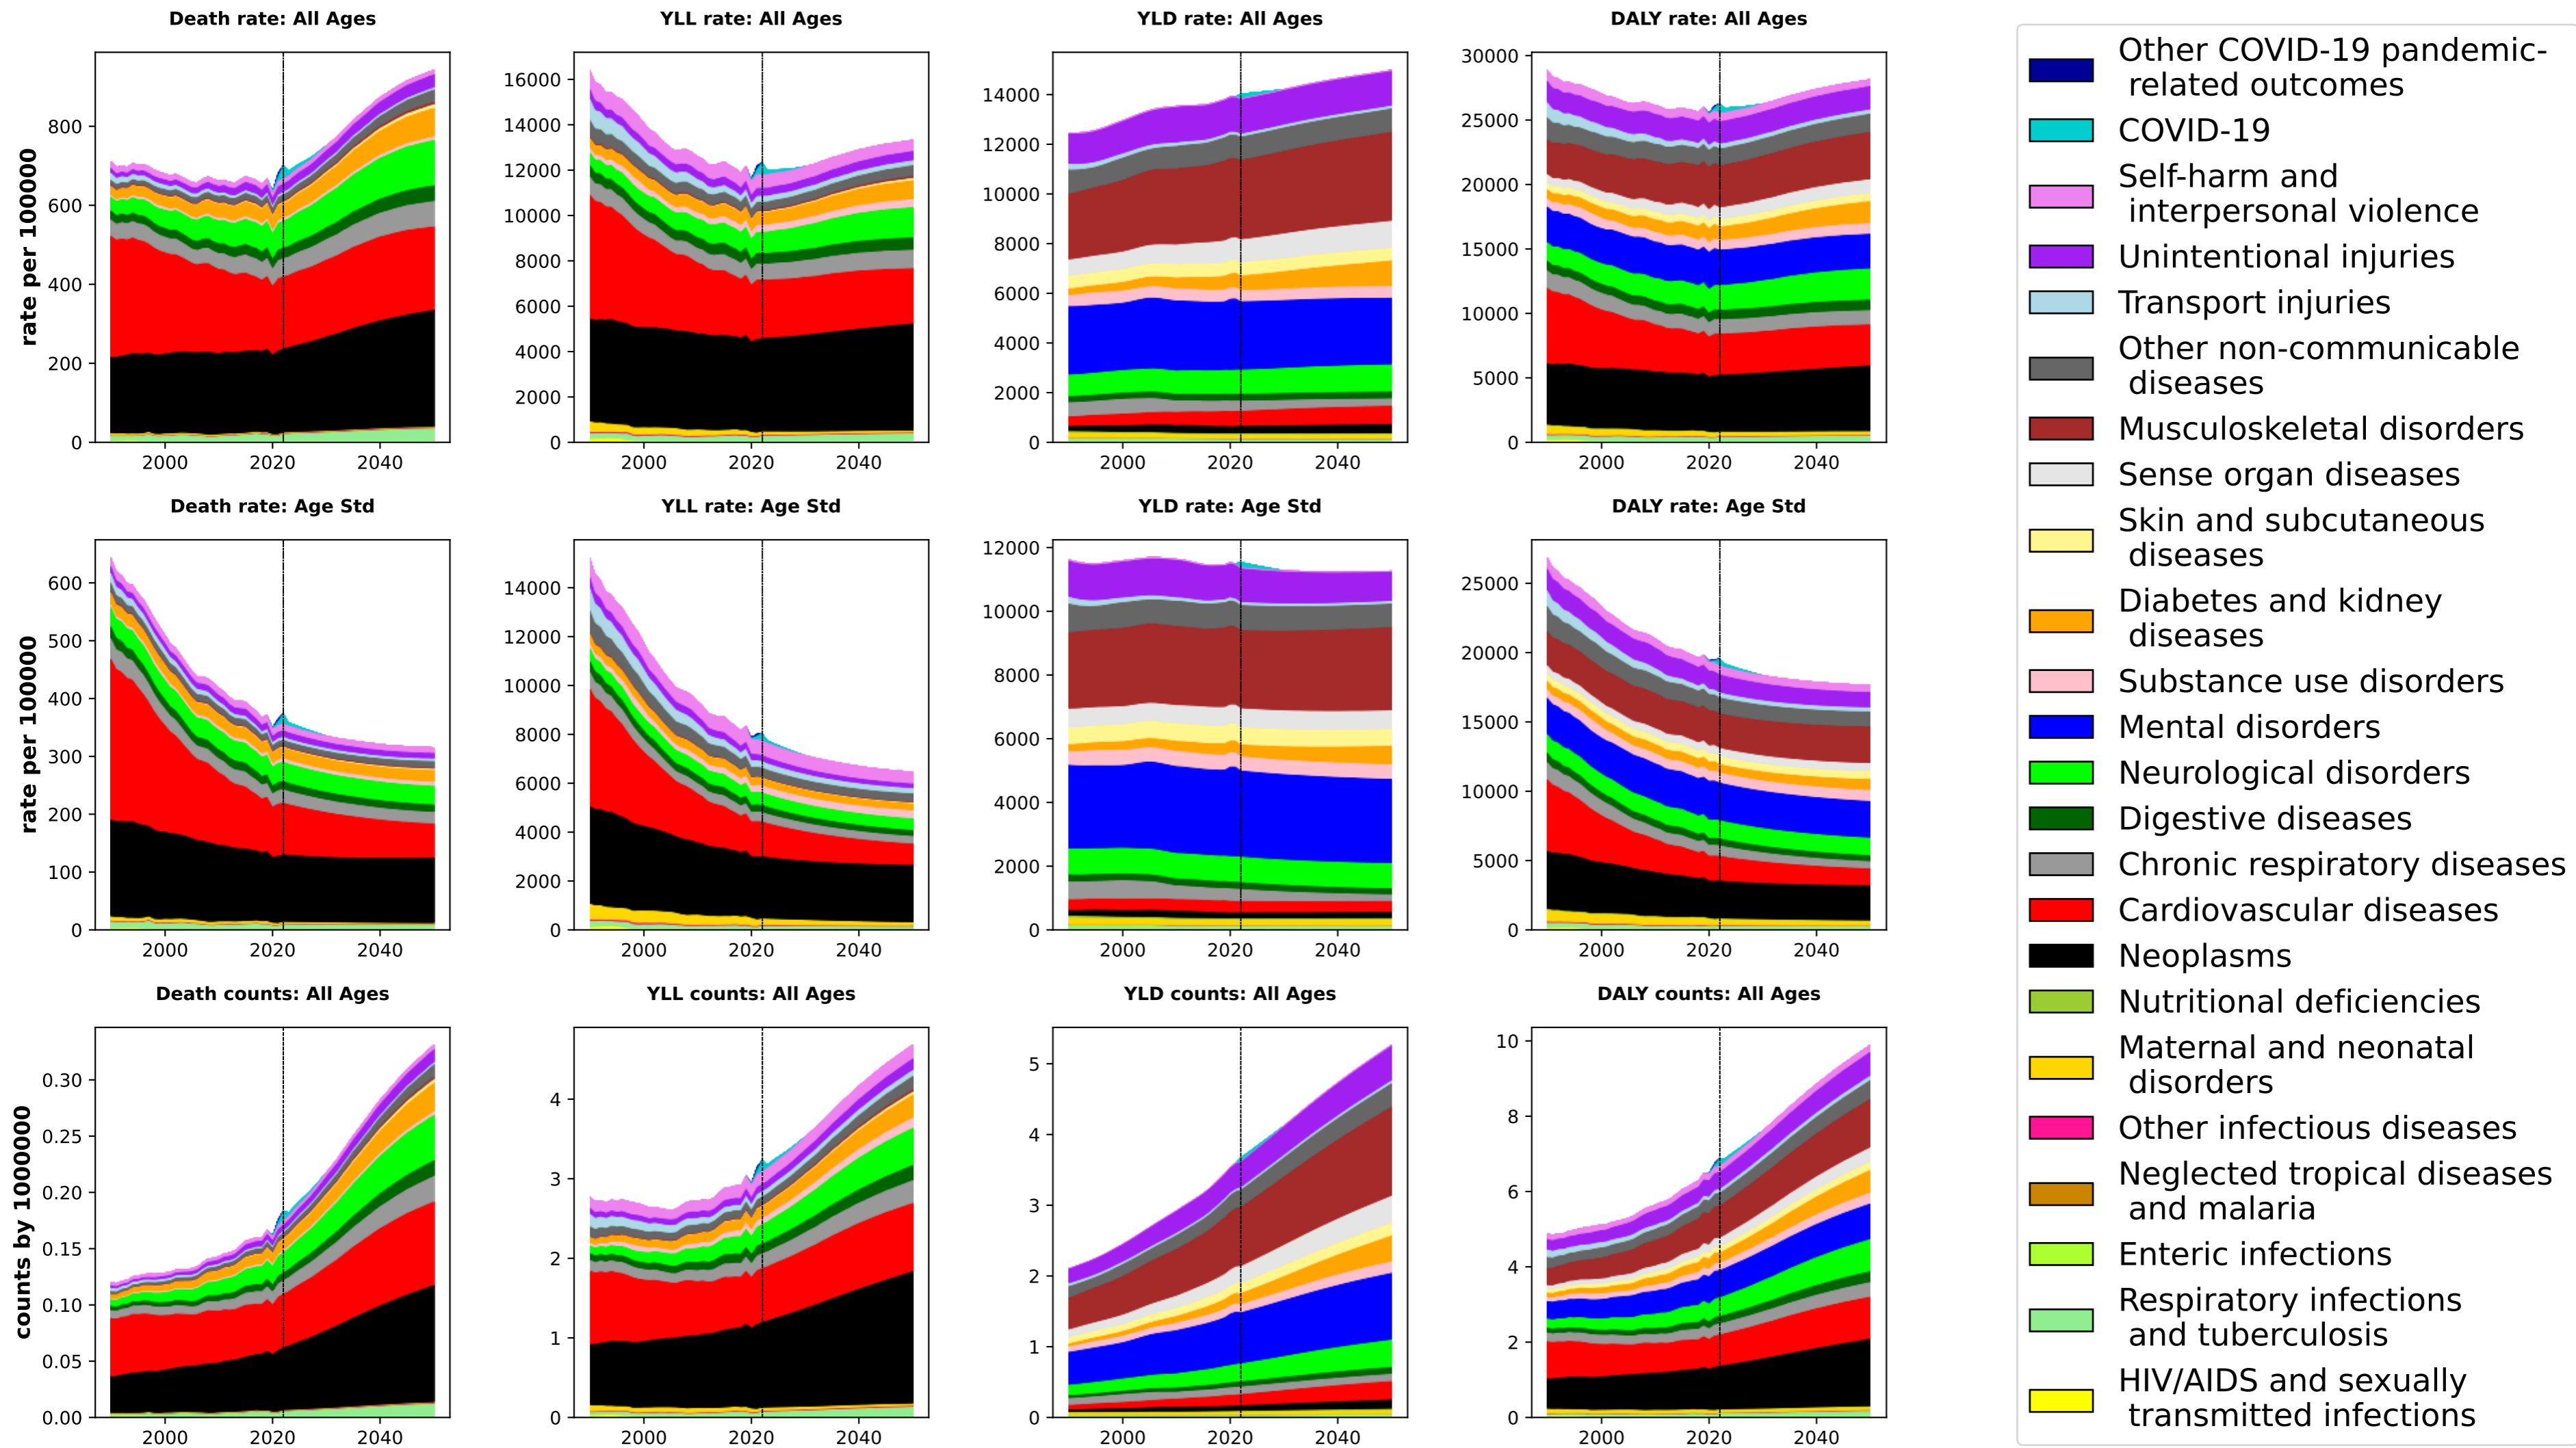

# New Zealand

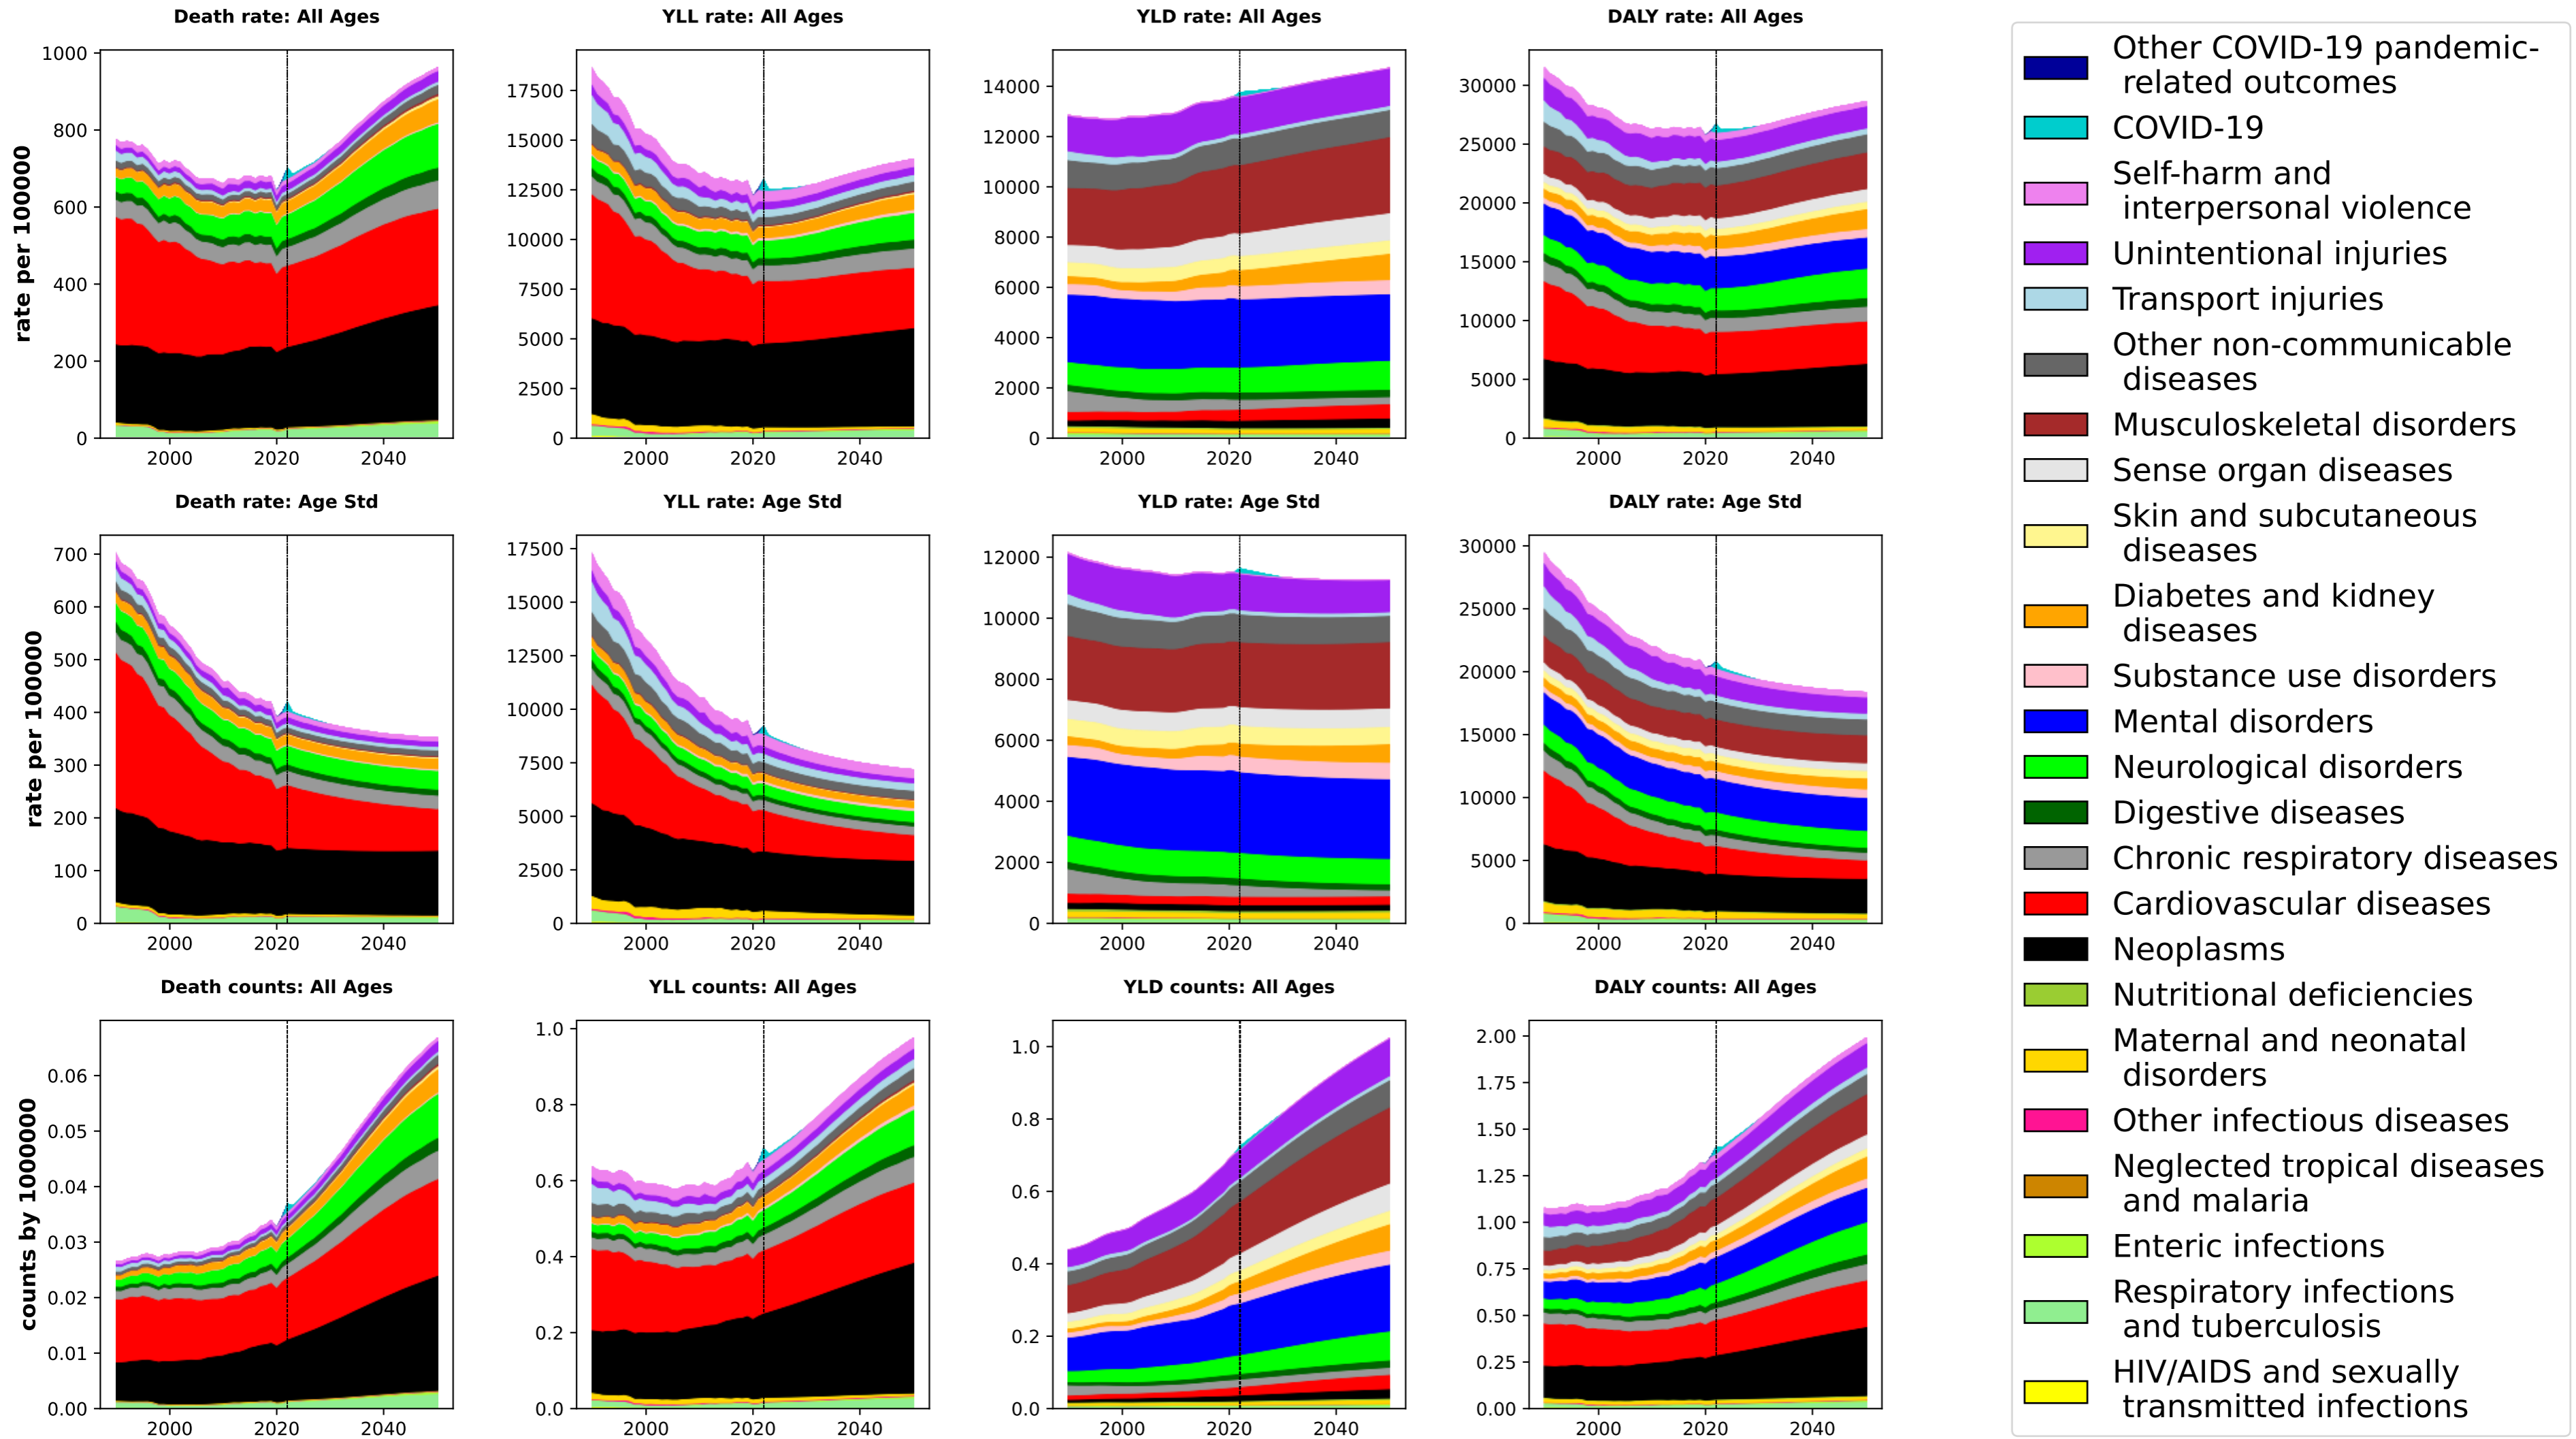

# Brunei

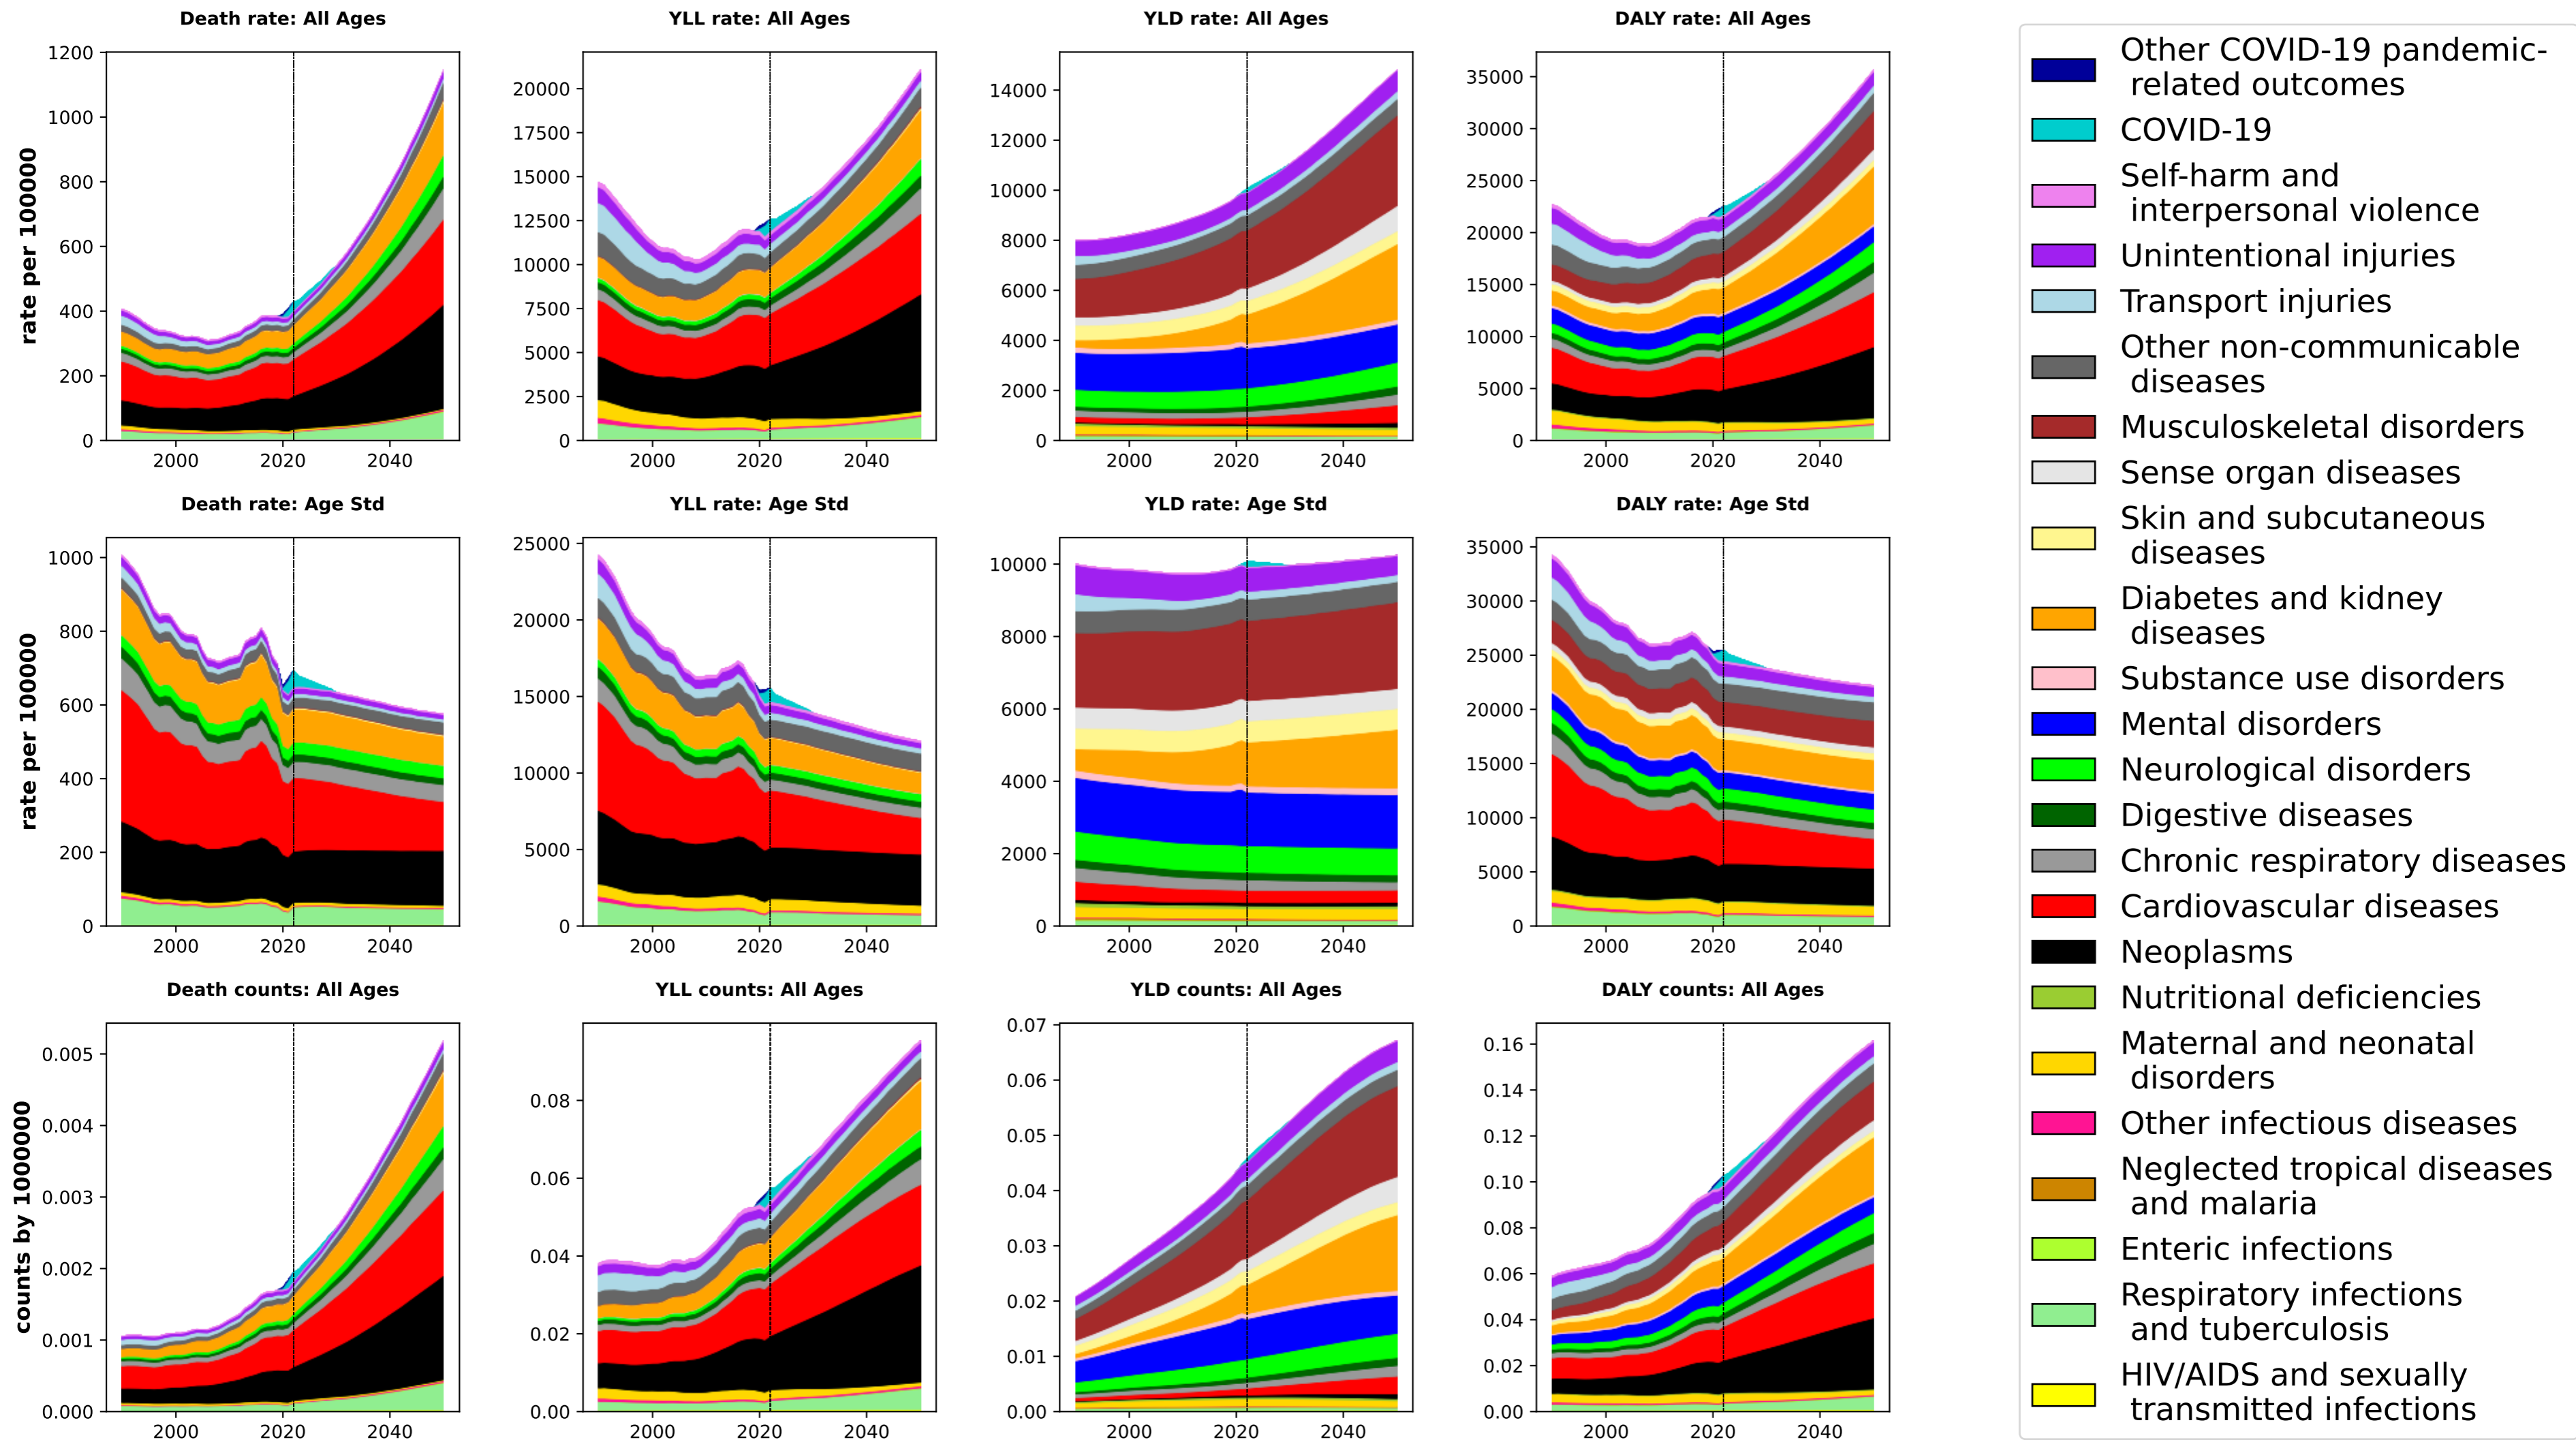

# Japan

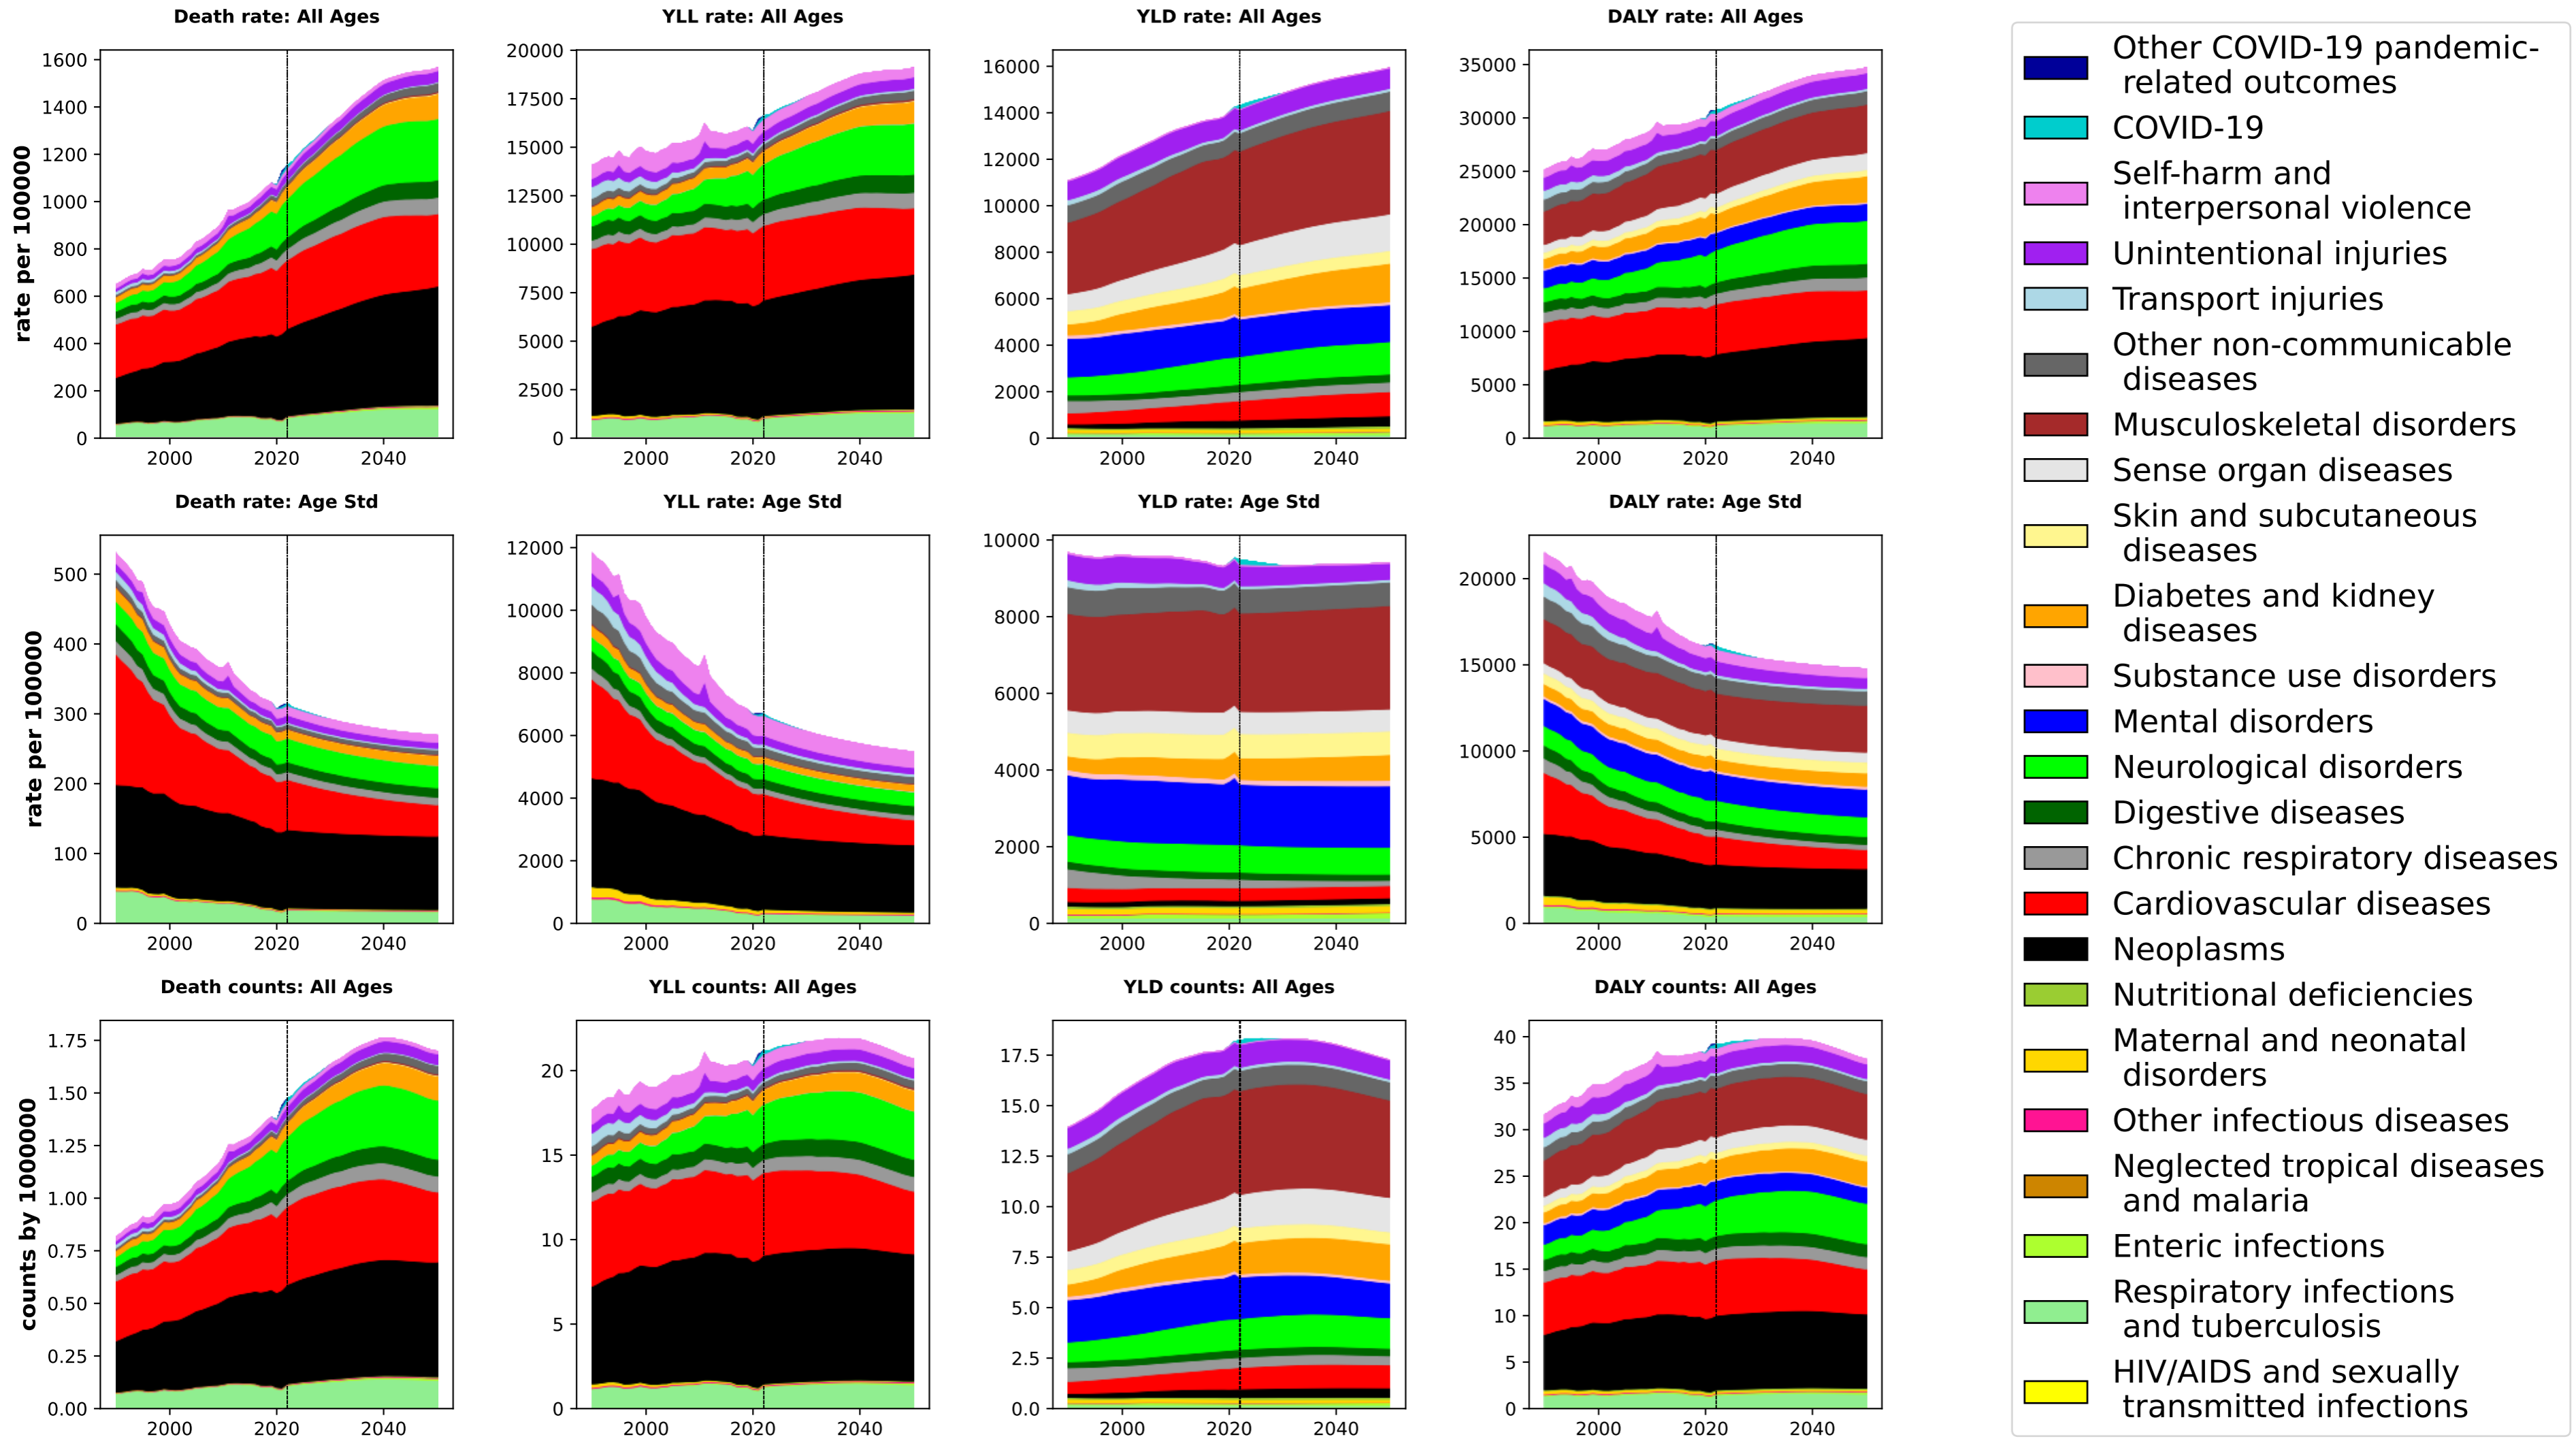



# South Korea

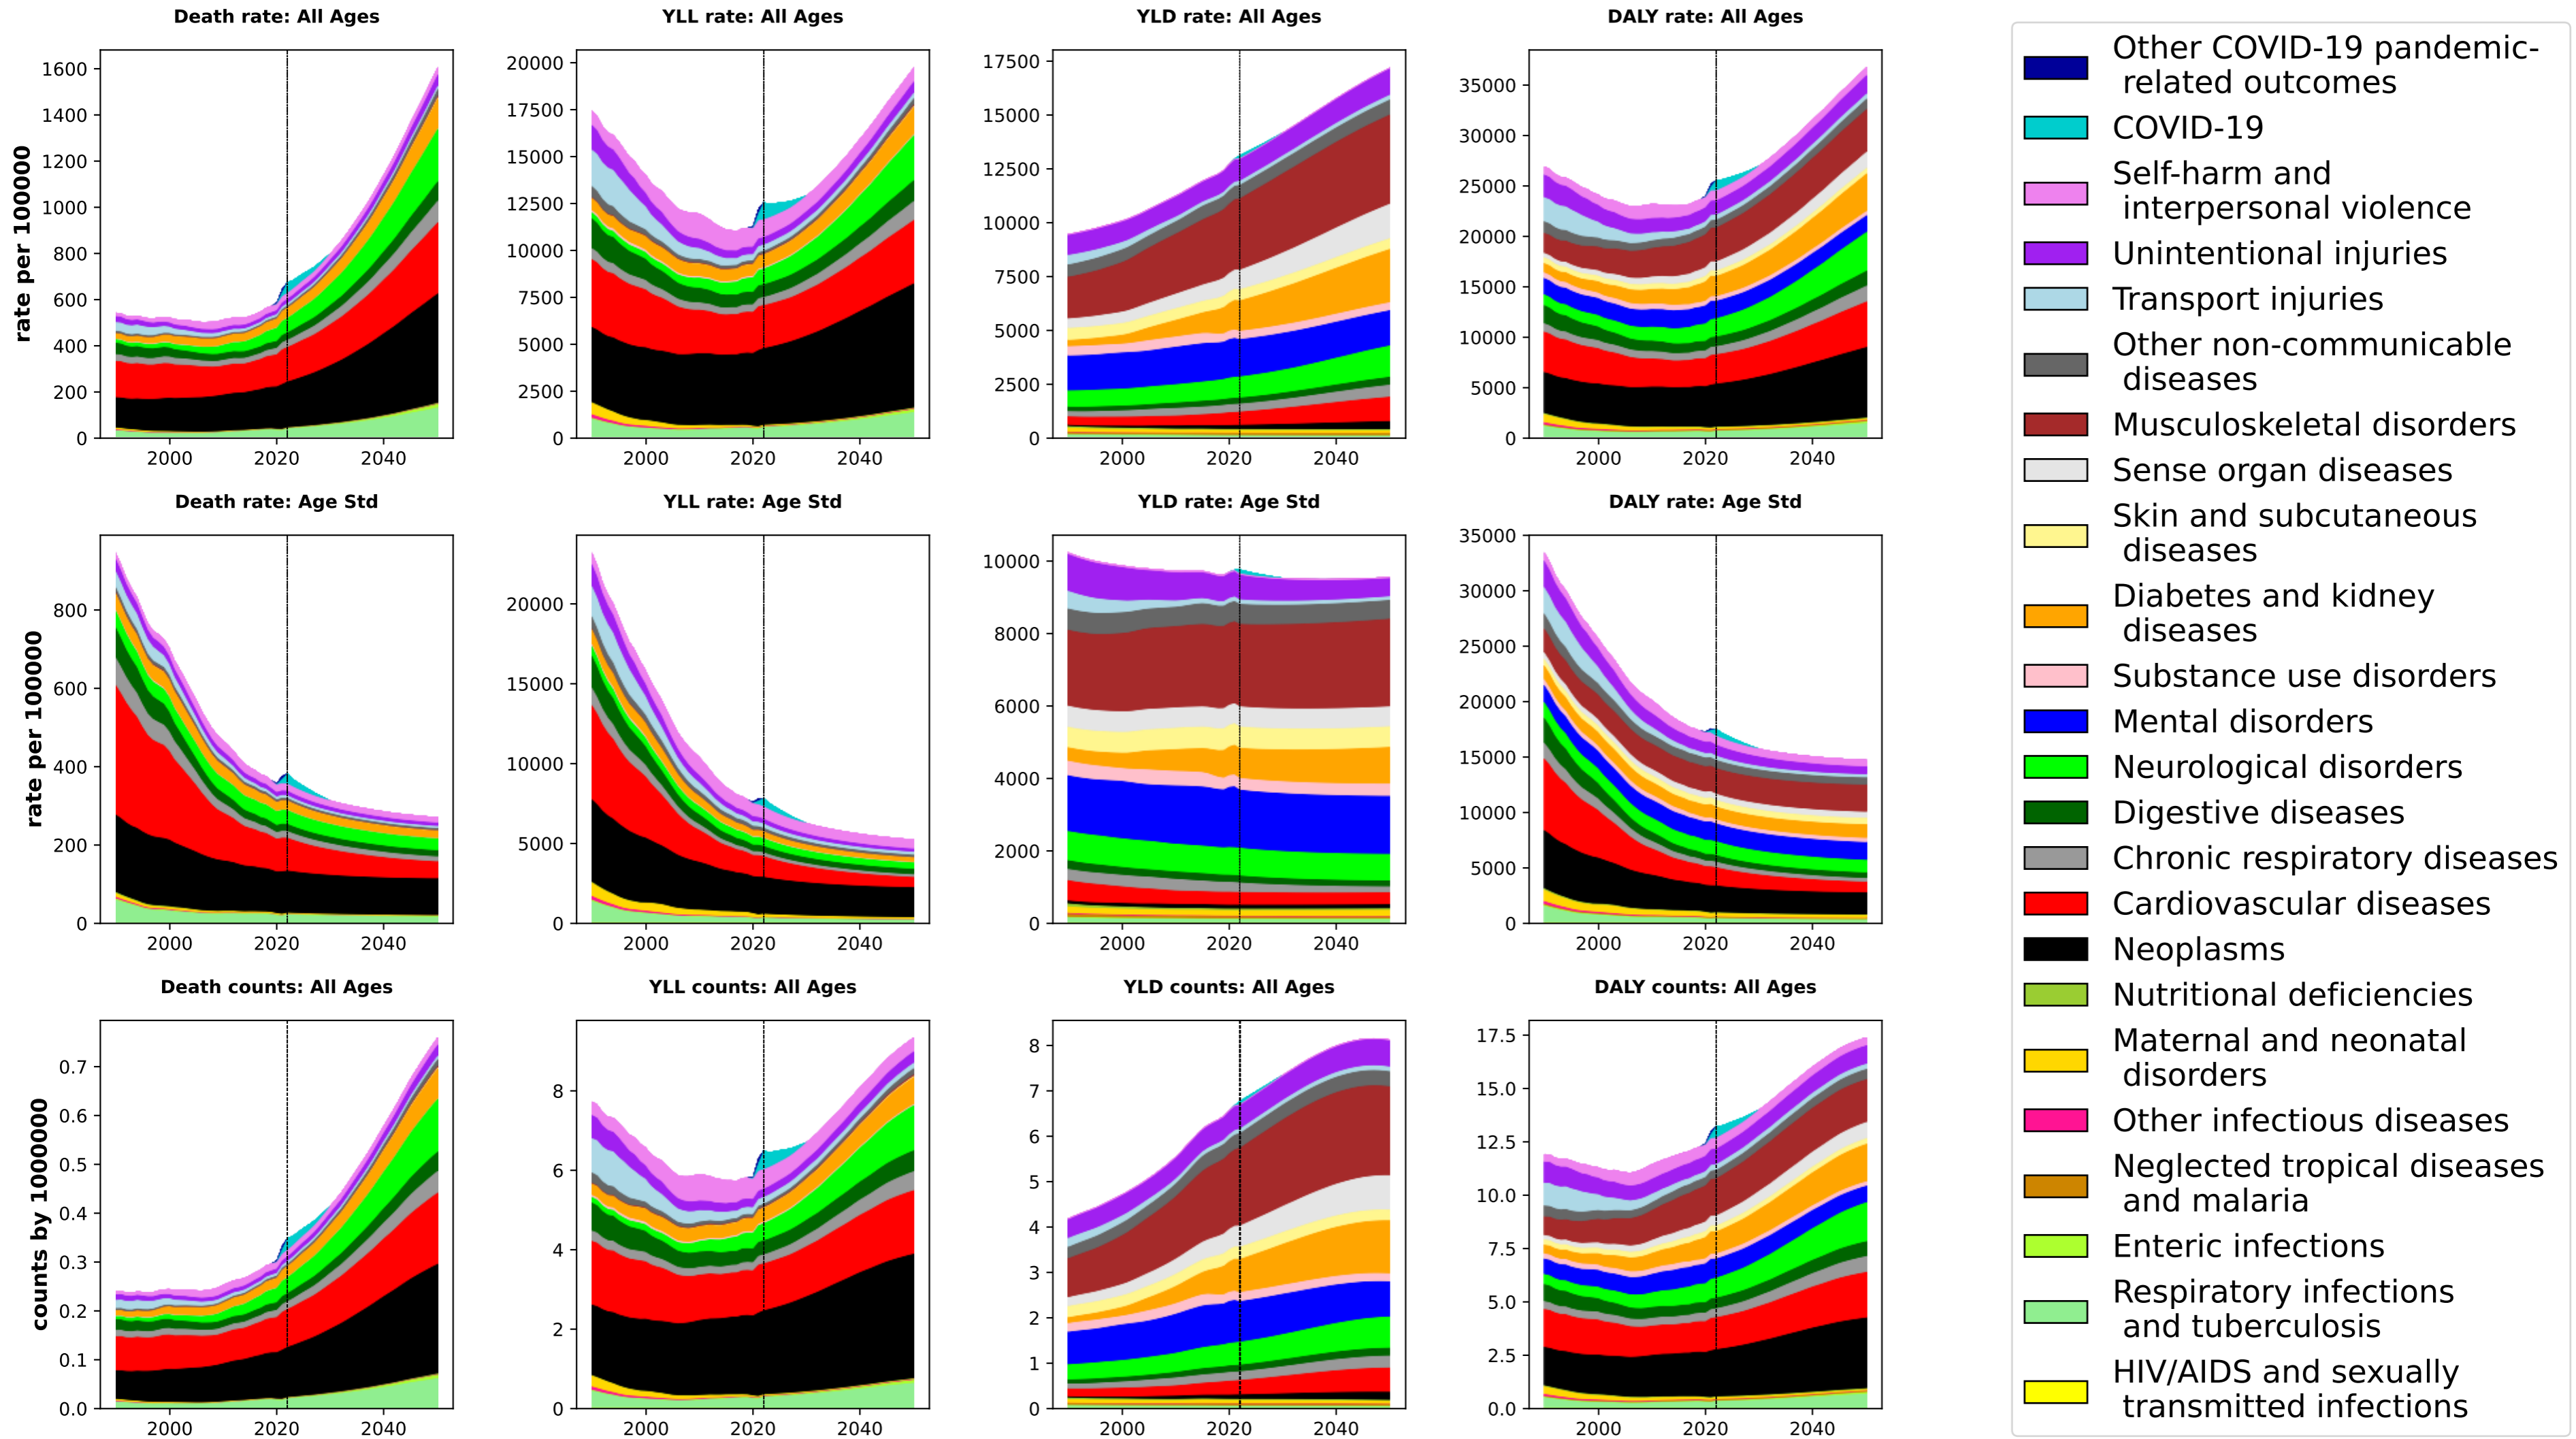



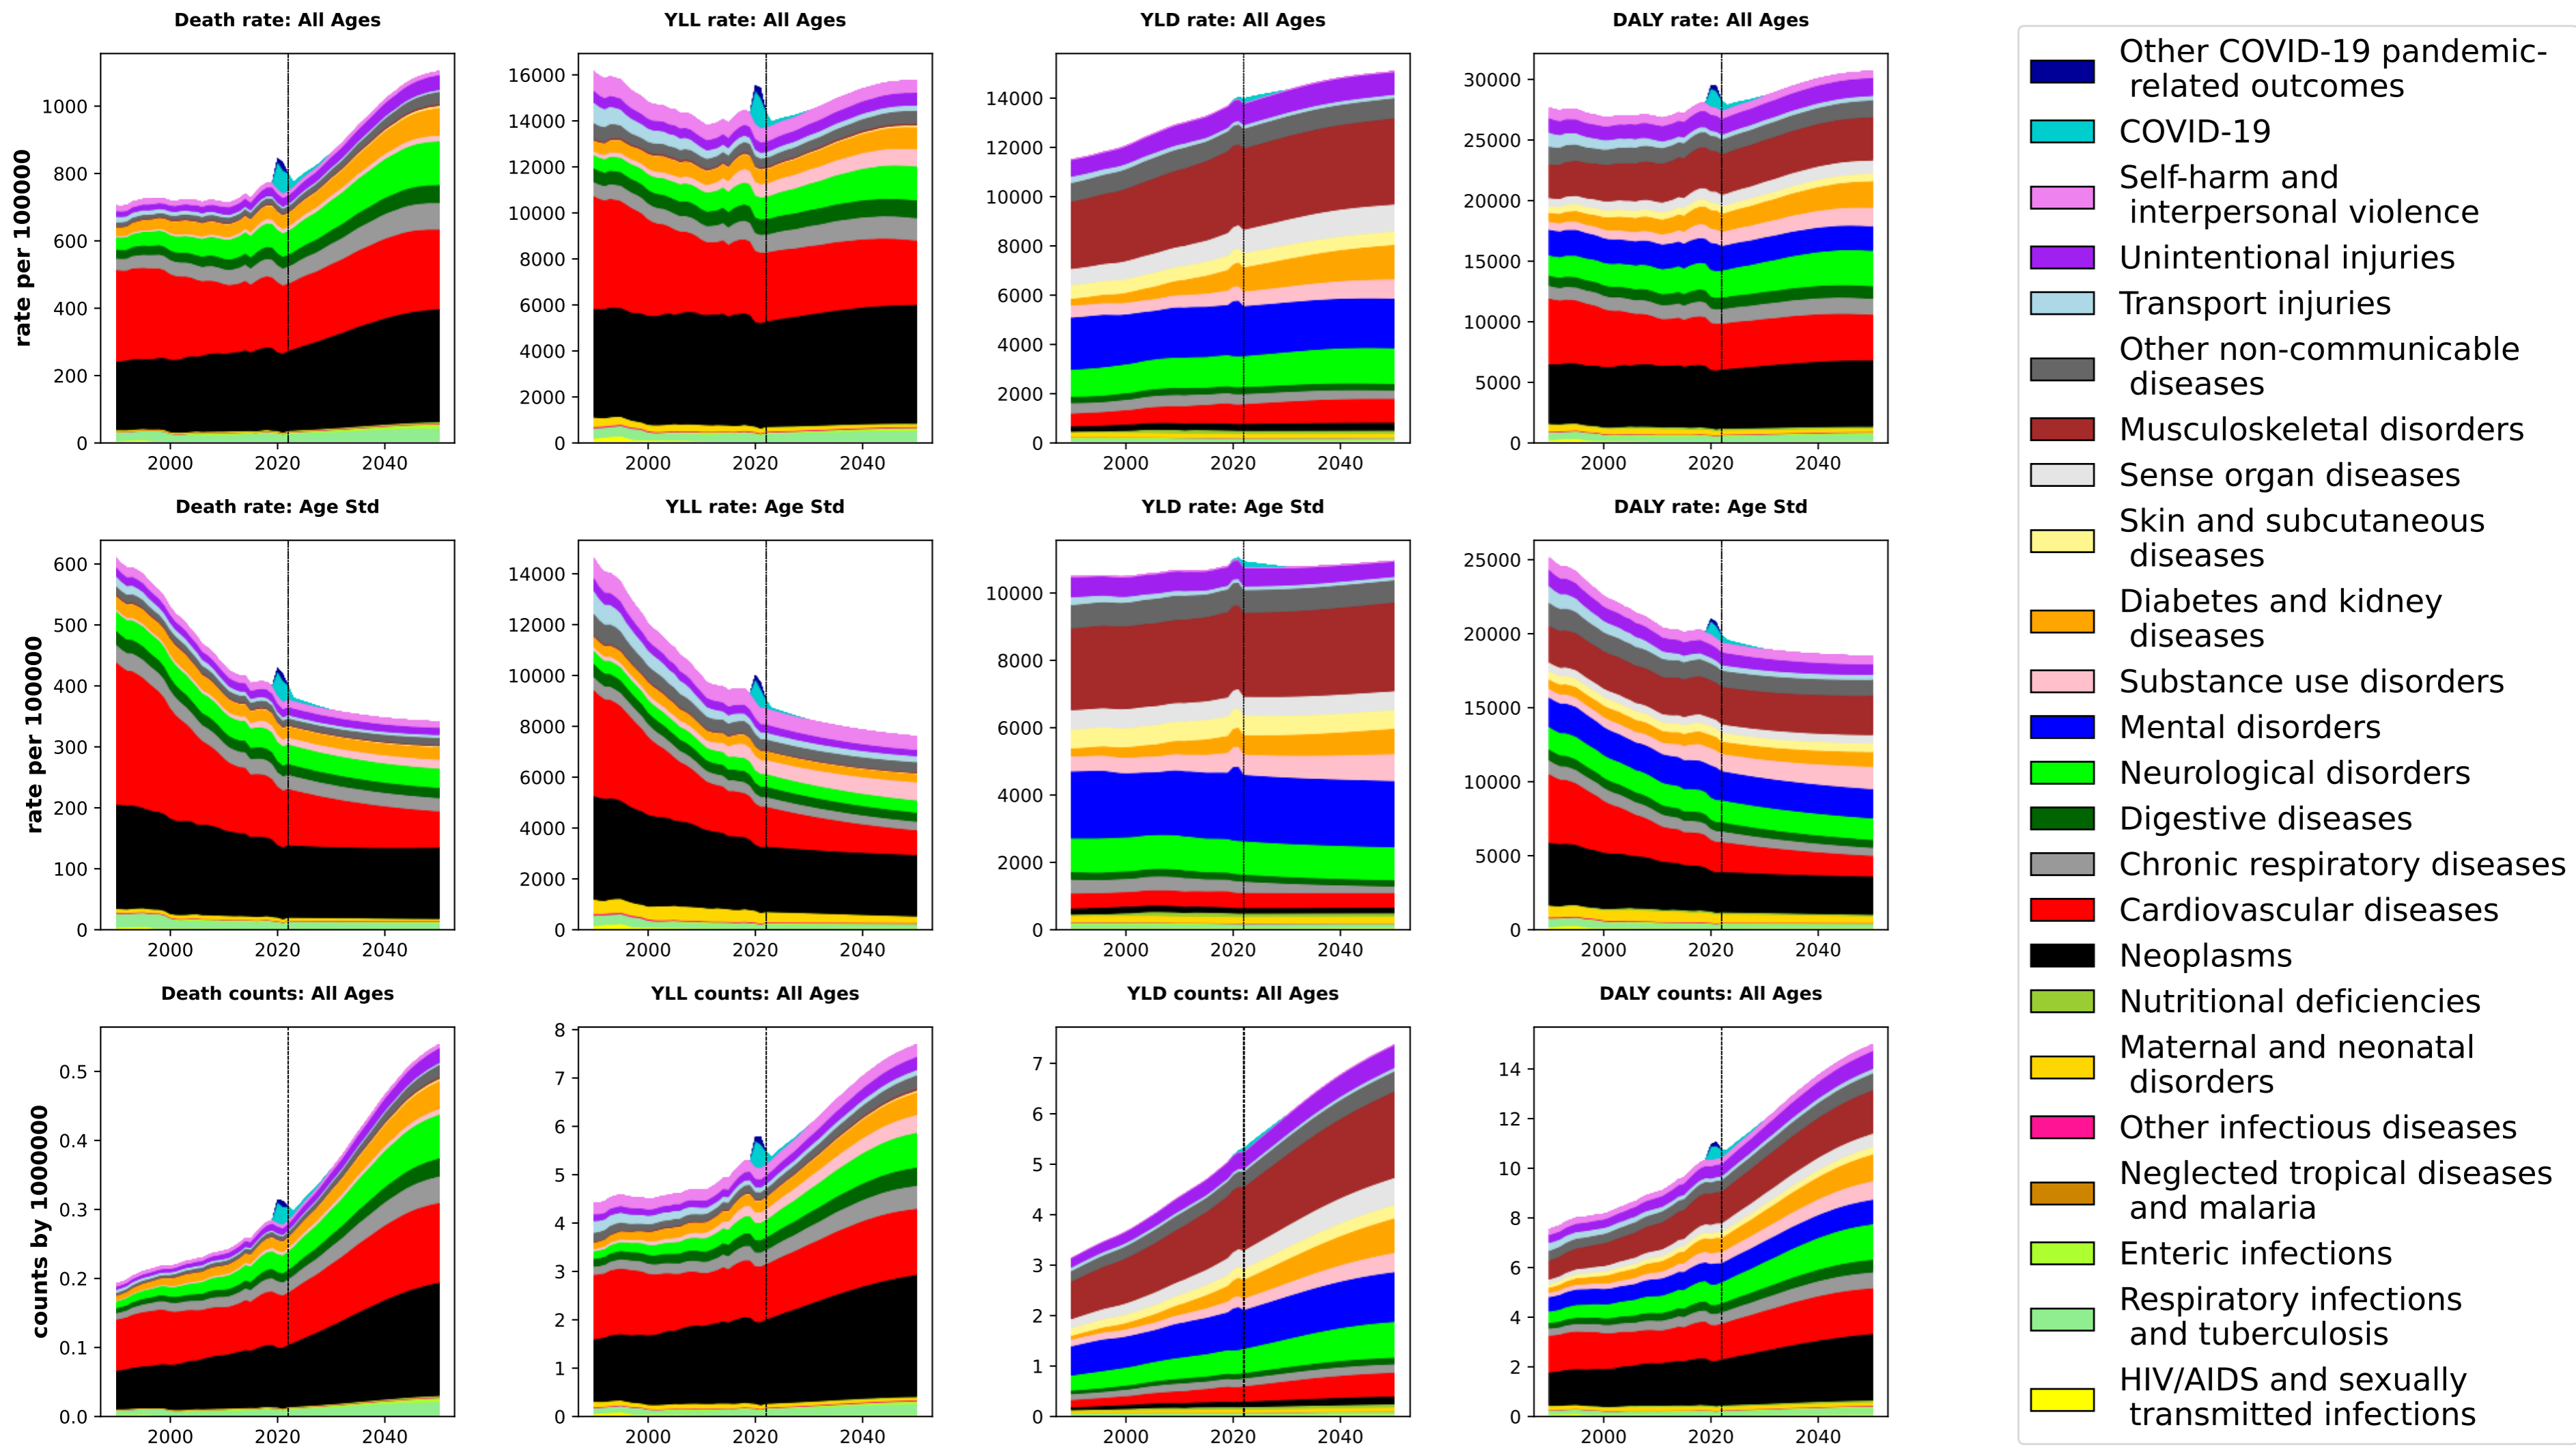

# Greenland

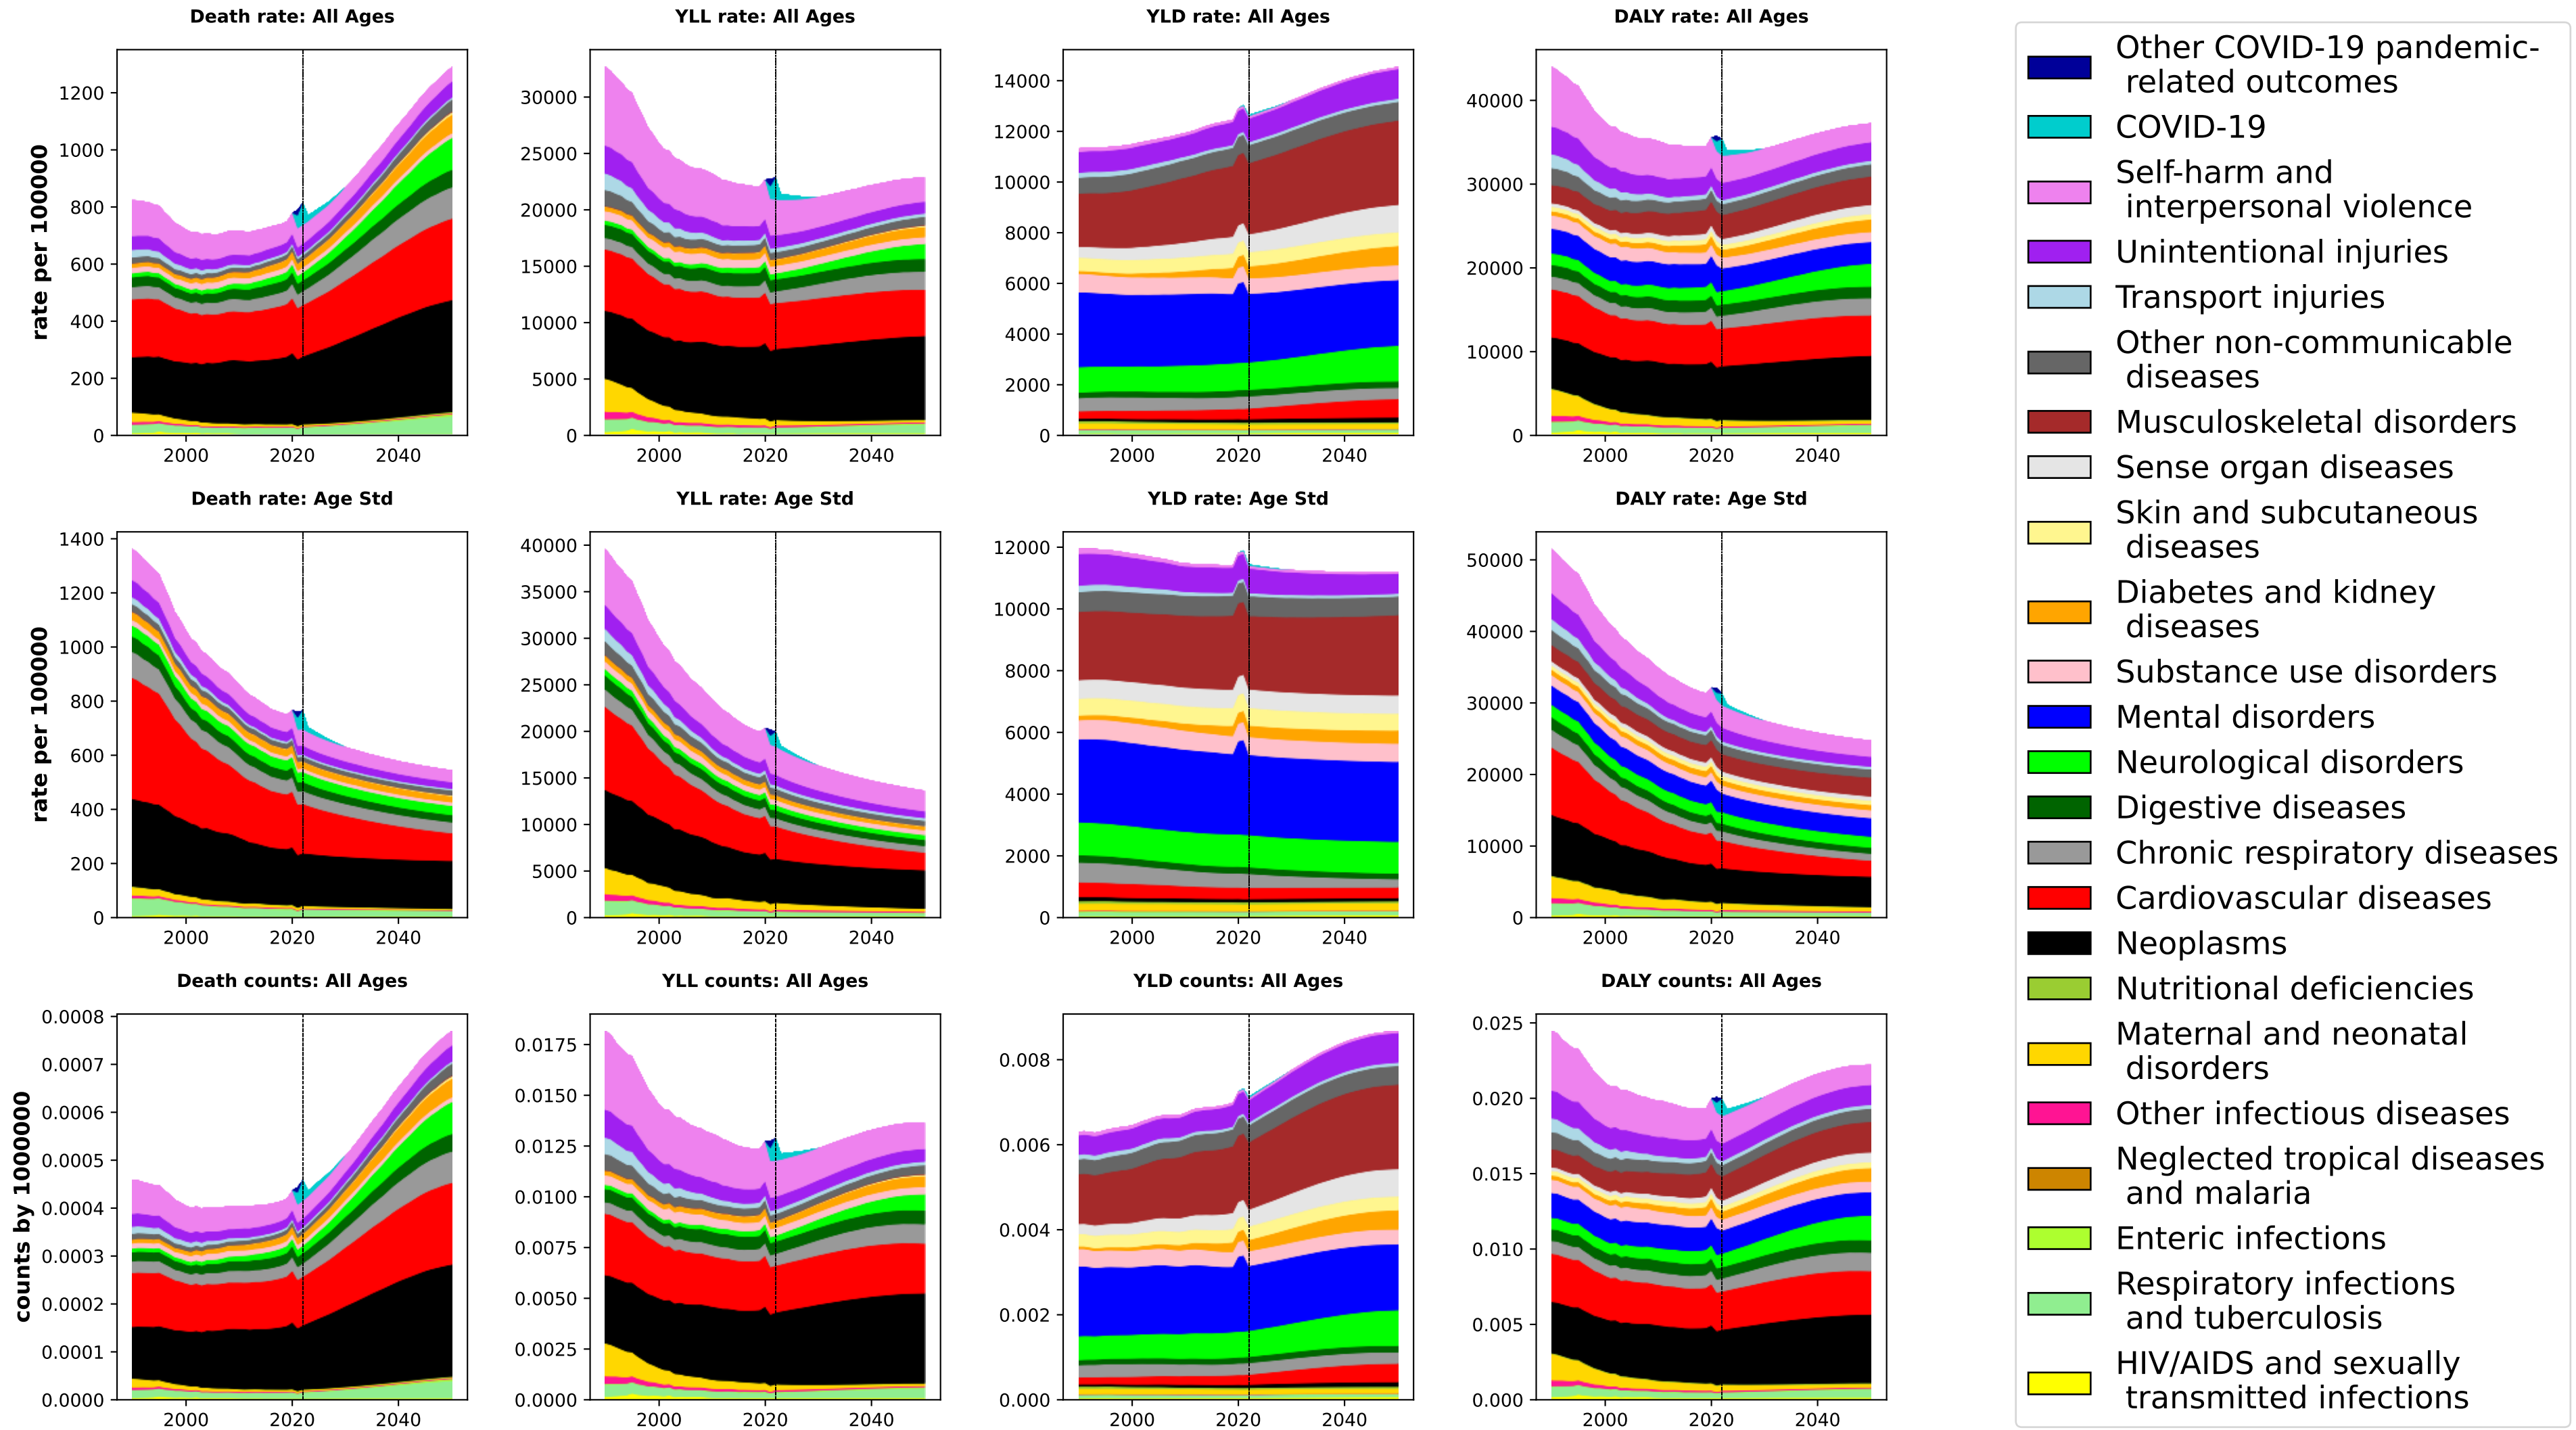

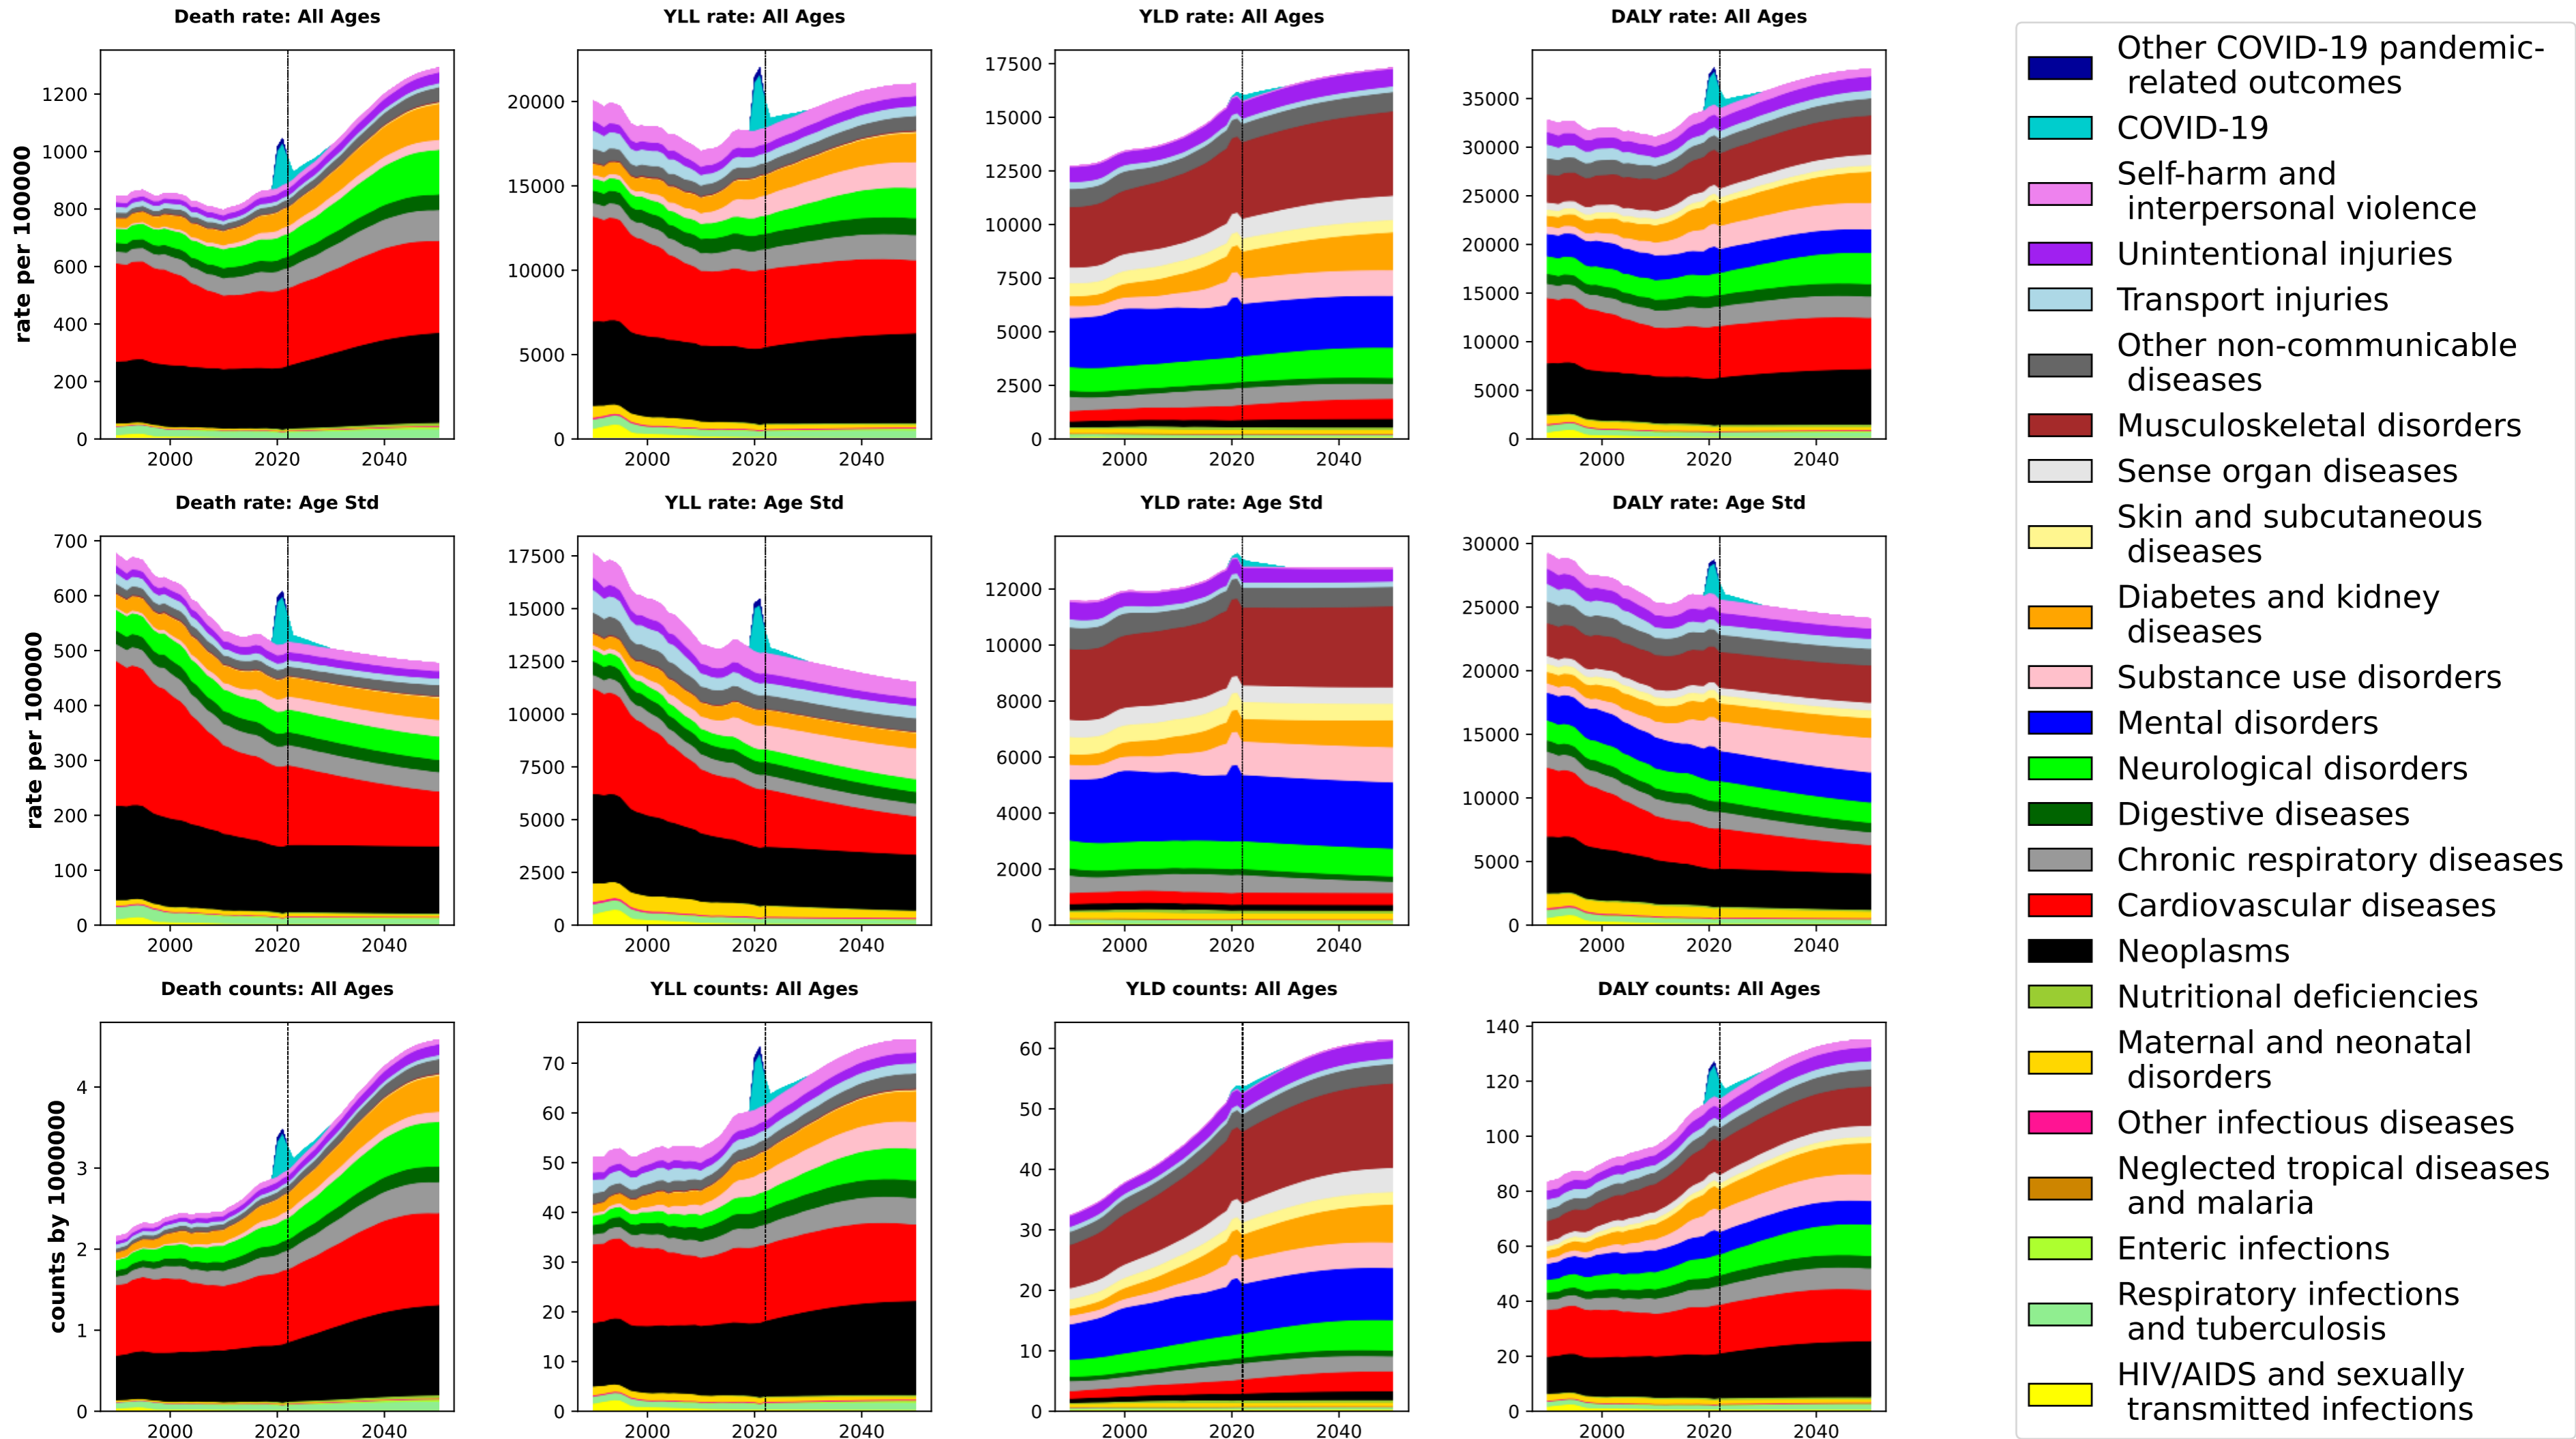

# Argentina

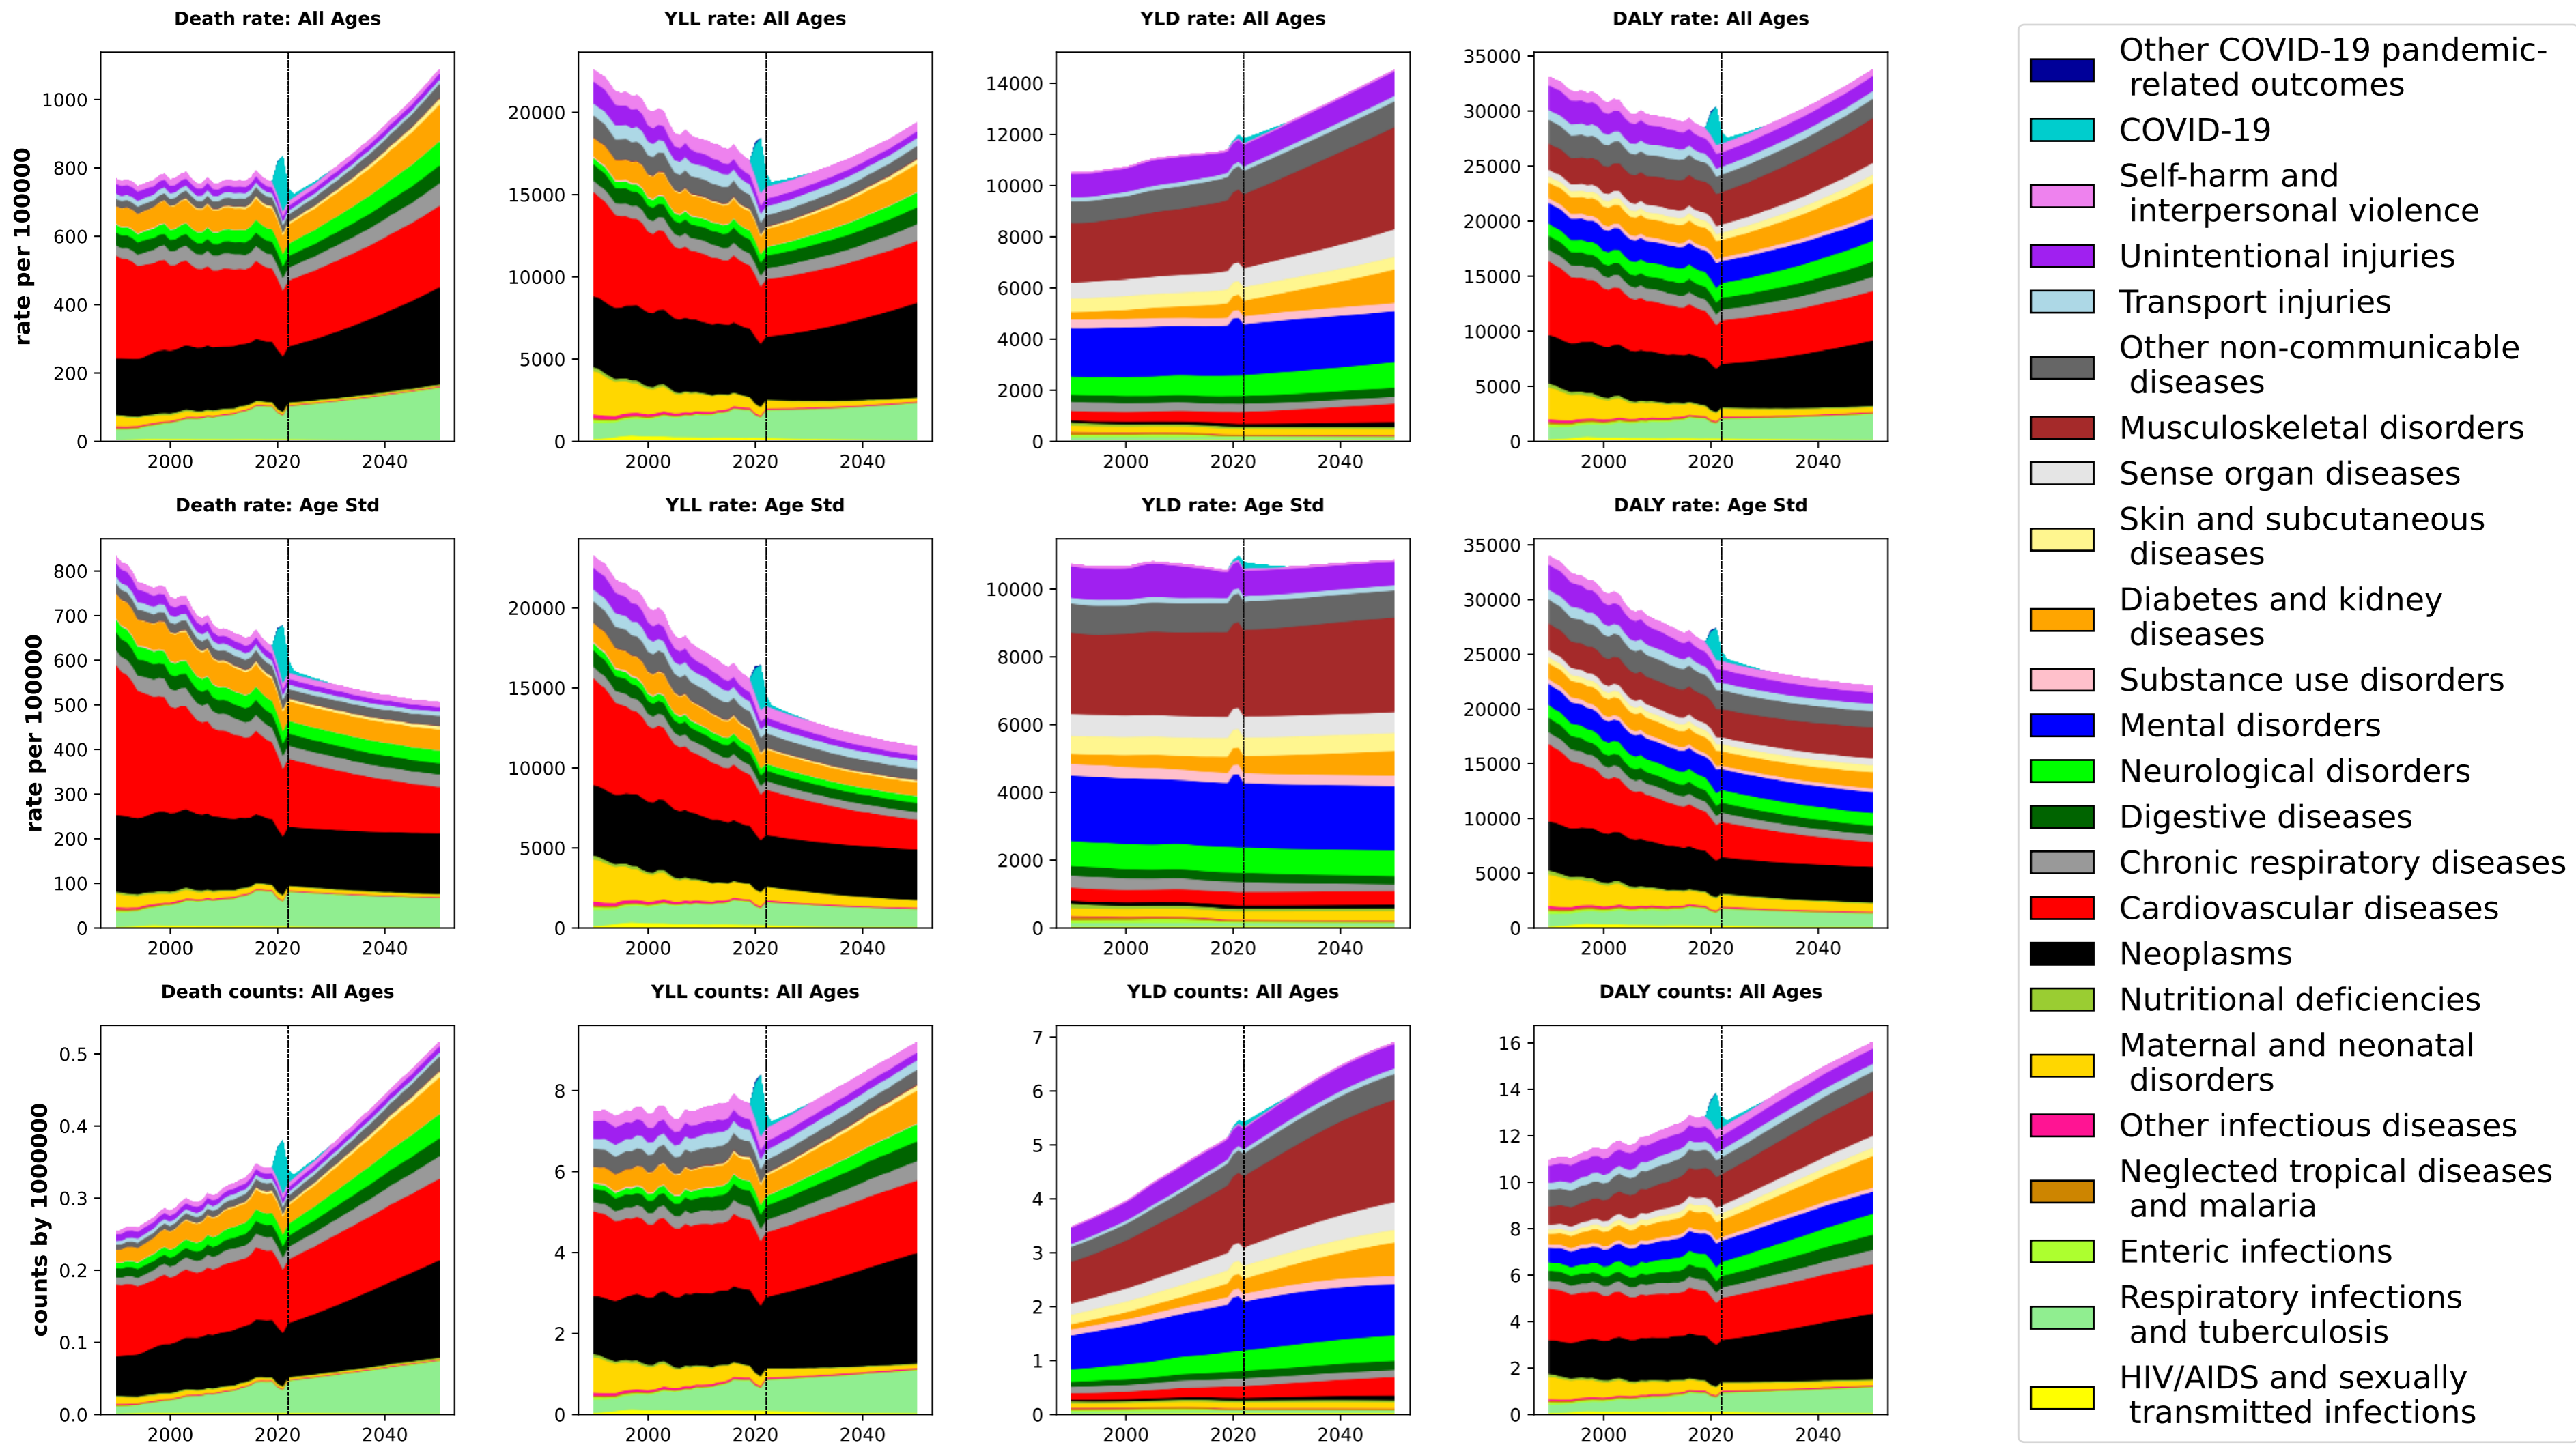

# Chile

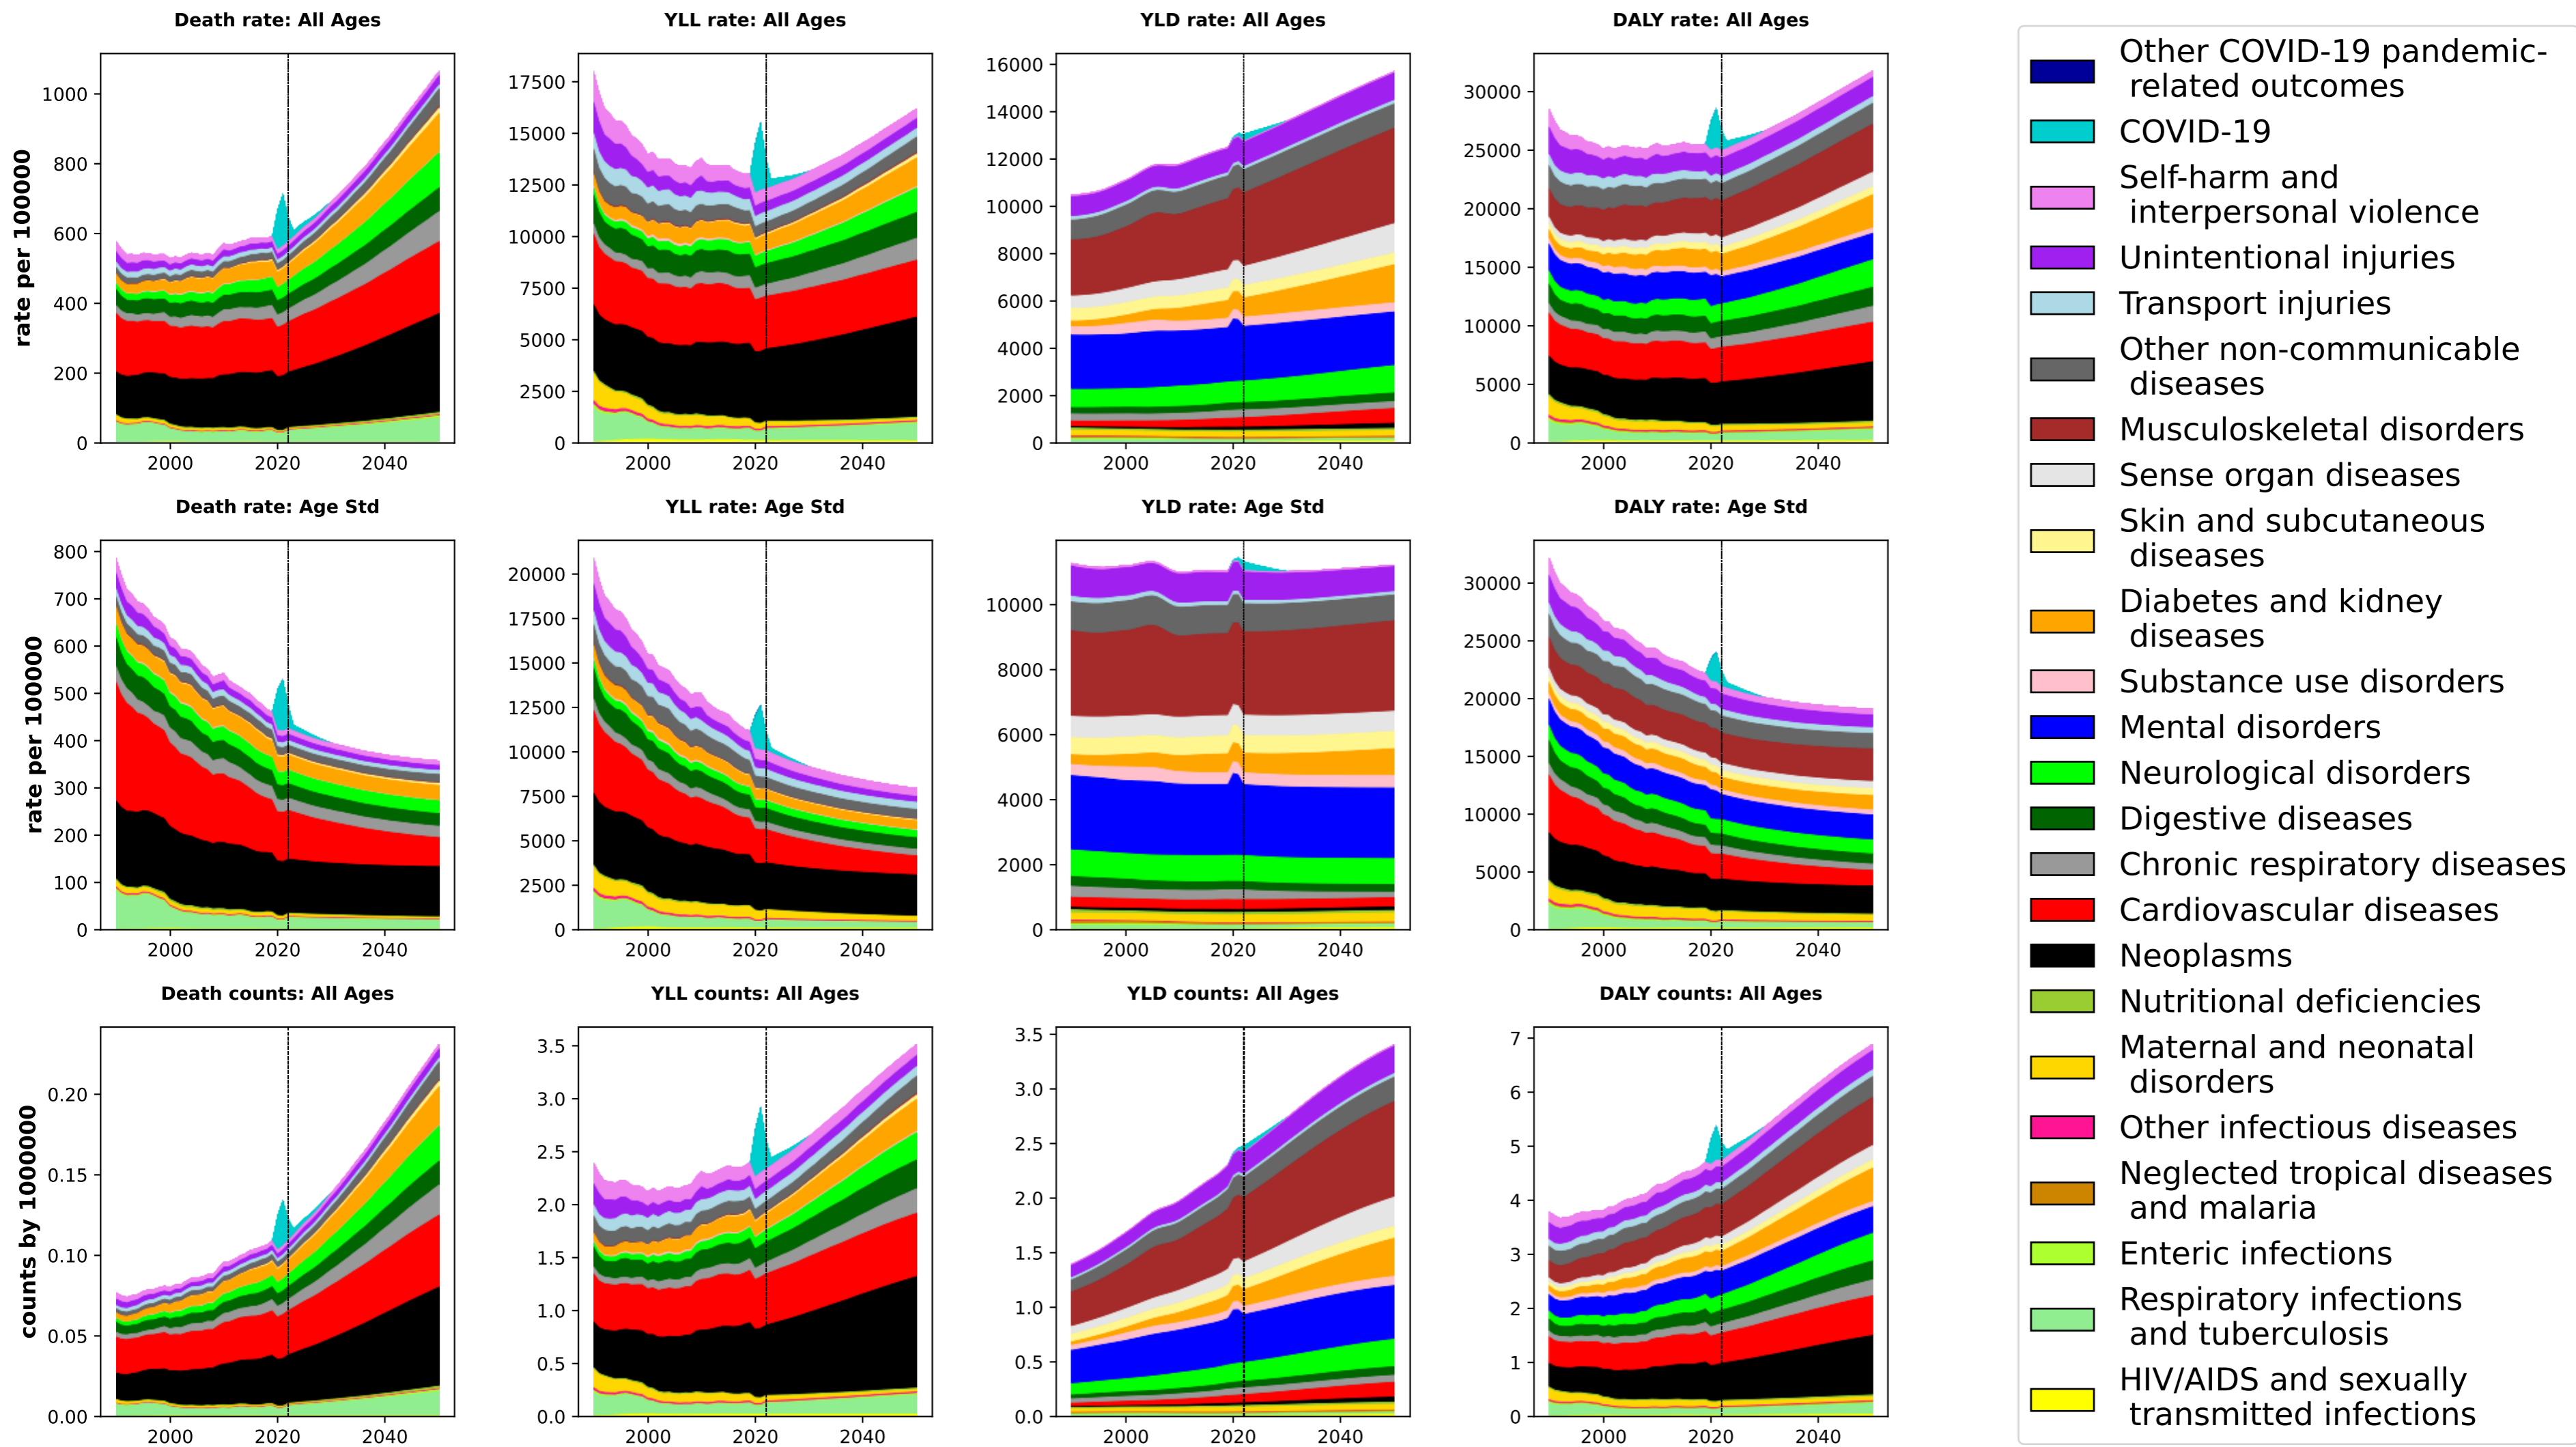

# Uruguay

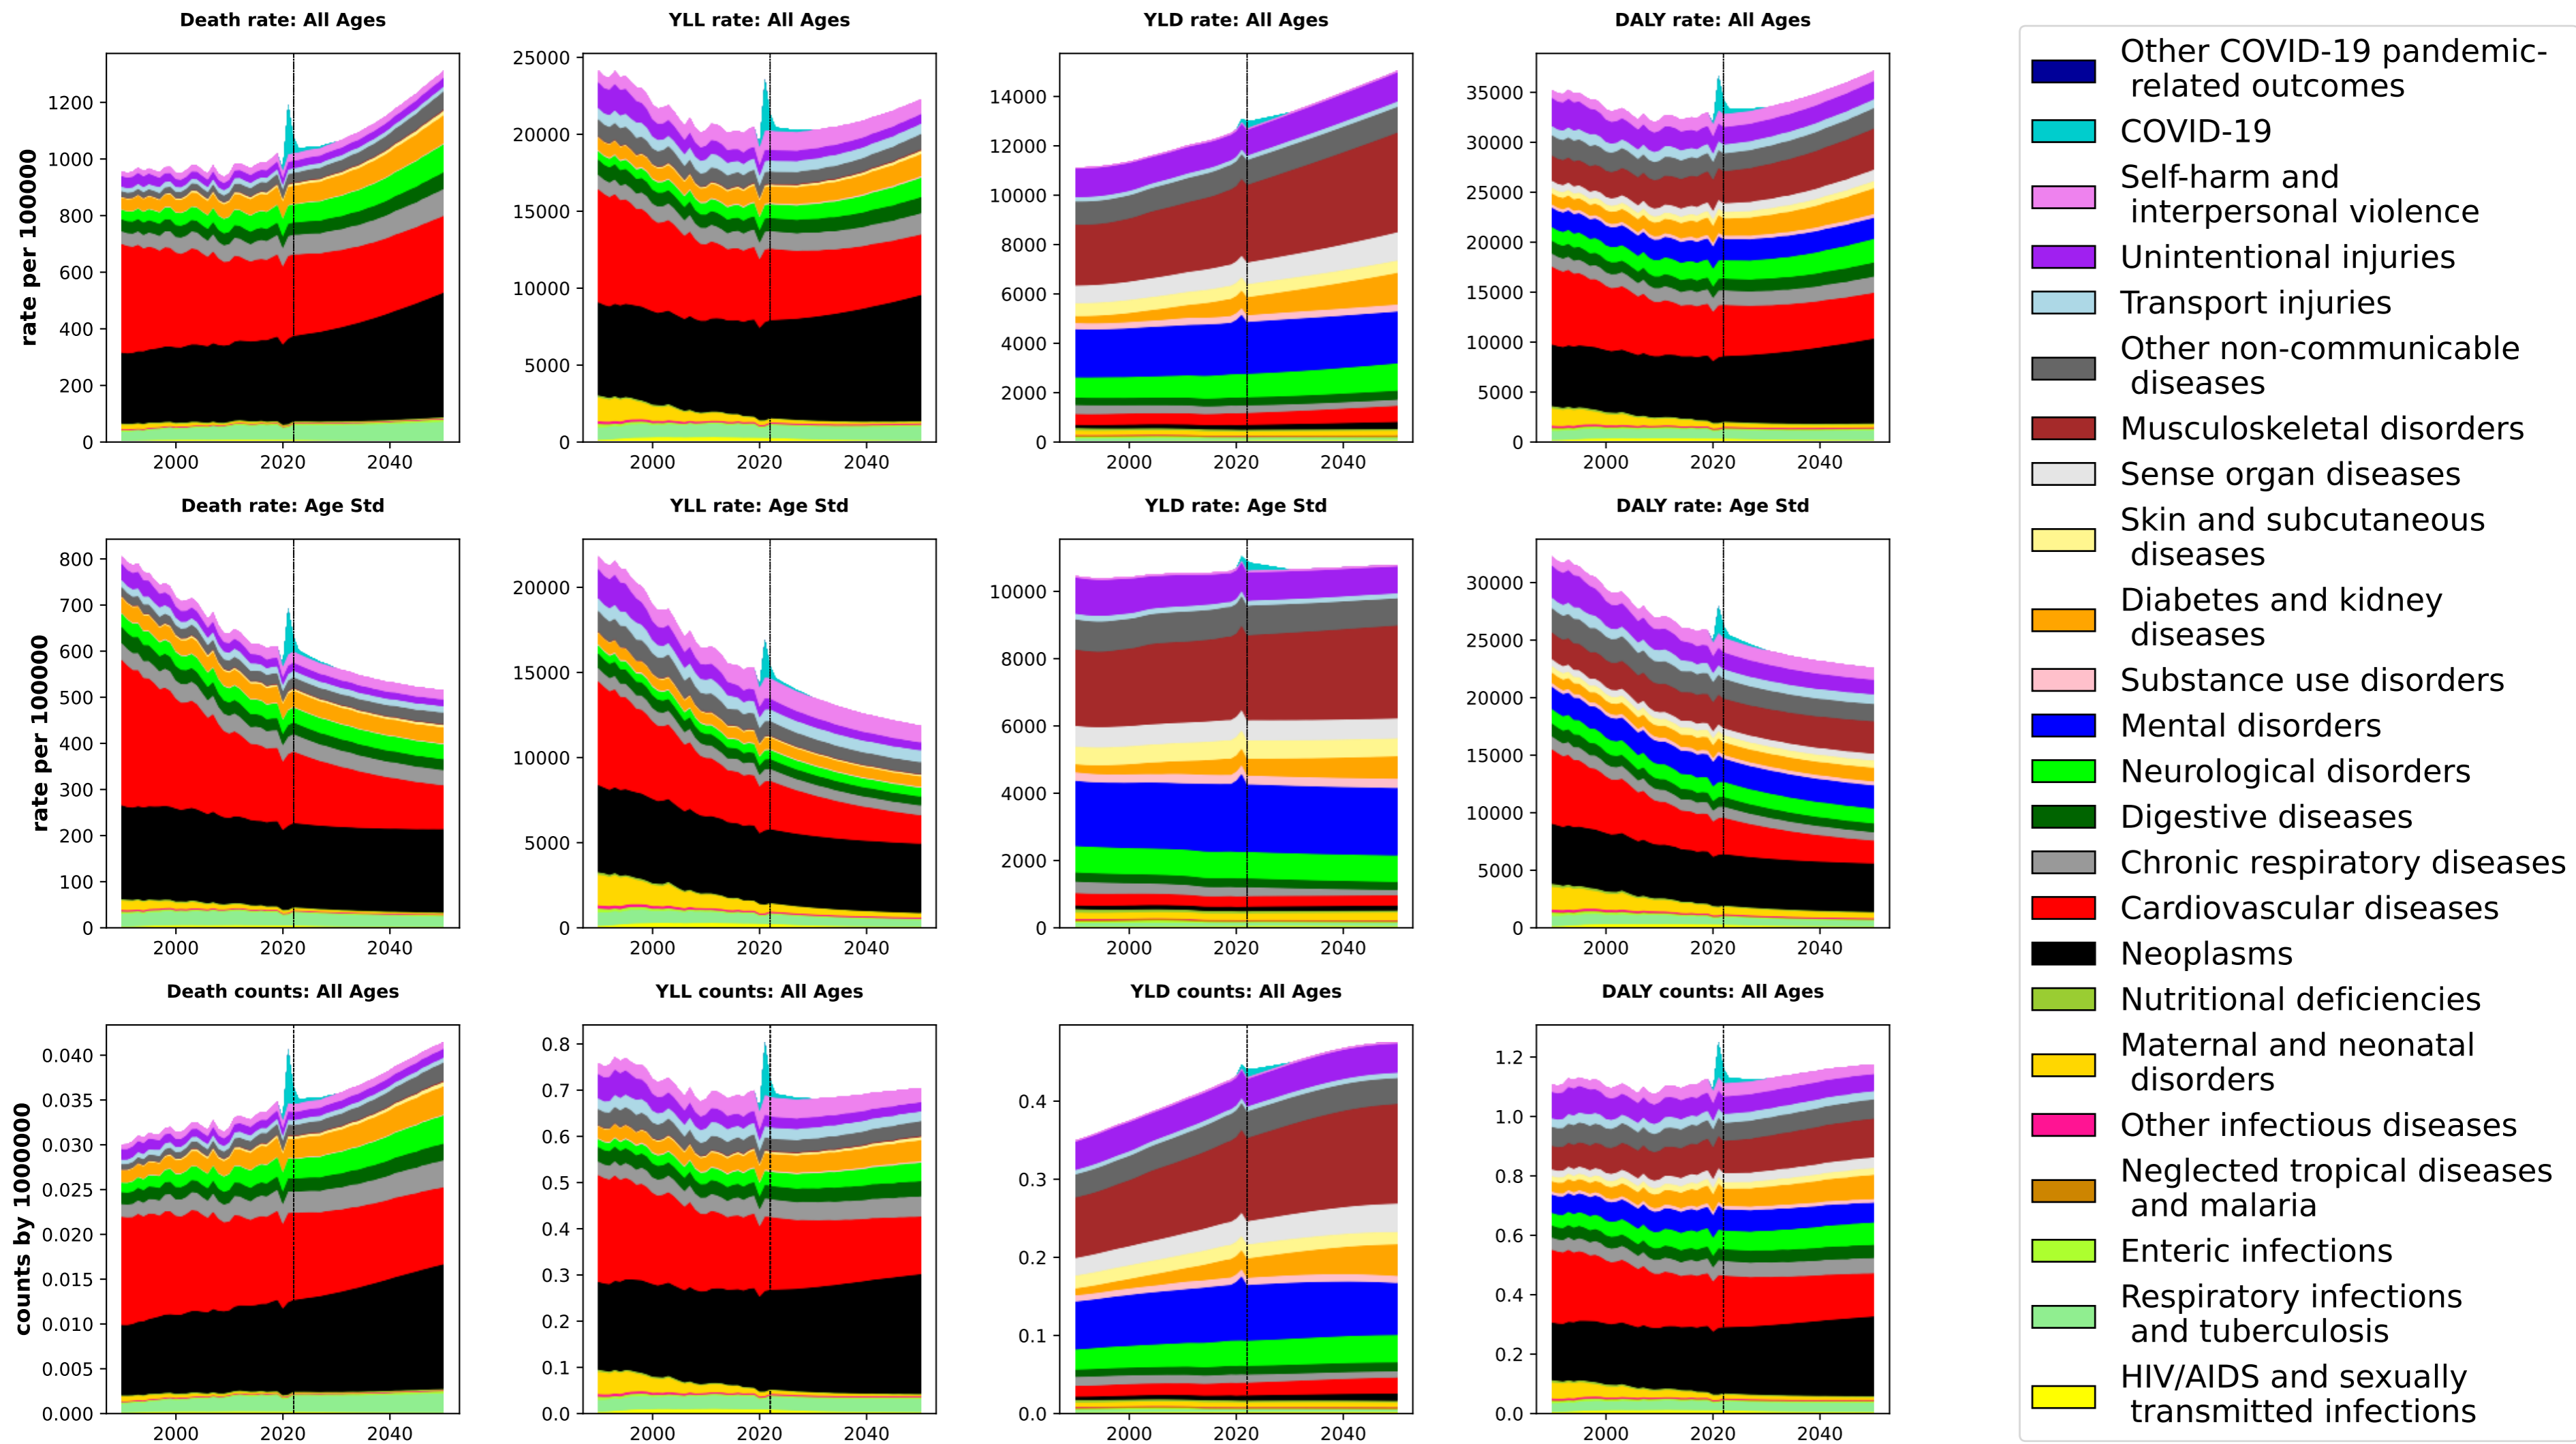



# Andorra

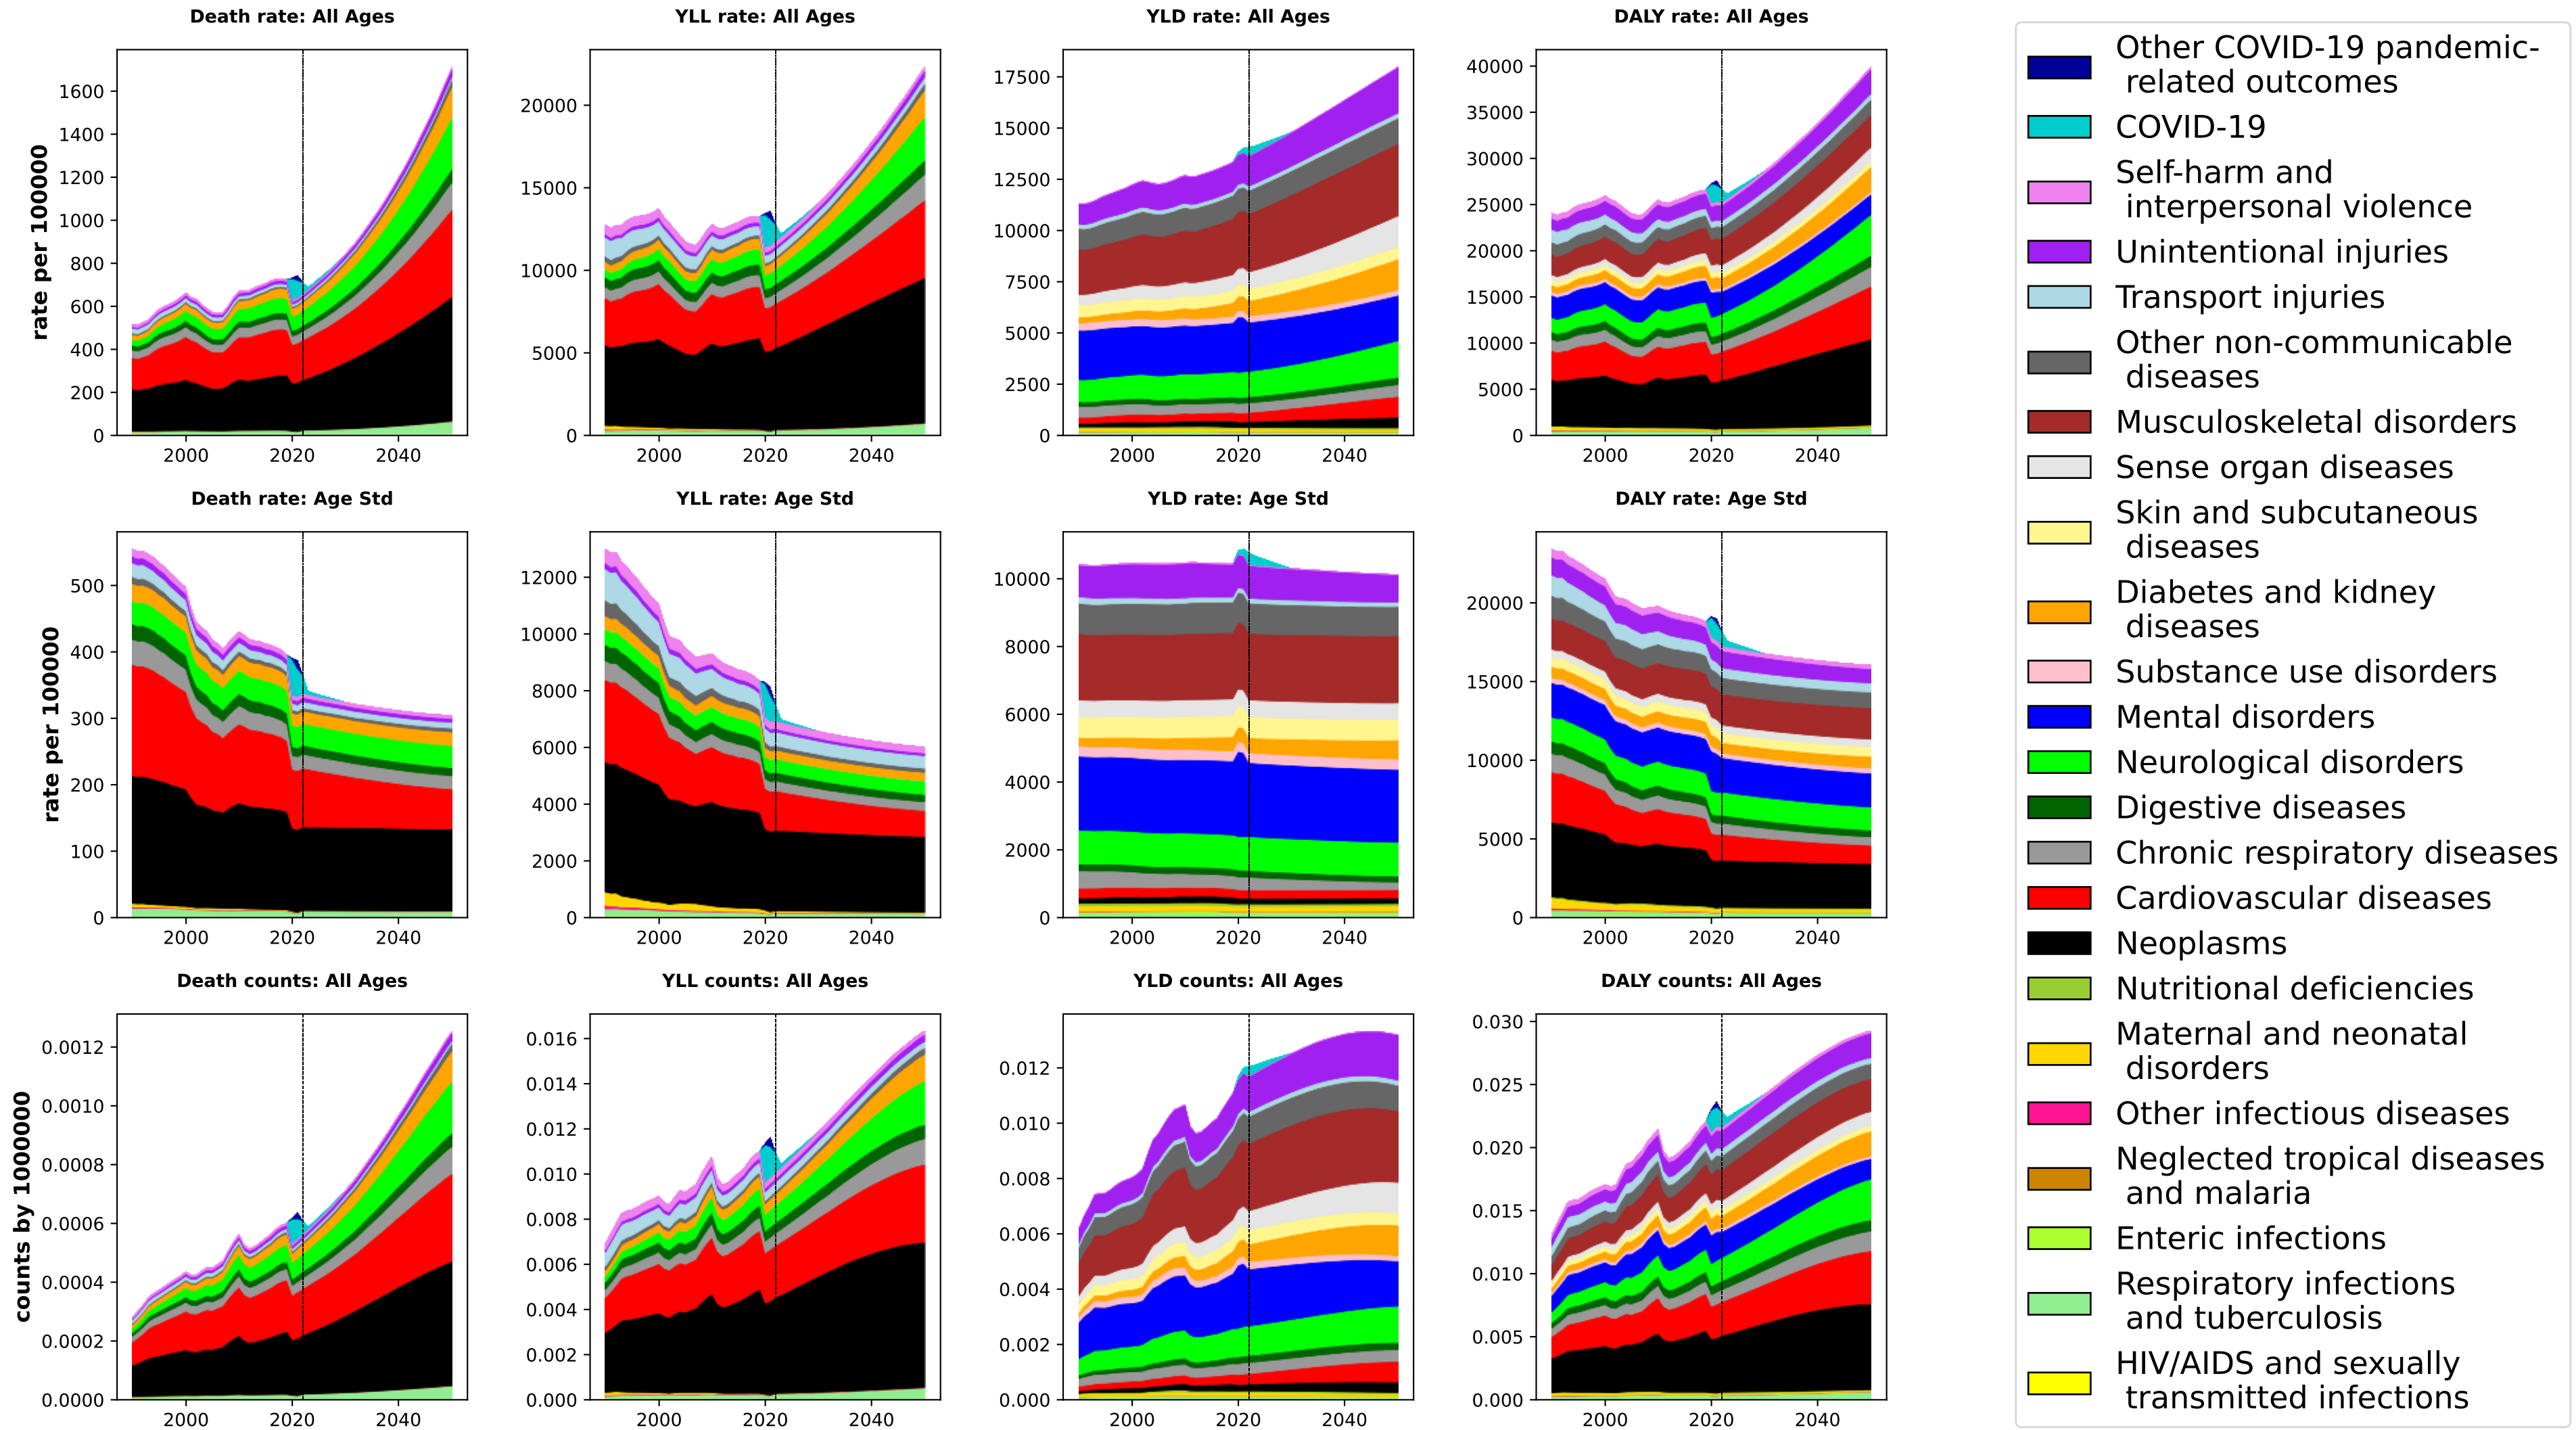

# Austria

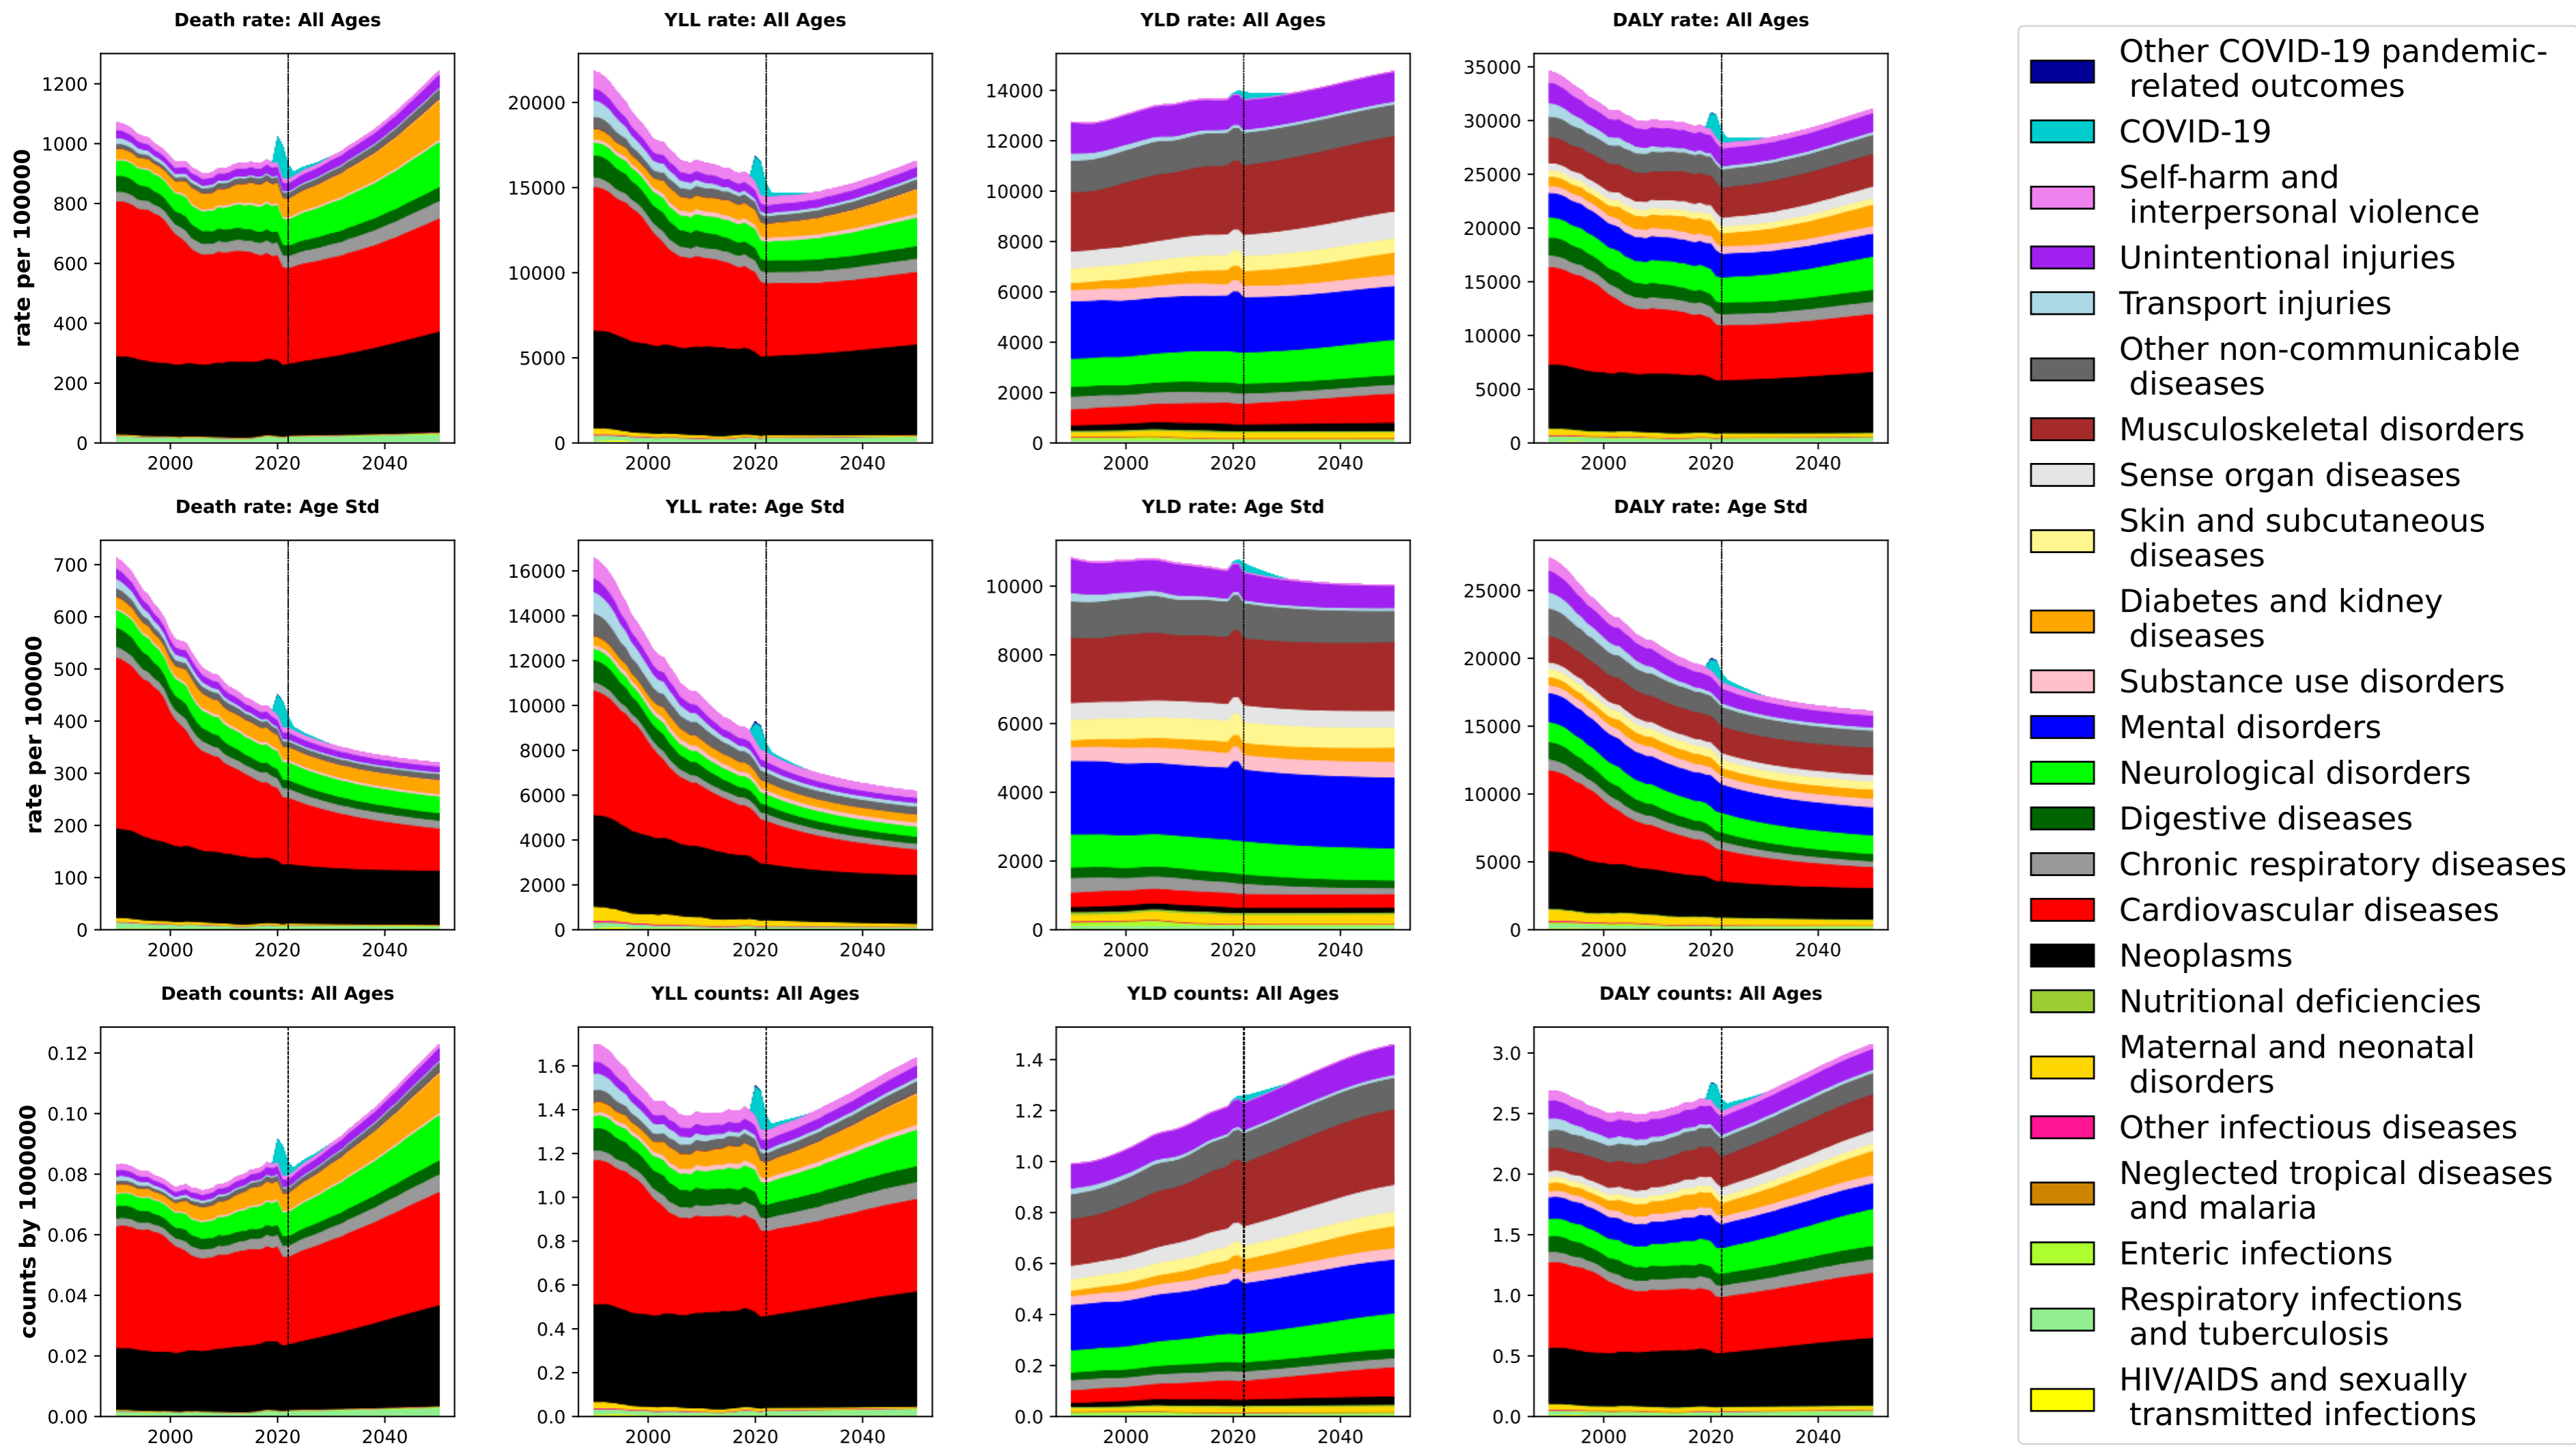

# Belgium

Supplemental Results Figure S6. Cause level 2 area plots for 4 burden measures for reference scenario by location, 1990-2050

754

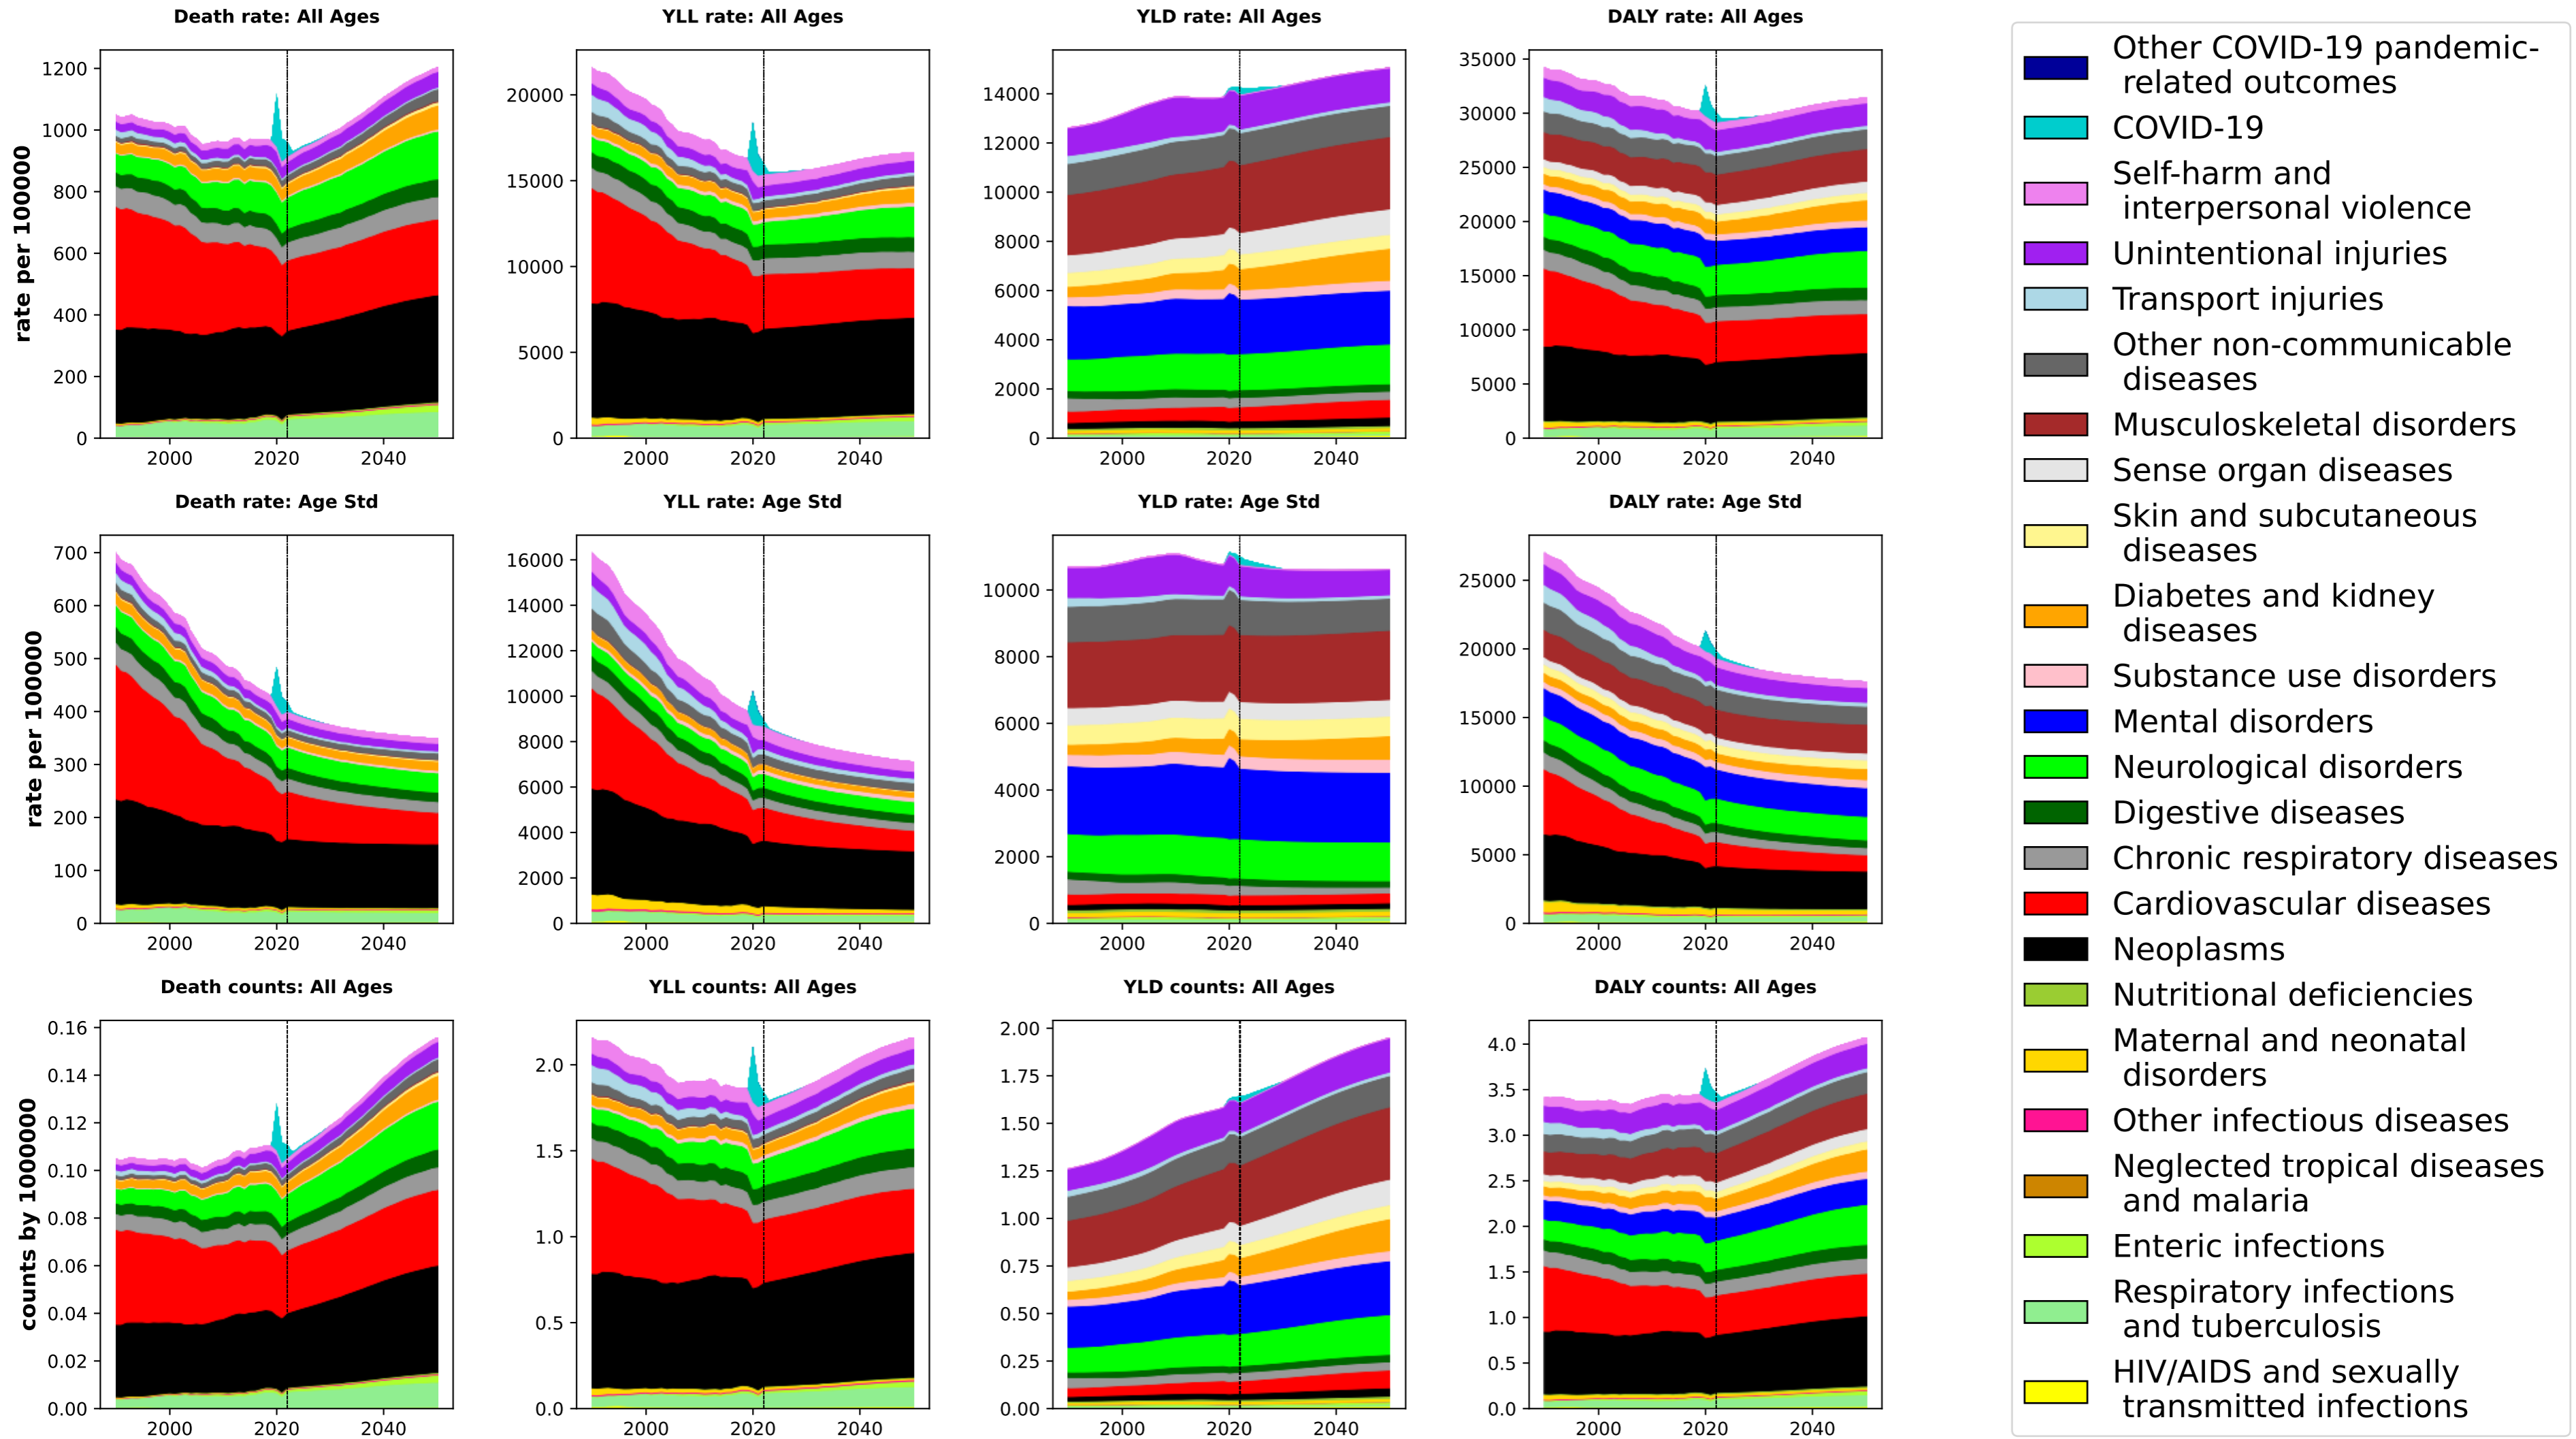

# Cyprus

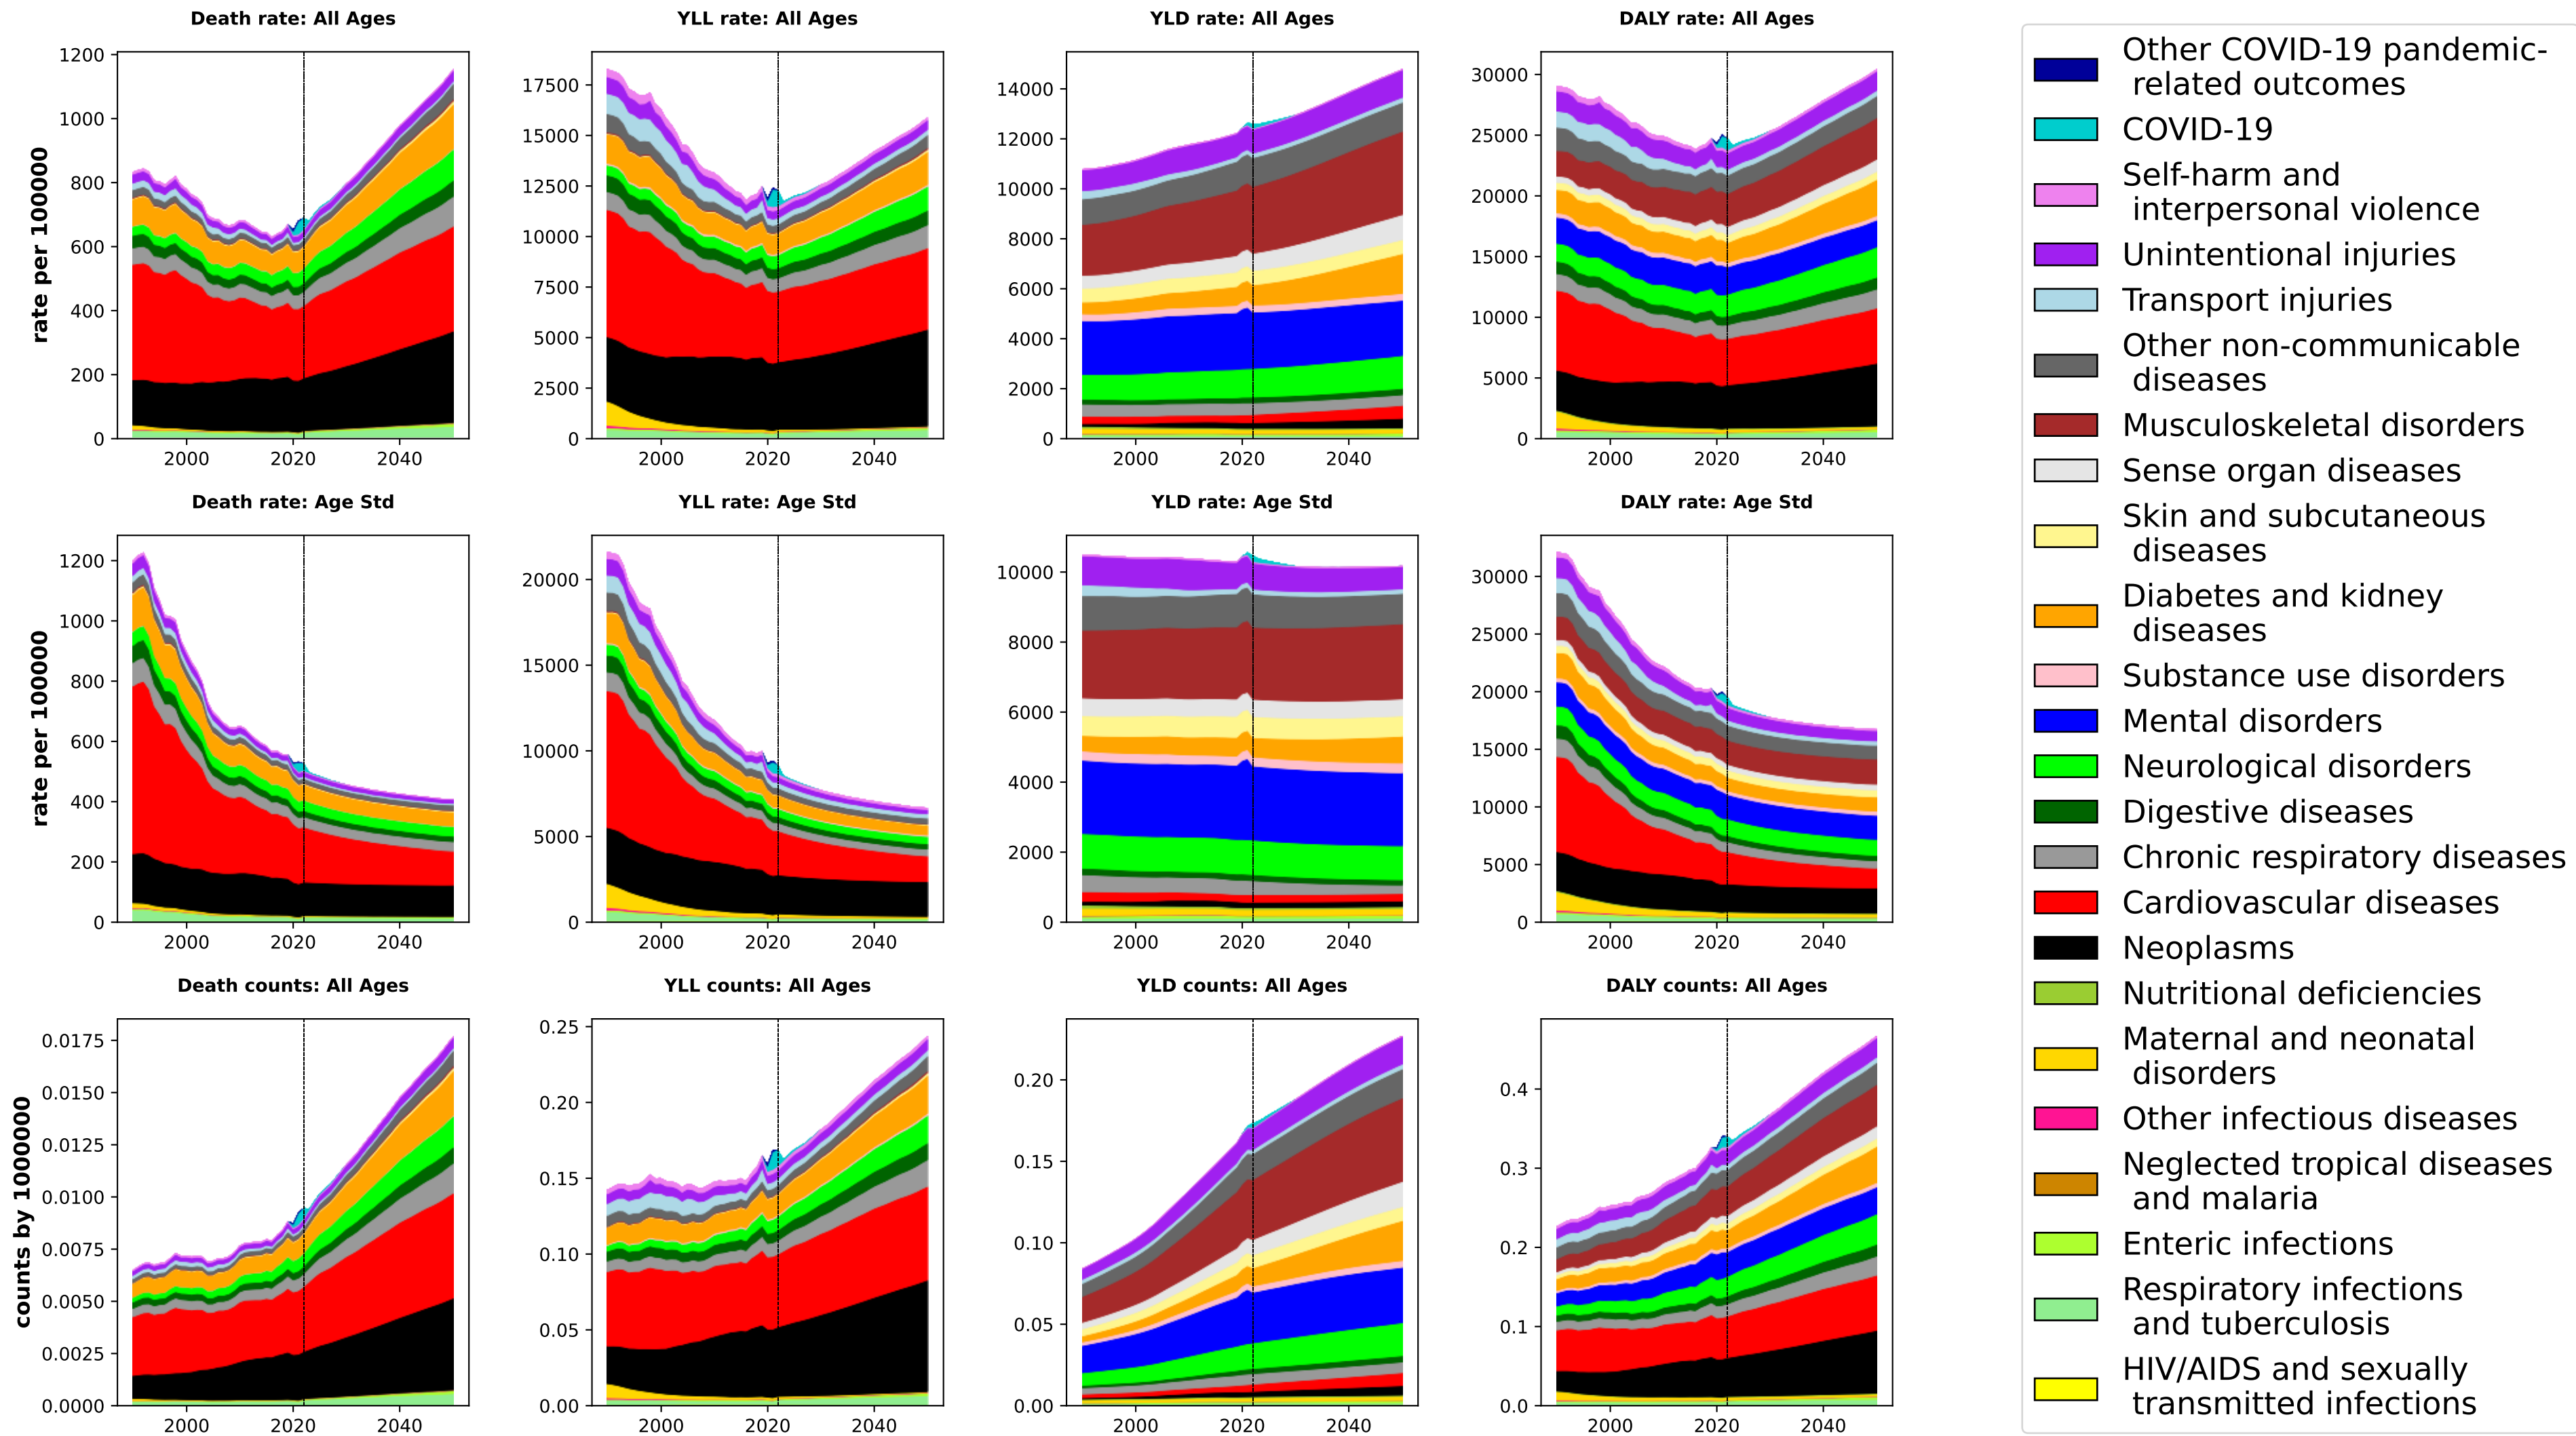

# Denmark

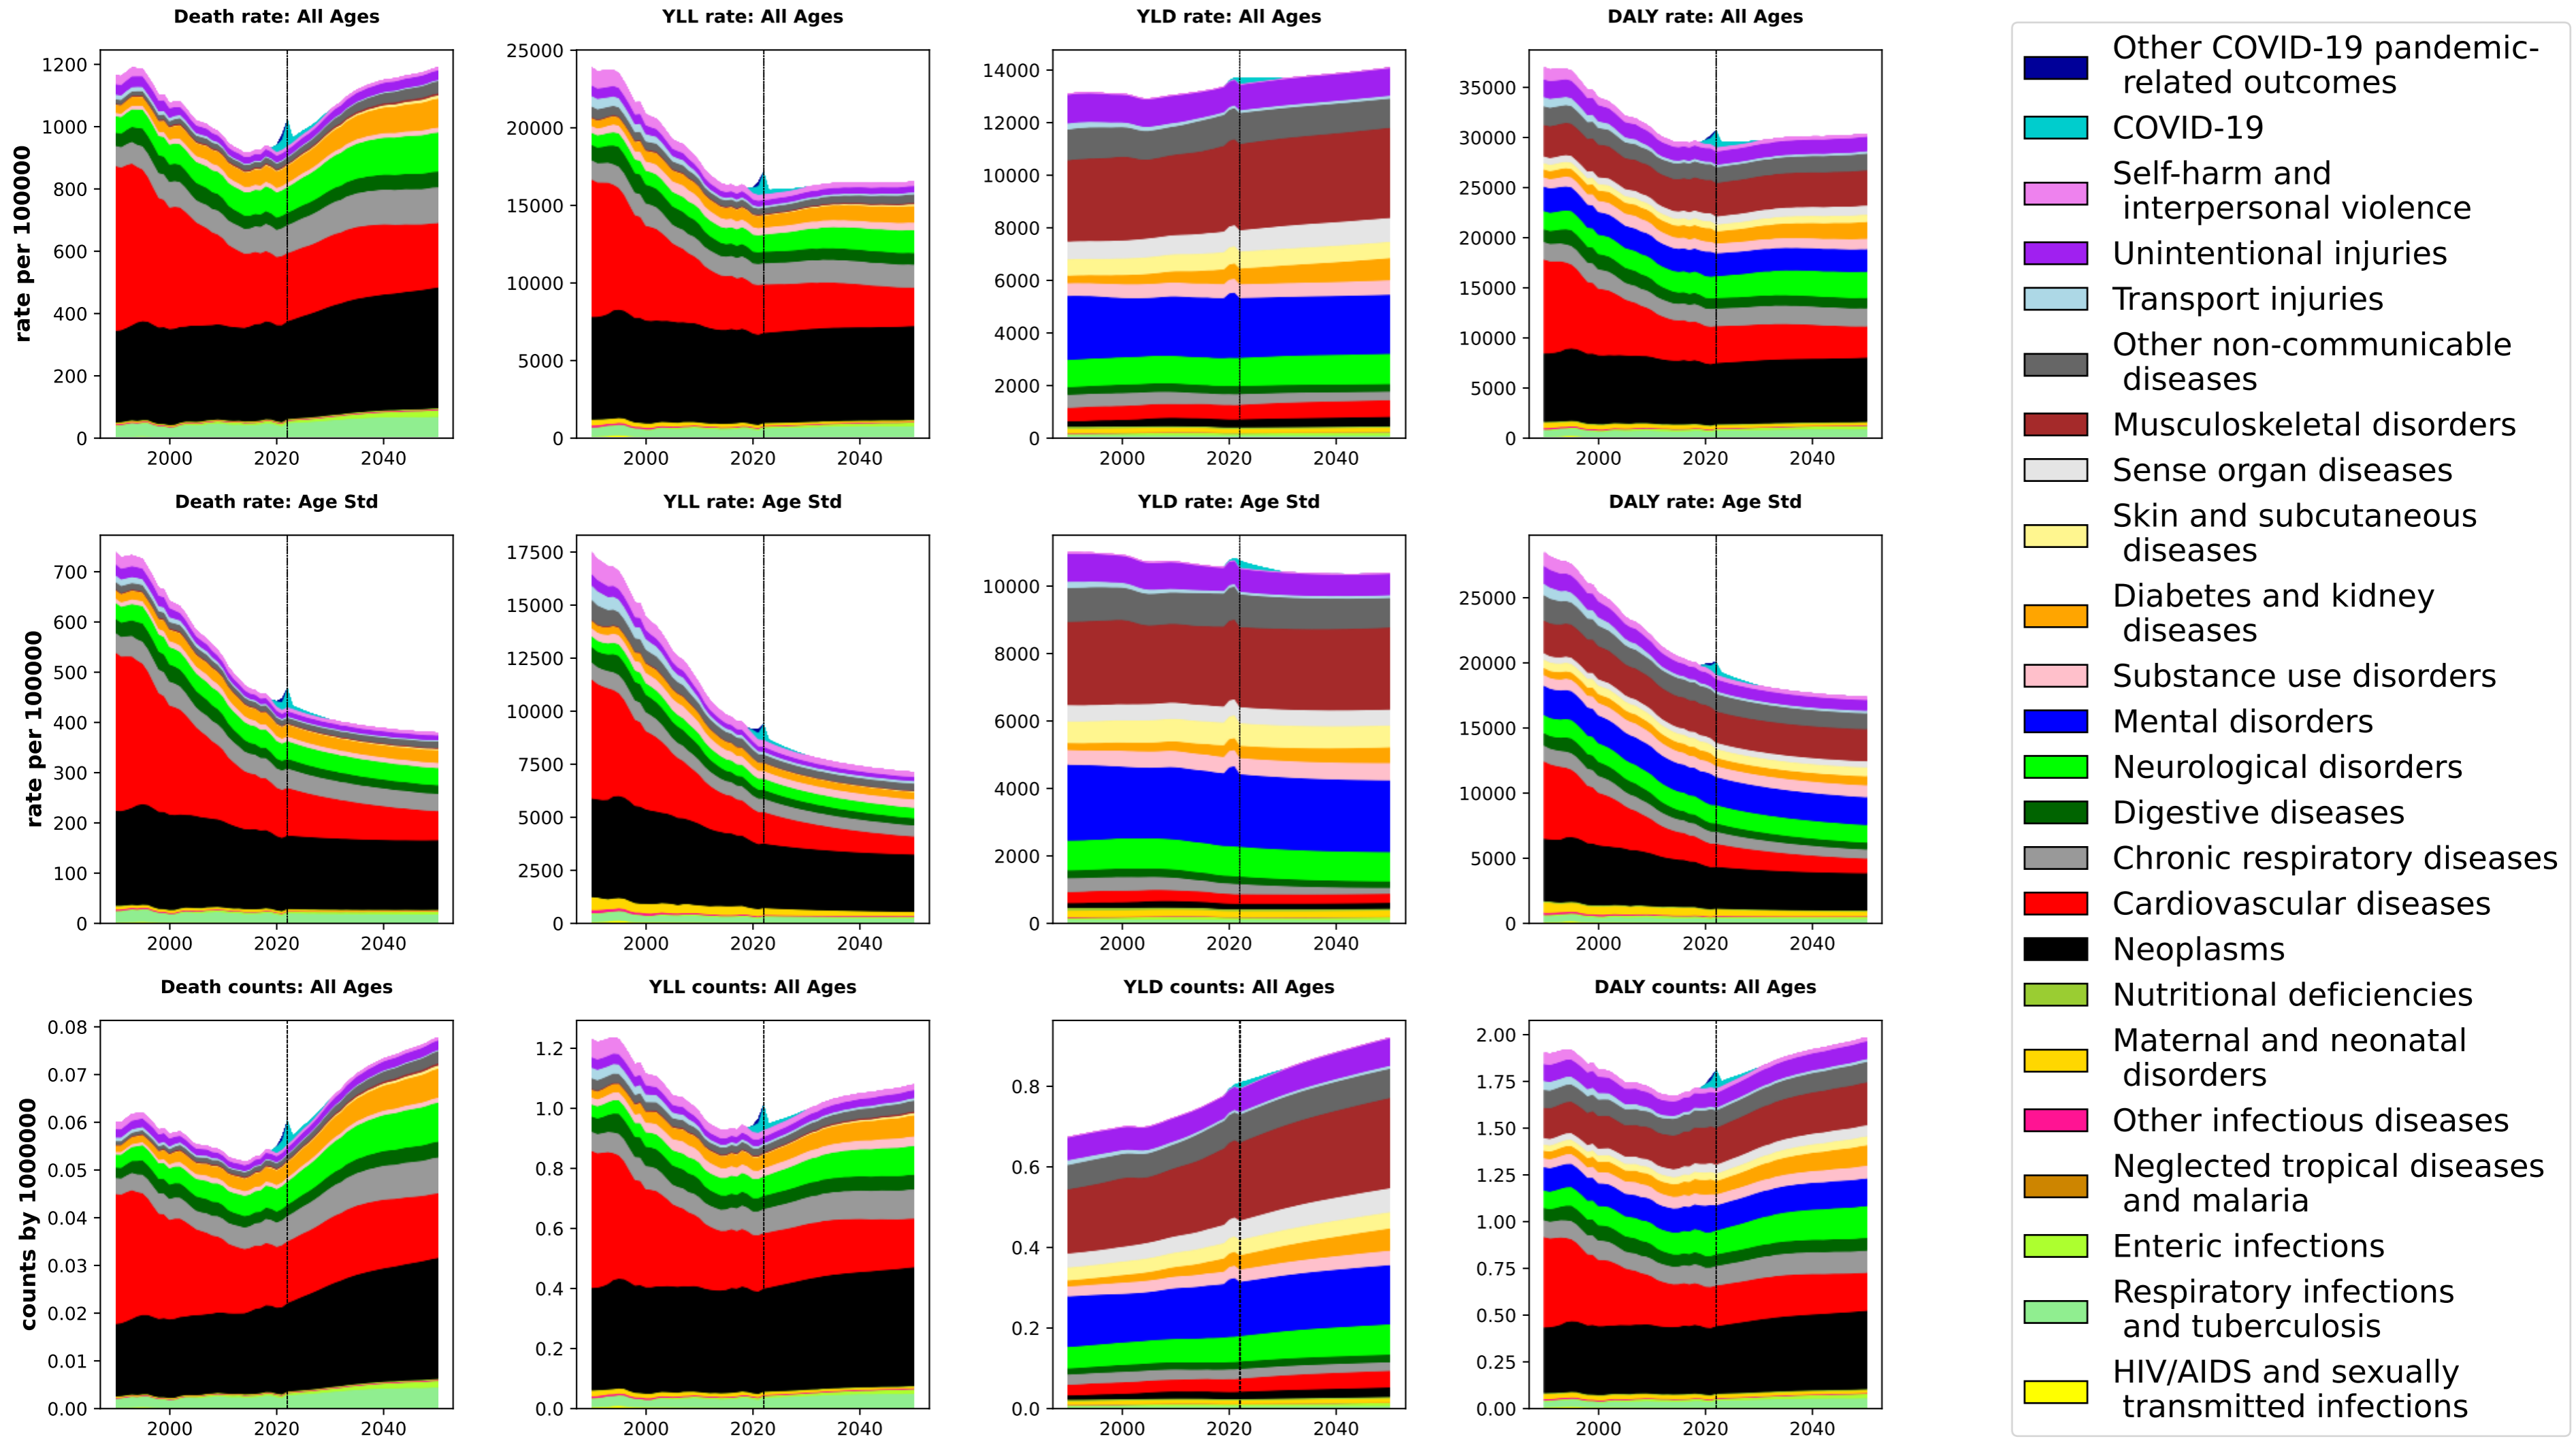

# Finland

Supplemental Results Figure S6. Cause level 2 area plots for 4 burden measures for reference scenario by location, 1990-2050

757

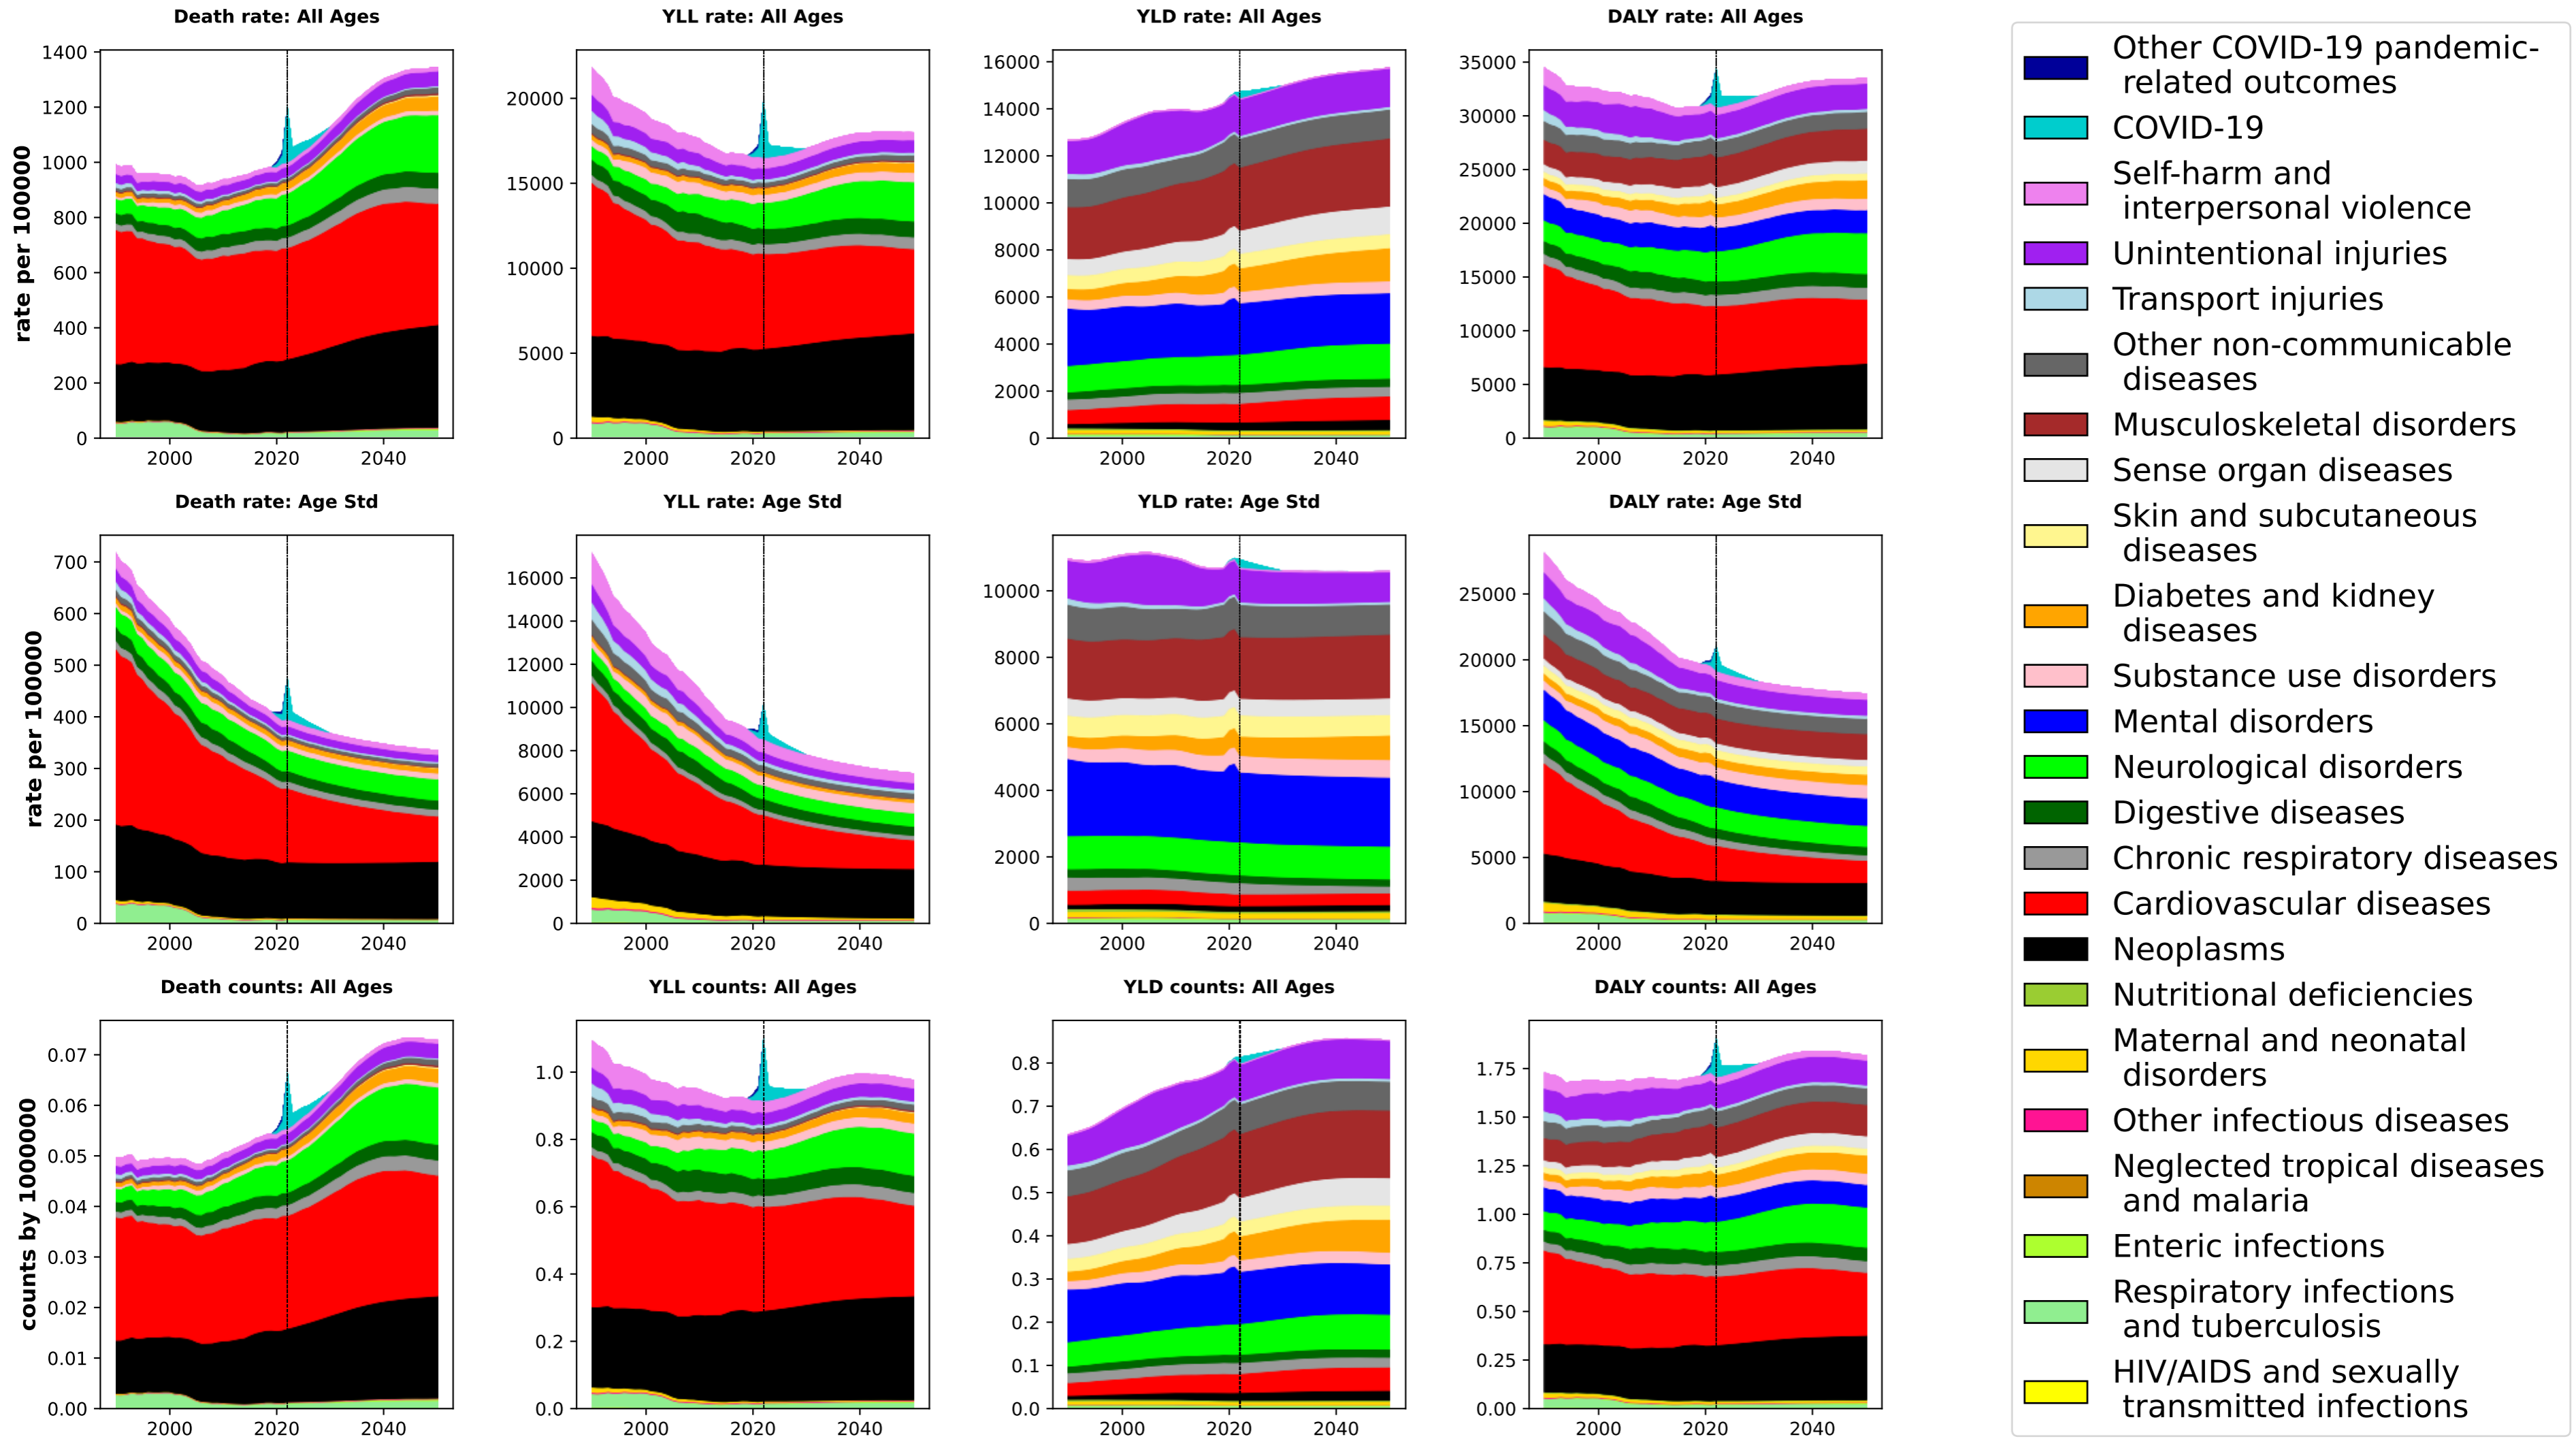

# France

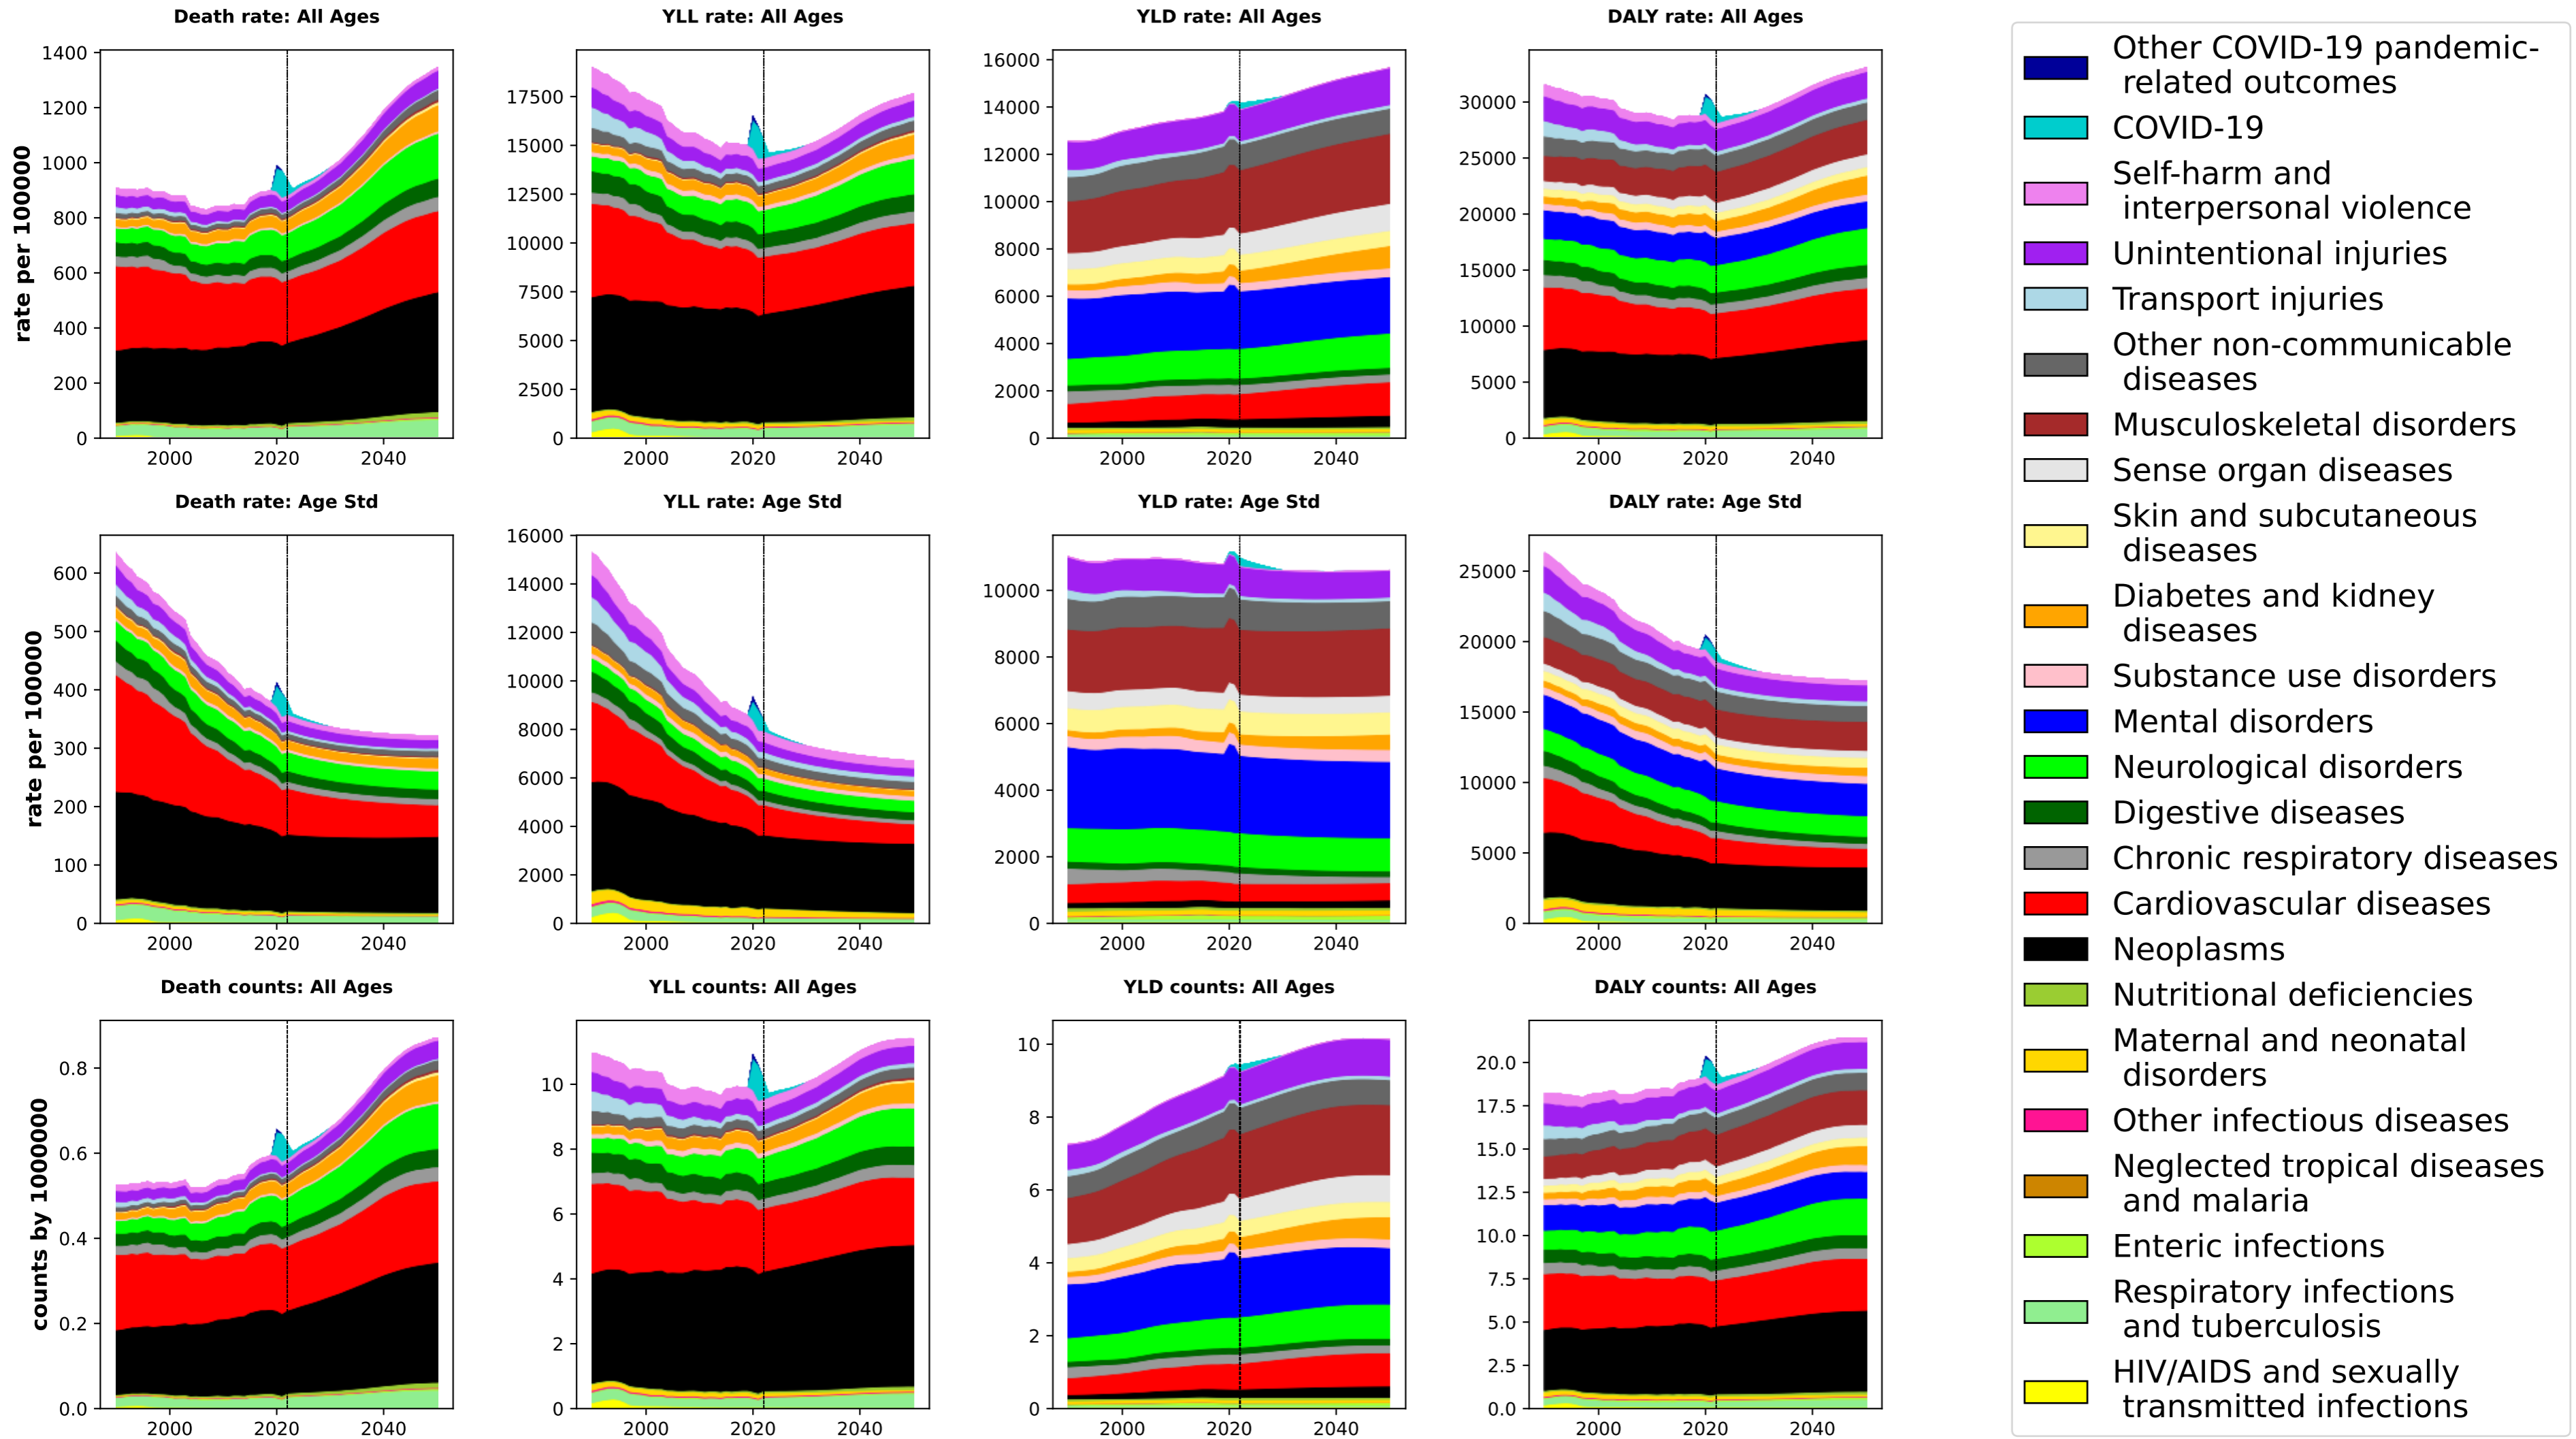

# Germany

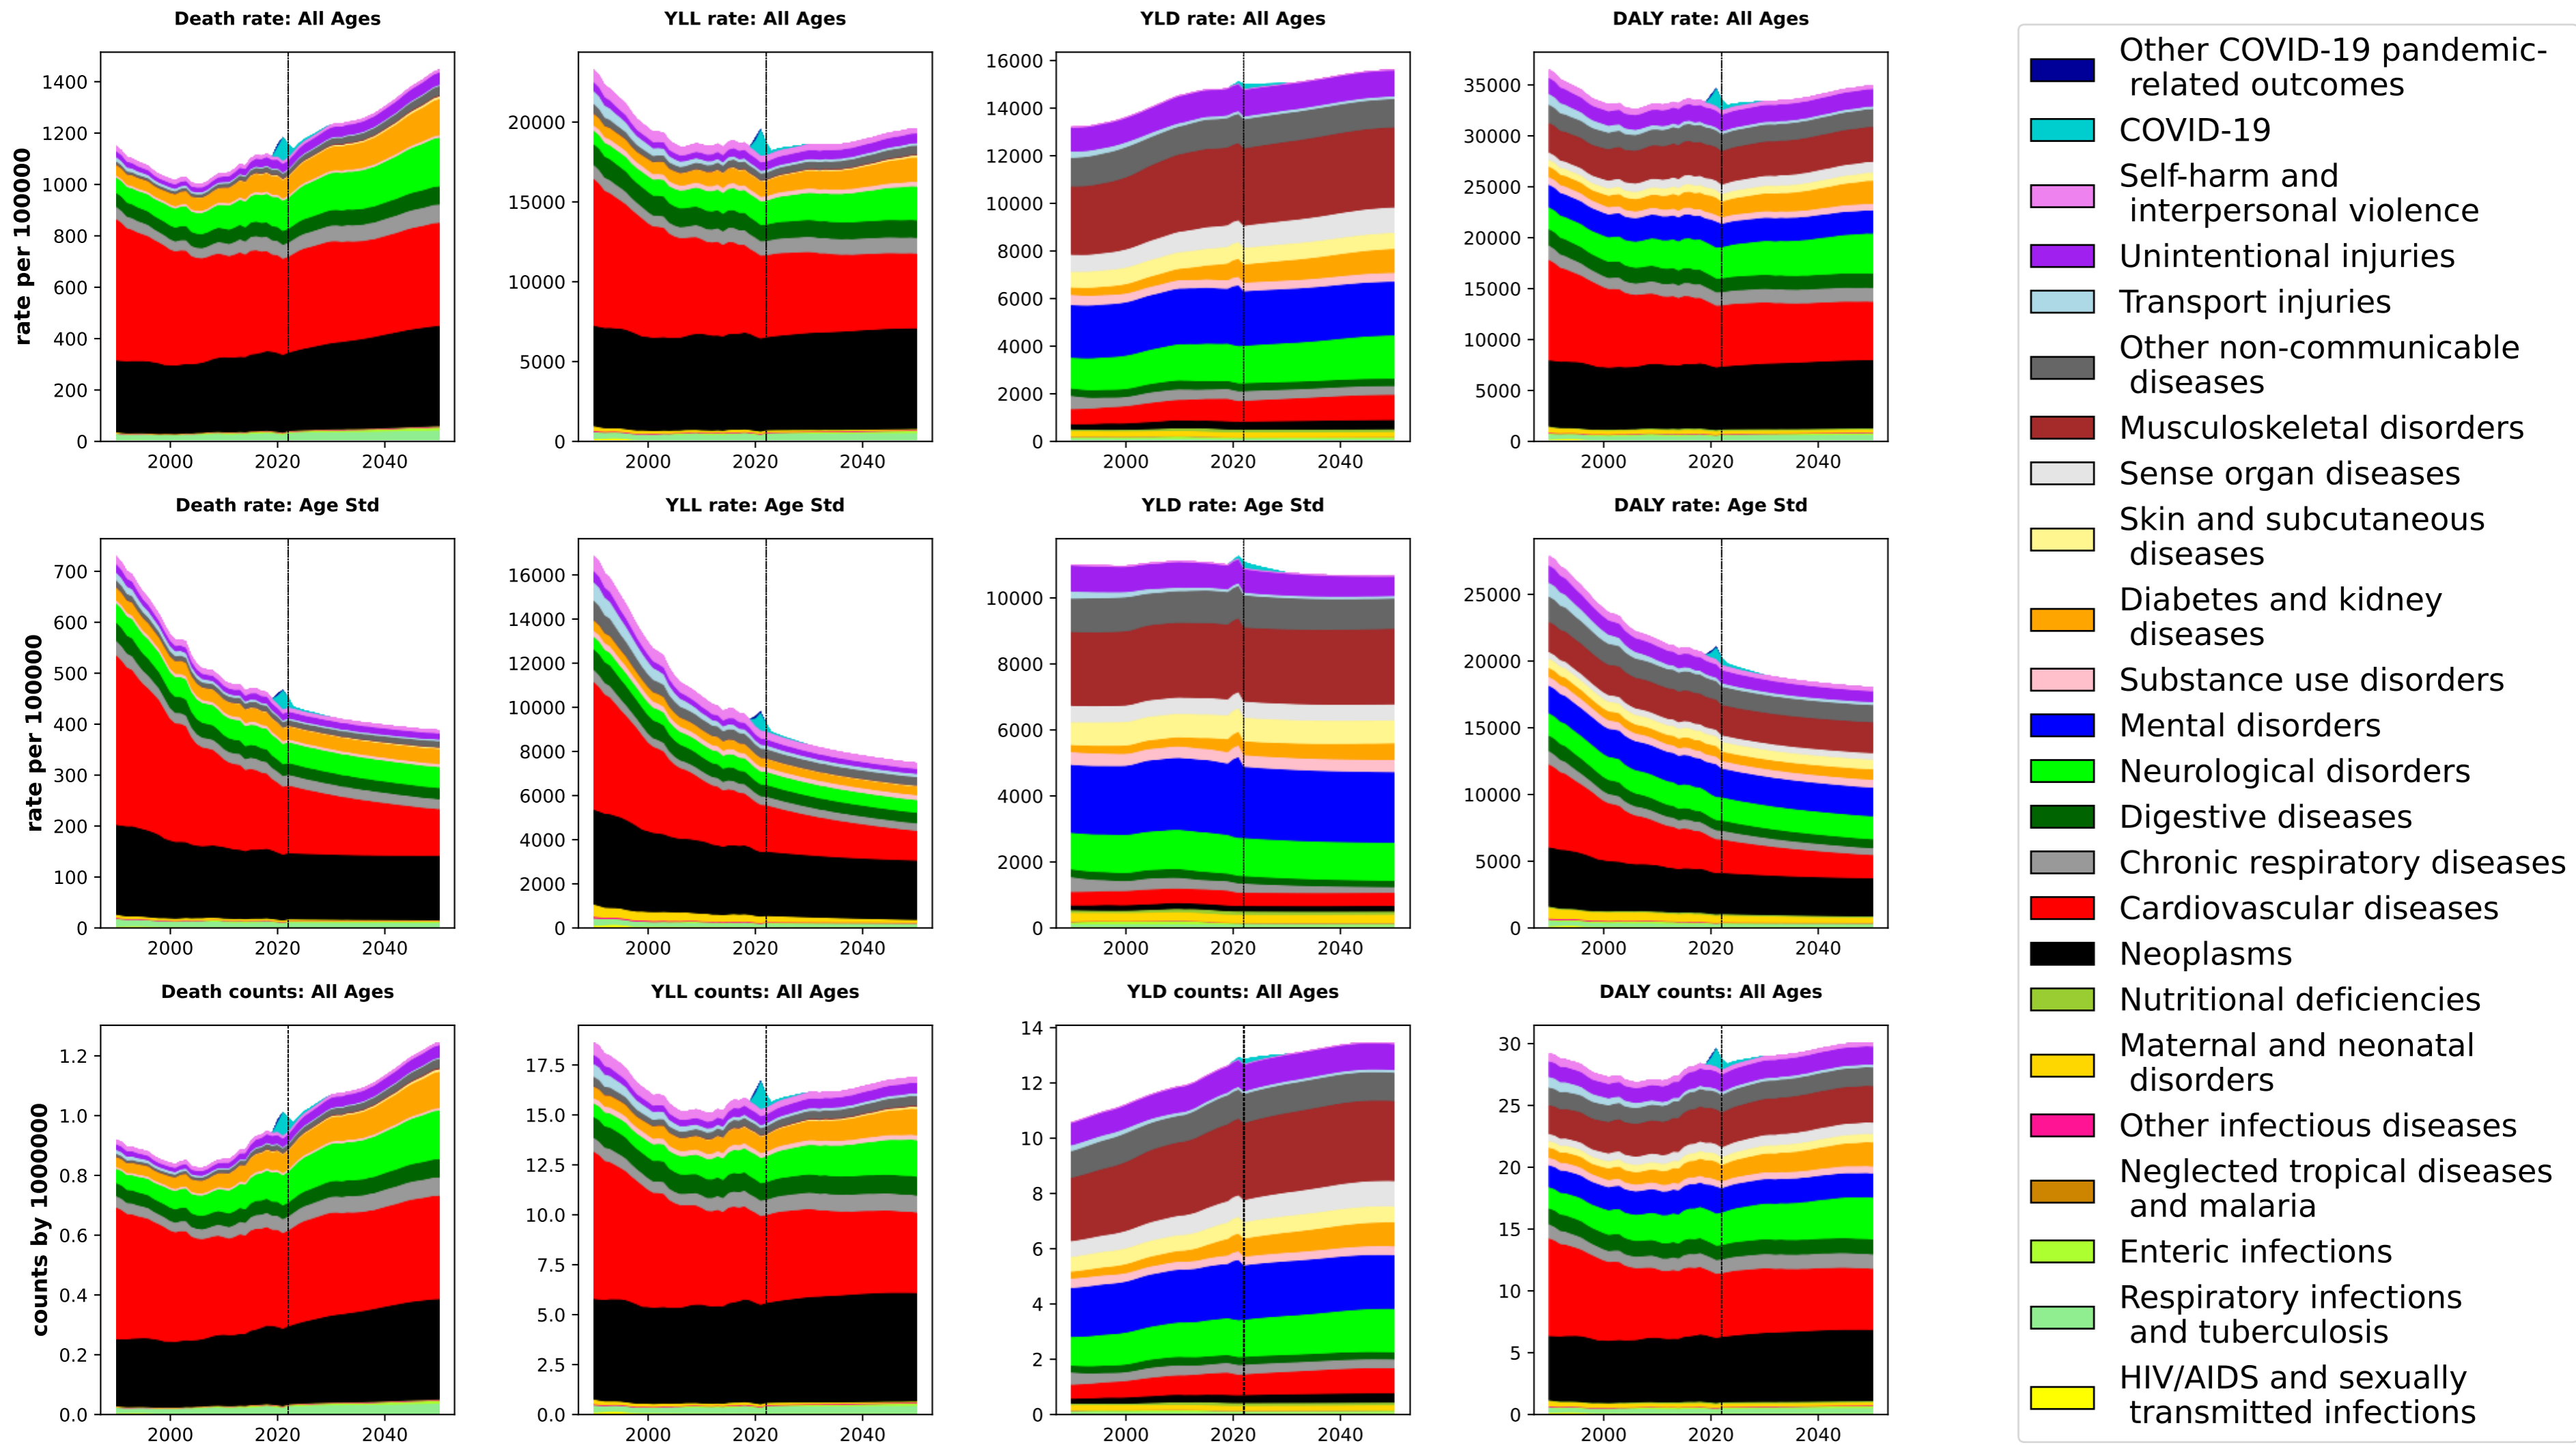



# Greece

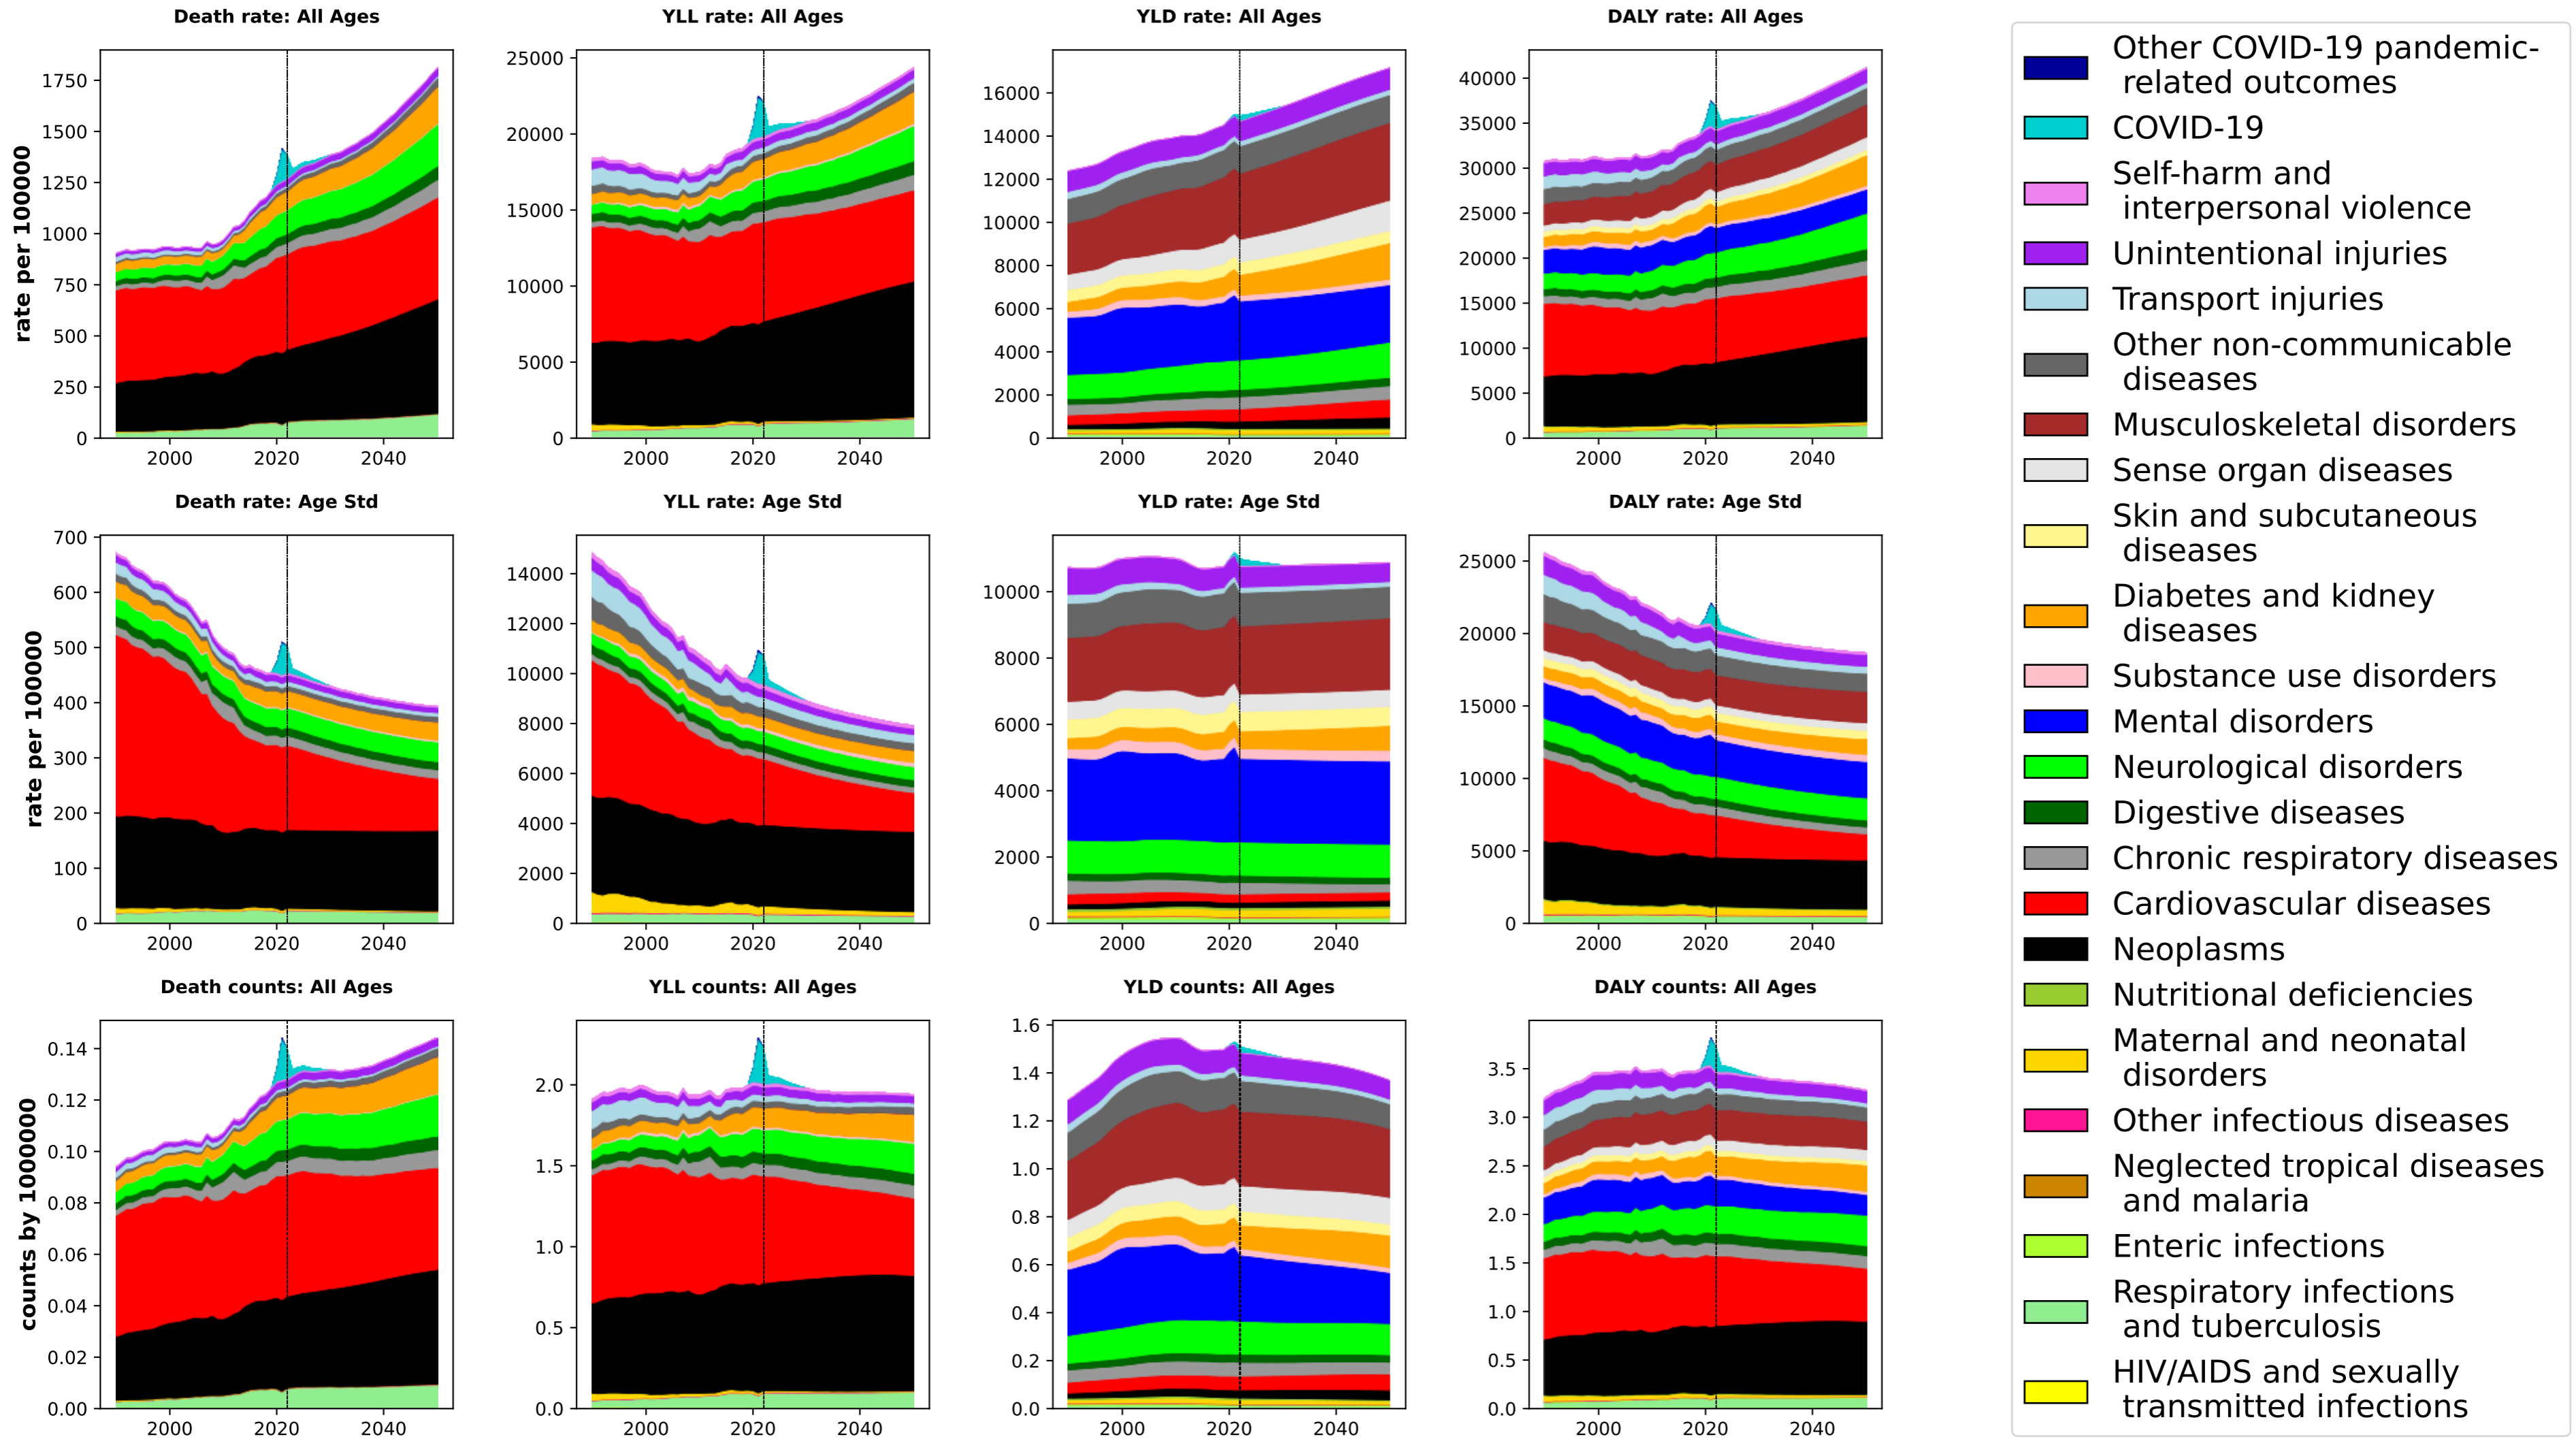

# Iceland

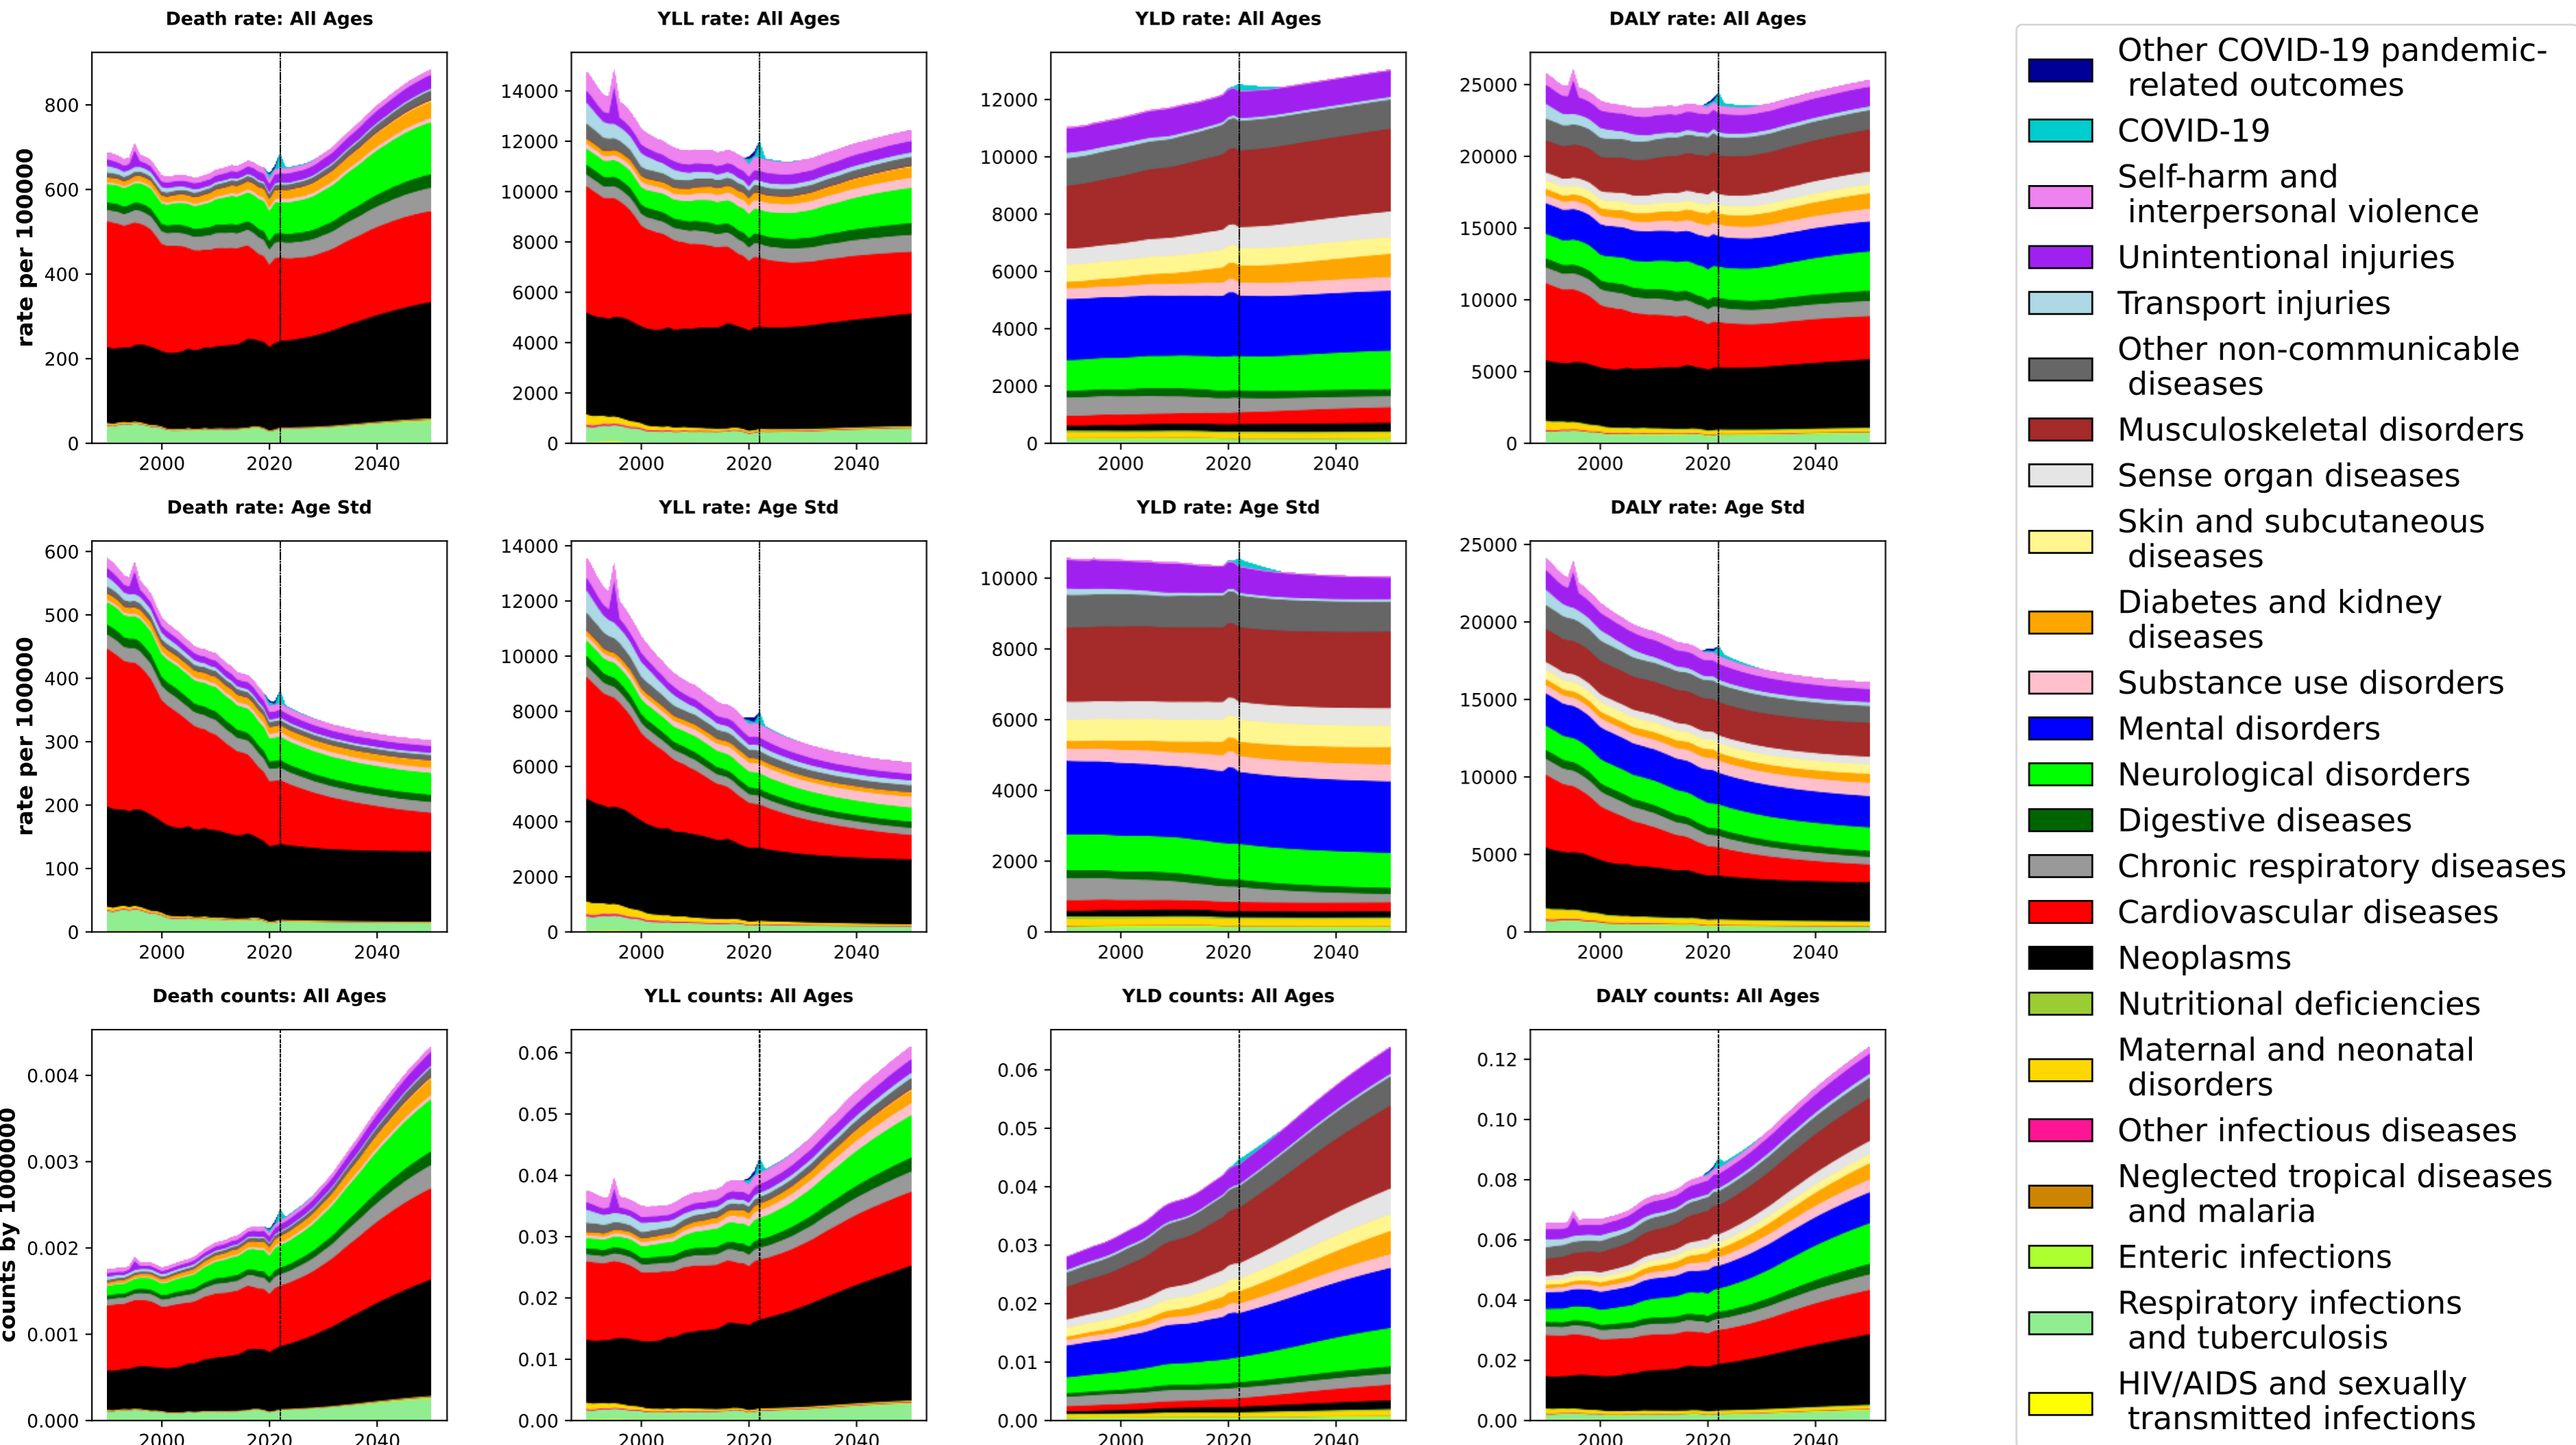

# Ireland

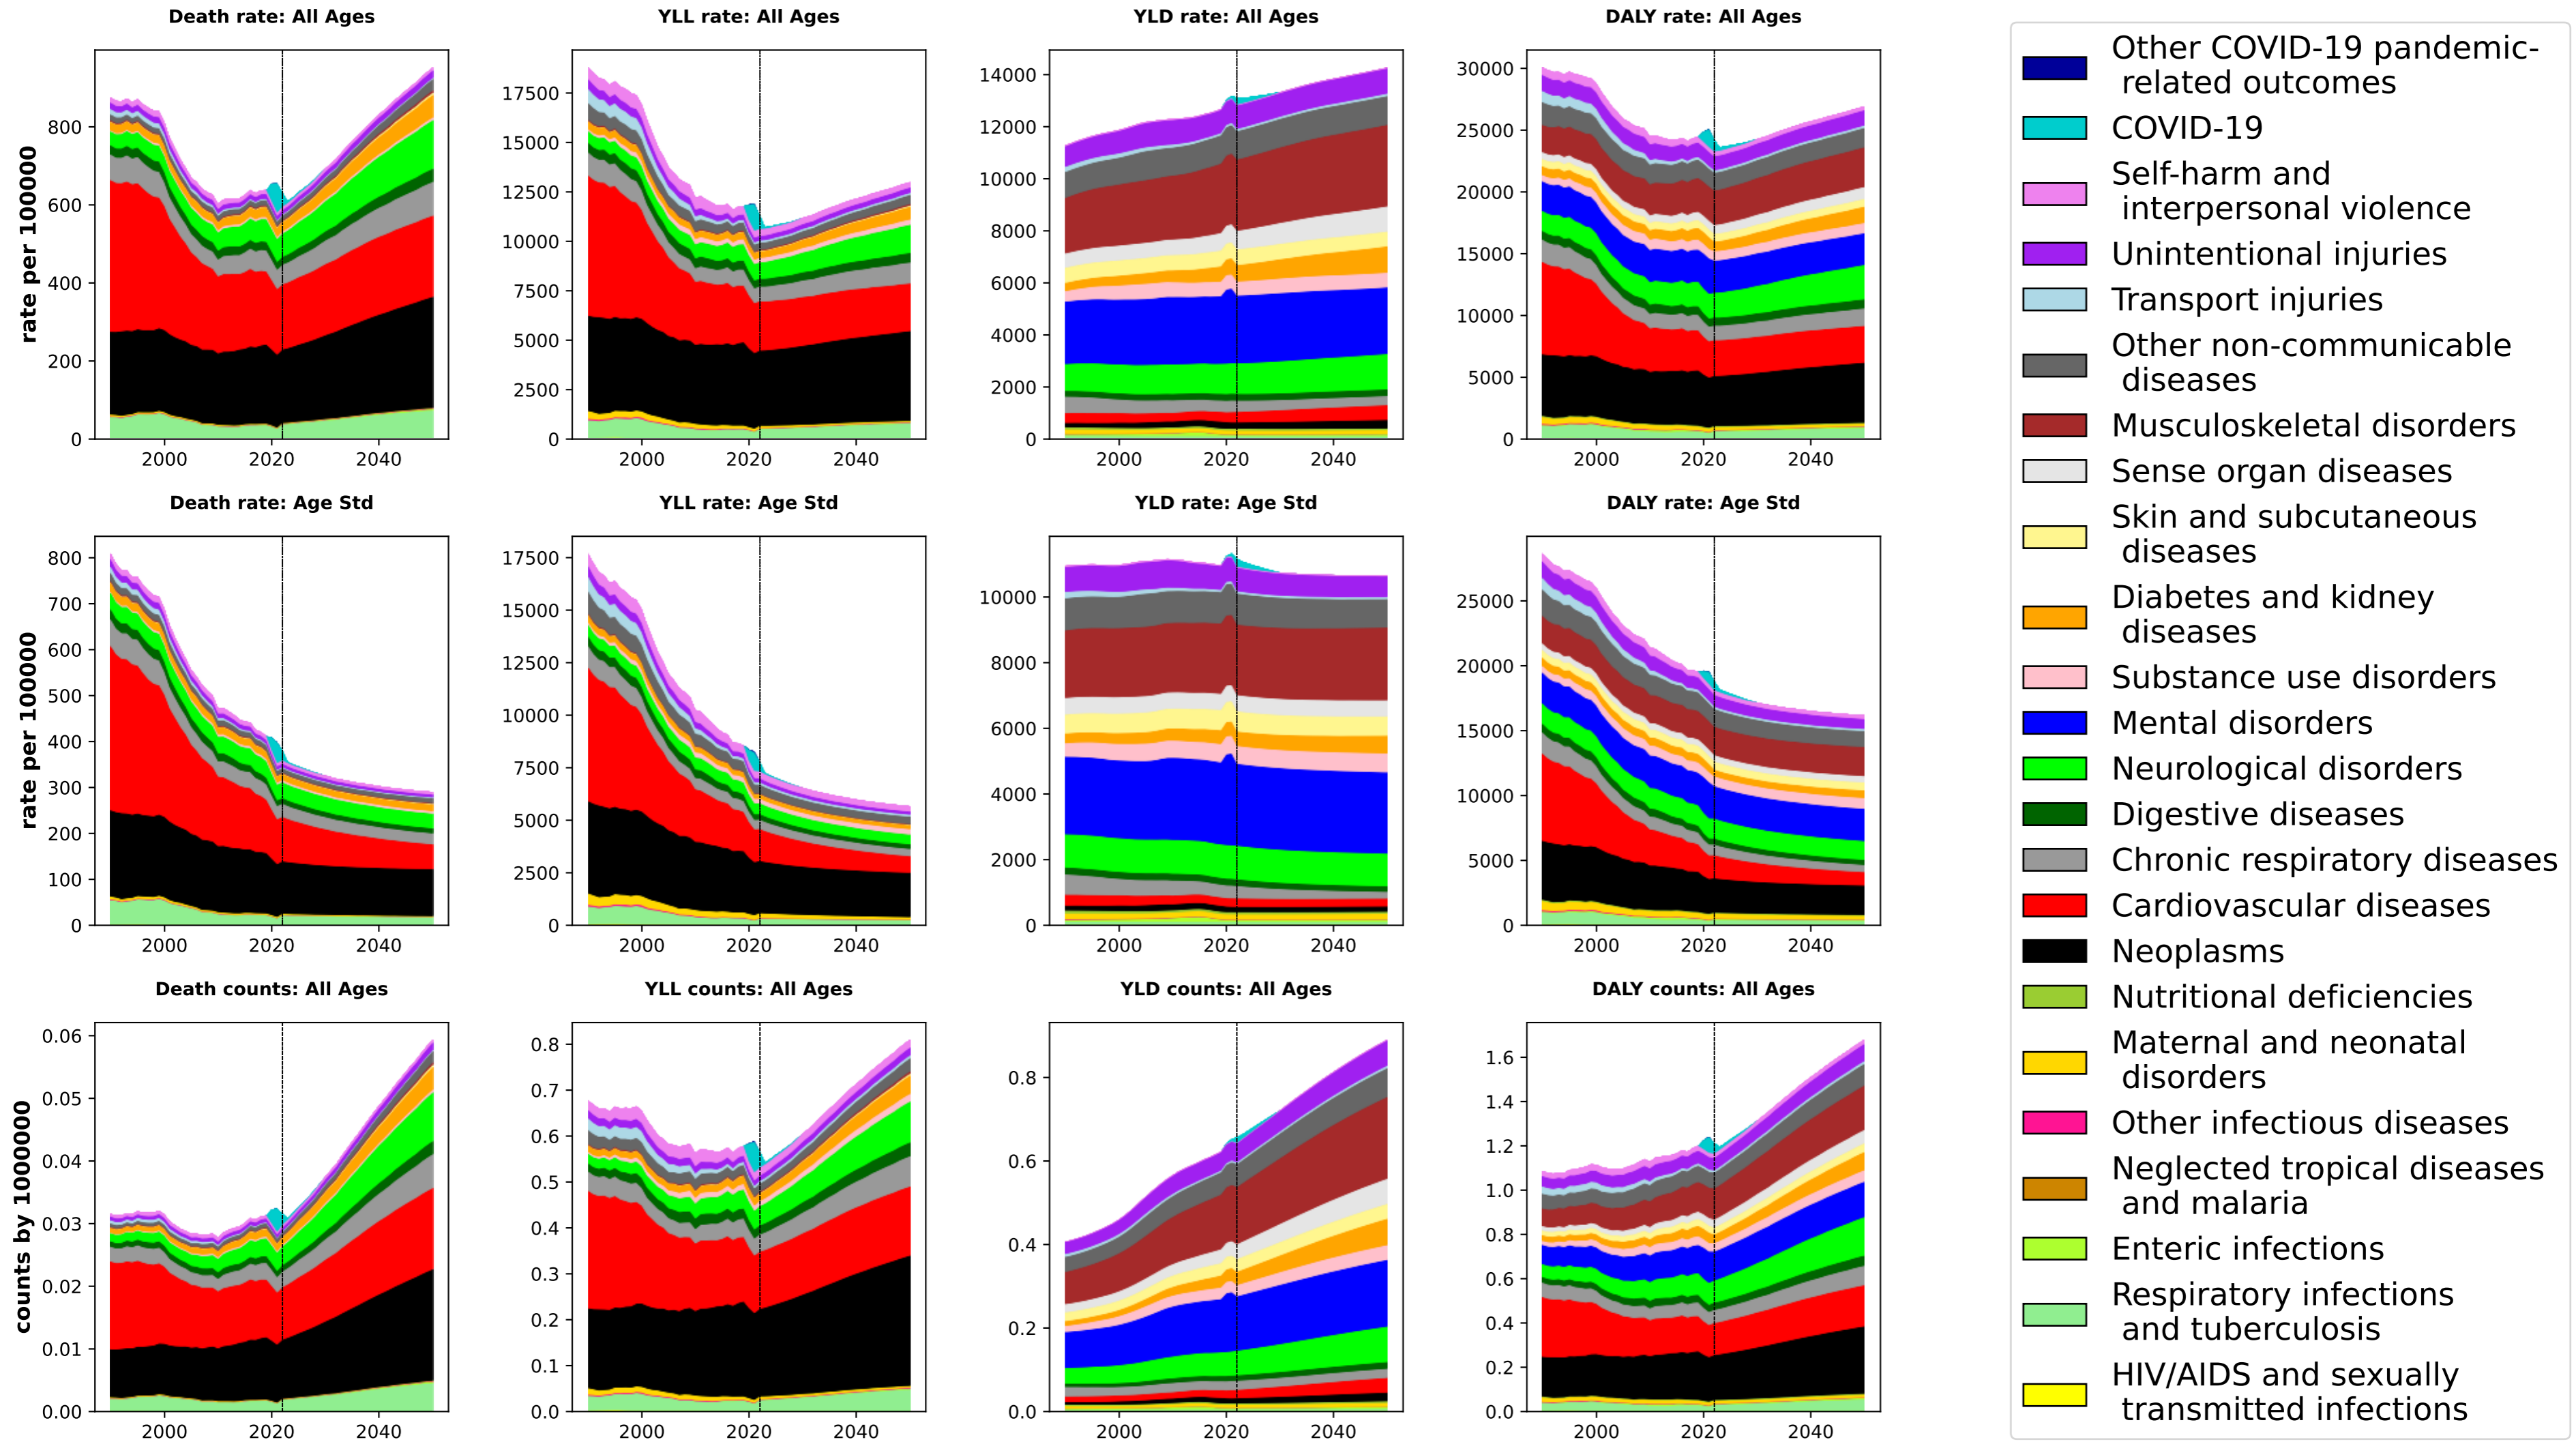

# Israel

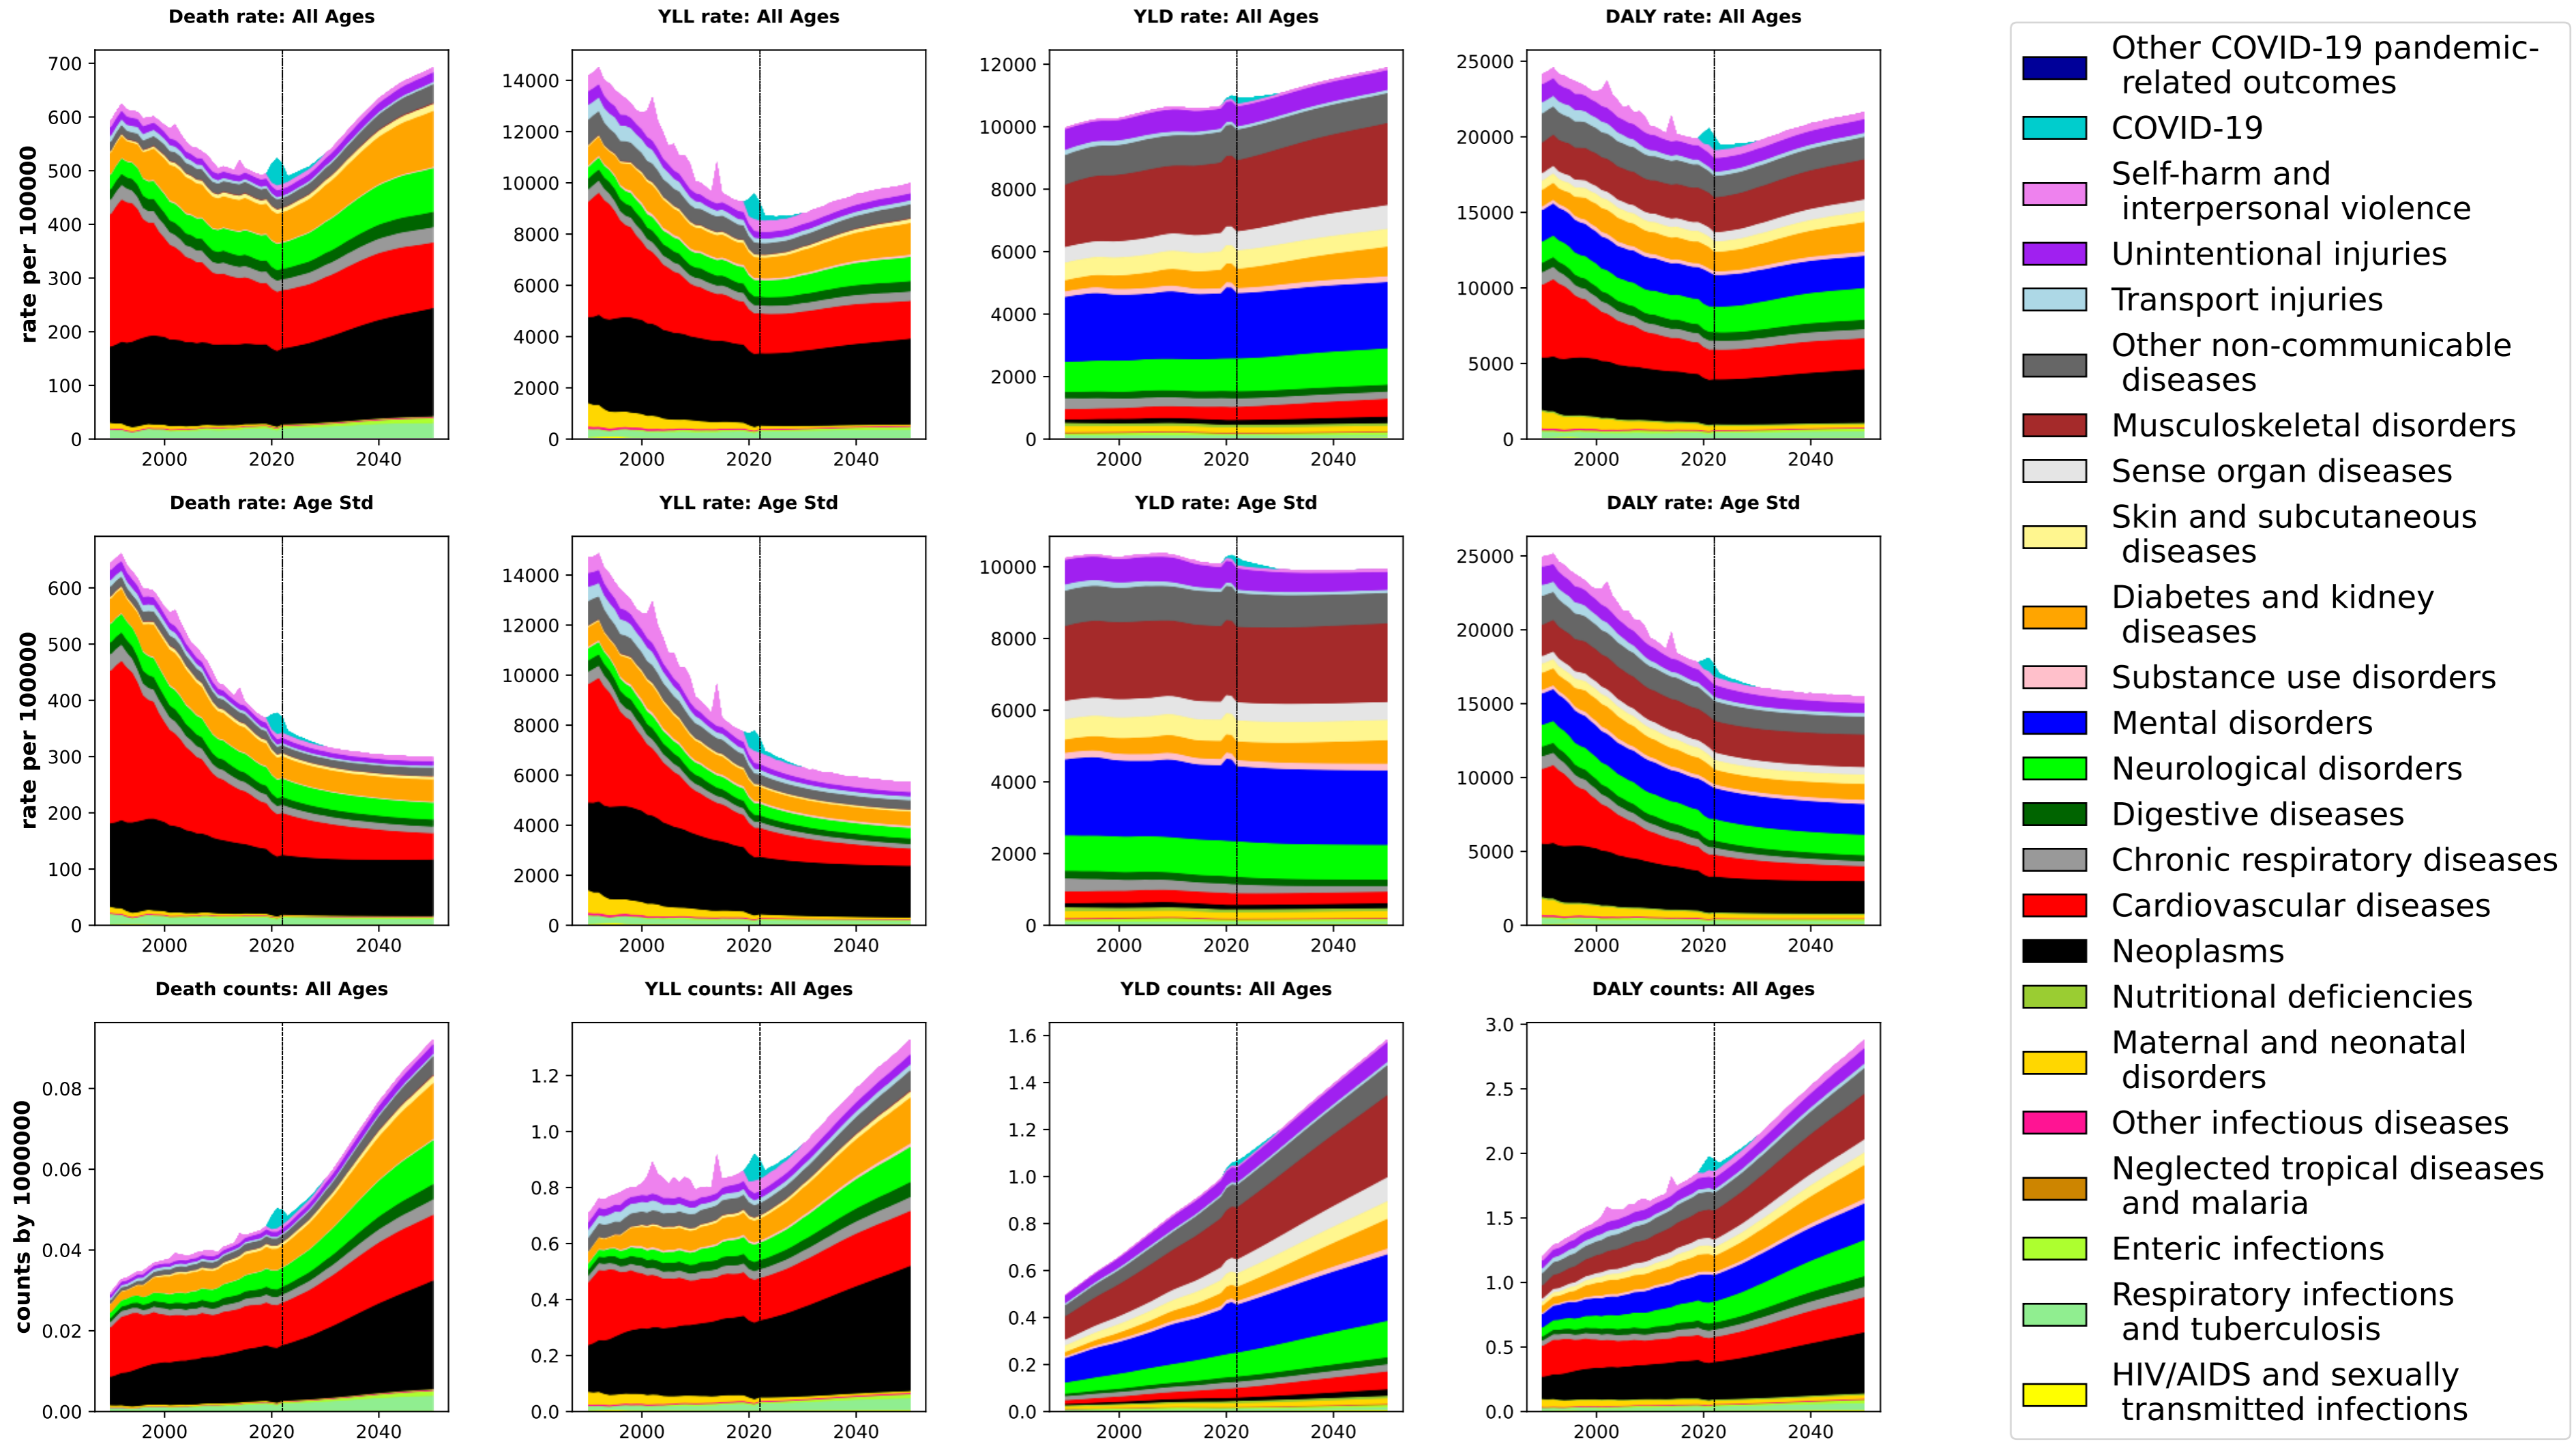

# Italy

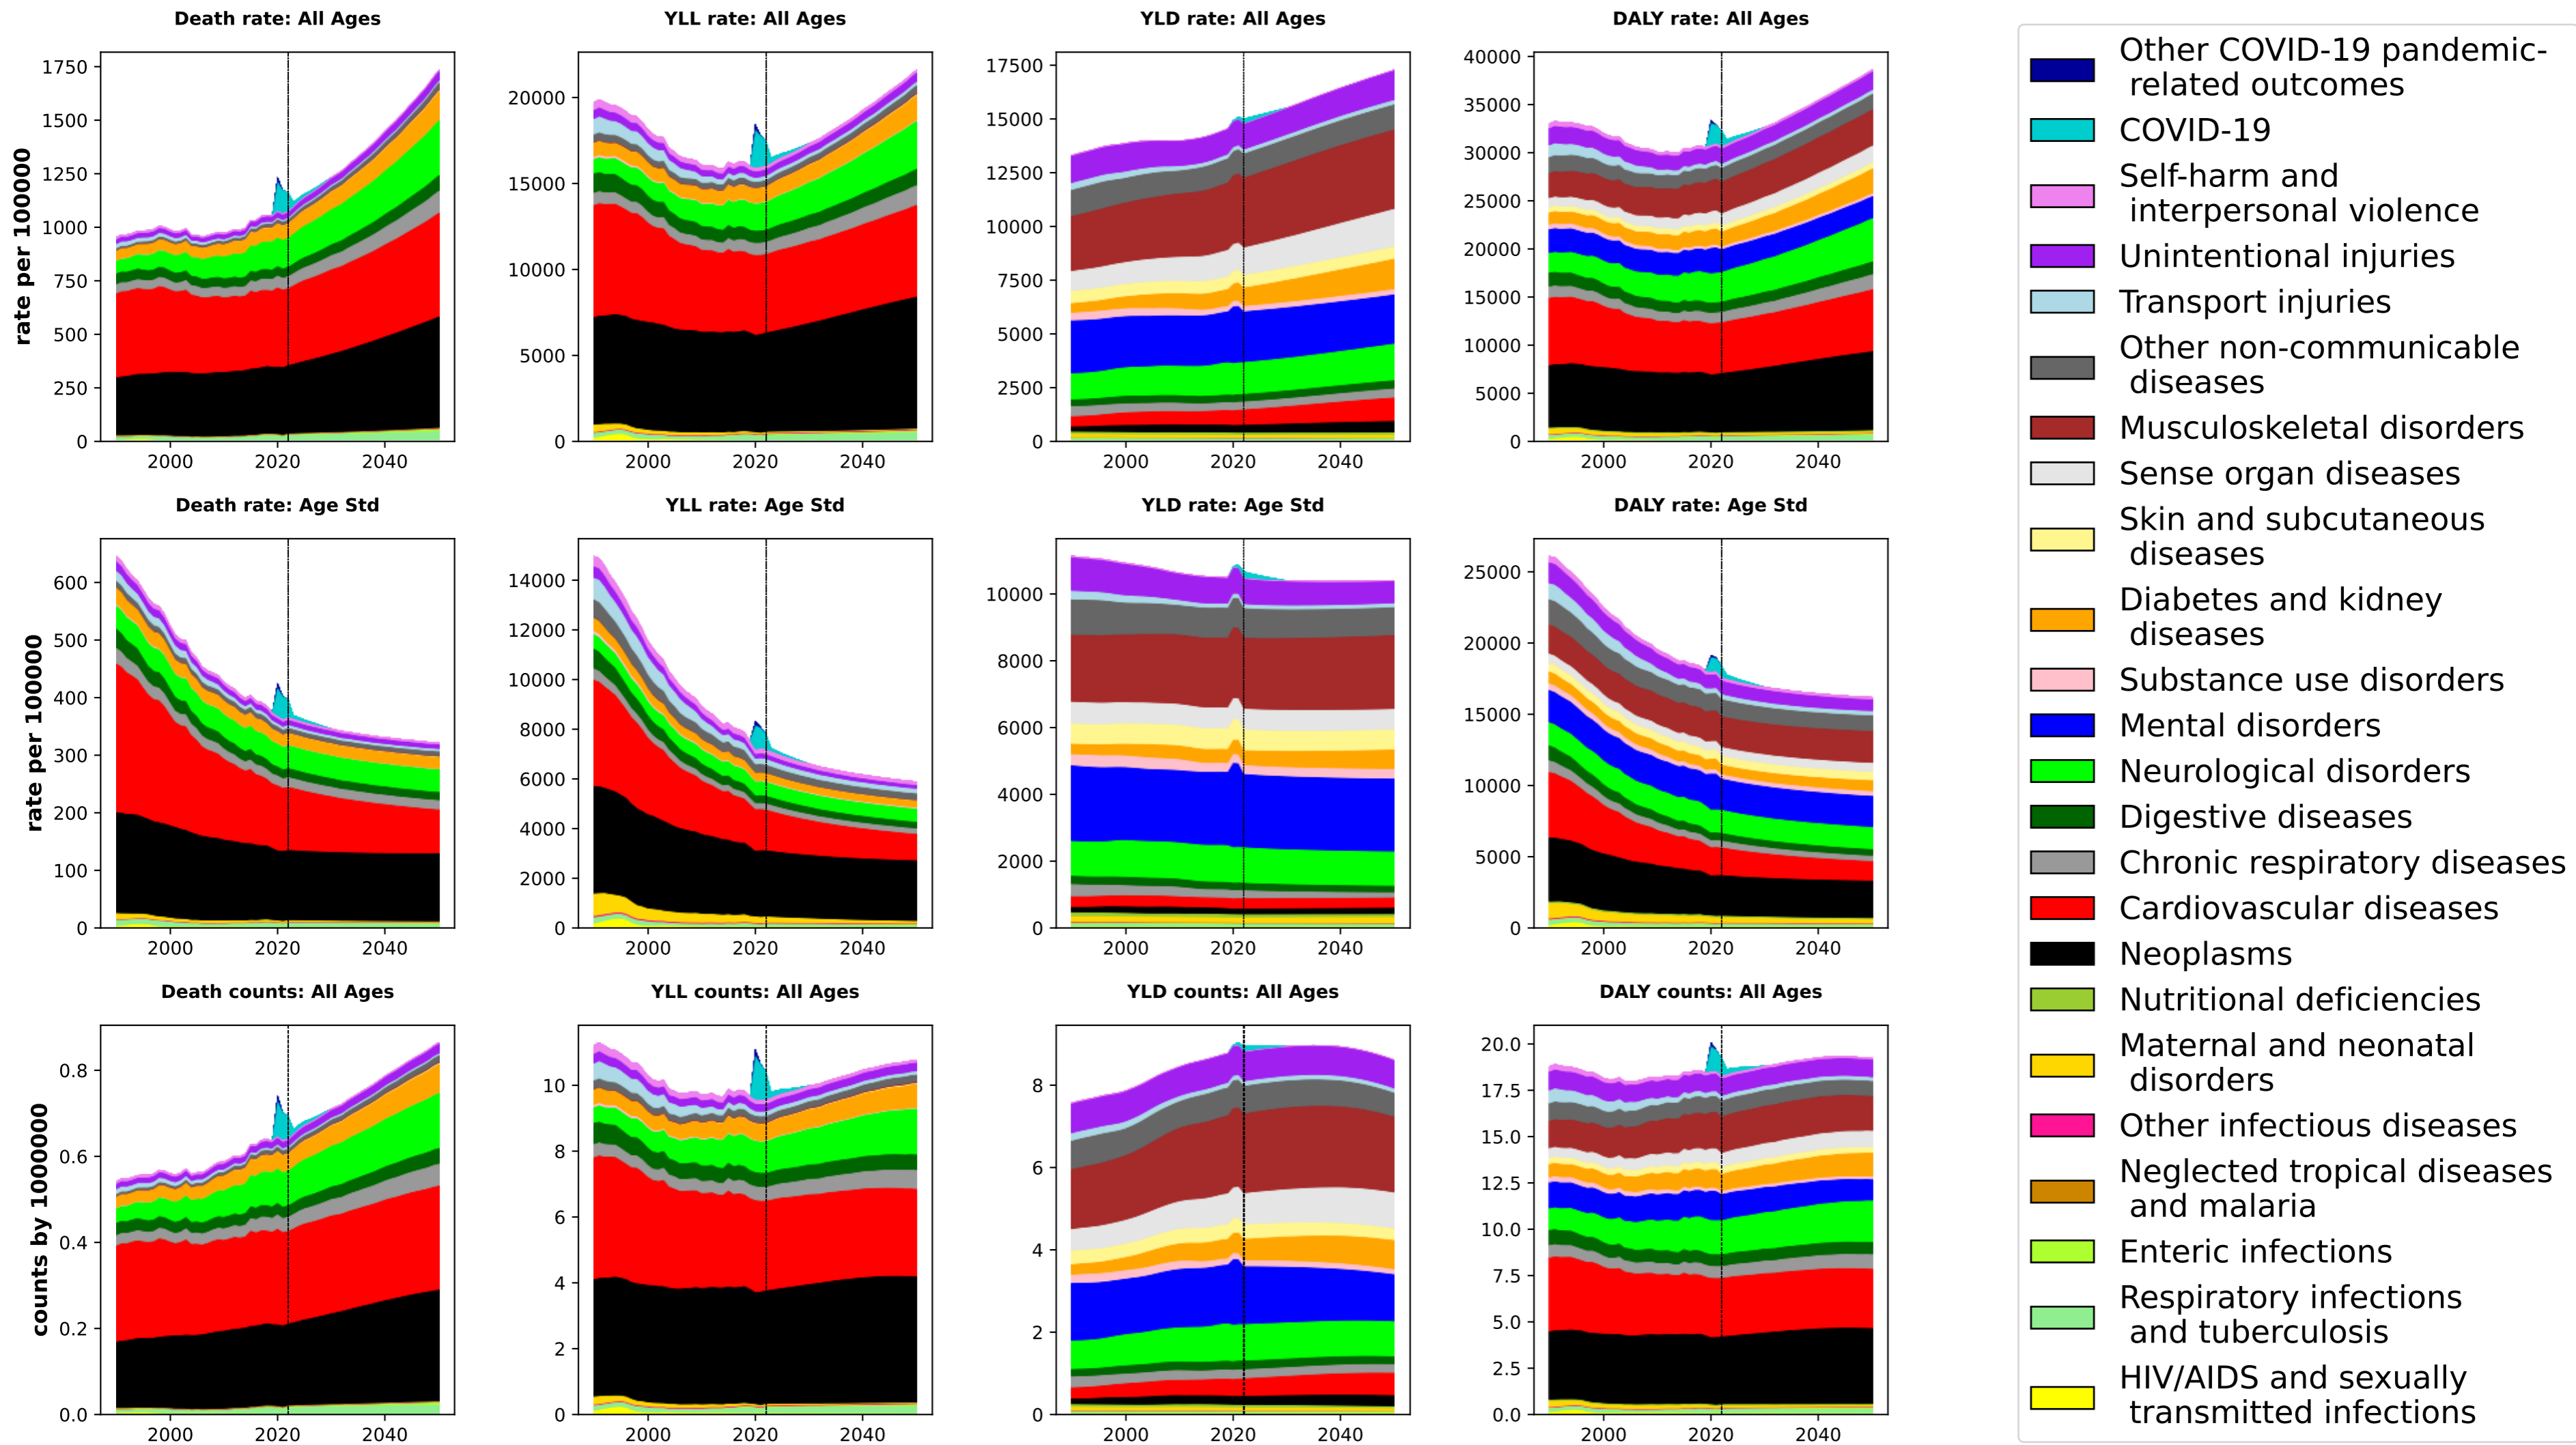

# Luxembourg

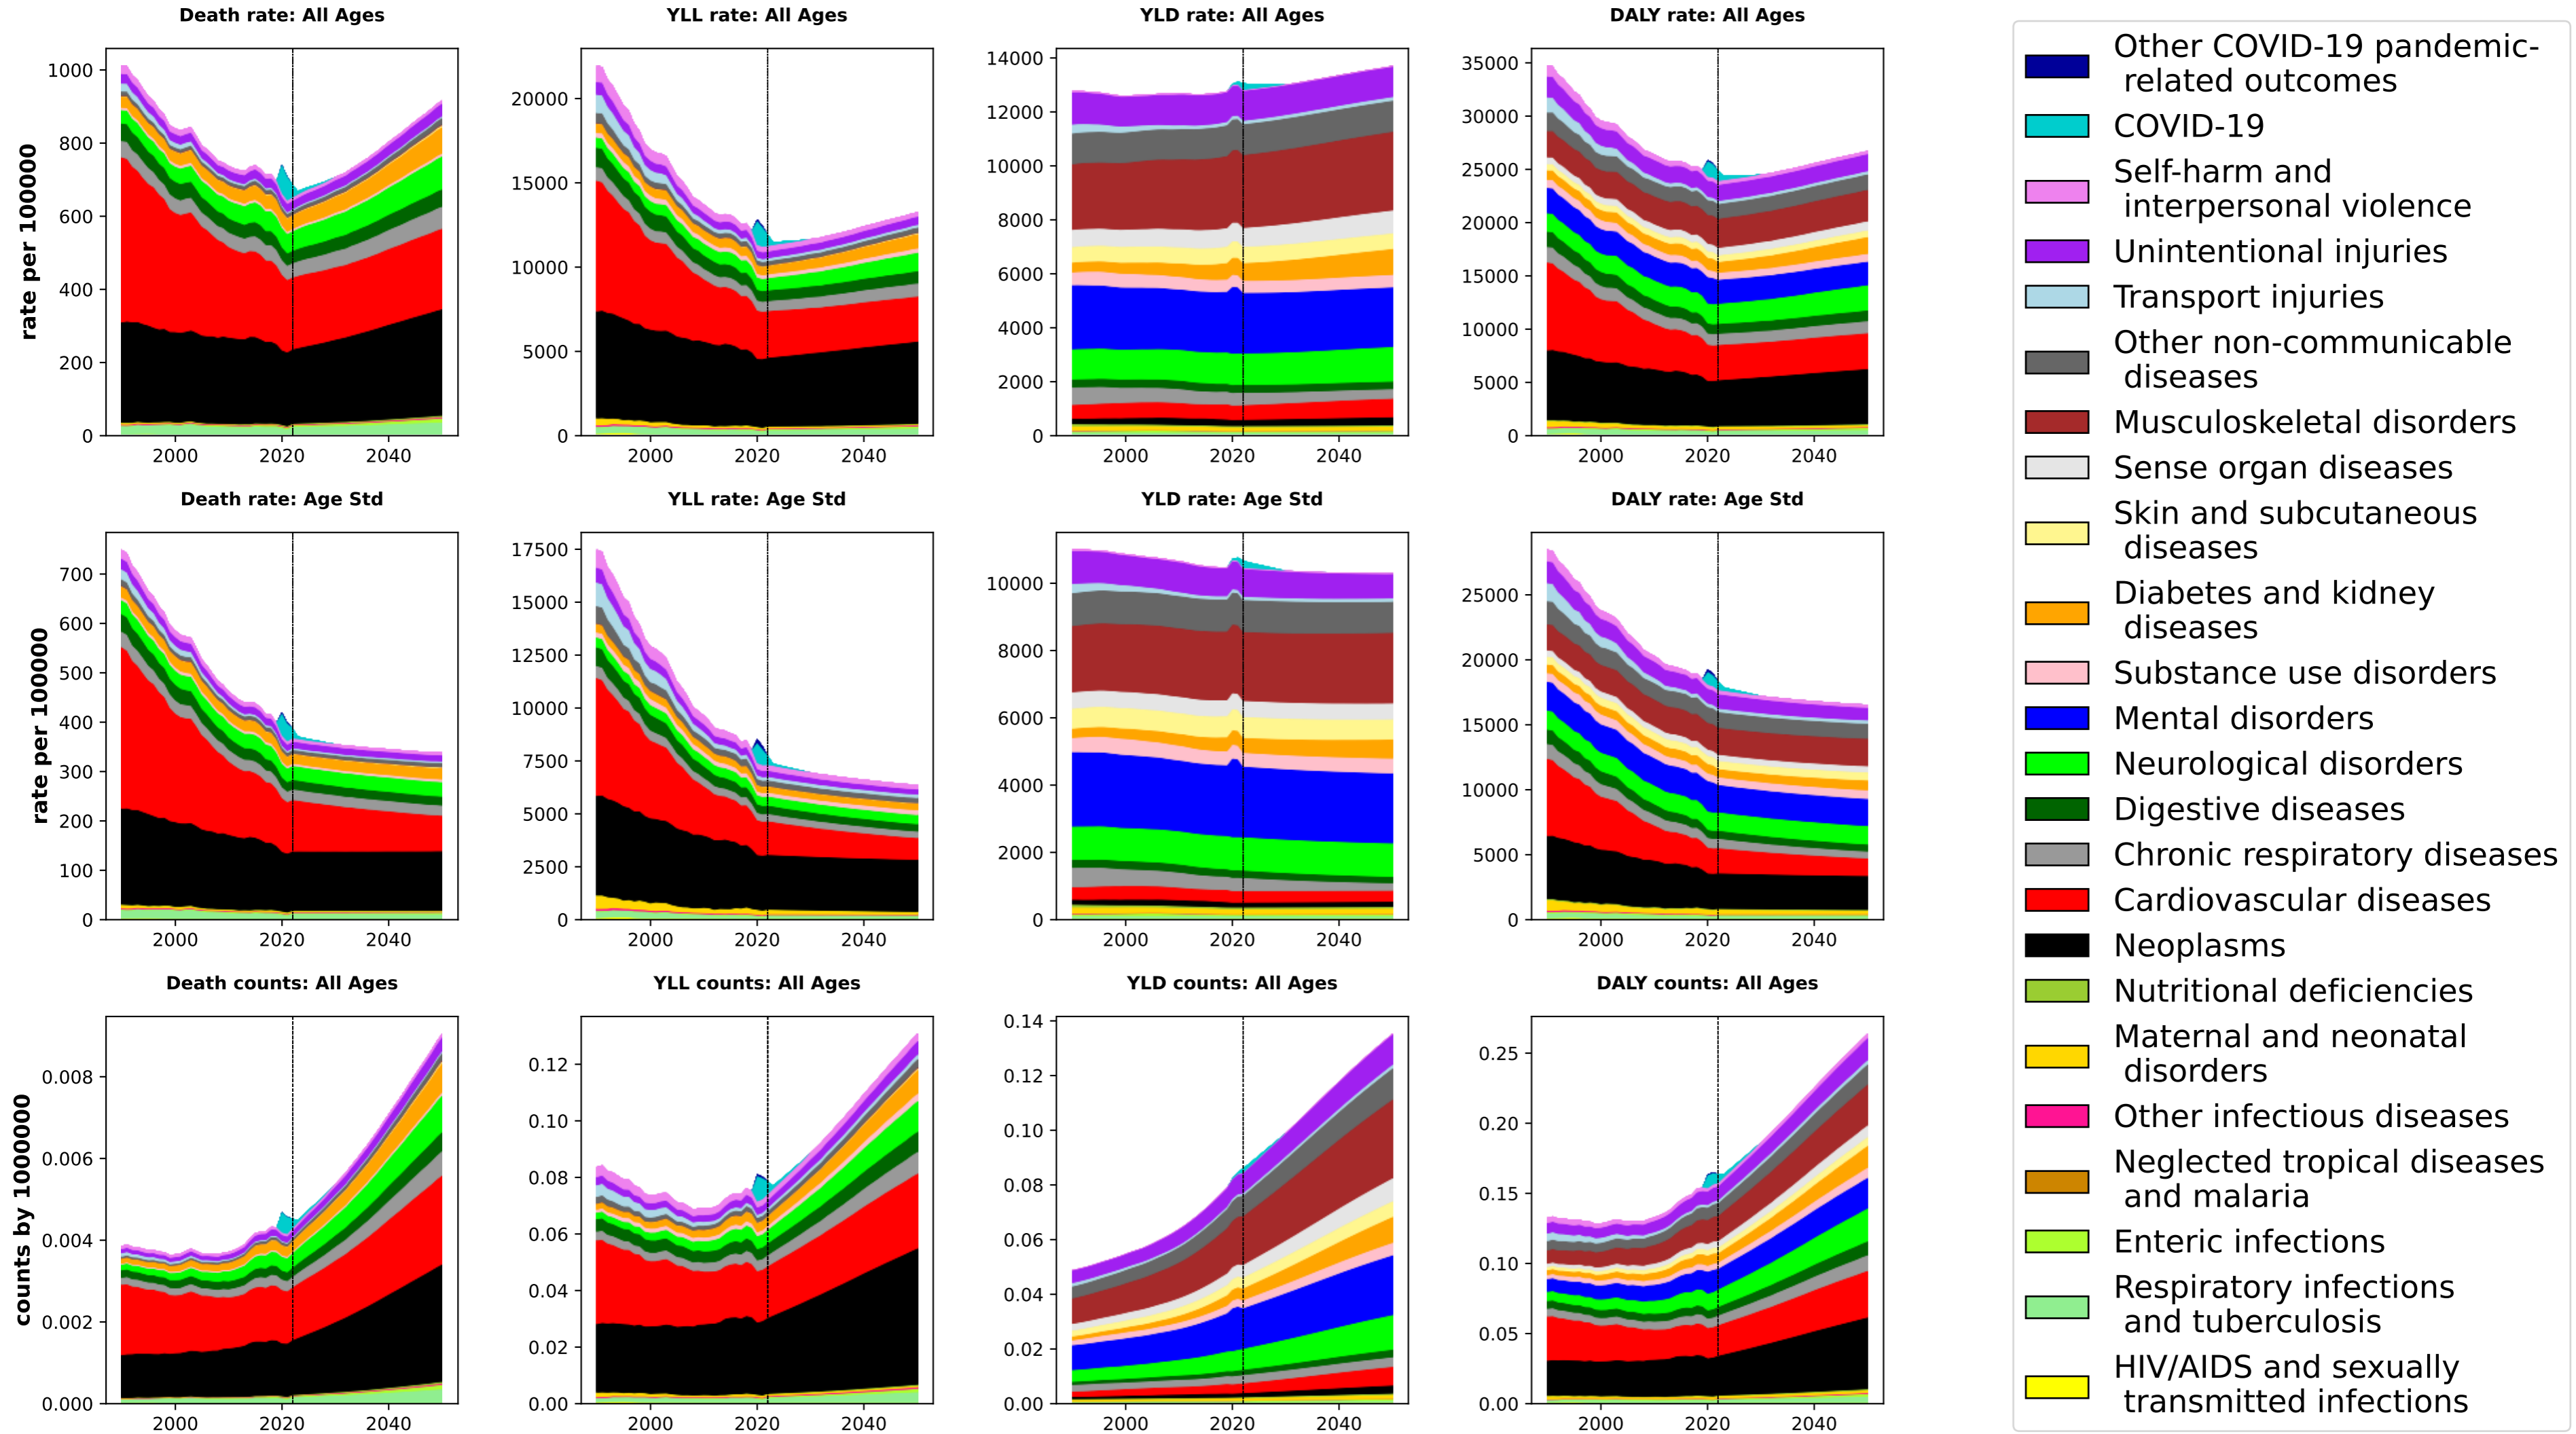

# Malta

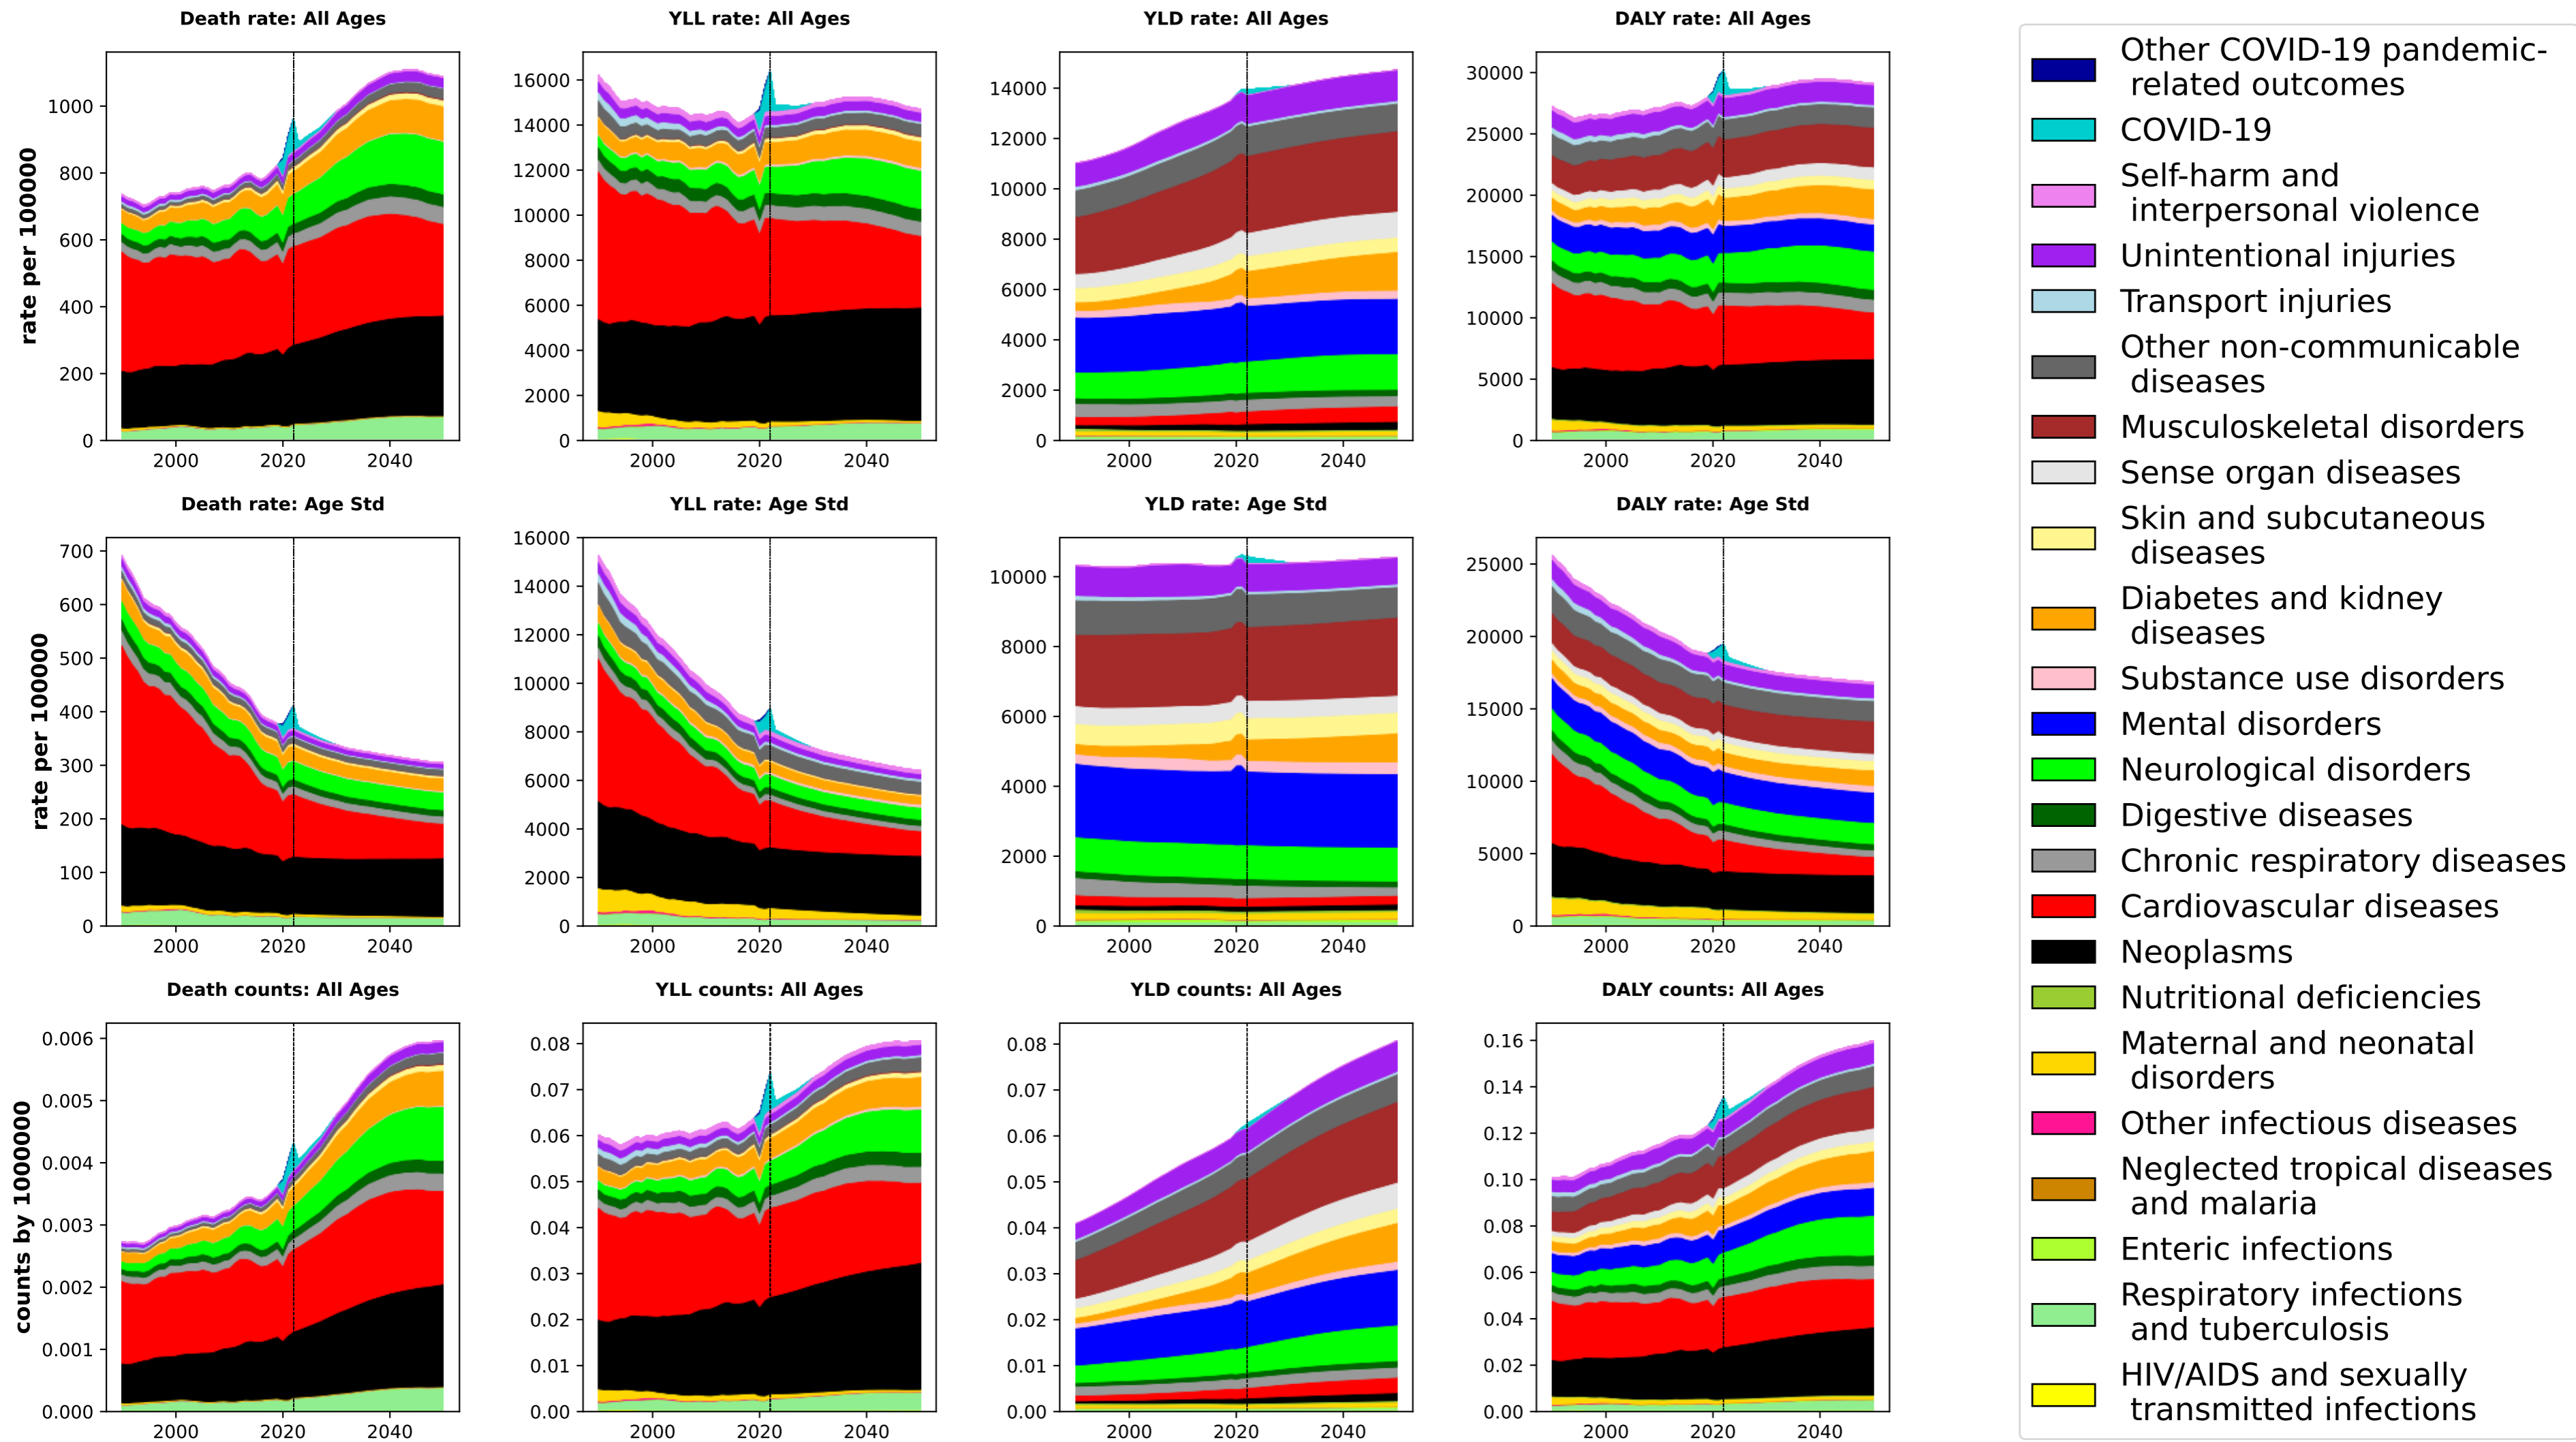

# Monaco

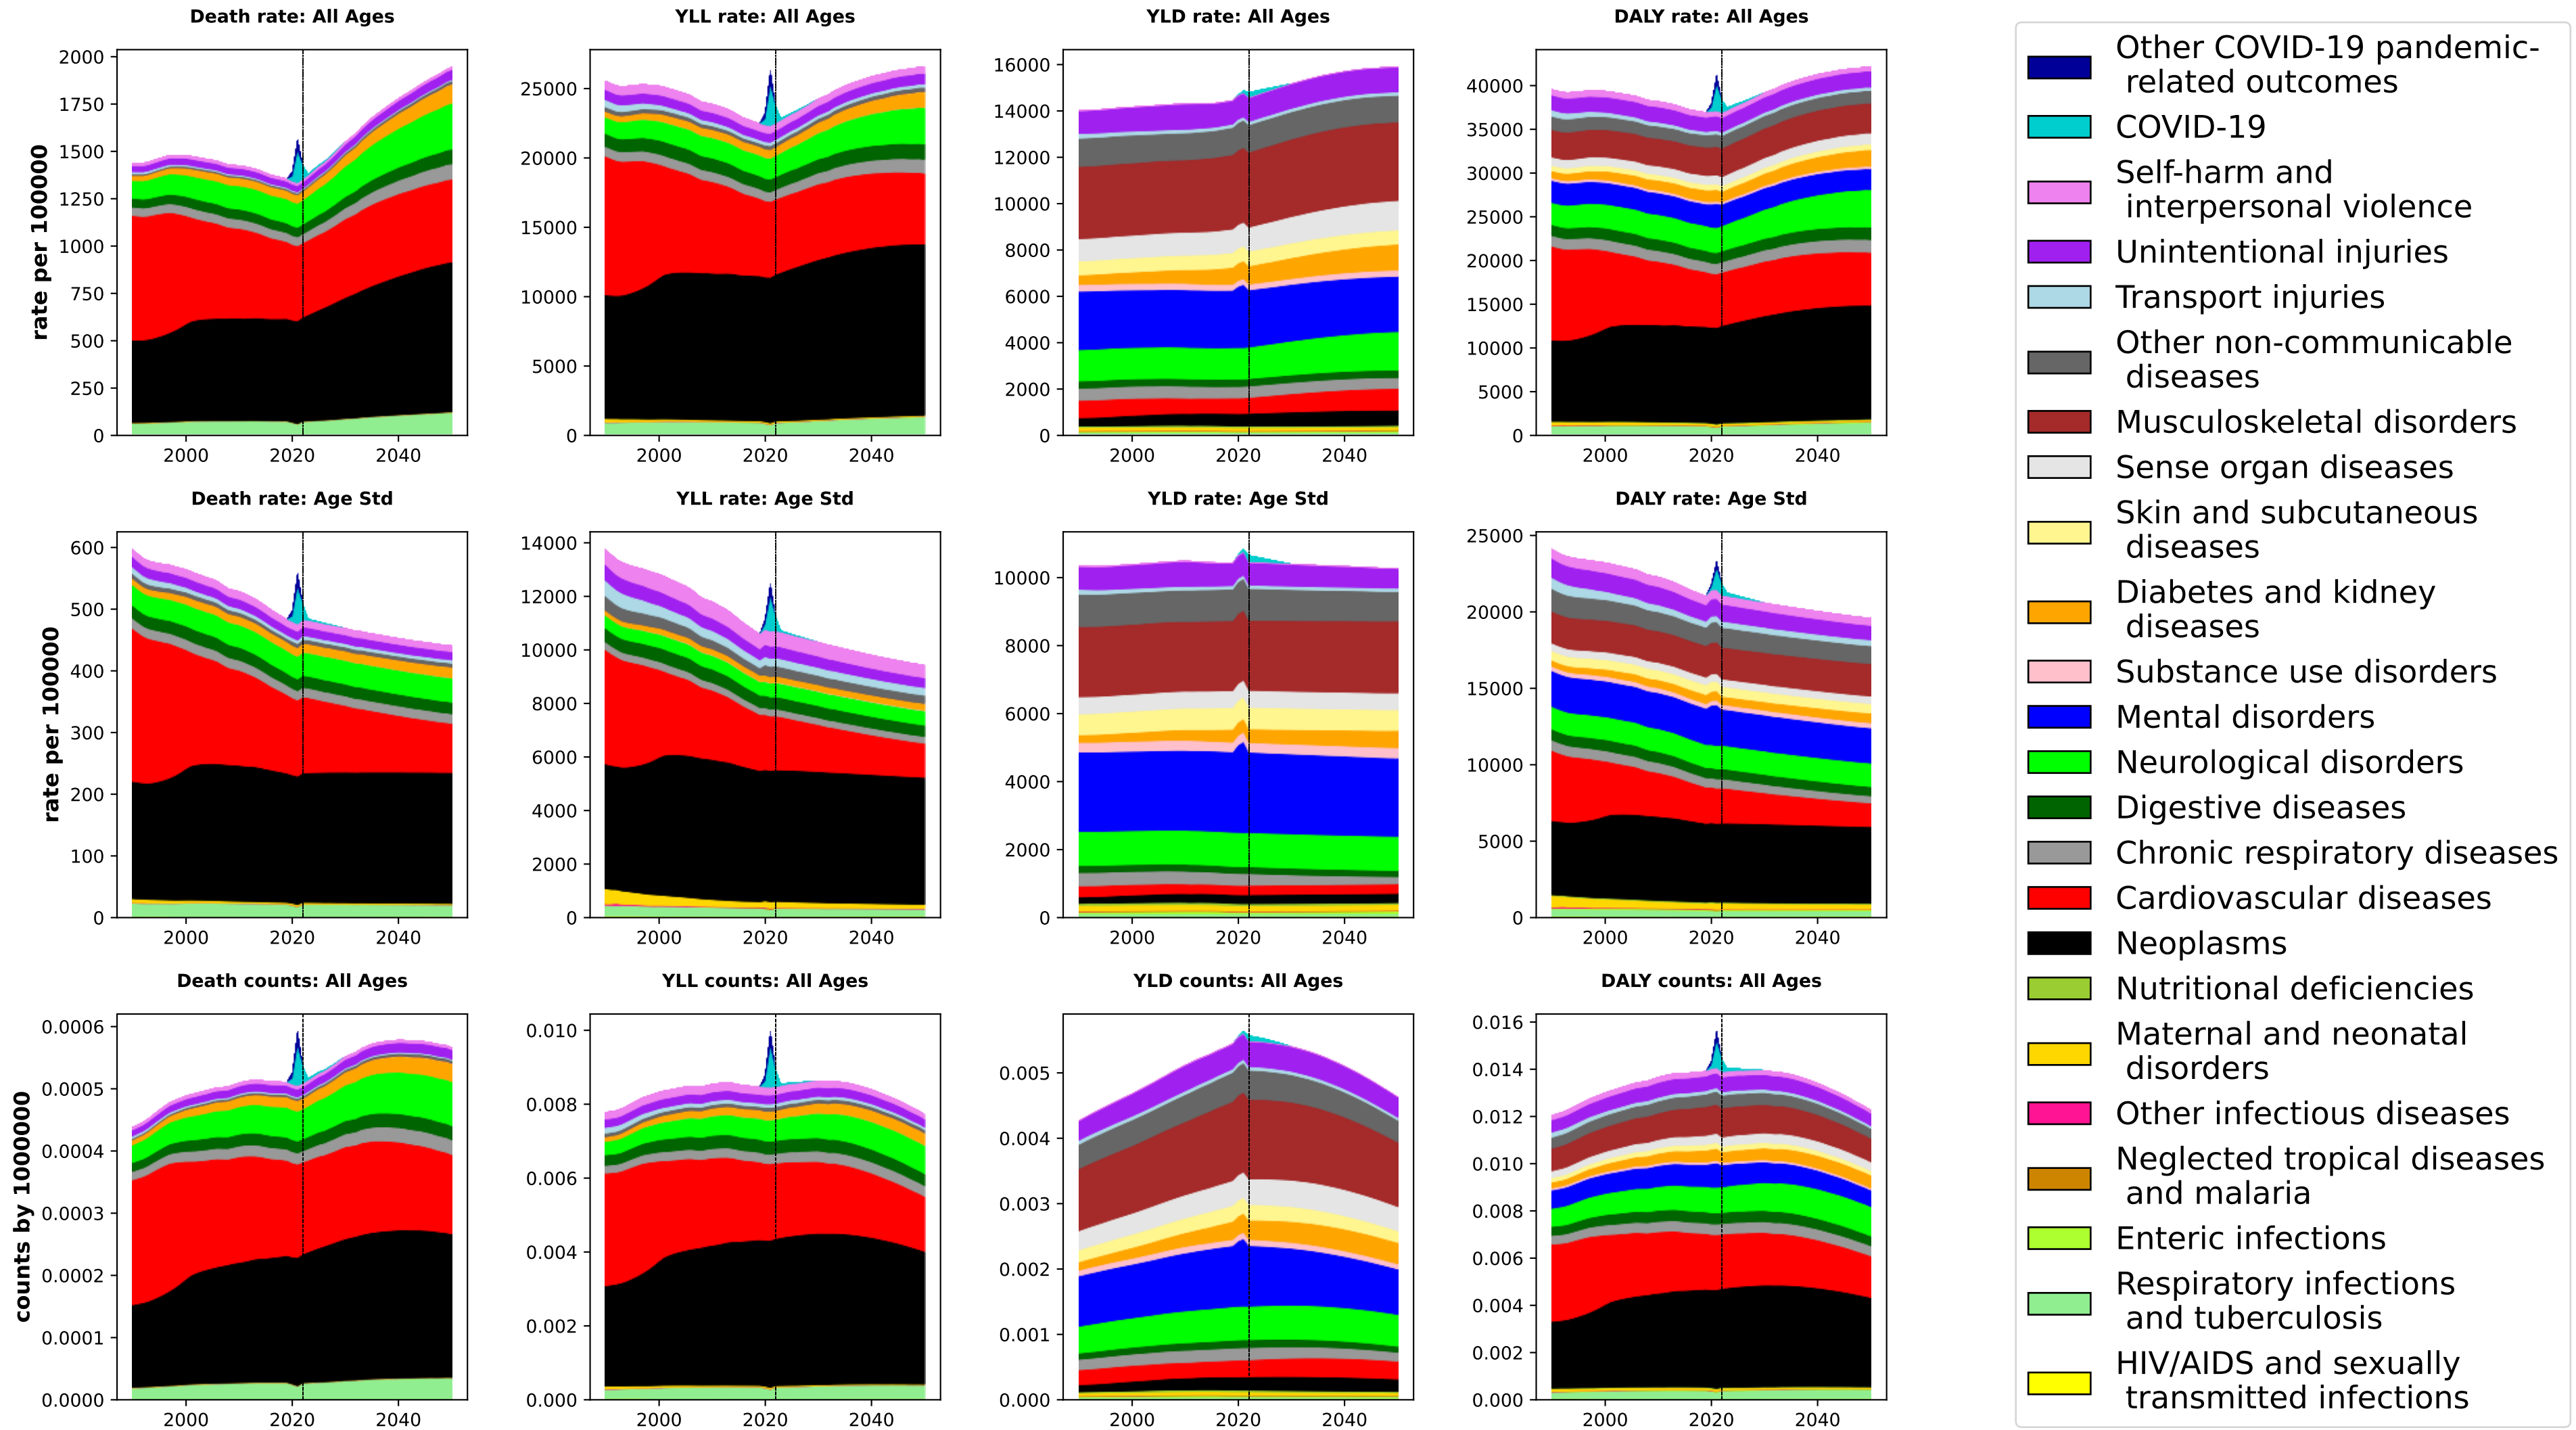



# Netherlands

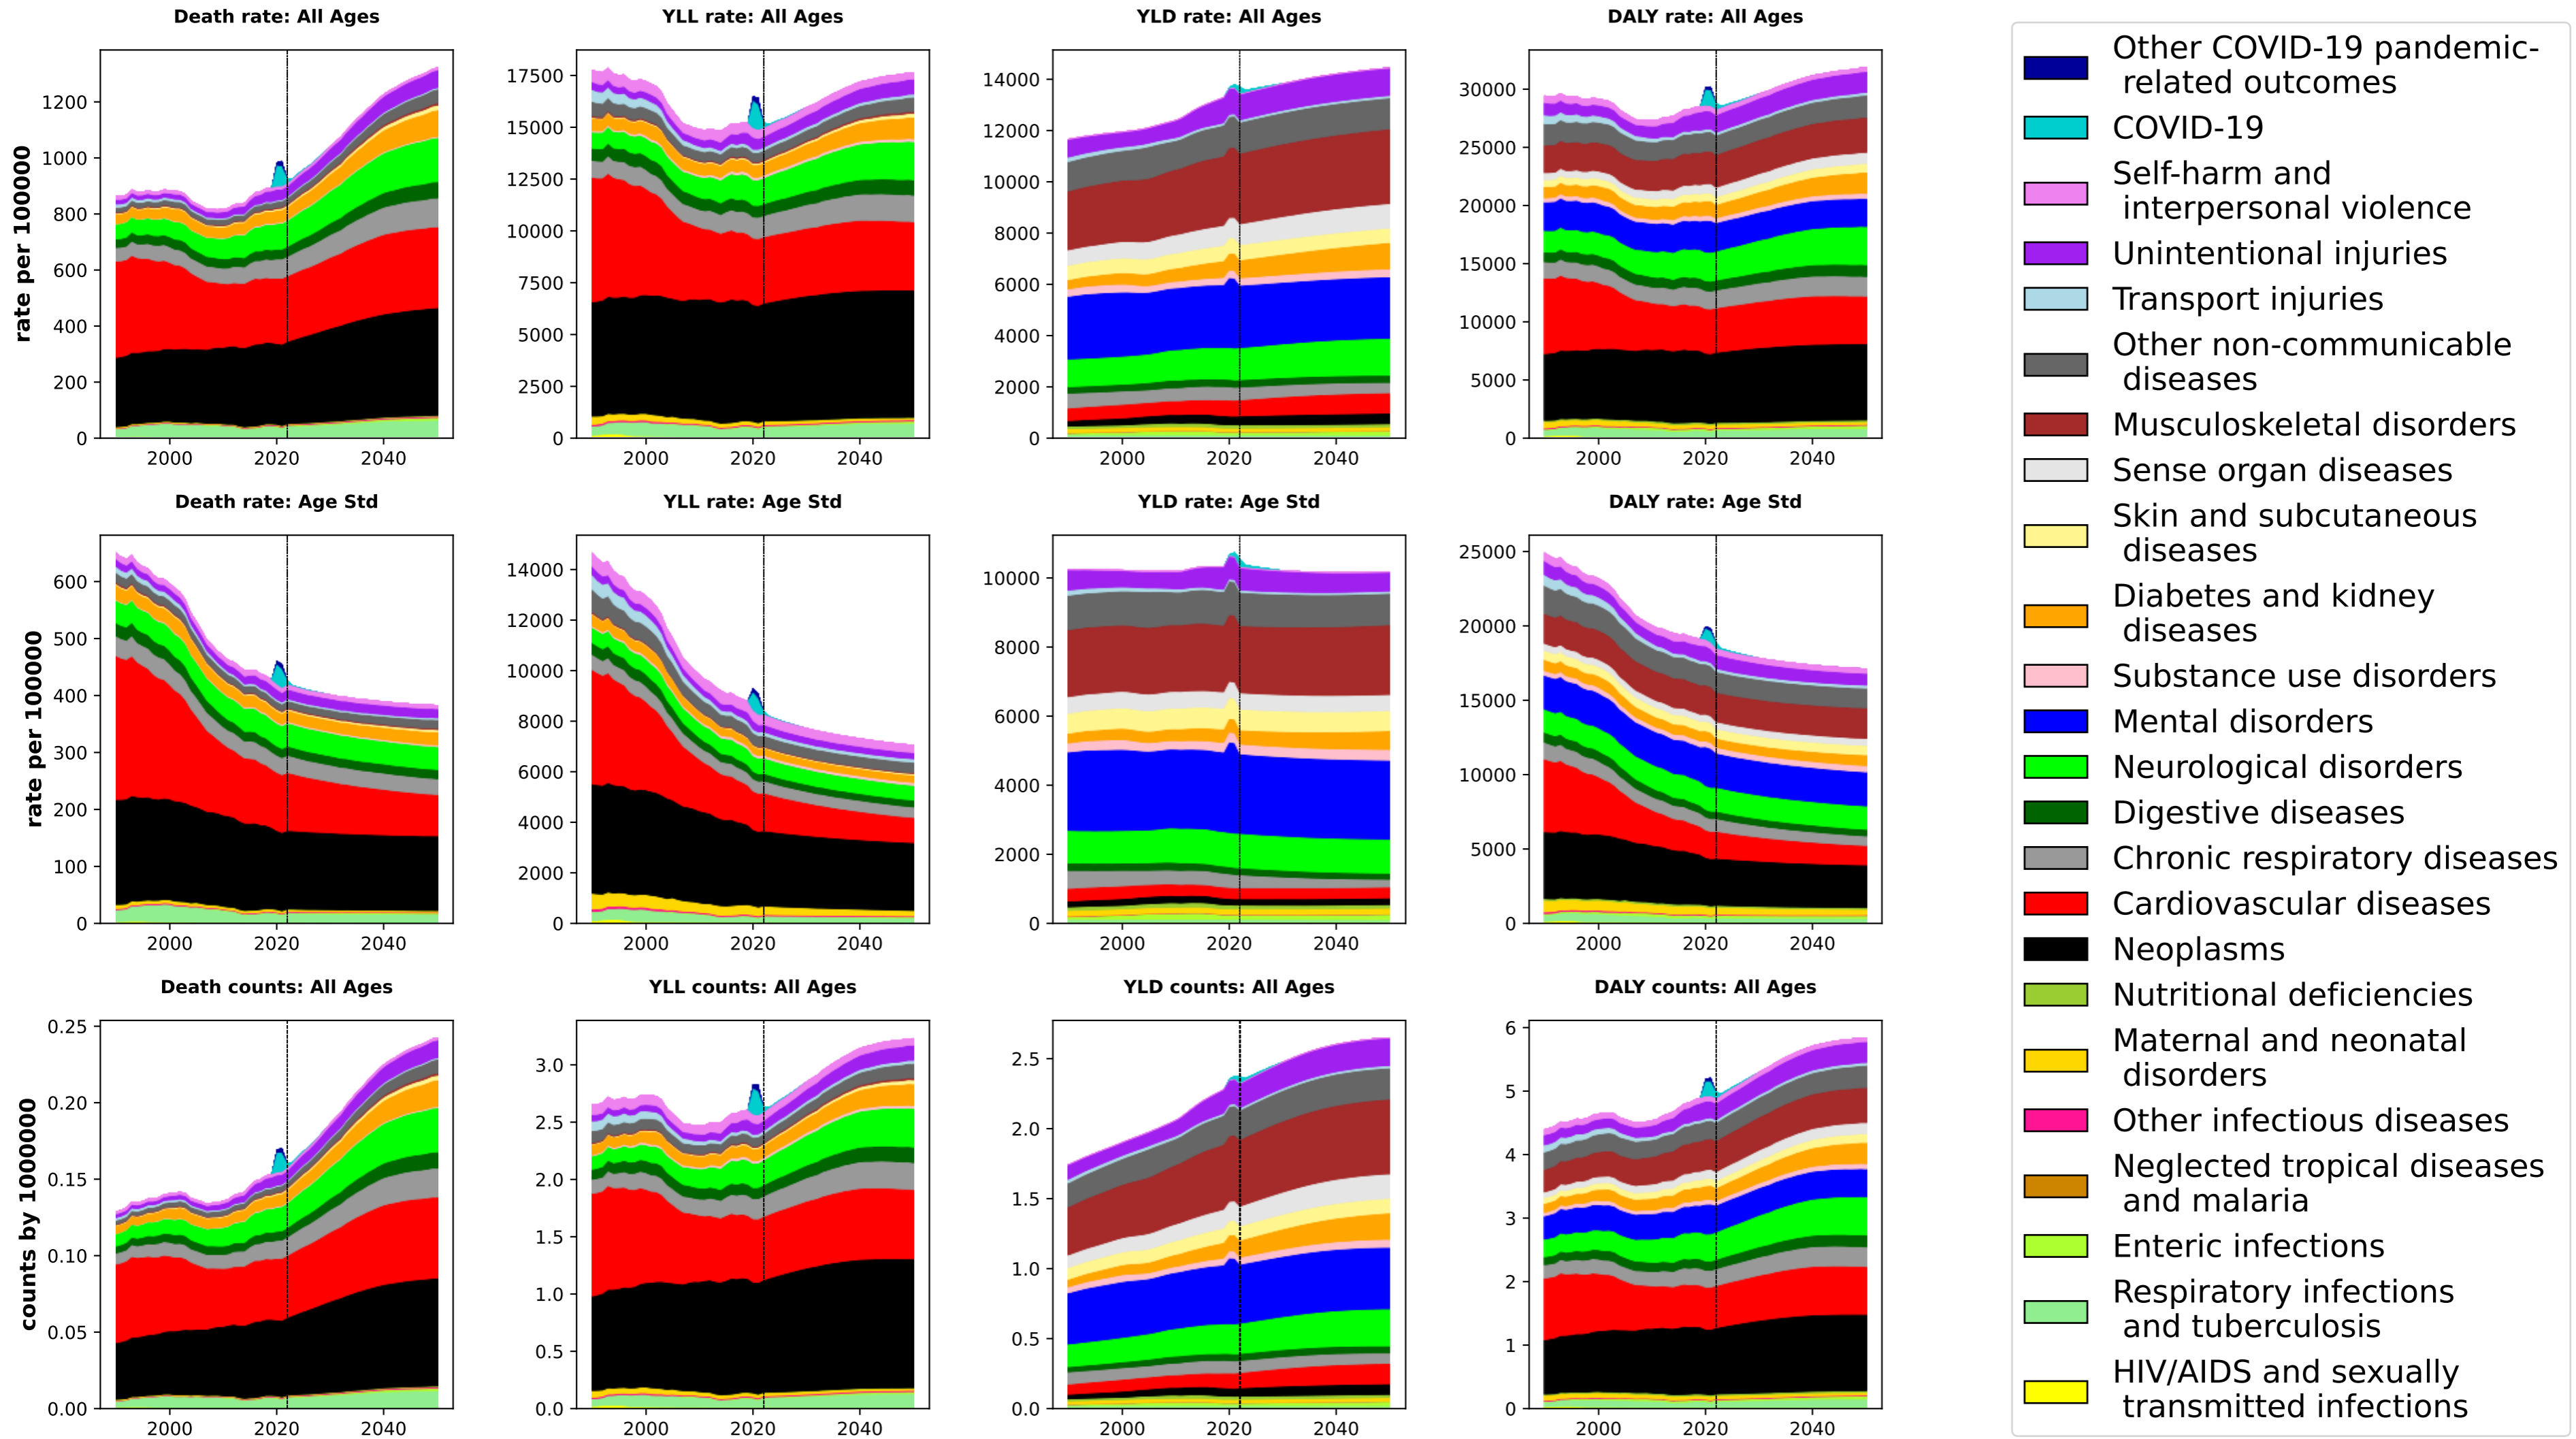

# Norway

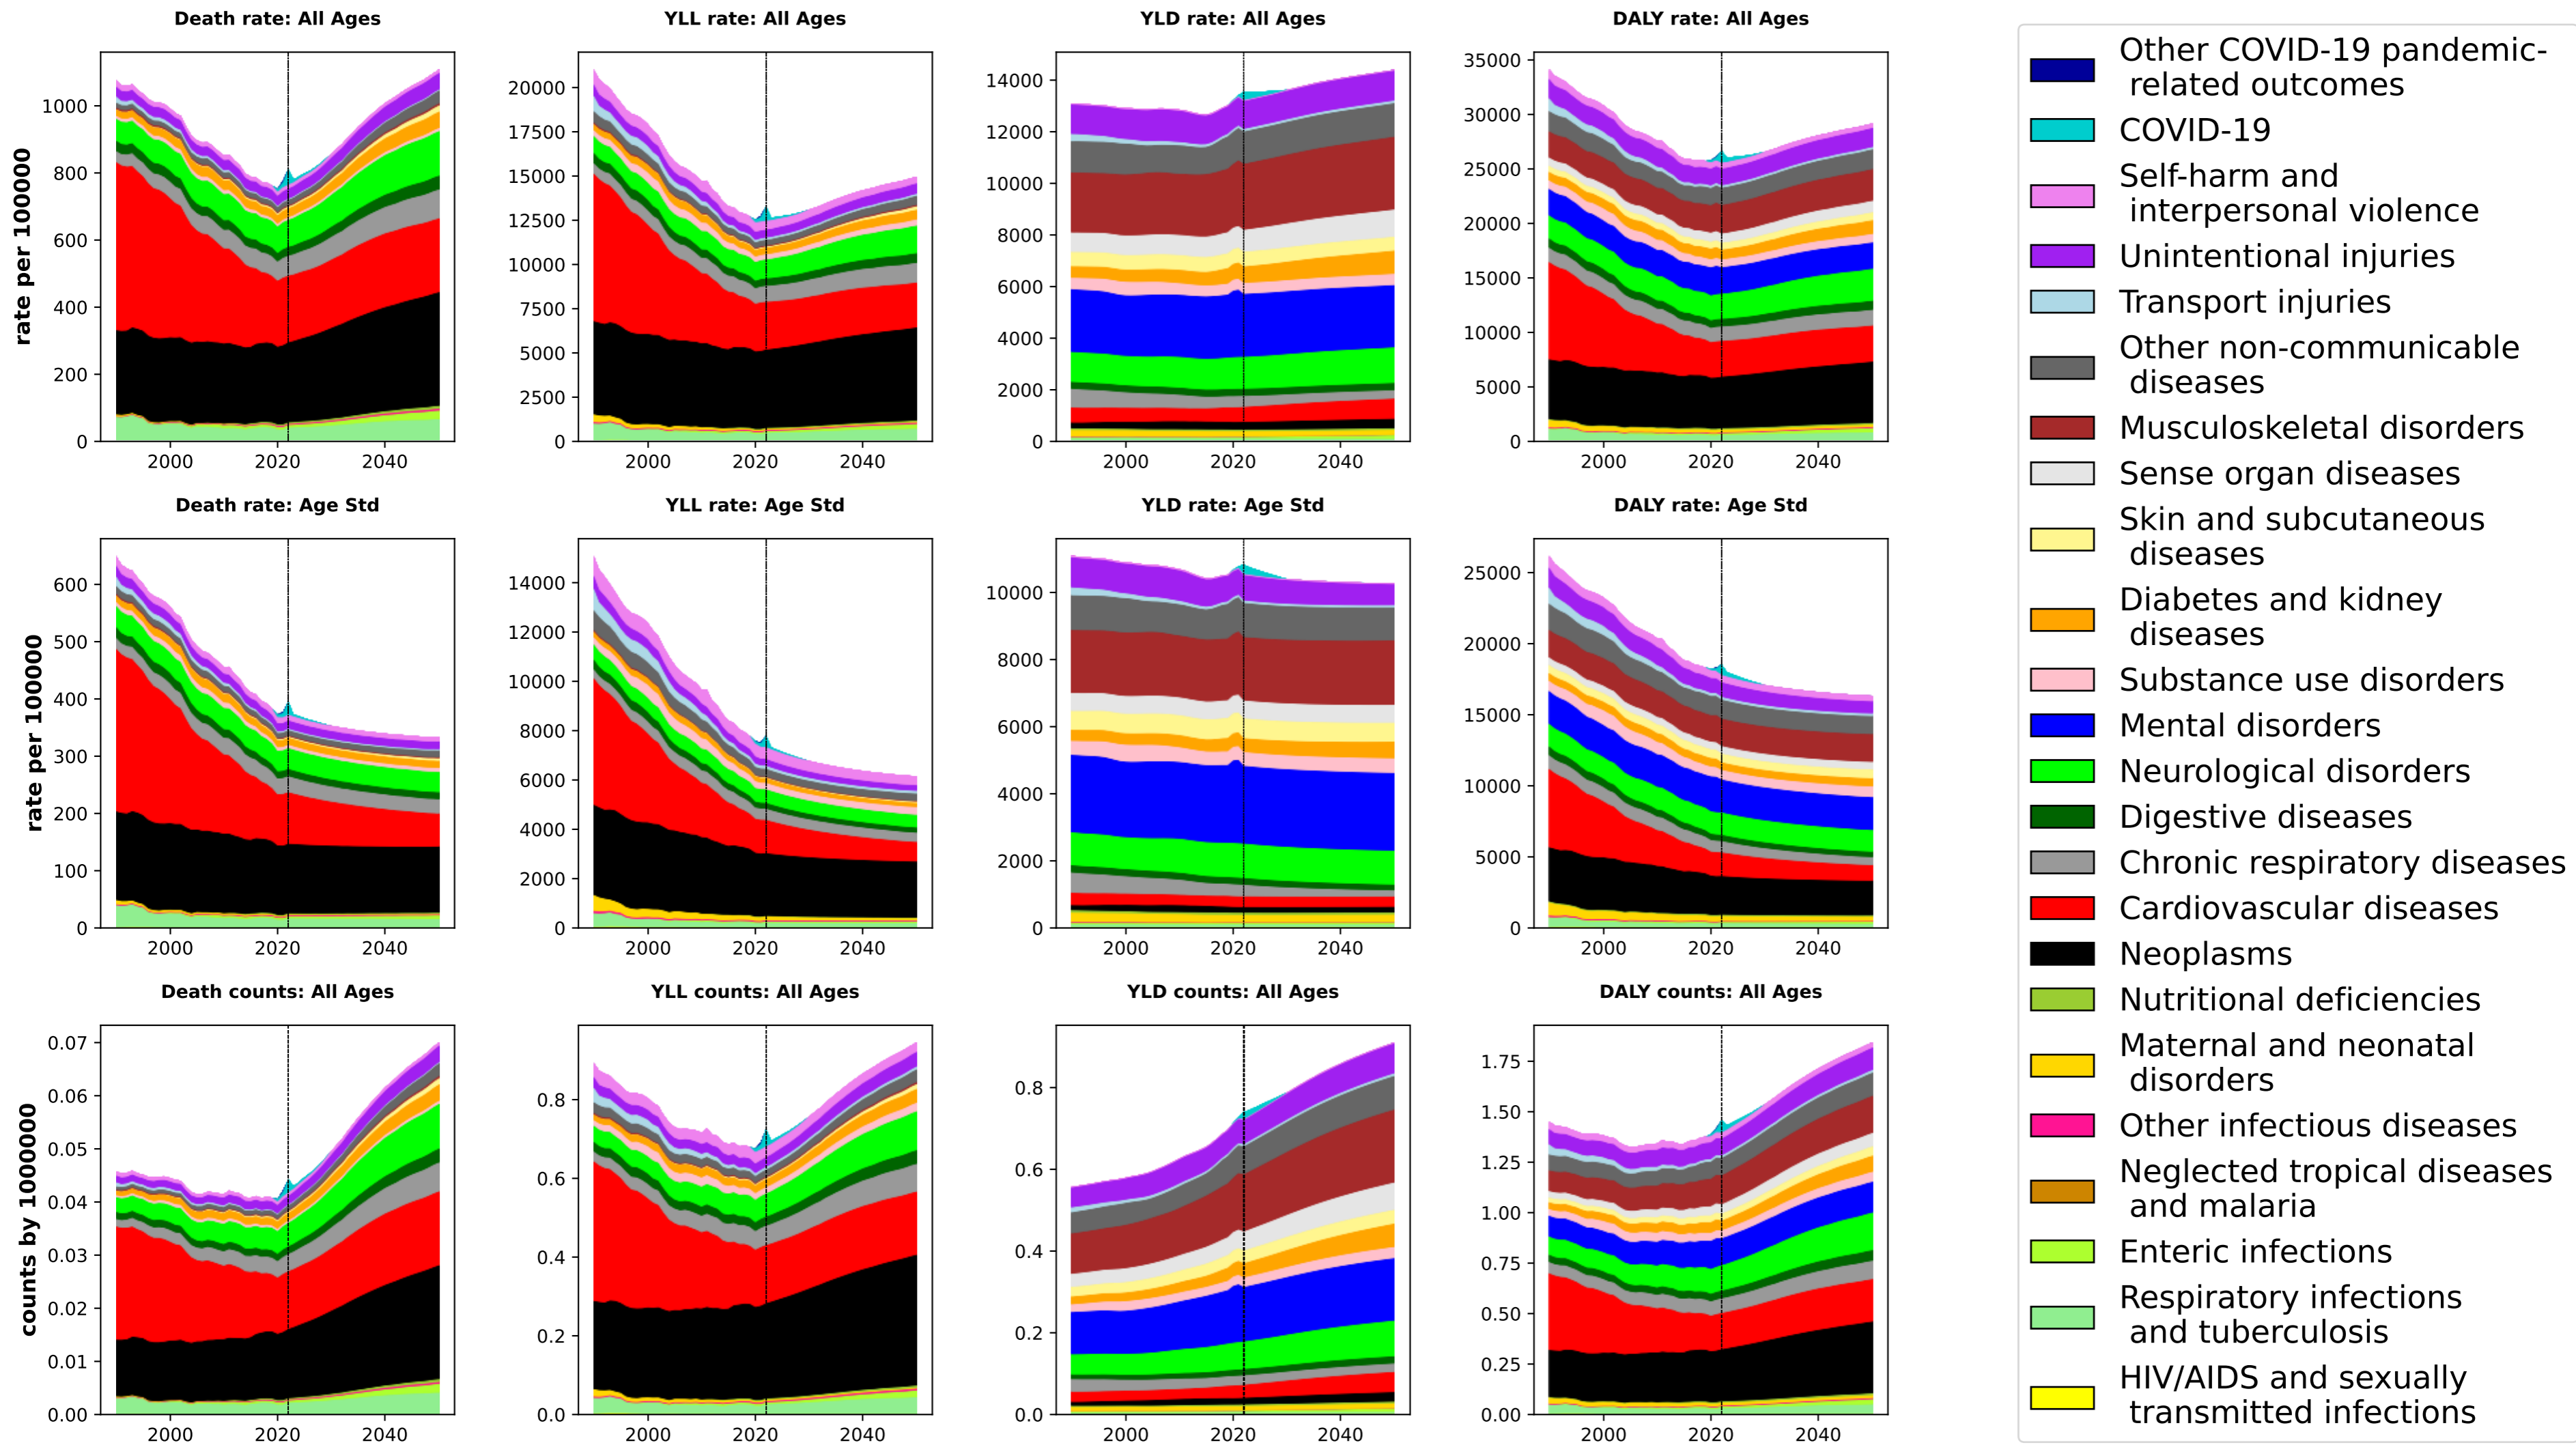

# Portugal

Supplemental Results Figure S6. Cause level 2 area plots for 4 burden measures for reference scenario by location, 1990-2050

770

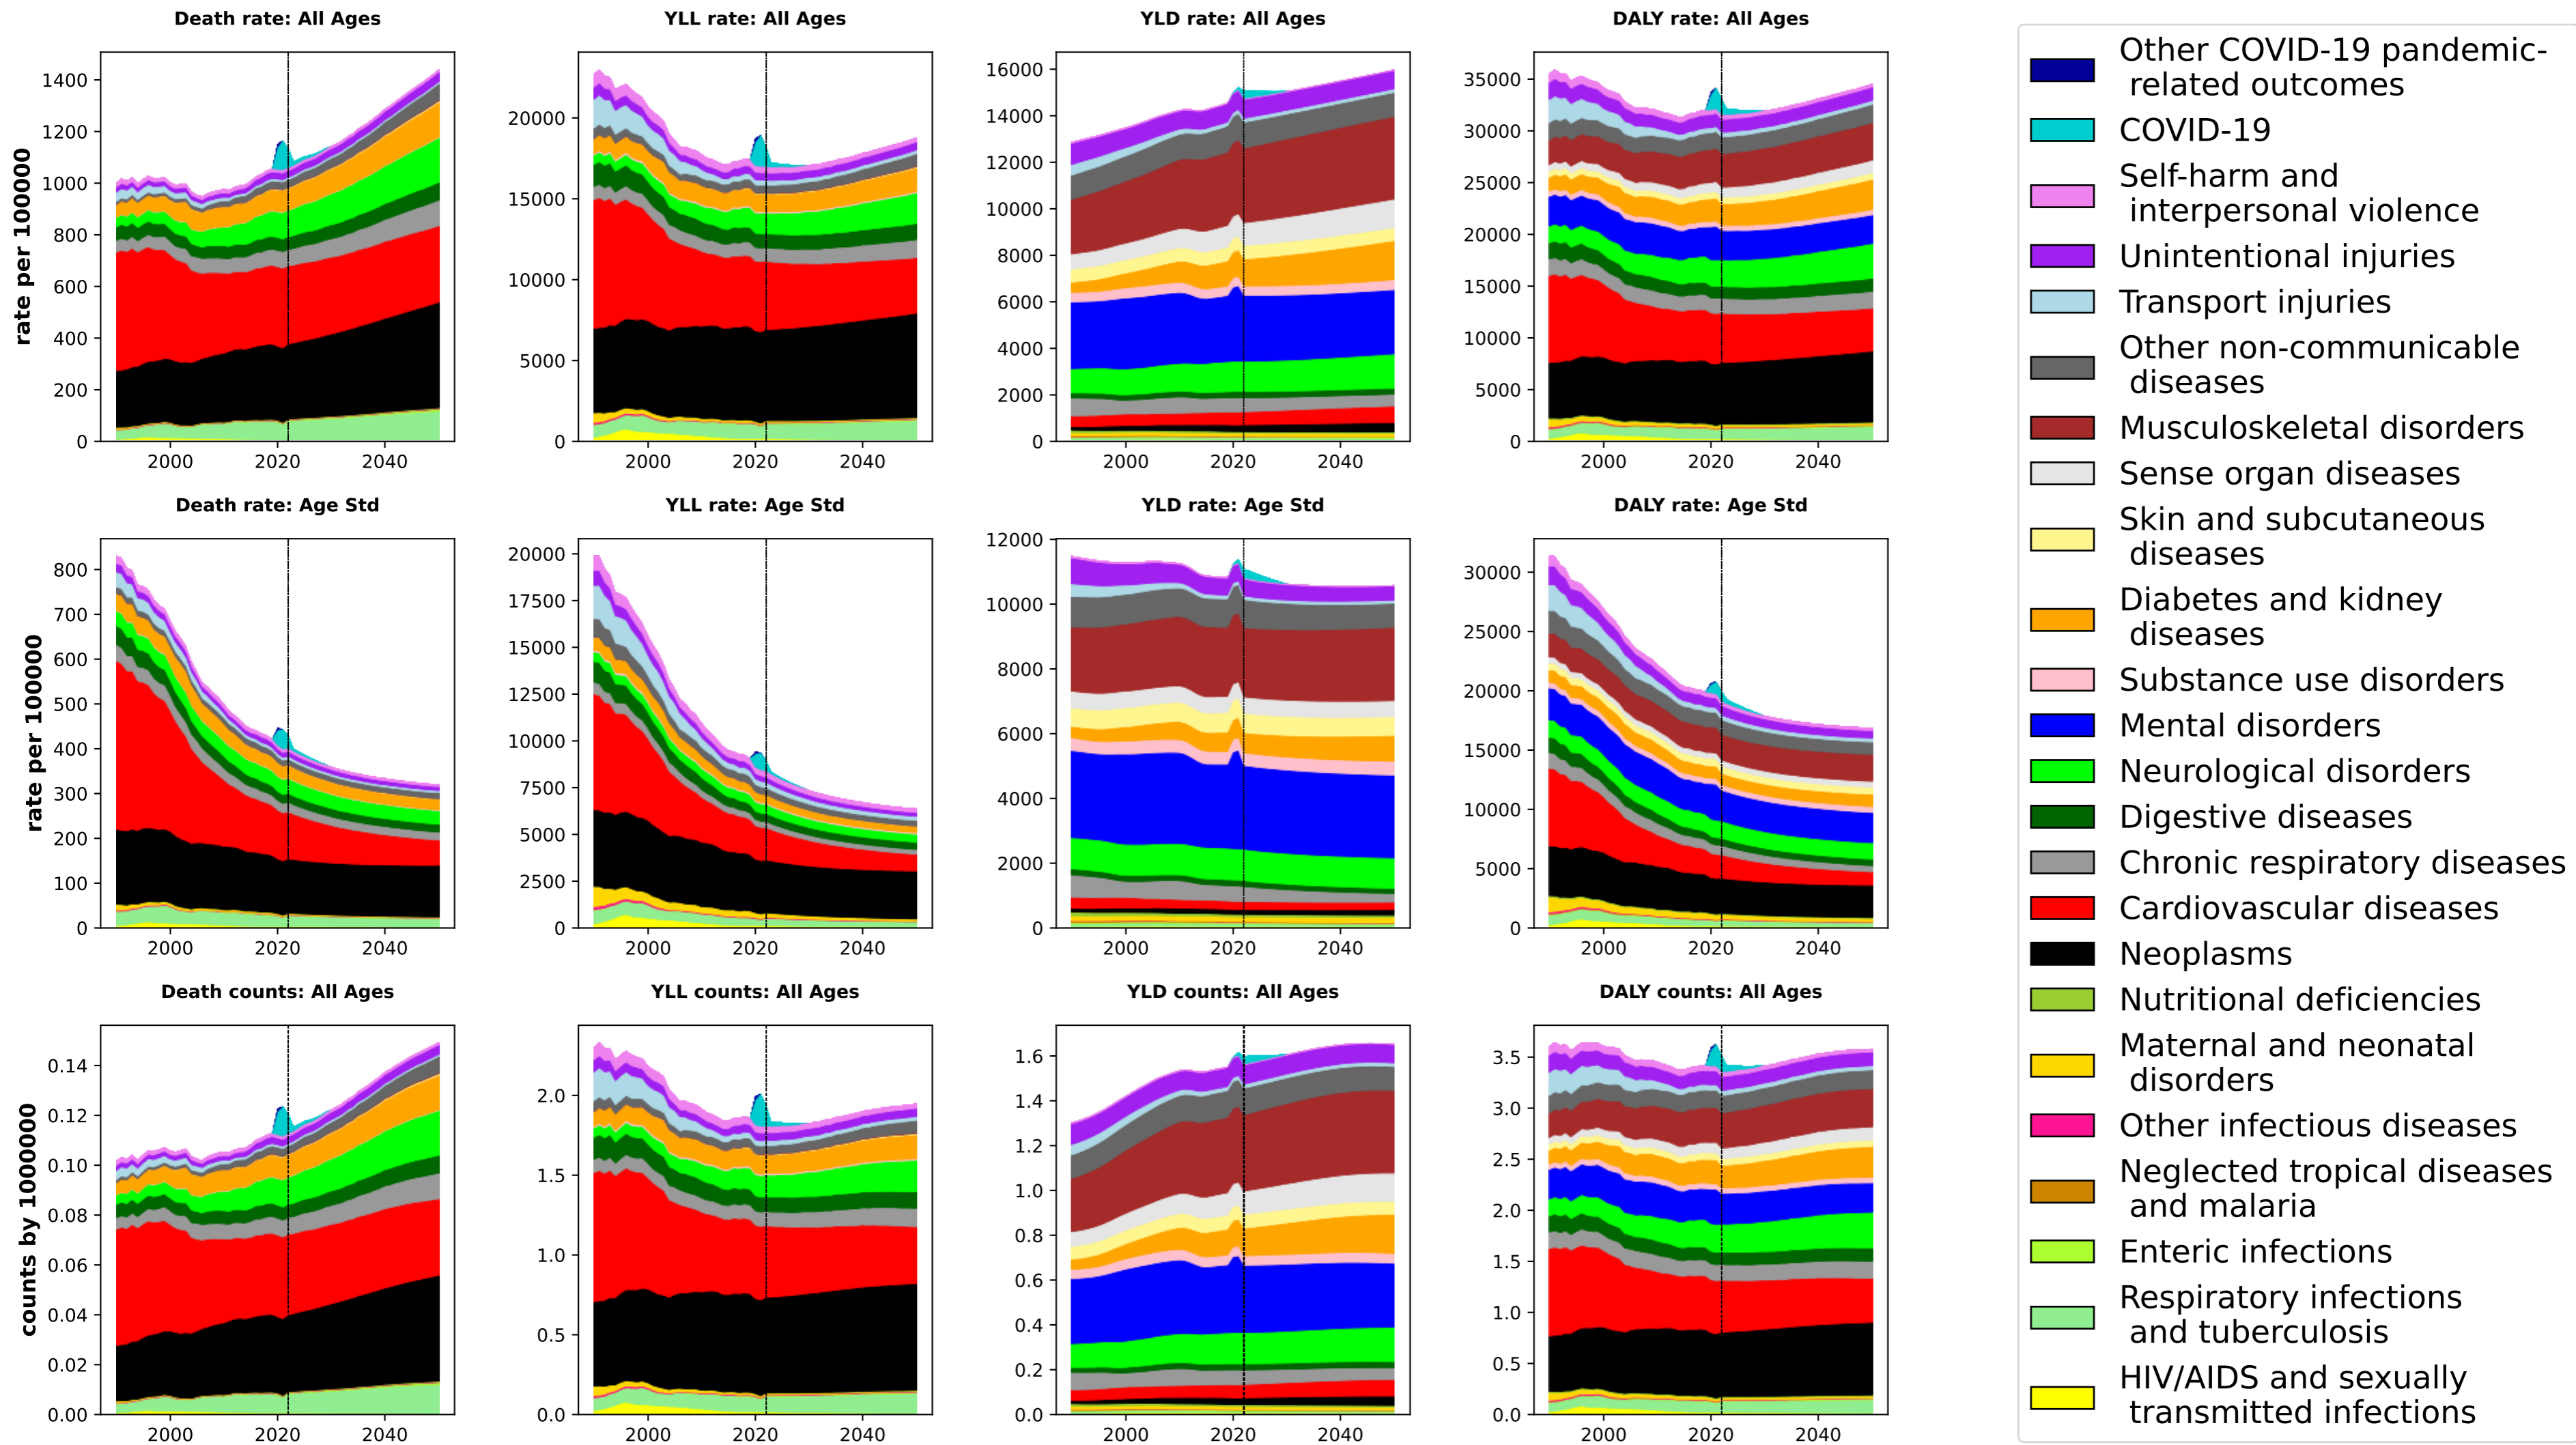

# San Marino

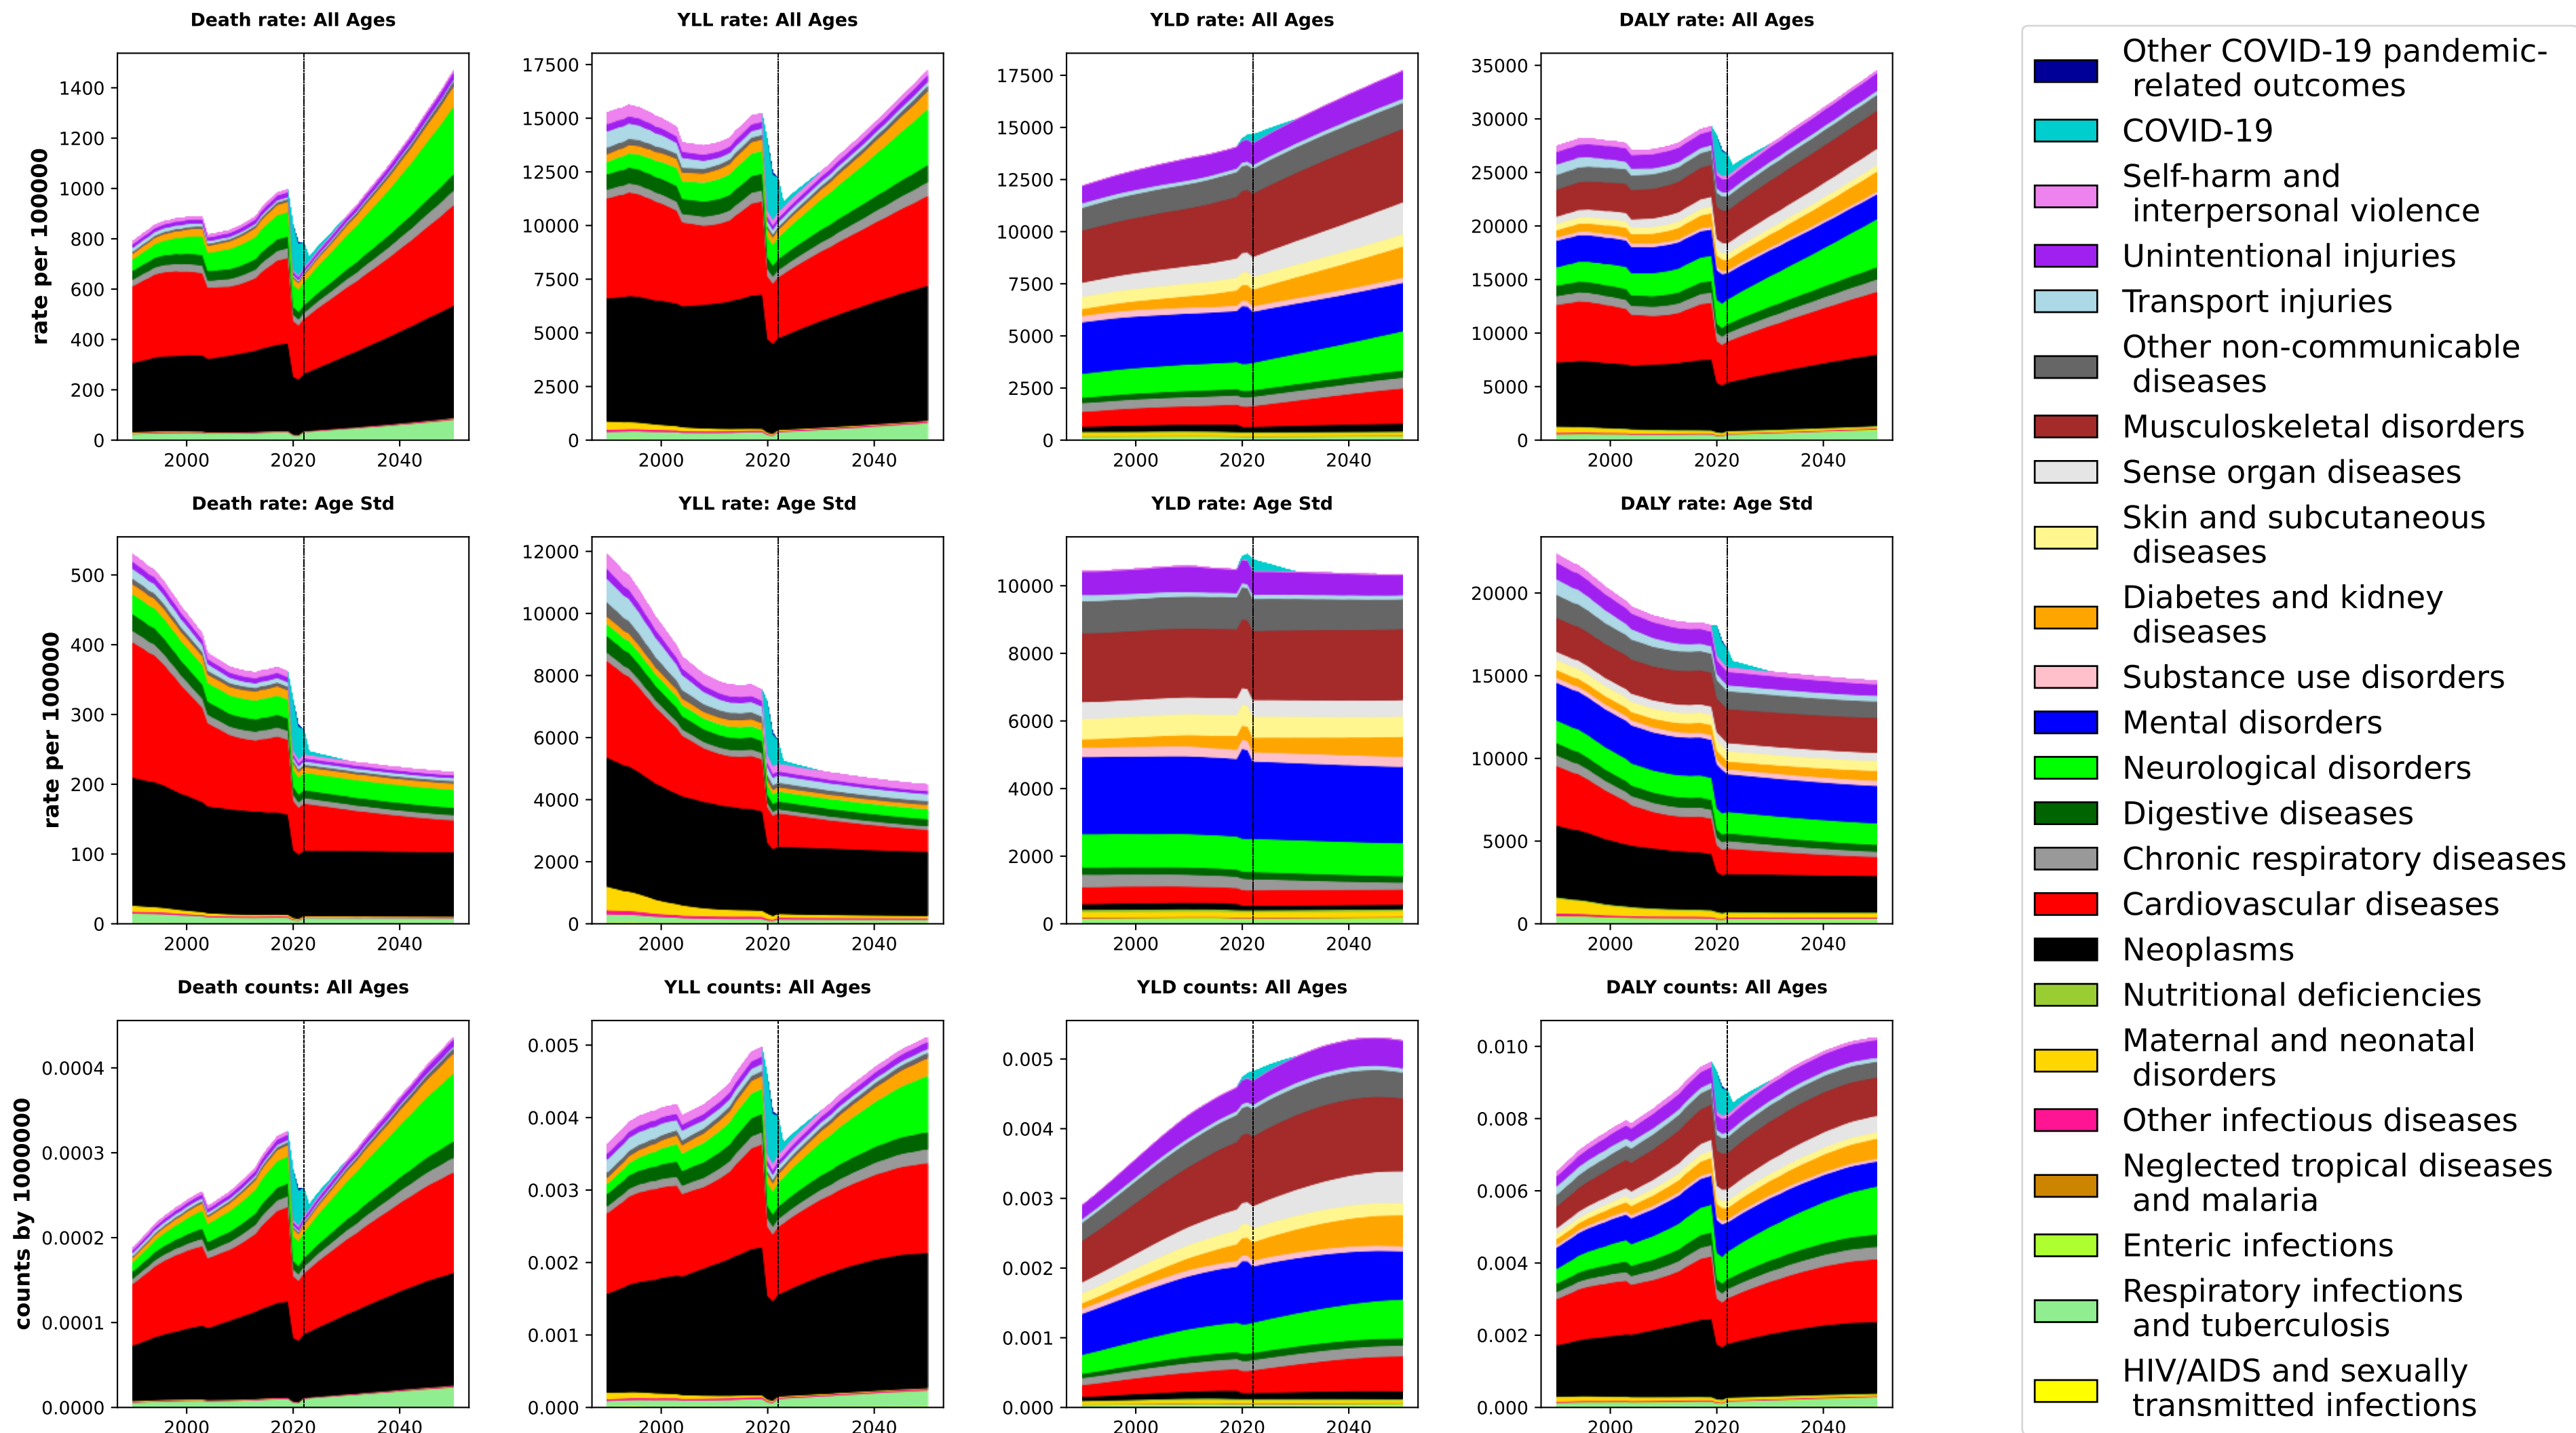

# Spain

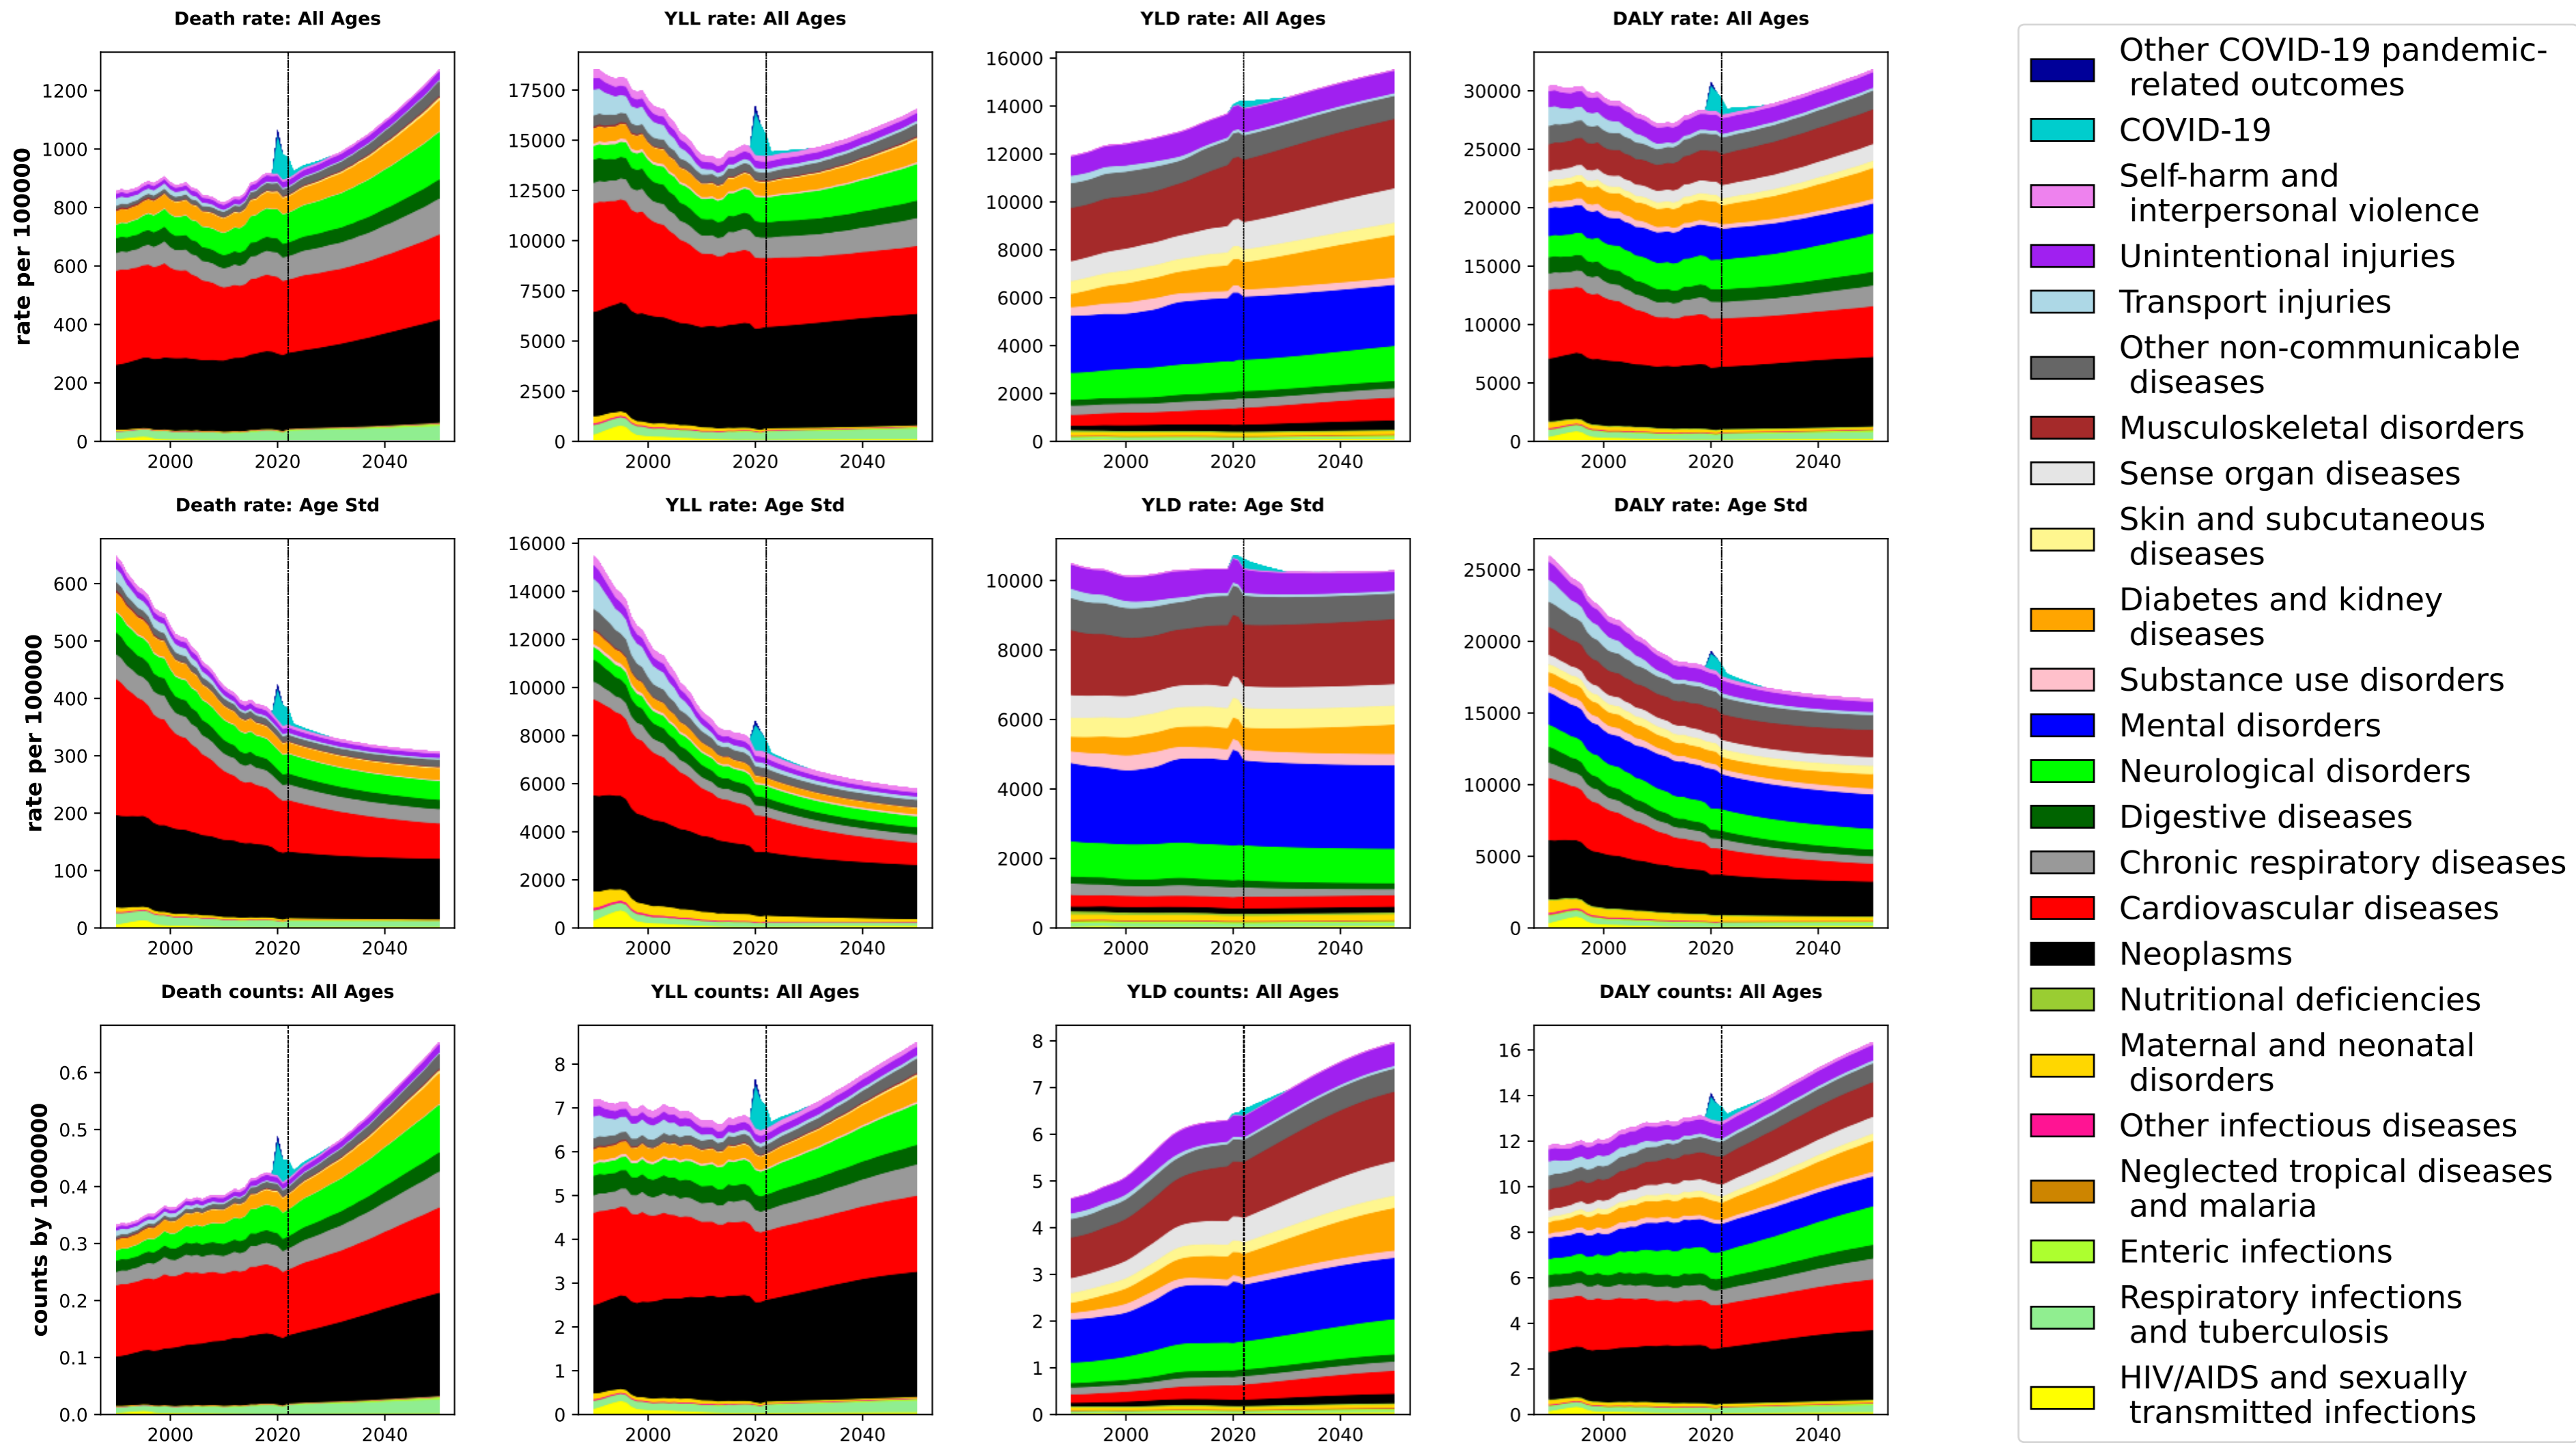

# Sweden

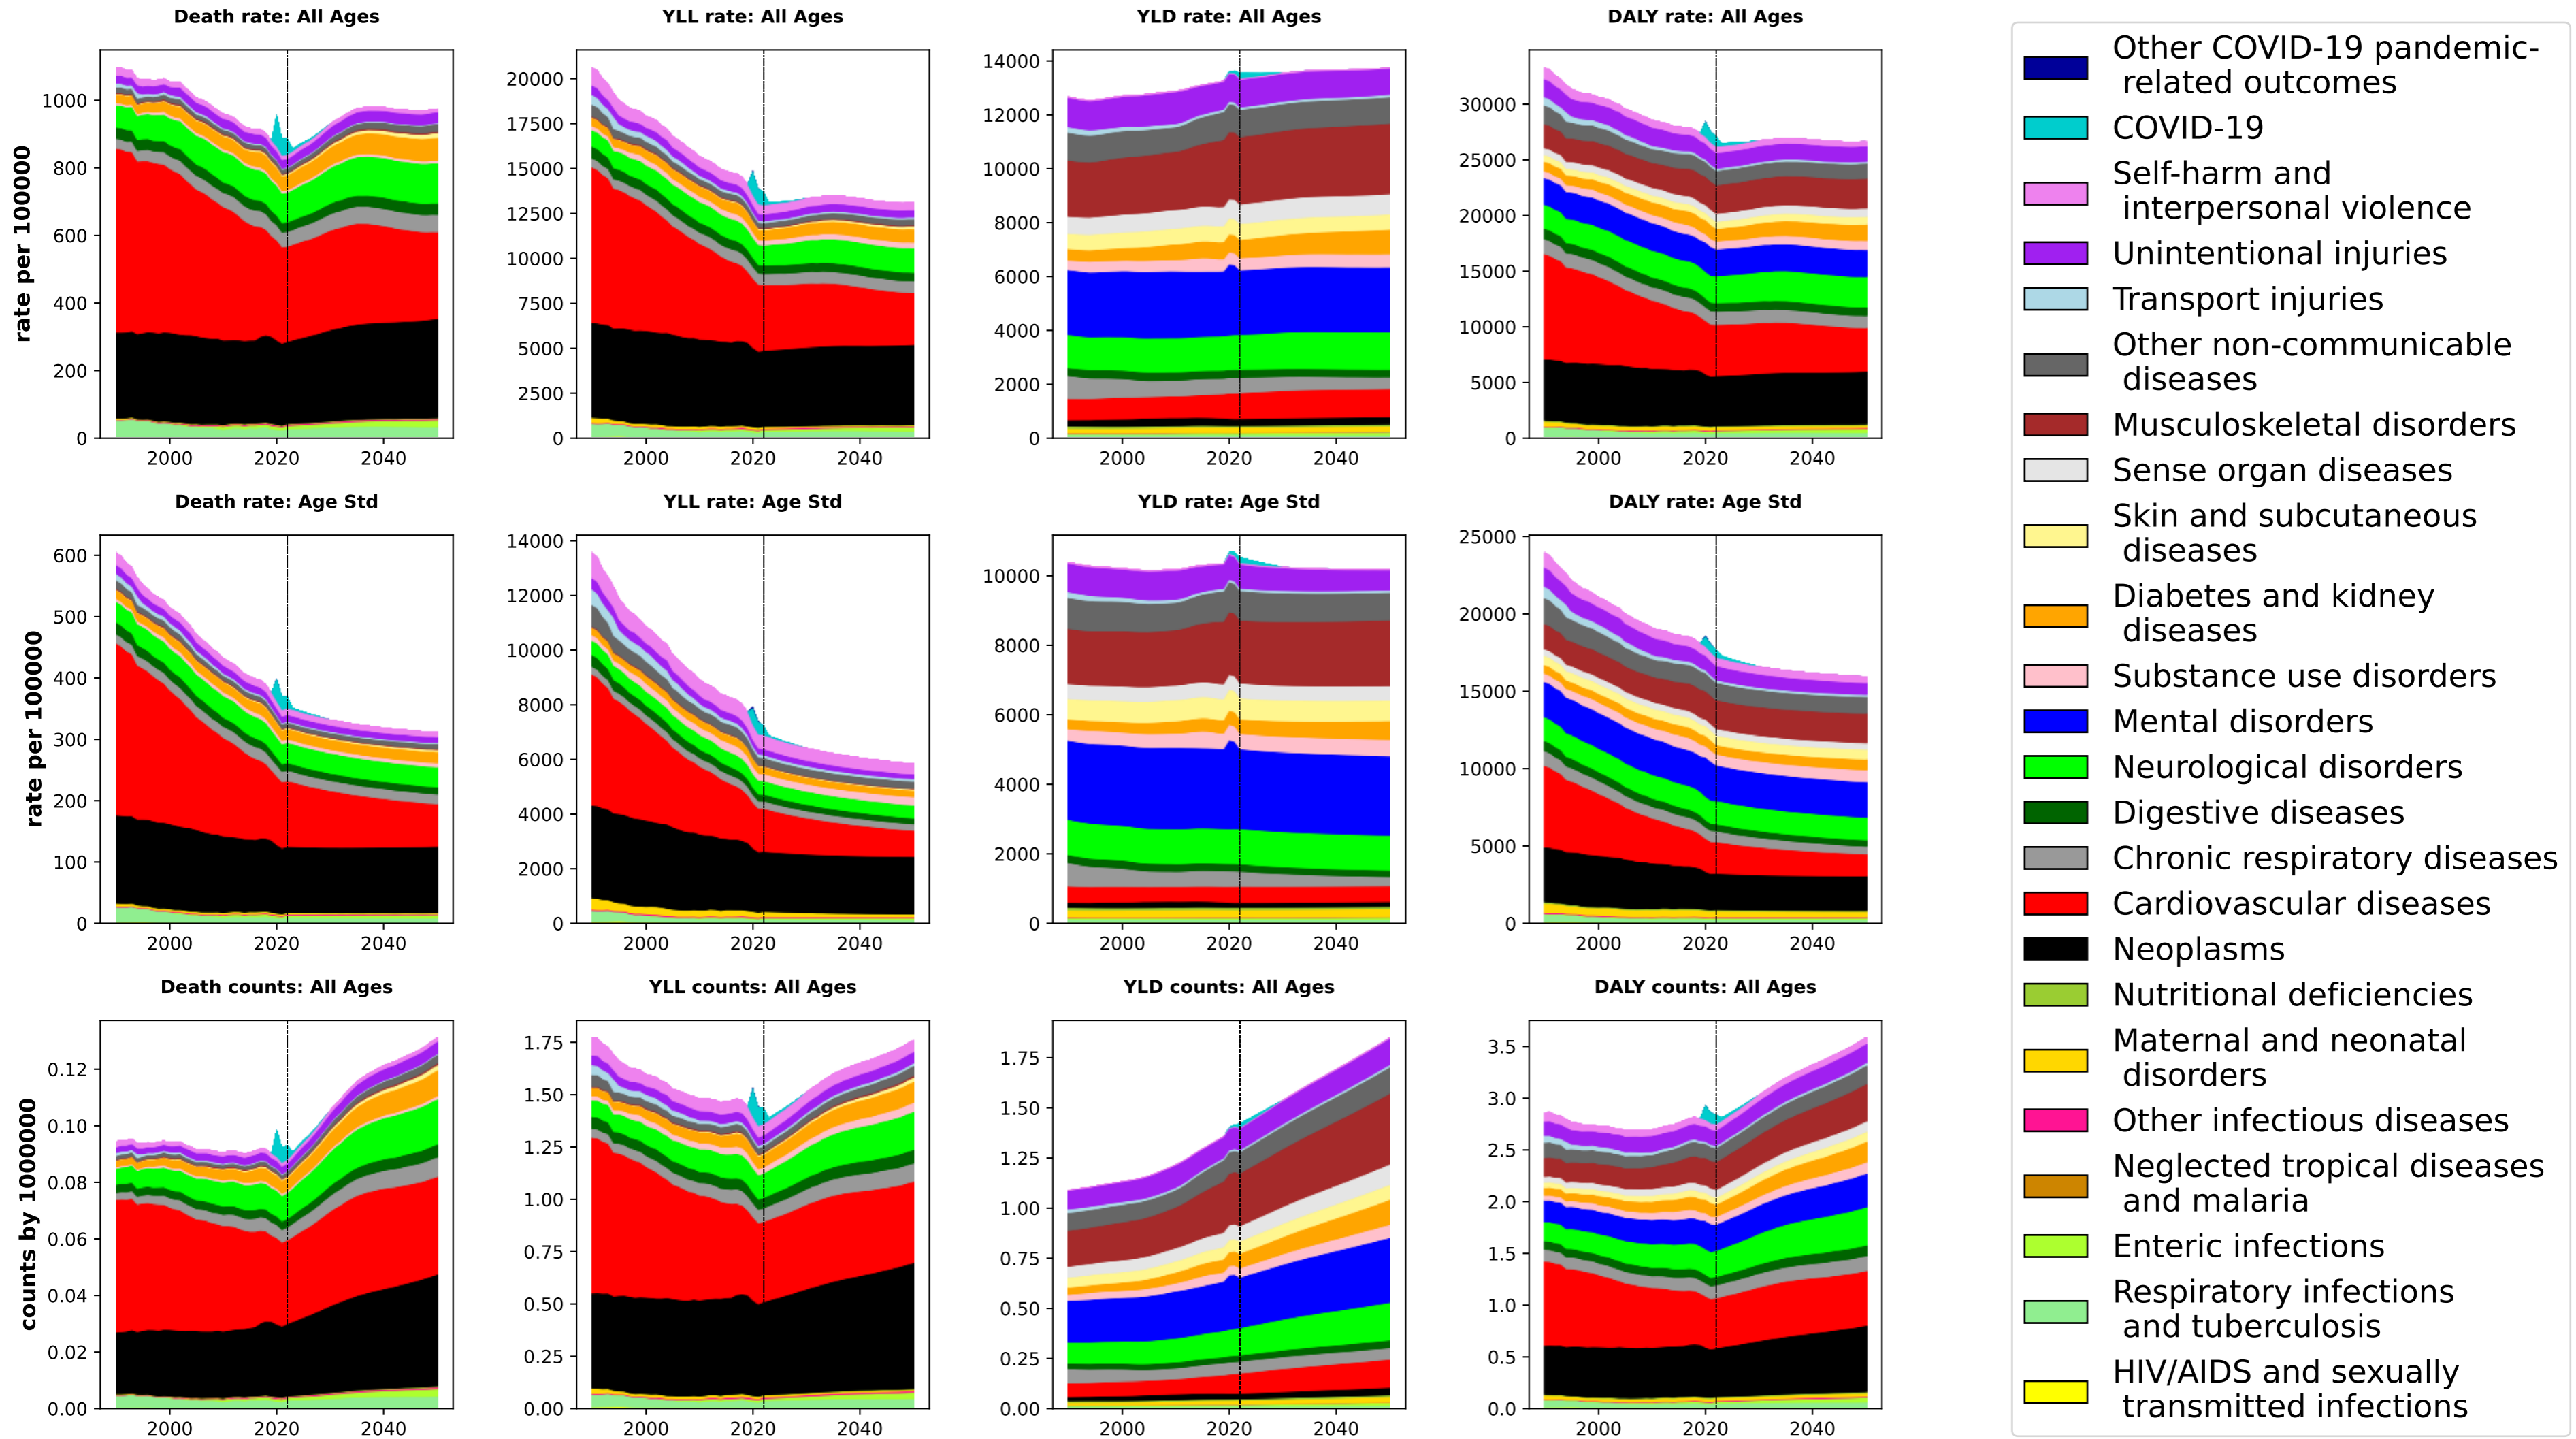

# Switzerland

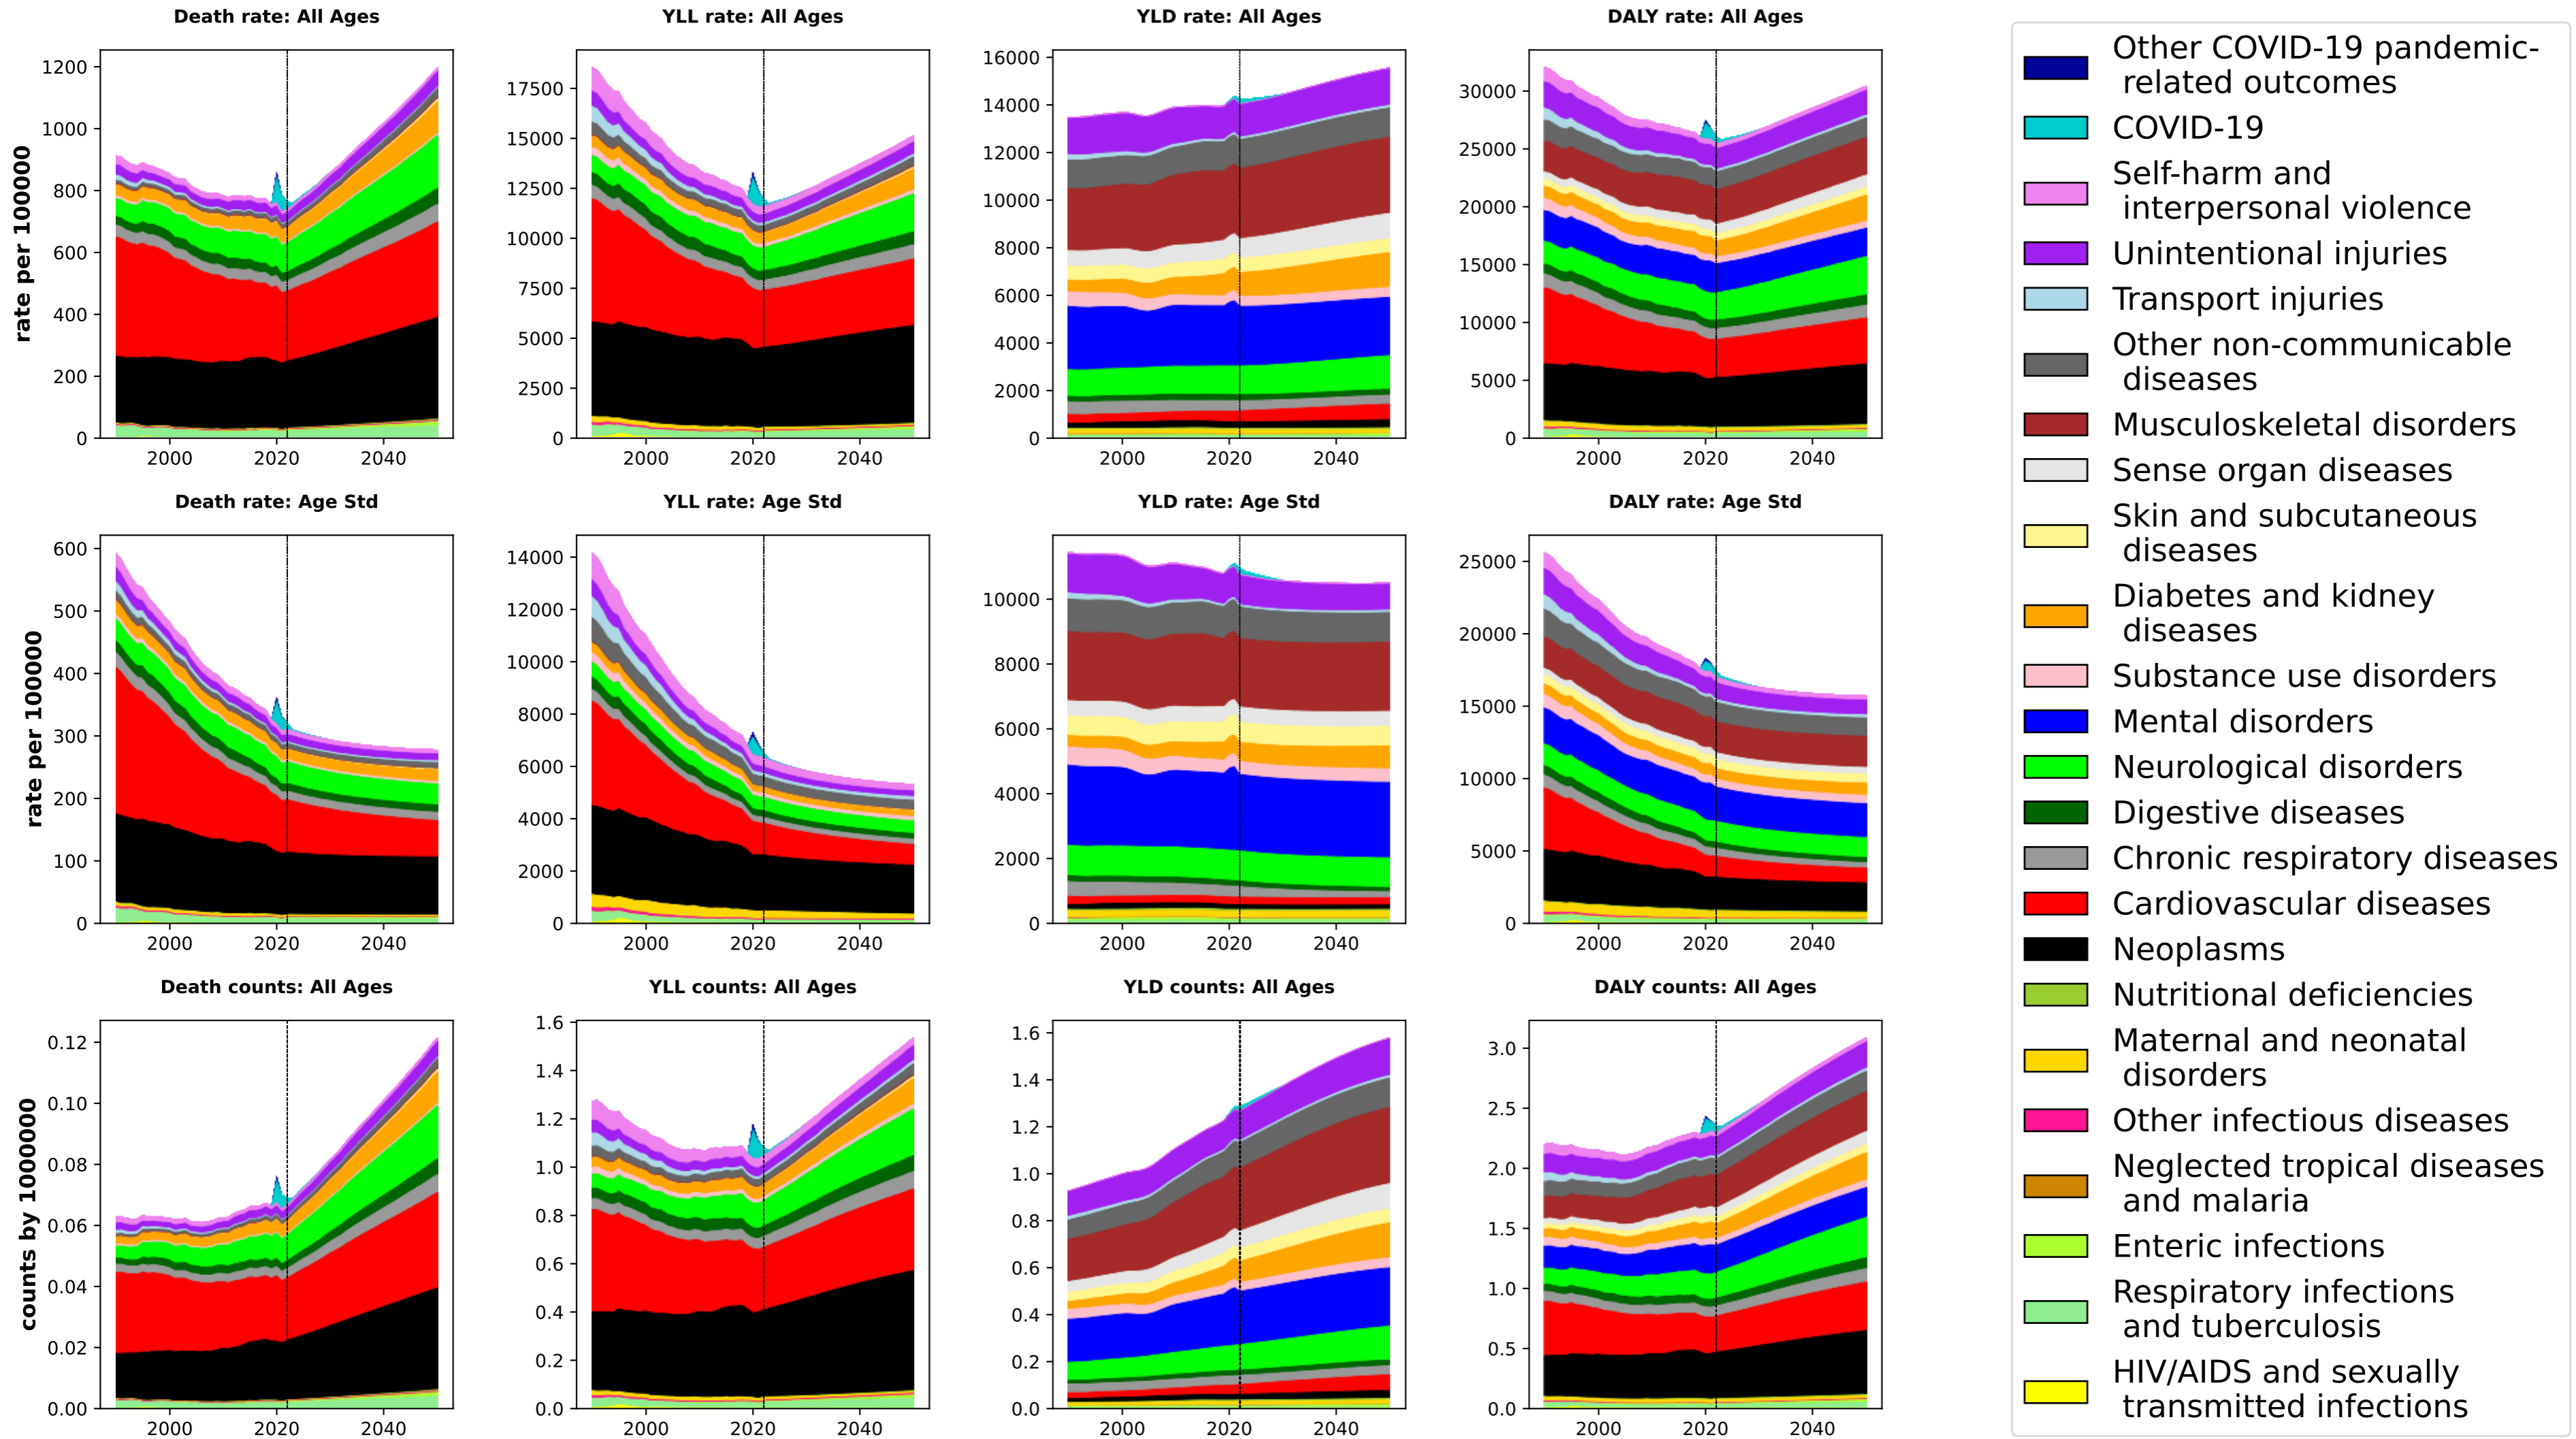

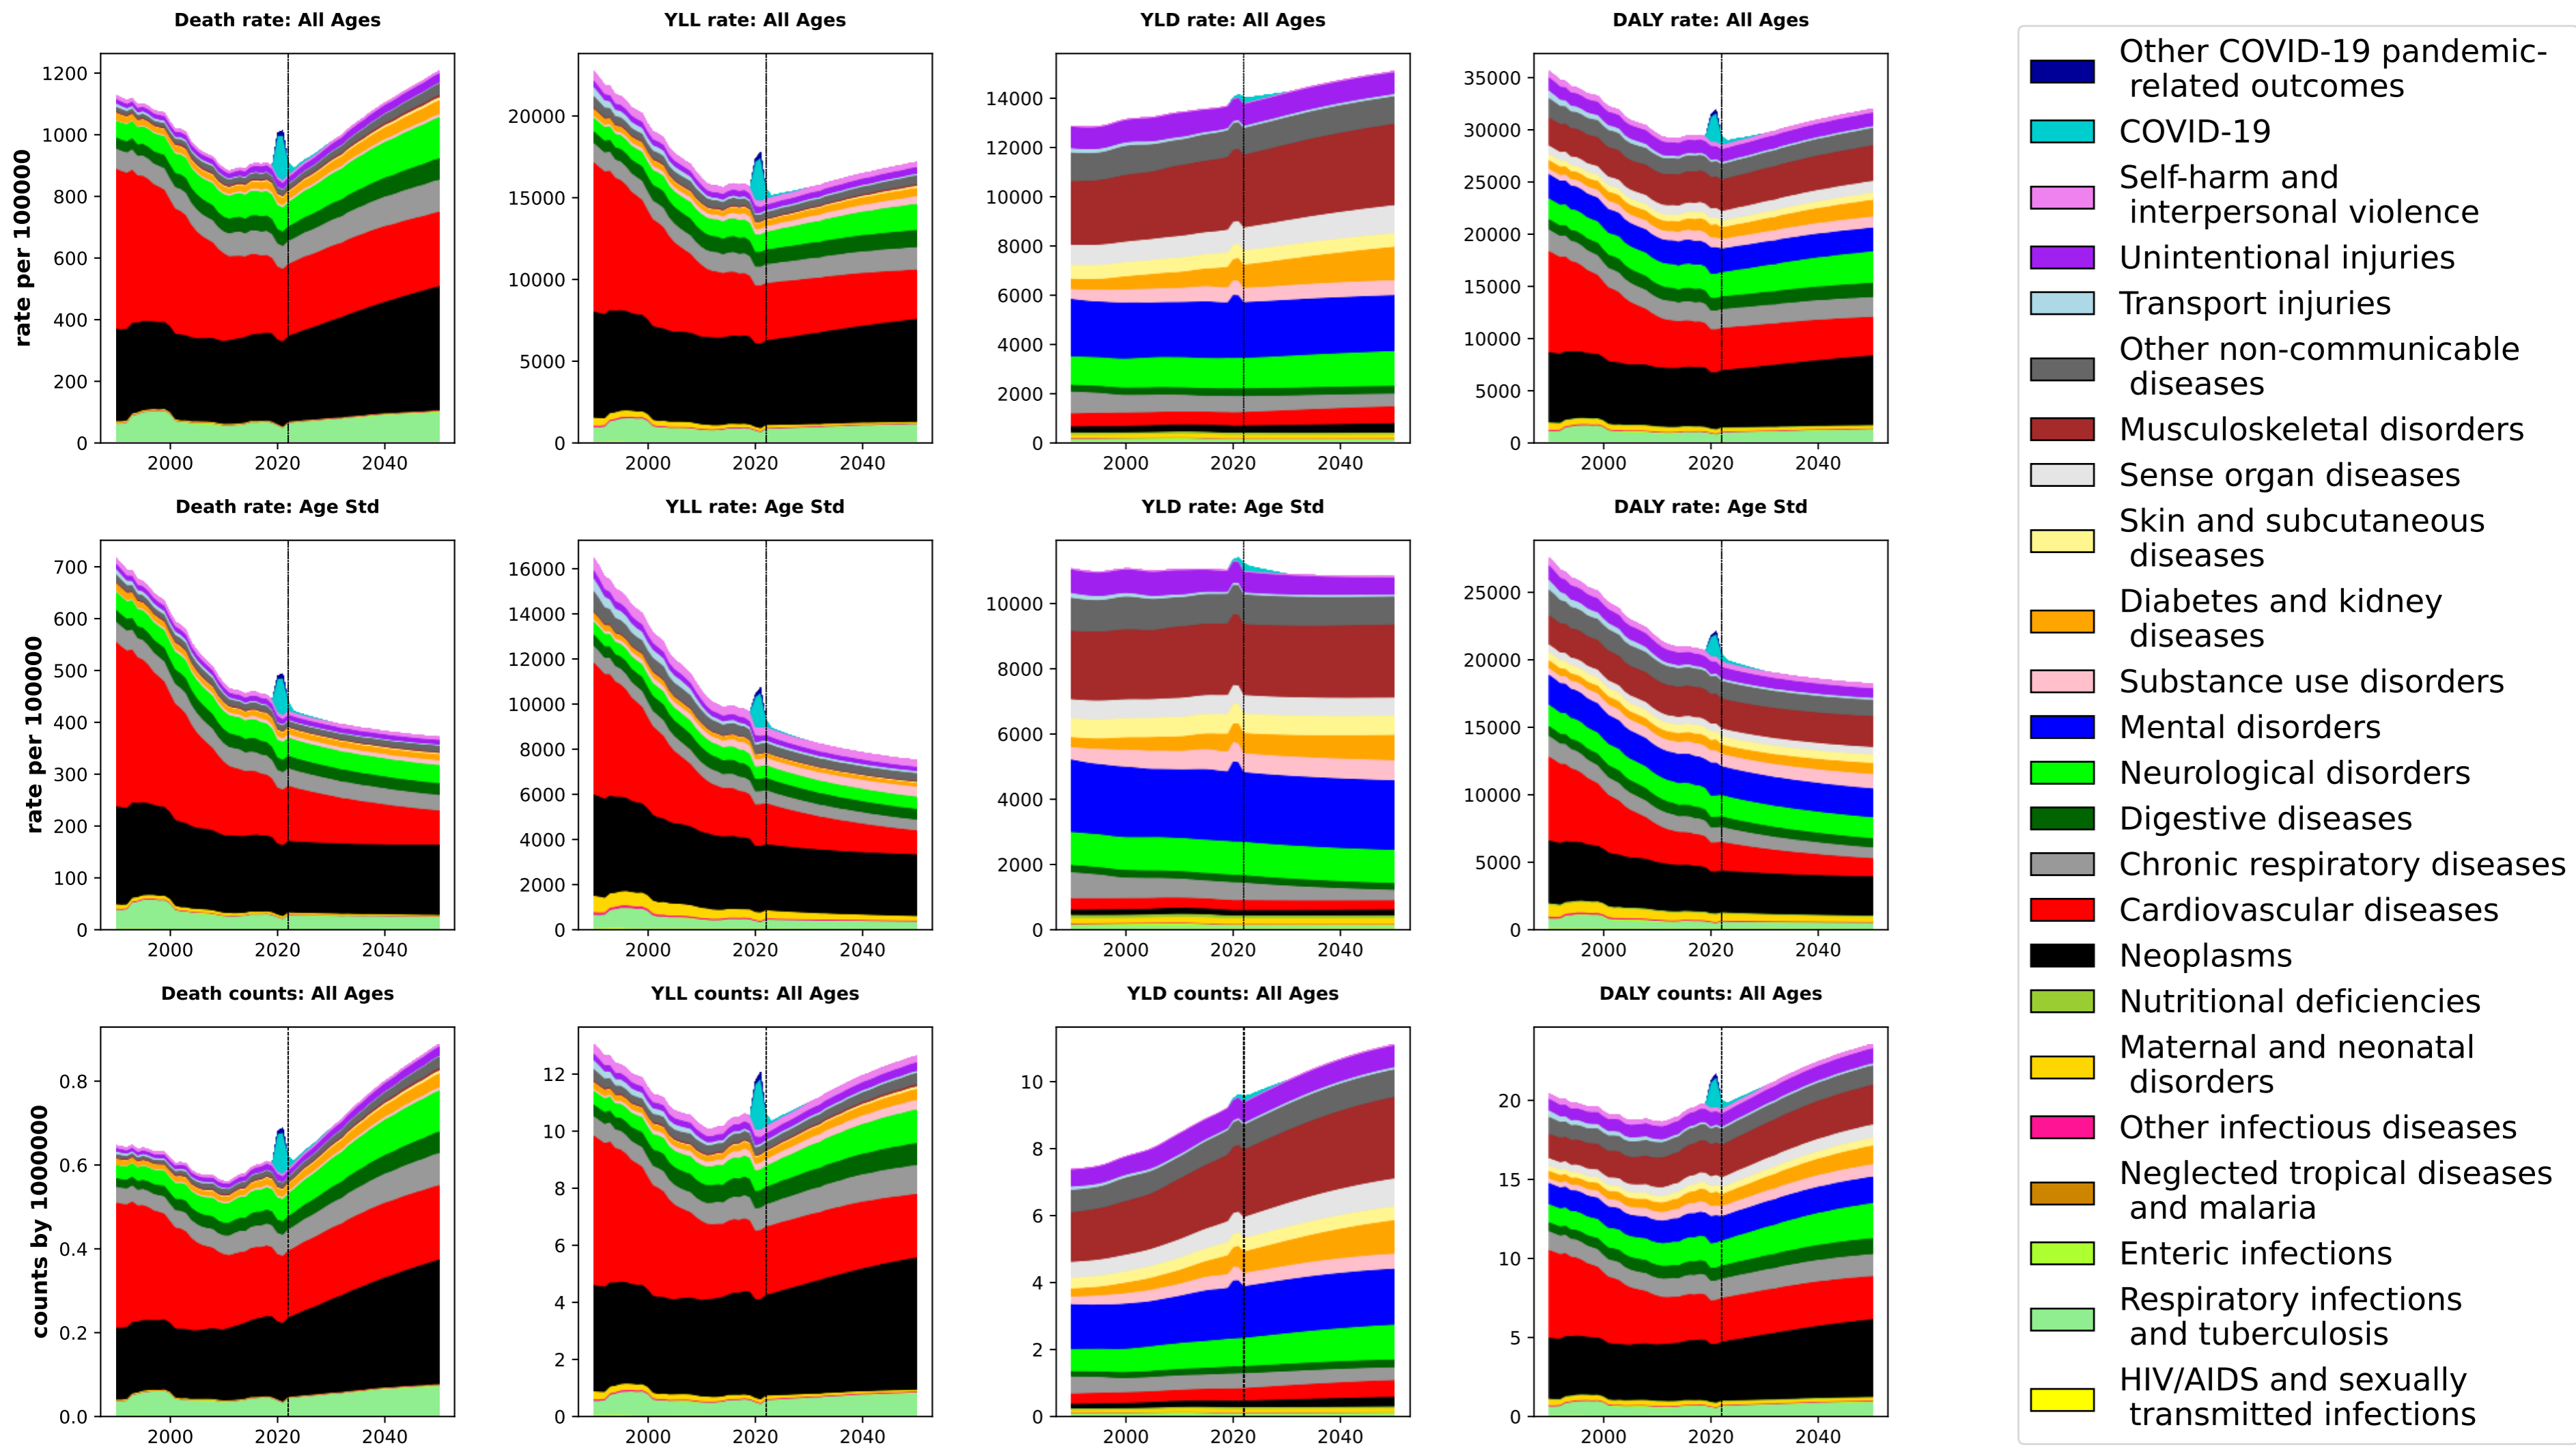



# Bolivia

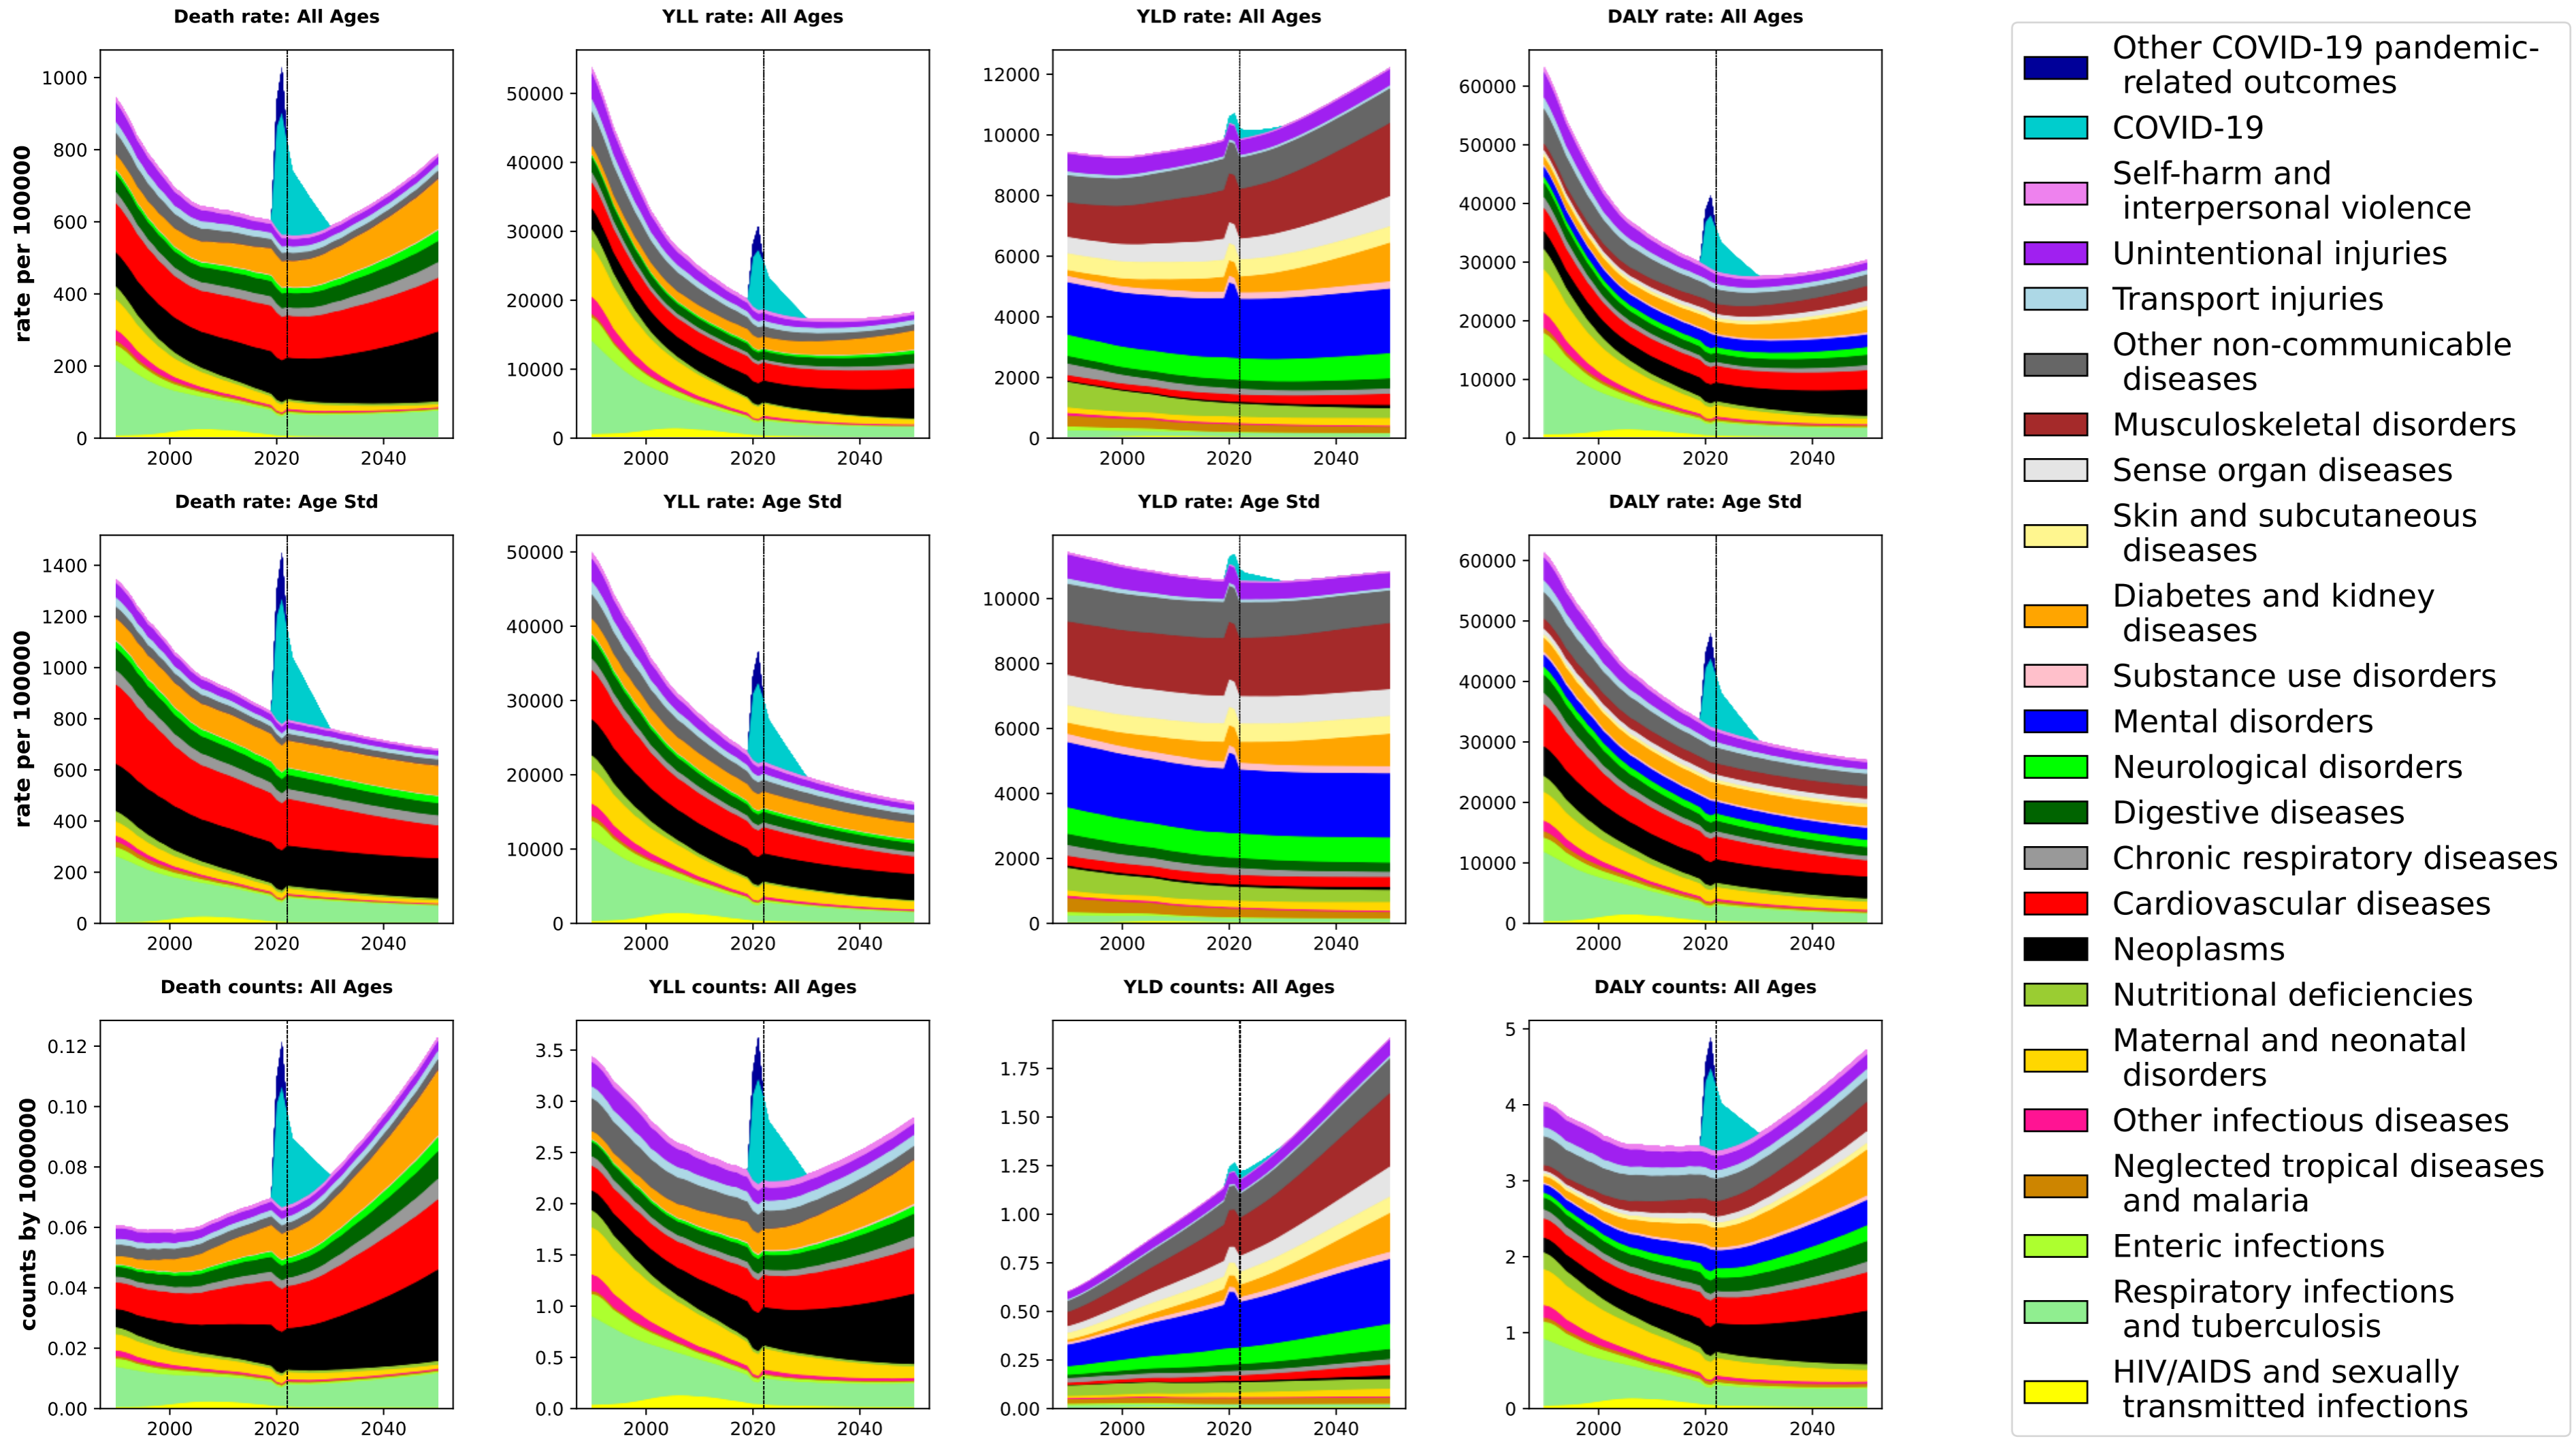

# Ecuador

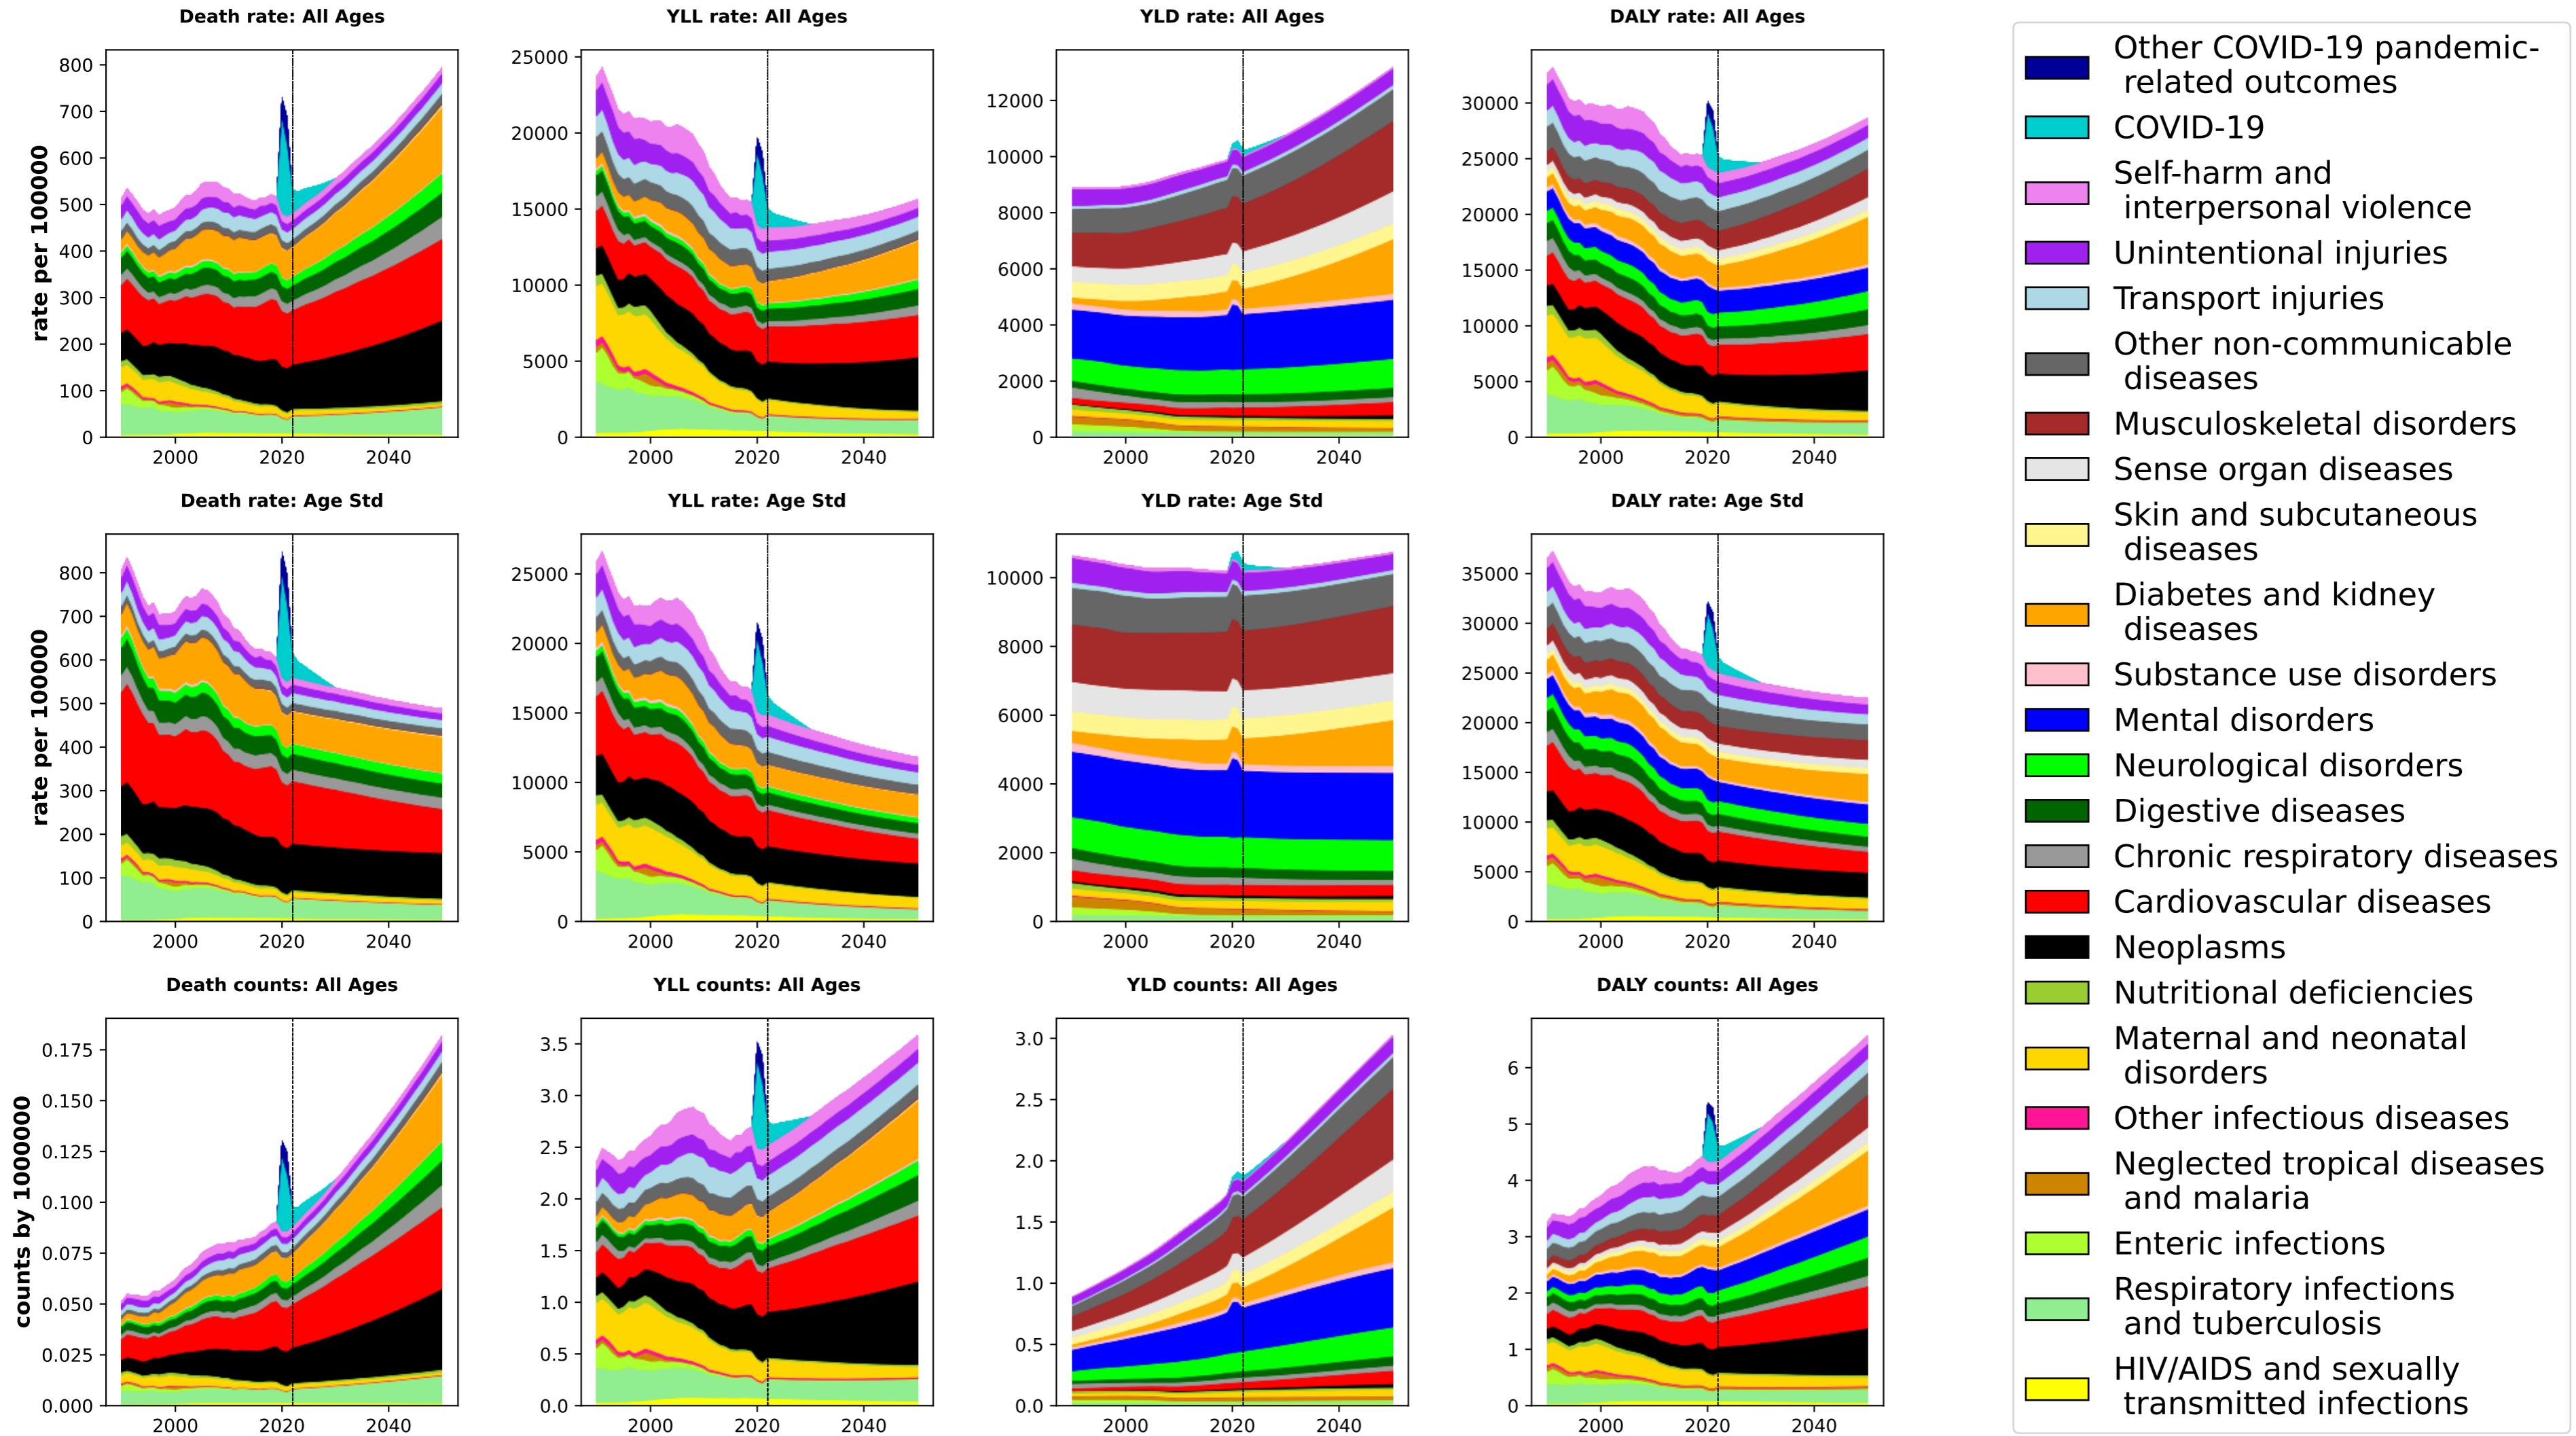

# Peru

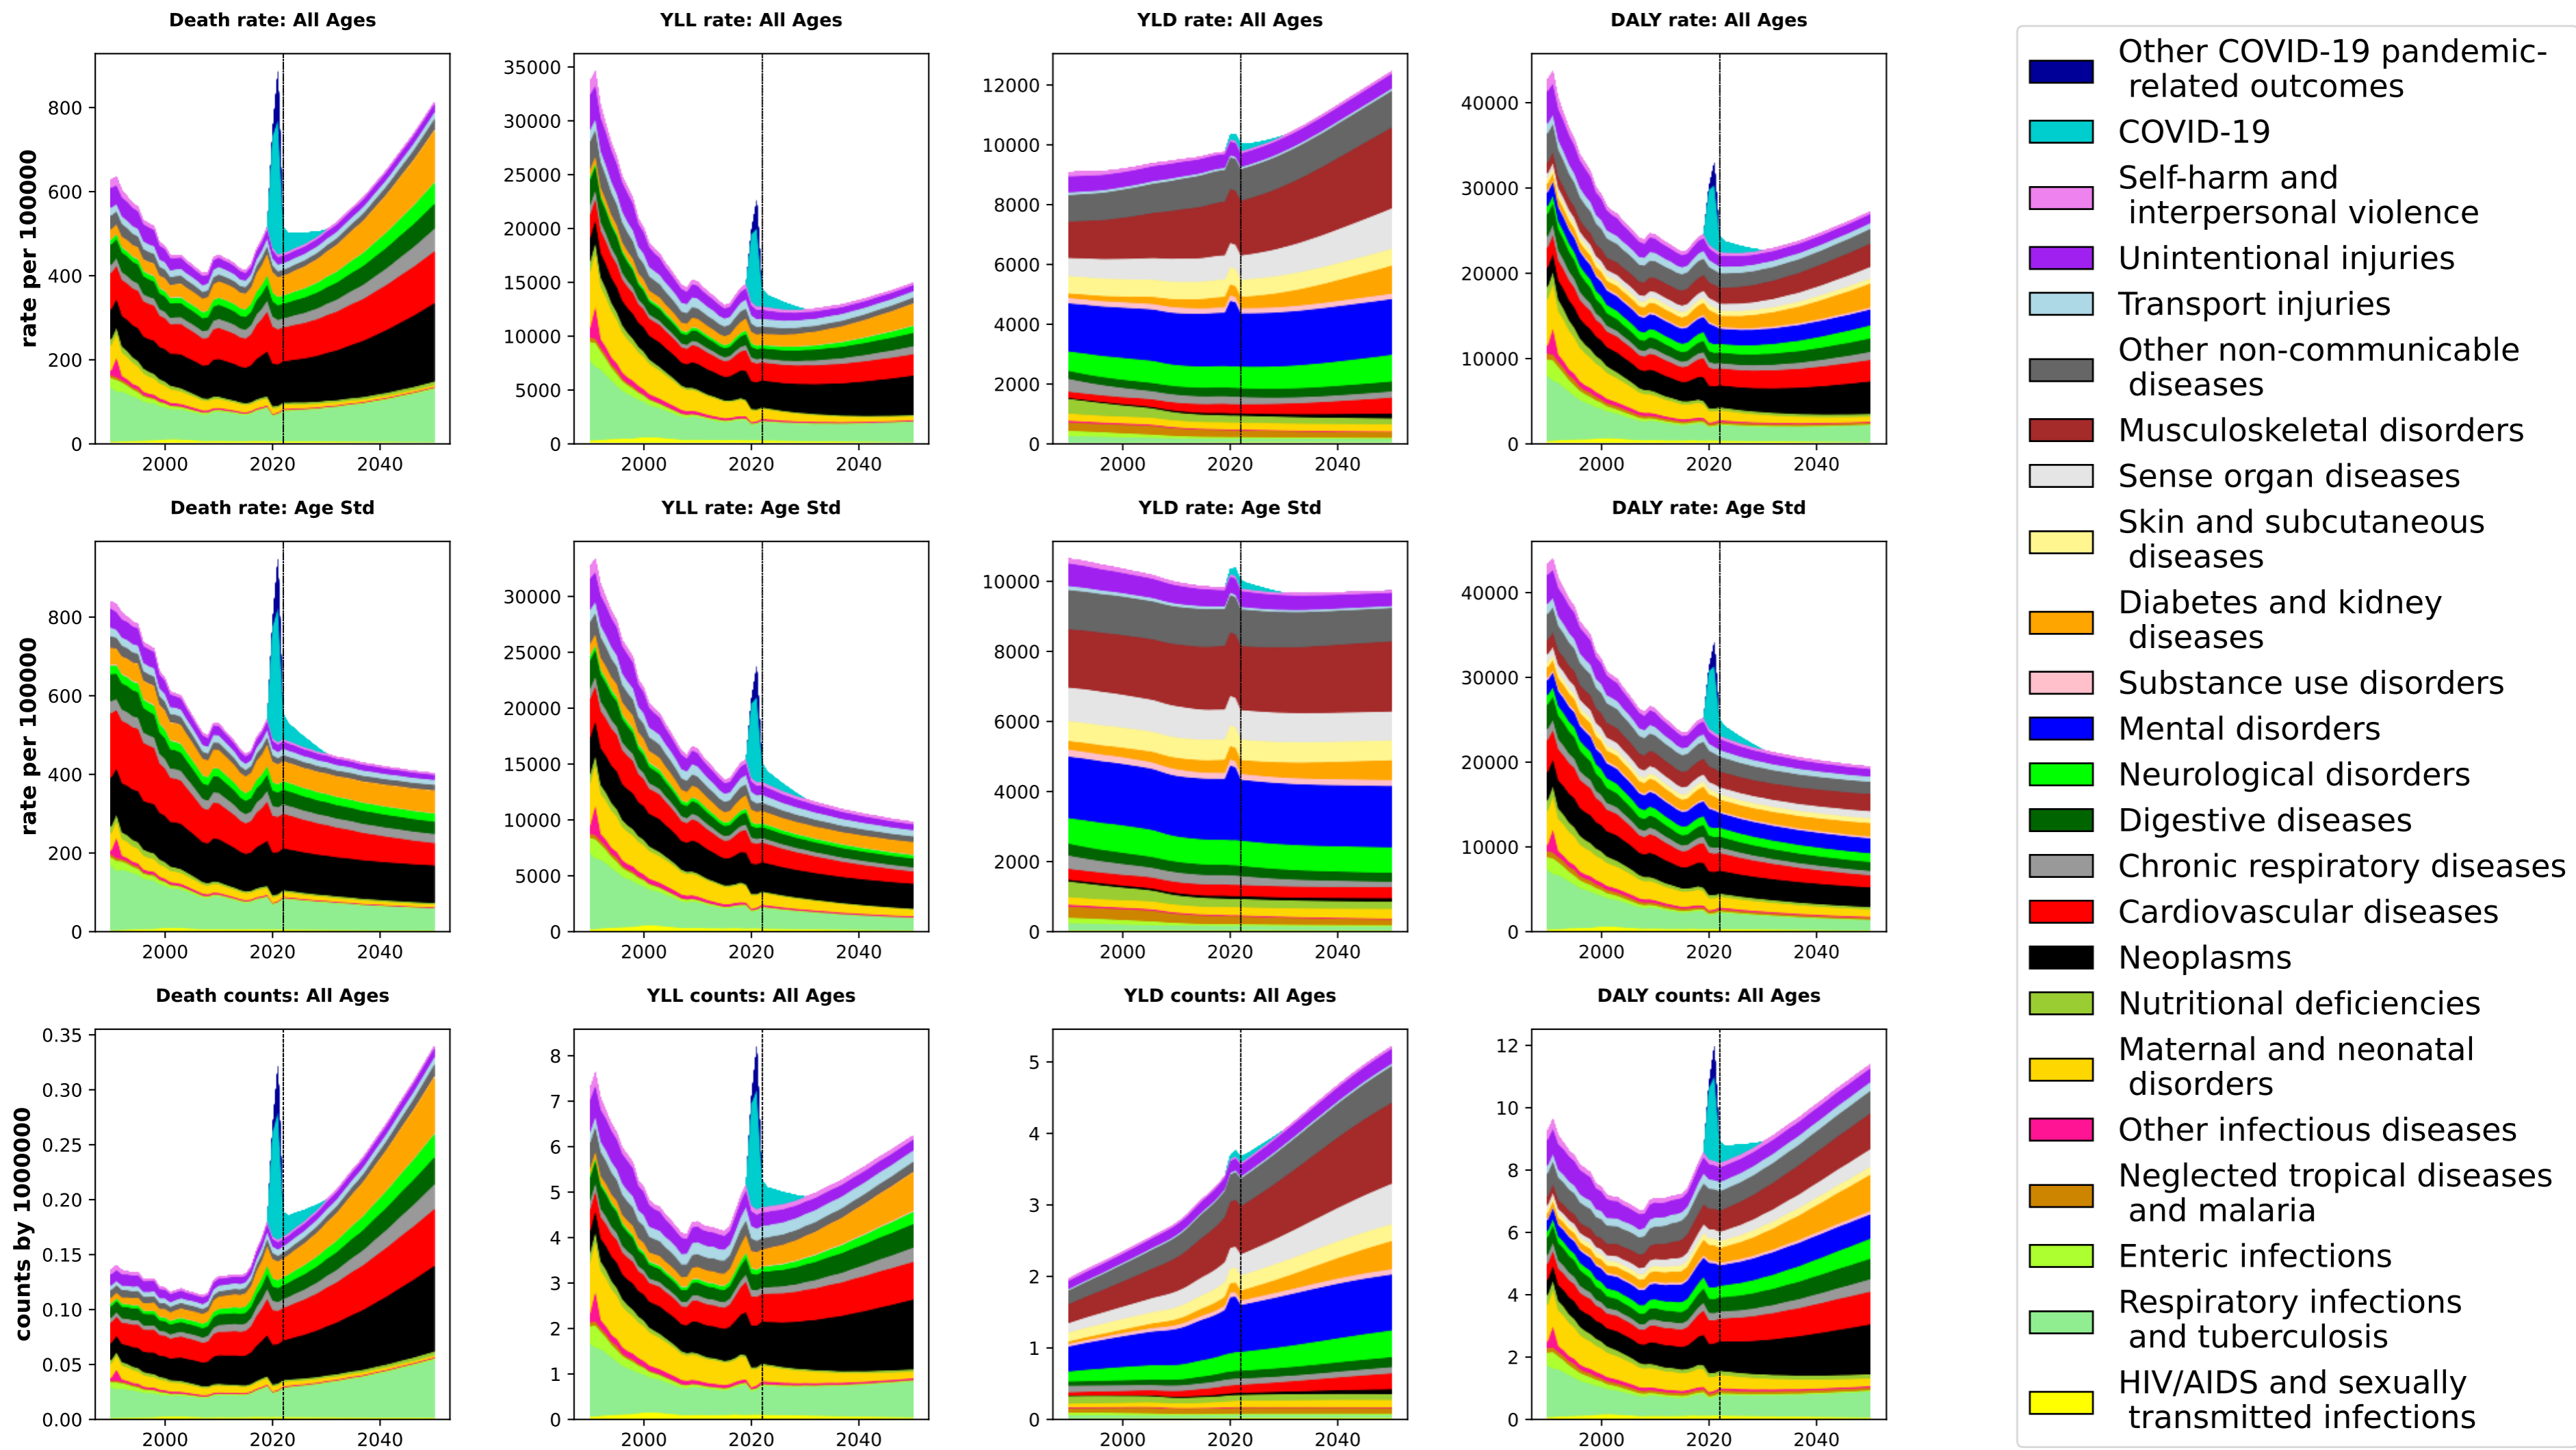

# Antigua and Barbuda

Supplemental Results Figure S6. Cause level 2 area plots for 4 burden measures for reference scenario by location, 1990-2050

779

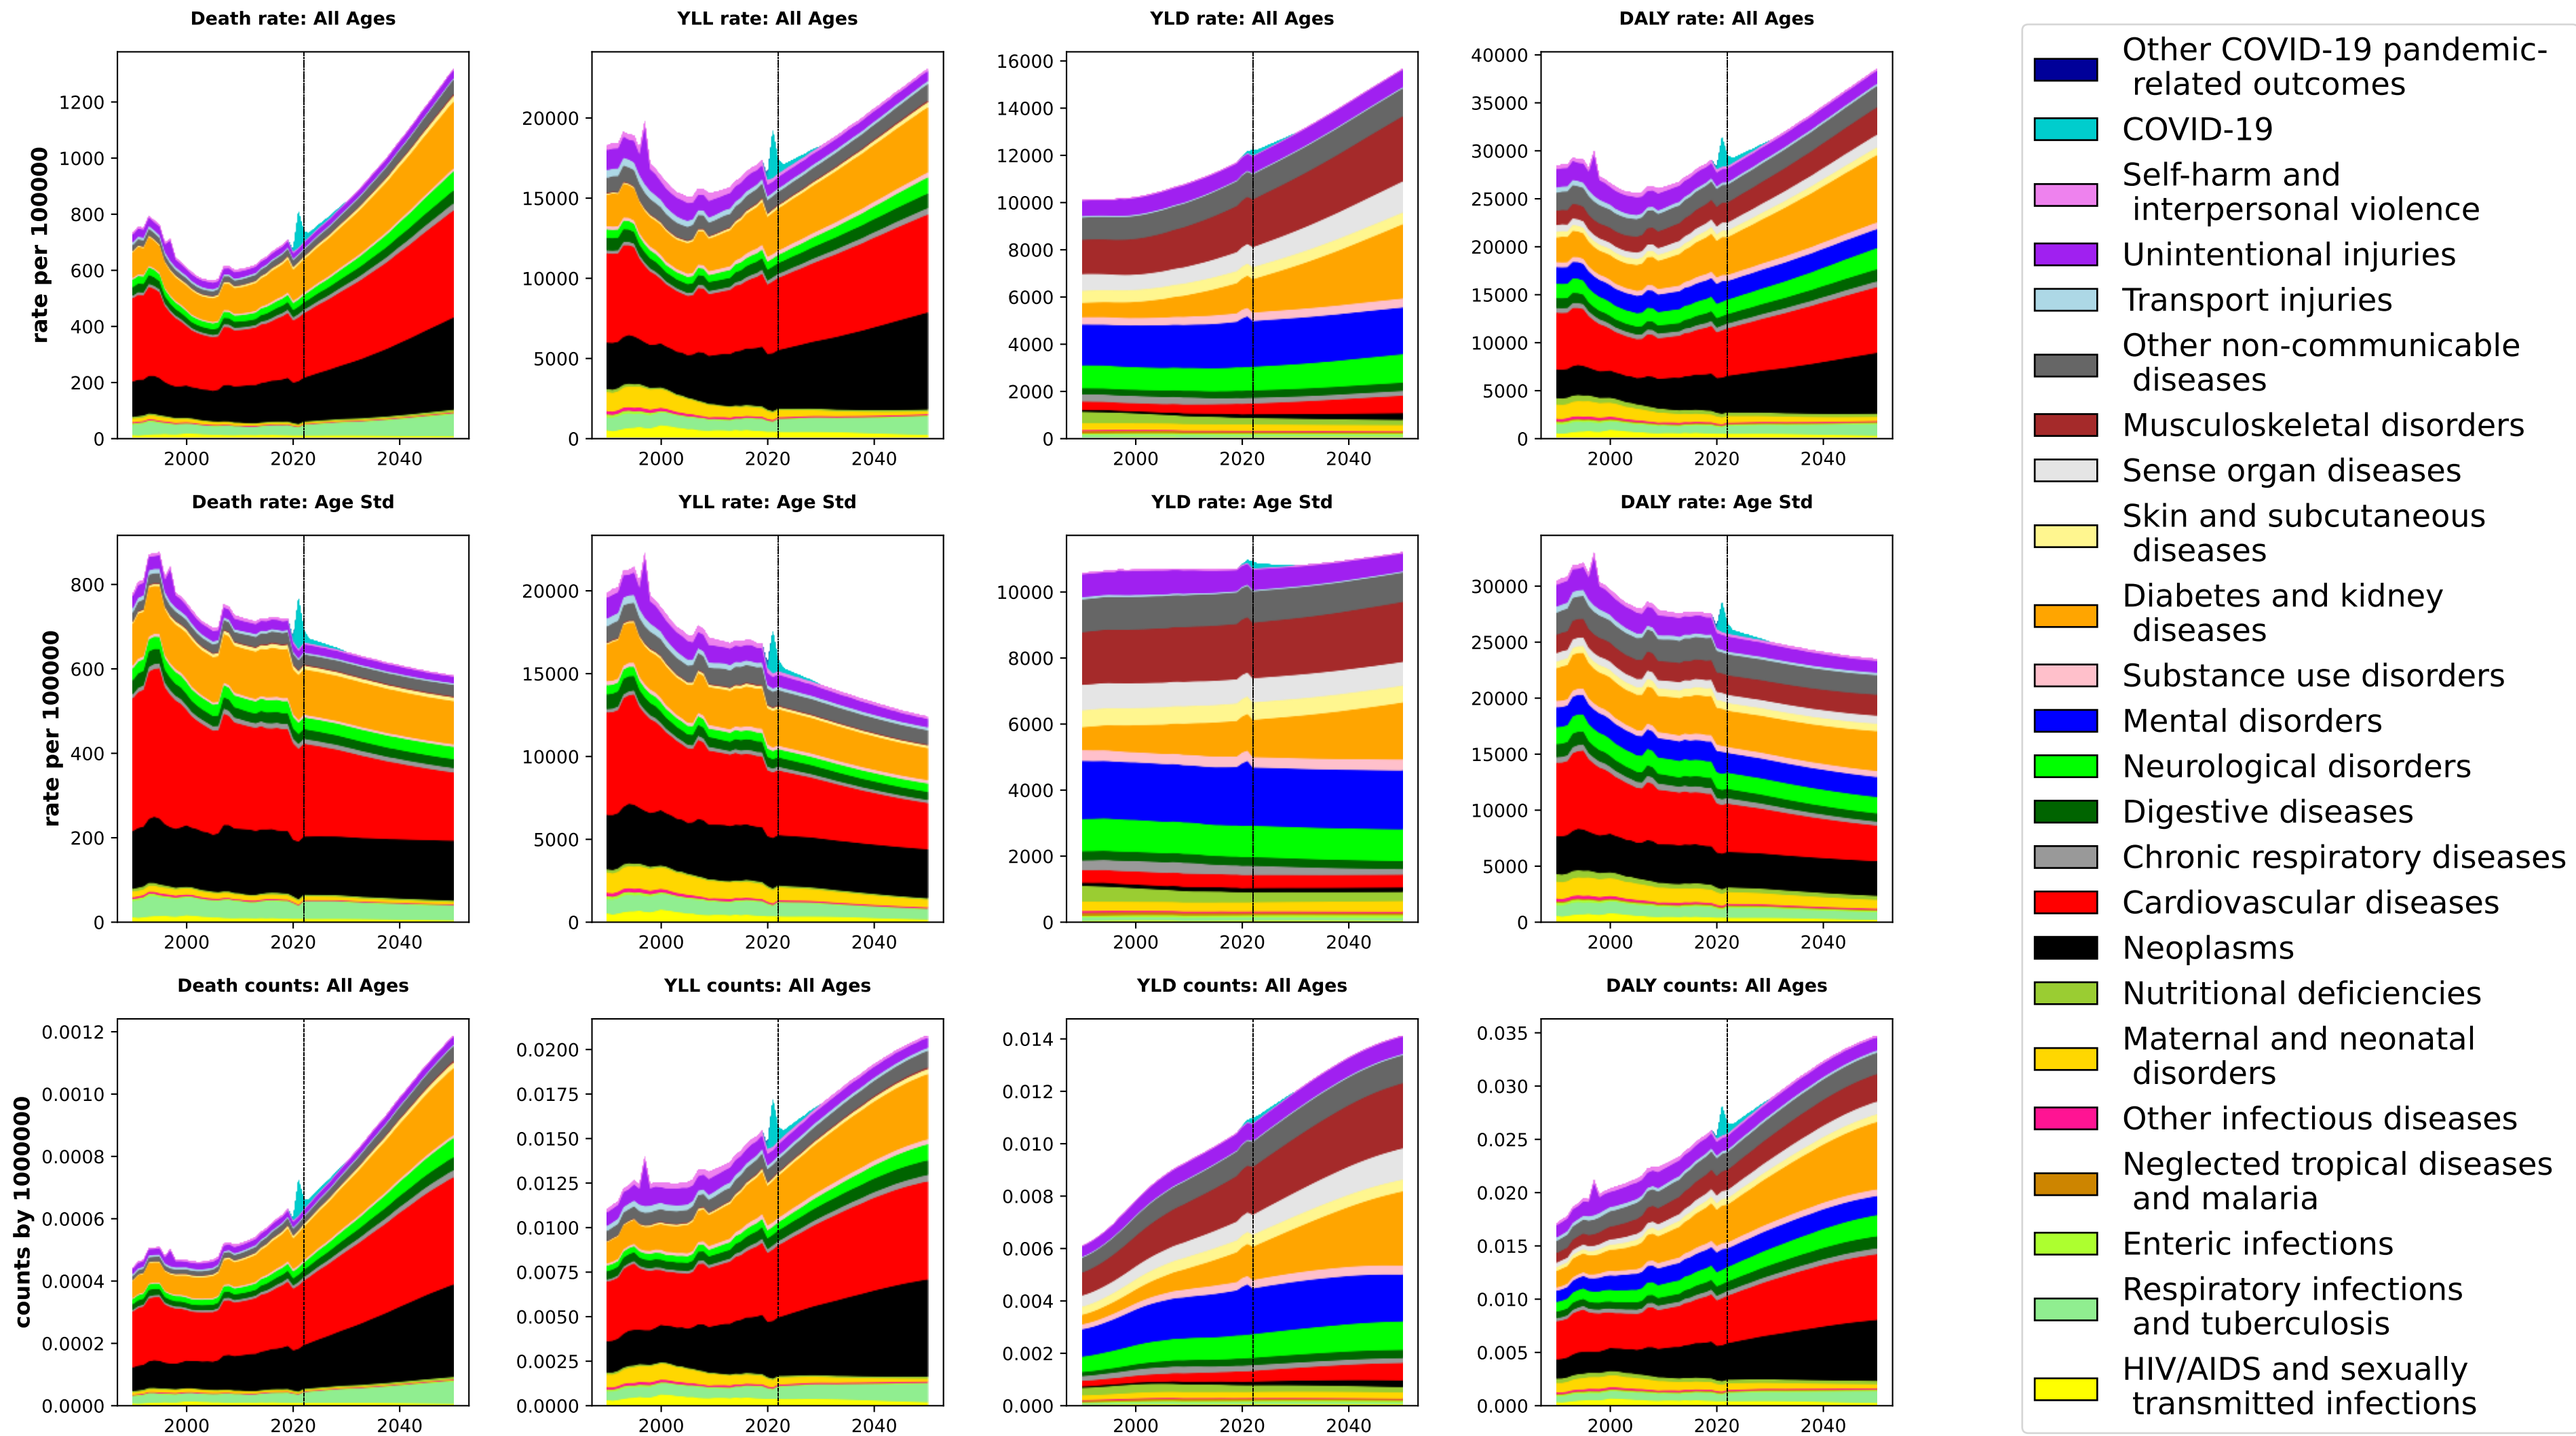

# The Bahamas

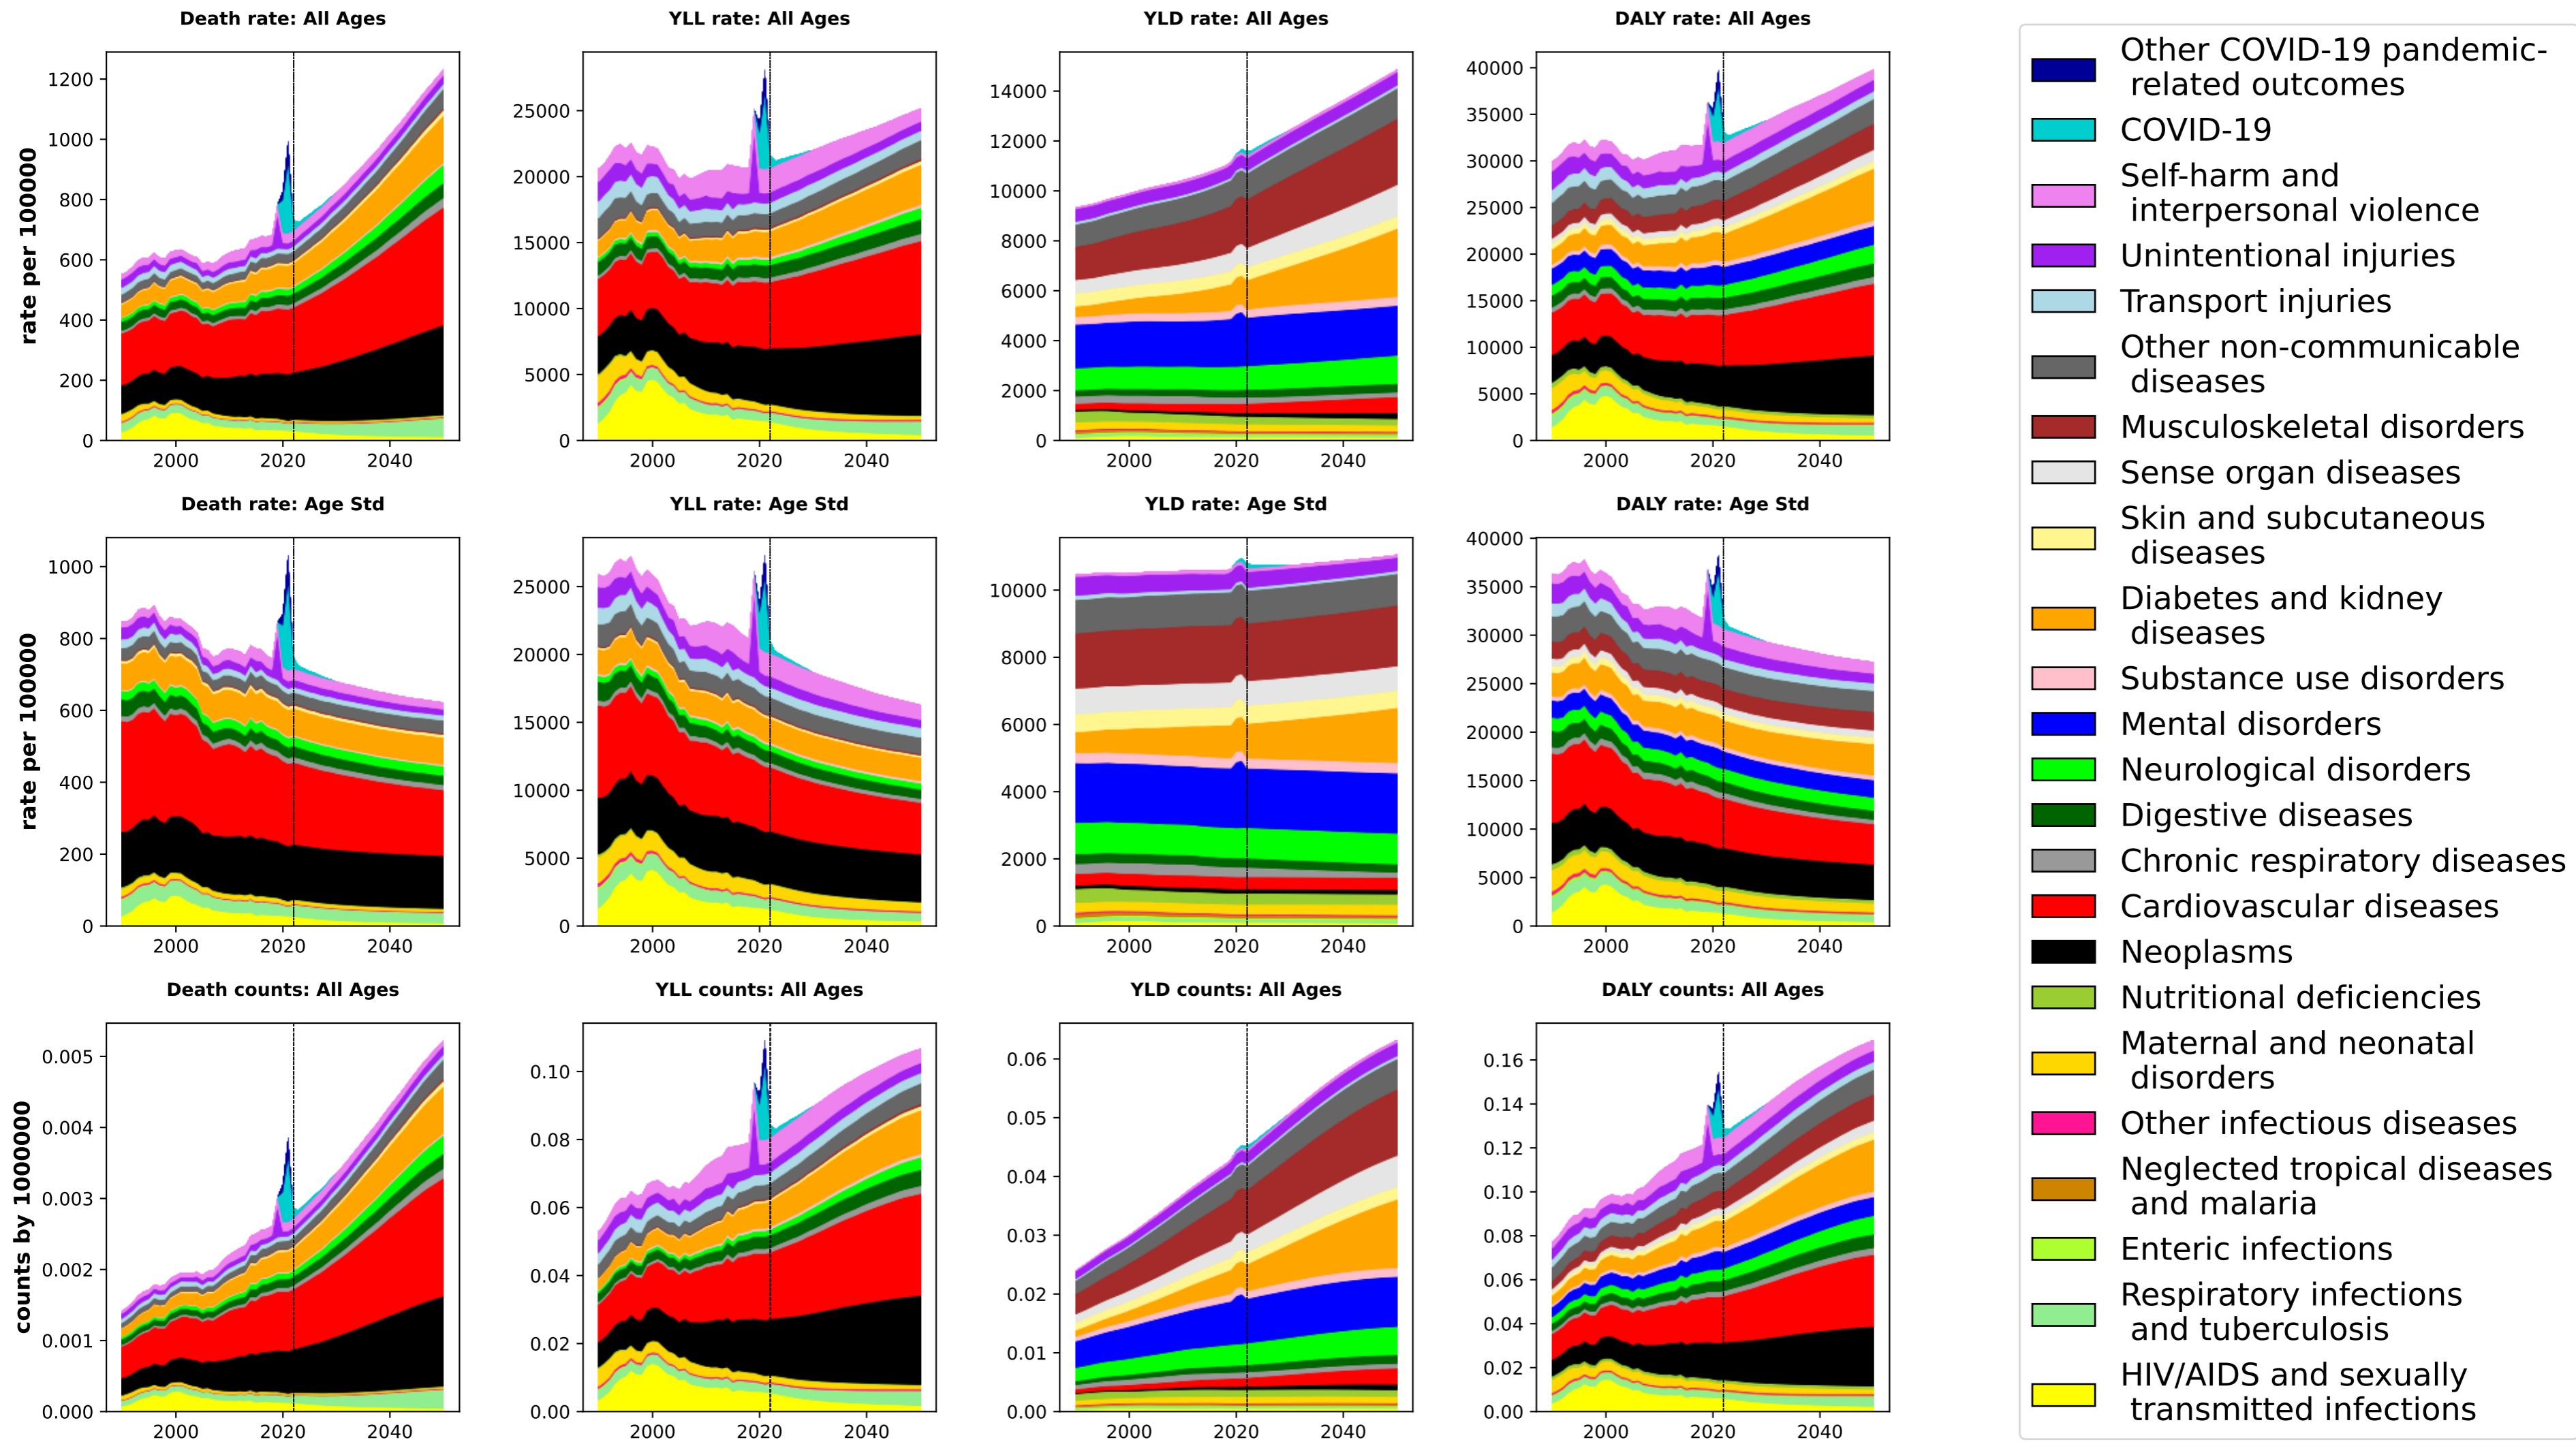

# Barbados

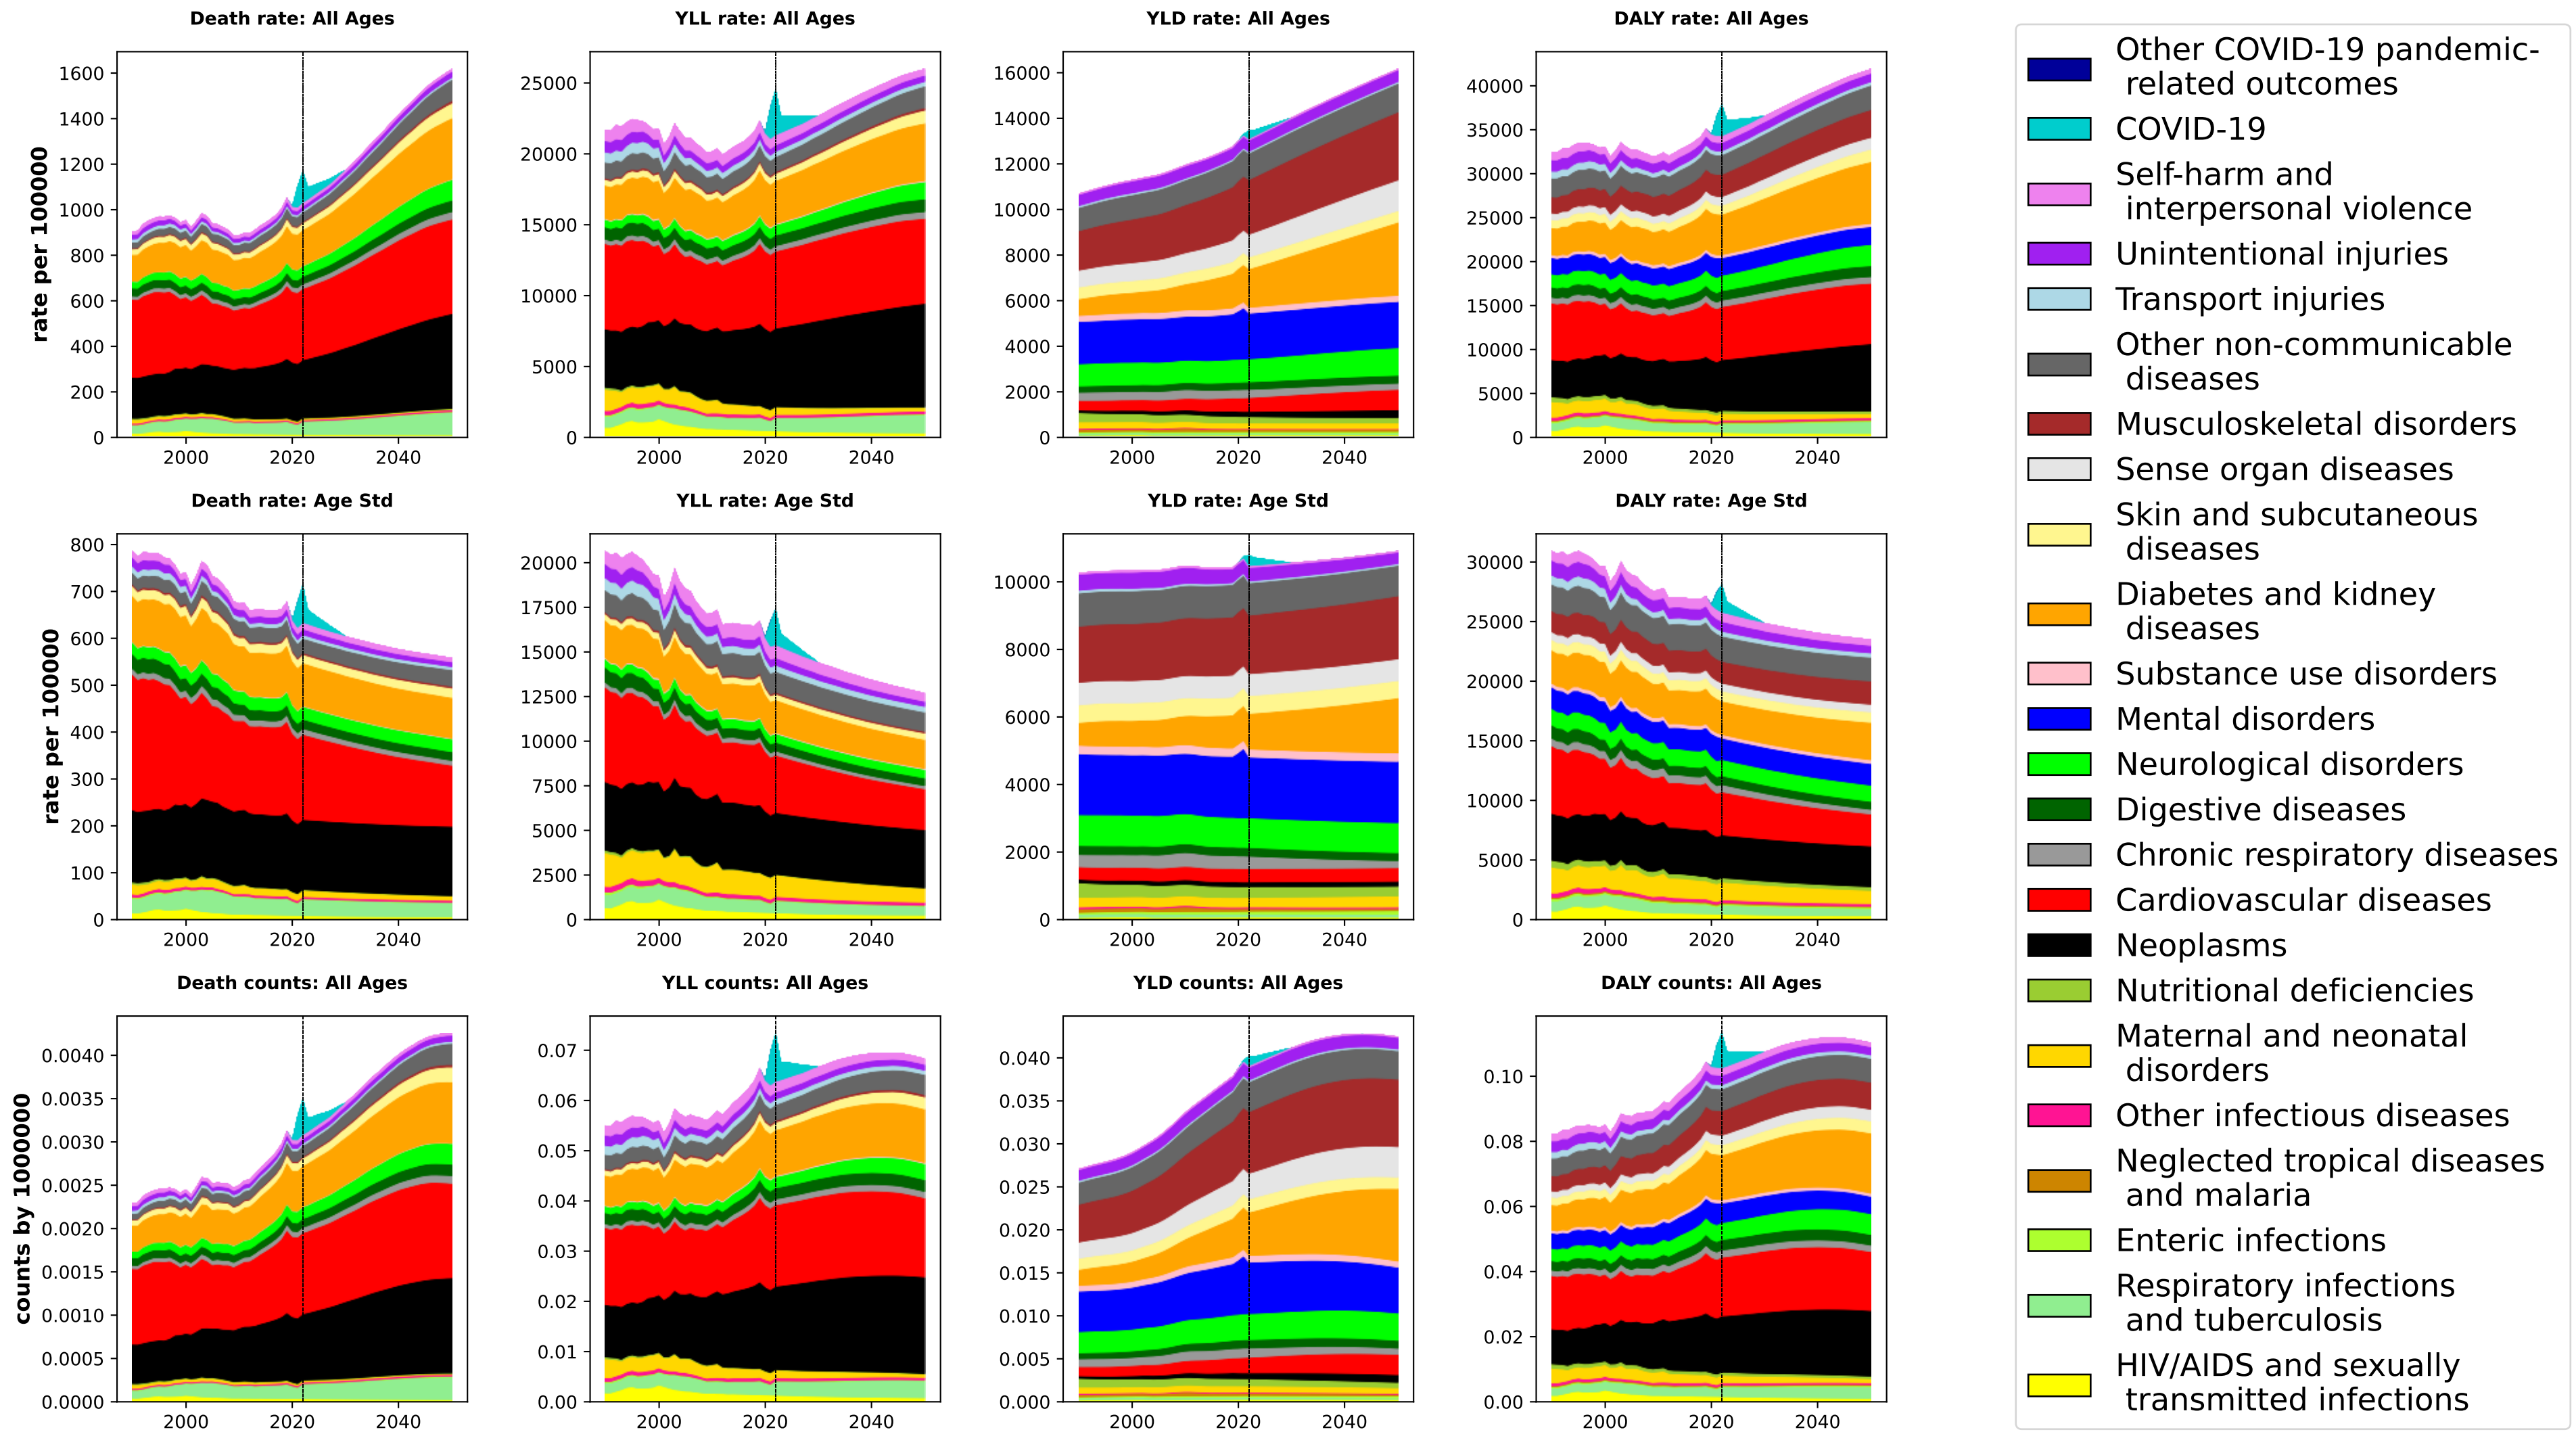

# Belize

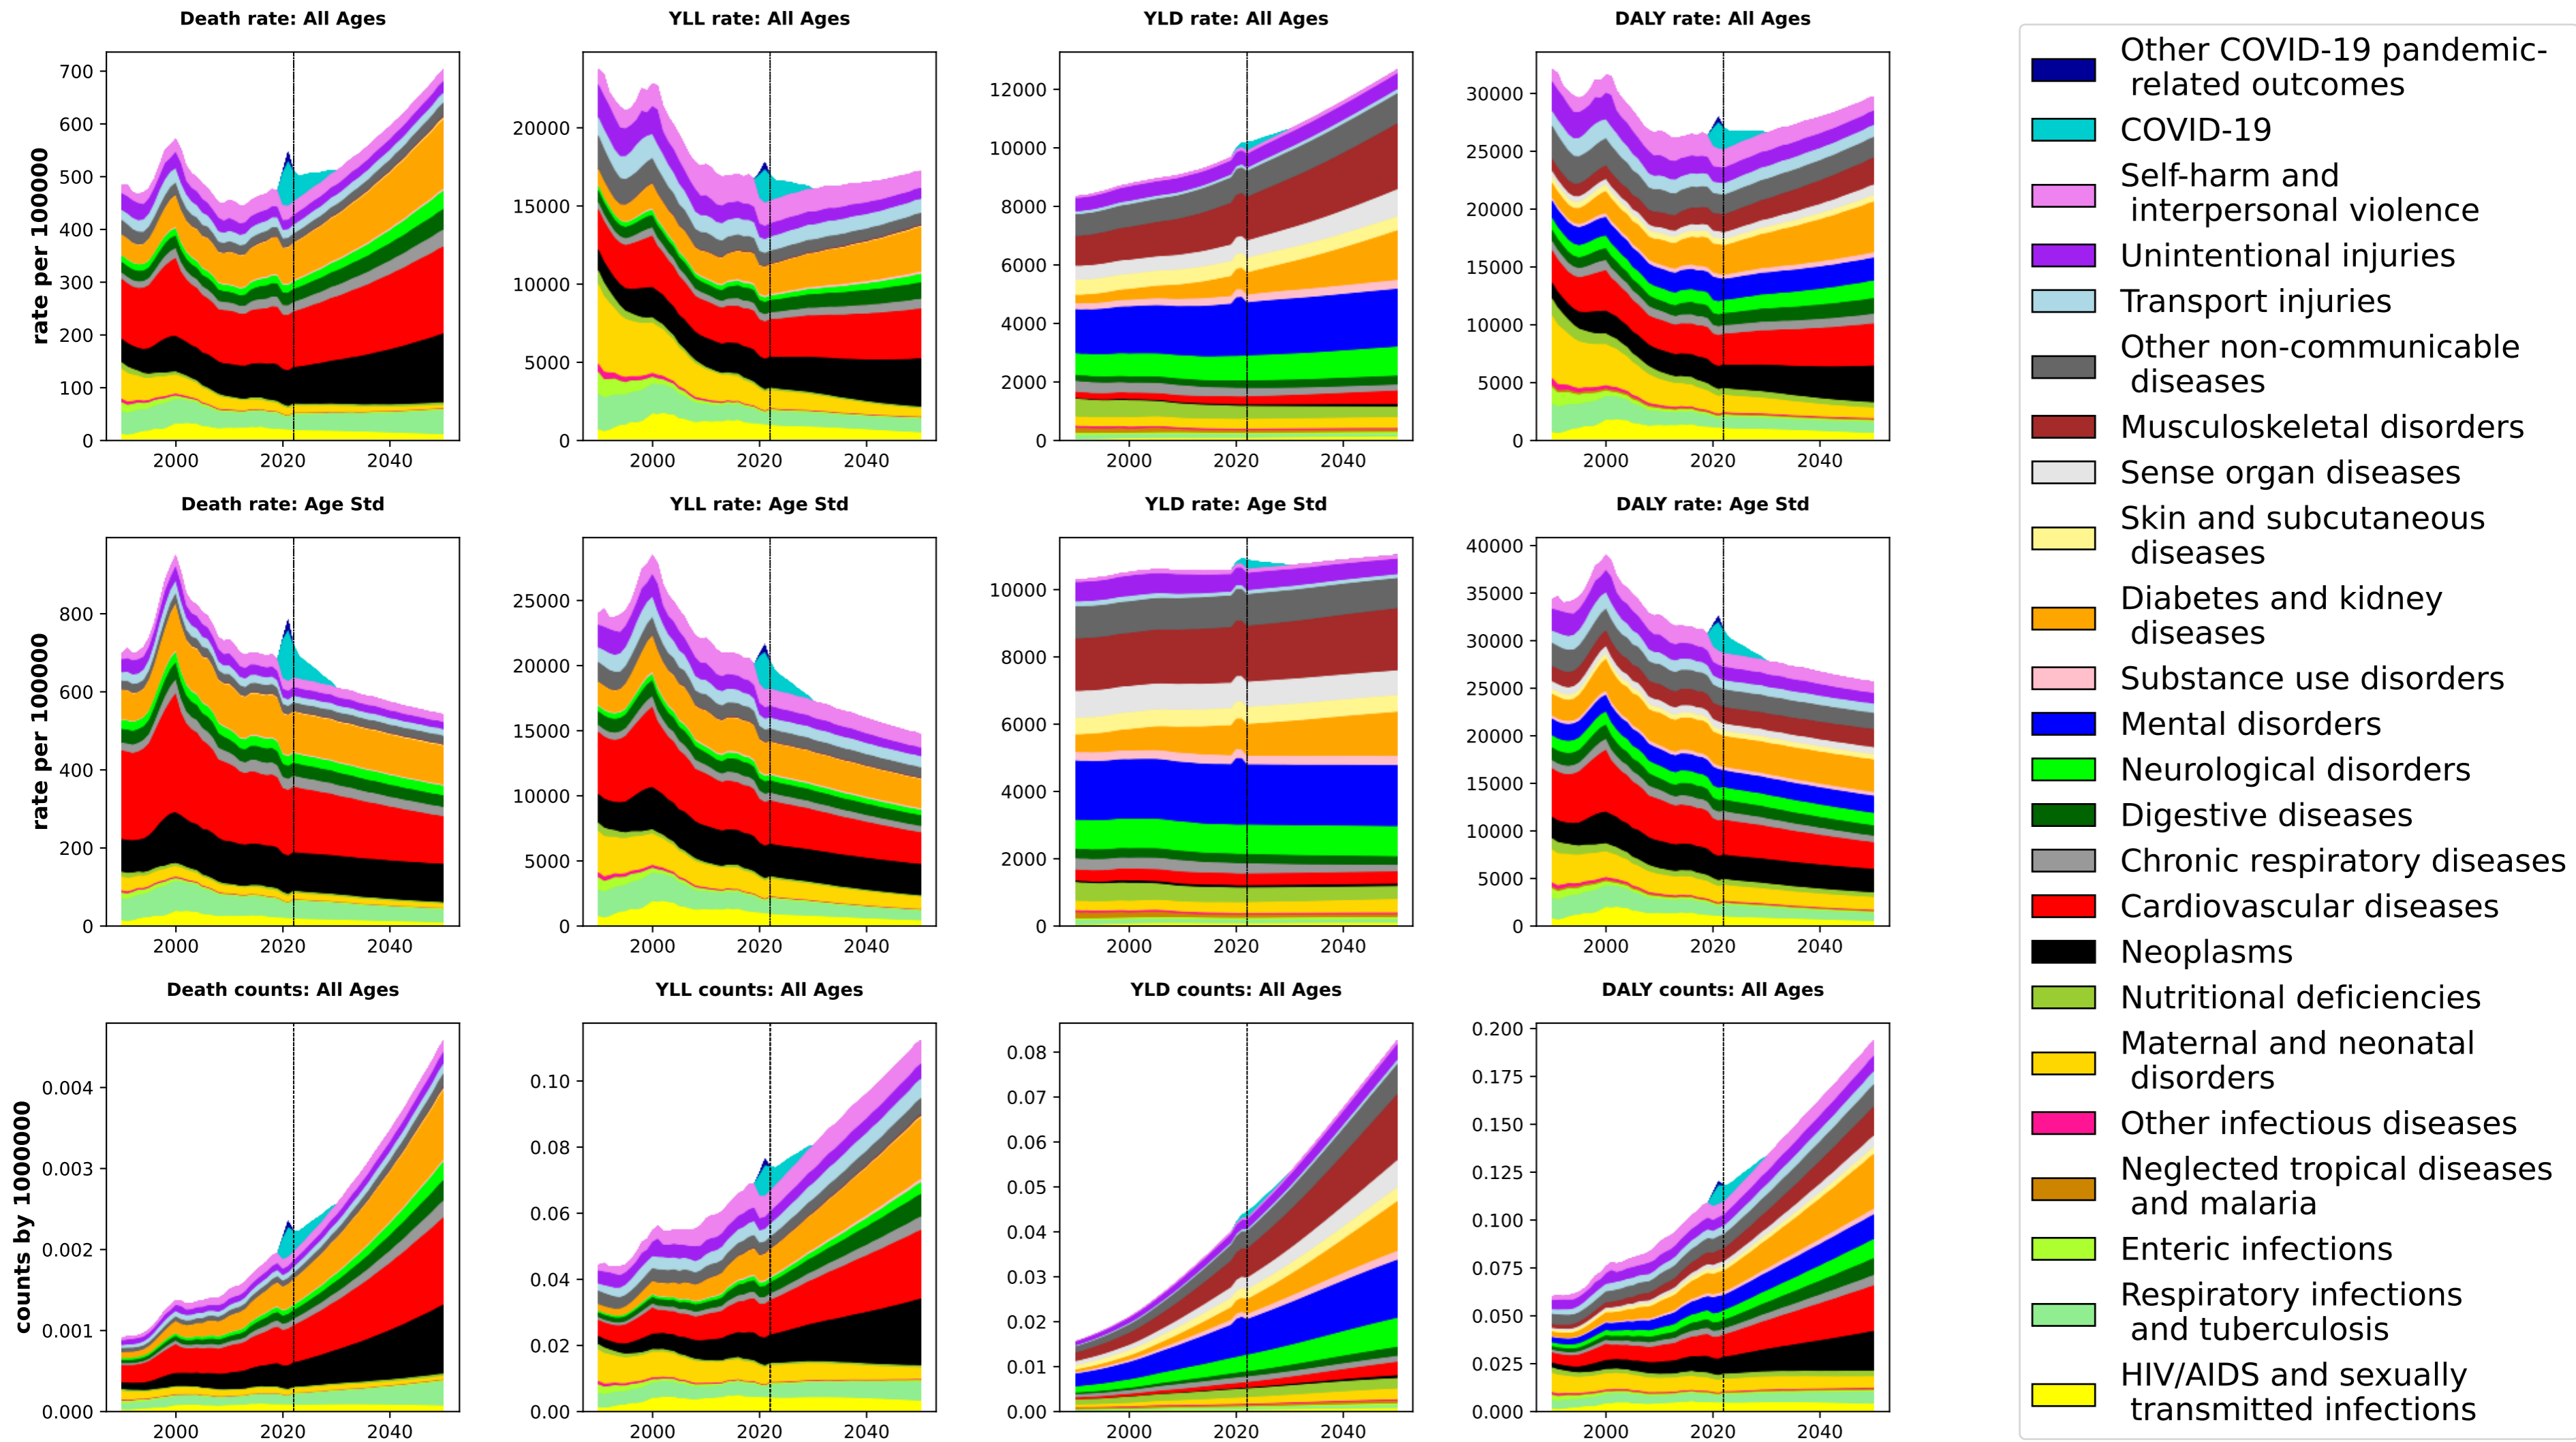

# Bermuda

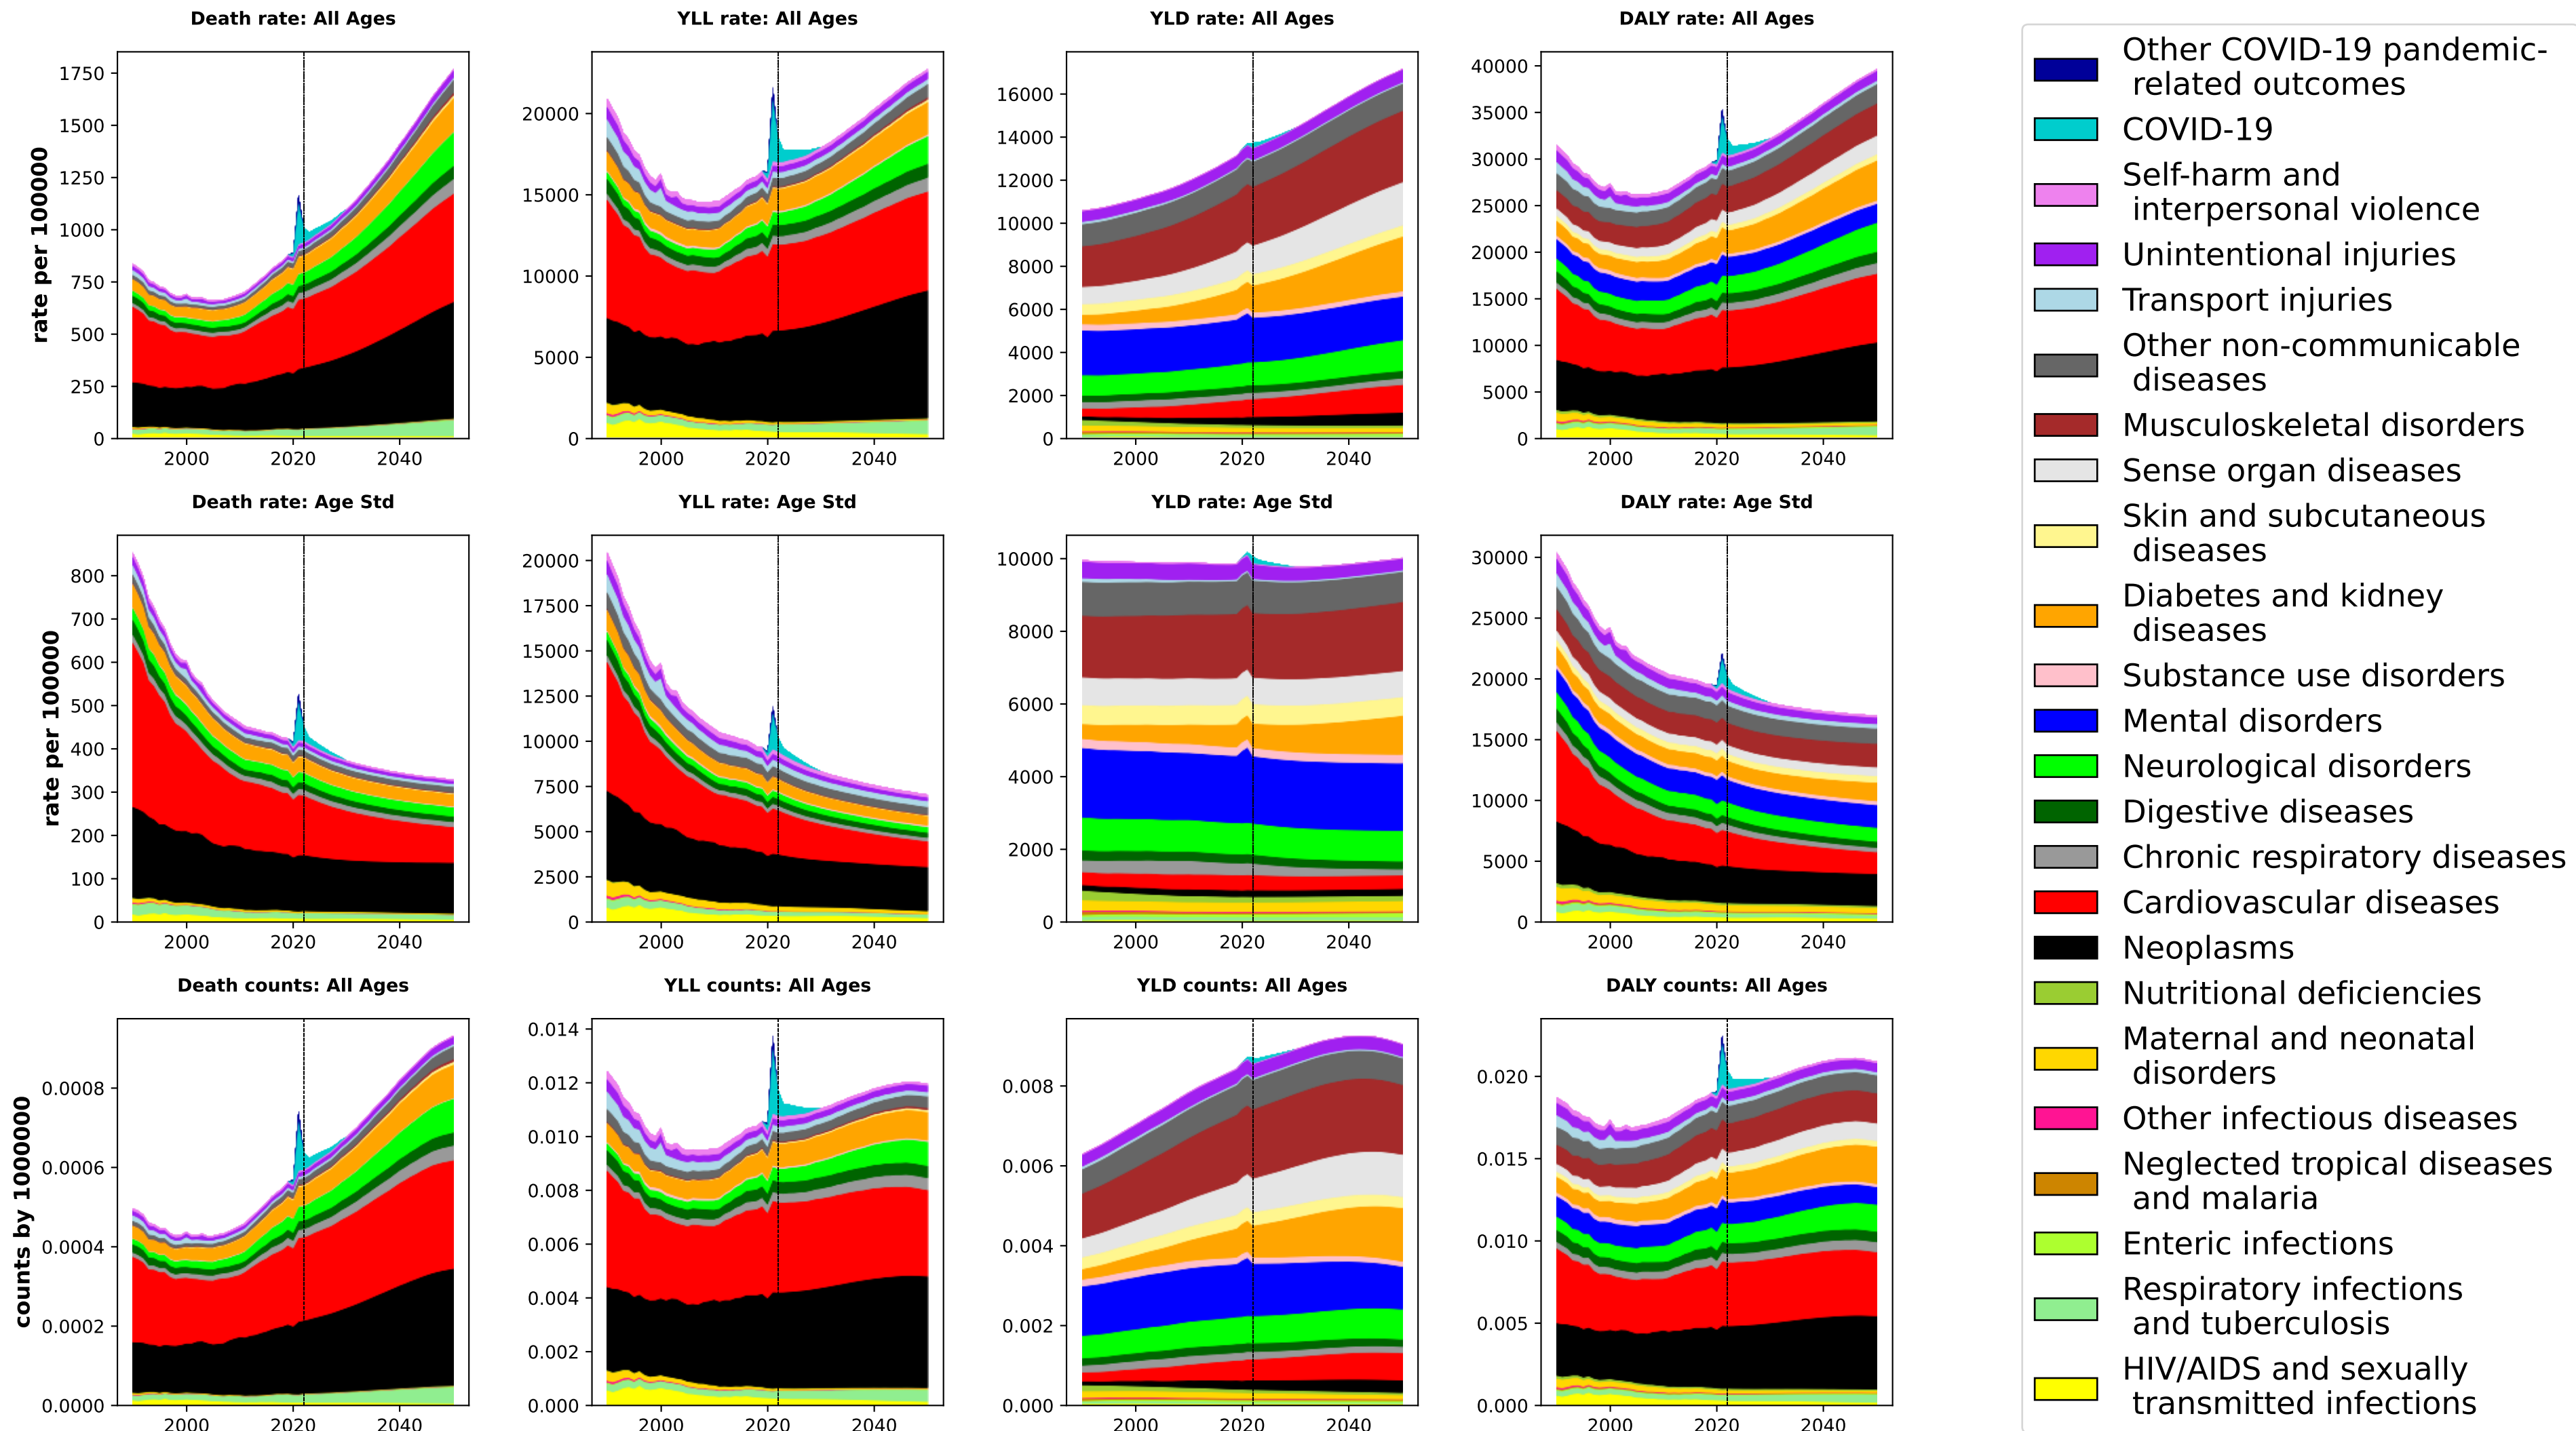



# Cuba

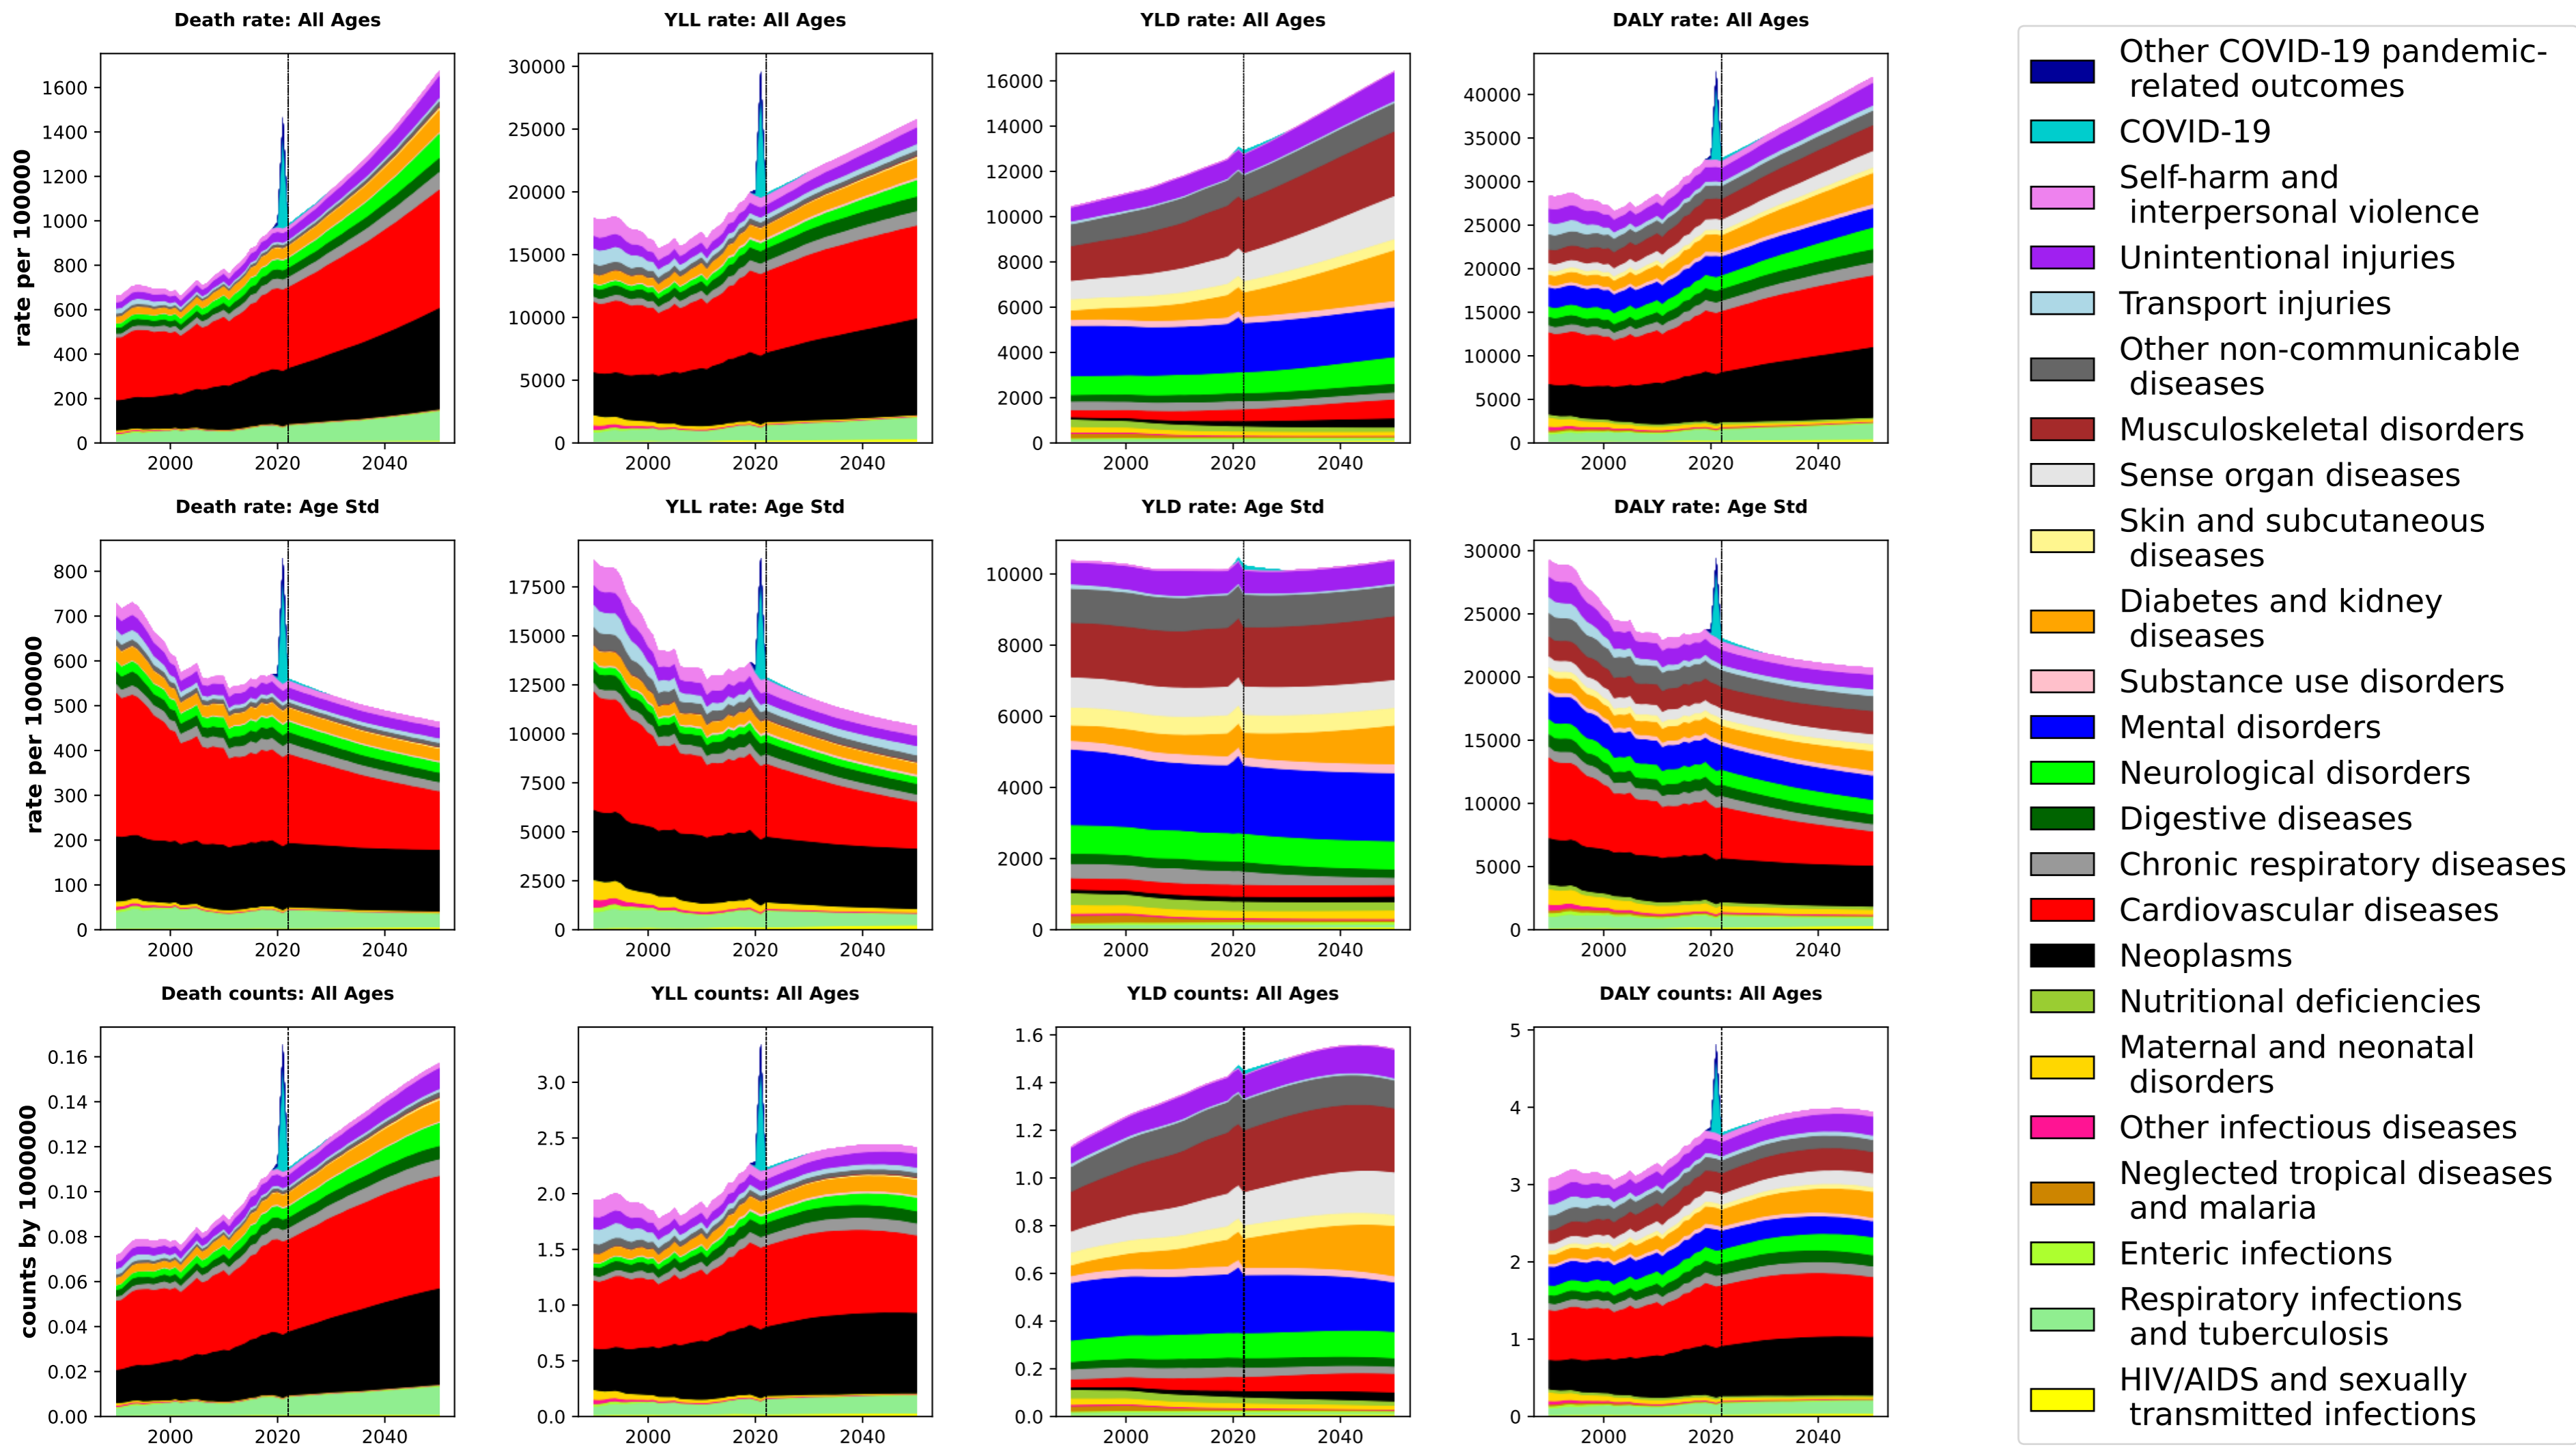

# Dominica

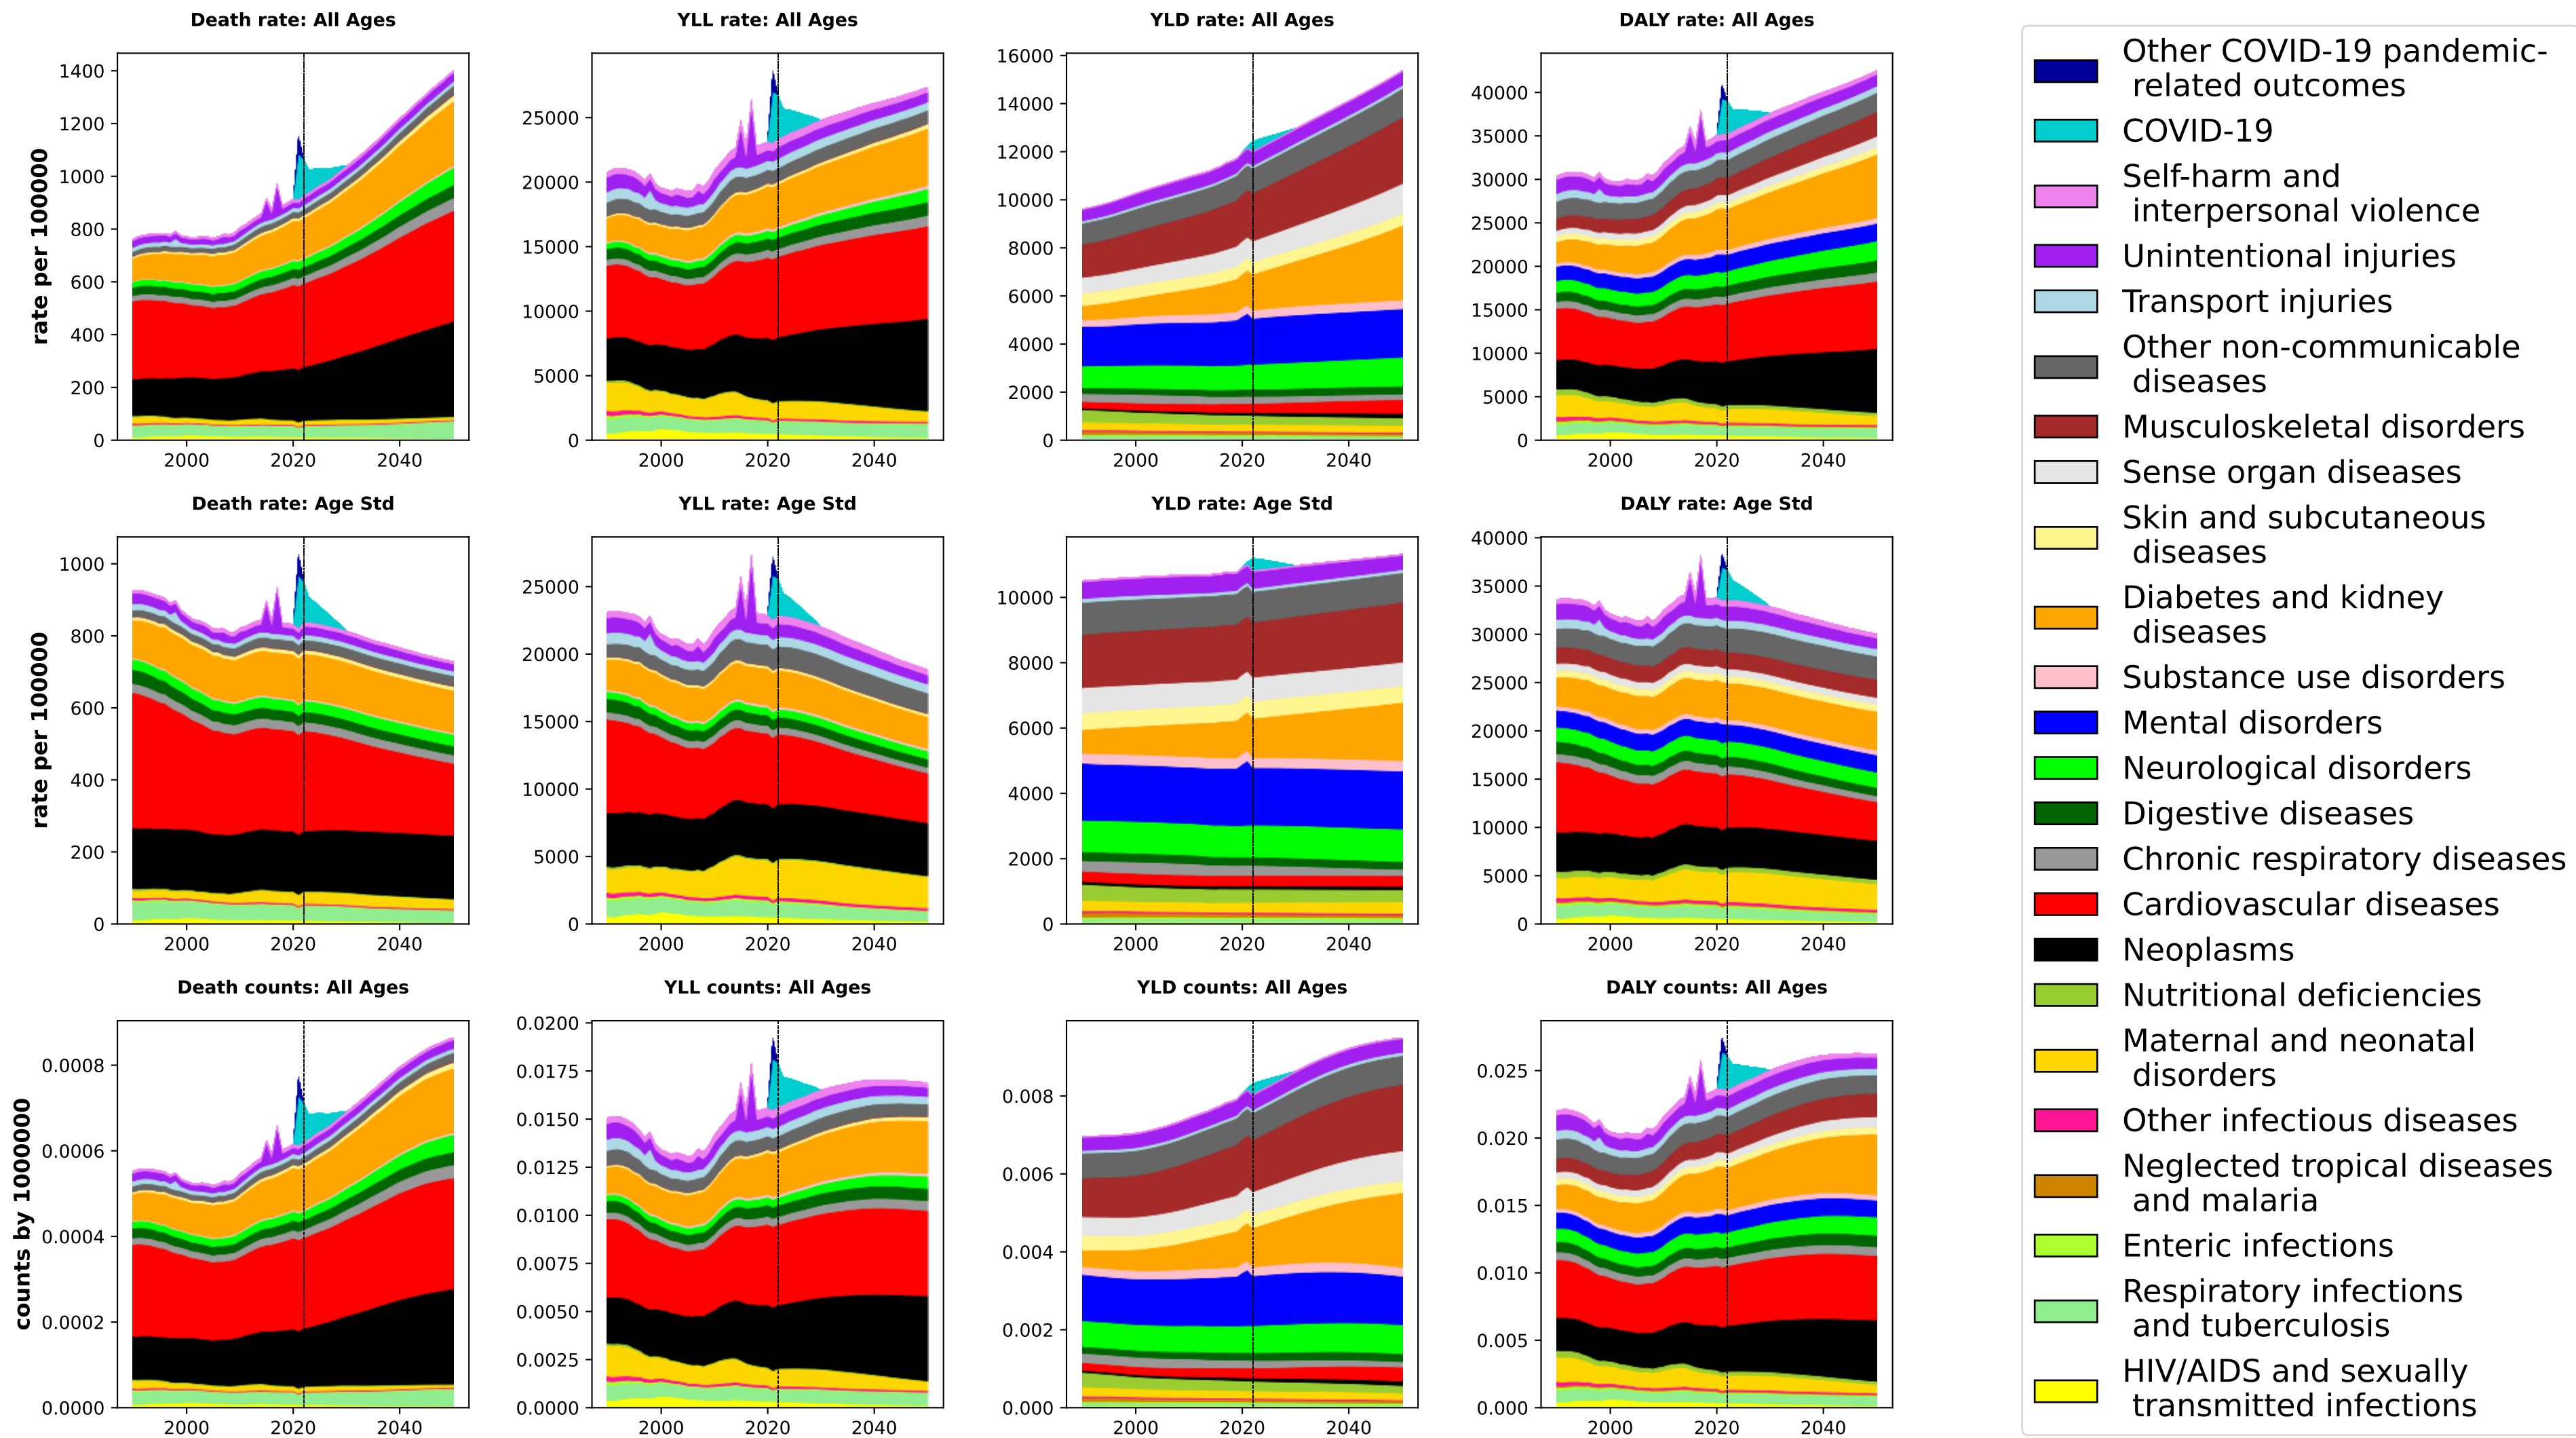

# Dominican Republic

Supplemental Results Figure S6. Cause level 2 area plots for 4 burden measures for reference scenario by location, 1990-2050

786

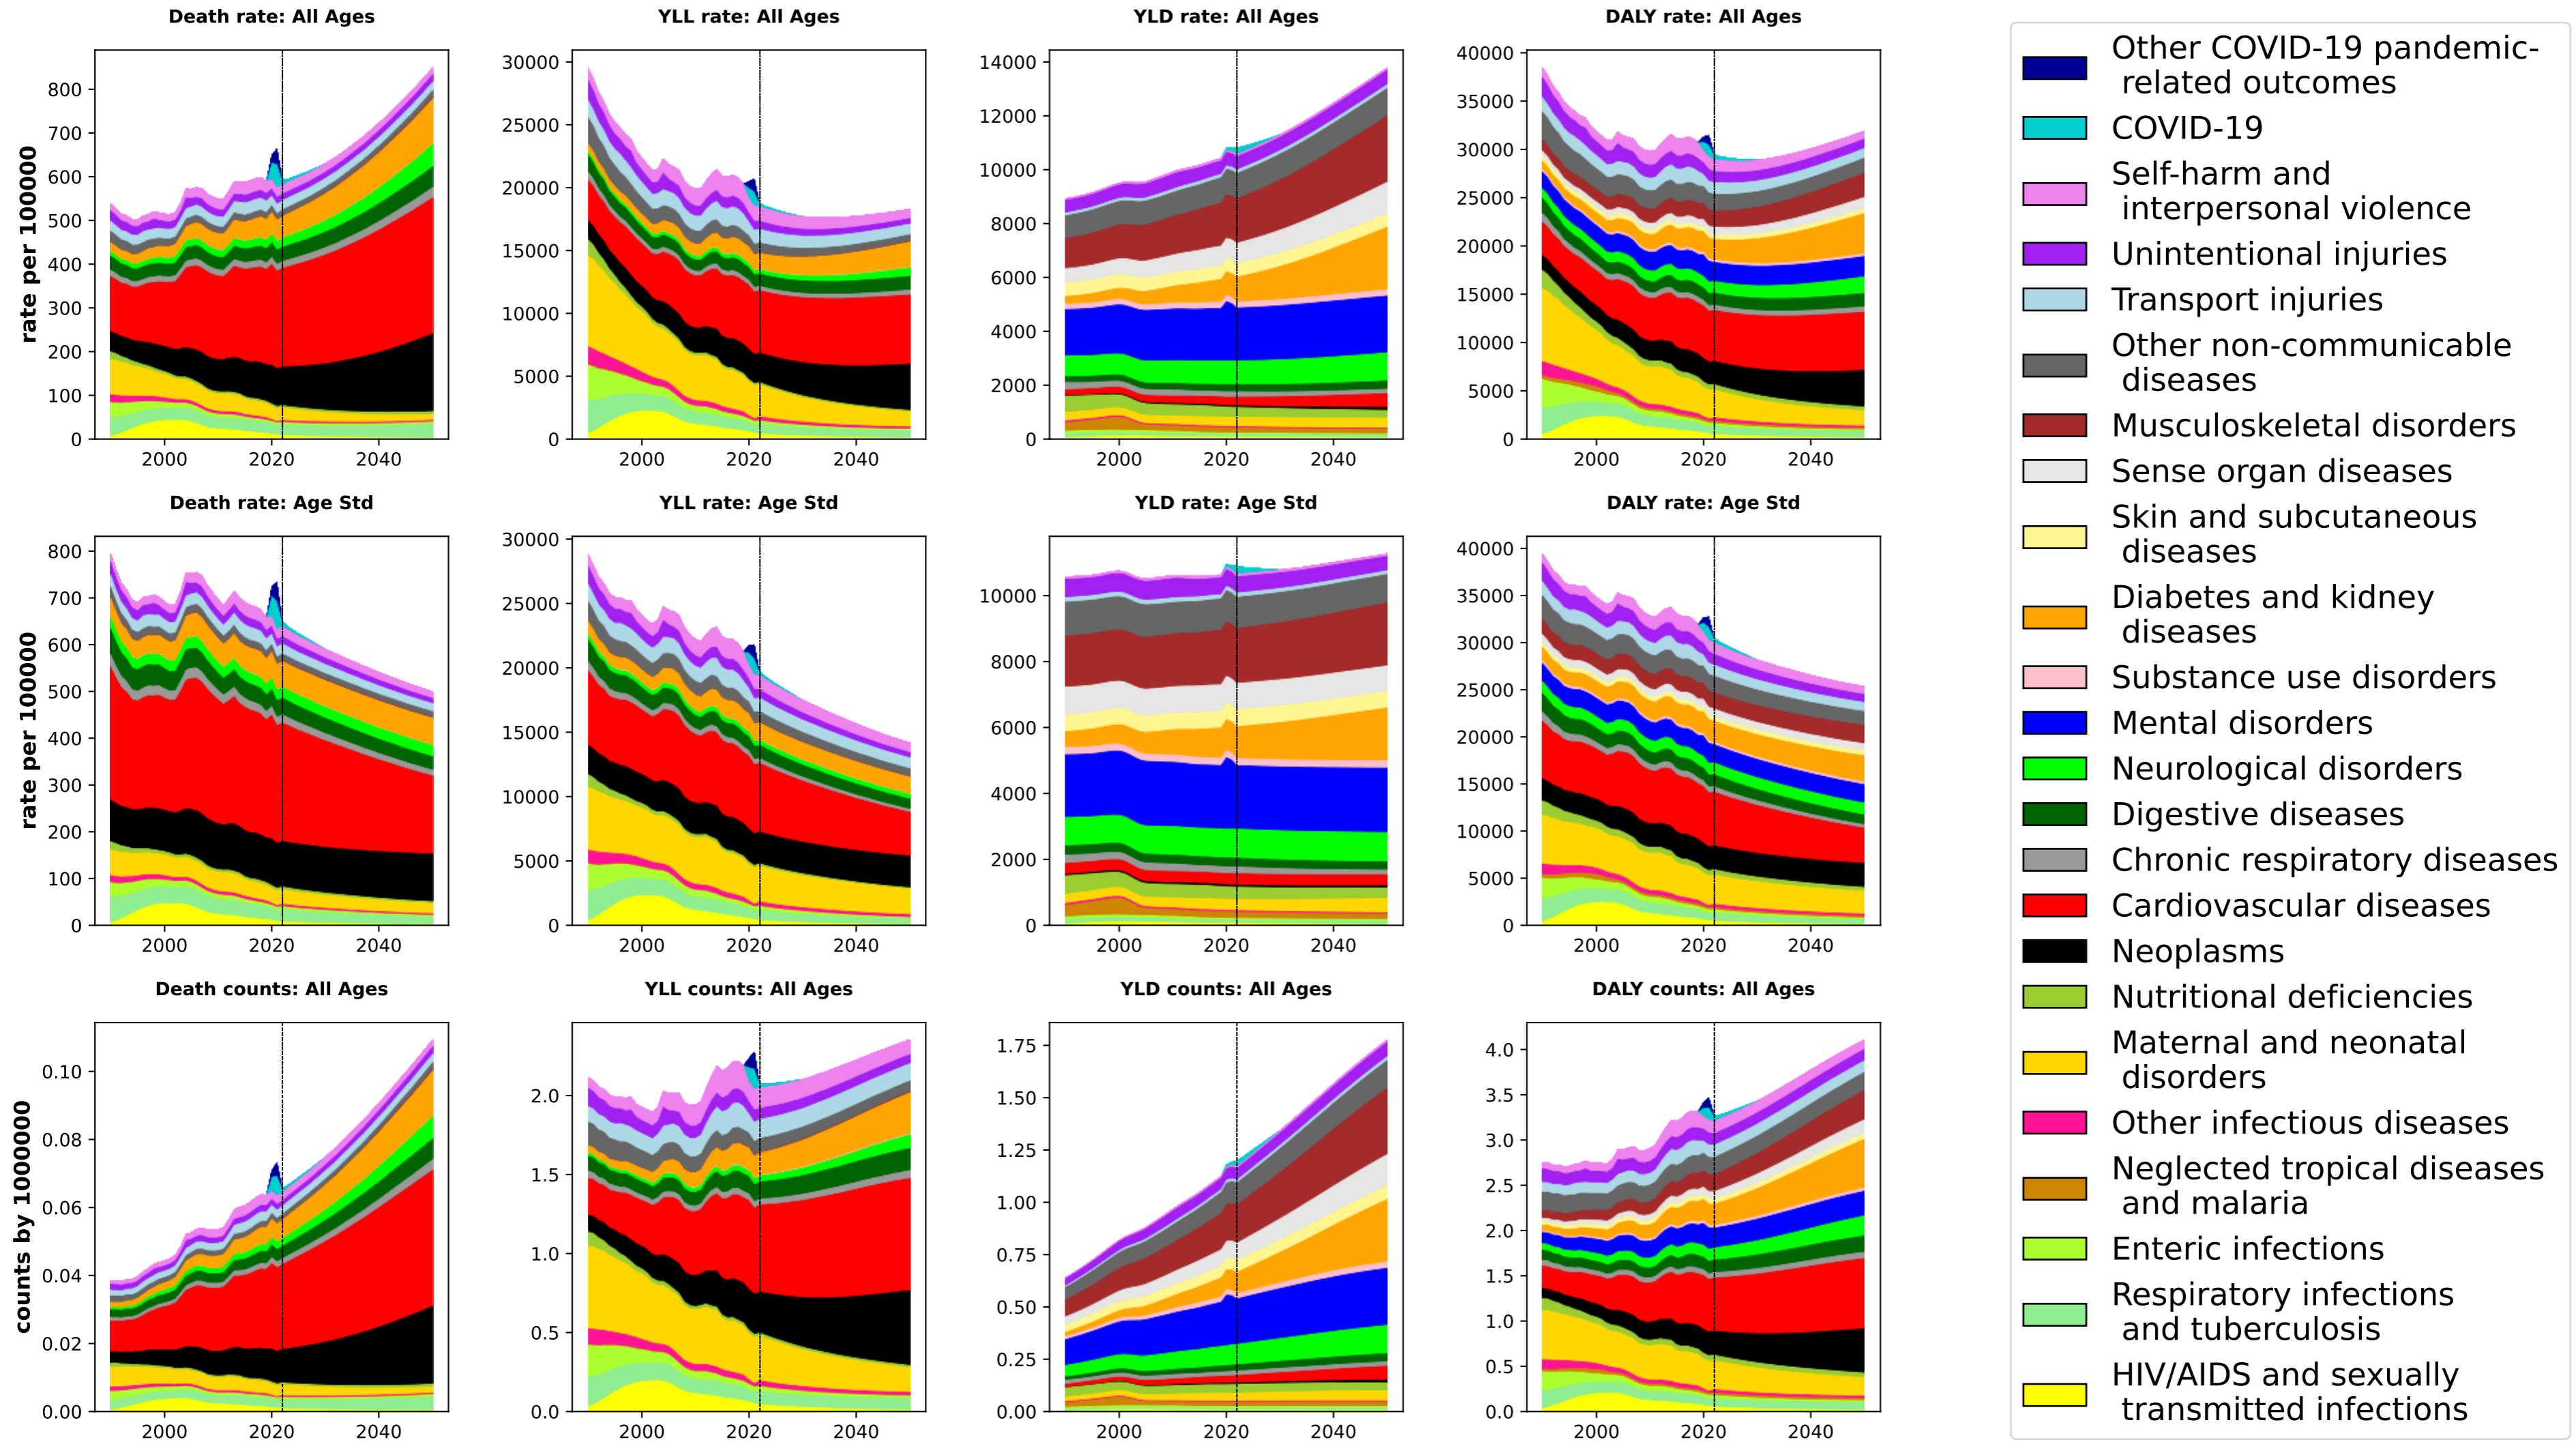

# Grenada

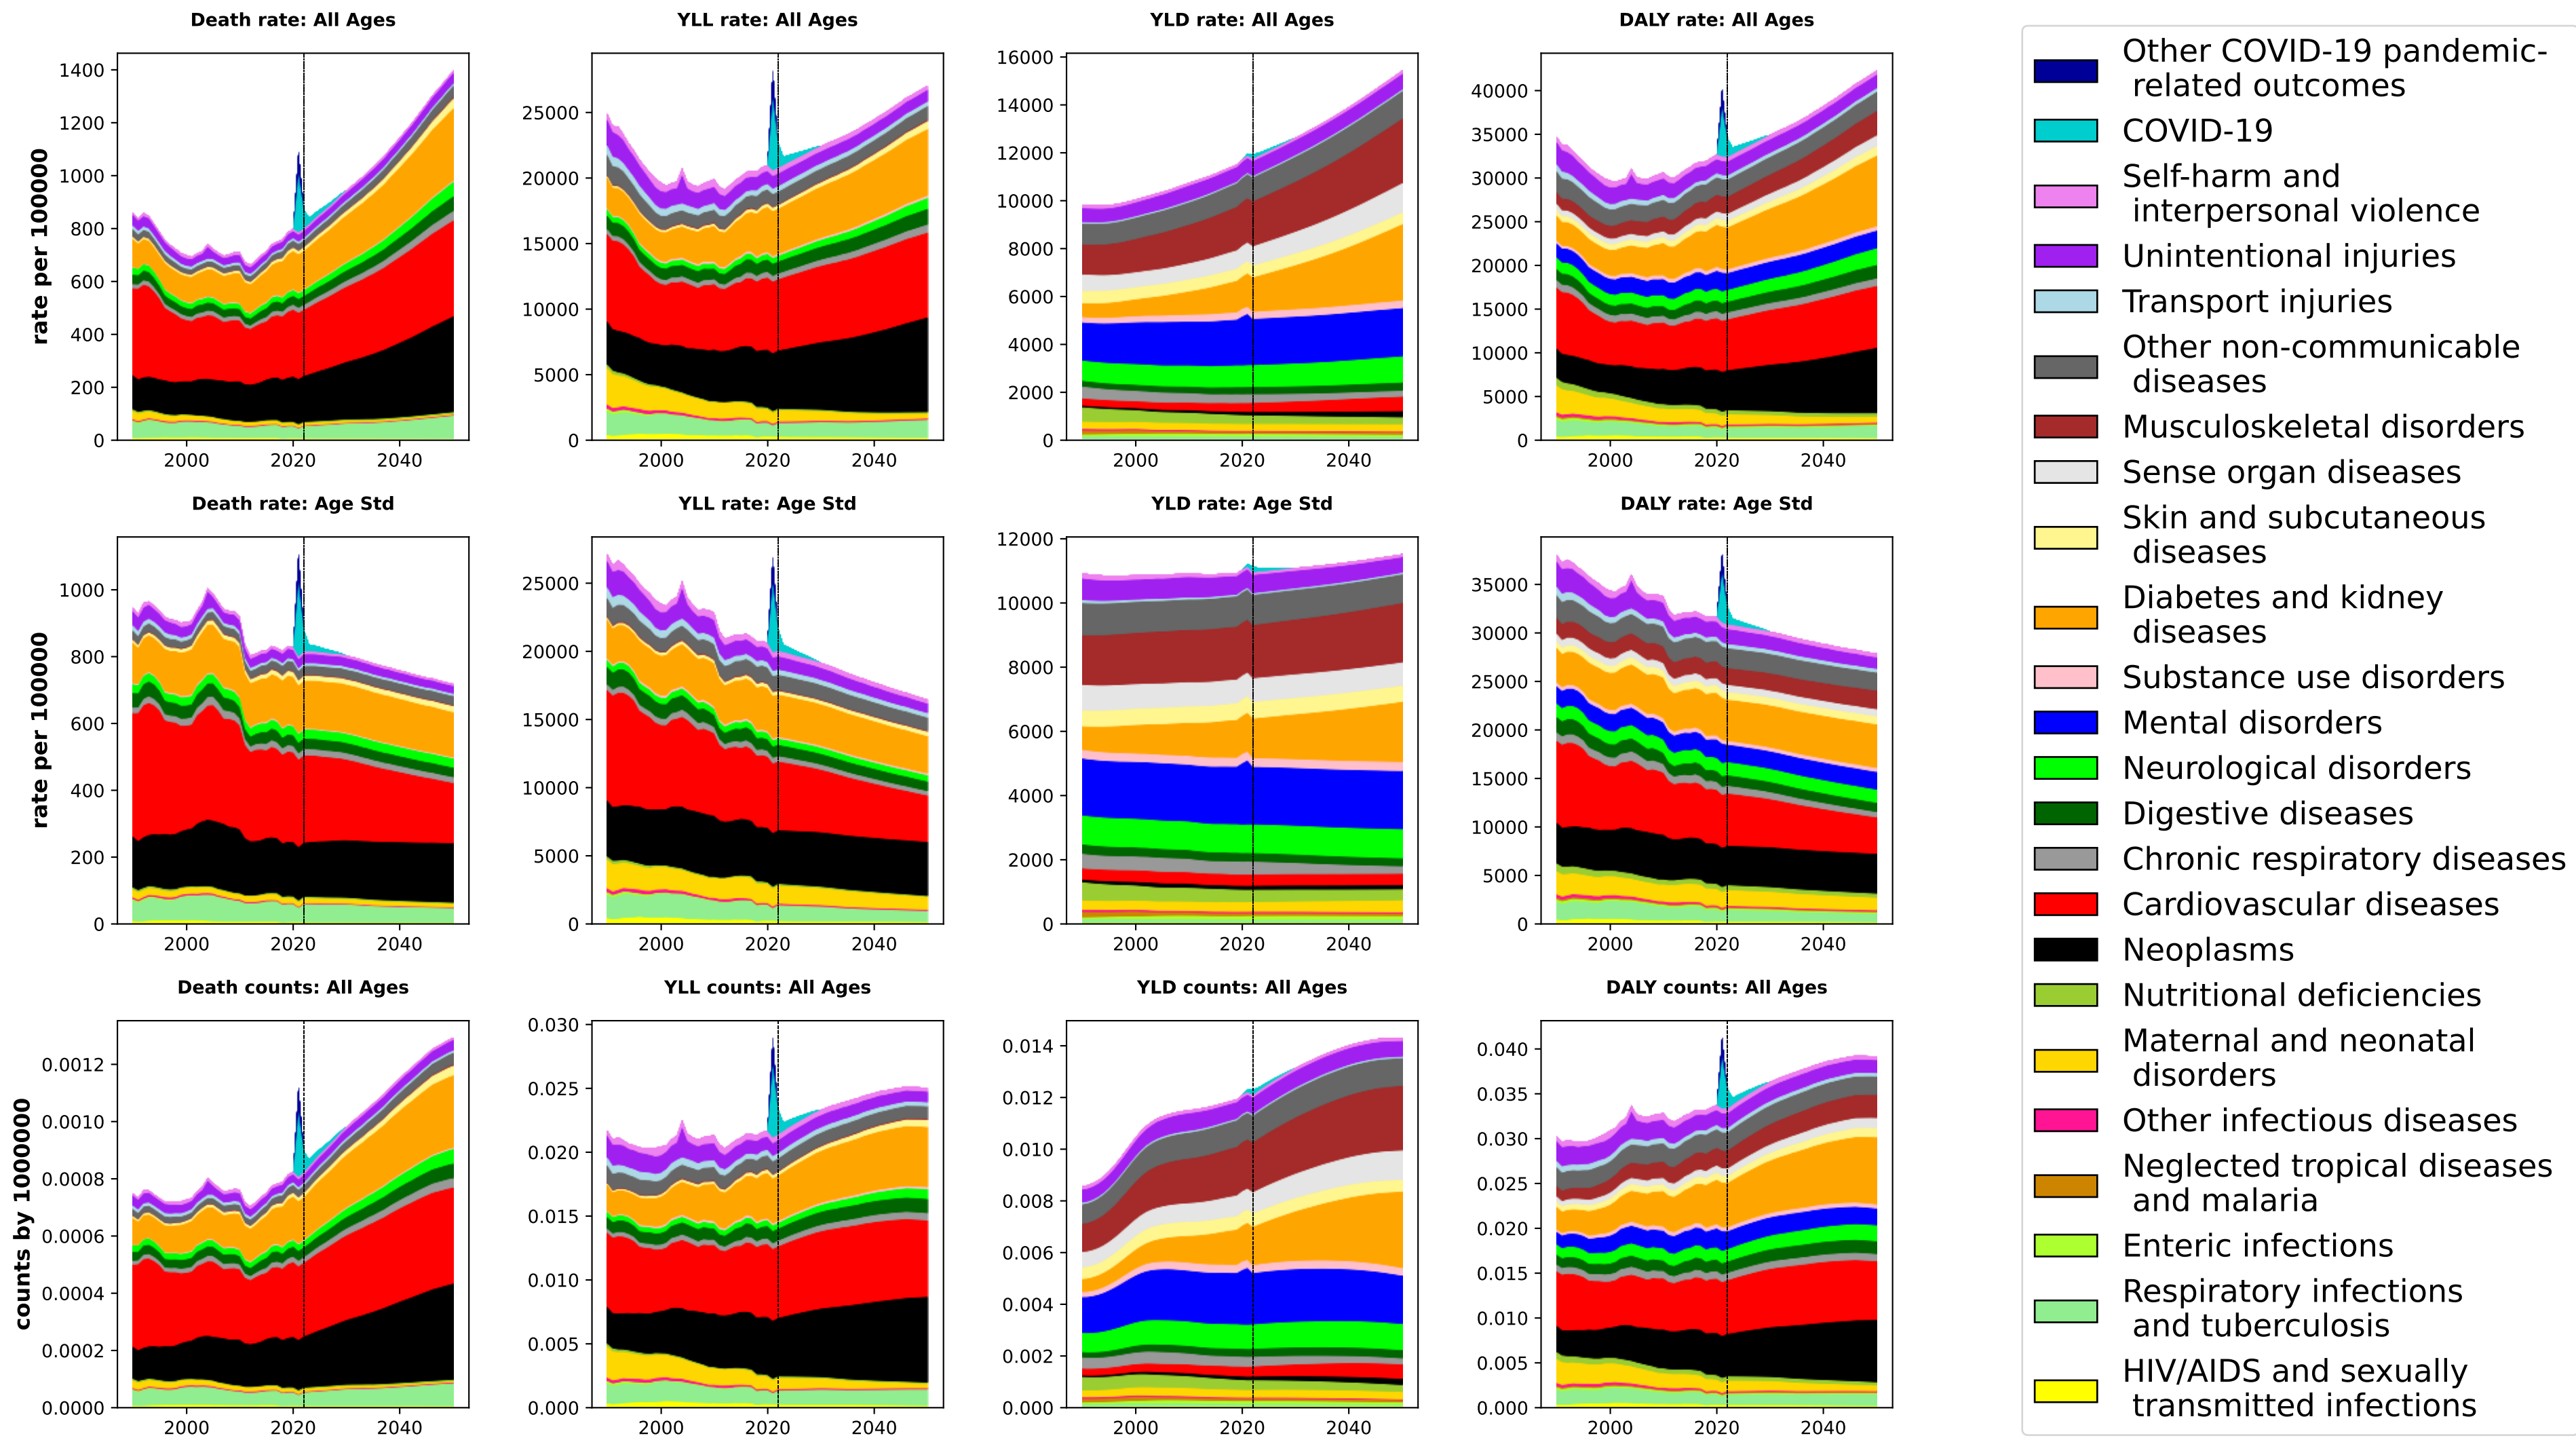

# Guyana

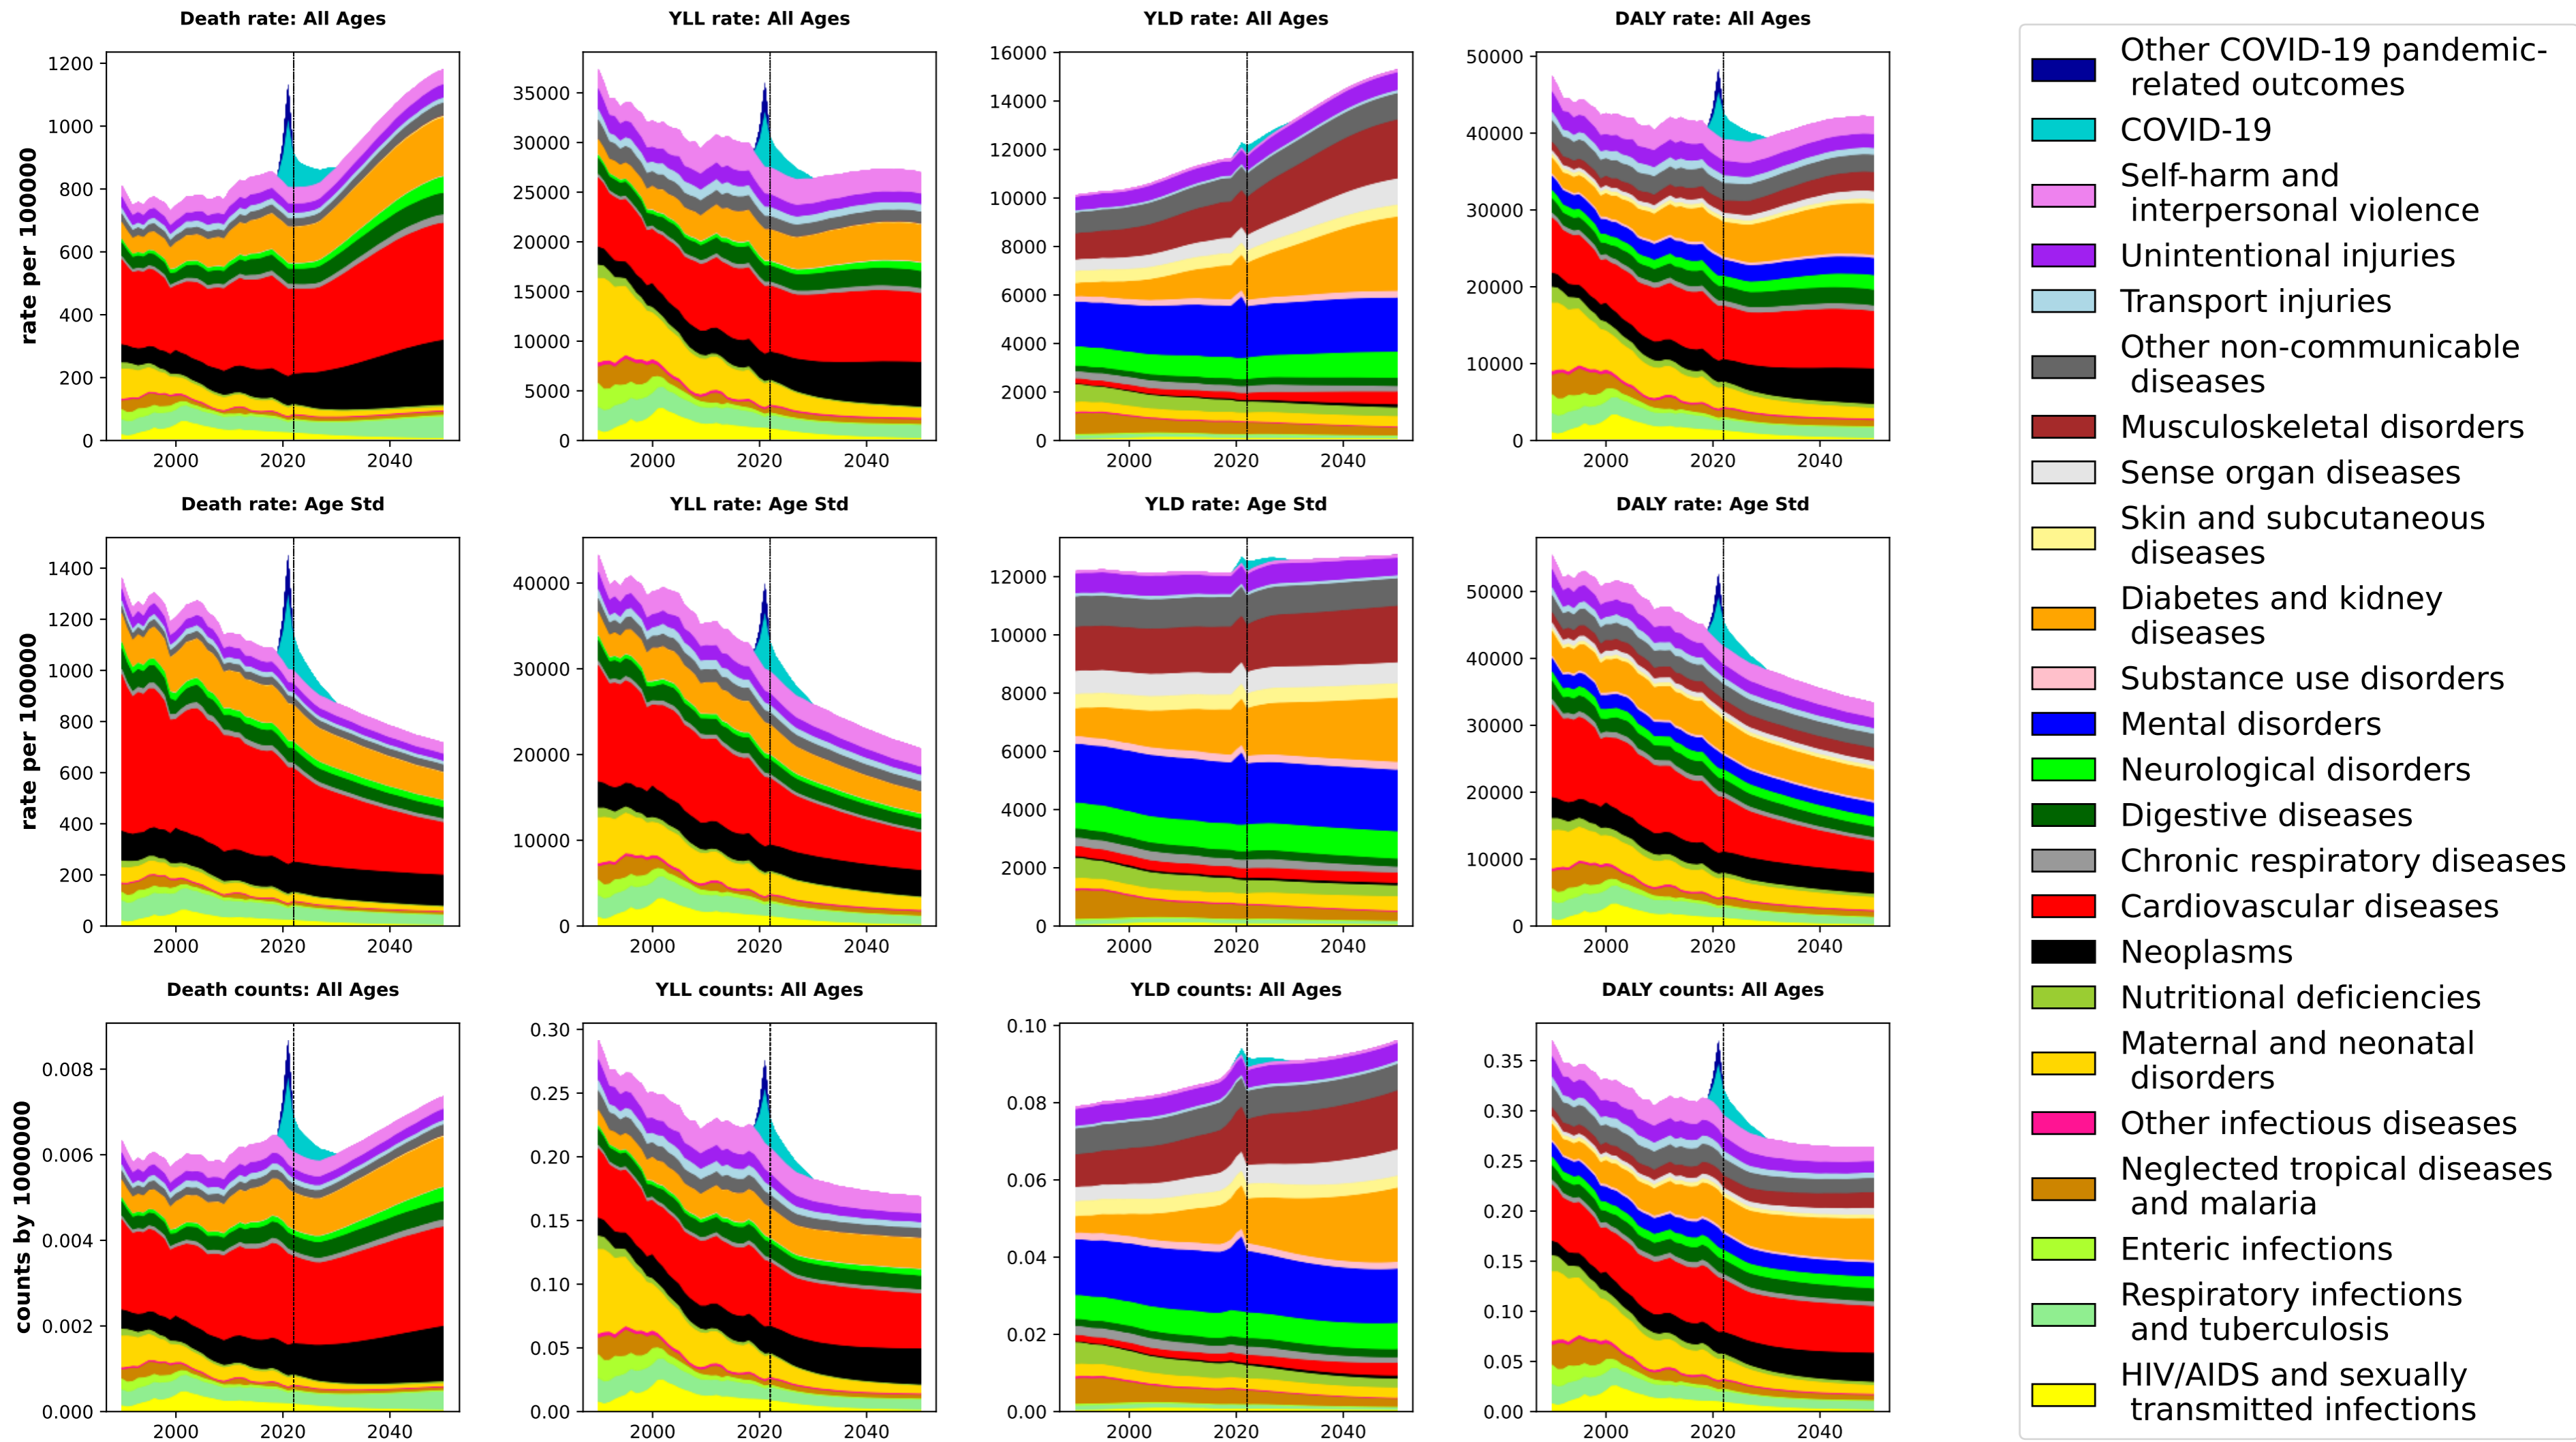

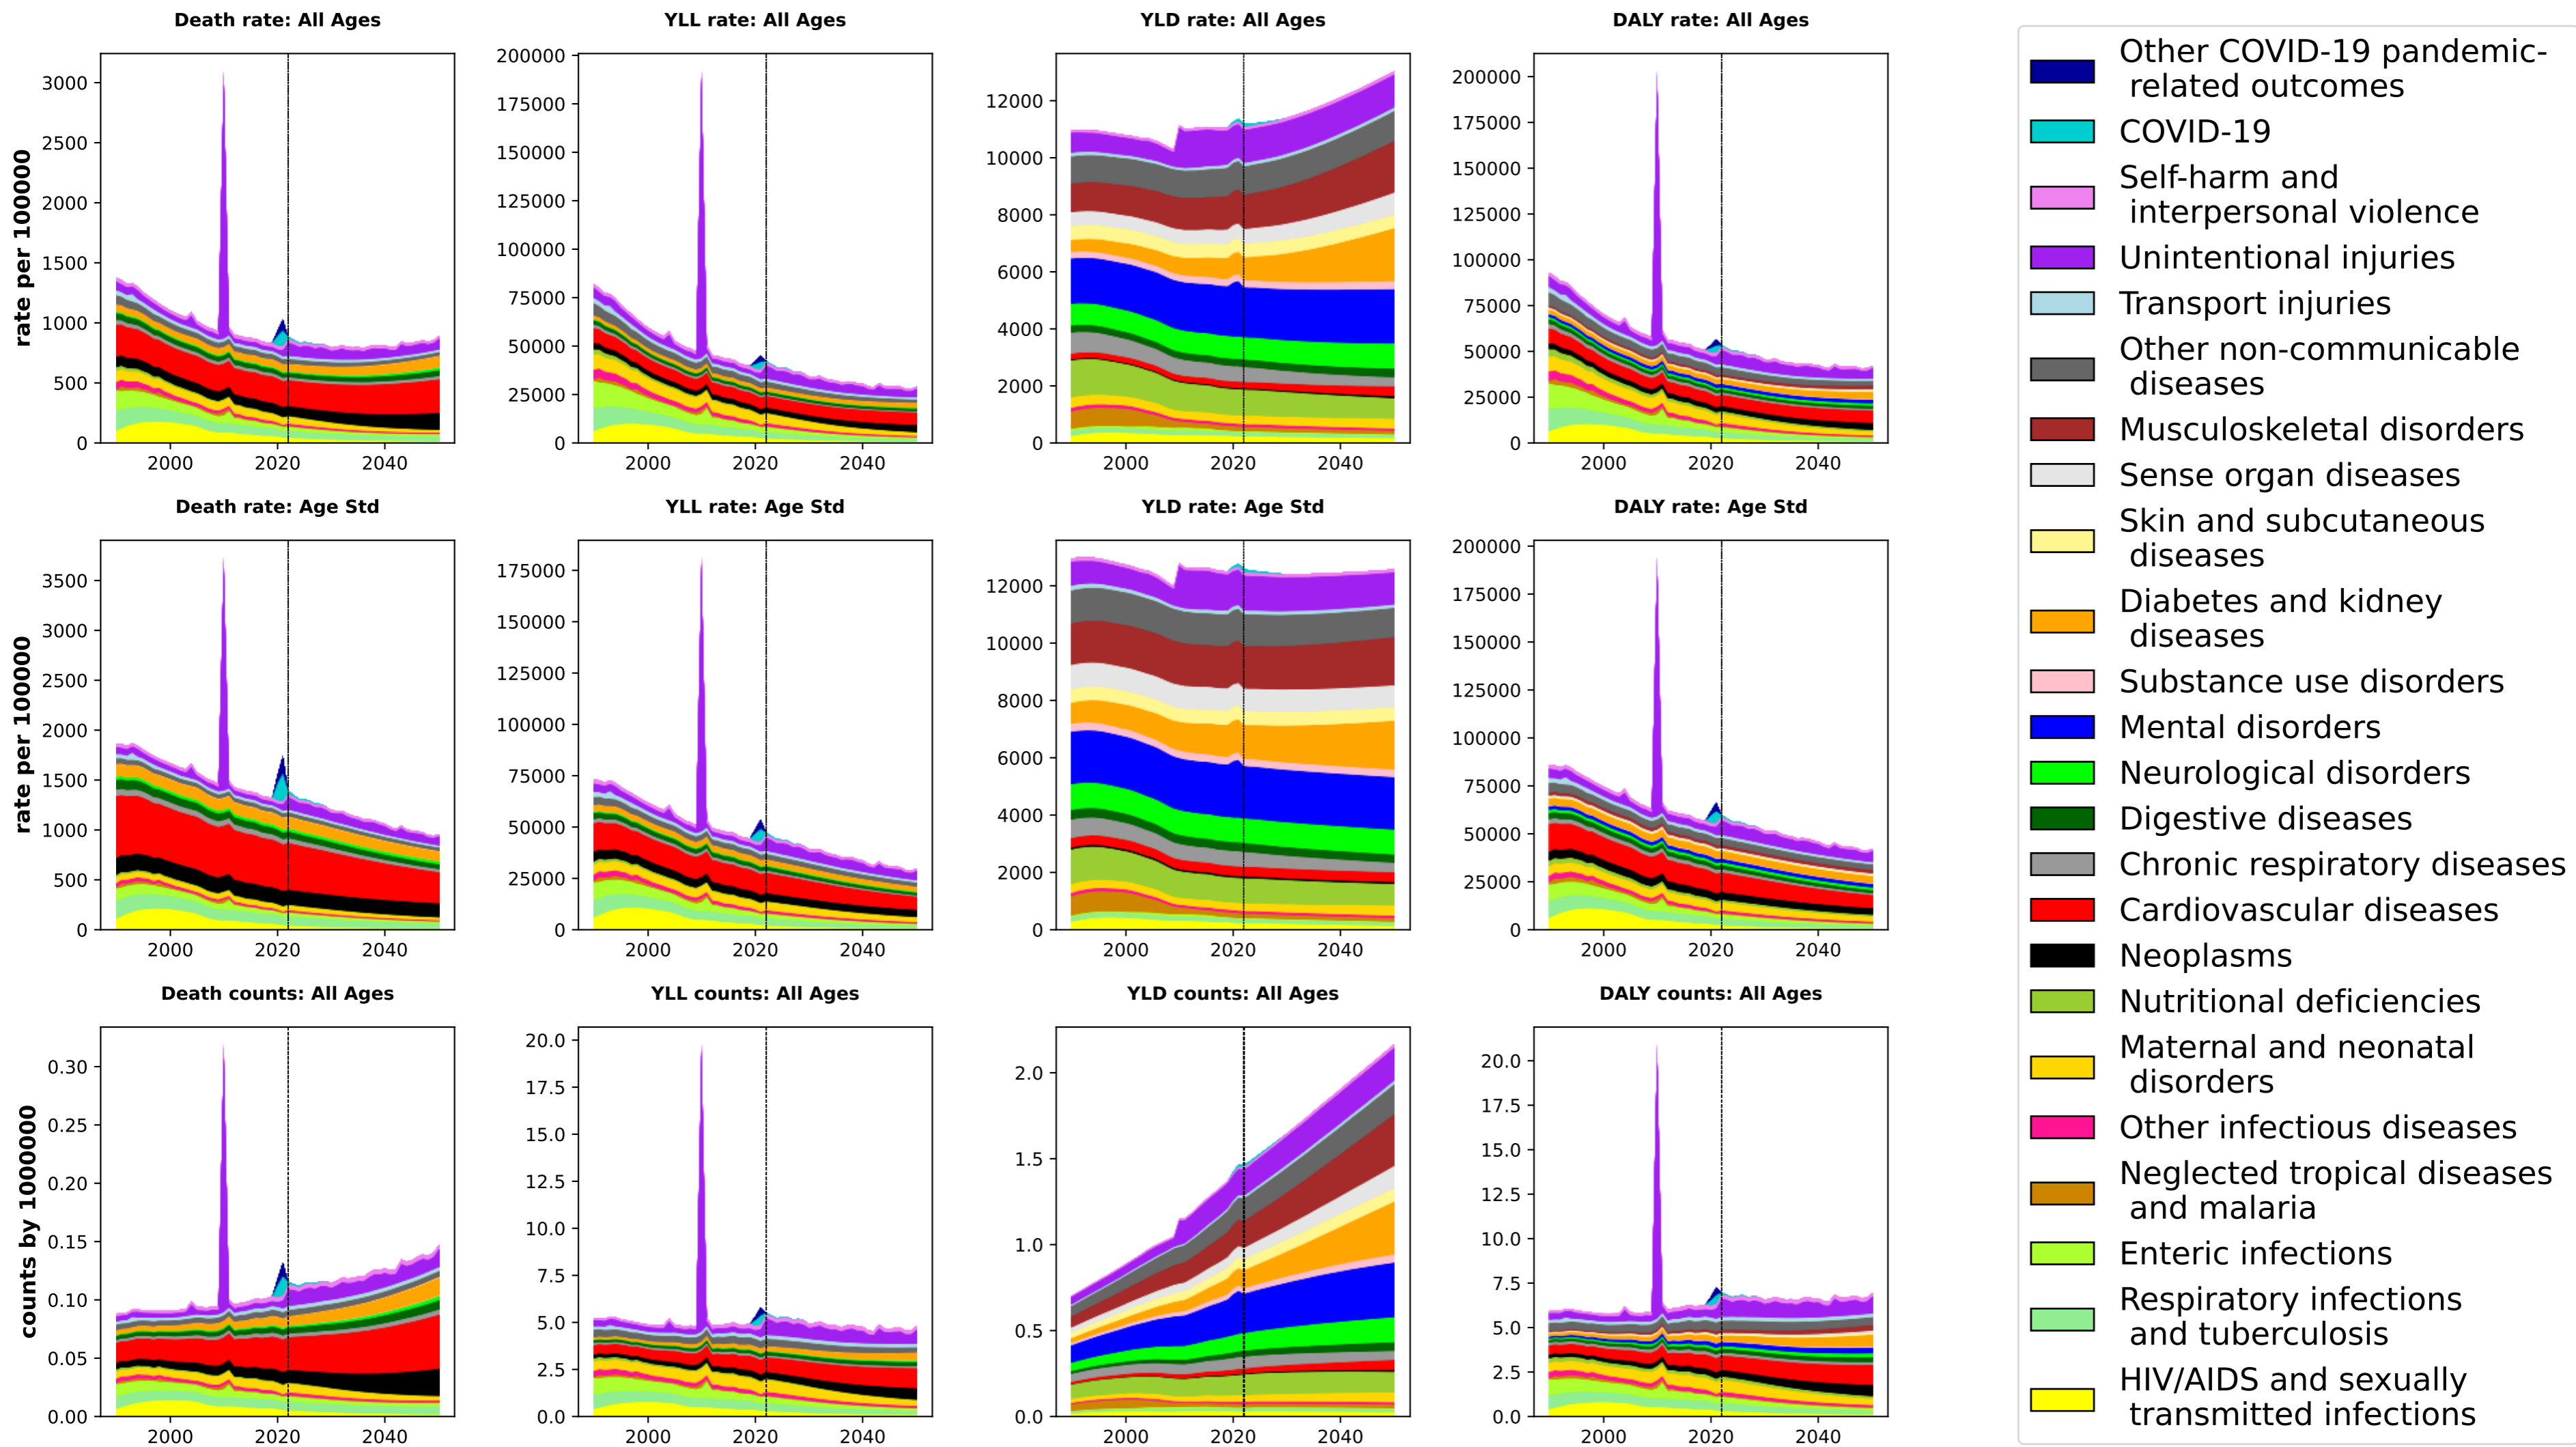

# Jamaica

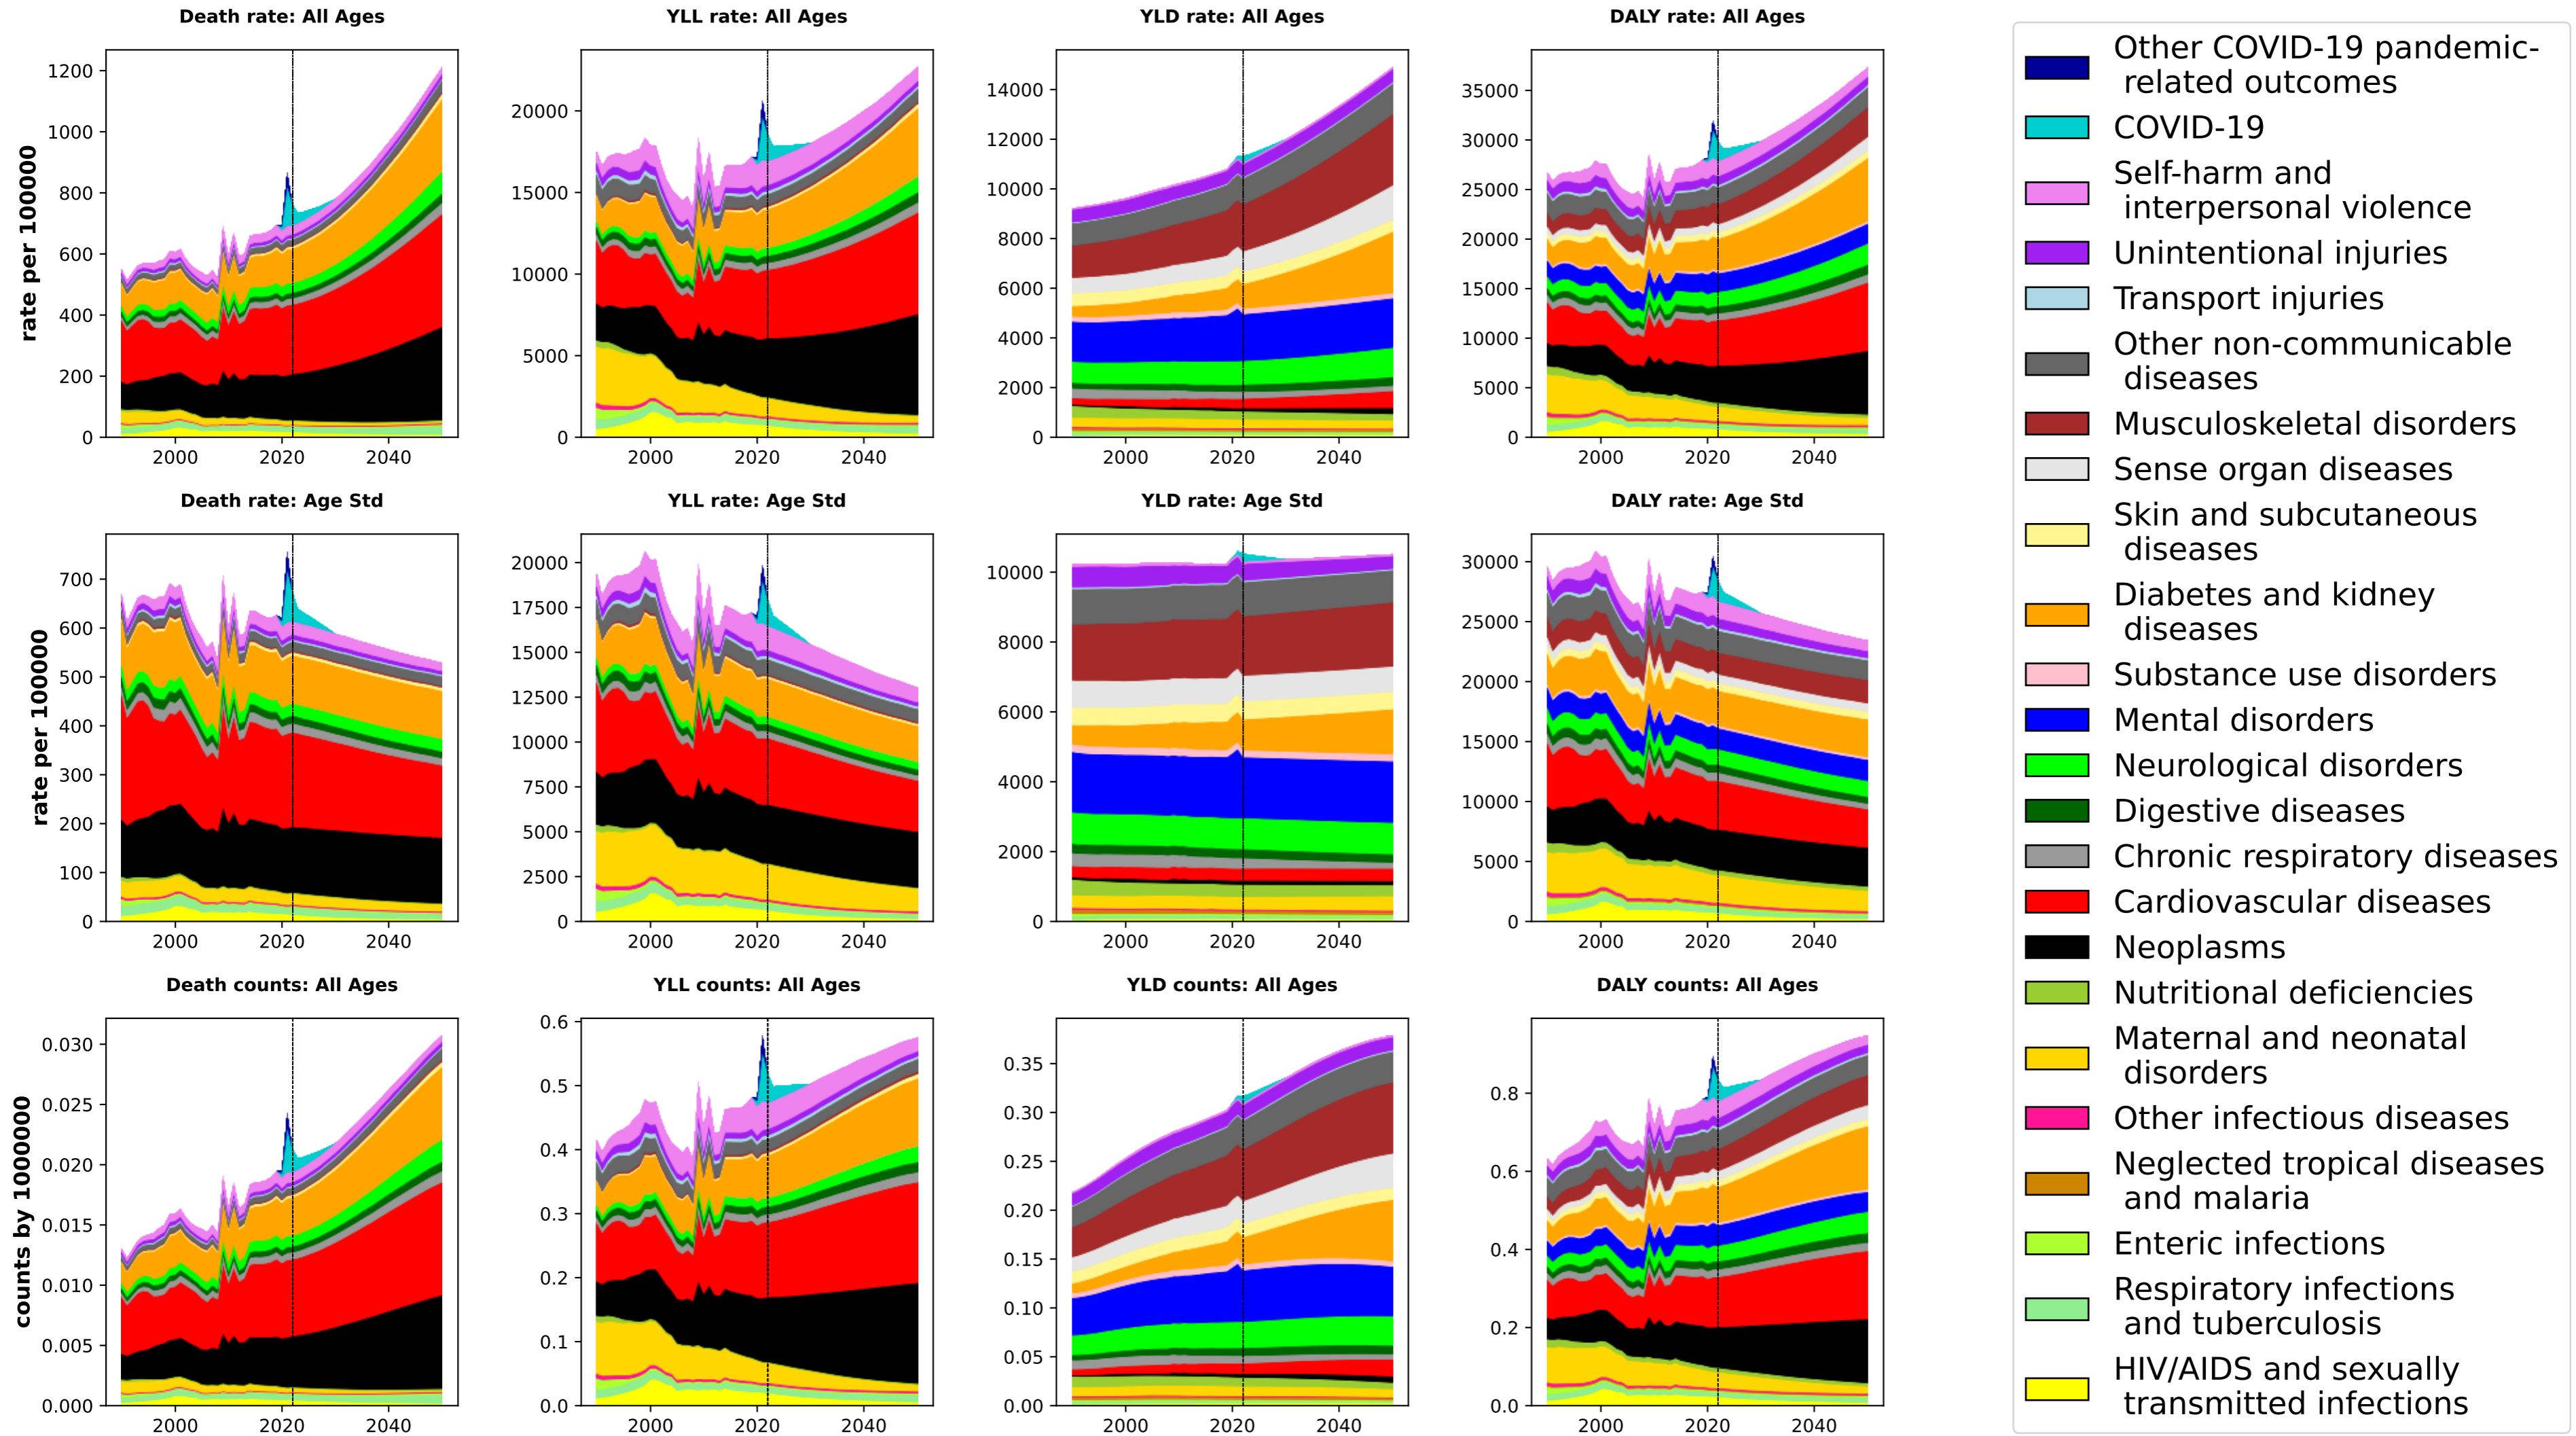

# Puerto Rico

Supplemental Results Figure S6. Cause level 2 area plots for 4 burden measures for reference scenario by location, 1990-2050

791

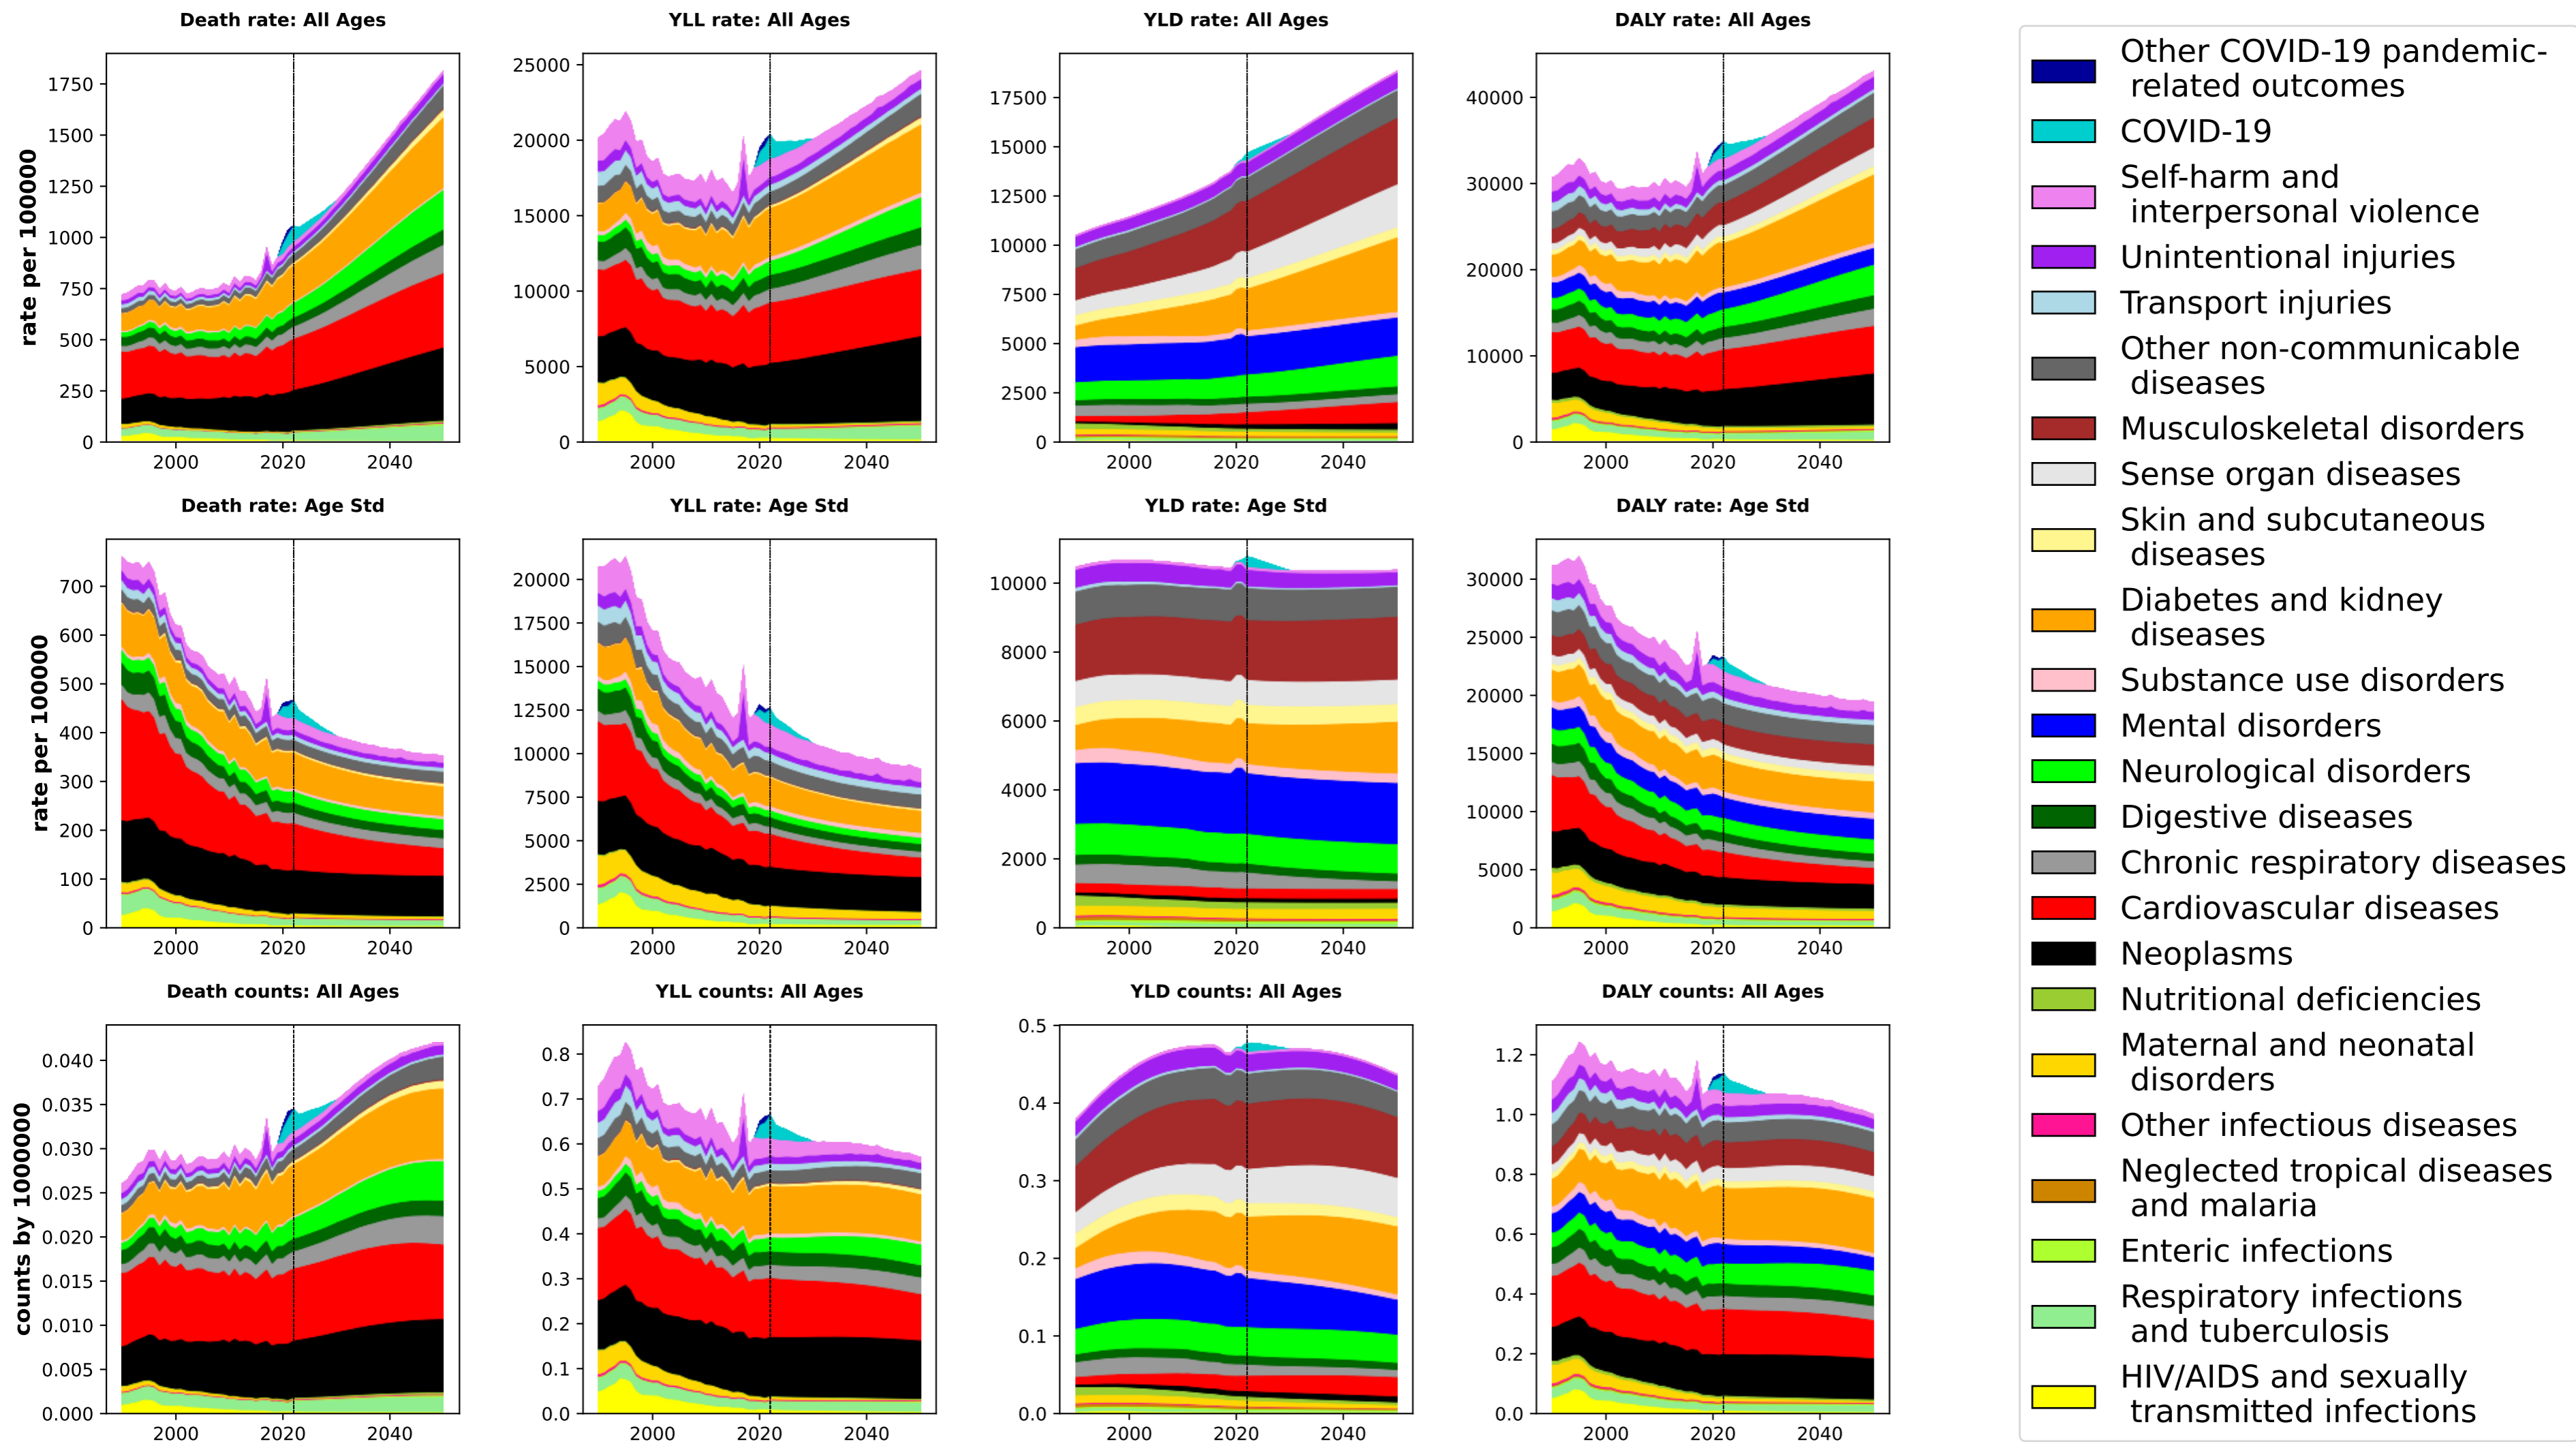



# Saint Kitts and Nevis

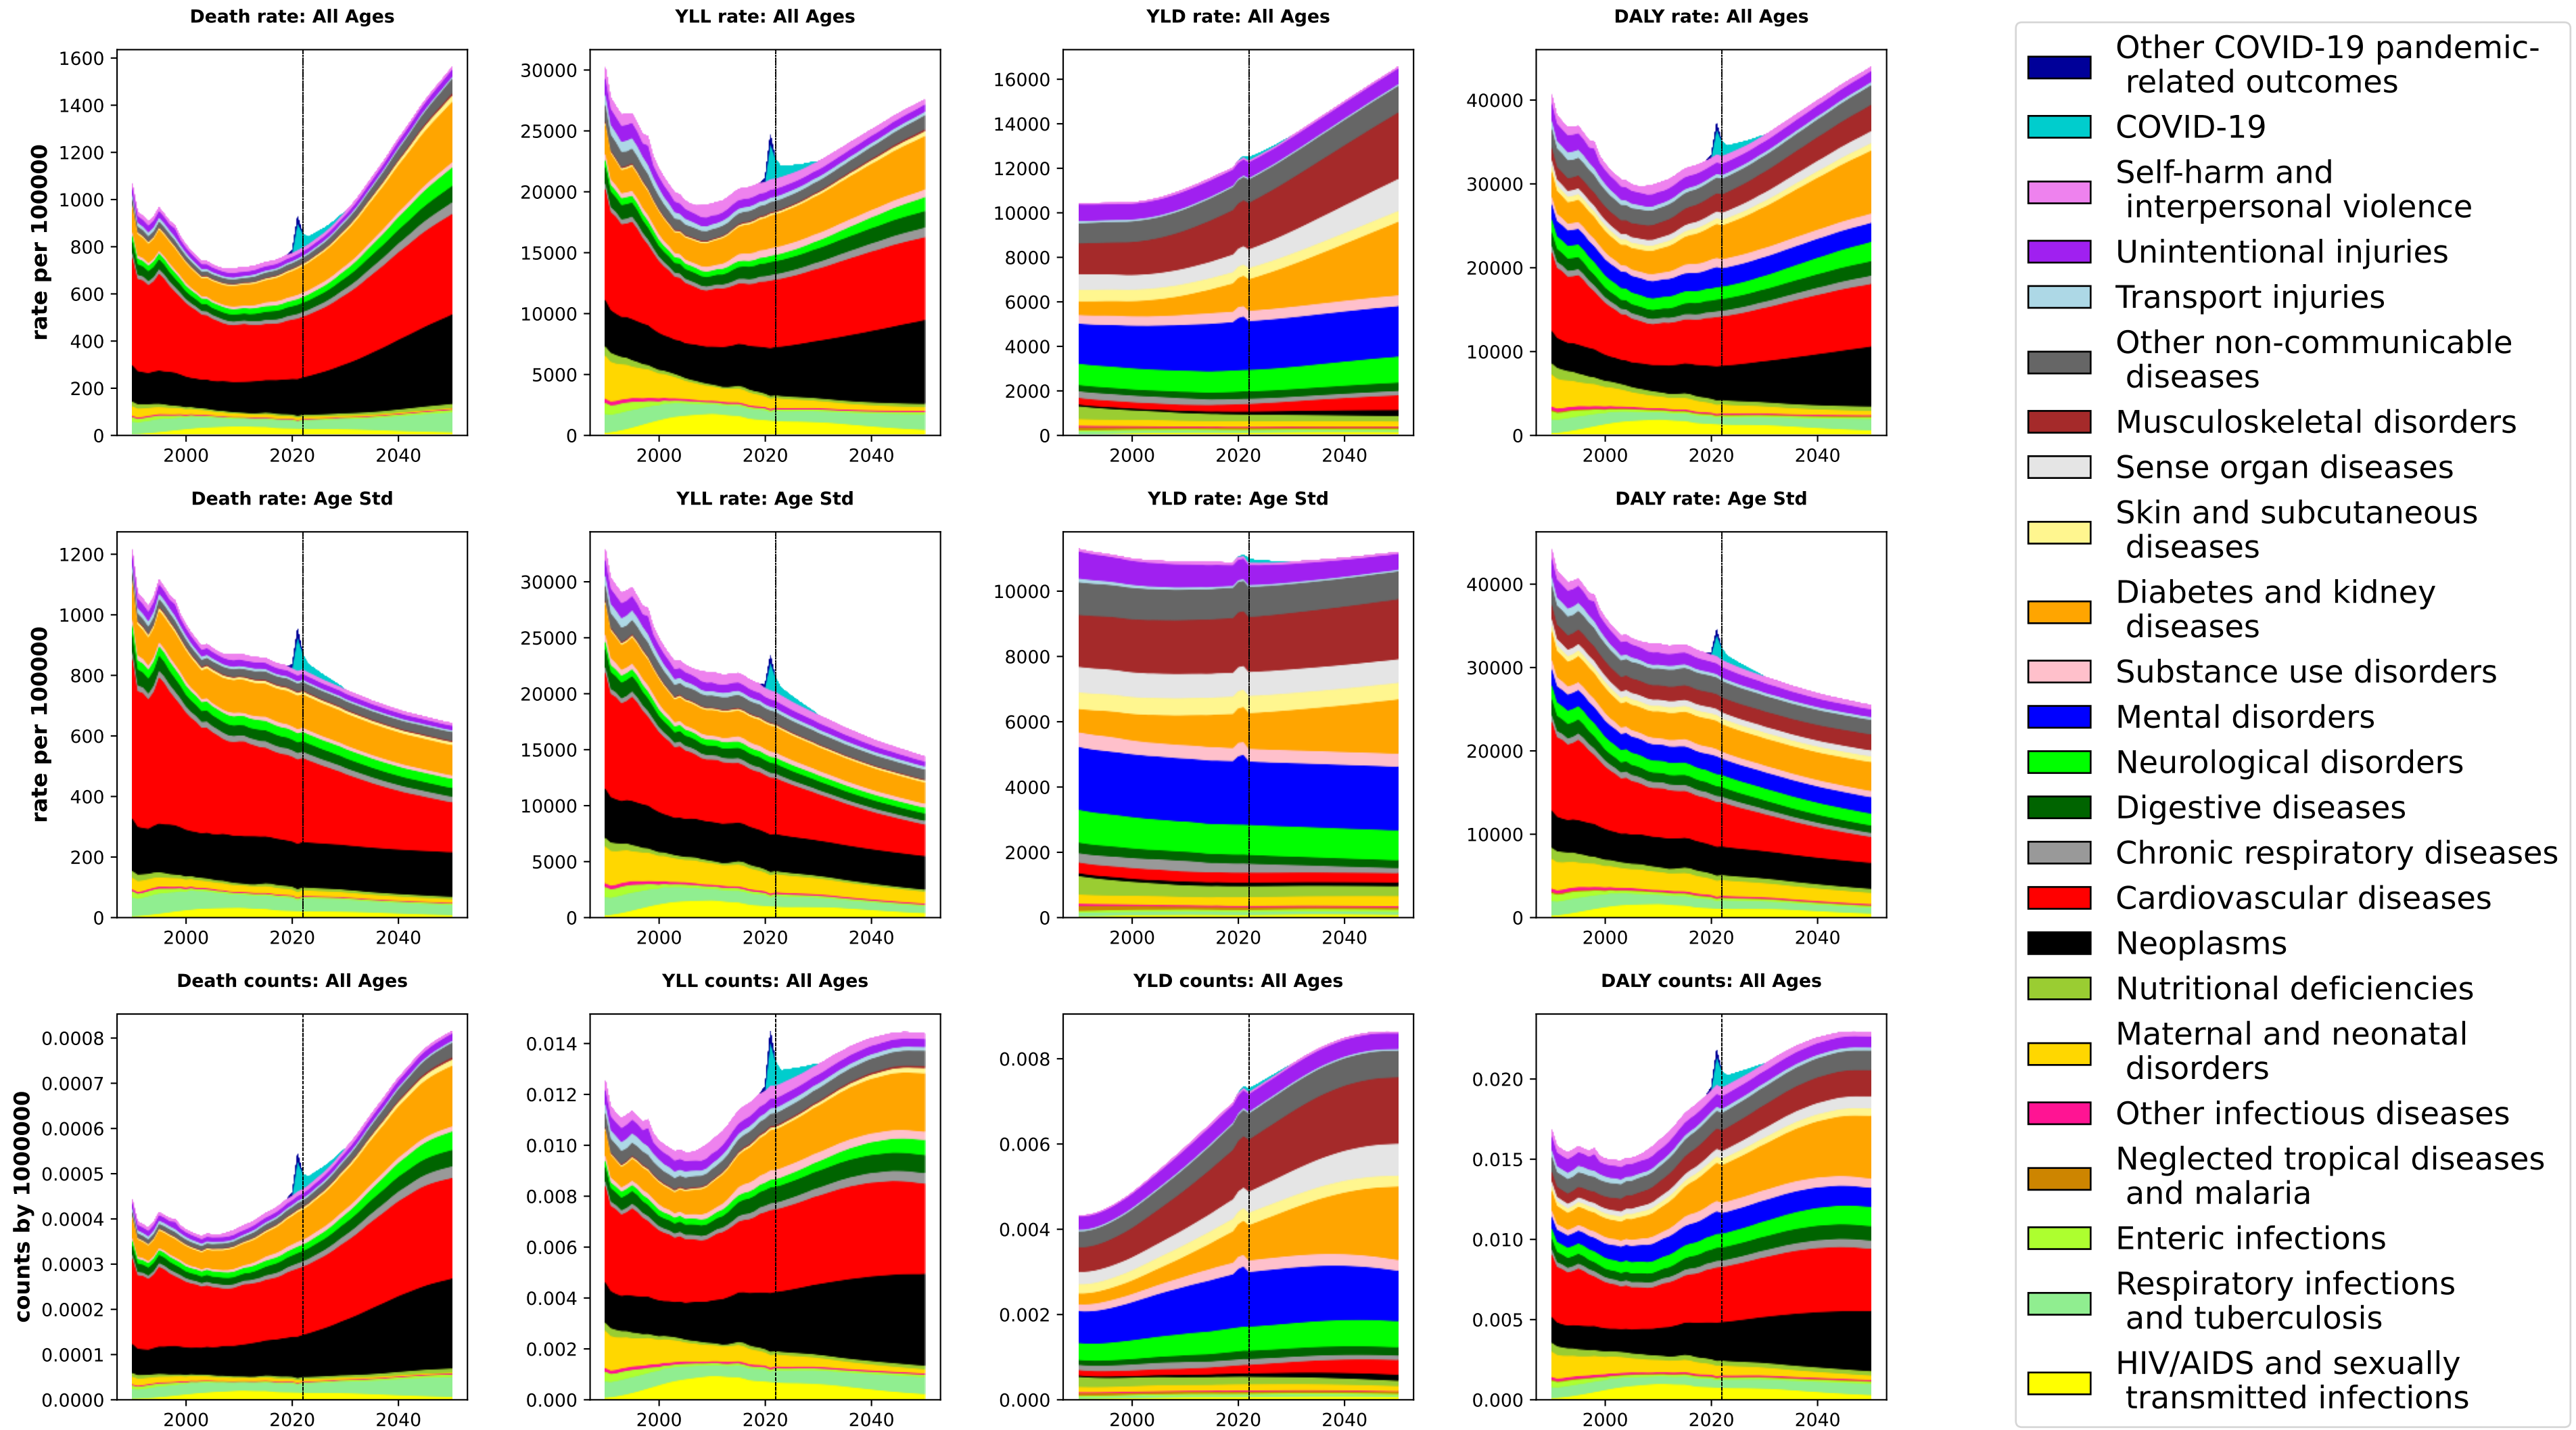

# Saint Lucia

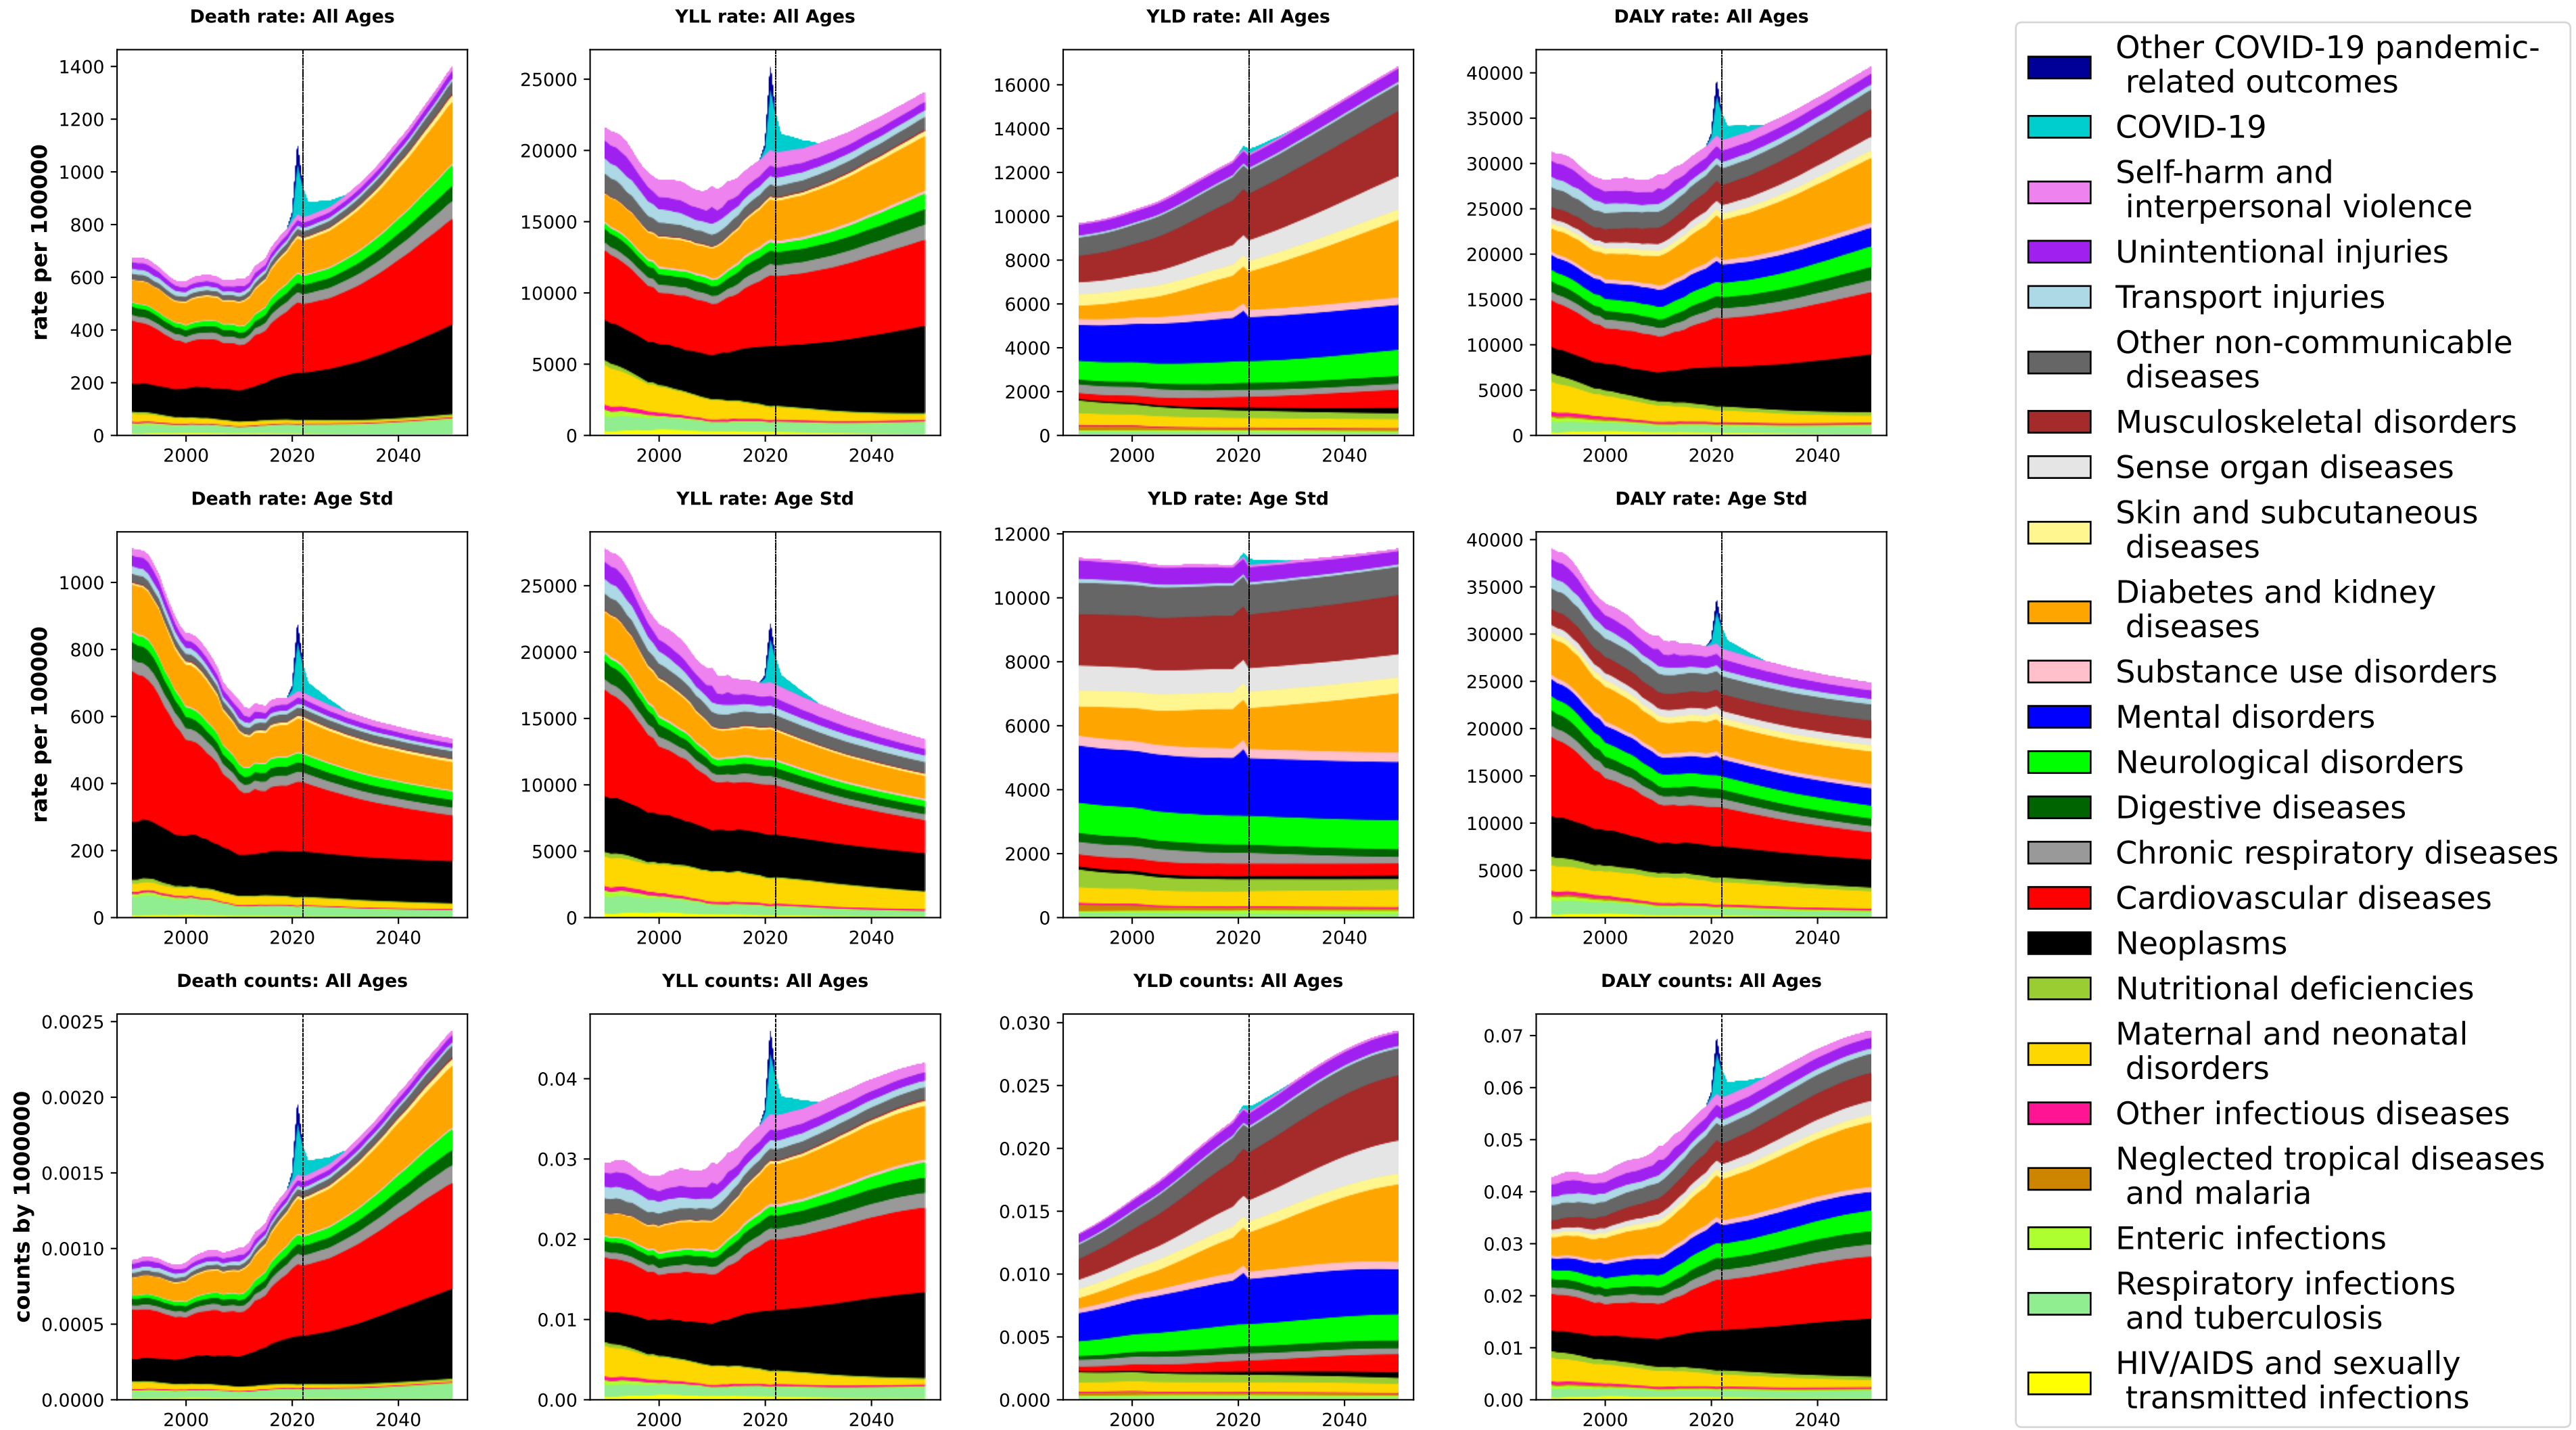

# Saint Vincent and the Grenadines

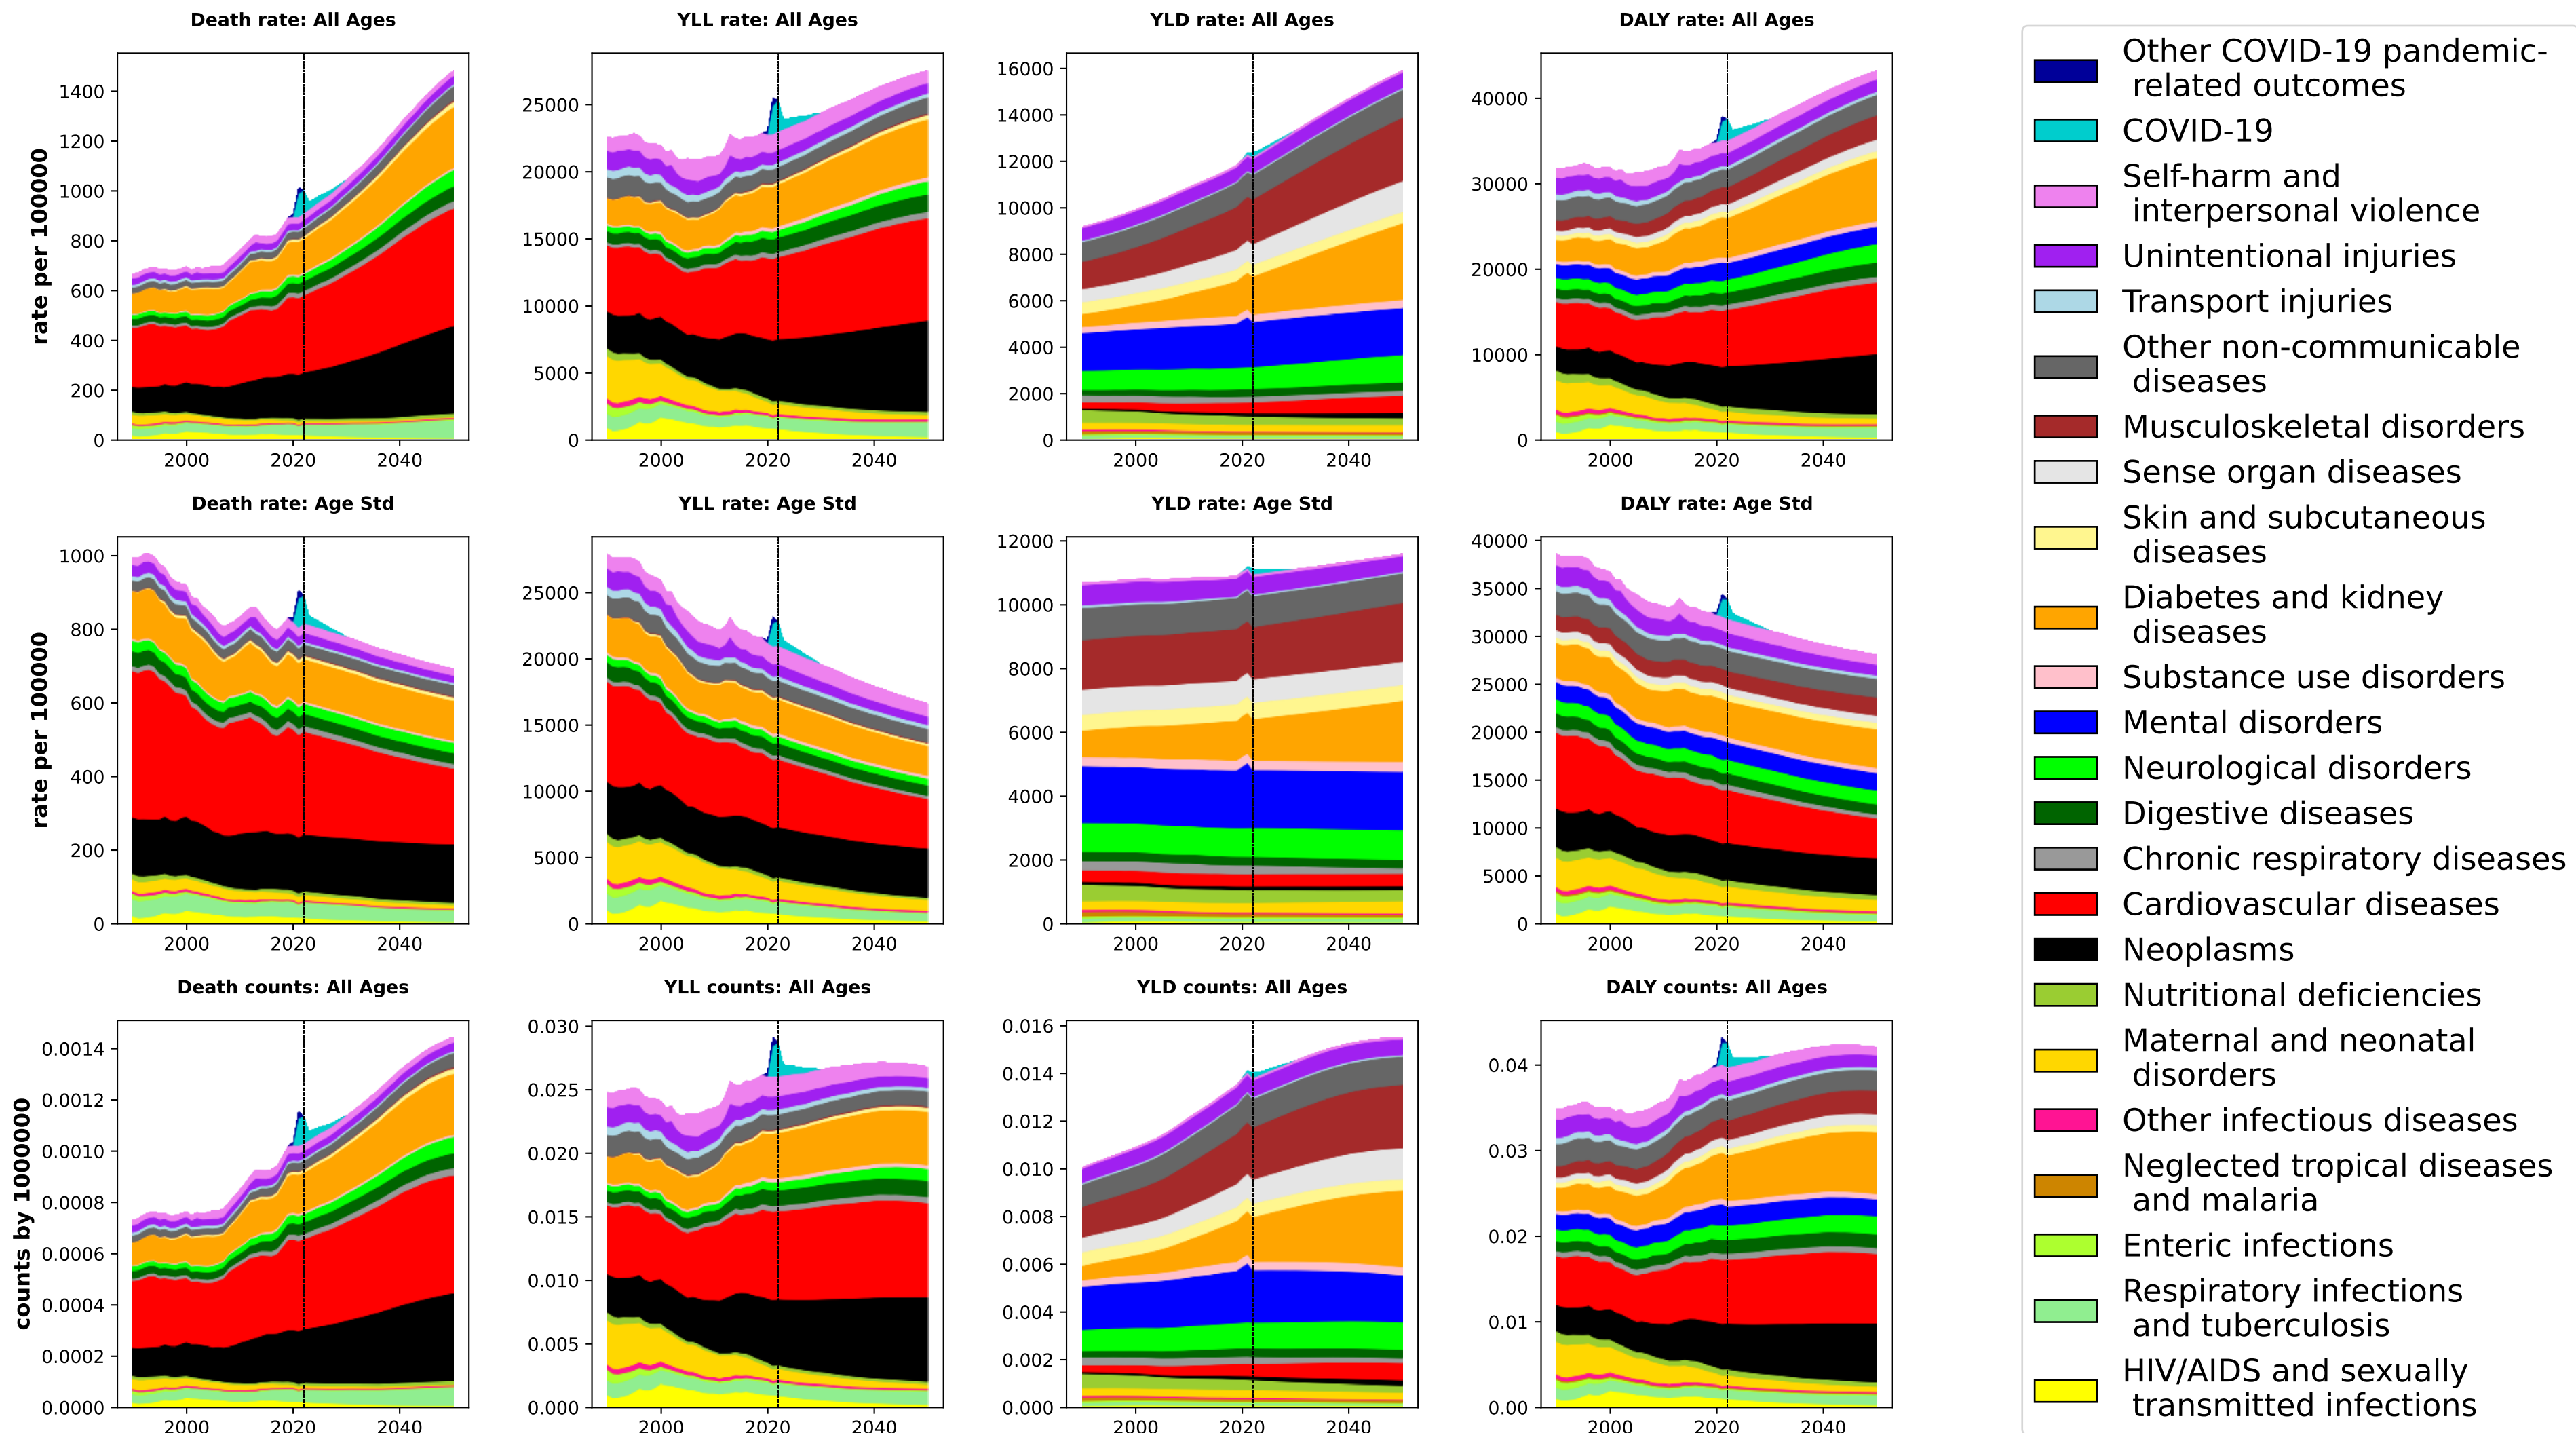

# Suriname

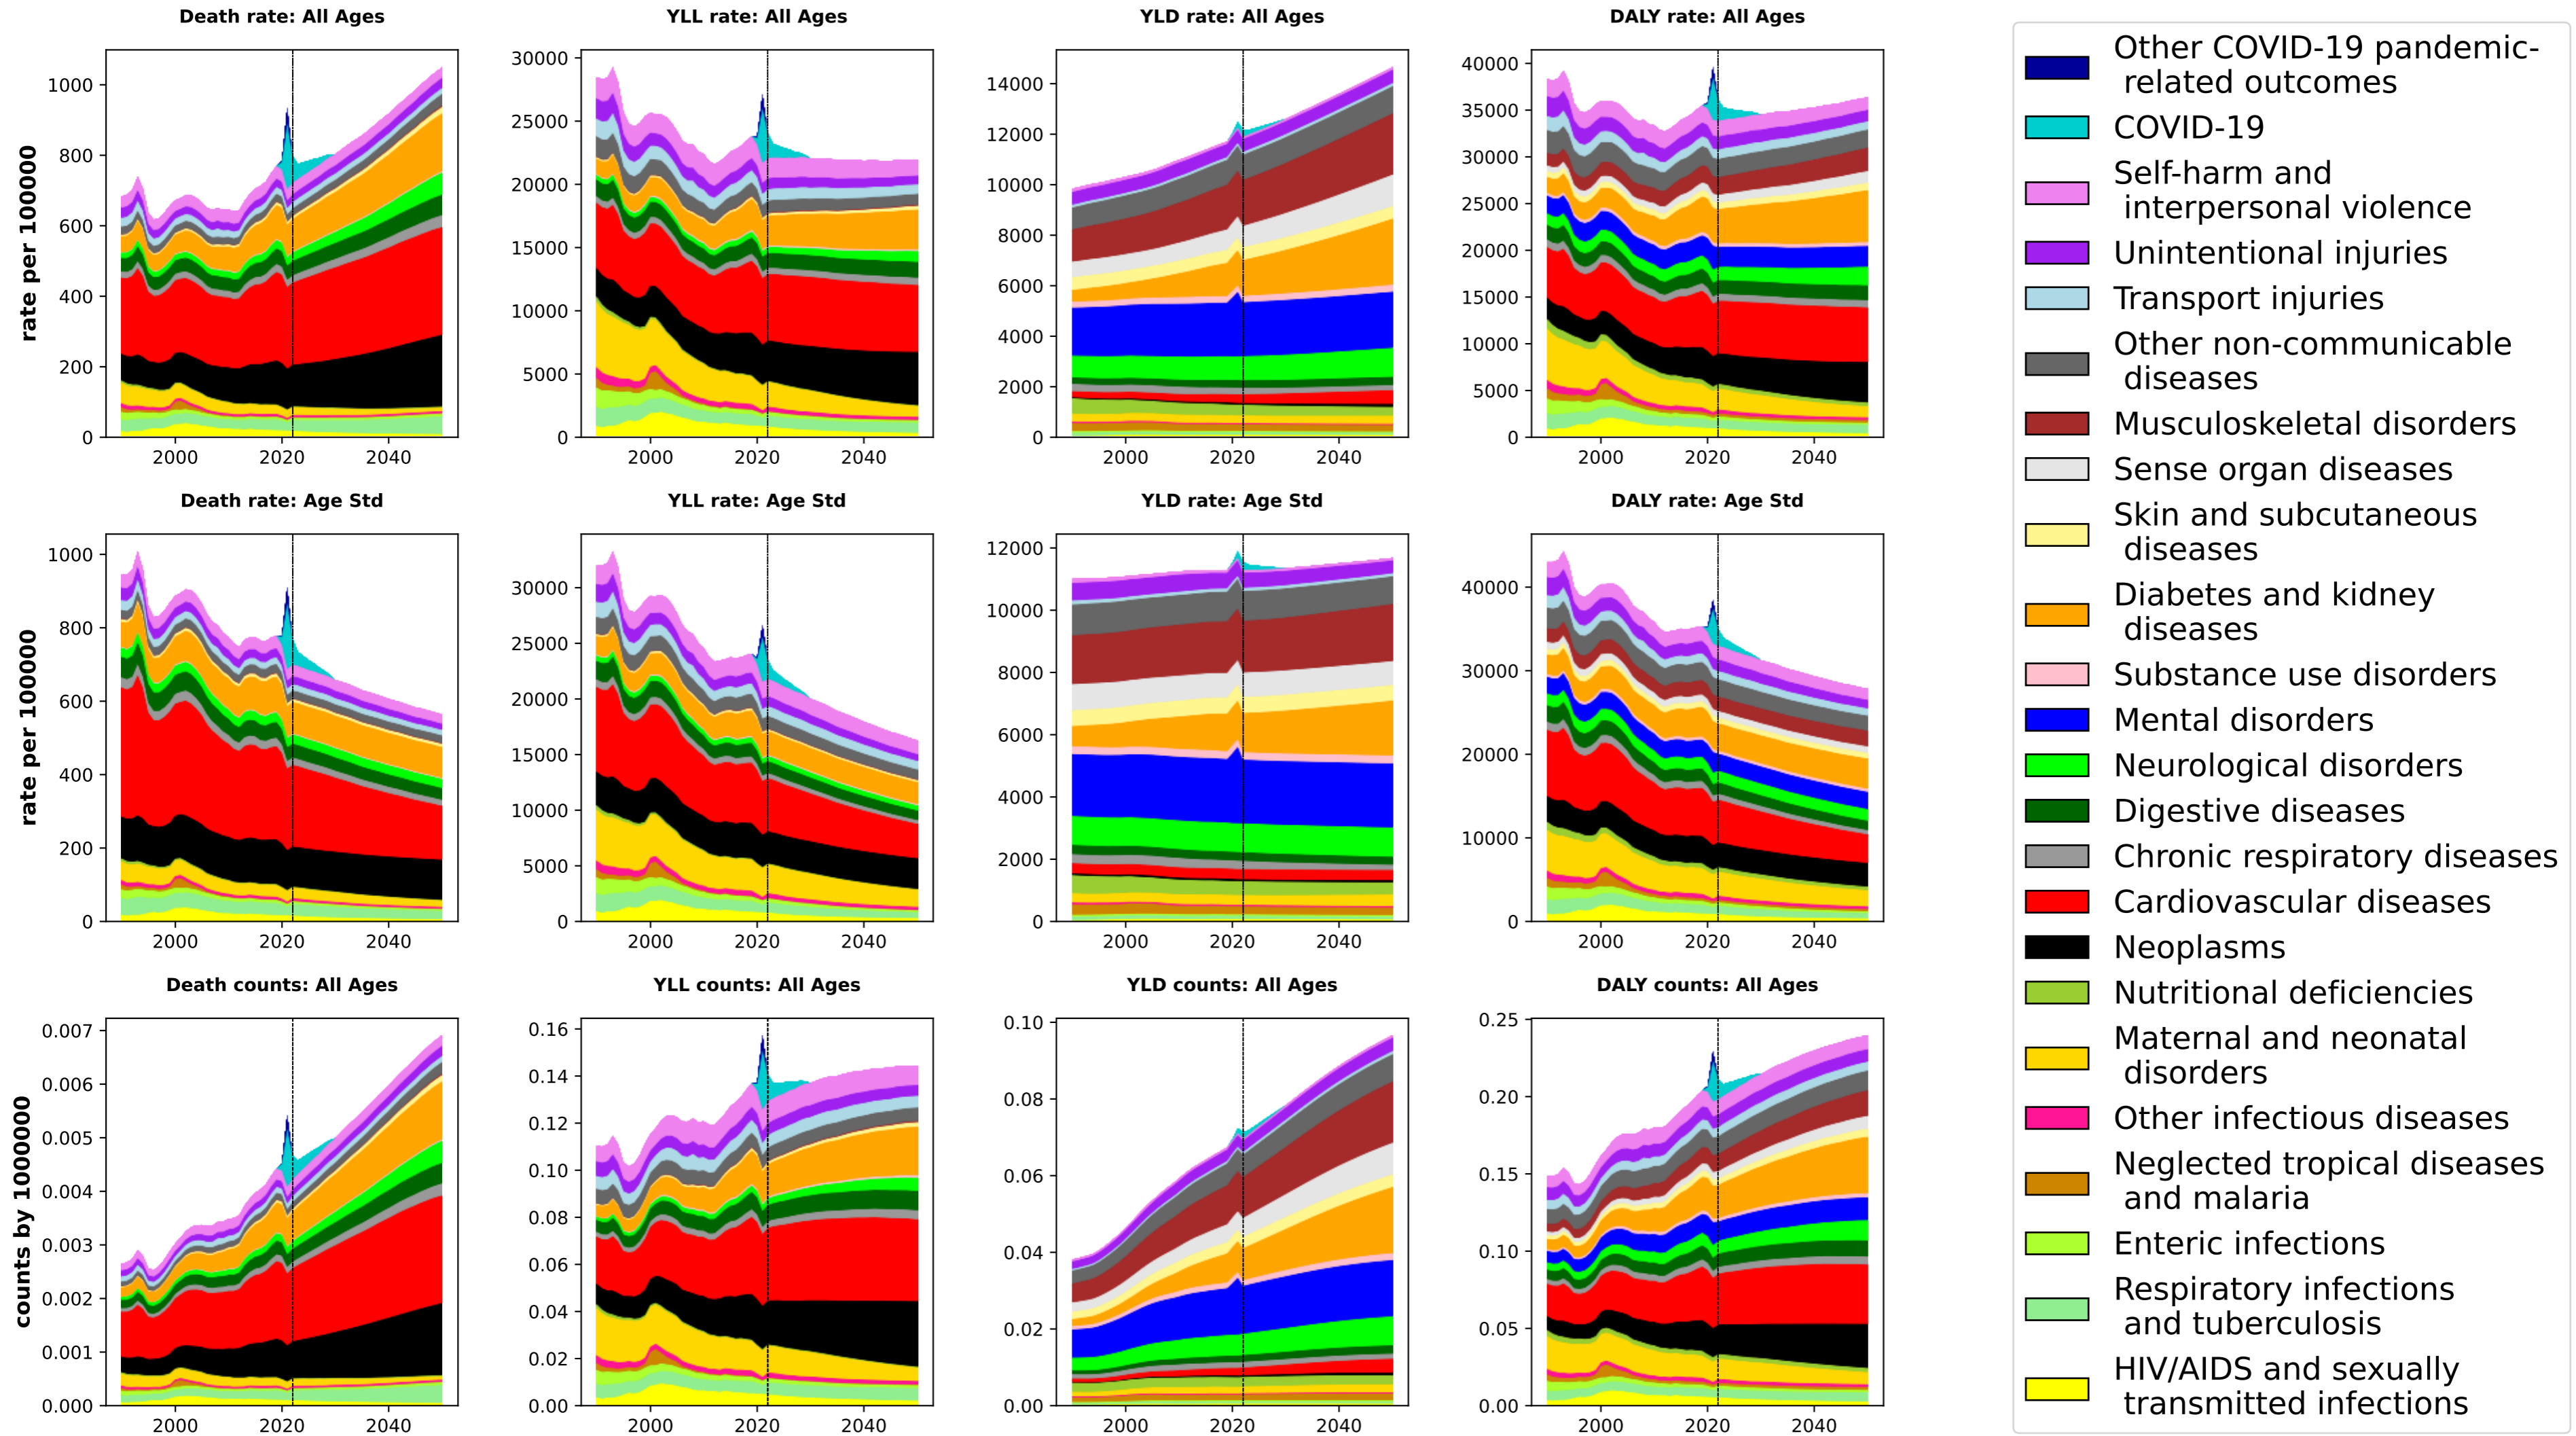

# Trinidad and Tobago

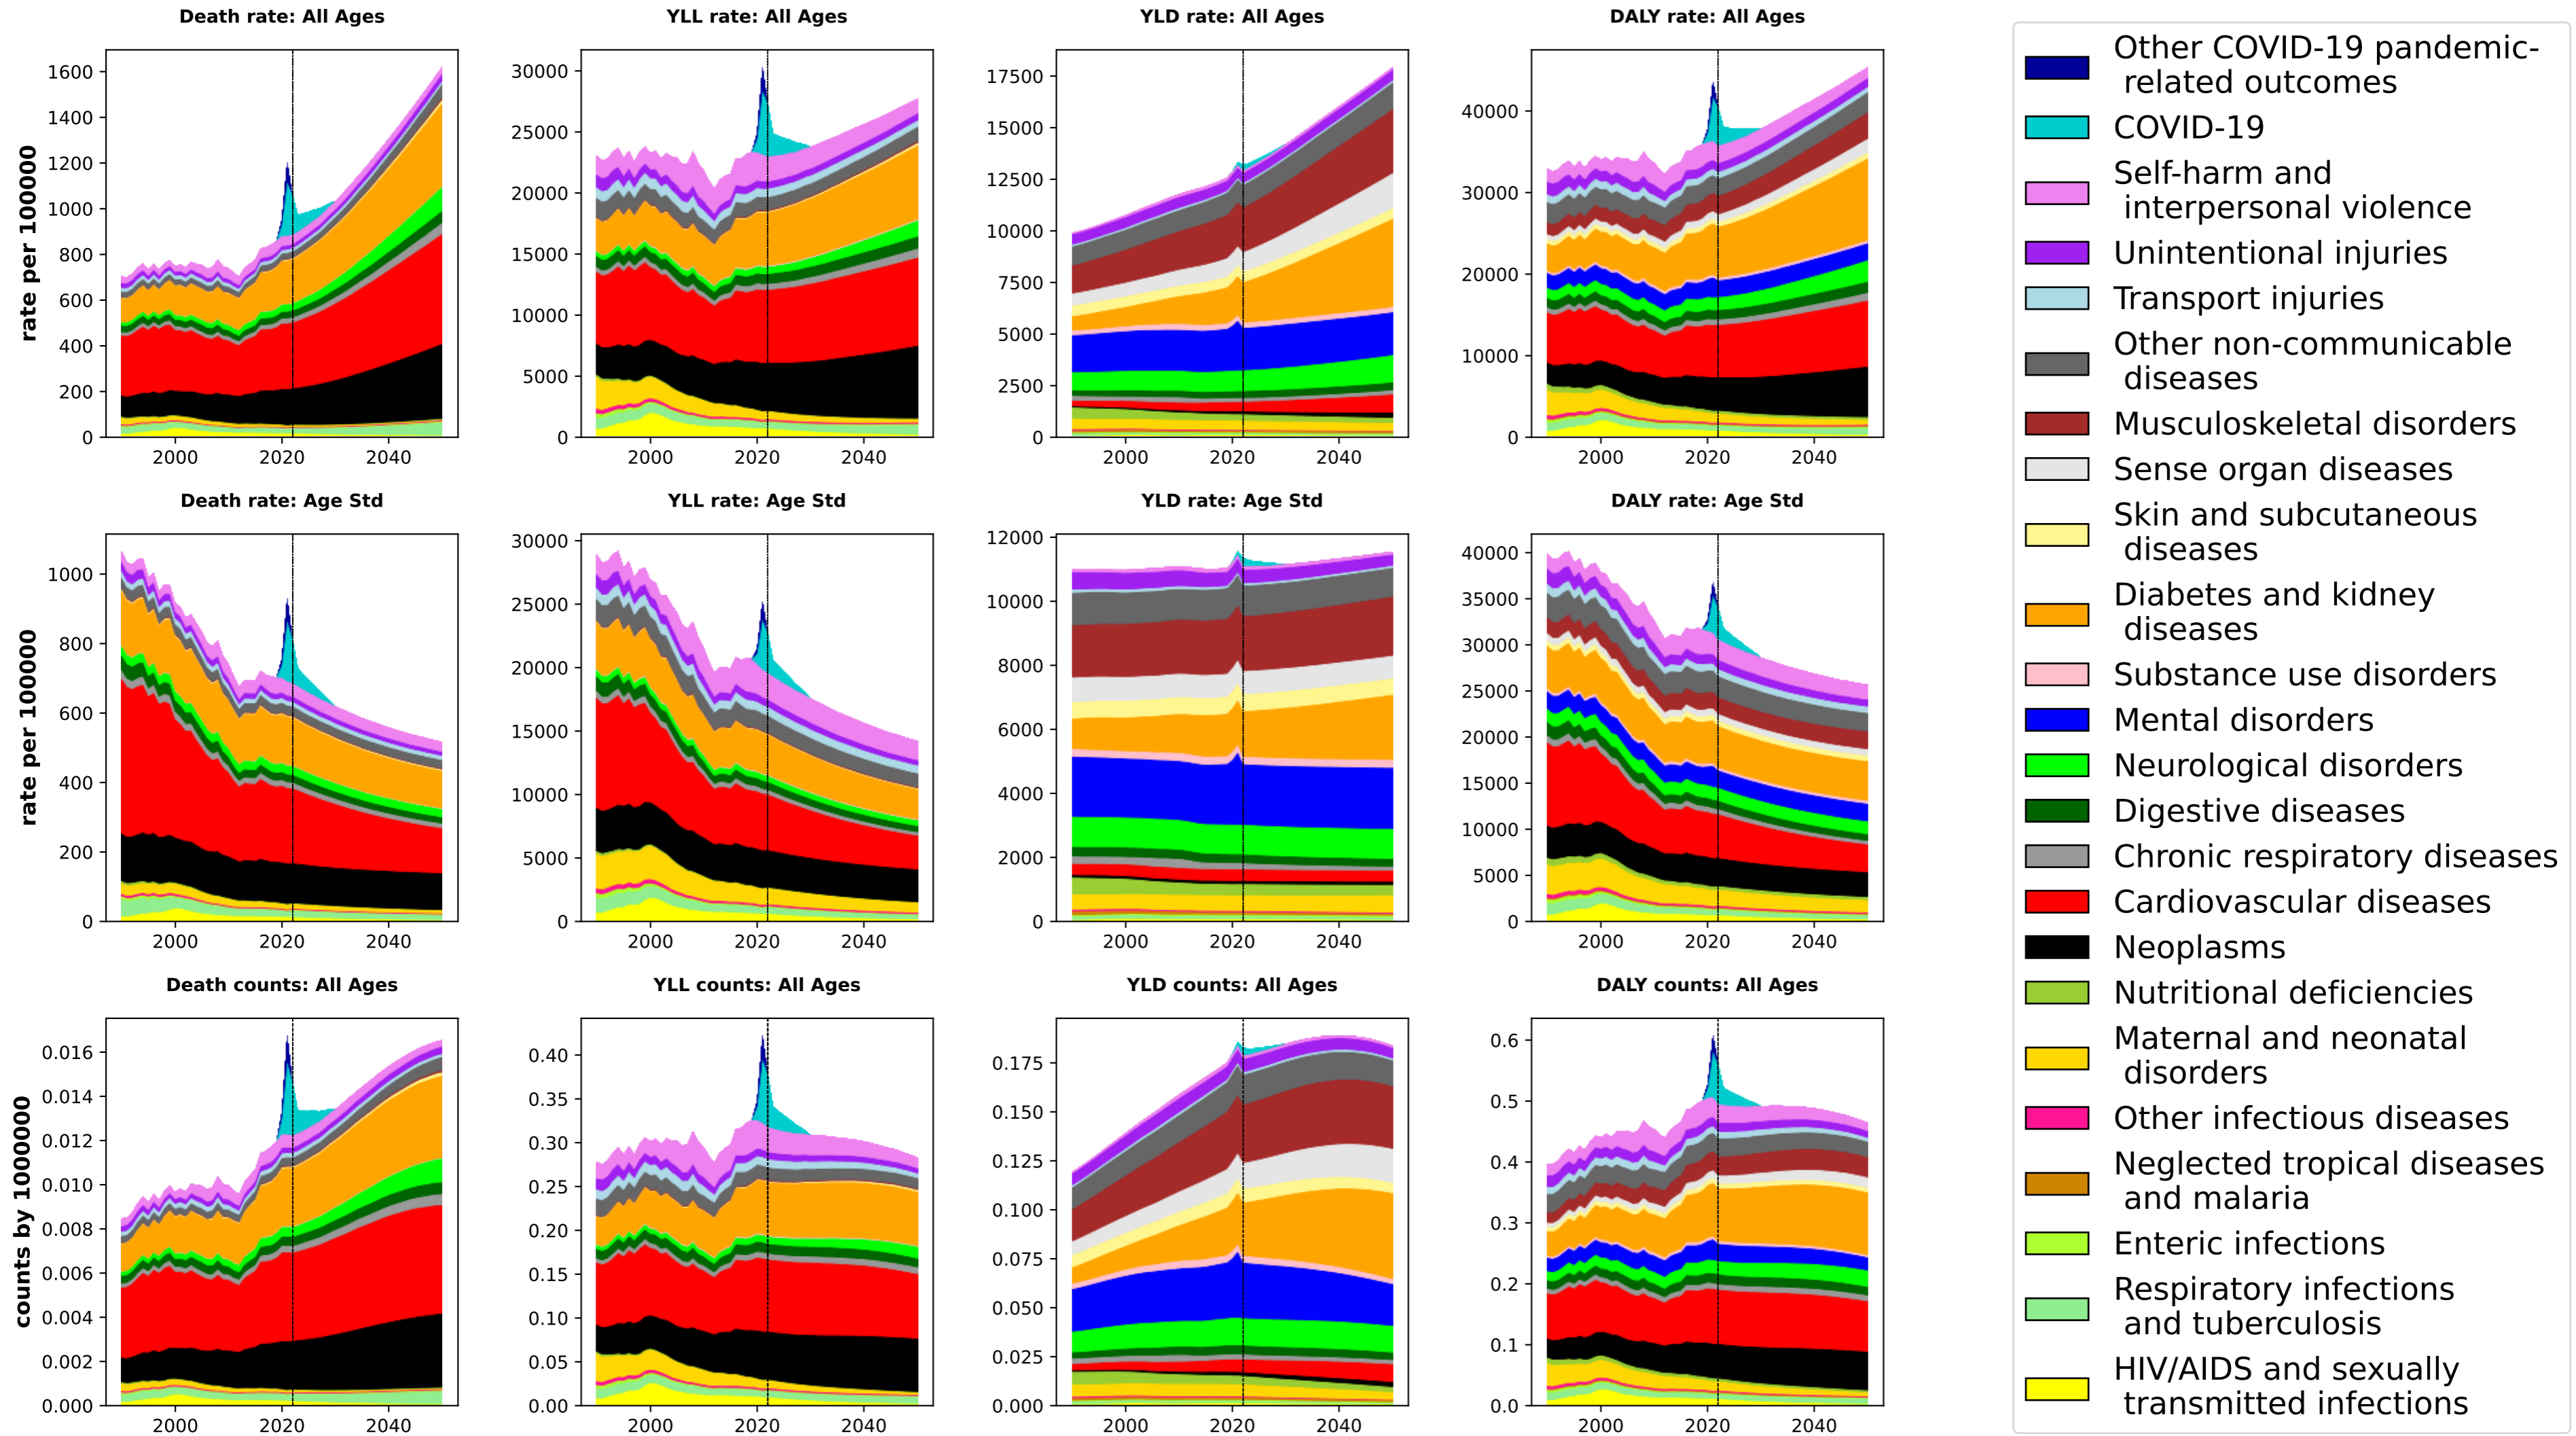

# Virgin Islands

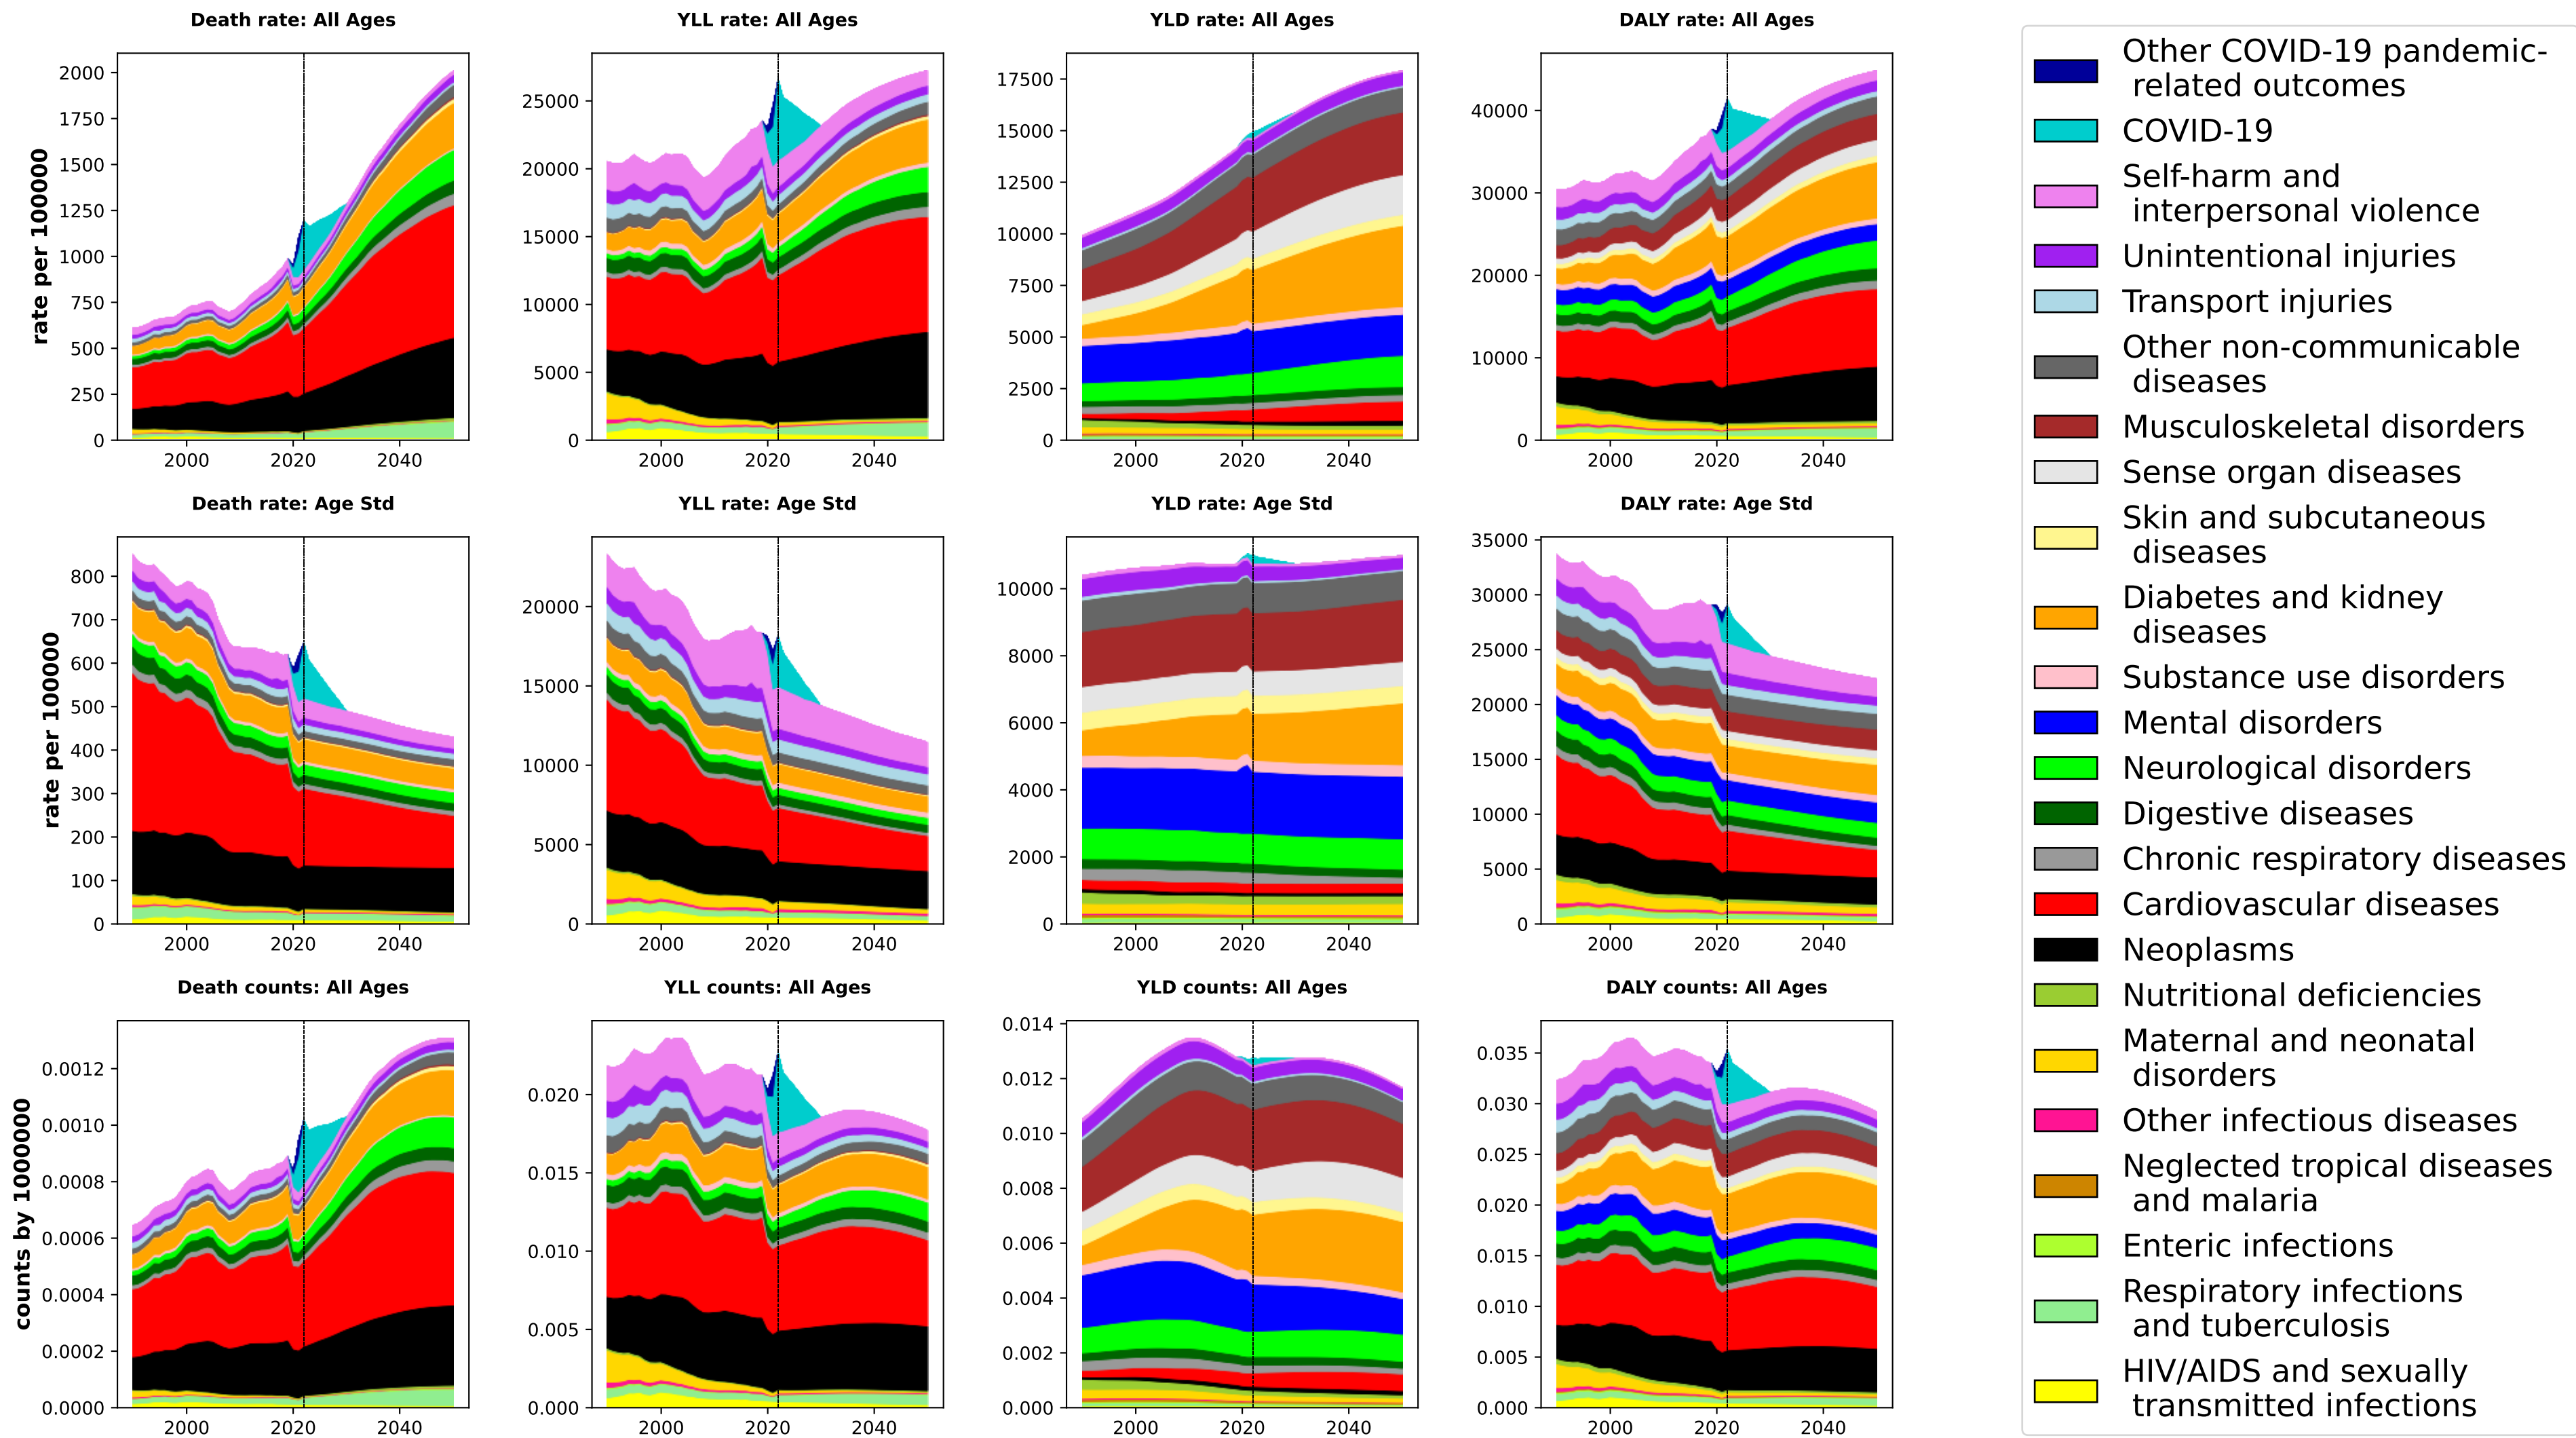

# Colombia

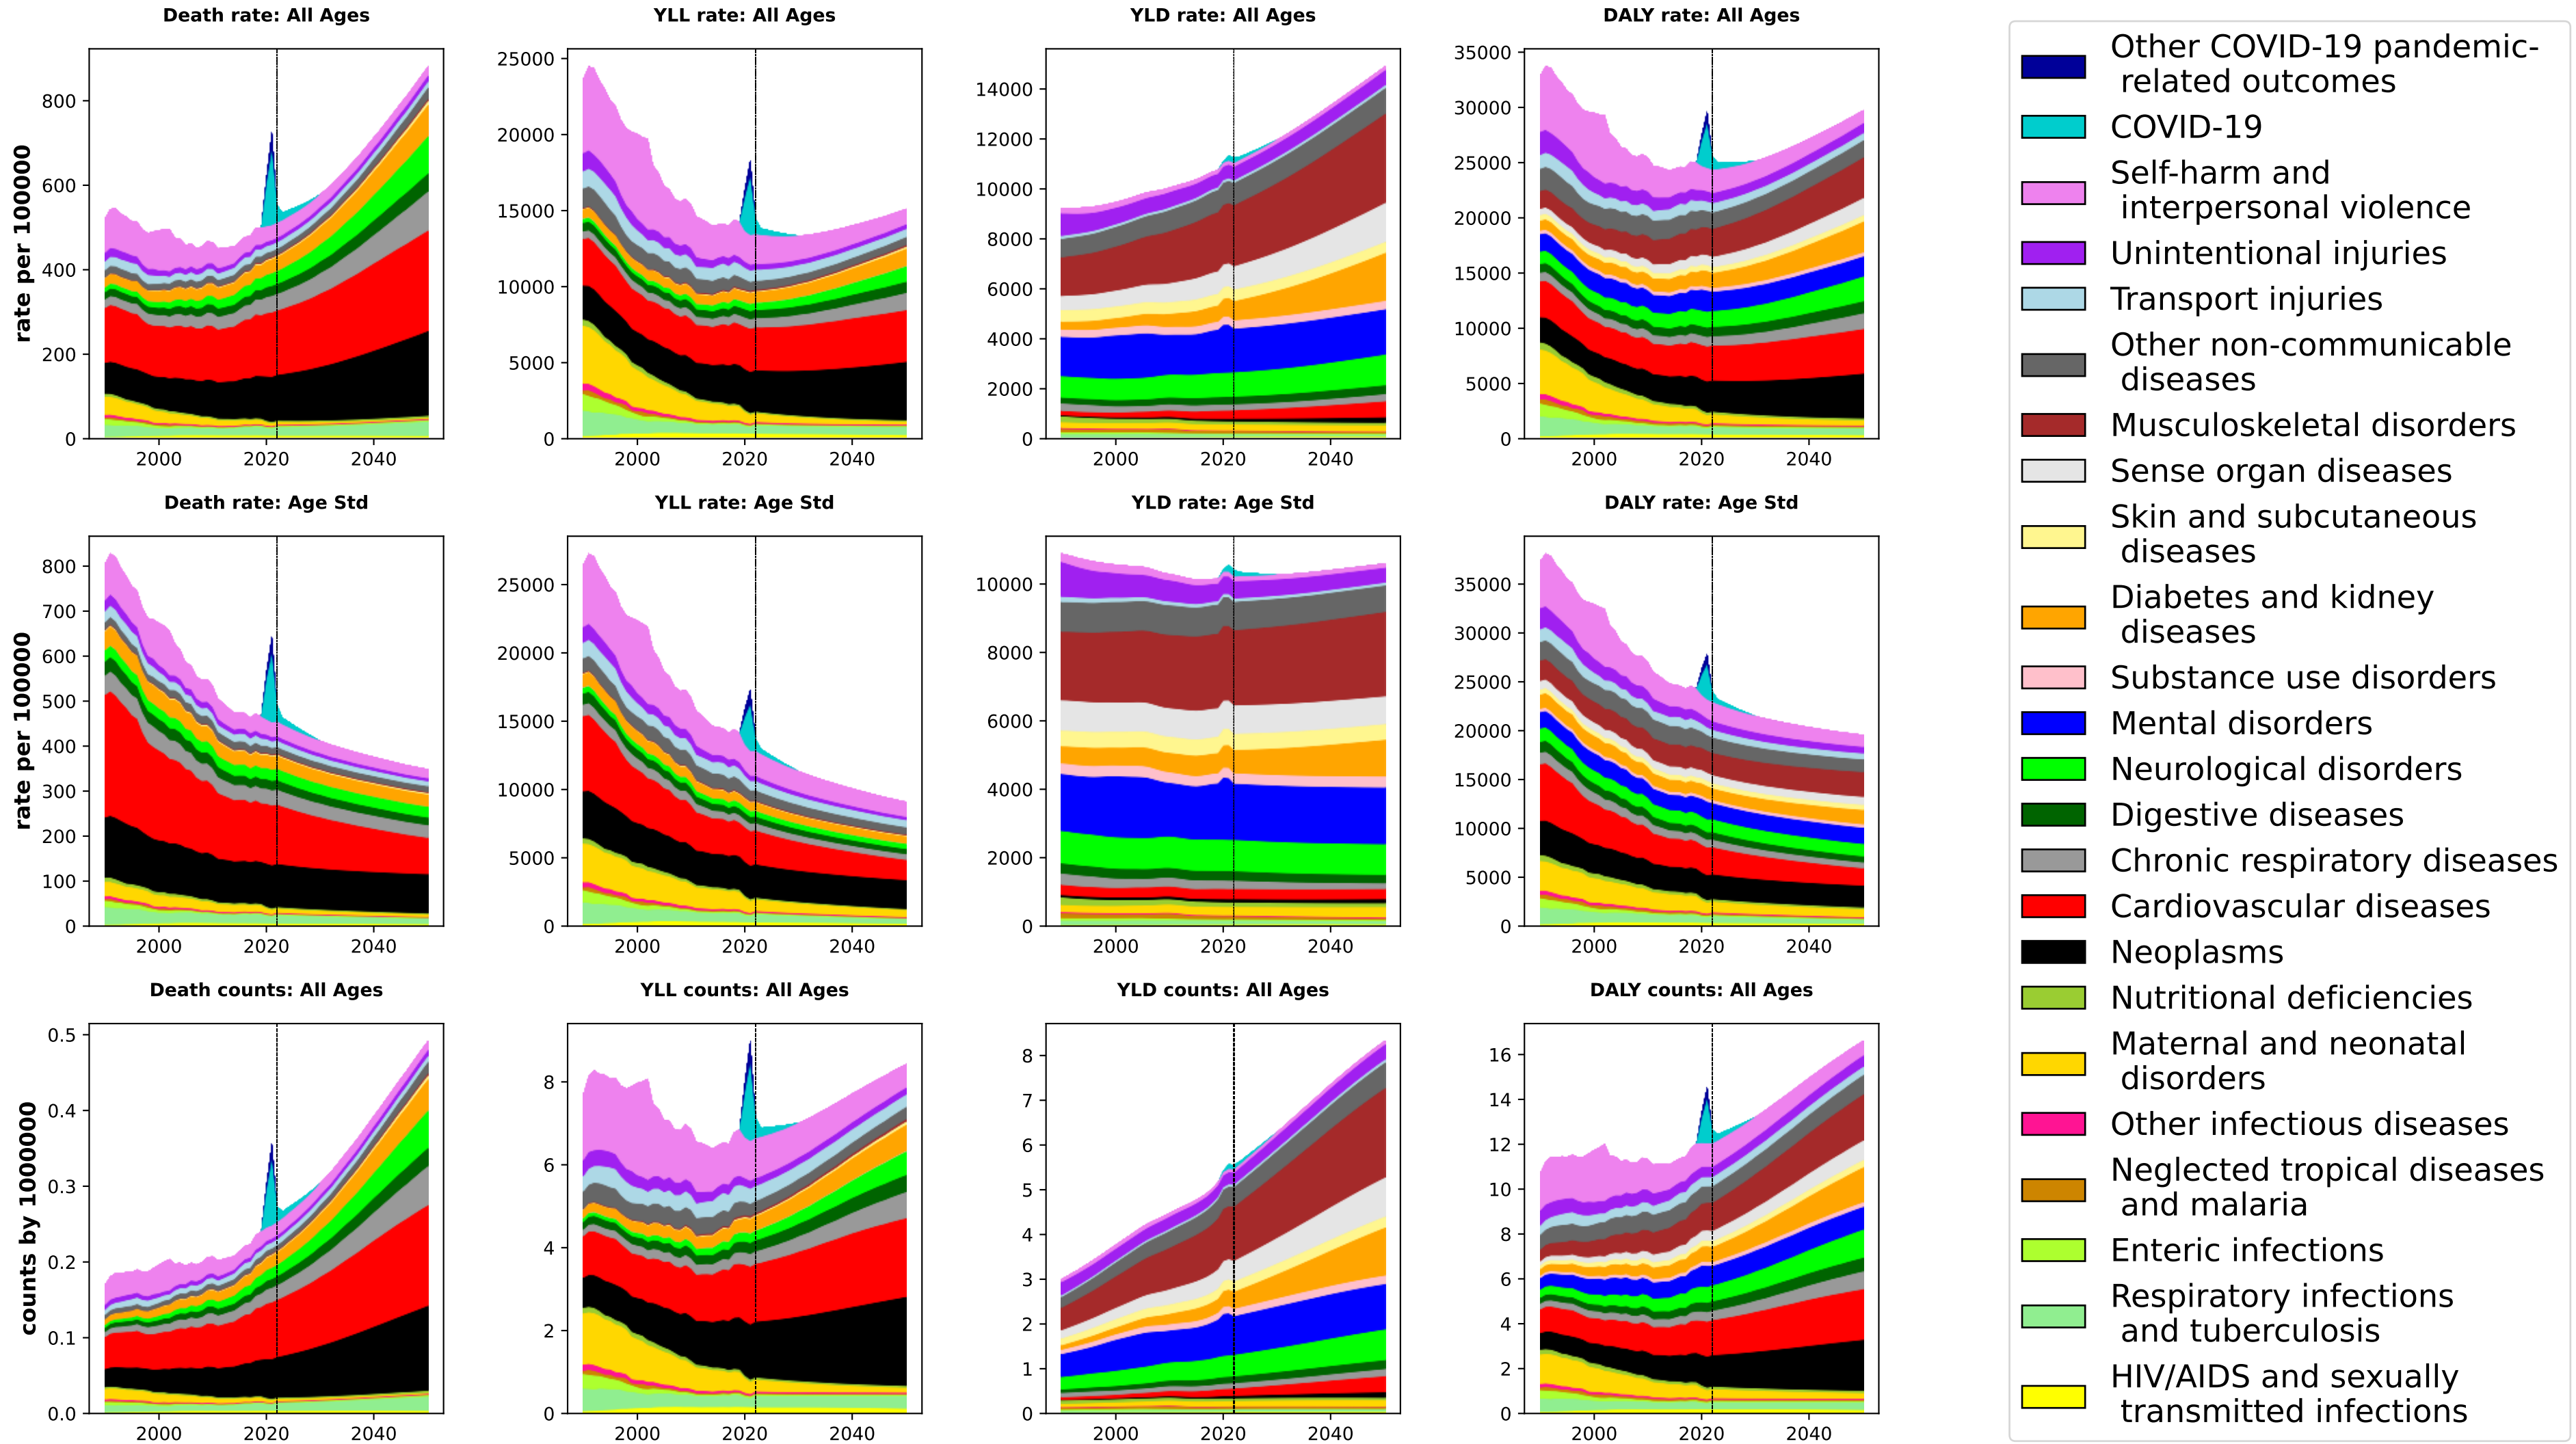

# Costa Rica

Supplemental Results Figure S6. Cause level 2 area plots for 4 burden measures for reference scenario by location, 1990-2050

799

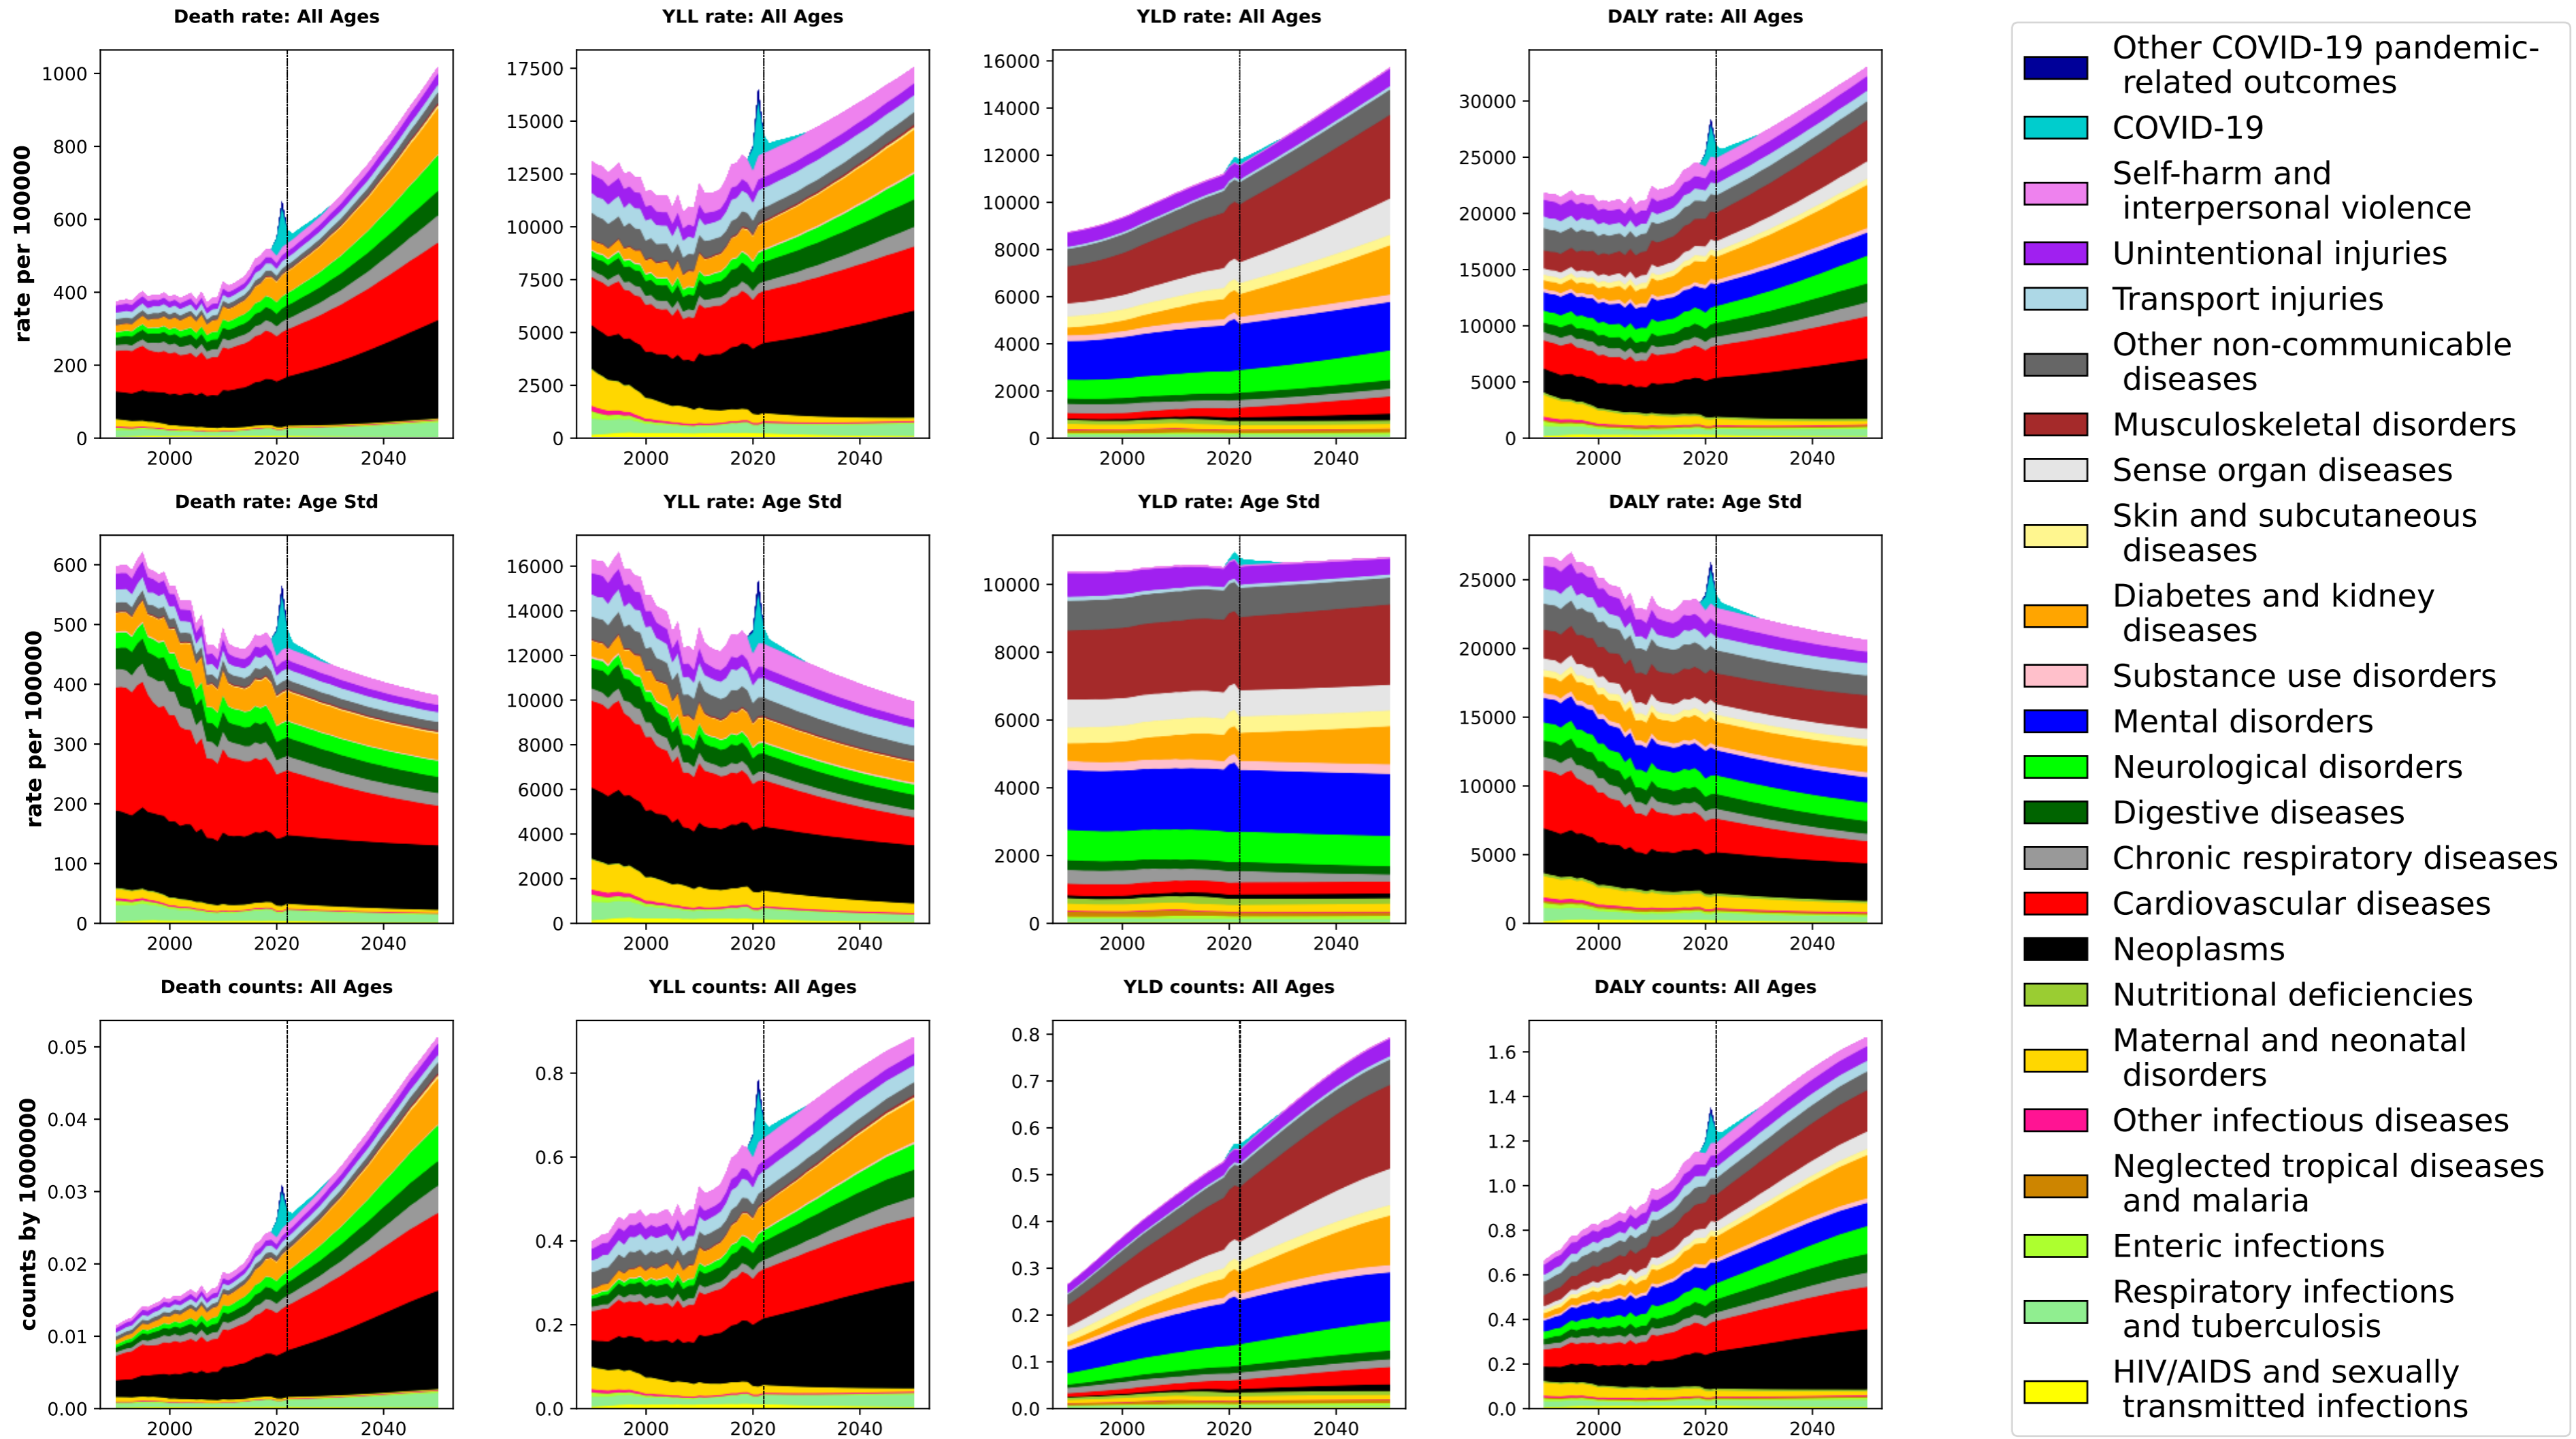



# El Salvador

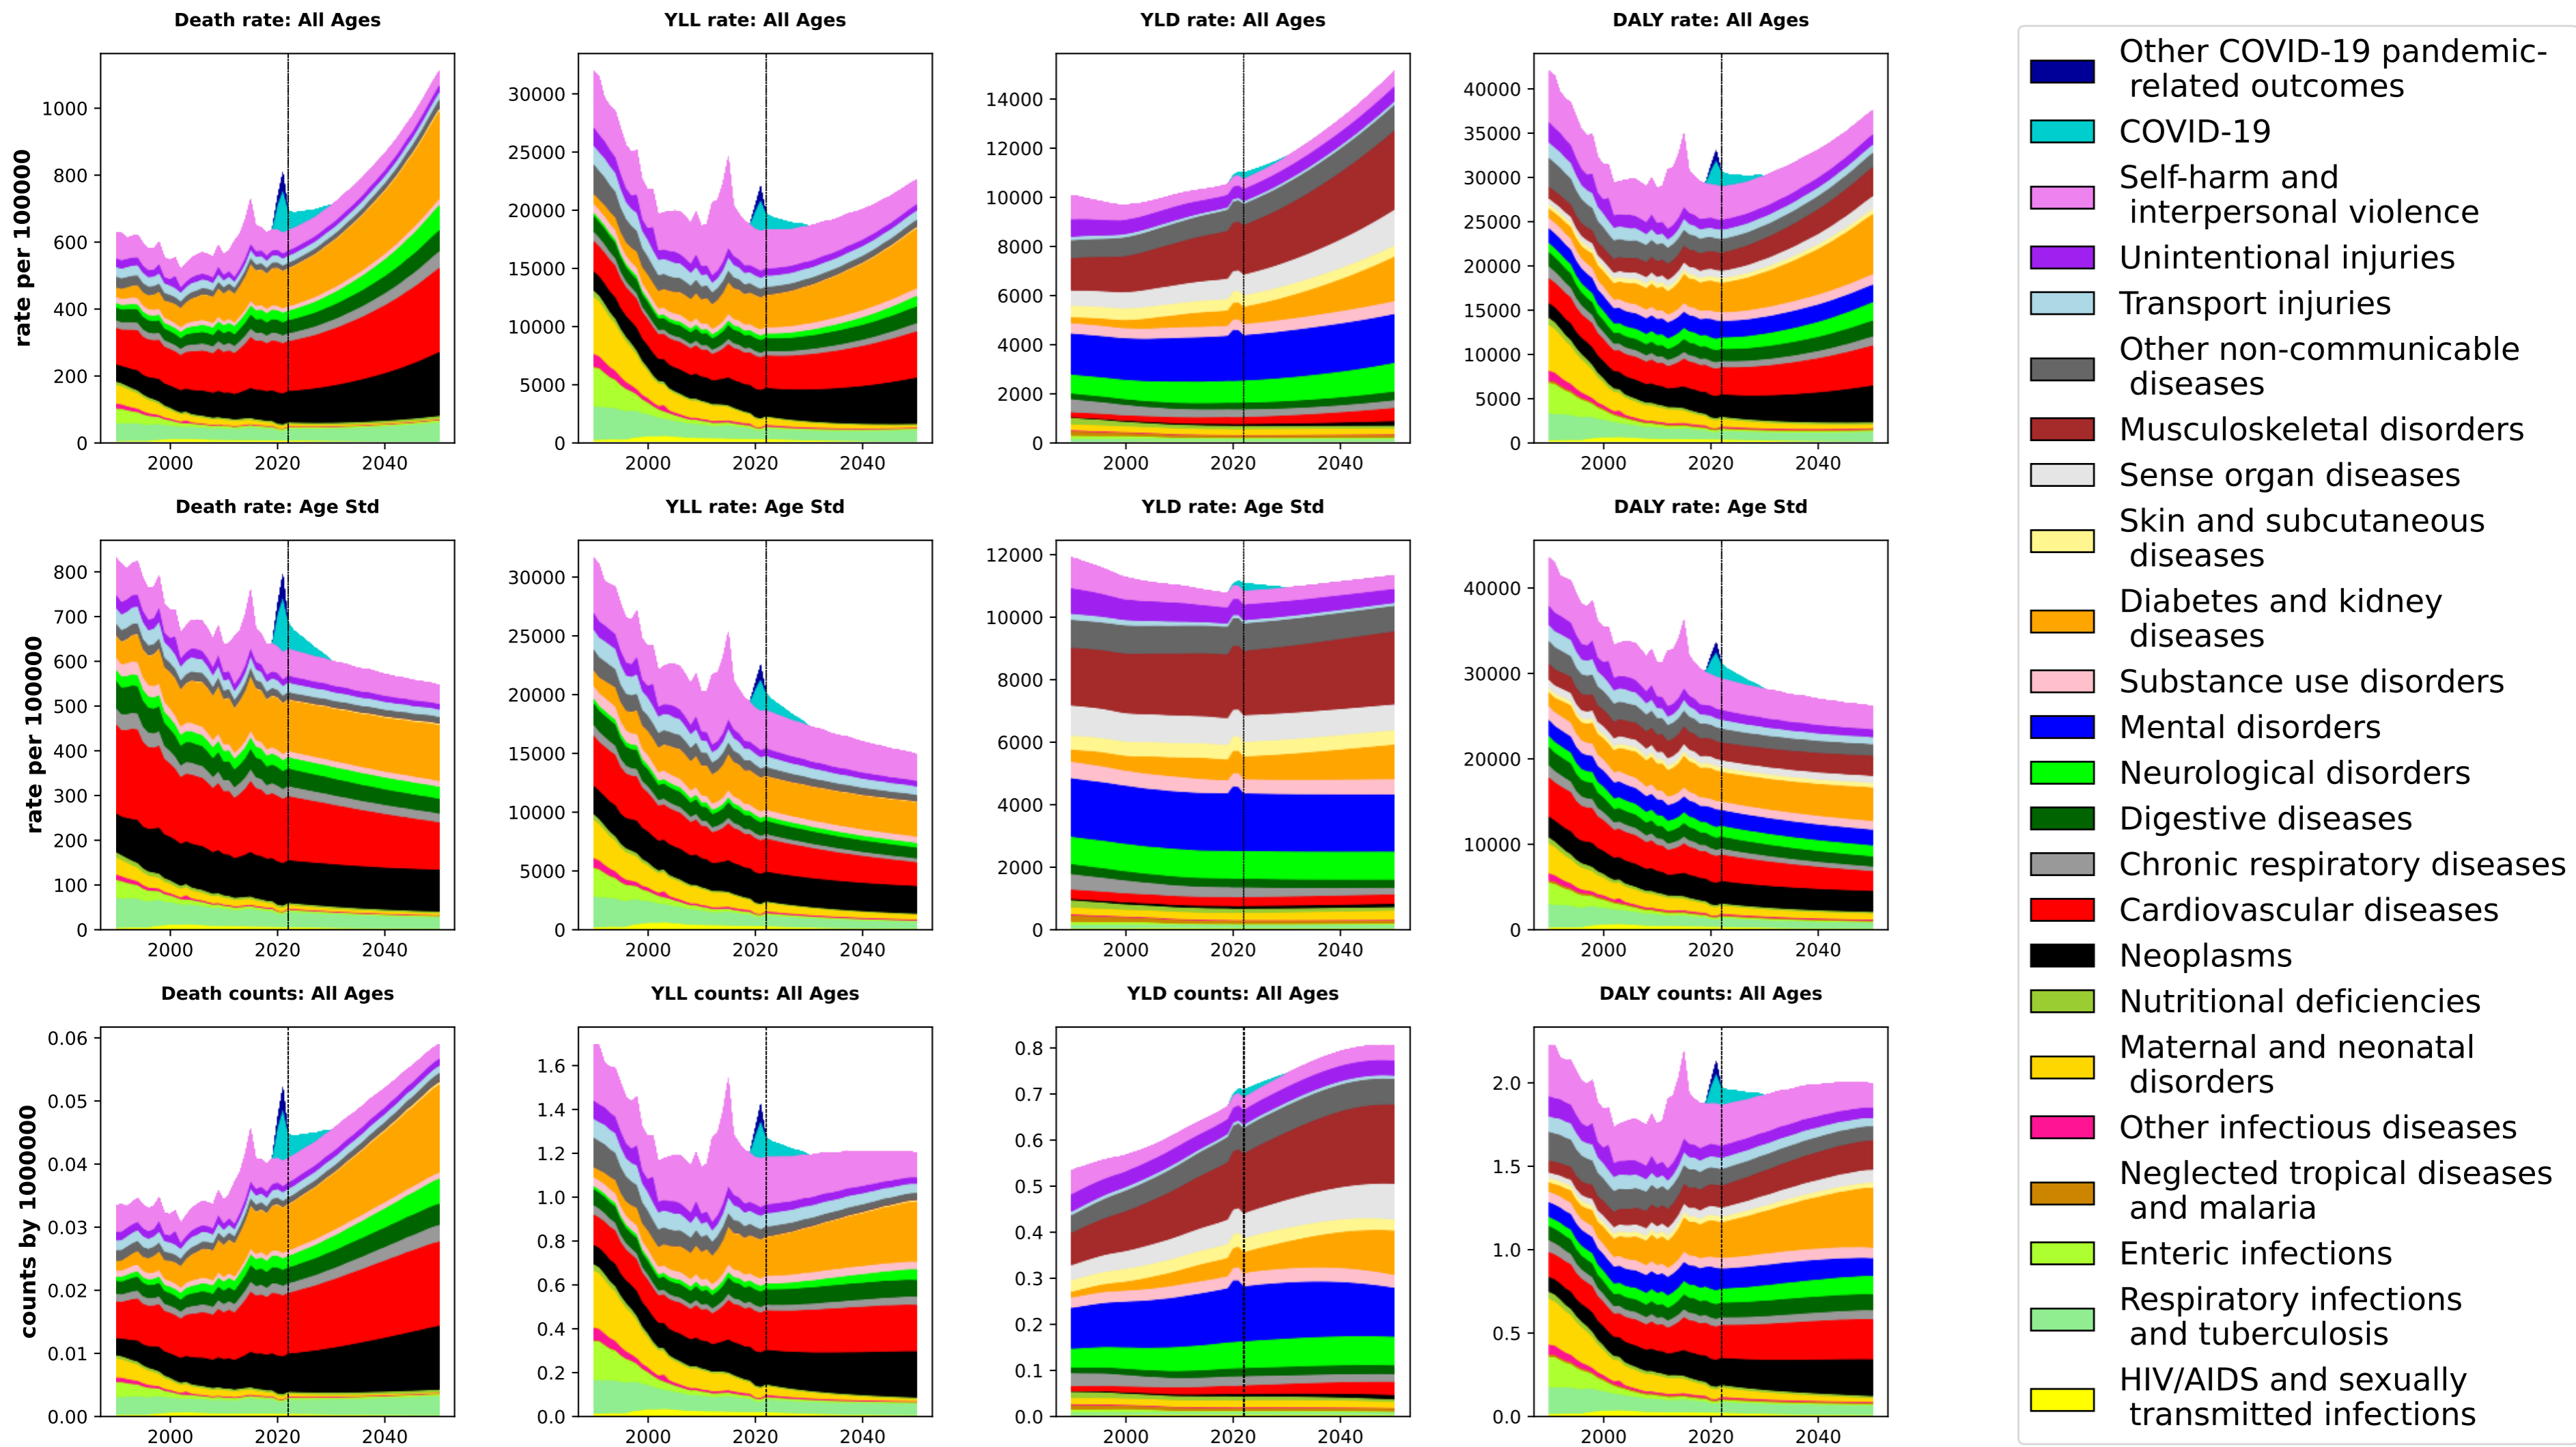

# Guatemala

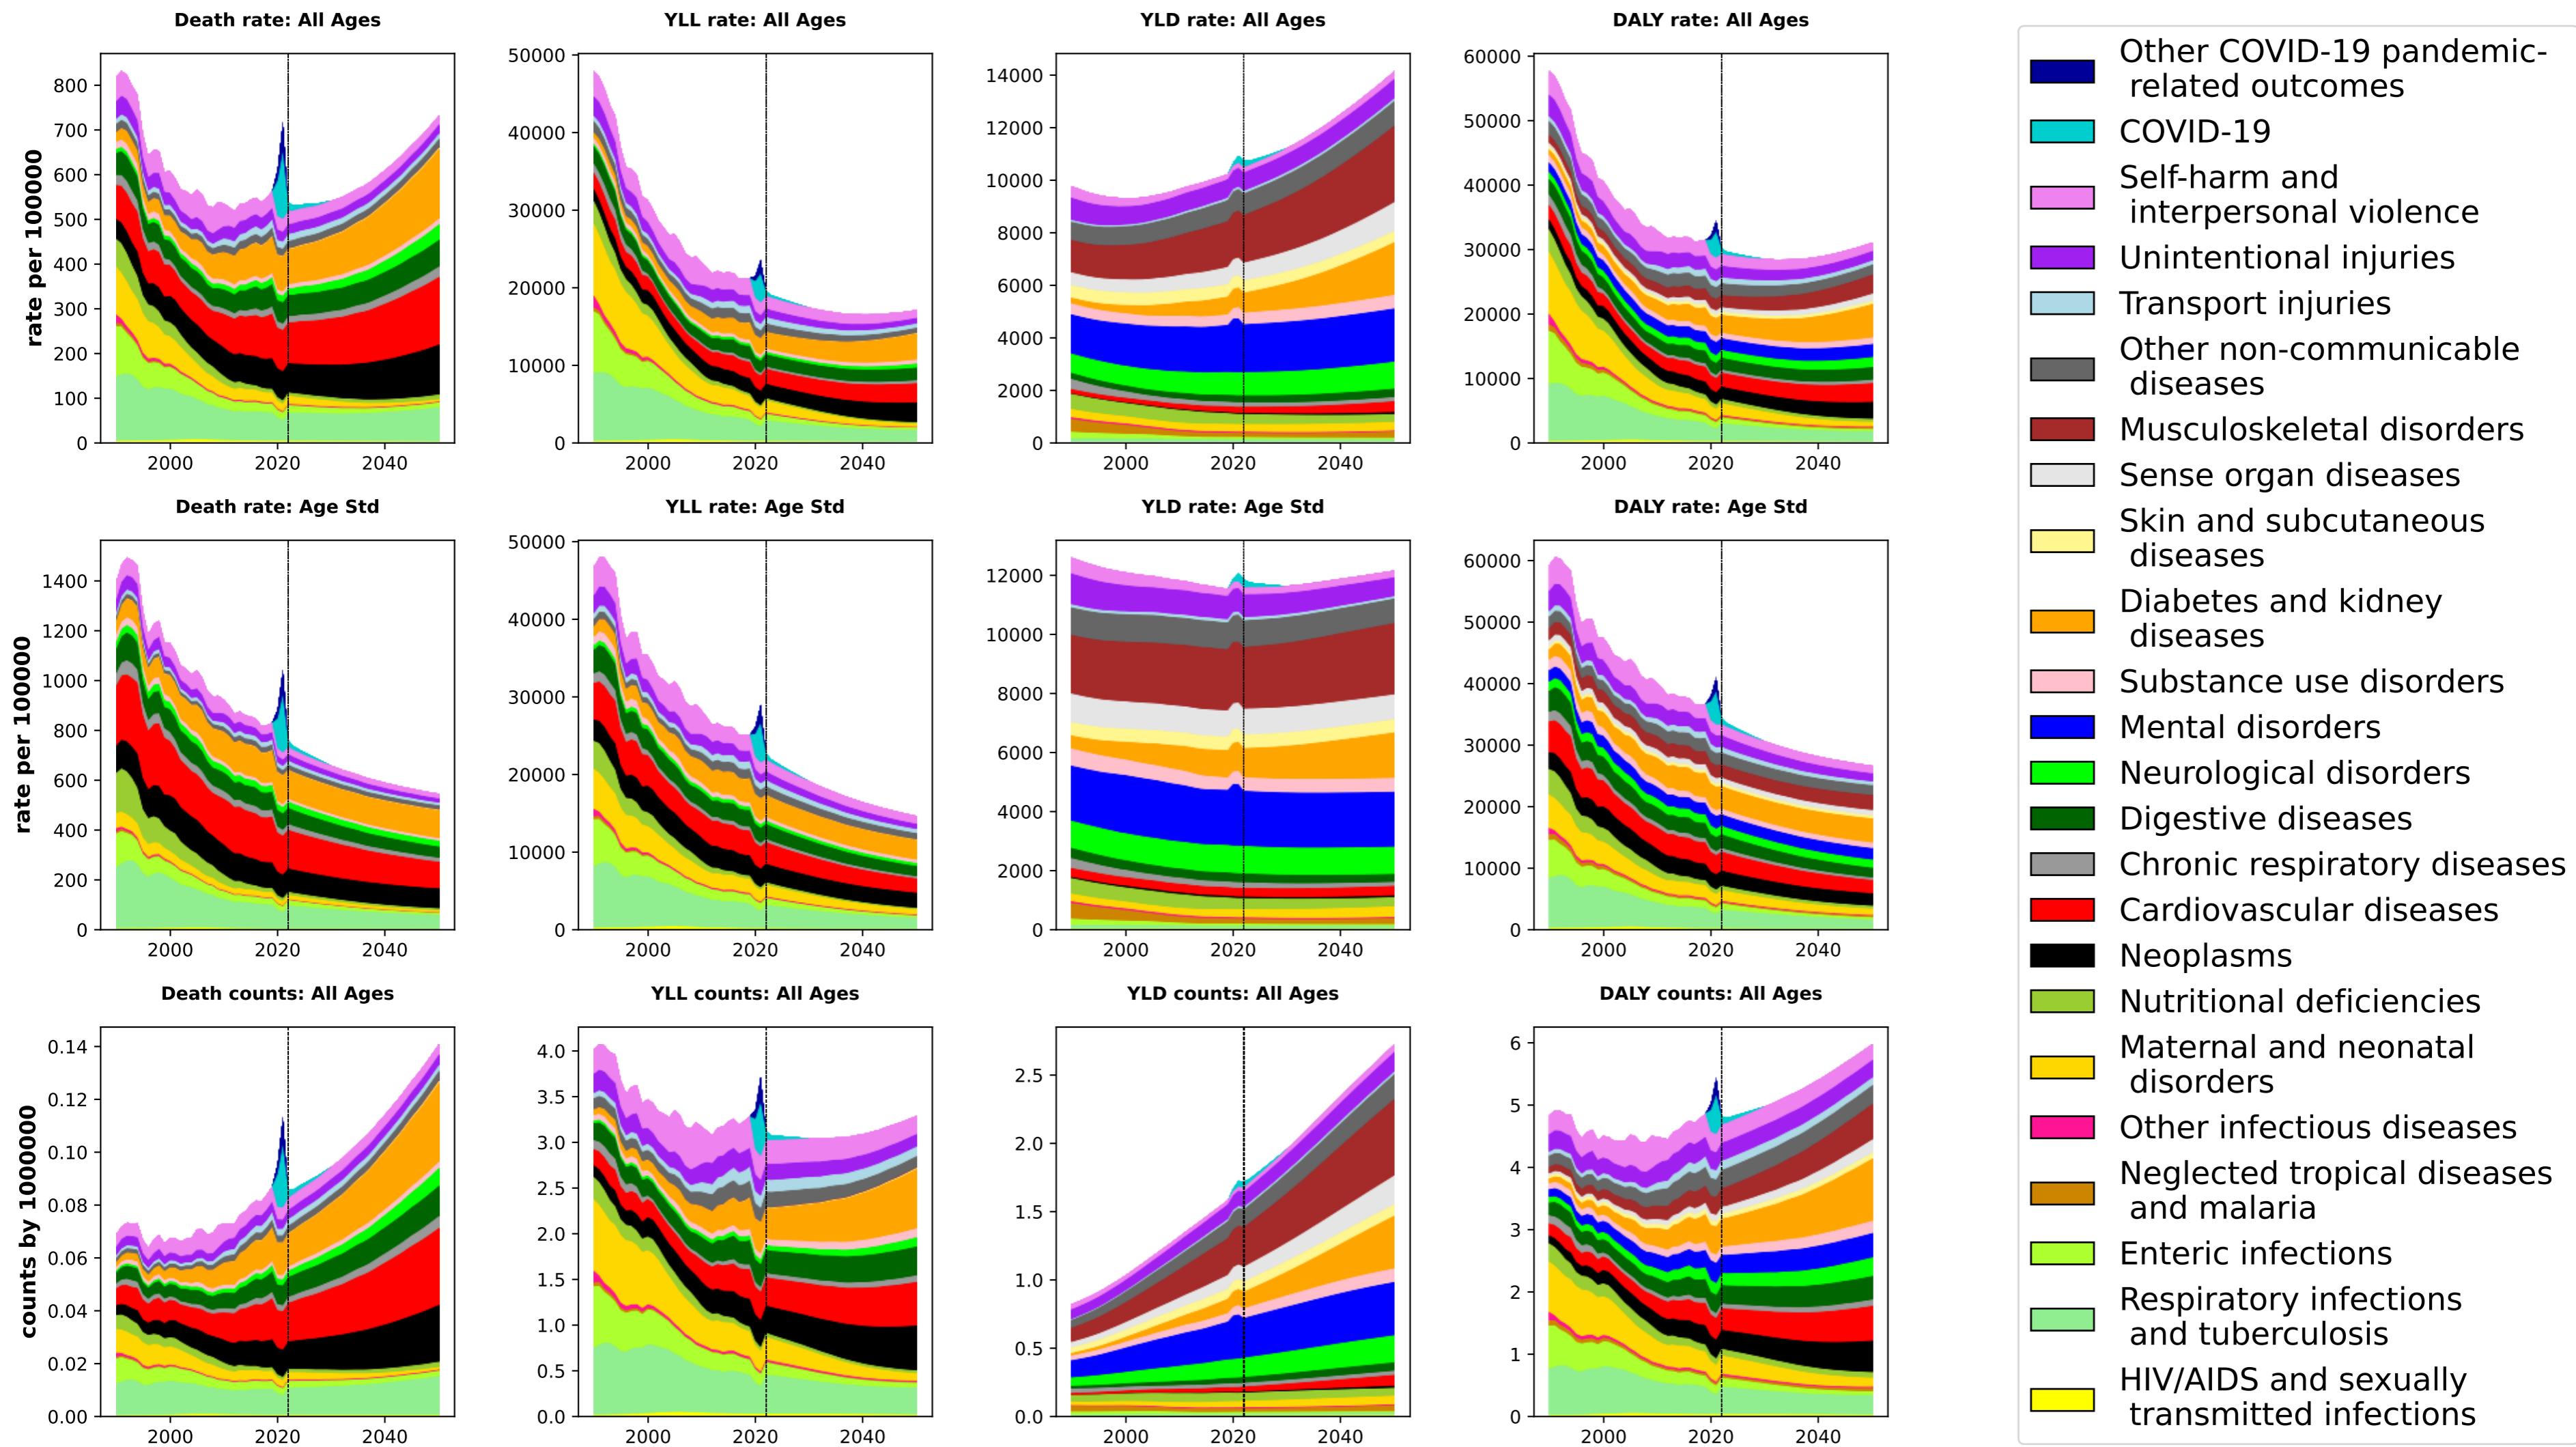

# Honduras

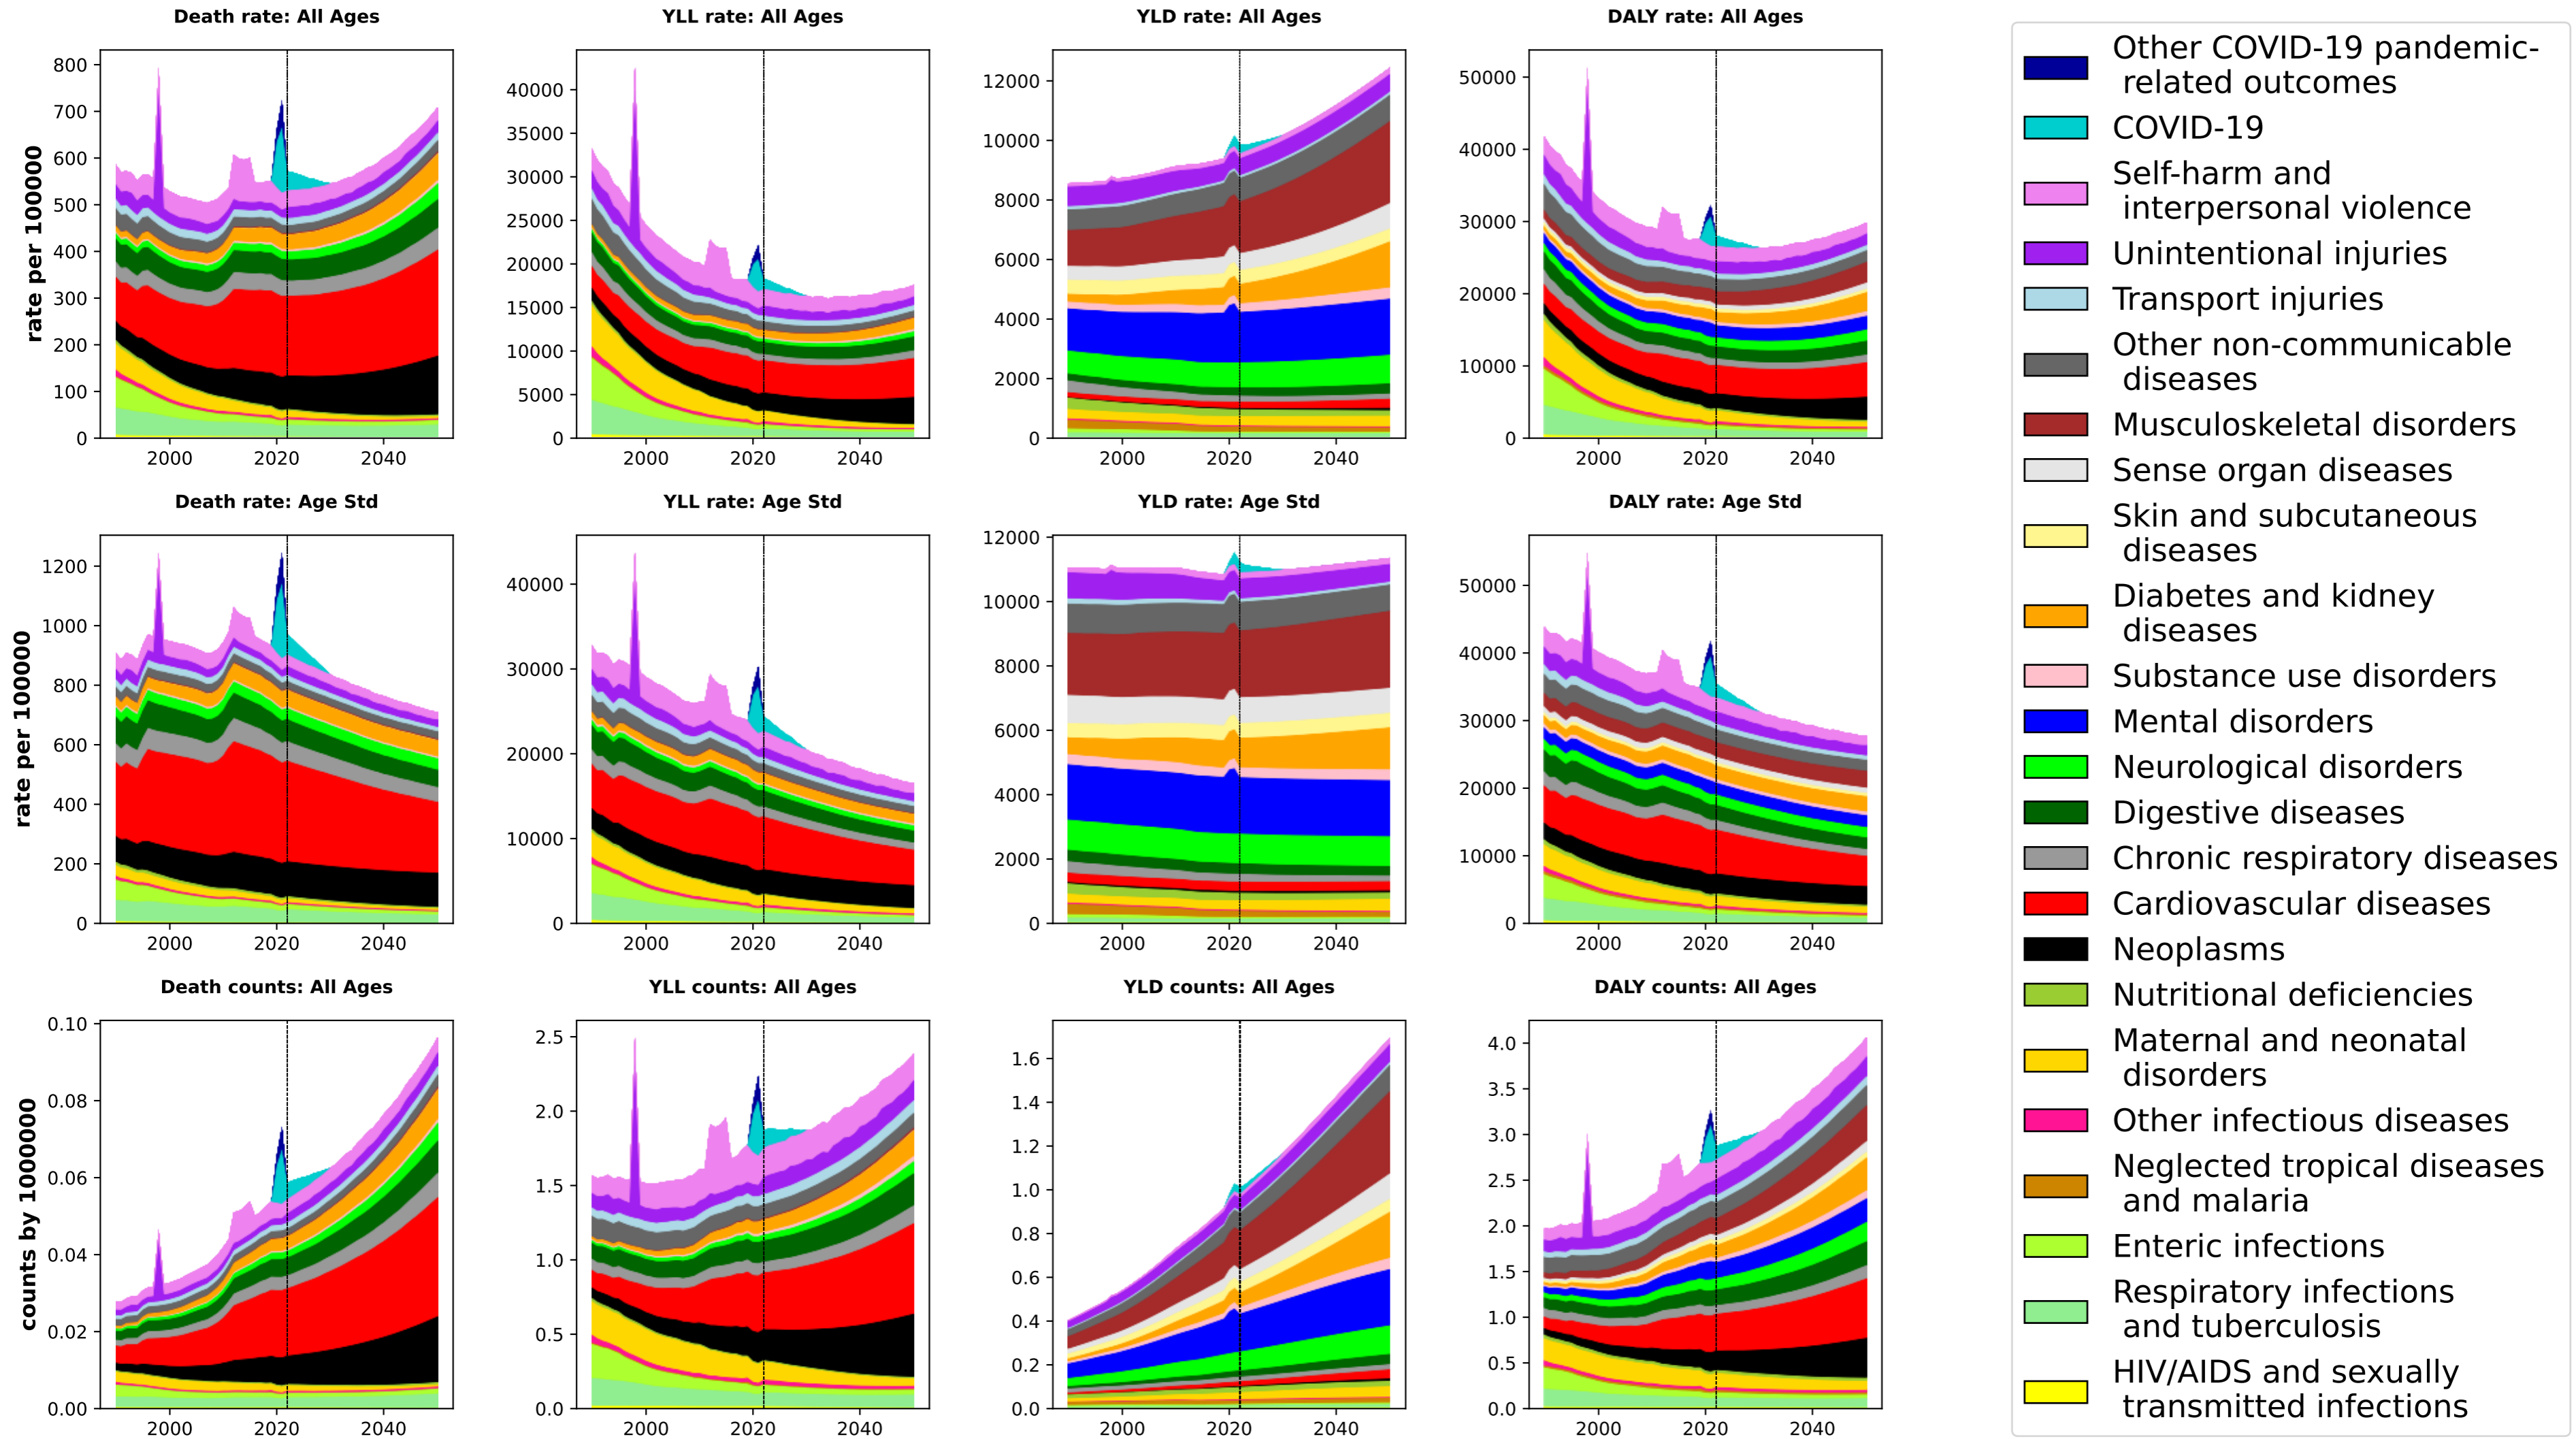

# Mexico

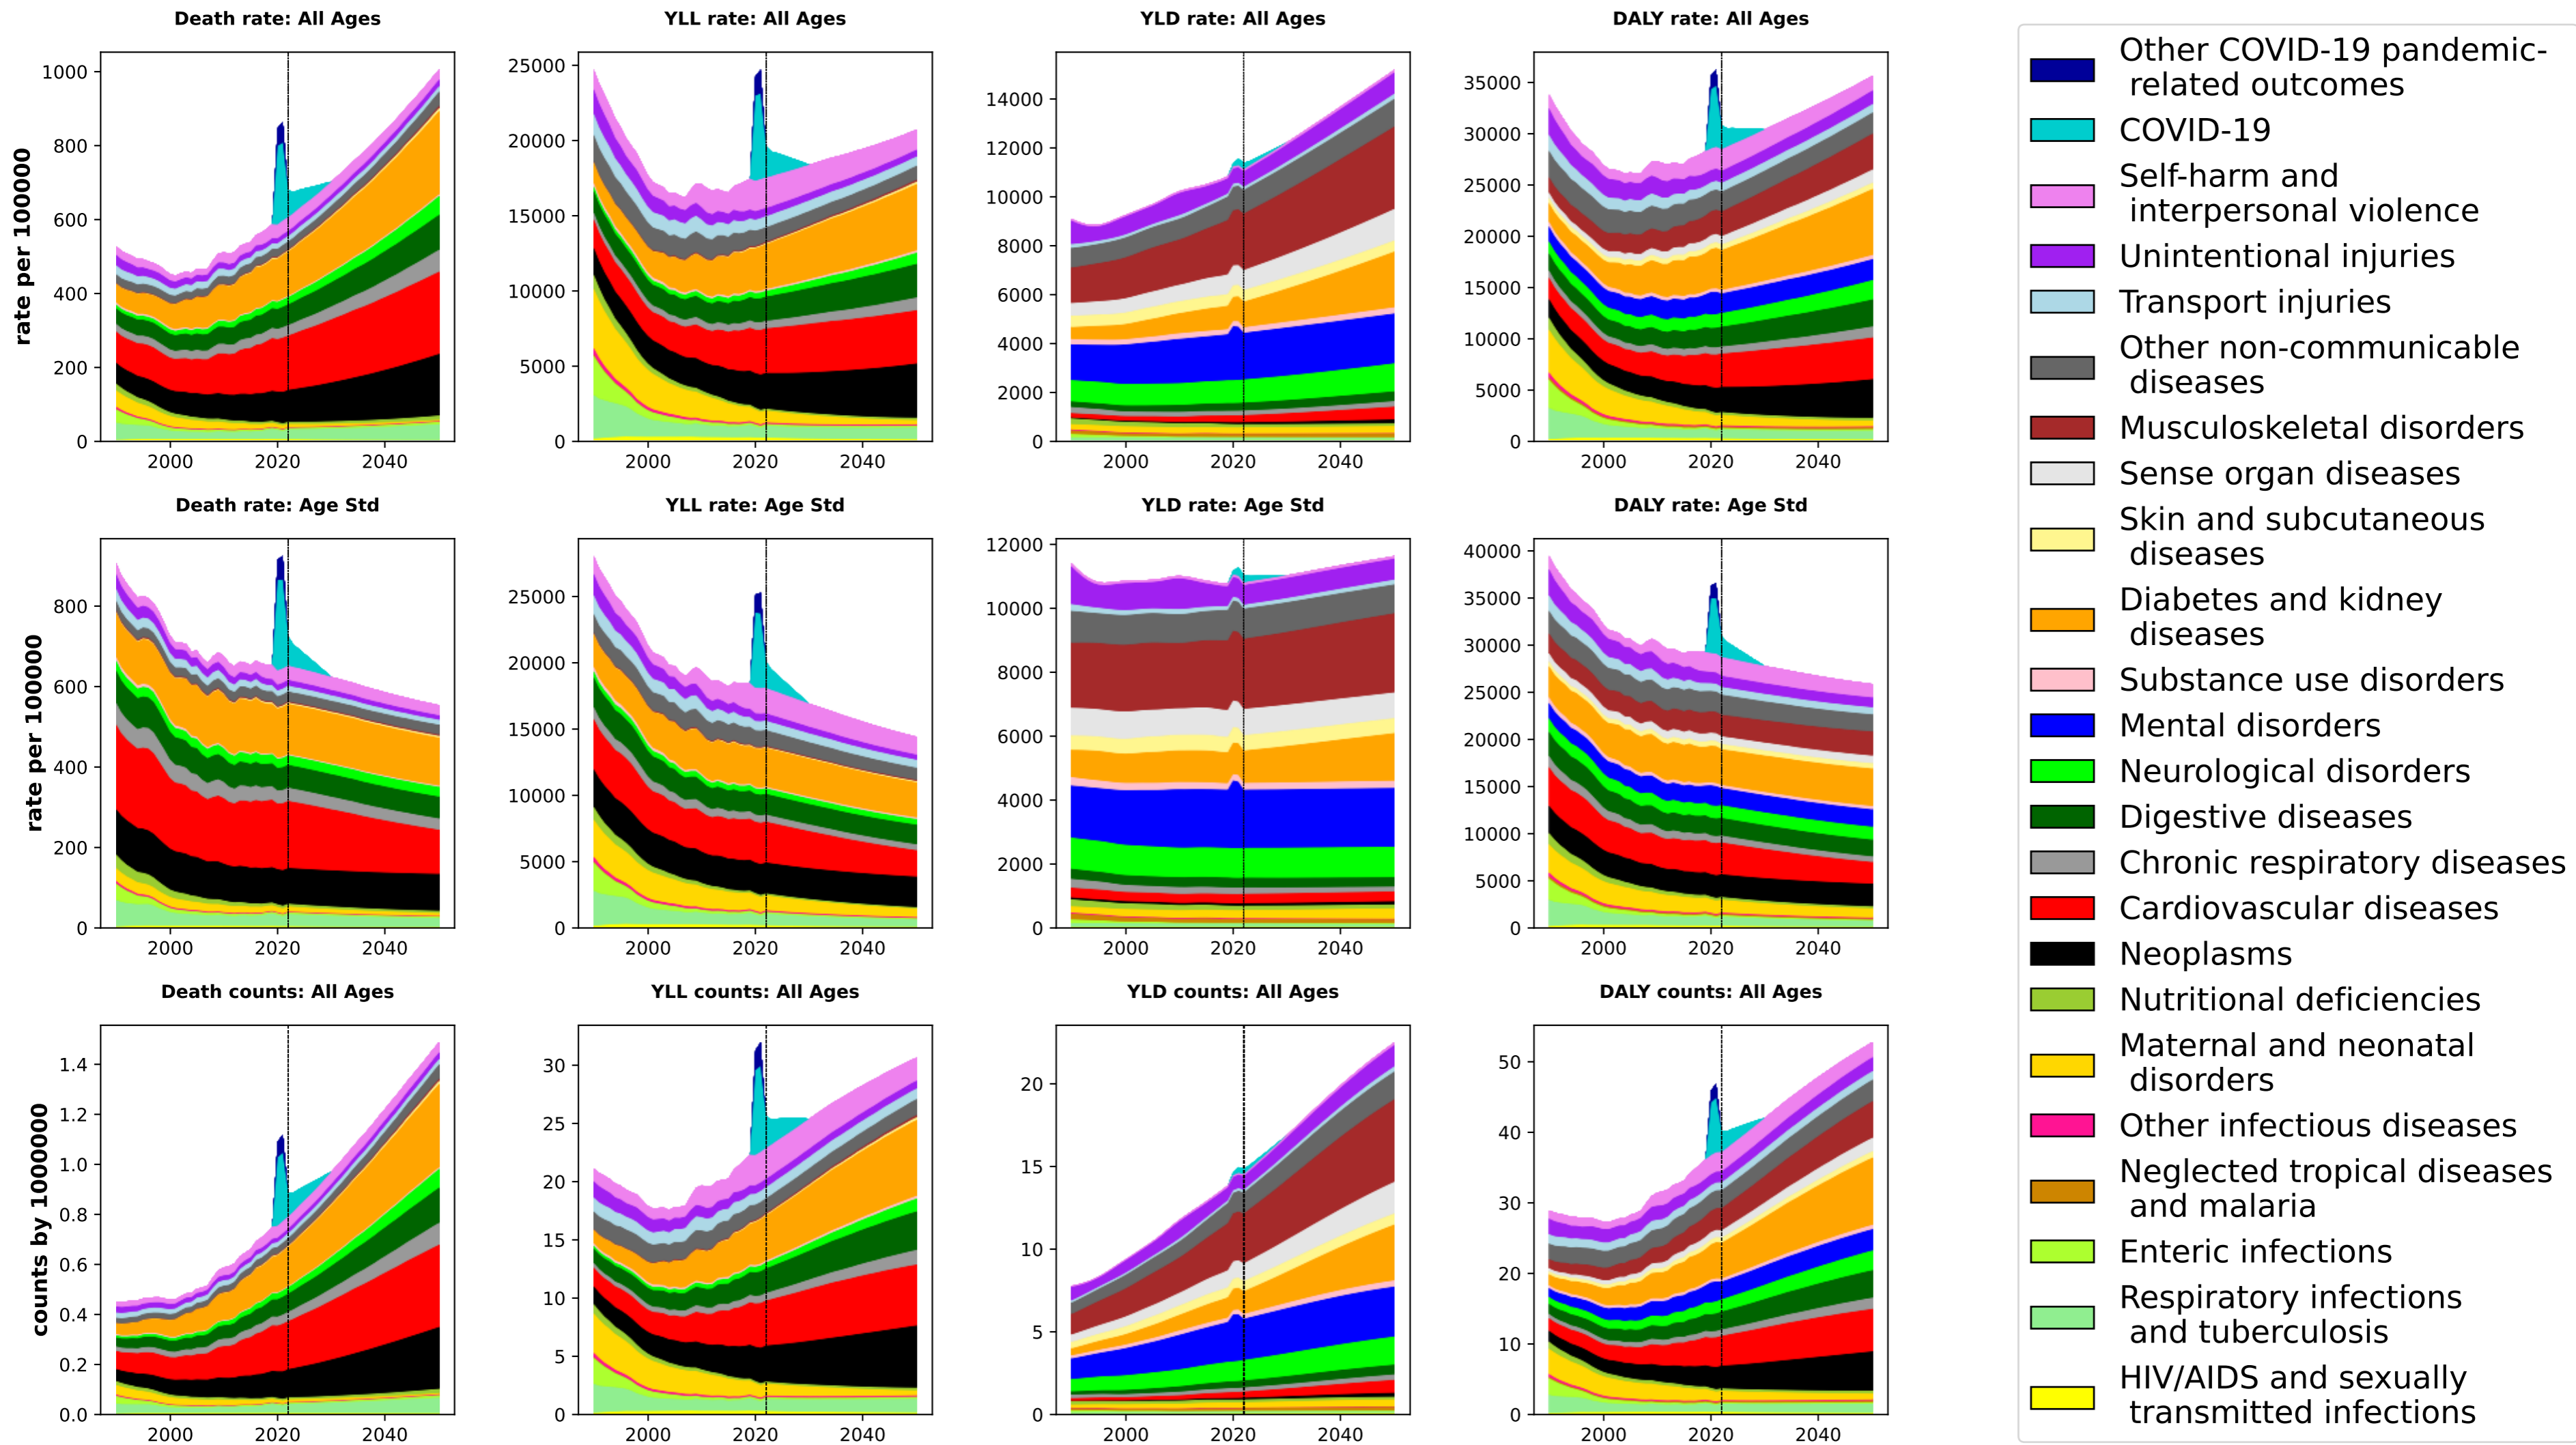

# Nicaragua

Supplemental Results Figure S6. Cause level 2 area plots for 4 burden measures for reference scenario by location, 1990-2050

804

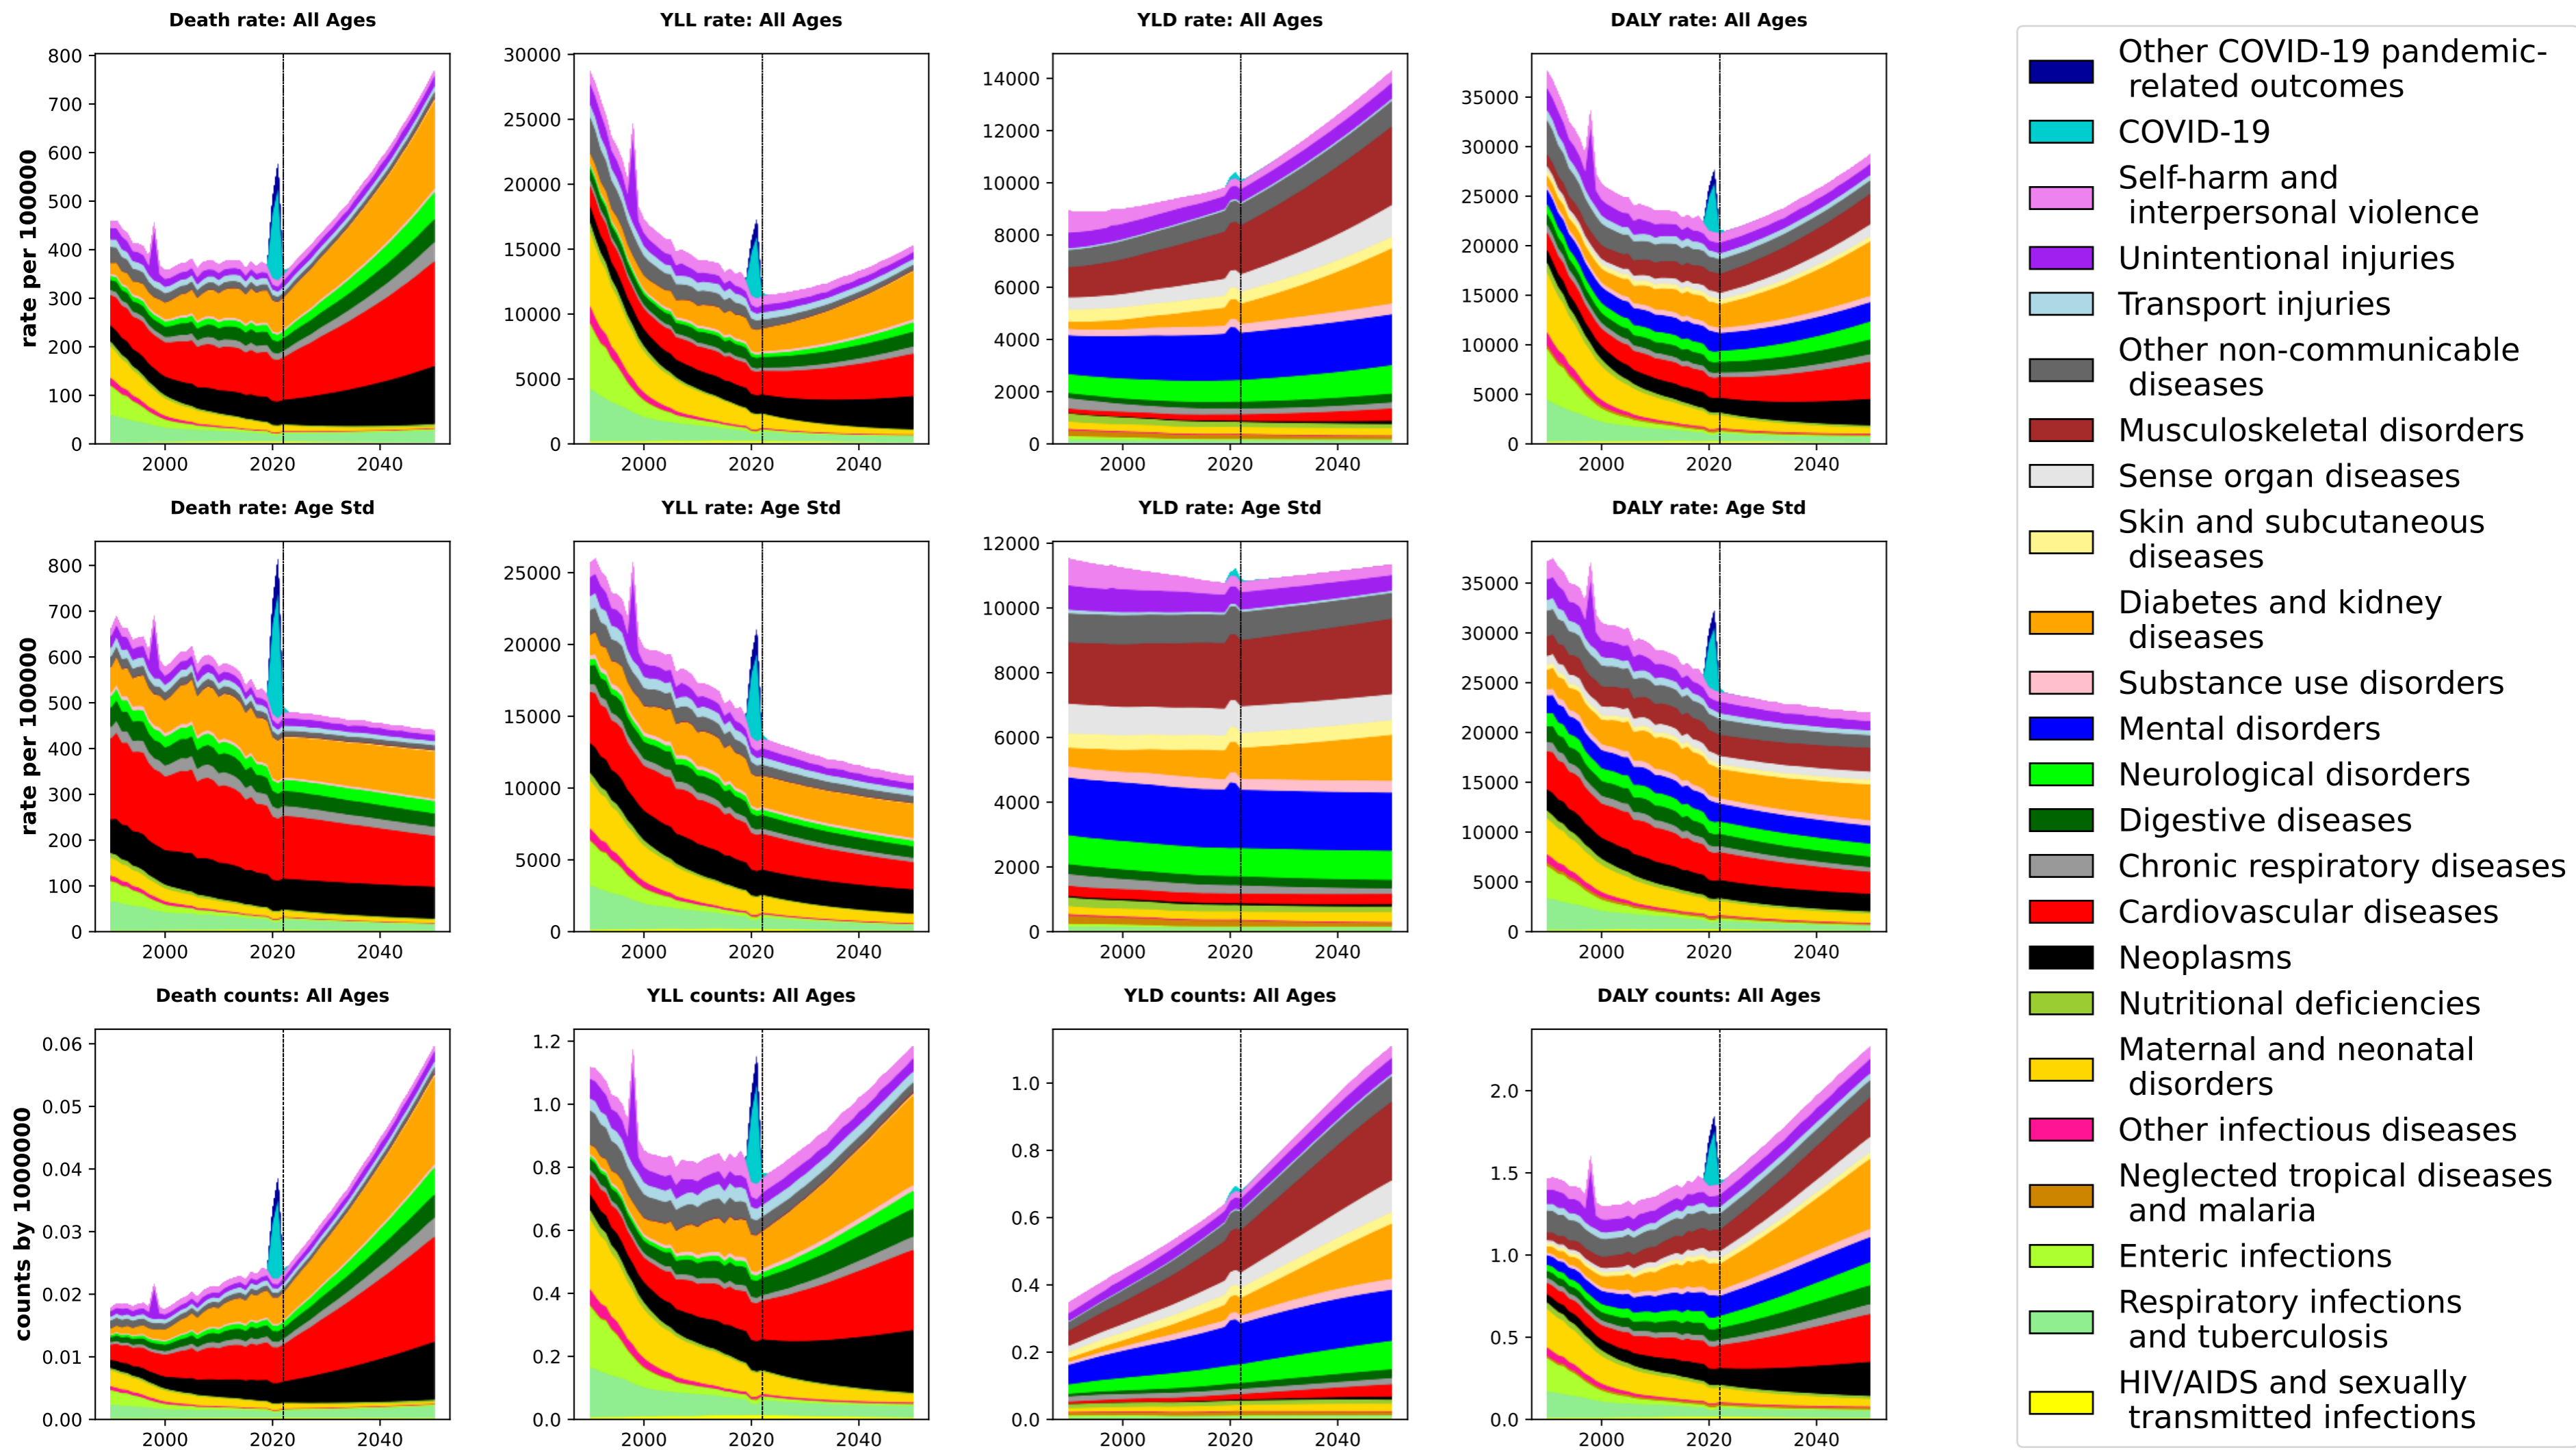

# Panama

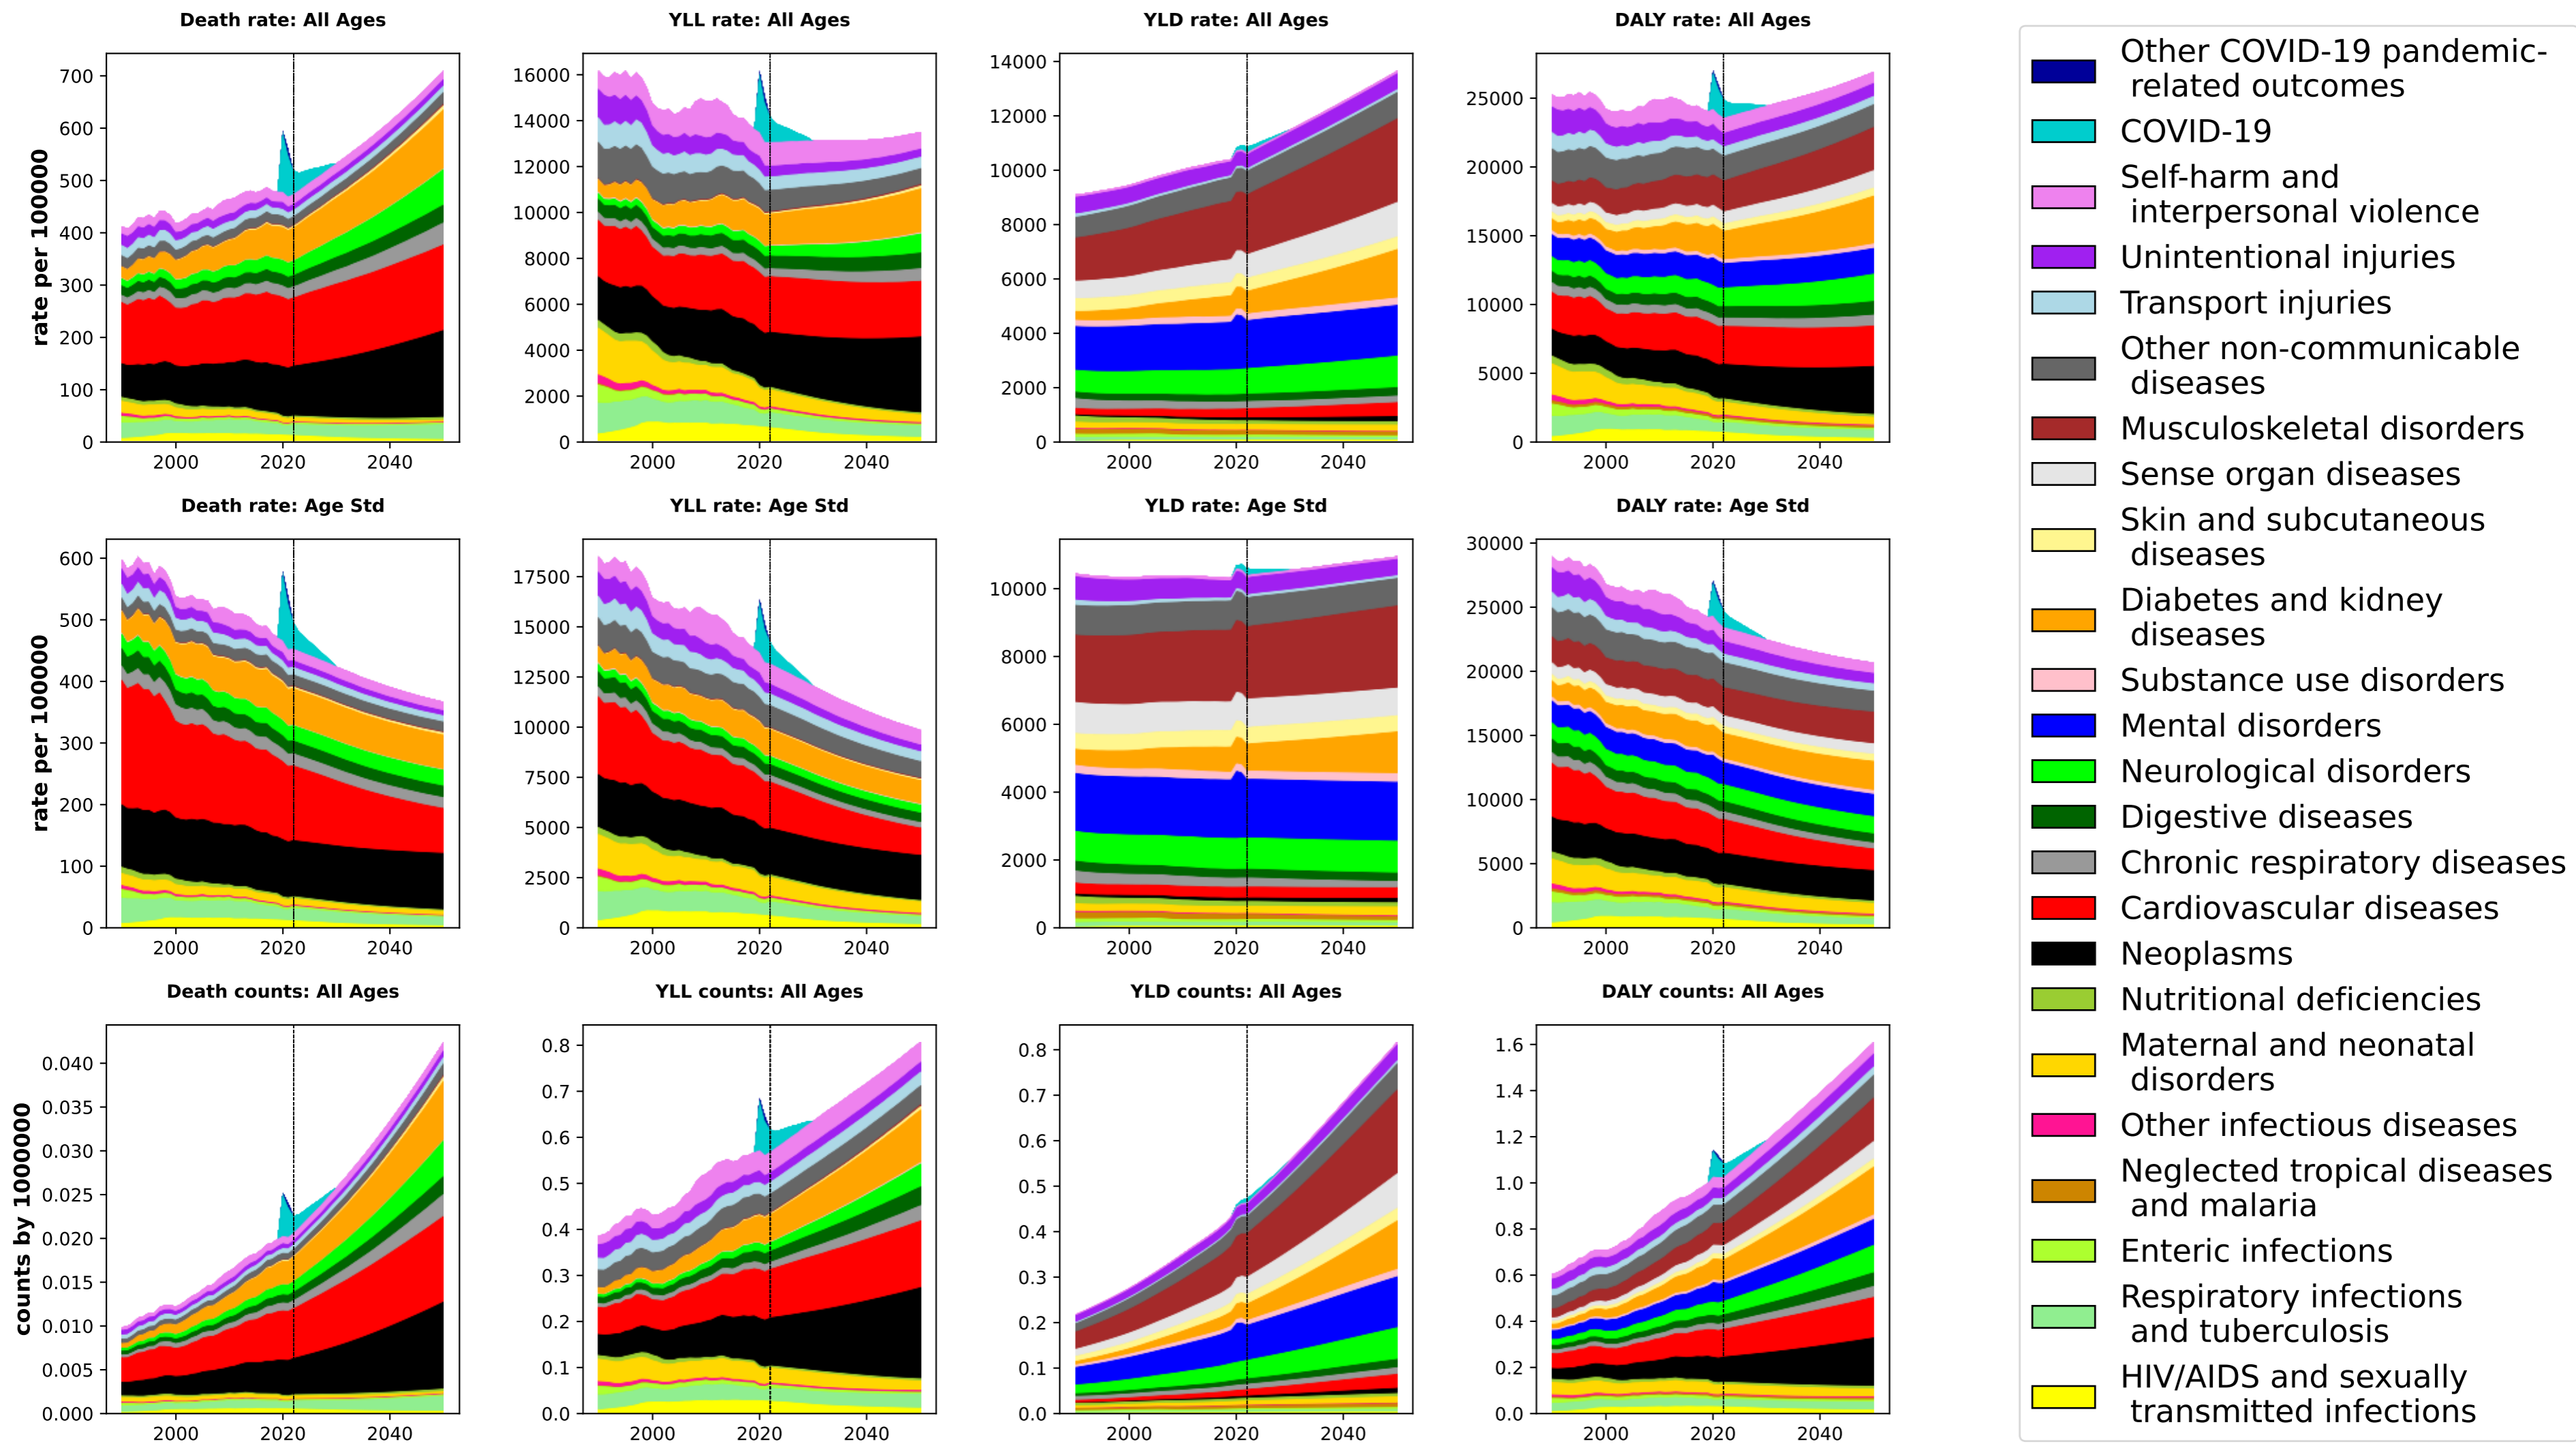

# Venezuela

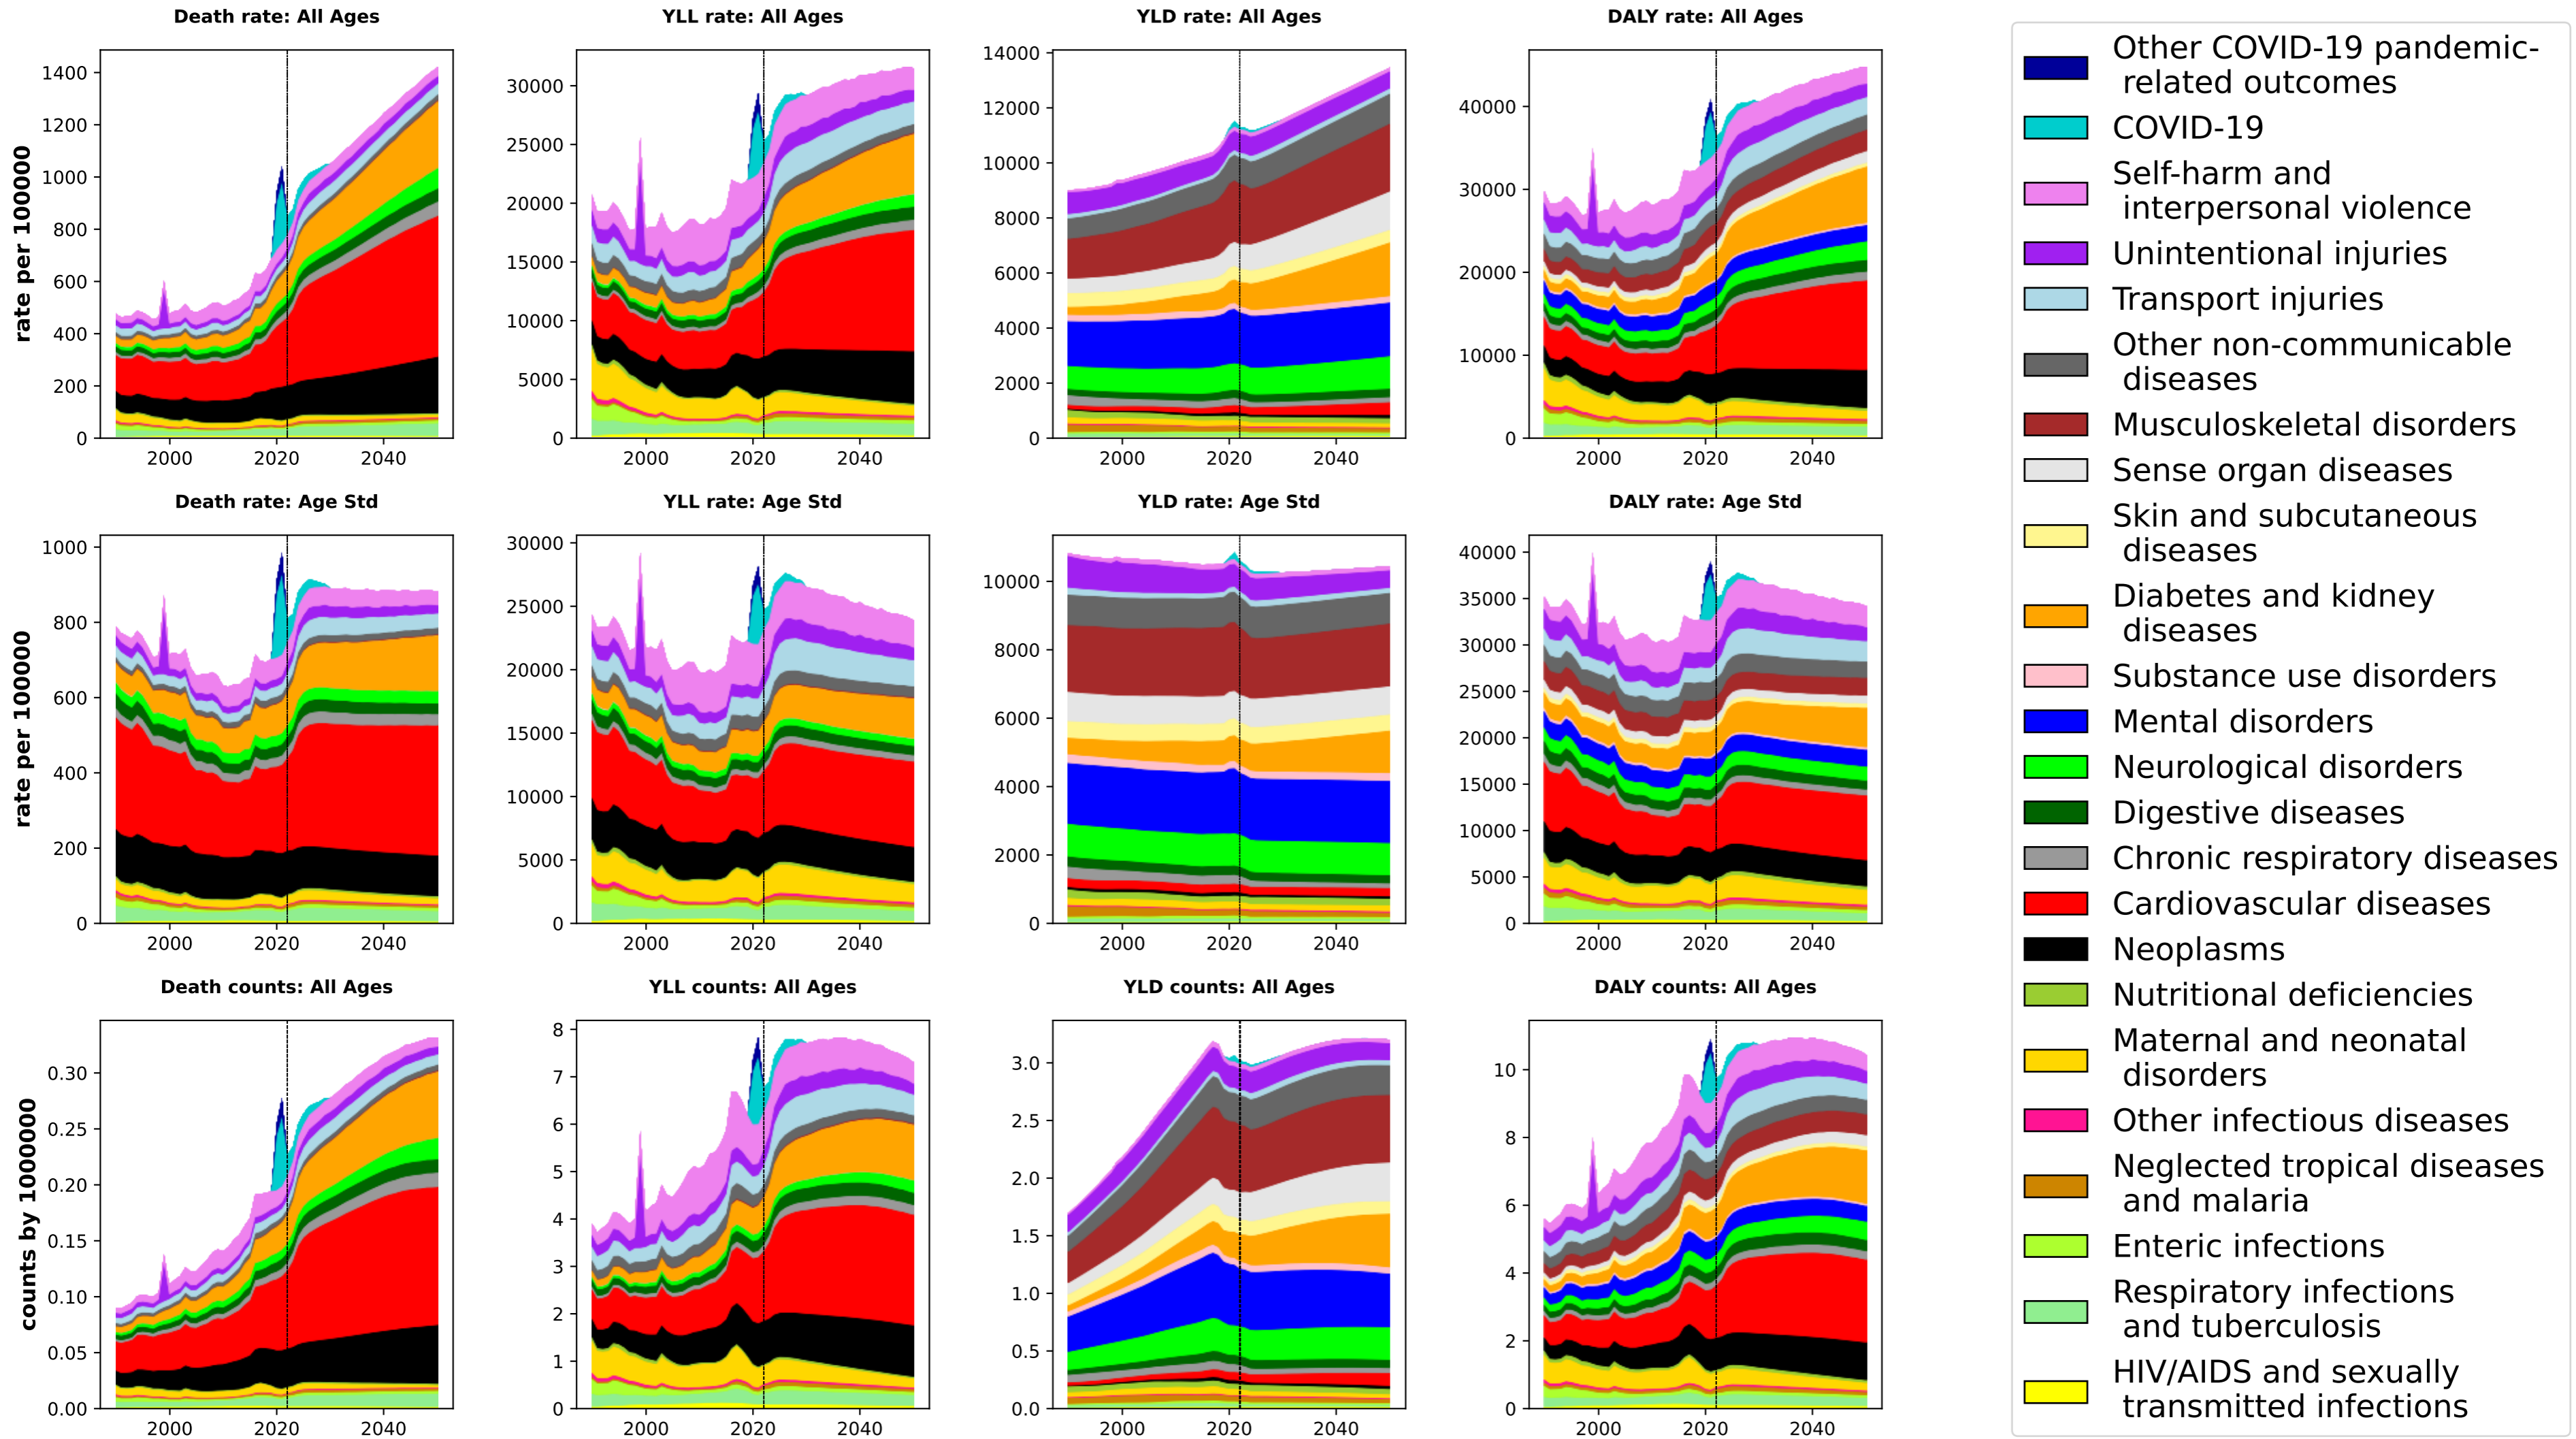

# Brazil

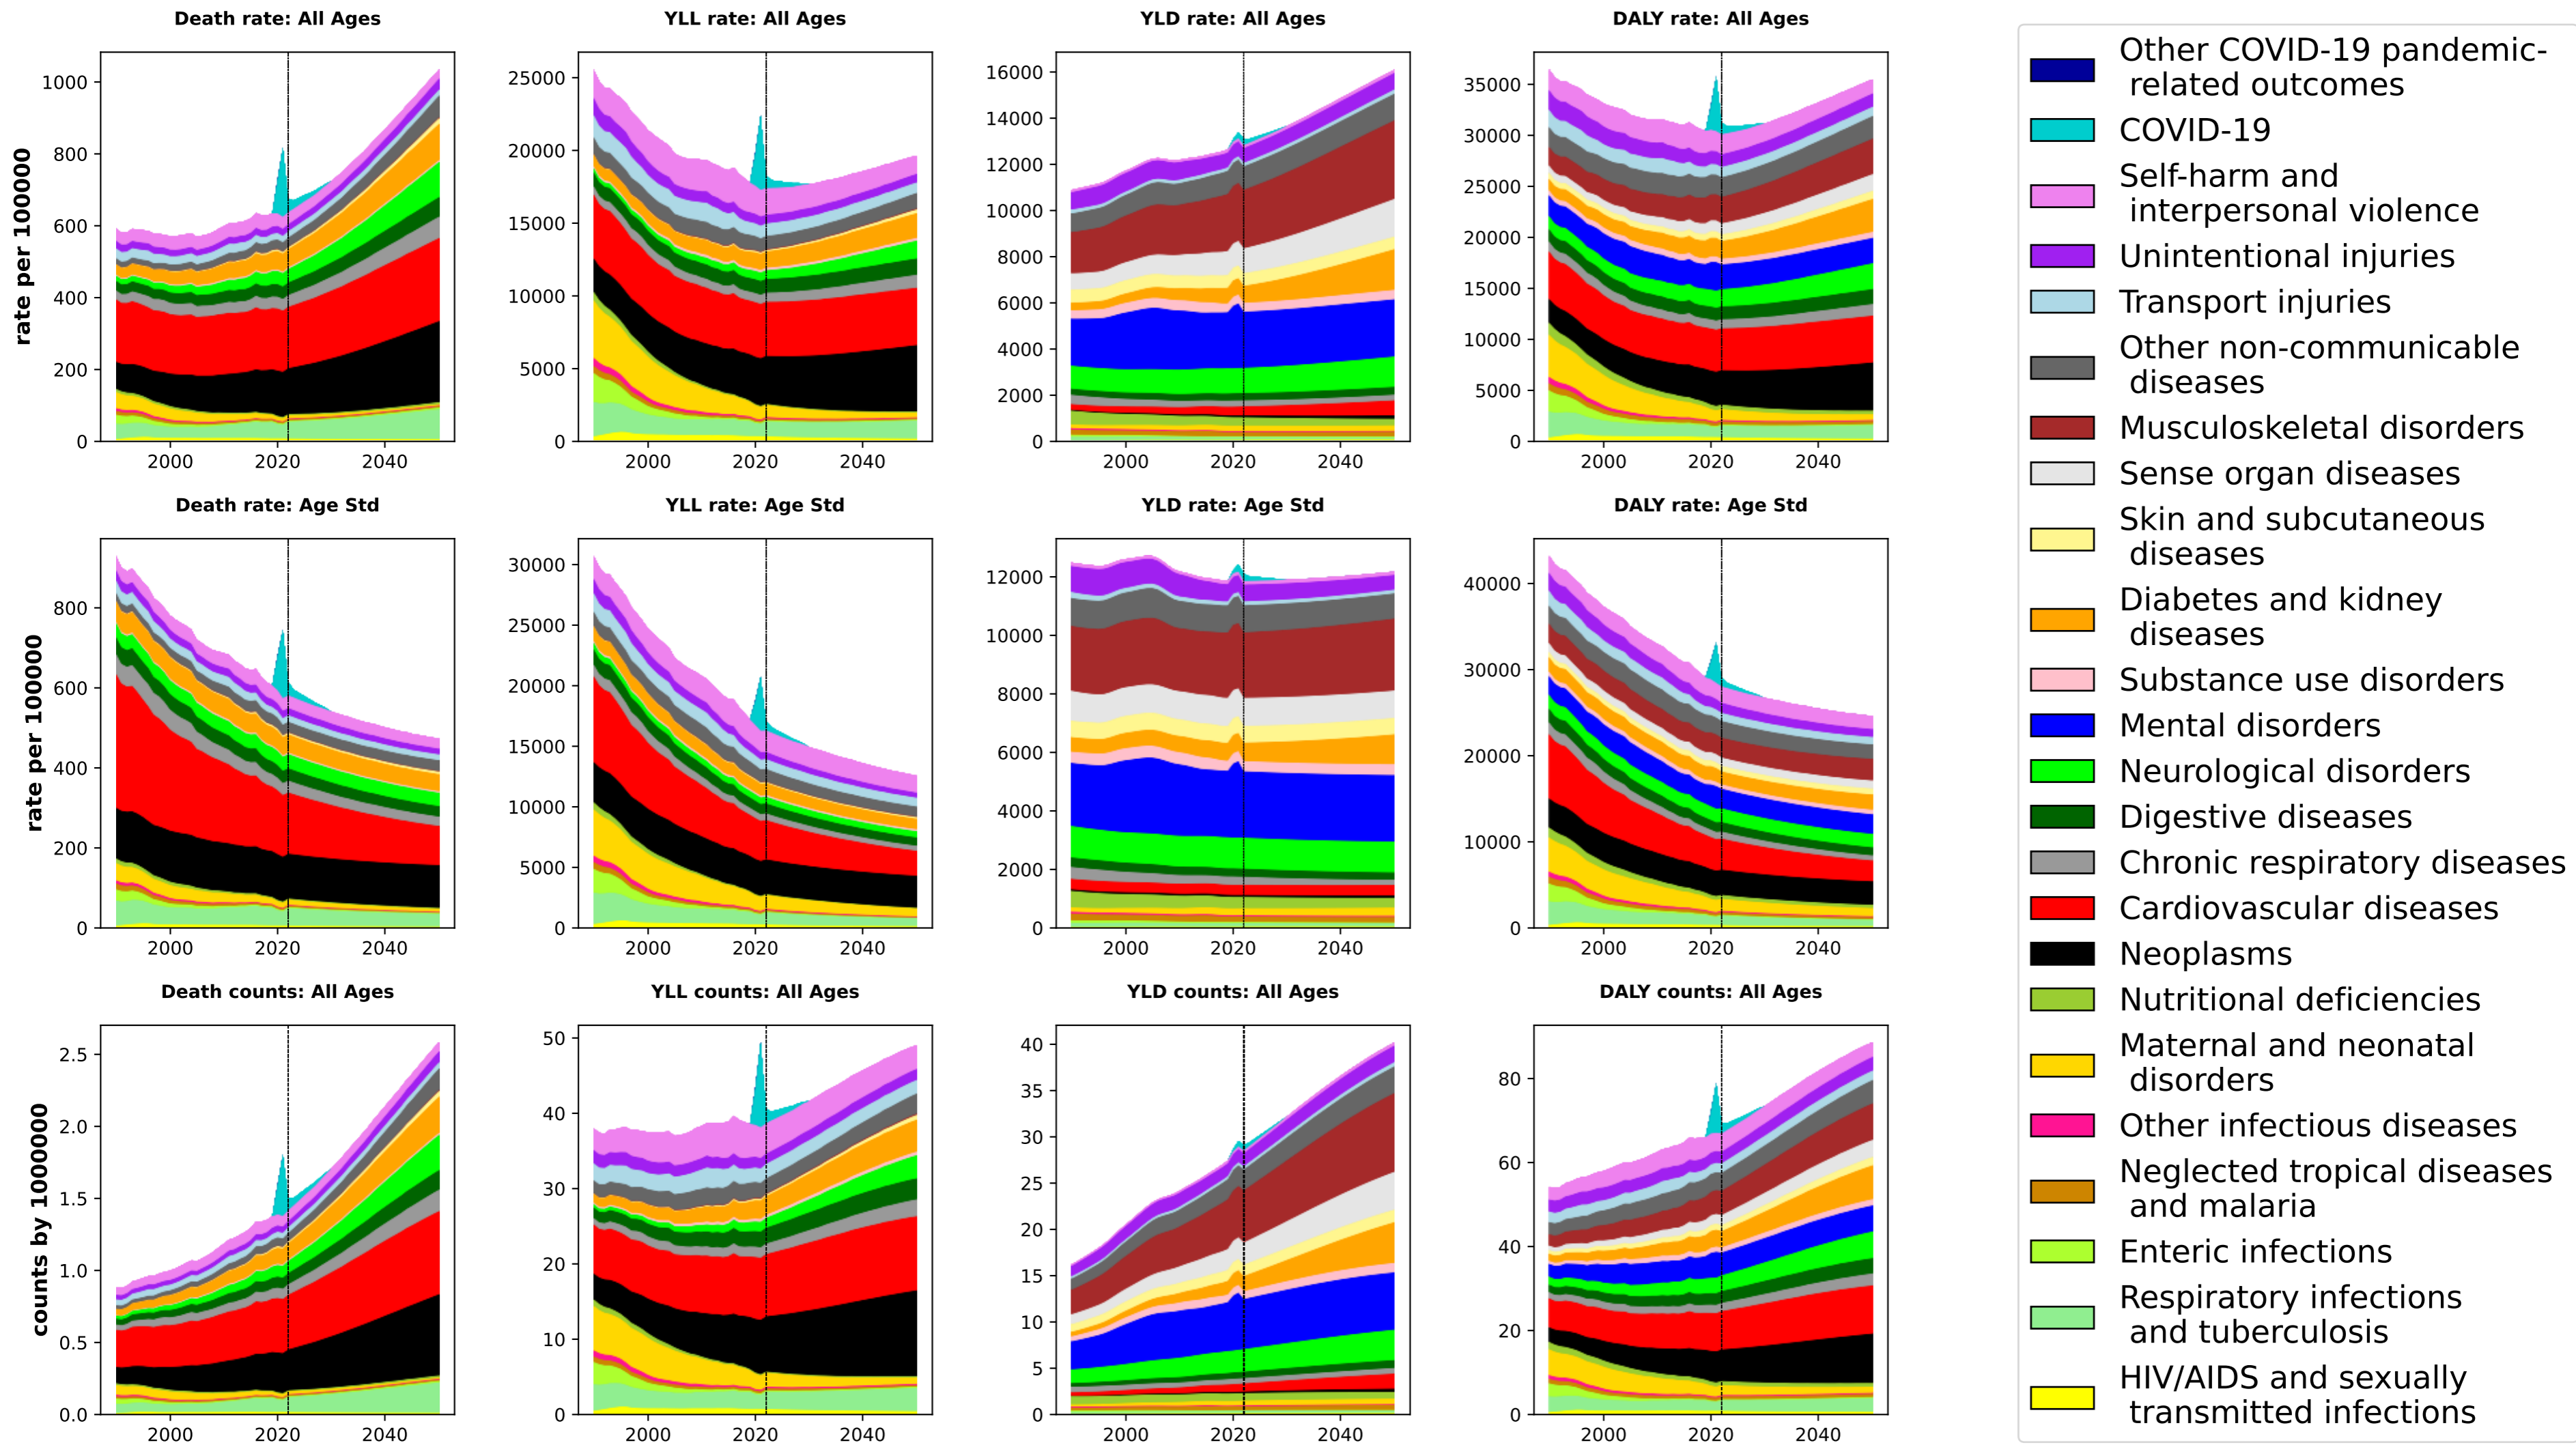



# Paraguay

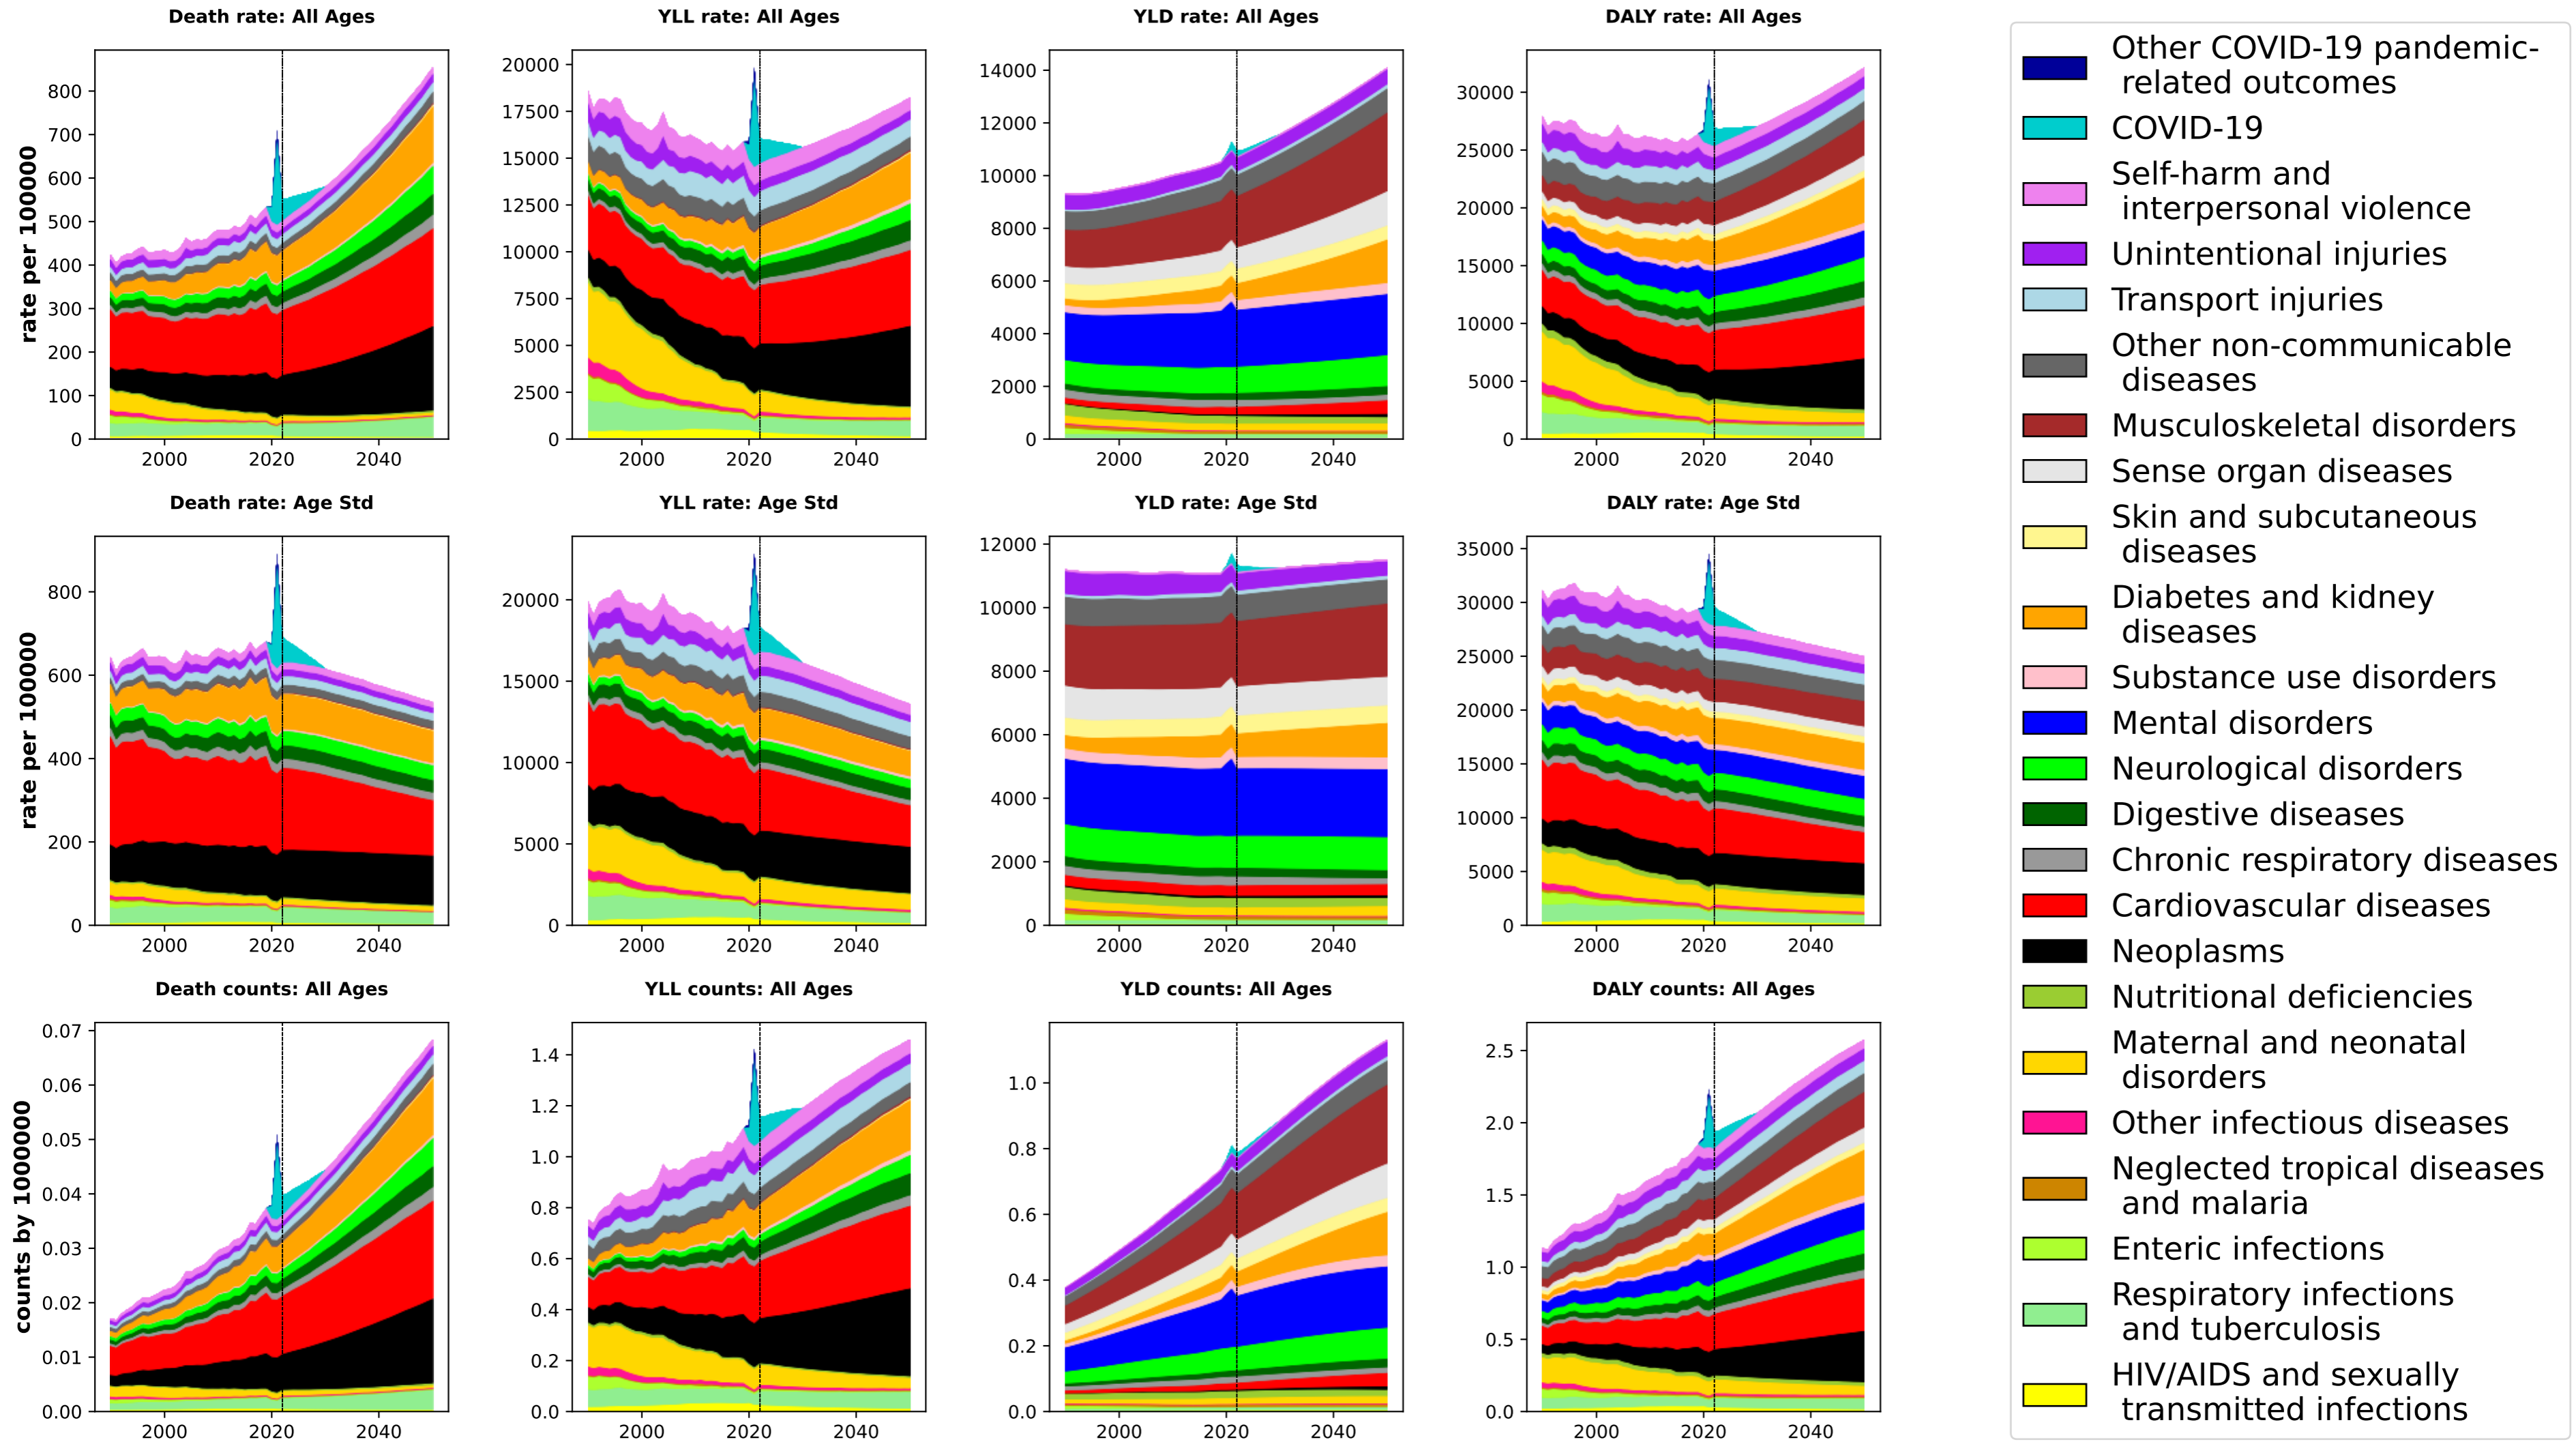

# Afghanistan

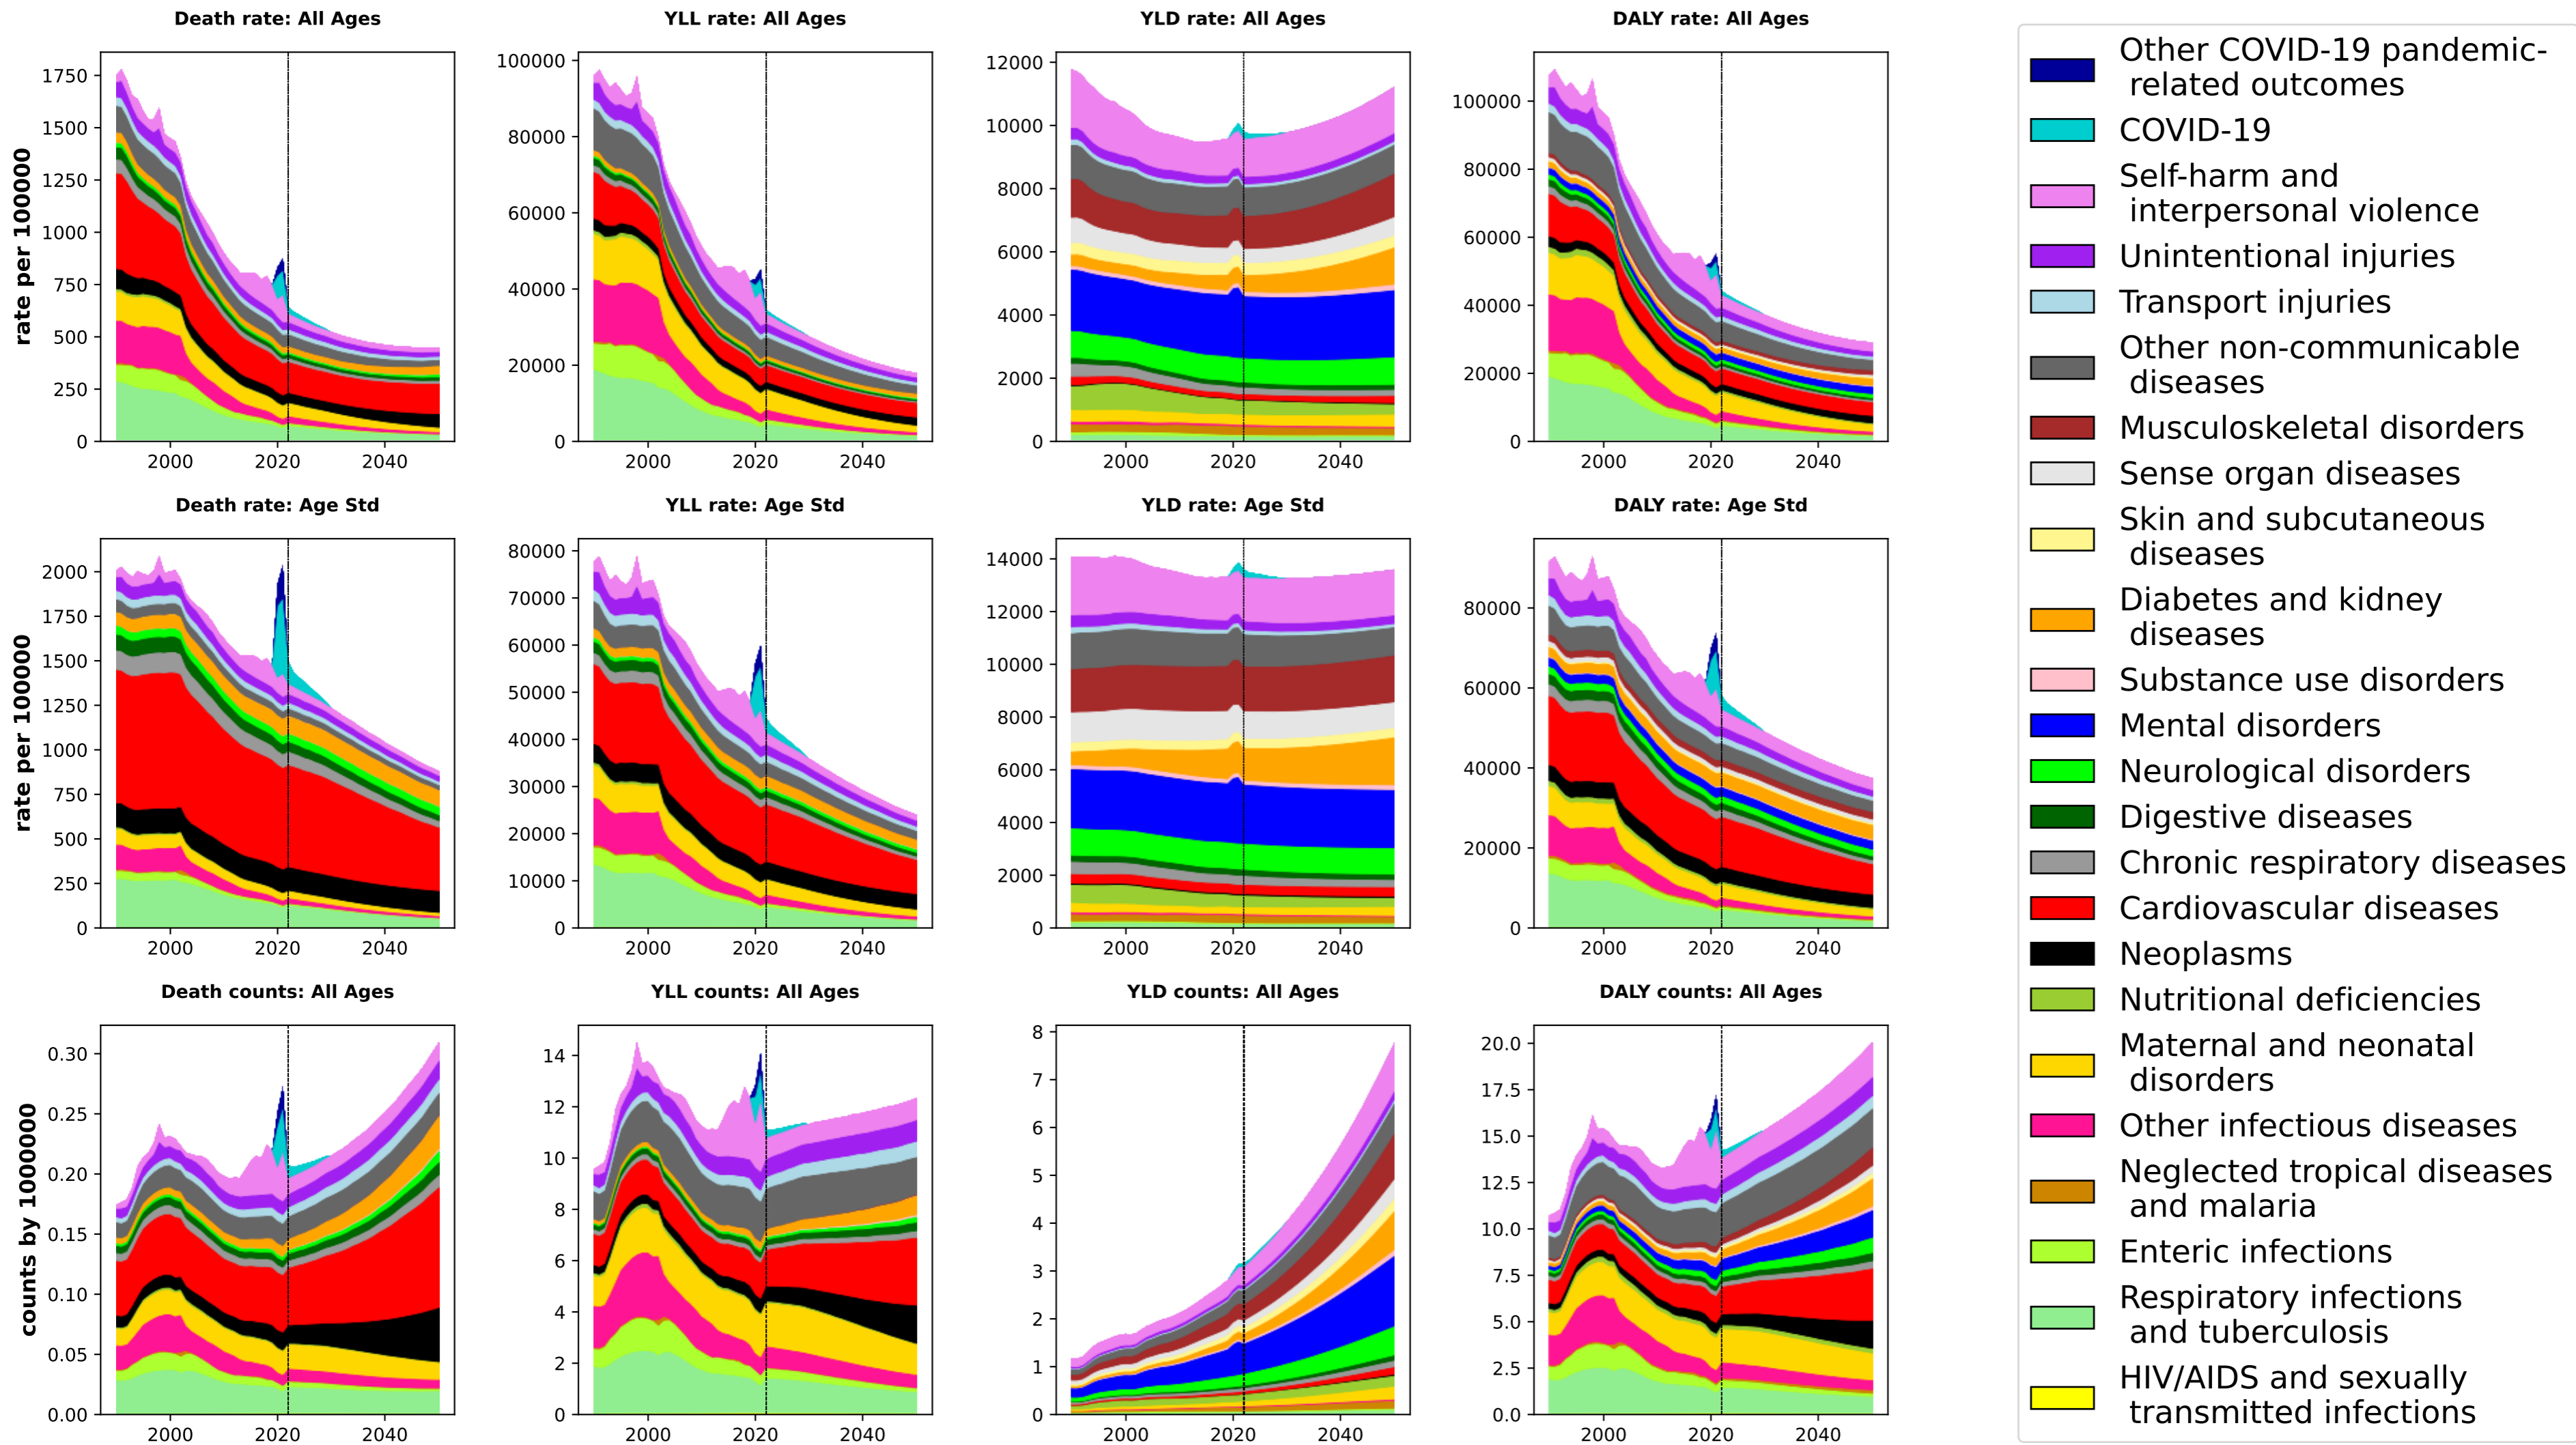

# Algeria

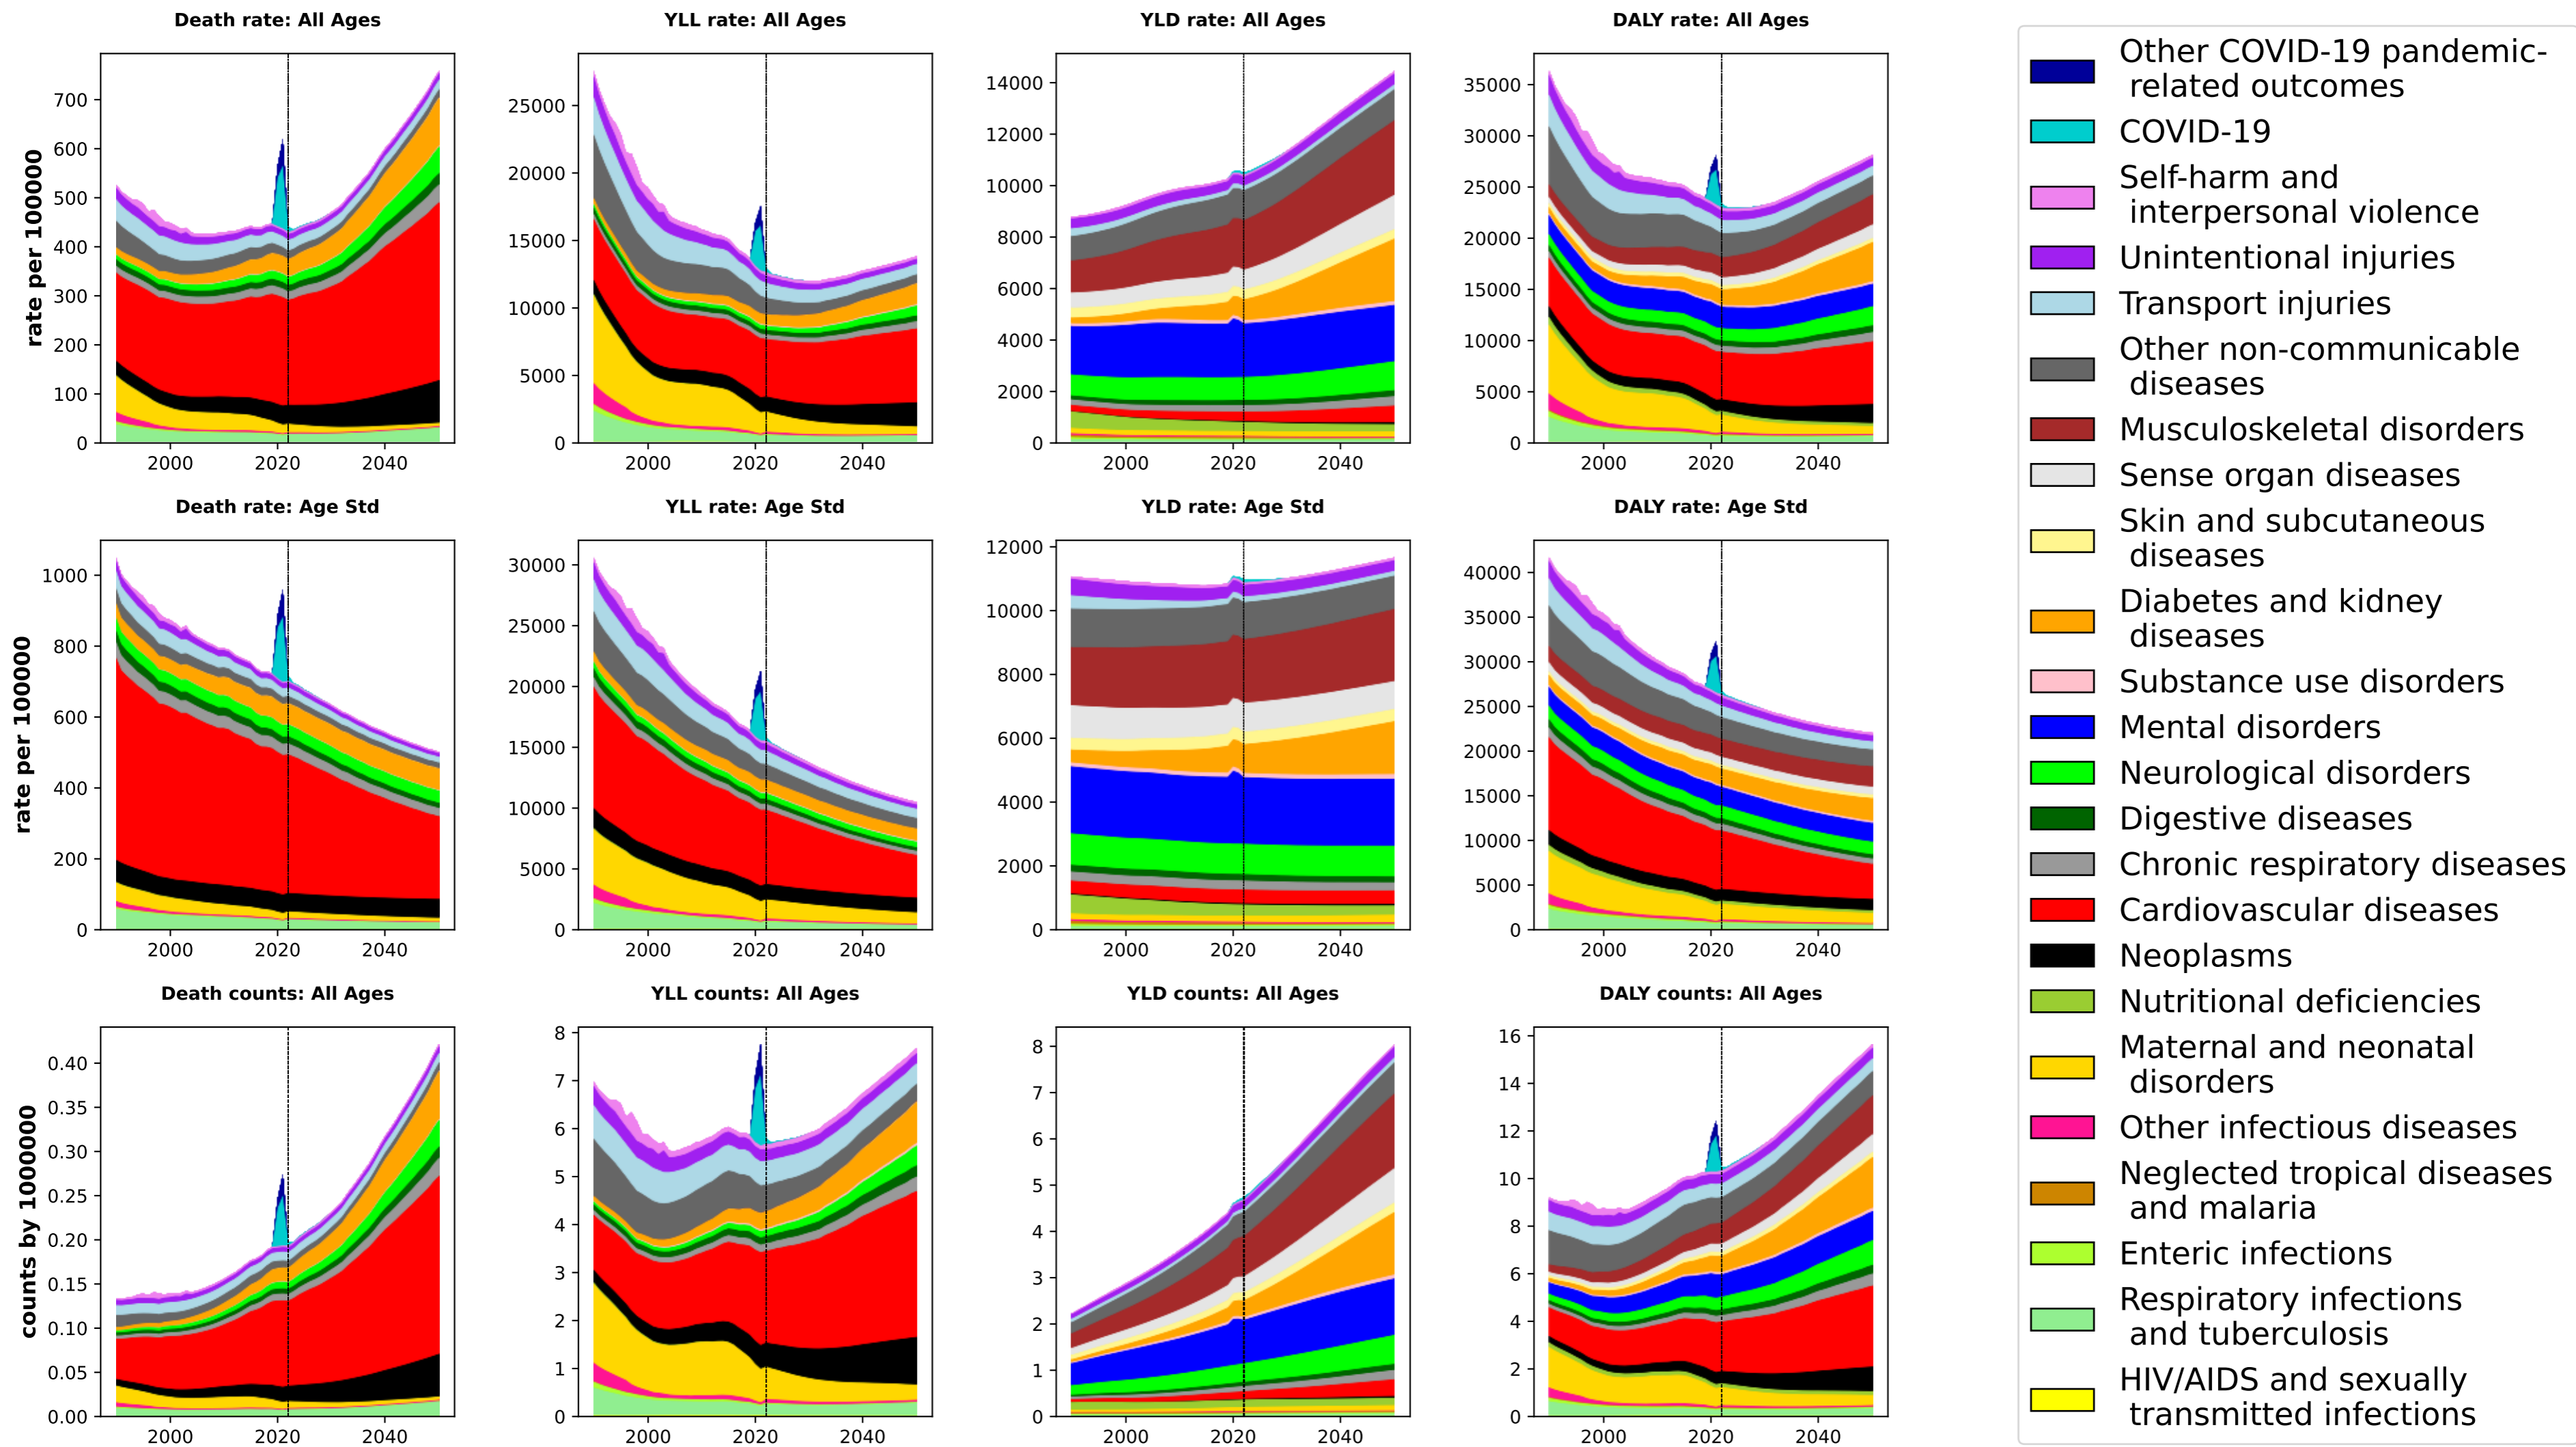

# Bahrain

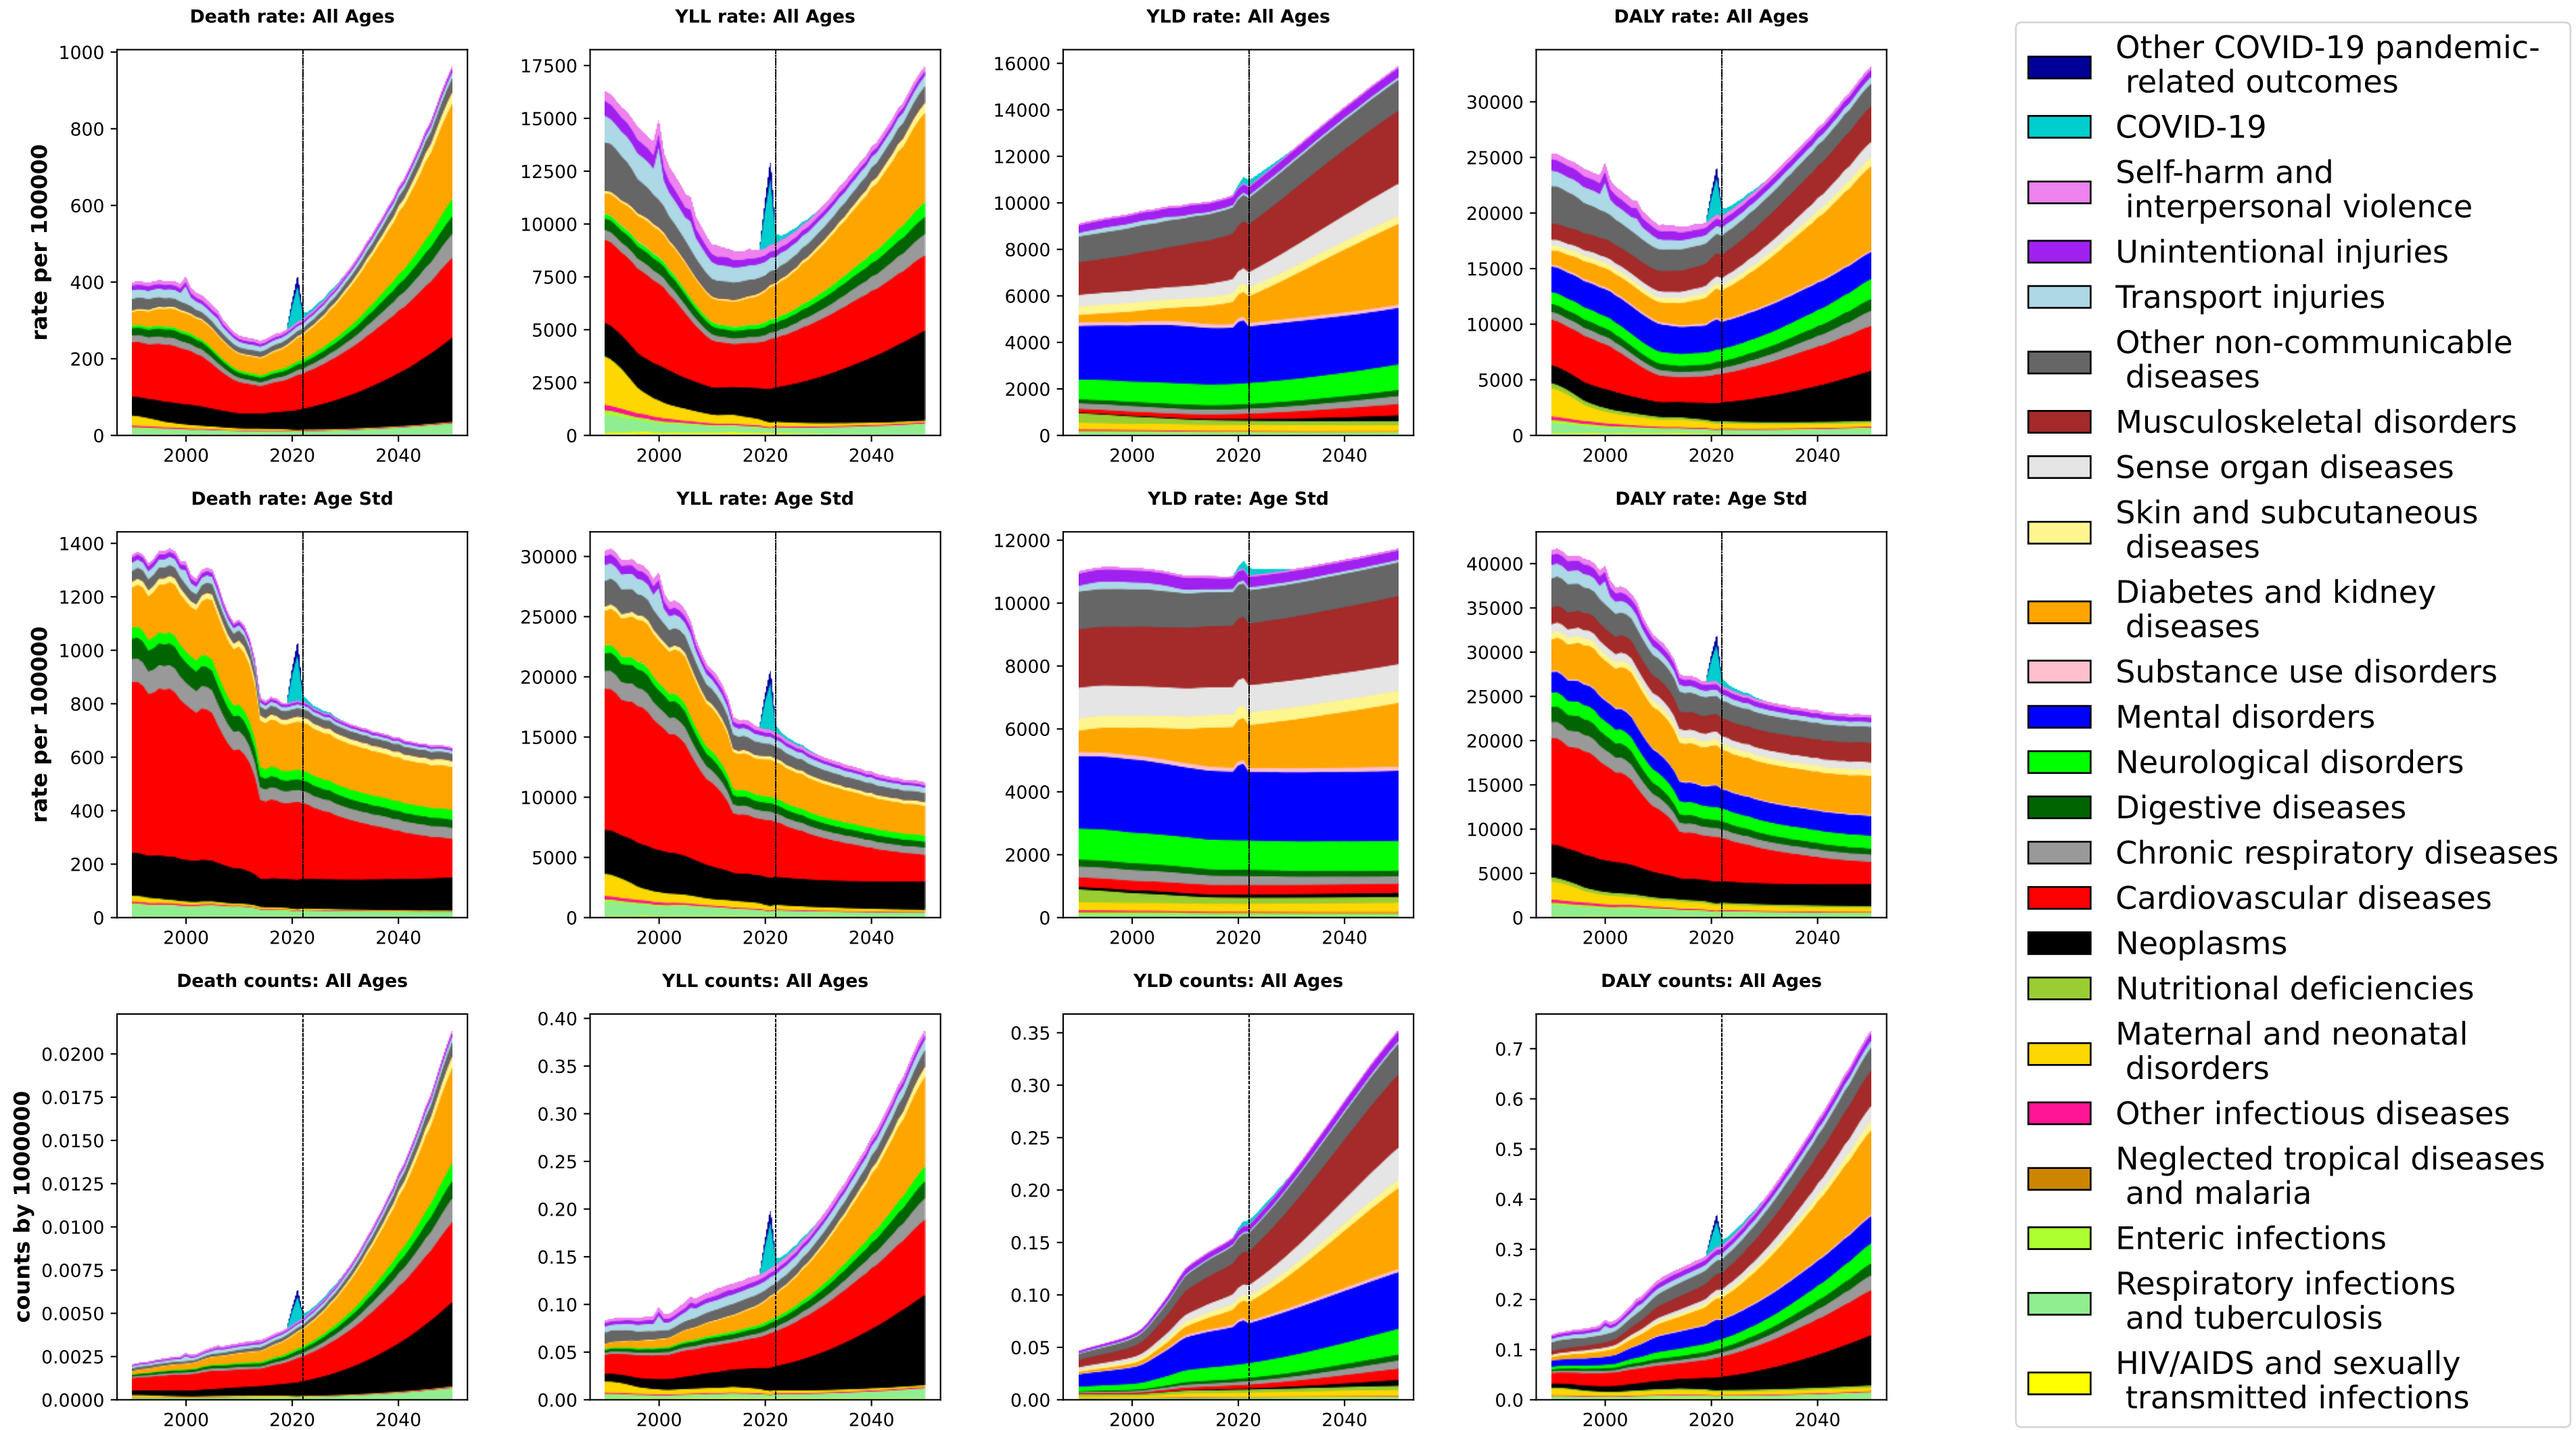

# Egypt

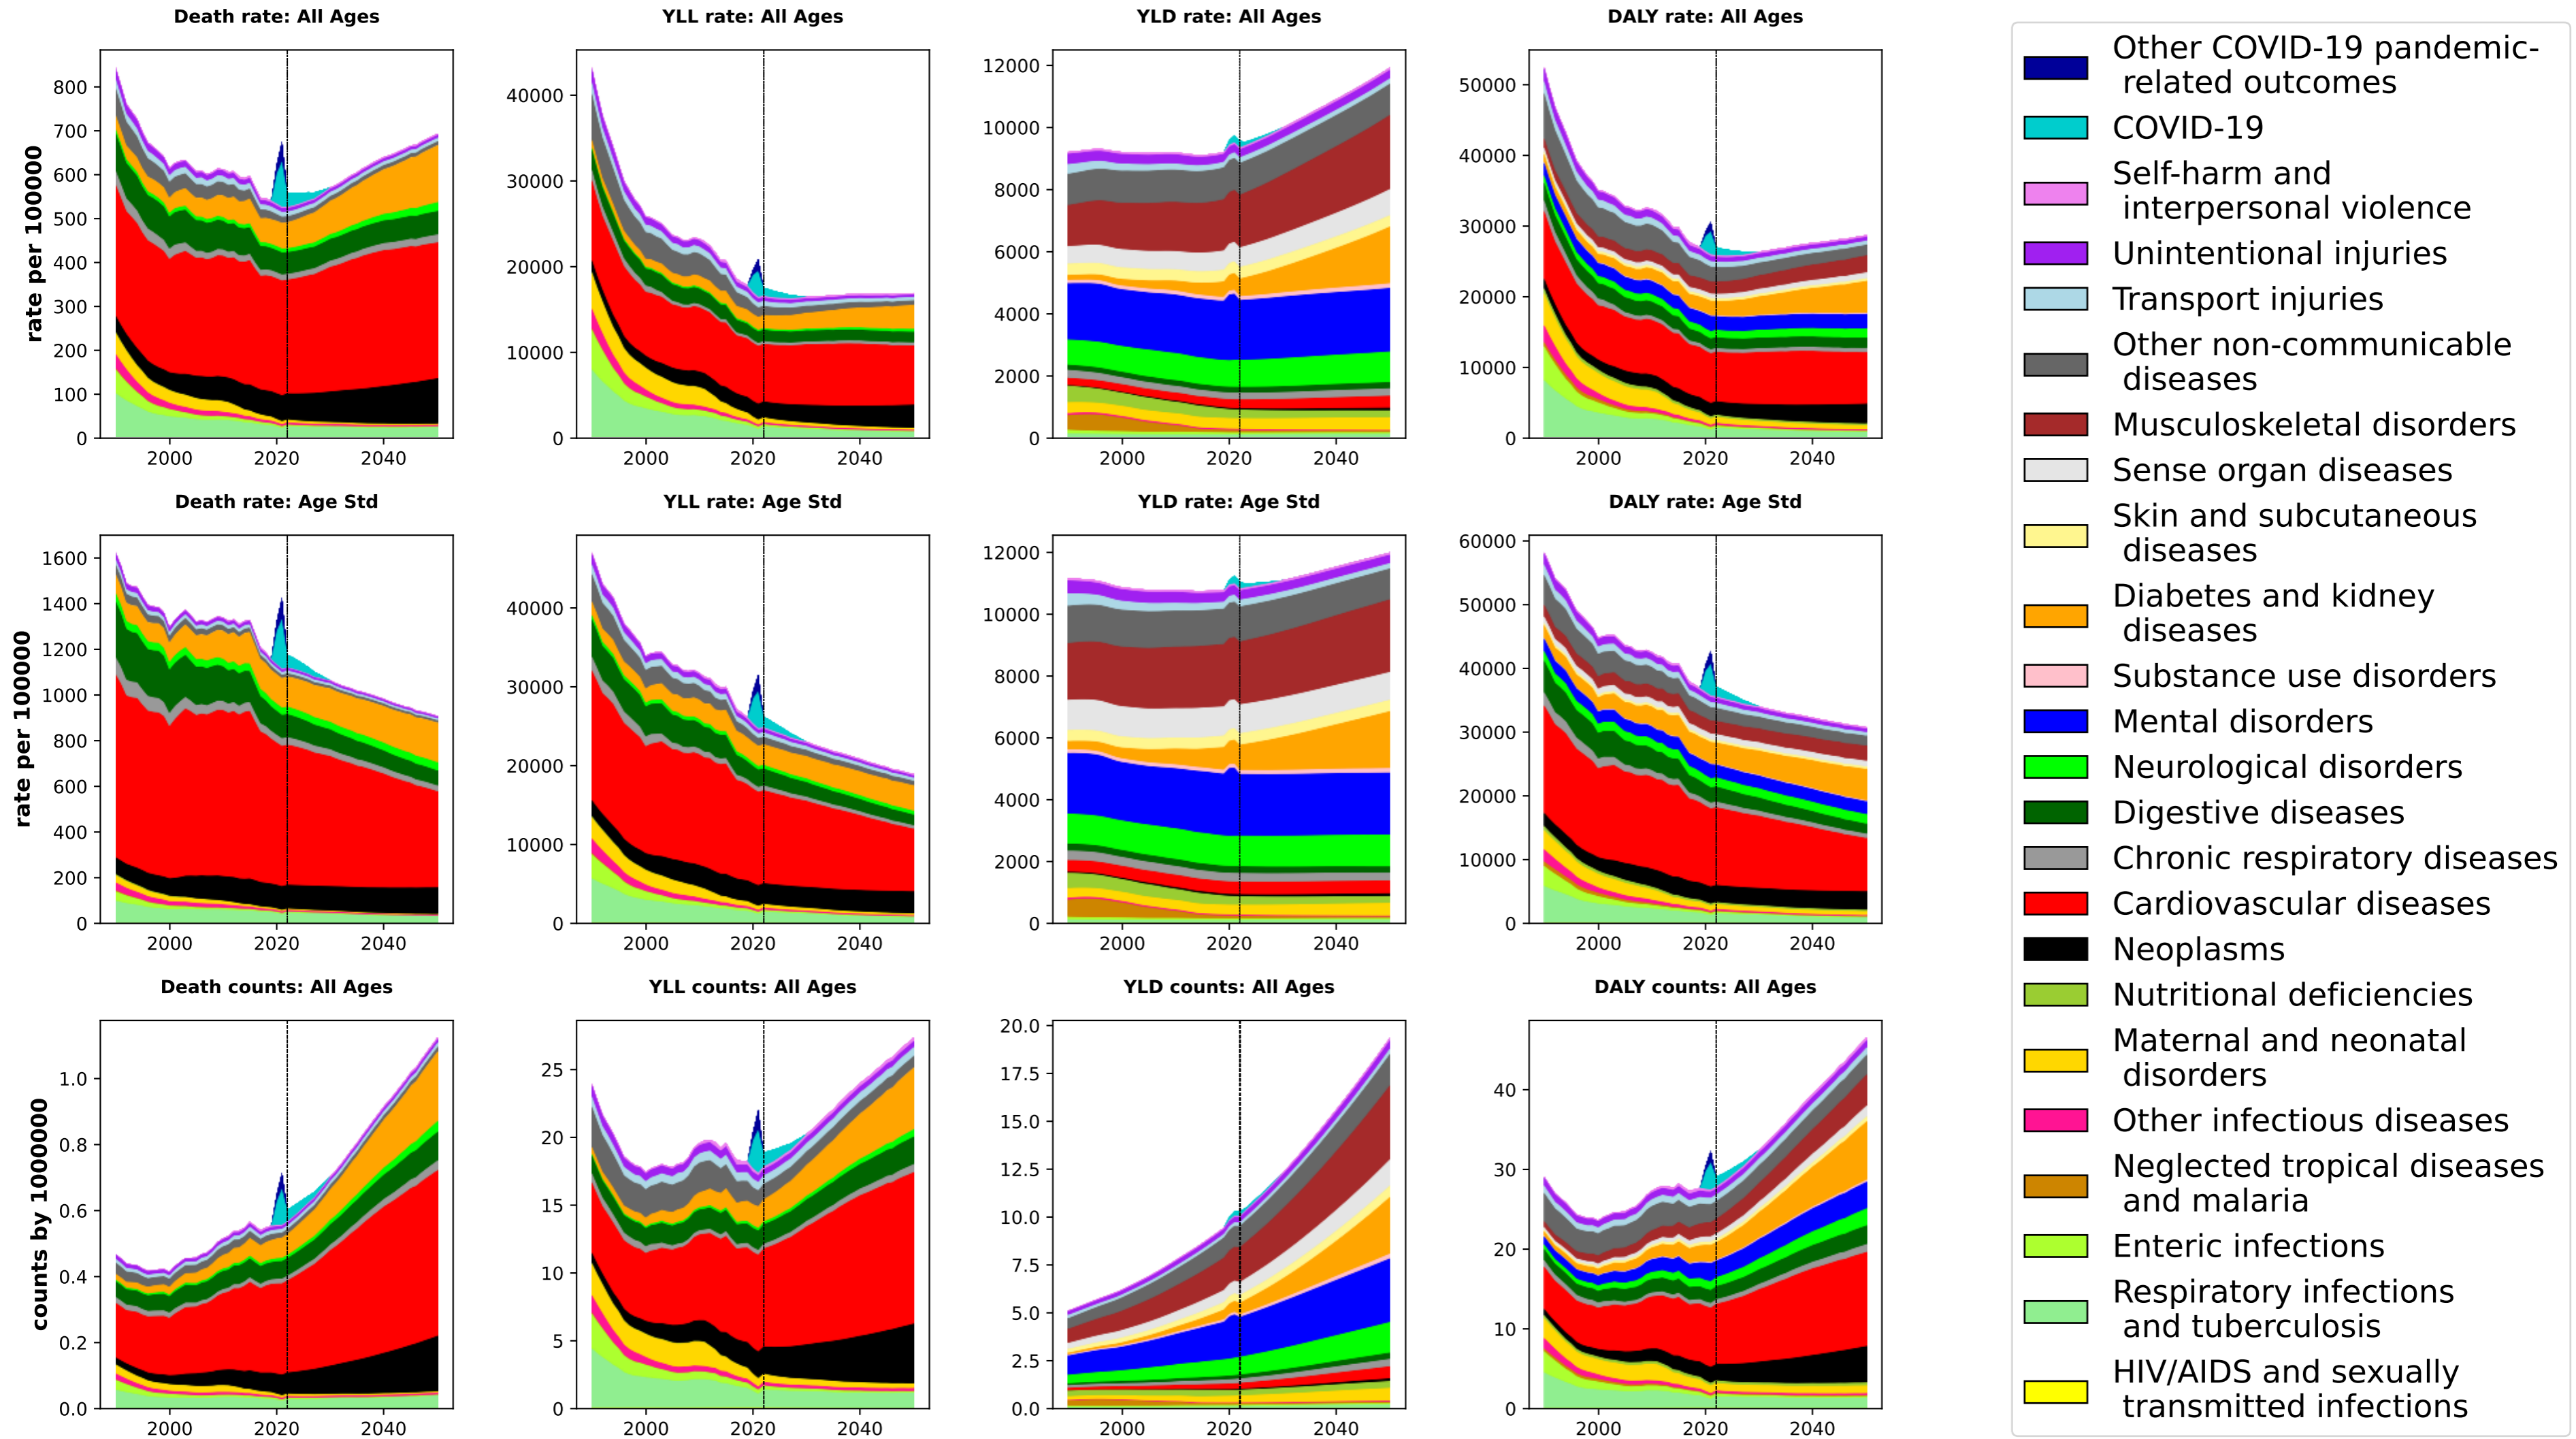

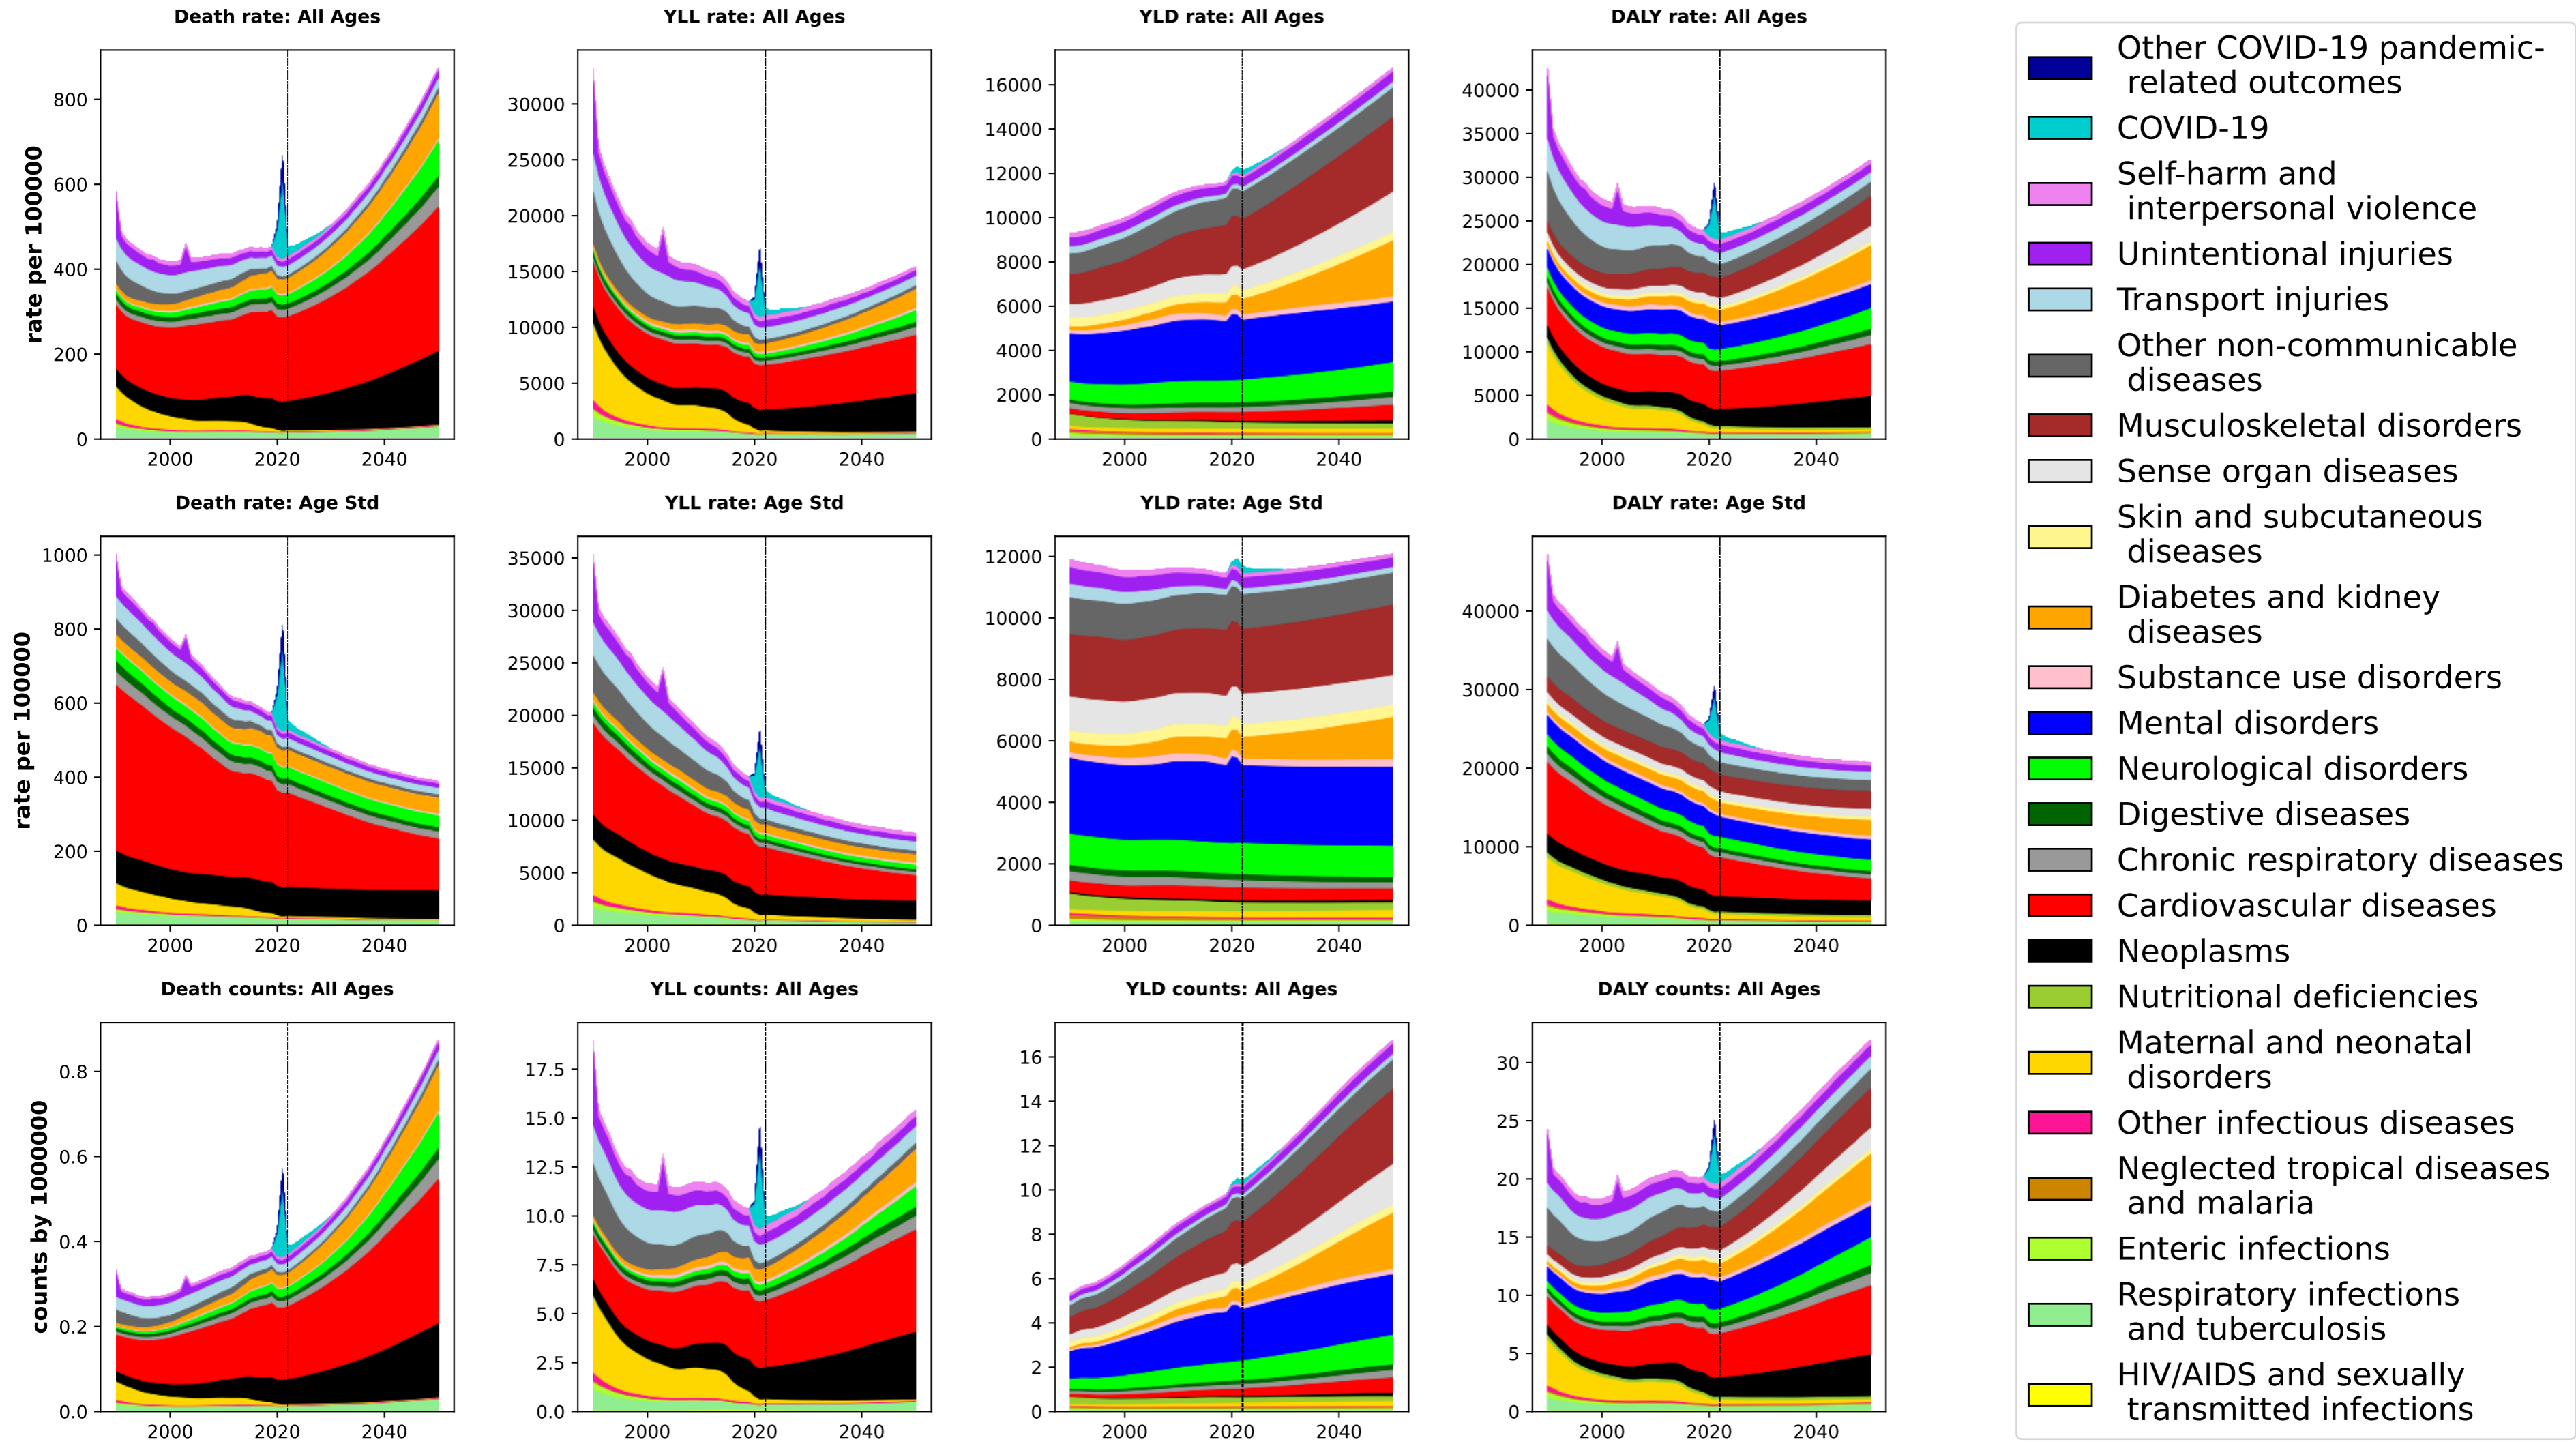

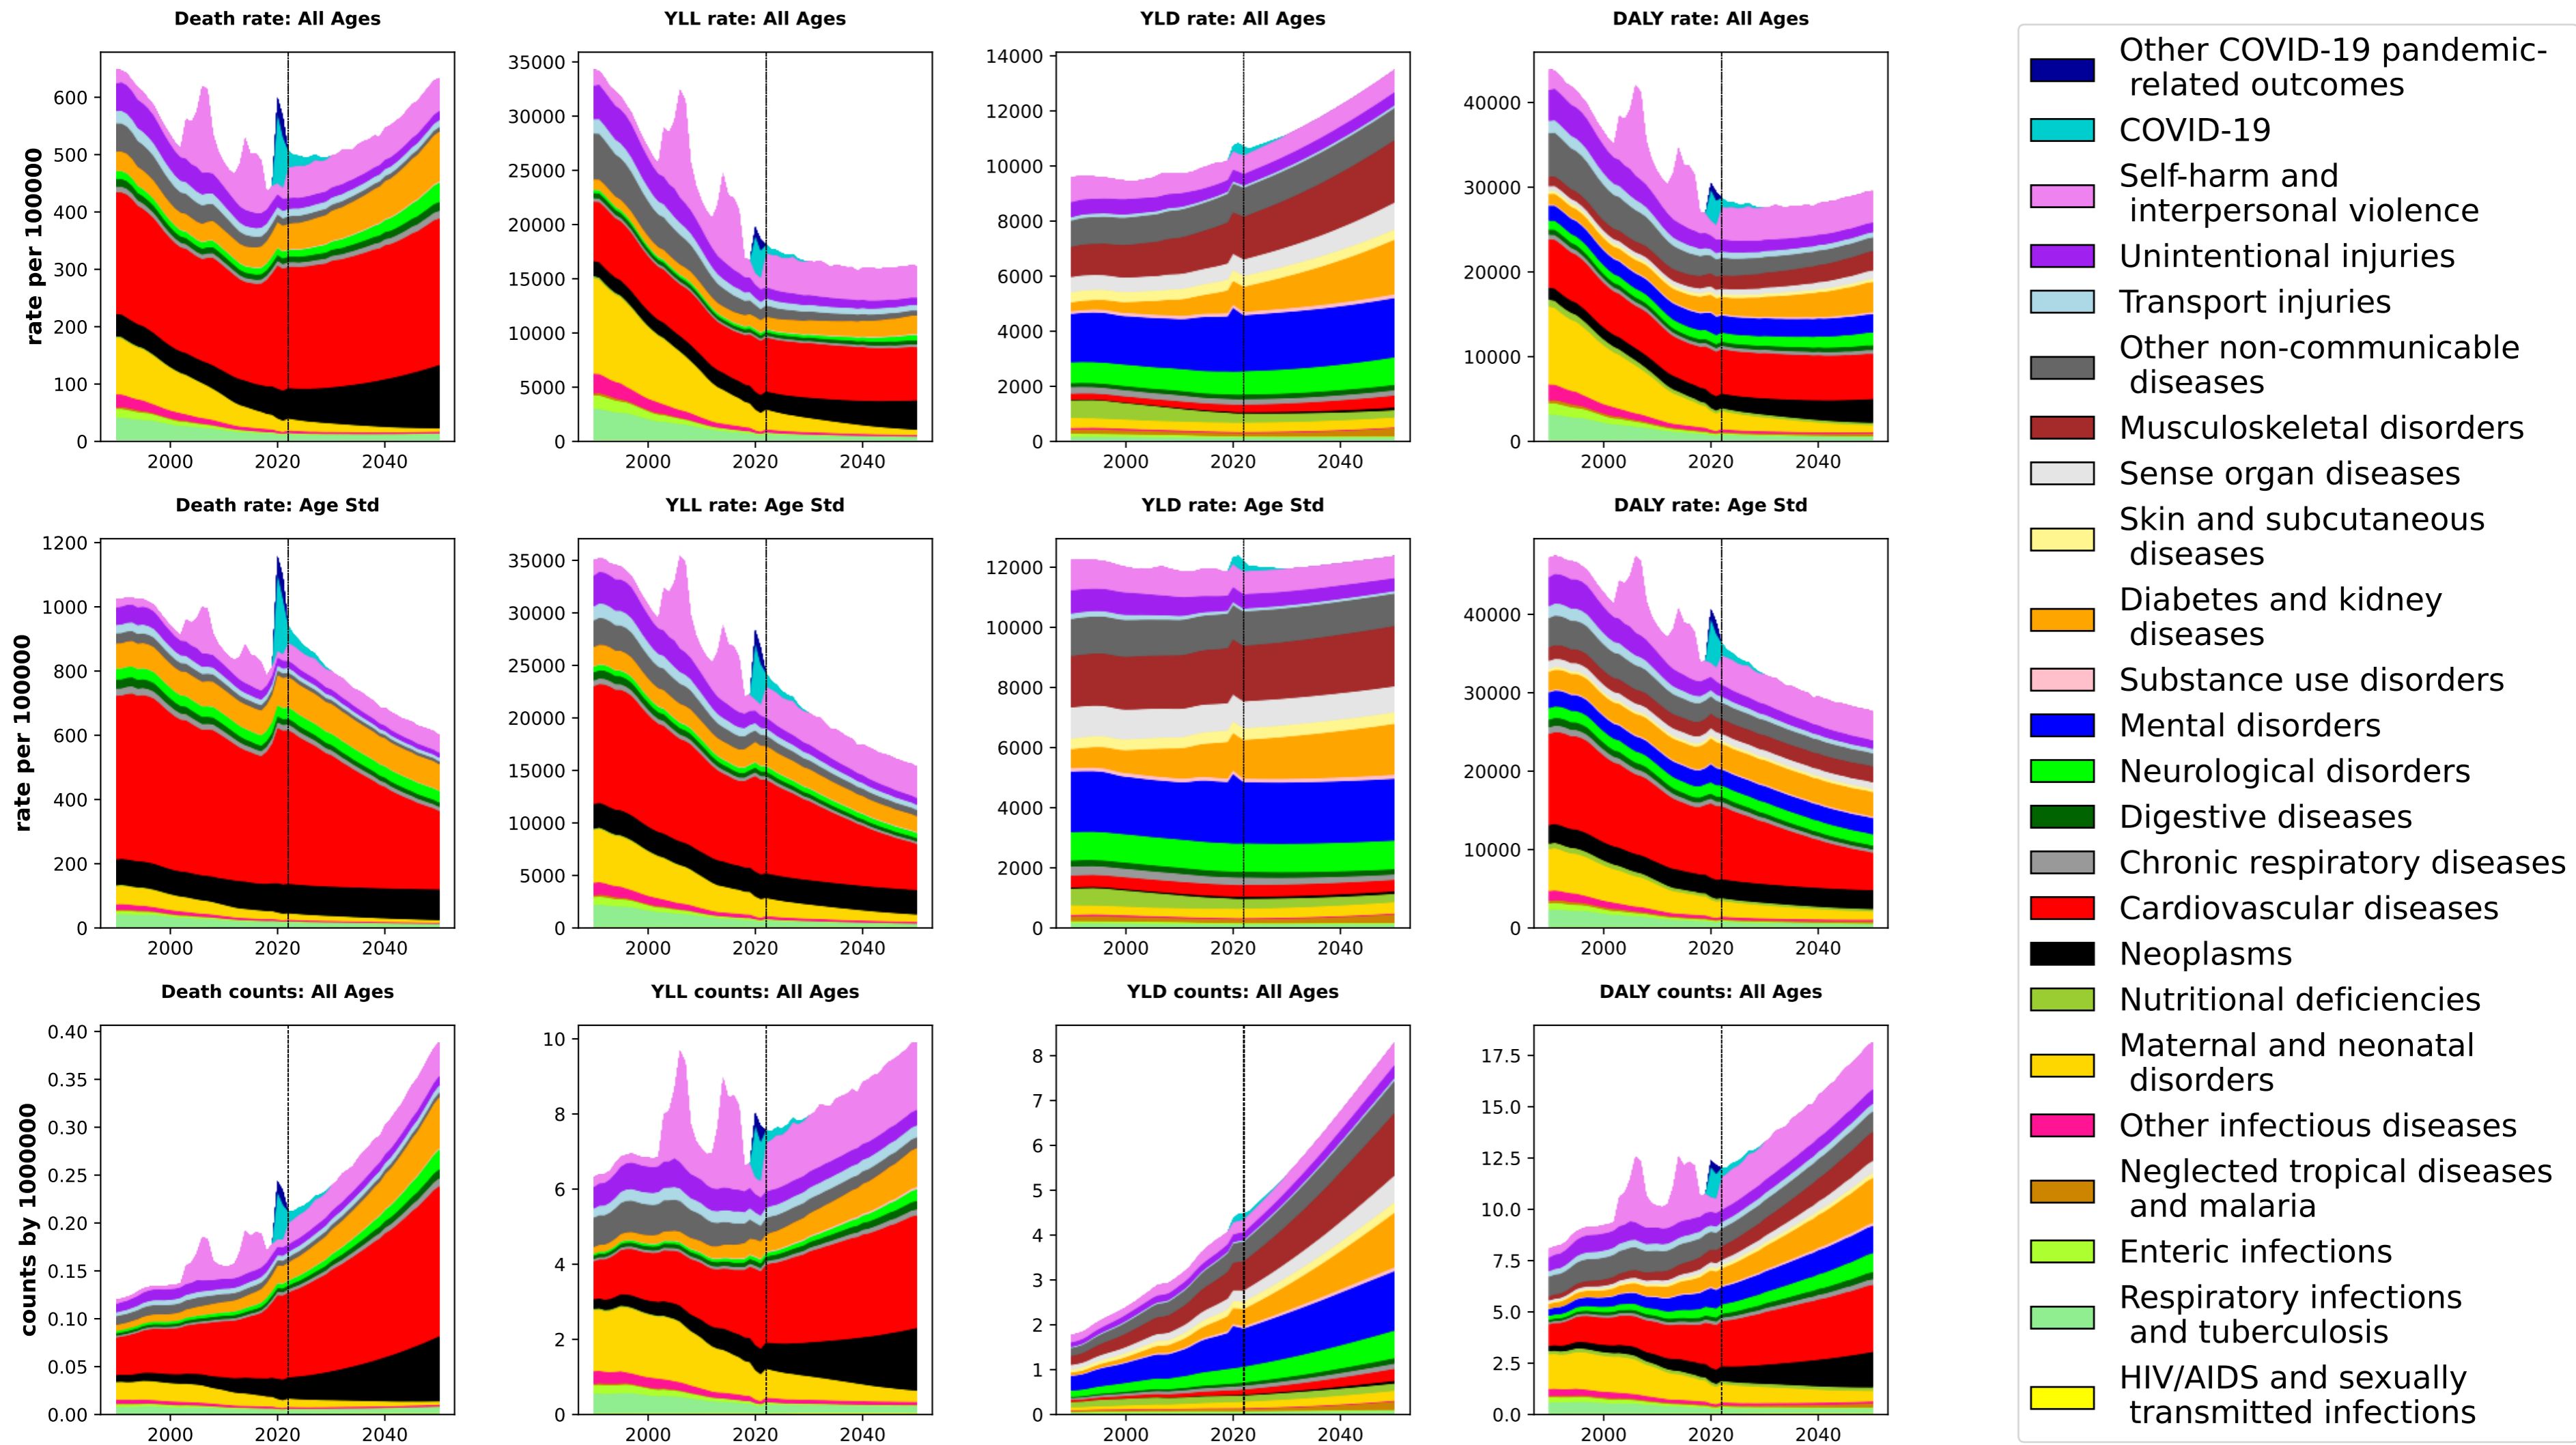

# Jordan

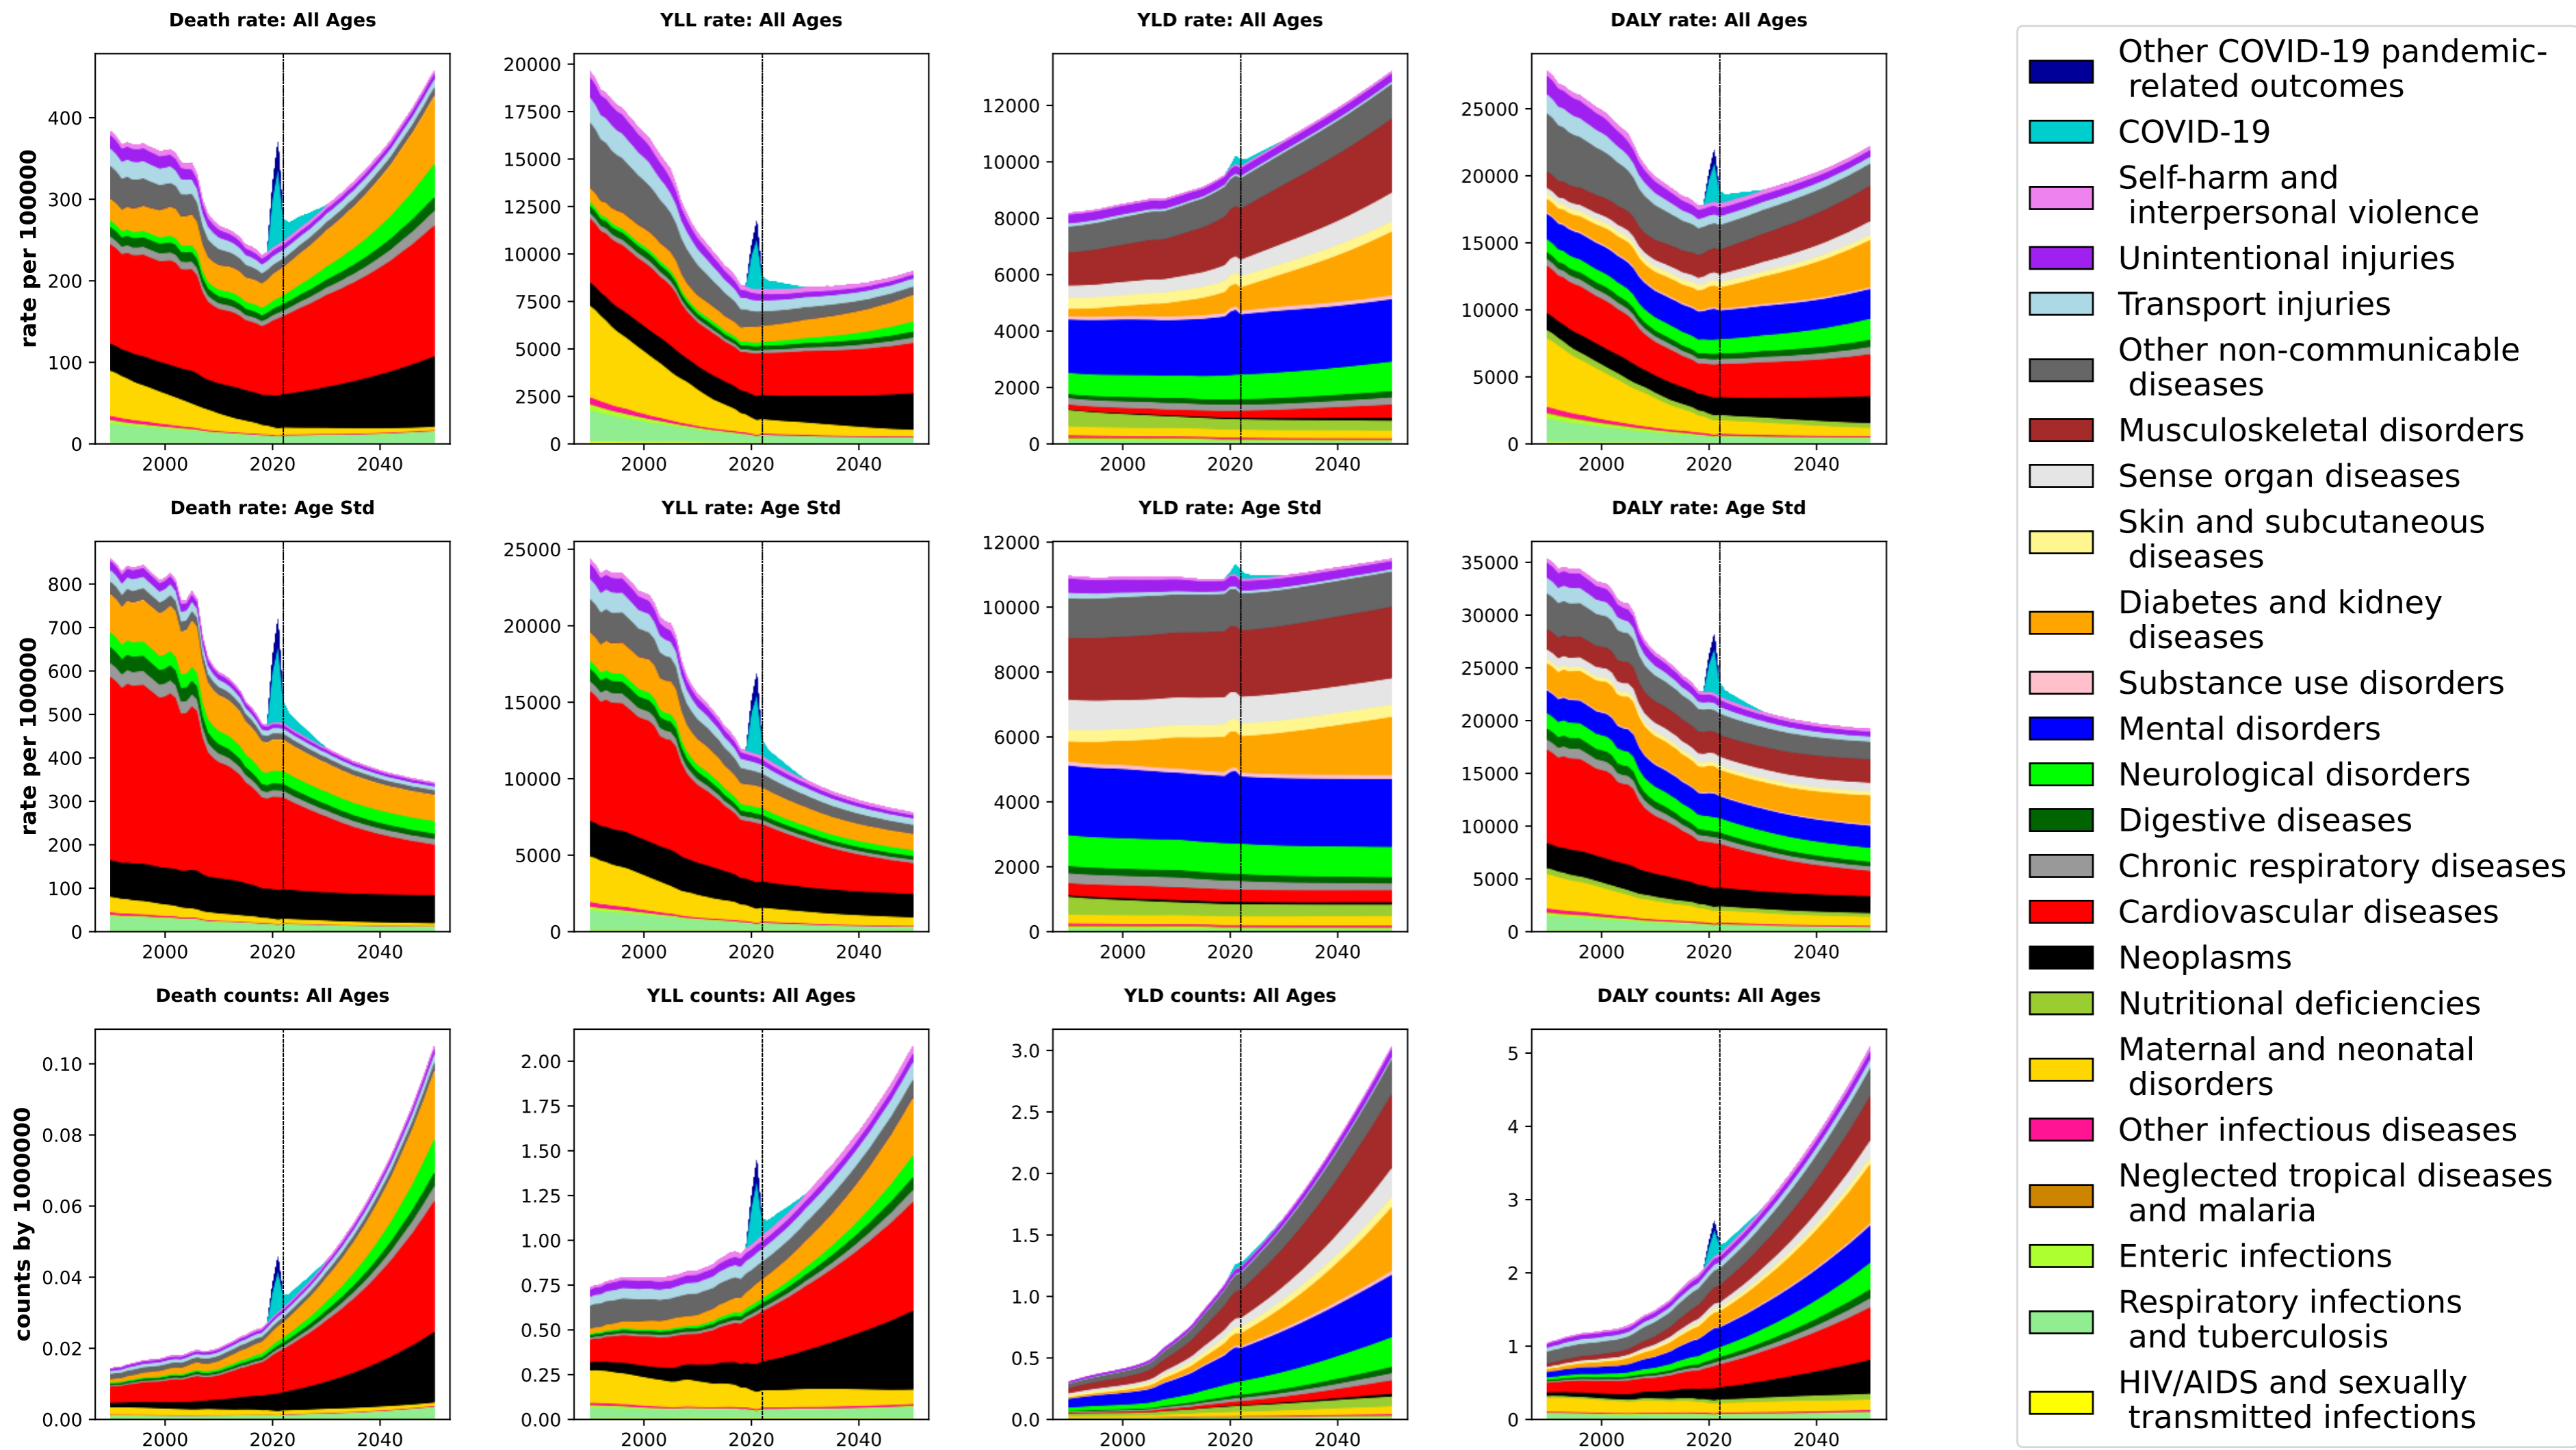



# Kuwait

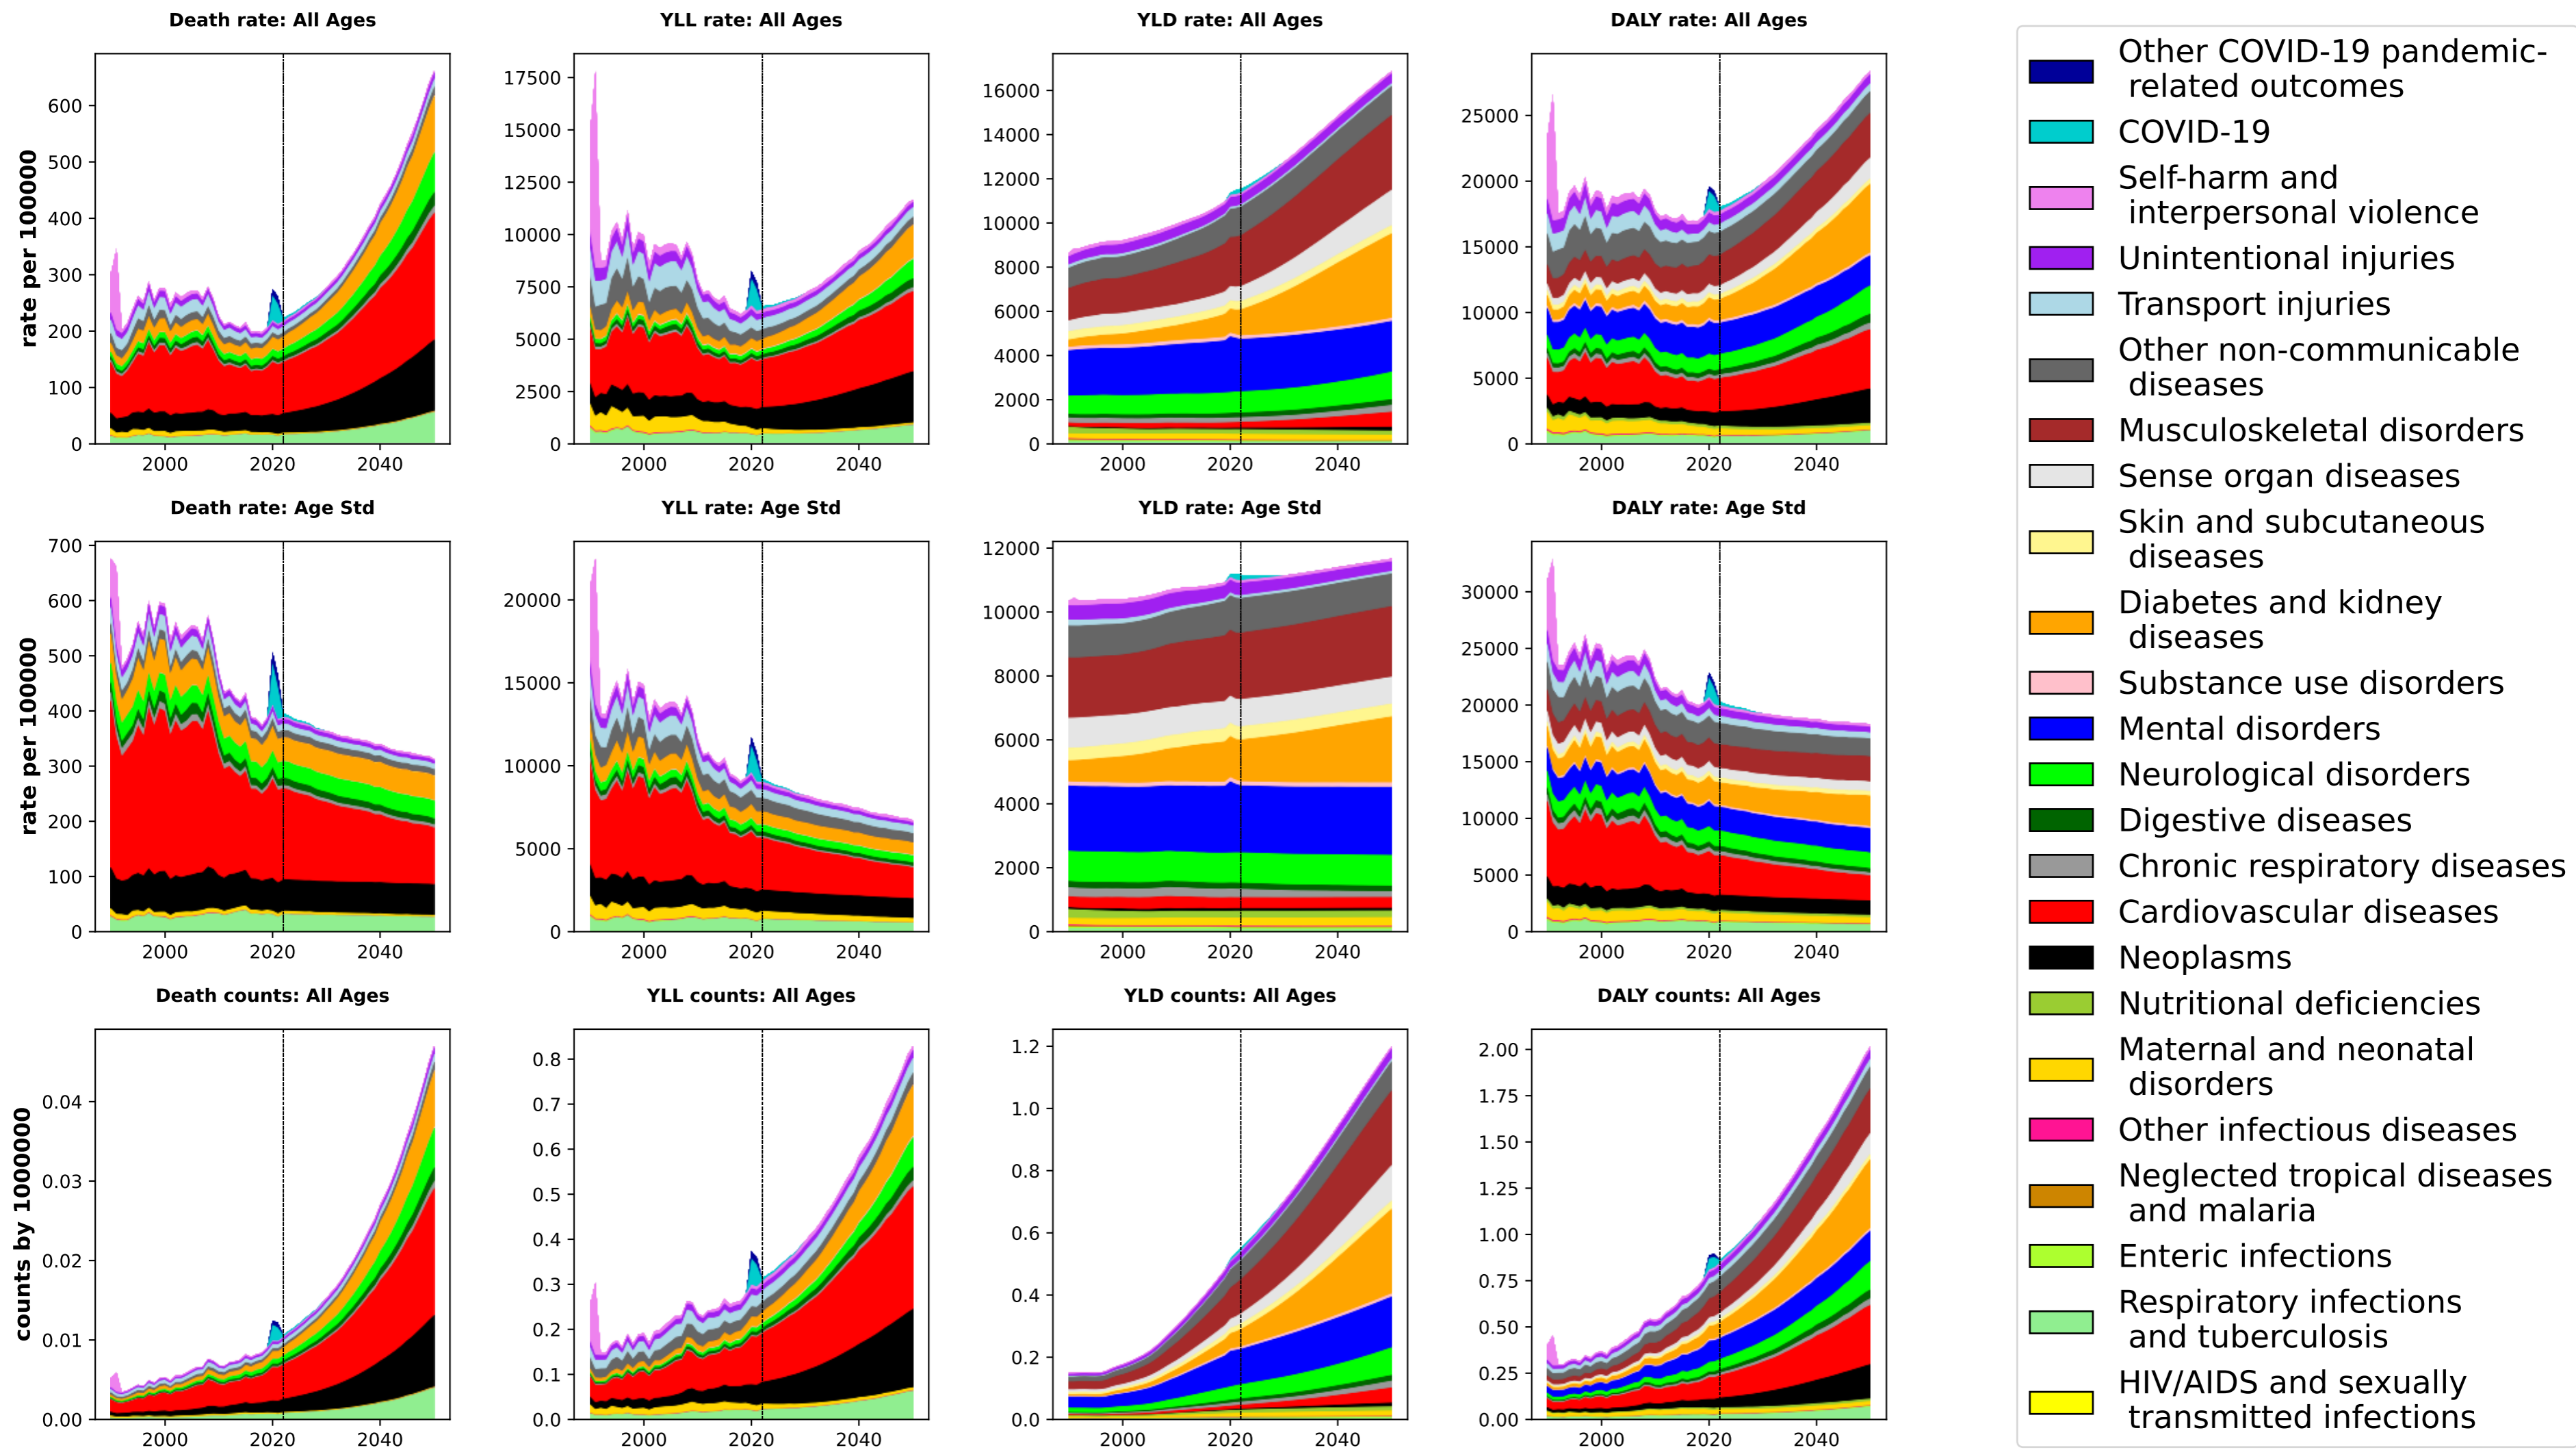

# Lebanon

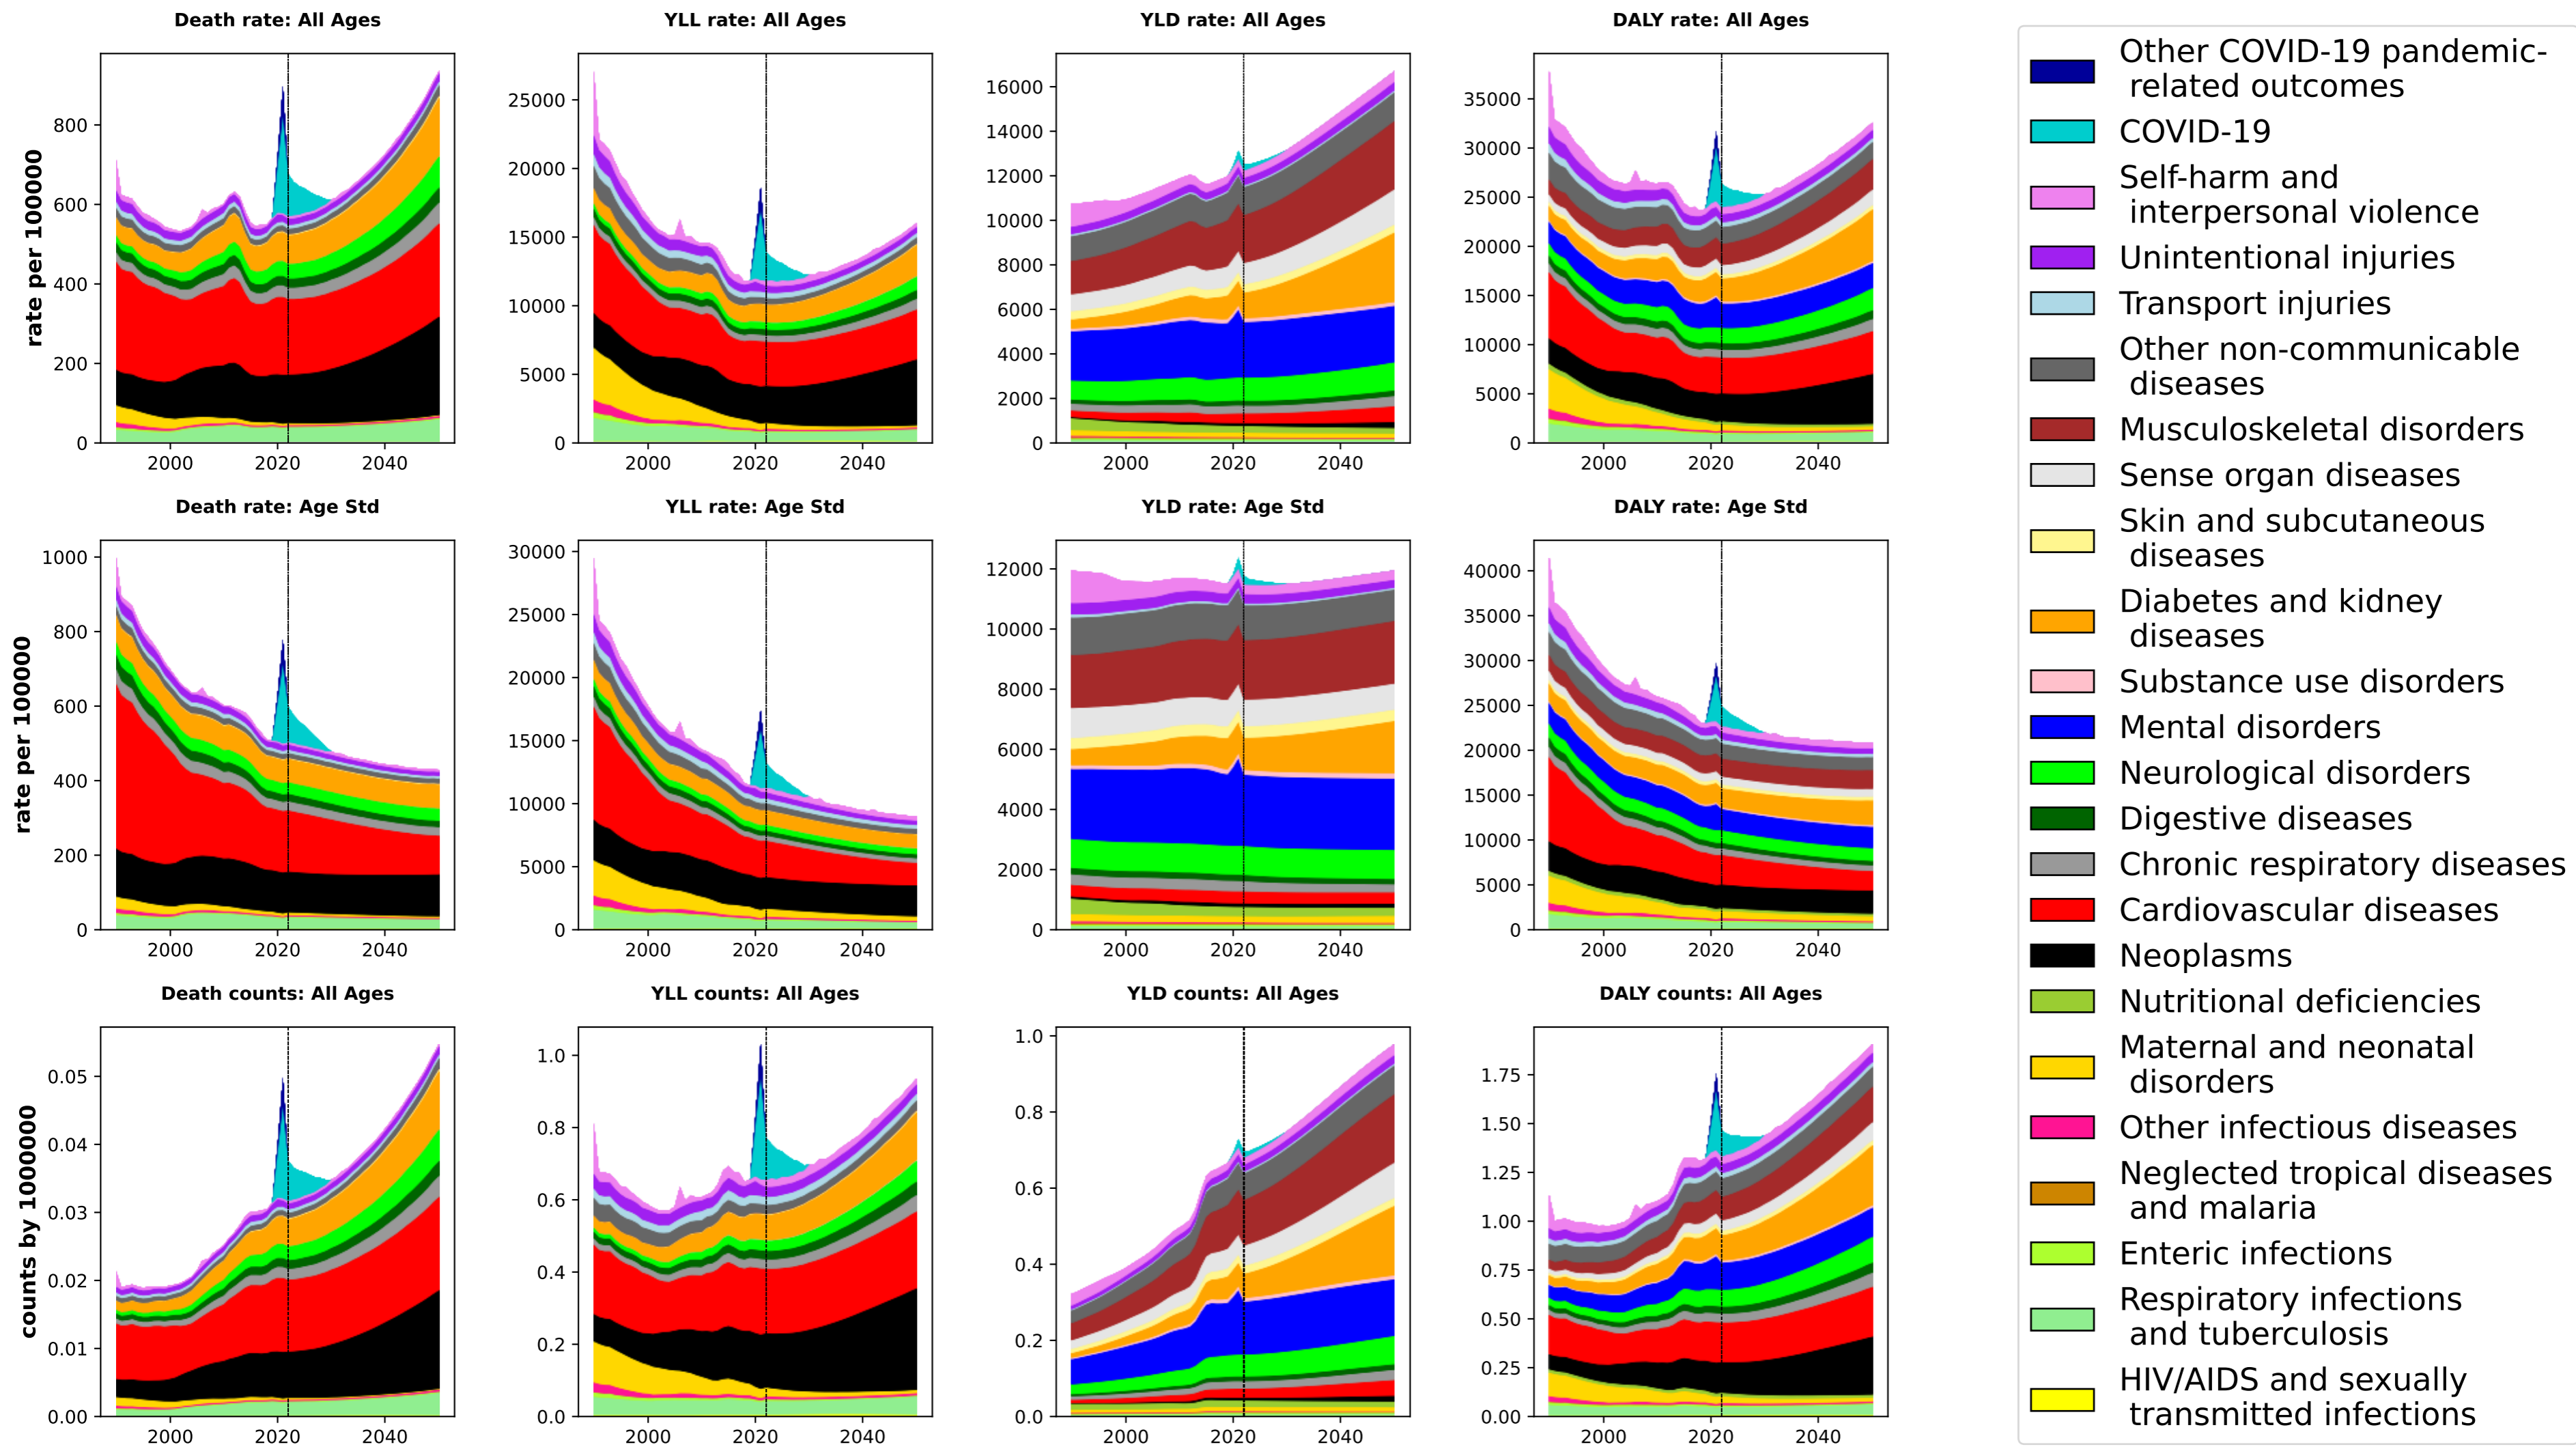

# Libya

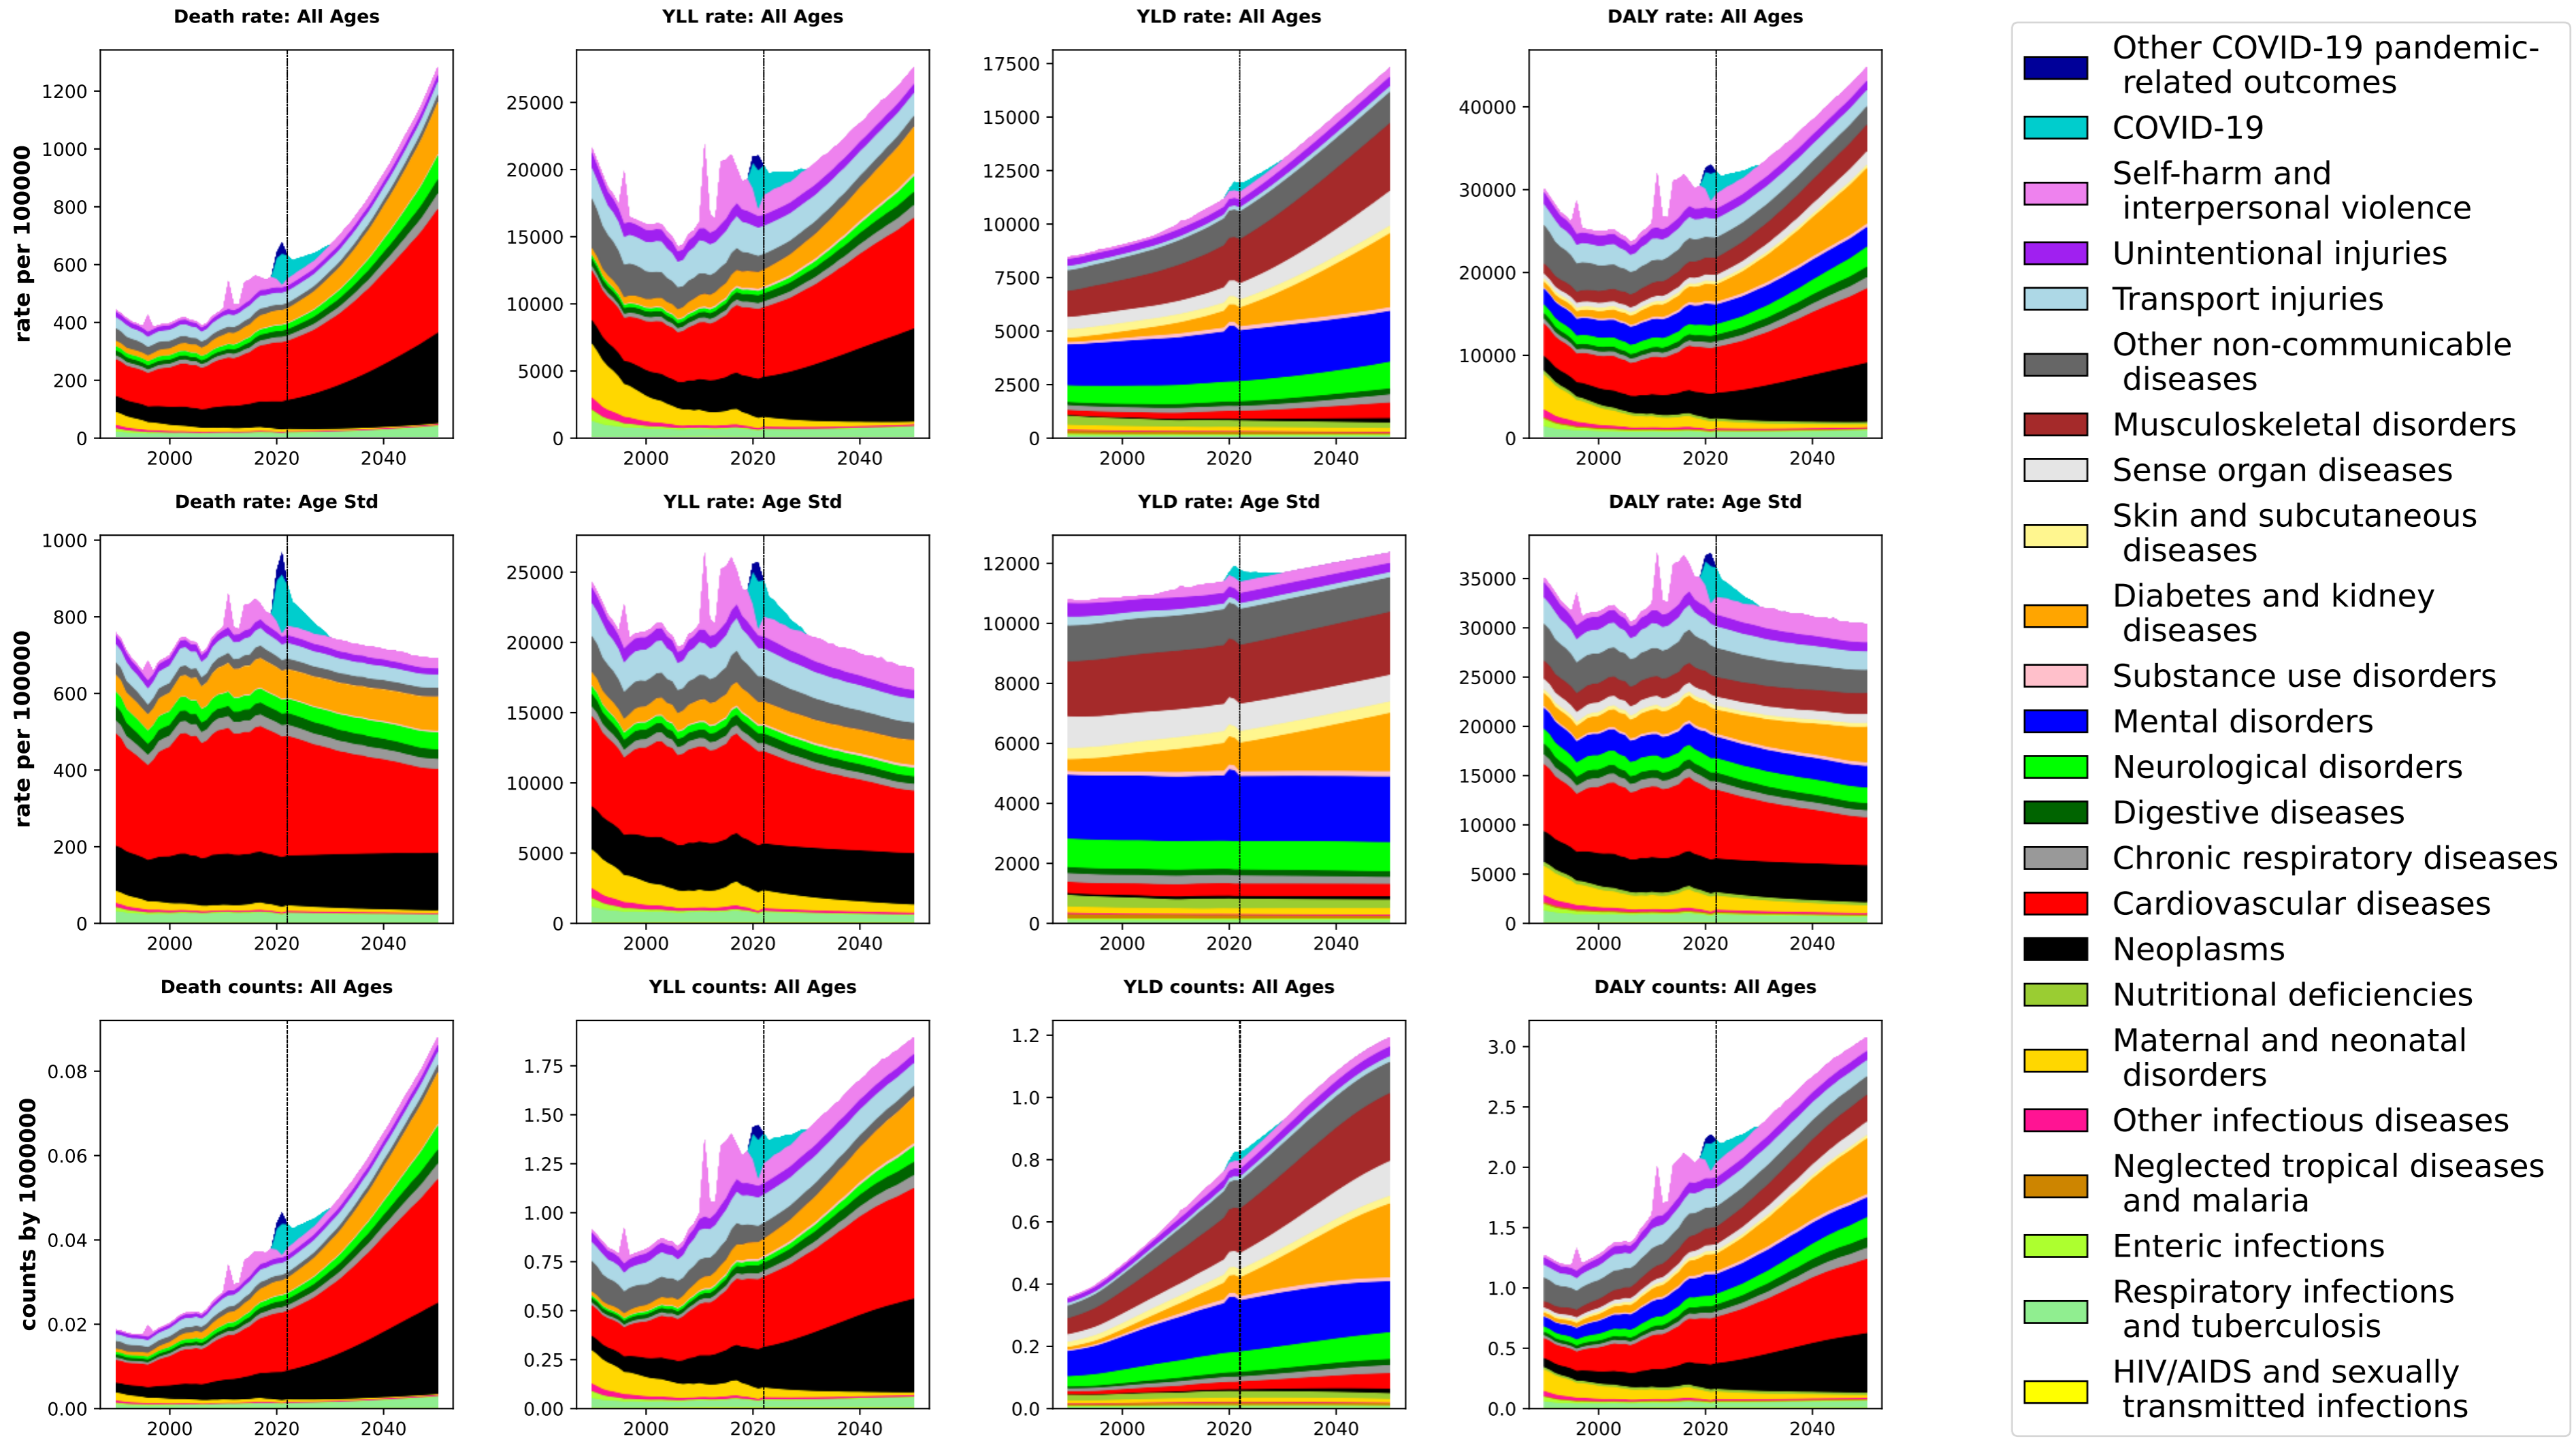

# Morocco

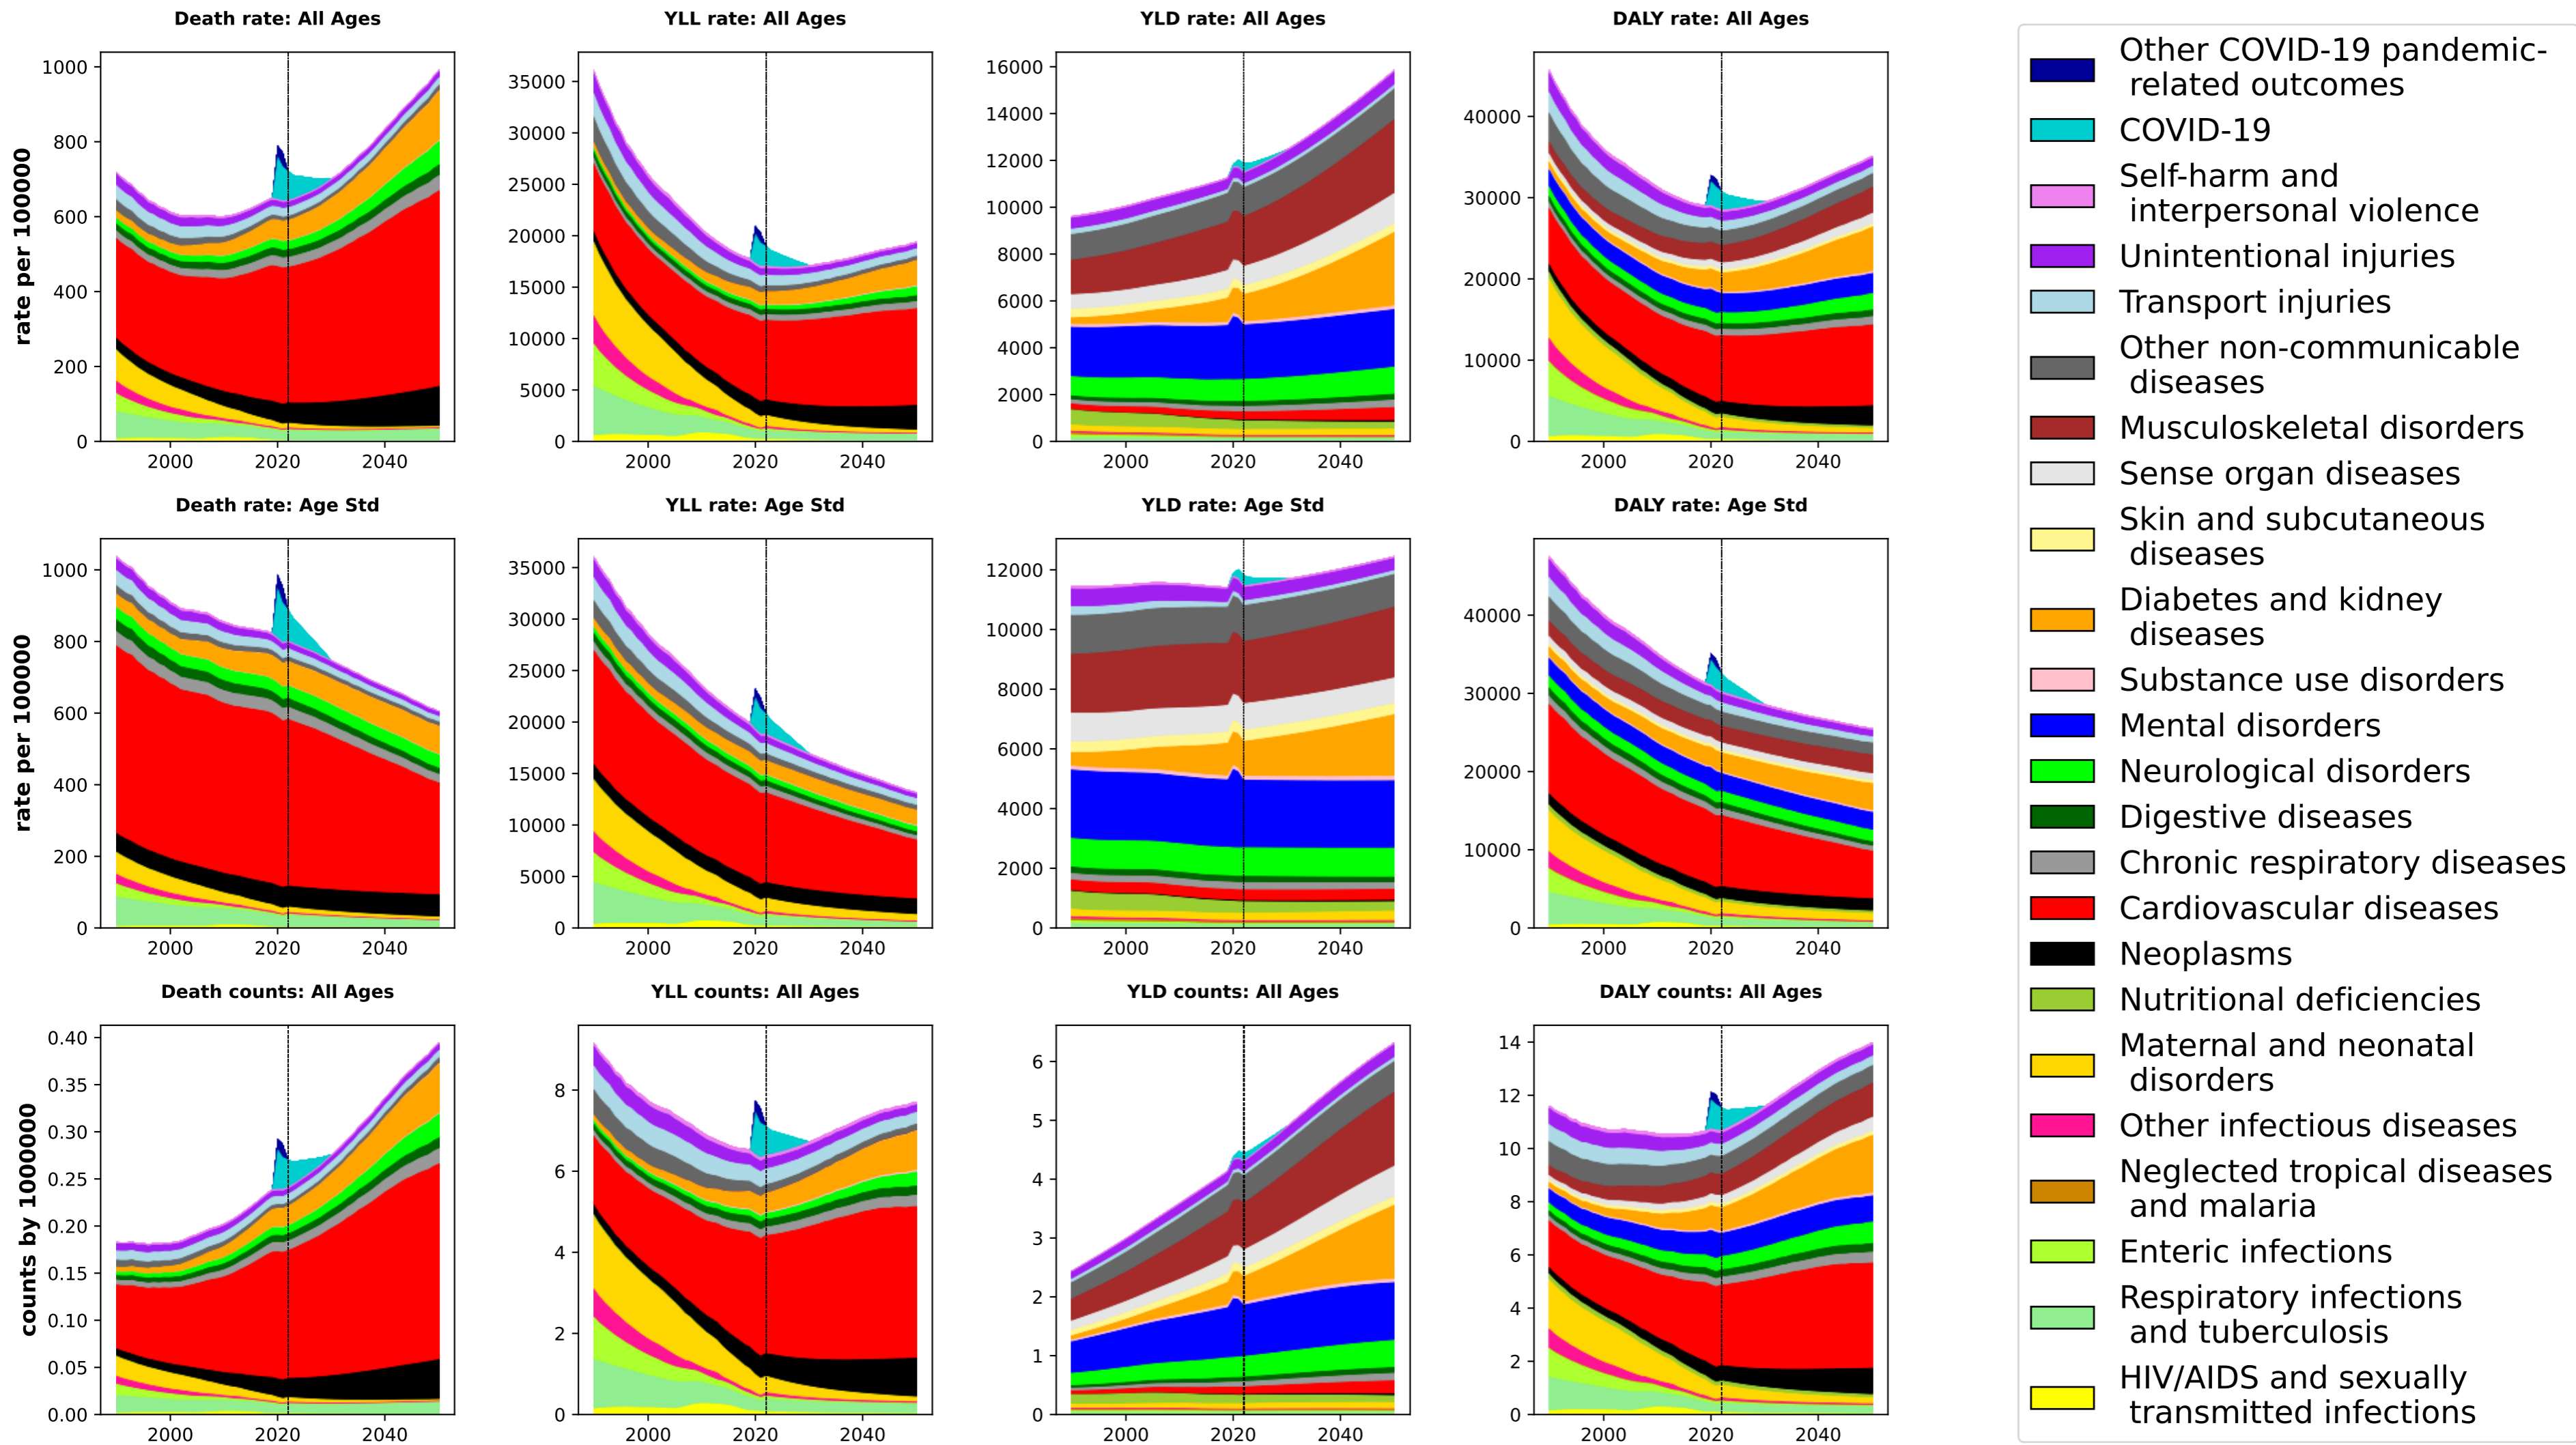

# Oman

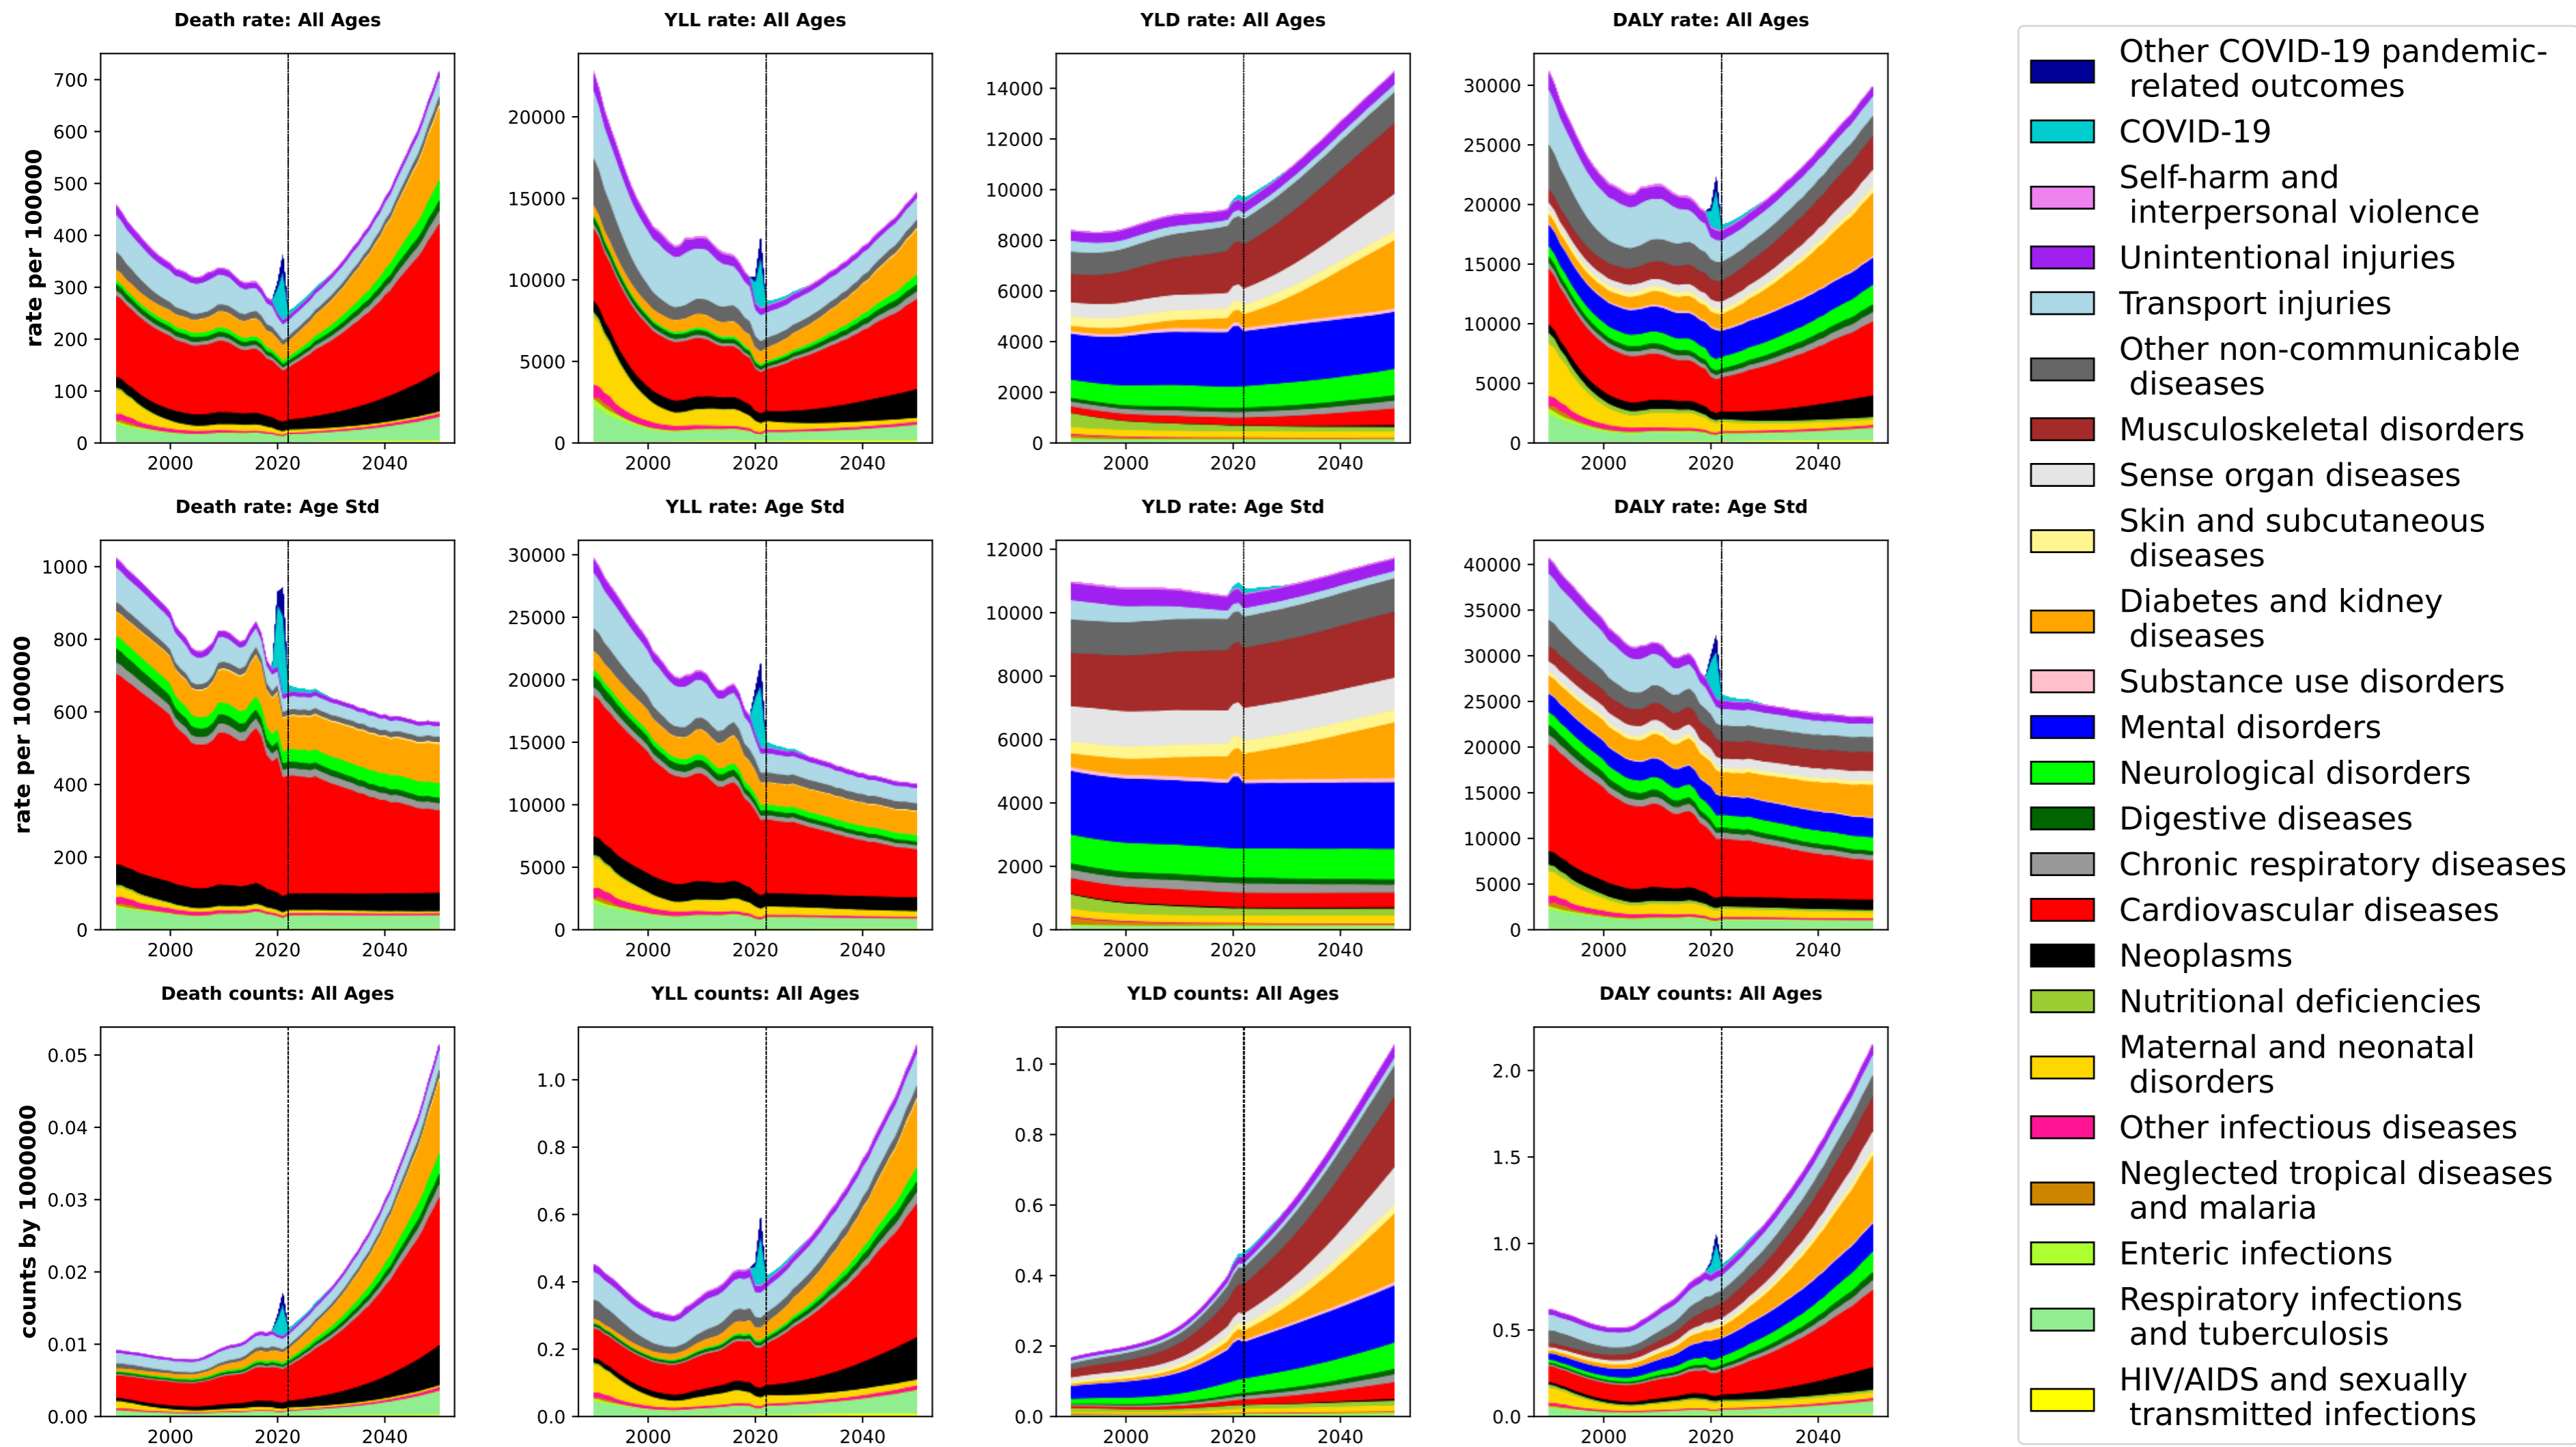

# Palestine

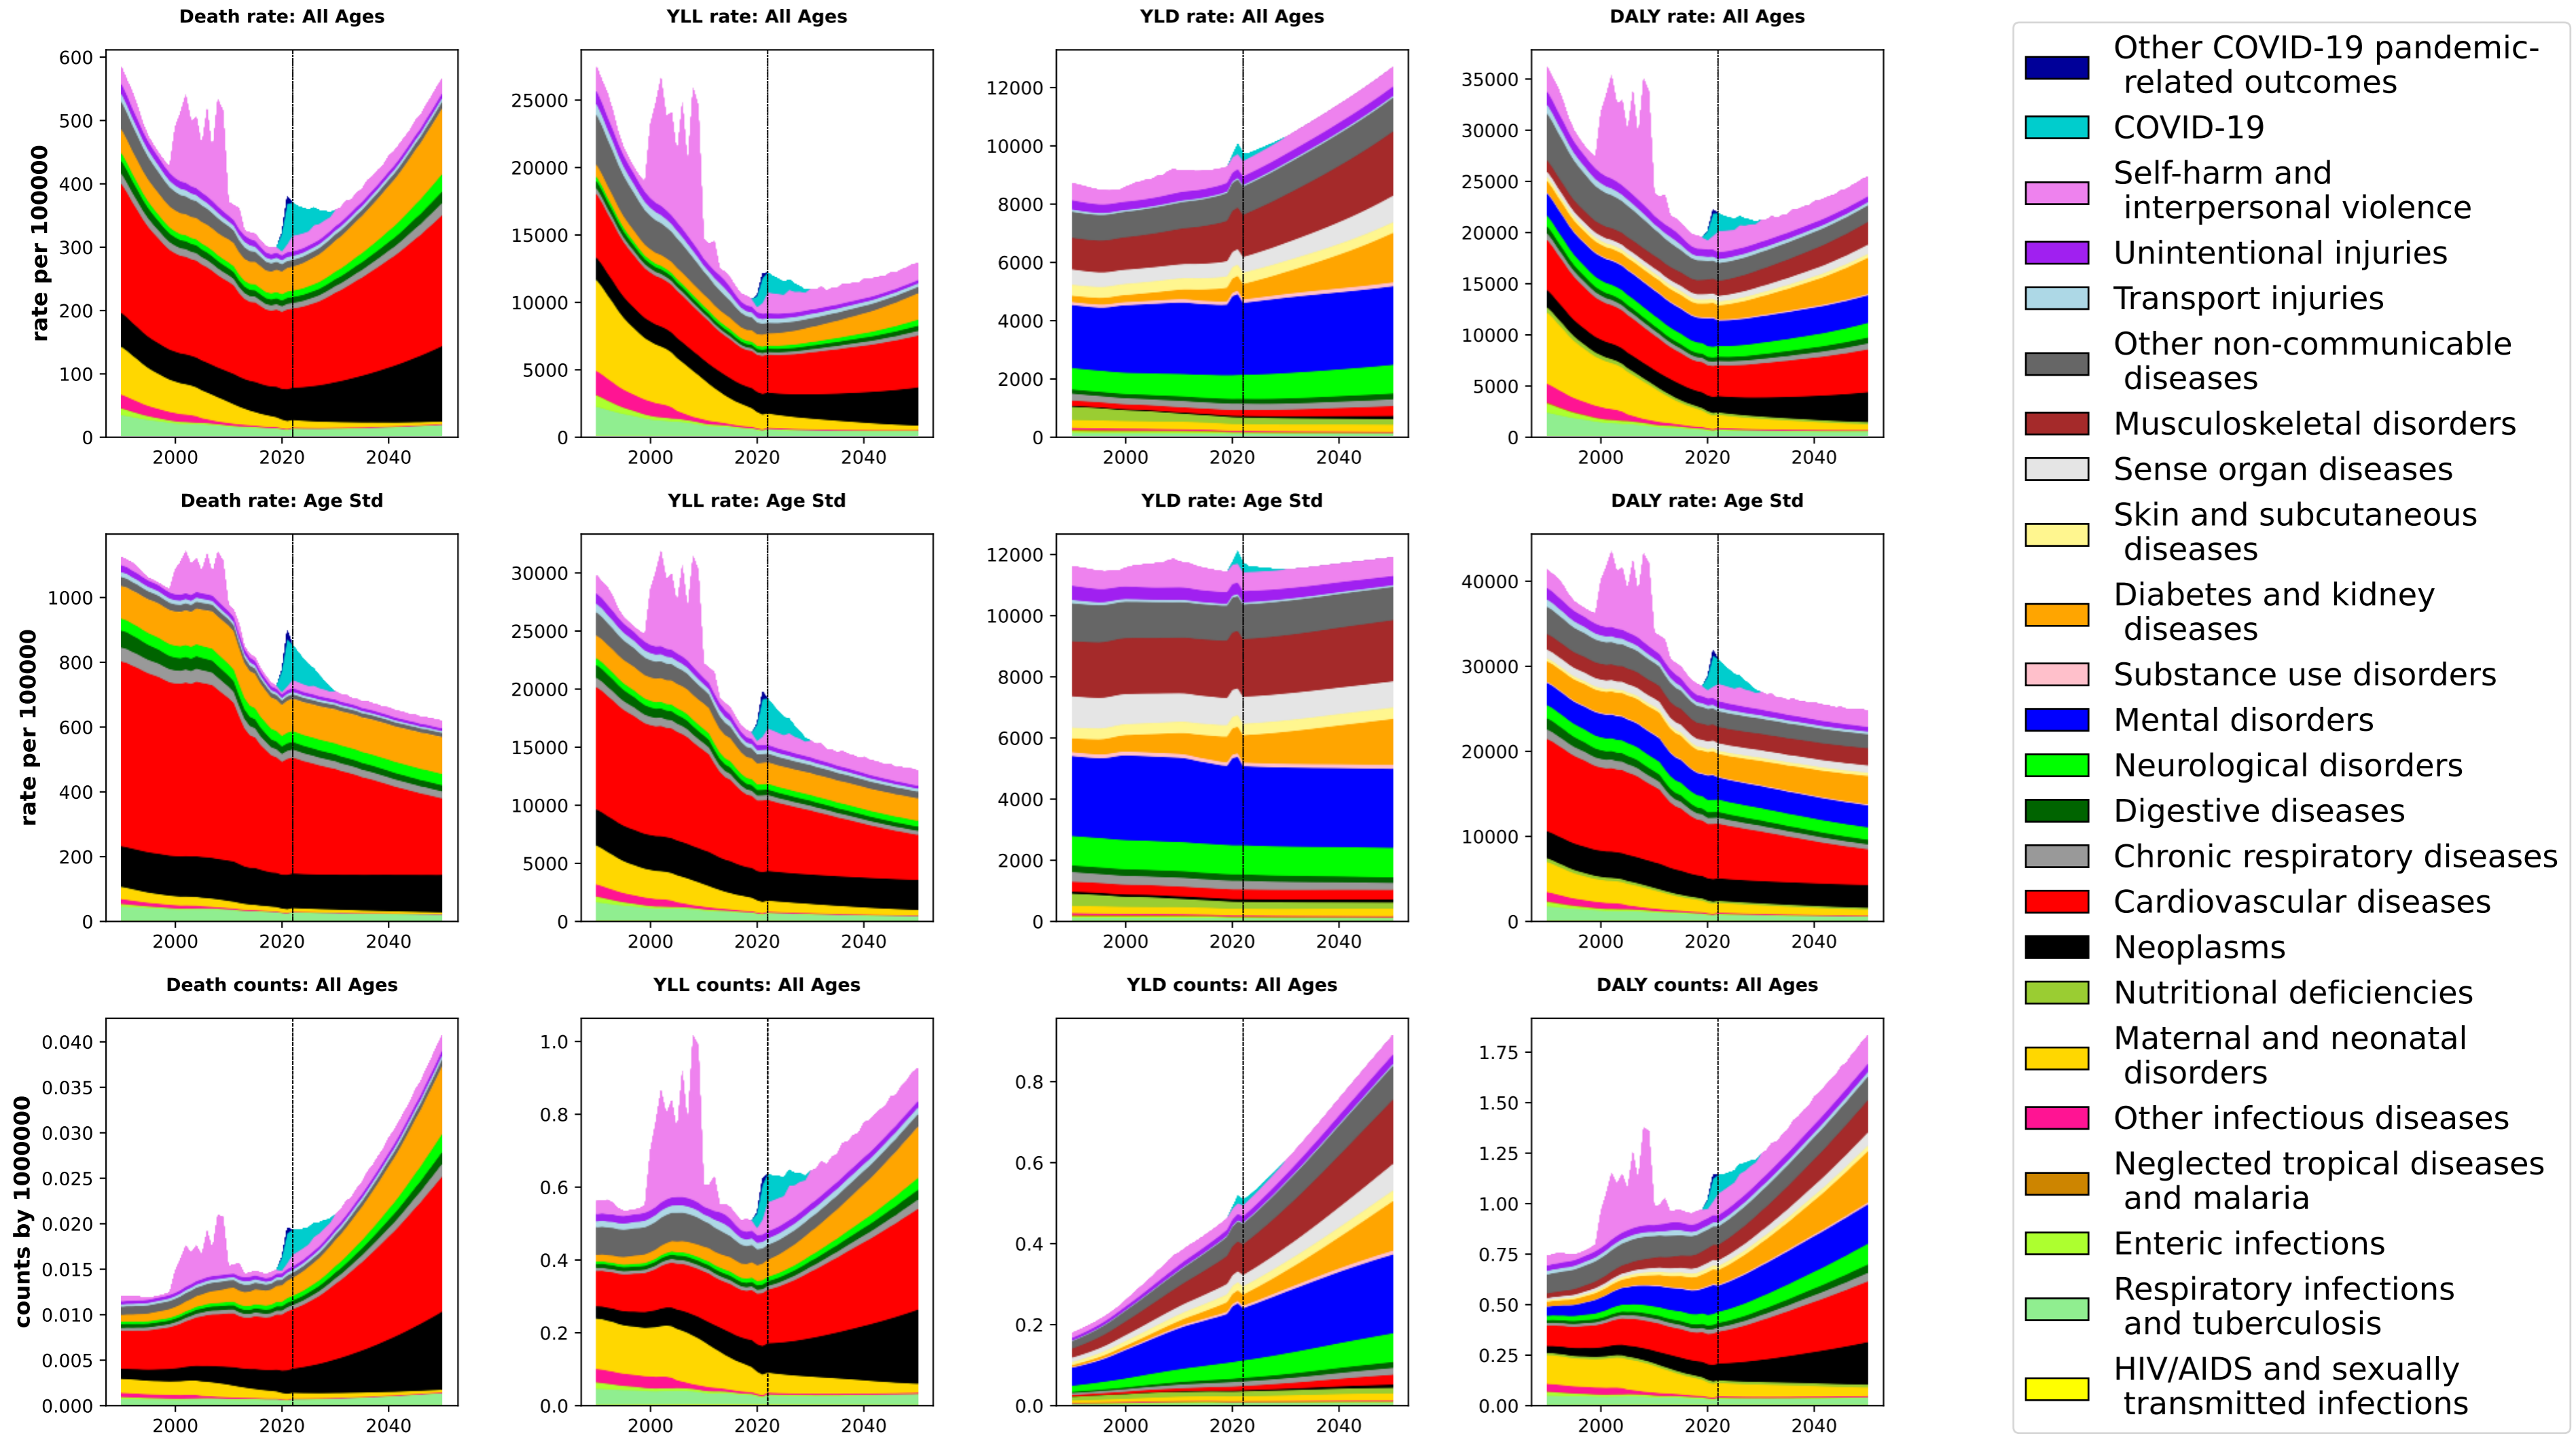

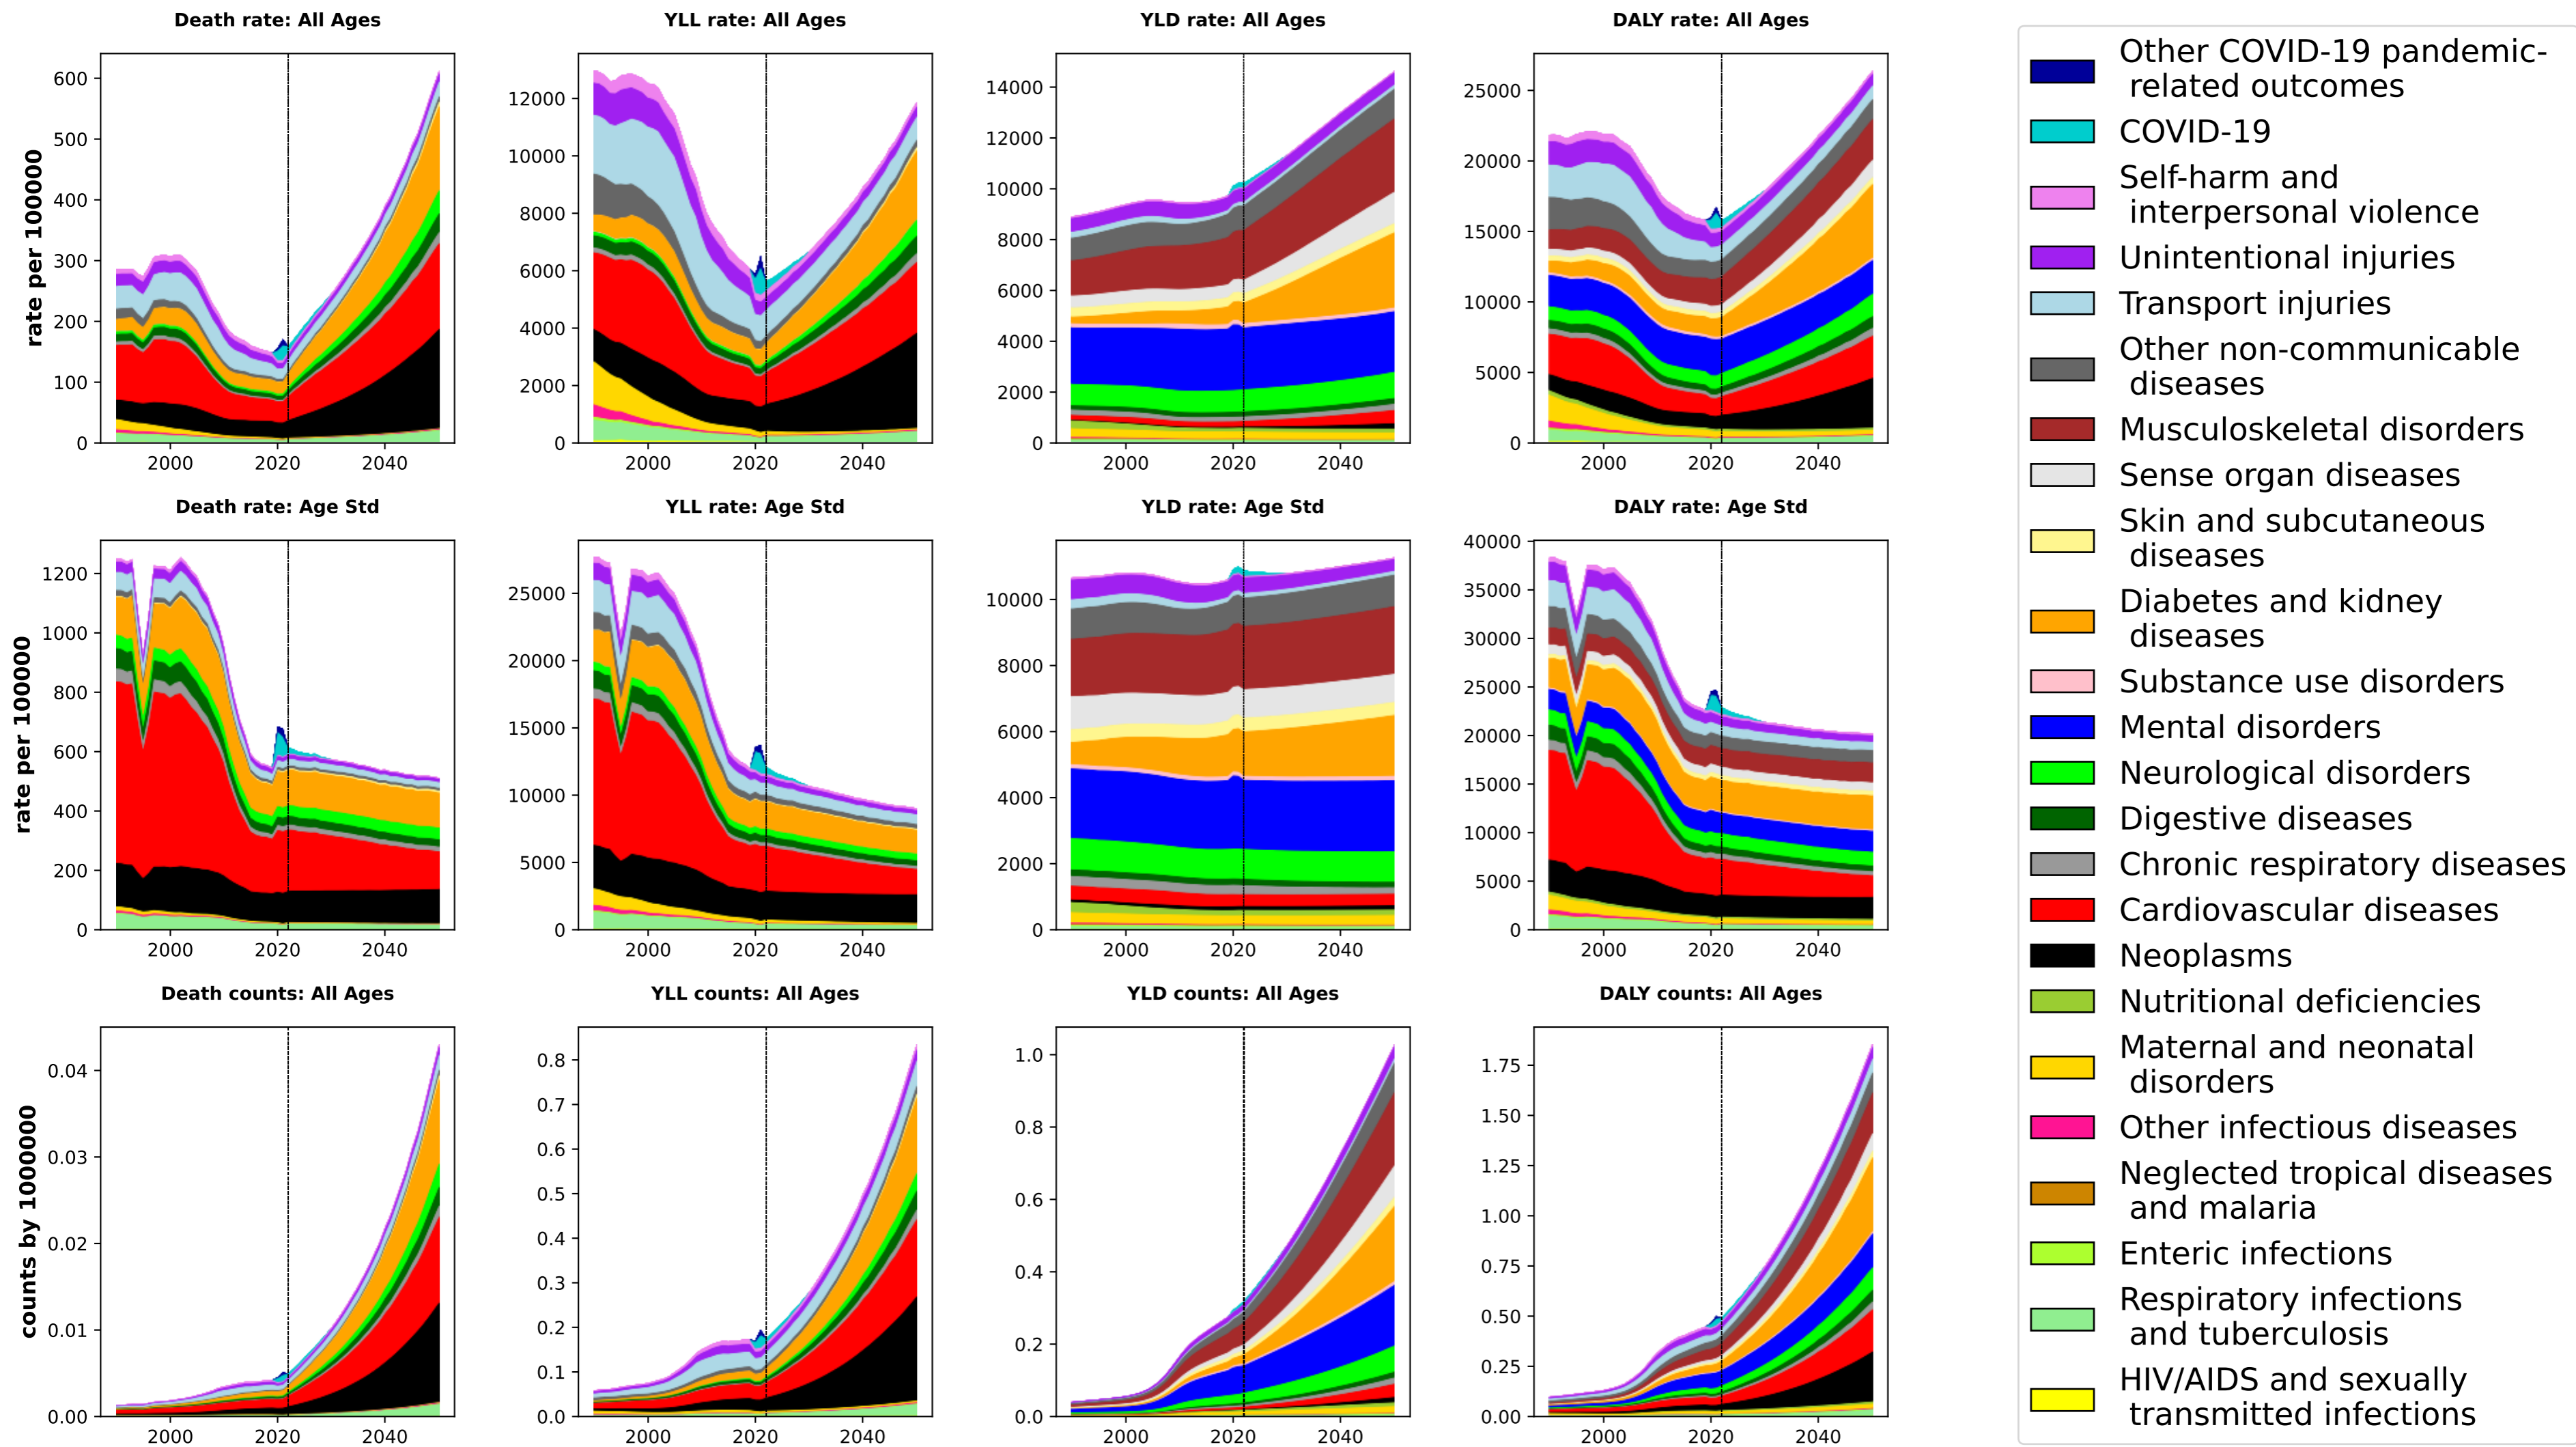

# Saudi Arabia

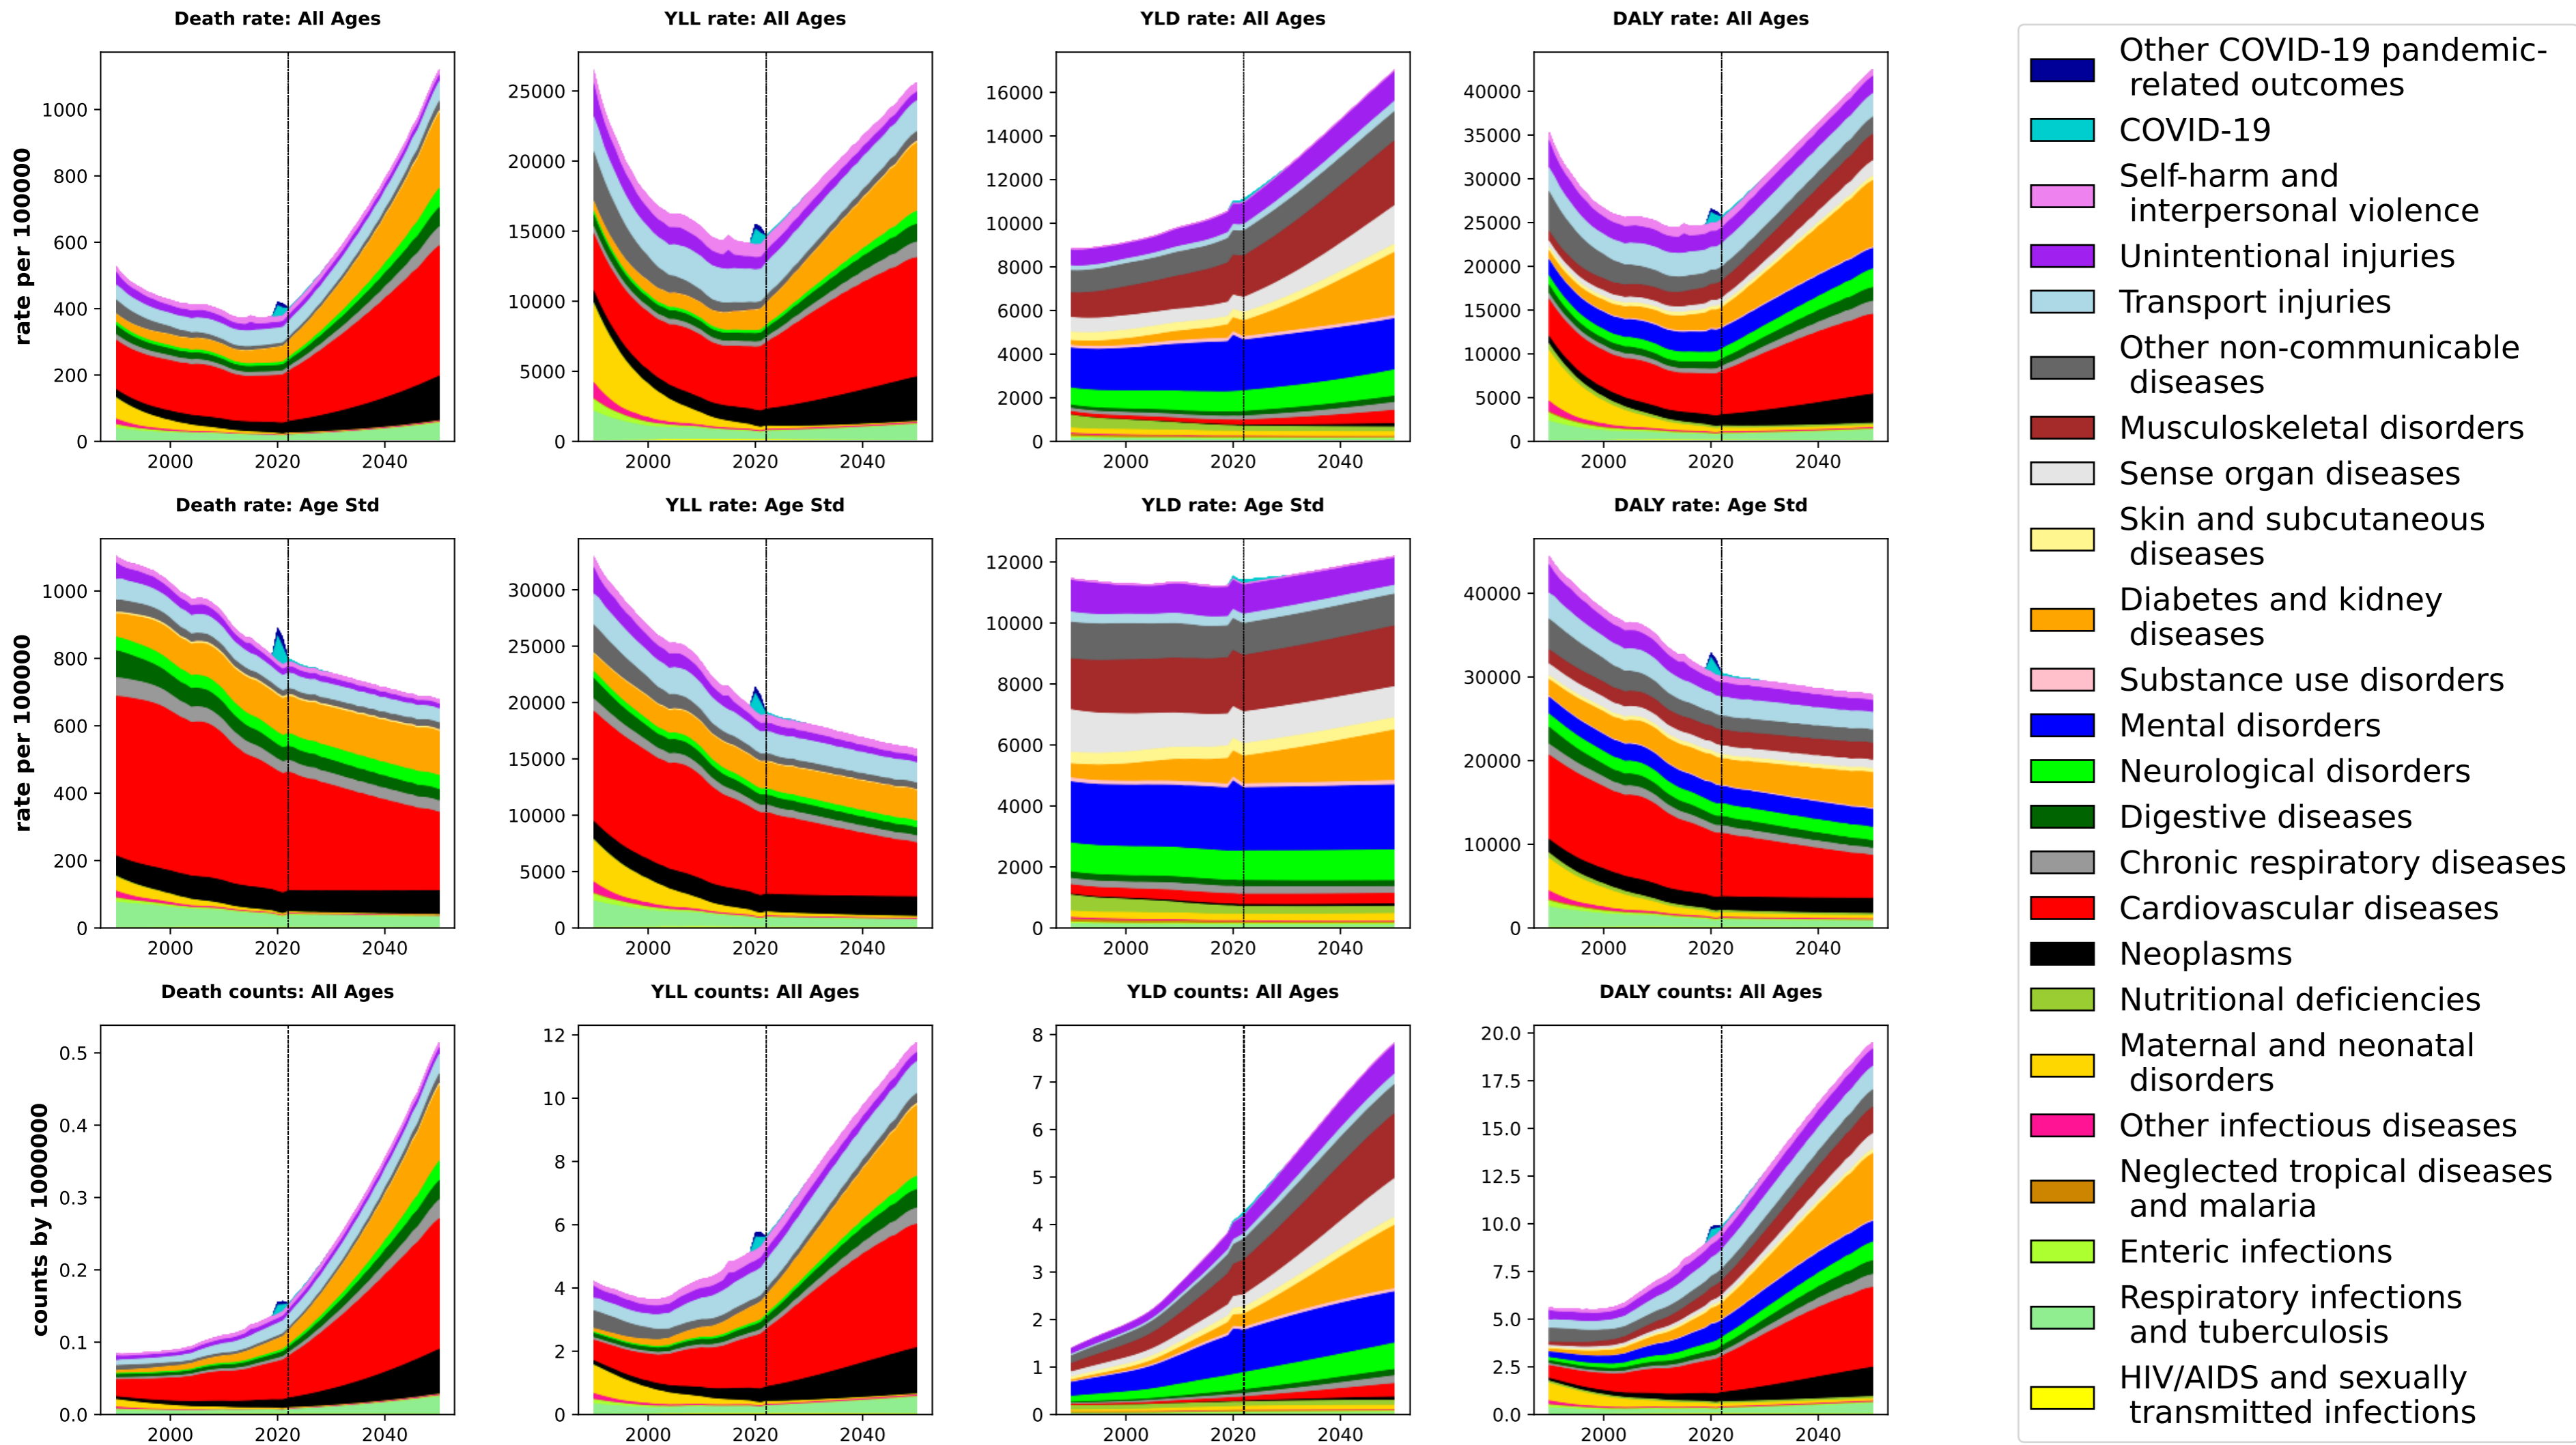



# Sudan

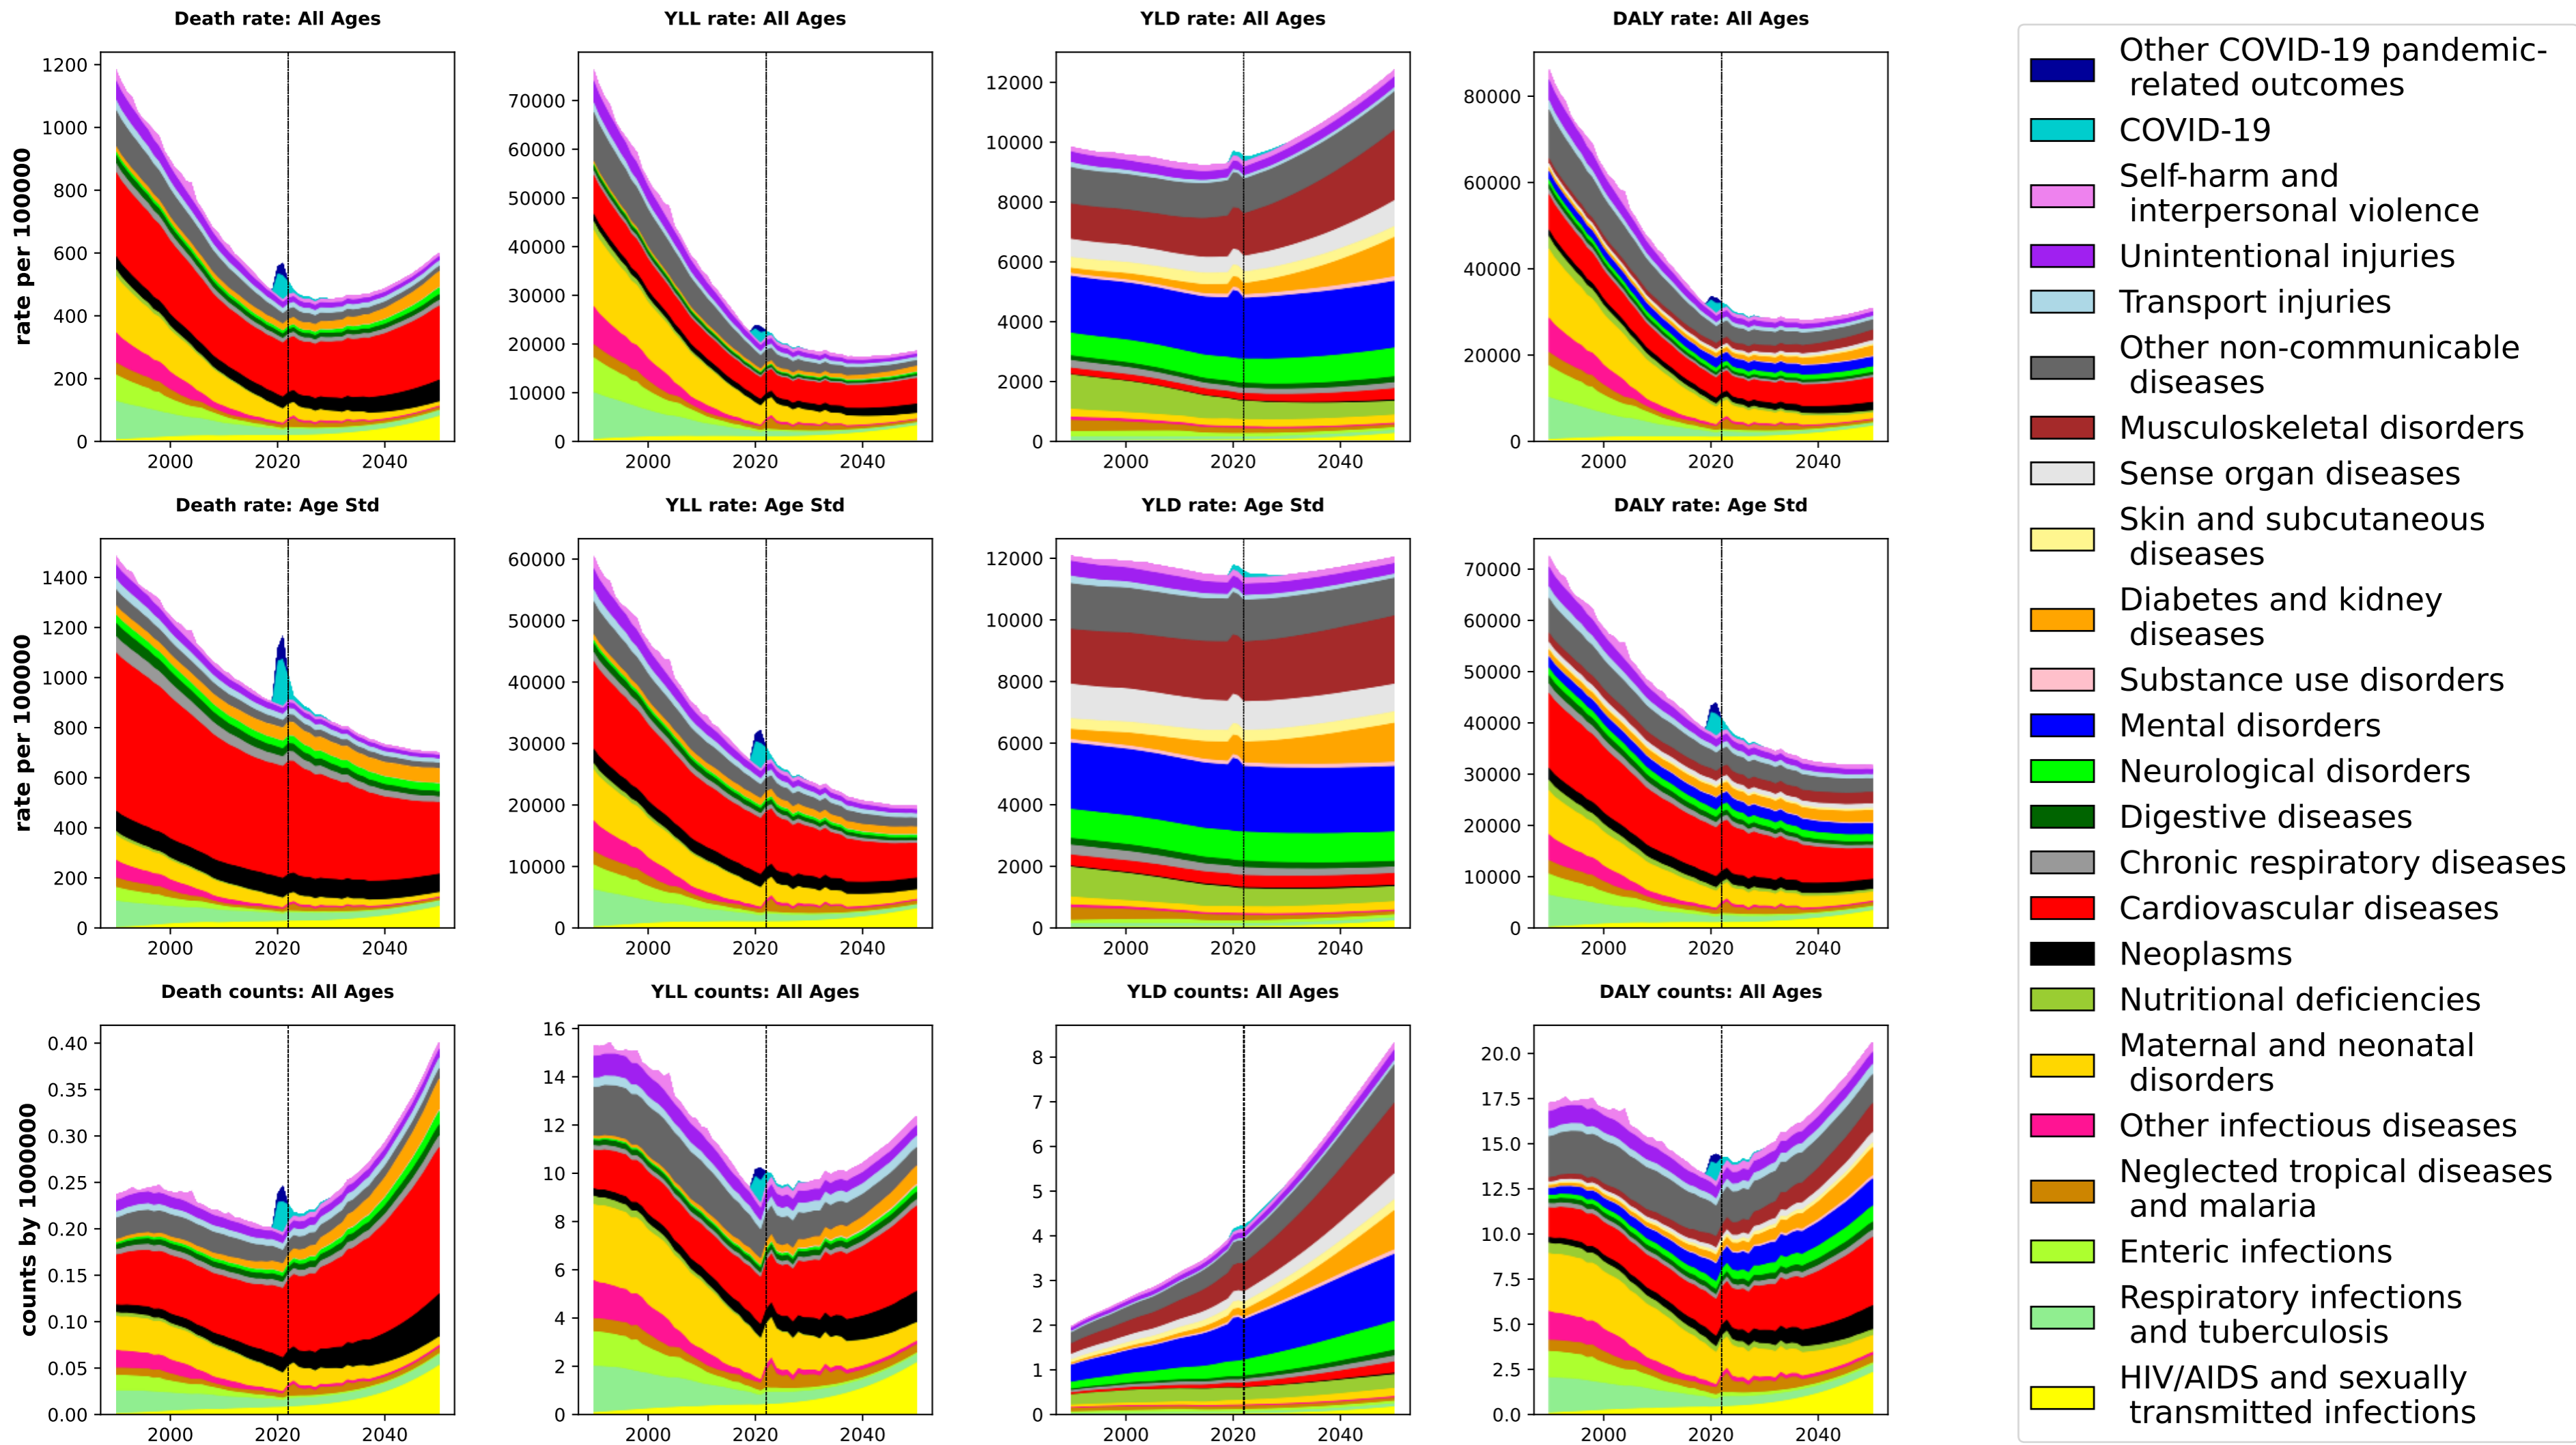

# Syria

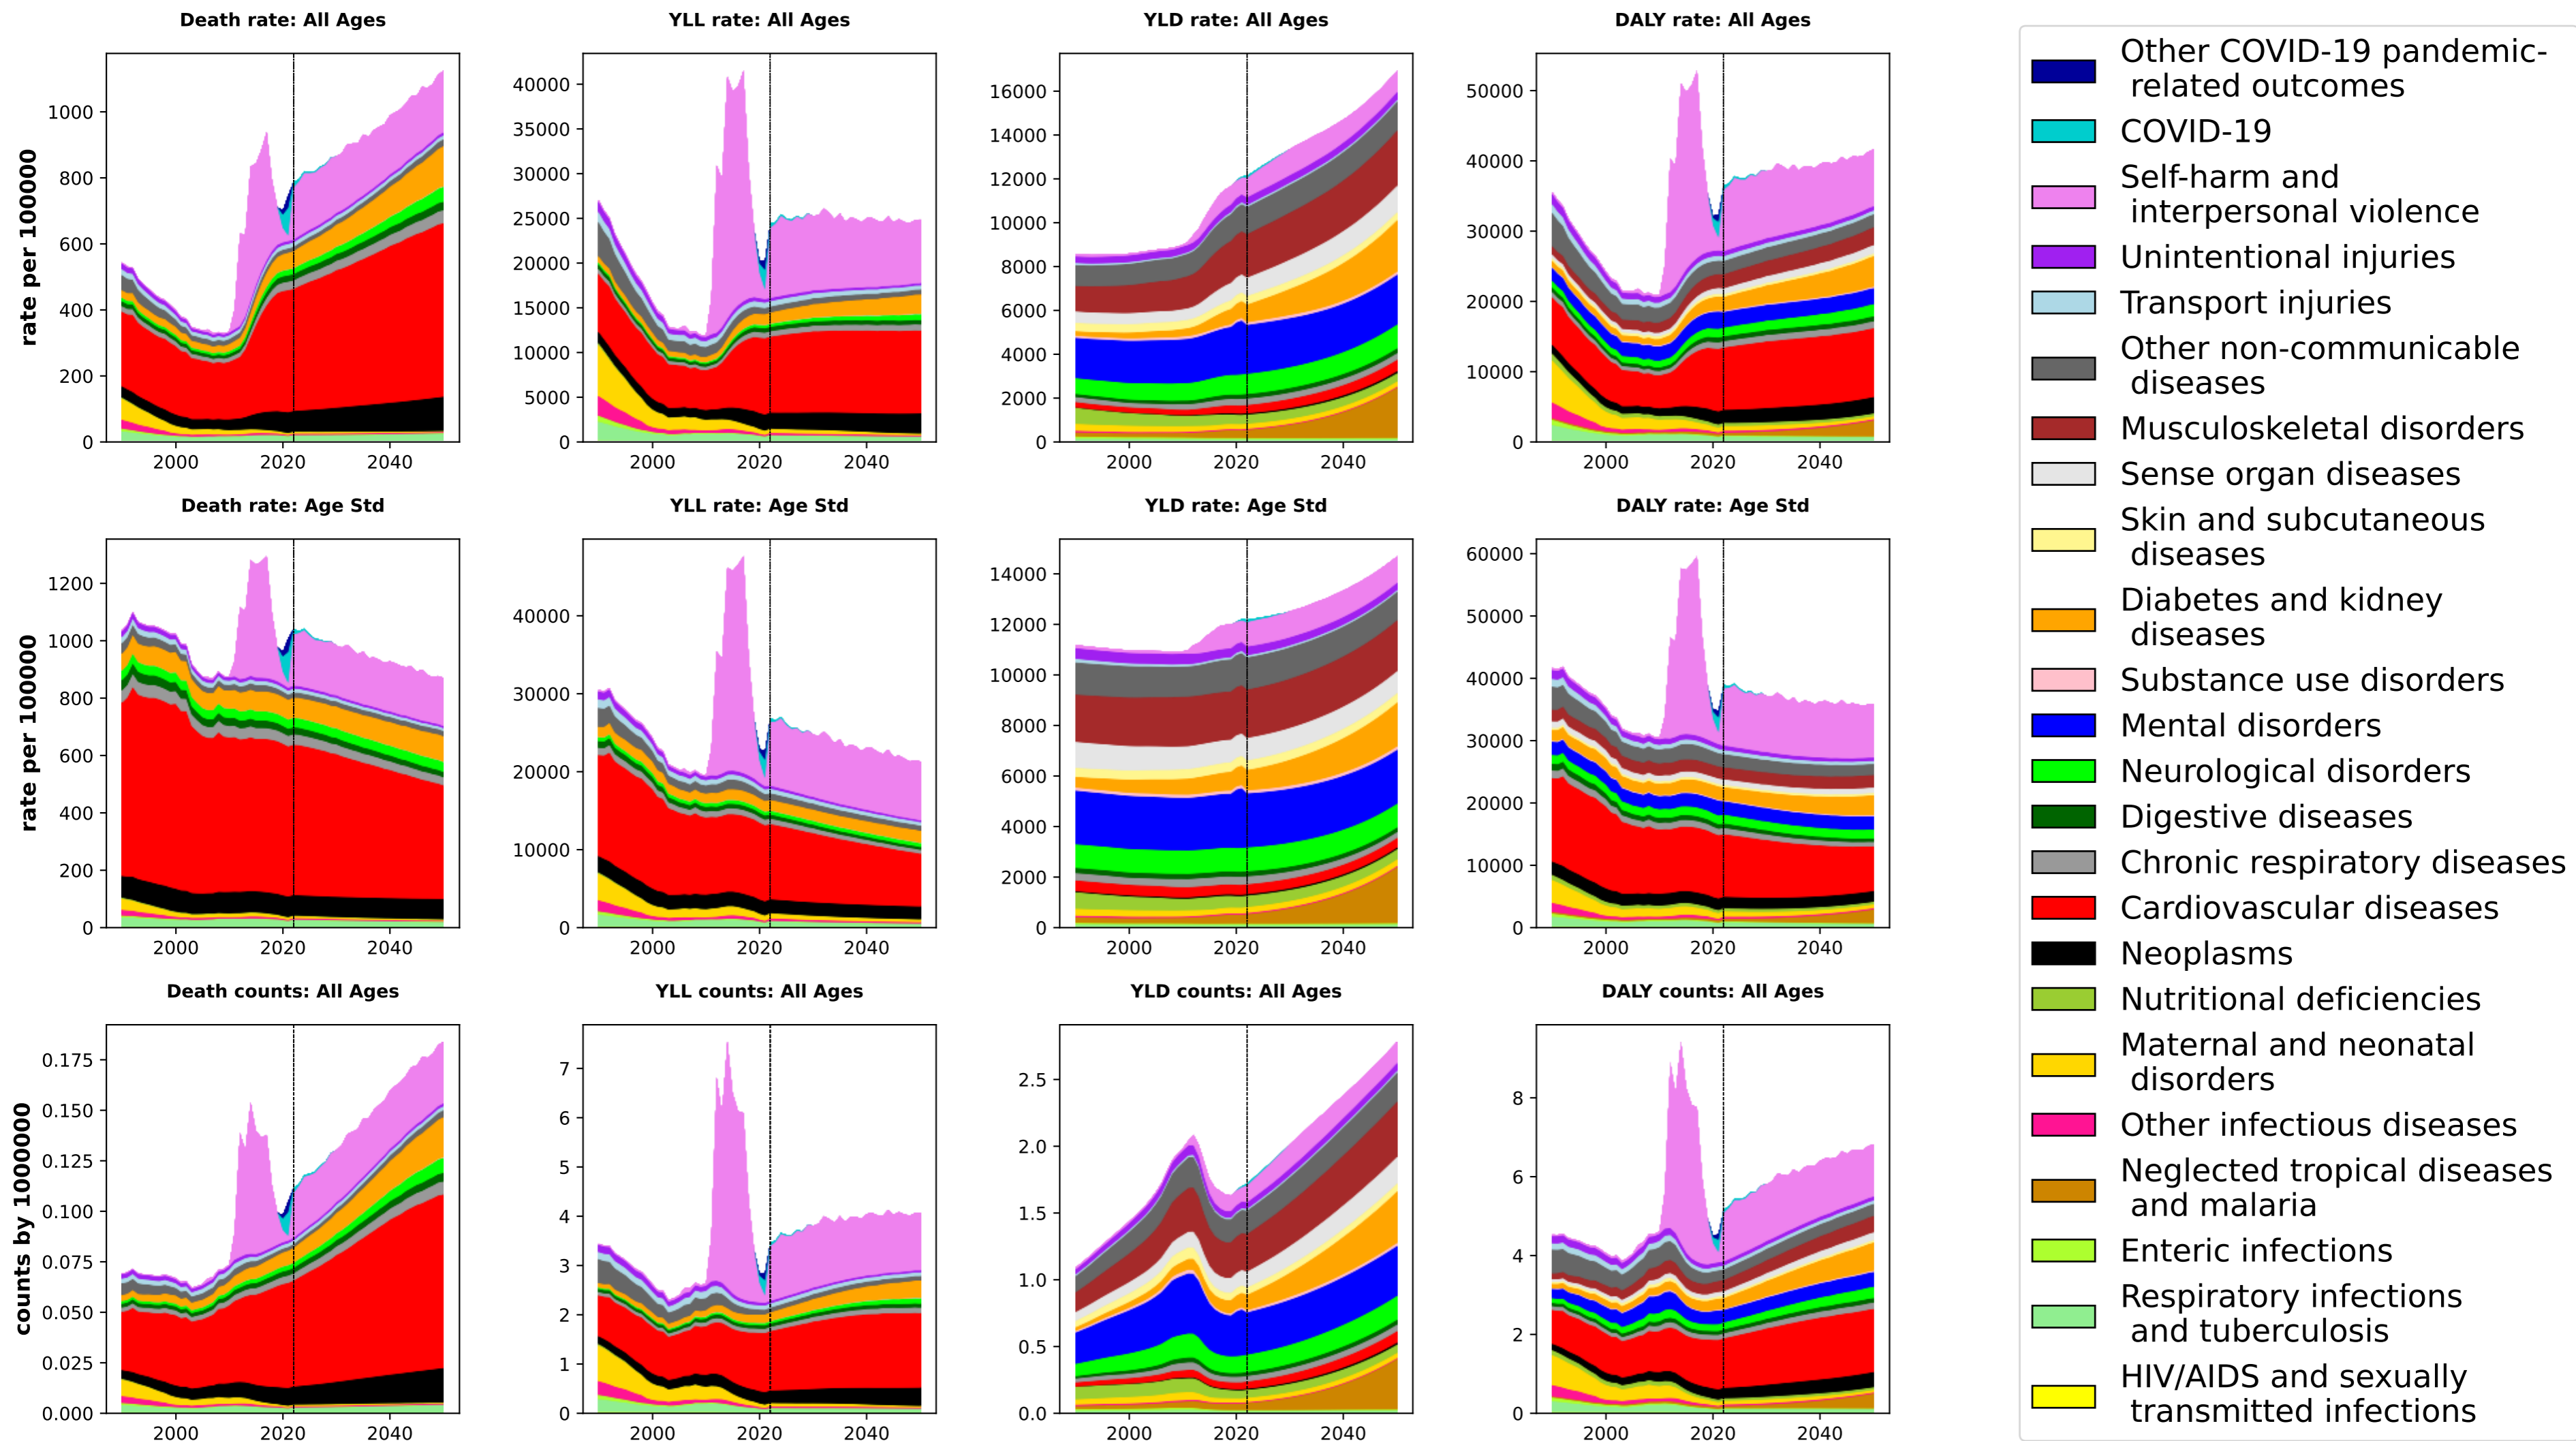

# Tunisia

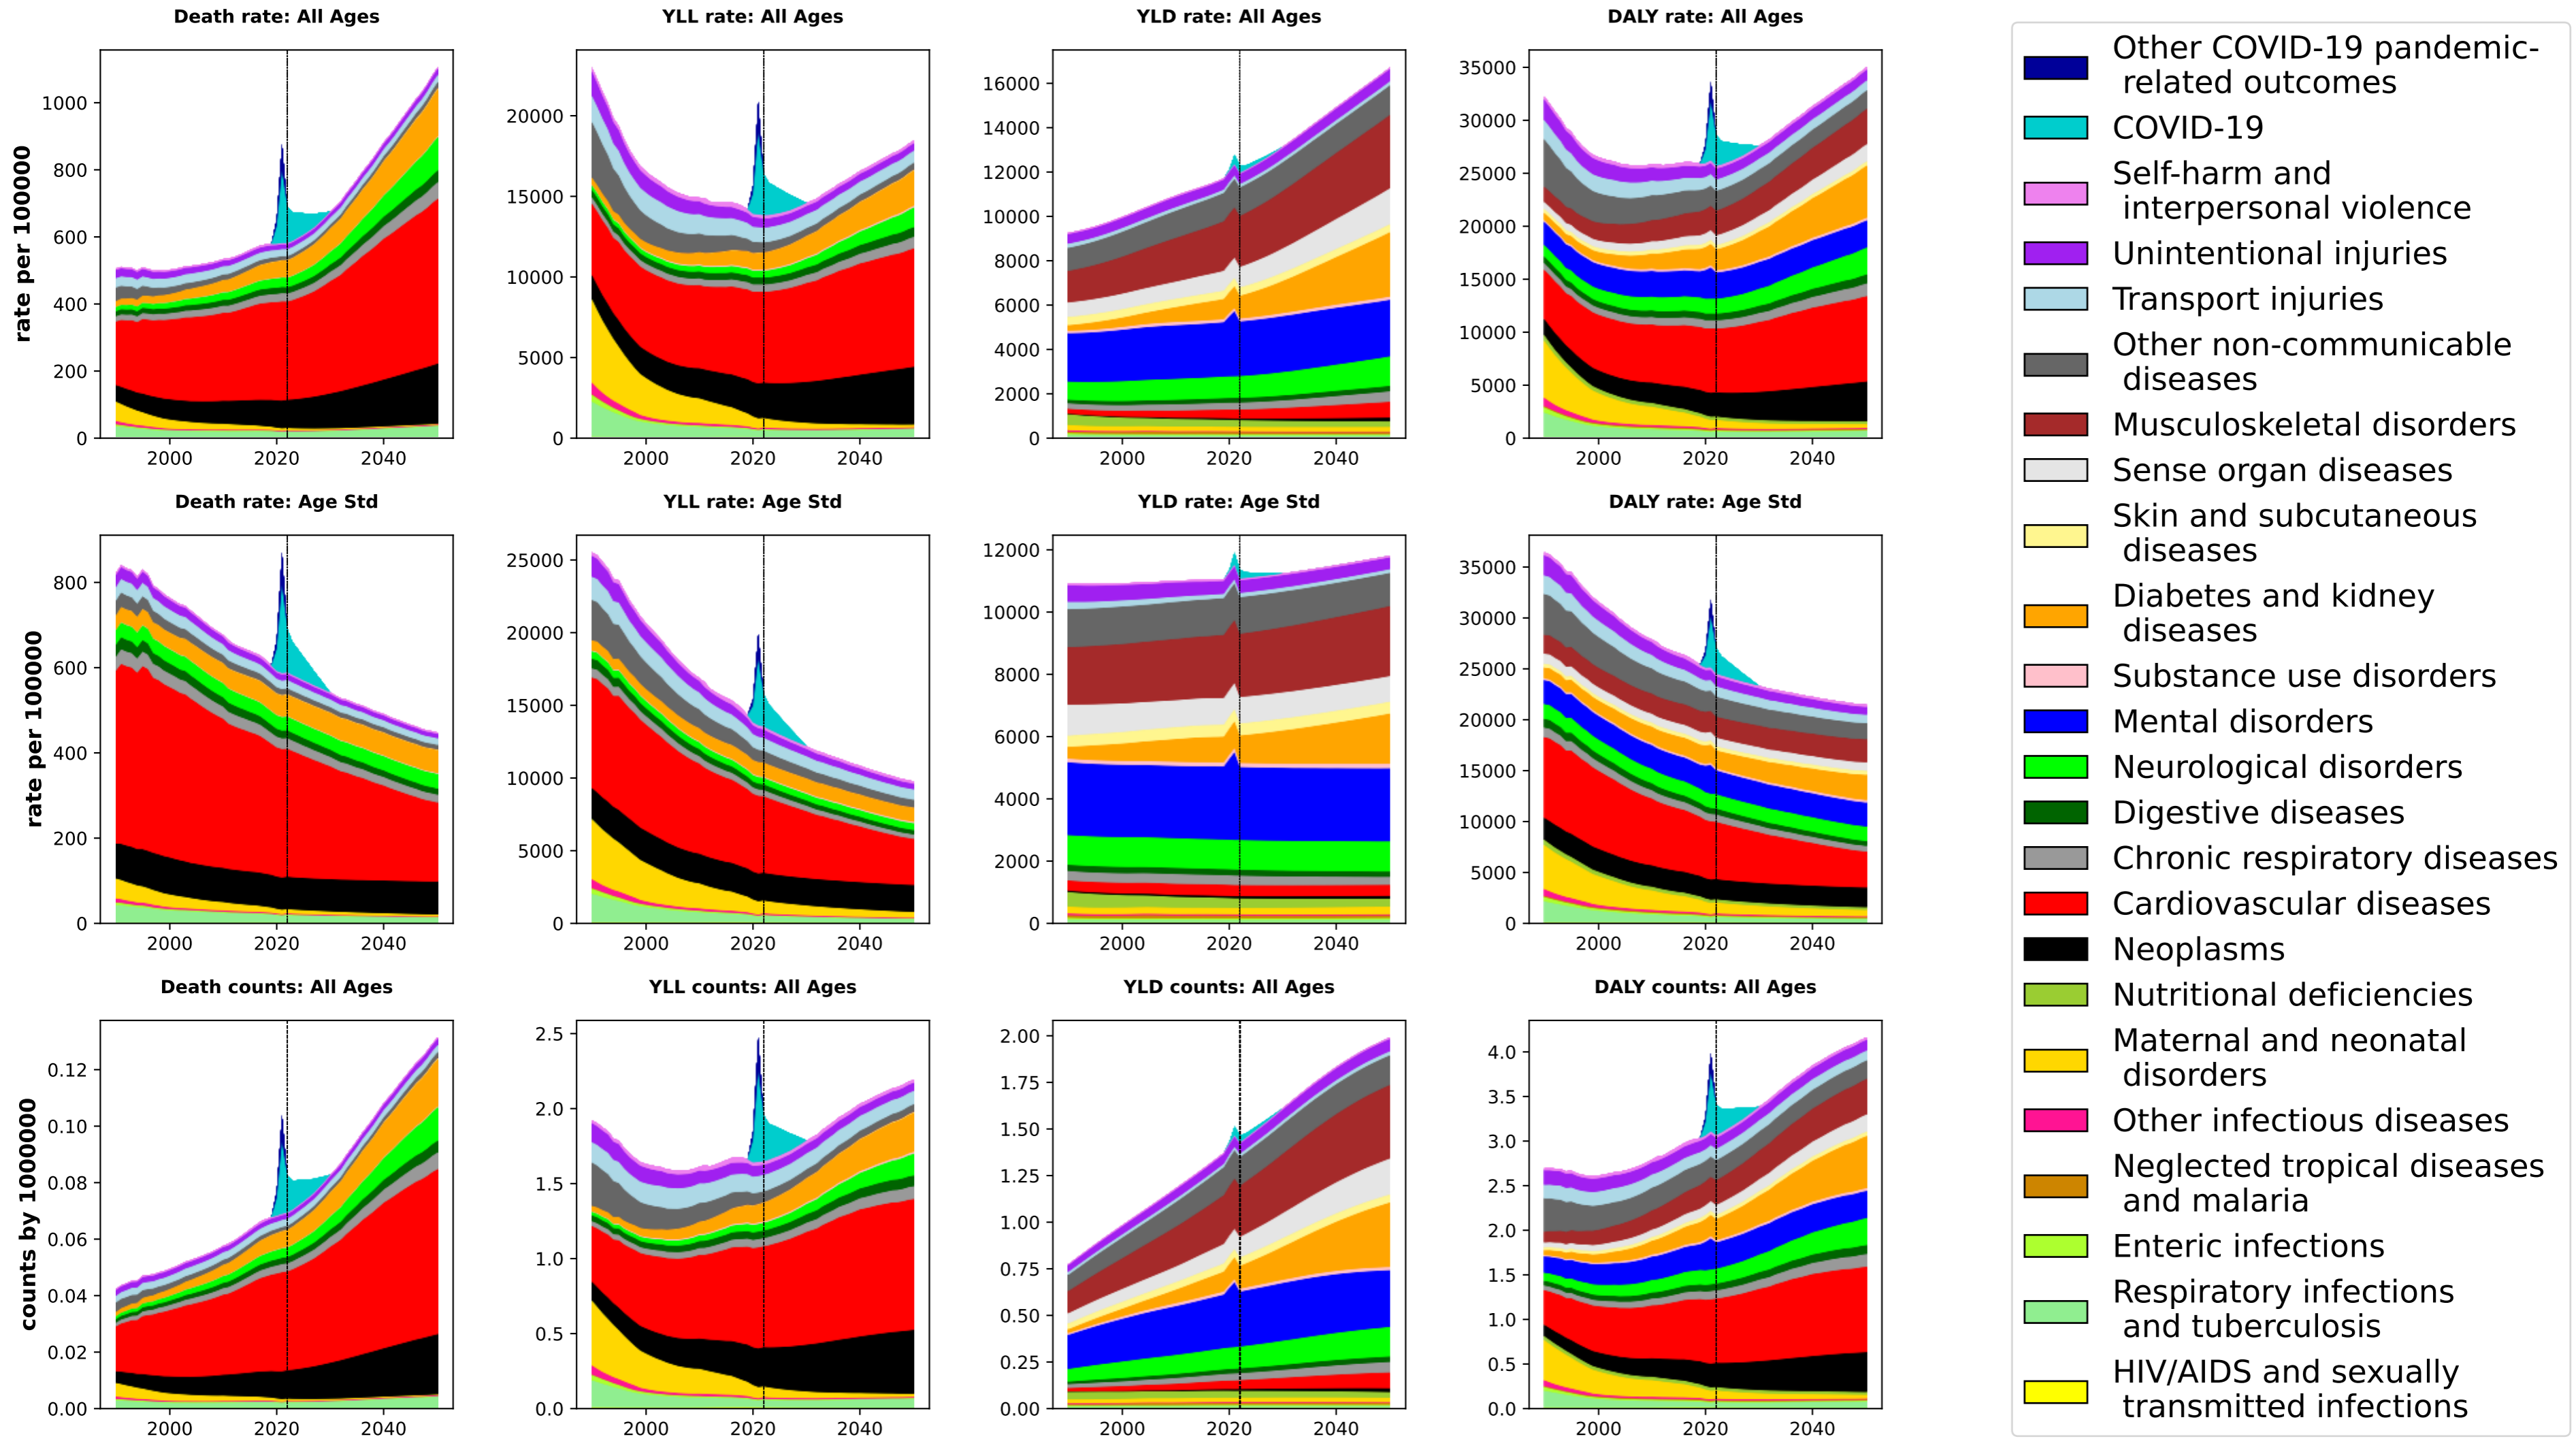

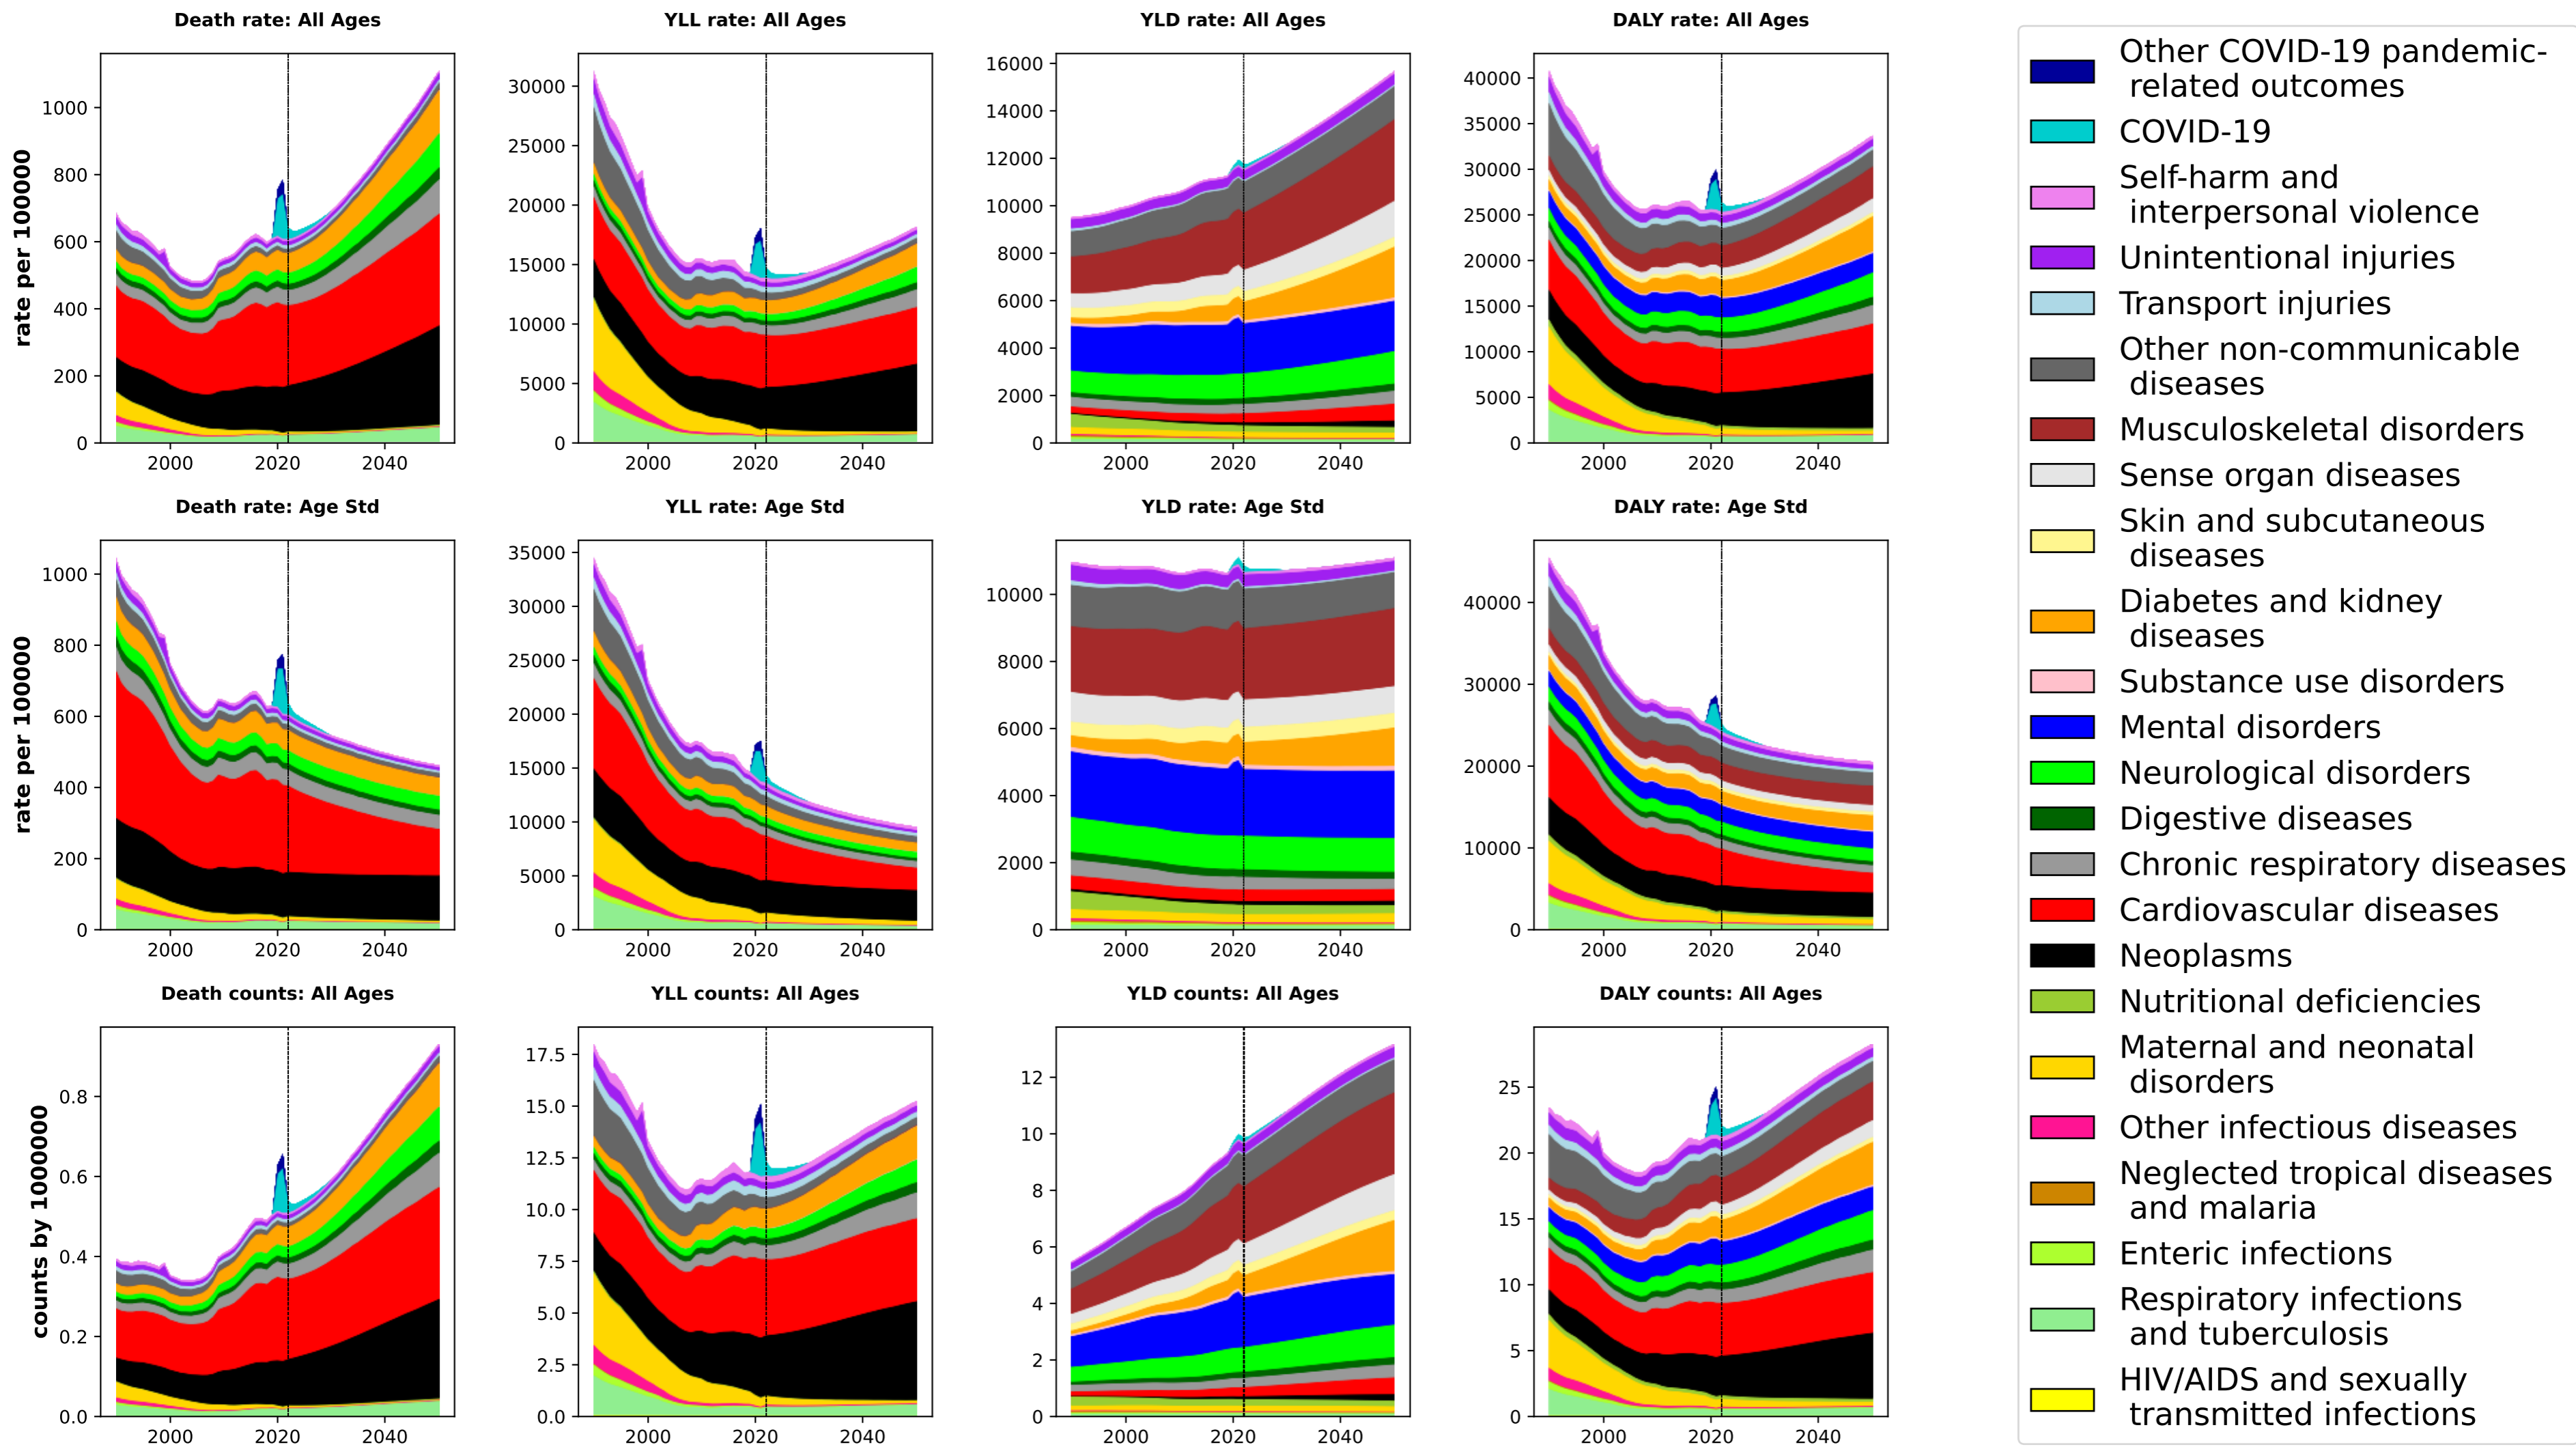

# United Arab Emirates

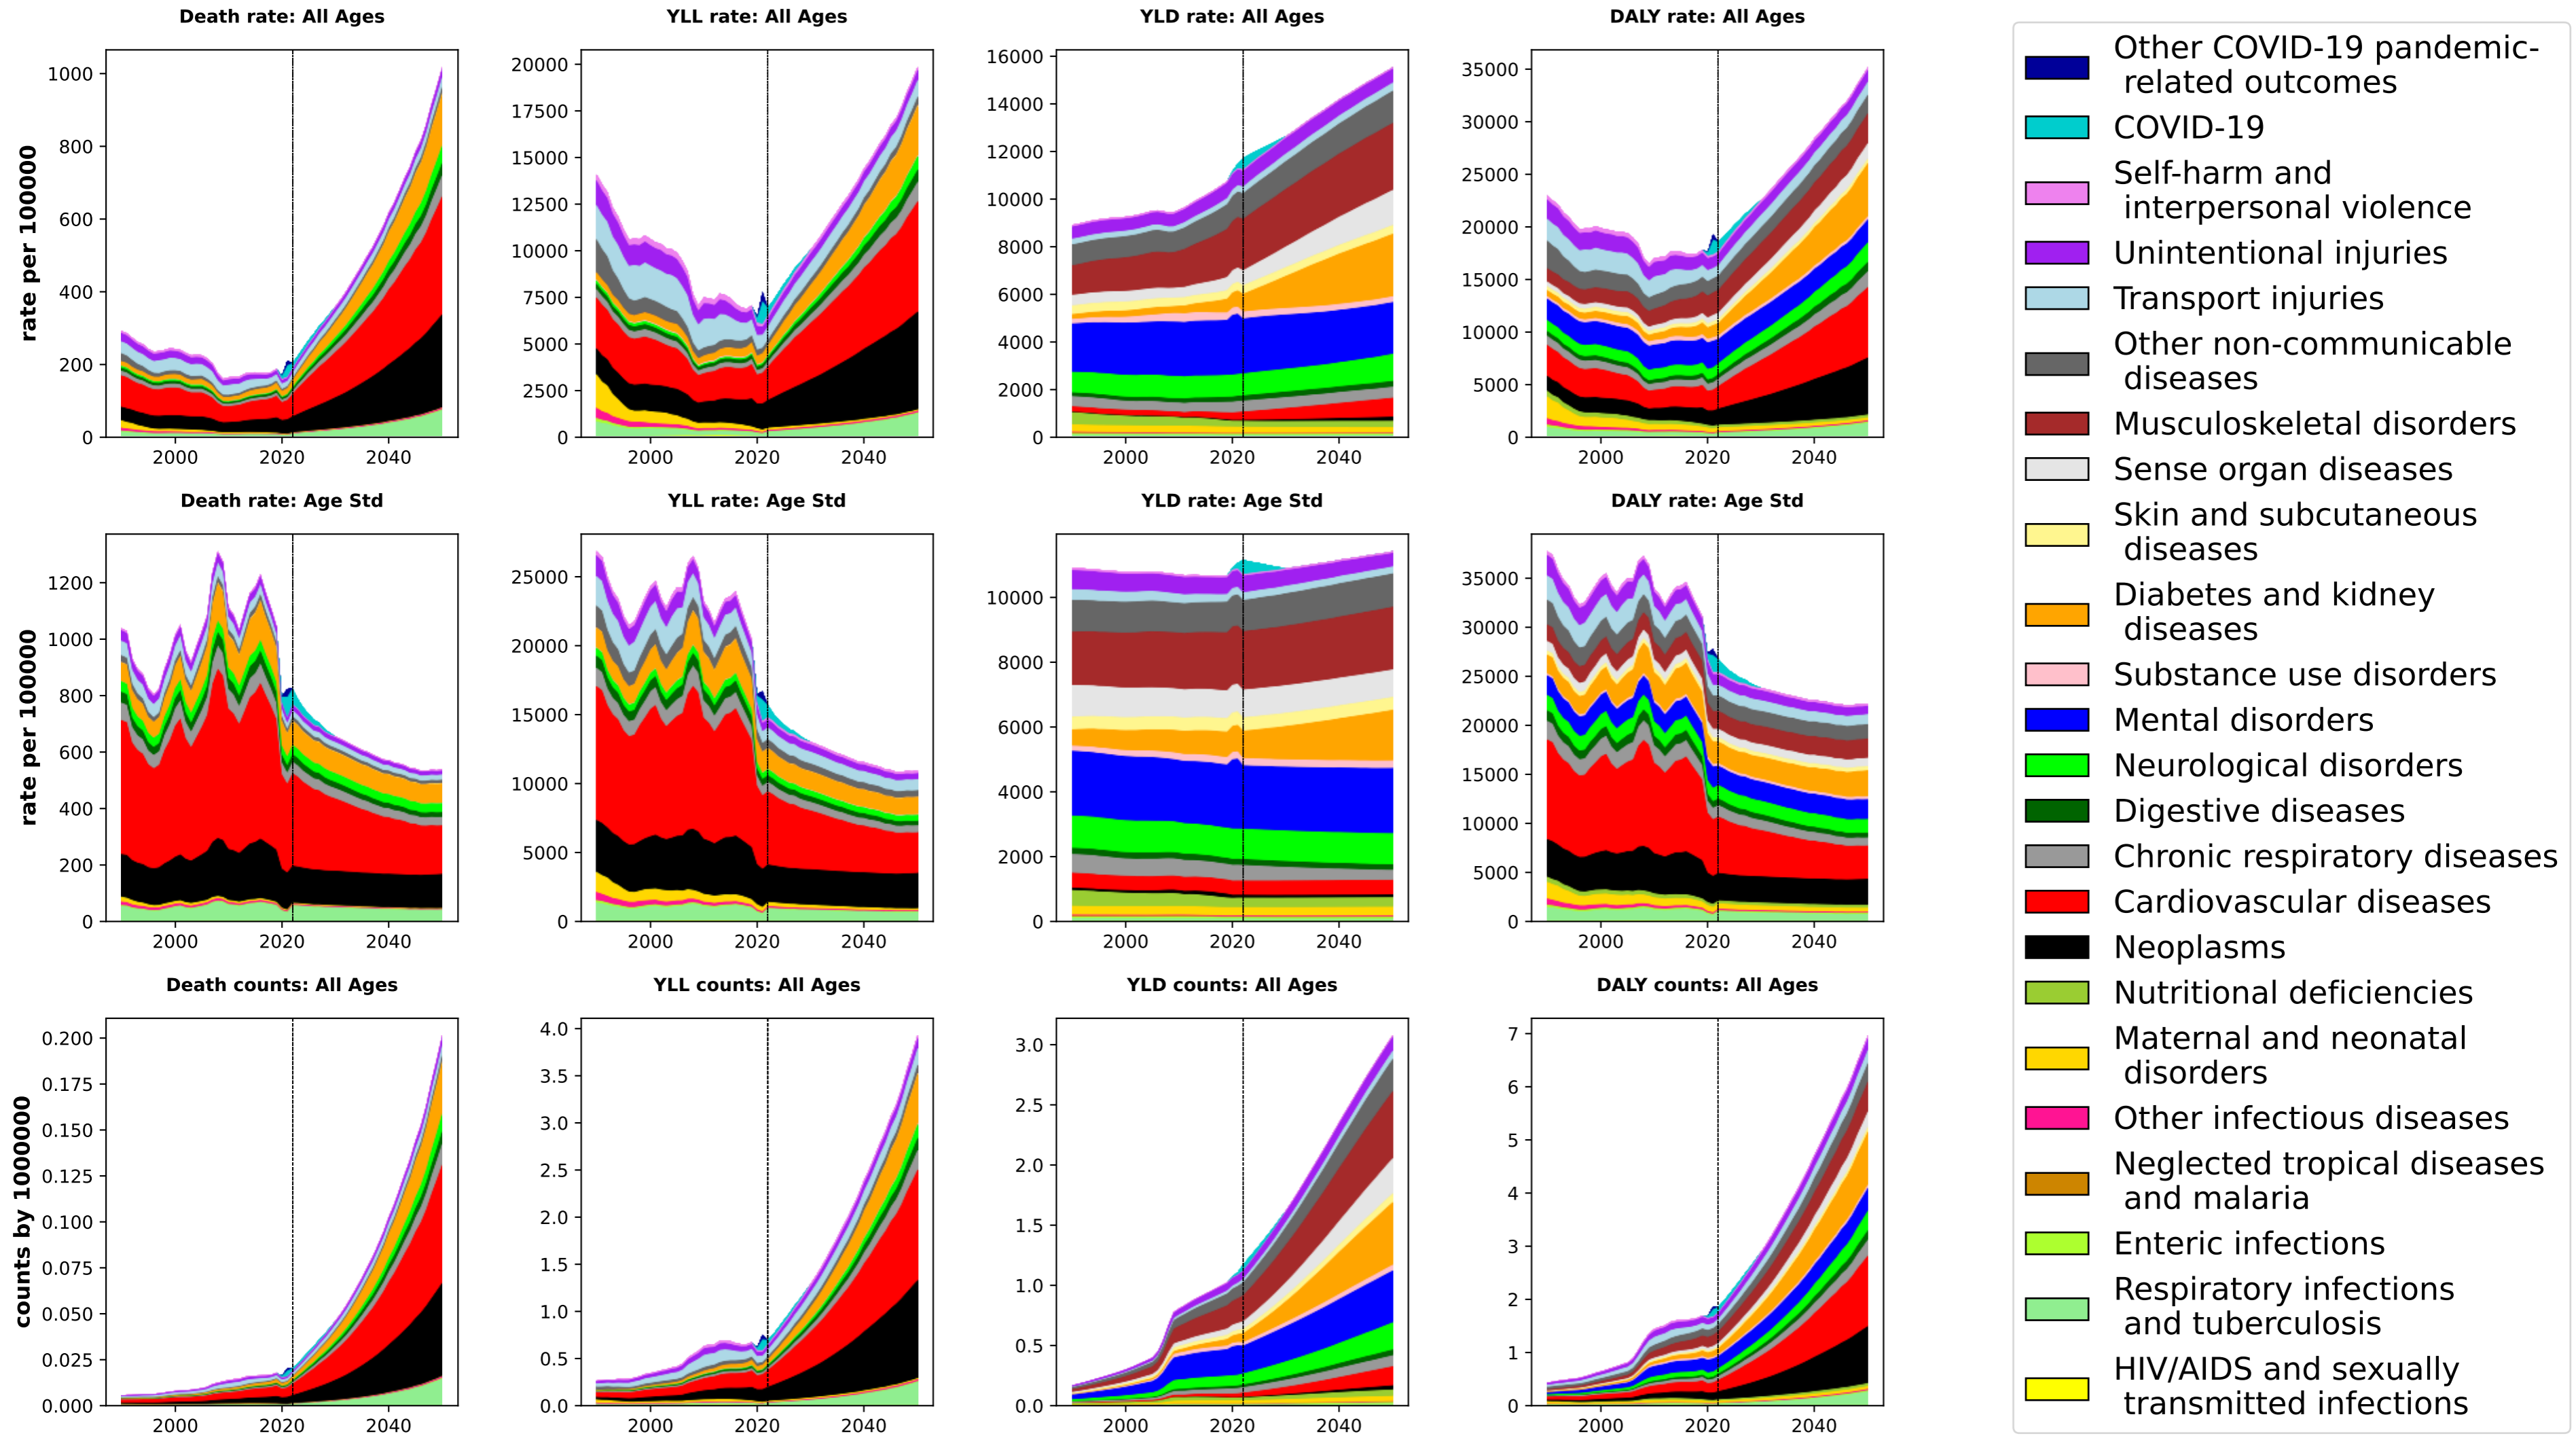

# Yemen

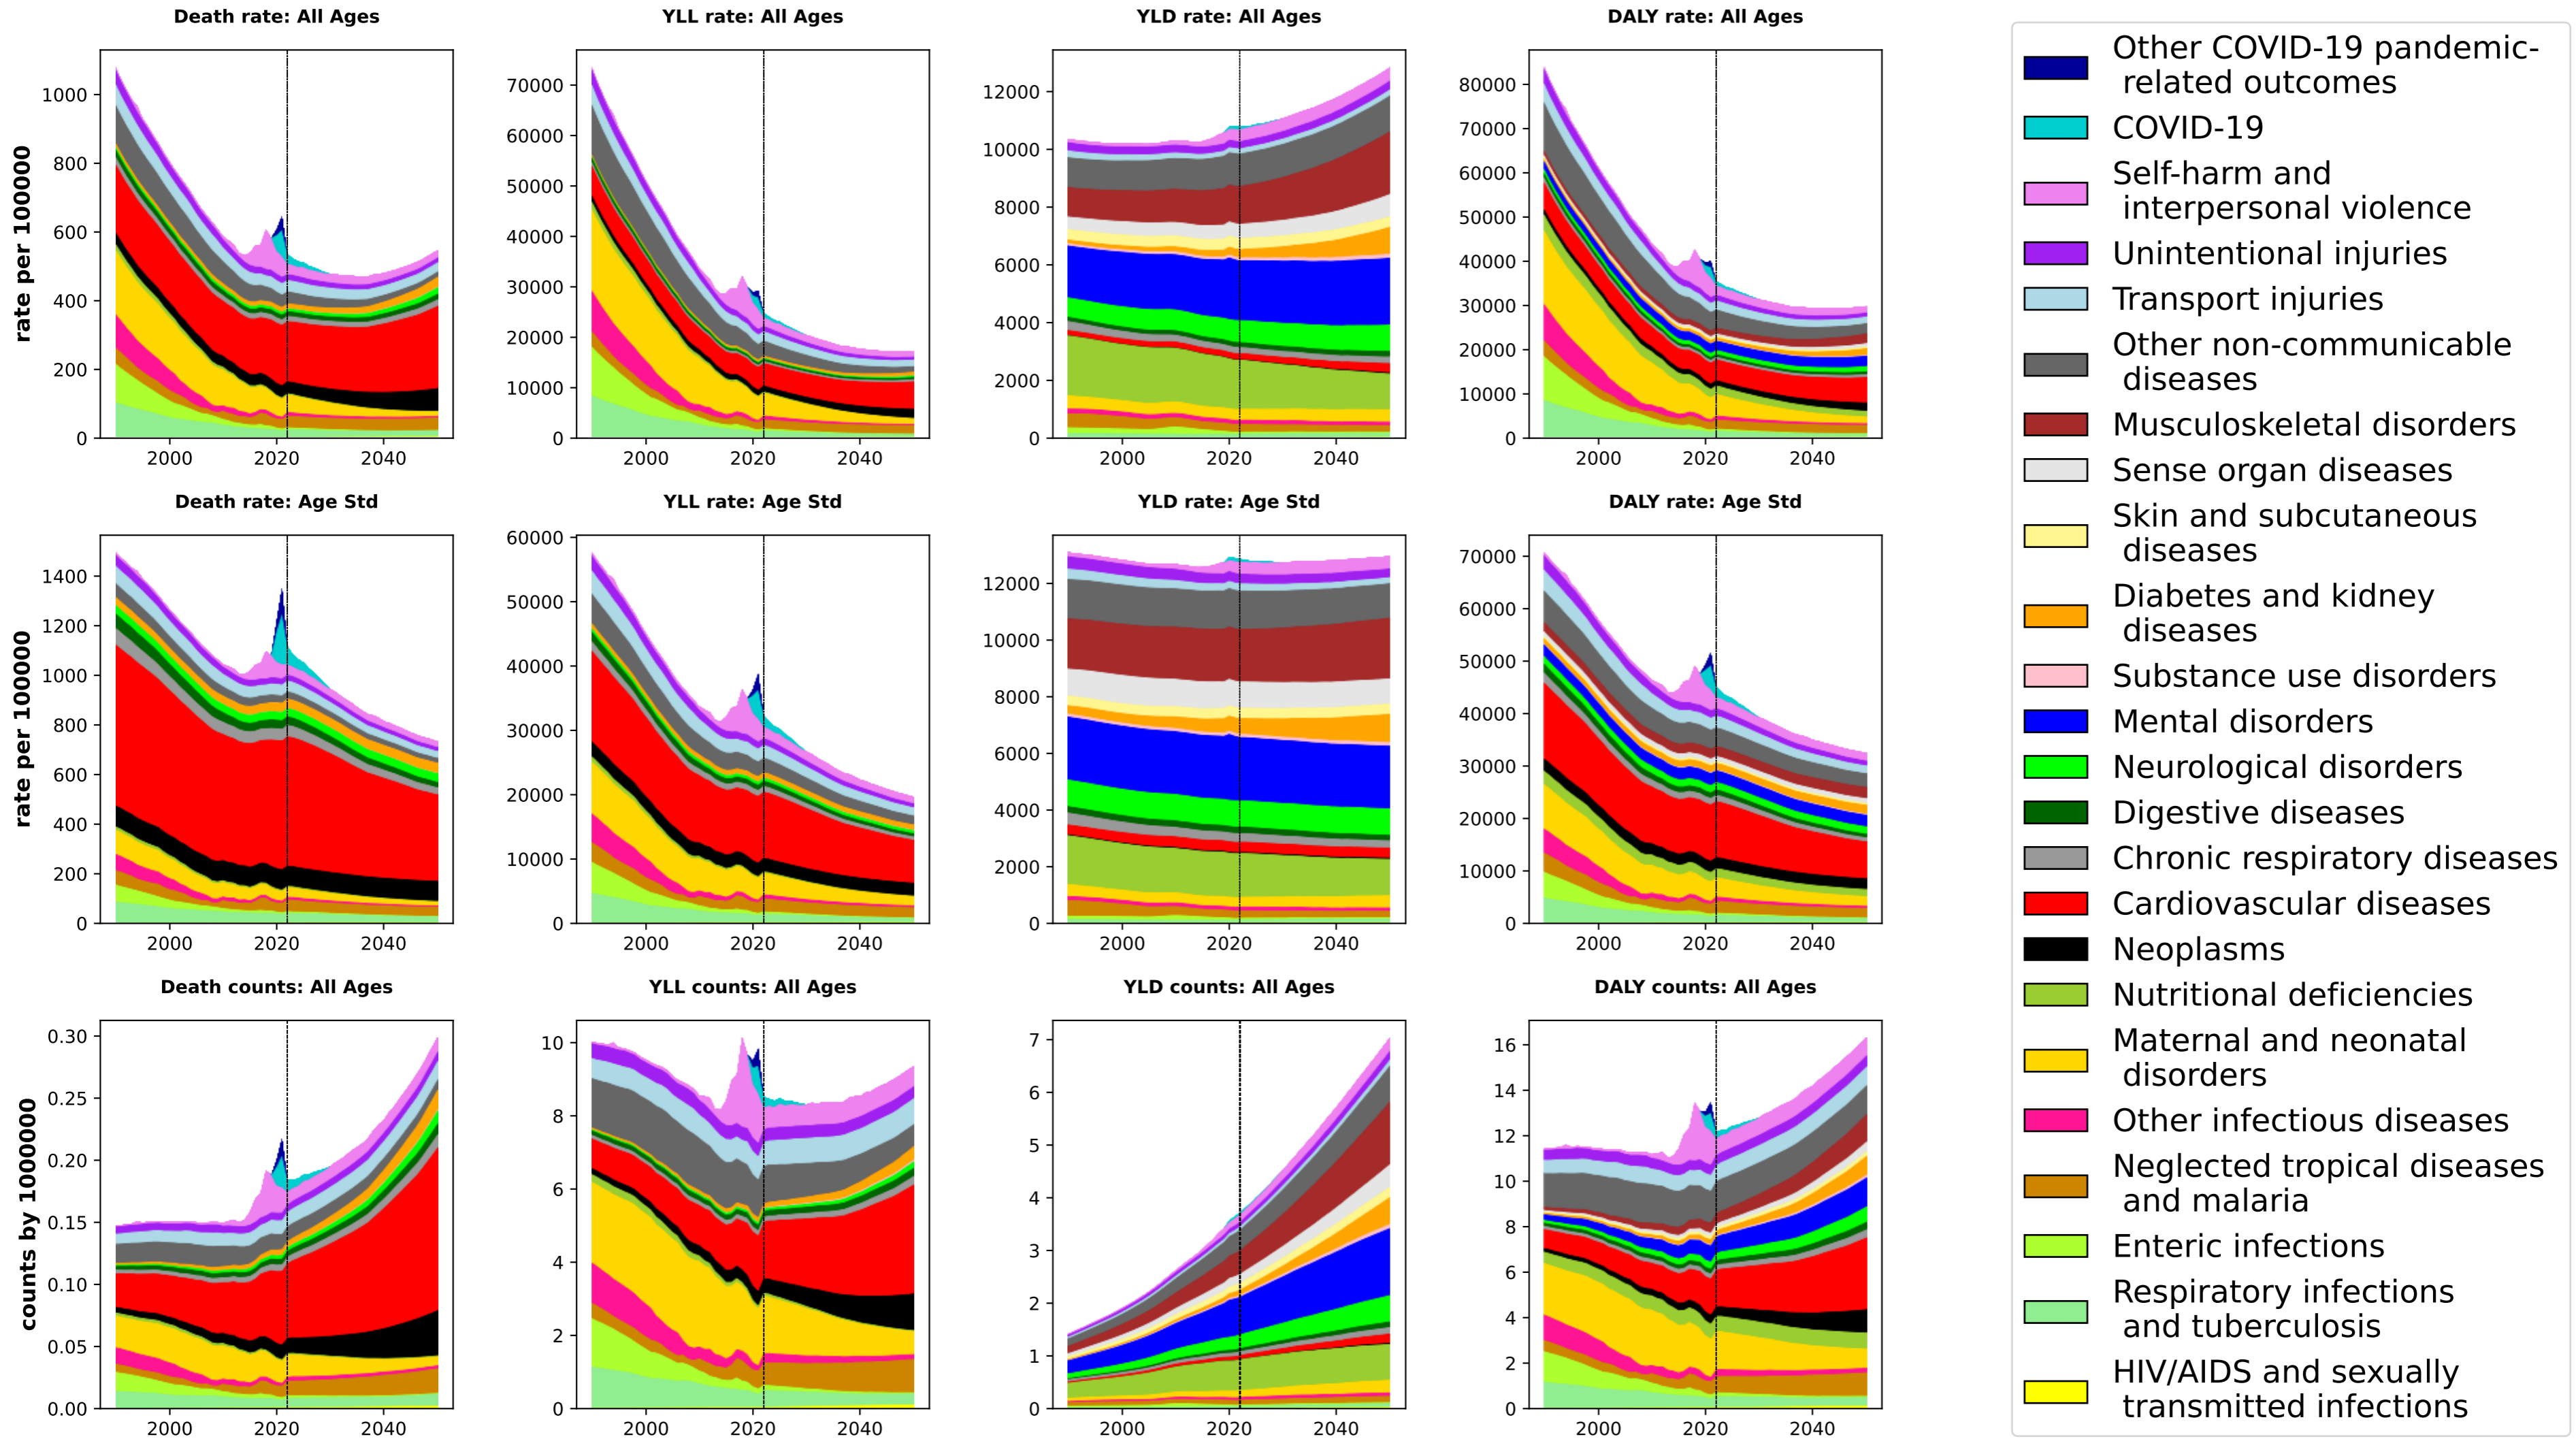

# Bangladesh

Supplemental Results Figure S6. Cause level 2 area plots for 4 burden measures for reference scenario by location, 1990-2050

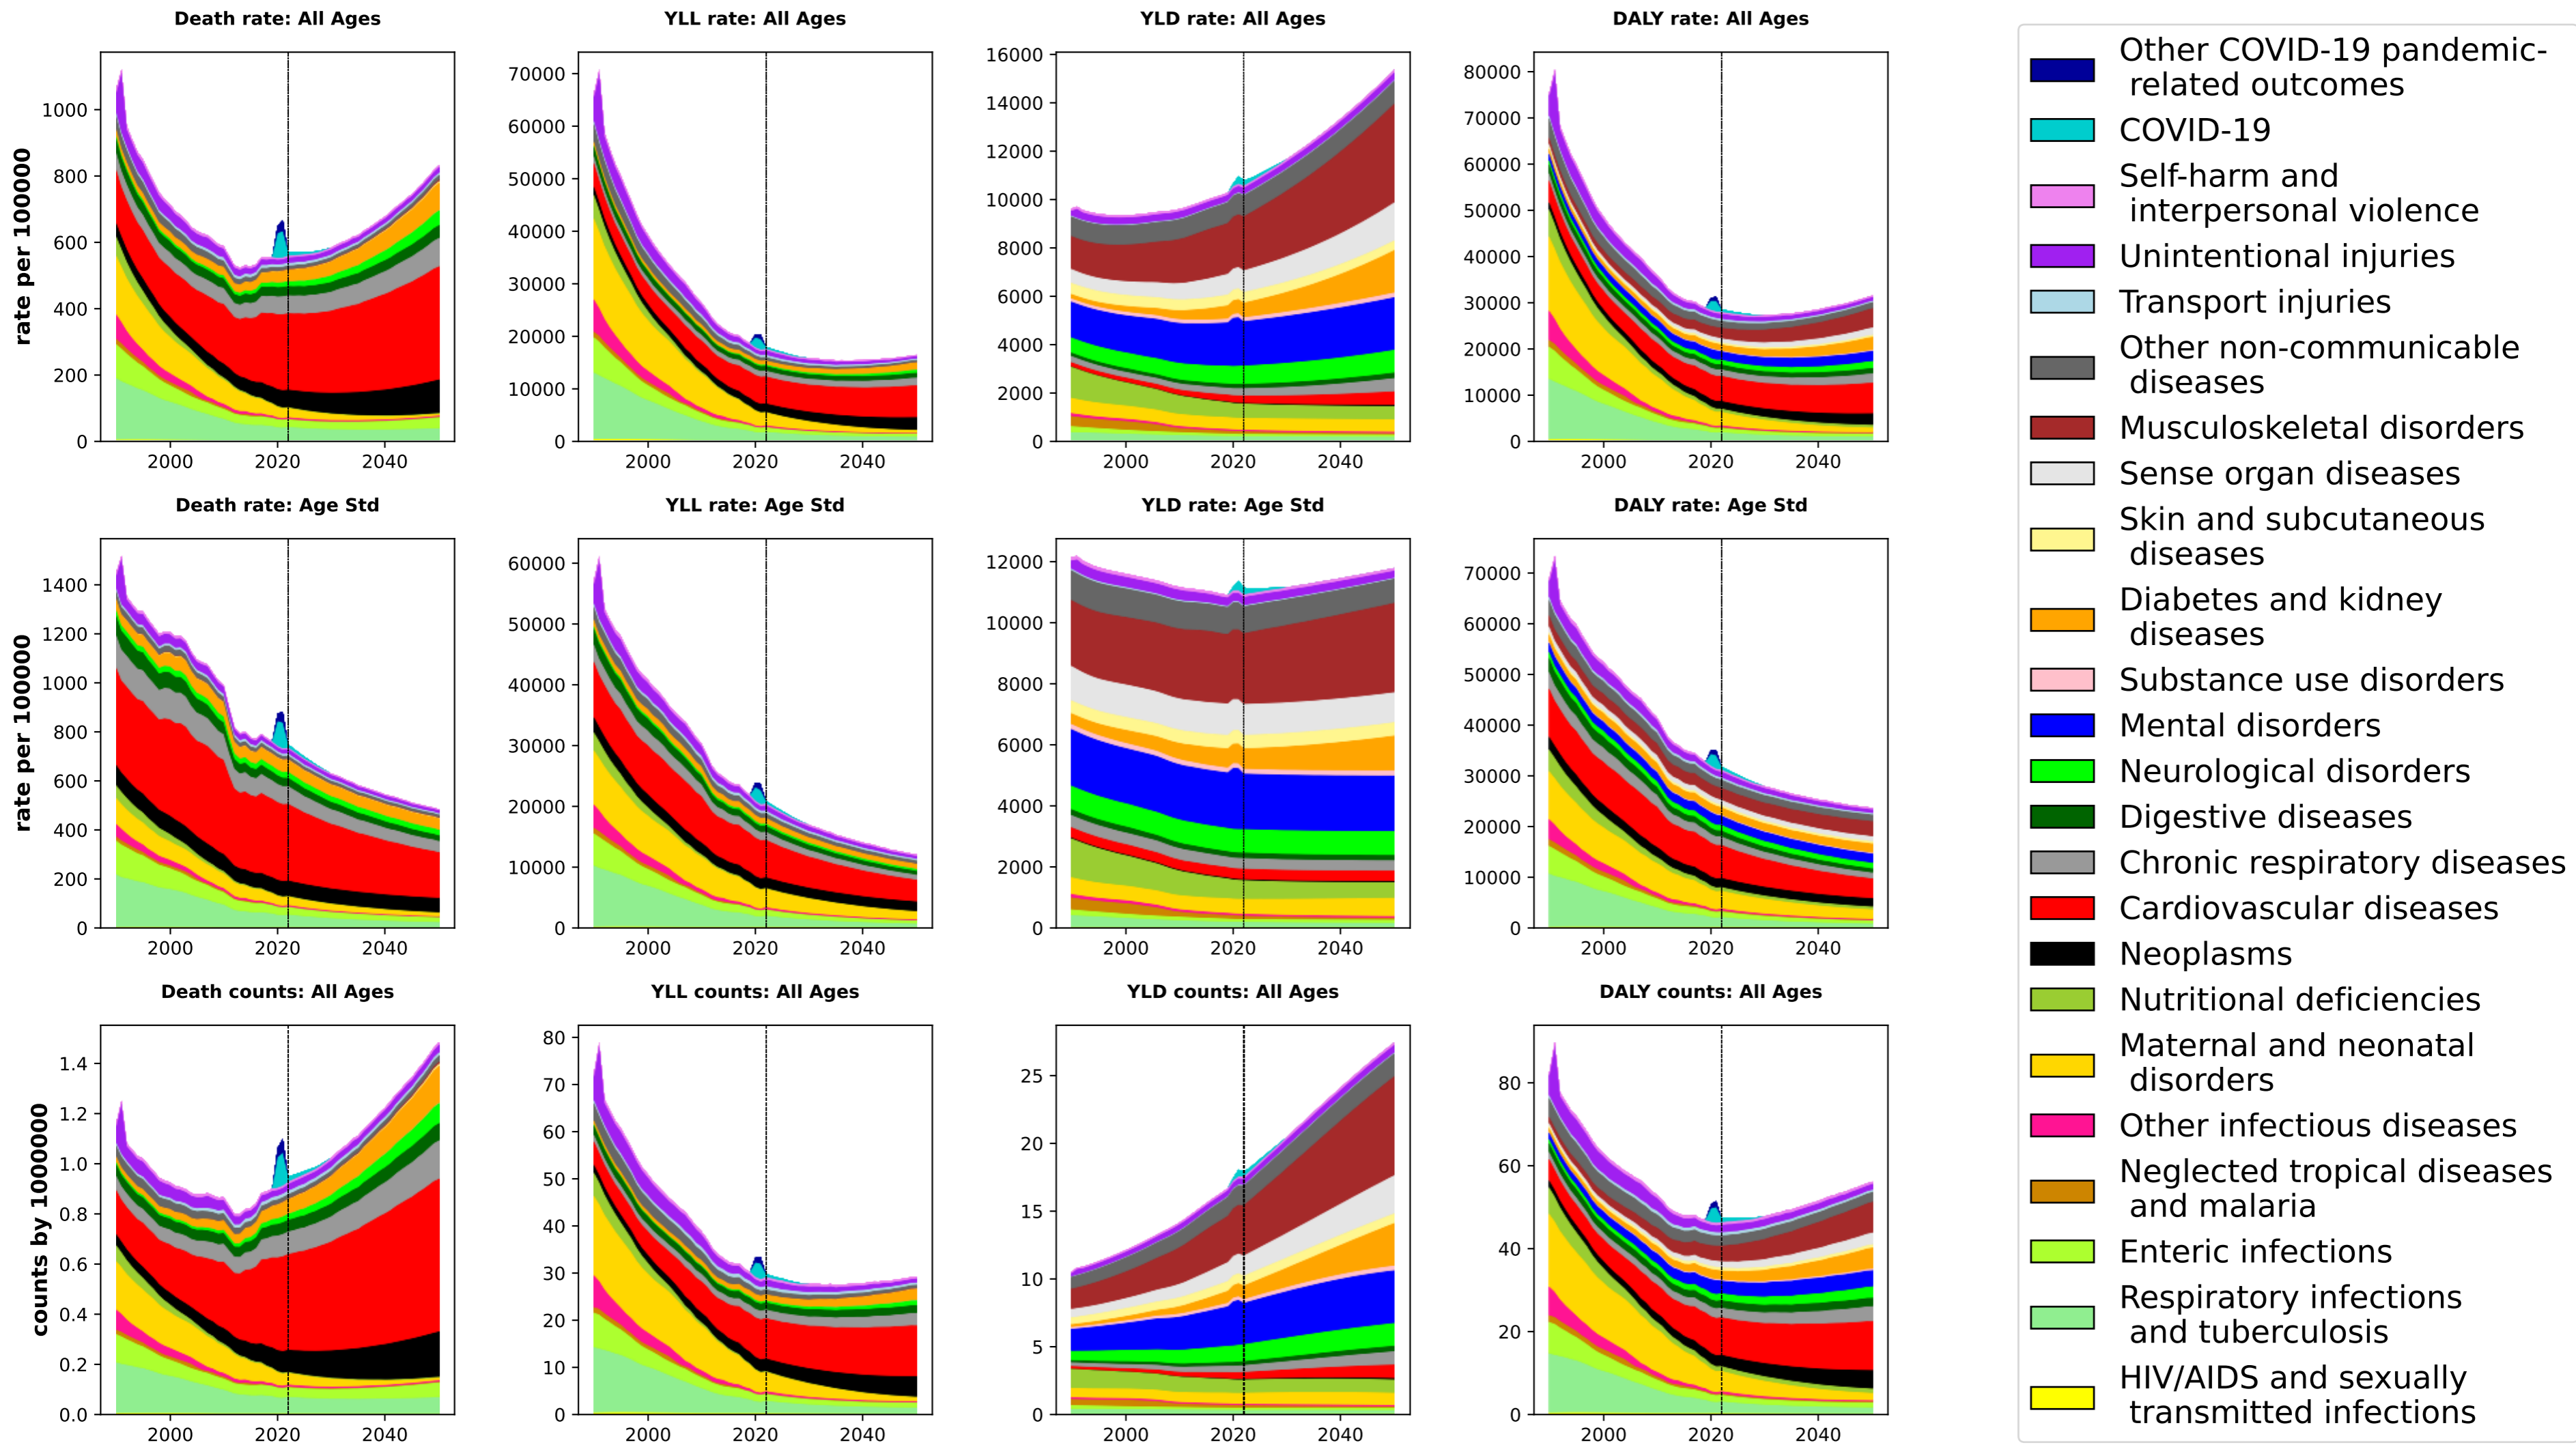

# Bhutan

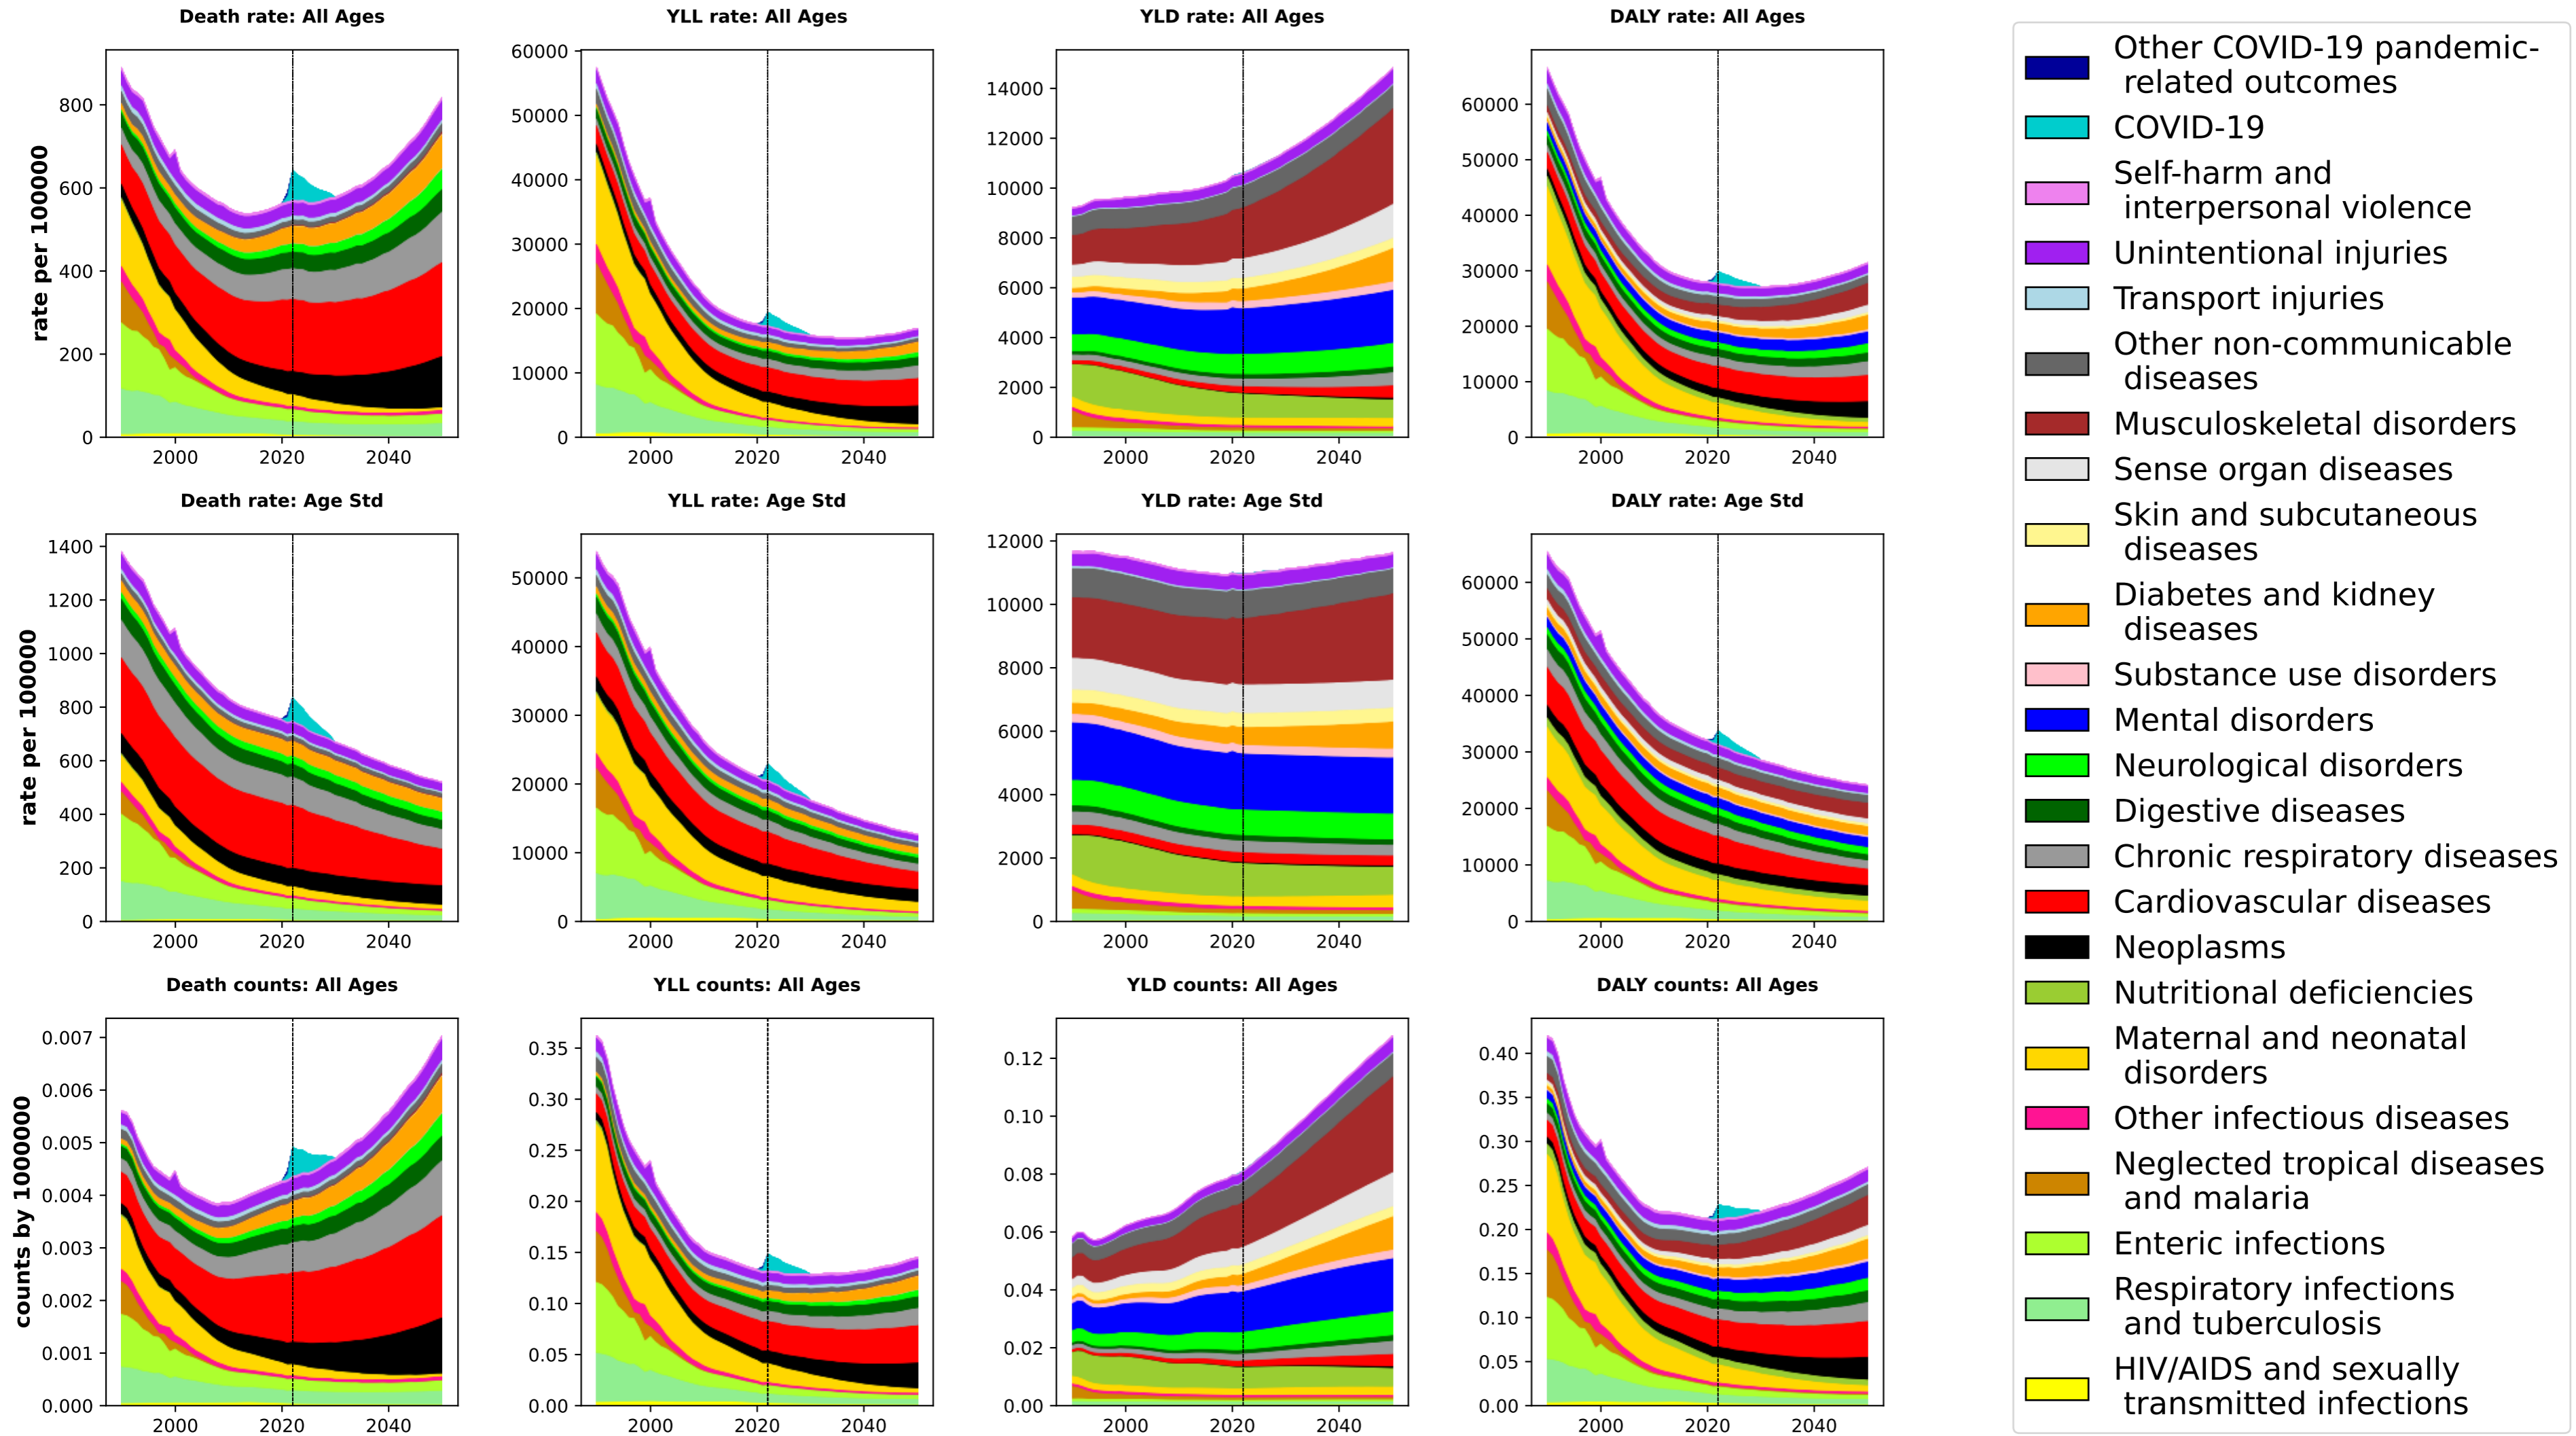



# India

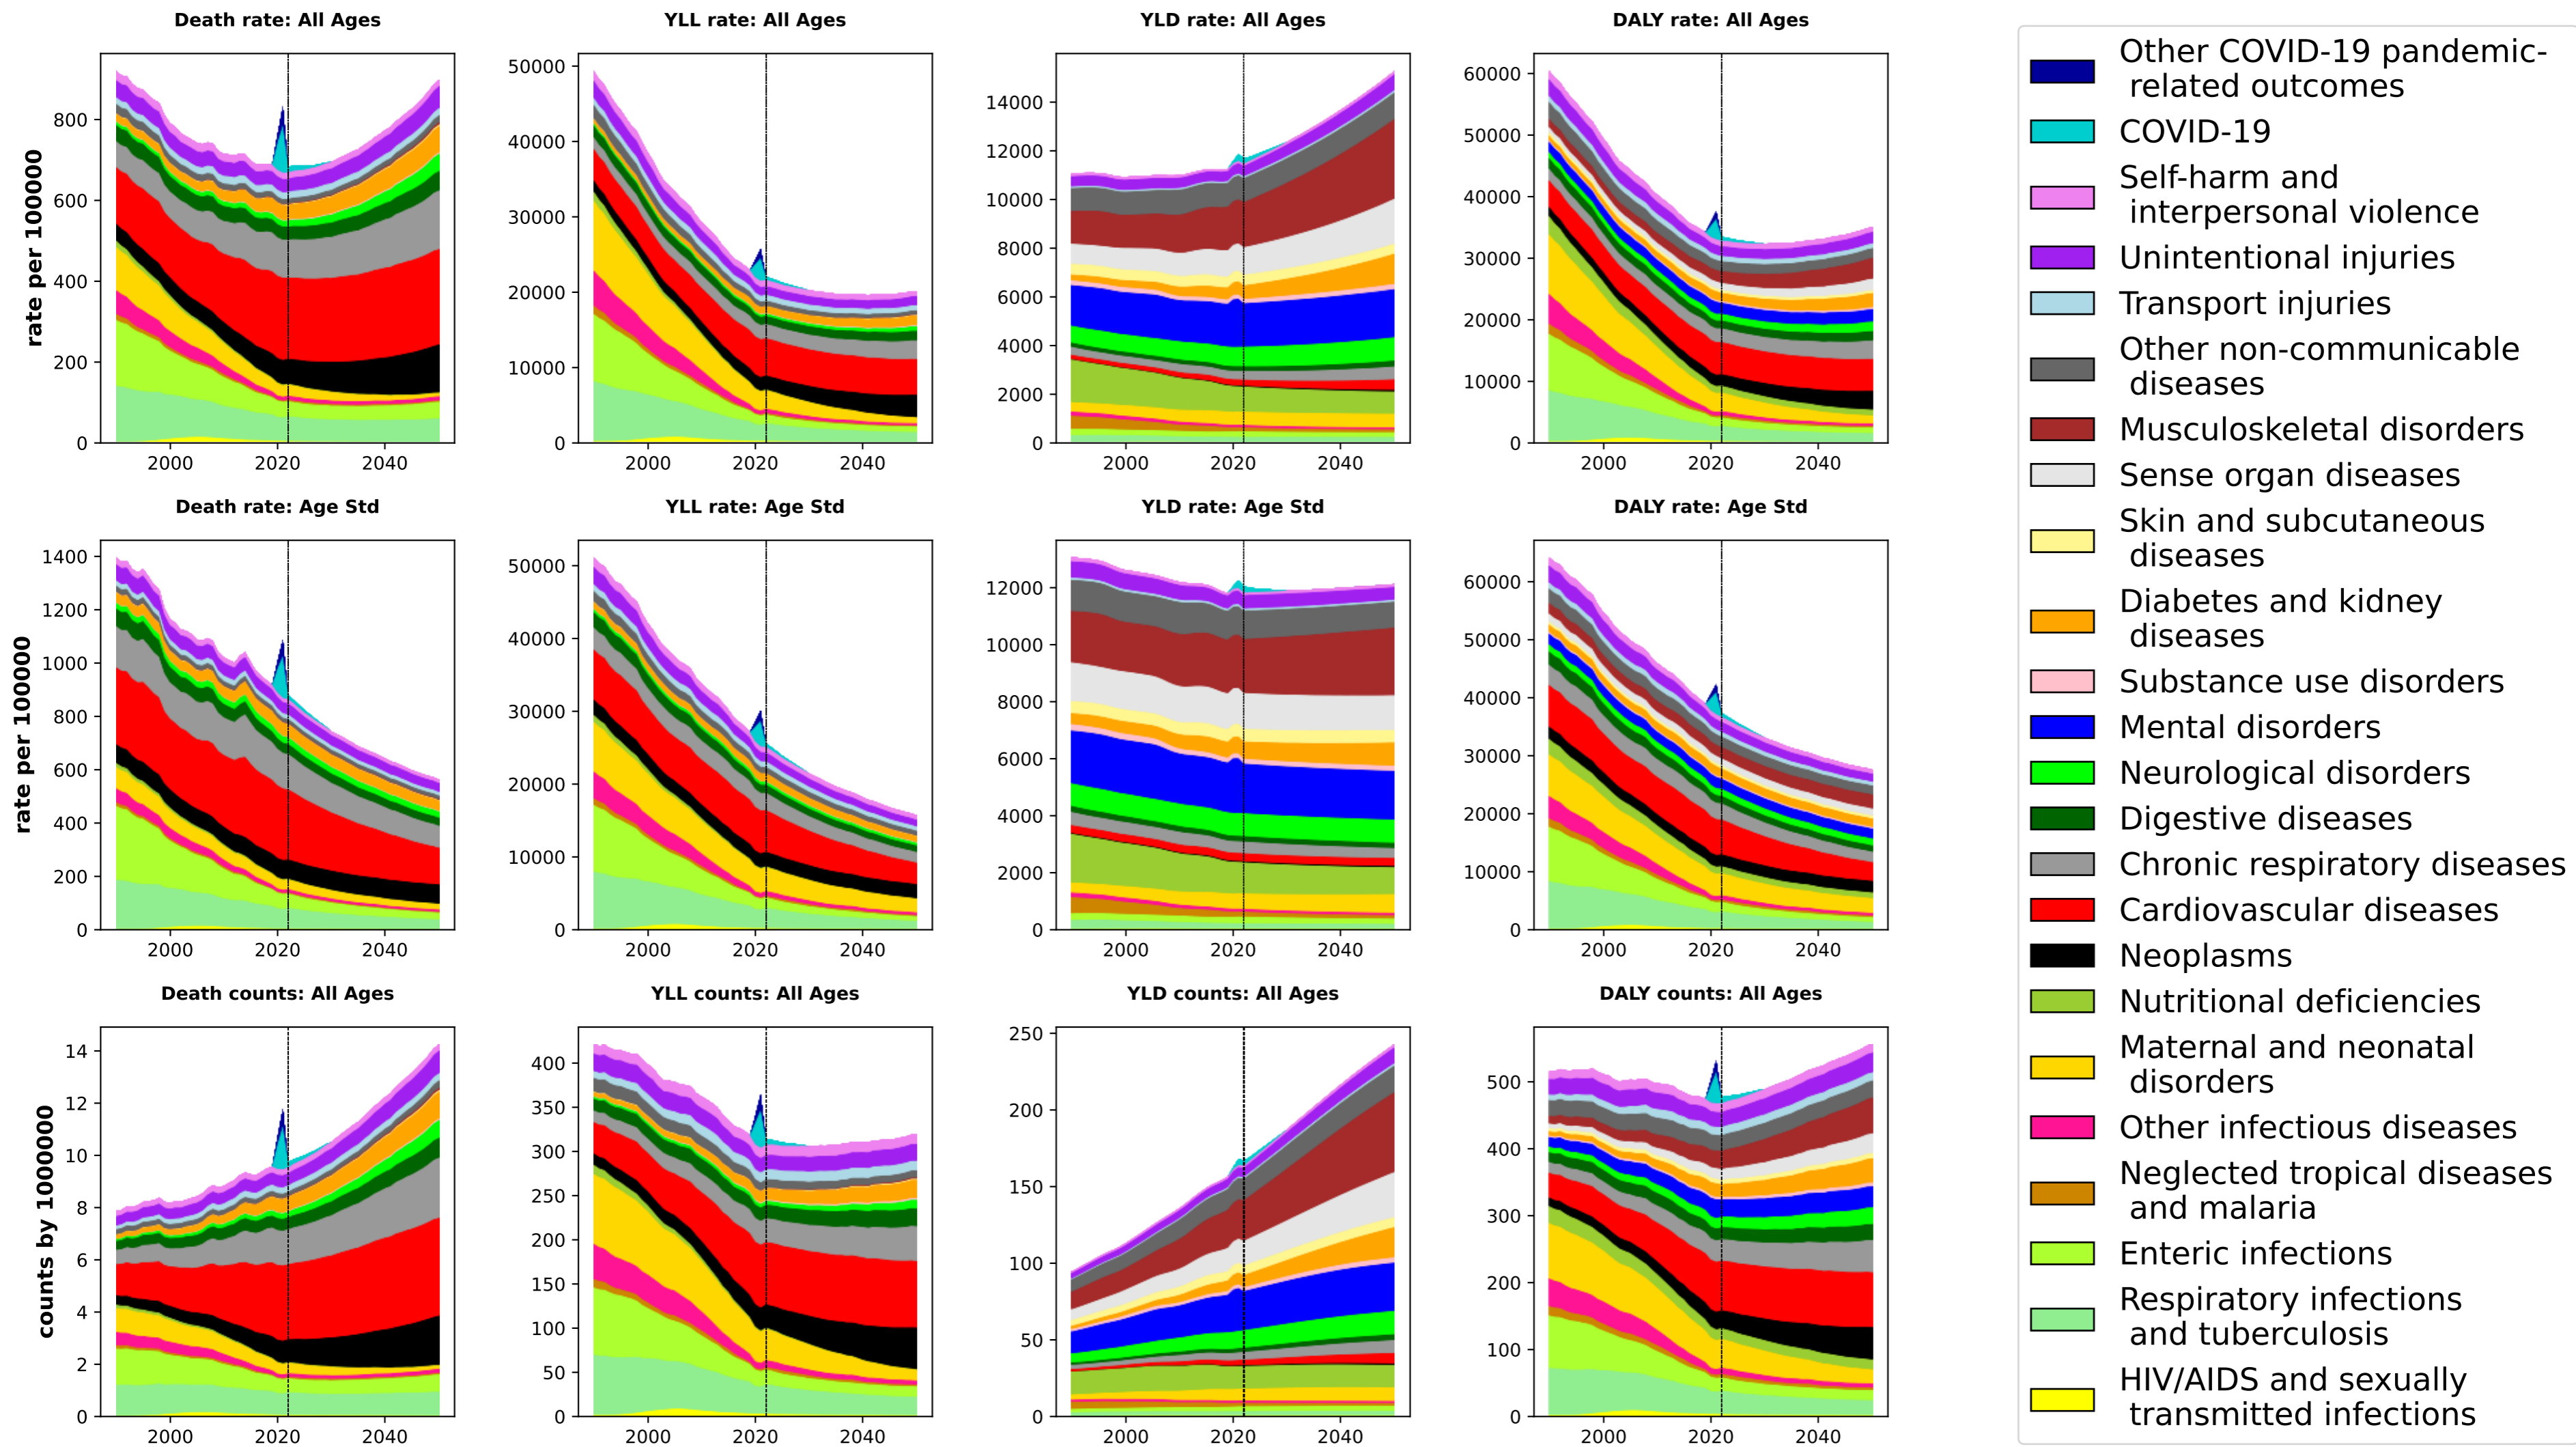

# Nepal

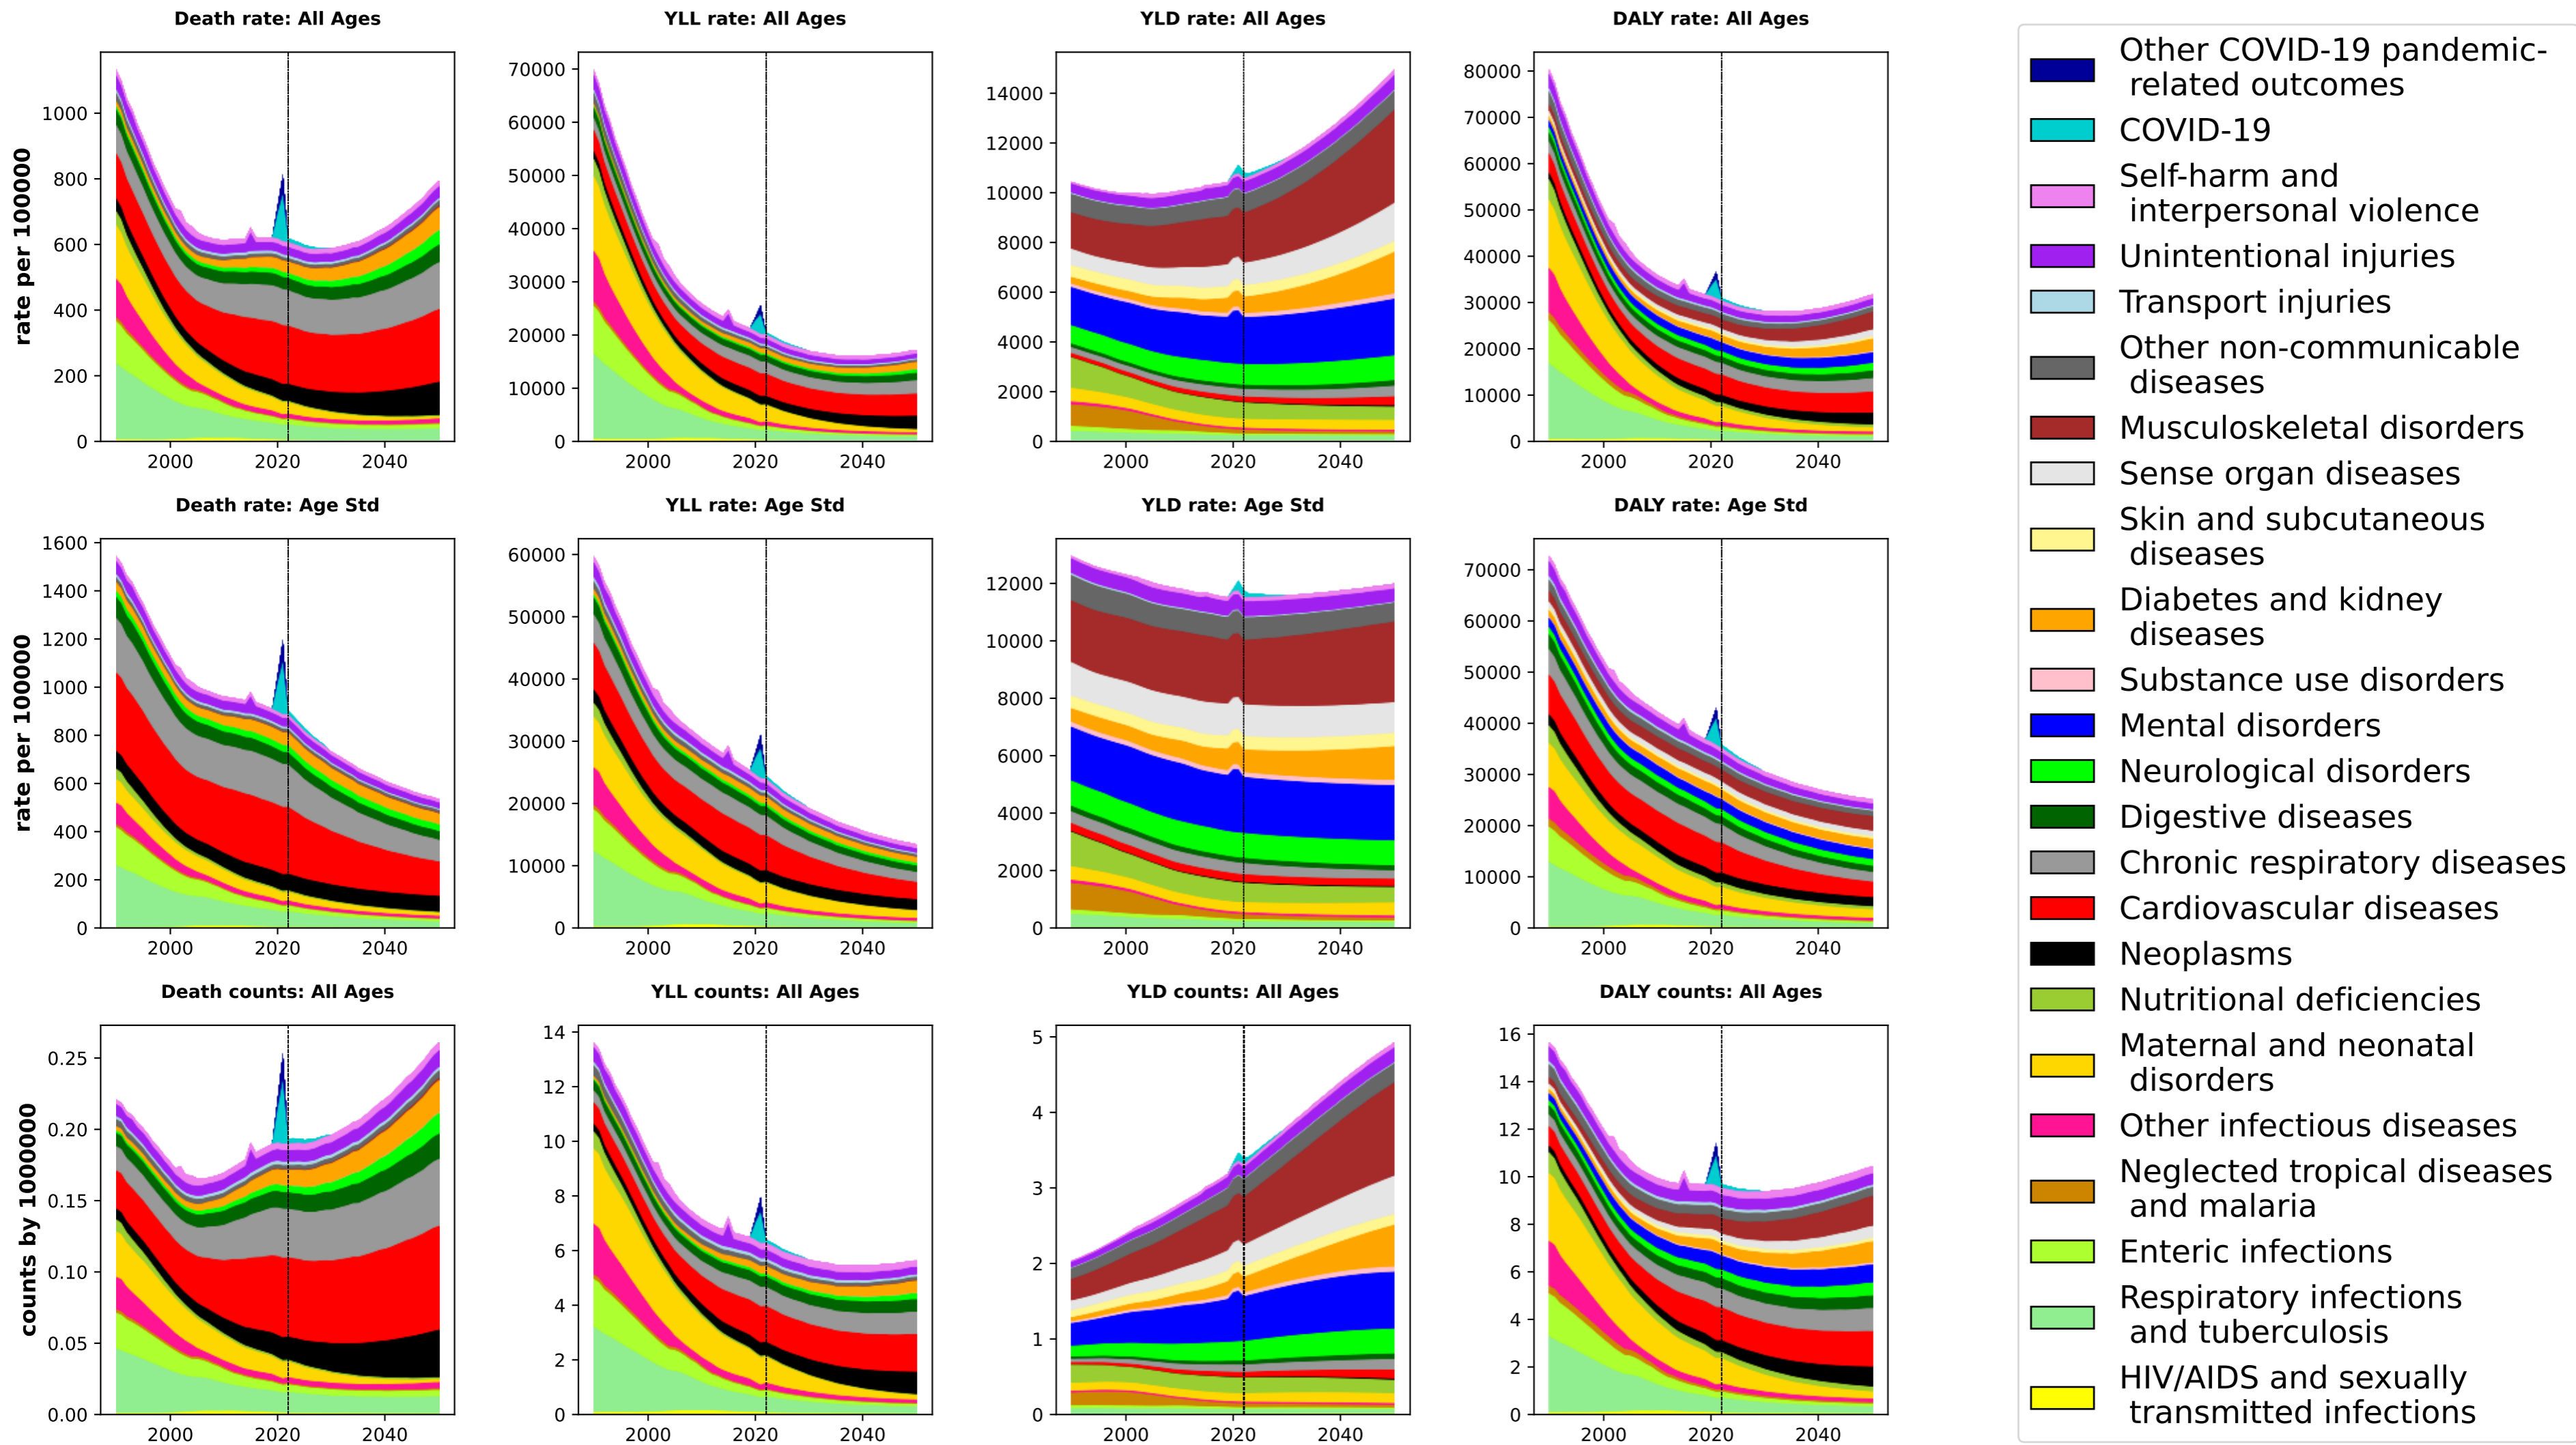

# Pakistan

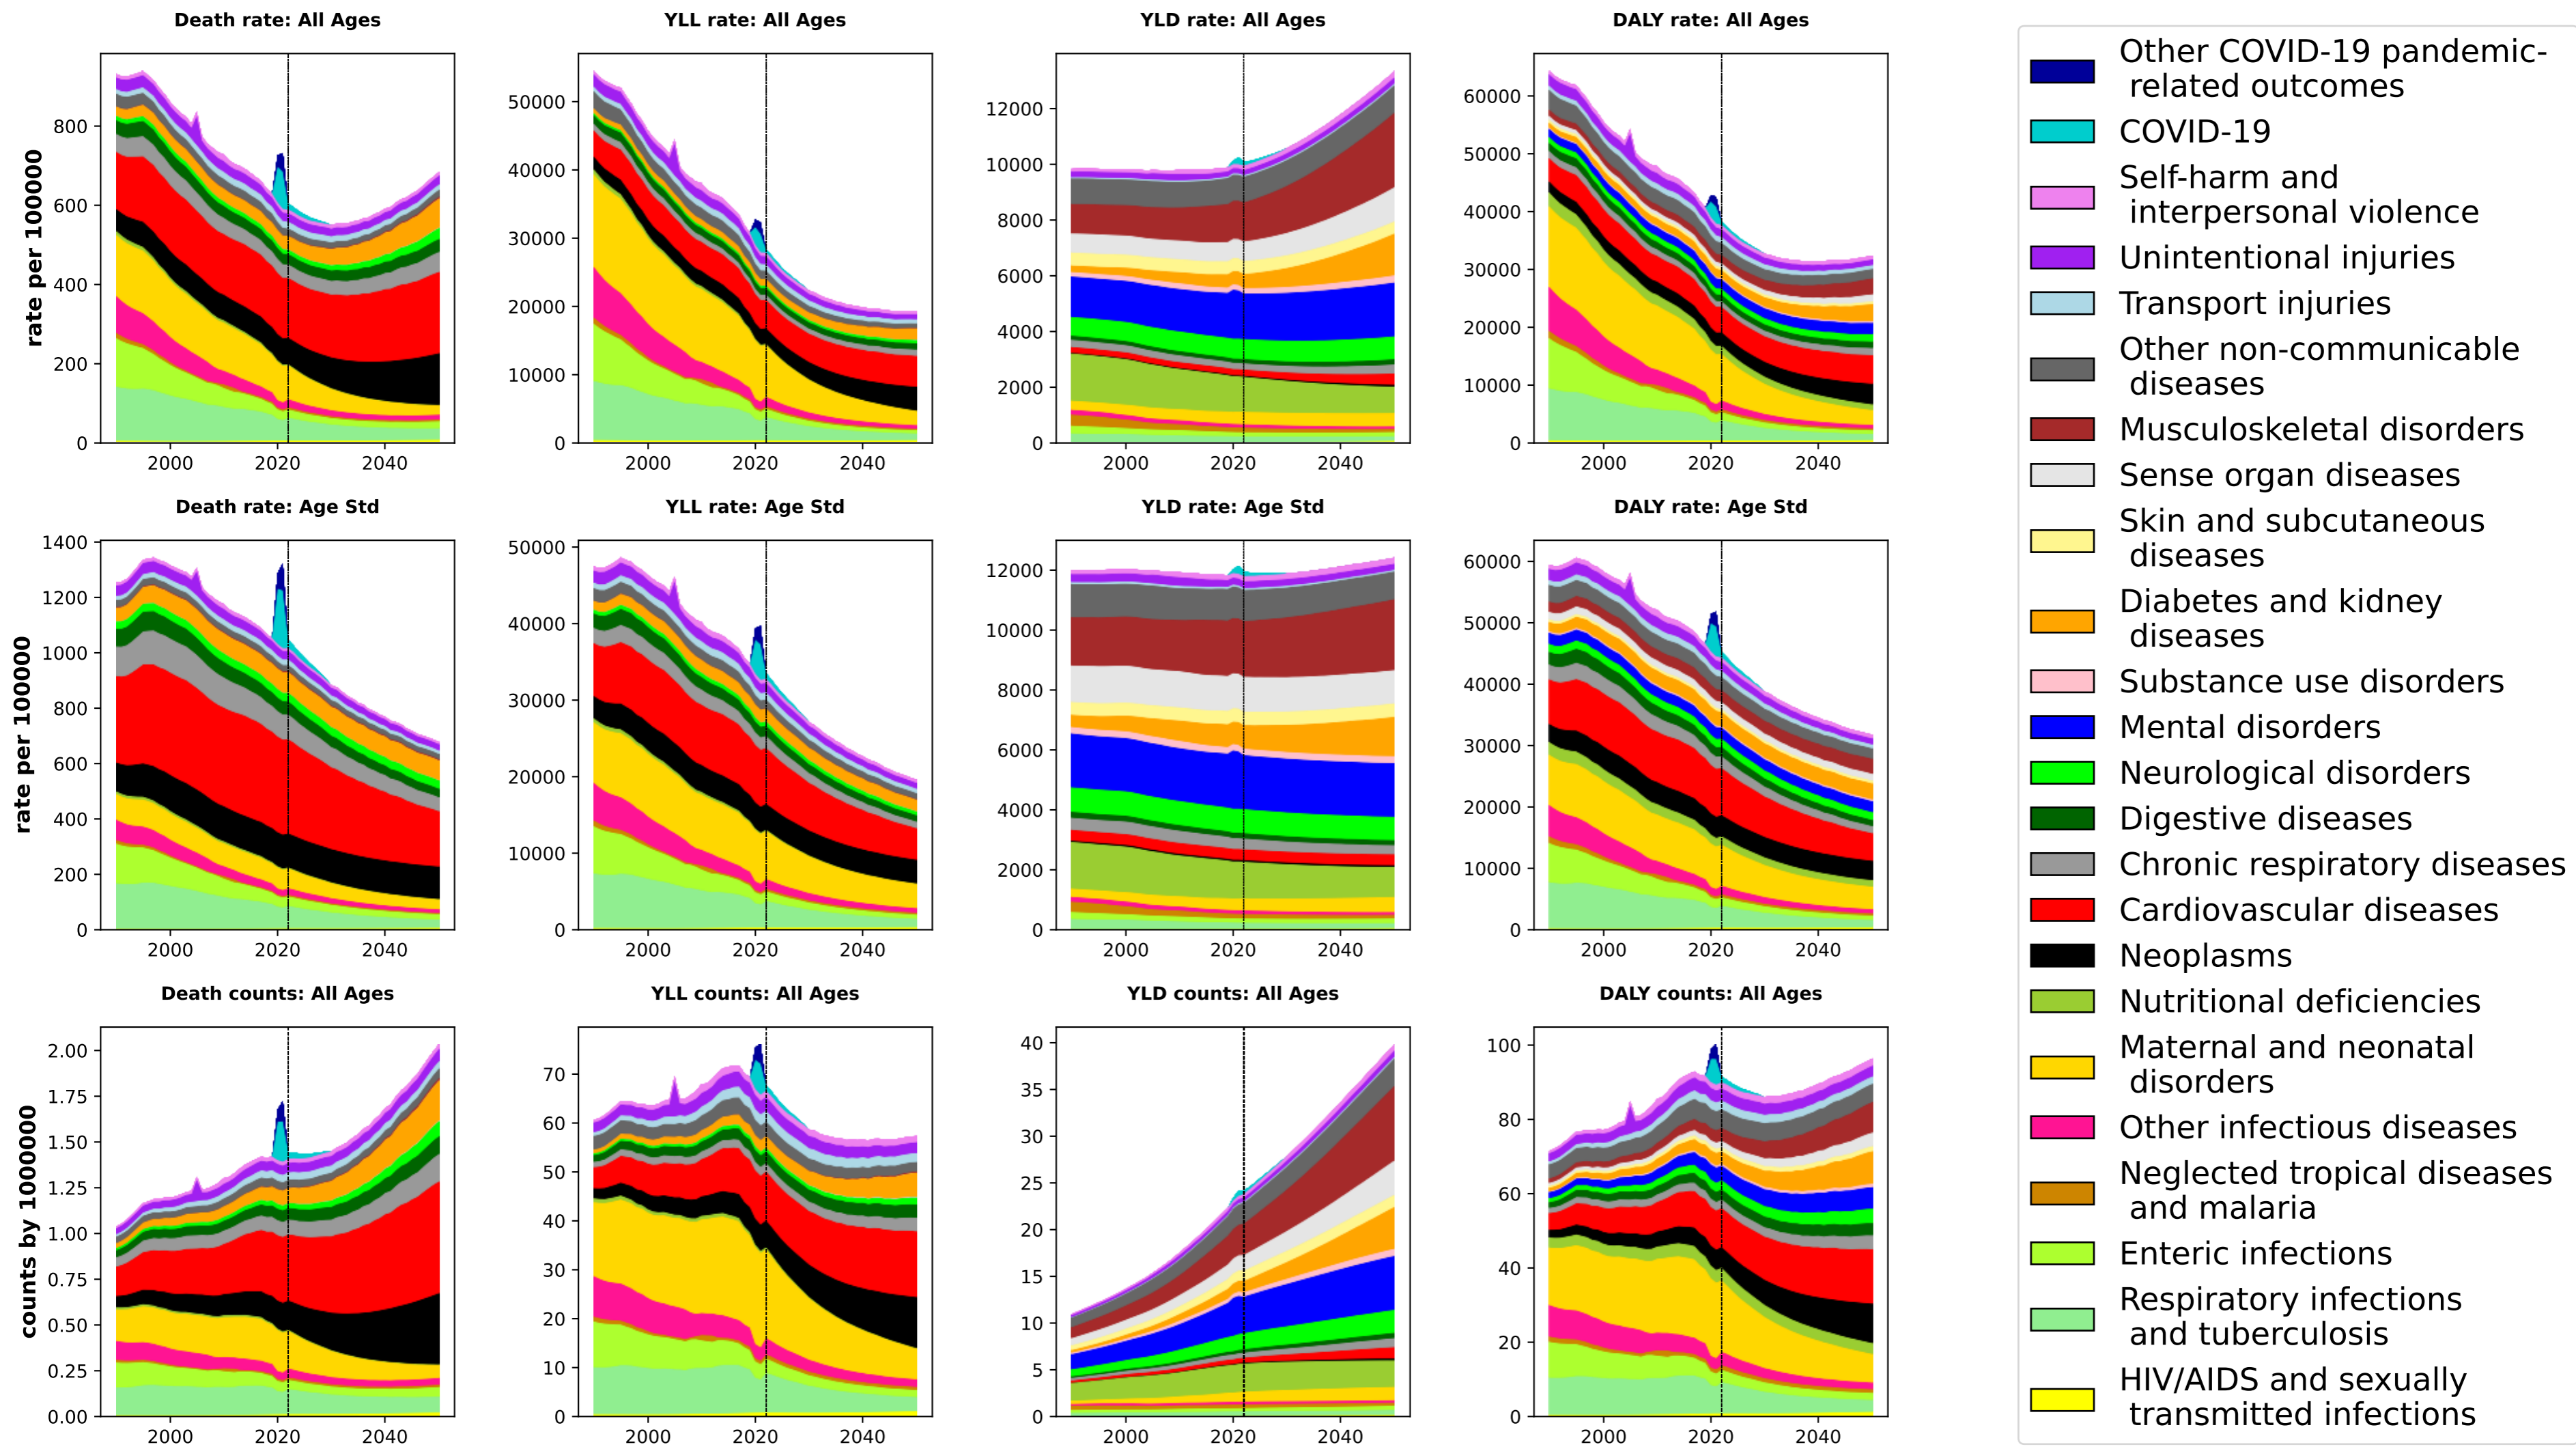

# China

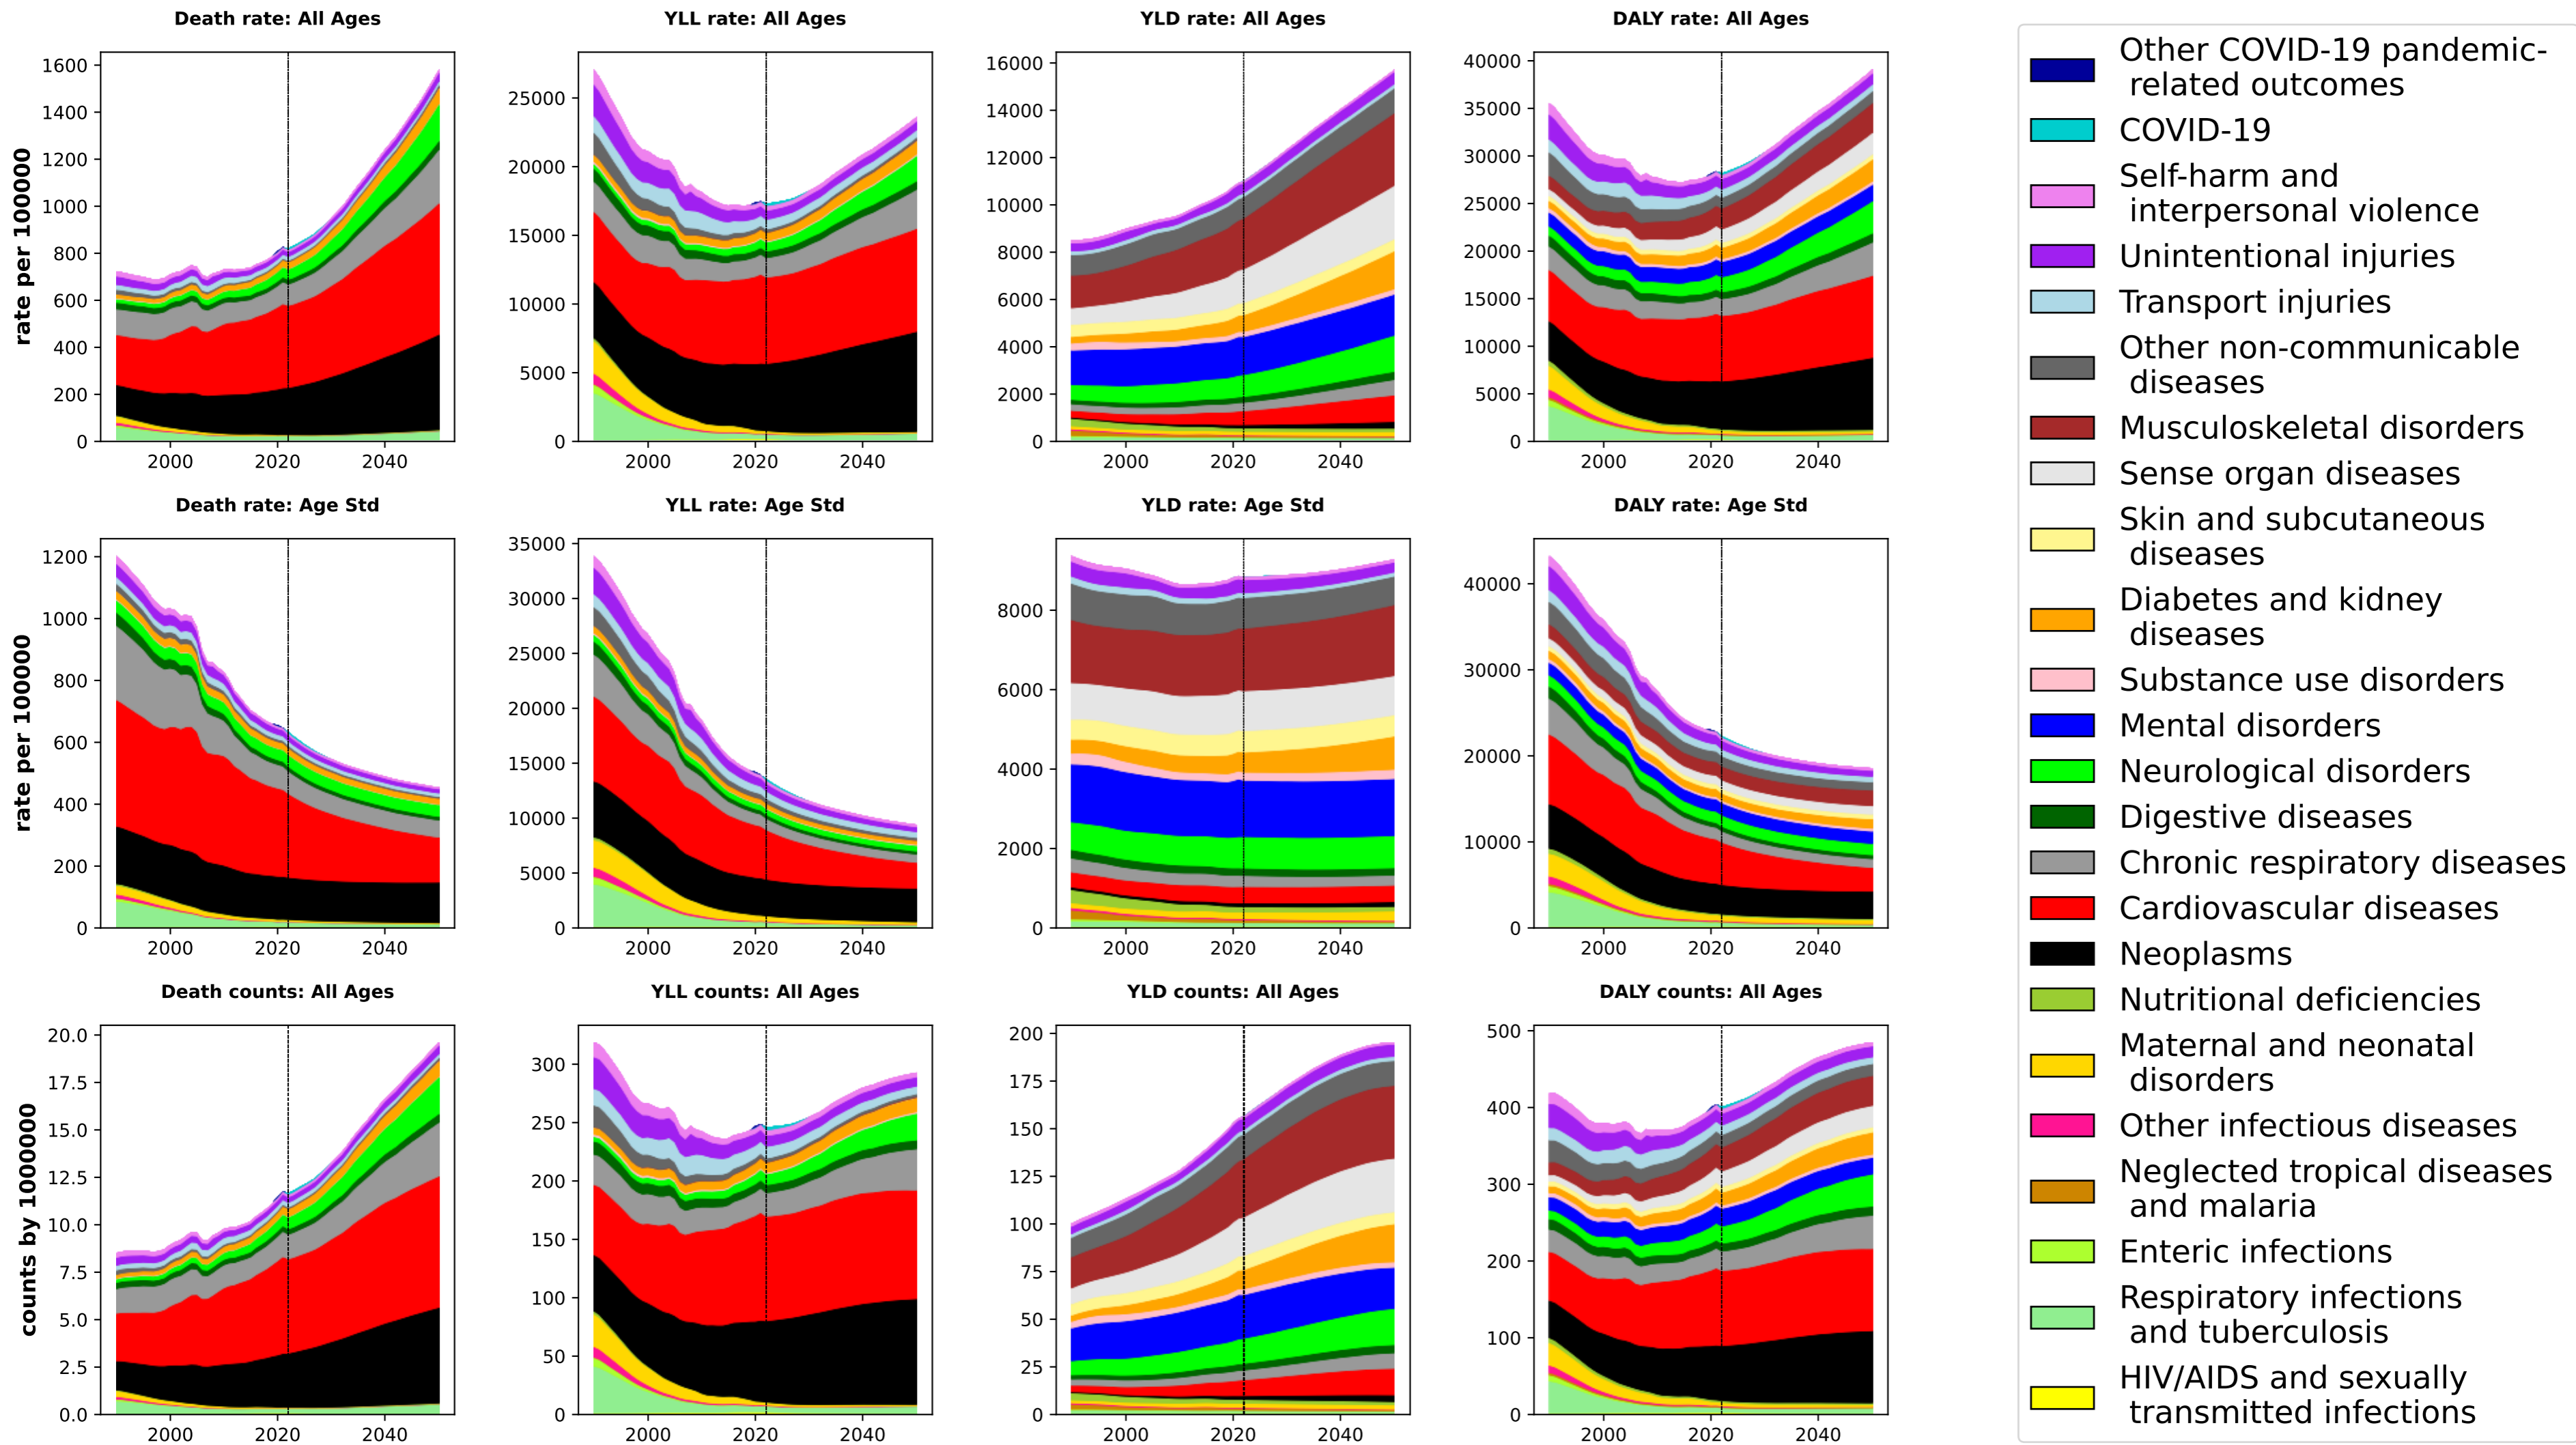

# North Korea

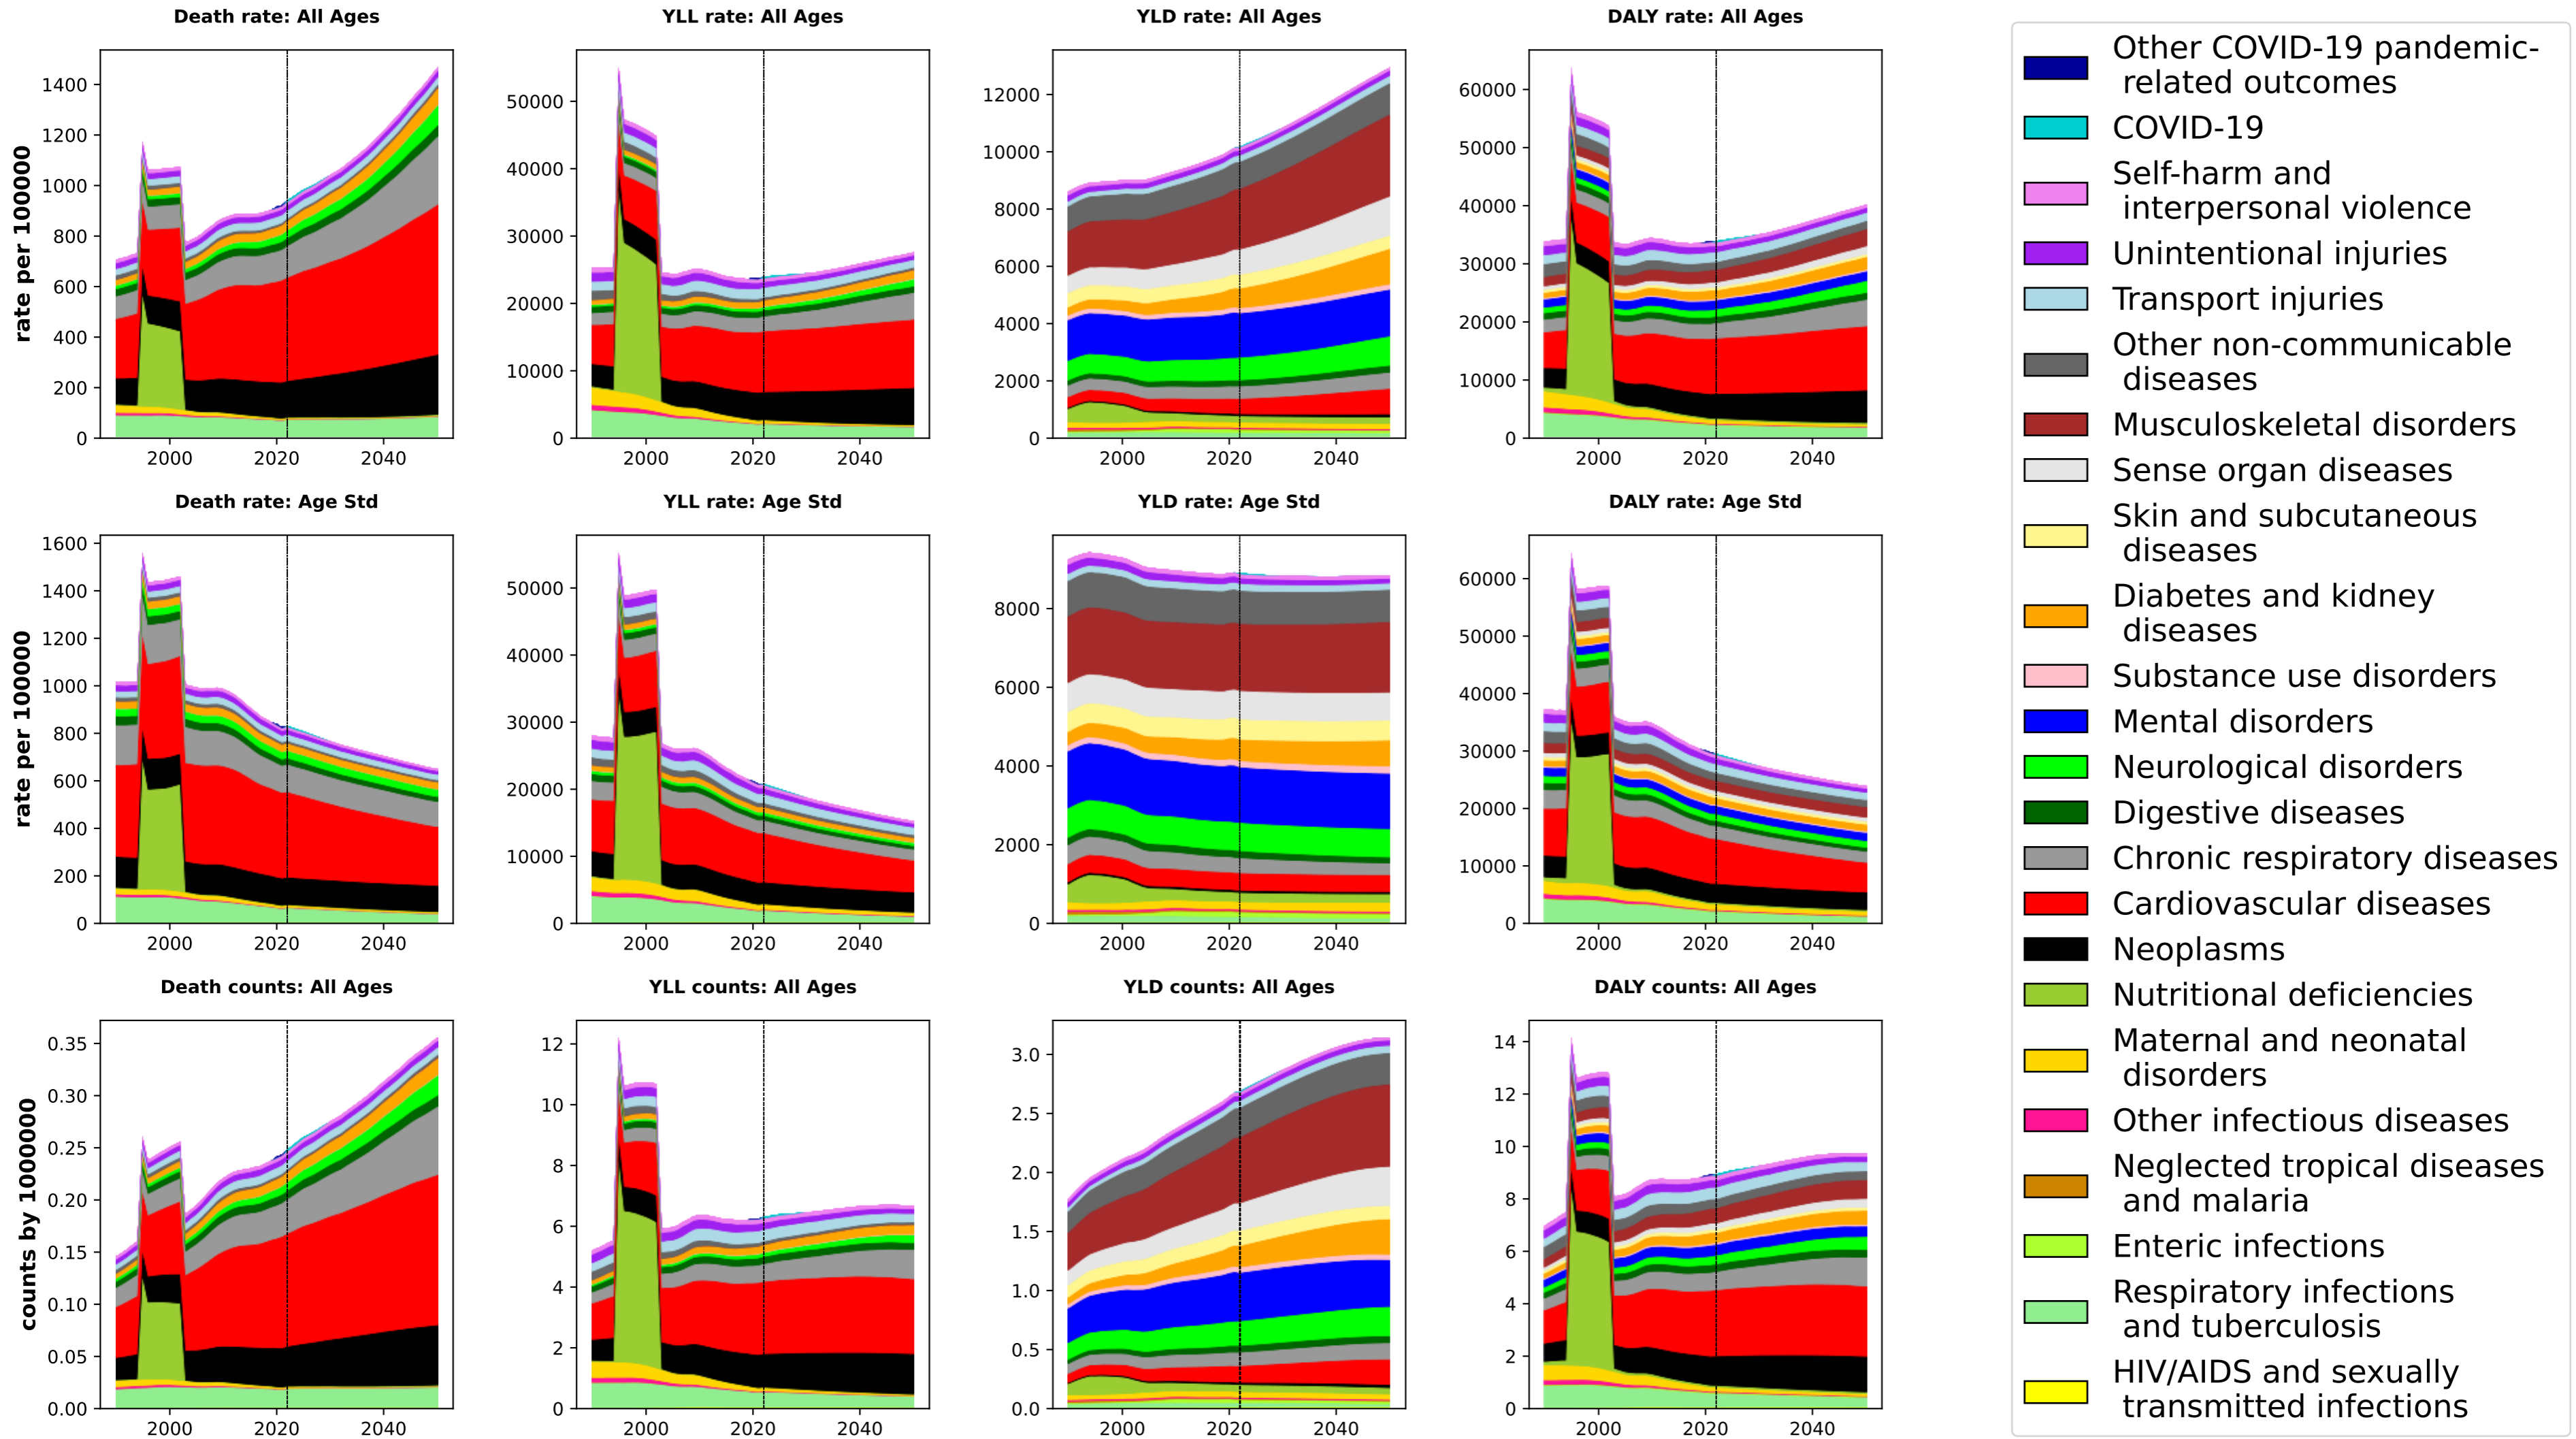

# Taiwan (Province of China)

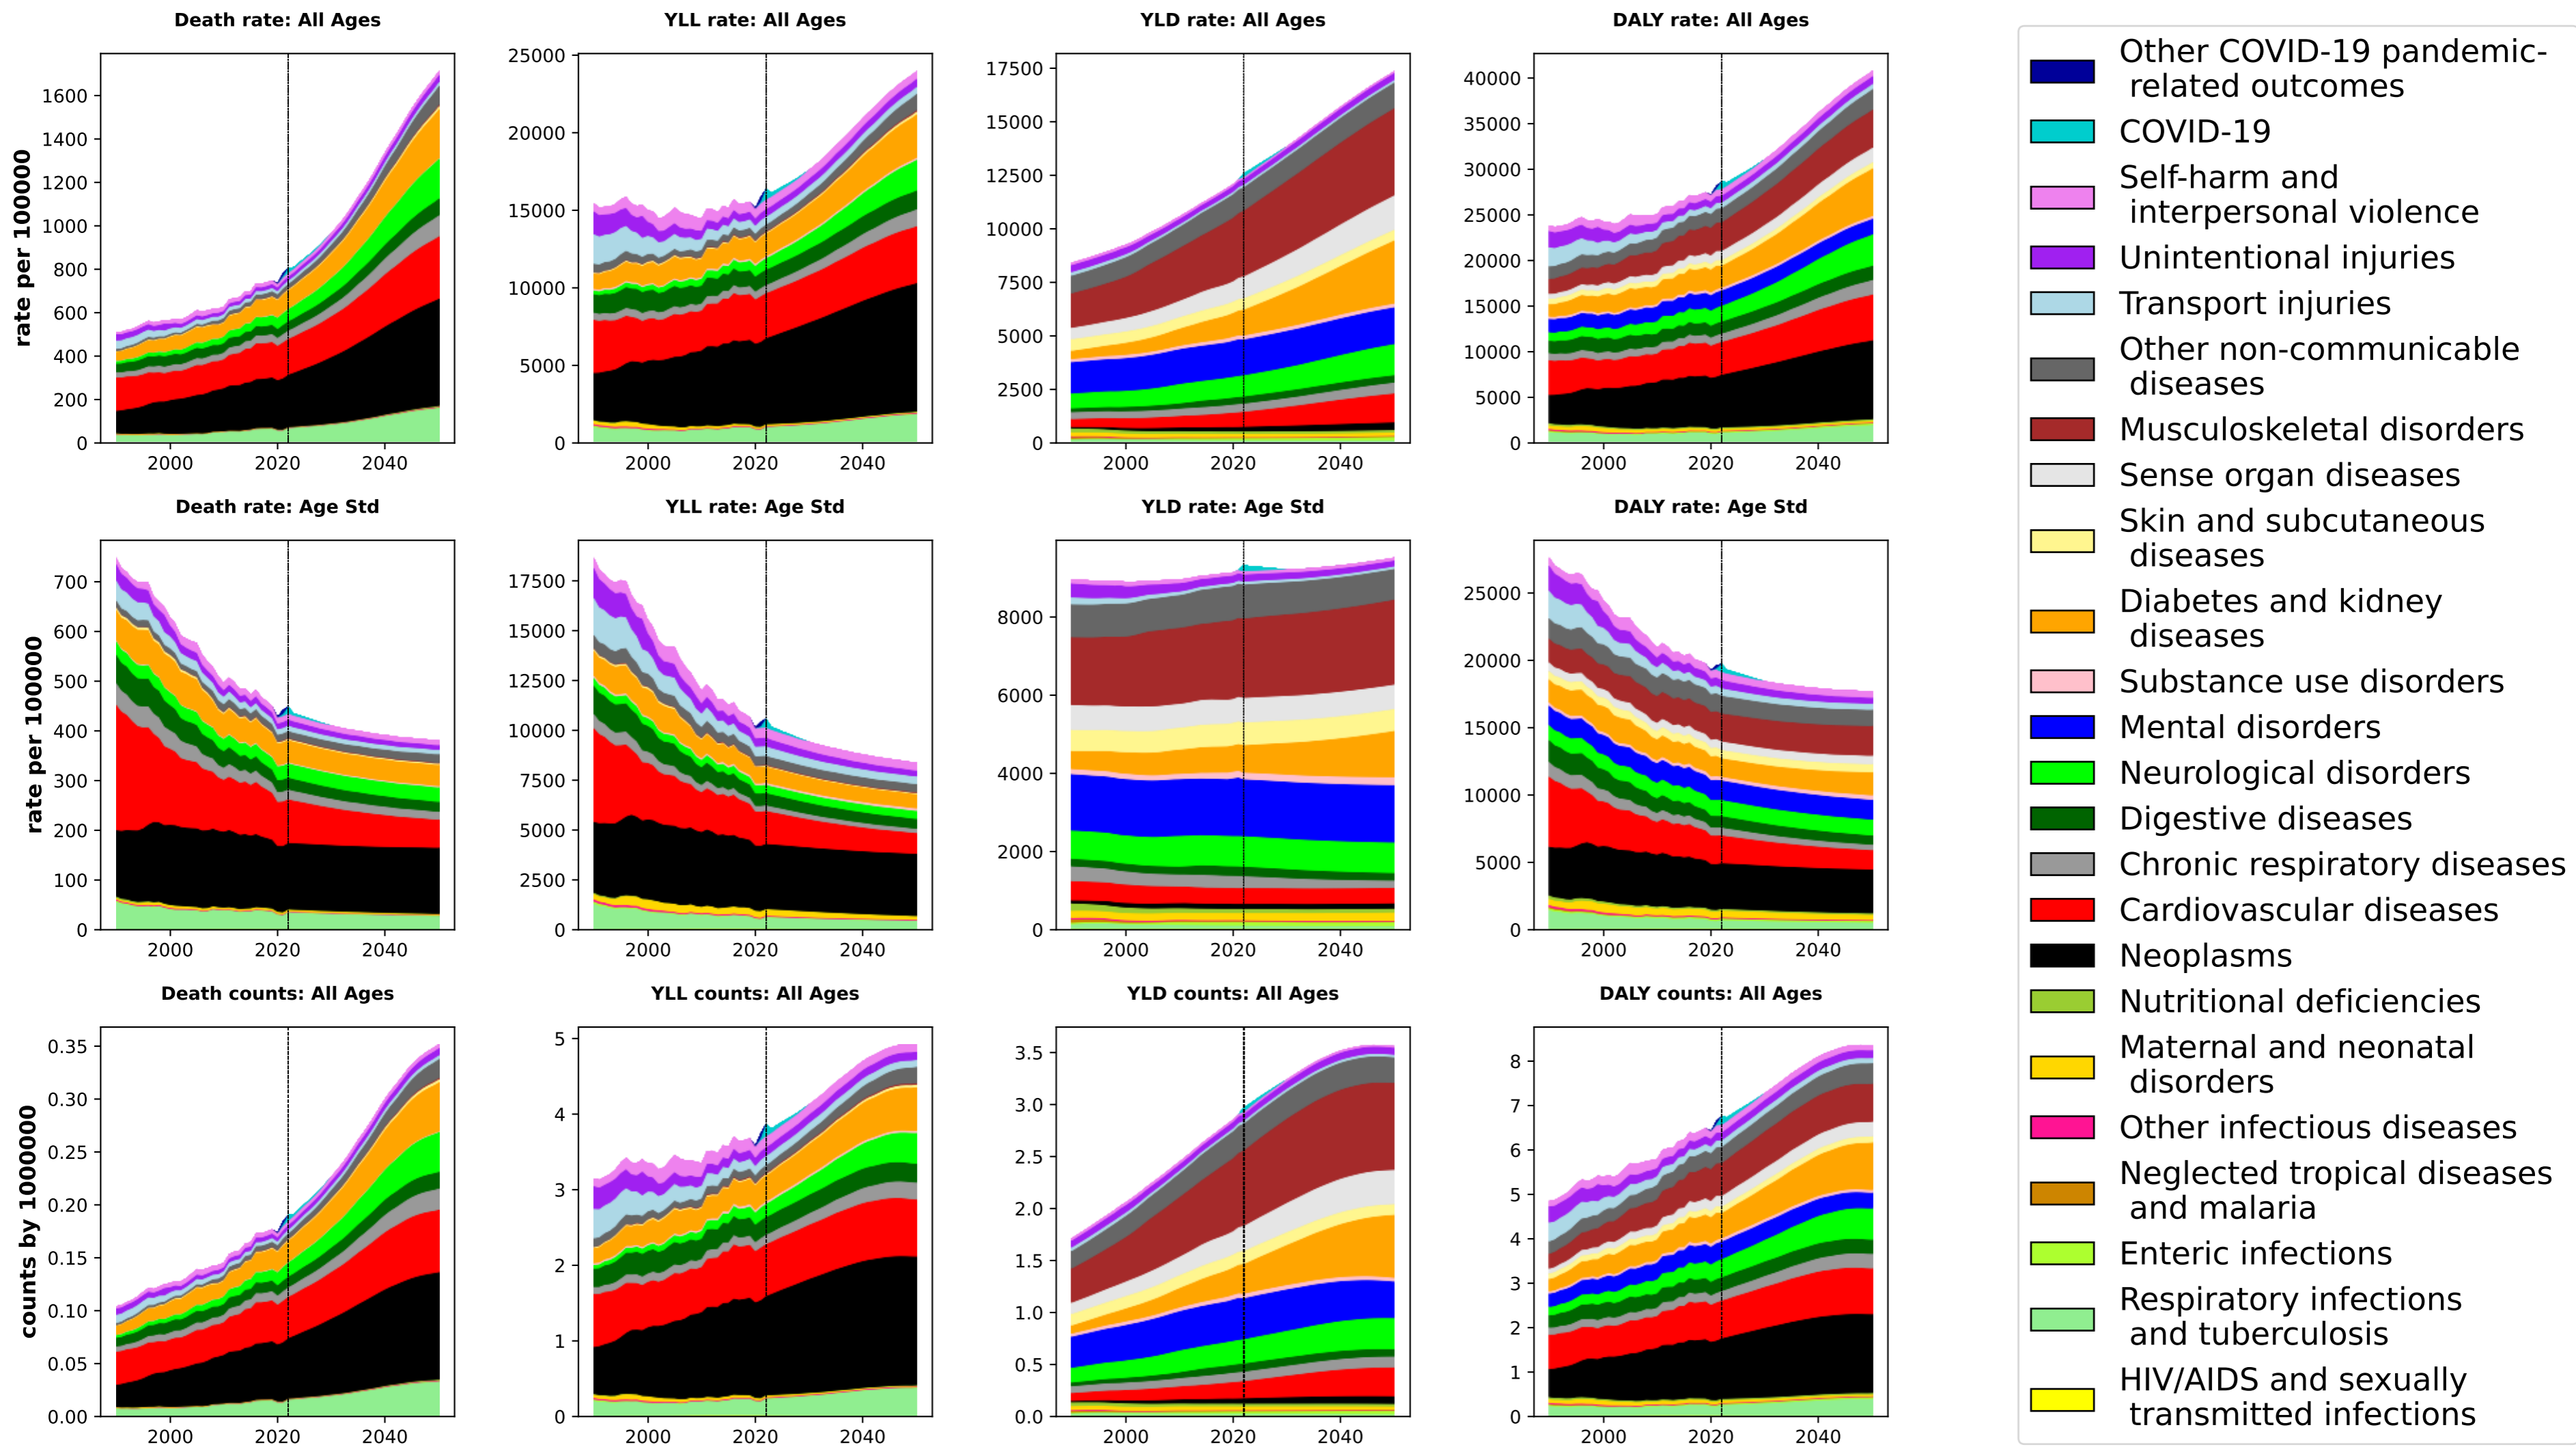

# American Samoa

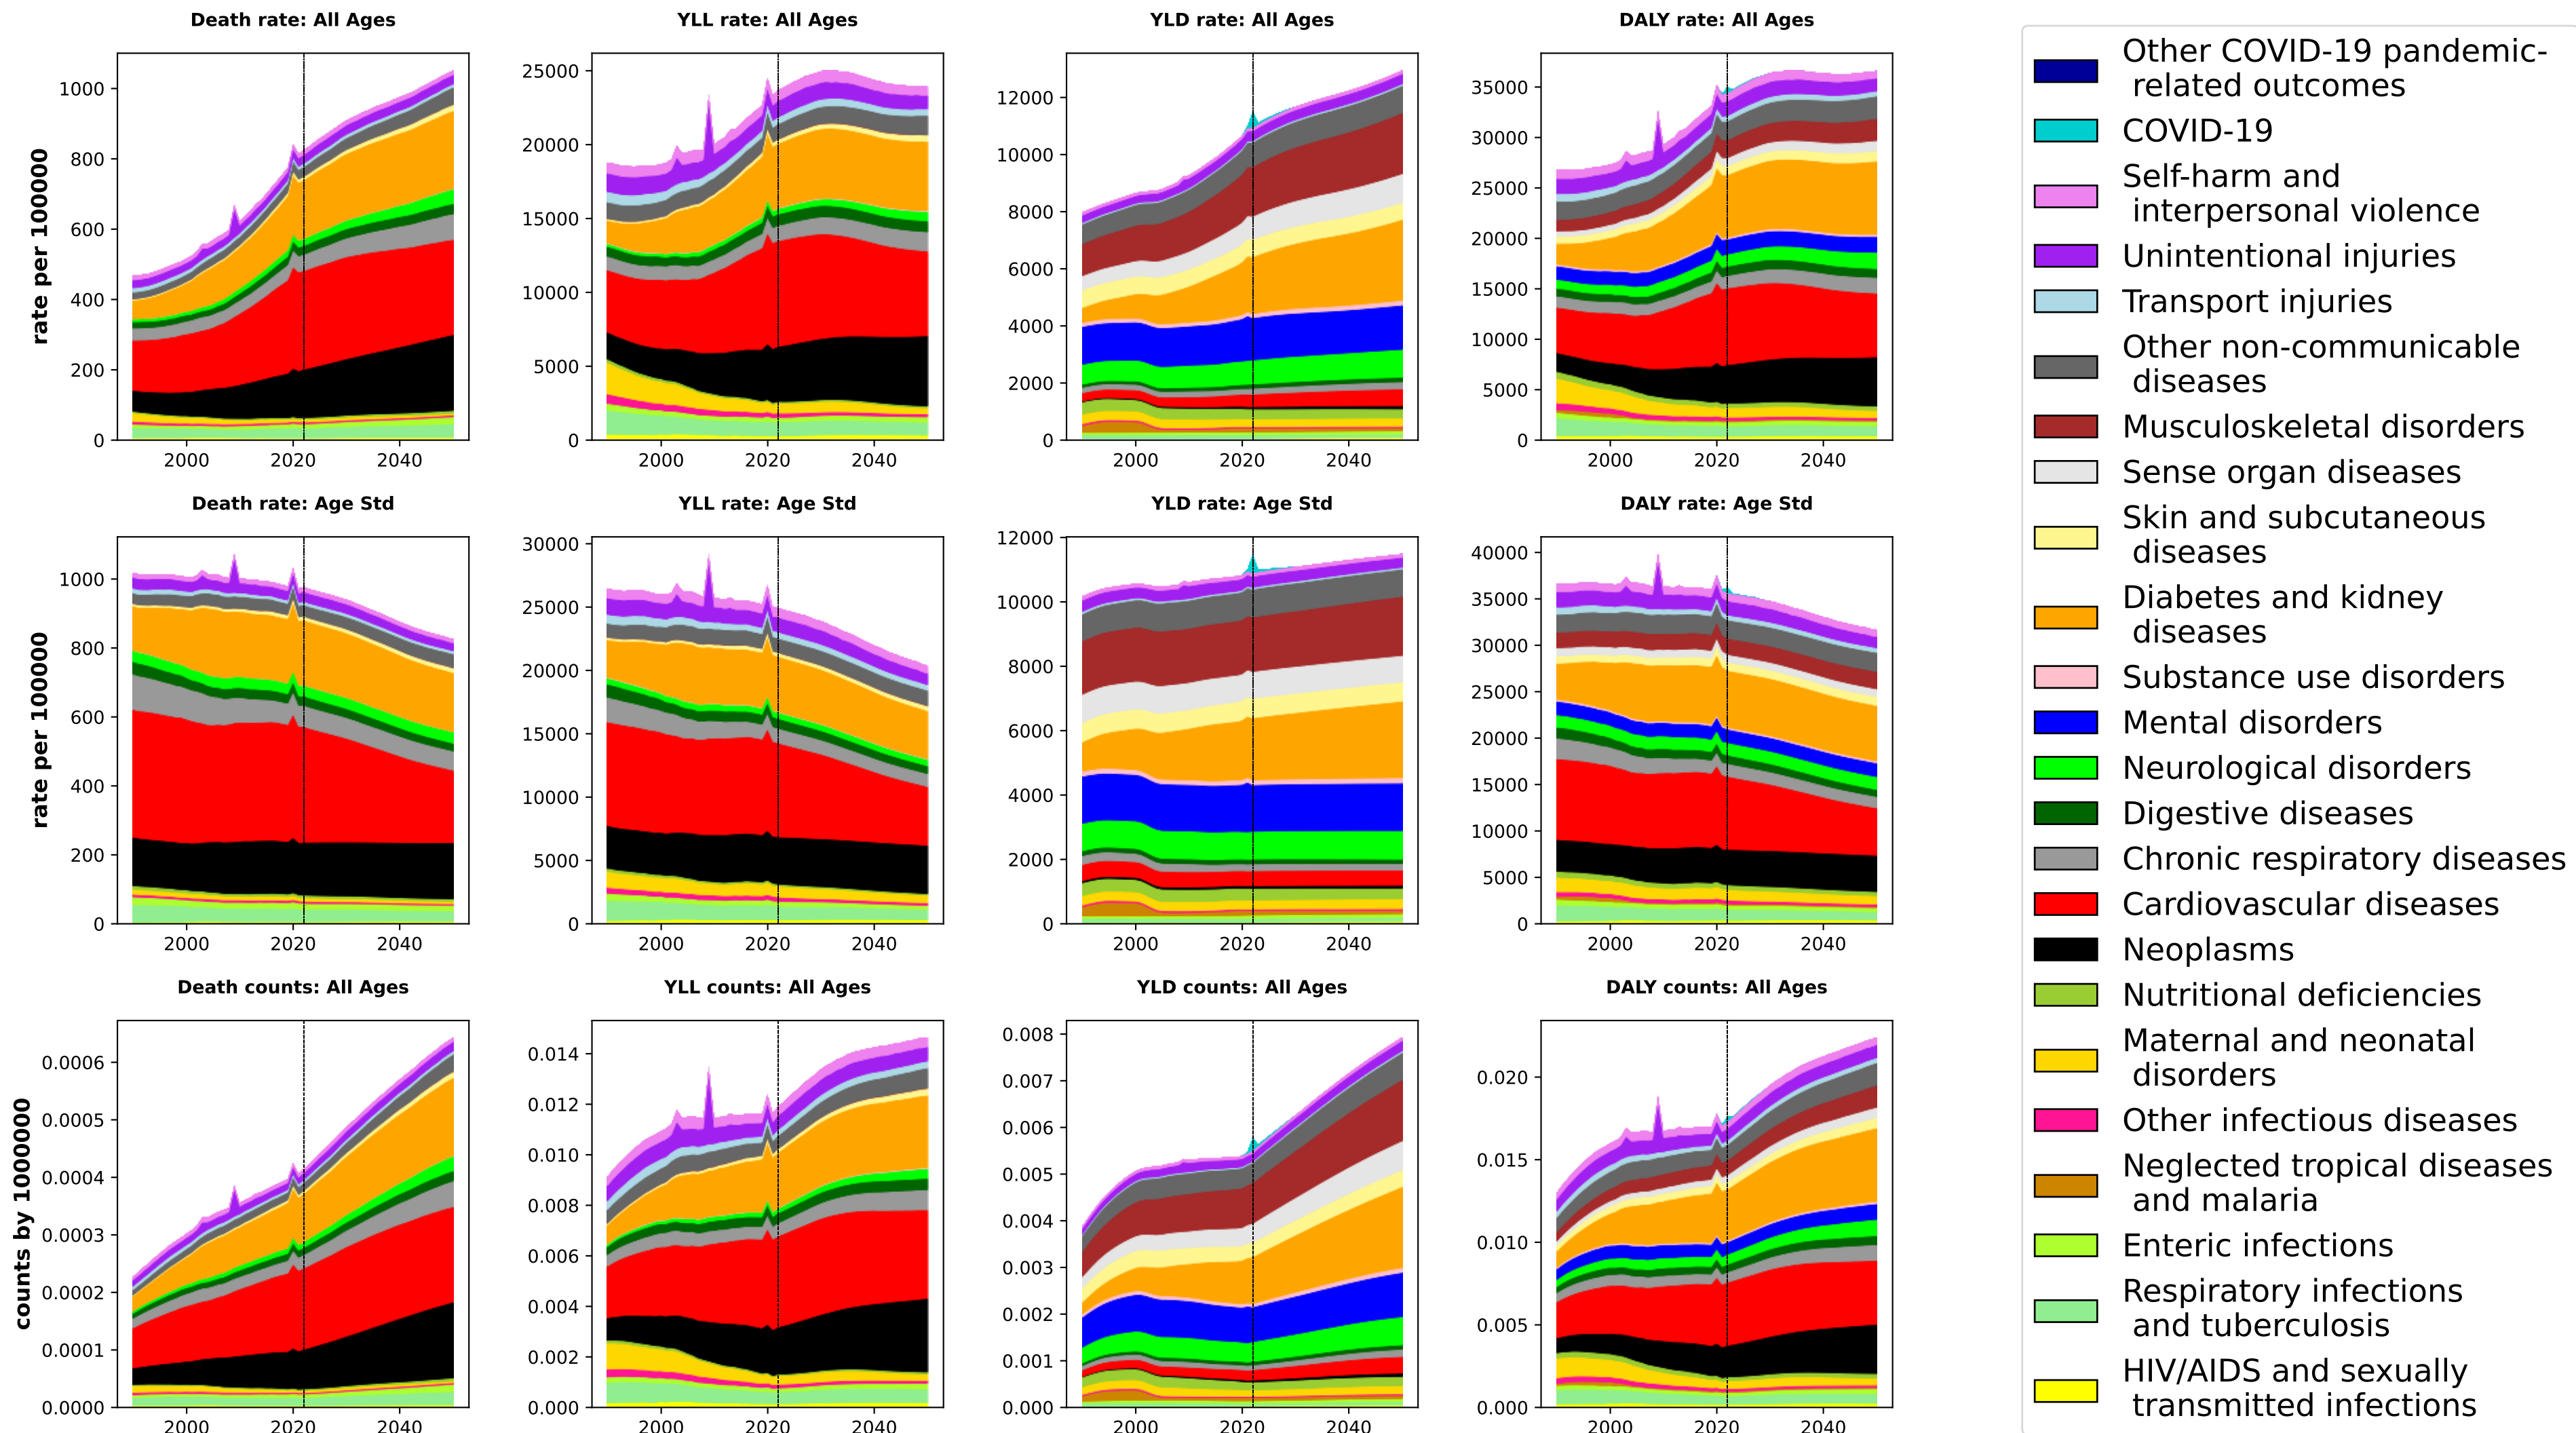

# Cook Islands

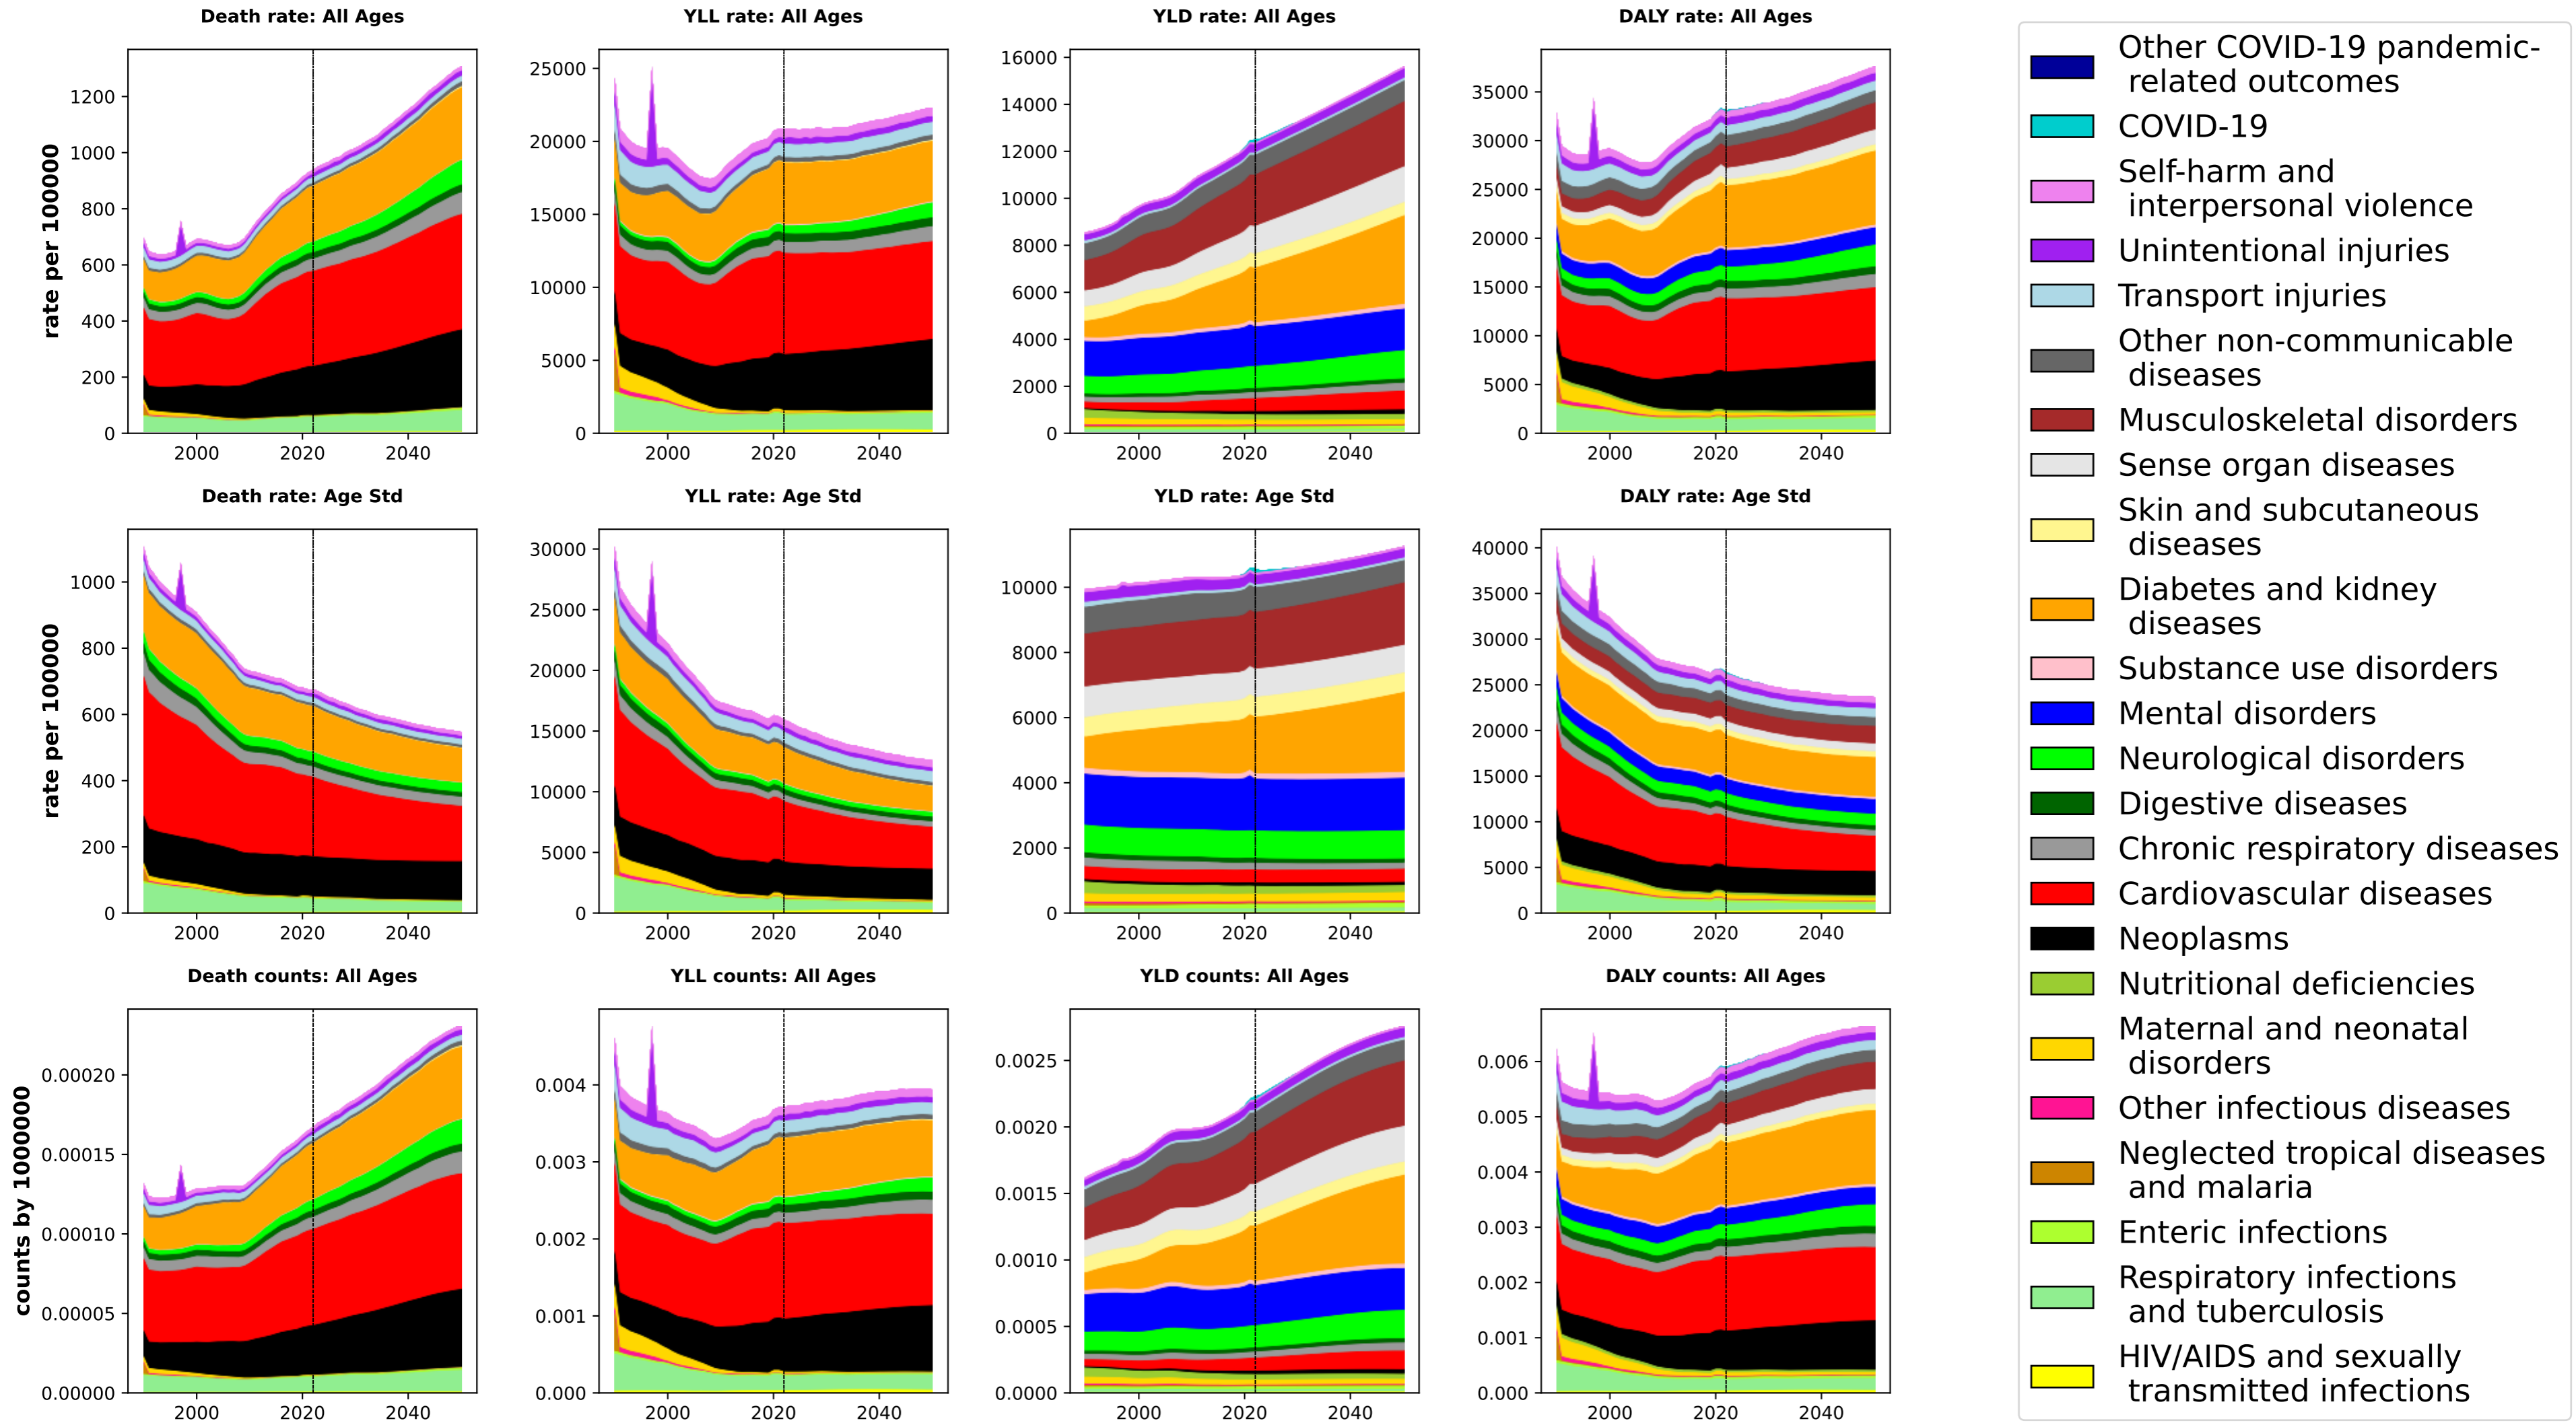



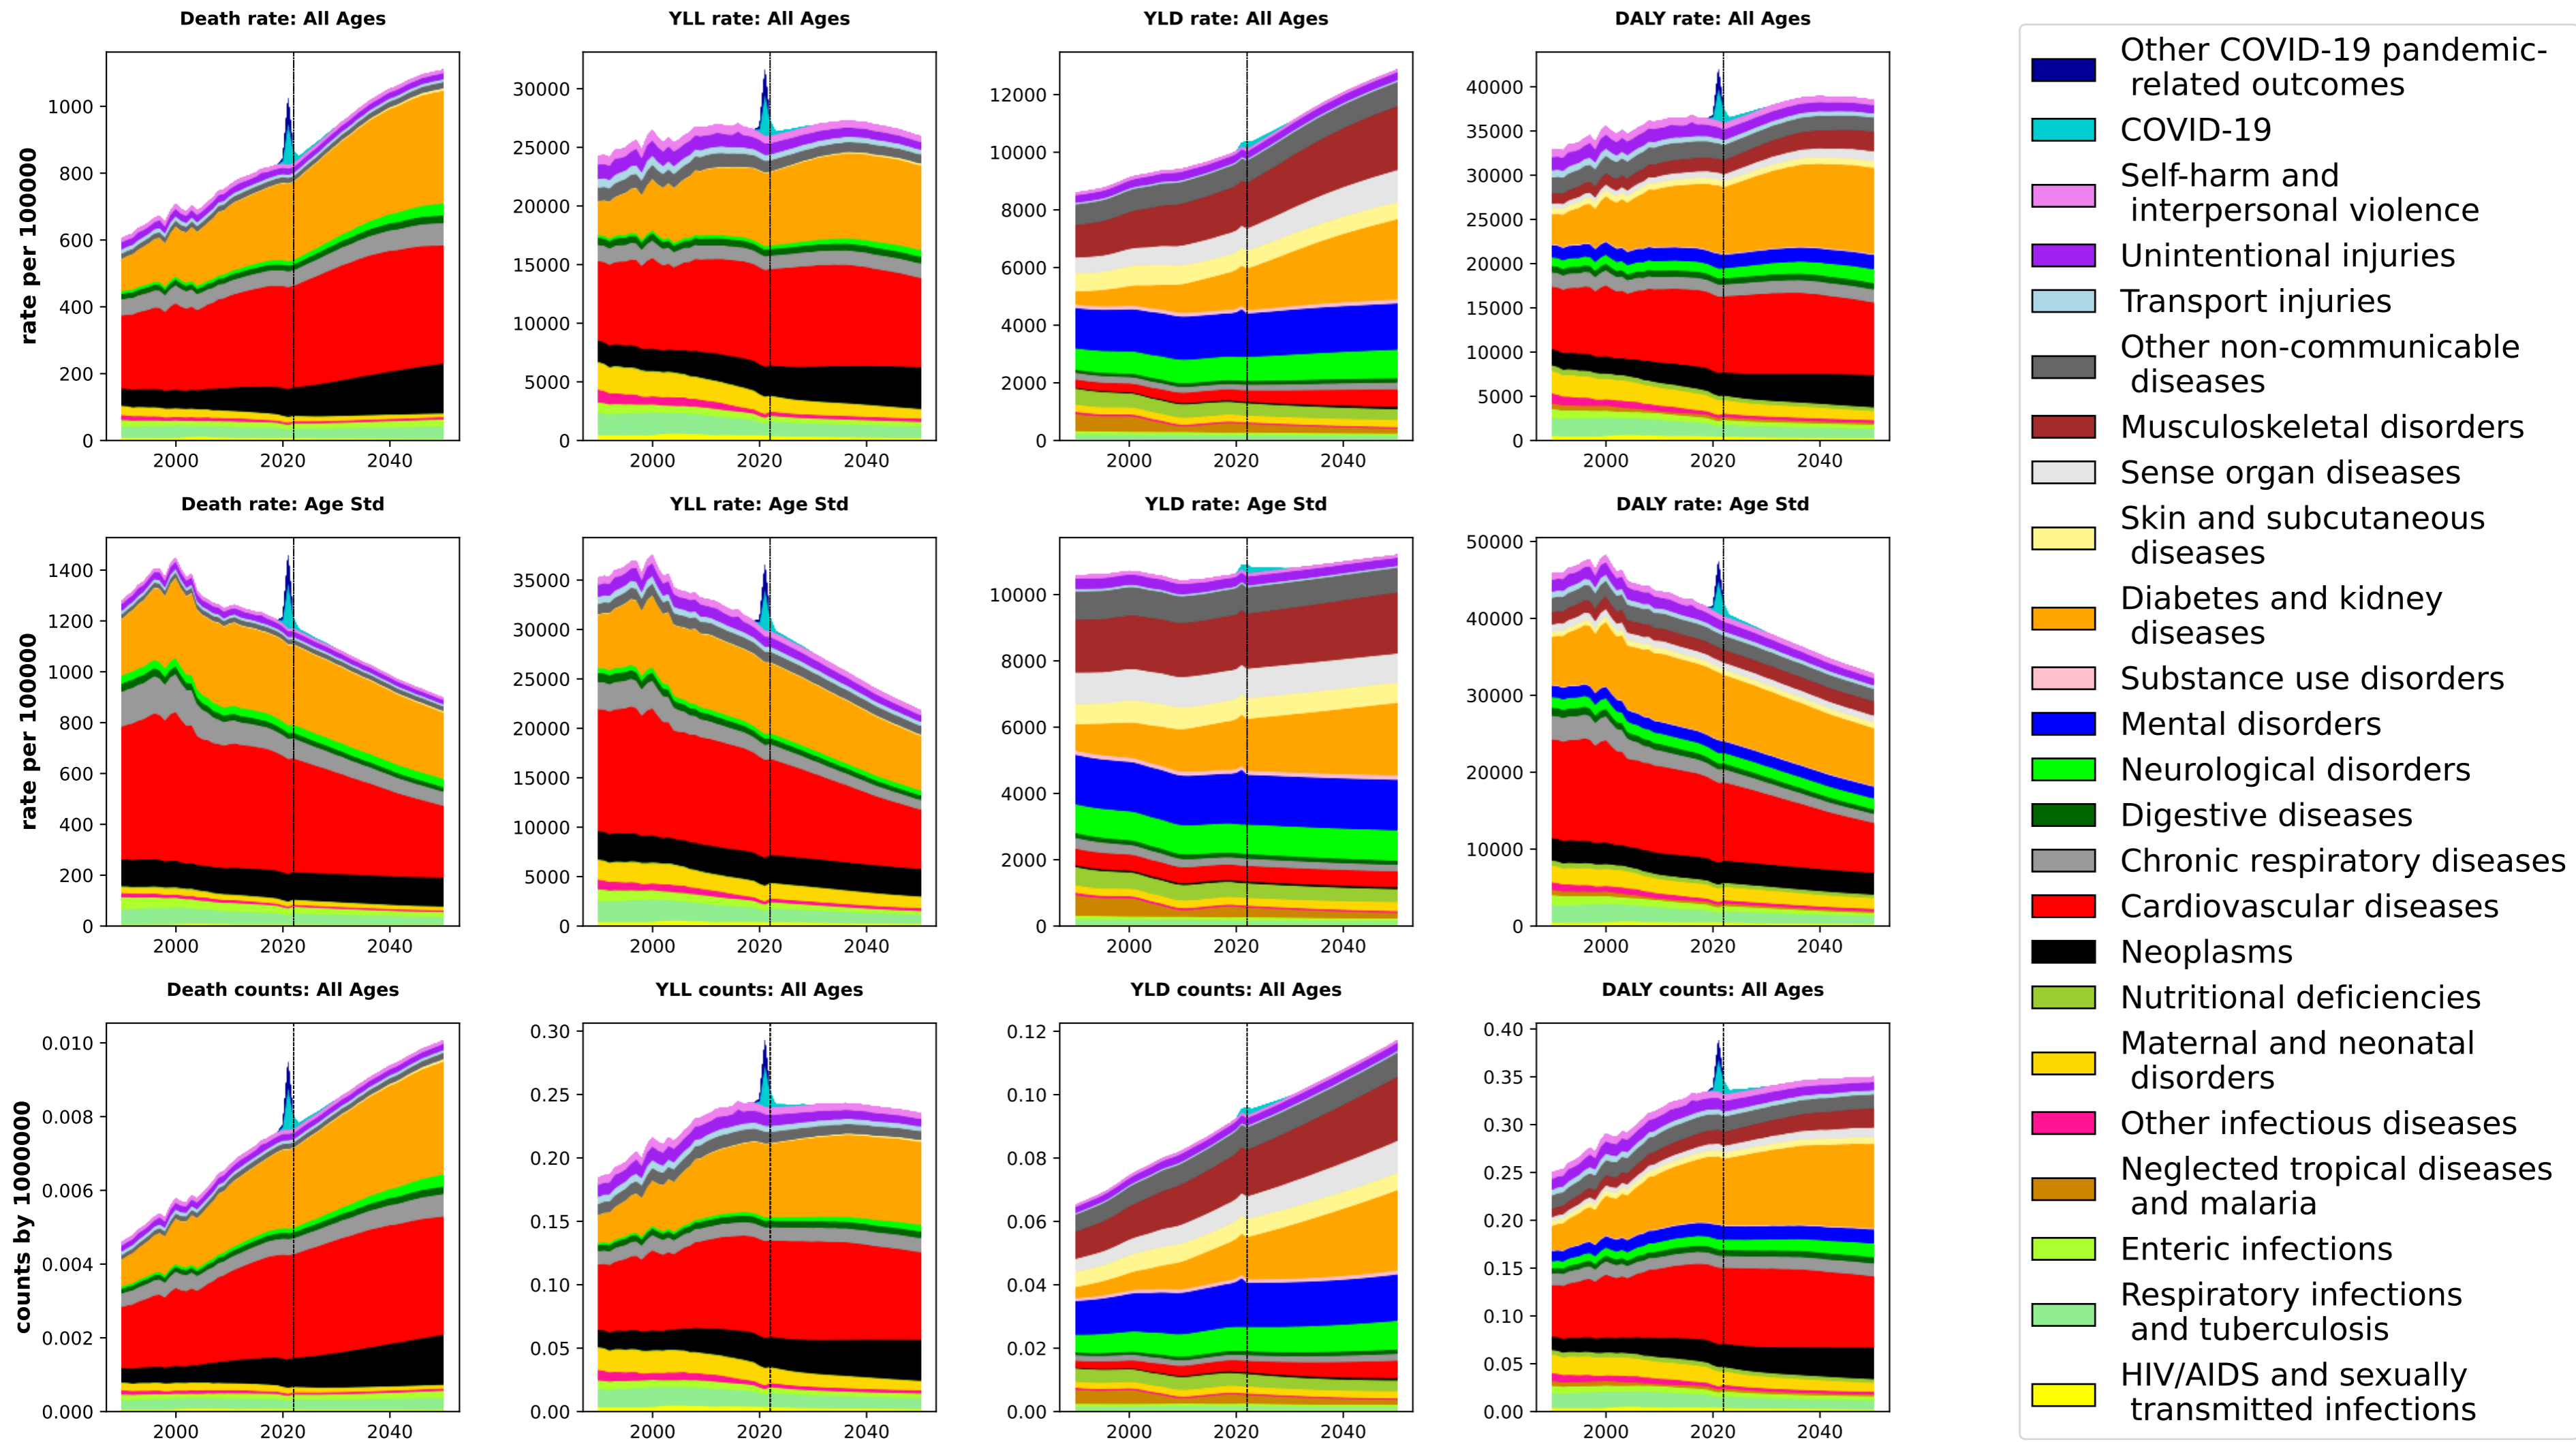

# Guam

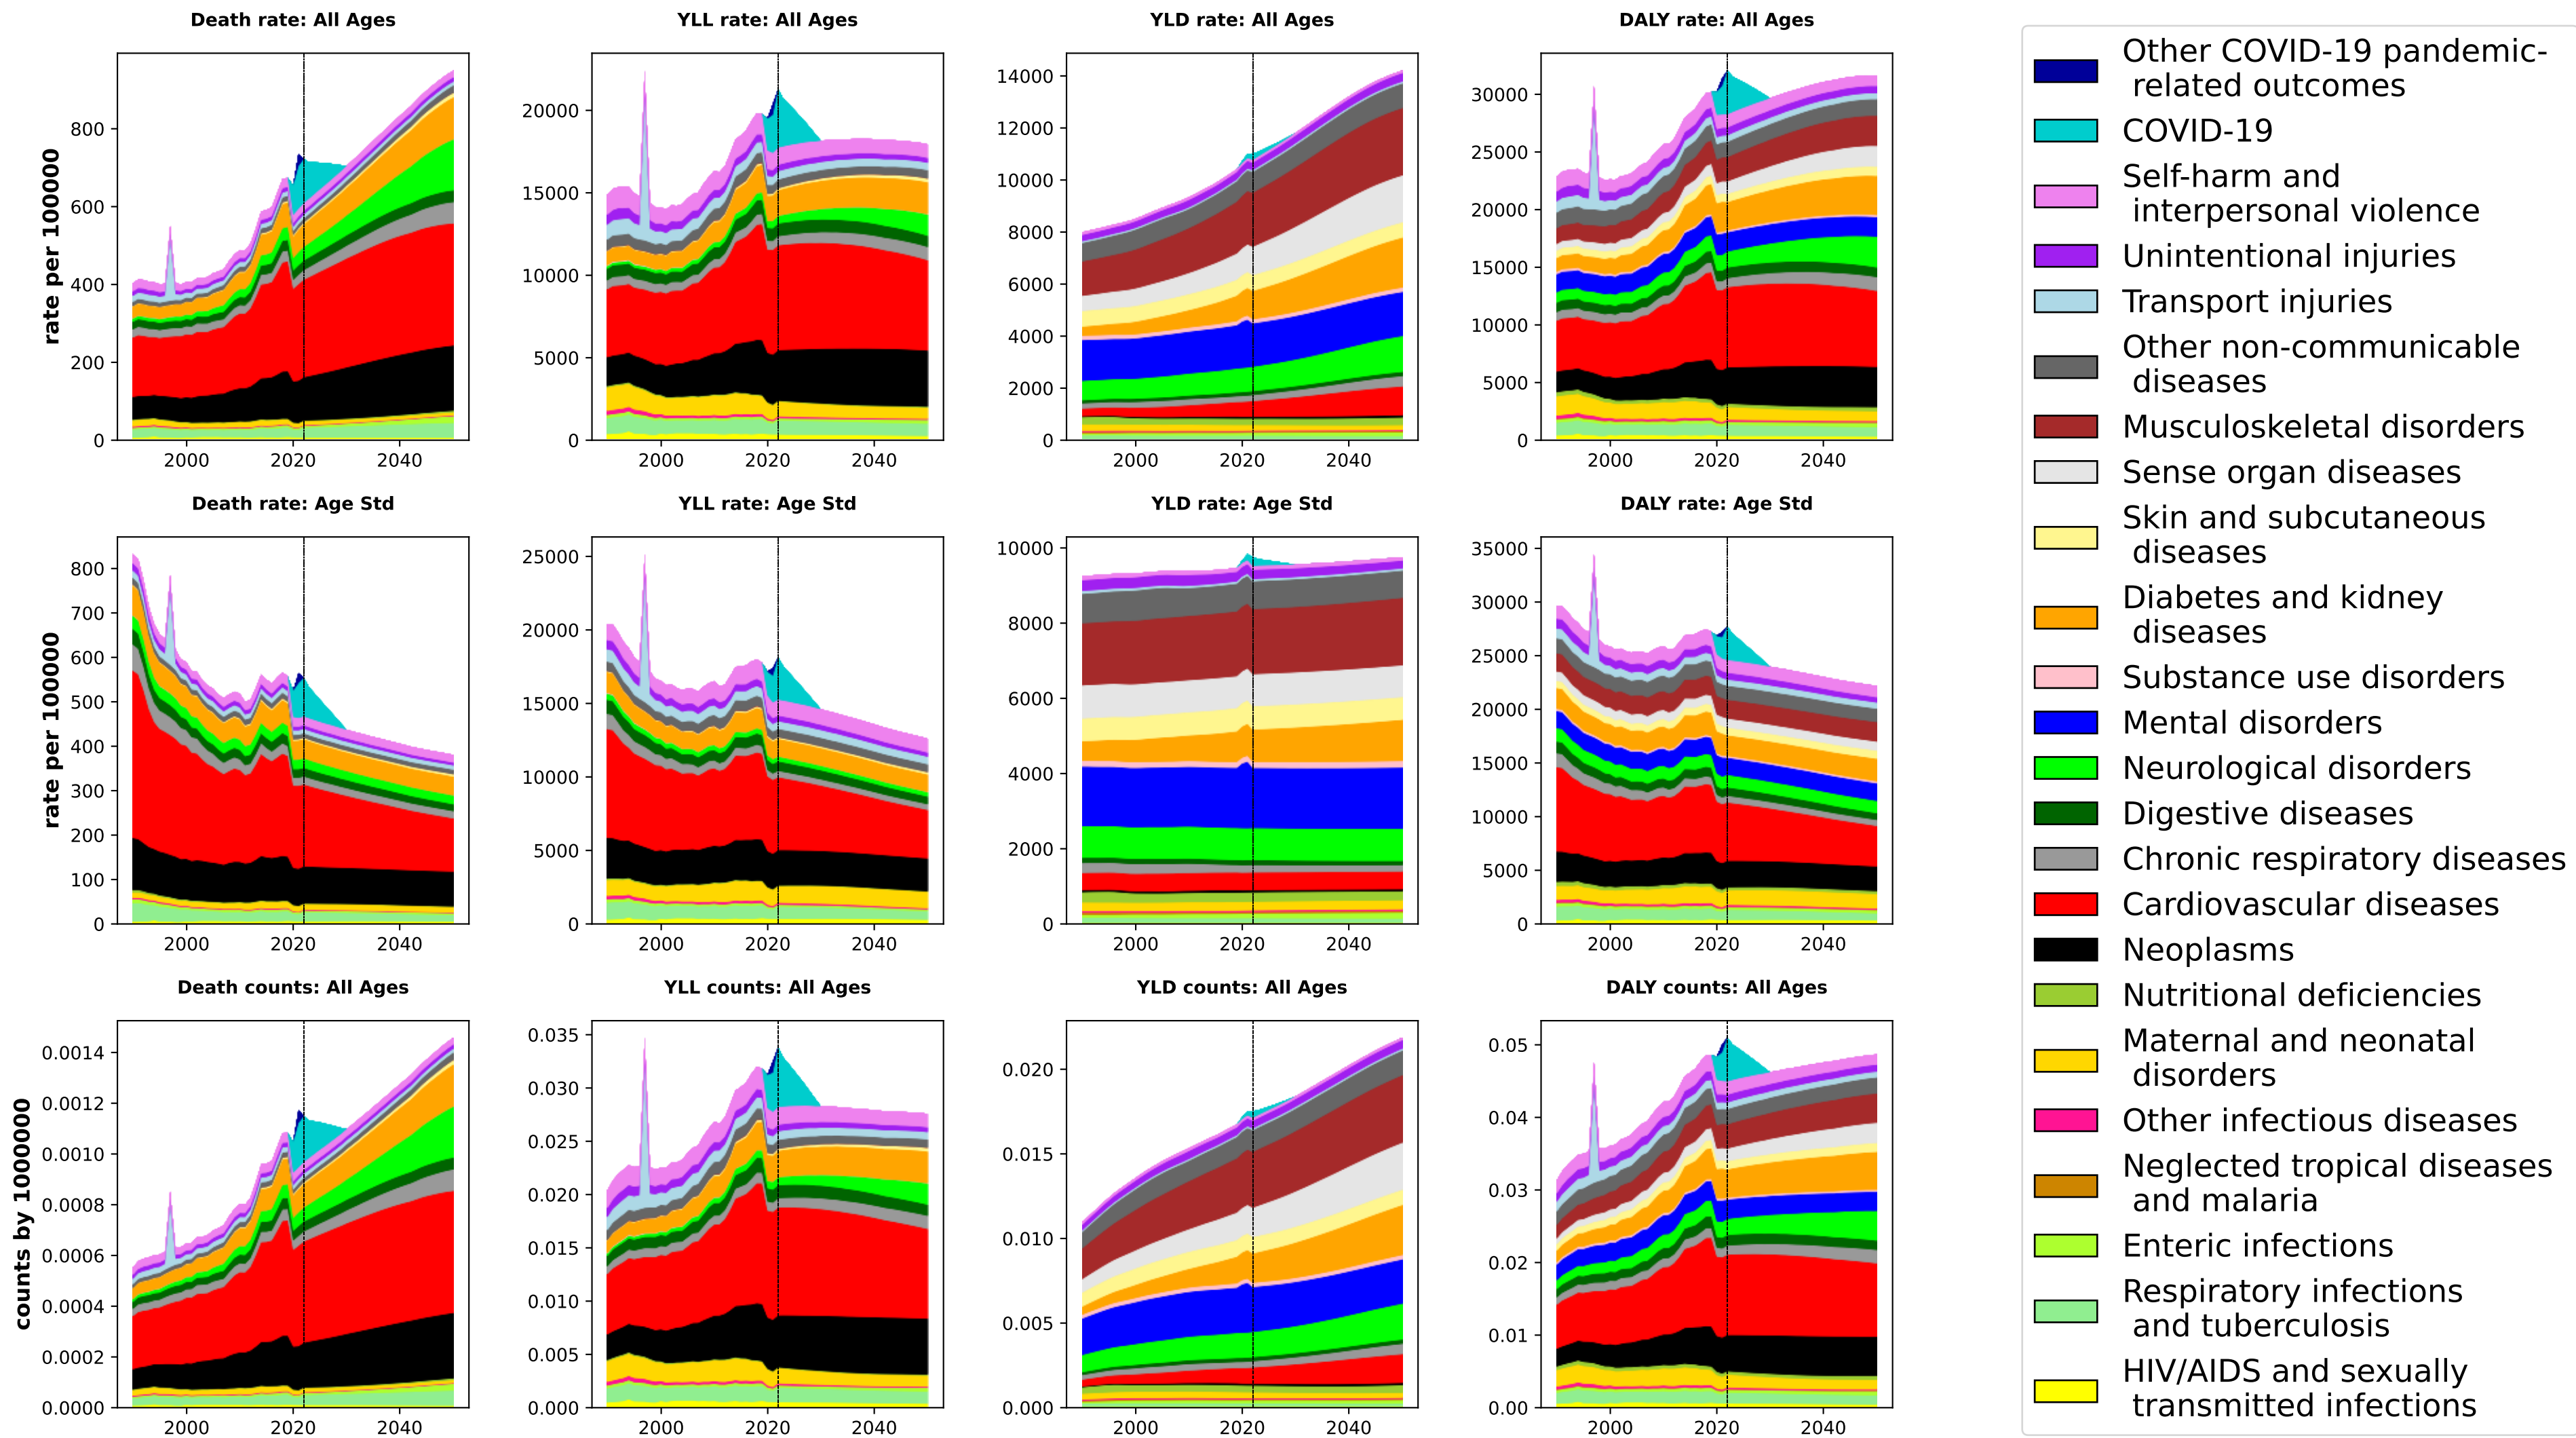

# Kiribati

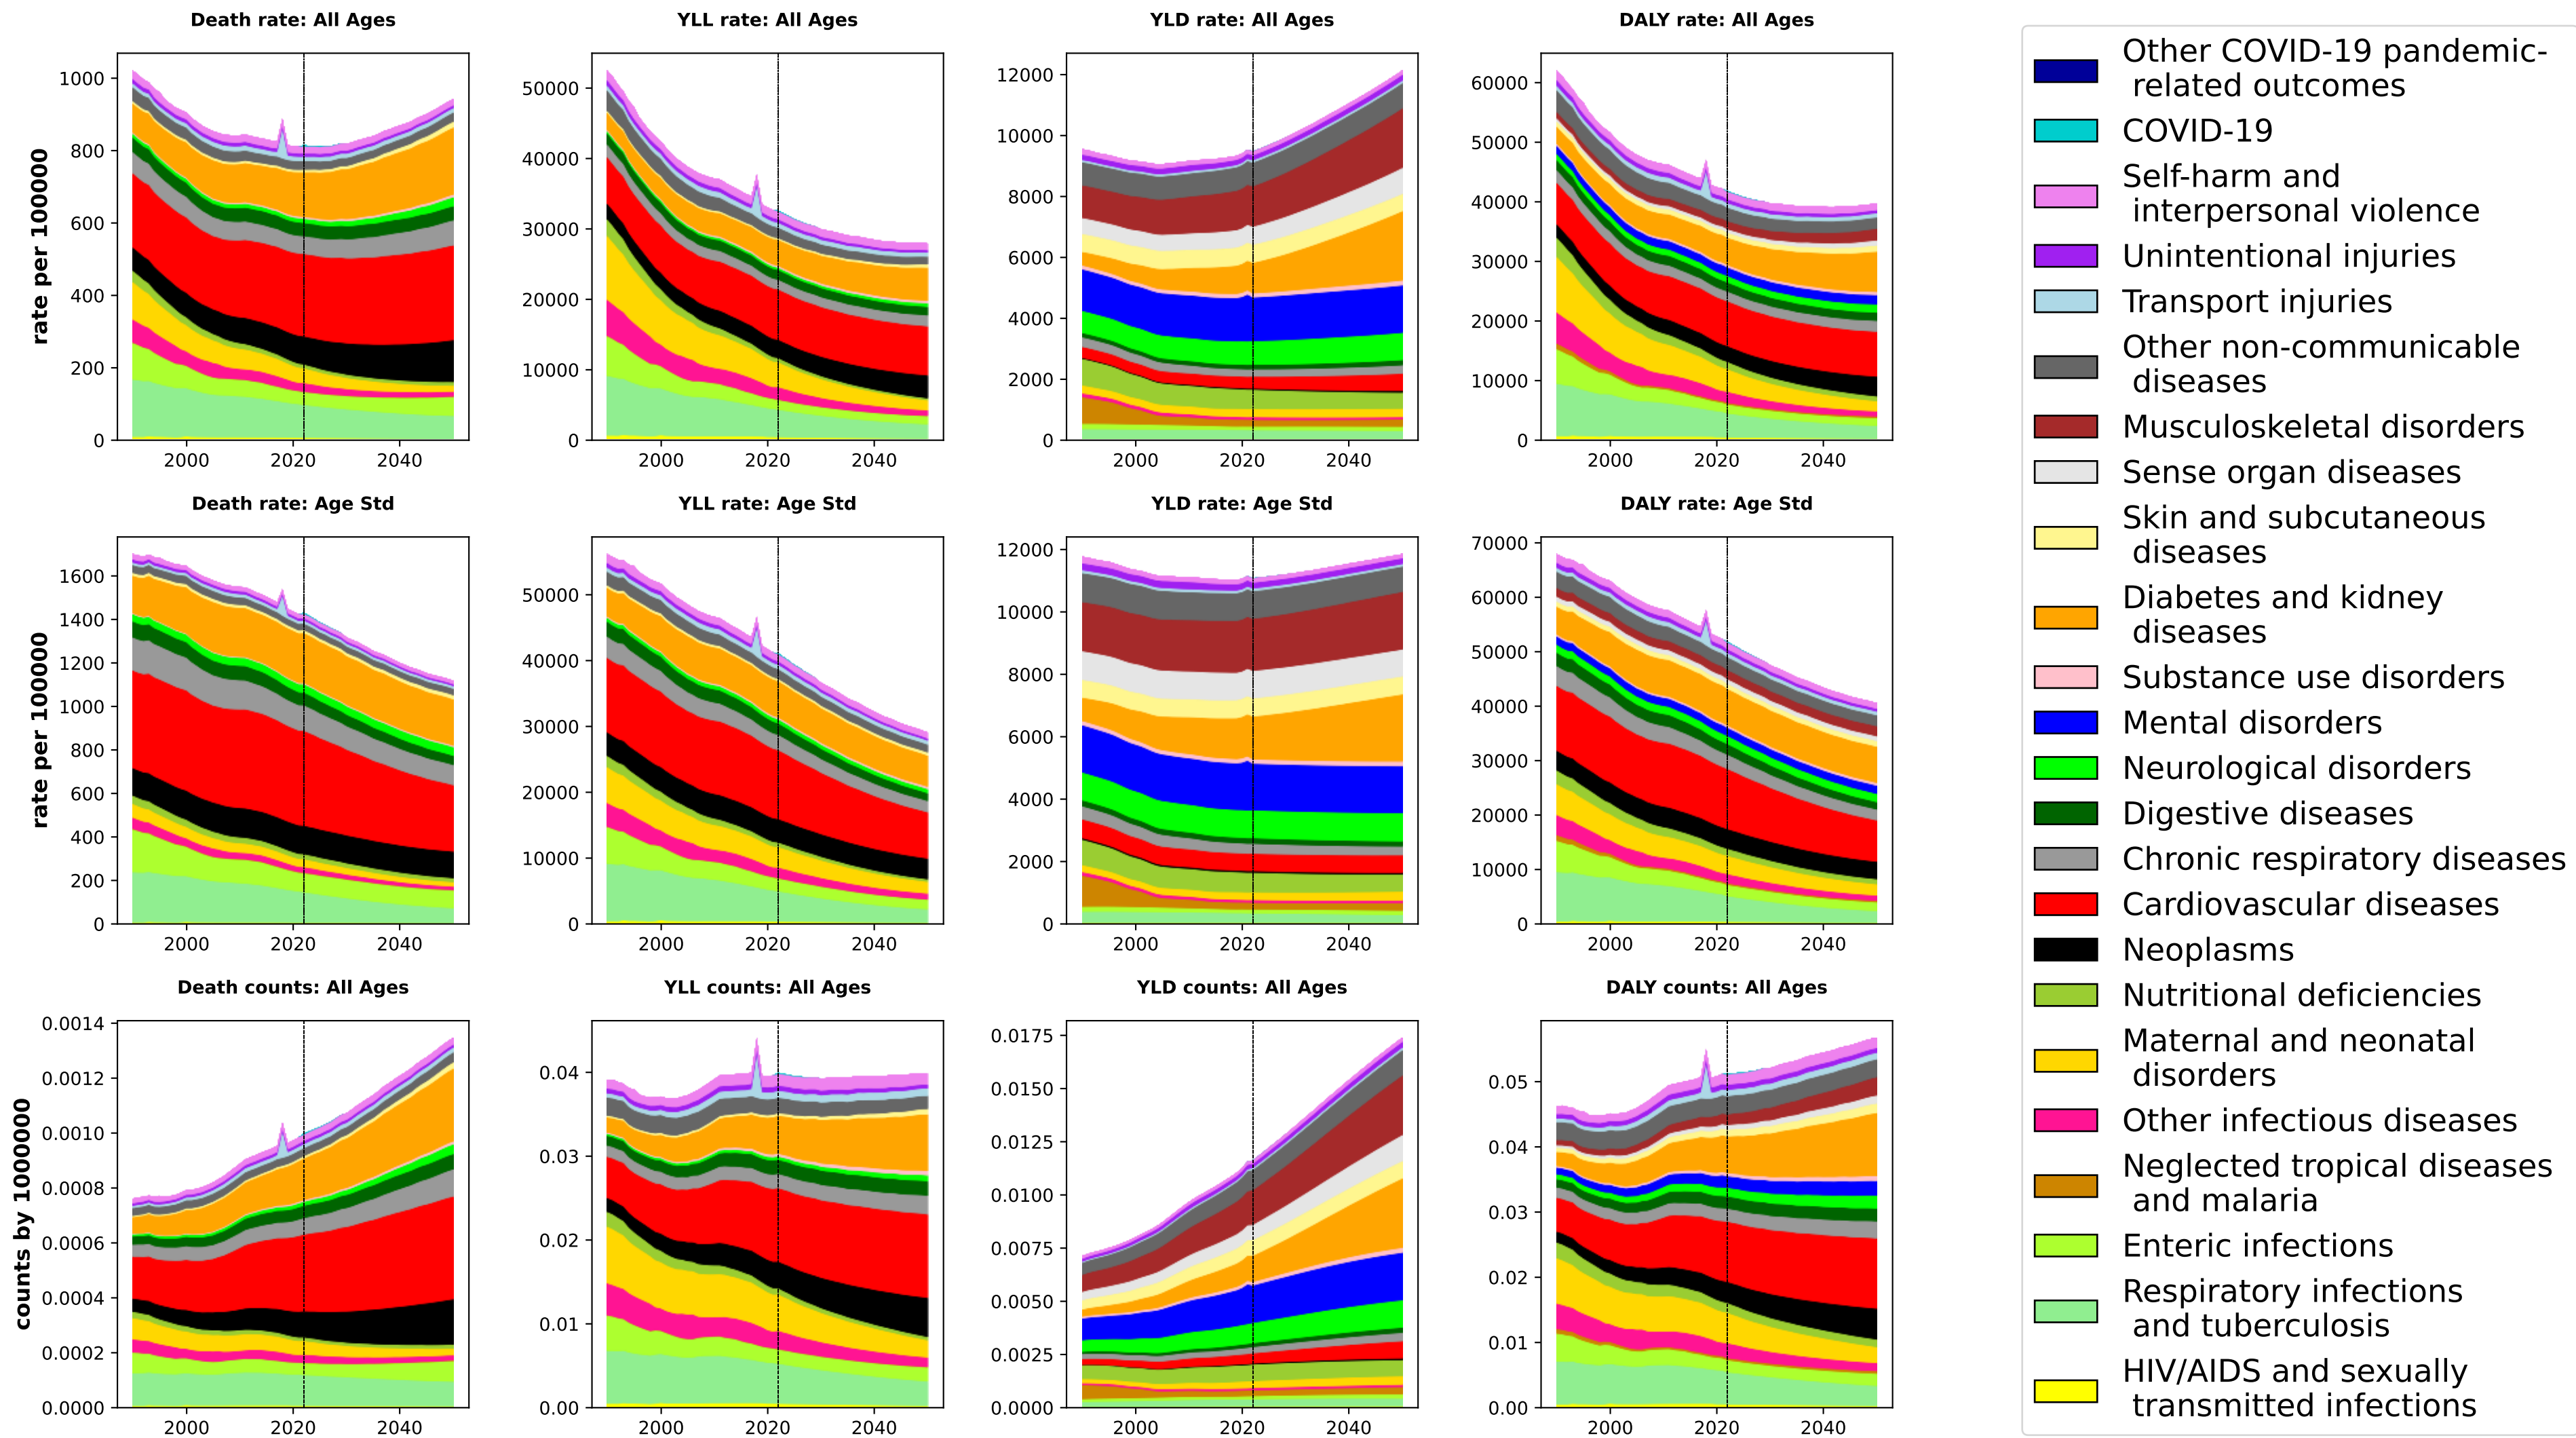

# Marshall Islands

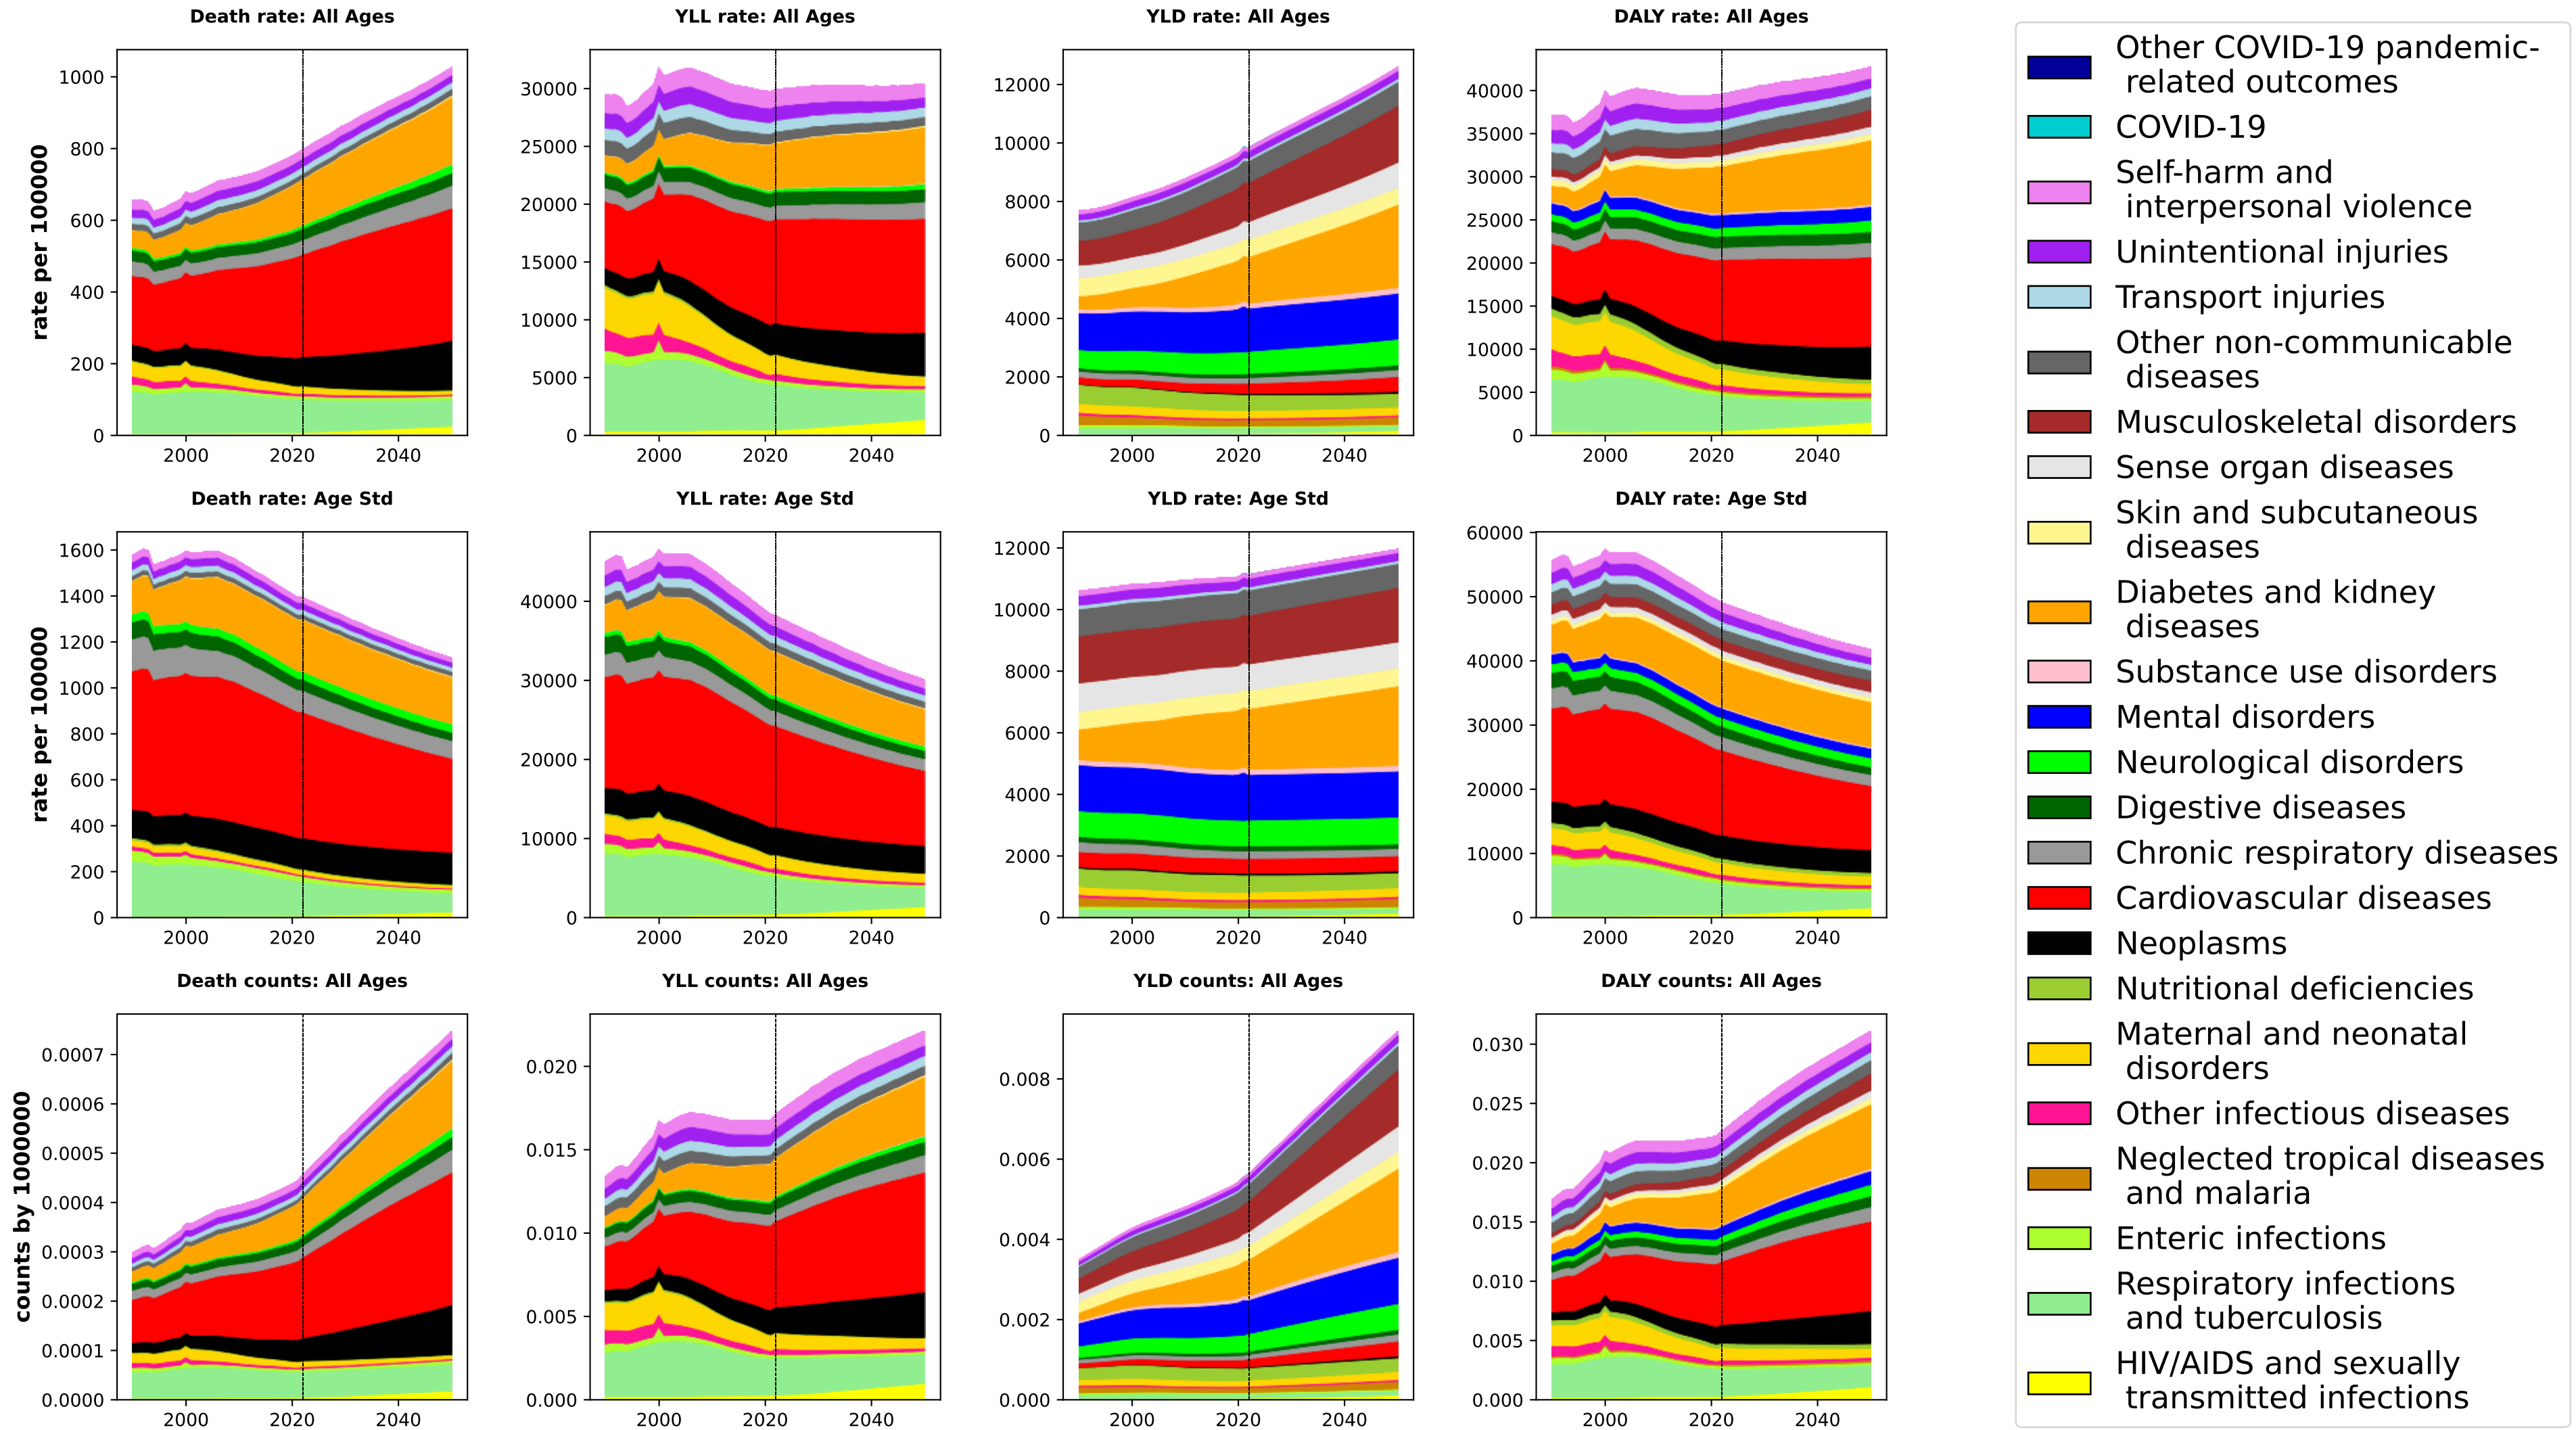

# Federated States of Micronesia

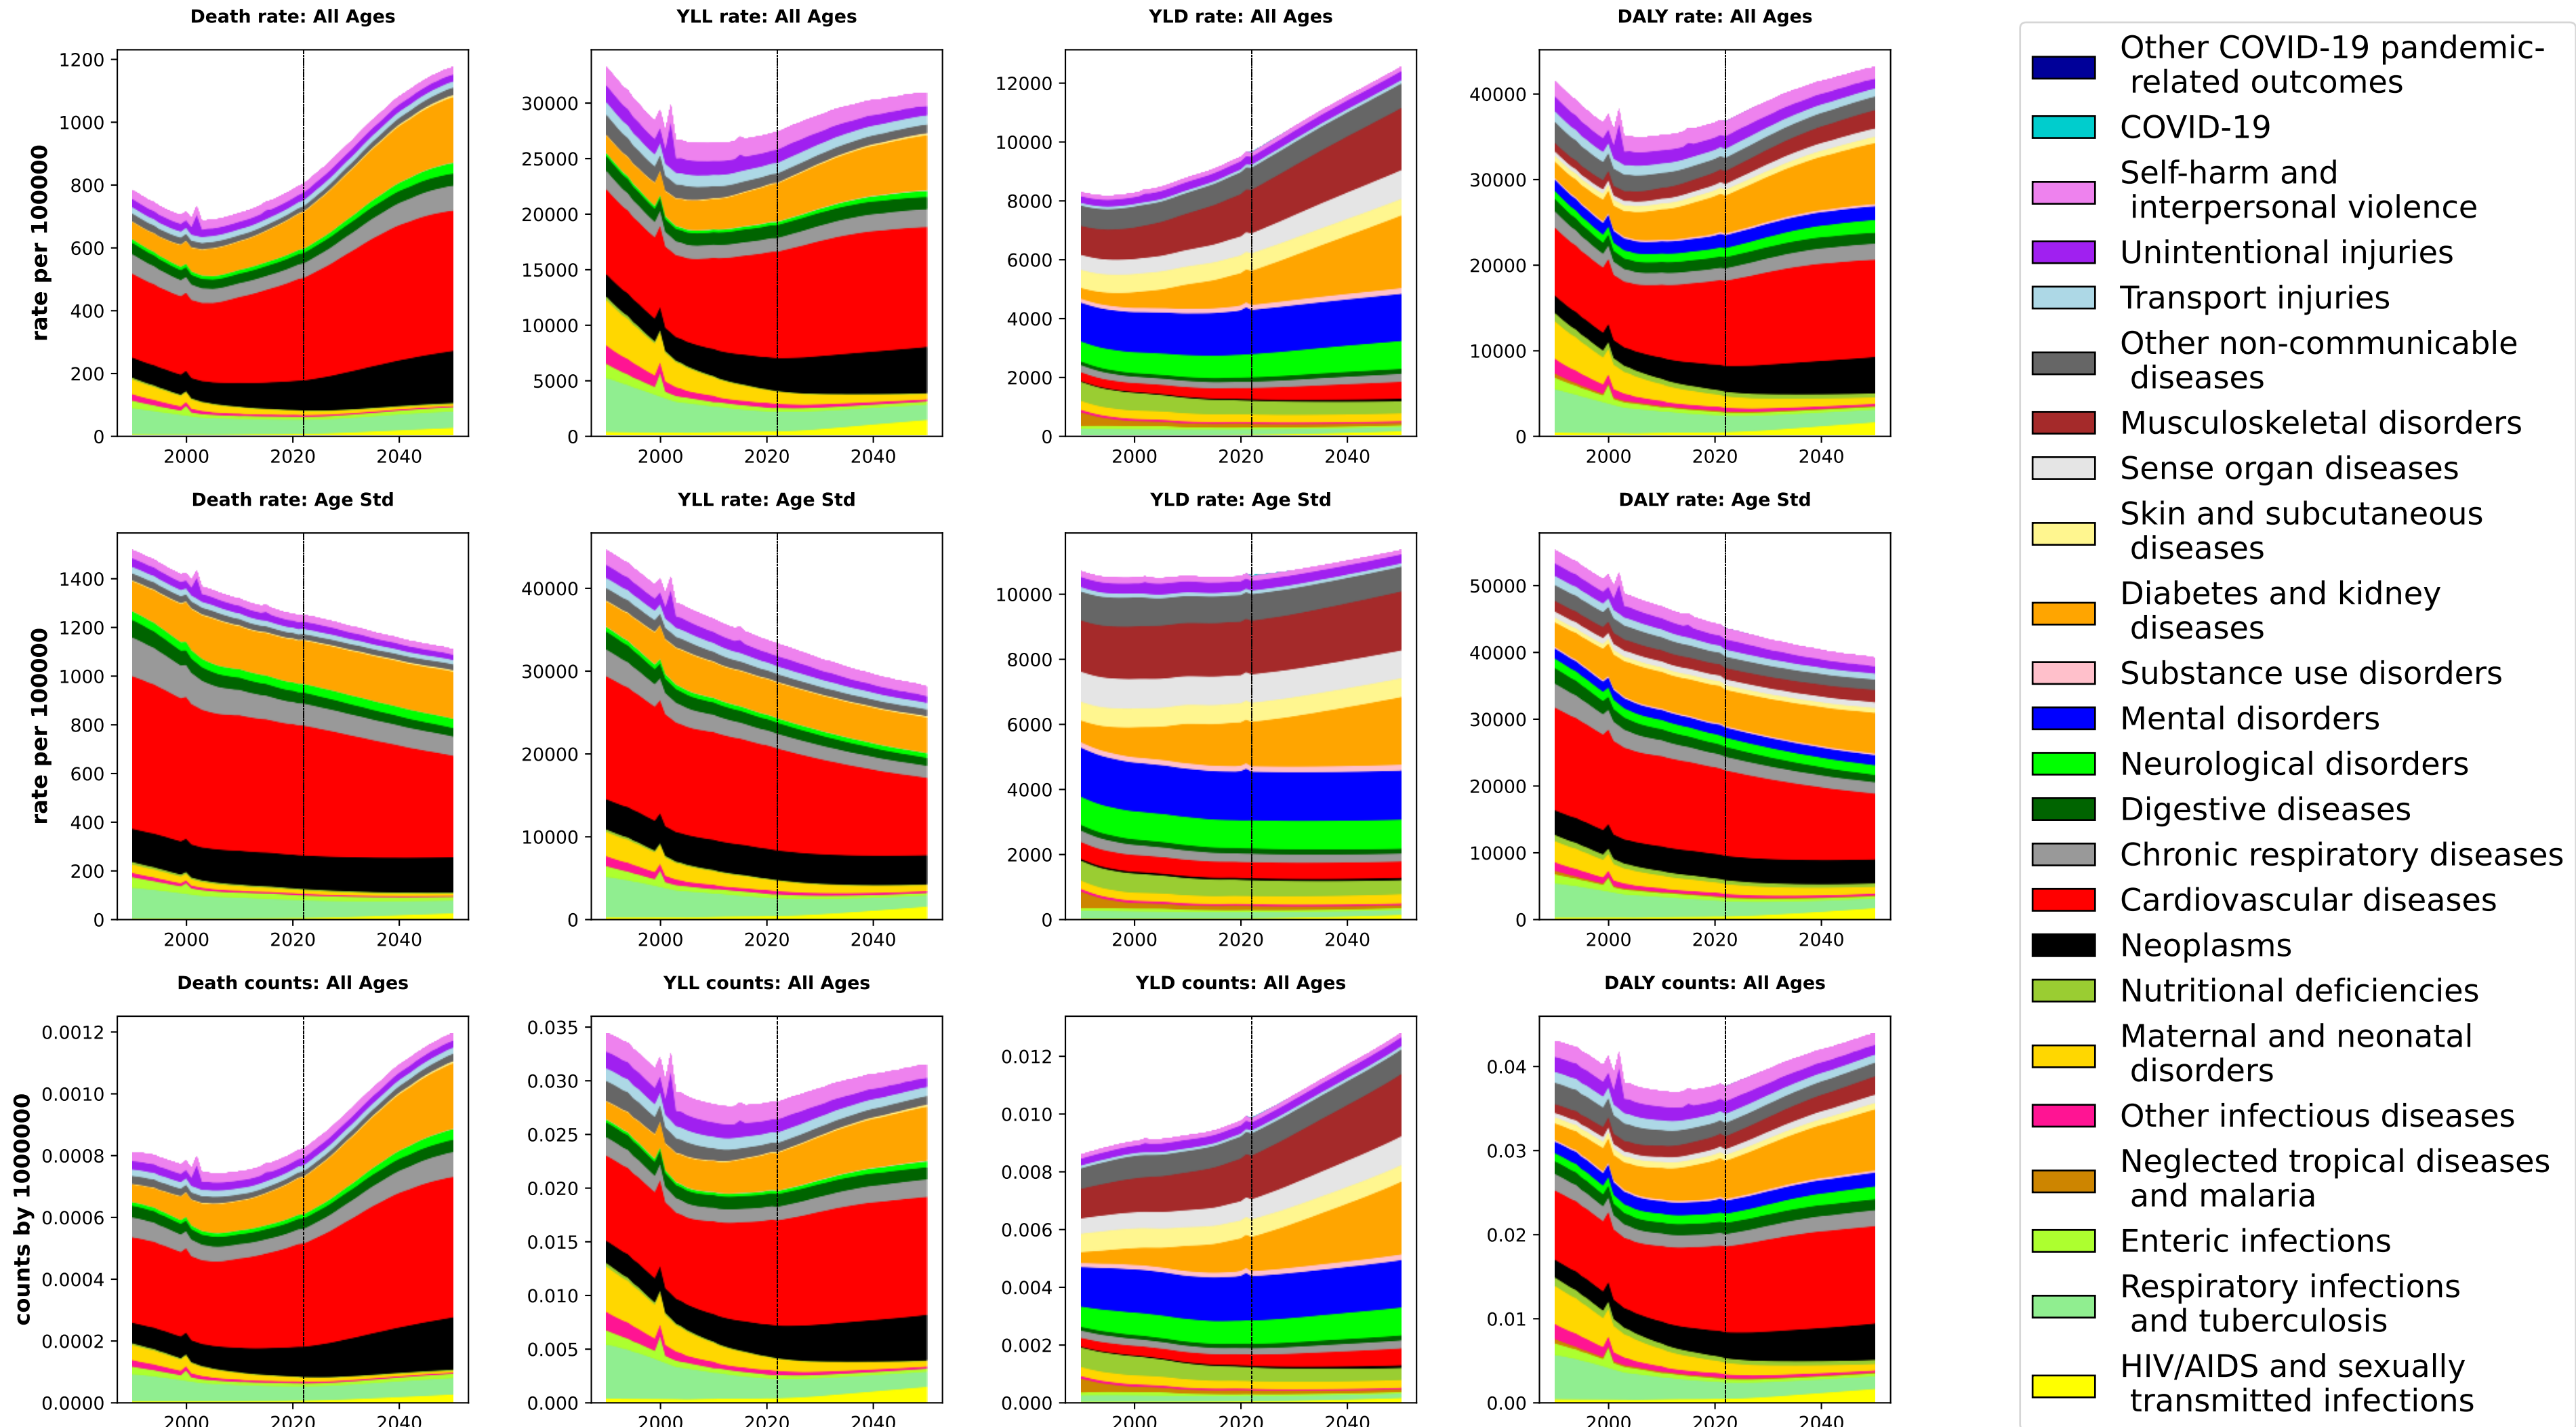

# Nauru

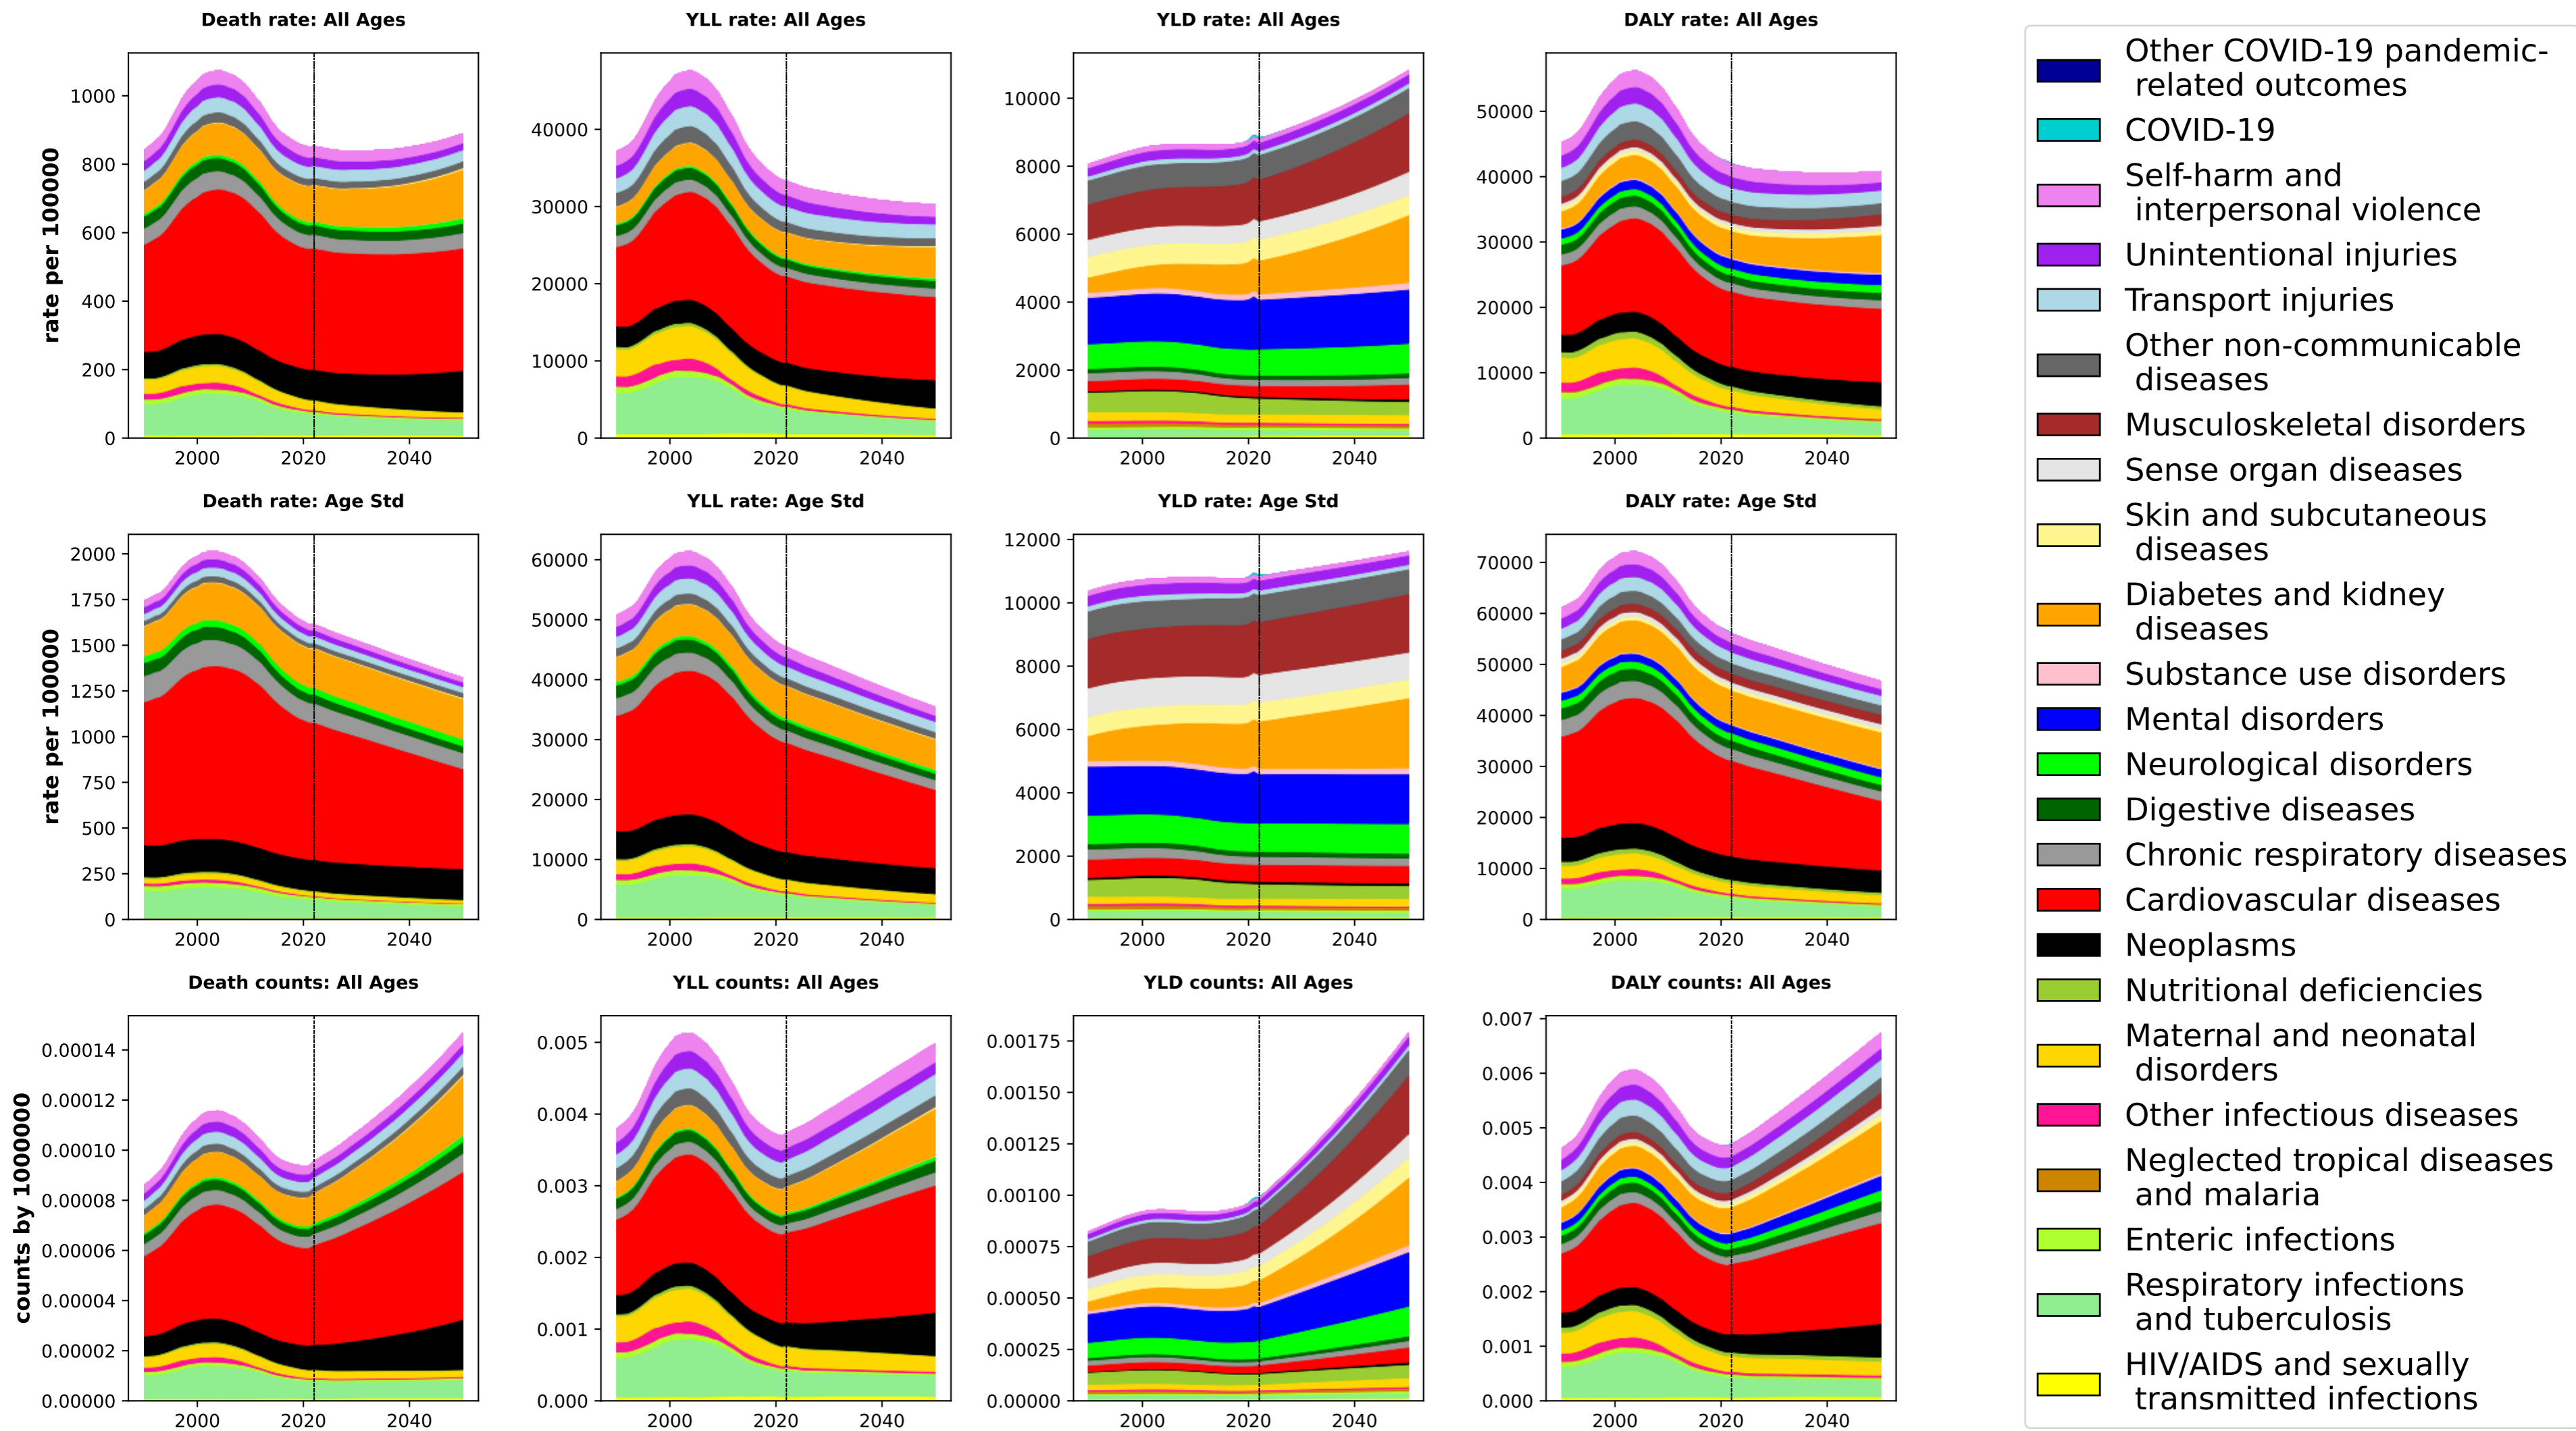

# Niue

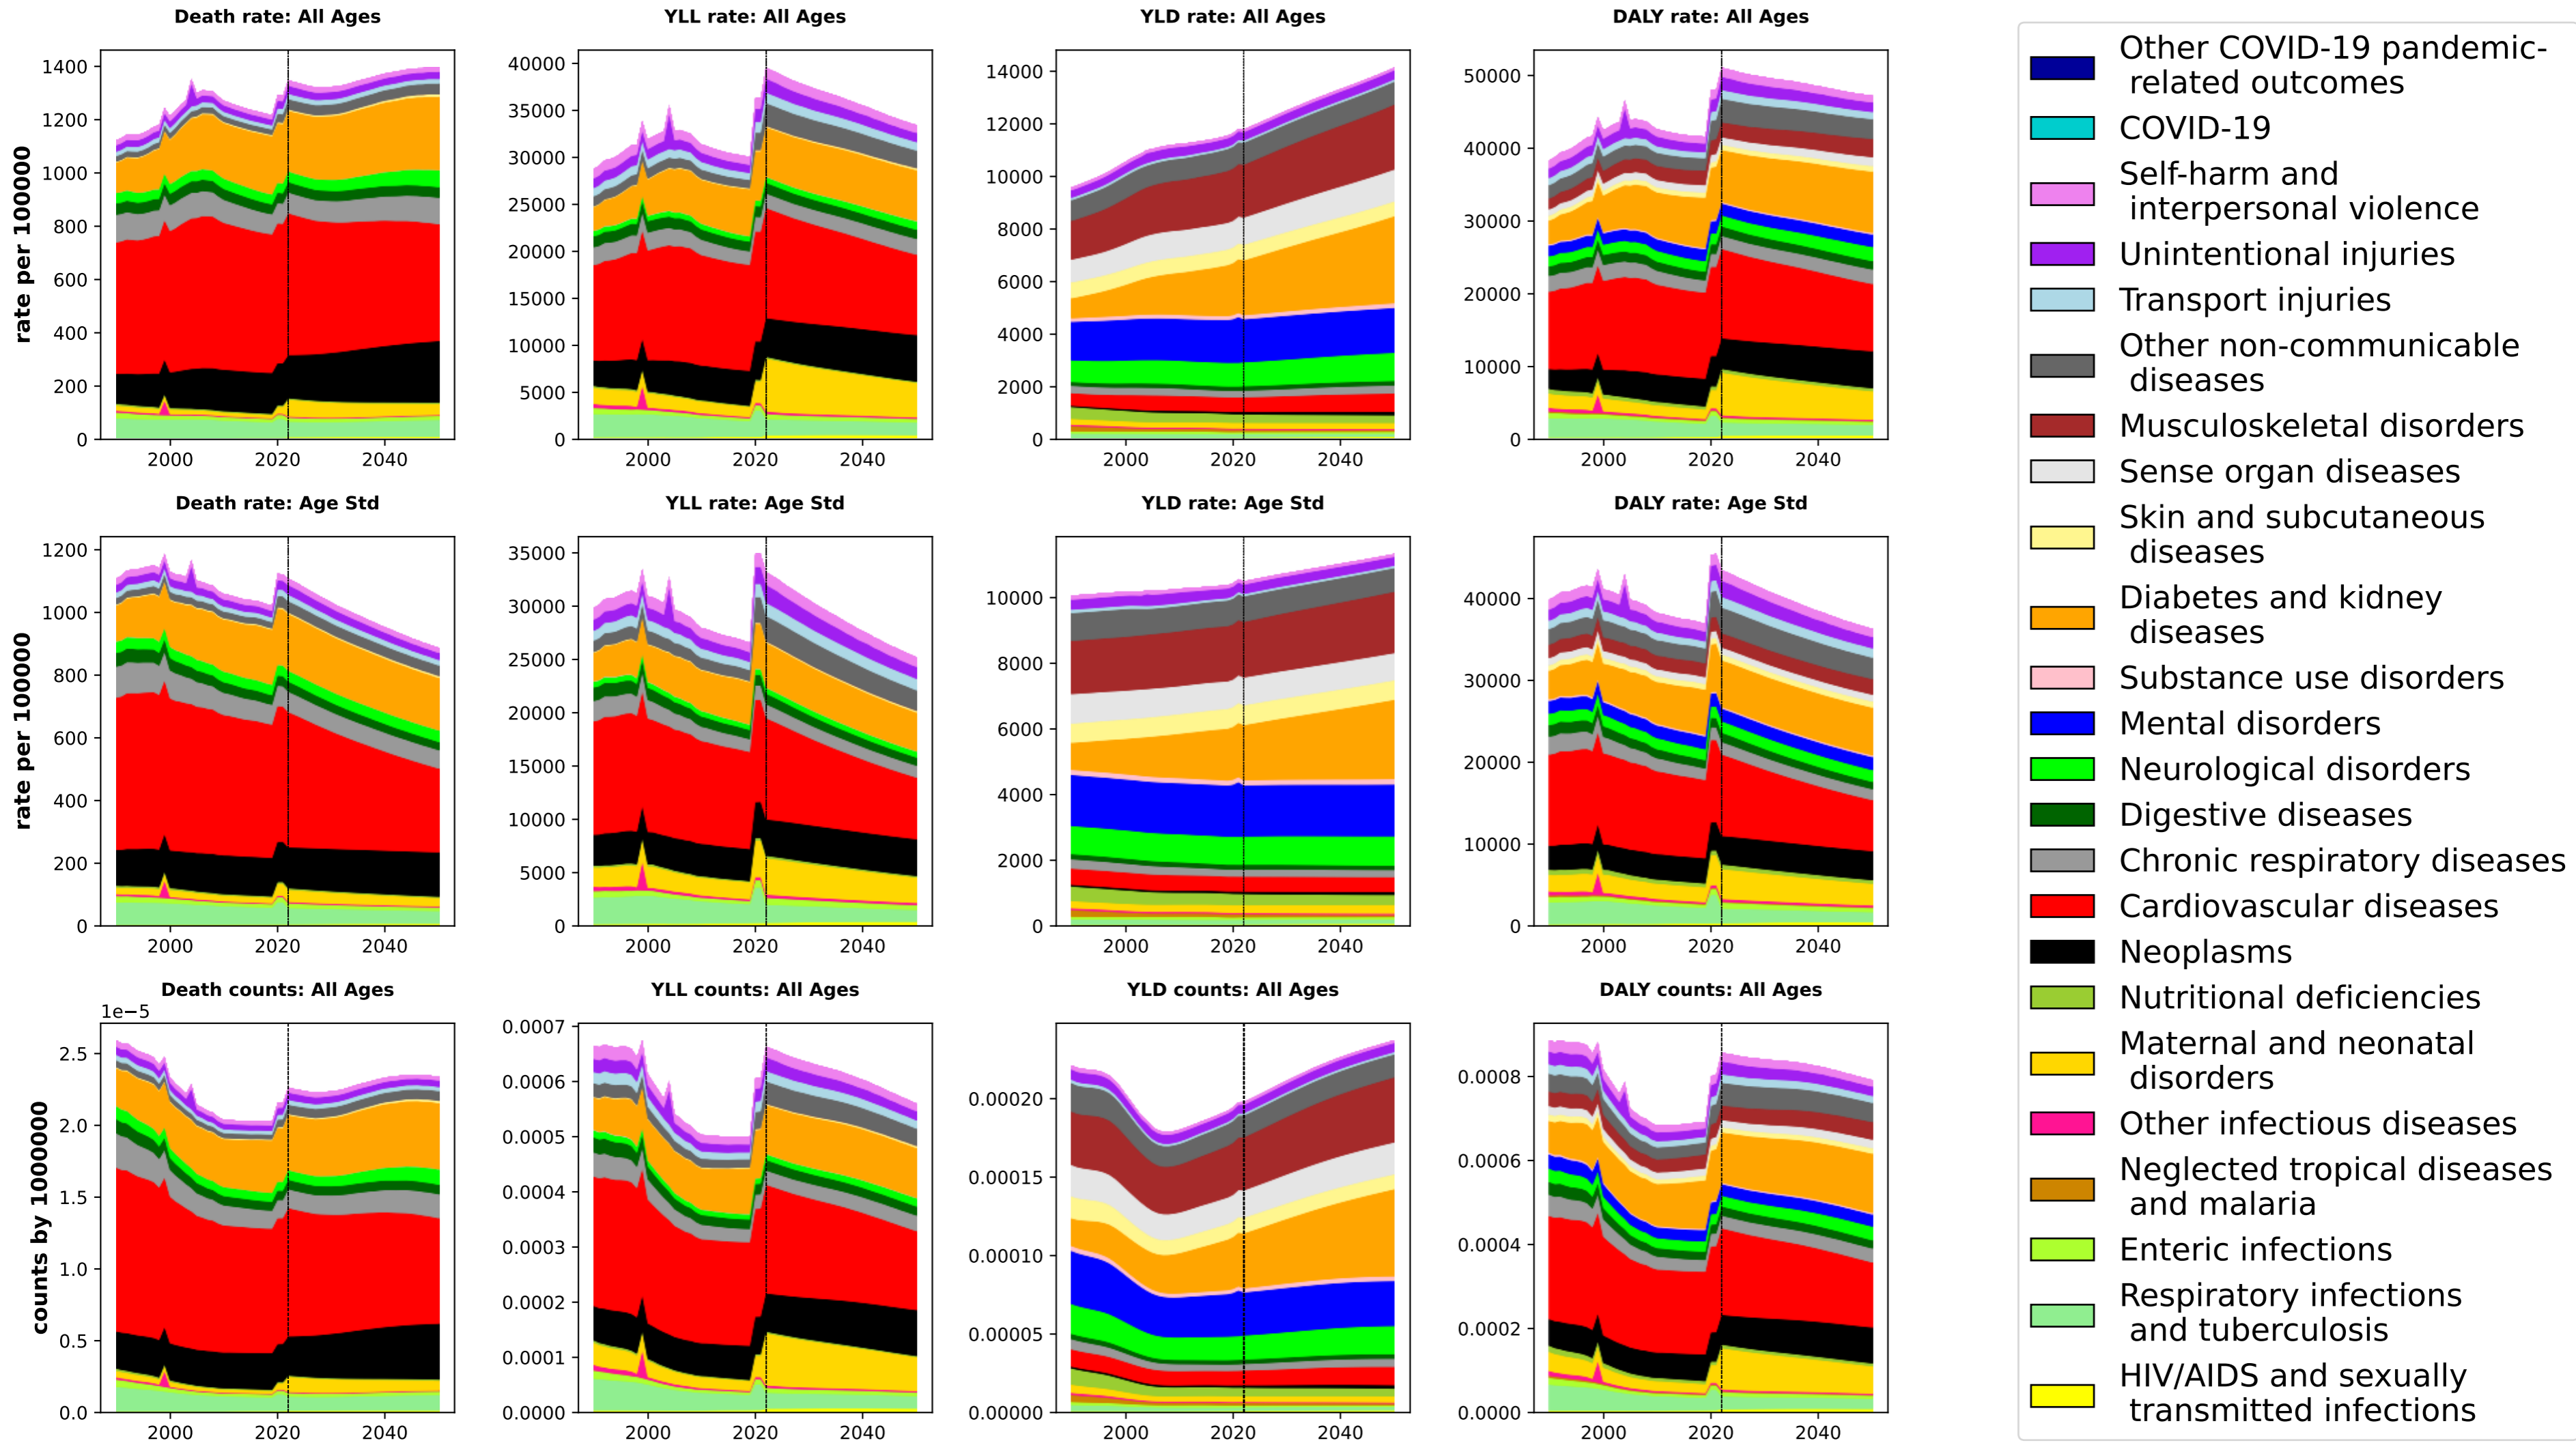

# Northern Mariana Islands

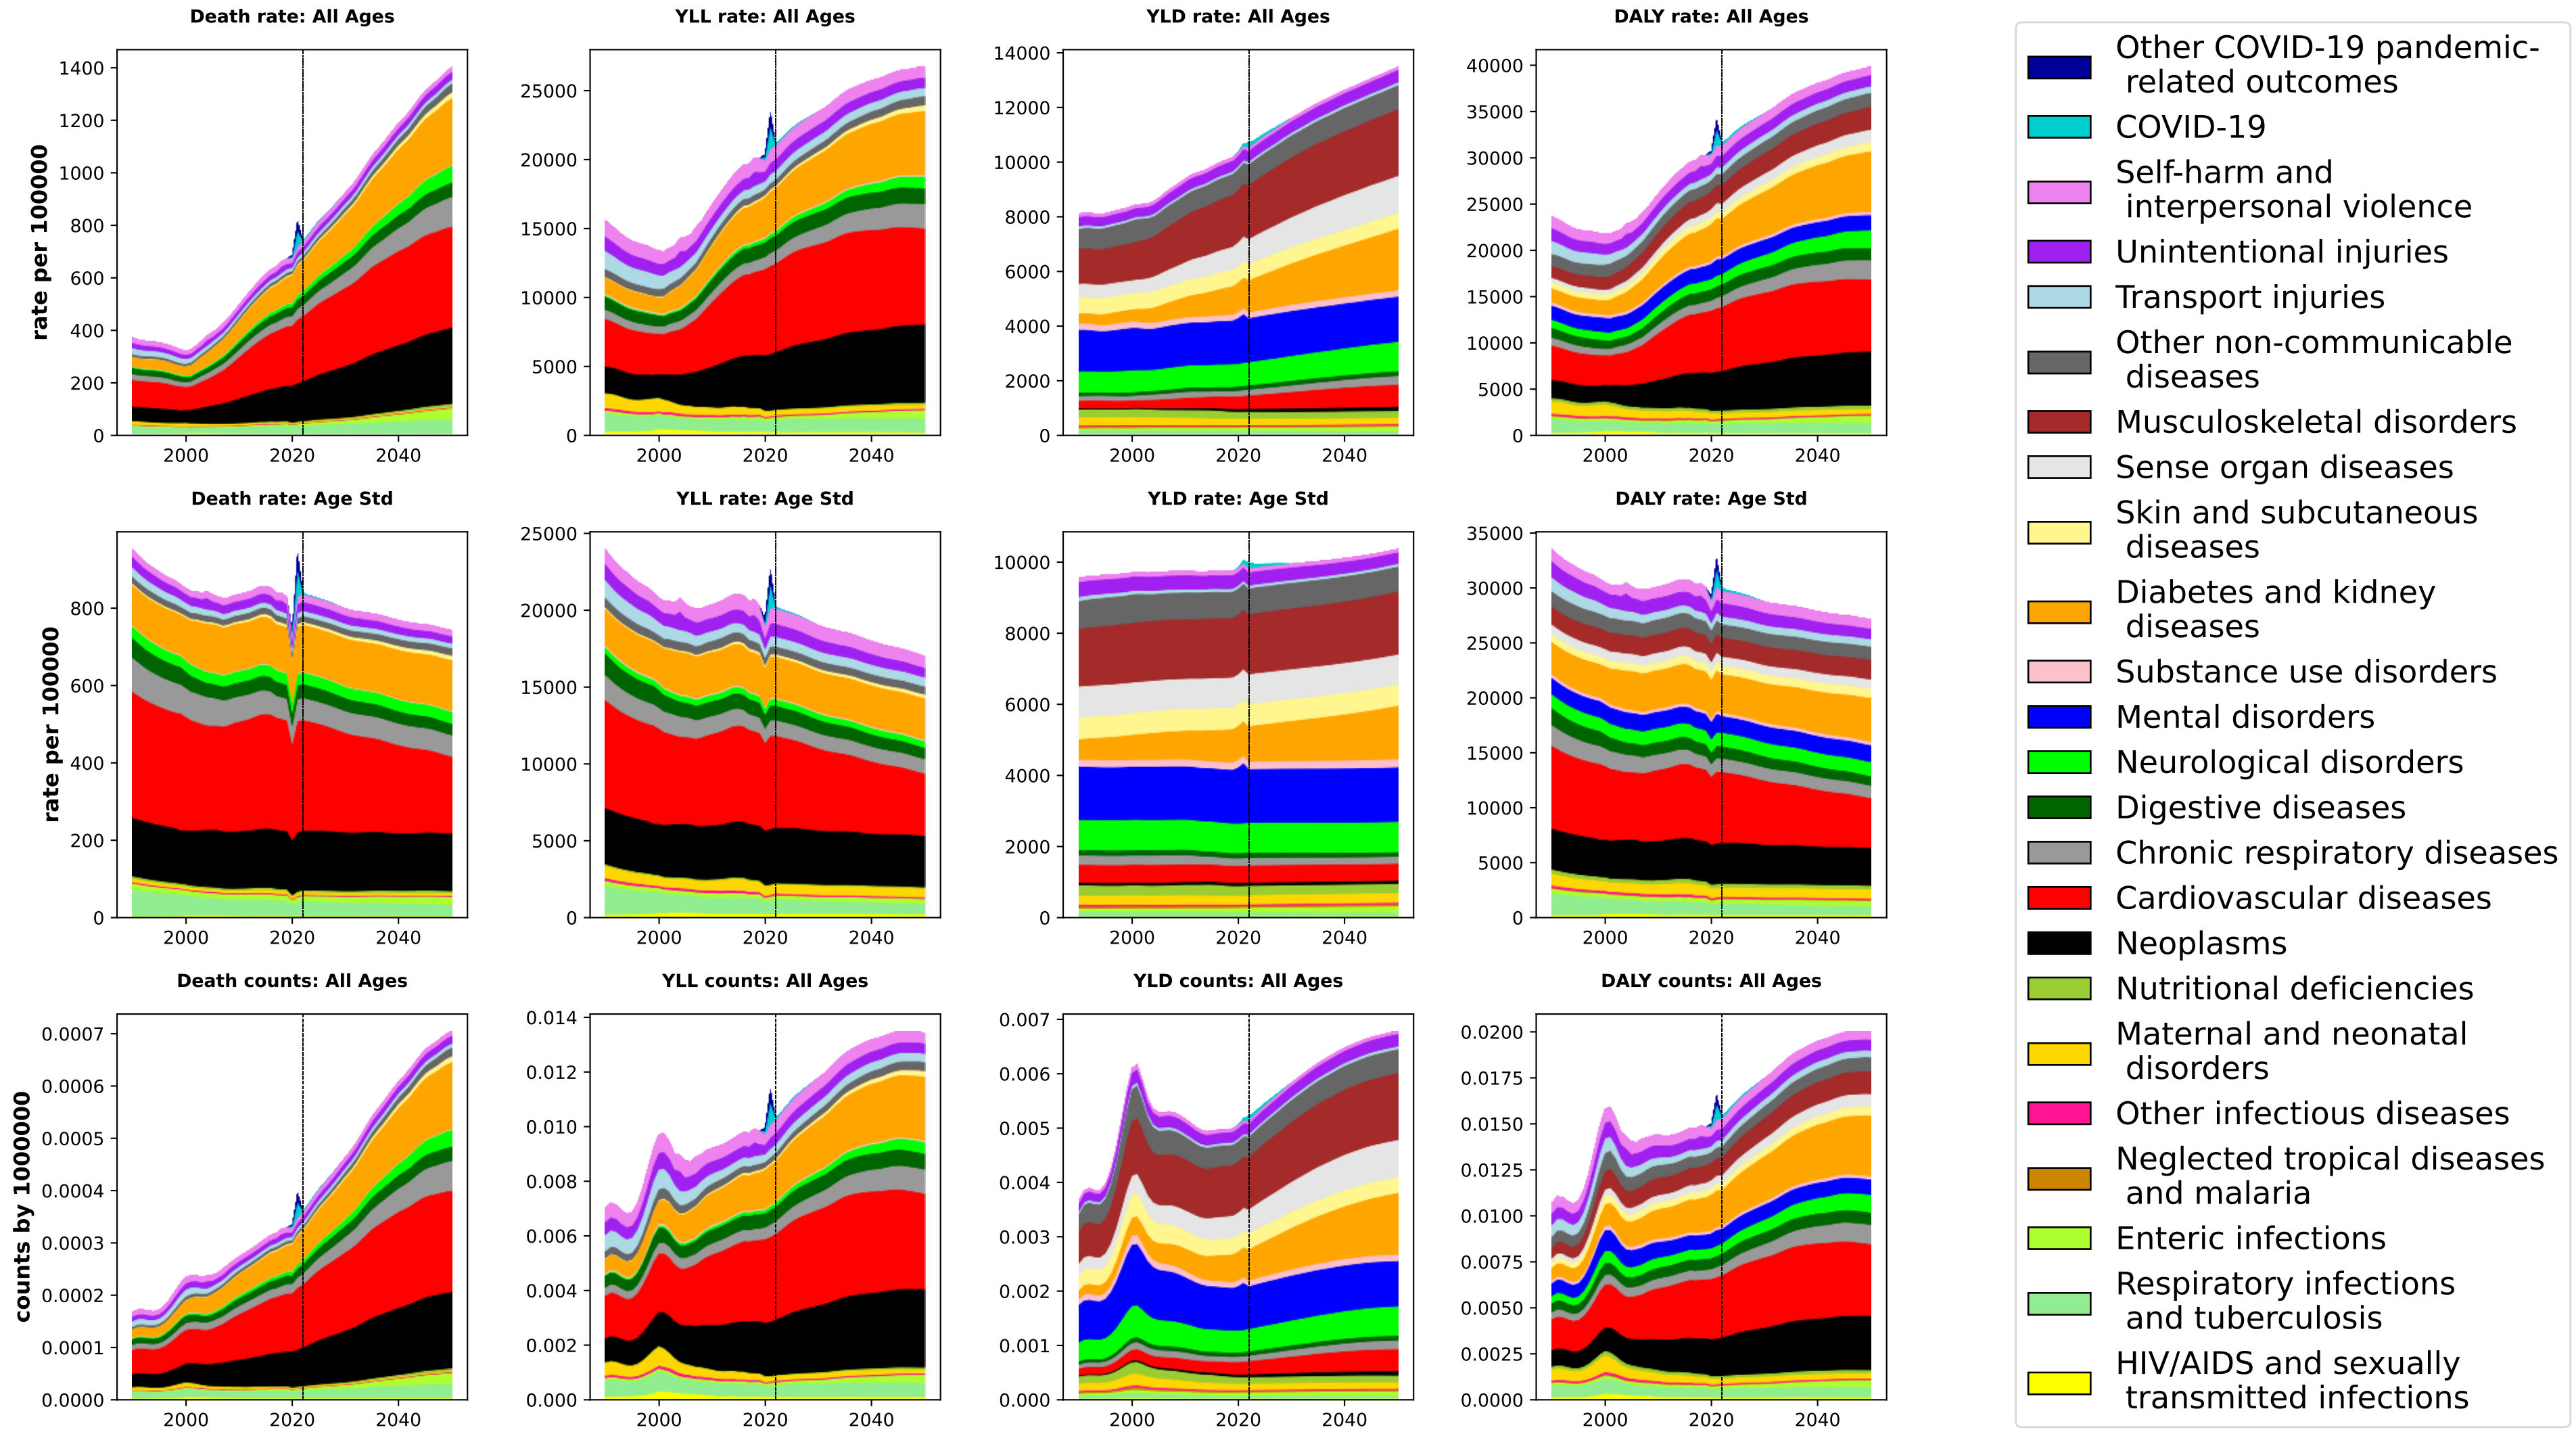



# Palau

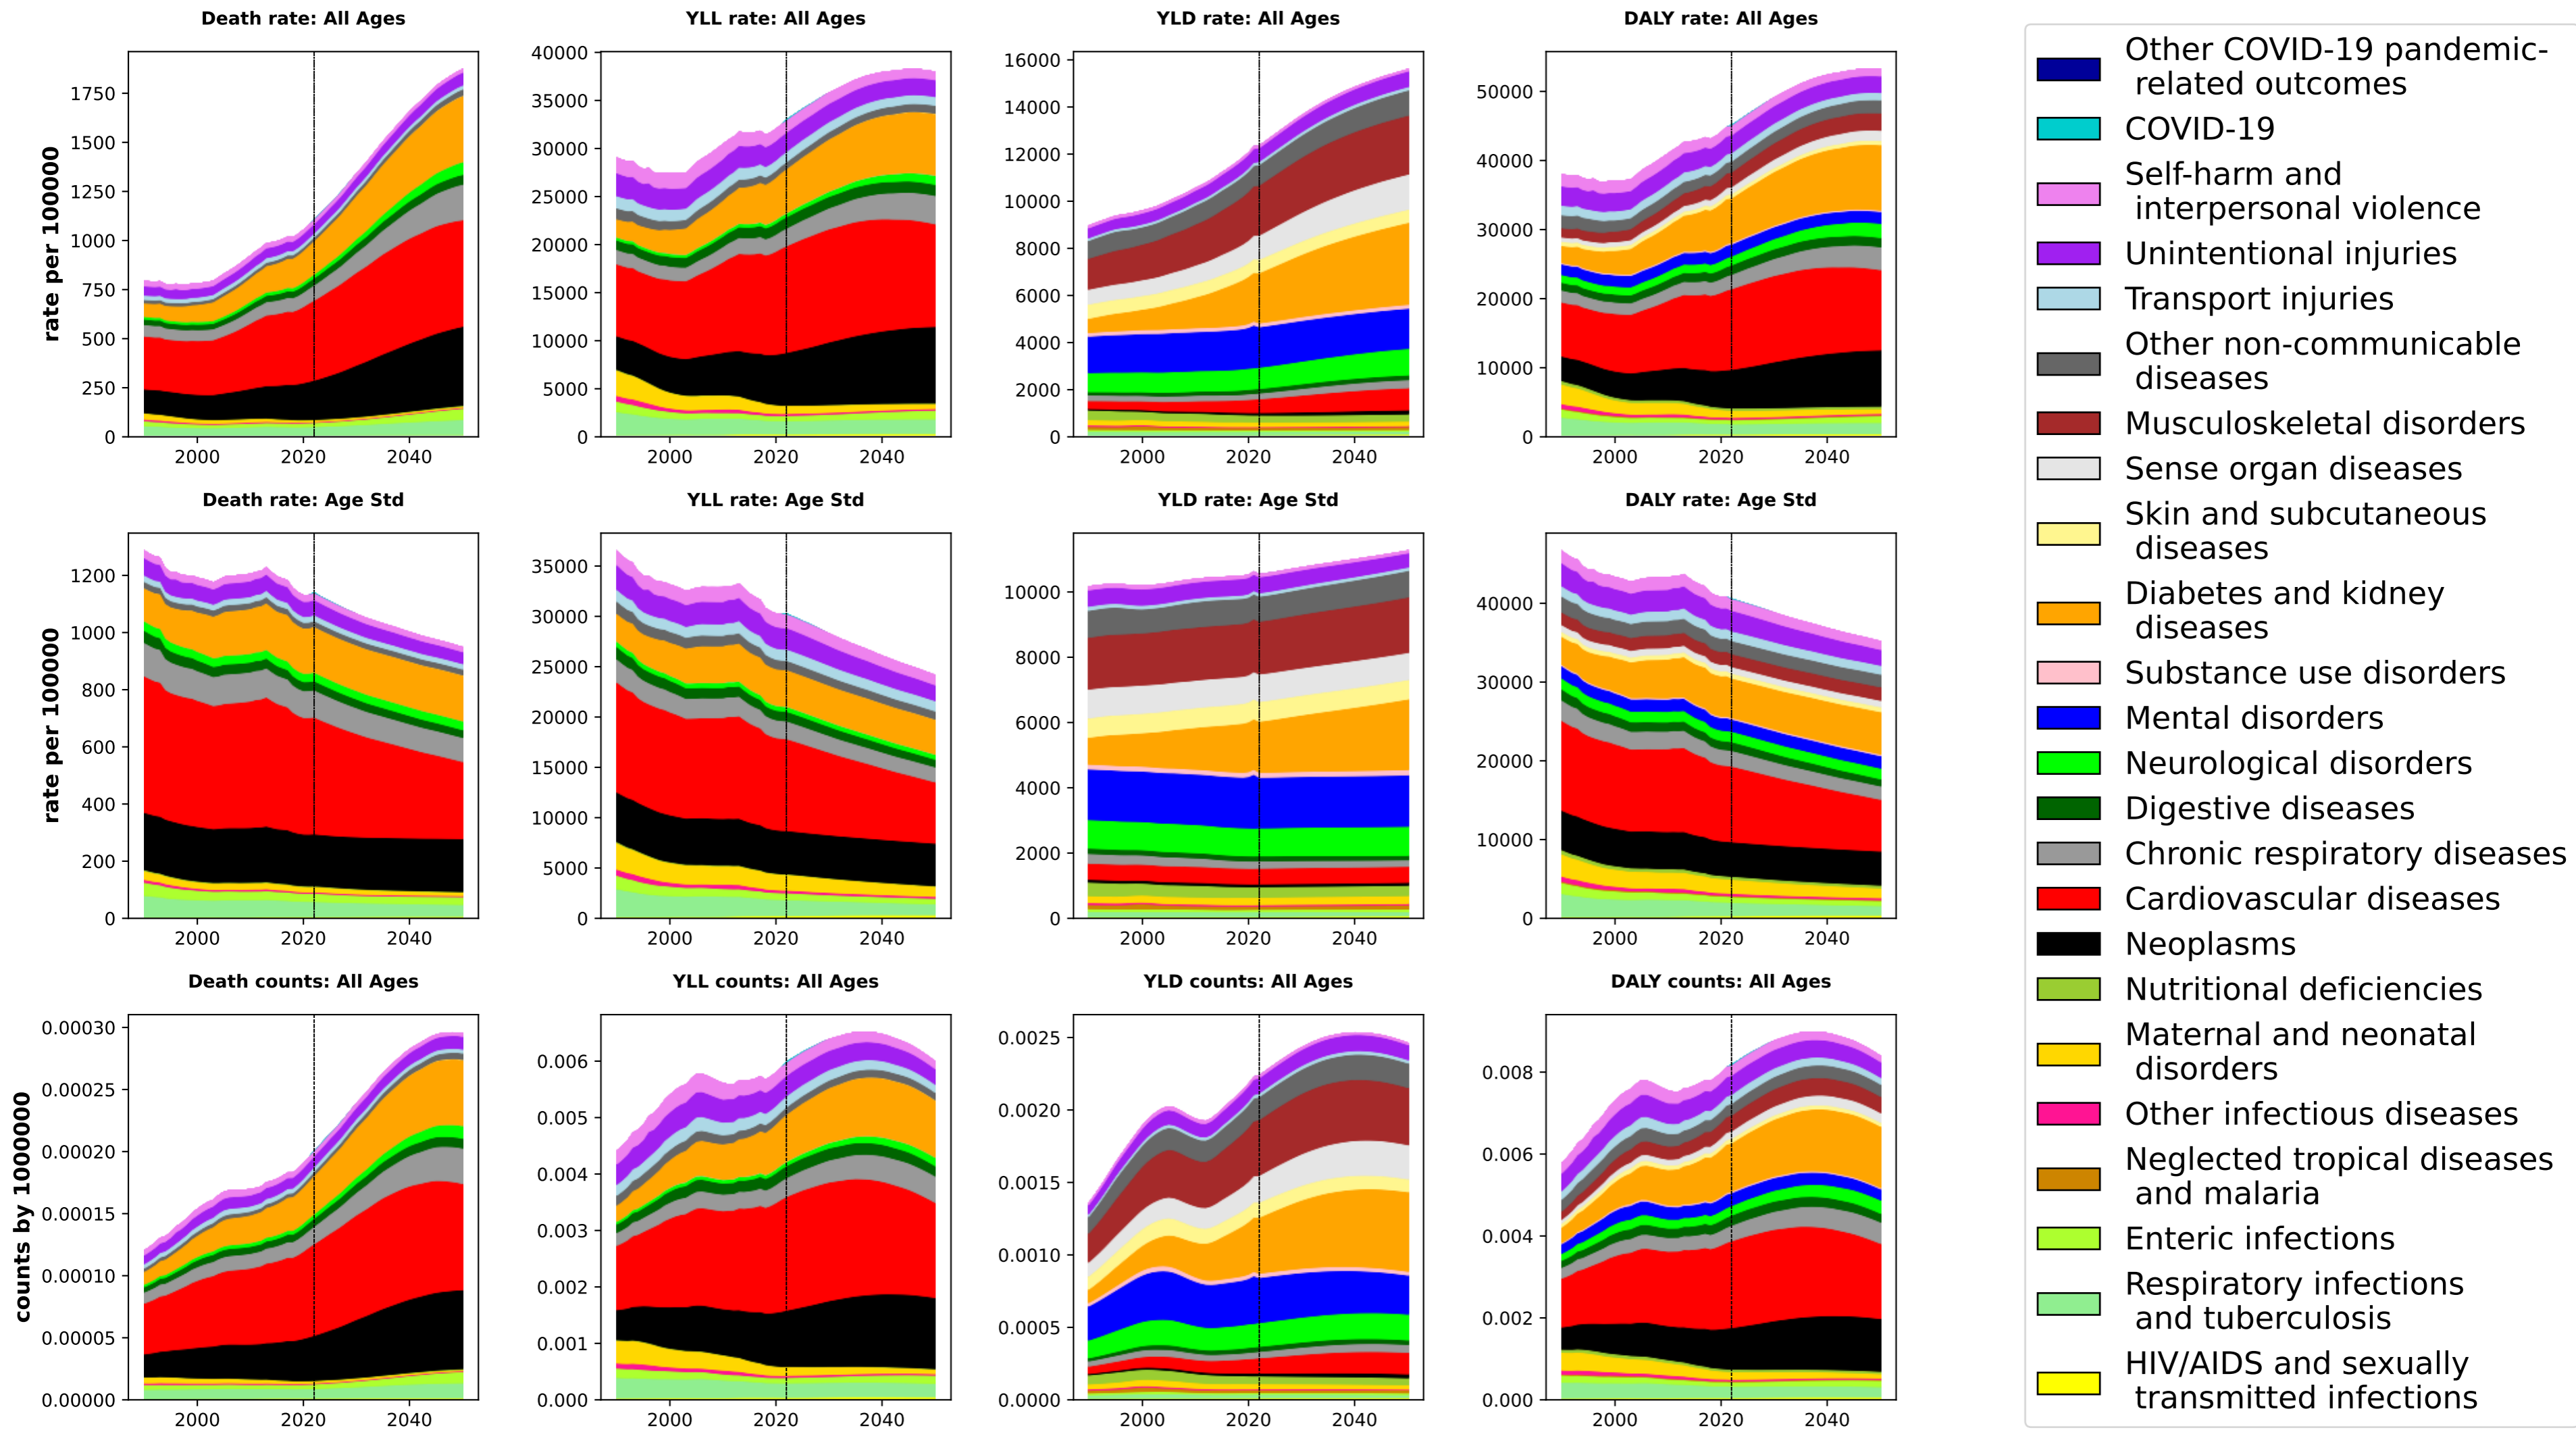

# Papua New Guinea

Supplemental Results Figure S6. Cause level 2 area plots for 4 burden measures for reference scenario by location, 1990-2050

849

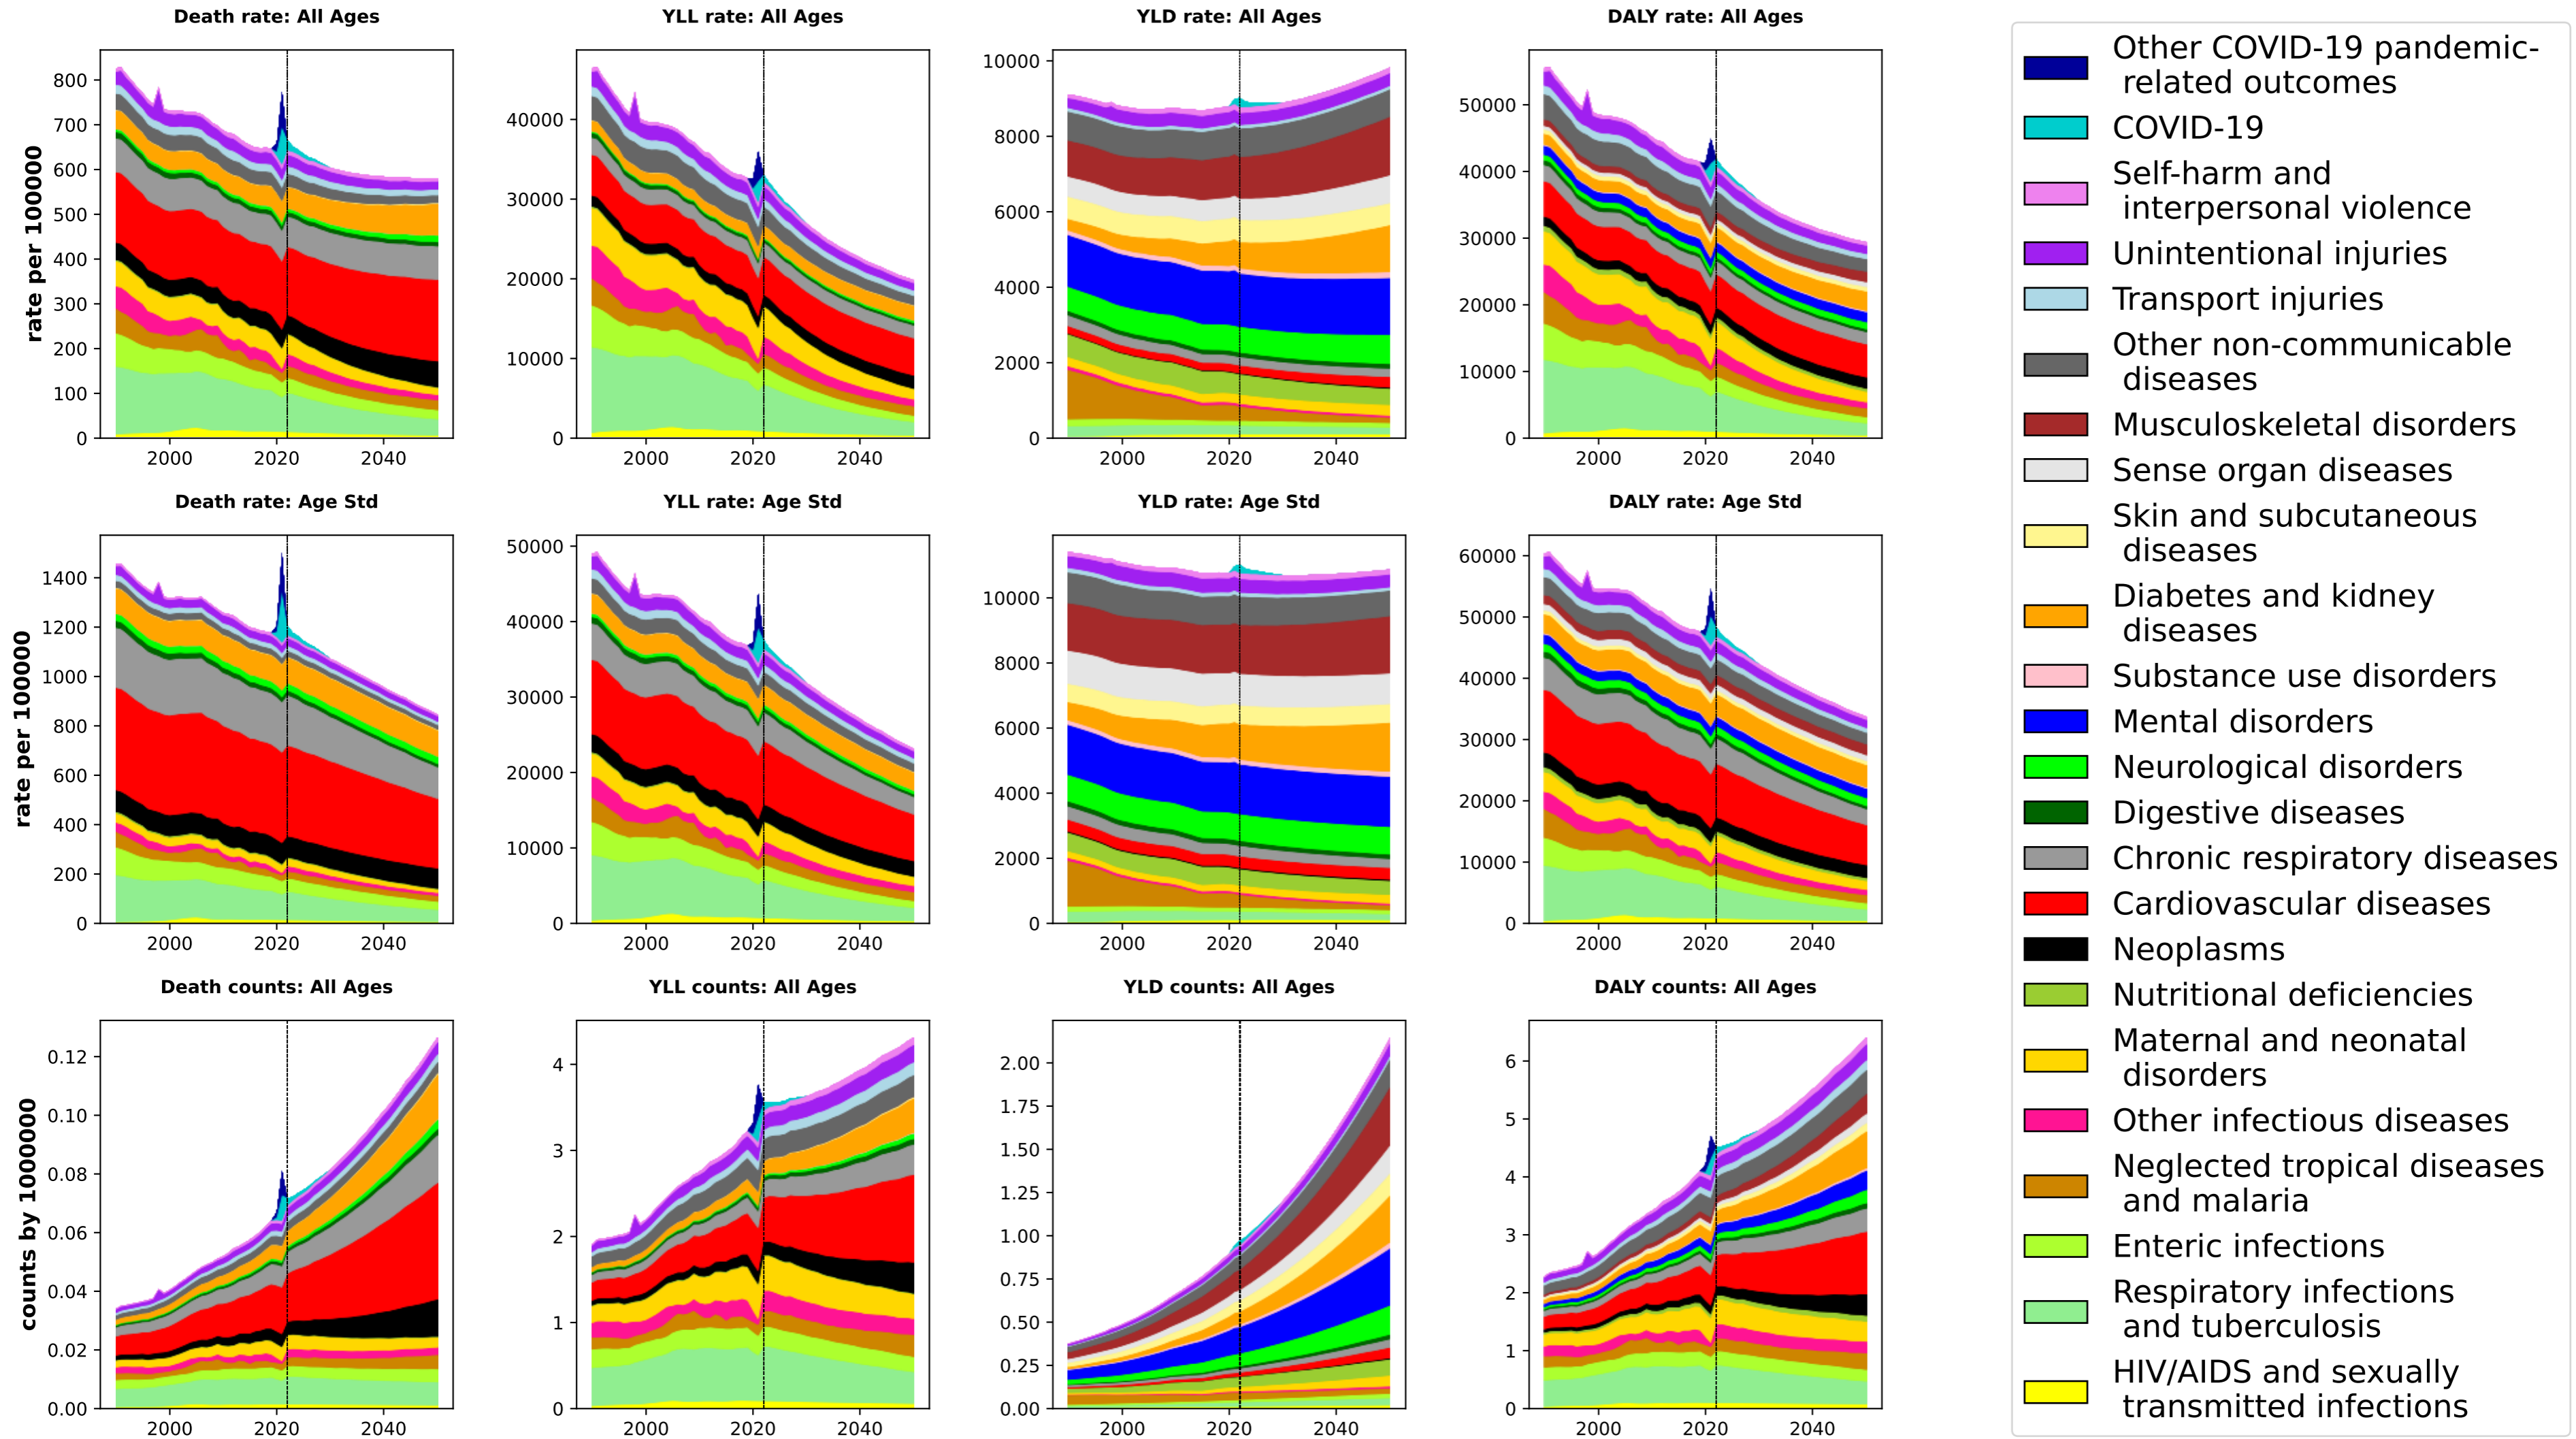

# Samoa

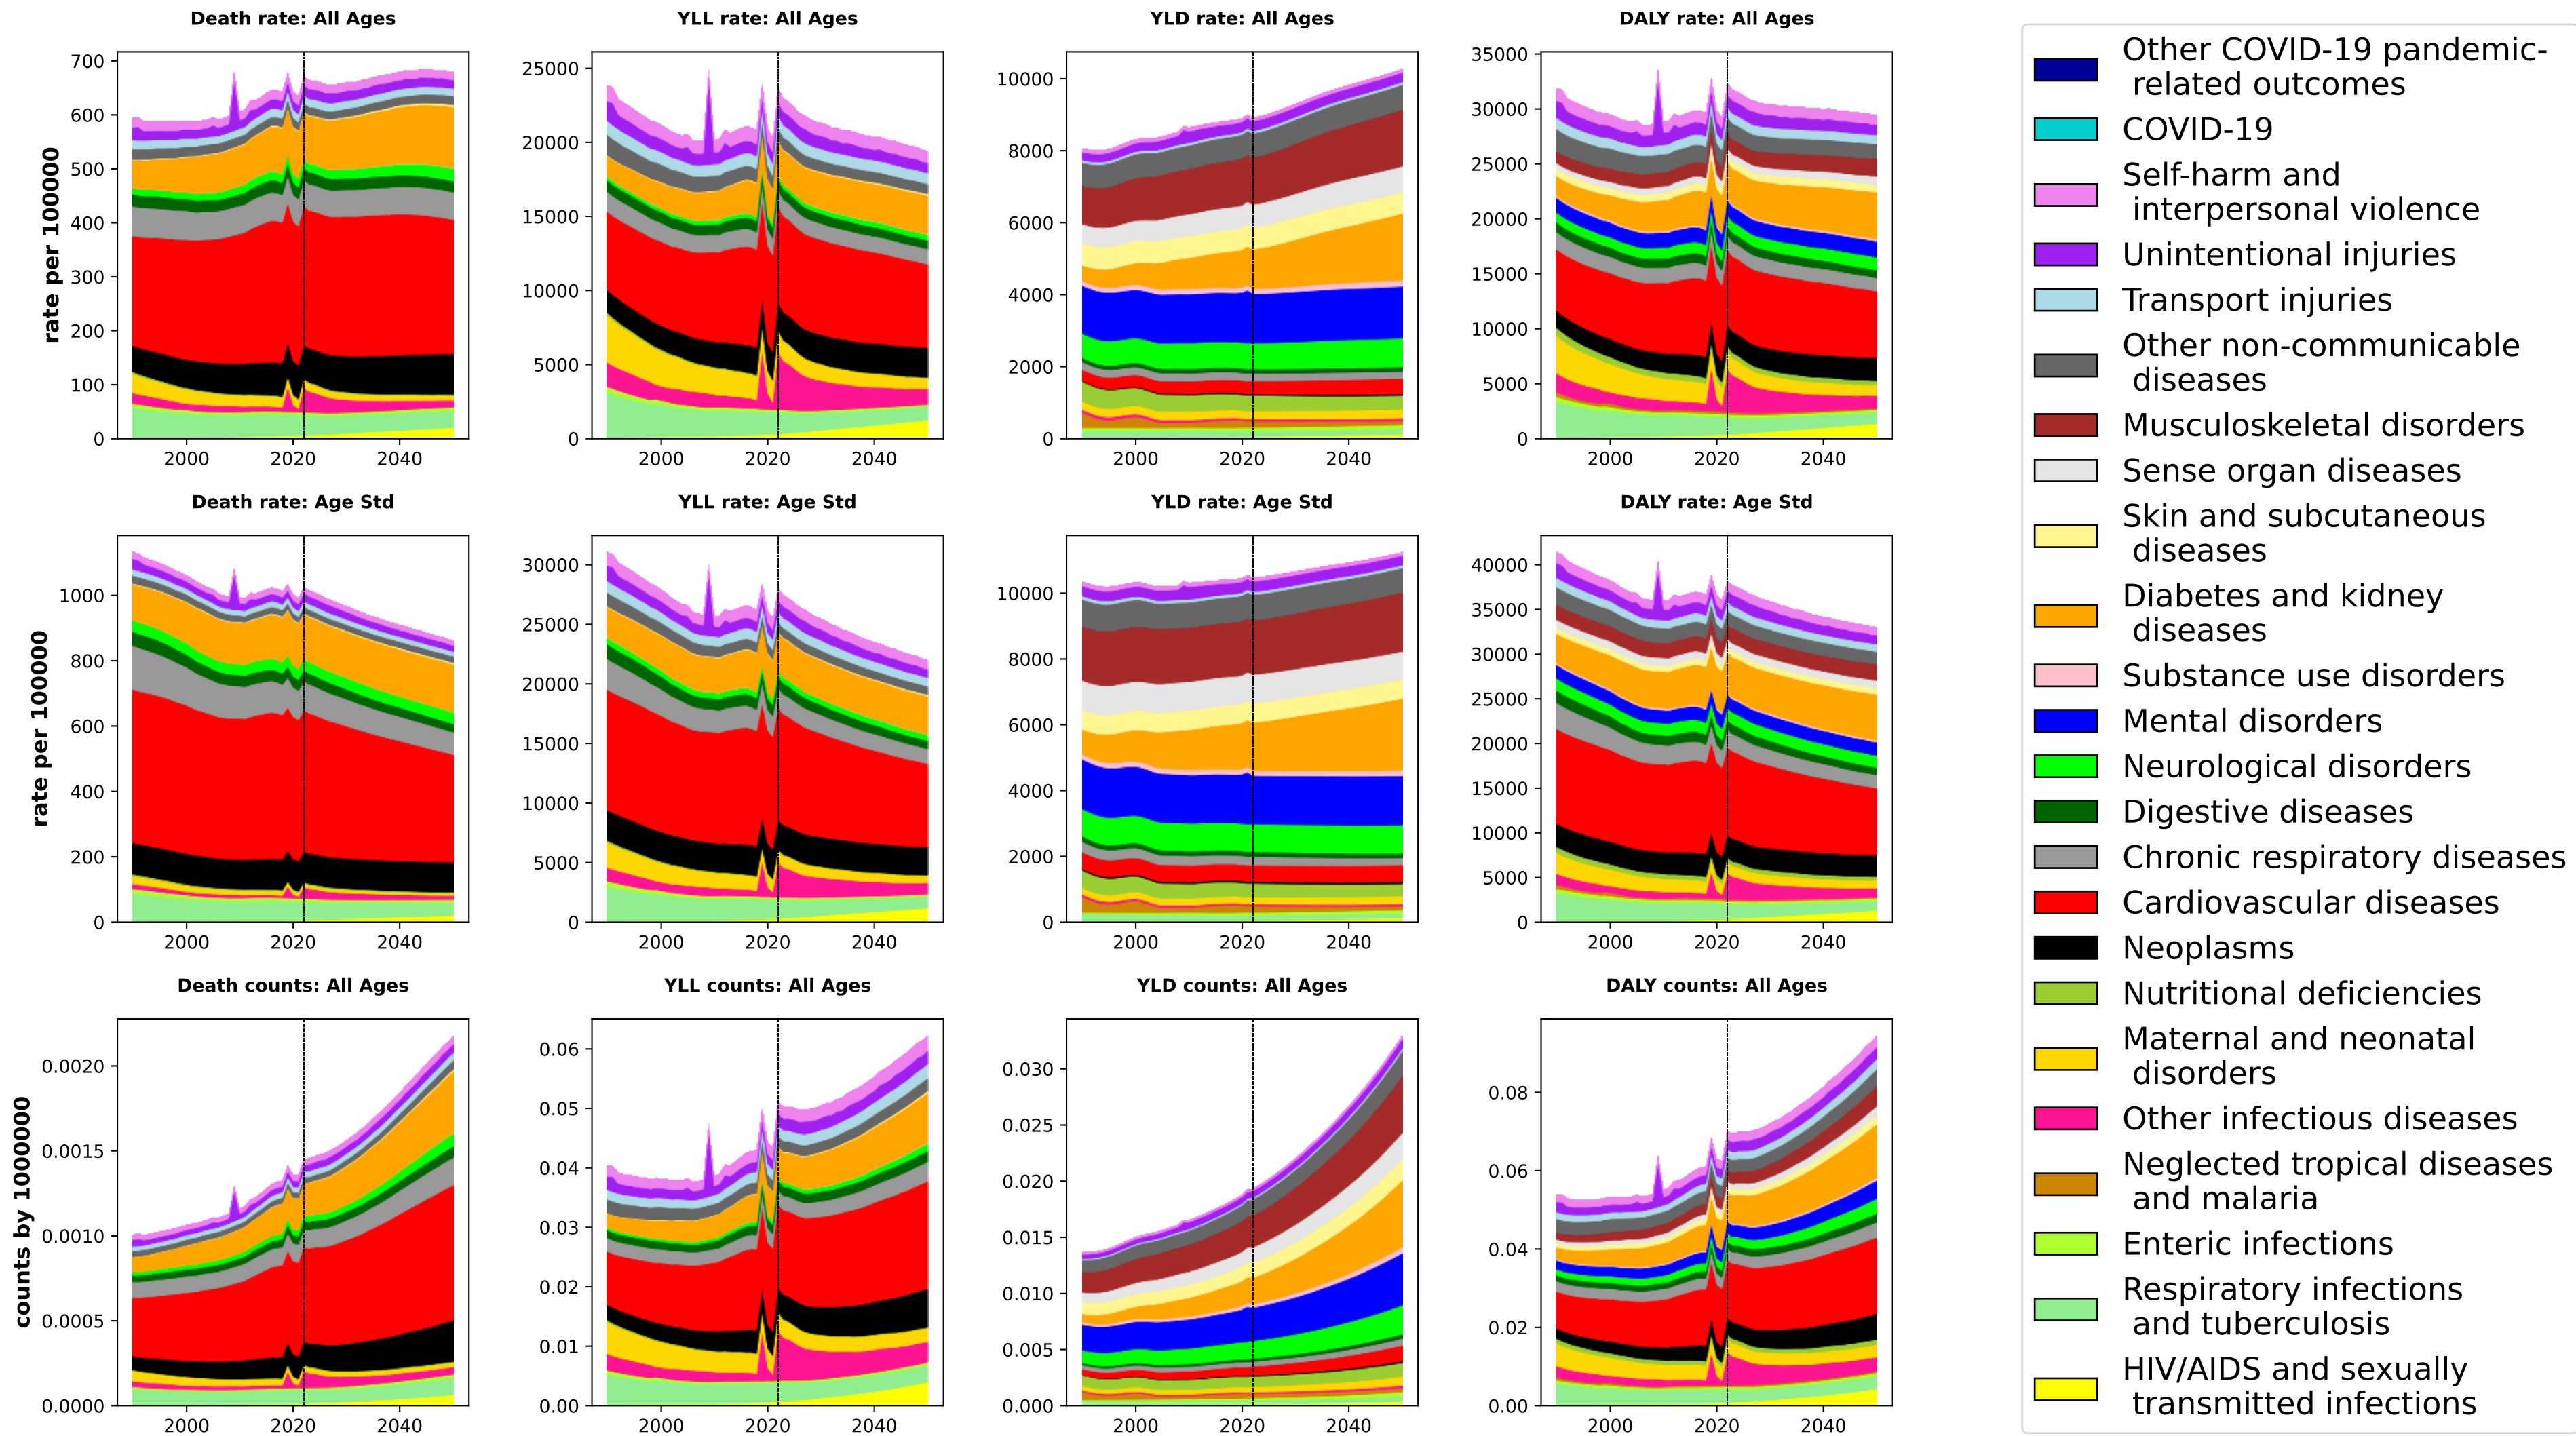

# Solomon Islands

Supplemental Results Figure S6. Cause level 2 area plots for 4 burden measures for reference scenario by location, 1990-2050

851

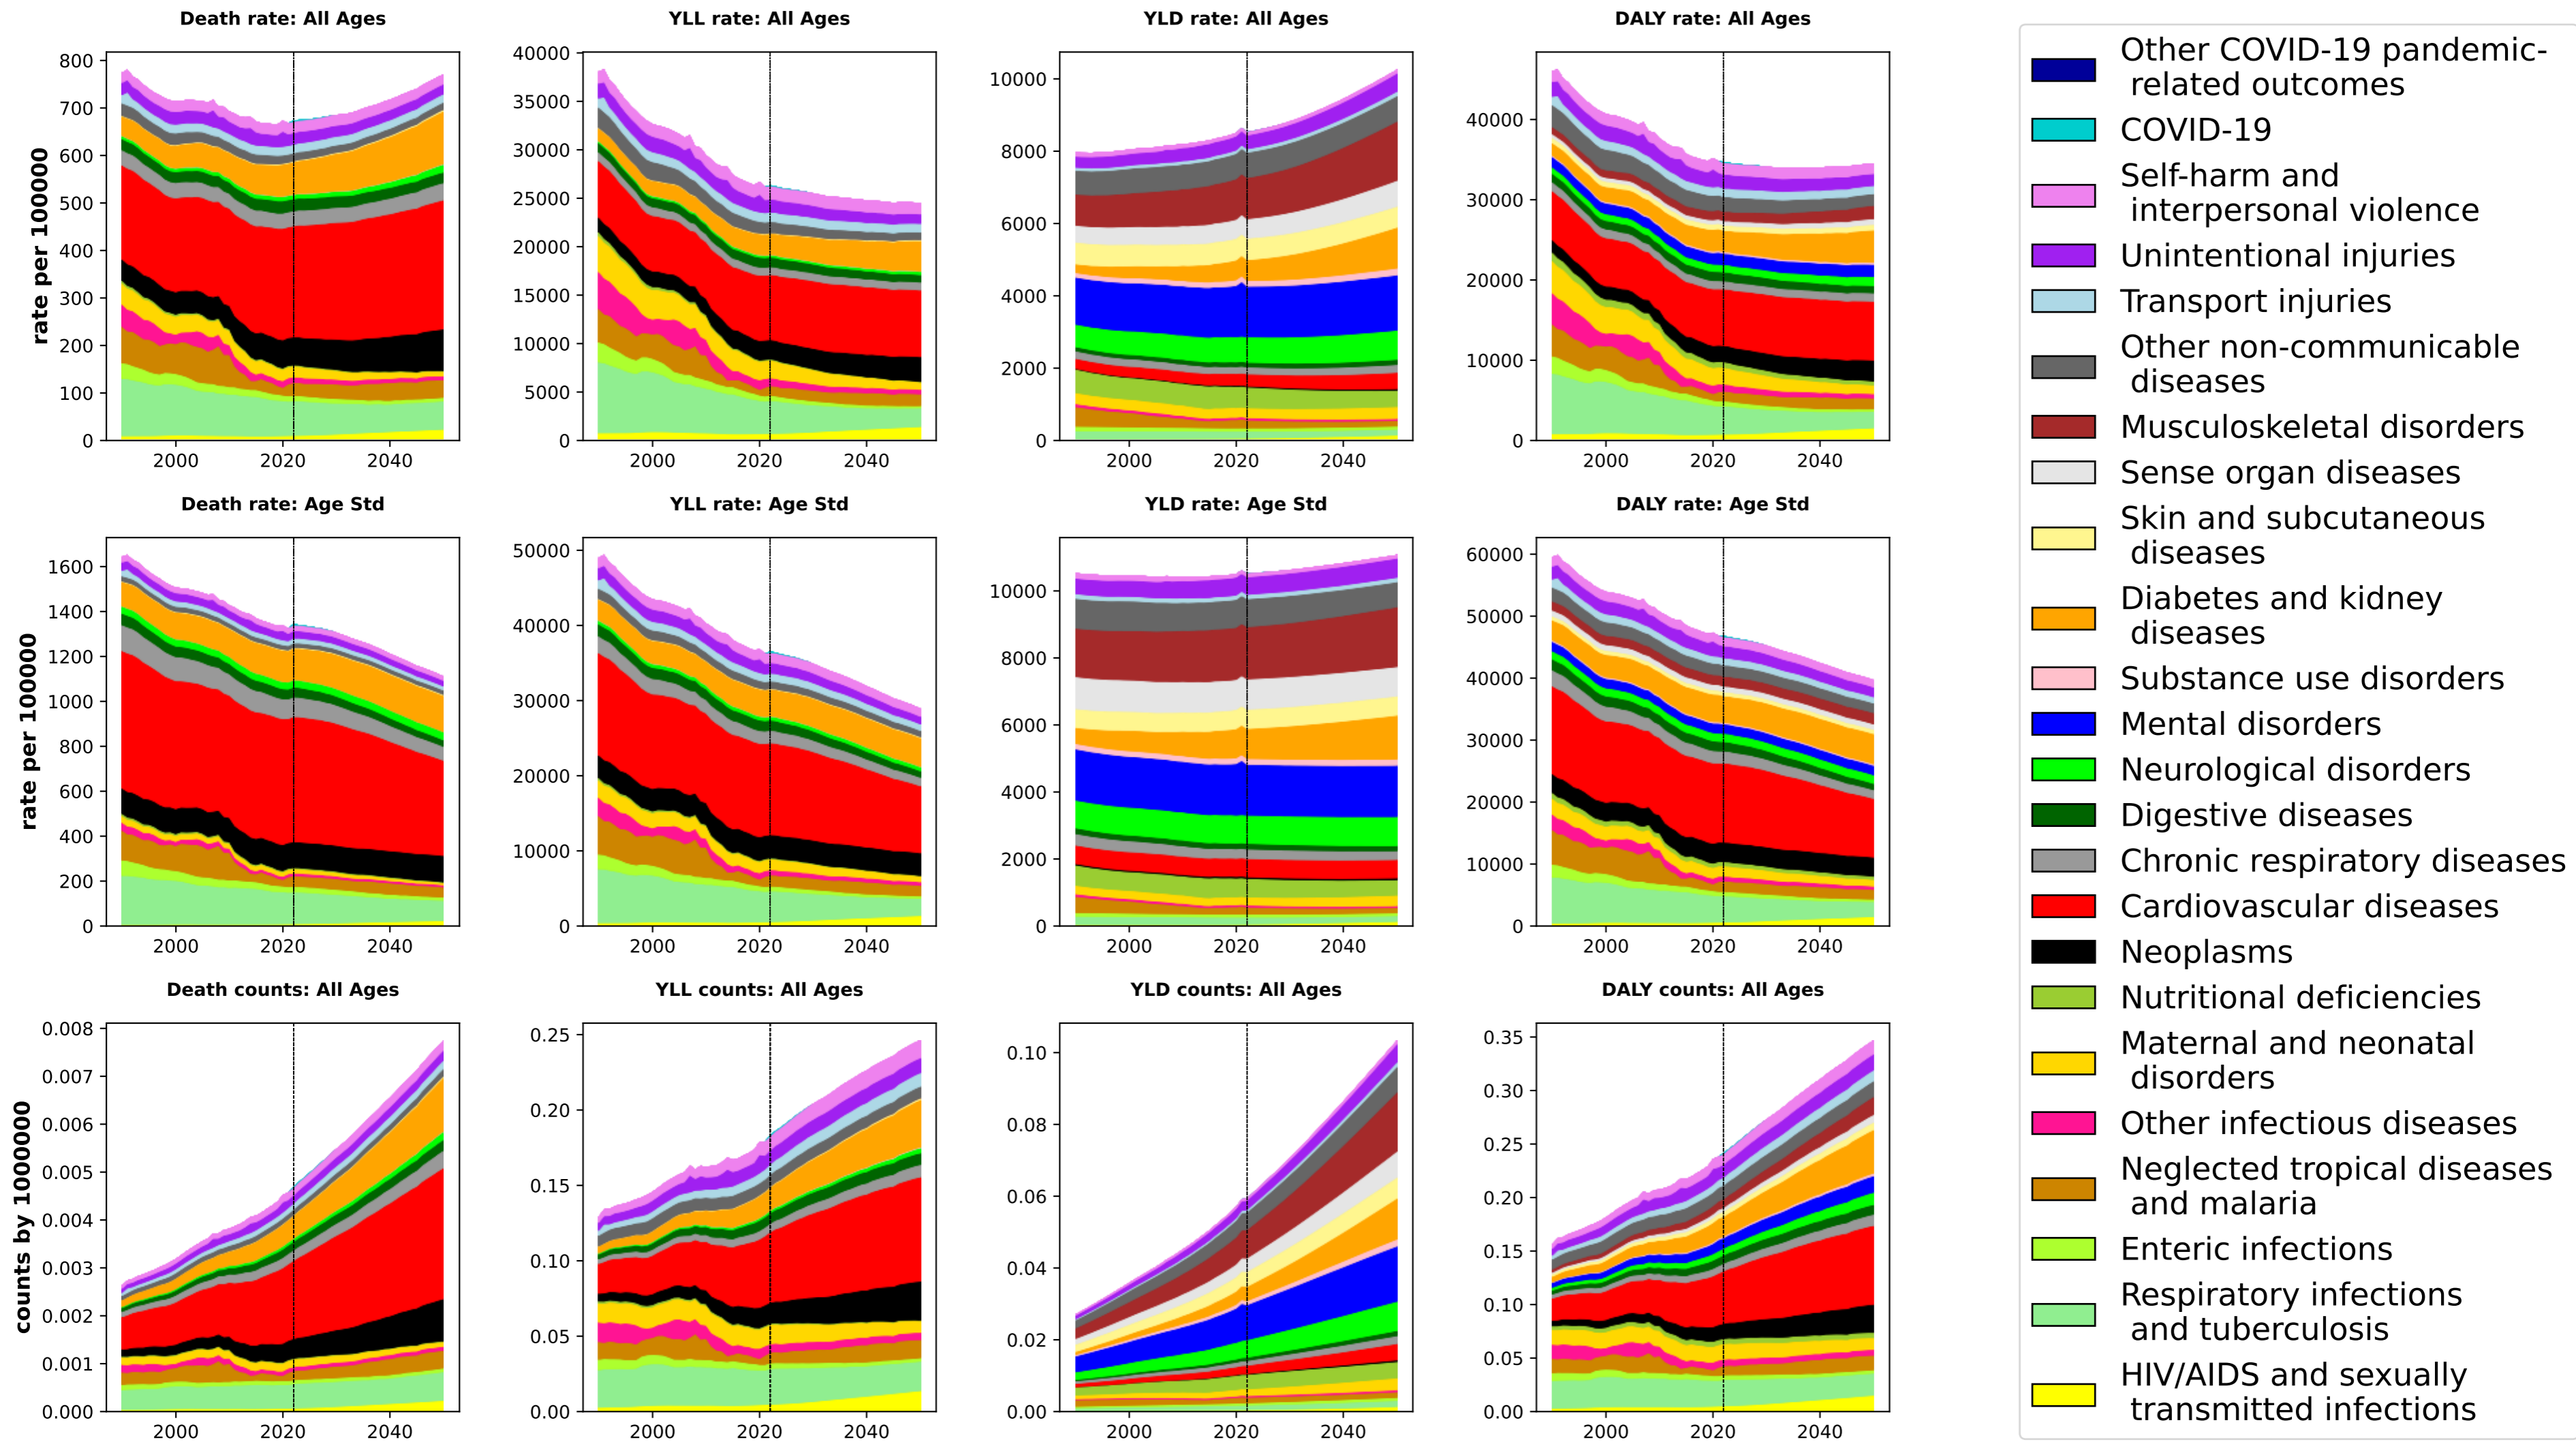

# Tokelau

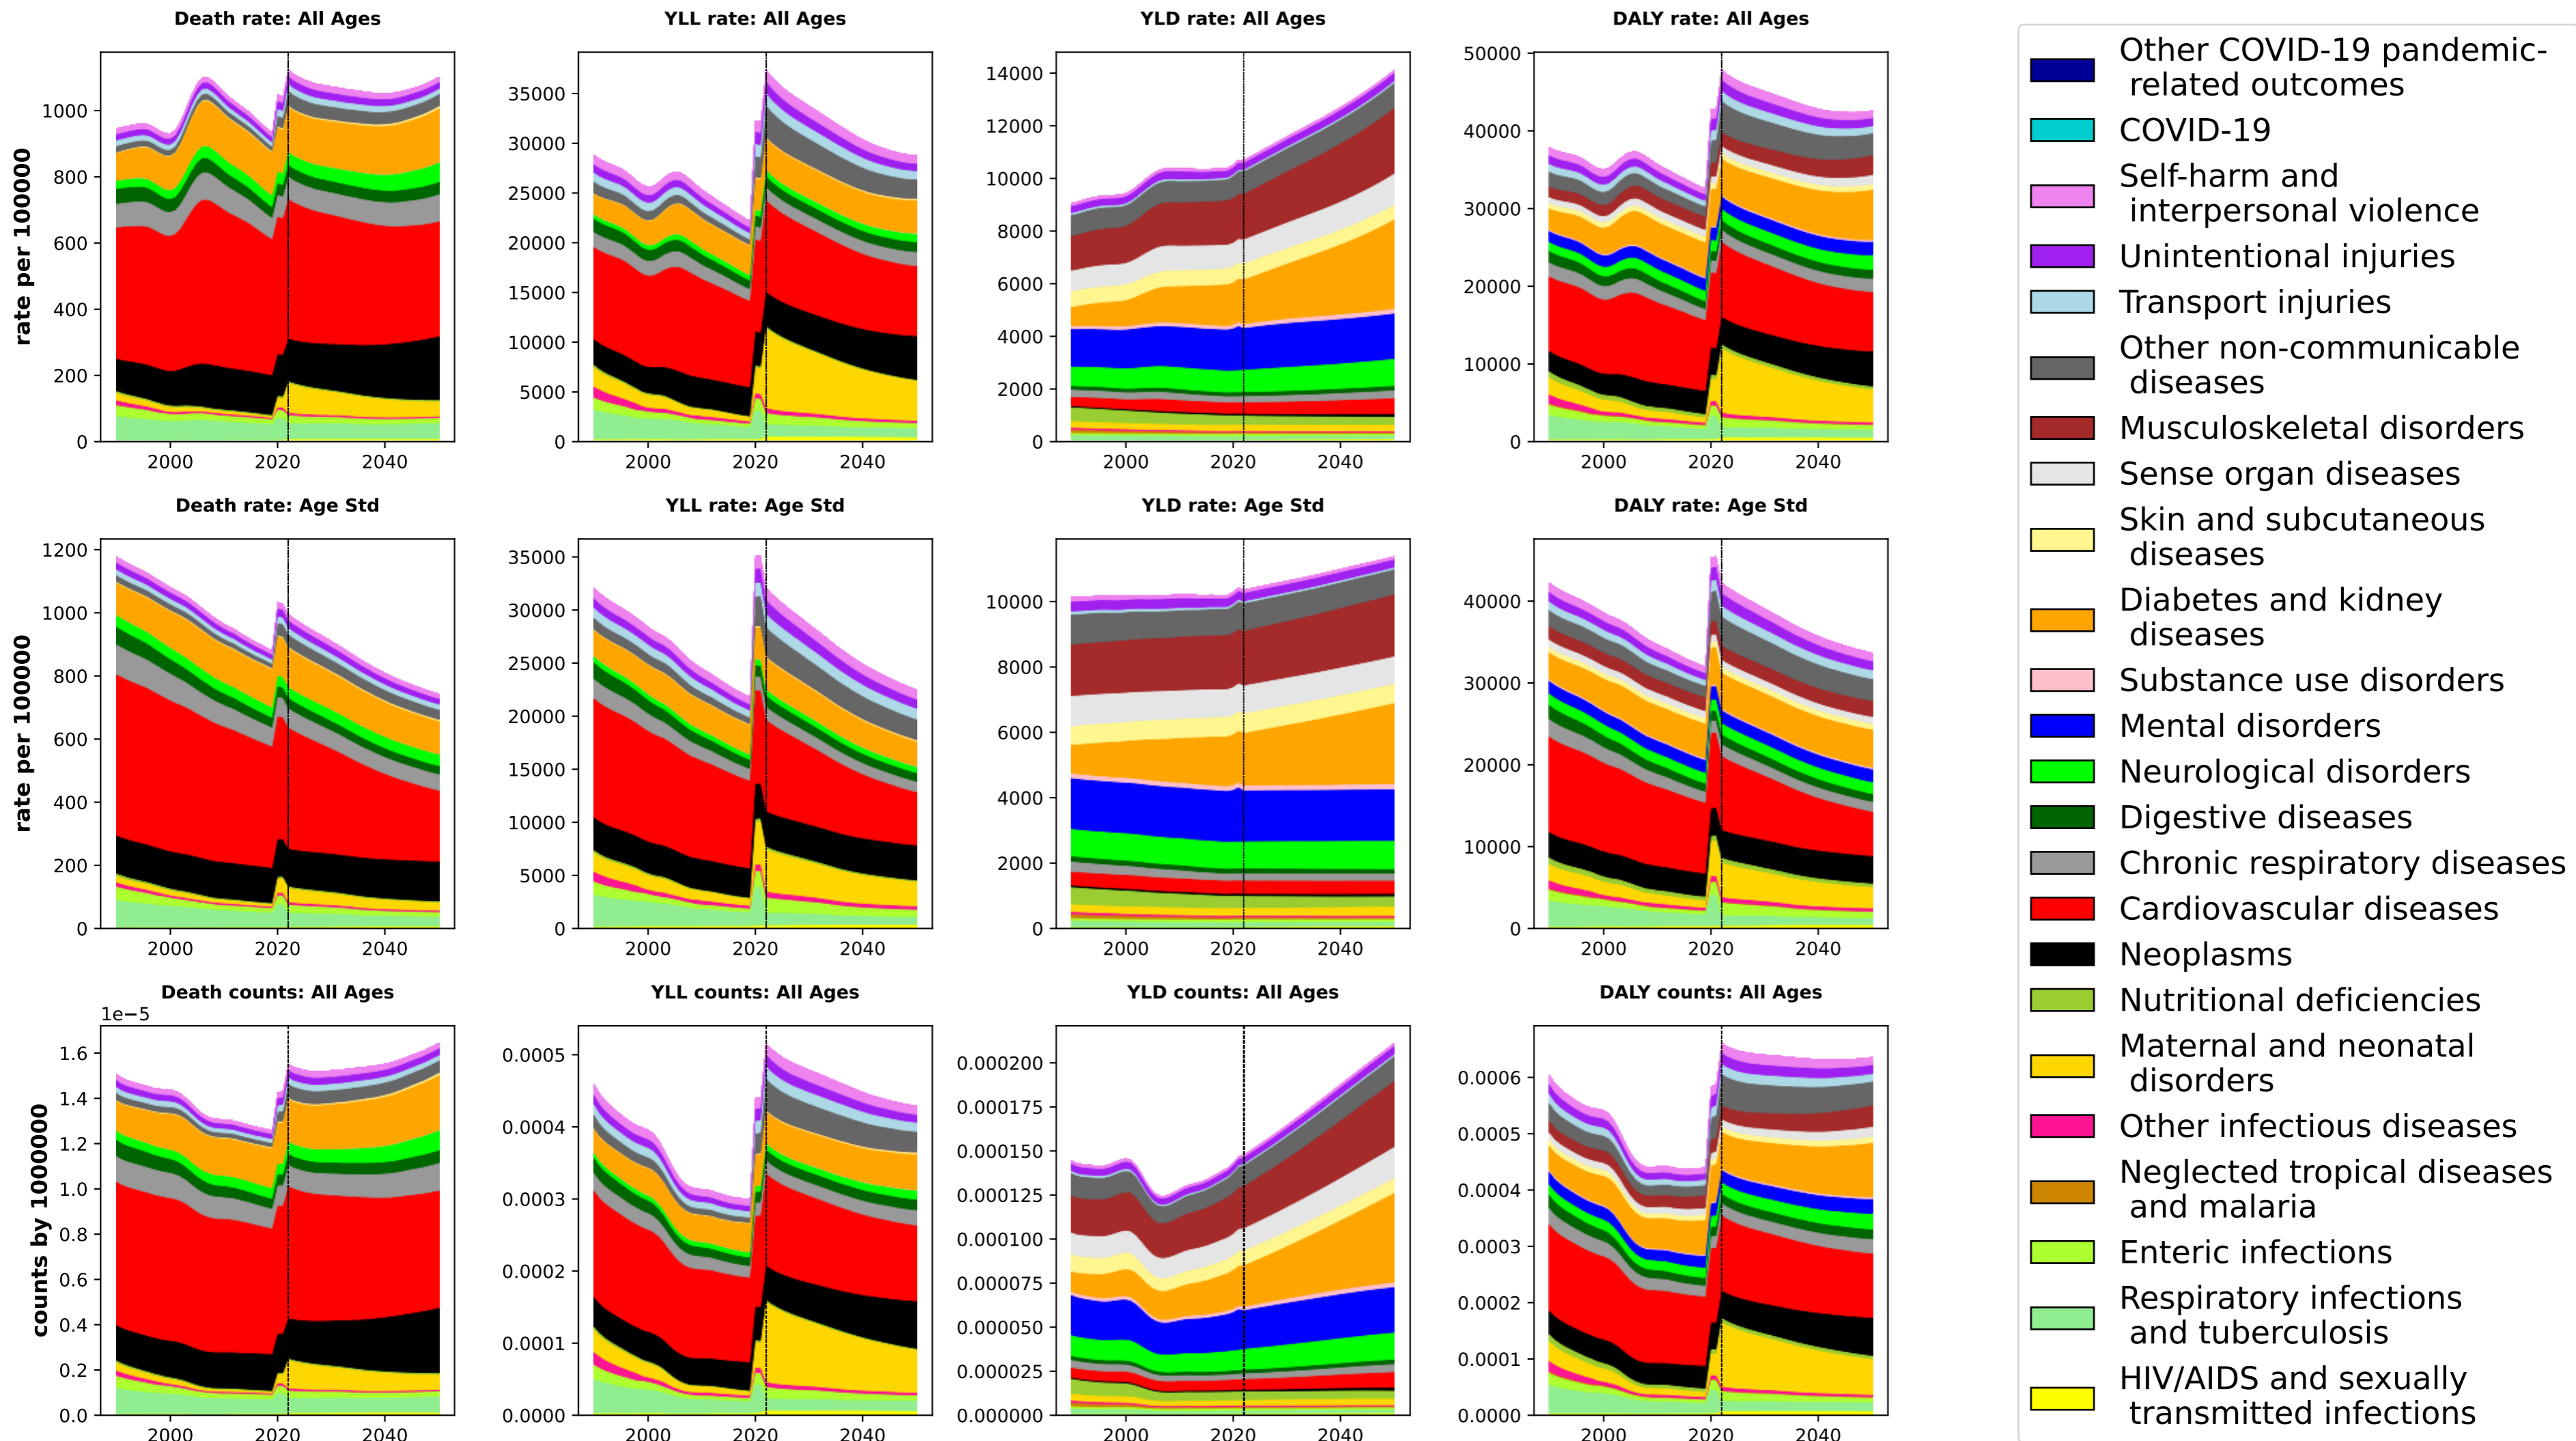

# Tonga

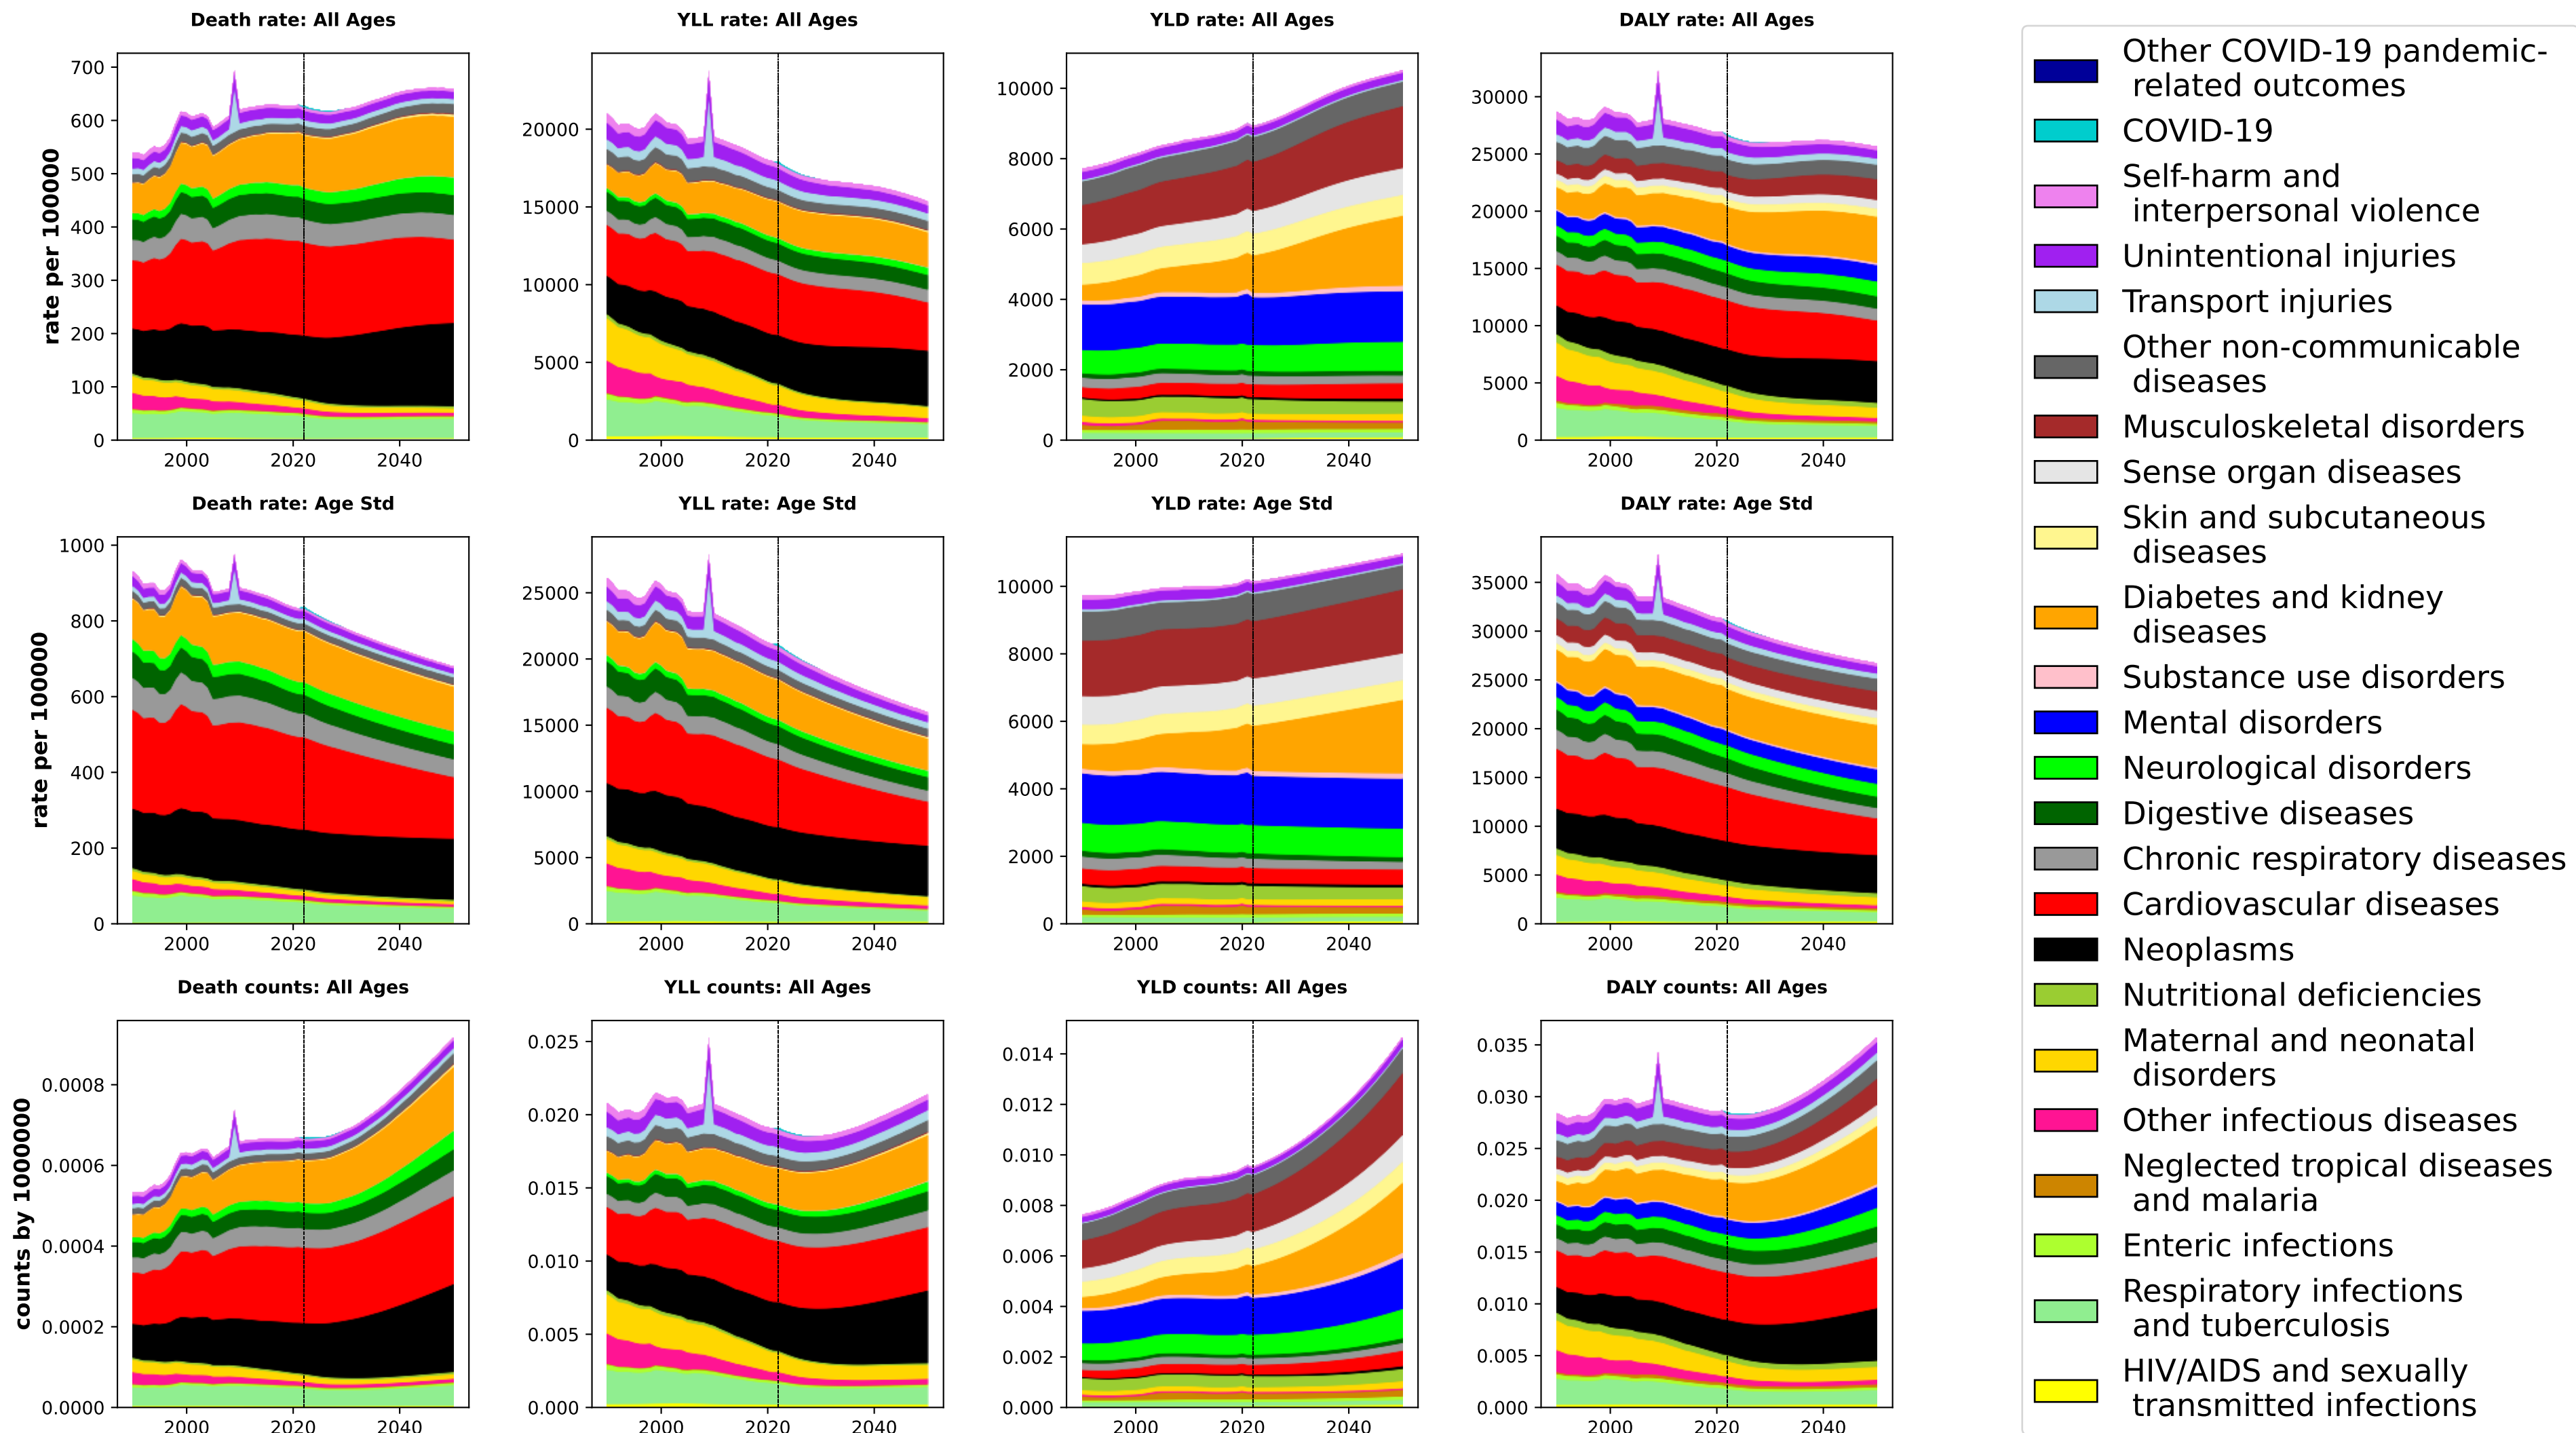

# Tuvalu

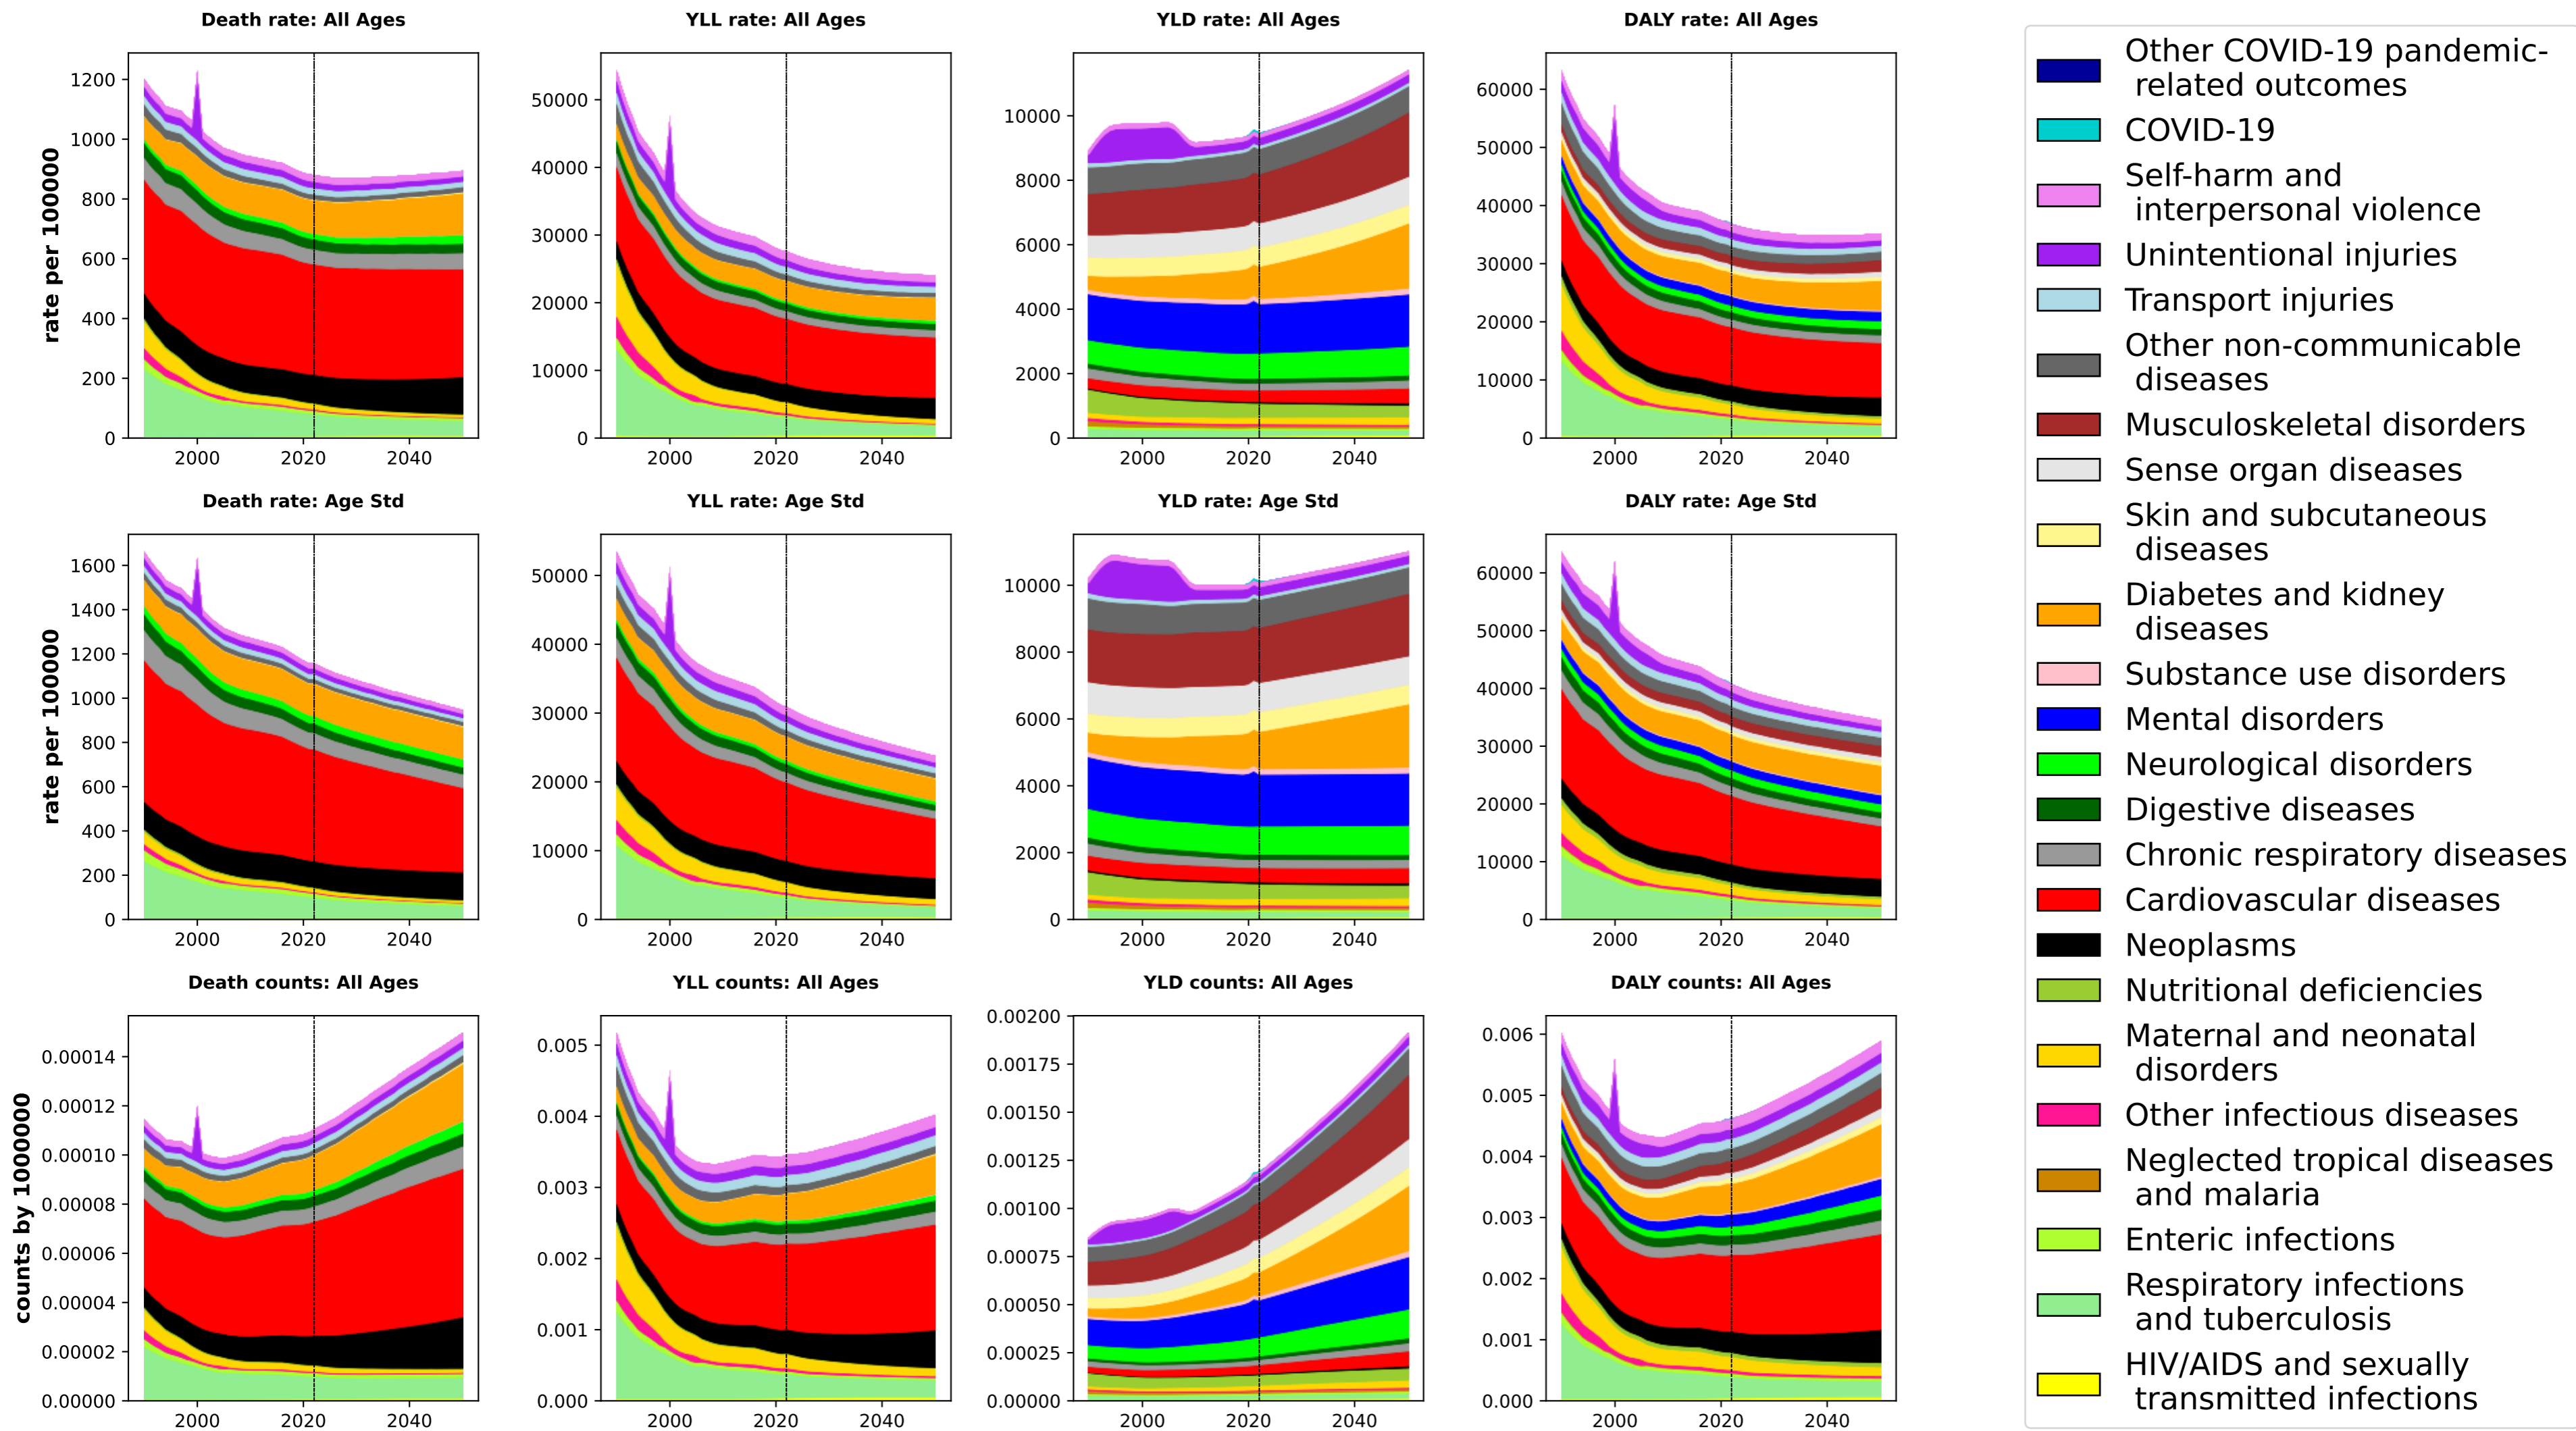

# Vanuatu

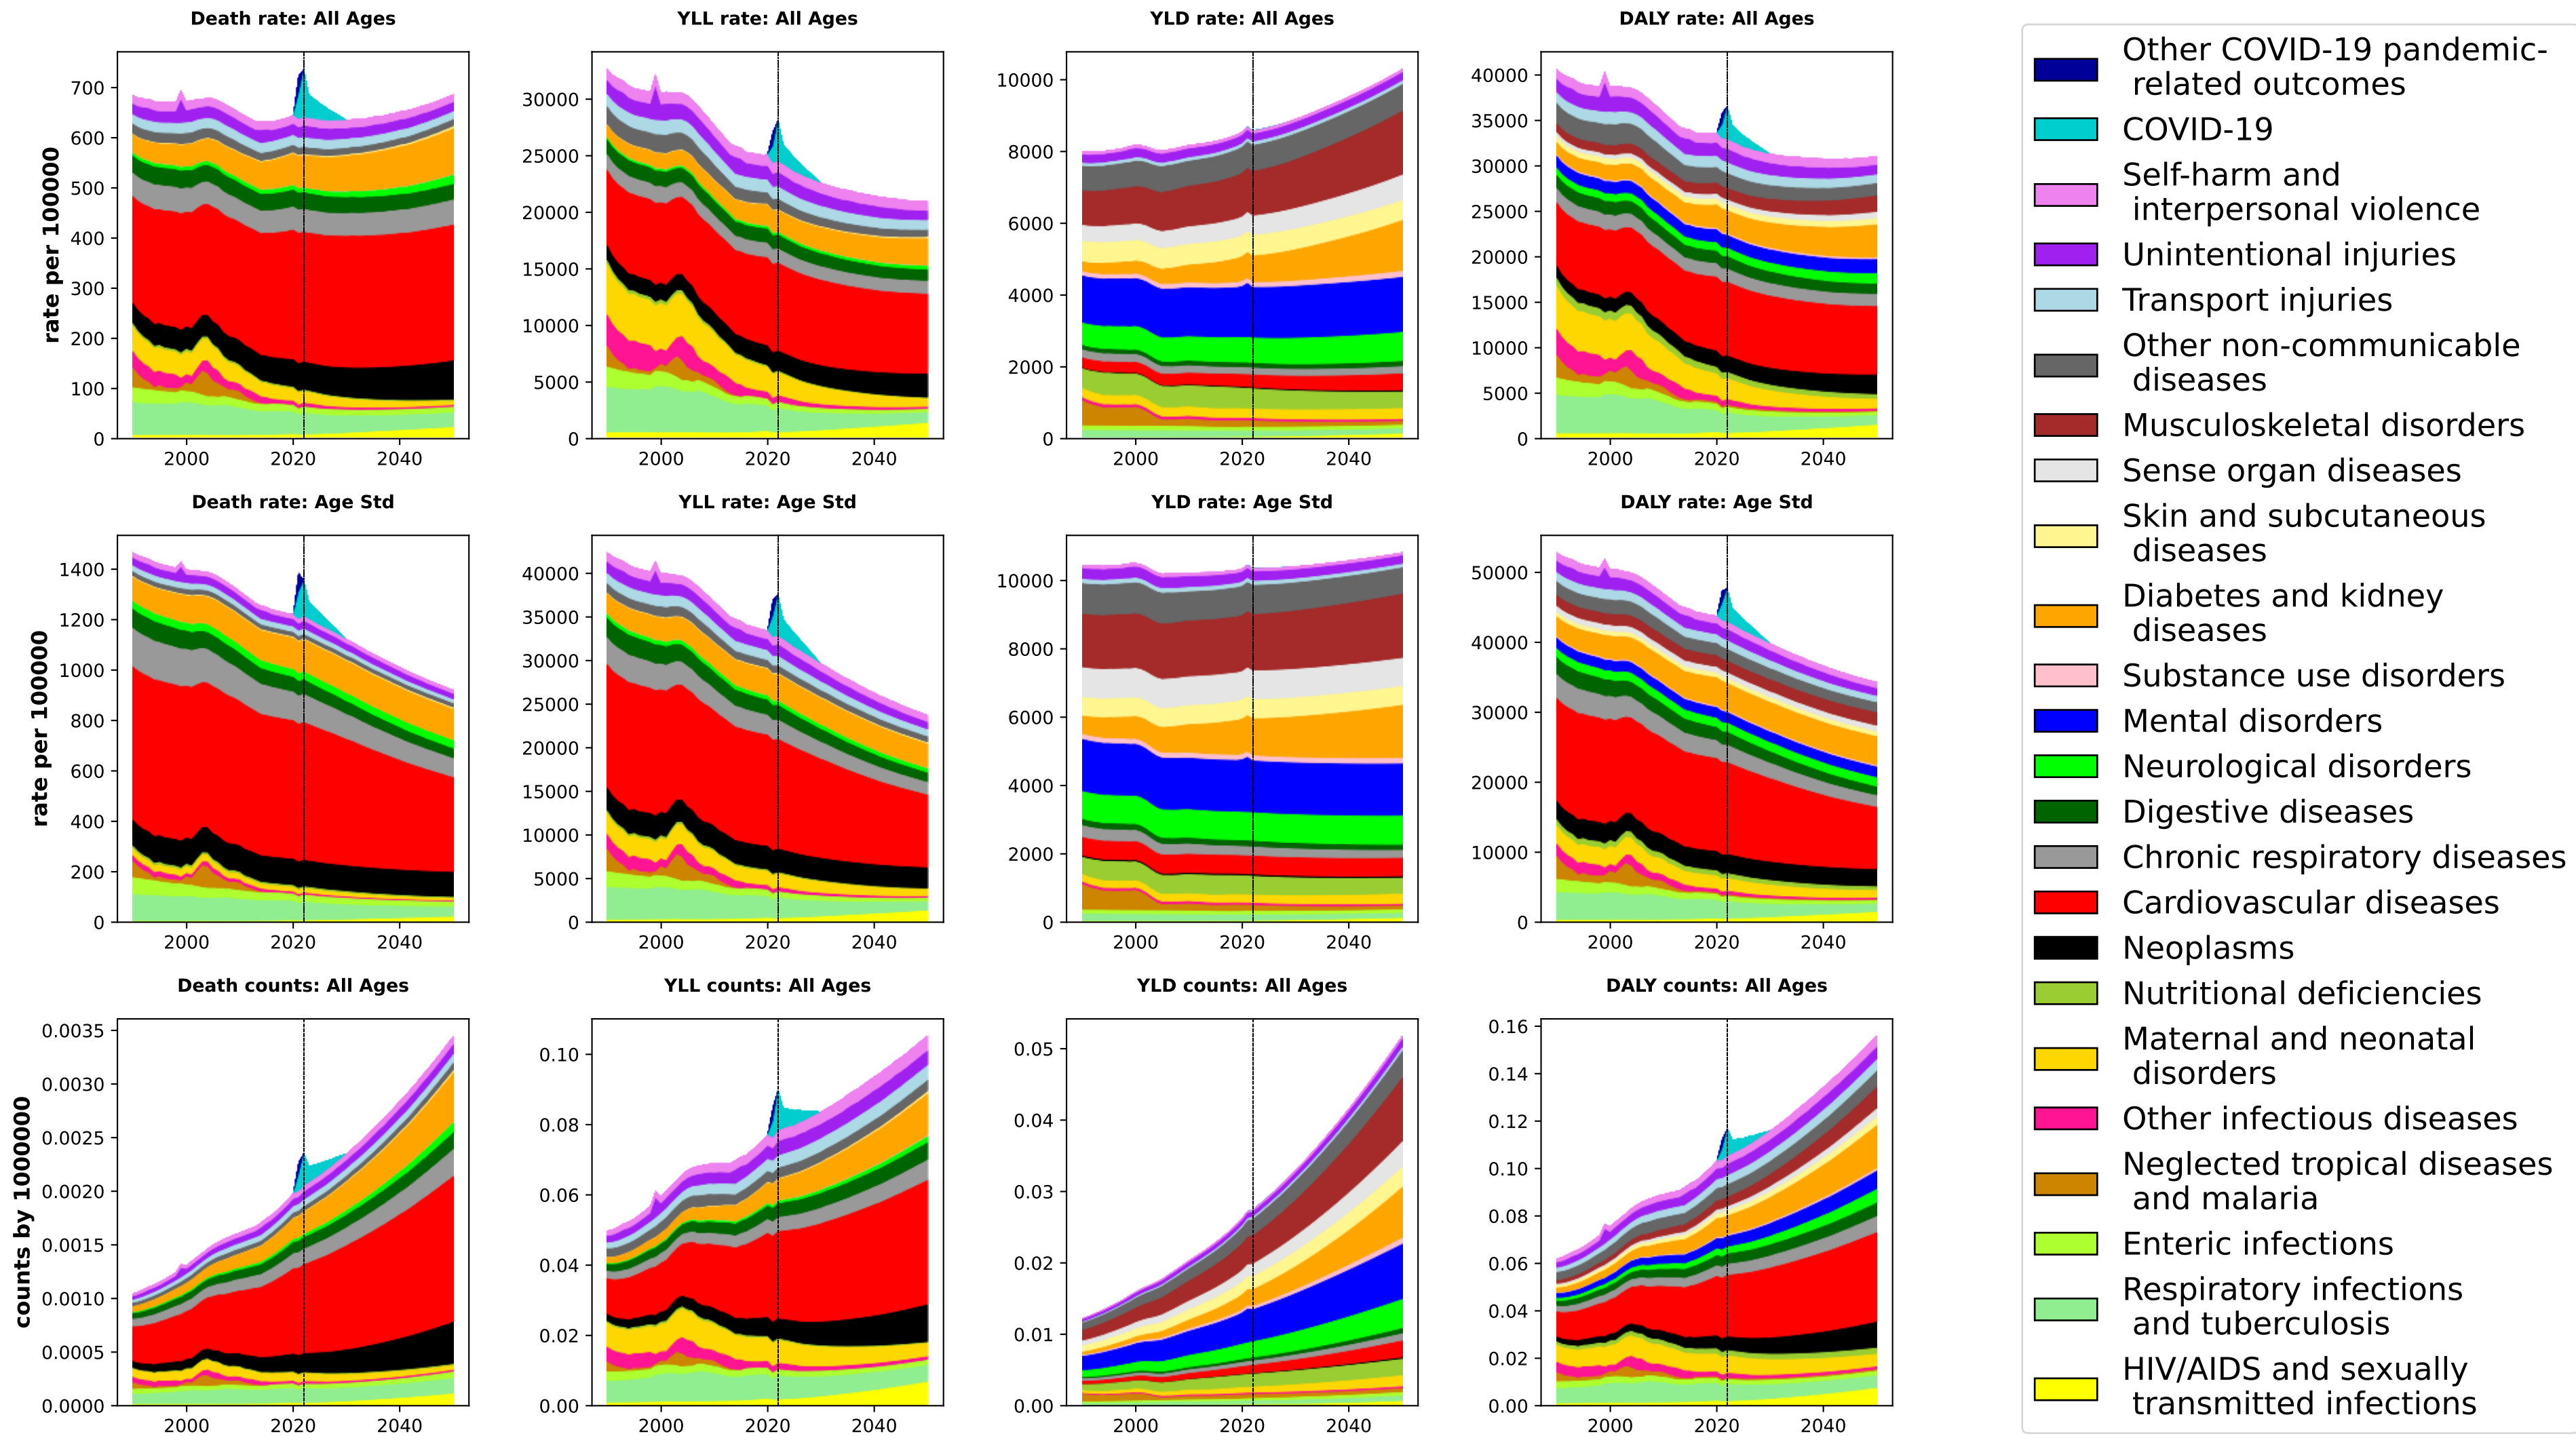



# Cambodia

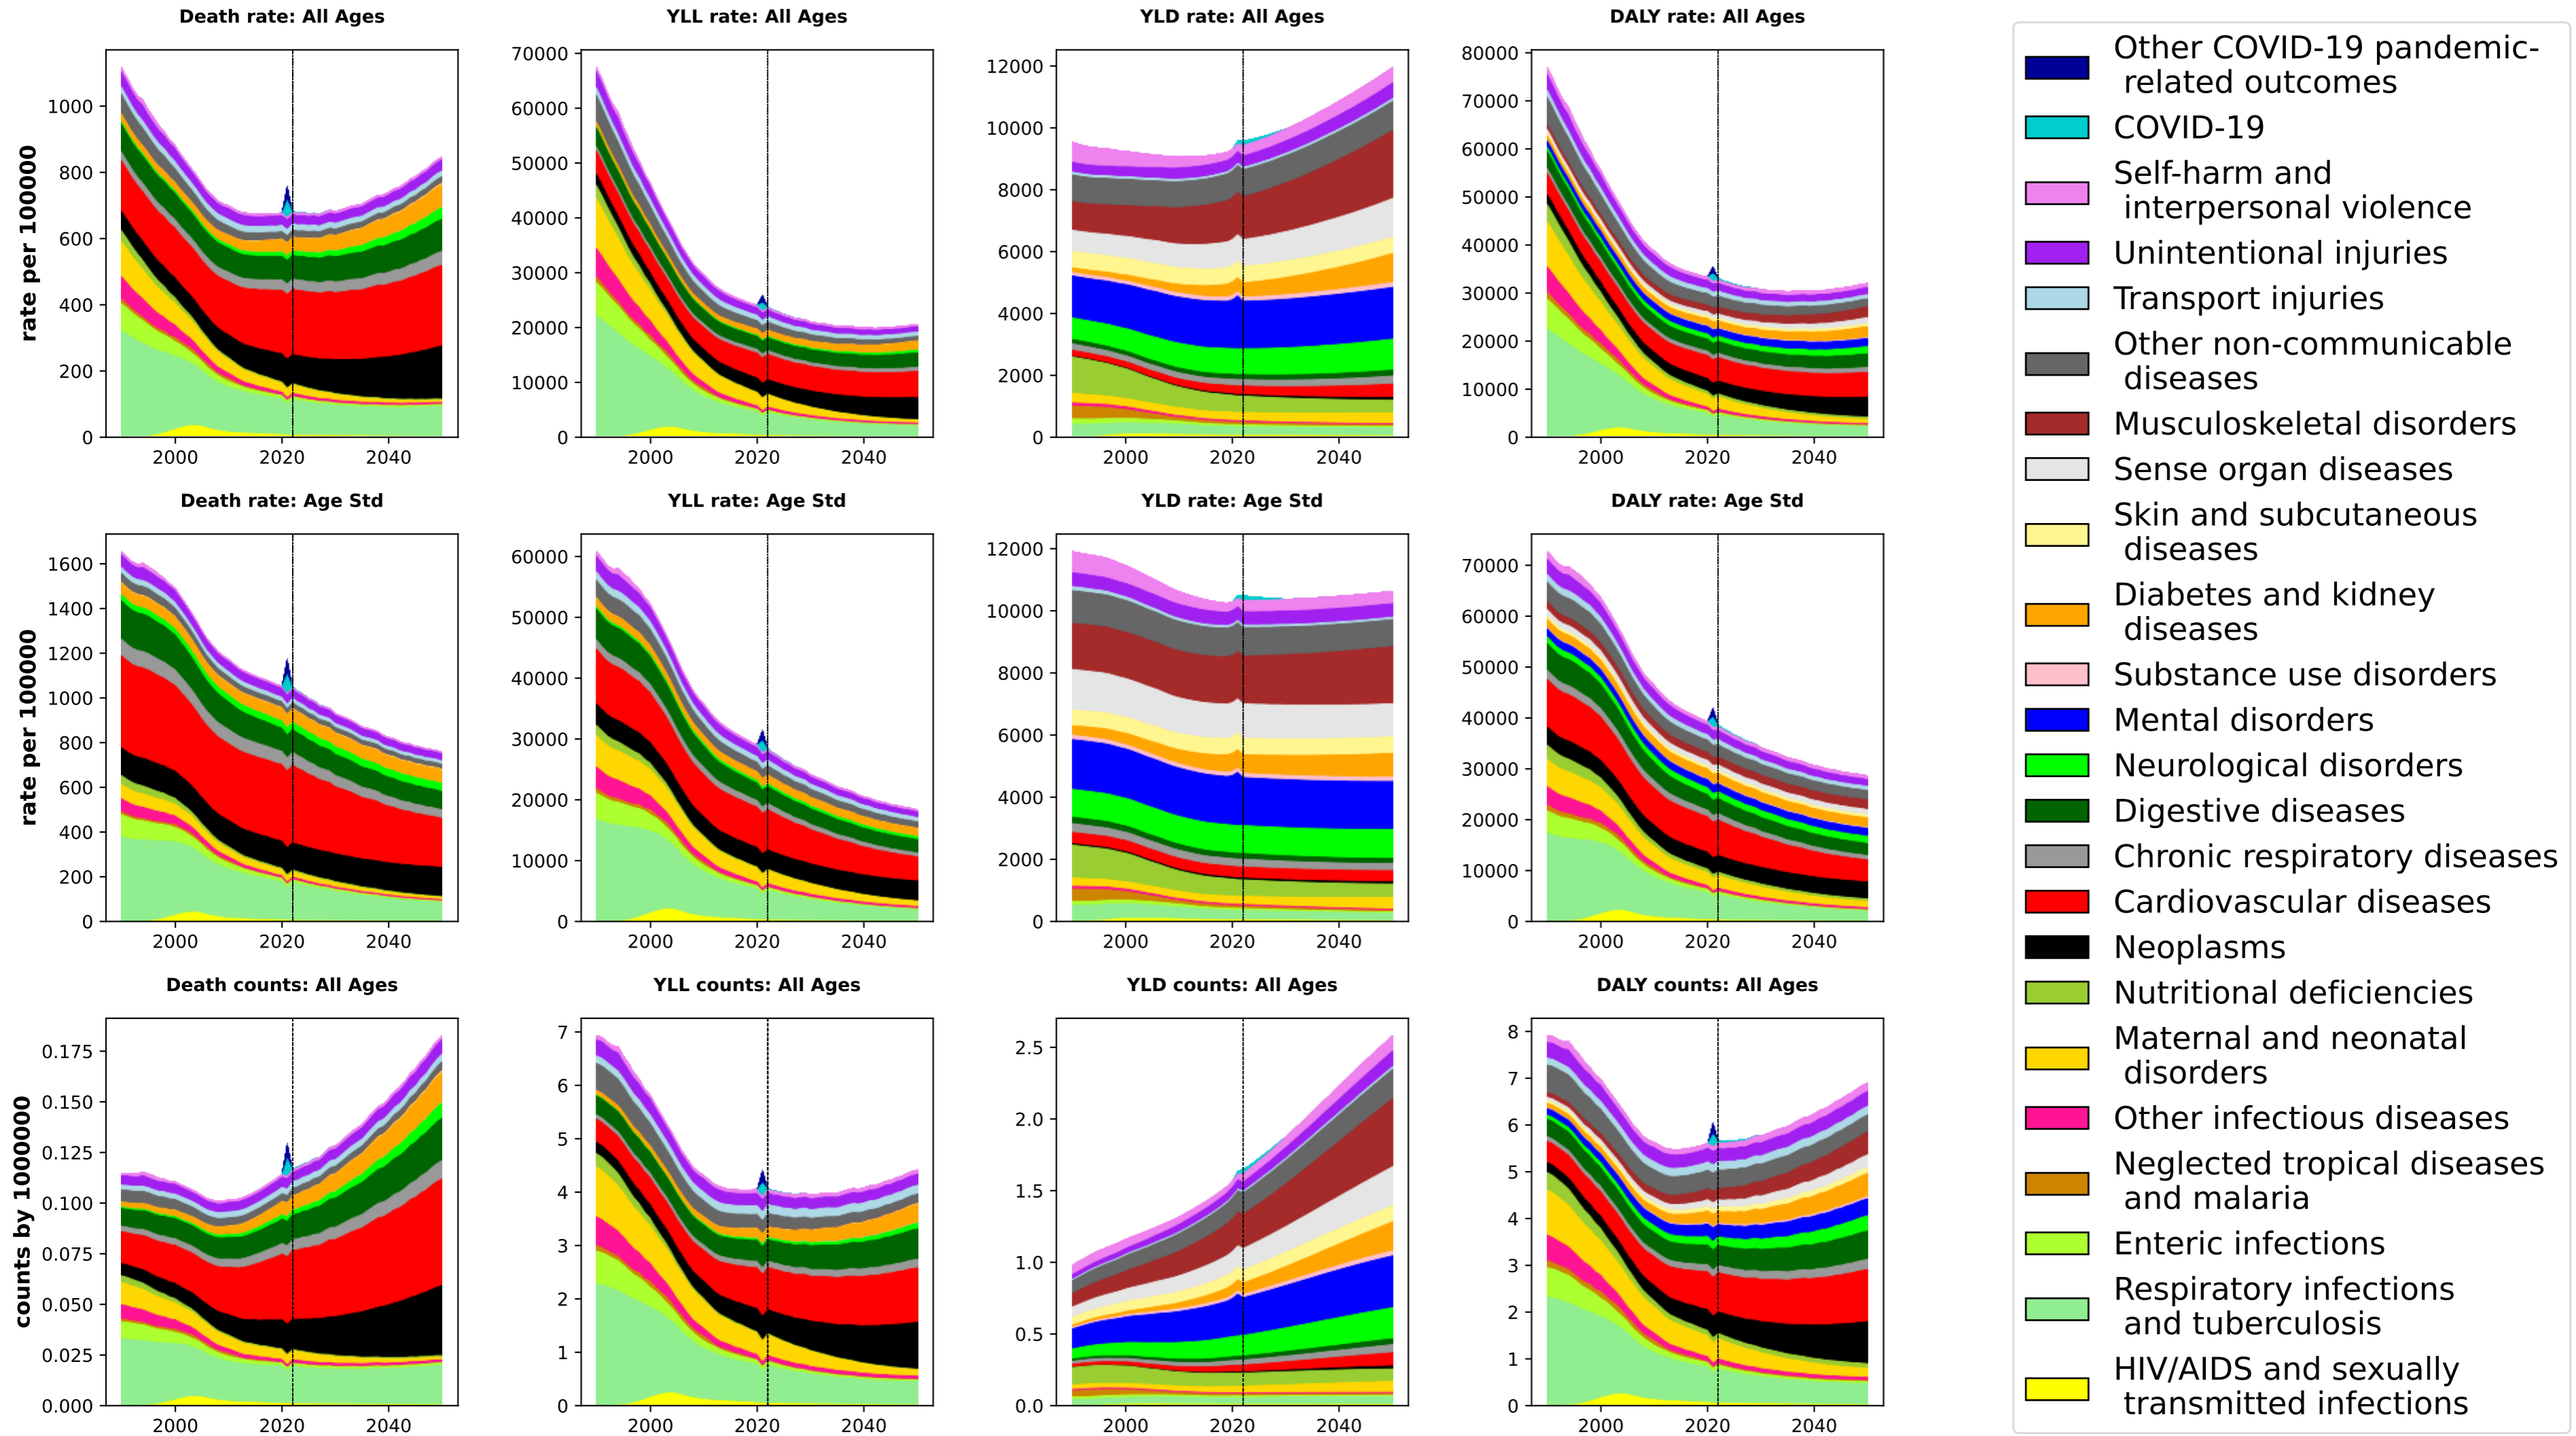

# Indonesia

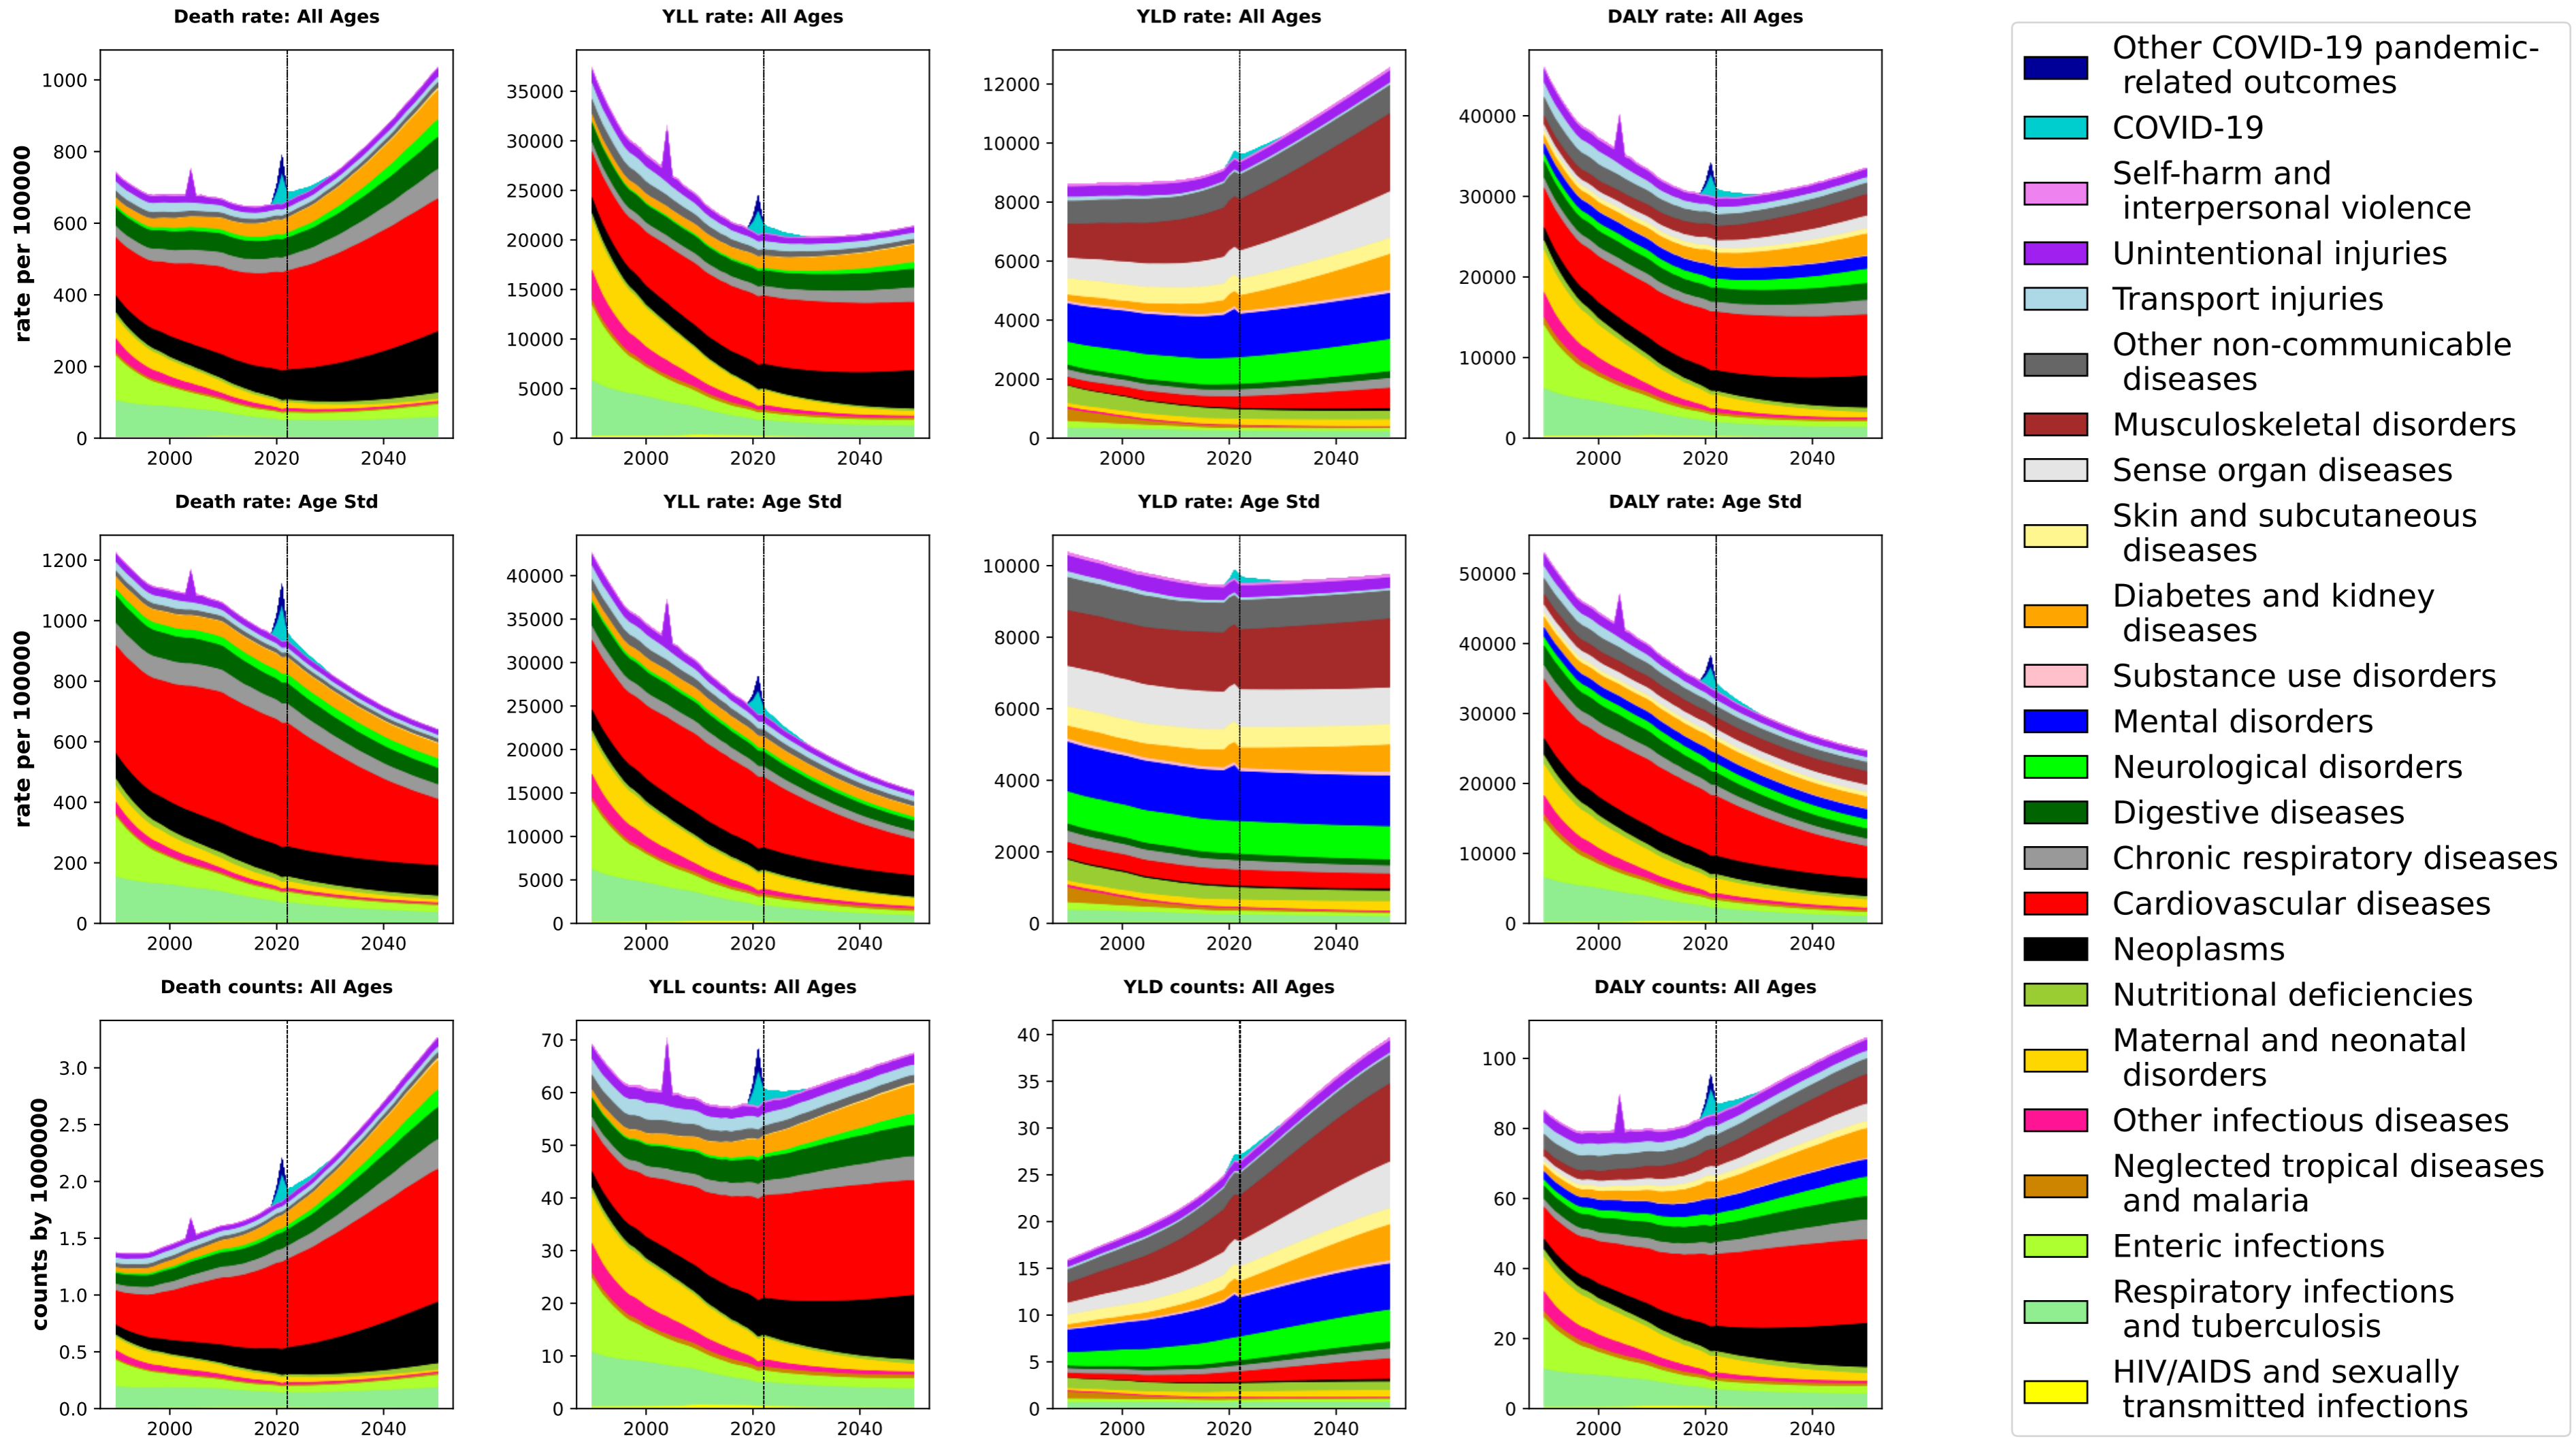

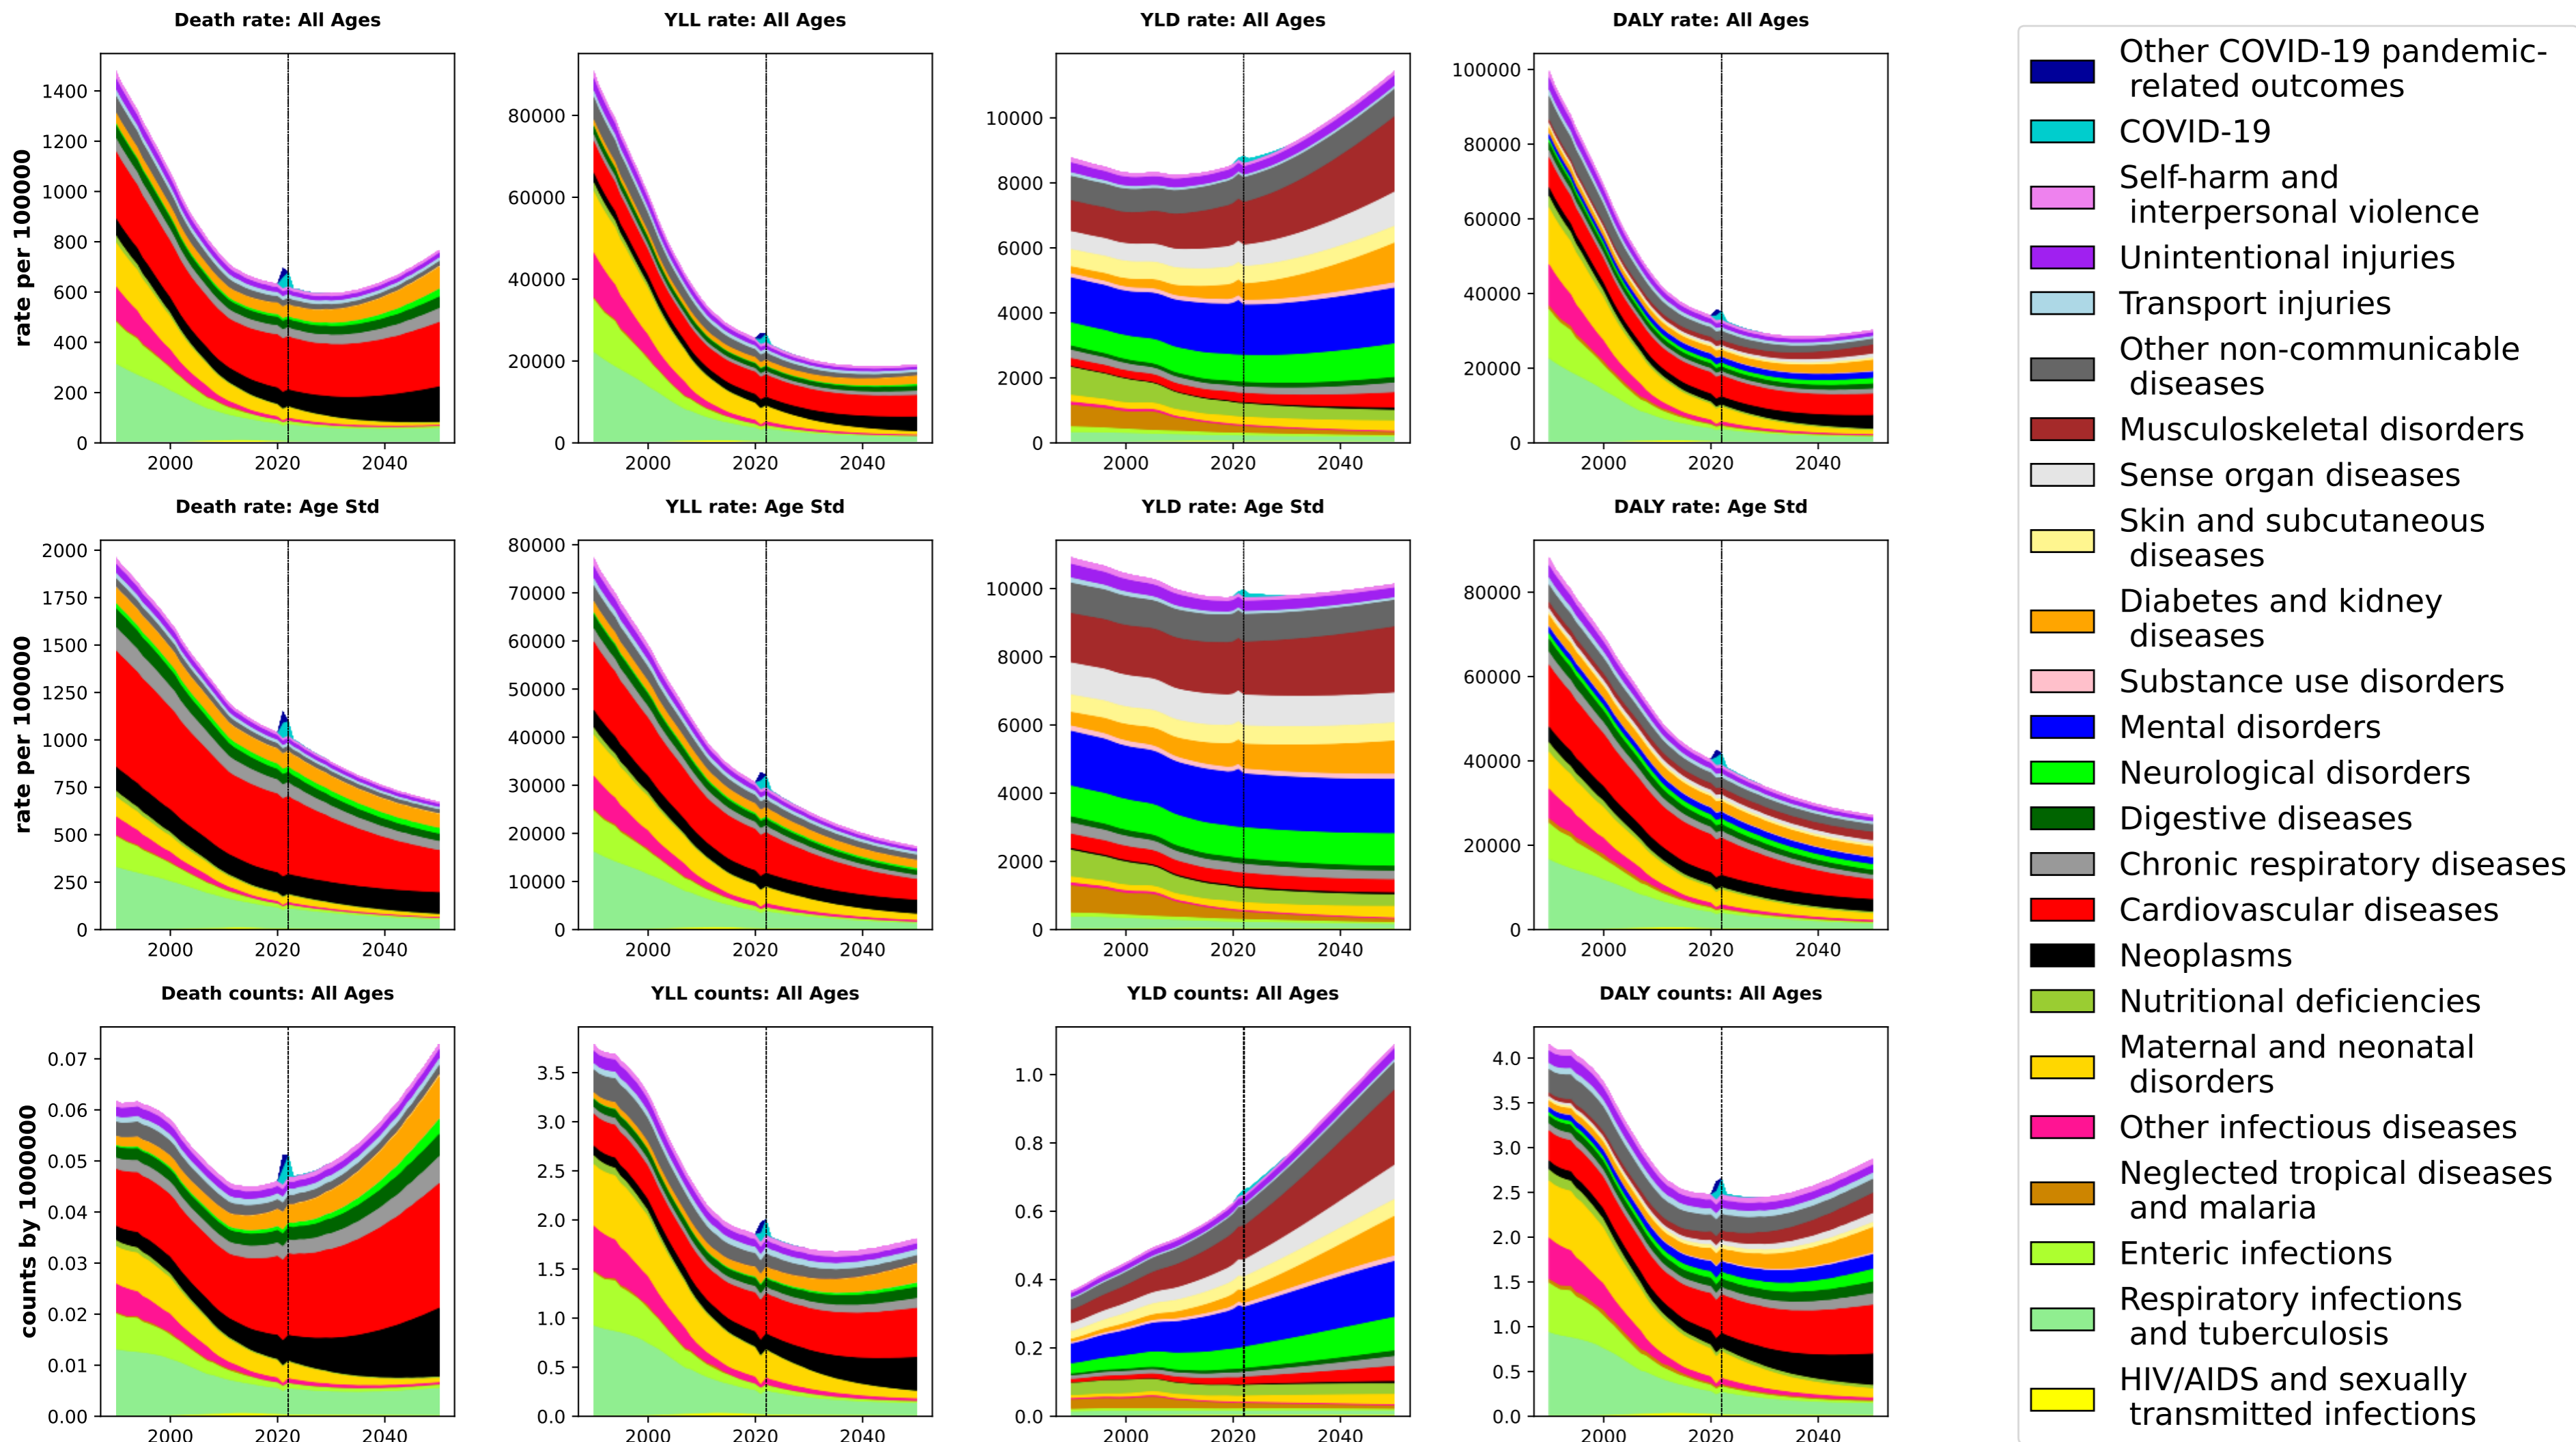

# Malaysia

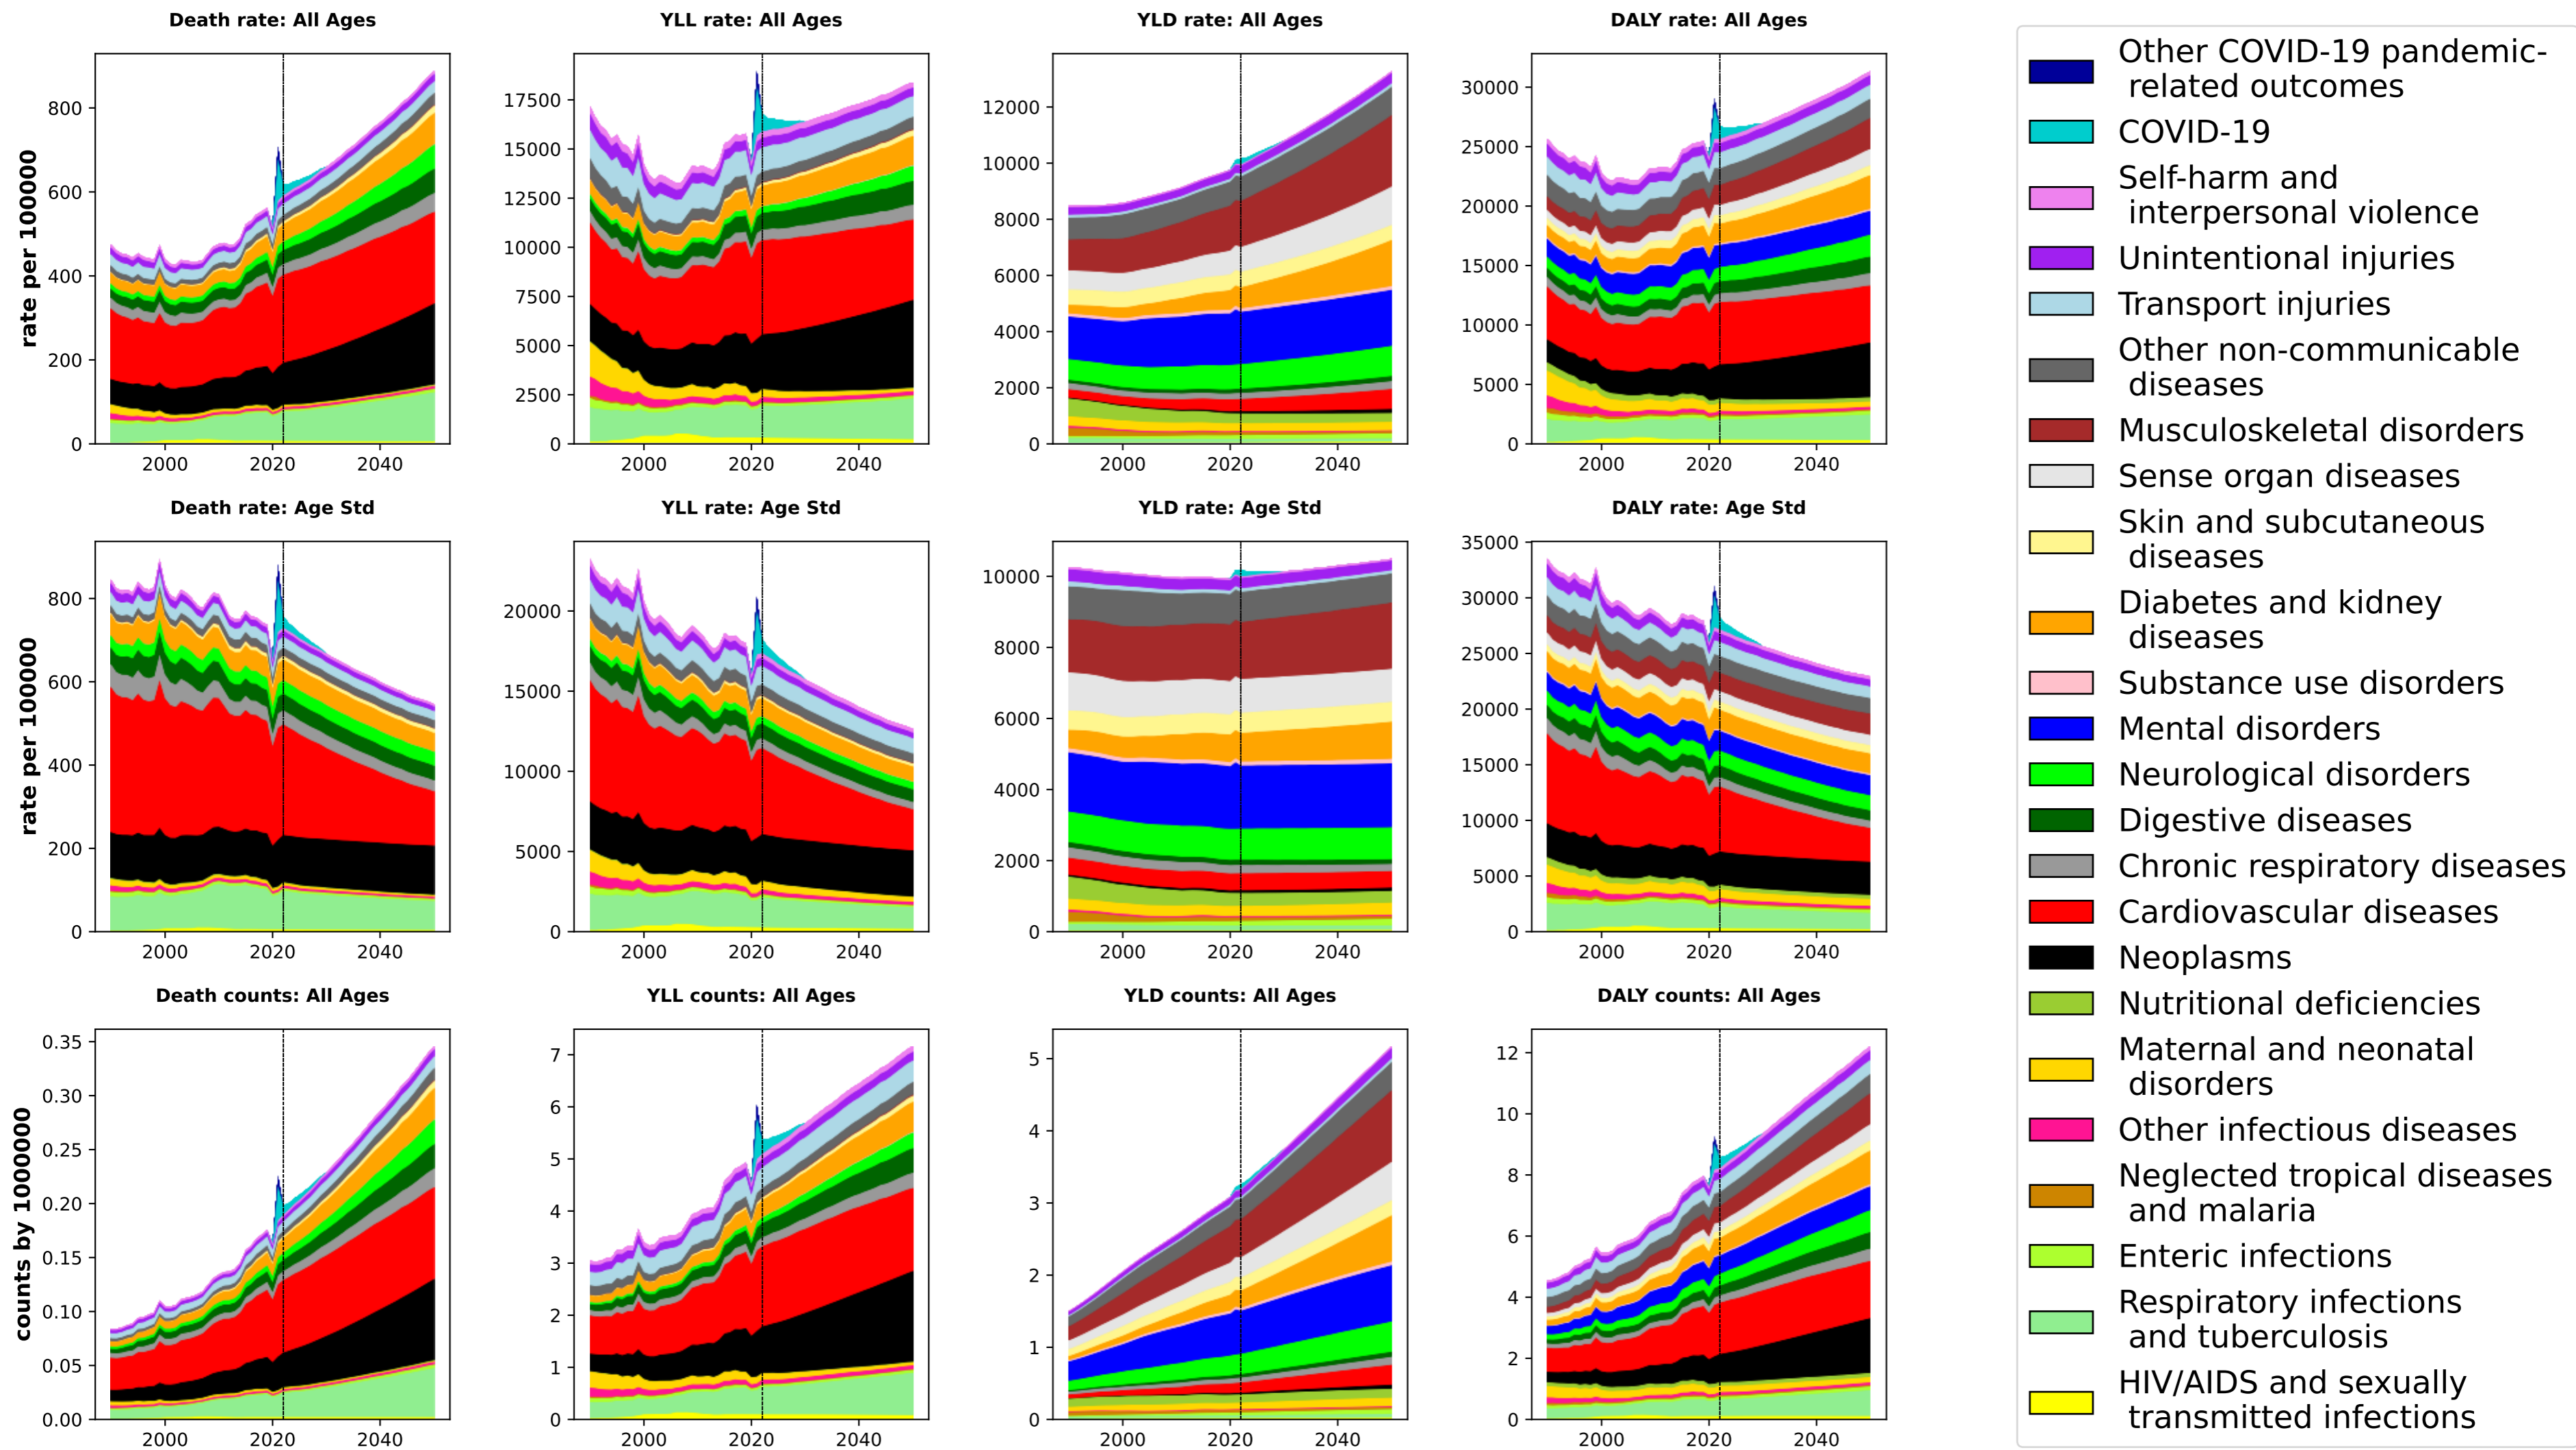

# Maldives

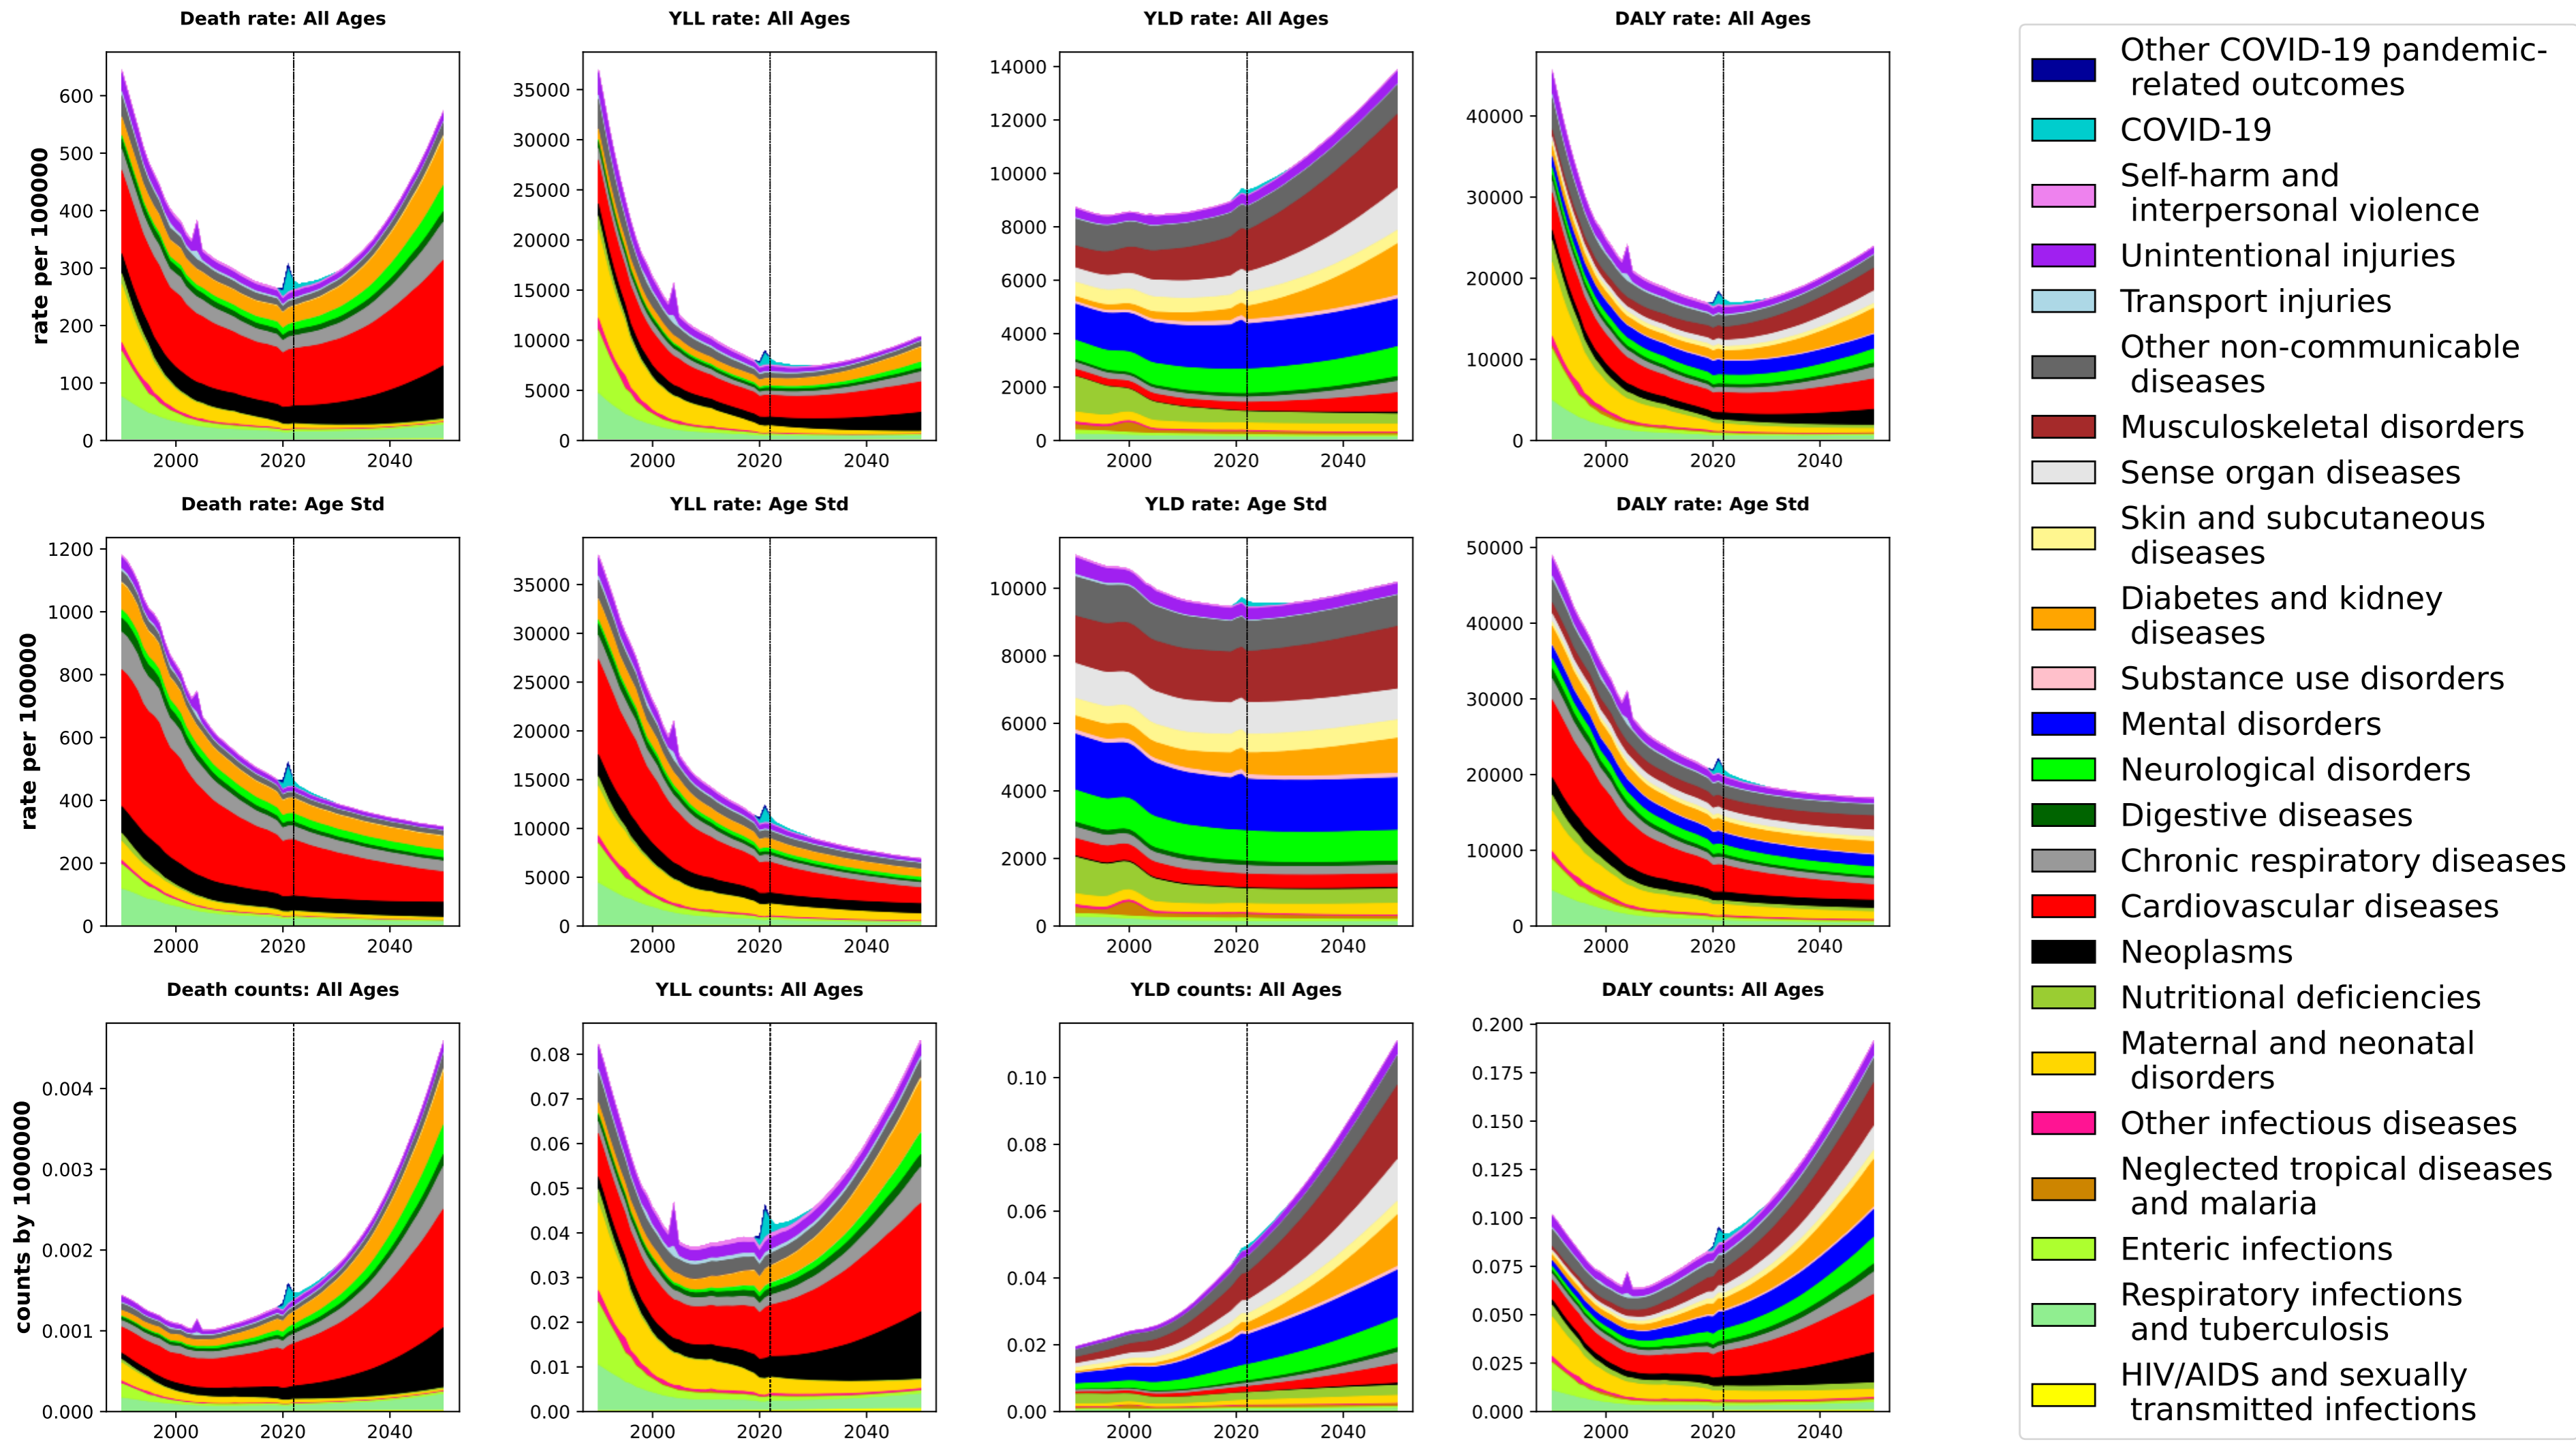

# Mauritius

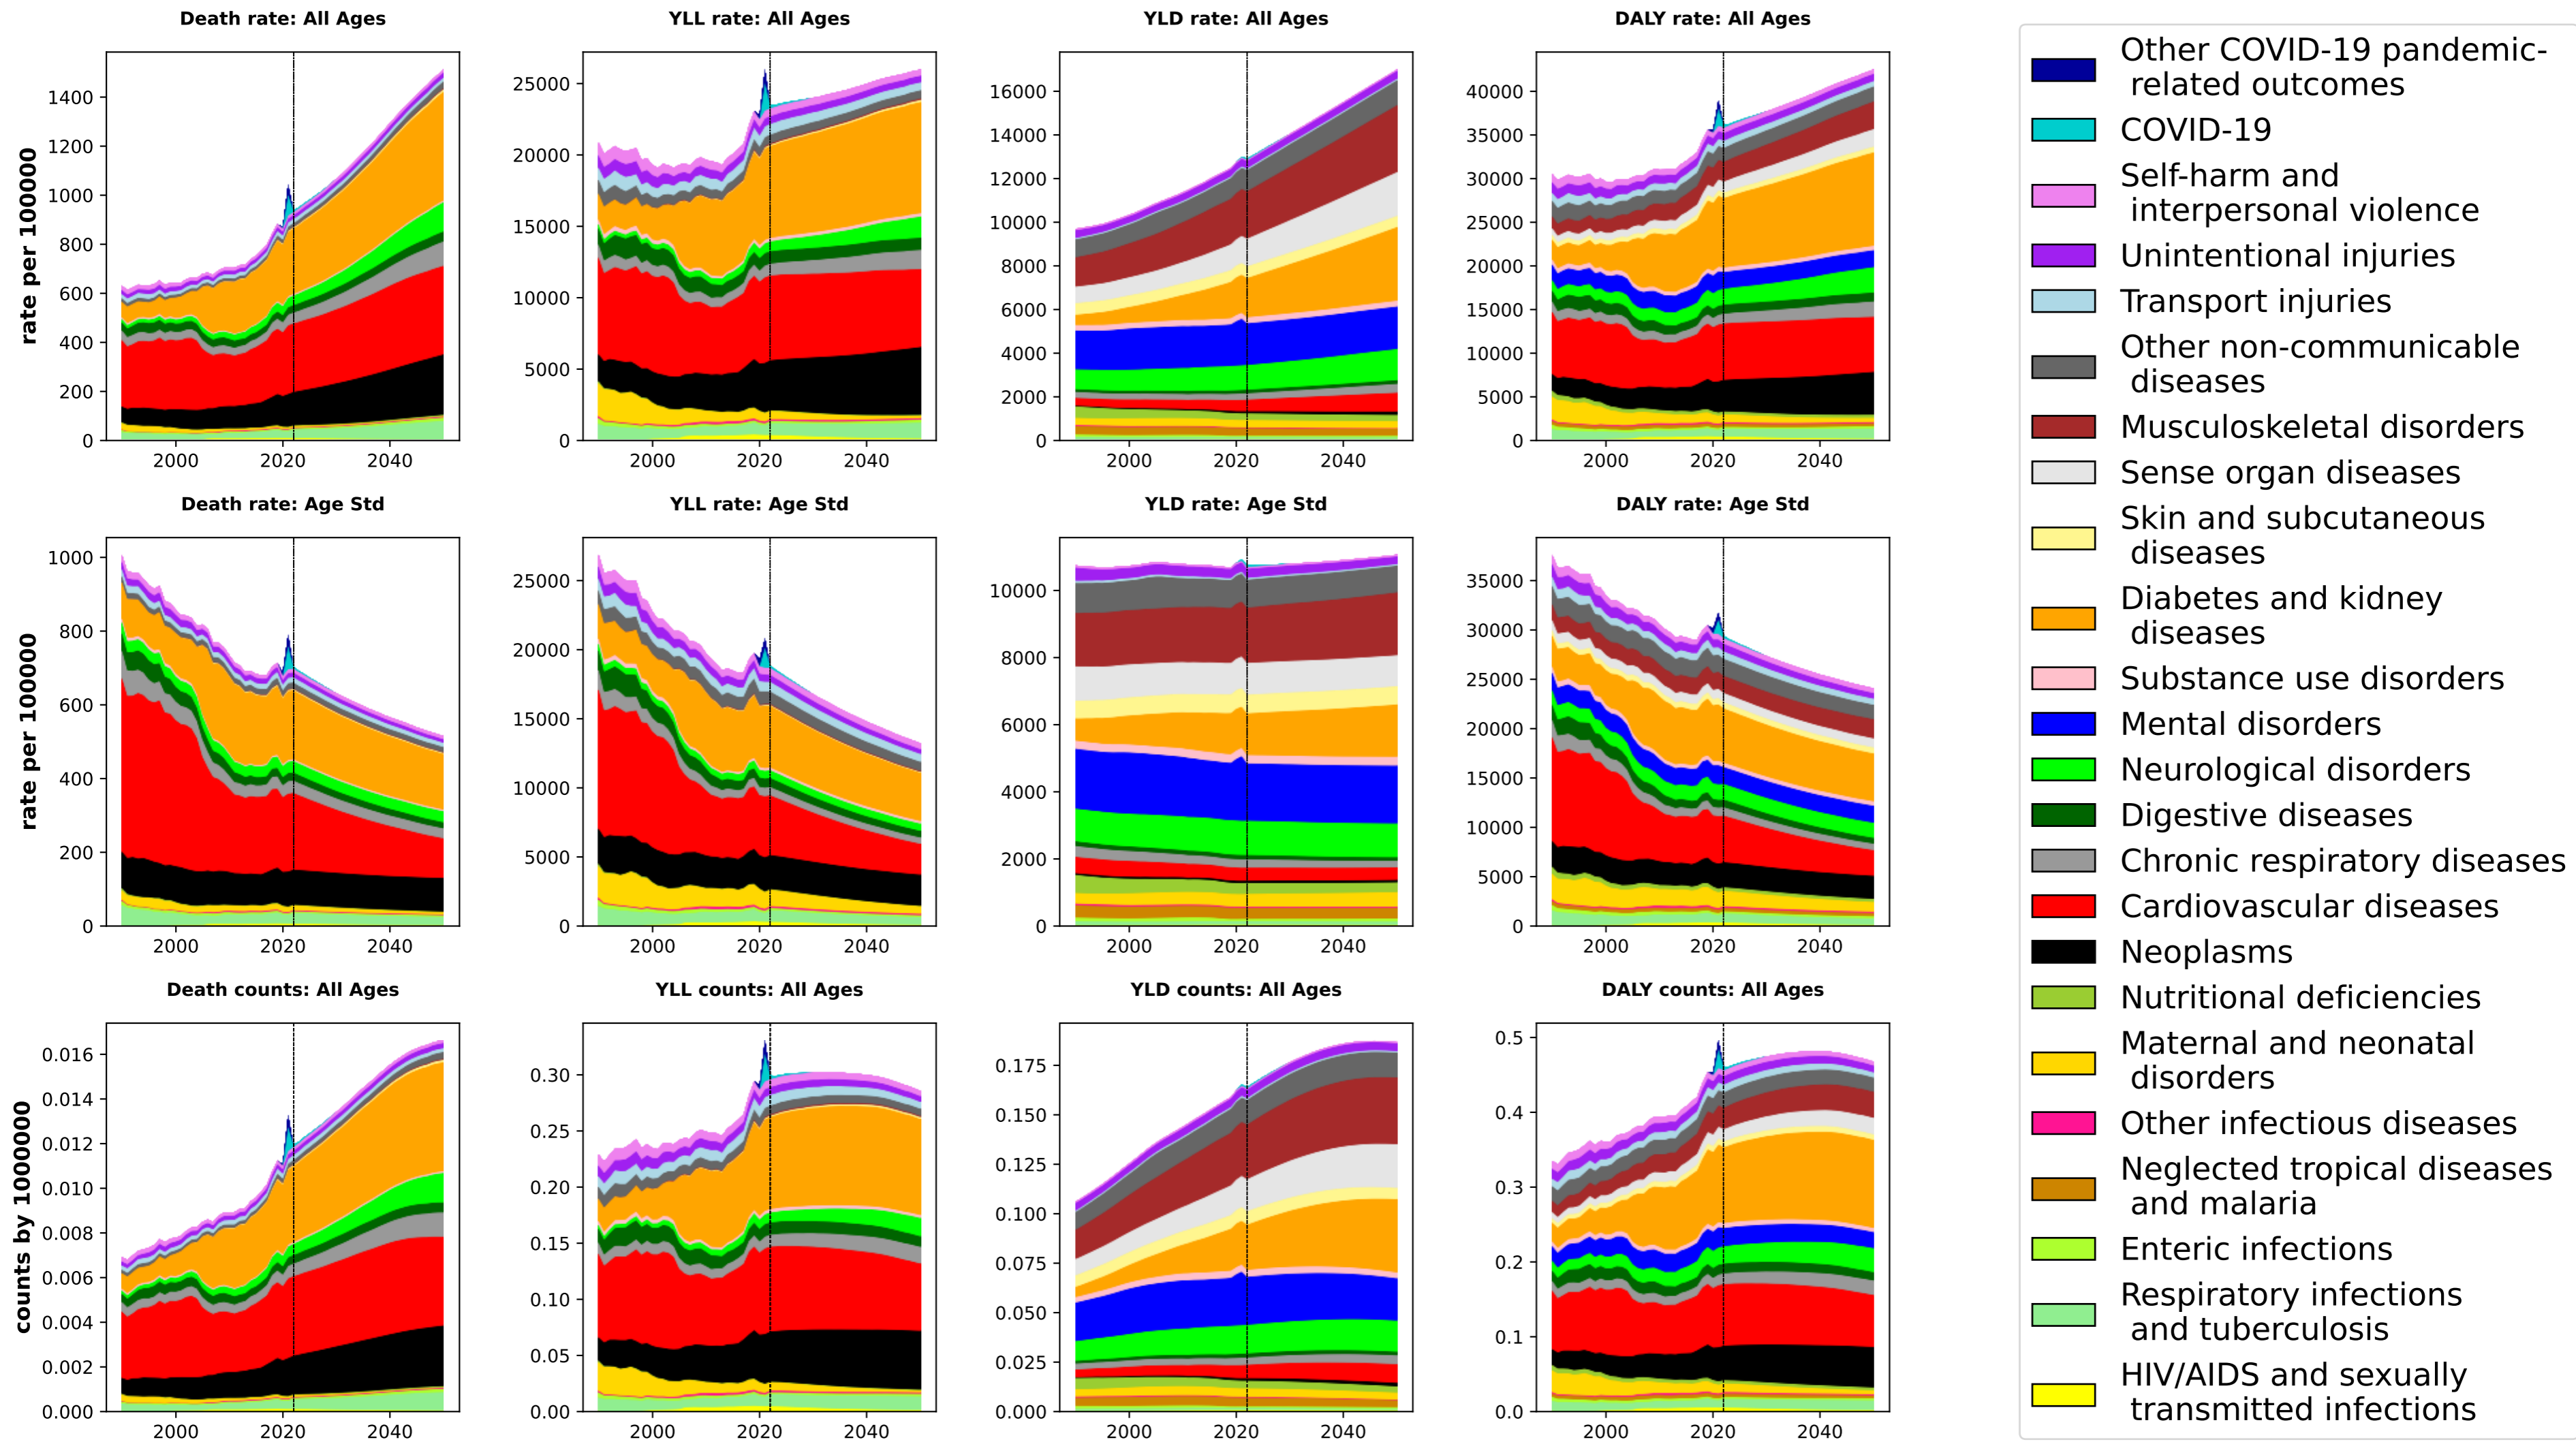

# Myanmar

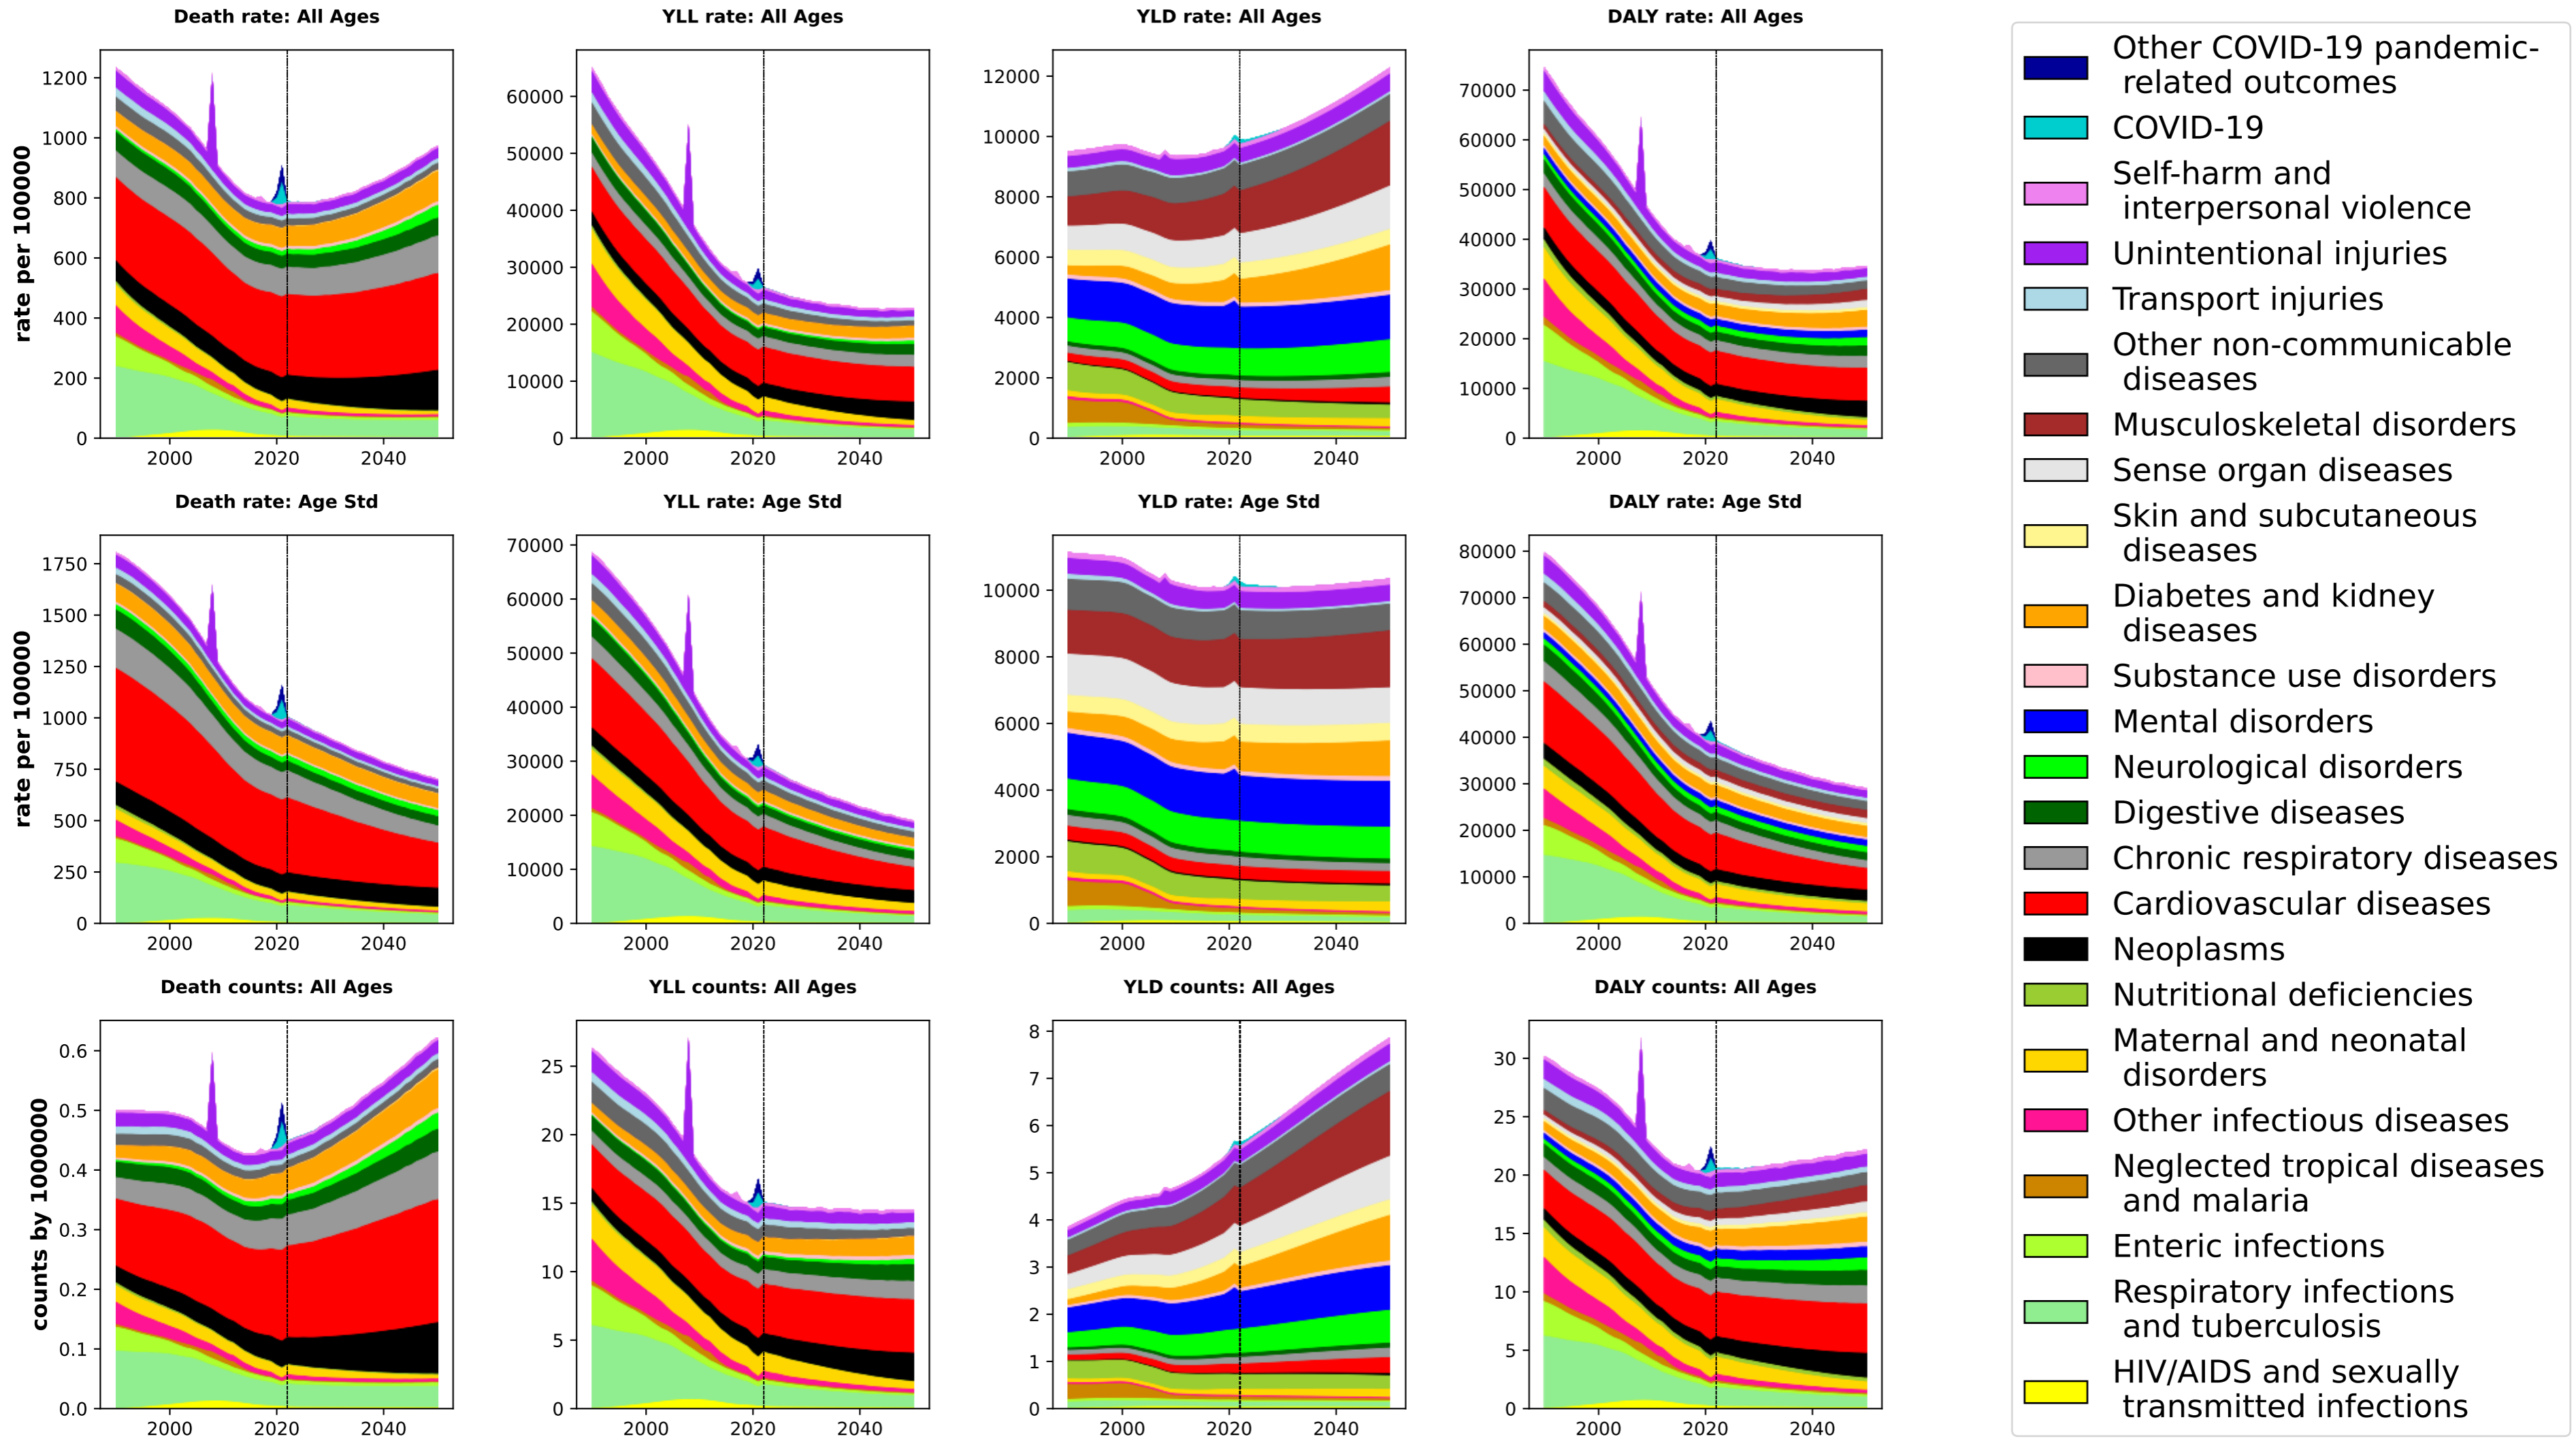

# Philippines

Supplemental Results Figure S6. Cause level 2 area plots for 4 burden measures for reference scenario by location, 1990-2050

863

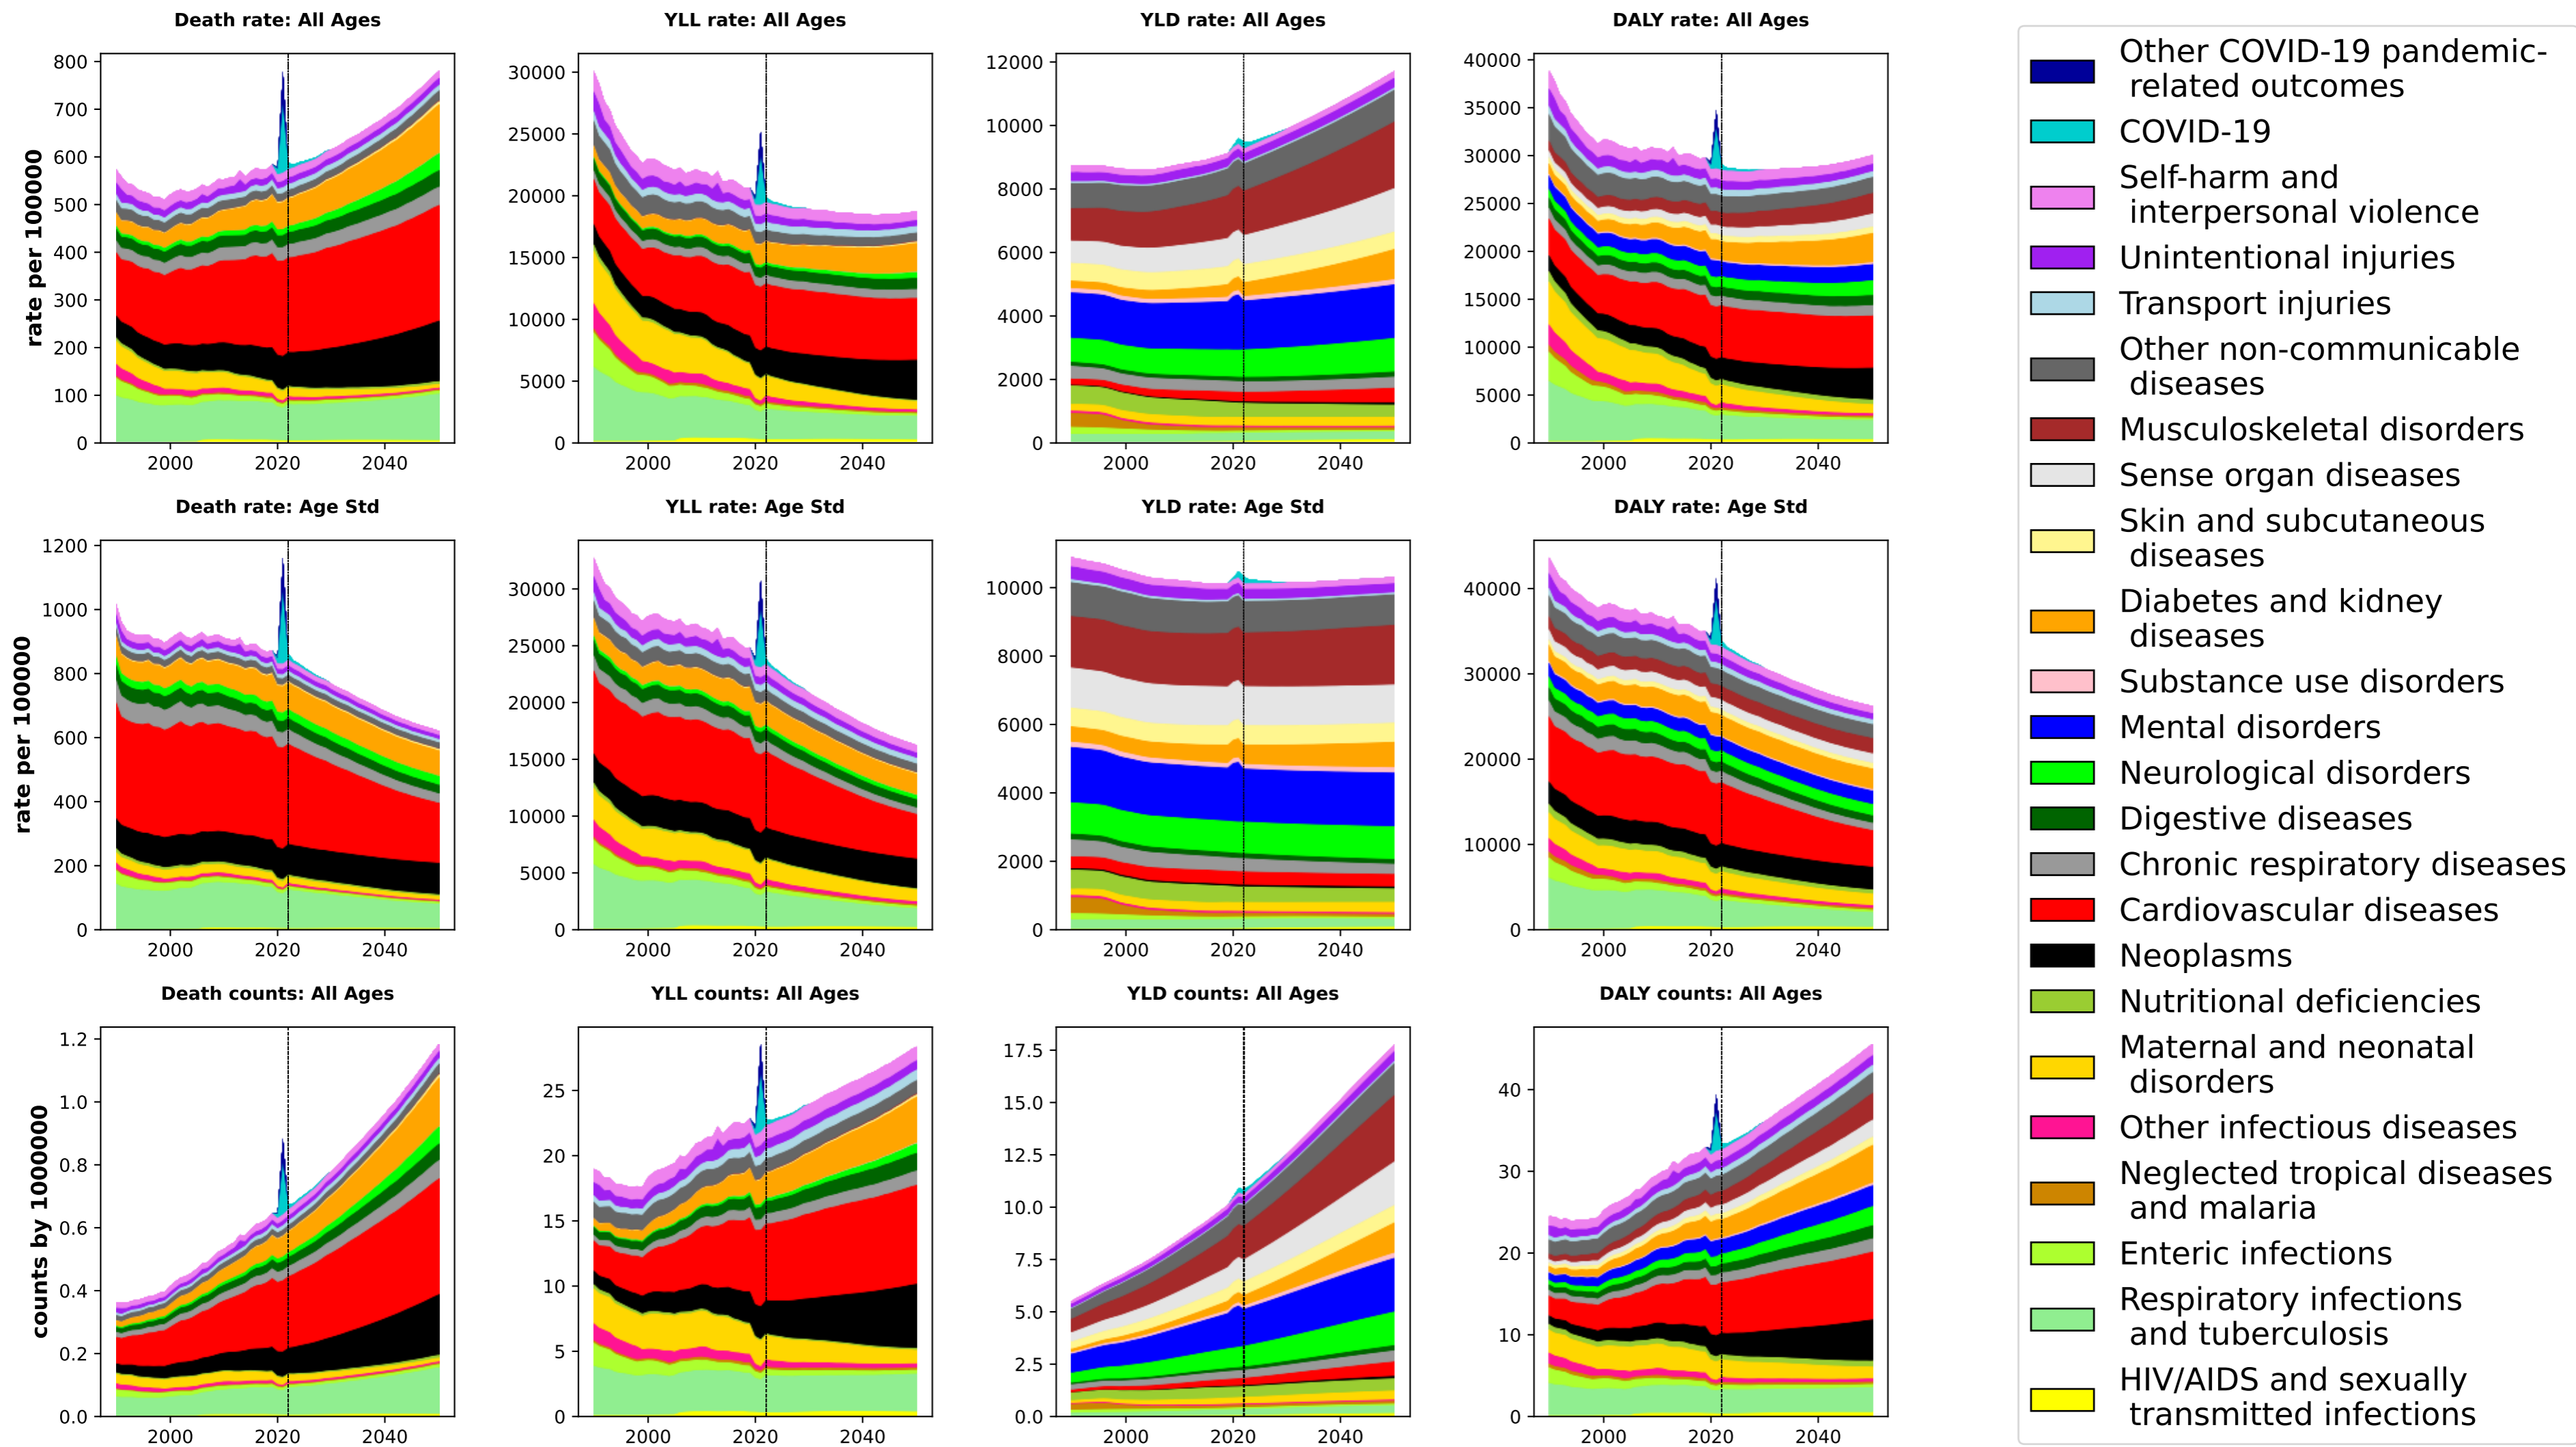



# Seychelles

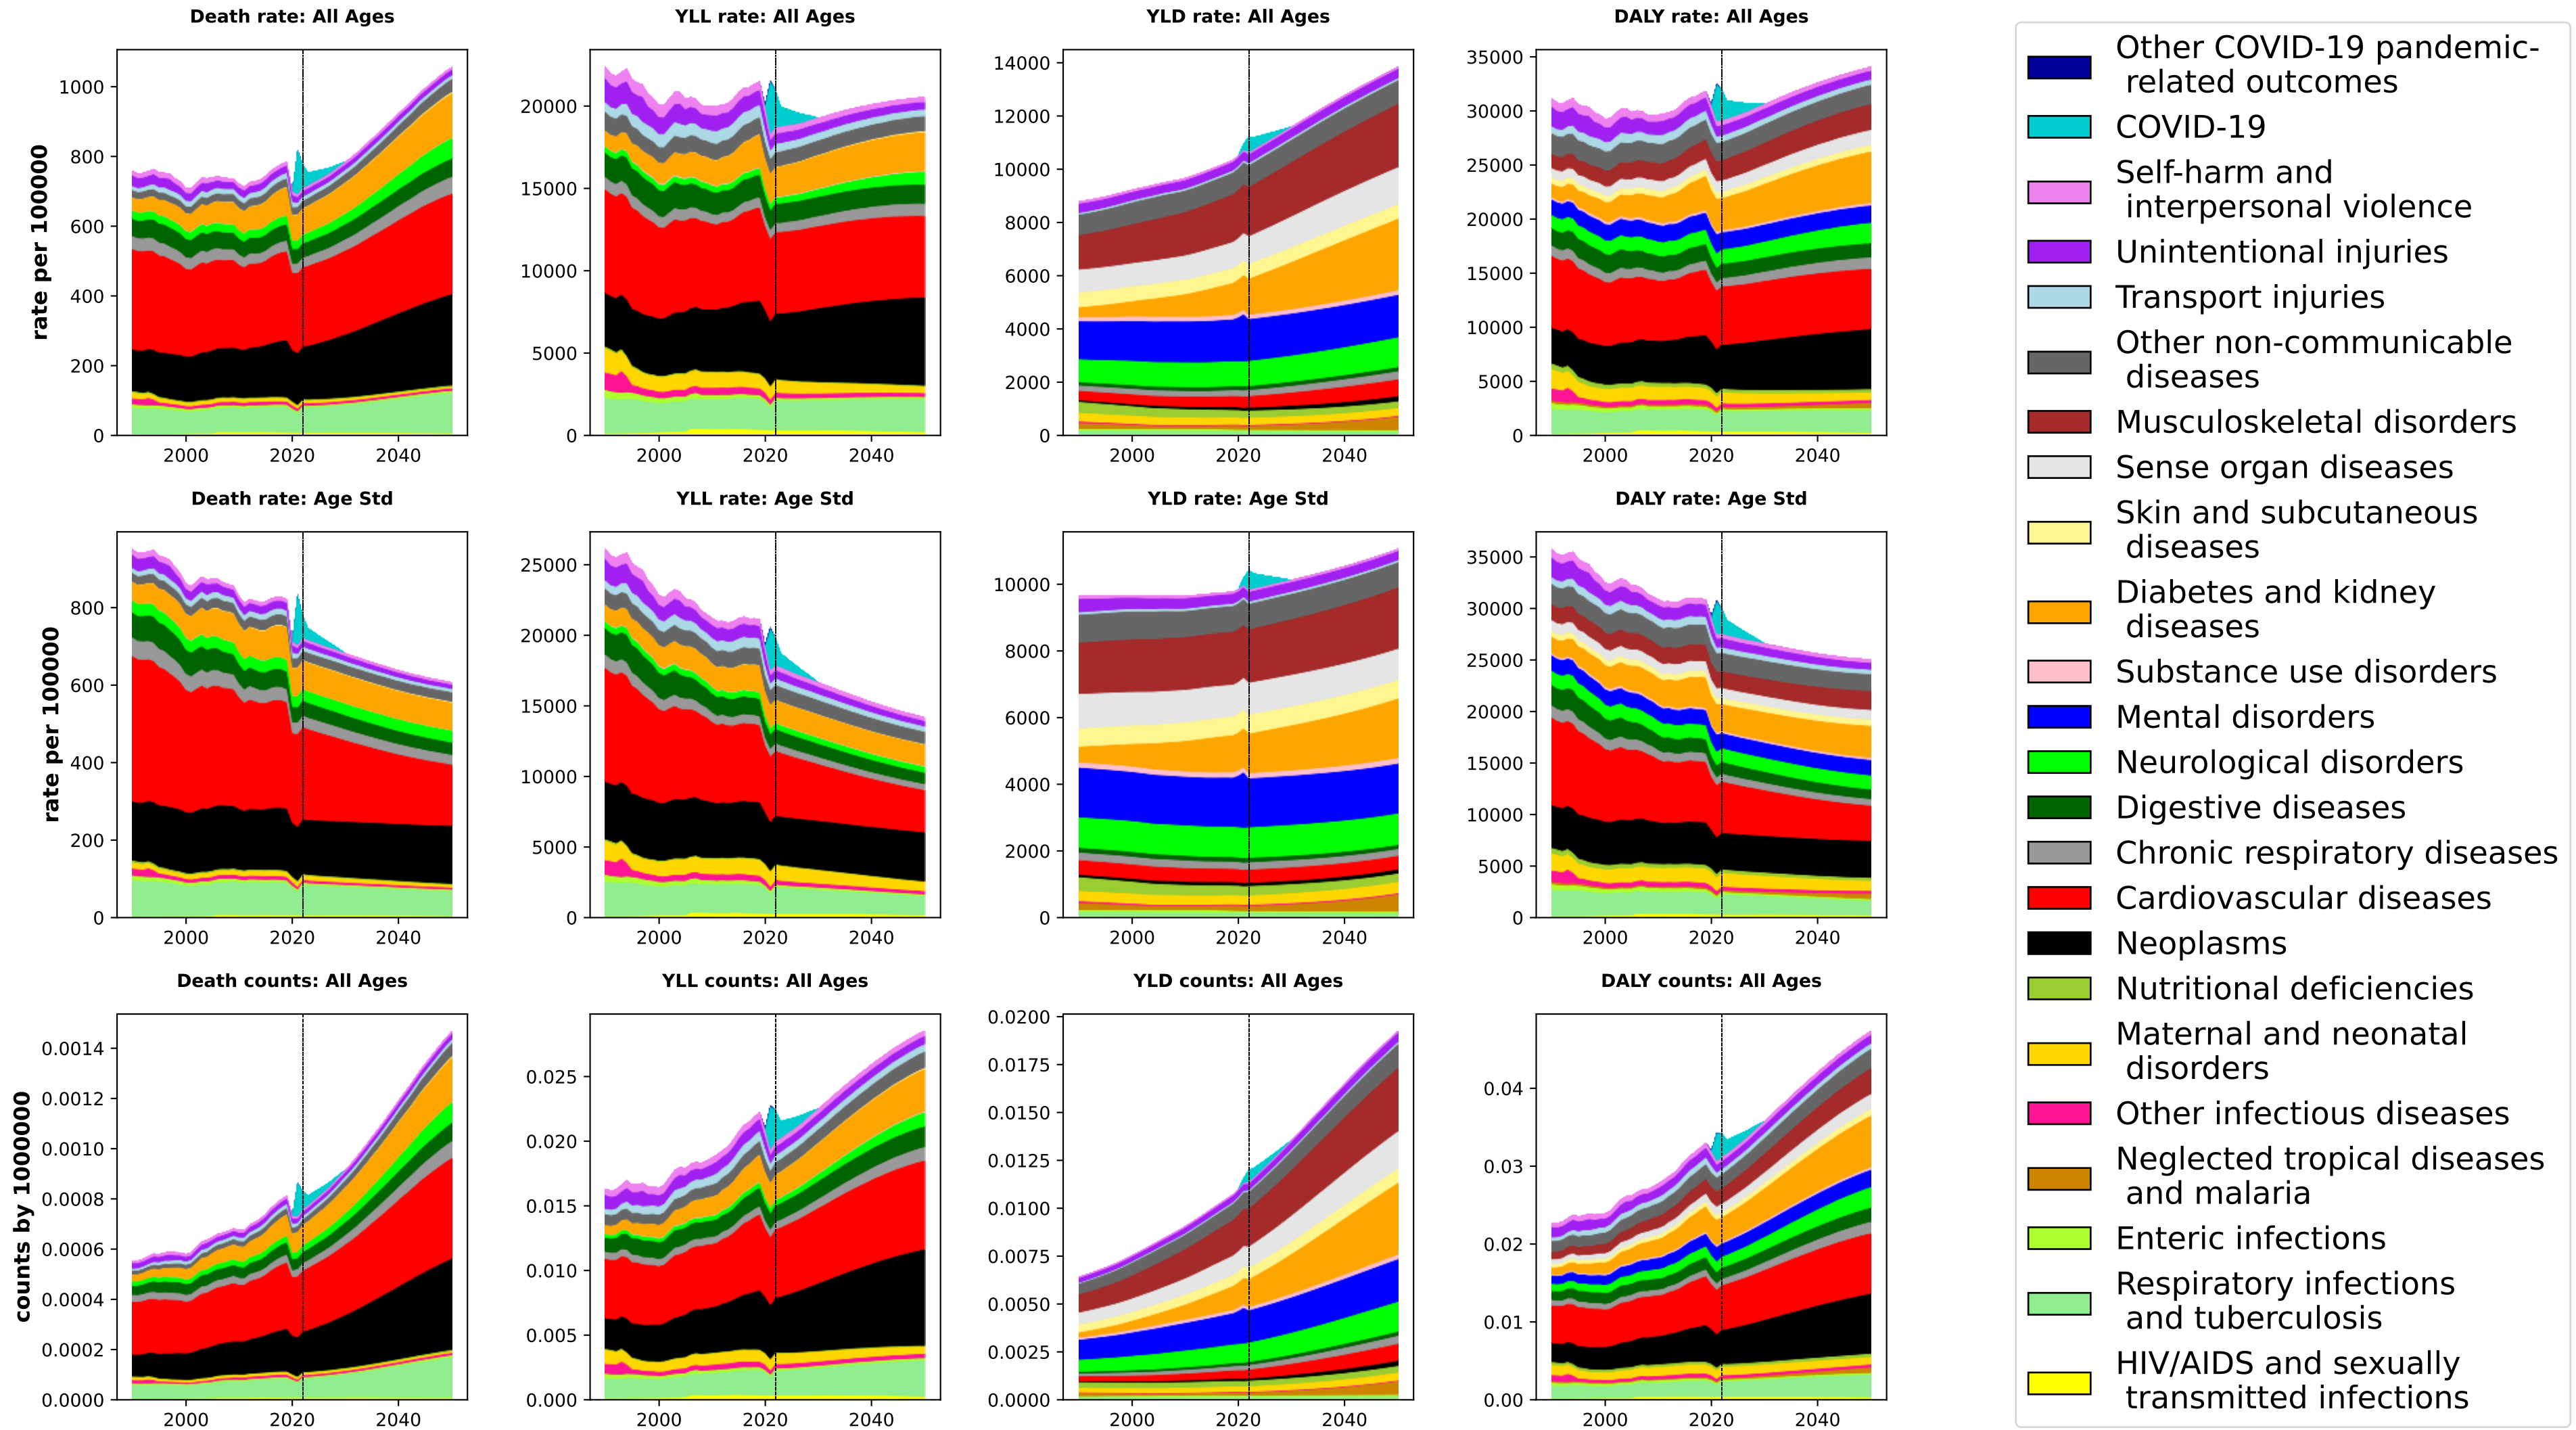

# Sri Lanka

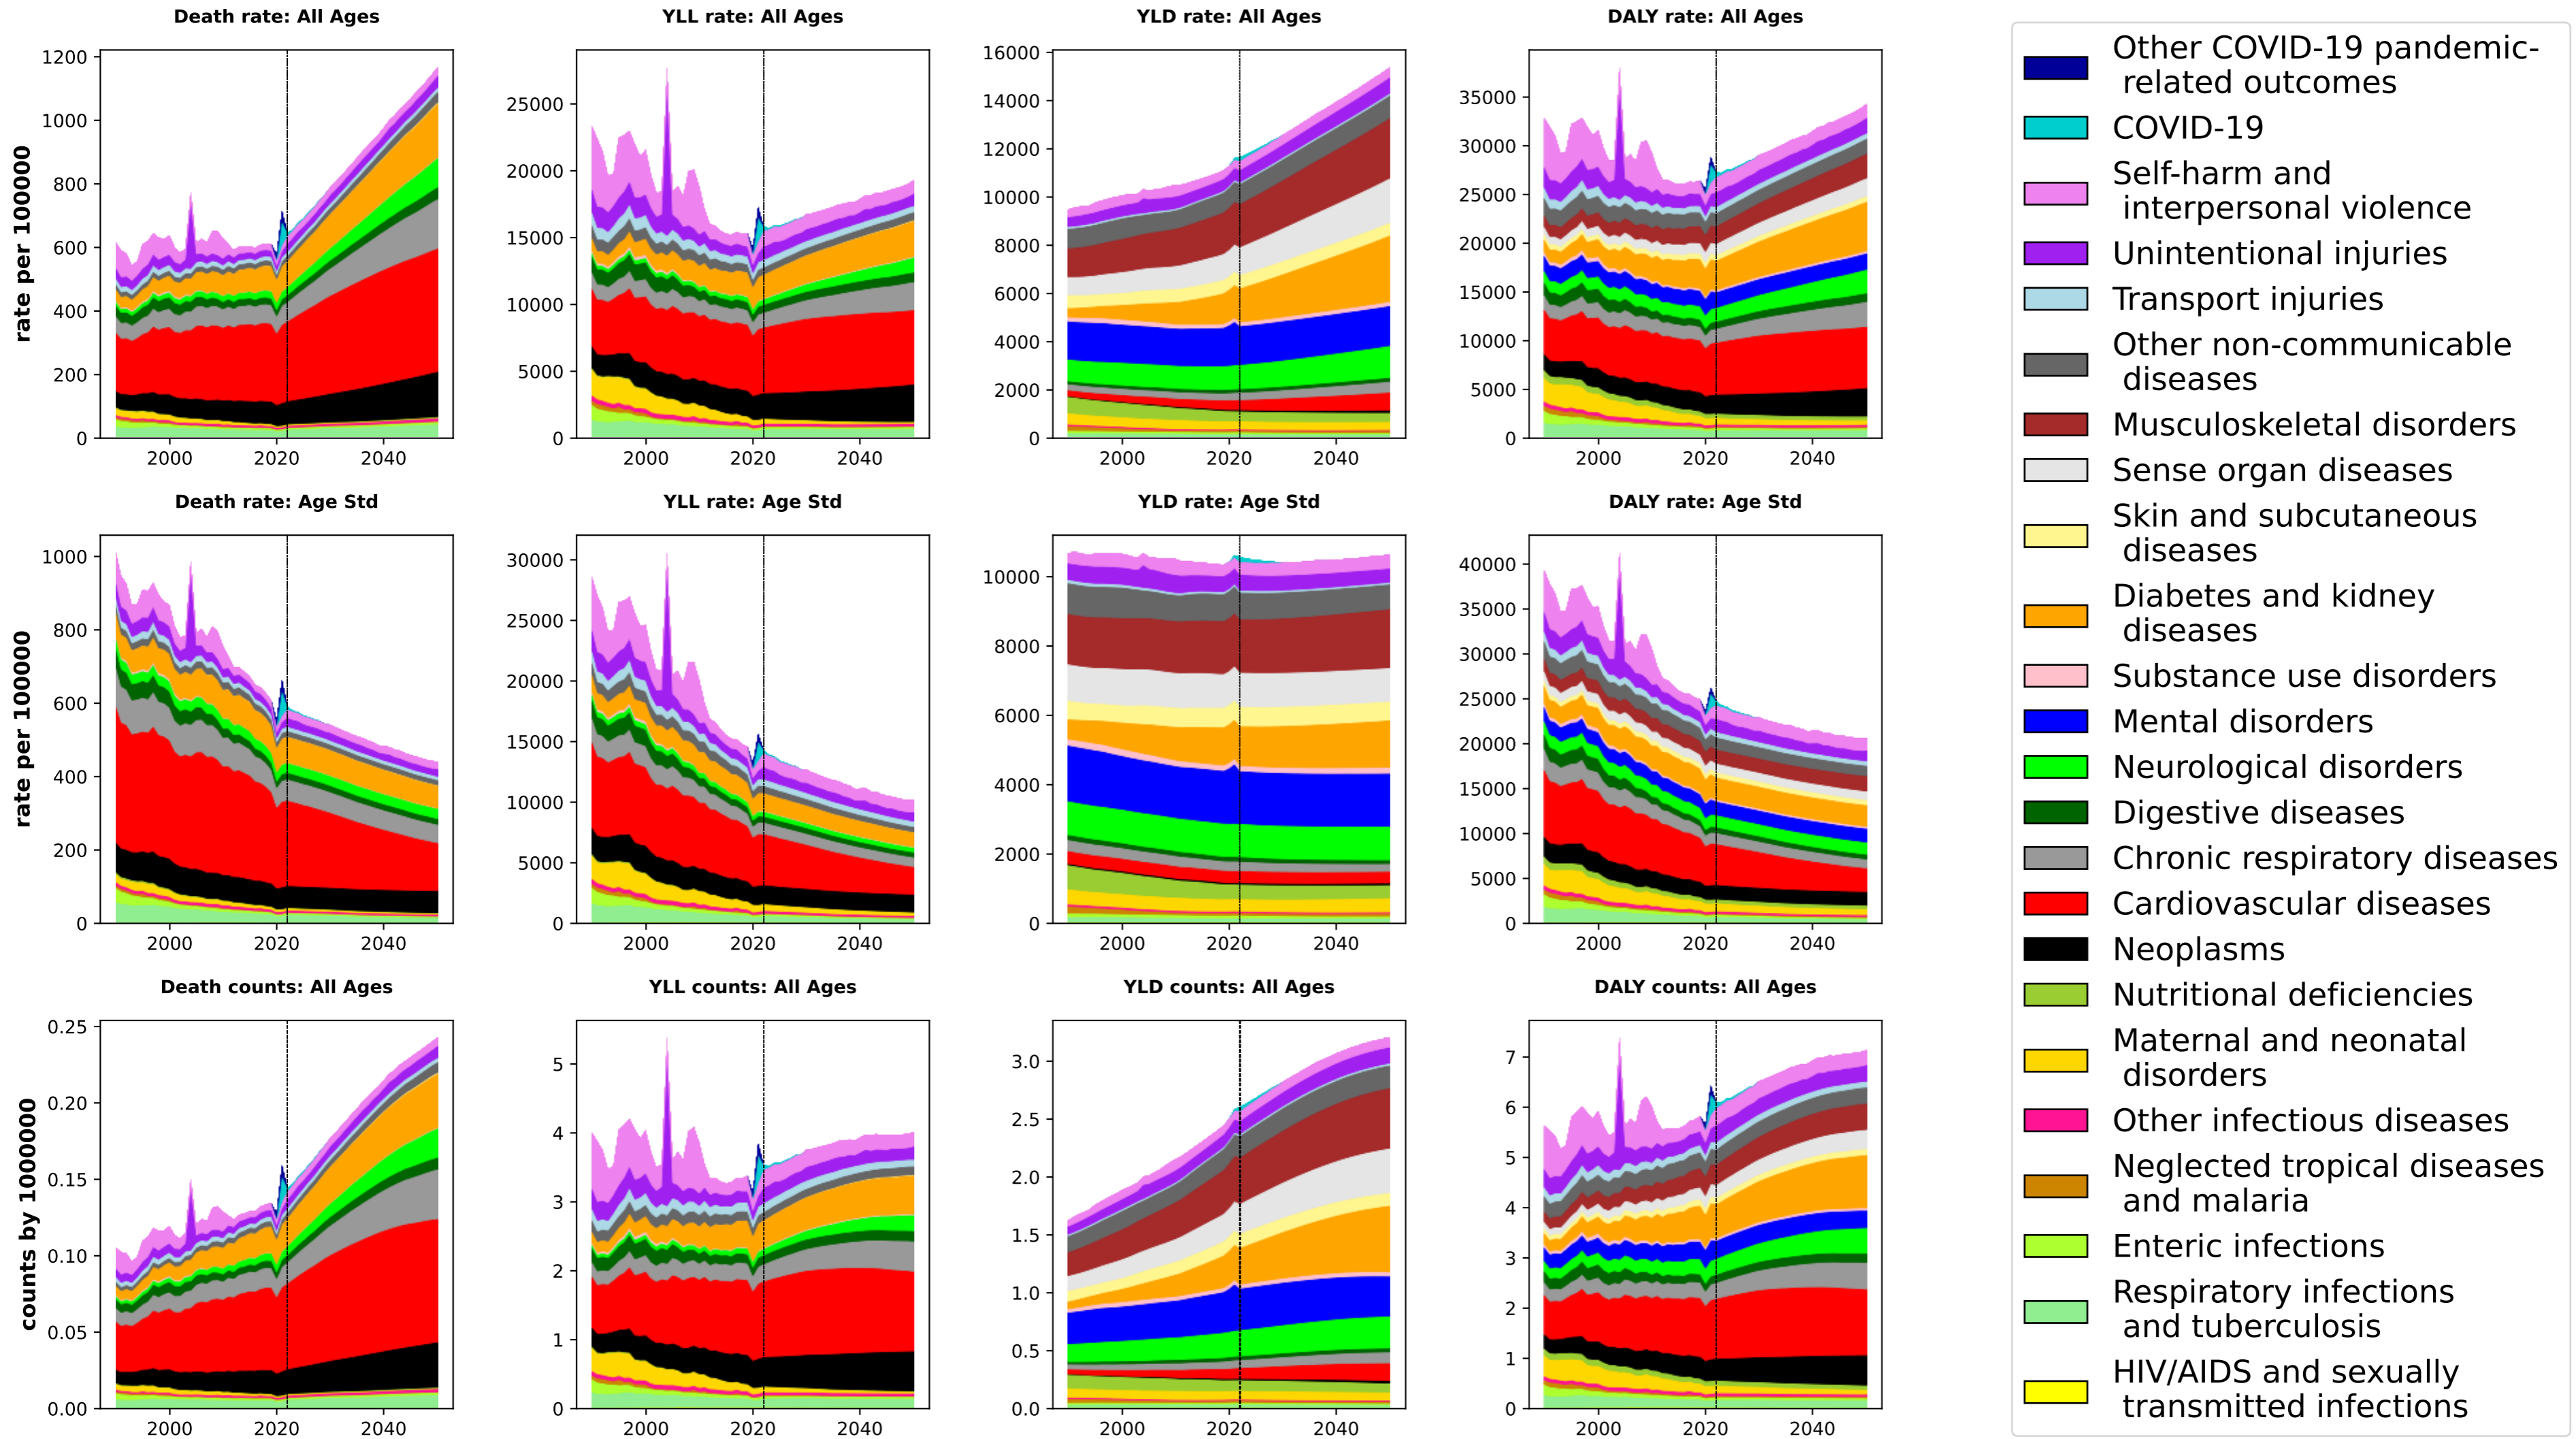

# Thailand

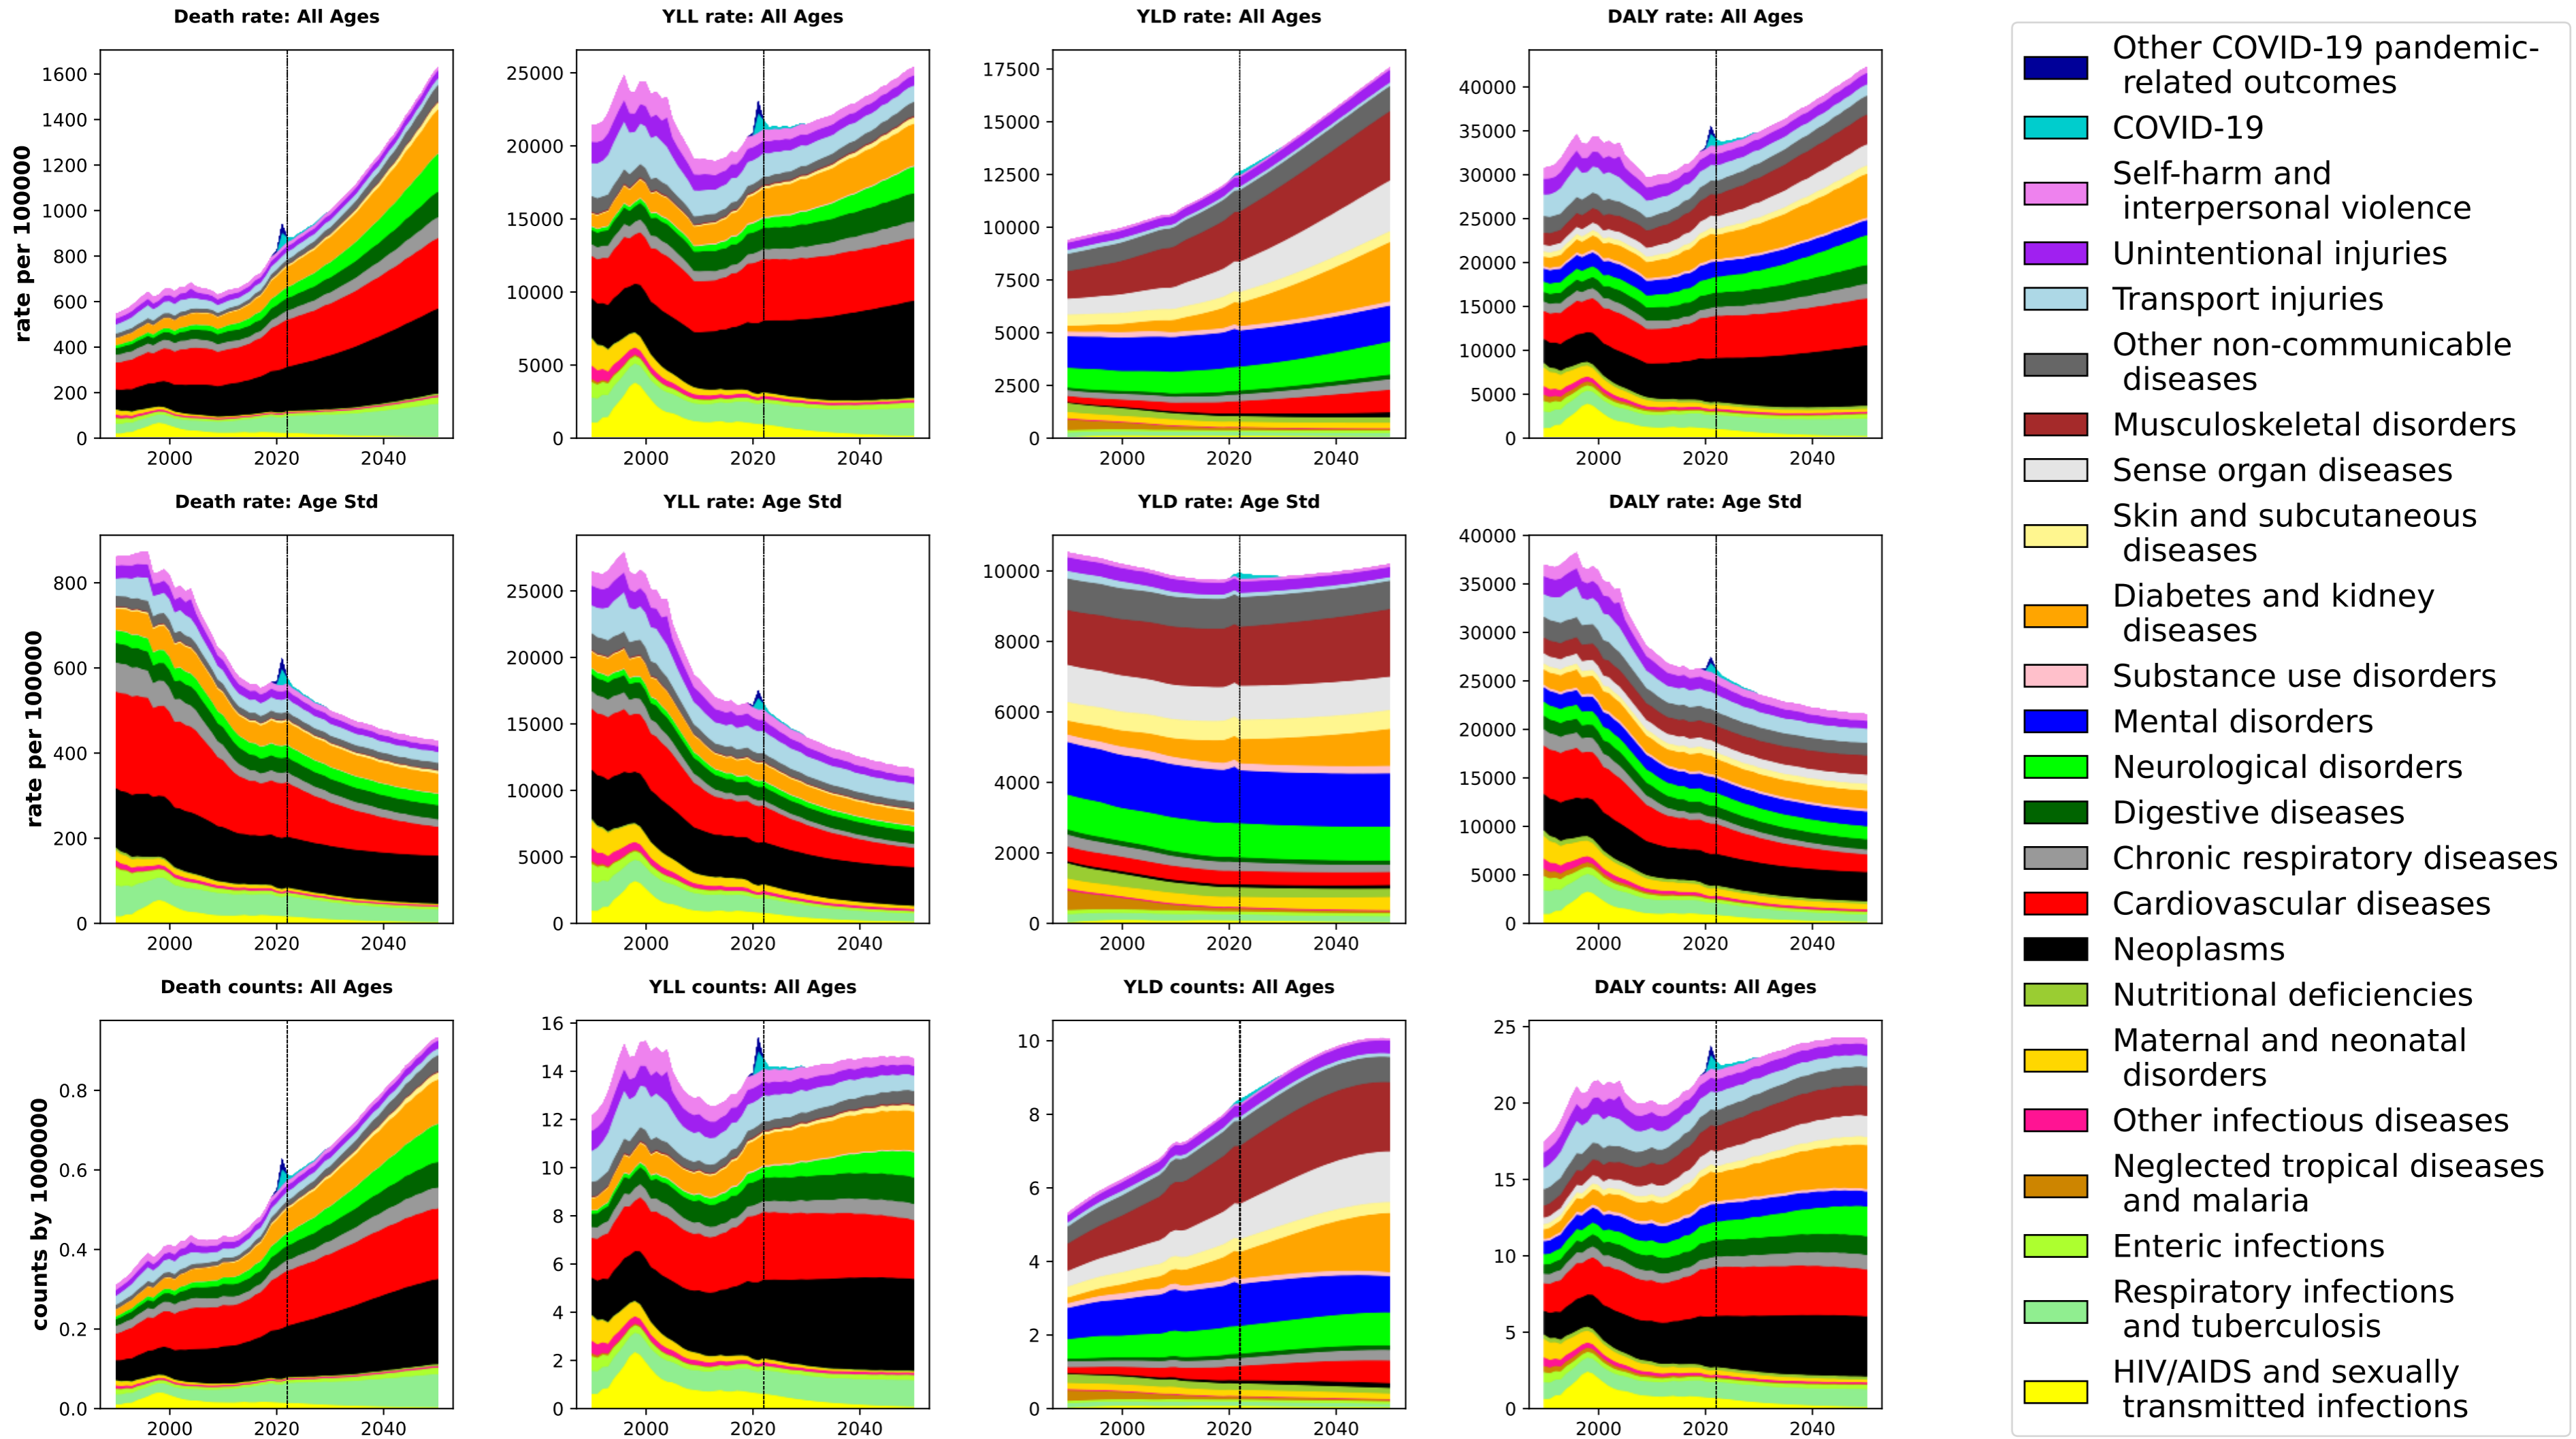

# Timor-Leste

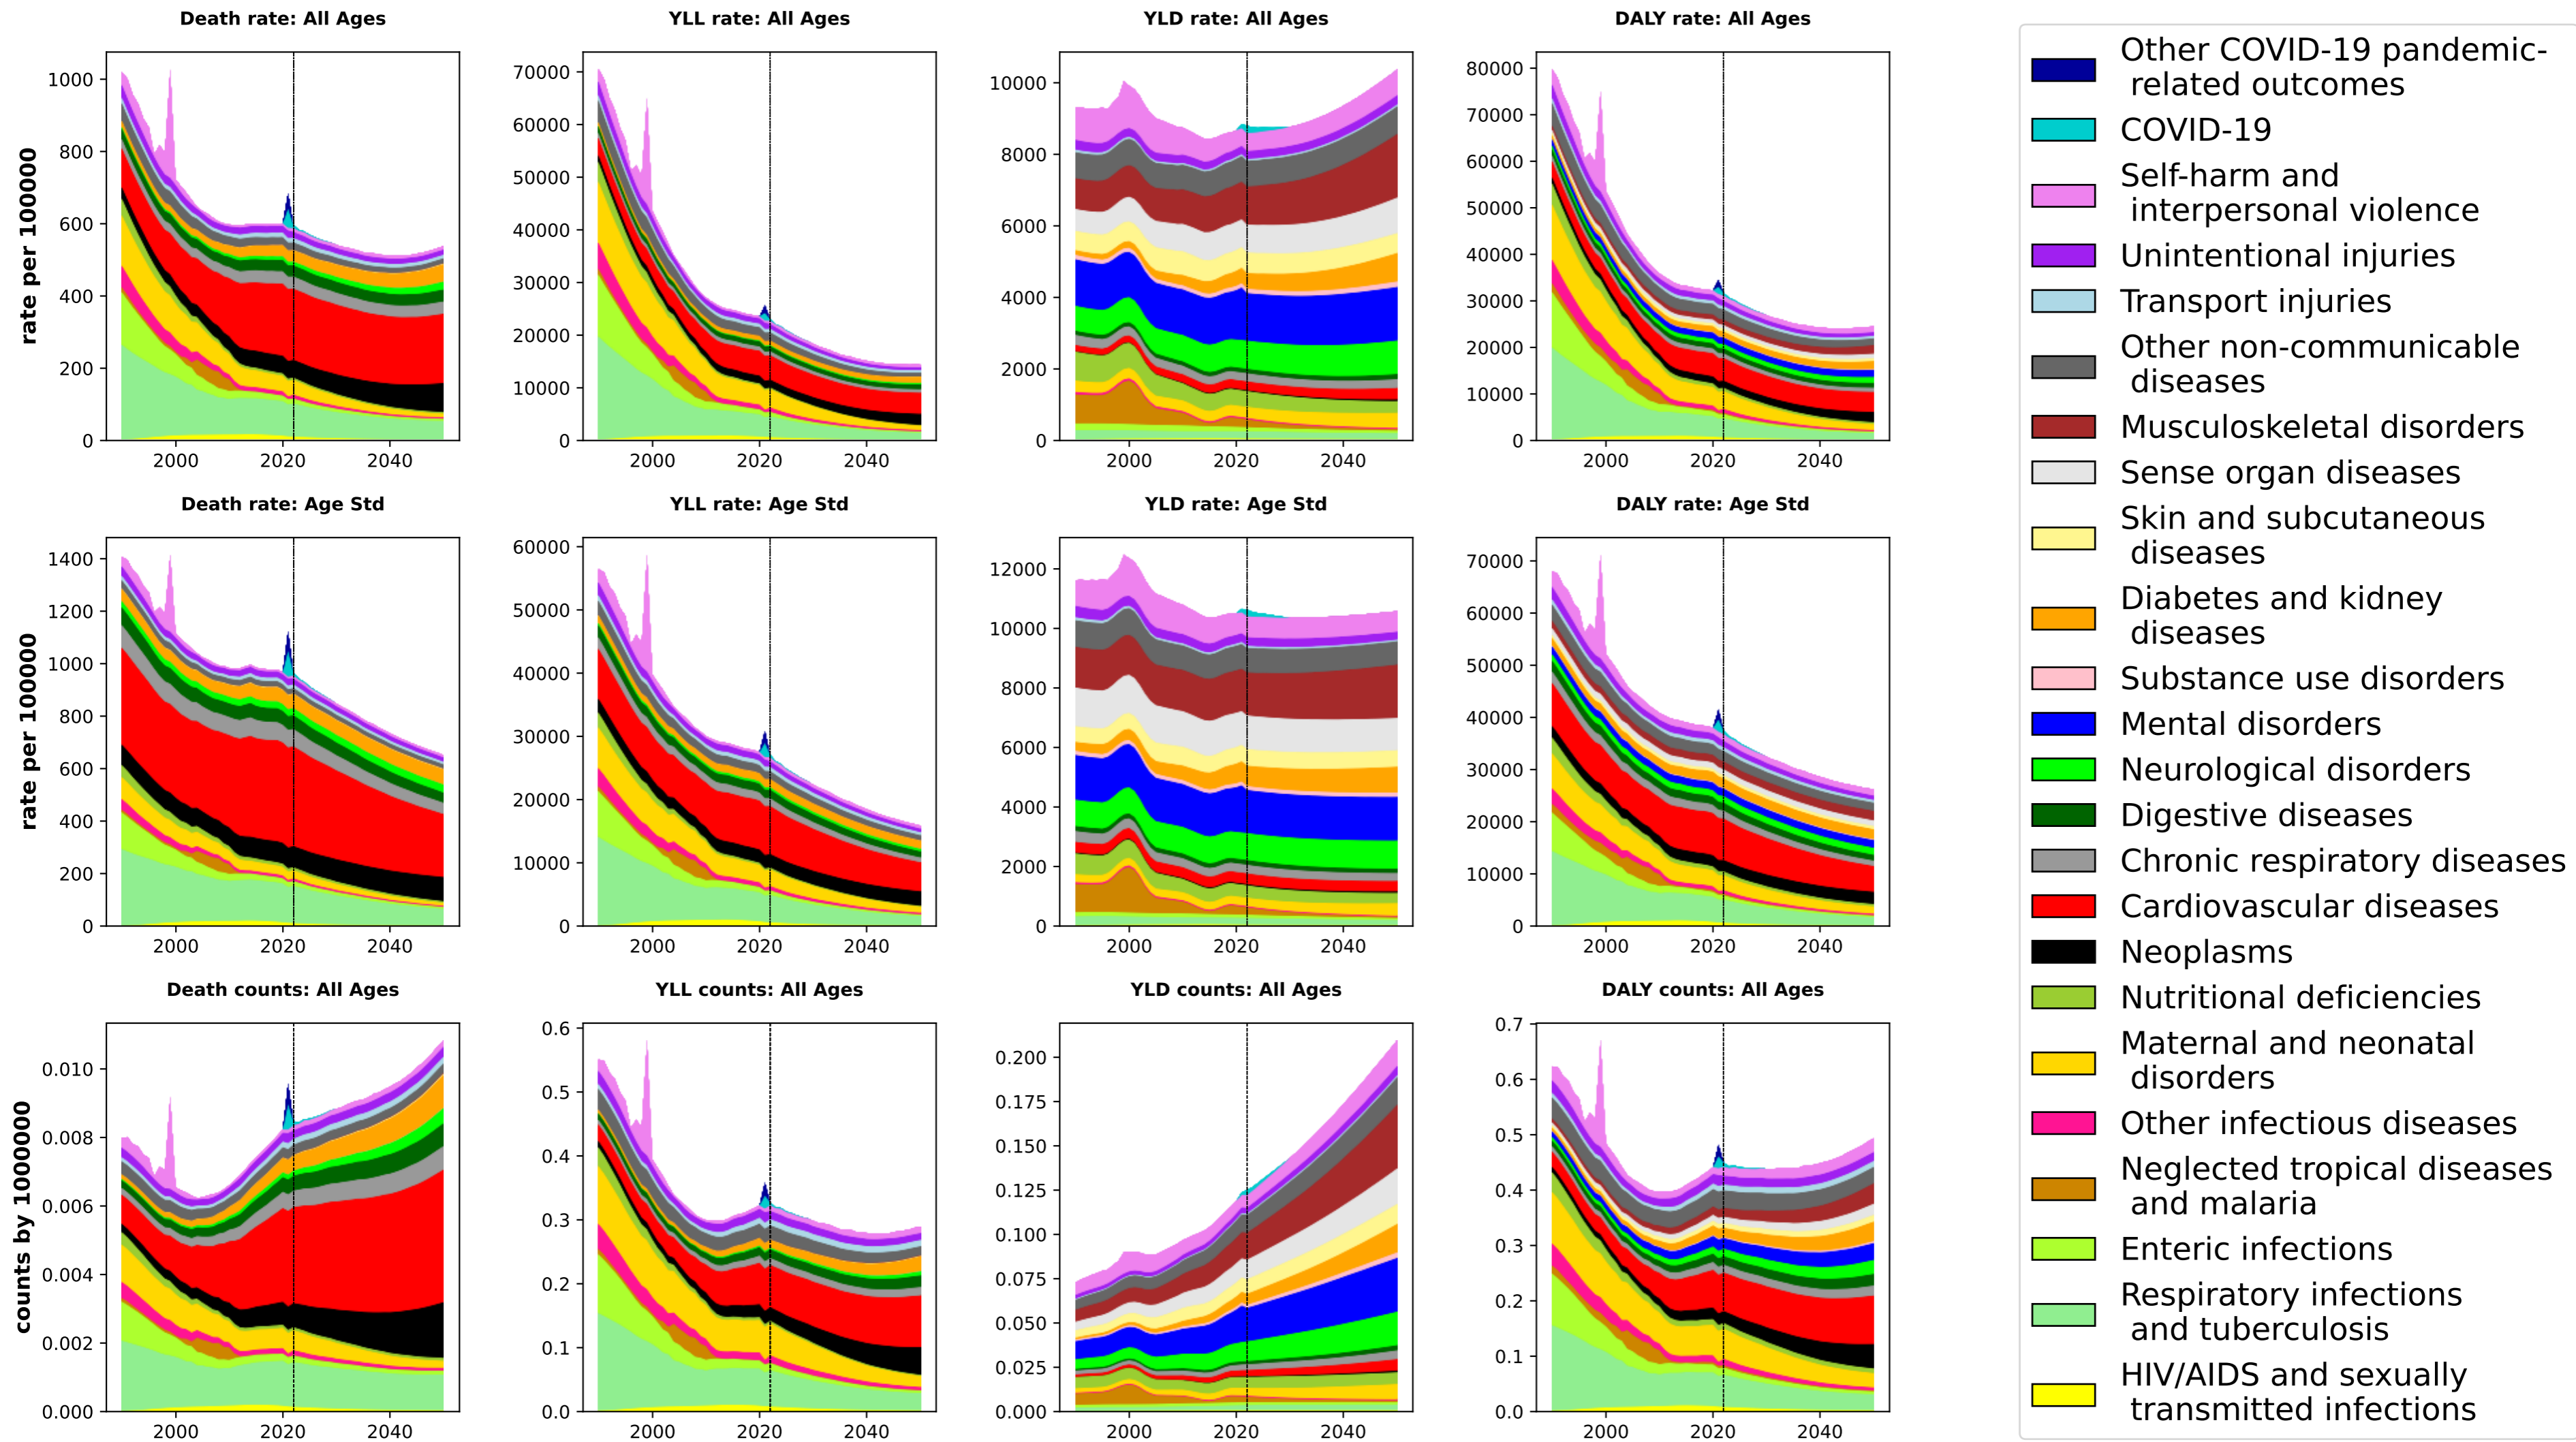

# Viet Nam

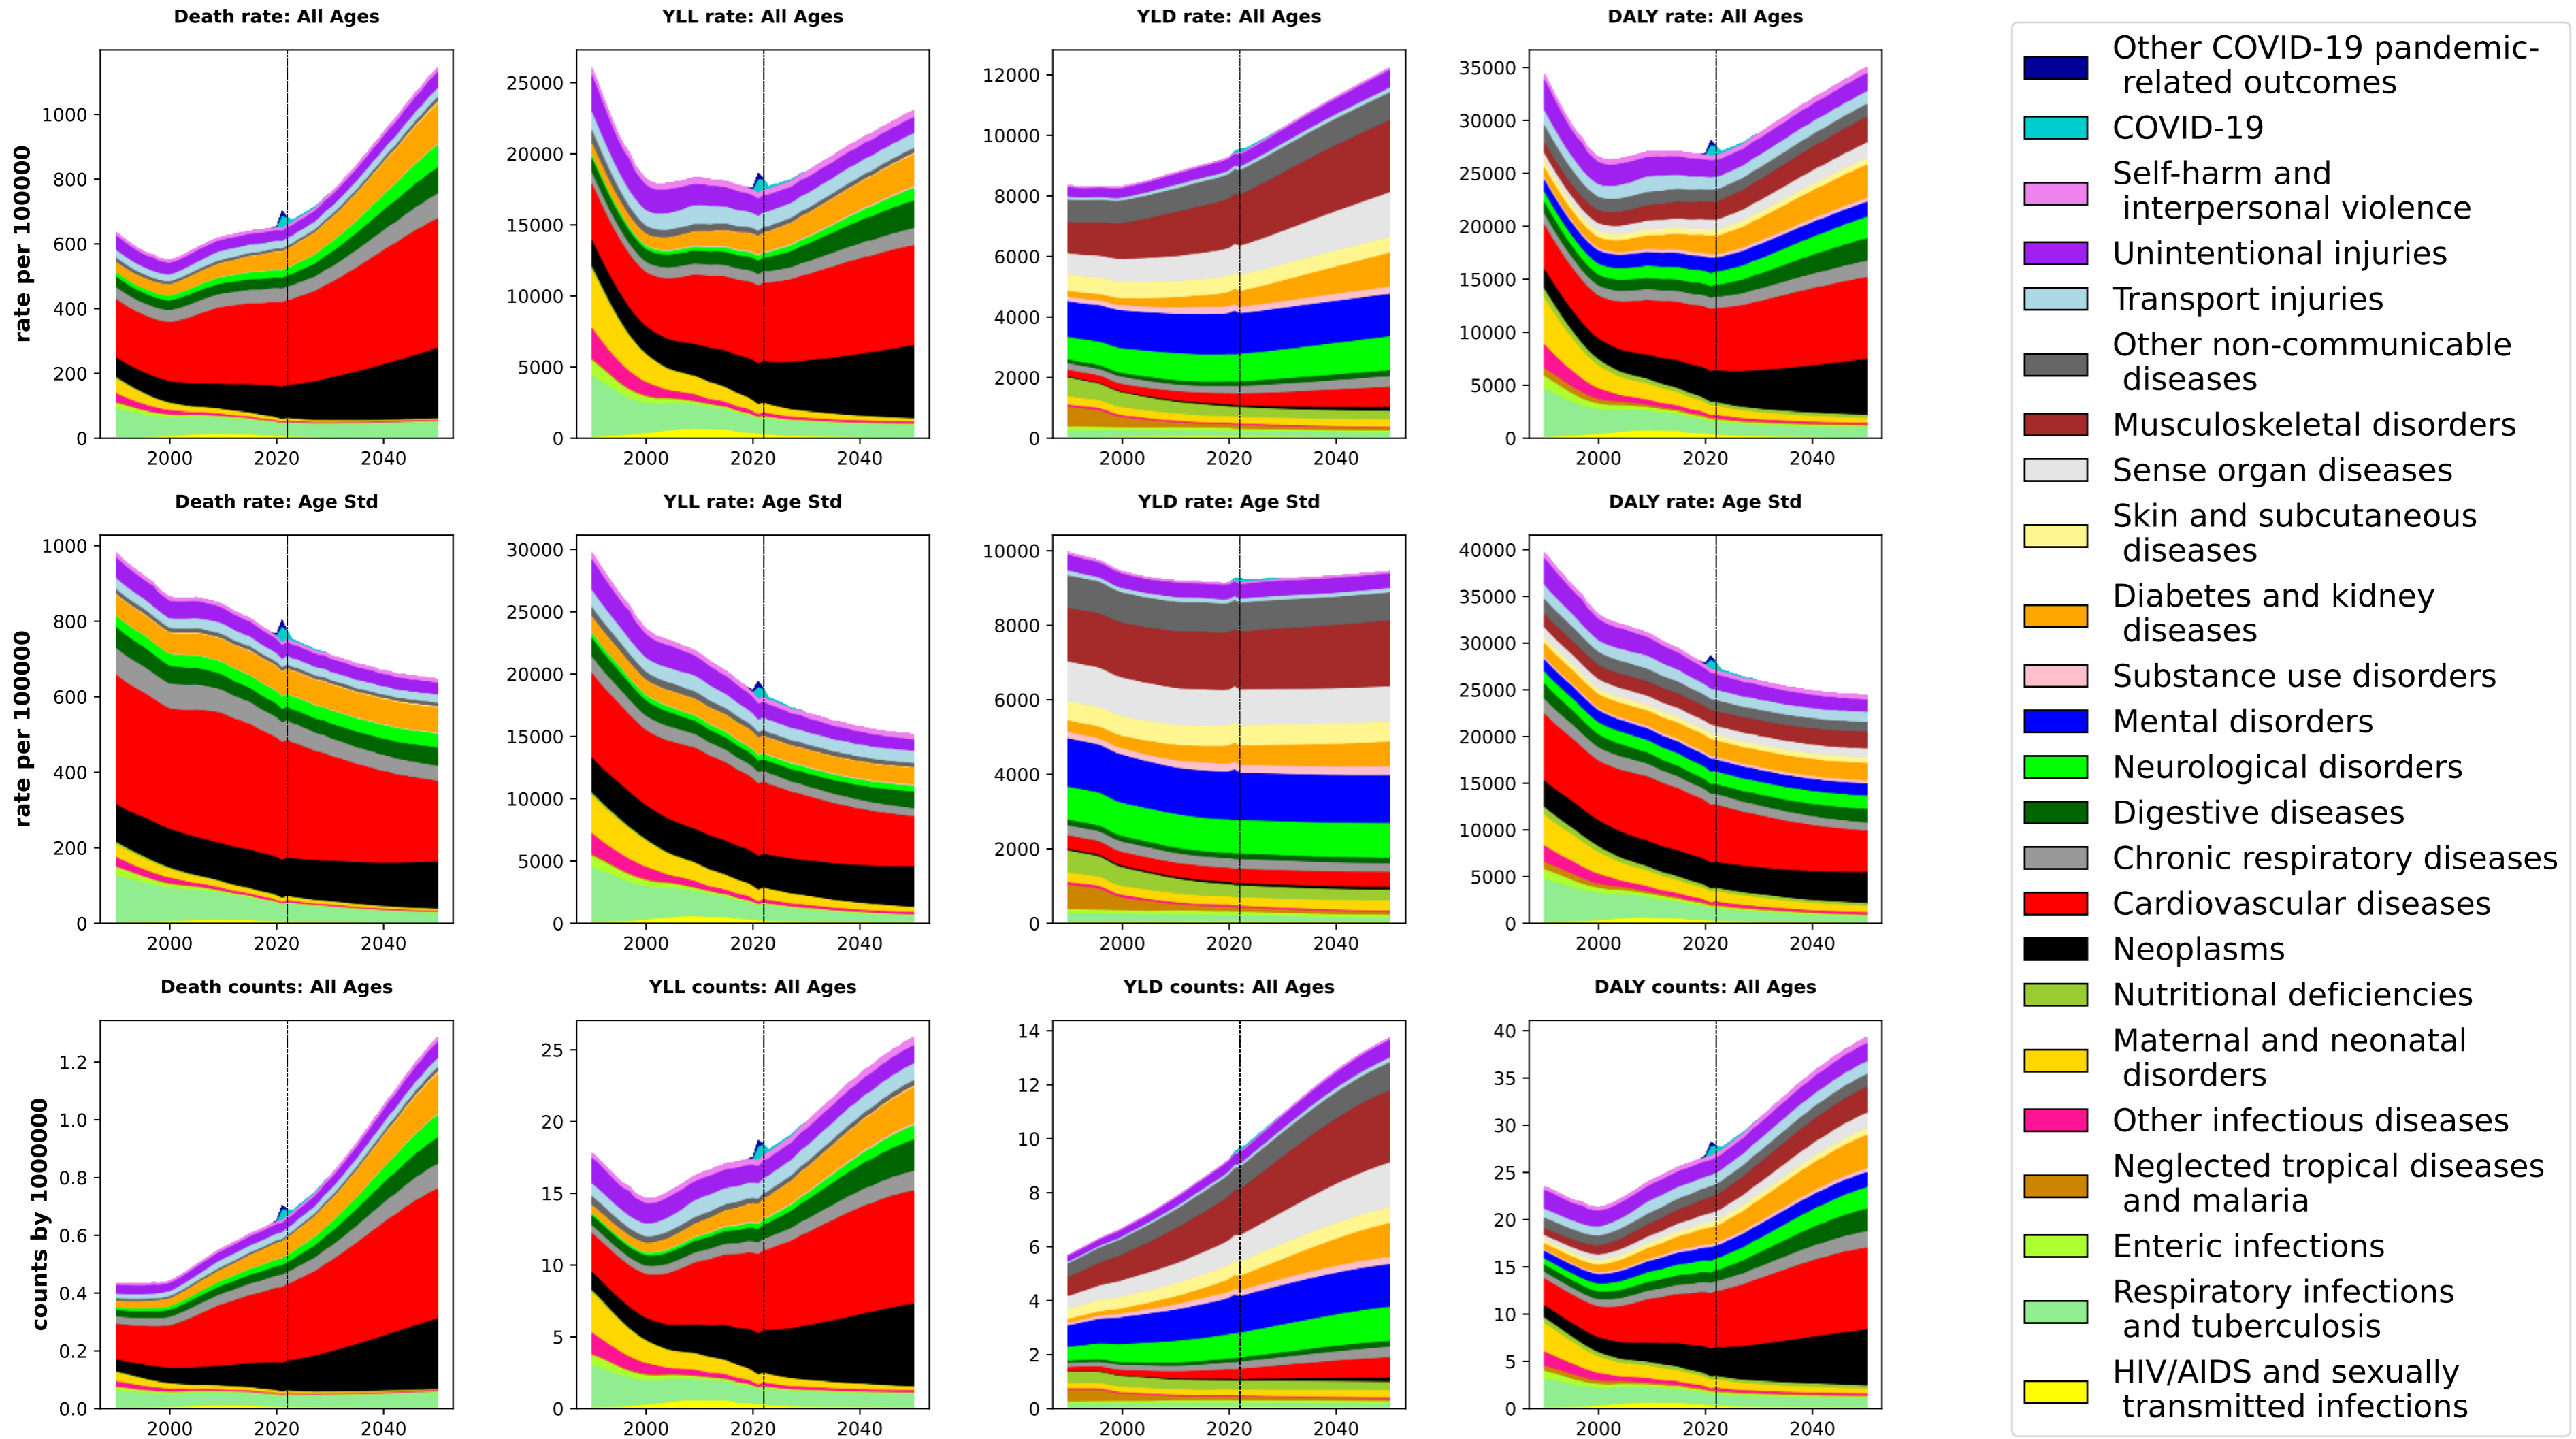

# Angola

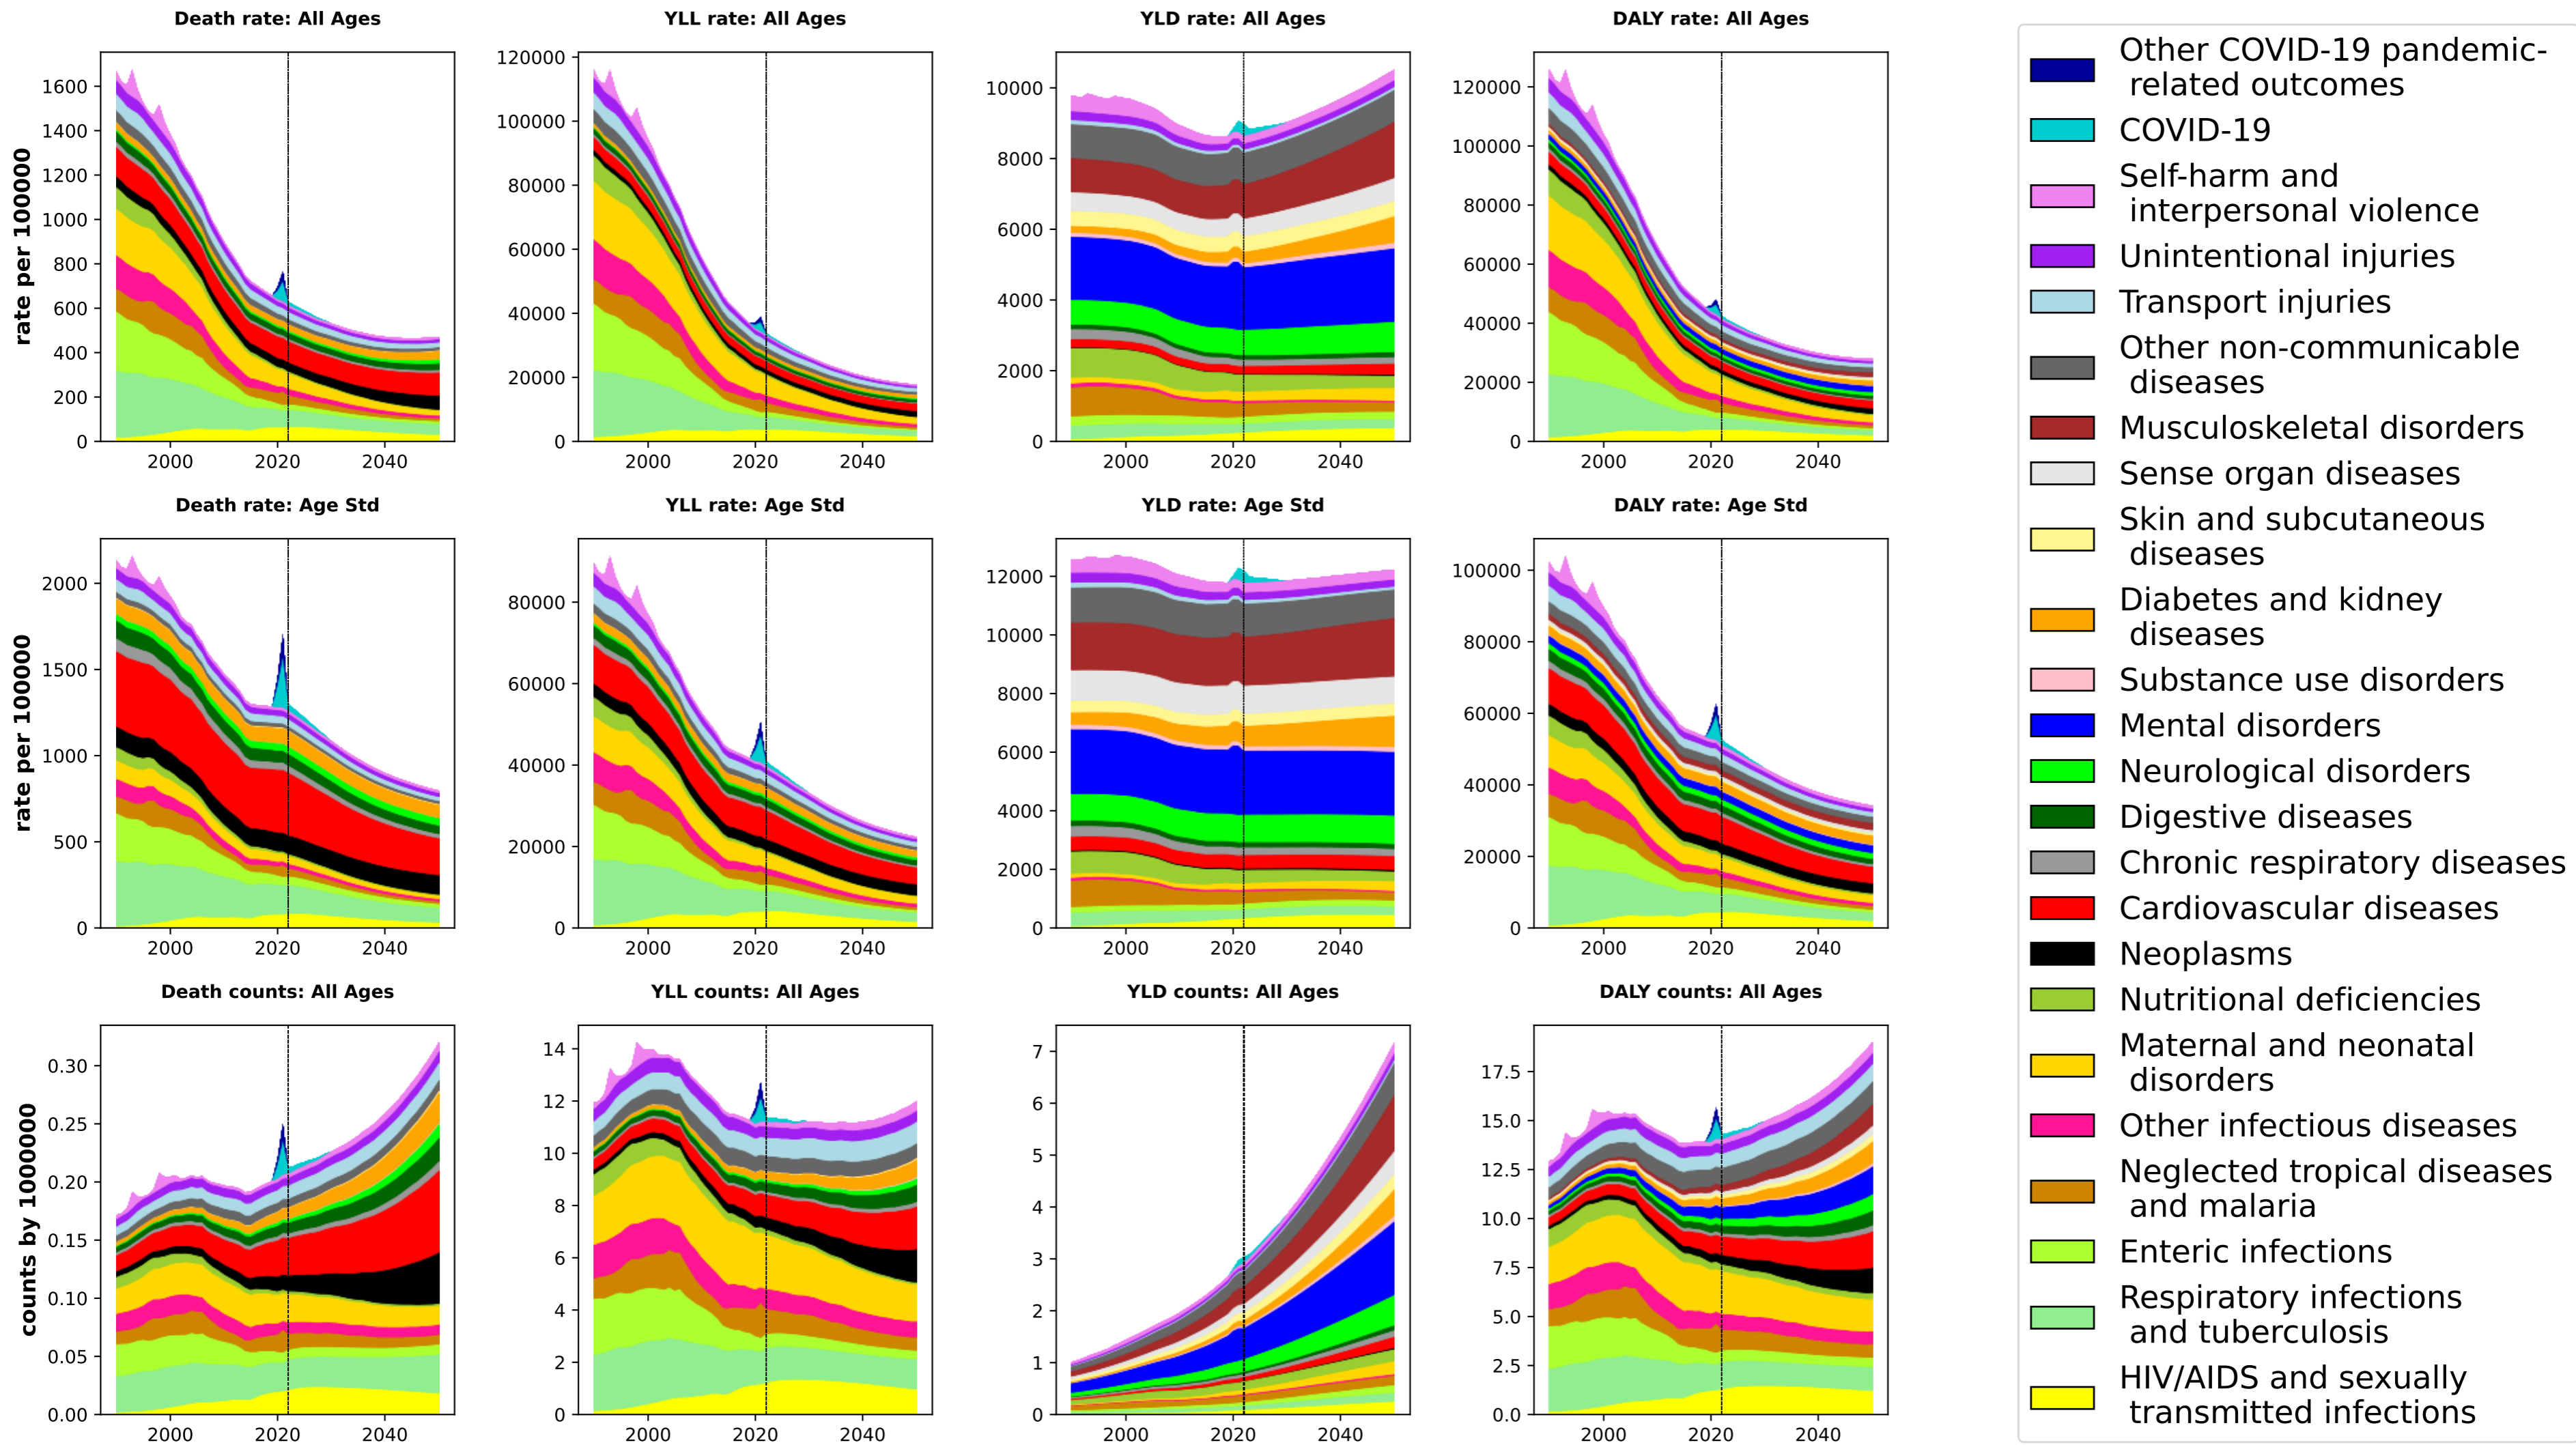

# Central African Republic

Supplemental Results Figure S6. Cause level 2 area plots for 4 burden measures for reference scenario by location, 1990-2050

870

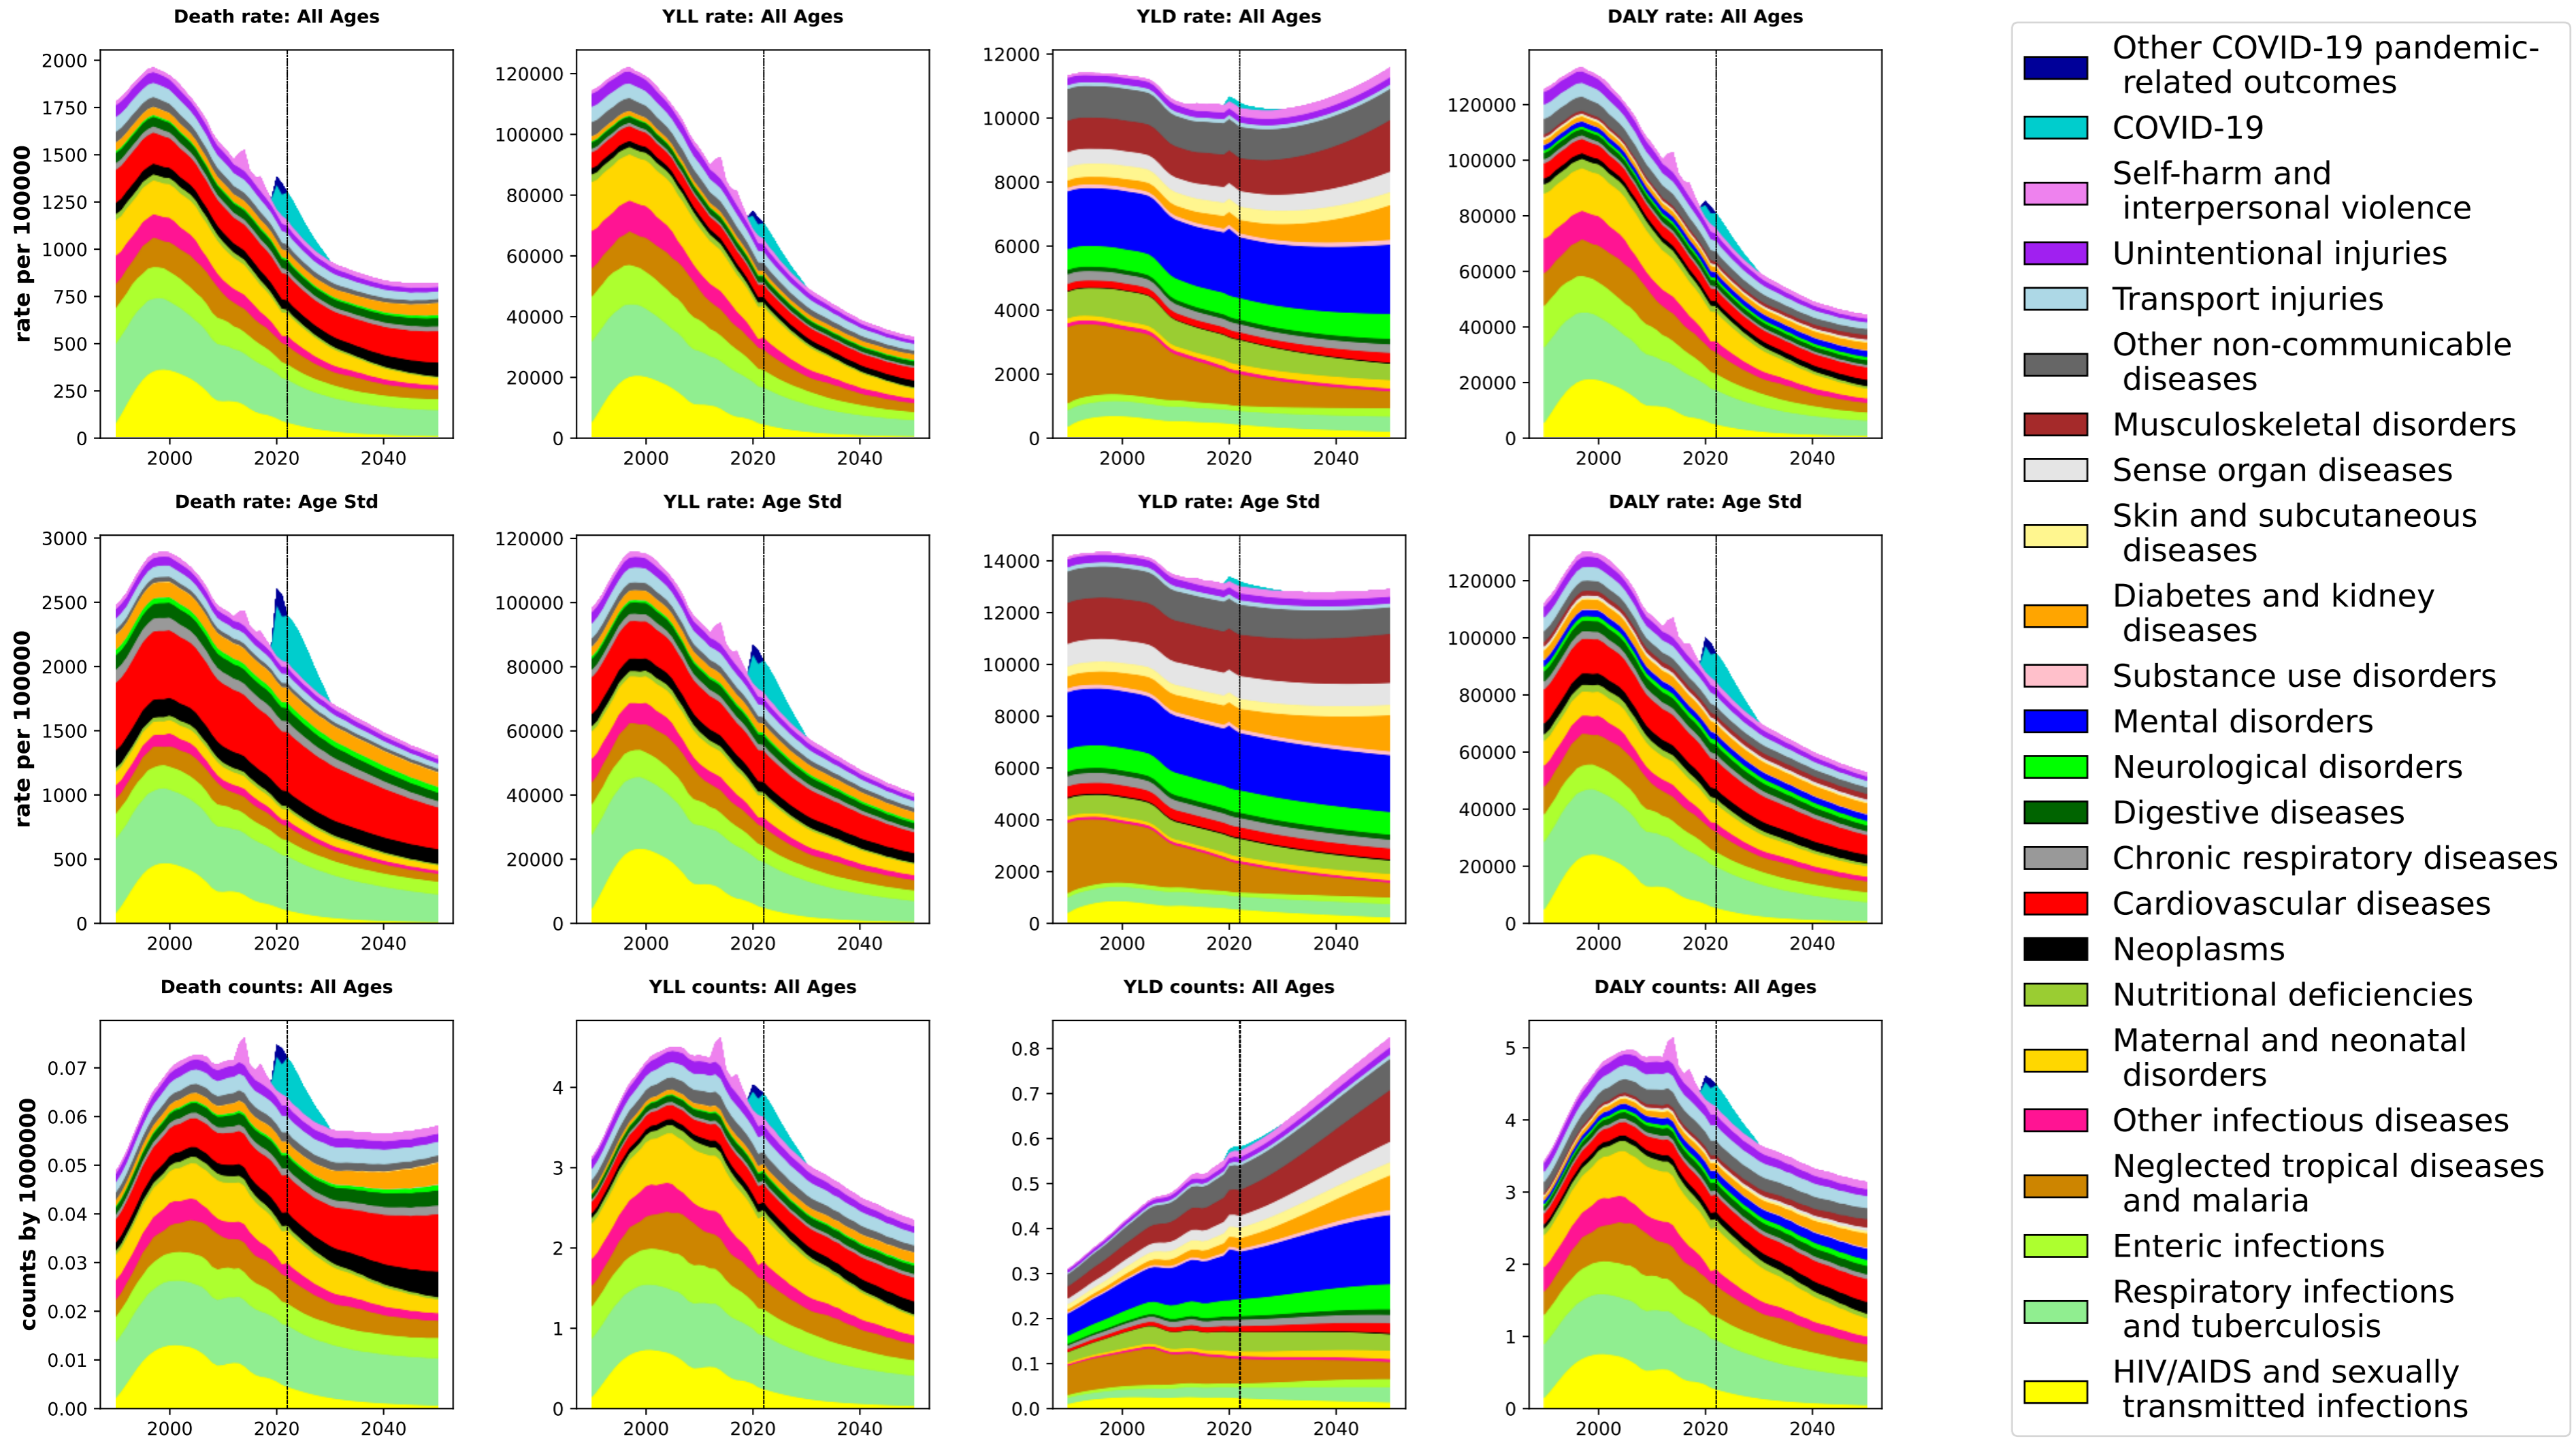

# Congo (Brazzaville)

Supplemental Results Figure S6. Cause level 2 area plots for 4 burden measures for reference scenario by location, 1990-2050

871

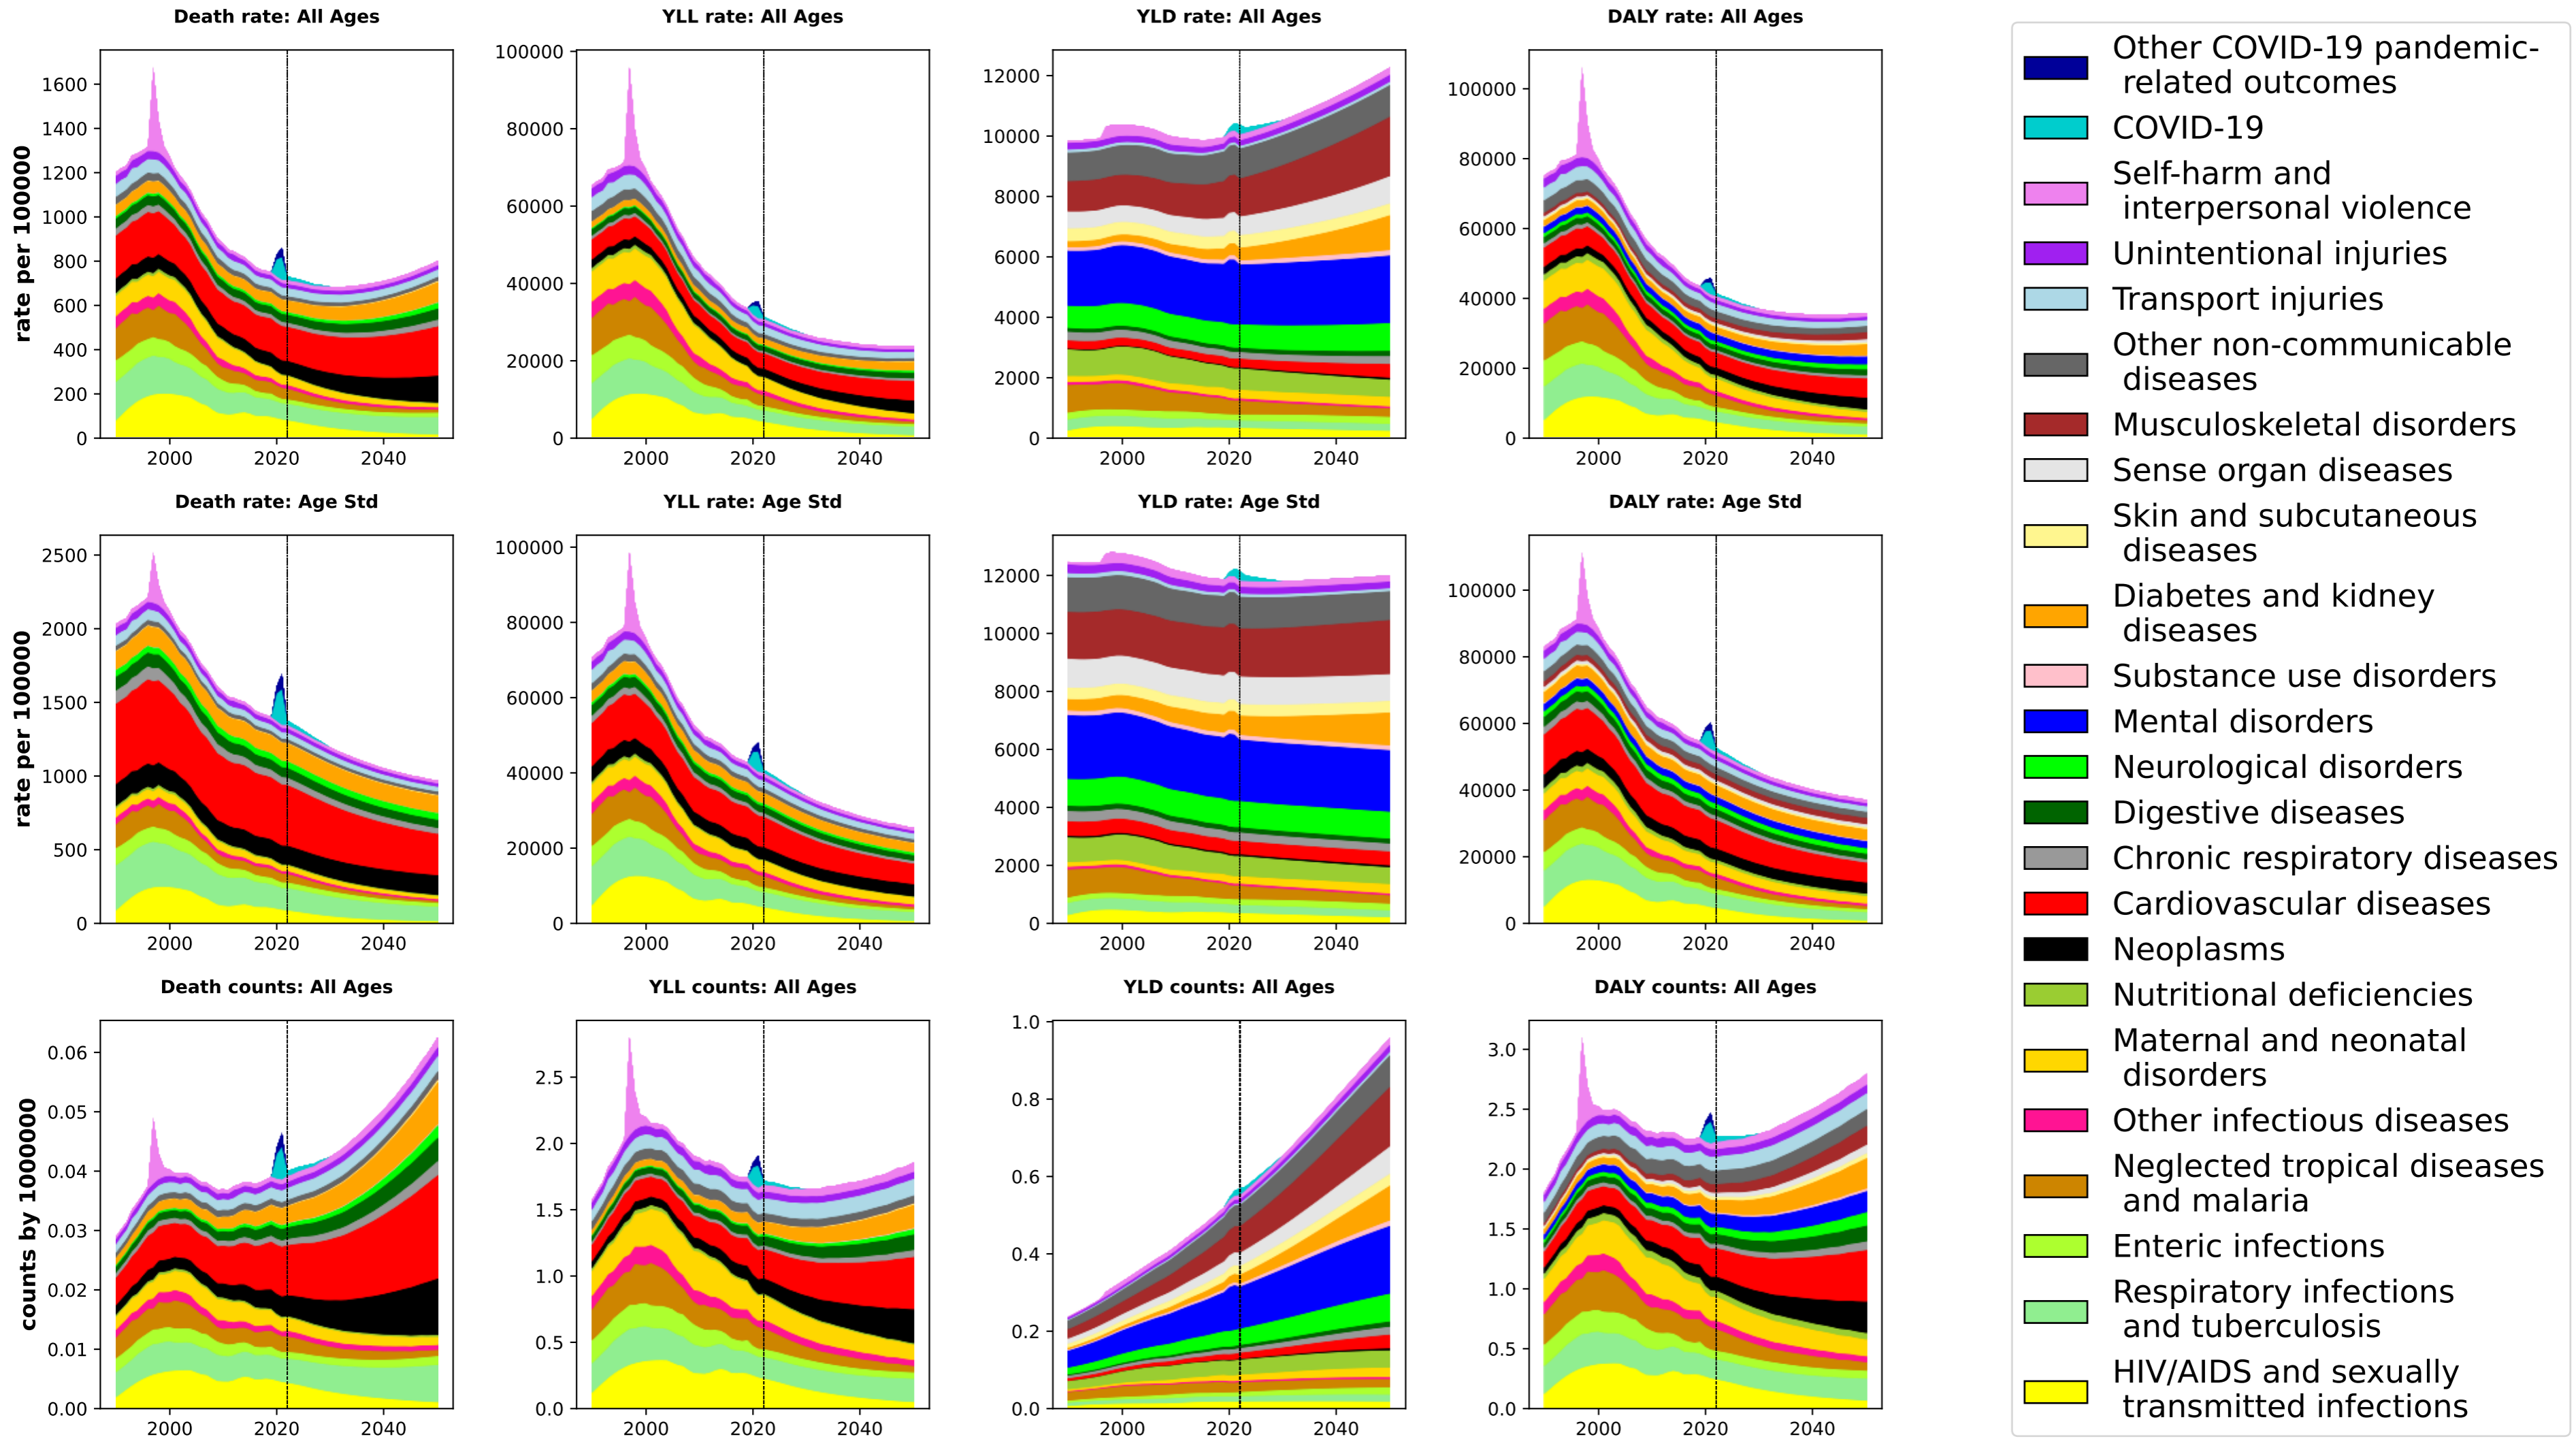



# DR Congo

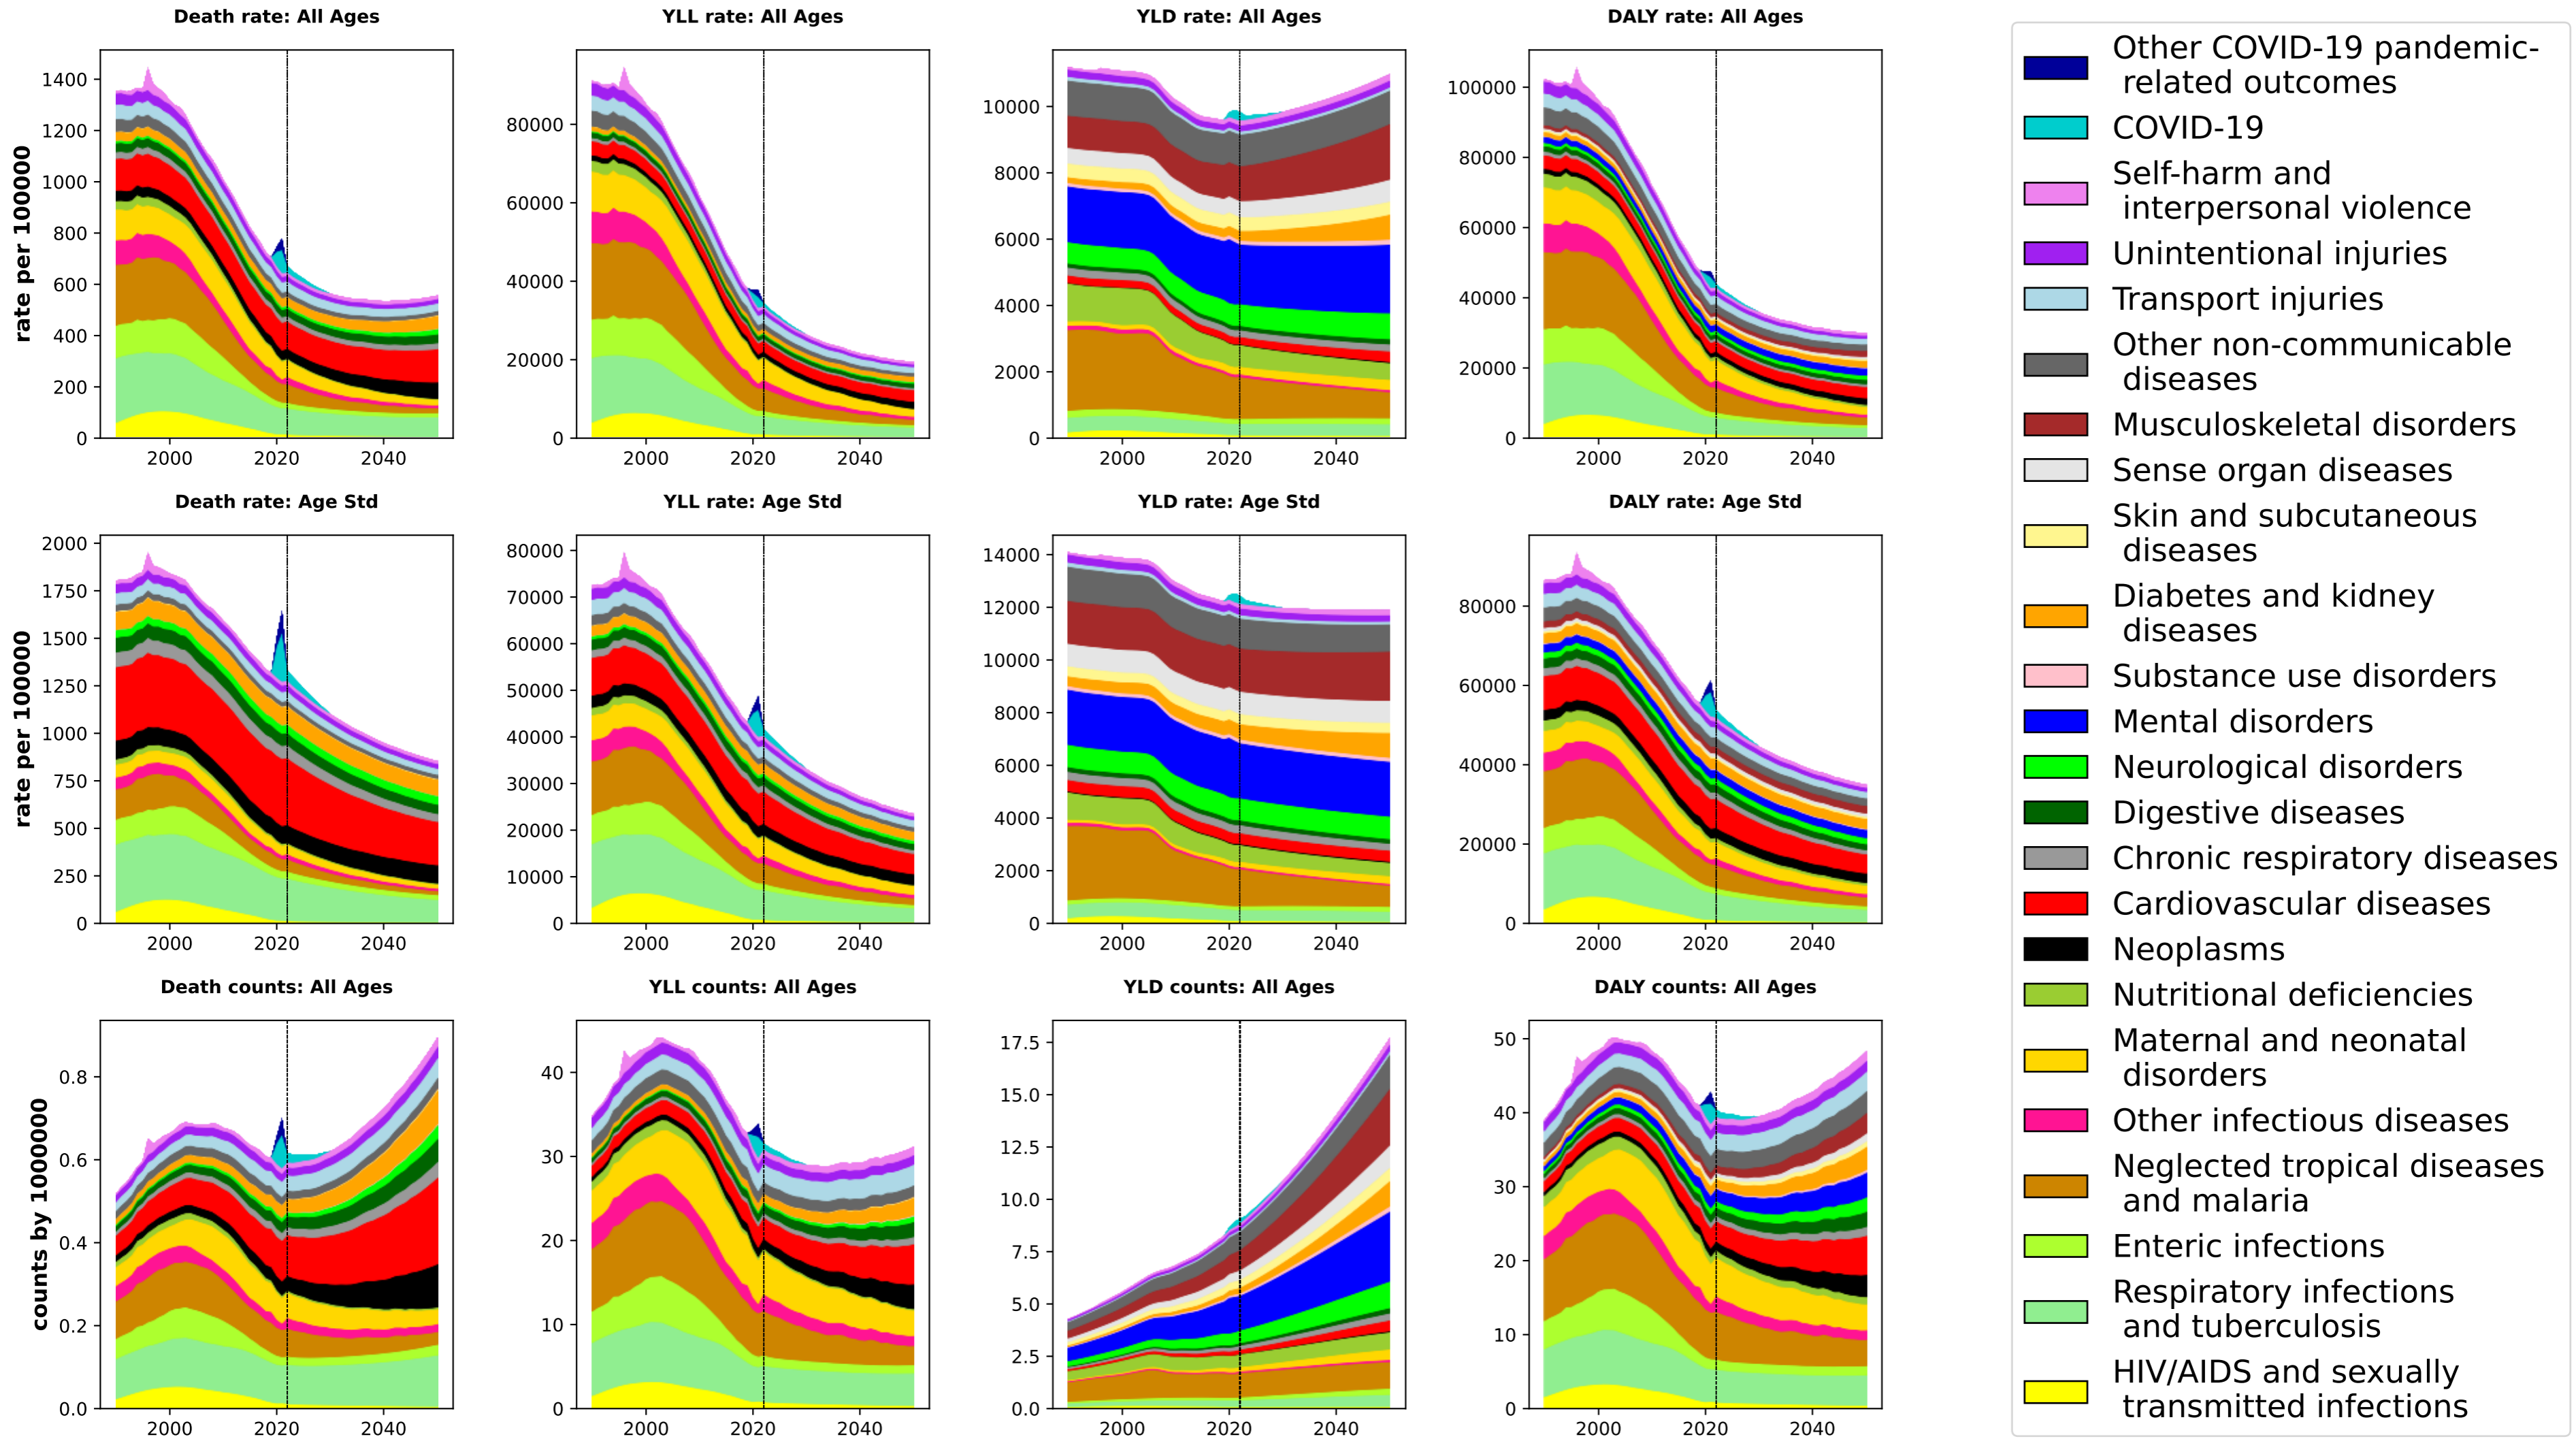

# Equatorial Guinea

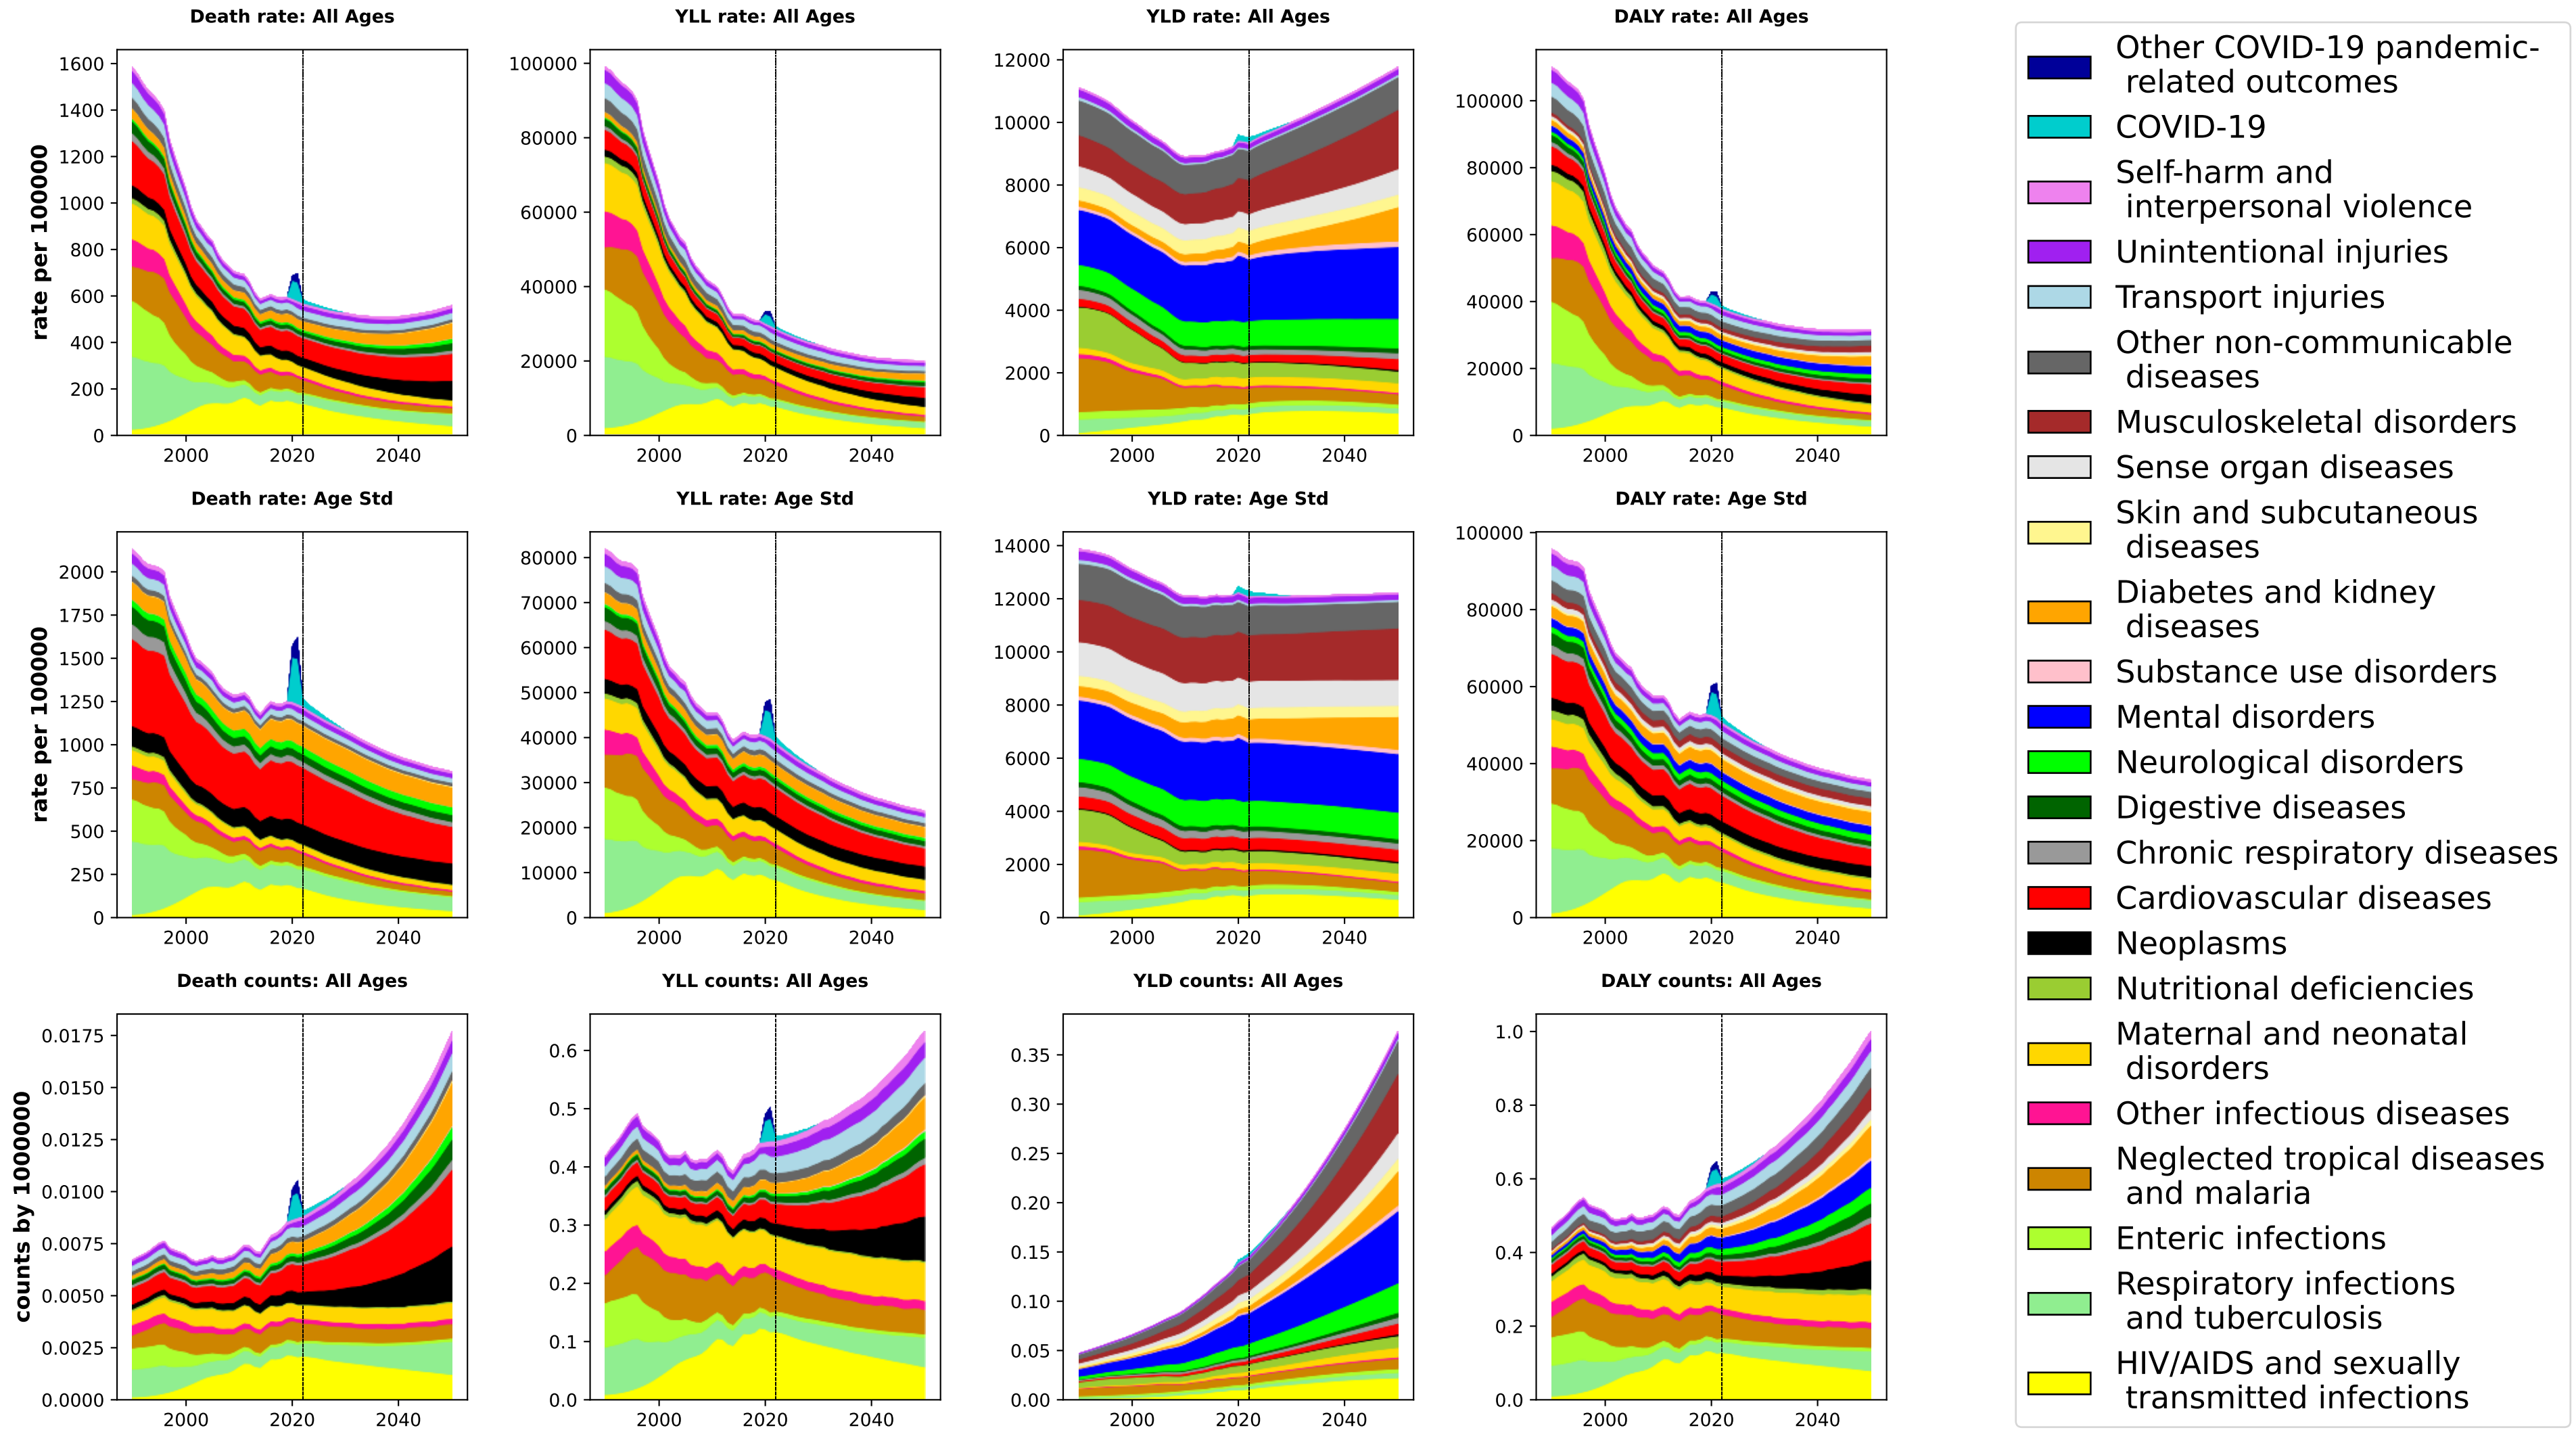

# Gabon

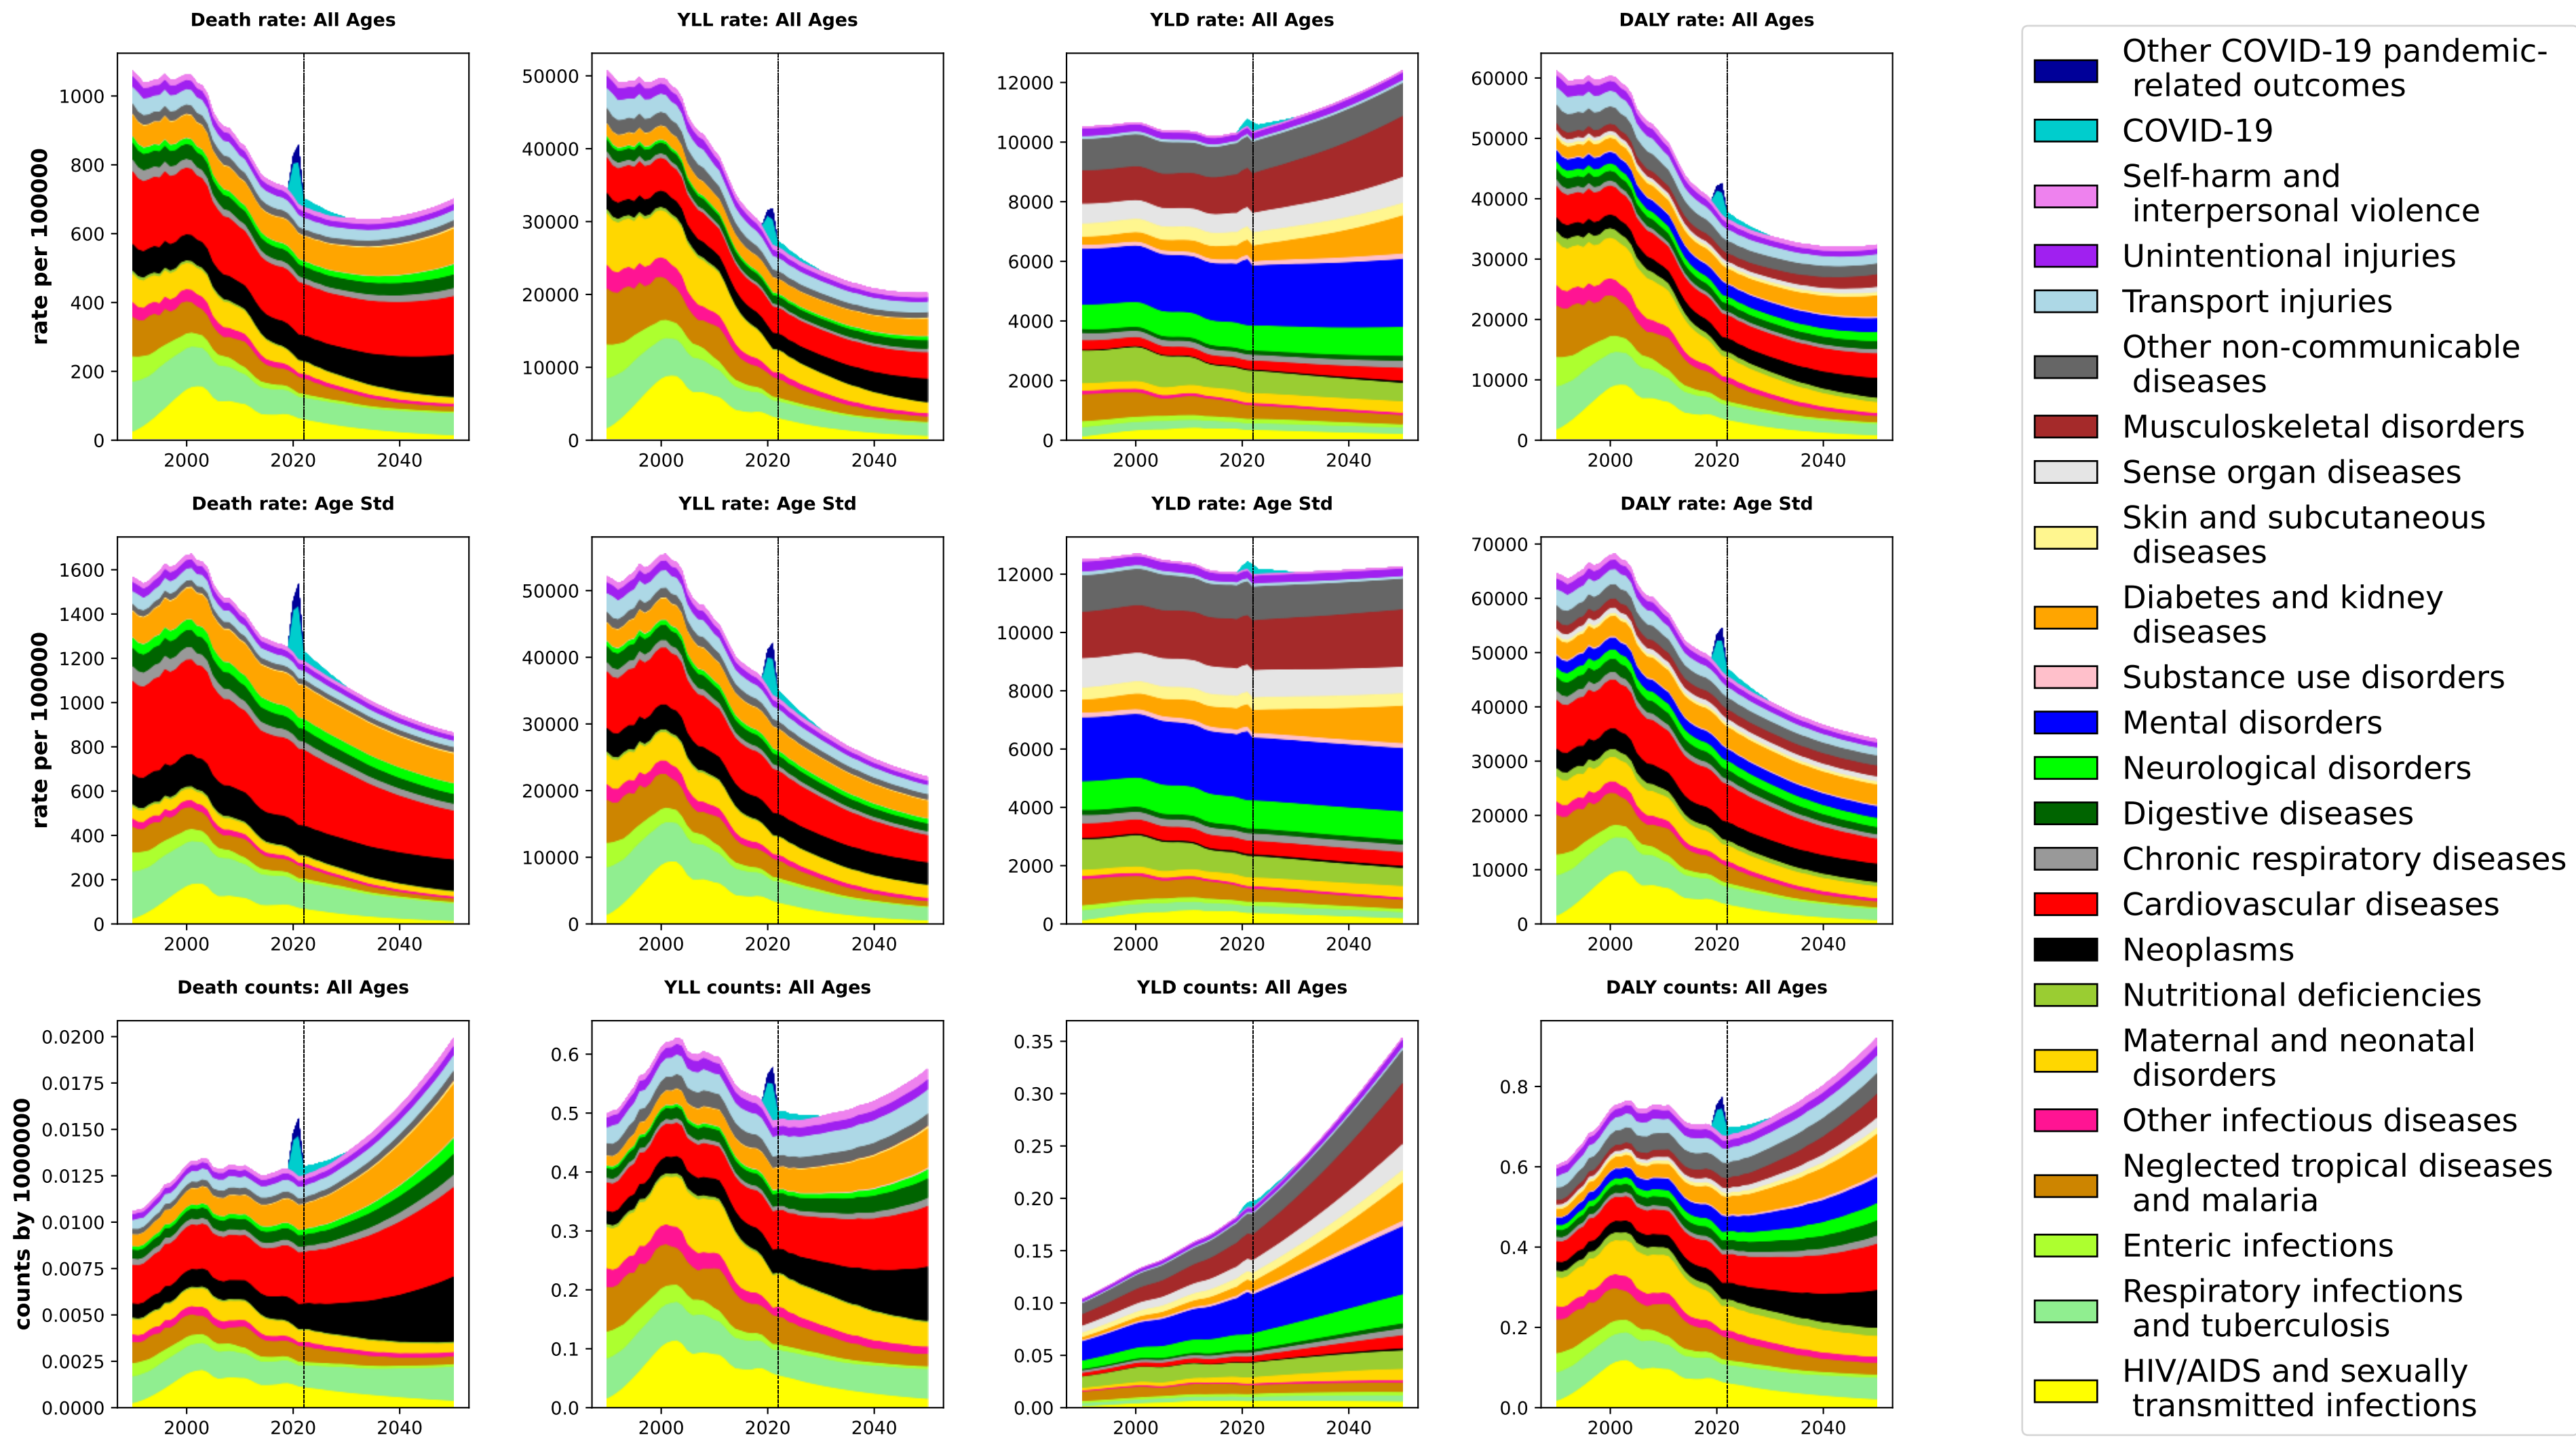

# Burundi

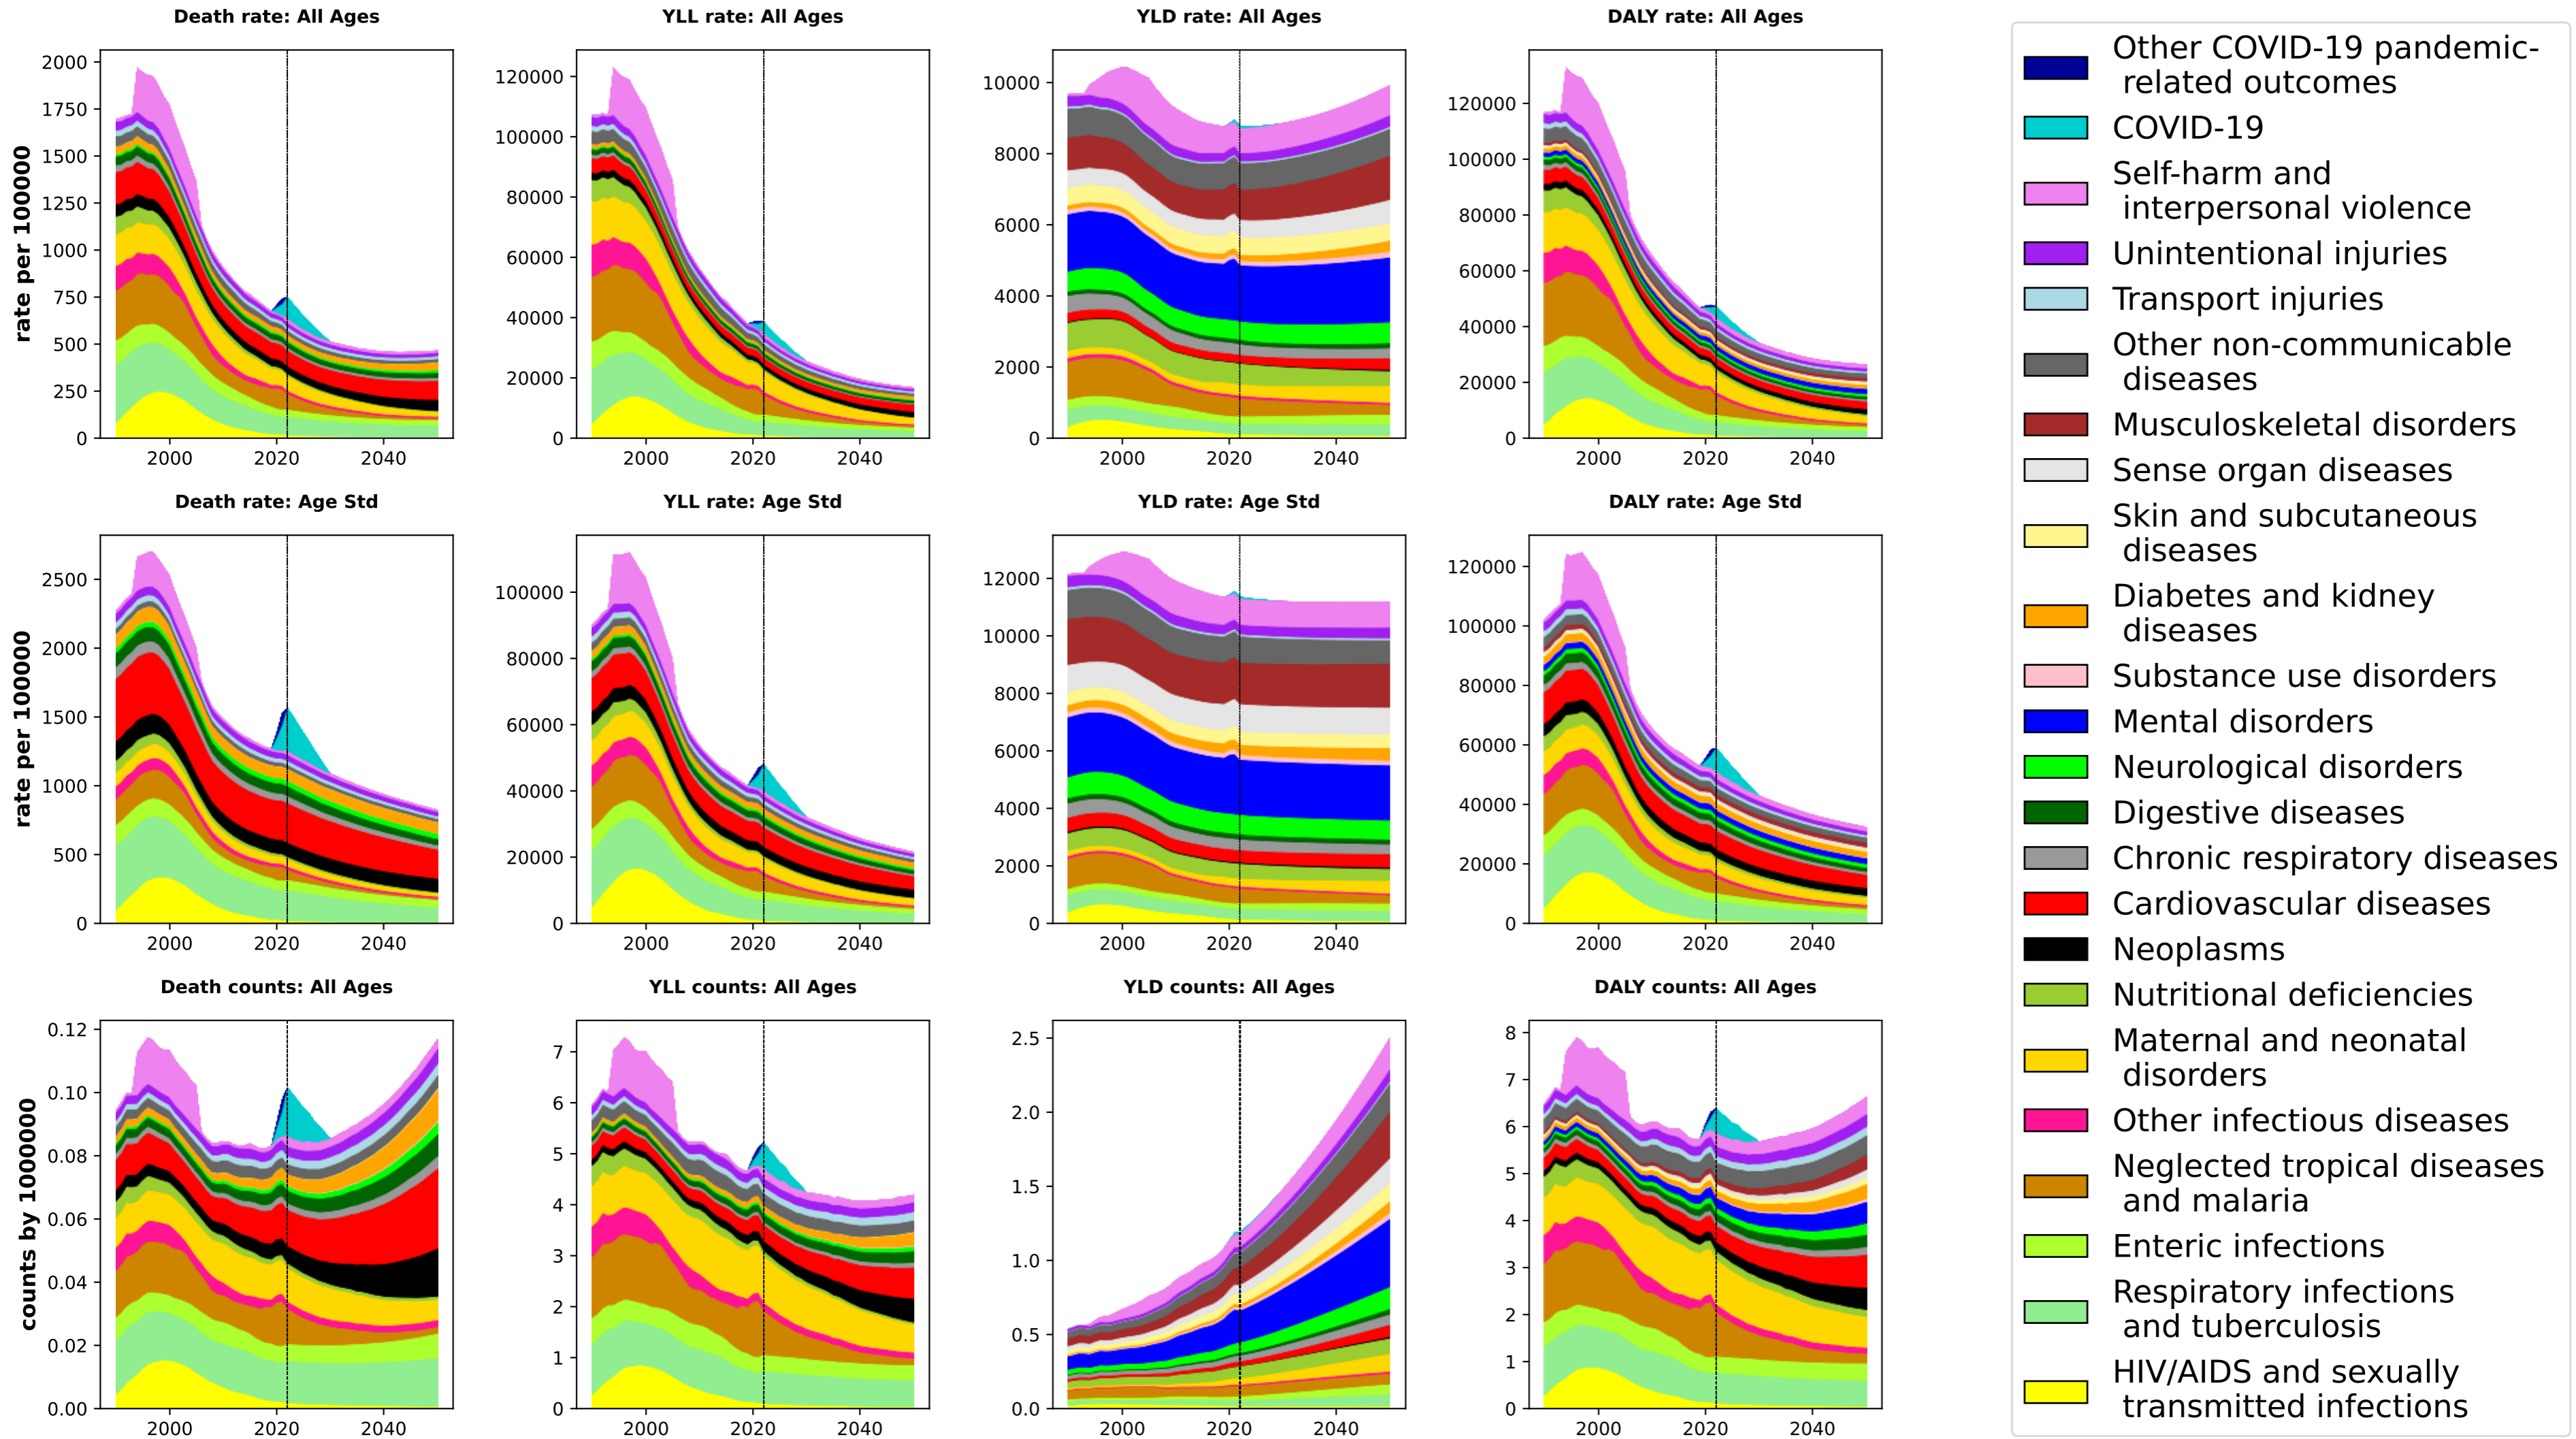

# Comoros

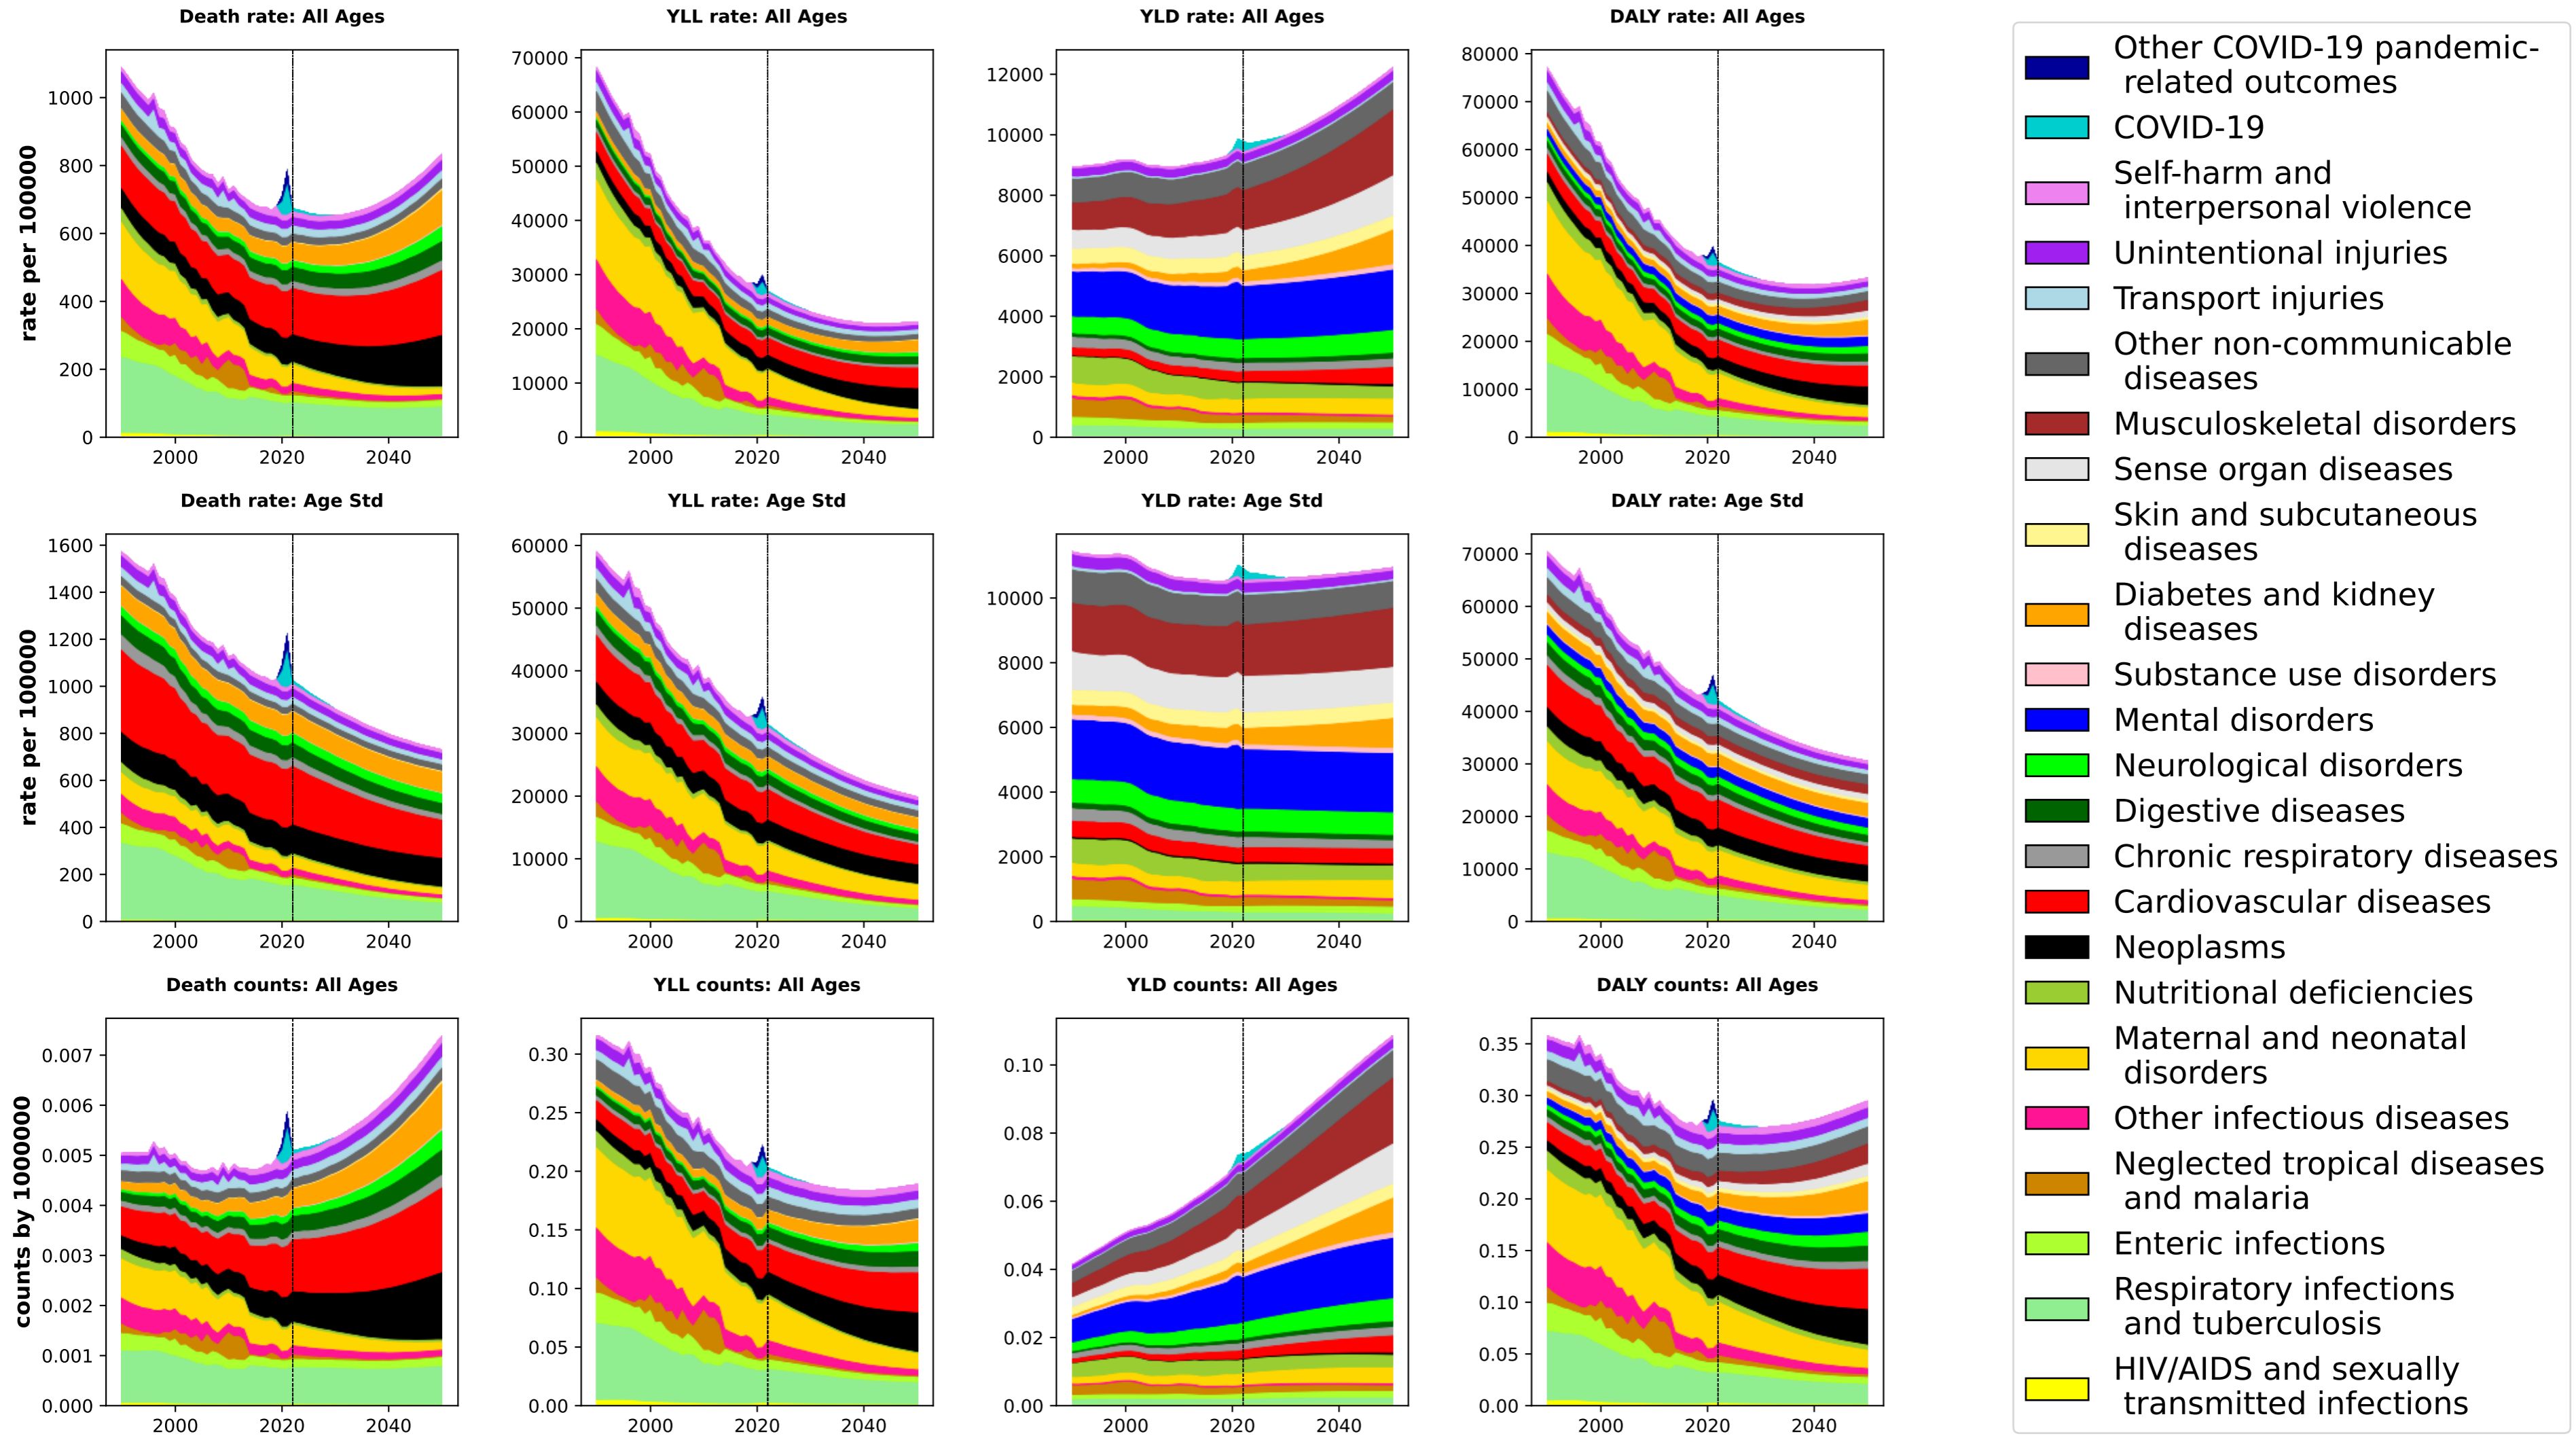

# Djibouti

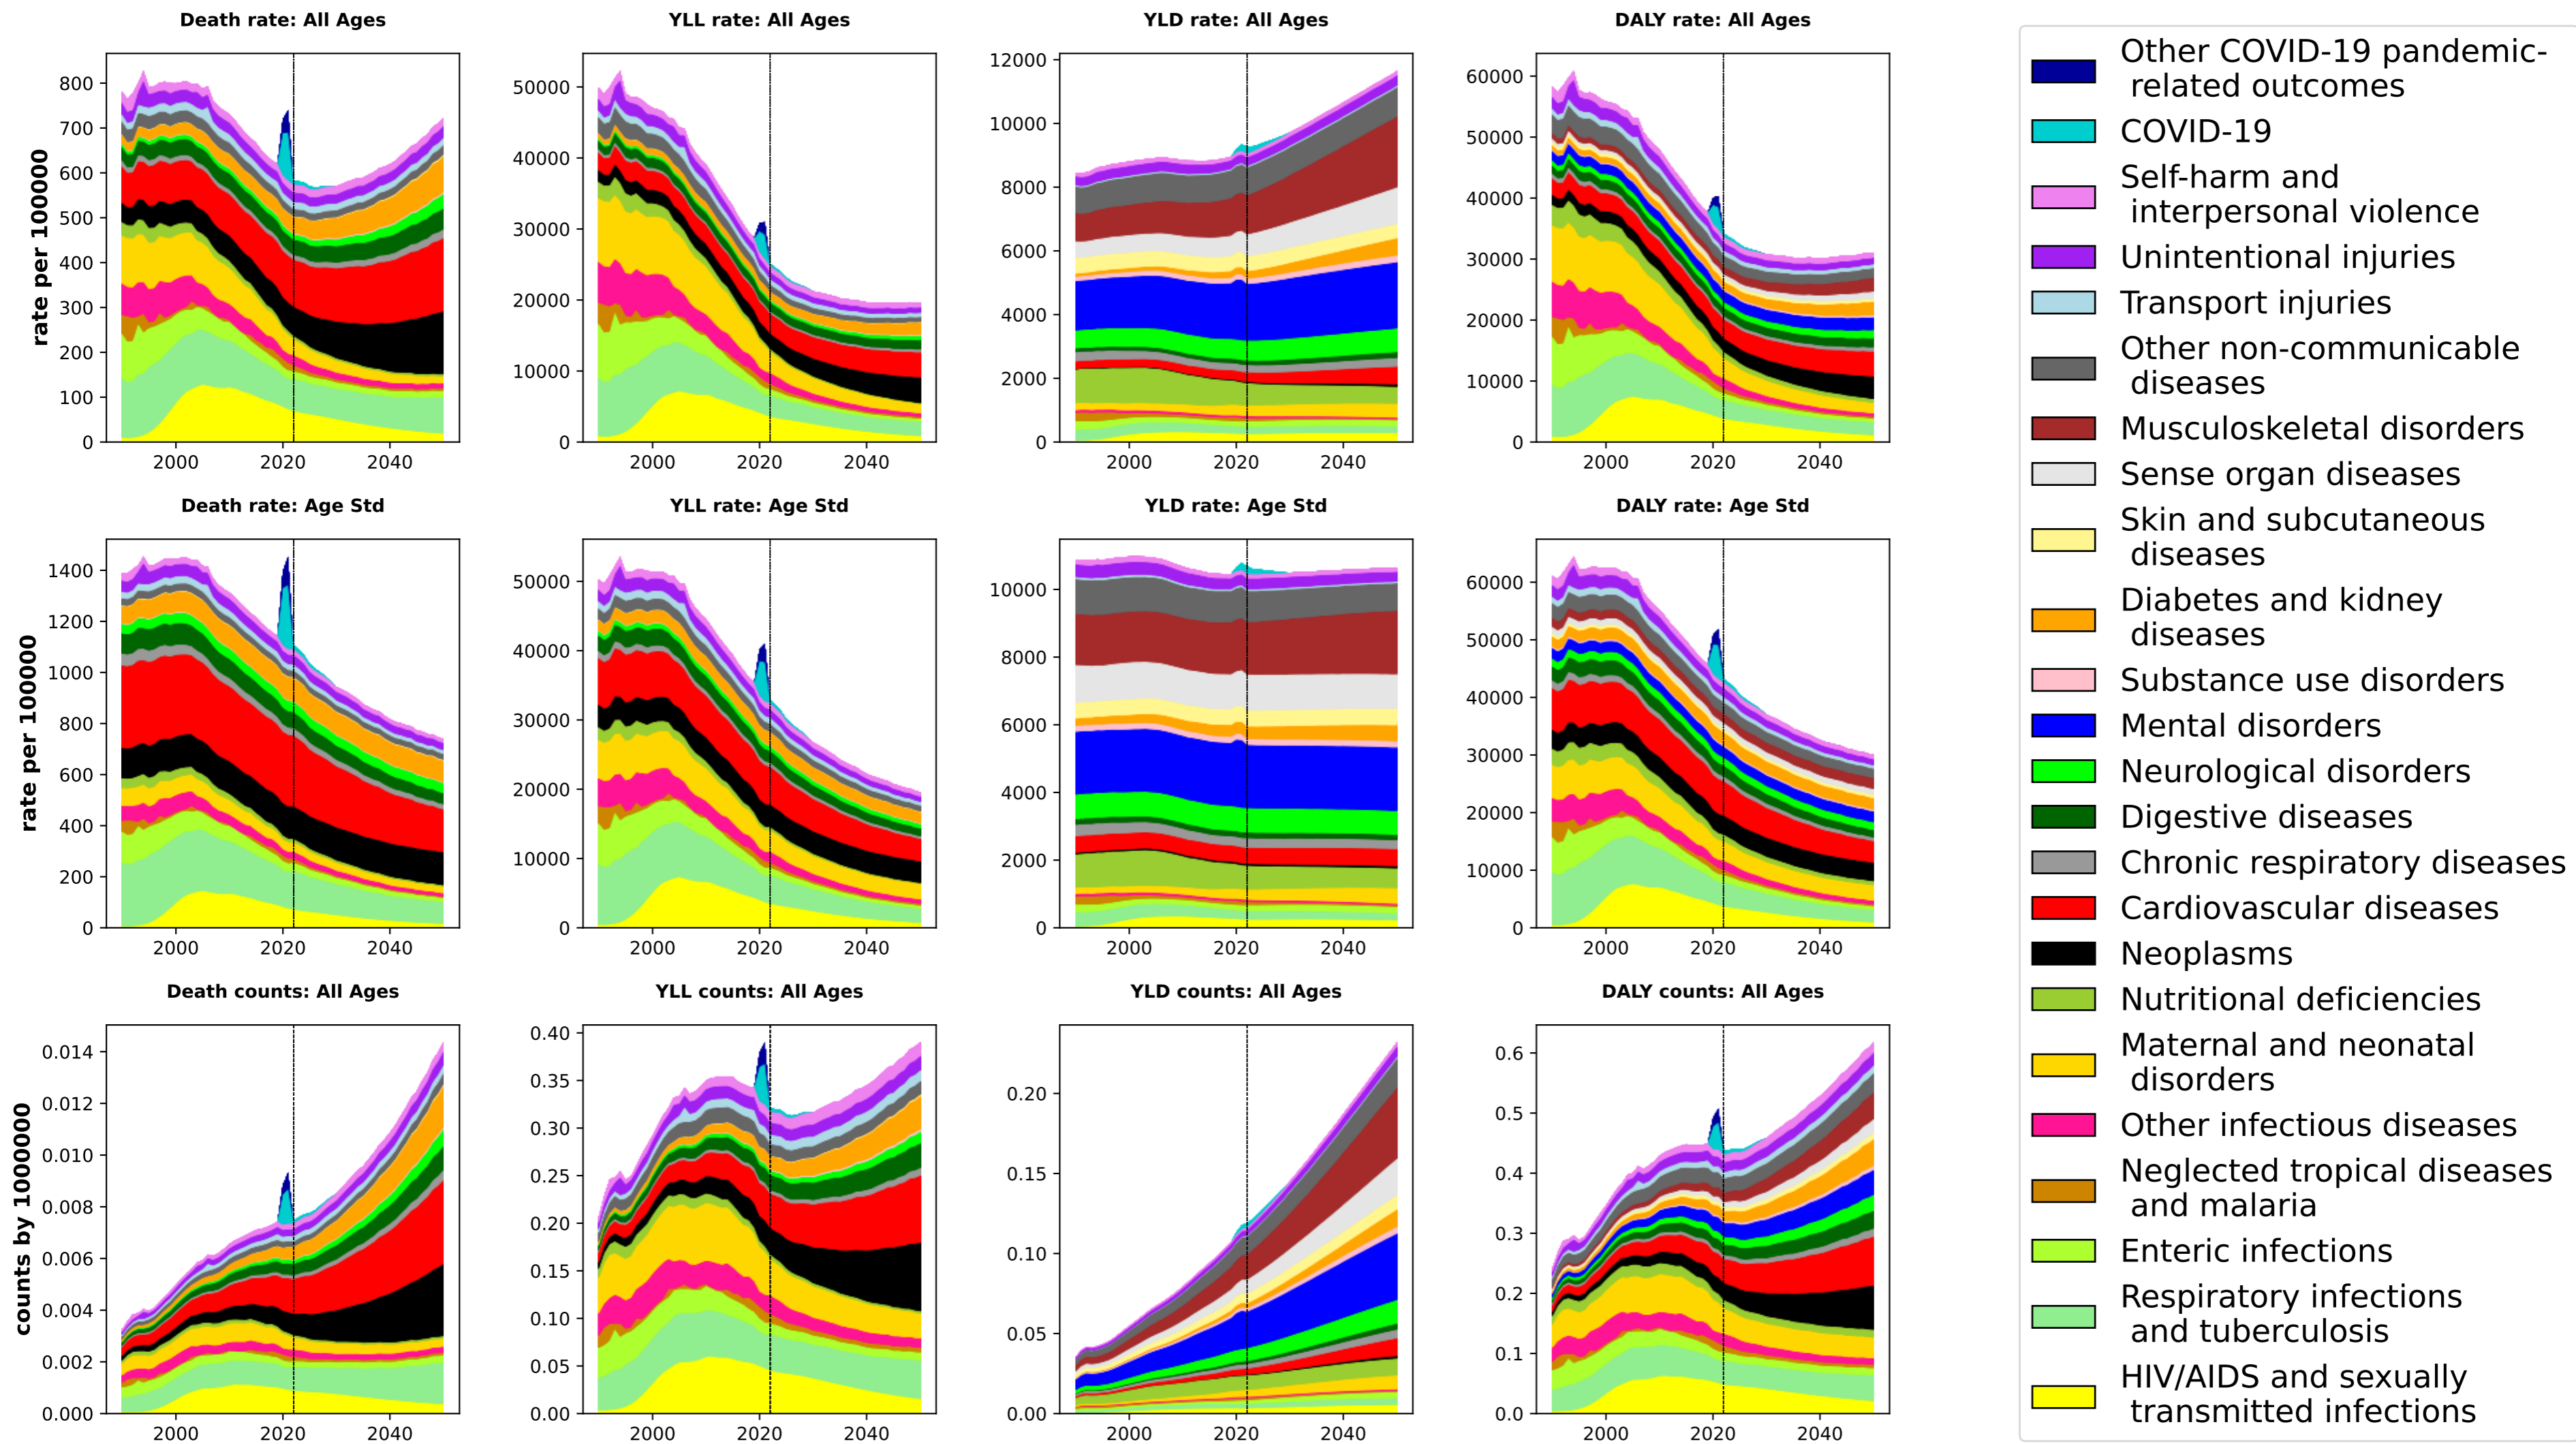

# Eritrea

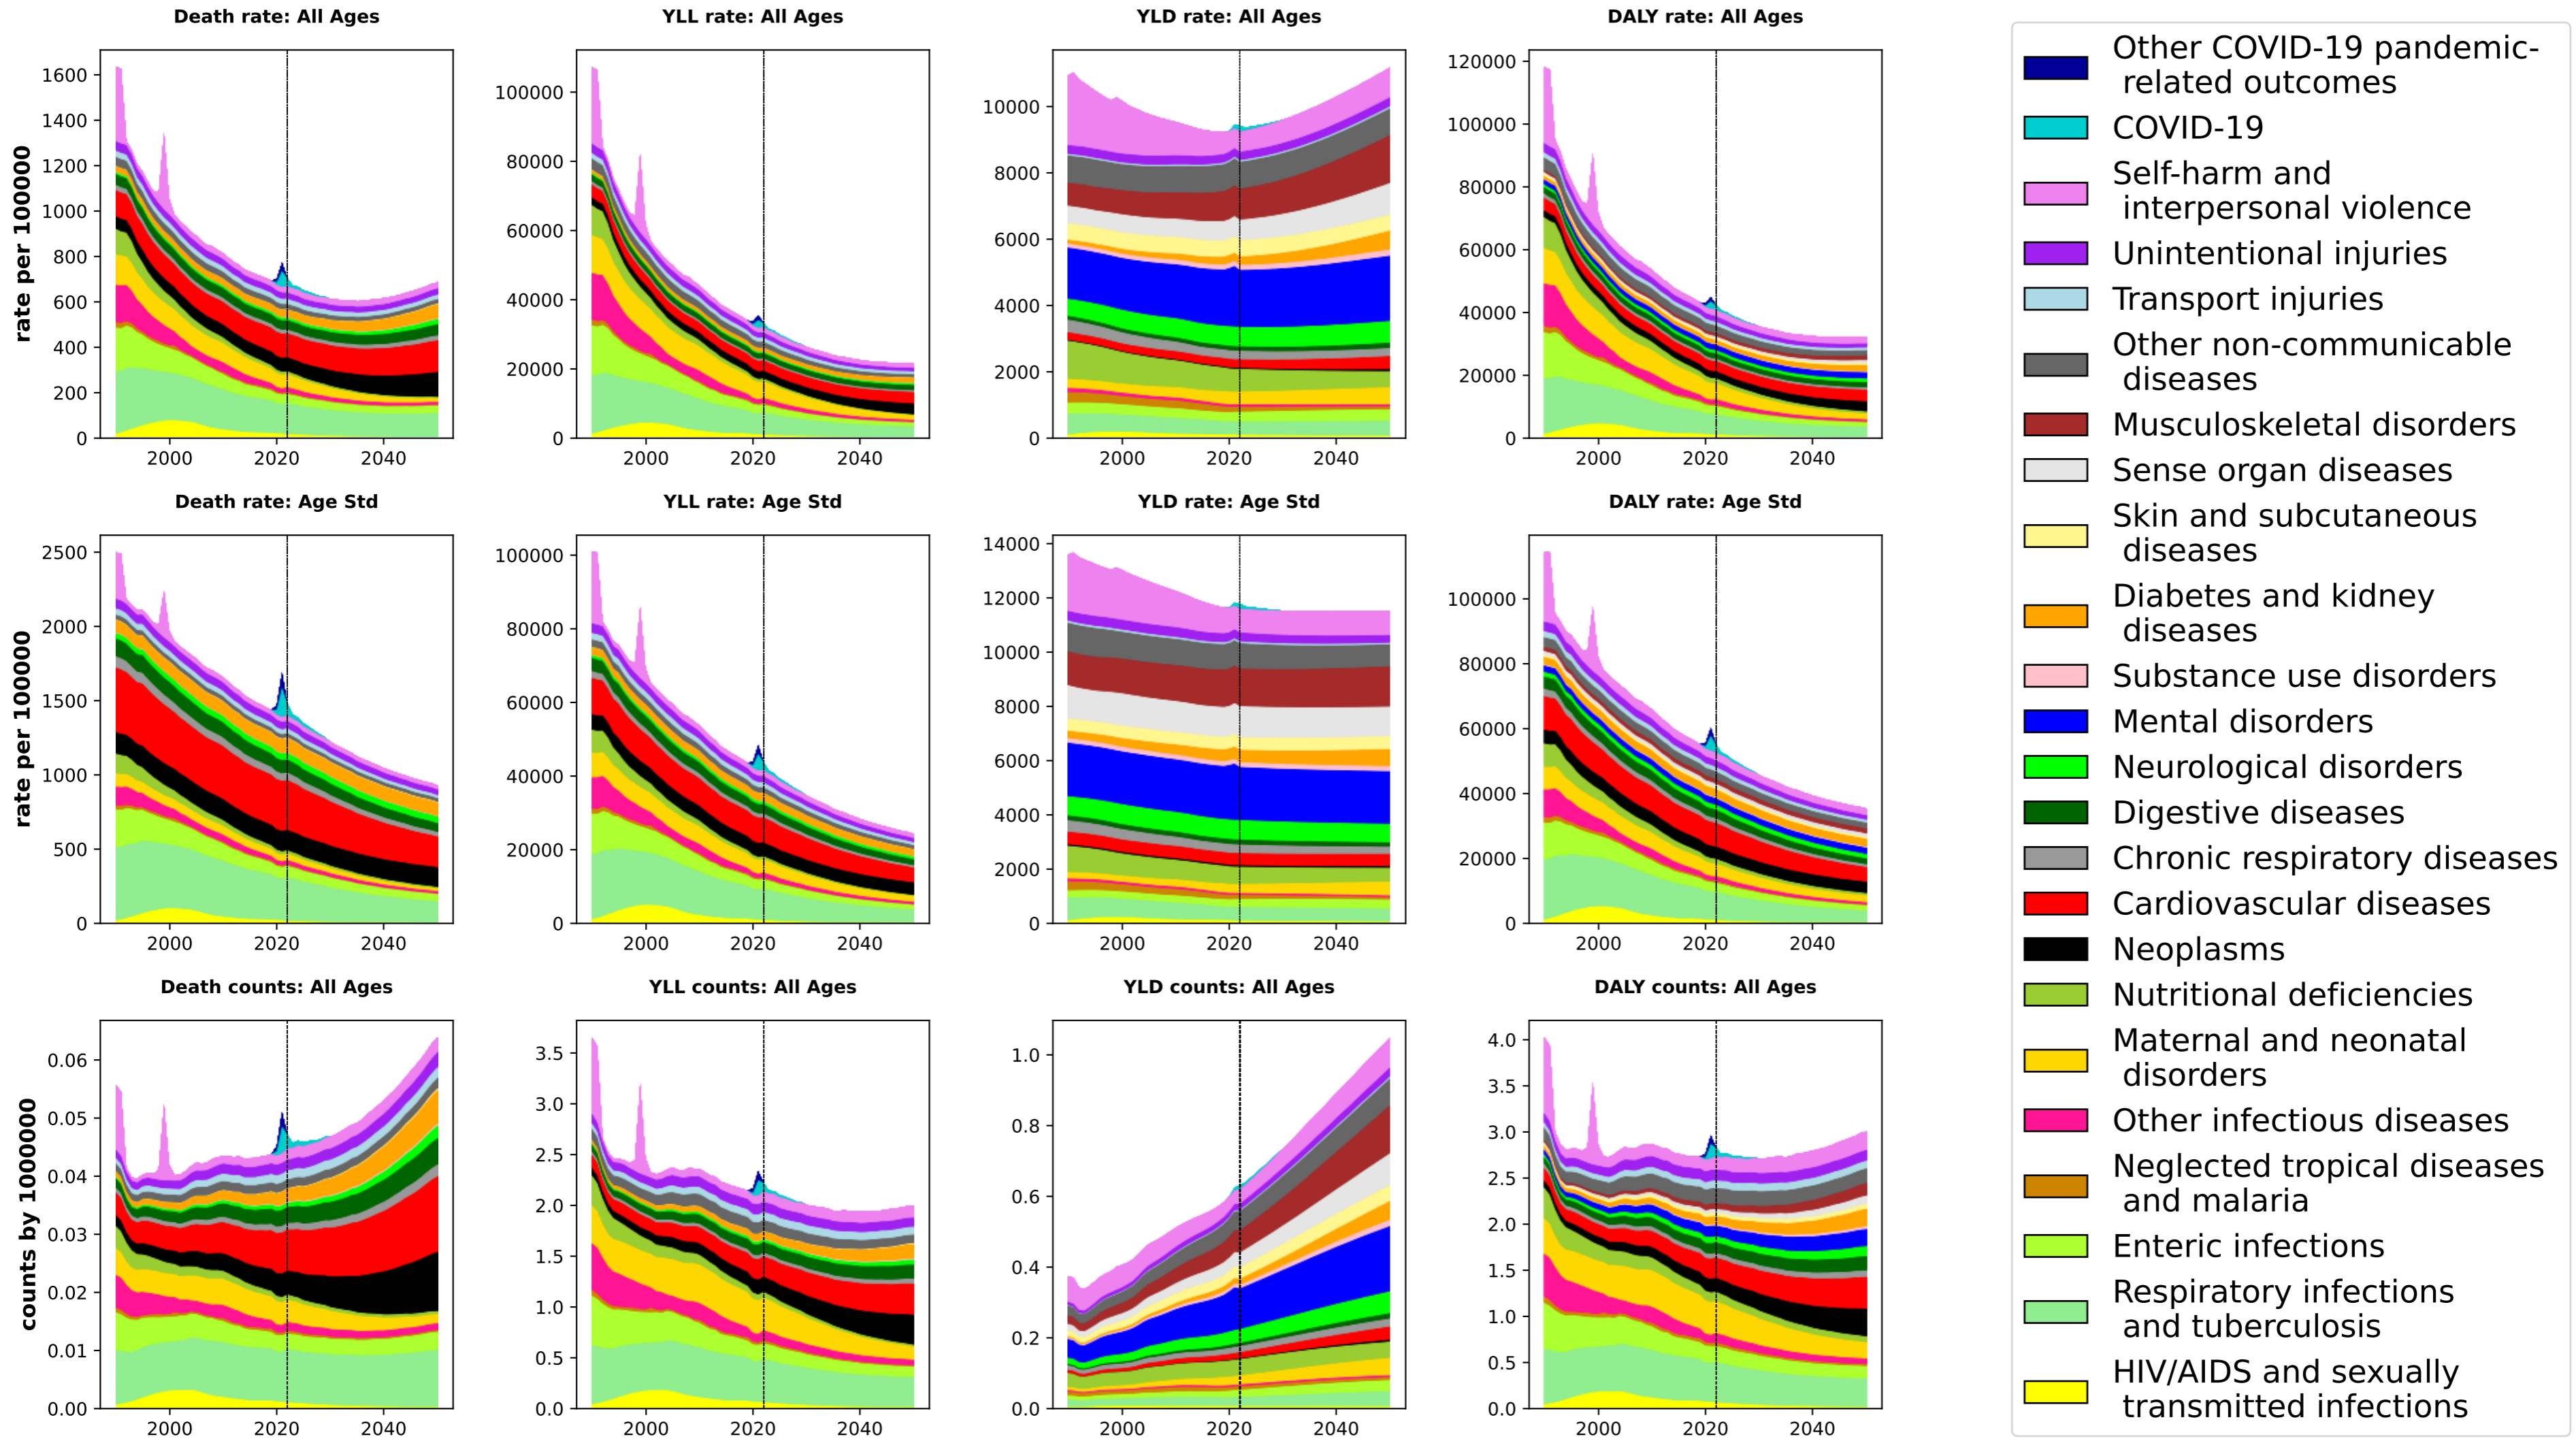

**Death rate: All Ages**

**YLL rate: All Ages**

**YLD rate: All Ages**

**DALY rate: All Ages**

**Death rate: Age Std**

**YLL rate: Age Std**

**YLD rate: Age Std**

**DALY rate: Age Std**

**Death counts: All Ages**

**YLL counts: All Ages**

**YLD counts: All Ages**

**DALY counts: All Ages**

- Other COVID-19 pandemic-related outcomes
- COVID-19
- Self-harm and interpersonal violence
- Unintentional injuries
- Transport injuries
- Other non-communicable diseases
- Musculoskeletal disorders
- Sense organ diseases
- Skin and subcutaneous diseases
- Diabetes and kidney diseases
- Substance use disorders
- Mental disorders
- Neurological disorders
- Digestive diseases
- Chronic respiratory diseases
- Cardiovascular diseases
- Neoplasms
- Nutritional deficiencies
- Maternal and neonatal disorders
- Other infectious diseases
- Neglected tropical diseases and malaria
- Enteric infections
- Respiratory infections and tuberculosis
- HIV/AIDS and sexually transmitted infections

# Ethiopia

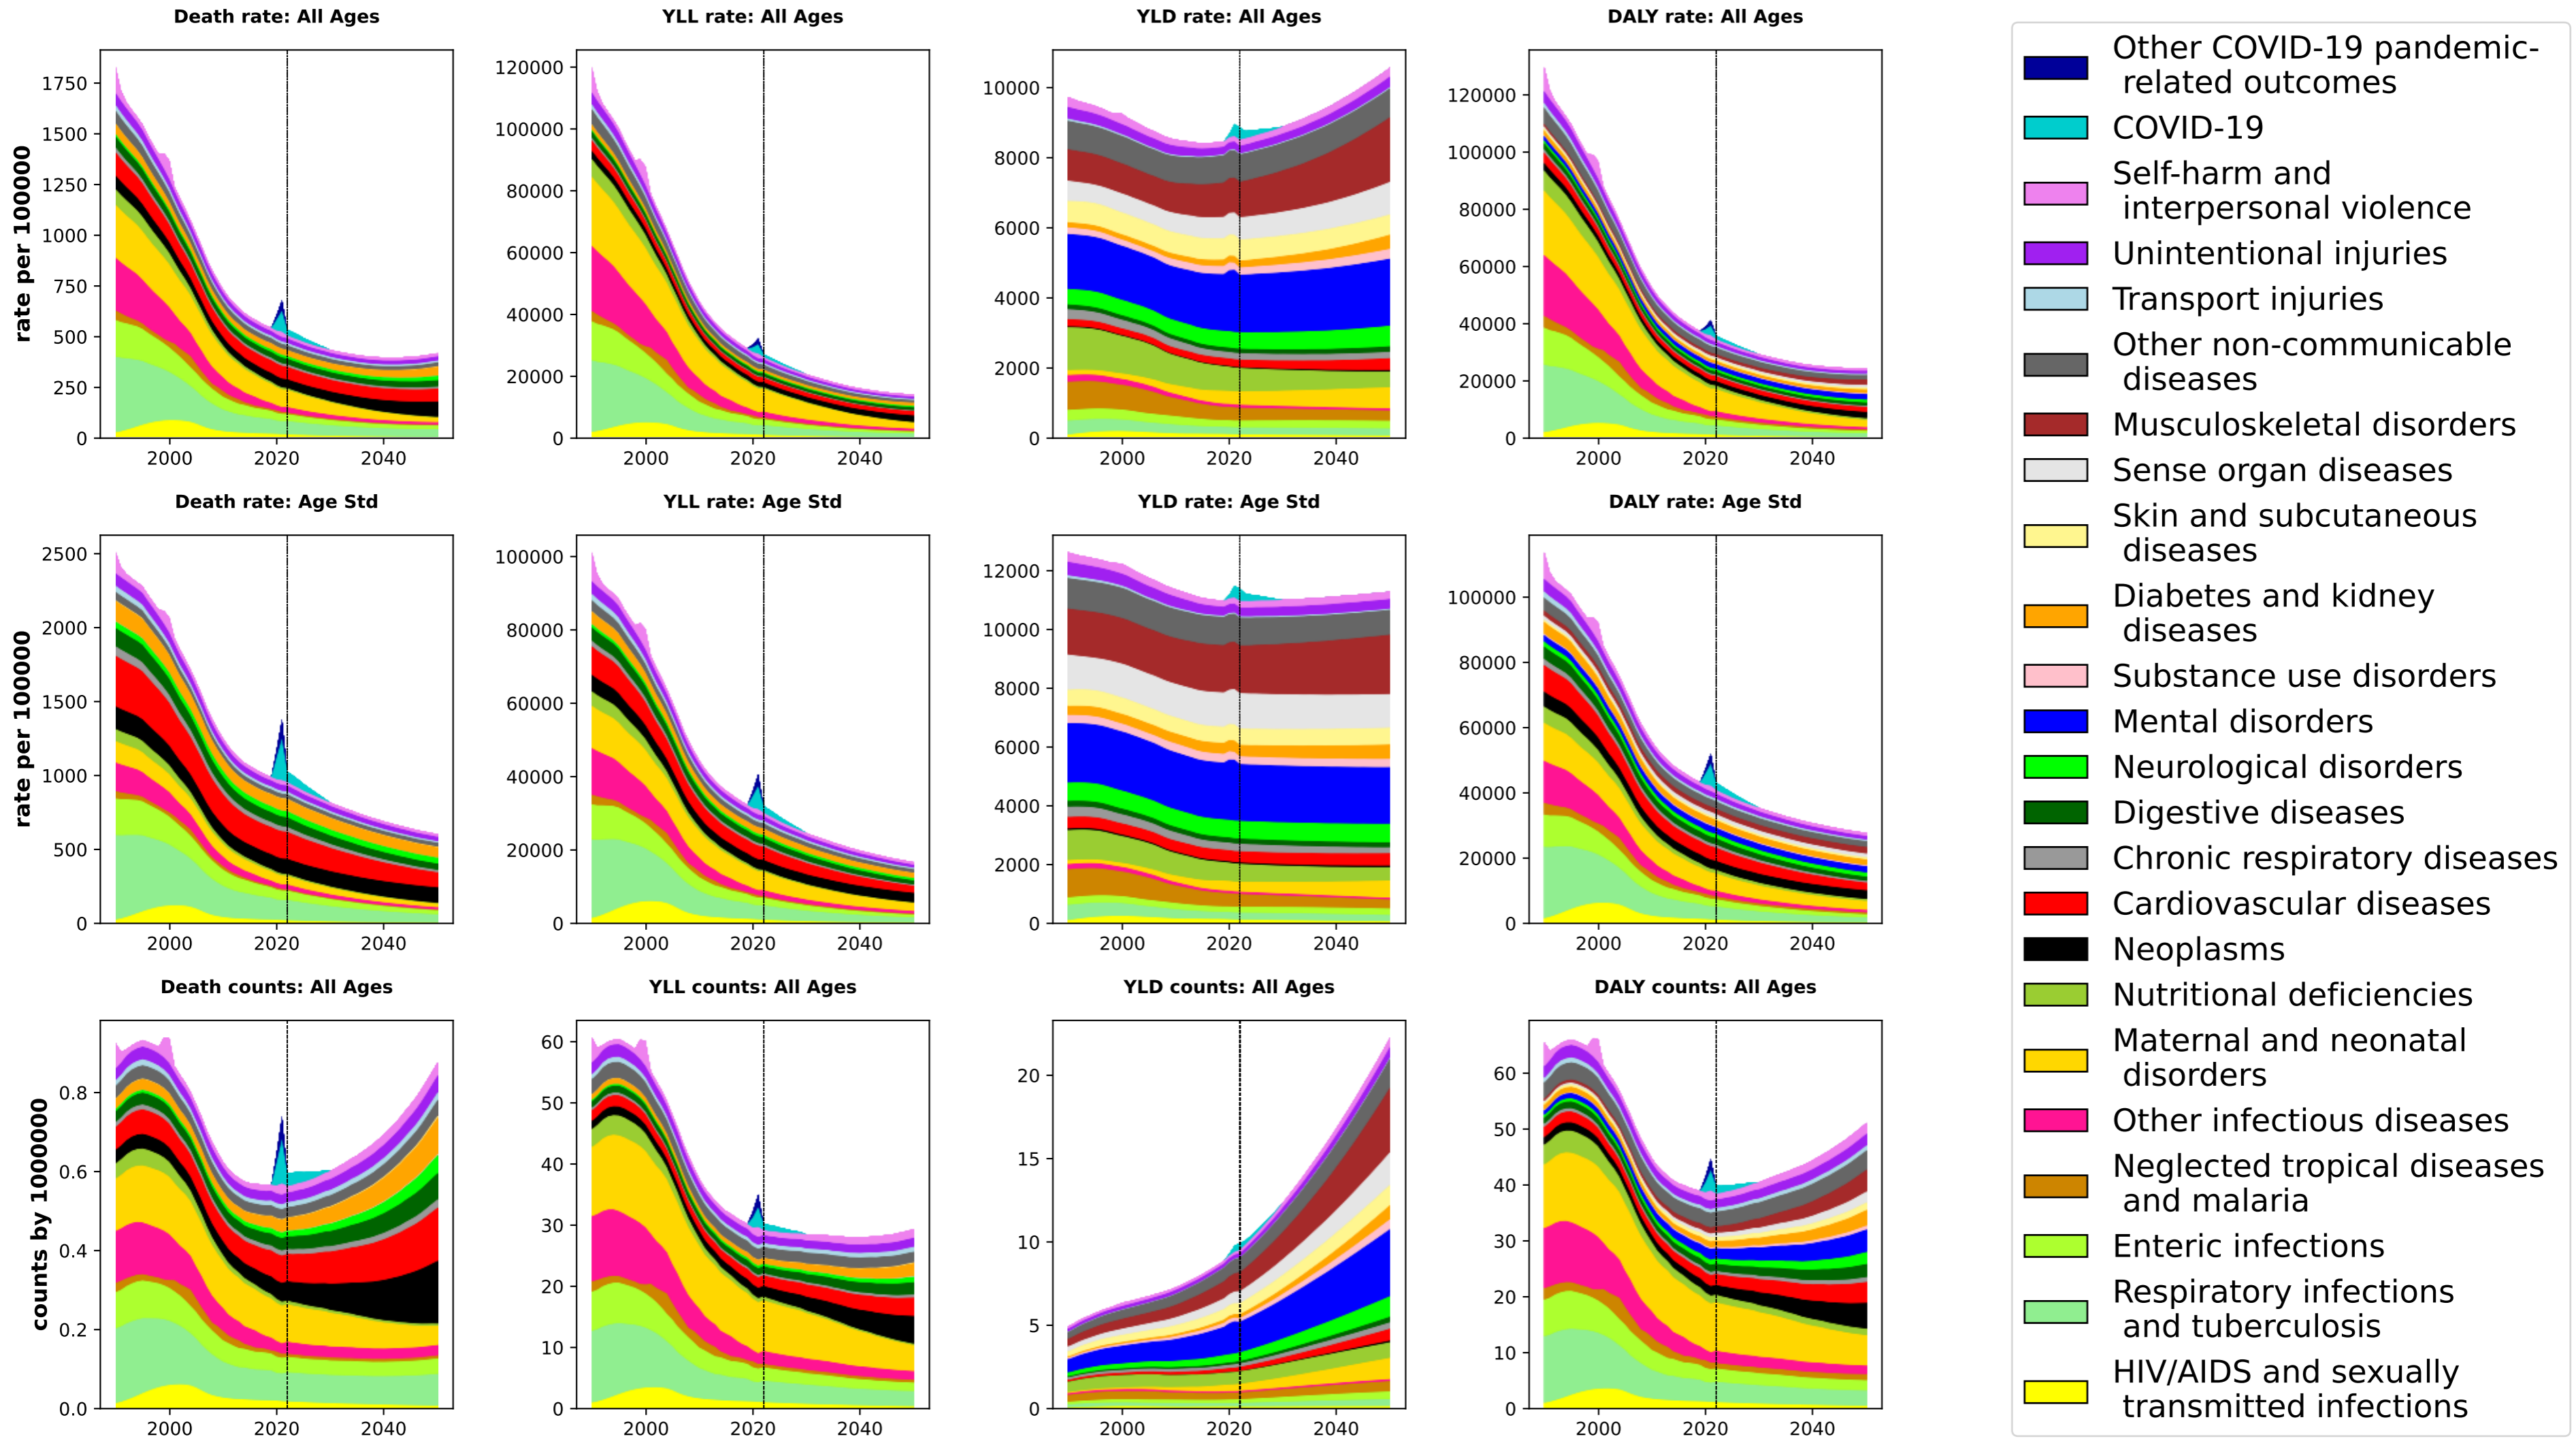



# Kenya

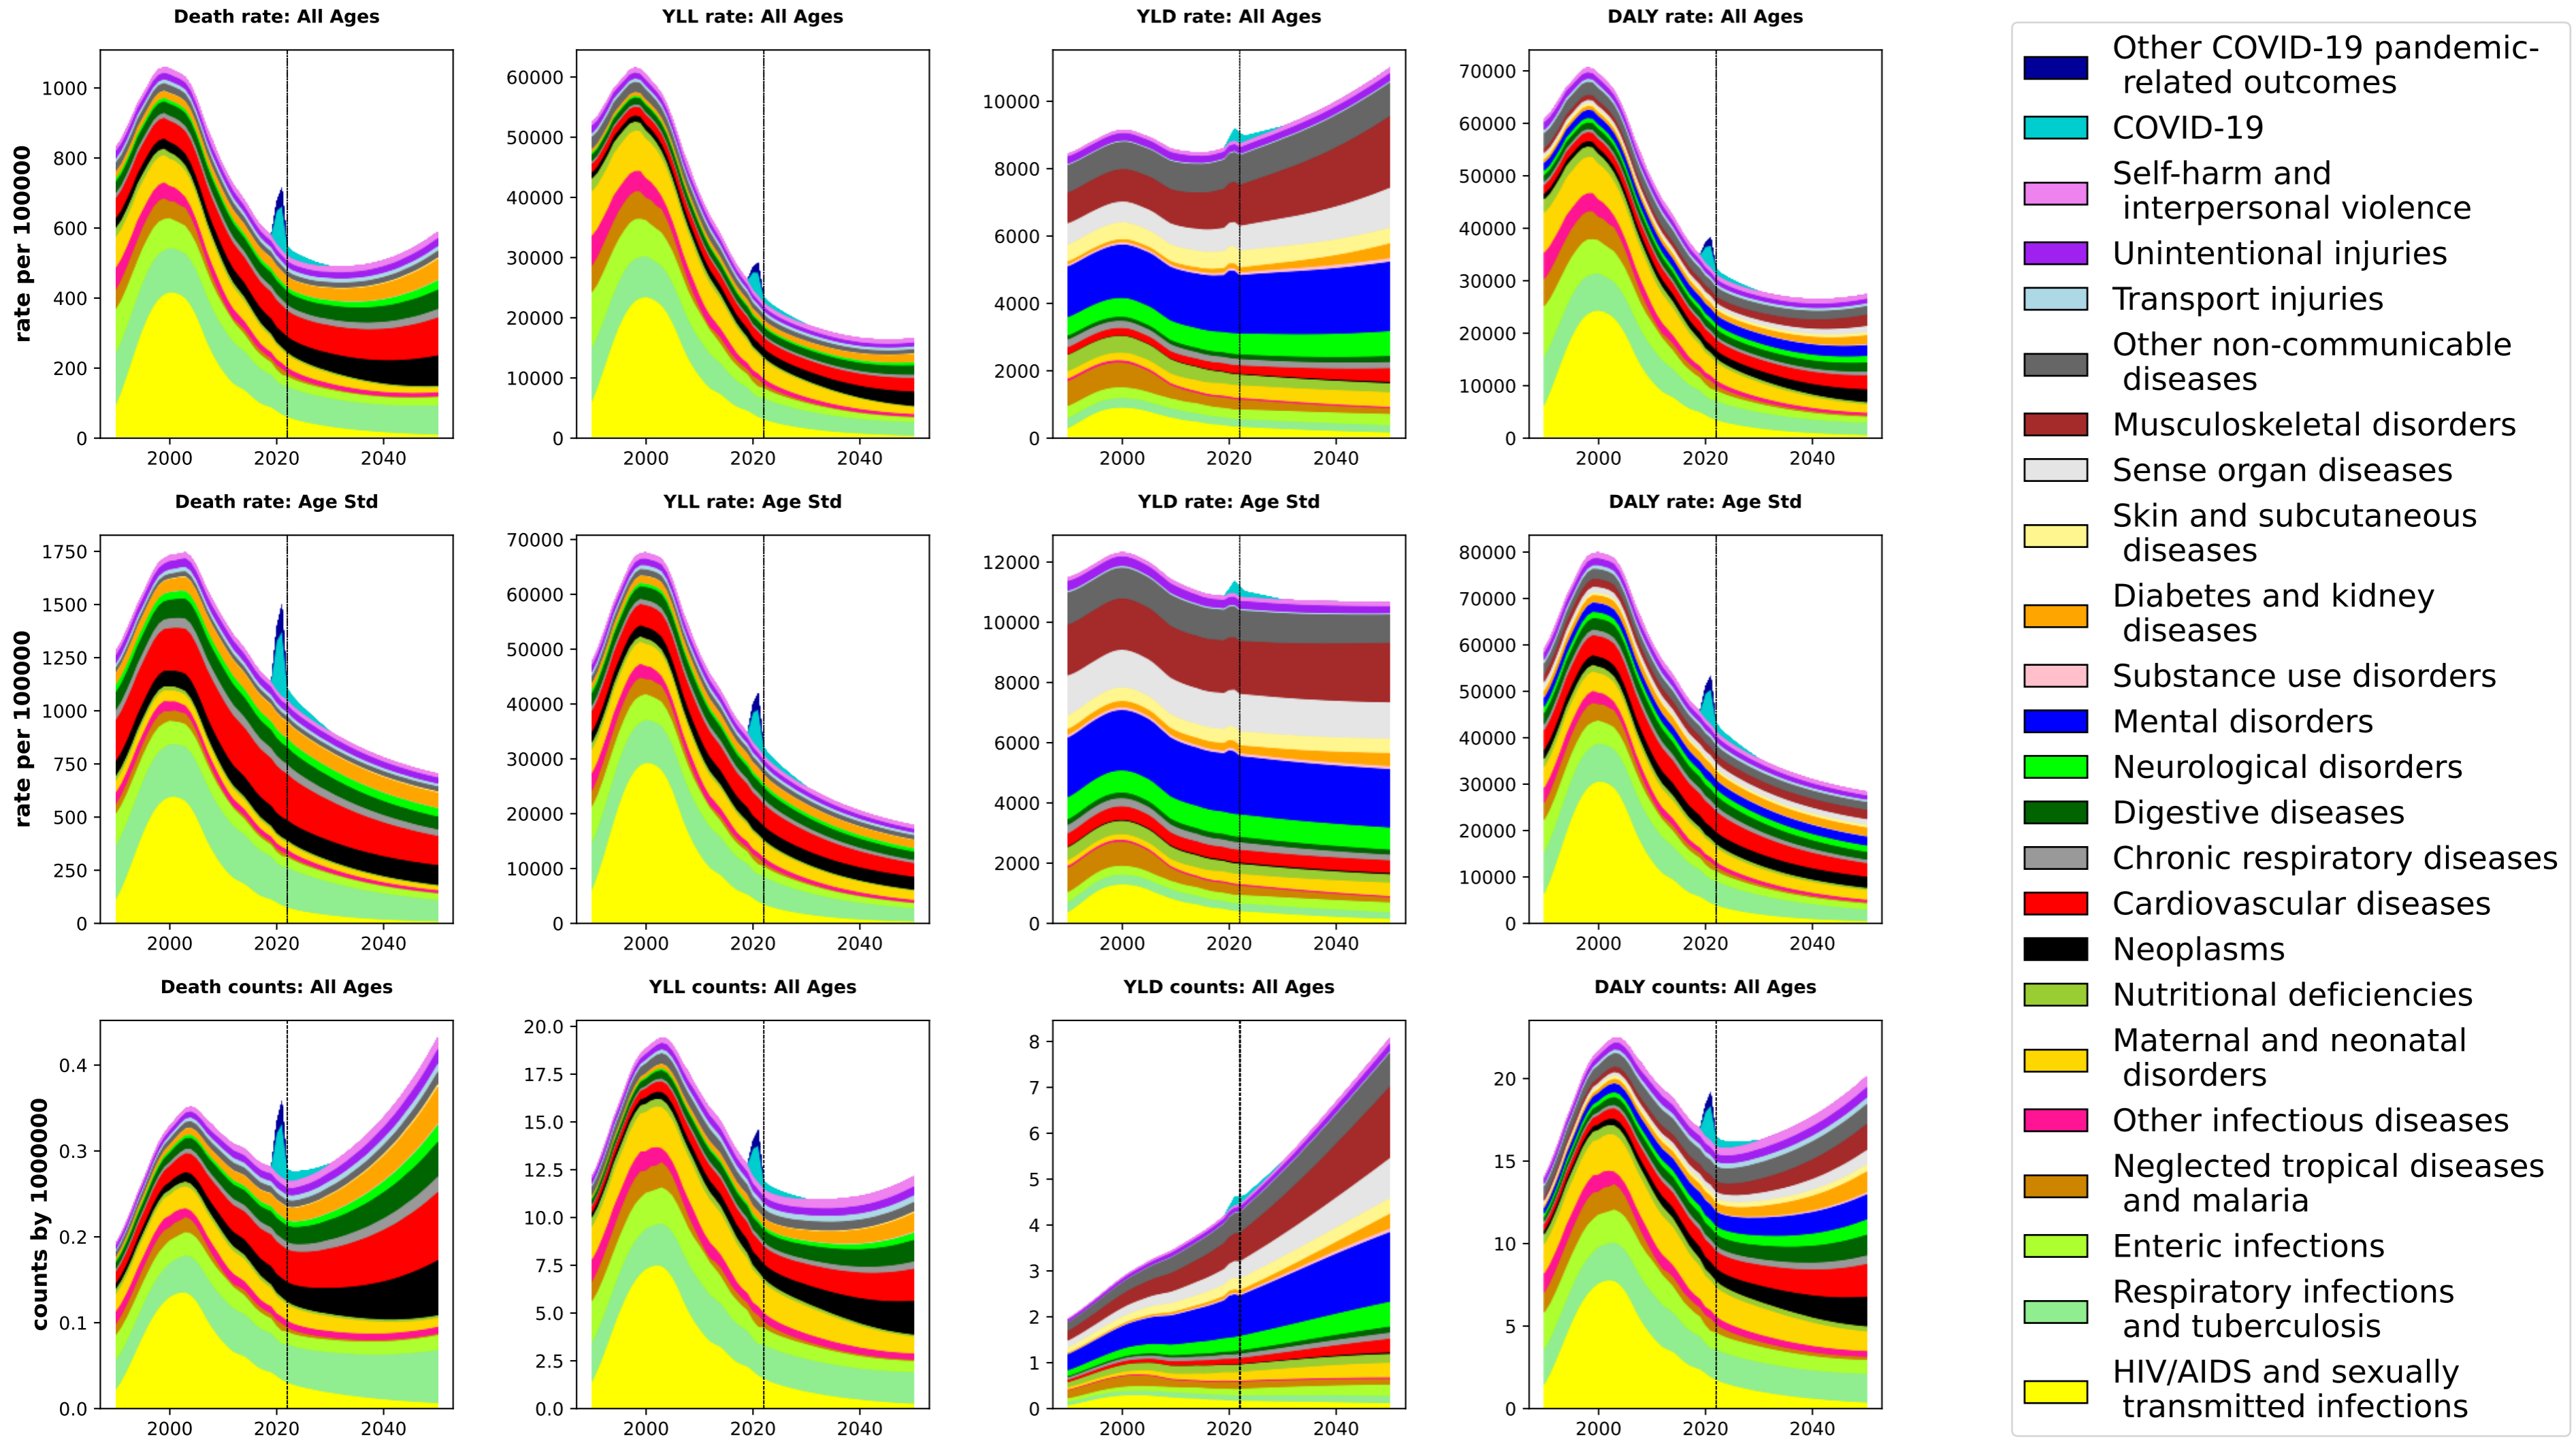

# Madagascar

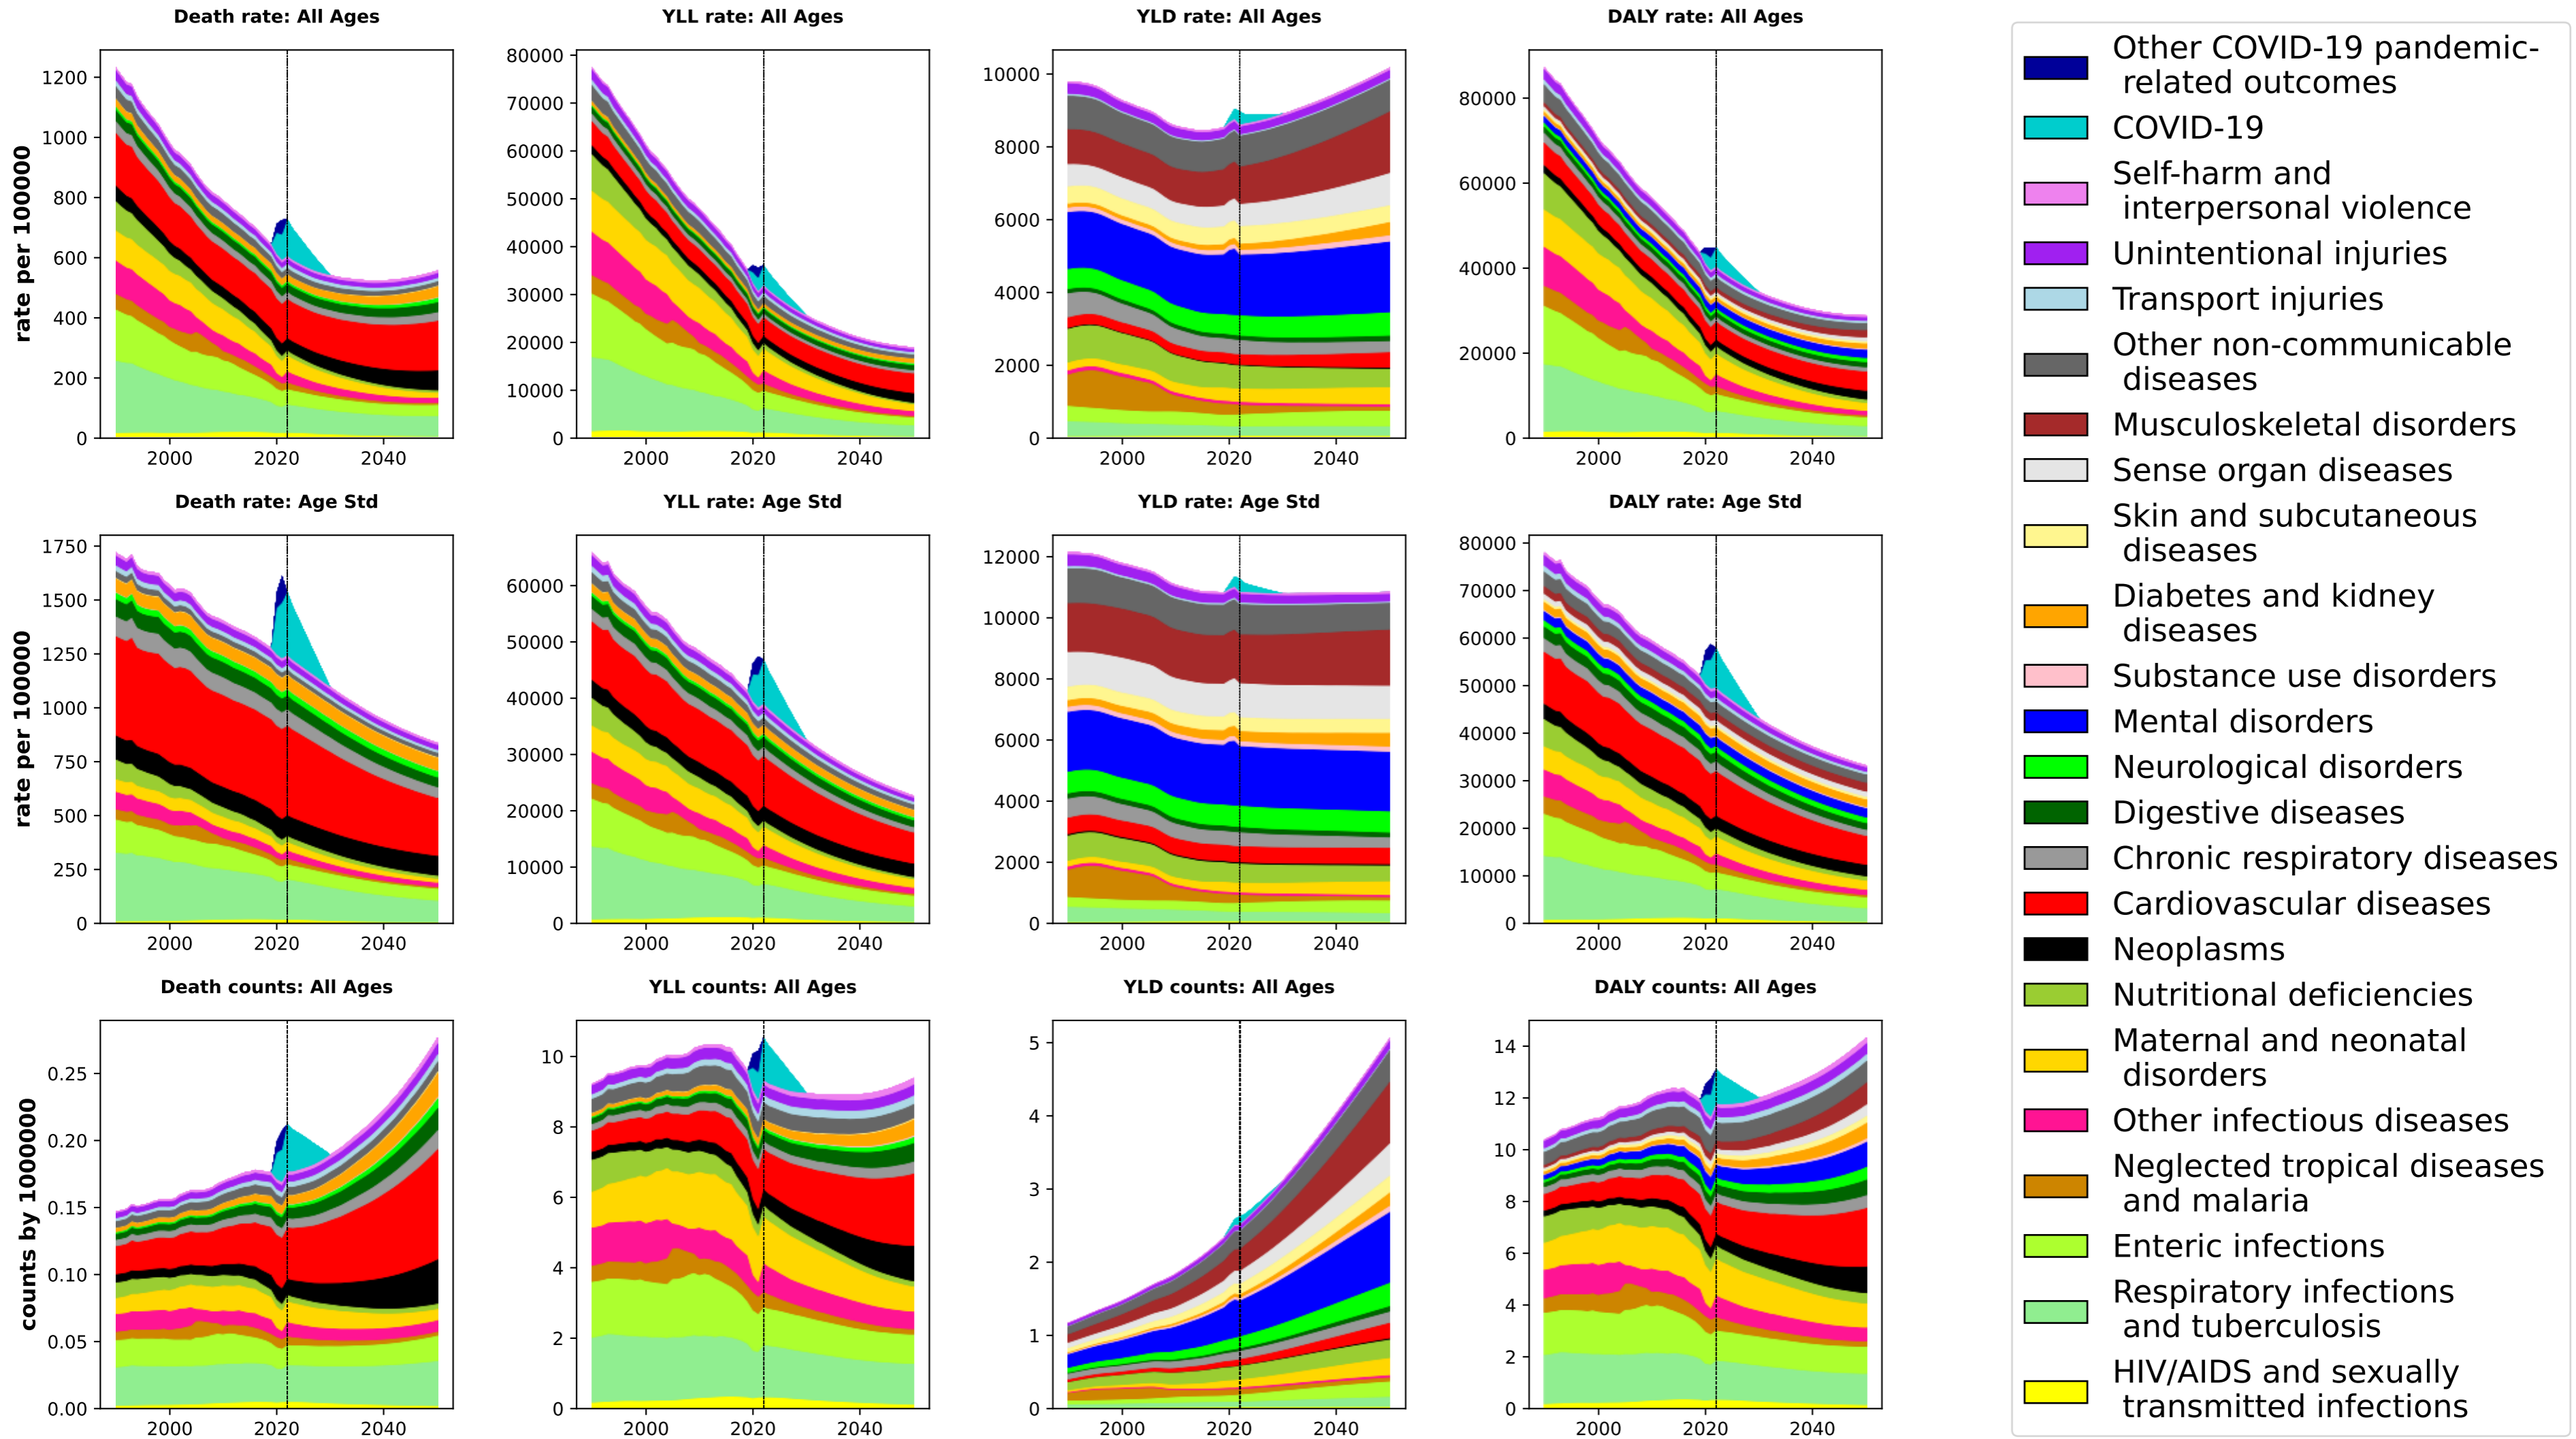

# Malawi

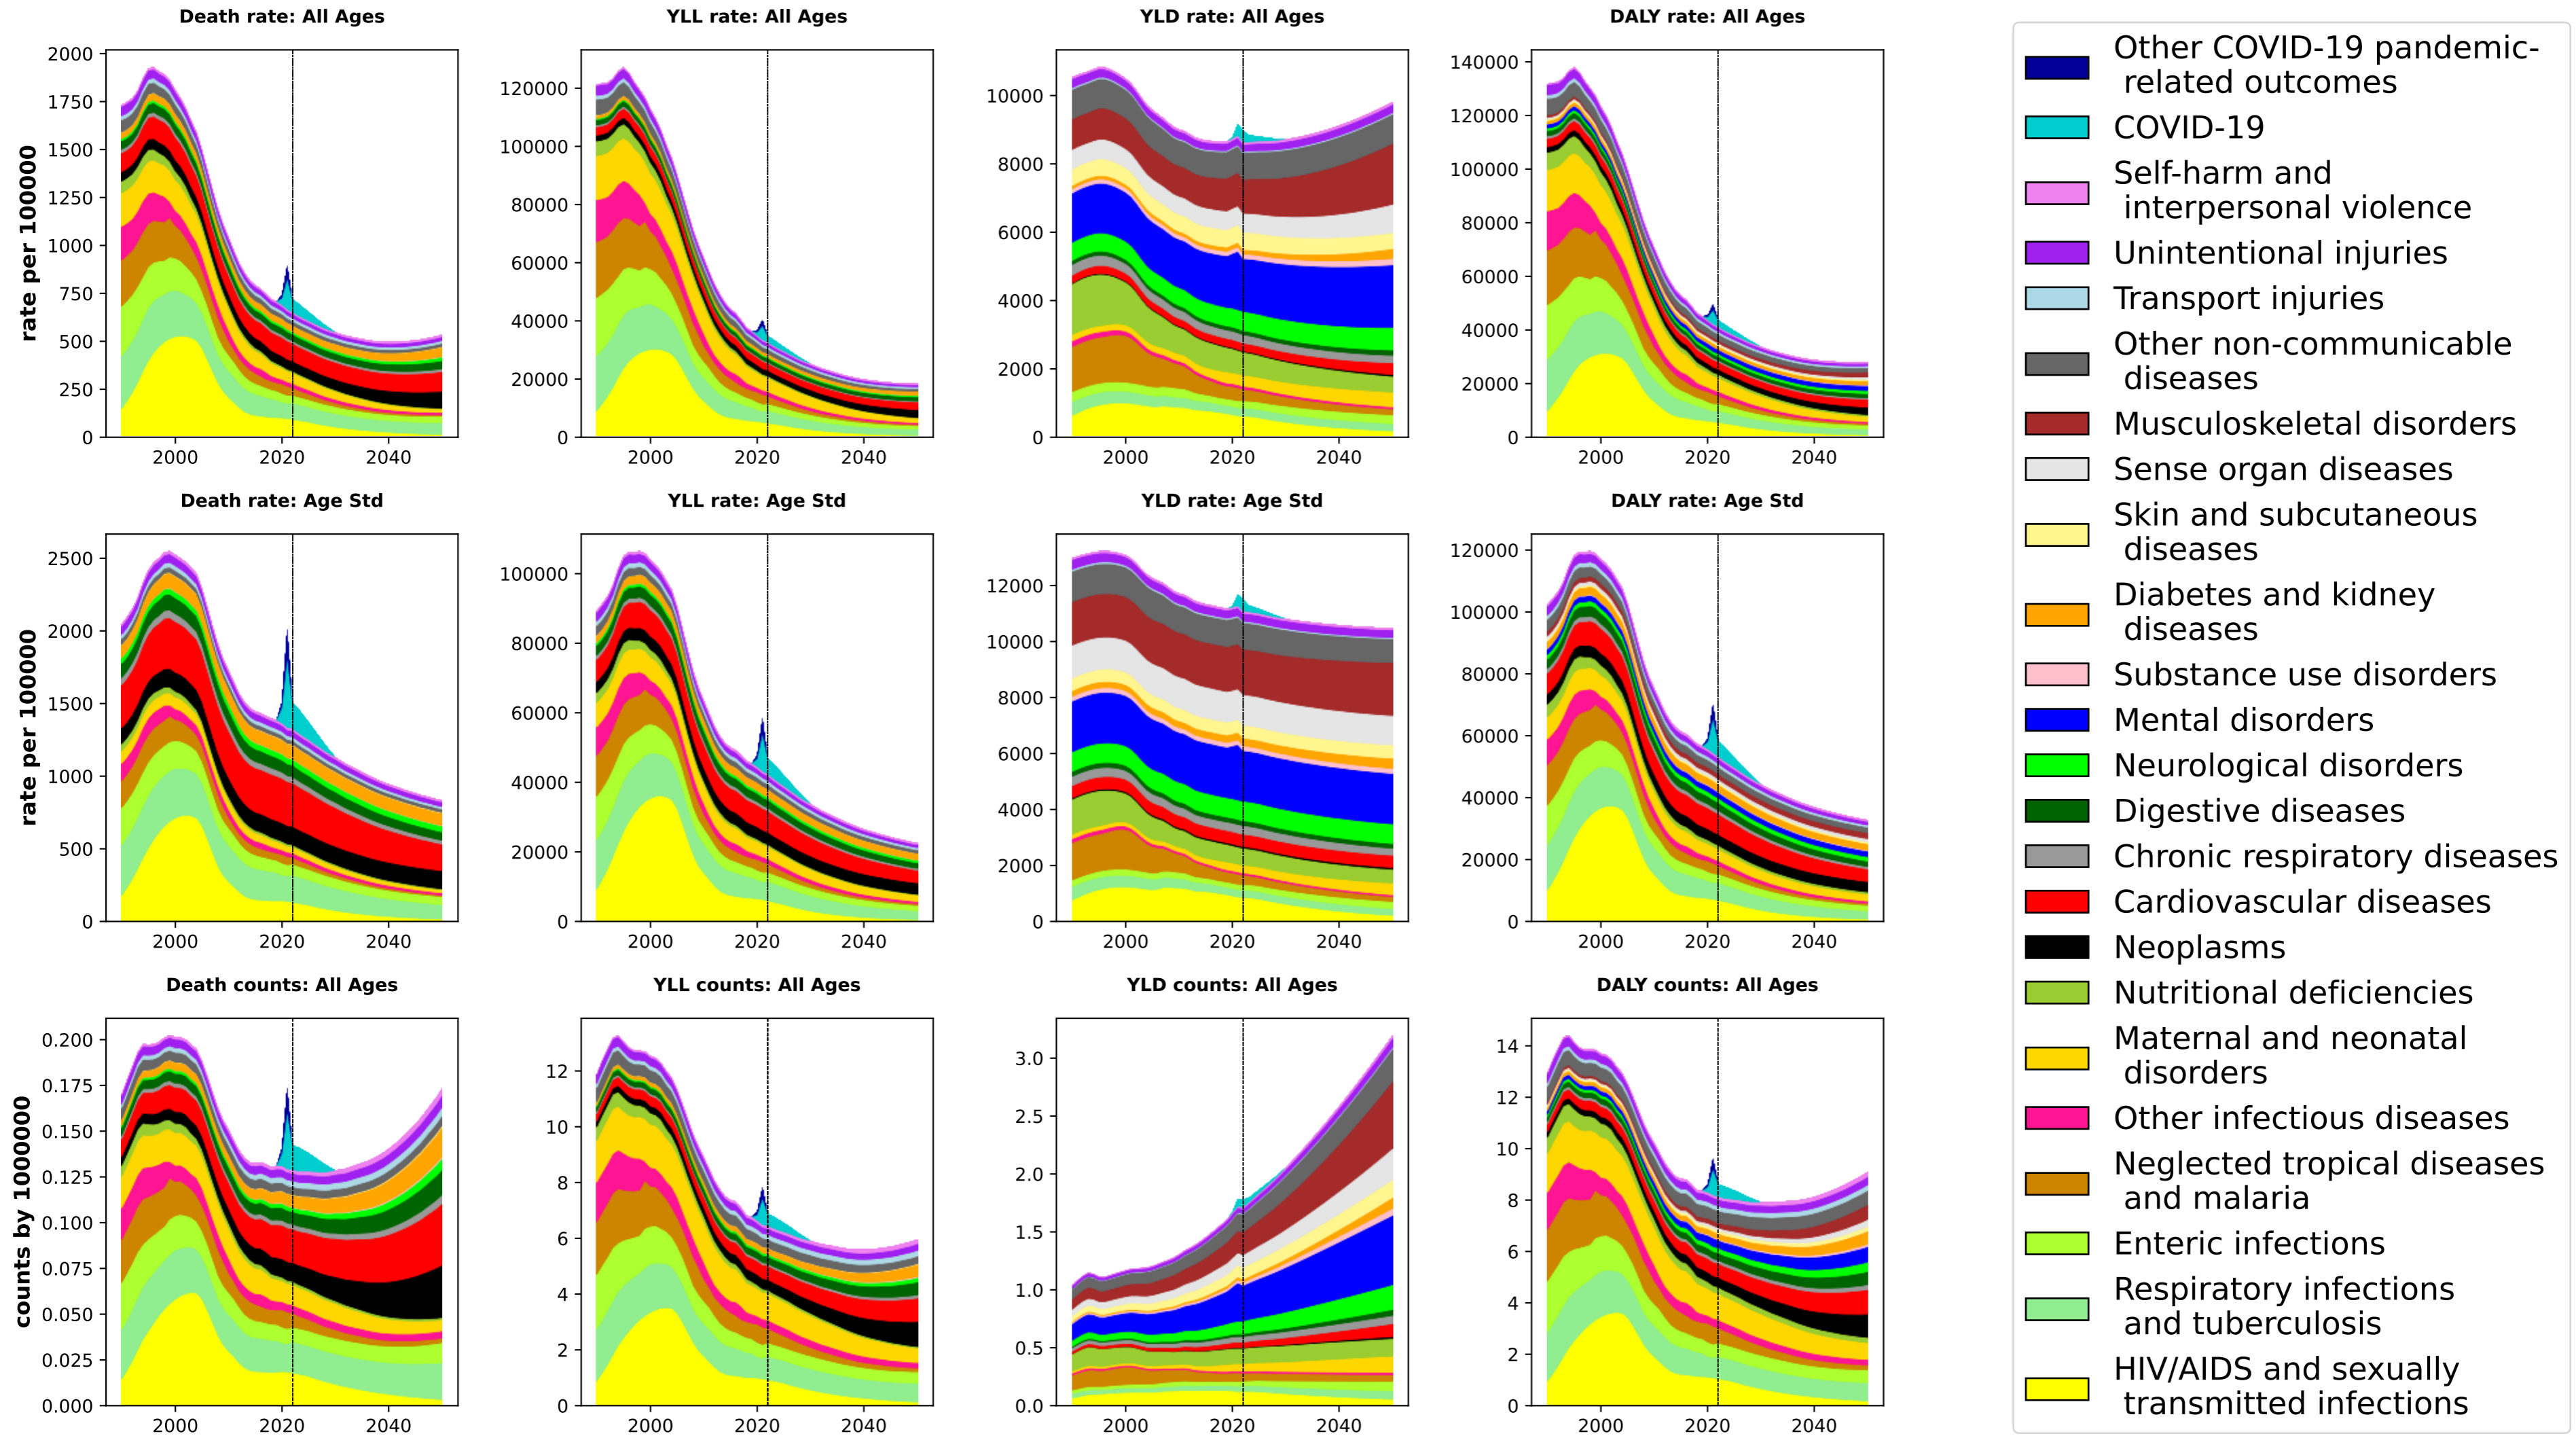

# Mozambique

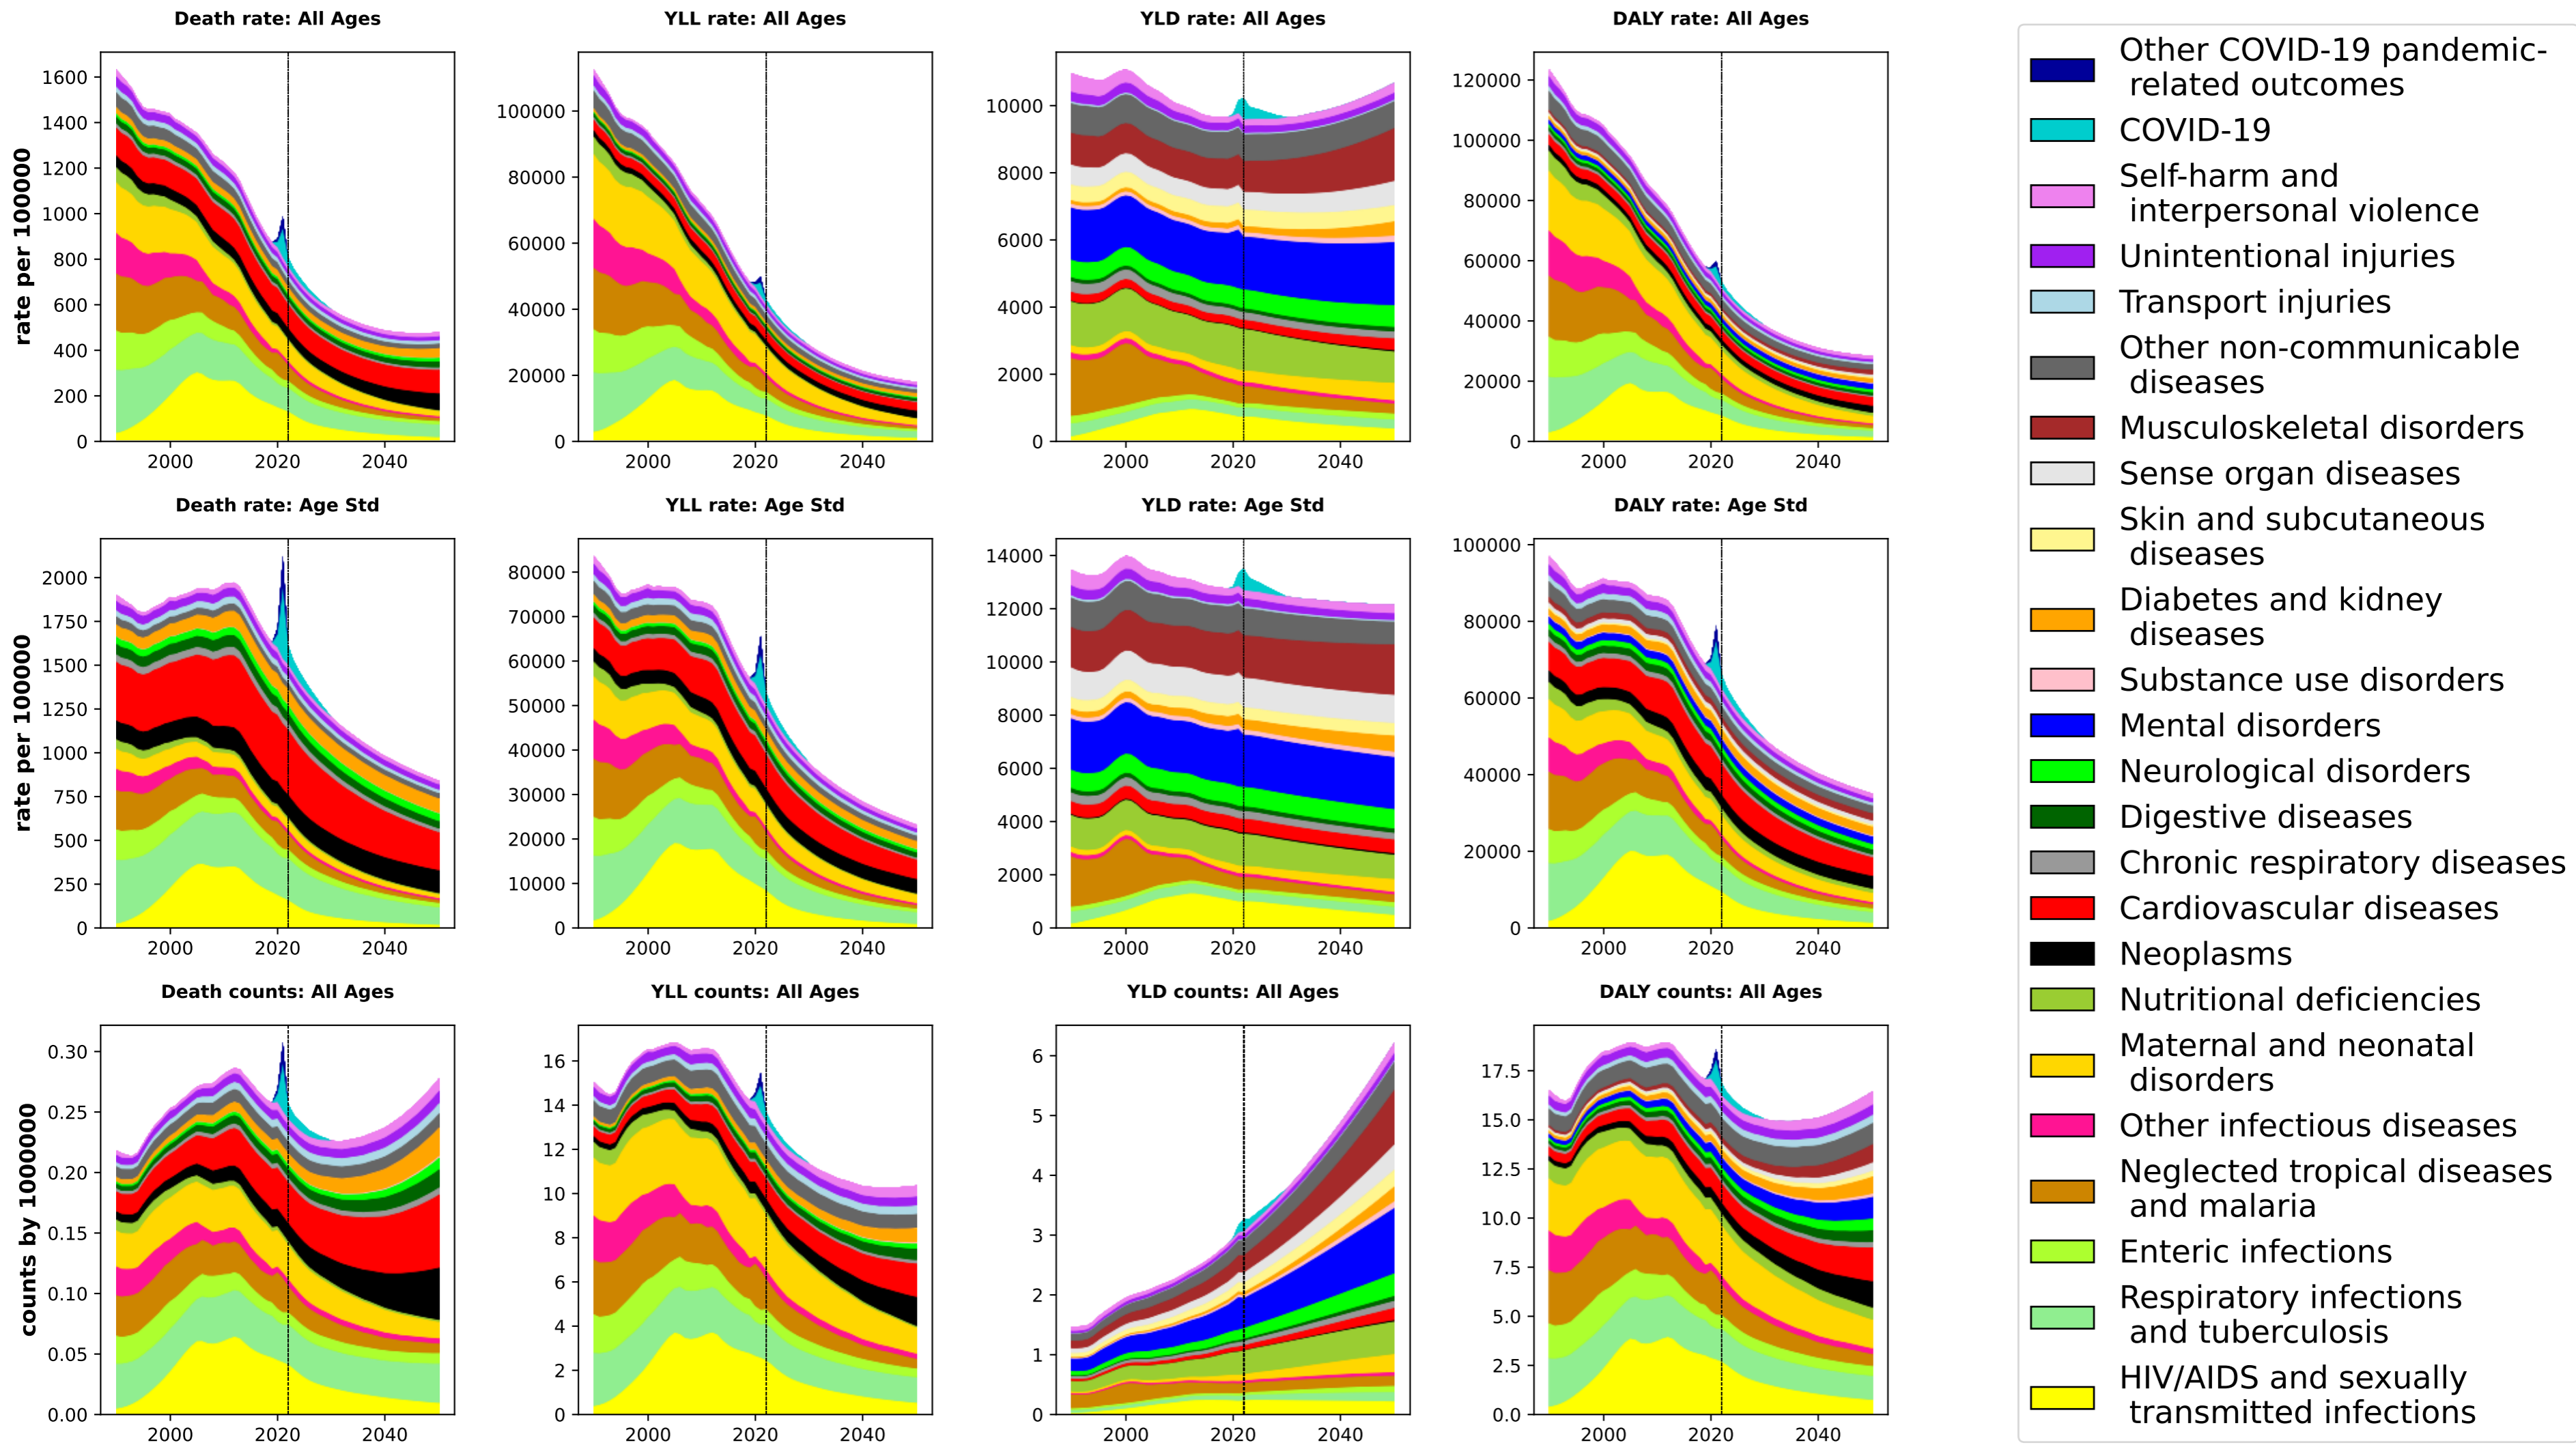

# Rwanda

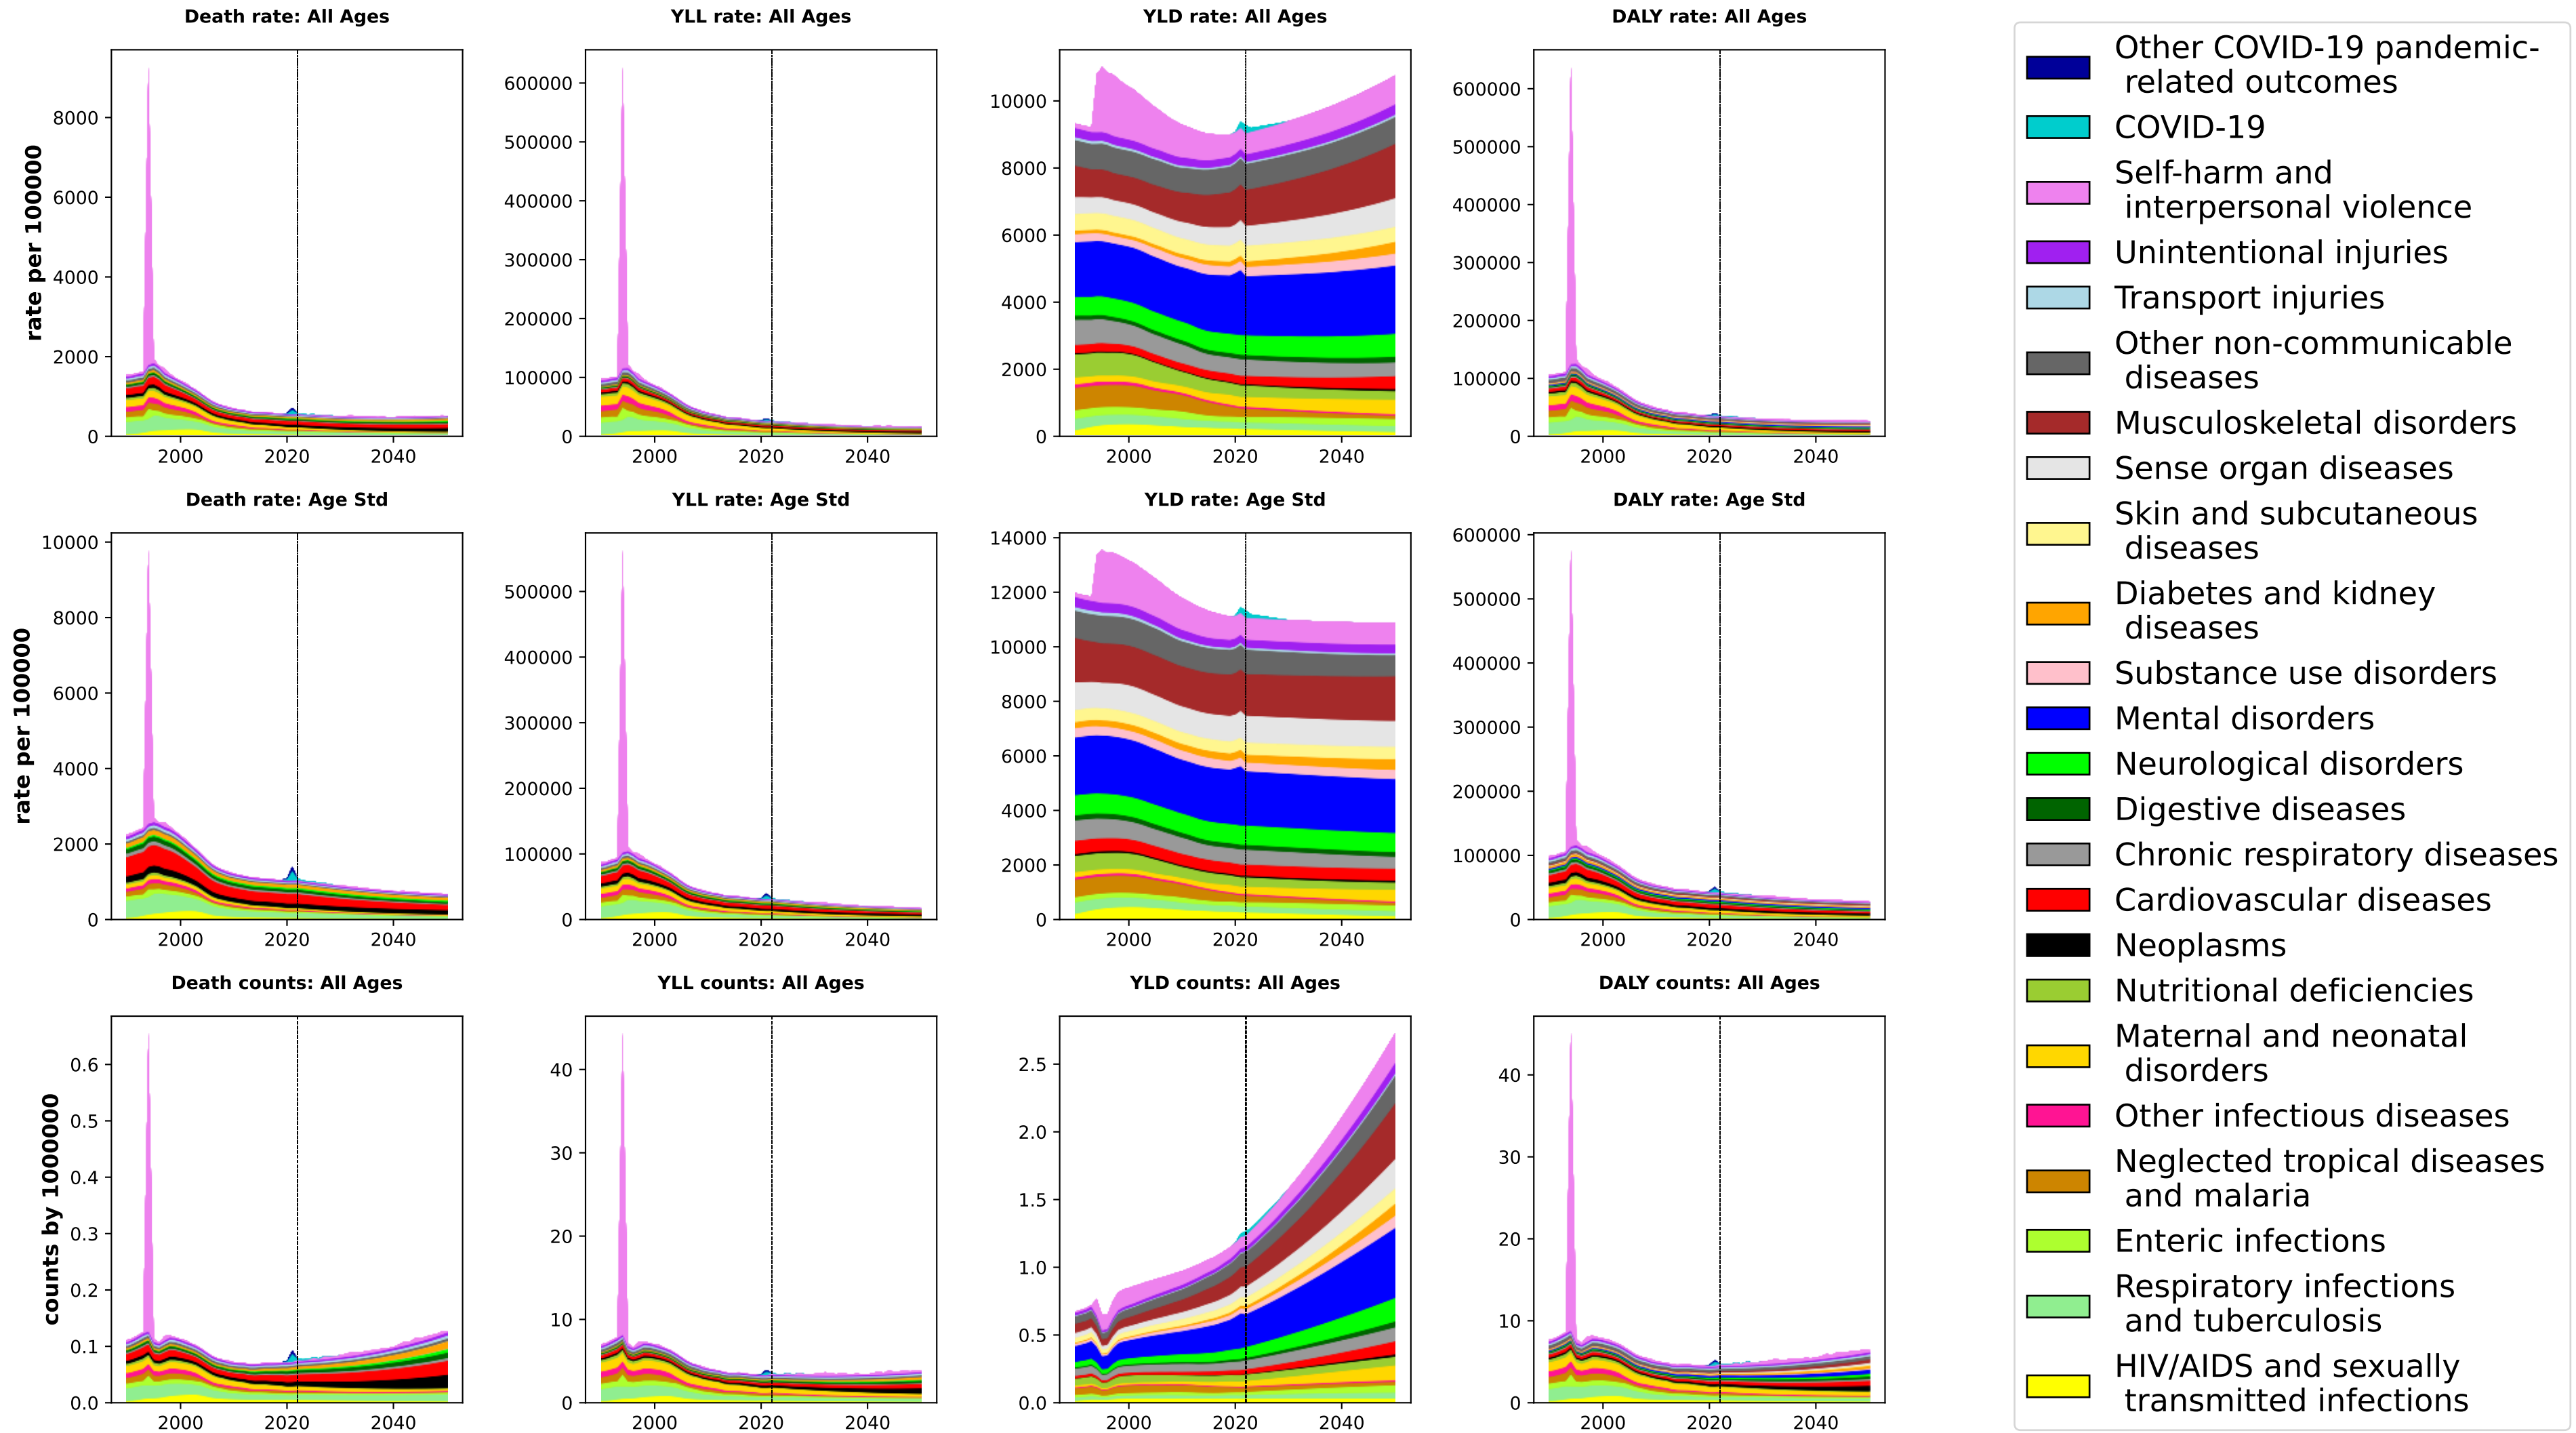

# Somalia

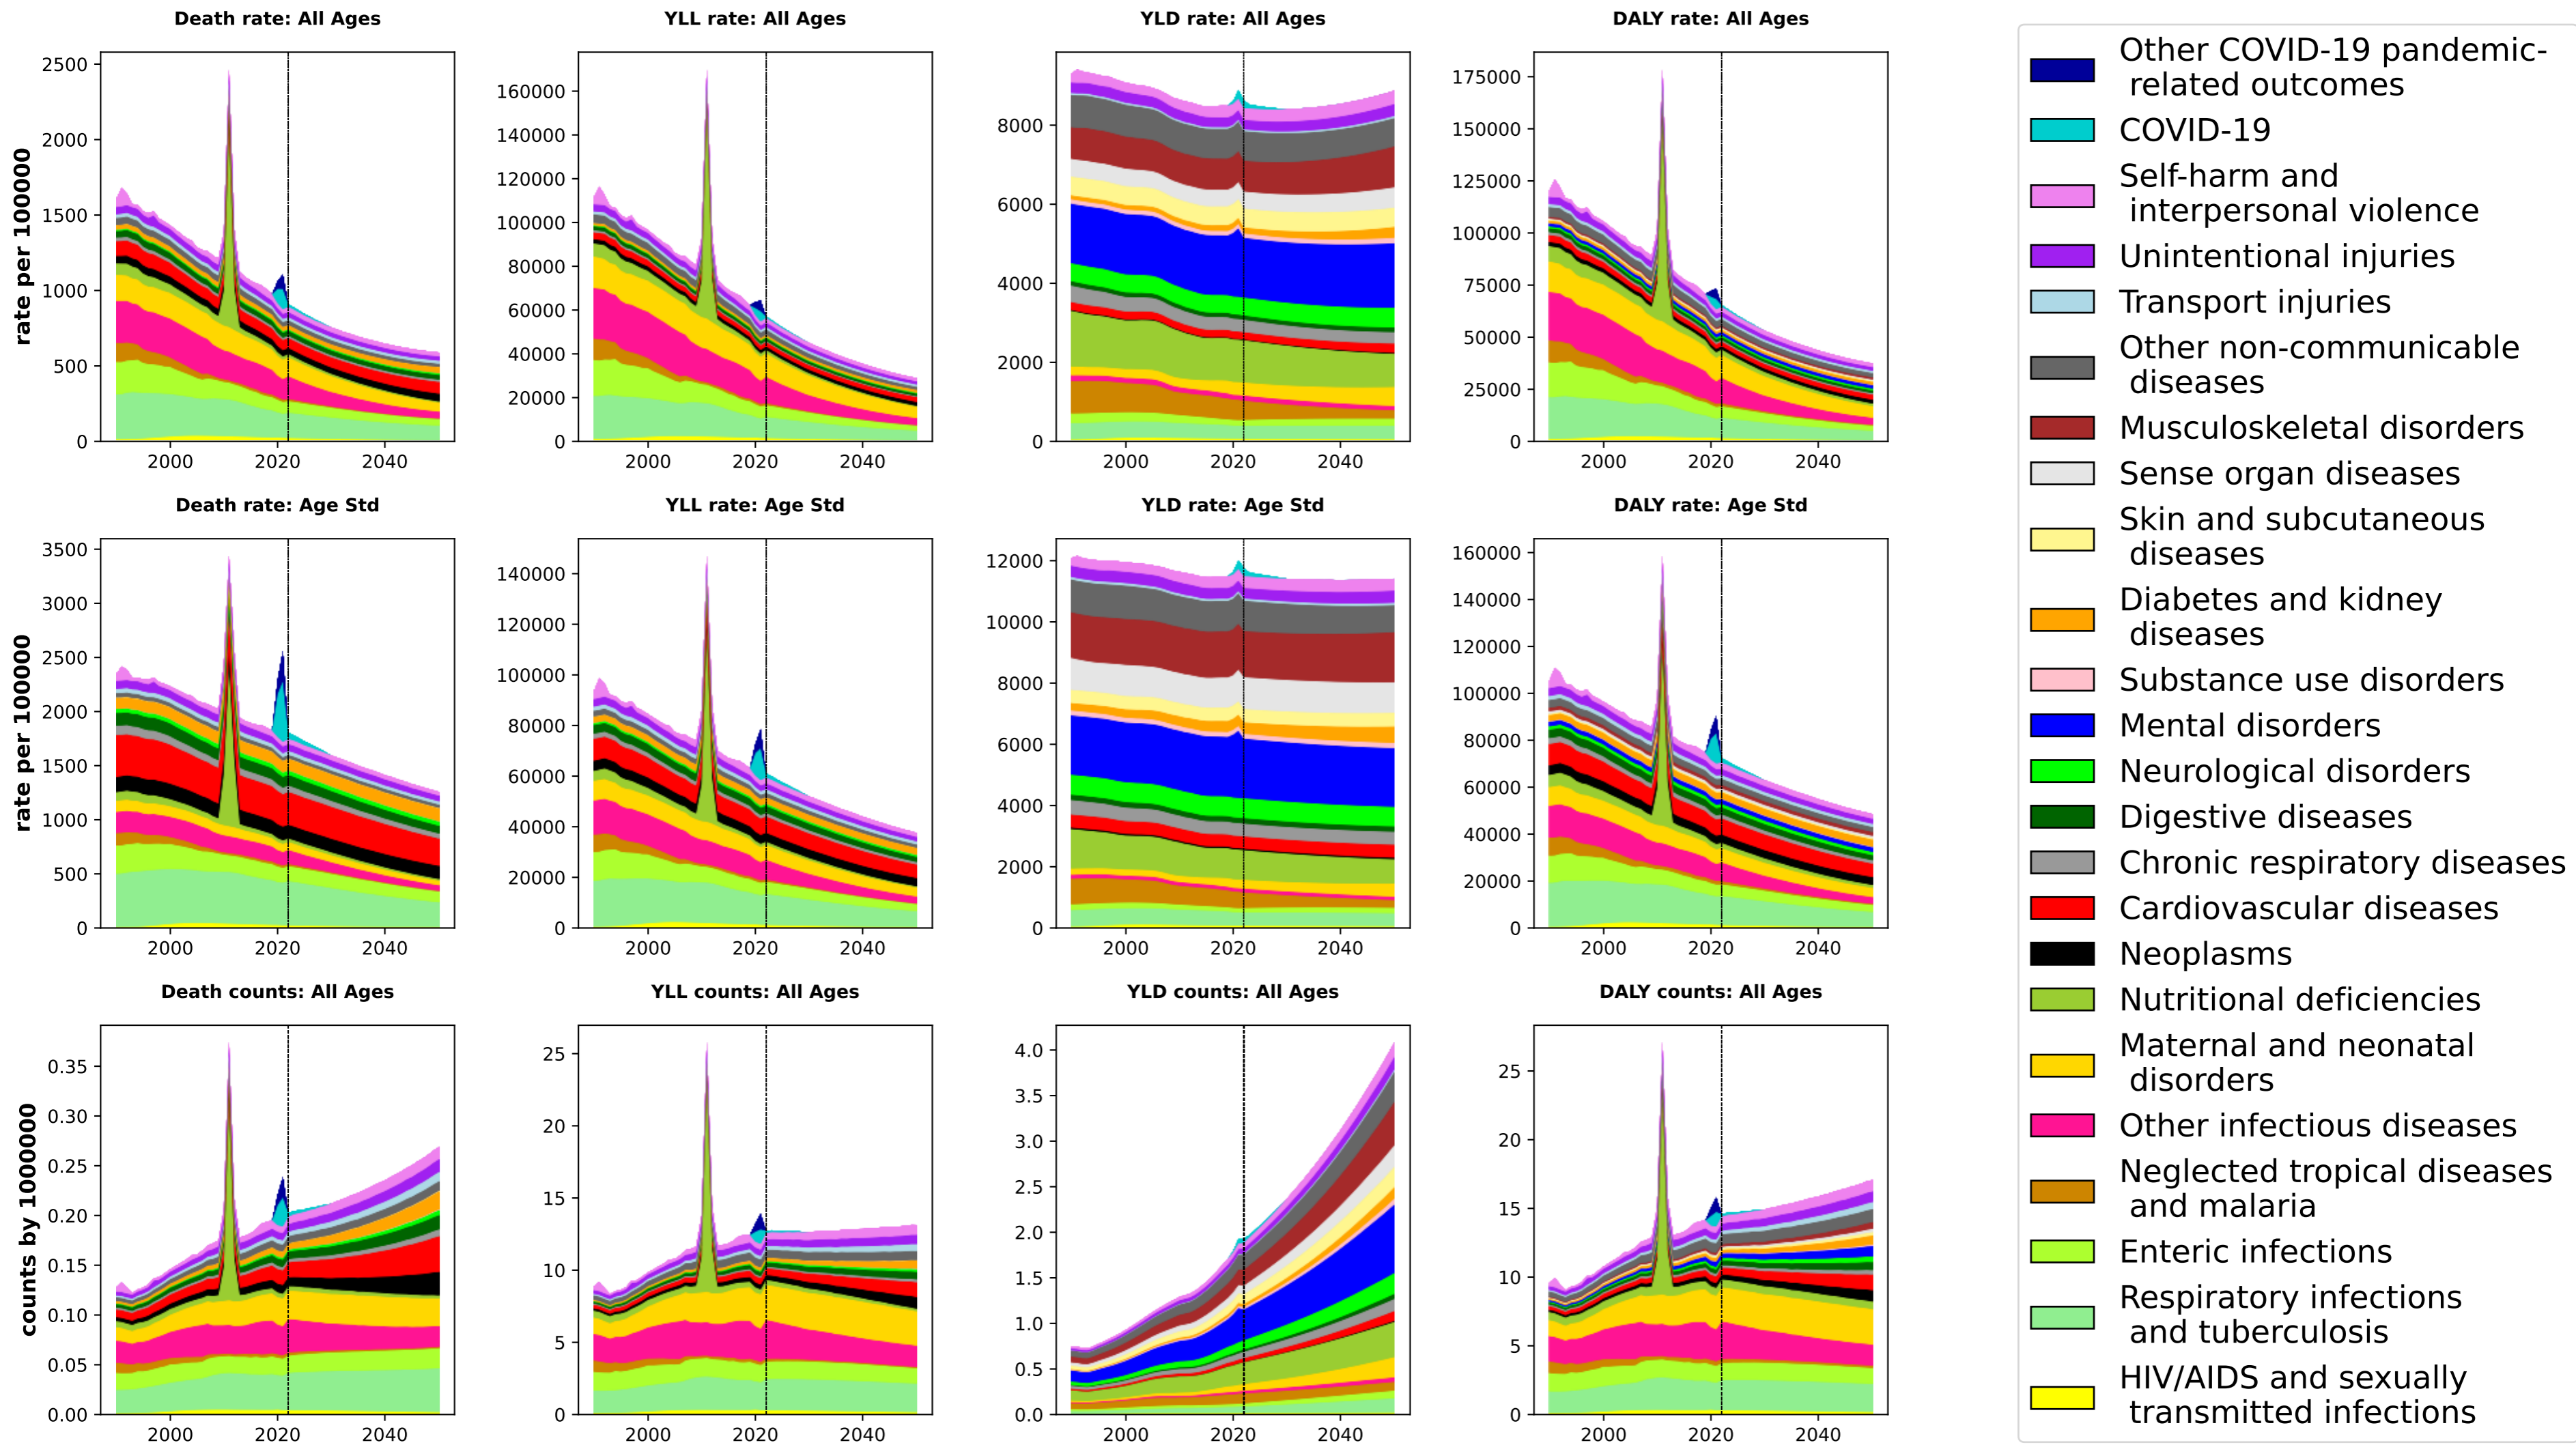

# South Sudan

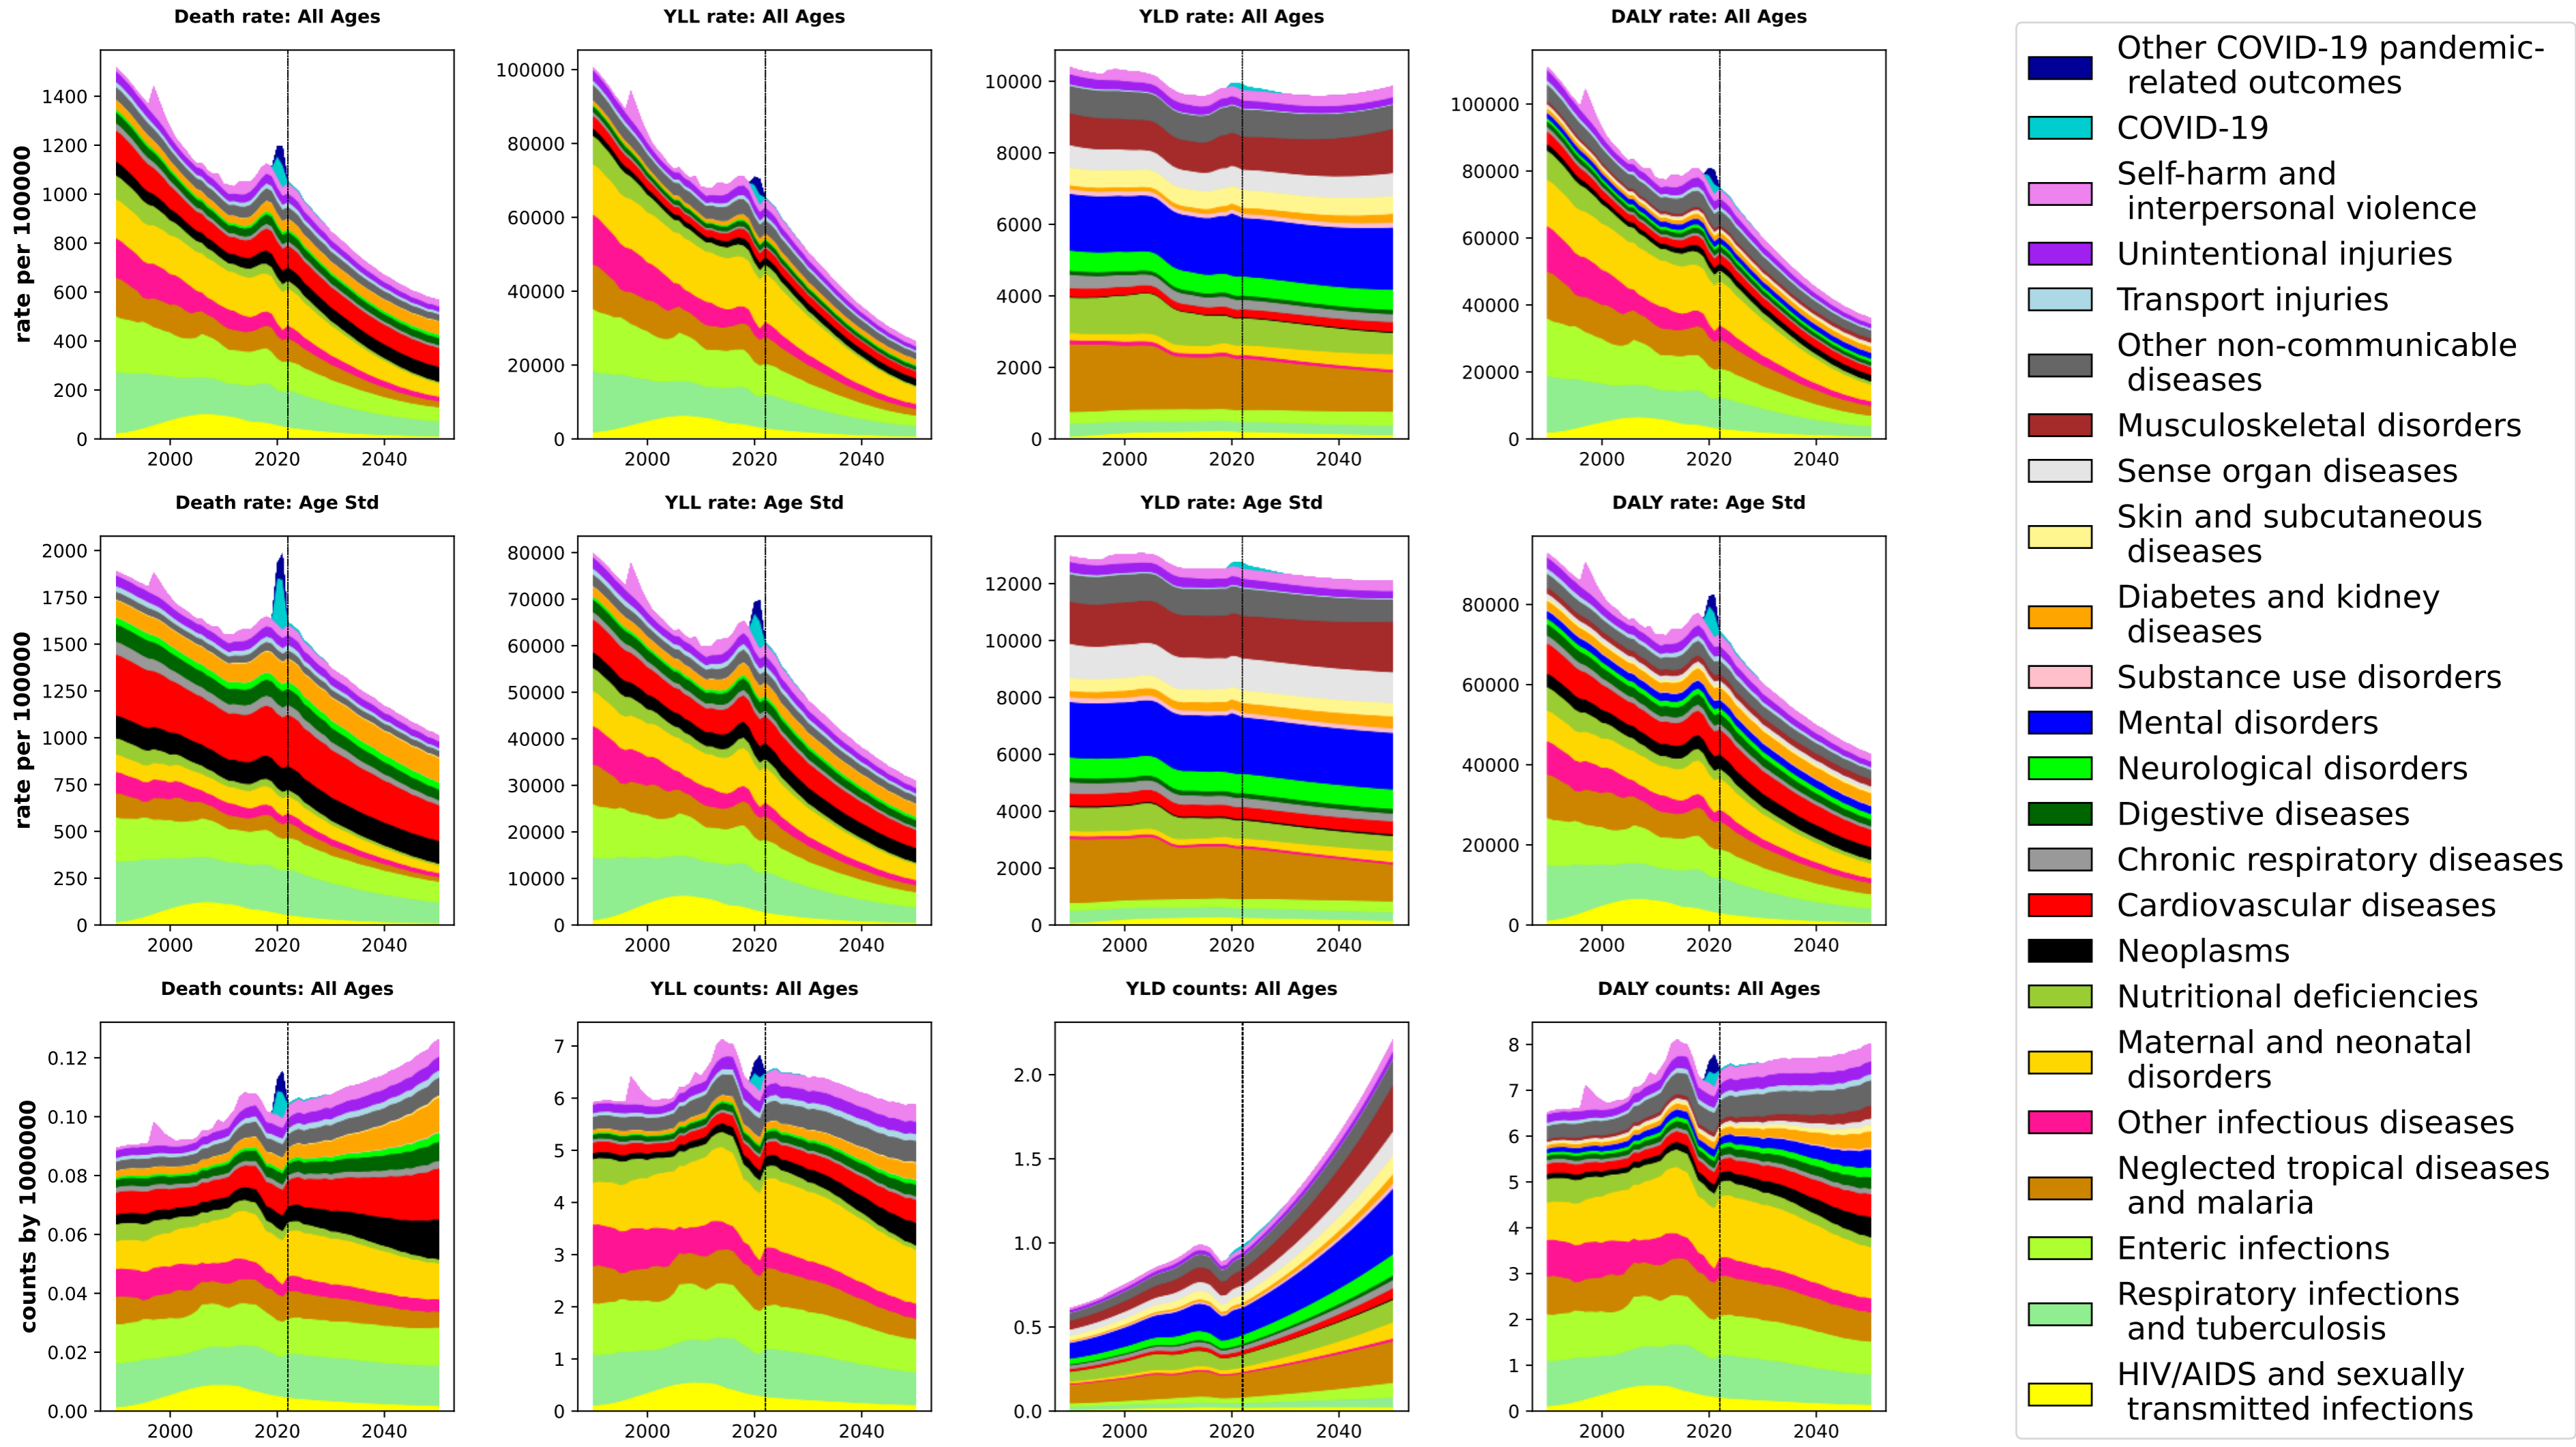

# Uganda

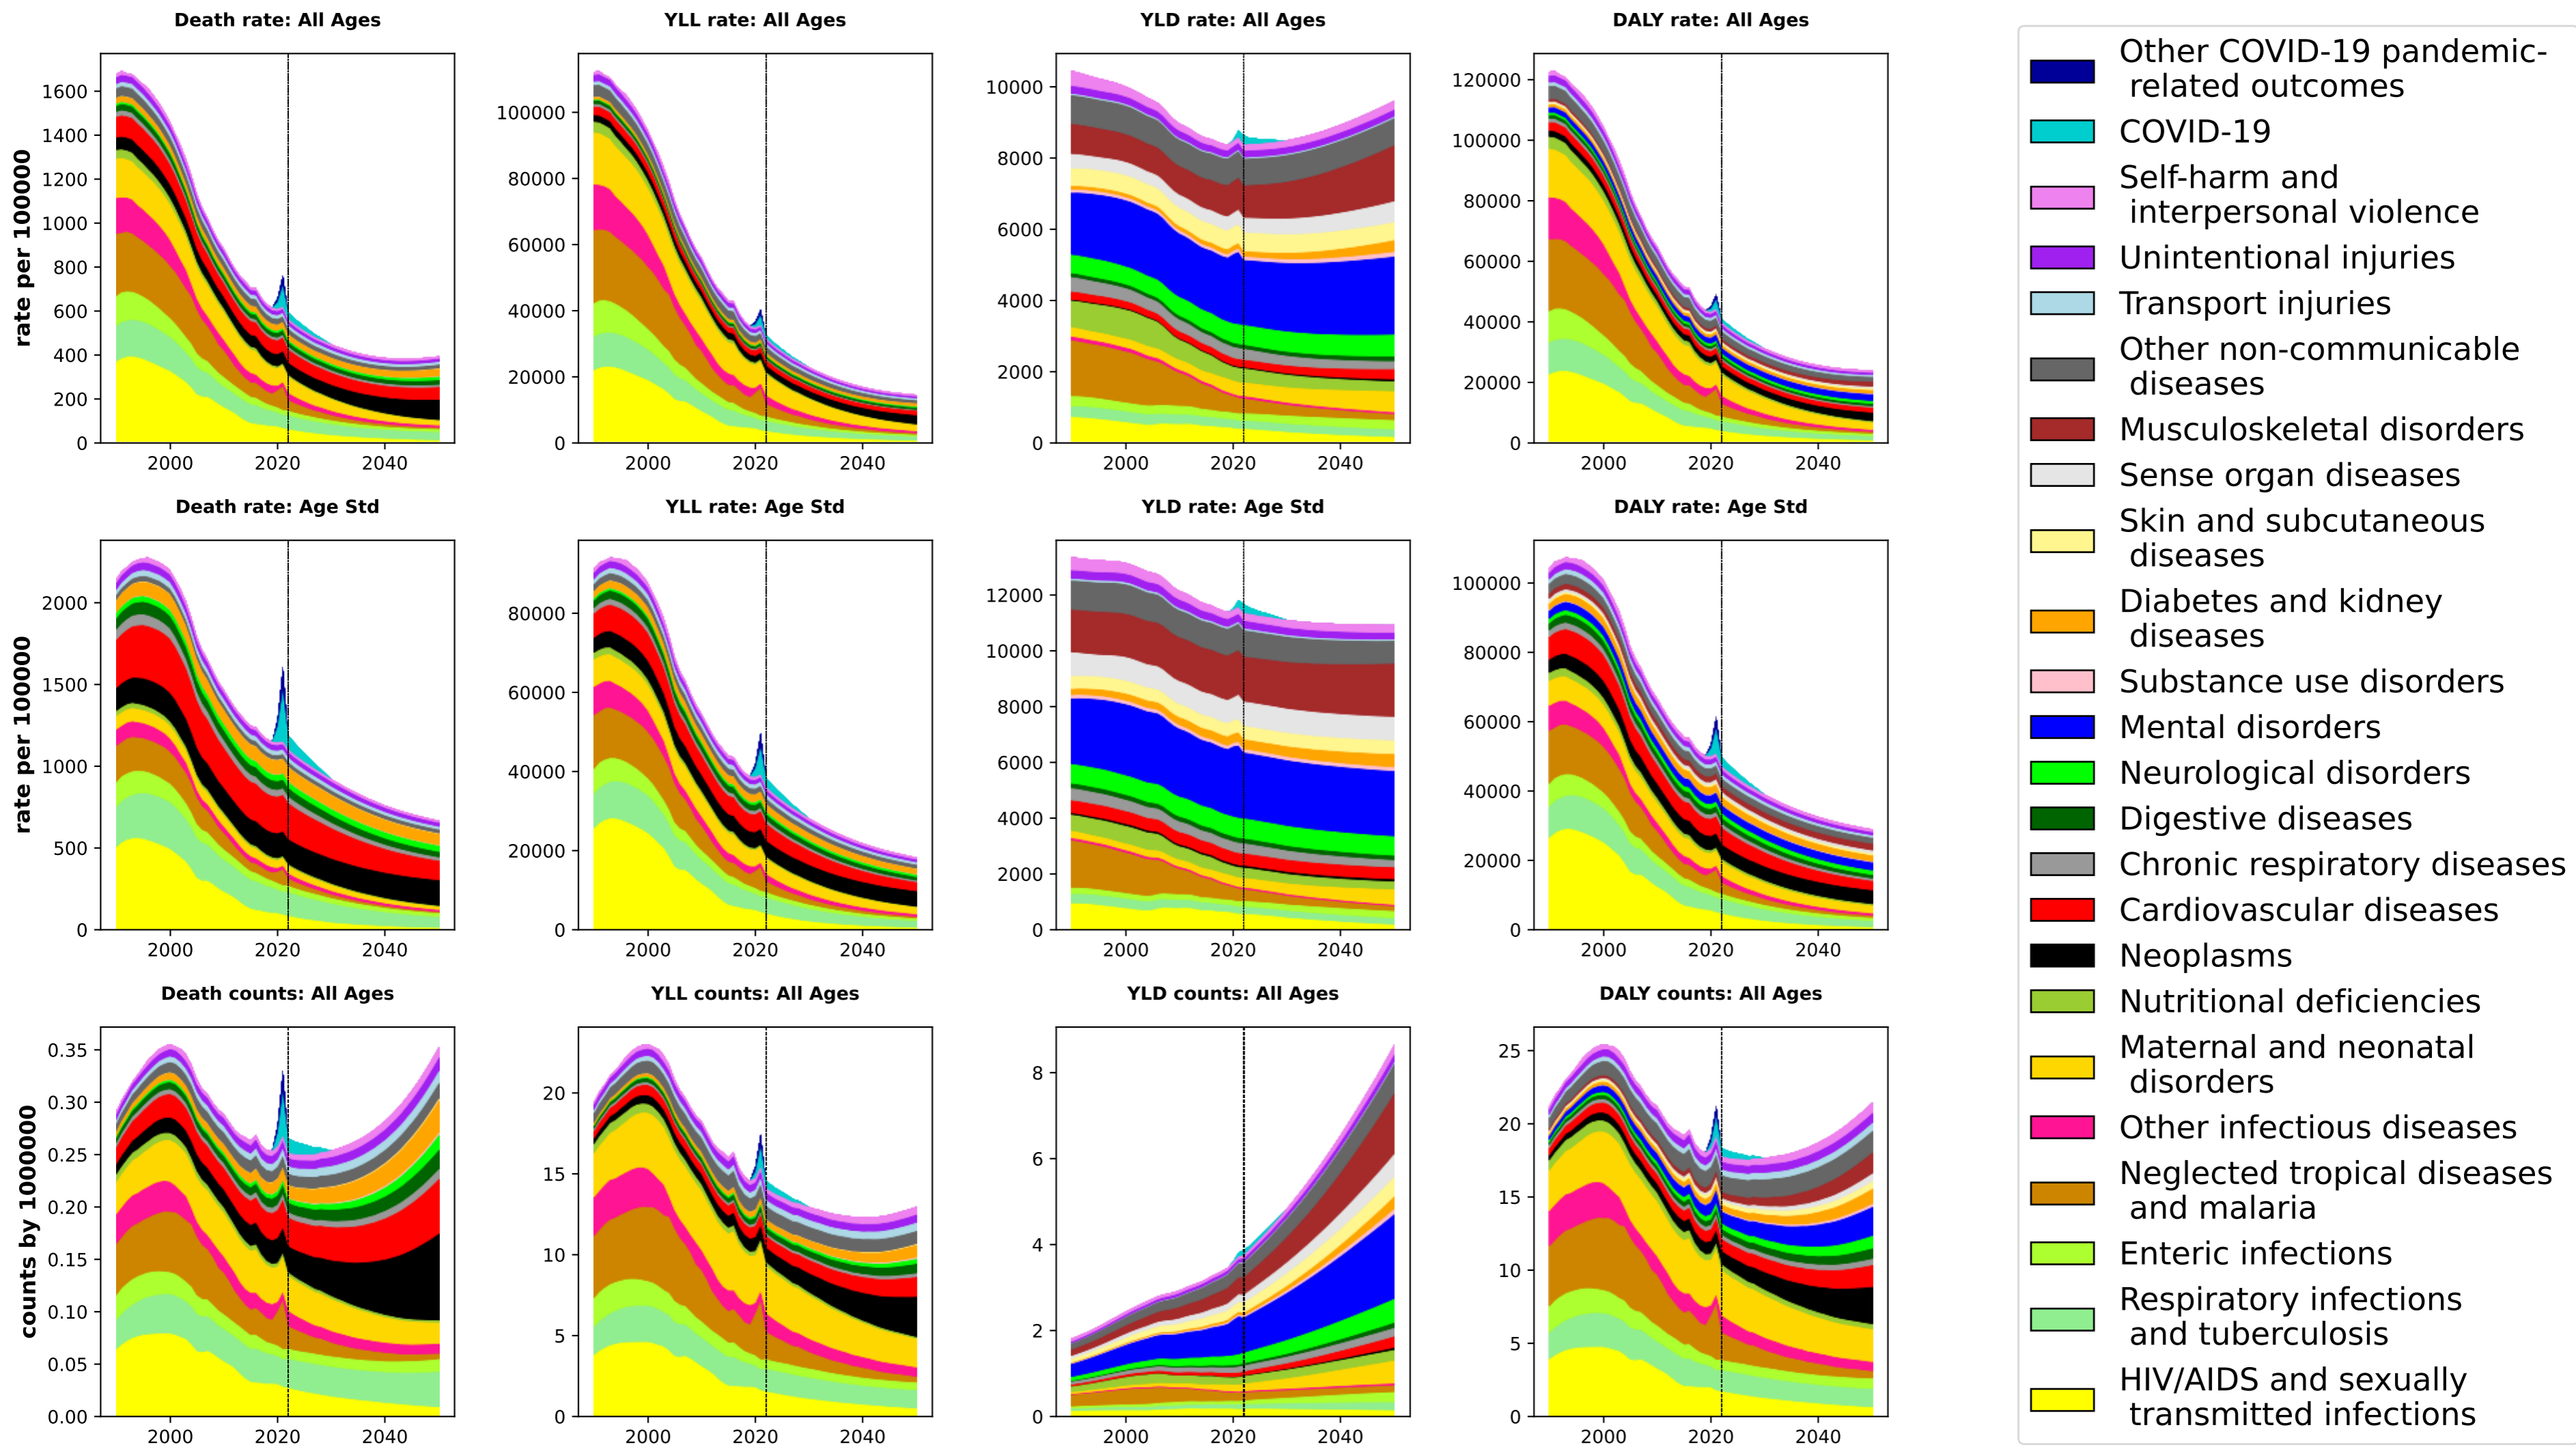



# Tanzania

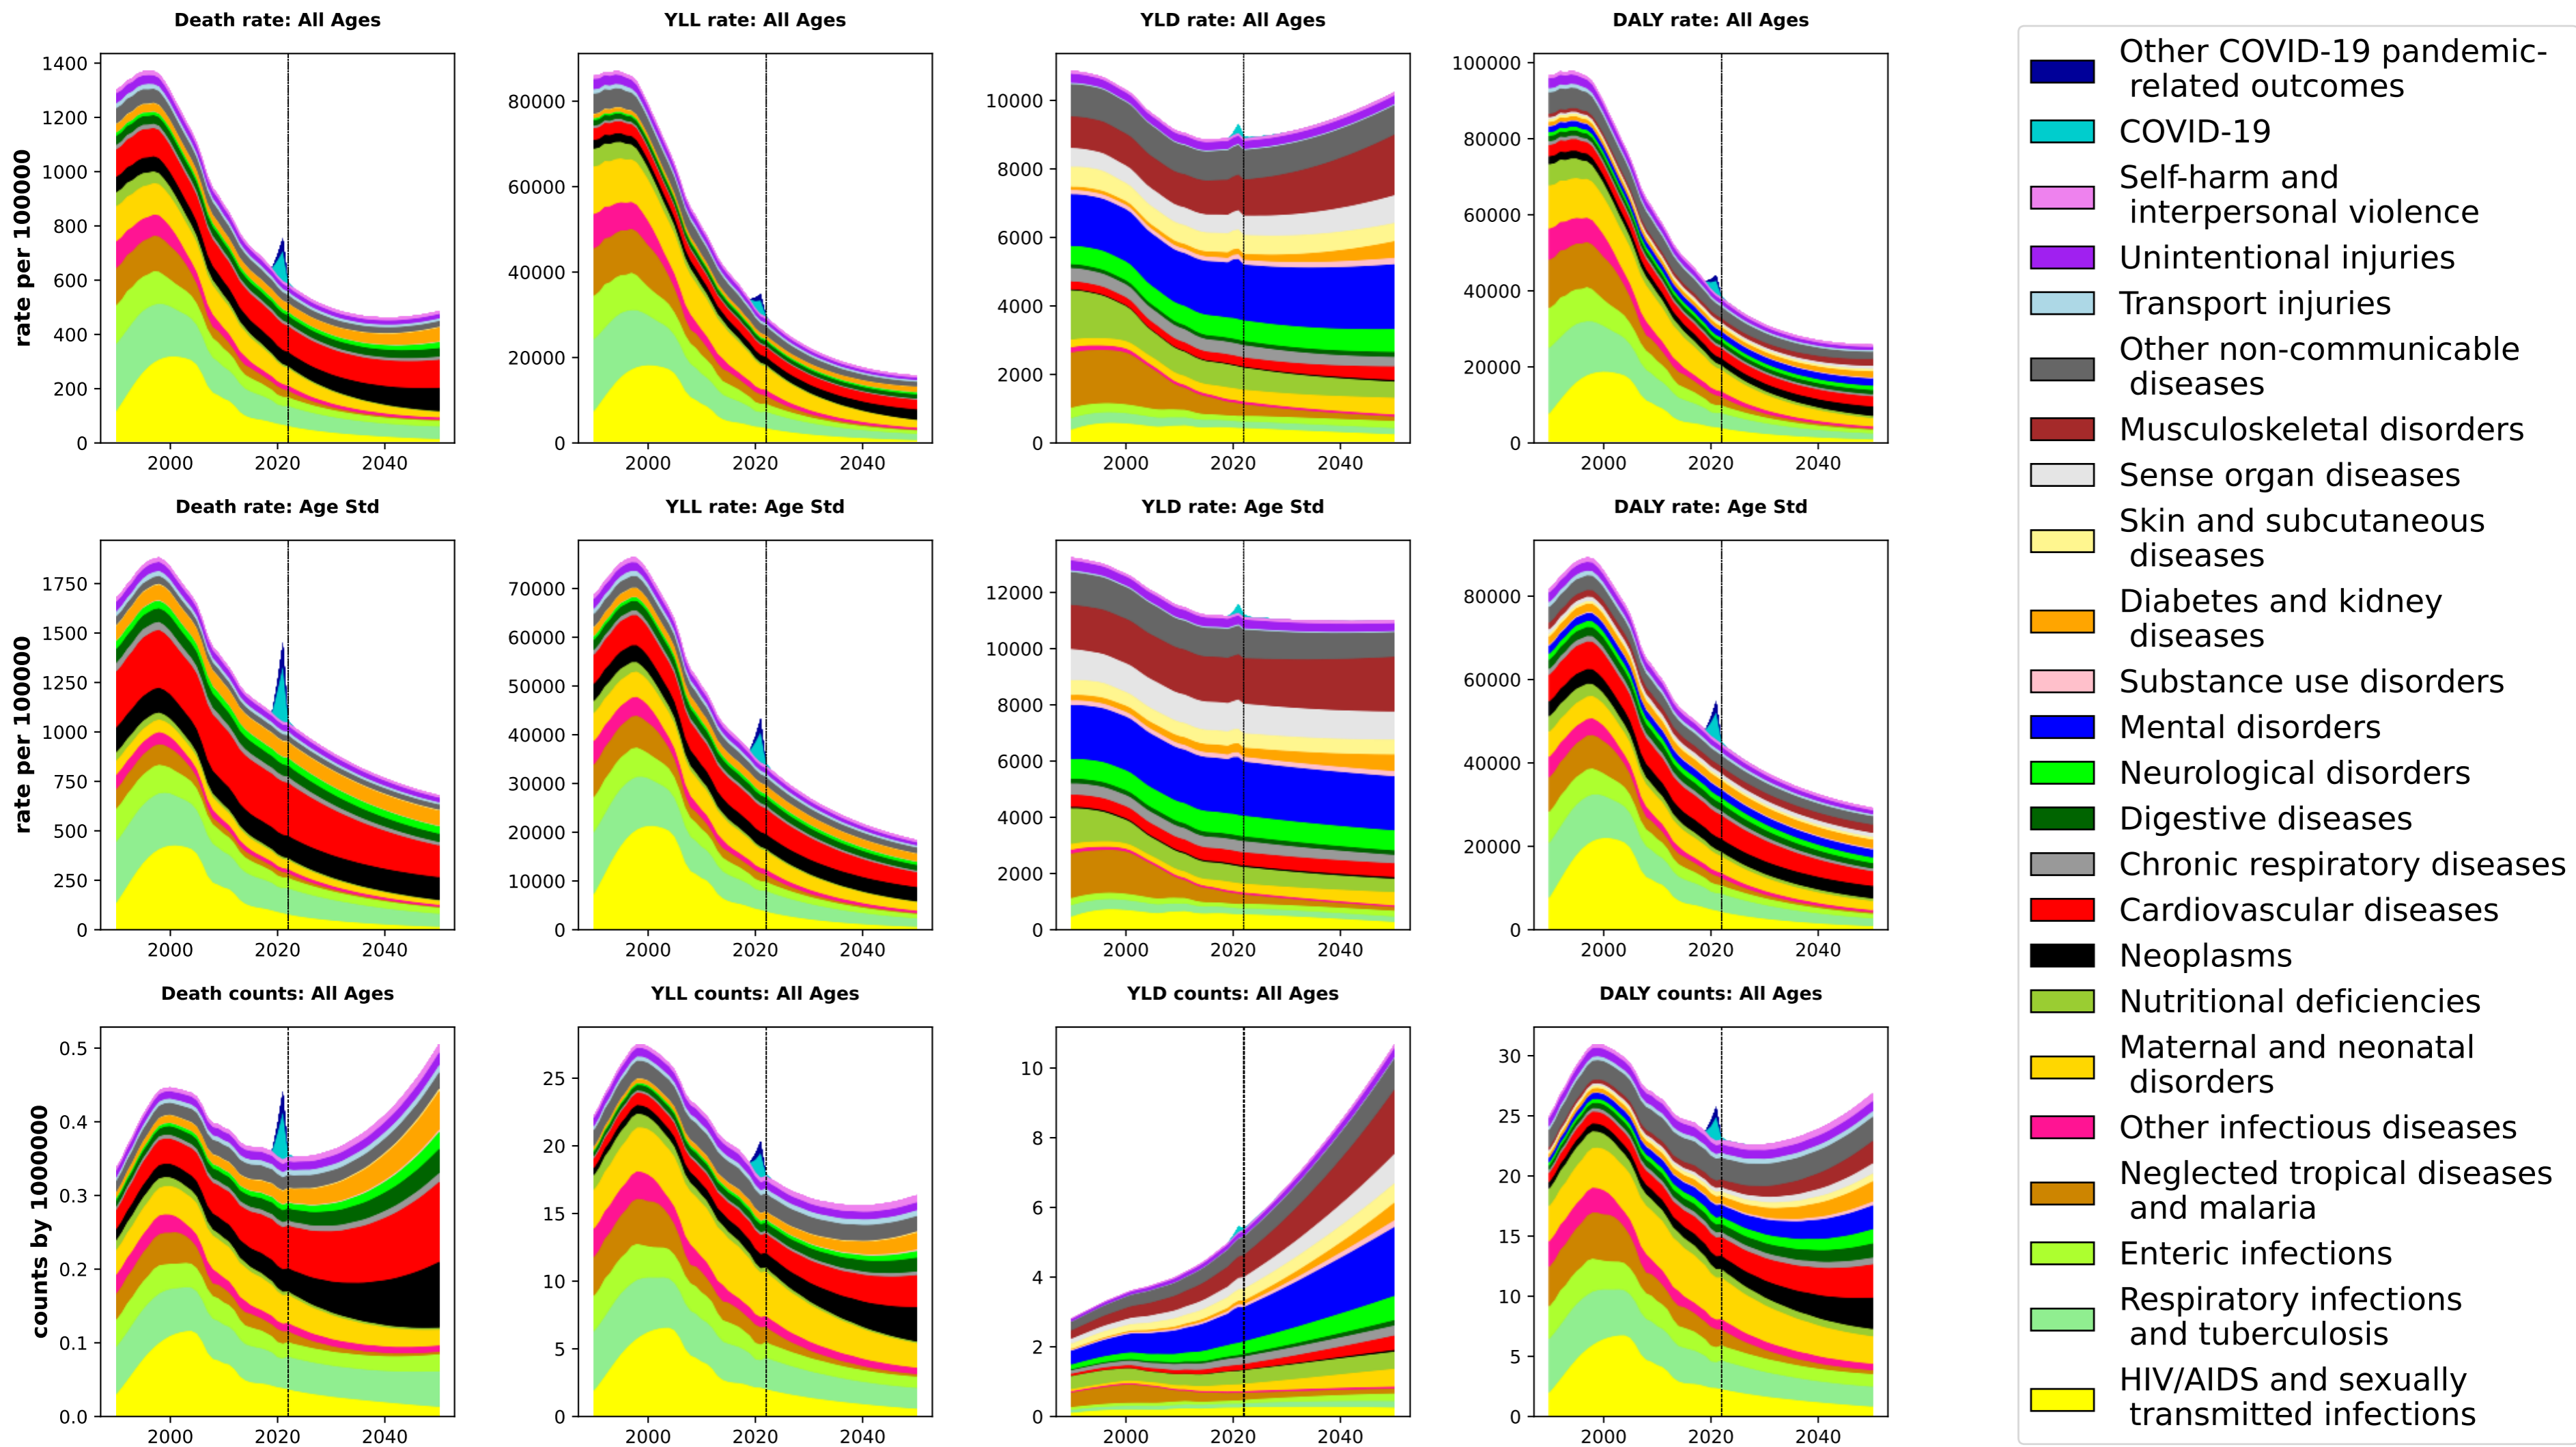

# Zambia

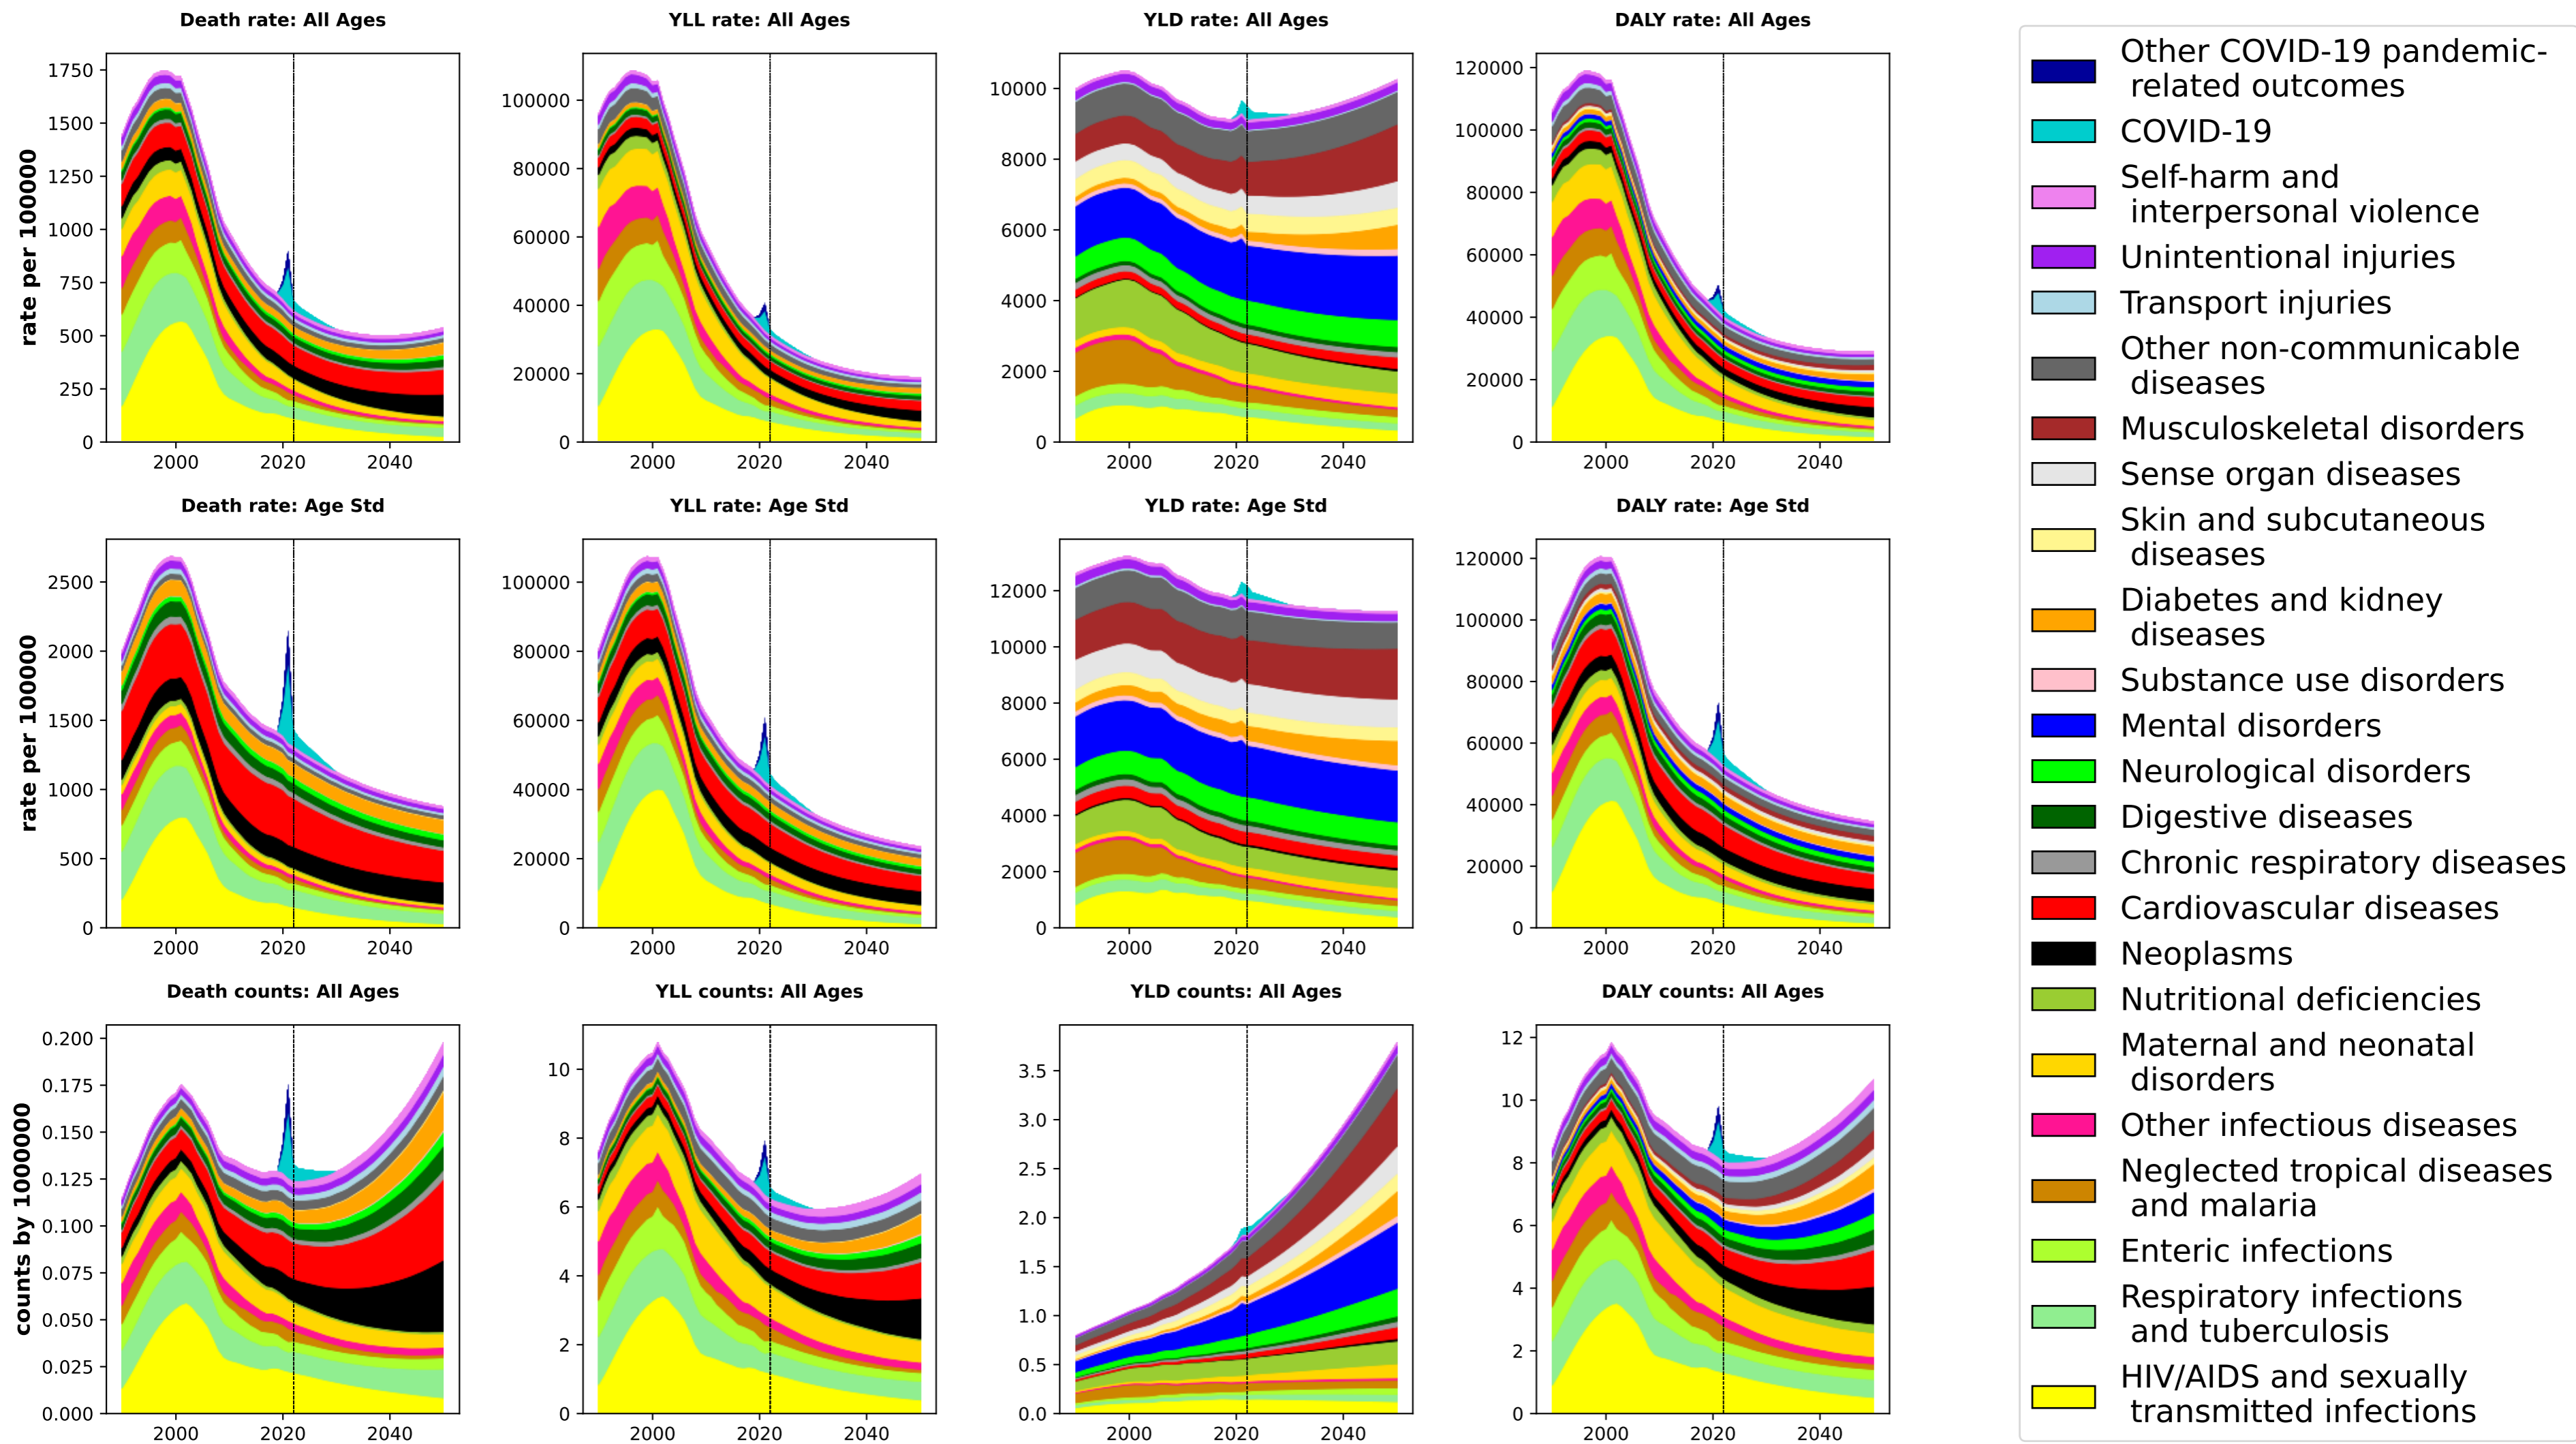

# Botswana

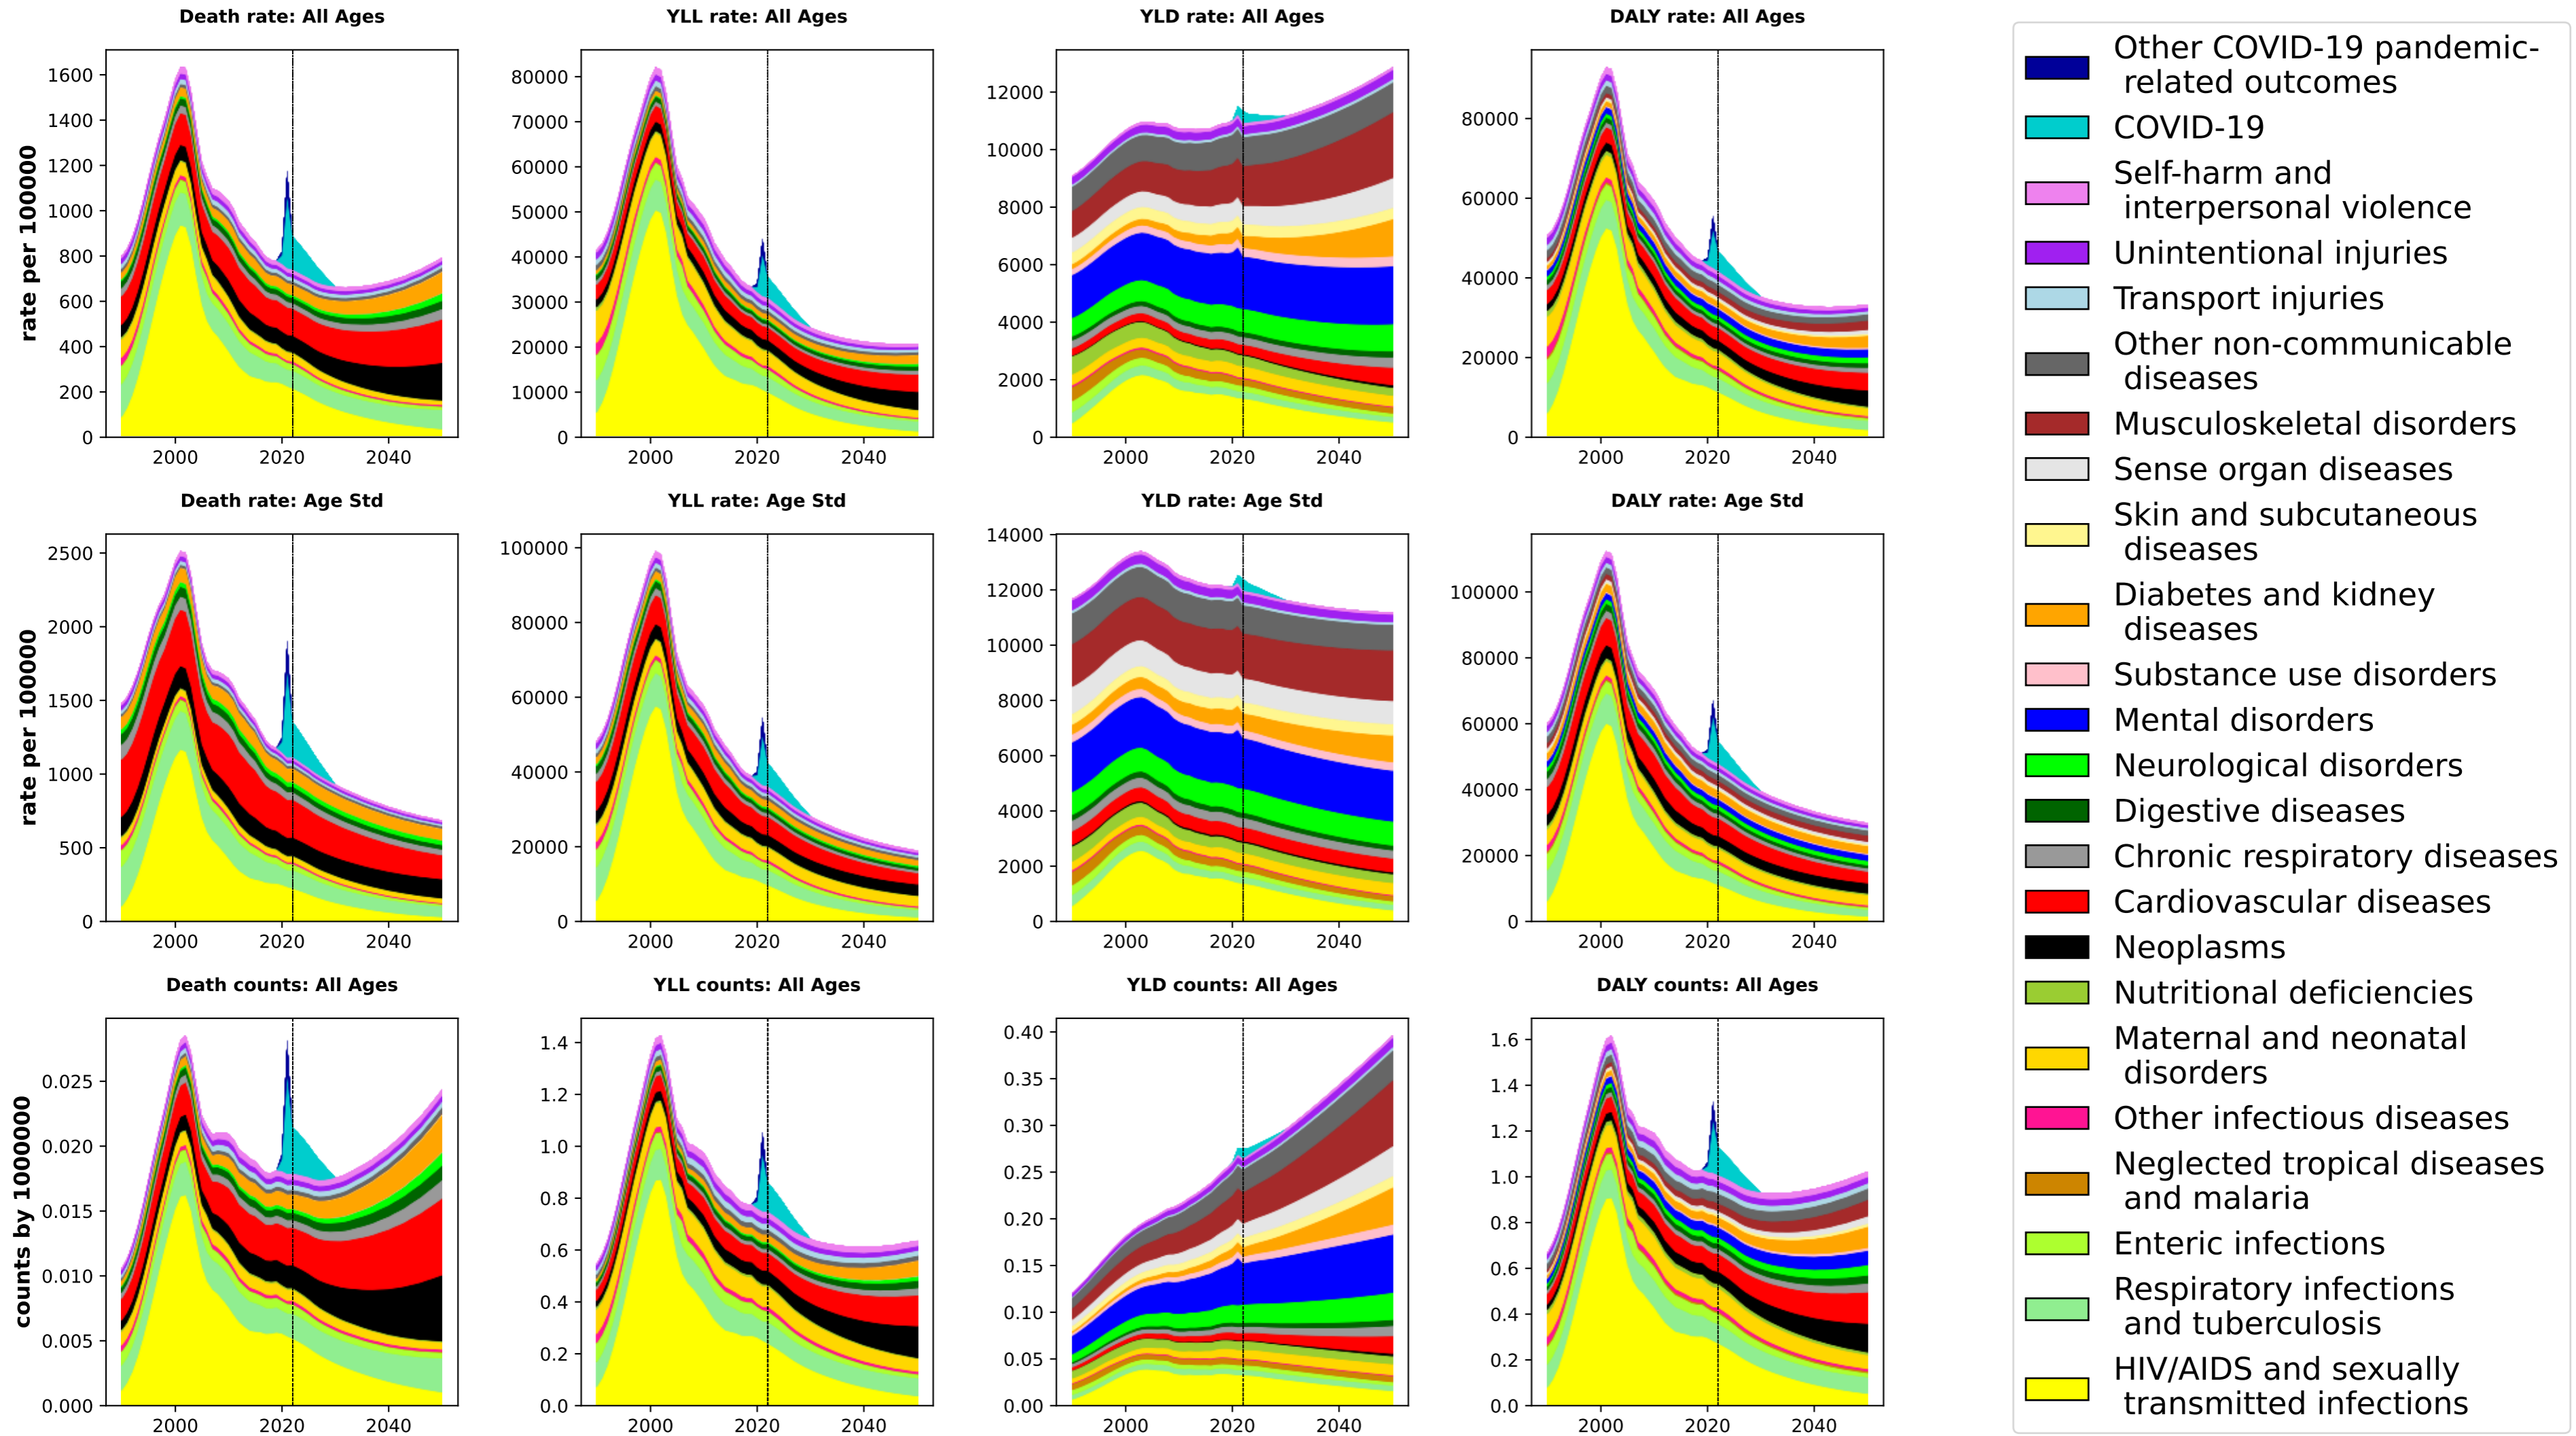

# Eswatini

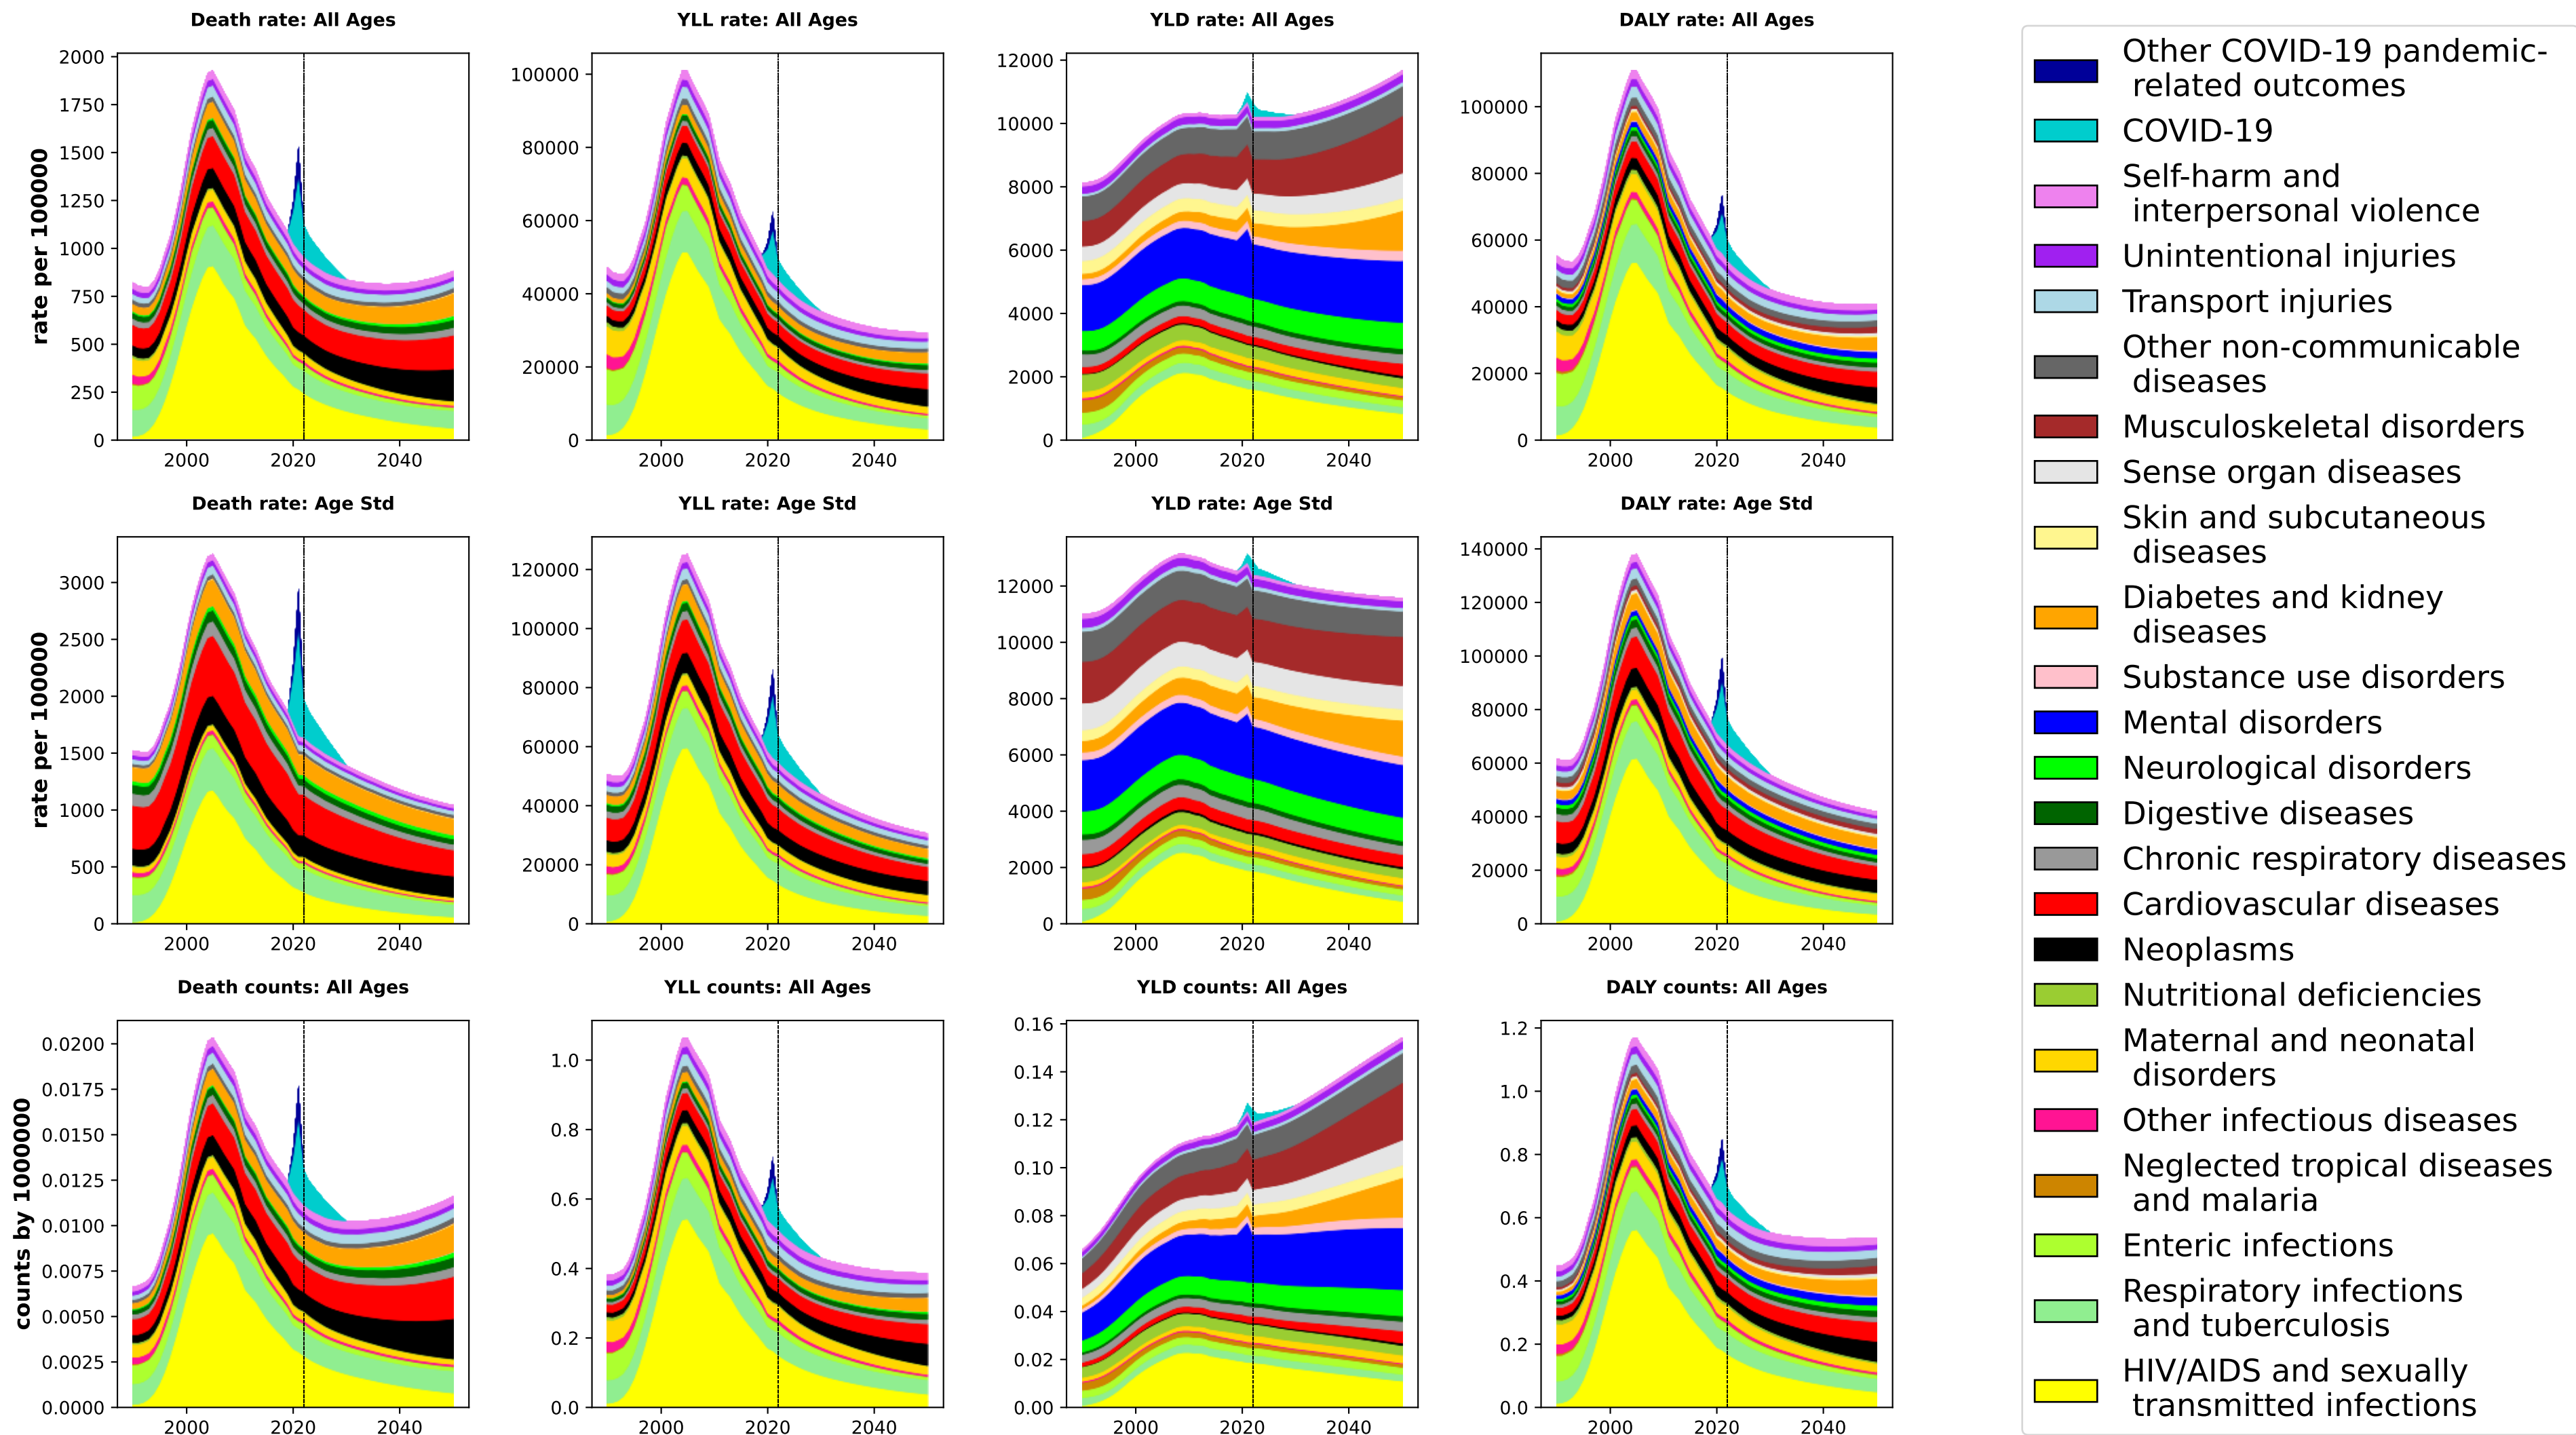

# Lesotho

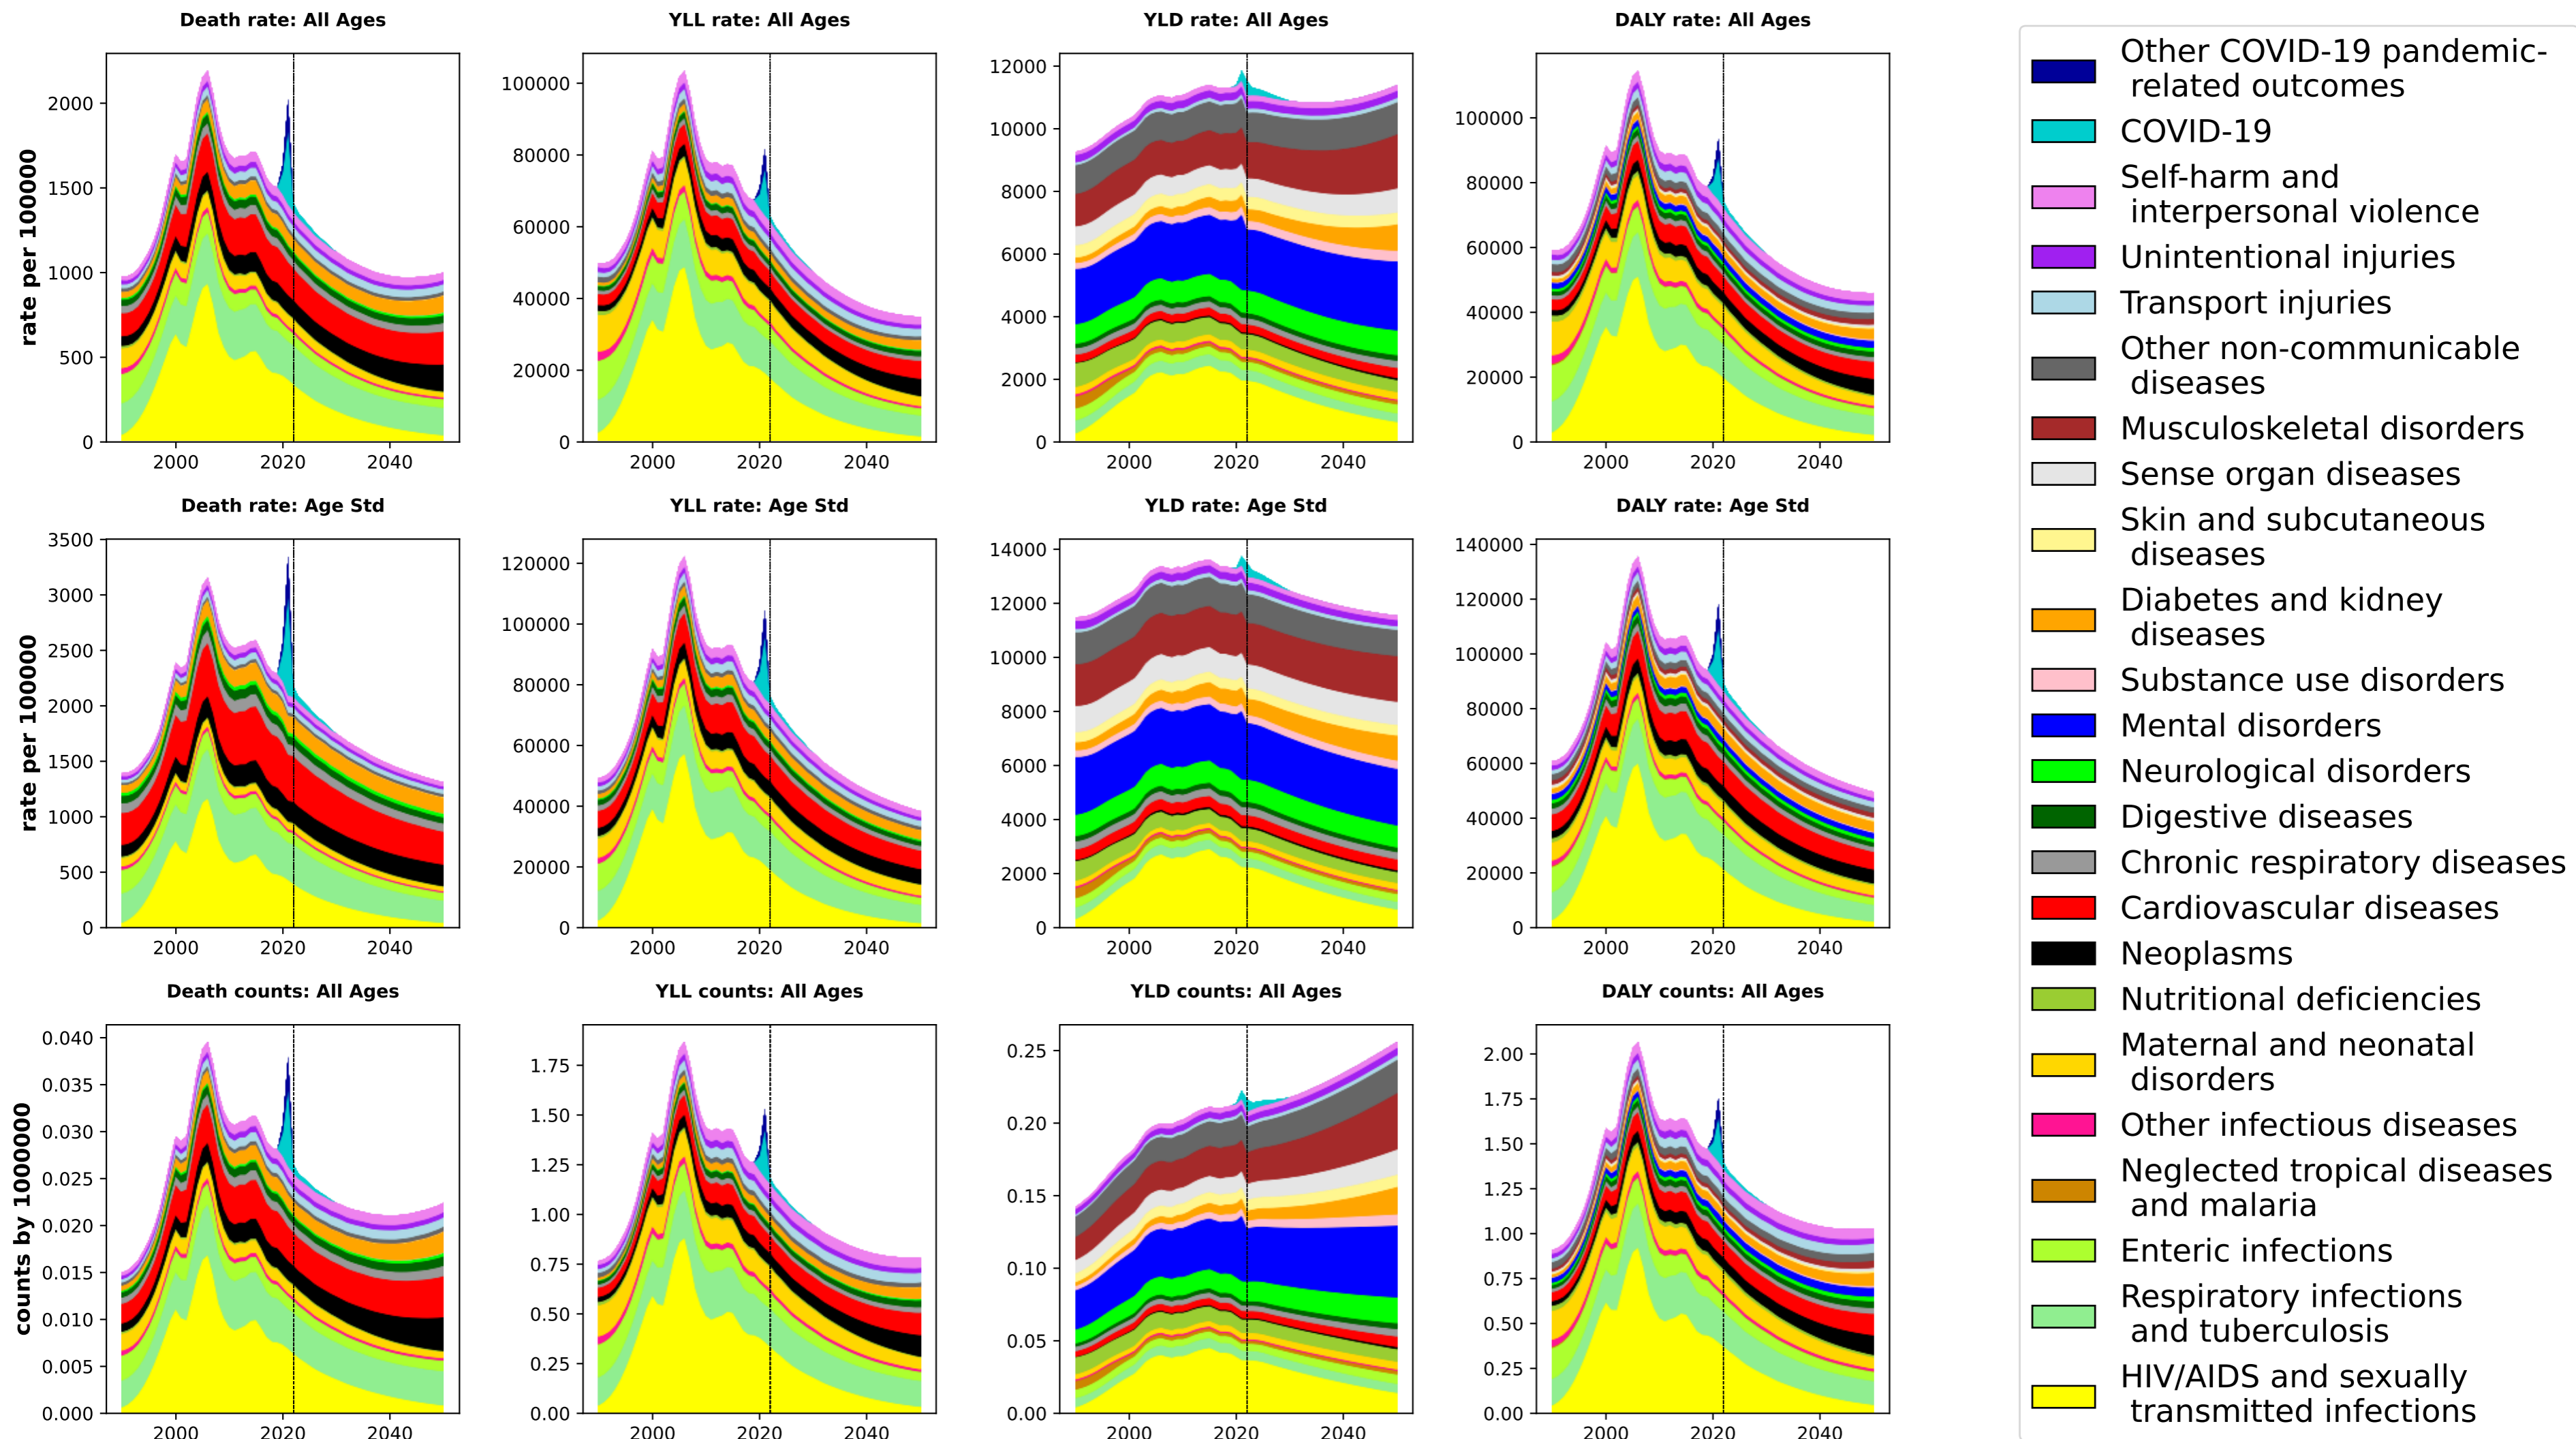

# Namibia

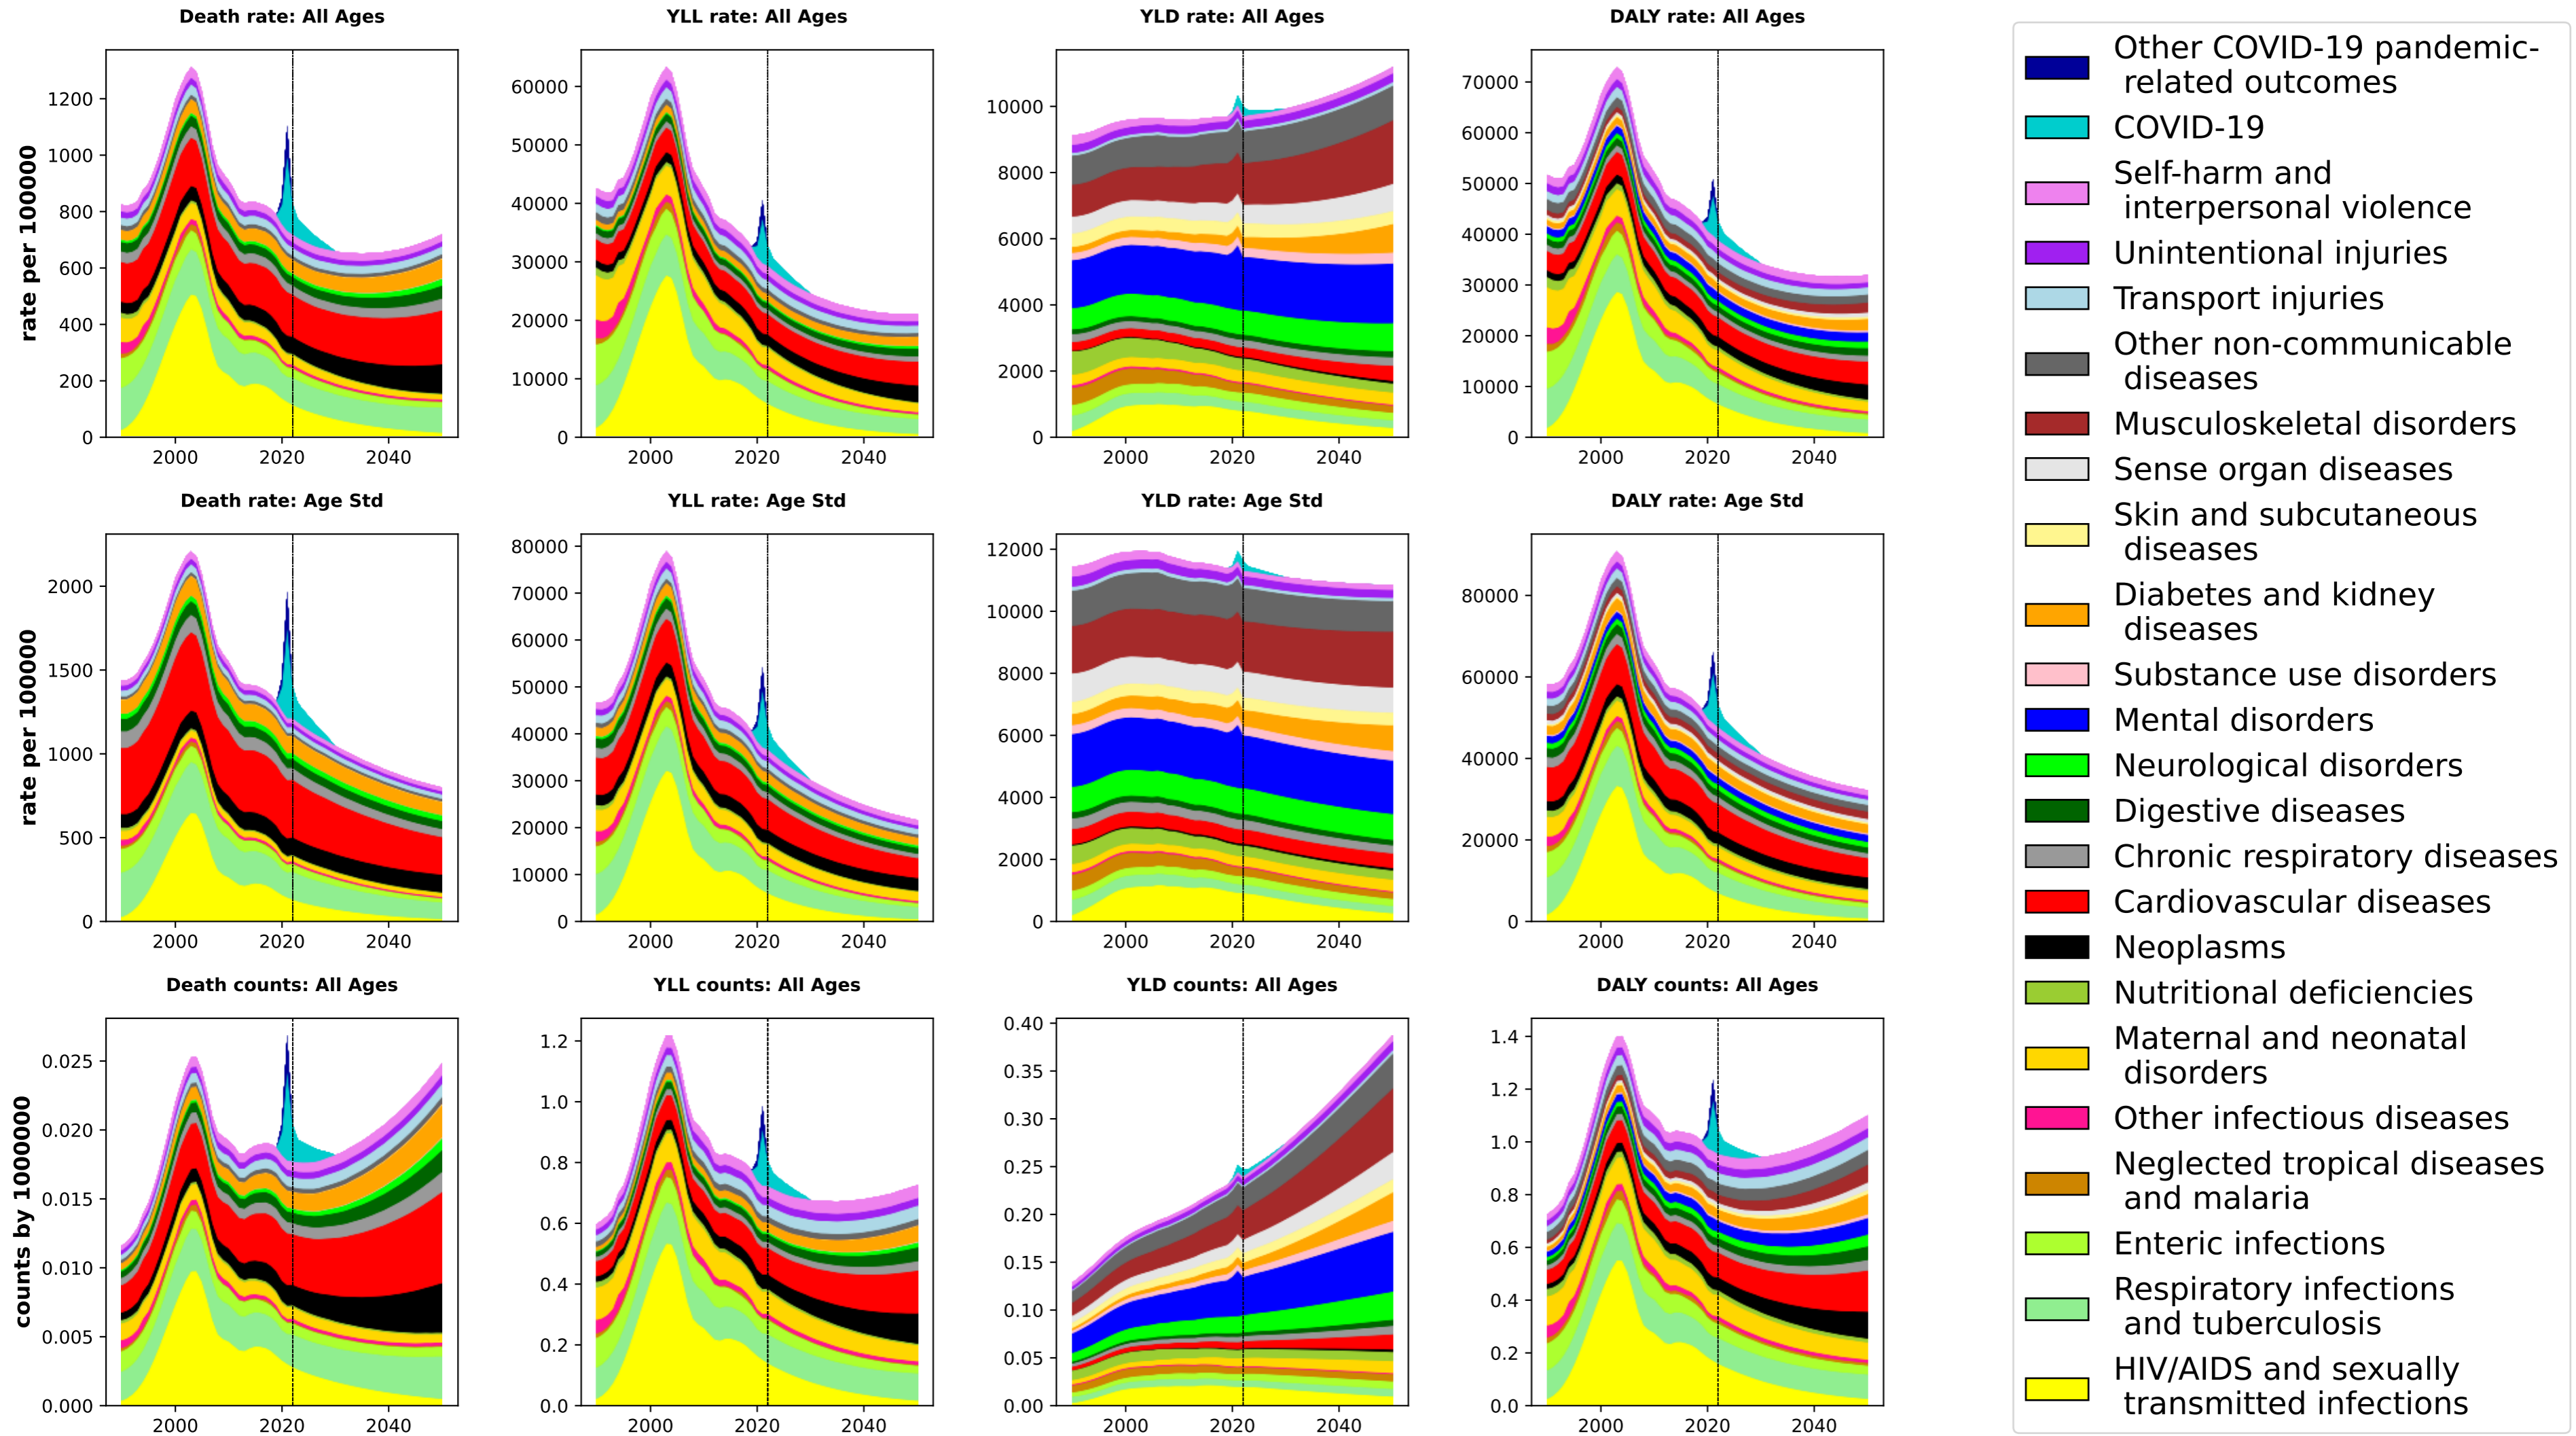

# South Africa

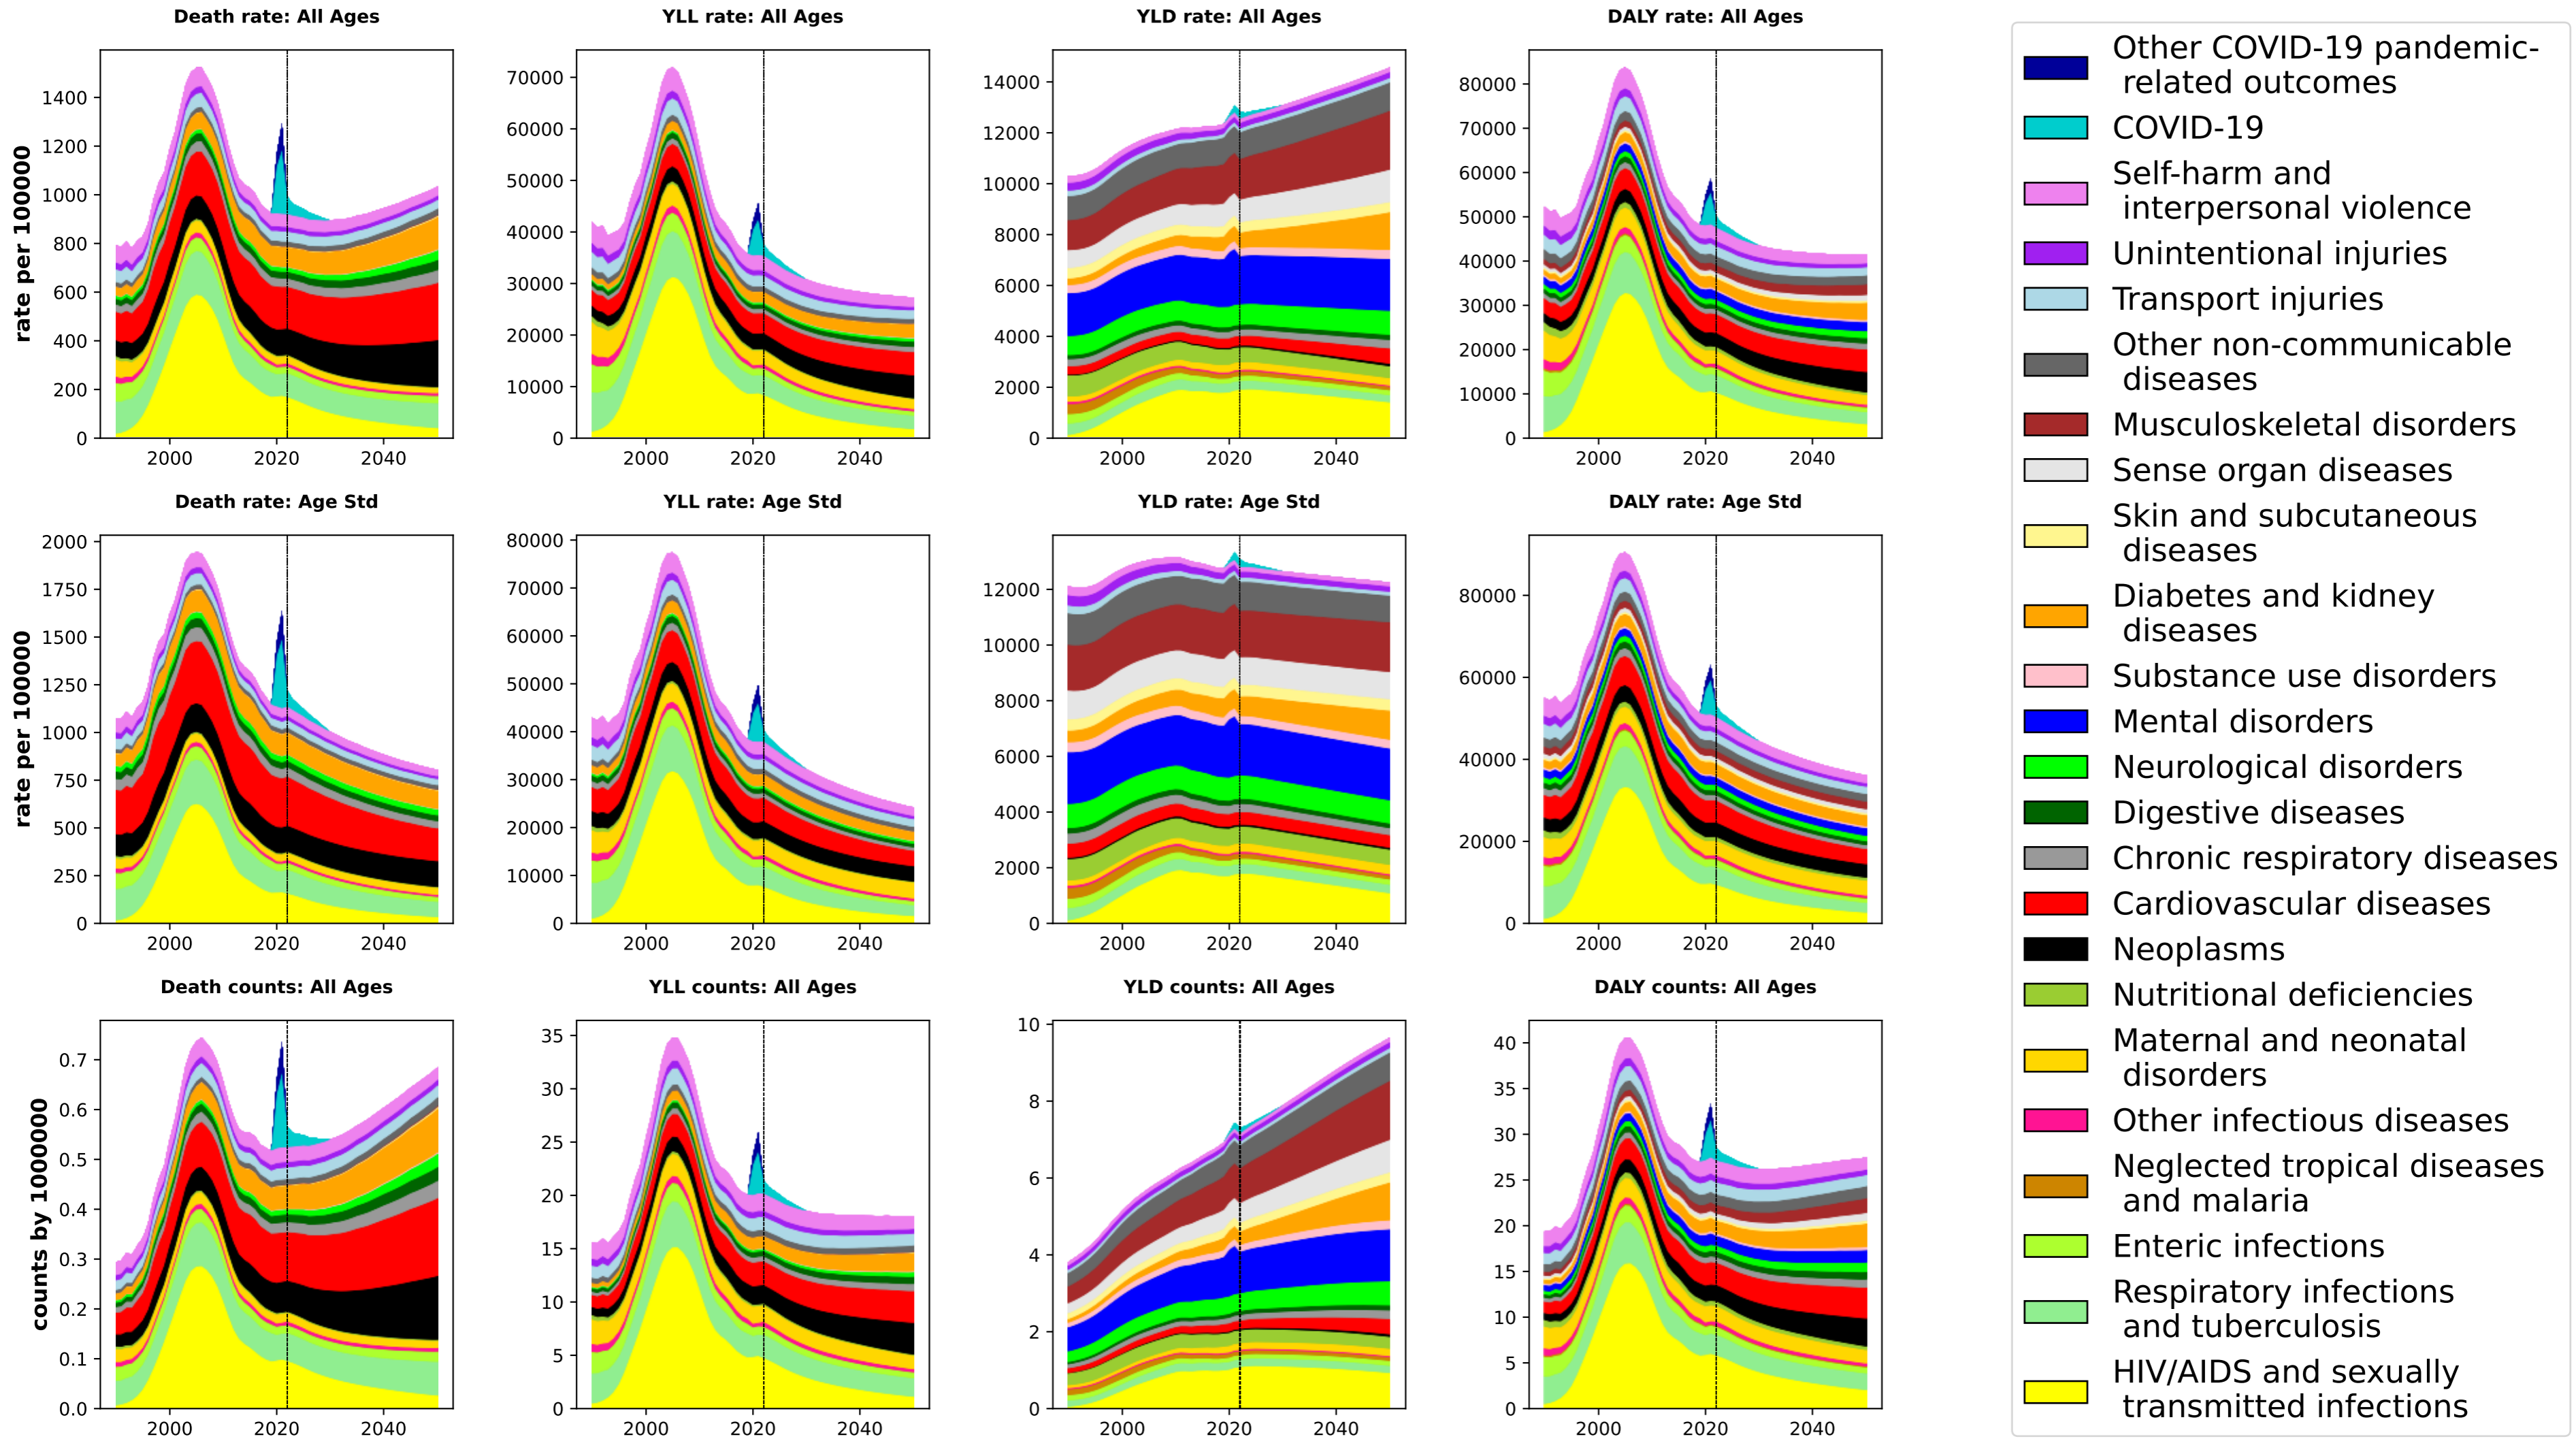

# Zimbabwe

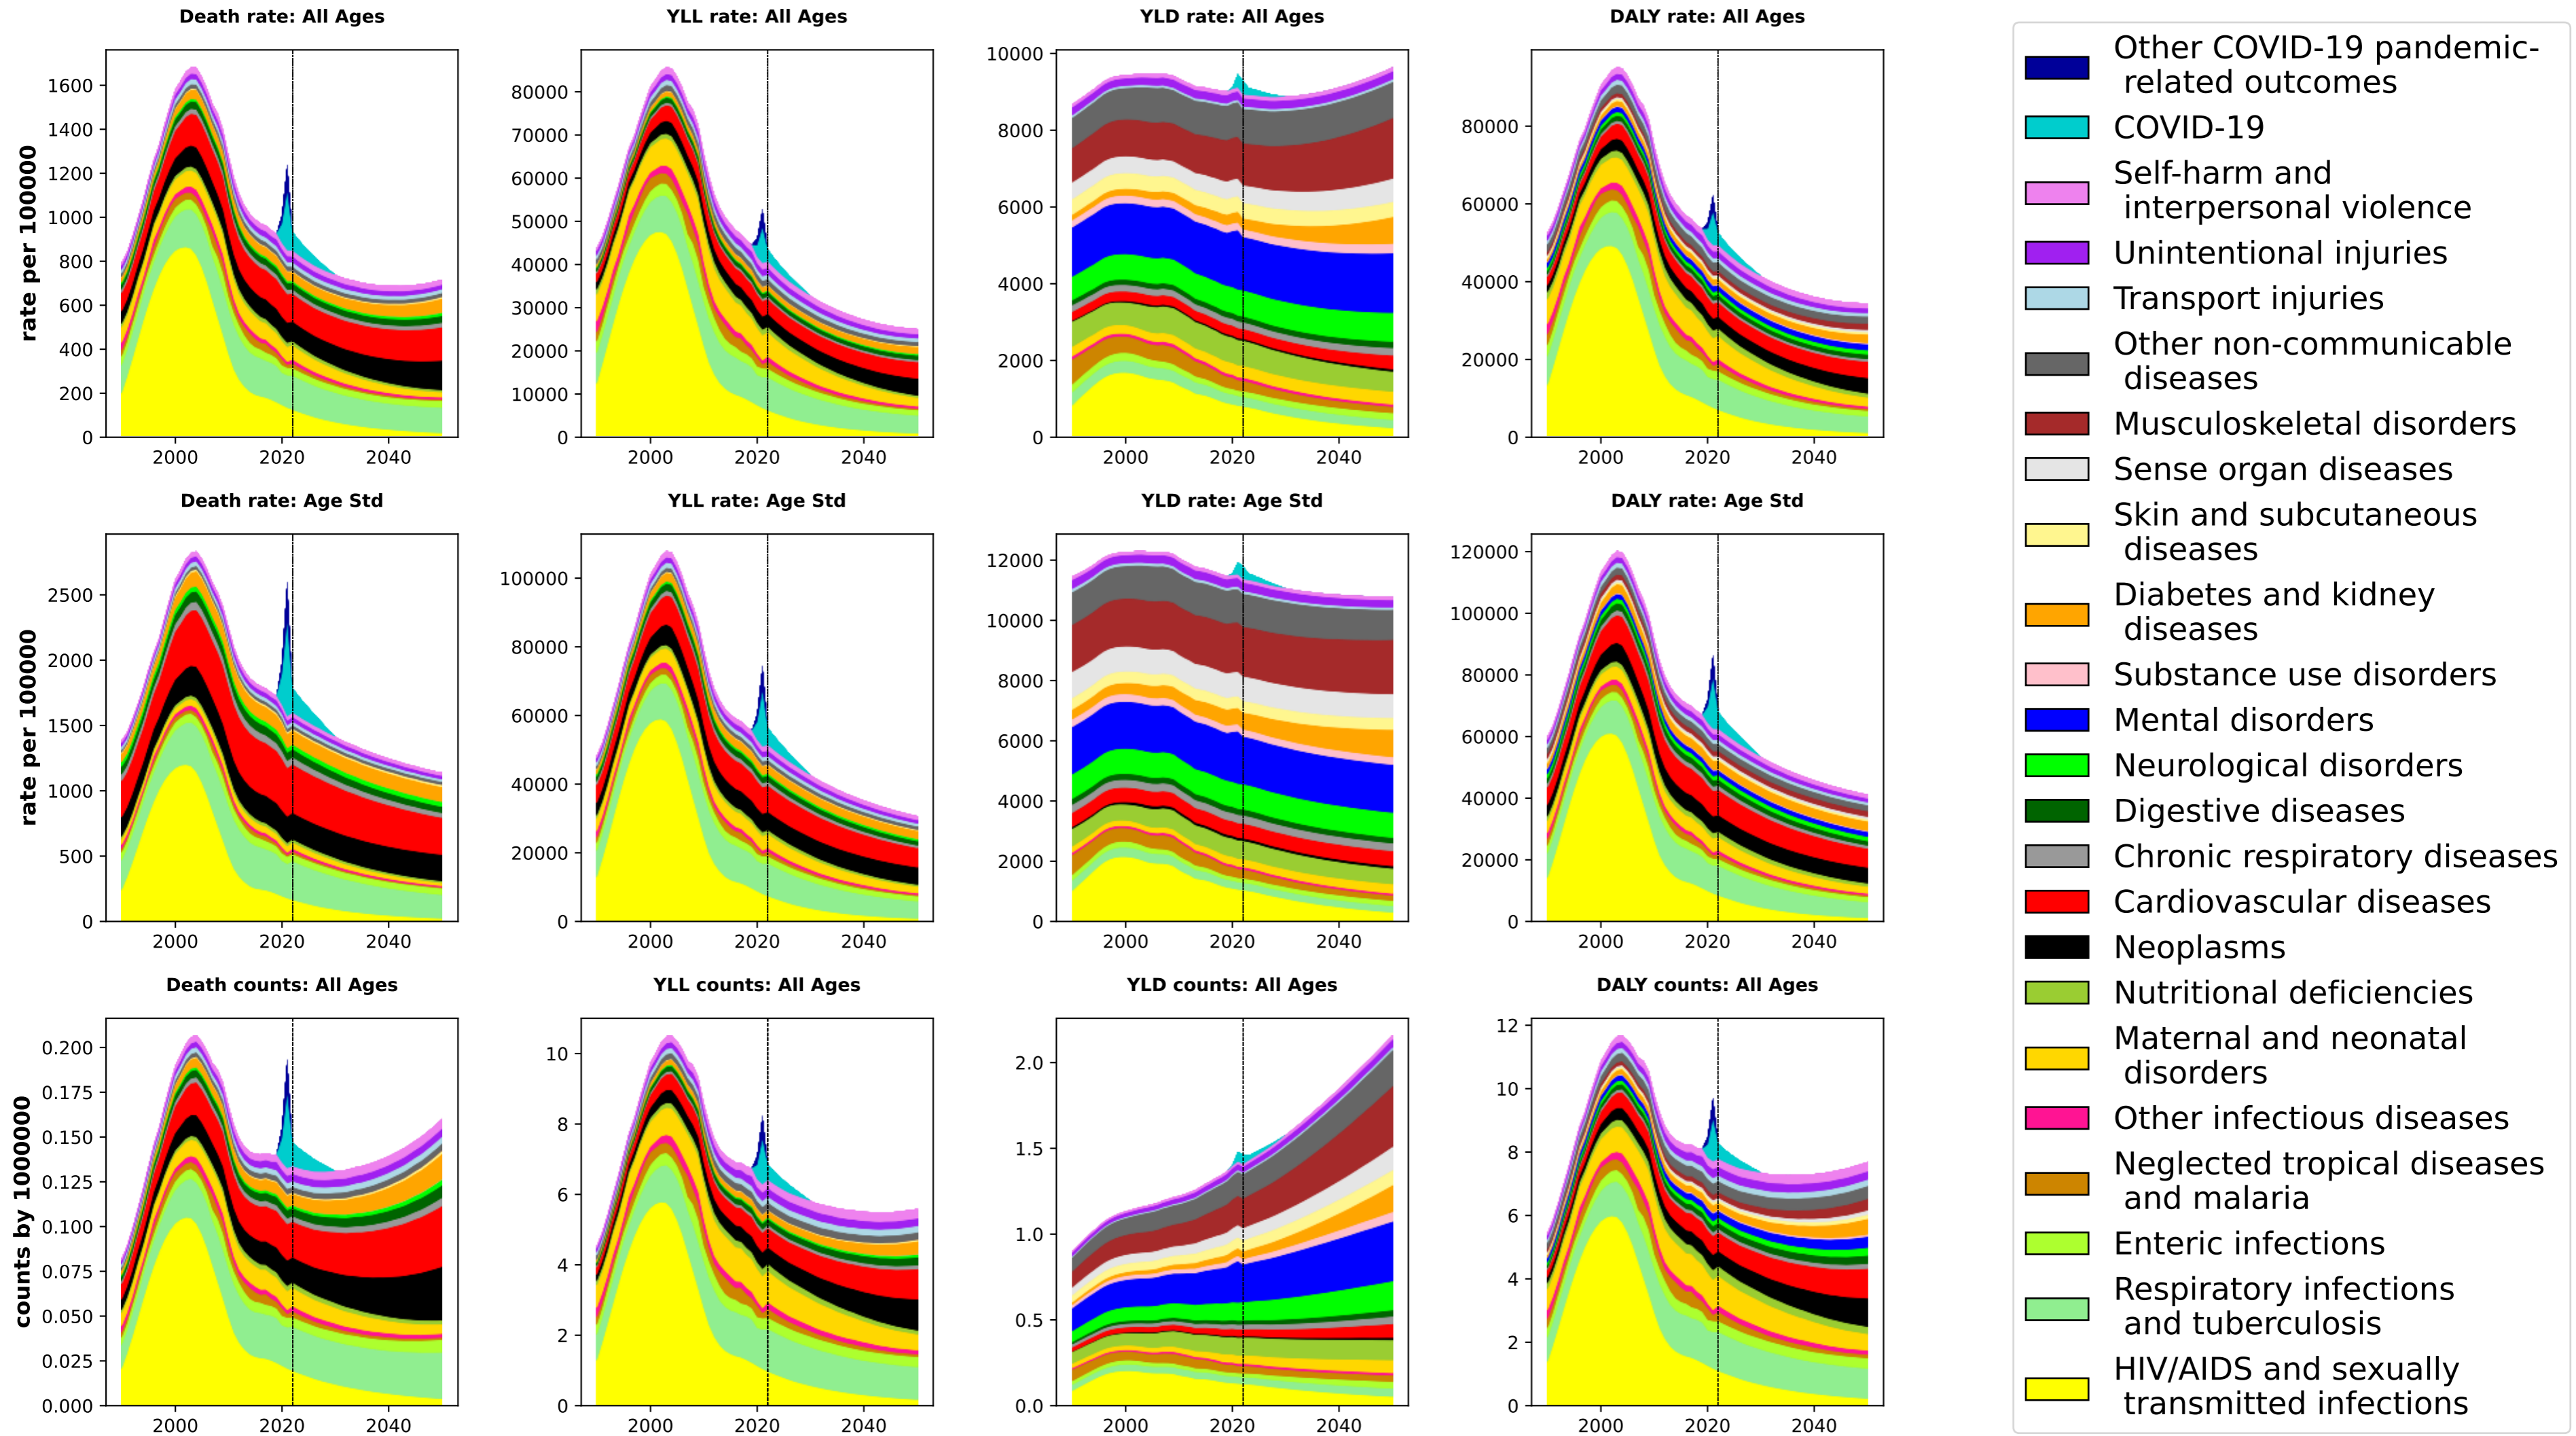



# Benin

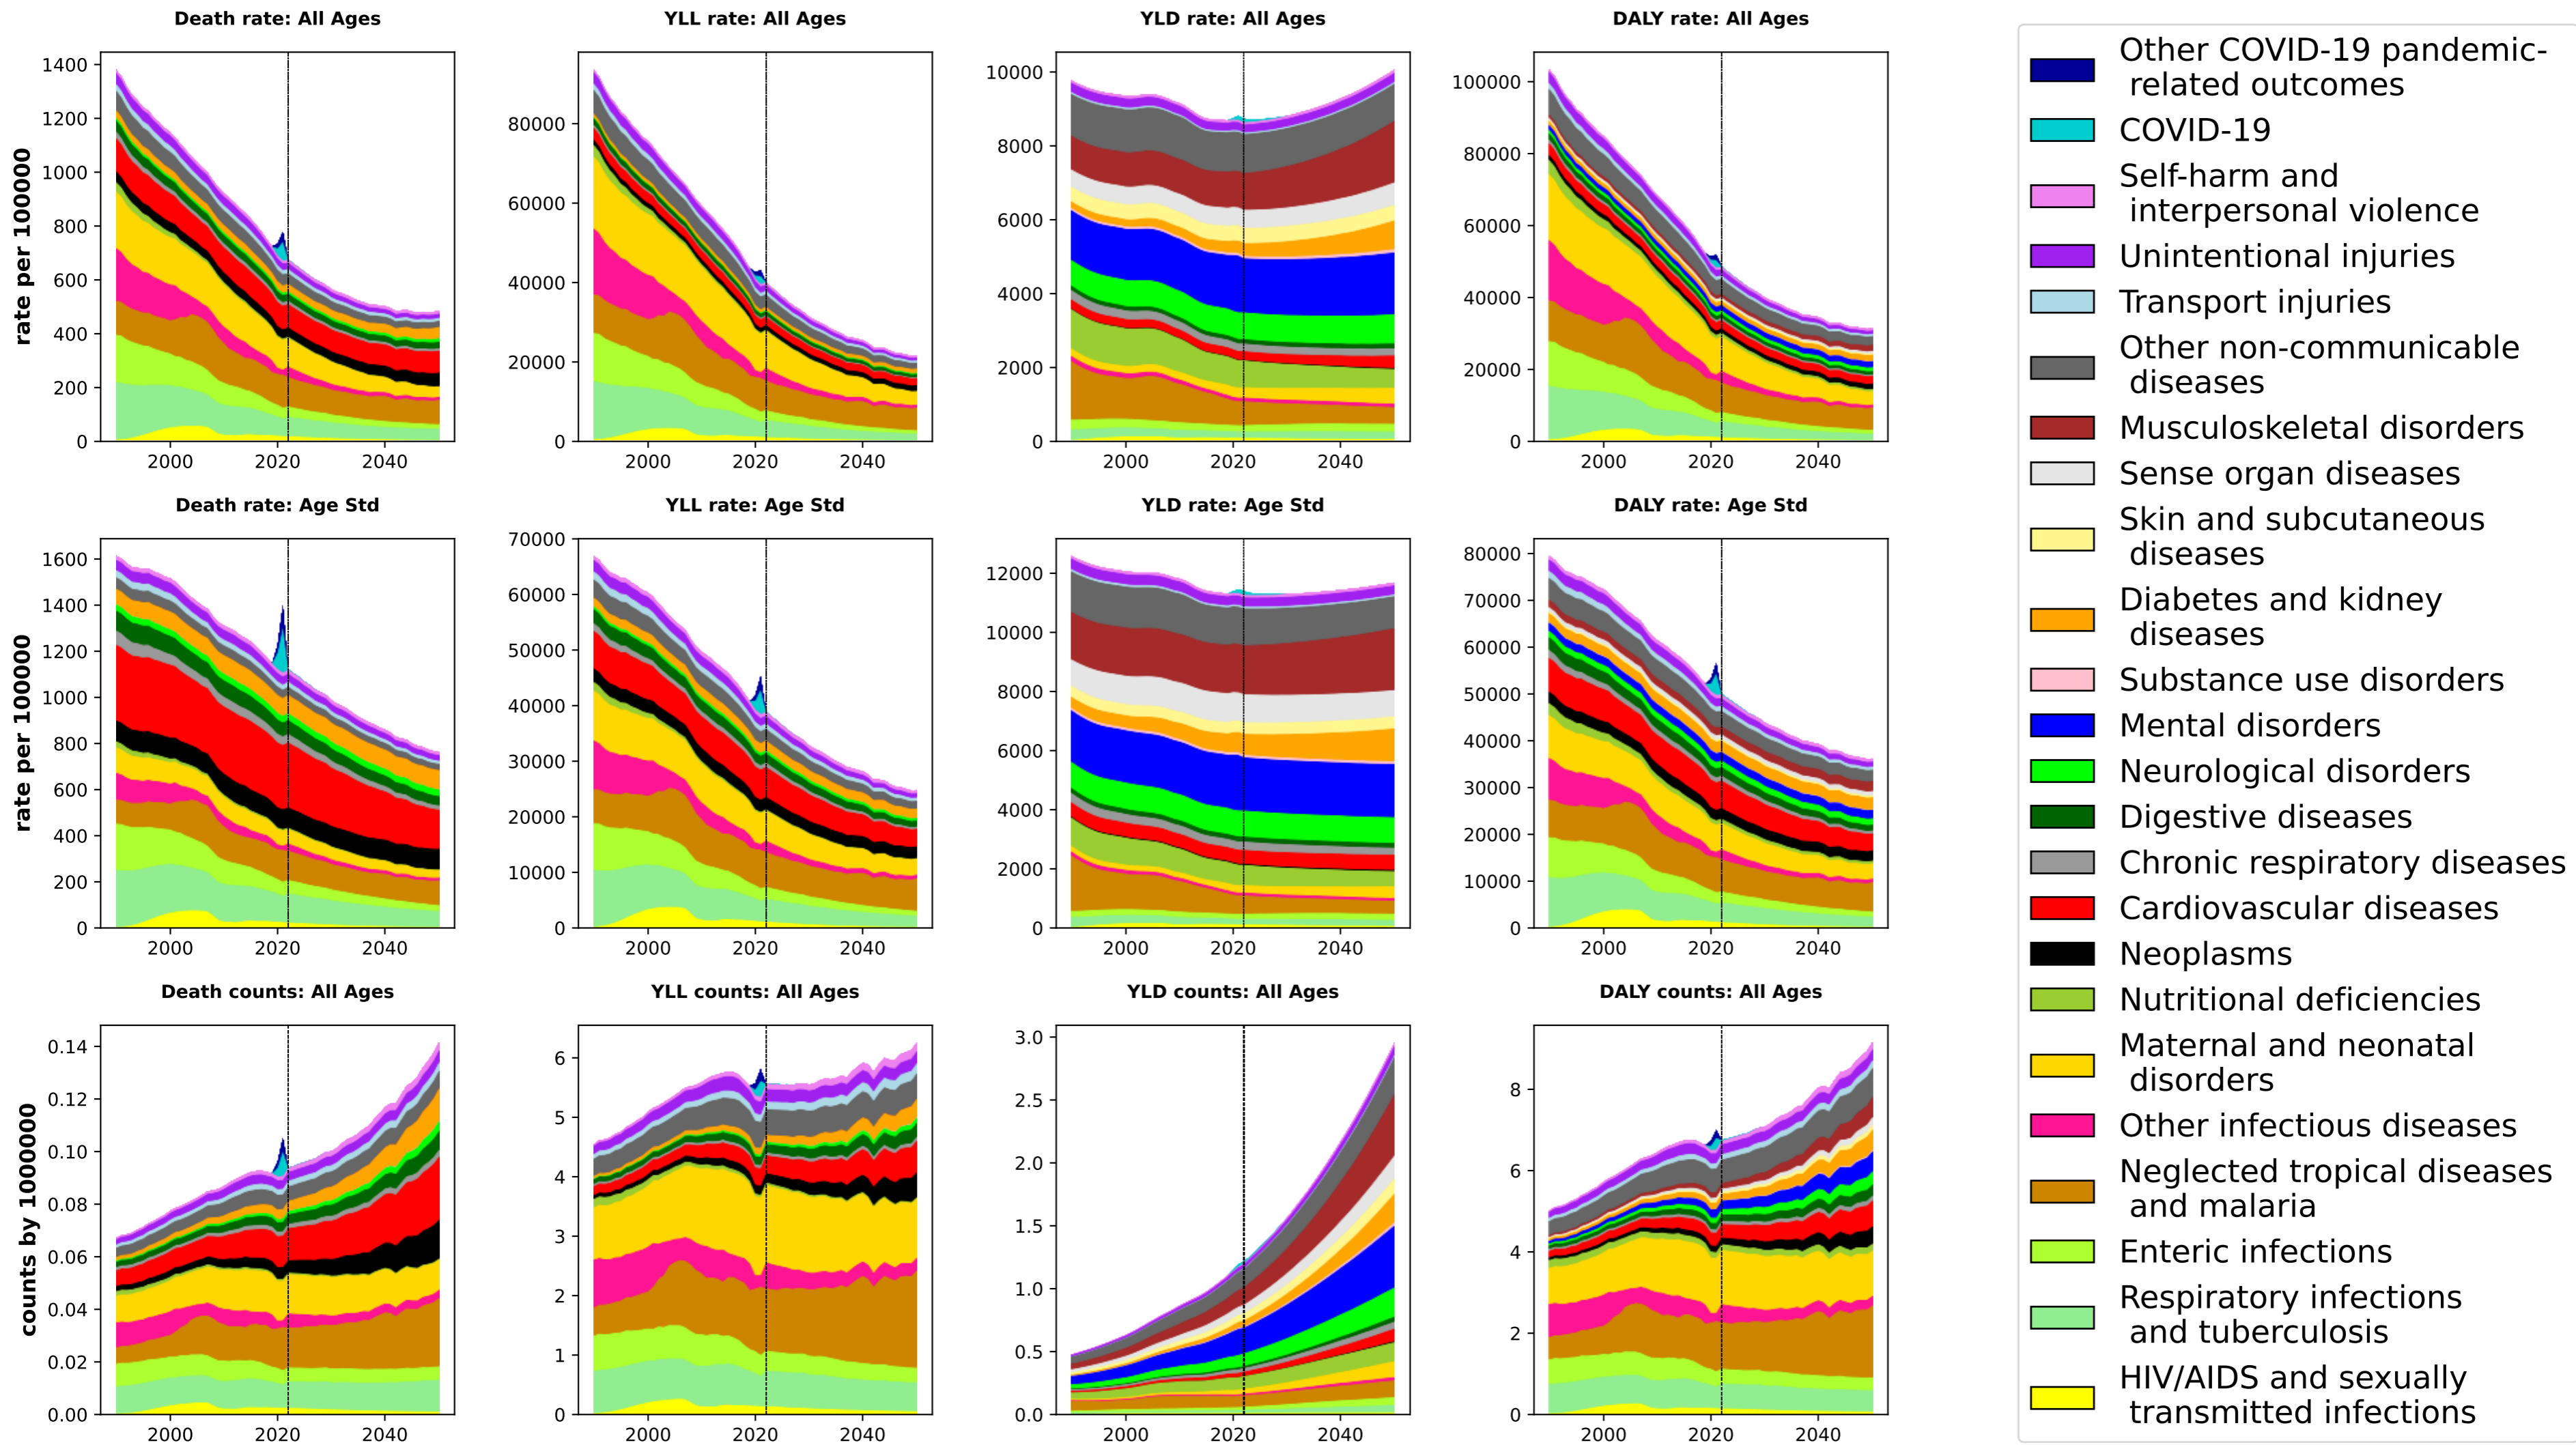

# Burkina Faso

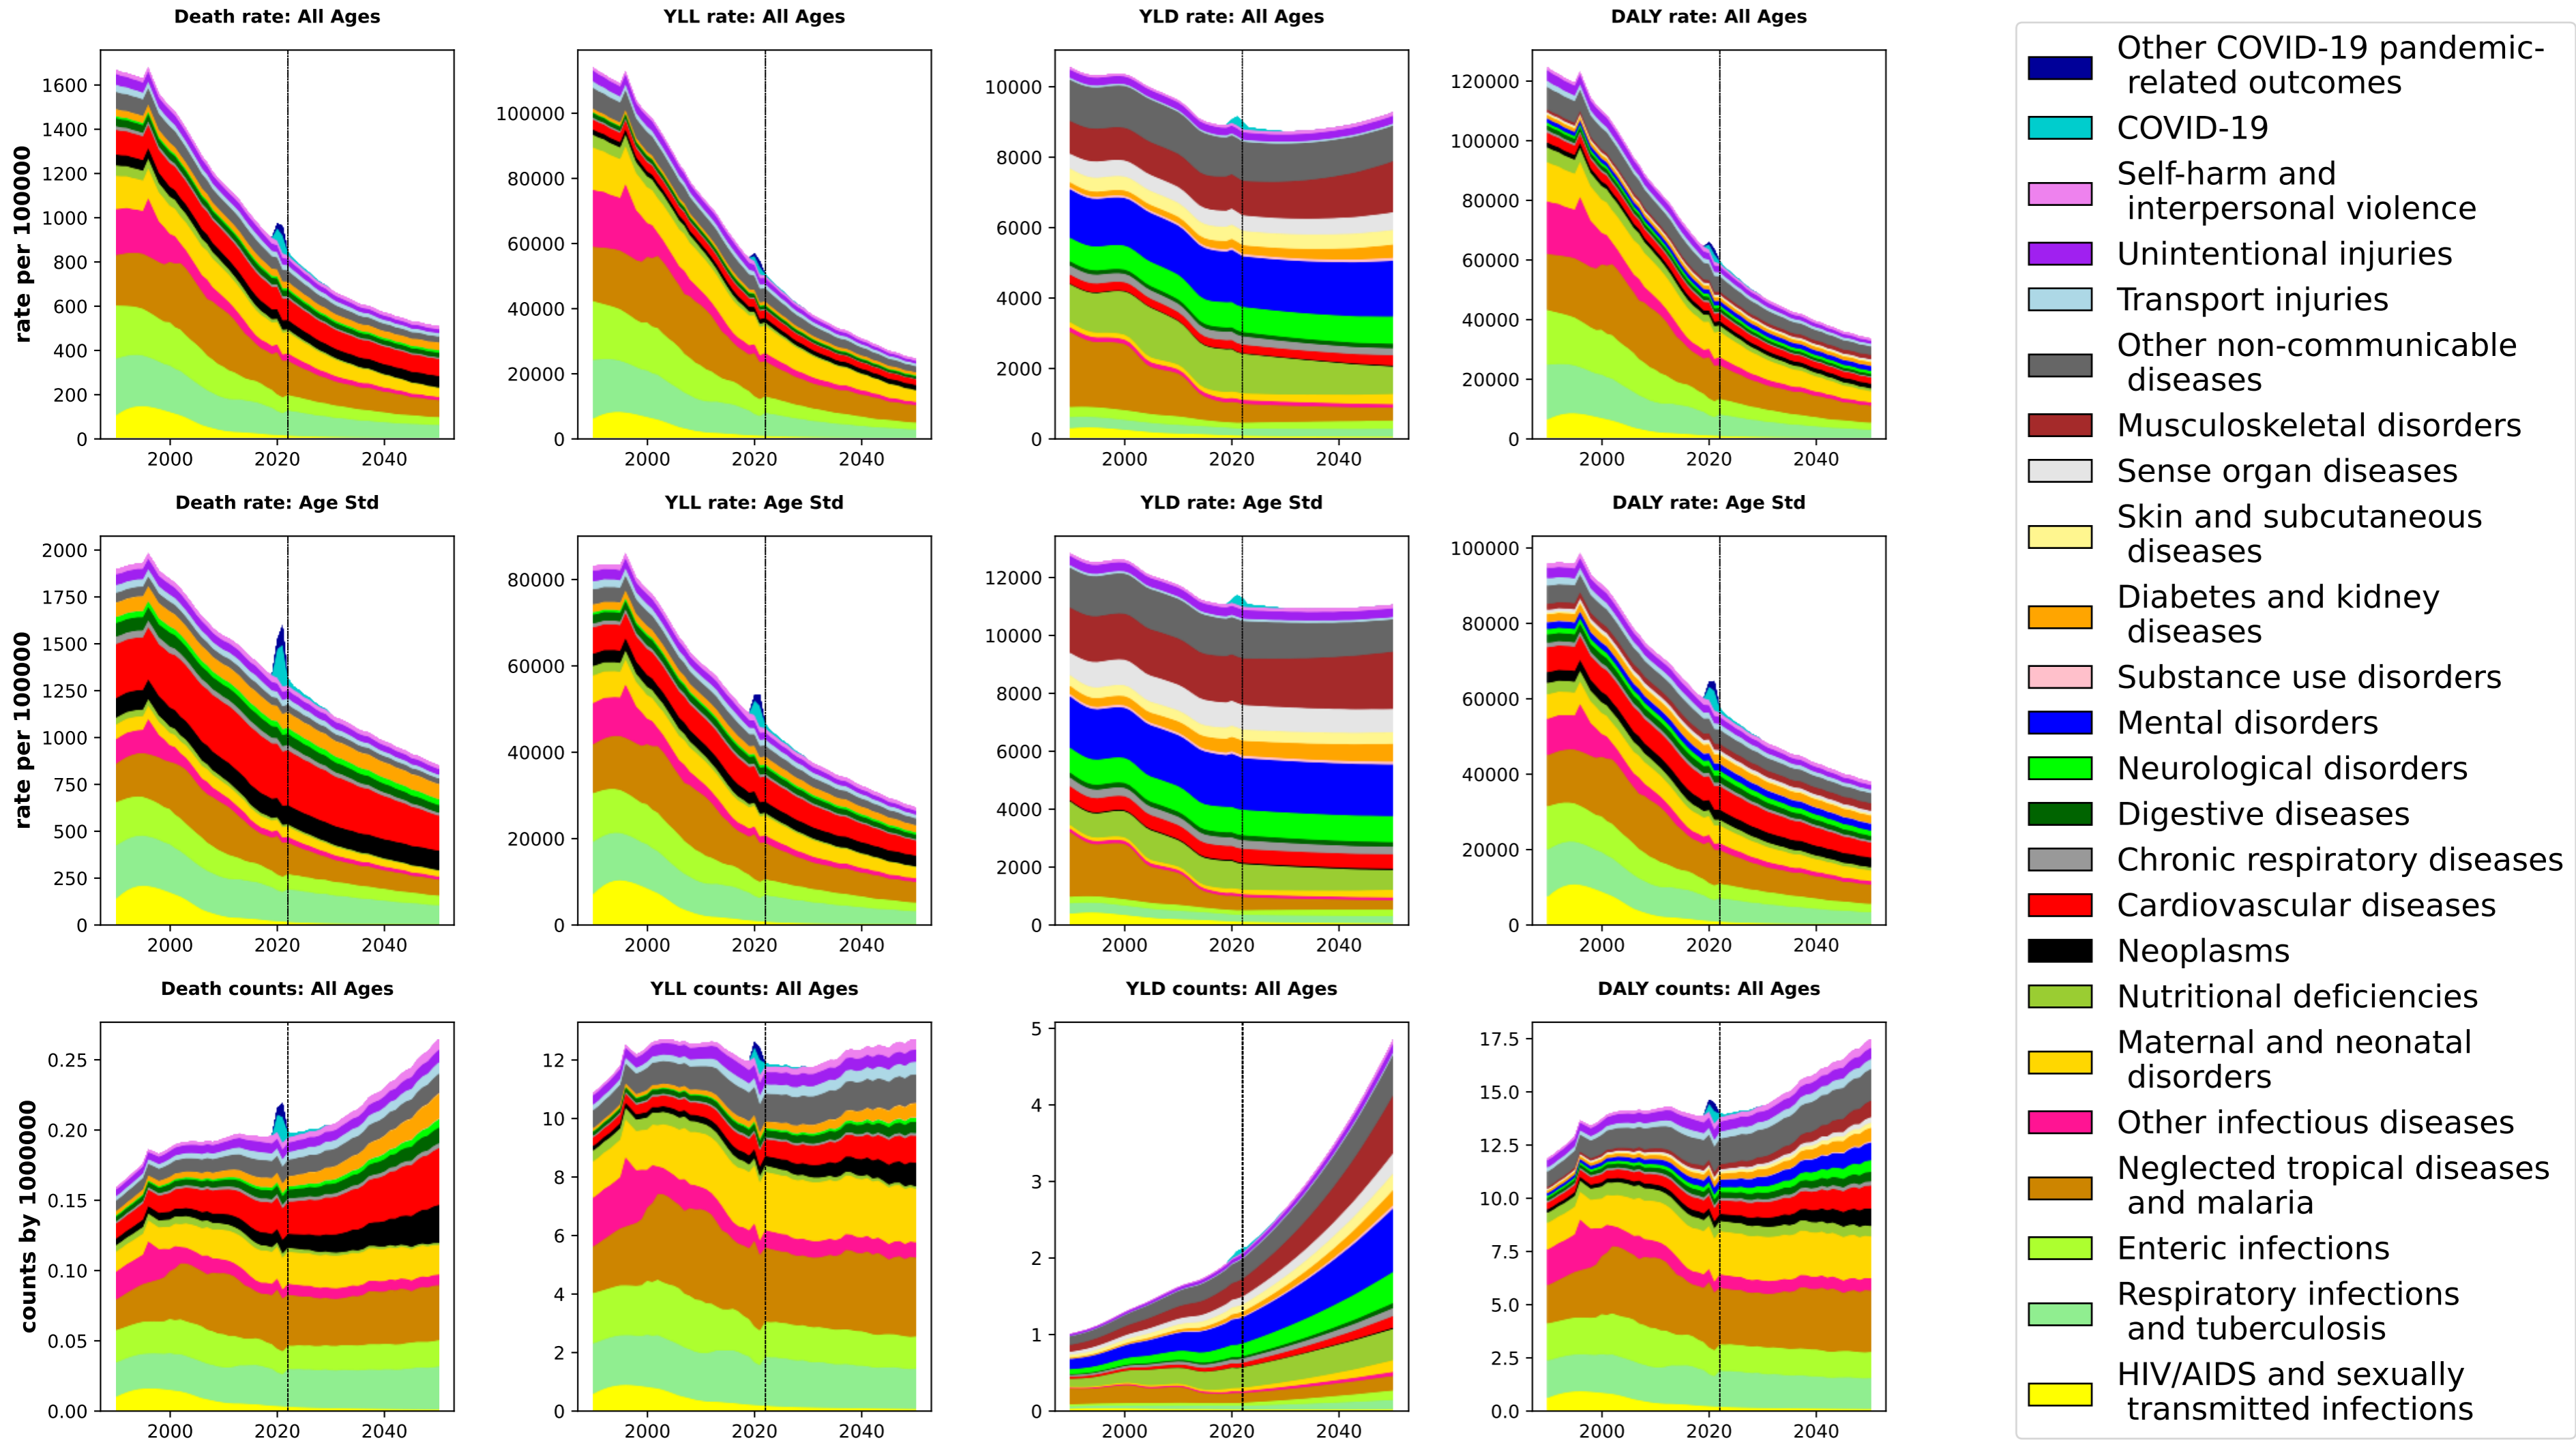

# Cabo Verde

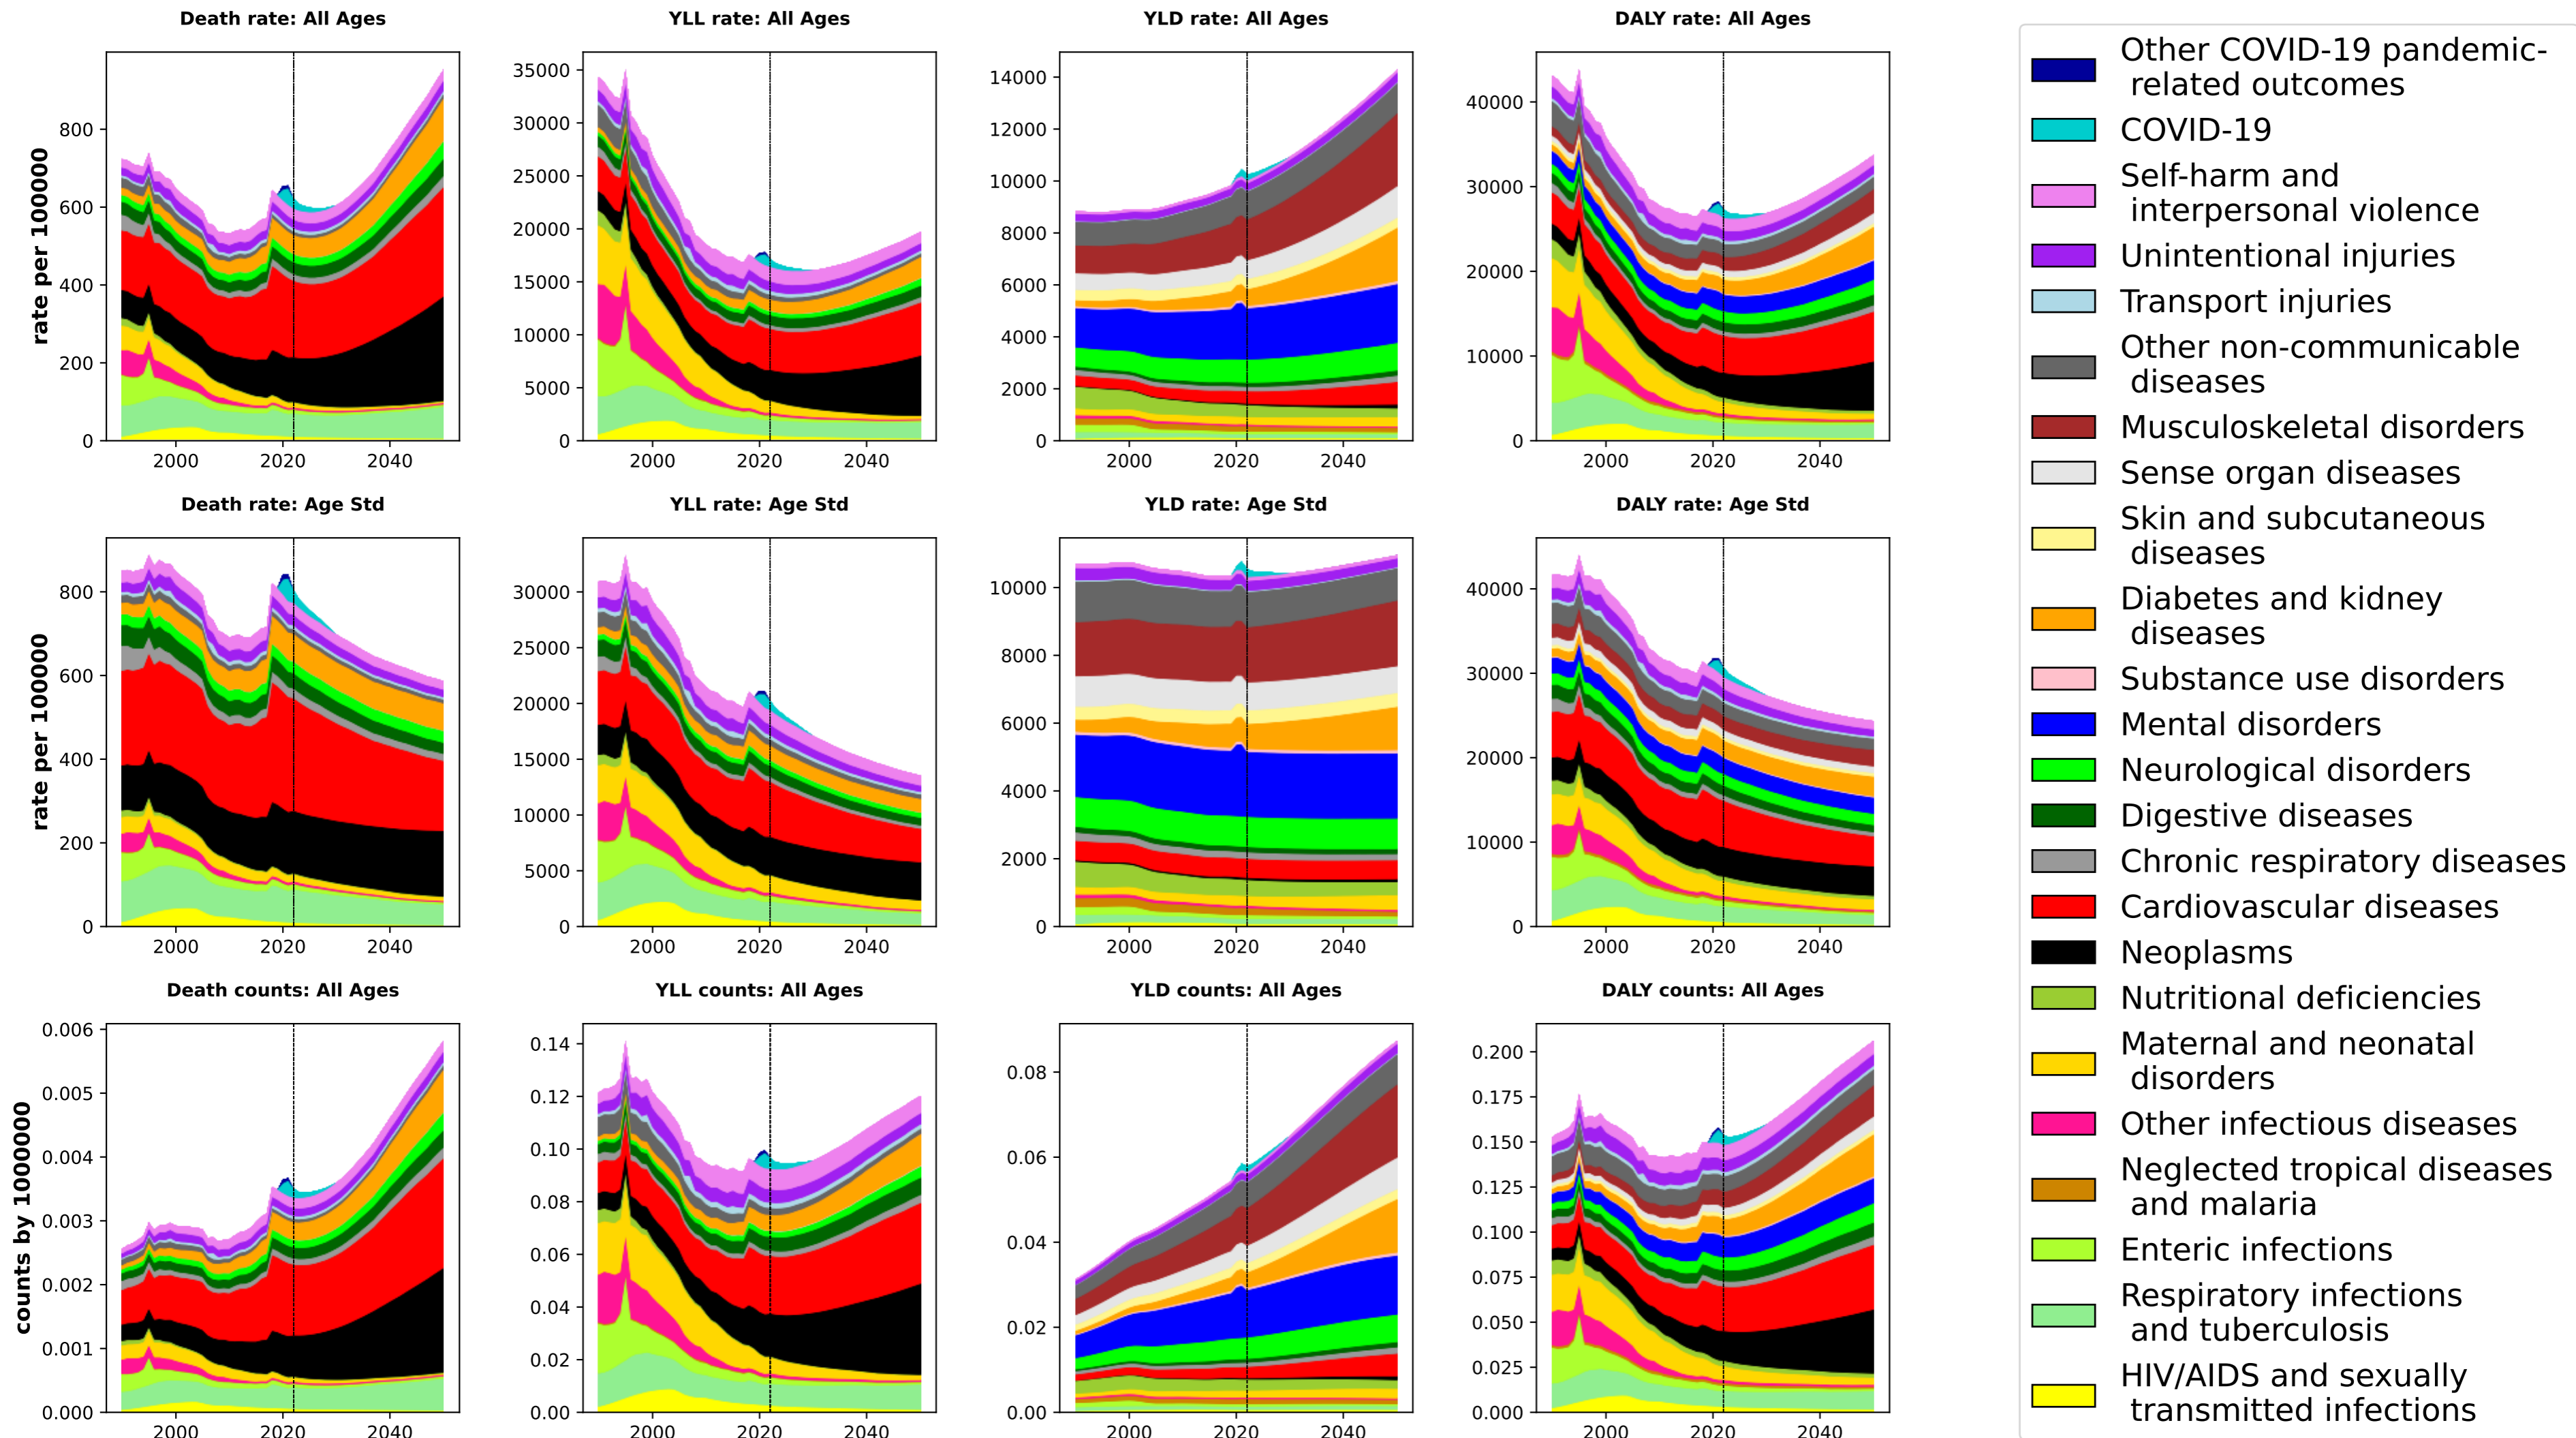

# Cameroon

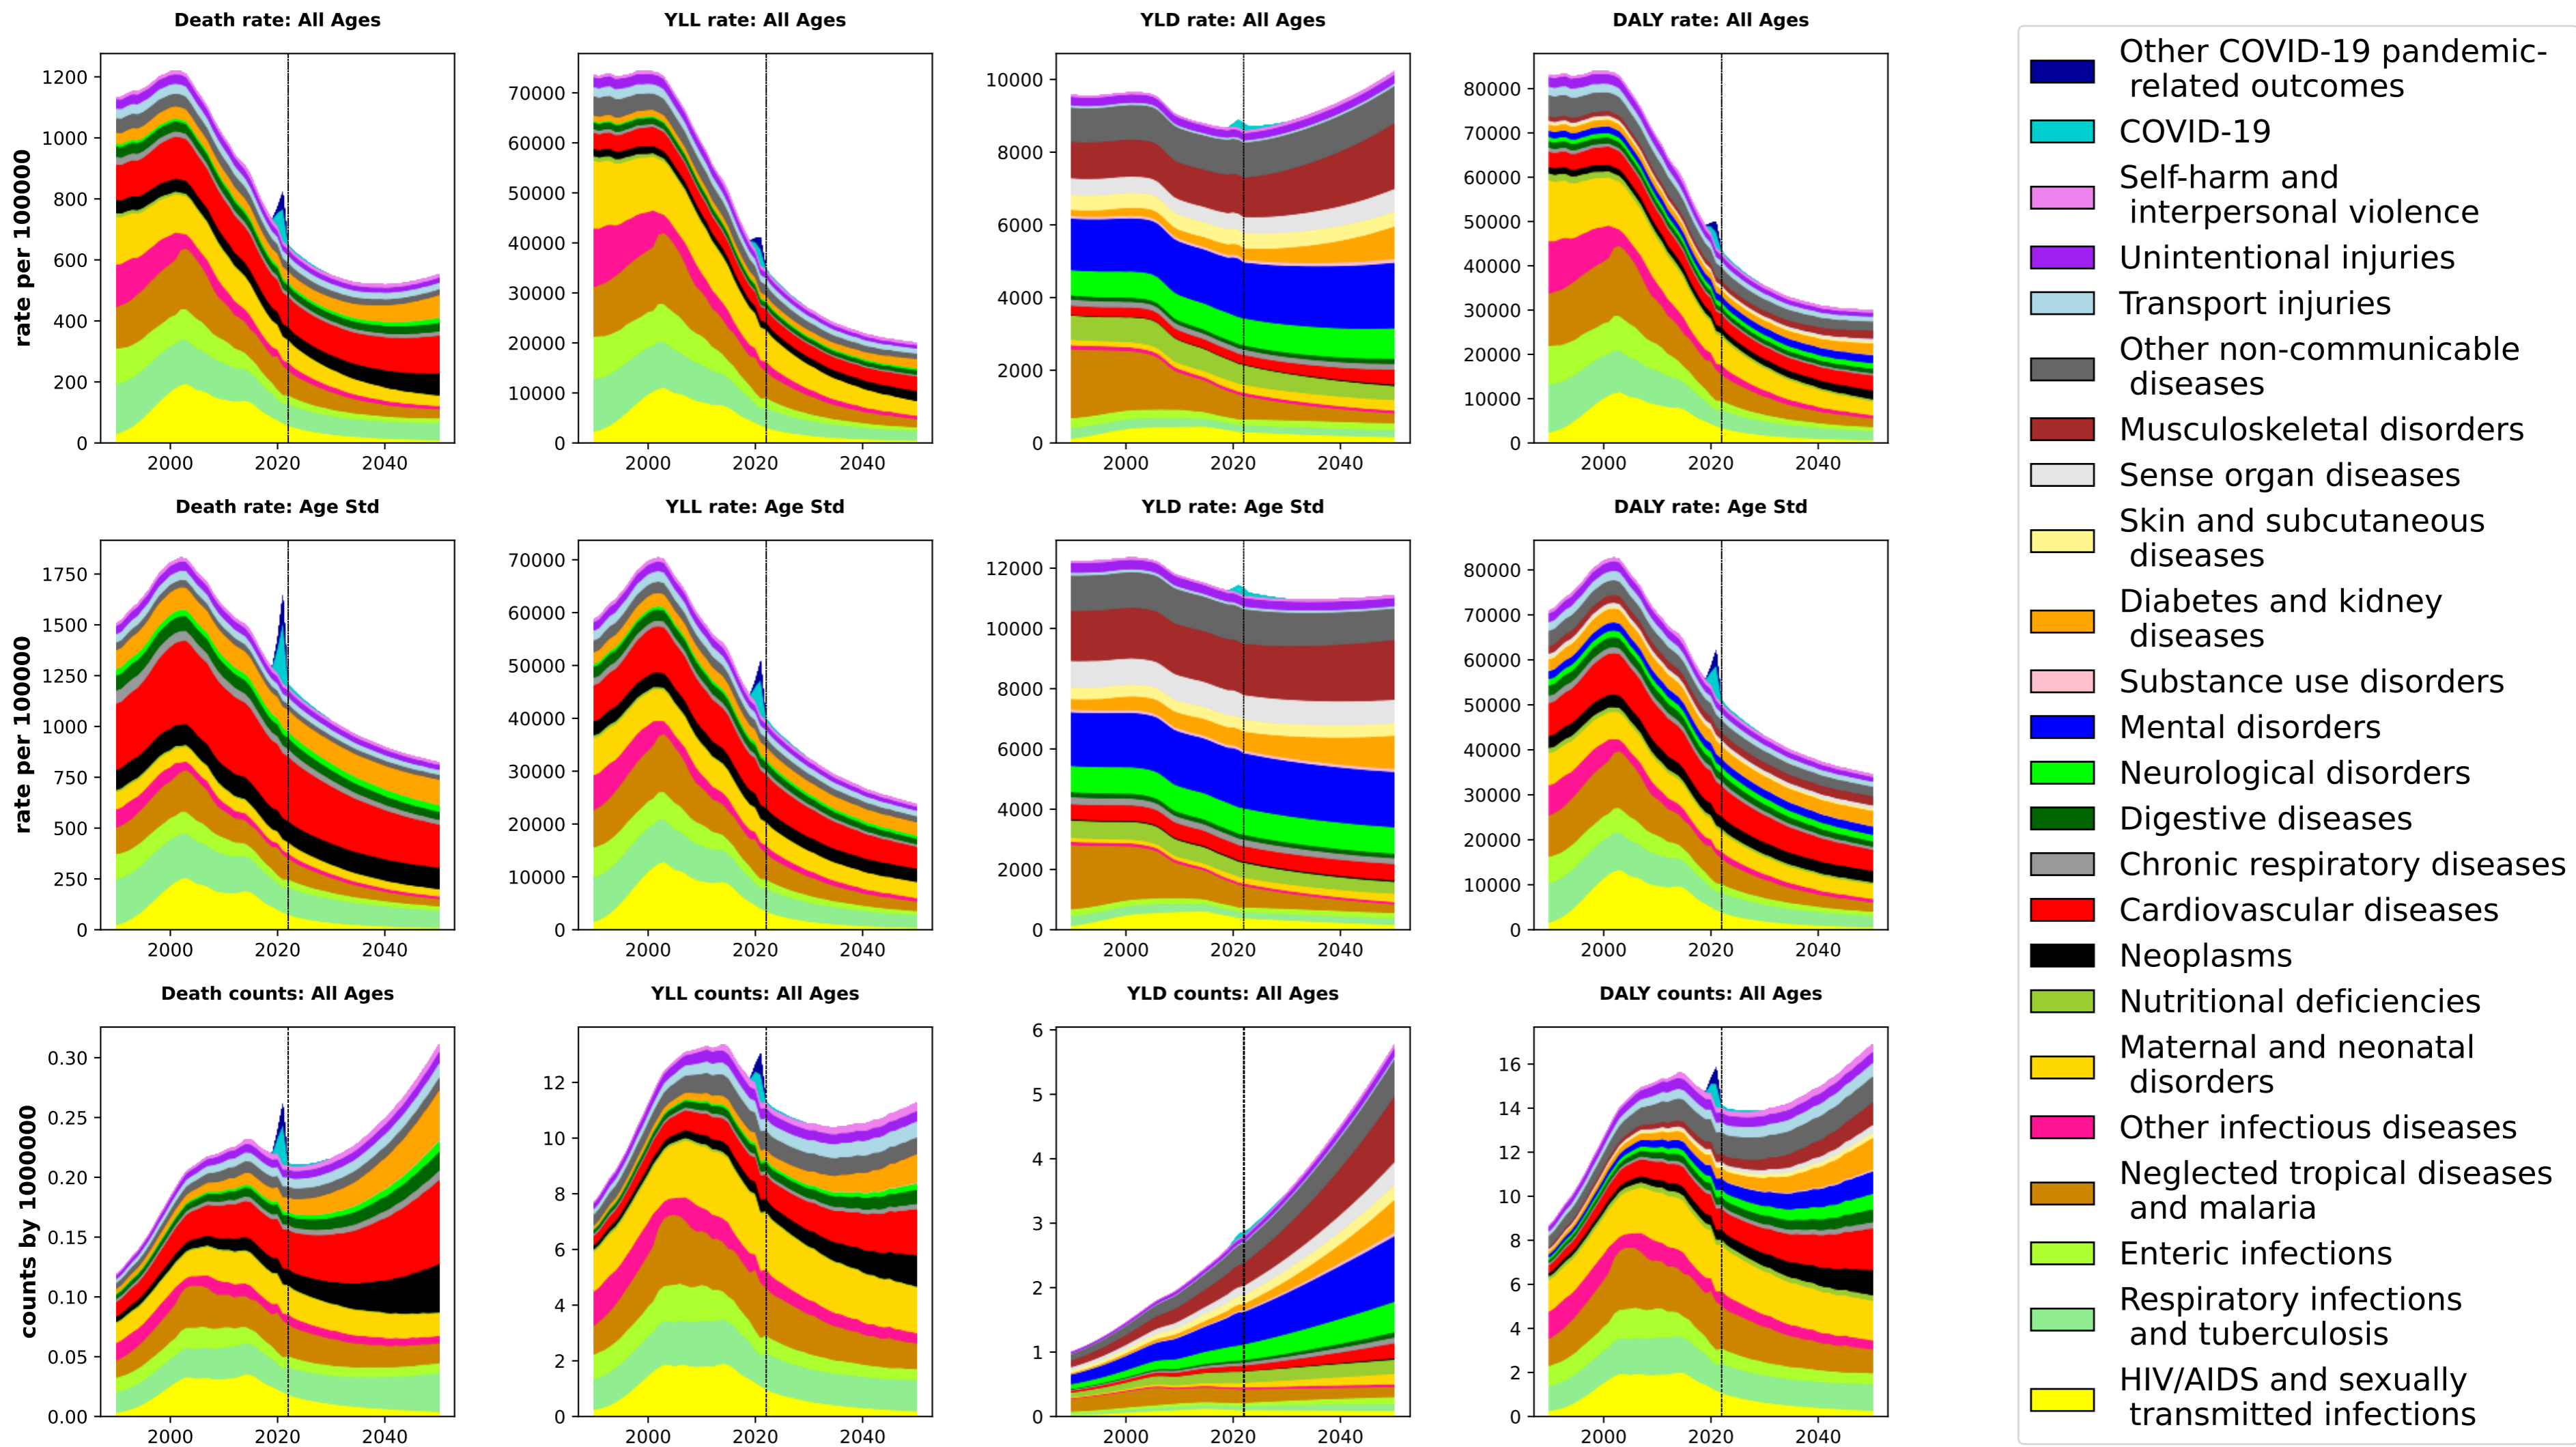

# Chad

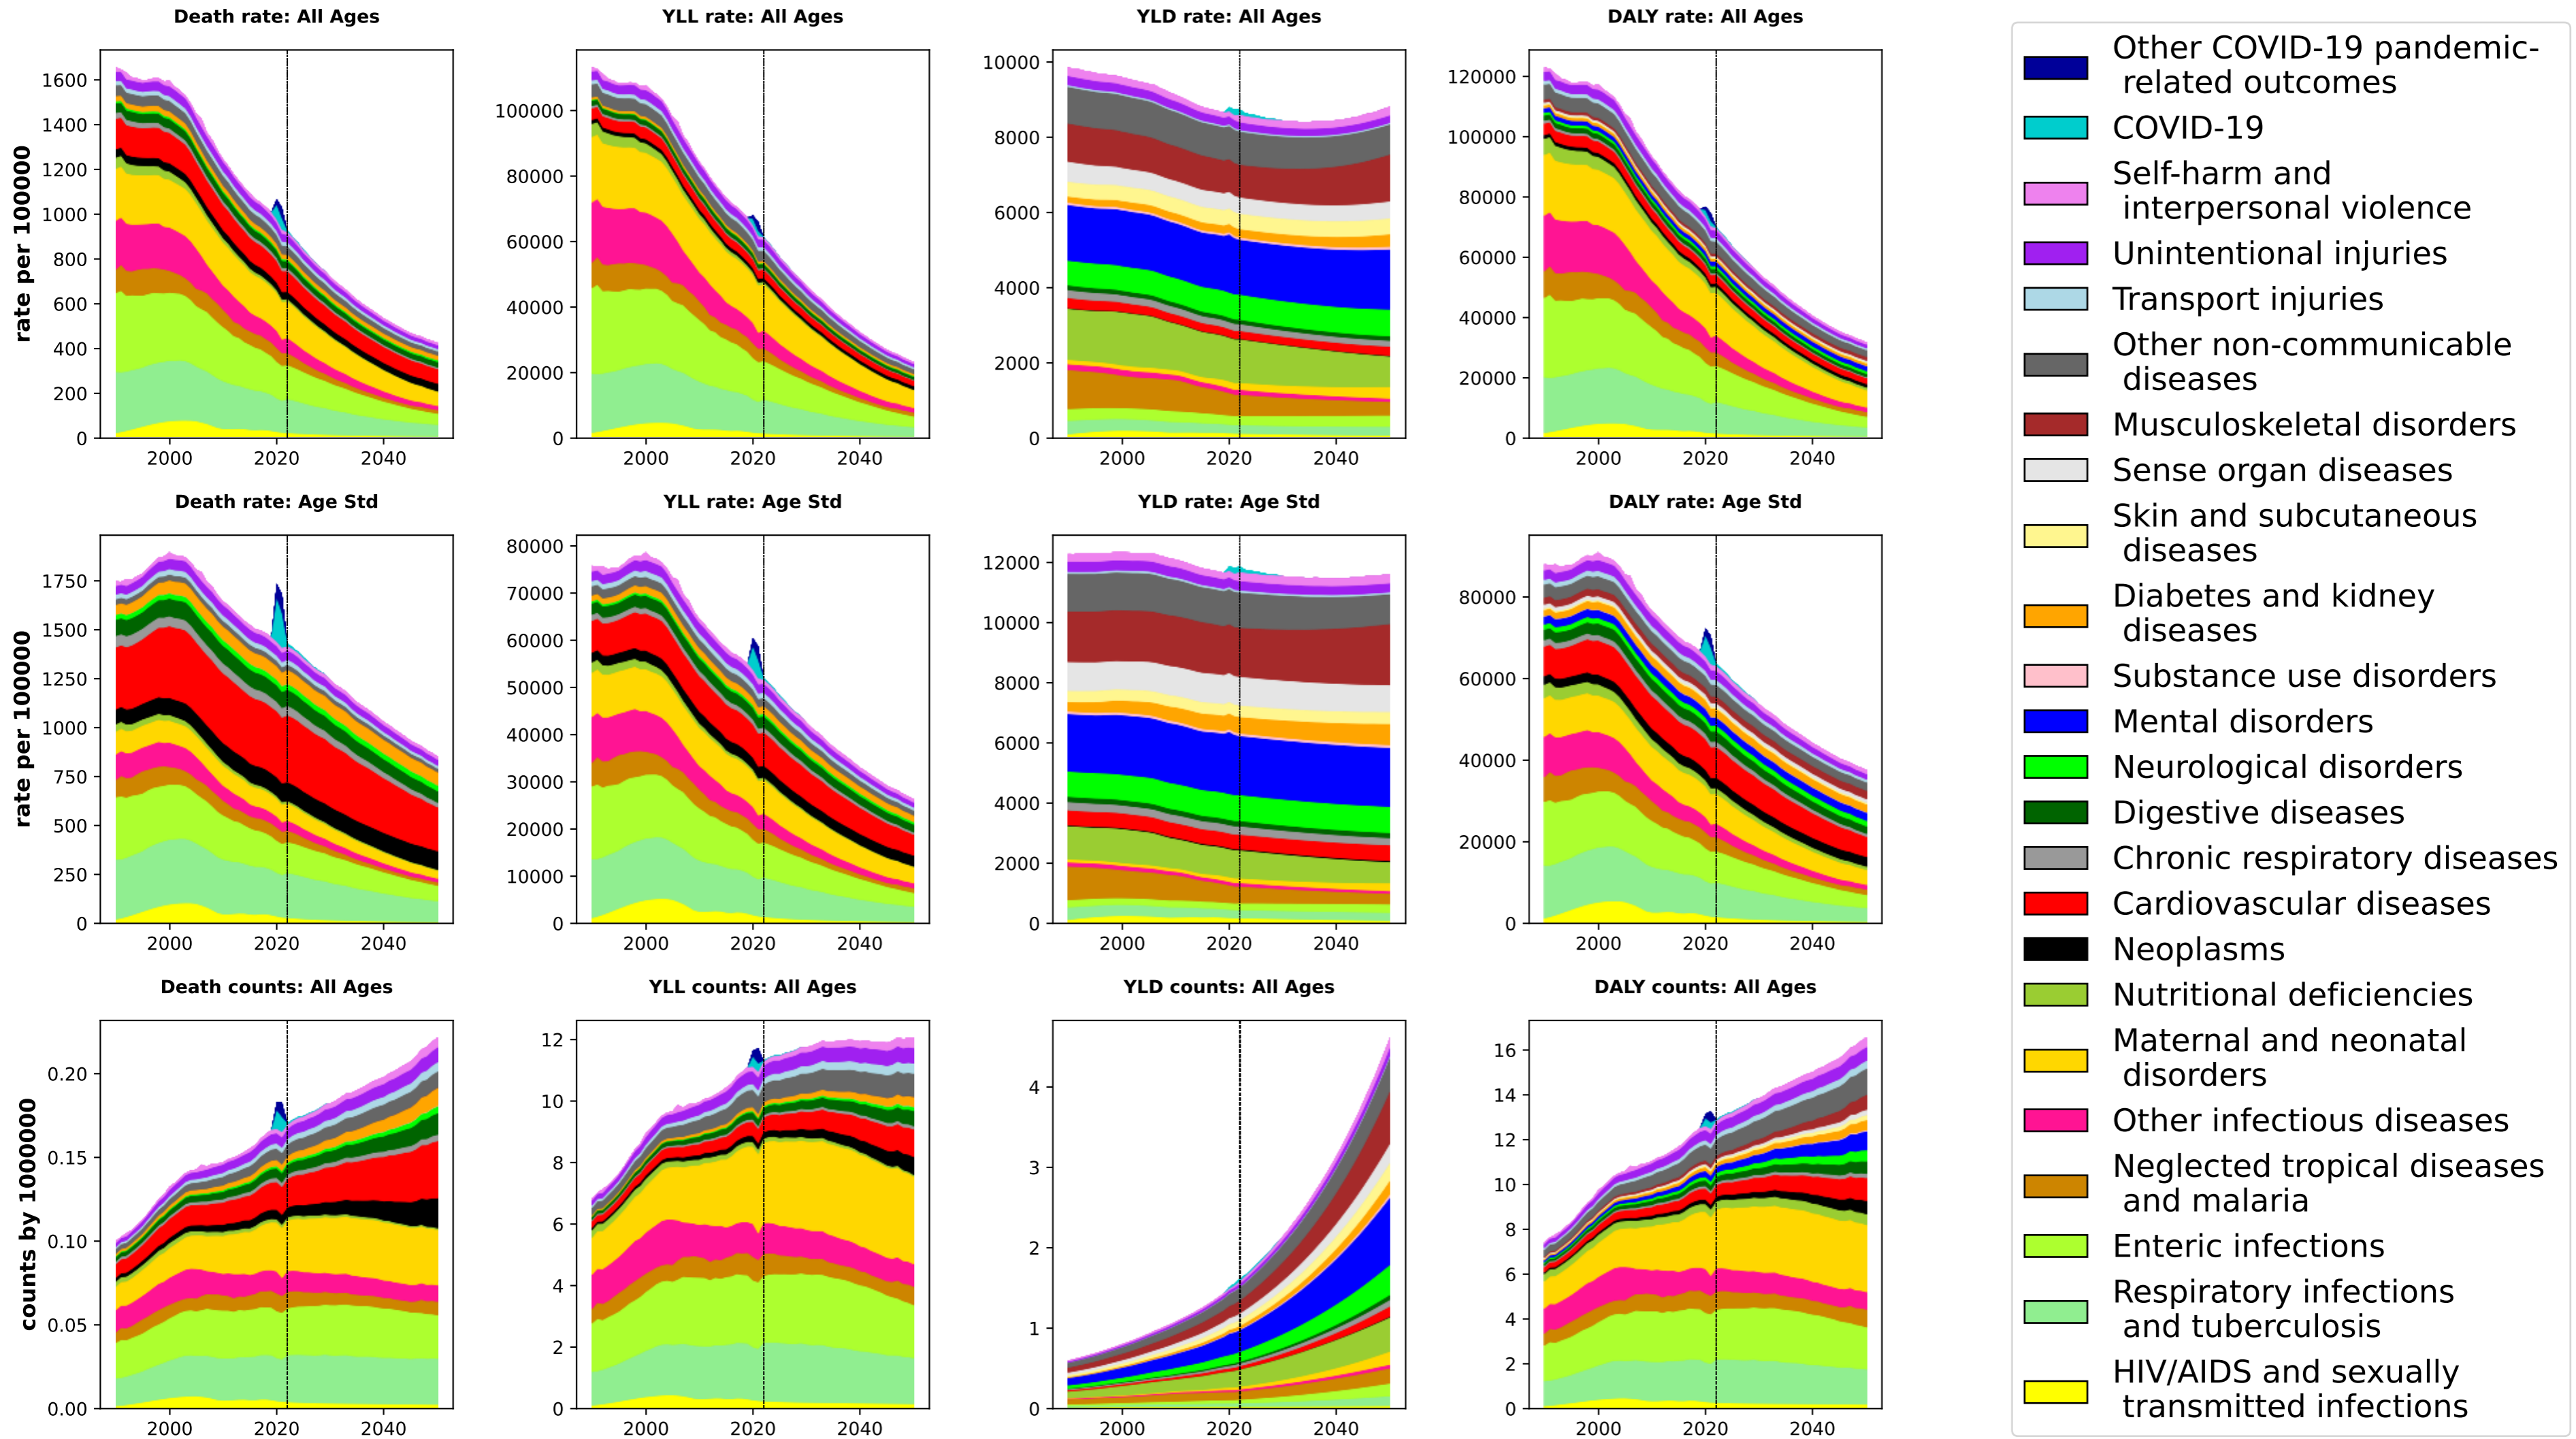

# Côte d'Ivoire

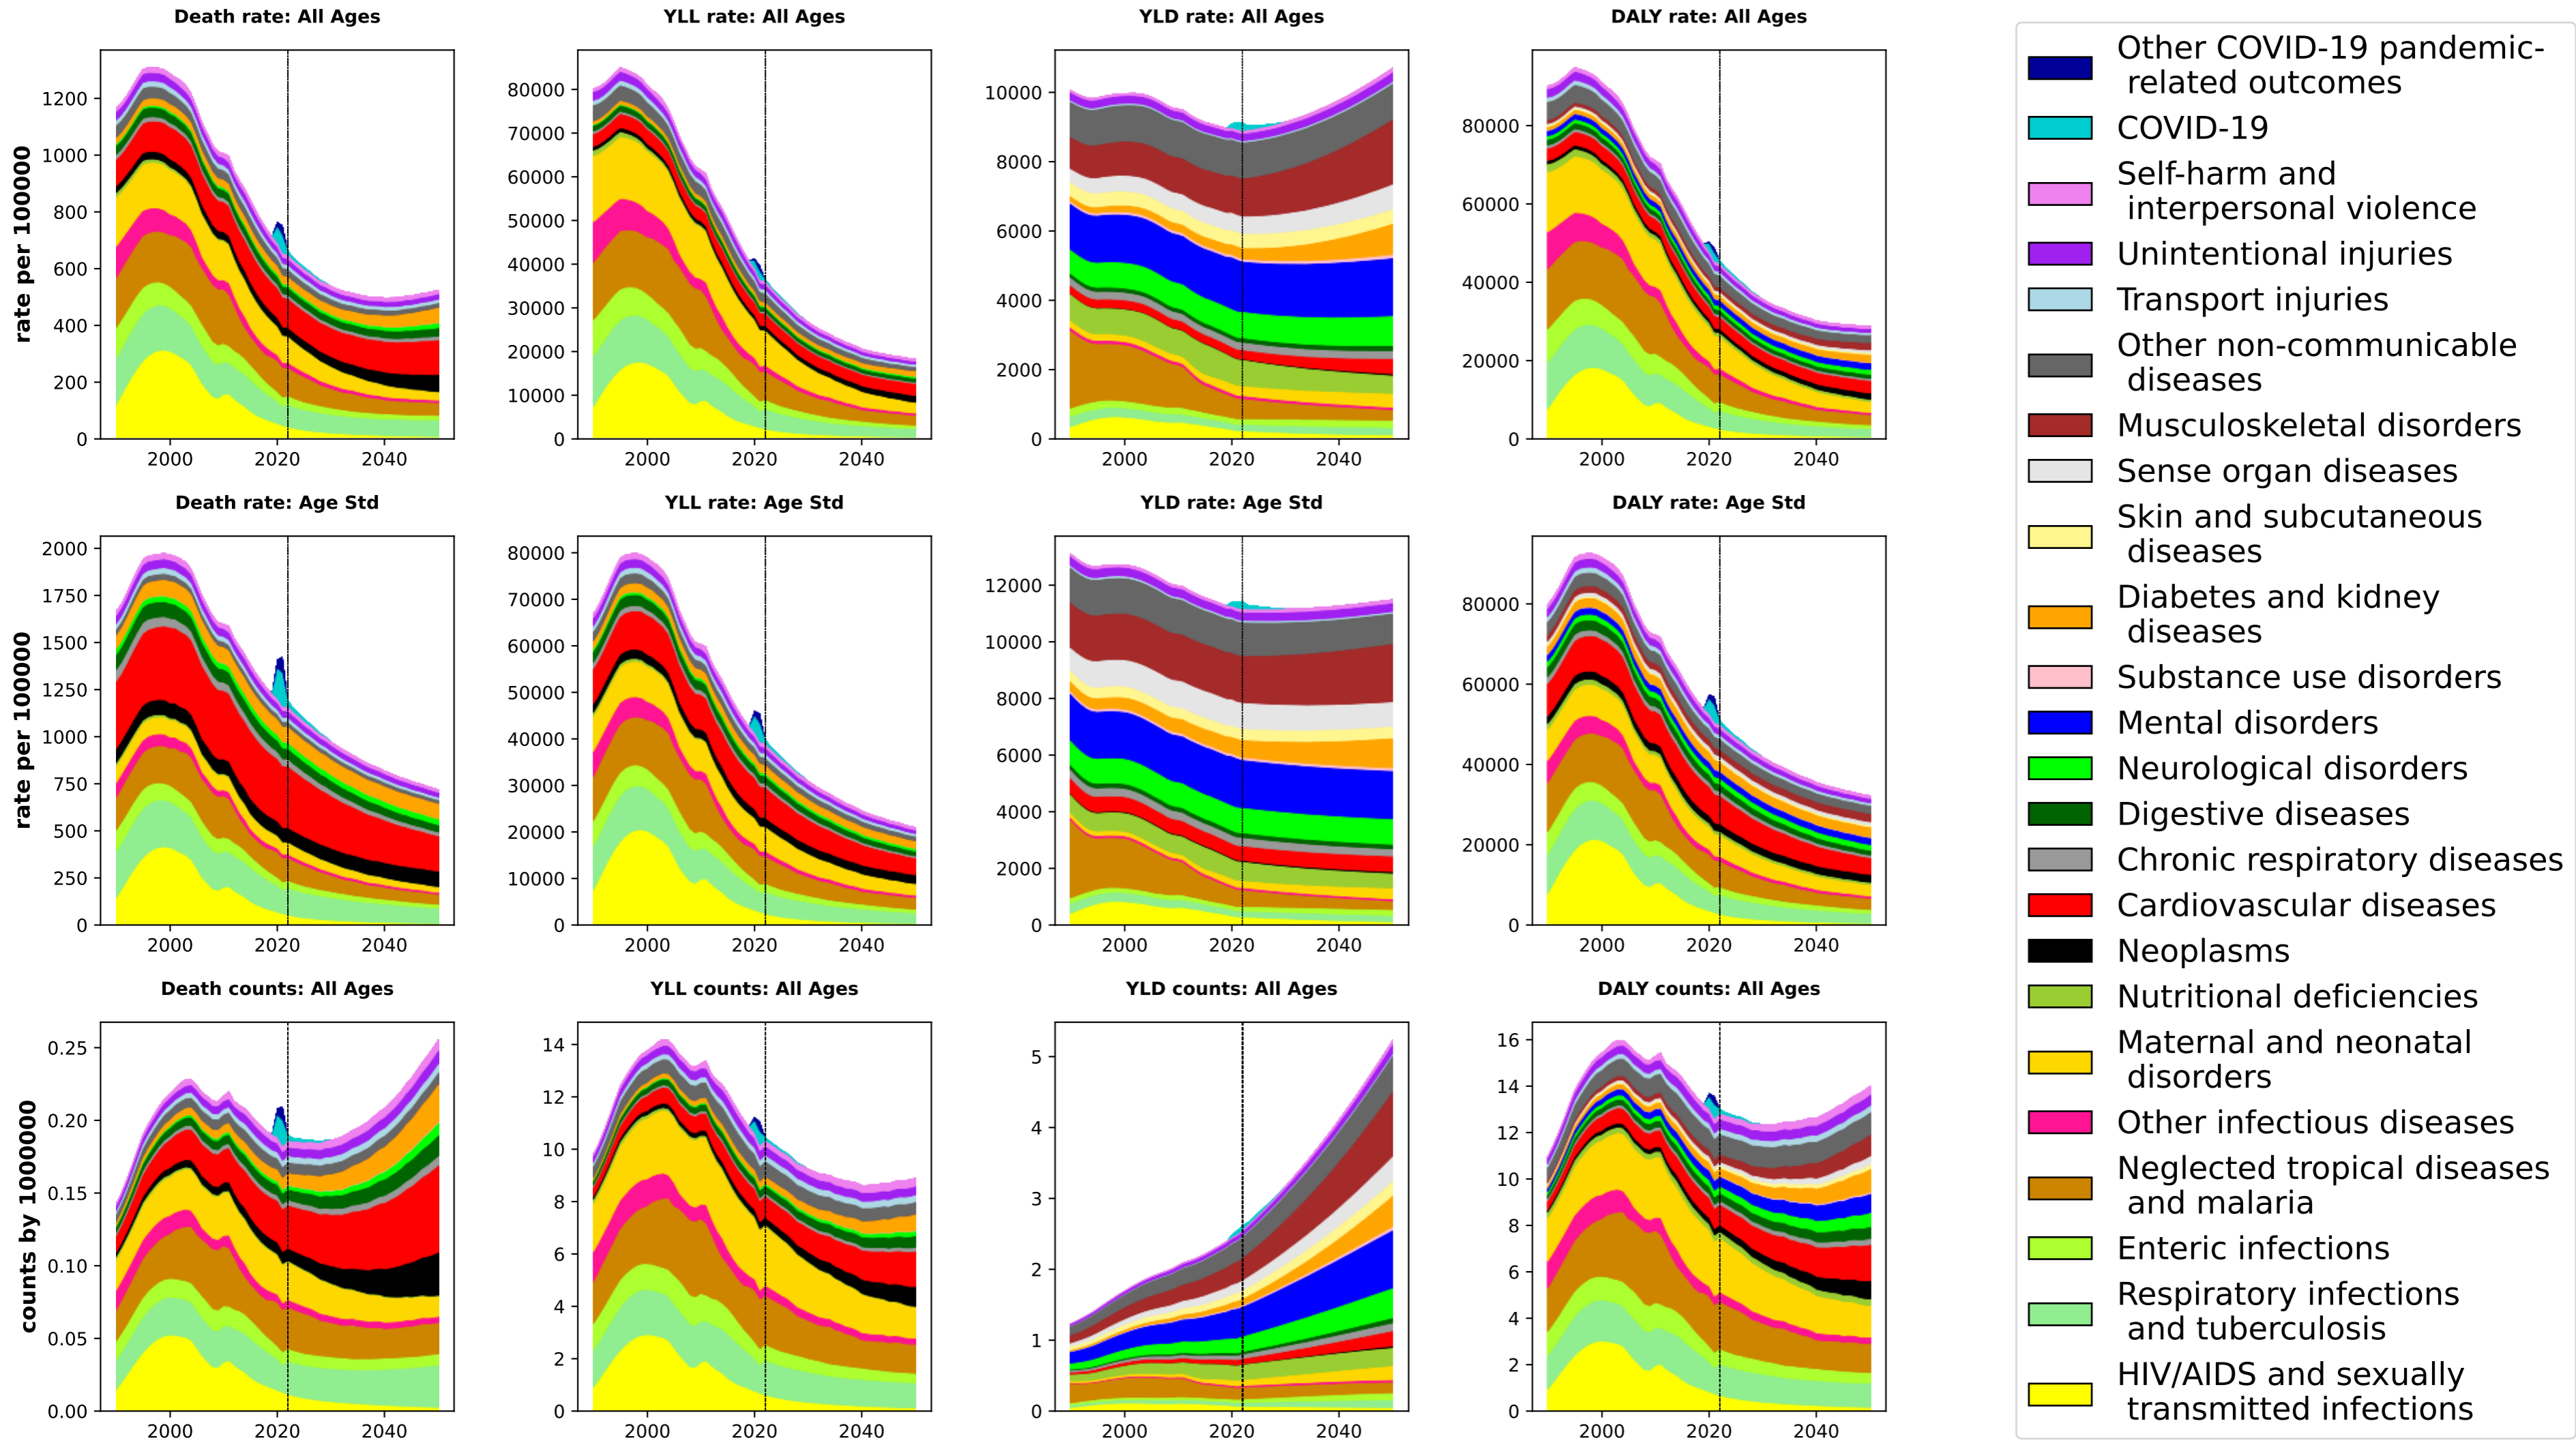

# The Gambia

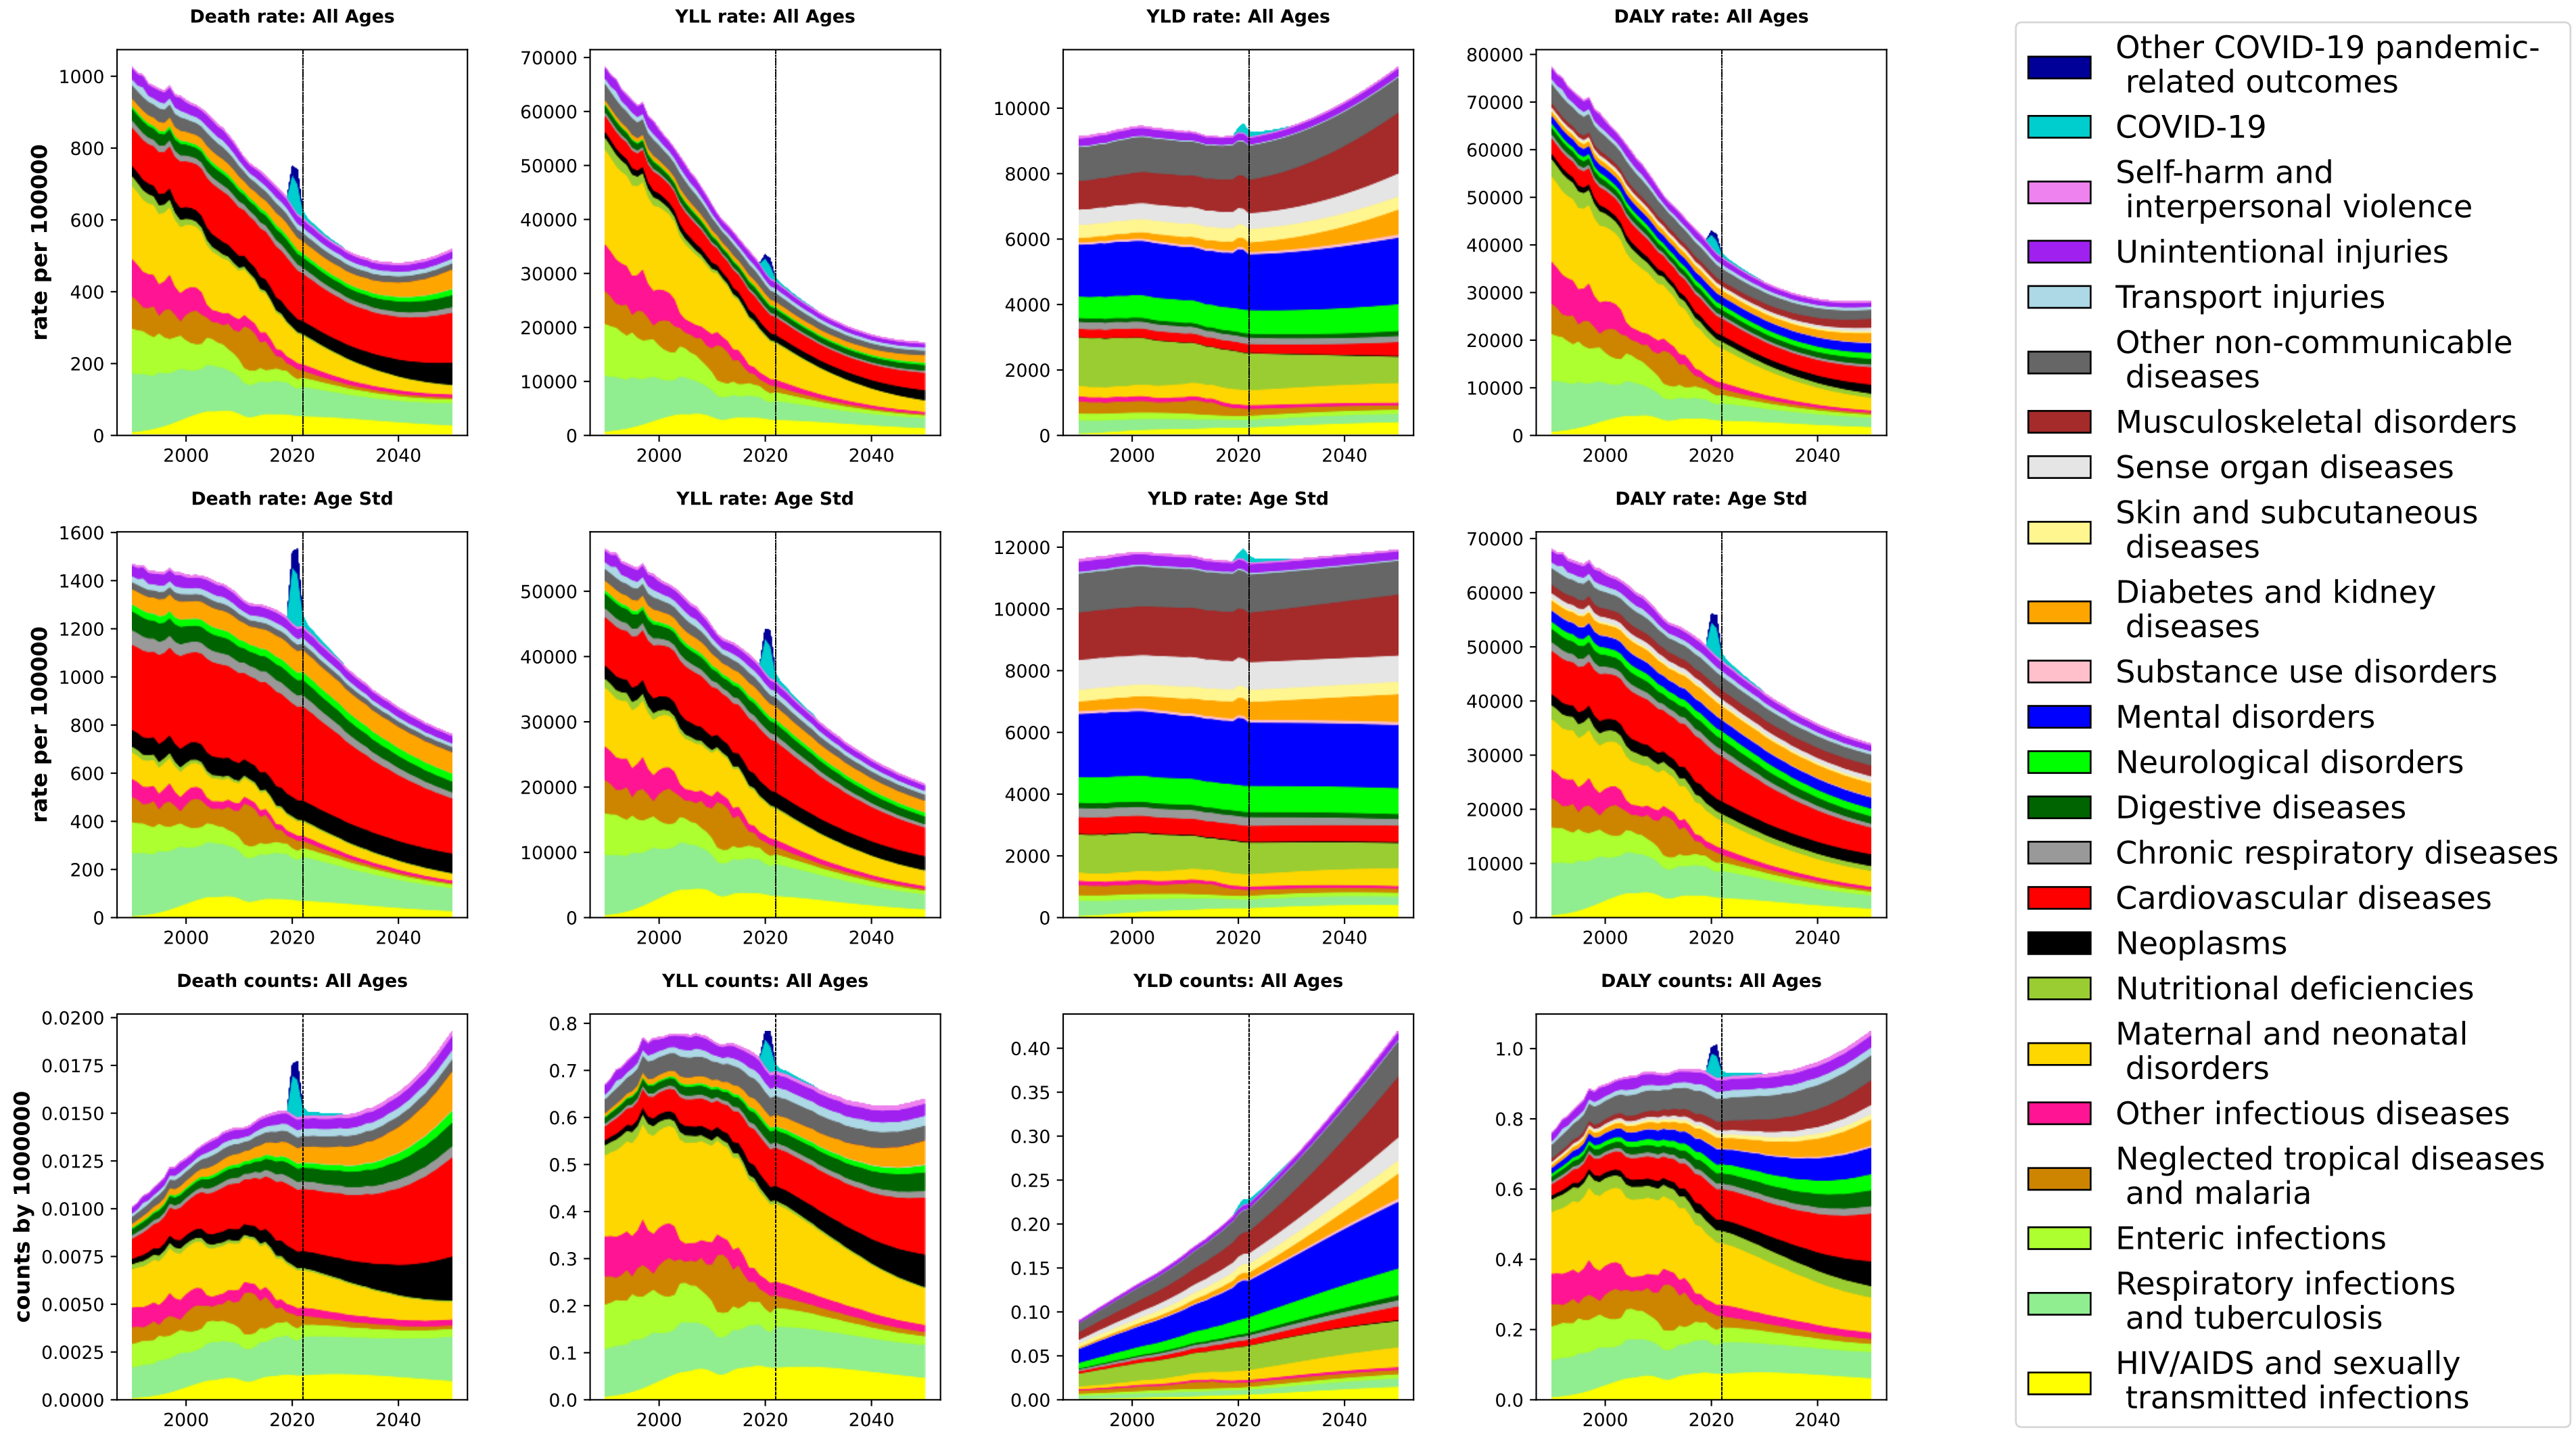

# Ghana

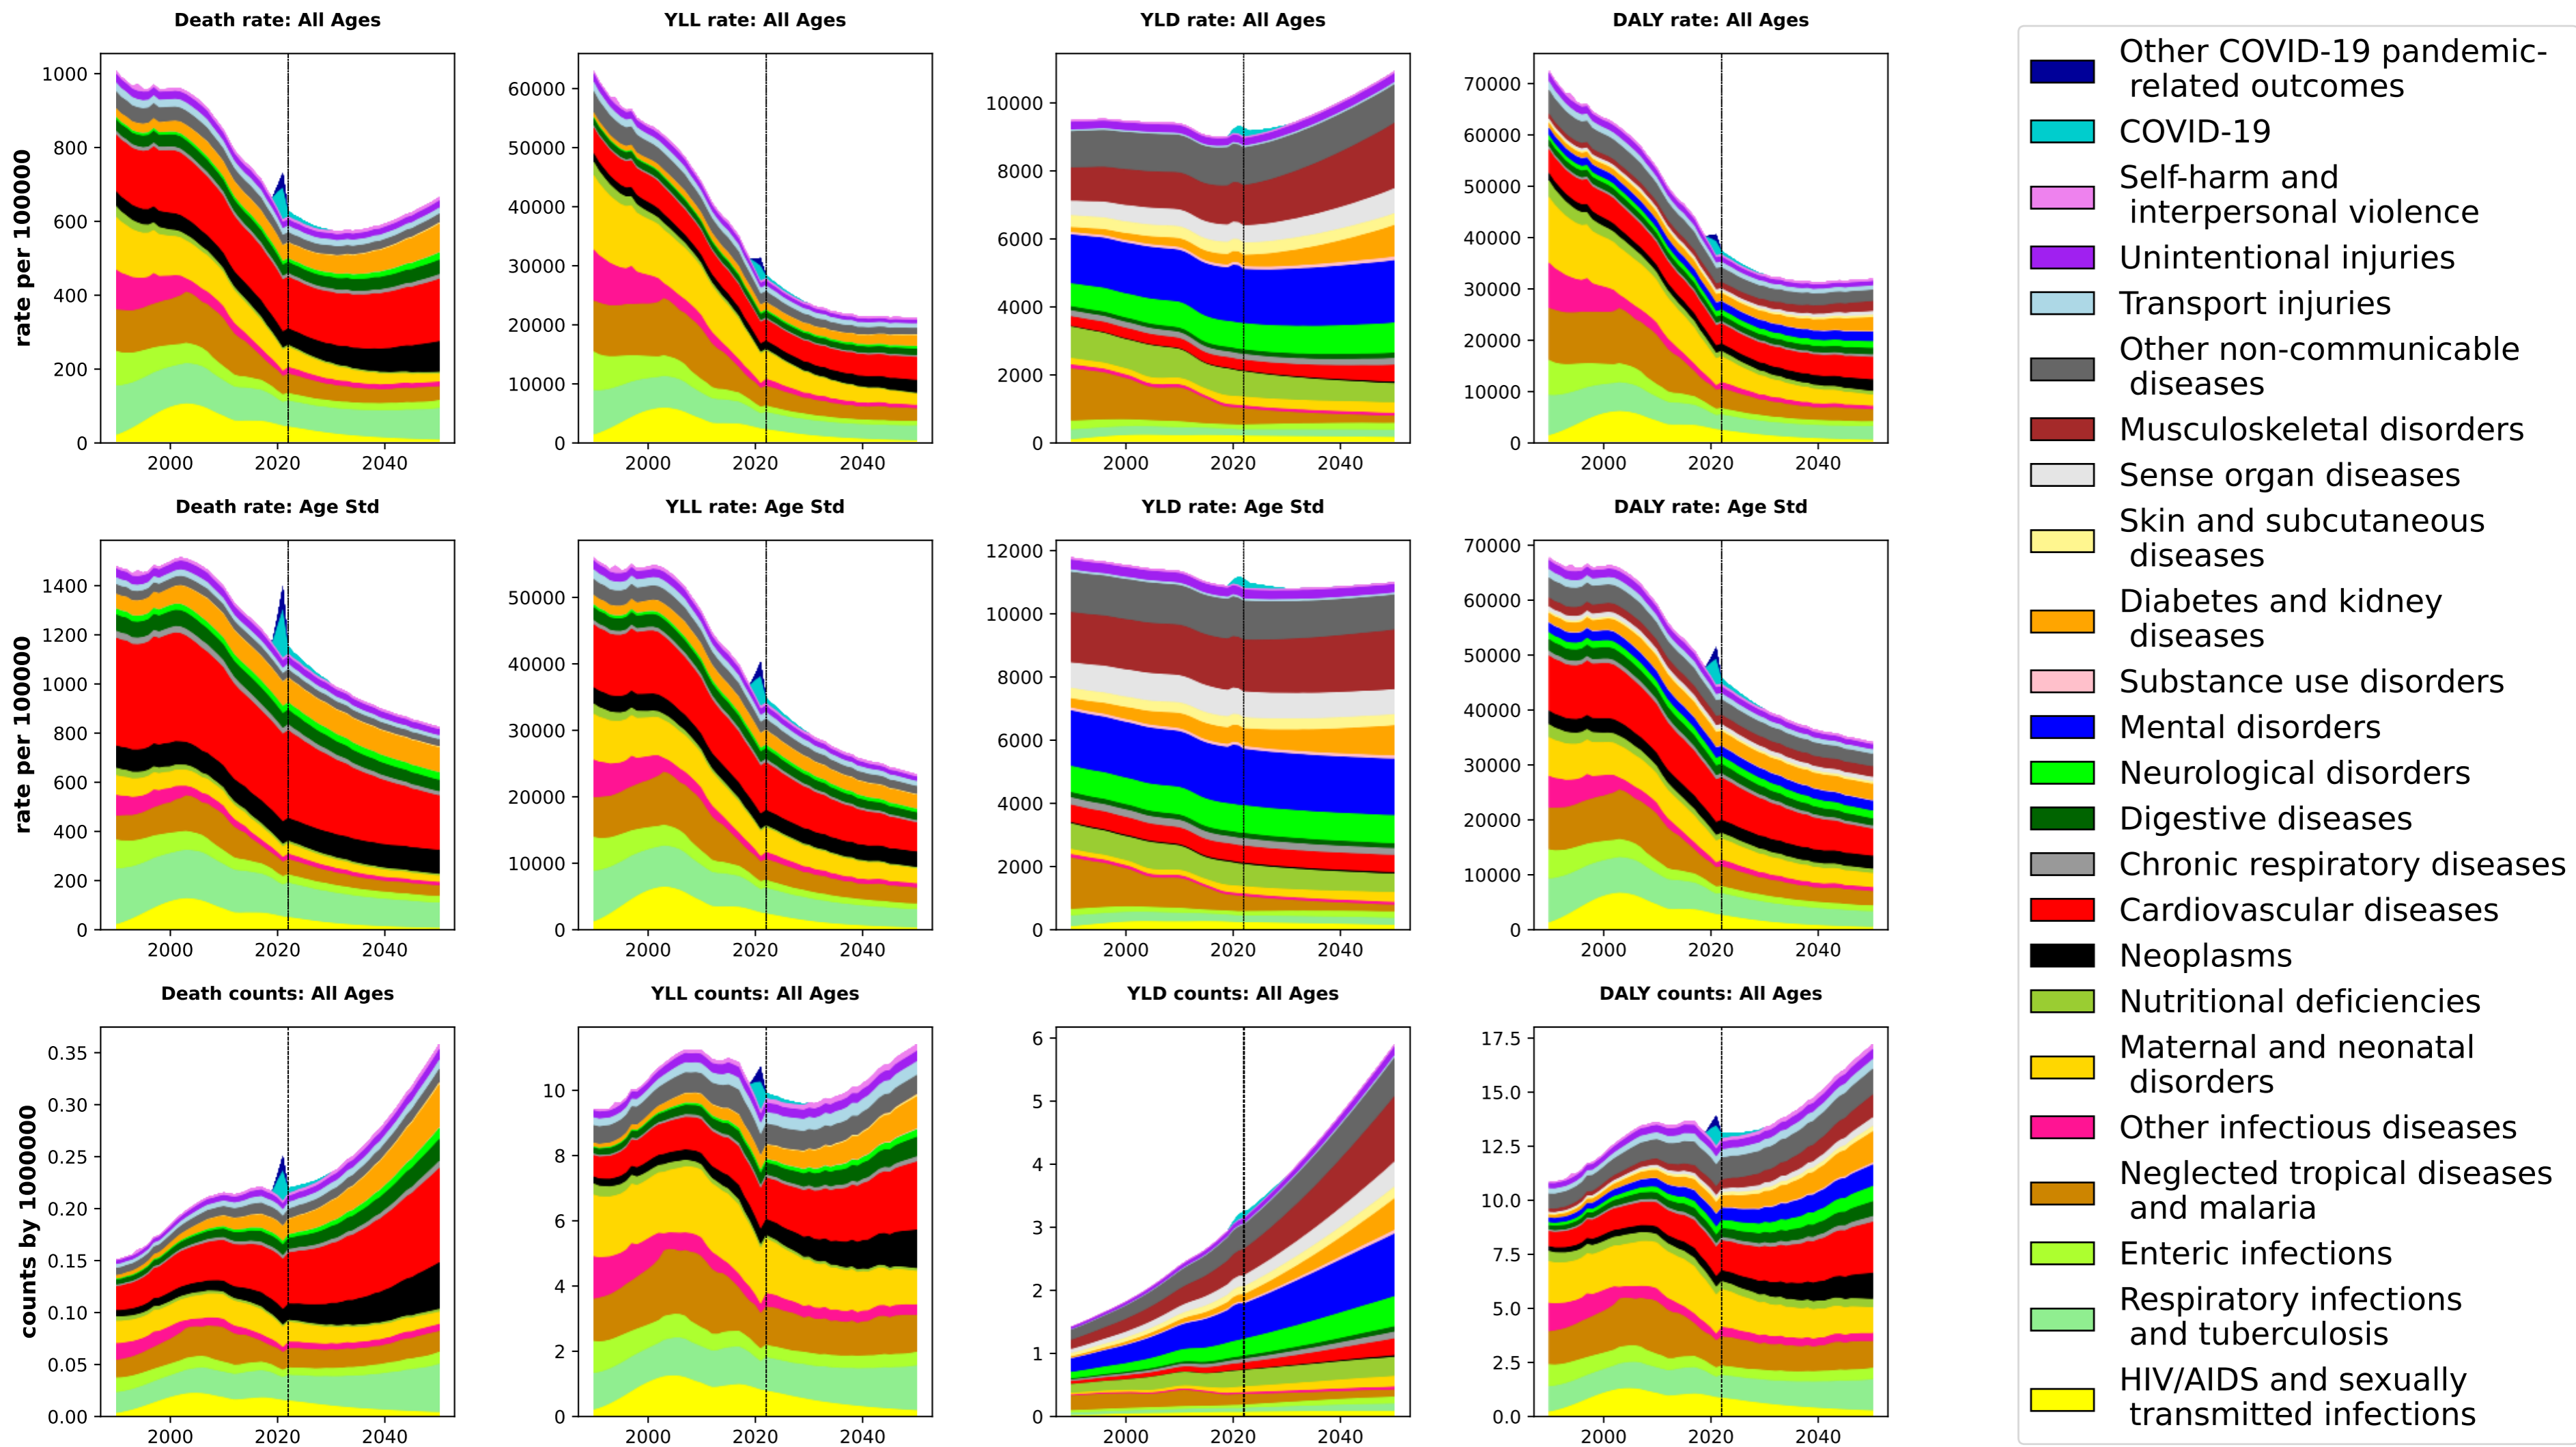



# Guinea

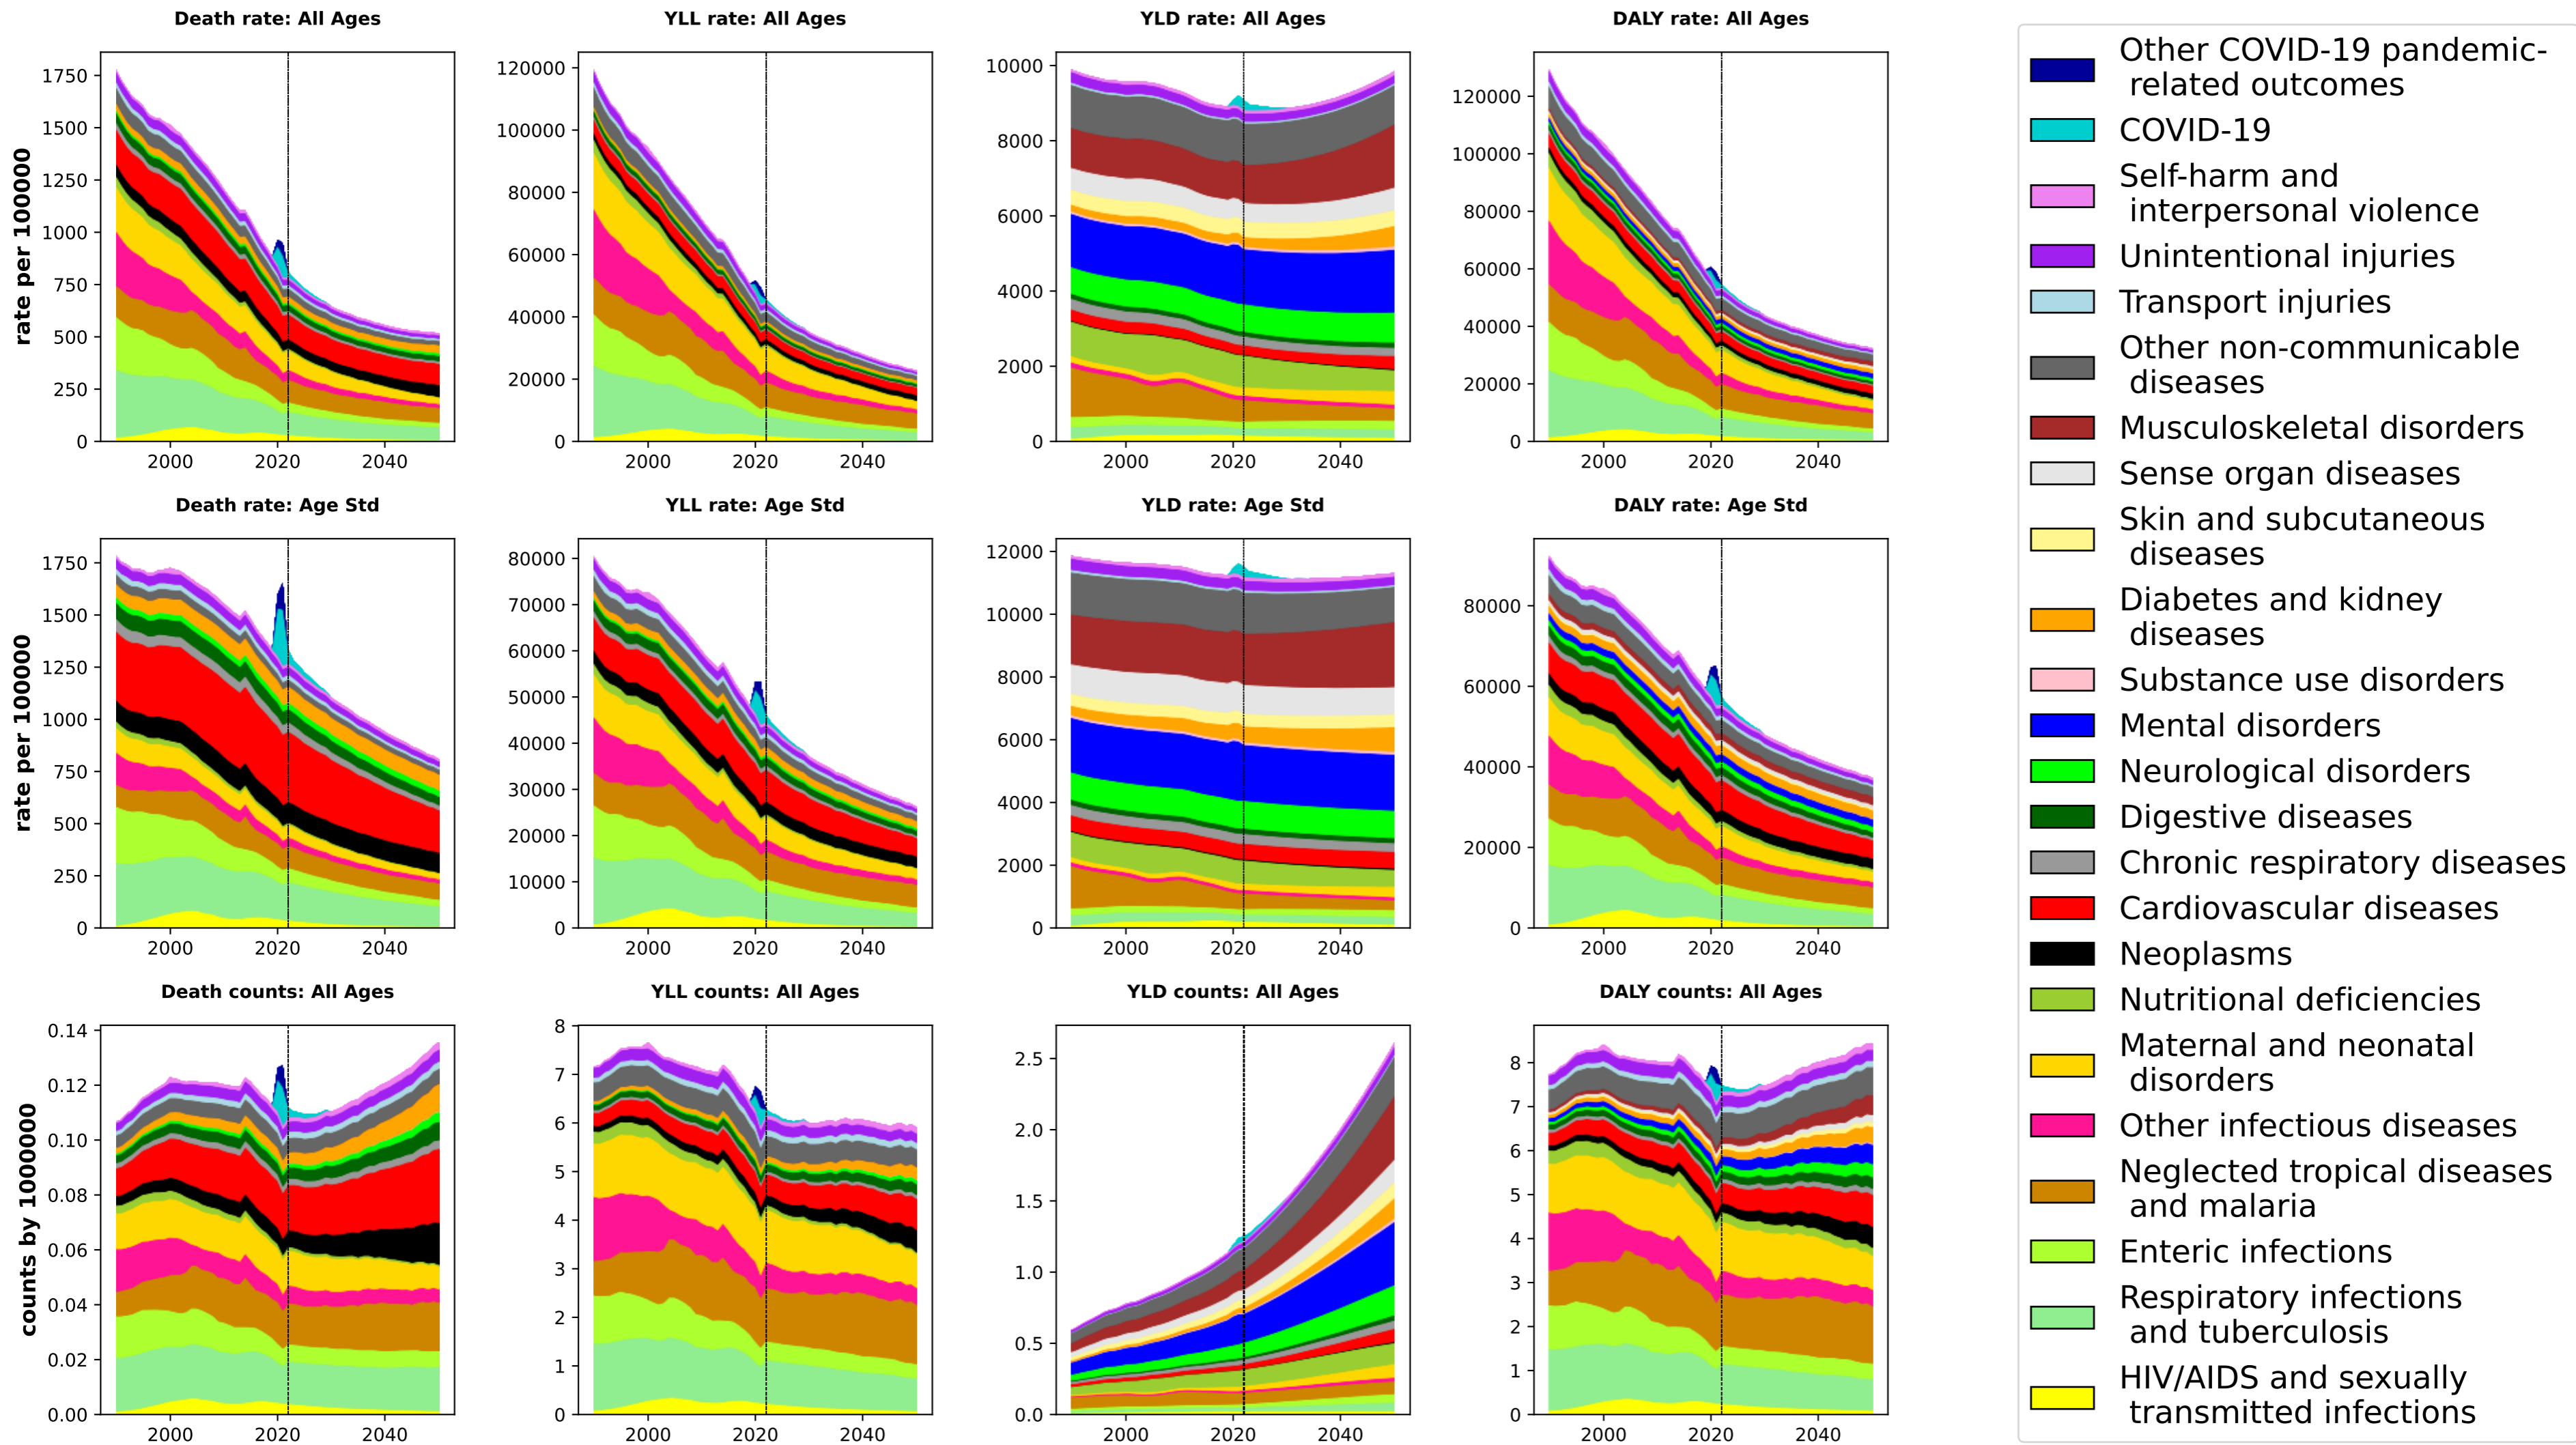

# Guinea-Bissau

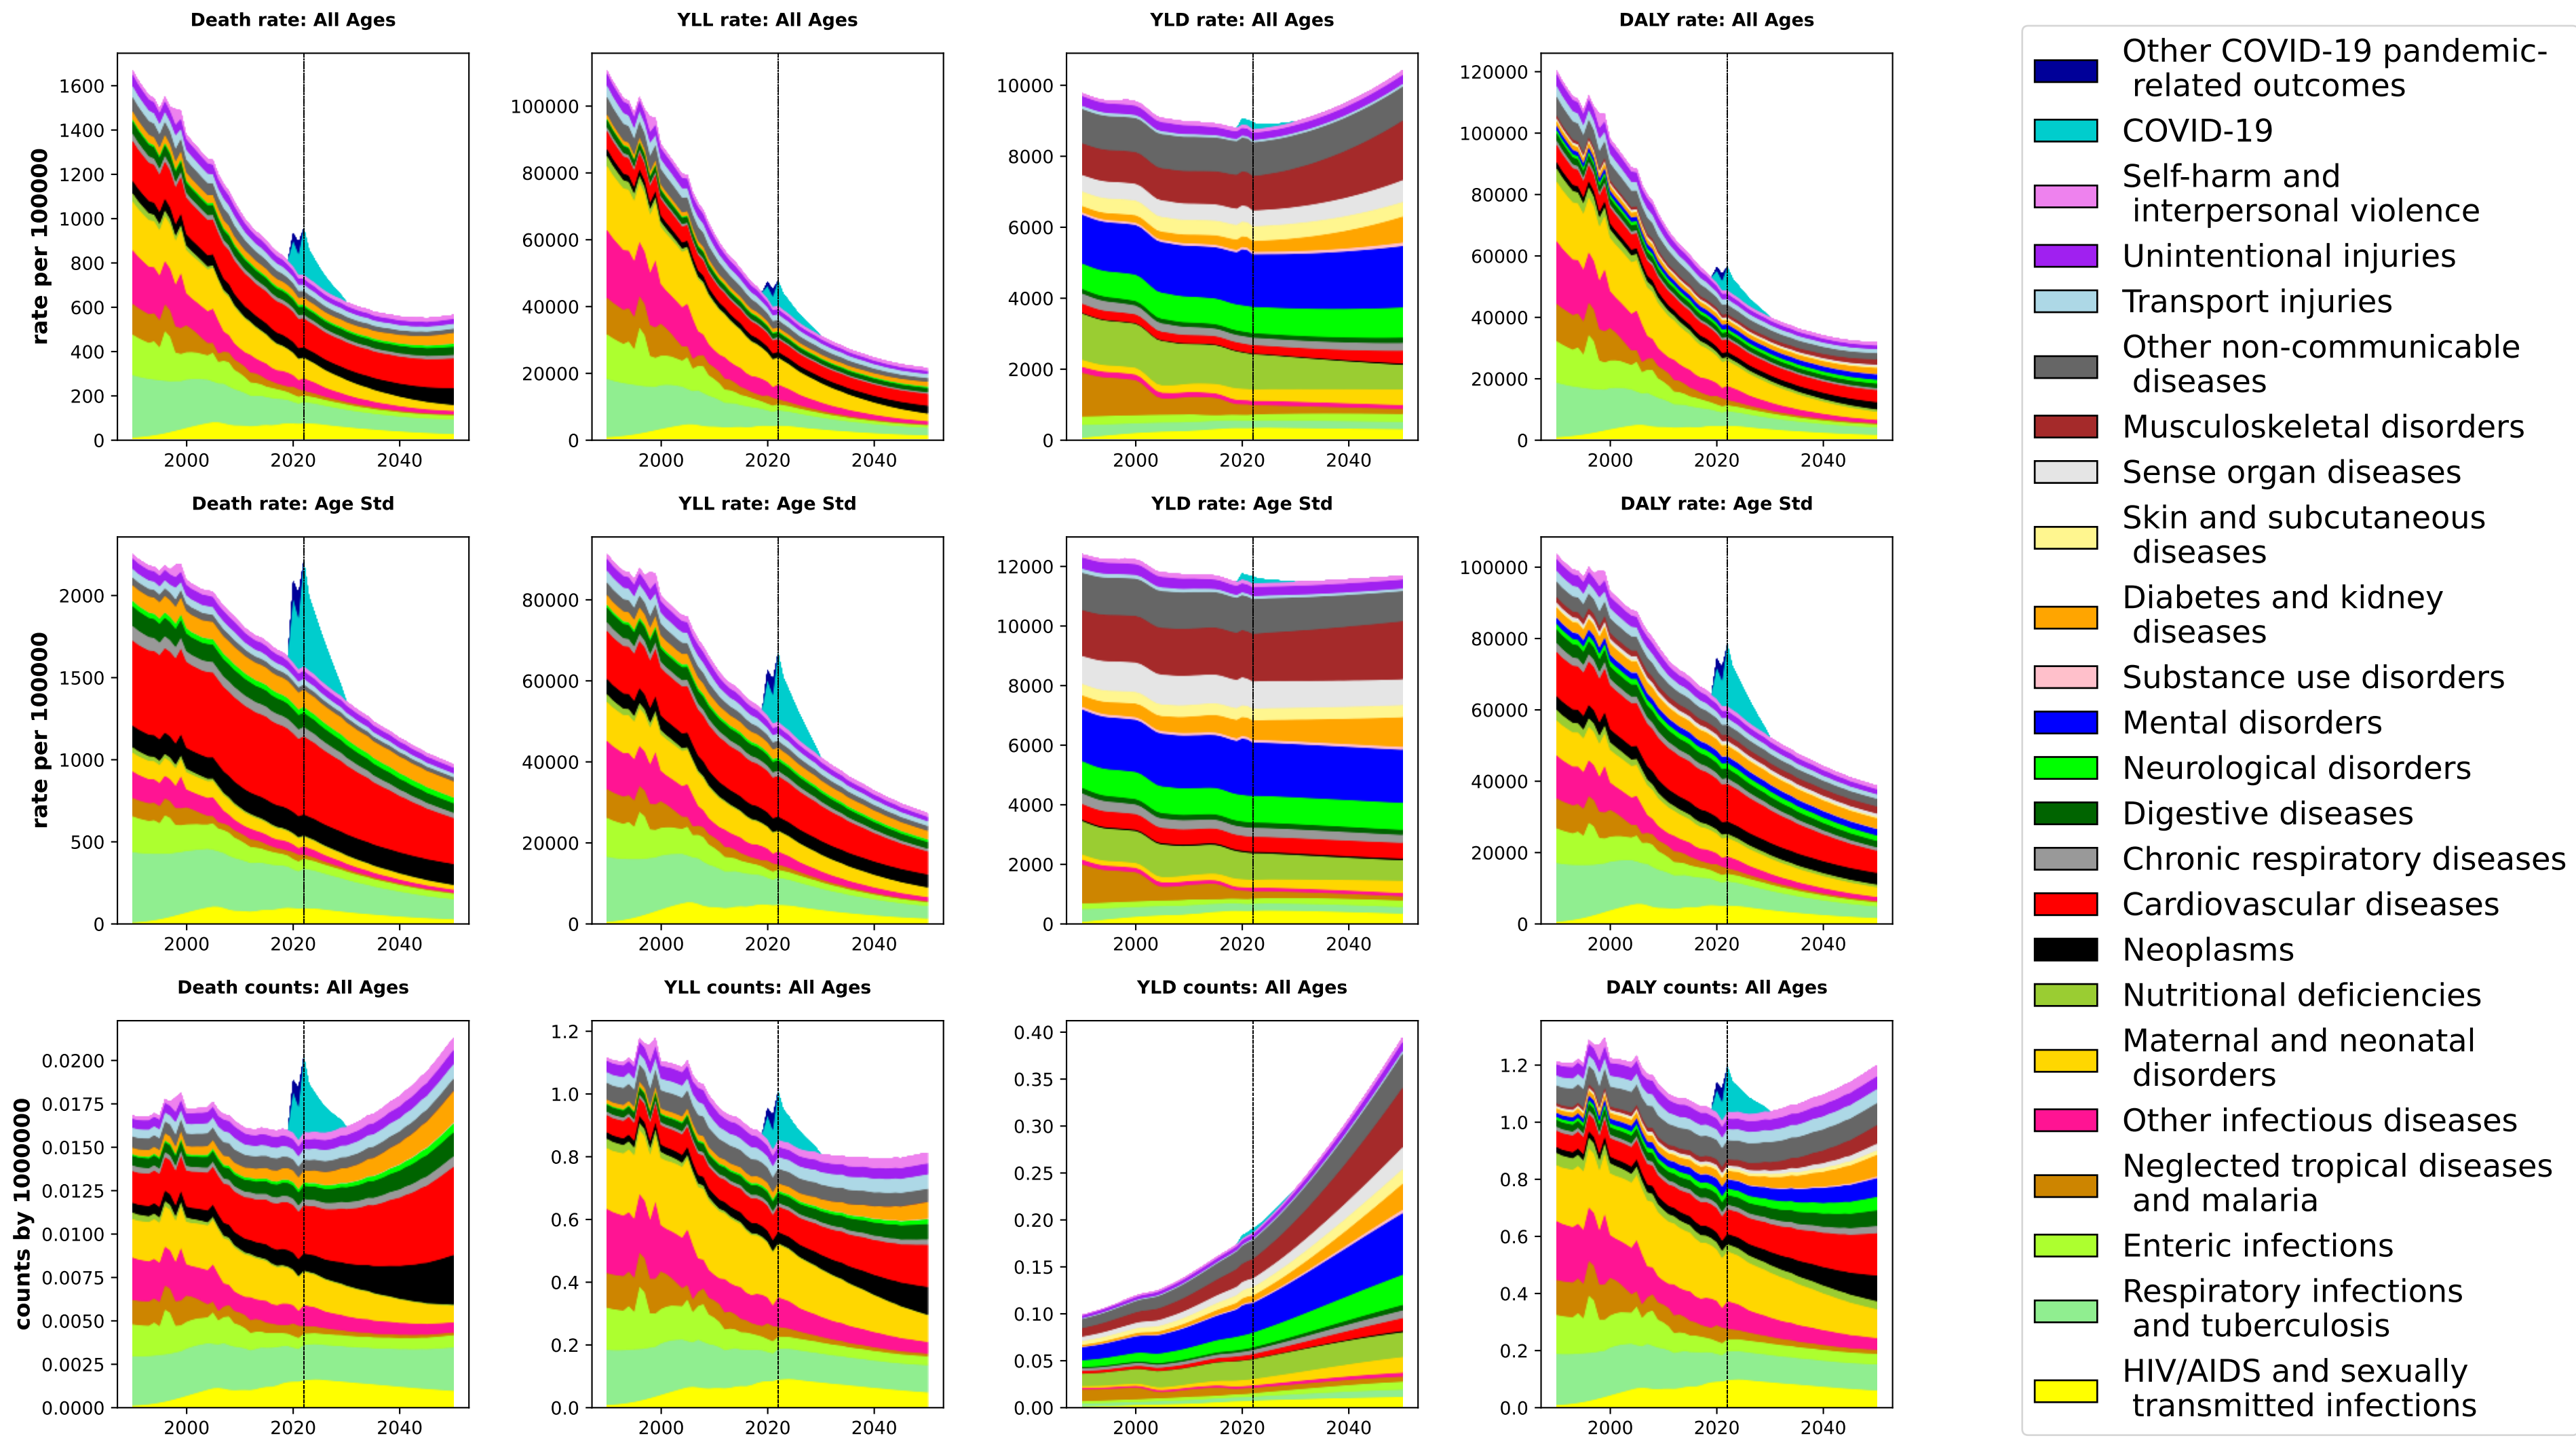

# Liberia

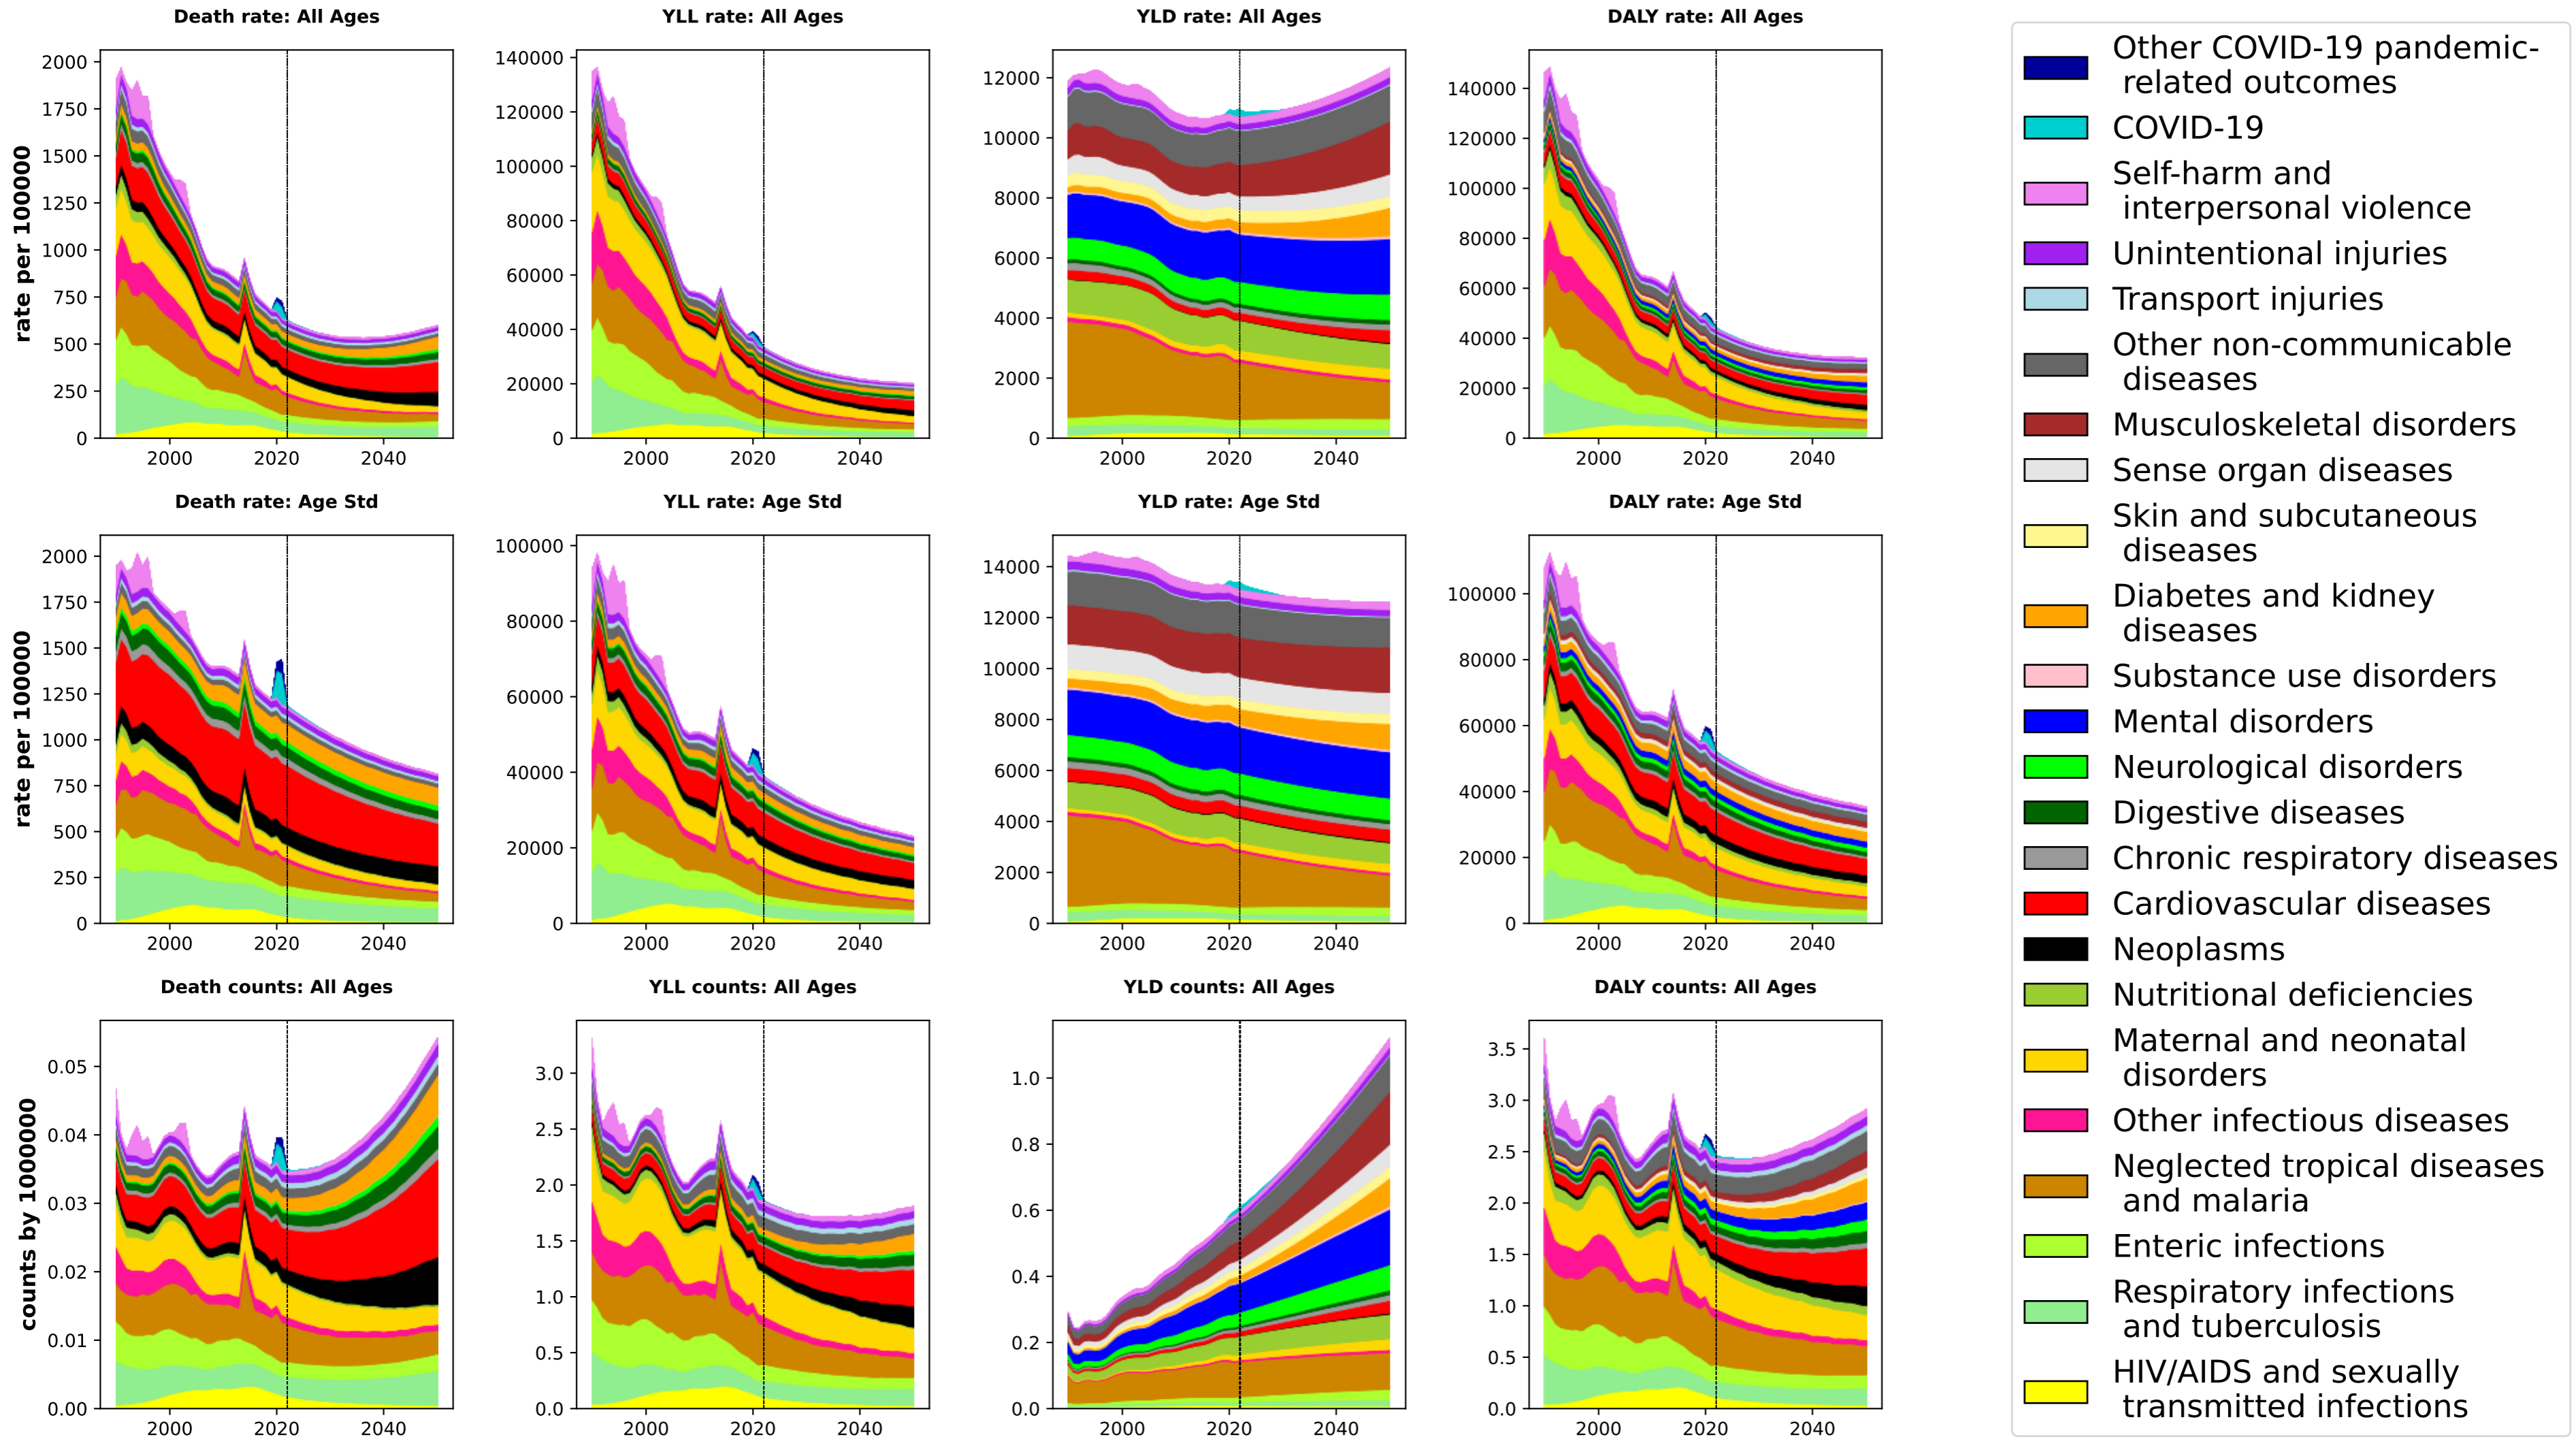

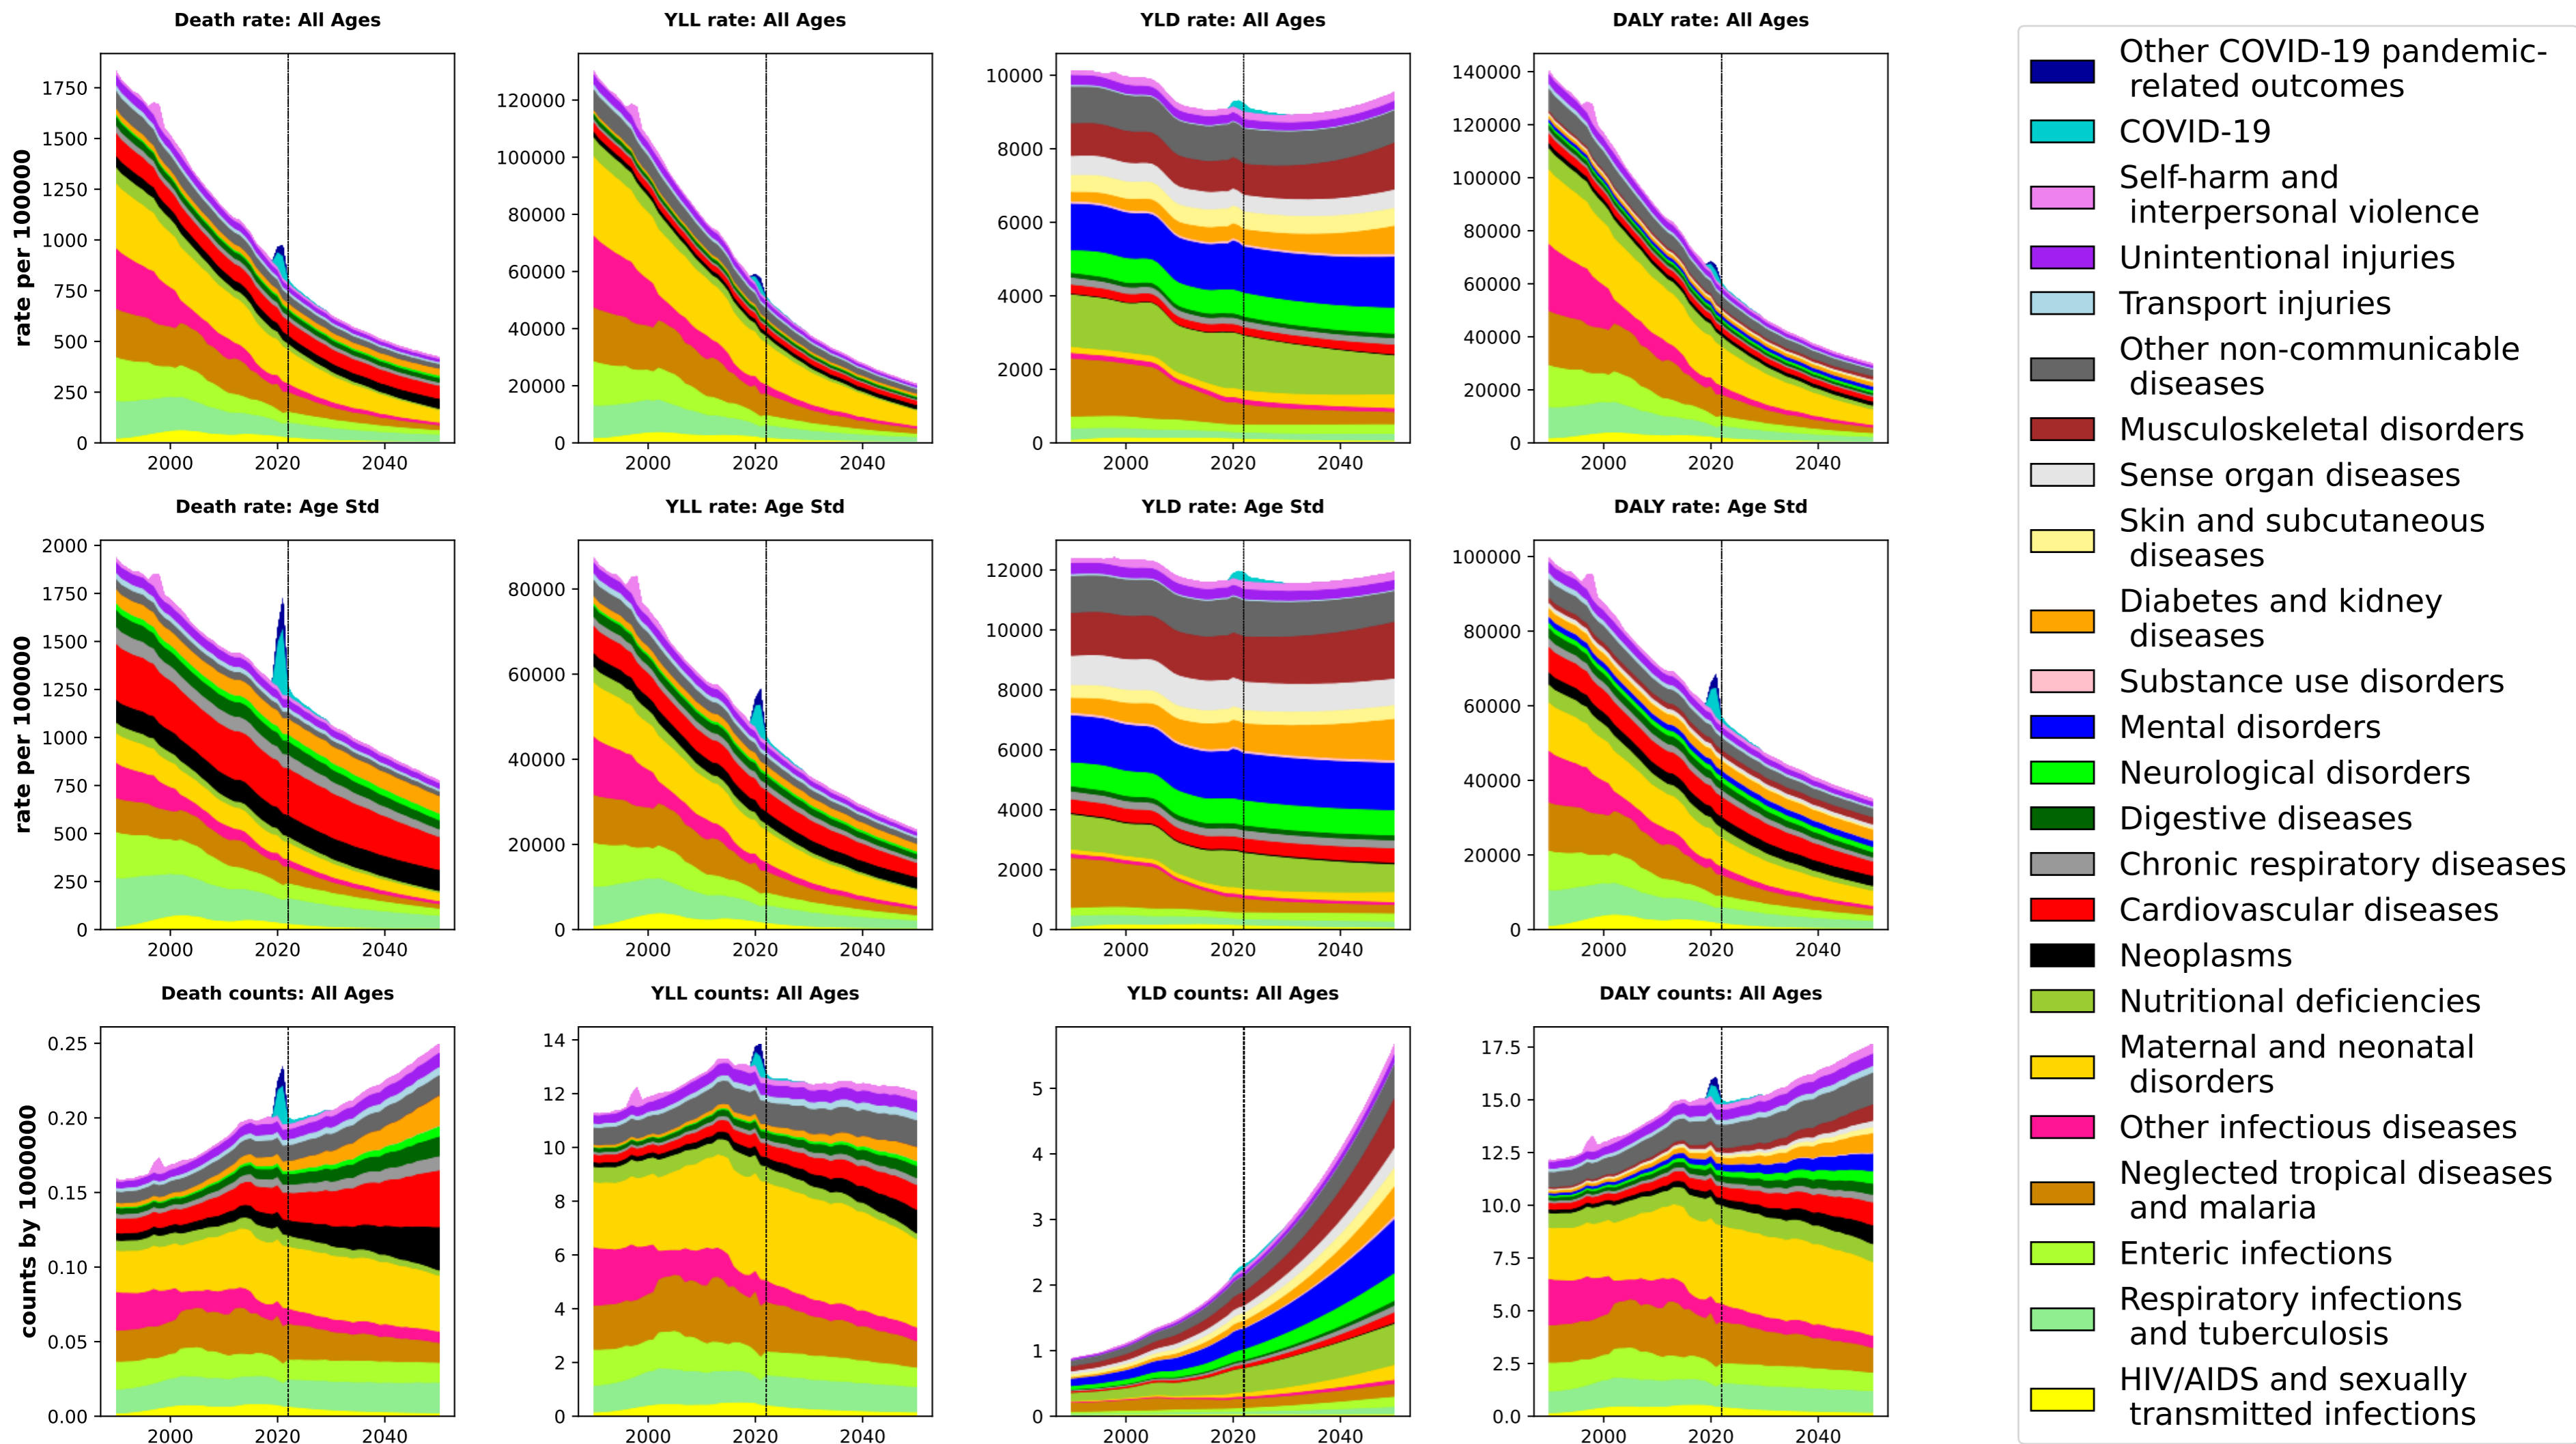

# Mauritania

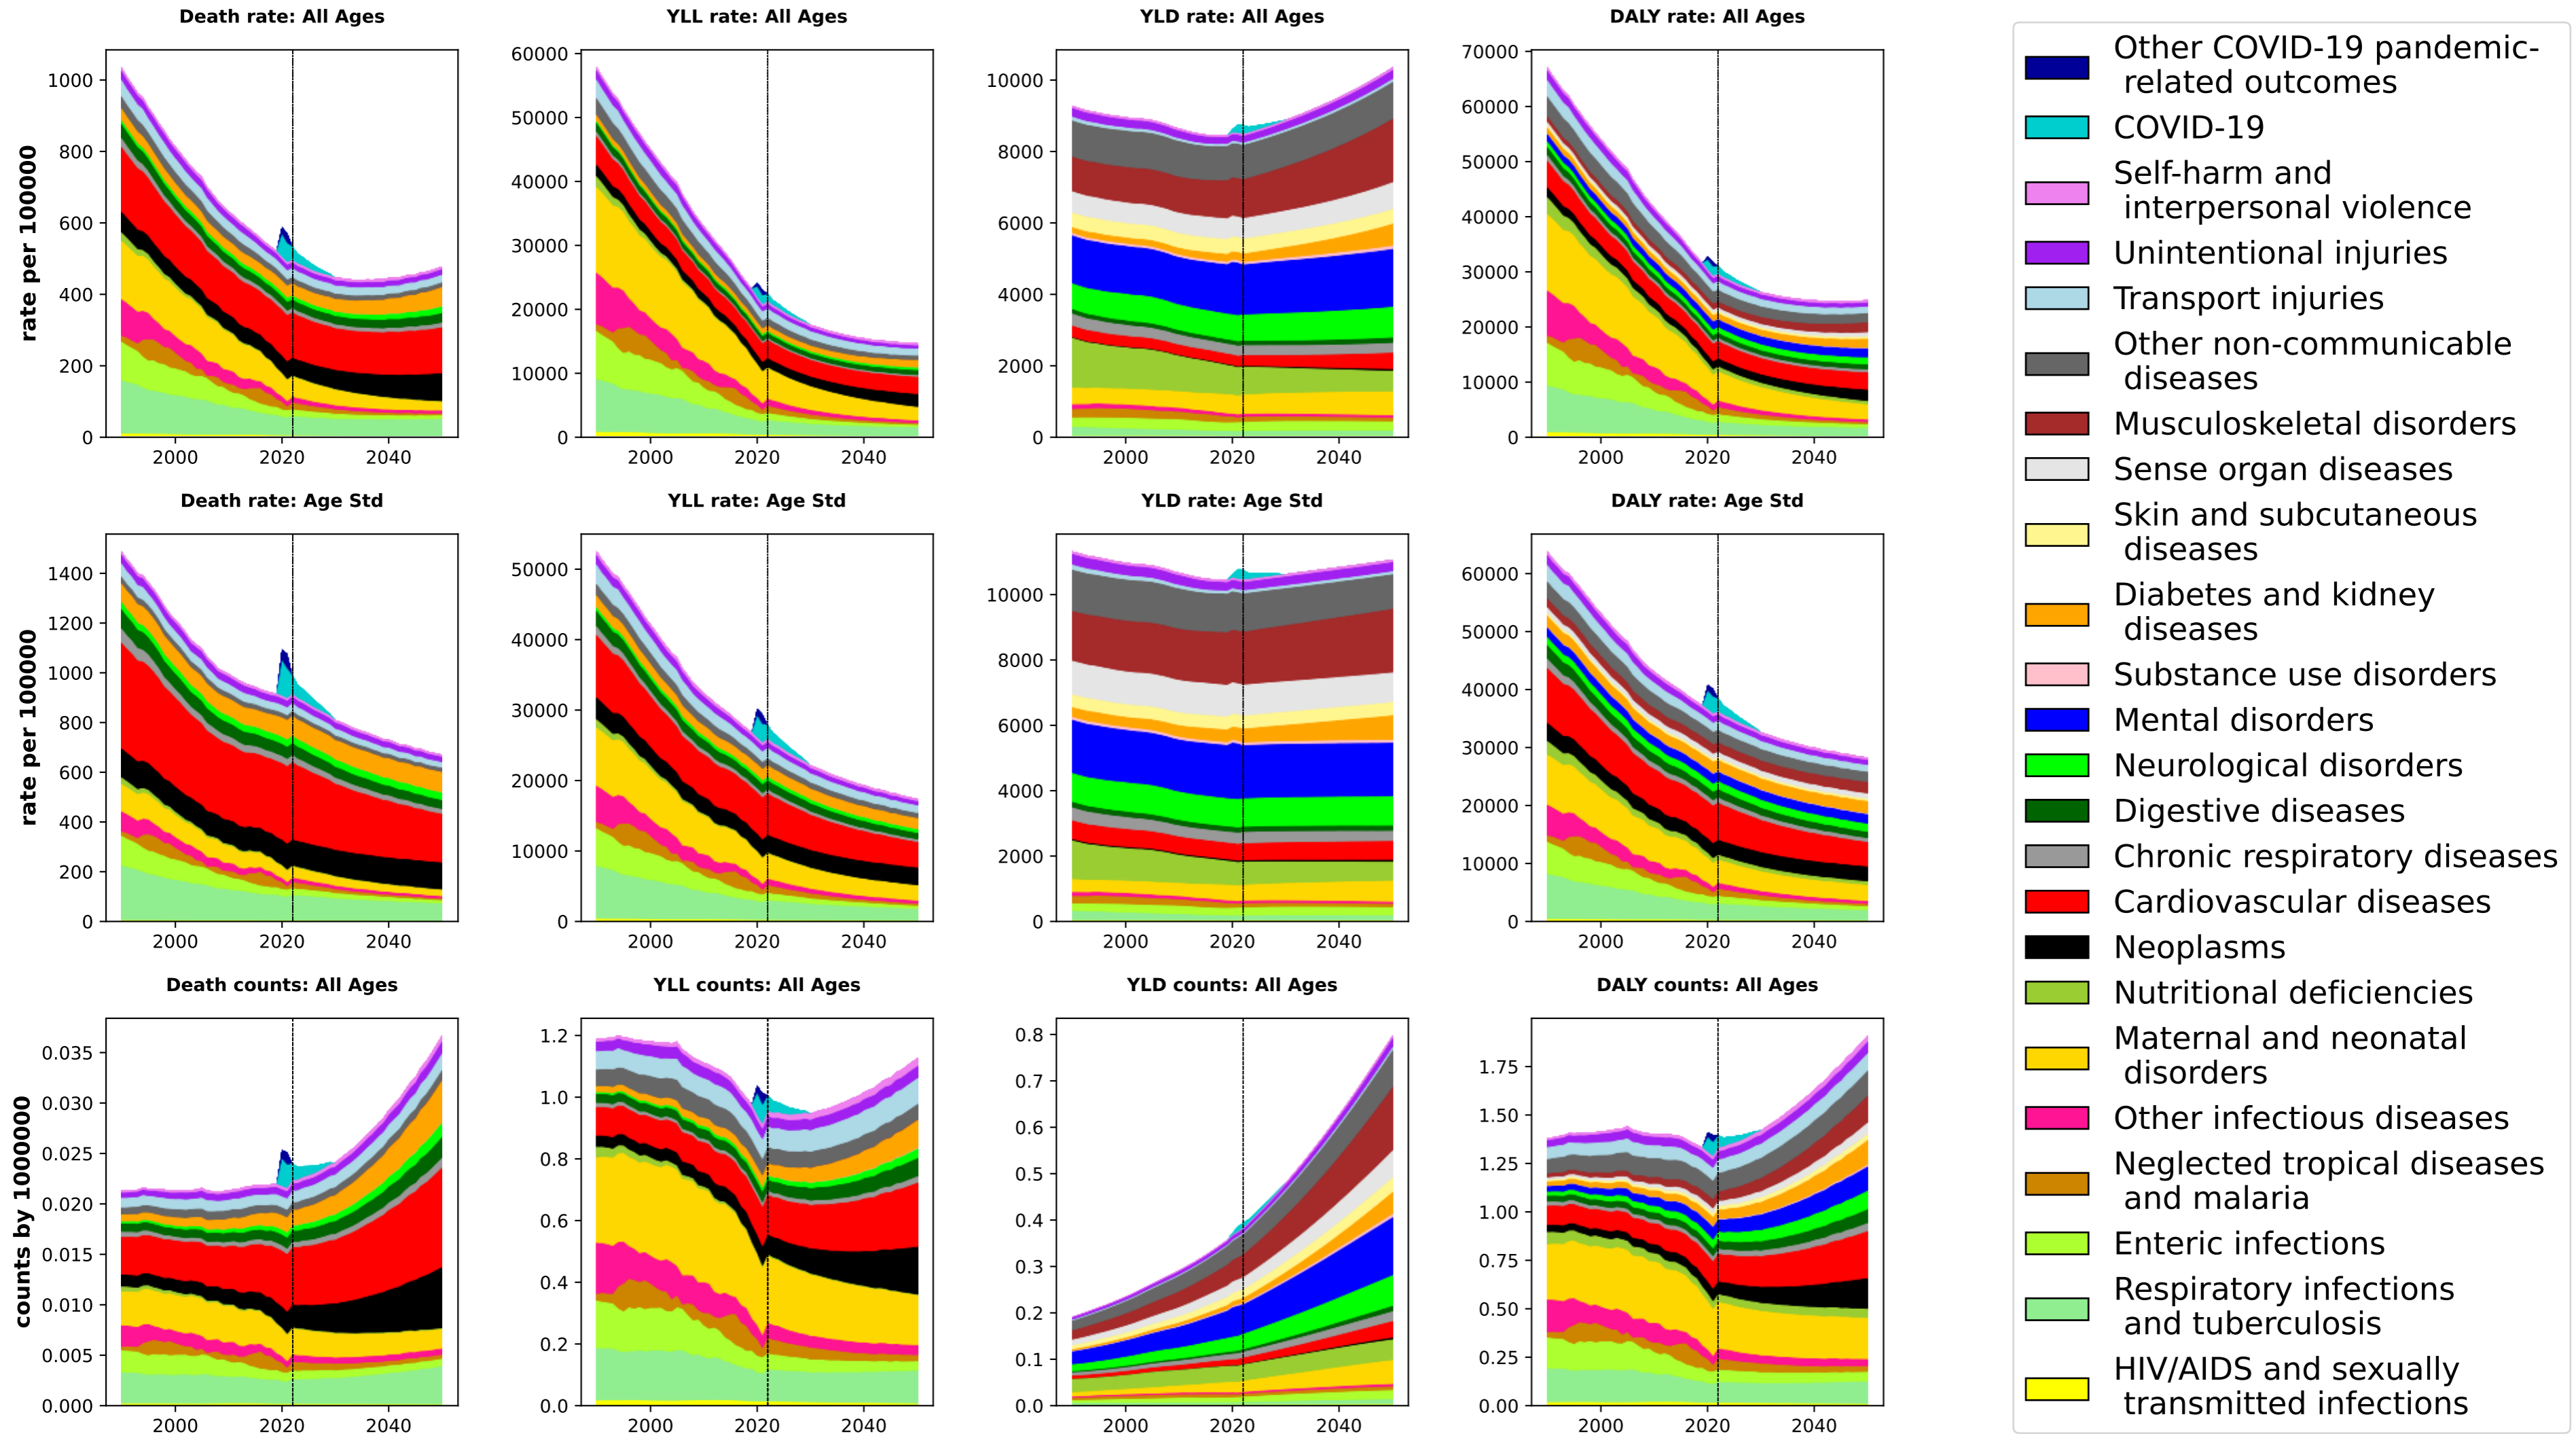

# Niger

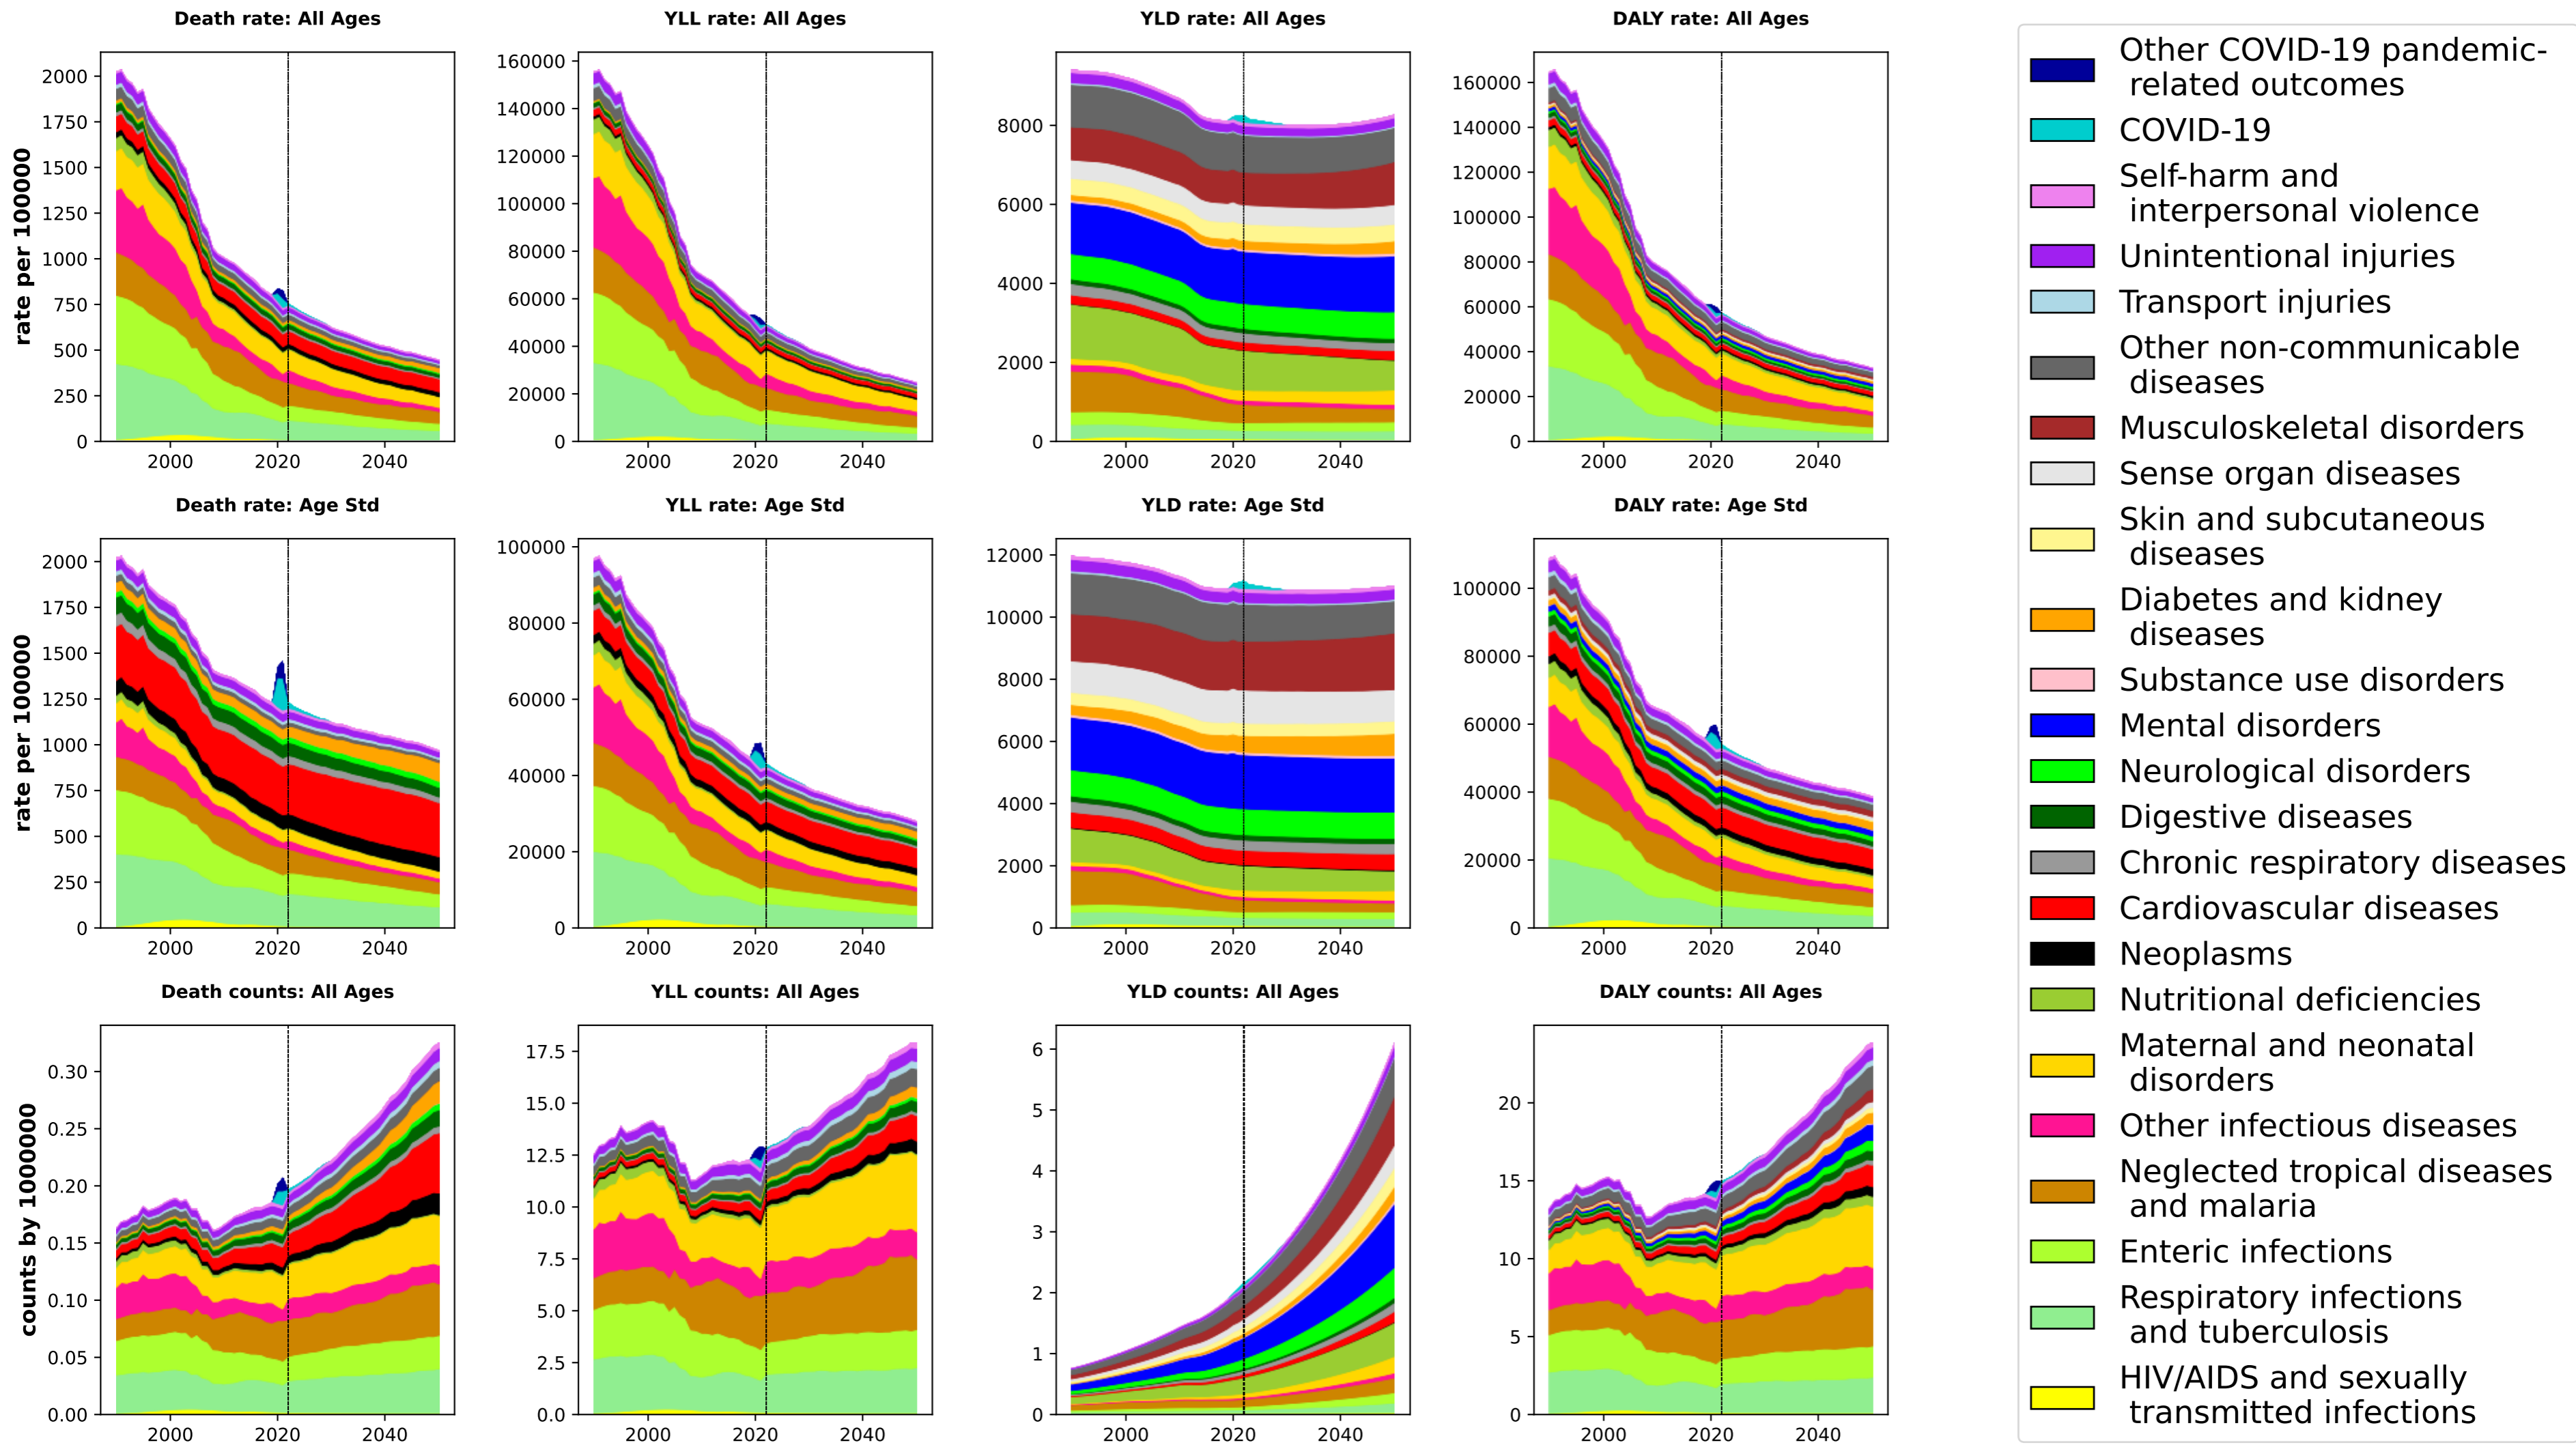

# Nigeria

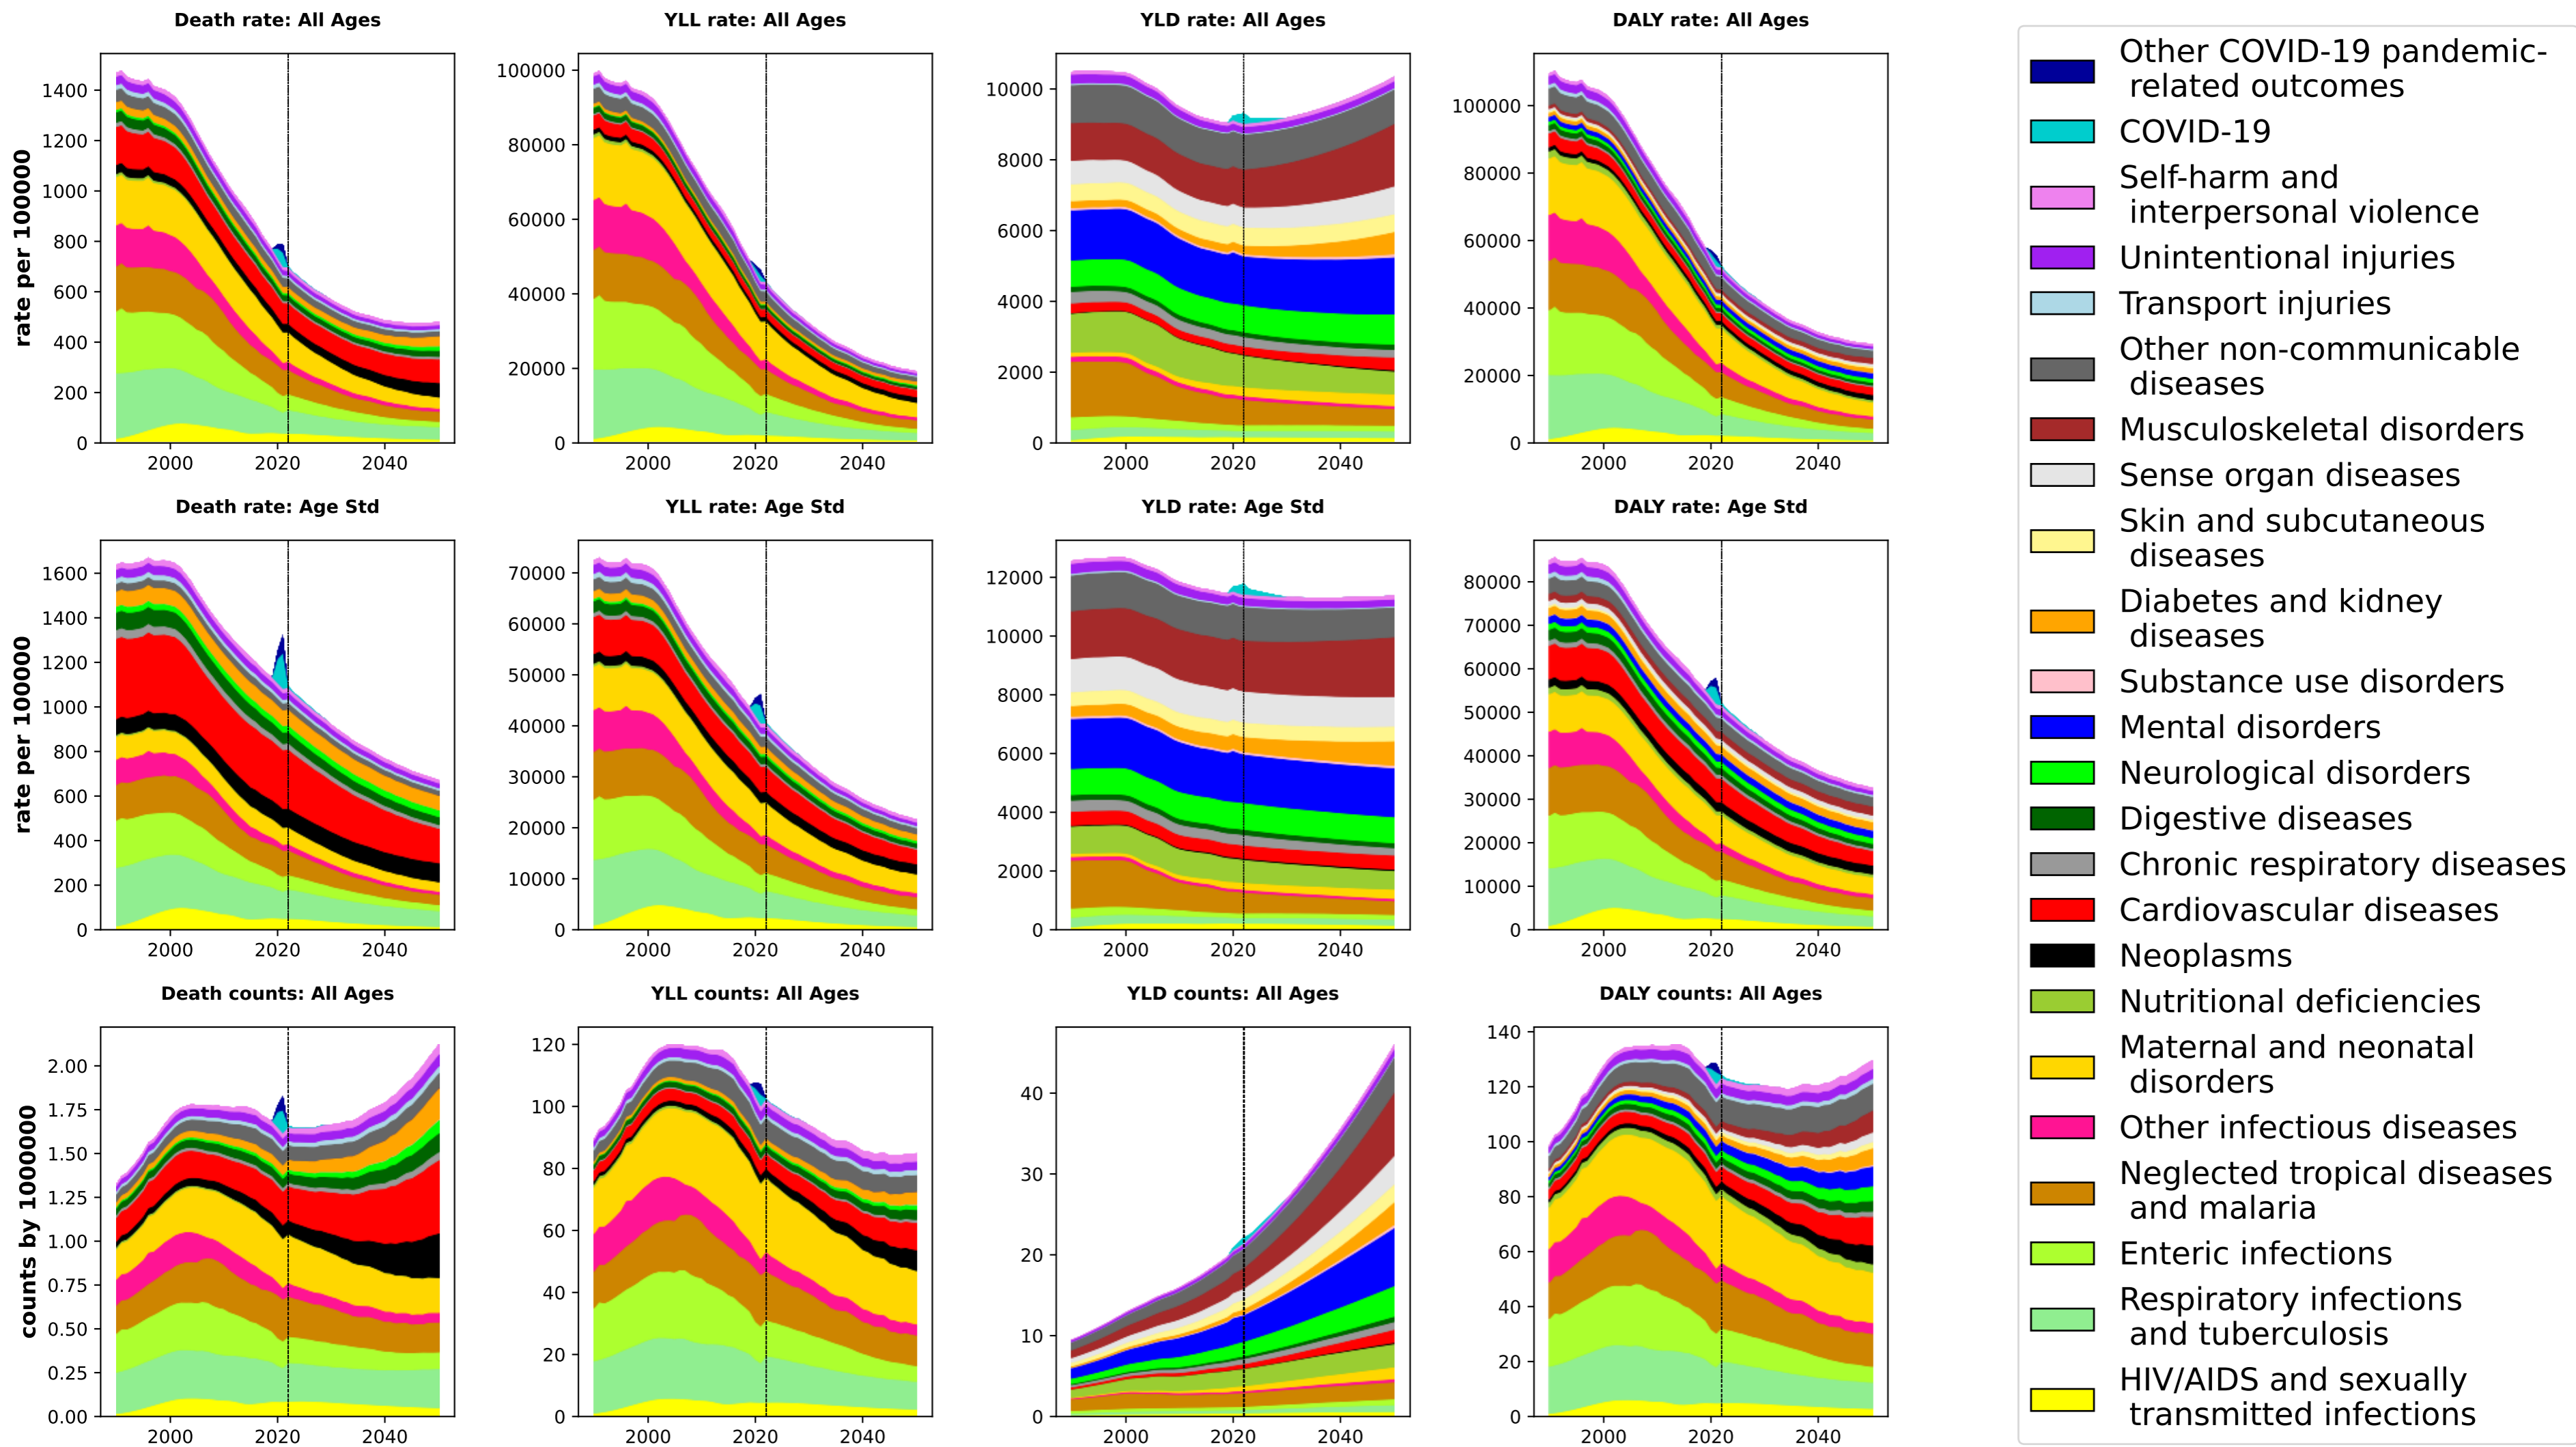

# São Tomé and Príncipe

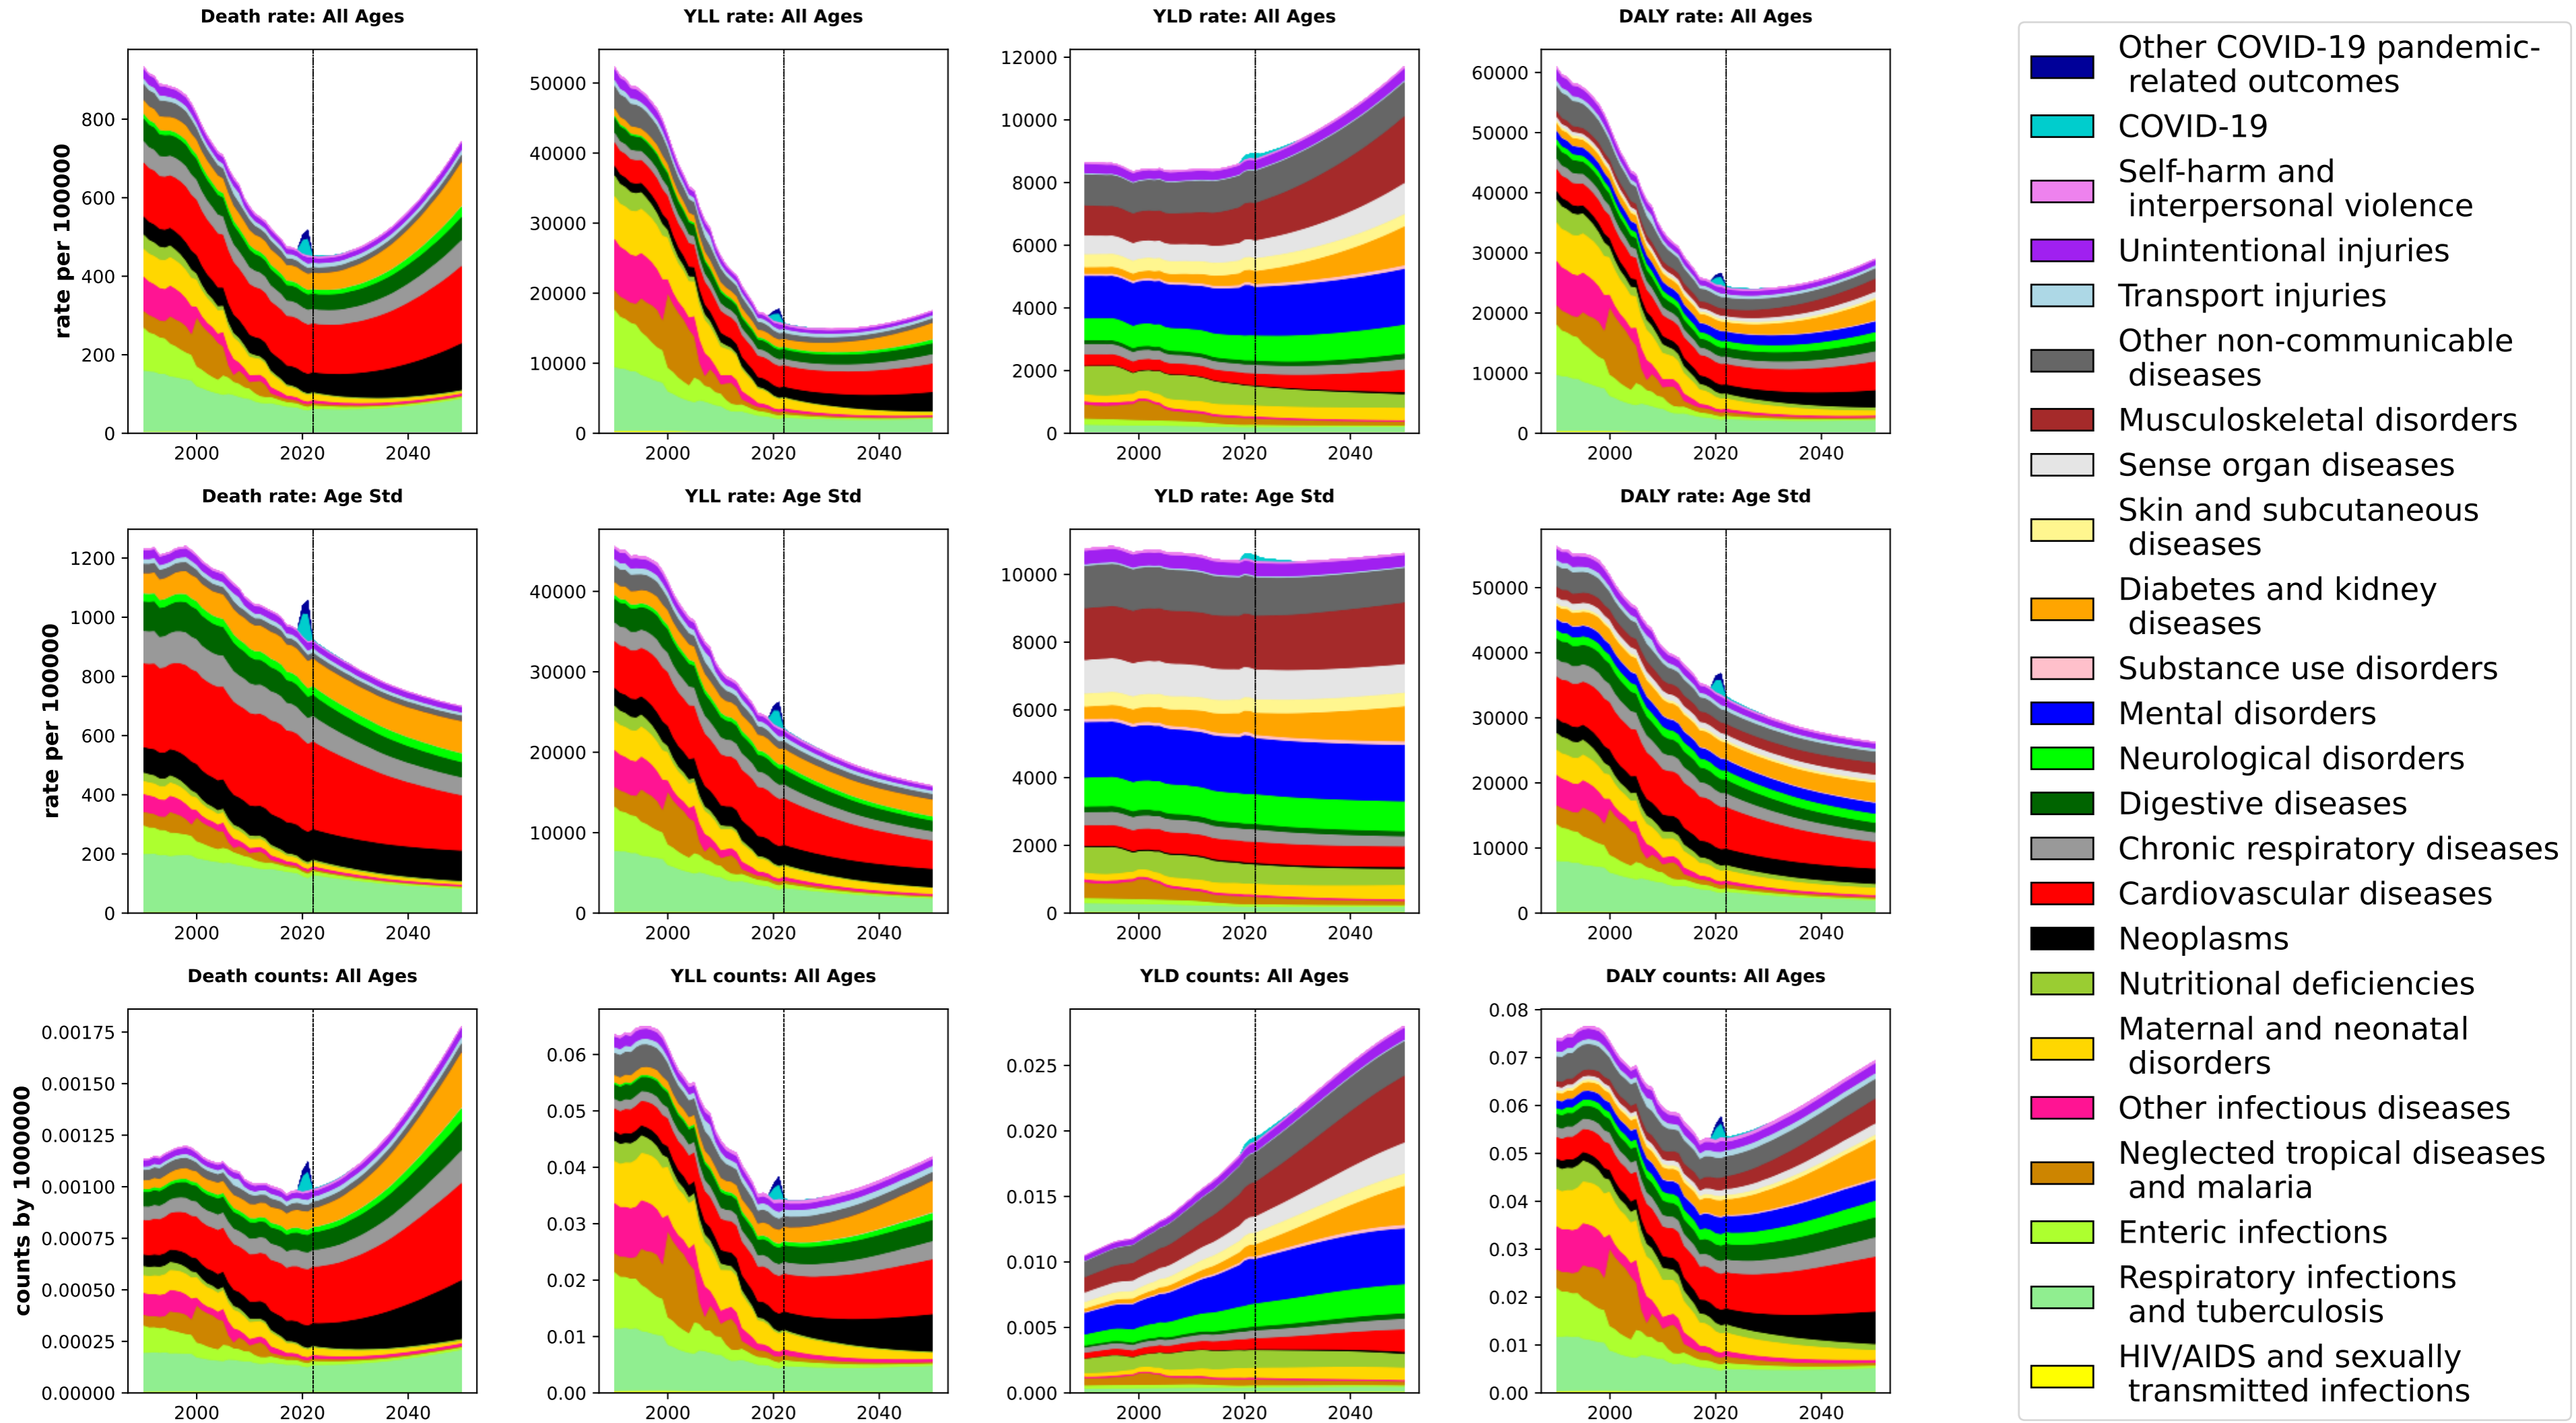



# Senegal

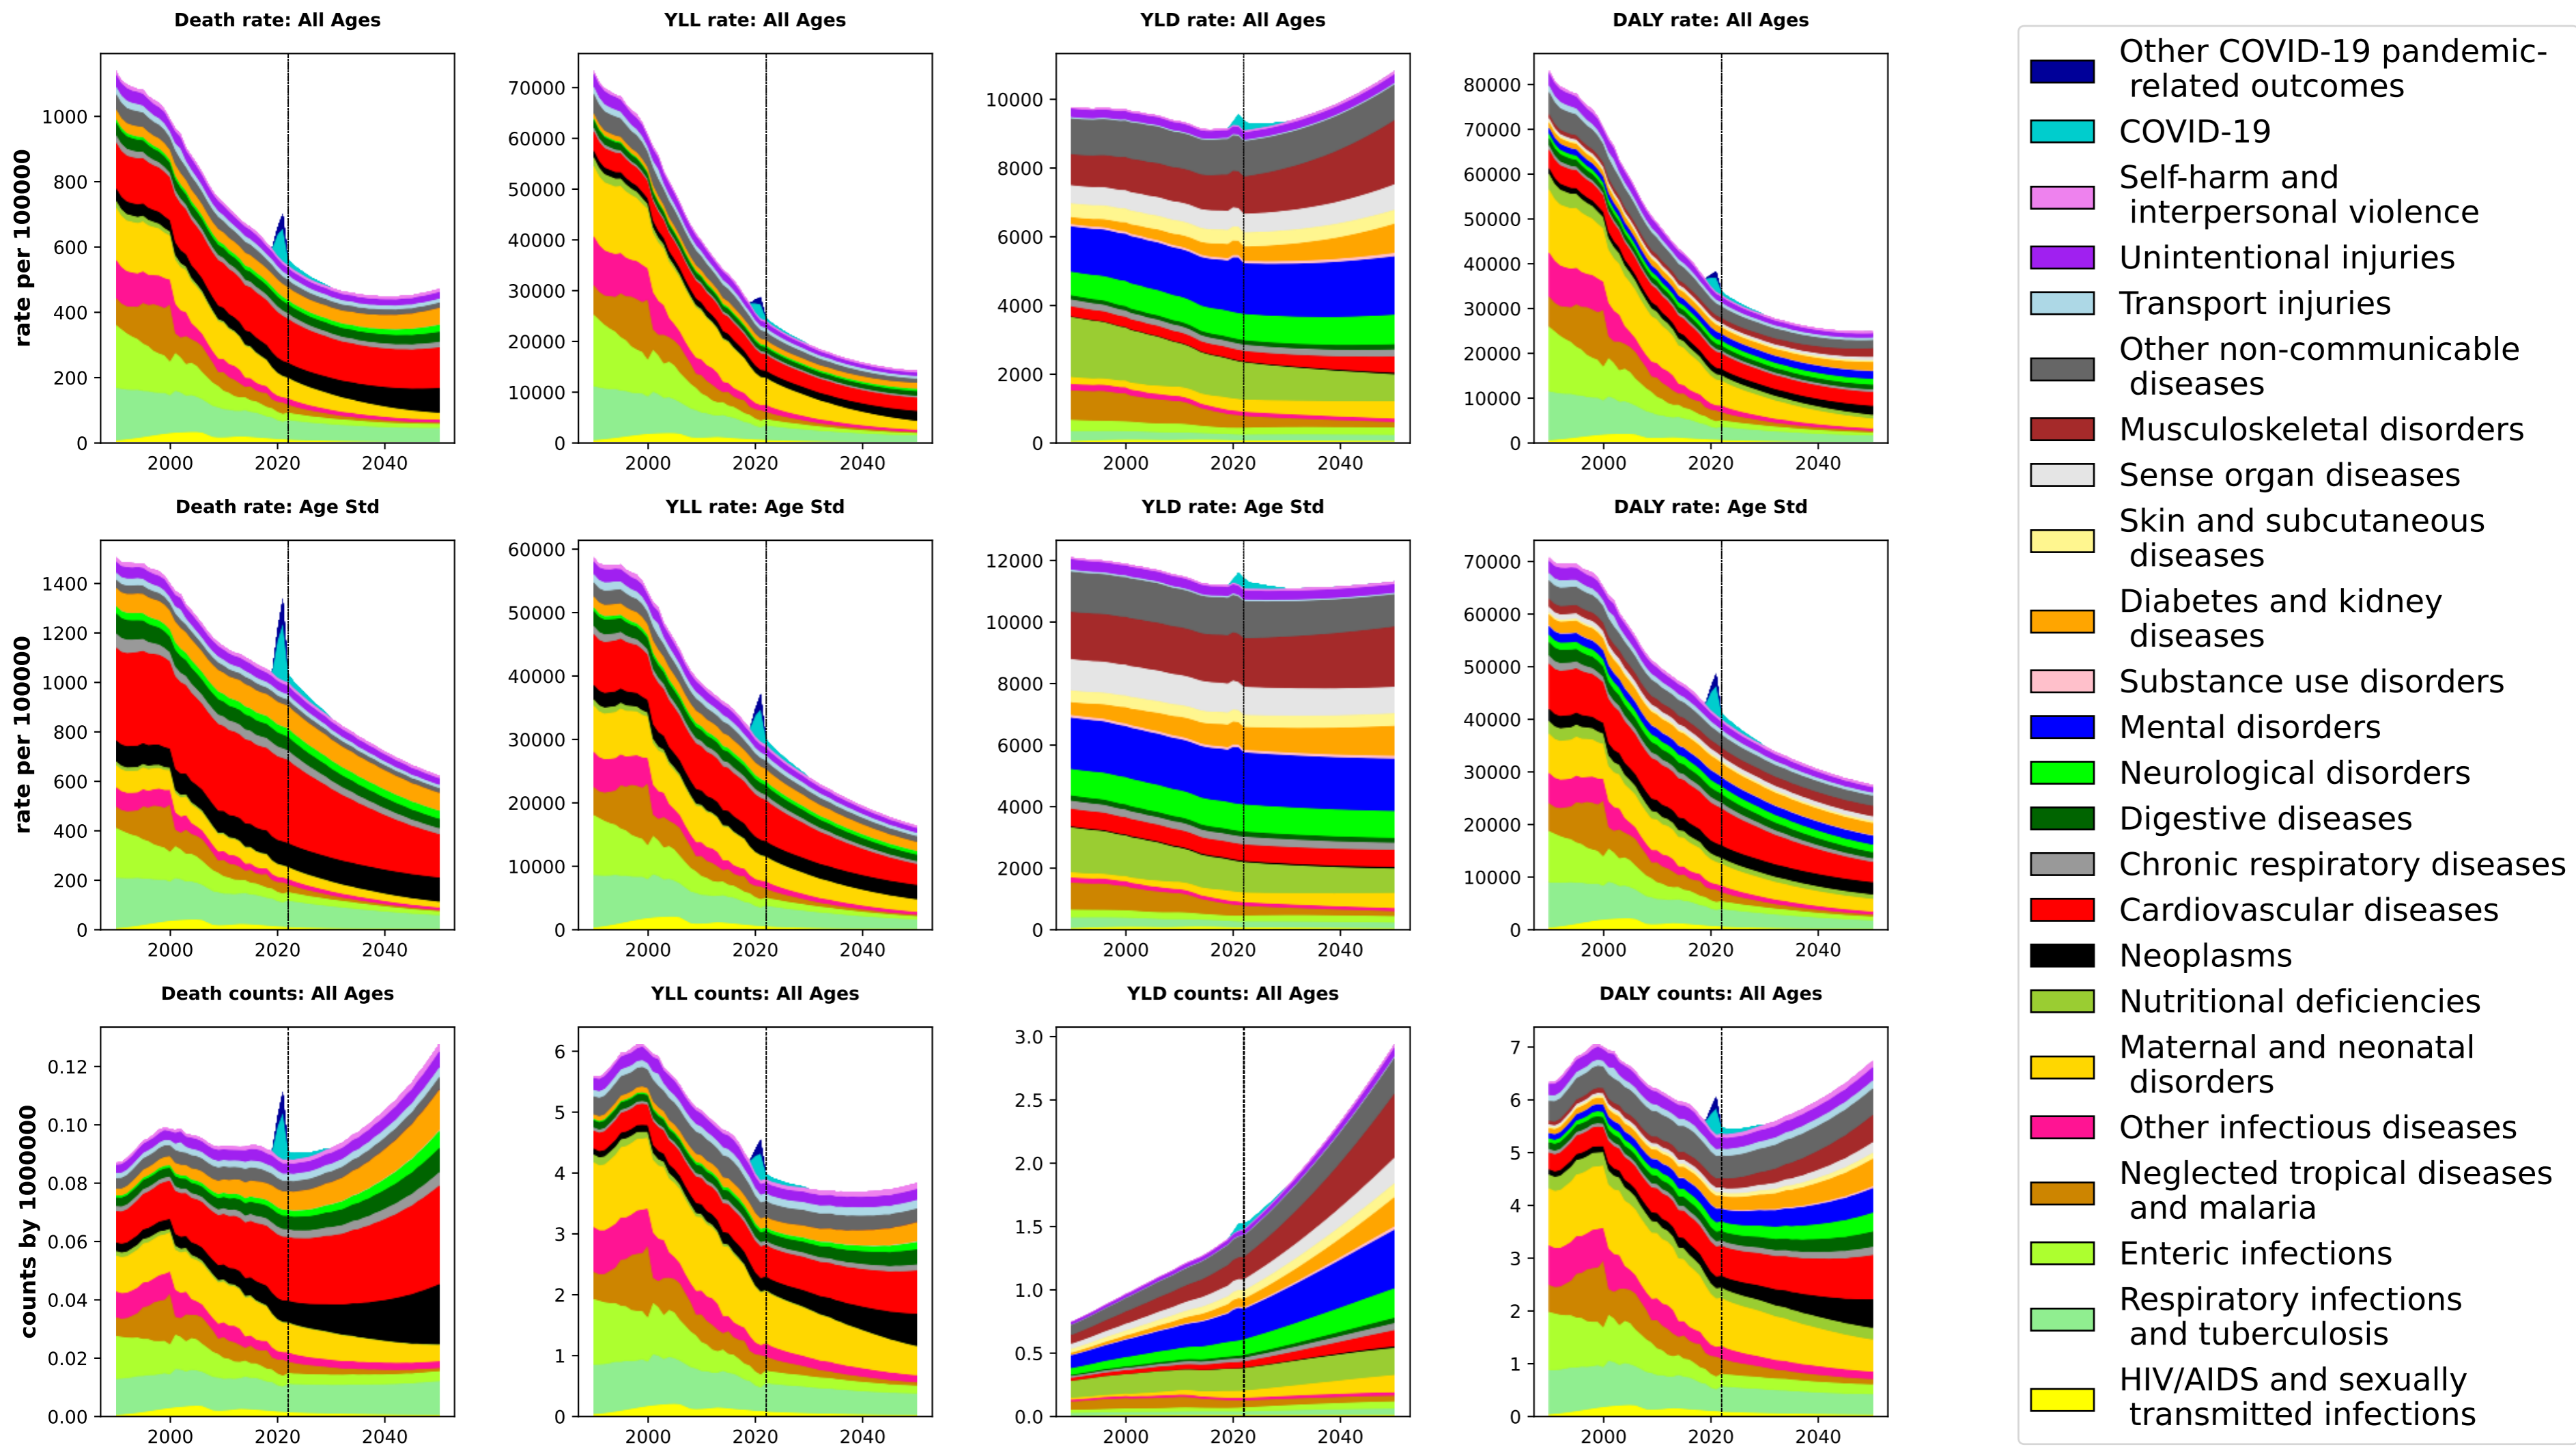

# Sierra Leone

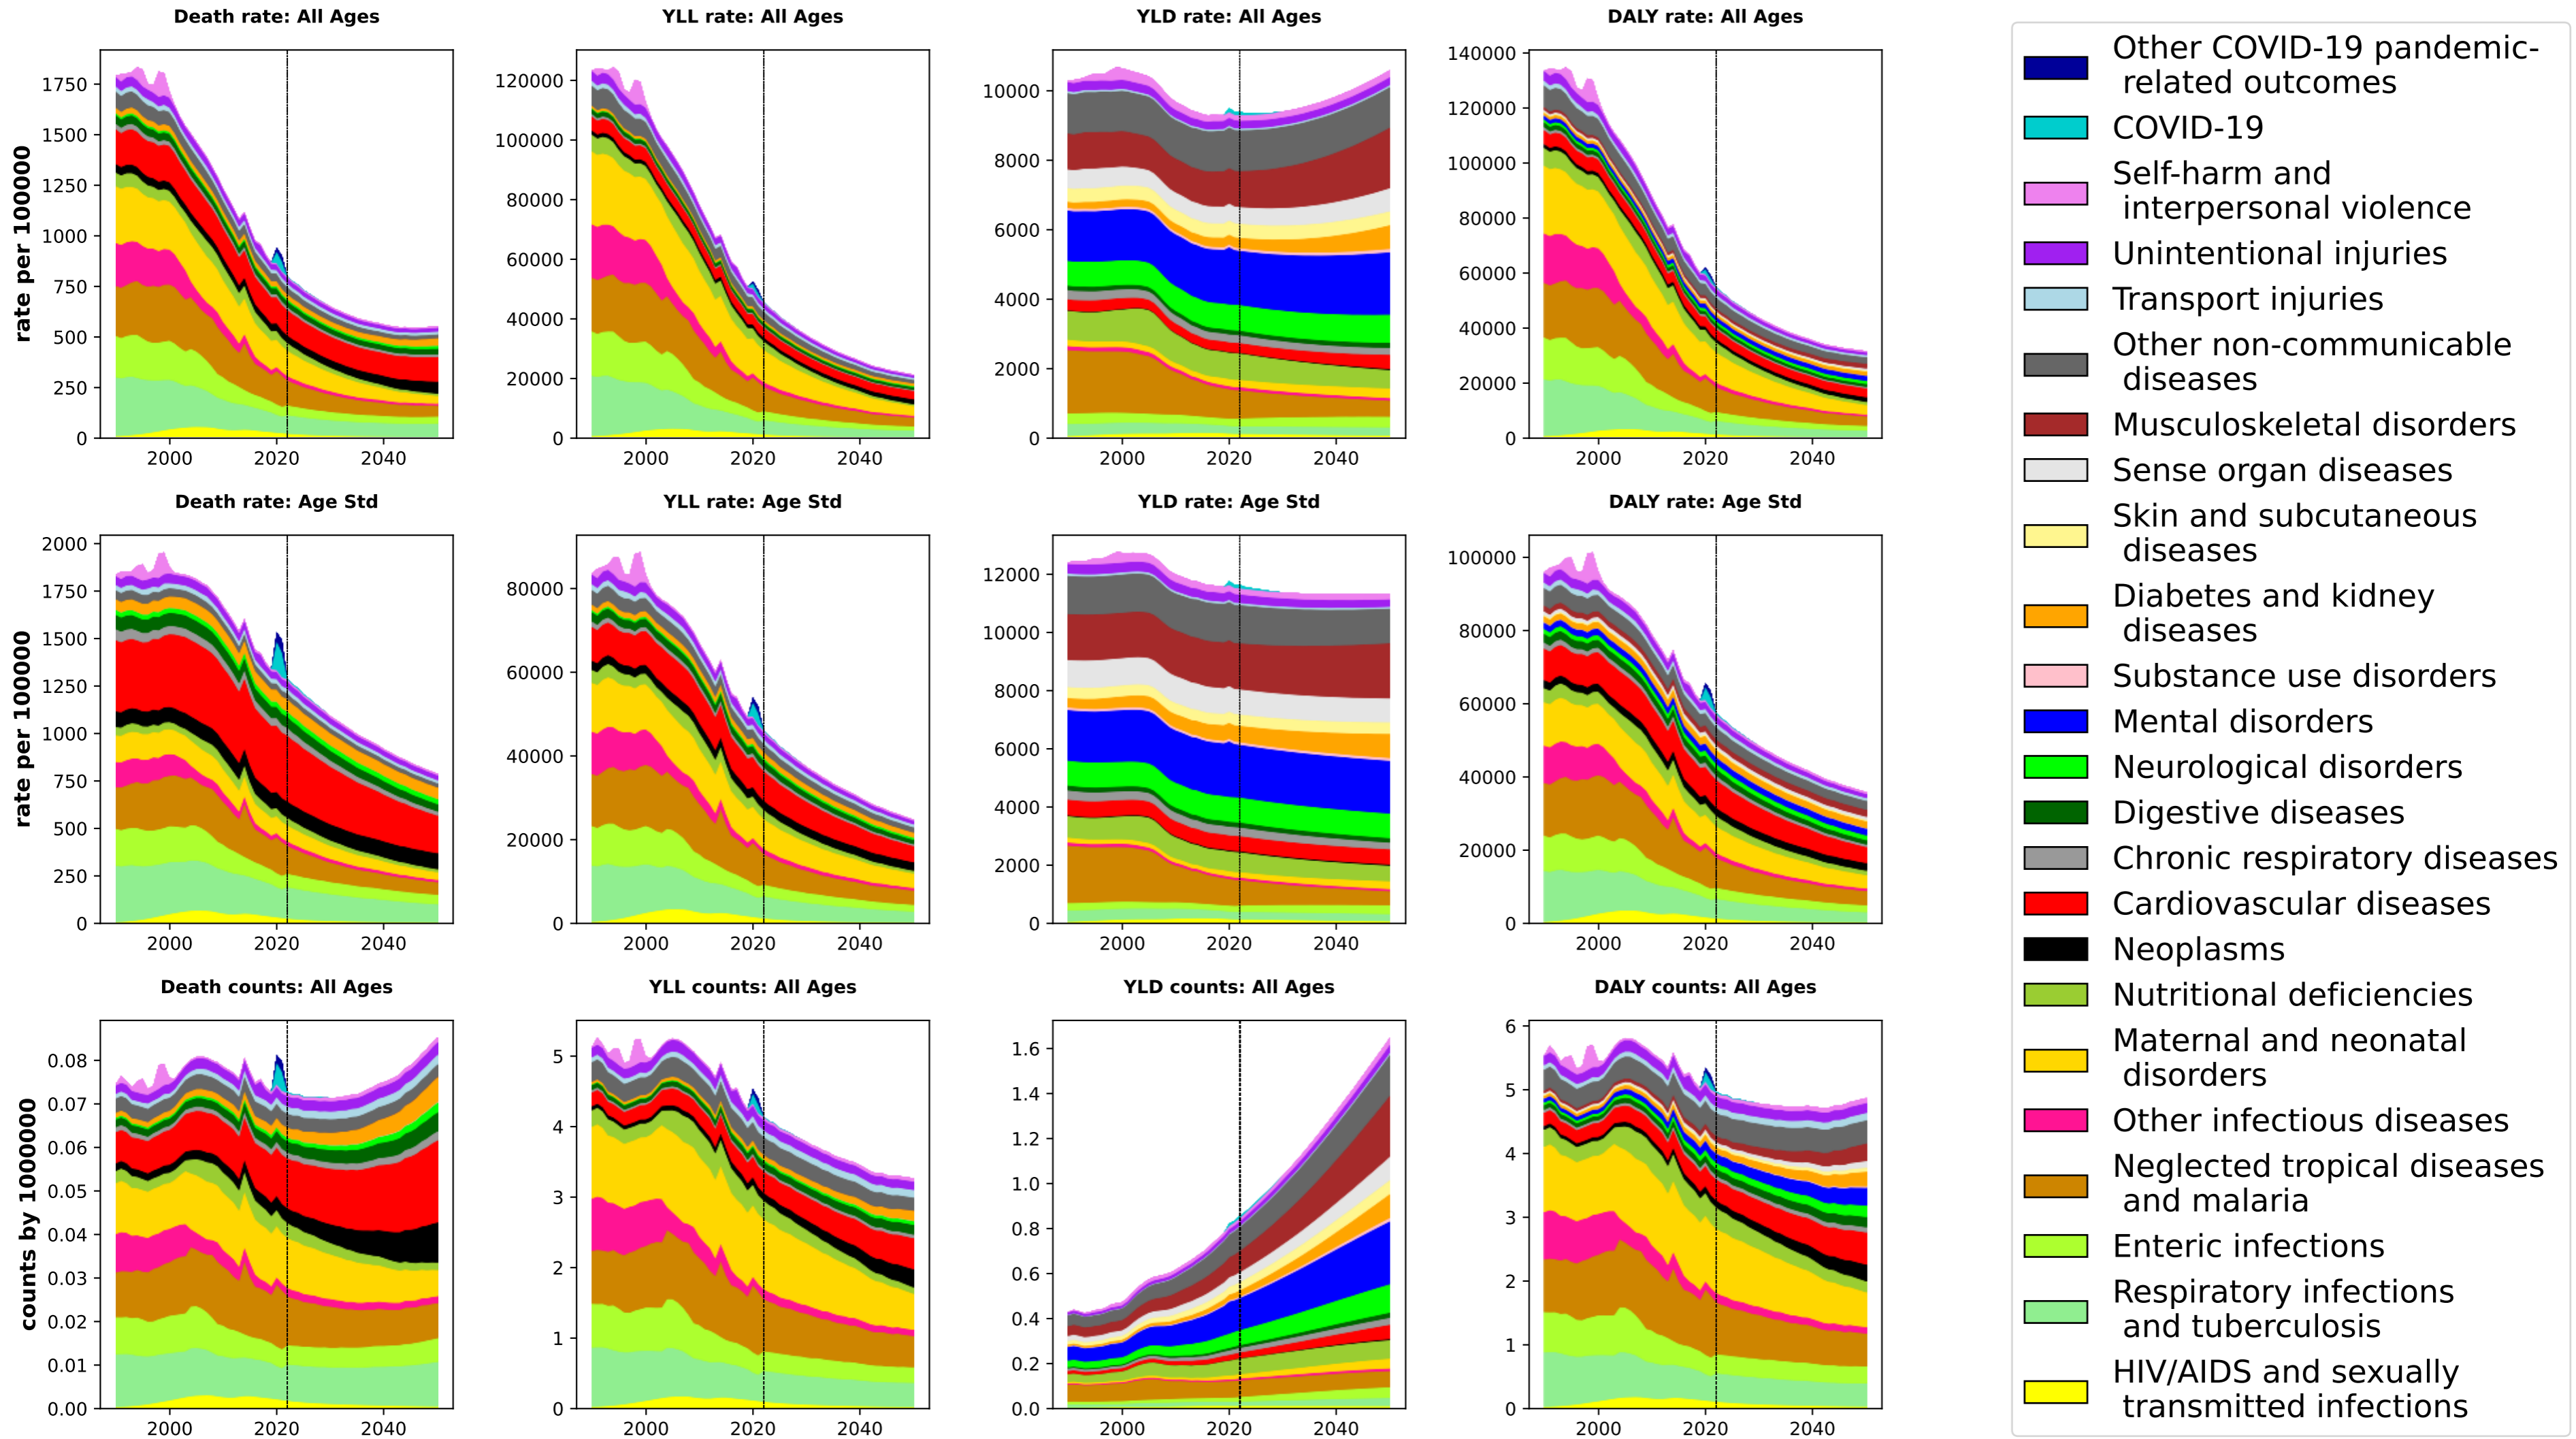

# Togo

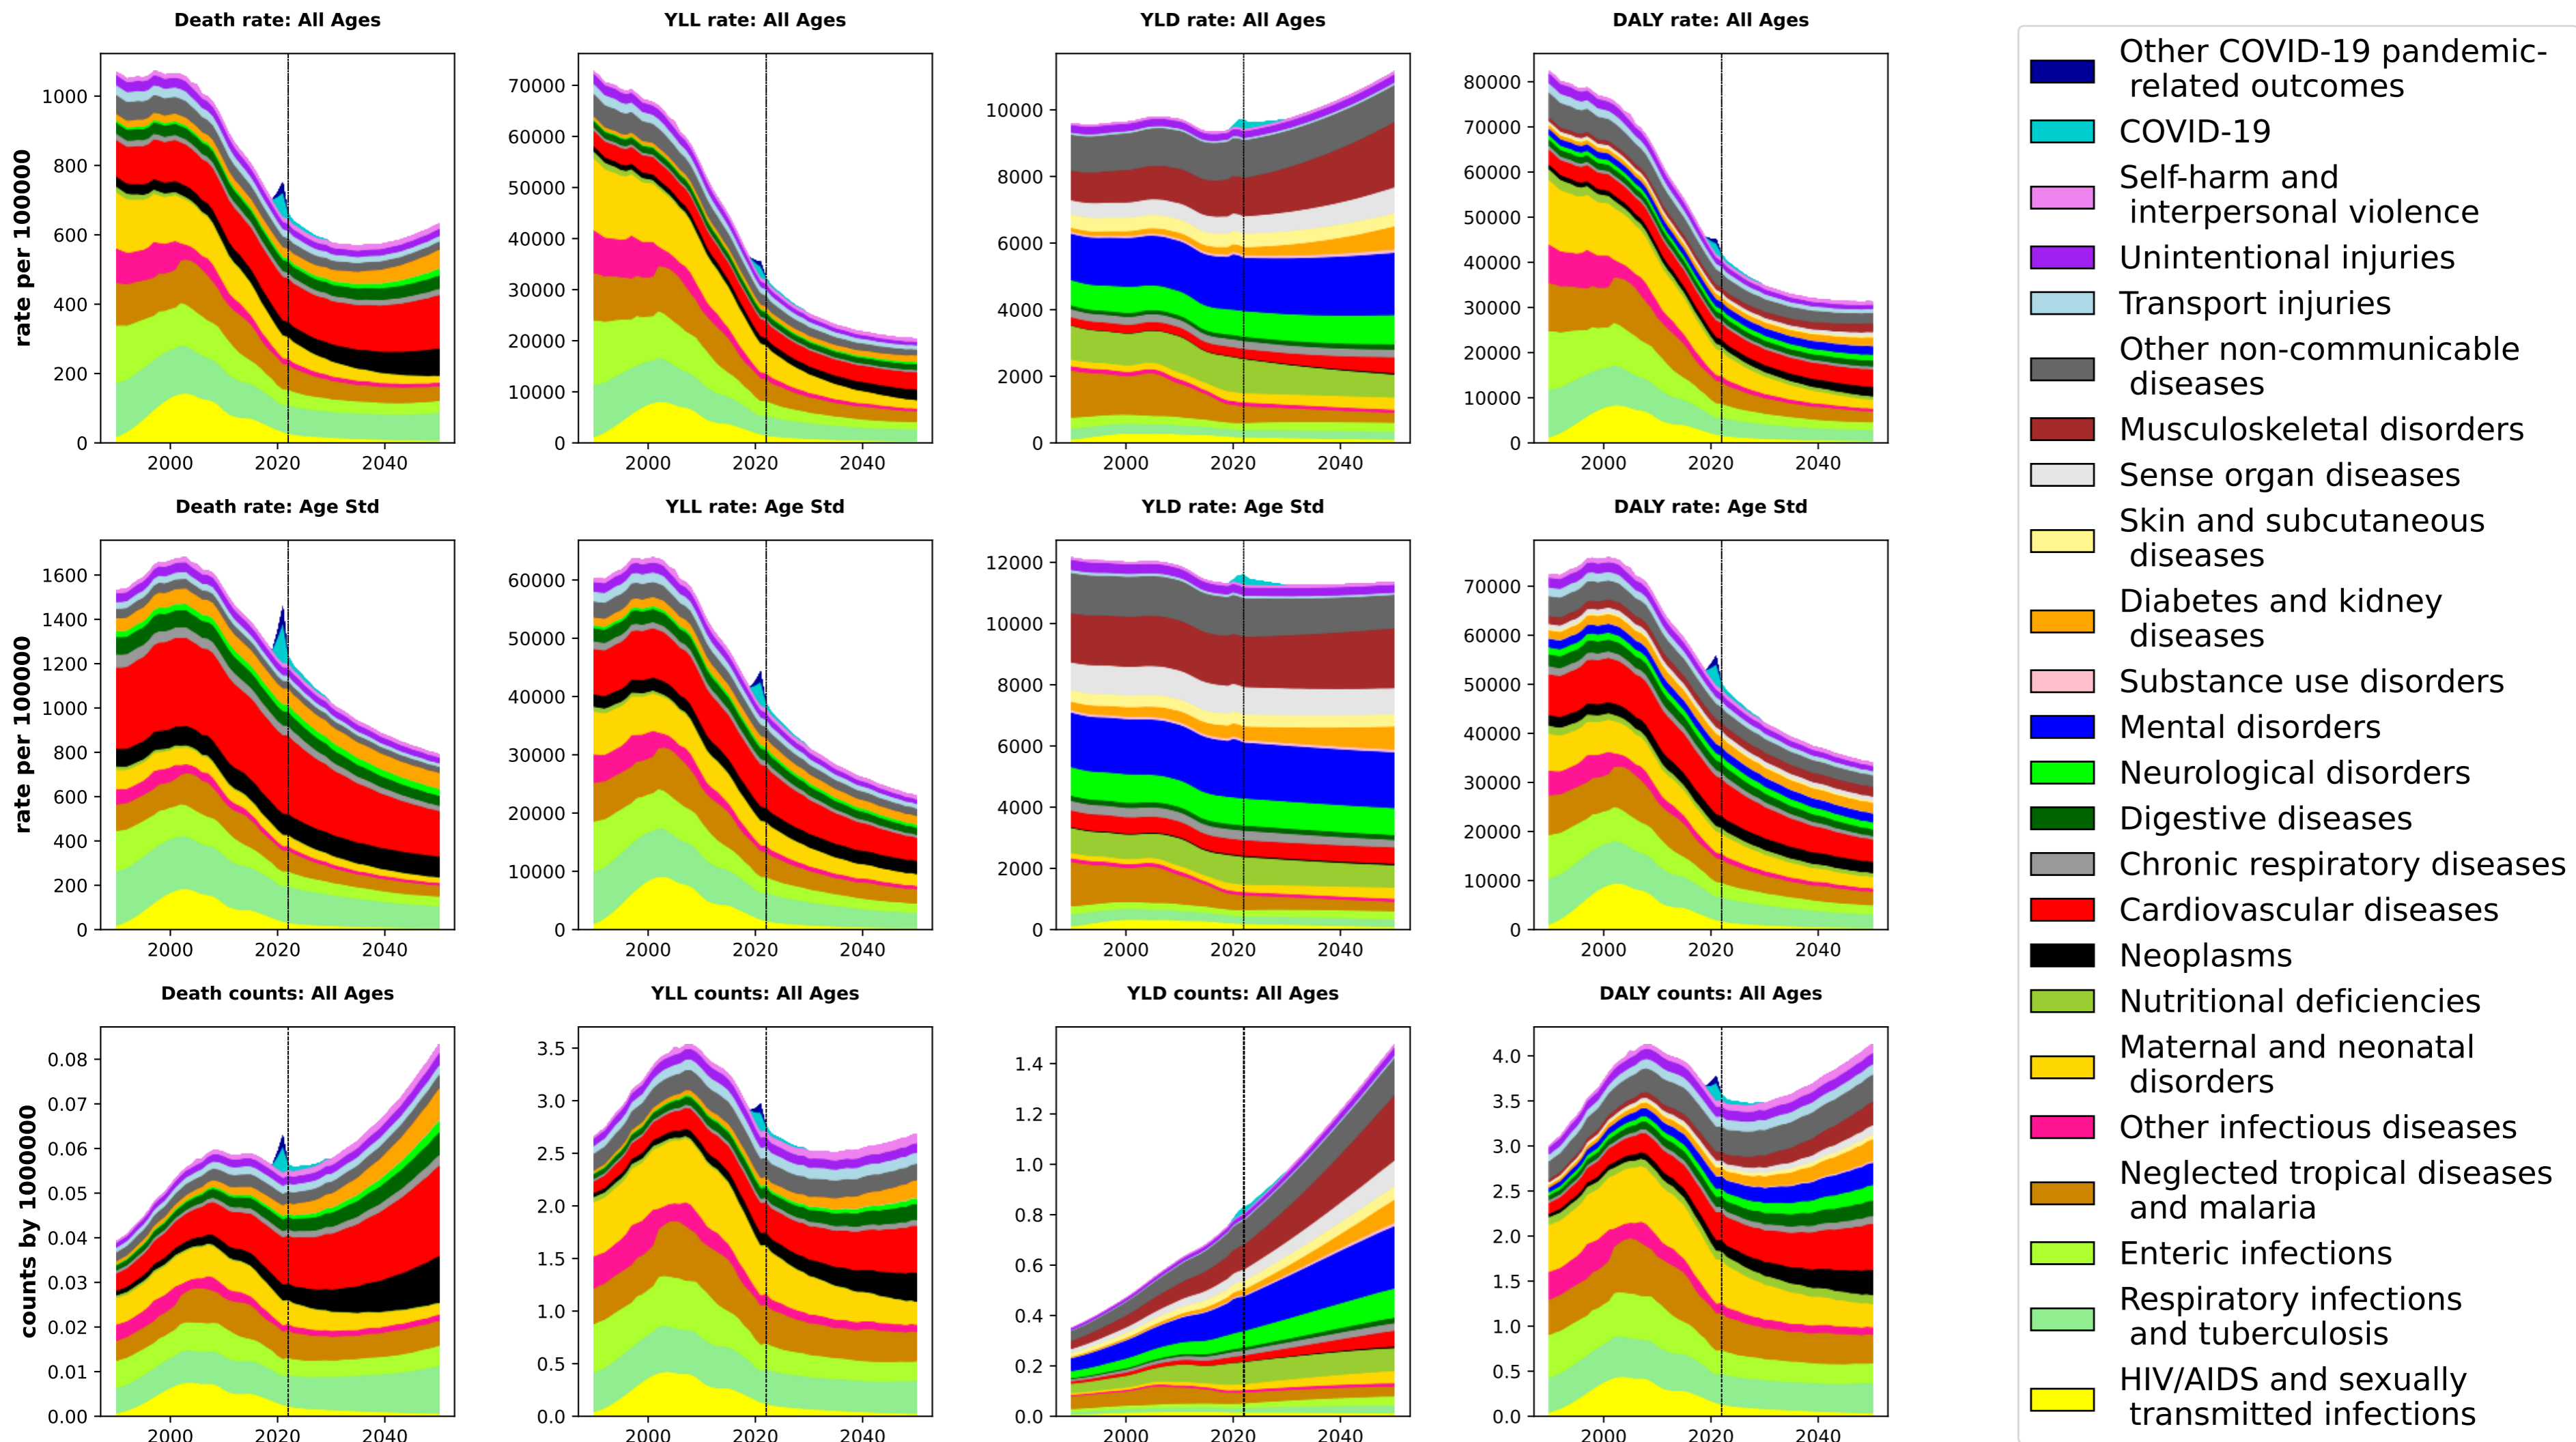

# Global

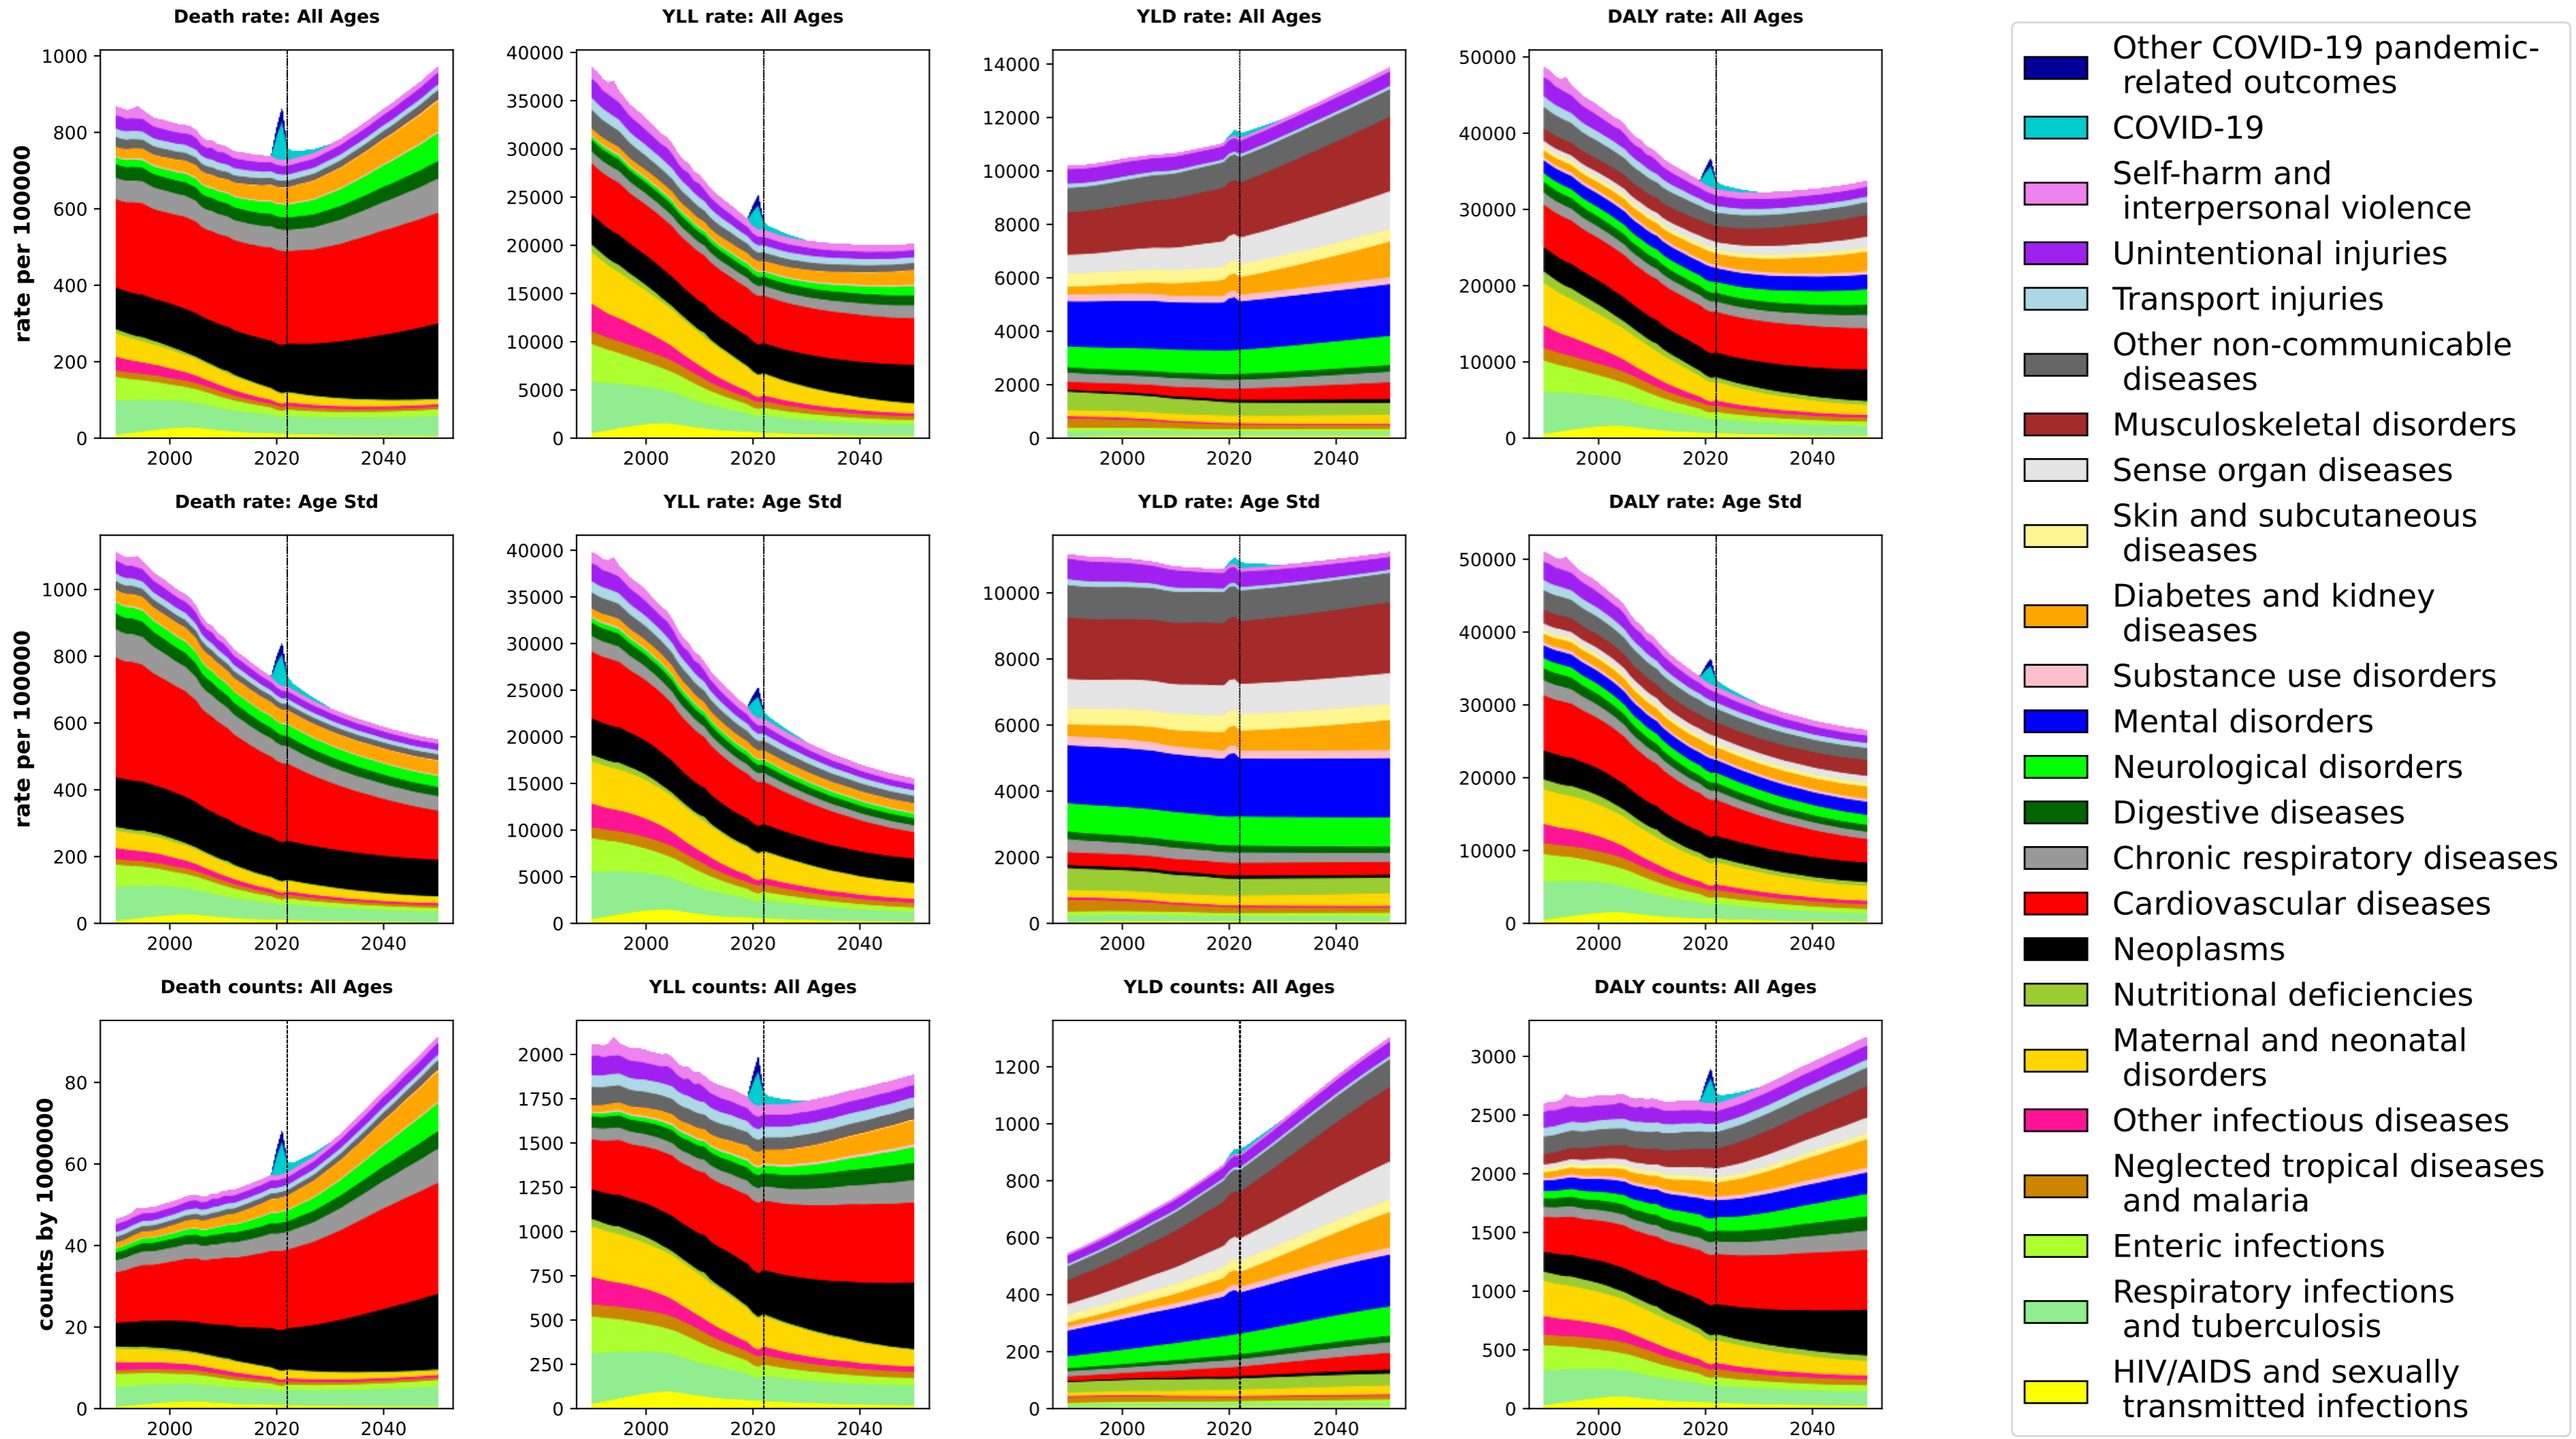

# Central Europe, Eastern Europe, and Central Asia

Supplemental Results Figure S6. Cause level 2 area plots for 4 burden measures for reference scenario by location, 1990-2050

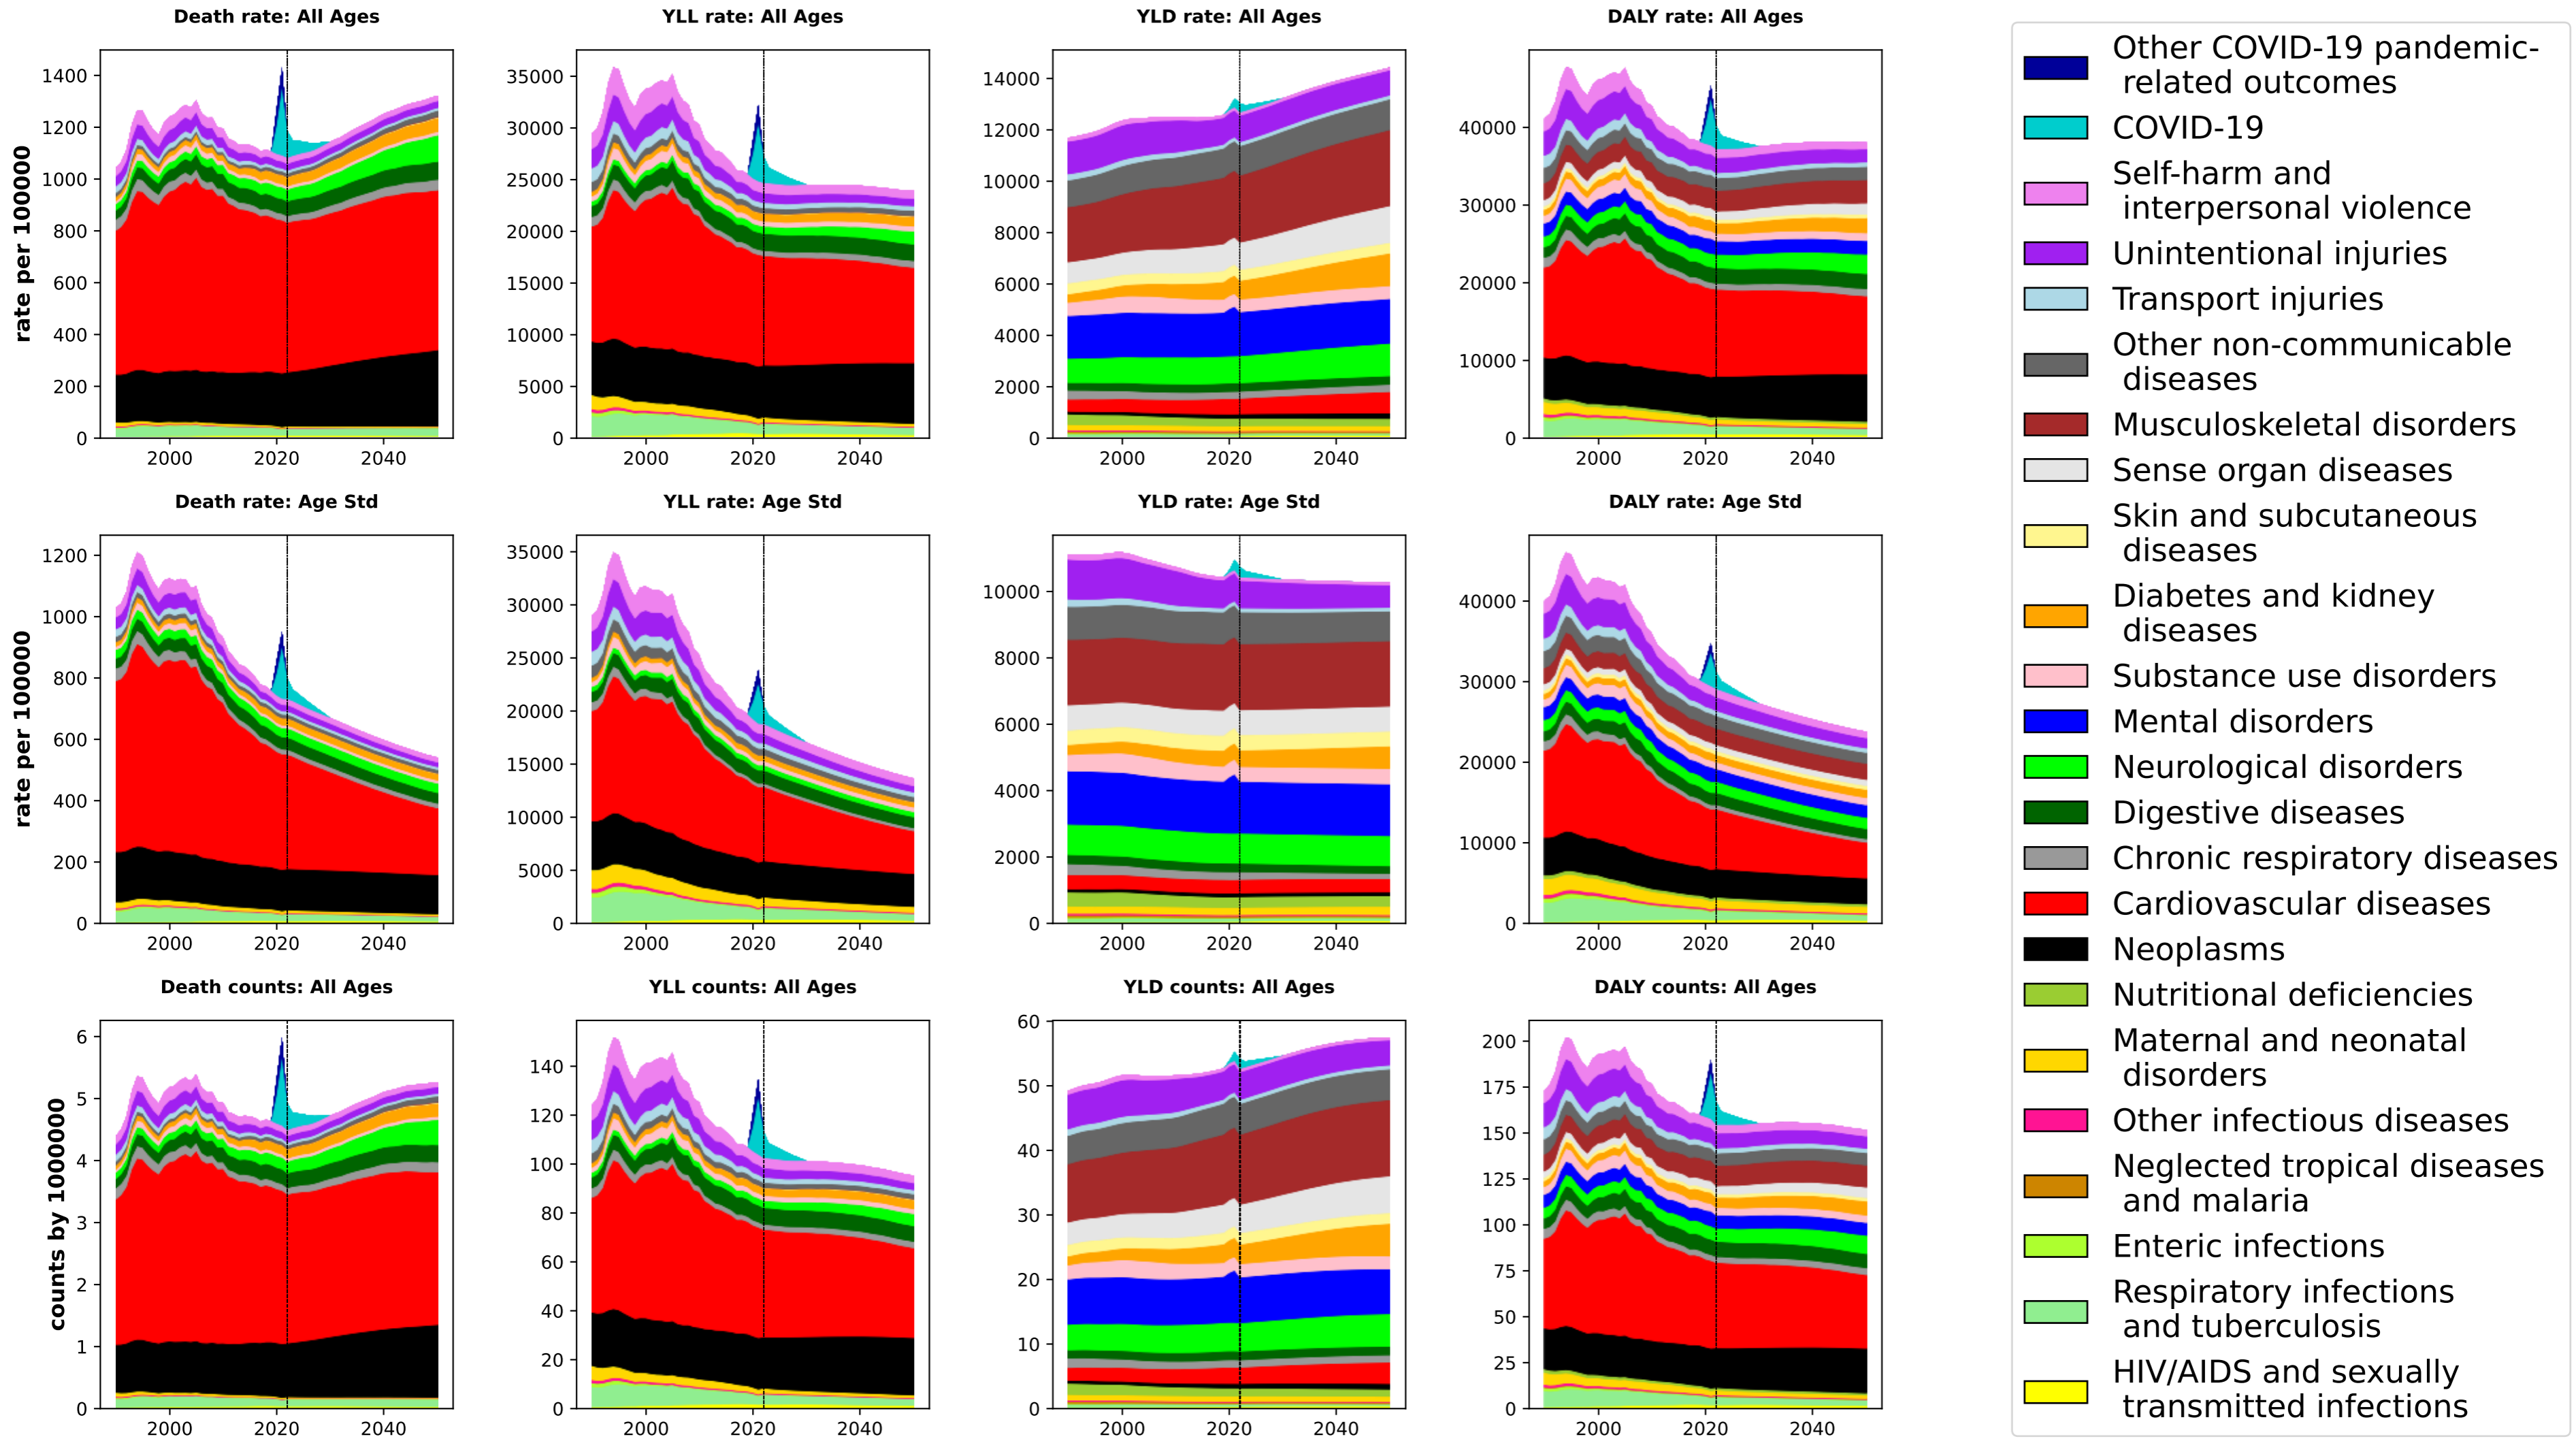

# High income

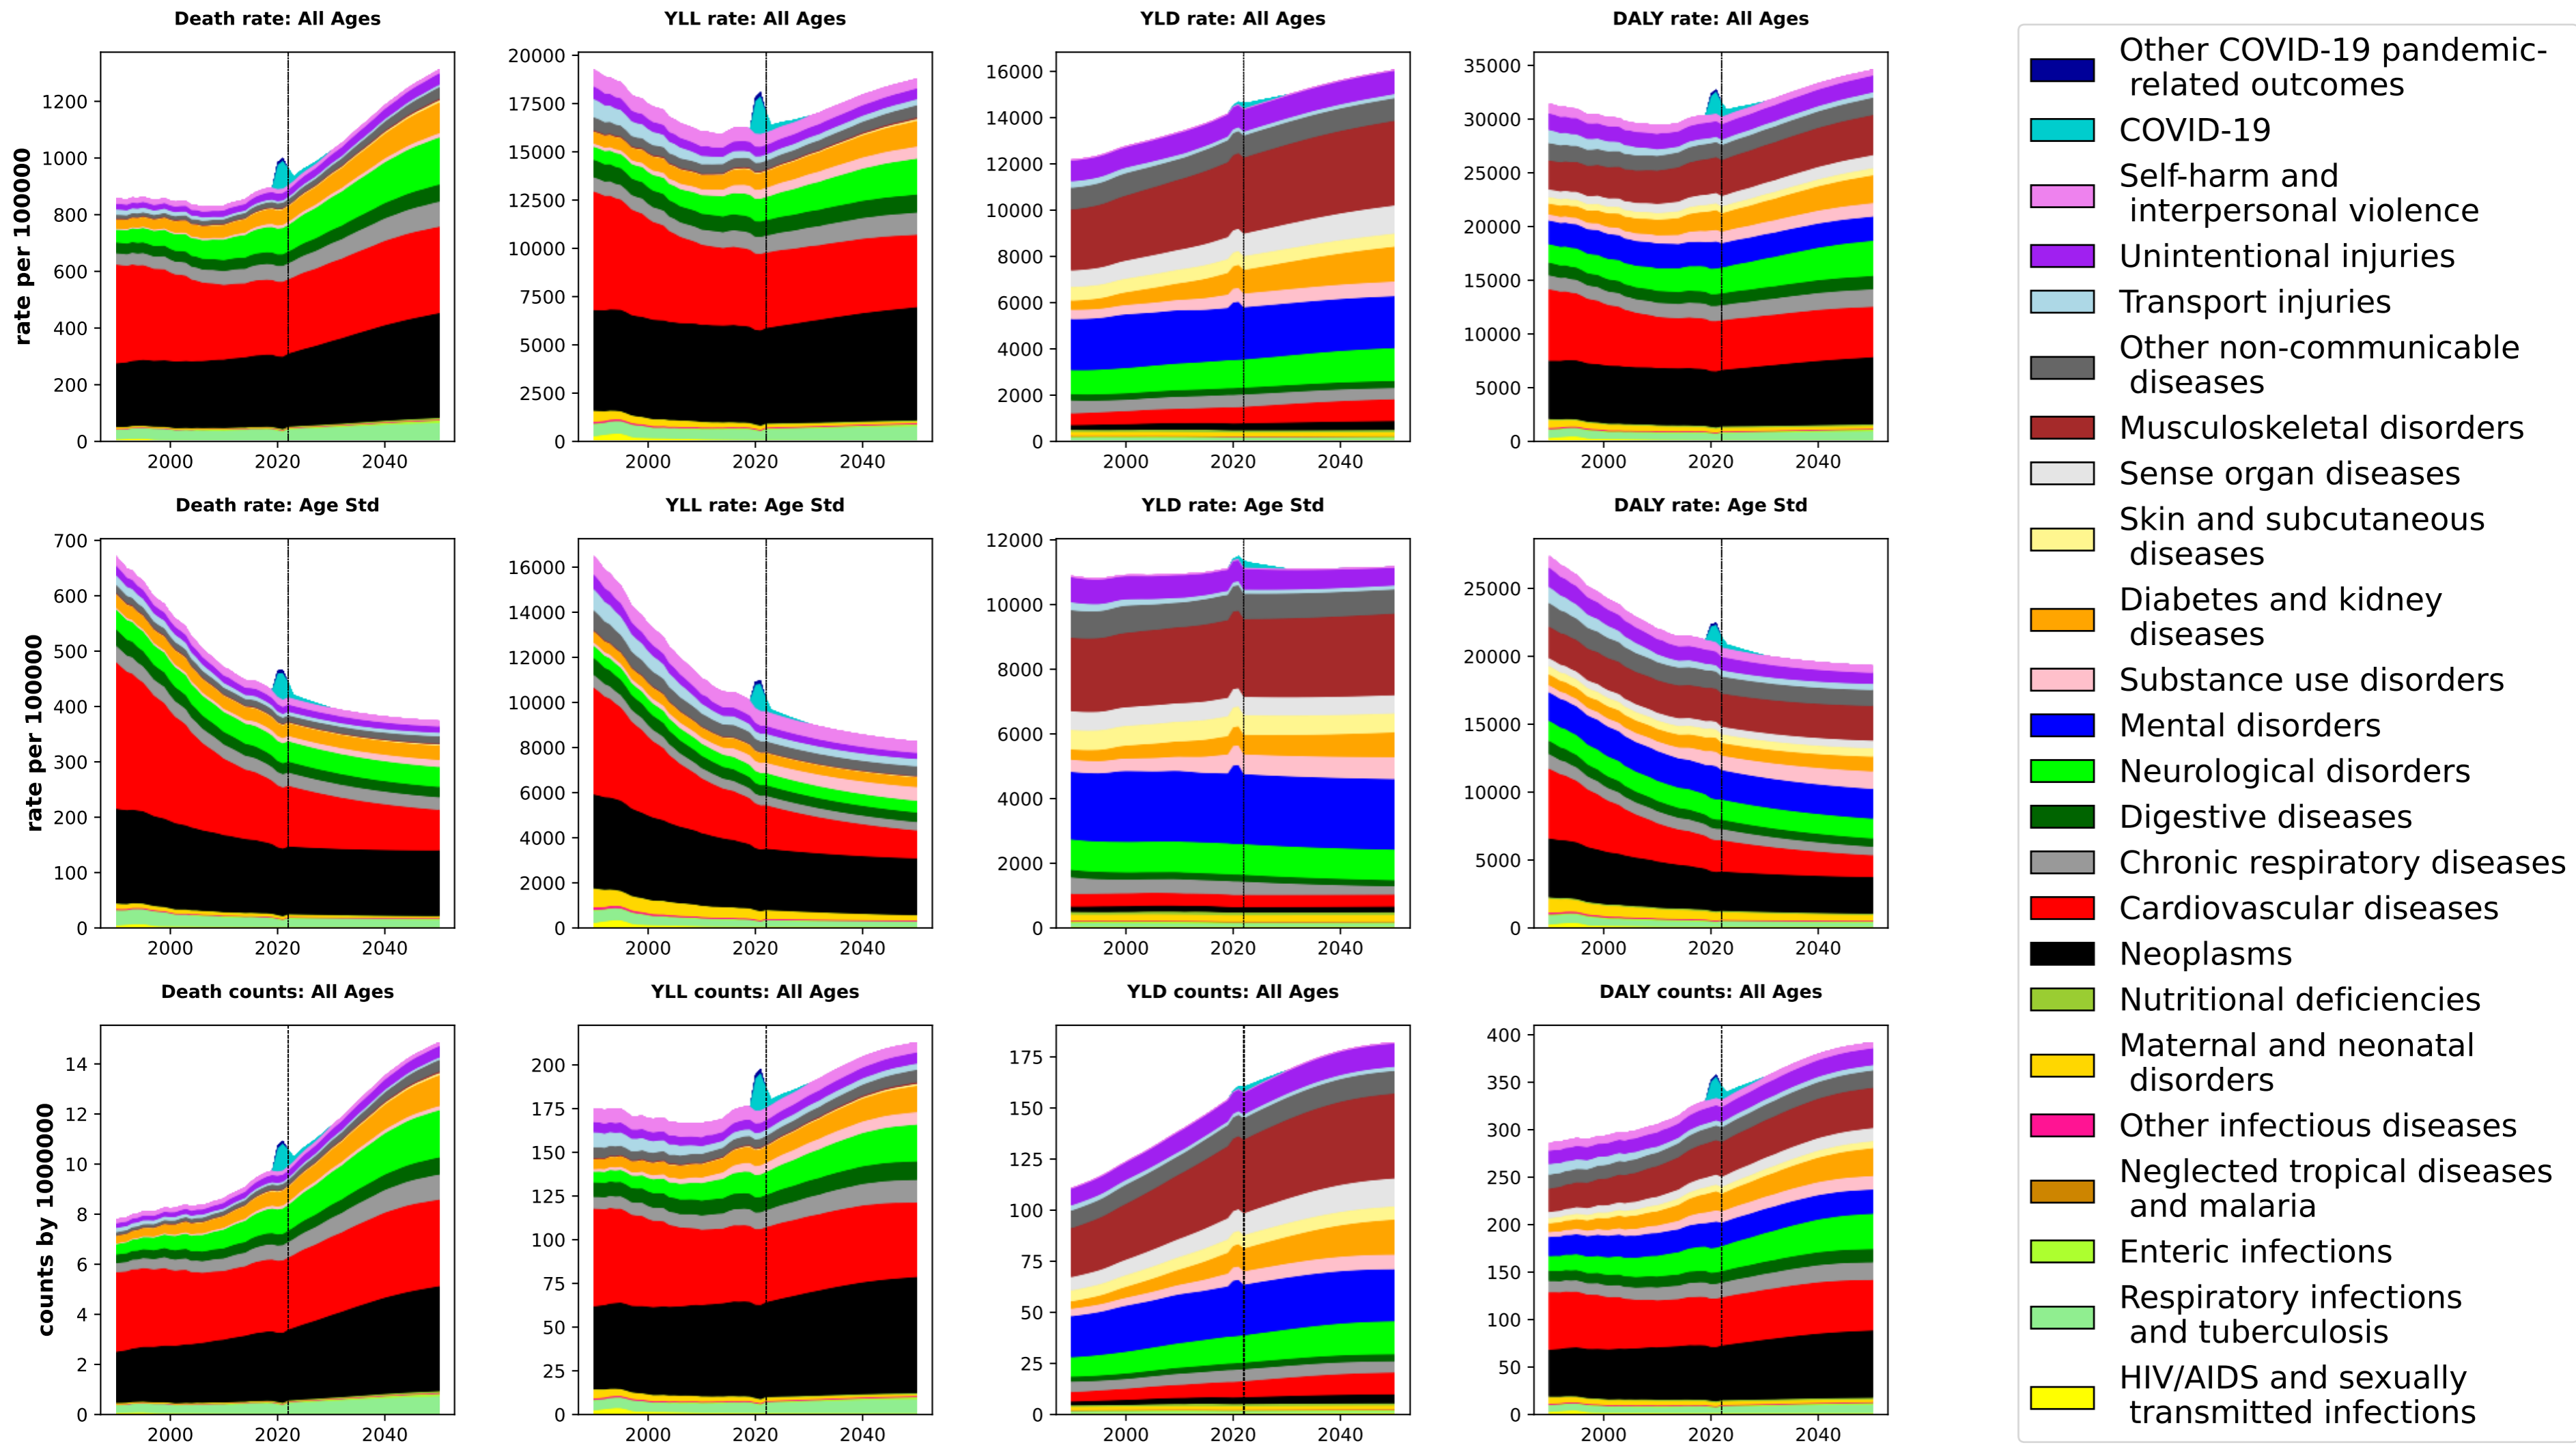

# Latin America and Caribbean

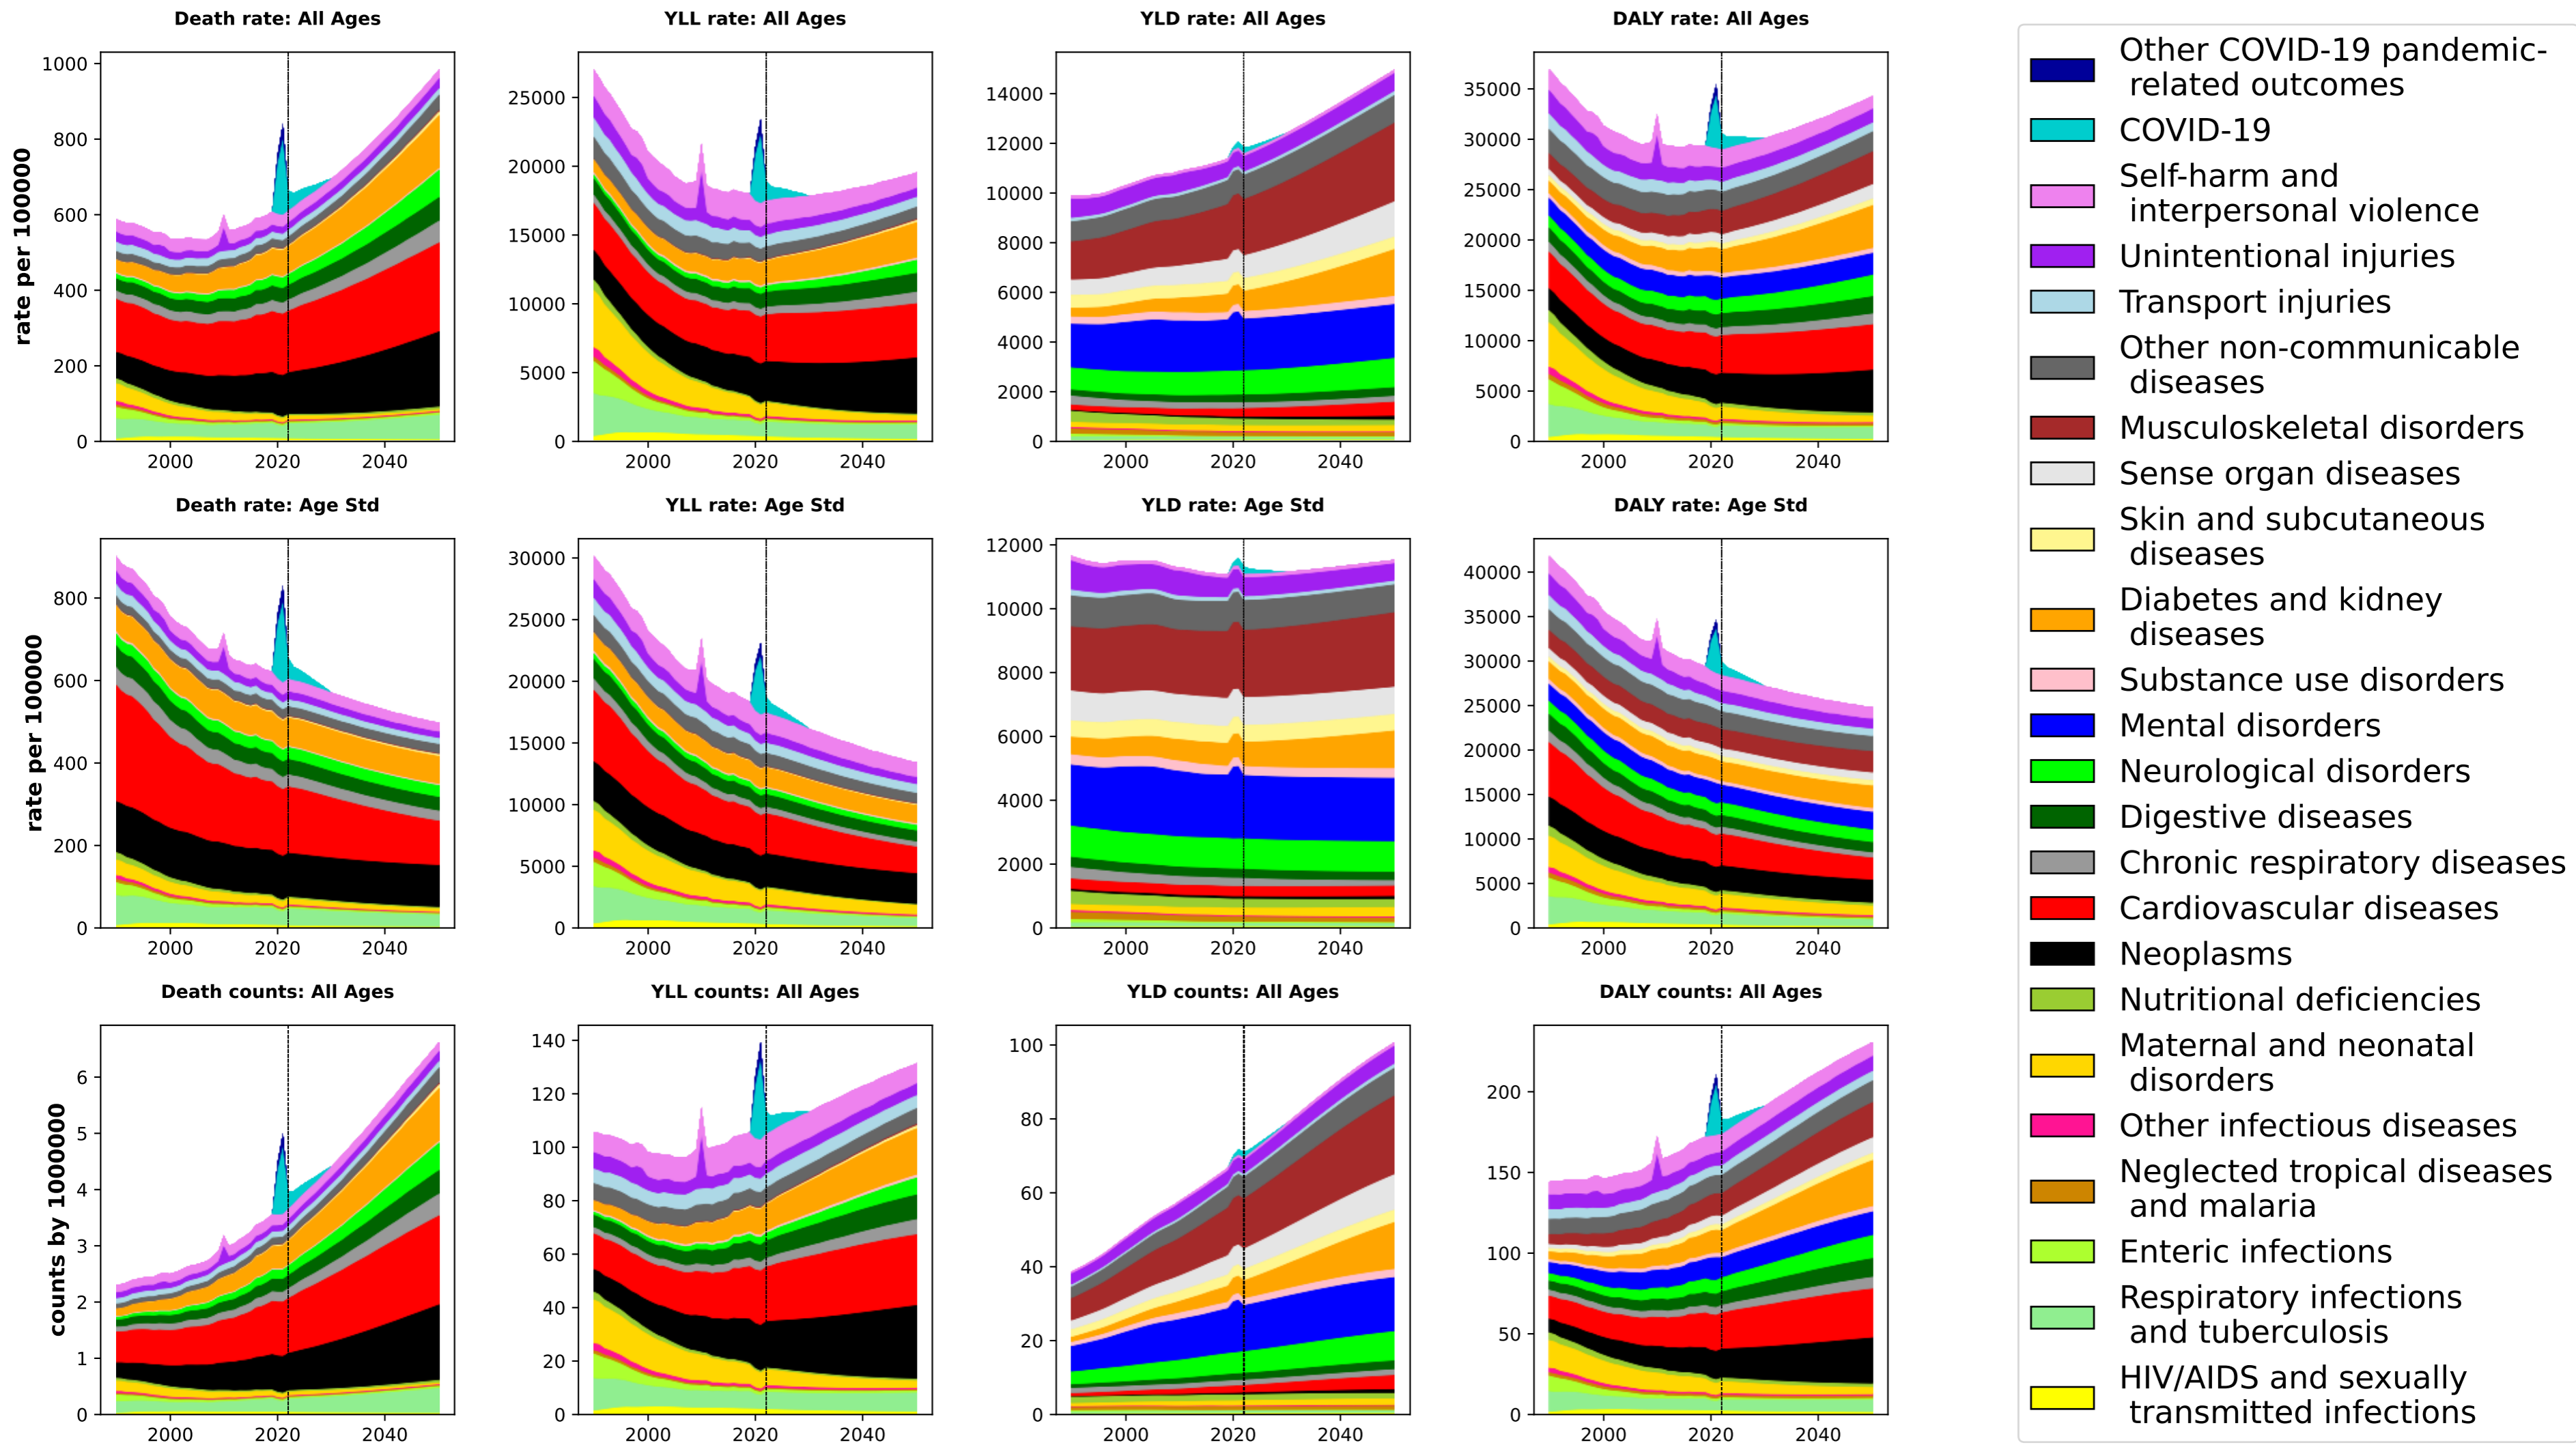

# North Africa and Middle East

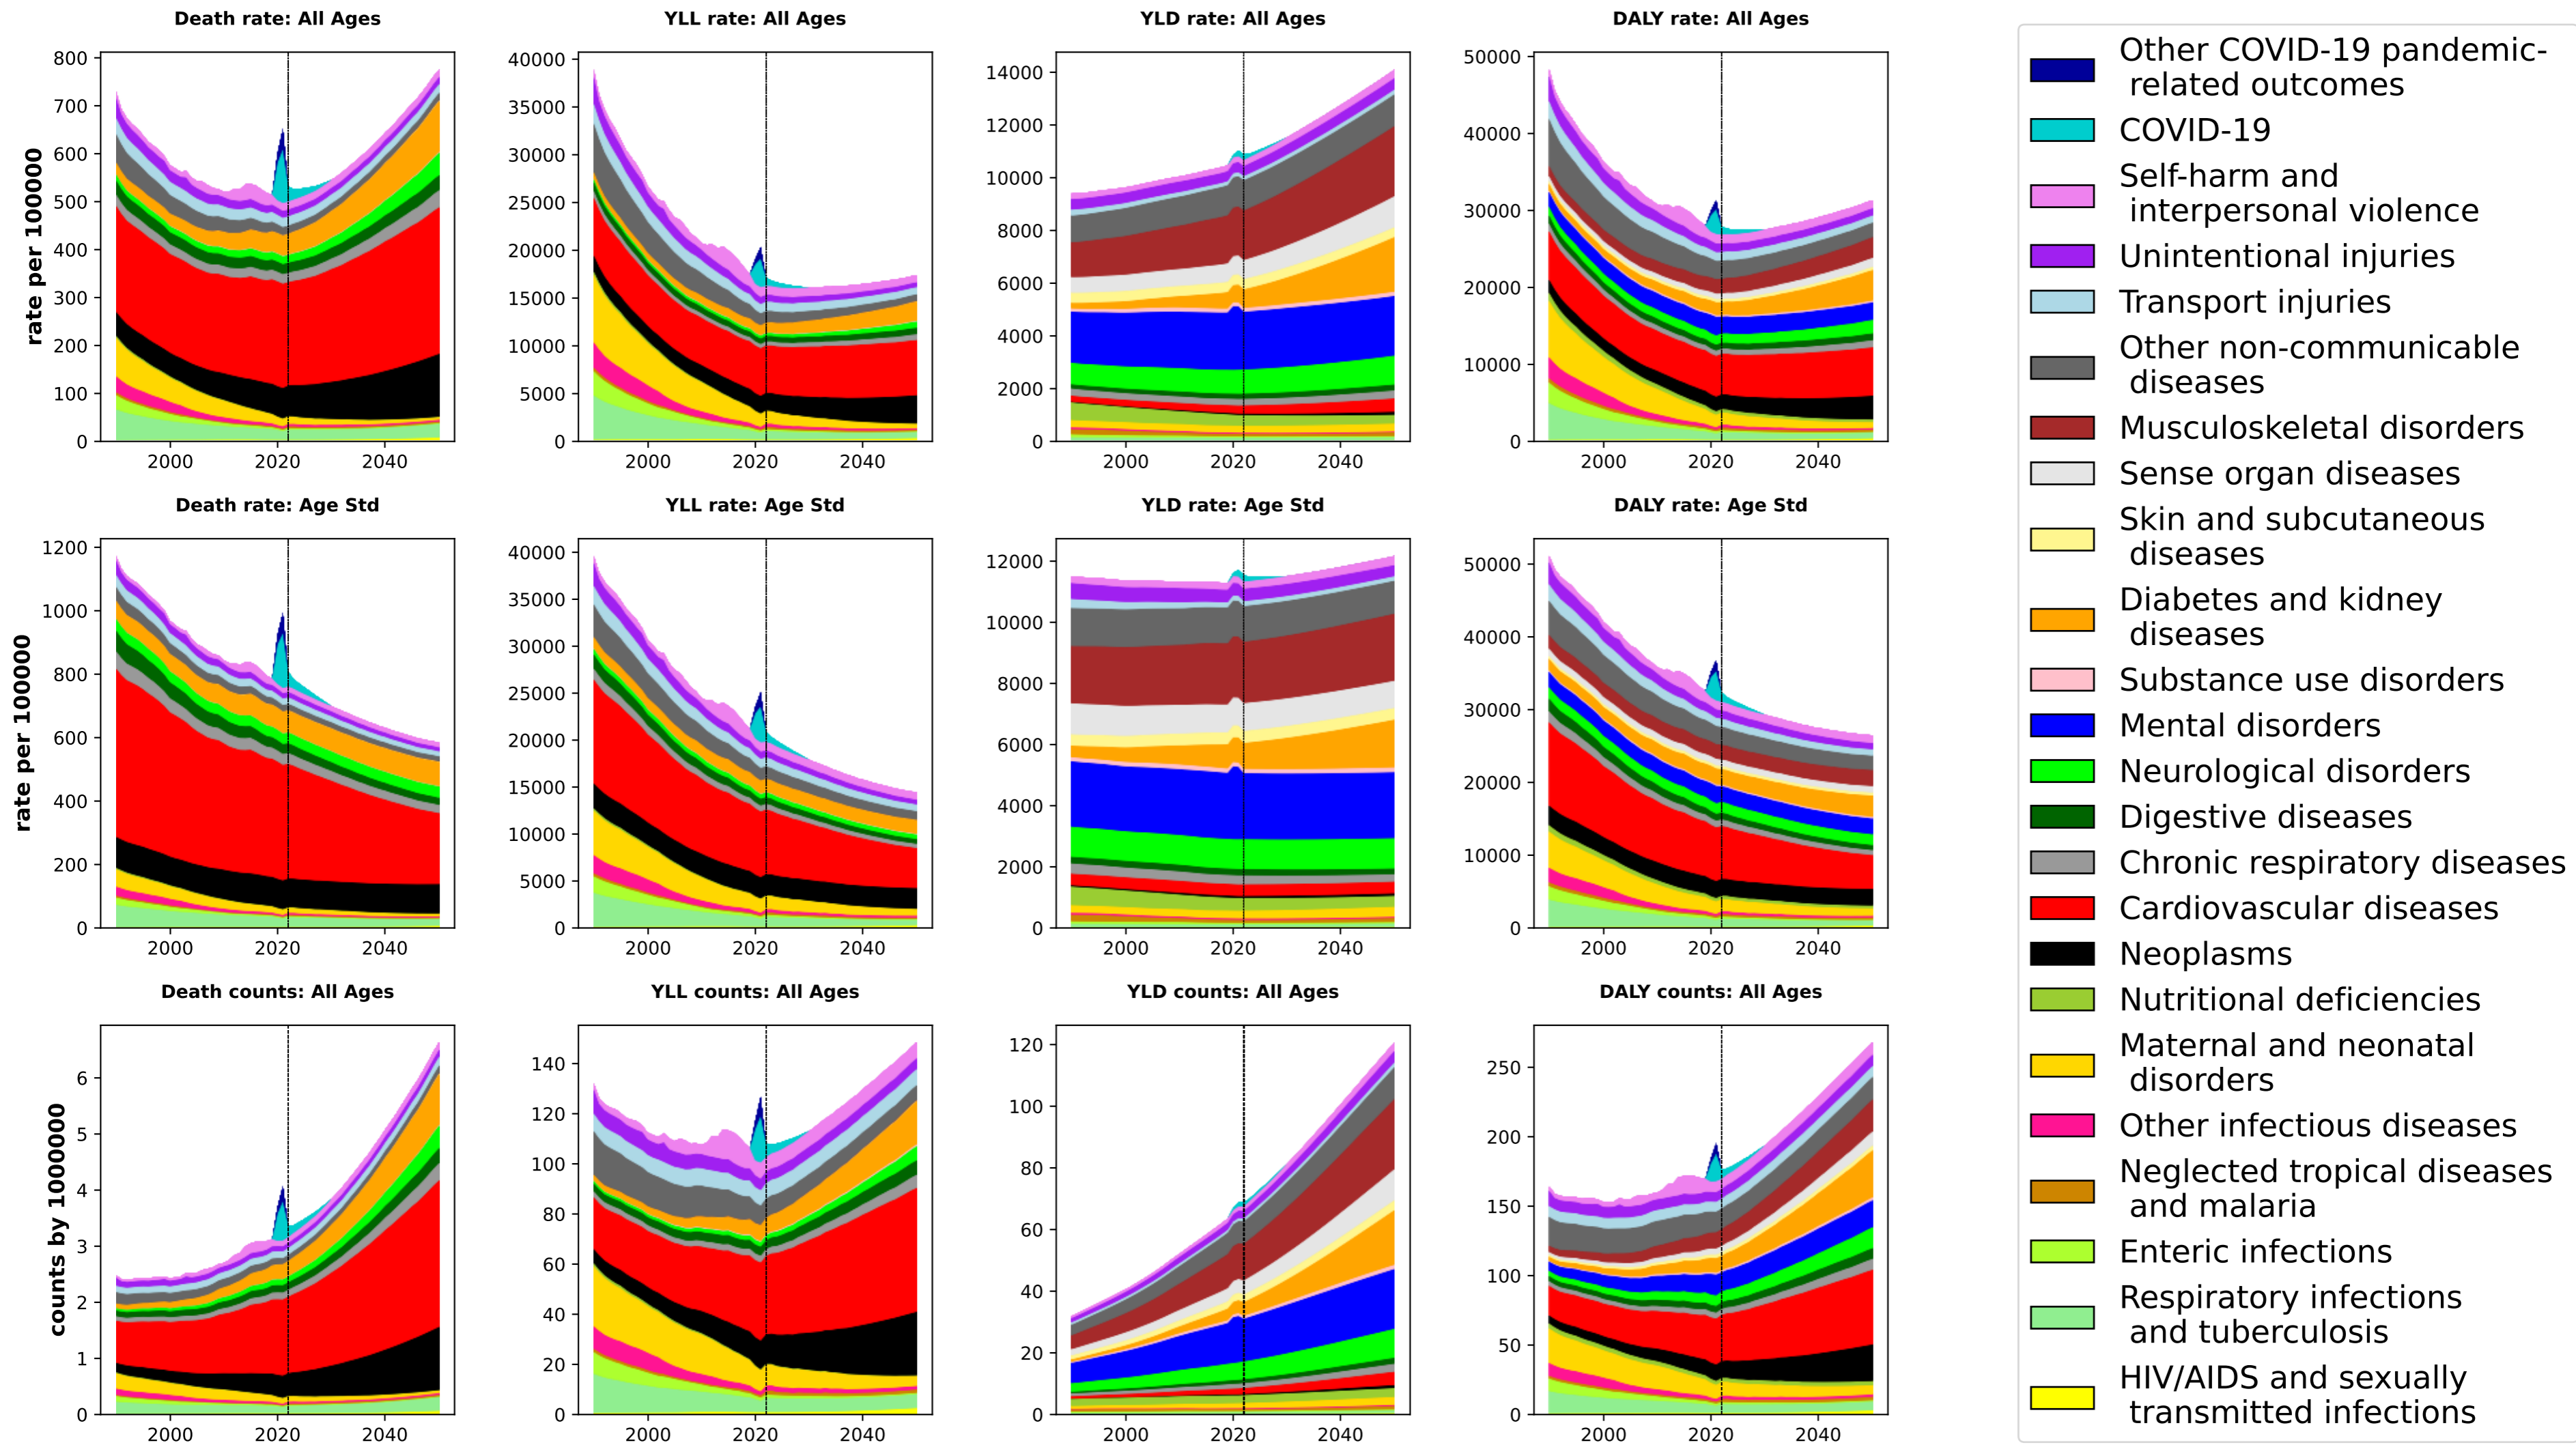



# South Asia

Supplemental Results Figure S6. Cause level 2 area plots for 4 burden measures for reference scenario by location, 1990-2050

920

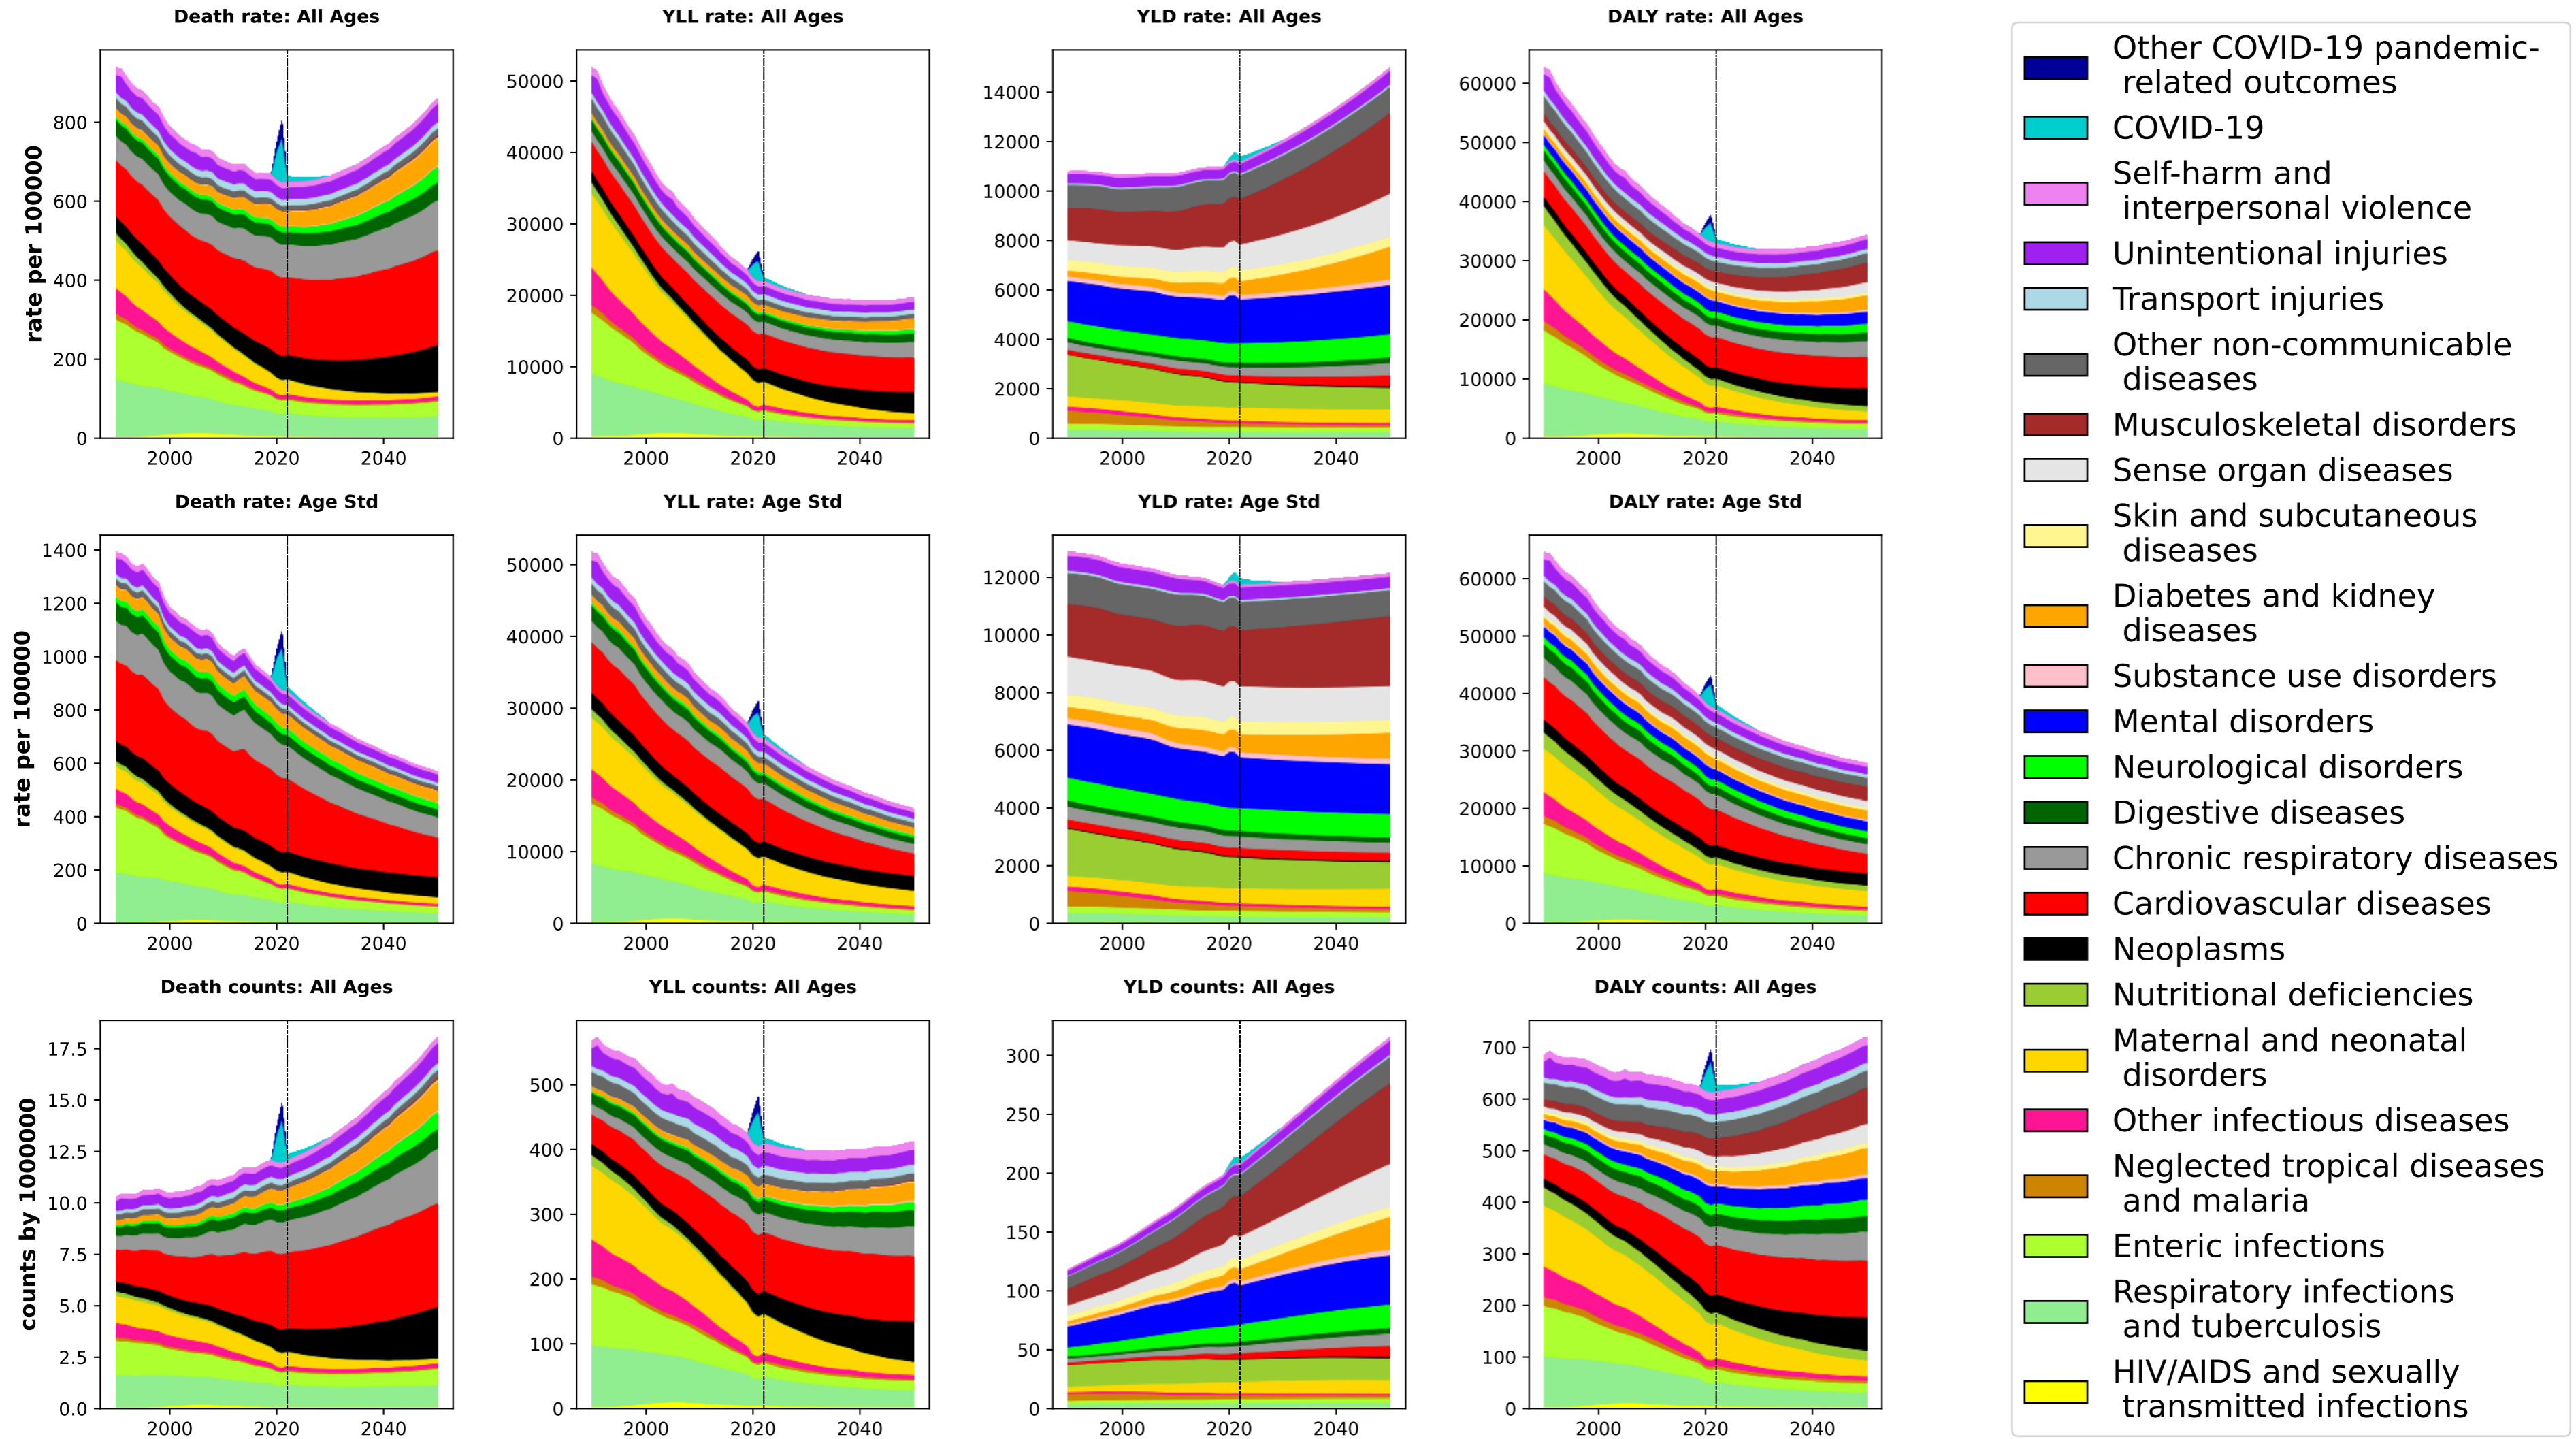

# Southeast Asia, East Asia, and Oceania

Supplemental Results Figure S6. Cause level 2 area plots for 4 burden measures for reference scenario by location, 1990-2050

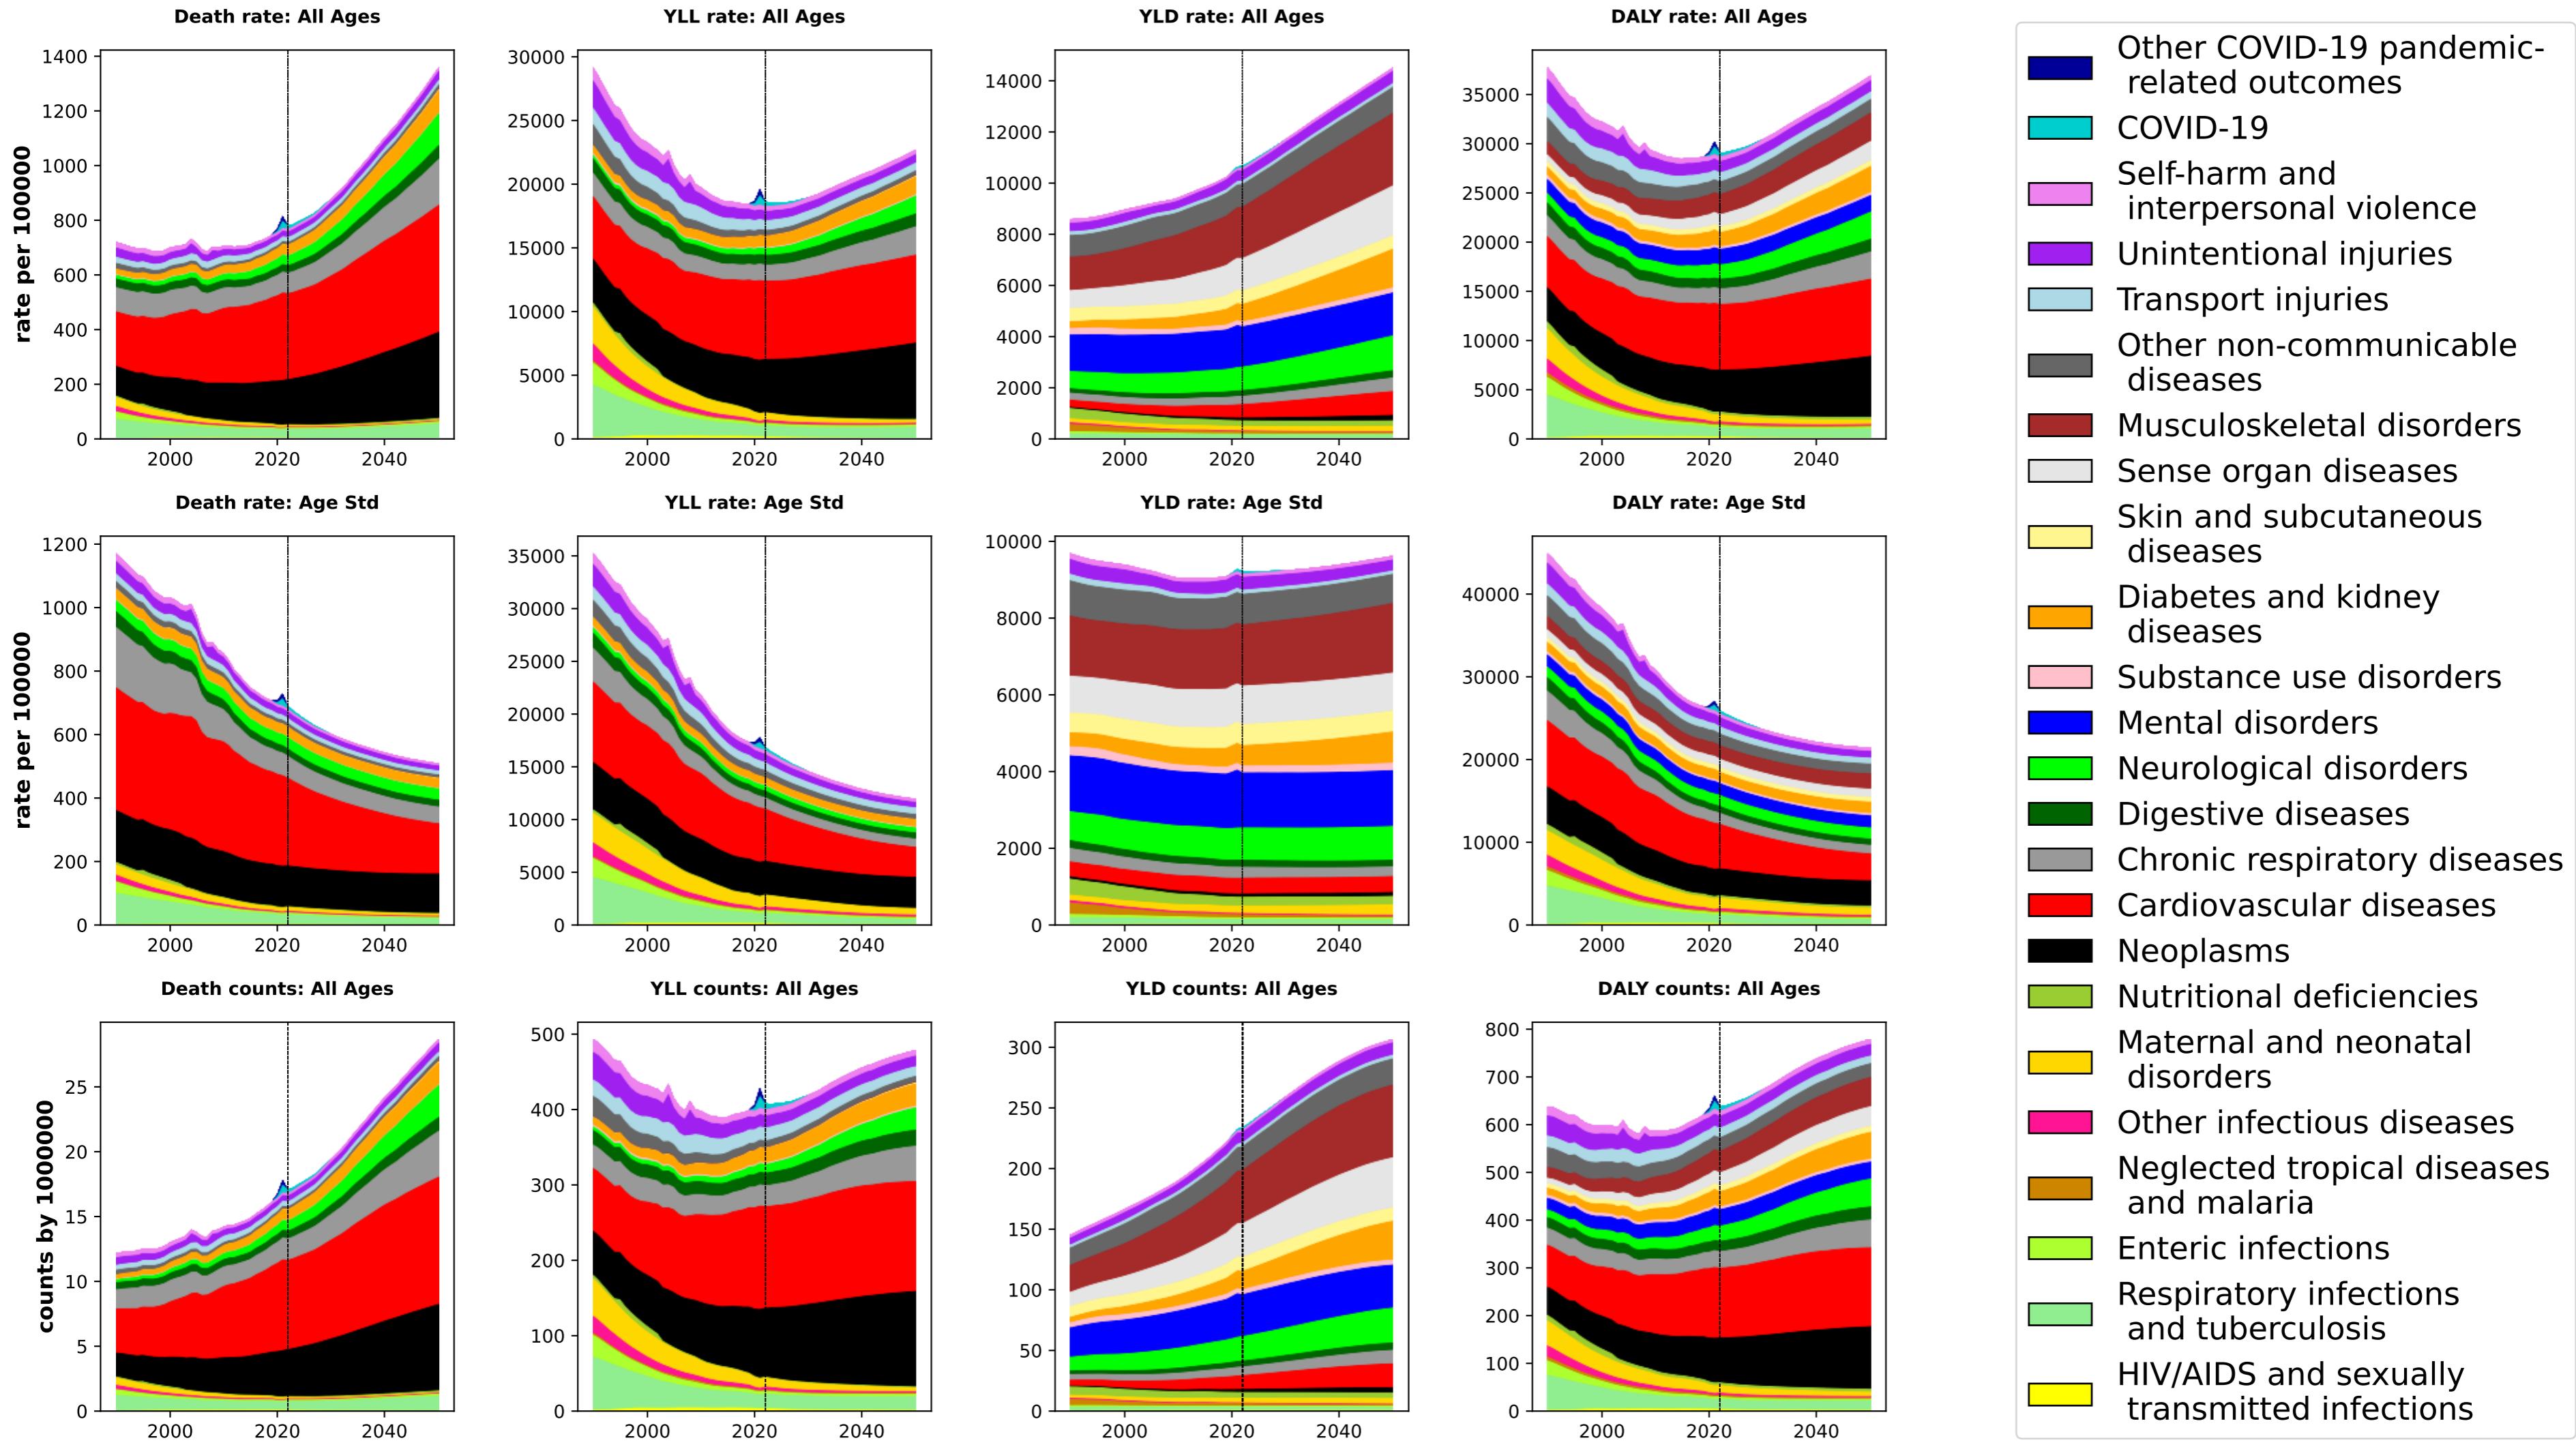

# Sub-Saharan Africa

Supplemental Results Figure S6. Cause level 2 area plots for 4 burden measures for reference scenario by location, 1990-2050

922

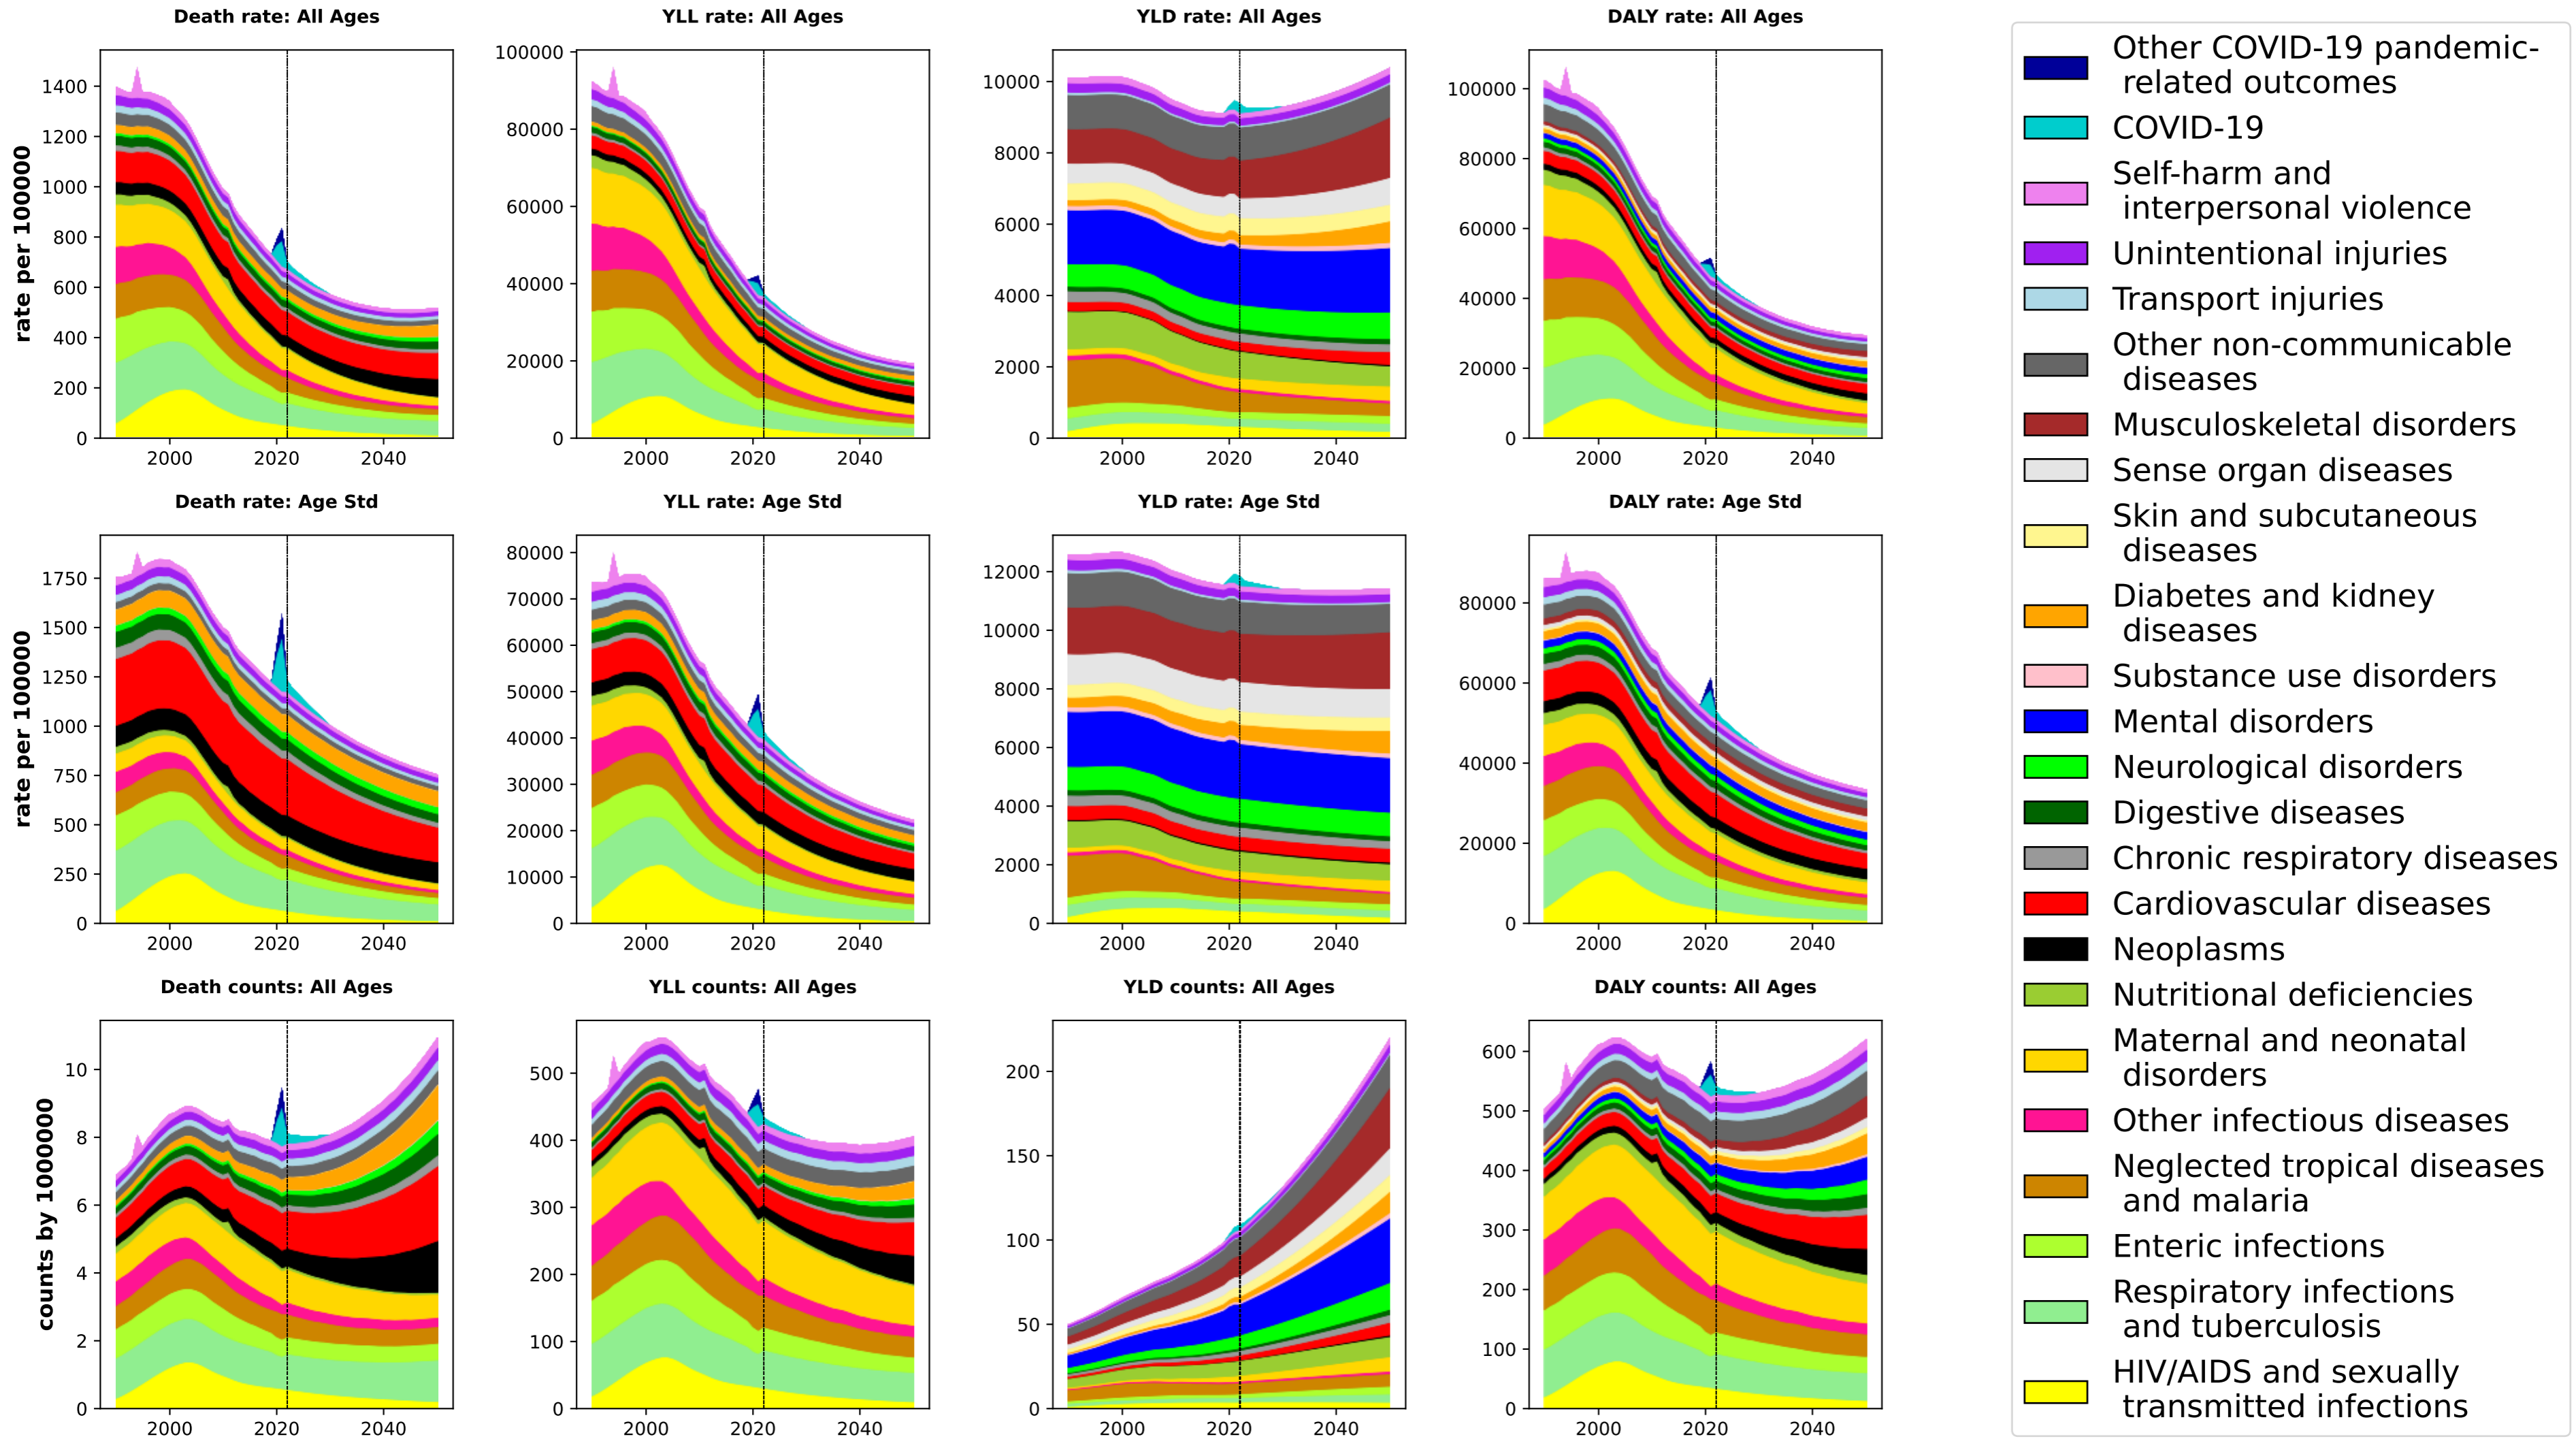

# Central Asia

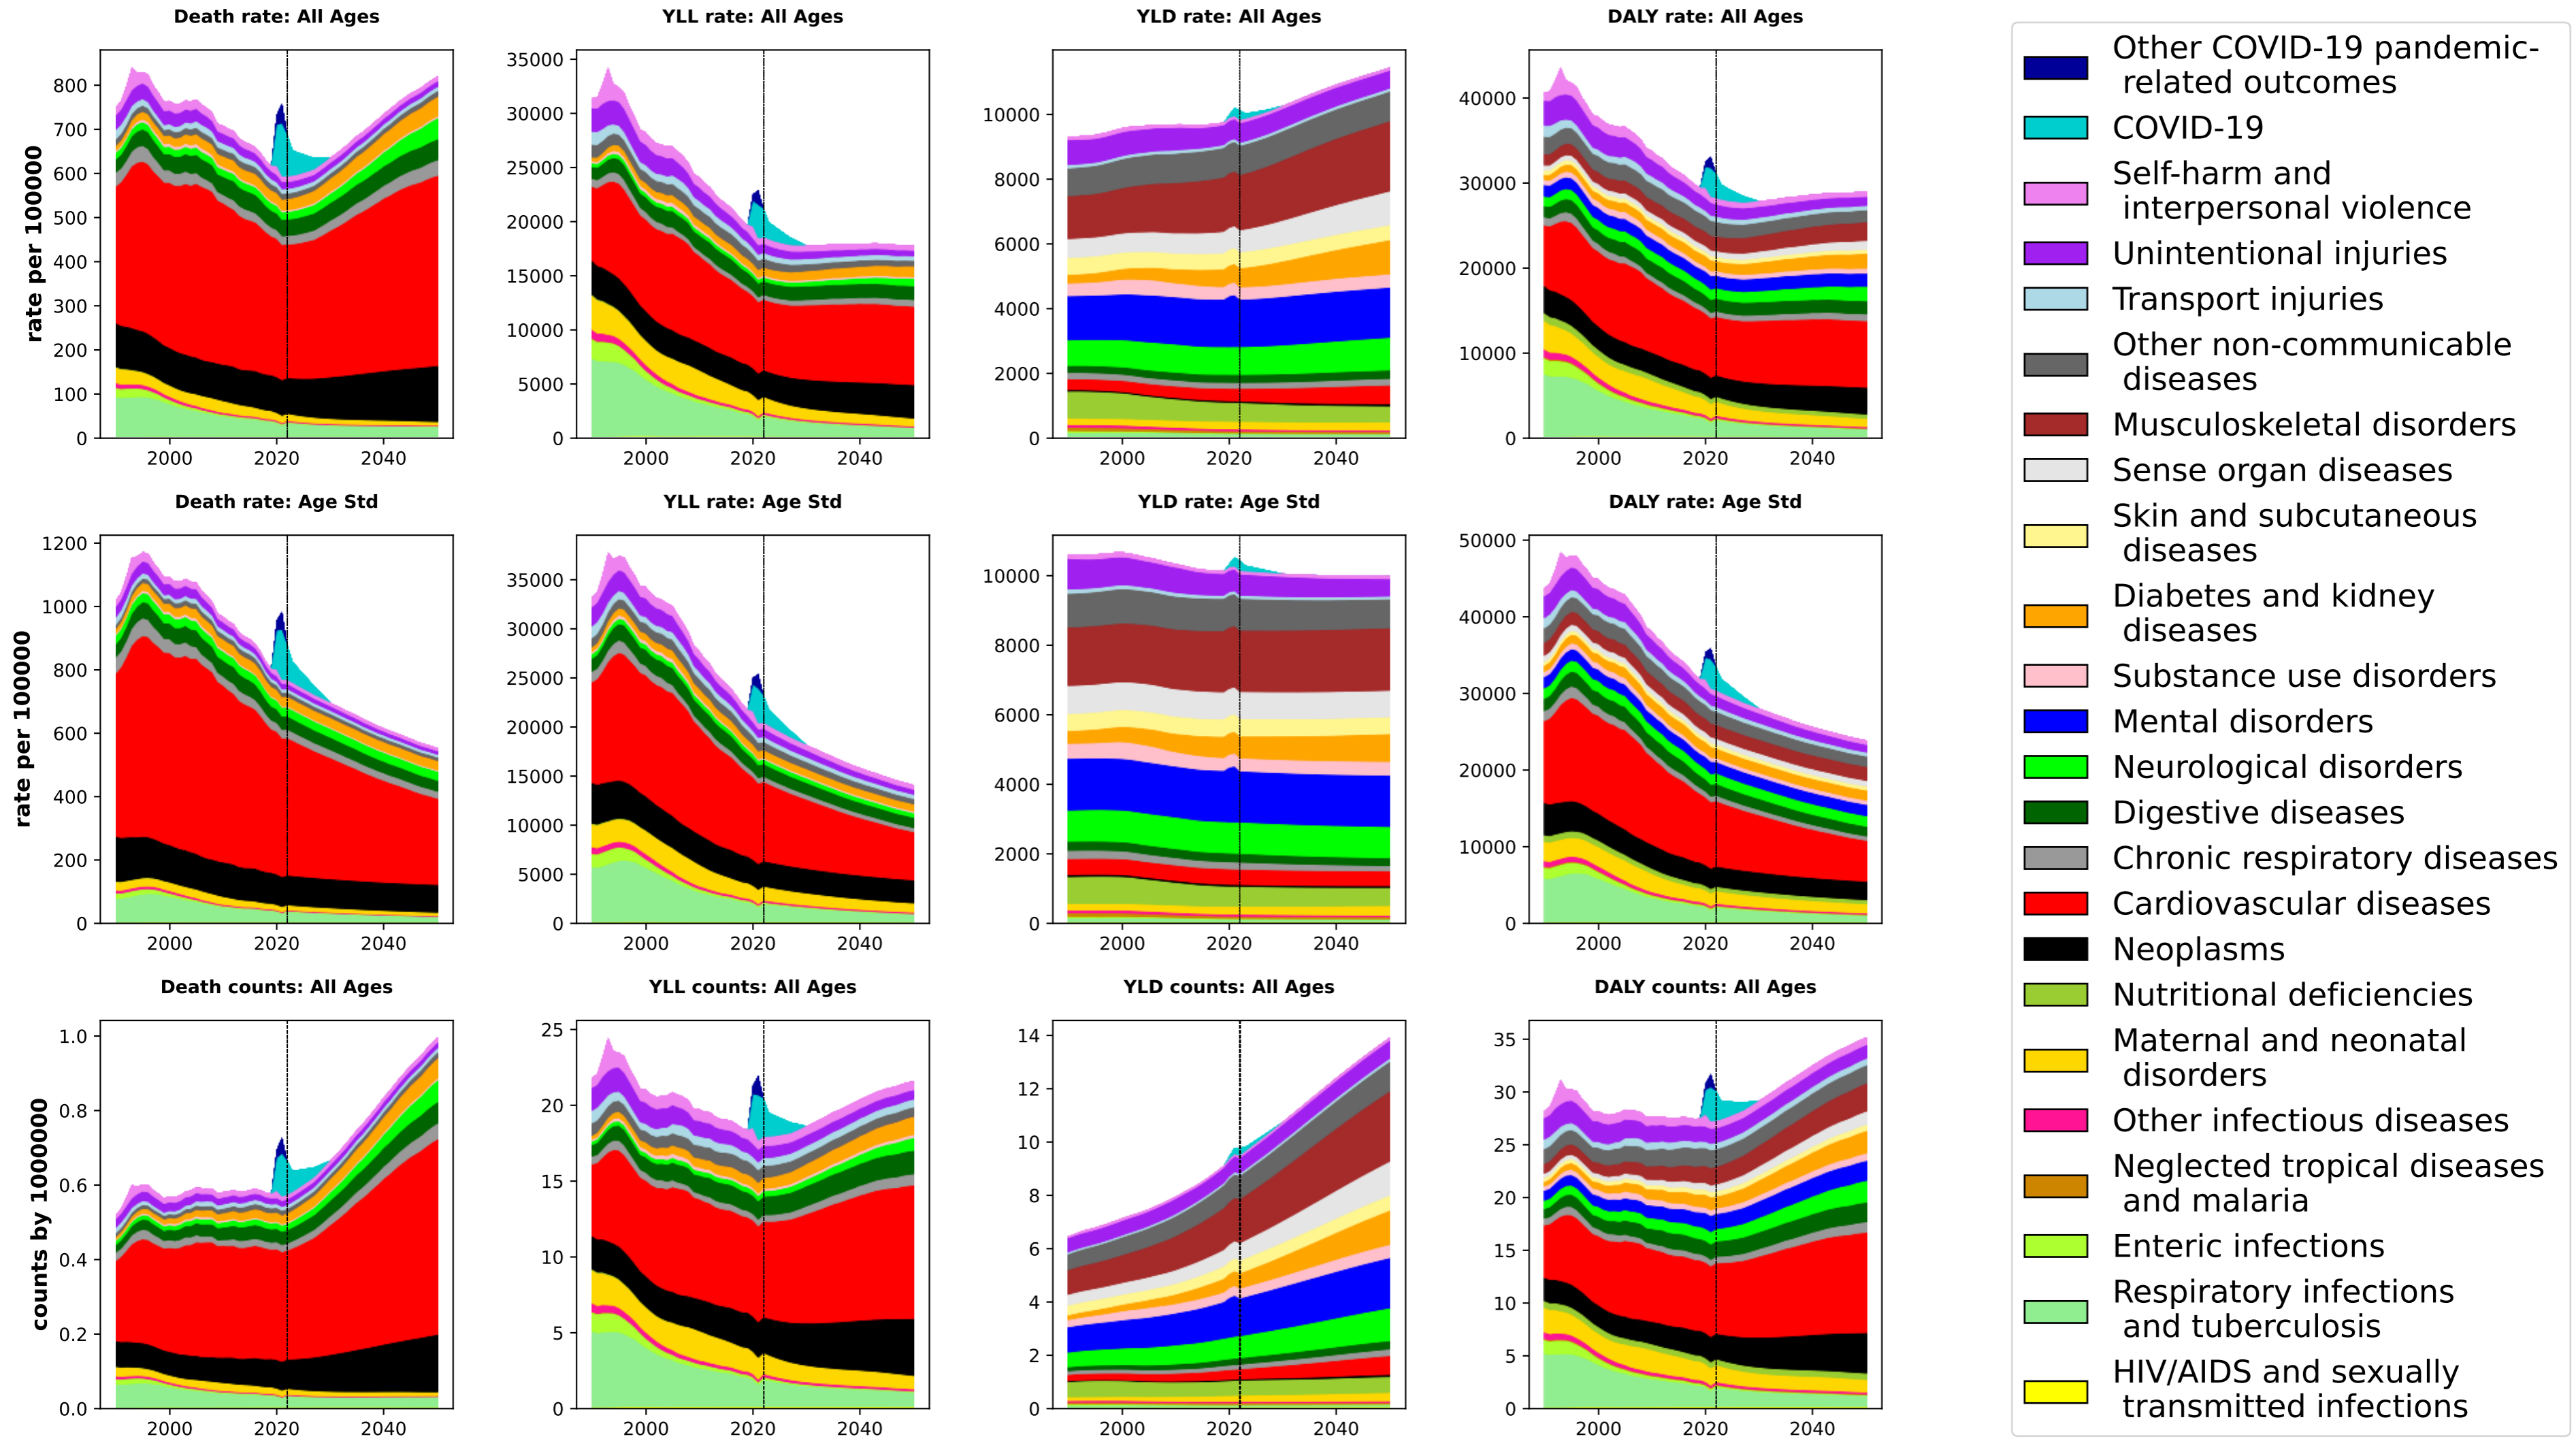

# Central Europe

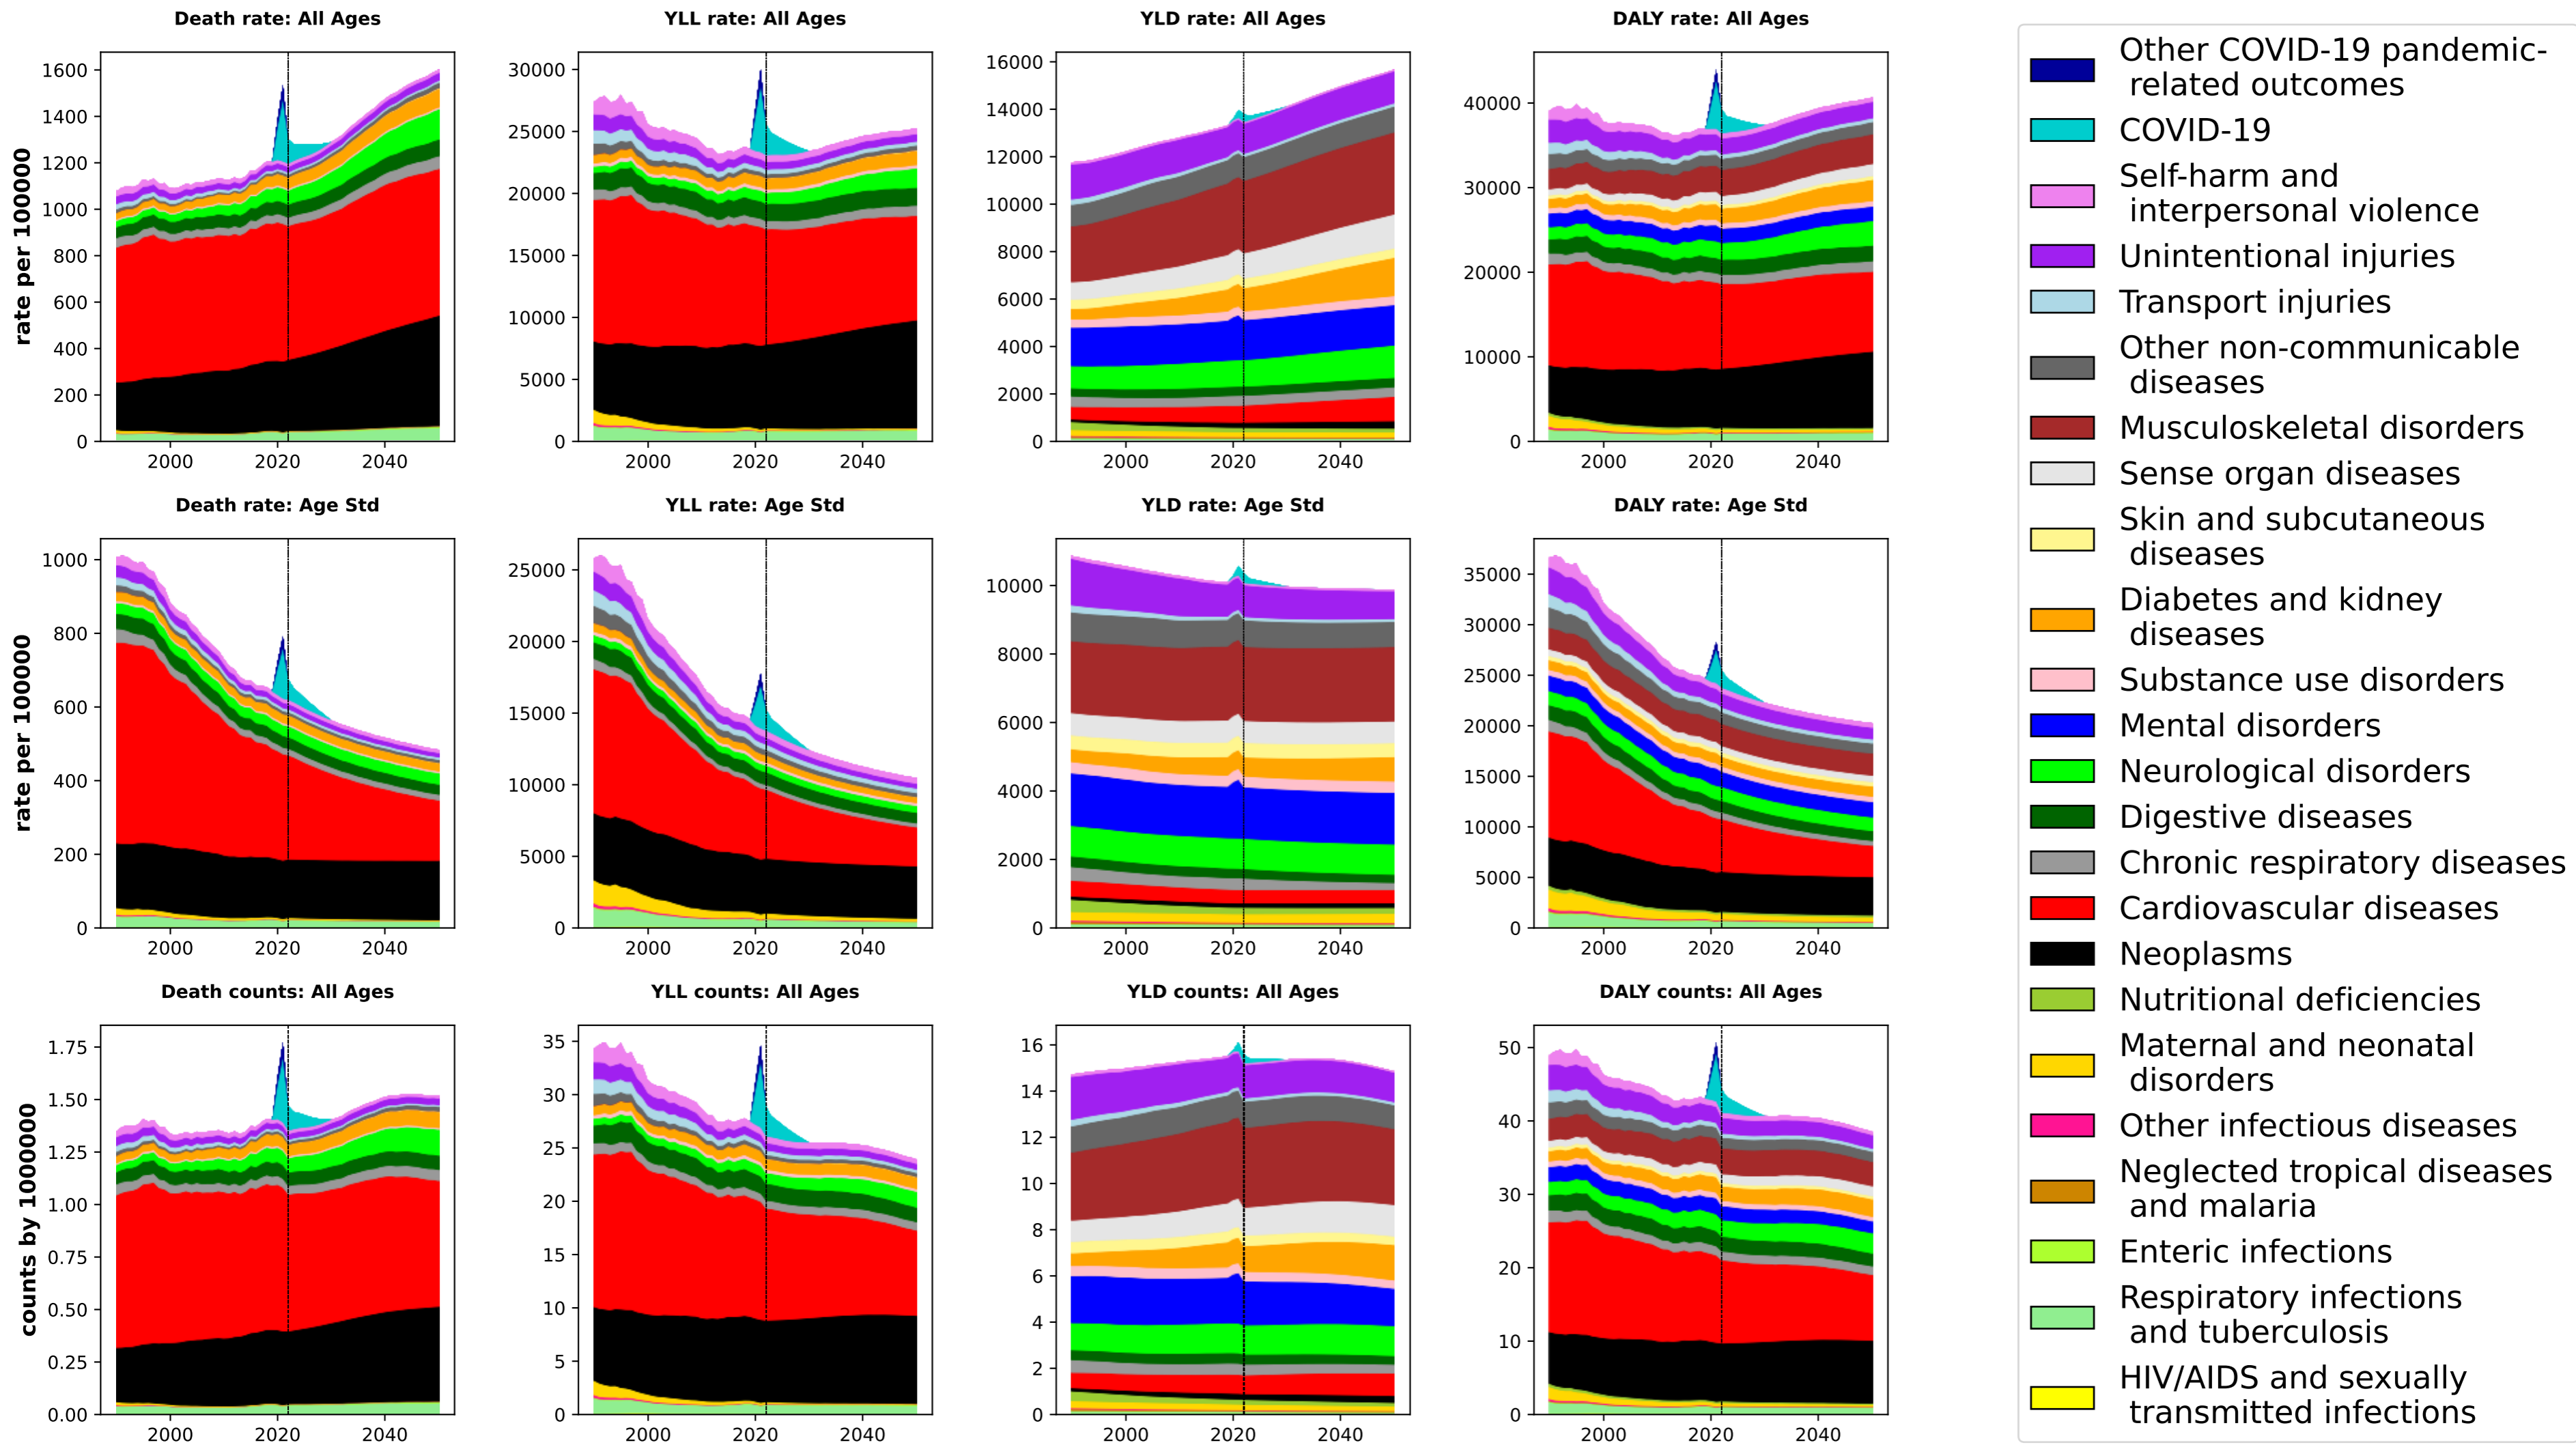

# Eastern Europe

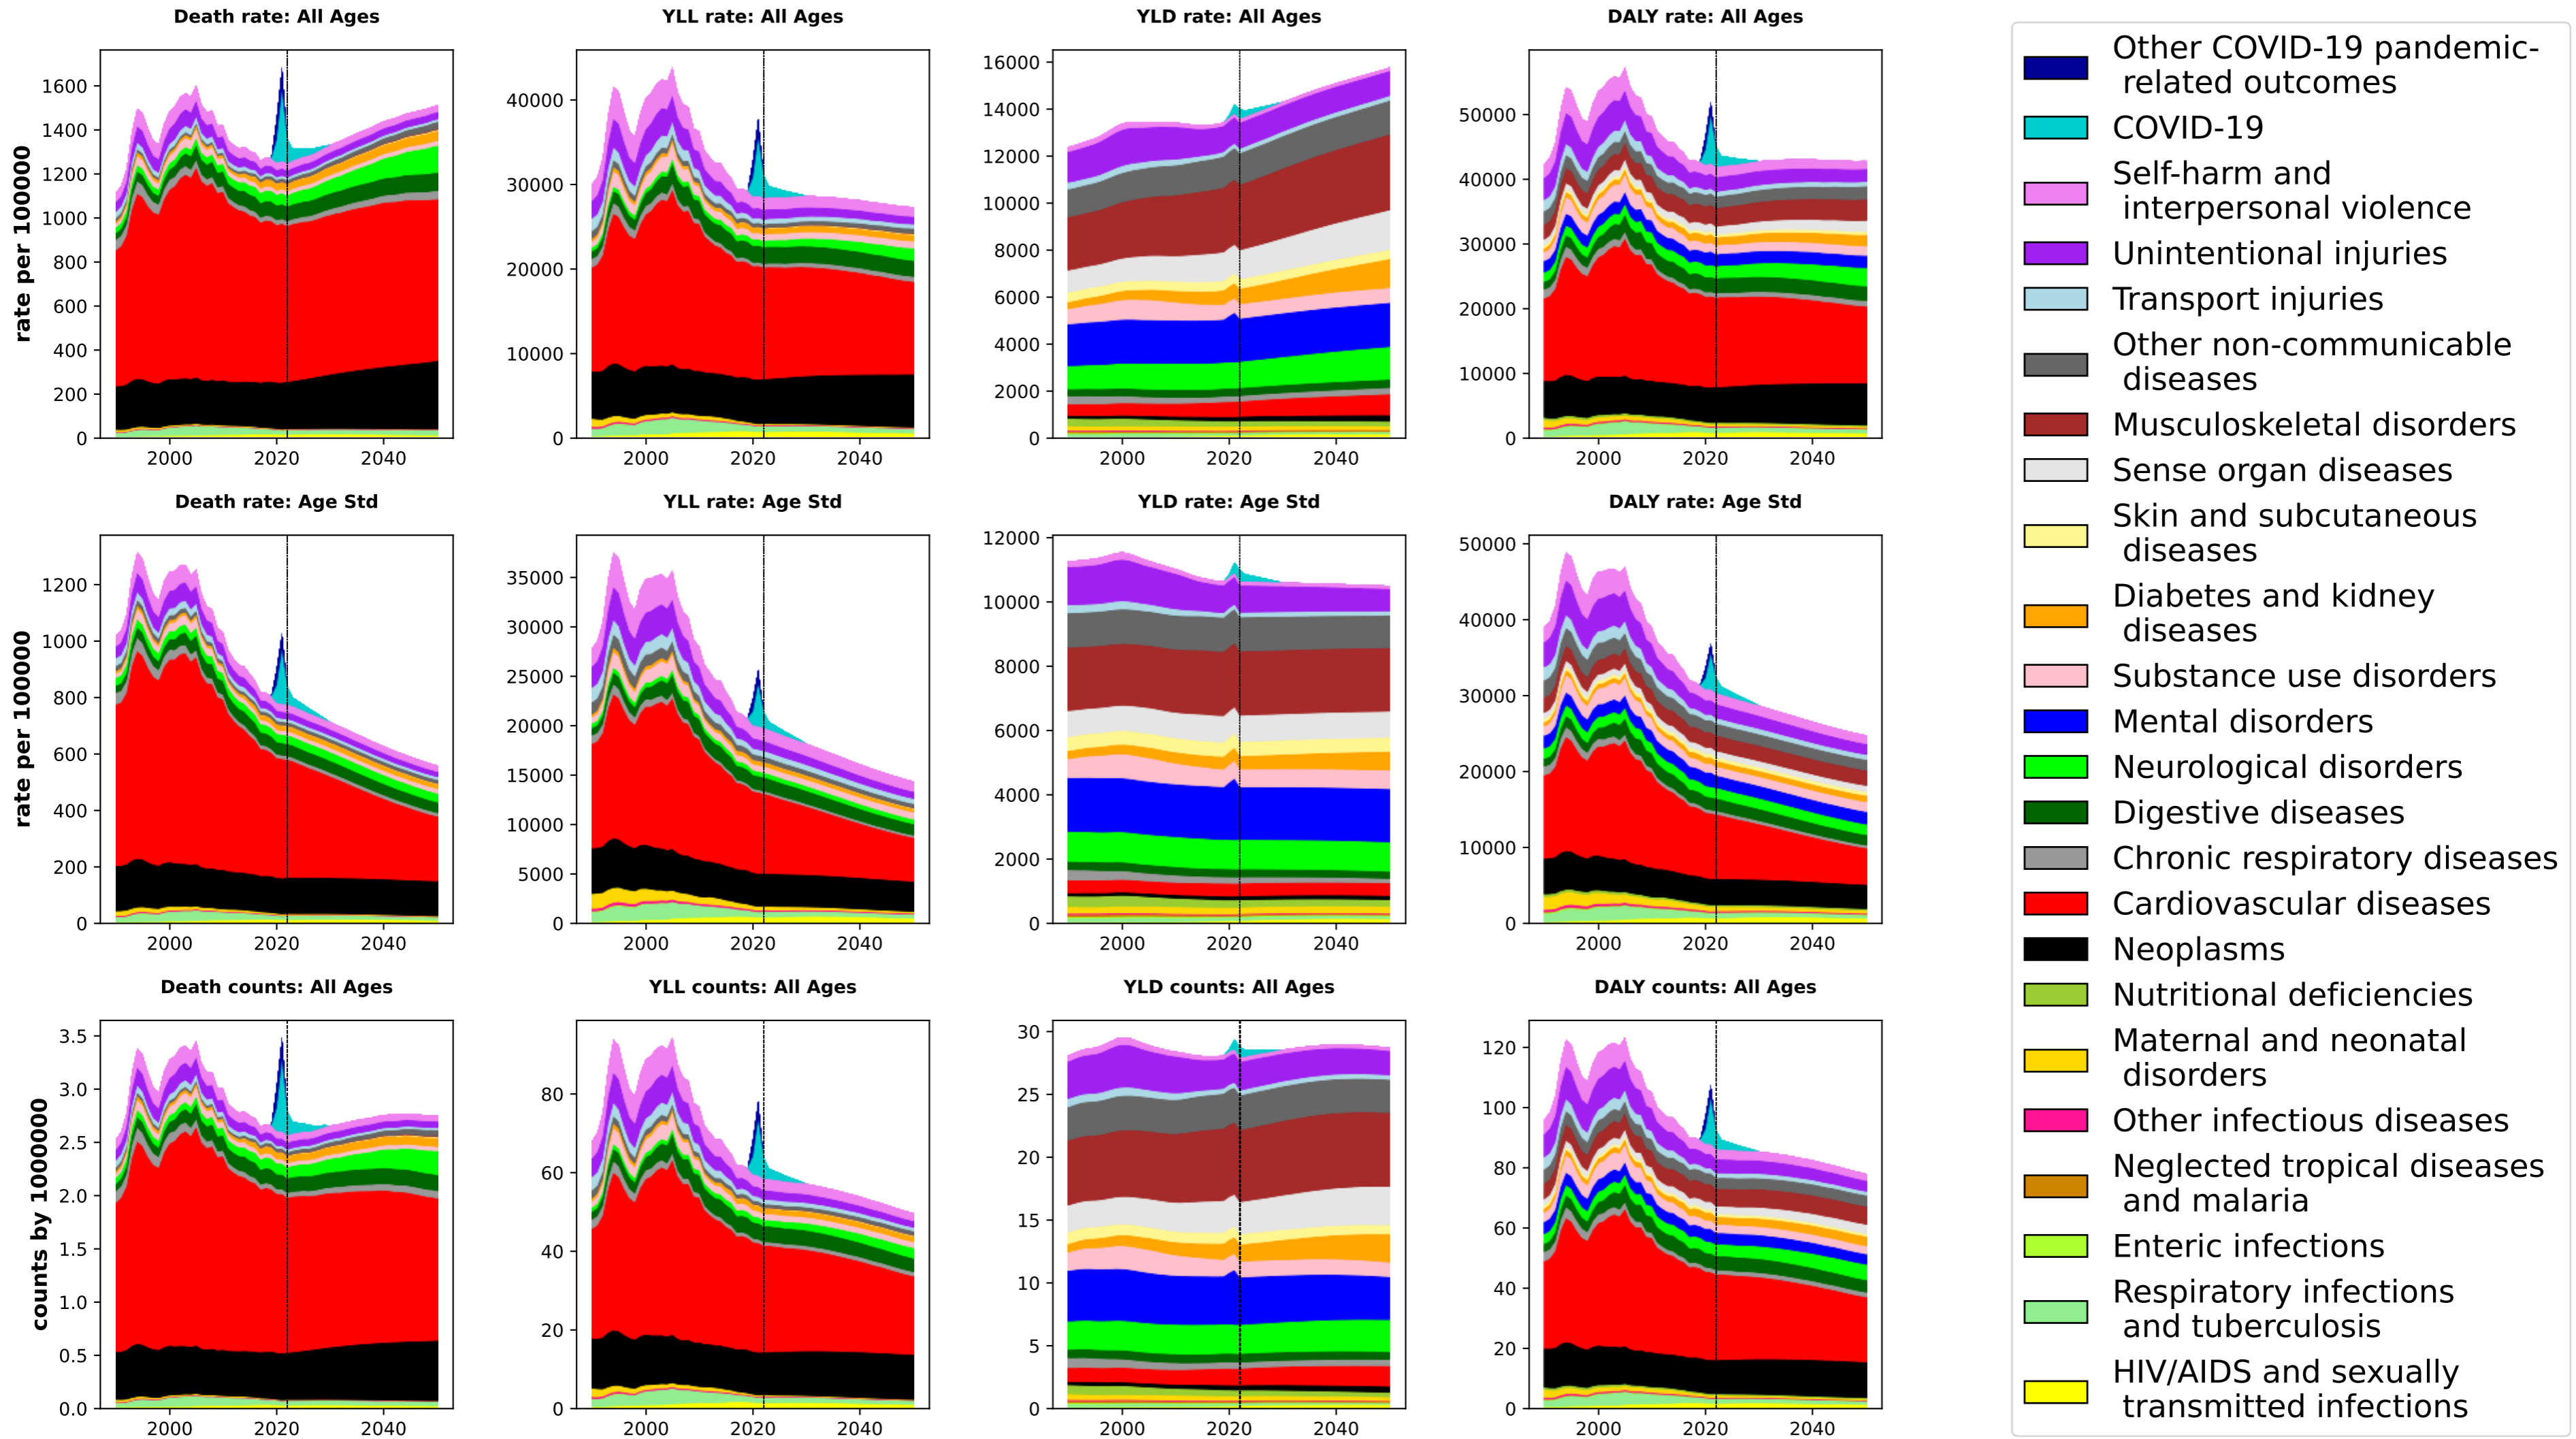

# Australasia

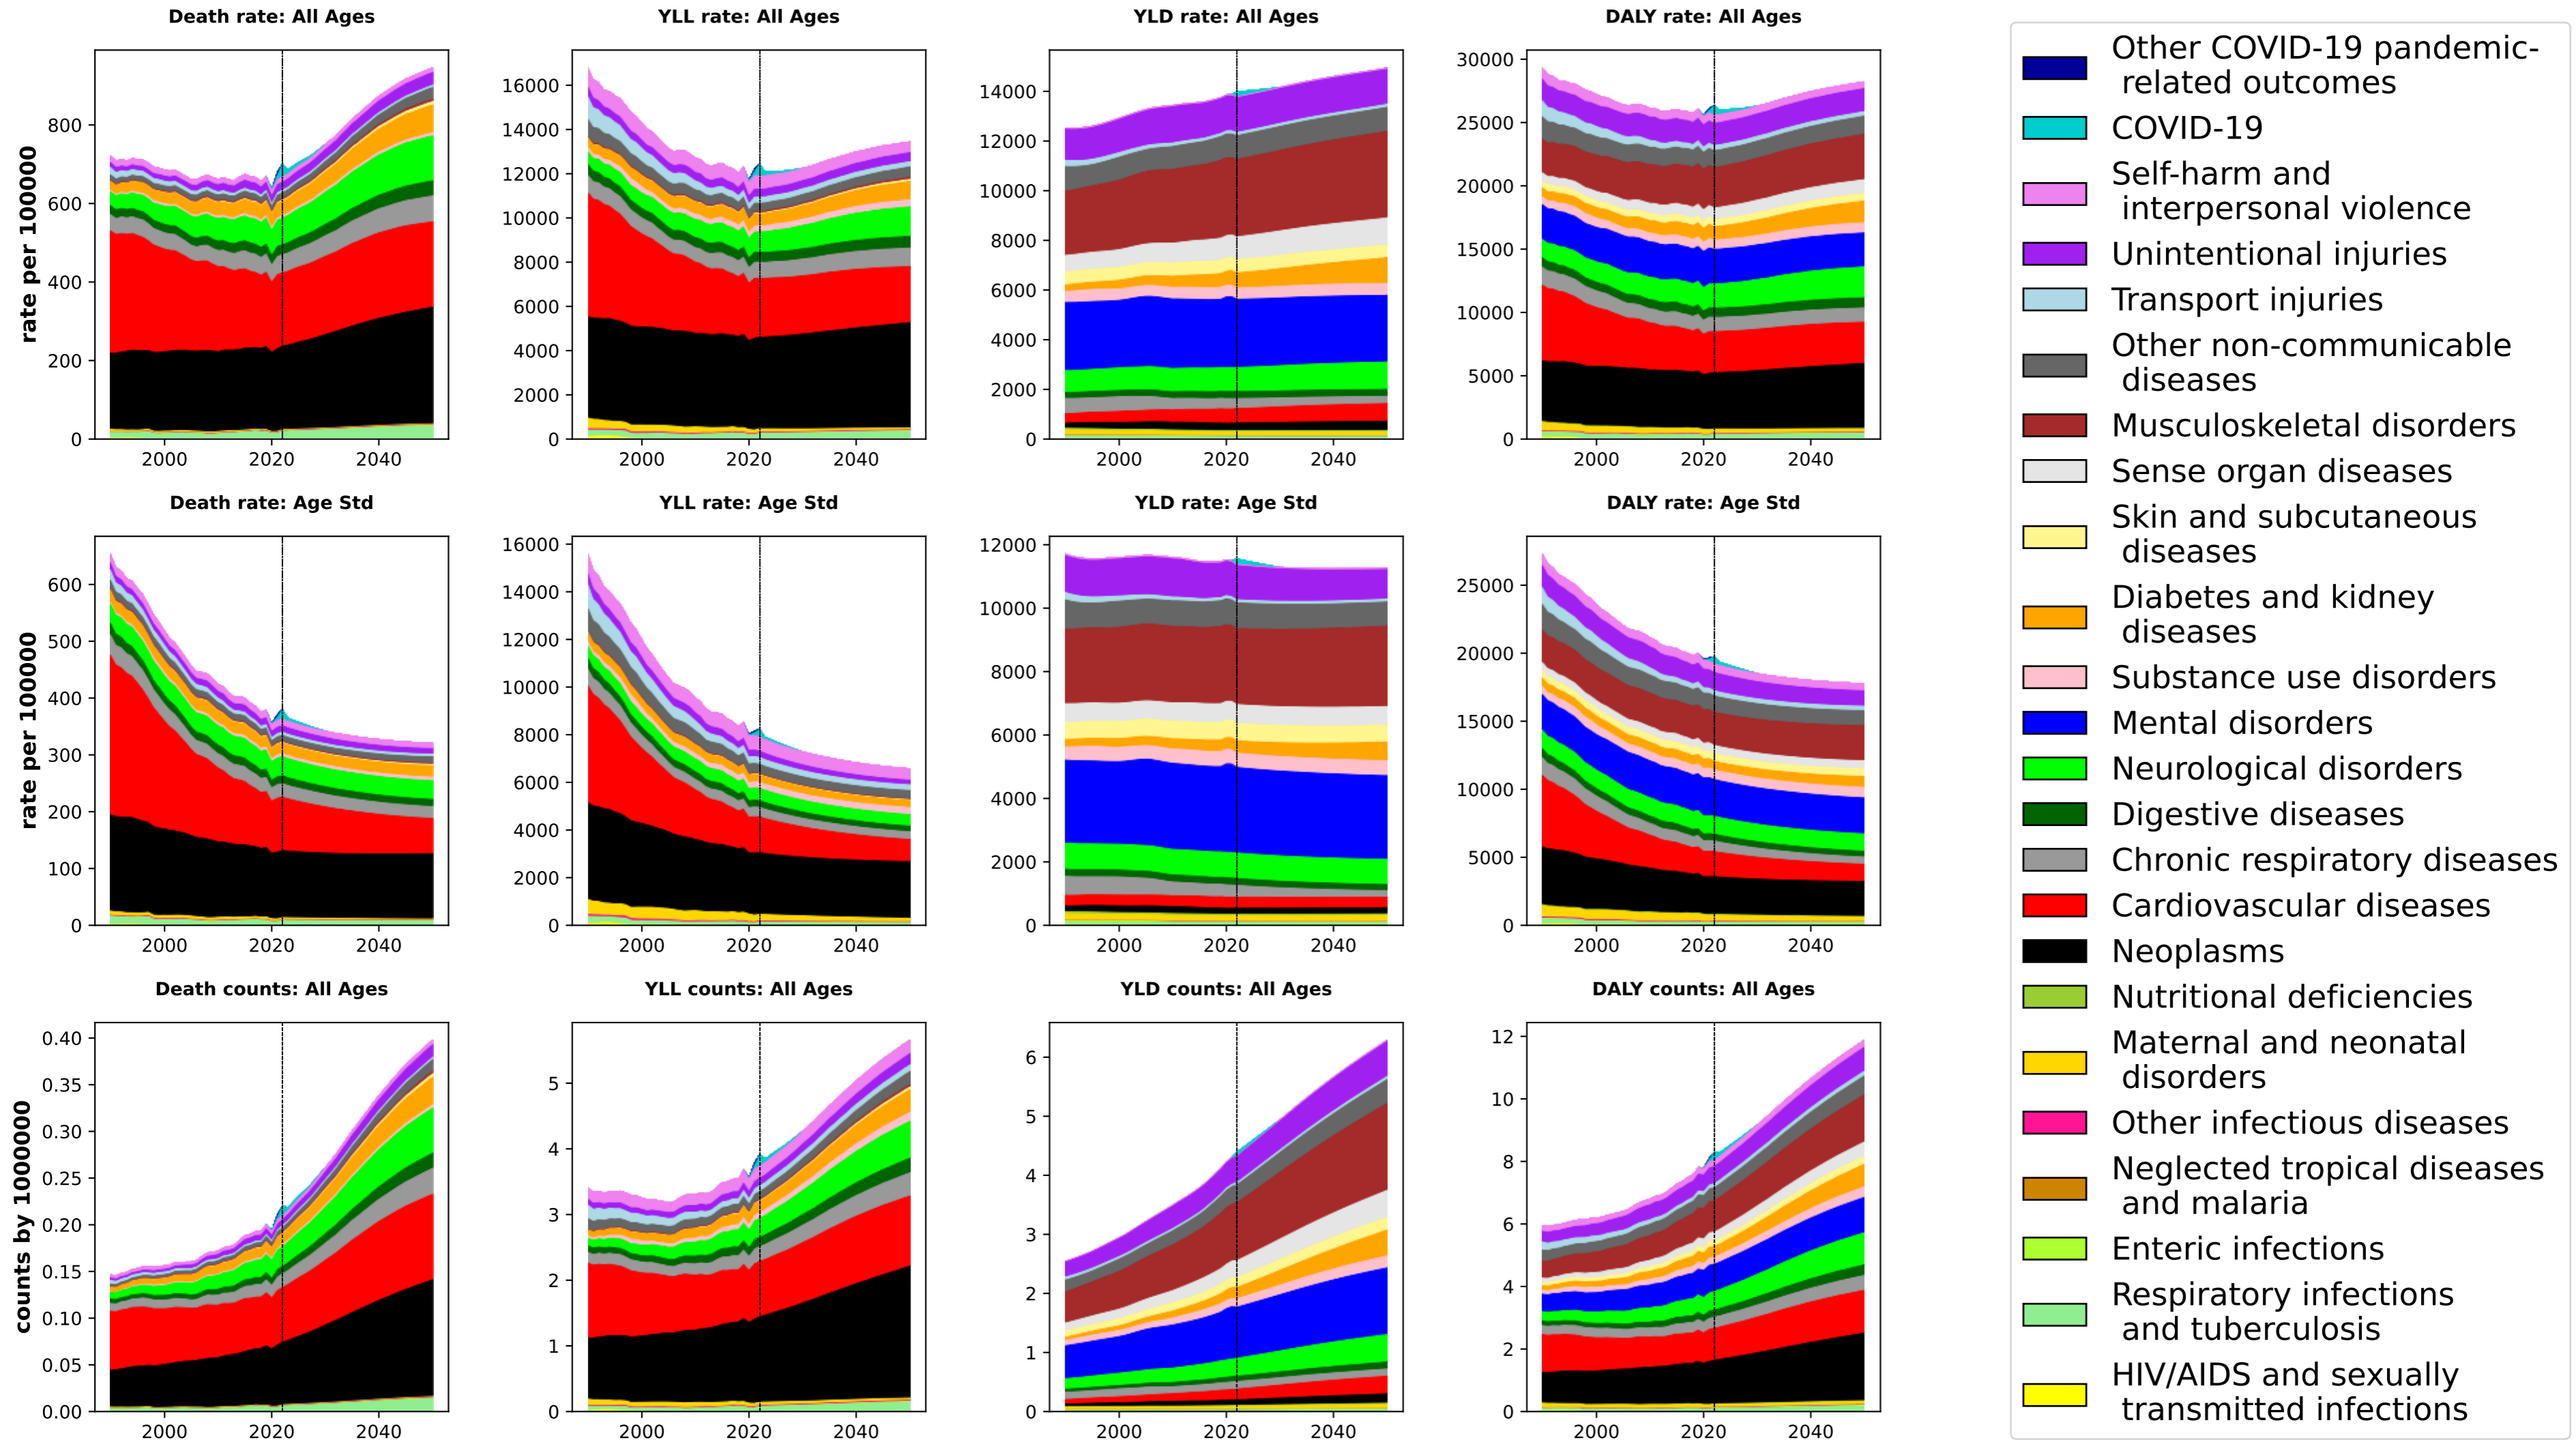

# High-income Asia Pacific

Supplemental Results Figure S6. Cause level 2 area plots for 4 burden measures for reference scenario by location, 1990-2050

927

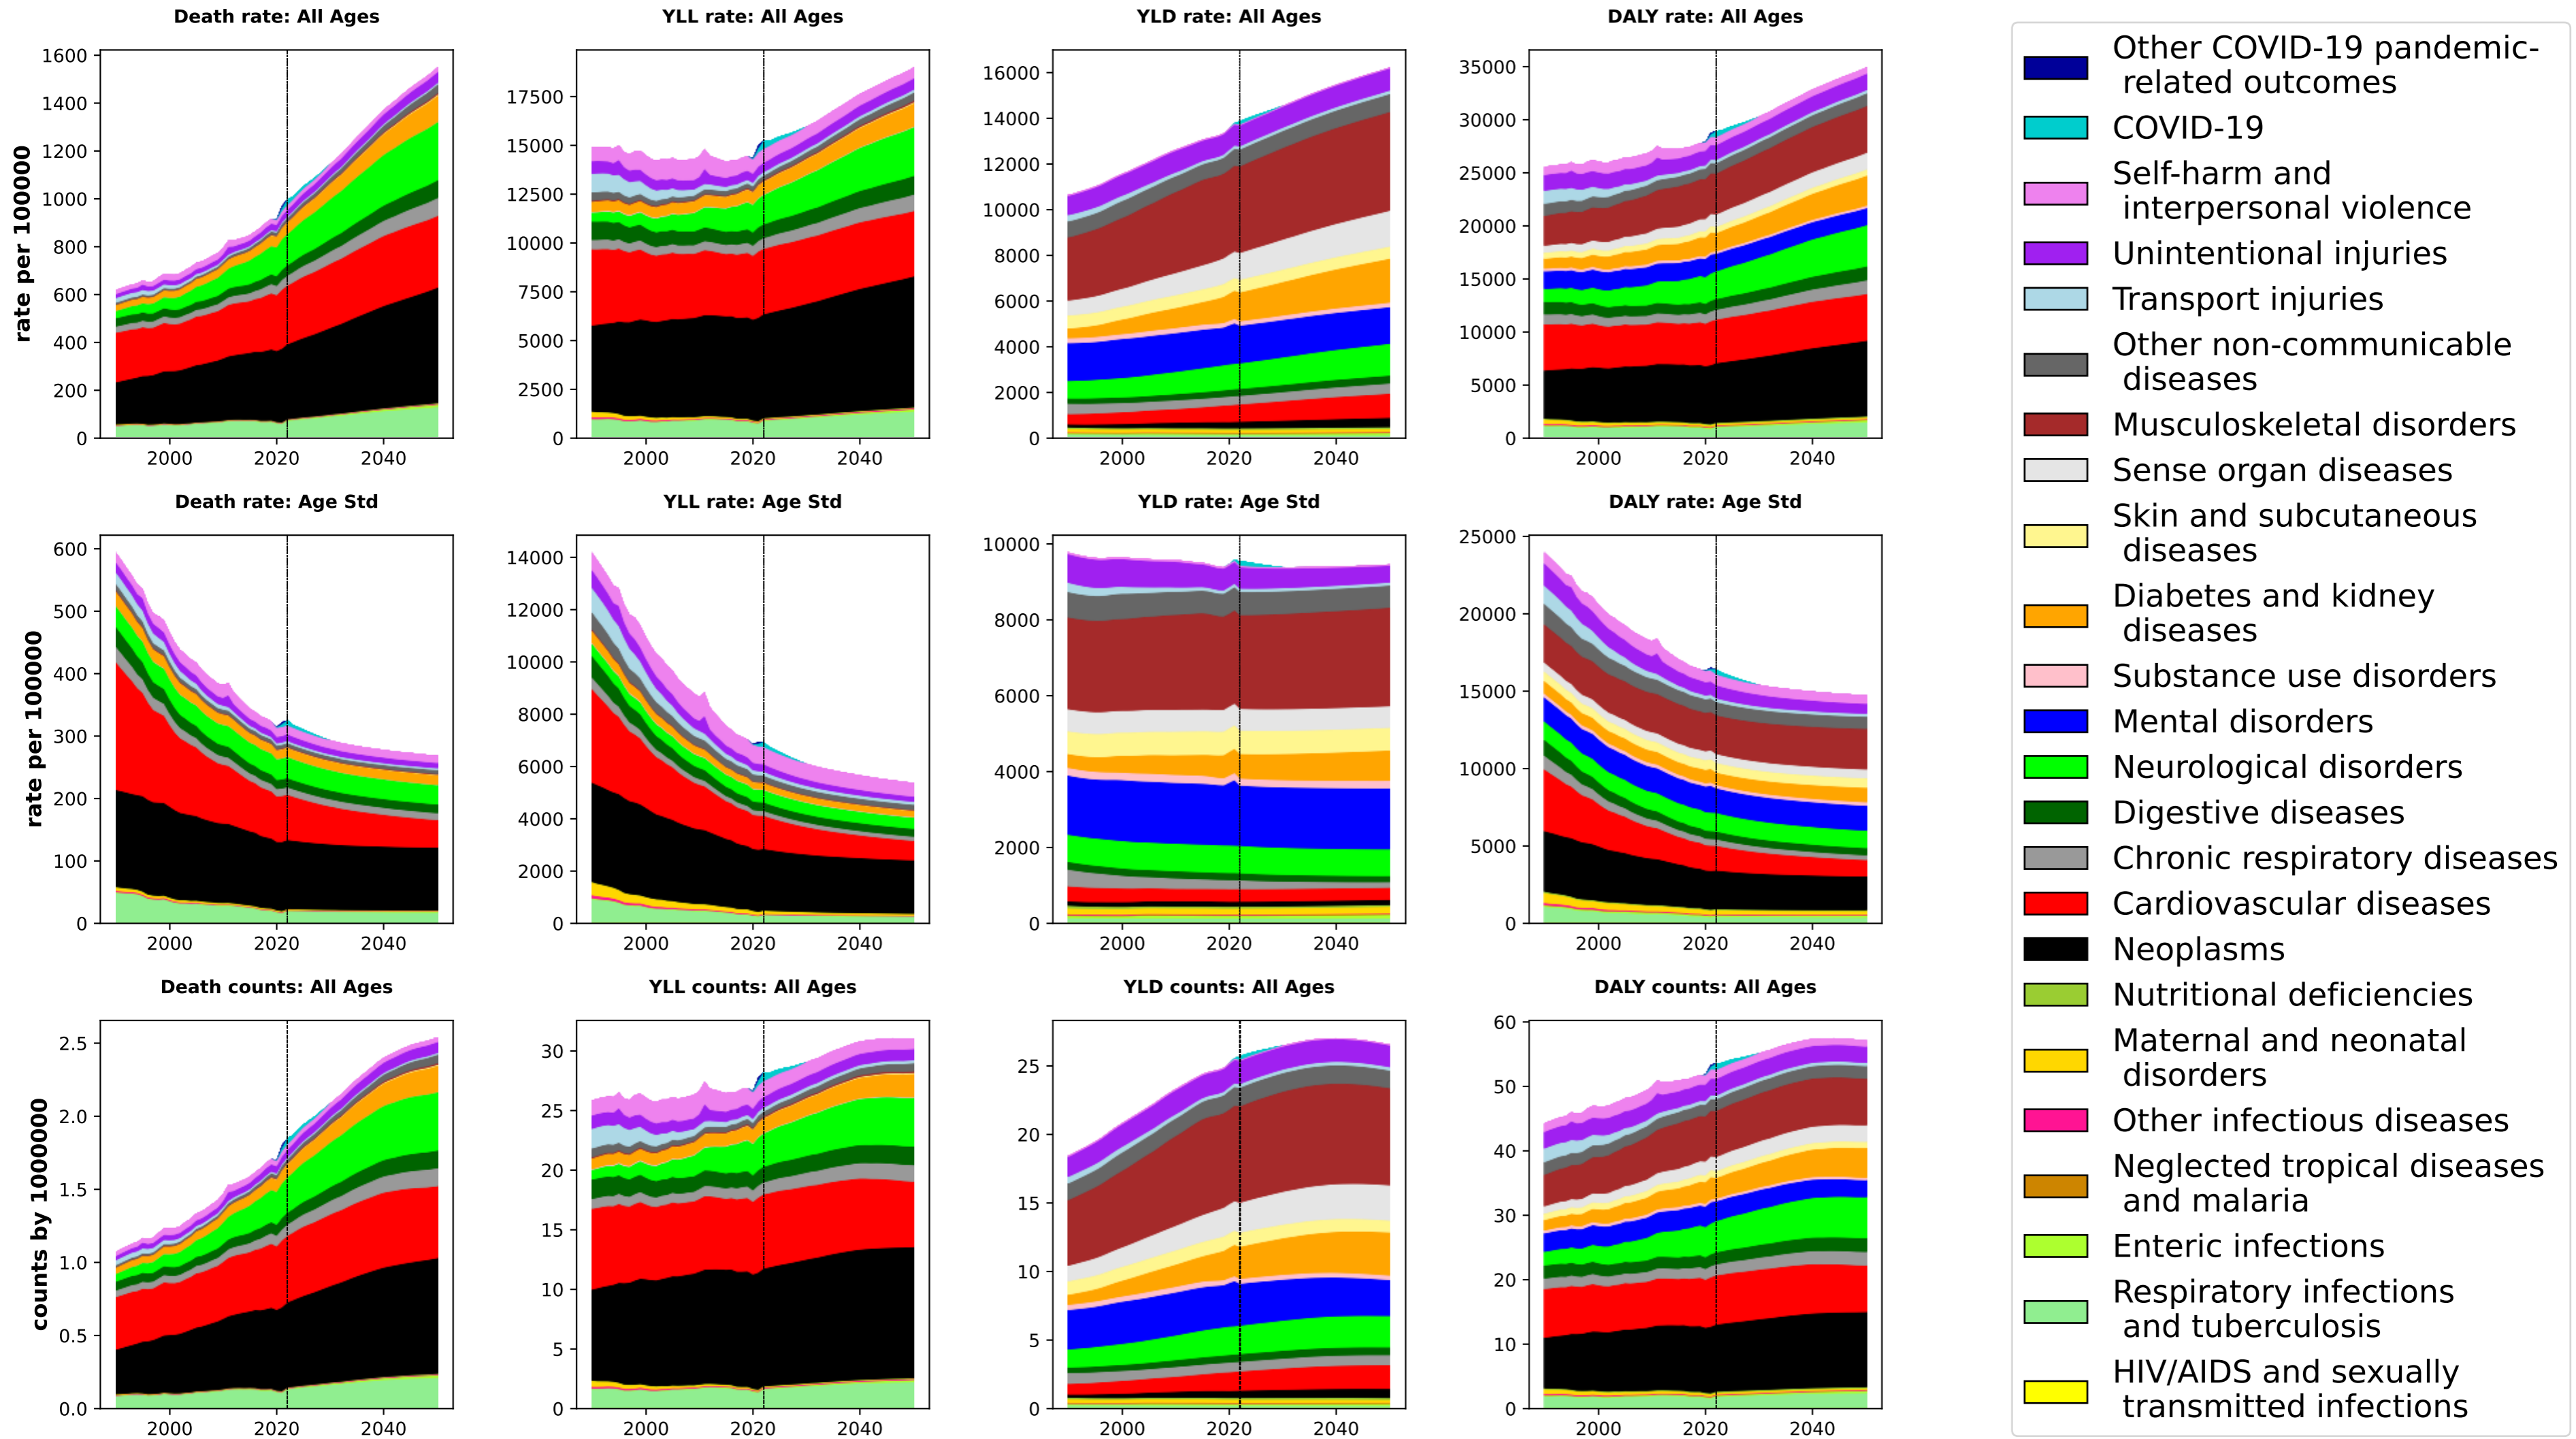



# High-income North America

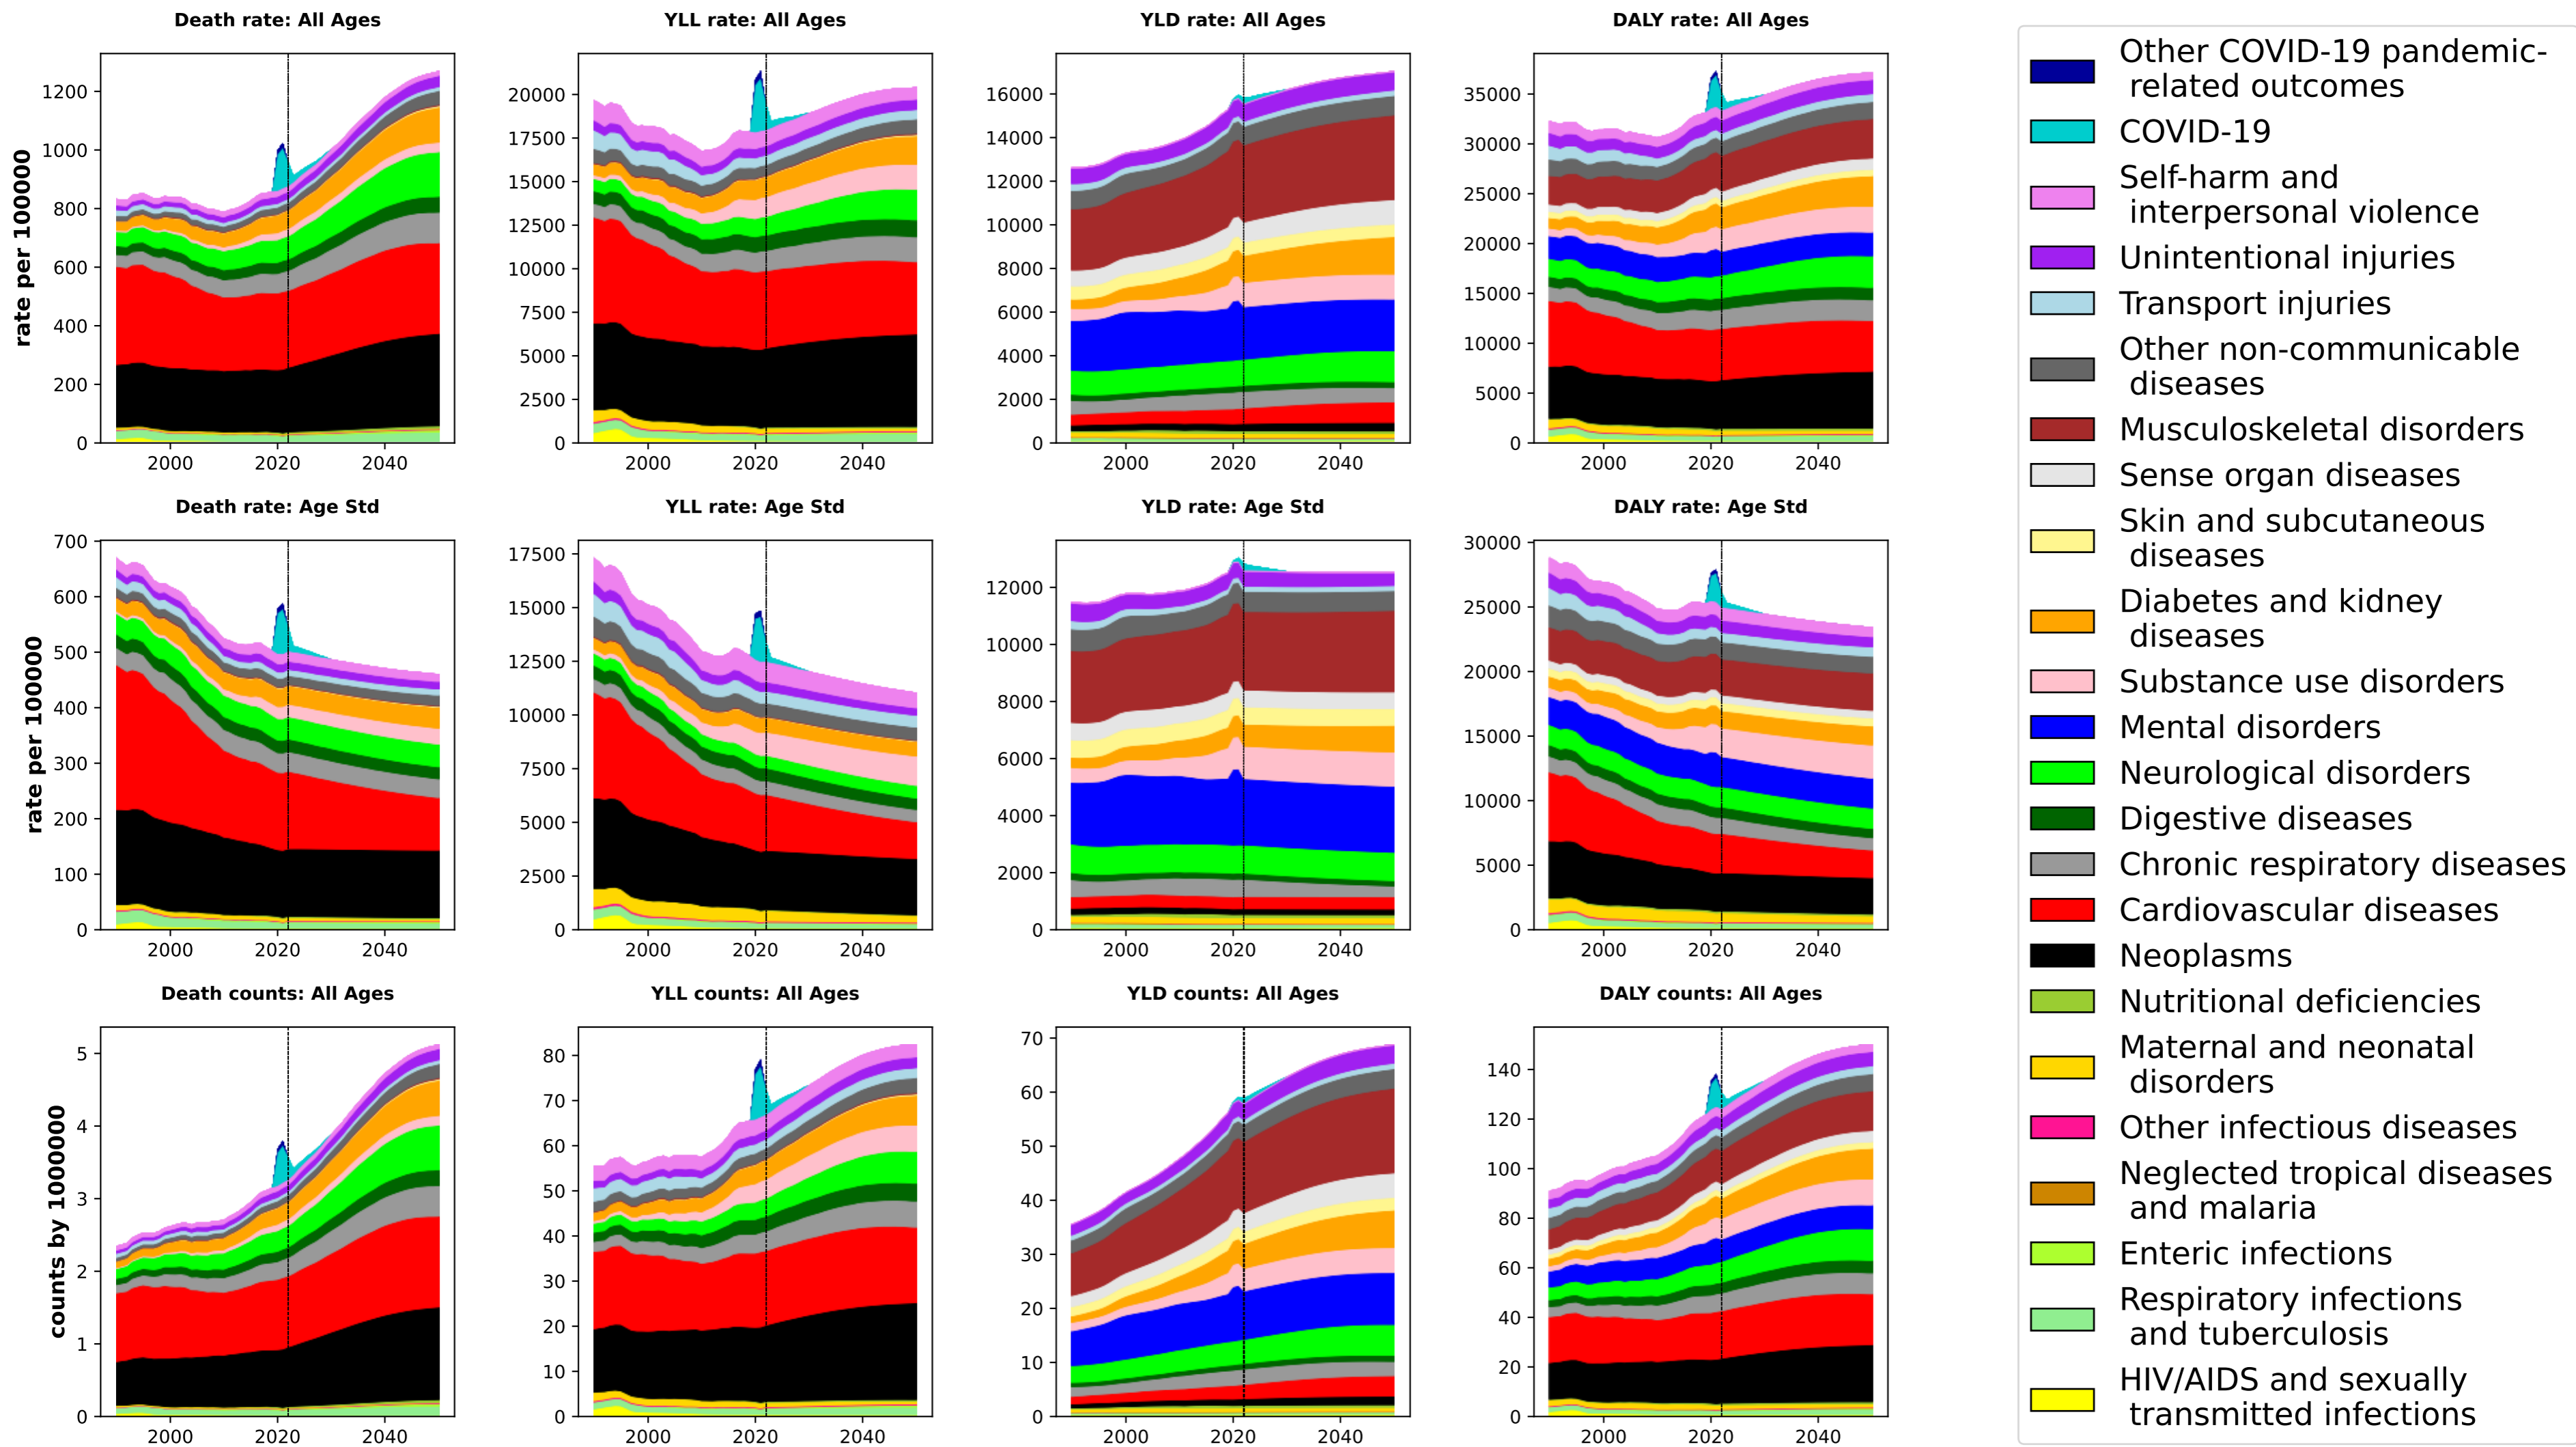

# Southern Latin America

Supplemental Results Figure S6. Cause level 2 area plots for 4 burden measures for reference scenario by location, 1990-2050

929

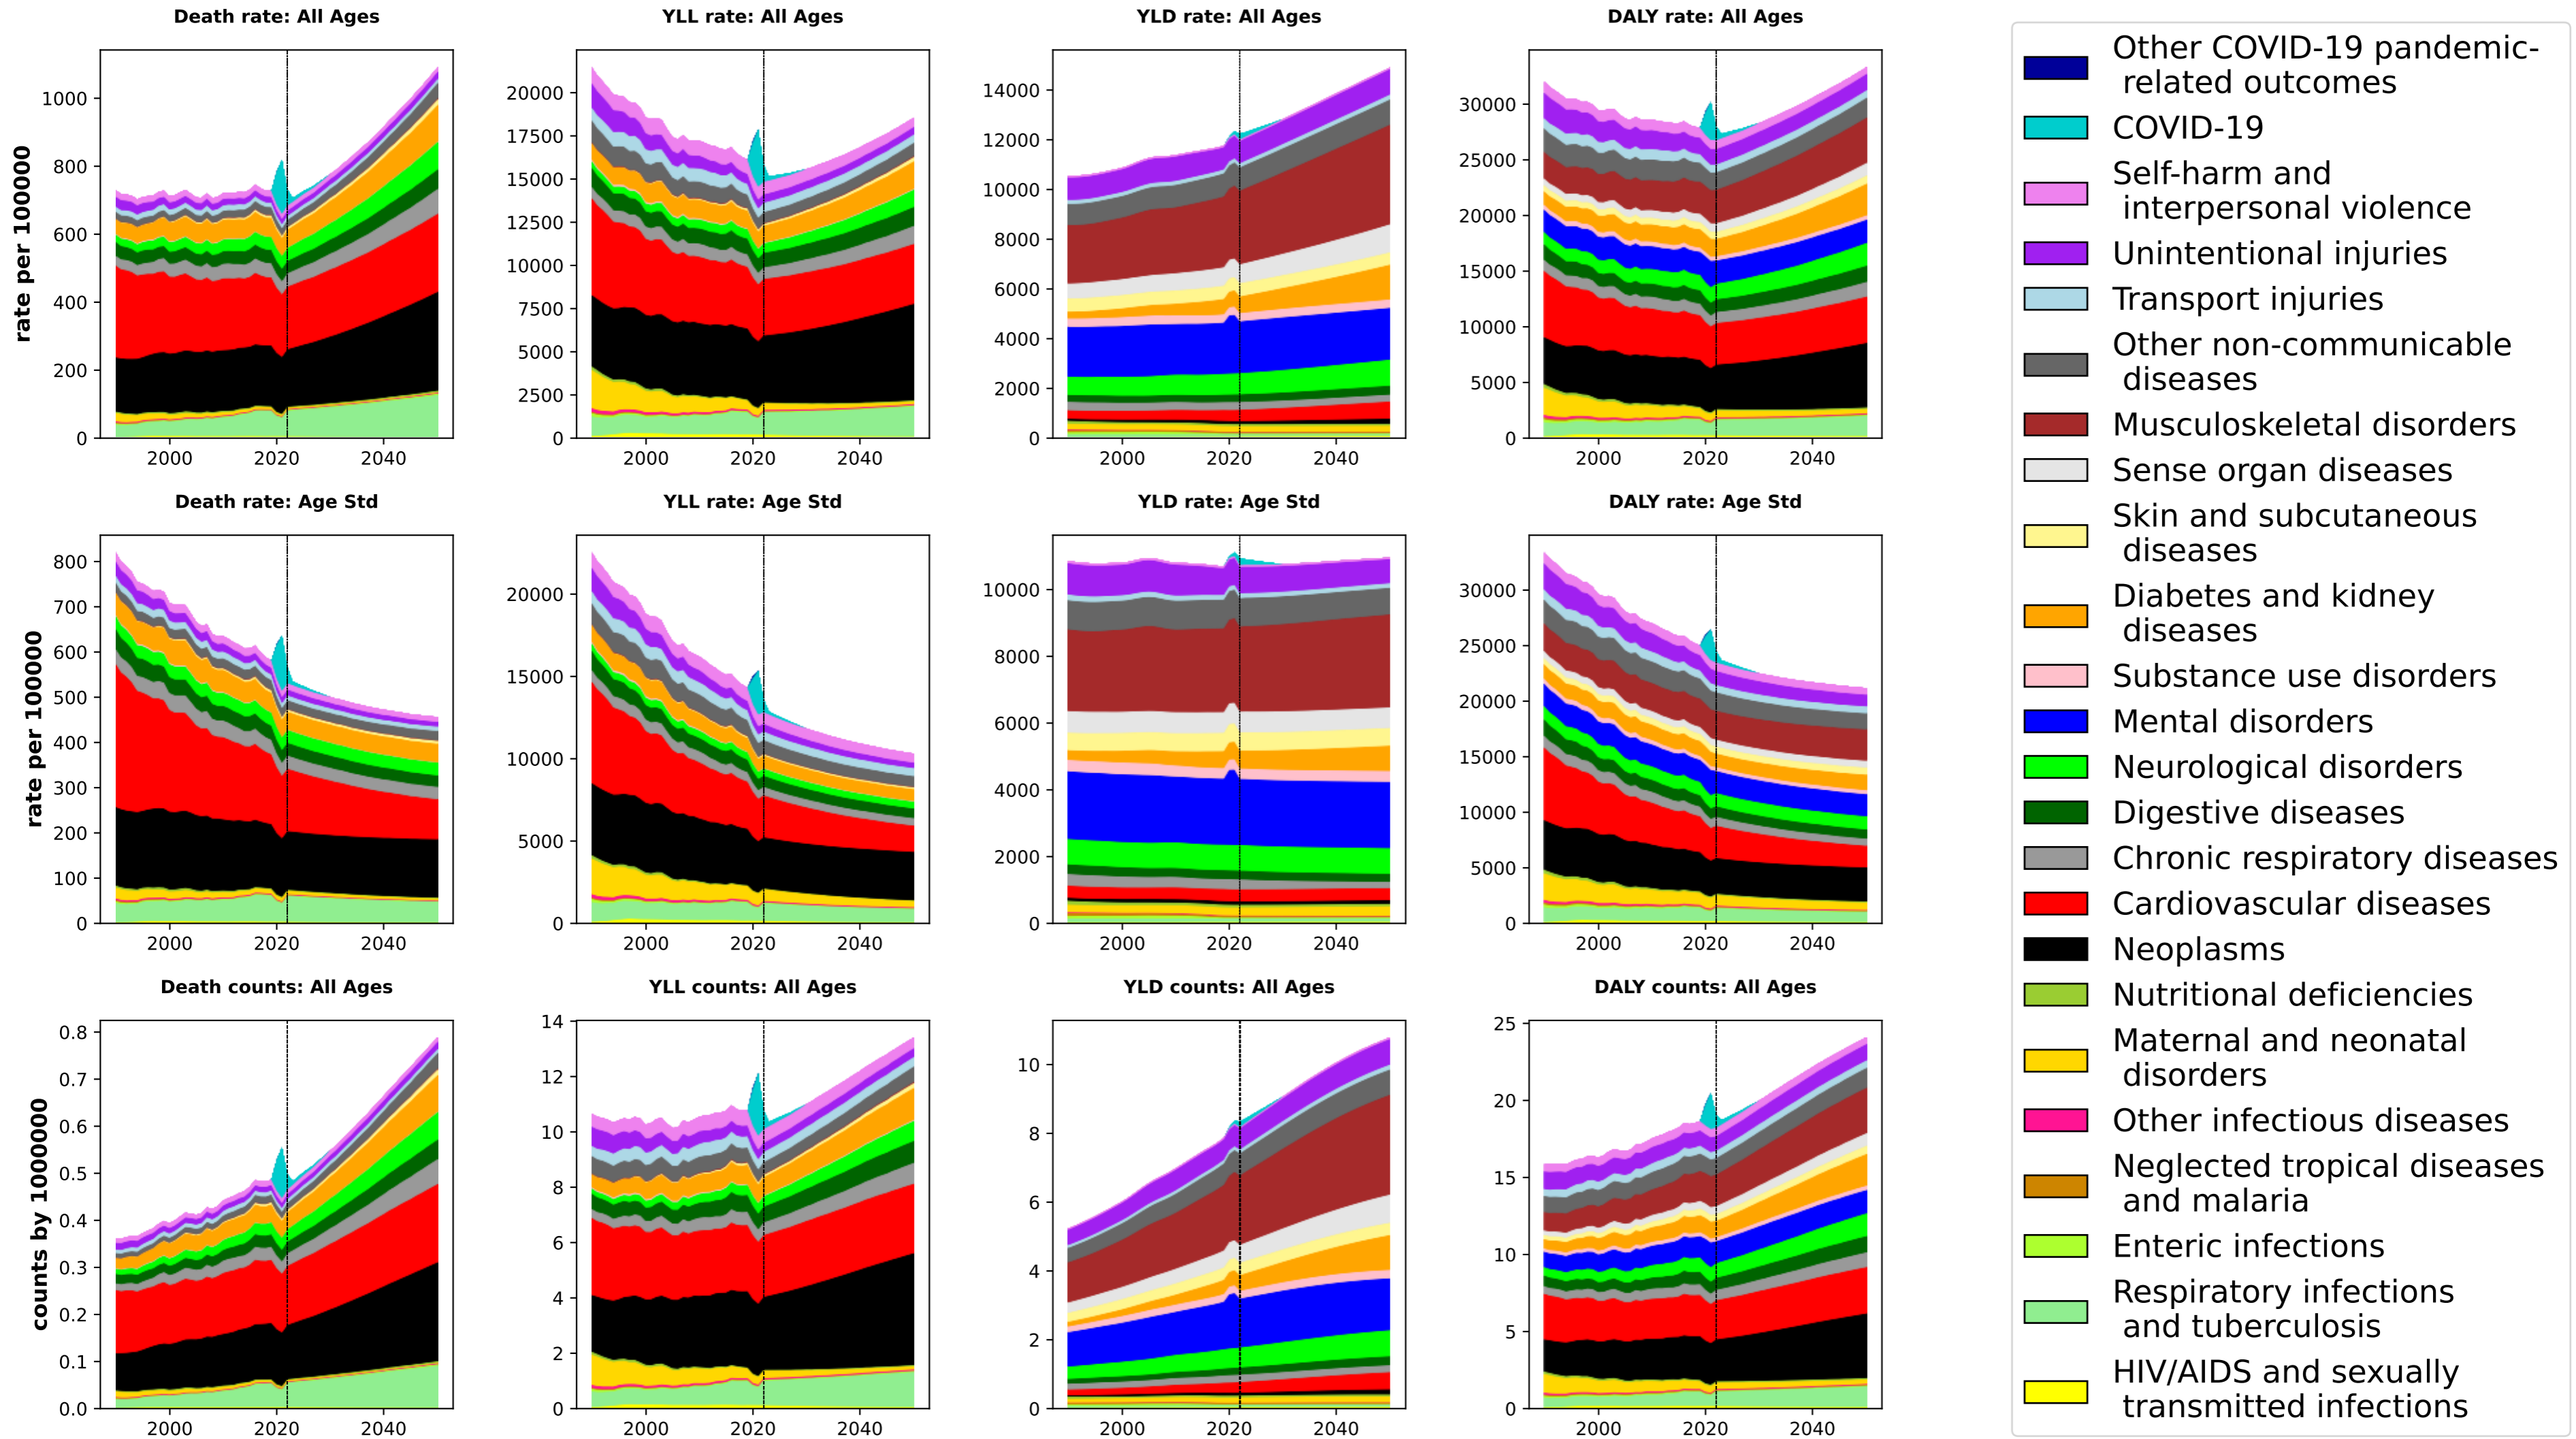

# Western Europe

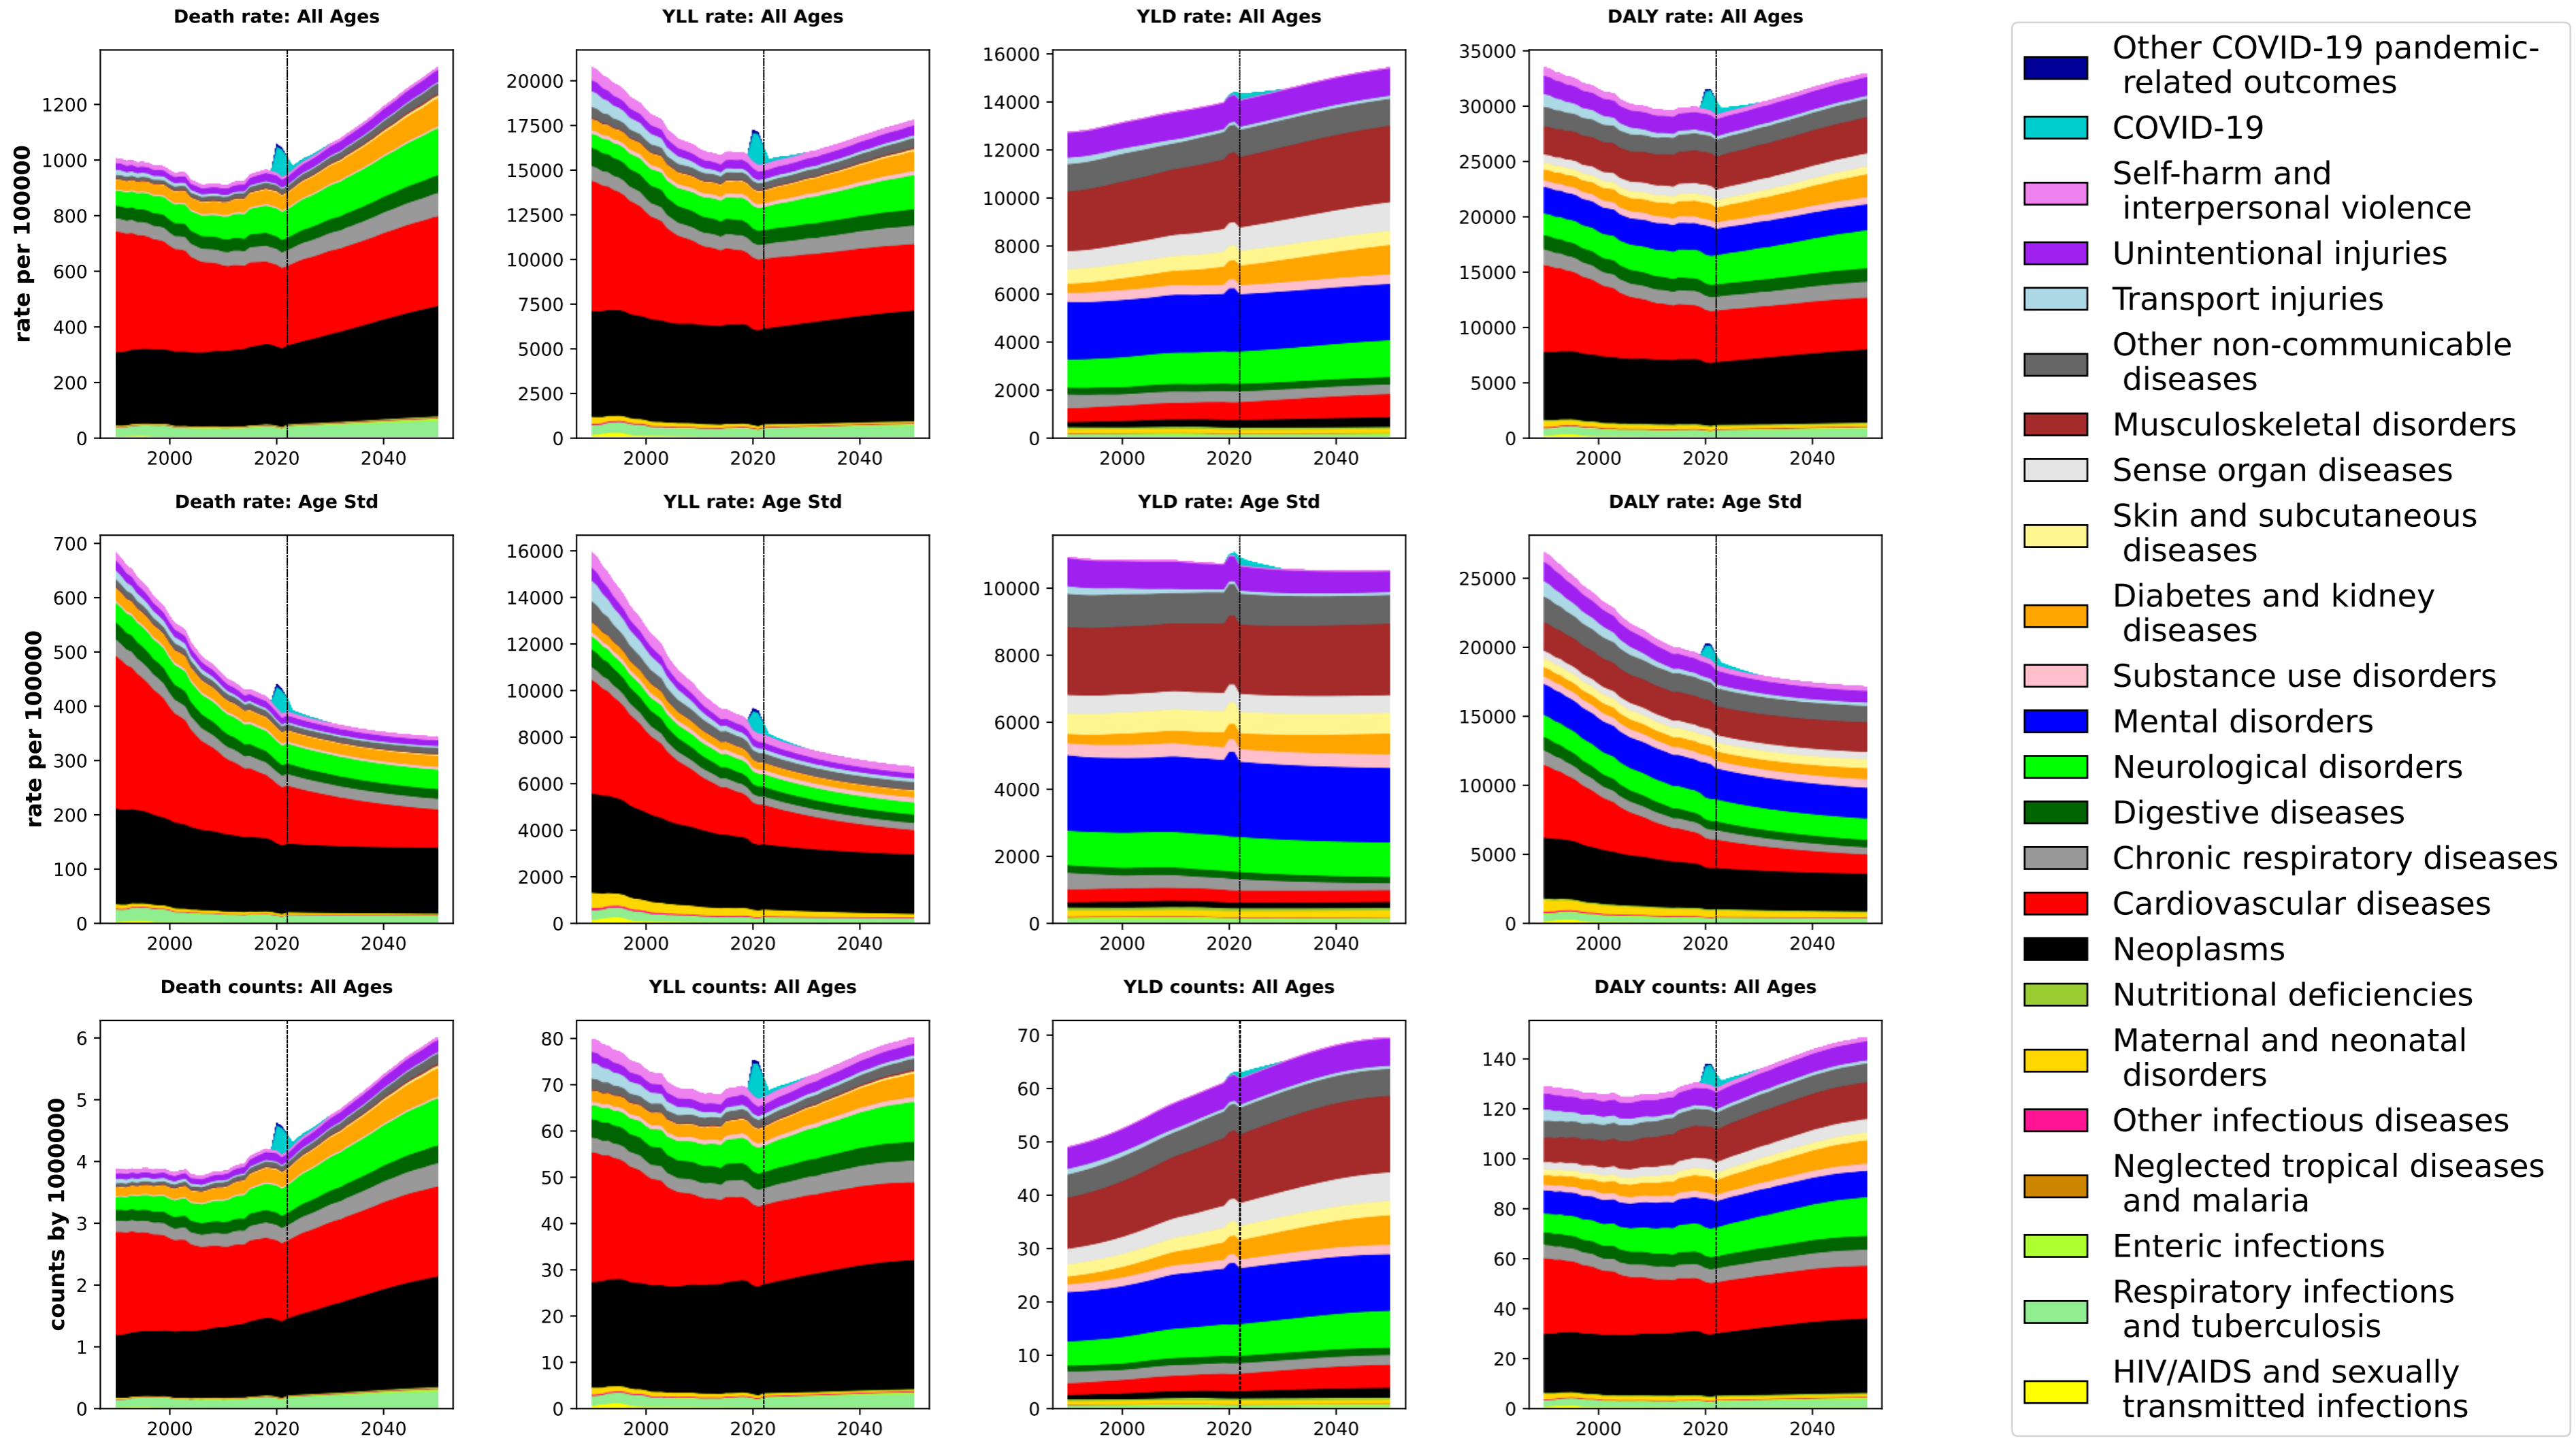

# Andean Latin America

Supplemental Results Figure S6. Cause level 2 area plots for 4 burden measures for reference scenario by location, 1990-2050

931

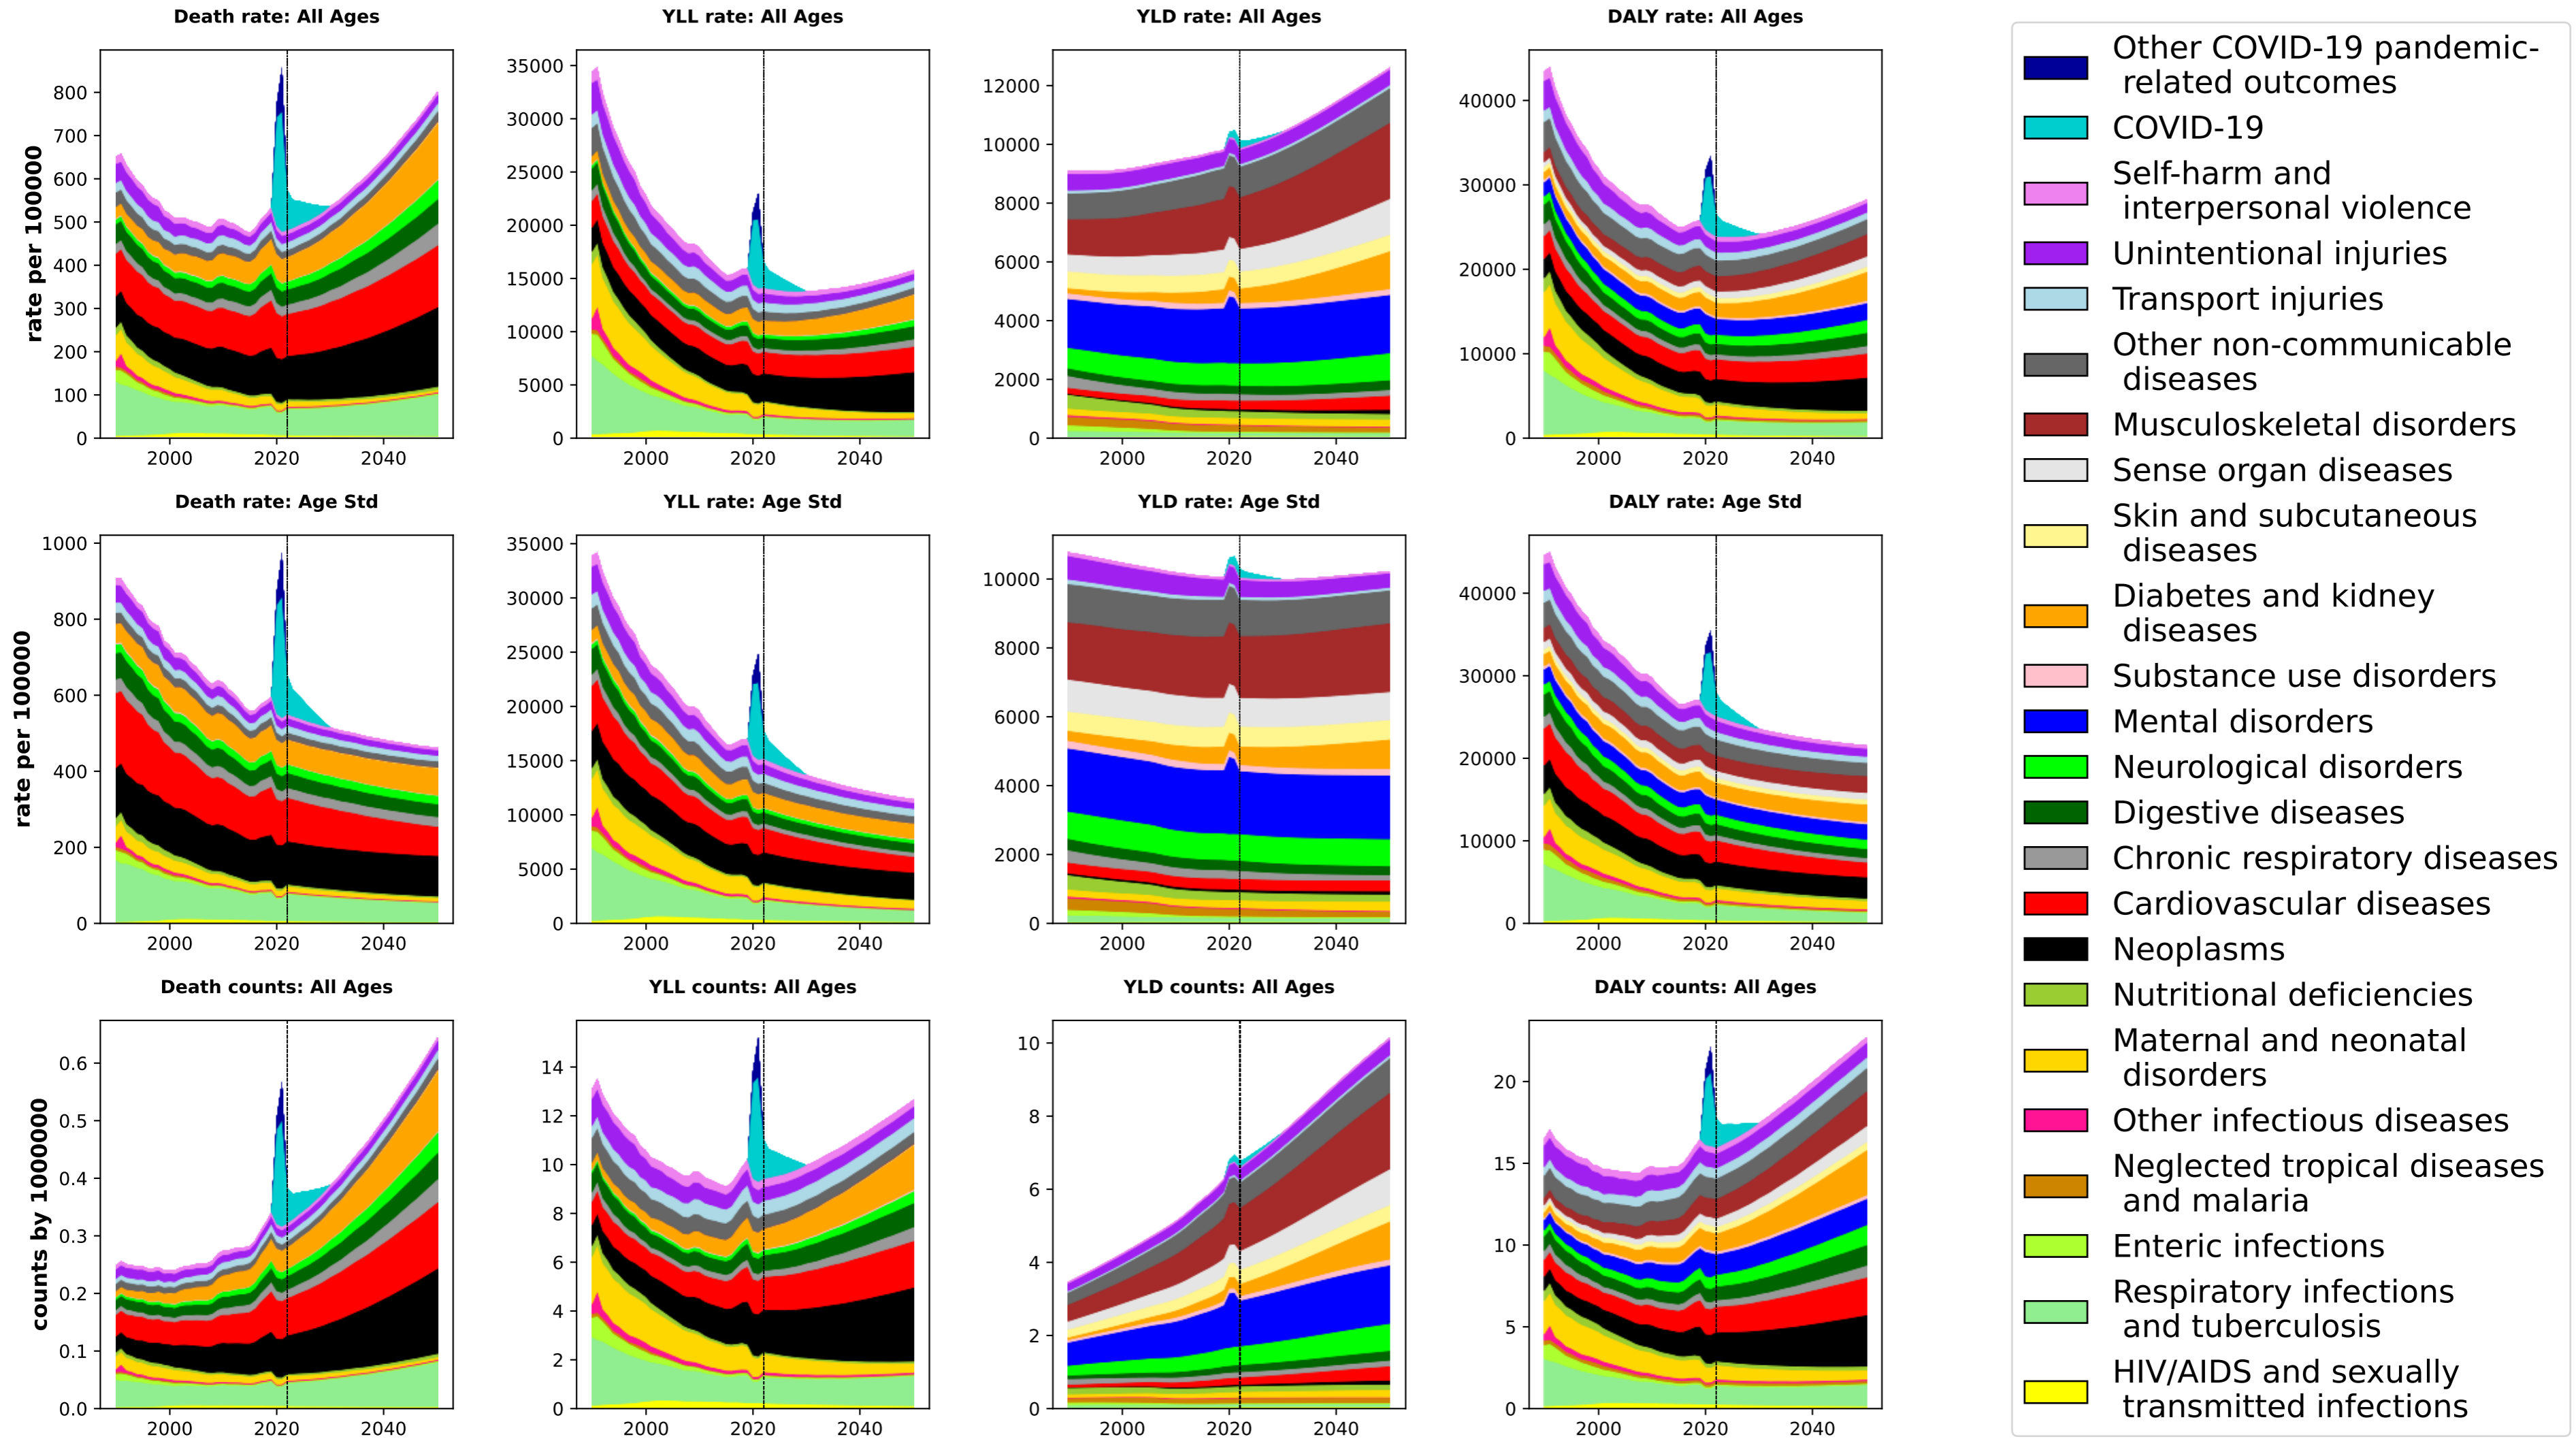

# Caribbean

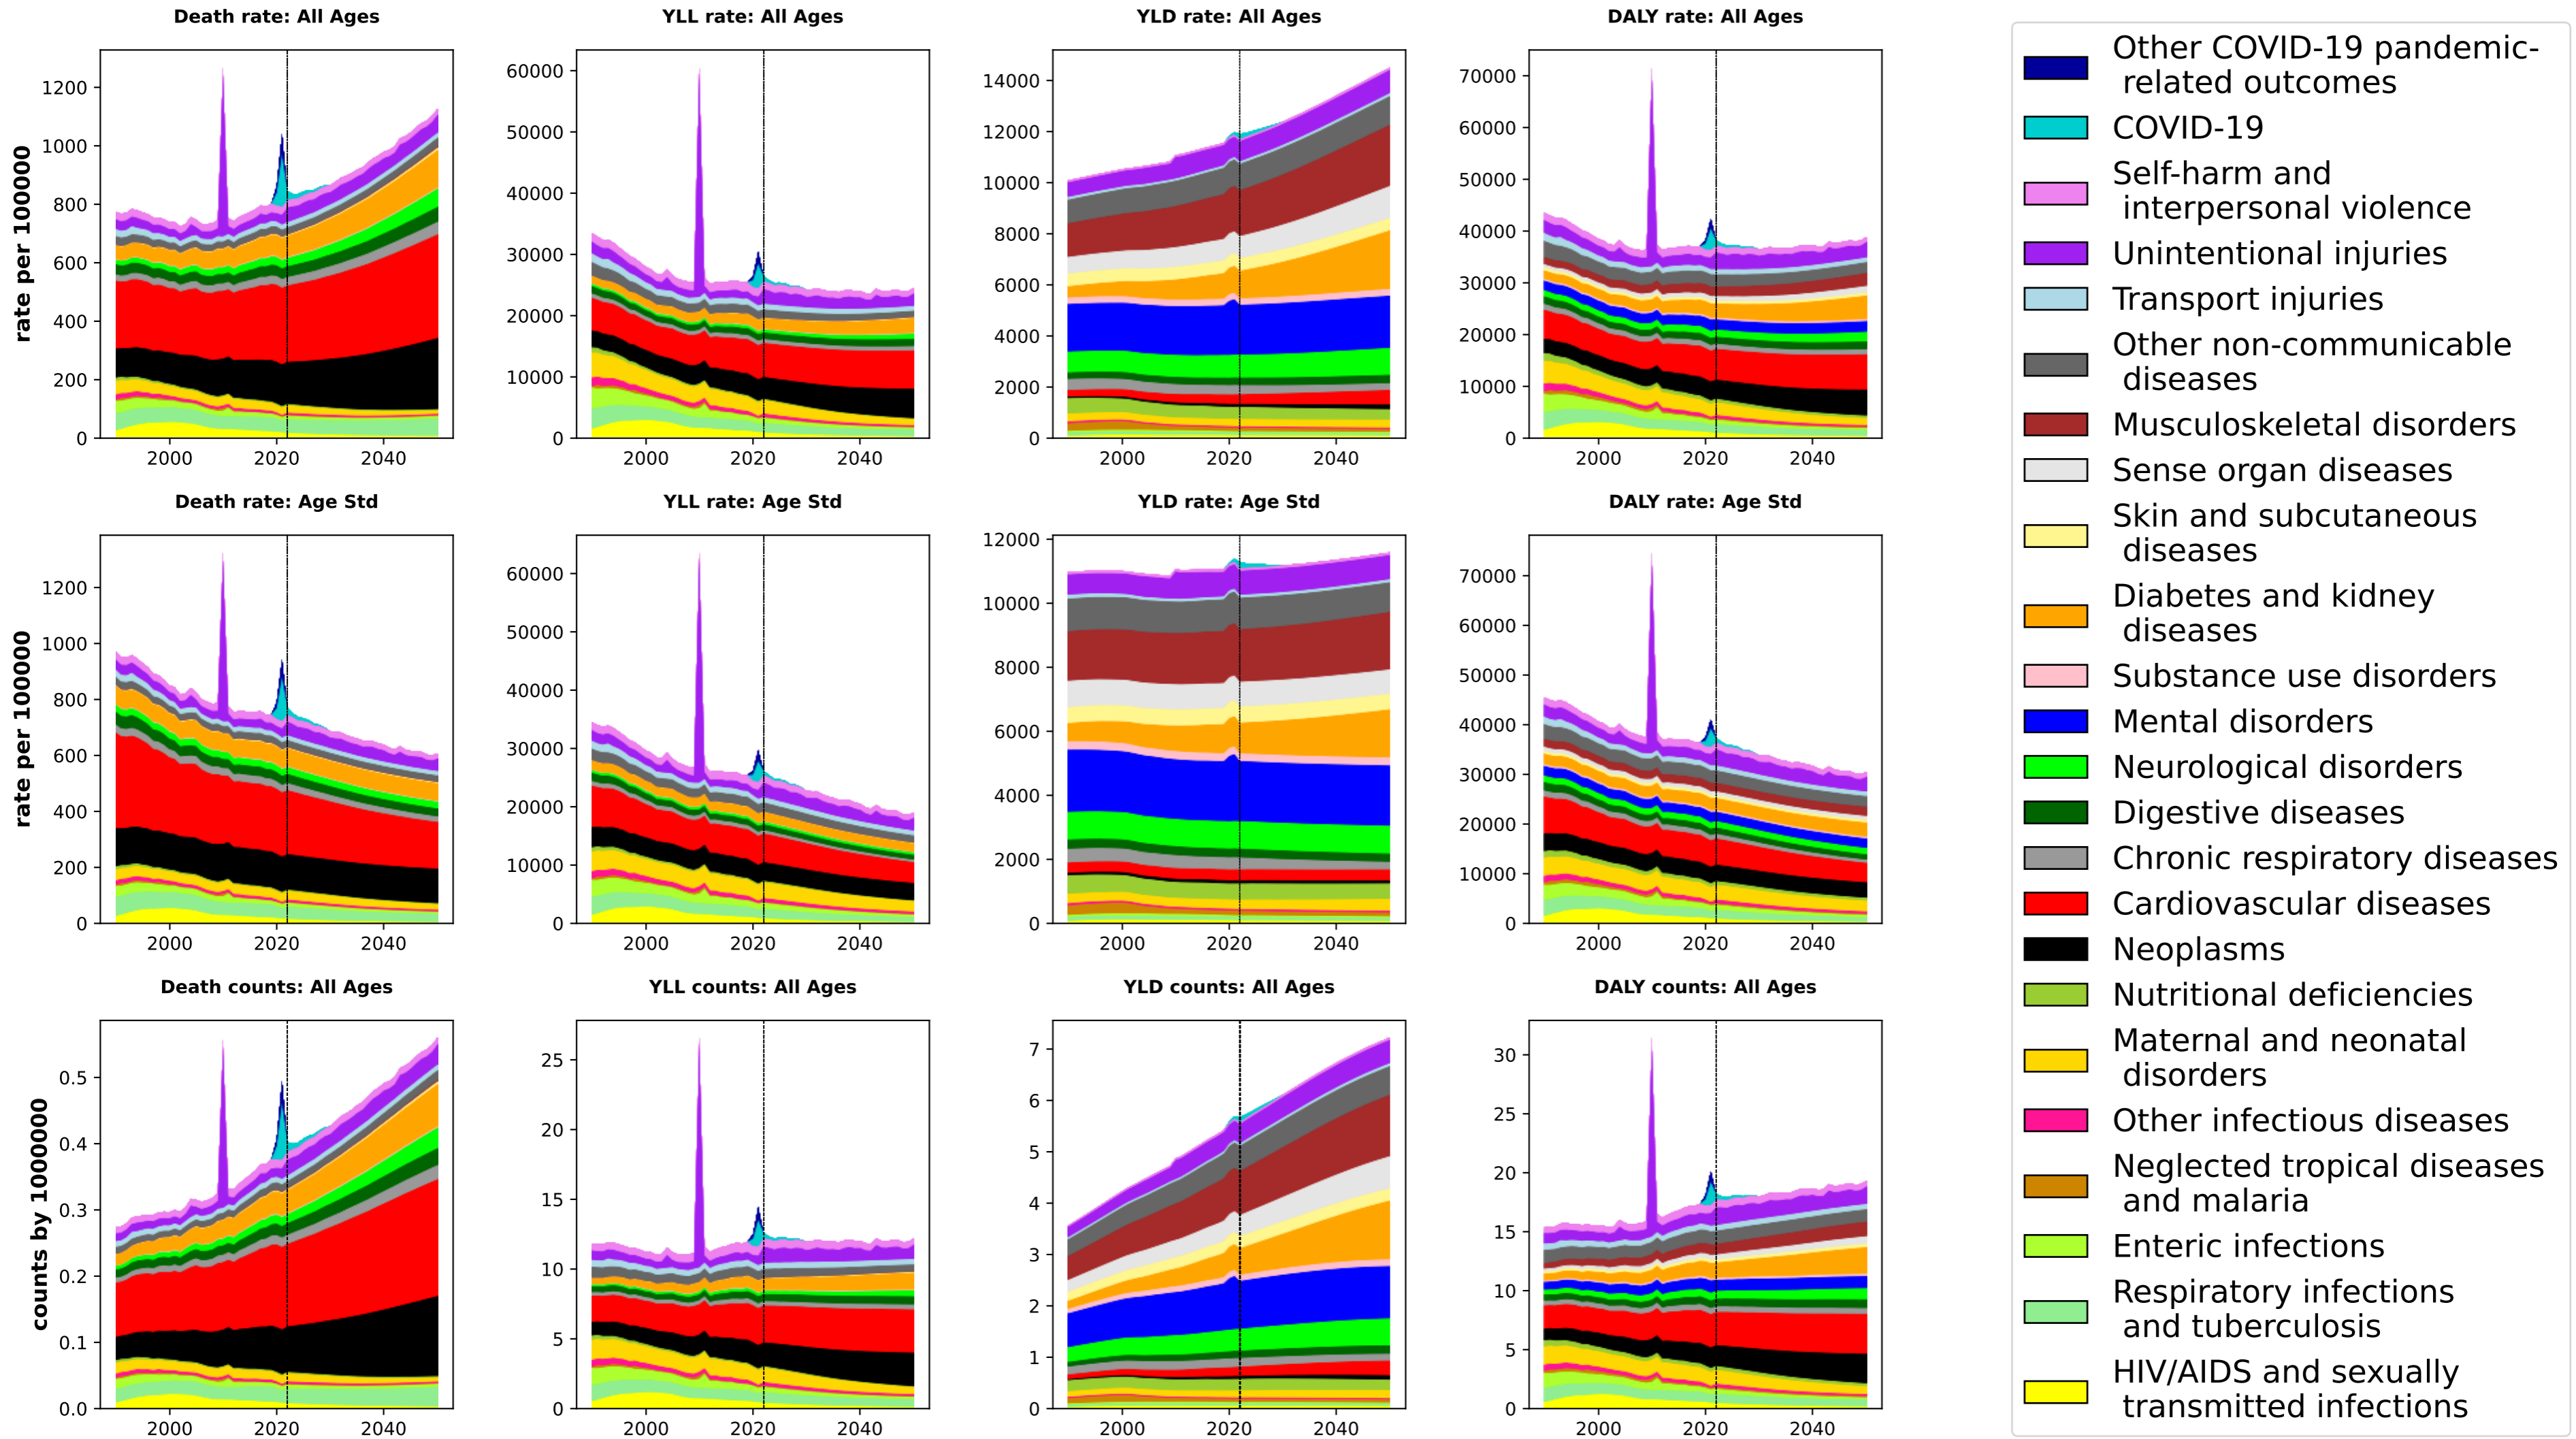

# Central Latin America

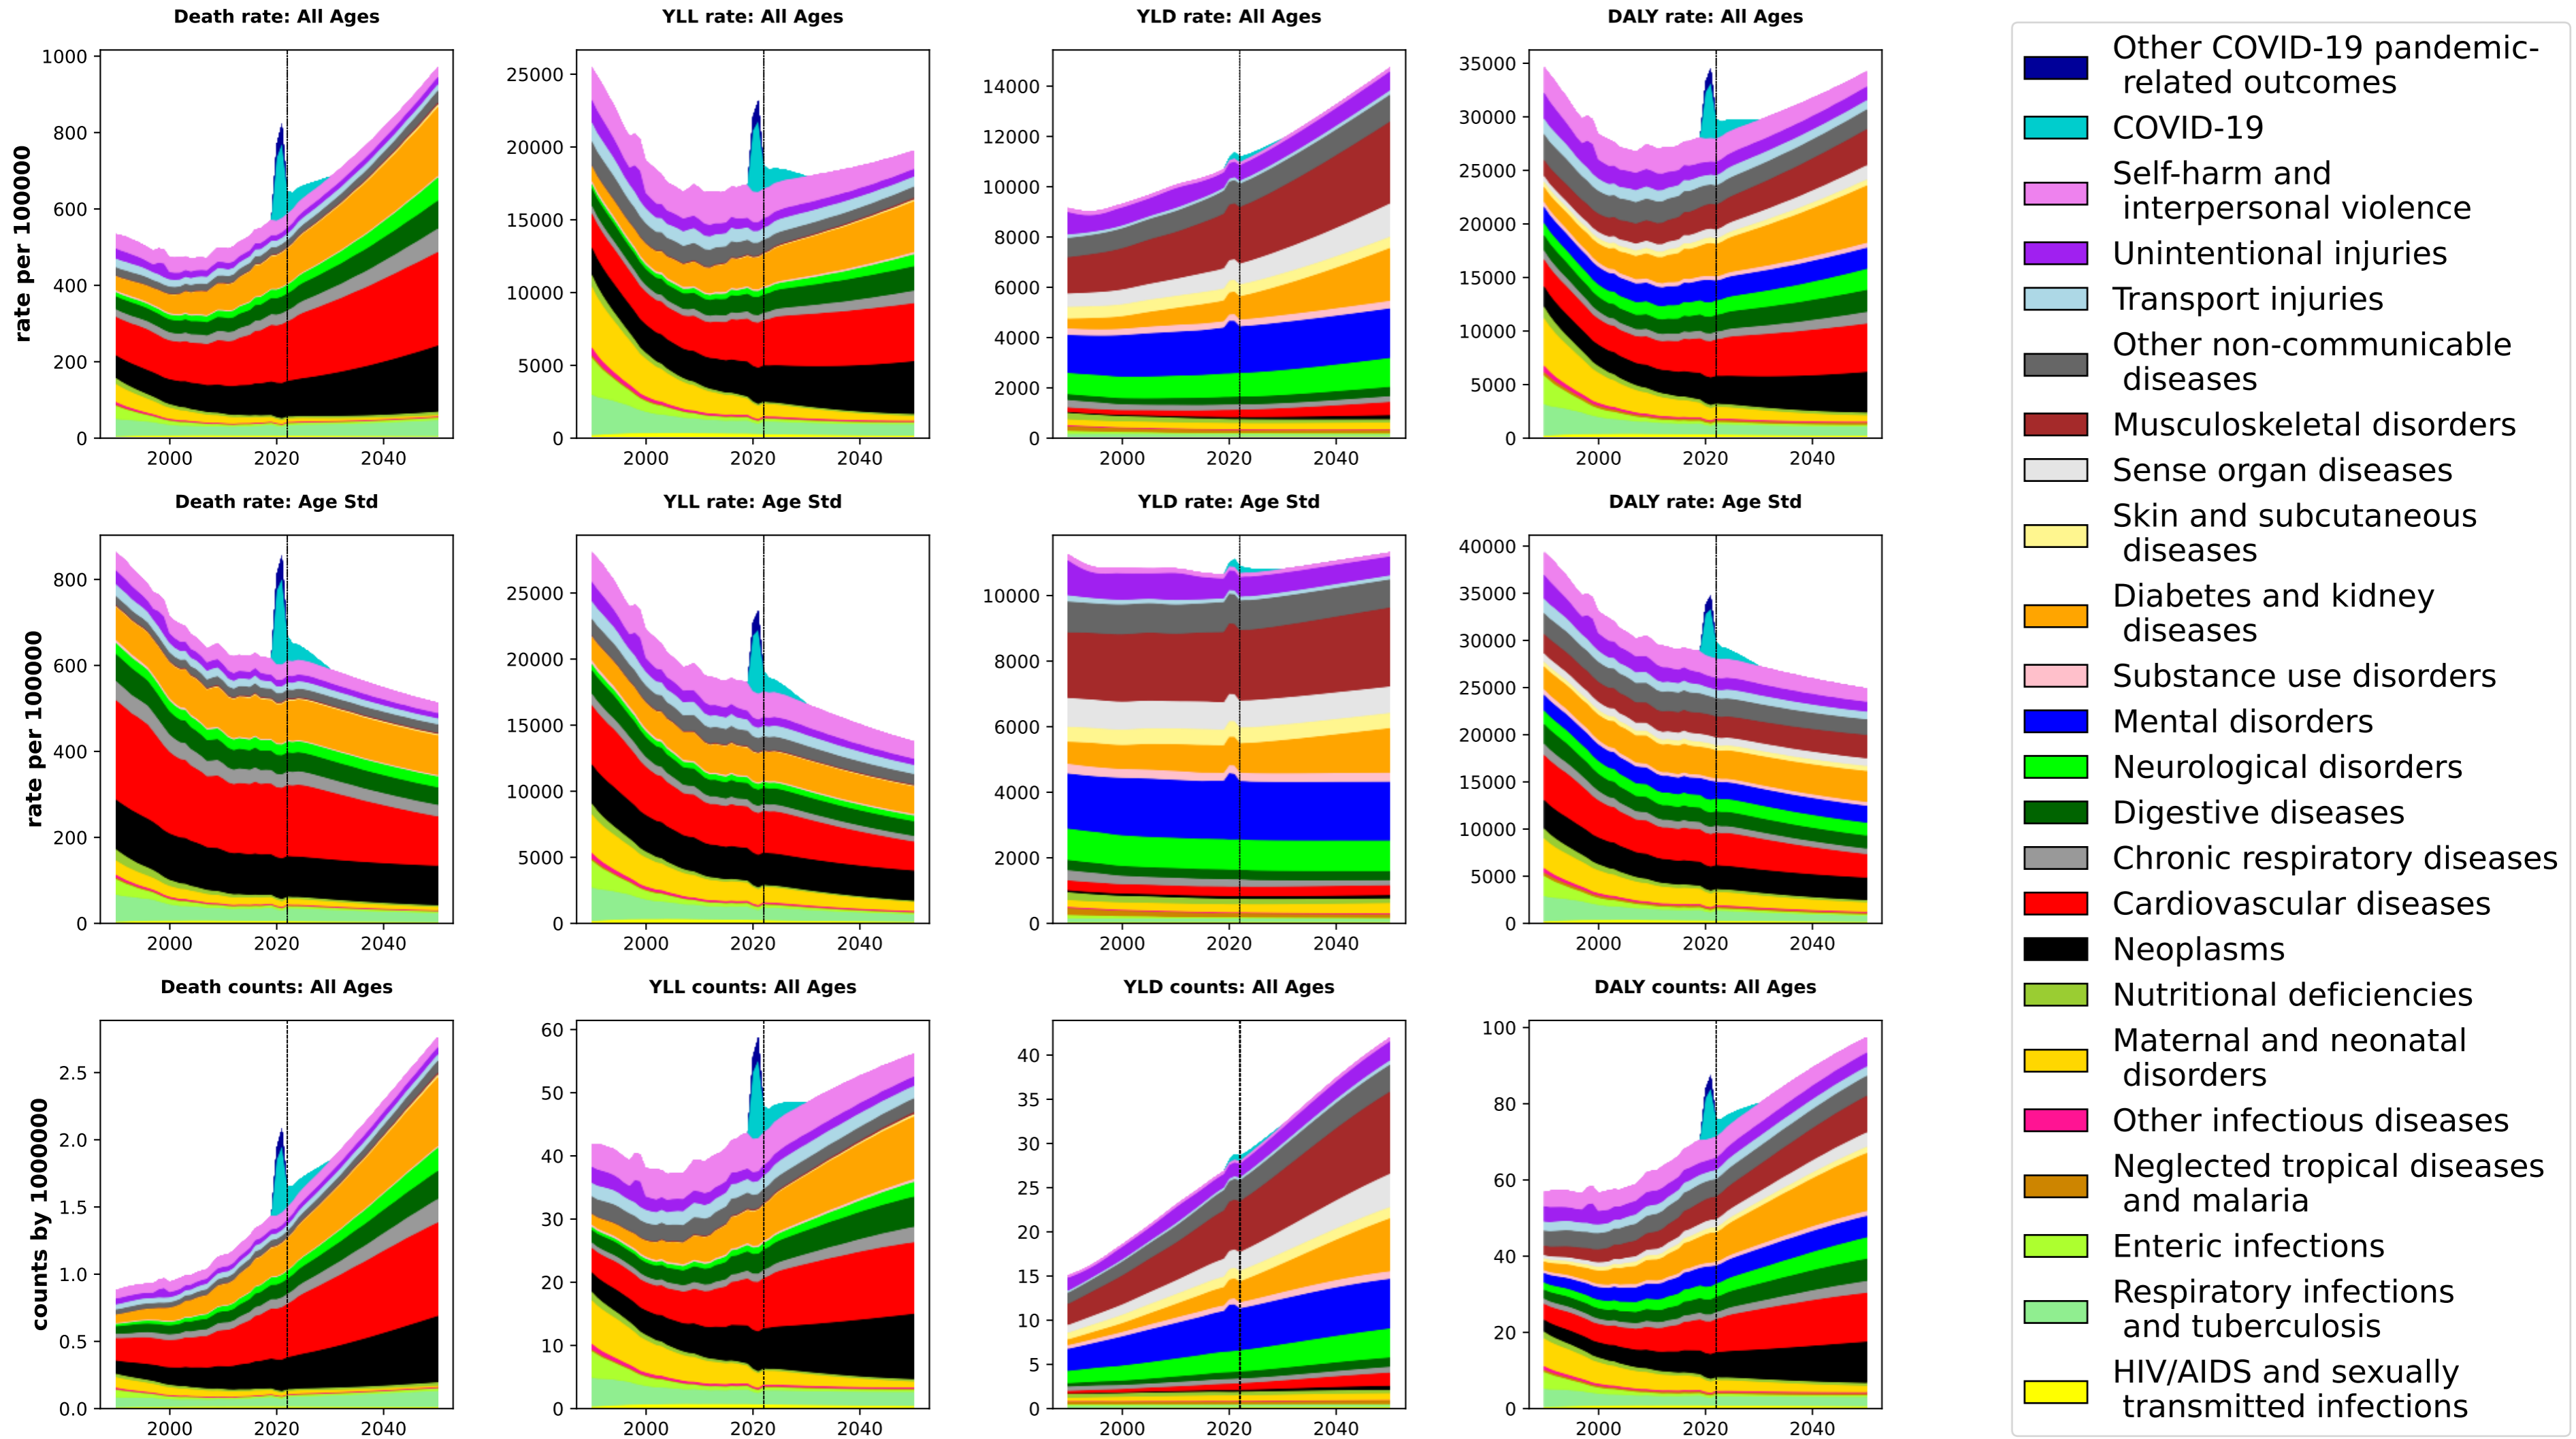

# Tropical Latin America

Supplemental Results Figure S6. Cause level 2 area plots for 4 burden measures for reference scenario by location, 1990-2050

934

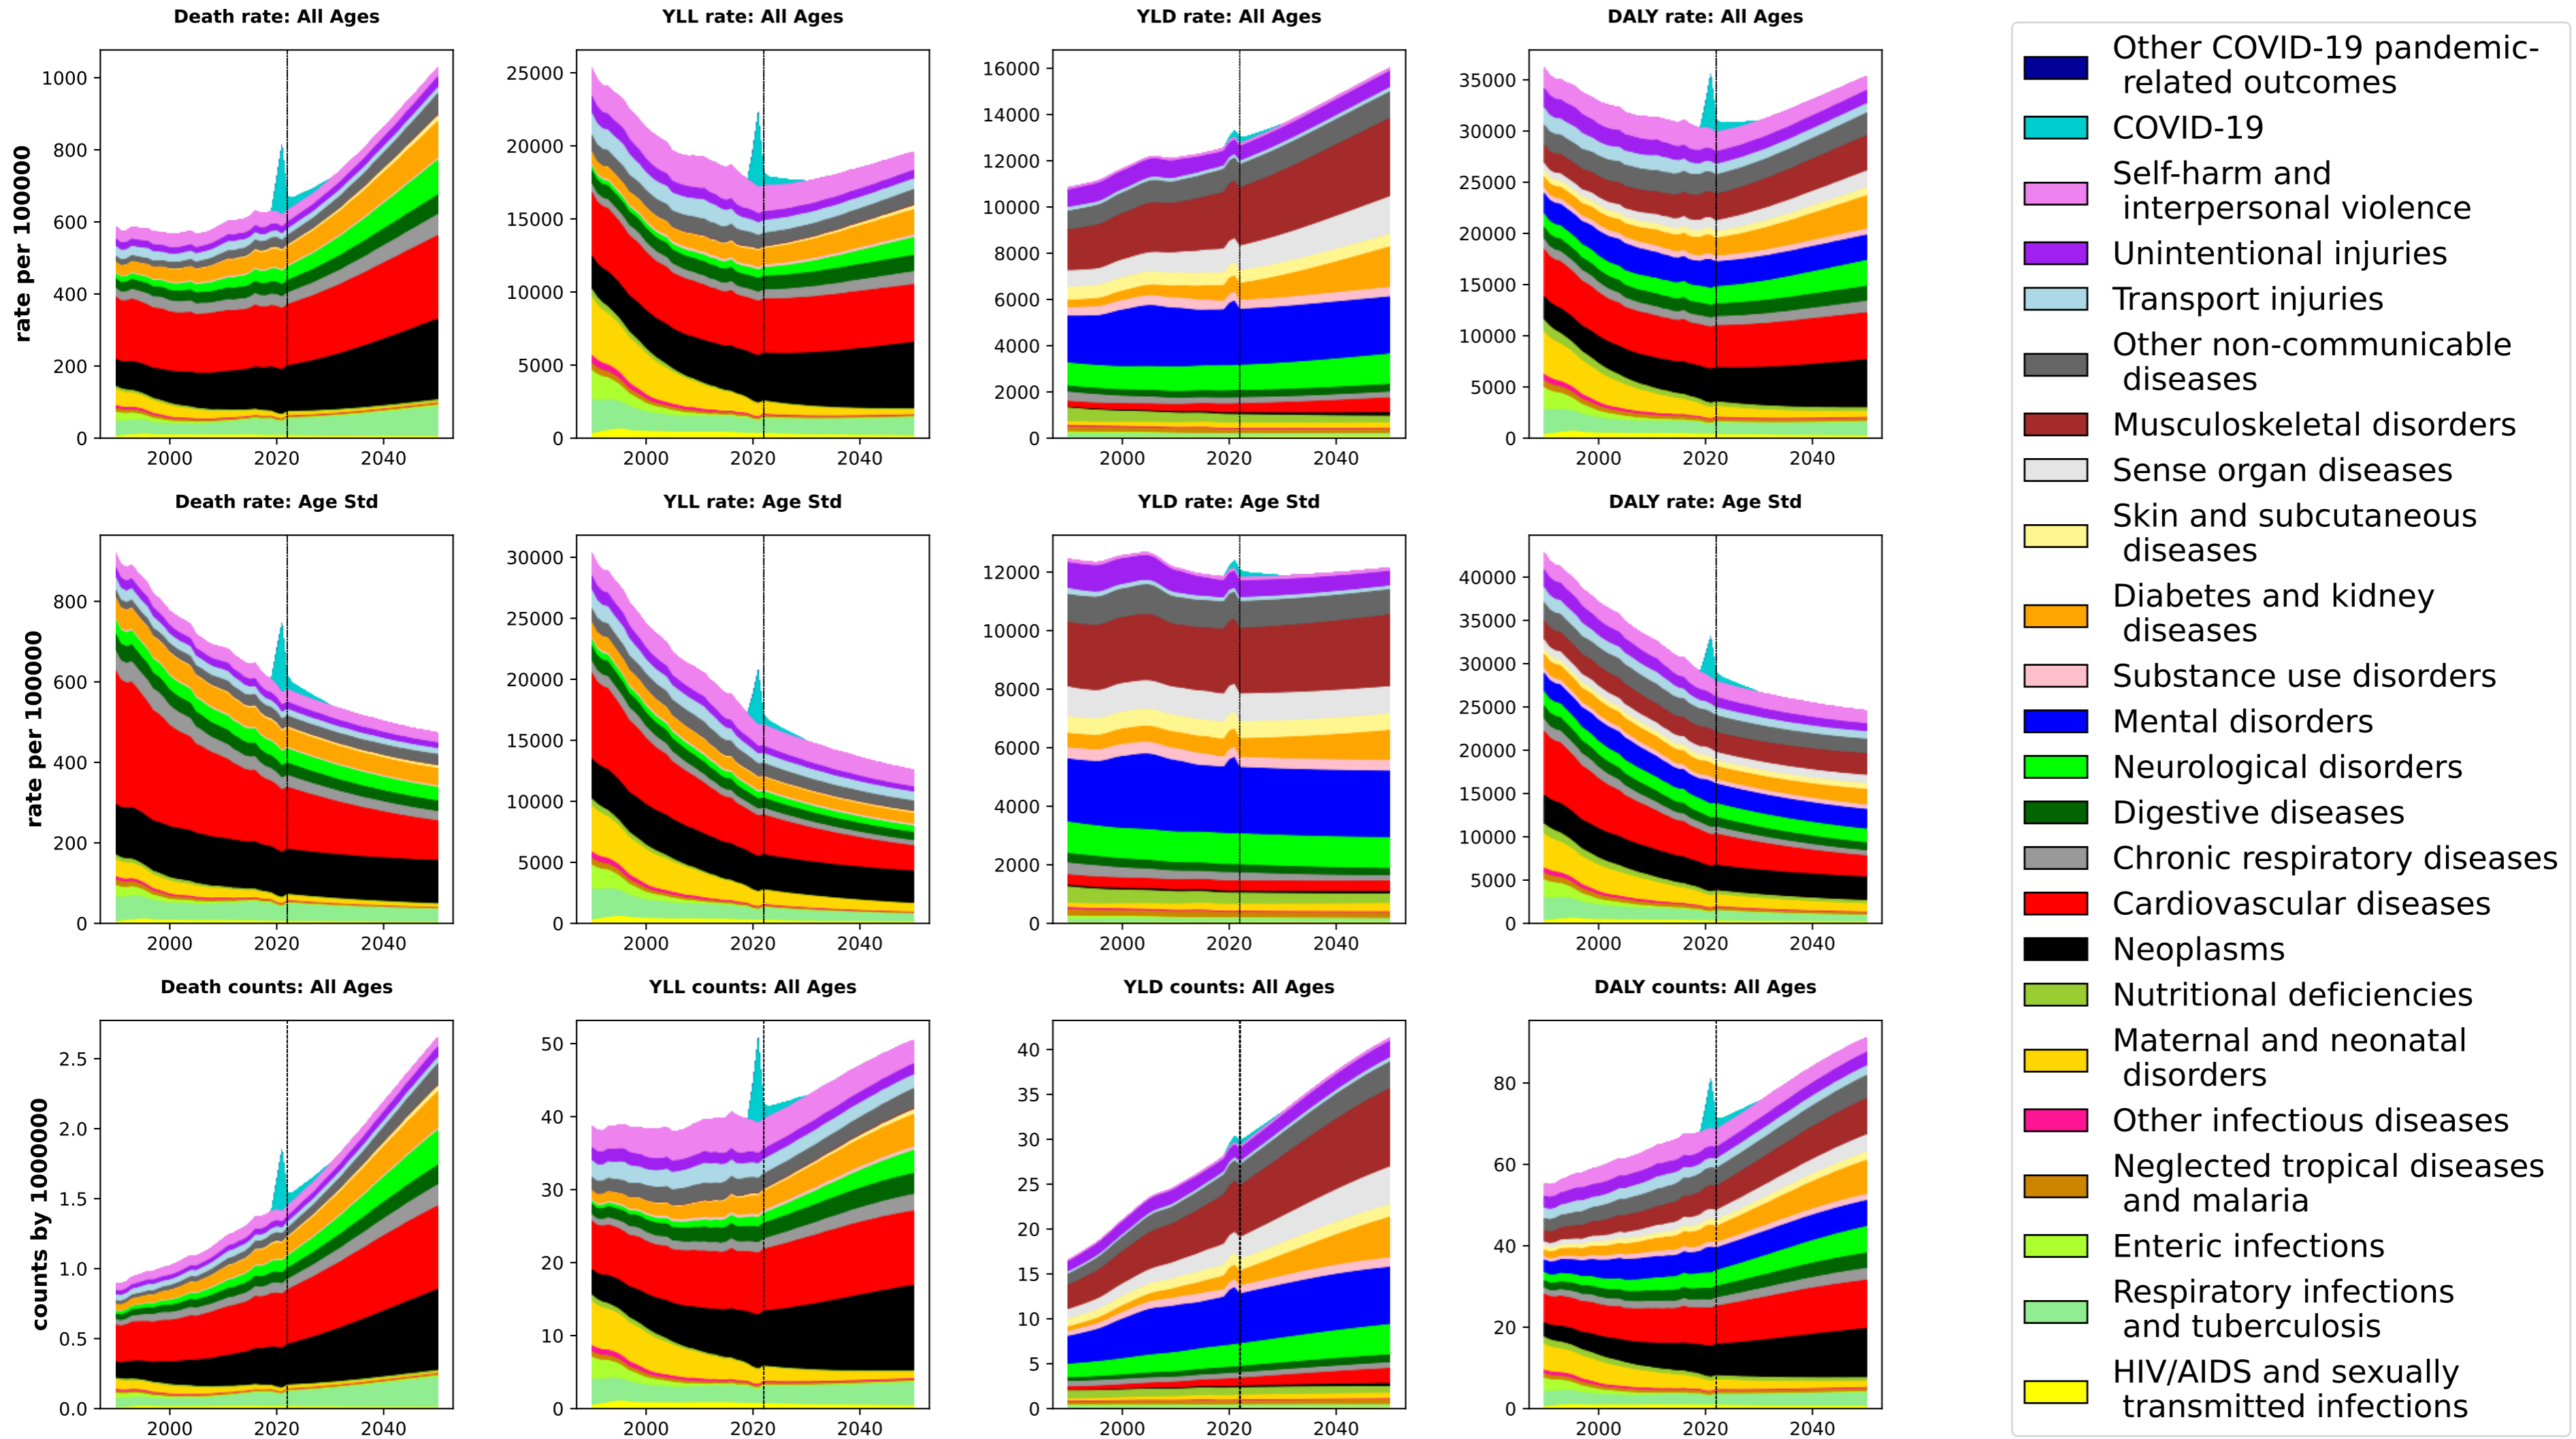

# North Africa and Middle East

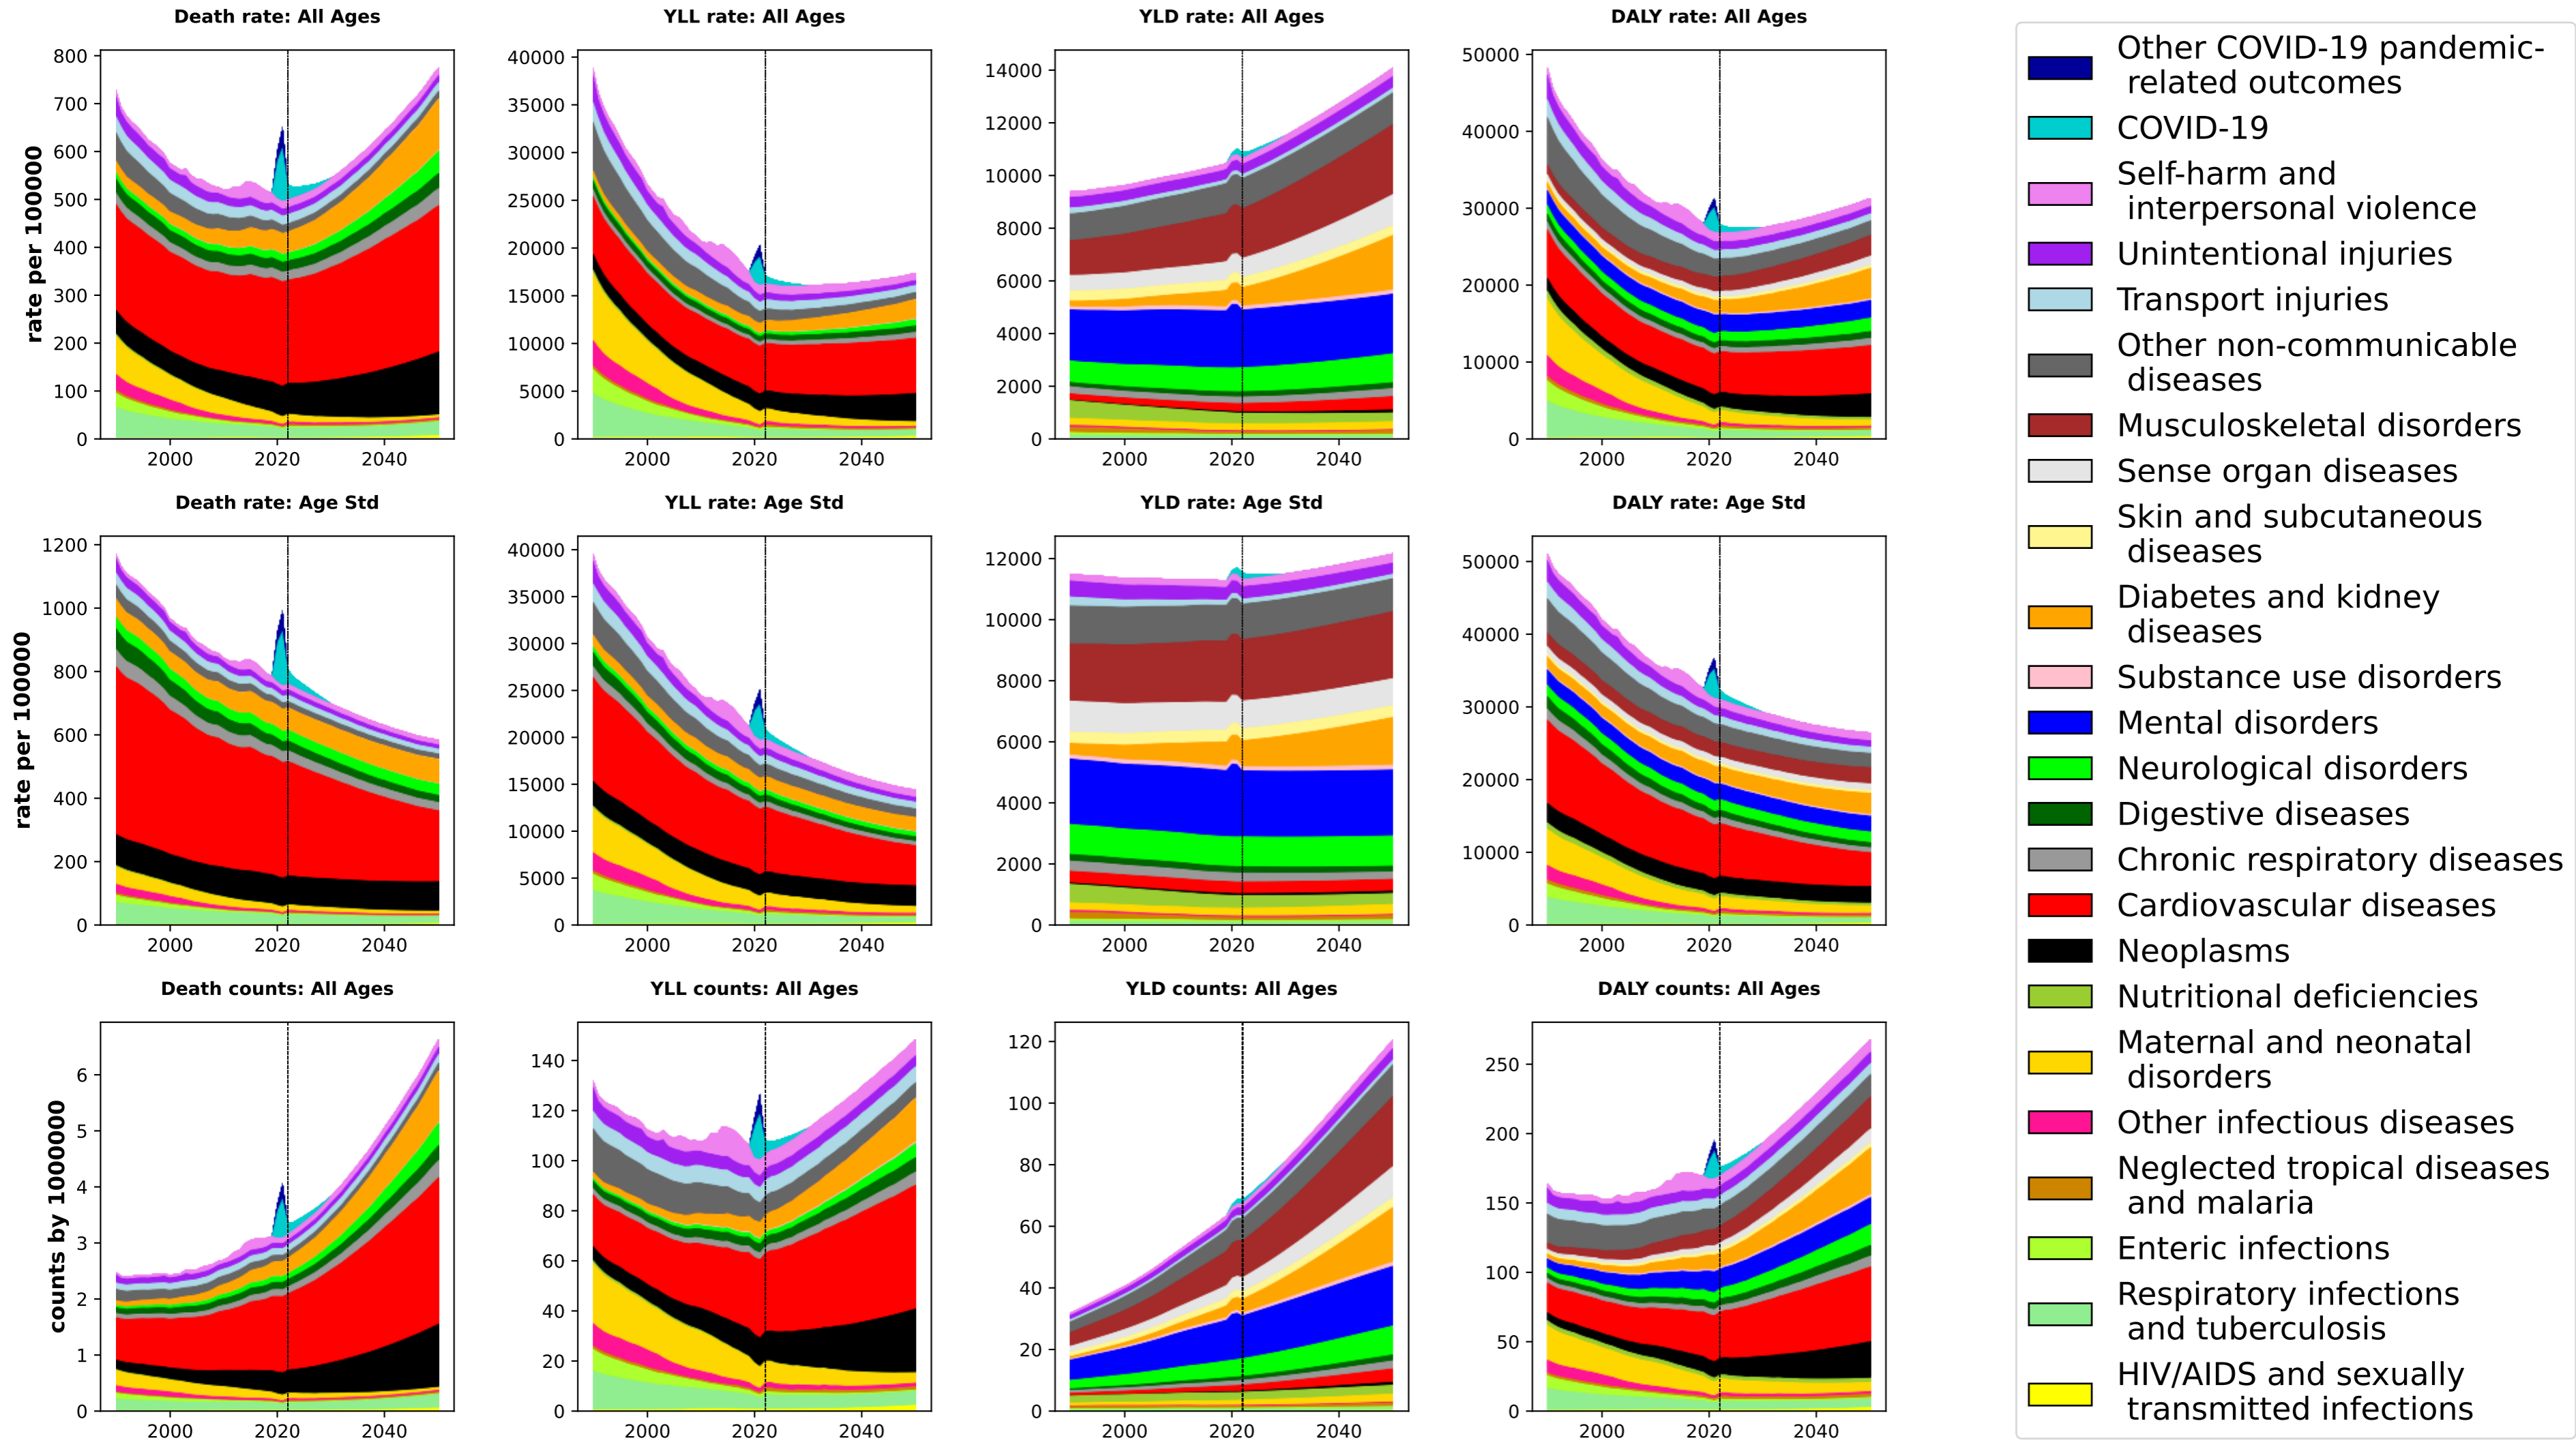



# South Asia



# East Asia

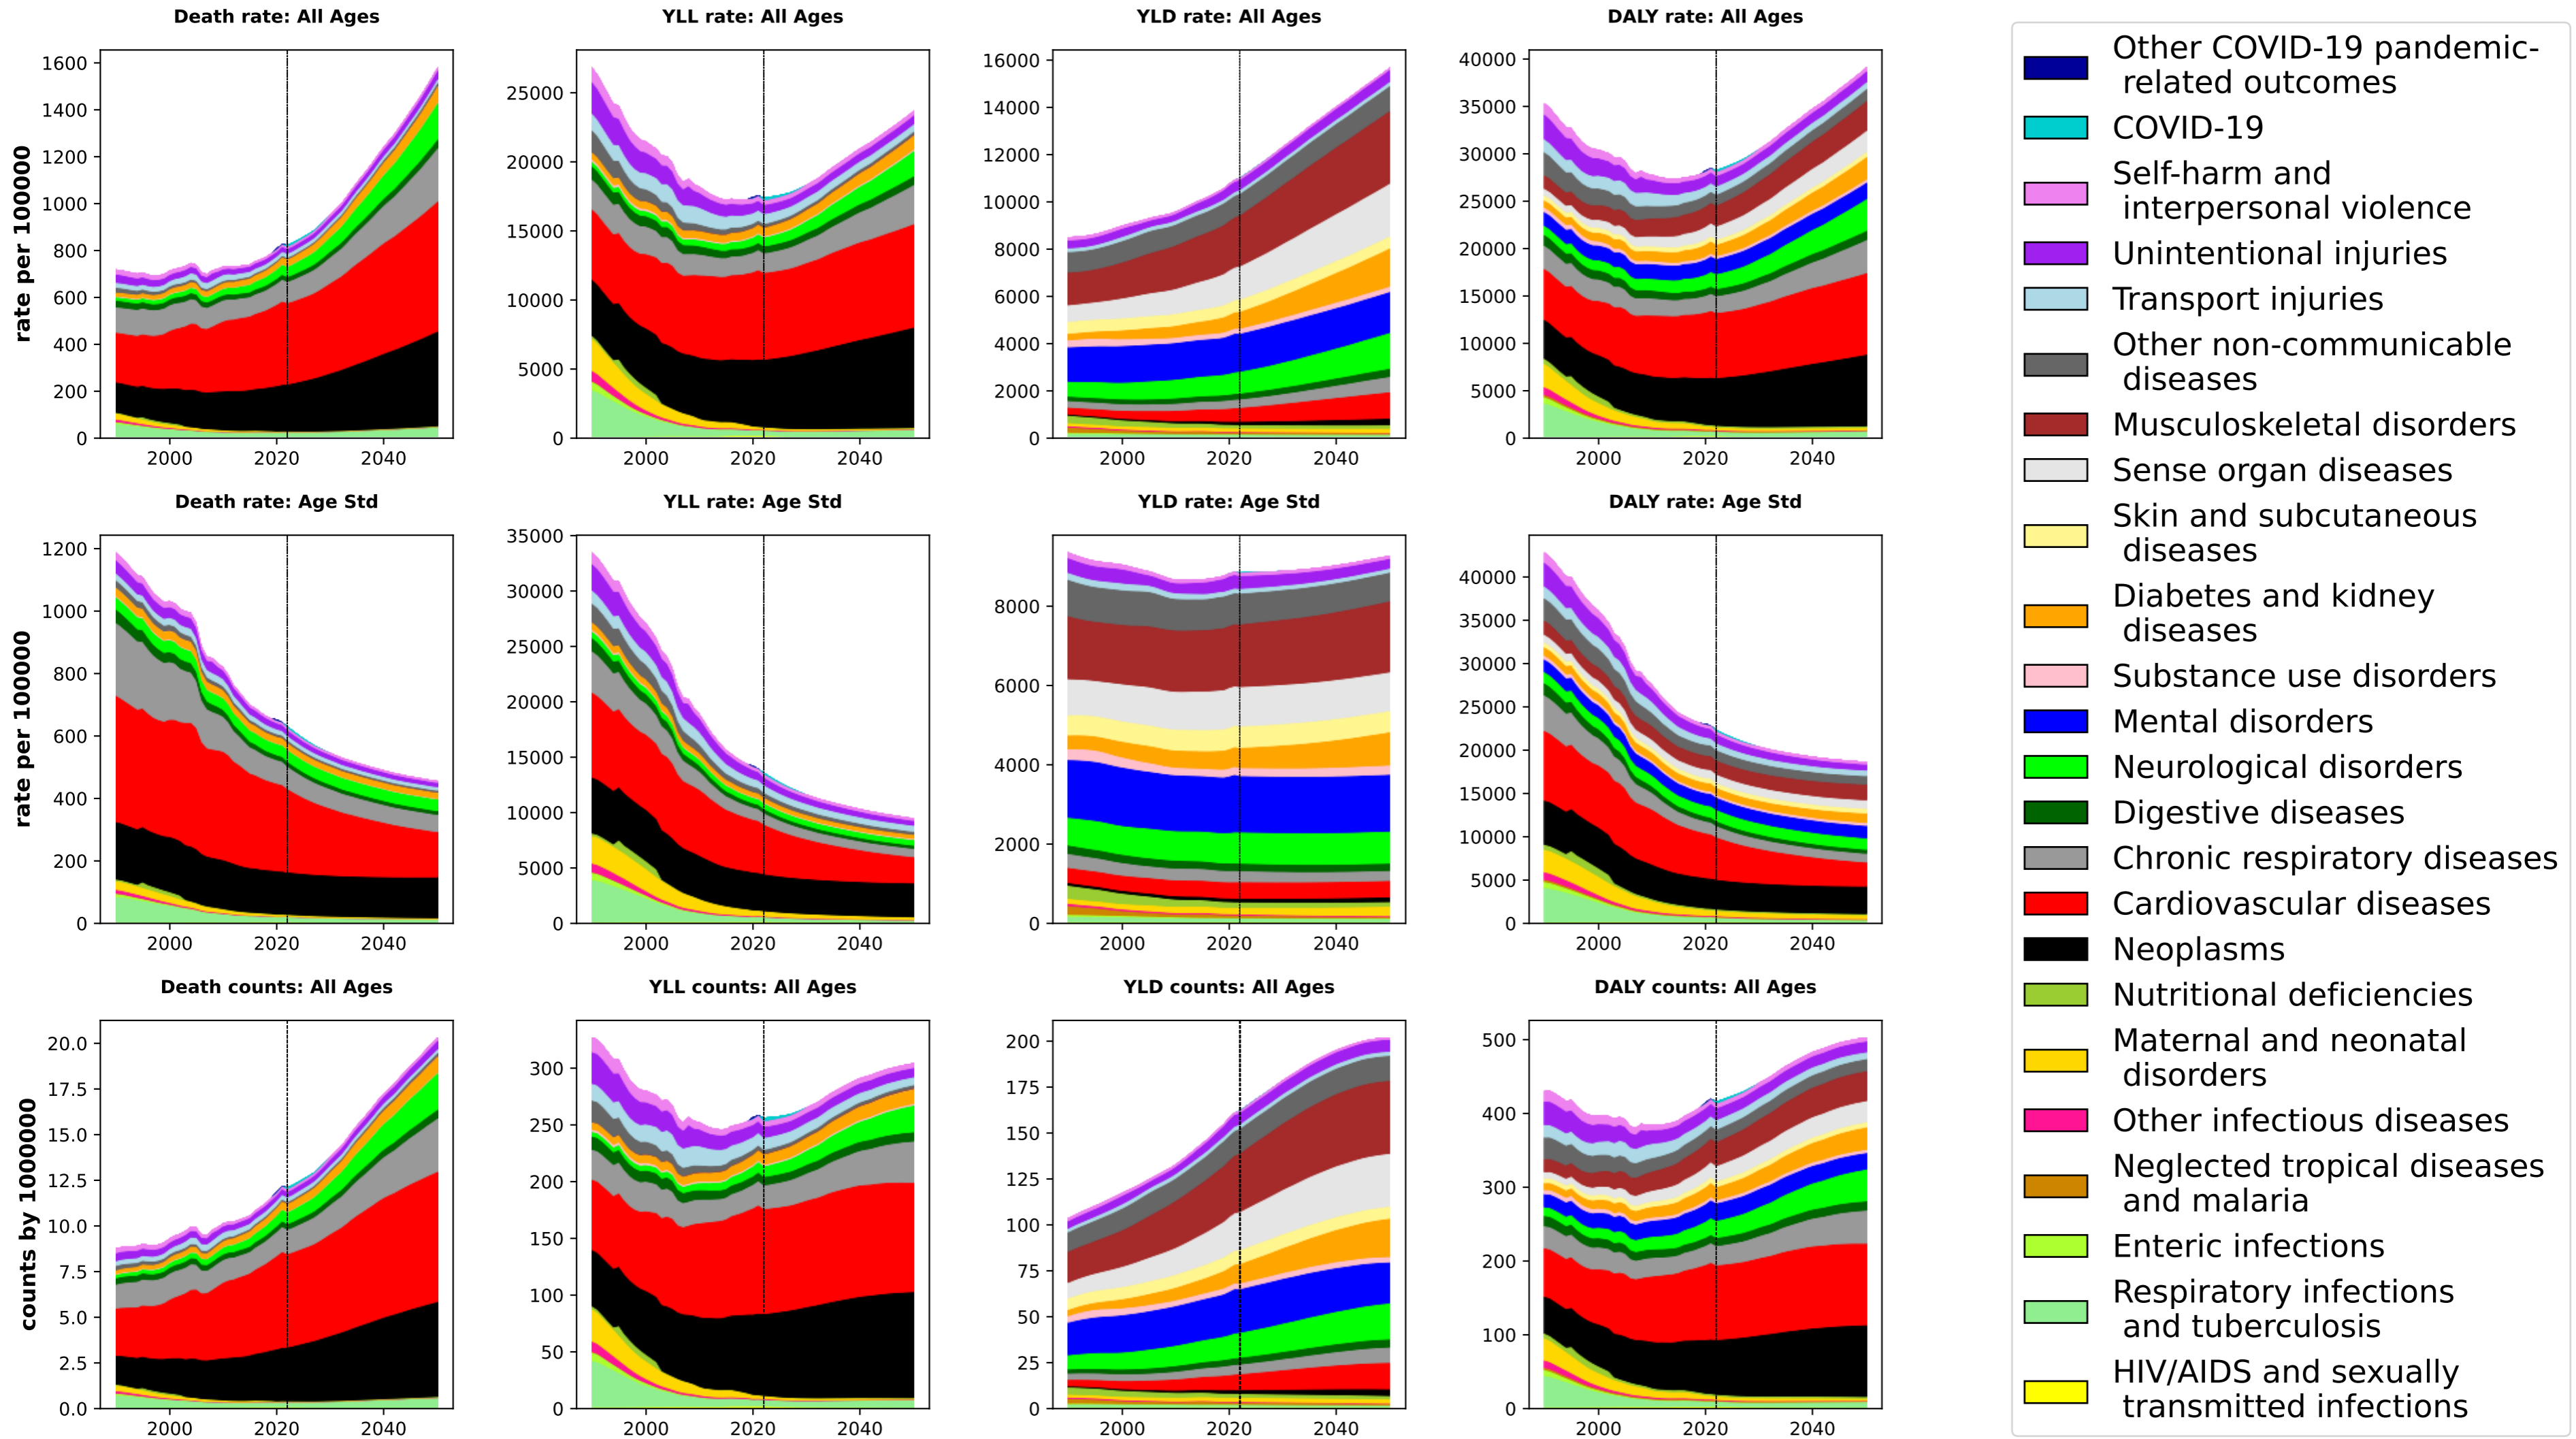

# Oceania

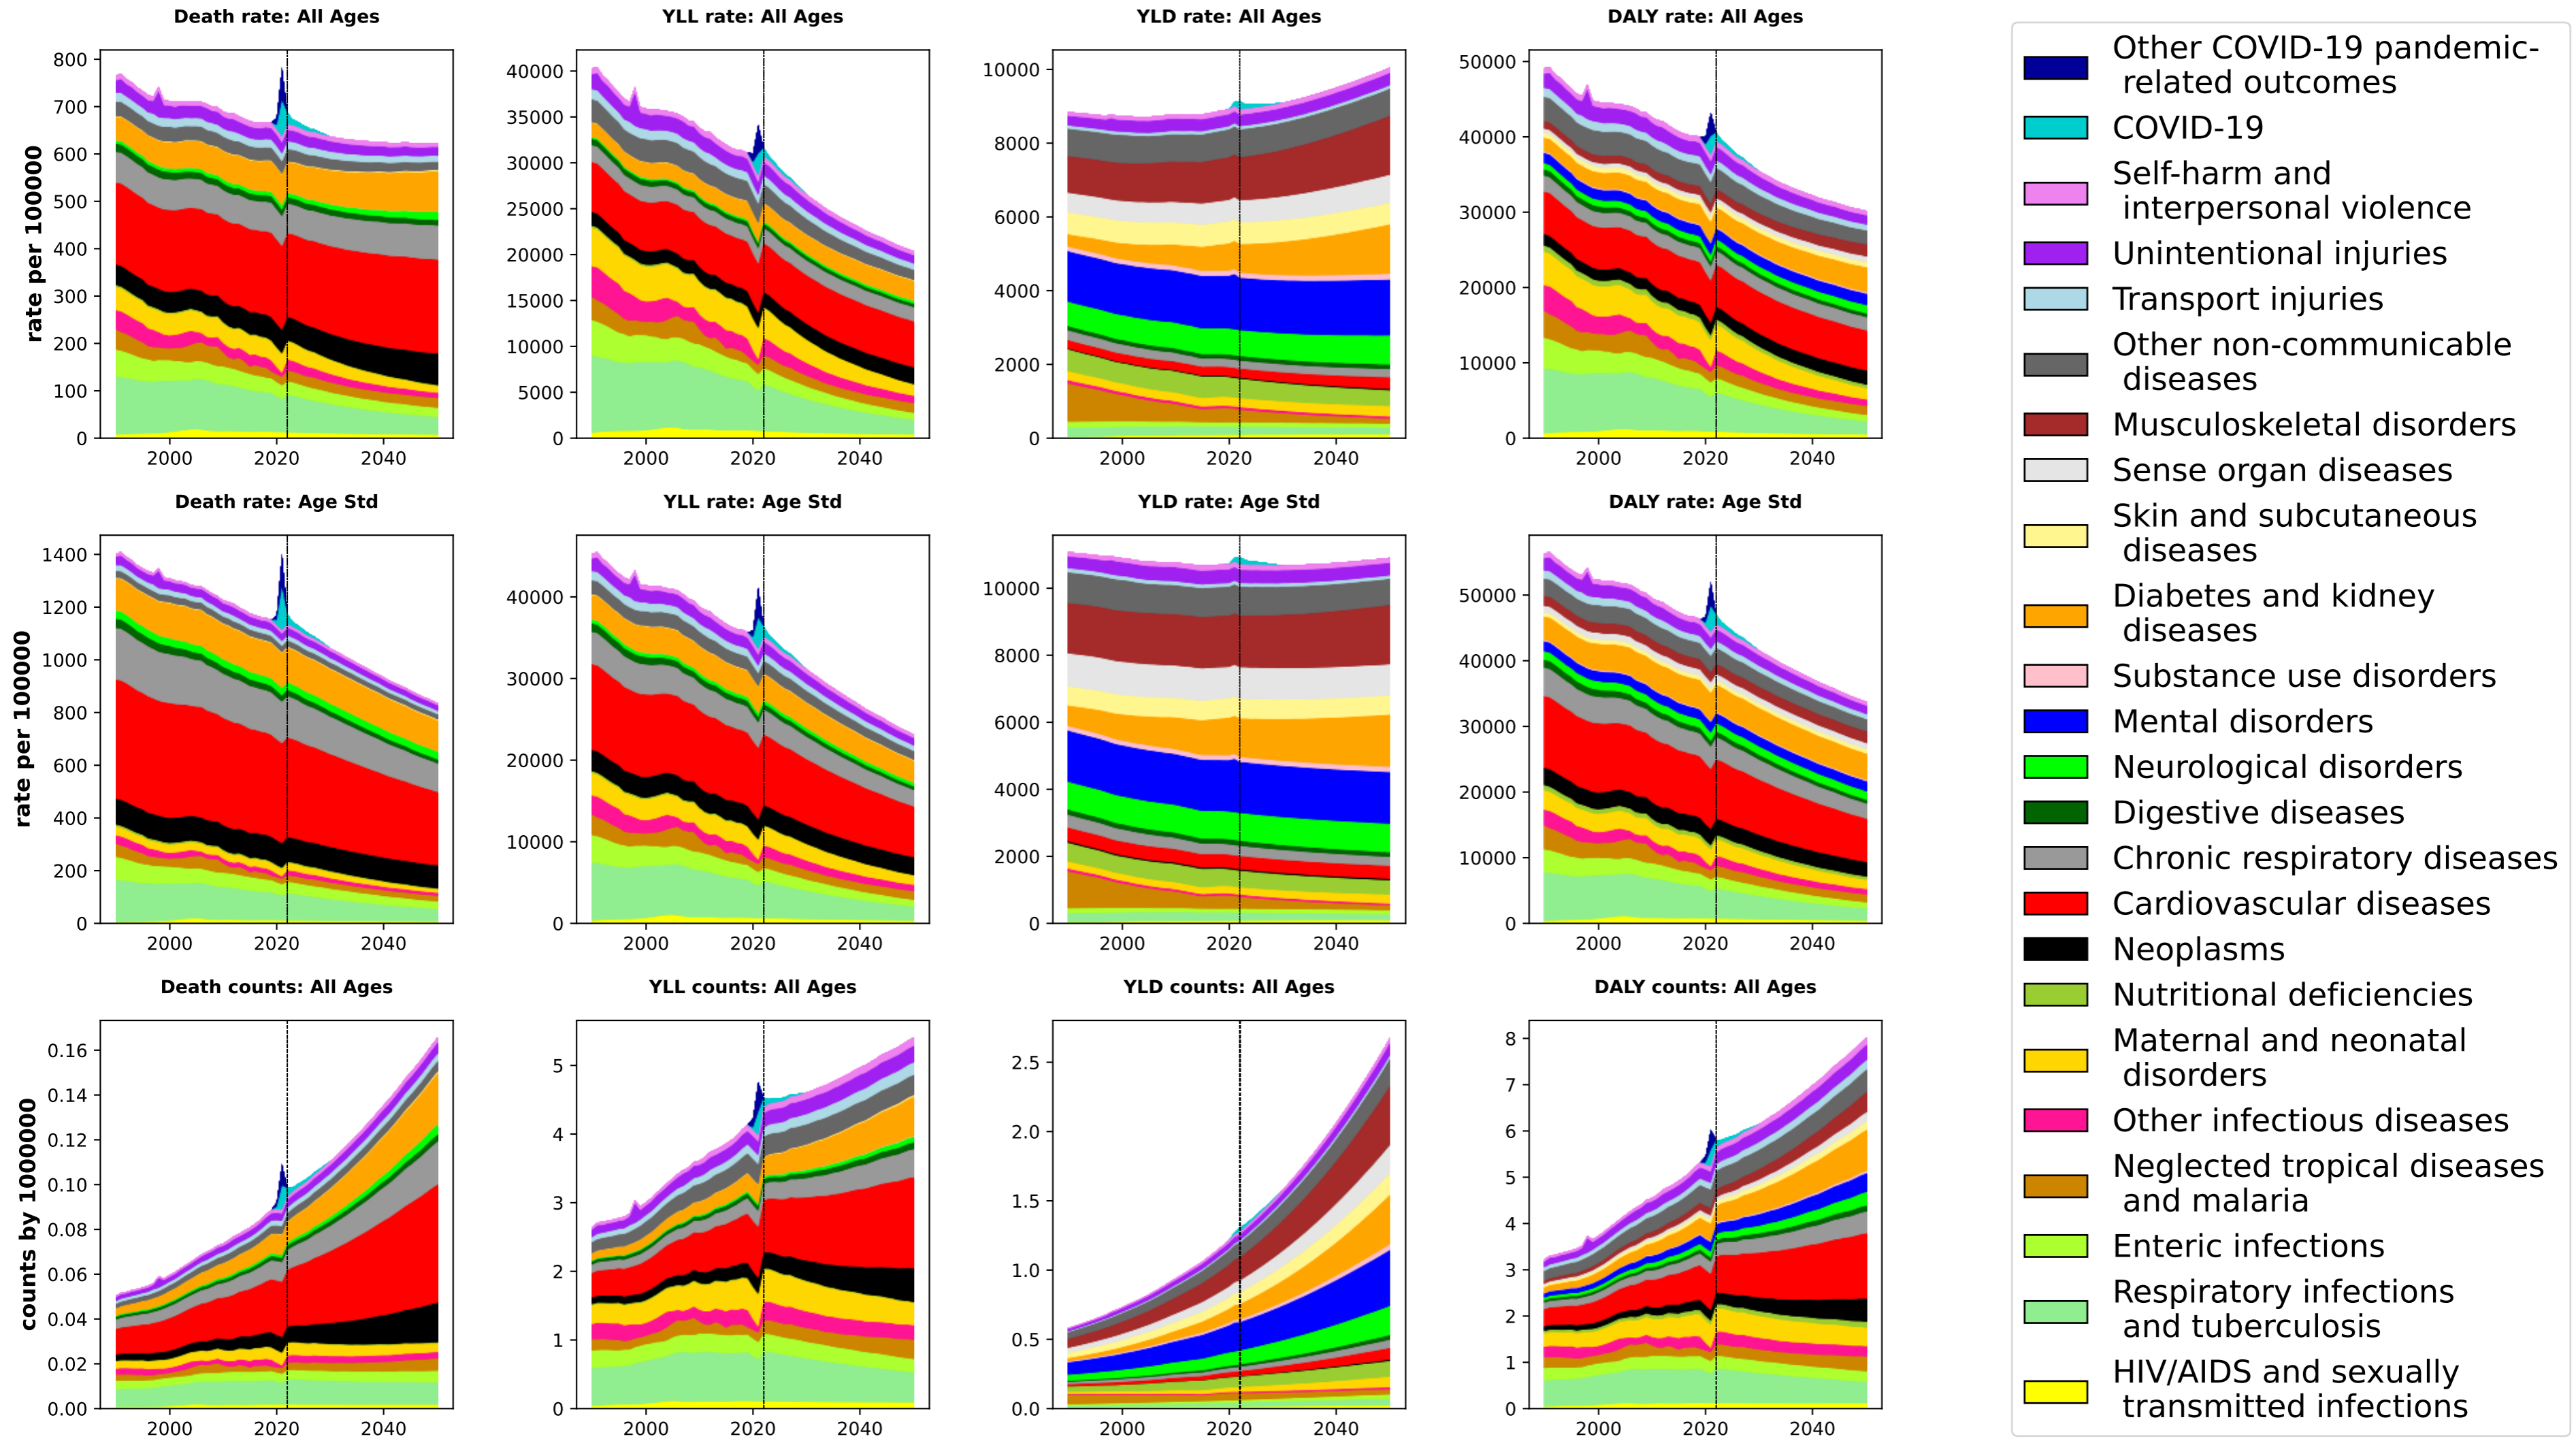

# Southeast Asia

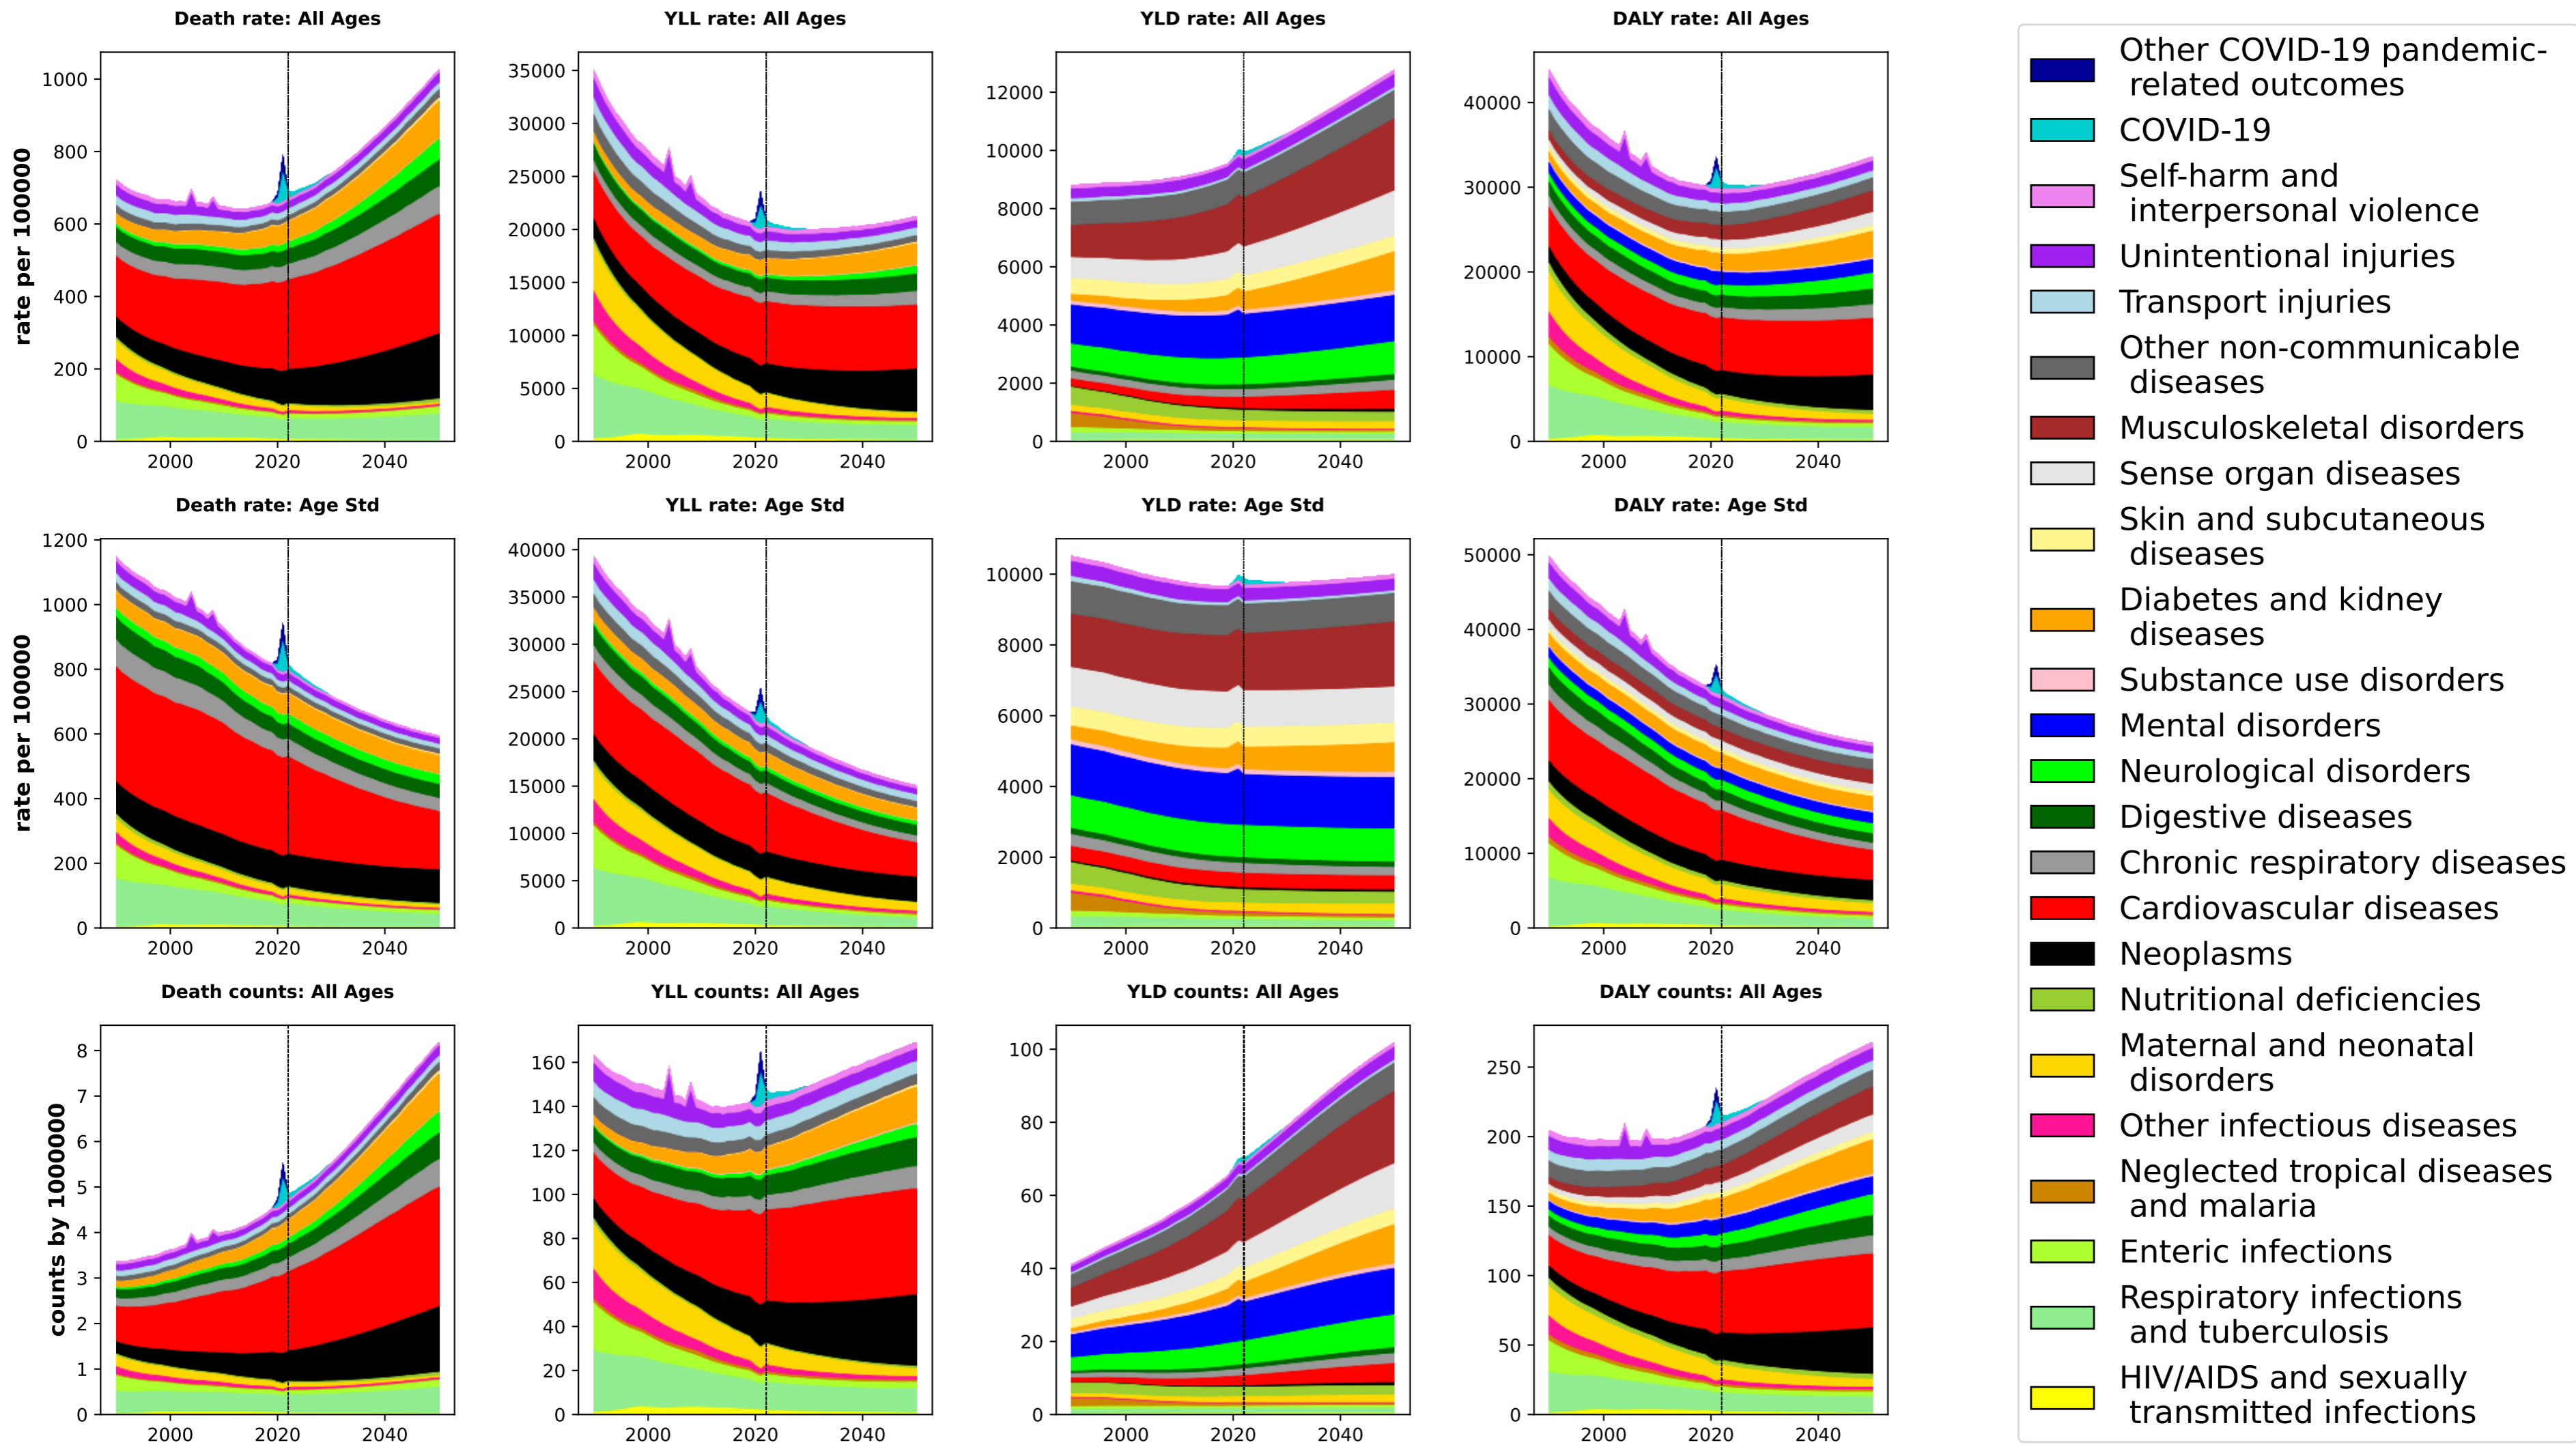

# Central sub-Saharan Africa

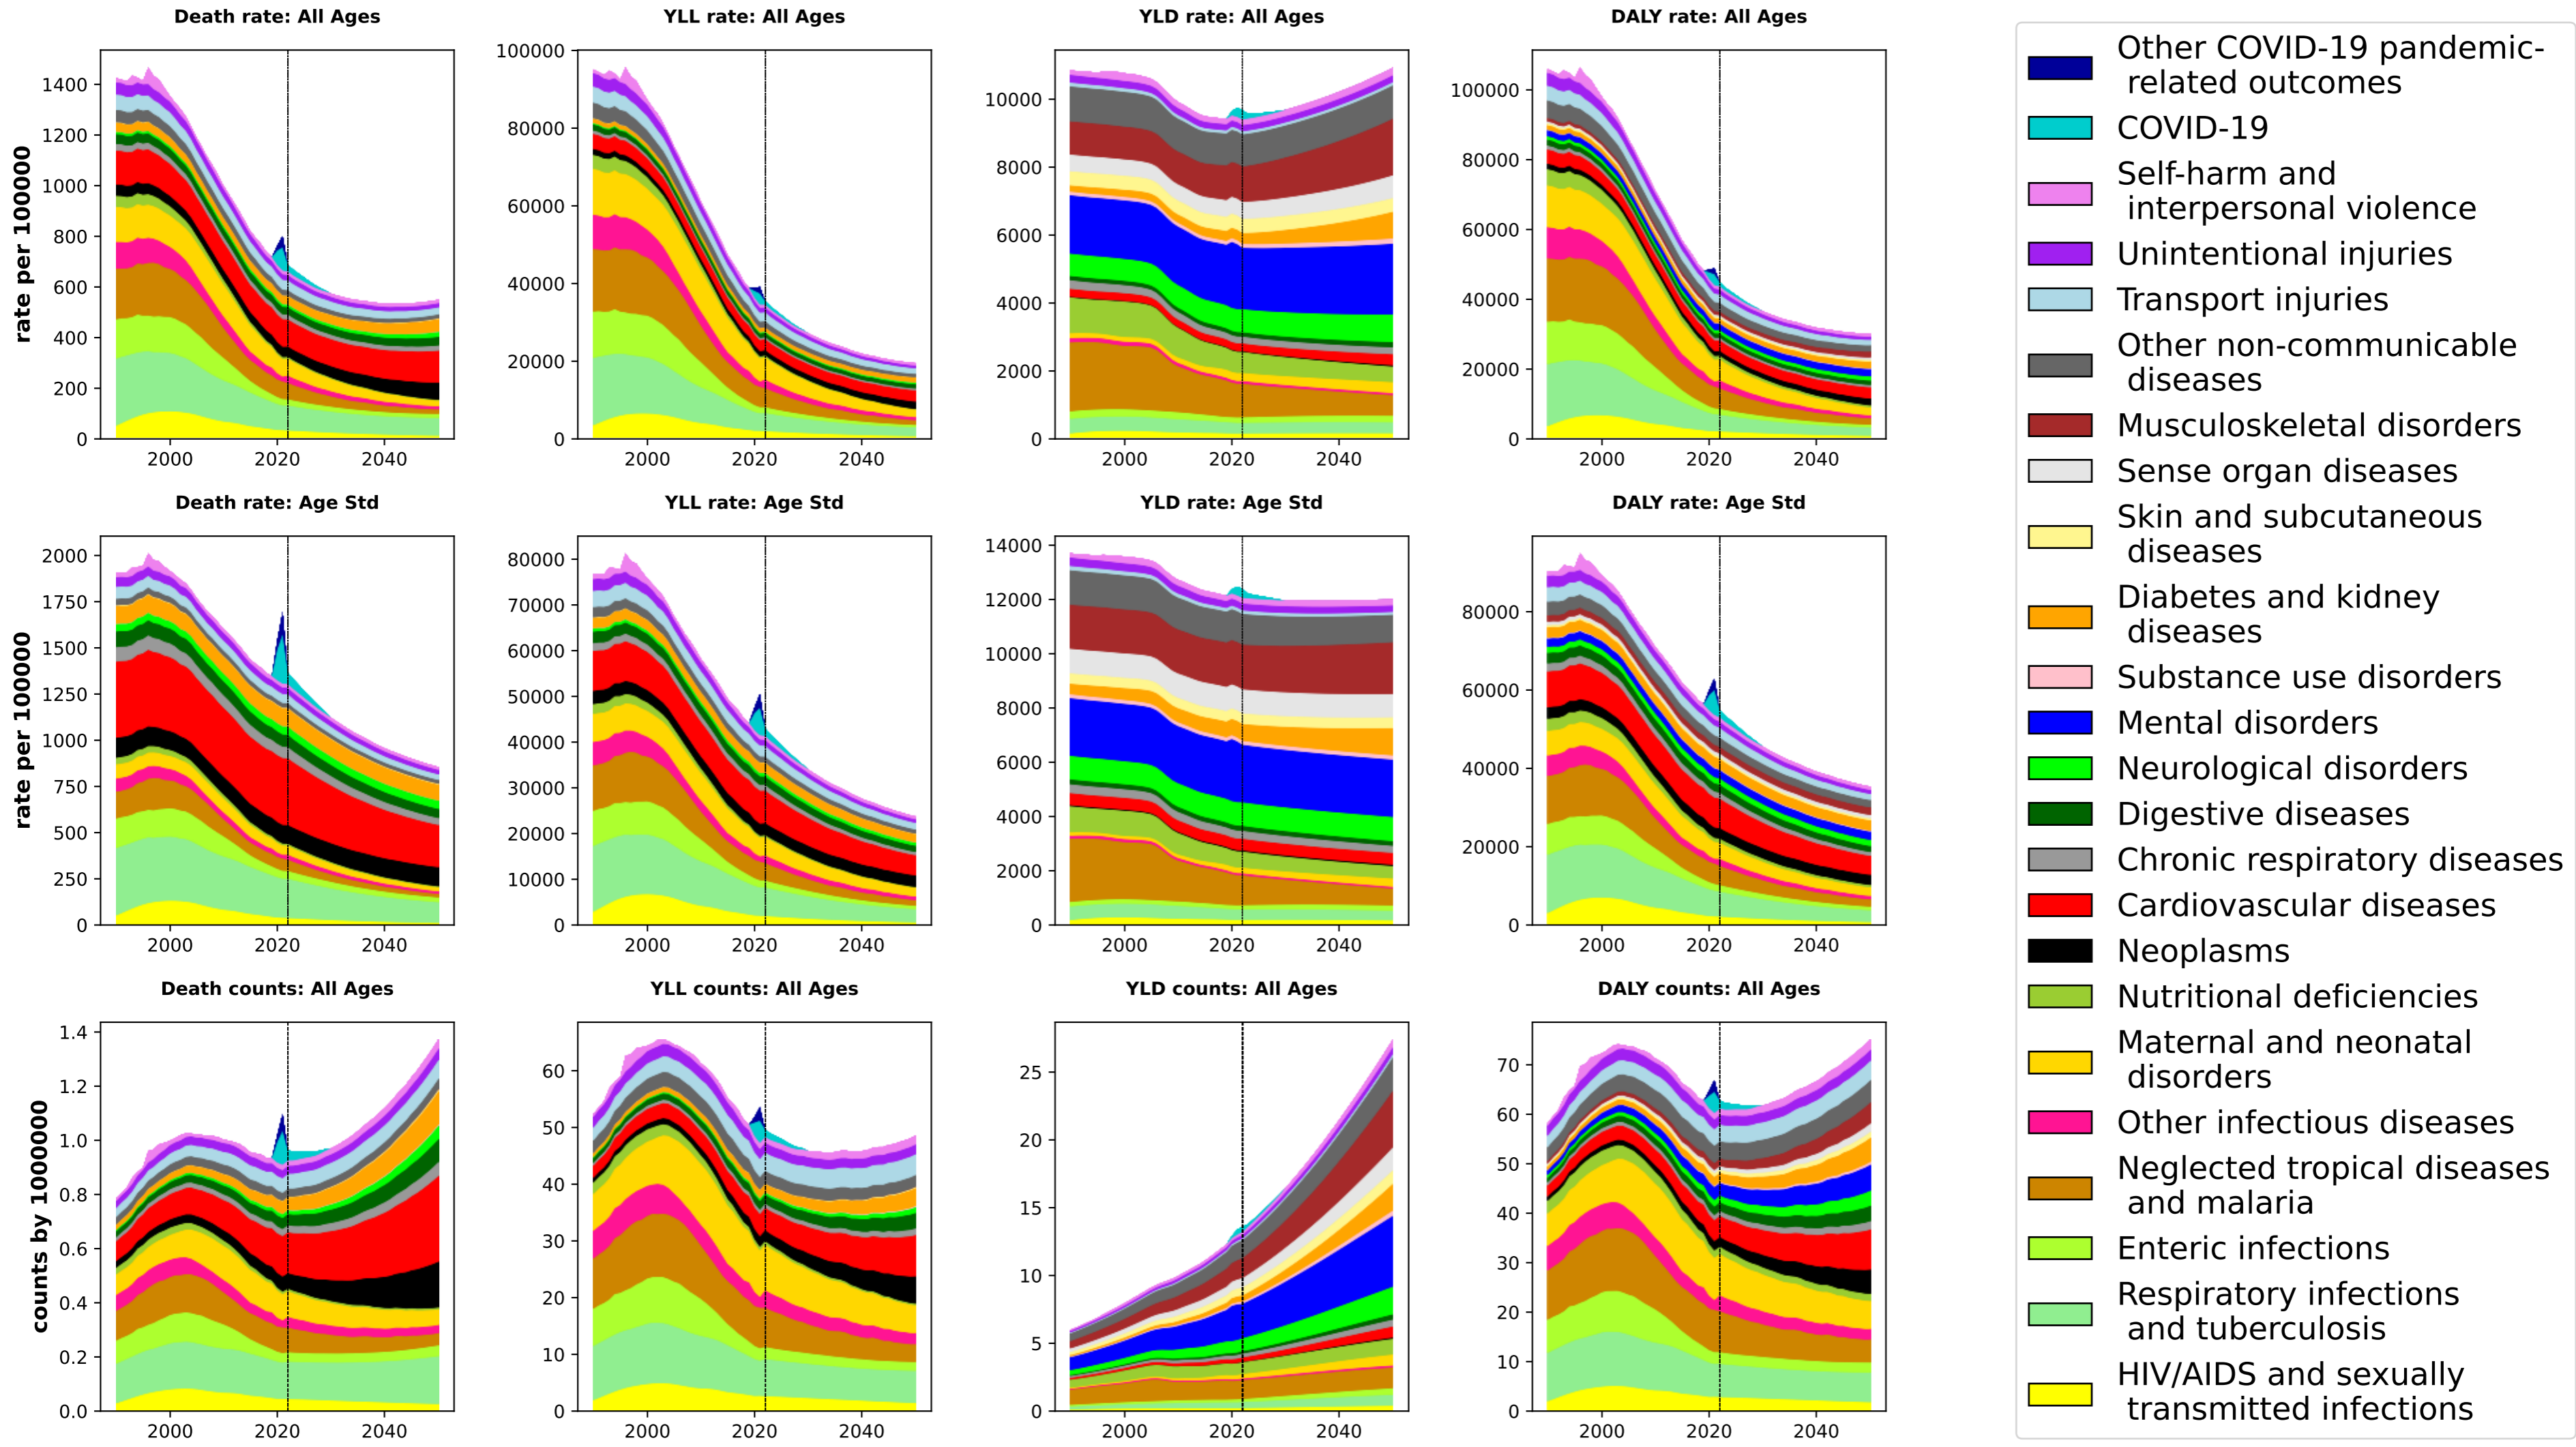

# Eastern sub-Saharan Africa

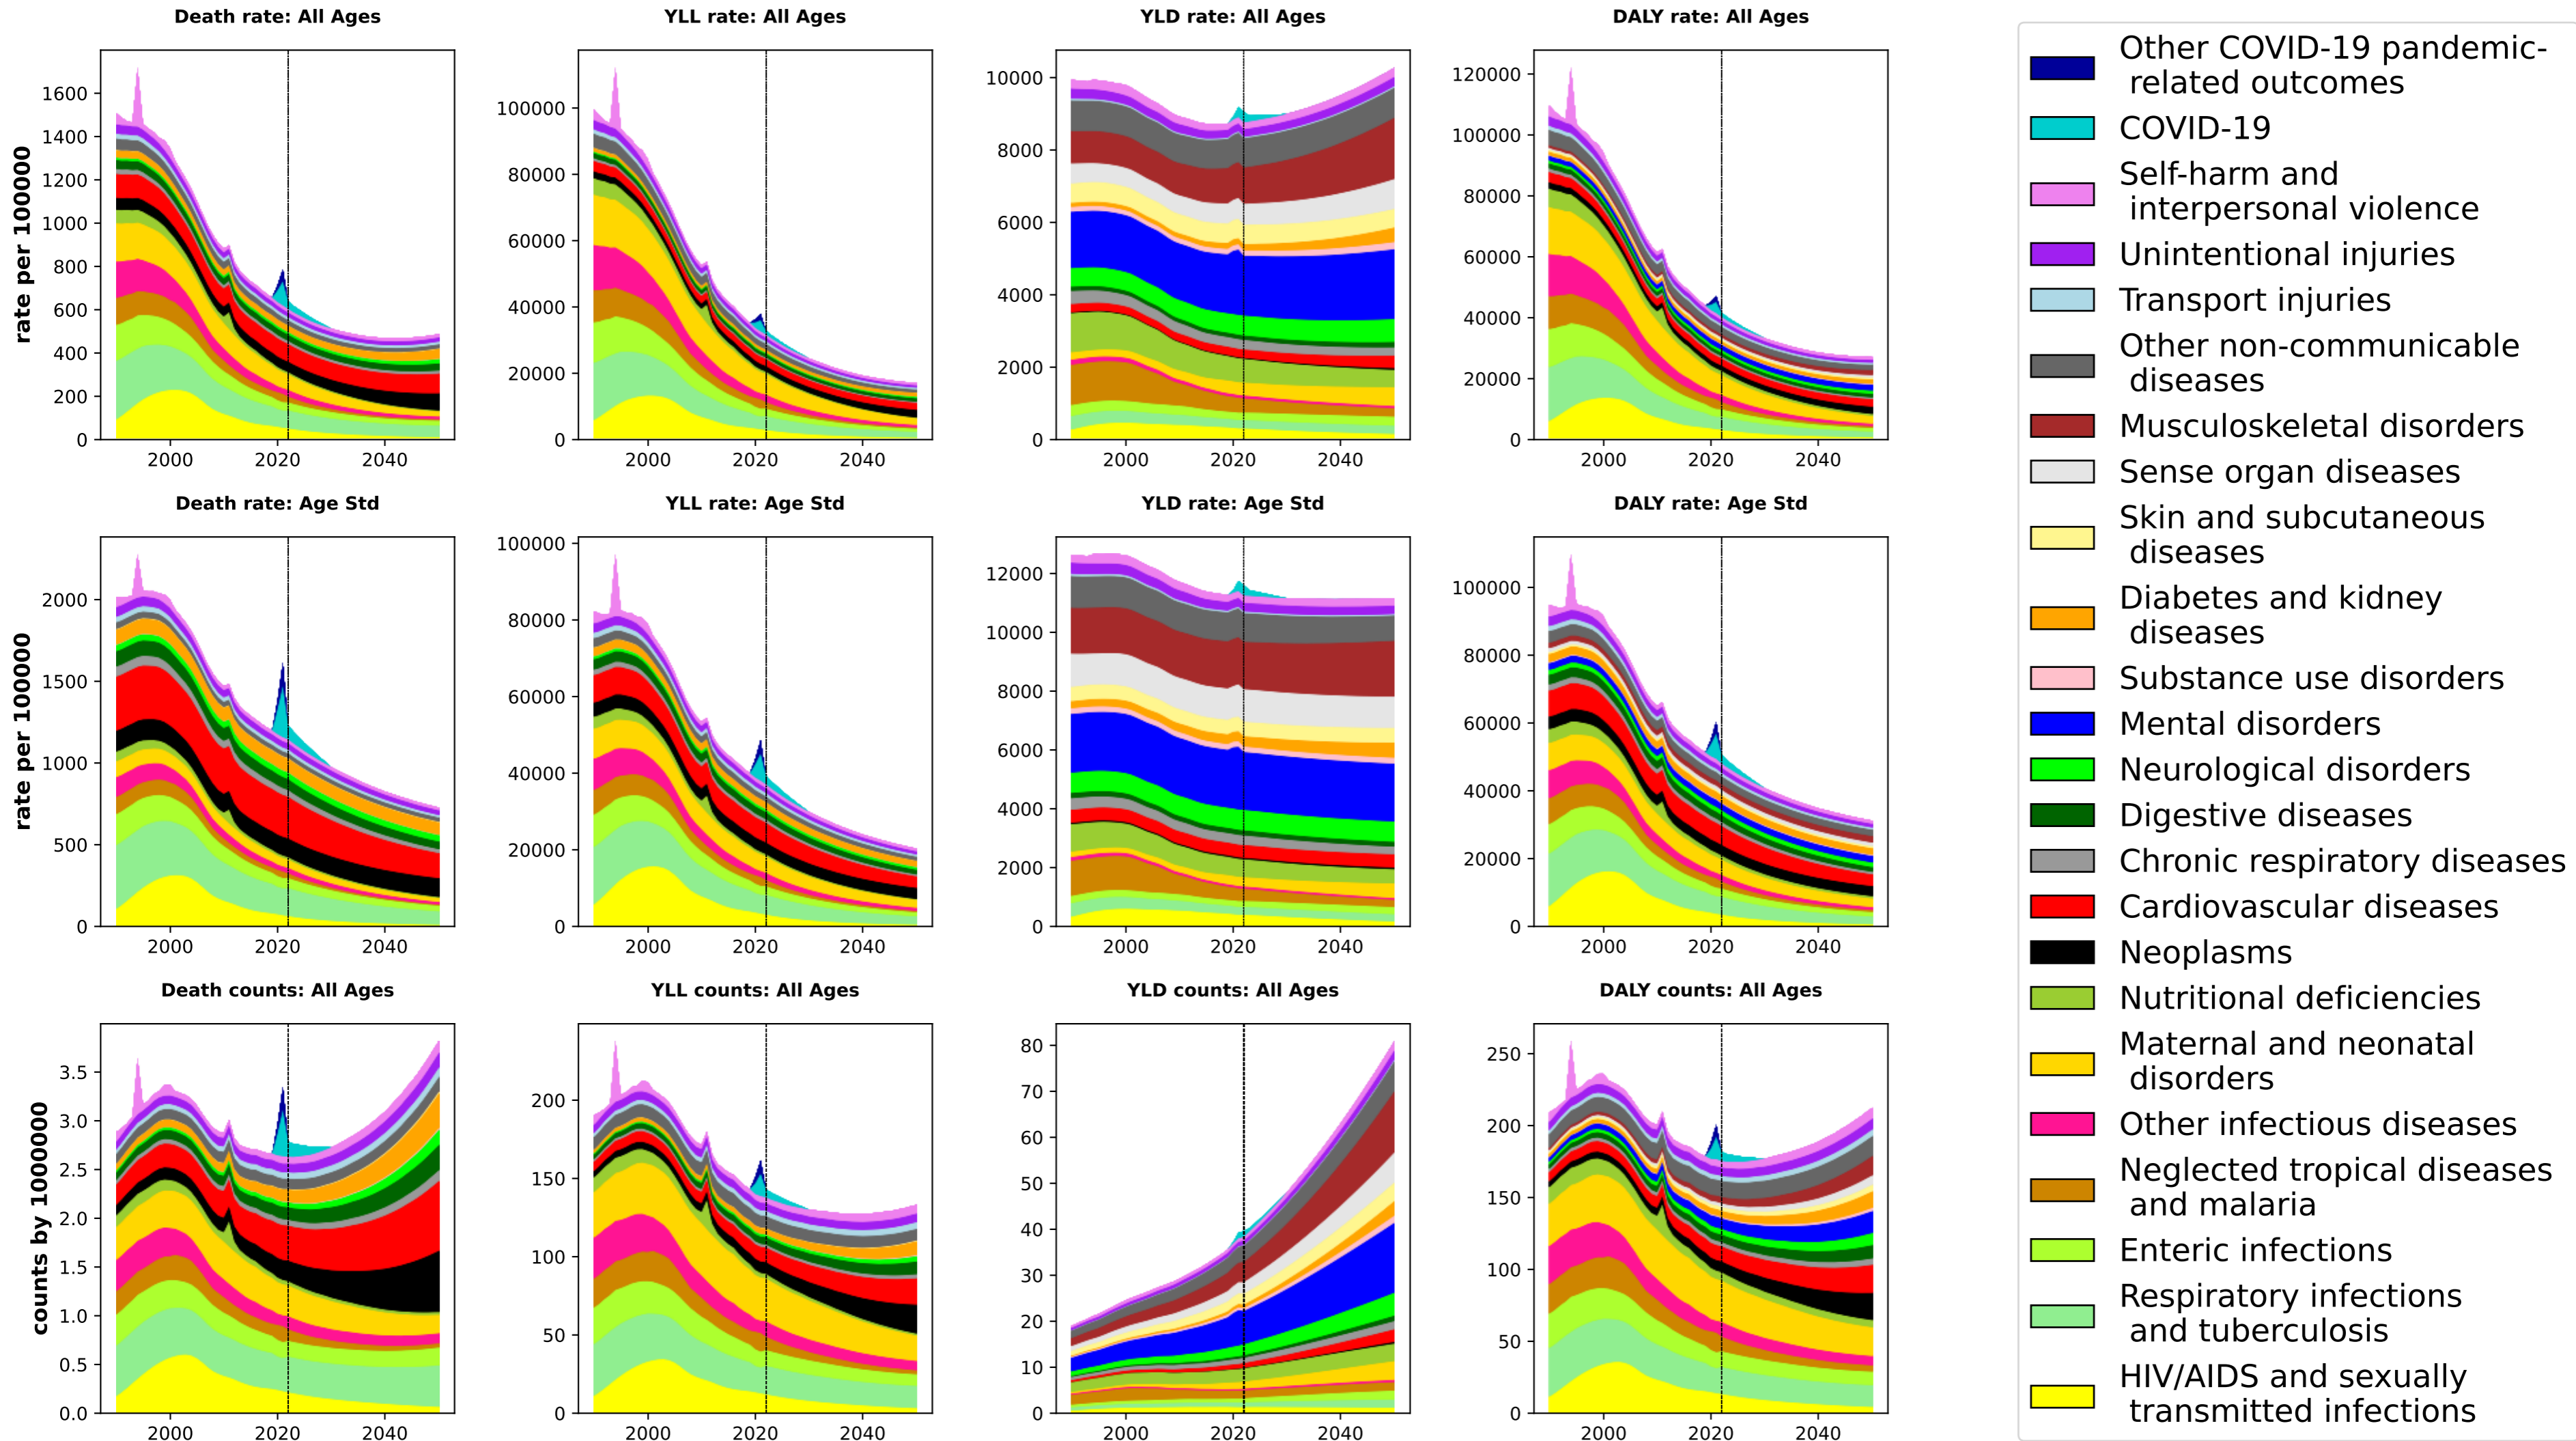

# Southern sub-Saharan Africa

Supplemental Results Figure S6. Cause level 2 area plots for 4 burden measures for reference scenario by location, 1990-2050

942

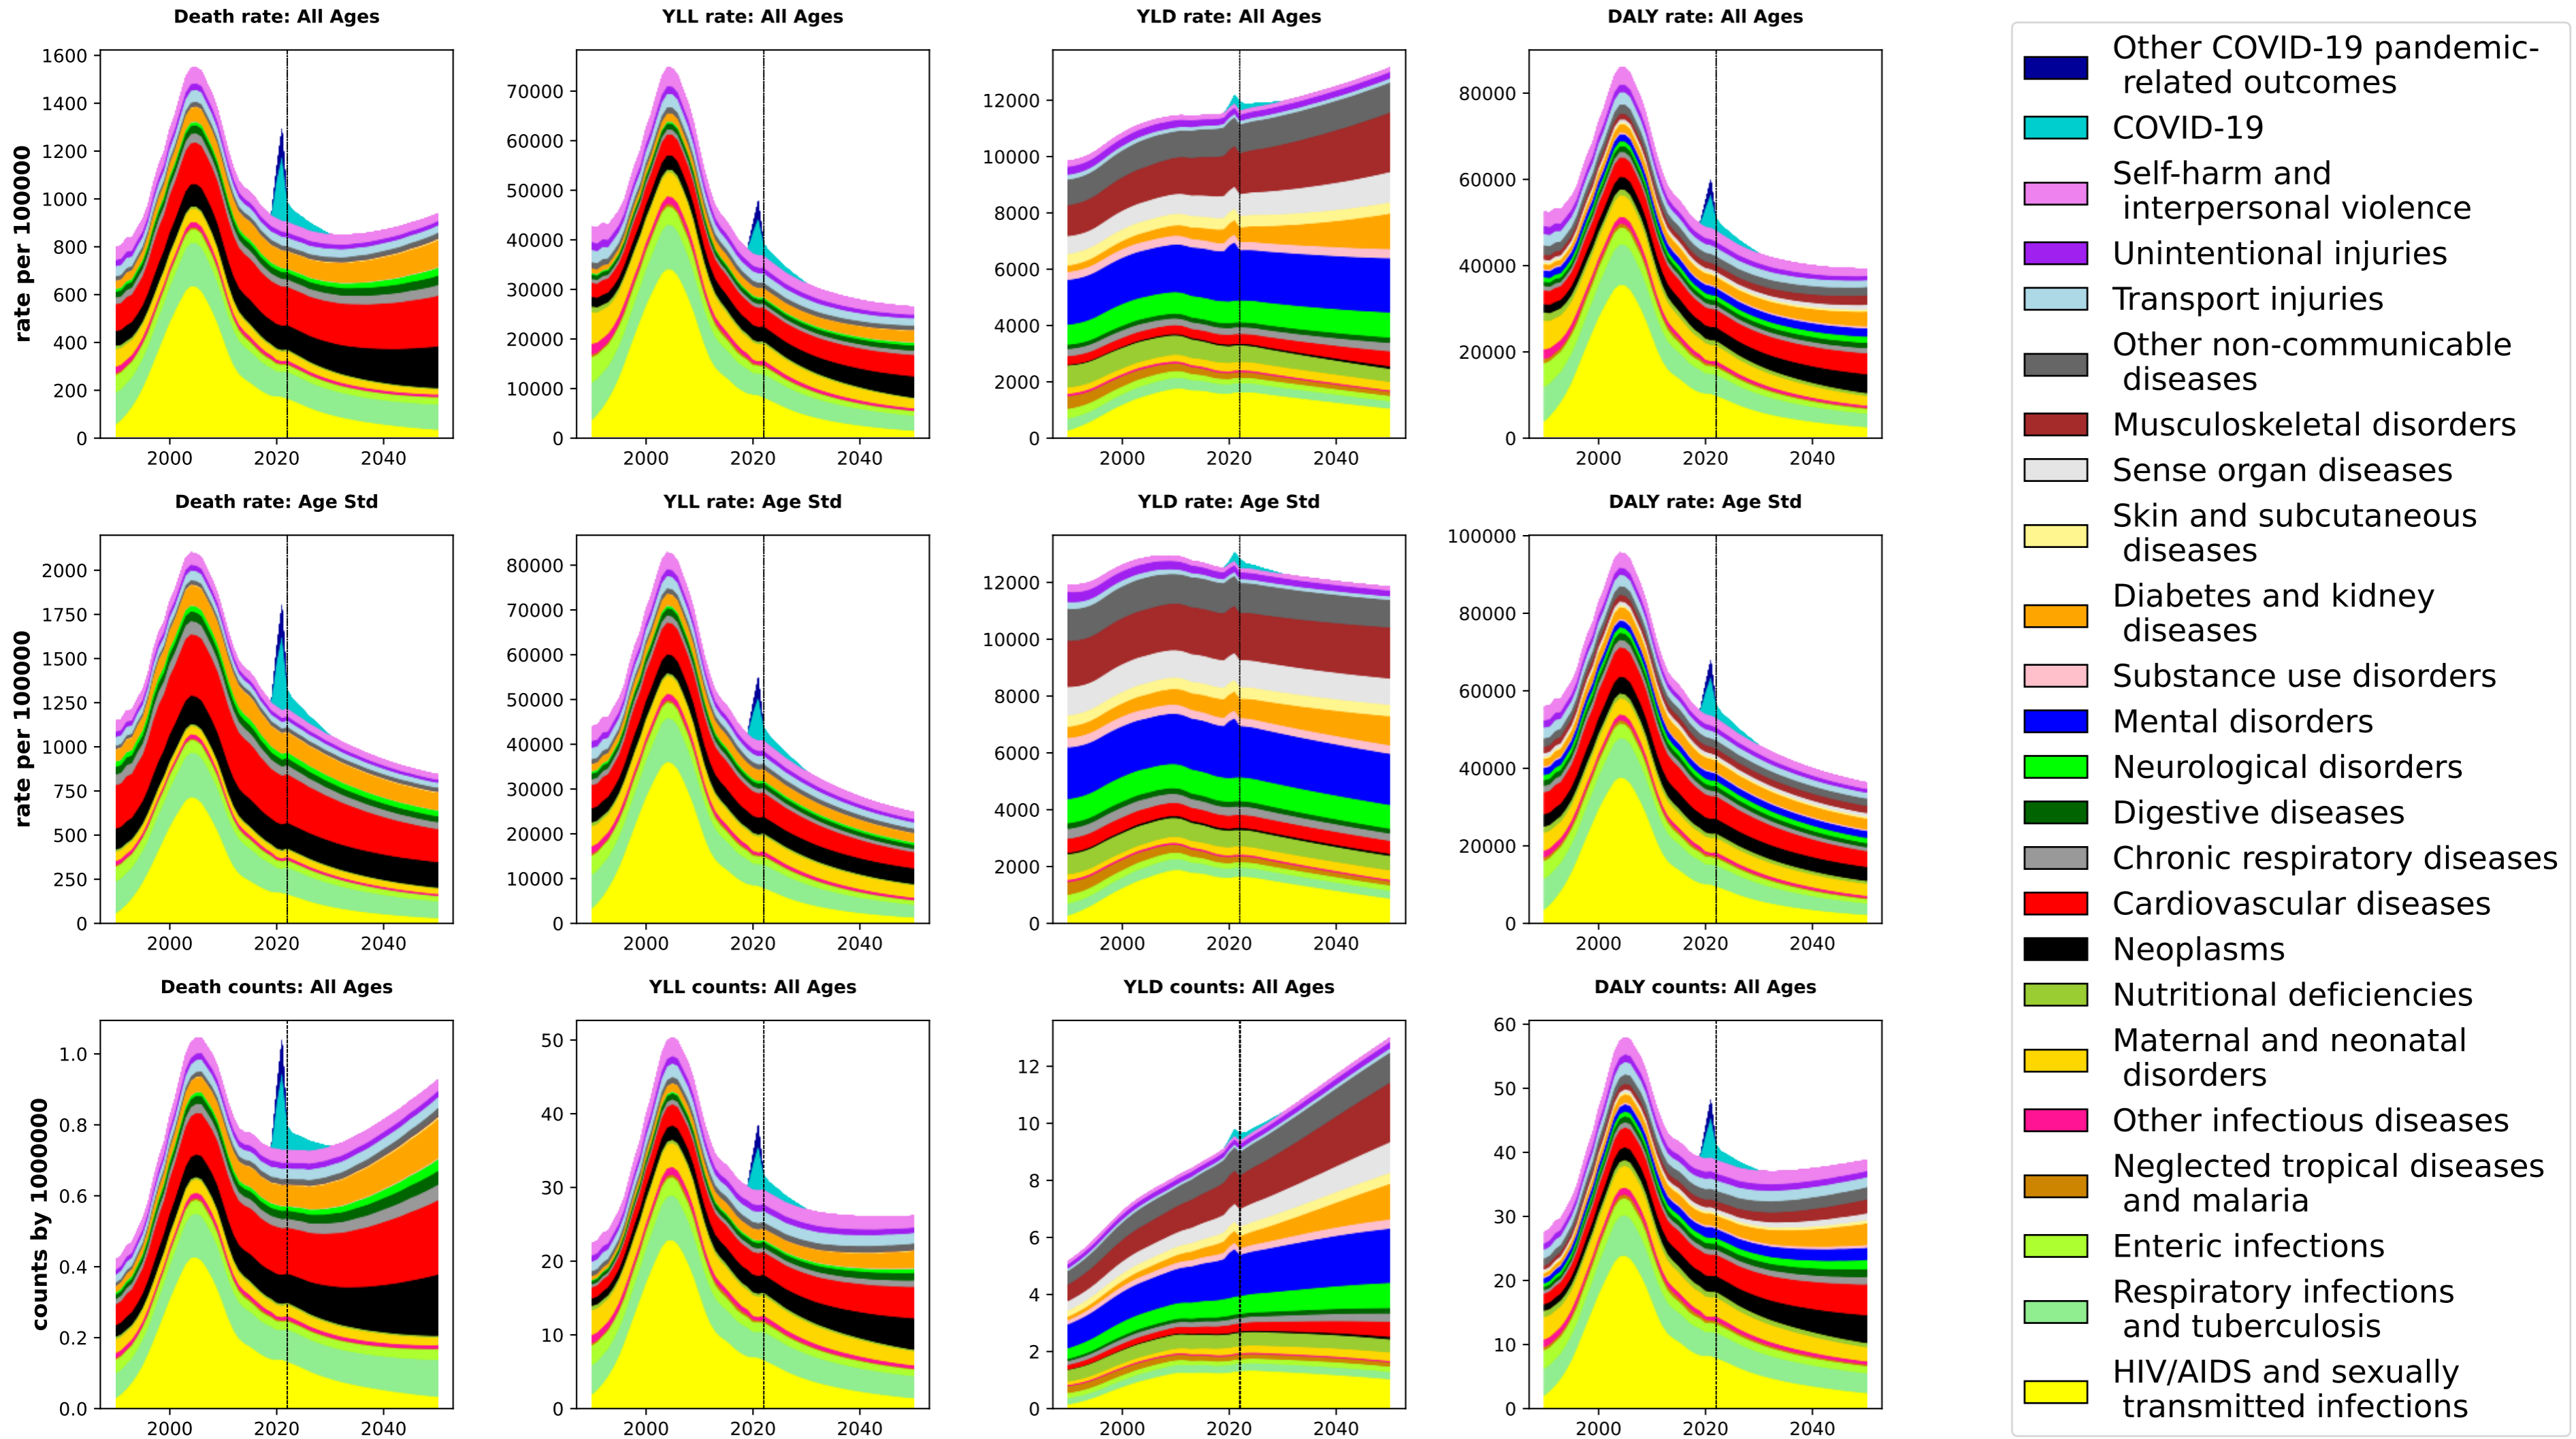

# Western sub-Saharan Africa

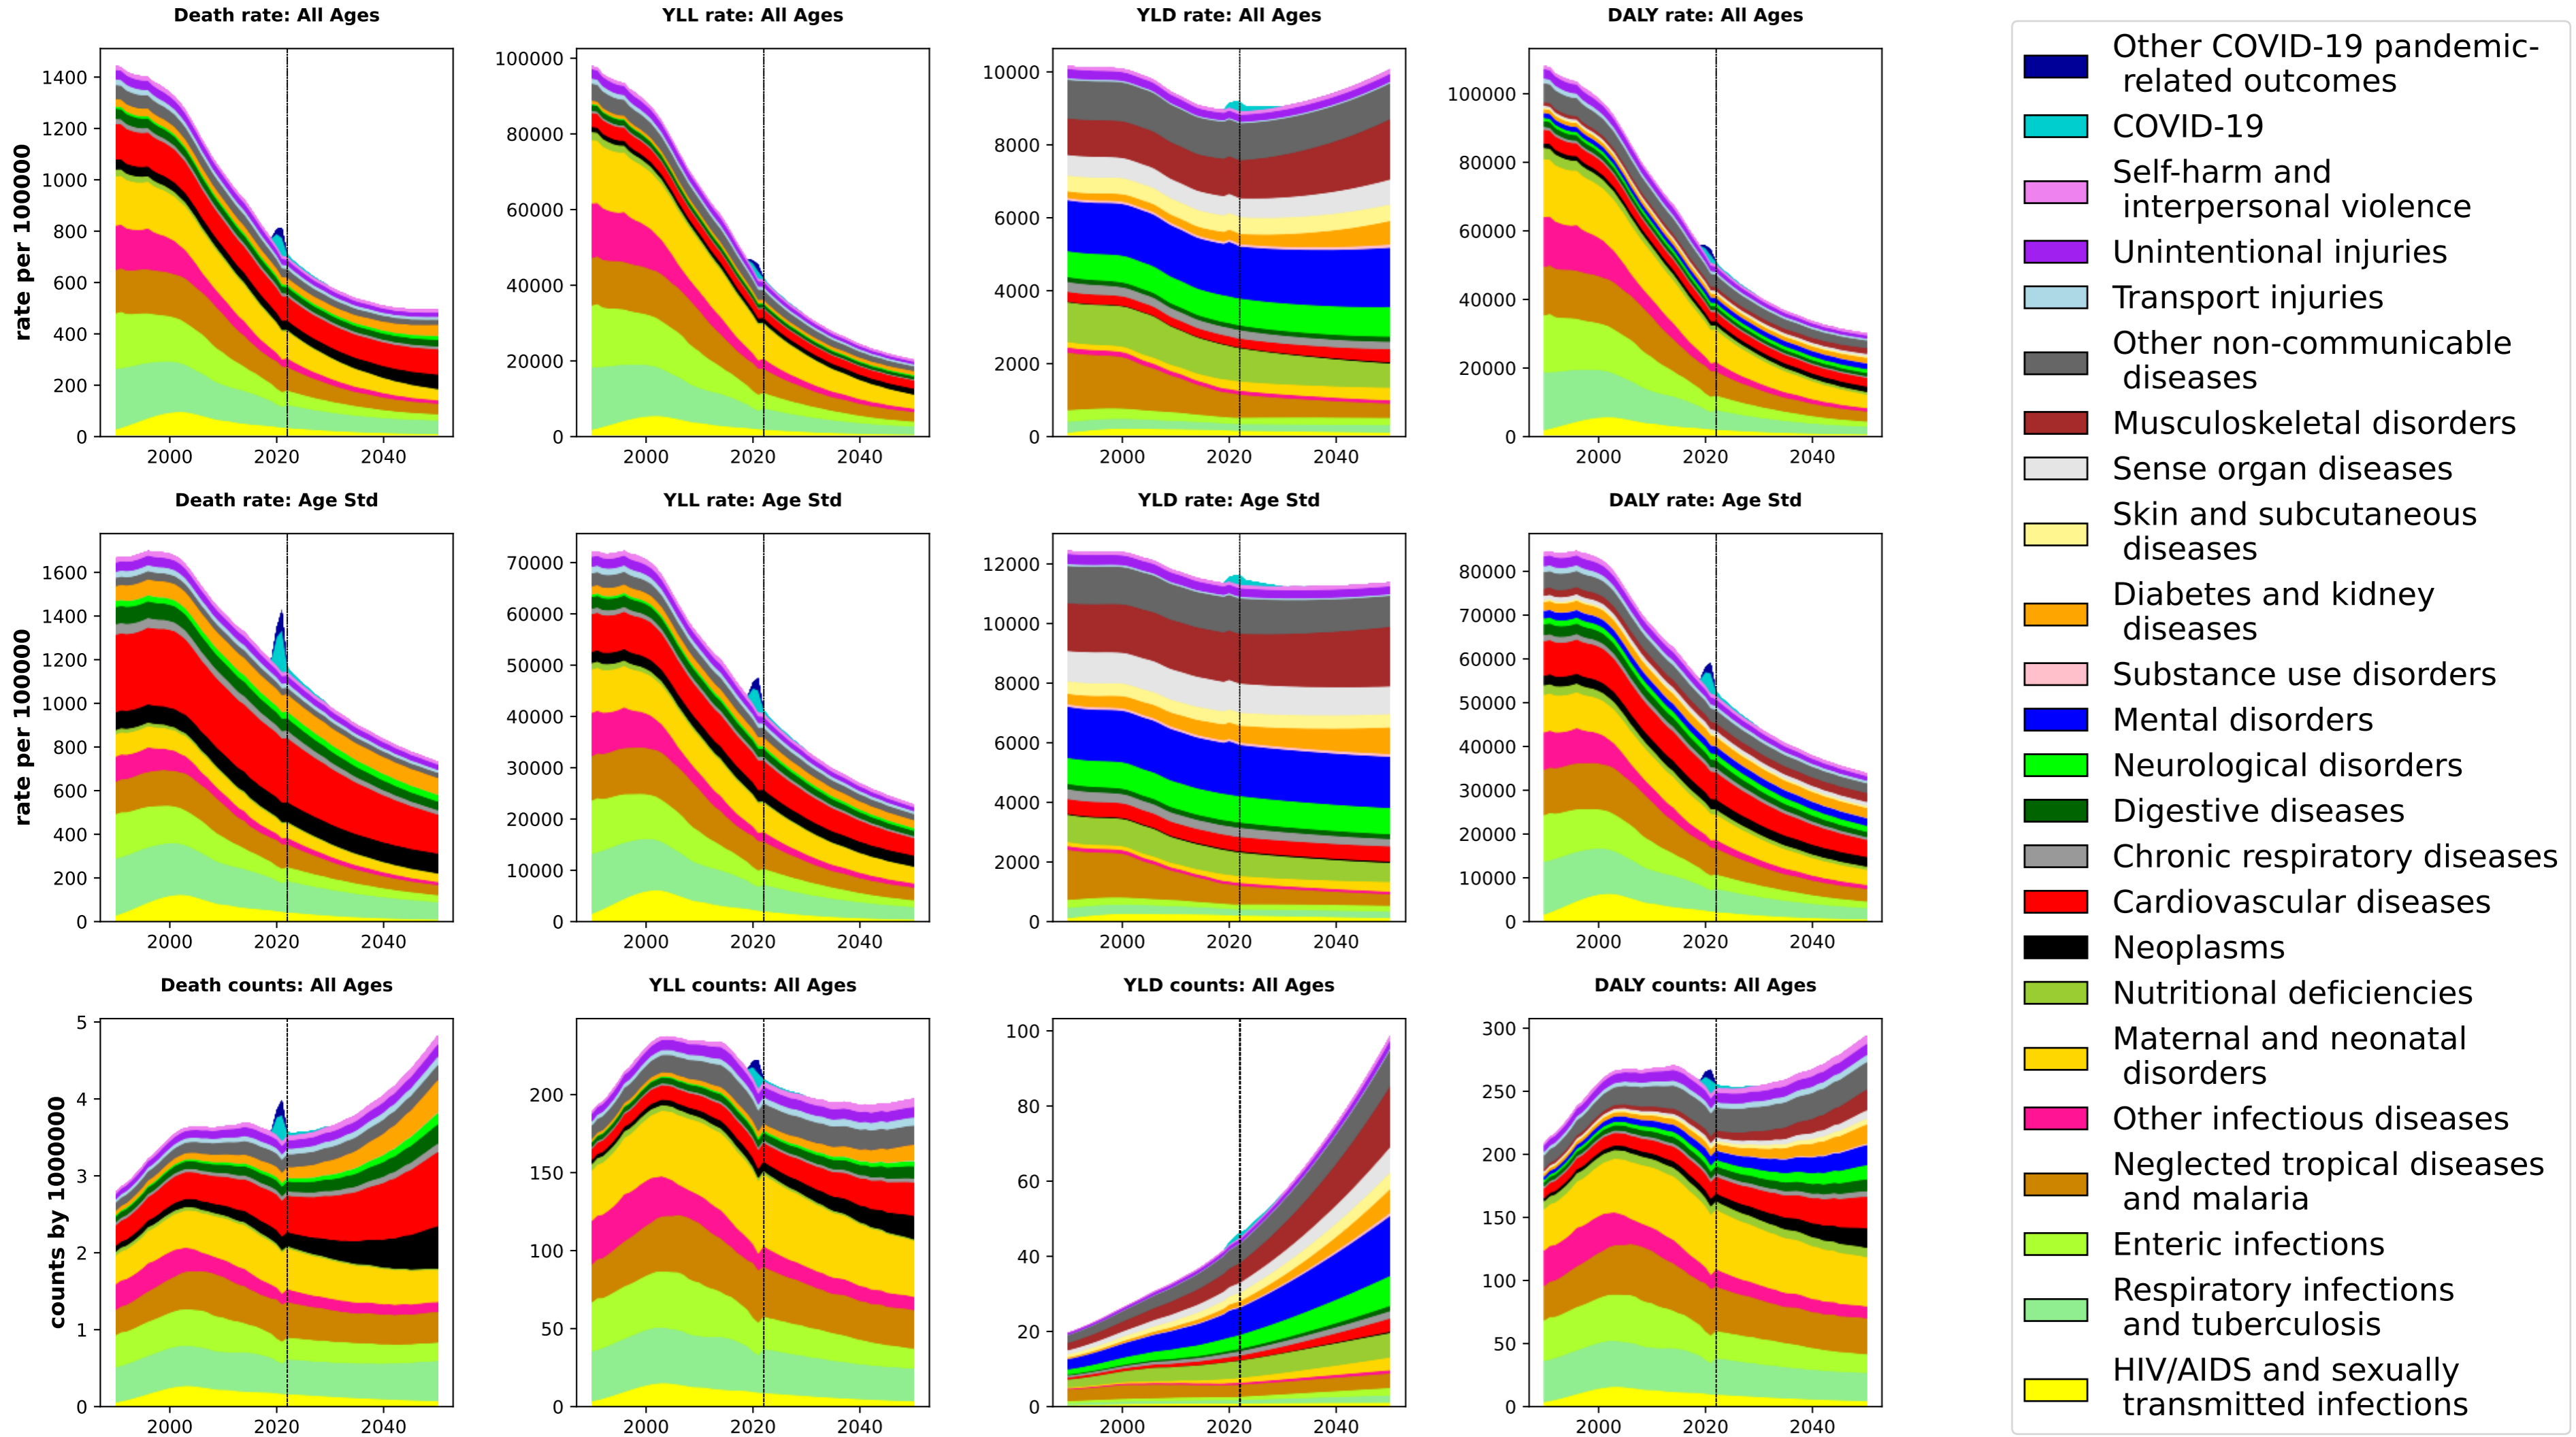



### Armenia, Reference scenario

**Legend:**  
Communicable, maternal, neonatal and nutritional  
Non-communicable  
Injuries

| Leading Causes 2022           | Leading Causes 2050           | Mean % change number of DALY   | Mean % change all-age DALY rate | Mean % change age-standardized DALY rate |
|-------------------------------|-------------------------------|--------------------------------|---------------------------------|------------------------------------------|
| 1 Ischemic heart disease      | 1 Ischemic heart disease      | -19.8 (-46.6 to 16.8)          | 0.872 (-33.2 to 42.1)           | <b>-52.9 (-70.3 to -25.5)</b>            |
| 2 COVID-19                    | 2 Stroke                      | <b>-21.3 (-38.9 to -0.445)</b> | -1.09 (-19.5 to 20.7)           | <b>-50.7 (-60.4 to -38.3)</b>            |
| 3 Stroke                      | 3 Low back pain               | -0.0186 (-18.2 to 19.1)        | <b>25.5 (18.4 to 33.6)</b>      | <b>-3.42 (-3.62 to -3.19)</b>            |
| 4 Low back pain               | 4 Alzheimer's disease         | <b>116 (70 to 164)</b>         | <b>172 (121 to 231)</b>         | <b>-9.3 (-11.1 to -7.46)</b>             |
| 5 Diabetes                    | 5 Diabetes                    | 11.2 (-10.5 to 32.9)           | <b>39.8 (21 to 59.1)</b>        | -10.7 (-20.7 to 0.386)                   |
| 6 Lung cancer                 | 6 Lung cancer                 | 8.19 (-21.5 to 51.9)           | 36.1 (-3.39 to 83.4)            | -16.3 (-39.3 to 12.2)                    |
| 7 Lower respiratory infect    | 7 Age-related hearing loss    | <b>37.1 (15.6 to 60.9)</b>     | <b>72.4 (56 to 90.1)</b>        | <b>-0.474 (-0.635 to -0.336)</b>         |
| 8 Neonatal disorders          | 8 COPD                        | <b>68.7 (20.5 to 130)</b>      | <b>112 (59.3 to 179)</b>        | -6.51 (-32.9 to 26.1)                    |
| 9 Depressive disorders        | 9 Lower respiratory infect    | -6.8 (-29.5 to 22.8)           | 17.2 (-10.6 to 44.8)            | <b>-45.6 (-58.9 to -32.4)</b>            |
| 10 Headache disorders         | 10 Pancreatic cancer          | <b>64.4 (7.1 to 138)</b>       | <b>107 (41.1 to 202)</b>        | 23.1 (-15.6 to 73.5)                     |
| 11 Age-related hearing loss   | 11 Depressive disorders       | -4.82 (-21.1 to 12.1)          | <b>19.5 (12.7 to 28.3)</b>      | <b>-2.48 (-2.81 to -2.11)</b>            |
| 12 Alzheimer's disease        | 12 Hypertensive heart disease | <b>60.6 (3.02 to 139)</b>      | <b>102 (31.2 to 199)</b>        | -10.6 (-43.8 to 39.4)                    |
| 13 Road injuries              | 13 Colorectal cancer          | 27.6 (-16 to 90.1)             | <b>60.5 (7.77 to 138)</b>       | -8.45 (-37.7 to 33.4)                    |
| 14 Cirrhosis liver            | 14 Cirrhosis liver            | 0.373 (-18.7 to 23.3)          | <b>26.1 (6.44 to 47.1)</b>      | -11.2 (-27.6 to 6.72)                    |
| 15 COPD                       | 15 Blindness and vision loss  | <b>38.8 (14.5 to 61.4)</b>     | <b>74.5 (57.2 to 95.9)</b>      | <b>-3.69 (-4.02 to -3.43)</b>            |
| 16 Breast cancer              | 16 Breast cancer              | 12.7 (-21 to 51.1)             | <b>41.6 (4.22 to 89.3)</b>      | -13.1 (-34.1 to 14.1)                    |
| 17 Colorectal cancer          | 17 Osteoarthritis             | <b>34.5 (13.8 to 55.4)</b>     | <b>69.1 (55.4 to 84.3)</b>      | 0.171 (-0.383 to 0.73)                   |
| 18 Oral disorders             | 18 Headache disorders         | <b>-23 (-39.3 to -7.51)</b>    | -3.5 (-9.31 to 6.83)            | <b>-0.969 (-1.23 to -0.613)</b>          |
| 19 Congenital defects         | 19 Oral disorders             | 15.4 (-6.43 to 35.9)           | <b>44.9 (33 to 58.5)</b>        | <b>0.917 (0.694 to 1.16)</b>             |
| 20 Blindness and vision loss  | 20 Chronic kidney disease     | 37 (-10.5 to 97.6)             | <b>72.1 (16.3 to 145)</b>       | -3.26 (-38.2 to 50.7)                    |
| 22 Pancreatic cancer          | 21 Road injuries              |                                |                                 |                                          |
| 23 Osteoarthritis             | 24 Neonatal disorders         |                                |                                 |                                          |
| 24 Hypertensive heart disease | 43 Congenital defects         |                                |                                 |                                          |
| 26 Chronic kidney disease     | 150 COVID-19                  |                                |                                 |                                          |

### Azerbaijan, Reference scenario

**Legend:**

Communicable, maternal, neonatal and nutritional  
Non-communicable  
Injuries

| Leading Causes 2022           | Leading Causes 2050          | Mean % change number of DALY | Mean % change all-age DALY rate | Mean % change age-standardized DALY rate |
|-------------------------------|------------------------------|------------------------------|---------------------------------|------------------------------------------|
| 1 Ischemic heart disease      | 1 Ischemic heart disease     | 42.5 (-13.1 to 109)          | 33.9 (-14.4 to 90.6)            | -43.6 (-66.8 to -6.08)                   |
| 2 COVID-19                    | 2 Stroke                     | 54.5 (17.1 to 96.7)          | 45 (16.7 to 78.2)               | -36.8 (-50.9 to -16.9)                   |
| 3 Stroke                      | 3 Diabetes                   | 75.5 (42 to 114)             | 64.7 (39.2 to 88.3)             | -0.265 (-14.7 to 15.4)                   |
| 4 Neonatal disorders          | 4 Low back pain              | 38.2 (17 to 59.8)            | 29.6 (22 to 37)                 | -3.29 (-3.48 to -3.1)                    |
| 5 Lower respiratory infect    | 5 Cirrhosis liver            | 55.5 (23.5 to 91.3)          | 45.9 (23.1 to 73.5)             | -9.52 (-25 to 10.5)                      |
| 6 Low back pain               | 6 Alzheimer's disease        | 284 (179 to 401)             | 260 (178 to 350)                | 2.28 (0.45 to 4.48)                      |
| 7 Diabetes                    | 7 Hypertensive heart disease | 166 (58.9 to 296)            | 150 (52.7 to 276)               | 8.05 (-37.4 to 74.5)                     |
| 8 Cirrhosis liver             | 8 Age-related hearing loss   | 90.8 (59.2 to 126)           | 78.9 (61.7 to 98.5)             | -0.477 (-0.621 to -0.324)                |
| 9 Headache disorders          | 9 COPD                       | 144 (75.7 to 219)            | 129 (71.1 to 195)               | 0.968 (-28.2 to 40.6)                    |
| 10 Depressive disorders       | 10 Neonatal disorders        | -50.8 (-67.9 to -22.8)       | -53.8 (-68.5 to -26.4)          | -36.5 (-60 to 1.9)                       |
| 11 Cardiomyopathy             | 11 Lower respiratory infect  | -52.2 (-66.8 to -33.7)       | -55.1 (-66.9 to -39.4)          | -56.8 (-70.3 to -38.8)                   |
| 12 Congenital defects         | 12 Lung cancer               | 60 (0.642 to 128)            | 49.8 (1.39 to 111)              | -9.19 (-37.8 to 26.8)                    |
| 13 Age-related hearing loss   | 13 Headache disorders        | 7.09 (-8.48 to 23.2)         | 0.49 (-5.33 to 10.8)            | -0.679 (-0.862 to -0.437)                |
| 14 Lung cancer                | 14 Depressive disorders      | 27.5 (8.33 to 49)            | 19.5 (12.3 to 27.7)             | -2.55 (-2.9 to -2.18)                    |
| 15 Dietary iron deficiency    | 15 Chronic kidney disease    | 95.6 (20.6 to 190)           | 83.8 (16.7 to 172)              | 14.9 (-32.1 to 88.2)                     |
| 16 Stomach cancer             | 16 Blindness and vision loss | 94.4 (61.5 to 128)           | 82.3 (62.7 to 100)              | -3.66 (-3.92 to -3.38)                   |
| 17 Gynecological diseases     | 17 Cardiomyopathy            | 13 (-12 to 40.3)             | 6.01 (-13.1 to 27.1)            | -23.3 (-34.8 to -9.2)                    |
| 18 Alcohol use disorders      | 18 Liver cancer              | 125 (56.5 to 218)            | 112 (48.3 to 193)               | 21.7 (-13.1 to 76)                       |
| 19 COPD                       | 19 Osteoarthritis            | 93.8 (63.9 to 125)           | 81.8 (68.9 to 93.6)             | -0.048 (-0.632 to 0.546)                 |
| 20 Hypertensive heart disease | 20 Oral disorders            | 57.4 (31.1 to 84.7)          | 47.6 (35.9 to 59.9)             | 0.966 (0.748 to 1.19)                    |
| 21 Oral disorders             | 21 Stomach cancer            |                              |                                 |                                          |
| 24 Chronic kidney disease     | 24 Alcohol use disorders     |                              |                                 |                                          |
| 26 Blindness and vision loss  | 26 Dietary iron deficiency   |                              |                                 |                                          |
| 28 Osteoarthritis             | 33 Gynecological diseases    |                              |                                 |                                          |
| 30 Alzheimer's disease        | 37 Congenital defects        |                              |                                 |                                          |
| 34 Liver cancer               | 155 COVID-19                 |                              |                                 |                                          |

### Georgia, Reference scenario

**Legend:**  
Communicable, maternal, neonatal and nutritional  
Non-communicable  
Injuries

| Leading Causes 2022          | Leading Causes 2050          | Mean % change number of DALY   | Mean % change all-age DALY rate | Mean % change age-standardized DALY rate |
|------------------------------|------------------------------|--------------------------------|---------------------------------|------------------------------------------|
| 1 Stroke                     | 1 Stroke                     | <b>-30.6 (-42.8 to -16.4)</b>  | <b>-25.6 (-39.6 to -9.75)</b>   | <b>-44.6 (-55.5 to -31.1)</b>            |
| 2 Ischemic heart disease     | 2 Ischemic heart disease     | <b>-36.7 (-57.3 to -13.5)</b>  | <b>-32.1 (-55 to -4.26)</b>     | <b>-49 (-66.3 to -22.6)</b>              |
| 3 COVID-19                   | 3 Hypertensive heart disease | 27.2 (-16.9 to 80.6)           | 36.6 (-13.3 to 96.7)            | -3.24 (-39.4 to 45.8)                    |
| 4 Diabetes                   | 4 Lung cancer                | <b>45.1 (3.44 to 94.4)</b>     | <b>55.1 (14.8 to 103)</b>       | <b>38.4 (3.15 to 84.6)</b>               |
| 5 Hypertensive heart disease | 5 Diabetes                   | 2.1 (-14.5 to 17.6)            | 9.33 (-3.35 to 24.5)            | -4.49 (-14 to 7.24)                      |
| 6 Low back pain              | 6 Alzheimer's disease        | <b>76.1 (40.2 to 113)</b>      | <b>88.6 (57.3 to 122)</b>       | -0.834 (-2.95 to 1.18)                   |
| 7 Lung cancer                | 7 Low back pain              | -1.08 (-15.1 to 13)            | <b>5.79 (1.5 to 10.9)</b>       | <b>-3.19 (-3.4 to -3.02)</b>             |
| 8 Lower respiratory infect   | 8 Cirrhosis liver            | 5.91 (-18.3 to 29.1)           | 13.3 (-5.34 to 35.3)            | 14.7 (-6.89 to 41.1)                     |
| 9 Cirrhosis liver            | 9 Lower respiratory infect   | -7.9 (-26 to 12.3)             | -1.34 (-19.5 to 17.2)           | <b>-26.3 (-40.9 to -10.8)</b>            |
| 10 Falls                     | 10 Age-related hearing loss  | <b>20 (2.33 to 35.4)</b>       | <b>28.5 (17.5 to 40.8)</b>      | <b>-0.572 (-0.669 to -0.45)</b>          |
| 11 Road injuries             | 11 Road injuries             | -15 (-46.5 to 29.9)            | -8.92 (-42.7 to 38.5)           | -8.87 (-43.4 to 40.6)                    |
| 12 Alzheimer's disease       | 12 Depressive disorders      | -0.919 (-14.6 to 13.5)         | <b>5.94 (1.97 to 9.65)</b>      | <b>-1.92 (-2.2 to -1.65)</b>             |
| 13 Depressive disorders      | 13 Falls                     | <b>-18.5 (-33.5 to -0.631)</b> | <b>-12.9 (-23.6 to -2.21)</b>   | <b>-21.8 (-32.3 to -10.4)</b>            |
| 14 Breast cancer             | 14 Breast cancer             | -2.27 (-29 to 29.7)            | 4.46 (-21.3 to 34.6)            | -8.03 (-29.9 to 17.1)                    |
| 15 Neonatal disorders        | 15 Colorectal cancer         | 13 (-24.6 to 57)               | 20.8 (-19.4 to 69.2)            | 2.05 (-30.1 to 38.1)                     |
| 16 Age-related hearing loss  | 16 Chronic kidney disease    | 29.6 (-14 to 81.7)             | 39 (-6.84 to 95.5)              | 12.2 (-28.1 to 70)                       |
| 17 Headache disorders        | 17 COPD                      | 21.6 (-9.4 to 55.9)            | 30.4 (-2.49 to 66.2)            | -4.55 (-28.9 to 25.7)                    |
| 18 Colorectal cancer         | 18 Headache disorders        | -8.41 (-23.1 to 6.43)          | <b>-2.16 (-4.22 to -0.162)</b>  | -0.175 (-0.368 to 0.0135)                |
| 19 COPD                      | 19 Blindness and vision loss | <b>19.2 (1.57 to 37.2)</b>     | <b>27.6 (16.5 to 38.8)</b>      | <b>-3.75 (-4.05 to -3.44)</b>            |
| 20 Stomach cancer            | 20 Oral disorders            | 7.7 (-7.3 to 23.1)             | <b>15.2 (8.51 to 22.8)</b>      | <b>0.685 (0.508 to 0.883)</b>            |
| 21 Chronic kidney disease    | 21 Neonatal disorders        |                                |                                 |                                          |
| 22 Blindness and vision loss | 26 Stomach cancer            |                                |                                 |                                          |
| 23 Oral disorders            | 158 COVID-19                 |                                |                                 |                                          |

### Kazakhstan, Reference scenario

**Legend:**  
Communicable, maternal, neonatal and nutritional  
Non-communicable  
Injuries

| Leading Causes 2022         | Leading Causes 2050         | Mean % change number of DALY | Mean % change all-age DALY rate | Mean % change age-standardized DALY rate |
|-----------------------------|-----------------------------|------------------------------|---------------------------------|------------------------------------------|
| 1 COVID-19                  | 1 Ischemic heart disease    | 10.8 (-24.1 to 49.1)         | -8.65 (-37.1 to 22.1)           | <b>-51.2 (-69.1 to -26)</b>              |
| 2 Ischemic heart disease    | 2 Stroke                    | 7.74 (-13.5 to 28.8)         | -11.2 (-27.8 to 6.27)           | <b>-48.8 (-59.8 to -33.6)</b>            |
| 3 Stroke                    | 3 COPD                      | <b>78.2 (34.9 to 135)</b>    | <b>46.9 (11.4 to 88.5)</b>      | -11.5 (-37.6 to 19.6)                    |
| 4 Cardiomyopathy            | 4 Low back pain             | <b>35.4 (18.3 to 49.9)</b>   | <b>11.5 (6.17 to 16.6)</b>      | <b>-3.75 (-4.01 to -3.53)</b>            |
| 5 Cirrhosis liver           | 5 Cirrhosis liver           | 12.8 (-7.75 to 34.8)         | -7.08 (-22.9 to 9.97)           | <b>-23.2 (-36.9 to -6.8)</b>             |
| 6 Low back pain             | 6 Diabetes                  | <b>75.8 (54.6 to 96.3)</b>   | <b>44.8 (33.6 to 56.5)</b>      | <b>10.5 (2.7 to 18.8)</b>                |
| 7 Neonatal disorders        | 7 Cardiomyopathy            | 5.73 (-10.2 to 28.5)         | -13 (-26 to 2.24)               | <b>-25.3 (-36.8 to -9.96)</b>            |
| 8 COPD                      | 8 Self-harm                 | 1 (-24.9 to 31.4)            | -16.8 (-33.8 to 6.05)           | -15.2 (-33.2 to 8.64)                    |
| 9 Self-harm                 | 9 Depressive disorders      | <b>31.3 (14.7 to 47.1)</b>   | <b>8.06 (3.61 to 13.2)</b>      | <b>-2.5 (-2.85 to -2.21)</b>             |
| 10 Lower respiratory infect | 10 Alzheimer's disease      | <b>200 (129 to 267)</b>      | <b>147 (97.8 to 196)</b>        | 1.9 (-0.144 to 4.02)                     |
| 11 Diabetes                 | 11 Age-related hearing loss | <b>74.4 (51.6 to 95.4)</b>   | <b>43.6 (31.7 to 55.5)</b>      | <b>-0.589 (-0.843 to -0.348)</b>         |
| 12 Congenital defects       | 12 Lower respiratory infect | -8.44 (-27.2 to 12.2)        | <b>-24.6 (-37.3 to -7.85)</b>   | <b>-39.5 (-51.3 to -24.8)</b>            |
| 13 Road injuries            | 13 Alcohol use disorders    | <b>19.6 (0.0183 to 37.9)</b> | -1.54 (-12.7 to 11.8)           | 1.24 (-9.4 to 15.9)                      |
| 14 Depressive disorders     | 14 Headache disorders       | <b>20.4 (5.4 to 33.7)</b>    | -0.929 (-3.71 to 3.45)          | <b>-0.347 (-0.487 to -0.189)</b>         |
| 15 Alcohol use disorders    | 15 Road injuries            | 3.24 (-38.3 to 68.2)         | -14.8 (-48.8 to 36.8)           | -14.4 (-48.7 to 38.6)                    |
| 16 Headache disorders       | 16 Neonatal disorders       | <b>-35 (-52.8 to -8.9)</b>   | <b>-46.5 (-59.8 to -27.3)</b>   | <b>-35.5 (-51.2 to -13.9)</b>            |
| 17 Falls                    | 17 Chronic kidney disease   | <b>102 (38.1 to 198)</b>     | <b>66.2 (11.2 to 140)</b>       | 16 (-27.4 to 79.1)                       |
| 18 Lung cancer              | 18 Lung cancer              | 30.1 (-12.4 to 78.4)         | 6.99 (-26.6 to 43.6)            | -21.1 (-42.5 to 3.77)                    |
| 19 Age-related hearing loss | 19 Falls                    | 10.4 (-7.77 to 29.2)         | -9.15 (-21.1 to 3.69)           | <b>-16.8 (-28.3 to -4.35)</b>            |
| 20 Dietary iron deficiency  | 20 Oral disorders           | <b>51.3 (30.2 to 69.5)</b>   | <b>24.5 (16.4 to 34)</b>        | <b>0.605 (0.419 to 0.82)</b>             |
| 23 Oral disorders           | 25 Dietary iron deficiency  |                              |                                 |                                          |
| 25 Chronic kidney disease   | 26 Congenital defects       |                              |                                 |                                          |
| 31 Alzheimer's disease      | 153 COVID-19                |                              |                                 |                                          |

### Kyrgyzstan, Reference scenario

**Legend:**  
Communicable, maternal, neonatal and nutritional  
Non-communicable  
Injuries

| Leading Causes 2022           | Leading Causes 2050           | Mean % change number of DALY  | Mean % change all-age DALY rate | Mean % change age-standardized DALY rate |
|-------------------------------|-------------------------------|-------------------------------|---------------------------------|------------------------------------------|
| 1 COVID-19                    | 1 Ischemic heart disease      | <b>72.3 (10.2 to 152)</b>     | 43.8 (-5.27 to 114)             | -32.8 (-60.5 to 9.58)                    |
| 2 Ischemic heart disease      | 2 Stroke                      | <b>32.6 (0.464 to 69.2)</b>   | 10.6 (-13.2 to 40)              | <b>-37.9 (-53.3 to -16.9)</b>            |
| 3 Neonatal disorders          | 3 Neonatal disorders          | -32.6 (-62.2 to 10.1)         | <b>-43.9 (-65.9 to -10.3)</b>   | -26.5 (-56.3 to 16.6)                    |
| 4 Stroke                      | 4 Low back pain               | <b>51.1 (23.4 to 76)</b>      | <b>25.8 (18.7 to 33.5)</b>      | <b>-3.35 (-3.52 to -3.11)</b>            |
| 5 Cirrhosis liver             | 5 Cirrhosis liver             | 28.3 (-3.14 to 60.5)          | 6.91 (-12.6 to 30.4)            | -16.2 (-33.4 to 3.85)                    |
| 6 Low back pain               | 6 COPD                        | <b>166 (88.8 to 246)</b>      | <b>122 (64.9 to 194)</b>        | 8.89 (-25.9 to 58.1)                     |
| 7 Road injuries               | 7 Diabetes                    | <b>124 (82 to 165)</b>        | <b>86.8 (66.1 to 109)</b>       | <b>22.4 (10 to 35.2)</b>                 |
| 8 Lower respiratory infect    | 8 Road injuries               | 2.16 (-45 to 81.5)            | -14.8 (-51.9 to 48.9)           | -17.4 (-53.3 to 43.8)                    |
| 9 Congenital defects          | 9 Depressive disorders        | <b>42.4 (16.3 to 66.6)</b>    | <b>18.5 (12.3 to 25.3)</b>      | <b>-2.17 (-2.5 to -1.85)</b>             |
| 10 Depressive disorders       | 10 Alzheimer's disease        | <b>279 (176 to 387)</b>       | <b>215 (146 to 299)</b>         | <b>11.5 (8.53 to 14.3)</b>               |
| 11 Headache disorders         | 11 Headache disorders         | <b>26.4 (3.75 to 50.2)</b>    | <b>5.2 (0.366 to 13.7)</b>      | -0.125 (-0.297 to 0.00915)               |
| 12 Alcohol use disorders      | 12 Age-related hearing loss   | <b>96.4 (59.5 to 132)</b>     | <b>63.5 (49 to 79)</b>          | <b>-0.601 (-0.737 to -0.431)</b>         |
| 13 Dietary iron deficiency    | 13 Alcohol use disorders      | <b>31.2 (1.54 to 62)</b>      | 9.24 (-6.35 to 28.2)            | -1.76 (-14.9 to 15.6)                    |
| 14 Self-harm                  | 14 Hypertensive heart disease | <b>171 (59.7 to 304)</b>      | <b>126 (38.2 to 235)</b>        | 12.6 (-34.9 to 82.4)                     |
| 15 Diabetes                   | 15 Lung cancer                | <b>117 (35.5 to 205)</b>      | <b>80.6 (24.2 to 157)</b>       | 8.96 (-21.9 to 50.7)                     |
| 16 COPD                       | 16 Chronic kidney disease     | <b>94 (14.8 to 205)</b>       | 62 (-2 to 155)                  | 16.2 (-33.3 to 93.6)                     |
| 17 Age-related hearing loss   | 17 Dietary iron deficiency    | 1.32 (-17.9 to 22.1)          | <b>-15.7 (-18.6 to -13)</b>     | <b>-9.68 (-10 to -9.22)</b>              |
| 18 Falls                      | 18 Self-harm                  | 0.537 (-28.1 to 34.1)         | -16.2 (-37.9 to 9.51)           | -19.1 (-40.3 to 6.76)                    |
| 19 Stomach cancer             | 19 Lower respiratory infect   | <b>-40.5 (-56.9 to -21.5)</b> | <b>-50.4 (-63.3 to -35.5)</b>   | <b>-48.8 (-62.2 to -31.5)</b>            |
| 20 Gynecological diseases     | 20 Oral disorders             | <b>70.3 (39.6 to 103)</b>     | <b>41.8 (31.1 to 53.4)</b>      | <b>0.968 (0.745 to 1.2)</b>              |
| 23 Oral disorders             | 22 Stomach cancer             |                               |                                 |                                          |
| 24 Chronic kidney disease     | 24 Congenital defects         |                               |                                 |                                          |
| 27 Hypertensive heart disease | 26 Falls                      |                               |                                 |                                          |
| 28 Lung cancer                | 27 Gynecological diseases     |                               |                                 |                                          |
| 35 Alzheimer's disease        | 152 COVID-19                  |                               |                                 |                                          |

### Mongolia, Reference scenario

**Legend:**  
Communicable, maternal, neonatal and nutritional  
Non-communicable  
Injuries

| Leading Causes 2022         | Leading Causes 2050         | Mean % change number of DALY | Mean % change all-age DALY rate | Mean % change age-standardized DALY rate |
|-----------------------------|-----------------------------|------------------------------|---------------------------------|------------------------------------------|
| 1 Ischemic heart disease    | 1 Liver cancer              | 192 (104 to 301)             | 81.3 (26 to 155)                | 30.3 (-14.2 to 90.9)                     |
| 2 Stroke                    | 2 Ischemic heart disease    | 46.5 (-3.84 to 111)          | -8.96 (-40.5 to 33.5)           | <b>-47.6 (-69.2 to -14.2)</b>            |
| 3 Liver cancer              | 3 Stroke                    | 55.1 (24.3 to 90.8)          | -3.67 (-24.4 to 21.8)           | <b>-36.3 (-51.7 to -18.2)</b>            |
| 4 Neonatal disorders        | 4 Alcohol use disorders     | 50.4 (19.3 to 93)            | -6.67 (-26 to 16.7)             | -3.88 (-23.7 to 22.4)                    |
| 5 Alcohol use disorders     | 5 Cirrhosis liver           | 124 (79.9 to 168)            | 39 (11.2 to 69.8)               | 13.4 (-10.3 to 41)                       |
| 6 Lower respiratory infect  | 6 Low back pain             | 80.7 (65.7 to 97)            | 12 (5.57 to 20)                 | <b>-3.88 (-4.12 to -3.55)</b>            |
| 7 Low back pain             | 7 Neonatal disorders        | 5.23 (-28 to 53.9)           | <b>-34.7 (-54.3 to -4.9)</b>    | -21 (-44.8 to 14.4)                      |
| 8 Road injuries             | 8 Self-harm                 | 66.4 (26.2 to 127)           | 3.24 (-22.2 to 38.9)            | 1.72 (-23 to 39)                         |
| 9 Cirrhosis liver           | 9 Road injuries             | 45.1 (-10 to 127)            | -9.88 (-43.6 to 44.3)           | -9.94 (-43.4 to 44.7)                    |
| 10 COVID-19                 | 10 Depressive disorders     | 75.3 (60.9 to 89.4)          | 8.71 (3.52 to 14.7)             | <b>-2.02 (-2.34 to -1.58)</b>            |
| 11 Self-harm                | 11 Stomach cancer           | 42.5 (20.3 to 61.2)          | -11.6 (-25 to 1.52)             | <b>-36.5 (-44 to -29.2)</b>              |
| 12 Stomach cancer           | 12 Diabetes                 | 109 (84.8 to 135)            | 29.5 (15.3 to 45.9)             | 1.27 (-9.51 to 14.7)                     |
| 13 Congenital defects       | 13 Lung cancer              | 125 (43 to 223)              | 39.6 (-8.15 to 99.4)            | -2.7 (-32.4 to 33.3)                     |
| 14 Depressive disorders     | 14 Falls                    | 61 (34.3 to 86.7)            | -0.174 (-17.7 to 12.7)          | -6.85 (-21.3 to 5.76)                    |
| 15 Tuberculosis             | 15 Headache disorders       | 65.7 (53.3 to 80)            | 2.71 (-0.653 to 6.77)           | <b>0.241 (0.0535 to 0.486)</b>           |
| 16 Falls                    | 16 Age-related hearing loss | 131 (104 to 157)             | 43.2 (29.8 to 56)               | <b>-0.959 (-1.05 to -0.861)</b>          |
| 17 Dietary iron deficiency  | 17 Esophageal cancer        | 172 (134 to 217)             | 68.8 (44.8 to 96.8)             | 8.35 (-6.3 to 23.1)                      |
| 18 Headache disorders       | 18 Cardiomyopathy           | 83.5 (49.3 to 131)           | 13.8 (-6.67 to 48.2)            | -0.394 (-18.8 to 25.2)                   |
| 19 Diabetes                 | 19 Dietary iron deficiency  | 30.8 (16.8 to 45.3)          | <b>-19 (-21.5 to -16.9)</b>     | <b>-12.9 (-13.1 to -12.5)</b>            |
| 20 Lung cancer              | 20 Alzheimer's disease      | 338 (244 to 436)             | 171 (109 to 234)                | 3.95 (1.57 to 6.29)                      |
| 21 Cardiomyopathy           | 21 Lower respiratory infect |                              |                                 |                                          |
| 23 Age-related hearing loss | 24 Congenital defects       |                              |                                 |                                          |
| 27 Esophageal cancer        | 36 Tuberculosis             |                              |                                 |                                          |
| 41 Alzheimer's disease      | 157 COVID-19                |                              |                                 |                                          |

### Tajikistan, Reference scenario

**Legend:**

Communicable, maternal, neonatal and nutritional  
Non-communicable  
Injuries

| Leading Causes 2022           | Leading Causes 2050          | Mean % change number of DALY | Mean % change all-age DALY rate | Mean % change age-standardized DALY rate |
|-------------------------------|------------------------------|------------------------------|---------------------------------|------------------------------------------|
| 1 Lower respiratory infect    | 1 Ischemic heart disease     | 124 (37.9 to 215)            | 50.5 (-6.58 to 134)             | -29.4 (-59.8 to 18)                      |
| 2 Neonatal disorders          | 2 Stroke                     | 102 (50 to 151)              | 35.4 (1.08 to 70.4)             | -33.4 (-52.7 to -12.2)                   |
| 3 Ischemic heart disease      | 3 Neonatal disorders         | -23.1 (-54.7 to 29.5)        | -48.4 (-69 to -9.69)            | -30.4 (-58.5 to 21.5)                    |
| 4 Stroke                      | 4 Lower respiratory infect   | -54.6 (-68.4 to -38.5)       | -69.6 (-77.5 to -58.5)          | -62.8 (-72.4 to -49.2)                   |
| 5 COVID-19                    | 5 Low back pain              | 85 (54.3 to 117)             | 23.7 (17.3 to 30.6)             | -3.87 (-4.17 to -3.57)                   |
| 6 Diarrheal diseases          | 6 Diabetes                   | 146 (101 to 198)             | 64.5 (40 to 95.1)               | 6.33 (-10.7 to 26.1)                     |
| 7 Congenital defects          | 7 Hypertensive heart disease | 204 (82.9 to 355)            | 104 (19.7 to 224)               | -5.59 (-47.6 to 64.3)                    |
| 8 Low back pain               | 8 Cirrhosis liver            | 50.2 (13.4 to 89.5)          | 0.597 (-22.2 to 25.6)           | -23.3 (-41.2 to -4.98)                   |
| 9 Dietary iron deficiency     | 9 Headache disorders         | 57.9 (29.1 to 87)            | 5.55 (1.64 to 13.1)             | 0.0824 (-0.0595 to 0.226)                |
| 10 Cirrhosis liver            | 10 COPD                      | 142 (67.7 to 218)            | 62.1 (13.9 to 117)              | -20.2 (-46.9 to 17.5)                    |
| 11 Headache disorders         | 11 Dietary iron deficiency   | 24.4 (2.97 to 49.4)          | -16.9 (-19 to -14.7)            | -11.9 (-12.2 to -11.7)                   |
| 12 Diabetes                   | 12 Age-related hearing loss  | 140 (97.4 to 183)            | 60.8 (47.2 to 75.4)             | -0.865 (-0.96 to -0.765)                 |
| 13 Falls                      | 13 Depressive disorders      | 74.8 (45.9 to 109)           | 16.8 (11.5 to 23.2)             | -2.13 (-2.63 to -1.66)                   |
| 14 Idiopathic epilepsy        | 14 Alzheimer's disease       | 350 (228 to 476)             | 201 (135 to 269)                | 0.847 (-1.89 to 3.15)                    |
| 15 Depressive disorders       | 15 Congenital defects        | -27.8 (-45.8 to -7.7)        | -51.7 (-61.3 to -41.3)          | -36 (-47.2 to -22.2)                     |
| 16 Drowning                   | 16 Falls                     | 26.3 (-1.57 to 62.4)         | -15.5 (-29.9 to 3.61)           | -19 (-30.4 to -4.17)                     |
| 17 Road injuries              | 17 Idiopathic epilepsy       | 28.5 (-27.6 to 105)          | -13.7 (-51.7 to 41.5)           | -9.95 (-49.9 to 45.4)                    |
| 18 Tuberculosis               | 18 Oral disorders            | 111 (73.9 to 149)            | 40.9 (30.8 to 51.2)             | 0.707 (0.393 to 1.06)                    |
| 19 COPD                       | 19 Road injuries             | 22.8 (-32.6 to 100)          | -17.5 (-54.7 to 42.3)           | -18.2 (-55.6 to 44.9)                    |
| 20 Age-related hearing loss   | 20 Blindness and vision loss | 144 (102 to 194)             | 63.3 (47.4 to 77.8)             | -5.22 (-5.65 to -4.75)                   |
| 23 Hypertensive heart disease | 22 Diarrheal diseases        |                              |                                 |                                          |
| 27 Oral disorders             | 32 Drowning                  |                              |                                 |                                          |
| 31 Blindness and vision loss  | 44 Tuberculosis              |                              |                                 |                                          |
| 41 Alzheimer's disease        | 151 COVID-19                 |                              |                                 |                                          |

### Turkmenistan, Reference scenario

**Legend:**  
Communicable, maternal, neonatal and nutritional  
Non-communicable  
Injuries

| Leading Causes 2022           | Leading Causes 2050           | Mean % change number of DALY  | Mean % change all-age DALY rate | Mean % change age-standardized DALY rate |
|-------------------------------|-------------------------------|-------------------------------|---------------------------------|------------------------------------------|
| 1 Ischemic heart disease      | 1 Ischemic heart disease      | 21.4 (-28.1 to 83.5)          | -3.52 (-40.8 to 48.7)           | <b>-48.8 (-72.1 to -9.95)</b>            |
| 2 Stroke                      | 2 Stroke                      | 11.5 (-16.4 to 54.3)          | -11.5 (-34.2 to 23.4)           | <b>-45.7 (-61.9 to -19.3)</b>            |
| 3 Lower respiratory infect    | 3 Cirrhosis liver             | <b>38.4 (6.3 to 80.1)</b>     | 9.87 (-16.7 to 47.5)            | -5.55 (-27.7 to 24.8)                    |
| 4 Cirrhosis liver             | 4 Low back pain               | <b>52.6 (31.4 to 72)</b>      | <b>20.8 (12.8 to 29.4)</b>      | <b>-3.48 (-3.78 to -3.16)</b>            |
| 5 Neonatal disorders          | 5 Neonatal disorders          | -35.3 (-63.2 to 11.9)         | <b>-48.6 (-69.3 to -13.5)</b>   | -34.8 (-60.7 to 6.73)                    |
| 6 COVID-19                    | 6 Diabetes                    | <b>49.2 (18.6 to 91.8)</b>    | 18.4 (-5.15 to 47.4)            | -15.1 (-33.3 to 9.67)                    |
| 7 Congenital defects          | 7 Lower respiratory infect    | <b>-56.3 (-70.1 to -36.8)</b> | <b>-65.3 (-75.4 to -51.3)</b>   | <b>-60.5 (-72 to -43.8)</b>              |
| 8 Low back pain               | 8 Chronic kidney disease      | <b>76 (2.11 to 213)</b>       | 40 (-20.5 to 139)               | 9.57 (-42.5 to 98.6)                     |
| 9 Diabetes                    | 9 Age-related hearing loss    | <b>95.5 (56.7 to 131)</b>     | <b>54.7 (34.2 to 75.5)</b>      | <b>-0.616 (-0.865 to -0.398)</b>         |
| 10 Headache disorders         | 10 Depressive disorders       | <b>43.8 (23.9 to 64.1)</b>    | <b>13.9 (7.84 to 21.3)</b>      | <b>-2.5 (-3.17 to -1.96)</b>             |
| 11 Chronic kidney disease     | 11 Headache disorders         | <b>30.6 (14 to 47)</b>        | 3.46 (-0.613 to 10.9)           | <b>0.586 (0.169 to 0.896)</b>            |
| 12 Depressive disorders       | 12 Alzheimer's disease        | <b>235 (121 to 364)</b>       | <b>165 (82.4 to 244)</b>        | -1.43 (-3.68 to 0.647)                   |
| 13 Cardiomyopathy             | 13 Hypertensive heart disease | <b>126 (33.4 to 264)</b>      | <b>79.4 (5.49 to 192)</b>       | 0.725 (-47 to 76.2)                      |
| 14 Self-harm                  | 14 Congenital defects         | <b>-40.2 (-54.1 to -23.4)</b> | <b>-52.6 (-60.7 to -40.6)</b>   | <b>-39.9 (-48.6 to -26.6)</b>            |
| 15 Dietary iron deficiency    | 15 Cardiomyopathy             | 14.6 (-6.16 to 42)            | -9.25 (-23.4 to 8.4)            | <b>-23.8 (-34.3 to -11.7)</b>            |
| 16 Alcohol use disorders      | 16 Self-harm                  | 12.9 (-22.7 to 62.2)          | -10.4 (-38 to 28)               | -9.78 (-37.7 to 29)                      |
| 17 Age-related hearing loss   | 17 Urinary diseases           | <b>83.2 (31.9 to 154)</b>     | <b>45.5 (6.42 to 102)</b>       | 7.85 (-25.9 to 58.9)                     |
| 18 Road injuries              | 18 Alcohol use disorders      | <b>26 (6.51 to 54)</b>        | -0.116 (-12 to 19.2)            | -4.62 (-15.9 to 11.3)                    |
| 19 Tuberculosis               | 19 Dietary iron deficiency    | 6.45 (-9.25 to 22.4)          | <b>-15.8 (-18.5 to -13)</b>     | <b>-8.91 (-9.54 to -8.3)</b>             |
| 20 Hypertensive heart disease | 20 Blindness and vision loss  | <b>95.6 (56.4 to 133)</b>     | <b>54.8 (34.1 to 75.4)</b>      | <b>-4.39 (-4.73 to -4.08)</b>            |
| 23 Urinary diseases           | 25 Road injuries              |                               |                                 |                                          |
| 27 Blindness and vision loss  | 51 Tuberculosis               |                               |                                 |                                          |
| 38 Alzheimer's disease        | 150 COVID-19                  |                               |                                 |                                          |



### Uzbekistan, Reference scenario

**Legend:**  
Communicable, maternal, neonatal and nutritional  
Non-communicable  
Injuries

| Leading Causes 2022           | Leading Causes 2050           | Mean % change number of DALY  | Mean % change all-age DALY rate | Mean % change age-standardized DALY rate |
|-------------------------------|-------------------------------|-------------------------------|---------------------------------|------------------------------------------|
| 1 Ischemic heart disease      | 1 Ischemic heart disease      | 68.8 (-0.845 to 168)          | 29.6 (-17.9 to 89.2)            | -36.3 (-63.1 to 5.88)                    |
| 2 Lower respiratory infect    | 2 Stroke                      | <b>51 (3.53 to 113)</b>       | 16 (-8.47 to 45.5)              | <b>-38.3 (-53.4 to -16.6)</b>            |
| 3 Stroke                      | 3 Diabetes                    | <b>96.5 (39.4 to 172)</b>     | <b>51.1 (26.4 to 86.6)</b>      | 0.37 (-16.4 to 25.9)                     |
| 4 Neonatal disorders          | 4 Low back pain               | <b>56.2 (15.3 to 100)</b>     | <b>20 (13.6 to 26.7)</b>        | <b>-3.72 (-3.9 to -3.52)</b>             |
| 5 COVID-19                    | 5 Neonatal disorders          | -12 (-49.3 to 55.6)           | -32.6 (-56.3 to 5.28)           | -11.4 (-42.2 to 33.2)                    |
| 6 Diabetes                    | 6 Cirrhosis liver             | 30.5 (-9.33 to 84.4)          | 0.213 (-18.6 to 28.2)           | -16.7 (-34.3 to 7.45)                    |
| 7 Low back pain               | 7 Lower respiratory infect    | <b>-47.2 (-67.3 to -17.1)</b> | <b>-59.5 (-71.1 to -41.4)</b>   | <b>-51.9 (-66.9 to -29.4)</b>            |
| 8 Cirrhosis liver             | 8 Chronic kidney disease      | <b>141 (37.4 to 317)</b>      | <b>85.1 (14.7 to 183)</b>       | 29.7 (-25.1 to 115)                      |
| 9 Congenital defects          | 9 Dietary iron deficiency     | 8.58 (-22.3 to 40.6)          | <b>-16.7 (-19 to -14.5)</b>     | <b>-10 (-10.5 to -9.37)</b>              |
| 10 Dietary iron deficiency    | 10 Depressive disorders       | <b>48.1 (8.93 to 89.2)</b>    | <b>13.7 (8.42 to 20.9)</b>      | <b>-2.26 (-2.53 to -1.96)</b>            |
| 11 Road injuries              | 11 Alzheimer's disease        | <b>297 (148 to 445)</b>       | <b>205 (124 to 289)</b>         | <b>3.11 (0.98 to 5.32)</b>               |
| 12 Headache disorders         | 12 Age-related hearing loss   | <b>109 (50.1 to 168)</b>      | <b>60.8 (43.8 to 78.4)</b>      | <b>-0.71 (-0.814 to -0.592)</b>          |
| 13 Depressive disorders       | 13 Headache disorders         | 31.6 (-1.81 to 68.5)          | 1.03 (-3 to 7.33)               | <b>-0.282 (-0.43 to -0.149)</b>          |
| 14 Self-harm                  | 14 Road injuries              | 7.67 (-49.1 to 117)           | -17.4 (-56.9 to 59.1)           | -17.2 (-57.6 to 61.8)                    |
| 15 Age-related hearing loss   | 15 Hypertensive heart disease | <b>136 (34.9 to 273)</b>      | <b>80.9 (11.2 to 178)</b>       | -5.26 (-44.6 to 50.4)                    |
| 16 Chronic kidney disease     | 16 Self-harm                  | 5.01 (-30.2 to 57.7)          | -19.5 (-42.1 to 12.9)           | -17.4 (-41.2 to 15.9)                    |
| 17 Gynecological diseases     | 17 Congenital defects         | <b>-36.2 (-56.6 to -12.2)</b> | <b>-51.1 (-59.8 to -39.5)</b>   | <b>-36.7 (-48.1 to -21.8)</b>            |
| 18 Falls                      | 18 Blindness and vision loss  | <b>112 (55.4 to 174)</b>      | <b>63.1 (43.8 to 81.5)</b>      | <b>-4.62 (-4.97 to -4.28)</b>            |
| 19 Drowning                   | 19 Other musculoskeletal      | <b>113 (52.3 to 171)</b>      | <b>63.4 (52.1 to 78.7)</b>      | <b>31.7 (27.9 to 36)</b>                 |
| 20 Idiopathic epilepsy        | 20 Oral disorders             | <b>75.4 (29.5 to 122)</b>     | <b>34.7 (24.2 to 46.5)</b>      | <b>1.29 (0.851 to 1.75)</b>              |
| 21 Hypertensive heart disease | 23 Falls                      |                               |                                 |                                          |
| 22 Oral disorders             | 24 Idiopathic epilepsy        |                               |                                 |                                          |
| 24 Blindness and vision loss  | 25 Gynecological diseases     |                               |                                 |                                          |
| 27 Other musculoskeletal      | 41 Drowning                   |                               |                                 |                                          |
| 34 Alzheimer's disease        | 155 COVID-19                  |                               |                                 |                                          |

### Albania, Reference scenario

**Legend:**  
Communicable, maternal, neonatal and nutritional  
Non-communicable  
Injuries

| Leading Causes 2022           | Leading Causes 2050           | Mean % change number of DALY  | Mean % change all-age DALY rate | Mean % change age-standardized DALY rate |
|-------------------------------|-------------------------------|-------------------------------|---------------------------------|------------------------------------------|
| 1 Ischemic heart disease      | 1 Stroke                      | 16.2 (-12.5 to 48.3)          | <b>32.7 (5.73 to 55.3)</b>      | <b>-33.5 (-48.8 to -15.7)</b>            |
| 2 Stroke                      | 2 Ischemic heart disease      | -9.22 (-36.8 to 24.7)         | 3.76 (-25.4 to 41.7)            | <b>-44.3 (-62.8 to -15.3)</b>            |
| 3 COVID-19                    | 3 Low back pain               | 0.104 (-15.5 to 17.3)         | <b>14.3 (9.3 to 19.8)</b>       | <b>-3.03 (-3.24 to -2.82)</b>            |
| 4 Low back pain               | 4 Alzheimer's disease         | <b>119 (74.3 to 178)</b>      | <b>151 (110 to 197)</b>         | <b>13.9 (11.7 to 16)</b>                 |
| 5 Lung cancer                 | 5 Lung cancer                 | 34.8 (-2.34 to 76.6)          | <b>54.2 (14.6 to 97.3)</b>      | 8.19 (-17.2 to 37.1)                     |
| 6 Neonatal disorders          | 6 COPD                        | <b>76 (32.5 to 131)</b>       | <b>101 (52.5 to 154)</b>        | 11.5 (-15.1 to 47.7)                     |
| 7 Age-related hearing loss    | 7 Diabetes                    | <b>36.6 (15 to 61)</b>        | <b>56.1 (42.2 to 70.9)</b>      | <b>11.6 (5.29 to 17.5)</b>               |
| 8 Diabetes                    | 8 Age-related hearing loss    | <b>25.9 (8.83 to 47.1)</b>    | <b>43.8 (31.8 to 56.9)</b>      | <b>-0.597 (-0.719 to -0.481)</b>         |
| 9 Mechanical forces           | 9 Mechanical forces           | -4.13 (-21.9 to 12.8)         | <b>9.42 (1.71 to 17.1)</b>      | -3.84 (-10.2 to 3.25)                    |
| 10 Headache disorders         | 10 Headache disorders         | -12.5 (-27.1 to 5.11)         | -0.22 (-4.51 to 7)              | <b>-0.29 (-0.561 to -0.0496)</b>         |
| 11 Alzheimer's disease        | 11 Liver cancer               | <b>74.9 (32 to 129)</b>       | <b>99.8 (52.8 to 156)</b>       | <b>40.9 (9.48 to 84.4)</b>               |
| 12 COPD                       | 12 Oral disorders             | 14.2 (-1.84 to 32.9)          | <b>30.5 (22.4 to 39.7)</b>      | <b>0.421 (0.229 to 0.604)</b>            |
| 13 Lower respiratory infect   | 13 Chronic kidney disease     | <b>67.1 (19.3 to 124)</b>     | <b>90.9 (40.3 to 154)</b>       | 8.63 (-24.7 to 57.3)                     |
| 14 Falls                      | 14 Lower respiratory infect   | -1.31 (-25.8 to 24.6)         | 12.8 (-12.8 to 38.9)            | <b>-41.7 (-52.7 to -25.6)</b>            |
| 15 Depressive disorders       | 15 Falls                      | 2.14 (-15.9 to 22.6)          | <b>16.7 (2.28 to 36.8)</b>      | <b>-12.2 (-23.8 to -1.55)</b>            |
| 16 Anxiety disorders          | 16 Depressive disorders       | -4.77 (-19.9 to 11)           | <b>8.7 (4.36 to 14)</b>         | <b>-2.13 (-2.57 to -1.64)</b>            |
| 17 Oral disorders             | 17 Hypertensive heart disease | <b>81.5 (17.6 to 161)</b>     | <b>108 (37.4 to 207)</b>        | 7.37 (-30.3 to 63.7)                     |
| 18 Road injuries              | 18 Neonatal disorders         | <b>-48.7 (-65.2 to -23.2)</b> | <b>-41.5 (-55.7 to -12.9)</b>   | -30.4 (-52.3 to 12.4)                    |
| 19 Stomach cancer             | 19 Anxiety disorders          | -10.2 (-25.8 to 5.47)         | 2.43 (-2.47 to 7.56)            | 0.154 (-0.223 to 0.483)                  |
| 20 Other cardiovascular       | 20 Osteoarthritis             | <b>25 (8.21 to 43.6)</b>      | <b>42.9 (33.5 to 54.1)</b>      | <b>2.02 (1.65 to 2.4)</b>                |
| 21 Osteoarthritis             | 21 Other cardiovascular       |                               |                                 |                                          |
| 22 Liver cancer               | 26 Stomach cancer             |                               |                                 |                                          |
| 23 Chronic kidney disease     | 30 Road injuries              |                               |                                 |                                          |
| 30 Hypertensive heart disease | 155 COVID-19                  |                               |                                 |                                          |

### Bosnia and Herzegovina, Reference scenario

**Legend:**  
Communicable, maternal, neonatal and nutritional  
Non-communicable  
Injuries

| Leading Causes 2022           | Leading Causes 2050           | Mean % change number of DALY  | Mean % change all-age DALY rate | Mean % change age-standardized DALY rate |
|-------------------------------|-------------------------------|-------------------------------|---------------------------------|------------------------------------------|
| 1 Ischemic heart disease      | 1 Ischemic heart disease      | -30.4 (-53.6 to 4.07)         | -2 (-35.7 to 48.5)              | <b>-53.1 (-70.4 to -27.5)</b>            |
| 2 Stroke                      | 2 Stroke                      | <b>-32.6 (-46.9 to -11.8)</b> | -5.17 (-26.2 to 22.1)           | <b>-51.3 (-61.3 to -37.4)</b>            |
| 3 COVID-19                    | 3 Diabetes                    | 5.12 (-13.1 to 27.8)          | <b>47.7 (25.6 to 74.2)</b>      | -4.62 (-16.3 to 9.43)                    |
| 4 Diabetes                    | 4 Low back pain               | <b>-18.2 (-32.1 to -4.89)</b> | <b>14.7 (9.42 to 21.2)</b>      | <b>-3.35 (-3.55 to -3.2)</b>             |
| 5 Low back pain               | 5 Alzheimer's disease         | <b>111 (60.1 to 168)</b>      | <b>196 (137 to 266)</b>         | <b>3.59 (1.42 to 5.87)</b>               |
| 6 Lung cancer                 | 6 Lung cancer                 | -7.37 (-37.7 to 29.7)         | 29.9 (-8.05 to 66.9)            | -10.8 (-35.3 to 17.2)                    |
| 7 Colorectal cancer           | 7 COPD                        | 28.5 (-7.45 to 78.3)          | <b>80.7 (30.3 to 142)</b>       | -5.65 (-32.4 to 30.4)                    |
| 8 COPD                        | 8 Colorectal cancer           | 16.4 (-26 to 73.9)            | <b>63.2 (5.6 to 130)</b>        | -2.06 (-34.7 to 35.2)                    |
| 9 Age-related hearing loss    | 9 Age-related hearing loss    | 15.7 (-6.47 to 34.8)          | <b>62.4 (46.8 to 82.6)</b>      | <b>-0.712 (-0.87 to -0.555)</b>          |
| 10 Alzheimer's disease        | 10 Hypertensive heart disease | 48 (-7.7 to 143)              | <b>108 (24.9 to 240)</b>        | -2.02 (-39.1 to 69)                      |
| 11 Headache disorders         | 11 Pancreatic cancer          | 49.1 (-2.71 to 120)           | <b>109 (39.2 to 192)</b>        | 33.2 (-9.43 to 86.6)                     |
| 12 Depressive disorders       | 12 Cardiomyopathy             | 2.72 (-25.7 to 39.8)          | <b>44.1 (11.4 to 83.6)</b>      | <b>-23.4 (-33.7 to -11.1)</b>            |
| 13 Falls                      | 13 Falls                      | -4.48 (-22.7 to 15.9)         | <b>34 (17.9 to 53)</b>          | -7.48 (-17.5 to 3.62)                    |
| 14 Cardiomyopathy             | 14 Chronic kidney disease     | 37.3 (-7.11 to 108)           | <b>93.2 (23.9 to 187)</b>       | 1.83 (-35.3 to 58.3)                     |
| 15 Neonatal disorders         | 15 Oral disorders             | -0.699 (-18.4 to 14.9)        | <b>39.3 (28 to 51.1)</b>        | 0.0205 (-0.259 to 0.278)                 |
| 16 Oral disorders             | 16 Depressive disorders       | <b>-20 (-34 to -5.27)</b>     | <b>12.2 (6.34 to 20.5)</b>      | <b>-2.35 (-2.75 to -2)</b>               |
| 17 Cirrhosis liver            | 17 Osteoarthritis             | 8.96 (-7.67 to 24.9)          | <b>53 (40.1 to 66.1)</b>        | <b>1.65 (1.24 to 2.07)</b>               |
| 18 Hypertensive heart disease | 18 Headache disorders         | <b>-32.7 (-46.7 to -20.7)</b> | -5.78 (-11 to 1.59)             | 0.114 (-0.076 to 0.323)                  |
| 19 Breast cancer              | 19 Breast cancer              | -4.1 (-34.4 to 38.2)          | 34.4 (-2 to 80.1)               | -9.88 (-32.8 to 19.4)                    |
| 20 Anxiety disorders          | 20 Cirrhosis liver            | -20.3 (-36.5 to 3.05)         | 12 (-8.71 to 39.5)              | -8.42 (-24.5 to 15.2)                    |
| 21 Osteoarthritis             | 27 Anxiety disorders          |                               |                                 |                                          |
| 23 Chronic kidney disease     | 30 Neonatal disorders         |                               |                                 |                                          |
| 25 Pancreatic cancer          | 155 COVID-19                  |                               |                                 |                                          |

### Bulgaria, Reference scenario

**Legend:**  
Communicable, maternal, neonatal and nutritional  
Non-communicable  
Injuries

| Leading Causes 2022          | Leading Causes 2050          | Mean % change number of DALY   | Mean % change all-age DALY rate | Mean % change age-standardized DALY rate |
|------------------------------|------------------------------|--------------------------------|---------------------------------|------------------------------------------|
| 1 Ischemic heart disease     | 1 Hypertensive heart disease | 9.37 (-20.9 to 41.7)           | <b>50.7 (7.09 to 95.4)</b>      | 13.6 (-22.5 to 58)                       |
| 2 Stroke                     | 2 Stroke                     | <b>-48.3 (-56.6 to -38.3)</b>  | <b>-28.8 (-39.7 to -16.2)</b>   | <b>-45.9 (-55.3 to -35.5)</b>            |
| 3 COVID-19                   | 3 Ischemic heart disease     | <b>-51 (-64.3 to -34)</b>      | <b>-32.5 (-50.9 to -10.6)</b>   | <b>-49.2 (-65.4 to -27.9)</b>            |
| 4 Hypertensive heart disease | 4 Low back pain              | <b>-24.8 (-33.7 to -16.3)</b>  | <b>3.44 (0.233 to 6.92)</b>     | <b>-2.04 (-2.16 to -1.91)</b>            |
| 5 Low back pain              | 5 Diabetes                   | <b>-15 (-25.8 to -3.44)</b>    | <b>17 (6.88 to 26.4)</b>        | -1.09 (-9.11 to 6.85)                    |
| 6 Lung cancer                | 6 Lung cancer                | <b>-28.2 (-47.4 to -6.58)</b>  | -1.24 (-23.6 to 23.1)           | -14.4 (-34.3 to 4.69)                    |
| 7 Diabetes                   | 7 Colorectal cancer          | -11.1 (-37.1 to 22.1)          | 22.2 (-9.03 to 68.6)            | -1.05 (-25.6 to 31.4)                    |
| 8 Cirrhosis liver            | 8 Alzheimer's disease        | 14.5 (-7.21 to 40.1)           | <b>57.5 (33.8 to 79.9)</b>      | <b>2.14 (0.033 to 4.15)</b>              |
| 9 Colorectal cancer          | 9 Cirrhosis liver            | <b>-27.4 (-40 to -14.3)</b>    | 0.0175 (-14.3 to 16.5)          | -2.67 (-18 to 14.7)                      |
| 10 Falls                     | 10 Chronic kidney disease    | 5.6 (-24.3 to 33.1)            | <b>45.5 (4.31 to 85.3)</b>      | 15.5 (-17.9 to 53.9)                     |
| 11 Alzheimer's disease       | 11 Age-related hearing loss  | <b>-11.7 (-24.1 to -0.706)</b> | <b>21.5 (13.4 to 28.7)</b>      | <b>-0.461 (-0.568 to -0.333)</b>         |
| 12 Age-related hearing loss  | 12 COPD                      | -12.1 (-30.8 to 8.95)          | 21 (-3.56 to 46.7)              | -7.32 (-28.9 to 15.4)                    |
| 13 COPD                      | 13 Falls                     | <b>-29 (-39.5 to -15.7)</b>    | <b>-2.21 (-13.1 to 10.8)</b>    | <b>-14 (-24.5 to -3.84)</b>              |
| 14 Chronic kidney disease    | 14 Pancreatic cancer         | 11.2 (-21.3 to 49.1)           | <b>52.9 (13.9 to 106)</b>       | 29.3 (-5.07 to 69.7)                     |
| 15 Breast cancer             | 15 Breast cancer             | -18.6 (-37.8 to 3.49)          | 11.9 (-9.42 to 39.2)            | -2.93 (-19 to 18.2)                      |
| 16 Lower respiratory infect  | 16 Depressive disorders      | <b>-24.3 (-33.5 to -15.8)</b>  | <b>4.13 (1.06 to 7.45)</b>      | <b>-1.34 (-1.69 to -1.02)</b>            |
| 17 Headache disorders        | 17 Lower respiratory infect  | <b>-31.1 (-43.1 to -18.5)</b>  | -5.05 (-18.8 to 11.7)           | <b>-34 (-45.7 to -21.7)</b>              |
| 18 Depressive disorders      | 18 Headache disorders        | <b>-29.6 (-37.5 to -22.3)</b>  | <b>-3.1 (-5.48 to -0.233)</b>   | <b>0.262 (0.117 to 0.377)</b>            |
| 19 Mechanical forces         | 19 Mechanical forces         | <b>-28.3 (-36.7 to -19.6)</b>  | -1.33 (-8 to 5.19)              | -6.34 (-13.7 to 0.715)                   |
| 20 Other cardiovascular      | 20 Osteoarthritis            | <b>-13.9 (-24.3 to -3.87)</b>  | <b>18.5 (12.9 to 23.9)</b>      | <b>0.947 (0.604 to 1.27)</b>             |
| 22 Pancreatic cancer         | 22 Other cardiovascular      |                                |                                 |                                          |
| 24 Osteoarthritis            | 150 COVID-19                 |                                |                                 |                                          |

### Croatia, Reference scenario

**Legend:**  
Communicable, maternal, neonatal and nutritional  
Non-communicable  
Injuries

| Leading Causes 2022           | Leading Causes 2050           | Mean % change number of DALY  | Mean % change all-age DALY rate | Mean % change age-standardized DALY rate |
|-------------------------------|-------------------------------|-------------------------------|---------------------------------|------------------------------------------|
| 1 Ischemic heart disease      | 1 Ischemic heart disease      | <b>-35 (-53.4 to -13.3)</b>   | -7.5 (-32 to 22.6)              | <b>-49.8 (-63.6 to -31)</b>              |
| 2 COVID-19                    | 2 Diabetes                    | 10.7 (-6.36 to 28.1)          | <b>57.5 (43.1 to 72.6)</b>      | <b>12.7 (4.19 to 20.8)</b>               |
| 3 Stroke                      | 3 Stroke                      | <b>-36 (-47.4 to -20.6)</b>   | -8.91 (-23 to 6.44)             | <b>-45.4 (-53.4 to -35.7)</b>            |
| 4 Low back pain               | 4 Lung cancer                 | -7.9 (-29.9 to 16.6)          | <b>31 (5.79 to 65.7)</b>        | -6.73 (-24.3 to 16.6)                    |
| 5 Lung cancer                 | 5 Low back pain               | <b>-20.8 (-33.3 to -9.12)</b> | <b>12.5 (7.64 to 17.1)</b>      | <b>-2.56 (-2.69 to -2.45)</b>            |
| 6 Diabetes                    | 6 Alzheimer's disease         | <b>43.6 (16.6 to 69.3)</b>    | <b>104 (78.4 to 131)</b>        | 1.63 (-0.622 to 3.8)                     |
| 7 Falls                       | 7 Falls                       | -0.297 (-18.2 to 18.4)        | <b>41.8 (26.1 to 60.8)</b>      | <b>-13.4 (-21.2 to -5.84)</b>            |
| 8 Colorectal cancer           | 8 Colorectal cancer           | 4.71 (-25.8 to 44.9)          | <b>48.9 (5.08 to 95.2)</b>      | -6.06 (-31.3 to 22.2)                    |
| 9 Alzheimer's disease         | 9 COPD                        | 18 (-9.53 to 46.8)            | <b>67.9 (35.7 to 106)</b>       | -4.17 (-23.5 to 17.2)                    |
| 10 COPD                       | 10 Age-related hearing loss   | 0.395 (-16.4 to 15.1)         | <b>42.8 (34.3 to 52.6)</b>      | <b>-0.518 (-0.653 to -0.374)</b>         |
| 11 Age-related hearing loss   | 11 Chronic kidney disease     | <b>47.7 (5.22 to 99.2)</b>    | <b>110 (54.7 to 175)</b>        | 16.4 (-13.3 to 54.7)                     |
| 12 Depressive disorders       | 12 Hypertensive heart disease | 37.5 (-5.87 to 101)           | <b>95.7 (35.1 to 188)</b>       | 4 (-31.9 to 62.9)                        |
| 13 Cirrhosis liver            | 13 Pancreatic cancer          | 30.5 (-6.62 to 75.5)          | <b>85.5 (37.4 to 136)</b>       | 24 (-5.54 to 55.6)                       |
| 14 Headache disorders         | 14 Depressive disorders       | <b>-22.2 (-34.4 to -10.6)</b> | <b>10.6 (6.37 to 15.5)</b>      | <b>-1.84 (-2.15 to -1.56)</b>            |
| 15 Breast cancer              | 15 Prostate cancer            | 30.4 (-0.569 to 64.9)         | <b>85.4 (51.1 to 127)</b>       | 9.31 (-6.36 to 26.8)                     |
| 16 Oral disorders             | 16 Breast cancer              | -10.4 (-32.8 to 14.4)         | <b>27.4 (1.59 to 58.5)</b>      | -14 (-29.9 to 2.79)                      |
| 17 Chronic kidney disease     | 17 Osteoarthritis             | -2.23 (-17.3 to 11)           | <b>39 (32.6 to 46.4)</b>        | <b>1.01 (0.701 to 1.31)</b>              |
| 18 Osteoarthritis             | 18 Oral disorders             | -10.5 (-25.6 to 3.65)         | <b>27.2 (19.8 to 35.3)</b>      | <b>0.257 (0.079 to 0.422)</b>            |
| 19 Self-harm                  | 19 Cirrhosis liver            | <b>-33.9 (-46.1 to -19)</b>   | -6.05 (-18.4 to 8.23)           | <b>-24.1 (-34.9 to -12.8)</b>            |
| 20 Anxiety disorders          | 20 Headache disorders         | <b>-32.4 (-44.5 to -20.8)</b> | -3.97 (-8.37 to 2.99)           | 0.113 (-0.0315 to 0.237)                 |
| 21 Hypertensive heart disease | 25 Anxiety disorders          |                               |                                 |                                          |
| 23 Pancreatic cancer          | 28 Self-harm                  |                               |                                 |                                          |
| 24 Prostate cancer            | 153 COVID-19                  |                               |                                 |                                          |

### Czechia, Reference scenario

**Legend:**

Communicable, maternal, neonatal and nutritional  
Non-communicable  
Injuries

| Leading Causes 2022           | Leading Causes 2050           | Mean % change number of DALY  | Mean % change all-age DALY rate | Mean % change age-standardized DALY rate |
|-------------------------------|-------------------------------|-------------------------------|---------------------------------|------------------------------------------|
| 1 Ischemic heart disease      | 1 Ischemic heart disease      | <b>-25.3 (-44.8 to -2.06)</b> | -17.8 (-38.7 to 10.1)           | <b>-51 (-64.2 to -31.8)</b>              |
| 2 Low back pain               | 2 Low back pain               | -4.59 (-12.9 to 7.29)         | <b>4.99 (1 to 9.06)</b>         | <b>-1.73 (-1.83 to -1.63)</b>            |
| 3 Stroke                      | 3 Diabetes                    | <b>20.4 (6.76 to 36.5)</b>    | <b>32.5 (21.7 to 45.1)</b>      | 1.14 (-5.9 to 9.63)                      |
| 4 Diabetes                    | 4 Alzheimer's disease         | <b>71.2 (45.2 to 103)</b>     | <b>88.3 (66.5 to 112)</b>       | <b>-2.35 (-4.37 to -0.101)</b>           |
| 5 COVID-19                    | 5 Stroke                      | <b>-21.4 (-34.3 to -8.81)</b> | <b>-13.5 (-26.5 to -1.07)</b>   | <b>-41.9 (-50.8 to -32.9)</b>            |
| 6 Lung cancer                 | 6 Lung cancer                 | 0.604 (-20 to 28.4)           | 10.7 (-9.81 to 35.1)            | -15.5 (-31.6 to 1.9)                     |
| 7 Falls                       | 7 Falls                       | 12.8 (-4.75 to 30.2)          | <b>24.2 (9.44 to 40.1)</b>      | <b>-13.8 (-22.1 to -3.96)</b>            |
| 8 Colorectal cancer           | 8 COPD                        | 19.7 (-6.78 to 46.8)          | <b>31.8 (2.55 to 61.4)</b>      | -10.4 (-30 to 11)                        |
| 9 Alzheimer's disease         | 9 Colorectal cancer           | 13.7 (-19.9 to 56)            | 25.1 (-7.32 to 66.9)            | -10.5 (-34.6 to 19.6)                    |
| 10 COPD                       | 10 Age-related hearing loss   | <b>19.9 (7.91 to 35.6)</b>    | <b>31.9 (24.5 to 39.3)</b>      | <b>-0.336 (-0.489 to -0.178)</b>         |
| 11 Age-related hearing loss   | 11 Pancreatic cancer          | <b>41.6 (3.56 to 85.5)</b>    | <b>55.7 (16.9 to 103)</b>       | 18.5 (-10.7 to 54.6)                     |
| 12 Lower respiratory infect   | 12 Lower respiratory infect   | 3.14 (-17.1 to 25.8)          | 13.5 (-4.4 to 35.9)             | <b>-29.5 (-40.5 to -17.6)</b>            |
| 13 Cirrhosis liver            | 13 Depressive disorders       | -5.61 (-14.2 to 5.4)          | <b>3.88 (0.637 to 7.19)</b>     | <b>-1.24 (-1.47 to -1.03)</b>            |
| 14 Headache disorders         | 14 Headache disorders         | <b>-13.7 (-21.5 to -4.6)</b>  | <b>-5 (-7.88 to -1.38)</b>      | <b>0.199 (0.084 to 0.271)</b>            |
| 15 Depressive disorders       | 15 Osteoarthritis             | <b>13 (2.45 to 25.5)</b>      | <b>24.4 (19.3 to 29.4)</b>      | <b>0.541 (0.311 to 0.794)</b>            |
| 16 Pancreatic cancer          | 16 Oral disorders             | 7.43 (-3.52 to 21.6)          | <b>18.2 (12 to 24.7)</b>        | 0.0618 (-0.0766 to 0.196)                |
| 17 Oral disorders             | 17 Hypertensive heart disease | <b>53.8 (0.504 to 122)</b>    | <b>69.3 (14.5 to 153)</b>       | 3.81 (-31.6 to 54.1)                     |
| 18 Osteoarthritis             | 18 Cirrhosis liver            | <b>-25 (-38.2 to -9.85)</b>   | <b>-17.5 (-29.7 to -2.86)</b>   | <b>-19.7 (-32.4 to -5.87)</b>            |
| 19 Self-harm                  | 19 Atrial fibrillation        | <b>62.2 (36.7 to 92.2)</b>    | <b>78.5 (54.9 to 104)</b>       | 7.05 (-2.62 to 17.9)                     |
| 20 Mechanical forces          | 20 Chronic kidney disease     | <b>99.6 (46.9 to 160)</b>     | <b>120 (59.8 to 187)</b>        | 33.9 (-4.33 to 80.1)                     |
| 25 Hypertensive heart disease | 23 Mechanical forces          |                               |                                 |                                          |
| 29 Atrial fibrillation        | 27 Self-harm                  |                               |                                 |                                          |
| 34 Chronic kidney disease     | 151 COVID-19                  |                               |                                 |                                          |

### Hungary, Reference scenario

**Legend:**  
Communicable, maternal, neonatal and nutritional  
Non-communicable  
Injuries

| Leading Causes 2022           | Leading Causes 2050          | Mean % change number of DALY  | Mean % change all-age DALY rate | Mean % change age-standardized DALY rate |
|-------------------------------|------------------------------|-------------------------------|---------------------------------|------------------------------------------|
| 1 Ischemic heart disease      | 1 Ischemic heart disease     | <b>-39.5 (-55.9 to -16.1)</b> | <b>-36.7 (-53.6 to -15.3)</b>   | <b>-54.1 (-67.8 to -34.2)</b>            |
| 2 COVID-19                    | 2 Low back pain              | -4.38 (-16.1 to 7.6)          | 0.0424 (-3.25 to 3.15)          | <b>-2.4 (-2.53 to -2.28)</b>             |
| 3 Stroke                      | 3 Lung cancer                | -10.6 (-32.4 to 13.2)         | -6.46 (-26.7 to 16)             | -15.3 (-33.2 to 4.32)                    |
| 4 Low back pain               | 4 Diabetes                   | <b>16.8 (0.601 to 33.7)</b>   | <b>22.2 (12.3 to 31.9)</b>      | <b>10.6 (1.96 to 19)</b>                 |
| 5 Lung cancer                 | 5 Hypertensive heart disease | <b>45.5 (3.52 to 104)</b>     | <b>52.2 (7.97 to 118)</b>       | 15.8 (-20.3 to 69)                       |
| 6 COPD                        | 6 Stroke                     | <b>-35.8 (-47.2 to -21)</b>   | <b>-32.8 (-42.9 to -21.3)</b>   | <b>-46.6 (-54.6 to -36.2)</b>            |
| 7 Diabetes                    | 7 COPD                       | -0.156 (-23.2 to 28.9)        | 4.54 (-17.9 to 32.5)            | -15.1 (-34.2 to 10.1)                    |
| 8 Colorectal cancer           | 8 Alzheimer's disease        | <b>58.1 (28.8 to 91.5)</b>    | <b>65.3 (43.1 to 88.5)</b>      | <b>3.27 (1.14 to 5.33)</b>               |
| 9 Falls                       | 9 Colorectal cancer          | 7.56 (-27.1 to 45.7)          | 12.4 (-19.5 to 45.4)            | -5.44 (-30.8 to 23.9)                    |
| 10 Hypertensive heart disease | 10 Falls                     | 11.4 (-5.34 to 30.5)          | <b>16.5 (3.33 to 29.5)</b>      | -7.11 (-16.5 to 1.26)                    |
| 11 Cirrhosis liver            | 11 Age-related hearing loss  | 12.1 (-2.55 to 27.4)          | <b>17.3 (10.5 to 24.8)</b>      | <b>-0.432 (-0.613 to -0.238)</b>         |
| 12 Alzheimer's disease        | 12 Cirrhosis liver           | <b>-21.7 (-35.4 to -5.48)</b> | <b>-18 (-29.4 to -2.68)</b>     | <b>-18.5 (-30.4 to -4.36)</b>            |
| 13 Age-related hearing loss   | 13 Pancreatic cancer         | 35.9 (-2.77 to 85.4)          | <b>42.1 (2.04 to 92.9)</b>      | 24.2 (-8.32 to 64.7)                     |
| 14 Headache disorders         | 14 Depressive disorders      | -4.65 (-15.8 to 6.4)          | -0.243 (-2.72 to 2.31)          | <b>-1.95 (-2.24 to -1.65)</b>            |
| 15 Depressive disorders       | 15 Headache disorders        | -7.94 (-18.3 to 3.32)         | <b>-3.67 (-5.9 to -1.63)</b>    | <b>-0.115 (-0.226 to -0.00868)</b>       |
| 16 Self-harm                  | 16 Chronic kidney disease    | <b>57.8 (16.1 to 110)</b>     | <b>65.2 (26 to 111)</b>         | 17.8 (-16.5 to 60.1)                     |
| 17 Breast cancer              | 17 Breast cancer             | -3.81 (-28.6 to 21.8)         | 0.622 (-22.5 to 28.1)           | -12.9 (-31.2 to 9.02)                    |
| 18 Cardiomyopathy             | 18 Osteoarthritis            | 7.07 (-5.76 to 21.4)          | <b>12 (6.6 to 17.1)</b>         | <b>0.62 (0.263 to 0.958)</b>             |
| 19 Pancreatic cancer          | 19 Oral disorders            | 5.57 (-7.97 to 20)            | <b>10.4 (5.45 to 15.8)</b>      | -0.0671 (-0.226 to 0.0947)               |
| 20 Osteoarthritis             | 20 Self-harm                 | <b>-23.5 (-37.6 to -5.41)</b> | <b>-20 (-31.8 to -4.31)</b>     | <b>-23.2 (-35.3 to -7.71)</b>            |
| 22 Oral disorders             | 23 Cardiomyopathy            |                               |                                 |                                          |
| 27 Chronic kidney disease     | 151 COVID-19                 |                               |                                 |                                          |

### Montenegro, Reference scenario

**Legend:**  
Communicable, maternal, neonatal and nutritional  
Non-communicable  
Injuries

| Leading Causes 2022           | Leading Causes 2050           | Mean % change number of DALY  | Mean % change all-age DALY rate | Mean % change age-standardized DALY rate |
|-------------------------------|-------------------------------|-------------------------------|---------------------------------|------------------------------------------|
| 1 Ischemic heart disease      | 1 Stroke                      | -6.2 (-24.7 to 14.6)          | 10.6 (-7.48 to 32.1)            | <b>-35.6 (-48.5 to -20.7)</b>            |
| 2 Stroke                      | 2 Ischemic heart disease      | <b>-31.9 (-52.8 to -5.02)</b> | -19.8 (-41.9 to 7.97)           | <b>-50.3 (-65.5 to -29.4)</b>            |
| 3 COVID-19                    | 3 Lung cancer                 | -3.62 (-29.2 to 23.9)         | 13.5 (-11.2 to 41.7)            | -14.9 (-33 to 6.66)                      |
| 4 Lung cancer                 | 4 Diabetes                    | <b>24.9 (4.87 to 45.8)</b>    | <b>47.2 (34 to 61.6)</b>        | 9.38 (-1.23 to 20)                       |
| 5 Low back pain               | 5 Low back pain               | -6.1 (-19 to 7.94)            | <b>10.6 (7.49 to 14.1)</b>      | <b>-2.49 (-2.64 to -2.35)</b>            |
| 6 Diabetes                    | 6 Alzheimer's disease         | <b>65.2 (34.2 to 98.2)</b>    | <b>94.6 (69.7 to 123)</b>       | <b>2.02 (0.0448 to 4.23)</b>             |
| 7 Falls                       | 7 Chronic kidney disease      | <b>56 (12.8 to 106)</b>       | <b>83.9 (36.3 to 144)</b>       | 19.2 (-14.7 to 63.9)                     |
| 8 Cardiomyopathy              | 8 Colorectal cancer           | 22.3 (-16.6 to 71.8)          | <b>43.9 (0.902 to 90.8)</b>     | -1.86 (-30.6 to 29.4)                    |
| 9 Headache disorders          | 9 Falls                       | -3.03 (-20.5 to 18.7)         | <b>14.2 (0.559 to 27.8)</b>     | <b>-10.9 (-21.2 to -0.849)</b>           |
| 10 Age-related hearing loss   | 10 Age-related hearing loss   | <b>16 (0.519 to 35.1)</b>     | <b>36.7 (29.4 to 44.8)</b>      | <b>-0.466 (-0.577 to -0.369)</b>         |
| 11 Colorectal cancer          | 11 Cardiomyopathy             | -2.6 (-23.7 to 20.4)          | 14.7 (-3.76 to 36.1)            | <b>-23.3 (-33.4 to -12.7)</b>            |
| 12 Breast cancer              | 12 Atrial fibrillation        | <b>76.4 (41.7 to 118)</b>     | <b>108 (76.1 to 147)</b>        | <b>12.9 (0.18 to 29)</b>                 |
| 13 Self-harm                  | 13 Breast cancer              | 6.91 (-21.7 to 38.4)          | 25.9 (-1.52 to 59.6)            | -6.4 (-26.6 to 18.5)                     |
| 14 Depressive disorders       | 14 Pancreatic cancer          | <b>54.2 (6.14 to 112)</b>     | <b>81.6 (27.6 to 142)</b>       | 29.3 (-6.72 to 70)                       |
| 15 Chronic kidney disease     | 15 Headache disorders         | <b>-16.4 (-27.4 to -3.12)</b> | -1.54 (-4.5 to 3.73)            | <b>-0.21 (-0.359 to -0.0748)</b>         |
| 16 Alzheimer's disease        | 16 Depressive disorders       | -8.36 (-19.8 to 6.04)         | <b>7.94 (4.23 to 12.1)</b>      | <b>-1.96 (-2.28 to -1.65)</b>            |
| 17 Anxiety disorders          | 17 Prostate cancer            | <b>47.3 (13.1 to 85.2)</b>    | <b>73.6 (41.7 to 113)</b>       | 6.41 (-11.2 to 25.8)                     |
| 18 Oral disorders             | 18 Brain cancer               | <b>32.4 (12 to 56.3)</b>      | <b>56 (43.3 to 72.9)</b>        | <b>32.8 (22.9 to 44.6)</b>               |
| 19 Neonatal disorders         | 19 Oral disorders             | 5.96 (-7.81 to 23.6)          | <b>24.8 (18.8 to 31.7)</b>      | 0.182 (-0.0015 to 0.34)                  |
| 20 Road injuries              | 20 Hypertensive heart disease | <b>61.6 (9.48 to 128)</b>     | <b>90.6 (31.7 to 176)</b>       | 10.6 (-27 to 65.9)                       |
| 22 Pancreatic cancer          | 22 Self-harm                  |                               |                                 |                                          |
| 24 Atrial fibrillation        | 23 Anxiety disorders          |                               |                                 |                                          |
| 25 Brain cancer               | 27 Road injuries              |                               |                                 |                                          |
| 26 Prostate cancer            | 28 Neonatal disorders         |                               |                                 |                                          |
| 30 Hypertensive heart disease | 147 COVID-19                  |                               |                                 |                                          |



### North Macedonia, Reference scenario

**Legend:**  
Communicable, maternal, neonatal and nutritional  
Non-communicable  
Injuries

| Leading Causes 2022          | Leading Causes 2050          | Mean % change number of DALY  | Mean % change all-age DALY rate | Mean % change age-standardized DALY rate |
|------------------------------|------------------------------|-------------------------------|---------------------------------|------------------------------------------|
| 1 COVID-19                   | 1 Stroke                     | -12 (-31.8 to 12.1)           | 9.47 (-10.2 to 28)              | <b>-45.1 (-56.4 to -31.6)</b>            |
| 2 Stroke                     | 2 Ischemic heart disease     | -15.4 (-40.2 to 12.8)         | 5.41 (-24.6 to 38.1)            | <b>-44.1 (-63.2 to -21.3)</b>            |
| 3 Ischemic heart disease     | 3 Diabetes                   | <b>30.1 (3.61 to 60.5)</b>    | <b>61.8 (43.3 to 83.1)</b>      | -0.0633 (-10.9 to 11.2)                  |
| 4 Diabetes                   | 4 Low back pain              | -4.78 (-23.8 to 15.1)         | <b>18.3 (14.1 to 23.1)</b>      | <b>-2.52 (-2.66 to -2.39)</b>            |
| 5 Low back pain              | 5 Lung cancer                | 20.4 (-17 to 72.5)            | <b>49.2 (18.5 to 95.3)</b>      | -4.13 (-23.7 to 24.1)                    |
| 6 Lung cancer                | 6 Hypertensive heart disease | <b>98 (31.3 to 182)</b>       | <b>147 (63.1 to 241)</b>        | 14.3 (-30.1 to 69.3)                     |
| 7 Hypertensive heart disease | 7 COPD                       | <b>57.8 (13 to 109)</b>       | <b>96.3 (49.3 to 144)</b>       | 4.58 (-21.3 to 34.6)                     |
| 8 Headache disorders         | 8 Colorectal cancer          | 42.5 (-8.85 to 113)           | <b>76.7 (25.4 to 145)</b>       | 2.54 (-24.3 to 42.2)                     |
| 9 COPD                       | 9 Alzheimer's disease        | <b>106 (53.6 to 163)</b>      | <b>155 (121 to 195)</b>         | <b>12.7 (10 to 15.6)</b>                 |
| 10 Colorectal cancer         | 10 Age-related hearing loss  | 24.4 (-1.56 to 50)            | <b>54.5 (45.8 to 65)</b>        | <b>-0.576 (-0.715 to -0.442)</b>         |
| 11 Age-related hearing loss  | 11 Breast cancer             | 16.9 (-17.7 to 61.1)          | <b>44.9 (15.6 to 82.3)</b>      | -5.75 (-25 to 18.5)                      |
| 12 Cardiomyopathy            | 12 Cardiomyopathy            | 10.1 (-23.8 to 45.1)          | <b>36.8 (9.31 to 77.1)</b>      | <b>-23.6 (-34.5 to -10.9)</b>            |
| 13 Falls                     | 13 Pancreatic cancer         | <b>88.4 (22.7 to 168)</b>     | <b>134 (70.9 to 227)</b>        | <b>41.2 (2.99 to 95.3)</b>               |
| 14 Breast cancer             | 14 Chronic kidney disease    | <b>68.4 (12.8 to 135)</b>     | <b>110 (47.9 to 178)</b>        | 18.3 (-18.2 to 67.7)                     |
| 15 Neonatal disorders        | 15 Liver cancer              | <b>77.4 (32 to 138)</b>       | <b>121 (70.6 to 175)</b>        | <b>36.6 (5.29 to 76.6)</b>               |
| 16 Depressive disorders      | 16 Headache disorders        | <b>-20.7 (-36.6 to -4.99)</b> | -1.44 (-7.09 to 7.38)           | <b>0.296 (0.151 to 0.388)</b>            |
| 17 Oral disorders            | 17 Falls                     | -4.89 (-27.6 to 23.3)         | <b>18 (2.62 to 35)</b>          | <b>-18.7 (-27.2 to -8.52)</b>            |
| 18 Stomach cancer            | 18 Oral disorders            | 11.8 (-8.54 to 34.3)          | <b>38.9 (31.3 to 46.9)</b>      | <b>0.176 (0.00536 to 0.341)</b>          |
| 19 Anxiety disorders         | 19 Brain cancer              | <b>43.3 (13.4 to 82.4)</b>    | <b>77.9 (60.7 to 97.2)</b>      | <b>28.6 (19.6 to 39.1)</b>               |
| 20 Mechanical forces         | 20 Depressive disorders      | -8.44 (-27.1 to 10.2)         | <b>13.7 (7.75 to 20.2)</b>      | <b>-1.47 (-1.75 to -1.2)</b>             |
| 21 Alzheimer's disease       | 22 Stomach cancer            |                               |                                 |                                          |
| 22 Chronic kidney disease    | 23 Mechanical forces         |                               |                                 |                                          |
| 25 Brain cancer              | 24 Anxiety disorders         |                               |                                 |                                          |
| 27 Pancreatic cancer         | 28 Neonatal disorders        |                               |                                 |                                          |
| 28 Liver cancer              | 154 COVID-19                 |                               |                                 |                                          |

### Poland, Reference scenario

**Legend:**  
 Communicable, maternal, neonatal and nutritional  
 Non-communicable  
 Injuries

| Leading Causes 2022           | Leading Causes 2050           | Mean % change number of DALY   | Mean % change all-age DALY rate | Mean % change age-standardized DALY rate |
|-------------------------------|-------------------------------|--------------------------------|---------------------------------|------------------------------------------|
| 1 Ischemic heart disease      | 1 Ischemic heart disease      | <b>-30.3 (-48.9 to -9.57)</b>  | -17.6 (-38.9 to 5.62)           | <b>-55 (-67 to -41)</b>                  |
| 2 COVID-19                    | 2 Lung cancer                 | 20.6 (-5.44 to 45.2)           | <b>42.6 (14.1 to 73)</b>        | -0.717 (-20.6 to 19.9)                   |
| 3 Stroke                      | 3 Low back pain               | -5.74 (-15.8 to 3.89)          | <b>11.4 (7.21 to 15.5)</b>      | <b>-2.49 (-2.59 to -2.39)</b>            |
| 4 Low back pain               | 4 Diabetes                    | <b>21.1 (8.2 to 36.3)</b>      | <b>43.2 (32.6 to 52)</b>        | 2.63 (-3.73 to 8.54)                     |
| 5 Lung cancer                 | 5 Stroke                      | <b>-27.4 (-38.4 to -14.2)</b>  | -14.2 (-26.8 to 1.17)           | <b>-48.2 (-55.2 to -39.7)</b>            |
| 6 Diabetes                    | 6 Alzheimer's disease         | <b>78.7 (57.3 to 104)</b>      | <b>111 (92.6 to 134)</b>        | <b>-2.03 (-3.8 to -0.0633)</b>           |
| 7 Colorectal cancer           | 7 Colorectal cancer           | 22.3 (-8.88 to 62.8)           | <b>44.6 (7.48 to 90.1)</b>      | -6.87 (-30.2 to 23.1)                    |
| 8 Falls                       | 8 Falls                       | 3.64 (-12.5 to 21.3)           | <b>22.5 (6.05 to 36.7)</b>      | <b>-14.4 (-25.2 to -5.1)</b>             |
| 9 Alcohol use disorders       | 9 Age-related hearing loss    | <b>20.9 (8.87 to 34.2)</b>     | <b>42.9 (36.7 to 49.2)</b>      | <b>-0.559 (-0.633 to -0.479)</b>         |
| 10 Lower respiratory infect   | 10 Lower respiratory infect   | 7.92 (-13.3 to 29.5)           | <b>27.6 (3.85 to 50.8)</b>      | <b>-25.1 (-37 to -12.4)</b>              |
| 11 Alzheimer's disease        | 11 Hypertensive heart disease | <b>59.3 (7.83 to 117)</b>      | <b>88.3 (28.6 to 157)</b>       | 7.66 (-25.8 to 47.3)                     |
| 12 Age-related hearing loss   | 12 COPD                       | 18 (-9.33 to 51.1)             | <b>39.4 (9.54 to 66.7)</b>      | -14.3 (-31.7 to 3.58)                    |
| 13 Cirrhosis liver            | 13 Alcohol use disorders      | <b>-18.6 (-31.4 to -1)</b>     | -3.77 (-15.8 to 11.2)           | -4.16 (-15.6 to 10.2)                    |
| 14 Headache disorders         | 14 Cirrhosis liver            | <b>-15.2 (-27.8 to -0.902)</b> | 0.285 (-12.5 to 14)             | -7.45 (-20.5 to 5.1)                     |
| 15 Self-harm                  | 15 Oral disorders             | 8.69 (-4.02 to 19.9)           | <b>28.5 (21.6 to 34.9)</b>      | <b>0.245 (0.091 to 0.404)</b>            |
| 16 COPD                       | 16 Pancreatic cancer          | <b>49.4 (13.1 to 88.8)</b>     | <b>76.7 (35 to 131)</b>         | 22.4 (-6.07 to 56.6)                     |
| 17 Oral disorders             | 17 Breast cancer              | 7.75 (-18 to 35.4)             | <b>27.4 (0.354 to 60.3)</b>     | -12.3 (-29.9 to 6.49)                    |
| 18 Breast cancer              | 18 Headache disorders         | <b>-18.1 (-25.8 to -10.7)</b>  | -3.21 (-6.68 to 2.64)           | 0.0714 (-0.0346 to 0.162)                |
| 19 Road injuries              | 19 Osteoarthritis             | <b>19.5 (7.67 to 31.3)</b>     | <b>41.3 (35.9 to 46.4)</b>      | <b>1.13 (0.755 to 1.48)</b>              |
| 20 Hypertensive heart disease | 20 Prostate cancer            | <b>48 (20.3 to 81.4)</b>       | <b>75 (45.5 to 110)</b>         | 5.79 (-8.94 to 22.8)                     |
| 22 Osteoarthritis             | 23 Self-harm                  |                                |                                 |                                          |
| 26 Pancreatic cancer          | 26 Road injuries              |                                |                                 |                                          |
| 29 Prostate cancer            | 151 COVID-19                  |                                |                                 |                                          |

### Romania, Reference scenario

**Legend:**  
 Communicable, maternal, neonatal and nutritional  
 Non-communicable  
 Injuries

| Leading Causes 2022          | Leading Causes 2050          | Mean % change number of DALY  | Mean % change all-age DALY rate | Mean % change age-standardized DALY rate |
|------------------------------|------------------------------|-------------------------------|---------------------------------|------------------------------------------|
| 1 Ischemic heart disease     | 1 Ischemic heart disease     | <b>-40 (-56.1 to -15.8)</b>   | -23.6 (-43.2 to 2.68)           | <b>-50.6 (-65.8 to -26.2)</b>            |
| 2 Stroke                     | 2 Stroke                     | <b>-37.6 (-49.8 to -23.7)</b> | <b>-20.6 (-32.6 to -7.81)</b>   | <b>-46.5 (-55.5 to -34.3)</b>            |
| 3 COVID-19                   | 3 Hypertensive heart disease | 38.6 (-6.02 to 100)           | <b>76.5 (25.7 to 154)</b>       | 11.5 (-24.2 to 75)                       |
| 4 Low back pain              | 4 Low back pain              | <b>-16.6 (-30 to -3.87)</b>   | <b>6 (2.22 to 10.5)</b>         | <b>-2.47 (-2.61 to -2.36)</b>            |
| 5 Cirrhosis liver            | 5 Alzheimer's disease        | <b>53.2 (16.1 to 90.3)</b>    | <b>94.6 (60.1 to 127)</b>       | 1.86 (-0.0664 to 3.77)                   |
| 6 Lung cancer                | 6 Lung cancer                | -17.6 (-41.4 to 12.2)         | 4.67 (-20.1 to 37.3)            | -12.6 (-32.4 to 12.8)                    |
| 7 Hypertensive heart disease | 7 Cirrhosis liver            | <b>-26.2 (-40.6 to -9.46)</b> | -6.2 (-19.8 to 10.6)            | -12.1 (-26.4 to 5.76)                    |
| 8 Cardiomyopathy             | 8 Colorectal cancer          | 4.61 (-33.2 to 48.2)          | 32.7 (-9.07 to 80.4)            | 0.00526 (-30 to 35)                      |
| 9 Lower respiratory infect   | 9 Diabetes                   | 12.4 (-6.29 to 31)            | <b>42.9 (31.4 to 52.8)</b>      | <b>16.1 (7.69 to 24.9)</b>               |
| 10 Colorectal cancer         | 10 Cardiomyopathy            | -13.3 (-29.6 to 6.38)         | 10.2 (-3.56 to 27.8)            | <b>-15.9 (-26.9 to -2.85)</b>            |
| 11 Falls                     | 11 COPD                      | 4.15 (-18.5 to 34.1)          | <b>32.5 (6.4 to 64.1)</b>       | -7.17 (-28.1 to 19.6)                    |
| 12 Diabetes                  | 12 Age-related hearing loss  | 5.16 (-13.5 to 22.9)          | <b>33.6 (25 to 42.9)</b>        | <b>-0.582 (-0.71 to -0.456)</b>          |
| 13 COPD                      | 13 Lower respiratory infect  | <b>-24.1 (-38.3 to -4.33)</b> | -3.55 (-17.9 to 13.4)           | <b>-35 (-46.1 to -22.2)</b>              |
| 14 Alzheimer's disease       | 14 Falls                     | <b>-22.5 (-36.9 to -7.28)</b> | -1.46 (-14.7 to 11)             | <b>-17 (-28.1 to -5.58)</b>              |
| 15 Age-related hearing loss  | 15 Pancreatic cancer         | 28.6 (-13.2 to 74.5)          | <b>63.3 (13.9 to 117)</b>       | 30.9 (-8.13 to 72.2)                     |
| 16 Headache disorders        | 16 Breast cancer             | -9.22 (-35.9 to 19.3)         | 15.3 (-11.6 to 43.6)            | -6.91 (-27.6 to 15.9)                    |
| 17 Road injuries             | 17 Headache disorders        | <b>-24.6 (-36.9 to -12)</b>   | <b>-4.18 (-6.87 to -0.923)</b>  | <b>0.298 (0.133 to 0.413)</b>            |
| 18 Depressive disorders      | 18 Depressive disorders      | <b>-17.8 (-31.8 to -5.37)</b> | <b>4.41 (1.01 to 8.17)</b>      | <b>-1.49 (-1.74 to -1.27)</b>            |
| 19 Breast cancer             | 19 Osteoarthritis            | 0.702 (-16.5 to 15.3)         | <b>28 (21.6 to 34.4)</b>        | <b>1.4 (1.1 to 1.66)</b>                 |
| 20 Mechanical forces         | 20 Oral disorders            | -5.71 (-21.5 to 8.67)         | <b>19.8 (12.9 to 27.2)</b>      | <b>0.189 (0.00678 to 0.36)</b>           |
| 23 Oral disorders            | 22 Road injuries             |                               |                                 |                                          |
| 24 Pancreatic cancer         | 23 Mechanical forces         |                               |                                 |                                          |
| 25 Osteoarthritis            | 152 COVID-19                 |                               |                                 |                                          |

### Serbia, Reference scenario

**Legend:**  
 Communicable, maternal, neonatal and nutritional  
 Non-communicable  
 Injuries

| Leading Causes 2022          | Leading Causes 2050          | Mean % change number of DALY  | Mean % change all-age DALY rate | Mean % change age-standardized DALY rate |
|------------------------------|------------------------------|-------------------------------|---------------------------------|------------------------------------------|
| 1 Ischemic heart disease     | 1 Ischemic heart disease     | <b>-38.6 (-54.7 to -17.6)</b> | -21.1 (-41.3 to 4.85)           | <b>-48.3 (-63.5 to -25.6)</b>            |
| 2 Stroke                     | 2 Stroke                     | <b>-39.5 (-52.5 to -26.2)</b> | <b>-22.3 (-34.8 to -8.65)</b>   | <b>-47.7 (-56.9 to -37)</b>              |
| 3 COVID-19                   | 3 Diabetes                   | 17.3 (-2 to 39.1)             | <b>50.6 (35.4 to 64.9)</b>      | <b>12.5 (2.56 to 22.5)</b>               |
| 4 Low back pain              | 4 Lung cancer                | -0.383 (-24.8 to 28)          | <b>27.9 (0.895 to 61.9)</b>     | -5.85 (-25.8 to 18.9)                    |
| 5 Lung cancer                | 5 Low back pain              | -11.6 (-24.5 to 0.8)          | <b>13.6 (10.1 to 16.6)</b>      | <b>-3.03 (-3.2 to -2.86)</b>             |
| 6 Diabetes                   | 6 Alzheimer's disease        | <b>46.3 (16.1 to 77.8)</b>    | <b>87.8 (57.4 to 118)</b>       | <b>12.7 (10.2 to 15.5)</b>               |
| 7 Colorectal cancer          | 7 Hypertensive heart disease | 40 (-7.08 to 89.9)            | <b>79.9 (23 to 141)</b>         | 15.2 (-22.6 to 65.8)                     |
| 8 COPD                       | 8 Colorectal cancer          | 15.1 (-22.9 to 58.4)          | <b>47.8 (5.98 to 90)</b>        | 3.77 (-24.1 to 32.7)                     |
| 9 Hypertensive heart disease | 9 COPD                       | 13.2 (-12.7 to 43.9)          | <b>45.4 (15.5 to 77.1)</b>      | -1.67 (-24.6 to 24.7)                    |
| 10 Alzheimer's disease       | 10 Chronic kidney disease    | 35.8 (-1.16 to 80.8)          | <b>74.4 (30.6 to 128)</b>       | 16.8 (-14.2 to 59.5)                     |
| 11 Age-related hearing loss  | 11 Age-related hearing loss  | 4.67 (-10.9 to 21.6)          | <b>34.4 (27.7 to 41.2)</b>      | <b>-0.614 (-0.72 to -0.495)</b>          |
| 12 Breast cancer             | 12 Breast cancer             | -0.784 (-23.6 to 24.1)        | <b>27.5 (4.73 to 53)</b>        | -7.84 (-24.6 to 11.9)                    |
| 13 Headache disorders        | 13 Falls                     | -3.23 (-21 to 17.6)           | <b>24.3 (9.03 to 41.2)</b>      | -6.26 (-17.1 to 7.26)                    |
| 14 Falls                     | 14 Pancreatic cancer         | <b>53.3 (2.86 to 110)</b>     | <b>96.7 (47.3 to 163)</b>       | <b>40.6 (4.53 to 85.3)</b>               |
| 15 Depressive disorders      | 15 Depressive disorders      | <b>-13.8 (-25.6 to -1.47)</b> | <b>10.7 (7.38 to 14.5)</b>      | <b>-2.29 (-2.64 to -1.94)</b>            |
| 16 Cardiomyopathy            | 16 Headache disorders        | <b>-21.5 (-33 to -9.82)</b>   | 0.859 (-3.96 to 9.2)            | 0.1 (-0.138 to 0.324)                    |
| 17 Chronic kidney disease    | 17 Cardiomyopathy            | -12.1 (-29 to 8.33)           | 12.9 (-5.36 to 35.9)            | <b>-21.4 (-32.9 to -6.7)</b>             |
| 18 Self-harm                 | 18 Oral disorders            | -0.815 (-15 to 14.2)          | <b>27.4 (22.6 to 32.5)</b>      | <b>0.27 (0.0737 to 0.497)</b>            |
| 19 Oral disorders            | 19 Osteoarthritis            | 7.87 (-7.06 to 22.7)          | <b>38.5 (34 to 42.8)</b>        | <b>1.48 (1.09 to 1.89)</b>               |
| 20 Cirrhosis liver           | 20 Brain cancer              | <b>30.6 (10.8 to 55.6)</b>    | <b>67.7 (50 to 85.5)</b>        | <b>26.7 (15.5 to 38.5)</b>               |
| 22 Osteoarthritis            | 21 Self-harm                 |                               |                                 |                                          |
| 24 Pancreatic cancer         | 23 Cirrhosis liver           |                               |                                 |                                          |
| 29 Brain cancer              | 153 COVID-19                 |                               |                                 |                                          |

### Slovakia, Reference scenario

**Legend:**  
 Communicable, maternal, neonatal and nutritional  
 Non-communicable  
 Injuries

| Leading Causes 2022           | Leading Causes 2050           | Mean % change number of DALY  | Mean % change all-age DALY rate | Mean % change age-standardized DALY rate |
|-------------------------------|-------------------------------|-------------------------------|---------------------------------|------------------------------------------|
| 1 Ischemic heart disease      | 1 Ischemic heart disease      | -16.3 (-38.2 to 12.9)         | -8.85 (-30 to 20)               | <b>-48.5 (-61.7 to -27.9)</b>            |
| 2 COVID-19                    | 2 Stroke                      | -14 (-26.5 to 1.51)           | -6.34 (-18.3 to 8.16)           | <b>-41.2 (-49 to -30.6)</b>              |
| 3 Stroke                      | 3 Low back pain               | -0.281 (-9.5 to 8.58)         | <b>8.6 (4.88 to 12.7)</b>       | <b>-1.91 (-2.08 to -1.77)</b>            |
| 4 Low back pain               | 4 Alzheimer's disease         | <b>105 (70.1 to 143)</b>      | <b>123 (91.5 to 154)</b>        | <b>5.76 (3.54 to 8.68)</b>               |
| 5 Lung cancer                 | 5 Colorectal cancer           | 30 (-8.2 to 71.6)             | <b>41.4 (2.28 to 80.7)</b>      | -3.87 (-29 to 22.3)                      |
| 6 Falls                       | 6 Diabetes                    | <b>32.1 (16.7 to 48.1)</b>    | <b>43.8 (33 to 55)</b>          | <b>8.66 (0.88 to 15.9)</b>               |
| 7 Colorectal cancer           | 7 Lung cancer                 | 7.98 (-15.9 to 34.6)          | 17.5 (-7.49 to 41.4)            | -12.9 (-31 to 5.9)                       |
| 8 Diabetes                    | 8 Falls                       | 7.6 (-8.61 to 24.3)           | <b>17.2 (3.36 to 30.5)</b>      | <b>-14.2 (-23.1 to -5.78)</b>            |
| 9 Cirrhosis liver             | 9 Age-related hearing loss    | <b>28.2 (14.2 to 42.6)</b>    | <b>39.6 (31.3 to 47.2)</b>      | <b>-0.32 (-0.511 to -0.132)</b>          |
| 10 Lower respiratory infect   | 10 Lower respiratory infect   | <b>22.5 (0.822 to 51.7)</b>   | <b>33.3 (11.2 to 61.1)</b>      | <b>-24.5 (-36.3 to -11.7)</b>            |
| 11 Age-related hearing loss   | 11 Cirrhosis liver            | -15.1 (-28.2 to 2.02)         | -7.59 (-20.8 to 7.18)           | <b>-15.8 (-28.8 to -0.561)</b>           |
| 12 Alzheimer's disease        | 12 COPD                       | <b>42.7 (11.7 to 77.1)</b>    | <b>55.4 (25.8 to 89.9)</b>      | -2.41 (-22.6 to 24.8)                    |
| 13 Headache disorders         | 13 Pancreatic cancer          | <b>58.3 (13.6 to 109)</b>     | <b>72.2 (27.4 to 125)</b>       | 24.5 (-6.14 to 61.4)                     |
| 14 Depressive disorders       | 14 Hypertensive heart disease | <b>77.4 (28.5 to 146)</b>     | <b>93.4 (42.4 to 179)</b>       | 15 (-16.1 to 72)                         |
| 15 Breast cancer              | 15 Headache disorders         | <b>-12.5 (-20.6 to -3.95)</b> | <b>-4.67 (-7.74 to -0.626)</b>  | 0.0231 (-0.0847 to 0.103)                |
| 16 Mechanical forces          | 16 Depressive disorders       | -2.62 (-11.5 to 7.29)         | <b>6.04 (2.35 to 10)</b>        | <b>-1.62 (-1.95 to -1.33)</b>            |
| 17 Self-harm                  | 17 Breast cancer              | 10.9 (-13.4 to 41.7)          | 20.6 (-2.71 to 48.9)            | -10.4 (-27.1 to 6.42)                    |
| 18 COPD                       | 18 Chronic kidney disease     | <b>78 (33 to 137)</b>         | <b>93.9 (50.3 to 156)</b>       | 22.3 (-8.52 to 67.7)                     |
| 19 Oral disorders             | 19 Oral disorders             | <b>14.2 (2.73 to 26.3)</b>    | <b>24.4 (17.6 to 31.2)</b>      | 0.0373 (-0.124 to 0.183)                 |
| 20 Anxiety disorders          | 20 Osteoarthritis             | <b>22.6 (10.6 to 37.2)</b>    | <b>33.5 (28.1 to 37.8)</b>      | <b>0.288 (0.0162 to 0.564)</b>           |
| 21 Osteoarthritis             | 23 Mechanical forces          |                               |                                 |                                          |
| 23 Pancreatic cancer          | 24 Anxiety disorders          |                               |                                 |                                          |
| 26 Hypertensive heart disease | 25 Self-harm                  |                               |                                 |                                          |
| 29 Chronic kidney disease     | 154 COVID-19                  |                               |                                 |                                          |

### Slovenia, Reference scenario

**Legend:**

Communicable, maternal, neonatal and nutritional  
Non-communicable  
Injuries

| Leading Causes 2022           | Leading Causes 2050          | Mean % change number of DALY | Mean % change all-age DALY rate | Mean % change age-standardized DALY rate |
|-------------------------------|------------------------------|------------------------------|---------------------------------|------------------------------------------|
| 1 COVID-19                    | 1 Low back pain              | 3.45 (-5.91 to 12.4)         | 1.68 (-1.52 to 5.27)            | -2.04 (-2.15 to -1.94)                   |
| 2 Low back pain               | 2 Falls                      | <b>26.4 (9.28 to 43.5)</b>   | <b>24.2 (11.1 to 37.5)</b>      | <b>-14.4 (-22.5 to -6.53)</b>            |
| 3 Ischemic heart disease      | 3 Alzheimer's disease        | <b>76.2 (53 to 102)</b>      | <b>73.1 (56.4 to 92.3)</b>      | <b>-5.71 (-7.63 to -3.25)</b>            |
| 4 Falls                       | 4 Ischemic heart disease     | -21.2 (-42.7 to 3.16)        | -22.5 (-43.2 to 0.212)          | <b>-51.3 (-63 to -37)</b>                |
| 5 Stroke                      | 5 Diabetes                   | <b>33.9 (19.5 to 47.7)</b>   | <b>31.6 (22.1 to 41)</b>        | <b>13.4 (5.39 to 20.7)</b>               |
| 6 Lung cancer                 | 6 Lung cancer                | 2.8 (-19.2 to 29.7)          | 0.974 (-17.7 to 22.4)           | <b>-18.3 (-33.1 to -0.21)</b>            |
| 7 Diabetes                    | 7 Stroke                     | <b>-18.2 (-32.4 to -2.5)</b> | <b>-19.6 (-31.3 to -5.51)</b>   | <b>-46.8 (-54.3 to -38.5)</b>            |
| 8 Alzheimer's disease         | 8 Hypertensive heart disease | <b>79.3 (12.9 to 168)</b>    | <b>76.2 (12.3 to 159)</b>       | -3.2 (-36.3 to 46.8)                     |
| 9 Alcohol use disorders       | 9 Age-related hearing loss   | <b>27.4 (14.7 to 40)</b>     | <b>25.2 (18.9 to 31.2)</b>      | <b>-0.519 (-0.669 to -0.366)</b>         |
| 10 Age-related hearing loss   | 10 COPD                      | <b>50.4 (17 to 91.6)</b>     | <b>47.8 (16 to 87.7)</b>        | -5.43 (-26.5 to 19.9)                    |
| 11 Depressive disorders       | 11 Nonrheum valv diseases    | <b>98.8 (53 to 154)</b>      | <b>95.4 (54.2 to 145)</b>       | 7.62 (-10.9 to 31.3)                     |
| 12 Colorectal cancer          | 12 Colorectal cancer         | 20.3 (-15.4 to 68.1)         | 18.1 (-14.6 to 60.3)            | -18 (-40.1 to 8.98)                      |
| 13 Headache disorders         | 13 Depressive disorders      | 3.61 (-5.72 to 13.3)         | 1.82 (-1.34 to 4.88)            | <b>-1.26 (-1.48 to -1.04)</b>            |
| 14 COPD                       | 14 Prostate cancer           | <b>63 (29.3 to 106)</b>      | <b>60.1 (30.3 to 99.2)</b>      | 3.98 (-13.2 to 22.9)                     |
| 15 Hypertensive heart disease | 15 Alcohol use disorders     | -9.01 (-22.2 to 5.44)        | -10.6 (-22 to 1.5)              | -8.6 (-19.1 to 3.82)                     |
| 16 Mechanical forces          | 16 Headache disorders        | -3.64 (-11.8 to 3.69)        | <b>-5.29 (-7.23 to -3.42)</b>   | <b>0.396 (0.23 to 0.495)</b>             |
| 17 Self-harm                  | 17 Oral disorders            | <b>14.2 (2.36 to 24.7)</b>   | <b>12.3 (6.99 to 17.2)</b>      | 0.129 (-0.0394 to 0.289)                 |
| 18 Oral disorders             | 18 Osteoarthritis            | <b>18.8 (7.2 to 31)</b>      | <b>16.7 (12.5 to 20.5)</b>      | <b>0.941 (0.689 to 1.18)</b>             |
| 19 Cirrhosis liver            | 19 Lower respiratory infect  | <b>28.1 (3.37 to 55.4)</b>   | <b>25.9 (3.79 to 52.8)</b>      | <b>-24.3 (-33.2 to -10.3)</b>            |
| 20 Osteoarthritis             | 20 Pancreatic cancer         | <b>48.3 (9.01 to 100)</b>    | <b>45.6 (6.74 to 92.8)</b>      | 12.8 (-14.5 to 46.6)                     |
| 21 Nonrheum valv diseases     | 21 Mechanical forces         |                              |                                 |                                          |
| 22 Lower respiratory infect   | 26 Self-harm                 |                              |                                 |                                          |
| 24 Prostate cancer            | 28 Cirrhosis liver           |                              |                                 |                                          |
| 27 Pancreatic cancer          | 148 COVID-19                 |                              |                                 |                                          |

### Belarus, Reference scenario

**Legend:**  
Communicable, maternal, neonatal and nutritional  
Non-communicable  
Injuries

| Leading Causes 2022         | Leading Causes 2050        | Mean % change number of DALY  | Mean % change all-age DALY rate | Mean % change age-standardized DALY rate |
|-----------------------------|----------------------------|-------------------------------|---------------------------------|------------------------------------------|
| 1 Ischemic heart disease    | 1 Ischemic heart disease   | -27.1 (-51.7 to 3.4)          | -17.3 (-46.1 to 16.9)           | <b>-47.3 (-66.7 to -18.7)</b>            |
| 2 COVID-19                  | 2 Stroke                   | <b>-29.9 (-47 to -11.8)</b>   | <b>-20.6 (-37.5 to -1.83)</b>   | <b>-44.6 (-55.8 to -27.2)</b>            |
| 3 Stroke                    | 3 Low back pain            | -1.91 (-18 to 12.4)           | <b>11 (5.77 to 16)</b>          | <b>-2.85 (-3.08 to -2.6)</b>             |
| 4 Low back pain             | 4 Alzheimer's disease      | <b>101 (37.9 to 161)</b>      | <b>127 (71.4 to 179)</b>        | <b>13.5 (11.1 to 16)</b>                 |
| 5 Alcohol use disorders     | 5 Alcohol use disorders    | -2.82 (-26.1 to 26)           | 10.1 (-14.3 to 44.9)            | 3.42 (-19.7 to 34.9)                     |
| 6 Falls                     | 6 Falls                    | -9.59 (-26.4 to 9.11)         | 2.26 (-9.82 to 15.5)            | -11.3 (-23.1 to 0.223)                   |
| 7 Lung cancer               | 7 Lung cancer              | 1.16 (-36.9 to 40.9)          | 14.1 (-19.6 to 54.4)            | -7.68 (-33 to 24.6)                      |
| 8 Depressive disorders      | 8 Colorectal cancer        | 24.3 (-27.9 to 91.2)          | 40.2 (-11.5 to 110)             | 2.69 (-30.7 to 50.1)                     |
| 9 Self-harm                 | 9 Age-related hearing loss | 20.5 (-4.32 to 43.1)          | <b>36.2 (22.6 to 49.1)</b>      | <b>-0.449 (-0.61 to -0.279)</b>          |
| 10 Colorectal cancer        | 10 Depressive disorders    | -6.34 (-20.5 to 8.42)         | <b>5.97 (2.03 to 10.4)</b>      | <b>-1.71 (-1.99 to -1.47)</b>            |
| 11 Cirrhosis liver          | 11 Diabetes                | <b>31.6 (9.36 to 58)</b>      | <b>48.9 (34.8 to 63.6)</b>      | <b>17.9 (8.43 to 27.4)</b>               |
| 12 Age-related hearing loss | 12 Self-harm               | -19.5 (-36.7 to 1.79)         | -8.79 (-28.5 to 15.4)           | -10.9 (-30.8 to 15.9)                    |
| 13 Alzheimer's disease      | 13 Headache disorders      | <b>-13.8 (-25.3 to -1.4)</b>  | -2.47 (-5.53 to 1.05)           | <b>-0.498 (-0.774 to -0.271)</b>         |
| 14 Headache disorders       | 14 COPD                    | 36.3 (-1.51 to 79.5)          | <b>54.5 (11.9 to 103)</b>       | 6.24 (-23.4 to 46.3)                     |
| 15 Diabetes                 | 15 Cirrhosis liver         | <b>-21.6 (-37.6 to -3.52)</b> | -11.1 (-26.3 to 9.31)           | -15.4 (-30.4 to 3.67)                    |
| 16 Stomach cancer           | 16 Osteoarthritis          | 13.1 (-6.74 to 33.1)          | <b>27.9 (18.8 to 35.3)</b>      | <b>0.475 (0.0307 to 0.951)</b>           |
| 17 Cardiomyopathy           | 17 Pancreatic cancer       | 52.9 (-10.8 to 132)           | <b>72.4 (9.84 to 151)</b>       | 35.5 (-12.8 to 94.8)                     |
| 18 Gynecological diseases   | 18 Prostate cancer         | <b>61 (9.84 to 117)</b>       | <b>81.7 (31.8 to 138)</b>       | 26.1 (-2.19 to 57.2)                     |
| 19 Road injuries            | 19 Oral disorders          | 7.09 (-11.1 to 23.9)          | <b>21.1 (11.6 to 28.6)</b>      | 0.183 (-0.00877 to 0.36)                 |
| 20 Osteoarthritis           | 20 Urinary diseases        | <b>50.6 (17.7 to 86.4)</b>    | <b>70.3 (41.5 to 105)</b>       | <b>22.8 (2.12 to 47.1)</b>               |
| 23 COPD                     | 23 Stomach cancer          |                               |                                 |                                          |
| 24 Oral disorders           | 24 Road injuries           |                               |                                 |                                          |
| 27 Pancreatic cancer        | 26 Gynecological diseases  |                               |                                 |                                          |
| 30 Urinary diseases         | 27 Cardiomyopathy          |                               |                                 |                                          |
| 32 Prostate cancer          | 149 COVID-19               |                               |                                 |                                          |

### Estonia, Reference scenario

**Legend:**  
Communicable, maternal, neonatal and nutritional  
Non-communicable  
Injuries

| Leading Causes 2022          | Leading Causes 2050          | Mean % change number of DALY  | Mean % change all-age DALY rate | Mean % change age-standardized DALY rate |
|------------------------------|------------------------------|-------------------------------|---------------------------------|------------------------------------------|
| 1 COVID-19                   | 1 Hypertensive heart disease | 25.7 (-15.1 to 79.1)          | 36.3 (-8.23 to 86.6)            | -8.09 (-39.8 to 36.7)                    |
| 2 Ischemic heart disease     | 2 Ischemic heart disease     | <b>-42.8 (-59.1 to -22.2)</b> | <b>-38 (-54.8 to -16.2)</b>     | <b>-61.1 (-72.8 to -43.6)</b>            |
| 3 Hypertensive heart disease | 3 Low back pain              | -0.782 (-10.9 to 8.71)        | <b>7.46 (4.67 to 11.4)</b>      | <b>-2.71 (-2.95 to -2.47)</b>            |
| 4 Low back pain              | 4 Alzheimer's disease        | <b>45.5 (19.5 to 72.9)</b>    | <b>57.6 (34.2 to 82.5)</b>      | <b>-6.36 (-8.57 to -3.88)</b>            |
| 5 Stroke                     | 5 Diabetes                   | 11.8 (-2.61 to 25.6)          | <b>21.1 (9.52 to 32.6)</b>      | 1.48 (-7.48 to 10.2)                     |
| 6 Diabetes                   | 6 Chronic kidney disease     | <b>52.4 (7.85 to 104)</b>     | <b>65.1 (16.3 to 127)</b>       | 7.53 (-25.2 to 50.5)                     |
| 7 Lung cancer                | 7 Lung cancer                | -9.58 (-33 to 20)             | -2.08 (-24.8 to 27.3)           | <b>-25.5 (-42.9 to -4.55)</b>            |
| 8 Alzheimer's disease        | 8 Age-related hearing loss   | <b>15.8 (2.59 to 26.7)</b>    | <b>25.4 (18.6 to 32.3)</b>      | <b>-0.394 (-0.654 to -0.05)</b>          |
| 9 Depressive disorders       | 9 Colorectal cancer          | 13.2 (-25.5 to 59.5)          | 22.5 (-17.8 to 71.1)            | -11.7 (-38.4 to 19)                      |
| 10 Falls                     | 10 Stroke                    | <b>-42.4 (-53.2 to -30.8)</b> | <b>-37.6 (-47.3 to -25.9)</b>   | <b>-52.9 (-60.2 to -44.5)</b>            |
| 11 Age-related hearing loss  | 11 Depressive disorders      | -2.1 (-11.7 to 7.25)          | <b>6.04 (3.05 to 9.23)</b>      | <b>-1.68 (-2.09 to -1.32)</b>            |
| 12 Colorectal cancer         | 12 Falls                     | -9.75 (-23.5 to 9.13)         | -2.25 (-16.2 to 13.4)           | <b>-20.7 (-31.1 to -9.69)</b>            |
| 13 Cirrhosis liver           | 13 Prostate cancer           | <b>42.8 (12.6 to 83.1)</b>    | <b>54.7 (23.8 to 92.1)</b>      | 11.5 (-6.81 to 30.6)                     |
| 14 Alcohol use disorders     | 14 Headache disorders        | -8.95 (-17.5 to 0.126)        | -1.39 (-3.67 to 1.77)           | -0.174 (-0.464 to 0.00355)               |
| 15 Headache disorders        | 15 Drug use disorders        | -9.06 (-21.6 to 5.61)         | -1.54 (-10.2 to 7.98)           | 2.01 (-6.72 to 12.2)                     |
| 16 Drug use disorders        | 16 Osteoarthritis            | 11.4 (-0.17 to 21.8)          | <b>20.6 (15.8 to 26)</b>        | -0.0807 (-0.492 to 0.336)                |
| 17 Chronic kidney disease    | 17 Pancreatic cancer         | 33.9 (-5.92 to 85)            | <b>45 (4.33 to 99.7)</b>        | 10.5 (-18.7 to 45.4)                     |
| 18 Self-harm                 | 18 Alcohol use disorders     | -15.4 (-30.2 to 1.91)         | -8.32 (-23.4 to 10.8)           | -11.6 (-24.9 to 4.12)                    |
| 19 Osteoarthritis            | 19 Cirrhosis liver           | <b>-23.2 (-37.1 to -8.59)</b> | <b>-16.8 (-29.6 to -1.85)</b>   | <b>-23.5 (-36.9 to -8.63)</b>            |
| 20 Prostate cancer           | 20 Urinary diseases          | <b>45.1 (19.6 to 71.2)</b>    | <b>57.1 (34.9 to 84.5)</b>      | 12 (-3.33 to 29.6)                       |
| 22 Pancreatic cancer         | 23 Self-harm                 |                               |                                 |                                          |
| 30 Urinary diseases          | 152 COVID-19                 |                               |                                 |                                          |



### Latvia, Reference scenario

**Legend:**  
Communicable, maternal, neonatal and nutritional  
Non-communicable  
Injuries

| Leading Causes 2022           | Leading Causes 2050          | Mean % change number of DALY  | Mean % change all-age DALY rate | Mean % change age-standardized DALY rate |
|-------------------------------|------------------------------|-------------------------------|---------------------------------|------------------------------------------|
| 1 Ischemic heart disease      | 1 Ischemic heart disease     | <b>-44.3 (-60.7 to -26.9)</b> | -23.2 (-47.2 to 2.32)           | <b>-53 (-68.3 to -33.2)</b>              |
| 2 COVID-19                    | 2 Stroke                     | <b>-43.2 (-53.9 to -31.8)</b> | <b>-21.7 (-37.5 to -6.86)</b>   | <b>-48.3 (-57.4 to -37.3)</b>            |
| 3 Stroke                      | 3 Alzheimer's disease        | <b>42 (13.4 to 66.7)</b>      | <b>95.4 (65.3 to 126)</b>       | <b>4.32 (1.77 to 7.1)</b>                |
| 4 Low back pain               | 4 Low back pain              | <b>-19.8 (-30.5 to -10.3)</b> | <b>10.3 (5.62 to 16)</b>        | <b>-2.54 (-2.79 to -2.33)</b>            |
| 5 Cardiomyopathy              | 5 Diabetes                   | <b>-14 (-26.3 to -0.762)</b>  | <b>18.4 (4.85 to 31.7)</b>      | -6.03 (-15 to 3.35)                      |
| 6 Diabetes                    | 6 Hypertensive heart disease | 24.1 (-17.2 to 77.4)          | <b>71.2 (13.7 to 147)</b>       | 13.8 (-23.2 to 68.5)                     |
| 7 Lung cancer                 | 7 Lung cancer                | -15.3 (-35.9 to 8.77)         | 16.6 (-9.39 to 48.5)            | -12 (-29.1 to 12)                        |
| 8 Alzheimer's disease         | 8 Cardiomyopathy             | <b>-39.4 (-52.7 to -24.6)</b> | -16.7 (-29.9 to 0.458)          | <b>-23.9 (-38 to -5.24)</b>              |
| 9 Falls                       | 9 Age-related hearing loss   | -2.9 (-16.8 to 9.72)          | <b>33.7 (23.7 to 45)</b>        | <b>-0.332 (-0.593 to -0.116)</b>         |
| 10 Depressive disorders       | 10 Falls                     | <b>-20.5 (-35 to -6.63)</b>   | 9.43 (-4.27 to 24.9)            | <b>-14.2 (-24.7 to -3.25)</b>            |
| 11 Age-related hearing loss   | 11 Colorectal cancer         | -2.77 (-34.4 to 38)           | 33.7 (-6.74 to 84.6)            | -5.76 (-30.4 to 27.1)                    |
| 12 Colorectal cancer          | 12 Depressive disorders      | <b>-22.6 (-33 to -13.8)</b>   | <b>6.55 (2.45 to 11.1)</b>      | <b>-1.39 (-1.72 to -1.14)</b>            |
| 13 Hypertensive heart disease | 13 Prostate cancer           | 26.3 (-4.72 to 61.6)          | <b>73.7 (40.8 to 117)</b>       | <b>17.6 (1.21 to 40)</b>                 |
| 14 Alcohol use disorders      | 14 Pancreatic cancer         | 19.6 (-18.1 to 67.4)          | <b>64.6 (17 to 118)</b>         | 23 (-10.3 to 66.5)                       |
| 15 Cirrhosis liver            | 15 Alcohol use disorders     | <b>-31.6 (-44.1 to -16.6)</b> | -5.88 (-19.5 to 11)             | -5.45 (-19.7 to 12.7)                    |
| 16 Self-harm                  | 16 Osteoarthritis            | -8.86 (-20.1 to 1.26)         | <b>25.5 (17.2 to 33.2)</b>      | -0.129 (-0.493 to 0.288)                 |
| 17 Headache disorders         | 17 Cirrhosis liver           | <b>-32.5 (-44.2 to -21.4)</b> | -7.01 (-20.3 to 7.13)           | -9.43 (-21.9 to 5.95)                    |
| 18 Osteoarthritis             | 18 Urinary diseases          | 20 (-1.54 to 40.9)            | <b>65.3 (39.9 to 92)</b>        | 13.2 (-1.98 to 27.7)                     |
| 19 Breast cancer              | 19 Headache disorders        | <b>-29.8 (-39.5 to -20.8)</b> | -3.41 (-6.38 to 0.549)          | <b>-0.474 (-0.753 to -0.291)</b>         |
| 20 Pancreatic cancer          | 20 COPD                      | 5.04 (-18.4 to 31.4)          | <b>44.8 (10.2 to 83.9)</b>      | -1.67 (-25.7 to 23.2)                    |
| 22 Prostate cancer            | 21 Self-harm                 |                               |                                 |                                          |
| 26 COPD                       | 22 Breast cancer             |                               |                                 |                                          |
| 30 Urinary diseases           | 150 COVID-19                 |                               |                                 |                                          |

### Lithuania, Reference scenario

**Legend:**  
Communicable, maternal, neonatal and nutritional  
Non-communicable  
Injuries

| Leading Causes 2022           | Leading Causes 2050           | Mean % change number of DALY  | Mean % change all-age DALY rate | Mean % change age-standardized DALY rate |
|-------------------------------|-------------------------------|-------------------------------|---------------------------------|------------------------------------------|
| 1 Ischemic heart disease      | 1 Ischemic heart disease      | <b>-40.9 (-60.3 to -18.8)</b> | -16.1 (-40.3 to 15.2)           | <b>-52.2 (-67.9 to -30)</b>              |
| 2 COVID-19                    | 2 Stroke                      | <b>-40.6 (-53.4 to -29.1)</b> | -15.6 (-30.2 to 1.46)           | <b>-43.6 (-52.5 to -32.2)</b>            |
| 3 Stroke                      | 3 Alzheimer's disease         | <b>58.3 (27.4 to 91.4)</b>    | <b>125 (91.2 to 162)</b>        | <b>14.7 (11.8 to 18)</b>                 |
| 4 Low back pain               | 4 Low back pain               | <b>-20.5 (-29.9 to -9.77)</b> | <b>12.9 (8.47 to 18.2)</b>      | <b>-2.66 (-2.84 to -2.48)</b>            |
| 5 Falls                       | 5 Lung cancer                 | -10.9 (-34.9 to 17.8)         | 26.6 (-3.46 to 63.1)            | -3.44 (-26.4 to 22.8)                    |
| 6 Lung cancer                 | 6 Falls                       | <b>-19 (-32.3 to -3.15)</b>   | <b>15 (1.03 to 32.8)</b>        | <b>-11.5 (-20.4 to -0.712)</b>           |
| 7 Self-harm                   | 7 Diabetes                    | -5.9 (-20.9 to 8.78)          | <b>33.7 (19.4 to 48.2)</b>      | 4.67 (-4.78 to 14.3)                     |
| 8 Alzheimer's disease         | 8 Colorectal cancer           | 7.98 (-28.4 to 53.4)          | <b>53.5 (6.33 to 111)</b>       | 3.44 (-28.4 to 36.7)                     |
| 9 Diabetes                    | 9 Age-related hearing loss    | -2.59 (-15.1 to 10.8)         | <b>38.4 (28.8 to 49.7)</b>      | <b>-0.431 (-0.633 to -0.241)</b>         |
| 10 Depressive disorders       | 10 Depressive disorders       | <b>-24.9 (-34.7 to -14.2)</b> | <b>6.63 (3.35 to 11.1)</b>      | <b>-1.61 (-1.94 to -1.3)</b>             |
| 11 Cirrhosis liver            | 11 Self-harm                  | <b>-34.1 (-49 to -17.7)</b>   | -6.49 (-23.5 to 11.5)           | -9.39 (-27.2 to 11.4)                    |
| 12 Age-related hearing loss   | 12 Cirrhosis liver            | <b>-27.6 (-41.9 to -12.3)</b> | 2.68 (-11.5 to 18.1)            | -2.76 (-17.4 to 15.2)                    |
| 13 Colorectal cancer          | 13 Pancreatic cancer          | 33.6 (-9.32 to 87.1)          | <b>89.8 (33.8 to 157)</b>       | 39.6 (-2.12 to 85)                       |
| 14 Alcohol use disorders      | 14 Prostate cancer            | 30.7 (-0.741 to 65.7)         | <b>85.7 (45.9 to 135)</b>       | <b>23.8 (4.06 to 45.1)</b>               |
| 15 Headache disorders         | 15 Hypertensive heart disease | 41 (-5.25 to 103)             | <b>100 (37.3 to 179)</b>        | 31.8 (-12 to 93.5)                       |
| 16 Cardiomyopathy             | 16 COPD                       | 16.5 (-13.6 to 50.7)          | <b>65.6 (28.5 to 120)</b>       | 6.56 (-18.2 to 37.8)                     |
| 17 Osteoarthritis             | 17 Osteoarthritis             | -8.65 (-19 to 2.76)           | <b>29.8 (22.8 to 37.3)</b>      | 0.316 (-0.0847 to 0.713)                 |
| 18 Anxiety disorders          | 18 Breast cancer              | -11.7 (-33.7 to 13.7)         | 25.4 (-2.79 to 55.3)            | -7.86 (-26.3 to 11.5)                    |
| 19 COPD                       | 19 Alcohol use disorders      | <b>-31.6 (-45.6 to -15.7)</b> | -2.91 (-15.9 to 15.4)           | -3.93 (-16.3 to 13.7)                    |
| 20 Breast cancer              | 20 Atrial fibrillation        | <b>66.5 (34.4 to 108)</b>     | <b>137 (95.3 to 183)</b>        | <b>30 (17.5 to 45.9)</b>                 |
| 23 Pancreatic cancer          | 21 Headache disorders         |                               |                                 |                                          |
| 24 Prostate cancer            | 24 Anxiety disorders          |                               |                                 |                                          |
| 25 Hypertensive heart disease | 25 Cardiomyopathy             |                               |                                 |                                          |
| 38 Atrial fibrillation        | 152 COVID-19                  |                               |                                 |                                          |

### Moldova, Reference scenario

**Legend:**  
Communicable, maternal, neonatal and nutritional  
Non-communicable  
Injuries

| Leading Causes 2022          | Leading Causes 2050          | Mean % change number of DALY  | Mean % change all-age DALY rate | Mean % change age-standardized DALY rate |
|------------------------------|------------------------------|-------------------------------|---------------------------------|------------------------------------------|
| 1 Ischemic heart disease     | 1 Ischemic heart disease     | -28.2 (-53.6 to 15.3)         | 12.3 (-29.7 to 70.5)            | <b>-50.5 (-71 to -15.9)</b>              |
| 2 Stroke                     | 2 Stroke                     | <b>-30.8 (-48.8 to -7.45)</b> | 8.05 (-15.7 to 41.5)            | <b>-44.6 (-56.7 to -25.1)</b>            |
| 3 Cirrhosis liver            | 3 Cirrhosis liver            | <b>-26 (-43.4 to -4.53)</b>   | 15.3 (-4.61 to 38.8)            | -11.5 (-26.6 to 10.8)                    |
| 4 Low back pain              | 4 Alzheimer's disease        | <b>129 (65.6 to 182)</b>      | <b>257 (172 to 330)</b>         | -1.28 (-3.34 to 0.718)                   |
| 5 COVID-19                   | 5 Hypertensive heart disease | 52.4 (-8.62 to 149)           | <b>138 (46.4 to 281)</b>        | 6.04 (-36.9 to 81.7)                     |
| 6 Diabetes                   | 6 Low back pain              | -14.3 (-33.4 to 4.44)         | <b>33.3 (23.4 to 44.4)</b>      | <b>-2.58 (-2.81 to -2.28)</b>            |
| 7 Hypertensive heart disease | 7 Diabetes                   | 21.1 (-5.4 to 46.4)           | <b>88.9 (66.8 to 114)</b>       | <b>15.2 (6.33 to 27)</b>                 |
| 8 Lower respiratory infect   | 8 Age-related hearing loss   | <b>27.4 (1.57 to 56.4)</b>    | <b>98.5 (73.5 to 129)</b>       | <b>-0.426 (-0.633 to -0.27)</b>          |
| 9 Lung cancer                | 9 Colorectal cancer          | 8.79 (-34.4 to 62.7)          | <b>69.2 (6.69 to 148)</b>       | -5.83 (-41.6 to 34.5)                    |
| 10 Colorectal cancer         | 10 Lung cancer               | -3.16 (-38.1 to 42.3)         | 50.7 (-0.464 to 107)            | -8.77 (-37.5 to 23.2)                    |
| 11 Depressive disorders      | 11 COPD                      | 36.3 (-1.18 to 91.9)          | <b>113 (52.1 to 192)</b>        | -1.13 (-28.7 to 45.7)                    |
| 12 Headache disorders        | 12 Blindness and vision loss | <b>28.2 (1.1 to 55.5)</b>     | <b>99.8 (72 to 131)</b>         | <b>-2.63 (-2.81 to -2.43)</b>            |
| 13 Age-related hearing loss  | 13 Depressive disorders      | <b>-23.4 (-42.2 to -4.34)</b> | <b>19 (10.7 to 29.1)</b>        | <b>-1.38 (-1.75 to -0.955)</b>           |
| 14 Falls                     | 14 Falls                     | -19.5 (-41.9 to 2.48)         | <b>25.1 (7.14 to 48.9)</b>      | -11 (-22.5 to 2.01)                      |
| 15 Alzheimer's disease       | 15 Lower respiratory infect  | <b>-40.2 (-57.3 to -14.5)</b> | -6.95 (-26.1 to 28.9)           | <b>-33.9 (-48.9 to -8.24)</b>            |
| 16 Alcohol use disorders     | 16 Osteoarthritis            | 18.9 (-6.41 to 45.8)          | <b>85.3 (67.3 to 106)</b>       | <b>0.628 (0.237 to 0.952)</b>            |
| 17 Self-harm                 | 17 Pancreatic cancer         | 38.3 (-17.4 to 105)           | <b>115 (34 to 202)</b>          | 28.8 (-18.9 to 82.8)                     |
| 18 COPD                      | 18 Oral disorders            | 2.8 (-20.5 to 27.4)           | <b>60 (43.7 to 81.5)</b>        | <b>0.178 (0.00341 to 0.349)</b>          |
| 19 Gynecological diseases    | 19 Alcohol use disorders     | <b>-33.9 (-52 to -10.4)</b>   | 2.59 (-15.8 to 29.8)            | -0.717 (-16.9 to 21.3)                   |
| 20 Road injuries             | 20 Headache disorders        | <b>-39.7 (-56.8 to -23.6)</b> | -6.51 (-14.5 to 3.68)           | -0.0657 (-0.366 to 0.376)                |
| 23 Blindness and vision loss | 23 Self-harm                 |                               |                                 |                                          |
| 25 Osteoarthritis            | 27 Road injuries             |                               |                                 |                                          |
| 26 Oral disorders            | 29 Gynecological diseases    |                               |                                 |                                          |
| 28 Pancreatic cancer         | 149 COVID-19                 |                               |                                 |                                          |

### Russia, Reference scenario

**Legend:**

Communicable, maternal, neonatal and nutritional  
 Non-communicable  
 Injuries

| Leading Causes 2022          | Leading Causes 2050          | Mean % change number of DALY | Mean % change all-age DALY rate | Mean % change age-standardized DALY rate |
|------------------------------|------------------------------|------------------------------|---------------------------------|------------------------------------------|
| 1 Ischemic heart disease     | 1 Ischemic heart disease     | -30.2 (-52.2 to -5.78)       | -25.7 (-47.9 to -1.89)          | -52.7 (-68.6 to -34.9)                   |
| 2 Stroke                     | 2 Stroke                     | -28.3 (-43.3 to -14.4)       | -23.7 (-36.3 to -11.5)          | -49.3 (-57.7 to -39.3)                   |
| 3 COVID-19                   | 3 Low back pain              | 4.4 (-7.44 to 18.3)          | 11.1 (7.64 to 15.2)             | -2.69 (-2.95 to -2.42)                   |
| 4 Low back pain              | 4 Diabetes                   | 27.7 (8.14 to 47.6)          | 35.9 (22.8 to 49.1)             | 5.46 (-4.46 to 15.7)                     |
| 5 Cardiomyopathy             | 5 Alzheimer's disease        | 101 (62.4 to 151)            | 114 (79.3 to 150)               | -0.903 (-3.09 to 1.49)                   |
| 6 Cirrhosis liver            | 6 Alcohol use disorders      | -7.7 (-24.7 to 11.7)         | -1.76 (-16.9 to 18.1)           | 0.707 (-13.4 to 19.4)                    |
| 7 Diabetes                   | 7 Age-related hearing loss   | 29.1 (11.8 to 51.7)          | 37.3 (28.6 to 45.3)             | -0.339 (-0.476 to -0.218)                |
| 8 Self-harm                  | 8 Cirrhosis liver            | -24.5 (-37.2 to -9.15)       | -19.6 (-30.4 to -5.21)          | -21.2 (-32.7 to -5.7)                    |
| 9 Alcohol use disorders      | 9 Lung cancer                | -6.9 (-31 to 19.4)           | -1.02 (-23.3 to 23.4)           | -21.5 (-39 to -3.01)                     |
| 10 Lung cancer               | 10 Cardiomyopathy            | -33.9 (-47 to -18.1)         | -29.7 (-41.8 to -15)            | -31.1 (-42.4 to -14.3)                   |
| 11 Falls                     | 11 Falls                     | -8.09 (-21.9 to 9.88)        | -2.26 (-12.6 to 9.53)           | -17.3 (-26.6 to -8.59)                   |
| 12 Headache disorders        | 12 Self-harm                 | -22.1 (-37.6 to -2.43)       | -17.1 (-31.8 to 0.951)          | -17.1 (-32.7 to 4.63)                    |
| 13 HIV/AIDS                  | 13 Colorectal cancer         | 9.68 (-25.8 to 51.1)         | 16.5 (-17.3 to 58.3)            | -16 (-38.5 to 12.5)                      |
| 14 Colorectal cancer         | 14 COPD                      | 33.4 (0.13 to 67.1)          | 41.8 (8.57 to 76.7)             | -5.66 (-28.6 to 22.3)                    |
| 15 Road injuries             | 15 Headache disorders        | -8.09 (-18.7 to 3.89)        | -2.22 (-4.36 to 0.697)          | -0.581 (-0.876 to -0.358)                |
| 16 Age-related hearing loss  | 16 Depressive disorders      | -0.468 (-11.7 to 12.7)       | 5.9 (2.72 to 8.7)               | -1.12 (-1.23 to -1.03)                   |
| 17 Alzheimer's disease       | 17 Blindness and vision loss | 20.7 (4.93 to 39.7)          | 28.4 (20 to 37.7)               | -2.55 (-2.83 to -2.27)                   |
| 18 Depressive disorders      | 18 Urinary diseases          | 73.5 (39.2 to 110)           | 84.5 (55.6 to 116)              | 24.2 (3.81 to 43.7)                      |
| 19 Interpersonal violence    | 19 HIV/AIDS                  | -21.8 (-37.4 to -8.01)       | -16.8 (-29.3 to -7.46)          | -8.9 (-23 to 0.632)                      |
| 20 COPD                      | 20 Road injuries             | -15.8 (-41.4 to 17.5)        | -10.4 (-36.2 to 21.2)           | -11.1 (-38.6 to 21)                      |
| 24 Blindness and vision loss | 31 Interpersonal violence    |                              |                                 |                                          |
| 32 Urinary diseases          | 153 COVID-19                 |                              |                                 |                                          |

### Ukraine, Reference scenario

**Legend:**

Communicable, maternal, neonatal and nutritional  
Non-communicable  
Injuries

| Leading Causes 2022         | Leading Causes 2050         | Mean % change number of DALY  | Mean % change all-age DALY rate | Mean % change age-standardized DALY rate |
|-----------------------------|-----------------------------|-------------------------------|---------------------------------|------------------------------------------|
| 1 Ischemic heart disease    | 1 Ischemic heart disease    | -21.3 (-47.2 to 13.6)         | 8.28 (-27.8 to 49.1)            | <b>-39 (-62.8 to -0.031)</b>             |
| 2 Stroke                    | 2 Stroke                    | <b>-29 (-47.7 to -8.81)</b>   | -2.5 (-22 to 18)                | <b>-38.8 (-52.7 to -21)</b>              |
| 3 Low back pain             | 3 Low back pain             | -12.6 (-31.3 to 5.73)         | <b>19.9 (14.3 to 25.4)</b>      | <b>-1.9 (-2.86 to -1.01)</b>             |
| 4 COVID-19                  | 4 Alzheimer's disease       | <b>72 (12.2 to 155)</b>       | <b>134 (63.6 to 208)</b>        | <b>8.6 (2.52 to 12.3)</b>                |
| 5 Cirrhosis liver           | 5 Cirrhosis liver           | <b>-33 (-48.5 to -12.4)</b>   | -7.76 (-24.7 to 14.5)           | -12.1 (-28.6 to 6.69)                    |
| 6 Self-harm                 | 6 Age-related hearing loss  | 10.2 (-17.1 to 39.5)          | <b>50.8 (33.7 to 66.5)</b>      | -0.129 (-0.324 to 0.101)                 |
| 7 Cardiomyopathy            | 7 Diabetes                  | 17.4 (-7.95 to 45.4)          | <b>60.9 (48.1 to 73.8)</b>      | <b>17.5 (9.54 to 25)</b>                 |
| 8 Falls                     | 8 Depressive disorders      | -18.1 (-33.9 to 1.36)         | <b>12.3 (7.13 to 17.5)</b>      | <b>-1.09 (-1.64 to -0.596)</b>           |
| 9 Depressive disorders      | 9 Falls                     | -20.4 (-39.1 to 1.14)         | 9.06 (-2.87 to 23.2)            | -9.56 (-19.9 to 0.276)                   |
| 10 Alcohol use disorders    | 10 Colorectal cancer        | 2.44 (-37.7 to 66.2)          | 39.5 (-7.42 to 104)             | -6.39 (-37.1 to 35.6)                    |
| 11 Lung cancer              | 11 Cardiomyopathy           | <b>-31.8 (-53.1 to -4.34)</b> | -6.6 (-26.5 to 18.9)            | -17 (-33.6 to 3.42)                      |
| 12 Age-related hearing loss | 12 Lung cancer              | -16.3 (-47.6 to 23.8)         | 14.2 (-20 to 57.6)              | -18.7 (-42.9 to 11.9)                    |
| 13 Alzheimer's disease      | 13 Self-harm                | <b>-34.2 (-50 to -16.5)</b>   | -9.41 (-27.5 to 9.44)           | -5.98 (-28.5 to 20.2)                    |
| 14 Road injuries            | 14 Alcohol use disorders    | <b>-23.4 (-41.3 to -0.78)</b> | 5.51 (-17.1 to 35.2)            | 8.11 (-13.1 to 38.4)                     |
| 15 Headache disorders       | 15 COPD                     | 23.7 (-10.3 to 68.7)          | <b>69.9 (28.1 to 124)</b>       | 2.48 (-26.2 to 36.8)                     |
| 16 HIV/AIDS                 | 16 Headache disorders       | <b>-28.7 (-44.4 to -13.4)</b> | -2.14 (-7.24 to 4.92)           | <b>-0.603 (-1.18 to -0.124)</b>          |
| 17 Colorectal cancer        | 17 Road injuries            | -30.2 (-55.3 to 7.51)         | -3.78 (-38.8 to 44.8)           | 0.0798 (-39.4 to 54.6)                   |
| 18 Diabetes                 | 18 Osteoarthritis           | 6.7 (-16.7 to 34.7)           | <b>46.2 (35.1 to 57.5)</b>      | -0.319 (-1.29 to 0.442)                  |
| 19 Lower respiratory infect | 19 Oral disorders           | -2.51 (-24.9 to 22.8)         | <b>33.6 (24.6 to 44.1)</b>      | -0.381 (-0.947 to 0.0967)                |
| 20 Gynecological diseases   | 20 HIV/AIDS                 | <b>-37.5 (-53.6 to -19.3)</b> | -14.1 (-34.9 to 5.01)           | -5.01 (-24.1 to 10.6)                    |
| 21 Oral disorders           | 25 Gynecological diseases   |                               |                                 |                                          |
| 23 COPD                     | 26 Lower respiratory infect |                               |                                 |                                          |
| 25 Osteoarthritis           | 155 COVID-19                |                               |                                 |                                          |

### Australia, Reference scenario

**Legend:**  
Communicable, maternal, neonatal and nutritional  
Non-communicable  
Injuries

| Leading Causes 2022         | Leading Causes 2050         | Mean % change number of DALY | Mean % change all-age DALY rate | Mean % change age-standardized DALY rate |
|-----------------------------|-----------------------------|------------------------------|---------------------------------|------------------------------------------|
| 1 Low back pain             | 1 Low back pain             | 37.4 (28.5 to 44.8)          | 2.59 (-0.491 to 5.26)           | -2.75 (-2.87 to -2.62)                   |
| 2 Ischemic heart disease    | 2 Alzheimer's disease       | 108 (87.9 to 130)            | 55.1 (42.9 to 69.6)             | -5.1 (-8.7 to -0.695)                    |
| 3 Falls                     | 3 Diabetes                  | 103 (85.5 to 122)            | 51.3 (40.7 to 63.2)             | 30.4 (21.5 to 38.9)                      |
| 4 Other musculoskeletal     | 4 Other musculoskeletal     | 72.7 (61.2 to 83.8)          | 29 (24.8 to 33.1)               | 26.3 (24.9 to 27.7)                      |
| 5 Depressive disorders      | 5 Falls                     | 53 (38.3 to 67.9)            | 14.2 (5.9 to 23.5)              | -14.9 (-21.1 to -8.88)                   |
| 6 Alzheimer's disease       | 6 Ischemic heart disease    | -0.289 (-19.4 to 27)         | -25.5 (-40.4 to -7.36)          | -51.4 (-61.7 to -37.3)                   |
| 7 Lung cancer               | 7 Depressive disorders      | 33.1 (24.5 to 41.3)          | -0.66 (-1.95 to 0.727)          | -1.52 (-1.69 to -1.36)                   |
| 8 Stroke                    | 8 COPD                      | 58.8 (35.1 to 87.5)          | 18.6 (0.687 to 40.2)            | -16 (-28.7 to 1.22)                      |
| 9 Diabetes                  | 9 Lung cancer               | 33.9 (8.81 to 59.6)          | -0.0722 (-16.9 to 18.4)         | -19 (-32.2 to -6.25)                     |
| 10 COVID-19                 | 10 Age-related hearing loss | 62.2 (50 to 73.8)            | 21.1 (15.9 to 26.9)             | -0.792 (-0.898 to -0.698)                |
| 11 Anxiety disorders        | 11 Stroke                   | 24.2 (10.7 to 38.7)          | -7.23 (-16.5 to 3.7)            | -33.4 (-40.7 to -25)                     |
| 12 COPD                     | 12 Anxiety disorders        | 33.2 (24.7 to 41.5)          | -0.595 (-1.86 to 0.929)         | 0.244 (0.0807 to 0.419)                  |
| 13 Age-related hearing loss | 13 Colorectal cancer        | 58.9 (25.3 to 97.7)          | 18.6 (-4.58 to 44.4)            | -9.14 (-27.7 to 10.3)                    |
| 14 Self-harm                | 14 Drug use disorders       | 51.2 (35.9 to 66.9)          | 12.9 (2.21 to 23.5)             | 12.4 (2.35 to 22.4)                      |
| 15 Headache disorders       | 15 Headache disorders       | 33.8 (25.8 to 41.7)          | -0.102 (-1.85 to 2.39)          | -0.0447 (-0.196 to 0.112)                |
| 16 Colorectal cancer        | 16 Chronic kidney disease   | 180 (129 to 251)             | 109 (73.8 to 160)               | 26 (2.32 to 64.8)                        |
| 17 Drug use disorders       | 17 Osteoarthritis           | 55.3 (44.4 to 65.7)          | 16 (11.5 to 20.4)               | 2.33 (2.13 to 2.57)                      |
| 18 Osteoarthritis           | 18 Atrial fibrillation      | 132 (105 to 159)             | 73.3 (55.8 to 90.5)             | 11.4 (3.32 to 18.4)                      |
| 19 Oral disorders           | 19 Self-harm                | 9.93 (-5.21 to 27.2)         | -17.9 (-29.7 to -4.45)          | -18.4 (-30.9 to -3.48)                   |
| 20 Breast cancer            | 20 Oral disorders           | 48.5 (38.4 to 58.3)          | 10.9 (6.47 to 14.4)             | 0.565 (0.427 to 0.722)                   |
| 27 Atrial fibrillation      | 23 Breast cancer            |                              |                                 |                                          |
| 30 Chronic kidney disease   | 155 COVID-19                |                              |                                 |                                          |

### New Zealand, Reference scenario

**Legend:**  
Communicable, maternal, neonatal and nutritional  
Non-communicable  
Injuries

| Leading Causes 2022         | Leading Causes 2050         | Mean % change number of DALY | Mean % change all-age DALY rate | Mean % change age-standardized DALY rate |
|-----------------------------|-----------------------------|------------------------------|---------------------------------|------------------------------------------|
| 1 Ischemic heart disease    | 1 Low back pain             | 40.2 (30.1 to 50.4)          | 5.11 (2.93 to 7.58)             | -2.2 (-2.31 to -2.08)                    |
| 2 Low back pain             | 2 Ischemic heart disease    | 4.67 (-20.1 to 33)           | -21.5 (-38.2 to -0.701)         | -48.8 (-60.4 to -35.1)                   |
| 3 Falls                     | 3 Alzheimer's disease       | 121 (95.6 to 146)            | 66 (53.3 to 78.3)               | -1.17 (-5.59 to 3.15)                    |
| 4 Anxiety disorders         | 4 Diabetes                  | 102 (84.5 to 122)            | 51.1 (41.8 to 60.6)             | 27.6 (20.9 to 35.1)                      |
| 5 Stroke                    | 5 Falls                     | 52.5 (36.2 to 66.8)          | 14.3 (5.63 to 23.9)             | -12.6 (-18.2 to -7.35)                   |
| 6 Lung cancer               | 6 COPD                      | 75.5 (43.8 to 109)           | 31.6 (9.49 to 52.6)             | -7.48 (-23.3 to 10.7)                    |
| 7 Alzheimer's disease       | 7 Anxiety disorders         | 32.7 (22.5 to 42.9)          | -0.537 (-2.23 to 1.14)          | 0.235 (0.118 to 0.362)                   |
| 8 Diabetes                  | 8 Lung cancer               | 40.7 (15.7 to 68.8)          | 5.46 (-12.4 to 26)              | -13.5 (-26 to 1.22)                      |
| 9 COVID-19                  | 9 Stroke                    | 22.8 (6.35 to 40.2)          | -7.94 (-19.1 to 3.78)           | -36.2 (-43.9 to -26.8)                   |
| 10 COPD                     | 10 Colorectal cancer        | 67.1 (29 to 115)             | 25.3 (-1.85 to 58)              | -8.25 (-25.8 to 14.3)                    |
| 11 Depressive disorders     | 11 Age-related hearing loss | 64.9 (52.7 to 78.1)          | 23.6 (18.5 to 29.3)             | -0.371 (-0.468 to -0.279)                |
| 12 Colorectal cancer        | 12 Depressive disorders     | 30.7 (20.4 to 40.7)          | -1.99 (-3.69 to -0.494)         | -0.936 (-1.02 to -0.864)                 |
| 13 Headache disorders       | 13 Headache disorders       | 35 (24.8 to 45.7)            | 1.19 (-0.748 to 4.65)           | 0.0238 (-0.129 to 0.139)                 |
| 14 Age-related hearing loss | 14 Other musculoskeletal    | 67.8 (54 to 81)              | 25.8 (21.8 to 30)               | 19.3 (16.9 to 21.2)                      |
| 15 Self-harm                | 15 Chronic kidney disease   | 132 (83.1 to 183)            | 74.2 (39.3 to 111)              | 15.1 (-8.77 to 41.6)                     |
| 16 Road injuries            | 16 Osteoarthritis           | 58.4 (46.5 to 70.7)          | 18.8 (14.5 to 23.1)             | 1.44 (1.27 to 1.64)                      |
| 17 Oral disorders           | 17 Oral disorders           | 50.2 (39.5 to 61.7)          | 12.6 (9.35 to 16)               | 0.333 (0.22 to 0.446)                    |
| 18 Osteoarthritis           | 18 Atrial fibrillation      | 137 (110 to 166)             | 77.4 (58.5 to 93.9)             | 8.87 (1.59 to 16.7)                      |
| 19 Other musculoskeletal    | 19 Road injuries            | 20.9 (-10.2 to 56.7)         | -9.37 (-32.3 to 16)             | -11 (-35.8 to 15.9)                      |
| 20 Mechanical forces        | 20 Mechanical forces        | 37.8 (26.1 to 48.5)          | 3.32 (-1.75 to 7.7)             | -4.17 (-9.51 to 0.313)                   |
| 27 Chronic kidney disease   | 23 Self-harm                |                              |                                 |                                          |
| 29 Atrial fibrillation      | 153 COVID-19                |                              |                                 |                                          |

### Brunei, Reference scenario

**Legend:**  
Communicable, maternal, neonatal and nutritional  
Non-communicable  
Injuries

| Leading Causes 2022           | Leading Causes 2050           | Mean % change number of DALY | Mean % change all-age DALY rate | Mean % change age-standardized DALY rate |
|-------------------------------|-------------------------------|------------------------------|---------------------------------|------------------------------------------|
| 1 Diabetes                    | 1 Diabetes                    | 109 (74.6 to 141)            | 110 (83.8 to 140)               | -2.21 (-12.8 to 10.2)                    |
| 2 Ischemic heart disease      | 2 Stroke                      | 70.3 (40.8 to 105)           | 71 (48 to 101)                  | -34.4 (-45.2 to -19.3)                   |
| 3 Stroke                      | 3 Ischemic heart disease      | 15.3 (-17.5 to 56.1)         | 15.8 (-15.9 to 61.1)            | -49.4 (-64.3 to -26.2)                   |
| 4 Low back pain               | 4 Chronic kidney disease      | 199 (131 to 292)             | 200 (135 to 292)                | 10.9 (-16.5 to 53.7)                     |
| 5 COVID-19                    | 5 COPD                        | 290 (218 to 366)             | 291 (226 to 374)                | 8.65 (-12.2 to 38.2)                     |
| 6 Neonatal disorders          | 6 Low back pain               | 28.2 (10.8 to 49.4)          | 28.5 (18.6 to 40.1)             | -2.93 (-3.16 to -2.69)                   |
| 7 Other musculoskeletal       | 7 Lung cancer                 | 172 (99.3 to 250)            | 172 (112 to 238)                | 2.3 (-18.4 to 26)                        |
| 8 Road injuries               | 8 Other musculoskeletal       | 68.5 (37.7 to 98.5)          | 68.9 (53.6 to 90.3)             | 30.5 (28.9 to 32.2)                      |
| 9 Congenital defects          | 9 Lower respiratory infect    | 164 (119 to 228)             | 165 (121 to 213)                | -16.2 (-30.4 to 1.94)                    |
| 10 Headache disorders         | 10 Colorectal cancer          | 129 (58.6 to 218)            | 129 (66.5 to 199)               | -2.92 (-27.8 to 26.5)                    |
| 11 Falls                      | 11 Alzheimer's disease        | 366 (283 to 454)             | 367 (304 to 441)                | 1.61 (-2.8 to 6.56)                      |
| 12 Chronic kidney disease     | 12 Falls                      | 43.9 (20.6 to 70.4)          | 44.3 (30.2 to 60.7)             | -16.9 (-23.8 to -8.6)                    |
| 13 Lung cancer                | 13 Osteoarthritis             | 142 (110 to 179)             | 142 (126 to 160)                | 0.341 (0.0168 to 0.738)                  |
| 14 Colorectal cancer          | 14 Age-related hearing loss   | 126 (94.1 to 166)            | 127 (107 to 148)                | -0.308 (-0.527 to -0.104)                |
| 15 Lower respiratory infect   | 15 Liver cancer               | 184 (131 to 243)             | 185 (136 to 247)                | 24.2 (2.28 to 55.9)                      |
| 16 COPD                       | 16 Road injuries              | -3.81 (-29 to 34)            | -3.41 (-27.5 to 35.5)           | -21.1 (-44.1 to 17.3)                    |
| 17 Anxiety disorders          | 17 Hypertensive heart disease | 268 (181 to 361)             | 269 (185 to 361)                | 18.3 (-10.2 to 55.1)                     |
| 18 Breast cancer              | 18 Headache disorders         | -3.97 (-21.1 to 15.3)        | -3.74 (-12 to 11.8)             | 0.772 (0.329 to 1.07)                    |
| 19 Depressive disorders       | 19 Urinary diseases           | 304 (233 to 388)             | 306 (241 to 380)                | 31.9 (13.4 to 60.1)                      |
| 20 Age-related hearing loss   | 20 Breast cancer              | 40.4 (3.43 to 79)            | 40.7 (8.1 to 71.2)              | -16.2 (-34.1 to 4.83)                    |
| 21 Osteoarthritis             | 22 Neonatal disorders         |                              |                                 |                                          |
| 26 Liver cancer               | 24 Anxiety disorders          |                              |                                 |                                          |
| 32 Alzheimer's disease        | 25 Congenital defects         |                              |                                 |                                          |
| 40 Hypertensive heart disease | 29 Depressive disorders       |                              |                                 |                                          |
| 52 Urinary diseases           | 153 COVID-19                  |                              |                                 |                                          |



### Japan, Reference scenario

**Legend:**  
Communicable, maternal, neonatal and nutritional  
Non-communicable  
Injuries

| Leading Causes 2022         | Leading Causes 2050        | Mean % change number of DALY | Mean % change all-age DALY rate | Mean % change age-standardized DALY rate |
|-----------------------------|----------------------------|------------------------------|---------------------------------|------------------------------------------|
| 1 Stroke                    | 1 Alzheimer's disease      | 23.3 (10.9 to 35.6)          | 44.5 (33.6 to 54.6)             | -10.2 (-14.2 to -6.05)                   |
| 2 Alzheimer's disease       | 2 Low back pain            | -13.1 (-19.7 to -6.44)       | 1.79 (-0.988 to 4.3)            | -2.02 (-2.07 to -1.97)                   |
| 3 Low back pain             | 3 Stroke                   | -26.1 (-34.1 to -17.1)       | -13.4 (-20.9 to -4.33)          | -31 (-37.7 to -23.2)                     |
| 4 Ischemic heart disease    | 4 Diabetes                 | 10.1 (2.05 to 18.8)          | 29 (24.5 to 32.7)               | 14.6 (12.4 to 16.5)                      |
| 5 Lung cancer               | 5 Other musculoskeletal    | 4.44 (-3.34 to 13.2)         | 22.4 (18.5 to 26.5)             | 19.9 (19.2 to 20.6)                      |
| 6 Other musculoskeletal     | 6 Lung cancer              | -4.99 (-21.3 to 14.8)        | 11.3 (-6.21 to 30.8)            | -18.2 (-30.1 to -5.58)                   |
| 7 Diabetes                  | 7 Lower respiratory infect | 12.2 (-3.29 to 30.7)         | 31.5 (14.1 to 47.4)             | -18.6 (-28.6 to -8.42)                   |
| 8 Colorectal cancer         | 8 Colorectal cancer        | 2.19 (-17.7 to 25)           | 19.8 (-3.19 to 45.1)            | -10.7 (-27.9 to 9.36)                    |
| 9 Lower respiratory infect  | 9 Age-related hearing loss | 5.42 (-2.27 to 13.9)         | 23.5 (19.6 to 27.9)             | -0.378 (-0.435 to -0.327)                |
| 10 Age-related hearing loss | 10 Chronic kidney disease  | 66.2 (34.7 to 100)           | 94.9 (55.2 to 136)              | 20.7 (-0.651 to 46.4)                    |
| 11 Osteoarthritis           | 11 Ischemic heart disease  | -44.9 (-55.6 to -31.4)       | -35.4 (-47.5 to -19.1)          | -55.3 (-64.8 to -43.7)                   |
| 12 Stomach cancer           | 12 Osteoarthritis          | -0.601 (-8.24 to 7)          | 16.5 (13.1 to 19.4)             | 0.923 (0.786 to 1.09)                    |
| 13 Falls                    | 13 Pancreatic cancer       | 29.2 (4.4 to 58.2)           | 51.4 (24.1 to 79.1)             | 19 (-1.96 to 39.6)                       |
| 14 Self-harm                | 14 Falls                   | -2.89 (-14 to 9.15)          | 13.8 (3.59 to 25.3)             | -15.6 (-22.5 to -8.11)                   |
| 15 Pancreatic cancer        | 15 COPD                    | 12.5 (-4.84 to 30.5)         | 31.8 (14.1 to 51)               | -12.6 (-25.4 to 1.88)                    |
| 16 COPD                     | 16 Liver cancer            | 29.9 (13.1 to 50.2)          | 52.3 (32.5 to 73)               | 28.1 (13.1 to 45.4)                      |
| 17 Chronic kidney disease   | 17 Stomach cancer          | -28.2 (-35.4 to -19.6)       | -15.9 (-22.3 to -7.88)          | -38.9 (-43.1 to -33.9)                   |
| 18 Headache disorders       | 18 Self-harm               | -30.5 (-38.7 to -22.2)       | -18.5 (-27.4 to -9.09)          | -14.9 (-26.5 to -1.25)                   |
| 19 Depressive disorders     | 19 Headache disorders      | -18.9 (-24.5 to -12.9)       | -4.92 (-6.69 to -2.36)          | 0.108 (0.0241 to 0.177)                  |
| 20 Liver cancer             | 20 Depressive disorders    | -15 (-21.7 to -8.64)         | -0.401 (-1.75 to 1.2)           | -1.05 (-1.1 to -0.988)                   |

### South Korea, Reference scenario

**Legend:**  
Communicable, maternal, neonatal and nutritional  
Non-communicable  
Injuries

| Leading Causes 2022         | Leading Causes 2050         | Mean % change number of DALY | Mean % change all-age DALY rate | Mean % change age-standardized DALY rate |
|-----------------------------|-----------------------------|------------------------------|---------------------------------|------------------------------------------|
| 1 Diabetes                  | 1 Diabetes                  | 49.7 (37.3 to 63.3)          | 62.9 (53.9 to 73.5)             | 8.02 (2.51 to 12.3)                      |
| 2 Stroke                    | 2 Alzheimer's disease       | 173 (144 to 206)             | 197 (172 to 225)                | -18.1 (-21.5 to -14.2)                   |
| 3 Low back pain             | 3 Stroke                    | 24.3 (11.8 to 38.6)          | 35.3 (21.9 to 48.2)             | -43.1 (-49.2 to -37.2)                   |
| 4 COVID-19                  | 4 Low back pain             | 4.68 (-4.1 to 14.2)          | 13.9 (7.98 to 20.9)             | -2.4 (-2.54 to -2.26)                    |
| 5 Other musculoskeletal     | 5 Lung cancer               | 47.6 (23.2 to 73.1)          | 60.6 (36.2 to 87)               | -28.6 (-37.5 to -18.8)                   |
| 6 Self-harm                 | 6 Falls                     | 35.4 (19.2 to 53.4)          | 47.3 (30.6 to 65.3)             | -24.1 (-30.8 to -17)                     |
| 7 Alzheimer's disease       | 7 Lower respiratory infect  | 152 (110 to 201)             | 175 (135 to 217)                | -25.7 (-35.3 to -16)                     |
| 8 Falls                     | 8 COPD                      | 114 (81 to 154)              | 133 (103 to 170)                | -20.5 (-30.3 to -8.67)                   |
| 9 Lung cancer               | 9 Other musculoskeletal     | 15.1 (4.78 to 25.6)          | 25.2 (16.7 to 35.5)             | 23.6 (22.4 to 24.7)                      |
| 10 Ischemic heart disease   | 10 Liver cancer             | 60.2 (39.4 to 82.8)          | 74.4 (52.5 to 97.1)             | 5.36 (-7.86 to 19.5)                     |
| 11 Liver cancer             | 11 Age-related hearing loss | 74.3 (58.8 to 91.7)          | 89.7 (74.7 to 105)              | -0.272 (-0.477 to -0.053)                |
| 12 Osteoarthritis           | 12 Chronic kidney disease   | 194 (137 to 251)             | 219 (158 to 280)                | 1.7 (-15.7 to 22.4)                      |
| 13 Age-related hearing loss | 13 Osteoarthritis           | 45.8 (34.6 to 56.8)          | 58.7 (52.8 to 65.8)             | 0.326 (0.109 to 0.556)                   |
| 14 Headache disorders       | 14 Colorectal cancer        | 79.9 (44.7 to 120)           | 95.8 (61.4 to 138)              | -13.4 (-27.4 to 4.56)                    |
| 15 COPD                     | 15 Ischemic heart disease   | 2.08 (-17.2 to 22.3)         | 11.1 (-9.97 to 32.8)            | -61.1 (-67.8 to -53)                     |
| 16 Stomach cancer           | 16 Self-harm                | -27.4 (-36.4 to -18.8)       | -21 (-29 to -12.8)              | -24.2 (-32.9 to -14.1)                   |
| 17 Colorectal cancer        | 17 Pancreatic cancer        | 98 (59.4 to 139)             | 115 (77.3 to 159)               | 6.43 (-10.9 to 25.2)                     |
| 18 Cirrhosis liver          | 18 Stomach cancer           | 8.4 (-5.37 to 22.3)          | 18 (5.66 to 29.1)               | -44.8 (-48.3 to -41)                     |
| 19 Road injuries            | 19 Cirrhosis liver          | 7 (-7.34 to 23.4)            | 16.4 (2.6 to 30.8)              | -14.1 (-24.5 to -3)                      |
| 20 Lower respiratory infect | 20 Atrial fibrillation      | 157 (125 to 184)             | 179 (148 to 211)                | 0.159 (-5.74 to 6.11)                    |
| 24 Chronic kidney disease   | 21 Headache disorders       |                              |                                 |                                          |
| 25 Pancreatic cancer        | 24 Road injuries            |                              |                                 |                                          |
| 36 Atrial fibrillation      | 155 COVID-19                |                              |                                 |                                          |

### Singapore, Reference scenario

**Legend:**  
Communicable, maternal, neonatal and nutritional  
Non-communicable  
Injuries

| Leading Causes 2022           | Leading Causes 2050           | Mean % change number of DALY | Mean % change all-age DALY rate | Mean % change age-standardized DALY rate |
|-------------------------------|-------------------------------|------------------------------|---------------------------------|------------------------------------------|
| 1 Ischemic heart disease      | 1 Lower respiratory infect    | 203 (164 to 247)             | 128 (102 to 161)                | -22.1 (-31 to -9.98)                     |
| 2 Low back pain               | 2 Diabetes                    | 164 (141 to 187)             | 99 (87 to 114)                  | 53.1 (50.1 to 55.7)                      |
| 3 Lower respiratory infect    | 3 Alzheimer's disease         | 294 (251 to 341)             | 197 (168 to 229)                | -7.58 (-11.4 to -3.46)                   |
| 4 Diabetes                    | 4 Other musculoskeletal       | 87.7 (70.4 to 106)           | 41.4 (31.5 to 50.8)             | 30.4 (29.3 to 31.5)                      |
| 5 Other musculoskeletal       | 5 Low back pain               | 44.4 (32.5 to 57)            | 8.8 (3.02 to 15.3)              | -2.5 (-2.73 to -2.23)                    |
| 6 Stroke                      | 6 Ischemic heart disease      | -2.73 (-23.7 to 27.6)        | -26.7 (-41.8 to -5.1)           | -63 (-70.9 to -51.7)                     |
| 7 Osteoarthritis              | 7 Age-related hearing loss    | 127 (106 to 151)             | 71.2 (57 to 86.1)               | -0.911 (-1.16 to -0.642)                 |
| 8 Age-related hearing loss    | 8 Osteoarthritis              | 102 (87.2 to 118)            | 52.3 (44.4 to 61.2)             | 2.38 (2.12 to 2.62)                      |
| 9 Falls                       | 9 Stroke                      | 62.7 (44 to 82.7)            | 22.6 (12.6 to 34.8)             | -33.4 (-40.2 to -25.1)                   |
| 10 Lung cancer                | 10 Lung cancer                | 104 (67.3 to 143)            | 54 (26.5 to 84.3)               | -19.9 (-33.2 to -5.08)                   |
| 11 Headache disorders         | 11 Colorectal cancer          | 132 (75.9 to 188)            | 74.9 (33.8 to 118)              | -7.9 (-27.4 to 12.3)                     |
| 12 Alzheimer's disease        | 12 Urinary diseases           | 372 (285 to 465)             | 256 (193 to 323)                | 24.4 (7.28 to 44.5)                      |
| 13 COVID-19                   | 13 Falls                      | 63 (46.2 to 81.2)            | 22.9 (12.7 to 35.1)             | -16.8 (-24.6 to -7.78)                   |
| 14 Colorectal cancer          | 14 Chronic kidney disease     | 215 (145 to 307)             | 138 (86.8 to 205)               | -3.06 (-24.7 to 27.1)                    |
| 15 Depressive disorders       | 15 COPD                       | 194 (141 to 252)             | 122 (86.3 to 159)               | -9.94 (-24.3 to 8.32)                    |
| 16 Anxiety disorders          | 16 Headache disorders         | 20.7 (11.6 to 30.9)          | -9.04 (-12.7 to -3.67)          | 0.5 (0.195 to 0.766)                     |
| 17 Self-harm                  | 17 Hypertensive heart disease | 201 (133 to 287)             | 126 (79.6 to 191)               | 11.3 (-14.9 to 44.6)                     |
| 18 Autism spectrum            | 18 Depressive disorders       | 40.8 (30 to 52.5)            | 6.07 (1.21 to 10.7)             | -1.48 (-1.73 to -1.19)                   |
| 19 Breast cancer              | 19 Pancreatic cancer          | 186 (123 to 250)             | 116 (70.3 to 163)               | 20.5 (-4.95 to 45.1)                     |
| 20 Neck pain                  | 20 Liver cancer               | 134 (96.5 to 178)            | 76.1 (51.1 to 104)              | 6.9 (-9.46 to 26.5)                      |
| 21 Chronic kidney disease     | 22 Anxiety disorders          |                              |                                 |                                          |
| 25 COPD                       | 24 Breast cancer              |                              |                                 |                                          |
| 28 Liver cancer               | 25 Neck pain                  |                              |                                 |                                          |
| 29 Hypertensive heart disease | 26 Autism spectrum            |                              |                                 |                                          |
| 30 Urinary diseases           | 27 Self-harm                  |                              |                                 |                                          |
| 32 Pancreatic cancer          | 151 COVID-19                  |                              |                                 |                                          |

### Canada, Reference scenario

**Legend:**  
Communicable, maternal, neonatal and nutritional  
Non-communicable  
Injuries

| Leading Causes 2022         | Leading Causes 2050         | Mean % change number of DALY | Mean % change all-age DALY rate | Mean % change age-standardized DALY rate |
|-----------------------------|-----------------------------|------------------------------|---------------------------------|------------------------------------------|
| 1 Ischemic heart disease    | 1 Diabetes                  | 67.2 (55.3 to 81.5)          | 29.7 (23 to 37)                 | 16.4 (10.9 to 21.2)                      |
| 2 Low back pain             | 2 Alzheimer's disease       | 108 (87.7 to 131)            | 61.3 (48 to 75.3)               | -5.13 (-9.66 to -0.991)                  |
| 3 Other musculoskeletal     | 3 Other musculoskeletal     | 45 (36.2 to 55.2)            | 12.5 (9.51 to 15.5)             | 14.9 (14.2 to 15.6)                      |
| 4 Diabetes                  | 4 Low back pain             | 30 (22.3 to 38.5)            | 0.832 (-1.99 to 4.03)           | -1.61 (-1.69 to -1.52)                   |
| 5 Lung cancer               | 5 Ischemic heart disease    | -6.68 (-24.2 to 14.8)        | -27.6 (-42 to -10.7)            | -51.6 (-61.6 to -39.5)                   |
| 6 Alzheimer's disease       | 6 Drug use disorders        | 83.7 (64.6 to 105)           | 42.4 (29 to 57.2)               | 40.6 (27.4 to 55.3)                      |
| 7 Stroke                    | 7 Lung cancer               | 25.3 (4.52 to 46.4)          | -2.86 (-16.9 to 14.9)           | -15.9 (-26.5 to -3.35)                   |
| 8 Drug use disorders        | 8 Falls                     | 63.7 (45.9 to 78.5)          | 27 (16.2 to 38.3)               | -13.5 (-18.9 to -7.11)                   |
| 9 Falls                     | 9 COPD                      | 60.4 (36.1 to 88.6)          | 24.4 (7.02 to 41.9)             | -9.42 (-23.1 to 4.05)                    |
| 10 COVID-19                 | 10 Stroke                   | 24 (11.6 to 36.1)            | -3.8 (-12 to 5.8)               | -27.8 (-34.8 to -20.2)                   |
| 11 COPD                     | 11 Age-related hearing loss | 51.3 (41.2 to 62.4)          | 17.3 (11.4 to 23.2)             | -0.421 (-0.495 to -0.338)                |
| 12 Headache disorders       | 12 Headache disorders       | 27.6 (19.4 to 35.9)          | -1.07 (-2.51 to 0.428)          | -0.277 (-0.473 to -0.0522)               |
| 13 Age-related hearing loss | 13 Chronic kidney disease   | 185 (139 to 242)             | 121 (82.5 to 160)               | 32.7 (9.39 to 61.5)                      |
| 14 Depressive disorders     | 14 Colorectal cancer        | 48.2 (22.4 to 82.5)          | 14.9 (-5.31 to 40.9)            | -11.5 (-27.4 to 7.13)                    |
| 15 Self-harm                | 15 Depressive disorders     | 28.3 (20.5 to 37.5)          | -0.493 (-1.65 to 0.816)         | -0.989 (-1.1 to -0.876)                  |
| 16 Colorectal cancer        | 16 Anxiety disorders        | 28.9 (20.3 to 37.7)          | -0.0909 (-1.57 to 1.43)         | 0.0902 (-0.0765 to 0.248)                |
| 17 Anxiety disorders        | 17 Self-harm                | 15.3 (-0.381 to 33.6)        | -10.6 (-22 to 2.12)             | -10.5 (-23.4 to 4.07)                    |
| 18 Breast cancer            | 18 Atrial fibrillation      | 122 (96.6 to 147)            | 72.3 (56.3 to 90.1)             | 11.8 (4.94 to 17.9)                      |
| 19 Osteoarthritis           | 19 Lower respiratory infect | 74.4 (53.7 to 99)            | 35.3 (17.8 to 53.3)             | -18.2 (-27.1 to -7.01)                   |
| 20 Cirrhosis liver          | 20 Pancreatic cancer        | 80.9 (50.1 to 120)           | 40.2 (17.8 to 71.4)             | 19.5 (1.91 to 43.3)                      |
| 23 Lower respiratory infect | 21 Osteoarthritis           |                              |                                 |                                          |
| 25 Pancreatic cancer        | 22 Breast cancer            |                              |                                 |                                          |
| 27 Chronic kidney disease   | 28 Cirrhosis liver          |                              |                                 |                                          |
| 29 Atrial fibrillation      | 152 COVID-19                |                              |                                 |                                          |

### Greenland, Reference scenario

**Legend:**  
 Communicable, maternal, neonatal and nutritional  
 Non-communicable  
 Injuries

| Leading Causes 2022         | Leading Causes 2050         | Mean % change number of DALY | Mean % change all-age DALY rate | Mean % change age-standardized DALY rate |
|-----------------------------|-----------------------------|------------------------------|---------------------------------|------------------------------------------|
| 1 Self-harm                 | 1 Lung cancer               | 17.8 (-4.93 to 46.5)         | 11.2 (-11 to 36.3)              | -17.5 (-32.9 to -0.279)                  |
| 2 Lung cancer               | 2 Self-harm                 | -22.3 (-36.6 to -4.87)       | -26.6 (-37.5 to -11.7)          | -21.9 (-35 to -4.29)                     |
| 3 COVID-19                  | 3 COPD                      | 73.7 (36.1 to 122)           | 63.9 (31.9 to 106)              | -14.6 (-31.3 to 7.21)                    |
| 4 Ischemic heart disease    | 4 Stroke                    | 17 (-6.02 to 43)             | 10.4 (-9.08 to 34.1)            | -42.4 (-52.8 to -29.8)                   |
| 5 Stroke                    | 5 Ischemic heart disease    | -17.3 (-40.5 to 12.3)        | -22 (-43 to 7.55)               | -56.8 (-69.3 to -39.2)                   |
| 6 Depressive disorders      | 6 Falls                     | 58.5 (36.7 to 79.5)          | 49.6 (35 to 64.8)               | -16.8 (-23 to -10.5)                     |
| 7 Low back pain             | 7 Other musculoskeletal     | 33.9 (19.8 to 48.7)          | 26.3 (21.5 to 31.9)             | 25.9 (24.9 to 26.9)                      |
| 8 COPD                      | 8 Alzheimer's disease       | 260 (192 to 331)             | 240 (181 to 296)                | -8.13 (-12.2 to -4.03)                   |
| 9 Other musculoskeletal     | 9 Low back pain             | 15.6 (2.86 to 26.4)          | 9.09 (4.69 to 14.2)             | -1.73 (-1.91 to -1.53)                   |
| 10 Falls                    | 10 Depressive disorders     | 0.48 (-9.97 to 10.7)         | -5.18 (-6.89 to -3.21)          | -0.938 (-1.17 to -0.679)                 |
| 11 Alcohol use disorders    | 11 Colorectal cancer        | 36.6 (1.97 to 77.7)          | 29 (-6.26 to 68.9)              | -15.2 (-37.7 to 9.94)                    |
| 12 Colorectal cancer        | 12 Diabetes                 | 45.6 (23.2 to 67.8)          | 37.4 (22.5 to 52.8)             | -3.76 (-12.5 to 6.27)                    |
| 13 Headache disorders       | 13 Alcohol use disorders    | -7.91 (-21.9 to 4.52)        | -13.1 (-21.8 to -1.65)          | -9.42 (-19.1 to 1.31)                    |
| 14 Neonatal disorders       | 14 Pancreatic cancer        | 70.7 (31.7 to 120)           | 61 (25.2 to 104)                | 16.3 (-9.58 to 44.1)                     |
| 15 Diabetes                 | 15 Age-related hearing loss | 70.2 (47.9 to 90.9)          | 60.7 (46.9 to 75.9)             | -1.45 (-1.73 to -1.12)                   |
| 16 Anxiety disorders        | 16 Lower respiratory infect | 87.3 (49.3 to 129)           | 76.8 (43.3 to 110)              | -24.5 (-37.2 to -11.9)                   |
| 17 Pancreatic cancer        | 17 Headache disorders       | 3.15 (-7.99 to 13.7)         | -2.65 (-5.12 to 2.4)            | 1.04 (0.629 to 1.45)                     |
| 18 Age-related hearing loss | 18 Chronic kidney disease   | 130 (72 to 199)              | 117 (59.9 to 187)               | -0.351 (-25.1 to 33)                     |
| 19 Interpersonal violence   | 19 Anxiety disorders        | 5.13 (-5.53 to 15.1)         | -0.779 (-4.05 to 2.63)          | 1.21 (0.814 to 1.59)                     |
| 20 Cirrhosis liver          | 20 Atrial fibrillation      | 166 (118 to 214)             | 151 (113 to 187)                | -2.76 (-9.08 to 3.23)                    |
| 21 Lower respiratory infect | 24 Cirrhosis liver          |                              |                                 |                                          |
| 22 Alzheimer's disease      | 25 Neonatal disorders       |                              |                                 |                                          |
| 31 Chronic kidney disease   | 38 Interpersonal violence   |                              |                                 |                                          |
| 44 Atrial fibrillation      | 157 COVID-19                |                              |                                 |                                          |

### USA, Reference scenario

**Legend:**  
Communicable, maternal, neonatal and nutritional  
Non-communicable  
Injuries

| Leading Causes 2022           | Leading Causes 2050           | Mean % change number of DALY | Mean % change all-age DALY rate | Mean % change age-standardized DALY rate |
|-------------------------------|-------------------------------|------------------------------|---------------------------------|------------------------------------------|
| 1 Ischemic heart disease      | 1 Drug use disorders          | 25.5 (11 to 42.4)            | 18.2 (5.64 to 32)               | 19.8 (6.49 to 33.7)                      |
| 2 Drug use disorders          | 2 Diabetes                    | 25.3 (16 to 34.6)            | 18.1 (11.5 to 24)               | 2.03 (-3.06 to 6.63)                     |
| 3 COVID-19                    | 3 Ischemic heart disease      | -25.6 (-38.8 to -10.2)       | -29.9 (-40.8 to -16.6)          | -51.9 (-60.7 to -41.1)                   |
| 4 Diabetes                    | 4 Alzheimer's disease         | 88.1 (69.8 to 107)           | 77.2 (64.1 to 90.1)             | 1.33 (-2.13 to 4.97)                     |
| 5 Low back pain               | 5 COPD                        | 32.4 (15.4 to 48.9)          | 24.7 (10.9 to 41)               | -8.78 (-20.4 to 3.44)                    |
| 6 COPD                        | 6 Low back pain               | 11.7 (4.5 to 19.4)           | 5.26 (3.35 to 7.29)             | -1.24 (-1.3 to -1.18)                    |
| 7 Other musculoskeletal       | 7 Chronic kidney disease      | 103 (74 to 136)              | 91.4 (63.7 to 122)              | 31.5 (11.9 to 55.3)                      |
| 8 Stroke                      | 8 Other musculoskeletal       | 22.6 (15.3 to 31.3)          | 15.5 (13.6 to 17.6)             | 12.8 (12.2 to 13.3)                      |
| 9 Lung cancer                 | 9 Stroke                      | 1.86 (-6.59 to 11.6)         | -4.03 (-10.3 to 3.05)           | -28.9 (-34.4 to -22.4)                   |
| 10 Alzheimer's disease        | 10 Lung cancer                | 7.48 (-7.48 to 24.4)         | 1.26 (-12.2 to 16.6)            | -17.5 (-27.9 to -6.64)                   |
| 11 Depressive disorders       | 11 Falls                      | 30.3 (18.5 to 44)            | 22.8 (13 to 33.5)               | -10 (-15.9 to -3.39)                     |
| 12 Road injuries              | 12 Age-related hearing loss   | 31.8 (23 to 40.7)            | 24.2 (20 to 28.9)               | -0.118 (-0.206 to -0.0359)               |
| 13 Falls                      | 13 Depressive disorders       | 4.34 (-2.23 to 11.2)         | -1.7 (-2.63 to -0.661)          | -0.853 (-0.95 to -0.759)                 |
| 14 Chronic kidney disease     | 14 Road injuries              | 10.6 (-11 to 33.9)           | 4.24 (-15.6 to 25.4)            | 4.09 (-18 to 29)                         |
| 15 Anxiety disorders          | 15 Anxiety disorders          | 6.02 (-0.381 to 13)          | -0.113 (-1.44 to 1.29)          | -0.000416 (-0.0758 to 0.0837)            |
| 16 Headache disorders         | 16 Headache disorders         | 5.02 (-1.72 to 12.7)         | -1.05 (-2.61 to 2.66)           | -0.228 (-0.378 to -0.028)                |
| 17 Age-related hearing loss   | 17 Hypertensive heart disease | 72.5 (45.9 to 107)           | 62.6 (35.9 to 98.4)             | 25.8 (3.84 to 53.9)                      |
| 18 Self-harm                  | 18 Osteoarthritis             | 23 (14.9 to 31.7)            | 15.9 (13.1 to 18.9)             | 0.584 (0.436 to 0.725)                   |
| 19 Cirrhosis liver            | 19 Colorectal cancer          | 18.9 (-2.49 to 43.1)         | 12 (-7.92 to 32.5)              | -11.9 (-26.9 to 3.32)                    |
| 20 Osteoarthritis             | 20 Self-harm                  | -9.11 (-20.3 to 1.23)        | -14.3 (-22.8 to -4.89)          | -13.3 (-22.9 to -2.28)                   |
| 21 Colorectal cancer          | 22 Cirrhosis liver            |                              |                                 |                                          |
| 24 Hypertensive heart disease | 153 COVID-19                  |                              |                                 |                                          |

### Argentina, Reference scenario

**Legend:**  
Communicable, maternal, neonatal and nutritional  
Non-communicable  
Injuries

| Leading Causes 2022           | Leading Causes 2050           | Mean % change number of DALY | Mean % change all-age DALY rate | Mean % change age-standardized DALY rate |
|-------------------------------|-------------------------------|------------------------------|---------------------------------|------------------------------------------|
| 1 Lower respiratory infect    | 1 Lower respiratory infect    | 42.5 (19.2 to 70.7)          | 38 (21.7 to 55)                 | -18.7 (-28.9 to -9.34)                   |
| 2 Ischemic heart disease      | 2 Other musculoskeletal       | 64.6 (42 to 89.5)            | 59.4 (52.1 to 67.4)             | 30.6 (29.1 to 32.1)                      |
| 3 Low back pain               | 3 Diabetes                    | 77.2 (49.8 to 108)           | 71.6 (56.4 to 88.2)             | 11.8 (2.05 to 21)                        |
| 4 Stroke                      | 4 Low back pain               | 22.3 (6.06 to 41.2)          | 18.4 (13.3 to 23.9)             | -3.78 (-3.88 to -3.67)                   |
| 5 Other musculoskeletal       | 5 Ischemic heart disease      | -11.8 (-34.7 to 13.8)        | -14.5 (-34.5 to 9.72)           | -48.4 (-61.9 to -30.8)                   |
| 6 COVID-19                    | 6 Chronic kidney disease      | 103 (60.4 to 153)            | 96.2 (58.2 to 135)              | 17.8 (-7.81 to 44.1)                     |
| 7 Diabetes                    | 7 Stroke                      | 4.16 (-12.4 to 24.3)         | 0.905 (-11.1 to 14.4)           | -35.3 (-44.2 to -25.8)                   |
| 8 Road injuries               | 8 Lung cancer                 | 67.1 (32 to 106)             | 61.7 (37.3 to 92.2)             | 0.706 (-13.9 to 17.4)                    |
| 9 Neonatal disorders          | 9 COPD                        | 62.9 (32.3 to 97.8)          | 57.9 (32.7 to 82.7)             | -7.16 (-22.7 to 8.37)                    |
| 10 Chronic kidney disease     | 10 Alzheimer's disease        | 94.3 (63.8 to 126)           | 88 (73.5 to 104)                | 0.0238 (-4.52 to 5)                      |
| 11 Anxiety disorders          | 11 Colorectal cancer          | 58.9 (18.1 to 108)           | 53.7 (19 to 94.4)               | -4.08 (-23.9 to 20)                      |
| 12 COPD                       | 12 Age-related hearing loss   | 57.8 (35.9 to 82.9)          | 52.8 (45.6 to 59.8)             | -0.363 (-0.485 to -0.222)                |
| 13 Lung cancer                | 13 Road injuries              | 0.358 (-22.8 to 26.6)        | -2.74 (-23.9 to 21.8)           | -2.69 (-25.9 to 23.4)                    |
| 14 Colorectal cancer          | 14 Anxiety disorders          | 3.76 (-10.7 to 21.6)         | 0.43 (-2.77 to 3.7)             | 0.08 (-0.0312 to 0.183)                  |
| 15 Headache disorders         | 15 Pancreatic cancer          | 125 (74.2 to 192)            | 118 (79.9 to 167)               | 36 (12.2 to 64.7)                        |
| 16 Self-harm                  | 16 Breast cancer              | 45.1 (15.6 to 87.2)          | 40.4 (21.6 to 68.8)             | -7.29 (-20.2 to 9.44)                    |
| 17 Depressive disorders       | 17 Hypertensive heart disease | 92.7 (48.4 to 138)           | 86.7 (52.1 to 121)              | 7.09 (-14.7 to 30.3)                     |
| 18 Alzheimer's disease        | 18 Other cardiovascular       | 43.6 (22.2 to 69.9)          | 39.1 (27.5 to 53.8)             | -13.1 (-21 to -4.32)                     |
| 19 Congenital defects         | 19 Headache disorders         | 6.55 (-9.16 to 25.2)         | 3.11 (-2.19 to 14.2)            | -0.144 (-0.278 to 0.00201)               |
| 20 Age-related hearing loss   | 20 Osteoarthritis             | 64.2 (42.5 to 88.1)          | 59 (52 to 65.3)                 | 2.01 (1.75 to 2.3)                       |
| 21 Breast cancer              | 22 Depressive disorders       |                              |                                 |                                          |
| 22 Other cardiovascular       | 26 Neonatal disorders         |                              |                                 |                                          |
| 26 Osteoarthritis             | 27 Self-harm                  |                              |                                 |                                          |
| 30 Hypertensive heart disease | 36 Congenital defects         |                              |                                 |                                          |
| 32 Pancreatic cancer          | 159 COVID-19                  |                              |                                 |                                          |

### Chile, Reference scenario

**Legend:**  
Communicable, maternal, neonatal and nutritional  
Non-communicable  
Injuries

| Leading Causes 2022           | Leading Causes 2050           | Mean % change number of DALY | Mean % change all-age DALY rate | Mean % change age-standardized DALY rate |
|-------------------------------|-------------------------------|------------------------------|---------------------------------|------------------------------------------|
| 1 COVID-19                    | 1 Diabetes                    | 106 (85.1 to 127)            | 80.1 (69.1 to 91.6)             | 20.4 (13.1 to 27.3)                      |
| 2 Low back pain               | 2 Other musculoskeletal       | 65.2 (49.8 to 82.1)          | 44.8 (39.4 to 51.1)             | 28.4 (27.1 to 29.8)                      |
| 3 Other musculoskeletal       | 3 Low back pain               | 30 (18.8 to 40.9)            | 13.9 (9.84 to 18.4)             | -3.56 (-3.66 to -3.45)                   |
| 4 Ischemic heart disease      | 4 Alzheimer's disease         | 166 (137 to 203)             | 133 (116 to 154)                | -4.76 (-8.47 to -0.589)                  |
| 5 Stroke                      | 5 Stroke                      | 15 (0.222 to 30.4)           | 0.779 (-9.95 to 12.1)           | -42.7 (-48.7 to -35.2)                   |
| 6 Diabetes                    | 6 Chronic kidney disease      | 155 (108 to 214)             | 124 (84.3 to 170)               | 7.67 (-11.2 to 29.8)                     |
| 7 Depressive disorders        | 7 Falls                       | 53.6 (33 to 76.7)            | 34.5 (21.2 to 48.6)             | -8.05 (-17.4 to 0.891)                   |
| 8 Anxiety disorders           | 8 Ischemic heart disease      | -8.25 (-26.6 to 16.7)        | -19.6 (-35 to 1.28)             | -54.1 (-63.2 to -41.2)                   |
| 9 Cirrhosis liver             | 9 Lower respiratory infect    | 90.2 (61.9 to 124)           | 66.7 (44.2 to 89.1)             | -23.6 (-32.4 to -16)                     |
| 10 Falls                      | 10 Age-related hearing loss   | 84.1 (64.9 to 107)           | 61.3 (53.2 to 69.7)             | -0.286 (-0.413 to -0.15)                 |
| 11 Road injuries              | 11 COPD                       | 127 (89.9 to 176)            | 98.6 (70.7 to 136)              | -9.3 (-22.6 to 6.84)                     |
| 12 Headache disorders         | 12 Depressive disorders       | 13.3 (3.09 to 25.7)          | -0.716 (-4.26 to 3.46)          | -1.82 (-1.98 to -1.68)                   |
| 13 Alzheimer's disease        | 13 Cirrhosis liver            | 27.1 (13.9 to 42.7)          | 11.4 (1.87 to 20.7)             | -14.8 (-22 to -7.56)                     |
| 14 Age-related hearing loss   | 14 Anxiety disorders          | 11.7 (1.37 to 25.2)          | -2.15 (-6.25 to 2.72)           | -0.0132 (-0.277 to 0.195)                |
| 15 Self-harm                  | 15 Lung cancer                | 62.1 (33.4 to 89.2)          | 42.1 (21.5 to 65.5)             | -10.5 (-22.5 to 3.18)                    |
| 16 Lower respiratory infect   | 16 Colorectal cancer          | 77.5 (42.9 to 117)           | 55.6 (25.6 to 91.4)             | -6.79 (-24.2 to 12.2)                    |
| 17 Chronic kidney disease     | 17 Hypertensive heart disease | 156 (102 to 214)             | 124 (82.2 to 167)               | 2.5 (-17 to 23.1)                        |
| 18 Stomach cancer             | 18 Osteoarthritis             | 73 (57.2 to 89.5)            | 51.6 (45.8 to 57.3)             | 1.8 (1.54 to 2.06)                       |
| 19 Neonatal disorders         | 19 Road injuries              | 4.36 (-19.5 to 32.5)         | -8.56 (-27 to 15.6)             | -10.5 (-30.5 to 15.1)                    |
| 20 Lung cancer                | 20 Urinary diseases           | 184 (140 to 240)             | 149 (118 to 184)                | 18.8 (6.58 to 33.2)                      |
| 22 Colorectal cancer          | 21 Headache disorders         |                              |                                 |                                          |
| 23 COPD                       | 24 Stomach cancer             |                              |                                 |                                          |
| 25 Osteoarthritis             | 27 Self-harm                  |                              |                                 |                                          |
| 30 Hypertensive heart disease | 31 Neonatal disorders         |                              |                                 |                                          |
| 37 Urinary diseases           | 153 COVID-19                  |                              |                                 |                                          |



### Uruguay, Reference scenario

**Legend:**  
Communicable, maternal, neonatal and nutritional  
Non-communicable  
Injuries

| Leading Causes 2022         | Leading Causes 2050         | Mean % change number of DALY | Mean % change all-age DALY rate | Mean % change age-standardized DALY rate |
|-----------------------------|-----------------------------|------------------------------|---------------------------------|------------------------------------------|
| 1 Ischemic heart disease    | 1 Diabetes                  | 36.6 (15.7 to 58.1)          | 46.7 (32.4 to 59.6)             | 9.12 (0.984 to 17.7)                     |
| 2 Stroke                    | 2 Other musculoskeletal     | 38.6 (18.7 to 60.1)          | 48.9 (43.1 to 54.7)             | 31 (29.5 to 32.6)                        |
| 3 COVID-19                  | 3 Low back pain             | 3.83 (-11.5 to 19.6)         | 11.5 (7.7 to 15.5)              | -3.87 (-3.99 to -3.74)                   |
| 4 Low back pain             | 4 Lung cancer               | 14.1 (-8.45 to 40)           | 22.5 (3.6 to 43.6)              | -11.8 (-25.3 to 1.53)                    |
| 5 Lung cancer               | 5 Stroke                    | -28.6 (-41 to -15.8)         | -23.2 (-31.6 to -14)            | -44.1 (-51.2 to -35.2)                   |
| 6 Diabetes                  | 6 COPD                      | 16.4 (-4.34 to 41.7)         | 25.1 (6.56 to 44.7)             | -15.1 (-28.2 to -0.156)                  |
| 7 Other musculoskeletal     | 7 Ischemic heart disease    | -36.8 (-51.6 to -17.5)       | -32.1 (-46.1 to -13.3)          | -52.8 (-63.2 to -38)                     |
| 8 COPD                      | 8 Colorectal cancer         | 26.4 (-2.47 to 56.8)         | 35.9 (7.7 to 65.1)              | -4.84 (-24.3 to 15)                      |
| 9 Colorectal cancer         | 9 Alzheimer's disease       | 40.8 (18.4 to 61.8)          | 51.2 (40.4 to 62)               | -2.82 (-7.13 to 1.56)                    |
| 10 Self-harm                | 10 Lower respiratory infect | 7.27 (-11.3 to 28.7)         | 15.2 (1.8 to 30.6)              | -24.1 (-32.2 to -13.9)                   |
| 11 Road injuries            | 11 Chronic kidney disease   | 51 (21.5 to 88.5)            | 62.2 (33.6 to 94.6)             | 9.49 (-11.6 to 37)                       |
| 12 Lower respiratory infect | 12 Road injuries            | -8.22 (-29 to 23)            | -1.45 (-20.7 to 24.4)           | 0.94 (-20.8 to 31.6)                     |
| 13 Alzheimer's disease      | 13 Pancreatic cancer        | 68.2 (32.5 to 111)           | 80.8 (47.5 to 117)              | 29.1 (7.04 to 55.7)                      |
| 14 Breast cancer            | 14 Breast cancer            | 14.5 (-6.01 to 37.4)         | 23 (5.73 to 41.8)               | -9.51 (-23.1 to 3.39)                    |
| 15 Anxiety disorders        | 15 Self-harm                | -20.3 (-34.1 to -5.89)       | -14.4 (-24.7 to -2.41)          | -11.2 (-24.2 to 3.12)                    |
| 16 Depressive disorders     | 16 Age-related hearing loss | 25.3 (6.32 to 43.2)          | 34.7 (28.6 to 40.2)             | -0.469 (-0.567 to -0.368)                |
| 17 Falls                    | 17 Falls                    | 16.7 (-1.44 to 36.3)         | 25.4 (14.6 to 35.7)             | -1.81 (-11.2 to 6.3)                     |
| 18 Age-related hearing loss | 18 Urinary diseases         | 78.2 (44.4 to 114)           | 91.4 (66.5 to 122)              | 24.6 (8.71 to 45.5)                      |
| 19 Chronic kidney disease   | 19 Anxiety disorders        | -7.54 (-21.5 to 6.73)        | -0.695 (-4.89 to 4.42)          | -0.256 (-0.446 to -0.0582)               |
| 20 Headache disorders       | 20 Prostate cancer          | 39.9 (15.9 to 67.9)          | 50.4 (31 to 72)                 | 1.87 (-10.3 to 14.5)                     |
| 22 Pancreatic cancer        | 21 Depressive disorders     |                              |                                 |                                          |
| 24 Prostate cancer          | 23 Headache disorders       |                              |                                 |                                          |
| 32 Urinary diseases         | 153 COVID-19                |                              |                                 |                                          |

### Andorra, Reference scenario

**Legend:**

Communicable, maternal, neonatal and nutritional  
Non-communicable  
Injuries

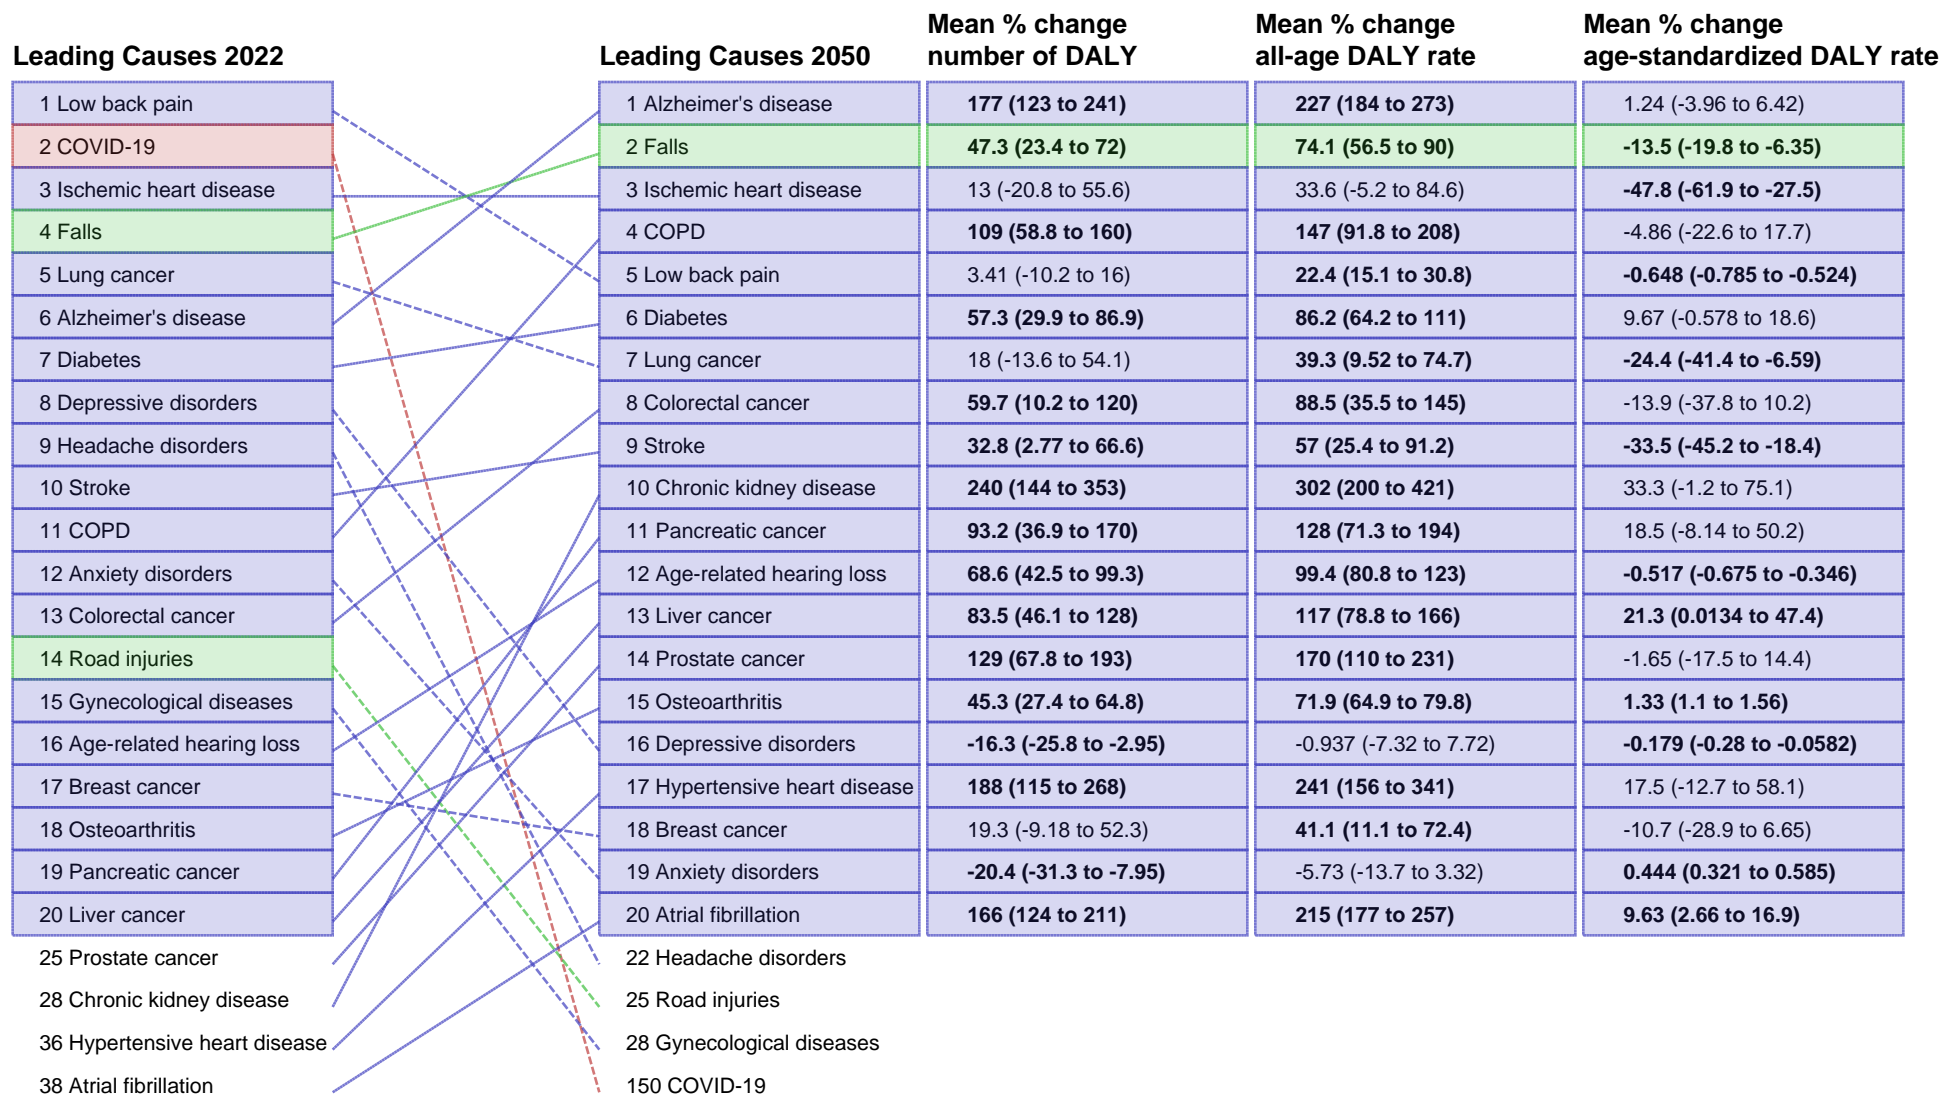

### Austria, Reference scenario

**Legend:**  
Communicable, maternal, neonatal and nutritional  
Non-communicable  
Injuries

| Leading Causes 2022           | Leading Causes 2050           | Mean % change number of DALY | Mean % change all-age DALY rate | Mean % change age-standardized DALY rate |
|-------------------------------|-------------------------------|------------------------------|---------------------------------|------------------------------------------|
| 1 Ischemic heart disease      | 1 Ischemic heart disease      | -15 (-31.6 to 3.04)          | -22.1 (-37.6 to -5.7)           | -51.7 (-62.3 to -40.3)                   |
| 2 Low back pain               | 2 Alzheimer's disease         | 74.2 (52.8 to 96.1)          | 59.4 (48.3 to 70.9)             | -9.94 (-14 to -6)                        |
| 3 Falls                       | 3 Falls                       | 24.5 (8.77 to 40)            | 13.9 (4.72 to 24.6)             | -15.7 (-22.2 to -8.8)                    |
| 4 Alzheimer's disease         | 4 Low back pain               | 15.2 (5.3 to 25.3)           | 5.5 (2.61 to 8.92)              | -1.91 (-1.99 to -1.83)                   |
| 5 COVID-19                    | 5 Chronic kidney disease      | 153 (105 to 202)             | 131 (87.7 to 171)               | 26.3 (3.21 to 50.7)                      |
| 6 Stroke                      | 6 COPD                        | 37.5 (14.5 to 59.3)          | 26 (8.51 to 43.7)               | -14.5 (-27.5 to -0.856)                  |
| 7 Lung cancer                 | 7 Stroke                      | 4.58 (-6.83 to 18.5)         | -4.25 (-12.6 to 4.23)           | -34.5 (-40.6 to -27.7)                   |
| 8 COPD                        | 8 Diabetes                    | 39.6 (23.7 to 58.3)          | 27.8 (15.9 to 40.4)             | 2.6 (-5.2 to 9.98)                       |
| 9 Diabetes                    | 9 Lung cancer                 | 3.51 (-13.6 to 21)           | -5.26 (-18.5 to 10.8)           | -22.7 (-33.5 to -9.86)                   |
| 10 Anxiety disorders          | 10 Atrial fibrillation        | 87.8 (64.2 to 112)           | 71.9 (57.7 to 86.3)             | 3.45 (-2.13 to 10.9)                     |
| 11 Headache disorders         | 11 Anxiety disorders          | 7.53 (-1.18 to 16.1)         | -1.54 (-3.77 to 0.936)          | 0.182 (0.0551 to 0.302)                  |
| 12 Depressive disorders       | 12 Headache disorders         | 3.52 (-5.06 to 11.9)         | -5.22 (-6.7 to -2.37)           | -0.0561 (-0.272 to 0.077)                |
| 13 Gynecological diseases     | 13 Hypertensive heart disease | 89.9 (56.7 to 127)           | 73.9 (45.7 to 108)              | 0.606 (-17.7 to 23.6)                    |
| 14 Age-related hearing loss   | 14 Age-related hearing loss   | 43.7 (29.4 to 57.8)          | 31.5 (25.7 to 38.1)             | -0.198 (-0.317 to -0.0457)               |
| 15 Colorectal cancer          | 15 Pancreatic cancer          | 58.4 (29.7 to 94.2)          | 45 (20 to 73.4)                 | 10.3 (-8.27 to 31.9)                     |
| 16 Self-harm                  | 16 Depressive disorders       | 8.43 (-0.406 to 17.1)        | -0.729 (-2.51 to 1.32)          | -1.01 (-1.13 to -0.885)                  |
| 17 Neck pain                  | 17 Colorectal cancer          | 27.3 (0.0689 to 58.4)        | 16.5 (-5.55 to 41.2)            | -18.5 (-33.1 to -1.29)                   |
| 18 Osteoarthritis             | 18 Osteoarthritis             | 32.1 (20 to 43.7)            | 20.9 (17.2 to 24.6)             | 0.801 (0.641 to 0.971)                   |
| 19 Chronic kidney disease     | 19 Other musculoskeletal      | 23.6 (12.2 to 35.8)          | 13.1 (9.65 to 17.2)             | 17.4 (16.3 to 18.1)                      |
| 20 Other musculoskeletal      | 20 Oral disorders             | 27.4 (15.6 to 40.4)          | 16.6 (11.7 to 20.8)             | -0.0187 (-0.149 to 0.123)                |
| 23 Oral disorders             | 21 Neck pain                  |                              |                                 |                                          |
| 25 Atrial fibrillation        | 22 Gynecological diseases     |                              |                                 |                                          |
| 26 Pancreatic cancer          | 28 Self-harm                  |                              |                                 |                                          |
| 27 Hypertensive heart disease | 153 COVID-19                  |                              |                                 |                                          |

### Belgium, Reference scenario

**Legend:**  
Communicable, maternal, neonatal and nutritional  
Non-communicable  
Injuries

| Leading Causes 2022         | Leading Causes 2050         | Mean % change number of DALY | Mean % change all-age DALY rate | Mean % change age-standardized DALY rate |
|-----------------------------|-----------------------------|------------------------------|---------------------------------|------------------------------------------|
| 1 Ischemic heart disease    | 1 Alzheimer's disease       | 60.1 (41.4 to 78.2)          | 42.7 (30.8 to 52.9)             | -8.52 (-12.7 to -4.57)                   |
| 2 Low back pain             | 2 Falls                     | 21.8 (9.17 to 35.6)          | 8.63 (1.04 to 16.9)             | -13.3 (-19.2 to -6.96)                   |
| 3 Falls                     | 3 Low back pain             | 14.2 (4.01 to 25)            | 1.82 (-0.721 to 4.57)           | -2.31 (-2.38 to -2.22)                   |
| 4 Lung cancer               | 4 Diabetes                  | 53.7 (38.8 to 67.9)          | 37 (30.4 to 43.7)               | 26 (20.4 to 31.1)                        |
| 5 Alzheimer's disease       | 5 Lung cancer               | -1.85 (-18.1 to 17.7)        | -12.5 (-24.6 to 2.92)           | -23.4 (-33.3 to -9.57)                   |
| 6 Stroke                    | 6 COPD                      | 22 (3.59 to 42.7)            | 8.77 (-5.81 to 24.1)            | -18.1 (-29.4 to -4.3)                    |
| 7 COPD                      | 7 Ischemic heart disease    | -28 (-41.6 to -9.98)         | -35.8 (-47.8 to -20.4)          | -54.3 (-62.7 to -42.9)                   |
| 8 COVID-19                  | 8 Stroke                    | -6.2 (-18.8 to 6.59)         | -16.4 (-24.5 to -7.53)          | -35.7 (-42.7 to -27.7)                   |
| 9 Headache disorders        | 9 Lower respiratory infect  | 38.5 (19.9 to 60.5)          | 23.5 (8.43 to 43.9)             | -20.1 (-30 to -8.62)                     |
| 10 Diabetes                 | 10 Headache disorders       | 10.5 (1.47 to 20.2)          | -1.47 (-2.69 to 0.364)          | -0.0114 (-0.141 to 0.139)                |
| 11 Depressive disorders     | 11 Depressive disorders     | 12.2 (2.79 to 22.3)          | 0.0576 (-1.51 to 1.77)          | -1.29 (-1.4 to -1.18)                    |
| 12 Lower respiratory infect | 12 Chronic kidney disease   | 147 (102 to 201)             | 120 (86.2 to 161)               | 36.7 (13.4 to 67.3)                      |
| 13 Self-harm                | 13 Colorectal cancer        | 28.2 (0.964 to 60.2)         | 14.3 (-8.68 to 39.8)            | -11.3 (-28.6 to 7.65)                    |
| 14 Anxiety disorders        | 14 Age-related hearing loss | 35.8 (23.6 to 48.9)          | 21.1 (16 to 26.8)               | -0.548 (-0.693 to -0.396)                |
| 15 Colorectal cancer        | 15 Anxiety disorders        | 11.7 (1.91 to 20.9)          | -0.385 (-1.83 to 1.05)          | 0.426 (0.35 to 0.498)                    |
| 16 Gynecological diseases   | 16 Pancreatic cancer        | 56.9 (27.2 to 92.9)          | 39.8 (15.6 to 64.7)             | 17.8 (-3.55 to 38.3)                     |
| 17 Age-related hearing loss | 17 Osteoarthritis           | 26.5 (15 to 38)              | 12.8 (8.78 to 16.7)             | 1.8 (1.61 to 2)                          |
| 18 Breast cancer            | 18 Breast cancer            | 14.5 (-3.1 to 35.8)          | 2.02 (-11.6 to 18.3)            | -13.2 (-25.1 to -0.947)                  |
| 19 Oral disorders           | 19 Oral disorders           | 22.9 (12.2 to 34.3)          | 9.55 (5.71 to 13.8)             | 0.392 (0.265 to 0.541)                   |
| 20 Osteoarthritis           | 20 Self-harm                | -12.1 (-25 to -0.257)        | -21.6 (-30.5 to -12.2)          | -22.6 (-32.1 to -12.3)                   |
| 23 Pancreatic cancer        | 22 Gynecological diseases   |                              |                                 |                                          |
| 27 Chronic kidney disease   | 149 COVID-19                |                              |                                 |                                          |

### Cyprus, Reference scenario

**Legend:**  
Communicable, maternal, neonatal and nutritional  
Non-communicable  
Injuries

| Leading Causes 2022           | Leading Causes 2050           | Mean % change number of DALY | Mean % change all-age DALY rate | Mean % change age-standardized DALY rate |
|-------------------------------|-------------------------------|------------------------------|---------------------------------|------------------------------------------|
| 1 Ischemic heart disease      | 1 Diabetes                    | <b>77.1 (48.2 to 104)</b>    | <b>60.4 (38.4 to 80.6)</b>      | 3.37 (-8.86 to 16.4)                     |
| 2 Low back pain               | 2 Ischemic heart disease      | -7.72 (-34.2 to 22.8)        | -16.4 (-37.7 to 11.4)           | <b>-54.2 (-66.7 to -35.2)</b>            |
| 3 Diabetes                    | 3 Low back pain               | <b>27.5 (13.2 to 44.7)</b>   | <b>15.5 (9.81 to 20.6)</b>      | <b>-2.43 (-2.62 to -2.2)</b>             |
| 4 COVID-19                    | 4 Alzheimer's disease         | <b>115 (82 to 150)</b>       | <b>94.6 (76.9 to 115)</b>       | <b>-7.47 (-11.7 to -3.77)</b>            |
| 5 Stroke                      | 5 COPD                        | <b>100 (57 to 149)</b>       | <b>81.5 (49.8 to 118)</b>       | -8.1 (-26.4 to 14)                       |
| 6 Falls                       | 6 Falls                       | <b>48.2 (26.1 to 70.1)</b>   | <b>34.2 (21.5 to 47.3)</b>      | <b>-11 (-17.5 to -3.73)</b>              |
| 7 Headache disorders          | 7 Stroke                      | 15.3 (-6.21 to 36.5)         | 4.41 (-12.4 to 23.1)            | <b>-46.1 (-55 to -34.5)</b>              |
| 8 Anxiety disorders           | 8 Chronic kidney disease      | <b>183 (114 to 270)</b>      | <b>156 (95.9 to 225)</b>        | 18.5 (-10.2 to 56.1)                     |
| 9 Lung cancer                 | 9 Lung cancer                 | <b>32.6 (1.26 to 65.7)</b>   | 20 (-6.83 to 48.5)              | <b>-23.5 (-39.9 to -7.84)</b>            |
| 10 COPD                       | 10 Anxiety disorders          | 10.1 (-2.33 to 23.7)         | -0.337 (-5.07 to 6.07)          | 0.139 (-0.177 to 0.466)                  |
| 11 Alzheimer's disease        | 11 Headache disorders         | 3.48 (-8.83 to 18.1)         | -6.32 (-10.3 to 1.33)           | <b>-0.638 (-1.09 to -0.268)</b>          |
| 12 Depressive disorders       | 12 Other musculoskeletal      | <b>53.2 (33.6 to 72.7)</b>   | <b>38.7 (29.7 to 51.2)</b>      | <b>27.3 (25.3 to 28.8)</b>               |
| 13 Gynecological diseases     | 13 Depressive disorders       | 12 (-1.95 to 26)             | 1.43 (-2.98 to 7.32)            | <b>-1.86 (-2.22 to -1.49)</b>            |
| 14 Other musculoskeletal      | 14 Age-related hearing loss   | <b>67.5 (46.6 to 89.2)</b>   | <b>51.6 (42.5 to 60)</b>        | <b>-0.791 (-0.979 to -0.596)</b>         |
| 15 Road injuries              | 15 Colorectal cancer          | <b>69.7 (22.3 to 129)</b>    | <b>53.6 (13.6 to 97.3)</b>      | -11.6 (-32.5 to 11.2)                    |
| 16 Breast cancer              | 16 Osteoarthritis             | <b>69.6 (48.1 to 89.5)</b>   | <b>53.5 (46.2 to 61)</b>        | <b>2.31 (2.05 to 2.6)</b>                |
| 17 Age-related hearing loss   | 17 Breast cancer              | <b>42.1 (13.5 to 73.4)</b>   | <b>28.7 (6.87 to 53.3)</b>      | <b>-17.2 (-30.2 to -2.49)</b>            |
| 18 Neck pain                  | 18 Hypertensive heart disease | <b>161 (95.3 to 222)</b>     | <b>136 (88.3 to 192)</b>        | 0.751 (-22.8 to 34.7)                    |
| 19 Colorectal cancer          | 19 Oral disorders             | <b>49.7 (30.6 to 68.2)</b>   | <b>35.6 (27.5 to 45.2)</b>      | <b>0.39 (0.223 to 0.586)</b>             |
| 20 Osteoarthritis             | 20 Prostate cancer            | <b>92.2 (51.6 to 139)</b>    | <b>74 (42 to 113)</b>           | -3.89 (-19.1 to 12.1)                    |
| 21 Chronic kidney disease     | 21 Gynecological diseases     |                              |                                 |                                          |
| 22 Oral disorders             | 26 Neck pain                  |                              |                                 |                                          |
| 24 Prostate cancer            | 27 Road injuries              |                              |                                 |                                          |
| 27 Hypertensive heart disease | 150 COVID-19                  |                              |                                 |                                          |

### Denmark, Reference scenario

**Legend:**

Communicable, maternal, neonatal and nutritional  
Non-communicable  
Injuries

| Leading Causes 2022         | Leading Causes 2050         | Mean % change number of DALY | Mean % change all-age DALY rate | Mean % change age-standardized DALY rate |
|-----------------------------|-----------------------------|------------------------------|---------------------------------|------------------------------------------|
| 1 Low back pain             | 1 Low back pain             | 11.6 (3 to 20.2)             | 0.707 (-1.29 to 3)              | -1.62 (-1.67 to -1.56)                   |
| 2 COVID-19                  | 2 COPD                      | 21.7 (4.44 to 42.1)          | 9.82 (-4.28 to 25.6)            | -15.1 (-25.1 to -3.27)                   |
| 3 COPD                      | 3 Lung cancer               | 1.96 (-12.2 to 17.7)         | -8.03 (-19 to 3.79)             | -18.8 (-27.4 to -8.81)                   |
| 4 Lung cancer               | 4 Alzheimer's disease       | 54.4 (38.1 to 73.2)          | 39.3 (28.8 to 50.7)             | -6.55 (-10.5 to -2.04)                   |
| 5 Ischemic heart disease    | 5 Falls                     | 33.1 (20.3 to 47.8)          | 20.1 (11.7 to 30.2)             | -2.32 (-9.31 to 4.01)                    |
| 6 Stroke                    | 6 Diabetes                  | 27.5 (13 to 42.9)            | 15 (7.22 to 24.1)               | 4.83 (-3.95 to 12.2)                     |
| 7 Falls                     | 7 Stroke                    | -19.2 (-27.5 to -9.14)       | -27.1 (-33.2 to -21.1)          | -41.4 (-46 to -36.2)                     |
| 8 Alzheimer's disease       | 8 Ischemic heart disease    | -36.3 (-46.2 to -22.9)       | -42.6 (-51.3 to -31.4)          | -57.1 (-63.8 to -48.5)                   |
| 9 Diabetes                  | 9 Colorectal cancer         | 15.3 (-7.52 to 42.3)         | 4.01 (-14 to 23.1)              | -15.2 (-29 to -0.454)                    |
| 10 Colorectal cancer        | 10 Chronic kidney disease   | 114 (79.3 to 155)            | 93.4 (65.8 to 126)              | 31.2 (11.4 to 53.9)                      |
| 11 Depressive disorders     | 11 Lower respiratory infect | 40.4 (19.4 to 62.9)          | 26.6 (12.2 to 42.8)             | -16.4 (-25 to -7.17)                     |
| 12 Headache disorders       | 12 Depressive disorders     | 11 (2.54 to 19.6)            | 0.12 (-1.12 to 1.49)            | -0.994 (-1.07 to -0.919)                 |
| 13 Anxiety disorders        | 13 Other musculoskeletal    | 30.1 (19.7 to 41)            | 17.4 (14.8 to 20.9)             | 17.9 (16.8 to 18.8)                      |
| 14 Alcohol use disorders    | 14 Headache disorders       | 9.8 (1.43 to 18.1)           | -0.937 (-1.85 to 0.468)         | 0.0282 (-0.0585 to 0.111)                |
| 15 Lower respiratory infect | 15 Prostate cancer          | 46.5 (23.3 to 70.2)          | 32.1 (14.9 to 50.1)             | 2.62 (-7.02 to 14.3)                     |
| 16 Other musculoskeletal    | 16 Anxiety disorders        | 10.4 (1.81 to 18.6)          | -0.376 (-1.41 to 0.679)         | 0.257 (0.208 to 0.308)                   |
| 17 Gynecological diseases   | 17 Alcohol use disorders    | 8.1 (-1.6 to 18)             | -2.45 (-7.81 to 2.76)           | -1.52 (-6.21 to 2.47)                    |
| 18 Prostate cancer          | 18 Pancreatic cancer        | 43.4 (20.4 to 71)            | 29.3 (9.62 to 47.9)             | 14.3 (-1.44 to 30.4)                     |
| 19 Breast cancer            | 19 Age-related hearing loss | 27.3 (15.8 to 38.2)          | 14.9 (10.5 to 18.8)             | -0.378 (-0.479 to -0.249)                |
| 20 Age-related hearing loss | 20 Osteoarthritis           | 19.6 (9.81 to 29.3)          | 7.89 (5.42 to 10.7)             | 1.24 (1.09 to 1.4)                       |
| 22 Osteoarthritis           | 22 Breast cancer            |                              |                                 |                                          |
| 24 Pancreatic cancer        | 26 Gynecological diseases   |                              |                                 |                                          |
| 25 Chronic kidney disease   | 148 COVID-19                |                              |                                 |                                          |

### Finland, Reference scenario

**Legend:**  
 Communicable, maternal, neonatal and nutritional  
 Non-communicable  
 Injuries

| Leading Causes 2022           | Leading Causes 2050          | Mean % change number of DALY | Mean % change all-age DALY rate | Mean % change age-standardized DALY rate |
|-------------------------------|------------------------------|------------------------------|---------------------------------|------------------------------------------|
| 1 COVID-19                    | 1 Alzheimer's disease        | 63.8 (44 to 84.6)            | 67.7 (53.8 to 79.4)             | 0.668 (-3.93 to 5.01)                    |
| 2 Ischemic heart disease      | 2 Ischemic heart disease     | -33.9 (-47.3 to -19.1)       | -32.2 (-45.5 to -18.8)          | -56.1 (-65.2 to -44.6)                   |
| 3 Falls                       | 3 Falls                      | 13.5 (-0.00941 to 26)        | 16.2 (7.67 to 25.1)             | -7.99 (-14.2 to -1.71)                   |
| 4 Stroke                      | 4 Low back pain              | -0.564 (-10.1 to 9.29)       | 1.84 (-0.232 to 4.39)           | -2.31 (-2.38 to -2.25)                   |
| 5 Low back pain               | 5 Diabetes                   | 26.8 (14.1 to 39.1)          | 29.9 (25.6 to 35)               | 19.1 (15.6 to 22.5)                      |
| 6 Alzheimer's disease         | 6 Stroke                     | -18.6 (-28.3 to -5.64)       | -16.6 (-23.4 to -8.14)          | -36.7 (-43.5 to -29.6)                   |
| 7 Diabetes                    | 7 Lung cancer                | -3.09 (-19.3 to 15.7)        | -0.758 (-15.2 to 16)            | -14.3 (-26.6 to -2.44)                   |
| 8 Lung cancer                 | 8 Depressive disorders       | -2.78 (-11.4 to 6.16)        | -0.414 (-1.77 to 0.962)         | -1.07 (-1.14 to -0.989)                  |
| 9 Depressive disorders        | 9 Hypertensive heart disease | 64.5 (32.2 to 104)           | 68.5 (38.5 to 103)              | 8.65 (-10.3 to 32.5)                     |
| 10 Headache disorders         | 10 COPD                      | 21.7 (4.99 to 42.5)          | 24.7 (11.1 to 42.6)             | -6.73 (-18.6 to 7.18)                    |
| 11 Age-related hearing loss   | 11 Pancreatic cancer         | 46.6 (15.5 to 77.2)          | 50.1 (24.4 to 77.3)             | 25.6 (6.04 to 45.2)                      |
| 12 COPD                       | 12 Age-related hearing loss  | 20 (7.44 to 32.5)            | 22.9 (17.7 to 28.1)             | -0.6 (-0.78 to -0.415)                   |
| 13 Self-harm                  | 13 Headache disorders        | -3.64 (-12.7 to 5.49)        | -1.29 (-2.84 to 2.03)           | 0.296 (0.123 to 0.375)                   |
| 14 Colorectal cancer          | 14 Colorectal cancer         | 16.7 (-6.82 to 44)           | 19.5 (-3.11 to 44.4)            | -6.93 (-23 to 11.5)                      |
| 15 Cirrhosis liver            | 15 Prostate cancer           | 43.6 (18.8 to 70.7)          | 47 (26.3 to 67.4)               | 12 (1.22 to 24.6)                        |
| 16 Pancreatic cancer          | 16 Osteoarthritis            | 9.61 (-1.66 to 20.1)         | 12.3 (9.77 to 14.7)             | 1.37 (1.15 to 1.58)                      |
| 17 Osteoarthritis             | 17 Drug use disorders        | 14.1 (0.26 to 28.4)          | 16.9 (6.22 to 27.8)             | 17.3 (6.02 to 29.9)                      |
| 18 Alcohol use disorders      | 18 Atrial fibrillation       | 56.1 (34.6 to 77.8)          | 59.9 (43.5 to 75.8)             | 6.81 (0.497 to 13.3)                     |
| 19 Gynecological diseases     | 19 Oral disorders            | 6.31 (-4.1 to 16.5)          | 8.89 (6.27 to 11.4)             | 0.301 (0.172 to 0.455)                   |
| 20 Hypertensive heart disease | 20 Alcohol use disorders     | -3.25 (-13.8 to 8.32)        | -0.875 (-7.19 to 6.68)          | -1.74 (-7.61 to 3.53)                    |
| 22 Drug use disorders         | 25 Self-harm                 |                              |                                 |                                          |
| 23 Oral disorders             | 26 Cirrhosis liver           |                              |                                 |                                          |
| 25 Prostate cancer            | 27 Gynecological diseases    |                              |                                 |                                          |
| 27 Atrial fibrillation        | 150 COVID-19                 |                              |                                 |                                          |

### France, Reference scenario

**Legend:**

Communicable, maternal, neonatal and nutritional  
Non-communicable  
Injuries

| Leading Causes 2022         | Leading Causes 2050         | Mean % change number of DALY | Mean % change all-age DALY rate | Mean % change age-standardized DALY rate |
|-----------------------------|-----------------------------|------------------------------|---------------------------------|------------------------------------------|
| 1 Low back pain             | 1 Falls                     | 24.6 (11 to 39.2)            | 28.2 (17.4 to 38.3)             | -5.26 (-12.6 to 2.07)                    |
| 2 Falls                     | 2 Alzheimer's disease       | 61.5 (42.5 to 80.7)          | 66.2 (56.1 to 77.2)             | -3.76 (-7.63 to -0.146)                  |
| 3 Lung cancer               | 3 Low back pain             | 1.81 (-8.51 to 12.1)         | 4.81 (1.41 to 8.04)             | -2.68 (-2.77 to -2.6)                    |
| 4 Ischemic heart disease    | 4 Lung cancer               | 5.46 (-11.4 to 22.4)         | 8.54 (-5.18 to 23.9)            | -7.11 (-18.8 to 5.72)                    |
| 5 COVID-19                  | 5 Diabetes                  | 51.1 (33.4 to 70.4)          | 55.6 (43.7 to 70.8)             | 28.3 (19.3 to 35.7)                      |
| 6 Alzheimer's disease       | 6 Ischemic heart disease    | -21.3 (-36 to -5.8)          | -19 (-32.4 to -3.81)            | -49.5 (-57.9 to -40.1)                   |
| 7 Stroke                    | 7 Stroke                    | -8.46 (-20.4 to 3.98)        | -5.76 (-14.1 to 3.48)           | -34.7 (-40.8 to -28.1)                   |
| 8 Depressive disorders      | 8 Other cardiovascular      | 20.4 (5.97 to 34.6)          | 24 (14.9 to 35.6)               | -10.6 (-17.4 to -3.49)                   |
| 9 Anxiety disorders         | 9 Colorectal cancer         | 24.5 (0.834 to 53.5)         | 28.2 (5.99 to 56.1)             | -10 (-24.5 to 7.42)                      |
| 10 Headache disorders       | 10 Depressive disorders     | -2.09 (-13.1 to 8.21)        | 0.785 (-1.2 to 3.13)            | -1.68 (-1.84 to -1.52)                   |
| 11 Other cardiovascular     | 11 Anxiety disorders        | -4.2 (-13.8 to 7.08)         | -1.39 (-3.72 to 0.926)          | 0.0455 (-0.091 to 0.183)                 |
| 12 Colorectal cancer        | 12 Age-related hearing loss | 27 (12.9 to 40.5)            | 30.8 (24.6 to 37.8)             | -0.464 (-0.561 to -0.352)                |
| 13 Diabetes                 | 13 Headache disorders       | -5.76 (-16.6 to 4.5)         | -2.99 (-4.65 to 0.388)          | -0.273 (-0.613 to -0.0782)               |
| 14 Age-related hearing loss | 14 COPD                     | 39 (19 to 62.2)              | 43.1 (25.2 to 62.7)             | -7.87 (-18.9 to 4.41)                    |
| 15 Breast cancer            | 15 Chronic kidney disease   | 140 (98.8 to 197)            | 147 (106 to 195)                | 34.5 (13.7 to 58.4)                      |
| 16 Gynecological diseases   | 16 Pancreatic cancer        | 55.1 (26.5 to 83.7)          | 59.7 (35.2 to 86.8)             | 24.5 (5.35 to 46.3)                      |
| 17 Self-harm                | 17 Lower respiratory infect | 49.3 (24.3 to 73)            | 53.7 (33.2 to 72.9)             | -15.5 (-25.3 to -4.91)                   |
| 18 COPD                     | 18 Osteoarthritis           | 17.6 (5.78 to 29.6)          | 21.1 (16.4 to 25.2)             | 1.81 (1.6 to 2.07)                       |
| 19 Osteoarthritis           | 19 Breast cancer            | 4.93 (-11.5 to 22.8)         | 8.01 (-4.73 to 22.4)            | -15.2 (-24.8 to -6.29)                   |
| 20 Other musculoskeletal    | 20 Other musculoskeletal    | 23.6 (10.9 to 36)            | 27.2 (22.8 to 32.4)             | 26.8 (25 to 28.2)                        |
| 21 Lower respiratory infect | 24 Gynecological diseases   |                              |                                 |                                          |
| 22 Pancreatic cancer        | 27 Self-harm                |                              |                                 |                                          |
| 31 Chronic kidney disease   | 149 COVID-19                |                              |                                 |                                          |



### Germany, Reference scenario

**Legend:**  
Communicable, maternal, neonatal and nutritional  
Non-communicable  
Injuries

| Leading Causes 2022           | Leading Causes 2050           | Mean % change number of DALY  | Mean % change all-age DALY rate | Mean % change age-standardized DALY rate |
|-------------------------------|-------------------------------|-------------------------------|---------------------------------|------------------------------------------|
| 1 Ischemic heart disease      | 1 Alzheimer's disease         | <b>49.1 (30 to 66)</b>        | <b>48.3 (39.5 to 57.3)</b>      | -0.222 (-4.08 to 4.15)                   |
| 2 Low back pain               | 2 Low back pain               | 0.878 (-9.68 to 9.42)         | 0.343 (-1.82 to 2.52)           | <b>-1.55 (-1.65 to -1.46)</b>            |
| 3 Alzheimer's disease         | 3 Ischemic heart disease      | <b>-34.3 (-47 to -21.6)</b>   | <b>-34.7 (-46.3 to -23.9)</b>   | <b>-52.5 (-60.9 to -43.8)</b>            |
| 4 Stroke                      | 4 Falls                       | 11.8 (-3 to 27.4)             | <b>11.2 (1.05 to 21.9)</b>      | <b>-12.3 (-19.4 to -4.81)</b>            |
| 5 Lung cancer                 | 5 Chronic kidney disease      | <b>113 (76.2 to 154)</b>      | <b>111 (76.3 to 151)</b>        | <b>36.3 (14.9 to 61.1)</b>               |
| 6 Falls                       | 6 COPD                        | 13.7 (-1.66 to 29.7)          | 13.1 (-0.0178 to 25.7)          | <b>-10.8 (-21.1 to -0.385)</b>           |
| 7 COVID-19                    | 7 Lung cancer                 | -9.43 (-23.6 to 5.27)         | -9.91 (-19.6 to 1.83)           | <b>-18.6 (-26.9 to -7.5)</b>             |
| 8 COPD                        | 8 Stroke                      | <b>-18.9 (-28.4 to -8.82)</b> | <b>-19.4 (-24.7 to -13)</b>     | <b>-34.4 (-40.1 to -28.9)</b>            |
| 9 Diabetes                    | 9 Diabetes                    | 12.3 (-0.929 to 26.7)         | <b>11.7 (3.82 to 19.2)</b>      | 0.934 (-5.2 to 6.34)                     |
| 10 Headache disorders         | 10 Anxiety disorders          | 0.0947 (-9.36 to 8.55)        | -0.428 (-1.79 to 0.717)         | <b>0.466 (0.234 to 0.681)</b>            |
| 11 Anxiety disorders          | 11 Hypertensive heart disease | <b>66.1 (38.4 to 98.8)</b>    | <b>65.2 (39.7 to 90.7)</b>      | 11.3 (-6.89 to 29.7)                     |
| 12 Depressive disorders       | 12 Headache disorders         | -2.33 (-11.5 to 5.34)         | <b>-2.84 (-3.8 to -1.87)</b>    | 0.329 (-0.0402 to 0.553)                 |
| 13 Colorectal cancer          | 13 Colorectal cancer          | 9.67 (-9.95 to 33.6)          | 9.09 (-6.3 to 27.5)             | -12.3 (-23.9 to 1.89)                    |
| 14 Chronic kidney disease     | 14 Atrial fibrillation        | <b>59.1 (40 to 80.5)</b>      | <b>58.2 (44.5 to 73.4)</b>      | <b>11.5 (4.17 to 18.1)</b>               |
| 15 Age-related hearing loss   | 15 Depressive disorders       | 0.185 (-9.55 to 8.29)         | -0.341 (-1.77 to 0.969)         | <b>-0.545 (-0.698 to -0.378)</b>         |
| 16 Breast cancer              | 16 Pancreatic cancer          | <b>38.6 (16.9 to 63.7)</b>    | <b>37.9 (19.9 to 59.5)</b>      | <b>18.8 (3.98 to 35.9)</b>               |
| 17 Gynecological diseases     | 17 Age-related hearing loss   | <b>18.2 (5.1 to 29.8)</b>     | <b>17.6 (13.4 to 21.6)</b>      | -0.0994 (-0.217 to 0.0214)               |
| 18 Cirrhosis liver            | 18 Other musculoskeletal      | <b>12.8 (2.03 to 22.7)</b>    | <b>12.3 (10.1 to 14.8)</b>      | <b>15.8 (15.1 to 16.5)</b>               |
| 19 Other musculoskeletal      | 19 Osteoarthritis             | 9.66 (-1.7 to 20)             | <b>9.07 (6.44 to 11.8)</b>      | <b>0.632 (0.457 to 0.814)</b>            |
| 20 Osteoarthritis             | 20 Breast cancer              | 0.646 (-14.3 to 17.6)         | 0.0955 (-10.2 to 15.1)          | <b>-14.6 (-23.4 to -4.78)</b>            |
| 21 Pancreatic cancer          | 24 Cirrhosis liver            |                               |                                 |                                          |
| 22 Atrial fibrillation        | 25 Gynecological diseases     |                               |                                 |                                          |
| 24 Hypertensive heart disease | 147 COVID-19                  |                               |                                 |                                          |

### Greece, Reference scenario

**Legend:**

Communicable, maternal, neonatal and nutritional  
 Non-communicable  
 Injuries

| Leading Causes 2022           | Leading Causes 2050           | Mean % change number of DALY | Mean % change all-age DALY rate | Mean % change age-standardized DALY rate |
|-------------------------------|-------------------------------|------------------------------|---------------------------------|------------------------------------------|
| 1 Ischemic heart disease      | 1 Alzheimer's disease         | 33.5 (14.1 to 55.2)          | 69.2 (55.1 to 83.5)             | 0.733 (-3.67 to 5.69)                    |
| 2 COVID-19                    | 2 Ischemic heart disease      | -43.1 (-57.7 to -28.5)       | -27.9 (-43 to -12.1)            | -51.4 (-64.3 to -38.6)                   |
| 3 Stroke                      | 3 Stroke                      | -29.2 (-41.6 to -16.1)       | -10.3 (-20.7 to 0.311)          | -39.5 (-47 to -33)                       |
| 4 Lung cancer                 | 4 Lung cancer                 | -8.31 (-26.6 to 13)          | 16.1 (-0.961 to 36.7)           | -14.5 (-26.8 to -0.269)                  |
| 5 Low back pain               | 5 Chronic kidney disease      | 55.2 (23 to 92.6)            | 96.6 (58.3 to 137)              | 16.6 (-3.93 to 40.2)                     |
| 6 Alzheimer's disease         | 6 Diabetes                    | 26.2 (7.21 to 46.4)          | 59.9 (47.7 to 71.5)             | 31.8 (25.8 to 37)                        |
| 7 Depressive disorders        | 7 Low back pain               | -14.1 (-28.2 to -1.25)       | 8.73 (3.89 to 13.7)             | -2.87 (-2.95 to -2.79)                   |
| 8 Diabetes                    | 8 COPD                        | 13 (-7.73 to 32.8)           | 43.2 (22.2 to 64.9)             | -10.4 (-24 to 3.96)                      |
| 9 COPD                        | 9 Lower respiratory infect    | 11.1 (-9.69 to 32.4)         | 40.8 (23.8 to 59.3)             | -19.3 (-28.9 to -8.17)                   |
| 10 Chronic kidney disease     | 10 Depressive disorders       | -21.2 (-34.2 to -7.9)        | -0.334 (-4.21 to 3.75)          | -1.79 (-1.93 to -1.63)                   |
| 11 Lower respiratory infect   | 11 Colorectal cancer          | 16.9 (-8.85 to 46.7)         | 48 (19.1 to 83.5)               | -0.436 (-19.3 to 25.2)                   |
| 12 Falls                      | 12 Falls                      | -2.36 (-17.9 to 14.1)        | 23.7 (10.8 to 36)               | -5.24 (-13.7 to 3.42)                    |
| 13 Headache disorders         | 13 Pancreatic cancer          | 49.7 (17.8 to 85.8)          | 89.5 (57.3 to 133)              | 36.2 (14.8 to 64.2)                      |
| 14 Anxiety disorders          | 14 Age-related hearing loss   | 9.95 (-7.6 to 26.9)          | 39.3 (30.7 to 47.2)             | -0.726 (-0.79 to -0.657)                 |
| 15 Colorectal cancer          | 15 Breast cancer              | 0.375 (-18.7 to 24)          | 27.1 (8.35 to 50.2)             | -8.29 (-20.5 to 6.84)                    |
| 16 Age-related hearing loss   | 16 Other musculoskeletal      | 11.3 (-8.93 to 30.3)         | 40.9 (31.9 to 49.9)             | 33.4 (32.4 to 34.3)                      |
| 17 Breast cancer              | 17 Hypertensive heart disease | 40 (9.24 to 71.6)            | 77.5 (42.2 to 111)              | 8.74 (-13.5 to 32.8)                     |
| 18 Road injuries              | 18 Headache disorders         | -27.8 (-40.5 to -15.4)       | -8.63 (-12 to -3.49)            | -0.198 (-0.432 to 0.0322)                |
| 19 Other musculoskeletal      | 19 Anxiety disorders          | -22.6 (-36.1 to -8.99)       | -2.04 (-5.84 to 3.04)           | 0.272 (0.143 to 0.381)                   |
| 20 Gynecological diseases     | 20 Osteoarthritis             | 5.25 (-10.5 to 20.8)         | 33.3 (25.8 to 40.7)             | 2.29 (2.03 to 2.55)                      |
| 21 Osteoarthritis             | 25 Road injuries              |                              |                                 |                                          |
| 22 Pancreatic cancer          | 28 Gynecological diseases     |                              |                                 |                                          |
| 25 Hypertensive heart disease | 153 COVID-19                  |                              |                                 |                                          |

### Iceland, Reference scenario

**Legend:**  
Communicable, maternal, neonatal and nutritional  
Non-communicable  
Injuries

| Leading Causes 2022         | Leading Causes 2050         | Mean % change number of DALY | Mean % change all-age DALY rate | Mean % change age-standardized DALY rate |
|-----------------------------|-----------------------------|------------------------------|---------------------------------|------------------------------------------|
| 1 Ischemic heart disease    | 1 Low back pain             | 44.1 (30.4 to 58.4)          | 3.69 (1.06 to 6.93)             | -1.55 (-1.62 to -1.48)                   |
| 2 Low back pain             | 2 Alzheimer's disease       | 117 (91.2 to 143)            | 56.5 (41.9 to 71)               | -10.2 (-14.3 to -6.15)                   |
| 3 Lung cancer               | 3 Ischemic heart disease    | -4.09 (-26.9 to 23.5)        | -31 (-45.1 to -12.5)            | -54.8 (-64.7 to -41.6)                   |
| 4 Falls                     | 4 Falls                     | 55.2 (35.7 to 75.2)          | 11.6 (1.61 to 23.2)             | -13.6 (-20.9 to -5.24)                   |
| 5 Alzheimer's disease       | 5 Lung cancer               | 29.6 (6.6 to 51.1)           | -6.73 (-22.1 to 8.5)            | -22.6 (-34.9 to -10.3)                   |
| 6 COVID-19                  | 6 COPD                      | 72.4 (42.1 to 110)           | 24 (5.46 to 48.1)               | -16 (-30.2 to 2.64)                      |
| 7 Headache disorders        | 7 Diabetes                  | 78.2 (59.7 to 97.8)          | 28.2 (21.5 to 35.9)             | 13 (8.58 to 17)                          |
| 8 Stroke                    | 8 Headache disorders        | 37 (24.9 to 50.2)            | -1.42 (-2.8 to 1.47)            | 0.334 (0.207 to 0.436)                   |
| 9 COPD                      | 9 Stroke                    | 25.9 (9.59 to 50.9)          | -9.46 (-19.7 to 2.23)           | -36 (-43.3 to -28.6)                     |
| 10 Anxiety disorders        | 10 Anxiety disorders        | 38.6 (25.5 to 53.8)          | -0.313 (-1.74 to 1.25)          | 0.394 (0.312 to 0.478)                   |
| 11 Diabetes                 | 11 Drug use disorders       | 59 (38.6 to 84)              | 14.4 (3.36 to 27.8)             | 16.8 (4.69 to 32.1)                      |
| 12 Depressive disorders     | 12 Depressive disorders     | 40.1 (27.4 to 53.5)          | 0.789 (-0.765 to 2.8)           | -0.734 (-0.846 to -0.615)                |
| 13 Drug use disorders       | 13 Other musculoskeletal    | 64.2 (50.6 to 78.1)          | 18.2 (14.9 to 22)               | 17.7 (16.8 to 18.5)                      |
| 14 Self-harm                | 14 Age-related hearing loss | 73.8 (57.7 to 91.9)          | 25 (18 to 32.2)                 | -0.417 (-0.506 to -0.329)                |
| 15 Other musculoskeletal    | 15 Lower respiratory infect | 87.5 (58 to 124)             | 34.9 (16.1 to 58.8)             | -21.3 (-31.1 to -10.6)                   |
| 16 Gynecological diseases   | 16 Atrial fibrillation      | 149 (117 to 180)             | 78.9 (60.5 to 97.8)             | 10.2 (3.04 to 16.6)                      |
| 17 Age-related hearing loss | 17 Osteoarthritis           | 61.2 (46.3 to 76.9)          | 16 (10.5 to 21.2)               | 1.28 (1.13 to 1.44)                      |
| 18 Osteoarthritis           | 18 Prostate cancer          | 98.2 (63.8 to 133)           | 42.7 (21 to 71.1)               | -2.8 (-14.6 to 11.6)                     |
| 19 Lower respiratory infect | 19 Pancreatic cancer        | 90.5 (51.9 to 128)           | 37.1 (9.38 to 65.1)             | 9.99 (-11.1 to 33.3)                     |
| 20 Colorectal cancer        | 20 Colorectal cancer        | 53 (21.2 to 92.8)            | 10.2 (-11.9 to 37.4)            | -17.2 (-33.4 to 1.78)                    |
| 24 Prostate cancer          | 21 Self-harm                |                              |                                 |                                          |
| 25 Pancreatic cancer        | 22 Gynecological diseases   |                              |                                 |                                          |
| 28 Atrial fibrillation      | 149 COVID-19                |                              |                                 |                                          |

### Ireland, Reference scenario

**Legend:**

Communicable, maternal, neonatal and nutritional  
Non-communicable  
Injuries

| Leading Causes 2022         | Leading Causes 2050         | Mean % change number of DALY | Mean % change all-age DALY rate | Mean % change age-standardized DALY rate |
|-----------------------------|-----------------------------|------------------------------|---------------------------------|------------------------------------------|
| 1 Ischemic heart disease    | 1 Low back pain             | 36.8 (24.3 to 48.8)          | 8.38 (4.83 to 12)               | -1.9 (-2.02 to -1.78)                    |
| 2 Low back pain             | 2 Alzheimer's disease       | 140 (115 to 170)             | 90.5 (74.7 to 106)              | -10.1 (-13.7 to -6.06)                   |
| 3 COVID-19                  | 3 Ischemic heart disease    | -5.02 (-20.9 to 13.9)        | -24.8 (-36.1 to -11.7)          | -57.9 (-63.2 to -50.8)                   |
| 4 Depressive disorders      | 4 COPD                      | 79.6 (55.1 to 109)           | 42.3 (23.7 to 63.7)             | -20.4 (-29.5 to -10.8)                   |
| 5 Lung cancer               | 5 Falls                     | 53.1 (35.3 to 70.2)          | 21.3 (11 to 31.2)               | -9.6 (-17.4 to -1.86)                    |
| 6 Anxiety disorders         | 6 Depressive disorders      | 27.4 (16.2 to 37.8)          | 0.943 (-0.814 to 3.08)          | -1.35 (-1.51 to -1.19)                   |
| 7 COPD                      | 7 Diabetes                  | 85.8 (66.9 to 104)           | 47.2 (39.8 to 55)               | 14.9 (10.3 to 18.7)                      |
| 8 Falls                     | 8 Lung cancer               | 26.2 (8.61 to 47)            | -0.0158 (-11.6 to 13.1)         | -27.1 (-35.2 to -19.9)                   |
| 9 Headache disorders        | 9 Anxiety disorders         | 24.3 (11.6 to 35.6)          | -1.53 (-4.71 to 0.943)          | 0.0184 (-0.169 to 0.193)                 |
| 10 Alzheimer's disease      | 10 Lower respiratory infect | 106 (76 to 136)              | 63.4 (44.5 to 87.1)             | -23.6 (-31.2 to -15.2)                   |
| 11 Stroke                   | 11 Headache disorders       | 21.6 (9.71 to 34.3)          | -3.66 (-5.73 to 0.614)          | -0.436 (-0.703 to -0.168)                |
| 12 Diabetes                 | 12 Other musculoskeletal    | 59.8 (45.1 to 74.8)          | 26.6 (20.6 to 32.8)             | 21 (19.9 to 21.9)                        |
| 13 Gynecological diseases   | 13 Colorectal cancer        | 60.7 (32.2 to 89.4)          | 27.3 (5.8 to 44.6)              | -16.7 (-29.7 to -4.61)                   |
| 14 Other musculoskeletal    | 14 Stroke                   | 18.7 (4.18 to 36.2)          | -5.97 (-14.4 to 3.46)           | -43.8 (-48 to -38.6)                     |
| 15 Colorectal cancer        | 15 Age-related hearing loss | 78.5 (60.5 to 96.1)          | 41.4 (33.4 to 49.8)             | -0.627 (-0.736 to -0.524)                |
| 16 Lower respiratory infect | 16 Osteoarthritis           | 63.8 (47.8 to 77.8)          | 29.8 (24.7 to 35)               | 1.84 (1.68 to 2)                         |
| 17 Age-related hearing loss | 17 Chronic kidney disease   | 204 (156 to 260)             | 141 (107 to 183)                | 17.9 (2.36 to 40.2)                      |
| 18 Drug use disorders       | 18 Drug use disorders       | 46.9 (29.9 to 64.5)          | 16.4 (5.63 to 27.3)             | 16.9 (6.38 to 28.6)                      |
| 19 Osteoarthritis           | 19 Oral disorders           | 57.8 (42.3 to 73.2)          | 25 (19 to 32.1)                 | 0.249 (0.145 to 0.365)                   |
| 20 Breast cancer            | 20 Gynecological diseases   | 6.08 (-15.9 to 37.9)         | -16 (-32 to 7.64)               | -16.1 (-30.8 to 5.99)                    |
| 22 Oral disorders           | 21 Breast cancer            |                              |                                 |                                          |
| 32 Chronic kidney disease   | 150 COVID-19                |                              |                                 |                                          |

### Israel, Reference scenario

**Legend:**  
Communicable, maternal, neonatal and nutritional  
Non-communicable  
Injuries

| Leading Causes 2022         | Leading Causes 2050         | Mean % change number of DALY | Mean % change all-age DALY rate | Mean % change age-standardized DALY rate |
|-----------------------------|-----------------------------|------------------------------|---------------------------------|------------------------------------------|
| 1 Low back pain             | 1 Low back pain             | 46.2 (25.1 to 68.6)          | 7.1 (4.42 to 9.79)              | -2.65 (-2.74 to -2.54)                   |
| 2 COVID-19                  | 2 Diabetes                  | 80.3 (52.8 to 109)           | 32.2 (20.1 to 44.6)             | 2.64 (-5.28 to 10.8)                     |
| 3 Diabetes                  | 3 Alzheimer's disease       | 112 (83.1 to 146)            | 55.3 (44.3 to 67.6)             | -10.5 (-14.2 to -7.18)                   |
| 4 Depressive disorders      | 4 Depressive disorders      | 41.7 (22 to 63.2)            | 3.76 (1.79 to 5.95)             | -1.59 (-1.71 to -1.46)                   |
| 5 Ischemic heart disease    | 5 Chronic kidney disease    | 176 (116 to 245)             | 102 (64.2 to 141)               | 22.1 (-3.66 to 49.6)                     |
| 6 Headache disorders        | 6 Headache disorders        | 37.3 (18.2 to 58.5)          | 0.564 (-1.05 to 4.34)           | -0.21 (-0.473 to -0.0124)                |
| 7 Alzheimer's disease       | 7 Ischemic heart disease    | 4.26 (-22.7 to 32.3)         | -23.6 (-39.7 to -5.84)          | -50.3 (-61.4 to -37.3)                   |
| 8 Stroke                    | 8 Other musculoskeletal     | 86.8 (62 to 115)             | 36.8 (33.2 to 41.2)             | 27.4 (26.2 to 28.4)                      |
| 9 Lung cancer               | 9 Falls                     | 52.7 (27.9 to 82.3)          | 11.9 (2.53 to 20.4)             | -10.8 (-18.4 to -2.81)                   |
| 10 Falls                    | 10 Stroke                   | 27.5 (4.11 to 52.1)          | -6.61 (-15.5 to 3.93)           | -34.5 (-41.9 to -26.8)                   |
| 11 Gynecological diseases   | 11 Lung cancer              | 35.4 (9.04 to 69.2)          | -0.825 (-15.5 to 19.9)          | -24 (-35.8 to -7.95)                     |
| 12 Anxiety disorders        | 12 COPD                     | 68.7 (34.7 to 102)           | 23.6 (5.12 to 45)               | -17.2 (-30.3 to -2.59)                   |
| 13 Other musculoskeletal    | 13 Age-related hearing loss | 78 (53.3 to 105)             | 30.4 (25 to 36.4)               | -0.452 (-0.577 to -0.33)                 |
| 14 Chronic kidney disease   | 14 Colorectal cancer        | 83.1 (35.9 to 141)           | 34 (6.62 to 67.8)               | -5.88 (-24.3 to 17.2)                    |
| 15 COPD                     | 15 Anxiety disorders        | 38.3 (19.2 to 58.8)          | 1.29 (-0.737 to 3.51)           | 0.282 (0.162 to 0.403)                   |
| 16 Age-related hearing loss | 16 Gynecological diseases   | 15.3 (-20.8 to 53.5)         | -15.5 (-36.2 to 10)             | -17.5 (-37.2 to 6.3)                     |
| 17 Colorectal cancer        | 17 Osteoarthritis           | 71 (46.9 to 96.2)            | 25.3 (20.9 to 29.7)             | 1.42 (1.19 to 1.66)                      |
| 18 Breast cancer            | 18 Pancreatic cancer        | 113 (63.8 to 165)            | 56.2 (27.3 to 90.1)             | 17.6 (-3.59 to 41.7)                     |
| 19 Neck pain                | 19 Oral disorders           | 60.2 (38.9 to 84)            | 17.4 (13.7 to 21.8)             | 0.0291 (-0.118 to 0.194)                 |
| 20 Osteoarthritis           | 20 Breast cancer            | 49.1 (20.6 to 82.2)          | 9.19 (-7.25 to 28)              | -15.3 (-27.5 to -2.35)                   |
| 21 Oral disorders           | 22 Neck pain                |                              |                                 |                                          |
| 26 Pancreatic cancer        | 153 COVID-19                |                              |                                 |                                          |

### Italy, Reference scenario

**Legend:**  
Communicable, maternal, neonatal and nutritional  
Non-communicable  
Injuries

| Leading Causes 2022           | Leading Causes 2050          | Mean % change number of DALY | Mean % change all-age DALY rate | Mean % change age-standardized DALY rate |
|-------------------------------|------------------------------|------------------------------|---------------------------------|------------------------------------------|
| 1 Ischemic heart disease      | 1 Alzheimer's disease        | 42.5 (24.1 to 58.2)          | 70.6 (55.8 to 83.7)             | -8.78 (-14.8 to -3.13)                   |
| 2 Alzheimer's disease         | 2 Ischemic heart disease     | -25.9 (-40.9 to -8.22)       | -11.2 (-28.6 to 7.98)           | -48.7 (-59.7 to -36.3)                   |
| 3 COVID-19                    | 3 Low back pain              | -10.6 (-18.1 to -2.97)       | 7.06 (2.89 to 11.1)             | -2.67 (-2.73 to -2.61)                   |
| 4 Low back pain               | 4 Diabetes                   | 22.2 (9.97 to 35.2)          | 46.3 (35.7 to 57.6)             | 12.5 (6.01 to 19.3)                      |
| 5 Stroke                      | 5 Falls                      | 9.81 (-2.41 to 23.3)         | 31.5 (19.8 to 45.1)             | -9.27 (-16.1 to -1.36)                   |
| 6 Falls                       | 6 Stroke                     | -19.1 (-28.7 to -8.19)       | -3.05 (-12.6 to 8.62)           | -39.8 (-46.5 to -32.3)                   |
| 7 Lung cancer                 | 7 Lung cancer                | -2.23 (-17.6 to 16.3)        | 17.1 (2.02 to 37.7)             | -18.2 (-28.4 to -5.33)                   |
| 8 Diabetes                    | 8 COPD                       | 38.4 (18.4 to 61.1)          | 65.8 (41.3 to 86.7)             | -6.87 (-21.5 to 5.09)                    |
| 9 COPD                        | 9 Hypertensive heart disease | 65.4 (31.7 to 94)            | 98.3 (58.6 to 136)              | 9.53 (-13.6 to 33.4)                     |
| 10 Depressive disorders       | 10 Age-related hearing loss  | 19.9 (8.69 to 31.4)          | 43.5 (36.8 to 51.1)             | -0.275 (-0.365 to -0.185)                |
| 11 Headache disorders         | 11 Colorectal cancer         | 14.4 (-9.31 to 44.9)         | 37 (11 to 70.5)                 | -10.8 (-26.8 to 7.84)                    |
| 12 Age-related hearing loss   | 12 Chronic kidney disease    | 95.2 (62.4 to 136)           | 134 (93.9 to 177)               | 20.1 (-1.97 to 42.6)                     |
| 13 Colorectal cancer          | 13 Pancreatic cancer         | 49.4 (25 to 80.8)            | 78.9 (48.3 to 114)              | 24.3 (2.25 to 46.6)                      |
| 14 Anxiety disorders          | 14 Depressive disorders      | -16.1 (-23.2 to -8.19)       | 0.478 (-2.76 to 3.74)           | -1.64 (-1.74 to -1.52)                   |
| 15 Hypertensive heart disease | 15 Osteoarthritis            | 8.65 (-0.171 to 18.1)        | 30.1 (25.4 to 34.4)             | 1.28 (1.06 to 1.54)                      |
| 16 Other musculoskeletal      | 16 Headache disorders        | -23.7 (-30.3 to -17)         | -8.68 (-10.9 to -3.9)           | -0.191 (-0.576 to -0.00466)              |
| 17 Osteoarthritis             | 17 Other musculoskeletal     | 3.97 (-6.95 to 14.5)         | 24.5 (17.7 to 32)               | 27.6 (26.5 to 28.5)                      |
| 18 Breast cancer              | 18 Atrial fibrillation       | 61.2 (43.1 to 80.8)          | 93.1 (76.7 to 111)              | 7.96 (1.46 to 14.4)                      |
| 19 Pancreatic cancer          | 19 Anxiety disorders         | -19 (-25.9 to -11.1)         | -3.01 (-5.85 to 0.00728)        | 0.173 (0.0507 to 0.285)                  |
| 20 Neck pain                  | 20 Breast cancer             | -6.02 (-20.2 to 9.21)        | 12.5 (-0.804 to 30.8)           | -17.1 (-26.6 to -6.15)                   |
| 24 Chronic kidney disease     | 25 Neck pain                 |                              |                                 |                                          |
| 26 Atrial fibrillation        | 152 COVID-19                 |                              |                                 |                                          |

### Luxembourg, Reference scenario

**Legend:**  
Communicable, maternal, neonatal and nutritional  
Non-communicable  
Injuries

| Leading Causes 2022         | Leading Causes 2050         | Mean % change number of DALY | Mean % change all-age DALY rate | Mean % change age-standardized DALY rate |
|-----------------------------|-----------------------------|------------------------------|---------------------------------|------------------------------------------|
| 1 Low back pain             | 1 Low back pain             | 56.8 (45.9 to 68.4)          | 4.43 (2 to 7.25)                | -1.17 (-1.29 to -1.04)                   |
| 2 Ischemic heart disease    | 2 Falls                     | 68.6 (49.6 to 87.9)          | 12.3 (2.46 to 23.7)             | -9.77 (-16 to -2.56)                     |
| 3 Falls                     | 3 Lung cancer               | 58.7 (29.4 to 81.4)          | 5.72 (-14.3 to 19.9)            | -14.2 (-29 to -4.08)                     |
| 4 Lung cancer               | 4 Ischemic heart disease    | 8.13 (-11.1 to 35.8)         | -28 (-40 to -7.51)              | -50.1 (-57.9 to -35.1)                   |
| 5 COVID-19                  | 5 Alzheimer's disease       | 141 (113 to 170)             | 60.4 (47.2 to 77)               | 0.455 (-3.5 to 4.75)                     |
| 6 Stroke                    | 6 Diabetes                  | 103 (85.6 to 121)            | 34.9 (27 to 42)                 | 16.8 (11.9 to 22.2)                      |
| 7 Headache disorders        | 7 COPD                      | 100 (71.4 to 139)            | 33.4 (16.2 to 57)               | -7.58 (-17.8 to 8.56)                    |
| 8 COPD                      | 8 Headache disorders        | 45.9 (35.3 to 56.4)          | -2.81 (-4.23 to -0.489)         | 0.266 (0.138 to 0.413)                   |
| 9 Diabetes                  | 9 Stroke                    | 29.4 (13.8 to 48.2)          | -13.8 (-22.6 to -1.92)          | -38 (-43 to -29.5)                       |
| 10 Anxiety disorders        | 10 Chronic kidney disease   | 209 (158 to 285)             | 106 (74.8 to 150)               | 30.5 (11.6 to 62.8)                      |
| 11 Depressive disorders     | 11 Depressive disorders     | 51 (40.7 to 60.9)            | 0.588 (-1.17 to 2.26)           | -0.567 (-0.684 to -0.447)                |
| 12 Alzheimer's disease      | 12 Anxiety disorders        | 50 (39.3 to 60.1)            | -0.12 (-1.58 to 1.86)           | 0.476 (0.378 to 0.602)                   |
| 13 Gynecological diseases   | 13 Colorectal cancer        | 83 (41.5 to 117)             | 21.9 (-5.16 to 43.2)            | -9.71 (-29 to 6.78)                      |
| 14 Colorectal cancer        | 14 Other musculoskeletal    | 71 (59.1 to 82.5)            | 13.9 (11 to 17.6)               | 15.8 (15 to 16.5)                        |
| 15 Other musculoskeletal    | 15 Age-related hearing loss | 86.6 (72.2 to 102)           | 24.3 (18.5 to 31)               | -0.557 (-0.738 to -0.377)                |
| 16 Age-related hearing loss | 16 Gynecological diseases   | 37.1 (8.56 to 73.5)          | -8.65 (-27 to 16)               | -6.34 (-24.7 to 16.8)                    |
| 17 Osteoarthritis           | 17 Osteoarthritis           | 77.9 (64.9 to 91.9)          | 18.5 (13.5 to 23.2)             | 1.48 (1.32 to 1.65)                      |
| 18 Alcohol use disorders    | 18 Pancreatic cancer        | 135 (92.3 to 170)            | 56.4 (29.3 to 78.8)             | 22.8 (0.534 to 41.5)                     |
| 19 Breast cancer            | 19 Breast cancer            | 64.9 (39.1 to 87.5)          | 9.84 (-5.86 to 21.5)            | -9.67 (-22 to -0.017)                    |
| 20 Neck pain                | 20 Oral disorders           | 70 (57.3 to 82.1)            | 13.2 (8.84 to 18.5)             | 0.324 (0.211 to 0.439)                   |
| 21 Oral disorders           | 22 Alcohol use disorders    |                              |                                 |                                          |
| 23 Chronic kidney disease   | 24 Neck pain                |                              |                                 |                                          |
| 26 Pancreatic cancer        | 146 COVID-19                |                              |                                 |                                          |

### Malta, Reference scenario

**Legend:**  
Communicable, maternal, neonatal and nutritional  
Non-communicable  
Injuries

| Leading Causes 2022         | Leading Causes 2050         | Mean % change number of DALY | Mean % change all-age DALY rate | Mean % change age-standardized DALY rate |
|-----------------------------|-----------------------------|------------------------------|---------------------------------|------------------------------------------|
| 1 Ischemic heart disease    | 1 Alzheimer's disease       | 93.4 (63.8 to 123)           | 56.8 (39.2 to 78.3)             | -5.01 (-9.16 to -0.585)                  |
| 2 COVID-19                  | 2 Diabetes                  | 43.8 (25.6 to 63.8)          | 16.5 (6.76 to 27.9)             | 14.2 (5.91 to 21.6)                      |
| 3 Low back pain             | 3 Ischemic heart disease    | -28.7 (-47 to -3.03)         | -42.2 (-55.8 to -23.4)          | -57.4 (-68.1 to -42.4)                   |
| 4 Diabetes                  | 4 Low back pain             | 19.1 (5.06 to 31.8)          | -3.52 (-6.48 to -0.663)         | -3.18 (-3.27 to -3.09)                   |
| 5 Alzheimer's disease       | 5 Falls                     | 44.2 (25.3 to 64.1)          | 16.8 (7.61 to 27.1)             | -0.899 (-7.02 to 6.27)                   |
| 6 Falls                     | 6 Lung cancer               | 18.8 (-8.75 to 45.3)         | -3.75 (-22.6 to 16.8)           | -8.16 (-25.7 to 9.9)                     |
| 7 Stroke                    | 7 Chronic kidney disease    | 109 (57.5 to 175)            | 69.2 (32.6 to 114)              | 10.8 (-11.8 to 45.2)                     |
| 8 Lung cancer               | 8 Stroke                    | -10.1 (-24.7 to 7.1)         | -27.2 (-37.2 to -15.1)          | -40.9 (-48.9 to -29.7)                   |
| 9 Headache disorders        | 9 Anxiety disorders         | 23.9 (10.5 to 36.8)          | 0.435 (-0.947 to 1.65)          | 0.735 (0.655 to 0.79)                    |
| 10 Anxiety disorders        | 10 Headache disorders       | 22.1 (8.98 to 34.7)          | -1.08 (-3.12 to 0.442)          | 0.393 (0.223 to 0.476)                   |
| 11 Depressive disorders     | 11 Lower respiratory infect | 53.8 (26.6 to 83.3)          | 24.6 (5.95 to 46.7)             | -25.3 (-34.6 to -12.1)                   |
| 12 Colorectal cancer        | 12 Colorectal cancer        | 36 (-0.913 to 72.7)          | 10.2 (-17.5 to 37.8)            | -4.26 (-25.9 to 17.1)                    |
| 13 COPD                     | 13 Other musculoskeletal    | 65.8 (47 to 82.4)            | 34.4 (30.5 to 38.1)             | 40 (38.6 to 41.2)                        |
| 14 Age-related hearing loss | 14 COPD                     | 43.2 (15.7 to 77.6)          | 16 (-4.49 to 38.7)              | -10.9 (-24.8 to 6.94)                    |
| 15 Lower respiratory infect | 15 Age-related hearing loss | 41.2 (23.6 to 59.4)          | 14.4 (7.89 to 22.9)             | -0.766 (-0.915 to -0.576)                |
| 16 Gynecological diseases   | 16 Depressive disorders     | 22.4 (9.07 to 35.8)          | -0.794 (-2.62 to 0.76)          | -1.59 (-1.71 to -1.46)                   |
| 17 Breast cancer            | 17 Pancreatic cancer        | 71.7 (29.6 to 116)           | 39.1 (7.36 to 69.7)             | 29.3 (1.39 to 58.8)                      |
| 18 Osteoarthritis           | 18 Osteoarthritis           | 30.3 (14.8 to 44.5)          | 5.6 (0.672 to 11.1)             | 2.49 (2.21 to 2.8)                       |
| 19 Other musculoskeletal    | 19 Breast cancer            | 19.8 (-4.11 to 46)           | -2.93 (-19.5 to 13.8)           | -10.4 (-25.2 to 5.78)                    |
| 20 Chronic kidney disease   | 20 Gynecological diseases   | 5.84 (-28.4 to 46.6)         | -14.2 (-38.6 to 16.3)           | -11.8 (-35.9 to 17.4)                    |
| 21 Pancreatic cancer        | 150 COVID-19                |                              |                                 |                                          |



### Monaco, Reference scenario

**Legend:**  
Communicable, maternal, neonatal and nutritional  
Non-communicable  
Injuries

| Leading Causes 2022         | Leading Causes 2050         | Mean % change number of DALY | Mean % change all-age DALY rate | Mean % change age-standardized DALY rate |
|-----------------------------|-----------------------------|------------------------------|---------------------------------|------------------------------------------|
| 1 Lung cancer               | 1 Lung cancer               | -21.8 (-36.5 to -6.46)       | 2.2 (-15 to 20.3)               | -11.7 (-27.5 to 5.4)                     |
| 2 Ischemic heart disease    | 2 Alzheimer's disease       | 35.6 (15.2 to 60.1)          | 77.1 (56.9 to 98.1)             | 2.6 (-2.01 to 7.93)                      |
| 3 Stroke                    | 3 Stroke                    | -36.2 (-47.6 to -22.9)       | -16.7 (-29.6 to -0.405)         | -39.5 (-47.7 to -30.3)                   |
| 4 Low back pain             | 4 Ischemic heart disease    | -44.3 (-57.3 to -26.9)       | -27.3 (-43.6 to -4.86)          | -50.9 (-61.6 to -35.3)                   |
| 5 Alzheimer's disease       | 5 Colorectal cancer         | -5.43 (-27.3 to 18.3)        | 23.5 (-2.5 to 49)               | -7.07 (-27.4 to 12.3)                    |
| 6 COVID-19                  | 6 Low back pain             | -22.5 (-30.1 to -14.2)       | 1.26 (-3.56 to 5.76)            | -1.58 (-1.7 to -1.45)                    |
| 7 Colorectal cancer         | 7 Lower respiratory infect  | 18.9 (-5.38 to 47.8)         | 55.2 (30 to 81.9)               | -9.14 (-21.6 to 4.1)                     |
| 8 Breast cancer             | 8 Breast cancer             | -17.1 (-31.4 to -0.441)      | 8.33 (-8.16 to 25.4)            | -8.57 (-21.3 to 4.61)                    |
| 9 Depressive disorders      | 9 COPD                      | 11.2 (-12 to 35.5)           | 45.3 (17.7 to 74.1)             | -0.475 (-15.4 to 18.7)                   |
| 10 Falls                    | 10 Pancreatic cancer        | 19.6 (-2.56 to 44.4)         | 56.2 (26.2 to 84)               | 27.7 (3.32 to 51)                        |
| 11 COPD                     | 11 Falls                    | -8.94 (-22.3 to 4.17)        | 18.9 (6.44 to 31)               | -9.01 (-17.1 to -1.26)                   |
| 12 Lower respiratory infect | 12 Diabetes                 | -1.44 (-13.4 to 11.2)        | 28.8 (19.3 to 38.9)             | 17 (11.7 to 20.9)                        |
| 13 Diabetes                 | 13 Chronic kidney disease   | 70.2 (26.2 to 121)           | 122 (76.9 to 181)               | 31.6 (7.34 to 68.2)                      |
| 14 Headache disorders       | 14 Depressive disorders     | -24.2 (-31.6 to -15.9)       | -0.992 (-4.68 to 2.72)          | -1.38 (-1.58 to -1.21)                   |
| 15 Pancreatic cancer        | 15 Prostate cancer          | 14.1 (-6.66 to 40.3)         | 49 (24.9 to 73.2)               | 3.18 (-10.1 to 17.1)                     |
| 16 Anxiety disorders        | 16 Age-related hearing loss | -3.44 (-14.3 to 8.79)        | 26.1 (17.2 to 35.3)             | -0.506 (-0.615 to -0.394)                |
| 17 Age-related hearing loss | 17 Osteoarthritis           | -14.5 (-23.4 to -5.05)       | 11.7 (5.17 to 17.7)             | 1.42 (1.27 to 1.58)                      |
| 18 Osteoarthritis           | 18 Headache disorders       | -27.3 (-33.9 to -20.3)       | -5.01 (-7.3 to -2.76)           | -0.769 (-1.09 to -0.406)                 |
| 19 Other musculoskeletal    | 19 Other musculoskeletal    | -14.3 (-23.1 to -5.08)       | 12 (6.66 to 18.3)               | 16.5 (15.8 to 17.1)                      |
| 20 Self-harm                | 20 Anxiety disorders        | -24.6 (-32.4 to -16.5)       | -1.52 (-4.23 to 0.992)          | -0.464 (-0.705 to -0.24)                 |
| 21 Prostate cancer          | 27 Self-harm                |                              |                                 |                                          |
| 26 Chronic kidney disease   | 150 COVID-19                |                              |                                 |                                          |

### Netherlands, Reference scenario

**Legend:**  
Communicable, maternal, neonatal and nutritional  
Non-communicable  
Injuries

| Leading Causes 2022         | Leading Causes 2050         | Mean % change number of DALY | Mean % change all-age DALY rate | Mean % change age-standardized DALY rate |
|-----------------------------|-----------------------------|------------------------------|---------------------------------|------------------------------------------|
| 1 Lung cancer               | 1 Alzheimer's disease       | 67 (47.9 to 88.5)            | 57.3 (46.8 to 68.9)             | -3.79 (-8.07 to 0.577)                   |
| 2 Ischemic heart disease    | 2 Falls                     | 35.5 (19.4 to 54.1)          | 27.6 (17.2 to 38.9)             | -11.5 (-17.5 to -4.35)                   |
| 3 Low back pain             | 3 COPD                      | 30.5 (12.5 to 50.2)          | 23 (7.11 to 41.9)               | -12.1 (-22.8 to 1.3)                     |
| 4 COPD                      | 4 Low back pain             | 7.11 (-2.45 to 16.8)         | 0.89 (-1.77 to 4.02)            | -1.97 (-2.03 to -1.9)                    |
| 5 Falls                     | 5 Lung cancer               | -4.8 (-18.1 to 9.48)         | -10.3 (-20.4 to 0.59)           | -21.3 (-29.8 to -11.9)                   |
| 6 Stroke                    | 6 Diabetes                  | 35.6 (21.5 to 48.1)          | 27.8 (19.5 to 36.7)             | 14.2 (7.68 to 20.3)                      |
| 7 Alzheimer's disease       | 7 Stroke                    | -8.32 (-19 to 3.45)          | -13.6 (-20.8 to -5.22)          | -37.2 (-43 to -31.1)                     |
| 8 Colorectal cancer         | 8 Colorectal cancer         | 17.4 (-4.18 to 39.8)         | 10.6 (-6.88 to 28.3)            | -11.5 (-26.3 to 1.4)                     |
| 9 Diabetes                  | 9 Ischemic heart disease    | -25.9 (-40.5 to -12.2)       | -30.2 (-41.2 to -17.7)          | -52.4 (-60.2 to -43.4)                   |
| 10 Anxiety disorders        | 10 Anxiety disorders        | 5.33 (-2.71 to 14.7)         | -0.78 (-1.98 to 0.539)          | 0.205 (0.133 to 0.274)                   |
| 11 Depressive disorders     | 11 Chronic kidney disease   | 153 (109 to 204)             | 139 (101 to 181)                | 40.8 (17.8 to 68.2)                      |
| 12 Headache disorders       | 12 Depressive disorders     | 5.43 (-3.6 to 14.4)          | -0.683 (-2.16 to 0.883)         | -1.16 (-1.27 to -1.07)                   |
| 13 COVID-19                 | 13 Headache disorders       | 3.44 (-4.85 to 11.4)         | -2.55 (-3.51 to -1.02)          | -0.124 (-0.276 to 0.0406)                |
| 14 Other musculoskeletal    | 14 Lower respiratory infect | 47 (26.1 to 67.9)            | 38.5 (20.9 to 56.9)             | -16.7 (-25.4 to -6.69)                   |
| 15 Breast cancer            | 15 Other musculoskeletal    | 24.6 (14.2 to 34.9)          | 17.3 (14.2 to 21.3)             | 20.4 (19.4 to 21.3)                      |
| 16 Gynecological diseases   | 16 Age-related hearing loss | 28.2 (16 to 40.9)            | 20.7 (15.3 to 26)               | -0.401 (-0.509 to -0.272)                |
| 17 Age-related hearing loss | 17 Breast cancer            | 11.4 (-4.77 to 28)           | 4.92 (-7 to 17.5)               | -11.2 (-21.6 to -0.153)                  |
| 18 Osteoarthritis           | 18 Atrial fibrillation      | 92.9 (70.3 to 118)           | 81.7 (66.4 to 98.2)             | 17.6 (9.75 to 25.5)                      |
| 19 Oral disorders           | 19 Osteoarthritis           | 17.4 (7.34 to 27.5)          | 10.6 (7.76 to 13.4)             | 1.41 (1.25 to 1.58)                      |
| 20 Lower respiratory infect | 20 Oral disorders           | 15.8 (6.24 to 25.6)          | 9.06 (5.56 to 12.2)             | 0.258 (0.166 to 0.361)                   |
| 25 Chronic kidney disease   | 24 Gynecological diseases   |                              |                                 |                                          |
| 27 Atrial fibrillation      | 150 COVID-19                |                              |                                 |                                          |

### Norway, Reference scenario

**Legend:**

Communicable, maternal, neonatal and nutritional  
Non-communicable  
Injuries

| Leading Causes 2022         | Leading Causes 2050         | Mean % change number of DALY | Mean % change all-age DALY rate | Mean % change age-standardized DALY rate |
|-----------------------------|-----------------------------|------------------------------|---------------------------------|------------------------------------------|
| 1 Ischemic heart disease    | 1 Alzheimer's disease       | 77.8 (56.9 to 96.5)          | 53.8 (42.6 to 64.4)             | -7.33 (-11.2 to -3.05)                   |
| 2 Low back pain             | 2 Low back pain             | 23.1 (13.2 to 33.8)          | 6.56 (4.34 to 8.74)             | -1.22 (-1.26 to -1.17)                   |
| 3 COVID-19                  | 3 Falls                     | 47.1 (31.4 to 64.4)          | 27.4 (19.7 to 36.9)             | -12.1 (-17.7 to -5.35)                   |
| 4 Falls                     | 4 COPD                      | 42.7 (24.5 to 60)            | 23.5 (11.2 to 36.6)             | -16.5 (-24.4 to -7.34)                   |
| 5 COPD                      | 5 Ischemic heart disease    | -24 (-35 to -11)             | -34.2 (-41.8 to -25.2)          | -56.8 (-61.8 to -50.3)                   |
| 6 Alzheimer's disease       | 6 Lung cancer               | 10.5 (-3.78 to 24.4)         | -4.36 (-13.5 to 6.22)           | -25.8 (-32.5 to -17.6)                   |
| 7 Stroke                    | 7 Diabetes                  | 44.2 (31.5 to 59.1)          | 24.8 (19 to 30.8)               | 5.72 (1.34 to 9.81)                      |
| 8 Lung cancer               | 8 Stroke                    | 4.81 (-6.01 to 16.8)         | -9.29 (-16 to -2.9)             | -36.8 (-41.5 to -32.6)                   |
| 9 Anxiety disorders         | 9 Anxiety disorders         | 14.5 (5.29 to 23.8)          | -0.919 (-2.4 to 0.649)          | 0.285 (0.247 to 0.317)                   |
| 10 Depressive disorders     | 10 Colorectal cancer        | 37.5 (17.3 to 59.5)          | 19 (2.94 to 34.7)               | -15.3 (-26.5 to -5.44)                   |
| 11 Headache disorders       | 11 Depressive disorders     | 15.4 (6.29 to 24.9)          | -0.139 (-1.5 to 1.42)           | -0.529 (-0.559 to -0.494)                |
| 12 Diabetes                 | 12 Headache disorders       | 12.9 (3.55 to 21.9)          | -2.31 (-4.02 to 1.87)           | 0.223 (0.148 to 0.278)                   |
| 13 Colorectal cancer        | 13 Lower respiratory infect | 75.1 (50.7 to 104)           | 51.5 (31.9 to 72.7)             | -11.4 (-21.6 to -0.791)                  |
| 14 Age-related hearing loss | 14 Age-related hearing loss | 47.6 (34.6 to 61.4)          | 27.7 (22.8 to 33.2)             | -0.209 (-0.299 to -0.113)                |
| 15 Self-harm                | 15 Prostate cancer          | 84 (57.3 to 111)             | 59.3 (38.1 to 76.1)             | 3.11 (-6.52 to 12.6)                     |
| 16 Gynecological diseases   | 16 Osteoarthritis           | 39.5 (28.1 to 51.9)          | 20.7 (17.7 to 24.2)             | 0.726 (0.618 to 0.851)                   |
| 17 Drug use disorders       | 17 Drug use disorders       | 30.2 (15.9 to 48.5)          | 12.7 (4.67 to 25)               | 17.4 (8.22 to 31.8)                      |
| 18 Oral disorders           | 18 Oral disorders           | 31.8 (21.6 to 43.8)          | 14.1 (10.6 to 17.7)             | 0.182 (0.103 to 0.265)                   |
| 19 Osteoarthritis           | 19 Pancreatic cancer        | 66.5 (44.9 to 87.2)          | 44.2 (26.7 to 61.2)             | 9.84 (-2.76 to 23.1)                     |
| 20 Lower respiratory infect | 20 Atrial fibrillation      | 98 (74.7 to 122)             | 71.4 (57 to 86.8)               | 7.73 (0.424 to 15.6)                     |
| 22 Prostate cancer          | 24 Gynecological diseases   |                              |                                 |                                          |
| 23 Pancreatic cancer        | 27 Self-harm                |                              |                                 |                                          |
| 26 Atrial fibrillation      | 146 COVID-19                |                              |                                 |                                          |

### Portugal, Reference scenario

**Legend:**  
Communicable, maternal, neonatal and nutritional  
Non-communicable  
Injuries

| Leading Causes 2022         | Leading Causes 2050         | Mean % change number of DALY | Mean % change all-age DALY rate | Mean % change age-standardized DALY rate |
|-----------------------------|-----------------------------|------------------------------|---------------------------------|------------------------------------------|
| 1 Stroke                    | 1 Alzheimer's disease       | 53.8 (33.5 to 76.2)          | 56.7 (45.1 to 67.9)             | -10.4 (-14.3 to -6.71)                   |
| 2 Low back pain             | 2 Diabetes                  | 29.6 (13.6 to 48.3)          | 32 (23 to 41)                   | 13.5 (7.25 to 19.7)                      |
| 3 Ischemic heart disease    | 3 Low back pain             | 0.134 (-10.7 to 11.2)        | 2.03 (-0.912 to 5.09)           | -3.57 (-3.69 to -3.46)                   |
| 4 COVID-19                  | 4 Stroke                    | -29.4 (-41.3 to -15.3)       | -28 (-36.4 to -19.3)            | -50.3 (-56.5 to -43.4)                   |
| 5 Diabetes                  | 5 COPD                      | 37.5 (14.8 to 65.5)          | 40.1 (19.1 to 61.9)             | -14.1 (-27.5 to 0.36)                    |
| 6 Alzheimer's disease       | 6 Lower respiratory infect  | 33.6 (14.2 to 56.2)          | 36.1 (19.7 to 55.1)             | -24.7 (-33.6 to -13.8)                   |
| 7 Depressive disorders      | 7 Colorectal cancer         | 23.5 (-3.28 to 58.2)         | 25.9 (1.52 to 55.3)             | -6.88 (-24.2 to 14.8)                    |
| 8 Lung cancer               | 8 Lung cancer               | 5.41 (-13.8 to 32)           | 7.38 (-10.1 to 28.6)            | -10.2 (-23.7 to 6.5)                     |
| 9 Anxiety disorders         | 9 Depressive disorders      | -2.45 (-13 to 8.39)          | -0.599 (-3.37 to 2.53)          | -2.56 (-2.76 to -2.34)                   |
| 10 COPD                     | 10 Ischemic heart disease   | -38.5 (-52 to -23)           | -37.4 (-49.6 to -23.3)          | -56.9 (-65.7 to -46.2)                   |
| 11 Lower respiratory infect | 11 Anxiety disorders        | -3.63 (-14.2 to 6.75)        | -1.8 (-4.17 to 0.649)           | 0.167 (-0.0227 to 0.357)                 |
| 12 Colorectal cancer        | 12 Chronic kidney disease   | 64.6 (30.1 to 101)           | 67.8 (37.5 to 99.4)             | -7.66 (-25.5 to 14.1)                    |
| 13 Falls                    | 13 Falls                    | 9.28 (-5.79 to 24.6)         | 11.4 (1.44 to 22.7)             | -13.3 (-21.4 to -4.83)                   |
| 14 Headache disorders       | 14 Age-related hearing loss | 28 (12.4 to 42.4)            | 30.5 (24.8 to 36)               | -0.843 (-0.925 to -0.753)                |
| 15 Age-related hearing loss | 15 Other musculoskeletal    | 34.8 (18.9 to 51.7)          | 37.4 (31.8 to 43.5)             | 41.2 (39.8 to 42.3)                      |
| 16 Chronic kidney disease   | 16 Headache disorders       | -8.46 (-18.4 to 1.47)        | -6.72 (-8.51 to -4.29)          | -0.509 (-0.859 to -0.163)                |
| 17 Other musculoskeletal    | 17 Osteoarthritis           | 18.9 (5.38 to 32.2)          | 21.1 (17.5 to 24.7)             | 2.67 (2.35 to 3.01)                      |
| 18 Osteoarthritis           | 18 Pancreatic cancer        | 54.2 (24 to 94)              | 57.1 (30 to 90.9)               | 25.4 (4.22 to 52.5)                      |
| 19 Stomach cancer           | 19 Urinary diseases         | 97 (64.3 to 136)             | 101 (69 to 131)                 | 13 (-2.26 to 26.5)                       |
| 20 Gynecological diseases   | 20 Prostate cancer          | 44.2 (19.8 to 72.4)          | 46.9 (28.7 to 69.1)             | 1.49 (-9.59 to 13.5)                     |
| 29 Prostate cancer          | 28 Stomach cancer           |                              |                                 |                                          |
| 30 Pancreatic cancer        | 31 Gynecological diseases   |                              |                                 |                                          |
| 32 Urinary diseases         | 153 COVID-19                |                              |                                 |                                          |

### San Marino, Reference scenario

**Legend:**  
Communicable, maternal, neonatal and nutritional  
Non-communicable  
Injuries

| Leading Causes 2022           | Leading Causes 2050           | Mean % change number of DALY | Mean % change all-age DALY rate | Mean % change age-standardized DALY rate |
|-------------------------------|-------------------------------|------------------------------|---------------------------------|------------------------------------------|
| 1 COVID-19                    | 1 Alzheimer's disease         | 135 (82.2 to 189)            | 161 (124 to 203)                | 3.68 (-1.37 to 8.84)                     |
| 2 Low back pain               | 2 Low back pain               | 0.0779 (-13.5 to 15.4)       | 11.4 (6.37 to 17.4)             | -2 (-2.2 to -1.76)                       |
| 3 Alzheimer's disease         | 3 Stroke                      | 13 (-16.1 to 41.1)           | 25.7 (-0.0336 to 52.2)          | -34.8 (-45.3 to -20.3)                   |
| 4 Stroke                      | 4 Diabetes                    | 52.9 (26.4 to 80.8)          | 70.3 (56.1 to 85.3)             | 27 (20.2 to 32.8)                        |
| 5 Ischemic heart disease      | 5 Falls                       | 34.8 (12.3 to 64.3)          | 50 (33.6 to 66)                 | -9.05 (-17.1 to -0.418)                  |
| 6 Depressive disorders        | 6 Ischemic heart disease      | -1.95 (-34.1 to 36.5)        | 9.14 (-19.6 to 48.4)            | -49.3 (-61.2 to -29.5)                   |
| 7 Lung cancer                 | 7 Other cardiovascular        | 43.4 (14 to 71)              | 59.6 (39.1 to 83.4)             | -10.7 (-19.7 to -0.426)                  |
| 8 Falls                       | 8 Lung cancer                 | 8.92 (-18.1 to 47)           | 21.1 (-7.38 to 54)              | -16.7 (-34.2 to 0.0955)                  |
| 9 Diabetes                    | 9 Age-related hearing loss    | 48.7 (22.9 to 75.1)          | 65.5 (52 to 81)                 | -0.588 (-0.775 to -0.42)                 |
| 10 Headache disorders         | 10 COPD                       | 83.4 (33.8 to 132)           | 104 (61.8 to 152)               | -0.987 (-19.9 to 27.4)                   |
| 11 Other cardiovascular       | 11 Colorectal cancer          | 52.1 (7.22 to 111)           | 69 (25.4 to 124)                | -6.44 (-29.9 to 19.8)                    |
| 12 Anxiety disorders          | 12 Depressive disorders       | -11.4 (-24.6 to 1.99)        | -1.32 (-6.18 to 4.91)           | -2 (-2.33 to -1.71)                      |
| 13 Age-related hearing loss   | 13 Osteoarthritis             | 26.3 (5.73 to 47.4)          | 40.7 (33.5 to 47.8)             | 1.74 (1.52 to 1.99)                      |
| 14 Colorectal cancer          | 14 Lower respiratory infect   | 108 (51.9 to 166)            | 131 (79.9 to 187)               | -12.6 (-25.8 to 4.65)                    |
| 15 Gynecological diseases     | 15 Atrial fibrillation        | 130 (83 to 183)              | 156 (123 to 192)                | 12.5 (6.08 to 19.9)                      |
| 16 Osteoarthritis             | 16 Anxiety disorders          | -14.8 (-27.2 to -1.66)       | -5.13 (-10 to 0.155)            | -0.6 (-1.01 to -0.125)                   |
| 17 Other musculoskeletal      | 17 Headache disorders         | -21.6 (-32.6 to -9.11)       | -12.7 (-16.1 to -6.68)          | -1.49 (-2.13 to -0.826)                  |
| 18 COPD                       | 18 Hypertensive heart disease | 151 (68.7 to 237)            | 179 (108 to 271)                | 20.4 (-7.74 to 60.7)                     |
| 19 Oral disorders             | 19 Other musculoskeletal      | 3.28 (-12.3 to 22.3)         | 15 (6.31 to 24.2)               | 19.8 (19 to 20.6)                        |
| 20 Stomach cancer             | 20 Oral disorders             | 18.8 (0.0678 to 38.9)        | 32.3 (22.6 to 42)               | 0.238 (0.0815 to 0.407)                  |
| 25 Lower respiratory infect   | 24 Stomach cancer             |                              |                                 |                                          |
| 31 Atrial fibrillation        | 28 Gynecological diseases     |                              |                                 |                                          |
| 34 Hypertensive heart disease | 150 COVID-19                  |                              |                                 |                                          |

### Spain, Reference scenario

**Legend:**  
Communicable, maternal, neonatal and nutritional  
Non-communicable  
Injuries

| Leading Causes 2022          | Leading Causes 2050          | Mean % change number of DALY | Mean % change all-age DALY rate | Mean % change age-standardized DALY rate |
|------------------------------|------------------------------|------------------------------|---------------------------------|------------------------------------------|
| 1 Ischemic heart disease     | 1 Alzheimer's disease        | 72.2 (53.5 to 92)            | 52.5 (40.2 to 63.7)             | -6.93 (-11.1 to -2.79)                   |
| 2 COVID-19                   | 2 Diabetes                   | 64.6 (45.8 to 79)            | 45.8 (37.5 to 53.7)             | 24.6 (20.2 to 28.5)                      |
| 3 Diabetes                   | 3 COPD                       | 56.5 (30.2 to 81)            | 38.6 (19 to 57.6)               | -13.7 (-25.6 to -0.525)                  |
| 4 Alzheimer's disease        | 4 Low back pain              | 16.8 (5.2 to 26.8)           | 3.44 (-0.335 to 7.41)           | -3 (-3.09 to -2.93)                      |
| 5 Low back pain              | 5 Depressive disorders       | 11.7 (1.79 to 21.7)          | -1.11 (-2.89 to 0.87)           | -1.81 (-1.89 to -1.7)                    |
| 6 Stroke                     | 6 Ischemic heart disease     | -18.9 (-34.5 to 0.26)        | -28.2 (-41.8 to -13.8)          | -52.2 (-62.3 to -40.8)                   |
| 7 Lung cancer                | 7 Stroke                     | 5.11 (-8.6 to 20.1)          | -6.92 (-16.4 to 4.24)           | -34.7 (-41.8 to -26.7)                   |
| 8 Depressive disorders       | 8 Lung cancer                | -5.78 (-20.9 to 11.5)        | -16.5 (-29.6 to -1.71)          | -31.2 (-40.8 to -20.4)                   |
| 9 COPD                       | 9 Falls                      | 18.3 (4.89 to 33.4)          | 4.73 (-4.38 to 13.9)            | -15.1 (-22.7 to -7.79)                   |
| 10 Falls                     | 10 Colorectal cancer         | 35.4 (9.1 to 67)             | 20 (-1.45 to 46)                | -13.8 (-29.1 to 3.57)                    |
| 11 Headache disorders        | 11 Chronic kidney disease    | 146 (93.8 to 201)            | 118 (80.3 to 164)               | 25.5 (1.23 to 56.2)                      |
| 12 Colorectal cancer         | 12 Age-related hearing loss  | 47.8 (31.8 to 62.8)          | 30.8 (23.2 to 37)               | -0.619 (-0.735 to -0.478)                |
| 13 Age-related hearing loss  | 13 Headache disorders        | 6.22 (-2.96 to 15.6)         | -5.93 (-7.79 to -3.42)          | -0.12 (-0.378 to 0.0713)                 |
| 14 Anxiety disorders         | 14 Other musculoskeletal     | 46.2 (33.2 to 60.6)          | 29.5 (23.7 to 36)               | 31.7 (30.2 to 32.8)                      |
| 15 Gynecological diseases    | 15 Osteoarthritis            | 36.3 (23.8 to 48.3)          | 20.7 (15.6 to 25.6)             | 2.11 (1.89 to 2.37)                      |
| 16 Other musculoskeletal     | 16 Anxiety disorders         | 10.9 (0.508 to 20.4)         | -1.76 (-4.82 to 1.35)           | 0.227 (0.109 to 0.333)                   |
| 17 Osteoarthritis            | 17 Atrial fibrillation       | 97.7 (77.4 to 120)           | 75.1 (62 to 91)                 | 10.7 (4.44 to 17.2)                      |
| 18 Blindness and vision loss | 18 Blindness and vision loss | 36.8 (22.6 to 49.2)          | 21.1 (14.1 to 26.9)             | -3.83 (-4.07 to -3.57)                   |
| 19 Lower respiratory infect  | 19 Lower respiratory infect  | 49.8 (28.8 to 74.4)          | 32.7 (17.6 to 48.1)             | -21.3 (-29.5 to -11.7)                   |
| 20 Chronic kidney disease    | 20 Pancreatic cancer         | 70 (37.7 to 108)             | 50.6 (22.2 to 81.4)             | 17.5 (-3.19 to 43.1)                     |
| 22 Pancreatic cancer         | 23 Gynecological diseases    |                              |                                 |                                          |
| 26 Atrial fibrillation       | 153 COVID-19                 |                              |                                 |                                          |

### Sweden, Reference scenario

**Legend:**  
Communicable, maternal, neonatal and nutritional  
Non-communicable  
Injuries

| Leading Causes 2022         | Leading Causes 2050         | Mean % change number of DALY | Mean % change all-age DALY rate | Mean % change age-standardized DALY rate |
|-----------------------------|-----------------------------|------------------------------|---------------------------------|------------------------------------------|
| 1 Ischemic heart disease    | 1 Alzheimer's disease       | 61.7 (40.7 to 81.2)          | 25.8 (15.2 to 38.4)             | -4.46 (-8.43 to 0.131)                   |
| 2 Alzheimer's disease       | 2 Ischemic heart disease    | -25.3 (-38.2 to -10.5)       | -41.9 (-51.3 to -31.1)          | -53.2 (-60.3 to -44.1)                   |
| 3 Low back pain             | 3 Low back pain             | 27.4 (16.4 to 37.8)          | -0.883 (-3.22 to 1.49)          | -1.83 (-1.93 to -1.74)                   |
| 4 Stroke                    | 4 Falls                     | 35.7 (19.8 to 51.8)          | 5.56 (-2.61 to 14.1)            | -11.2 (-17.5 to -3.17)                   |
| 5 Falls                     | 5 Diabetes                  | 47.3 (33.5 to 62.9)          | 14.6 (6.02 to 22.2)             | 11.7 (5.17 to 17.2)                      |
| 6 COVID-19                  | 6 Depressive disorders      | 29.7 (19.2 to 39.5)          | 0.884 (-0.147 to 1.87)          | -0.823 (-0.913 to -0.732)                |
| 7 Depressive disorders      | 7 COPD                      | 35.4 (14.2 to 58.6)          | 5.36 (-8.26 to 22.8)            | -9.23 (-20.6 to 6.04)                    |
| 8 Diabetes                  | 8 Stroke                    | -5.64 (-16.8 to 6.61)        | -26.6 (-33.5 to -18.2)          | -35.5 (-41.5 to -29)                     |
| 9 COPD                      | 9 Atrial fibrillation       | 80.2 (56.9 to 106)           | 40.2 (25.6 to 55.2)             | 9.92 (3.32 to 17)                        |
| 10 Headache disorders       | 10 Headache disorders       | 30.3 (20.5 to 39.3)          | 1.36 (0.329 to 2.5)             | 0.312 (0.175 to 0.4)                     |
| 11 Lung cancer              | 11 Lung cancer              | 20.1 (2.86 to 40.2)          | -6.53 (-18.3 to 5.27)           | -12.2 (-22.5 to -1.48)                   |
| 12 Anxiety disorders        | 12 Anxiety disorders        | 29.2 (18.8 to 38.5)          | 0.532 (-0.195 to 1.26)          | 0.513 (0.453 to 0.575)                   |
| 13 Colorectal cancer        | 13 Other musculoskeletal    | 54.7 (42.6 to 67.6)          | 20.4 (17.4 to 23.2)             | 20.7 (19.8 to 21.4)                      |
| 14 Atrial fibrillation      | 14 Colorectal cancer        | 31.9 (6.66 to 58.2)          | 2.6 (-15.1 to 22.1)             | -10.9 (-25.1 to 4.96)                    |
| 15 Other musculoskeletal    | 15 Chronic kidney disease   | 131 (88.4 to 176)            | 79.4 (49.9 to 111)              | 30.8 (10.5 to 56.9)                      |
| 16 Self-harm                | 16 Prostate cancer          | 57.7 (33.2 to 88.6)          | 22.7 (6.72 to 41.2)             | 3.08 (-7.63 to 14.3)                     |
| 17 Age-related hearing loss | 17 Pancreatic cancer        | 67.2 (37.1 to 99)            | 30 (9.16 to 51.6)               | 20.2 (2.41 to 40.1)                      |
| 18 Prostate cancer          | 18 Drug use disorders       | 58.5 (40.3 to 80.5)          | 23.3 (11.8 to 37.1)             | 19.3 (6.95 to 34.1)                      |
| 19 Osteoarthritis           | 19 Age-related hearing loss | 35.6 (23.5 to 46.8)          | 5.5 (1.48 to 9.43)              | -0.646 (-0.702 to -0.588)                |
| 20 Drug use disorders       | 20 Osteoarthritis           | 33.3 (21.5 to 45.6)          | 3.7 (0.0887 to 7.06)            | 1.5 (1.28 to 1.73)                       |
| 23 Pancreatic cancer        | 21 Self-harm                |                              |                                 |                                          |
| 29 Chronic kidney disease   | 148 COVID-19                |                              |                                 |                                          |

### Switzerland, Reference scenario

**Legend:**

Communicable, maternal, neonatal and nutritional  
Non-communicable  
Injuries

| Leading Causes 2022           | Leading Causes 2050           | Mean % change number of DALY | Mean % change all-age DALY rate | Mean % change age-standardized DALY rate |
|-------------------------------|-------------------------------|------------------------------|---------------------------------|------------------------------------------|
| 1 Low back pain               | 1 Alzheimer's disease         | 93.2 (69.6 to 119)           | 71.4 (60.2 to 83.8)             | -6.28 (-10.6 to -2.23)                   |
| 2 Ischemic heart disease      | 2 Falls                       | 43.9 (25.2 to 60.1)          | 27.6 (18.5 to 37)               | -8.84 (-14.5 to -2.53)                   |
| 3 Falls                       | 3 Low back pain               | 19.7 (8.27 to 30.4)          | 6.21 (3.38 to 9.4)              | -0.974 (-1.03 to -0.924)                 |
| 4 Alzheimer's disease         | 4 Diabetes                    | 54.9 (37.5 to 69.6)          | 37.5 (31.1 to 43.9)             | 13.9 (10.4 to 16.8)                      |
| 5 Diabetes                    | 5 Ischemic heart disease      | -9.07 (-21.9 to 5.14)        | -19.3 (-29.7 to -6.8)           | -53.6 (-59.4 to -45.9)                   |
| 6 Anxiety disorders           | 6 COPD                        | 61.7 (40.5 to 84.9)          | 43.4 (29.4 to 62.7)             | -9.01 (-17 to 1.29)                      |
| 7 Lung cancer                 | 7 Chronic kidney disease      | 184 (134 to 234)             | 152 (116 to 193)                | 29.3 (13 to 47.4)                        |
| 8 Depressive disorders        | 8 Anxiety disorders           | 11.2 (1.8 to 20.6)           | -1.39 (-3.59 to 0.965)          | 0.112 (0.0534 to 0.173)                  |
| 9 Stroke                      | 9 Lung cancer                 | 14 (-3.29 to 29.4)           | 1.06 (-10.2 to 12.1)            | -22.5 (-30.2 to -15.7)                   |
| 10 Headache disorders         | 10 Depressive disorders       | 12.5 (3.15 to 21.7)          | -0.21 (-2.01 to 1.84)           | -0.507 (-0.572 to -0.447)                |
| 11 COPD                       | 11 Stroke                     | 10.4 (-2.09 to 23.7)         | -2.06 (-10.3 to 6.34)           | -35.7 (-40.7 to -30.2)                   |
| 12 Gynecological diseases     | 12 Age-related hearing loss   | 52 (37.1 to 69)              | 34.8 (28 to 41.9)               | -0.0795 (-0.214 to 0.0603)               |
| 13 COVID-19                   | 13 Headache disorders         | 6.5 (-3.09 to 17.1)          | -5.53 (-7.27 to -2.86)          | 0.00939 (-0.149 to 0.0744)               |
| 14 Age-related hearing loss   | 14 Hypertensive heart disease | 131 (91.1 to 176)            | 104 (75.7 to 137)               | 11.9 (-2.38 to 29.5)                     |
| 15 Other musculoskeletal      | 15 Osteoarthritis             | 38.6 (25.6 to 51.7)          | 22.9 (19.4 to 26.3)             | 0.36 (0.243 to 0.492)                    |
| 16 Osteoarthritis             | 16 Prostate cancer            | 87.4 (61.3 to 118)           | 66.2 (46.7 to 87)               | -0.504 (-9.29 to 8.43)                   |
| 17 Colorectal cancer          | 17 Colorectal cancer          | 37.4 (13.7 to 61.4)          | 21.8 (1.96 to 38)               | -18.3 (-30.4 to -7.62)                   |
| 18 Self-harm                  | 18 Other musculoskeletal      | 20.2 (8.07 to 32.6)          | 6.62 (3.02 to 11.2)             | 8.86 (8.15 to 9.38)                      |
| 19 Oral disorders             | 19 Pancreatic cancer          | 71.5 (41.8 to 96.8)          | 52.1 (32 to 70.5)               | 10.3 (-3.4 to 24.7)                      |
| 20 Neck pain                  | 20 Gynecological diseases     | -3.89 (-18.8 to 14.6)        | -14.7 (-28.6 to 0.0616)         | -11.6 (-25.1 to 3.38)                    |
| 22 Chronic kidney disease     | 21 Oral disorders             |                              |                                 |                                          |
| 24 Prostate cancer            | 24 Neck pain                  |                              |                                 |                                          |
| 25 Pancreatic cancer          | 32 Self-harm                  |                              |                                 |                                          |
| 27 Hypertensive heart disease | 150 COVID-19                  |                              |                                 |                                          |



### UK, Reference scenario

**Legend:**

Communicable, maternal, neonatal and nutritional  
 Non-communicable  
 Injuries

| Leading Causes 2022         | Leading Causes 2050         | Mean % change number of DALY | Mean % change all-age DALY rate | Mean % change age-standardized DALY rate |
|-----------------------------|-----------------------------|------------------------------|---------------------------------|------------------------------------------|
| 1 Ischemic heart disease    | 1 Low back pain             | 14.7 (8.64 to 21.1)          | 6.17 (3.29 to 9.4)              | -1.87 (-1.94 to -1.8)                    |
| 2 Low back pain             | 2 Alzheimer's disease       | 73 (58.2 to 87.2)            | 60.1 (49 to 72.1)               | -2.69 (-6.47 to 1.89)                    |
| 3 COPD                      | 3 COPD                      | 28.9 (10.7 to 46.3)          | 19.4 (1.45 to 38.2)             | -15.8 (-28.8 to -2.86)                   |
| 4 Lung cancer               | 4 Diabetes                  | 49.2 (41 to 57.9)            | 38 (32.1 to 44.1)               | 20.8 (17.3 to 24.2)                      |
| 5 Stroke                    | 5 Lung cancer               | 19.6 (-0.241 to 40.7)        | 10.7 (-6.81 to 27.5)            | -15.8 (-26.5 to -3.83)                   |
| 6 Alzheimer's disease       | 6 Ischemic heart disease    | -30.5 (-43.3 to -14.8)       | -35.6 (-47.9 to -20)            | -55 (-63.9 to -43.4)                     |
| 7 Diabetes                  | 7 Lower respiratory infect  | 47.4 (29 to 65.8)            | 36.4 (20.5 to 53)               | -16.9 (-26 to -5.29)                     |
| 8 Depressive disorders      | 8 Falls                     | 22.2 (10.7 to 34.8)          | 13.1 (3.35 to 24.7)             | -14.7 (-21.6 to -6.44)                   |
| 9 Falls                     | 9 Depressive disorders      | 9.89 (3.83 to 15.9)          | 1.67 (-0.25 to 4.11)            | -1.16 (-1.23 to -1.08)                   |
| 10 COVID-19                 | 10 Stroke                   | -9.64 (-17.8 to -1.39)       | -16.4 (-24.1 to -8.48)          | -39.3 (-44.7 to -32.6)                   |
| 11 Lower respiratory infect | 11 Colorectal cancer        | 33.3 (7.59 to 64.1)          | 23.3 (0.715 to 51.1)            | -10.2 (-25.8 to 9.22)                    |
| 12 Headache disorders       | 12 Headache disorders       | 6.54 (0.771 to 13.6)         | -1.43 (-3.17 to 2.73)           | -0.448 (-0.677 to -0.178)                |
| 13 Colorectal cancer        | 13 Age-related hearing loss | 36.2 (28 to 44)              | 26.1 (20.8 to 30.9)             | -0.596 (-0.647 to -0.552)                |
| 14 Anxiety disorders        | 14 Drug use disorders       | 34.6 (20.8 to 54.7)          | 24.5 (13.1 to 38.5)             | 26.4 (14.8 to 41.3)                      |
| 15 Age-related hearing loss | 15 Other musculoskeletal    | 35.8 (28.7 to 43.9)          | 25.6 (21.1 to 30.6)             | 20 (18.8 to 21)                          |
| 16 Drug use disorders       | 16 Osteoarthritis           | 30.3 (22.9 to 37.5)          | 20.5 (16.1 to 25)               | 1.68 (1.53 to 1.84)                      |
| 17 Other musculoskeletal    | 17 Anxiety disorders        | 7.89 (1.08 to 15.2)          | -0.193 (-1.88 to 1.62)          | 0.1 (0.0167 to 0.185)                    |
| 18 Osteoarthritis           | 18 Prostate cancer          | 59.7 (35.7 to 84.6)          | 47.8 (28.5 to 70.8)             | 0.705 (-9.93 to 12.9)                    |
| 19 Breast cancer            | 19 Breast cancer            | 22.7 (5.41 to 42.5)          | 13.5 (-0.699 to 29.5)           | -11.7 (-22.6 to 2.02)                    |
| 20 Gynecological diseases   | 20 Pancreatic cancer        | 69.1 (36.2 to 104)           | 56.4 (28.5 to 86.9)             | 20.7 (0.657 to 43)                       |
| 27 Prostate cancer          | 24 Gynecological diseases   |                              |                                 |                                          |
| 28 Pancreatic cancer        | 150 COVID-19                |                              |                                 |                                          |

### Bolivia, Reference scenario

**Legend:**

Communicable, maternal, neonatal and nutritional  
Non-communicable  
Injuries

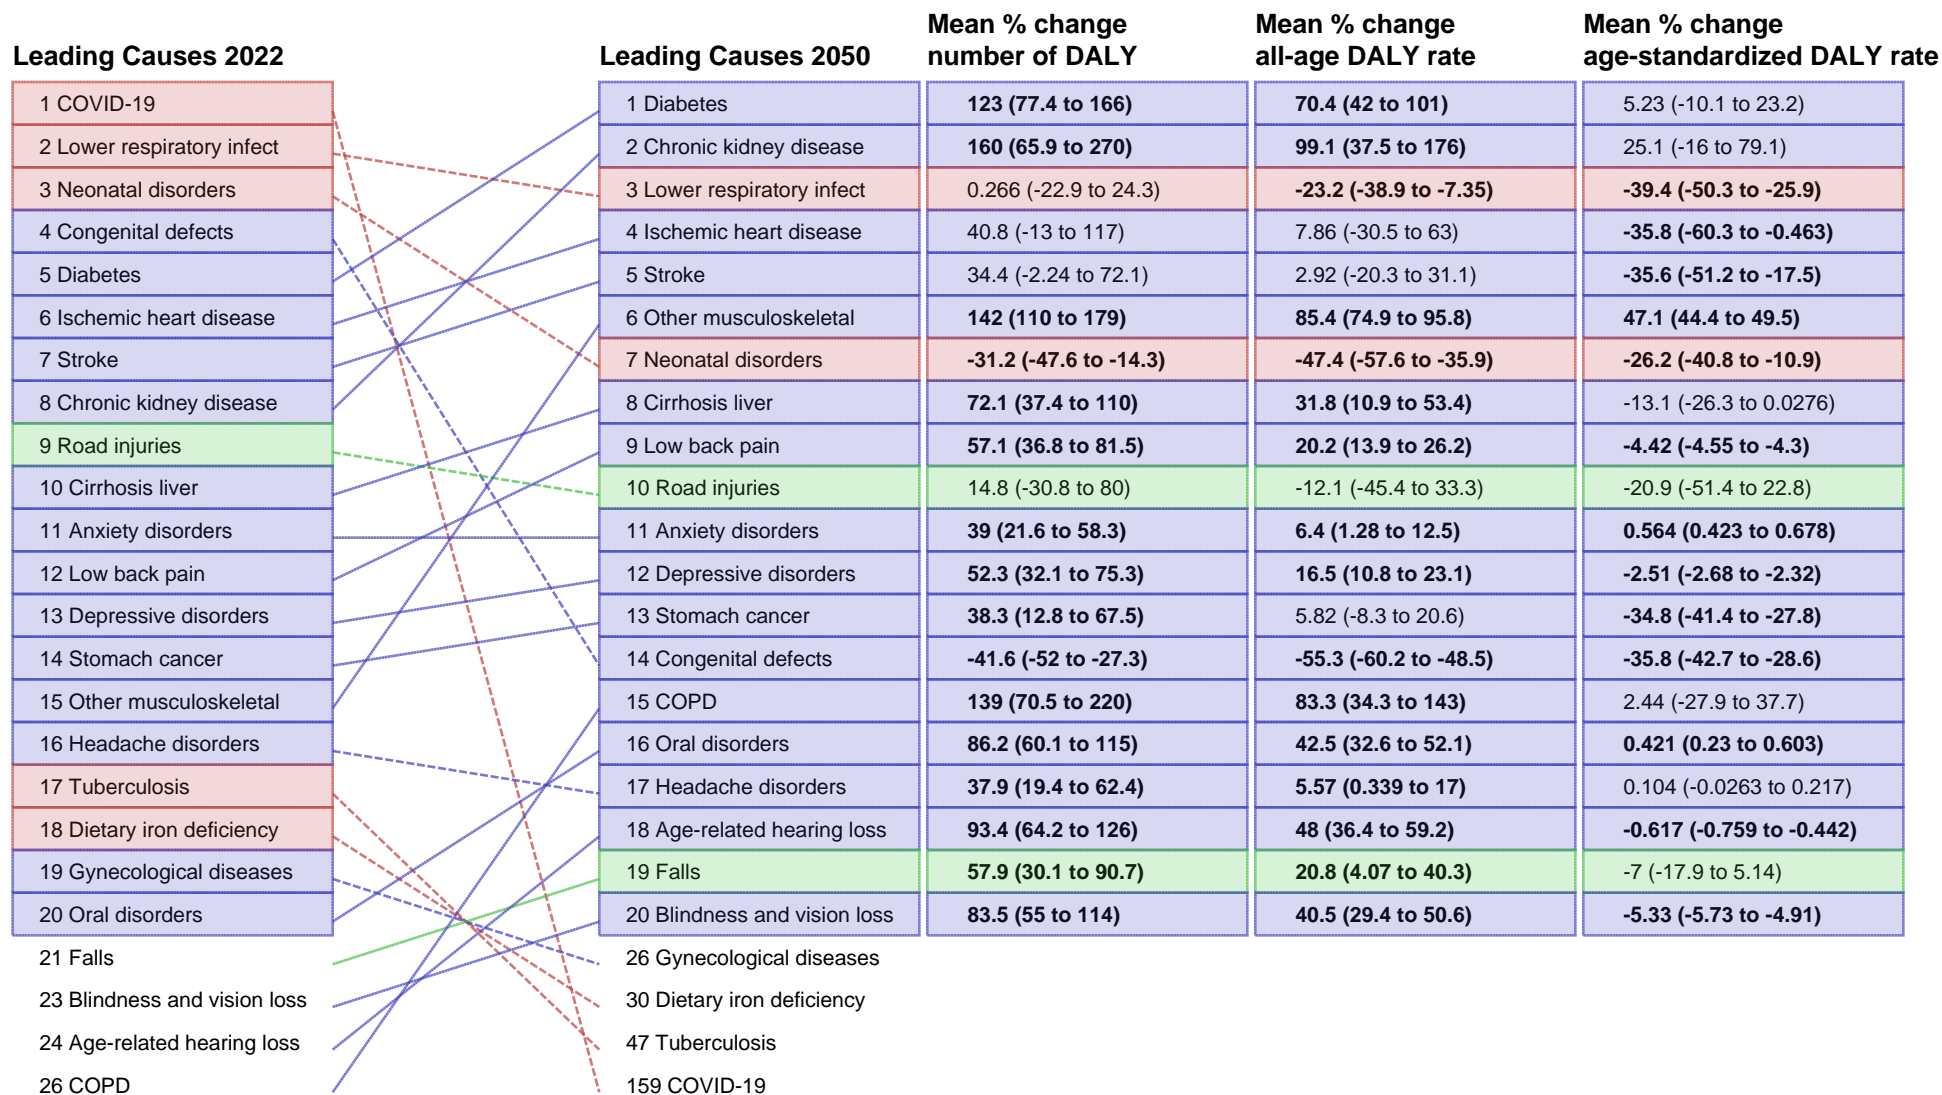

### Ecuador, Reference scenario

**Legend:**  
Communicable, maternal, neonatal and nutritional  
Non-communicable  
Injuries

| Leading Causes 2022          | Leading Causes 2050          | Mean % change number of DALY | Mean % change all-age DALY rate | Mean % change age-standardized DALY rate |
|------------------------------|------------------------------|------------------------------|---------------------------------|------------------------------------------|
| 1 COVID-19                   | 1 Diabetes                   | 168 (122 to 218)             | 115 (87.3 to 144)               | 33.3 (19 to 48.6)                        |
| 2 Ischemic heart disease     | 2 Chronic kidney disease     | 169 (81.5 to 263)            | 116 (53.5 to 199)               | 26.6 (-11.5 to 80.5)                     |
| 3 Road injuries              | 3 Ischemic heart disease     | 41.4 (-9.33 to 100)          | 13.5 (-23.2 to 62.4)            | <b>-36.7 (-59.1 to -2.76)</b>            |
| 4 Diabetes                   | 4 Road injuries              | 7.07 (-30.3 to 56.8)         | -14 (-44.1 to 25.7)             | -16.7 (-46.5 to 22.9)                    |
| 5 Neonatal disorders         | 5 Other musculoskeletal      | 120 (85.5 to 151)            | 76 (65.7 to 86.3)               | 38.8 (36.8 to 41.2)                      |
| 6 Lower respiratory infect   | 6 Stroke                     | 42.1 (10.2 to 77.1)          | 14 (-8.25 to 40.2)              | <b>-31.3 (-46.4 to -12.7)</b>            |
| 7 Chronic kidney disease     | 7 Lower respiratory infect   | 24.8 (-2.87 to 57.5)         | 0.114 (-18.6 to 22.2)           | <b>-35.2 (-46.7 to -21.5)</b>            |
| 8 Stroke                     | 8 Low back pain              | 54.3 (32.6 to 77.3)          | 23.8 (17.5 to 31)               | -3.62 (-3.77 to -3.46)                   |
| 9 Congenital defects         | 9 Depressive disorders       | 43 (22.6 to 63)              | 14.6 (9.15 to 21.4)             | -1.93 (-2.08 to -1.77)                   |
| 10 Anxiety disorders         | 10 Cirrhosis liver           | 66.9 (38 to 95.1)            | 33.9 (18.6 to 51.7)             | <b>-12.9 (-22.3 to -0.619)</b>           |
| 11 Low back pain             | 11 Neonatal disorders        | <b>-24.3 (-41 to -4.82)</b>  | <b>-39.3 (-49.8 to -27.1)</b>   | <b>-19.4 (-34.3 to -1.35)</b>            |
| 12 Depressive disorders      | 12 Anxiety disorders         | 31.4 (11.9 to 51.4)          | 5.27 (-0.347 to 11.5)           | 0.545 (0.396 to 0.703)                   |
| 13 Other musculoskeletal     | 13 Age-related hearing loss  | 92.2 (61.8 to 124)           | 54.1 (41.8 to 66.7)             | <b>-0.69 (-0.805 to -0.562)</b>          |
| 14 Headache disorders        | 14 Falls                     | 53.5 (22.3 to 89.1)          | 23 (9.02 to 39.8)               | -10.4 (-19.3 to 1.58)                    |
| 15 Cirrhosis liver           | 15 Oral disorders            | 79.5 (51.9 to 109)           | 43.9 (33.9 to 54.3)             | 0.461 (0.293 to 0.638)                   |
| 16 Interpersonal violence    | 16 Headache disorders        | 29.5 (9.49 to 47.7)          | 3.85 (-2.14 to 17.4)            | 0.115 (-0.0102 to 0.254)                 |
| 17 Falls                     | 17 Alzheimer's disease       | 182 (127 to 253)             | 126 (92.5 to 160)               | 3.57 (0.558 to 6.27)                     |
| 18 Self-harm                 | 18 COPD                      | 152 (80.5 to 232)            | 102 (51.8 to 154)               | -1.47 (-29.2 to 31.5)                    |
| 19 Age-related hearing loss  | 19 Blindness and vision loss | 82.4 (52.7 to 113)           | 46.2 (35.9 to 57.4)             | <b>-4.61 (-4.95 to -4.27)</b>            |
| 20 Gynecological diseases    | 20 Osteoarthritis            | 110 (79.5 to 140)            | 68.3 (57.4 to 79.4)             | 2.63 (2.3 to 3.04)                       |
| 22 Oral disorders            | 23 Self-harm                 |                              |                                 |                                          |
| 25 Blindness and vision loss | 26 Congenital defects        |                              |                                 |                                          |
| 26 COPD                      | 27 Gynecological diseases    |                              |                                 |                                          |
| 27 Osteoarthritis            | 31 Interpersonal violence    |                              |                                 |                                          |
| 30 Alzheimer's disease       | 160 COVID-19                 |                              |                                 |                                          |

### Peru, Reference scenario

**Legend:**

Communicable, maternal, neonatal and nutritional  
Non-communicable  
Injuries

| Leading Causes 2022          | Leading Causes 2050          | Mean % change number of DALY | Mean % change all-age DALY rate | Mean % change age-standardized DALY rate |
|------------------------------|------------------------------|------------------------------|---------------------------------|------------------------------------------|
| 1 COVID-19                   | 1 Lower respiratory infect   | 35.9 (6.04 to 67.5)          | 20.1 (-2.1 to 49.4)             | -35.9 (-46.1 to -23.9)                   |
| 2 Lower respiratory infect   | 2 Chronic kidney disease     | 180 (95.7 to 274)            | 148 (76.3 to 233)               | 26.2 (-7.98 to 72.3)                     |
| 3 Neonatal disorders         | 3 Diabetes                   | 116 (79.4 to 156)            | 91.3 (63.7 to 120)              | 4.91 (-6.34 to 17.7)                     |
| 4 Ischemic heart disease     | 4 Other musculoskeletal      | 93.3 (69.5 to 118)           | 70.9 (59.7 to 82.9)             | 33 (31.5 to 34.3)                        |
| 5 Road injuries              | 5 Ischemic heart disease     | 35.1 (-13.2 to 97)           | 19.4 (-19.3 to 75.6)            | -40.7 (-59.7 to -10.4)                   |
| 6 Stroke                     | 6 Low back pain              | 43.1 (26.8 to 59.9)          | 26.5 (19.3 to 33.7)             | -3.3 (-3.48 to -3.15)                    |
| 7 Diabetes                   | 7 Stroke                     | 27.5 (0.389 to 59.8)         | 12.7 (-8.41 to 37.8)            | -36.1 (-48.2 to -21.6)                   |
| 8 Low back pain              | 8 Cirrhosis liver            | 56.2 (29.8 to 80.3)          | 38.1 (18.1 to 57.1)             | -13.9 (-25.1 to -3.45)                   |
| 9 Anxiety disorders          | 9 Blindness and vision loss  | 86.8 (64 to 113)             | 65.1 (50.5 to 77.8)             | -3.84 (-4.07 to -3.6)                    |
| 10 Chronic kidney disease    | 10 Oral disorders            | 75.6 (52.8 to 98.5)          | 55.2 (42.8 to 68.1)             | 0.172 (-0.000845 to 0.359)               |
| 11 Other musculoskeletal     | 11 Anxiety disorders         | 16.7 (1.77 to 33.3)          | 3.12 (-2.7 to 11.1)             | 0.276 (0.0133 to 0.567)                  |
| 12 Cirrhosis liver           | 12 Alzheimer's disease       | 190 (139 to 245)             | 156 (121 to 190)                | -2.33 (-5.43 to 0.214)                   |
| 13 Congenital defects        | 13 Road injuries             | -4.07 (-36.1 to 45.2)        | -15.2 (-42.7 to 24.9)           | -20.2 (-46.7 to 19.9)                    |
| 14 Oral disorders            | 14 Age-related hearing loss  | 96.4 (71.7 to 124)           | 73.6 (60.6 to 86.1)             | -0.555 (-0.659 to -0.457)                |
| 15 Headache disorders        | 15 Neonatal disorders        | -41.6 (-53.3 to -27.2)       | -48.4 (-57 to -38.6)            | -29.6 (-40.5 to -16)                     |
| 16 Stomach cancer            | 16 Interstitial lung disease | 141 (105 to 184)             | 113 (83.2 to 145)               | -2.55 (-12.1 to 7.77)                    |
| 17 Blindness and vision loss | 17 Osteoarthritis            | 110 (85.6 to 133)            | 85.4 (72.5 to 96.3)             | 1.94 (1.64 to 2.29)                      |
| 18 Gynecological diseases    | 18 Stomach cancer            | 24 (4.64 to 44)              | 9.59 (-5.29 to 23.5)            | -41.3 (-46.3 to -35.4)                   |
| 19 Depressive disorders      | 19 Headache disorders        | 14.9 (-1.45 to 30.2)         | 1.48 (-4.35 to 13.4)            | -0.142 (-0.368 to 0.0883)                |
| 20 Foreign body              | 20 Lung cancer               | 98.5 (50.9 to 156)           | 75.4 (34.2 to 121)              | -7.16 (-27 to 15.4)                      |
| 21 Age-related hearing loss  | 22 Depressive disorders      |                              |                                 |                                          |
| 24 Osteoarthritis            | 26 Gynecological diseases    |                              |                                 |                                          |
| 25 Alzheimer's disease       | 32 Congenital defects        |                              |                                 |                                          |
| 26 Lung cancer               | 34 Foreign body              |                              |                                 |                                          |
| 28 Interstitial lung disease | 162 COVID-19                 |                              |                                 |                                          |

### Antigua and Barbuda, Reference scenario

**Legend:**  
 Communicable, maternal, neonatal and nutritional  
 Non-communicable  
 Injuries

| Leading Causes 2022          | Leading Causes 2050          | Mean % change number of DALY | Mean % change all-age DALY rate | Mean % change age-standardized DALY rate |
|------------------------------|------------------------------|------------------------------|---------------------------------|------------------------------------------|
| 1 Diabetes                   | 1 Diabetes                   | 75.8 (47.8 to 105)           | 75.1 (56.1 to 96.5)             | 9.89 (-3.15 to 26.3)                     |
| 2 Stroke                     | 2 Chronic kidney disease     | 89.3 (27.7 to 169)           | 88.6 (34.7 to 165)              | 10.7 (-24.2 to 65.3)                     |
| 3 Ischemic heart disease     | 3 Hypertensive heart disease | 123 (56.1 to 211)            | 122 (62.5 to 206)               | 14.4 (-21.2 to 66.5)                     |
| 4 Chronic kidney disease     | 4 Stroke                     | 13.2 (-13.2 to 43.2)         | 12.8 (-9.48 to 40.8)            | -39.6 (-52.7 to -20.3)                   |
| 5 COVID-19                   | 5 Ischemic heart disease     | 5.3 (-32 to 56.1)            | 4.95 (-32.3 to 57.3)            | -45.9 (-66.3 to -15.6)                   |
| 6 Hypertensive heart disease | 6 Prostate cancer            | 109 (39.9 to 187)            | 108 (47 to 180)                 | -4.43 (-27.8 to 20)                      |
| 7 Low back pain              | 7 Lower respiratory infect   | 53.3 (21.1 to 92.6)          | 52.7 (27.7 to 82.9)             | -24.8 (-38.9 to -2.42)                   |
| 8 Lower respiratory infect   | 8 Other musculoskeletal      | 55.6 (33.4 to 79.2)          | 54.9 (45.8 to 64.6)             | 28.3 (24.8 to 31.7)                      |
| 9 Neonatal disorders         | 9 Low back pain              | 19.7 (3.24 to 35.1)          | 19.2 (13.2 to 25.2)             | -3.13 (-3.3 to -2.93)                    |
| 10 Prostate cancer           | 10 Breast cancer             | 52.1 (7.94 to 106)           | 51.5 (9.35 to 99)               | -1.67 (-27.5 to 28.2)                    |
| 11 Other musculoskeletal     | 11 Alzheimer's disease       | 164 (116 to 207)             | 163 (119 to 197)                | 6.8 (3.76 to 9.71)                       |
| 12 Headache disorders        | 12 Age-related hearing loss  | 62.6 (41.1 to 86.3)          | 62 (52.1 to 76)                 | -0.533 (-0.63 to -0.449)                 |
| 13 Breast cancer             | 13 Colorectal cancer         | 82.7 (10.9 to 169)           | 82 (13.7 to 173)                | 0.711 (-33.6 to 44.1)                    |
| 14 Depressive disorders      | 14 Endo/metab/blood/immune   | 54.8 (26 to 89.5)            | 54.2 (34.1 to 76.3)             | 9.65 (-7.47 to 30.8)                     |
| 15 Anxiety disorders         | 15 Depressive disorders      | 9.84 (-6.12 to 26.8)         | 9.37 (3.82 to 15.3)             | -2.05 (-2.38 to -1.78)                   |
| 16 Alcohol use disorders     | 16 Alcohol use disorders     | 9.89 (-7.46 to 31.3)         | 9.45 (-3.25 to 25)              | -2.95 (-11.8 to 9.05)                    |
| 17 Mechanical forces         | 17 Headache disorders        | -3.05 (-17.7 to 12.2)        | -3.45 (-8.66 to 8.35)           | -0.33 (-0.526 to -0.0981)                |
| 18 Age-related hearing loss  | 18 Anxiety disorders         | 0.866 (-14.2 to 18.9)        | 0.404 (-4.54 to 7.02)           | 0.0546 (-0.225 to 0.331)                 |
| 19 Endo/metab/blood/immune   | 19 Osteoarthritis            | 63.5 (44.6 to 82.9)          | 62.9 (53.3 to 73.6)             | 1.95 (1.69 to 2.22)                      |
| 20 HIV/AIDS                  | 20 Cirrhosis liver           | 27.3 (4.63 to 52.1)          | 26.9 (9.34 to 45.5)             | -13.1 (-24.9 to 1.8)                     |
| 21 Cirrhosis liver           | 23 Mechanical forces         |                              |                                 |                                          |
| 22 Colorectal cancer         | 25 Neonatal disorders        |                              |                                 |                                          |
| 27 Osteoarthritis            | 41 HIV/AIDS                  |                              |                                 |                                          |
| 28 Alzheimer's disease       | 153 COVID-19                 |                              |                                 |                                          |

### The Bahamas, Reference scenario

**Legend:**  
Communicable, maternal, neonatal and nutritional  
Non-communicable  
Injuries

| Leading Causes 2022          | Leading Causes 2050          | Mean % change number of DALY | Mean % change all-age DALY rate | Mean % change age-standardized DALY rate |
|------------------------------|------------------------------|------------------------------|---------------------------------|------------------------------------------|
| 1 Diabetes                   | 1 Diabetes                   | 97.4 (62.4 to 136)           | 80.8 (60.4 to 104)              | 16.6 (4.67 to 31.5)                      |
| 2 Interpersonal violence     | 2 Hypertensive heart disease | 139 (65.2 to 230)            | 119 (57.9 to 208)               | 21.2 (-14.8 to 77.1)                     |
| 3 Ischemic heart disease     | 3 Chronic kidney disease     | 114 (46.5 to 207)            | 96.3 (34.3 to 179)              | 25.3 (-18 to 82.5)                       |
| 4 HIV/AIDS                   | 4 Ischemic heart disease     | 16.2 (-26.4 to 70.8)         | 6.51 (-28.6 to 62.4)            | <b>-40.2 (-62.4 to -4.33)</b>            |
| 5 Hypertensive heart disease | 5 Stroke                     | 28 (-4.21 to 59)             | 17.3 (-6.89 to 47.7)            | <b>-33.8 (-48.6 to -13.1)</b>            |
| 6 Stroke                     | 6 Prostate cancer            | 132 (55.6 to 240)            | 112 (51.8 to 200)               | -5.76 (-28 to 23.7)                      |
| 7 COVID-19                   | 7 Interpersonal violence     | -41.8 (-68 to 15.9)          | -46.7 (-70.4 to 2.29)           | -37.1 (-66.4 to 27.8)                    |
| 8 Chronic kidney disease     | 8 Other musculoskeletal      | 55 (31.2 to 78.3)            | 42 (32.2 to 53.3)               | 15.2 (10.3 to 20.8)                      |
| 9 Road injuries              | 9 Lower respiratory infect   | 68.8 (31 to 110)             | 54.6 (27.4 to 87.8)             | <b>-20.6 (-35.5 to -0.31)</b>            |
| 10 Low back pain             | 10 Low back pain             | 34.3 (15.7 to 51.5)          | 23 (17.1 to 29.7)               | <b>-2.07 (-2.25 to -1.86)</b>            |
| 11 Breast cancer             | 11 Endo/metab/blood/immune   | 58.9 (28.2 to 90.1)          | 45.6 (23.6 to 67.6)             | 10.4 (-7.9 to 31.5)                      |
| 12 Neonatal disorders        | 12 Breast cancer             | 37.4 (-2.97 to 94.4)         | 25.8 (-8.41 to 68.1)            | -14.7 (-36.3 to 11.4)                    |
| 13 Other musculoskeletal     | 13 Alzheimer's disease       | 213 (144 to 294)             | 187 (139 to 234)                | 3.77 (0.954 to 6.5)                      |
| 14 Endo/metab/blood/immune   | 14 Age-related hearing loss  | 83.2 (53.6 to 114)           | 67.7 (53.6 to 83)               | <b>-0.347 (-0.423 to -0.272)</b>         |
| 15 Headache disorders        | 15 Road injuries             | 2.93 (-38 to 63.6)           | -5.62 (-42.8 to 56.8)           | -0.844 (-39.7 to 70.1)                   |
| 16 Lower respiratory infect  | 16 Colorectal cancer         | 66.7 (2.66 to 156)           | 52.4 (-4.79 to 131)             | -10.3 (-41.3 to 29.8)                    |
| 17 Depressive disorders      | 17 Depressive disorders      | 22.3 (5.45 to 39.2)          | 12 (6.76 to 18.4)               | <b>-1.42 (-1.65 to -1.22)</b>            |
| 18 Anxiety disorders         | 18 Headache disorders        | 6.52 (-7.35 to 23)           | -2.4 (-7.98 to 12.3)            | <b>-0.345 (-0.525 to -0.137)</b>         |
| 19 Cirrhosis liver           | 19 Lung cancer               | 62.8 (12 to 129)             | 48.9 (4.76 to 102)              | -7.68 (-33.9 to 19.7)                    |
| 20 Prostate cancer           | 20 Anxiety disorders         | 10.2 (-5.3 to 26.1)          | 0.937 (-5.33 to 7.82)           | -0.0974 (-0.305 to 0.125)                |
| 21 Colorectal cancer         | 21 Cirrhosis liver           |                              |                                 |                                          |
| 22 Age-related hearing loss  | 27 Neonatal disorders        |                              |                                 |                                          |
| 24 Lung cancer               | 28 HIV/AIDS                  |                              |                                 |                                          |
| 36 Alzheimer's disease       | 156 COVID-19                 |                              |                                 |                                          |

### Barbados, Reference scenario

**Legend:**  
Communicable, maternal, neonatal and nutritional  
Non-communicable  
Injuries

| Leading Causes 2022           | Leading Causes 2050           | Mean % change number of DALY  | Mean % change all-age DALY rate | Mean % change age-standardized DALY rate |
|-------------------------------|-------------------------------|-------------------------------|---------------------------------|------------------------------------------|
| 1 COVID-19                    | 1 Diabetes                    | 27.3 (3.2 to 58.3)            | 44.9 (21.7 to 76)               | 8.54 (-7.11 to 27.8)                     |
| 2 Diabetes                    | 2 Stroke                      | -14.1 (-36.4 to 16.3)         | -2.17 (-26.5 to 30.9)           | <b>-35.6 (-51.1 to -11.8)</b>            |
| 3 Stroke                      | 3 Chronic kidney disease      | 63.7 (9.51 to 147)            | 86.5 (30.3 to 174)              | 26.4 (-12.4 to 92.7)                     |
| 4 Ischemic heart disease      | 4 Ischemic heart disease      | -17.3 (-47.3 to 33.2)         | -5.72 (-39.8 to 46.5)           | <b>-40.4 (-61.9 to -5.96)</b>            |
| 5 Chronic kidney disease      | 5 Lower respiratory infect    | 27 (-1.85 to 65.2)            | 44.6 (13.7 to 82.6)             | -22.2 (-37.3 to 0.0987)                  |
| 6 Lower respiratory infect    | 6 Colorectal cancer           | 25.8 (-24 to 94.6)            | 42.7 (-13.5 to 107)             | -3.59 (-37.7 to 33.3)                    |
| 7 Low back pain               | 7 Prostate cancer             | 44.2 (-8.79 to 106)           | 63.7 (3.13 to 125)              | -3.29 (-28.4 to 24.2)                    |
| 8 Colorectal cancer           | 8 Other musculoskeletal       | 25.1 (6.89 to 49.7)           | 42.3 (32.6 to 51.9)             | 25.4 (19.5 to 30.1)                      |
| 9 Breast cancer               | 9 Alzheimer's disease         | 71.9 (29.6 to 115)            | 95.3 (58.1 to 128)              | 1.36 (-1.85 to 4.13)                     |
| 10 Other musculoskeletal      | 10 Breast cancer              | 8.25 (-26.6 to 50.3)          | 22.9 (-14.2 to 64)              | -8.03 (-33.2 to 20.3)                    |
| 11 Neonatal disorders         | 11 Low back pain              | -2.98 (-16.2 to 13.3)         | 10.4 (4.91 to 15.8)             | <b>-3.41 (-3.55 to -3.25)</b>            |
| 12 Prostate cancer            | 12 Hypertensive heart disease | 59.3 (11.3 to 133)            | 81.5 (24.7 to 159)              | 16.4 (-21.8 to 70.4)                     |
| 13 Age-related hearing loss   | 13 Urinary diseases           | 76.3 (36.7 to 129)            | 101 (58.9 to 158)               | 21.3 (-2.65 to 59.9)                     |
| 14 Depressive disorders       | 14 Age-related hearing loss   | 23 (2.55 to 46.5)             | 39.9 (26.5 to 51.7)             | <b>-0.382 (-0.491 to -0.27)</b>          |
| 15 Interpersonal violence     | 15 Depressive disorders       | -7.43 (-19.3 to 7.96)         | 5.29 (1.58 to 9.55)             | <b>-2.08 (-2.33 to -1.8)</b>             |
| 16 Headache disorders         | 16 Endo/metab/blood/immune    | 25.2 (3.66 to 55.5)           | 42.5 (18.9 to 71.3)             | 7.44 (-9.83 to 30.9)                     |
| 17 Anxiety disorders          | 17 Osteoarthritis             | 16.6 (-0.264 to 37.9)         | 32.6 (23.3 to 40.1)             | 1.49 (1.21 to 1.77)                      |
| 18 Alzheimer's disease        | 18 Headache disorders         | <b>-15.2 (-25.5 to -2.03)</b> | -3.49 (-7.44 to 4.43)           | <b>-0.517 (-0.718 to -0.277)</b>         |
| 19 Hypertensive heart disease | 19 Anxiety disorders          | -12.6 (-23.8 to 2.42)         | -0.54 (-4.25 to 3.5)            | -0.185 (-0.431 to 0.0384)                |
| 20 Urinary diseases           | 20 Oral disorders             | 7.74 (-6.96 to 25.7)          | 22.5 (14.9 to 30.3)             | 0.151 (-0.0848 to 0.359)                 |
| 21 Osteoarthritis             | 22 Neonatal disorders         |                               |                                 |                                          |
| 22 Endo/metab/blood/immune    | 31 Interpersonal violence     |                               |                                 |                                          |
| 23 Oral disorders             | 153 COVID-19                  |                               |                                 |                                          |

### Belize, Reference scenario

**Legend:**  
Communicable, maternal, neonatal and nutritional  
Non-communicable  
Injuries

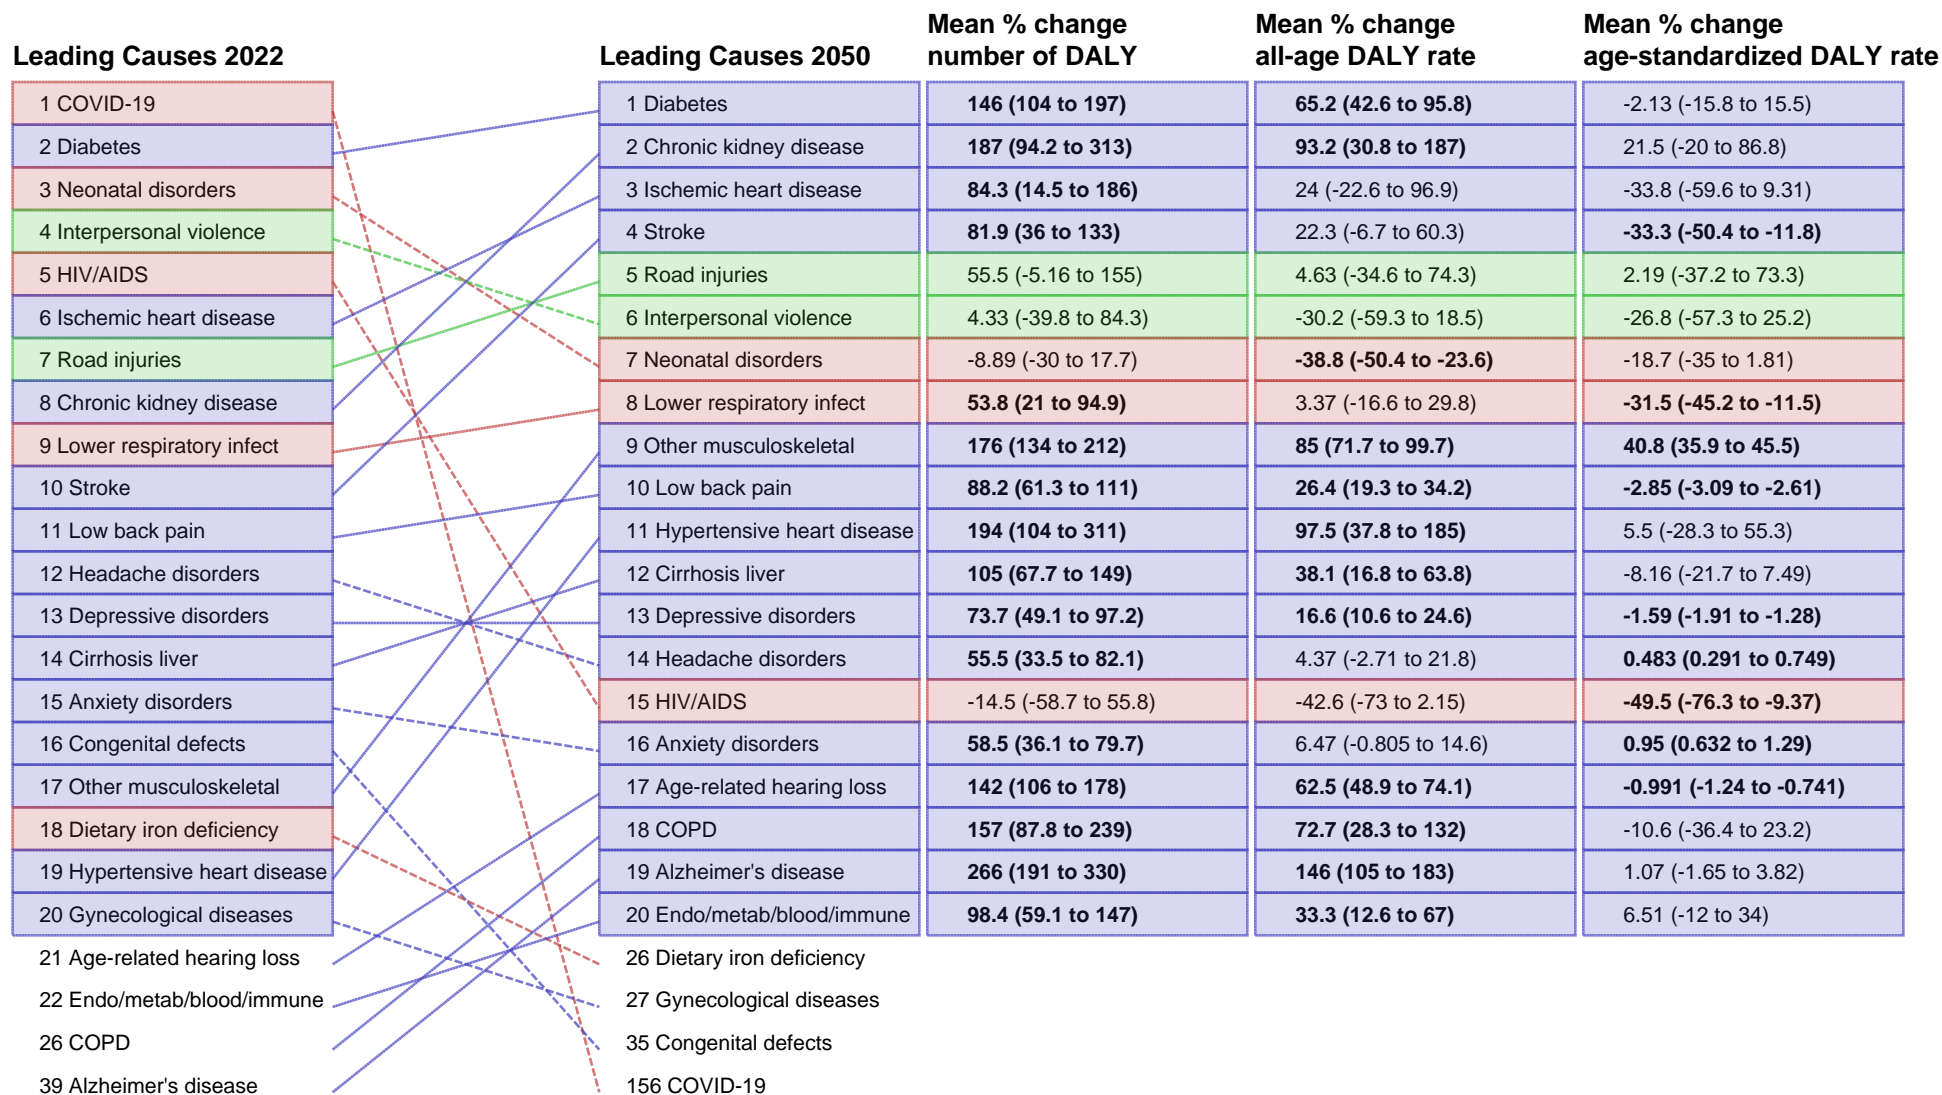



### Bermuda, Reference scenario

**Legend:**  
Communicable, maternal, neonatal and nutritional  
Non-communicable  
Injuries

| Leading Causes 2022           | Leading Causes 2050           | Mean % change number of DALY   | Mean % change all-age DALY rate | Mean % change age-standardized DALY rate |
|-------------------------------|-------------------------------|--------------------------------|---------------------------------|------------------------------------------|
| 1 Ischemic heart disease      | 1 Diabetes                    | <b>39.4 (20.1 to 60.9)</b>     | <b>67.5 (51 to 84.6)</b>        | <b>26.4 (15.3 to 37.2)</b>               |
| 2 Diabetes                    | 2 Ischemic heart disease      | -18.8 (-48.9 to 27)            | -2.28 (-36.1 to 47.2)           | <b>-50.8 (-65.3 to -24.7)</b>            |
| 3 COVID-19                    | 3 Alzheimer's disease         | <b>100 (60 to 140)</b>         | <b>141 (106 to 175)</b>         | <b>-8.86 (-11.5 to -6.13)</b>            |
| 4 Stroke                      | 4 Prostate cancer             | <b>54.7 (9.79 to 103)</b>      | <b>85.8 (36.4 to 139)</b>       | -5.66 (-26.2 to 15.2)                    |
| 5 Lung cancer                 | 5 Age-related hearing loss    | <b>30.9 (14.2 to 50.8)</b>     | <b>57.4 (45 to 70.2)</b>        | <b>-0.402 (-0.496 to -0.305)</b>         |
| 6 Low back pain               | 6 Colorectal cancer           | 28 (-19.4 to 83.1)             | 53.7 (-1.98 to 115)             | -15.4 (-43.1 to 15.7)                    |
| 7 Colorectal cancer           | 7 Lung cancer                 | 1.7 (-27.8 to 33.5)            | 22.2 (-12.5 to 58.6)            | <b>-20.5 (-39.9 to -0.343)</b>           |
| 8 Age-related hearing loss    | 8 Chronic kidney disease      | <b>62.7 (6.71 to 140)</b>      | <b>95.6 (32.1 to 189)</b>       | 3.65 (-27.9 to 49.9)                     |
| 9 Other musculoskeletal       | 9 Stroke                      | -19.2 (-40.3 to 5.9)           | -2.84 (-25.6 to 26.4)           | <b>-46.1 (-56 to -31.8)</b>              |
| 10 Alzheimer's disease        | 10 Low back pain              | -7.98 (-18 to 3.91)            | <b>10.7 (5.01 to 15.9)</b>      | <b>-2.54 (-2.7 to -2.38)</b>             |
| 11 Prostate cancer            | 11 Other musculoskeletal      | 11.2 (-1.6 to 26)              | <b>33.7 (26 to 44.8)</b>        | <b>23.3 (21 to 25.2)</b>                 |
| 12 Depressive disorders       | 12 Lower respiratory infect   | <b>56.4 (16 to 98.8)</b>       | <b>88 (45.7 to 134)</b>         | <b>-25.3 (-38.4 to -9.43)</b>            |
| 13 Chronic kidney disease     | 13 Other cardiovascular       | 12.4 (-10.8 to 38.9)           | <b>35.1 (11.9 to 61.6)</b>      | <b>-25.3 (-34.9 to -13.2)</b>            |
| 14 Other cardiovascular       | 14 COPD                       | <b>52.4 (7.62 to 105)</b>      | <b>83.1 (34 to 147)</b>         | -11.5 (-32.1 to 19.5)                    |
| 15 Headache disorders         | 15 Osteoarthritis             | <b>14.6 (2.22 to 30.2)</b>     | <b>37.7 (32.2 to 43.6)</b>      | <b>1.64 (1.42 to 1.86)</b>               |
| 16 Osteoarthritis             | 16 Depressive disorders       | <b>-12.1 (-20.8 to -0.536)</b> | <b>5.63 (0.621 to 11)</b>       | <b>-1.48 (-1.68 to -1.3)</b>             |
| 17 Anxiety disorders          | 17 Hypertensive heart disease | <b>67.5 (6.64 to 148)</b>      | <b>101 (32.7 to 189)</b>        | 0.799 (-30 to 41.9)                      |
| 18 Breast cancer              | 18 Pancreatic cancer          | 54.5 (-11.7 to 136)            | <b>85.5 (9.14 to 182)</b>       | 11.8 (-28.8 to 62.5)                     |
| 19 Oral disorders             | 19 Breast cancer              | 0.756 (-29.4 to 37.7)          | 21 (-12.5 to 58)                | <b>-23.6 (-41.7 to -4.6)</b>             |
| 20 Lower respiratory infect   | 20 Atrial fibrillation        | <b>110 (64.2 to 162)</b>       | <b>153 (109 to 207)</b>         | 2.11 (-9.28 to 14.2)                     |
| 21 COPD                       | 21 Oral disorders             |                                |                                 |                                          |
| 26 Pancreatic cancer          | 25 Anxiety disorders          |                                |                                 |                                          |
| 27 Hypertensive heart disease | 26 Headache disorders         |                                |                                 |                                          |
| 35 Atrial fibrillation        | 152 COVID-19                  |                                |                                 |                                          |

### Cuba, Reference scenario

**Legend:**  
Communicable, maternal, neonatal and nutritional  
Non-communicable  
Injuries

| Leading Causes 2022           | Leading Causes 2050           | Mean % change number of DALY | Mean % change all-age DALY rate | Mean % change age-standardized DALY rate |
|-------------------------------|-------------------------------|------------------------------|---------------------------------|------------------------------------------|
| 1 Ischemic heart disease      | 1 Ischemic heart disease      | -12.9 (-41 to 22.3)          | 4.44 (-28.4 to 45.1)            | <b>-42.2 (-60.2 to -14.5)</b>            |
| 2 Stroke                      | 2 Diabetes                    | <b>53.8 (32 to 74.7)</b>     | <b>84.1 (69.9 to 95.6)</b>      | <b>40.3 (30.8 to 48.9)</b>               |
| 3 Diabetes                    | 3 Stroke                      | -14.4 (-32 to 5.55)          | 2.66 (-17.3 to 24.9)            | <b>-41.2 (-52.1 to -28.6)</b>            |
| 4 Lung cancer                 | 4 Falls                       | <b>64.7 (34.5 to 98.2)</b>   | <b>97.2 (72.5 to 124)</b>       | 7.09 (-3.62 to 19.2)                     |
| 5 Lower respiratory infect    | 5 Lower respiratory infect    | 21.4 (-1.69 to 50)           | <b>45.3 (21.2 to 73.7)</b>      | <b>-30.7 (-41.7 to -17.1)</b>            |
| 6 Falls                       | 6 Lung cancer                 | 7.53 (-23.4 to 44.1)         | 28.5 (-1.96 to 67.1)            | -13.8 (-32.7 to 9.4)                     |
| 7 COPD                        | 7 COPD                        | 27.4 (-3.58 to 63.8)         | <b>52.7 (16.2 to 89.9)</b>      | -14.5 (-35.1 to 11.8)                    |
| 8 Low back pain               | 8 Alzheimer's disease         | <b>95.5 (59.5 to 131)</b>    | <b>134 (104 to 164)</b>         | -2.59 (-5.89 to 0.375)                   |
| 9 Depressive disorders        | 9 Prostate cancer             | <b>59.6 (15.2 to 117)</b>    | <b>90.8 (42.8 to 151)</b>       | -0.393 (-19.7 to 22.2)                   |
| 10 Age-related hearing loss   | 10 Chronic kidney disease     | <b>52.2 (11 to 107)</b>      | <b>82.5 (34.8 to 144)</b>       | 11.6 (-17.4 to 54.3)                     |
| 11 Other musculoskeletal      | 11 Colorectal cancer          | 36.6 (-9.07 to 98.7)         | <b>63.2 (14.6 to 133)</b>       | -3.13 (-30 to 33.3)                      |
| 12 Colorectal cancer          | 12 Age-related hearing loss   | <b>32.6 (13.5 to 51.5)</b>   | <b>58.8 (45.9 to 71.4)</b>      | <b>-0.468 (-0.552 to -0.386)</b>         |
| 13 Chronic kidney disease     | 13 Hypertensive heart disease | <b>69 (22.6 to 128)</b>      | <b>103 (46 to 175)</b>          | 16.3 (-15.9 to 59.4)                     |
| 14 Headache disorders         | 14 Low back pain              | -4.15 (-16.7 to 8.2)         | <b>14.8 (9.9 to 20.8)</b>       | <b>-2.94 (-3.09 to -2.76)</b>            |
| 15 Prostate cancer            | 15 Depressive disorders       | -8.51 (-20.3 to 3.68)        | <b>9.54 (5.24 to 15.9)</b>      | <b>-1.58 (-1.75 to -1.42)</b>            |
| 16 Alzheimer's disease        | 16 Other musculoskeletal      | 8.67 (-6.16 to 22.4)         | <b>30.1 (25.3 to 35.7)</b>      | <b>27.7 (25.2 to 29.8)</b>               |
| 17 Cirrhosis liver            | 17 Blindness and vision loss  | <b>23.5 (5.59 to 41.8)</b>   | <b>47.9 (35.5 to 58.1)</b>      | <b>-3.77 (-4 to -3.54)</b>               |
| 18 Anxiety disorders          | 18 Osteoarthritis             | <b>20.5 (3.25 to 37.3)</b>   | <b>44.3 (38.1 to 51.4)</b>      | <b>1.8 (1.54 to 2.09)</b>                |
| 19 Self-harm                  | 19 Oral disorders             | 10.3 (-5.9 to 26.2)          | <b>32.1 (23.1 to 40.9)</b>      | <b>0.268 (0.0897 to 0.452)</b>           |
| 20 Hypertensive heart disease | 20 Cirrhosis liver            | -14.2 (-28.9 to 2.43)        | 2.7 (-9 to 16.2)                | -9.25 (-20.1 to 2.8)                     |
| 21 Blindness and vision loss  | 22 Headache disorders         |                              |                                 |                                          |
| 22 Oral disorders             | 24 Anxiety disorders          |                              |                                 |                                          |
| 24 Osteoarthritis             | 26 Self-harm                  |                              |                                 |                                          |

### Dominica, Reference scenario

**Legend:**  
Communicable, maternal, neonatal and nutritional  
Non-communicable  
Injuries

| Leading Causes 2022          | Leading Causes 2050          | Mean % change number of DALY  | Mean % change all-age DALY rate | Mean % change age-standardized DALY rate |
|------------------------------|------------------------------|-------------------------------|---------------------------------|------------------------------------------|
| 1 COVID-19                   | 1 Diabetes                   | 40.9 (13 to 70.8)             | 52.6 (31.7 to 77.2)             | 3.28 (-11.2 to 19.5)                     |
| 2 Diabetes                   | 2 Chronic kidney disease     | 54.7 (7.94 to 121)            | 67.7 (15.7 to 141)              | 12.6 (-25 to 71.8)                       |
| 3 Ischemic heart disease     | 3 Hypertensive heart disease | 77.7 (22.6 to 142)            | 92.6 (31.6 to 169)              | 16.2 (-21.4 to 66.7)                     |
| 4 Stroke                     | 4 Stroke                     | -11.6 (-33.2 to 13.8)         | -4.16 (-25.4 to 21.8)           | <b>-41.4 (-55.7 to -18.7)</b>            |
| 5 Neonatal disorders         | 5 Ischemic heart disease     | -15.5 (-44.7 to 29.5)         | -8.4 (-41.6 to 38.7)            | <b>-44.2 (-64.3 to -9.57)</b>            |
| 6 Chronic kidney disease     | 6 Prostate cancer            | 75.1 (18.4 to 146)            | 89.6 (32.6 to 163)              | 9.59 (-16 to 47.5)                       |
| 7 Hypertensive heart disease | 7 Neonatal disorders         | <b>-38.1 (-53.6 to -20.3)</b> | <b>-33 (-45.7 to -14.8)</b>     | -12.2 (-31.1 to 14.8)                    |
| 8 Lower respiratory infect   | 8 Lower respiratory infect   | 11.5 (-14.1 to 41.1)          | 20.8 (-6.89 to 47.4)            | <b>-28.5 (-42.8 to -9.19)</b>            |
| 9 Road injuries              | 9 Other musculoskeletal      | 49.9 (25.2 to 75.5)           | 62.3 (52.9 to 71)               | 30.2 (27.4 to 32.9)                      |
| 10 Low back pain             | 10 Low back pain             | 11.8 (-7.06 to 29.2)          | 21.1 (15.2 to 27.2)             | <b>-2.35 (-2.57 to -2.13)</b>            |
| 11 Headache disorders        | 11 Lung cancer               | 39.1 (-7.72 to 92.9)          | 50.5 (4.57 to 99.5)             | -0.399 (-28.1 to 30.4)                   |
| 12 Other musculoskeletal     | 12 Breast cancer             | 33.4 (-9.75 to 79.1)          | 44.4 (3.62 to 90.4)             | -3.29 (-29.3 to 25.4)                    |
| 13 Congenital defects        | 13 COPD                      | 58.5 (11.7 to 111)            | 71.7 (27.5 to 128)              | 2.7 (-26.4 to 42.5)                      |
| 14 Depressive disorders      | 14 Alzheimer's disease       | 97.7 (53.1 to 138)            | 114 (80.5 to 145)               | 7.58 (4.65 to 10.9)                      |
| 15 Lung cancer               | 15 Age-related hearing loss  | 36.8 (12.7 to 61.9)           | 48.1 (35.7 to 58.7)             | <b>-0.65 (-0.903 to -0.341)</b>          |
| 16 Cardiomyopathy            | 16 Road injuries             | -14.8 (-48.8 to 34.3)         | -7.67 (-39.8 to 45.8)           | -4.22 (-39.7 to 55.2)                    |
| 17 Stomach cancer            | 17 Colorectal cancer         | 48.6 (-12.3 to 122)           | 60.7 (2.1 to 140)               | 1.03 (-34 to 46.1)                       |
| 18 Interpersonal violence    | 18 Depressive disorders      | 4.73 (-12.4 to 22.4)          | 13.4 (8.13 to 19.4)             | <b>-0.88 (-1.17 to -0.655)</b>           |
| 19 Breast cancer             | 19 Cardiomyopathy            | 0.0857 (-19.8 to 19.3)        | 8.31 (-5.16 to 22)              | <b>-21.7 (-28.3 to -14.6)</b>            |
| 20 Prostate cancer           | 20 Headache disorders        | -6.38 (-21.7 to 10.6)         | 1.36 (-5.43 to 17)              | <b>0.775 (0.532 to 0.935)</b>            |
| 22 Age-related hearing loss  | 23 Stomach cancer            |                               |                                 |                                          |
| 23 COPD                      | 31 Congenital defects        |                               |                                 |                                          |
| 26 Colorectal cancer         | 37 Interpersonal violence    |                               |                                 |                                          |
| 32 Alzheimer's disease       | 156 COVID-19                 |                               |                                 |                                          |

### Dominican Republic, Reference scenario

**Legend:**  
Communicable, maternal, neonatal and nutritional  
Non-communicable  
Injuries

| Leading Causes 2022           | Leading Causes 2050           | Mean % change number of DALY  | Mean % change all-age DALY rate | Mean % change age-standardized DALY rate |
|-------------------------------|-------------------------------|-------------------------------|---------------------------------|------------------------------------------|
| 1 Ischemic heart disease      | 1 Ischemic heart disease      | 22.5 (-23.9 to 78.8)          | 6.44 (-31.4 to 59.8)            | <b>-39.9 (-63 to -5.07)</b>              |
| 2 Neonatal disorders          | 2 Diabetes                    | <b>133 (87.7 to 174)</b>      | <b>102 (79 to 128)</b>          | <b>29.5 (15.3 to 44.2)</b>               |
| 3 Stroke                      | 3 Stroke                      | 22.5 (-10.4 to 56.9)          | 6.45 (-16 to 29.7)              | <b>-37.8 (-51.2 to -21.9)</b>            |
| 4 Diabetes                    | 4 Neonatal disorders          | <b>-35.9 (-54.9 to -15.9)</b> | <b>-44.4 (-54.2 to -31.8)</b>   | <b>-20.5 (-34.9 to -2.76)</b>            |
| 5 Road injuries               | 5 Chronic kidney disease      | <b>118 (41.3 to 201)</b>      | <b>89.2 (33.7 to 163)</b>       | 20.3 (-17.2 to 72.3)                     |
| 6 Interpersonal violence      | 6 Road injuries               | -5.53 (-42.6 to 42.8)         | -18.1 (-45.8 to 25.1)           | -17.8 (-47.7 to 26.8)                    |
| 7 Cirrhosis liver             | 7 Other musculoskeletal       | <b>124 (81.9 to 160)</b>      | <b>94.2 (82.7 to 107)</b>       | <b>56.5 (53.5 to 59.4)</b>               |
| 8 Low back pain               | 8 Cirrhosis liver             | <b>37.2 (10 to 66)</b>        | <b>19.2 (1.8 to 36.3)</b>       | <b>-17.6 (-29.7 to -3.99)</b>            |
| 9 Depressive disorders        | 9 Low back pain               | <b>38.7 (14.3 to 61.6)</b>    | <b>20.4 (13.9 to 27.2)</b>      | <b>-4.37 (-4.53 to -4.16)</b>            |
| 10 Chronic kidney disease     | 10 Depressive disorders       | <b>32.6 (9.16 to 57.1)</b>    | <b>15.2 (9.42 to 22.9)</b>      | <b>-2.07 (-2.25 to -1.87)</b>            |
| 11 Headache disorders         | 11 Alzheimer's disease        | <b>179 (119 to 239)</b>       | <b>142 (99.7 to 186)</b>        | 2.44 (-0.265 to 5.53)                    |
| 12 Anxiety disorders          | 12 Age-related hearing loss   | <b>85.9 (52.3 to 118)</b>     | <b>61.6 (48 to 77.2)</b>        | <b>-0.961 (-1.1 to -0.841)</b>           |
| 13 Lower respiratory infect   | 13 Hypertensive heart disease | <b>120 (48.4 to 202)</b>      | <b>91.4 (37.1 to 158)</b>       | 5.65 (-25.1 to 50.7)                     |
| 14 Congenital defects         | 14 Headache disorders         | 16.9 (-5.46 to 39.6)          | 1.54 (-3.3 to 13.6)             | <b>0.76 (0.486 to 0.946)</b>             |
| 15 COVID-19                   | 15 Lung cancer                | <b>96.3 (36.9 to 163)</b>     | <b>70.8 (21.7 to 128)</b>       | 1.25 (-23.7 to 30.5)                     |
| 16 Other musculoskeletal      | 16 Interpersonal violence     | -35.7 (-62.2 to 7.48)         | <b>-44 (-64.6 to -7.59)</b>     | -38.6 (-61.6 to 3.84)                    |
| 17 Age-related hearing loss   | 17 Anxiety disorders          | 20.6 (-1.12 to 42)            | 4.75 (-0.931 to 11.1)           | <b>1.27 (1.14 to 1.41)</b>               |
| 18 HIV/AIDS                   | 18 Lower respiratory infect   | 10.7 (-16.6 to 40.5)          | -3.82 (-21.9 to 19.6)           | <b>-34.5 (-44.4 to -21.1)</b>            |
| 19 Dietary iron deficiency    | 19 Prostate cancer            | <b>149 (64.2 to 255)</b>      | <b>116 (49.7 to 198)</b>        | 3.3 (-21.6 to 29.3)                      |
| 20 Endo/metab/blood/immune    | 20 Oral disorders             | <b>63.6 (33.2 to 89.9)</b>    | <b>42.1 (30.8 to 53.9)</b>      | <b>0.862 (0.575 to 1.16)</b>             |
| 21 Hypertensive heart disease | 25 Endo/metab/blood/immune    |                               |                                 |                                          |
| 23 Lung cancer                | 30 Dietary iron deficiency    |                               |                                 |                                          |
| 25 Oral disorders             | 33 Congenital defects         |                               |                                 |                                          |
| 27 Alzheimer's disease        | 71 HIV/AIDS                   |                               |                                 |                                          |
| 34 Prostate cancer            | 161 COVID-19                  |                               |                                 |                                          |

### Grenada, Reference scenario

**Legend:**  
Communicable, maternal, neonatal and nutritional  
Non-communicable  
Injuries

| Leading Causes 2022          | Leading Causes 2050          | Mean % change number of DALY  | Mean % change all-age DALY rate | Mean % change age-standardized DALY rate |
|------------------------------|------------------------------|-------------------------------|---------------------------------|------------------------------------------|
| 1 Diabetes                   | 1 Diabetes                   | <b>50.8 (21.8 to 78)</b>      | <b>66.9 (41.6 to 96.4)</b>      | 4.61 (-10.4 to 24)                       |
| 2 COVID-19                   | 2 Chronic kidney disease     | <b>61.7 (7.12 to 127)</b>     | <b>79.4 (18.4 to 158)</b>       | 11.5 (-28.9 to 68.1)                     |
| 3 Ischemic heart disease     | 3 Ischemic heart disease     | -9.11 (-43.3 to 38.6)         | 0.936 (-36.7 to 53)             | <b>-42.9 (-65.9 to -5.07)</b>            |
| 4 Stroke                     | 4 Stroke                     | -3.22 (-27.6 to 24)           | 7.24 (-16.9 to 38.1)            | <b>-40.8 (-56.1 to -16.8)</b>            |
| 5 Chronic kidney disease     | 5 Prostate cancer            | <b>101 (28.3 to 186)</b>      | <b>122 (49.5 to 205)</b>        | 13.1 (-17.2 to 47.9)                     |
| 6 Neonatal disorders         | 6 Hypertensive heart disease | <b>78.6 (27.8 to 148)</b>     | <b>98.2 (37.3 to 180)</b>       | 8.03 (-26.1 to 62.5)                     |
| 7 Lower respiratory infect   | 7 Lower respiratory infect   | 23 (-3.41 to 50)              | <b>36.1 (10.4 to 64.1)</b>      | <b>-27.7 (-43.1 to -7.82)</b>            |
| 8 Low back pain              | 8 Other musculoskeletal      | <b>59.3 (32.7 to 85.3)</b>    | <b>76 (64.3 to 89.5)</b>        | <b>41.3 (35.9 to 46.7)</b>               |
| 9 Hypertensive heart disease | 9 Low back pain              | 9.55 (-5.43 to 27.4)          | <b>21.1 (14.3 to 27.4)</b>      | <b>-3.8 (-3.99 to -3.58)</b>             |
| 10 Prostate cancer           | 10 Breast cancer             | 34.7 (-9.06 to 87.2)          | <b>48.6 (2.87 to 99.4)</b>      | -3.17 (-30.1 to 26.1)                    |
| 11 Headache disorders        | 11 Colorectal cancer         | 60.8 (-4.36 to 151)           | <b>77.2 (7.72 to 157)</b>       | 2.46 (-35.1 to 44.7)                     |
| 12 Depressive disorders      | 12 Age-related hearing loss  | <b>45 (21.6 to 71.7)</b>      | <b>60.3 (45.3 to 73.9)</b>      | <b>-0.778 (-1.05 to -0.466)</b>          |
| 13 Other musculoskeletal     | 13 Alzheimer's disease       | <b>122 (72.4 to 175)</b>      | <b>145 (103 to 189)</b>         | -0.614 (-3.66 to 2.29)                   |
| 14 Anxiety disorders         | 14 Depressive disorders      | 1.06 (-13.7 to 19.5)          | <b>11.7 (6.09 to 17.7)</b>      | <b>-1.67 (-1.91 to -1.43)</b>            |
| 15 Breast cancer             | 15 Neonatal disorders        | <b>-44.9 (-58.7 to -28.2)</b> | <b>-39.2 (-50.4 to -23)</b>     | -18.2 (-34.2 to 3.88)                    |
| 16 Cirrhosis liver           | 16 Endo/metab/blood/immune   | <b>29.7 (4.87 to 58.4)</b>    | <b>43.6 (21 to 73)</b>          | 7.06 (-12.4 to 29.9)                     |
| 17 Age-related hearing loss  | 17 Pancreatic cancer         | <b>110 (16.9 to 248)</b>      | <b>131 (30.7 to 275)</b>        | 38.3 (-18.2 to 116)                      |
| 18 Endo/metab/blood/immune   | 18 Headache disorders        | -9.21 (-23.9 to 8.15)         | 0.299 (-5.62 to 15.1)           | <b>0.765 (0.411 to 0.956)</b>            |
| 19 Colorectal cancer         | 19 COPD                      | <b>59.8 (17.6 to 113)</b>     | <b>77.2 (27.8 to 131)</b>       | -4.67 (-35.6 to 29.7)                    |
| 20 Congenital defects        | 20 Cirrhosis liver           | 9.19 (-10.7 to 31.6)          | <b>20.9 (1.08 to 43.1)</b>      | -15.1 (-29.8 to 1.05)                    |
| 29 COPD                      | 21 Anxiety disorders         |                               |                                 |                                          |
| 37 Alzheimer's disease       | 44 Congenital defects        |                               |                                 |                                          |
| 39 Pancreatic cancer         | 154 COVID-19                 |                               |                                 |                                          |

### Guyana, Reference scenario

**Legend:**  
Communicable, maternal, neonatal and nutritional  
Non-communicable  
Injuries

| Leading Causes 2022           | Leading Causes 2050          | Mean % change number of DALY | Mean % change all-age DALY rate | Mean % change age-standardized DALY rate |
|-------------------------------|------------------------------|------------------------------|---------------------------------|------------------------------------------|
| 1 Diabetes                    | 1 Diabetes                   | 20.3 (-9.08 to 50.9)         | <b>48.5 (25.6 to 76.6)</b>      | -7.16 (-19.5 to 7.31)                    |
| 2 COVID-19                    | 2 Stroke                     | -22.5 (-43.4 to 1.83)        | -4.07 (-29.2 to 28.2)           | <b>-49.8 (-61.7 to -34.7)</b>            |
| 3 Ischemic heart disease      | 3 Ischemic heart disease     | <b>-35.3 (-61 to -3.4)</b>   | -19.7 (-49 to 22.7)             | <b>-58.1 (-73.5 to -33.8)</b>            |
| 4 Neonatal disorders          | 4 Chronic kidney disease     | 19.9 (-22.7 to 72.2)         | <b>48.5 (2.73 to 118)</b>       | -6.95 (-37.1 to 36.4)                    |
| 5 Stroke                      | 5 Hypertensive heart disease | 45 (-4.44 to 106)            | <b>79.5 (23.5 to 153)</b>       | -5.87 (-34.9 to 35.2)                    |
| 6 Self-harm                   | 6 Self-harm                  | -26.1 (-47.7 to 2.29)        | -8.93 (-30.9 to 15)             | -8.17 (-31.8 to 17.3)                    |
| 7 Chronic kidney disease      | 7 Neonatal disorders         | <b>-56 (-68.2 to -40)</b>    | <b>-46 (-55.8 to -33.7)</b>     | <b>-28.1 (-41.9 to -10.3)</b>            |
| 8 Interpersonal violence      | 8 Lower respiratory infect   | -11.6 (-34.3 to 14.2)        | 9.34 (-13.4 to 42.9)            | <b>-32.4 (-45.2 to -15.7)</b>            |
| 9 HIV/AIDS                    | 9 Cirrhosis liver            | -13.1 (-35.1 to 9.99)        | 7.16 (-8.38 to 26.4)            | <b>-18.8 (-29.7 to -5.19)</b>            |
| 10 Lower respiratory infect   | 10 Other musculoskeletal     | <b>67.6 (27.9 to 101)</b>    | <b>106 (89.7 to 126)</b>        | <b>70 (65.6 to 74.5)</b>                 |
| 11 Hypertensive heart disease | 11 Depressive disorders      | -11.5 (-32 to 8.9)           | <b>8.94 (2.46 to 16.3)</b>      | <b>-2.62 (-2.95 to -2.2)</b>             |
| 12 Cirrhosis liver            | 12 Interpersonal violence    | <b>-47 (-71.2 to -13.8)</b>  | -35.1 (-58.1 to 0.582)          | -30.2 (-55.1 to 9.79)                    |
| 13 Road injuries              | 13 Prostate cancer           | <b>96.1 (25.8 to 181)</b>    | <b>142 (68.1 to 243)</b>        | 0.688 (-22.6 to 29.8)                    |
| 14 Depressive disorders       | 14 Low back pain             | -2.17 (-24.6 to 19.5)        | <b>20.5 (11.1 to 30.2)</b>      | <b>-4.96 (-5.36 to -4.45)</b>            |
| 15 Congenital defects         | 15 Road injuries             | -31.5 (-58.8 to 5.84)        | -15.5 (-44.6 to 31.7)           | -14.1 (-43.8 to 33.7)                    |
| 16 Low back pain              | 16 Falls                     | 26.4 (-9.06 to 65.4)         | <b>55.8 (28.7 to 92.2)</b>      | -3.54 (-16.1 to 10.9)                    |
| 17 Malaria                    | 17 Endo/metab/blood/immune   | 5.21 (-21.6 to 36.5)         | <b>29.7 (10.6 to 52.5)</b>      | 7.08 (-10.2 to 26.2)                     |
| 18 Headache disorders         | 18 Age-related hearing loss  | <b>43.4 (11.2 to 75.6)</b>   | <b>77.1 (53.8 to 105)</b>       | <b>-1.22 (-1.41 to -1.06)</b>            |
| 19 Endo/metab/blood/immune    | 19 Alzheimer's disease       | <b>176 (99.5 to 250)</b>     | <b>241 (159 to 325)</b>         | 1.91 (-1.09 to 4.53)                     |
| 20 Anxiety disorders          | 20 Breast cancer             | 20.7 (-20.9 to 63.2)         | <b>48.6 (9.65 to 100)</b>       | 3.67 (-24.6 to 40.2)                     |
| 21 Other musculoskeletal      | 21 Headache disorders        |                              |                                 |                                          |
| 23 Falls                      | 23 Anxiety disorders         |                              |                                 |                                          |
| 24 Breast cancer              | 24 Malaria                   |                              |                                 |                                          |
| 26 Age-related hearing loss   | 31 Congenital defects        |                              |                                 |                                          |
| 31 Prostate cancer            | 45 HIV/AIDS                  |                              |                                 |                                          |
| 49 Alzheimer's disease        | 161 COVID-19                 |                              |                                 |                                          |

### Haiti, Reference scenario

**Legend:**  
Communicable, maternal, neonatal and nutritional  
Non-communicable  
Injuries

| Leading Causes 2022           | Leading Causes 2050           | Mean % change number of DALY  | Mean % change all-age DALY rate | Mean % change age-standardized DALY rate |
|-------------------------------|-------------------------------|-------------------------------|---------------------------------|------------------------------------------|
| 1 Nature disaster             | 1 Nature disaster             | 848 (-99.3 to 15100)          | 620 (-99.4 to 12000)            | 640 (-99.4 to 12300)                     |
| 2 Neonatal disorders          | 2 Diabetes                    | <b>107 (55 to 173)</b>        | <b>65 (34 to 101)</b>           | -2.48 (-20.4 to 23.7)                    |
| 3 Lower respiratory infect    | 3 Ischemic heart disease      | 49.8 (-14.9 to 139)           | 19.5 (-28.8 to 96.5)            | -34.6 (-63.1 to 13)                      |
| 4 Diarrheal diseases          | 4 Stroke                      | 25.3 (-14.6 to 74.9)          | -0.0951 (-27.3 to 34.3)         | <b>-41.3 (-59.1 to -15.3)</b>            |
| 5 Ischemic heart disease      | 5 Neonatal disorders          | <b>-45.3 (-64.3 to -20.2)</b> | <b>-56.5 (-68.1 to -41.5)</b>   | <b>-32.5 (-48.9 to -8.88)</b>            |
| 6 Congenital defects          | 6 Road injuries               | -5.68 (-48.1 to 70.6)         | -24.8 (-55.7 to 28)             | -22.1 (-53.6 to 33)                      |
| 7 Stroke                      | 7 Lower respiratory infect    | <b>-48.5 (-62.8 to -30.1)</b> | <b>-59 (-69.1 to -46.5)</b>     | <b>-54.5 (-65 to -41.4)</b>              |
| 8 HIV/AIDS                    | 8 Congenital defects          | <b>-41 (-56.6 to -22.2)</b>   | <b>-53.1 (-60.6 to -44)</b>     | <b>-29 (-38.7 to -17.2)</b>              |
| 9 Diabetes                    | 9 Chronic kidney disease      | <b>108 (30.7 to 213)</b>      | <b>66.2 (10.9 to 160)</b>       | 11.8 (-27.7 to 73.5)                     |
| 10 Road injuries              | 10 Interpersonal violence     | -24.6 (-56.7 to 24.7)         | -40 (-62.9 to 0.11)             | -37.7 (-61.4 to 3.56)                    |
| 11 Interpersonal violence     | 11 Diarrheal diseases         | <b>-62 (-80.6 to -29.7)</b>   | <b>-69.8 (-83.1 to -47.2)</b>   | <b>-58.7 (-76.7 to -27.6)</b>            |
| 12 Pertussis                  | 12 Cirrhosis liver            | 32 (-1.94 to 70.4)            | 5.24 (-14.9 to 33.3)            | <b>-29.7 (-42.7 to -12.7)</b>            |
| 13 Dietary iron deficiency    | 13 Hypertensive heart disease | <b>125 (46.2 to 220)</b>      | <b>79.4 (25.3 to 152)</b>       | -5.55 (-40.6 to 41.7)                    |
| 14 Asthma                     | 14 Other musculoskeletal      | <b>146 (92.3 to 197)</b>      | <b>95.6 (73.5 to 117)</b>       | <b>54.6 (43.6 to 63.8)</b>               |
| 15 Drowning                   | 15 Low back pain              | <b>53 (21 to 84.3)</b>        | <b>21.9 (13.7 to 30.6)</b>      | <b>-5.21 (-5.48 to -4.92)</b>            |
| 16 Cirrhosis liver            | 16 Dietary iron deficiency    | 0.147 (-19.1 to 22.6)         | <b>-20.4 (-24.5 to -16.7)</b>   | <b>-13 (-13.7 to -12.3)</b>              |
| 17 COVID-19                   | 17 Depressive disorders       | <b>44.1 (14.8 to 73.5)</b>    | <b>14.7 (8.51 to 22.5)</b>      | <b>-2.98 (-3.28 to -2.62)</b>            |
| 18 Maternal disorders         | 18 Headache disorders         | <b>33.2 (1.84 to 62.4)</b>    | <b>6 (1.03 to 17.9)</b>         | -0.0314 (-0.309 to 0.236)                |
| 19 Chronic kidney disease     | 19 Anxiety disorders          | <b>36 (9.42 to 64.2)</b>      | <b>8.21 (2.46 to 14.4)</b>      | <b>0.579 (0.227 to 0.898)</b>            |
| 20 Headache disorders         | 20 COPD                       | <b>66.2 (11.8 to 135)</b>     | 32.5 (-2.67 to 80.6)            | <b>-32.4 (-52.7 to -3.27)</b>            |
| 21 Low back pain              | 26 Asthma                     |                               |                                 |                                          |
| 23 Depressive disorders       | 27 HIV/AIDS                   |                               |                                 |                                          |
| 25 Anxiety disorders          | 31 Drowning                   |                               |                                 |                                          |
| 29 Hypertensive heart disease | 34 Pertussis                  |                               |                                 |                                          |
| 31 COPD                       | 46 Maternal disorders         |                               |                                 |                                          |
| 36 Other musculoskeletal      | 161 COVID-19                  |                               |                                 |                                          |

### Jamaica, Reference scenario

**Legend:**  
Communicable, maternal, neonatal and nutritional  
Non-communicable  
Injuries

| Leading Causes 2022          | Leading Causes 2050          | Mean % change number of DALY | Mean % change all-age DALY rate | Mean % change age-standardized DALY rate |
|------------------------------|------------------------------|------------------------------|---------------------------------|------------------------------------------|
| 1 Diabetes                   | 1 Diabetes                   | 73.8 (39 to 118)             | 92.6 (61.3 to 132)              | 3.51 (-12.5 to 24.3)                     |
| 2 COVID-19                   | 2 Stroke                     | 17.8 (-9.77 to 54)           | 30.7 (4.24 to 68)               | -32.6 (-46.8 to -8.15)                   |
| 3 Stroke                     | 3 Chronic kidney disease     | 97 (34.5 to 186)             | 118 (50.8 to 217)               | 25.4 (-13.9 to 87.4)                     |
| 4 Interpersonal violence     | 4 Hypertensive heart disease | 107 (39.1 to 199)            | 130 (61 to 227)                 | 19.7 (-17.1 to 76.9)                     |
| 5 Neonatal disorders         | 5 Ischemic heart disease     | 19.1 (-24.6 to 81)           | 32.2 (-12 to 109)               | -33.6 (-57.2 to 8.71)                    |
| 6 Ischemic heart disease     | 6 Prostate cancer            | 93.2 (30.7 to 165)           | 114 (52.6 to 183)               | -1.67 (-24.9 to 24.1)                    |
| 7 Chronic kidney disease     | 7 Other musculoskeletal      | 50.2 (27.5 to 75.8)          | 66.3 (52 to 79.6)               | 25.3 (19.4 to 30.1)                      |
| 8 Low back pain              | 8 Low back pain              | 18.7 (0.905 to 36.8)         | 31.5 (23 to 39.7)               | -2.58 (-2.8 to -2.33)                    |
| 9 Hypertensive heart disease | 9 Alzheimer's disease        | 109 (56.6 to 163)            | 132 (88.6 to 174)               | 4.07 (0.84 to 7.25)                      |
| 10 HIV/AIDS                  | 10 Interpersonal violence    | -48.2 (-66.3 to -17.5)       | -42.7 (-61.1 to -13.2)          | -39.2 (-59.9 to -6.03)                   |
| 11 Other musculoskeletal     | 11 Age-related hearing loss  | 57.2 (30 to 83.7)            | 74.1 (59 to 89.3)               | -0.558 (-0.691 to -0.461)                |
| 12 Headache disorders        | 12 Breast cancer             | 43.9 (3.2 to 87.5)           | 59.3 (16.2 to 105)              | -4.53 (-28.4 to 20.1)                    |
| 13 Depressive disorders      | 13 Lung cancer               | 58.9 (6.73 to 116)           | 75.8 (19.1 to 140)              | -7.11 (-35 to 20.6)                      |
| 14 Anxiety disorders         | 14 Colorectal cancer         | 70.9 (8.15 to 145)           | 89.1 (24.7 to 170)              | -0.433 (-33.5 to 37.9)                   |
| 15 Prostate cancer           | 15 Neonatal disorders        | -54.3 (-65.8 to -40.8)       | -49.4 (-58.2 to -38.3)          | -25.6 (-39.4 to -6.47)                   |
| 16 Breast cancer             | 16 Depressive disorders      | 6.31 (-11.7 to 23.4)         | 17.7 (9.73 to 27.3)             | -1.45 (-1.75 to -1.18)                   |
| 17 Age-related hearing loss  | 17 COPD                      | 56.8 (13.4 to 119)           | 73.8 (32 to 135)                | -13.5 (-34.2 to 19.3)                    |
| 18 Lung cancer               | 18 Headache disorders        | -10.2 (-24.9 to 9.34)        | -0.59 (-9.46 to 19.1)           | 0.0707 (-0.0813 to 0.247)                |
| 19 Alzheimer's disease       | 19 Anxiety disorders         | -6.76 (-22.1 to 11.9)        | 3.21 (-5.04 to 14.2)            | 0.399 (0.233 to 0.594)                   |
| 20 Colorectal cancer         | 20 Osteoarthritis            | 72.2 (46.1 to 98.2)          | 90.8 (78.9 to 104)              | 2.19 (1.92 to 2.49)                      |
| 22 COPD                      | 39 HIV/AIDS                  |                              |                                 |                                          |
| 29 Osteoarthritis            | 154 COVID-19                 |                              |                                 |                                          |



### Puerto Rico, Reference scenario

**Legend:**  
Communicable, maternal, neonatal and nutritional  
Non-communicable  
Injuries

| Leading Causes 2022           | Leading Causes 2050          | Mean % change number of DALY  | Mean % change all-age DALY rate | Mean % change age-standardized DALY rate |
|-------------------------------|------------------------------|-------------------------------|---------------------------------|------------------------------------------|
| 1 Diabetes                    | 1 Diabetes                   | -1.95 (-14 to 13.5)           | <b>37.6 (22.8 to 53.9)</b>      | -5.19 (-13.1 to 3.55)                    |
| 2 Ischemic heart disease      | 2 Chronic kidney disease     | <b>39.6 (4.37 to 92.6)</b>    | <b>96.2 (45.4 to 162)</b>       | 8.17 (-15.5 to 45.3)                     |
| 3 COVID-19                    | 3 Alzheimer's disease        | <b>71.7 (39.4 to 102)</b>     | <b>141 (108 to 178)</b>         | <b>-6.16 (-8.61 to -3.64)</b>            |
| 4 Chronic kidney disease      | 4 Ischemic heart disease     | <b>-35.8 (-54.3 to -13.2)</b> | -9.75 (-34 to 21.6)             | <b>-51.4 (-63.1 to -33.7)</b>            |
| 5 Interpersonal violence      | 5 COPD                       | <b>40.5 (10.7 to 73.7)</b>    | <b>97.4 (51.9 to 151)</b>       | -6.72 (-24.5 to 15.8)                    |
| 6 Low back pain               | 6 Age-related hearing loss   | <b>18.8 (1.72 to 33.6)</b>    | <b>66.7 (53.4 to 84.2)</b>      | <b>-0.299 (-0.354 to -0.235)</b>         |
| 7 Alzheimer's disease         | 7 Low back pain              | <b>-14.1 (-23.3 to -4.64)</b> | <b>20.5 (15.1 to 26.3)</b>      | <b>-2.33 (-2.48 to -2.19)</b>            |
| 8 Stroke                      | 8 Endo/metab/blood/immune    | 19 (-0.802 to 43.9)           | <b>67 (43.5 to 94.6)</b>        | 4.64 (-5.91 to 17.3)                     |
| 9 COPD                        | 9 Hypertensive heart disease | <b>40.9 (1.25 to 83.8)</b>    | <b>98 (41.5 to 162)</b>         | 5.79 (-19.4 to 39.9)                     |
| 10 Age-related hearing loss   | 10 Other musculoskeletal     | -3.49 (-15.5 to 7.96)         | <b>35.3 (29.5 to 41.3)</b>      | <b>18.5 (17.1 to 19.9)</b>               |
| 11 Other musculoskeletal      | 11 Stroke                    | <b>-25.9 (-37.5 to -11.9)</b> | 4.06 (-11.4 to 22.8)            | <b>-39.8 (-48.2 to -29.7)</b>            |
| 12 Colorectal cancer          | 12 Colorectal cancer         | -0.457 (-31.4 to 33.2)        | <b>39.6 (1.21 to 86.6)</b>      | -14.9 (-38.4 to 14.8)                    |
| 13 Cirrhosis liver            | 13 Osteoarthritis            | 8.94 (-3.23 to 20.8)          | <b>52.9 (43.9 to 62.7)</b>      | <b>1.2 (1.01 to 1.38)</b>                |
| 14 Endo/metab/blood/immune    | 14 Lower respiratory infect  | 11.7 (-13.4 to 39.3)          | <b>56.9 (22.3 to 97.7)</b>      | <b>-26.3 (-36.8 to -14.1)</b>            |
| 15 Headache disorders         | 15 Falls                     | 3.27 (-15.9 to 23.7)          | <b>45 (22.2 to 71.1)</b>        | <b>-17.3 (-26.4 to -6.3)</b>             |
| 16 Depressive disorders       | 16 Oral disorders            | -0.898 (-12.3 to 11.7)        | <b>39 (29.5 to 50.2)</b>        | <b>0.207 (0.0546 to 0.357)</b>           |
| 17 Anxiety disorders          | 17 Blindness and vision loss | 12.4 (-2.84 to 26.7)          | <b>57.8 (45.6 to 74)</b>        | <b>-2.69 (-2.83 to -2.52)</b>            |
| 18 Osteoarthritis             | 18 Urinary diseases          | <b>66.8 (34.1 to 110)</b>     | <b>134 (88.2 to 192)</b>        | 12.5 (-1.74 to 27)                       |
| 19 Falls                      | 19 Prostate cancer           | 22.9 (-9.48 to 58.5)          | <b>72.4 (32.6 to 124)</b>       | -7.99 (-25 to 9.49)                      |
| 20 Lower respiratory infect   | 20 Depressive disorders      | <b>-20.7 (-30.9 to -12.1)</b> | <b>11.2 (6.02 to 18.3)</b>      | <b>-1.23 (-1.46 to -1.05)</b>            |
| 22 Oral disorders             | 21 Cirrhosis liver           |                               |                                 |                                          |
| 23 Hypertensive heart disease | 25 Anxiety disorders         |                               |                                 |                                          |
| 26 Blindness and vision loss  | 26 Headache disorders        |                               |                                 |                                          |
| 27 Prostate cancer            | 28 Interpersonal violence    |                               |                                 |                                          |
| 34 Urinary diseases           | 153 COVID-19                 |                               |                                 |                                          |

### Saint Kitts and Nevis, Reference scenario

**Legend:**  
Communicable, maternal, neonatal and nutritional  
Non-communicable  
Injuries

| Leading Causes 2022           | Leading Causes 2050          | Mean % change number of DALY | Mean % change all-age DALY rate | Mean % change age-standardized DALY rate |
|-------------------------------|------------------------------|------------------------------|---------------------------------|------------------------------------------|
| 1 Diabetes                    | 1 Diabetes                   | <b>63.6 (26.9 to 107)</b>    | <b>85.3 (60.3 to 115)</b>       | 8.47 (-5.89 to 24.7)                     |
| 2 Stroke                      | 2 Chronic kidney disease     | <b>70.3 (9.66 to 155)</b>    | <b>93.1 (31.4 to 181)</b>       | 0.858 (-32.4 to 53.1)                    |
| 3 Ischemic heart disease      | 3 Stroke                     | -4.53 (-32.5 to 32.2)        | 8.22 (-18.6 to 42.3)            | <b>-50.5 (-63.5 to -29.7)</b>            |
| 4 COVID-19                    | 4 Ischemic heart disease     | -11.1 (-48.6 to 38.8)        | 0.788 (-38.9 to 55)             | <b>-53.5 (-72.6 to -24.5)</b>            |
| 5 Chronic kidney disease      | 5 Prostate cancer            | <b>129 (46.9 to 233)</b>     | <b>159 (74.1 to 267)</b>        | -0.541 (-29.6 to 29)                     |
| 6 HIV/AIDS                    | 6 Hypertensive heart disease | <b>106 (33.1 to 201)</b>     | <b>133 (59.1 to 227)</b>        | 3.2 (-31.1 to 56.4)                      |
| 7 Alcohol use disorders       | 7 Lower respiratory infect   | <b>42.9 (6.3 to 92.7)</b>    | <b>61.9 (28.6 to 100)</b>       | <b>-32.4 (-45.9 to -13.2)</b>            |
| 8 Neonatal disorders          | 8 Other musculoskeletal      | <b>41.7 (14.3 to 74.7)</b>   | <b>60.5 (48.2 to 74.3)</b>      | <b>29.2 (24.2 to 34.3)</b>               |
| 9 Interpersonal violence      | 9 Alcohol use disorders      | -9.47 (-29.5 to 15.3)        | 2.59 (-11.6 to 21)              | -12.9 (-24.4 to 1.29)                    |
| 10 Depressive disorders       | 10 Low back pain             | 9.34 (-10.8 to 33.2)         | <b>23.8 (17.2 to 30.4)</b>      | <b>-2.79 (-2.99 to -2.61)</b>            |
| 11 Low back pain              | 11 Depressive disorders      | -0.117 (-17.9 to 25.6)       | <b>13.1 (5.53 to 21.5)</b>      | <b>-1.26 (-1.46 to -1.08)</b>            |
| 12 Lower respiratory infect   | 12 Age-related hearing loss  | <b>57.8 (28.1 to 92.8)</b>   | <b>78.7 (63.4 to 93.6)</b>      | <b>-0.607 (-0.733 to -0.45)</b>          |
| 13 Other musculoskeletal      | 13 Alzheimer's disease       | <b>178 (109 to 259)</b>      | <b>215 (161 to 268)</b>         | 0.561 (-2.08 to 3.37)                    |
| 14 Prostate cancer            | 14 Colorectal cancer         | 61.7 (-0.97 to 148)          | <b>82.8 (13.6 to 170)</b>       | -9.57 (-40.6 to 31.3)                    |
| 15 Headache disorders         | 15 Breast cancer             | 33.6 (-10.8 to 89.2)         | <b>51.1 (7.9 to 99.7)</b>       | -12.6 (-33.9 to 13.9)                    |
| 16 Cirrhosis liver            | 16 COPD                      | <b>83.6 (26.8 to 165)</b>    | <b>108 (53 to 182)</b>          | -8.92 (-35.2 to 31.7)                    |
| 17 Hypertensive heart disease | 17 Urinary diseases          | <b>119 (64 to 189)</b>       | <b>148 (99 to 224)</b>          | 14.8 (-9.78 to 49.6)                     |
| 18 Anxiety disorders          | 18 Cirrhosis liver           | -6.03 (-26.4 to 18.7)        | 6.49 (-9.76 to 24.6)            | <b>-30.7 (-40.4 to -17.6)</b>            |
| 19 Breast cancer              | 19 Osteoarthritis            | <b>55.2 (26.9 to 89)</b>     | <b>75.8 (66.3 to 84.7)</b>      | <b>2.27 (1.99 to 2.53)</b>               |
| 20 Age-related hearing loss   | 20 Headache disorders        | -15.1 (-30 to 5.26)          | -3.83 (-9.75 to 9.26)           | <b>0.583 (0.339 to 0.767)</b>            |
| 21 Colorectal cancer          | 21 Anxiety disorders         |                              |                                 |                                          |
| 23 COPD                       | 25 Neonatal disorders        |                              |                                 |                                          |
| 29 Osteoarthritis             | 27 HIV/AIDS                  |                              |                                 |                                          |
| 37 Urinary diseases           | 32 Interpersonal violence    |                              |                                 |                                          |
| 38 Alzheimer's disease        | 153 COVID-19                 |                              |                                 |                                          |

### Saint Lucia, Reference scenario

**Legend:**  
Communicable, maternal, neonatal and nutritional  
Non-communicable  
Injuries

| Leading Causes 2022          | Leading Causes 2050          | Mean % change number of DALY  | Mean % change all-age DALY rate | Mean % change age-standardized DALY rate |
|------------------------------|------------------------------|-------------------------------|---------------------------------|------------------------------------------|
| 1 Diabetes                   | 1 Diabetes                   | <b>58.4 (27 to 92.9)</b>      | <b>61.5 (38.9 to 89.2)</b>      | 5.85 (-7.56 to 23.2)                     |
| 2 COVID-19                   | 2 Stroke                     | 3.4 (-25.4 to 43.7)           | 5.55 (-24.1 to 44.3)            | <b>-43.6 (-58.6 to -20.5)</b>            |
| 3 Stroke                     | 3 Chronic kidney disease     | <b>63.4 (1.7 to 141)</b>      | <b>66.9 (9.74 to 150)</b>       | 3.51 (-33.5 to 61.5)                     |
| 4 Neonatal disorders         | 4 Hypertensive heart disease | <b>93.3 (29.8 to 184)</b>     | <b>97.5 (35.1 to 189)</b>       | 3.47 (-32.1 to 58.4)                     |
| 5 Chronic kidney disease     | 5 Prostate cancer            | <b>102 (27.5 to 198)</b>      | <b>105 (35.1 to 196)</b>        | -6.74 (-31.6 to 22.3)                    |
| 6 Ischemic heart disease     | 6 Ischemic heart disease     | 2.02 (-40.2 to 58.8)          | 4.25 (-34.2 to 66)              | <b>-44.7 (-65.4 to -7.97)</b>            |
| 7 Interpersonal violence     | 7 Other musculoskeletal      | <b>60.2 (34.8 to 83)</b>      | <b>63.3 (51.9 to 74.5)</b>      | <b>35.5 (31.5 to 39.1)</b>               |
| 8 Low back pain              | 8 COPD                       | <b>61 (16.6 to 115)</b>       | <b>64.4 (21 to 128)</b>         | -14.5 (-38.3 to 23.1)                    |
| 9 Hypertensive heart disease | 9 Low back pain              | <b>17.4 (1.27 to 32.8)</b>    | <b>19.7 (13.5 to 26.3)</b>      | <b>-3.16 (-3.31 to -2.99)</b>            |
| 10 Prostate cancer           | 10 Alzheimer's disease       | <b>133 (83.6 to 182)</b>      | <b>137 (99.2 to 172)</b>        | <b>-5.83 (-8.35 to -2.91)</b>            |
| 11 Depressive disorders      | 11 Age-related hearing loss  | <b>63.4 (35.4 to 90.7)</b>    | <b>66.5 (50.7 to 80.4)</b>      | <b>-0.723 (-0.816 to -0.638)</b>         |
| 12 Other musculoskeletal     | 12 Lower respiratory infect  | 30.3 (-0.014 to 68.7)         | <b>32.9 (5.35 to 65.6)</b>      | <b>-34.6 (-48.6 to -13.2)</b>            |
| 13 Road injuries             | 13 Neonatal disorders        | <b>-40.5 (-52.7 to -25.5)</b> | <b>-39.3 (-49.3 to -26.4)</b>   | -21.4 (-39.1 to 1.94)                    |
| 14 COPD                      | 14 Depressive disorders      | 7.03 (-7.23 to 21.2)          | <b>9.11 (4.1 to 15.1)</b>       | <b>-1.54 (-1.69 to -1.4)</b>             |
| 15 Headache disorders        | 15 Cirrhosis liver           | 6.85 (-13.4 to 31.4)          | 9.03 (-7.68 to 31)              | <b>-19.7 (-32.2 to -2.25)</b>            |
| 16 Lower respiratory infect  | 16 Breast cancer             | 23.7 (-18.8 to 70.6)          | 25.9 (-14.7 to 73.3)            | -14 (-39.3 to 14.6)                      |
| 17 Cirrhosis liver           | 17 Osteoarthritis            | <b>60.6 (36.7 to 84)</b>      | <b>63.7 (52.8 to 74.9)</b>      | <b>2.73 (2.43 to 3)</b>                  |
| 18 Anxiety disorders         | 18 Headache disorders        | -5.59 (-19.4 to 8.62)         | -3.73 (-9.12 to 8.73)           | <b>0.447 (0.276 to 0.564)</b>            |
| 19 Age-related hearing loss  | 19 Anxiety disorders         | -1.14 (-15 to 12.8)           | 0.799 (-4.75 to 7.51)           | <b>0.84 (0.745 to 0.955)</b>             |
| 20 Breast cancer             | 20 Oral disorders            | <b>37.3 (15.7 to 56.6)</b>    | <b>40 (28.6 to 51.9)</b>        | <b>0.681 (0.475 to 0.857)</b>            |
| 23 Alzheimer's disease       | 21 Road injuries             |                               |                                 |                                          |
| 24 Oral disorders            | 25 Interpersonal violence    |                               |                                 |                                          |
| 27 Osteoarthritis            | 154 COVID-19                 |                               |                                 |                                          |

### Saint Vincent and the Grenadines, Reference scenario

**Legend:**  
Communicable, maternal, neonatal and nutritional  
Non-communicable  
Injuries

| Leading Causes 2022          | Leading Causes 2050          | Mean % change number of DALY   | Mean % change all-age DALY rate | Mean % change age-standardized DALY rate |
|------------------------------|------------------------------|--------------------------------|---------------------------------|------------------------------------------|
| 1 Diabetes                   | 1 Diabetes                   | 33.5 (8.7 to 61.7)             | 57.1 (36.4 to 85.8)             | 7.04 (-6.8 to 26)                        |
| 2 COVID-19                   | 2 Hypertensive heart disease | 65.5 (11.8 to 131)             | 95 (30.8 to 176)                | 13.7 (-25.5 to 73.4)                     |
| 3 Ischemic heart disease     | 3 Ischemic heart disease     | -10.5 (-45.9 to 39.6)          | 5.45 (-34.6 to 68.5)            | -40 (-65.4 to 2.4)                       |
| 4 Stroke                     | 4 Stroke                     | -9.95 (-32.1 to 20.8)          | 6.05 (-17.4 to 41.5)            | <b>-36.9 (-53 to -11.2)</b>              |
| 5 Hypertensive heart disease | 5 Chronic kidney disease     | 44.3 (-5.26 to 109)            | 70 (13.7 to 148)                | 12 (-29.1 to 72.6)                       |
| 6 Interpersonal violence     | 6 Prostate cancer            | 57.6 (1.07 to 126)             | 85.2 (20 to 160)                | -5.95 (-31 to 24.7)                      |
| 7 Chronic kidney disease     | 7 Lower respiratory infect   | 11.5 (-15.3 to 36.2)           | 31.2 (4.91 to 58.1)             | <b>-29.6 (-46.4 to -8.94)</b>            |
| 8 Neonatal disorders         | 8 Other musculoskeletal      | 49.4 (24.2 to 71.9)            | 75.6 (63.3 to 89.4)             | 44.4 (38.9 to 49.8)                      |
| 9 Lower respiratory infect   | 9 Low back pain              | 1.4 (-12.7 to 17)              | 19.2 (13.4 to 25.6)             | <b>-3.07 (-3.26 to -2.85)</b>            |
| 10 Prostate cancer           | 10 Alzheimer's disease       | 103 (58.3 to 142)              | 139 (97.4 to 179)               | 6.32 (3.23 to 9.56)                      |
| 11 HIV/AIDS                  | 11 Breast cancer             | 24.1 (-18.4 to 72.8)           | 45.7 (1.07 to 105)              | 3.44 (-26.4 to 41.6)                     |
| 12 Low back pain             | 12 Age-related hearing loss  | 32.2 (9.61 to 53)              | 55.5 (42.4 to 67.2)             | <b>-1.04 (-1.23 to -0.835)</b>           |
| 13 Depressive disorders      | 13 Interpersonal violence    | <b>-47.4 (-70.7 to -7.36)</b>  | -38.2 (-63 to 9.45)             | -32.1 (-59.9 to 18.5)                    |
| 14 Headache disorders        | 14 Depressive disorders      | -5.72 (-19.7 to 8.16)          | 10.8 (6.14 to 16.5)             | <b>-1.52 (-1.77 to -1.25)</b>            |
| 15 Other musculoskeletal     | 15 Endo/metab/blood/immune   | 16.7 (-9.33 to 42.6)           | 37.3 (12.1 to 62.3)             | 5.14 (-15.8 to 29.7)                     |
| 16 Breast cancer             | 16 Cirrhosis liver           | 4.09 (-16.3 to 28.4)           | 22.5 (0.884 to 50.4)            | -2.69 (-18.9 to 19.2)                    |
| 17 Cirrhosis liver           | 17 Colorectal cancer         | 45.9 (-12.1 to 113)            | 71.4 (7.86 to 154)              | 6.23 (-30.1 to 55.7)                     |
| 18 Anxiety disorders         | 18 Neonatal disorders        | <b>-46.7 (-59 to -32.1)</b>    | <b>-37.4 (-47.6 to -24.8)</b>   | <b>-26 (-39.2 to -7.76)</b>              |
| 19 Alcohol use disorders     | 19 Headache disorders        | <b>-14.7 (-28.6 to -0.283)</b> | 0.268 (-4.99 to 12.5)           | 1.06 (0.694 to 1.22)                     |
| 20 Age-related hearing loss  | 20 Falls                     | 20.2 (-8.48 to 49)             | 41.3 (14.3 to 66.7)             | -4.82 (-19.2 to 11.8)                    |
| 21 Endo/metab/blood/immune   | 21 Alcohol use disorders     |                                |                                 |                                          |
| 23 Falls                     | 22 Anxiety disorders         |                                |                                 |                                          |
| 24 Colorectal cancer         | 47 HIV/AIDS                  |                                |                                 |                                          |
| 29 Alzheimer's disease       | 154 COVID-19                 |                                |                                 |                                          |

### Suriname, Reference scenario

**Legend:**

Communicable, maternal, neonatal and nutritional  
Non-communicable  
Injuries

| Leading Causes 2022           | Leading Causes 2050           | Mean % change number of DALY | Mean % change all-age DALY rate | Mean % change age-standardized DALY rate |
|-------------------------------|-------------------------------|------------------------------|---------------------------------|------------------------------------------|
| 1 Diabetes                    | 1 Diabetes                    | <b>68.6 (39.6 to 99.6)</b>   | <b>48.7 (30.6 to 72.1)</b>      | 9.31 (-3.28 to 23.7)                     |
| 2 COVID-19                    | 2 Ischemic heart disease      | 7.28 (-36.4 to 64.4)         | -5.16 (-44.3 to 49.8)           | <b>-39.4 (-63.9 to -0.297)</b>           |
| 3 Ischemic heart disease      | 3 Stroke                      | 6.27 (-20.1 to 43.1)         | -6.19 (-28.3 to 24.2)           | <b>-40 (-55 to -19.1)</b>                |
| 4 Stroke                      | 4 Chronic kidney disease      | <b>86.8 (23.1 to 160)</b>    | <b>65 (10.8 to 137)</b>         | 16.1 (-22.4 to 73.9)                     |
| 5 Neonatal disorders          | 5 Neonatal disorders          | <b>-39.9 (-53.5 to -21)</b>  | <b>-47.1 (-58.9 to -29.7)</b>   | <b>-32.1 (-47.7 to -11.1)</b>            |
| 6 Chronic kidney disease      | 6 Self-harm                   | 0.923 (-25.1 to 28)          | -11 (-33 to 15.7)               | -11.2 (-34.2 to 15.8)                    |
| 7 Self-harm                   | 7 Depressive disorders        | <b>22.1 (3.58 to 39.3)</b>   | <b>7.53 (3.76 to 12.4)</b>      | <b>-1.98 (-2.26 to -1.76)</b>            |
| 8 Road injuries               | 8 Other musculoskeletal       | <b>81.1 (54.3 to 110)</b>    | <b>59.5 (49.6 to 71.3)</b>      | <b>37.1 (31.9 to 42.4)</b>               |
| 9 Depressive disorders        | 9 Low back pain               | <b>30.1 (11.8 to 47.8)</b>   | <b>14.6 (8.51 to 21.5)</b>      | <b>-3.62 (-3.85 to -3.32)</b>            |
| 10 HIV/AIDS                   | 10 Road injuries              | -0.526 (-41 to 58.8)         | -12 (-47.7 to 44.1)             | -9.94 (-46.7 to 49.8)                    |
| 11 Lower respiratory infect   | 11 Hypertensive heart disease | <b>99.5 (35.9 to 179)</b>    | <b>76.3 (17.1 to 152)</b>       | 8.46 (-26.9 to 59.6)                     |
| 12 Low back pain              | 12 Alzheimer's disease        | <b>192 (107 to 269)</b>      | <b>157 (97.2 to 220)</b>        | 0.414 (-2.38 to 3.3)                     |
| 13 Cirrhosis liver            | 13 Lower respiratory infect   | 15.4 (-12 to 45.7)           | 1.78 (-23.5 to 30.5)            | <b>-38.7 (-51.8 to -22.3)</b>            |
| 14 Congenital defects         | 14 Age-related hearing loss   | <b>76 (42.3 to 105)</b>      | <b>55 (36.3 to 73)</b>          | <b>-0.677 (-0.807 to -0.559)</b>         |
| 15 Headache disorders         | 15 Cirrhosis liver            | 13.8 (-6.46 to 38.1)         | 0.315 (-15.9 to 18.1)           | <b>-18.4 (-31.5 to -4.19)</b>            |
| 16 Interpersonal violence     | 16 Headache disorders         | 13.1 (-3.46 to 32.4)         | -0.448 (-4.16 to 8.72)          | 0.0415 (-0.131 to 0.228)                 |
| 17 Other musculoskeletal      | 17 COPD                       | <b>74.1 (24 to 147)</b>      | <b>53.7 (9.41 to 108)</b>       | -10.9 (-35.6 to 27.5)                    |
| 18 Anxiety disorders          | 18 Prostate cancer            | <b>129 (37 to 234)</b>       | <b>101 (24.4 to 196)</b>        | 3.93 (-26.2 to 36.9)                     |
| 19 Hypertensive heart disease | 19 Colorectal cancer          | 67.8 (-0.724 to 159)         | 47.4 (-8.77 to 120)             | -2.01 (-35.6 to 40.2)                    |
| 20 Age-related hearing loss   | 20 Anxiety disorders          | 16.2 (-1.13 to 32.1)         | 2.32 (-1.6 to 7.01)             | <b>0.42 (0.202 to 0.661)</b>             |
| 23 COPD                       | 29 HIV/AIDS                   |                              |                                 |                                          |
| 24 Colorectal cancer          | 30 Congenital defects         |                              |                                 |                                          |
| 30 Alzheimer's disease        | 34 Interpersonal violence     |                              |                                 |                                          |
| 35 Prostate cancer            | 160 COVID-19                  |                              |                                 |                                          |

### Trinidad and Tobago, Reference scenario

**Legend:**  
Communicable, maternal, neonatal and nutritional  
Non-communicable  
Injuries

| Leading Causes 2022           | Leading Causes 2050          | Mean % change number of DALY  | Mean % change all-age DALY rate | Mean % change age-standardized DALY rate |
|-------------------------------|------------------------------|-------------------------------|---------------------------------|------------------------------------------|
| 1 Diabetes                    | 1 Diabetes                   | 14 (-8.91 to 41.4)            | <b>56 (31.8 to 85)</b>          | -7.1 (-19.1 to 7.45)                     |
| 2 COVID-19                    | 2 Ischemic heart disease     | -22.3 (-47.5 to 18.1)         | 6.35 (-28.6 to 58.6)            | <b>-47.1 (-64.9 to -21.7)</b>            |
| 3 Ischemic heart disease      | 3 Chronic kidney disease     | 40.6 (-2.3 to 99.3)           | <b>92.5 (39.2 to 166)</b>       | 8.78 (-21.6 to 53.9)                     |
| 4 Stroke                      | 4 Stroke                     | -16.3 (-35.9 to 7.37)         | 14.5 (-6.77 to 43.5)            | <b>-43.1 (-53.6 to -29.6)</b>            |
| 5 Interpersonal violence      | 5 Alzheimer's disease        | <b>133 (77.5 to 200)</b>      | <b>218 (149 to 291)</b>         | <b>-4.91 (-7.52 to -1.95)</b>            |
| 6 Chronic kidney disease      | 6 Prostate cancer            | <b>59.9 (7.72 to 134)</b>     | <b>118 (48 to 204)</b>          | -8.92 (-31.1 to 16.6)                    |
| 7 Neonatal disorders          | 7 Hypertensive heart disease | <b>66.4 (15.6 to 132)</b>     | <b>128 (56.3 to 215)</b>        | 10.9 (-21.1 to 54.9)                     |
| 8 Low back pain               | 8 Age-related hearing loss   | <b>38 (11 to 67.9)</b>        | <b>88.8 (67.5 to 110)</b>       | <b>-0.533 (-0.62 to -0.441)</b>          |
| 9 Road injuries               | 9 Other musculoskeletal      | 12.5 (-7.5 to 35.4)           | <b>53.8 (42.7 to 65.4)</b>      | <b>23.4 (19.6 to 27.1)</b>               |
| 10 Depressive disorders       | 10 Low back pain             | -7.68 (-22.9 to 9.25)         | <b>26.3 (18.6 to 35.1)</b>      | <b>-2.06 (-2.26 to -1.81)</b>            |
| 11 HIV/AIDS                   | 11 Depressive disorders      | <b>-19.1 (-33.5 to -2.63)</b> | <b>10.6 (3.54 to 19.1)</b>      | <b>-0.917 (-1.11 to -0.734)</b>          |
| 12 Other musculoskeletal      | 12 Colorectal cancer         | 18.5 (-23.2 to 71.9)          | <b>61.8 (6.48 to 127)</b>       | -12.4 (-38.8 to 18)                      |
| 13 Self-harm                  | 13 Lower respiratory infect  | 13.8 (-13.9 to 50.2)          | <b>55.6 (21.1 to 96.1)</b>      | <b>-30.1 (-41.6 to -16.2)</b>            |
| 14 Headache disorders         | 14 Interpersonal violence    | <b>-64.2 (-80 to -36.3)</b>   | <b>-51.3 (-70.1 to -19.2)</b>   | -36.8 (-64.7 to 15.4)                    |
| 15 Prostate cancer            | 15 COPD                      | <b>47.7 (6.4 to 97.4)</b>     | <b>102 (52 to 164)</b>          | -8.95 (-29.4 to 15.1)                    |
| 16 Age-related hearing loss   | 16 Breast cancer             | -5.61 (-33.8 to 29.1)         | 28.9 (-5.29 to 61.3)            | -16.5 (-37.1 to 2.15)                    |
| 17 Breast cancer              | 17 Endo/metab/blood/immune   | 4.77 (-15.6 to 30.8)          | <b>43.3 (23.2 to 66.3)</b>      | 3.33 (-11 to 19.9)                       |
| 18 Hypertensive heart disease | 18 Osteoarthritis            | <b>31.7 (11.6 to 57.2)</b>    | <b>80.2 (66 to 94.3)</b>        | <b>1.87 (1.6 to 2.17)</b>                |
| 19 Congenital defects         | 19 Road injuries             | <b>-40.2 (-61.9 to -6)</b>    | -18.3 (-46.4 to 16.2)           | -6.14 (-42 to 39.9)                      |
| 20 Anxiety disorders          | 20 Neonatal disorders        | <b>-57 (-66.5 to -45.7)</b>   | <b>-41.4 (-49.1 to -31.9)</b>   | <b>-23.4 (-34.5 to -9.52)</b>            |
| 21 Lower respiratory infect   | 22 Headache disorders        |                               |                                 |                                          |
| 22 Colorectal cancer          | 26 Anxiety disorders         |                               |                                 |                                          |
| 23 Endo/metab/blood/immune    | 27 Self-harm                 |                               |                                 |                                          |
| 24 Alzheimer's disease        | 35 Congenital defects        |                               |                                 |                                          |
| 26 Osteoarthritis             | 43 HIV/AIDS                  |                               |                                 |                                          |
| 30 COPD                       | 156 COVID-19                 |                               |                                 |                                          |

### Virgin Islands, Reference scenario

**Legend:**  
Communicable, maternal, neonatal and nutritional  
Non-communicable  
Injuries

| Leading Causes 2022           | Leading Causes 2050          | Mean % change number of DALY  | Mean % change all-age DALY rate | Mean % change age-standardized DALY rate |
|-------------------------------|------------------------------|-------------------------------|---------------------------------|------------------------------------------|
| 1 COVID-19                    | 1 Diabetes                   | 6.36 (-10.1 to 23.2)          | <b>37.4 (21.9 to 55.6)</b>      | <b>9.99 (1.19 to 18.8)</b>               |
| 2 Ischemic heart disease      | 2 Ischemic heart disease     | -10.4 (-45 to 45.6)           | 15.8 (-28.6 to 87.3)            | <b>-44.8 (-63.4 to -17.2)</b>            |
| 3 Diabetes                    | 3 Alzheimer's disease        | <b>124 (82.2 to 172)</b>      | <b>189 (134 to 248)</b>         | <b>4.85 (1.68 to 7.74)</b>               |
| 4 Interpersonal violence      | 4 Chronic kidney disease     | <b>63.8 (14.7 to 144)</b>     | <b>112 (43.5 to 224)</b>        | 19.1 (-15.9 to 77.2)                     |
| 5 Stroke                      | 5 Stroke                     | -11.7 (-32.8 to 14.5)         | 14.1 (-11.1 to 45.3)            | <b>-34.5 (-47.4 to -19.4)</b>            |
| 6 Low back pain               | 6 Hypertensive heart disease | <b>74.5 (15.7 to 149)</b>     | <b>126 (51.7 to 226)</b>        | 15.8 (-19.4 to 60.1)                     |
| 7 Chronic kidney disease      | 7 Prostate cancer            | <b>63.2 (2.98 to 143)</b>     | <b>111 (40.1 to 203)</b>        | 1.69 (-22.4 to 27.2)                     |
| 8 Age-related hearing loss    | 8 Age-related hearing loss   | <b>16.7 (0.913 to 31.3)</b>   | <b>50.8 (34 to 68.5)</b>        | <b>-0.472 (-0.551 to -0.389)</b>         |
| 9 Other musculoskeletal       | 9 Low back pain              | <b>-16.7 (-27.4 to -5.8)</b>  | <b>7.54 (0.68 to 15.3)</b>      | <b>-2.01 (-2.28 to -1.74)</b>            |
| 10 Depressive disorders       | 10 Lower respiratory infect  | <b>68.1 (27.7 to 120)</b>     | <b>117 (65.3 to 183)</b>        | -16 (-30.5 to 0.804)                     |
| 11 Road injuries              | 11 Other musculoskeletal     | 0.4 (-13.2 to 13.5)           | <b>29.6 (20.6 to 40.9)</b>      | <b>22.1 (19.3 to 24.2)</b>               |
| 12 Alzheimer's disease        | 12 Colorectal cancer         | 19.8 (-24.1 to 77.1)          | 54.6 (-2.45 to 127)             | -7.45 (-38.8 to 26.7)                    |
| 13 Lung cancer                | 13 Interpersonal violence    | <b>-59.2 (-78.5 to -22.3)</b> | <b>-47.5 (-71.5 to -0.488)</b>  | <b>-44 (-72.5 to 8.74)</b>               |
| 14 Colorectal cancer          | 14 Lung cancer               | 4.27 (-25.8 to 39.4)          | 34.5 (-2.2 to 77)               | -3.71 (-28.9 to 22.5)                    |
| 15 Hypertensive heart disease | 15 COPD                      | <b>59.6 (11.7 to 130)</b>     | <b>106 (49.3 to 185)</b>        | 1.22 (-23.9 to 35.4)                     |
| 16 Prostate cancer            | 16 Atrial fibrillation       | <b>149 (85.4 to 234)</b>      | <b>221 (149 to 321)</b>         | <b>12.4 (0.528 to 27.5)</b>              |
| 17 Breast cancer              | 17 Breast cancer             | -0.933 (-30 to 31.3)          | 27.8 (-5.87 to 64)              | -8.39 (-29.2 to 12.8)                    |
| 18 Headache disorders         | 18 Osteoarthritis            | -1.35 (-13.2 to 9.41)         | <b>27.5 (18.1 to 39)</b>        | <b>1.89 (1.66 to 2.15)</b>               |
| 19 Osteoarthritis             | 19 Depressive disorders      | <b>-19.4 (-30.7 to -8.51)</b> | 3.97 (-0.857 to 8.91)           | <b>-1.16 (-1.44 to -0.874)</b>           |
| 20 Cirrhosis liver            | 20 Blindness and vision loss | 9.05 (-6.01 to 22.7)          | <b>40.9 (24.4 to 56.7)</b>      | <b>-2.76 (-3.07 to -2.37)</b>            |
| 23 Lower respiratory infect   | 22 Road injuries             |                               |                                 |                                          |
| 25 Blindness and vision loss  | 25 Headache disorders        |                               |                                 |                                          |
| 28 COPD                       | 26 Cirrhosis liver           |                               |                                 |                                          |
| 37 Atrial fibrillation        | 156 COVID-19                 |                               |                                 |                                          |

### Colombia, Reference scenario

**Legend:**  
Communicable, maternal, neonatal and nutritional  
Non-communicable  
Injuries

| Leading Causes 2022          | Leading Causes 2050          | Mean % change number of DALY | Mean % change all-age DALY rate | Mean % change age-standardized DALY rate |
|------------------------------|------------------------------|------------------------------|---------------------------------|------------------------------------------|
| 1 Ischemic heart disease     | 1 Diabetes                   | 137 (109 to 164)             | 109 (89.4 to 130)               | 32.5 (22 to 43)                          |
| 2 Interpersonal violence     | 2 Ischemic heart disease     | 30.1 (-15.8 to 92.8)         | 15.2 (-26.4 to 75.4)            | -44.8 (-65.2 to -13.6)                   |
| 3 COVID-19                   | 3 Other musculoskeletal      | 96.5 (76.3 to 116)           | 73.7 (62.8 to 85)               | 37.9 (34.6 to 41.2)                      |
| 4 Low back pain              | 4 COPD                       | 126 (71.4 to 187)            | 99.6 (50.3 to 157)              | -16.7 (-38.7 to 14.6)                    |
| 5 Diabetes                   | 5 Low back pain              | 33.9 (20.2 to 47.3)          | 18.3 (12.1 to 25.1)             | -4.52 (-4.7 to -4.33)                    |
| 6 Other musculoskeletal      | 6 Alzheimer's disease        | 205 (154 to 263)             | 169 (128 to 209)                | -4.53 (-7.67 to -1.46)                   |
| 7 Road injuries              | 7 Stroke                     | 25.2 (0.45 to 54.4)          | 10.8 (-11.5 to 39.3)            | -40.9 (-53.3 to -24)                     |
| 8 Neonatal disorders         | 8 Age-related hearing loss   | 96.8 (73.6 to 121)           | 73.9 (57.7 to 88.3)             | -0.627 (-0.747 to -0.51)                 |
| 9 Stroke                     | 9 Interpersonal violence     | -45.1 (-68.2 to -11)         | -51.6 (-70.3 to -21)            | -44.5 (-66.9 to -4.56)                   |
| 10 COPD                      | 10 Chronic kidney disease    | 132 (66.1 to 230)            | 105 (41.2 to 188)               | 5.83 (-25.9 to 56.1)                     |
| 11 Headache disorders        | 11 Blindness and vision loss | 84.1 (62.8 to 107)           | 62.7 (47.7 to 76.3)             | -5 (-5.3 to -4.68)                       |
| 12 Anxiety disorders         | 12 Road injuries             | -11.9 (-41.4 to 25.1)        | -22.1 (-45.5 to 13.8)           | -21.9 (-47.3 to 14.3)                    |
| 13 Lower respiratory infect  | 13 Headache disorders        | 11.6 (-1.67 to 26.1)         | -1.44 (-7.63 to 12.4)           | -0.355 (-0.591 to -0.0899)               |
| 14 Age-related hearing loss  | 14 Anxiety disorders         | 14.5 (0.578 to 29.8)         | 1.1 (-5.25 to 8.48)             | 0.412 (0.181 to 0.658)                   |
| 15 Congenital defects        | 15 Osteoarthritis            | 98.9 (79.4 to 119)           | 75.8 (62.9 to 87.5)             | 2.36 (1.96 to 2.73)                      |
| 16 Alzheimer's disease       | 16 Lower respiratory infect  | 15.8 (-8.63 to 44)           | 2.49 (-19.8 to 29.1)            | -39.5 (-50.7 to -24.5)                   |
| 17 Depressive disorders      | 17 Oral disorders            | 64 (47.2 to 81.6)            | 44.9 (33.9 to 55.9)             | 0.316 (0.0465 to 0.629)                  |
| 18 Blindness and vision loss | 18 Colorectal cancer         | 83.1 (15.6 to 174)           | 61.6 (7.31 to 128)              | -6.74 (-38.5 to 34)                      |
| 19 Stomach cancer            | 19 Depressive disorders      | 30.6 (16.5 to 44.4)          | 15.4 (9.96 to 21.8)             | -1.86 (-2.08 to -1.62)                   |
| 20 Chronic kidney disease    | 20 Falls                     | 52.2 (30.1 to 75.5)          | 34.5 (18.4 to 52.6)             | -9.3 (-18.8 to 1.71)                     |
| 21 Oral disorders            | 22 Neonatal disorders        |                              |                                 |                                          |
| 23 Falls                     | 26 Stomach cancer            |                              |                                 |                                          |
| 26 Osteoarthritis            | 39 Congenital defects        |                              |                                 |                                          |
| 27 Colorectal cancer         | 158 COVID-19                 |                              |                                 |                                          |



### Costa Rica, Reference scenario

**Legend:**  
■ Communicable, maternal, neonatal and nutritional  
■ Non-communicable  
■ Injuries

| Leading Causes 2022          | Leading Causes 2050          | Mean % change number of DALY | Mean % change all-age DALY rate | Mean % change age-standardized DALY rate |
|------------------------------|------------------------------|------------------------------|---------------------------------|------------------------------------------|
| 1 Ischemic heart disease     | 1 Diabetes                   | 99.1 (69.4 to 125)           | 88.5 (74.3 to 105)              | 14.5 (5.46 to 23.1)                      |
| 2 Diabetes                   | 2 Other musculoskeletal      | 71.3 (49.3 to 92.3)          | 62.1 (55 to 71.1)               | 29.9 (27.4 to 32.4)                      |
| 3 COVID-19                   | 3 Chronic kidney disease     | 99.1 (41.3 to 176)           | 88.4 (34.3 to 160)              | 0.722 (-29.7 to 42.2)                    |
| 4 Road injuries              | 4 Ischemic heart disease     | 8.28 (-30.1 to 62)           | 2.5 (-32.6 to 50.2)             | -49.2 (-66.6 to -24.8)                   |
| 5 Low back pain              | 5 Alzheimer's disease        | 198 (153 to 253)             | 182 (150 to 215)                | -1.76 (-4.39 to 0.755)                   |
| 6 Other musculoskeletal      | 6 Low back pain              | 29.5 (12.9 to 45.1)          | 22.6 (16.9 to 29)               | -3.58 (-3.72 to -3.42)                   |
| 7 Chronic kidney disease     | 7 COPD                       | 133 (64.4 to 208)            | 121 (64.1 to 188)               | -11 (-35.4 to 17.4)                      |
| 8 Interpersonal violence     | 8 Road injuries              | -4.35 (-34.7 to 40.5)        | -9.49 (-36.9 to 30.5)           | -6.38 (-36.2 to 35.2)                    |
| 9 Stroke                     | 9 Age-related hearing loss   | 88.7 (63.8 to 115)           | 78.6 (67 to 90)                 | -0.603 (-0.695 to -0.52)                 |
| 10 Depressive disorders      | 10 Stroke                    | 26.7 (-1.77 to 56.7)         | 19.9 (-2.92 to 47.5)            | -40.3 (-52.3 to -26.1)                   |
| 11 Headache disorders        | 11 Depressive disorders      | 22.7 (5.86 to 39.6)          | 16.1 (9.75 to 23.4)             | -1.99 (-2.25 to -1.73)                   |
| 12 Neonatal disorders        | 12 Falls                     | 69.8 (41.6 to 101)           | 60.8 (39.9 to 84.8)             | -7.74 (-17.3 to 3.7)                     |
| 13 Cirrhosis liver           | 13 Colorectal cancer         | 73.9 (15.6 to 159)           | 64.6 (8 to 132)                 | -8.02 (-37.7 to 29.4)                    |
| 14 Anxiety disorders         | 14 Cirrhosis liver           | 33.1 (11.7 to 55.2)          | 26 (11 to 41.2)                 | -15.6 (-26.4 to -4.9)                    |
| 15 Congenital defects        | 15 Blindness and vision loss | 78.9 (54.1 to 104)           | 69.4 (56.9 to 81.3)             | -4.01 (-4.28 to -3.71)                   |
| 16 Age-related hearing loss  | 16 Headache disorders        | 3.93 (-9.14 to 22.7)         | -1.63 (-8.39 to 13.4)           | -0.498 (-0.744 to -0.197)                |
| 17 Self-harm                 | 17 Lower respiratory infect  | 43 (14.6 to 75.1)            | 35.4 (11 to 60.4)               | -32.4 (-43.2 to -19)                     |
| 18 Falls                     | 18 Osteoarthritis            | 90.6 (66.5 to 114)           | 80.4 (74 to 87.4)               | 2.39 (2.14 to 2.64)                      |
| 19 Stomach cancer            | 19 Oral disorders            | 56.8 (34.4 to 77.7)          | 48.4 (38.2 to 58.4)             | 0.548 (0.379 to 0.736)                   |
| 20 COPD                      | 20 Anxiety disorders         | 6.25 (-8.47 to 22)           | 0.584 (-6.24 to 8.55)           | 0.056 (-0.184 to 0.295)                  |
| 21 Colorectal cancer         | 21 Stomach cancer            |                              |                                 |                                          |
| 22 Alzheimer's disease       | 25 Self-harm                 |                              |                                 |                                          |
| 23 Lower respiratory infect  | 26 Interpersonal violence    |                              |                                 |                                          |
| 24 Oral disorders            | 31 Neonatal disorders        |                              |                                 |                                          |
| 25 Blindness and vision loss | 35 Congenital defects        |                              |                                 |                                          |
| 28 Osteoarthritis            | 158 COVID-19                 |                              |                                 |                                          |

### El Salvador, Reference scenario

**Legend:**  
Communicable, maternal, neonatal and nutritional  
Non-communicable  
Injuries

| Leading Causes 2022          | Leading Causes 2050          | Mean % change number of DALY | Mean % change all-age DALY rate | Mean % change age-standardized DALY rate |
|------------------------------|------------------------------|------------------------------|---------------------------------|------------------------------------------|
| 1 Interpersonal violence     | 1 Chronic kidney disease     | 79.1 (20.6 to 145)           | 120 (47.5 to 204)               | 21.7 (-20.5 to 74.3)                     |
| 2 Ischemic heart disease     | 2 Diabetes                   | 54.9 (22.6 to 93.9)          | 90.2 (59.1 to 132)              | 5.47 (-9.61 to 23.5)                     |
| 3 Chronic kidney disease     | 3 Ischemic heart disease     | 15.9 (-27 to 77.1)           | 42.5 (-10.6 to 114)             | -29.2 (-57.7 to 13.8)                    |
| 4 COVID-19                   | 4 Interpersonal violence     | -49.7 (-73.4 to -10.8)       | -38.9 (-64.1 to 5.89)           | -32.8 (-62.9 to 17.9)                    |
| 5 Diabetes                   | 5 Other musculoskeletal      | 62.3 (26.1 to 94.5)          | 98.7 (82.3 to 117)              | 45.8 (42.8 to 48.8)                      |
| 6 Road injuries              | 6 Alcohol use disorders      | -1.96 (-30.9 to 26.9)        | 19.8 (3.99 to 37.7)             | 1 (-10.9 to 15.1)                        |
| 7 Alcohol use disorders      | 7 Low back pain              | 4.44 (-19.3 to 25)           | 27.9 (17.7 to 39.3)             | -5.25 (-5.54 to -4.91)                   |
| 8 Low back pain              | 8 Alzheimer's disease        | 115 (60 to 170)              | 164 (112 to 223)                | 8.36 (5.29 to 11.6)                      |
| 9 Neonatal disorders         | 9 Stroke                     | 9.48 (-19 to 43.6)           | 34.5 (4.3 to 71.4)              | -30 (-45 to -8.82)                       |
| 10 Lower respiratory infect  | 10 Lower respiratory infect  | -2.27 (-26.9 to 30.1)        | 20 (-5.89 to 54.7)              | -29.5 (-44.9 to -9.57)                   |
| 11 Stroke                    | 11 Cirrhosis liver           | 6.26 (-18.9 to 31.5)         | 30.3 (9.58 to 52.3)             | -15.4 (-26.6 to -3.55)                   |
| 12 Cirrhosis liver           | 12 Road injuries             | -27.1 (-56.2 to 17)          | -10.8 (-44.2 to 44.1)           | -21.8 (-54.1 to 31)                      |
| 13 Other musculoskeletal     | 13 COPD                      | 74.1 (25.2 to 132)           | 114 (60 to 183)                 | -3.09 (-30.7 to 31.1)                    |
| 14 Depressive disorders      | 14 Age-related hearing loss  | 47.7 (16.8 to 76.1)          | 81.2 (61.5 to 105)              | -0.793 (-0.943 to -0.632)                |
| 15 Headache disorders        | 15 Depressive disorders      | -3.88 (-25.9 to 18.2)        | 17.6 (9.63 to 28.2)             | -3.27 (-3.67 to -2.84)                   |
| 16 Congenital defects        | 16 Blindness and vision loss | 36.1 (7.16 to 62.8)          | 66.9 (48.5 to 88.6)             | -5.76 (-6.11 to -5.35)                   |
| 17 Anxiety disorders         | 17 Headache disorders        | -16 (-39.5 to 4.38)          | 2.66 (-5.78 to 21.7)            | -1.13 (-1.71 to -0.585)                  |
| 18 Self-harm                 | 18 Falls                     | 19.9 (-8.36 to 49.1)         | 47 (25.4 to 73.7)               | -6.63 (-16.8 to 5.29)                    |
| 19 Age-related hearing loss  | 19 Anxiety disorders         | -14.7 (-38 to 6)             | 4.28 (-3.57 to 13.8)            | -0.226 (-0.701 to 0.222)                 |
| 20 Stomach cancer            | 20 Oral disorders            | 28.7 (1.06 to 56.1)          | 57.8 (42.8 to 74.3)             | 0.579 (0.229 to 0.86)                    |
| 21 Falls                     | 22 Stomach cancer            |                              |                                 |                                          |
| 22 Alzheimer's disease       | 24 Neonatal disorders        |                              |                                 |                                          |
| 23 Blindness and vision loss | 27 Self-harm                 |                              |                                 |                                          |
| 24 COPD                      | 38 Congenital defects        |                              |                                 |                                          |
| 25 Oral disorders            | 160 COVID-19                 |                              |                                 |                                          |

### Guatemala, Reference scenario

**Legend:**  
Communicable, maternal, neonatal and nutritional  
Non-communicable  
Injuries

| Leading Causes 2022          | Leading Causes 2050          | Mean % change number of DALY | Mean % change all-age DALY rate | Mean % change age-standardized DALY rate |
|------------------------------|------------------------------|------------------------------|---------------------------------|------------------------------------------|
| 1 Lower respiratory infect   | 1 Diabetes                   | 106 (75.9 to 141)            | 71.9 (46.2 to 99.4)             | -1.85 (-15.4 to 12.8)                    |
| 2 Diabetes                   | 2 Chronic kidney disease     | 163 (84.8 to 272)            | 119 (55.3 to 208)               | 28 (-12.4 to 84)                         |
| 3 Neonatal disorders         | 3 Ischemic heart disease     | 66.4 (6.91 to 149)           | 38.6 (-8.91 to 110)             | -31.6 (-58.5 to 12.6)                    |
| 4 Interpersonal violence     | 4 Lower respiratory infect   | -29.3 (-42.7 to -15.3)       | -41.1 (-51.4 to -27.6)          | -50.8 (-59.5 to -40.6)                   |
| 5 Ischemic heart disease     | 5 Other musculoskeletal      | 158 (129 to 188)             | 115 (101 to 131)                | 57.3 (53.9 to 60.3)                      |
| 6 Cirrhosis liver            | 6 Cirrhosis liver            | 30.6 (9.7 to 51.2)           | 8.68 (-4.94 to 24.3)            | -29.5 (-37.9 to -19.7)                   |
| 7 Chronic kidney disease     | 7 Low back pain              | 50.4 (32.2 to 68.6)          | 25.1 (17.4 to 34.7)             | -5.31 (-5.48 to -5.13)                   |
| 8 Diarrheal diseases         | 8 Interpersonal violence     | -25.1 (-57.5 to 44.3)        | -37.8 (-64.9 to 14.6)           | -36.7 (-64.6 to 20.6)                    |
| 9 Congenital defects         | 9 Alcohol use disorders      | 39.8 (17.9 to 64.8)          | 16.3 (3.1 to 33.3)              | -6.3 (-16.1 to 5.66)                     |
| 10 Road injuries             | 10 Depressive disorders      | 48.4 (28.4 to 66.2)          | 23.5 (15.8 to 33.3)             | -2.98 (-3.3 to -2.68)                    |
| 11 Low back pain             | 11 Stroke                    | 38.6 (11.6 to 73)            | 15.3 (-8.93 to 42.1)            | -38.3 (-53 to -21.3)                     |
| 12 COVID-19                  | 12 Neonatal disorders        | -49.9 (-60.7 to -35.8)       | -58.4 (-65.9 to -48.9)          | -37.6 (-48.5 to -23.9)                   |
| 13 Alcohol use disorders     | 13 Road injuries             | -15.9 (-49.7 to 33.6)        | -30 (-56.5 to 12.5)             | -33.7 (-59.4 to 7.68)                    |
| 14 Stroke                    | 14 Headache disorders        | 28.2 (9.64 to 51.3)          | 6.57 (-0.903 to 25.7)           | -0.163 (-0.379 to 0.101)                 |
| 15 Depressive disorders      | 15 Falls                     | 47.9 (23.6 to 74.7)          | 23 (4.48 to 41.3)               | -13.2 (-23.8 to -2.38)                   |
| 16 Other musculoskeletal     | 16 Age-related hearing loss  | 104 (82.1 to 128)            | 69.8 (54.9 to 83.9)             | -1.02 (-1.13 to -0.897)                  |
| 17 Headache disorders        | 17 Anxiety disorders         | 27.6 (10.6 to 47.7)          | 6.07 (-1.74 to 14.8)            | 0.576 (0.361 to 0.817)                   |
| 18 Anxiety disorders         | 18 Alzheimer's disease       | 189 (139 to 243)             | 140 (101 to 180)                | -4.12 (-6.66 to -1.1)                    |
| 19 Mechanical forces         | 19 Blindness and vision loss | 89.3 (67.1 to 114)           | 57.6 (44.4 to 70.2)             | -6.75 (-7.25 to -6.28)                   |
| 20 Falls                     | 20 Stomach cancer            | 25 (7.47 to 45.7)            | 4.07 (-9.41 to 17.6)            | -42.3 (-48.2 to -36.8)                   |
| 21 Stomach cancer            | 22 Congenital defects        |                              |                                 |                                          |
| 23 Age-related hearing loss  | 23 Mechanical forces         |                              |                                 |                                          |
| 24 Blindness and vision loss | 26 Diarrheal diseases        |                              |                                 |                                          |
| 34 Alzheimer's disease       | 158 COVID-19                 |                              |                                 |                                          |

### Honduras, Reference scenario

**Legend:**  
Communicable, maternal, neonatal and nutritional  
Non-communicable  
Injuries

| Leading Causes 2022           | Leading Causes 2050           | Mean % change number of DALY | Mean % change all-age DALY rate | Mean % change age-standardized DALY rate |
|-------------------------------|-------------------------------|------------------------------|---------------------------------|------------------------------------------|
| 1 Interpersonal violence      | 1 Ischemic heart disease      | 57.7 (-1.7 to 140)           | 20.4 (-23.2 to 79.6)            | -33.8 (-62.5 to 7.27)                    |
| 2 Ischemic heart disease      | 2 Diabetes                    | 149 (108 to 189)             | 90 (65.6 to 117)                | 10.4 (-1.83 to 24.2)                     |
| 3 COVID-19                    | 3 Stroke                      | 42.6 (8.11 to 83.8)          | 8.77 (-16.4 to 39.4)            | -38.3 (-54.9 to -17)                     |
| 4 Stroke                      | 4 Interpersonal violence      | -9.74 (-40.6 to 47.8)        | -31.2 (-51.6 to 16)             | -37.4 (-57 to 6.17)                      |
| 5 Neonatal disorders          | 5 Other musculoskeletal       | 169 (132 to 204)             | 105 (88.5 to 123)               | 49.4 (44.8 to 53.4)                      |
| 6 Diabetes                    | 6 Low back pain               | 62.2 (42.3 to 85)            | 23.7 (14.9 to 31)               | -5.38 (-5.65 to -5.12)                   |
| 7 Low back pain               | 7 COPD                        | 86.7 (40.1 to 152)           | 42.5 (7.42 to 88.2)             | -22.8 (-46.7 to 8.05)                    |
| 8 Road injuries               | 8 Chronic kidney disease      | 173 (84.9 to 289)            | 108 (45.6 to 203)               | 22.3 (-19.3 to 82)                       |
| 9 Congenital defects          | 9 Cirrhosis liver             | 53.6 (26.9 to 80.6)          | 17.3 (-1.16 to 39.5)            | -28.2 (-38.2 to -17.4)                   |
| 10 Lower respiratory infect   | 10 Road injuries              | 28.5 (-22.2 to 113)          | -1.9 (-41.6 to 63.3)            | -22.4 (-53.3 to 27.9)                    |
| 11 Cirrhosis liver            | 11 Neonatal disorders         | -34.8 (-51.1 to -18.5)       | -50.4 (-59.2 to -40)            | -31.8 (-43.7 to -17.4)                   |
| 12 Nature disaster            | 12 Depressive disorders       | 63.8 (40.4 to 88.1)          | 24.9 (15.9 to 34.7)             | -3.13 (-3.56 to -2.66)                   |
| 13 Other musculoskeletal      | 13 Headache disorders         | 41.2 (20.9 to 67.9)          | 7.66 (0.592 to 23.8)            | -0.733 (-1.14 to -0.281)                 |
| 14 COPD                       | 14 Hypertensive heart disease | 135 (63.3 to 230)            | 79.7 (23.7 to 149)              | -4.37 (-36.6 to 37.8)                    |
| 15 Headache disorders         | 15 Lung cancer                | 131 (58.9 to 216)            | 76 (25.6 to 138)                | -2.06 (-28.1 to 32.3)                    |
| 16 Diarrheal diseases         | 16 Lower respiratory infect   | 0.993 (-23 to 31.4)          | -23 (-38.2 to -0.084)           | -39 (-51.1 to -24.6)                     |
| 17 Depressive disorders       | 17 Anxiety disorders          | 40 (17.4 to 61.7)            | 6.7 (-0.51 to 15.7)             | 0.102 (-0.261 to 0.463)                  |
| 18 Anxiety disorders          | 18 Alcohol use disorders      | 81 (50.2 to 108)             | 38.1 (23.3 to 55.8)             | 0.866 (-8.38 to 10.3)                    |
| 19 Chronic kidney disease     | 19 Age-related hearing loss   | 106 (77.6 to 136)            | 56.8 (42.1 to 70.4)             | -0.907 (-1.07 to -0.786)                 |
| 20 Alcohol use disorders      | 20 Nature disaster            | 780 (-99.2 to 15300)         | 573 (-99.4 to 11600)            | 617 (-99.4 to 12700)                     |
| 21 Hypertensive heart disease | 24 Congenital defects         |                              |                                 |                                          |
| 22 Lung cancer                | 28 Diarrheal diseases         |                              |                                 |                                          |
| 24 Age-related hearing loss   | 158 COVID-19                  |                              |                                 |                                          |

### Mexico, Reference scenario

**Legend:**  
Communicable, maternal, neonatal and nutritional  
Non-communicable  
Injuries

| Leading Causes 2022          | Leading Causes 2050          | Mean % change number of DALY  | Mean % change all-age DALY rate | Mean % change age-standardized DALY rate |
|------------------------------|------------------------------|-------------------------------|---------------------------------|------------------------------------------|
| 1 Diabetes                   | 1 Diabetes                   | 76.3 (53.8 to 101)            | 55.3 (35.5 to 76.8)             | -1.29 (-13.6 to 11.9)                    |
| 2 COVID-19                   | 2 Chronic kidney disease     | 111 (55.1 to 180)             | 86.4 (40.8 to 146)              | 17.1 (-16.9 to 57.2)                     |
| 3 Ischemic heart disease     | 3 Ischemic heart disease     | 29.2 (-8.34 to 79.1)          | 13.9 (-21.5 to 59.3)            | <b>-39 (-60.9 to -8.08)</b>              |
| 4 Interpersonal violence     | 4 Cirrhosis liver            | 54.3 (36.6 to 73.7)           | 35.9 (21.2 to 51)               | -1.22 (-12.5 to 11)                      |
| 5 Chronic kidney disease     | 5 Other musculoskeletal      | 96.2 (80.4 to 114)            | 72.8 (65.2 to 81.8)             | 37.5 (35 to 40.3)                        |
| 6 Cirrhosis liver            | 6 Interpersonal violence     | -29.5 (-59.1 to 17.7)         | -38.1 (-62.9 to 4.73)           | -35 (-62.4 to 11.1)                      |
| 7 Neonatal disorders         | 7 Low back pain              | 35.3 (24.3 to 46.9)           | 19.1 (14.2 to 24.1)             | <b>-3.88 (-4.2 to -3.61)</b>             |
| 8 Other musculoskeletal      | 8 COPD                       | 107 (64 to 156)               | 82.1 (42.1 to 127)              | -13.8 (-37.6 to 17.1)                    |
| 9 Low back pain              | 9 Stroke                     | 28.9 (9.2 to 52.9)            | 13.5 (-3.1 to 34.7)             | <b>-35 (-47.3 to -20.4)</b>              |
| 10 Road injuries             | 10 Road injuries             | 9.38 (-25.1 to 58.2)          | -3.53 (-36.1 to 43.8)           | -8.57 (-40.3 to 34.7)                    |
| 11 Lower respiratory infect  | 11 Depressive disorders      | 28.6 (17.9 to 39.7)           | 13.2 (9.27 to 17.9)             | <b>-2.27 (-2.46 to -2.04)</b>            |
| 12 Stroke                    | 12 Lower respiratory infect  | 20.5 (1.99 to 40.9)           | 6.14 (-9.82 to 24.1)            | <b>-33.9 (-46 to -22.1)</b>              |
| 13 Congenital defects        | 13 Falls                     | 75.7 (50 to 107)              | 54.6 (37.2 to 73.6)             | 9.46 (-2.2 to 22.7)                      |
| 14 Depressive disorders      | 14 Age-related hearing loss  | 84.9 (66.3 to 105)            | 62.8 (52.2 to 75)               | <b>-0.797 (-0.934 to -0.641)</b>         |
| 15 Headache disorders        | 15 Alzheimer's disease       | 188 (139 to 239)              | 153 (116 to 192)                | 3.43 (-0.00453 to 6.3)                   |
| 16 COPD                      | 16 Headache disorders        | 16.3 (5.03 to 31.4)           | 2.37 (-2.64 to 16.2)            | 0.0513 (-0.165 to 0.275)                 |
| 17 Falls                     | 17 Neonatal disorders        | <b>-35.6 (-46.1 to -24.6)</b> | <b>-43.3 (-52.3 to -33.5)</b>   | <b>-27.9 (-39.7 to -15.8)</b>            |
| 18 Anxiety disorders         | 18 Oral disorders            | 62.9 (47.9 to 77.4)           | 43.5 (34.1 to 52)               | 0.906 (0.572 to 1.28)                    |
| 19 Age-related hearing loss  | 19 Urinary diseases          | 127 (96.2 to 165)             | 100 (73.5 to 129)               | 15.1 (-1.79 to 34.7)                     |
| 20 Self-harm                 | 20 Blindness and vision loss | 73.7 (55 to 94.1)             | 52.9 (42.2 to 63.7)             | <b>-4.77 (-5.12 to -4.38)</b>            |
| 21 Oral disorders            | 22 Anxiety disorders         |                               |                                 |                                          |
| 23 Blindness and vision loss | 27 Congenital defects        |                               |                                 |                                          |
| 27 Alzheimer's disease       | 28 Self-harm                 |                               |                                 |                                          |
| 28 Urinary diseases          | 159 COVID-19                 |                               |                                 |                                          |

### Nicaragua, Reference scenario

**Legend:**  
 Communicable, maternal, neonatal and nutritional  
 Non-communicable  
 Injuries

| Leading Causes 2022          | Leading Causes 2050          | Mean % change number of DALY | Mean % change all-age DALY rate | Mean % change age-standardized DALY rate |
|------------------------------|------------------------------|------------------------------|---------------------------------|------------------------------------------|
| 1 Neonatal disorders         | 1 Chronic kidney disease     | 178 (81.8 to 312)            | 144 (62.5 to 247)               | 29.7 (-11.9 to 91.6)                     |
| 2 Diabetes                   | 2 Diabetes                   | 157 (111 to 215)             | 125 (96.7 to 153)               | 17.7 (5.16 to 31.3)                      |
| 3 Chronic kidney disease     | 3 Ischemic heart disease     | 109 (27.7 to 226)            | 83.1 (17.9 to 175)              | -24.8 (-54.3 to 22.5)                    |
| 4 Ischemic heart disease     | 4 Other musculoskeletal      | 125 (85.4 to 169)            | 97.5 (82.1 to 114)              | 44.5 (41.1 to 48.1)                      |
| 5 Low back pain              | 5 Low back pain              | 45.6 (18.4 to 74.6)          | 27.5 (19 to 36.7)               | -4.88 (-5.06 to -4.66)                   |
| 6 Other musculoskeletal      | 6 Stroke                     | 77.6 (33.4 to 138)           | 55.4 (23.7 to 93.4)             | -30.1 (-44.9 to -10.4)                   |
| 7 Congenital defects         | 7 Cirrhosis liver            | 59.6 (26.9 to 97.1)          | 39.7 (21.3 to 59.3)             | -13.5 (-24.4 to -2.79)                   |
| 8 Lower respiratory infect   | 8 Alzheimer's disease        | 312 (225 to 398)             | 261 (205 to 322)                | 15.2 (11.4 to 18.3)                      |
| 9 Cirrhosis liver            | 9 Depressive disorders       | 36.2 (12.3 to 62.2)          | 19.2 (11.6 to 28.1)             | -2.65 (-2.94 to -2.38)                   |
| 10 Headache disorders        | 10 COPD                      | 180 (101 to 278)             | 146 (85.3 to 212)               | -7.3 (-34.6 to 28.7)                     |
| 11 Road injuries             | 11 Age-related hearing loss  | 117 (77 to 154)              | 90.1 (71.8 to 109)              | -0.678 (-0.801 to -0.553)                |
| 12 Depressive disorders      | 12 Neonatal disorders        | -45.5 (-59.6 to -27.8)       | -52.4 (-61 to -43.1)            | -32.4 (-43.2 to -19.6)                   |
| 13 Stroke                    | 13 Headache disorders        | 18.3 (-6.02 to 44.2)         | 3.51 (-3.68 to 22.7)            | -0.401 (-0.642 to -0.159)                |
| 14 Anxiety disorders         | 14 Alcohol use disorders     | 44.9 (16.2 to 79.1)          | 26.9 (12.8 to 41)               | 1.98 (-7.2 to 11.7)                      |
| 15 Alcohol use disorders     | 15 Anxiety disorders         | 19.5 (-5.04 to 45.4)         | 4.56 (-3.47 to 13.7)            | 0.308 (0.0373 to 0.573)                  |
| 16 Interpersonal violence    | 16 Blindness and vision loss | 100 (62.2 to 134)            | 75.5 (60.6 to 91.3)             | -5.48 (-5.87 to -5.13)                   |
| 17 Age-related hearing loss  | 17 Road injuries             | 0.346 (-40.5 to 64.2)        | -12.4 (-43.1 to 33.7)           | -18.6 (-48.2 to 26.7)                    |
| 18 Self-harm                 | 18 Falls                     | 79.4 (41 to 122)             | 57.2 (35 to 84.6)               | -4.52 (-13.5 to 7.97)                    |
| 19 Falls                     | 19 Oral disorders            | 81.9 (48 to 113)             | 59.4 (45.6 to 72.1)             | 0.139 (-0.193 to 0.468)                  |
| 20 Blindness and vision loss | 20 Lower respiratory infect  | -20.3 (-40.7 to 3.67)        | -30.2 (-43.7 to -13.3)          | -50.4 (-60 to -38.6)                     |
| 21 Oral disorders            | 25 Interpersonal violence    |                              |                                 |                                          |
| 24 COPD                      | 26 Congenital defects        |                              |                                 |                                          |
| 27 Alzheimer's disease       | 27 Self-harm                 |                              |                                 |                                          |

### Panama, Reference scenario

**Legend:**  
Communicable, maternal, neonatal and nutritional  
Non-communicable  
Injuries

| Leading Causes 2022          | Leading Causes 2050          | Mean % change number of DALY | Mean % change all-age DALY rate | Mean % change age-standardized DALY rate |
|------------------------------|------------------------------|------------------------------|---------------------------------|------------------------------------------|
| 1 Diabetes                   | 1 Diabetes                   | 135 (95 to 175)              | 70.6 (48.8 to 92.1)             | 18.7 (6.31 to 31.4)                      |
| 2 COVID-19                   | 2 Other musculoskeletal      | 132 (103 to 160)             | 68.3 (60.6 to 76.6)             | 38.7 (36.4 to 41.2)                      |
| 3 Ischemic heart disease     | 3 Chronic kidney disease     | 131 (57.7 to 228)            | 68.1 (16.2 to 134)              | 9.05 (-25 to 50.4)                       |
| 4 Stroke                     | 4 Low back pain              | 58.7 (38.6 to 78.5)          | 15.2 (10.4 to 20.2)             | -3.7 (-3.8 to -3.57)                     |
| 5 Neonatal disorders         | 5 Ischemic heart disease     | 19.5 (-24.1 to 77.5)         | -13.2 (-43.3 to 31)             | -49.6 (-67.6 to -25.5)                   |
| 6 Low back pain              | 6 Stroke                     | 32.1 (1.29 to 71.3)          | -4.08 (-24.9 to 20)             | -42.1 (-54.6 to -26.6)                   |
| 7 Interpersonal violence     | 7 Alzheimer's disease        | 219 (164 to 283)             | 132 (98.6 to 165)               | 4.16 (1.55 to 6.81)                      |
| 8 Other musculoskeletal      | 8 Age-related hearing loss   | 107 (74.9 to 134)            | 49.9 (39.7 to 59.8)             | -0.759 (-0.846 to -0.671)                |
| 9 Congenital defects         | 9 Depressive disorders       | 56.2 (36.5 to 77)            | 13.4 (9.37 to 18.6)             | -1.87 (-2.02 to -1.7)                    |
| 10 Chronic kidney disease    | 10 Road injuries             | 24.8 (-23.1 to 93.3)         | -9.36 (-44.6 to 39.3)           | -12.7 (-47.1 to 36.4)                    |
| 11 HIV/AIDS                  | 11 COPD                      | 147 (82.8 to 220)            | 79.2 (31.8 to 131)              | -7.28 (-33.8 to 24.9)                    |
| 12 Road injuries             | 12 Headache disorders        | 41.3 (23.1 to 62.4)          | 2.56 (-1.97 to 13.1)            | 0.277 (0.157 to 0.384)                   |
| 13 Headache disorders        | 13 Neonatal disorders        | -14.8 (-30.9 to 2.66)        | -38.2 (-47.6 to -28.2)          | -24.8 (-36.7 to -12.2)                   |
| 14 Lower respiratory infect  | 14 Blindness and vision loss | 97.8 (69 to 126)             | 43.5 (31.8 to 54.6)             | -4.78 (-5.14 to -4.41)                   |
| 15 Depressive disorders      | 15 Interpersonal violence    | -13 (-47.5 to 65.9)          | -36.9 (-60.1 to 18.8)           | -34.9 (-60.2 to 21)                      |
| 16 Anxiety disorders         | 16 Anxiety disorders         | 42.2 (22.7 to 60.5)          | 3.19 (-1.08 to 8)               | 0.758 (0.674 to 0.846)                   |
| 17 Age-related hearing loss  | 17 Lower respiratory infect  | 18.2 (-11.8 to 47.9)         | -14.2 (-32.8 to 7.49)           | -39.3 (-50.6 to -27.6)                   |
| 18 Alzheimer's disease       | 18 Congenital defects        | -22.9 (-36.6 to -9.12)       | -44.1 (-49.4 to -37.8)          | -27.9 (-33.8 to -21.5)                   |
| 19 Blindness and vision loss | 19 Oral disorders            | 81 (56.9 to 104)             | 31.4 (23.5 to 39.1)             | 0.661 (0.439 to 0.854)                   |
| 20 Oral disorders            | 20 Colorectal cancer         | 114 (44.2 to 213)            | 55.2 (4.44 to 129)              | 2.05 (-29.4 to 43.9)                     |
| 21 COPD                      | 32 HIV/AIDS                  |                              |                                 |                                          |
| 24 Colorectal cancer         | 159 COVID-19                 |                              |                                 |                                          |

### Venezuela, Reference scenario

**Legend:**  
Communicable, maternal, neonatal and nutritional  
Non-communicable  
Injuries

| Leading Causes 2022           | Leading Causes 2050          | Mean % change number of DALY  | Mean % change all-age DALY rate | Mean % change age-standardized DALY rate |
|-------------------------------|------------------------------|-------------------------------|---------------------------------|------------------------------------------|
| 1 Ischemic heart disease      | 1 Ischemic heart disease     | 57.6 (-54.1 to 302)           | 89.1 (-49 to 421)               | 39.7 (-73.3 to 318)                      |
| 2 Interpersonal violence      | 2 Diabetes                   | <b>75.2 (23.7 to 141)</b>     | <b>102 (42.1 to 203)</b>        | 44.3 (-7.52 to 149)                      |
| 3 Diabetes                    | 3 Chronic kidney disease     | <b>121 (17.9 to 283)</b>      | <b>158 (23.7 to 395)</b>        | 81.8 (-22.6 to 287)                      |
| 4 COVID-19                    | 4 Stroke                     | 35.1 (-21.2 to 126)           | 57.2 (-13.5 to 192)             | 9.29 (-51.3 to 143)                      |
| 5 Road injuries               | 5 Road injuries              | 2.09 (-65 to 142)             | 21.7 (-61.5 to 216)             | 24.7 (-58.7 to 219)                      |
| 6 Neonatal disorders          | 6 Interpersonal violence     | -50.7 (-85.6 to 18.9)         | -46.1 (-81 to 28.8)             | -41.2 (-81.5 to 45.6)                    |
| 7 Stroke                      | 7 Alzheimer's disease        | 129 (-27.4 to 284)            | 153 (-6.67 to 284)              | <b>8.77 (6.01 to 11.8)</b>               |
| 8 Chronic kidney disease      | 8 Low back pain              | 6.84 (-19.7 to 33.9)          | <b>20.7 (8.51 to 30.9)</b>      | <b>3.33 (2.78 to 4.14)</b>               |
| 9 Low back pain               | 9 Hypertensive heart disease | <b>105 (13.1 to 242)</b>      | <b>138 (23.2 to 331)</b>        | 49 (-42.8 to 247)                        |
| 10 Lower respiratory infect   | 10 COPD                      | <b>57.3 (4.16 to 114)</b>     | <b>80.8 (17.5 to 172)</b>       | 8.53 (-49.1 to 115)                      |
| 11 Other musculoskeletal      | 11 Lower respiratory infect  | -1.06 (-21.6 to 23.8)         | 12.5 (-9.92 to 38.2)            | -20.3 (-44.3 to 23.4)                    |
| 12 Congenital defects         | 12 Neonatal disorders        | <b>-49.7 (-72.7 to -4.08)</b> | -41.3 (-68.5 to 20.1)           | -25.2 (-57.7 to 39.1)                    |
| 13 Depressive disorders       | 13 Age-related hearing loss  | 40.3 (-17.5 to 92)            | <b>57.3 (8.01 to 93.3)</b>      | <b>0.459 (0.137 to 0.64)</b>             |
| 14 Headache disorders         | 14 Depressive disorders      | 1.62 (-23.3 to 28.8)          | <b>14.8 (6.21 to 24.2)</b>      | <b>1.77 (1.29 to 2.31)</b>               |
| 15 Cirrhosis liver            | 15 Other musculoskeletal     | -22.6 (-44.3 to 0.506)        | <b>-12.7 (-24.7 to -1.27)</b>   | <b>-24.5 (-29.1 to -18.7)</b>            |
| 16 COPD                       | 16 Lung cancer               | 17.5 (-64.8 to 113)           | 29.6 (-53.3 to 121)             | -18.4 (-61.1 to 33.1)                    |
| 17 Anxiety disorders          | 17 Blindness and vision loss | 42.3 (-17.4 to 99.3)          | <b>59.6 (9.57 to 98.7)</b>      | <b>4.07 (3.66 to 4.51)</b>               |
| 18 Lung cancer                | 18 Headache disorders        | -13.3 (-29.9 to 7.04)         | -1.71 (-7.53 to 7.47)           | -0.334 (-0.908 to 0.302)                 |
| 19 Mechanical forces          | 19 Cirrhosis liver           | -6.82 (-26.5 to 12.6)         | 6.4 (-16.1 to 35)               | -14 (-33.1 to 15.7)                      |
| 20 Age-related hearing loss   | 20 Prostate cancer           | 63.2 (-57.1 to 215)           | 79.6 (-44.9 to 225)             | -14.4 (-55.7 to 31.4)                    |
| 21 Alzheimer's disease        | 21 Anxiety disorders         |                               |                                 |                                          |
| 23 Hypertensive heart disease | 23 Congenital defects        |                               |                                 |                                          |
| 25 Blindness and vision loss  | 27 Mechanical forces         |                               |                                 |                                          |
| 36 Prostate cancer            | 160 COVID-19                 |                               |                                 |                                          |



### Brazil, Reference scenario

**Legend:**  
 Communicable, maternal, neonatal and nutritional  
 Non-communicable  
 Injuries

| Leading Causes 2022          | Leading Causes 2050          | Mean % change number of DALY | Mean % change all-age DALY rate | Mean % change age-standardized DALY rate |
|------------------------------|------------------------------|------------------------------|---------------------------------|------------------------------------------|
| 1 Ischemic heart disease     | 1 Diabetes                   | 105 (71.7 to 140)            | 83.3 (62.9 to 108)              | 19.1 (4.4 to 35)                         |
| 2 Interpersonal violence     | 2 Ischemic heart disease     | 3.58 (-37.6 to 61)           | -7.43 (-42.6 to 48.8)           | -42.9 (-65.7 to -6.28)                   |
| 3 Stroke                     | 3 Low back pain              | 29.1 (10.9 to 47.2)          | 15.1 (10.7 to 20.1)             | -4.01 (-4.2 to -3.85)                    |
| 4 Diabetes                   | 4 Alzheimer's disease        | 165 (113 to 218)             | 136 (105 to 166)                | -5.39 (-7.7 to -2.79)                    |
| 5 Low back pain              | 5 Stroke                     | 10.2 (-19.5 to 44.8)         | -1.68 (-25.5 to 29.5)           | -41.2 (-56.4 to -20.3)                   |
| 6 COVID-19                   | 6 Other musculoskeletal      | 79.8 (57 to 105)             | 60.2 (52.1 to 69.2)             | 38.8 (35.9 to 41.5)                      |
| 7 Neonatal disorders         | 7 Lower respiratory infect   | 42.7 (10.9 to 75.3)          | 27.4 (0.283 to 56.3)            | -32 (-47.8 to -11.3)                     |
| 8 Road injuries              | 8 Interpersonal violence     | -26.8 (-61.5 to 29)          | -34.9 (-64 to 22.2)             | -26.2 (-61.4 to 43)                      |
| 9 Lower respiratory infect   | 9 COPD                       | 72.2 (18.1 to 130)           | 53.7 (11.6 to 108)              | -20.5 (-44.4 to 13.9)                    |
| 10 Anxiety disorders         | 10 Anxiety disorders         | 13.6 (-1.42 to 28.8)         | 1.22 (-1.88 to 5.15)            | 0.425 (0.252 to 0.619)                   |
| 11 Other musculoskeletal     | 11 Chronic kidney disease    | 118 (39.1 to 210)            | 94.4 (29.6 to 182)              | 14.9 (-26.8 to 75.4)                     |
| 12 Headache disorders        | 12 Road injuries             | 0.79 (-39.1 to 54.6)         | -9.97 (-39.6 to 40.5)           | -8.58 (-40.9 to 45.3)                    |
| 13 Depressive disorders      | 13 Age-related hearing loss  | 77 (49.9 to 103)             | 57.8 (47.4 to 67.7)             | -0.923 (-1.02 to -0.814)                 |
| 14 Falls                     | 14 Falls                     | 45.2 (19.8 to 78.2)          | 29.4 (13.2 to 48.6)             | -11.8 (-20.2 to -0.663)                  |
| 15 COPD                      | 15 Depressive disorders      | 19.5 (2.13 to 36.5)          | 6.46 (3.27 to 10.7)             | -2.87 (-3.1 to -2.67)                    |
| 16 Age-related hearing loss  | 16 Headache disorders        | 7.49 (-8.27 to 23.8)         | -4.19 (-7.9 to 6.31)            | -0.125 (-0.372 to 0.125)                 |
| 17 Alzheimer's disease       | 17 Oral disorders            | 61.5 (36.9 to 85.4)          | 44 (34.3 to 53.2)               | 0.0901 (-0.267 to 0.456)                 |
| 18 Congenital defects        | 18 Urinary diseases          | 156 (103 to 226)             | 128 (83 to 179)                 | 15.5 (-8.2 to 50.1)                      |
| 19 Chronic kidney disease    | 19 Blindness and vision loss | 64.4 (39.1 to 89.5)          | 46.6 (35.1 to 56.8)             | -4.86 (-5.13 to -4.55)                   |
| 20 Oral disorders            | 20 Lung cancer               | 50.5 (-0.516 to 115)         | 33.9 (-8.21 to 82.7)            | -17.2 (-41.3 to 10)                      |
| 22 Blindness and vision loss | 21 Neonatal disorders        |                              |                                 |                                          |
| 24 Lung cancer               | 37 Congenital defects        |                              |                                 |                                          |
| 33 Urinary diseases          | 161 COVID-19                 |                              |                                 |                                          |

### Paraguay, Reference scenario

**Legend:**  
Communicable, maternal, neonatal and nutritional  
Non-communicable  
Injuries

| Leading Causes 2022           | Leading Causes 2050           | Mean % change number of DALY | Mean % change all-age DALY rate | Mean % change age-standardized DALY rate |
|-------------------------------|-------------------------------|------------------------------|---------------------------------|------------------------------------------|
| 1 COVID-19                    | 1 Diabetes                    | <b>100 (51.3 to 153)</b>     | <b>82.6 (51.3 to 126)</b>       | -1.45 (-17 to 21)                        |
| 2 Diabetes                    | 2 Ischemic heart disease      | 24.9 (-26.1 to 91.9)         | 14 (-25.9 to 82.6)              | <b>-42 (-64 to -6.22)</b>                |
| 3 Ischemic heart disease      | 3 Stroke                      | 30.4 (-9.4 to 74.9)          | 18.9 (-9.54 to 58.5)            | <b>-38.7 (-53.1 to -15.7)</b>            |
| 4 Neonatal disorders          | 4 Other musculoskeletal       | <b>105 (59.9 to 145)</b>     | <b>87.1 (71.2 to 104)</b>       | <b>41.9 (38.5 to 45.2)</b>               |
| 5 Stroke                      | 5 Chronic kidney disease      | <b>156 (60.7 to 279)</b>     | <b>134 (52.1 to 244)</b>        | 27.1 (-14.8 to 89.1)                     |
| 6 Road injuries               | 6 Road injuries               | 2.26 (-36.7 to 64.4)         | -6.85 (-39.7 to 45.8)           | -9.17 (-42 to 44.1)                      |
| 7 Low back pain               | 7 Low back pain               | <b>38.3 (8.31 to 65.3)</b>   | <b>26 (16.6 to 35.6)</b>        | <b>-3.71 (-3.92 to -3.46)</b>            |
| 8 Anxiety disorders           | 8 Anxiety disorders           | 18.4 (-8.47 to 43.3)         | <b>7.77 (0.145 to 17.1)</b>     | <b>0.957 (0.809 to 1.13)</b>             |
| 9 Interpersonal violence      | 9 Alzheimer's disease         | <b>183 (108 to 258)</b>      | <b>158 (108 to 208)</b>         | <b>4.81 (2.43 to 7.38)</b>               |
| 10 Headache disorders         | 10 Lower respiratory infect   | 27.5 (-8.64 to 67.7)         | 16.4 (-9.33 to 48.7)            | <b>-27.7 (-41.3 to -6.92)</b>            |
| 11 Other musculoskeletal      | 11 Neonatal disorders         | <b>-34 (-55.2 to -9.36)</b>  | <b>-40.1 (-52 to -22.9)</b>     | -15.1 (-32.5 to 10.5)                    |
| 12 Lower respiratory infect   | 12 Age-related hearing loss   | <b>86 (44.4 to 122)</b>      | <b>69.7 (52.6 to 86.4)</b>      | <b>-0.782 (-0.877 to -0.683)</b>         |
| 13 Congenital defects         | 13 Headache disorders         | 9.37 (-18.1 to 37.3)         | -0.483 (-7.43 to 21.8)          | <b>0.499 (0.303 to 0.658)</b>            |
| 14 Depressive disorders       | 14 Hypertensive heart disease | <b>169 (68.7 to 280)</b>     | <b>145 (67.5 to 255)</b>        | 17.6 (-20.8 to 70.9)                     |
| 15 Chronic kidney disease     | 15 Depressive disorders       | 25.3 (-2.41 to 50.2)         | <b>14.1 (7.67 to 23.7)</b>      | <b>-1.76 (-2.03 to -1.44)</b>            |
| 16 Alcohol use disorders      | 16 Lung cancer                | <b>95.7 (20.4 to 170)</b>    | <b>78.6 (20.2 to 145)</b>       | -6.54 (-34.7 to 25.3)                    |
| 17 Age-related hearing loss   | 17 Alcohol use disorders      | <b>38.1 (7.51 to 68.8)</b>   | <b>25.9 (12 to 42.9)</b>        | 2.01 (-6.63 to 11.5)                     |
| 18 Falls                      | 18 COPD                       | <b>98.5 (37.9 to 172)</b>    | <b>81.2 (34.4 to 145)</b>       | -13.6 (-37.6 to 21.1)                    |
| 19 Alzheimer's disease        | 19 Blindness and vision loss  | <b>67.2 (32 to 99.2)</b>     | <b>52.4 (37 to 68.4)</b>        | <b>-4.84 (-5.23 to -4.42)</b>            |
| 20 Blindness and vision loss  | 20 Falls                      | <b>42.3 (7.92 to 76.2)</b>   | <b>29.7 (10 to 51.1)</b>        | -9.99 (-20.6 to 2.9)                     |
| 22 Lung cancer                | 22 Interpersonal violence     |                              |                                 |                                          |
| 23 COPD                       | 30 Congenital defects         |                              |                                 |                                          |
| 27 Hypertensive heart disease | 160 COVID-19                  |                              |                                 |                                          |

### Afghanistan, Reference scenario

**Legend:**

Communicable, maternal, neonatal and nutritional  
Non-communicable  
Injuries

| Leading Causes 2022           | Leading Causes 2050           | Mean % change number of DALY | Mean % change all-age DALY rate | Mean % change age-standardized DALY rate |
|-------------------------------|-------------------------------|------------------------------|---------------------------------|------------------------------------------|
| 1 Neonatal disorders          | 1 Ischemic heart disease      | 96.6 (9.33 to 242)           | -8.12 (-48.3 to 56.7)           | -39.4 (-67.8 to 8.71)                    |
| 2 Congenital defects          | 2 Congenital defects          | -7.26 (-39.9 to 27.3)        | -57 (-63.4 to -48.7)            | -38.3 (-46 to -28.3)                     |
| 3 Lower respiratory infect    | 3 Neonatal disorders          | -17.1 (-53 to 26.2)          | -61.4 (-73.7 to -43.3)          | -42.4 (-59.5 to -19)                     |
| 4 Conflict & terror           | 4 Conflict & terror           | 80.3 (-36.7 to 375)          | -16.3 (-70.2 to 96.2)           | -19.8 (-71.1 to 80.1)                    |
| 5 Ischemic heart disease      | 5 Diabetes                    | 266 (152 to 386)             | 70.3 (46 to 97.9)               | 10.1 (-6.49 to 30.6)                     |
| 6 Stroke                      | 6 Stroke                      | 67.3 (5.8 to 152)            | -22 (-45.1 to 8.61)             | -46.2 (-65.6 to -19.7)                   |
| 7 Road injuries               | 7 Road injuries               | 44.5 (-22.6 to 163)          | -32.4 (-64.4 to 18.5)           | -37.7 (-66.4 to 9.8)                     |
| 8 Tuberculosis                | 8 Lower respiratory infect    | -41.3 (-63 to -18.4)         | -72.7 (-78.9 to -63.9)          | -59.6 (-69.2 to -47.2)                   |
| 9 COVID-19                    | 9 Depressive disorders        | 142 (72 to 215)              | 12.5 (7.74 to 18.2)             | -4.03 (-4.45 to -3.7)                    |
| 10 Pertussis                  | 10 Chronic kidney disease     | 209 (93.7 to 362)            | 44.4 (-6.17 to 113)             | 4.08 (-33.5 to 60.6)                     |
| 11 Diarrheal diseases         | 11 Low back pain              | 144 (72 to 219)              | 13.4 (7.49 to 19.5)             | -7.96 (-8.4 to -7.62)                    |
| 12 Diabetes                   | 12 Headache disorders         | 143 (73.3 to 213)            | 12.8 (8.66 to 20.9)             | 0.0705 (-0.294 to 0.334)                 |
| 13 Interpersonal violence     | 13 Interpersonal violence     | 67 (-7.69 to 152)            | -22.6 (-46.7 to 13.3)           | -28.4 (-49.3 to 1.26)                    |
| 14 Depressive disorders       | 14 Hypertensive heart disease | 196 (76.2 to 342)            | 38.2 (-10.7 to 103)             | -18.1 (-50.1 to 30.5)                    |
| 15 Maternal disorders         | 15 Anxiety disorders          | 133 (65.4 to 204)            | 8.15 (4.37 to 13.2)             | 0.792 (0.351 to 1.19)                    |
| 16 Low back pain              | 16 Pertussis                  | -23.6 (-66.2 to 43.4)        | -64.7 (-81 to -39.9)            | -50.8 (-73 to -17.7)                     |
| 17 Headache disorders         | 17 Tuberculosis               | -32.3 (-62.9 to 13.8)        | -68.3 (-81.2 to -48)            | -72.5 (-84.2 to -54.2)                   |
| 18 Anxiety disorders          | 18 Gynecological diseases     | 105 (27.1 to 189)            | -4.68 (-31.1 to 22)             | -23.3 (-44.8 to -1.52)                   |
| 19 Chronic kidney disease     | 19 Falls                      | 60.9 (4.44 to 143)           | -25.5 (-40 to -6.43)            | -16.8 (-24.8 to -7.56)                   |
| 20 Meningitis                 | 20 Cirrhosis liver            | 66.2 (14.5 to 126)           | -22.6 (-37.2 to -5.8)           | -41.2 (-53.3 to -27.2)                   |
| 21 Falls                      | 30 Maternal disorders         |                              |                                 |                                          |
| 23 Cirrhosis liver            | 37 Diarrheal diseases         |                              |                                 |                                          |
| 24 Hypertensive heart disease | 53 Meningitis                 |                              |                                 |                                          |
| 26 Gynecological diseases     | 157 COVID-19                  |                              |                                 |                                          |

### Algeria, Reference scenario

**Legend:**

Communicable, maternal, neonatal and nutritional  
Non-communicable  
Injuries

| Leading Causes 2022           | Leading Causes 2050          | Mean % change number of DALY | Mean % change all-age DALY rate | Mean % change age-standardized DALY rate |
|-------------------------------|------------------------------|------------------------------|---------------------------------|------------------------------------------|
| 1 Ischemic heart disease      | 1 Diabetes                   | 234 (168 to 293)             | 168 (141 to 196)                | 55.3 (41.9 to 68.7)                      |
| 2 Neonatal disorders          | 2 Ischemic heart disease     | 40.3 (-9.65 to 114)          | 13 (-23.7 to 72.4)              | -48.4 (-68.2 to -13.8)                   |
| 3 Stroke                      | 3 Stroke                     | 52.6 (16.5 to 99.1)          | 22.8 (-1.68 to 56.6)            | -45.7 (-57.8 to -22)                     |
| 4 Road injuries               | 4 Hypertensive heart disease | 203 (115 to 313)             | 144 (76 to 232)                 | 0.89 (-30.6 to 46.3)                     |
| 5 Congenital defects          | 5 Chronic kidney disease     | 186 (99.2 to 308)            | 131 (63.8 to 227)               | 9.72 (-25.9 to 68.3)                     |
| 6 Diabetes                    | 6 Low back pain              | 53.2 (24.5 to 77.1)          | 23.2 (16.2 to 31.2)             | -5.12 (-5.21 to -5.03)                   |
| 7 Low back pain               | 7 Other musculoskeletal      | 159 (110 to 203)             | 108 (92.7 to 126)               | 65.6 (63 to 68.1)                        |
| 8 Depressive disorders        | 8 Road injuries              | -6.04 (-39.7 to 53.6)        | -24.4 (-49.7 to 20.2)           | -28.7 (-52.6 to 15.5)                    |
| 9 Headache disorders          | 9 Alzheimer's disease        | 282 (198 to 372)             | 207 (159 to 255)                | 4.68 (2 to 7.02)                         |
| 10 Anxiety disorders          | 10 Depressive disorders      | 35.7 (13.5 to 60.2)          | 9.05 (3.07 to 16)               | -2.65 (-2.81 to -2.48)                   |
| 11 Gynecological diseases     | 11 Neonatal disorders        | -41.7 (-60.3 to -14.4)       | -53.2 (-65.3 to -32.3)          | -33.1 (-51.1 to -4.65)                   |
| 12 Hypertensive heart disease | 12 COPD                      | 165 (102 to 254)             | 114 (58 to 183)                 | -5.76 (-32.7 to 34.4)                    |
| 13 Chronic kidney disease     | 13 Age-related hearing loss  | 120 (81.5 to 157)            | 76.6 (61.3 to 91.8)             | -1.51 (-1.62 to -1.4)                    |
| 14 Other musculoskeletal      | 14 Headache disorders        | 29.2 (4.86 to 50.4)          | 3.77 (-0.92 to 12.2)            | 0.406 (0.259 to 0.518)                   |
| 15 Lower respiratory infect   | 15 Anxiety disorders         | 27.1 (3.6 to 50.4)           | 2.06 (-3.02 to 8.65)            | 1.03 (0.922 to 1.15)                     |
| 16 Age-related hearing loss   | 16 Blindness and vision loss | 113 (77.1 to 149)            | 71.5 (56.2 to 87)               | -6.89 (-7.33 to -6.43)                   |
| 17 Neck pain                  | 17 Congenital defects        | -42.9 (-57.5 to -26.7)       | -54.2 (-62.1 to -45.8)          | -33.2 (-41.8 to -21.5)                   |
| 18 COVID-19                   | 18 Gynecological diseases    | 2.89 (-23.3 to 36.1)         | -17.3 (-37.5 to 7.55)           | -16.9 (-35.6 to 4.51)                    |
| 19 COPD                       | 19 Neck pain                 | 52.9 (28.1 to 79.6)          | 23 (12.8 to 34.8)               | -0.387 (-0.528 to -0.231)                |
| 20 Falls                      | 20 Oral disorders            | 84.2 (51.1 to 113)           | 48 (36.2 to 61.8)               | 0.831 (0.579 to 1.12)                    |
| 22 Blindness and vision loss  | 21 Lower respiratory infect  |                              |                                 |                                          |
| 23 Oral disorders             | 22 Falls                     |                              |                                 |                                          |
| 24 Alzheimer's disease        | 162 COVID-19                 |                              |                                 |                                          |

### Bahrain, Reference scenario

**Legend:**  
Communicable, maternal, neonatal and nutritional  
Non-communicable  
Injuries

| Leading Causes 2022           | Leading Causes 2050           | Mean % change number of DALY | Mean % change all-age DALY rate | Mean % change age-standardized DALY rate |
|-------------------------------|-------------------------------|------------------------------|---------------------------------|------------------------------------------|
| 1 Diabetes                    | 1 Diabetes                    | 303 (237 to 382)             | 181 (132 to 241)                | 2.17 (-16.4 to 27.1)                     |
| 2 Ischemic heart disease      | 2 Ischemic heart disease      | 82.6 (19 to 171)             | 27.3 (-15.8 to 88.4)            | -57.1 (-73.6 to -28.7)                   |
| 3 Depressive disorders        | 3 Chronic kidney disease      | 371 (222 to 541)             | 228 (126 to 360)                | 3.21 (-33.9 to 55.3)                     |
| 4 Low back pain               | 4 Low back pain               | 83.6 (66.5 to 101)           | 27.7 (18.8 to 38.4)             | -2.77 (-3.36 to -2.14)                   |
| 5 Headache disorders          | 5 COPD                        | 432 (276 to 594)             | 271 (166 to 390)                | 0.431 (-31.7 to 46.3)                    |
| 6 Road injuries               | 6 Other musculoskeletal       | 163 (130 to 192)             | 82.8 (67.1 to 98.9)             | 42.3 (38.7 to 45.3)                      |
| 7 COVID-19                    | 7 Depressive disorders        | 50.6 (35.7 to 68.6)          | 4.72 (-1.46 to 13.2)            | -0.365 (-1.35 to 0.665)                  |
| 8 Stroke                      | 8 Stroke                      | 116 (62 to 177)              | 50.7 (13.8 to 97.5)             | -53.7 (-65.9 to -33.3)                   |
| 9 Anxiety disorders           | 9 Lung cancer                 | 370 (187 to 571)             | 227 (109 to 363)                | 11 (-23.8 to 50.5)                       |
| 10 Other musculoskeletal      | 10 Age-related hearing loss   | 200 (168 to 238)             | 109 (90.5 to 131)               | -0.81 (-1.26 to -0.334)                  |
| 11 Gynecological diseases     | 11 Alzheimer's disease        | 638 (513 to 794)             | 413 (325 to 519)                | 0.0599 (-2.23 to 2.63)                   |
| 12 Chronic kidney disease     | 12 Headache disorders         | 40.6 (25.9 to 60.5)          | -2.23 (-8.08 to 6.69)           | 3.28 (1.89 to 4.44)                      |
| 13 Neonatal disorders         | 13 Hypertensive heart disease | 486 (303 to 691)             | 308 (183 to 469)                | -1.08 (-35.5 to 46.6)                    |
| 14 Age-related hearing loss   | 14 Anxiety disorders          | 39.2 (25.7 to 57.5)          | -3.18 (-9.59 to 5.63)           | 3.31 (1.96 to 4.44)                      |
| 15 Neck pain                  | 15 Road injuries              | 19.8 (-27 to 93)             | -16.5 (-48 to 35.3)             | -20.7 (-51.8 to 36)                      |
| 16 Congenital defects         | 16 Blindness and vision loss  | 203 (164 to 240)             | 111 (87.5 to 133)               | -5.58 (-6.19 to -4.91)                   |
| 17 Oral disorders             | 17 Oral disorders             | 129 (100 to 157)             | 59.4 (43.8 to 79.7)             | 1.87 (1.31 to 2.54)                      |
| 18 COPD                       | 18 Cirrhosis liver            | 155 (110 to 192)             | 77.2 (44.5 to 107)              | -35.2 (-45.8 to -21.5)                   |
| 19 Lung cancer                | 19 Lower respiratory infect   | 200 (127 to 280)             | 109 (57.7 to 171)               | -23.7 (-42.3 to 1.81)                    |
| 20 Hemoglobinopathies         | 20 Neck pain                  | 83.6 (59 to 108)             | 27.7 (14.4 to 43)               | 2.91 (1.15 to 5.01)                      |
| 22 Cirrhosis liver            | 21 Gynecological diseases     |                              |                                 |                                          |
| 23 Blindness and vision loss  | 30 Neonatal disorders         |                              |                                 |                                          |
| 27 Lower respiratory infect   | 32 Hemoglobinopathies         |                              |                                 |                                          |
| 35 Hypertensive heart disease | 36 Congenital defects         |                              |                                 |                                          |
| 40 Alzheimer's disease        | 150 COVID-19                  |                              |                                 |                                          |

### Egypt, Reference scenario

**Legend:**

Communicable, maternal, neonatal and nutritional  
Non-communicable  
Injuries

| Leading Causes 2022           | Leading Causes 2050          | Mean % change number of DALY | Mean % change all-age DALY rate | Mean % change age-standardized DALY rate |
|-------------------------------|------------------------------|------------------------------|---------------------------------|------------------------------------------|
| 1 Ischemic heart disease      | 1 Ischemic heart disease     | 55.9 (3.72 to 125)           | 3.93 (-31.5 to 49.7)            | -31.6 (-58.8 to 7.56)                    |
| 2 Stroke                      | 2 Diabetes                   | 241 (193 to 298)             | 127 (96.4 to 162)               | 50.2 (27.4 to 75.2)                      |
| 3 Cirrhosis liver             | 3 Chronic kidney disease     | 235 (143 to 343)             | 123 (68.9 to 200)               | 48 (0.842 to 112)                        |
| 4 Lower respiratory infect    | 4 Stroke                     | 48.7 (16.1 to 90.4)          | -0.882 (-22.5 to 25.6)          | -38.9 (-54.4 to -16)                     |
| 5 Diabetes                    | 5 Cirrhosis liver            | 41.5 (19.6 to 65.4)          | -5.78 (-19 to 8.52)             | -37.5 (-46.6 to -26.3)                   |
| 6 COVID-19                    | 6 Hypertensive heart disease | 140 (75.1 to 228)            | 60.1 (19.5 to 116)              | -3.82 (-35.1 to 43.2)                    |
| 7 Congenital defects          | 7 Low back pain              | 69.2 (50.4 to 85.6)          | 12.7 (6.56 to 18.6)             | -5 (-5.16 to -4.82)                      |
| 8 Chronic kidney disease      | 8 Other musculoskeletal      | 218 (188 to 249)             | 112 (97.2 to 126)               | 75.5 (72.8 to 78.2)                      |
| 9 Neonatal disorders          | 9 Depressive disorders       | 63.9 (47 to 82.1)            | 9.14 (4.68 to 14.4)             | -2.05 (-2.3 to -1.76)                    |
| 10 Low back pain              | 10 Headache disorders        | 60 (42.3 to 78)              | 6.51 (2.91 to 13.1)             | 1.1 (0.845 to 1.29)                      |
| 11 Road injuries              | 11 Lower respiratory infect  | -16.1 (-33 to 5.21)          | -44.1 (-54.6 to -30.4)          | -44.7 (-55.4 to -31.2)                   |
| 12 Headache disorders         | 12 Neonatal disorders        | 6.06 (-12.1 to 31.2)         | -29.4 (-40.8 to -15.8)          | -16.9 (-29.8 to -0.78)                   |
| 13 Depressive disorders       | 13 Road injuries             | 14.4 (-29.8 to 84.5)         | -23.7 (-52.9 to 27.1)           | -29 (-56.5 to 19.4)                      |
| 14 Hypertensive heart disease | 14 Anxiety disorders         | 56.9 (37.4 to 74.5)          | 4.45 (0.878 to 8.92)            | 1.81 (1.63 to 2)                         |
| 15 Anxiety disorders          | 15 Congenital defects        | -27.7 (-41.3 to -13.2)       | -51.9 (-58.1 to -44.9)          | -39.2 (-46 to -31.2)                     |
| 16 Gynecological diseases     | 16 Liver cancer              | 124 (88.2 to 169)            | 49.4 (26.2 to 80.6)             | 1.73 (-16.2 to 22.1)                     |
| 17 Other musculoskeletal      | 17 COPD                      | 118 (62.3 to 187)            | 45.4 (8.98 to 90.8)             | -8.77 (-33.9 to 27.2)                    |
| 18 Other cardiovascular       | 18 Gynecological diseases    | 28.4 (-9.01 to 67.8)         | -14.4 (-39 to 11.7)             | -21.7 (-43.6 to 1.76)                    |
| 19 Liver cancer               | 19 Age-related hearing loss  | 105 (77.8 to 134)            | 36.3 (23.2 to 50.1)             | -1.92 (-2.1 to -1.72)                    |
| 20 COPD                       | 20 Lung cancer               | 142 (64.1 to 235)            | 61 (7.34 to 121)                | 11.1 (-19.7 to 44.8)                     |
| 21 Age-related hearing loss   | 27 Other cardiovascular      |                              |                                 |                                          |
| 27 Lung cancer                | 161 COVID-19                 |                              |                                 |                                          |

### Iran, Reference scenario

**Legend:**  
Communicable, maternal, neonatal and nutritional  
Non-communicable  
Injuries

| Leading Causes 2022           | Leading Causes 2050          | Mean % change number of DALY | Mean % change all-age DALY rate | Mean % change age-standardized DALY rate |
|-------------------------------|------------------------------|------------------------------|---------------------------------|------------------------------------------|
| 1 Ischemic heart disease      | 1 Diabetes                   | <b>262 (216 to 304)</b>      | <b>210 (182 to 244)</b>         | <b>54.4 (40.3 to 70.7)</b>               |
| 2 Road injuries               | 2 Ischemic heart disease     | 34.4 (-11.4 to 101)          | 15.2 (-24 to 79.3)              | <b>-52.1 (-70.1 to -23.3)</b>            |
| 3 Low back pain               | 3 Low back pain              | <b>50.1 (34.6 to 71.8)</b>   | <b>28.4 (20.7 to 37.6)</b>      | <b>-3.95 (-4.04 to -3.85)</b>            |
| 4 Stroke                      | 4 Stroke                     | <b>37.4 (8.64 to 76)</b>     | 17.7 (-8.07 to 53.1)            | <b>-51.4 (-62.7 to -33.7)</b>            |
| 5 Depressive disorders        | 5 Alzheimer's disease        | <b>309 (235 to 385)</b>      | <b>250 (197 to 300)</b>         | 2.09 (-0.296 to 4.49)                    |
| 6 Diabetes                    | 6 Hypertensive heart disease | <b>232 (136 to 348)</b>      | <b>184 (107 to 298)</b>         | 6.58 (-24.8 to 57.8)                     |
| 7 Anxiety disorders           | 7 Road injuries              | 0.802 (-33.7 to 58.5)        | <b>-13.6 (-44.2 to 37.8)</b>    | <b>-16.1 (-47.2 to 37.6)</b>             |
| 8 COVID-19                    | 8 Depressive disorders       | <b>21.1 (7.1 to 36.9)</b>    | 3.57 (-2.5 to 10.3)             | <b>-2.01 (-2.09 to -1.91)</b>            |
| 9 Headache disorders          | 9 Chronic kidney disease     | <b>218 (125 to 334)</b>      | <b>172 (93.9 to 290)</b>        | 13.9 (-21.2 to 71.2)                     |
| 10 Gynecological diseases     | 10 Age-related hearing loss  | <b>124 (97.4 to 152)</b>     | <b>91.7 (76.5 to 109)</b>       | <b>-1.22 (-1.29 to -1.14)</b>            |
| 11 Neck pain                  | 11 Other musculoskeletal     | <b>123 (93.4 to 154)</b>     | <b>90.2 (72.9 to 109)</b>       | <b>50.2 (48 to 52.3)</b>                 |
| 12 Age-related hearing loss   | 12 COPD                      | <b>174 (102 to 257)</b>      | <b>135 (73.9 to 220)</b>        | -6.41 (-34.6 to 33.9)                    |
| 13 Other musculoskeletal      | 13 Anxiety disorders         | <b>15.5 (1.51 to 29.1)</b>   | -1.29 (-6.24 to 5.14)           | <b>0.974 (0.937 to 1.02)</b>             |
| 14 Neonatal disorders         | 14 Blindness and vision loss | <b>132 (102 to 163)</b>      | <b>98.1 (80.7 to 115)</b>       | <b>-5.86 (-6.16 to -5.53)</b>            |
| 15 Hypertensive heart disease | 15 Headache disorders        | <b>16.2 (1.96 to 34.7)</b>   | -0.693 (-6.11 to 9.03)          | <b>0.518 (0.349 to 0.608)</b>            |
| 16 Blindness and vision loss  | 16 Neck pain                 | <b>44.2 (22.9 to 64.1)</b>   | <b>23.3 (10.8 to 38.3)</b>      | -0.0187 (-0.113 to 0.0942)               |
| 17 Drug use disorders         | 17 Lung cancer               | <b>156 (75 to 255)</b>       | <b>118 (52.2 to 195)</b>        | 1.19 (-26.5 to 31.5)                     |
| 18 COPD                       | 18 Oral disorders            | <b>85.3 (61.2 to 110)</b>    | <b>58.4 (44.9 to 73.7)</b>      | <b>0.749 (0.554 to 0.947)</b>            |
| 19 Alzheimer's disease        | 19 Gynecological diseases    | -6.41 (-28.3 to 17.7)        | -19.9 (-39.6 to 3.06)           | -12.6 (-31.4 to 8.23)                    |
| 20 Chronic kidney disease     | 20 Osteoarthritis            | <b>150 (123 to 179)</b>      | <b>114 (101 to 128)</b>         | <b>3.33 (3.03 to 3.68)</b>               |
| 21 Oral disorders             | 21 Drug use disorders        |                              |                                 |                                          |
| 28 Lung cancer                | 29 Neonatal disorders        |                              |                                 |                                          |
| 30 Osteoarthritis             | 155 COVID-19                 |                              |                                 |                                          |

### Iraq, Reference scenario

**Legend:**  
Communicable, maternal, neonatal and nutritional  
Non-communicable  
Injuries

| Leading Causes 2022           | Leading Causes 2050           | Mean % change number of DALY  | Mean % change all-age DALY rate | Mean % change age-standardized DALY rate |
|-------------------------------|-------------------------------|-------------------------------|---------------------------------|------------------------------------------|
| 1 Ischemic heart disease      | 1 Conflict & terror           | 166 (-78.4 to 875)            | 82.5 (-84.2 to 638)             | 79.1 (-84.6 to 611)                      |
| 2 Conflict & terror           | 2 Diabetes                    | <b>165 (76.7 to 246)</b>      | <b>79.4 (54.5 to 110)</b>       | 1.15 (-12.2 to 18.4)                     |
| 3 Neonatal disorders          | 3 Ischemic heart disease      | 39 (-21.2 to 123)             | -5.52 (-42.7 to 47.7)           | <b>-53.3 (-72.1 to -22)</b>              |
| 4 Stroke                      | 4 Stroke                      | 39 (-14.3 to 100)             | -5.73 (-31.2 to 30.2)           | <b>-53.1 (-66 to -31.2)</b>              |
| 5 Diabetes                    | 5 Low back pain               | <b>81.1 (27.1 to 133)</b>     | <b>22.7 (15.9 to 29.7)</b>      | <b>-4.31 (-4.48 to -4.15)</b>            |
| 6 COVID-19                    | 6 Chronic kidney disease      | <b>186 (67.7 to 323)</b>      | <b>94.2 (29.8 to 180)</b>       | 2.26 (-32 to 60.3)                       |
| 7 Congenital defects          | 7 Neonatal disorders          | <b>-42.7 (-61.4 to -20.4)</b> | <b>-61.1 (-69.5 to -50.4)</b>   | <b>-46.8 (-58.7 to -30.9)</b>            |
| 8 Low back pain               | 8 Depressive disorders        | <b>62.9 (15.1 to 107)</b>     | <b>10.3 (5.42 to 16)</b>        | <b>-1.81 (-2.03 to -1.61)</b>            |
| 9 Road injuries               | 9 Headache disorders          | <b>57.6 (8.61 to 104)</b>     | <b>6.77 (1.51 to 16.9)</b>      | <b>1.14 (0.776 to 1.39)</b>              |
| 10 Depressive disorders       | 10 Anxiety disorders          | <b>51.2 (5.08 to 93.2)</b>    | 2.41 (-3.62 to 8.84)            | <b>1.69 (1.44 to 1.92)</b>               |
| 11 Mechanical forces          | 11 Hypertensive heart disease | <b>217 (89.9 to 354)</b>      | <b>115 (48.5 to 204)</b>        | -3.77 (-38 to 48)                        |
| 12 Headache disorders         | 12 Other musculoskeletal      | <b>198 (93.5 to 280)</b>      | <b>102 (79.1 to 122)</b>        | <b>55.1 (40.7 to 62.2)</b>               |
| 13 Interpersonal violence     | 13 Road injuries              | 23.5 (-29.9 to 103)           | -16.1 (-48.4 to 36.9)           | -24.1 (-53.4 to 23)                      |
| 14 Anxiety disorders          | 14 Mechanical forces          | 19.6 (-21.6 to 67.7)          | -18.9 (-36 to 5.47)             | <b>-26.6 (-41.8 to -3.33)</b>            |
| 15 Gynecological diseases     | 15 Age-related hearing loss   | <b>142 (72.1 to 218)</b>      | <b>63.9 (48.2 to 80.3)</b>      | <b>-1.37 (-1.5 to -1.24)</b>             |
| 16 Chronic kidney disease     | 16 Gynecological diseases     | 47.1 (-4.21 to 101)           | -0.0942 (-26.6 to 25.5)         | -10.5 (-33.1 to 13)                      |
| 17 Lower respiratory infect   | 17 Lung cancer                | <b>179 (58 to 336)</b>        | <b>88.4 (24.9 to 160)</b>       | -3.81 (-30.6 to 29.3)                    |
| 18 Age-related hearing loss   | 18 Alzheimer's disease        | <b>324 (168 to 491)</b>       | <b>186 (122 to 249)</b>         | <b>2.89 (0.392 to 5.29)</b>              |
| 19 Neck pain                  | 19 Congenital defects         | <b>-34.9 (-54.7 to -14.2)</b> | <b>-55.9 (-62.2 to -49.7)</b>   | <b>-37.8 (-44.7 to -29.3)</b>            |
| 20 Other musculoskeletal      | 20 Interpersonal violence     | -5.16 (-47.5 to 51.9)         | -35.9 (-57.8 to 1.58)           | -37.9 (-59.7 to 0.195)                   |
| 21 Hypertensive heart disease | 21 Neck pain                  |                               |                                 |                                          |
| 23 Lung cancer                | 30 Lower respiratory infect   |                               |                                 |                                          |
| 34 Alzheimer's disease        | 157 COVID-19                  |                               |                                 |                                          |



### Jordan, Reference scenario

**Legend:**

Communicable, maternal, neonatal and nutritional  
Non-communicable  
Injuries

| Leading Causes 2022           | Leading Causes 2050          | Mean % change number of DALY | Mean % change all-age DALY rate | Mean % change age-standardized DALY rate |
|-------------------------------|------------------------------|------------------------------|---------------------------------|------------------------------------------|
| 1 Diabetes                    | 1 Diabetes                   | 306 (253 to 363)             | 125 (99.7 to 150)               | 20.5 (7.31 to 32.7)                      |
| 2 Ischemic heart disease      | 2 Ischemic heart disease     | 81.1 (20.2 to 164)           | 0.642 (-34 to 49.8)             | -52.5 (-68.7 to -25.1)                   |
| 3 Neonatal disorders          | 3 Low back pain              | 124 (103 to 145)             | 24.4 (18.8 to 32)               | -2.32 (-2.55 to -2.11)                   |
| 4 COVID-19                    | 4 Stroke                     | 99.4 (62.2 to 142)           | 10.7 (-10.8 to 34.8)            | -50.4 (-60.6 to -38.2)                   |
| 5 Low back pain               | 5 Hypertensive heart disease | 344 (214 to 491)             | 147 (73 to 237)                 | -3.43 (-35.2 to 38.3)                    |
| 6 Stroke                      | 6 Chronic kidney disease     | 279 (168 to 411)             | 111 (48.2 to 196)               | -1.13 (-31.6 to 43.1)                    |
| 7 Congenital defects          | 7 Other musculoskeletal      | 216 (190 to 247)             | 75.4 (65.4 to 85.9)             | 34.2 (32.1 to 36)                        |
| 8 Depressive disorders        | 8 Depressive disorders       | 98.7 (79.3 to 119)           | 10.2 (4.91 to 16.9)             | 0.0128 (-0.398 to 0.425)                 |
| 9 Headache disorders          | 9 Headache disorders         | 88.1 (67.6 to 110)           | 4.33 (-1.35 to 15.2)            | 1.64 (1.1 to 2.05)                       |
| 10 Anxiety disorders          | 10 Alzheimer's disease       | 527 (413 to 644)             | 248 (189 to 305)                | -1.26 (-3.59 to 0.834)                   |
| 11 Road injuries              | 11 Anxiety disorders         | 79.4 (63.9 to 102)           | -0.529 (-6.26 to 6.7)           | 1.89 (1.46 to 2.37)                      |
| 12 Gynecological diseases     | 12 Neonatal disorders        | 10.1 (-12.6 to 36.4)         | -38.9 (-51.2 to -23.6)          | -26.3 (-42.6 to -5.36)                   |
| 13 Other musculoskeletal      | 13 Age-related hearing loss  | 212 (180 to 249)             | 73.3 (59 to 90.1)               | -0.971 (-1.1 to -0.849)                  |
| 14 Chronic kidney disease     | 14 Gynecological diseases    | 84.4 (49.6 to 127)           | 2.38 (-20 to 23.1)              | -6.98 (-26 to 10.5)                      |
| 15 Dietary iron deficiency    | 15 Road injuries             | 41.9 (-7.71 to 118)          | -21.2 (-48.5 to 21.5)           | -23 (-50.4 to 22.7)                      |
| 16 Lower respiratory infect   | 16 Neck pain                 | 137 (114 to 160)             | 31.4 (23.3 to 40.9)             | 2.02 (1.51 to 2.55)                      |
| 17 Age-related hearing loss   | 17 COPD                      | 295 (197 to 406)             | 119 (64.6 to 182)               | -2.5 (-29.1 to 33.9)                     |
| 18 Hypertensive heart disease | 18 Oral disorders            | 166 (140 to 194)             | 47.8 (36.6 to 59)               | 0.485 (0.297 to 0.657)                   |
| 19 Neck pain                  | 19 Congenital defects        | -5.06 (-20.1 to 10.6)        | -47.4 (-53.8 to -41.2)          | -33.5 (-40.4 to -25)                     |
| 20 Oral disorders             | 20 Blindness and vision loss | 210 (175 to 246)             | 71.7 (56 to 86.9)               | -3.88 (-4.23 to -3.5)                    |
| 23 Blindness and vision loss  | 21 Dietary iron deficiency   |                              |                                 |                                          |
| 25 COPD                       | 24 Lower respiratory infect  |                              |                                 |                                          |
| 26 Alzheimer's disease        | 155 COVID-19                 |                              |                                 |                                          |

### Kuwait, Reference scenario

**Legend:**

Communicable, maternal, neonatal and nutritional  
Non-communicable  
Injuries

| Leading Causes 2022           | Leading Causes 2050          | Mean % change number of DALY | Mean % change all-age DALY rate | Mean % change age-standardized DALY rate |
|-------------------------------|------------------------------|------------------------------|---------------------------------|------------------------------------------|
| 1 Ischemic heart disease      | 1 Diabetes                   | 369 (299 to 449)             | 216 (188 to 250)                | 35.4 (26.3 to 44.3)                      |
| 2 Diabetes                    | 2 Ischemic heart disease     | 111 (46.6 to 213)            | 41.9 (-3.22 to 110)             | -46.6 (-63.3 to -17.7)                   |
| 3 Low back pain               | 3 Low back pain              | 97.5 (67.9 to 125)           | 33 (21.3 to 45.4)               | -0.538 (-0.937 to -0.112)                |
| 4 Depressive disorders        | 4 Alzheimer's disease        | 722 (596 to 856)             | 453 (395 to 510)                | 6.86 (4.3 to 9.33)                       |
| 5 Headache disorders          | 5 Other musculoskeletal      | 124 (89.1 to 166)            | 51 (33.5 to 70.1)               | 22.2 (21.3 to 23.1)                      |
| 6 Gynecological diseases      | 6 Depressive disorders       | 53.1 (31.2 to 76.1)          | 3.11 (-5.93 to 14)              | 0.194 (-0.289 to 0.755)                  |
| 7 Other musculoskeletal       | 7 Hypertensive heart disease | 716 (485 to 1060)            | 449 (295 to 648)                | 38.3 (-2.87 to 99.3)                     |
| 8 Anxiety disorders           | 8 Age-related hearing loss   | 251 (196 to 309)             | 136 (110 to 160)                | -1.11 (-1.43 to -0.757)                  |
| 9 Road injuries               | 9 Chronic kidney disease     | 573 (374 to 841)             | 353 (213 to 529)                | 42 (-0.689 to 107)                       |
| 10 Stroke                     | 10 Lower respiratory infect  | 204 (134 to 292)             | 105 (62.1 to 158)               | -27 (-40.9 to -7.62)                     |
| 11 Neonatal disorders         | 11 Stroke                    | 146 (94 to 203)              | 65.5 (37 to 103)                | -42.7 (-52.7 to -28.3)                   |
| 12 Congenital defects         | 12 Headache disorders        | 36.6 (21 to 59.9)            | -8 (-14.3 to 3.75)              | 1.24 (0.857 to 1.63)                     |
| 13 Lower respiratory infect   | 13 Blindness and vision loss | 270 (212 to 346)             | 149 (117 to 180)                | -1.35 (-1.74 to -1.01)                   |
| 14 Neck pain                  | 14 Anxiety disorders         | 39.9 (22.4 to 61.4)          | -5.81 (-13.3 to 5.33)           | 1.42 (0.908 to 1.89)                     |
| 15 Falls                      | 15 Road injuries             | 43.2 (-4.77 to 122)          | -3.51 (-34 to 49.9)             | -11 (-42 to 45.4)                        |
| 16 Age-related hearing loss   | 16 Gynecological diseases    | 8.48 (-19.1 to 42.5)         | -26.9 (-46.4 to -5.44)          | -8.49 (-30.6 to 13.6)                    |
| 17 Oral disorders             | 17 Osteoarthritis            | 281 (233 to 334)             | 157 (135 to 177)                | 3.7 (3.17 to 4.23)                       |
| 18 COVID-19                   | 18 Oral disorders            | 140 (103 to 188)             | 61.2 (42.6 to 83.4)             | -0.849 (-1.31 to -0.381)                 |
| 19 Blindness and vision loss  | 19 Neck pain                 | 85.7 (54.6 to 134)           | 25.1 (5.49 to 46.1)             | 4.59 (3.51 to 5.67)                      |
| 20 Schizophrenia              | 20 Falls                     | 69.2 (44.4 to 98)            | 13.9 (1.52 to 27.5)             | -20.8 (-28.5 to -11.3)                   |
| 21 Alzheimer's disease        | 24 Neonatal disorders        |                              |                                 |                                          |
| 23 Osteoarthritis             | 27 Congenital defects        |                              |                                 |                                          |
| 24 Chronic kidney disease     | 30 Schizophrenia             |                              |                                 |                                          |
| 26 Hypertensive heart disease | 153 COVID-19                 |                              |                                 |                                          |

### Lebanon, Reference scenario

**Legend:**  
Communicable, maternal, neonatal and nutritional  
Non-communicable  
Injuries

| Leading Causes 2022          | Leading Causes 2050          | Mean % change number of DALY | Mean % change all-age DALY rate | Mean % change age-standardized DALY rate |
|------------------------------|------------------------------|------------------------------|---------------------------------|------------------------------------------|
| 1 COVID-19                   | 1 Diabetes                   | 141 (91.7 to 186)            | 129 (104 to 153)                | 33 (19.5 to 47)                          |
| 2 Ischemic heart disease     | 2 Ischemic heart disease     | 14.3 (-27.7 to 80.2)         | 8.92 (-28.3 to 67.5)            | -40.9 (-64.2 to -4.1)                    |
| 3 Diabetes                   | 3 Chronic kidney disease     | 131 (54.3 to 229)            | 120 (54.3 to 223)               | 17.9 (-20.2 to 85.9)                     |
| 4 Stroke                     | 4 Low back pain              | 30.7 (4.95 to 53.9)          | 24.5 (16.6 to 32.6)             | -3.69 (-3.98 to -3.42)                   |
| 5 Low back pain              | 5 Alzheimer's disease        | 132 (80.7 to 192)            | 121 (84.7 to 155)               | 8.22 (5.98 to 10.6)                      |
| 6 Depressive disorders       | 6 Lung cancer                | 115 (43.1 to 197)            | 105 (44.7 to 173)               | 3.75 (-24.5 to 35.4)                     |
| 7 Anxiety disorders          | 7 Stroke                     | 14.9 (-15.7 to 49.8)         | 9.47 (-13.1 to 40.5)            | -37.1 (-49.4 to -17.9)                   |
| 8 Headache disorders         | 8 COPD                       | 104 (39.8 to 179)            | 94 (45.4 to 157)                | 1.26 (-31.3 to 46.7)                     |
| 9 Lower respiratory infect   | 9 Depressive disorders       | 13.2 (-9.17 to 34.9)         | 7.73 (-0.0885 to 16.8)          | -2.34 (-2.8 to -1.91)                    |
| 10 Gynecological diseases    | 10 Age-related hearing loss  | 75.9 (47 to 105)             | 67.6 (54.2 to 80.5)             | -0.543 (-0.735 to -0.354)                |
| 11 Chronic kidney disease    | 11 Lower respiratory infect  | 33.1 (1.79 to 66.4)          | 26.8 (2.99 to 55.7)             | -27.4 (-41.8 to -9.13)                   |
| 12 Neonatal disorders        | 12 Other musculoskeletal     | 79.7 (46.8 to 115)           | 71.1 (53.6 to 86.2)             | 33.1 (28.8 to 35.4)                      |
| 13 Lung cancer               | 13 Anxiety disorders         | 2.45 (-17.2 to 19.5)         | -2.46 (-9.11 to 6.33)           | 0.159 (-0.267 to 0.604)                  |
| 14 Alzheimer's disease       | 14 Headache disorders        | 3.88 (-15.7 to 25.4)         | -1.12 (-7.35 to 9.47)           | -0.523 (-0.87 to -0.111)                 |
| 15 COPD                      | 15 Blindness and vision loss | 73.6 (43.9 to 103)           | 65.4 (51.3 to 77.7)             | -4.23 (-4.5 to -3.98)                    |
| 16 Age-related hearing loss  | 16 Conflict & terror         | 99.5 (-47.4 to 519)          | 89.1 (-51.6 to 501)             | 67.5 (-67 to 518)                        |
| 17 Other musculoskeletal     | 17 Breast cancer             | 55.9 (9.33 to 112)           | 48.4 (6.54 to 99.4)             | -14.7 (-35.3 to 9.64)                    |
| 18 Road injuries             | 18 Colorectal cancer         | 108 (32.1 to 201)            | 98.2 (31.6 to 181)              | 2.79 (-29.3 to 41.4)                     |
| 19 Conflict & terror         | 19 Gynecological diseases    | -17.5 (-42.6 to 9.64)        | -21.4 (-42.9 to 3.06)           | -16.9 (-38.2 to 5.34)                    |
| 20 Neck pain                 | 20 Oral disorders            | 57.5 (30.7 to 88.4)          | 50 (38.5 to 62.2)               | 0.828 (0.58 to 1.07)                     |
| 21 Blindness and vision loss | 21 Neck pain                 |                              |                                 |                                          |
| 22 Breast cancer             | 26 Road injuries             |                              |                                 |                                          |
| 24 Oral disorders            | 27 Neonatal disorders        |                              |                                 |                                          |
| 28 Colorectal cancer         | 155 COVID-19                 |                              |                                 |                                          |

### Libya, Reference scenario

**Legend:**  
Communicable, maternal, neonatal and nutritional  
Non-communicable  
Injuries

| Leading Causes 2022           | Leading Causes 2050          | Mean % change number of DALY | Mean % change all-age DALY rate | Mean % change age-standardized DALY rate |
|-------------------------------|------------------------------|------------------------------|---------------------------------|------------------------------------------|
| 1 Ischemic heart disease      | 1 Ischemic heart disease     | 46.1 (-13 to 123)            | 47.8 (-6.27 to 133)             | -36.6 (-61.8 to 5.1)                     |
| 2 COVID-19                    | 2 Diabetes                   | <b>230 (161 to 300)</b>      | <b>232 (188 to 274)</b>         | <b>59.6 (38 to 81)</b>                   |
| 3 Road injuries               | 3 Chronic kidney disease     | <b>218 (109 to 347)</b>      | <b>221 (126 to 376)</b>         | 34 (-8.46 to 102)                        |
| 4 Stroke                      | 4 Road injuries              | -14 (-48.4 to 42)            | -13.1 (-45.3 to 46.4)           | -12.7 (-46.6 to 51)                      |
| 5 Diabetes                    | 5 Stroke                     | 35.2 (-7.07 to 88.7)         | <b>36.5 (1.47 to 95.7)</b>      | <b>-41.3 (-56.7 to -13.4)</b>            |
| 6 Conflict & terror           | 6 Hypertensive heart disease | <b>267 (143 to 403)</b>      | <b>270 (152 to 405)</b>         | 31.2 (-12 to 95.3)                       |
| 7 Congenital defects          | 7 Lung cancer                | <b>168 (63.4 to 268)</b>     | <b>169 (83.6 to 271)</b>        | 7.74 (-23.4 to 42)                       |
| 8 Low back pain               | 8 Low back pain              | <b>33.3 (7.87 to 60.6)</b>   | <b>34.1 (23.5 to 44.8)</b>      | <b>-2.72 (-2.88 to -2.58)</b>            |
| 9 Depressive disorders        | 9 Alzheimer's disease        | <b>343 (221 to 466)</b>      | <b>345 (259 to 433)</b>         | <b>21.2 (18.4 to 24.1)</b>               |
| 10 Neonatal disorders         | 10 COPD                      | <b>183 (104 to 284)</b>      | <b>186 (106 to 288)</b>         | 8.52 (-23.7 to 58.3)                     |
| 11 Chronic kidney disease     | 11 Conflict & terror         | 4.04e+07 (-100 to 35100)     | 4.24e+07 (-100 to 33900)        | 2.95e+07 (-100 to 49200)                 |
| 12 Headache disorders         | 12 Depressive disorders      | 6.42 (-14 to 31.1)           | 7.02 (-1.56 to 18)              | <b>-1.17 (-1.37 to -0.97)</b>            |
| 13 Anxiety disorders          | 13 Age-related hearing loss  | <b>113 (67 to 158)</b>       | <b>114 (88.9 to 140)</b>        | <b>-0.881 (-0.984 to -0.775)</b>         |
| 14 Gynecological diseases     | 14 Other musculoskeletal     | <b>73.9 (35.8 to 109)</b>    | <b>75 (58.4 to 93.8)</b>        | <b>35.5 (33.1 to 37.7)</b>               |
| 15 Lung cancer                | 15 Colorectal cancer         | <b>163 (58 to 287)</b>       | <b>164 (73.7 to 289)</b>        | 12.6 (-20.2 to 54.1)                     |
| 16 Hypertensive heart disease | 16 Lower respiratory infect  | <b>49.1 (11.2 to 90.9)</b>   | <b>50.4 (17.7 to 95.5)</b>      | -25.3 (-41.5 to 1.92)                    |
| 17 Other musculoskeletal      | 17 Blindness and vision loss | <b>120 (76.3 to 169)</b>     | <b>121 (92.1 to 148)</b>        | <b>-4.19 (-4.52 to -3.8)</b>             |
| 18 Lower respiratory infect   | 18 Headache disorders        | -3.01 (-21 to 19.5)          | -2.48 (-9.65 to 11.7)           | <b>0.86 (0.565 to 1.08)</b>              |
| 19 Cirrhosis liver            | 19 Cirrhosis liver           | <b>54.9 (18.8 to 90.4)</b>   | <b>56.2 (26.9 to 90.8)</b>      | <b>-25.2 (-36.5 to -7.52)</b>            |
| 20 Age-related hearing loss   | 20 Anxiety disorders         | -5.57 (-23.3 to 12.8)        | -5.03 (-13.5 to 4.98)           | <b>1.08 (0.891 to 1.29)</b>              |
| 23 COPD                       | 22 Gynecological diseases    |                              |                                 |                                          |
| 25 Blindness and vision loss  | 28 Congenital defects        |                              |                                 |                                          |
| 30 Colorectal cancer          | 32 Neonatal disorders        |                              |                                 |                                          |
| 31 Alzheimer's disease        | 156 COVID-19                 |                              |                                 |                                          |

### Morocco, Reference scenario

**Legend:**  
Communicable, maternal, neonatal and nutritional  
Non-communicable  
Injuries

| Leading Causes 2022          | Leading Causes 2050          | Mean % change number of DALY | Mean % change all-age DALY rate | Mean % change age-standardized DALY rate |
|------------------------------|------------------------------|------------------------------|---------------------------------|------------------------------------------|
| 1 Ischemic heart disease     | 1 Ischemic heart disease     | 25.5 (-18.8 to 97.2)         | 18.3 (-22.6 to 84.6)            | -35.1 (-62.6 to 11.8)                    |
| 2 COVID-19                   | 2 Diabetes                   | 149 (115 to 191)             | 134 (112 to 159)                | 47.7 (33.3 to 63.3)                      |
| 3 Stroke                     | 3 Stroke                     | 23.2 (-7.71 to 68.8)         | 15.9 (-11.6 to 52.9)            | -37.7 (-55.8 to -10.9)                   |
| 4 Diabetes                   | 4 Chronic kidney disease     | 154 (80.5 to 260)            | 139 (73.1 to 224)               | 32.2 (-13.2 to 102)                      |
| 5 Neonatal disorders         | 5 Hypertensive heart disease | 101 (42.4 to 174)            | 89.4 (36.9 to 157)              | -4.17 (-37 to 46.6)                      |
| 6 Road injuries              | 6 Low back pain              | 27.1 (8.99 to 45.1)          | 19.5 (13.2 to 26.4)             | -5.89 (-6 to -5.77)                      |
| 7 Low back pain              | 7 Depressive disorders       | 16.9 (1.4 to 34.1)           | 9.85 (5.04 to 16)               | -3.05 (-3.2 to -2.89)                    |
| 8 Depressive disorders       | 8 Other musculoskeletal      | 136 (102 to 172)             | 122 (108 to 139)                | 78.6 (72.6 to 83)                        |
| 9 Hypertensive heart disease | 9 Alzheimer's disease        | 185 (105 to 287)             | 168 (97.5 to 238)               | 9.04 (6.59 to 12)                        |
| 10 Chronic kidney disease    | 10 Road injuries             | -20.1 (-51.3 to 32.5)        | -24.7 (-53.1 to 21.1)           | -32.9 (-59.1 to 10.9)                    |
| 11 Headache disorders        | 11 COPD                      | 76 (30.4 to 134)             | 65.7 (24 to 112)                | -12.7 (-41 to 28.5)                      |
| 12 Anxiety disorders         | 12 Age-related hearing loss  | 72.3 (46.2 to 109)           | 61.9 (43.3 to 79.5)             | -1.75 (-1.87 to -1.63)                   |
| 13 Lower respiratory infect  | 13 Headache disorders        | 11.2 (-4.41 to 26.9)         | 4.46 (-0.335 to 13.2)           | 0.505 (0.314 to 0.64)                    |
| 14 Gynecological diseases    | 14 Anxiety disorders         | 8.15 (-6.78 to 23.7)         | 1.59 (-4.51 to 7.67)            | 1.26 (1.16 to 1.37)                      |
| 15 COPD                      | 15 Neonatal disorders        | -52.5 (-64.4 to -35.6)       | -55.3 (-64.7 to -41.1)          | -36.4 (-52.1 to -15.3)                   |
| 16 Other musculoskeletal     | 16 Lung cancer               | 73.8 (11 to 154)             | 63 (6.39 to 128)                | -6.57 (-35 to 25.3)                      |
| 17 Age-related hearing loss  | 17 Lower respiratory infect  | -6.57 (-27 to 17.7)          | -12.1 (-31.7 to 9.89)           | -42.2 (-55.4 to -23.1)                   |
| 18 Congenital defects        | 18 Gynecological diseases    | -6.13 (-31.3 to 27.4)        | -11.6 (-33.2 to 16.3)           | -16.4 (-35.5 to 6.91)                    |
| 19 Neck pain                 | 19 Blindness and vision loss | 61.1 (36.9 to 95.7)          | 51.3 (34.8 to 68.3)             | -7.61 (-8.1 to -7.1)                     |
| 20 Falls                     | 20 Falls                     | 39.4 (16.1 to 68.6)          | 30.9 (13.8 to 47.7)             | -6.4 (-15.5 to 3.09)                     |
| 22 Alzheimer's disease       | 22 Neck pain                 |                              |                                 |                                          |
| 23 Blindness and vision loss | 31 Congenital defects        |                              |                                 |                                          |
| 26 Lung cancer               | 160 COVID-19                 |                              |                                 |                                          |

### Oman, Reference scenario

**Legend:**

Communicable, maternal, neonatal and nutritional  
Non-communicable  
Injuries

| Leading Causes 2022           | Leading Causes 2050          | Mean % change number of DALY | Mean % change all-age DALY rate | Mean % change age-standardized DALY rate |
|-------------------------------|------------------------------|------------------------------|---------------------------------|------------------------------------------|
| 1 Road injuries               | 1 Diabetes                   | 524 (444 to 614)             | 325 (271 to 392)                | 48.8 (30.3 to 72.4)                      |
| 2 Ischemic heart disease      | 2 Ischemic heart disease     | 175 (83.6 to 311)            | 87.6 (24.4 to 185)              | -44.1 (-65.6 to -8.83)                   |
| 3 Diabetes                    | 3 Road injuries              | 34.6 (-18.1 to 121)          | -8.17 (-44.1 to 49.9)           | -17.6 (-51.6 to 41.6)                    |
| 4 Low back pain               | 4 Chronic kidney disease     | 542 (371 to 782)             | 338 (217 to 513)                | 34.2 (-6.33 to 101)                      |
| 5 Depressive disorders        | 5 Hypertensive heart disease | 640 (425 to 869)             | 405 (258 to 589)                | 27.6 (-15.6 to 86.6)                     |
| 6 Neonatal disorders          | 6 Stroke                     | 162 (106 to 236)             | 78.8 (39.7 to 139)              | -43.5 (-57.2 to -18.9)                   |
| 7 Headache disorders          | 7 Low back pain              | 95.5 (72.3 to 117)           | 33 (22.1 to 46)                 | -2.75 (-3.57 to -1.97)                   |
| 8 Stroke                      | 8 Other musculoskeletal      | 177 (138 to 219)             | 88.8 (65.5 to 116)              | 45.6 (42.9 to 48.3)                      |
| 9 Anxiety disorders           | 9 Depressive disorders       | 63 (45.5 to 84.4)            | 11 (1.72 to 23.5)               | -0.0548 (-1.4 to 1.32)                   |
| 10 Congenital defects         | 10 Lower respiratory infect  | 169 (106 to 233)             | 83.2 (40.3 to 135)              | -14.1 (-34.2 to 16.4)                    |
| 11 Gynecological diseases     | 11 Blindness and vision loss | 243 (196 to 290)             | 134 (107 to 157)                | -4.15 (-4.64 to -3.61)                   |
| 12 Other musculoskeletal      | 12 Age-related hearing loss  | 237 (194 to 285)             | 129 (105 to 154)                | -0.667 (-1.24 to -0.143)                 |
| 13 COVID-19                   | 13 Headache disorders        | 50 (33 to 68.9)              | 2.09 (-4.78 to 12.5)            | 3.67 (1.82 to 5.1)                       |
| 14 Lower respiratory infect   | 14 Alzheimer's disease       | 694 (544 to 859)             | 440 (341 to 529)                | 12.3 (8.52 to 16.2)                      |
| 15 Falls                      | 15 COPD                      | 455 (305 to 639)             | 278 (174 to 420)                | 10.5 (-25 to 59.1)                       |
| 16 Chronic kidney disease     | 16 Anxiety disorders         | 48.6 (32.8 to 69.6)          | 1.11 (-6.15 to 11.3)            | 3.44 (1.94 to 4.88)                      |
| 17 Neck pain                  | 17 Other cardiovascular      | 163 (106 to 221)             | 79.4 (44 to 116)                | -19.9 (-36.3 to 4.82)                    |
| 18 Blindness and vision loss  | 18 Falls                     | 92.8 (63.1 to 129)           | 31.1 (13.1 to 50.3)             | -11.2 (-20.6 to -0.0519)                 |
| 19 Other cardiovascular       | 19 Gynecological diseases    | 50.1 (14.2 to 87.5)          | 2.3 (-21.8 to 30.6)             | 15.5 (-9.67 to 41.9)                     |
| 20 Age-related hearing loss   | 20 Neonatal disorders        | -10.3 (-28.5 to 16)          | -38.9 (-50.9 to -20.3)          | -19.4 (-37.7 to 7.38)                    |
| 21 Hypertensive heart disease | 22 Neck pain                 |                              |                                 |                                          |
| 28 COPD                       | 25 Congenital defects        |                              |                                 |                                          |
| 36 Alzheimer's disease        | 158 COVID-19                 |                              |                                 |                                          |

### Palestine, Reference scenario

**Legend:**  
 Communicable, maternal, neonatal and nutritional  
 Non-communicable  
 Injuries

| Leading Causes 2022           | Leading Causes 2050           | Mean % change number of DALY | Mean % change all-age DALY rate | Mean % change age-standardized DALY rate |
|-------------------------------|-------------------------------|------------------------------|---------------------------------|------------------------------------------|
| 1 COVID-19                    | 1 Diabetes                    | 251 (198 to 310)             | 155 (124 to 191)                | 22.3 (6.31 to 42.4)                      |
| 2 Ischemic heart disease      | 2 Ischemic heart disease      | 79.6 (18.3 to 168)           | 30.7 (-15.9 to 100)             | -38.8 (-63.1 to -0.557)                  |
| 3 Conflict & terror           | 3 Conflict & terror           | 223 (-89.4 to 1900)          | 133 (-92.2 to 1390)             | 109 (-92.3 to 1290)                      |
| 4 Neonatal disorders          | 4 Depressive disorders        | 60.1 (40.3 to 80)            | 16.3 (9.66 to 24.2)             | -1.86 (-1.95 to -1.77)                   |
| 5 Depressive disorders        | 5 Stroke                      | 75.3 (37.8 to 121)           | 27.5 (0.761 to 60.7)            | -41.1 (-56.1 to -18.6)                   |
| 6 Diabetes                    | 6 Chronic kidney disease      | 270 (165 to 404)             | 169 (94.3 to 275)               | 35.2 (-9.52 to 105)                      |
| 7 Stroke                      | 7 Low back pain               | 77.8 (56.5 to 99.7)          | 29.2 (22 to 36.1)               | -3.79 (-3.92 to -3.68)                   |
| 8 Low back pain               | 8 Headache disorders          | 50.8 (29.9 to 78)            | 9.45 (2.78 to 22.9)             | 0.534 (0.356 to 0.637)                   |
| 9 Congenital defects          | 9 Anxiety disorders           | 41.5 (19.3 to 64.3)          | 2.69 (-4.35 to 10.3)            | 0.923 (0.842 to 1.01)                    |
| 10 Anxiety disorders          | 10 Hypertensive heart disease | 248 (156 to 376)             | 153 (83 to 258)                 | 2.61 (-33.3 to 57.4)                     |
| 11 Headache disorders         | 11 Neonatal disorders         | -36.5 (-51.2 to -16.9)       | -53.9 (-64 to -40.9)            | -37.9 (-51.6 to -19.1)                   |
| 12 Gynecological diseases     | 12 Other musculoskeletal      | 176 (137 to 220)             | 100 (77.5 to 123)               | 41.9 (30.6 to 48.9)                      |
| 13 Lower respiratory infect   | 13 Gynecological diseases     | 50.3 (16.2 to 85.6)          | 9.26 (-13.8 to 33.5)            | -8.58 (-26.5 to 9.29)                    |
| 14 Chronic kidney disease     | 14 Age-related hearing loss   | 137 (104 to 172)             | 71.8 (56.8 to 90.1)             | -1.13 (-1.28 to -0.975)                  |
| 15 Road injuries              | 15 Lung cancer                | 160 (77.9 to 269)            | 88.8 (29 to 161)                | -7.09 (-32.3 to 23.5)                    |
| 16 Interpersonal violence     | 16 Alzheimer's disease        | 306 (228 to 399)             | 195 (144 to 246)                | 4.29 (2.15 to 6.85)                      |
| 17 Falls                      | 17 Neck pain                  | 94.5 (70.2 to 121)           | 41.3 (29.8 to 53.5)             | -0.118 (-0.334 to 0.0836)                |
| 18 Age-related hearing loss   | 18 Congenital defects         | -24.3 (-38.1 to -8.18)       | -45.1 (-52.1 to -36.4)          | -22.8 (-31.8 to -11.9)                   |
| 19 Neck pain                  | 19 Lower respiratory infect   | 15.8 (-8.82 to 45.4)         | -15.8 (-32.2 to 5.19)           | -33.6 (-47.3 to -15.7)                   |
| 20 Other musculoskeletal      | 20 Colorectal cancer          | 185 (85.5 to 323)            | 107 (33.6 to 192)               | 3.33 (-28.9 to 42.8)                     |
| 21 Hypertensive heart disease | 26 Falls                      |                              |                                 |                                          |
| 22 Lung cancer                | 27 Road injuries              |                              |                                 |                                          |
| 27 Colorectal cancer          | 30 Interpersonal violence     |                              |                                 |                                          |
| 35 Alzheimer's disease        | 155 COVID-19                  |                              |                                 |                                          |

### Qatar, Reference scenario

**Legend:**  
Communicable, maternal, neonatal and nutritional  
Non-communicable  
Injuries

| Leading Causes 2022          | Leading Causes 2050          | Mean % change number of DALY | Mean % change all-age DALY rate | Mean % change age-standardized DALY rate |
|------------------------------|------------------------------|------------------------------|---------------------------------|------------------------------------------|
| 1 Diabetes                   | 1 Diabetes                   | 738 (638 to 869)             | 265 (224 to 316)                | 4.31 (-9.86 to 21.9)                     |
| 2 Road injuries              | 2 Ischemic heart disease     | 357 (214 to 543)             | 98.8 (36 to 182)                | -49.3 (-65.8 to -21.8)                   |
| 3 Low back pain              | 3 Low back pain              | 195 (165 to 233)             | 28.5 (16.5 to 41.4)             | -0.523 (-1.19 to 0.226)                  |
| 4 Depressive disorders       | 4 Chronic kidney disease     | 1110 (787 to 1600)           | 428 (289 to 641)                | 22.5 (-12.9 to 84.1)                     |
| 5 Ischemic heart disease     | 5 Road injuries              | 120 (44.2 to 249)            | -4.09 (-36.4 to 53.3)           | -17.1 (-46.9 to 33.2)                    |
| 6 Headache disorders         | 6 Depressive disorders       | 136 (111 to 165)             | 2.58 (-6.06 to 12.7)            | 1.4 (0.163 to 2.9)                       |
| 7 Anxiety disorders          | 7 Other musculoskeletal      | 249 (197 to 297)             | 51.9 (32.7 to 73.3)             | 26.2 (24.6 to 27.8)                      |
| 8 Other musculoskeletal      | 8 Stroke                     | 389 (297 to 493)             | 113 (75.7 to 155)               | -42.5 (-53.5 to -26)                     |
| 9 COVID-19                   | 9 Age-related hearing loss   | 421 (356 to 489)             | 126 (101 to 153)                | -0.502 (-1.03 to 0.0533)                 |
| 10 Falls                     | 10 Headache disorders        | 123 (102 to 147)             | -2.84 (-9.05 to 6.66)           | 4.29 (2.44 to 5.91)                      |
| 11 Gynecological diseases    | 11 Liver cancer              | 1150 (921 to 1400)           | 442 (345 to 550)                | 23.3 (2.28 to 50.5)                      |
| 12 Neonatal disorders        | 12 Anxiety disorders         | 127 (103 to 154)             | -1.28 (-8.37 to 8.05)           | 4.1 (2.56 to 6.03)                       |
| 13 Stroke                    | 13 Alzheimer's disease       | 1740 (1450 to 2080)          | 698 (584 to 840)                | 5.84 (1.65 to 9.81)                      |
| 14 Neck pain                 | 14 Falls                     | 143 (108 to 183)             | 5.81 (-8.27 to 22.2)            | -20.7 (-29.6 to -8.79)                   |
| 15 Congenital defects        | 15 Blindness and vision loss | 473 (389 to 565)             | 149 (115 to 182)                | -3.6 (-4.18 to -2.96)                    |
| 16 Age-related hearing loss  | 16 Gynecological diseases    | 148 (107 to 202)             | 7.72 (-10.9 to 34)              | 30.4 (9.59 to 56)                        |
| 17 Oral disorders            | 17 Lung cancer               | 746 (510 to 1070)            | 268 (170 to 405)                | -5.87 (-30 to 22.1)                      |
| 18 Schizophrenia             | 18 COPD                      | 814 (590 to 1070)            | 298 (207 to 412)                | -1.09 (-25.7 to 33.1)                    |
| 19 Chronic kidney disease    | 19 Cirrhosis liver           | 488 (395 to 583)             | 156 (116 to 201)                | -29.2 (-38.4 to -17.9)                   |
| 20 Mechanical forces         | 20 Neck pain                 | 202 (151 to 267)             | 31.3 (11.5 to 55.7)             | 5.66 (3.44 to 8.19)                      |
| 22 Blindness and vision loss | 22 Oral disorders            |                              |                                 |                                          |
| 25 Cirrhosis liver           | 27 Neonatal disorders        |                              |                                 |                                          |
| 31 Liver cancer              | 30 Schizophrenia             |                              |                                 |                                          |
| 33 Lung cancer               | 31 Congenital defects        |                              |                                 |                                          |
| 37 COPD                      | 40 Mechanical forces         |                              |                                 |                                          |
| 43 Alzheimer's disease       | 151 COVID-19                 |                              |                                 |                                          |



### Saudi Arabia, Reference scenario

**Legend:**  
Communicable, maternal, neonatal and nutritional  
Non-communicable  
Injuries

| Leading Causes 2022           | Leading Causes 2050          | Mean % change number of DALY | Mean % change all-age DALY rate | Mean % change age-standardized DALY rate |
|-------------------------------|------------------------------|------------------------------|---------------------------------|------------------------------------------|
| 1 Ischemic heart disease      | 1 Ischemic heart disease     | 76.1 (11.1 to 171)           | 46.9 (-2.09 to 120)             | -41.9 (-62.2 to -9.13)                   |
| 2 Road injuries               | 2 Chronic kidney disease     | 334 (200 to 512)             | 262 (154 to 409)                | 30 (-7.02 to 91.5)                       |
| 3 Stroke                      | 3 Diabetes                   | 308 (231 to 386)             | 240 (196 to 287)                | 41 (24 to 59.4)                          |
| 4 Diabetes                    | 4 Road injuries              | 23.3 (-22.2 to 93.8)         | 2.92 (-33.4 to 60.4)            | -6.44 (-40.8 to 54.6)                    |
| 5 Chronic kidney disease      | 5 Hypertensive heart disease | 455 (278 to 671)             | 363 (226 to 532)                | 27.1 (-11.1 to 82.8)                     |
| 6 Low back pain               | 6 Stroke                     | 97.3 (45.2 to 169)           | 64.4 (24.5 to 120)              | -42.7 (-56.1 to -20.8)                   |
| 7 Depressive disorders        | 7 Low back pain              | 63.7 (39.4 to 90.3)          | 36.5 (23.7 to 51)               | -1.95 (-2.23 to -1.64)                   |
| 8 Falls                       | 8 Falls                      | 80 (49 to 108)               | 50 (36.1 to 64.1)               | -4.38 (-9.08 to 0.281)                   |
| 9 Headache disorders          | 9 COPD                       | 344 (220 to 527)             | 271 (171 to 414)                | 11.5 (-21.9 to 56.5)                     |
| 10 Anxiety disorders          | 10 Lower respiratory infect  | 163 (97.1 to 257)            | 119 (69.7 to 188)               | -7.28 (-27.1 to 20.3)                    |
| 11 Gynecological diseases     | 11 Cirrhosis liver           | 141 (95.8 to 206)            | 101 (68 to 136)                 | -23 (-32.4 to -9.68)                     |
| 12 Interpersonal violence     | 12 Depressive disorders      | 29.2 (8.28 to 50.8)          | 7.66 (-2.24 to 19.3)            | -0.266 (-0.738 to 0.263)                 |
| 13 Cirrhosis liver            | 13 Blindness and vision loss | 229 (166 to 286)             | 174 (138 to 206)                | -4 (-4.28 to -3.69)                      |
| 14 Hypertensive heart disease | 14 Alzheimer's disease       | 781 (576 to 983)             | 634 (516 to 753)                | 13 (10.5 to 15.5)                        |
| 15 Lower respiratory infect   | 15 Age-related hearing loss  | 190 (140 to 243)             | 142 (114 to 174)                | -1.09 (-1.23 to -0.945)                  |
| 16 Other musculoskeletal      | 16 Other musculoskeletal     | 89.6 (56.2 to 128)           | 58.1 (33 to 86.8)               | 38.3 (34.7 to 41.4)                      |
| 17 Self-harm                  | 17 Headache disorders        | 15.9 (-3.02 to 35.6)         | -3.38 (-11 to 9.1)              | 1.83 (1.16 to 2.37)                      |
| 18 Neonatal disorders         | 18 Anxiety disorders         | 14.6 (-3.71 to 32.8)         | -4.44 (-13.3 to 5.83)           | 2.38 (1.76 to 2.96)                      |
| 19 Neck pain                  | 19 Gynecological diseases    | 3.09 (-24.5 to 32.7)         | -14 (-35.9 to 9.19)             | 0.23 (-23 to 23.6)                       |
| 20 Mechanical forces          | 20 Neck pain                 | 63.6 (33.4 to 102)           | 36.4 (15.4 to 61.2)             | 2.99 (2.32 to 3.76)                      |
| 21 Age-related hearing loss   | 27 Self-harm                 |                              |                                 |                                          |
| 22 Blindness and vision loss  | 28 Interpersonal violence    |                              |                                 |                                          |
| 24 COPD                       | 29 Mechanical forces         |                              |                                 |                                          |
| 46 Alzheimer's disease        | 34 Neonatal disorders        |                              |                                 |                                          |

### Sudan, Reference scenario

**Legend:**  
Communicable, maternal, neonatal and nutritional  
Non-communicable  
Injuries

| Leading Causes 2022           | Leading Causes 2050          | Mean % change number of DALY  | Mean % change all-age DALY rate | Mean % change age-standardized DALY rate |
|-------------------------------|------------------------------|-------------------------------|---------------------------------|------------------------------------------|
| 1 Neonatal disorders          | 1 HIV/AIDS                   | 458 (-36.3 to 3080)           | 274 (-56.7 to 1930)             | 199 (-64.5 to 1640)                      |
| 2 Ischemic heart disease      | 2 Ischemic heart disease     | 80 (-0.336 to 189)            | 19.9 (-31.1 to 97.8)            | -40.3 (-68 to 3.54)                      |
| 3 Congenital defects          | 3 Diabetes                   | <b>322 (247 to 404)</b>       | <b>180 (138 to 222)</b>         | <b>44.2 (24.6 to 64.9)</b>               |
| 4 Malaria                     | 4 Stroke                     | <b>63.7 (12 to 133)</b>       | 8.89 (-21 to 50.8)              | <b>-42.9 (-60.2 to -16.3)</b>            |
| 5 COVID-19                    | 5 Neonatal disorders         | <b>-46.5 (-67.1 to -18)</b>   | <b>-64.5 (-77.3 to -45)</b>     | <b>-41.3 (-61.7 to -7.94)</b>            |
| 6 Stroke                      | 6 Congenital defects         | <b>-39.5 (-53.5 to -22.3)</b> | <b>-59.9 (-66.5 to -51.9)</b>   | <b>-33.9 (-41.7 to -24.6)</b>            |
| 7 Lower respiratory infect    | 7 Low back pain              | <b>94.4 (62.4 to 128)</b>     | <b>29.1 (21.2 to 38)</b>        | <b>-5.1 (-5.39 to -4.76)</b>             |
| 8 Road injuries               | 8 Hypertensive heart disease | <b>226 (109 to 365)</b>       | <b>117 (43.7 to 212)</b>        | -0.817 (-37.3 to 51.9)                   |
| 9 HIV/AIDS                    | 9 Chronic kidney disease     | <b>233 (113 to 384)</b>       | <b>121 (47.1 to 230)</b>        | 24.2 (-20.7 to 93.8)                     |
| 10 Low back pain              | 10 Road injuries             | 36 (-19.5 to 126)             | -9.49 (-45.9 to 47.3)           | -26 (-55.5 to 19.9)                      |
| 11 Depressive disorders       | 11 Depressive disorders      | <b>76.9 (49.7 to 109)</b>     | <b>17.5 (10.7 to 25.7)</b>      | <b>-2.68 (-3.03 to -2.32)</b>            |
| 12 Headache disorders         | 12 Other musculoskeletal     | <b>283 (218 to 350)</b>       | <b>154 (137 to 177)</b>         | <b>73.5 (69.7 to 77.1)</b>               |
| 13 Anxiety disorders          | 13 Headache disorders        | <b>70.6 (41.5 to 106)</b>     | <b>13.3 (5.56 to 28.9)</b>      | <b>0.357 (0.0741 to 0.676)</b>           |
| 14 Diabetes                   | 14 Anxiety disorders         | <b>58.9 (30.2 to 91)</b>      | 5.48 (-2.19 to 14.7)            | <b>1.33 (0.928 to 1.8)</b>               |
| 15 Gynecological diseases     | 15 Gynecological diseases    | <b>59.3 (16.5 to 111)</b>     | 5.93 (-19.7 to 34.9)            | -16 (-38 to 7.77)                        |
| 16 Dietary iron deficiency    | 16 Lower respiratory infect  | <b>-31.9 (-53.5 to -7.33)</b> | <b>-54.8 (-67.4 to -42)</b>     | <b>-50.6 (-62.8 to -34.1)</b>            |
| 17 Diarrheal diseases         | 17 Age-related hearing loss  | <b>151 (107 to 197)</b>       | <b>67 (48.6 to 85.4)</b>        | <b>-1.98 (-2.28 to -1.68)</b>            |
| 18 Hypertensive heart disease | 18 Malaria                   | 18.7 (-61.6 to 53.3)          | <b>-21.5 (-72.7 to -6.53)</b>   | -6.53 (-71.4 to 5.92)                    |
| 19 Conflict & terror          | 19 COPD                      | <b>127 (53.3 to 214)</b>      | <b>51 (4.43 to 112)</b>         | -25.6 (-49.5 to 14.6)                    |
| 20 Chronic kidney disease     | 20 Neck pain                 | <b>119 (86.2 to 154)</b>      | <b>45.6 (32.2 to 59.6)</b>      | 0.492 (-0.437 to 1.36)                   |
| 22 Other musculoskeletal      | 21 Dietary iron deficiency   |                               |                                 |                                          |
| 25 COPD                       | 27 Conflict & terror         |                               |                                 |                                          |
| 26 Age-related hearing loss   | 43 Diarrheal diseases        |                               |                                 |                                          |
| 28 Neck pain                  | 166 COVID-19                 |                               |                                 |                                          |

### Syria, Reference scenario

**Legend:**  
■ Communicable, maternal, neonatal and nutritional  
■ Non-communicable  
■ Injuries

| Leading Causes 2022           | Leading Causes 2050          | Mean % change number of DALY | Mean % change all-age DALY rate | Mean % change age-standardized DALY rate |
|-------------------------------|------------------------------|------------------------------|---------------------------------|------------------------------------------|
| 1 Conflict & terror           | 1 Conflict & terror          | 26900 (-97.2 to 5280)        | 25300 (-97.4 to 4450)           | 4600 (-96.9 to 4380)                     |
| 2 Ischemic heart disease      | 2 Ischemic heart disease     | 21.9 (-26 to 84.8)           | 6.26 (-34.1 to 58.2)            | -30.6 (-61.6 to 18.7)                    |
| 3 Stroke                      | 3 Diabetes                   | <b>179 (123 to 241)</b>      | <b>142 (113 to 178)</b>         | <b>75.6 (53.9 to 99.8)</b>               |
| 4 Diabetes                    | 4 Leishmaniasis              | <b>709 (324 to 1150)</b>     | <b>600 (307 to 914)</b>         | <b>580 (303 to 872)</b>                  |
| 5 Low back pain               | 5 Stroke                     | 16.5 (-16.8 to 54.2)         | 1.29 (-25.4 to 35.2)            | <b>-35.8 (-56 to -5.7)</b>               |
| 6 Chronic kidney disease      | 6 Chronic kidney disease     | <b>133 (66.4 to 207)</b>     | <b>103 (45.9 to 174)</b>        | 31.4 (-11.5 to 97.8)                     |
| 7 Depressive disorders        | 7 Low back pain              | <b>34.9 (10.7 to 61.4)</b>   | <b>16.9 (9.16 to 26.2)</b>      | <b>-2.74 (-3.37 to -2.11)</b>            |
| 8 Headache disorders          | 8 Hypertensive heart disease | <b>139 (70.9 to 218)</b>     | <b>108 (52.1 to 181)</b>        | 15.5 (-23.3 to 77.6)                     |
| 9 Anxiety disorders           | 9 Depressive disorders       | 22.1 (-2.96 to 48.2)         | 5.73 (-0.269 to 12.4)           | <b>-1.77 (-3.04 to -0.574)</b>           |
| 10 Neonatal disorders         | 10 COPD                      | <b>69.8 (20.2 to 125)</b>    | <b>47.7 (5.13 to 92.7)</b>      | -10.9 (-41 to 28.5)                      |
| 11 Road injuries              | 11 Headache disorders        | 18.8 (-4.29 to 45.3)         | 2.97 (-2.49 to 11.8)            | -0.692 (-1.47 to 0.233)                  |
| 12 Lower respiratory infect   | 12 Alzheimer's disease       | <b>181 (99.2 to 298)</b>     | <b>143 (79.5 to 221)</b>        | <b>6.42 (4.17 to 9.42)</b>               |
| 13 Gynecological diseases     | 13 Anxiety disorders         | 13.5 (-9.57 to 37.5)         | -1.72 (-7.44 to 3.95)           | -0.742 (-1.93 to 0.604)                  |
| 14 COVID-19                   | 14 Age-related hearing loss  | <b>69 (33.6 to 110)</b>      | <b>46.5 (27.5 to 70.5)</b>      | <b>-1.49 (-1.82 to -1.14)</b>            |
| 15 Congenital defects         | 15 Gynecological diseases    | 10.9 (-22.8 to 45.2)         | -3.58 (-31.3 to 23.6)           | -21.1 (-42.6 to 2.81)                    |
| 16 COPD                       | 16 Other musculoskeletal     | <b>77.9 (42.8 to 113)</b>    | <b>54.3 (39.8 to 68.4)</b>      | <b>31.5 (26.2 to 35.5)</b>               |
| 17 Hypertensive heart disease | 17 Blindness and vision loss | <b>67.1 (32.9 to 108)</b>    | <b>44.8 (25.3 to 66.4)</b>      | <b>-3.32 (-3.69 to -2.9)</b>             |
| 18 Age-related hearing loss   | 18 Road injuries             | -10.2 (-47.5 to 48)          | -21.8 (-51.5 to 27.4)           | -23.5 (-53.7 to 28.4)                    |
| 19 Neck pain                  | 19 Lower respiratory infect  | -5.85 (-30.2 to 20.1)        | -18.3 (-34.9 to 0.873)          | <b>-38.7 (-53.3 to -16.2)</b>            |
| 20 Cirrhosis liver            | 20 Neck pain                 | <b>38.5 (11.7 to 68.1)</b>   | <b>20.1 (10.3 to 32.6)</b>      | 1.71 (-0.157 to 3.36)                    |
| 21 Blindness and vision loss  | 22 Neonatal disorders        |                              |                                 |                                          |
| 22 Other musculoskeletal      | 23 Cirrhosis liver           |                              |                                 |                                          |
| 25 Leishmaniasis              | 30 Congenital defects        |                              |                                 |                                          |
| 29 Alzheimer's disease        | 163 COVID-19                 |                              |                                 |                                          |

### Tunisia, Reference scenario

**Legend:**  
Communicable, maternal, neonatal and nutritional  
Non-communicable  
Injuries

| Leading Causes 2022           | Leading Causes 2050          | Mean % change number of DALY | Mean % change all-age DALY rate | Mean % change age-standardized DALY rate |
|-------------------------------|------------------------------|------------------------------|---------------------------------|------------------------------------------|
| 1 Ischemic heart disease      | 1 Ischemic heart disease     | 14.8 (-28.8 to 67.9)         | 14.7 (-24.8 to 70.4)            | <b>-45.9 (-64.7 to -16.4)</b>            |
| 2 COVID-19                    | 2 Diabetes                   | <b>155 (115 to 193)</b>      | <b>155 (130 to 182)</b>         | <b>56.2 (43.2 to 69.1)</b>               |
| 3 Stroke                      | 3 Stroke                     | 19.9 (-10.8 to 59)           | 19.7 (-6.52 to 56.6)            | <b>-44.4 (-56 to -25.8)</b>              |
| 4 Diabetes                    | 4 Hypertensive heart disease | <b>153 (73.2 to 254)</b>     | <b>152 (78.6 to 245)</b>        | 9.01 (-23.8 to 55.5)                     |
| 5 Depressive disorders        | 5 Chronic kidney disease     | <b>146 (72.3 to 246)</b>     | <b>146 (75.6 to 243)</b>        | 16.1 (-19.6 to 73.1)                     |
| 6 Road injuries               | 6 Alzheimer's disease        | <b>221 (141 to 306)</b>      | <b>220 (153 to 284)</b>         | <b>7.65 (5.33 to 9.95)</b>               |
| 7 Low back pain               | 7 Low back pain              | <b>23.1 (6.68 to 41)</b>     | <b>22.9 (15.4 to 30.4)</b>      | <b>-4.69 (-4.87 to -4.47)</b>            |
| 8 Neonatal disorders          | 8 Depressive disorders       | 9.87 (-4.79 to 25.3)         | <b>9.67 (3.96 to 16.7)</b>      | <b>-2.41 (-2.69 to -2.15)</b>            |
| 9 Headache disorders          | 9 Other musculoskeletal      | <b>88.6 (61.8 to 114)</b>    | <b>88.3 (75.3 to 103)</b>       | <b>54.6 (51.9 to 56.7)</b>               |
| 10 Hypertensive heart disease | 10 COPD                      | <b>100 (44.6 to 170)</b>     | <b>99.8 (49.7 to 164)</b>       | -8.7 (-33.4 to 24.5)                     |
| 11 Chronic kidney disease     | 11 Road injuries             | <b>-12.4 (-41.8 to 33.5)</b> | <b>-12.5 (-38.9 to 30.1)</b>    | <b>-17.7 (-43.9 to 24)</b>               |
| 12 Gynecological diseases     | 12 Age-related hearing loss  | <b>78.3 (51.5 to 104)</b>    | <b>78 (60.3 to 95.3)</b>        | <b>-1.33 (-1.44 to -1.22)</b>            |
| 13 Anxiety disorders          | 13 Lung cancer               | <b>51.9 (6.95 to 108)</b>    | <b>51.6 (12 to 99.6)</b>        | -13.1 (-32.9 to 11)                      |
| 14 Other musculoskeletal      | 14 Headache disorders        | -0.691 (-13 to 15.5)         | -0.872 (-6.47 to 8.1)           | -0.119 (-0.359 to 0.107)                 |
| 15 Congenital defects         | 15 Blindness and vision loss | <b>74.2 (46.3 to 99.6)</b>   | <b>73.9 (52.6 to 89.6)</b>      | <b>-6.01 (-6.43 to -5.58)</b>            |
| 16 Lung cancer                | 16 Anxiety disorders         | -1.46 (-16 to 12.9)          | -1.65 (-7.12 to 5.51)           | <b>0.441 (0.101 to 0.75)</b>             |
| 17 Age-related hearing loss   | 17 Oral disorders            | <b>46.3 (25.9 to 67)</b>     | <b>46 (33.9 to 58.5)</b>        | <b>0.643 (0.372 to 0.909)</b>            |
| 18 COPD                       | 18 Gynecological diseases    | -19.6 (-40.9 to 5.82)        | -19.7 (-38.2 to 2.63)           | -16.6 (-35 to 2.9)                       |
| 19 Alzheimer's disease        | 19 Lower respiratory infect  | <b>28.2 (-0.165 to 66.7)</b> | <b>28 (2.53 to 61.7)</b>        | <b>-37.7 (-48.2 to -21.9)</b>            |
| 20 Neck pain                  | 20 Neck pain                 | <b>20.4 (2.01 to 38.3)</b>   | <b>20.2 (8.78 to 32.1)</b>      | <b>-0.809 (-1.22 to -0.36)</b>           |
| 21 Lower respiratory infect   | 26 Neonatal disorders        |                              |                                 |                                          |
| 22 Blindness and vision loss  | 30 Congenital defects        |                              |                                 |                                          |
| 24 Oral disorders             | 156 COVID-19                 |                              |                                 |                                          |

### Türkiye, Reference scenario

**Legend:**  
Communicable, maternal, neonatal and nutritional  
Non-communicable  
Injuries

| Leading Causes 2022           | Leading Causes 2050          | Mean % change number of DALY | Mean % change all-age DALY rate | Mean % change age-standardized DALY rate |
|-------------------------------|------------------------------|------------------------------|---------------------------------|------------------------------------------|
| 1 Ischemic heart disease      | 1 Diabetes                   | 120 (88.3 to 151)            | 120 (94.8 to 144)               | 25.8 (12.3 to 41.7)                      |
| 2 Stroke                      | 2 Ischemic heart disease     | -15.7 (-41.7 to 20.3)        | -15.5 (-41.7 to 21.4)           | -60.1 (-73.3 to -37.4)                   |
| 3 Diabetes                    | 3 COPD                       | 99.9 (52.7 to 155)           | 100 (54.4 to 160)               | -9.21 (-32.2 to 22.2)                    |
| 4 Low back pain               | 4 Stroke                     | 5.65 (-13.1 to 26.8)         | 5.82 (-12.8 to 27.4)            | -49.6 (-58.7 to -35.4)                   |
| 5 COVID-19                    | 5 Lung cancer                | 45.4 (2.56 to 90.9)          | 45.3 (6.9 to 85.9)              | -18 (-38.7 to 2.28)                      |
| 6 Lung cancer                 | 6 Alzheimer's disease        | 192 (131 to 252)             | 192 (146 to 240)                | 7.32 (4.77 to 10.1)                      |
| 7 COPD                        | 7 Low back pain              | 22.9 (11.1 to 35.9)          | 22.9 (17.1 to 28.8)             | -3.95 (-4.05 to -3.87)                   |
| 8 Depressive disorders        | 8 Chronic kidney disease     | 102 (50.8 to 174)            | 102 (50.2 to 188)               | -4.5 (-31.9 to 41.4)                     |
| 9 Neonatal disorders          | 9 Hypertensive heart disease | 170 (99.8 to 262)            | 170 (99.3 to 273)               | 9.77 (-22.6 to 62.6)                     |
| 10 Headache disorders         | 10 Other musculoskeletal     | 79.8 (62.3 to 95.9)          | 79.9 (68.9 to 90.9)             | 46.8 (44.6 to 48.9)                      |
| 11 Gynecological diseases     | 11 Age-related hearing loss  | 72.6 (52.3 to 93.8)          | 72.7 (61.2 to 87.7)             | -1.1 (-1.19 to -1)                       |
| 12 Other musculoskeletal      | 12 Depressive disorders      | 4.1 (-7.03 to 15.2)          | 4.17 (-0.618 to 9.68)           | -2.18 (-2.3 to -2.01)                    |
| 13 Chronic kidney disease     | 13 Headache disorders        | -0.548 (-10.3 to 9.89)       | -0.465 (-5.53 to 8.3)           | 0.306 (0.16 to 0.432)                    |
| 14 Anxiety disorders          | 14 Colorectal cancer         | 96.2 (27.1 to 171)           | 96 (34.7 to 165)                | 4.65 (-24.8 to 37.6)                     |
| 15 Age-related hearing loss   | 15 Lower respiratory infect  | 38.6 (10.9 to 72.3)          | 38.7 (14.8 to 77)               | -35.2 (-47.1 to -15.5)                   |
| 16 Congenital defects         | 16 Oral disorders            | 47.3 (30.6 to 65.2)          | 47.4 (37.1 to 58.1)             | 0.827 (0.642 to 1.02)                    |
| 17 Road injuries              | 17 Pancreatic cancer         | 162 (74.5 to 259)            | 162 (88.9 to 258)               | 41.3 (3.47 to 85.4)                      |
| 18 Alzheimer's disease        | 18 Blindness and vision loss | 62.8 (44.9 to 83.6)          | 62.8 (48.7 to 74.7)             | -5.21 (-5.57 to -4.84)                   |
| 19 Lower respiratory infect   | 19 Anxiety disorders         | -2.6 (-13.9 to 8.45)         | -2.54 (-8.13 to 4.46)           | 0.813 (0.73 to 0.894)                    |
| 20 Neck pain                  | 20 Neck pain                 | 22.1 (8.21 to 36.4)          | 22.2 (11.8 to 32.2)             | -0.577 (-0.774 to -0.394)                |
| 21 Oral disorders             | 23 Gynecological diseases    |                              |                                 |                                          |
| 22 Hypertensive heart disease | 25 Neonatal disorders        |                              |                                 |                                          |
| 24 Colorectal cancer          | 26 Road injuries             |                              |                                 |                                          |
| 25 Blindness and vision loss  | 34 Congenital defects        |                              |                                 |                                          |
| 32 Pancreatic cancer          | 156 COVID-19                 |                              |                                 |                                          |

### United Arab Emirates, Reference scenario

**Legend:**  
Communicable, maternal, neonatal and nutritional  
Non-communicable  
Injuries

| Leading Causes 2022           | Leading Causes 2050          | Mean % change number of DALY | Mean % change all-age DALY rate | Mean % change age-standardized DALY rate |
|-------------------------------|------------------------------|------------------------------|---------------------------------|------------------------------------------|
| 1 Ischemic heart disease      | 1 Diabetes                   | 652 (519 to 801)             | 269 (220 to 333)                | 26 (8.17 to 43.1)                        |
| 2 Road injuries               | 2 Ischemic heart disease     | 436 (256 to 735)             | 163 (73.2 to 288)               | -52.2 (-68.6 to -23.1)                   |
| 3 Low back pain               | 3 Stroke                     | 490 (355 to 664)             | 190 (127 to 273)                | -46.9 (-56.8 to -31.6)                   |
| 4 Diabetes                    | 4 Chronic kidney disease     | 1310 (829 to 1960)           | 592 (385 to 915)                | 11.1 (-23.8 to 61.3)                     |
| 5 COVID-19                    | 5 Hypertensive heart disease | 1580 (996 to 2430)           | 727 (458 to 1120)               | 17.3 (-17.4 to 79.9)                     |
| 6 Depressive disorders        | 6 Lower respiratory infect   | 981 (705 to 1290)            | 431 (304 to 581)                | -23.6 (-39.7 to -4.98)                   |
| 7 Headache disorders          | 7 Road injuries              | 157 (66 to 307)              | 26 (-16.2 to 97.2)              | -4.55 (-38.7 to 51.9)                    |
| 8 Other musculoskeletal       | 8 Low back pain              | 150 (110 to 195)             | 22.6 (9.33 to 37.8)             | 0.743 (-0.227 to 1.72)                   |
| 9 Stroke                      | 9 COPD                       | 702 (485 to 1020)            | 294 (198 to 457)                | -10 (-32.8 to 22.4)                      |
| 10 Anxiety disorders          | 10 Age-related hearing loss  | 371 (285 to 471)             | 131 (97.1 to 172)               | -0.827 (-1.21 to -0.424)                 |
| 11 Falls                      | 11 Depressive disorders      | 95.9 (65 to 126)             | -3.81 (-13.7 to 5.87)           | 1.69 (0.308 to 3.18)                     |
| 12 Gynecological diseases     | 12 Alzheimer's disease       | 1990 (1510 to 2540)          | 925 (740 to 1170)               | 2.57 (-0.919 to 5.9)                     |
| 13 Oral disorders             | 13 Other musculoskeletal     | 160 (108 to 225)             | 27.5 (8.24 to 51.7)             | 19.4 (17.4 to 21.3)                      |
| 14 Neck pain                  | 14 Headache disorders        | 88.1 (63 to 113)             | -7.59 (-14.2 to 0.889)          | 3.97 (2.39 to 5.25)                      |
| 15 Asthma                     | 15 Liver cancer              | 710 (526 to 896)             | 298 (225 to 398)                | 16.4 (-0.819 to 38.5)                    |
| 16 Neonatal disorders         | 16 Oral disorders            | 213 (155 to 283)             | 53.7 (30.2 to 78.5)             | -0.129 (-0.523 to 0.323)                 |
| 17 Age-related hearing loss   | 17 Pancreatic cancer         | 961 (556 to 1480)            | 421 (234 to 642)                | 14.8 (-22.5 to 55.1)                     |
| 18 Congenital defects         | 18 Falls                     | 127 (86.1 to 174)            | 11.4 (-5.45 to 27.5)            | -17.6 (-28.1 to -6.36)                   |
| 19 COPD                       | 19 Blindness and vision loss | 414 (308 to 517)             | 152 (108 to 196)                | -1.4 (-2.01 to -0.451)                   |
| 20 Schizophrenia              | 20 Lung cancer               | 670 (409 to 978)             | 278 (160 to 411)                | -11.6 (-35.1 to 15.2)                    |
| 22 Chronic kidney disease     | 21 Anxiety disorders         |                              |                                 |                                          |
| 23 Lower respiratory infect   | 24 Neck pain                 |                              |                                 |                                          |
| 24 Blindness and vision loss  | 26 Gynecological diseases    |                              |                                 |                                          |
| 30 Hypertensive heart disease | 30 Neonatal disorders        |                              |                                 |                                          |
| 32 Liver cancer               | 31 Asthma                    |                              |                                 |                                          |
| 34 Lung cancer                | 38 Congenital defects        |                              |                                 |                                          |
| 42 Pancreatic cancer          | 39 Schizophrenia             |                              |                                 |                                          |

### Yemen, Reference scenario

**Legend:**  
■ Communicable, maternal, neonatal and nutritional  
■ Non-communicable  
■ Injuries

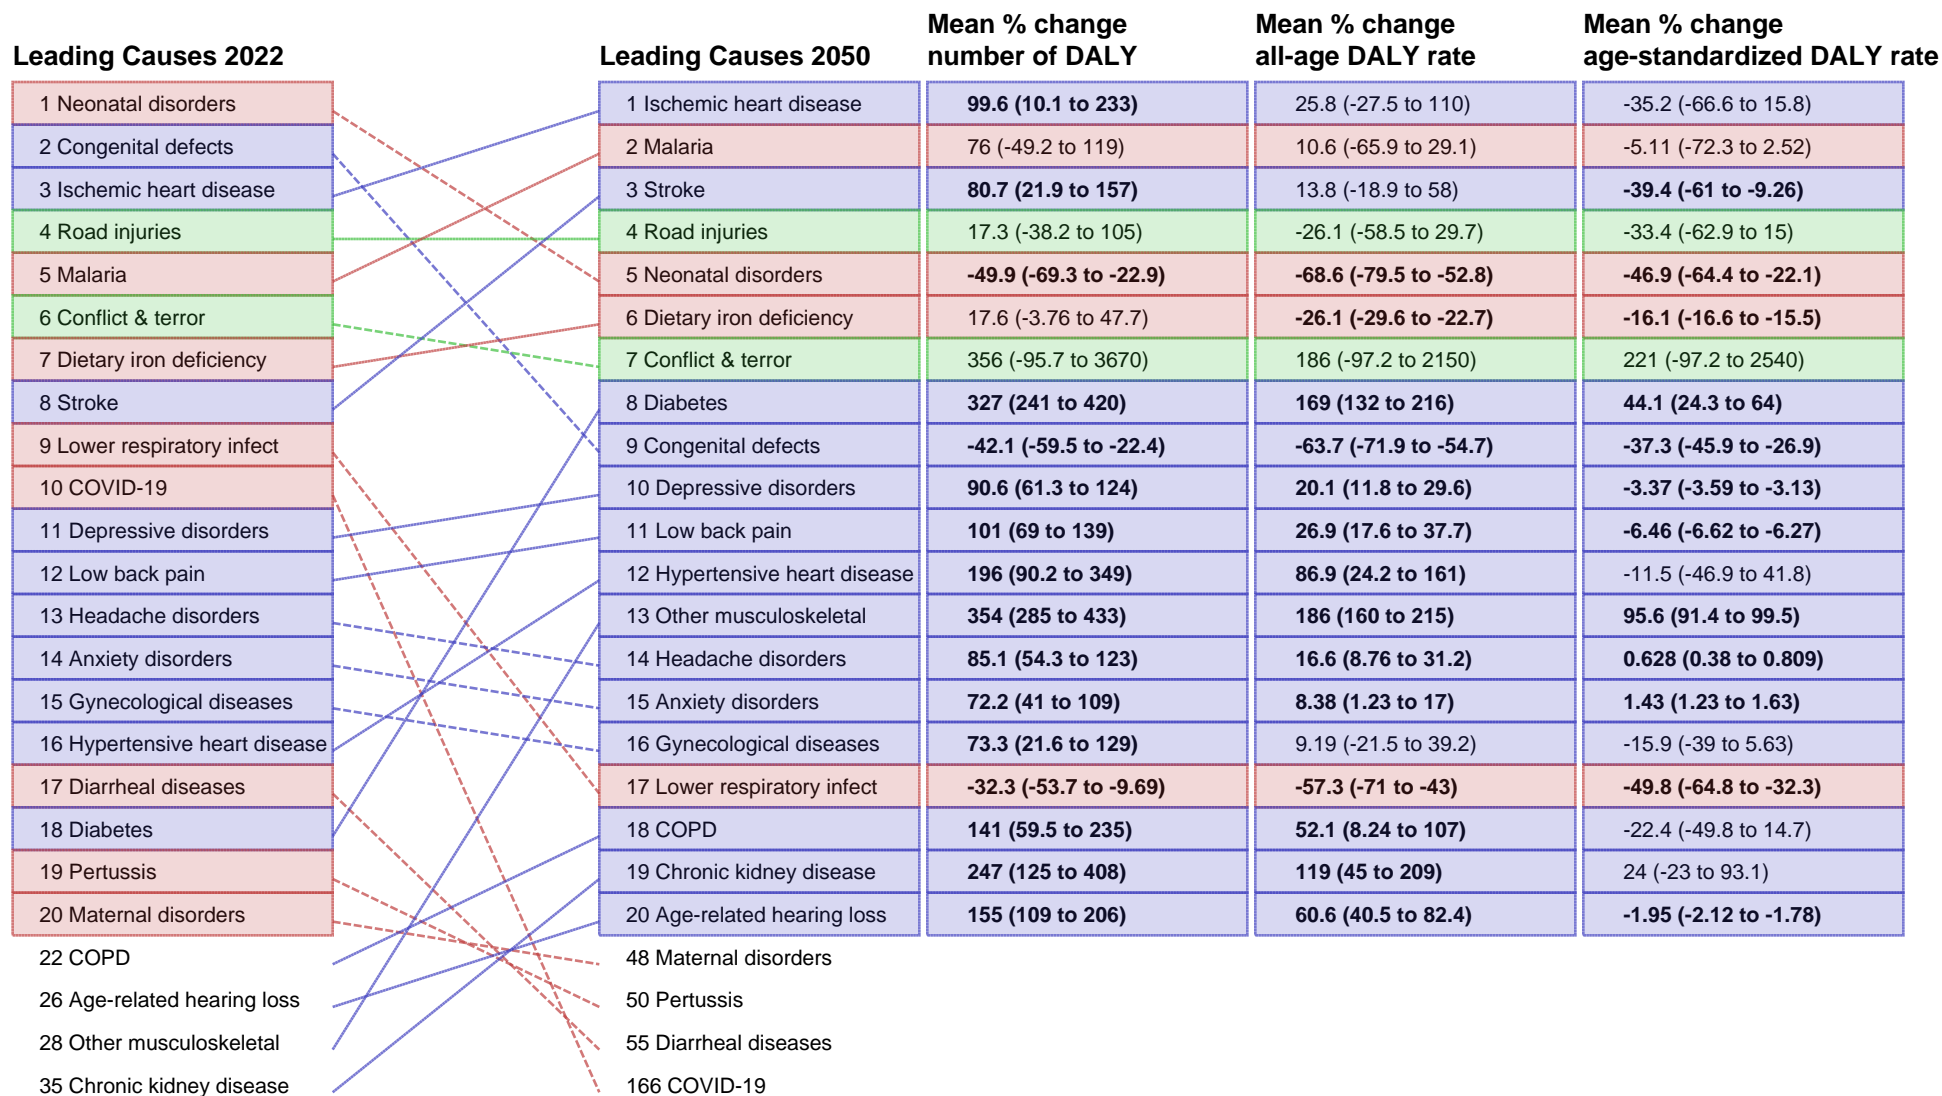

### Bangladesh, Reference scenario

**Legend:**  
■ Communicable, maternal, neonatal and nutritional  
■ Non-communicable  
■ Injuries

| Leading Causes 2022           | Leading Causes 2050           | Mean % change number of DALY | Mean % change all-age DALY rate | Mean % change age-standardized DALY rate |
|-------------------------------|-------------------------------|------------------------------|---------------------------------|------------------------------------------|
| 1 Neonatal disorders          | 1 Stroke                      | 28.8 (-4.1 to 65.3)          | 20.3 (-9.29 to 56.3)            | -42.6 (-58.3 to -20.3)                   |
| 2 Stroke                      | 2 Diabetes                    | 143 (96.4 to 193)            | 127 (90.7 to 160)               | 21.5 (2.36 to 44)                        |
| 3 Ischemic heart disease      | 3 Other musculoskeletal       | 151 (110 to 187)             | 134 (118 to 149)                | 67.5 (63.7 to 71.2)                      |
| 4 Lower respiratory infect    | 4 Ischemic heart disease      | 15 (-28.6 to 83.3)           | 7.62 (-35.9 to 70.8)            | -45.5 (-69.3 to -7.32)                   |
| 5 COPD                        | 5 COPD                        | 75.9 (28.1 to 142)           | 64.4 (17.9 to 120)              | -26 (-49.2 to 8.92)                      |
| 6 Diabetes                    | 6 Low back pain               | 46.1 (22.1 to 69.6)          | 36.2 (28.6 to 45.4)             | -5.47 (-5.82 to -5.16)                   |
| 7 Low back pain               | 7 Depressive disorders        | 35.3 (11.8 to 56.5)          | 26.1 (18.6 to 35.5)             | -3.3 (-3.64 to -3)                       |
| 8 Other musculoskeletal       | 8 Neonatal disorders          | -62.9 (-71.9 to -52.9)       | -65.4 (-71.2 to -58.3)          | -45.2 (-53.9 to -35.5)                   |
| 9 Depressive disorders        | 9 Age-related hearing loss    | 84.5 (50.8 to 119)           | 71.9 (56.4 to 88.8)             | -1.71 (-1.92 to -1.49)                   |
| 10 Cirrhosis liver            | 10 Blindness and vision loss  | 94.7 (58.2 to 133)           | 81.5 (64.3 to 98.2)             | -6.23 (-6.68 to -5.75)                   |
| 11 COVID-19                   | 11 Cirrhosis liver            | 4.45 (-17.1 to 28.7)         | -2.52 (-21.4 to 22.3)           | -37.1 (-50.7 to -20.1)                   |
| 12 Diarrheal diseases         | 12 Headache disorders         | 15.9 (-5.18 to 41.1)         | 8 (0.222 to 26.4)               | 0.438 (0.164 to 0.718)                   |
| 13 Headache disorders         | 13 Alzheimer's disease        | 211 (131 to 298)             | 189 (125 to 256)                | 1.56 (-3.03 to 6.82)                     |
| 14 Tuberculosis               | 14 Diarrheal diseases         | 3.11 (-33.4 to 45.9)         | -3.61 (-41.6 to 32.3)           | -38.5 (-62.1 to -5.18)                   |
| 15 Congenital defects         | 15 Hypertensive heart disease | 143 (69.6 to 253)            | 127 (52.1 to 222)               | -3.77 (-39.6 to 46.3)                    |
| 16 Dietary iron deficiency    | 16 Chronic kidney disease     | 125 (54.4 to 219)            | 110 (41.6 to 204)               | 17.4 (-25.3 to 83.1)                     |
| 17 Age-related hearing loss   | 17 Lower respiratory infect   | -47.1 (-60.8 to -29.4)       | -50.7 (-62.4 to -36.7)          | -62.5 (-70.8 to -51)                     |
| 18 Rheumatic heart disease    | 18 Dietary iron deficiency    | 0.645 (-18.3 to 18.6)        | -6.3 (-12.2 to 0.878)           | -18.4 (-19.1 to -17.6)                   |
| 19 Anxiety disorders          | 19 Anxiety disorders          | 24.1 (1.87 to 46.9)          | 15.7 (7.71 to 25.6)             | 1.24 (0.882 to 1.52)                     |
| 20 Blindness and vision loss  | 20 Osteoarthritis             | 121 (82 to 157)              | 106 (89.9 to 121)               | 6.5 (6.09 to 6.99)                       |
| 27 Chronic kidney disease     | 22 Rheumatic heart disease    |                              |                                 |                                          |
| 28 Hypertensive heart disease | 26 Tuberculosis               |                              |                                 |                                          |
| 31 Alzheimer's disease        | 29 Congenital defects         |                              |                                 |                                          |
| 35 Osteoarthritis             | 161 COVID-19                  |                              |                                 |                                          |



### Bhutan, Reference scenario

**Legend:**  
Communicable, maternal, neonatal and nutritional  
Non-communicable  
Injuries

| Leading Causes 2022           | Leading Causes 2050           | Mean % change number of DALY | Mean % change all-age DALY rate | Mean % change age-standardized DALY rate |
|-------------------------------|-------------------------------|------------------------------|---------------------------------|------------------------------------------|
| 1 Neonatal disorders          | 1 COPD                        | 91.5 (37.8 to 155)           | 68.6 (17.8 to 131)              | -25 (-51.6 to 13.2)                      |
| 2 COVID-19                    | 2 Ischemic heart disease      | 22 (-29.2 to 99.1)           | 7.48 (-39.1 to 81)              | -47.8 (-72.1 to -3.59)                   |
| 3 Ischemic heart disease      | 3 Other musculoskeletal       | 192 (153 to 235)             | 157 (139 to 177)                | 89.1 (83.9 to 94.2)                      |
| 4 COPD                        | 4 Diabetes                    | 128 (86.5 to 175)            | 101 (64.1 to 141)               | 4.53 (-14.7 to 31.1)                     |
| 5 Stroke                      | 5 Stroke                      | 32.9 (-1.17 to 77.1)         | 17 (-14.6 to 60.9)              | -45.1 (-61.6 to -22)                     |
| 6 Dietary iron deficiency     | 6 Low back pain               | 54.2 (34.4 to 73)            | 35.4 (26.9 to 45.4)             | -6.27 (-6.49 to -6.05)                   |
| 7 Low back pain               | 7 Depressive disorders        | 46.3 (27.8 to 65.3)          | 28.5 (19.2 to 39.9)             | -3.03 (-3.27 to -2.76)                   |
| 8 Diabetes                    | 8 Falls                       | 77.1 (43.6 to 115)           | 55.6 (29.4 to 80.1)             | -11.7 (-21 to -0.998)                    |
| 9 Cirrhosis liver             | 9 Chronic kidney disease      | 132 (52.2 to 228)            | 104 (29.2 to 201)               | 8.82 (-34.2 to 72.7)                     |
| 10 Lower respiratory infect   | 10 Age-related hearing loss   | 94.5 (68.3 to 119)           | 70.8 (56.9 to 85.4)             | -1.77 (-1.9 to -1.62)                    |
| 11 Diarrheal diseases         | 11 Cirrhosis liver            | 13.9 (-10.7 to 43.6)         | 0.109 (-21.5 to 30.4)           | -35.5 (-49.4 to -15.9)                   |
| 12 Other musculoskeletal      | 12 Neonatal disorders         | -64.2 (-73.4 to -55.4)       | -68.6 (-75 to -61.3)            | -44.6 (-54.3 to -31.8)                   |
| 13 Depressive disorders       | 13 Dietary iron deficiency    | -11.7 (-25.3 to 0.149)       | -22.5 (-28.4 to -16.4)          | -15.6 (-16.5 to -14.9)                   |
| 14 Headache disorders         | 14 Headache disorders         | 20.9 (2.58 to 40.7)          | 6.19 (-1.45 to 24.6)            | 1.36 (0.827 to 1.59)                     |
| 15 Falls                      | 15 Alzheimer's disease        | 193 (128 to 254)             | 157 (107 to 214)                | 4.36 (-1.44 to 10.6)                     |
| 16 Congenital defects         | 16 Hypertensive heart disease | 121 (52.3 to 205)            | 94.4 (29.3 to 177)              | -13 (-46.2 to 34.2)                      |
| 17 Road injuries              | 17 Lower respiratory infect   | -33.2 (-54.6 to -4.93)       | -41.2 (-59.4 to -15.1)          | -57.7 (-68.2 to -42.1)                   |
| 18 Age-related hearing loss   | 18 Blindness and vision loss  | 98.1 (70.9 to 122)           | 74 (59.7 to 89)                 | -7.97 (-8.77 to -7.15)                   |
| 19 Tuberculosis               | 19 Anxiety disorders          | 30.2 (11.8 to 51.2)          | 14.2 (4.87 to 26.3)             | 2.12 (1.88 to 2.38)                      |
| 20 Chronic kidney disease     | 20 Diarrheal diseases         | -35.9 (-58.9 to -8.53)       | -43.6 (-65 to -15.3)            | -61.9 (-75.9 to -41.5)                   |
| 22 Anxiety disorders          | 24 Road injuries              |                              |                                 |                                          |
| 28 Blindness and vision loss  | 34 Congenital defects         |                              |                                 |                                          |
| 32 Hypertensive heart disease | 38 Tuberculosis               |                              |                                 |                                          |
| 33 Alzheimer's disease        | 164 COVID-19                  |                              |                                 |                                          |

### India, Reference scenario

**Legend:**  
 Communicable, maternal, neonatal and nutritional  
 Non-communicable  
 Injuries

| Leading Causes 2022          | Leading Causes 2050         | Mean % change number of DALY | Mean % change all-age DALY rate | Mean % change age-standardized DALY rate |
|------------------------------|-----------------------------|------------------------------|---------------------------------|------------------------------------------|
| 1 Neonatal disorders         | 1 COPD                      | 63.3 (18.1 to 112)           | 47.6 (9.91 to 98.4)             | -31.3 (-51.7 to 2.17)                    |
| 2 Ischemic heart disease     | 2 Ischemic heart disease    | -3.5 (-43.6 to 50.1)         | -12.6 (-47.8 to 39.9)           | -53.1 (-73.9 to -18.3)                   |
| 3 COPD                       | 3 Other musculoskeletal     | 145 (110 to 179)             | 121 (107 to 135)                | 66 (62.4 to 69.7)                        |
| 4 Lower respiratory infect   | 4 Diabetes                  | 92.2 (60.8 to 126)           | 73.5 (51.8 to 101)              | -1.7 (-14.7 to 18.1)                     |
| 5 Stroke                     | 5 Stroke                    | 12.7 (-11.6 to 44.2)         | 1.82 (-20.1 to 32.1)            | -47 (-60.6 to -30.3)                     |
| 6 Diarrheal diseases         | 6 Neonatal disorders        | -51 (-61.4 to -40.5)         | -55.8 (-63.2 to -47)            | -31.8 (-42.4 to -19)                     |
| 7 Diabetes                   | 7 Falls                     | 76.3 (39.9 to 114)           | 59.1 (35.6 to 81.2)             | -10.8 (-19.2 to -1.64)                   |
| 8 Tuberculosis               | 8 Low back pain             | 47.1 (27 to 68.1)            | 32.7 (25.1 to 41.1)             | -6.15 (-6.52 to -5.72)                   |
| 9 Dietary iron deficiency    | 9 Blindness and vision loss | 84 (53.5 to 116)             | 66 (50.7 to 81.3)               | -6.54 (-7.04 to -6.05)                   |
| 10 Other musculoskeletal     | 10 Lower respiratory infect | -32.6 (-46.2 to -15.7)       | -39.2 (-50.5 to -26.4)          | -55.3 (-63.7 to -43.3)                   |
| 11 Road injuries             | 11 Diarrheal diseases       | -15.4 (-41.5 to 17.5)        | -23.5 (-48.2 to 10.2)           | -52 (-70.3 to -24.8)                     |
| 12 Falls                     | 12 Cirrhosis liver          | 34.8 (6.95 to 68.8)          | 21.7 (-2.95 to 50.5)            | -15.9 (-32.5 to 5.77)                    |
| 13 Cirrhosis liver           | 13 Age-related hearing loss | 80.5 (53.5 to 109)           | 62.8 (50 to 76.2)               | -1.45 (-1.62 to -1.32)                   |
| 14 Self-harm                 | 14 Depressive disorders     | 35.1 (15.7 to 54.9)          | 21.8 (15.9 to 28.8)             | -4.67 (-5.08 to -4.33)                   |
| 15 Low back pain             | 15 Dietary iron deficiency  | 0.877 (-13.4 to 16.5)        | -9.04 (-11.5 to -6.8)           | -13.6 (-14.2 to -12.7)                   |
| 16 COVID-19                  | 16 Road injuries            | -0.251 (-38.4 to 49.1)       | -9.78 (-42.7 to 42.8)           | -20 (-51.5 to 29.4)                      |
| 17 Depressive disorders      | 17 Headache disorders       | 18.2 (0.589 to 41.3)         | 6.61 (0.42 to 22.7)             | 0.583 (0.292 to 0.775)                   |
| 18 Headache disorders        | 18 Chronic kidney disease   | 89.4 (31.2 to 165)           | 71.2 (19.1 to 145)              | -2.81 (-35.1 to 44.5)                    |
| 19 Congenital defects        | 19 Self-harm                | -10 (-33.6 to 16.8)          | -18.8 (-38.2 to 6.29)           | -19.1 (-40 to 8.59)                      |
| 20 Blindness and vision loss | 20 Alzheimer's disease      | 189 (120 to 275)             | 161 (115 to 209)                | -6.92 (-11.4 to -2.69)                   |
| 21 Age-related hearing loss  | 21 Tuberculosis             |                              |                                 |                                          |
| 25 Chronic kidney disease    | 31 Congenital defects       |                              |                                 |                                          |
| 34 Alzheimer's disease       | 166 COVID-19                |                              |                                 |                                          |

### Nepal, Reference scenario

**Legend:**  
Communicable, maternal, neonatal and nutritional  
Non-communicable  
Injuries

| Leading Causes 2022           | Leading Causes 2050           | Mean % change number of DALY  | Mean % change all-age DALY rate | Mean % change age-standardized DALY rate |
|-------------------------------|-------------------------------|-------------------------------|---------------------------------|------------------------------------------|
| 1 Neonatal disorders          | 1 COPD                        | 27.8 (-10.4 to 72.9)          | 22.8 (-14.1 to 67.6)            | <b>-45.8 (-62.8 to -19.8)</b>            |
| 2 Ischemic heart disease      | 2 Diabetes                    | <b>118 (82.2 to 165)</b>      | <b>110 (77.4 to 142)</b>        | 13 (-3.98 to 31.8)                       |
| 3 COPD                        | 3 Ischemic heart disease      | -5.35 (-44.7 to 54.6)         | -8.98 (-44.6 to 51.1)           | <b>-55.2 (-74.9 to -20)</b>              |
| 4 Stroke                      | 4 Other musculoskeletal       | <b>175 (137 to 218)</b>       | <b>164 (146 to 187)</b>         | <b>84.4 (80 to 89.4)</b>                 |
| 5 Lower respiratory infect    | 5 Low back pain               | <b>42.6 (23.1 to 64.5)</b>    | <b>37.1 (27.8 to 47)</b>        | <b>-7.15 (-7.55 to -6.68)</b>            |
| 6 Low back pain               | 6 Stroke                      | 3.1 (-22.5 to 38.4)           | -0.882 (-26.5 to 31.5)          | <b>-52.6 (-64.9 to -33.1)</b>            |
| 7 Diabetes                    | 7 Depressive disorders        | <b>38.2 (19.7 to 56.9)</b>    | <b>32.8 (24.5 to 43.4)</b>      | <b>-3.92 (-4.34 to -3.51)</b>            |
| 8 Depressive disorders        | 8 Cirrhosis liver             | 20.9 (-9.82 to 59.2)          | 16.2 (-10.2 to 51.7)            | <b>-25.1 (-41.5 to -1.3)</b>             |
| 9 Cirrhosis liver             | 9 Neonatal disorders          | <b>-71.9 (-79.9 to -64.1)</b> | <b>-73.1 (-78.9 to -67.7)</b>   | <b>-50.2 (-58.4 to -41.1)</b>            |
| 10 Other musculoskeletal      | 10 Falls                      | <b>37.1 (9.36 to 70.2)</b>    | <b>31.9 (8.63 to 66.3)</b>      | <b>-19.1 (-28.2 to -8.76)</b>            |
| 11 Self-harm                  | 11 Age-related hearing loss   | <b>79.5 (52.5 to 108)</b>     | <b>72.6 (55.5 to 91.9)</b>      | <b>-1.84 (-2.09 to -1.62)</b>            |
| 12 Tuberculosis               | 12 Blindness and vision loss  | <b>79.5 (55.4 to 103)</b>     | <b>72.6 (57.6 to 88)</b>        | <b>-6.7 (-7.45 to -5.79)</b>             |
| 13 Falls                      | 13 Headache disorders         | 15.7 (-1.91 to 41.1)          | <b>11.2 (2.72 to 32.2)</b>      | 0.0832 (-0.29 to 0.593)                  |
| 14 Headache disorders         | 14 Chronic kidney disease     | <b>88.8 (24.5 to 175)</b>     | <b>81.5 (24.6 to 168)</b>       | -1.91 (-34.4 to 54.6)                    |
| 15 Dietary iron deficiency    | 15 Self-harm                  | -2.39 (-28 to 36.4)           | -6.33 (-27.3 to 22.7)           | <b>-12.3 (-33.8 to 17.1)</b>             |
| 16 COVID-19                   | 16 Hypertensive heart disease | <b>123 (53 to 211)</b>        | <b>114 (45.8 to 200)</b>        | -7.84 (-41.2 to 38.2)                    |
| 17 Diarrheal diseases         | 17 Lower respiratory infect   | <b>-55.9 (-69.9 to -34.4)</b> | <b>-57.7 (-70.1 to -39.1)</b>   | <b>-64.3 (-72.3 to -52)</b>              |
| 18 Asthma                     | 18 Dietary iron deficiency    | -14.1 (-27.9 to 0.00295)      | <b>-17.6 (-23.2 to -12)</b>     | <b>-19.9 (-20.9 to -18.6)</b>            |
| 19 Age-related hearing loss   | 19 Alzheimer's disease        | <b>186 (114 to 265)</b>       | <b>175 (110 to 243)</b>         | <b>-6.55 (-11.4 to -1.36)</b>            |
| 20 Rheumatic heart disease    | 20 Anxiety disorders          | <b>23.4 (3.35 to 45.1)</b>    | <b>18.6 (8.97 to 29.9)</b>      | <b>0.958 (0.416 to 1.52)</b>             |
| 21 Blindness and vision loss  | 24 Asthma                     |                               |                                 |                                          |
| 22 Anxiety disorders          | 25 Tuberculosis               |                               |                                 |                                          |
| 25 Chronic kidney disease     | 27 Rheumatic heart disease    |                               |                                 |                                          |
| 31 Hypertensive heart disease | 28 Diarrheal diseases         |                               |                                 |                                          |
| 36 Alzheimer's disease        | 162 COVID-19                  |                               |                                 |                                          |

### Pakistan, Reference scenario

**Legend:**  
Communicable, maternal, neonatal and nutritional  
Non-communicable  
Injuries

| Leading Causes 2022           | Leading Causes 2050           | Mean % change number of DALY  | Mean % change all-age DALY rate | Mean % change age-standardized DALY rate |
|-------------------------------|-------------------------------|-------------------------------|---------------------------------|------------------------------------------|
| 1 Neonatal disorders          | 1 Neonatal disorders          | <b>-60.4 (-73.6 to -44.9)</b> | <b>-68 (-75.7 to -58)</b>       | <b>-43.4 (-54.3 to -28.4)</b>            |
| 2 Lower respiratory infect    | 2 Ischemic heart disease      | 31.4 (-25.3 to 111)           | 6.97 (-40.7 to 83.5)            | <b>-45.9 (-71.3 to -4.75)</b>            |
| 3 Ischemic heart disease      | 3 Diabetes                    | <b>168 (125 to 218)</b>       | <b>117 (80.9 to 161)</b>        | 11.2 (-7.19 to 35.4)                     |
| 4 Stroke                      | 4 Stroke                      | <b>49.3 (10.9 to 99.3)</b>    | 21.5 (-9.83 to 74.4)            | <b>-40.9 (-58.5 to -13.6)</b>            |
| 5 Tuberculosis                | 5 Other musculoskeletal       | <b>241 (199 to 288)</b>       | <b>177 (154 to 202)</b>         | <b>86.7 (81.8 to 91.6)</b>               |
| 6 Dietary iron deficiency     | 6 COPD                        | <b>82 (28 to 147)</b>         | <b>48.1 (7.72 to 103)</b>       | <b>-37.2 (-59.7 to -6.58)</b>            |
| 7 Diarrheal diseases          | 7 Chronic kidney disease      | <b>166 (71.5 to 289)</b>      | <b>116 (41.6 to 228)</b>        | 27 (-21 to 101)                          |
| 8 Diabetes                    | 8 Low back pain               | <b>67.8 (47.6 to 89.4)</b>    | <b>36.3 (25.3 to 46)</b>        | <b>-6.51 (-7.34 to -5.52)</b>            |
| 9 Road injuries               | 9 Dietary iron deficiency     | -6.5 (-20.4 to 10.9)          | <b>-24.2 (-27.5 to -20.4)</b>   | <b>-17.7 (-18.3 to -16.8)</b>            |
| 10 Congenital defects         | 10 Depressive disorders       | <b>60.3 (40.5 to 78.2)</b>    | <b>30.2 (20.8 to 39.6)</b>      | <b>-3.24 (-3.63 to -2.83)</b>            |
| 11 COPD                       | 11 Road injuries              | -16.9 (-52.2 to 37.6)         | <b>-32.4 (-59.1 to 17.5)</b>    | <b>-37 (-62.7 to 9.24)</b>               |
| 12 Cirrhosis liver            | 12 Headache disorders         | <b>40 (20.3 to 64.7)</b>      | <b>13.6 (7.16 to 29.9)</b>      | <b>0.89 (0.497 to 1.13)</b>              |
| 13 Low back pain              | 13 Blindness and vision loss  | <b>127 (99.8 to 161)</b>      | <b>84.2 (61.3 to 105)</b>       | <b>-8.65 (-9.35 to -8.04)</b>            |
| 14 COVID-19                   | 14 Cirrhosis liver            | 5.24 (-17 to 32.1)            | -14.4 (-32.3 to 9.4)            | <b>-41.1 (-53.6 to -24.4)</b>            |
| 15 Depressive disorders       | 15 Lower respiratory infect   | <b>-68.9 (-78.4 to -57.1)</b> | <b>-74.8 (-81.8 to -66.3)</b>   | <b>-65.1 (-73.7 to -53.9)</b>            |
| 16 Headache disorders         | 16 Age-related hearing loss   | <b>108 (83.2 to 137)</b>      | <b>69.3 (50.7 to 88.5)</b>      | <b>-1.77 (-1.98 to -1.56)</b>            |
| 17 Other musculoskeletal      | 17 Breast cancer              | <b>111 (32.9 to 196)</b>      | <b>71.4 (9.89 to 144)</b>       | 3 (-31.9 to 40.4)                        |
| 18 Rheumatic heart disease    | 18 Diarrheal diseases         | -33.6 (-62.7 to 11)           | <b>-46 (-68.8 to -14.9)</b>     | <b>-47.3 (-69 to -12.3)</b>              |
| 19 Chronic kidney disease     | 19 Anxiety disorders          | <b>48.1 (30.7 to 67.8)</b>    | <b>20.2 (12.8 to 27.7)</b>      | <b>1.7 (1.52 to 1.93)</b>                |
| 20 Meningitis                 | 20 Hypertensive heart disease | <b>162 (82.2 to 267)</b>      | <b>113 (47.4 to 204)</b>        | -8.47 (-41.8 to 37.6)                    |
| 24 Anxiety disorders          | 22 Tuberculosis               |                               |                                 |                                          |
| 25 Age-related hearing loss   | 25 Congenital defects         |                               |                                 |                                          |
| 29 Blindness and vision loss  | 33 Rheumatic heart disease    |                               |                                 |                                          |
| 30 Breast cancer              | 59 Meningitis                 |                               |                                 |                                          |
| 43 Hypertensive heart disease | 164 COVID-19                  |                               |                                 |                                          |

### China, Reference scenario

**Legend:**  
Communicable, maternal, neonatal and nutritional  
Non-communicable  
Injuries

| Leading Causes 2022           | Leading Causes 2050          | Mean % change number of DALY  | Mean % change all-age DALY rate | Mean % change age-standardized DALY rate |
|-------------------------------|------------------------------|-------------------------------|---------------------------------|------------------------------------------|
| 1 Stroke                      | 1 Stroke                     | 3.1 (-16.5 to 24.4)           | 18.5 (-1.45 to 47.2)            | <b>-44.8 (-54.2 to -30.9)</b>            |
| 2 Ischemic heart disease      | 2 COPD                       | <b>82.7 (40.3 to 126)</b>     | <b>110 (66.8 to 165)</b>        | -19.7 (-39.4 to 7.62)                    |
| 3 COPD                        | 3 Ischemic heart disease     | -11.5 (-37.6 to 20.4)         | 1.79 (-27.8 to 42.1)            | <b>-56.5 (-70.1 to -36.7)</b>            |
| 4 Lung cancer                 | 4 Alzheimer's disease        | <b>173 (127 to 231)</b>       | <b>214 (172 to 263)</b>         | -0.256 (-3.9 to 3.1)                     |
| 5 Age-related hearing loss    | 5 Lung cancer                | 34.2 (-0.962 to 77.5)         | <b>54 (16.4 to 99)</b>          | -13.8 (-30.8 to 7.4)                     |
| 6 Road injuries               | 6 Diabetes                   | <b>75.4 (54.4 to 95.3)</b>    | <b>101 (84.8 to 117)</b>        | <b>44.2 (33.1 to 54.7)</b>               |
| 7 Diabetes                    | 7 Age-related hearing loss   | <b>43.1 (27.9 to 60.4)</b>    | <b>64.3 (53.1 to 75.9)</b>      | <b>-0.821 (-0.969 to -0.67)</b>          |
| 8 Low back pain               | 8 Hypertensive heart disease | <b>140 (72.7 to 225)</b>      | <b>176 (102 to 288)</b>         | 10.7 (-23.9 to 58.3)                     |
| 9 Stomach cancer              | 9 Low back pain              | 8.16 (-2.97 to 20.7)          | <b>24.3 (17.7 to 30.7)</b>      | <b>-4.16 (-4.53 to -3.72)</b>            |
| 10 Alzheimer's disease        | 10 Other musculoskeletal     | <b>50.1 (35.4 to 66)</b>      | <b>72.5 (61.4 to 83.2)</b>      | <b>55 (52.6 to 57.1)</b>                 |
| 11 Falls                      | 11 Colorectal cancer         | <b>68.1 (16.7 to 127)</b>     | <b>92.8 (40.4 to 158)</b>       | 11.8 (-17.4 to 44.5)                     |
| 12 Depressive disorders       | 12 Esophageal cancer         | <b>43 (22.9 to 65)</b>        | <b>64.3 (46.4 to 86.3)</b>      | -0.617 (-11.3 to 10.7)                   |
| 13 Other musculoskeletal      | 13 Falls                     | <b>19.1 (2.13 to 39.5)</b>    | <b>36.8 (19.4 to 56.9)</b>      | <b>-22.7 (-29.5 to -14.6)</b>            |
| 14 Headache disorders         | 14 Stomach cancer            | -11.4 (-22.6 to 3.5)          | 1.79 (-10.1 to 14.3)            | <b>-40 (-44.8 to -35.2)</b>              |
| 15 Esophageal cancer          | 15 Blindness and vision loss | <b>32 (13.7 to 50.2)</b>      | <b>51.6 (36.6 to 66.3)</b>      | <b>-5.19 (-5.68 to -4.8)</b>             |
| 16 Colorectal cancer          | 16 Road injuries             | -29.2 (-51.8 to 5.52)         | -18.5 (-45.2 to 23.7)           | -19.2 (-49 to 29.3)                      |
| 17 Blindness and vision loss  | 17 Depressive disorders      | 4.64 (-4.31 to 14)            | <b>20.2 (15.1 to 26.2)</b>      | <b>-1.99 (-2.36 to -1.61)</b>            |
| 18 Hypertensive heart disease | 18 Osteoarthritis            | <b>38.4 (25.7 to 52.5)</b>    | <b>59 (51.4 to 68)</b>          | <b>3.54 (3.02 to 4.03)</b>               |
| 19 Anxiety disorders          | 19 Chronic kidney disease    | <b>68.3 (26.7 to 117)</b>     | <b>93.4 (46.8 to 154)</b>       | 1.13 (-26.7 to 37.6)                     |
| 20 Osteoarthritis             | 20 Headache disorders        | <b>-14.7 (-21.6 to -6.45)</b> | -1.98 (-6.54 to 6.31)           | -0.025 (-0.417 to 0.49)                  |
| 24 Chronic kidney disease     | 25 Anxiety disorders         |                               |                                 |                                          |

### North Korea, Reference scenario

**Legend:**  
Communicable, maternal, neonatal and nutritional  
Non-communicable  
Injuries

| Leading Causes 2022           | Leading Causes 2050          | Mean % change number of DALY | Mean % change all-age DALY rate | Mean % change age-standardized DALY rate |
|-------------------------------|------------------------------|------------------------------|---------------------------------|------------------------------------------|
| 1 Stroke                      | 1 Stroke                     | -3.45 (-25.6 to 22.9)        | 5.27 (-16.1 to 33.2)            | <b>-38.8 (-52.7 to -18.7)</b>            |
| 2 Ischemic heart disease      | 2 COPD                       | <b>71.7 (29.8 to 119)</b>    | <b>87.2 (43 to 143)</b>         | -8.47 (-35.1 to 29.7)                    |
| 3 COPD                        | 3 Ischemic heart disease     | 7 (-27.7 to 59.4)            | 16.8 (-20.4 to 69.7)            | -32.3 (-56.8 to 7.58)                    |
| 4 Road injuries               | 4 Diabetes                   | <b>36.1 (10.6 to 62.3)</b>   | <b>48.3 (26.5 to 67.1)</b>      | -2 (-13.9 to 12.5)                       |
| 5 Tuberculosis                | 5 Road injuries              | -22 (-51.6 to 27.5)          | -14.8 (-45 to 39)               | -13.1 (-45.7 to 45.2)                    |
| 6 Diabetes                    | 6 Lung cancer                | 27.9 (-10.3 to 72.7)         | <b>39 (4.59 to 77.3)</b>        | -9.98 (-29.1 to 10.5)                    |
| 7 Low back pain               | 7 Low back pain              | 12.9 (-3.5 to 30.6)          | <b>23 (16.5 to 30.1)</b>        | <b>-3.72 (-4.11 to -3.38)</b>            |
| 8 Lung cancer                 | 8 Hypertensive heart disease | <b>88.8 (25.8 to 169)</b>    | <b>106 (41.3 to 185)</b>        | 5.21 (-31.2 to 57.8)                     |
| 9 Stomach cancer              | 9 Alzheimer's disease        | <b>120 (63.3 to 182)</b>     | <b>140 (86.4 to 189)</b>        | -3.43 (-6.74 to 0.145)                   |
| 10 Lower respiratory infect   | 10 Age-related hearing loss  | <b>46.5 (23.3 to 71)</b>     | <b>59.5 (45 to 74.1)</b>        | <b>-0.862 (-1.37 to -0.421)</b>          |
| 11 Cirrhosis liver            | 11 Other musculoskeletal     | <b>37.5 (16.1 to 58.2)</b>   | <b>49.7 (41.7 to 59.5)</b>      | <b>26.3 (23.3 to 28.6)</b>               |
| 12 Neonatal disorders         | 12 Tuberculosis              | -45.6 (-63.8 to -20.7)       | -40.6 (-59.1 to -14.2)          | -56 (-70 to -33.5)                       |
| 13 Age-related hearing loss   | 13 Chronic kidney disease    | <b>53.8 (12 to 105)</b>      | <b>67.8 (26.1 to 123)</b>       | 10.9 (-18.7 to 56.9)                     |
| 14 Hypertensive heart disease | 14 Stomach cancer            | -11.9 (-26.8 to 6.03)        | -4.11 (-15 to 8.69)             | <b>-35.2 (-41.4 to -28.9)</b>            |
| 15 Headache disorders         | 15 Lower respiratory infect  | 6.28 (-15.8 to 34.9)         | 15.8 (-3.67 to 38.3)            | -41.7 (-52.3 to -26.6)                   |
| 16 Other musculoskeletal      | 16 Cirrhosis liver           | -9.95 (-30.9 to 20.7)        | -1.77 (-23.1 to 26.6)           | <b>-24.8 (-41.3 to -3.99)</b>            |
| 17 Depressive disorders       | 17 Depressive disorders      | 6.36 (-9.43 to 22.5)         | <b>15.8 (10.2 to 21.5)</b>      | <b>-1.8 (-2.27 to -1.41)</b>             |
| 18 Alzheimer's disease        | 18 Colorectal cancer         | 31.8 (-12.2 to 84.2)         | <b>43.3 (1.07 to 99.6)</b>      | -4.64 (-29.7 to 27)                      |
| 19 Self-harm                  | 19 Headache disorders        | -8.98 (-22.1 to 6.48)        | -0.883 (-5.49 to 7.26)          | <b>0.34 (0.0286 to 0.606)</b>            |
| 20 Chronic kidney disease     | 20 Esophageal cancer         | <b>43.7 (15.9 to 73)</b>     | <b>56.5 (37.3 to 77.1)</b>      | 4.64 (-8.38 to 17)                       |
| 22 Colorectal cancer          | 24 Self-harm                 |                              |                                 |                                          |
| 25 Esophageal cancer          | 29 Neonatal disorders        |                              |                                 |                                          |

### Taiwan (Province of China), Reference scenario

**Legend:**  
Communicable, maternal, neonatal and nutritional  
Non-communicable  
Injuries

| Leading Causes 2022           | Leading Causes 2050           | Mean % change number of DALY | Mean % change all-age DALY rate | Mean % change age-standardized DALY rate |
|-------------------------------|-------------------------------|------------------------------|---------------------------------|------------------------------------------|
| 1 Diabetes                    | 1 Diabetes                    | 66.3 (48.6 to 85.2)          | 91.3 (76.2 to 107)              | 25 (13.6 to 36)                          |
| 2 Stroke                      | 2 Alzheimer's disease         | 155 (123 to 194)             | 194 (168 to 218)                | 0.536 (-2.34 to 3.59)                    |
| 3 Low back pain               | 3 Chronic kidney disease      | 150 (108 to 198)             | 188 (141 to 241)                | 24.7 (2.69 to 53.6)                      |
| 4 Ischemic heart disease      | 4 Stroke                      | 6.01 (-6.92 to 20.6)         | 22 (11 to 34.7)                 | -34.8 (-42.3 to -26.7)                   |
| 5 Lung cancer                 | 5 Lower respiratory infect    | 72.1 (46.9 to 98.4)          | 98 (75.3 to 124)                | -25.5 (-32.9 to -15.9)                   |
| 6 Lower respiratory infect    | 6 Lung cancer                 | 40.4 (15.3 to 64.8)          | 61.3 (35 to 83.1)               | -7.29 (-20.9 to 4.18)                    |
| 7 Colorectal cancer           | 7 Low back pain               | 6.66 (-3.23 to 16.9)         | 22.7 (19.9 to 26)               | -2.72 (-2.79 to -2.64)                   |
| 8 COVID-19                    | 8 Colorectal cancer           | 51.8 (17.4 to 85.3)          | 74.5 (40.8 to 102)              | -1.55 (-19.5 to 15.1)                    |
| 9 Alzheimer's disease         | 9 COPD                        | 87.7 (57 to 130)             | 116 (82.4 to 158)               | -15.6 (-30.4 to 1.48)                    |
| 10 Other musculoskeletal      | 10 Age-related hearing loss   | 43.3 (26.9 to 59.3)          | 64.8 (52.1 to 78.1)             | -0.648 (-0.715 to -0.577)                |
| 11 Cirrhosis liver            | 11 Other musculoskeletal      | 27.7 (14.5 to 43.6)          | 46.9 (38.7 to 55.3)             | 30.7 (28.9 to 32.3)                      |
| 12 Age-related hearing loss   | 12 Ischemic heart disease     | -21.9 (-35.6 to -2.25)       | -10 (-25.7 to 13.3)             | -54.1 (-62.7 to -40.8)                   |
| 13 Chronic kidney disease     | 13 Urinary diseases           | 161 (120 to 211)             | 200 (160 to 245)                | 21.2 (9.91 to 34.9)                      |
| 14 COPD                       | 14 Hypertensive heart disease | 121 (75.2 to 178)            | 154 (98.7 to 224)               | 18 (-7.6 to 55)                          |
| 15 Road injuries              | 15 Osteoarthritis             | 30.9 (18.1 to 43.3)          | 50.6 (45.4 to 56.3)             | 1.96 (1.76 to 2.17)                      |
| 16 Self-harm                  | 16 Liver cancer               | 38.4 (16.6 to 63.5)          | 59.3 (37.1 to 89.8)             | 13.1 (-6.05 to 37)                       |
| 17 Headache disorders         | 17 Cirrhosis liver            | -17.8 (-27.9 to -4.32)       | -5.43 (-15.2 to 6.4)            | -22.2 (-30.4 to -11.3)                   |
| 18 Depressive disorders       | 18 Pancreatic cancer          | 78.6 (40.1 to 119)           | 105 (69.6 to 142)               | 30.5 (7.45 to 51.1)                      |
| 19 Osteoarthritis             | 19 Falls                      | 16.6 (0.852 to 34)           | 34.1 (20.7 to 46)               | -18.6 (-27.1 to -10.5)                   |
| 20 Anxiety disorders          | 20 Depressive disorders       | -3.61 (-13.9 to 6.67)        | 10.9 (5.76 to 16.5)             | -1.41 (-1.58 to -1.22)                   |
| 21 Liver cancer               | 21 Road injuries              |                              |                                 |                                          |
| 23 Falls                      | 22 Headache disorders         |                              |                                 |                                          |
| 27 Hypertensive heart disease | 24 Self-harm                  |                              |                                 |                                          |
| 29 Urinary diseases           | 26 Anxiety disorders          |                              |                                 |                                          |
| 30 Pancreatic cancer          | 156 COVID-19                  |                              |                                 |                                          |

### American Samoa, Reference scenario

**Legend:**  
Communicable, maternal, neonatal and nutritional  
Non-communicable  
Injuries

| Leading Causes 2022         | Leading Causes 2050         | Mean % change number of DALY | Mean % change all-age DALY rate | Mean % change age-standardized DALY rate |
|-----------------------------|-----------------------------|------------------------------|---------------------------------|------------------------------------------|
| 1 Diabetes                  | 1 Diabetes                  | <b>31.5 (12.8 to 50.4)</b>   | 5.8 (-7.77 to 21)               | -11.7 (-22 to 2.36)                      |
| 2 Ischemic heart disease    | 2 Ischemic heart disease    | -13.9 (-39.7 to 24.8)        | -30.6 (-52.8 to 1.74)           | <b>-45 (-63 to -17.3)</b>                |
| 3 Stroke                    | 3 Chronic kidney disease    | <b>86.6 (41.8 to 150)</b>    | <b>50.3 (13 to 105)</b>         | 20.7 (-12.3 to 66.8)                     |
| 4 Chronic kidney disease    | 4 Stroke                    | 10.2 (-10.5 to 32.6)         | -11.3 (-27.8 to 9.73)           | <b>-33.3 (-46.1 to -16.4)</b>            |
| 5 COPD                      | 5 COPD                      | <b>85.9 (44.1 to 139)</b>    | <b>49.7 (15 to 94.5)</b>        | 0.499 (-24.3 to 35.5)                    |
| 6 Lower respiratory infect  | 6 Endo/metab/blood/immune   | <b>77 (56.4 to 98.3)</b>     | <b>42.4 (27.4 to 59.5)</b>      | <b>22 (8.42 to 40.2)</b>                 |
| 7 Neonatal disorders        | 7 Lung cancer               | <b>74 (31.9 to 125)</b>      | <b>39.7 (7.72 to 73.6)</b>      | 9.92 (-11.4 to 33.8)                     |
| 8 Low back pain             | 8 Lower respiratory infect  | <b>21.8 (6.22 to 39.5)</b>   | -2.05 (-15.2 to 13.1)           | <b>-22.2 (-31.9 to -9.33)</b>            |
| 9 Endo/metab/blood/immune   | 9 Low back pain             | <b>37.8 (24.4 to 51.3)</b>   | <b>10.8 (4.57 to 17.3)</b>      | <b>-2.49 (-2.65 to -2.32)</b>            |
| 10 Lung cancer              | 10 Breast cancer            | <b>51.7 (12.1 to 98.7)</b>   | 21.8 (-8.59 to 56.2)            | 4.01 (-19.2 to 31.5)                     |
| 11 Breast cancer            | 11 Other musculoskeletal    | <b>86.2 (69.8 to 107)</b>    | <b>49.7 (40.7 to 60)</b>        | <b>34.6 (31.6 to 37.1)</b>               |
| 12 Headache disorders       | 12 Neonatal disorders       | -6.11 (-26.4 to 23.3)        | <b>-24.5 (-39.6 to -2.22)</b>   | -16.8 (-34.8 to 9.6)                     |
| 13 COVID-19                 | 13 Age-related hearing loss | <b>57.3 (40.7 to 75.9)</b>   | <b>26.4 (15.7 to 35.9)</b>      | <b>-0.776 (-0.847 to -0.71)</b>          |
| 14 Age-related hearing loss | 14 Prostate cancer          | <b>115 (64.5 to 172)</b>     | <b>72.7 (31.8 to 114)</b>       | 3.94 (-11.7 to 20.1)                     |
| 15 Road injuries            | 15 Alzheimer's disease      | <b>158 (104 to 210)</b>      | <b>107 (67 to 140)</b>          | <b>7.84 (4.68 to 11.7)</b>               |
| 16 Other musculoskeletal    | 16 Headache disorders       | <b>28.5 (16.7 to 40)</b>     | <b>3.33 (0.207 to 8.73)</b>     | <b>0.475 (0.33 to 0.592)</b>             |
| 17 Anxiety disorders        | 17 Colorectal cancer        | <b>61.2 (16.1 to 114)</b>    | 29.4 (-5.11 to 68.1)            | 2.37 (-22.4 to 28)                       |
| 18 Self-harm                | 18 Road injuries            | 21.2 (-26.3 to 100)          | -2.34 (-40.4 to 62)             | -5.43 (-43.8 to 59.5)                    |
| 19 Cirrhosis liver          | 19 Anxiety disorders        | <b>27.3 (15 to 38.6)</b>     | 2.31 (-1.26 to 6.2)             | <b>0.816 (0.68 to 0.965)</b>             |
| 20 Stomach cancer           | 20 Diarrheal diseases       | <b>56.1 (13.3 to 117)</b>    | 25.7 (-10 to 73.9)              | -4.92 (-34.2 to 45.1)                    |
| 24 Colorectal cancer        | 23 Self-harm                |                              |                                 |                                          |
| 26 Diarrheal diseases       | 25 Stomach cancer           |                              |                                 |                                          |
| 27 Prostate cancer          | 27 Cirrhosis liver          |                              |                                 |                                          |
| 31 Alzheimer's disease      | 162 COVID-19                |                              |                                 |                                          |



### Cook Islands, Reference scenario

**Legend:**  
Communicable, maternal, neonatal and nutritional  
Non-communicable  
Injuries

| Leading Causes 2022          | Leading Causes 2050          | Mean % change number of DALY | Mean % change all-age DALY rate | Mean % change age-standardized DALY rate |
|------------------------------|------------------------------|------------------------------|---------------------------------|------------------------------------------|
| 1 Diabetes                   | 1 Diabetes                   | 14.8 (0.191 to 35.6)         | 15.5 (0.765 to 33.9)            | -5.94 (-16.7 to 8.02)                    |
| 2 Ischemic heart disease     | 2 Hypertensive heart disease | 59.3 (11.1 to 122)           | 60.4 (11.6 to 126)              | 17.5 (-19.4 to 69.6)                     |
| 3 Stroke                     | 3 Ischemic heart disease     | -34.2 (-54.7 to -7.38)       | -33.8 (-51.1 to -6.26)          | -52.4 (-67.4 to -28.8)                   |
| 4 Hypertensive heart disease | 4 Stroke                     | -4.77 (-20.5 to 16.1)        | -4.2 (-19.1 to 15.7)            | -31 (-42.3 to -13.7)                     |
| 5 Lower respiratory infect   | 5 Alzheimer's disease        | 111 (71.3 to 162)            | 112 (75.5 to 150)               | 3.6 (-0.478 to 7.31)                     |
| 6 Lung cancer                | 6 COPD                       | 55.3 (16.5 to 94.3)          | 56.3 (22.5 to 99.9)             | -5.92 (-30.9 to 30.2)                    |
| 7 Road injuries              | 7 Lower respiratory infect   | 8.48 (-9.24 to 27.6)         | 9.09 (-4.75 to 24.1)            | -30.8 (-40.1 to -18.5)                   |
| 8 Low back pain              | 8 Lung cancer                | 9.64 (-16.5 to 42.8)         | 10.1 (-16.2 to 36.4)            | -15.7 (-32 to 3.09)                      |
| 9 Breast cancer              | 9 Breast cancer              | 36.7 (1.73 to 79.7)          | 37.3 (3.45 to 76.1)             | 1.38 (-21.7 to 23.8)                     |
| 10 COPD                      | 10 Chronic kidney disease    | 53.1 (15.6 to 109)           | 54.1 (20 to 106)                | 9.41 (-17.9 to 50)                       |
| 11 Prostate cancer           | 11 Low back pain             | 13.5 (0.254 to 26.3)         | 14.2 (8.4 to 20.2)              | -1.98 (-2.38 to -1.47)                   |
| 12 Age-related hearing loss  | 12 Prostate cancer           | 38.9 (5.56 to 77.5)          | 39.5 (7.81 to 71.9)             | -16.2 (-31.7 to -3.13)                   |
| 13 Chronic kidney disease    | 13 Road injuries             | -1.98 (-38.2 to 50.5)        | -1.23 (-36.4 to 52.2)           | -2.38 (-38.1 to 50.8)                    |
| 14 Headache disorders        | 14 Age-related hearing loss  | 29.6 (13.5 to 48.2)          | 30.3 (19.7 to 40.3)             | -0.911 (-1.16 to -0.654)                 |
| 15 Alzheimer's disease       | 15 Other musculoskeletal     | 57.5 (40.7 to 74.1)          | 58.4 (50.2 to 66.6)             | 41.2 (40 to 42.3)                        |
| 16 Depressive disorders      | 16 Headache disorders        | 2.31 (-9.61 to 15.4)         | 2.86 (-0.305 to 7.02)           | -0.0864 (-0.464 to 0.43)                 |
| 17 Self-harm                 | 17 Depressive disorders      | 6.29 (-5.6 to 17.8)          | 6.89 (2.99 to 11.2)             | -1.2 (-1.56 to -0.828)                   |
| 18 Other musculoskeletal     | 18 Liver cancer              | 44.6 (5.29 to 103)           | 45.6 (8.99 to 105)              | 26 (-7.77 to 75.9)                       |
| 19 Anxiety disorders         | 19 Self-harm                 | 0.264 (-20.7 to 29.9)        | 0.83 (-17.8 to 27.6)            | 0.449 (-18.9 to 28.5)                    |
| 20 Blindness and vision loss | 20 Blindness and vision loss | 29.8 (12.8 to 49.9)          | 30.5 (18.3 to 41.1)             | -3.32 (-3.65 to -3.05)                   |
| 21 Liver cancer              | 22 Anxiety disorders         |                              |                                 |                                          |

### Fiji, Reference scenario

**Legend:**

Communicable, maternal, neonatal and nutritional  
Non-communicable  
Injuries

| Leading Causes 2022           | Leading Causes 2050          | Mean % change number of DALY  | Mean % change all-age DALY rate | Mean % change age-standardized DALY rate |
|-------------------------------|------------------------------|-------------------------------|---------------------------------|------------------------------------------|
| 1 Diabetes                    | 1 Diabetes                   | 19.7 (-6.97 to 54.8)          | <b>23 (0.124 to 54.9)</b>       | -16.9 (-33.5 to 5.96)                    |
| 2 Ischemic heart disease      | 2 Ischemic heart disease     | -18.6 (-44.8 to 21.4)         | -16.2 (-43 to 22.9)             | <b>-43.7 (-63.6 to -13.4)</b>            |
| 3 Stroke                      | 3 Stroke                     | 4.4 (-18.2 to 35.6)           | 7.32 (-15 to 36.3)              | <b>-32.7 (-47.8 to -11.1)</b>            |
| 4 COVID-19                    | 4 Chronic kidney disease     | <b>74.2 (31.3 to 143)</b>     | <b>79.1 (34.4 to 140)</b>       | 24.4 (-11.1 to 75.4)                     |
| 5 Neonatal disorders          | 5 Neonatal disorders         | <b>-33.4 (-51.4 to -5.02)</b> | <b>-31.6 (-50.3 to -4.81)</b>   | -16.7 (-39.7 to 14.8)                    |
| 6 Lower respiratory infect    | 6 COPD                       | <b>67.2 (25.9 to 131)</b>     | <b>71.9 (29 to 128)</b>         | -3.8 (-30.2 to 35.7)                     |
| 7 Chronic kidney disease      | 7 Lower respiratory infect   | -18.4 (-35.3 to 4.36)         | -16.2 (-31.9 to 4.43)           | <b>-29.3 (-44 to -8.44)</b>              |
| 8 Congenital defects          | 8 Low back pain              | 15.9 (-0.299 to 32.8)         | <b>19.1 (10 to 27.2)</b>        | <b>-3.79 (-4.13 to -3.42)</b>            |
| 9 Asthma                      | 9 Hypertensive heart disease | <b>72.9 (20.9 to 148)</b>     | <b>77.8 (27.4 to 154)</b>       | 10.8 (-24.6 to 60.3)                     |
| 10 Low back pain              | 10 Other musculoskeletal     | <b>72.5 (47.3 to 99.2)</b>    | <b>77.2 (65.5 to 90.6)</b>      | <b>47.2 (45.8 to 48.6)</b>               |
| 11 COPD                       | 11 Breast cancer             | 28.7 (-7.22 to 72.3)          | 32.1 (-4.98 to 73.9)            | -2.49 (-26.2 to 24.7)                    |
| 12 Headache disorders         | 12 Age-related hearing loss  | <b>40.5 (17.2 to 66.5)</b>    | <b>44.3 (28.5 to 59.6)</b>      | <b>-0.9 (-1.05 to -0.755)</b>            |
| 13 Breast cancer              | 13 Headache disorders        | 1.74 (-13.4 to 18.2)          | <b>4.44 (0.672 to 12.8)</b>     | <b>0.52 (0.29 to 0.709)</b>              |
| 14 Road injuries              | 14 Alzheimer's disease       | <b>156 (80.2 to 241)</b>      | <b>163 (91.6 to 232)</b>        | <b>6.83 (3.21 to 10.8)</b>               |
| 15 Diarrheal diseases         | 15 Congenital defects        | <b>-37.9 (-50.1 to -19.7)</b> | <b>-36.4 (-44.8 to -23.8)</b>   | <b>-21 (-29.4 to -8.03)</b>              |
| 16 Self-harm                  | 16 Depressive disorders      | 6.74 (-8.07 to 23.9)          | <b>9.6 (4.95 to 15)</b>         | <b>-1.64 (-1.87 to -1.38)</b>            |
| 17 Age-related hearing loss   | 17 Anxiety disorders         | 2.82 (-11.5 to 19.3)          | <b>5.56 (1.1 to 10.5)</b>       | <b>0.815 (0.605 to 1.04)</b>             |
| 18 Depressive disorders       | 18 Diarrheal diseases        | -14.7 (-45.1 to 28.5)         | -12.5 (-40.9 to 29.6)           | -34.7 (-57.8 to 3.1)                     |
| 19 Anxiety disorders          | 19 Road injuries             | -16.6 (-49.6 to 50.1)         | -14.3 (-49.8 to 46.1)           | -13.6 (-49.5 to 47)                      |
| 20 Hypertensive heart disease | 20 Asthma                    | <b>-37.9 (-49.4 to -21.3)</b> | <b>-36.2 (-46.7 to -21.8)</b>   | <b>-57.1 (-64.7 to -46.7)</b>            |
| 21 Other musculoskeletal      | 21 Self-harm                 |                               |                                 |                                          |
| 39 Alzheimer's disease        | 160 COVID-19                 |                               |                                 |                                          |

### Guam, Reference scenario

**Legend:**  
Communicable, maternal, neonatal and nutritional  
Non-communicable  
Injuries

| Leading Causes 2022           | Leading Causes 2050           | Mean % change number of DALY  | Mean % change all-age DALY rate | Mean % change age-standardized DALY rate |
|-------------------------------|-------------------------------|-------------------------------|---------------------------------|------------------------------------------|
| 1 Ischemic heart disease      | 1 Ischemic heart disease      | -22.3 (-44.2 to 5.36)         | -19.3 (-42.7 to 13.4)           | <b>-40.2 (-56.7 to -16.9)</b>            |
| 2 COVID-19                    | 2 Diabetes                    | <b>21.7 (6.16 to 36.2)</b>    | <b>26 (13.1 to 40.9)</b>        | -0.0977 (-8.53 to 8.41)                  |
| 3 Stroke                      | 3 Alzheimer's disease         | <b>207 (166 to 250)</b>       | <b>219 (175 to 261)</b>         | <b>-7.3 (-9.9 to -4.36)</b>              |
| 4 Diabetes                    | 4 Stroke                      | 1.89 (-14.7 to 17.2)          | 5.6 (-9.1 to 25.9)              | <b>-24.3 (-35.1 to -10.8)</b>            |
| 5 Neonatal disorders          | 5 Chronic kidney disease      | <b>57 (17.5 to 103)</b>       | <b>62.8 (23.9 to 114)</b>       | 27.4 (-4.39 to 66)                       |
| 6 Lung cancer                 | 6 Age-related hearing loss    | <b>61 (38.2 to 82.1)</b>      | <b>66.8 (49.8 to 86.3)</b>      | <b>-0.337 (-0.431 to -0.234)</b>         |
| 7 Self-harm                   | 7 Lung cancer                 | 7.8 (-16.9 to 30.5)           | 11.5 (-9.97 to 35.4)            | -10.6 (-26.2 to 5.36)                    |
| 8 Chronic kidney disease      | 8 COPD                        | <b>79.1 (38.9 to 123)</b>     | <b>85.9 (46.9 to 141)</b>       | -1.43 (-22.5 to 27.9)                    |
| 9 Low back pain               | 9 Low back pain               | 14.4 (-1.12 to 29.1)          | <b>18.4 (10.4 to 28)</b>        | <b>-1.71 (-1.9 to -1.52)</b>             |
| 10 Lower respiratory infect   | 10 Neonatal disorders         | -23.1 (-43.9 to 5.46)         | -20.4 (-39.1 to 3.74)           | 2.88 (-21.1 to 35.1)                     |
| 11 Age-related hearing loss   | 11 Self-harm                  | -19.6 (-39 to 3.43)           | -16.9 (-32.2 to 1.26)           | -7.95 (-25.4 to 12.1)                    |
| 12 Cirrhosis liver            | 12 Other musculoskeletal      | <b>22.1 (3.79 to 38.1)</b>    | <b>26.3 (18.4 to 36.1)</b>      | <b>15.8 (14.3 to 17.1)</b>               |
| 13 Headache disorders         | 13 Lower respiratory infect   | -7.84 (-20.7 to 8.36)         | -4.58 (-16.7 to 10.9)           | <b>-26.6 (-35.8 to -15.5)</b>            |
| 14 Other musculoskeletal      | 14 Blindness and vision loss  | <b>64.4 (44.4 to 84.6)</b>    | <b>70.3 (52.9 to 92.3)</b>      | <b>-2.08 (-2.29 to -1.88)</b>            |
| 15 Alzheimer's disease        | 15 Hypertensive heart disease | <b>47.8 (7.85 to 97.3)</b>    | <b>53.4 (12.2 to 109)</b>       | 24 (-7.76 to 65)                         |
| 16 Depressive disorders       | 16 Depressive disorders       | 1.98 (-13.4 to 15.9)          | <b>5.44 (1.01 to 10.2)</b>      | <b>-0.811 (-0.937 to -0.679)</b>         |
| 17 Road injuries              | 17 Osteoarthritis             | <b>41.2 (24.3 to 55.2)</b>    | <b>46.3 (34.3 to 59.6)</b>      | <b>0.782 (0.595 to 0.986)</b>            |
| 18 COPD                       | 18 Headache disorders         | -8.61 (-24.7 to 4.23)         | -5.58 (-8.91 to 0.216)          | <b>0.264 (0.111 to 0.412)</b>            |
| 19 Anxiety disorders          | 19 Cirrhosis liver            | <b>-24.2 (-37.6 to -10.1)</b> | <b>-21.5 (-32.8 to -6.46)</b>   | <b>-21.4 (-30.9 to -7.85)</b>            |
| 20 Hypertensive heart disease | 20 Road injuries              | -12.1 (-42.8 to 30.9)         | -8.95 (-38.4 to 35.1)           | -0.296 (-32.7 to 49.9)                   |
| 23 Osteoarthritis             | 21 Anxiety disorders          |                               |                                 |                                          |
| 24 Blindness and vision loss  | 157 COVID-19                  |                               |                                 |                                          |

### Kiribati, Reference scenario

**Legend:**  
Communicable, maternal, neonatal and nutritional  
Non-communicable  
Injuries

| Leading Causes 2022            | Leading Causes 2050            | Mean % change number of DALY  | Mean % change all-age DALY rate | Mean % change age-standardized DALY rate |
|--------------------------------|--------------------------------|-------------------------------|---------------------------------|------------------------------------------|
| 1 Diabetes                     | 1 Diabetes                     | <b>63.3 (29.4 to 101)</b>     | <b>40.9 (16.5 to 70.2)</b>      | -7.91 (-23.4 to 13.5)                    |
| 2 Neonatal disorders           | 2 Ischemic heart disease       | 19.5 (-18.9 to 73.8)          | 3.1 (-29.1 to 49.6)             | -30.9 (-53.1 to 3.89)                    |
| 3 Ischemic heart disease       | 3 Stroke                       | 13.9 (-8.86 to 38.2)          | -1.76 (-17.7 to 18.5)           | <b>-34.2 (-46.2 to -17.6)</b>            |
| 4 Stroke                       | 4 Neonatal disorders           | <b>-47.2 (-64 to -22.3)</b>   | <b>-54.6 (-67 to -35.2)</b>     | <b>-36 (-53.6 to -11.5)</b>              |
| 5 Tuberculosis                 | 5 Chronic kidney disease       | <b>120 (64.8 to 203)</b>      | <b>89.6 (48.1 to 160)</b>       | 36.4 (-0.619 to 87.8)                    |
| 6 Diarrheal diseases           | 6 COPD                         | <b>71.1 (32 to 120)</b>       | <b>47.6 (15.2 to 86.3)</b>      | -11.4 (-33.6 to 23.4)                    |
| 7 Lower respiratory infect     | 7 Tuberculosis                 | <b>-42.6 (-61.6 to -11.9)</b> | <b>-50.5 (-66.7 to -24.9)</b>   | <b>-61 (-74.4 to -39.1)</b>              |
| 8 Congenital defects           | 8 Diarrheal diseases           | 4.85 (-31.4 to 48.8)          | -9.71 (-39 to 27.8)             | -20.7 (-49.2 to 19.5)                    |
| 9 Self-harm                    | 9 Self-harm                    | 2.84 (-21.8 to 35.7)          | -11.5 (-30.1 to 8.11)           | -11.9 (-29.7 to 7.73)                    |
| 10 COPD                        | 10 Low back pain               | <b>44.4 (24.6 to 66.3)</b>    | <b>24.5 (15.5 to 35)</b>        | <b>-4.32 (-4.62 to -3.92)</b>            |
| 11 Chronic kidney disease      | 11 Lower respiratory infect    | <b>-29.2 (-43.5 to -13)</b>   | <b>-39.1 (-50.2 to -26.2)</b>   | <b>-40.7 (-51.3 to -29.6)</b>            |
| 12 Cirrhosis liver             | 12 Road injuries               | 9.57 (-28.3 to 76.8)          | -5.64 (-38 to 43.8)             | -8.75 (-40.1 to 38.5)                    |
| 13 Road injuries               | 13 Other musculoskeletal       | <b>123 (94 to 154)</b>        | <b>92.5 (79.2 to 107)</b>       | <b>50.3 (49.1 to 51.4)</b>               |
| 14 Pertussis                   | 14 Cirrhosis liver             | -5.06 (-22.9 to 17.5)         | -18.1 (-32.2 to 0.851)          | <b>-34.6 (-44.8 to -21.1)</b>            |
| 15 Low back pain               | 15 Cervical cancer             | 22.6 (-1.05 to 53.7)          | 5.79 (-11.5 to 29.5)            | <b>-24.2 (-36.9 to -8.42)</b>            |
| 16 Protein-energy malnutrition | 16 Headache disorders          | <b>26.4 (6.78 to 47.4)</b>    | <b>8.82 (3.91 to 17.7)</b>      | -0.00546 (-0.229 to 0.246)               |
| 17 Dietary iron deficiency     | 17 Congenital defects          | <b>-40.1 (-54.7 to -21.9)</b> | <b>-48.5 (-56.2 to -37.5)</b>   | <b>-30.7 (-39.1 to -19.8)</b>            |
| 18 Cervical cancer             | 18 Breast cancer               | <b>53.5 (11 to 109)</b>       | 32.3 (-4.24 to 74.6)            | -6.66 (-27.8 to 17.6)                    |
| 19 Asthma                      | 19 Endo/metab/blood/immune     | <b>64.8 (39 to 90.8)</b>      | <b>42.1 (26.1 to 59.1)</b>      | 12 (-0.7 to 24.9)                        |
| 20 Headache disorders          | 20 Age-related hearing loss    | <b>68.1 (43.7 to 94.9)</b>    | <b>44.9 (31 to 61.5)</b>        | <b>-0.868 (-1.03 to -0.697)</b>          |
| 26 Breast cancer               | 21 Dietary iron deficiency     |                               |                                 |                                          |
| 27 Endo/metab/blood/immune     | 30 Asthma                      |                               |                                 |                                          |
| 28 Age-related hearing loss    | 31 Pertussis                   |                               |                                 |                                          |
| 30 Other musculoskeletal       | 33 Protein-energy malnutrition |                               |                                 |                                          |

### Marshall Islands, Reference scenario

**Legend:**

Communicable, maternal, neonatal and nutritional  
Non-communicable  
Injuries

| Leading Causes 2022           | Leading Causes 2050           | Mean % change number of DALY | Mean % change all-age DALY rate | Mean % change age-standardized DALY rate |
|-------------------------------|-------------------------------|------------------------------|---------------------------------|------------------------------------------|
| 1 Ischemic heart disease      | 1 Diabetes                    | 64.8 (30 to 101)             | 28.5 (5.99 to 55.9)             | -11.5 (-27.9 to 10.9)                    |
| 2 Diabetes                    | 2 Ischemic heart disease      | 40.4 (-13.1 to 118)          | 9.71 (-28.4 to 71.8)            | -26.3 (-56.4 to 17)                      |
| 3 Stroke                      | 3 Stroke                      | 43.5 (7.24 to 90.4)          | 12 (-12.8 to 43.4)              | -26.1 (-44.7 to 0.766)                   |
| 4 Tuberculosis                | 4 Chronic kidney disease      | 134 (64.2 to 243)            | 82.8 (32.2 to 160)              | 33.5 (-10.3 to 99.4)                     |
| 5 Neonatal disorders          | 5 HIV/AIDS                    | 614 (270 to 1060)            | 456 (189 to 795)                | 486 (203 to 841)                         |
| 6 Lower respiratory infect    | 6 Lower respiratory infect    | 2.04 (-20.1 to 26.7)         | -20.4 (-34.3 to -3.87)          | -28.8 (-42.4 to -10.7)                   |
| 7 Self-harm                   | 7 COPD                        | 102 (48.1 to 161)            | 57.8 (19.2 to 105)              | -6.61 (-32.7 to 26.8)                    |
| 8 Chronic kidney disease      | 8 Tuberculosis                | -37 (-58.4 to -2.84)         | -50.8 (-67.5 to -26.8)          | -61.3 (-74.6 to -39.9)                   |
| 9 Road injuries               | 9 Self-harm                   | 10.2 (-19.8 to 48.5)         | -14 (-37.7 to 15.1)             | -12.6 (-35.5 to 15.5)                    |
| 10 COPD                       | 10 Neonatal disorders         | -25 (-46.8 to 7.84)          | -41.5 (-57.5 to -19.3)          | -24.4 (-46 to 5.62)                      |
| 11 Cirrhosis liver            | 11 Road injuries              | 15.5 (-36.9 to 114)          | -9.69 (-49.6 to 66.4)           | -15.1 (-53.1 to 58.5)                    |
| 12 Drowning                   | 12 Lung cancer                | 108 (43.4 to 192)            | 61.5 (17.1 to 121)              | 3.65 (-19.6 to 28.1)                     |
| 13 Congenital defects         | 13 Hypertensive heart disease | 107 (41.4 to 201)            | 62 (12.2 to 134)                | 4.14 (-32.1 to 57.3)                     |
| 14 Low back pain              | 14 Low back pain              | 55.3 (31.1 to 81.2)          | 21.1 (13.3 to 28.3)             | -3.47 (-3.85 to -3.01)                   |
| 15 Headache disorders         | 15 Other musculoskeletal      | 136 (96.4 to 180)            | 84 (71.3 to 96.2)               | 51.2 (47.9 to 54.3)                      |
| 16 Lung cancer                | 16 Cirrhosis liver            | 13.7 (-10.8 to 43.2)         | -11.2 (-27.6 to 10.8)           | -27.7 (-41.3 to -9.93)                   |
| 17 Hypertensive heart disease | 17 Headache disorders         | 36.2 (17.1 to 57.8)          | 6.1 (2.41 to 13.8)              | 0.629 (0.374 to 0.822)                   |
| 18 Interpersonal violence     | 18 Breast cancer              | 78.7 (22.4 to 160)           | 39 (-3.52 to 89.9)              | 4.89 (-23.3 to 38.9)                     |
| 19 Dietary iron deficiency    | 19 Age-related hearing loss   | 84.1 (50.6 to 119)           | 43.4 (28.9 to 58.9)             | -1.03 (-1.16 to -0.902)                  |
| 20 Rheumatic heart disease    | 20 Depressive disorders       | 41.7 (20 to 64.5)            | 10.4 (5.84 to 15.3)             | -1.57 (-1.8 to -1.29)                    |
| 22 Depressive disorders       | 22 Drowning                   |                              |                                 |                                          |
| 23 Breast cancer              | 24 Congenital defects         |                              |                                 |                                          |
| 26 Age-related hearing loss   | 25 Dietary iron deficiency    |                              |                                 |                                          |
| 27 Other musculoskeletal      | 26 Interpersonal violence     |                              |                                 |                                          |
| 34 HIV/AIDS                   | 37 Rheumatic heart disease    |                              |                                 |                                          |

### Federated States of Micronesia, Reference scenario

**Legend:**  
Communicable, maternal, neonatal and nutritional  
Non-communicable  
Injuries

| Leading Causes 2022           | Leading Causes 2050           | Mean % change number of DALY | Mean % change all-age DALY rate | Mean % change age-standardized DALY rate |
|-------------------------------|-------------------------------|------------------------------|---------------------------------|------------------------------------------|
| 1 Ischemic heart disease      | 1 Ischemic heart disease      | 11.5 (-29.5 to 62.4)         | 12.5 (-24 to 61.4)              | -24.5 (-51.2 to 14.6)                    |
| 2 Stroke                      | 2 Diabetes                    | <b>44 (11.5 to 75.1)</b>     | <b>45.2 (20.8 to 76.5)</b>      | -0.638 (-18 to 20.2)                     |
| 3 Diabetes                    | 3 Stroke                      | 14.2 (-15.8 to 43.4)         | 15.2 (-9.62 to 45.6)            | <b>-24.4 (-40.6 to -2.53)</b>            |
| 4 Lower respiratory infect    | 4 Chronic kidney disease      | <b>111 (45.6 to 187)</b>     | <b>113 (59.7 to 182)</b>        | <b>50.2 (6.95 to 110)</b>                |
| 5 Neonatal disorders          | 5 HIV/AIDS                    | <b>505 (270 to 910)</b>      | <b>509 (266 to 855)</b>         | <b>534 (282 to 908)</b>                  |
| 6 Chronic kidney disease      | 6 COPD                        | <b>62.8 (16.9 to 109)</b>    | <b>64.3 (23.4 to 114)</b>       | -2.6 (-27.9 to 33.3)                     |
| 7 Self-harm                   | 7 Lower respiratory infect    | -13.1 (-32.4 to 10.5)        | -12.5 (-25.4 to 4.66)           | <b>-29.9 (-41.3 to -13.9)</b>            |
| 8 Road injuries               | 8 Lung cancer                 | <b>58.8 (12 to 127)</b>      | <b>59.9 (15.8 to 115)</b>       | 6.18 (-16.6 to 32.1)                     |
| 9 COPD                        | 9 Self-harm                   | -17.4 (-41.2 to 16.6)        | -16.9 (-36.5 to 6.16)           | -14.6 (-34.3 to 9.39)                    |
| 10 Cirrhosis liver            | 10 Hypertensive heart disease | <b>65.1 (8.58 to 128)</b>    | <b>66.6 (17.9 to 133)</b>       | 6.18 (-29.6 to 58.7)                     |
| 11 Low back pain              | 11 Road injuries              | -10 (-50.7 to 47.2)          | -9.37 (-44.7 to 52.9)           | -15.2 (-50.4 to 45.6)                    |
| 12 Lung cancer                | 12 Low back pain              | 22.3 (-0.91 to 47.4)         | <b>23 (13.8 to 34)</b>          | <b>-3.63 (-3.91 to -3.27)</b>            |
| 13 Drowning                   | 13 Neonatal disorders         | <b>-42.2 (-62 to -18.1)</b>  | <b>-42 (-55.9 to -20.1)</b>     | <b>-27.6 (-45.1 to -0.588)</b>           |
| 14 Interpersonal violence     | 14 Other musculoskeletal      | <b>78.3 (44.2 to 116)</b>    | <b>79.4 (65.2 to 93.4)</b>      | <b>45.3 (42 to 48.1)</b>                 |
| 15 Hypertensive heart disease | 15 Headache disorders         | 6.2 (-16 to 32.8)            | <b>6.74 (2.2 to 15.1)</b>       | <b>0.639 (0.338 to 0.855)</b>            |
| 16 Headache disorders         | 16 Cirrhosis liver            | -12 (-34 to 12.5)            | -11.3 (-26.6 to 7.06)           | <b>-29.1 (-40.5 to -13)</b>              |
| 17 Congenital defects         | 17 Breast cancer              | 30 (-11.7 to 85)             | 30.8 (-6.39 to 80.6)            | -6.63 (-30.1 to 19.5)                    |
| 18 Breast cancer              | 18 Age-related hearing loss   | <b>43.5 (14.4 to 75.2)</b>   | <b>44.5 (25 to 65.9)</b>        | <b>-0.921 (-1.06 to -0.751)</b>          |
| 19 Anxiety disorders          | 19 Endo/metab/blood/immune    | <b>46.3 (15.3 to 79.8)</b>   | <b>47.4 (31.2 to 68.9)</b>      | <b>13.5 (0.698 to 30.5)</b>              |
| 20 Depressive disorders       | 20 Alzheimer's disease        | <b>161 (88 to 265)</b>       | <b>163 (90.9 to 247)</b>        | <b>10.5 (6.71 to 14.1)</b>               |
| 23 Age-related hearing loss   | 21 Depressive disorders       |                              |                                 |                                          |
| 26 Other musculoskeletal      | 22 Anxiety disorders          |                              |                                 |                                          |
| 27 Endo/metab/blood/immune    | 23 Interpersonal violence     |                              |                                 |                                          |
| 33 HIV/AIDS                   | 26 Drowning                   |                              |                                 |                                          |
| 41 Alzheimer's disease        | 31 Congenital defects         |                              |                                 |                                          |

### Nauru, Reference scenario

**Legend:**  
Communicable, maternal, neonatal and nutritional  
Non-communicable  
Injuries

| Leading Causes 2022           | Leading Causes 2050           | Mean % change number of DALY | Mean % change all-age DALY rate | Mean % change age-standardized DALY rate |
|-------------------------------|-------------------------------|------------------------------|---------------------------------|------------------------------------------|
| 1 Ischemic heart disease      | 1 Ischemic heart disease      | 42 (-16.4 to 119)            | -3.83 (-39.3 to 53.9)           | -30.1 (-58.3 to 19.3)                    |
| 2 Stroke                      | 2 Diabetes                    | <b>98.8 (55.4 to 147)</b>    | <b>34.5 (9.27 to 66.1)</b>      | -3.02 (-23.2 to 25.8)                    |
| 3 Diabetes                    | 3 Stroke                      | <b>49.1 (7.41 to 92.4)</b>   | 0.901 (-22.4 to 33.1)           | -25.3 (-44.8 to 4.51)                    |
| 4 Lower respiratory infect    | 4 Road injuries               | 37.4 (-29.3 to 142)          | -7.04 (-49.7 to 73.6)           | -10.9 (-51.2 to 64.6)                    |
| 5 Neonatal disorders          | 5 Chronic kidney disease      | <b>159 (78.2 to 264)</b>     | <b>75 (25.2 to 150)</b>         | 37.7 (-6.23 to 108)                      |
| 6 Road injuries               | 6 Neonatal disorders          | -8.51 (-43.1 to 38.5)        | <b>-38.3 (-57.4 to -8.18)</b>   | -18.4 (-44 to 23)                        |
| 7 Self-harm                   | 7 Lower respiratory infect    | -14.1 (-38.4 to 13.3)        | <b>-42 (-53.4 to -27)</b>       | <b>-36.5 (-50 to -18.1)</b>              |
| 8 Chronic kidney disease      | 8 Self-harm                   | 38.7 (-1.76 to 89.5)         | -6.21 (-30.3 to 23)             | -8.98 (-31.2 to 17.8)                    |
| 9 Congenital defects          | 9 COPD                        | <b>87.2 (33.1 to 142)</b>    | 26.7 (-4.15 to 65.8)            | -7.96 (-36.1 to 31.9)                    |
| 10 Drowning                   | 10 Lung cancer                | <b>108 (37.4 to 181)</b>     | 40.5 (-2.29 to 94.8)            | -0.121 (-24 to 27.9)                     |
| 11 Tuberculosis               | 11 Low back pain              | <b>75.8 (51.7 to 102)</b>    | <b>18.9 (10.3 to 28.6)</b>      | <b>-3.29 (-3.74 to -2.72)</b>            |
| 12 COPD                       | 12 Hypertensive heart disease | <b>120 (40.3 to 212)</b>     | <b>48.7 (2.68 to 113)</b>       | 4.62 (-32.4 to 59.6)                     |
| 13 Interpersonal violence     | 13 Cirrhosis liver            | <b>45.8 (11.4 to 81.3)</b>   | -1.36 (-19.7 to 24.4)           | -21.2 (-36.2 to 0.719)                   |
| 14 Cirrhosis liver            | 14 Congenital defects         | -12.5 (-34.1 to 7.76)        | <b>-41 (-49.7 to -29.7)</b>     | <b>-25.2 (-34.6 to -12.5)</b>            |
| 15 Lung cancer                | 15 Other musculoskeletal      | <b>161 (122 to 201)</b>      | <b>76.2 (61.6 to 91.4)</b>      | <b>45.4 (42 to 48.8)</b>                 |
| 16 Low back pain              | 16 Headache disorders         | <b>61.7 (38.4 to 89.5)</b>   | <b>9.26 (4.82 to 16.5)</b>      | <b>0.371 (0.173 to 0.583)</b>            |
| 17 Headache disorders         | 17 Breast cancer              | <b>87.1 (24 to 159)</b>      | 26.6 (-12.7 to 80.1)            | -2.93 (-27.5 to 29.5)                    |
| 18 Hypertensive heart disease | 18 Drowning                   | -7.56 (-41.6 to 39.6)        | <b>-37.5 (-59.2 to -7.25)</b>   | <b>-36.9 (-58 to -6.66)</b>              |
| 19 Depressive disorders       | 19 Interpersonal violence     | 12.6 (-11.5 to 41.9)         | <b>-23.9 (-37.4 to -7.69)</b>   | <b>-27.9 (-39.7 to -11.7)</b>            |
| 20 Breast cancer              | 20 Depressive disorders       | <b>65.5 (41.9 to 90)</b>     | <b>11.9 (5.26 to 19.1)</b>      | <b>-1.57 (-1.79 to -1.33)</b>            |
| 27 Other musculoskeletal      | 25 Tuberculosis               |                              |                                 |                                          |

### Niue, Reference scenario

**Legend:**

Communicable, maternal, neonatal and nutritional  
Non-communicable  
Injuries

| Leading Causes 2022           | Leading Causes 2050           | Mean % change number of DALY  | Mean % change all-age DALY rate | Mean % change age-standardized DALY rate |
|-------------------------------|-------------------------------|-------------------------------|---------------------------------|------------------------------------------|
| 1 Ischemic heart disease      | 1 Diabetes                    | 11.9 (-5.86 to 35.9)          | 12.9 (-4.91 to 32.9)            | -1.41 (-15.4 to 16.5)                    |
| 2 Neonatal disorders          | 2 Ischemic heart disease      | <b>-35.2 (-53.6 to -9.5)</b>  | <b>-34.5 (-53.9 to -5.97)</b>   | <b>-45.7 (-63.2 to -20.1)</b>            |
| 3 Diabetes                    | 3 Neonatal disorders          | <b>-32.8 (-53.2 to -2.51)</b> | <b>-32.2 (-52.6 to -3.44)</b>   | -26 (-44.7 to 1.76)                      |
| 4 Stroke                      | 4 Stroke                      | <b>-21.2 (-35.2 to -3.6)</b>  | <b>-20.5 (-35.2 to -1.74)</b>   | <b>-34.9 (-46.9 to -17.6)</b>            |
| 5 Congenital defects          | 5 Chronic kidney disease      | <b>35.4 (1.39 to 80.5)</b>    | <b>36.7 (3.42 to 82.4)</b>      | 15.3 (-17.3 to 60.1)                     |
| 6 Chronic kidney disease      | 6 COPD                        | <b>31 (5.39 to 67.3)</b>      | <b>32.1 (3.3 to 63.8)</b>       | 0.745 (-24.9 to 33.4)                    |
| 7 Lower respiratory infect    | 7 Congenital defects          | <b>-33.9 (-45.4 to -18.5)</b> | <b>-33.4 (-41.9 to -21.2)</b>   | <b>-24.6 (-34.4 to -11.9)</b>            |
| 8 COPD                        | 8 Lower respiratory infect    | -18.3 (-32.7 to 0.945)        | <b>-17.6 (-29.1 to -1.87)</b>   | <b>-32.4 (-43.1 to -17.5)</b>            |
| 9 Road injuries               | 9 Lung cancer                 | 31.8 (-5.69 to 68.2)          | 32.7 (-0.485 to 68.2)           | 9.67 (-11.5 to 32.8)                     |
| 10 Lung cancer                | 10 Road injuries              | <b>-17.7 (-46.3 to 38.5)</b>  | <b>-17 (-48.2 to 33.7)</b>      | <b>-10.5 (-44.9 to 49.4)</b>             |
| 11 Self-harm                  | 11 Low back pain              | 7.35 (-6.45 to 22.2)          | <b>8.2 (1.86 to 14.6)</b>       | <b>-3.43 (-3.71 to -3.12)</b>            |
| 12 Low back pain              | 12 Alzheimer's disease        | <b>61.8 (27.5 to 100)</b>     | <b>63 (32.9 to 90)</b>          | <b>12.4 (8.53 to 17.2)</b>               |
| 13 Drowning                   | 13 Hypertensive heart disease | 32.7 (-4.43 to 84.9)          | 34 (-6.37 to 90.5)              | 10 (-22.3 to 60.3)                       |
| 14 Breast cancer              | 14 Other musculoskeletal      | <b>53.3 (32.5 to 74.1)</b>    | <b>54.5 (46.2 to 64.5)</b>      | <b>40.3 (36.2 to 43.6)</b>               |
| 15 Hypertensive heart disease | 15 Breast cancer              | 17 (-18.3 to 54.5)            | 17.8 (-11 to 49.9)              | -2.01 (-24.8 to 23.3)                    |
| 16 Age-related hearing loss   | 16 Age-related hearing loss   | 17.4 (-0.689 to 35.1)         | <b>18.3 (8.07 to 27.6)</b>      | <b>-0.867 (-1.02 to -0.708)</b>          |
| 17 Cirrhosis liver            | 17 Self-harm                  | -22.3 (-39.4 to 3.75)         | -21.7 (-37.9 to 0.0515)         | -17.8 (-35.3 to 5.86)                    |
| 18 Headache disorders         | 18 Headache disorders         | 2.84 (-11.8 to 16.4)          | <b>3.63 (0.637 to 8.41)</b>     | <b>0.227 (6.65e-05 to 0.458)</b>         |
| 19 Depressive disorders       | 19 Depressive disorders       | 4.12 (-9.21 to 18.4)          | <b>4.93 (1.15 to 9.4)</b>       | <b>-1.58 (-1.76 to -1.4)</b>             |
| 20 Alzheimer's disease        | 20 Endo/metab/blood/immune    | <b>22.1 (3.33 to 40.9)</b>    | <b>23 (12.1 to 36.4)</b>        | 9.12 (-1.97 to 21.5)                     |
| 21 Other musculoskeletal      | 21 Cirrhosis liver            |                               |                                 |                                          |
| 22 Endo/metab/blood/immune    | 28 Drowning                   |                               |                                 |                                          |



### Northern Mariana Islands, Reference scenario

**Legend:**  
Communicable, maternal, neonatal and nutritional  
Non-communicable  
Injuries

| Leading Causes 2022         | Leading Causes 2050         | Mean % change number of DALY | Mean % change all-age DALY rate | Mean % change age-standardized DALY rate |
|-----------------------------|-----------------------------|------------------------------|---------------------------------|------------------------------------------|
| 1 Ischemic heart disease    | 1 Diabetes                  | 46 (26.6 to 64.2)            | 40.9 (24.4 to 58.6)             | 2.29 (-9.83 to 17.6)                     |
| 2 Diabetes                  | 2 Ischemic heart disease    | -3 (-29.3 to 34.9)           | -6.27 (-33.7 to 31.2)           | <b>-38.1 (-56.9 to -7.83)</b>            |
| 3 Stroke                    | 3 Chronic kidney disease    | 114 (67.9 to 178)            | 107 (63 to 163)                 | 34.6 (3.14 to 85.1)                      |
| 4 Chronic kidney disease    | 4 Stroke                    | 29.7 (10.1 to 58)            | 25.2 (4.84 to 49.7)             | <b>-26.5 (-39.6 to -8.36)</b>            |
| 5 Lung cancer               | 5 COPD                      | 116 (77.5 to 160)            | 109 (68.9 to 154)               | 1.94 (-20 to 35.1)                       |
| 6 COPD                      | 6 Lung cancer               | 45.3 (9.41 to 82)            | 40 (8.55 to 69.7)               | -9.16 (-25.5 to 9.7)                     |
| 7 Low back pain             | 7 Low back pain             | 22.6 (11.5 to 33.4)          | 18.3 (9.77 to 28.8)             | <b>-0.98 (-1.29 to -0.686)</b>           |
| 8 Cirrhosis liver           | 8 Alzheimer's disease       | 238 (172 to 299)             | 226 (166 to 276)                | 4.06 (0.921 to 7.11)                     |
| 9 Self-harm                 | 9 Lower respiratory infect  | 42.1 (25.9 to 61.3)          | 37.2 (22.9 to 56)               | <b>-19.7 (-29 to -7.69)</b>              |
| 10 Road injuries            | 10 Age-related hearing loss | 55.7 (39.1 to 73.8)          | 50.2 (37.9 to 65.2)             | <b>-0.543 (-0.677 to -0.429)</b>         |
| 11 Lower respiratory infect | 11 Diarrheal diseases       | 157 (84.9 to 240)            | 149 (77.9 to 234)               | 39.4 (-2.19 to 99.7)                     |
| 12 Headache disorders       | 12 Road injuries            | 0.0381 (-37.7 to 66.6)       | -3.31 (-40.5 to 63.9)           | -4.74 (-42.8 to 65.1)                    |
| 13 Age-related hearing loss | 13 Cirrhosis liver          | -12.9 (-26.1 to 3.51)        | <b>-15.9 (-29.2 to -0.469)</b>  | <b>-28.1 (-38.3 to -12.9)</b>            |
| 14 Neonatal disorders       | 14 Other musculoskeletal    | 37.7 (26.2 to 51.9)          | 32.9 (24.3 to 42.1)             | 21.4 (20.4 to 22.5)                      |
| 15 Other musculoskeletal    | 15 Self-harm                | -13.3 (-30.1 to 5.57)        | -16.3 (-30.7 to 1.4)            | -15.8 (-31.8 to 3.2)                     |
| 16 Breast cancer            | 16 Headache disorders       | 3.11 (-5.25 to 13.1)         | -0.549 (-3.85 to 4.77)          | <b>0.74 (0.275 to 1.05)</b>              |
| 17 Depressive disorders     | 17 Colorectal cancer        | 46.6 (0.0144 to 92.2)        | 41.3 (-0.849 to 80.6)           | -9.07 (-31.4 to 12.8)                    |
| 18 Anxiety disorders        | 18 Breast cancer            | 21.8 (-7.97 to 56.2)         | 17.4 (-12.4 to 48.5)            | -12.5 (-31.7 to 8.29)                    |
| 19 Drowning                 | 19 Falls                    | 46 (26.3 to 70.2)            | 40.8 (22.7 to 59.7)             | <b>-10 (-18.4 to -0.292)</b>             |
| 20 Colorectal cancer        | 20 Neonatal disorders       | -5.73 (-25.2 to 25.9)        | -9.08 (-26.8 to 19.3)           | 3.89 (-19.8 to 39.3)                     |
| 21 Falls                    | 21 Depressive disorders     |                              |                                 |                                          |
| 27 Diarrheal diseases       | 22 Anxiety disorders        |                              |                                 |                                          |
| 31 Alzheimer's disease      | 37 Drowning                 |                              |                                 |                                          |

### Palau, Reference scenario

**Legend:**  
■ Communicable, maternal, neonatal and nutritional  
■ Non-communicable  
■ Injuries

| Leading Causes 2022         | Leading Causes 2050         | Mean % change number of DALY  | Mean % change all-age DALY rate | Mean % change age-standardized DALY rate |
|-----------------------------|-----------------------------|-------------------------------|---------------------------------|------------------------------------------|
| 1 Ischemic heart disease    | 1 Diabetes                  | 13.8 (-8.99 to 36.8)          | <b>30.9 (10.5 to 51.9)</b>      | -0.965 (-14.8 to 14.7)                   |
| 2 Diabetes                  | 2 Ischemic heart disease    | -22.3 (-46 to 10.3)           | -10.5 (-37.2 to 22.1)           | <b>-36.9 (-56.5 to -9.64)</b>            |
| 3 Stroke                    | 3 Stroke                    | -4.35 (-25.5 to 17.7)         | 10.1 (-9.48 to 32.3)            | <b>-26.4 (-39.8 to -8.71)</b>            |
| 4 Lung cancer               | 4 Chronic kidney disease    | <b>75.3 (29.1 to 131)</b>     | <b>102 (52.7 to 157)</b>        | 36.8 (-0.0756 to 82.9)                   |
| 5 Chronic kidney disease    | 5 COPD                      | <b>74.9 (33.7 to 123)</b>     | <b>101 (59.8 to 152)</b>        | 2.11 (-23.1 to 36)                       |
| 6 COPD                      | 6 Lung cancer               | <b>43.5 (2.3 to 90.4)</b>     | <b>65 (23 to 107)</b>           | 6.04 (-14.6 to 27.3)                     |
| 7 Lower respiratory infect  | 7 Lower respiratory infect  | 5.46 (-15 to 26.9)            | <b>21.3 (2.13 to 40.7)</b>      | <b>-27.8 (-39.3 to -12.3)</b>            |
| 8 Road injuries             | 8 Falls                     | 14.3 (-6.59 to 37)            | <b>31.4 (12.4 to 51.1)</b>      | <b>-13.2 (-20.8 to -3.6)</b>             |
| 9 Low back pain             | 9 Low back pain             | -4.56 (-16.9 to 9.36)         | <b>9.83 (2.62 to 18.3)</b>      | <b>-2.58 (-3.22 to -1.94)</b>            |
| 10 Neonatal disorders       | 10 Road injuries            | -22.4 (-53.1 to 25)           | -10.6 (-43.2 to 45)             | -6.43 (-41.6 to 54.7)                    |
| 11 Self-harm                | 11 Diarrheal diseases       | <b>62.6 (15.1 to 116)</b>     | <b>87.2 (36.6 to 149)</b>       | -7.81 (-36.1 to 29.7)                    |
| 12 Falls                    | 12 Alzheimer's disease      | <b>168 (107 to 242)</b>       | <b>208 (147 to 276)</b>         | <b>5.98 (2.32 to 10.3)</b>               |
| 13 Cirrhosis liver          | 13 Breast cancer            | 9.9 (-20 to 46.8)             | 26.4 (-7.94 to 61)              | -9.92 (-30.9 to 12.9)                    |
| 14 Breast cancer            | 14 Age-related hearing loss | <b>27.7 (7.13 to 46.2)</b>    | <b>46.9 (29.9 to 64)</b>        | <b>-0.457 (-0.785 to -0.0962)</b>        |
| 15 Interpersonal violence   | 15 Lip oral cavity cancer   | <b>17.5 (0.291 to 40.3)</b>   | <b>35.2 (19.6 to 53.3)</b>      | 6.62 (-3.46 to 16.1)                     |
| 16 Age-related hearing loss | 16 Prostate cancer          | <b>125 (65.2 to 196)</b>      | <b>159 (89.9 to 226)</b>        | <b>18.2 (1.67 to 37.4)</b>               |
| 17 Headache disorders       | 17 Self-harm                | <b>-31.1 (-46 to -10.1)</b>   | -20.7 (-37.3 to 0.648)          | -15.2 (-34 to 7.45)                      |
| 18 Stomach cancer           | 18 Other musculoskeletal    | 10.5 (-3.23 to 25.8)          | <b>27.2 (17.4 to 37.1)</b>      | <b>25.4 (24.1 to 26.8)</b>               |
| 19 Depressive disorders     | 19 Pancreatic cancer        | <b>103 (35.2 to 177)</b>      | <b>133 (62.7 to 211)</b>        | 28.9 (-2.04 to 64)                       |
| 20 Lip oral cavity cancer   | 20 Neonatal disorders       | <b>-40.6 (-56.7 to -20.6)</b> | <b>-31.6 (-47.1 to -6.8)</b>    | <b>-29.9 (-47.5 to -0.897)</b>           |
| 23 Diarrheal diseases       | 21 Depressive disorders     |                               |                                 |                                          |
| 24 Other musculoskeletal    | 23 Cirrhosis liver          |                               |                                 |                                          |
| 35 Alzheimer's disease      | 24 Headache disorders       |                               |                                 |                                          |
| 40 Prostate cancer          | 25 Stomach cancer           |                               |                                 |                                          |
| 42 Pancreatic cancer        | 32 Interpersonal violence   |                               |                                 |                                          |

### Papua New Guinea, Reference scenario

**Legend:**  
 Communicable, maternal, neonatal and nutritional  
 Non-communicable  
 Injuries

| Leading Causes 2022         | Leading Causes 2050         | Mean % change number of DALY  | Mean % change all-age DALY rate | Mean % change age-standardized DALY rate |
|-----------------------------|-----------------------------|-------------------------------|---------------------------------|------------------------------------------|
| 1 Lower respiratory infect  | 1 Diabetes                  | 176 (120 to 232)              | 36.7 (11.8 to 64.1)             | 0.934 (-16.8 to 23.7)                    |
| 2 Neonatal disorders        | 2 Ischemic heart disease    | 125 (40.2 to 247)             | 11.2 (-28.7 to 68.9)            | -19.8 (-50.9 to 24.6)                    |
| 3 Malaria                   | 3 Stroke                    | 111 (57.6 to 169)             | 4.42 (-19.3 to 32.6)            | <b>-26.8 (-44.6 to -4.98)</b>            |
| 4 Congenital defects        | 4 Neonatal disorders        | -19.1 (-47.1 to 20.9)         | <b>-60 (-72.7 to -42.3)</b>     | <b>-44.3 (-60.4 to -21.4)</b>            |
| 5 Stroke                    | 5 COPD                      | 121 (60.9 to 191)             | 9.45 (-18.1 to 48.1)            | <b>-32.1 (-51.7 to -5.19)</b>            |
| 6 Ischemic heart disease    | 6 Lower respiratory infect  | <b>-44.3 (-58.9 to -28.7)</b> | <b>-72.5 (-79.1 to -64.9)</b>   | <b>-62.5 (-71 to -52.8)</b>              |
| 7 Diarrheal diseases        | 7 Malaria                   | 118 (-87.3 to 420)            | 8.76 (-93.5 to 141)             | 7.92 (-92.2 to 158)                      |
| 8 Diabetes                  | 8 Congenital defects        | -4.15 (-24.6 to 21.8)         | <b>-52.7 (-60.6 to -41.8)</b>   | <b>-36.3 (-45.2 to -25)</b>              |
| 9 COPD                      | 9 Diarrheal diseases        | -19.6 (-52.8 to 24.2)         | <b>-60.2 (-75.3 to -38.6)</b>   | <b>-50.7 (-70.6 to -23.1)</b>            |
| 10 COVID-19                 | 10 Road injuries            | 48 (-18.1 to 152)             | -26.7 (-57.7 to 30.7)           | -28.5 (-58.2 to 24.7)                    |
| 11 Tuberculosis             | 11 Low back pain            | 128 (97.5 to 158)             | 13 (6.02 to 19.9)               | -4.22 (-4.61 to -3.81)                   |
| 12 Road injuries            | 12 Other musculoskeletal    | 315 (259 to 374)              | 105 (91.3 to 120)               | 79.6 (74.9 to 82.8)                      |
| 13 Pertussis                | 13 Headache disorders       | 116 (88.9 to 143)             | 6.96 (3.53 to 11.7)             | 0.852 (0.504 to 1.1)                     |
| 14 Measles                  | 14 Pertussis                | 15.1 (-42.2 to 113)           | -43.2 (-71.5 to 0.0865)         | -24.9 (-61.2 to 31.1)                    |
| 15 Drowning                 | 15 Chronic kidney disease   | 241 (125 to 378)              | 68.6 (13.2 to 137)              | 45.5 (-2.58 to 108)                      |
| 16 Interpersonal violence   | 16 Depressive disorders     | 117 (90.6 to 146)             | 7.51 (3.14 to 11.9)             | -2.06 (-2.39 to -1.72)                   |
| 17 Asthma                   | 17 Anxiety disorders        | 117 (88.9 to 146)             | 7.48 (3.86 to 11.5)             | 1.72 (1.38 to 2.04)                      |
| 18 Low back pain            | 18 Interpersonal violence   | 48.2 (22.3 to 82.1)           | <b>-26.7 (-36.3 to -14.2)</b>   | <b>-29.7 (-38.1 to -18.5)</b>            |
| 19 Headache disorders       | 19 Age-related hearing loss | 164 (125 to 205)              | 30.4 (19.2 to 42.1)             | -1.52 (-1.74 to -1.28)                   |
| 20 Rheumatic heart disease  | 20 Tuberculosis             | -28.1 (-54.8 to 8.3)          | <b>-64.4 (-77.7 to -44)</b>     | <b>-68.8 (-80.4 to -50.6)</b>            |
| 24 Depressive disorders     | 24 Drowning                 |                               |                                 |                                          |
| 27 Anxiety disorders        | 25 Asthma                   |                               |                                 |                                          |
| 29 Age-related hearing loss | 30 Rheumatic heart disease  |                               |                                 |                                          |
| 31 Other musculoskeletal    | 70 Measles                  |                               |                                 |                                          |
| 33 Chronic kidney disease   | 163 COVID-19                |                               |                                 |                                          |

### Samoa, Reference scenario

**Legend:**  
■ Communicable, maternal, neonatal and nutritional  
■ Non-communicable  
■ Injuries

| Leading Causes 2022           | Leading Causes 2050           | Mean % change number of DALY | Mean % change all-age DALY rate | Mean % change age-standardized DALY rate |
|-------------------------------|-------------------------------|------------------------------|---------------------------------|------------------------------------------|
| 1 Ischemic heart disease      | 1 Diabetes                    | <b>76.1 (43.5 to 107)</b>    | <b>19.6 (3.53 to 35.7)</b>      | 3.58 (-10 to 20.4)                       |
| 2 Measles                     | 2 Ischemic heart disease      | 26.5 (-13.1 to 80.1)         | -14.1 (-41 to 23.6)             | -26.6 (-51.5 to 10.4)                    |
| 3 Diabetes                    | 3 Stroke                      | <b>30 (1.25 to 62.3)</b>     | -11.7 (-26.6 to 10.1)           | <b>-26.2 (-40.7 to -6.02)</b>            |
| 4 Stroke                      | 4 Chronic kidney disease      | <b>155 (85.1 to 235)</b>     | <b>73.3 (28.5 to 133)</b>       | <b>52.1 (9.49 to 109)</b>                |
| 5 Neonatal disorders          | 5 HIV/AIDS                    | <b>677 (290 to 1220)</b>     | <b>427 (156 to 828)</b>         | <b>406 (149 to 783)</b>                  |
| 6 Lower respiratory infect    | 6 Neonatal disorders          | -10.9 (-36.9 to 25.2)        | <b>-39.6 (-56 to -16.5)</b>     | <b>-28.8 (-47 to -5.39)</b>              |
| 7 COPD                        | 7 COPD                        | <b>57.3 (22.2 to 98.1)</b>   | 6.86 (-16.6 to 36.8)            | -15.4 (-38.5 to 15.2)                    |
| 8 Road injuries               | 8 Lower respiratory infect    | -5.22 (-21.6 to 15.7)        | <b>-35.7 (-45.4 to -23.3)</b>   | <b>-34.5 (-44.4 to -20.1)</b>            |
| 9 Chronic kidney disease      | 9 Road injuries               | 36 (-21.2 to 132)            | -7.71 (-43.6 to 56.8)           | -13.3 (-46.5 to 45.5)                    |
| 10 Self-harm                  | 10 Self-harm                  | <b>38 (5.77 to 79.4)</b>     | -6.36 (-25.6 to 16.8)           | -12.4 (-29.2 to 8.41)                    |
| 11 Congenital defects         | 11 Low back pain              | <b>57.2 (36.6 to 77.8)</b>   | <b>6.67 (0.612 to 13.3)</b>     | <b>-3.46 (-3.74 to -3.21)</b>            |
| 12 Low back pain              | 12 Measles                    | -74.1 (-95.1 to 43)          | <b>-82.5 (-96.6 to -17.6)</b>   | <b>-79.2 (-95.8 to -7.12)</b>            |
| 13 Headache disorders         | 13 Headache disorders         | <b>55.8 (36 to 76.5)</b>     | <b>5.68 (2.53 to 10)</b>        | <b>0.386 (0.217 to 0.521)</b>            |
| 14 Anxiety disorders          | 14 Other musculoskeletal      | <b>126 (98.2 to 157)</b>     | <b>53.3 (43.8 to 64)</b>        | <b>39.4 (36.6 to 41.6)</b>               |
| 15 Cirrhosis liver            | 15 Hypertensive heart disease | <b>84.5 (30.4 to 153)</b>    | 25.3 (-10.8 to 73)              | 5.42 (-28.4 to 50.9)                     |
| 16 Hypertensive heart disease | 16 Age-related hearing loss   | <b>70.3 (48.9 to 93.4)</b>   | <b>15.6 (7.11 to 24.3)</b>      | <b>-0.754 (-0.948 to -0.546)</b>         |
| 17 Dietary iron deficiency    | 17 Anxiety disorders          | <b>53.9 (33.2 to 75.5)</b>   | <b>4.35 (1.71 to 7.78)</b>      | <b>0.533 (0.301 to 0.765)</b>            |
| 18 Age-related hearing loss   | 18 Congenital defects         | -5.44 (-23 to 13.5)          | <b>-35.9 (-43.1 to -27)</b>     | <b>-26.4 (-33.7 to -16.9)</b>            |
| 19 Depressive disorders       | 19 Depressive disorders       | <b>56.4 (35.8 to 76.9)</b>   | <b>6.12 (2.27 to 10.5)</b>      | <b>-1.41 (-1.61 to -1.18)</b>            |
| 20 Drowning                   | 20 Pertussis                  | 54.2 (-20.4 to 172)          | 4.39 (-46.5 to 81.7)            | 22 (-35.6 to 99.4)                       |
| 22 Pertussis                  | 22 Dietary iron deficiency    |                              |                                 |                                          |
| 23 Other musculoskeletal      | 24 Cirrhosis liver            |                              |                                 |                                          |
| 29 HIV/AIDS                   | 31 Drowning                   |                              |                                 |                                          |

### Solomon Islands, Reference scenario

**Legend:**  
Communicable, maternal, neonatal and nutritional  
Non-communicable  
Injuries

| Leading Causes 2022        | Leading Causes 2050        | Mean % change number of DALY  | Mean % change all-age DALY rate | Mean % change age-standardized DALY rate |
|----------------------------|----------------------------|-------------------------------|---------------------------------|------------------------------------------|
| 1 Ischemic heart disease   | 1 Ischemic heart disease   | 56 (-2.72 to 146)             | 8.69 (-28.3 to 61.2)            | -23.2 (-51.7 to 19.1)                    |
| 2 Lower respiratory infect | 2 Diabetes                 | <b>112 (60.6 to 172)</b>      | <b>47.3 (18.8 to 82.6)</b>      | 7.42 (-14.1 to 40.2)                     |
| 3 Stroke                   | 3 Stroke                   | <b>49.2 (11.6 to 92)</b>      | 3.9 (-16.1 to 27.6)             | <b>-28.5 (-44.4 to -7.87)</b>            |
| 4 Diabetes                 | 4 Lower respiratory infect | -14.6 (-33.4 to 8.03)         | <b>-40.5 (-50.8 to -27)</b>     | <b>-39.7 (-49.7 to -26.5)</b>            |
| 5 Neonatal disorders       | 5 HIV/AIDS                 | <b>628 (273 to 1040)</b>      | <b>405 (167 to 641)</b>         | <b>418 (171 to 665)</b>                  |
| 6 Malaria                  | 6 Malaria                  | 128 (-59.2 to 276)            | 56 (-72.2 to 153)               | 25.6 (-80 to 95.9)                       |
| 7 Self-harm                | 7 Self-harm                | 32.7 (-0.769 to 78.2)         | -7.67 (-28.7 to 21.1)           | -13.6 (-31.6 to 11.8)                    |
| 8 Road injuries            | 8 Road injuries            | 37.7 (-25 to 145)             | -4.05 (-44.2 to 70.2)           | -13.5 (-48.1 to 51.2)                    |
| 9 Congenital defects       | 9 Chronic kidney disease   | <b>174 (86.8 to 296)</b>      | <b>90.6 (37 to 167)</b>         | <b>53.1 (6.93 to 118)</b>                |
| 10 Cirrhosis liver         | 10 Neonatal disorders      | -22.2 (-46.5 to 7.34)         | <b>-45.9 (-59.8 to -27.3)</b>   | -25.5 (-44.1 to 1.51)                    |
| 11 Drowning                | 11 COPD                    | <b>79.6 (28.7 to 141)</b>     | 25 (-4.85 to 60.6)              | -20.4 (-42.8 to 12.2)                    |
| 12 COPD                    | 12 Low back pain           | <b>69.1 (41.7 to 100)</b>     | <b>17.7 (10.7 to 25)</b>        | <b>-4.41 (-4.94 to -3.65)</b>            |
| 13 Low back pain           | 13 Headache disorders      | <b>58.2 (29.3 to 88.4)</b>    | <b>9.98 (6.42 to 16.3)</b>      | <b>0.676 (0.382 to 0.894)</b>            |
| 14 Maternal disorders      | 14 Cirrhosis liver         | 9.7 (-17.3 to 37.2)           | <b>-23.6 (-37.4 to -6.38)</b>   | <b>-37 (-49 to -20.9)</b>                |
| 15 Headache disorders      | 15 Other musculoskeletal   | <b>200 (147 to 259)</b>       | <b>109 (94.8 to 124)</b>        | <b>74.4 (69.6 to 78.3)</b>               |
| 16 Diarrheal diseases      | 16 Congenital defects      | <b>-21.7 (-38.8 to -1.14)</b> | <b>-45.6 (-53.5 to -36.5)</b>   | <b>-27.2 (-35 to -16.2)</b>              |
| 17 Chronic kidney disease  | 17 Lung cancer             | <b>123 (58.1 to 201)</b>      | <b>54.8 (12.6 to 107)</b>       | 9.72 (-14.5 to 36.4)                     |
| 18 Dietary iron deficiency | 18 Falls                   | <b>86.9 (51.9 to 124)</b>     | <b>30 (13.5 to 44.5)</b>        | 5.6 (-4.15 to 15.8)                      |
| 19 Tuberculosis            | 19 Drowning                | -0.953 (-33.5 to 42.6)        | <b>-31.1 (-53.1 to -0.0725)</b> | <b>-31.9 (-52.8 to -2.48)</b>            |
| 20 Anxiety disorders       | 20 Depressive disorders    | <b>61.2 (34.7 to 92.7)</b>    | <b>12.1 (7.81 to 17.4)</b>      | <b>-2.07 (-2.39 to -1.71)</b>            |
| 21 Depressive disorders    | 21 Anxiety disorders       |                               |                                 |                                          |
| 24 Falls                   | 23 Dietary iron deficiency |                               |                                 |                                          |
| 27 Lung cancer             | 30 Maternal disorders      |                               |                                 |                                          |
| 34 Other musculoskeletal   | 32 Diarrheal diseases      |                               |                                 |                                          |
| 35 HIV/AIDS                | 41 Tuberculosis            |                               |                                 |                                          |

### Tokelau, Reference scenario

**Legend:**  
■ Communicable, maternal, neonatal and nutritional  
■ Non-communicable  
■ Injuries

| Leading Causes 2022           | Leading Causes 2050           | Mean % change number of DALY | Mean % change all-age DALY rate | Mean % change age-standardized DALY rate |
|-------------------------------|-------------------------------|------------------------------|---------------------------------|------------------------------------------|
| 1 Neonatal disorders          | 1 Diabetes                    | 50 (23.1 to 77.7)            | 38.5 (17.8 to 64.2)             | 4.93 (-9 to 23.5)                        |
| 2 Ischemic heart disease      | 2 Neonatal disorders          | -43.6 (-62.8 to -18.3)       | -47.9 (-65 to -21.6)            | -37.8 (-56.3 to -13.7)                   |
| 3 Diabetes                    | 3 Ischemic heart disease      | -26.5 (-50.4 to 5.72)        | -32.1 (-53.4 to 1.24)           | -50.3 (-67.3 to -24.2)                   |
| 4 Stroke                      | 4 Stroke                      | -7.94 (-28.5 to 18.5)        | -15 (-32.1 to 12.4)             | -35.9 (-50.6 to -12.5)                   |
| 5 Congenital defects          | 5 Chronic kidney disease      | 49.4 (4.13 to 100)           | 38.1 (2.32 to 90.3)             | 8.48 (-24.1 to 56.1)                     |
| 6 Road injuries               | 6 Congenital defects          | -42.9 (-53.2 to -29.5)       | -47.4 (-55 to -35.1)            | -33.4 (-43 to -22)                       |
| 7 Lower respiratory infect    | 7 COPD                        | 44.6 (8.64 to 85)            | 33.6 (2.85 to 74.3)             | -5.07 (-28.8 to 29.7)                    |
| 8 Chronic kidney disease      | 8 Lung cancer                 | 67.7 (20.5 to 119)           | 54.6 (14.6 to 97.7)             | 11.1 (-12.4 to 36.9)                     |
| 9 COPD                        | 9 Other musculoskeletal       | 109 (87 to 131)              | 92.5 (80.4 to 105)              | 56.3 (51.6 to 60.5)                      |
| 10 Diarrheal diseases         | 10 Lower respiratory infect   | -8.23 (-25.7 to 9.39)        | -15.3 (-30.8 to 4.21)           | -34.8 (-45.9 to -18.8)                   |
| 11 Self-harm                  | 11 Low back pain              | 29.7 (16.2 to 44.4)          | 19.7 (12.1 to 27.5)             | -4.86 (-5.07 to -4.66)                   |
| 12 Low back pain              | 12 Road injuries              | -22.3 (-54.2 to 33.5)        | -28.2 (-56.1 to 21.7)           | -17.7 (-47.8 to 46.1)                    |
| 13 Lung cancer                | 13 Alzheimer's disease        | 74.6 (39.7 to 117)           | 61 (30.7 to 90.2)               | 9.4 (5.12 to 13.9)                       |
| 14 Headache disorders         | 14 Age-related hearing loss   | 41.5 (25.6 to 61.6)          | 30.5 (18.6 to 41)               | -1.05 (-1.18 to -0.928)                  |
| 15 Age-related hearing loss   | 15 Self-harm                  | -16.6 (-38.1 to 13.3)        | -23.1 (-42.2 to 3.38)           | -14.2 (-34.1 to 16.8)                    |
| 16 Cirrhosis liver            | 16 Breast cancer              | 41.7 (1.81 to 81.7)          | 30.7 (-3.61 to 69.1)            | -2.98 (-27.7 to 22.8)                    |
| 17 Breast cancer              | 17 Hypertensive heart disease | 47.2 (-2.23 to 112)          | 36.1 (-5.96 to 97.8)            | -0.733 (-33 to 47.2)                     |
| 18 Depressive disorders       | 18 Headache disorders         | 18.4 (5.06 to 35)            | 9.21 (3.68 to 21.5)             | 0.224 (0.0237 to 0.445)                  |
| 19 Alzheimer's disease        | 19 Depressive disorders       | 22.1 (7.73 to 36.7)          | 12.6 (7.32 to 19.5)             | -2.2 (-2.38 to -1.99)                    |
| 20 Hypertensive heart disease | 20 Cirrhosis liver            | 2.13 (-18.4 to 24.2)         | -5.67 (-22.7 to 17.1)           | -19.8 (-34.7 to 1.05)                    |
| 21 Other musculoskeletal      | 24 Diarrheal diseases         |                              |                                 |                                          |

### Tonga, Reference scenario

**Legend:**  
Communicable, maternal, neonatal and nutritional  
Non-communicable  
Injuries

| Leading Causes 2022         | Leading Causes 2050         | Mean % change number of DALY | Mean % change all-age DALY rate | Mean % change age-standardized DALY rate |
|-----------------------------|-----------------------------|------------------------------|---------------------------------|------------------------------------------|
| 1 Diabetes                  | 1 Diabetes                  | <b>55.7 (25 to 94.4)</b>     | 19.2 (-0.807 to 41.8)           | 0.445 (-15.1 to 18.3)                    |
| 2 Ischemic heart disease    | 2 Ischemic heart disease    | -1.09 (-30.7 to 42.2)        | -24.2 (-48.5 to 11.3)           | <b>-37.5 (-58.1 to -7.81)</b>            |
| 3 Stroke                    | 3 Stroke                    | 12.3 (-11.1 to 41)           | -13.9 (-31 to 8.64)             | <b>-31.8 (-44.8 to -13.9)</b>            |
| 4 Neonatal disorders        | 4 Neonatal disorders        | -13.3 (-36.3 to 19.2)        | <b>-33.7 (-49.3 to -11.1)</b>   | -22.2 (-39.6 to 4.6)                     |
| 5 Lower respiratory infect  | 5 Lower respiratory infect  | -12.7 (-27.7 to 7.15)        | <b>-33.1 (-43 to -20.3)</b>     | <b>-36.2 (-46.2 to -22.1)</b>            |
| 6 COPD                      | 6 COPD                      | <b>44.8 (7.92 to 88.4)</b>   | 11 (-14.3 to 43.7)              | -16.4 (-37.2 to 9.91)                    |
| 7 Low back pain             | 7 Low back pain             | <b>41.6 (19.6 to 61.6)</b>   | <b>8.31 (2.04 to 15)</b>        | <b>-3.53 (-3.8 to -3.22)</b>             |
| 8 Cirrhosis liver           | 8 Chronic kidney disease    | <b>124 (57.2 to 217)</b>     | <b>71.5 (24.7 to 145)</b>       | <b>44 (2.13 to 109)</b>                  |
| 9 Road injuries             | 9 Other musculoskeletal     | <b>109 (76.2 to 140)</b>     | <b>59.9 (49 to 71.1)</b>        | <b>42.9 (38.4 to 46.9)</b>               |
| 10 Lung cancer              | 10 Liver cancer             | <b>68.7 (16.9 to 143)</b>    | 29.2 (-5.14 to 78.5)            | 15.6 (-16.2 to 64.1)                     |
| 11 Headache disorders       | 11 Lung cancer              | <b>50.6 (12.3 to 96)</b>     | 15.2 (-12.9 to 45.6)            | -7.06 (-25 to 12.2)                      |
| 12 Liver cancer             | 12 Headache disorders       | <b>38.4 (16 to 59.8)</b>     | <b>5.85 (2.36 to 10.4)</b>      | -0.0682 (-0.384 to 0.341)                |
| 13 Breast cancer            | 13 Road injuries            | 11.2 (-32.6 to 94)           | -14.8 (-46.4 to 48.7)           | -19.4 (-50 to 40.4)                      |
| 14 Congenital defects       | 14 Breast cancer            | <b>41.3 (4.22 to 90.6)</b>   | 8.04 (-20 to 40.1)              | -4.38 (-26.3 to 20.7)                    |
| 15 Anxiety disorders        | 15 Cirrhosis liver          | 6.4 (-15.6 to 30.1)          | <b>-18.6 (-32.1 to -2.49)</b>   | <b>-24.6 (-36.5 to -9.26)</b>            |
| 16 Age-related hearing loss | 16 Age-related hearing loss | <b>55.6 (32.3 to 78.3)</b>   | <b>19.1 (9.67 to 29.2)</b>      | <b>-0.965 (-1.11 to -0.837)</b>          |
| 17 Other musculoskeletal    | 17 Alzheimer's disease      | <b>101 (53.7 to 150)</b>     | <b>53.8 (20.9 to 85.3)</b>      | <b>4.98 (1.85 to 8.24)</b>               |
| 18 Chronic kidney disease   | 18 Anxiety disorders        | <b>36.8 (15.3 to 58.6)</b>   | <b>4.6 (1.26 to 7.91)</b>       | 0.311 (-0.0441 to 0.641)                 |
| 19 Dietary iron deficiency  | 19 Depressive disorders     | <b>39.6 (18.2 to 61.8)</b>   | <b>6.78 (2.89 to 11.1)</b>      | <b>-1.77 (-2.12 to -1.42)</b>            |
| 20 Depressive disorders     | 20 Endo/metab/blood/immune  | <b>60.2 (30.1 to 91)</b>     | <b>22.6 (8.27 to 39.3)</b>      | 10.7 (-0.985 to 24.3)                    |
| 22 Alzheimer's disease      | 21 Dietary iron deficiency  |                              |                                 |                                          |
| 25 Endo/metab/blood/immune  | 23 Congenital defects       |                              |                                 |                                          |

### Tuvalu, Reference scenario

**Legend:**  
Communicable, maternal, neonatal and nutritional  
Non-communicable  
Injuries

| Leading Causes 2022           | Leading Causes 2050           | Mean % change number of DALY  | Mean % change all-age DALY rate | Mean % change age-standardized DALY rate |
|-------------------------------|-------------------------------|-------------------------------|---------------------------------|------------------------------------------|
| 1 Ischemic heart disease      | 1 Ischemic heart disease      | 23 (-17.1 to 78.6)            | -8.14 (-38.3 to 38.1)           | -24.8 (-51.2 to 15.1)                    |
| 2 Stroke                      | 2 Diabetes                    | <b>67.5 (36.3 to 103)</b>     | <b>24.9 (4.74 to 50)</b>        | 4.5 (-13.1 to 25.8)                      |
| 3 Diabetes                    | 3 Stroke                      | 26.9 (-2.37 to 58)            | -5.28 (-25.1 to 18.9)           | -22.3 (-39.8 to 0.366)                   |
| 4 Neonatal disorders          | 4 Chronic kidney disease      | <b>122 (63.1 to 196)</b>      | <b>65.7 (25.7 to 124)</b>       | <b>41.3 (2.49 to 103)</b>                |
| 5 Lower respiratory infect    | 5 COPD                        | <b>59.2 (23.3 to 98.2)</b>    | 18.8 (-5.01 to 50.5)            | -4.3 (-28.9 to 27.9)                     |
| 6 Road injuries               | 6 Lower respiratory infect    | -15.5 (-32.3 to 0.533)        | <b>-37 (-45.1 to -25.1)</b>     | <b>-38.6 (-48.5 to -25.1)</b>            |
| 7 Tuberculosis                | 7 Road injuries               | 9.7 (-36.2 to 83.7)           | -18.1 (-53.2 to 39.8)           | -20.6 (-53.9 to 35.6)                    |
| 8 Self-harm                   | 8 Neonatal disorders          | <b>-32.7 (-54.5 to -5.94)</b> | <b>-49.9 (-62.6 to -31.2)</b>   | <b>-36.2 (-52.4 to -13.1)</b>            |
| 9 Chronic kidney disease      | 9 Self-harm                   | 16.2 (-10.3 to 49.8)          | -13.4 (-30.3 to 8.34)           | -14.5 (-30.7 to 7.17)                    |
| 10 COPD                       | 10 Low back pain              | <b>45.3 (25 to 65.5)</b>      | <b>8.36 (0.544 to 15.8)</b>     | <b>-5.07 (-5.91 to -4.29)</b>            |
| 11 Low back pain              | 11 Lung cancer                | <b>76.1 (23.6 to 134)</b>     | 31.2 (-3.72 to 71.3)            | 10.5 (-13.4 to 34.1)                     |
| 12 Congenital defects         | 12 Other musculoskeletal      | <b>145 (111 to 176)</b>       | <b>82.5 (69.1 to 95.4)</b>      | <b>61.4 (58.2 to 64)</b>                 |
| 13 Cirrhosis liver            | 13 Hypertensive heart disease | <b>65.8 (15.7 to 131)</b>     | 23.8 (-12.2 to 74.1)            | -0.0169 (-32.5 to 55)                    |
| 14 Headache disorders         | 14 Headache disorders         | <b>43 (21.8 to 60.5)</b>      | <b>6.51 (2.74 to 11)</b>        | <b>0.801 (0.341 to 1.18)</b>             |
| 15 Lung cancer                | 15 Age-related hearing loss   | <b>56.8 (33.5 to 82.2)</b>    | <b>16.9 (5.14 to 27.5)</b>      | <b>-1.06 (-1.32 to -0.745)</b>           |
| 16 Hypertensive heart disease | 16 Cirrhosis liver            | 11.2 (-11.9 to 33.1)          | -17 (-31.3 to 1.35)             | <b>-28 (-39.6 to -13.6)</b>              |
| 17 Interpersonal violence     | 17 Depressive disorders       | <b>42.6 (21.9 to 62)</b>      | <b>6.24 (1.47 to 12.3)</b>      | <b>-2.18 (-2.55 to -1.75)</b>            |
| 18 Depressive disorders       | 18 Tuberculosis               | <b>-44.6 (-62 to -21.3)</b>   | <b>-58.7 (-70.2 to -39.2)</b>   | <b>-63.2 (-73.6 to -44.8)</b>            |
| 19 Drowning                   | 19 Anxiety disorders          | <b>40.8 (19.8 to 59.9)</b>    | <b>4.87 (1.87 to 8.78)</b>      | <b>1.23 (0.746 to 1.65)</b>              |
| 20 Age-related hearing loss   | 20 Breast cancer              | <b>55.8 (7.17 to 122)</b>     | 16.1 (-16.7 to 56.4)            | -3.17 (-27.3 to 27.9)                    |
| 21 Anxiety disorders          | 23 Interpersonal violence     |                               |                                 |                                          |
| 23 Breast cancer              | 25 Congenital defects         |                               |                                 |                                          |
| 24 Other musculoskeletal      | 29 Drowning                   |                               |                                 |                                          |



### Vanuatu, Reference scenario

**Legend:**  
Communicable, maternal, neonatal and nutritional  
Non-communicable  
Injuries

| Leading Causes 2022           | Leading Causes 2050           | Mean % change number of DALY | Mean % change all-age DALY rate | Mean % change age-standardized DALY rate |
|-------------------------------|-------------------------------|------------------------------|---------------------------------|------------------------------------------|
| 1 Ischemic heart disease      | 1 Ischemic heart disease      | 49.1 (-1.45 to 118)          | -4.68 (-36 to 42.3)             | -31.3 (-56.2 to 7.75)                    |
| 2 COVID-19                    | 2 Diabetes                    | 114 (83.1 to 150)            | 36.9 (15.3 to 61.5)             | -1.23 (-17.8 to 20.1)                    |
| 3 Stroke                      | 3 Stroke                      | 40.3 (12.1 to 72.2)          | -10.4 (-27.8 to 12.4)           | -35.7 (-50.6 to -16)                     |
| 4 Neonatal disorders          | 4 HIV/AIDS                    | 751 (358 to 1250)            | 443 (190 to 778)                | 449 (193 to 785)                         |
| 5 Diabetes                    | 5 Neonatal disorders          | -27.1 (-47.1 to 0.124)       | -53.5 (-65.3 to -35.7)          | -37.7 (-53.8 to -15.4)                   |
| 6 Lower respiratory infect    | 6 Chronic kidney disease      | 162 (89.1 to 257)            | 67.2 (20.8 to 132)              | 28 (-12.3 to 84.7)                       |
| 7 Road injuries               | 7 COPD                        | 75.3 (37.4 to 126)           | 12 (-10.5 to 47.2)              | -25.4 (-44.6 to 2.59)                    |
| 8 Self-harm                   | 8 Road injuries               | 24.8 (-28.8 to 110)          | -20.2 (-53.6 to 47)             | -25.2 (-56.2 to 37.5)                    |
| 9 COPD                        | 9 Self-harm                   | 37.4 (4.85 to 79.1)          | -12.3 (-31.1 to 13.1)           | -17.1 (-34.4 to 6.04)                    |
| 10 Congenital defects         | 10 Lower respiratory infect   | -27.6 (-40.4 to -12.3)       | -53.8 (-60.9 to -45.3)          | -50.1 (-58.5 to -37.8)                   |
| 11 Cirrhosis liver            | 11 Low back pain              | 86.1 (70.6 to 106)           | 18.8 (12.7 to 25.8)             | -3.63 (-3.94 to -3.24)                   |
| 12 Low back pain              | 12 Other musculoskeletal      | 213 (187 to 243)             | 100 (86.7 to 112)               | 63.6 (59.9 to 66.3)                      |
| 13 Chronic kidney disease     | 13 Headache disorders         | 72.9 (57.5 to 92.1)          | 10.3 (6.17 to 15.5)             | 0.639 (0.4 to 0.861)                     |
| 14 Drowning                   | 14 Cirrhosis liver            | 18.2 (-2.62 to 44)           | -24.5 (-38.4 to -5.3)           | -37.8 (-48.8 to -22)                     |
| 15 Diarrheal diseases         | 15 Depressive disorders       | 75.8 (61.5 to 93.8)          | 12.1 (7.53 to 17)               | -1.75 (-2.04 to -1.46)                   |
| 16 Headache disorders         | 16 Anxiety disorders          | 69.5 (53.8 to 88.1)          | 8.12 (3.65 to 13.2)             | 1.3 (0.973 to 1.6)                       |
| 17 Dietary iron deficiency    | 17 Age-related hearing loss   | 108 (85.1 to 134)            | 32.7 (21.8 to 44.6)             | -1.29 (-1.45 to -1.11)                   |
| 18 Rheumatic heart disease    | 18 Hypertensive heart disease | 118 (51.7 to 197)            | 39.1 (-1.54 to 92.6)            | -3.76 (-38.2 to 46.6)                    |
| 19 Anxiety disorders          | 19 Dietary iron deficiency    | 29.8 (16.1 to 45.8)          | -17.3 (-20.1 to -14.6)          | -14.1 (-14.9 to -13.2)                   |
| 20 Asthma                     | 20 Congenital defects         | -15.6 (-29.7 to 1.78)        | -46.2 (-52.6 to -37.3)          | -30.7 (-37.8 to -21.6)                   |
| 21 Depressive disorders       | 22 Diarrheal diseases         |                              |                                 |                                          |
| 23 Age-related hearing loss   | 24 Drowning                   |                              |                                 |                                          |
| 24 Hypertensive heart disease | 28 Rheumatic heart disease    |                              |                                 |                                          |
| 26 Other musculoskeletal      | 32 Asthma                     |                              |                                 |                                          |
| 33 HIV/AIDS                   | 164 COVID-19                  |                              |                                 |                                          |

### Cambodia, Reference scenario

**Legend:**  
Communicable, maternal, neonatal and nutritional  
Non-communicable  
Injuries

| Leading Causes 2022           | Leading Causes 2050           | Mean % change number of DALY  | Mean % change all-age DALY rate | Mean % change age-standardized DALY rate |
|-------------------------------|-------------------------------|-------------------------------|---------------------------------|------------------------------------------|
| 1 Lower respiratory infect    | 1 Stroke                      | 28.4 (-0.26 to 62.6)          | 2.35 (-15.3 to 24.9)            | <b>-41.5 (-53.2 to -27)</b>              |
| 2 Stroke                      | 2 Cirrhosis liver             | <b>63.7 (29.4 to 98.6)</b>    | <b>30.5 (10.1 to 53.1)</b>      | -6.67 (-20.1 to 8.73)                    |
| 3 Neonatal disorders          | 3 Lower respiratory infect    | <b>-33.7 (-45.9 to -18.5)</b> | <b>-47.2 (-55.1 to -37.9)</b>   | <b>-56.1 (-62.5 to -48.6)</b>            |
| 4 Ischemic heart disease      | 4 Ischemic heart disease      | 13.8 (-22.8 to 61)            | -9.24 (-35.6 to 28)             | <b>-46.5 (-63.4 to -20.2)</b>            |
| 5 Cirrhosis liver             | 5 Diabetes                    | <b>90.2 (54 to 134)</b>       | <b>51.5 (29.5 to 73.6)</b>      | -7.29 (-19.8 to 6.46)                    |
| 6 Congenital defects          | 6 Other musculoskeletal       | <b>172 (129 to 224)</b>       | <b>117 (103 to 132)</b>         | <b>76.6 (68.7 to 81.8)</b>               |
| 7 Tuberculosis                | 7 Chronic kidney disease      | <b>121 (61.9 to 194)</b>      | <b>76 (34.6 to 127)</b>         | 20.8 (-10.4 to 63.5)                     |
| 8 Road injuries               | 8 Falls                       | <b>65.4 (31.4 to 104)</b>     | <b>31.7 (14.5 to 52.1)</b>      | -5.69 (-14.6 to 4.15)                    |
| 9 Diabetes                    | 9 Neonatal disorders          | <b>-55.3 (-66 to -41.5)</b>   | <b>-64.4 (-72 to -54.3)</b>     | <b>-47.8 (-59.5 to -31.7)</b>            |
| 10 Falls                      | 10 COPD                       | <b>75 (30.7 to 125)</b>       | <b>39.5 (9.68 to 71.1)</b>      | <b>-24 (-42.1 to -0.566)</b>             |
| 11 Headache disorders         | 11 Road injuries              | 1.95 (-31.2 to 45.1)          | -18.7 (-44.1 to 21.6)           | -23.4 (-47.9 to 15.7)                    |
| 12 Low back pain              | 12 Low back pain              | <b>53.2 (28.5 to 79.6)</b>    | <b>22 (15.8 to 28.4)</b>        | <b>-7.03 (-7.32 to -6.76)</b>            |
| 13 COPD                       | 13 Hypertensive heart disease | <b>115 (47.7 to 206)</b>      | <b>71.7 (26.1 to 134)</b>       | -4.64 (-34.4 to 36.9)                    |
| 14 Age-related hearing loss   | 14 Lung cancer                | <b>98.3 (44.4 to 163)</b>     | <b>57.9 (20.8 to 96.8)</b>      | -4.66 (-23.7 to 16)                      |
| 15 Chronic kidney disease     | 15 Age-related hearing loss   | <b>80.7 (50.7 to 114)</b>     | <b>44 (33.6 to 54.8)</b>        | <b>-1.36 (-1.54 to -1.15)</b>            |
| 16 Upper digest diseases      | 16 Headache disorders         | <b>35.1 (14.7 to 57.8)</b>    | <b>7.59 (3.01 to 17.5)</b>      | 0.261 (-0.00811 to 0.607)                |
| 17 Lung cancer                | 17 Colorectal cancer          | <b>141 (67.4 to 228)</b>      | <b>92 (36.6 to 154)</b>         | 20 (-10 to 51.3)                         |
| 18 Dietary iron deficiency    | 18 Alzheimer's disease        | <b>190 (125 to 265)</b>       | <b>131 (91.8 to 182)</b>        | 3.75 (-0.0403 to 7.56)                   |
| 19 Anxiety disorders          | 19 Congenital defects         | <b>-48.4 (-58.9 to -35.2)</b> | <b>-58.9 (-64.7 to -52.3)</b>   | <b>-36.5 (-43.9 to -27.8)</b>            |
| 20 Depressive disorders       | 20 Depressive disorders       | <b>42.1 (20.6 to 65.8)</b>    | <b>13.2 (8.38 to 18.4)</b>      | <b>-2.88 (-3.14 to -2.54)</b>            |
| 21 Hypertensive heart disease | 21 Anxiety disorders          |                               |                                 |                                          |
| 22 Other musculoskeletal      | 22 Tuberculosis               |                               |                                 |                                          |
| 28 Colorectal cancer          | 25 Upper digest diseases      |                               |                                 |                                          |
| 35 Alzheimer's disease        | 27 Dietary iron deficiency    |                               |                                 |                                          |

### Indonesia, Reference scenario

**Legend:**  
Communicable, maternal, neonatal and nutritional  
Non-communicable  
Injuries

| Leading Causes 2022           | Leading Causes 2050          | Mean % change number of DALY  | Mean % change all-age DALY rate | Mean % change age-standardized DALY rate |
|-------------------------------|------------------------------|-------------------------------|---------------------------------|------------------------------------------|
| 1 Stroke                      | 1 Stroke                     | 14.3 (-5.33 to 32.7)          | 2.33 (-14.8 to 21.2)            | <b>-48.2 (-56.8 to -38.1)</b>            |
| 2 Ischemic heart disease      | 2 Ischemic heart disease     | -8.96 (-34.3 to 21.5)         | -18.4 (-40.5 to 11.5)           | <b>-56.1 (-69 to -37.7)</b>              |
| 3 Neonatal disorders          | 3 Diabetes                   | <b>88.4 (61.4 to 119)</b>     | <b>68.6 (47.6 to 89.7)</b>      | -4.69 (-17.4 to 8.72)                    |
| 4 Cirrhosis liver             | 4 COPD                       | <b>112 (70.6 to 160)</b>      | <b>89.7 (50.4 to 136)</b>       | -13.5 (-30.9 to 13.5)                    |
| 5 COVID-19                    | 5 Cirrhosis liver            | <b>19.2 (3.11 to 33.6)</b>    | 6.65 (-7.28 to 21.5)            | <b>-30.2 (-38.1 to -20.1)</b>            |
| 6 Diabetes                    | 6 Hypertensive heart disease | <b>127 (62.4 to 201)</b>      | <b>103 (49.1 to 177)</b>        | -3.44 (-32.9 to 40.4)                    |
| 7 Tuberculosis                | 7 Other musculoskeletal      | <b>112 (92.1 to 136)</b>      | <b>89.8 (79 to 102)</b>         | <b>56.2 (54.6 to 58)</b>                 |
| 8 Road injuries               | 8 Chronic kidney disease     | <b>87.6 (44.3 to 140)</b>     | <b>68 (26.9 to 120)</b>         | 10.5 (-16.8 to 47.7)                     |
| 9 COPD                        | 9 Low back pain              | <b>41.5 (27.4 to 56.4)</b>    | <b>26.5 (20.3 to 34.2)</b>      | <b>-4.51 (-5.28 to -3.78)</b>            |
| 10 Low back pain              | 10 Age-related hearing loss  | <b>80.2 (60.1 to 106)</b>     | <b>61.1 (49.5 to 74.4)</b>      | <b>-1.1 (-1.19 to -1.02)</b>             |
| 11 Headache disorders         | 11 Lung cancer               | <b>92.8 (45.6 to 145)</b>     | <b>72.2 (34.2 to 111)</b>       | -4.79 (-22.7 to 13.5)                    |
| 12 Diarrheal diseases         | 12 Alzheimer's disease       | <b>252 (184 to 331)</b>       | <b>214 (166 to 276)</b>         | 1.08 (-2.48 to 5.31)                     |
| 13 Lower respiratory infect   | 13 Headache disorders        | <b>13.4 (1.99 to 28.2)</b>    | 1.41 (-2.9 to 12.3)             | <b>0.502 (0.305 to 0.686)</b>            |
| 14 Chronic kidney disease     | 14 Diarrheal diseases        | 7.11 (-29.4 to 60.9)          | -4 (-38.8 to 47.4)              | <b>-45.1 (-62.3 to -16.5)</b>            |
| 15 Age-related hearing loss   | 15 Neonatal disorders        | <b>-52.8 (-62.5 to -39.4)</b> | <b>-57.8 (-66.5 to -46.8)</b>   | <b>-42.8 (-55.1 to -27)</b>              |
| 16 Other musculoskeletal      | 16 Road injuries             | -13.6 (-39.2 to 23.6)         | -22.7 (-45.4 to 7.32)           | -21.1 (-46 to 9.4)                       |
| 17 Lung cancer                | 17 Lower respiratory infect  | 7.84 (-13.2 to 29)            | -3.55 (-19.4 to 14)             | <b>-43.4 (-52 to -33.3)</b>              |
| 18 Hypertensive heart disease | 18 Blindness and vision loss | <b>93.9 (68.8 to 121)</b>     | <b>73.3 (56.7 to 91.2)</b>      | <b>-5.58 (-6.04 to -5.11)</b>            |
| 19 Congenital defects         | 19 Tuberculosis              | <b>-38.2 (-54.9 to -14.6)</b> | <b>-44.7 (-61 to -23.8)</b>     | <b>-63.6 (-75.2 to -47.1)</b>            |
| 20 Anxiety disorders          | 20 Falls                     | <b>59.4 (35.4 to 87)</b>      | <b>42.5 (24.6 to 60.9)</b>      | <b>-13.4 (-19.9 to -5.85)</b>            |
| 23 Falls                      | 22 Anxiety disorders         |                               |                                 |                                          |
| 24 Blindness and vision loss  | 32 Congenital defects        |                               |                                 |                                          |
| 31 Alzheimer's disease        | 164 COVID-19                 |                               |                                 |                                          |

### Laos, Reference scenario

**Legend:**  
Communicable, maternal, neonatal and nutritional  
Non-communicable  
Injuries

| Leading Causes 2022           | Leading Causes 2050          | Mean % change number of DALY  | Mean % change all-age DALY rate | Mean % change age-standardized DALY rate |
|-------------------------------|------------------------------|-------------------------------|---------------------------------|------------------------------------------|
| 1 Neonatal disorders          | 1 Stroke                     | 22.6 (-1.83 to 53.6)          | -4.01 (-23.6 to 16.7)           | <b>-49.8 (-60.5 to -37)</b>              |
| 2 Stroke                      | 2 Ischemic heart disease     | 11.5 (-23.2 to 59.3)          | -12.7 (-39.8 to 23.4)           | <b>-53.8 (-68.8 to -32.3)</b>            |
| 3 Lower respiratory infect    | 3 Diabetes                   | <b>113 (76.1 to 150)</b>      | <b>66.4 (36 to 90.1)</b>        | -10.8 (-24.5 to 3.28)                    |
| 4 Ischemic heart disease      | 4 Chronic kidney disease     | <b>132 (69.3 to 213)</b>      | <b>81.5 (33.8 to 139)</b>       | 9.87 (-18.5 to 47.9)                     |
| 5 COVID-19                    | 5 COPD                       | 115 (66.9 to 168)             | <b>68.4 (29.2 to 108)</b>       | <b>-21.2 (-40.8 to -0.269)</b>           |
| 6 Congenital defects          | 6 Other musculoskeletal      | <b>201 (165 to 237)</b>       | <b>136 (120 to 154)</b>         | <b>82.2 (75.9 to 87.3)</b>               |
| 7 Diabetes                    | 7 Neonatal disorders         | <b>-64.8 (-73.8 to -53.7)</b> | <b>-72.5 (-78.9 to -64.6)</b>   | <b>-53.7 (-64.8 to -39.4)</b>            |
| 8 Road injuries               | 8 Lower respiratory infect   | <b>-45.3 (-55.9 to -31.2)</b> | <b>-57.2 (-65 to -45.6)</b>     | <b>-59.9 (-66.4 to -51.7)</b>            |
| 9 Tuberculosis                | 9 Hypertensive heart disease | <b>139 (64.3 to 244)</b>      | <b>87.3 (30.3 to 160)</b>       | -8.76 (-38.8 to 33.8)                    |
| 10 Chronic kidney disease     | 10 Age-related hearing loss  | <b>102 (75.2 to 126)</b>      | <b>57.9 (45.3 to 70.8)</b>      | <b>-1.57 (-1.67 to -1.47)</b>            |
| 11 Diarrheal diseases         | 11 Cirrhosis liver           | <b>46.4 (23.1 to 78)</b>      | 14.6 (-3.5 to 37.2)             | <b>-24.5 (-35.7 to -10.5)</b>            |
| 12 COPD                       | 12 Low back pain             | <b>66.7 (47.3 to 86.9)</b>    | <b>30.5 (23.3 to 38.7)</b>      | <b>-5.95 (-6.18 to -5.71)</b>            |
| 13 Cirrhosis liver            | 13 Road injuries             | -0.337 (-34.7 to 51.6)        | -21.9 (-48.7 to 20.4)           | -25.2 (-51.1 to 16.1)                    |
| 14 Headache disorders         | 14 Lung cancer               | <b>140 (78.7 to 207)</b>      | <b>87.8 (42 to 137)</b>         | -2.25 (-23.5 to 18.2)                    |
| 15 Low back pain              | 15 Headache disorders        | <b>39.6 (22.5 to 58.9)</b>    | <b>9.26 (4.02 to 20.7)</b>      | <b>0.785 (0.551 to 0.916)</b>            |
| 16 Anxiety disorders          | 16 Anxiety disorders         | <b>43.2 (24.3 to 61.5)</b>    | <b>12 (5.63 to 19.8)</b>        | <b>1.52 (1.42 to 1.61)</b>               |
| 17 Interpersonal violence     | 17 Congenital defects        | <b>-54.1 (-63.5 to -44.7)</b> | <b>-64.1 (-70.6 to -57.6)</b>   | <b>-39.1 (-47.8 to -29.8)</b>            |
| 18 Age-related hearing loss   | 18 Alzheimer's disease       | <b>265 (187 to 343)</b>       | <b>185 (136 to 236)</b>         | <b>6.87 (4.05 to 10)</b>                 |
| 19 Other musculoskeletal      | 19 Colorectal cancer         | <b>166 (88 to 255)</b>        | <b>108 (51.4 to 177)</b>        | 15.5 (-12.9 to 50.6)                     |
| 20 Hypertensive heart disease | 20 Depressive disorders      | <b>46.3 (30.3 to 63.5)</b>    | <b>14.5 (8.74 to 21.3)</b>      | <b>-2.53 (-2.77 to -2.26)</b>            |
| 21 Depressive disorders       | 23 Interpersonal violence    |                               |                                 |                                          |
| 25 Lung cancer                | 24 Tuberculosis              |                               |                                 |                                          |
| 32 Colorectal cancer          | 39 Diarrheal diseases        |                               |                                 |                                          |
| 40 Alzheimer's disease        | 165 COVID-19                 |                               |                                 |                                          |

### Malaysia, Reference scenario

**Legend:**  
Communicable, maternal, neonatal and nutritional  
Non-communicable  
Injuries

| Leading Causes 2022         | Leading Causes 2050        | Mean % change number of DALY | Mean % change all-age DALY rate  | Mean % change age-standardized DALY rate |
|-----------------------------|----------------------------|------------------------------|----------------------------------|------------------------------------------|
| 1 Ischemic heart disease    | 1 Ischemic heart disease   | -12.2 (-37 to 21.4)          | <b>-27.7 (-47.6 to -0.00157)</b> | <b>-59.7 (-71.4 to -42.6)</b>            |
| 2 Stroke                    | 2 Lower respiratory infect | <b>64.7 (37.5 to 94.4)</b>   | <b>35.6 (18.3 to 53.5)</b>       | <b>-25.3 (-36.2 to -12.5)</b>            |
| 3 Lower respiratory infect  | 3 Stroke                   | <b>23.3 (2.58 to 53.1)</b>   | 1.49 (-15 to 23.6)               | <b>-43.6 (-53 to -30.3)</b>              |
| 4 Road injuries             | 4 Diabetes                 | <b>112 (83.1 to 141)</b>     | <b>74.4 (58.1 to 90.8)</b>       | 2.44 (-6.43 to 11.7)                     |
| 5 COVID-19                  | 5 Chronic kidney disease   | <b>113 (61.8 to 181)</b>     | <b>75.3 (34.4 to 128)</b>        | 3.49 (-21.3 to 37.1)                     |
| 6 Diabetes                  | 6 Other musculoskeletal    | <b>125 (92.5 to 152)</b>     | <b>85 (74.7 to 94.9)</b>         | <b>50.2 (47.4 to 53.3)</b>               |
| 7 Depressive disorders      | 7 Road injuries            | 7.1 (-24.7 to 62)            | -11.8 (-37.6 to 30.2)            | -17.3 (-42.5 to 25.4)                    |
| 8 Low back pain             | 8 Age-related hearing loss | <b>84.3 (59.8 to 109)</b>    | <b>51.7 (42.5 to 60.3)</b>       | <b>-1.07 (-1.15 to -0.98)</b>            |
| 9 Chronic kidney disease    | 9 COPD                     | <b>104 (61.2 to 166)</b>     | <b>67.8 (32.1 to 114)</b>        | -13.7 (-34.4 to 13)                      |
| 10 Headache disorders       | 10 Alzheimer's disease     | <b>213 (162 to 271)</b>      | <b>157 (125 to 185)</b>          | <b>4.61 (1.38 to 7.95)</b>               |
| 11 Neonatal disorders       | 11 Low back pain           | <b>54.8 (33.8 to 73.4)</b>   | <b>27.4 (19.8 to 33.8)</b>       | <b>-3.83 (-4.03 to -3.65)</b>            |
| 12 Age-related hearing loss | 12 Lung cancer             | <b>113 (65.6 to 173)</b>     | <b>75.4 (38.3 to 121)</b>        | 0.653 (-17.2 to 22.4)                    |
| 13 Other musculoskeletal    | 13 Depressive disorders    | <b>33.4 (14.3 to 50.6)</b>   | <b>9.75 (4.16 to 15.3)</b>       | <b>-1.83 (-2 to -1.64)</b>               |
| 14 Anxiety disorders        | 14 Colorectal cancer       | <b>118 (60 to 195)</b>       | <b>79.5 (33.1 to 133)</b>        | 3.18 (-21.1 to 28.9)                     |
| 15 COPD                     | 15 Cirrhosis liver         | <b>62.7 (34.1 to 97.6)</b>   | <b>34 (11.1 to 58.1)</b>         | -13 (-26.7 to 2.6)                       |
| 16 Cirrhosis liver          | 16 Headache disorders      | <b>25.6 (10.8 to 41.5)</b>   | 3.4 (-2.25 to 15.5)              | <b>0.789 (0.437 to 0.995)</b>            |
| 17 Breast cancer            | 17 Breast cancer           | <b>81.1 (38.2 to 136)</b>    | <b>48.9 (16.2 to 89)</b>         | -2.17 (-23 to 22.6)                      |
| 18 Lung cancer              | 18 Anxiety disorders       | <b>31.1 (13.2 to 50.9)</b>   | <b>7.89 (1.17 to 15.6)</b>       | <b>1.39 (1.24 to 1.54)</b>               |
| 19 Colorectal cancer        | 19 Neonatal disorders      | -14.3 (-28.3 to 1.02)        | <b>-29.5 (-38.1 to -20)</b>      | -15.7 (-27.1 to 0.236)                   |
| 20 Congenital defects       | 20 Urinary diseases        | <b>132 (96.4 to 167)</b>     | <b>90.6 (72.4 to 110)</b>        | 3.98 (-3.27 to 14.9)                     |
| 21 Alzheimer's disease      | 34 Congenital defects      |                              |                                  |                                          |
| 31 Urinary diseases         | 159 COVID-19               |                              |                                  |                                          |

### Maldives, Reference scenario

**Legend:**  
Communicable, maternal, neonatal and nutritional  
Non-communicable  
Injuries

| Leading Causes 2022          | Leading Causes 2050          | Mean % change number of DALY | Mean % change all-age DALY rate | Mean % change age-standardized DALY rate |
|------------------------------|------------------------------|------------------------------|---------------------------------|------------------------------------------|
| 1 Stroke                     | 1 Diabetes                   | 381 (313 to 450)             | 220 (183 to 262)                | 25.6 (13 to 37.8)                        |
| 2 Ischemic heart disease     | 2 Stroke                     | 130 (82.5 to 179)            | 52.9 (23.6 to 84.8)             | -44.1 (-54.8 to -27.5)                   |
| 3 Neonatal disorders         | 3 Ischemic heart disease     | 94.6 (36.4 to 181)           | 29.7 (-9.64 to 87.1)            | -51.3 (-67.5 to -25.8)                   |
| 4 COVID-19                   | 4 COPD                       | 335 (231 to 441)             | 189 (117 to 267)                | -9.73 (-33.1 to 18.6)                    |
| 5 Headache disorders         | 5 Other musculoskeletal      | 220 (176 to 265)             | 113 (89.5 to 140)               | 72.7 (69.8 to 75.9)                      |
| 6 Diabetes                   | 6 Age-related hearing loss   | 197 (159 to 233)             | 97.5 (81.4 to 116)              | -1.36 (-1.84 to -0.892)                  |
| 7 Low back pain              | 7 Chronic kidney disease     | 251 (152 to 369)             | 134 (71.4 to 210)               | -1.53 (-27.2 to 34)                      |
| 8 Other musculoskeletal      | 8 Low back pain              | 105 (78.1 to 129)            | 36.3 (24.8 to 49)               | -4.52 (-5.56 to -3.55)                   |
| 9 Age-related hearing loss   | 9 Alzheimer's disease        | 440 (358 to 523)             | 259 (212 to 303)                | -6.75 (-9.85 to -3.38)                   |
| 10 Depressive disorders      | 10 Headache disorders        | 48.2 (30.5 to 70.9)          | -1.41 (-9.19 to 12.5)           | 3.45 (0.671 to 5.43)                     |
| 11 Chronic kidney disease    | 11 Depressive disorders      | 77.2 (54.3 to 105)           | 17.8 (8.59 to 30.2)             | -0.453 (-1.55 to 0.657)                  |
| 12 Anxiety disorders         | 12 Neonatal disorders        | -12 (-28.3 to 8.7)           | -41.5 (-52 to -28.2)            | -26.9 (-44.5 to -1.61)                   |
| 13 COPD                      | 13 Anxiety disorders         | 64.3 (40.6 to 92.6)          | 9.31 (-0.32 to 23.3)            | 4.73 (3.33 to 6.35)                      |
| 14 Dietary iron deficiency   | 14 Falls                     | 118 (70.1 to 158)            | 45.1 (16.6 to 69.4)             | -12.2 (-21.6 to -2.37)                   |
| 15 Congenital defects        | 15 Blindness and vision loss | 238 (193 to 285)             | 125 (101 to 145)                | -7.49 (-8.15 to -6.7)                    |
| 16 Falls                     | 16 Osteoarthritis            | 287 (240 to 328)             | 157 (139 to 176)                | 3.03 (2.4 to 3.79)                       |
| 17 Lower respiratory infect  | 17 Oral disorders            | 162 (127 to 200)             | 74.5 (57.3 to 93.3)             | 0.52 (0.000654 to 1.04)                  |
| 18 Schizophrenia             | 18 Endo/metab/blood/immune   | 112 (73 to 152)              | 40.8 (17.4 to 63)               | -5.85 (-17.3 to 8.4)                     |
| 19 Hemoglobinopathies        | 19 Lung cancer               | 326 (213 to 453)             | 183 (115 to 261)                | -2.12 (-22.4 to 22.5)                    |
| 20 Endo/metab/blood/immune   | 20 Lower respiratory infect  | 80.8 (49.6 to 111)           | 20.4 (0.623 to 40.7)            | -47 (-55.8 to -36)                       |
| 24 Oral disorders            | 21 Dietary iron deficiency   |                              |                                 |                                          |
| 25 Alzheimer's disease       | 24 Hemoglobinopathies        |                              |                                 |                                          |
| 26 Blindness and vision loss | 25 Schizophrenia             |                              |                                 |                                          |
| 30 Osteoarthritis            | 31 Congenital defects        |                              |                                 |                                          |
| 35 Lung cancer               | 154 COVID-19                 |                              |                                 |                                          |

### Mauritius, Reference scenario

**Legend:**  
Communicable, maternal, neonatal and nutritional  
Non-communicable  
Injuries

| Leading Causes 2022           | Leading Causes 2050          | Mean % change number of DALY  | Mean % change all-age DALY rate | Mean % change age-standardized DALY rate |
|-------------------------------|------------------------------|-------------------------------|---------------------------------|------------------------------------------|
| 1 Diabetes                    | 1 Diabetes                   | 8.36 (-9.25 to 28.6)          | <b>25.9 (11.1 to 42.3)</b>      | <b>-18.3 (-27.1 to -6.78)</b>            |
| 2 Ischemic heart disease      | 2 Chronic kidney disease     | <b>30.2 (0.981 to 67)</b>     | <b>51.4 (18.5 to 89.9)</b>      | -0.0206 (-21.6 to 29.7)                  |
| 3 Chronic kidney disease      | 3 Ischemic heart disease     | <b>-35 (-51.2 to -11.8)</b>   | -24.4 (-44.3 to 0.907)          | <b>-58.1 (-70.3 to -40.9)</b>            |
| 4 Stroke                      | 4 Stroke                     | <b>-26 (-37.4 to -11.1)</b>   | -14 (-25.2 to 0.858)            | <b>-47.8 (-55.2 to -37.8)</b>            |
| 5 Neonatal disorders          | 5 Alzheimer's disease        | <b>140 (94 to 184)</b>        | <b>178 (141 to 216)</b>         | <b>-4.56 (-7.33 to -1.58)</b>            |
| 6 Low back pain               | 6 Age-related hearing loss   | <b>31.8 (10.6 to 51.3)</b>    | <b>53.2 (43.6 to 62.9)</b>      | <b>-0.941 (-1.02 to -0.842)</b>          |
| 7 Age-related hearing loss    | 7 Hypertensive heart disease | <b>47.7 (8.72 to 107)</b>     | <b>71.8 (26 to 146)</b>         | -11.8 (-36.6 to 27.3)                    |
| 8 Lower respiratory infect    | 8 Other musculoskeletal      | <b>38.5 (18.1 to 59.5)</b>    | <b>61 (52.5 to 69.7)</b>        | <b>40.4 (36.3 to 43.7)</b>               |
| 9 Road injuries               | 9 Lower respiratory infect   | <b>18.3 (1.24 to 40.3)</b>    | <b>37.5 (21.5 to 54.2)</b>      | <b>-31.3 (-39.3 to -22)</b>              |
| 10 Depressive disorders       | 10 COPD                      | <b>73 (44.2 to 114)</b>       | <b>101 (69.3 to 138)</b>        | -8.49 (-27.2 to 15.6)                    |
| 11 Other musculoskeletal      | 11 Low back pain             | 5.06 (-9.88 to 20.5)          | <b>22.1 (16.1 to 29.6)</b>      | <b>-3.89 (-4.04 to -3.74)</b>            |
| 12 Hypertensive heart disease | 12 Depressive disorders      | -10.3 (-23.1 to 3.63)         | 4.21 (-0.0625 to 9.02)          | <b>-1.74 (-1.88 to -1.58)</b>            |
| 13 Headache disorders         | 13 Colorectal cancer         | 27 (-5.46 to 65.1)            | <b>47.4 (13.9 to 84.5)</b>      | -6.17 (-26.1 to 16.7)                    |
| 14 Cirrhosis liver            | 14 Blindness and vision loss | <b>48 (27.6 to 71.6)</b>      | <b>72 (58.5 to 85.2)</b>        | <b>-5.3 (-5.68 to -4.94)</b>             |
| 15 Breast cancer              | 15 Breast cancer             | 4.23 (-17.8 to 32.3)          | 21 (-0.417 to 48)               | -10.4 (-27.7 to 8.23)                    |
| 16 COPD                       | 16 Headache disorders        | <b>-17.4 (-29.7 to -3.98)</b> | -4.03 (-8.28 to 6.18)           | <b>0.529 (0.319 to 0.629)</b>            |
| 17 Alzheimer's disease        | 17 Road injuries             | <b>-34.2 (-52.9 to -11)</b>   | -23.5 (-43.7 to 3.71)           | -17.3 (-40.3 to 13)                      |
| 18 Colorectal cancer          | 18 Lung cancer               | <b>30.2 (2.44 to 64.7)</b>    | <b>51.2 (20.4 to 83.2)</b>      | -3.14 (-19.9 to 14.9)                    |
| 19 Self-harm                  | 19 Oral disorders            | <b>24.8 (5.55 to 42.2)</b>    | <b>45.1 (34.9 to 55)</b>        | <b>0.401 (0.205 to 0.597)</b>            |
| 20 Anxiety disorders          | 20 Osteoarthritis            | <b>34.1 (13.5 to 54.2)</b>    | <b>55.8 (48.6 to 63.6)</b>      | <b>2.62 (2.33 to 2.93)</b>               |
| 22 Blindness and vision loss  | 22 Cirrhosis liver           |                               |                                 |                                          |
| 23 Lung cancer                | 23 Neonatal disorders        |                               |                                 |                                          |
| 25 Oral disorders             | 24 Anxiety disorders         |                               |                                 |                                          |
| 29 Osteoarthritis             | 25 Self-harm                 |                               |                                 |                                          |

### Myanmar, Reference scenario

**Legend:**  
Communicable, maternal, neonatal and nutritional  
Non-communicable  
Injuries

| Leading Causes 2022           | Leading Causes 2050           | Mean % change number of DALY | Mean % change all-age DALY rate | Mean % change age-standardized DALY rate |
|-------------------------------|-------------------------------|------------------------------|---------------------------------|------------------------------------------|
| 1 Stroke                      | 1 Stroke                      | 5.17 (-17.7 to 31.5)         | -6.1 (-24.9 to 14.9)            | -43.5 (-56 to -28.7)                     |
| 2 Neonatal disorders          | 2 Diabetes                    | 47.2 (18.2 to 79.4)          | 31.4 (8.53 to 52)               | -17.6 (-30.3 to -4.43)                   |
| 3 Ischemic heart disease      | 3 COPD                        | 52.9 (12.6 to 96.4)          | 36.5 (4.14 to 70.5)             | -28.5 (-46.3 to -5.83)                   |
| 4 Lower respiratory infect    | 4 Ischemic heart disease      | -2.1 (-32.9 to 39.4)         | -12.6 (-39.7 to 20.9)           | -49 (-65.7 to -23.8)                     |
| 5 Diabetes                    | 5 Cirrhosis liver             | 65.4 (32.1 to 102)           | 47.8 (22 to 72.2)               | 21.3 (1.76 to 42.4)                      |
| 6 COPD                        | 6 Neonatal disorders          | -51.7 (-64.4 to -34.6)       | -56.9 (-67.1 to -43)            | -37.3 (-53.2 to -14.8)                   |
| 7 Congenital defects          | 7 Chronic kidney disease      | 85.1 (30.9 to 151)           | 65.3 (20 to 117)                | 14.2 (-19.2 to 58.3)                     |
| 8 Cirrhosis liver             | 8 Lower respiratory infect    | -44.6 (-54.9 to -32.6)       | -50.6 (-57.3 to -41.1)          | -57 (-63.4 to -48.7)                     |
| 9 Tuberculosis                | 9 Other musculoskeletal       | 111 (83.3 to 140)            | 88.6 (78.9 to 98.8)             | 58.4 (54.1 to 62.2)                      |
| 10 Road injuries              | 10 Age-related hearing loss   | 59.9 (39 to 81.7)            | 42.8 (32.7 to 54.1)             | -1.18 (-1.27 to -1.09)                   |
| 11 Headache disorders         | 11 Hypertensive heart disease | 97.3 (38.4 to 177)           | 76.3 (22.3 to 142)              | 1.14 (-31.3 to 45.7)                     |
| 12 Chronic kidney disease     | 12 Falls                      | 43.5 (18.6 to 71.6)          | 28.1 (12.5 to 44.8)             | -6.01 (-15.7 to 2.61)                    |
| 13 Age-related hearing loss   | 13 Road injuries              | -2.08 (-32.5 to 42.4)        | -12.6 (-39.4 to 31.9)           | -14 (-40.9 to 29)                        |
| 14 Falls                      | 14 Headache disorders         | 17 (1.85 to 33.1)            | 4.44 (0.503 to 12.8)            | 0.135 (-0.141 to 0.527)                  |
| 15 Asthma                     | 15 Low back pain              | 36.7 (19 to 54.2)            | 22.1 (16.3 to 27.6)             | -5.18 (-5.48 to -4.86)                   |
| 16 Low back pain              | 16 Alzheimer's disease        | 164 (98.5 to 229)            | 136 (89.2 to 184)               | 1.99 (-1.48 to 5.34)                     |
| 17 Dietary iron deficiency    | 17 Congenital defects         | -52.5 (-62.5 to -41.4)       | -57.6 (-64.1 to -50.6)          | -38.2 (-46.8 to -28.9)                   |
| 18 Alcohol use disorders      | 18 Alcohol use disorders      | 22.3 (-3.32 to 52.9)         | 9.26 (-14 to 33)                | -3.23 (-21.7 to 17.8)                    |
| 19 Hypertensive heart disease | 19 Lung cancer                | 49.8 (9.7 to 98.6)           | 33.7 (1.62 to 74.1)             | -15.8 (-31.3 to 4.87)                    |
| 20 Other musculoskeletal      | 20 Blindness and vision loss  | 75 (47.6 to 103)             | 56.2 (41.8 to 71.1)             | -6.23 (-6.54 to -5.92)                   |
| 24 Lung cancer                | 24 Dietary iron deficiency    |                              |                                 |                                          |
| 28 Blindness and vision loss  | 25 Tuberculosis               |                              |                                 |                                          |
| 33 Alzheimer's disease        | 28 Asthma                     |                              |                                 |                                          |



### Philippines, Reference scenario

**Legend:**  
Communicable, maternal, neonatal and nutritional  
Non-communicable  
Injuries

| Leading Causes 2022           | Leading Causes 2050          | Mean % change number of DALY  | Mean % change all-age DALY rate | Mean % change age-standardized DALY rate |
|-------------------------------|------------------------------|-------------------------------|---------------------------------|------------------------------------------|
| 1 Ischemic heart disease      | 1 Ischemic heart disease     | 7.93 (-20 to 42.1)            | -18.3 (-38.1 to 8.03)           | <b>-51.3 (-64.4 to -33.7)</b>            |
| 2 Stroke                      | 2 Stroke                     | <b>24.4 (5.15 to 48.5)</b>    | -5.87 (-18.1 to 8.69)           | <b>-43.9 (-51.5 to -34.2)</b>            |
| 3 Neonatal disorders          | 3 Lower respiratory infect   | 19.4 (-0.306 to 41.6)         | -9.7 (-22.7 to 3.72)            | <b>-39.6 (-46.8 to -31.1)</b>            |
| 4 Lower respiratory infect    | 4 Chronic kidney disease     | <b>128 (81.2 to 185)</b>      | <b>72.4 (37.9 to 114)</b>       | 14.4 (-9.39 to 48)                       |
| 5 Diabetes                    | 5 Diabetes                   | <b>91.3 (64.3 to 125)</b>     | <b>44.7 (25 to 62.4)</b>        | <b>-12.7 (-23.5 to -2.08)</b>            |
| 6 Chronic kidney disease      | 6 Hypertensive heart disease | <b>166 (96.6 to 253)</b>      | <b>101 (48 to 161)</b>          | 11.8 (-17.9 to 49.9)                     |
| 7 Tuberculosis                | 7 Neonatal disorders         | <b>-32.3 (-45.4 to -16.7)</b> | <b>-48.8 (-57.4 to -38.1)</b>   | <b>-31.2 (-43.3 to -16)</b>              |
| 8 Interpersonal violence      | 8 COPD                       | <b>93.7 (54.7 to 135)</b>     | <b>46.5 (20.1 to 71.3)</b>      | <b>-21.3 (-36.3 to -2.19)</b>            |
| 9 Congenital defects          | 9 Low back pain              | <b>68.4 (50.1 to 87.4)</b>    | <b>27.4 (22.1 to 33.4)</b>      | <b>-4.26 (-5.06 to -3.48)</b>            |
| 10 Headache disorders         | 10 Age-related hearing loss  | <b>94.9 (72.4 to 119)</b>     | <b>47.4 (38.7 to 57.1)</b>      | <b>-0.933 (-1.02 to -0.852)</b>          |
| 11 Road injuries              | 11 Other musculoskeletal     | <b>142 (117 to 167)</b>       | <b>82.8 (73.7 to 92.2)</b>      | <b>45.1 (41.6 to 48.2)</b>               |
| 12 Low back pain              | 12 Headache disorders        | <b>41 (25.5 to 62.6)</b>      | <b>6.65 (2.1 to 18.2)</b>       | <b>0.37 (0.172 to 0.514)</b>             |
| 13 COVID-19                   | 13 Alzheimer's disease       | <b>243 (183 to 299)</b>       | <b>159 (125 to 195)</b>         | 3.87 (-1.64 to 10)                       |
| 14 COPD                       | 14 Road injuries             | 13 (-16.3 to 58.6)            | -14.5 (-37.9 to 18.9)           | -16.7 (-39.6 to 16.4)                    |
| 15 Hypertensive heart disease | 15 Interpersonal violence    | -7.38 (-33.3 to 33.6)         | <b>-30 (-48.6 to -3.65)</b>     | <b>-34.1 (-52.3 to -8.82)</b>            |
| 16 Age-related hearing loss   | 16 Blindness and vision loss | <b>102 (78.1 to 128)</b>      | <b>52.9 (41.4 to 63.6)</b>      | <b>-5.04 (-5.51 to -4.58)</b>            |
| 17 Anxiety disorders          | 17 Cirrhosis liver           | <b>52.6 (30.9 to 77.3)</b>    | <b>15.4 (2.5 to 29)</b>         | <b>-17.5 (-26.1 to -6.95)</b>            |
| 18 Cirrhosis liver            | 18 Depressive disorders      | <b>52.3 (35.4 to 70.5)</b>    | <b>15.2 (10.7 to 20.4)</b>      | <b>-1.68 (-1.82 to -1.51)</b>            |
| 19 Asthma                     | 19 Breast cancer             | <b>89.9 (43.7 to 137)</b>     | <b>43.6 (16.5 to 77.5)</b>      | -0.985 (-20.2 to 21.2)                   |
| 20 Depressive disorders       | 20 Anxiety disorders         | <b>44 (27.8 to 60.1)</b>      | <b>8.88 (4.33 to 13.6)</b>      | <b>0.681 (0.379 to 0.965)</b>            |
| 21 Other musculoskeletal      | 23 Tuberculosis              |                               |                                 |                                          |
| 24 Breast cancer              | 24 Congenital defects        |                               |                                 |                                          |
| 25 Blindness and vision loss  | 35 Asthma                    |                               |                                 |                                          |
| 36 Alzheimer's disease        | 165 COVID-19                 |                               |                                 |                                          |

### Seychelles, Reference scenario

**Legend:**  
Communicable, maternal, neonatal and nutritional  
Non-communicable  
Injuries

| Leading Causes 2022          | Leading Causes 2050          | Mean % change number of DALY | Mean % change all-age DALY rate | Mean % change age-standardized DALY rate |
|------------------------------|------------------------------|------------------------------|---------------------------------|------------------------------------------|
| 1 COVID-19                   | 1 Diabetes                   | 121 (89.9 to 154)            | 69 (56 to 84.2)                 | 26.2 (17.4 to 36.3)                      |
| 2 Ischemic heart disease     | 2 Lower respiratory infect   | 50.8 (25.3 to 74.7)          | 15.1 (-0.179 to 29.5)           | -26.6 (-36.1 to -16.3)                   |
| 3 Stroke                     | 3 Hypertensive heart disease | 141 (69.3 to 238)            | 84.2 (35.7 to 155)              | 14.9 (-17.2 to 62.2)                     |
| 4 Diabetes                   | 4 Chronic kidney disease     | 96.4 (49.4 to 155)           | 49.9 (18.6 to 92.8)             | 8.21 (-16.9 to 45)                       |
| 5 Lower respiratory infect   | 5 Stroke                     | 13.8 (-9.33 to 39)           | -13.1 (-25.4 to 3.02)           | -41.5 (-50.5 to -29)                     |
| 6 Chronic kidney disease     | 6 Ischemic heart disease     | -10.6 (-37.7 to 28.4)        | -31.7 (-50.3 to -3.54)          | -54.2 (-67.2 to -33.4)                   |
| 7 Hypertensive heart disease | 7 Other musculoskeletal      | 106 (82 to 129)              | 57.1 (49.7 to 65.3)             | 48.5 (47.1 to 50)                        |
| 8 Neonatal disorders         | 8 COPD                       | 118 (66.1 to 170)            | 66.6 (34.4 to 99.6)             | -1.28 (-22.2 to 23.5)                    |
| 9 Cirrhosis liver            | 9 Age-related hearing loss   | 72.2 (47.4 to 96.4)          | 31.4 (23.4 to 40.3)             | -0.99 (-1.2 to -0.783)                   |
| 10 Age-related hearing loss  | 10 Alzheimer's disease       | 192 (138 to 249)             | 123 (95.1 to 151)               | 4.52 (1.55 to 7.58)                      |
| 11 Low back pain             | 11 Prostate cancer           | 165 (108 to 235)             | 102 (61.3 to 143)               | 11 (-4.98 to 26.5)                       |
| 12 Headache disorders        | 12 Colorectal cancer         | 88.9 (40.7 to 157)           | 44 (9.67 to 84.2)               | 2.89 (-19.9 to 30.1)                     |
| 13 Other musculoskeletal     | 13 Cirrhosis liver           | 19.1 (-1.23 to 38.8)         | -9.03 (-20.2 to 2.82)           | -18.1 (-28 to -5.59)                     |
| 14 Congenital defects        | 14 Low back pain             | 43.2 (27 to 59.7)            | 9.3 (3.83 to 15.6)              | -3.69 (-4.06 to -3.32)                   |
| 15 COPD                      | 15 Neonatal disorders        | -11.2 (-30.5 to 9.7)         | -32.2 (-45.4 to -18.6)          | -25.4 (-39.7 to -9.26)                   |
| 16 Road injuries             | 16 Headache disorders        | 29 (13.3 to 44.1)            | -1.51 (-3.68 to 1.46)           | 1.34 (0.43 to 1.9)                       |
| 17 Colorectal cancer         | 17 Lung cancer               | 81.2 (41.5 to 134)           | 38.2 (9.62 to 72.9)             | -2.31 (-20.5 to 18.3)                    |
| 18 Depressive disorders      | 18 Dengue                    | 396 (307 to 493)             | 279 (213 to 320)                | 277 (211 to 318)                         |
| 19 Anxiety disorders         | 19 Urinary diseases          | 132 (92.7 to 174)            | 77.4 (55.6 to 105)              | 15.4 (0.508 to 34.9)                     |
| 20 Breast cancer             | 20 Breast cancer             | 52.7 (20.7 to 100)           | 16.5 (-7.23 to 46.6)            | -0.559 (-19.5 to 20.4)                   |
| 21 Lung cancer               | 21 Depressive disorders      |                              |                                 |                                          |
| 22 Prostate cancer           | 22 Road injuries             |                              |                                 |                                          |
| 23 Alzheimer's disease       | 23 Anxiety disorders         |                              |                                 |                                          |
| 27 Urinary diseases          | 25 Congenital defects        |                              |                                 |                                          |
| 56 Dengue                    | 153 COVID-19                 |                              |                                 |                                          |

### Sri Lanka, Reference scenario

**Legend:**  
Communicable, maternal, neonatal and nutritional  
Non-communicable  
Injuries

| Leading Causes 2022           | Leading Causes 2050           | Mean % change number of DALY  | Mean % change all-age DALY rate | Mean % change age-standardized DALY rate |
|-------------------------------|-------------------------------|-------------------------------|---------------------------------|------------------------------------------|
| 1 Diabetes                    | 1 Diabetes                    | <b>49.2 (23.9 to 82.1)</b>    | <b>61.2 (37.5 to 89.8)</b>      | -6.63 (-16.2 to 4.63)                    |
| 2 Ischemic heart disease      | 2 Stroke                      | 14 (-10.8 to 48.3)            | 23.2 (-0.877 to 51.3)           | <b>-45.2 (-53.9 to -33.2)</b>            |
| 3 Stroke                      | 3 COPD                        | <b>105 (52.5 to 174)</b>      | <b>121 (71.7 to 184)</b>        | -5.22 (-27.1 to 23.8)                    |
| 4 COPD                        | 4 Ischemic heart disease      | -14 (-40 to 23.5)             | -6.93 (-34 to 32)               | <b>-52.1 (-66.7 to -30.6)</b>            |
| 5 Self-harm                   | 5 Alzheimer's disease         | <b>188 (112 to 281)</b>       | <b>210 (141 to 287)</b>         | <b>4.73 (1.72 to 7.82)</b>               |
| 6 Age-related hearing loss    | 6 Chronic kidney disease      | <b>87.4 (37 to 155)</b>       | <b>103 (50.4 to 167)</b>        | 13 (-15.3 to 53.5)                       |
| 7 Low back pain               | 7 Age-related hearing loss    | <b>44.6 (21 to 71.6)</b>      | <b>56.1 (40.8 to 70)</b>        | <b>-0.756 (-0.834 to -0.671)</b>         |
| 8 Neonatal disorders          | 8 Low back pain               | 16.8 (-0.305 to 36.5)         | <b>26.1 (17.8 to 34.2)</b>      | <b>-3.62 (-3.97 to -3.24)</b>            |
| 9 Headache disorders          | 9 Other musculoskeletal       | <b>43.9 (21.7 to 65.7)</b>    | <b>55.4 (46.6 to 64.1)</b>      | <b>37.5 (36.3 to 38.5)</b>               |
| 10 Conflict & terror          | 10 Hypertensive heart disease | <b>97.9 (32.3 to 172)</b>     | <b>114 (47.7 to 193)</b>        | 6.97 (-24.7 to 53.2)                     |
| 11 Chronic kidney disease     | 11 Falls                      | <b>35.3 (9.69 to 67)</b>      | <b>46 (21.5 to 72.5)</b>        | <b>-11.5 (-18.9 to -1.54)</b>            |
| 12 Road injuries              | 12 Conflict & terror          | 3430 (-93.9 to 2180)          | 3240 (-93.3 to 2190)            | 3710 (-93.4 to 2780)                     |
| 13 Other musculoskeletal      | 13 Headache disorders         | -8.24 (-24 to 7.29)           | -0.984 (-5.57 to 10.2)          | 0.0418 (-0.172 to 0.321)                 |
| 14 Falls                      | 14 Blindness and vision loss  | <b>59 (31.1 to 94.4)</b>      | <b>71.7 (50.6 to 91.1)</b>      | <b>-4.24 (-4.54 to -3.98)</b>            |
| 15 Lower respiratory infect   | 15 Self-harm                  | <b>-21.7 (-38.7 to -4.72)</b> | <b>-15.4 (-27.6 to -0.614)</b>  | <b>-18.5 (-31.7 to -1.94)</b>            |
| 16 Depressive disorders       | 16 Lower respiratory infect   | 11.2 (-11.4 to 41.4)          | 20.1 (-1.28 to 49.8)            | <b>-38.1 (-45.5 to -26.2)</b>            |
| 17 Cirrhosis liver            | 17 Cirrhosis liver            | 3.12 (-13.2 to 25.5)          | 11.4 (-4.7 to 32.1)             | <b>-19.2 (-30 to -6.01)</b>              |
| 18 Nature disaster            | 18 Depressive disorders       | -1.2 (-17.3 to 14.7)          | <b>6.64 (2.41 to 12.1)</b>      | <b>-1.41 (-1.56 to -1.27)</b>            |
| 19 COVID-19                   | 19 Urinary diseases           | <b>73.3 (37.1 to 122)</b>     | <b>87.2 (56.9 to 130)</b>       | 0.797 (-9.78 to 12.9)                    |
| 20 Anxiety disorders          | 20 Road injuries              | -19.1 (-42.2 to 14.2)         | -12.5 (-38.1 to 26)             | -16.2 (-41.3 to 21.7)                    |
| 21 Alzheimer's disease        | 21 Anxiety disorders          |                               |                                 |                                          |
| 22 Blindness and vision loss  | 22 Neonatal disorders         |                               |                                 |                                          |
| 23 Hypertensive heart disease | 24 Nature disaster            |                               |                                 |                                          |
| 27 Urinary diseases           | 160 COVID-19                  |                               |                                 |                                          |

### Thailand, Reference scenario

**Legend:**  
Communicable, maternal, neonatal and nutritional  
Non-communicable  
Injuries

| Leading Causes 2022          | Leading Causes 2050          | Mean % change number of DALY | Mean % change all-age DALY rate | Mean % change age-standardized DALY rate |
|------------------------------|------------------------------|------------------------------|---------------------------------|------------------------------------------|
| 1 Stroke                     | 1 Diabetes                   | 57.4 (25.4 to 99.1)          | 82.9 (58.8 to 111)              | 13.3 (-0.459 to 27.3)                    |
| 2 Road injuries              | 2 Stroke                     | -11.2 (-30.5 to 12.4)        | 3.25 (-16.8 to 25.3)            | -42.4 (-53.1 to -30.1)                   |
| 3 Diabetes                   | 3 Alzheimer's disease        | 167 (111 to 239)             | 210 (163 to 261)                | -3.49 (-7.35 to 0.838)                   |
| 4 Ischemic heart disease     | 4 Chronic kidney disease     | 57.9 (15.1 to 117)           | 83.7 (38 to 142)                | 0.667 (-24.2 to 32)                      |
| 5 Lower respiratory infect   | 5 Lower respiratory infect   | 24.2 (-0.242 to 54.5)        | 44.4 (23.4 to 72.7)             | -41.3 (-48.3 to -32.6)                   |
| 6 Chronic kidney disease     | 6 Age-related hearing loss   | 40.7 (17.5 to 68.1)          | 63.6 (51.6 to 75.8)             | -0.907 (-0.978 to -0.83)                 |
| 7 Cirrhosis liver            | 7 COPD                       | 71.3 (30.7 to 125)           | 99.2 (55.8 to 151)              | -12.7 (-30.4 to 9.6)                     |
| 8 HIV/AIDS                   | 8 Ischemic heart disease     | -25.3 (-48.9 to 4.4)         | -13.1 (-36.6 to 18.6)           | -55.9 (-67.7 to -39.3)                   |
| 9 Lung cancer                | 9 Other musculoskeletal      | 28.6 (8.96 to 52.7)          | 49.6 (40.5 to 59.1)             | 36.1 (32.5 to 39.3)                      |
| 10 Age-related hearing loss  | 10 Lung cancer               | 21 (-10.1 to 59.1)           | 40.5 (13.4 to 69.4)             | -15.9 (-30.3 to -0.339)                  |
| 11 Other musculoskeletal     | 11 Road injuries             | -37.5 (-55.6 to -11.7)       | -27.2 (-45.2 to -2.32)          | -17.5 (-40.8 to 13.4)                    |
| 12 Low back pain             | 12 Cirrhosis liver           | -6.52 (-23.4 to 14.2)        | 8.72 (-6.78 to 23.5)            | -3.8 (-18.6 to 9.95)                     |
| 13 COVID-19                  | 13 Low back pain             | 6.41 (-10.4 to 27.4)         | 23.7 (16.7 to 32.6)             | -3.73 (-4.04 to -3.36)                   |
| 14 Headache disorders        | 14 Colorectal cancer         | 30.3 (-7.46 to 74.9)         | 51.3 (14.8 to 92.2)             | -5.64 (-27.6 to 20.4)                    |
| 15 COPD                      | 15 Urinary diseases          | 115 (66.1 to 178)            | 150 (105 to 211)                | 9.65 (-3.15 to 26.8)                     |
| 16 Alzheimer's disease       | 16 Blindness and vision loss | 52.5 (26.2 to 82.3)          | 77.3 (62.1 to 91.6)             | -4.93 (-5.27 to -4.62)                   |
| 17 Colorectal cancer         | 17 Liver cancer              | 45.7 (7.6 to 95.7)           | 69.5 (29.8 to 124)              | 24 (-5.32 to 64.7)                       |
| 18 Depressive disorders      | 18 Falls                     | 19.2 (-4.3 to 45.1)          | 38.6 (21.4 to 58.8)             | -13.5 (-22.8 to -2.69)                   |
| 19 Self-harm                 | 19 Headache disorders        | -21.3 (-34.1 to -9.42)       | -8.53 (-12.5 to -0.229)         | 0.0186 (-0.247 to 0.398)                 |
| 20 Falls                     | 20 Depressive disorders      | -8.48 (-23.3 to 7.24)        | 6.43 (1.24 to 12.2)             | -1.7 (-1.89 to -1.51)                    |
| 21 Liver cancer              | 27 Self-harm                 |                              |                                 |                                          |
| 22 Blindness and vision loss | 59 HIV/AIDS                  |                              |                                 |                                          |
| 28 Urinary diseases          | 164 COVID-19                 |                              |                                 |                                          |

### Timor-Leste, Reference scenario

**Legend:**

Communicable, maternal, neonatal and nutritional  
Non-communicable  
Injuries

| Leading Causes 2022           | Leading Causes 2050           | Mean % change number of DALY  | Mean % change all-age DALY rate | Mean % change age-standardized DALY rate |
|-------------------------------|-------------------------------|-------------------------------|---------------------------------|------------------------------------------|
| 1 Neonatal disorders          | 1 Stroke                      | 18.3 (-5.79 to 51)            | -15.5 (-32.3 to 6.33)           | -41.2 (-53.2 to -24.2)                   |
| 2 Lower respiratory infect    | 2 Ischemic heart disease      | 18.4 (-20.8 to 80.2)          | -15.4 (-44.4 to 27)             | -41.9 (-63.5 to -11.2)                   |
| 3 Stroke                      | 3 Neonatal disorders          | <b>-53 (-67.4 to -34.7)</b>   | <b>-66.6 (-74.6 to -56.9)</b>   | <b>-49.1 (-60.3 to -32.7)</b>            |
| 4 Ischemic heart disease      | 4 Diabetes                    | <b>95.3 (64.4 to 137)</b>     | <b>39.3 (18.7 to 63.9)</b>      | -2.81 (-14.4 to 12.4)                    |
| 5 Tuberculosis                | 5 Conflict & terror           | 168 (-70 to 493)              | 90.7 (-78.7 to 358)             | 29.1 (-79.6 to 207)                      |
| 6 Congenital defects          | 6 Other musculoskeletal       | <b>232 (182 to 289)</b>       | <b>137 (109 to 161)</b>         | <b>82.9 (70.6 to 90.2)</b>               |
| 7 Diarrheal diseases          | 7 Chronic kidney disease      | <b>134 (74.6 to 216)</b>      | <b>66.9 (22 to 128)</b>         | 24 (-8.6 to 76)                          |
| 8 Road injuries               | 8 Lower respiratory infect    | <b>-54.4 (-65.3 to -42.4)</b> | <b>-67.5 (-73.9 to -59.7)</b>   | <b>-60.6 (-68.3 to -51.6)</b>            |
| 9 Diabetes                    | 9 COPD                        | <b>61.7 (23.1 to 118)</b>     | 15.5 (-13.8 to 52.6)            | -22.1 (-42 to 3.86)                      |
| 10 Conflict & terror          | 10 Headache disorders         | <b>59.7 (35.1 to 89.7)</b>    | <b>13.7 (7.4 to 26.2)</b>       | <b>0.684 (0.381 to 0.916)</b>            |
| 11 COPD                       | 11 Age-related hearing loss   | <b>80.8 (51.7 to 109)</b>     | <b>28.9 (17.4 to 42.7)</b>      | <b>-1.59 (-1.74 to -1.45)</b>            |
| 12 Headache disorders         | 12 Congenital defects         | <b>-42.9 (-59.1 to -24.8)</b> | <b>-59.6 (-67.4 to -50.8)</b>   | <b>-38.7 (-46 to -29.9)</b>              |
| 13 COVID-19                   | 13 Tuberculosis               | <b>-47.7 (-66.1 to -20.1)</b> | <b>-62.7 (-75.3 to -43)</b>     | <b>-69.5 (-80.1 to -52.2)</b>            |
| 14 HIV/AIDS                   | 14 Low back pain              | <b>72.5 (49.5 to 98.6)</b>    | <b>23 (13.2 to 34.8)</b>        | <b>-5.62 (-5.95 to -5.24)</b>            |
| 15 Chronic kidney disease     | 15 Road injuries              | 4.58 (-35.1 to 61.7)          | -25.5 (-51.7 to 17.6)           | -28.9 (-53.9 to 13.1)                    |
| 16 Low back pain              | 16 Hypertensive heart disease | <b>87.3 (31.1 to 165)</b>     | 33.8 (-12.1 to 91.9)            | -10.6 (-40.8 to 37.7)                    |
| 17 Age-related hearing loss   | 17 Cirrhosis liver            | <b>45.9 (19.1 to 82.2)</b>    | 4.12 (-15 to 26.8)              | <b>-25 (-36.4 to -8.44)</b>              |
| 18 Cirrhosis liver            | 18 Anxiety disorders          | <b>57.9 (32.5 to 85.3)</b>    | <b>12.4 (5.18 to 21.1)</b>      | <b>1.47 (1.16 to 1.74)</b>               |
| 19 Drowning                   | 19 Depressive disorders       | <b>62.5 (36.9 to 89)</b>      | <b>15.7 (9.14 to 24.2)</b>      | <b>-2.52 (-2.8 to -2.2)</b>              |
| 20 Anxiety disorders          | 20 Blindness and vision loss  | <b>78 (52 to 108)</b>         | <b>27 (12.4 to 42.7)</b>        | <b>-8.89 (-9.42 to -8.28)</b>            |
| 22 Hypertensive heart disease | 32 Diarrheal diseases         |                               |                                 |                                          |
| 25 Depressive disorders       | 40 Drowning                   |                               |                                 |                                          |
| 26 Other musculoskeletal      | 75 HIV/AIDS                   |                               |                                 |                                          |
| 29 Blindness and vision loss  | 161 COVID-19                  |                               |                                 |                                          |

### Viet Nam, Reference scenario

**Legend:**

Communicable, maternal, neonatal and nutritional  
Non-communicable  
Injuries

| Leading Causes 2022           | Leading Causes 2050           | Mean % change number of DALY | Mean % change all-age DALY rate | Mean % change age-standardized DALY rate |
|-------------------------------|-------------------------------|------------------------------|---------------------------------|------------------------------------------|
| 1 Stroke                      | 1 Stroke                      | 40.7 (13.5 to 65.3)          | 26.8 (4.32 to 51)               | -30.2 (-43 to -16.4)                     |
| 2 Ischemic heart disease      | 2 Diabetes                    | 81.7 (51.5 to 114)           | 63.7 (39.7 to 87.2)             | -6.72 (-19.9 to 8.32)                    |
| 3 Diabetes                    | 3 Cirrhosis liver             | 138 (97.7 to 182)            | 114 (81.2 to 147)               | 62.4 (38.9 to 87.3)                      |
| 4 Road injuries               | 4 Ischemic heart disease      | 12.5 (-20.4 to 50.7)         | 1.33 (-27.4 to 35.9)            | -45 (-61.2 to -22)                       |
| 5 Neonatal disorders          | 5 COPD                        | 93.9 (53 to 145)             | 74.7 (41.1 to 121)              | -14 (-32.4 to 13.9)                      |
| 6 COVID-19                    | 6 Chronic kidney disease      | 141 (80.6 to 207)            | 117 (67.3 to 180)               | 31.3 (-0.954 to 77.6)                    |
| 7 COPD                        | 7 Road injuries               | 14 (-18.2 to 58.5)           | 2.76 (-24.5 to 44.3)            | -3.59 (-31.1 to 35.6)                    |
| 8 Cirrhosis liver             | 8 Liver cancer                | 193 (107 to 309)             | 164 (88.1 to 279)               | 84.3 (34.9 to 164)                       |
| 9 Low back pain               | 9 Alzheimer's disease         | 189 (139 to 245)             | 160 (118 to 207)                | 4.72 (1.43 to 8.01)                      |
| 10 Headache disorders         | 10 Falls                      | 83.8 (48.3 to 121)           | 65.5 (40.7 to 93.7)             | -0.00195 (-9.08 to 8.98)                 |
| 11 Lower respiratory infect   | 11 Age-related hearing loss   | 65.7 (49.6 to 85.1)          | 49.2 (38.8 to 60.8)             | -1.08 (-1.15 to -1)                      |
| 12 Age-related hearing loss   | 12 Lung cancer                | 63 (23.2 to 105)             | 46.7 (13.1 to 82.5)             | -4.55 (-23.6 to 15.5)                    |
| 13 Lung cancer                | 13 Hypertensive heart disease | 153 (76.1 to 240)            | 128 (64.2 to 206)               | 18.7 (-19 to 68.1)                       |
| 14 Chronic kidney disease     | 14 Other musculoskeletal      | 92.4 (74.3 to 114)           | 73.2 (62.8 to 84.3)             | 54.5 (51.6 to 56.8)                      |
| 15 Falls                      | 15 Low back pain              | 34.6 (21.1 to 48.8)          | 21.2 (14.8 to 26.9)             | -4.48 (-4.81 to -4.14)                   |
| 16 Tuberculosis               | 16 Colorectal cancer          | 137 (65.4 to 210)            | 113 (53.7 to 178)               | 35.3 (1.39 to 71.6)                      |
| 17 Other musculoskeletal      | 17 Headache disorders         | 12.2 (2.14 to 25.1)          | 1.05 (-2.26 to 8.91)            | 0.4 (0.227 to 0.578)                     |
| 18 Drowning                   | 18 Lower respiratory infect   | 0.306 (-16.2 to 18.1)        | -9.6 (-22.9 to 4.59)            | -47.5 (-55.1 to -38.6)                   |
| 19 Liver cancer               | 19 Neonatal disorders         | -39.9 (-50.5 to -27.6)       | -45.9 (-55.4 to -34.4)          | -36.3 (-47.6 to -22.1)                   |
| 20 Hypertensive heart disease | 20 Blindness and vision loss  | 84.4 (63.8 to 107)           | 66 (51.6 to 80.6)               | -6.22 (-6.55 to -5.87)                   |
| 22 Alzheimer's disease        | 27 Tuberculosis               |                              |                                 |                                          |
| 24 Colorectal cancer          | 30 Drowning                   |                              |                                 |                                          |
| 26 Blindness and vision loss  | 166 COVID-19                  |                              |                                 |                                          |

### Angola, Reference scenario

**Legend:**

Communicable, maternal, neonatal and nutritional  
Non-communicable  
Injuries

| Leading Causes 2022            | Leading Causes 2050            | Mean % change number of DALY | Mean % change all-age DALY rate | Mean % change age-standardized DALY rate |
|--------------------------------|--------------------------------|------------------------------|---------------------------------|------------------------------------------|
| 1 Neonatal disorders           | 1 Neonatal disorders           | -23.5 (-44.3 to 3.86)        | -62.2 (-70.5 to -53.3)          | -42.1 (-53.3 to -29)                     |
| 2 HIV/AIDS                     | 2 HIV/AIDS                     | -0.962 (-38.7 to 68.9)       | -51 (-69.3 to -16.9)            | -57.1 (-72.7 to -30.4)                   |
| 3 Malaria                      | 3 Road injuries                | 24 (-39.5 to 143)            | -38.6 (-70.3 to 15.6)           | -41.3 (-70.1 to 11.9)                    |
| 4 Lower respiratory infect     | 4 Lower respiratory infect     | 3.18 (-20.5 to 29.9)         | -48.9 (-58.9 to -36.5)          | -39.1 (-48.1 to -26.3)                   |
| 5 Road injuries                | 5 Diabetes                     | 209 (149 to 273)             | 53 (26.3 to 79.2)               | -2.26 (-17.3 to 12.3)                    |
| 6 Tuberculosis                 | 6 Depressive disorders         | 145 (116 to 174)             | 21.1 (14.5 to 29.1)             | -4.26 (-4.51 to -4)                      |
| 7 Diarrheal diseases           | 7 Stroke                       | 75.5 (35.3 to 118)           | -13 (-31.1 to 5.8)              | -46.3 (-55.8 to -34.6)                   |
| 8 Congenital defects           | 8 Malaria                      | -37.7 (-89.7 to 195)         | -68.7 (-94.8 to 55.5)           | -63.4 (-93.8 to 90.1)                    |
| 9 Pertussis                    | 9 Cirrhosis liver              | 93.9 (56.3 to 135)           | -3.92 (-22.5 to 15.2)           | -28.6 (-40.4 to -13.3)                   |
| 10 Stroke                      | 10 Ischemic heart disease      | 53.7 (7.65 to 113)           | -23.8 (-47.9 to 6.08)           | -54 (-68.3 to -34.1)                     |
| 11 Ischemic heart disease      | 11 Diarrheal diseases          | -18.8 (-48.1 to 20.3)        | -59.8 (-72.5 to -42.7)          | -54.2 (-67.1 to -34.9)                   |
| 12 COVID-19                    | 12 Congenital defects          | -13.4 (-34.2 to 10.5)        | -57.2 (-64.3 to -47.6)          | -37.3 (-46.4 to -25.3)                   |
| 13 Depressive disorders        | 13 Low back pain               | 147 (118 to 178)             | 22.3 (14.3 to 30.5)             | -7.81 (-8.01 to -7.57)                   |
| 14 Cirrhosis liver             | 14 Other musculoskeletal       | 498 (422 to 582)             | 196 (164 to 223)                | 117 (100 to 127)                         |
| 15 Diabetes                    | 15 Hypertensive heart disease  | 219 (142 to 311)             | 58.3 (21.4 to 102)              | -10.7 (-30.8 to 15.1)                    |
| 16 Meningitis                  | 16 Chronic kidney disease      | 171 (101 to 255)             | 34.3 (-2.11 to 72.7)            | -1.11 (-24.8 to 30.7)                    |
| 17 Protein-energy malnutrition | 17 Tuberculosis                | -35.1 (-58.2 to -1.11)       | -67.8 (-78.7 to -50.9)          | -72.2 (-80.7 to -59.1)                   |
| 18 Low back pain               | 18 Headache disorders          | 141 (107 to 173)             | 19.1 (13.4 to 30)               | 0.488 (0.222 to 0.765)                   |
| 19 Drowning                    | 19 Pertussis                   | -16.7 (-52.7 to 34.5)        | -59 (-75.7 to -33.3)            | -39 (-62.7 to 2.29)                      |
| 20 STIs                        | 20 Anxiety disorders           | 133 (102 to 167)             | 15.4 (9.21 to 22.3)             | 1.63 (1.32 to 1.88)                      |
| 21 Chronic kidney disease      | 29 Meningitis                  |                              |                                 |                                          |
| 22 Headache disorders          | 38 Drowning                    |                              |                                 |                                          |
| 26 Anxiety disorders           | 47 STIs                        |                              |                                 |                                          |
| 27 Hypertensive heart disease  | 53 Protein-energy malnutrition |                              |                                 |                                          |
| 41 Other musculoskeletal       | 168 COVID-19                   |                              |                                 |                                          |

### Central African Republic, Reference scenario

**Legend:**

Communicable, maternal, neonatal and nutritional  
 Non-communicable  
 Injuries

| Leading Causes 2022            | Leading Causes 2050            | Mean % change number of DALY | Mean % change all-age DALY rate | Mean % change age-standardized DALY rate |
|--------------------------------|--------------------------------|------------------------------|---------------------------------|------------------------------------------|
| 1 Neonatal disorders           | 1 Neonatal disorders           | -57 (-71.9 to -39.8)         | -66.2 (-74.8 to -55.1)          | -42.7 (-55.9 to -26.7)                   |
| 2 Malaria                      | 2 Malaria                      | -41.4 (-92 to 214)           | -53 (-92.9 to 179)              | -40 (-91.2 to 282)                       |
| 3 Tuberculosis                 | 3 Lower respiratory infect     | -32.5 (-53.5 to -10.5)       | -46.7 (-56.8 to -34.3)          | -33.7 (-45.1 to -20.5)                   |
| 4 Lower respiratory infect     | 4 Diarrheal diseases           | -34.6 (-60.1 to -1.77)       | -48.3 (-66.8 to -24.1)          | -30.9 (-54 to 0.0975)                    |
| 5 Diarrheal diseases           | 5 Road injuries                | -21.7 (-65.3 to 45.5)        | -37.9 (-69.6 to 16.3)           | -39.3 (-69.1 to 11.2)                    |
| 6 COVID-19                     | 6 Tuberculosis                 | -54 (-72.8 to -27.1)         | -63.6 (-77.4 to -41.4)          | -67.5 (-79.5 to -49.7)                   |
| 7 HIV/AIDS                     | 7 Diabetes                     | 132 (67.4 to 205)            | 83 (54.1 to 116)                | 20.9 (2.34 to 41.5)                      |
| 8 Road injuries                | 8 Stroke                       | 13.1 (-19.5 to 52.9)         | -10.7 (-29.6 to 9.87)           | -42.4 (-55 to -27.6)                     |
| 9 Congenital defects           | 9 Ischemic heart disease       | 40.1 (-13.5 to 109)          | 10.9 (-26.5 to 57.3)            | -28.5 (-54.1 to 8.19)                    |
| 10 Stroke                      | 10 Cirrhosis liver             | 2.67 (-26.5 to 31.8)         | -19.1 (-33.2 to -4.2)           | -39.3 (-49.5 to -27.6)                   |
| 11 Protein-energy malnutrition | 11 Depressive disorders        | 49.2 (4.07 to 91.2)          | 17.4 (11.7 to 24.5)             | -3.72 (-4.12 to -3.32)                   |
| 12 Pertussis                   | 12 Congenital defects          | -50 (-65.2 to -30.8)         | -60.7 (-67.6 to -51.9)          | -38.1 (-47.1 to -25.9)                   |
| 13 Ischemic heart disease      | 13 Chronic kidney disease      | 63.5 (8.87 to 131)           | 29.2 (-4.38 to 72)              | -2.97 (-29.3 to 29.2)                    |
| 14 Cirrhosis liver             | 14 Hypertensive heart disease  | 101 (39.1 to 177)            | 59.2 (19.3 to 105)              | -11.4 (-34.2 to 17.6)                    |
| 15 Meningitis                  | 15 Low back pain               | 53.4 (8.16 to 99.6)          | 20.8 (13 to 30)                 | -7.01 (-7.42 to -6.28)                   |
| 16 Diabetes                    | 16 Pertussis                   | -41.8 (-69.3 to 2.93)        | -54.4 (-74.8 to -21.1)          | -29 (-60.2 to 23.8)                      |
| 17 Maternal disorders          | 17 COPD                        | 52 (6.82 to 100)             | 20.1 (-5.09 to 48.9)            | -27.7 (-43.5 to -6.77)                   |
| 18 Drowning                    | 18 Other musculoskeletal       | 262 (154 to 371)             | 185 (156 to 214)                | 112 (103 to 121)                         |
| 19 Conflict & terror           | 19 Self-harm                   | 26.4 (-11.5 to 69.3)         | -0.331 (-21.9 to 23.1)          | -21 (-36.7 to -3.33)                     |
| 20 Depressive disorders        | 20 Headache disorders          | 47.9 (5.15 to 87.8)          | 16.3 (11.3 to 24.7)             | 1.22 (0.674 to 1.88)                     |
| 23 Chronic kidney disease      | 21 Meningitis                  |                              |                                 |                                          |
| 25 Low back pain               | 25 Protein-energy malnutrition |                              |                                 |                                          |
| 27 Self-harm                   | 27 Maternal disorders          |                              |                                 |                                          |
| 29 Hypertensive heart disease  | 28 HIV/AIDS                    |                              |                                 |                                          |
| 30 COPD                        | 30 Drowning                    |                              |                                 |                                          |
| 31 Headache disorders          | 32 Conflict & terror           |                              |                                 |                                          |
| 48 Other musculoskeletal       | 170 COVID-19                   |                              |                                 |                                          |



### Congo (Brazzaville), Reference scenario

**Legend:**  
Communicable, maternal, neonatal and nutritional  
Non-communicable  
Injuries

| Leading Causes 2022           | Leading Causes 2050          | Mean % change number of DALY | Mean % change all-age DALY rate | Mean % change age-standardized DALY rate |
|-------------------------------|------------------------------|------------------------------|---------------------------------|------------------------------------------|
| 1 HIV/AIDS                    | 1 Diabetes                   | 146 (93.6 to 208)            | 72.8 (43.2 to 105)              | 0.54 (-12.7 to 16.9)                     |
| 2 Neonatal disorders          | 2 Stroke                     | 62 (26 to 105)               | 13.7 (-5.27 to 38.2)            | -39.9 (-50 to -26.4)                     |
| 3 Malaria                     | 3 Road injuries              | 15.5 (-39 to 97.9)           | -18.8 (-56.9 to 49.2)           | -23 (-59.4 to 43.1)                      |
| 4 Road injuries               | 4 Ischemic heart disease     | 49.5 (1.73 to 104)           | 4.95 (-26.1 to 49.5)            | -44.1 (-61.6 to -19)                     |
| 5 Ischemic heart disease      | 5 Neonatal disorders         | -28.2 (-46.3 to -5.26)       | -49.7 (-58.8 to -36.8)          | -25.9 (-37.9 to -8.49)                   |
| 6 Lower respiratory infect    | 6 Lower respiratory infect   | 46.7 (17.1 to 83.3)          | 2.94 (-13.2 to 22.6)            | -23.3 (-34.2 to -10.4)                   |
| 7 Stroke                      | 7 Hypertensive heart disease | 219 (141 to 316)             | 124 (74.8 to 187)               | 10.6 (-13.9 to 42.2)                     |
| 8 Tuberculosis                | 8 Chronic kidney disease     | 148 (83.1 to 230)            | 74.3 (36.6 to 126)              | 13.2 (-13.6 to 46.7)                     |
| 9 Diarrheal diseases          | 9 Depressive disorders       | 69.2 (40.8 to 100)           | 18.6 (12.5 to 25.6)             | -2.42 (-2.64 to -2.18)                   |
| 10 Diabetes                   | 10 Cirrhosis liver           | 64.9 (33.1 to 103)           | 15.7 (-2.29 to 37.9)            | -19.5 (-30.7 to -5)                      |
| 11 Cirrhosis liver            | 11 Diarrheal diseases        | -3.4 (-36.1 to 36.1)         | -32.2 (-55.9 to -3)             | -35.3 (-54.3 to -9.17)                   |
| 12 Depressive disorders       | 12 Low back pain             | 84.2 (52.3 to 117)           | 29.1 (20.3 to 37.1)             | -4.67 (-4.88 to -4.43)                   |
| 13 COVID-19                   | 13 HIV/AIDS                  | -74.7 (-83.8 to -60.3)       | -82.3 (-88.1 to -72.9)          | -84.1 (-89.2 to -75.7)                   |
| 14 Congenital defects         | 14 Tuberculosis              | -29 (-51.3 to 0.881)         | -50.1 (-65.7 to -26.9)          | -63 (-74.8 to -45.5)                     |
| 15 Chronic kidney disease     | 15 COPD                      | 157 (99.6 to 227)            | 80.6 (48.1 to 121)              | -6.41 (-23.4 to 17.3)                    |
| 16 Low back pain              | 16 Other musculoskeletal     | 212 (159 to 262)             | 119 (100 to 136)                | 60.9 (55.1 to 64.8)                      |
| 17 Hypertensive heart disease | 17 Malaria                   | -66 (-92 to 85.4)            | -76 (-94.5 to 42.7)             | -74.5 (-94.3 to 65.7)                    |
| 18 Dietary iron deficiency    | 18 Headache disorders        | 60.3 (31.9 to 90)            | 12.3 (6.97 to 23.3)             | 0.587 (0.357 to 0.797)                   |
| 19 Headache disorders         | 19 Age-related hearing loss  | 109 (71.2 to 144)            | 46.7 (33.6 to 59.5)             | -1.22 (-1.42 to -0.998)                  |
| 20 Maternal disorders         | 20 Breast cancer             | 125 (59 to 194)              | 57.6 (19.8 to 104)              | 5.21 (-16.6 to 27.6)                     |
| 26 COPD                       | 24 Dietary iron deficiency   |                              |                                 |                                          |
| 30 Age-related hearing loss   | 25 Congenital defects        |                              |                                 |                                          |
| 34 Breast cancer              | 46 Maternal disorders        |                              |                                 |                                          |
| 36 Other musculoskeletal      | 168 COVID-19                 |                              |                                 |                                          |

### DR Congo, Reference scenario

**Legend:**  
Communicable, maternal, neonatal and nutritional  
Non-communicable  
Injuries

| Leading Causes 2022           | Leading Causes 2050           | Mean % change number of DALY | Mean % change all-age DALY rate | Mean % change age-standardized DALY rate |
|-------------------------------|-------------------------------|------------------------------|---------------------------------|------------------------------------------|
| 1 Malaria                     | 1 Neonatal disorders          | -33.7 (-57.8 to -6.76)       | -62.4 (-70.4 to -51.3)          | -43.4 (-54.5 to -29.3)                   |
| 2 Neonatal disorders          | 2 Malaria                     | -55.4 (-94.4 to 240)         | -75.2 (-96.6 to 91)             | -66 (-95.4 to 150)                       |
| 3 Lower respiratory infect    | 3 Road injuries               | 19.3 (-38.1 to 119)          | -31.9 (-64.8 to 28.6)           | -35.1 (-65 to 23.2)                      |
| 4 Road injuries               | 4 Lower respiratory infect    | 7.05 (-27.2 to 43.8)         | -39.2 (-53.7 to -24.5)          | -39.2 (-49.4 to -29.1)                   |
| 5 Tuberculosis                | 5 Diabetes                    | 198 (104 to 313)             | 69.3 (36.9 to 106)              | 4.56 (-11.8 to 22.4)                     |
| 6 Diarrheal diseases          | 6 Stroke                      | 57.6 (10.4 to 114)           | -10.3 (-28.1 to 11.1)           | -47 (-56.9 to -34.3)                     |
| 7 Congenital defects          | 7 Depressive disorders        | 113 (51.3 to 177)            | 20.8 (14.5 to 28.8)             | -2.9 (-3.07 to -2.68)                    |
| 8 Stroke                      | 8 Tuberculosis                | -26.5 (-52.6 to 11)          | -58.1 (-72.6 to -34.7)          | -66.8 (-77.4 to -48.8)                   |
| 9 COVID-19                    | 9 Ischemic heart disease      | 70.1 (9.03 to 157)           | -3.03 (-34.3 to 48)             | -43.6 (-62.1 to -14.9)                   |
| 10 Ischemic heart disease     | 10 Cirrhosis liver            | 81.3 (28.3 to 145)           | 3.22 (-15.7 to 24.8)            | -27.7 (-38.6 to -15.9)                   |
| 11 Depressive disorders       | 11 Hypertensive heart disease | 220 (112 to 340)             | 81.9 (34.4 to 143)              | -3.47 (-26 to 28.5)                      |
| 12 Cirrhosis liver            | 12 Low back pain              | 124 (60.2 to 195)            | 27.2 (18 to 36.9)               | -5.95 (-6.15 to -5.77)                   |
| 13 Maternal disorders         | 13 Chronic kidney disease     | 143 (67.5 to 242)            | 38.3 (1.73 to 88.8)             | -4.14 (-27.7 to 30.2)                    |
| 14 Diabetes                   | 14 Diarrheal diseases         | -0.257 (-35.6 to 56.9)       | -43.2 (-62.4 to -11.1)          | -37.4 (-54.9 to -11.4)                   |
| 15 Measles                    | 15 Other musculoskeletal      | 347 (219 to 489)             | 154 (132 to 175)                | 82.6 (75.8 to 87.2)                      |
| 16 Onchocerciasis             | 16 Congenital defects         | -17 (-45.9 to 14.8)          | -52.9 (-60.6 to -43.9)          | -32.4 (-41.9 to -20.9)                   |
| 17 Pertussis                  | 17 Headache disorders         | 106 (46.1 to 170)            | 17.1 (10.7 to 28.2)             | 0.809 (0.456 to 1.08)                    |
| 18 Low back pain              | 18 COPD                       | 122 (55.3 to 211)            | 26.6 (-1.66 to 59.1)            | -27.5 (-42.6 to -9.4)                    |
| 19 Meningitis                 | 19 Onchocerciasis             | 12.8 (-19 to 46.7)           | -36 (-39.2 to -31.8)            | -46 (-46.8 to -44.7)                     |
| 20 STIs                       | 20 Anxiety disorders          | 98.1 (38.8 to 153)           | 12.4 (5.58 to 19.5)             | 1.34 (1.12 to 1.63)                      |
| 21 Chronic kidney disease     | 26 Pertussis                  |                              |                                 |                                          |
| 23 Headache disorders         | 28 Maternal disorders         |                              |                                 |                                          |
| 25 Hypertensive heart disease | 33 Meningitis                 |                              |                                 |                                          |
| 27 COPD                       | 44 STIs                       |                              |                                 |                                          |
| 29 Anxiety disorders          | 86 Measles                    |                              |                                 |                                          |
| 40 Other musculoskeletal      | 169 COVID-19                  |                              |                                 |                                          |

### Equatorial Guinea, Reference scenario

**Legend:**  
■ Communicable, maternal, neonatal and nutritional  
■ Non-communicable  
■ Injuries

| Leading Causes 2022           | Leading Causes 2050           | Mean % change number of DALY | Mean % change all-age DALY rate | Mean % change age-standardized DALY rate |
|-------------------------------|-------------------------------|------------------------------|---------------------------------|------------------------------------------|
| 1 HIV/AIDS                    | 1 HIV/AIDS                    | -38.9 (-57.9 to -5.21)       | -70 (-79.5 to -56.1)            | -75.2 (-82 to -63.5)                     |
| 2 Malaria                     | 2 Neonatal disorders          | 26.6 (-6.67 to 66.4)         | -38.1 (-49.5 to -21)            | -14.1 (-28.8 to 8.02)                    |
| 3 Neonatal disorders          | 3 Diabetes                    | 349 (250 to 441)             | 120 (78.5 to 164)               | 7.22 (-10.4 to 26.4)                     |
| 4 Road injuries               | 4 Road injuries               | 59.3 (-13.4 to 210)          | -21.7 (-58.8 to 55.6)           | -24.3 (-59.2 to 51.1)                    |
| 5 Lower respiratory infect    | 5 Malaria                     | -23.9 (-90.3 to 160)         | -63.1 (-95.2 to 27.2)           | -58.6 (-94.9 to 62.8)                    |
| 6 Depressive disorders        | 6 Lower respiratory infect    | 109 (61.4 to 155)            | 2.32 (-19.1 to 23.9)            | -21.5 (-33.8 to -6.73)                   |
| 7 Ischemic heart disease      | 7 Depressive disorders        | 153 (121 to 182)             | 23.9 (14.6 to 33.4)             | -2.5 (-3.04 to -1.98)                    |
| 8 Diabetes                    | 8 Chronic kidney disease      | 252 (163 to 363)             | 72.6 (29.3 to 123)              | 7.03 (-18.5 to 41.9)                     |
| 9 Congenital defects          | 9 Ischemic heart disease      | 118 (50.8 to 204)            | 6.85 (-24.8 to 51.2)            | -50.9 (-65.8 to -31.3)                   |
| 10 COVID-19                   | 10 Stroke                     | 155 (102 to 218)             | 25.1 (2.13 to 53.9)             | -40.6 (-50.9 to -24.4)                   |
| 11 Stroke                     | 11 Cirrhosis liver            | 258 (196 to 326)             | 75.8 (42.1 to 111)              | 0.879 (-14.3 to 20.7)                    |
| 12 Chronic kidney disease     | 12 Low back pain              | 188 (150 to 223)             | 41.2 (27.3 to 53.4)             | -5.2 (-5.64 to -4.77)                    |
| 13 Diarrheal diseases         | 13 Hypertensive heart disease | 417 (292 to 556)             | 154 (95.9 to 219)               | 13.9 (-10.6 to 44.6)                     |
| 14 Tuberculosis               | 14 Other musculoskeletal      | 384 (321 to 443)             | 137 (118 to 159)                | 56.7 (53.3 to 60)                        |
| 15 Low back pain              | 15 Headache disorders         | 139 (108 to 177)             | 17 (8.15 to 35.7)               | 0.32 (-0.453 to 0.927)                   |
| 16 Mechanical forces          | 16 Gynecological diseases     | 133 (90.6 to 180)            | 14.2 (-5.97 to 36.4)            | -17.8 (-32.2 to -0.51)                   |
| 17 Headache disorders         | 17 Self-harm                  | 162 (106 to 231)             | 28.3 (4.06 to 60.1)             | -2.82 (-21.3 to 22.9)                    |
| 18 STIs                       | 18 Anxiety disorders          | 125 (93 to 157)              | 10.1 (1.32 to 21.8)             | 1.35 (0.609 to 2.06)                     |
| 19 Cirrhosis liver            | 19 Age-related hearing loss   | 206 (161 to 248)             | 50.2 (34 to 65)                 | -1.18 (-1.45 to -0.885)                  |
| 20 Pertussis                  | 20 Idiopathic epilepsy        | 137 (76.4 to 217)            | 16.4 (-12.7 to 61)              | 13.3 (-14.6 to 54.9)                     |
| 21 Anxiety disorders          | 21 Mechanical forces          |                              |                                 |                                          |
| 22 Gynecological diseases     | 22 Congenital defects         |                              |                                 |                                          |
| 25 Idiopathic epilepsy        | 25 Tuberculosis               |                              |                                 |                                          |
| 26 Self-harm                  | 30 Diarrheal diseases         |                              |                                 |                                          |
| 30 Age-related hearing loss   | 46 Pertussis                  |                              |                                 |                                          |
| 31 Hypertensive heart disease | 50 STIs                       |                              |                                 |                                          |
| 32 Other musculoskeletal      | 166 COVID-19                  |                              |                                 |                                          |

### Gabon, Reference scenario

**Legend:**  
Communicable, maternal, neonatal and nutritional  
Non-communicable  
Injuries

| Leading Causes 2022           | Leading Causes 2050          | Mean % change number of DALY | Mean % change all-age DALY rate | Mean % change age-standardized DALY rate |
|-------------------------------|------------------------------|------------------------------|---------------------------------|------------------------------------------|
| 1 Neonatal disorders          | 1 Diabetes                   | 135 (93.2 to 179)            | 52.5 (27.9 to 78.2)             | -1.31 (-14 to 14)                        |
| 2 HIV/AIDS                    | 2 Neonatal disorders         | -14.1 (-34.8 to 16.1)        | -44.4 (-54.6 to -32.1)          | -19.7 (-32.1 to -4.29)                   |
| 3 Malaria                     | 3 Road injuries              | 24.4 (-32.4 to 135)          | -19.3 (-54.9 to 52.5)           | -24.1 (-56.8 to 43.2)                    |
| 4 Road injuries               | 4 Chronic kidney disease     | 119 (66.1 to 181)            | 42.2 (10.8 to 83.3)             | -0.66 (-22.2 to 27.8)                    |
| 5 Lower respiratory infect    | 5 Lower respiratory infect   | 41.4 (15.3 to 68.1)          | -8.09 (-23.1 to 11.8)           | -25 (-35.6 to -12.6)                     |
| 6 Diabetes                    | 6 Stroke                     | 46.3 (19.4 to 76)            | -4.91 (-20.3 to 13.3)           | -42.2 (-51 to -29.9)                     |
| 7 Ischemic heart disease      | 7 Depressive disorders       | 80.1 (59.5 to 102)           | 17 (9.67 to 25.2)               | -2.63 (-3.01 to -2.3)                    |
| 8 Stroke                      | 8 Hypertensive heart disease | 176 (113 to 254)             | 79.3 (42 to 127)                | 4.63 (-18.1 to 33)                       |
| 9 COVID-19                    | 9 Ischemic heart disease     | 16.1 (-17 to 57.1)           | -24.6 (-44.7 to 1.16)           | -53.5 (-67.1 to -36.5)                   |
| 10 Chronic kidney disease     | 10 Cirrhosis liver           | 57.4 (32.4 to 88.5)          | 2.35 (-14.8 to 20.6)            | -26.4 (-36.3 to -14.2)                   |
| 11 Depressive disorders       | 11 Low back pain             | 91.5 (73.7 to 113)           | 24.4 (15.3 to 34.7)             | -4.68 (-4.96 to -4.33)                   |
| 12 Tuberculosis               | 12 Other musculoskeletal     | 239 (208 to 280)             | 120 (101 to 140)                | 67.5 (63.8 to 71.8)                      |
| 13 Cirrhosis liver            | 13 HIV/AIDS                  | -68.9 (-75.3 to -61.3)       | -79.8 (-84.9 to -74.7)          | -82.7 (-86.1 to -78.9)                   |
| 14 Congenital defects         | 14 Malaria                   | -63.5 (-90.6 to 107)         | -76.6 (-94.1 to 41.6)           | -74 (-94.1 to 55.6)                      |
| 15 Dietary iron deficiency    | 15 Dietary iron deficiency   | 29.5 (12.8 to 47.5)          | -16 (-20.6 to -11.2)            | -14.5 (-15.4 to -13.5)                   |
| 16 Low back pain              | 16 Headache disorders        | 73.9 (54.3 to 98.7)          | 12.9 (6.7 to 23.2)              | 0.576 (0.269 to 0.909)                   |
| 17 Diarrheal diseases         | 17 COPD                      | 155 (102 to 213)             | 65.8 (36.1 to 104)              | 2.1 (-17.2 to 25.7)                      |
| 18 Hypertensive heart disease | 18 Age-related hearing loss  | 106 (83.1 to 130)            | 34.1 (22.7 to 48.5)             | -1.66 (-1.88 to -1.44)                   |
| 19 Headache disorders         | 19 Gynecological diseases    | 61.2 (29.9 to 93.6)          | 4.75 (-12.9 to 27.3)            | -14.4 (-29.2 to 3.19)                    |
| 20 Gynecological diseases     | 20 Anxiety disorders         | 68 (48.9 to 91.4)            | 9.02 (3.02 to 17.7)             | 1.18 (0.755 to 1.62)                     |
| 21 Anxiety disorders          | 23 Tuberculosis              |                              |                                 |                                          |
| 24 Age-related hearing loss   | 27 Congenital defects        |                              |                                 |                                          |
| 27 Other musculoskeletal      | 37 Diarrheal diseases        |                              |                                 |                                          |
| 28 COPD                       | 166 COVID-19                 |                              |                                 |                                          |

### Burundi, Reference scenario

**Legend:**  
Communicable, maternal, neonatal and nutritional  
Non-communicable  
Injuries

| Leading Causes 2022            | Leading Causes 2050            | Mean % change number of DALY   | Mean % change all-age DALY rate | Mean % change age-standardized DALY rate |
|--------------------------------|--------------------------------|--------------------------------|---------------------------------|------------------------------------------|
| 1 Malaria                      | 1 Neonatal disorders           | <b>-31.6 (-49.2 to -10.8)</b>  | <b>-62.9 (-70.2 to -54)</b>     | <b>-42 (-51.4 to -30.3)</b>              |
| 2 Neonatal disorders           | 2 Diarrheal diseases           | 11.9 (-32.8 to 74.6)           | <b>-39.2 (-61.7 to -7.82)</b>   | <b>-30.6 (-53.4 to -1.57)</b>            |
| 3 COVID-19                     | 3 Lower respiratory infect     | -3.93 (-28.9 to 22.9)          | <b>-47.8 (-58.9 to -34)</b>     | <b>-39.6 (-49.5 to -28.1)</b>            |
| 4 Lower respiratory infect     | 4 Stroke                       | <b>85.2 (45 to 131)</b>        | 0.683 (-22 to 22.9)             | <b>-36.5 (-49.3 to -21.1)</b>            |
| 5 Diarrheal diseases           | 5 Conflict & terror            | 134 (-88.2 to 772)             | 25.7 (-93.5 to 375)             | 0.394 (-92.6 to 254)                     |
| 6 Tuberculosis                 | 6 Ischemic heart disease       | <b>119 (42.4 to 221)</b>       | 19.4 (-20.6 to 75.8)            | -22.6 (-48.7 to 20.1)                    |
| 7 Conflict & terror            | 7 Tuberculosis                 | -32.2 (-56.9 to 2.81)          | <b>-63.1 (-76.8 to -43)</b>     | <b>-70.7 (-80.7 to -56)</b>              |
| 8 Congenital defects           | 8 Depressive disorders         | <b>128 (89.8 to 163)</b>       | <b>23.9 (17.2 to 32)</b>        | <b>-2.39 (-2.79 to -1.96)</b>            |
| 9 Stroke                       | 9 Diabetes                     | <b>141 (86 to 198)</b>         | <b>31 (4.54 to 57.6)</b>        | -14.1 (-30.1 to 4.8)                     |
| 10 Road injuries               | 10 Road injuries               | 32.8 (-24.6 to 141)            | -27.8 (-58.9 to 23.6)           | -37.1 (-62 to 3.03)                      |
| 11 Ischemic heart disease      | 11 Congenital defects          | <b>-21 (-38.9 to -1.4)</b>     | <b>-57.2 (-64.2 to -48.6)</b>   | <b>-36.5 (-45.1 to -26.8)</b>            |
| 12 Protein-energy malnutrition | 12 Low back pain               | <b>132 (94.6 to 167)</b>       | <b>26 (17.3 to 34.7)</b>        | <b>-5.63 (-5.94 to -5.34)</b>            |
| 13 Cirrhosis liver             | 13 Malaria                     | <b>-83.4 (-96.1 to -0.874)</b> | <b>-91 (-97.8 to -49.5)</b>     | <b>-88 (-96.9 to -34.5)</b>              |
| 14 HIV/AIDS                    | 14 Chronic kidney disease      | <b>171 (97.4 to 259)</b>       | <b>47.4 (10.9 to 97.4)</b>      | 6.43 (-20.3 to 44)                       |
| 15 Depressive disorders        | 15 Cirrhosis liver             | <b>47.5 (17.7 to 80.9)</b>     | <b>-19.8 (-32.2 to -5.68)</b>   | <b>-44.4 (-52.9 to -34.6)</b>            |
| 16 Maternal disorders          | 16 Age-related hearing loss    | <b>156 (115 to 198)</b>        | <b>38.8 (26.3 to 50.1)</b>      | <b>-1.8 (-2.02 to -1.56)</b>             |
| 17 Meningitis                  | 17 Anxiety disorders           | <b>112 (77.3 to 145)</b>       | <b>14.9 (9.18 to 21.9)</b>      | <b>2.28 (1.89 to 2.67)</b>               |
| 18 Diabetes                    | 18 COPD                        | <b>136 (81.7 to 203)</b>       | <b>28.4 (0.371 to 68.5)</b>     | <b>-24.3 (-39.5 to -0.903)</b>           |
| 19 Low back pain               | 19 Headache disorders          | <b>119 (82.3 to 156)</b>       | <b>18.8 (13 to 28.6)</b>        | <b>1.74 (1.15 to 2.16)</b>               |
| 20 Dietary iron deficiency     | 20 Gynecological diseases      | <b>84.3 (41.3 to 129)</b>      | 0.194 (-19.3 to 22.3)           | -17.5 (-33.2 to 0.339)                   |
| 23 Anxiety disorders           | 21 Dietary iron deficiency     |                                |                                 |                                          |
| 24 Chronic kidney disease      | 27 Meningitis                  |                                |                                 |                                          |
| 25 Gynecological diseases      | 29 Maternal disorders          |                                |                                 |                                          |
| 26 Age-related hearing loss    | 39 Protein-energy malnutrition |                                |                                 |                                          |
| 27 Headache disorders          | 77 HIV/AIDS                    |                                |                                 |                                          |
| 29 COPD                        | 167 COVID-19                   |                                |                                 |                                          |

### Comoros, Reference scenario

**Legend:**  
Communicable, maternal, neonatal and nutritional  
Non-communicable  
Injuries

| Leading Causes 2022           | Leading Causes 2050          | Mean % change number of DALY | Mean % change all-age DALY rate | Mean % change age-standardized DALY rate |
|-------------------------------|------------------------------|------------------------------|---------------------------------|------------------------------------------|
| 1 Neonatal disorders          | 1 Neonatal disorders         | -55.3 (-69 to -36.3)         | -62 (-69.8 to -52.5)            | -37.9 (-48.7 to -22)                     |
| 2 Lower respiratory infect    | 2 Diabetes                   | 131 (77.4 to 206)            | 98.4 (56.3 to 145)              | 12.2 (-6.89 to 33.3)                     |
| 3 Stroke                      | 3 Stroke                     | 28.6 (-5.49 to 77.7)         | 10.2 (-13.2 to 37.8)            | -42.3 (-54.1 to -26.3)                   |
| 4 Tuberculosis                | 4 Lower respiratory infect   | -30.8 (-49.1 to -7.22)       | -40.7 (-54.2 to -24)            | -50.9 (-60.3 to -37.5)                   |
| 5 Road injuries               | 5 Chronic kidney disease     | 127 (60.1 to 221)            | 94.5 (46 to 153)                | 14.4 (-15.2 to 54.7)                     |
| 6 Diarrheal diseases          | 6 Ischemic heart disease     | 28.6 (-20 to 102)            | 10.1 (-27 to 62.8)              | -41.5 (-61 to -11.9)                     |
| 7 Congenital defects          | 7 Hypertensive heart disease | 127 (62.5 to 218)            | 94.7 (44 to 151)                | -4.22 (-28.3 to 26.1)                    |
| 8 Ischemic heart disease      | 8 Road injuries              | -7.19 (-47.9 to 58.2)        | -20.7 (-51.9 to 31.8)           | -30 (-59.5 to 20.1)                      |
| 9 Diabetes                    | 9 Low back pain              | 53.8 (21.8 to 87.1)          | 31.8 (20.3 to 43.5)             | -6.04 (-6.25 to -5.86)                   |
| 10 Cirrhosis liver            | 10 Depressive disorders      | 45.6 (15.3 to 80)            | 24.8 (15.4 to 36.9)             | -3.02 (-3.24 to -2.78)                   |
| 11 Low back pain              | 11 Age-related hearing loss  | 84.2 (46 to 125)             | 58 (41 to 75.8)                 | -1.54 (-1.76 to -1.32)                   |
| 12 Depressive disorders       | 12 Cirrhosis liver           | 23.4 (-5.97 to 68)           | 5.72 (-15.4 to 29.4)            | -31.6 (-43.2 to -17.5)                   |
| 13 Chronic kidney disease     | 13 Other musculoskeletal     | 179 (119 to 242)             | 139 (117 to 167)                | 74.9 (69.9 to 78.8)                      |
| 14 Meningitis                 | 14 Tuberculosis              | -40.5 (-62.1 to -11.4)       | -49.1 (-65.4 to -25.6)          | -65.2 (-76.7 to -47.7)                   |
| 15 Interpersonal violence     | 15 Diarrheal diseases        | -27.9 (-54.9 to 7.45)        | -38.2 (-58.7 to -10.1)          | -44.5 (-63 to -20.4)                     |
| 16 Malaria                    | 16 COPD                      | 76.7 (28.5 to 146)           | 51.5 (16.5 to 96.2)             | -23.3 (-40.2 to 0.439)                   |
| 17 COVID-19                   | 17 Alzheimer's disease       | 181 (98.8 to 259)            | 141 (94.7 to 191)               | -1.79 (-5.59 to 1.65)                    |
| 18 Age-related hearing loss   | 18 Congenital defects        | -51.2 (-67.2 to -28.8)       | -58.4 (-67.4 to -48.4)          | -33.8 (-43.8 to -18.8)                   |
| 19 Hypertensive heart disease | 19 Breast cancer             | 80.4 (28.1 to 137)           | 54.9 (17 to 98.8)               | -1.86 (-21.8 to 20.7)                    |
| 20 Dietary iron deficiency    | 20 Interpersonal violence    | -15.3 (-37.2 to 12)          | -27.5 (-40.7 to -11.8)          | -32.5 (-44.4 to -18.7)                   |
| 25 COPD                       | 30 Dietary iron deficiency   |                              |                                 |                                          |
| 30 Other musculoskeletal      | 34 Meningitis                |                              |                                 |                                          |
| 32 Breast cancer              | 67 Malaria                   |                              |                                 |                                          |
| 44 Alzheimer's disease        | 163 COVID-19                 |                              |                                 |                                          |

### Djibouti, Reference scenario

**Legend:**  
 Communicable, maternal, neonatal and nutritional  
 Non-communicable  
 Injuries

| Leading Causes 2022            | Leading Causes 2050            | Mean % change number of DALY | Mean % change all-age DALY rate | Mean % change age-standardized DALY rate |
|--------------------------------|--------------------------------|------------------------------|---------------------------------|------------------------------------------|
| 1 HIV/AIDS                     | 1 Stroke                       | 103 (50.7 to 168)            | 31.8 (6.55 to 71.4)             | -40 (-51.1 to -22.5)                     |
| 2 Neonatal disorders           | 2 Lower respiratory infect     | 35.4 (0.809 to 73.5)         | -12 (-31.9 to 14.3)             | -35.6 (-47 to -20.6)                     |
| 3 Lower respiratory infect     | 3 Neonatal disorders           | -13.6 (-35.8 to 11.7)        | -44 (-56 to -30.8)              | -12.3 (-26 to 7.05)                      |
| 4 Stroke                       | 4 Diabetes                     | 138 (78.5 to 209)            | 54.4 (23.2 to 92.1)             | -21.8 (-37.1 to -1.88)                   |
| 5 Tuberculosis                 | 5 Chronic kidney disease       | 225 (134 to 345)             | 111 (60.9 to 177)               | 12.4 (-14.3 to 47.7)                     |
| 6 Diarrheal diseases           | 6 Ischemic heart disease       | 60.4 (1.58 to 153)           | 4.13 (-29.2 to 56.3)            | -50.8 (-67.4 to -26)                     |
| 7 Ischemic heart disease       | 7 HIV/AIDS                     | -58.4 (-79.4 to -17.4)       | -73 (-86.6 to -46.7)            | -76.7 (-88.3 to -53.3)                   |
| 8 Congenital defects           | 8 Depressive disorders         | 97.8 (66.8 to 126)           | 28.6 (20 to 40.4)               | -2.34 (-2.73 to -1.96)                   |
| 9 Road injuries                | 9 Other musculoskeletal        | 339 (274 to 405)             | 185 (165 to 211)                | 101 (94.6 to 105)                        |
| 10 Diabetes                    | 10 Low back pain               | 111 (81.3 to 143)            | 36.9 (26.9 to 47.9)             | -5.66 (-6.02 to -5.24)                   |
| 11 Pertussis                   | 11 Age-related hearing loss    | 156 (115 to 199)             | 66.4 (50.8 to 83)               | -1.84 (-2.15 to -1.51)                   |
| 12 Cirrhosis liver             | 12 Cirrhosis liver             | 58.2 (21 to 104)             | 2.81 (-15.7 to 26.2)            | -37.7 (-48.3 to -24.1)                   |
| 13 Interpersonal violence      | 13 Hypertensive heart disease  | 205 (120 to 307)             | 97.9 (53.6 to 153)              | -18.3 (-36.9 to 6.12)                    |
| 14 Depressive disorders        | 14 Road injuries               | 22.7 (-31.4 to 121)          | -20.4 (-53.3 to 39.3)           | -36 (-62.8 to 14.4)                      |
| 15 Malaria                     | 15 Diarrheal diseases          | -9.35 (-43 to 31.4)          | -41.2 (-59.2 to -14.4)          | -49.2 (-65.6 to -25.8)                   |
| 16 Low back pain               | 16 Interpersonal violence      | 18 (-8.33 to 48.4)           | -23.3 (-37.7 to -7.8)           | -31.3 (-43.3 to -18.3)                   |
| 17 Maternal disorders          | 17 Tuberculosis                | -32.3 (-54.7 to -0.203)      | -56 (-69.5 to -37.6)            | -71.6 (-80.4 to -59.5)                   |
| 18 COVID-19                    | 18 COPD                        | 213 (127 to 314)             | 103 (60.8 to 159)               | -9.67 (-29.5 to 16.2)                    |
| 19 Chronic kidney disease      | 19 Headache disorders          | 78.8 (54.4 to 108)           | 16.2 (9.71 to 29.5)             | 1.64 (1.02 to 2)                         |
| 20 Protein-energy malnutrition | 20 Anxiety disorders           | 72.5 (47.5 to 98.4)          | 12.1 (5.64 to 20.5)             | 2.52 (2.2 to 2.85)                       |
| 21 Age-related hearing loss    | 29 Congenital defects          |                              |                                 |                                          |
| 25 Anxiety disorders           | 42 Malaria                     |                              |                                 |                                          |
| 26 Headache disorders          | 44 Protein-energy malnutrition |                              |                                 |                                          |
| 28 Hypertensive heart disease  | 45 Maternal disorders          |                              |                                 |                                          |
| 30 Other musculoskeletal       | 51 Pertussis                   |                              |                                 |                                          |
| 34 COPD                        | 163 COVID-19                   |                              |                                 |                                          |

### Eritrea, Reference scenario

**Legend:**

Communicable, maternal, neonatal and nutritional  
 Non-communicable  
 Injuries

| Leading Causes 2022            | Leading Causes 2050            | Mean % change number of DALY | Mean % change all-age DALY rate | Mean % change age-standardized DALY rate |
|--------------------------------|--------------------------------|------------------------------|---------------------------------|------------------------------------------|
| 1 Neonatal disorders           | 1 Lower respiratory infect     | -18.1 (-50.8 to 16.3)        | -40 (-56 to -22.4)              | -43.9 (-55.5 to -30)                     |
| 2 Lower respiratory infect     | 2 Neonatal disorders           | -49.7 (-70.1 to -27.9)       | -63.5 (-70.5 to -54.8)          | -42.4 (-51.7 to -29.4)                   |
| 3 Tuberculosis                 | 3 Stroke                       | 48.2 (-6.04 to 102)          | 8.55 (-14.1 to 35.7)            | -43 (-54.1 to -26.5)                     |
| 4 Diarrheal diseases           | 4 Diarrheal diseases           | -22.3 (-56.1 to 20.1)        | -43.3 (-62.9 to -18.2)          | -42.7 (-60.3 to -20.4)                   |
| 5 Stroke                       | 5 Diabetes                     | 107 (29.8 to 184)            | 51.1 (24.5 to 83.2)             | -14.2 (-28.7 to 4.61)                    |
| 6 Congenital defects           | 6 Tuberculosis                 | -46.1 (-68.6 to -18.7)       | -60.5 (-72.5 to -42.1)          | -70.6 (-79.7 to -57.2)                   |
| 7 COVID-19                     | 7 Conflict & terror            | 180 (-20.1 to 391)           | 105 (-38.9 to 294)              | 36.4 (-46.3 to 157)                      |
| 8 Road injuries                | 8 Ischemic heart disease       | 41.2 (-17.8 to 109)          | 3.51 (-28.1 to 45.9)            | -44.3 (-62.2 to -18.8)                   |
| 9 Interpersonal violence       | 9 Cirrhosis liver              | 28.6 (-20.7 to 75.7)         | -5.9 (-22.5 to 14.9)            | -37.9 (-47.9 to -24.7)                   |
| 10 Cirrhosis liver             | 10 Road injuries               | 0.8 (-51 to 80)              | -26.3 (-56.8 to 30.3)           | -36.4 (-62.7 to 9.69)                    |
| 11 Ischemic heart disease      | 11 Chronic kidney disease      | 152 (51.1 to 250)            | 84.2 (40 to 142)                | 15.9 (-12.5 to 52.7)                     |
| 12 Protein-energy malnutrition | 12 Depressive disorders        | 70.2 (10.7 to 133)           | 24.2 (15.3 to 34.9)             | -4.02 (-4.48 to -3.62)                   |
| 13 Diabetes                    | 13 Interpersonal violence      | 2.25 (-35.9 to 48.8)         | -25.5 (-39 to -7.5)             | -31.4 (-42.6 to -17.1)                   |
| 14 Maternal disorders          | 14 Low back pain               | 77 (14.6 to 144)             | 29.2 (18.6 to 41.9)             | -8.1 (-8.46 to -7.79)                    |
| 15 HIV/AIDS                    | 15 Hypertensive heart disease  | 111 (29.4 to 193)            | 54.3 (17.8 to 94.7)             | -28.7 (-46.2 to -6.34)                   |
| 16 Meningitis                  | 16 Age-related hearing loss    | 111 (38.7 to 188)            | 54 (39.1 to 72.4)               | -2.01 (-2.35 to -1.61)                   |
| 17 Depressive disorders        | 17 Congenital defects          | -42.8 (-66.2 to -12.9)       | -58.5 (-67.2 to -46.5)          | -36.3 (-45.4 to -23.1)                   |
| 18 Conflict & terror           | 18 COPD                        | 98.3 (24.4 to 168)           | 45.2 (16.5 to 83.1)             | -28 (-44 to -9.52)                       |
| 19 Dietary iron deficiency     | 19 Self-harm                   | 42.9 (-11.3 to 105)          | 4.33 (-17.1 to 28.1)            | -18 (-34.2 to 0.958)                     |
| 20 Low back pain               | 20 Anxiety disorders           | 53.5 (-6.98 to 113)          | 11.8 (5.71 to 20)               | 1.23 (0.839 to 1.6)                      |
| 21 Chronic kidney disease      | 22 Dietary iron deficiency     |                              |                                 |                                          |
| 22 Self-harm                   | 31 Meningitis                  |                              |                                 |                                          |
| 25 Hypertensive heart disease  | 36 Maternal disorders          |                              |                                 |                                          |
| 26 Anxiety disorders           | 38 Protein-energy malnutrition |                              |                                 |                                          |
| 28 Age-related hearing loss    | 75 HIV/AIDS                    |                              |                                 |                                          |
| 32 COPD                        | 166 COVID-19                   |                              |                                 |                                          |



### Ethiopia, Reference scenario

**Legend:**  
Communicable, maternal, neonatal and nutritional  
Non-communicable  
Injuries

| Leading Causes 2022            | Leading Causes 2050            | Mean % change number of DALY | Mean % change all-age DALY rate | Mean % change age-standardized DALY rate |
|--------------------------------|--------------------------------|------------------------------|---------------------------------|------------------------------------------|
| 1 Neonatal disorders           | 1 Neonatal disorders           | -36.8 (-53.4 to -16.8)       | -66.6 (-73.6 to -57.9)          | -46 (-55.6 to -32.3)                     |
| 2 Lower respiratory infect     | 2 Lower respiratory infect     | -24 (-40.7 to -1.79)         | -59.8 (-67.6 to -51.3)          | -54.6 (-62.3 to -44.9)                   |
| 3 Diarrheal diseases           | 3 Diarrheal diseases           | -21.2 (-50.3 to 19.7)        | -58.3 (-73.1 to -36.4)          | -55.7 (-70.5 to -33.8)                   |
| 4 Congenital defects           | 4 Depressive disorders         | 137 (102 to 174)             | 25.7 (19 to 33.7)               | -3.92 (-4.1 to -3.69)                    |
| 5 COVID-19                     | 5 Chronic kidney disease       | 207 (122 to 309)             | 62.5 (23.8 to 115)              | 7.93 (-19.3 to 42.9)                     |
| 6 Tuberculosis                 | 6 Other musculoskeletal        | 554 (461 to 643)             | 246 (223 to 272)                | 139 (132 to 146)                         |
| 7 Stroke                       | 7 Stroke                       | 80.5 (44.2 to 124)           | -4.36 (-21.5 to 16.5)           | -46 (-55.4 to -33.5)                     |
| 8 HIV/AIDS                     | 8 Low back pain                | 144 (105 to 182)             | 29.2 (21.4 to 38.6)             | -7.84 (-8.13 to -7.47)                   |
| 9 Meningitis                   | 9 Diabetes                     | 125 (83.4 to 169)            | 19 (0.279 to 42.3)              | -30.7 (-40.9 to -18.5)                   |
| 10 Pertussis                   | 10 Age-related hearing loss    | 177 (133 to 218)             | 46.6 (35.5 to 56.6)             | -2.21 (-2.4 to -2.02)                    |
| 11 Depressive disorders        | 11 Cirrhosis liver             | 88.9 (51.8 to 140)           | 0.0898 (-16.8 to 21.8)          | -35.9 (-46.4 to -22.3)                   |
| 12 Protein-energy malnutrition | 12 Congenital defects          | -24.6 (-42.7 to -2.53)       | -60.2 (-66.6 to -52.7)          | -38.4 (-45.7 to -27.8)                   |
| 13 Road injuries               | 13 Anxiety disorders           | 115 (81.2 to 147)            | 13.9 (8.65 to 20)               | 2.14 (1.87 to 2.42)                      |
| 14 Low back pain               | 14 Interpersonal violence      | 64.4 (27.3 to 105)           | -13 (-25.7 to 2.36)             | -24.3 (-34.7 to -10.8)                   |
| 15 Cirrhosis liver             | 15 Road injuries               | 32.7 (-26.3 to 140)          | -29.7 (-59.5 to 29.8)           | -39.2 (-64.8 to 8.05)                    |
| 16 Diabetes                    | 16 Ischemic heart disease      | 50.7 (-2.28 to 124)          | -20.1 (-46.4 to 19.6)           | -54.7 (-70.2 to -30)                     |
| 17 Interpersonal violence      | 17 Headache disorders          | 124 (87.3 to 160)            | 18.5 (12.1 to 29.2)             | 1.1 (0.709 to 1.38)                      |
| 18 Ischemic heart disease      | 18 Gynecological diseases      | 80.3 (41.4 to 130)           | -4.52 (-22.5 to 18)             | -24.3 (-38 to -6.41)                     |
| 19 Dietary iron deficiency     | 19 Tuberculosis                | -36.2 (-59.2 to -1.56)       | -66.2 (-77.8 to -47.3)          | -75.2 (-83.3 to -62.4)                   |
| 20 Chronic kidney disease      | 20 Idiopathic epilepsy         | 76.1 (15.9 to 162)           | -6.76 (-35.4 to 31.4)           | -9.44 (-36.1 to 27.6)                    |
| 22 Age-related hearing loss    | 24 Dietary iron deficiency     |                              |                                 |                                          |
| 23 Anxiety disorders           | 32 Meningitis                  |                              |                                 |                                          |
| 24 Gynecological diseases      | 36 Pertussis                   |                              |                                 |                                          |
| 25 Idiopathic epilepsy         | 47 HIV/AIDS                    |                              |                                 |                                          |
| 28 Headache disorders          | 48 Protein-energy malnutrition |                              |                                 |                                          |
| 39 Other musculoskeletal       | 168 COVID-19                   |                              |                                 |                                          |

### Kenya, Reference scenario

**Legend:**  
Communicable, maternal, neonatal and nutritional  
Non-communicable  
Injuries

| Leading Causes 2022            | Leading Causes 2050            | Mean % change number of DALY | Mean % change all-age DALY rate | Mean % change age-standardized DALY rate |
|--------------------------------|--------------------------------|------------------------------|---------------------------------|------------------------------------------|
| 1 HIV/AIDS                     | 1 Neonatal disorders           | -31.4 (-46.8 to -13.7)       | -52.4 (-61 to -41.7)            | -28.1 (-38.2 to -15.2)                   |
| 2 Neonatal disorders           | 2 Lower respiratory infect     | 9.46 (-12.4 to 31.5)         | -23.9 (-37.2 to -6.46)          | -38.7 (-47.5 to -27.3)                   |
| 3 Lower respiratory infect     | 3 Stroke                       | 67.9 (41.3 to 94)            | 16.8 (-2.27 to 37.6)            | -43.5 (-51.9 to -32.6)                   |
| 4 Tuberculosis                 | 4 Cirrhosis liver              | 73.9 (50.2 to 102)           | 20.9 (2.09 to 41.4)             | -31.1 (-40 to -19.6)                     |
| 5 Diarrheal diseases           | 5 Diarrheal diseases           | -10.5 (-38.7 to 30.7)        | -37.8 (-56.9 to -8.38)          | -38.8 (-57.4 to -12)                     |
| 6 COVID-19                     | 6 Low back pain                | 104 (86.3 to 122)            | 41.5 (30.2 to 52.1)             | -5.25 (-5.72 to -4.83)                   |
| 7 Stroke                       | 7 Depressive disorders         | 91.8 (74.1 to 112)           | 33.3 (24.8 to 42.9)             | -2.57 (-2.76 to -2.38)                   |
| 8 Cirrhosis liver              | 8 Tuberculosis                 | -23.3 (-46.8 to 6.4)         | -46.6 (-62.6 to -25.3)          | -65.6 (-76.1 to -51)                     |
| 9 Congenital defects           | 9 Diabetes                     | 157 (118 to 197)             | 78.4 (49.7 to 109)              | -8.79 (-22.2 to 5.9)                     |
| 10 Depressive disorders        | 10 Chronic kidney disease      | 183 (121 to 255)             | 96.8 (52.4 to 148)              | 11.7 (-13.9 to 45)                       |
| 11 Low back pain               | 11 Age-related hearing loss    | 131 (108 to 151)             | 60.3 (44.7 to 75)               | -1.24 (-1.38 to -1.1)                    |
| 12 Malaria                     | 12 Other musculoskeletal       | 276 (242 to 310)             | 162 (140 to 183)                | 71.5 (68.3 to 74.2)                      |
| 13 Ischemic heart disease      | 13 Ischemic heart disease      | 57.9 (13.7 to 113)           | 9.88 (-21.4 to 51)              | -46.6 (-61.4 to -26.7)                   |
| 14 Interpersonal violence      | 14 Hypertensive heart disease  | 209 (143 to 285)             | 115 (65.9 to 169)               | -5.31 (-27.3 to 20.5)                    |
| 15 Road injuries               | 15 COPD                        | 121 (76.8 to 162)            | 53.5 (24.2 to 84.6)             | -26.6 (-40.7 to -11.4)                   |
| 16 Diabetes                    | 16 Road injuries               | 30.4 (-12.2 to 98.8)         | -9.31 (-38.7 to 38.6)           | -29.3 (-53 to 8.43)                      |
| 17 Age-related hearing loss    | 17 Headache disorders          | 72.1 (55.1 to 97.1)          | 19.6 (11.8 to 32.9)             | 0.579 (0.347 to 0.834)                   |
| 18 Meningitis                  | 18 Interpersonal violence      | 23.7 (4.29 to 48.2)          | -14.1 (-26.5 to -0.942)         | -27.3 (-36.4 to -16)                     |
| 19 Chronic kidney disease      | 19 Gynecological diseases      | 61.6 (33 to 91)              | 12.3 (-6.18 to 34.4)            | -13.8 (-27.6 to 1.92)                    |
| 20 Protein-energy malnutrition | 20 Anxiety disorders           | 61.8 (44.1 to 79.5)          | 12.4 (6.01 to 20.4)             | 1.08 (0.894 to 1.31)                     |
| 21 Gynecological diseases      | 21 HIV/AIDS                    |                              |                                 |                                          |
| 22 Anxiety disorders           | 25 Congenital defects          |                              |                                 |                                          |
| 23 Headache disorders          | 34 Meningitis                  |                              |                                 |                                          |
| 26 COPD                        | 42 Protein-energy malnutrition |                              |                                 |                                          |
| 28 Hypertensive heart disease  | 97 Malaria                     |                              |                                 |                                          |
| 29 Other musculoskeletal       | 167 COVID-19                   |                              |                                 |                                          |

### Madagascar, Reference scenario

**Legend:**  
Communicable, maternal, neonatal and nutritional  
Non-communicable  
Injuries

| Leading Causes 2022           | Leading Causes 2050            | Mean % change number of DALY | Mean % change all-age DALY rate | Mean % change age-standardized DALY rate |
|-------------------------------|--------------------------------|------------------------------|---------------------------------|------------------------------------------|
| 1 COVID-19                    | 1 Diarrheal diseases           | -7.88 (-38 to 45)            | -45.9 (-63.4 to -17.8)          | -33 (-52.6 to -5.25)                     |
| 2 Neonatal disorders          | 2 Stroke                       | 64.2 (36.4 to 101)           | -3.51 (-21.8 to 18.3)           | -44 (-53.4 to -31.6)                     |
| 3 Diarrheal diseases          | 3 Neonatal disorders           | -34.9 (-47.5 to -18.8)       | -61.8 (-68 to -54.2)            | -42.6 (-50.8 to -32.2)                   |
| 4 Lower respiratory infect    | 4 Lower respiratory infect     | -19.6 (-34.2 to -0.474)      | -52.7 (-61.8 to -41.3)          | -46.3 (-54.6 to -35.7)                   |
| 5 Stroke                      | 5 Ischemic heart disease       | 72.4 (24 to 149)             | 1.33 (-29.6 to 50.1)            | -41.8 (-59.5 to -15.7)                   |
| 6 Tuberculosis                | 6 Hypertensive heart disease   | 181 (119 to 269)             | 65.2 (25.7 to 117)              | -13 (-33.1 to 13.9)                      |
| 7 Malaria                     | 7 Depressive disorders         | 114 (92.2 to 137)            | 25.6 (18.5 to 34.1)             | -2.85 (-3.05 to -2.62)                   |
| 8 Congenital defects          | 8 Low back pain                | 123 (103 to 148)             | 31.1 (22.7 to 39.2)             | -5.65 (-5.83 to -5.47)                   |
| 9 Protein-energy malnutrition | 9 Diabetes                     | 141 (99.5 to 192)            | 41.7 (15.7 to 73.4)             | -14.2 (-26.7 to 2.31)                    |
| 10 Ischemic heart disease     | 10 Tuberculosis                | -24.4 (-48.7 to 13.9)        | -55.5 (-69.2 to -35)            | -66.1 (-76.1 to -51)                     |
| 11 Measles                    | 11 Age-related hearing loss    | 147 (121 to 177)             | 45.2 (33.8 to 56.5)             | -1.52 (-1.62 to -1.41)                   |
| 12 Road injuries              | 12 Congenital defects          | -22.7 (-37.8 to -5.81)       | -54.7 (-61.6 to -46.3)          | -34.2 (-42.4 to -23.3)                   |
| 13 Pertussis                  | 13 Other musculoskeletal       | 329 (290 to 376)             | 152 (135 to 167)                | 78.1 (73.4 to 81.7)                      |
| 14 Asthma                     | 14 COPD                        | 142 (92.3 to 213)            | 42.4 (11.6 to 80.3)             | -24.5 (-40.3 to -6.03)                   |
| 15 Depressive disorders       | 15 Cirrhosis liver             | 66.8 (41.8 to 99.7)          | -1.93 (-17.4 to 17.7)           | -34.6 (-43.9 to -22.2)                   |
| 16 Meningitis                 | 16 Chronic kidney disease      | 174 (110 to 267)             | 61 (21.3 to 116)                | 9.38 (-17.1 to 46.2)                     |
| 17 Cirrhosis liver            | 17 Road injuries               | 18 (-27.8 to 103)            | -30.7 (-56.9 to 15.1)           | -37.6 (-59.8 to 1.32)                    |
| 18 STIs                       | 18 Anxiety disorders           | 92.4 (72.4 to 112)           | 13 (5.95 to 20.8)               | 1.08 (0.876 to 1.29)                     |
| 19 Hypertensive heart disease | 19 Dietary iron deficiency     | 37.8 (20.3 to 55.6)          | -19.1 (-24 to -15.1)            | -17.3 (-17.8 to -16.5)                   |
| 20 Low back pain              | 20 Headache disorders          | 100 (80.2 to 124)            | 17.6 (11.3 to 28.1)             | 0.394 (0.201 to 0.578)                   |
| 22 Dietary iron deficiency    | 23 Protein-energy malnutrition |                              |                                 |                                          |
| 24 Diabetes                   | 25 Asthma                      |                              |                                 |                                          |
| 26 Age-related hearing loss   | 27 Pertussis                   |                              |                                 |                                          |
| 27 COPD                       | 28 Malaria                     |                              |                                 |                                          |
| 28 Anxiety disorders          | 30 Meningitis                  |                              |                                 |                                          |
| 30 Headache disorders         | 45 STIs                        |                              |                                 |                                          |
| 32 Chronic kidney disease     | 84 Measles                     |                              |                                 |                                          |

### Malawi, Reference scenario

**Legend:**  
■ Communicable, maternal, neonatal and nutritional  
■ Non-communicable  
■ Injuries

| Leading Causes 2022            | Leading Causes 2050            | Mean % change number of DALY | Mean % change all-age DALY rate | Mean % change age-standardized DALY rate |
|--------------------------------|--------------------------------|------------------------------|---------------------------------|------------------------------------------|
| 1 HIV/AIDS                     | 1 Neonatal disorders           | -35.4 (-52.1 to -14.3)       | -60.8 (-68.3 to -50.4)          | -37.3 (-48.3 to -23.8)                   |
| 2 Neonatal disorders           | 2 Lower respiratory infect     | -15.9 (-31.6 to 3.46)        | -48.7 (-58.2 to -35.6)          | -43.5 (-53 to -30.5)                     |
| 3 Lower respiratory infect     | 3 Diarrheal diseases           | 3.26 (-29.2 to 55.1)         | -37 (-57.5 to -5.54)            | -34 (-55.1 to -0.788)                    |
| 4 COVID-19                     | 4 Stroke                       | 60.8 (31.9 to 93.5)          | -1.82 (-21.8 to 22.4)           | -44.9 (-55.7 to -29.5)                   |
| 5 Malaria                      | 5 Cirrhosis liver              | 82.7 (53.2 to 115)           | 11.5 (-8.06 to 35.5)            | -31.5 (-42.1 to -18.7)                   |
| 6 Diarrheal diseases           | 6 Chronic kidney disease       | 144 (81.3 to 225)            | 48.9 (10 to 104)                | 0.823 (-26 to 36.4)                      |
| 7 Tuberculosis                 | 7 Ischemic heart disease       | 67.9 (12.9 to 152)           | 2.64 (-33.4 to 60.2)            | -42.8 (-62.1 to -11.9)                   |
| 8 Congenital defects           | 8 Diabetes                     | 122 (80.9 to 170)            | 35.8 (9.49 to 70.4)             | -20.6 (-36.1 to -0.118)                  |
| 9 Stroke                       | 9 Low back pain                | 125 (100 to 149)             | 37.4 (26.2 to 49.4)             | -6.09 (-6.5 to -5.61)                    |
| 10 Meningitis                  | 10 Depressive disorders        | 114 (87.2 to 137)            | 30.3 (20.1 to 41.5)             | -2.94 (-3.37 to -2.51)                   |
| 11 Road injuries               | 11 Other musculoskeletal       | 369 (315 to 416)             | 186 (162 to 213)                | 88.3 (82.7 to 92.9)                      |
| 12 Cirrhosis liver             | 12 Road injuries               | 24.6 (-27.9 to 110)          | -23.9 (-57 to 32.9)             | -34.8 (-61.2 to 10.6)                    |
| 13 Ischemic heart disease      | 13 Tuberculosis                | -25.7 (-51.7 to 13.6)        | -54.6 (-71.7 to -28.8)          | -67.7 (-79.1 to -50.1)                   |
| 14 Dietary iron deficiency     | 14 Age-related hearing loss    | 145 (116 to 172)             | 49.5 (35.4 to 64.7)             | -1.68 (-2.2 to -1.11)                    |
| 15 Protein-energy malnutrition | 15 Congenital defects          | -32.8 (-50 to -15.1)         | -59.2 (-66.7 to -50.8)          | -36.8 (-45.6 to -24.9)                   |
| 16 Diabetes                    | 16 Esophageal cancer           | 187 (148 to 225)             | 75.2 (52.5 to 99.7)             | -7.89 (-18 to 1.1)                       |
| 17 Low back pain               | 17 Self-harm                   | 89.8 (54.8 to 133)           | 15.8 (-7.72 to 40.3)            | -14.3 (-29.7 to 2.73)                    |
| 18 Chronic kidney disease      | 18 Anxiety disorders           | 90 (64.7 to 116)             | 15.7 (6.74 to 26)               | 1.36 (0.994 to 1.75)                     |
| 19 Depressive disorders        | 19 Hypertensive heart disease  | 163 (101 to 241)             | 60.6 (19.1 to 117)              | -16.5 (-38.2 to 13.1)                    |
| 20 Idiopathic epilepsy         | 20 Headache disorders          | 100 (75.2 to 128)            | 22.1 (12.8 to 35.9)             | 0.691 (0.286 to 1.09)                    |
| 22 Self-harm                   | 21 Idiopathic epilepsy         |                              |                                 |                                          |
| 23 Anxiety disorders           | 22 Dietary iron deficiency     |                              |                                 |                                          |
| 25 Age-related hearing loss    | 23 HIV/AIDS                    |                              |                                 |                                          |
| 27 Headache disorders          | 27 Meningitis                  |                              |                                 |                                          |
| 30 Esophageal cancer           | 30 Malaria                     |                              |                                 |                                          |
| 33 Hypertensive heart disease  | 43 Protein-energy malnutrition |                              |                                 |                                          |
| 38 Other musculoskeletal       | 167 COVID-19                   |                              |                                 |                                          |

### Mozambique, Reference scenario

**Legend:**  
 Communicable, maternal, neonatal and nutritional  
 Non-communicable  
 Injuries

| Leading Causes 2022            | Leading Causes 2050            | Mean % change number of DALY | Mean % change all-age DALY rate | Mean % change age-standardized DALY rate |
|--------------------------------|--------------------------------|------------------------------|---------------------------------|------------------------------------------|
| 1 HIV/AIDS                     | 1 Neonatal disorders           | -44.9 (-58.7 to -30.2)       | -69.6 (-75.2 to -62.4)          | -50.7 (-58.8 to -40.6)                   |
| 2 Neonatal disorders           | 2 Stroke                       | 49.3 (22.7 to 80.8)          | -17.4 (-34.9 to 0.212)          | -48.8 (-57.6 to -37.8)                   |
| 3 Malaria                      | 3 Lower respiratory infect     | -19.1 (-33.6 to -0.537)      | -55.3 (-63.7 to -45.3)          | -47.5 (-55.7 to -38)                     |
| 4 Lower respiratory infect     | 4 HIV/AIDS                     | -75.5 (-79.7 to -70.2)       | -86.5 (-88.9 to -83.5)          | -87.2 (-89.3 to -84.6)                   |
| 5 Tuberculosis                 | 5 Diabetes                     | 165 (113 to 223)             | 46.5 (17.1 to 74.9)             | -5.19 (-21 to 13.6)                      |
| 6 Stroke                       | 6 Malaria                      | -62.1 (-93.4 to 69.8)        | -79 (-96.2 to -8.36)            | -76.6 (-95.8 to -1.98)                   |
| 7 COVID-19                     | 7 Dietary iron deficiency      | 41.2 (21.7 to 59.3)          | -22 (-24.8 to -18.8)            | -23.5 (-24.3 to -22.7)                   |
| 8 Congenital defects           | 8 Tuberculosis                 | -38.2 (-59.1 to -9.76)       | -65.8 (-77.3 to -47.3)          | -73.2 (-81.5 to -60)                     |
| 9 Diarrheal diseases           | 9 Depressive disorders         | 130 (103 to 157)             | 27.1 (19.6 to 35.1)             | -3.99 (-4.41 to -3.62)                   |
| 10 Dietary iron deficiency     | 10 Diarrheal diseases          | -25.6 (-49.6 to 3.69)        | -58.8 (-72.3 to -40.6)          | -51.8 (-65.3 to -33.7)                   |
| 11 Road injuries               | 11 Congenital defects          | -29.8 (-45.5 to -12.6)       | -61.3 (-67.9 to -53)            | -39.8 (-47.7 to -29.8)                   |
| 12 STIs                        | 12 Low back pain               | 130 (107 to 153)             | 27.2 (18.1 to 36.1)             | -8.02 (-8.34 to -7.61)                   |
| 13 Diabetes                    | 13 Road injuries               | 14.8 (-29.8 to 87.3)         | -36.4 (-63.6 to 8.55)           | -45.7 (-66.9 to -9.41)                   |
| 14 Depressive disorders        | 14 Other musculoskeletal       | 480 (396 to 558)             | 221 (184 to 251)                | 120 (101 to 136)                         |
| 15 Protein-energy malnutrition | 15 Hypertensive heart disease  | 160 (97 to 231)              | 43.9 (6.59 to 87.7)             | -19.4 (-39.3 to 3.53)                    |
| 16 Low back pain               | 16 Chronic kidney disease      | 137 (76.4 to 204)            | 31.3 (-2.16 to 71.2)            | 2.01 (-22.8 to 34.4)                     |
| 17 Meningitis                  | 17 Self-harm                   | 114 (74.9 to 156)            | 18.2 (-2.4 to 42.5)             | -12.4 (-25.5 to 3.48)                    |
| 18 Interpersonal violence      | 18 Age-related hearing loss    | 151 (119 to 180)             | 38.5 (26.2 to 50)               | -2.27 (-2.47 to -2.05)                   |
| 19 Maternal disorders          | 19 Anxiety disorders           | 115 (88 to 145)              | 18.7 (11.7 to 27.4)             | 1.89 (1.49 to 2.27)                      |
| 20 Self-harm                   | 20 Interpersonal violence      | 62.7 (29.2 to 103)           | -10.1 (-26 to 6.74)             | -21.4 (-32.6 to -9)                      |
| 21 Chronic kidney disease      | 36 STIs                        |                              |                                 |                                          |
| 22 Hypertensive heart disease  | 37 Meningitis                  |                              |                                 |                                          |
| 26 Anxiety disorders           | 42 Maternal disorders          |                              |                                 |                                          |
| 29 Age-related hearing loss    | 52 Protein-energy malnutrition |                              |                                 |                                          |
| 44 Other musculoskeletal       | 160 COVID-19                   |                              |                                 |                                          |

### Rwanda, Reference scenario

**Legend:**  
 Communicable, maternal, neonatal and nutritional  
 Non-communicable  
 Injuries

| Leading Causes 2022           | Leading Causes 2050           | Mean % change number of DALY | Mean % change all-age DALY rate | Mean % change age-standardized DALY rate |
|-------------------------------|-------------------------------|------------------------------|---------------------------------|------------------------------------------|
| 1 Neonatal disorders          | 1 Neonatal disorders          | -27.1 (-43.6 to -11.3)       | -61 (-68.4 to -53.2)            | -37.6 (-48.2 to -25.9)                   |
| 2 Lower respiratory infect    | 2 Stroke                      | 60.1 (31 to 91.8)            | -14.2 (-29.1 to 1.39)           | -50.4 (-58.1 to -40.8)                   |
| 3 Conflict & terror           | 3 Lower respiratory infect    | -9.46 (-28.7 to 13.2)        | -51.5 (-61.5 to -38.8)          | -50.3 (-58.6 to -39)                     |
| 4 HIV/AIDS                    | 4 Depressive disorders        | 129 (96.1 to 161)            | 22.7 (16.1 to 30.4)             | -4.34 (-4.68 to -3.88)                   |
| 5 Malaria                     | 5 Road injuries               | 44.9 (-8.74 to 124)          | -22.2 (-51.4 to 18.5)           | -30.4 (-56.5 to 5.94)                    |
| 6 Diarrheal diseases          | 6 Conflict & terror           | 159 (-31.4 to 425)           | 38.4 (-62.1 to 156)             | 1.91 (-65.6 to 90.6)                     |
| 7 Stroke                      | 7 Low back pain               | 137 (106 to 166)             | 27.1 (20.3 to 35.4)             | -7.29 (-7.53 to -6.96)                   |
| 8 Congenital defects          | 8 Diabetes                    | 133 (86.8 to 184)            | 24.7 (1.25 to 48.6)             | -24.1 (-36.3 to -8.49)                   |
| 9 Road injuries               | 9 Diarrheal diseases          | -4.64 (-40.3 to 39.9)        | -48.9 (-68.1 to -24.9)          | -42.6 (-63 to -18.2)                     |
| 10 Tuberculosis               | 10 Chronic kidney disease     | 173 (109 to 255)             | 46.2 (13.1 to 91.3)             | -2.09 (-25.2 to 30.6)                    |
| 11 Cirrhosis liver            | 11 Cirrhosis liver            | 57 (31.1 to 85)              | -15.8 (-27.5 to -3.07)          | -43.4 (-50.7 to -35)                     |
| 12 COVID-19                   | 12 Age-related hearing loss   | 171 (131 to 211)             | 45.4 (34.5 to 55.4)             | -1.87 (-2.02 to -1.72)                   |
| 13 Depressive disorders       | 13 Ischemic heart disease     | 52 (7.23 to 114)             | -18.5 (-42.3 to 17.6)           | -52.9 (-66.7 to -31.5)                   |
| 14 Low back pain              | 14 Congenital defects         | -25.5 (-40.7 to -8.08)       | -60.2 (-66.6 to -52.1)          | -38.5 (-47 to -28.4)                     |
| 15 Ischemic heart disease     | 15 COPD                       | 138 (84.7 to 201)            | 27.5 (-0.0133 to 58.5)          | -28.5 (-43.3 to -11.5)                   |
| 16 Diabetes                   | 16 Anxiety disorders          | 109 (78.8 to 134)            | 12 (5.33 to 18.9)               | 1.02 (0.728 to 1.32)                     |
| 17 Asthma                     | 17 Headache disorders         | 117 (86.6 to 144)            | 16.2 (10.3 to 26.6)             | 0.133 (-0.133 to 0.503)                  |
| 18 Meningitis                 | 18 Hypertensive heart disease | 164 (104 to 238)             | 41.6 (7.96 to 81.2)             | -25.2 (-42.6 to -4.97)                   |
| 19 Chronic kidney disease     | 19 Gynecological diseases     | 76.7 (42.5 to 116)           | -5.23 (-22.1 to 12.7)           | -23.8 (-37.7 to -9.73)                   |
| 20 Gynecological diseases     | 20 Tuberculosis               | -27.8 (-50.1 to 4.97)        | -61.3 (-73.7 to -43.9)          | -71.3 (-79.9 to -58.6)                   |
| 21 Age-related hearing loss   | 27 Asthma                     |                              |                                 |                                          |
| 22 Anxiety disorders          | 28 HIV/AIDS                   |                              |                                 |                                          |
| 26 Headache disorders         | 38 Meningitis                 |                              |                                 |                                          |
| 27 COPD                       | 78 Malaria                    |                              |                                 |                                          |
| 30 Hypertensive heart disease | 164 COVID-19                  |                              |                                 |                                          |

### Somalia, Reference scenario

**Legend:**  
 Communicable, maternal, neonatal and nutritional  
 Non-communicable  
 Injuries

| Leading Causes 2022           | Leading Causes 2050            | Mean % change number of DALY | Mean % change all-age DALY rate | Mean % change age-standardized DALY rate |
|-------------------------------|--------------------------------|------------------------------|---------------------------------|------------------------------------------|
| 1 Neonatal disorders          | 1 Neonatal disorders           | 4.89 (-35.2 to 66.3)         | <b>-48.6 (-62 to -25.3)</b>     | -29.3 (-46.6 to 1.52)                    |
| 2 Measles                     | 2 Lower respiratory infect     | 5.94 (-34.2 to 56.5)         | <b>-48.1 (-60.2 to -33.5)</b>   | <b>-24.7 (-40 to -3.61)</b>              |
| 3 Diarrheal diseases          | 3 Diarrheal diseases           | -6.07 (-52.6 to 97.2)        | <b>-54 (-71.5 to -13.4)</b>     | -37.9 (-60.4 to 18.1)                    |
| 4 Lower respiratory infect    | 4 Tuberculosis                 | -22.9 (-60.8 to 50.7)        | <b>-62.1 (-79 to -27.7)</b>     | <b>-63.8 (-78.7 to -32.1)</b>            |
| 5 Tuberculosis                | 5 Pertussis                    | 29.7 (-27.6 to 116)          | -36.6 (-60.9 to 2.42)           | -19.4 (-48.8 to 28.9)                    |
| 6 Congenital defects          | 6 Stroke                       | <b>115 (36.2 to 230)</b>     | 5.39 (-20.1 to 44.4)            | -20.8 (-44.3 to 20)                      |
| 7 Pertussis                   | 7 Congenital defects           | 3.94 (-33.1 to 47.9)         | <b>-49.1 (-58 to -36.9)</b>     | <b>-32.6 (-43.7 to -17.2)</b>            |
| 8 Protein-energy malnutrition | 8 Road injuries                | 93.9 (-18.6 to 310)          | -4.7 (-55 to 100)               | -13.6 (-55.8 to 72.2)                    |
| 9 Meningitis                  | 9 Interpersonal violence       | <b>71.9 (0.298 to 154)</b>   | -15.9 (-37 to 8.4)              | <b>-21.7 (-39.5 to -0.923)</b>           |
| 10 Maternal disorders         | 10 Diabetes                    | <b>188 (72.2 to 361)</b>     | <b>41.4 (3.31 to 111)</b>       | 9.34 (-23 to 71.7)                       |
| 11 Conflict & terror          | 11 Meningitis                  | -6.09 (-51.2 to 66.6)        | <b>-53.9 (-71.7 to -22.4)</b>   | <b>-46.1 (-64.4 to -15)</b>              |
| 12 Road injuries              | 12 Cirrhosis liver             | <b>79 (15.6 to 167)</b>      | -12.2 (-30.9 to 16.3)           | <b>-29 (-44.2 to -5.77)</b>              |
| 13 Stroke                     | 13 Chronic kidney disease      | <b>181 (67.6 to 354)</b>     | 38 (-2.74 to 107)               | 14.8 (-19.7 to 75.4)                     |
| 14 Tetanus                    | 14 Conflict & terror           | 67.6 (-68.6 to 465)          | -17.7 (-84.3 to 192)            | -18.5 (-83.3 to 156)                     |
| 15 Interpersonal violence     | 15 Ischemic heart disease      | <b>162 (22.8 to 488)</b>     | 28.9 (-31.3 to 163)             | -6.25 (-51.8 to 102)                     |
| 16 COVID-19                   | 16 Depressive disorders        | <b>129 (52.7 to 197)</b>     | <b>12.3 (7.99 to 17.3)</b>      | <b>-3.67 (-4.13 to -3.19)</b>            |
| 17 Cirrhosis liver            | 17 Measles                     | -80.5 (-98.2 to 8.38)        | <b>-90.8 (-98.9 to -49.1)</b>   | <b>-88.3 (-98.5 to -35.4)</b>            |
| 18 Malaria                    | 18 Maternal disorders          | -4.22 (-51.6 to 78.9)        | <b>-53 (-73.1 to -17.6)</b>     | <b>-57.9 (-74.6 to -27.6)</b>            |
| 19 HIV/AIDS                   | 19 Low back pain               | <b>128 (50.7 to 196)</b>     | <b>11.5 (6.21 to 17.7)</b>      | <b>-6.95 (-7.42 to -6.58)</b>            |
| 20 STIs                       | 20 Protein-energy malnutrition | -38.4 (-72.9 to 60.5)        | <b>-69.7 (-85.4 to -24.3)</b>   | -59.2 (-79.4 to 0.0628)                  |
| 22 Diabetes                   | 41 Tetanus                     |                              |                                 |                                          |
| 23 Depressive disorders       | 43 STIs                        |                              |                                 |                                          |
| 24 Ischemic heart disease     | 58 HIV/AIDS                    |                              |                                 |                                          |
| 25 Chronic kidney disease     | 92 Malaria                     |                              |                                 |                                          |
| 27 Low back pain              | 165 COVID-19                   |                              |                                 |                                          |

### South Sudan, Reference scenario

**Legend:**  
 Communicable, maternal, neonatal and nutritional  
 Non-communicable  
 Injuries

| Leading Causes 2022           | Leading Causes 2050            | Mean % change number of DALY | Mean % change all-age DALY rate | Mean % change age-standardized DALY rate |
|-------------------------------|--------------------------------|------------------------------|---------------------------------|------------------------------------------|
| 1 Neonatal disorders          | 1 Neonatal disorders           | -16.8 (-46.6 to 31)          | <b>-62.8 (-74.5 to -42.3)</b>   | <b>-50.4 (-65.4 to -22.9)</b>            |
| 2 Diarrheal diseases          | 2 Diarrheal diseases           | -14 (-58.1 to 60.2)          | <b>-61.5 (-81 to -24.5)</b>     | <b>-48.2 (-74.2 to -0.559)</b>           |
| 3 Malaria                     | 3 Lower respiratory infect     | -25.5 (-50.4 to 1.75)        | <b>-66.7 (-76.1 to -55.1)</b>   | <b>-54 (-65.8 to -38.1)</b>              |
| 4 Lower respiratory infect    | 4 Malaria                      | -51.9 (-90.7 to 159)         | -77.7 (-95.6 to 16.6)           | -73.6 (-94.1 to 25)                      |
| 5 Congenital defects          | 5 Congenital defects           | 5.91 (-23.8 to 37.9)         | <b>-52.7 (-62.2 to -39.5)</b>   | <b>-40.5 (-51.2 to -24.1)</b>            |
| 6 Tuberculosis                | 6 Stroke                       | <b>75.6 (24.4 to 144)</b>    | -21.5 (-42 to 9.02)             | -32.9 (-52.9 to 3.17)                    |
| 7 Protein-energy malnutrition | 7 Chronic kidney disease       | <b>190 (74.4 to 353)</b>     | 29.7 (-17.6 to 103)             | 24.7 (-25.1 to 105)                      |
| 8 HIV/AIDS                    | 8 Interpersonal violence       | <b>72.3 (30.9 to 118)</b>    | <b>-23.1 (-35.4 to -6.55)</b>   | <b>-26.8 (-38.1 to -11)</b>              |
| 9 Meningitis                  | 9 Onchocerciasis               | <b>75.8 (46.6 to 110)</b>    | <b>-21.5 (-25.7 to -17.3)</b>   | <b>-27.6 (-29.4 to -25.1)</b>            |
| 10 Conflict & terror          | 10 Diabetes                    | <b>123 (55.9 to 212)</b>     | -0.468 (-25.8 to 42.2)          | -13.1 (-38.9 to 34.4)                    |
| 11 Stroke                     | 11 Tuberculosis                | -42.4 (-75 to 20.6)          | <b>-74.2 (-88.3 to -42)</b>     | <b>-72.4 (-86.9 to -40.4)</b>            |
| 12 Interpersonal violence     | 12 Depressive disorders        | <b>139 (97.1 to 184)</b>     | <b>6.64 (1.21 to 12.3)</b>      | <b>-2.99 (-3.74 to -2.13)</b>            |
| 13 STIs                       | 13 Ischemic heart disease      | 82.6 (-15.1 to 276)          | -18.3 (-60.5 to 76.5)           | -31.4 (-68.8 to 51.5)                    |
| 14 Maternal disorders         | 14 Protein-energy malnutrition | -49.1 (-75.7 to 22.6)        | <b>-77.2 (-89.1 to -45.2)</b>   | <b>-71.5 (-86.4 to -29.4)</b>            |
| 15 Road injuries              | 15 Cirrhosis liver             | <b>59.4 (17.2 to 111)</b>    | <b>-28.7 (-44.2 to -6.57)</b>   | <b>-37.1 (-50.6 to -17.1)</b>            |
| 16 Onchocerciasis             | 16 Road injuries               | 21.3 (-46.4 to 153)          | -45.7 (-74.6 to 25.4)           | -46.6 (-73.5 to 17.6)                    |
| 17 Pertussis                  | 17 Low back pain               | <b>133 (92.6 to 181)</b>     | 4.16 (-2.07 to 11)              | <b>-6.26 (-6.86 to -5.62)</b>            |
| 18 Cirrhosis liver            | 18 Maternal disorders          | 5.4 (-42.4 to 80.2)          | <b>-52.9 (-72.9 to -18.1)</b>   | <b>-58.3 (-75.6 to -28.7)</b>            |
| 19 Ischemic heart disease     | 19 Meningitis                  | -32 (-61.4 to 24.6)          | <b>-69.6 (-81.6 to -42.3)</b>   | <b>-61.6 (-75.5 to -32.1)</b>            |
| 20 Diabetes                   | 20 Anxiety disorders           | <b>141 (97.9 to 188)</b>     | <b>7.82 (4.25 to 12)</b>        | <b>2.07 (1.34 to 2.81)</b>               |
| 21 Chronic kidney disease     | 21 Conflict & terror           |                              |                                 |                                          |
| 23 Depressive disorders       | 24 Pertussis                   |                              |                                 |                                          |
| 26 Low back pain              | 26 STIs                        |                              |                                 |                                          |
| 31 Anxiety disorders          | 37 HIV/AIDS                    |                              |                                 |                                          |



### Uganda, Reference scenario

**Legend:**

Communicable, maternal, neonatal and nutritional  
Non-communicable  
Injuries

| Leading Causes 2022            | Leading Causes 2050            | Mean % change number of DALY | Mean % change all-age DALY rate | Mean % change age-standardized DALY rate |
|--------------------------------|--------------------------------|------------------------------|---------------------------------|------------------------------------------|
| 1 Neonatal disorders           | 1 Neonatal disorders           | -27 (-45.2 to -5.26)         | -63.8 (-70.3 to -55.5)          | -43.6 (-52.3 to -32.5)                   |
| 2 Malaria                      | 2 Depressive disorders         | 157 (123 to 197)             | 27.7 (19.6 to 36.5)             | -3.79 (-4.05 to -3.51)                   |
| 3 HIV/AIDS                     | 3 Lower respiratory infect     | -12 (-34.2 to 11.9)          | -56.3 (-66 to -44.4)            | -49.3 (-57.9 to -39.3)                   |
| 4 Lower respiratory infect     | 4 Diarrheal diseases           | 10.3 (-32.3 to 57.4)         | -45.2 (-64.5 to -19.1)          | -38.2 (-57.3 to -12.1)                   |
| 5 Congenital defects           | 5 Low back pain                | 162 (127 to 197)             | 29.9 (21.5 to 37.3)             | -7.44 (-7.67 to -7.18)                   |
| 6 Diarrheal diseases           | 6 Diabetes                     | 163 (108 to 230)             | 30.7 (7.82 to 56.4)             | -21.5 (-34.4 to -7.08)                   |
| 7 COVID-19                     | 7 Congenital defects           | -17.4 (-34.7 to 3.7)         | -59.1 (-64.8 to -50.7)          | -38.4 (-46 to -27.5)                     |
| 8 Tuberculosis                 | 8 Stroke                       | 60 (23.3 to 94.6)            | -20.6 (-34.8 to -6.04)          | -52.3 (-59.7 to -43.6)                   |
| 9 Measles                      | 9 Other musculoskeletal        | 505 (423 to 592)             | 200 (178 to 224)                | 107 (96.7 to 113)                        |
| 10 Depressive disorders        | 10 Road injuries               | 38.8 (-20.3 to 138)          | -31.1 (-58 to 10)               | -37.6 (-60.4 to -0.914)                  |
| 11 Road injuries               | 11 HIV/AIDS                    | -67.7 (-74.6 to -59.8)       | -84 (-86.8 to -80.7)            | -87.1 (-89.3 to -84.2)                   |
| 12 Stroke                      | 12 Chronic kidney disease      | 158 (83.7 to 245)            | 27.9 (-4.24 to 72.5)            | -10.1 (-31.1 to 18.4)                    |
| 13 Meningitis                  | 13 Malaria                     | -77.3 (-95 to -7.78)         | -88.6 (-97.5 to -50.2)          | -84.4 (-96.5 to -31.1)                   |
| 14 STIs                        | 14 Anxiety disorders           | 135 (105 to 166)             | 16.5 (9.7 to 25.5)              | 1.48 (1.21 to 1.75)                      |
| 15 Ischemic heart disease      | 15 Cirrhosis liver             | 71.4 (39.4 to 107)           | -14.9 (-28.7 to 2)              | -43.5 (-51.5 to -33.5)                   |
| 16 Protein-energy malnutrition | 16 Tuberculosis                | -27.4 (-51.4 to 6.87)        | -63.9 (-76 to -47.4)            | -71.8 (-80.1 to -59.1)                   |
| 17 Low back pain               | 17 Ischemic heart disease      | 56.4 (6.81 to 123)           | -22.4 (-46.7 to 13)             | -54.5 (-68 to -36.2)                     |
| 18 Diabetes                    | 18 Age-related hearing loss    | 191 (154 to 227)             | 44.7 (33.2 to 54.2)             | -2.14 (-2.27 to -2.03)                   |
| 19 Cirrhosis liver             | 19 Headache disorders          | 144 (113 to 180)             | 21.2 (14.8 to 31.9)             | 0.267 (-0.0415 to 0.531)                 |
| 20 Pertussis                   | 20 Gynecological diseases      | 102 (57.9 to 149)            | 0.394 (-18 to 22.1)             | -25.6 (-39.9 to -10.8)                   |
| 22 Chronic kidney disease      | 29 Meningitis                  |                              |                                 |                                          |
| 23 Anxiety disorders           | 36 Pertussis                   |                              |                                 |                                          |
| 28 Gynecological diseases      | 42 STIs                        |                              |                                 |                                          |
| 29 Headache disorders          | 55 Protein-energy malnutrition |                              |                                 |                                          |
| 31 Age-related hearing loss    | 95 Measles                     |                              |                                 |                                          |
| 38 Other musculoskeletal       | 169 COVID-19                   |                              |                                 |                                          |

### Tanzania, Reference scenario

**Legend:**  
Communicable, maternal, neonatal and nutritional  
Non-communicable  
Injuries

| Leading Causes 2022            | Leading Causes 2050            | Mean % change number of DALY | Mean % change all-age DALY rate | Mean % change age-standardized DALY rate |
|--------------------------------|--------------------------------|------------------------------|---------------------------------|------------------------------------------|
| 1 Neonatal disorders           | 1 Neonatal disorders           | -32.8 (-47.8 to -15.2)       | -61.5 (-67.8 to -53.9)          | -40.9 (-49.4 to -28.5)                   |
| 2 HIV/AIDS                     | 2 Lower respiratory infect     | -31.1 (-47.9 to -13.2)       | -60.5 (-68.8 to -50.5)          | -52.1 (-60.7 to -41)                     |
| 3 Lower respiratory infect     | 3 Diarrheal diseases           | -9.97 (-40.9 to 30)          | -48.4 (-65.6 to -25.2)          | -44.1 (-61.1 to -21)                     |
| 4 Malaria                      | 4 Stroke                       | 60.1 (28.9 to 98.9)          | -8.23 (-24.1 to 10.2)           | -46 (-54.7 to -35.1)                     |
| 5 Diarrheal diseases           | 5 Diabetes                     | 183 (131 to 254)             | 62.1 (32.5 to 92.6)             | 2.3 (-13.4 to 19.6)                      |
| 6 Congenital defects           | 6 Ischemic heart disease       | 55.5 (4.62 to 117)           | -10.8 (-37.6 to 26)             | -47.2 (-63.8 to -24.3)                   |
| 7 Tuberculosis                 | 7 Depressive disorders         | 116 (85.3 to 146)            | 23.6 (16.8 to 30.5)             | -3.38 (-3.75 to -3.05)                   |
| 8 Stroke                       | 8 Chronic kidney disease       | 183 (108 to 271)             | 62 (24.1 to 116)                | 12.1 (-13.1 to 45)                       |
| 9 Ischemic heart disease       | 9 Congenital defects           | -27.8 (-43.1 to -8)          | -58.7 (-65 to -49.7)            | -37.8 (-45.8 to -24.9)                   |
| 10 STIs                        | 10 Low back pain               | 122 (90.3 to 153)            | 26.8 (18.7 to 34.5)             | -6.73 (-6.96 to -6.49)                   |
| 11 Road injuries               | 11 Other musculoskeletal       | 388 (319 to 457)             | 179 (161 to 198)                | 102 (95.7 to 106)                        |
| 12 Depressive disorders        | 12 HIV/AIDS                    | -67.1 (-76 to -55.8)         | -81.1 (-86.1 to -75.7)          | -82.9 (-87.2 to -78.2)                   |
| 13 Dietary iron deficiency     | 13 Cirrhosis liver             | 80.7 (50.3 to 117)           | 3.55 (-11.3 to 23.9)            | -30.1 (-39.8 to -16.5)                   |
| 14 Maternal disorders          | 14 Age-related hearing loss    | 152 (115 to 191)             | 44.5 (33 to 56.3)               | -1.89 (-2.05 to -1.71)                   |
| 15 Cirrhosis liver             | 15 Dietary iron deficiency     | 30.3 (7.6 to 51.5)           | -25.5 (-30.2 to -21.5)          | -19.3 (-20.4 to -17.9)                   |
| 16 Low back pain               | 16 Anxiety disorders           | 98.9 (71 to 127)             | 13.8 (7.94 to 20.9)             | 1.38 (1.08 to 1.69)                      |
| 17 Diabetes                    | 17 Hypertensive heart disease  | 181 (109 to 264)             | 61.2 (22.3 to 108)              | -11.9 (-32.2 to 14.7)                    |
| 18 Protein-energy malnutrition | 18 Road injuries               | 19 (-26.3 to 90.9)           | -31.7 (-56.1 to 17.5)           | -39 (-60 to 4.34)                        |
| 19 Meningitis                  | 19 Headache disorders          | 105 (76.7 to 137)            | 17.5 (11.9 to 26.9)             | 0.457 (0.174 to 0.721)                   |
| 20 Chronic kidney disease      | 20 Gynecological diseases      | 69.6 (30.9 to 106)           | -2.84 (-22.2 to 18.1)           | -22.4 (-37.2 to -5.47)                   |
| 24 Anxiety disorders           | 21 Tuberculosis                |                              |                                 |                                          |
| 25 Gynecological diseases      | 33 Maternal disorders          |                              |                                 |                                          |
| 26 Headache disorders          | 40 Meningitis                  |                              |                                 |                                          |
| 27 Age-related hearing loss    | 43 STIs                        |                              |                                 |                                          |
| 30 Hypertensive heart disease  | 53 Malaria                     |                              |                                 |                                          |
| 35 Other musculoskeletal       | 59 Protein-energy malnutrition |                              |                                 |                                          |

### Zambia, Reference scenario

**Legend:**  
 Communicable, maternal, neonatal and nutritional  
 Non-communicable  
 Injuries

| Leading Causes 2022           | Leading Causes 2050           | Mean % change number of DALY | Mean % change all-age DALY rate | Mean % change age-standardized DALY rate |
|-------------------------------|-------------------------------|------------------------------|---------------------------------|------------------------------------------|
| 1 HIV/AIDS                    | 1 Neonatal disorders          | -20.7 (-38.3 to 1.45)        | -56.8 (-63.9 to -47.6)          | -35.9 (-44.9 to -23.9)                   |
| 2 Neonatal disorders          | 2 Stroke                      | 86.3 (49.6 to 127)           | 1.75 (-14.1 to 20.6)            | -43.8 (-51.8 to -33)                     |
| 3 Lower respiratory infect    | 3 Lower respiratory infect    | -6.9 (-27.7 to 16.7)         | -49.2 (-58.3 to -38.4)          | -44 (-51.9 to -33.5)                     |
| 4 Malaria                     | 4 HIV/AIDS                    | -64.1 (-71.4 to -55.2)       | -80.4 (-83.5 to -76.6)          | -83.4 (-85.9 to -80.3)                   |
| 5 COVID-19                    | 5 Diabetes                    | 212 (154 to 286)             | 70.5 (44.2 to 101)              | -0.972 (-13.9 to 14.3)                   |
| 6 Diarrheal diseases          | 6 Chronic kidney disease      | 212 (133 to 309)             | 70.6 (29.3 to 116)              | 16.8 (-8.82 to 51.1)                     |
| 7 Congenital defects          | 7 Diarrheal diseases          | -14.2 (-45.7 to 33.4)        | -53.2 (-69.5 to -30.8)          | -47.6 (-64.8 to -25.3)                   |
| 8 Stroke                      | 8 Cirrhosis liver             | 93.6 (56.6 to 133)           | 5.81 (-11.9 to 25.3)            | -31.8 (-40.9 to -19.8)                   |
| 9 Dietary iron deficiency     | 9 Depressive disorders        | 134 (97.7 to 169)            | 28 (19.9 to 36.5)               | -2.37 (-2.64 to -2.09)                   |
| 10 Road injuries              | 10 Ischemic heart disease     | 79.5 (23.6 to 154)           | -1.91 (-30.5 to 35.1)           | -45.9 (-61.6 to -23.4)                   |
| 11 Cirrhosis liver            | 11 Idiopathic epilepsy        | 77.7 (25 to 149)             | -3.02 (-29.9 to 36.4)           | -7.6 (-32.5 to 29.5)                     |
| 12 Ischemic heart disease     | 12 Hypertensive heart disease | 244 (155 to 348)             | 87.7 (45.4 to 137)              | -3.43 (-25.7 to 26.4)                    |
| 13 Idiopathic epilepsy        | 13 Congenital defects         | -17.7 (-37.8 to 6.53)        | -55.2 (-62.6 to -48.5)          | -35.1 (-43.8 to -25.8)                   |
| 14 Meningitis                 | 14 Low back pain              | 145 (107 to 180)             | 34 (24.8 to 44.1)               | -5.01 (-5.26 to -4.73)                   |
| 15 Diabetes                   | 15 Road injuries              | 46.8 (-10 to 149)            | -19.8 (-51.1 to 36)             | -31 (-57 to 15.8)                        |
| 16 Interpersonal violence     | 16 Other musculoskeletal      | 361 (284 to 429)             | 152 (132 to 173)                | 75.2 (72.2 to 78.5)                      |
| 17 Tuberculosis               | 17 Dietary iron deficiency    | 39.8 (13.8 to 68.4)          | -23.8 (-29 to -18.6)            | -13.7 (-14.8 to -12.6)                   |
| 18 Chronic kidney disease     | 18 Age-related hearing loss   | 169 (128 to 209)             | 47 (33.2 to 60.4)               | -1.46 (-1.62 to -1.3)                    |
| 19 Depressive disorders       | 19 Interpersonal violence     | 45.5 (14.7 to 74.6)          | -20.6 (-34 to -8.95)            | -31.2 (-41.7 to -21.9)                   |
| 20 STIs                       | 20 Headache disorders         | 120 (85.5 to 157)            | 20 (12.8 to 31.9)               | 0.984 (0.633 to 1.25)                    |
| 21 Low back pain              | 30 Meningitis                 |                              |                                 |                                          |
| 25 Headache disorders         | 33 Malaria                    |                              |                                 |                                          |
| 27 Hypertensive heart disease | 34 Tuberculosis               |                              |                                 |                                          |
| 28 Age-related hearing loss   | 47 STIs                       |                              |                                 |                                          |
| 37 Other musculoskeletal      | 167 COVID-19                  |                              |                                 |                                          |

### Botswana, Reference scenario

**Legend:**  
Communicable, maternal, neonatal and nutritional  
Non-communicable  
Injuries

| Leading Causes 2022           | Leading Causes 2050          | Mean % change number of DALY | Mean % change all-age DALY rate | Mean % change age-standardized DALY rate |
|-------------------------------|------------------------------|------------------------------|---------------------------------|------------------------------------------|
| 1 HIV/AIDS                    | 1 Diabetes                   | 163 (117 to 218)             | 106 (74.7 to 141)               | -3.5 (-15.5 to 10.9)                     |
| 2 COVID-19                    | 2 Neonatal disorders         | -28.6 (-45 to -9.88)         | -44 (-53.7 to -32.5)            | -13.2 (-26.5 to 1.64)                    |
| 3 Neonatal disorders          | 3 Lower respiratory infect   | 4.01 (-18.8 to 27.6)         | -18.3 (-32.7 to -2.37)          | -39 (-48.1 to -27.7)                     |
| 4 Lower respiratory infect    | 4 Stroke                     | 58.8 (26.8 to 91.9)          | 24.7 (5.24 to 45)               | -44.9 (-52.2 to -35.9)                   |
| 5 Diarrheal diseases          | 5 HIV/AIDS                   | -82 (-85.9 to -77.8)         | -85.8 (-88.4 to -82.9)          | -87.9 (-89.9 to -85.7)                   |
| 6 Tuberculosis                | 6 Hypertensive heart disease | 201 (125 to 277)             | 136 (81.1 to 204)               | 0.903 (-22 to 29.1)                      |
| 7 Stroke                      | 7 Ischemic heart disease     | 43.7 (-0.813 to 88.4)        | 12.9 (-19 to 53.9)              | -48.2 (-62.3 to -28.9)                   |
| 8 Diabetes                    | 8 COPD                       | 162 (101 to 217)             | 105 (64.4 to 149)               | -9.6 (-25.2 to 9.18)                     |
| 9 Road injuries               | 9 Depressive disorders       | 52.7 (32.9 to 74.4)          | 19.8 (11.6 to 28.3)             | -2.65 (-2.88 to -2.45)                   |
| 10 Ischemic heart disease     | 10 Low back pain             | 75.8 (53.5 to 99.7)          | 38 (27.2 to 47.6)               | -5.32 (-5.53 to -5.14)                   |
| 11 Depressive disorders       | 11 Chronic kidney disease    | 159 (96.6 to 227)            | 104 (59 to 155)                 | 8.37 (-13.4 to 37.7)                     |
| 12 Interpersonal violence     | 12 Other musculoskeletal     | 180 (138 to 221)             | 120 (102 to 138)                | 61.7 (58.3 to 64.3)                      |
| 13 Low back pain              | 13 Road injuries             | -5.98 (-43.8 to 53.2)        | -26 (-54.4 to 27.3)             | -27.3 (-57.4 to 29.9)                    |
| 14 Congenital defects         | 14 Diarrheal diseases        | -60.4 (-74.5 to -42.5)       | -68.9 (-79.2 to -53.4)          | -69 (-79 to -53.2)                       |
| 15 Gynecological diseases     | 15 Headache disorders        | 36.3 (16.6 to 58.9)          | 6.96 (0.689 to 19.4)            | 0.316 (0.119 to 0.455)                   |
| 16 Headache disorders         | 16 Tuberculosis              | -47.3 (-62.7 to -25.8)       | -58.5 (-71.3 to -41.2)          | -69.7 (-79.3 to -56.2)                   |
| 17 Self-harm                  | 17 Lung cancer               | 146 (82.5 to 205)            | 92.8 (48.2 to 133)              | -5.84 (-22.8 to 10.6)                    |
| 18 COPD                       | 18 Age-related hearing loss  | 106 (78.5 to 136)            | 61.6 (46.8 to 76.6)             | -1.18 (-1.31 to -1.04)                   |
| 19 Hypertensive heart disease | 19 Blindness and vision loss | 108 (79 to 142)              | 63.6 (45 to 79.4)               | -6.01 (-6.74 to -5.24)                   |
| 20 Cirrhosis liver            | 20 Cirrhosis liver           | 43 (19.2 to 65.3)            | 12.4 (-3.65 to 29.7)            | -28.8 (-37.5 to -18.5)                   |
| 22 Chronic kidney disease     | 22 Gynecological diseases    |                              |                                 |                                          |
| 25 Other musculoskeletal      | 25 Self-harm                 |                              |                                 |                                          |
| 28 Age-related hearing loss   | 27 Interpersonal violence    |                              |                                 |                                          |
| 29 Blindness and vision loss  | 36 Congenital defects        |                              |                                 |                                          |
| 31 Lung cancer                | 161 COVID-19                 |                              |                                 |                                          |

### Eswatini, Reference scenario

**Legend:**  
Communicable, maternal, neonatal and nutritional  
Non-communicable  
Injuries

| Leading Causes 2022           | Leading Causes 2050          | Mean % change number of DALY | Mean % change all-age DALY rate | Mean % change age-standardized DALY rate |
|-------------------------------|------------------------------|------------------------------|---------------------------------|------------------------------------------|
| 1 HIV/AIDS                    | 1 HIV/AIDS                   | -71.9 (-77.4 to -65.3)       | -75.4 (-78.5 to -70.9)          | -78 (-80.7 to -74.3)                     |
| 2 COVID-19                    | 2 Diabetes                   | 81.3 (41.6 to 128)           | 59.2 (30.9 to 98.5)             | -17.7 (-29.4 to -2.18)                   |
| 3 Neonatal disorders          | 3 Lower respiratory infect   | -24.9 (-38.3 to -8.19)       | -34 (-44.3 to -20.9)            | -41 (-49.7 to -31.8)                     |
| 4 Lower respiratory infect    | 4 Neonatal disorders         | -32.4 (-48.5 to -13.1)       | -40.7 (-51.9 to -27.1)          | -8.9 (-23.6 to 9.05)                     |
| 5 Road injuries               | 5 Road injuries              | -9.67 (-45.2 to 53.4)        | -20.5 (-52.7 to 35.2)           | -27.3 (-57.1 to 24)                      |
| 6 Tuberculosis                | 6 Stroke                     | 19.6 (-3.48 to 46.2)         | 5.06 (-12.2 to 25.5)            | -45.2 (-53 to -35.7)                     |
| 7 Diarrheal diseases          | 7 Chronic kidney disease     | 120 (73.6 to 183)            | 93.8 (52.8 to 147)              | 19.5 (-4.87 to 50.6)                     |
| 8 Diabetes                    | 8 Ischemic heart disease     | 20.2 (-12.7 to 65.7)         | 5.74 (-24.5 to 45.1)            | -44.5 (-60 to -22.8)                     |
| 9 Stroke                      | 9 Hypertensive heart disease | 124 (69.3 to 189)            | 97.2 (52.4 to 155)              | -1.5 (-23.9 to 24.7)                     |
| 10 Interpersonal violence     | 10 Tuberculosis              | -52.6 (-66.6 to -33.3)       | -58.3 (-71.1 to -43.4)          | -68.6 (-77.9 to -55.4)                   |
| 11 Ischemic heart disease     | 11 Self-harm                 | 6.36 (-16.1 to 30.8)         | -6.64 (-23.2 to 11.4)           | -18.1 (-32.8 to -1.01)                   |
| 12 Self-harm                  | 12 Diarrheal diseases        | -57.6 (-70.4 to -38.7)       | -62.7 (-75.4 to -46.4)          | -58.6 (-71.1 to -39.8)                   |
| 13 Chronic kidney disease     | 13 COPD                      | 67.7 (32.9 to 102)           | 47.4 (18.9 to 79.2)             | -23 (-37 to -5.84)                       |
| 14 Congenital defects         | 14 Depressive disorders      | 39.4 (17.3 to 63.1)          | 22.3 (15.7 to 30.8)             | -2.64 (-2.87 to -2.4)                    |
| 15 Cirrhosis liver            | 15 Interpersonal violence    | -25.6 (-40.7 to -7.88)       | -34.8 (-43.3 to -25.3)          | -35 (-42.6 to -25.6)                     |
| 16 Depressive disorders       | 16 Cirrhosis liver           | 21.5 (1.94 to 48)            | 6.71 (-7.93 to 22.9)            | -30.4 (-38.1 to -21.4)                   |
| 17 Hypertensive heart disease | 17 Other musculoskeletal     | 153 (116 to 206)             | 122 (102 to 142)                | 59.7 (54.1 to 64)                        |
| 18 COPD                       | 18 Liver cancer              | 92.6 (46.9 to 153)           | 69.3 (31.6 to 121)              | 3.66 (-17.4 to 32)                       |
| 19 Asthma                     | 19 Low back pain             | 56 (33.4 to 78.6)            | 36.9 (26.9 to 47.2)             | -5.36 (-5.68 to -5.02)                   |
| 20 Headache disorders         | 20 Headache disorders        | 28.4 (7.96 to 50)            | 12.7 (6.51 to 25.7)             | 0.352 (0.105 to 0.587)                   |
| 22 Low back pain              | 28 Congenital defects        |                              |                                 |                                          |
| 29 Liver cancer               | 32 Asthma                    |                              |                                 |                                          |
| 35 Other musculoskeletal      | 162 COVID-19                 |                              |                                 |                                          |

### Lesotho, Reference scenario

**Legend:**  
■ Communicable, maternal, neonatal and nutritional  
■ Non-communicable  
■ Injuries

| Leading Causes 2022            | Leading Causes 2050            | Mean % change number of DALY | Mean % change all-age DALY rate | Mean % change age-standardized DALY rate |
|--------------------------------|--------------------------------|------------------------------|---------------------------------|------------------------------------------|
| 1 HIV/AIDS                     | 1 Lower respiratory infect     | -18.1 (-31.1 to -1.54)       | -30.8 (-42.3 to -16)            | -36 (-44.6 to -24.2)                     |
| 2 Tuberculosis                 | 2 Tuberculosis                 | -43.1 (-59.6 to -20.5)       | -51.9 (-66.4 to -33)            | -63.8 (-74.3 to -50.3)                   |
| 3 Neonatal disorders           | 3 Neonatal disorders           | -41.6 (-55.4 to -25.9)       | -50.9 (-60.6 to -39.3)          | -28.3 (-40.2 to -14.1)                   |
| 4 Lower respiratory infect     | 4 Diarrheal diseases           | -37.5 (-57.7 to -10.9)       | -47.2 (-64.9 to -23.6)          | -43.1 (-60.6 to -18.4)                   |
| 5 Diarrheal diseases           | 5 Stroke                       | 10.4 (-11.5 to 30.2)         | -6.78 (-24.2 to 9.82)           | -37 (-46.2 to -26.4)                     |
| 6 Road injuries                | 6 Road injuries                | -1.28 (-38 to 61.7)          | -16.5 (-50 to 40.1)             | -25.4 (-55.3 to 23.8)                    |
| 7 Stroke                       | 7 Diabetes                     | 64.1 (32 to 102)             | 38.5 (11.5 to 66.8)             | -6.81 (-21 to 11)                        |
| 8 Interpersonal violence       | 8 HIV/AIDS                     | -88.5 (-91.1 to -85.6)       | -90.3 (-92.3 to -88.5)          | -90.7 (-92.4 to -89.1)                   |
| 9 COVID-19                     | 9 Interpersonal violence       | -23.1 (-36.5 to -2.72)       | -35.2 (-42.6 to -26.4)          | -36.4 (-43.2 to -27.1)                   |
| 10 Diabetes                    | 10 Hypertensive heart disease  | 89.3 (43.4 to 143)           | 60 (20.6 to 108)                | 1.17 (-21.8 to 28.9)                     |
| 11 Ischemic heart disease      | 11 Chronic kidney disease      | 104 (59.4 to 158)            | 72.2 (30.8 to 117)              | 25.4 (-1.68 to 58.7)                     |
| 12 Self-harm                   | 12 COPD                        | 53.4 (21.6 to 88.3)          | 29.5 (2.8 to 58.5)              | -10.1 (-25.6 to 10.5)                    |
| 13 Depressive disorders        | 13 Ischemic heart disease      | 24 (-11.4 to 68.2)           | 4.83 (-27.1 to 44.8)            | -31.6 (-50.5 to -5.37)                   |
| 14 COPD                        | 14 Depressive disorders        | 40.9 (22.5 to 62.7)          | 18.7 (10.7 to 27.2)             | -2.36 (-2.64 to -2.06)                   |
| 15 Congenital defects          | 15 Self-harm                   | 10.3 (-8.85 to 32.9)         | -6.95 (-22 to 9.07)             | -20.7 (-31.9 to -7.85)                   |
| 16 Cirrhosis liver             | 16 Cirrhosis liver             | 22.1 (3.38 to 41.5)          | 3.01 (-12.8 to 17.6)            | -29.4 (-37.2 to -21)                     |
| 17 Hypertensive heart disease  | 17 Low back pain               | 51 (32 to 73)                | 27.3 (15.4 to 37.6)             | -4.64 (-4.91 to -4.39)                   |
| 18 Chronic kidney disease      | 18 Lung cancer                 | 95.5 (47.6 to 150)           | 64.6 (27.4 to 103)              | 5.56 (-13.5 to 25.2)                     |
| 19 Protein-energy malnutrition | 19 Cervical cancer             | 34.8 (12.6 to 55.1)          | 13.8 (-4.92 to 32.9)            | -26.2 (-35 to -16.4)                     |
| 20 Low back pain               | 20 Other musculoskeletal       | 137 (103 to 175)             | 99.5 (81.3 to 119)              | 51.2 (46.6 to 54.5)                      |
| 21 Cervical cancer             | 24 Congenital defects          |                              |                                 |                                          |
| 30 Lung cancer                 | 50 Protein-energy malnutrition |                              |                                 |                                          |
| 38 Other musculoskeletal       | 160 COVID-19                   |                              |                                 |                                          |

### Namibia, Reference scenario

**Legend:**

Communicable, maternal, neonatal and nutritional  
 Non-communicable  
 Injuries

| Leading Causes 2022           | Leading Causes 2050          | Mean % change number of DALY | Mean % change all-age DALY rate | Mean % change age-standardized DALY rate |
|-------------------------------|------------------------------|------------------------------|---------------------------------|------------------------------------------|
| 1 HIV/AIDS                    | 1 Lower respiratory infect   | 15.4 (-7.69 to 41.9)         | -17.6 (-29.3 to -4.46)          | -33.9 (-42.2 to -24.4)                   |
| 2 COVID-19                    | 2 Neonatal disorders         | -18 (-36.6 to 2.41)          | -41.5 (-51.6 to -29.6)          | -16.7 (-29.6 to -0.0988)                 |
| 3 Neonatal disorders          | 3 Stroke                     | 45.2 (18.9 to 77.5)          | 3.76 (-11 to 22.4)              | -43.6 (-50.2 to -34.9)                   |
| 4 Lower respiratory infect    | 4 Diabetes                   | 110 (70.2 to 156)            | 50 (26.4 to 84.1)               | -15.7 (-26.9 to -2.08)                   |
| 5 Diarrheal diseases          | 5 Road injuries              | 22.9 (-25.3 to 99.3)         | -12.2 (-44.3 to 36.9)           | -19.6 (-50.3 to 26.7)                    |
| 6 Stroke                      | 6 Hypertensive heart disease | 200 (129 to 284)             | 114 (69.5 to 171)               | 12.4 (-13 to 43)                         |
| 7 Tuberculosis                | 7 Ischemic heart disease     | 27.5 (-8.34 to 74.2)         | -8.95 (-30.8 to 21.3)           | -49 (-61.8 to -30)                       |
| 8 Road injuries               | 8 Diarrheal diseases         | -37.6 (-58.7 to -8.02)       | -55.5 (-70 to -30)              | -53.6 (-69.5 to -31)                     |
| 9 Ischemic heart disease      | 9 COPD                       | 101 (61.6 to 150)            | 43.9 (18.4 to 69.9)             | -21 (-34.2 to -5.74)                     |
| 10 Diabetes                   | 10 Cirrhosis liver           | 91.4 (56.2 to 129)           | 36.7 (16.9 to 58.2)             | -8.35 (-19.2 to 5.22)                    |
| 11 Interpersonal violence     | 11 Low back pain             | 83.2 (54.8 to 109)           | 30.8 (21.8 to 39.3)             | -4.51 (-4.68 to -4.3)                    |
| 12 COPD                       | 12 Interpersonal violence    | -1.11 (-19.2 to 22.2)        | -29.4 (-39.2 to -18.7)          | -30 (-39 to -19.5)                       |
| 13 Congenital defects         | 13 Tuberculosis              | -36.6 (-56.1 to -11.7)       | -54.7 (-66.7 to -36.4)          | -65.8 (-75.1 to -51.5)                   |
| 14 Cirrhosis liver            | 14 Depressive disorders      | 66.3 (42 to 90.6)            | 18.7 (12.7 to 25)               | -2.14 (-2.31 to -1.96)                   |
| 15 Self-harm                  | 15 Other musculoskeletal     | 186 (143 to 228)             | 104 (89 to 120)                 | 53.2 (50.2 to 55.5)                      |
| 16 Low back pain              | 16 Self-harm                 | 48.2 (17.3 to 82.6)          | 5.79 (-9 to 25.5)               | -7.08 (-19.3 to 12.3)                    |
| 17 Depressive disorders       | 17 Chronic kidney disease    | 143 (85.8 to 207)            | 73.3 (40.9 to 117)              | 8.06 (-12.6 to 35.2)                     |
| 18 Hypertensive heart disease | 18 HIV/AIDS                  | -86 (-89.8 to -80.2)         | -90 (-92.3 to -86.2)            | -91.2 (-92.9 to -88.4)                   |
| 19 Headache disorders         | 19 Breast cancer             | 120 (70.2 to 175)            | 57.2 (25.9 to 95)               | -0.154 (-16.2 to 17.8)                   |
| 20 Gynecological diseases     | 20 Headache disorders        | 54.3 (31.3 to 78.6)          | 10.2 (5.05 to 20.6)             | 0.259 (0.0757 to 0.417)                  |
| 23 Breast cancer              | 21 Gynecological diseases    |                              |                                 |                                          |
| 24 Chronic kidney disease     | 26 Congenital defects        |                              |                                 |                                          |
| 27 Other musculoskeletal      | 162 COVID-19                 |                              |                                 |                                          |

### South Africa, Reference scenario

**Legend:**  
Communicable, maternal, neonatal and nutritional  
Non-communicable  
Injuries

| Leading Causes 2022           | Leading Causes 2050          | Mean % change number of DALY | Mean % change all-age DALY rate | Mean % change age-standardized DALY rate |
|-------------------------------|------------------------------|------------------------------|---------------------------------|------------------------------------------|
| 1 HIV/AIDS                    | 1 HIV/AIDS                   | -66 (-71 to -59.9)           | -70.5 (-74.3 to -67.1)          | -73.1 (-75.9 to -70)                     |
| 2 Neonatal disorders          | 2 Diabetes                   | 76.7 (54.3 to 105)           | 53 (38.3 to 70.6)               | -11.7 (-21 to -1.42)                     |
| 3 COVID-19                    | 3 Neonatal disorders         | -12.1 (-27.9 to 7.08)        | -23.9 (-35.1 to -11.7)          | 6.65 (-9.32 to 22.6)                     |
| 4 Lower respiratory infect    | 4 Lower respiratory infect   | -4.27 (-19.1 to 10.7)        | -17.1 (-25.5 to -8.16)          | -36.4 (-42.5 to -29.6)                   |
| 5 Road injuries               | 5 Road injuries              | -6.63 (-35.9 to 39.4)        | -19.1 (-43.5 to 21.6)           | -17.8 (-43.5 to 26.4)                    |
| 6 Interpersonal violence      | 6 Stroke                     | 16.4 (-0.281 to 33.5)        | 0.834 (-9.89 to 12.2)           | -44 (-49.3 to -38.3)                     |
| 7 Diabetes                    | 7 Interpersonal violence     | -30.1 (-41.9 to -18.5)       | -39.5 (-45.4 to -32.7)          | -35.9 (-43 to -27.8)                     |
| 8 Stroke                      | 8 Hypertensive heart disease | 133 (88.9 to 180)            | 102 (71.2 to 145)               | 9.46 (-9.77 to 30.9)                     |
| 9 Tuberculosis                | 9 Ischemic heart disease     | 5.61 (-18.1 to 32.5)         | -8.45 (-27.3 to 15.4)           | -47.8 (-59.3 to -32.3)                   |
| 10 Diarrheal diseases         | 10 Chronic kidney disease    | 99 (64.1 to 140)             | 72.4 (44.1 to 103)              | 8.9 (-8.7 to 31.2)                       |
| 11 Ischemic heart disease     | 11 COPD                      | 82.9 (55.4 to 115)           | 58.4 (40.9 to 80.2)             | -12.7 (-23.4 to 0.095)                   |
| 12 Self-harm                  | 12 Diarrheal diseases        | -21.9 (-43.6 to 5.89)        | -32.3 (-49.6 to -9.89)          | -39.5 (-56.9 to -15.8)                   |
| 13 Depressive disorders       | 13 Depressive disorders      | 31.7 (15.9 to 47.7)          | 14 (10 to 19)                   | -1.84 (-2.01 to -1.67)                   |
| 14 COPD                       | 14 Low back pain             | 49.3 (30.6 to 68.3)          | 29.3 (23.6 to 35.8)             | -3.69 (-3.87 to -3.54)                   |
| 15 Low back pain              | 15 Tuberculosis              | -47.1 (-60.1 to -30.6)       | -54.2 (-64.8 to -39.9)          | -63.4 (-72.2 to -51.2)                   |
| 16 Hypertensive heart disease | 16 Other musculoskeletal     | 98.6 (71.4 to 125)           | 71.9 (62 to 82.4)               | 33.3 (30.7 to 35.4)                      |
| 17 Chronic kidney disease     | 17 Self-harm                 | -3.47 (-19.6 to 13.9)        | -16.4 (-26.9 to -2.05)          | -15.4 (-27 to 0.755)                     |
| 18 Dietary iron deficiency    | 18 Blindness and vision loss | 61.2 (38.7 to 83.4)          | 39.5 (28.9 to 51.5)             | -3.57 (-4.03 to -3.12)                   |
| 19 Headache disorders         | 19 Endo/metab/blood/immune   | 52.9 (32.1 to 76.5)          | 32.4 (20.7 to 44)               | 6.04 (-3.22 to 13.8)                     |
| 20 Gynecological diseases     | 20 Lung cancer               | 55 (24.9 to 84.4)            | 34.2 (12.9 to 54.4)             | -19.6 (-30.8 to -7.82)                   |
| 22 Endo/metab/blood/immune    | 21 Headache disorders        |                              |                                 |                                          |
| 24 Lung cancer                | 25 Gynecological diseases    |                              |                                 |                                          |
| 25 Blindness and vision loss  | 29 Dietary iron deficiency   |                              |                                 |                                          |
| 27 Other musculoskeletal      | 162 COVID-19                 |                              |                                 |                                          |



### Zimbabwe, Reference scenario

**Legend:**  
Communicable, maternal, neonatal and nutritional  
Non-communicable  
Injuries

| Leading Causes 2022           | Leading Causes 2050            | Mean % change number of DALY   | Mean % change all-age DALY rate | Mean % change age-standardized DALY rate |
|-------------------------------|--------------------------------|--------------------------------|---------------------------------|------------------------------------------|
| 1 HIV/AIDS                    | 1 Lower respiratory infect     | -12.7 (-27.4 to 5.97)          | <b>-38.1 (-47.3 to -23.5)</b>   | <b>-33.9 (-43.1 to -20.5)</b>            |
| 2 Neonatal disorders          | 2 Neonatal disorders           | <b>-45.3 (-59.2 to -26.6)</b>  | <b>-61.3 (-68.3 to -49.9)</b>   | <b>-46.8 (-56.1 to -33.7)</b>            |
| 3 Lower respiratory infect    | 3 Stroke                       | <b>44.7 (12 to 79.3)</b>       | 2.7 (-16.8 to 26.3)             | <b>-33.5 (-46.1 to -15.5)</b>            |
| 4 COVID-19                    | 4 Diarrheal diseases           | -2.05 (-41.7 to 48.1)          | -30.6 (-54.6 to 5.56)           | -22.6 (-45.6 to 11)                      |
| 5 Tuberculosis                | 5 Diabetes                     | <b>116 (71.8 to 166)</b>       | <b>53.5 (26.6 to 88)</b>        | -1.46 (-17.2 to 20.1)                    |
| 6 Diarrheal diseases          | 6 Tuberculosis                 | <b>-39.6 (-61.4 to -12.2)</b>  | <b>-57.1 (-71.2 to -34.8)</b>   | <b>-63.8 (-75.1 to -45.5)</b>            |
| 7 Malaria                     | 7 Ischemic heart disease       | <b>66.9 (13 to 140)</b>        | 18.6 (-17.5 to 72.8)            | -24.1 (-48.4 to 10.7)                    |
| 8 Stroke                      | 8 Chronic kidney disease       | <b>147 (82.4 to 224)</b>       | <b>75.3 (35.4 to 128)</b>       | 29.3 (-0.314 to 72.3)                    |
| 9 Protein-energy malnutrition | 9 Road injuries                | 13.4 (-37.2 to 101)            | -19.5 (-54 to 46.5)             | -27.3 (-56.5 to 28.7)                    |
| 10 Road injuries              | 10 Self-harm                   | 29.2 (-1.42 to 65.4)           | -8.36 (-25.2 to 15.1)           | <b>-20.1 (-34.2 to -0.948)</b>           |
| 11 Ischemic heart disease     | 11 HIV/AIDS                    | <b>-82.3 (-85.9 to -78.1)</b>  | <b>-87.4 (-89.5 to -85)</b>     | <b>-88.3 (-90.3 to -86)</b>              |
| 12 Congenital defects         | 12 Low back pain               | <b>74.9 (48 to 101)</b>        | <b>24 (15.3 to 32.2)</b>        | <b>-4.47 (-4.66 to -4.3)</b>             |
| 13 Self-harm                  | 13 Hypertensive heart disease  | <b>137 (77.4 to 203)</b>       | <b>68.4 (30.8 to 121)</b>       | 3.6 (-20.5 to 35)                        |
| 14 Diabetes                   | 14 Congenital defects          | <b>-22.2 (-38.7 to -5.04)</b>  | <b>-44.9 (-51.2 to -36.4)</b>   | <b>-27.5 (-34.6 to -17.9)</b>            |
| 15 Interpersonal violence     | 15 Headache disorders          | <b>57.6 (32.8 to 82.3)</b>     | <b>11.6 (6.46 to 19.7)</b>      | 0.0874 (-0.138 to 0.286)                 |
| 16 Dietary iron deficiency    | 16 Depressive disorders        | <b>68.1 (40.1 to 94.5)</b>     | <b>19.1 (12.5 to 26.8)</b>      | <b>-2.16 (-2.39 to -1.96)</b>            |
| 17 Cirrhosis liver            | 17 Protein-energy malnutrition | <b>-44.9 (-73.3 to -0.224)</b> | <b>-60.9 (-80.3 to -29.6)</b>   | <b>-51.1 (-75 to -9.81)</b>              |
| 18 Meningitis                 | 18 Other musculoskeletal       | <b>176 (132 to 219)</b>        | <b>95.4 (80.6 to 110)</b>       | <b>51.1 (48.2 to 53.8)</b>               |
| 19 Low back pain              | 19 Cirrhosis liver             | 21.9 (-1.4 to 46.4)            | -13.5 (-25.9 to 3.04)           | <b>-36.1 (-44.4 to -25)</b>              |
| 20 Chronic kidney disease     | 20 Interpersonal violence      | 0.0189 (-20.7 to 25.7)         | <b>-29.2 (-38.8 to -18.4)</b>   | <b>-32.1 (-41.8 to -22.3)</b>            |
| 22 Headache disorders         | 21 Dietary iron deficiency     |                                |                                 |                                          |
| 25 Depressive disorders       | 34 Malaria                     |                                |                                 |                                          |
| 27 Hypertensive heart disease | 37 Meningitis                  |                                |                                 |                                          |
| 36 Other musculoskeletal      | 164 COVID-19                   |                                |                                 |                                          |

### Benin, Reference scenario

**Legend:**  
Communicable, maternal, neonatal and nutritional  
Non-communicable  
Injuries

| Leading Causes 2022        | Leading Causes 2050        | Mean % change number of DALY | Mean % change all-age DALY rate | Mean % change age-standardized DALY rate |
|----------------------------|----------------------------|------------------------------|---------------------------------|------------------------------------------|
| 1 Neonatal disorders       | 1 Malaria                  | 50.2 (-79.7 to 705)          | -26.8 (-90 to 297)              | -13.1 (-87.3 to 345)                     |
| 2 Malaria                  | 2 Neonatal disorders       | -17 (-37.8 to 5.94)          | <b>-60.6 (-68.6 to -50.8)</b>   | <b>-39 (-49.3 to -24.5)</b>              |
| 3 Lower respiratory infect | 3 Lower respiratory infect | -18.1 (-39.7 to 7.99)        | <b>-61.1 (-69.3 to -49.2)</b>   | <b>-47.3 (-56.8 to -32.7)</b>            |
| 4 Congenital defects       | 4 Stroke                   | <b>76 (41.3 to 117)</b>      | -16.2 (-31.8 to 0.966)          | <b>-43.7 (-52.8 to -30.8)</b>            |
| 5 Diarrheal diseases       | 5 Diabetes                 | <b>232 (172 to 298)</b>      | <b>58 (35.5 to 80.1)</b>        | 6.03 (-7.18 to 19.9)                     |
| 6 Measles                  | 6 Congenital defects       | -11.5 (-29.8 to 10.8)        | <b>-58 (-64 to -49.2)</b>       | <b>-38.9 (-46.1 to -28.9)</b>            |
| 7 Hemoglobinopathies       | 7 Hemoglobinopathies       | <b>31.8 (1.72 to 62.8)</b>   | <b>-37.5 (-47.2 to -26.6)</b>   | <b>-26.4 (-35 to -17.9)</b>              |
| 8 Stroke                   | 8 Chronic kidney disease   | <b>214 (141 to 329)</b>      | <b>49.4 (15.5 to 97.2)</b>      | 24.5 (-1.67 to 63.4)                     |
| 9 Road injuries            | 9 Diarrheal diseases       | -19.2 (-49.4 to 23.6)        | <b>-61.6 (-75.4 to -43.1)</b>   | <b>-55.8 (-68.4 to -39.5)</b>            |
| 10 Meningitis              | 10 Other musculoskeletal   | <b>560 (464 to 661)</b>      | <b>214 (192 to 236)</b>         | <b>139 (132 to 146)</b>                  |
| 11 HIV/AIDS                | 11 Depressive disorders    | <b>150 (118 to 185)</b>      | <b>19.1 (13.3 to 25.7)</b>      | <b>-4.15 (-4.8 to -3.36)</b>             |
| 12 Pertussis               | 12 Road injuries           | 39.1 (-22.8 to 145)          | -33.8 (-62.6 to 13.7)           | -35.1 (-60.9 to 8.29)                    |
| 13 Diabetes                | 13 Headache disorders      | <b>143 (110 to 180)</b>      | <b>15.4 (10.9 to 24.4)</b>      | <b>0.805 (0.184 to 1.29)</b>             |
| 14 Dietary iron deficiency | 14 Low back pain           | <b>149 (112 to 182)</b>      | <b>18.2 (11 to 25)</b>          | <b>-8.28 (-8.75 to -7.47)</b>            |
| 15 Ischemic heart disease  | 15 Ischemic heart disease  | <b>75.4 (25.6 to 145)</b>    | -16.5 (-39.8 to 13.4)           | <b>-45.5 (-61 to -25.5)</b>              |
| 16 Depressive disorders    | 16 Dietary iron deficiency | <b>56.6 (30.8 to 83.6)</b>   | <b>-25.6 (-28.8 to -21.9)</b>   | <b>-24.1 (-25.1 to -23.1)</b>            |
| 17 Cirrhosis liver         | 17 Cirrhosis liver         | <b>67.1 (36 to 105)</b>      | <b>-20.5 (-34.1 to -2.29)</b>   | <b>-38.7 (-47.3 to -25.5)</b>            |
| 18 iNTS                    | 18 Anxiety disorders       | <b>134 (103 to 173)</b>      | <b>11.1 (6.4 to 16.4)</b>       | <b>2.01 (1.45 to 2.65)</b>               |
| 19 Tuberculosis            | 19 Gynecological diseases  | <b>89.7 (49.4 to 140)</b>    | -9.73 (-24.6 to 11)             | <b>-26.9 (-40.1 to -11.3)</b>            |
| 20 Maternal disorders      | 20 Interpersonal violence  | <b>69.6 (32.5 to 112)</b>    | <b>-19.4 (-32.5 to -3.88)</b>   | <b>-23.8 (-34.7 to -9.38)</b>            |
| 21 Headache disorders      | 22 Meningitis              |                              |                                 |                                          |
| 22 Chronic kidney disease  | 24 iNTS                    |                              |                                 |                                          |
| 23 Low back pain           | 29 Pertussis               |                              |                                 |                                          |
| 25 Interpersonal violence  | 33 Maternal disorders      |                              |                                 |                                          |
| 26 Gynecological diseases  | 35 Tuberculosis            |                              |                                 |                                          |
| 27 Anxiety disorders       | 48 HIV/AIDS                |                              |                                 |                                          |
| 39 Other musculoskeletal   | 89 Measles                 |                              |                                 |                                          |

### Burkina Faso, Reference scenario

**Legend:**  
■ Communicable, maternal, neonatal and nutritional  
■ Non-communicable  
■ Injuries

| Leading Causes 2022            | Leading Causes 2050            | Mean % change number of DALY | Mean % change all-age DALY rate | Mean % change age-standardized DALY rate |
|--------------------------------|--------------------------------|------------------------------|---------------------------------|------------------------------------------|
| 1 Malaria                      | 1 Malaria                      | 14.4 (-92.4 to 600)          | -47.1 (-96.4 to 186)            | -41.4 (-95.5 to 208)                     |
| 2 Neonatal disorders           | 2 Neonatal disorders           | -2.91 (-25.2 to 23.7)        | <b>-56.5 (-65.5 to -45.8)</b>   | <b>-37.5 (-48.2 to -24.6)</b>            |
| 3 Lower respiratory infect     | 3 Lower respiratory infect     | -15.9 (-35.3 to 9.08)        | <b>-62.3 (-70 to -52.9)</b>     | <b>-44.6 (-54.3 to -33.2)</b>            |
| 4 Diarrheal diseases           | 4 Diarrheal diseases           | -8.29 (-44.6 to 40.3)        | <b>-58.9 (-74.1 to -37.7)</b>   | <b>-43.6 (-62.6 to -18)</b>              |
| 5 Congenital defects           | 5 Congenital defects           | -0.311 (-19.7 to 22.3)       | <b>-55.4 (-61.5 to -47.2)</b>   | <b>-39.1 (-46.9 to -29.2)</b>            |
| 6 Road injuries                | 6 Road injuries                | 44.4 (-17.5 to 146)          | -35.2 (-63.2 to 13.8)           | -36.4 (-61.3 to 7.23)                    |
| 7 Hemoglobinopathies           | 7 Hemoglobinopathies           | <b>41.8 (2.2 to 75)</b>      | <b>-36.5 (-52.5 to -24)</b>     | <b>-26.3 (-41.1 to -15.5)</b>            |
| 8 Meningitis                   | 8 Stroke                       | <b>51.2 (22.8 to 80.8)</b>   | <b>-32.2 (-45.1 to -18.2)</b>   | <b>-43.5 (-53 to -31.7)</b>              |
| 9 iNTS                         | 9 Dietary iron deficiency      | <b>58 (38.1 to 80)</b>       | <b>-29.3 (-32 to -26.6)</b>     | <b>-22 (-23.5 to -20.8)</b>              |
| 10 Tuberculosis                | 10 Diabetes                    | <b>159 (117 to 204)</b>      | 16.1 (-0.76 to 35.2)            | -6.04 (-19.2 to 9.32)                    |
| 11 Stroke                      | 11 iNTS                        | 24.7 (-33.2 to 103)          | <b>-44.1 (-68.9 to -10.8)</b>   | -31.7 (-61.4 to 9.17)                    |
| 12 Protein-energy malnutrition | 12 Depressive disorders        | <b>149 (127 to 173)</b>      | <b>11.7 (6.72 to 17.5)</b>      | <b>-3.98 (-4.53 to -3.33)</b>            |
| 13 Dietary iron deficiency     | 13 Other musculoskeletal       | <b>507 (450 to 565)</b>      | <b>172 (153 to 190)</b>         | <b>127 (119 to 133)</b>                  |
| 14 Ischemic heart disease      | 14 Chronic kidney disease      | <b>123 (62.7 to 196)</b>     | -0.0612 (-27.8 to 34.4)         | -5.84 (-29.7 to 22)                      |
| 15 Measles                     | 15 Headache disorders          | <b>149 (127 to 174)</b>      | <b>11.5 (7.85 to 17)</b>        | <b>0.707 (0.048 to 1.22)</b>             |
| 16 COVID-19                    | 16 Low back pain               | <b>143 (121 to 165)</b>      | <b>9.16 (3.43 to 15.5)</b>      | <b>-7.63 (-8.4 to -6.97)</b>             |
| 17 Interpersonal violence      | 17 Ischemic heart disease      | <b>61.4 (8.19 to 124)</b>    | -27.6 (-51 to 1.85)             | <b>-42.8 (-60 to -20.1)</b>              |
| 18 Chronic kidney disease      | 18 Interpersonal violence      | <b>80.1 (46.3 to 122)</b>    | <b>-19.3 (-32.8 to -4.42)</b>   | <b>-22.9 (-33.4 to -10.3)</b>            |
| 19 Typhoid & paratyph          | 19 Meningitis                  | -9.16 (-45 to 42.9)          | <b>-59.3 (-75 to -35.2)</b>     | <b>-49.9 (-67.1 to -25.9)</b>            |
| 20 Diabetes                    | 20 Cirrhosis liver             | <b>66 (35.9 to 102)</b>      | <b>-25.6 (-39.1 to -11.1)</b>   | <b>-36.2 (-46.2 to -25.1)</b>            |
| 21 Depressive disorders        | 22 Tuberculosis                |                              |                                 |                                          |
| 24 Headache disorders          | 25 Typhoid & paratyph          |                              |                                 |                                          |
| 25 Low back pain               | 36 Protein-energy malnutrition |                              |                                 |                                          |
| 26 Cirrhosis liver             | 75 Measles                     |                              |                                 |                                          |
| 45 Other musculoskeletal       | 166 COVID-19                   |                              |                                 |                                          |

### Cabo Verde, Reference scenario

**Legend:**  
Communicable, maternal, neonatal and nutritional  
Non-communicable  
Injuries

| Leading Causes 2022           | Leading Causes 2050           | Mean % change number of DALY | Mean % change all-age DALY rate | Mean % change age-standardized DALY rate |
|-------------------------------|-------------------------------|------------------------------|---------------------------------|------------------------------------------|
| 1 Ischemic heart disease      | 1 Diabetes                    | 161 (114 to 203)             | 143 (114 to 179)                | 24 (10.5 to 39.9)                        |
| 2 Stroke                      | 2 Ischemic heart disease      | 30.6 (-6.68 to 80.1)         | 21.8 (-9.97 to 69.6)            | -44.5 (-60.9 to -22.7)                   |
| 3 Neonatal disorders          | 3 Stroke                      | 32.3 (6.83 to 60.4)          | 23.3 (3.05 to 51)               | -41.3 (-50 to -28.4)                     |
| 4 Lower respiratory infect    | 4 Lower respiratory infect    | 29.7 (4.02 to 53.6)          | 20.9 (3.61 to 47.3)             | -35.5 (-43.5 to -25.1)                   |
| 5 Diabetes                    | 5 Depressive disorders        | 37.2 (16.7 to 58.2)          | 27.8 (17.9 to 39.5)             | -3.27 (-3.63 to -2.9)                    |
| 6 COVID-19                    | 6 Chronic kidney disease      | 143 (86 to 210)              | 127 (81.3 to 185)               | 18.1 (-8.15 to 49.8)                     |
| 7 Depressive disorders        | 7 Other musculoskeletal       | 194 (143 to 240)             | 174 (151 to 199)                | 93.1 (89.8 to 96.3)                      |
| 8 Interpersonal violence      | 8 Low back pain               | 48.6 (28.7 to 69.3)          | 38.5 (28.2 to 49.7)             | -6.57 (-6.87 to -6.3)                    |
| 9 Low back pain               | 9 Lung cancer                 | 142 (91.6 to 208)            | 126 (78.2 to 174)               | 4.77 (-13 to 23.8)                       |
| 10 Self-harm                  | 10 Prostate cancer            | 204 (129 to 301)             | 183 (117 to 260)                | 17.7 (-3.64 to 45.9)                     |
| 11 Cirrhosis liver            | 11 Cirrhosis liver            | 16.3 (-5.97 to 41)           | 8.38 (-11.1 to 30.3)            | -35.7 (-45.4 to -23.5)                   |
| 12 Headache disorders         | 12 Hypertensive heart disease | 116 (63 to 175)              | 101 (59 to 156)                 | -5.67 (-25.9 to 19.1)                    |
| 13 Gynecological diseases     | 13 Age-related hearing loss   | 79 (50.4 to 105)             | 66.8 (52.2 to 83.7)             | -1.68 (-1.92 to -1.48)                   |
| 14 Chronic kidney disease     | 14 Headache disorders         | 16.2 (-3.27 to 38.7)         | 8.24 (-0.404 to 27.9)           | 1.04 (0.603 to 1.28)                     |
| 15 Drowning                   | 15 Self-harm                  | 7.44 (-12.6 to 33)           | 0.0551 (-16.7 to 18.6)          | -20.9 (-33.3 to -7.09)                   |
| 16 Dietary iron deficiency    | 16 Esophageal cancer          | 108 (72.3 to 146)            | 93.9 (66.2 to 126)              | -6.02 (-16.1 to 4.49)                    |
| 17 HIV/AIDS                   | 17 Neonatal disorders         | -46.7 (-60.1 to -33.5)       | -50.4 (-58.8 to -41.5)          | -27.2 (-36.9 to -15.6)                   |
| 18 Diarrheal diseases         | 18 Pancreatic cancer          | 275 (173 to 388)             | 250 (163 to 344)                | 64.4 (24.6 to 105)                       |
| 19 Age-related hearing loss   | 19 Stomach cancer             | 49.3 (22.5 to 77.1)          | 39.1 (21.3 to 56.1)             | -35 (-39.6 to -29.6)                     |
| 20 Stomach cancer             | 20 COPD                       | 101 (57.5 to 146)            | 87.3 (51.7 to 132)              | -11.3 (-27.9 to 11)                      |
| 22 Other musculoskeletal      | 21 Interpersonal violence     |                              |                                 |                                          |
| 25 Hypertensive heart disease | 25 Gynecological diseases     |                              |                                 |                                          |
| 26 Esophageal cancer          | 35 Dietary iron deficiency    |                              |                                 |                                          |
| 27 Lung cancer                | 37 Drowning                   |                              |                                 |                                          |
| 29 COPD                       | 42 Diarrheal diseases         |                              |                                 |                                          |
| 36 Prostate cancer            | 45 HIV/AIDS                   |                              |                                 |                                          |
| 43 Pancreatic cancer          | 158 COVID-19                  |                              |                                 |                                          |

### Cameroon, Reference scenario

**Legend:**  
Communicable, maternal, neonatal and nutritional  
Non-communicable  
Injuries

| Leading Causes 2022           | Leading Causes 2050           | Mean % change number of DALY | Mean % change all-age DALY rate | Mean % change age-standardized DALY rate |
|-------------------------------|-------------------------------|------------------------------|---------------------------------|------------------------------------------|
| 1 Neonatal disorders          | 1 Neonatal disorders          | -14.1 (-41.1 to 16.8)        | <b>-50.4 (-60.4 to -38.2)</b>   | <b>-22 (-34.8 to -7.29)</b>              |
| 2 Malaria                     | 2 Lower respiratory infect    | -12.3 (-35.2 to 16.4)        | <b>-49.2 (-58.8 to -36.5)</b>   | <b>-39.7 (-49.9 to -27.4)</b>            |
| 3 Lower respiratory infect    | 3 Malaria                     | -47.5 (-95 to 193)           | -69.4 (-96.8 to 68.3)           | -65.2 (-96.5 to 111)                     |
| 4 HIV/AIDS                    | 4 Stroke                      | <b>75.4 (32.4 to 123)</b>    | 1.71 (-17.2 to 22.6)            | <b>-40.3 (-50 to -26.9)</b>              |
| 5 Diarrheal diseases          | 5 Diabetes                    | <b>232 (147 to 308)</b>      | <b>92.3 (61.8 to 129)</b>       | 13.1 (-2.77 to 30.5)                     |
| 6 Congenital defects          | 6 Chronic kidney disease      | <b>225 (130 to 336)</b>      | <b>88.4 (43 to 145)</b>         | <b>35.4 (4.71 to 77.3)</b>               |
| 7 Stroke                      | 7 Road injuries               | 38.1 (-21 to 131)            | -20 (-50 to 39.5)               | -26.3 (-52.4 to 27)                      |
| 8 Road injuries               | 8 Ischemic heart disease      | <b>89.7 (25 to 175)</b>      | 10 (-23.2 to 51.7)              | <b>-39.2 (-57.6 to -11.6)</b>            |
| 9 Ischemic heart disease      | 9 Depressive disorders        | <b>119 (81.8 to 163)</b>     | <b>27 (18.9 to 36.1)</b>        | <b>-2.9 (-3.27 to -2.51)</b>             |
| 10 Diabetes                   | 10 Congenital defects         | -24.8 (-45.8 to 1.12)        | <b>-56.5 (-63.8 to -47.9)</b>   | <b>-36 (-44 to -25.1)</b>                |
| 11 Pertussis                  | 11 Diarrheal diseases         | -25.4 (-58.6 to 14.3)        | <b>-56.8 (-74.3 to -33.2)</b>   | <b>-48.3 (-66.9 to -25.2)</b>            |
| 12 Meningitis                 | 12 Low back pain              | <b>125 (88.4 to 168)</b>     | <b>30.6 (21.5 to 40.4)</b>      | <b>-5.9 (-6.25 to -5.59)</b>             |
| 13 Chronic kidney disease     | 13 Other musculoskeletal      | <b>351 (268 to 431)</b>      | <b>161 (141 to 182)</b>         | <b>86.6 (81.9 to 91.2)</b>               |
| 14 Tuberculosis               | 14 Headache disorders         | <b>101 (62.4 to 145)</b>     | <b>16.4 (10.2 to 29.4)</b>      | <b>0.678 (0.351 to 0.995)</b>            |
| 15 Depressive disorders       | 15 Cirrhosis liver            | <b>60.8 (23.2 to 98.8)</b>   | -6.73 (-22.4 to 11.8)           | <b>-35.7 (-44.7 to -24.1)</b>            |
| 16 Maternal disorders         | 16 Hypertensive heart disease | <b>196 (109 to 304)</b>      | <b>71.7 (28.6 to 120)</b>       | -5.35 (-28.1 to 21.4)                    |
| 17 Cirrhosis liver            | 17 Gynecological diseases     | <b>79.2 (36.2 to 129)</b>    | 3.92 (-14.3 to 22.4)            | <b>-18.7 (-32.3 to -3.63)</b>            |
| 18 Low back pain              | 18 Anxiety disorders          | <b>89.5 (54.5 to 129)</b>    | <b>9.78 (3.11 to 18.6)</b>      | <b>1.53 (1.27 to 1.82)</b>               |
| 19 Headache disorders         | 19 Age-related hearing loss   | <b>146 (100 to 193)</b>      | <b>42.6 (29.5 to 57.1)</b>      | <b>-1.87 (-2.09 to -1.7)</b>             |
| 20 Measles                    | 20 Dietary iron deficiency    | <b>28.6 (2.36 to 57.1)</b>   | <b>-25.6 (-30.4 to -20.9)</b>   | <b>-19.1 (-19.7 to -18.3)</b>            |
| 21 Dietary iron deficiency    | 24 HIV/AIDS                   |                              |                                 |                                          |
| 24 Gynecological diseases     | 29 Tuberculosis               |                              |                                 |                                          |
| 27 Anxiety disorders          | 31 Meningitis                 |                              |                                 |                                          |
| 31 Hypertensive heart disease | 34 Pertussis                  |                              |                                 |                                          |
| 32 Age-related hearing loss   | 35 Maternal disorders         |                              |                                 |                                          |
| 34 Other musculoskeletal      | 117 Measles                   |                              |                                 |                                          |

### Chad, Reference scenario

**Legend:**  
Communicable, maternal, neonatal and nutritional  
Non-communicable  
Injuries

| Leading Causes 2022            | Leading Causes 2050            | Mean % change number of DALY | Mean % change all-age DALY rate | Mean % change age-standardized DALY rate |
|--------------------------------|--------------------------------|------------------------------|---------------------------------|------------------------------------------|
| 1 Neonatal disorders           | 1 Neonatal disorders           | 14.8 (-11.4 to 51.7)         | -59.6 (-67.7 to -49.6)          | -44.6 (-55.3 to -30.6)                   |
| 2 Diarrheal diseases           | 2 Diarrheal diseases           | -16.2 (-50 to 33.1)          | -70.5 (-80.9 to -52.9)          | -58 (-71.6 to -36.3)                     |
| 3 Lower respiratory infect     | 3 Lower respiratory infect     | -19 (-39.1 to 6.98)          | -71.5 (-77.7 to -63.8)          | -55.7 (-63.5 to -46.2)                   |
| 4 Malaria                      | 4 Congenital defects           | <b>34 (5.53 to 70.7)</b>     | -52.9 (-60.4 to -44.3)          | -38.5 (-47.7 to -28.2)                   |
| 5 Congenital defects           | 5 Malaria                      | -26.8 (-89.8 to 62.3)        | -72.7 (-96.3 to -41.1)          | -69.2 (-95.2 to -23.4)                   |
| 6 Tuberculosis                 | 6 Stroke                       | <b>82.4 (44.5 to 129)</b>    | -35.8 (-48.4 to -21)            | -38.6 (-51.4 to -21.2)                   |
| 7 Measles                      | 7 Road injuries                | 69.7 (-8.81 to 209)          | -40.3 (-68.7 to 8.27)           | -40.2 (-66.3 to 3.08)                    |
| 8 Meningitis                   | 8 Dietary iron deficiency      | <b>107 (77.8 to 134)</b>     | -27.1 (-28.9 to -25.2)          | -23.6 (-24.8 to -22.3)                   |
| 9 Pertussis                    | 9 Depressive disorders         | <b>211 (165 to 252)</b>      | <b>9.39 (6.02 to 12.8)</b>      | -3.58 (-4.16 to -2.99)                   |
| 10 Stroke                      | 10 Pertussis                   | 12.5 (-33.3 to 84.8)         | -60.5 (-76.1 to -36.8)          | -50.7 (-70.1 to -22.2)                   |
| 11 Maternal disorders          | 11 Cirrhosis liver             | <b>129 (82.6 to 194)</b>     | -19.3 (-34.7 to -0.311)         | -26.8 (-40 to -10.3)                     |
| 12 Road injuries               | 12 Maternal disorders          | 17 (-28.5 to 81.3)           | -58.9 (-73.7 to -35.3)          | -64.5 (-76.8 to -45.8)                   |
| 13 Dietary iron deficiency     | 13 Headache disorders          | <b>219 (174 to 260)</b>      | <b>12.2 (9.57 to 15.8)</b>      | <b>1.19 (0.728 to 1.57)</b>              |
| 14 Protein-energy malnutrition | 14 Diabetes                    | <b>193 (138 to 257)</b>      | 3.21 (-12.6 to 22)              | -7.79 (-21.6 to 8.89)                    |
| 15 HIV/AIDS                    | 15 Low back pain               | <b>198 (155 to 235)</b>      | <b>4.89 (1.48 to 8.06)</b>      | -7.57 (-8.11 to -7.1)                    |
| 16 Cirrhosis liver             | 16 Other musculoskeletal       | <b>728 (611 to 843)</b>      | <b>191 (175 to 206)</b>         | <b>149 (139 to 156)</b>                  |
| 17 Drowning                    | 17 Ischemic heart disease      | <b>97 (27.6 to 195)</b>      | -30.7 (-55.1 to 5.26)           | -38.2 (-61 to -5.81)                     |
| 18 Ischemic heart disease      | 18 Interpersonal violence      | <b>136 (85 to 202)</b>       | -16.9 (-29.7 to 2.62)           | -19.8 (-31.9 to -3.43)                   |
| 19 Depressive disorders        | 19 Meningitis                  | -25.2 (-54.2 to 25.8)        | -73.7 (-84.1 to -57.5)          | -65 (-77.7 to -46.6)                     |
| 20 iNTS                        | 20 Tuberculosis                | -36.3 (-62.9 to 7.88)        | -77.6 (-86.7 to -62.3)          | -74.8 (-84.4 to -60.4)                   |
| 21 Interpersonal violence      | 28 Drowning                    |                              |                                 |                                          |
| 23 Diabetes                    | 31 iNTS                        |                              |                                 |                                          |
| 24 Low back pain               | 35 Protein-energy malnutrition |                              |                                 |                                          |
| 25 Headache disorders          | 41 HIV/AIDS                    |                              |                                 |                                          |
| 59 Other musculoskeletal       | 71 Measles                     |                              |                                 |                                          |

### Côte d'Ivoire, Reference scenario

**Legend:**  
■ Communicable, maternal, neonatal and nutritional  
■ Non-communicable  
■ Injuries

| Leading Causes 2022           | Leading Causes 2050           | Mean % change number of DALY | Mean % change all-age DALY rate | Mean % change age-standardized DALY rate |
|-------------------------------|-------------------------------|------------------------------|---------------------------------|------------------------------------------|
| 1 Neonatal disorders          | 1 Neonatal disorders          | -42.2 (-56.8 to -25.9)       | -66.3 (-72.8 to -57.8)          | -45.9 (-55.1 to -33.7)                   |
| 2 Malaria                     | 2 Malaria                     | -46 (-95.3 to 172)           | -67.7 (-97.2 to 64.6)           | -61.3 (-96.7 to 111)                     |
| 3 Lower respiratory infect    | 3 Lower respiratory infect    | -25.9 (-41.6 to -4.79)       | -56.6 (-65.9 to -44.6)          | -47.5 (-56.8 to -34.5)                   |
| 4 HIV/AIDS                    | 4 Diabetes                    | 231 (170 to 297)             | 93.6 (66.5 to 124)              | 10.7 (-4.03 to 26.2)                     |
| 5 Congenital defects          | 5 Stroke                      | 53.8 (22.1 to 92.4)          | -10 (-27 to 11.3)               | -49 (-58.1 to -36.7)                     |
| 6 Diarrheal diseases          | 6 Ischemic heart disease      | 65 (9.12 to 132)             | -3.42 (-32 to 37.7)             | -49.3 (-64.5 to -25.6)                   |
| 7 Stroke                      | 7 Chronic kidney disease      | 168 (95.3 to 254)            | 56.7 (21.3 to 107)              | 7.19 (-18.3 to 43.6)                     |
| 8 Ischemic heart disease      | 8 Other musculoskeletal       | 412 (342 to 476)             | 200 (178 to 220)                | 123 (118 to 128)                         |
| 9 Road injuries               | 9 Congenital defects          | -27.9 (-44.3 to -11.9)       | -57.9 (-64.4 to -48.7)          | -37 (-44.9 to -26.3)                     |
| 10 COVID-19                   | 10 Low back pain              | 114 (87.7 to 140)            | 25.3 (17.4 to 33.2)             | -7 (-7.4 to -6.6)                        |
| 11 Tuberculosis               | 11 Depressive disorders       | 112 (84.6 to 140)            | 24.2 (17.4 to 31.4)             | -2.95 (-3.45 to -2.4)                    |
| 12 Dietary iron deficiency    | 12 Diarrheal diseases         | -28.6 (-56.7 to 7.4)         | -58.2 (-73.3 to -37.9)          | -51.1 (-66.8 to -30.2)                   |
| 13 Diabetes                   | 13 Headache disorders         | 96 (67.1 to 121)             | 14.5 (9.43 to 23.1)             | 1.57 (1.04 to 1.97)                      |
| 14 iNTS                       | 14 Road injuries              | 20.3 (-31.6 to 107)          | -29.5 (-57.4 to 26.9)           | -36.2 (-60.6 to 12.1)                    |
| 15 Meningitis                 | 15 Cirrhosis liver            | 47.2 (16.7 to 78.8)          | -13.9 (-27.6 to 3.54)           | -39.4 (-48.7 to -26.6)                   |
| 16 Cirrhosis liver            | 16 Dietary iron deficiency    | 22.9 (2.36 to 40.3)          | -28.2 (-31.2 to -25)            | -21 (-22 to -20)                         |
| 17 Low back pain              | 17 Hypertensive heart disease | 172 (101 to 261)             | 59.3 (23.2 to 113)              | -15.7 (-36.4 to 13.7)                    |
| 18 Maternal disorders         | 18 Interpersonal violence     | 41.2 (12.2 to 74.8)          | -17.5 (-32.6 to 1.11)           | -27 (-39.1 to -12.9)                     |
| 19 Headache disorders         | 19 Age-related hearing loss   | 145 (113 to 185)             | 43.5 (31.3 to 55)               | -2.41 (-2.63 to -2.18)                   |
| 20 Interpersonal violence     | 20 Anxiety disorders          | 89.3 (64.5 to 114)           | 10.6 (5.45 to 16.1)             | 2.32 (1.98 to 2.67)                      |
| 21 Depressive disorders       | 29 Tuberculosis               |                              |                                 |                                          |
| 22 Chronic kidney disease     | 33 iNTS                       |                              |                                 |                                          |
| 26 Anxiety disorders          | 35 Maternal disorders         |                              |                                 |                                          |
| 30 Hypertensive heart disease | 36 Meningitis                 |                              |                                 |                                          |
| 33 Age-related hearing loss   | 42 HIV/AIDS                   |                              |                                 |                                          |
| 37 Other musculoskeletal      | 169 COVID-19                  |                              |                                 |                                          |

### The Gambia, Reference scenario

**Legend:**  
Communicable, maternal, neonatal and nutritional  
Non-communicable  
Injuries

| Leading Causes 2022           | Leading Causes 2050           | Mean % change number of DALY | Mean % change all-age DALY rate | Mean % change age-standardized DALY rate |
|-------------------------------|-------------------------------|------------------------------|---------------------------------|------------------------------------------|
| 1 Neonatal disorders          | 1 Neonatal disorders          | -42.3 (-55.3 to -25)         | -62.1 (-69 to -55.2)            | -36.7 (-46.6 to -25.3)                   |
| 2 HIV/AIDS                    | 2 Lower respiratory infect    | -12.4 (-29.6 to 8.52)        | -42.4 (-51.2 to -30.1)          | -45.8 (-53.7 to -36.2)                   |
| 3 Lower respiratory infect    | 3 HIV/AIDS                    | -13.5 (-41.8 to 44.9)        | -43 (-62.7 to 1.23)             | -55 (-70 to -20.5)                       |
| 4 Stroke                      | 4 Stroke                      | 35.7 (8.75 to 65.8)          | -10.7 (-25.3 to 8.19)           | -48.9 (-57.5 to -37.1)                   |
| 5 Diarrheal diseases          | 5 Diabetes                    | 158 (107 to 212)             | 69.6 (40.5 to 98.3)             | -3.17 (-16.8 to 13.5)                    |
| 6 Congenital defects          | 6 Ischemic heart disease      | 43 (1.52 to 88.6)            | -5.86 (-32.9 to 31.7)           | -48.3 (-63.8 to -26.5)                   |
| 7 Ischemic heart disease      | 7 Depressive disorders        | 96.4 (67.7 to 125)           | 29.2 (20.9 to 37.6)             | -3.08 (-3.7 to -2.41)                    |
| 8 Dietary iron deficiency     | 8 Chronic kidney disease      | 150 (88.2 to 228)            | 64.7 (26.2 to 113)              | 13.7 (-13.1 to 48)                       |
| 9 Tuberculosis                | 9 Liver cancer                | 131 (67.8 to 210)            | 51.9 (14.4 to 100)              | -7.25 (-29.5 to 21.9)                    |
| 10 Malaria                    | 10 Other musculoskeletal      | 364 (301 to 427)             | 205 (185 to 228)                | 113 (107 to 118)                         |
| 11 Road injuries              | 11 Dietary iron deficiency    | 11.5 (-5.31 to 31.1)         | -26.7 (-30 to -22.8)            | -18.8 (-19.7 to -17.7)                   |
| 12 Maternal disorders         | 12 Low back pain              | 102 (75.7 to 127)            | 32.7 (23.4 to 40.5)             | -6.95 (-7.25 to -6.68)                   |
| 13 Depressive disorders       | 13 Headache disorders         | 78.5 (51.2 to 106)           | 17.4 (10.6 to 30.6)             | 0.875 (0.573 to 1.14)                    |
| 14 COVID-19                   | 14 Road injuries              | 9.36 (-32.3 to 71.2)         | -28.1 (-54.4 to 19.4)           | -38.4 (-60 to 0.178)                     |
| 15 Diabetes                   | 15 Hypertensive heart disease | 142 (80.7 to 204)            | 59 (20.3 to 103)                | -14.2 (-35.2 to 11.5)                    |
| 16 Hemoglobinopathies         | 16 Congenital defects         | -32.6 (-45.9 to -16.2)       | -55.7 (-61.6 to -48.7)          | -33 (-40.3 to -23)                       |
| 17 Meningitis                 | 17 Cirrhosis liver            | 44.3 (17.7 to 80.4)          | -4.99 (-20.9 to 14.9)           | -37.8 (-47.8 to -25.3)                   |
| 18 Chronic kidney disease     | 18 Diarrheal diseases         | -46 (-64.8 to -20.5)         | -64.5 (-76.3 to -46.4)          | -59.8 (-72.4 to -41.2)                   |
| 19 Liver cancer               | 19 Gynecological diseases     | 54.8 (22.8 to 93.3)          | 1.87 (-15.5 to 23)              | -20.7 (-34.3 to -5.8)                    |
| 20 Headache disorders         | 20 Hemoglobinopathies         | 0.895 (-16.7 to 20.4)        | -33.7 (-41.6 to -27.8)          | -26.3 (-34 to -20.6)                     |
| 21 Cirrhosis liver            | 23 Tuberculosis               |                              |                                 |                                          |
| 22 Low back pain              | 31 Maternal disorders         |                              |                                 |                                          |
| 23 Gynecological diseases     | 33 Meningitis                 |                              |                                 |                                          |
| 24 Hypertensive heart disease | 47 Malaria                    |                              |                                 |                                          |
| 38 Other musculoskeletal      | 165 COVID-19                  |                              |                                 |                                          |



### Ghana, Reference scenario

**Legend:**  
Communicable, maternal, neonatal and nutritional  
Non-communicable  
Injuries

| Leading Causes 2022           | Leading Causes 2050           | Mean % change number of DALY  | Mean % change all-age DALY rate | Mean % change age-standardized DALY rate |
|-------------------------------|-------------------------------|-------------------------------|---------------------------------|------------------------------------------|
| 1 Neonatal disorders          | 1 Malaria                     | 0.719 (-93.1 to 533)          | -34.6 (-95.7 to 300)            | -20.5 (-94.9 to 454)                     |
| 2 Malaria                     | 2 Neonatal disorders          | <b>-33 (-49.8 to -14.1)</b>   | <b>-56.6 (-64.6 to -46.9)</b>   | <b>-32.1 (-42.8 to -18.6)</b>            |
| 3 HIV/AIDS                    | 3 Lower respiratory infect    | <b>51.4 (18.5 to 89.3)</b>    | -1.46 (-20.9 to 21.8)           | -15 (-29.5 to 1.5)                       |
| 4 Lower respiratory infect    | 4 Stroke                      | <b>50.7 (21.6 to 85.3)</b>    | -1.91 (-21.4 to 21.2)           | <b>-44.4 (-54.7 to -32)</b>              |
| 5 Stroke                      | 5 Diabetes                    | <b>188 (133 to 245)</b>       | <b>87.1 (54 to 119)</b>         | 9.03 (-7.01 to 27.7)                     |
| 6 Congenital defects          | 6 Chronic kidney disease      | <b>163 (93.2 to 250)</b>      | <b>71.1 (27.5 to 124)</b>       | 16.1 (-12.7 to 52.2)                     |
| 7 Road injuries               | 7 Ischemic heart disease      | <b>55.1 (4.57 to 121)</b>     | 1.02 (-30.5 to 44.6)            | <b>-44.5 (-61.9 to -20.5)</b>            |
| 8 Ischemic heart disease      | 8 Road injuries               | 22 (-31 to 126)               | -20.7 (-54.1 to 42)             | -25.1 (-56.4 to 31.7)                    |
| 9 Diarrheal diseases          | 9 Diarrheal diseases          | 34.1 (-11.1 to 95.6)          | -12.8 (-40 to 25.9)             | -18.1 (-43.9 to 18.1)                    |
| 10 Tuberculosis               | 10 Depressive disorders       | <b>91.7 (64.7 to 121)</b>     | <b>24.6 (15.6 to 34.5)</b>      | <b>-3.04 (-3.42 to -2.65)</b>            |
| 11 Diabetes                   | 11 Other musculoskeletal      | <b>262 (211 to 316)</b>       | <b>135 (117 to 157)</b>         | <b>70.6 (67 to 73.6)</b>                 |
| 12 Hemoglobinopathies         | 12 Low back pain              | <b>99.8 (73.9 to 129)</b>     | <b>29.9 (19.4 to 40.5)</b>      | <b>-5.48 (-5.66 to -5.29)</b>            |
| 13 COVID-19                   | 13 Hypertensive heart disease | <b>185 (117 to 274)</b>       | <b>85.5 (37.7 to 146)</b>       | 1.76 (-23.6 to 37.2)                     |
| 14 Chronic kidney disease     | 14 Headache disorders         | <b>74.2 (44.7 to 99.7)</b>    | <b>13.2 (7.38 to 28.4)</b>      | 0.0462 (-0.237 to 0.324)                 |
| 15 Dietary iron deficiency    | 15 Cirrhosis liver            | <b>57.1 (28.1 to 94.9)</b>    | 2.24 (-16.2 to 24.2)            | <b>-32.2 (-42 to -18.5)</b>              |
| 16 Depressive disorders       | 16 Hemoglobinopathies         | 5.74 (-14.9 to 28.1)          | <b>-31.4 (-39.4 to -24.1)</b>   | <b>-24 (-30.8 to -17.4)</b>              |
| 17 Cirrhosis liver            | 17 Tuberculosis               | -4.56 (-36.2 to 42.2)         | <b>-37.9 (-57.1 to -10.5)</b>   | <b>-57.3 (-71.2 to -38.2)</b>            |
| 18 Meningitis                 | 18 Congenital defects         | <b>-26.2 (-42.4 to -6.52)</b> | <b>-52.2 (-58.6 to -44.1)</b>   | <b>-31 (-38.1 to -21.8)</b>              |
| 19 Headache disorders         | 19 Dietary iron deficiency    | 19.9 (-2.63 to 43)            | <b>-22.3 (-28.4 to -17.3)</b>   | <b>-15.5 (-16.4 to -14.2)</b>            |
| 20 Low back pain              | 20 Gynecological diseases     | <b>52 (20.4 to 87.9)</b>      | -1.07 (-19.7 to 21.7)           | <b>-18.9 (-33.7 to -2.94)</b>            |
| 21 Gynecological diseases     | 21 HIV/AIDS                   |                               |                                 |                                          |
| 22 Hypertensive heart disease | 24 Meningitis                 |                               |                                 |                                          |
| 25 Other musculoskeletal      | 165 COVID-19                  |                               |                                 |                                          |

### Guinea, Reference scenario

**Legend:**  
 Communicable, maternal, neonatal and nutritional  
 Non-communicable  
 Injuries

| Leading Causes 2022            | Leading Causes 2050            | Mean % change number of DALY  | Mean % change all-age DALY rate | Mean % change age-standardized DALY rate |
|--------------------------------|--------------------------------|-------------------------------|---------------------------------|------------------------------------------|
| 1 Malaria                      | 1 Malaria                      | 15.4 (-88.5 to 614)           | -37 (-94.4 to 287)              | -14.2 (-92 to 423)                       |
| 2 Neonatal disorders           | 2 Neonatal disorders           | <b>-31.8 (-46.9 to -13.5)</b> | <b>-64.6 (-71.5 to -56.4)</b>   | <b>-46.1 (-55.2 to -33)</b>              |
| 3 Lower respiratory infect     | 3 Lower respiratory infect     | <b>-23.7 (-41.5 to -3.57)</b> | <b>-60.4 (-69 to -50.1)</b>     | <b>-47.4 (-56.8 to -35.9)</b>            |
| 4 Congenital defects           | 4 Stroke                       | <b>44.8 (13.8 to 74.9)</b>    | <b>-24.7 (-37.8 to -8.16)</b>   | <b>-44.2 (-53.5 to -30)</b>              |
| 5 Diarrheal diseases           | 5 Congenital defects           | -17.8 (-33.2 to 3.01)         | <b>-57.3 (-62.8 to -50.4)</b>   | <b>-38.7 (-45.9 to -29.4)</b>            |
| 6 Stroke                       | 6 Diabetes                     | <b>167 (112 to 219)</b>       | <b>38.6 (16.4 to 63.6)</b>      | -0.878 (-14.6 to 15.9)                   |
| 7 Pertussis                    | 7 Diarrheal diseases           | -13.9 (-44.4 to 23.5)         | <b>-55.3 (-71.1 to -35.9)</b>   | <b>-52.2 (-66.2 to -33.3)</b>            |
| 8 Meningitis                   | 8 Other musculoskeletal        | <b>513 (433 to 591)</b>       | <b>218 (198 to 240)</b>         | <b>145 (137 to 152)</b>                  |
| 9 HIV/AIDS                     | 9 Ischemic heart disease       | <b>51.9 (2.68 to 110)</b>     | -21 (-45.4 to 13.9)             | <b>-44.8 (-62.3 to -19.6)</b>            |
| 10 COVID-19                    | 10 Depressive disorders        | <b>127 (100 to 156)</b>       | <b>18 (12.1 to 25.2)</b>        | <b>-4.18 (-5 to -3.41)</b>               |
| 11 iNTS                        | 11 Pertussis                   | -11.4 (-50.6 to 42.6)         | <b>-54.1 (-73 to -28.5)</b>     | -34.3 (-60.8 to 1.88)                    |
| 12 Road injuries               | 12 Low back pain               | <b>125 (96.7 to 155)</b>      | <b>17 (11 to 24.6)</b>          | <b>-8.2 (-8.68 to -7.7)</b>              |
| 13 Ischemic heart disease      | 13 Headache disorders          | <b>122 (93.3 to 154)</b>      | <b>15.3 (10.8 to 24.4)</b>      | <b>0.579 (0.0693 to 1.25)</b>            |
| 14 Tuberculosis                | 14 Chronic kidney disease      | <b>145 (81.5 to 223)</b>      | 27.5 (-3.42 to 67.5)            | 8.04 (-18.2 to 42)                       |
| 15 Maternal disorders          | 15 Hemoglobinopathies          | <b>29.7 (3.8 to 58.3)</b>     | <b>-32.7 (-43.1 to -23)</b>     | <b>-23.1 (-33.2 to -13.9)</b>            |
| 16 Measles                     | 16 Road injuries               | 9.02 (-36.6 to 87.2)          | <b>-43.3 (-67.5 to -3.23)</b>   | <b>-45.1 (-67.4 to -9.06)</b>            |
| 17 Hemoglobinopathies          | 17 iNTS                        | -5.85 (-53.7 to 59.7)         | <b>-51.1 (-74.5 to -15.6)</b>   | -36.4 (-64.6 to 9.81)                    |
| 18 Protein-energy malnutrition | 18 Cirrhosis liver             | <b>47.8 (18.9 to 82.5)</b>    | <b>-23.2 (-36.5 to -5.59)</b>   | <b>-40.6 (-51 to -27.8)</b>              |
| 19 Dietary iron deficiency     | 19 Dietary iron deficiency     | <b>32 (12.5 to 52.2)</b>      | <b>-31.5 (-34.2 to -28.5)</b>   | <b>-25.3 (-26.4 to -24.1)</b>            |
| 20 Cirrhosis liver             | 20 Meningitis                  | -34.3 (-59.4 to 9.19)         | <b>-65.8 (-78.4 to -42.9)</b>   | <b>-56.6 (-71.6 to -31)</b>              |
| 21 Diabetes                    | 21 Maternal disorders          |                               |                                 |                                          |
| 22 Depressive disorders        | 28 Tuberculosis                |                               |                                 |                                          |
| 23 Low back pain               | 42 Protein-energy malnutrition |                               |                                 |                                          |
| 24 Headache disorders          | 48 HIV/AIDS                    |                               |                                 |                                          |
| 27 Chronic kidney disease      | 103 Measles                    |                               |                                 |                                          |
| 44 Other musculoskeletal       | 166 COVID-19                   |                               |                                 |                                          |

### Guinea-Bissau, Reference scenario

**Legend:**  
Communicable, maternal, neonatal and nutritional  
Non-communicable  
Injuries

| Leading Causes 2022           | Leading Causes 2050           | Mean % change number of DALY | Mean % change all-age DALY rate | Mean % change age-standardized DALY rate |
|-------------------------------|-------------------------------|------------------------------|---------------------------------|------------------------------------------|
| 1 Neonatal disorders          | 1 Neonatal disorders          | -42.1 (-57.2 to -24.8)       | -67.4 (-74.2 to -60.2)          | -45.3 (-54.5 to -33.1)                   |
| 2 COVID-19                    | 2 Lower respiratory infect    | 0.833 (-22.5 to 26.3)        | -43.1 (-54.9 to -29.5)          | -42.3 (-52.2 to -30.5)                   |
| 3 HIV/AIDS                    | 3 Stroke                      | 49.9 (17.5 to 89.7)          | -15.4 (-32.5 to 4.33)           | -48.1 (-59 to -34.7)                     |
| 4 Lower respiratory infect    | 4 HIV/AIDS                    | -38.2 (-59 to -4.84)         | -65.2 (-76.2 to -48.2)          | -68.6 (-77.5 to -53.8)                   |
| 5 Measles                     | 5 Road injuries               | 26.9 (-34.1 to 133)          | -28.4 (-61.8 to 30.8)           | -33.1 (-63.7 to 18.8)                    |
| 6 Stroke                      | 6 Diabetes                    | 183 (132 to 244)             | 59.8 (31.1 to 89.2)             | -2.96 (-18.5 to 13.6)                    |
| 7 Diarrheal diseases          | 7 Ischemic heart disease      | 67.4 (8.36 to 145)           | -5.48 (-36.8 to 37.4)           | -45.5 (-64.3 to -19.8)                   |
| 8 Road injuries               | 8 Diarrheal diseases          | -9.23 (-42.3 to 30.4)        | -48.8 (-65.4 to -28.7)          | -44.4 (-61.7 to -22.6)                   |
| 9 Congenital defects          | 9 Chronic kidney disease      | 156 (83.9 to 249)            | 44.3 (5.3 to 92.3)              | 5.1 (-21.6 to 37.3)                      |
| 10 Tuberculosis               | 10 Congenital defects         | -20.8 (-38.4 to 1.96)        | -55.5 (-61.8 to -47.8)          | -32.8 (-40.7 to -22.5)                   |
| 11 Ischemic heart disease     | 11 Cirrhosis liver            | 53.3 (21.4 to 97.1)          | -13.5 (-30.8 to 5.73)           | -40 (-50.8 to -27.4)                     |
| 12 Malaria                    | 12 Depressive disorders       | 121 (89 to 153)              | 24.7 (17.2 to 33.6)             | -3.9 (-4.4 to -3.4)                      |
| 13 Dietary iron deficiency    | 13 Other musculoskeletal      | 426 (347 to 511)             | 196 (173 to 222)                | 115 (107 to 121)                         |
| 14 Cirrhosis liver            | 14 Dietary iron deficiency    | 28 (5.04 to 53.8)            | -28 (-31.1 to -24.5)            | -21.2 (-22.1 to -20.1)                   |
| 15 Pertussis                  | 15 Headache disorders         | 109 (73.8 to 142)            | 17.6 (11.9 to 31.6)             | 0.536 (0.211 to 0.846)                   |
| 16 Meningitis                 | 16 Low back pain              | 125 (92.3 to 158)            | 27.1 (18.5 to 37)               | -7.42 (-7.69 to -7.07)                   |
| 17 Diabetes                   | 17 Hypertensive heart disease | 156 (84.2 to 248)            | 44.8 (8.11 to 95.1)             | -18 (-38.3 to 11.6)                      |
| 18 Interpersonal violence     | 18 Tuberculosis               | -35.4 (-59.1 to -1.35)       | -63.5 (-75.5 to -47.9)          | -72.2 (-81.3 to -59.1)                   |
| 19 Chronic kidney disease     | 19 Interpersonal violence     | 47.1 (11.5 to 83.4)          | -17.2 (-31 to 0.137)            | -26.5 (-37.5 to -11.2)                   |
| 20 Depressive disorders       | 20 Self-harm                  | 85.3 (45 to 131)             | 4.58 (-16.5 to 28.4)            | -19.7 (-34.3 to -2.63)                   |
| 21 Headache disorders         | 25 Meningitis                 |                              |                                 |                                          |
| 23 Low back pain              | 29 Pertussis                  |                              |                                 |                                          |
| 25 Self-harm                  | 45 Measles                    |                              |                                 |                                          |
| 28 Hypertensive heart disease | 75 Malaria                    |                              |                                 |                                          |
| 40 Other musculoskeletal      | 166 COVID-19                  |                              |                                 |                                          |

### Liberia, Reference scenario

**Legend:**  
Communicable, maternal, neonatal and nutritional  
Non-communicable  
Injuries

| Leading Causes 2022           | Leading Causes 2050           | Mean % change number of DALY | Mean % change all-age DALY rate | Mean % change age-standardized DALY rate |
|-------------------------------|-------------------------------|------------------------------|---------------------------------|------------------------------------------|
| 1 Malaria                     | 1 Neonatal disorders          | -37.3 (-56.8 to -12.2)       | -61.5 (-71 to -49.3)            | -35.6 (-48.3 to -18.4)                   |
| 2 Neonatal disorders          | 2 Malaria                     | -42.3 (-90.1 to 175)         | -64.2 (-93.8 to 80.6)           | -59.4 (-93.1 to 97)                      |
| 3 Diarrheal diseases          | 3 Stroke                      | 83.9 (39.8 to 139)           | 13.6 (-10.1 to 45.3)            | -40.7 (-53.5 to -20.9)                   |
| 4 Lower respiratory infect    | 4 Diabetes                    | 238 (166 to 316)             | 109 (75.8 to 149)               | 11.5 (-4.71 to 33.8)                     |
| 5 Congenital defects          | 5 Lower respiratory infect    | 7.69 (-17.1 to 33.6)         | -33.5 (-45.9 to -18.2)          | -35.2 (-46.7 to -19)                     |
| 6 Stroke                      | 6 Diarrheal diseases          | -11.4 (-48.8 to 45)          | -45.3 (-67.1 to -10.5)          | -36.8 (-61.2 to 1.52)                    |
| 7 HIV/AIDS                    | 7 Ischemic heart disease      | 128 (49.3 to 257)            | 41 (-7.7 to 116)                | -32.2 (-56.8 to 9.34)                    |
| 8 Onchocerciasis              | 8 Chronic kidney disease      | 178 (103 to 291)             | 72 (26.4 to 134)                | 10.8 (-21.1 to 57)                       |
| 9 Maternal disorders          | 9 Depressive disorders        | 112 (73 to 154)              | 30.8 (21.3 to 42.9)             | -1.94 (-3.23 to -0.561)                  |
| 10 Dietary iron deficiency    | 10 Dietary iron deficiency    | 37.9 (13.6 to 66.3)          | -15.1 (-19.2 to -11)            | -13.9 (-15 to -12.1)                     |
| 11 Ischemic heart disease     | 11 Low back pain              | 121 (80.3 to 158)            | 36.3 (25.6 to 48.7)             | -5.18 (-5.64 to -4.73)                   |
| 12 Road injuries              | 12 Hypertensive heart disease | 213 (130 to 333)             | 93.6 (42.6 to 163)              | -5.79 (-32.2 to 32.1)                    |
| 13 Diabetes                   | 13 Onchocerciasis             | 7.98 (-12.2 to 31)           | -33.4 (-40.6 to -24.7)          | -45.7 (-47.9 to -42.8)                   |
| 14 Cirrhosis liver            | 14 Cirrhosis liver            | 65 (25.7 to 108)             | 1.93 (-19.8 to 27.8)            | -34.2 (-46.1 to -18)                     |
| 15 Depressive disorders       | 15 Congenital defects         | -31.2 (-49.7 to -7.35)       | -57.8 (-65 to -47.7)            | -34.8 (-43.2 to -23.1)                   |
| 16 STIs                       | 16 Headache disorders         | 87.4 (56.3 to 121)           | 15.5 (8.1 to 29.1)              | 0.918 (0.433 to 1.4)                     |
| 17 Chronic kidney disease     | 17 Road injuries              | 23.2 (-30.6 to 135)          | -23.9 (-57.4 to 38.8)           | -30.9 (-61.5 to 23.4)                    |
| 18 Tuberculosis               | 18 Other musculoskeletal      | 317 (239 to 393)             | 157 (134 to 183)                | 77.2 (68.8 to 82.4)                      |
| 19 Meningitis                 | 19 Liver cancer               | 179 (103 to 288)             | 72.6 (27.8 to 131)              | 1.6 (-25.3 to 41.7)                      |
| 20 Hemoglobinopathies         | 20 Gynecological diseases     | 71.7 (34.4 to 122)           | 6.02 (-16.4 to 31.6)            | -15.3 (-31.5 to 3.97)                    |
| 22 Headache disorders         | 21 Hemoglobinopathies         |                              |                                 |                                          |
| 23 Low back pain              | 25 Maternal disorders         |                              |                                 |                                          |
| 26 Gynecological diseases     | 27 Tuberculosis               |                              |                                 |                                          |
| 29 Hypertensive heart disease | 34 Meningitis                 |                              |                                 |                                          |
| 33 Liver cancer               | 44 STIs                       |                              |                                 |                                          |
| 41 Other musculoskeletal      | 71 HIV/AIDS                   |                              |                                 |                                          |

### Mali, Reference scenario

**Legend:**  
Communicable, maternal, neonatal and nutritional  
Non-communicable  
Injuries

| Leading Causes 2022           | Leading Causes 2050            | Mean % change number of DALY  | Mean % change all-age DALY rate | Mean % change age-standardized DALY rate |
|-------------------------------|--------------------------------|-------------------------------|---------------------------------|------------------------------------------|
| 1 Neonatal disorders          | 1 Neonatal disorders           | -6.16 (-29.3 to 24.5)         | <b>-60.4 (-69.2 to -47.8)</b>   | <b>-45 (-57.2 to -28.1)</b>              |
| 2 Malaria                     | 2 Malaria                      | -46.6 (-93.9 to 198)          | -76 (-97.4 to 26.4)             | -71.6 (-96.3 to 64.1)                    |
| 3 Lower respiratory infect    | 3 Congenital defects           | 9.91 (-14.7 to 36.2)          | <b>-53.6 (-60.7 to -45)</b>     | <b>-38.7 (-47.6 to -30)</b>              |
| 4 Congenital defects          | 4 Lower respiratory infect     | -14.6 (-36.7 to 10.6)         | <b>-63.9 (-71.6 to -54)</b>     | <b>-47.3 (-56.5 to -35)</b>              |
| 5 Protein-energy malnutrition | 5 Diabetes                     | <b>241 (174 to 312)</b>       | <b>44.2 (24 to 64.1)</b>        | <b>16.9 (2.51 to 33.1)</b>               |
| 6 Diarrheal diseases          | 6 Dietary iron deficiency      | <b>74.2 (49.9 to 105)</b>     | <b>-26.4 (-28.2 to -24.9)</b>   | <b>-21.1 (-22.1 to -20.1)</b>            |
| 7 Dietary iron deficiency     | 7 Diarrheal diseases           | -10.5 (-47.2 to 41)           | <b>-62.2 (-76.5 to -42.6)</b>   | <b>-52.6 (-68.4 to -31.9)</b>            |
| 8 Measles                     | 8 Stroke                       | <b>73.8 (32.1 to 122)</b>     | <b>-26.6 (-41.4 to -10.7)</b>   | <b>-36.2 (-49 to -20.7)</b>              |
| 9 iNTS                        | 9 iNTS                         | 4.4 (-48.3 to 94.3)           | <b>-56 (-78.1 to -19.7)</b>     | <b>-48.2 (-72.6 to -8.81)</b>            |
| 10 HIV/AIDS                   | 10 Headache disorders          | <b>165 (125 to 214)</b>       | <b>12 (9.03 to 16.2)</b>        | <b>0.896 (0.464 to 1.28)</b>             |
| 11 Stroke                     | 11 Other musculoskeletal       | <b>576 (461 to 701)</b>       | <b>186 (168 to 202)</b>         | <b>138 (129 to 145)</b>                  |
| 12 Meningitis                 | 12 Road injuries               | 37.2 (-21.2 to 133)           | <b>-42.1 (-67 to -2.19)</b>     | <b>-42.9 (-65.7 to -7.23)</b>            |
| 13 Road injuries              | 13 Chronic kidney disease      | <b>178 (88.4 to 274)</b>      | 17.5 (-16.7 to 59.2)            | 13 (-15.4 to 51.9)                       |
| 14 COVID-19                   | 14 Depressive disorders        | <b>163 (123 to 206)</b>       | <b>10.9 (6.84 to 15.4)</b>      | <b>-3.9 (-4.43 to -3.3)</b>              |
| 15 Tuberculosis               | 15 Low back pain               | <b>155 (116 to 198)</b>       | <b>7.74 (2.57 to 12.1)</b>      | <b>-8.22 (-8.54 to -7.88)</b>            |
| 16 Diabetes                   | 16 Ischemic heart disease      | <b>100 (25.3 to 194)</b>      | -15.5 (-45.4 to 23.4)           | -31.7 (-56.1 to 1.22)                    |
| 17 Maternal disorders         | 17 Hemoglobinopathies          | <b>60.2 (25.5 to 92.9)</b>    | <b>-32.4 (-39.8 to -25.3)</b>   | <b>-23.5 (-29.7 to -17.3)</b>            |
| 18 Pertussis                  | 18 Interpersonal violence      | <b>88.6 (49.6 to 142)</b>     | <b>-20.4 (-32.8 to -1.41)</b>   | <b>-23.2 (-34.3 to -6.46)</b>            |
| 19 STIs                       | 19 Protein-energy malnutrition | <b>-59.1 (-81.2 to -17.2)</b> | <b>-82.7 (-92.1 to -64.8)</b>   | <b>-75.8 (-88.1 to -54.1)</b>            |
| 20 Hemoglobinopathies         | 20 Liver cancer                | <b>144 (80.1 to 213)</b>      | 2.89 (-19.8 to 29.8)            | -12.7 (-33 to 11.4)                      |
| 21 Interpersonal violence     | 23 Meningitis                  |                               |                                 |                                          |
| 22 Ischemic heart disease     | 26 Maternal disorders          |                               |                                 |                                          |
| 25 Headache disorders         | 28 Pertussis                   |                               |                                 |                                          |
| 26 Chronic kidney disease     | 35 STIs                        |                               |                                 |                                          |
| 27 Low back pain              | 36 Tuberculosis                |                               |                                 |                                          |
| 28 Depressive disorders       | 71 Measles                     |                               |                                 |                                          |
| 30 Liver cancer               | 84 HIV/AIDS                    |                               |                                 |                                          |

### Mauritania, Reference scenario

**Legend:**  
Communicable, maternal, neonatal and nutritional  
Non-communicable  
Injuries

| Leading Causes 2022           | Leading Causes 2050           | Mean % change number of DALY | Mean % change all-age DALY rate | Mean % change age-standardized DALY rate |
|-------------------------------|-------------------------------|------------------------------|---------------------------------|------------------------------------------|
| 1 Neonatal disorders          | 1 Neonatal disorders          | -9.5 (-30.8 to 16.6)         | <b>-47 (-55.6 to -35.9)</b>     | <b>-23 (-33.7 to -9.17)</b>              |
| 2 Lower respiratory infect    | 2 Lower respiratory infect    | 8.31 (-16.3 to 36.1)         | <b>-36.4 (-48 to -20.8)</b>     | <b>-32.5 (-43.8 to -17.2)</b>            |
| 3 Road injuries               | 3 Road injuries               | 32.2 (-31.4 to 143)          | -22.4 (-57.1 to 42.2)           | -25.3 (-57 to 33.7)                      |
| 4 COVID-19                    | 4 Stroke                      | <b>51.1 (19.8 to 86.3)</b>   | -11.2 (-28 to 9.97)             | <b>-42.4 (-53.2 to -26.6)</b>            |
| 5 Stroke                      | 5 Diabetes                    | <b>162 (117 to 218)</b>      | <b>54.2 (30.2 to 84.6)</b>      | 0.947 (-15.3 to 20.3)                    |
| 6 Diarrheal diseases          | 6 Ischemic heart disease      | 43.4 (-0.336 to 105)         | -15.7 (-40.1 to 17.2)           | <b>-46.3 (-63.3 to -21.2)</b>            |
| 7 Malaria                     | 7 Chronic kidney disease      | <b>192 (119 to 287)</b>      | <b>71.3 (34.9 to 122)</b>       | 24.3 (-4.83 to 65.3)                     |
| 8 Congenital defects          | 8 Other musculoskeletal       | <b>348 (288 to 408)</b>      | <b>163 (145 to 184)</b>         | <b>94 (90 to 97.7)</b>                   |
| 9 Ischemic heart disease      | 9 Low back pain               | <b>112 (81.7 to 140)</b>     | <b>24.7 (16.9 to 33.7)</b>      | <b>-6.43 (-6.65 to -6.21)</b>            |
| 10 Maternal disorders         | 10 Headache disorders         | <b>97.5 (69.5 to 127)</b>    | <b>15.9 (10.3 to 26.9)</b>      | <b>0.411 (0.196 to 0.606)</b>            |
| 11 Dietary iron deficiency    | 11 Depressive disorders       | <b>110 (77.8 to 139)</b>     | <b>23.1 (15.5 to 31)</b>        | <b>-3.2 (-3.5 to -2.89)</b>              |
| 12 Diabetes                   | 12 Hypertensive heart disease | <b>153 (90.7 to 229)</b>     | <b>48.9 (15 to 89.8)</b>        | -5.59 (-28.7 to 23.8)                    |
| 13 Headache disorders         | 13 Diarrheal diseases         | -20 (-50.7 to 14.4)          | <b>-53.1 (-69.6 to -34.3)</b>   | <b>-48.9 (-64.8 to -29.4)</b>            |
| 14 Low back pain              | 14 Congenital defects         | -14.6 (-35.3 to 7.44)        | <b>-50 (-57.2 to -42.7)</b>     | <b>-29.7 (-37.8 to -19.2)</b>            |
| 15 Depressive disorders       | 15 Dietary iron deficiency    | <b>25.4 (3.13 to 47.3)</b>   | <b>-26.5 (-31.4 to -22.7)</b>   | <b>-18.7 (-19.5 to -17.6)</b>            |
| 16 Chronic kidney disease     | 16 Liver cancer               | <b>150 (89.4 to 238)</b>     | <b>46.9 (15.2 to 94.2)</b>      | 1.12 (-22 to 35.6)                       |
| 17 Pertussis                  | 17 Gynecological diseases     | <b>75.8 (39.5 to 116)</b>    | 3.22 (-15.4 to 25.7)            | <b>-20.2 (-35.1 to -2.84)</b>            |
| 18 Cirrhosis liver            | 18 Cirrhosis liver            | <b>55.1 (24.2 to 92.3)</b>   | -8.9 (-25.2 to 11.5)            | <b>-34.2 (-45.1 to -19.6)</b>            |
| 19 Gynecological diseases     | 19 Age-related hearing loss   | <b>124 (90.9 to 158)</b>     | <b>31.5 (19.9 to 43.3)</b>      | <b>-1.98 (-2.13 to -1.85)</b>            |
| 20 Hypertensive heart disease | 20 Anxiety disorders          | <b>86.8 (58.2 to 119)</b>    | <b>9.57 (3.6 to 17.7)</b>       | <b>1.5 (1.23 to 1.79)</b>                |
| 23 Anxiety disorders          | 26 Maternal disorders         |                              |                                 |                                          |
| 24 Liver cancer               | 32 Malaria                    |                              |                                 |                                          |
| 27 Age-related hearing loss   | 45 Pertussis                  |                              |                                 |                                          |
| 29 Other musculoskeletal      | 162 COVID-19                  |                              |                                 |                                          |

### Niger, Reference scenario

**Legend:**

Communicable, maternal, neonatal and nutritional  
 Non-communicable  
 Injuries

| Leading Causes 2022            | Leading Causes 2050            | Mean % change number of DALY | Mean % change all-age DALY rate | Mean % change age-standardized DALY rate |
|--------------------------------|--------------------------------|------------------------------|---------------------------------|------------------------------------------|
| 1 Neonatal disorders           | 1 Neonatal disorders           | <b>53.3 (19.6 to 91.8)</b>   | <b>-45.6 (-56.4 to -33)</b>     | <b>-31.6 (-43.8 to -17.1)</b>            |
| 2 Malaria                      | 2 Malaria                      | 30.9 (-92.4 to 659)          | -52.8 (-97.3 to 172)            | -49.5 (-96 to 192)                       |
| 3 Lower respiratory infect     | 3 Lower respiratory infect     | 24.9 (-4.38 to 65.5)         | <b>-55.7 (-65.3 to -40.3)</b>   | <b>-36.2 (-47.6 to -21.8)</b>            |
| 4 Diarrheal diseases           | 4 Diarrheal diseases           | 17.4 (-24.4 to 70.1)         | <b>-58.3 (-72.5 to -39.4)</b>   | <b>-44 (-61.7 to -21.9)</b>              |
| 5 Measles                      | 5 Congenital defects           | <b>43.7 (14.7 to 77)</b>     | <b>-49 (-56.7 to -38.8)</b>     | <b>-37.5 (-45.8 to -27)</b>              |
| 6 Congenital defects           | 6 Stroke                       | <b>141 (87.9 to 205)</b>     | -14.4 (-28.9 to 3.81)           | -7.32 (-23.8 to 14.2)                    |
| 7 Meningitis                   | 7 iNTS                         | 76 (-7.02 to 192)            | <b>-37.5 (-66.9 to -0.529)</b>  | -30.9 (-60.7 to 6.79)                    |
| 8 Tuberculosis                 | 8 Pertussis                    | <b>90.4 (5.75 to 194)</b>    | -32.5 (-60 to 2.54)             | -20.5 (-51.2 to 20.4)                    |
| 9 iNTS                         | 9 Meningitis                   | 22.1 (-26.7 to 100)          | <b>-56.6 (-73.7 to -27.6)</b>   | <b>-47.8 (-65.6 to -18.5)</b>            |
| 10 Pertussis                   | 10 Diabetes                    | <b>307 (235 to 388)</b>      | <b>44.5 (26.4 to 67.4)</b>      | <b>48.1 (25.9 to 74.6)</b>               |
| 11 Stroke                      | 11 Dietary iron deficiency     | <b>119 (84.1 to 153)</b>     | <b>-22.5 (-24.7 to -20.3)</b>   | <b>-19.2 (-20.3 to -18)</b>              |
| 12 Maternal disorders          | 12 Ischemic heart disease      | <b>235 (130 to 359)</b>      | 19.1 (-16.1 to 62.8)            | 23.1 (-14.3 to 77.8)                     |
| 13 Dietary iron deficiency     | 13 Maternal disorders          | <b>53 (1.2 to 122)</b>       | <b>-45.6 (-63.1 to -20.2)</b>   | <b>-53.9 (-68.1 to -33.8)</b>            |
| 14 Road injuries               | 14 Headache disorders          | <b>210 (169 to 257)</b>      | <b>9.97 (6.91 to 14.3)</b>      | <b>0.429 (0.043 to 0.881)</b>            |
| 15 Protein-energy malnutrition | 15 Depressive disorders        | <b>204 (163 to 249)</b>      | <b>7.74 (3.48 to 13.1)</b>      | <b>-3.53 (-4.25 to -2.73)</b>            |
| 16 Cirrhosis liver             | 16 Road injuries               | <b>102 (14 to 235)</b>       | -28 (-58.1 to 23.4)             | -28.4 (-55 to 15.1)                      |
| 17 COVID-19                    | 17 Low back pain               | <b>195 (152 to 241)</b>      | <b>4.57 (0.251 to 9.93)</b>     | <b>-6.65 (-7.03 to -6.24)</b>            |
| 18 Drowning                    | 18 Cirrhosis liver             | <b>90 (53.8 to 131)</b>      | <b>-32.5 (-42.8 to -18.3)</b>   | <b>-35.4 (-44.9 to -23.3)</b>            |
| 19 Hemoglobinopathies          | 19 Tuberculosis                | -10.7 (-46.2 to 46.2)        | <b>-68.2 (-80.7 to -48.8)</b>   | <b>-66.3 (-78 to -49.2)</b>              |
| 20 Headache disorders          | 20 Hemoglobinopathies          | <b>101 (64.3 to 140)</b>     | <b>-28.7 (-36.2 to -20.9)</b>   | <b>-19.8 (-25.9 to -13.7)</b>            |
| 21 Depressive disorders        | 26 Measles                     |                              |                                 |                                          |
| 22 Ischemic heart disease      | 34 Drowning                    |                              |                                 |                                          |
| 23 Low back pain               | 36 Protein-energy malnutrition |                              |                                 |                                          |
| 24 Diabetes                    | 167 COVID-19                   |                              |                                 |                                          |

### Nigeria, Reference scenario

**Legend:**  
Communicable, maternal, neonatal and nutritional  
Non-communicable  
Injuries

| Leading Causes 2022         | Leading Causes 2050         | Mean % change number of DALY | Mean % change all-age DALY rate | Mean % change age-standardized DALY rate |
|-----------------------------|-----------------------------|------------------------------|---------------------------------|------------------------------------------|
| 1 Neonatal disorders        | 1 Neonatal disorders        | -24.7 (-45 to -3.92)         | -60 (-67.6 to -51.7)            | -36.4 (-46.6 to -23.4)                   |
| 2 Malaria                   | 2 Malaria                   | -24.4 (-92.1 to 400)         | -58.6 (-95.6 to 173)            | -50.3 (-94.7 to 253)                     |
| 3 Lower respiratory infect  | 3 Lower respiratory infect  | -42.2 (-55.3 to -26.1)       | -69.2 (-75.1 to -61.9)          | -54.8 (-62.6 to -44.7)                   |
| 4 Diarrheal diseases        | 4 Diarrheal diseases        | -57.9 (-73 to -34.4)         | -77.5 (-85.4 to -65.4)          | -67.7 (-78.4 to -51.7)                   |
| 5 Congenital defects        | 5 Congenital defects        | -21.2 (-41.6 to 0.654)       | -58.1 (-65.7 to -49.2)          | -37.2 (-45.6 to -25.7)                   |
| 6 HIV/AIDS                  | 6 Diabetes                  | 210 (156 to 271)             | 65.4 (40.1 to 92.9)             | -1.15 (-14 to 12.2)                      |
| 7 Meningitis                | 7 Stroke                    | 74.4 (45.2 to 110)           | -6.9 (-21.3 to 9.67)            | -45.6 (-53.3 to -36.3)                   |
| 8 Tuberculosis              | 8 Ischemic heart disease    | 76.5 (26.7 to 146)           | -5.76 (-33.8 to 30.4)           | -48.2 (-63 to -28.3)                     |
| 9 Stroke                    | 9 Other musculoskeletal     | 410 (344 to 473)             | 172 (150 to 192)                | 93.5 (88.7 to 97.7)                      |
| 10 Pertussis                | 10 Low back pain            | 138 (108 to 168)             | 27.1 (19.1 to 36.5)             | -6.72 (-7.2 to -6.22)                    |
| 11 Dietary iron deficiency  | 11 Headache disorders       | 118 (87.2 to 151)            | 16.3 (10.1 to 27.3)             | 0.116 (-0.241 to 0.467)                  |
| 12 Ischemic heart disease   | 12 Dietary iron deficiency  | 37.3 (15.8 to 61.5)          | -26.9 (-29.7 to -24.1)          | -19.1 (-19.9 to -18.1)                   |
| 13 iNTS                     | 13 Chronic kidney disease   | 199 (129 to 294)             | 59.5 (18.9 to 112)              | 14.3 (-11.7 to 50.4)                     |
| 14 Hemoglobinopathies       | 14 Depressive disorders     | 134 (105 to 166)             | 25 (17.8 to 33.7)               | -3.5 (-4 to -3.04)                       |
| 15 Maternal disorders       | 15 HIV/AIDS                 | -45.1 (-61.4 to -36.3)       | -70.8 (-78.3 to -65.4)          | -75.5 (-81.5 to -71.8)                   |
| 16 Headache disorders       | 16 Hemoglobinopathies       | 23.8 (2.04 to 52.2)          | -34.1 (-42.5 to -26)            | -23.5 (-30.6 to -16.5)                   |
| 17 Road injuries            | 17 Cirrhosis liver          | 51.2 (25.2 to 83.5)          | -19.3 (-33.1 to -1.92)          | -39.8 (-48.2 to -27.9)                   |
| 18 Cirrhosis liver          | 18 Gynecological diseases   | 94.8 (59.6 to 138)           | 3.99 (-13.8 to 23.3)            | -20 (-32.6 to -6.95)                     |
| 19 Low back pain            | 19 Road injuries            | 39.9 (-11.4 to 129)          | -25.3 (-53.6 to 20.6)           | -32.6 (-56.9 to 8.82)                    |
| 20 Diabetes                 | 20 Age-related hearing loss | 155 (122 to 190)             | 35.9 (25.4 to 47)               | -2.05 (-2.28 to -1.8)                    |
| 22 Depressive disorders     | 24 Tuberculosis             |                              |                                 |                                          |
| 24 Gynecological diseases   | 26 Meningitis               |                              |                                 |                                          |
| 25 Chronic kidney disease   | 27 iNTS                     |                              |                                 |                                          |
| 28 Age-related hearing loss | 30 Pertussis                |                              |                                 |                                          |
| 34 Other musculoskeletal    | 31 Maternal disorders       |                              |                                 |                                          |



### São Tomé and Príncipe, Reference scenario

**Legend:**

Communicable, maternal, neonatal and nutritional  
 Non-communicable  
 Injuries

| Leading Causes 2022           | Leading Causes 2050           | Mean % change number of DALY | Mean % change all-age DALY rate | Mean % change age-standardized DALY rate |
|-------------------------------|-------------------------------|------------------------------|---------------------------------|------------------------------------------|
| 1 Lower respiratory infect    | 1 Chronic kidney disease      | 141 (73.9 to 216)            | 124 (70.8 to 198)               | 17.1 (-10.4 to 52.5)                     |
| 2 Neonatal disorders          | 2 Stroke                      | 33.5 (2.95 to 66.7)          | 23.8 (-0.41 to 53.8)            | -43.8 (-52.9 to -31.5)                   |
| 3 Stroke                      | 3 Lower respiratory infect    | 11.2 (-14 to 37.1)           | 3.1 (-16.5 to 27.8)             | -37.3 (-45.9 to -26.7)                   |
| 4 Cirrhosis liver             | 4 Diabetes                    | 171 (128 to 222)             | 152 (121 to 190)                | 25.1 (13.1 to 36.4)                      |
| 5 Ischemic heart disease      | 5 Ischemic heart disease      | 48 (1.04 to 103)             | 37.2 (-1.56 to 94.5)            | -40.8 (-58.3 to -17.8)                   |
| 6 Chronic kidney disease      | 6 COPD                        | 103 (56.5 to 153)            | 88.2 (47.2 to 136)              | -20.4 (-34.8 to -1.22)                   |
| 7 COPD                        | 7 Cirrhosis liver             | 22.1 (-8.02 to 48.9)         | 13.2 (-8.6 to 40)               | -34.6 (-44.2 to -23)                     |
| 8 Congenital defects          | 8 Neonatal disorders          | -45.4 (-60 to -26.8)         | -49.7 (-58.1 to -41.5)          | -26.3 (-36.5 to -14.2)                   |
| 9 Headache disorders          | 9 Low back pain               | 54.9 (28.5 to 79.2)          | 43.4 (30.7 to 57.4)             | -5.37 (-5.52 to -5.21)                   |
| 10 Dietary iron deficiency    | 10 Other musculoskeletal      | 169 (128 to 219)             | 149 (127 to 178)                | 70.4 (65.9 to 73.9)                      |
| 11 Diabetes                   | 11 Depressive disorders       | 39.3 (15.6 to 64.8)          | 28.8 (18.7 to 41.1)             | -2.49 (-2.77 to -2.2)                    |
| 12 Depressive disorders       | 12 Headache disorders         | 21.7 (-0.173 to 47.3)        | 12.5 (4.5 to 33.6)              | 0.751 (0.461 to 0.926)                   |
| 13 Road injuries              | 13 Falls                      | 54.4 (21.2 to 90.8)          | 43.1 (17.7 to 75.5)             | -11.9 (-21 to -2.08)                     |
| 14 Low back pain              | 14 Other cardiovascular       | 76.1 (43.4 to 114)           | 63.4 (33.4 to 99.8)             | -19.6 (-29.5 to -8.14)                   |
| 15 Asthma                     | 15 Age-related hearing loss   | 82.9 (55.3 to 115)           | 69.4 (52.5 to 87.3)             | -1.4 (-1.54 to -1.24)                    |
| 16 Gynecological diseases     | 16 Lung cancer                | 141 (88.2 to 211)            | 123 (73.2 to 181)               | -2.9 (-19.7 to 17.2)                     |
| 17 Diarrheal diseases         | 17 Road injuries              | -4.68 (-46.4 to 55)          | -11.8 (-43.8 to 40.5)           | -28.6 (-56.2 to 13.5)                    |
| 18 Falls                      | 18 Gynecological diseases     | 10.8 (-14.8 to 39.9)         | 2.6 (-16.8 to 24.3)             | -16.4 (-30.4 to 0.507)                   |
| 19 Anxiety disorders          | 19 Hypertensive heart disease | 139 (73.3 to 213)            | 121 (69.8 to 192)               | -2.74 (-25.1 to 25.8)                    |
| 20 Hemoglobinopathies         | 20 Blindness and vision loss  | 97.9 (66.1 to 128)           | 83.4 (62.3 to 106)              | -7.41 (-8.1 to -6.74)                    |
| 21 Other cardiovascular       | 21 Dietary iron deficiency    |                              |                                 |                                          |
| 22 Age-related hearing loss   | 22 Anxiety disorders          |                              |                                 |                                          |
| 24 Other musculoskeletal      | 27 Asthma                     |                              |                                 |                                          |
| 31 Lung cancer                | 30 Congenital defects         |                              |                                 |                                          |
| 32 Blindness and vision loss  | 34 Hemoglobinopathies         |                              |                                 |                                          |
| 34 Hypertensive heart disease | 42 Diarrheal diseases         |                              |                                 |                                          |

### Senegal, Reference scenario

**Legend:**  
 Communicable, maternal, neonatal and nutritional  
 Non-communicable  
 Injuries

| Leading Causes 2022           | Leading Causes 2050           | Mean % change number of DALY | Mean % change all-age DALY rate | Mean % change age-standardized DALY rate |
|-------------------------------|-------------------------------|------------------------------|---------------------------------|------------------------------------------|
| 1 Neonatal disorders          | 1 Neonatal disorders          | -32.6 (-48.5 to -14.9)       | -59.7 (-66.3 to -52)            | -36.9 (-45.2 to -25.7)                   |
| 2 Lower respiratory infect    | 2 Diabetes                    | 146 (106 to 190)             | 47.4 (28 to 71.9)               | -8.16 (-19.1 to 5.11)                    |
| 3 Stroke                      | 3 Stroke                      | 26.2 (2.44 to 52.4)          | -24.5 (-36.8 to -11)            | -53.5 (-60.4 to -44.8)                   |
| 4 Congenital defects          | 4 Lower respiratory infect    | -20 (-38.1 to -0.0297)       | -52.2 (-61.2 to -41.4)          | -46.7 (-55.3 to -36.9)                   |
| 5 Malaria                     | 5 Ischemic heart disease      | 23.9 (-12.2 to 65.4)         | -25.9 (-45.7 to 0.752)          | -56 (-68.4 to -38.6)                     |
| 6 Diarrheal diseases          | 6 Other musculoskeletal       | 392 (341 to 456)             | 194 (176 to 216)                | 116 (111 to 121)                         |
| 7 Ischemic heart disease      | 7 Dietary iron deficiency     | 21.8 (3.55 to 39.3)          | -27.2 (-30.9 to -23.7)          | -19 (-19.7 to -18.1)                     |
| 8 Dietary iron deficiency     | 8 Depressive disorders        | 106 (81.9 to 135)            | 23.5 (16.6 to 32)               | -3.87 (-4.19 to -3.54)                   |
| 9 Diabetes                    | 9 Chronic kidney disease      | 98.8 (45.5 to 158)           | 18.9 (-7.42 to 53.2)            | -17.1 (-35 to 8.15)                      |
| 10 Road injuries              | 10 Low back pain              | 109 (85.9 to 134)            | 25 (17.4 to 33.1)               | -7.71 (-7.95 to -7.51)                   |
| 11 COVID-19                   | 11 Headache disorders         | 92.2 (68 to 117)             | 15 (9.62 to 26.2)               | 0.585 (0.261 to 0.836)                   |
| 12 Tuberculosis               | 12 Congenital defects         | -25.6 (-40.3 to -6.9)        | -55.6 (-61.9 to -47.8)          | -34.4 (-41.6 to -24.3)                   |
| 13 Chronic kidney disease     | 13 Diarrheal diseases         | -18.3 (-44.4 to 15.7)        | -51.1 (-66.7 to -31.5)          | -49.8 (-63.9 to -31.6)                   |
| 14 Maternal disorders         | 14 Road injuries              | 13.7 (-33.4 to 96)           | -32 (-57.4 to 13.8)             | -38.7 (-61.3 to -0.505)                  |
| 15 Depressive disorders       | 15 Hypertensive heart disease | 129 (73.4 to 195)            | 36.8 (6.88 to 77.4)             | -19.2 (-36.4 to 7.16)                    |
| 16 Headache disorders         | 16 Cirrhosis liver            | 45.6 (18.4 to 75.8)          | -12.9 (-27.3 to 5.09)           | -38.7 (-47.5 to -27.3)                   |
| 17 Meningitis                 | 17 Age-related hearing loss   | 128 (102 to 157)             | 36.6 (26.3 to 48.6)             | -2.18 (-2.31 to -2.04)                   |
| 18 Cirrhosis liver            | 18 Gynecological diseases     | 61 (28.8 to 96.9)            | -3.63 (-20.8 to 15)             | -24.2 (-36.3 to -9.72)                   |
| 19 Low back pain              | 19 COPD                       | 102 (59.4 to 142)            | 21 (-0.558 to 48)               | -26.9 (-41 to -10.3)                     |
| 20 Hemoglobinopathies         | 20 Anxiety disorders          | 83.3 (60.4 to 108)           | 9.61 (3.48 to 17.7)             | 2.03 (1.79 to 2.29)                      |
| 22 Gynecological diseases     | 23 Hemoglobinopathies         |                              |                                 |                                          |
| 26 Hypertensive heart disease | 30 Tuberculosis               |                              |                                 |                                          |
| 27 Anxiety disorders          | 31 Meningitis                 |                              |                                 |                                          |
| 29 COPD                       | 36 Maternal disorders         |                              |                                 |                                          |
| 30 Age-related hearing loss   | 46 Malaria                    |                              |                                 |                                          |
| 32 Other musculoskeletal      | 164 COVID-19                  |                              |                                 |                                          |

### Sierra Leone, Reference scenario

**Legend:**  
Communicable, maternal, neonatal and nutritional  
Non-communicable  
Injuries

| Leading Causes 2022           | Leading Causes 2050            | Mean % change number of DALY | Mean % change all-age DALY rate | Mean % change age-standardized DALY rate |
|-------------------------------|--------------------------------|------------------------------|---------------------------------|------------------------------------------|
| 1 Neonatal disorders          | 1 Neonatal disorders           | -47.2 (-60.6 to -29)         | -69 (-76 to -58.5)              | -47.6 (-58.9 to -30.4)                   |
| 2 Malaria                     | 2 Malaria                      | -37.8 (-93.3 to 228)         | -61.5 (-96.2 to 113)            | -50.4 (-95.2 to 131)                     |
| 3 Lower respiratory infect    | 3 Lower respiratory infect     | -16.2 (-31.5 to 1.85)        | -50.7 (-61 to -39.9)            | -42 (-52.3 to -31.1)                     |
| 4 Protein-energy malnutrition | 4 Diarrheal diseases           | -1.62 (-38.4 to 43.1)        | -42.2 (-62.2 to -16.6)          | -34 (-53.3 to -10)                       |
| 5 Diarrheal diseases          | 5 Stroke                       | 32.2 (6.04 to 62.6)          | -22.3 (-37.9 to -1.8)           | -49.9 (-59.4 to -37.3)                   |
| 6 Congenital defects          | 6 Diabetes                     | 183 (135 to 236)             | 66.2 (37.6 to 96.8)             | 3.34 (-11 to 19.4)                       |
| 7 Stroke                      | 7 Ischemic heart disease       | 50.9 (1.81 to 112)           | -11.2 (-41.9 to 27.9)           | -47.8 (-65.4 to -23.8)                   |
| 8 Tuberculosis                | 8 Congenital defects           | -33.1 (-49 to -15.2)         | -60.8 (-68 to -51.7)            | -38.6 (-47.1 to -26.7)                   |
| 9 Ischemic heart disease      | 9 Depressive disorders         | 110 (82.6 to 136)            | 23.1 (16 to 31.6)               | -3.09 (-3.83 to -2.32)                   |
| 10 Road injuries              | 10 Road injuries               | 18 (-30.1 to 93.9)           | -30.6 (-58.1 to 10.8)           | -32.7 (-58.1 to 9.83)                    |
| 11 HIV/AIDS                   | 11 Low back pain               | 116 (88.7 to 142)            | 26.9 (19.6 to 37.1)             | -6.63 (-7.16 to -6.18)                   |
| 12 Maternal disorders         | 12 Other musculoskeletal       | 387 (324 to 452)             | 186 (166 to 209)                | 108 (101 to 113)                         |
| 13 iNTS                       | 13 Headache disorders          | 95.5 (69.3 to 125)           | 14.8 (9.39 to 26.5)             | 0.967 (0.369 to 1.51)                    |
| 14 Hemoglobinopathies         | 14 Protein-energy malnutrition | -65.6 (-82.6 to -38.7)       | -79.7 (-89.3 to -62.3)          | -69.3 (-83.4 to -42.4)                   |
| 15 Meningitis                 | 15 Chronic kidney disease      | 127 (67.3 to 203)            | 33.6 (-0.122 to 76.1)           | 0.346 (-25.9 to 32.3)                    |
| 16 Dietary iron deficiency    | 16 Hemoglobinopathies          | 12.2 (-11.3 to 37.9)         | -34.2 (-42.7 to -24.1)          | -22.8 (-30.5 to -13.2)                   |
| 17 Depressive disorders       | 17 Cirrhosis liver             | 38.5 (11.9 to 64)            | -18.6 (-32.7 to -0.873)         | -42.6 (-52.3 to -30.9)                   |
| 18 Diabetes                   | 18 Dietary iron deficiency     | 23.1 (3.67 to 41)            | -27.8 (-31.6 to -24.1)          | -20.4 (-21.2 to -19.2)                   |
| 19 Cirrhosis liver            | 19 Tuberculosis                | -36.2 (-58.6 to -3.35)       | -62.4 (-76.5 to -43.1)          | -67.8 (-79.1 to -51.7)                   |
| 20 Headache disorders         | 20 Maternal disorders          | -26.5 (-53 to 9.81)          | -56.9 (-71.1 to -37.6)          | -59.1 (-72.7 to -40.9)                   |
| 21 Low back pain              | 25 iNTS                        |                              |                                 |                                          |
| 24 Chronic kidney disease     | 29 Meningitis                  |                              |                                 |                                          |
| 40 Other musculoskeletal      | 63 HIV/AIDS                    |                              |                                 |                                          |

### Togo, Reference scenario

**Legend:**  
Communicable, maternal, neonatal and nutritional  
Non-communicable  
Injuries

| Leading Causes 2022           | Leading Causes 2050           | Mean % change number of DALY  | Mean % change all-age DALY rate | Mean % change age-standardized DALY rate |
|-------------------------------|-------------------------------|-------------------------------|---------------------------------|------------------------------------------|
| 1 Neonatal disorders          | 1 Lower respiratory infect    | 1.47 (-22.5 to 24.4)          | <b>-34.4 (-46.5 to -19.8)</b>   | <b>-37.5 (-47.4 to -24.1)</b>            |
| 2 Malaria                     | 2 Neonatal disorders          | <b>-46 (-60.2 to -30.5)</b>   | <b>-65.1 (-71.5 to -56.4)</b>   | <b>-42.6 (-51.8 to -29.5)</b>            |
| 3 Lower respiratory infect    | 3 Malaria                     | -37.2 (-92.3 to 154)          | -59.7 (-95.1 to 72.7)           | -55.9 (-94.7 to 93)                      |
| 4 Diarrheal diseases          | 4 Stroke                      | <b>41.1 (9.88 to 74.7)</b>    | -8.71 (-26 to 15.2)             | <b>-49.7 (-59.1 to -35.3)</b>            |
| 5 Stroke                      | 5 Diarrheal diseases          | -12.7 (-42.9 to 25.7)         | <b>-43.5 (-62.6 to -16.3)</b>   | <b>-38 (-58.1 to -12.1)</b>              |
| 6 HIV/AIDS                    | 6 Diabetes                    | <b>187 (125 to 251)</b>       | <b>85.7 (55 to 122)</b>         | 6.16 (-9.74 to 25)                       |
| 7 Congenital defects          | 7 Ischemic heart disease      | 48.4 (-0.487 to 120)          | -3.81 (-34.5 to 45.3)           | <b>-49.4 (-66.8 to -22.2)</b>            |
| 8 Road injuries               | 8 Road injuries               | 4.22 (-39.1 to 82.6)          | -32.4 (-61.3 to 20.5)           | -34.3 (-61.4 to 15.7)                    |
| 9 Hemoglobinopathies          | 9 Depressive disorders        | <b>96.9 (63.9 to 133)</b>     | <b>27.1 (20.9 to 34.6)</b>      | <b>-3.93 (-4.41 to -3.41)</b>            |
| 10 Ischemic heart disease     | 10 Chronic kidney disease     | <b>162 (95.1 to 251)</b>      | <b>69.5 (30.4 to 129)</b>       | 9.81 (-17.9 to 49.5)                     |
| 11 Dietary iron deficiency    | 11 Other musculoskeletal      | <b>336 (264 to 406)</b>       | <b>181 (163 to 200)</b>         | <b>101 (96.2 to 105)</b>                 |
| 12 Tuberculosis               | 12 Hemoglobinopathies         | 2.44 (-19 to 24.2)            | <b>-33.9 (-40.1 to -27.3)</b>   | <b>-26.7 (-33.5 to -20)</b>              |
| 13 COVID-19                   | 13 Low back pain              | <b>101 (69.6 to 134)</b>      | <b>29.7 (22.4 to 37.3)</b>      | <b>-7.22 (-7.71 to -6.78)</b>            |
| 14 iNTS                       | 14 Dietary iron deficiency    | 6.48 (-15.2 to 28.2)          | <b>-31.4 (-36.2 to -27.3)</b>   | <b>-17.5 (-18.7 to -16.5)</b>            |
| 15 Depressive disorders       | 15 Headache disorders         | <b>79.2 (45.9 to 111)</b>     | <b>15.7 (10.6 to 28)</b>        | 0.295 (-0.102 to 0.683)                  |
| 16 Cirrhosis liver            | 16 Hypertensive heart disease | <b>170 (100 to 266)</b>       | <b>74.8 (31 to 133)</b>         | -8.89 (-32.2 to 21.8)                    |
| 17 Diabetes                   | 17 Cirrhosis liver            | <b>43.4 (13.7 to 75.6)</b>    | -7.25 (-23.1 to 11.8)           | <b>-37.2 (-47.6 to -24.4)</b>            |
| 18 Low back pain              | 18 Congenital defects         | <b>-30.8 (-46.4 to -15.4)</b> | <b>-55.3 (-61.3 to -47.7)</b>   | <b>-32.4 (-40.1 to -22.9)</b>            |
| 19 Headache disorders         | 19 Tuberculosis               | -22.5 (-47.7 to 16.3)         | <b>-49.8 (-65.3 to -24.7)</b>   | <b>-63.9 (-75.5 to -46)</b>              |
| 20 Meningitis                 | 20 Gynecological diseases     | <b>47.5 (17.3 to 83.4)</b>    | -4.6 (-22.8 to 18.2)            | <b>-24.5 (-38.9 to -6.36)</b>            |
| 21 Chronic kidney disease     | 26 iNTS                       |                               |                                 |                                          |
| 22 Gynecological diseases     | 34 Meningitis                 |                               |                                 |                                          |
| 27 Hypertensive heart disease | 50 HIV/AIDS                   |                               |                                 |                                          |
| 34 Other musculoskeletal      | 166 COVID-19                  |                               |                                 |                                          |

### Global, Reference scenario

**Legend:**

Communicable, maternal, neonatal and nutritional  
Non-communicable  
Injuries

| Leading Causes 2022           | Leading Causes 2050           | Mean % change number of DALY | Mean % change all-age DALY rate | Mean % change age-standardized DALY rate |
|-------------------------------|-------------------------------|------------------------------|---------------------------------|------------------------------------------|
| 1 Ischemic heart disease      | 1 Ischemic heart disease      | 1.61 (-28.3 to 44.6)         | -13.5 (-40.7 to 27.6)           | <b>-44.4 (-63.9 to -13.7)</b>            |
| 2 Neonatal disorders          | 2 Stroke                      | 12.9 (-4.67 to 34)           | -3.94 (-18.4 to 16)             | <b>-38.8 (-49.7 to -24.1)</b>            |
| 3 Stroke                      | 3 Diabetes                    | <b>97.5 (82.1 to 114)</b>    | <b>68 (51.7 to 86.5)</b>        | <b>22.4 (10.4 to 36.6)</b>               |
| 4 Lower respiratory infect    | 4 COPD                        | <b>72.8 (39.6 to 113)</b>    | <b>47 (19 to 86.1)</b>          | -13.8 (-34.6 to 15.6)                    |
| 5 Diabetes                    | 5 Neonatal disorders          | <b>-37.2 (-48.4 to -23)</b>  | <b>-46.6 (-55.8 to -34.4)</b>   | <b>-32.7 (-43.2 to -17.5)</b>            |
| 6 COPD                        | 6 Other musculoskeletal       | <b>109 (97.2 to 119)</b>     | <b>77.5 (70.8 to 84.9)</b>      | <b>54.8 (52.3 to 57.6)</b>               |
| 7 COVID-19                    | 7 Low back pain               | <b>34.1 (28.1 to 40.4)</b>   | <b>13.9 (10.3 to 18)</b>        | <b>-5.23 (-5.58 to -4.9)</b>             |
| 8 Low back pain               | 8 Alzheimer's disease         | <b>142 (106 to 173)</b>      | <b>106 (80.6 to 129)</b>        | <b>-2.91 (-4.6 to -1.47)</b>             |
| 9 Road injuries               | 9 Lower respiratory infect    | <b>-14.6 (-25 to -4.23)</b>  | <b>-27.4 (-36.3 to -16.1)</b>   | <b>-44.1 (-53.2 to -32.1)</b>            |
| 10 Diarrheal diseases         | 10 Chronic kidney disease     | <b>122 (71.7 to 183)</b>     | <b>88.8 (43.8 to 151)</b>       | 28.6 (-6.61 to 77.7)                     |
| 11 Congenital defects         | 11 Age-related hearing loss   | <b>66.7 (56 to 78.8)</b>     | <b>41.7 (33.4 to 50.1)</b>      | 0.387 (-0.408 to 1.17)                   |
| 12 Malaria                    | 12 Depressive disorders       | <b>35.4 (28.9 to 41.6)</b>   | <b>15.1 (11.8 to 18.9)</b>      | <b>3.8 (3.02 to 4.51)</b>                |
| 13 Depressive disorders       | 13 Road injuries              | <b>-1.47 (-34.3 to 50.4)</b> | <b>-16.1 (-44.8 to 31.3)</b>    | <b>-18.7 (-48.2 to 30.6)</b>             |
| 14 Headache disorders         | 14 Lung cancer                | <b>36.9 (3.35 to 74.6)</b>   | 16.3 (-9.81 to 44.2)            | <b>-23.5 (-37.7 to -6.91)</b>            |
| 15 Cirrhosis liver            | 15 Falls                      | <b>45.1 (32.2 to 59.1)</b>   | <b>23.3 (13.3 to 32.7)</b>      | <b>-14.9 (-18.6 to -11.5)</b>            |
| 16 Lung cancer                | 16 Hypertensive heart disease | <b>135 (78.8 to 203)</b>     | <b>99.8 (49.4 to 167)</b>       | 22.6 (-12.9 to 68.4)                     |
| 17 Other musculoskeletal      | 17 Cirrhosis liver            | <b>27.3 (11 to 45.7)</b>     | 8.27 (-6.41 to 27)              | -12 (-24.5 to 4.22)                      |
| 18 Age-related hearing loss   | 18 Headache disorders         | <b>19.8 (13.8 to 28.9)</b>   | 1.84 (-1.1 to 8.87)             | -0.299 (-0.866 to 0.375)                 |
| 19 Falls                      | 19 Blindness and vision loss  | <b>71.9 (57.2 to 87.2)</b>   | <b>46.1 (34.5 to 56.6)</b>      | <b>3.69 (1.76 to 5.39)</b>               |
| 20 Tuberculosis               | 20 Diarrheal diseases         | -20.2 (-44.3 to 15.3)        | <b>-32.1 (-53.2 to -0.585)</b>  | <b>-40.9 (-61.1 to -8.07)</b>            |
| 22 Alzheimer's disease        | 25 Congenital defects         |                              |                                 |                                          |
| 23 Chronic kidney disease     | 27 Malaria                    |                              |                                 |                                          |
| 27 Blindness and vision loss  | 32 Tuberculosis               |                              |                                 |                                          |
| 30 Hypertensive heart disease | 172 COVID-19                  |                              |                                 |                                          |

### Central Europe, Eastern Europe, and Central Asia, Reference scenario

**Legend:**  
Communicable, maternal, neonatal and nutritional  
Non-communicable  
Injuries

| Leading Causes 2022           | Leading Causes 2050           | Mean % change number of DALY  | Mean % change all-age DALY rate | Mean % change age-standardized DALY rate |
|-------------------------------|-------------------------------|-------------------------------|---------------------------------|------------------------------------------|
| 1 Ischemic heart disease      | 1 Ischemic heart disease      | -18.3 (-41.9 to 14.3)         | -14.2 (-40 to 19.3)             | <b>-45.4 (-64.3 to -19.6)</b>            |
| 2 Stroke                      | 2 Stroke                      | <b>-21.3 (-33.1 to -8.77)</b> | <b>-17.4 (-29.4 to -3.69)</b>   | <b>-44.3 (-54.3 to -32.1)</b>            |
| 3 COVID-19                    | 3 Low back pain               | 2.86 (-3.04 to 10.3)          | <b>7.92 (4.53 to 11.4)</b>      | <b>-5.11 (-5.43 to -4.75)</b>            |
| 4 Low back pain               | 4 Diabetes                    | <b>32.5 (22.1 to 44)</b>      | <b>39.1 (27.4 to 51.6)</b>      | 8.92 (-0.909 to 20.2)                    |
| 5 Cirrhosis liver             | 5 Alzheimer's disease         | <b>95.7 (60.9 to 128)</b>     | <b>105 (72.3 to 136)</b>        | 1.28 (-0.0805 to 2.48)                   |
| 6 Diabetes                    | 6 Lung cancer                 | 1.18 (-22 to 28.5)            | 6.08 (-16.5 to 31.8)            | -18.5 (-34.8 to 0.694)                   |
| 7 Lung cancer                 | 7 Cirrhosis liver             | -13.1 (-24.6 to 2.69)         | -8.74 (-20.5 to 7.56)           | -14.2 (-26.2 to 2.02)                    |
| 8 Lower respiratory infect    | 8 Age-related hearing loss    | <b>29.7 (19.4 to 40.9)</b>    | <b>36.1 (27.6 to 44.6)</b>      | <b>-0.537 (-0.769 to -0.351)</b>         |
| 9 Cardiomyopathy              | 9 COPD                        | <b>36.5 (9.45 to 66.2)</b>    | <b>43.3 (14.7 to 76.3)</b>      | -4.35 (-26.7 to 23.7)                    |
| 10 Falls                      | 10 Falls                      | -5.12 (-13.2 to 3.47)         | -0.468 (-7.37 to 6.23)          | <b>-18 (-22.6 to -13.2)</b>              |
| 11 Self-harm                  | 11 Colorectal cancer          | 14.2 (-19.7 to 54.9)          | 19.7 (-16.2 to 61.9)            | -14.6 (-38.6 to 15.1)                    |
| 12 Alcohol use disorders      | 12 Alcohol use disorders      | -8.01 (-18.5 to 5.01)         | -3.45 (-15.2 to 12.5)           | -1.74 (-13.5 to 12.8)                    |
| 13 Headache disorders         | 13 Hypertensive heart disease | <b>58.5 (9.37 to 126)</b>     | <b>66.5 (15.1 to 132)</b>       | 7.46 (-29.8 to 59.4)                     |
| 14 Colorectal cancer          | 14 Depressive disorders       | 1.29 (-4.68 to 7.58)          | <b>6.26 (2.84 to 9.53)</b>      | <b>-1.08 (-1.65 to -0.46)</b>            |
| 15 Age-related hearing loss   | 15 Headache disorders         | <b>-7.75 (-12.5 to -1.93)</b> | <b>-3.21 (-5.41 to -0.781)</b>  | <b>-1.13 (-3.08 to -0.289)</b>           |
| 16 Neonatal disorders         | 16 Cardiomyopathy             | <b>-24 (-32.2 to -14.2)</b>   | <b>-20.3 (-28.2 to -12.4)</b>   | <b>-28.7 (-36.5 to -20)</b>              |
| 17 Depressive disorders       | 17 Lower respiratory infect   | <b>-27.8 (-38.8 to -11.7)</b> | <b>-24.2 (-35.4 to -8.61)</b>   | <b>-42.8 (-55.1 to -23.8)</b>            |
| 18 Alzheimer's disease        | 18 Self-harm                  | <b>-21.5 (-32.1 to -8.09)</b> | <b>-17.6 (-29.9 to -4.59)</b>   | -16.2 (-29.2 to 0.0409)                  |
| 19 Road injuries              | 19 Road injuries              | -15.6 (-43.8 to 27.5)         | -11.3 (-39.7 to 31.9)           | -11.2 (-42.1 to 36)                      |
| 20 COPD                       | 20 Osteoarthritis             | <b>25.1 (16.3 to 34.3)</b>    | <b>31.3 (25.6 to 36.6)</b>      | -0.0285 (-0.382 to 0.336)                |
| 23 Hypertensive heart disease | 25 Neonatal disorders         |                               |                                 |                                          |
| 25 Osteoarthritis             | 157 COVID-19                  |                               |                                 |                                          |

### High income, Reference scenario

**Legend:**  
 Communicable, maternal, neonatal and nutritional  
 Non-communicable  
 Injuries

| Leading Causes 2022           | Leading Causes 2050           | Mean % change number of DALY | Mean % change all-age DALY rate | Mean % change age-standardized DALY rate |
|-------------------------------|-------------------------------|------------------------------|---------------------------------|------------------------------------------|
| 1 Ischemic heart disease      | 1 Alzheimer's disease         | 67.8 (56.5 to 76.4)          | 62.3 (53.7 to 70.9)             | -5.02 (-6.72 to -3.41)                   |
| 2 Low back pain               | 2 Diabetes                    | 36 (30.2 to 41.8)            | 31.6 (25.3 to 37.4)             | 11.9 (7.25 to 16.5)                      |
| 3 COVID-19                    | 3 Low back pain               | 7.76 (4.79 to 10.8)          | 4.22 (1.96 to 6.48)             | -2.07 (-2.3 to -1.83)                    |
| 4 Stroke                      | 4 Ischemic heart disease      | -25.8 (-37.8 to -10.8)       | -28.2 (-39.7 to -13.8)          | -51.7 (-60.6 to -40.6)                   |
| 5 Diabetes                    | 5 COPD                        | 36.3 (22 to 51.3)            | 31.8 (17.8 to 45.8)             | -8.72 (-19.5 to 2.36)                    |
| 6 Alzheimer's disease         | 6 Stroke                      | -6.08 (-12.1 to 0.603)       | -9.16 (-15.3 to -2)             | -33.5 (-39.4 to -27.3)                   |
| 7 Lung cancer                 | 7 Lung cancer                 | 8.27 (-5.73 to 23.1)         | 4.71 (-8.48 to 20)              | -17.6 (-27.2 to -8)                      |
| 8 COPD                        | 8 Other musculoskeletal       | 26.2 (22 to 30.4)            | 22.1 (19.6 to 24.7)             | 19.7 (18.9 to 20.6)                      |
| 9 Falls                       | 9 Falls                       | 24.8 (19.1 to 31.3)          | 20.7 (15.4 to 26.5)             | -11.5 (-13.8 to -8.89)                   |
| 10 Other musculoskeletal      | 10 Chronic kidney disease     | 110 (81.6 to 139)            | 103 (75.4 to 132)               | 29.2 (9.75 to 52.8)                      |
| 11 Drug use disorders         | 11 Drug use disorders         | 27.7 (15.8 to 39.2)          | 23.5 (13 to 34.8)               | 28 (16.8 to 39.8)                        |
| 12 Depressive disorders       | 12 Age-related hearing loss   | 32.2 (27.8 to 37.5)          | 27.8 (23.5 to 32.6)             | 0.0685 (-0.243 to 0.367)                 |
| 13 Headache disorders         | 13 Colorectal cancer          | 24.7 (3.2 to 49.5)           | 20.5 (0.203 to 44.2)            | -10.6 (-25.3 to 5.74)                    |
| 14 Age-related hearing loss   | 14 Depressive disorders       | 4.1 (0.86 to 7.79)           | 0.674 (-0.403 to 2.23)          | 0.705 (0.435 to 1.01)                    |
| 15 Anxiety disorders          | 15 Lower respiratory infect   | 41.1 (30.1 to 51.1)          | 36.4 (26.3 to 46.1)             | -16.1 (-22.8 to -9.15)                   |
| 16 Colorectal cancer          | 16 Headache disorders         | 0.895 (-2.36 to 4.54)        | -2.42 (-3.74 to 0.492)          | 0.555 (-0.193 to 1.08)                   |
| 17 Self-harm                  | 17 Anxiety disorders          | 3.63 (0.295 to 7.53)         | 0.217 (-1.26 to 1.75)           | 1.87 (1.57 to 2.2)                       |
| 18 Lower respiratory infect   | 18 Osteoarthritis             | 23 (19.6 to 26.9)            | 19 (16.1 to 21.9)               | 1.01 (0.801 to 1.27)                     |
| 19 Osteoarthritis             | 19 Pancreatic cancer          | 57 (31.9 to 85.2)            | 51.9 (28.8 to 79.2)             | 19.5 (2.83 to 38)                        |
| 20 Chronic kidney disease     | 20 Hypertensive heart disease | 75.8 (50.2 to 105)           | 70.1 (43.7 to 98.4)             | 21 (1.43 to 45.3)                        |
| 24 Pancreatic cancer          | 24 Self-harm                  |                              |                                 |                                          |
| 30 Hypertensive heart disease | 156 COVID-19                  |                              |                                 |                                          |

### Latin America and Caribbean, Reference scenario

**Legend:**  
 Communicable, maternal, neonatal and nutritional  
 Non-communicable  
 Injuries

| Leading Causes 2022          | Leading Causes 2050          | Mean % change number of DALY | Mean % change all-age DALY rate | Mean % change age-standardized DALY rate |
|------------------------------|------------------------------|------------------------------|---------------------------------|------------------------------------------|
| 1 Ischemic heart disease     | 1 Diabetes                   | 94.3 (72.4 to 116)           | 73.6 (52.9 to 97.4)             | 12.4 (-0.846 to 28.6)                    |
| 2 COVID-19                   | 2 Ischemic heart disease     | 22.8 (-24.7 to 91)           | 9.95 (-32.9 to 78.5)            | -37.4 (-63.2 to 5.63)                    |
| 3 Diabetes                   | 3 Chronic kidney disease     | 121 (54.5 to 199)            | 97.5 (39 to 174)                | 21.7 (-18.5 to 78.4)                     |
| 4 Interpersonal violence     | 4 Other musculoskeletal      | 86.1 (72.7 to 100)           | 66.2 (58.5 to 75)               | 37.2 (34.6 to 40)                        |
| 5 Neonatal disorders         | 5 Stroke                     | 19 (-5.99 to 47.6)           | 6.41 (-17.2 to 38.3)            | -37.4 (-53.2 to -16.3)                   |
| 6 Stroke                     | 6 Low back pain              | 31.9 (22.1 to 40.9)          | 17.8 (13.2 to 22.6)             | -4.12 (-4.37 to -3.86)                   |
| 7 Lower respiratory infect   | 7 Lower respiratory infect   | 19.7 (-0.897 to 38.9)        | 6.98 (-10.5 to 26.9)            | -37.2 (-48.7 to -22.3)                   |
| 8 Low back pain              | 8 Alzheimer's disease        | 170 (126 to 209)             | 141 (107 to 172)                | -2.23 (-3.94 to -0.544)                  |
| 9 Road injuries              | 9 Interpersonal violence     | -32 (-61.4 to 16.3)          | -39.4 (-63.2 to 2.84)           | -33.2 (-61.6 to 14.9)                    |
| 10 Chronic kidney disease    | 10 COPD                      | 87.5 (43.7 to 135)           | 67.6 (27.6 to 118)              | -17 (-40.7 to 15.1)                      |
| 11 Other musculoskeletal     | 11 Road injuries             | 1.18 (-34.6 to 56.5)         | -9.44 (-42.4 to 44.4)           | -10.1 (-43.2 to 45)                      |
| 12 Anxiety disorders         | 12 Cirrhosis liver           | 36.6 (21.8 to 51.7)          | 22 (9.72 to 37.7)               | -8.63 (-19.5 to 3.71)                    |
| 13 Headache disorders        | 13 Age-related hearing loss  | 79.7 (61.7 to 96.1)          | 60.4 (50.2 to 70.8)             | -1.04 (-1.18 to -0.89)                   |
| 14 Congenital defects        | 14 Depressive disorders      | 24.2 (15.1 to 33.6)          | 10.9 (7.41 to 15.5)             | -2.43 (-2.73 to -2.13)                   |
| 15 Cirrhosis liver           | 15 Anxiety disorders         | 14.7 (6.29 to 23.2)          | 2.38 (-1.32 to 7.13)            | -0.319 (-0.865 to 0.279)                 |
| 16 Depressive disorders      | 16 Falls                     | 52.1 (35.5 to 68.2)          | 35.8 (23.4 to 47)               | -6.84 (-12.4 to -1.1)                    |
| 17 COPD                      | 17 Neonatal disorders        | -39.2 (-50.5 to -26.3)       | -45.6 (-55.6 to -33.1)          | -27.9 (-41.7 to -10.1)                   |
| 18 Falls                     | 18 Headache disorders        | 10.9 (1.47 to 23.8)          | -0.985 (-5.43 to 11.6)          | -0.0452 (-0.499 to 0.511)                |
| 19 Age-related hearing loss  | 19 Blindness and vision loss | 69.1 (52.5 to 83.3)          | 50.9 (39.2 to 61.1)             | -4.34 (-4.61 to -4.07)                   |
| 20 Oral disorders            | 20 Oral disorders            | 61.2 (46.6 to 73.3)          | 43.9 (35.4 to 52)               | 0.614 (0.253 to 0.973)                   |
| 21 Alzheimer's disease       | 30 Congenital defects        |                              |                                 |                                          |
| 22 Blindness and vision loss | 165 COVID-19                 |                              |                                 |                                          |



### North Africa and Middle East, Reference scenario

**Legend:**  
Communicable, maternal, neonatal and nutritional  
Non-communicable  
Injuries

| Leading Causes 2022           | Leading Causes 2050          | Mean % change number of DALY | Mean % change all-age DALY rate | Mean % change age-standardized DALY rate |
|-------------------------------|------------------------------|------------------------------|---------------------------------|------------------------------------------|
| 1 Ischemic heart disease      | 1 Ischemic heart disease     | 47 (-1.31 to 124)            | 8.8 (-29.3 to 67.4)             | -41.5 (-63.3 to -6.12)                   |
| 2 Neonatal disorders          | 2 Diabetes                   | 227 (199 to 256)             | 142 (119 to 169)                | 41.7 (27.9 to 58.6)                      |
| 3 Stroke                      | 3 Stroke                     | 47.6 (16.5 to 86.6)          | 9.19 (-13.9 to 41.2)            | -43.1 (-56.4 to -22.1)                   |
| 4 Congenital defects          | 4 Chronic kidney disease     | 219 (134 to 327)             | 136 (71.6 to 223)               | 28.1 (-9.1 to 87.5)                      |
| 5 Road injuries               | 5 Low back pain              | 61.1 (50.4 to 71.2)          | 19 (13.4 to 24.9)               | -5.17 (-5.46 to -4.91)                   |
| 6 Diabetes                    | 6 Hypertensive heart disease | 207 (126 to 312)             | 127 (66.5 to 209)               | 8.27 (-26.5 to 58.5)                     |
| 7 COVID-19                    | 7 Road injuries              | 12.5 (-27.9 to 77.1)         | -16.8 (-47.4 to 34.4)           | -22.2 (-51.8 to 26)                      |
| 8 Low back pain               | 8 Depressive disorders       | 44.8 (35.6 to 55.5)          | 6.93 (2.67 to 12.3)             | -2.32 (-2.96 to -1.65)                   |
| 9 Depressive disorders        | 9 Other musculoskeletal      | 157 (138 to 176)             | 90 (77.5 to 102)                | 54.2 (51 to 57.2)                        |
| 10 Lower respiratory infect   | 10 Neonatal disorders        | -34 (-50.4 to -12.1)         | -51.2 (-62.4 to -35.4)          | -37.3 (-52.4 to -15.4)                   |
| 11 Conflict & terror          | 11 COPD                      | 140 (84.2 to 209)            | 77.9 (38 to 135)                | -12.7 (-37.5 to 23.5)                    |
| 12 Headache disorders         | 12 Alzheimer's disease       | 281 (211 to 345)             | 181 (136 to 227)                | 5.76 (4.12 to 7.55)                      |
| 13 Anxiety disorders          | 13 Headache disorders        | 39.6 (30 to 51.5)            | 3.15 (-0.804 to 10.3)           | 0.69 (-0.0384 to 1.21)                   |
| 14 Chronic kidney disease     | 14 Conflict & terror         | 60.1 (-59.4 to 350)          | 18.5 (-69.8 to 235)             | 21.5 (-68.9 to 251)                      |
| 15 Gynecological diseases     | 15 Age-related hearing loss  | 122 (99.9 to 142)            | 63.8 (51.2 to 77.2)             | -1.77 (-2.03 to -1.51)                   |
| 16 Hypertensive heart disease | 16 Anxiety disorders         | 36 (26.2 to 45.5)            | 0.448 (-3.83 to 5.36)           | 0.213 (-0.49 to 0.826)                   |
| 17 Cirrhosis liver            | 17 Lower respiratory infect  | 2.15 (-14.2 to 21.9)         | -24.5 (-36.6 to -7.31)          | -42 (-53.8 to -25.3)                     |
| 18 Other musculoskeletal      | 18 Congenital defects        | -31.3 (-43.5 to -20.5)       | -49.3 (-56.3 to -41.5)          | -31.7 (-38.6 to -22.9)                   |
| 19 COPD                       | 19 Cirrhosis liver           | 57.3 (38.3 to 77.2)          | 16.3 (0.994 to 34.2)            | -30.7 (-39.8 to -17.9)                   |
| 20 Age-related hearing loss   | 20 Blindness and vision loss | 124 (101 to 145)             | 65.2 (49.6 to 79.4)             | -3.32 (-3.95 to -2.67)                   |
| 25 Blindness and vision loss  | 22 Gynecological diseases    |                              |                                 |                                          |
| 27 Alzheimer's disease        | 167 COVID-19                 |                              |                                 |                                          |

### South Asia, Reference scenario

**Legend:**  
Communicable, maternal, neonatal and nutritional  
Non-communicable  
Injuries

| Leading Causes 2022          | Leading Causes 2050         | Mean % change number of DALY  | Mean % change all-age DALY rate | Mean % change age-standardized DALY rate |
|------------------------------|-----------------------------|-------------------------------|---------------------------------|------------------------------------------|
| 1 Neonatal disorders         | 1 Ischemic heart disease    | 1.4 (-39.9 to 57.8)           | -9.19 (-46.1 to 46.7)           | <b>-51.5 (-73.2 to -15.8)</b>            |
| 2 Ischemic heart disease     | 2 COPD                      | <b>64.3 (19.9 to 112)</b>     | <b>47 (9.5 to 99.4)</b>         | -32.2 (-52.7 to 0.761)                   |
| 3 COPD                       | 3 Diabetes                  | <b>107 (80 to 135)</b>        | <b>84.5 (62.3 to 113)</b>       | 3.49 (-10.3 to 24.5)                     |
| 4 Lower respiratory infect   | 4 Other musculoskeletal     | <b>154 (126 to 182)</b>       | <b>127 (114 to 140)</b>         | <b>67.5 (64 to 71.3)</b>                 |
| 5 Stroke                     | 5 Stroke                    | 18.7 (-7.69 to 48.6)          | 6.13 (-16.5 to 38.6)            | <b>-45.4 (-59.5 to -27)</b>              |
| 6 Diarrheal diseases         | 6 Neonatal disorders        | <b>-54.8 (-63.6 to -44.5)</b> | <b>-59.6 (-66.4 to -50.8)</b>   | <b>-35.5 (-45.6 to -22.3)</b>            |
| 7 Diabetes                   | 7 Falls                     | <b>72.3 (39 to 106)</b>       | <b>53.7 (32.2 to 73.5)</b>      | <b>-12.7 (-20.2 to -4.75)</b>            |
| 8 Tuberculosis               | 8 Low back pain             | <b>49.3 (32.9 to 66.3)</b>    | <b>33.3 (25.9 to 40.9)</b>      | <b>-5.8 (-6.14 to -5.44)</b>             |
| 9 Dietary iron deficiency    | 9 Blindness and vision loss | <b>88.2 (62.7 to 117)</b>     | <b>68 (53.6 to 82.9)</b>        | <b>-6.79 (-7.1 to -6.45)</b>             |
| 10 Other musculoskeletal     | 10 Depressive disorders     | <b>38.1 (22.4 to 55.2)</b>    | <b>23.3 (17.8 to 30.6)</b>      | <b>-4.05 (-4.45 to -3.61)</b>            |
| 11 Road injuries             | 11 Age-related hearing loss | <b>83.3 (59 to 109)</b>       | <b>63.6 (51.3 to 76.7)</b>      | <b>-1.74 (-1.91 to -1.57)</b>            |
| 12 Low back pain             | 12 Cirrhosis liver          | <b>28.2 (3.31 to 57.4)</b>    | 14.6 (-7.56 to 42.9)            | <b>-21.1 (-37.1 to -1.04)</b>            |
| 13 Cirrhosis liver           | 13 Lower respiratory infect | <b>-41 (-52.5 to -27.2)</b>   | <b>-47.3 (-56.6 to -35.9)</b>   | <b>-57.5 (-65.7 to -46.2)</b>            |
| 14 Depressive disorders      | 14 Diarrheal diseases       | -16.8 (-41.6 to 16.7)         | -25.6 (-49.3 to 8.23)           | <b>-51.2 (-69.9 to -22.2)</b>            |
| 15 COVID-19                  | 15 Dietary iron deficiency  | -0.56 (-12.1 to 12.3)         | <b>-11.3 (-13.4 to -9.18)</b>   | <b>-13.7 (-14.8 to -12.6)</b>            |
| 16 Falls                     | 16 Road injuries            | -4.34 (-40.9 to 45.2)         | -14.4 (-45.8 to 36.8)           | -23.1 (-52.9 to 25.6)                    |
| 17 Self-harm                 | 17 Headache disorders       | <b>20.4 (6.48 to 41.7)</b>    | <b>7.43 (1.56 to 23.8)</b>      | 0.422 (-0.117 to 0.668)                  |
| 18 Headache disorders        | 18 Chronic kidney disease   | <b>104 (41.2 to 185)</b>      | <b>82.4 (26.2 to 164)</b>       | 4.93 (-32 to 59)                         |
| 19 Congenital defects        | 19 Self-harm                | -9.2 (-31.1 to 16.1)          | -18.9 (-37.9 to 6.93)           | -20.3 (-40.2 to 6.49)                    |
| 20 Blindness and vision loss | 20 Alzheimer's disease      | <b>196 (127 to 272)</b>       | <b>164 (114 to 214)</b>         | <b>-5.84 (-9.4 to -2.54)</b>             |
| 21 Age-related hearing loss  | 22 Tuberculosis             |                               |                                 |                                          |
| 25 Chronic kidney disease    | 30 Congenital defects       |                               |                                 |                                          |
| 38 Alzheimer's disease       | 166 COVID-19                |                               |                                 |                                          |

### Southeast Asia, East Asia, and Oceania, Reference scenario

**Legend:**  
Communicable, maternal, neonatal and nutritional  
Non-communicable  
Injuries

| Leading Causes 2022           | Leading Causes 2050          | Mean % change number of DALY | Mean % change all-age DALY rate | Mean % change age-standardized DALY rate |
|-------------------------------|------------------------------|------------------------------|---------------------------------|------------------------------------------|
| 1 Stroke                      | 1 Stroke                     | 7.42 (-9.3 to 28.7)          | 11.9 (-3.77 to 35.6)            | <b>-41.5 (-50.7 to -28.6)</b>            |
| 2 Ischemic heart disease      | 2 COPD                       | <b>84.5 (47.2 to 122)</b>    | <b>92.2 (54 to 138)</b>         | -18 (-35.7 to 8.95)                      |
| 3 COPD                        | 3 Ischemic heart disease     | -8.65 (-33.7 to 23.2)        | -4.81 (-29.6 to 29.7)           | <b>-52 (-66 to -31.3)</b>                |
| 4 Lung cancer                 | 4 Diabetes                   | <b>75.9 (58.4 to 92.6)</b>   | <b>83.1 (66.4 to 99.8)</b>      | <b>25.2 (13.7 to 36.3)</b>               |
| 5 Diabetes                    | 5 Alzheimer's disease        | <b>179 (136 to 230)</b>      | <b>190 (153 to 234)</b>         | -0.379 (-3.61 to 2.41)                   |
| 6 Road injuries               | 6 Lung cancer                | <b>40.2 (4.26 to 81.4)</b>   | <b>45.7 (10.8 to 85.8)</b>      | -14.8 (-31.8 to 4.86)                    |
| 7 Age-related hearing loss    | 7 Age-related hearing loss   | <b>50.5 (37.5 to 65.2)</b>   | <b>56.6 (46.3 to 66.4)</b>      | <b>-0.87 (-1.23 to -0.558)</b>           |
| 8 Low back pain               | 8 Hypertensive heart disease | <b>137 (74.2 to 206)</b>     | <b>146 (80 to 238)</b>          | 17.8 (-18 to 62.9)                       |
| 9 Neonatal disorders          | 9 Other musculoskeletal      | <b>66.3 (54.6 to 79.5)</b>   | <b>73.1 (63.8 to 81.9)</b>      | <b>54.4 (52 to 56.6)</b>                 |
| 10 Headache disorders         | 10 Low back pain             | <b>17.9 (10 to 27.1)</b>     | <b>22.7 (17.2 to 28.1)</b>      | <b>-3.43 (-3.73 to -3.06)</b>            |
| 11 Alzheimer's disease        | 11 Chronic kidney disease    | <b>85.5 (43.6 to 135)</b>    | <b>93.2 (51.7 to 150)</b>       | 20.6 (-8.45 to 61.1)                     |
| 12 Lower respiratory infect   | 12 Colorectal cancer         | <b>72.9 (23 to 131)</b>      | <b>79.7 (31.4 to 137)</b>       | 8.97 (-18.8 to 39.8)                     |
| 13 Stomach cancer             | 13 Road injuries             | -21.2 (-43.4 to 15.3)        | -17.8 (-42.2 to 21)             | -17.6 (-43.5 to 23.2)                    |
| 14 Other musculoskeletal      | 14 Falls                     | <b>29.2 (14.5 to 46.7)</b>   | <b>34.5 (21.4 to 49.9)</b>      | <b>-18.4 (-23.1 to -13.3)</b>            |
| 15 Falls                      | 15 Lower respiratory infect  | <b>15.2 (0.676 to 30)</b>    | <b>19.9 (7.02 to 33)</b>        | <b>-42.8 (-50.2 to -33.3)</b>            |
| 16 Depressive disorders       | 16 Cirrhosis liver           | <b>19.3 (1.9 to 39)</b>      | <b>24.2 (6.8 to 48)</b>         | -2.29 (-16 to 16.3)                      |
| 17 Cirrhosis liver            | 17 Blindness and vision loss | <b>46.7 (30.8 to 63)</b>     | <b>52.6 (37.9 to 64.6)</b>      | <b>-4.18 (-5.18 to -3.39)</b>            |
| 18 Chronic kidney disease     | 18 Depressive disorders      | <b>10.4 (3.6 to 18.5)</b>    | <b>14.9 (10.7 to 19.6)</b>      | <b>-2.22 (-2.78 to -1.61)</b>            |
| 19 Colorectal cancer          | 19 Headache disorders        | -3.16 (-9.49 to 3.72)        | 0.793 (-3.3 to 6.89)            | <b>2.66 (0.607 to 4.22)</b>              |
| 20 Hypertensive heart disease | 20 Stomach cancer            | -8.88 (-19.2 to 3.15)        | -5.19 (-15.3 to 5.44)           | <b>-42.9 (-47 to -38.5)</b>              |
| 22 Blindness and vision loss  | 26 Neonatal disorders        |                              |                                 |                                          |

### Sub-Saharan Africa, Reference scenario

**Legend:**  
Communicable, maternal, neonatal and nutritional  
Non-communicable  
Injuries

| Leading Causes 2022            | Leading Causes 2050            | Mean % change number of DALY | Mean % change all-age DALY rate | Mean % change age-standardized DALY rate |
|--------------------------------|--------------------------------|------------------------------|---------------------------------|------------------------------------------|
| 1 Neonatal disorders           | 1 Neonatal disorders           | -23.3 (-38.8 to -5.55)       | -57.9 (-65.8 to -47.8)          | -37.8 (-48.4 to -24)                     |
| 2 Malaria                      | 2 Lower respiratory infect     | -19.3 (-31.6 to -5.55)       | -55.7 (-62.6 to -48)            | -45.8 (-53.4 to -36.2)                   |
| 3 Lower respiratory infect     | 3 Malaria                      | -33.3 (-79.8 to 145)         | -63.4 (-88.8 to 36.7)           | -56.4 (-86.4 to 62)                      |
| 4 Diarrheal diseases           | 4 Diarrheal diseases           | -26.1 (-49.5 to 10.2)        | -59.4 (-72.4 to -40.2)          | -50.3 (-65.3 to -26.3)                   |
| 5 HIV/AIDS                     | 5 Stroke                       | 62 (38.3 to 89.9)            | -11 (-25.4 to 6.5)              | -44.6 (-53.3 to -33.1)                   |
| 6 Congenital defects           | 6 Diabetes                     | 167 (135 to 202)             | 46.8 (25.7 to 71.1)             | -7.28 (-19.6 to 6.91)                    |
| 7 Tuberculosis                 | 7 Congenital defects           | -16.8 (-30.8 to -1.18)       | -54.3 (-60.6 to -46.8)          | -35.5 (-42 to -25)                       |
| 8 Stroke                       | 8 Depressive disorders         | 120 (109 to 133)             | 20.8 (15.7 to 26.3)             | -2.85 (-3.19 to -2.53)                   |
| 9 COVID-19                     | 9 Road injuries                | 25.5 (-25.5 to 116)          | -31 (-59.8 to 17.8)             | -36 (-61.6 to 7.38)                      |
| 10 Road injuries               | 10 Ischemic heart disease      | 63.8 (16.5 to 128)           | -9.92 (-37 to 27.8)             | -45.5 (-62 to -22.4)                     |
| 11 Meningitis                  | 11 Chronic kidney disease      | 170 (107 to 248)             | 48.5 (14.2 to 92.9)             | 8.5 (-17.5 to 42.1)                      |
| 12 Ischemic heart disease      | 12 Low back pain               | 126 (114 to 138)             | 24 (18.1 to 29.8)               | -6.13 (-6.33 to -5.95)                   |
| 13 Diabetes                    | 13 Other musculoskeletal       | 379 (352 to 407)             | 163 (147 to 178)                | 94.6 (90.1 to 98.4)                      |
| 14 Dietary iron deficiency     | 14 Cirrhosis liver             | 67.5 (44.8 to 94.4)          | -7.93 (-22.5 to 10.1)           | -33.3 (-42.8 to -21.1)                   |
| 15 Pertussis                   | 15 Tuberculosis                | -31 (-54.1 to 4.03)          | -62 (-74.5 to -42.1)            | -68.6 (-78.4 to -53.5)                   |
| 16 Depressive disorders        | 16 Headache disorders          | 109 (94.8 to 126)            | 15 (10.3 to 23.4)               | 0.779 (0.0505 to 1.37)                   |
| 17 Cirrhosis liver             | 17 Dietary iron deficiency     | 37.3 (25.5 to 48.8)          | -24.7 (-26.1 to -23.2)          | -18.1 (-18.8 to -17.4)                   |
| 18 Measles                     | 18 HIV/AIDS                    | -65.6 (-70.5 to -59.9)       | -81.1 (-83.8 to -78)            | -83.2 (-85.3 to -81.1)                   |
| 19 Maternal disorders          | 19 Hypertensive heart disease  | 174 (118 to 244)             | 50.8 (17.9 to 91.9)             | -12 (-32.2 to 12.8)                      |
| 20 Protein-energy malnutrition | 20 Age-related hearing loss    | 148 (132 to 165)             | 36.3 (27.2 to 44)               | -1.03 (-1.37 to -0.631)                  |
| 21 Low back pain               | 27 Meningitis                  |                              |                                 |                                          |
| 23 Chronic kidney disease      | 31 Pertussis                   |                              |                                 |                                          |
| 24 Headache disorders          | 34 Maternal disorders          |                              |                                 |                                          |
| 32 Age-related hearing loss    | 48 Protein-energy malnutrition |                              |                                 |                                          |
| 35 Hypertensive heart disease  | 100 Measles                    |                              |                                 |                                          |
| 37 Other musculoskeletal       | 170 COVID-19                   |                              |                                 |                                          |

### Central Asia, Reference scenario

**Legend:**  
Communicable, maternal, neonatal and nutritional  
Non-communicable  
Injuries

| Leading Causes 2022           | Leading Causes 2050           | Mean % change number of DALY  | Mean % change all-age DALY rate | Mean % change age-standardized DALY rate |
|-------------------------------|-------------------------------|-------------------------------|---------------------------------|------------------------------------------|
| 1 Ischemic heart disease      | 1 Ischemic heart disease      | 47.4 (-3 to 120)              | 17.8 (-23.6 to 72)              | <b>-38 (-63.2 to -1.44)</b>              |
| 2 COVID-19                    | 2 Stroke                      | <b>30.8 (4.58 to 62.3)</b>    | 4.45 (-14.8 to 28.5)            | <b>-41.6 (-55.1 to -23.2)</b>            |
| 3 Stroke                      | 3 Diabetes                    | <b>83.2 (56.9 to 119)</b>     | <b>46.3 (27 to 68.7)</b>        | 2.68 (-10.9 to 22.4)                     |
| 4 Lower respiratory infect    | 4 Low back pain               | <b>47.2 (31.6 to 62.9)</b>    | <b>17.5 (12.8 to 22.8)</b>      | <b>-3.9 (-4.14 to -3.66)</b>             |
| 5 Neonatal disorders          | 5 Cirrhosis liver             | <b>31.7 (6.67 to 64.4)</b>    | 5.23 (-13.9 to 28.5)            | -14 (-30.3 to 7.97)                      |
| 6 Low back pain               | 6 Neonatal disorders          | -24.5 (-51.1 to 19.9)         | <b>-39.7 (-58.6 to -6.56)</b>   | -23.9 (-47.9 to 15.1)                    |
| 7 Cirrhosis liver             | 7 Lower respiratory infect    | <b>-44.1 (-57.9 to -26.5)</b> | <b>-55.4 (-65.2 to -39.3)</b>   | <b>-54.1 (-65.6 to -35)</b>              |
| 8 Diabetes                    | 8 COPD                        | <b>108 (55.7 to 174)</b>      | <b>65.9 (26.3 to 115)</b>       | -9.26 (-35.8 to 28.2)                    |
| 9 Congenital defects          | 9 Alzheimer's disease         | <b>236 (157 to 321)</b>       | <b>168 (111 to 228)</b>         | <b>1.39 (0.219 to 2.61)</b>              |
| 10 Road injuries              | 10 Depressive disorders       | <b>40.7 (25.4 to 56.1)</b>    | <b>12.3 (8.19 to 17.4)</b>      | <b>-2.26 (-2.76 to -1.84)</b>            |
| 11 Headache disorders         | 11 Age-related hearing loss   | <b>92.4 (67.8 to 118)</b>     | <b>53.5 (41.1 to 67.3)</b>      | <b>-0.569 (-0.812 to -0.333)</b>         |
| 12 Dietary iron deficiency    | 12 Headache disorders         | <b>26.5 (12.5 to 42)</b>      | 0.945 (-2.25 to 6.4)            | <b>-0.238 (-0.433 to -0.0437)</b>        |
| 13 Depressive disorders       | 13 Hypertensive heart disease | <b>123 (39.9 to 239)</b>      | <b>78.6 (12.6 to 163)</b>       | -4.15 (-44.2 to 54.4)                    |
| 14 Self-harm                  | 14 Chronic kidney disease     | <b>110 (30.6 to 232)</b>      | <b>67.5 (3.79 to 157)</b>       | 19.2 (-30.3 to 100)                      |
| 15 COPD                       | 15 Road injuries              | 6.49 (-39.2 to 92.4)          | -14.9 (-51.2 to 50.1)           | -14.9 (-51.8 to 51.8)                    |
| 16 Cardiomyopathy             | 16 Dietary iron deficiency    | 6.55 (-4.83 to 19.6)          | <b>-15 (-16.4 to -13.4)</b>     | <b>-8.59 (-9.67 to -7.54)</b>            |
| 17 Age-related hearing loss   | 17 Self-harm                  | 6.54 (-17.5 to 38.8)          | -14.9 (-33.6 to 8.71)           | -14.1 (-33.5 to 9.82)                    |
| 18 Falls                      | 18 Lung cancer                | <b>56.9 (6.49 to 117)</b>     | 25.1 (-12.6 to 67.1)            | -16.3 (-40.7 to 13)                      |
| 19 Alcohol use disorders      | 19 Alcohol use disorders      | <b>27.8 (11.2 to 50.8)</b>    | 2.05 (-7.64 to 15.6)            | -0.351 (-9.77 to 13.2)                   |
| 20 Gynecological diseases     | 20 Blindness and vision loss  | <b>94.2 (66.6 to 120)</b>     | <b>55 (40.7 to 68.8)</b>        | <b>-3.9 (-4.15 to -3.67)</b>             |
| 21 Lung cancer                | 22 Falls                      |                               |                                 |                                          |
| 22 Chronic kidney disease     | 23 Congenital defects         |                               |                                 |                                          |
| 23 Hypertensive heart disease | 25 Cardiomyopathy             |                               |                                 |                                          |
| 27 Blindness and vision loss  | 29 Gynecological diseases     |                               |                                 |                                          |
| 30 Alzheimer's disease        | 157 COVID-19                  |                               |                                 |                                          |

### Central Europe, Reference scenario

**Legend:**  
 Communicable, maternal, neonatal and nutritional  
 Non-communicable  
 Injuries

| Leading Causes 2022           | Leading Causes 2050          | Mean % change number of DALY  | Mean % change all-age DALY rate | Mean % change age-standardized DALY rate |
|-------------------------------|------------------------------|-------------------------------|---------------------------------|------------------------------------------|
| 1 Ischemic heart disease      | 1 Ischemic heart disease     | <b>-35 (-50.4 to -14.4)</b>   | -21.1 (-40.7 to 2.19)           | <b>-52.3 (-65.2 to -33.9)</b>            |
| 2 Stroke                      | 2 Stroke                     | <b>-33.3 (-41.3 to -23.9)</b> | <b>-19.1 (-28.7 to -7.98)</b>   | <b>-47.5 (-54.6 to -38.7)</b>            |
| 3 COVID-19                    | 3 Low back pain              | <b>-10.5 (-15.1 to -5.05)</b> | <b>8.52 (5.15 to 11.8)</b>      | <b>-2.19 (-2.35 to -2.06)</b>            |
| 4 Low back pain               | 4 Lung cancer                | 1.24 (-18.3 to 22.1)          | 22.8 (-0.581 to 48.1)           | -7.01 (-24 to 11.1)                      |
| 5 Lung cancer                 | 5 Diabetes                   | <b>14.7 (7.58 to 23.6)</b>    | <b>39.2 (30.4 to 48.3)</b>      | 6.23 (-1.18 to 13.6)                     |
| 6 Diabetes                    | 6 Alzheimer's disease        | <b>64.3 (43.4 to 82.1)</b>    | <b>99.2 (76.6 to 121)</b>       | <b>1.31 (0.259 to 2.43)</b>              |
| 7 Colorectal cancer           | 7 Hypertensive heart disease | 37.4 (-0.801 to 87.7)         | <b>66.7 (20.9 to 127)</b>       | 3.84 (-27.4 to 46.8)                     |
| 8 Falls                       | 8 Colorectal cancer          | 12.3 (-17.9 to 49)            | 36.1 (-1.6 to 78.3)             | -4.63 (-30 to 22.8)                      |
| 9 Cirrhosis liver             | 9 Falls                      | -2.02 (-10.3 to 5.86)         | <b>18.8 (10.1 to 26.8)</b>      | <b>-13.3 (-17.7 to -8.56)</b>            |
| 10 Hypertensive heart disease | 10 COPD                      | 12 (-10.3 to 34.4)            | <b>35.8 (10.3 to 61.3)</b>      | -10.2 (-28.6 to 10.2)                    |
| 11 Alzheimer's disease        | 11 Age-related hearing loss  | <b>12.2 (3.89 to 19.9)</b>    | <b>36.1 (29.8 to 42.1)</b>      | <b>-0.446 (-0.547 to -0.33)</b>          |
| 12 COPD                       | 12 Cirrhosis liver           | <b>-22.3 (-31.7 to -11.6)</b> | -5.7 (-16.8 to 6.71)            | <b>-14.1 (-24.5 to -2.15)</b>            |
| 13 Age-related hearing loss   | 13 Lower respiratory infect  | -4.69 (-16.3 to 6.69)         | 15.6 (-0.149 to 30.7)           | <b>-29.7 (-39.3 to -19.6)</b>            |
| 14 Lower respiratory infect   | 14 Pancreatic cancer         | <b>39.6 (4.26 to 80.9)</b>    | <b>69.3 (28.1 to 118)</b>       | 25.5 (-4.15 to 60.8)                     |
| 15 Headache disorders         | 15 Breast cancer             | -1.56 (-19.8 to 19.6)         | 19.4 (-2.72 to 42.9)            | -10.6 (-26.8 to 5.98)                    |
| 16 Depressive disorders       | 16 Headache disorders        | <b>-20.3 (-25.1 to -15.5)</b> | -3.37 (-6.16 to 0.954)          | 0.114 (-0.0423 to 0.259)                 |
| 17 Alcohol use disorders      | 17 Oral disorders            | 2.05 (-4.29 to 8.66)          | <b>23.8 (18 to 29.3)</b>        | <b>0.473 (0.293 to 0.633)</b>            |
| 18 Breast cancer              | 18 Chronic kidney disease    | <b>46.3 (10.8 to 85.3)</b>    | <b>77.5 (33.9 to 125)</b>       | 12.7 (-17 to 49.4)                       |
| 19 Self-harm                  | 19 Osteoarthritis            | <b>9.32 (2.65 to 15)</b>      | <b>32.6 (28.1 to 37.3)</b>      | <b>1.23 (0.964 to 1.51)</b>              |
| 20 Cardiomyopathy             | 20 Depressive disorders      | <b>-13.2 (-19.3 to -8.4)</b>  | <b>5.24 (2.4 to 8.27)</b>       | <b>-1.75 (-2.18 to -1.35)</b>            |
| 21 Oral disorders             | 21 Cardiomyopathy            |                               |                                 |                                          |
| 23 Osteoarthritis             | 23 Alcohol use disorders     |                               |                                 |                                          |
| 26 Pancreatic cancer          | 26 Self-harm                 |                               |                                 |                                          |
| 29 Chronic kidney disease     | 153 COVID-19                 |                               |                                 |                                          |

### Eastern Europe, Reference scenario

**Legend:**  
Communicable, maternal, neonatal and nutritional  
Non-communicable  
Injuries

| Leading Causes 2022          | Leading Causes 2050          | Mean % change number of DALY | Mean % change all-age DALY rate | Mean % change age-standardized DALY rate |
|------------------------------|------------------------------|------------------------------|---------------------------------|------------------------------------------|
| 1 Ischemic heart disease     | 1 Ischemic heart disease     | -27.7 (-49.5 to -2.46)       | -18 (-42.9 to 12.3)             | -49.4 (-66.9 to -26.9)                   |
| 2 Stroke                     | 2 Stroke                     | -29 (-42.8 to -17.2)         | -19.5 (-32.1 to -7.49)          | -46.7 (-56 to -36.1)                     |
| 3 COVID-19                   | 3 Low back pain              | -0.828 (-10.8 to 10.3)       | 12.3 (8.73 to 16.3)             | -3.06 (-3.39 to -2.77)                   |
| 4 Low back pain              | 4 Alzheimer's disease        | 92.8 (54.3 to 137)           | 118 (77.8 to 154)               | 1.63 (-0.806 to 3.57)                    |
| 5 Cirrhosis liver            | 5 Diabetes                   | 25.1 (9.88 to 39.3)          | 41.7 (30.1 to 53.6)             | 8.65 (-0.441 to 18.8)                    |
| 6 Cardiomyopathy             | 6 Age-related hearing loss   | 23.6 (9.38 to 41.9)          | 39.9 (30.2 to 48.9)             | -0.259 (-0.427 to -0.128)                |
| 7 Self-harm                  | 7 Cirrhosis liver            | -26.5 (-37.6 to -12.6)       | -16.7 (-27.7 to -2.03)          | -19.3 (-31.2 to -4.23)                   |
| 8 Alcohol use disorders      | 8 Alcohol use disorders      | -10.9 (-26 to 7.64)          | 0.872 (-15 to 22.8)             | 2.68 (-11.9 to 22.2)                     |
| 9 Diabetes                   | 9 Lung cancer                | -8.54 (-32.5 to 21.9)        | 3.38 (-20.7 to 30.9)            | -19.9 (-37.7 to 1.58)                    |
| 10 Lung cancer               | 10 Falls                     | -11.3 (-22.8 to 3.17)        | 0.343 (-8.63 to 10.1)           | -15.5 (-23 to -7.97)                     |
| 11 Falls                     | 11 Colorectal cancer         | 8.58 (-27 to 54.3)           | 22.7 (-15 to 67.4)              | -12.6 (-37.2 to 18.9)                    |
| 12 Headache disorders        | 12 Cardiomyopathy            | -33.7 (-45.4 to -21)         | -24.9 (-35.8 to -13.3)          | -27.6 (-38.3 to -14.6)                   |
| 13 Depressive disorders      | 13 Self-harm                 | -25.1 (-38.1 to -9.17)       | -15.1 (-27.9 to 1.03)           | -14.7 (-29 to 4.12)                      |
| 14 Colorectal cancer         | 14 COPD                      | 31.1 (-0.168 to 63.1)        | 48.4 (14.8 to 84.5)             | -3.07 (-26.4 to 25.5)                    |
| 15 Age-related hearing loss  | 15 Depressive disorders      | -6.51 (-15.3 to 4.15)        | 5.83 (2.41 to 9.23)             | -2.27 (-2.56 to -1.98)                   |
| 16 HIV/AIDS                  | 16 Headache disorders        | -13.4 (-22 to -4.26)         | -2.01 (-4.75 to 1.47)           | -0.0797 (-0.479 to 0.297)                |
| 17 Alzheimer's disease       | 17 Road injuries             | -19.7 (-44 to 10.7)          | -8.95 (-36.3 to 27.1)           | -9.09 (-39.3 to 26.7)                    |
| 18 Road injuries             | 18 Osteoarthritis            | 17.2 (4.54 to 32.6)          | 32.7 (26 to 38.8)               | 0.204 (-0.263 to 0.576)                  |
| 19 Interpersonal violence    | 19 Blindness and vision loss | 18.2 (4.07 to 34.6)          | 33.8 (24.4 to 43.9)             | -1.22 (-1.79 to -0.629)                  |
| 20 COPD                      | 20 Oral disorders            | 9.24 (-3.03 to 22.9)         | 23.6 (17.3 to 30.3)             | -0.0124 (-0.234 to 0.228)                |
| 24 Oral disorders            | 21 HIV/AIDS                  |                              |                                 |                                          |
| 26 Osteoarthritis            | 33 Interpersonal violence    |                              |                                 |                                          |
| 27 Blindness and vision loss | 154 COVID-19                 |                              |                                 |                                          |

### Australasia, Reference scenario

**Legend:**  
Communicable, maternal, neonatal and nutritional  
Non-communicable  
Injuries

| Leading Causes 2022         | Leading Causes 2050         | Mean % change number of DALY | Mean % change all-age DALY rate | Mean % change age-standardized DALY rate |
|-----------------------------|-----------------------------|------------------------------|---------------------------------|------------------------------------------|
| 1 Low back pain             | 1 Low back pain             | 37.9 (30.5 to 44.6)          | 3.01 (0.0809 to 5.53)           | -2.64 (-2.77 to -2.53)                   |
| 2 Ischemic heart disease    | 2 Alzheimer's disease       | 110 (92.1 to 131)            | 56.9 (45.8 to 70)               | -4.38 (-7.71 to -0.688)                  |
| 3 Falls                     | 3 Diabetes                  | 102 (87.3 to 118)            | 51.3 (41.1 to 62.4)             | 29.9 (21.6 to 37.7)                      |
| 4 Depressive disorders      | 4 Falls                     | 52.9 (40 to 67.1)            | 14.3 (6.96 to 22.9)             | -14.6 (-20 to -9.44)                     |
| 5 Alzheimer's disease       | 5 Ischemic heart disease    | 0.653 (-18.3 to 27)          | -24.8 (-38.8 to -5.77)          | -50.9 (-60.9 to -37.3)                   |
| 6 Other musculoskeletal     | 6 Other musculoskeletal     | 72.5 (63.3 to 82.8)          | 28.9 (24.8 to 32.9)             | 25.7 (24.2 to 27.2)                      |
| 7 Lung cancer               | 7 COPD                      | 61.8 (38.5 to 88.6)          | 20.9 (2.66 to 41.6)             | -14.4 (-27.3 to 3.51)                    |
| 8 Stroke                    | 8 Depressive disorders      | 32.8 (26 to 39.9)            | -0.787 (-1.97 to 0.548)         | -1.47 (-1.7 to -1.22)                    |
| 9 Diabetes                  | 9 Lung cancer               | 35 (12.4 to 60.2)            | 0.856 (-15.4 to 18.9)           | -18 (-31.4 to -5.46)                     |
| 10 Anxiety disorders        | 10 Age-related hearing loss | 62.6 (51.6 to 73.3)          | 21.5 (16.5 to 27.3)             | -0.734 (-0.832 to -0.654)                |
| 11 COVID-19                 | 11 Stroke                   | 23.9 (11.2 to 38.2)          | -7.38 (-16 to 3.54)             | -33.8 (-41.1 to -25.3)                   |
| 12 COPD                     | 12 Anxiety disorders        | 33 (26 to 40.5)              | -0.645 (-2 to 0.762)            | 0.151 (-0.151 to 0.396)                  |
| 13 Age-related hearing loss | 13 Colorectal cancer        | 60.4 (27.6 to 99.8)          | 19.8 (-4.67 to 45.8)            | -8.91 (-27.1 to 10.9)                    |
| 14 Headache disorders       | 14 Headache disorders       | 34 (27.4 to 40.9)            | 0.107 (-1.53 to 2.71)           | -0.0329 (-0.202 to 0.134)                |
| 15 Self-harm                | 15 Chronic kidney disease   | 171 (123 to 235)             | 102 (67.8 to 150)               | 23.8 (-0.203 to 58.9)                    |
| 16 Colorectal cancer        | 16 Osteoarthritis           | 55.8 (46.9 to 64.5)          | 16.4 (12.2 to 20.5)             | 2.17 (1.98 to 2.41)                      |
| 17 Drug use disorders       | 17 Drug use disorders       | 51.6 (37 to 65.7)            | 13.3 (3.03 to 23.5)             | 12.9 (3.1 to 22.2)                       |
| 18 Osteoarthritis           | 18 Atrial fibrillation      | 133 (109 to 155)             | 74 (58.3 to 88.5)               | 11 (4.07 to 17)                          |
| 19 Oral disorders           | 19 Oral disorders           | 48.8 (40.8 to 56.9)          | 11.2 (7.09 to 14.5)             | 0.58 (0.416 to 0.729)                    |
| 20 Road injuries            | 20 Self-harm                | 8.75 (-4.86 to 23.9)         | -18.7 (-29.3 to -6.54)          | -19.2 (-30.4 to -5.62)                   |
| 27 Atrial fibrillation      | 26 Road injuries            |                              |                                 |                                          |
| 31 Chronic kidney disease   | 155 COVID-19                |                              |                                 |                                          |



### High-income Asia Pacific, Reference scenario

**Legend:**  
 Communicable, maternal, neonatal and nutritional  
 Non-communicable  
 Injuries

| Leading Causes 2022         | Leading Causes 2050        | Mean % change number of DALY | Mean % change all-age DALY rate | Mean % change age-standardized DALY rate |
|-----------------------------|----------------------------|------------------------------|---------------------------------|------------------------------------------|
| 1 Stroke                    | 1 Alzheimer's disease      | 48.9 (37.6 to 61.5)          | 67.9 (56.9 to 77.9)             | -12.2 (-15.2 to -9.13)                   |
| 2 Alzheimer's disease       | 2 Diabetes                 | 29 (21.4 to 36.9)            | 45.5 (39.7 to 50.7)             | 17.6 (14.1 to 20.4)                      |
| 3 Low back pain             | 3 Stroke                   | -13.6 (-21.4 to -4.09)       | -2.57 (-10.4 to 6.84)           | -33.6 (-39.5 to -26.5)                   |
| 4 Diabetes                  | 4 Low back pain            | -7.56 (-13.2 to -2.01)       | 4.24 (1.31 to 7.64)             | -2.5 (-2.74 to -2.29)                    |
| 5 Ischemic heart disease    | 5 Other musculoskeletal    | 9.6 (3.11 to 17.2)           | 23.6 (18.9 to 28.2)             | 20.5 (19.5 to 21.4)                      |
| 6 Other musculoskeletal     | 6 Lung cancer              | 8.74 (-7.81 to 27.4)         | 22.6 (4.55 to 41.3)             | -21.2 (-31.8 to -9.89)                   |
| 7 Lung cancer               | 7 Lower respiratory infect | 42.5 (26.9 to 59.3)          | 60.7 (44.4 to 76.9)             | -17.2 (-25.5 to -8.66)                   |
| 8 Lower respiratory infect  | 8 Age-related hearing loss | 22.2 (14.9 to 30.1)          | 37.9 (32.2 to 44.2)             | -0.606 (-1.06 to -0.155)                 |
| 9 Colorectal cancer         | 9 Colorectal cancer        | 17.7 (-4.16 to 44.6)         | 32.8 (8.7 to 60.7)              | -12.5 (-29.2 to 5.66)                    |
| 10 Age-related hearing loss | 10 Chronic kidney disease  | 93.1 (58.1 to 129)           | 118 (78.9 to 160)               | 15.4 (-3.92 to 40.4)                     |
| 11 Falls                    | 11 Falls                   | 11.3 (1.08 to 21.1)          | 25.5 (16 to 34.7)               | -17 (-22.2 to -11.5)                     |
| 12 Self-harm                | 12 Ischemic heart disease  | -34.6 (-46.7 to -20.1)       | -26.3 (-39.6 to -9.59)          | -55.9 (-64.8 to -44.9)                   |
| 13 Osteoarthritis           | 13 Osteoarthritis          | 13.2 (7.25 to 19.7)          | 27.7 (24.3 to 31)               | 1 (0.748 to 1.29)                        |
| 14 Stomach cancer           | 14 COPD                    | 43.5 (24.6 to 63.4)          | 61.9 (42.8 to 83.3)             | -9.33 (-21.2 to 2.58)                    |
| 15 COVID-19                 | 15 Pancreatic cancer       | 42.8 (15.8 to 72.7)          | 61 (32.4 to 89.8)               | 12.6 (-6.25 to 31.8)                     |
| 16 COPD                     | 16 Liver cancer            | 43.1 (26.5 to 62.4)          | 61.4 (43.8 to 79.8)             | 18.3 (5.75 to 32)                        |
| 17 Headache disorders       | 17 Stomach cancer          | -19.6 (-26.6 to -12.6)       | -9.31 (-15.8 to -2.39)          | -41.8 (-45 to -38.4)                     |
| 18 Pancreatic cancer        | 18 Self-harm               | -28.9 (-36 to -21.7)         | -19.8 (-26.9 to -12.2)          | -18.3 (-27.3 to -8.8)                    |
| 19 Liver cancer             | 19 Headache disorders      | -17.7 (-22.4 to -12.5)       | -7.19 (-9.82 to -2.66)          | -0.207 (-0.605 to 0.228)                 |
| 20 Chronic kidney disease   | 20 Depressive disorders    | -10 (-15.4 to -4.47)         | 1.45 (-0.968 to 4.02)           | -0.597 (-0.86 to -0.311)                 |
| 21 Depressive disorders     | 154 COVID-19               |                              |                                 |                                          |

### High-income North America, Reference scenario

**Legend:**  
 Communicable, maternal, neonatal and nutritional  
 Non-communicable  
 Injuries

| Leading Causes 2022           | Leading Causes 2050           | Mean % change number of DALY | Mean % change all-age DALY rate | Mean % change age-standardized DALY rate |
|-------------------------------|-------------------------------|------------------------------|---------------------------------|------------------------------------------|
| 1 Ischemic heart disease      | 1 Drug use disorders          | 28.3 (13.7 to 44.2)          | 18.3 (5.9 to 31.4)              | 19.5 (6.98 to 32.7)                      |
| 2 Drug use disorders          | 2 Diabetes                    | 28.7 (19.9 to 37.5)          | 18.6 (12.2 to 24.5)             | 2.92 (-2.22 to 7.48)                     |
| 3 COVID-19                    | 3 Ischemic heart disease      | -24.3 (-37.2 to -9.26)       | -30.2 (-41 to -17)              | -52.2 (-61 to -41.4)                     |
| 4 Diabetes                    | 4 Alzheimer's disease         | 90 (72.4 to 107)             | 75.2 (63.2 to 87.2)             | 0.359 (-2.98 to 3.78)                    |
| 5 Low back pain               | 5 COPD                        | 34.1 (17.2 to 50.3)          | 23.7 (10.1 to 39.8)             | -9.3 (-20.7 to 2.73)                     |
| 6 COPD                        | 6 Low back pain               | 13.4 (6.93 to 20.4)          | 4.52 (2.52 to 6.65)             | -1.55 (-1.71 to -1.41)                   |
| 7 Other musculoskeletal       | 7 Other musculoskeletal       | 25 (18.2 to 33)              | 15.3 (13.2 to 17.5)             | 13.1 (12.4 to 13.6)                      |
| 8 Stroke                      | 8 Chronic kidney disease      | 107 (77.2 to 140)            | 90.8 (63.1 to 121)              | 30.5 (10.8 to 53.9)                      |
| 9 Lung cancer                 | 9 Lung cancer                 | 9.36 (-6.02 to 25.7)         | 0.826 (-12.1 to 16.4)           | -17.3 (-27.4 to -6.57)                   |
| 10 Alzheimer's disease        | 10 Stroke                     | 3.65 (-4.48 to 12.5)         | -4.42 (-10.5 to 1.97)           | -29.1 (-34.7 to -22.6)                   |
| 11 Depressive disorders       | 11 Falls                      | 34.1 (23.3 to 46.6)          | 23.7 (14.8 to 33.2)             | -10.3 (-16 to -3.95)                     |
| 12 Falls                      | 12 Age-related hearing loss   | 33.8 (26 to 42.2)            | 23.4 (19.2 to 28.3)             | -0.231 (-0.322 to -0.139)                |
| 13 Road injuries              | 13 Depressive disorders       | 6.13 (0.228 to 12.5)         | -2.15 (-3.06 to -1.14)          | -1.48 (-1.65 to -1.31)                   |
| 14 Headache disorders         | 14 Road injuries              | 11.1 (-10.4 to 34.5)         | 2.47 (-16.6 to 22.9)            | 2.13 (-19.1 to 25.7)                     |
| 15 Anxiety disorders          | 15 Headache disorders         | 7.28 (1.4 to 14)             | -1.08 (-2.51 to 2.23)           | -0.274 (-0.481 to -0.0552)               |
| 16 Chronic kidney disease     | 16 Anxiety disorders          | 7.82 (2.02 to 14.4)          | -0.588 (-1.94 to 0.836)         | -0.502 (-0.759 to -0.261)                |
| 17 Age-related hearing loss   | 17 Hypertensive heart disease | 73.4 (46.3 to 107)           | 59.9 (34 to 94.8)               | 24.2 (2.64 to 51.8)                      |
| 18 Self-harm                  | 18 Colorectal cancer          | 22.2 (0.675 to 46.8)         | 12.7 (-7.21 to 33.4)            | -11.8 (-26.4 to 3.43)                    |
| 19 Cirrhosis liver            | 19 Osteoarthritis             | 24.3 (17 to 32.5)            | 14.6 (11.8 to 17.6)             | 0.343 (0.2 to 0.483)                     |
| 20 Colorectal cancer          | 20 Self-harm                  | -6.95 (-17.5 to 2.45)        | -14.2 (-22.6 to -5.04)          | -13.1 (-22.4 to -2.98)                   |
| 21 Osteoarthritis             | 24 Cirrhosis liver            |                              |                                 |                                          |
| 26 Hypertensive heart disease | 153 COVID-19                  |                              |                                 |                                          |

### Southern Latin America, Reference scenario

**Legend:**  
Communicable, maternal, neonatal and nutritional  
Non-communicable  
Injuries

| Leading Causes 2022           | Leading Causes 2050           | Mean % change number of DALY | Mean % change all-age DALY rate | Mean % change age-standardized DALY rate |
|-------------------------------|-------------------------------|------------------------------|---------------------------------|------------------------------------------|
| 1 Ischemic heart disease      | 1 Lower respiratory infect    | 46.6 (27.5 to 66.5)          | 38.7 (22.9 to 55)               | -21.5 (-30.5 to -13)                     |
| 2 Low back pain               | 2 Diabetes                    | 82.8 (62.1 to 105)           | 72.9 (59.4 to 87.2)             | 14.2 (5.13 to 22.1)                      |
| 3 Lower respiratory infect    | 3 Other musculoskeletal       | 63.5 (46.9 to 80.9)          | 54.5 (48.4 to 61.7)             | 29.8 (28.5 to 31.3)                      |
| 4 COVID-19                    | 4 Low back pain               | 23.5 (11.8 to 37.5)          | 16.8 (12.2 to 21.5)             | -3.73 (-3.85 to -3.61)                   |
| 5 Stroke                      | 5 Chronic kidney disease      | 112 (71.4 to 155)            | 101 (63.3 to 139)               | 15.1 (-8.22 to 40.4)                     |
| 6 Other musculoskeletal       | 6 Ischemic heart disease      | -12.8 (-31.7 to 10.4)        | -17.5 (-35.4 to 4.99)           | -50.7 (-62.7 to -35.5)                   |
| 7 Diabetes                    | 7 Stroke                      | 4.4 (-8.83 to 20.2)          | -1.28 (-11.8 to 10.4)           | -38 (-45.6 to -30.1)                     |
| 8 Road injuries               | 8 Alzheimer's disease         | 111 (87.6 to 135)            | 99.4 (85.2 to 115)              | -2.18 (-5.45 to 1.1)                     |
| 9 Anxiety disorders           | 9 COPD                        | 70.8 (44.2 to 96.7)          | 61.5 (39.5 to 86.2)             | -8.98 (-22.8 to 5.9)                     |
| 10 Neonatal disorders         | 10 Lung cancer                | 60.7 (33.6 to 93.5)          | 51.8 (30.4 to 77.8)             | -3.2 (-16.7 to 11.4)                     |
| 11 Lung cancer                | 11 Colorectal cancer          | 59.9 (23.2 to 101)           | 51.1 (18.7 to 87.2)             | -5.67 (-25 to 17.6)                      |
| 12 COPD                       | 12 Age-related hearing loss   | 63.7 (48.1 to 81.5)          | 54.7 (47.3 to 61.6)             | -0.271 (-0.462 to -0.0965)               |
| 13 Chronic kidney disease     | 13 Road injuries              | 0.816 (-20.8 to 26.5)        | -4.64 (-24.4 to 18.3)           | -5.13 (-26.2 to 18.5)                    |
| 14 Depressive disorders       | 14 Anxiety disorders          | 5.52 (-4.83 to 17)           | -0.272 (-3.42 to 3.85)          | 0.126 (-0.248 to 0.507)                  |
| 15 Headache disorders         | 15 Falls                      | 44.7 (29.1 to 63.2)          | 36.8 (27.3 to 47)               | -1.77 (-7.84 to 4.92)                    |
| 16 Self-harm                  | 16 Depressive disorders       | 7.62 (-3.79 to 19.3)         | 1.71 (-1.22 to 5.5)             | -1.37 (-1.81 to -0.808)                  |
| 17 Colorectal cancer          | 17 Hypertensive heart disease | 105 (66.6 to 143)            | 94.1 (59.9 to 130)              | 5.42 (-15.5 to 27.5)                     |
| 18 Alzheimer's disease        | 18 Pancreatic cancer          | 121 (72.4 to 177)            | 109 (71.6 to 156)               | 32.1 (9.68 to 59.9)                      |
| 19 Falls                      | 19 Osteoarthritis             | 64.7 (49.1 to 81.5)          | 55.7 (49.1 to 61.2)             | 1.93 (1.67 to 2.22)                      |
| 20 Age-related hearing loss   | 20 Cirrhosis liver            | 24.5 (11.1 to 41.1)          | 17.7 (7.61 to 27.5)             | -15.5 (-22.5 to -9.04)                   |
| 21 Cirrhosis liver            | 21 Headache disorders         |                              |                                 |                                          |
| 25 Osteoarthritis             | 26 Self-harm                  |                              |                                 |                                          |
| 30 Hypertensive heart disease | 28 Neonatal disorders         |                              |                                 |                                          |
| 32 Pancreatic cancer          | 157 COVID-19                  |                              |                                 |                                          |

### Western Europe, Reference scenario

**Legend:**  
Communicable, maternal, neonatal and nutritional  
Non-communicable  
Injuries

| Leading Causes 2022         | Leading Causes 2050         | Mean % change number of DALY | Mean % change all-age DALY rate | Mean % change age-standardized DALY rate |
|-----------------------------|-----------------------------|------------------------------|---------------------------------|------------------------------------------|
| 1 Ischemic heart disease    | 1 Alzheimer's disease       | 58.8 (48.6 to 67.9)          | 54.5 (47.2 to 62.2)             | -5.52 (-7.21 to -3.75)                   |
| 2 Low back pain             | 2 Low back pain             | 5.84 (2.21 to 9.44)          | 3 (0.554 to 5.53)               | -2.56 (-2.76 to -2.4)                    |
| 3 Alzheimer's disease       | 3 Ischemic heart disease    | -28 (-39.4 to -15.3)         | -29.9 (-41.4 to -17.2)          | -52.9 (-61.2 to -42.8)                   |
| 4 COVID-19                  | 4 Falls                     | 20.1 (13.4 to 26.6)          | 16.9 (11.6 to 22)               | -11.6 (-14.5 to -8.51)                   |
| 5 Stroke                    | 5 Diabetes                  | 38.4 (32 to 44.9)            | 34.7 (27.8 to 41.1)             | 16.4 (11.1 to 21.5)                      |
| 6 Lung cancer               | 6 Lung cancer               | 1.81 (-10.8 to 14.9)         | -0.935 (-12.6 to 12.1)          | -18.6 (-27.9 to -9.11)                   |
| 7 Falls                     | 7 COPD                      | 32.3 (17.9 to 46.2)          | 28.8 (15.1 to 43.3)             | -11.6 (-21.9 to -1.31)                   |
| 8 Diabetes                  | 8 Stroke                    | -12 (-18.4 to -5.28)         | -14.4 (-20.4 to -7.45)          | -37.8 (-43.5 to -32.2)                   |
| 9 COPD                      | 9 Depressive disorders      | 3.17 (-0.334 to 6.95)        | 0.39 (-1.14 to 2.11)            | -0.923 (-1.19 to -0.614)                 |
| 10 Depressive disorders     | 10 Colorectal cancer        | 23.5 (2.6 to 45.5)           | 20.2 (0.804 to 43.5)            | -11.4 (-24.9 to 4.85)                    |
| 11 Headache disorders       | 11 Chronic kidney disease   | 118 (89.5 to 149)            | 112 (84 to 146)                 | 25.5 (6.65 to 47.9)                      |
| 12 Anxiety disorders        | 12 Age-related hearing loss | 29.9 (24.4 to 35.3)          | 26.4 (21.8 to 30.8)             | -0.551 (-0.677 to -0.416)                |
| 13 Colorectal cancer        | 13 Headache disorders       | -1.24 (-4.86 to 2.16)        | -3.9 (-5.21 to -1.13)           | -0.311 (-0.65 to 0.106)                  |
| 14 Age-related hearing loss | 14 Anxiety disorders        | 1.04 (-2.56 to 5.24)         | -1.68 (-3.34 to -0.0235)        | -0.374 (-0.685 to 0.041)                 |
| 15 Other musculoskeletal    | 15 Lower respiratory infect | 40.8 (30.8 to 51.2)          | 37.1 (27.5 to 47.4)             | -16.8 (-24 to -9.85)                     |
| 16 Osteoarthritis           | 16 Other musculoskeletal    | 25.8 (19.8 to 30.9)          | 22.4 (19.1 to 26.5)             | 23.1 (22.1 to 24)                        |
| 17 Breast cancer            | 17 Pancreatic cancer        | 54.8 (31.6 to 79.8)          | 50.6 (28 to 75.4)               | 19.4 (1.58 to 37.8)                      |
| 18 Gynecological diseases   | 18 Osteoarthritis           | 21 (16.8 to 25)              | 17.7 (14.8 to 20.8)             | 1.53 (1.31 to 1.74)                      |
| 19 Lower respiratory infect | 19 Atrial fibrillation      | 72.5 (63 to 82.5)            | 67.8 (59.2 to 76.5)             | 7.7 (4.58 to 10.6)                       |
| 20 Oral disorders           | 20 Breast cancer            | 7.99 (-3.73 to 19.8)         | 5.08 (-5.83 to 17.3)            | -15.4 (-23.3 to -6.73)                   |
| 21 Pancreatic cancer        | 23 Oral disorders           |                              |                                 |                                          |
| 23 Chronic kidney disease   | 24 Gynecological diseases   |                              |                                 |                                          |
| 27 Atrial fibrillation      | 152 COVID-19                |                              |                                 |                                          |

### Andean Latin America, Reference scenario

**Legend:**  
Communicable, maternal, neonatal and nutritional  
Non-communicable  
Injuries

| Leading Causes 2022          | Leading Causes 2050          | Mean % change number of DALY | Mean % change all-age DALY rate | Mean % change age-standardized DALY rate |
|------------------------------|------------------------------|------------------------------|---------------------------------|------------------------------------------|
| 1 COVID-19                   | 1 Diabetes                   | 136 (104 to 169)             | 97.4 (73 to 122)                | 15.9 (4.17 to 29.9)                      |
| 2 Lower respiratory infect   | 2 Chronic kidney disease     | 171 (88.8 to 261)            | 127 (62.8 to 206)               | 25.6 (-11.9 to 75.4)                     |
| 3 Neonatal disorders         | 3 Lower respiratory infect   | 26 (1.38 to 52.9)            | 5.46 (-12.3 to 26.5)            | -36.9 (-47.1 to -24.7)                   |
| 4 Ischemic heart disease     | 4 Ischemic heart disease     | 38 (-8.68 to 100)            | 15.6 (-22.4 to 68.5)            | -38.5 (-59.7 to -6.12)                   |
| 5 Diabetes                   | 5 Other musculoskeletal      | 108 (90.2 to 130)            | 74.5 (65.4 to 84.1)             | 37.3 (35.7 to 39.2)                      |
| 6 Road injuries              | 6 Stroke                     | 32.9 (6.35 to 63)            | 11.3 (-11 to 36.3)              | -34.6 (-48.1 to -18.5)                   |
| 7 Stroke                     | 7 Low back pain              | 48.5 (36.1 to 61.4)          | 24.3 (18.4 to 30.3)             | -3.59 (-3.8 to -3.36)                    |
| 8 Chronic kidney disease     | 8 Cirrhosis liver            | 61.8 (38.8 to 83.7)          | 35.5 (18.1 to 52.5)             | -13.6 (-23.3 to -3.1)                    |
| 9 Congenital defects         | 9 Road injuries              | 3.21 (-31.2 to 54.2)         | -13.5 (-43.3 to 28.9)           | -18.2 (-47.4 to 23.3)                    |
| 10 Anxiety disorders         | 10 Anxiety disorders         | 24.6 (12.6 to 37.6)          | 4.28 (-1.06 to 10.6)            | 0.399 (0.0447 to 0.737)                  |
| 11 Low back pain             | 11 Neonatal disorders        | -34.7 (-46.7 to -22.8)       | -45.4 (-53.4 to -36.1)          | -25.4 (-36.1 to -12.7)                   |
| 12 Other musculoskeletal     | 12 Oral disorders            | 78.4 (62.5 to 97.7)          | 49.4 (39.1 to 60)               | 0.296 (-0.0648 to 0.671)                 |
| 13 Cirrhosis liver           | 13 Age-related hearing loss  | 94.6 (77.6 to 117)           | 62.9 (53.1 to 72.7)             | -0.515 (-0.743 to -0.287)                |
| 14 Headache disorders        | 14 Blindness and vision loss | 85.3 (68.2 to 107)           | 55.2 (43.9 to 65.3)             | -4.36 (-4.82 to -3.97)                   |
| 15 Depressive disorders      | 15 Alzheimer's disease       | 186 (143 to 232)             | 140 (108 to 171)                | 0.335 (-1.69 to 2.17)                    |
| 16 Stomach cancer            | 16 Depressive disorders      | 40.2 (27.6 to 54.4)          | 17.4 (12.1 to 23.6)             | -0.0892 (-0.765 to 0.63)                 |
| 17 Oral disorders            | 17 Falls                     | 48.1 (29.5 to 71.1)          | 23.9 (12.2 to 35.5)             | -10.2 (-17.7 to -1.84)                   |
| 18 Gynecological diseases    | 18 Stomach cancer            | 27.7 (11.7 to 41.3)          | 6.95 (-2.44 to 16.3)            | -39.1 (-42.9 to -35)                     |
| 19 Falls                     | 19 Headache disorders        | 23.4 (12 to 38.1)            | 3.32 (-2.18 to 15.1)            | 0.511 (-0.179 to 1.13)                   |
| 20 Blindness and vision loss | 20 COPD                      | 147 (86.9 to 215)            | 107 (60 to 161)                 | -2.24 (-27.3 to 29.1)                    |
| 21 Age-related hearing loss  | 25 Congenital defects        |                              |                                 |                                          |
| 30 Alzheimer's disease       | 27 Gynecological diseases    |                              |                                 |                                          |
| 32 COPD                      | 162 COVID-19                 |                              |                                 |                                          |

### Caribbean, Reference scenario

**Legend:**

Communicable, maternal, neonatal and nutritional  
Non-communicable  
Injuries

| Leading Causes 2022           | Leading Causes 2050          | Mean % change number of DALY | Mean % change all-age DALY rate | Mean % change age-standardized DALY rate |
|-------------------------------|------------------------------|------------------------------|---------------------------------|------------------------------------------|
| 1 Ischemic heart disease      | 1 Diabetes                   | 73.4 (50.3 to 97.3)          | 67.2 (47.9 to 89.9)             | 19.7 (6.19 to 36)                        |
| 2 Neonatal disorders          | 2 Ischemic heart disease     | 11.2 (-29 to 58.1)           | 7.41 (-31.9 to 61.9)            | -32.2 (-58 to 7.6)                       |
| 3 Diabetes                    | 3 Stroke                     | 9.58 (-14.4 to 35.3)         | 5.75 (-17.5 to 31)              | -30.4 (-47.1 to -8.75)                   |
| 4 Stroke                      | 4 Nature disaster            | 768 (-99.3 to 13300)         | 721 (-99.3 to 13000)            | 835 (-99.3 to 15000)                     |
| 5 Nature disaster             | 5 Chronic kidney disease     | 80.8 (29.8 to 150)           | 74.5 (23.8 to 145)              | 19.1 (-18 to 73.3)                       |
| 6 Lower respiratory infect    | 6 Neonatal disorders         | -42.5 (-56.3 to -27)         | -44.6 (-55.9 to -29.3)          | -25.1 (-39.9 to -5.8)                    |
| 7 Interpersonal violence      | 7 Lower respiratory infect   | -21.2 (-35.8 to -3.03)       | -23.9 (-37 to -6.11)            | -47.8 (-56.7 to -36.1)                   |
| 8 COVID-19                    | 8 Hypertensive heart disease | 94.3 (37.4 to 154)           | 87.6 (32.2 to 152)              | 17.7 (-18.9 to 64.4)                     |
| 9 Road injuries               | 9 Road injuries              | -6.72 (-39.3 to 42.2)        | -9.95 (-41.6 to 42)             | -6.01 (-40.4 to 49.8)                    |
| 10 Congenital defects         | 10 Other musculoskeletal     | 66 (48.9 to 85.8)            | 60 (50.2 to 69)                 | 38.8 (33.8 to 44)                        |
| 11 Diarrheal diseases         | 11 Low back pain             | 20.2 (9.49 to 31.8)          | 15.9 (11.2 to 20.4)             | -3.7 (-4.39 to -3.01)                    |
| 12 HIV/AIDS                   | 12 Alzheimer's disease       | 121 (83 to 153)              | 113 (82.7 to 139)               | -0.801 (-2.71 to 1.19)                   |
| 13 Chronic kidney disease     | 13 Depressive disorders      | 14.7 (4.47 to 25.3)          | 10.6 (6.71 to 15)               | -1.91 (-3 to -1.01)                      |
| 14 Low back pain              | 14 Age-related hearing loss  | 56.3 (38.3 to 72.6)          | 50.7 (38.8 to 61.2)             | -0.904 (-1.24 to -0.542)                 |
| 15 Depressive disorders       | 15 COPD                      | 46.8 (13.9 to 82.7)          | 41.7 (10.4 to 78.5)             | -17.7 (-39.4 to 8.33)                    |
| 16 Cirrhosis liver            | 16 Cirrhosis liver           | 16.8 (-0.617 to 33.9)        | 12.8 (-3.02 to 30.7)            | -12 (-24.4 to 3.31)                      |
| 17 Headache disorders         | 17 Lung cancer               | 33.5 (-6.48 to 78.1)         | 28.8 (-7.25 to 70.9)            | -16.4 (-37.5 to 9.29)                    |
| 18 Anxiety disorders          | 18 Prostate cancer           | 94.2 (35.9 to 156)           | 87.2 (37.5 to 141)              | 3.19 (-20 to 28.1)                       |
| 19 Lung cancer                | 19 Falls                     | 55.8 (33.1 to 75.4)          | 50.3 (32.9 to 66.7)             | -7.31 (-13.5 to -1.56)                   |
| 20 Other musculoskeletal      | 20 Interpersonal violence    | -37.2 (-59.2 to -1.9)        | -39.5 (-59.4 to -4.61)          | -34.3 (-56.9 to 5.97)                    |
| 21 COPD                       | 21 Headache disorders        |                              |                                 |                                          |
| 22 Age-related hearing loss   | 23 Anxiety disorders         |                              |                                 |                                          |
| 23 Hypertensive heart disease | 24 Congenital defects        |                              |                                 |                                          |
| 26 Falls                      | 31 Diarrheal diseases        |                              |                                 |                                          |
| 29 Alzheimer's disease        | 40 HIV/AIDS                  |                              |                                 |                                          |
| 30 Prostate cancer            | 164 COVID-19                 |                              |                                 |                                          |

### Central Latin America, Reference scenario

**Legend:**  
Communicable, maternal, neonatal and nutritional  
Non-communicable  
Injuries

| Leading Causes 2022          | Leading Causes 2050          | Mean % change number of DALY | Mean % change all-age DALY rate | Mean % change age-standardized DALY rate |
|------------------------------|------------------------------|------------------------------|---------------------------------|------------------------------------------|
| 1 Ischemic heart disease     | 1 Diabetes                   | 87 (66.7 to 112)             | 67.9 (46.4 to 94.2)             | 6.81 (-7.34 to 22.9)                     |
| 2 Diabetes                   | 2 Ischemic heart disease     | 37.8 (-17.3 to 123)          | 24.1 (-26.7 to 105)             | -33.1 (-63.7 to 20.4)                    |
| 3 COVID-19                   | 3 Chronic kidney disease     | 118 (55.6 to 193)            | 96.1 (39.2 to 168)              | 21.4 (-18.4 to 75)                       |
| 4 Interpersonal violence     | 4 Other musculoskeletal      | 89.3 (77.3 to 103)           | 69.8 (61.5 to 79.7)             | 35.2 (32.6 to 38.1)                      |
| 5 Chronic kidney disease     | 5 Low back pain              | 33.6 (23.9 to 42.3)          | 19.9 (14.4 to 25.3)             | -3.49 (-3.78 to -3.22)                   |
| 6 Neonatal disorders         | 6 Cirrhosis liver            | 46.1 (32.8 to 59.9)          | 31.1 (17.7 to 48.3)             | -5.15 (-16.2 to 6.72)                    |
| 7 Road injuries              | 7 Interpersonal violence     | -35.4 (-62.2 to 10.4)        | -42.3 (-64.6 to -3.95)          | -38 (-64 to 3.98)                        |
| 8 Low back pain              | 8 Stroke                     | 31.2 (5.08 to 64.6)          | 18 (-8.15 to 54.7)              | -33 (-50.2 to -8.02)                     |
| 9 Stroke                     | 9 COPD                       | 105 (62.6 to 150)            | 84.6 (40.3 to 131)              | -13.5 (-38.8 to 21)                      |
| 10 Other musculoskeletal     | 10 Road injuries             | 2.55 (-35.9 to 66.8)         | -7.69 (-43.4 to 52.4)           | -9.66 (-45.4 to 52.6)                    |
| 11 Cirrhosis liver           | 11 Alzheimer's disease       | 184 (129 to 236)             | 155 (109 to 200)                | 1.1 (-2.03 to 3.29)                      |
| 12 Lower respiratory infect  | 12 Lower respiratory infect  | 5.61 (-10.9 to 20.9)         | -5.17 (-20.4 to 11.5)           | -38.7 (-49.6 to -25.8)                   |
| 13 Congenital defects        | 13 Age-related hearing loss  | 84 (64.9 to 101)             | 65.1 (51.4 to 78.2)             | -0.628 (-0.753 to -0.483)                |
| 14 Depressive disorders      | 14 Depressive disorders      | 28 (18.4 to 38.3)            | 14.8 (10.2 to 20.3)             | -1.6 (-1.94 to -1.29)                    |
| 15 Headache disorders        | 15 Falls                     | 61.8 (43.2 to 82.3)          | 45.1 (31.4 to 60.2)             | 2.33 (-5.45 to 10.8)                     |
| 16 COPD                      | 16 Headache disorders        | 13.4 (4.21 to 28)            | 1.7 (-3.4 to 14.9)              | -0.157 (-0.405 to 0.117)                 |
| 17 Anxiety disorders         | 17 Neonatal disorders        | -39.2 (-51.1 to -26)         | -45.4 (-56.1 to -32.4)          | -28 (-41.9 to -8.15)                     |
| 18 Age-related hearing loss  | 18 Blindness and vision loss | 73.9 (55.1 to 90.5)          | 56 (42.1 to 68.7)               | -4.22 (-4.64 to -3.89)                   |
| 19 Falls                     | 19 Anxiety disorders         | 14.4 (5.42 to 24.1)          | 2.6 (-2.5 to 8.16)              | 0.131 (-0.267 to 0.495)                  |
| 20 Self-harm                 | 20 Oral disorders            | 59.6 (46.7 to 72.4)          | 43.2 (33.5 to 52.9)             | 0.729 (0.45 to 1.11)                     |
| 21 Oral disorders            | 28 Congenital defects        |                              |                                 |                                          |
| 22 Blindness and vision loss | 31 Self-harm                 |                              |                                 |                                          |
| 24 Alzheimer's disease       | 162 COVID-19                 |                              |                                 |                                          |

### Tropical Latin America, Reference scenario

**Legend:**  
 Communicable, maternal, neonatal and nutritional  
 Non-communicable  
 Injuries

| Leading Causes 2022          | Leading Causes 2050          | Mean % change number of DALY | Mean % change all-age DALY rate | Mean % change age-standardized DALY rate |
|------------------------------|------------------------------|------------------------------|---------------------------------|------------------------------------------|
| 1 Ischemic heart disease     | 1 Diabetes                   | <b>105 (72.8 to 138)</b>     | <b>83.2 (62.8 to 108)</b>       | <b>18.5 (3.89 to 34.7)</b>               |
| 2 Interpersonal violence     | 2 Ischemic heart disease     | 4.15 (-37.1 to 61.1)         | -6.86 (-42.3 to 49.6)           | <b>-42.9 (-65.6 to -6.22)</b>            |
| 3 Stroke                     | 3 Low back pain              | <b>29.3 (11 to 46.7)</b>     | <b>15.4 (11.1 to 20.2)</b>      | <b>-4.05 (-4.23 to -3.88)</b>            |
| 4 Diabetes                   | 4 Alzheimer's disease        | <b>165 (114 to 218)</b>      | <b>136 (105 to 167)</b>         | <b>-5.19 (-7.45 to -2.68)</b>            |
| 5 Low back pain              | 5 Stroke                     | 10.7 (-18.3 to 45.2)         | -1.12 (-25.2 to 30.4)           | <b>-41.1 (-56.2 to -20.2)</b>            |
| 6 COVID-19                   | 6 Other musculoskeletal      | <b>80.5 (58.4 to 106)</b>    | <b>61 (52.6 to 69.9)</b>        | <b>38.9 (36 to 41.6)</b>                 |
| 7 Neonatal disorders         | 7 Lower respiratory infect   | <b>42.4 (10.9 to 73.7)</b>   | <b>27.1 (0.16 to 55.6)</b>      | <b>-31.9 (-47.6 to -11.2)</b>            |
| 8 Road injuries              | 8 Interpersonal violence     | -26.9 (-61.7 to 28.8)        | -34.9 (-64 to 22.1)             | -26.2 (-61.4 to 42.5)                    |
| 9 Lower respiratory infect   | 9 COPD                       | <b>72.6 (18.9 to 132)</b>    | <b>54.1 (12.2 to 108)</b>       | -20.5 (-44.3 to 13.8)                    |
| 10 Anxiety disorders         | 10 Anxiety disorders         | 13.7 (-0.921 to 28.7)        | 1.4 (-1.64 to 5.39)             | <b>0.421 (0.228 to 0.629)</b>            |
| 11 Other musculoskeletal     | 11 Chronic kidney disease    | <b>119 (40.3 to 210)</b>     | <b>95.6 (30.7 to 184)</b>       | 15.4 (-26.1 to 76)                       |
| 12 Headache disorders        | 12 Road injuries             | 0.846 (-37.8 to 54.1)        | -9.86 (-39.6 to 40.2)           | -8.61 (-40.5 to 45.5)                    |
| 13 Depressive disorders      | 13 Age-related hearing loss  | <b>77.2 (50.1 to 102)</b>    | <b>58.1 (47.7 to 67.8)</b>      | <b>-0.925 (-1.03 to -0.818)</b>          |
| 14 Falls                     | 14 Falls                     | <b>45.1 (20.5 to 77)</b>     | <b>29.4 (13.3 to 48.4)</b>      | <b>-11.8 (-20.1 to -1.01)</b>            |
| 15 COPD                      | 15 Depressive disorders      | <b>19.6 (2.5 to 36.1)</b>    | <b>6.65 (3.45 to 11)</b>        | <b>-2.92 (-3.15 to -2.71)</b>            |
| 16 Age-related hearing loss  | 16 Headache disorders        | 7.54 (-8.07 to 24.2)         | -4.09 (-7.87 to 6.83)           | -0.119 (-0.344 to 0.169)                 |
| 17 Alzheimer's disease       | 17 Oral disorders            | <b>61.6 (37.2 to 85.5)</b>   | <b>44.1 (34.6 to 53.2)</b>      | -0.0468 (-0.417 to 0.336)                |
| 18 Congenital defects        | 18 Urinary diseases          | <b>155 (104 to 224)</b>      | <b>128 (82.9 to 179)</b>        | 15.3 (-8.08 to 49.9)                     |
| 19 Chronic kidney disease    | 19 Blindness and vision loss | <b>64.5 (39.2 to 88.5)</b>   | <b>46.7 (35.6 to 56.7)</b>      | <b>-4.87 (-5.15 to -4.57)</b>            |
| 20 Cirrhosis liver           | 20 Lung cancer               | <b>51.5 (0.579 to 116)</b>   | 35 (-7.54 to 83.7)              | -16.9 (-41.2 to 10.3)                    |
| 21 Oral disorders            | 21 Neonatal disorders        |                              |                                 |                                          |
| 22 Blindness and vision loss | 25 Cirrhosis liver           |                              |                                 |                                          |
| 24 Lung cancer               | 36 Congenital defects        |                              |                                 |                                          |
| 33 Urinary diseases          | 162 COVID-19                 |                              |                                 |                                          |



### North Africa and Middle East, Reference scenario

**Legend:**  
Communicable, maternal, neonatal and nutritional  
Non-communicable  
Injuries

| Leading Causes 2022           | Leading Causes 2050          | Mean % change number of DALY | Mean % change all-age DALY rate | Mean % change age-standardized DALY rate |
|-------------------------------|------------------------------|------------------------------|---------------------------------|------------------------------------------|
| 1 Ischemic heart disease      | 1 Ischemic heart disease     | 47 (-1.31 to 124)            | 8.8 (-29.3 to 67.4)             | -41.5 (-63.3 to -6.12)                   |
| 2 Neonatal disorders          | 2 Diabetes                   | 227 (199 to 256)             | 142 (119 to 169)                | 41.7 (27.9 to 58.6)                      |
| 3 Stroke                      | 3 Stroke                     | 47.6 (16.5 to 86.6)          | 9.19 (-13.9 to 41.2)            | -43.1 (-56.4 to -22.1)                   |
| 4 Congenital defects          | 4 Chronic kidney disease     | 219 (134 to 327)             | 136 (71.6 to 223)               | 28.1 (-9.1 to 87.5)                      |
| 5 Road injuries               | 5 Low back pain              | 61.1 (50.4 to 71.2)          | 19 (13.4 to 24.9)               | -5.17 (-5.46 to -4.91)                   |
| 6 Diabetes                    | 6 Hypertensive heart disease | 207 (126 to 312)             | 127 (66.5 to 209)               | 8.27 (-26.5 to 58.5)                     |
| 7 COVID-19                    | 7 Road injuries              | 12.5 (-27.9 to 77.1)         | -16.8 (-47.4 to 34.4)           | -22.2 (-51.8 to 26)                      |
| 8 Low back pain               | 8 Depressive disorders       | 44.8 (35.6 to 55.5)          | 6.93 (2.67 to 12.3)             | -2.32 (-2.96 to -1.65)                   |
| 9 Depressive disorders        | 9 Other musculoskeletal      | 157 (138 to 176)             | 90 (77.5 to 102)                | 54.2 (51 to 57.2)                        |
| 10 Lower respiratory infect   | 10 Neonatal disorders        | -34 (-50.4 to -12.1)         | -51.2 (-62.4 to -35.4)          | -37.3 (-52.4 to -15.4)                   |
| 11 Conflict & terror          | 11 COPD                      | 140 (84.2 to 209)            | 77.9 (38 to 135)                | -12.7 (-37.5 to 23.5)                    |
| 12 Headache disorders         | 12 Alzheimer's disease       | 281 (211 to 345)             | 181 (136 to 227)                | 5.76 (4.12 to 7.55)                      |
| 13 Anxiety disorders          | 13 Headache disorders        | 39.6 (30 to 51.5)            | 3.15 (-0.804 to 10.3)           | 0.69 (-0.0384 to 1.21)                   |
| 14 Chronic kidney disease     | 14 Conflict & terror         | 60.1 (-59.4 to 350)          | 18.5 (-69.8 to 235)             | 21.5 (-68.9 to 251)                      |
| 15 Gynecological diseases     | 15 Age-related hearing loss  | 122 (99.9 to 142)            | 63.8 (51.2 to 77.2)             | -1.77 (-2.03 to -1.51)                   |
| 16 Hypertensive heart disease | 16 Anxiety disorders         | 36 (26.2 to 45.5)            | 0.448 (-3.83 to 5.36)           | 0.213 (-0.49 to 0.826)                   |
| 17 Cirrhosis liver            | 17 Lower respiratory infect  | 2.15 (-14.2 to 21.9)         | -24.5 (-36.6 to -7.31)          | -42 (-53.8 to -25.3)                     |
| 18 Other musculoskeletal      | 18 Congenital defects        | -31.3 (-43.5 to -20.5)       | -49.3 (-56.3 to -41.5)          | -31.7 (-38.6 to -22.9)                   |
| 19 COPD                       | 19 Cirrhosis liver           | 57.3 (38.3 to 77.2)          | 16.3 (0.994 to 34.2)            | -30.7 (-39.8 to -17.9)                   |
| 20 Age-related hearing loss   | 20 Blindness and vision loss | 124 (101 to 145)             | 65.2 (49.6 to 79.4)             | -3.32 (-3.95 to -2.67)                   |
| 25 Blindness and vision loss  | 22 Gynecological diseases    |                              |                                 |                                          |
| 27 Alzheimer's disease        | 167 COVID-19                 |                              |                                 |                                          |

### South Asia, Reference scenario

**Legend:**  
Communicable, maternal, neonatal and nutritional  
Non-communicable  
Injuries

| Leading Causes 2022          | Leading Causes 2050         | Mean % change number of DALY  | Mean % change all-age DALY rate | Mean % change age-standardized DALY rate |
|------------------------------|-----------------------------|-------------------------------|---------------------------------|------------------------------------------|
| 1 Neonatal disorders         | 1 Ischemic heart disease    | 1.4 (-39.9 to 57.8)           | -9.19 (-46.1 to 46.7)           | <b>-51.5 (-73.2 to -15.8)</b>            |
| 2 Ischemic heart disease     | 2 COPD                      | <b>64.3 (19.9 to 112)</b>     | <b>47 (9.5 to 99.4)</b>         | -32.2 (-52.7 to 0.761)                   |
| 3 COPD                       | 3 Diabetes                  | <b>107 (80 to 135)</b>        | <b>84.5 (62.3 to 113)</b>       | 3.49 (-10.3 to 24.5)                     |
| 4 Lower respiratory infect   | 4 Other musculoskeletal     | <b>154 (126 to 182)</b>       | <b>127 (114 to 140)</b>         | <b>67.5 (64 to 71.3)</b>                 |
| 5 Stroke                     | 5 Stroke                    | 18.7 (-7.69 to 48.6)          | 6.13 (-16.5 to 38.6)            | <b>-45.4 (-59.5 to -27)</b>              |
| 6 Diarrheal diseases         | 6 Neonatal disorders        | <b>-54.8 (-63.6 to -44.5)</b> | <b>-59.6 (-66.4 to -50.8)</b>   | <b>-35.5 (-45.6 to -22.3)</b>            |
| 7 Diabetes                   | 7 Falls                     | <b>72.3 (39 to 106)</b>       | <b>53.7 (32.2 to 73.5)</b>      | <b>-12.7 (-20.2 to -4.75)</b>            |
| 8 Tuberculosis               | 8 Low back pain             | <b>49.3 (32.9 to 66.3)</b>    | <b>33.3 (25.9 to 40.9)</b>      | <b>-5.8 (-6.14 to -5.44)</b>             |
| 9 Dietary iron deficiency    | 9 Blindness and vision loss | <b>88.2 (62.7 to 117)</b>     | <b>68 (53.6 to 82.9)</b>        | <b>-6.79 (-7.1 to -6.45)</b>             |
| 10 Other musculoskeletal     | 10 Depressive disorders     | <b>38.1 (22.4 to 55.2)</b>    | <b>23.3 (17.8 to 30.6)</b>      | <b>-4.05 (-4.45 to -3.61)</b>            |
| 11 Road injuries             | 11 Age-related hearing loss | <b>83.3 (59 to 109)</b>       | <b>63.6 (51.3 to 76.7)</b>      | <b>-1.74 (-1.91 to -1.57)</b>            |
| 12 Low back pain             | 12 Cirrhosis liver          | <b>28.2 (3.31 to 57.4)</b>    | 14.6 (-7.56 to 42.9)            | <b>-21.1 (-37.1 to -1.04)</b>            |
| 13 Cirrhosis liver           | 13 Lower respiratory infect | <b>-41 (-52.5 to -27.2)</b>   | <b>-47.3 (-56.6 to -35.9)</b>   | <b>-57.5 (-65.7 to -46.2)</b>            |
| 14 Depressive disorders      | 14 Diarrheal diseases       | -16.8 (-41.6 to 16.7)         | -25.6 (-49.3 to 8.23)           | <b>-51.2 (-69.9 to -22.2)</b>            |
| 15 COVID-19                  | 15 Dietary iron deficiency  | -0.56 (-12.1 to 12.3)         | <b>-11.3 (-13.4 to -9.18)</b>   | <b>-13.7 (-14.8 to -12.6)</b>            |
| 16 Falls                     | 16 Road injuries            | -4.34 (-40.9 to 45.2)         | -14.4 (-45.8 to 36.8)           | -23.1 (-52.9 to 25.6)                    |
| 17 Self-harm                 | 17 Headache disorders       | <b>20.4 (6.48 to 41.7)</b>    | <b>7.43 (1.56 to 23.8)</b>      | 0.422 (-0.117 to 0.668)                  |
| 18 Headache disorders        | 18 Chronic kidney disease   | <b>104 (41.2 to 185)</b>      | <b>82.4 (26.2 to 164)</b>       | 4.93 (-32 to 59)                         |
| 19 Congenital defects        | 19 Self-harm                | -9.2 (-31.1 to 16.1)          | -18.9 (-37.9 to 6.93)           | -20.3 (-40.2 to 6.49)                    |
| 20 Blindness and vision loss | 20 Alzheimer's disease      | <b>196 (127 to 272)</b>       | <b>164 (114 to 214)</b>         | <b>-5.84 (-9.4 to -2.54)</b>             |
| 21 Age-related hearing loss  | 22 Tuberculosis             |                               |                                 |                                          |
| 25 Chronic kidney disease    | 30 Congenital defects       |                               |                                 |                                          |
| 38 Alzheimer's disease       | 166 COVID-19                |                               |                                 |                                          |

### East Asia, Reference scenario

**Legend:**  
Communicable, maternal, neonatal and nutritional  
Non-communicable  
Injuries

| Leading Causes 2022           | Leading Causes 2050          | Mean % change number of DALY  | Mean % change all-age DALY rate | Mean % change age-standardized DALY rate |
|-------------------------------|------------------------------|-------------------------------|---------------------------------|------------------------------------------|
| 1 Stroke                      | 1 Stroke                     | 2.92 (-16.4 to 24)            | 18.2 (-1.53 to 46.7)            | <b>-44.4 (-53.8 to -30.3)</b>            |
| 2 Ischemic heart disease      | 2 COPD                       | <b>82.4 (40.9 to 125)</b>     | <b>109 (66.3 to 163)</b>        | -19.1 (-38.9 to 8.26)                    |
| 3 COPD                        | 3 Ischemic heart disease     | -11.1 (-37 to 21.2)           | 2.07 (-27.4 to 42.5)            | <b>-55.7 (-69.4 to -35.7)</b>            |
| 4 Lung cancer                 | 4 Alzheimer's disease        | <b>172 (127 to 229)</b>       | <b>212 (171 to 261)</b>         | 0.00387 (-3.54 to 3.35)                  |
| 5 Age-related hearing loss    | 5 Lung cancer                | 34.2 (-0.635 to 76.7)         | <b>53.8 (16.5 to 98.3)</b>      | -13.6 (-30.6 to 7.45)                    |
| 6 Diabetes                    | 6 Diabetes                   | <b>74.3 (53.8 to 93.5)</b>    | <b>100 (83.8 to 115)</b>        | <b>42.3 (31.2 to 52.7)</b>               |
| 7 Road injuries               | 7 Age-related hearing loss   | <b>43.1 (27.9 to 60.1)</b>    | <b>64.2 (53 to 75.8)</b>        | <b>-0.819 (-0.983 to -0.657)</b>         |
| 8 Low back pain               | 8 Hypertensive heart disease | <b>139 (72.4 to 221)</b>      | <b>174 (100 to 283)</b>         | 11 (-23.4 to 58.2)                       |
| 9 Stomach cancer              | 9 Low back pain              | 8.21 (-2.51 to 20.2)          | <b>24.2 (17.8 to 30.4)</b>      | <b>-4.13 (-4.51 to -3.67)</b>            |
| 10 Alzheimer's disease        | 10 Other musculoskeletal     | <b>49.4 (35.3 to 64.9)</b>    | <b>71.5 (60.6 to 82)</b>        | <b>53.8 (51.4 to 55.9)</b>               |
| 11 Falls                      | 11 Colorectal cancer         | <b>67.1 (16.7 to 125)</b>     | <b>91.5 (39.7 to 154)</b>       | 11.1 (-17.7 to 42.9)                     |
| 12 Depressive disorders       | 12 Esophageal cancer         | <b>42.4 (23.3 to 63.9)</b>    | <b>63.5 (45.9 to 85)</b>        | -0.463 (-10.9 to 10.5)                   |
| 13 Other musculoskeletal      | 13 Falls                     | <b>19 (2.53 to 38.7)</b>      | <b>36.5 (19.4 to 56.1)</b>      | <b>-22.5 (-29.3 to -14.6)</b>            |
| 14 Headache disorders         | 14 Stomach cancer            | -11.3 (-22.3 to 3.31)         | 1.72 (-10 to 13.9)              | <b>-39.8 (-44.4 to -35.2)</b>            |
| 15 Colorectal cancer          | 15 Road injuries             | -28.9 (-51.4 to 6.08)         | -18.3 (-44.8 to 23.8)           | -18.7 (-48.1 to 29.5)                    |
| 16 Esophageal cancer          | 16 Depressive disorders      | 4.55 (-4.17 to 13.9)          | <b>20 (14.9 to 25.9)</b>        | <b>-1.97 (-2.32 to -1.61)</b>            |
| 17 Blindness and vision loss  | 17 Blindness and vision loss | <b>32 (13.7 to 50.1)</b>      | <b>51.4 (36.5 to 66.1)</b>      | <b>-5.12 (-5.59 to -4.75)</b>            |
| 18 Hypertensive heart disease | 18 Chronic kidney disease    | <b>70.4 (29.4 to 119)</b>     | <b>95.7 (49.3 to 154)</b>       | 2.14 (-25.4 to 38.3)                     |
| 19 Anxiety disorders          | 19 Osteoarthritis            | <b>38.3 (25.8 to 51.7)</b>    | <b>58.7 (51.3 to 67.5)</b>      | <b>3.42 (2.92 to 3.9)</b>                |
| 20 Osteoarthritis             | 20 Headache disorders        | <b>-14.7 (-21.2 to -6.44)</b> | -2.04 (-6.59 to 6.29)           | -0.023 (-0.398 to 0.474)                 |
| 24 Chronic kidney disease     | 25 Anxiety disorders         |                               |                                 |                                          |

### Oceania, Reference scenario

**Legend:**

Communicable, maternal, neonatal and nutritional  
Non-communicable  
Injuries

| Leading Causes 2022         | Leading Causes 2050         | Mean % change number of DALY | Mean % change all-age DALY rate | Mean % change age-standardized DALY rate |
|-----------------------------|-----------------------------|------------------------------|---------------------------------|------------------------------------------|
| 1 Lower respiratory infect  | 1 Diabetes                  | 130 (88.3 to 174)            | 23.7 (3.44 to 47.8)             | -7.23 (-22.6 to 14.6)                    |
| 2 Neonatal disorders        | 2 Ischemic heart disease    | 82 (16.4 to 170)             | -2.04 (-37.5 to 47.8)           | -27.6 (-55.1 to 12.4)                    |
| 3 Ischemic heart disease    | 3 Stroke                    | 89.4 (43.8 to 137)           | 1.89 (-18.8 to 27)              | -26 (-43.9 to -5.05)                     |
| 4 Diabetes                  | 4 Neonatal disorders        | -19.8 (-46.2 to 17.7)        | -56.9 (-70.3 to -38.5)          | -42 (-58.7 to -18.5)                     |
| 5 Stroke                    | 5 Lower respiratory infect  | -41.8 (-56 to -26.6)         | -68.7 (-75.7 to -60.4)          | -59.7 (-68.1 to -49.4)                   |
| 6 Congenital defects        | 6 COPD                      | 115 (58.7 to 181)            | 15.8 (-13.6 to 54.1)            | -24.3 (-45.2 to 5.52)                    |
| 7 Malaria                   | 7 Malaria                   | 117 (-86.9 to 449)           | 17.4 (-92.7 to 178)             | 16.2 (-91.7 to 200)                      |
| 8 Diarrheal diseases        | 8 Congenital defects        | -6.08 (-23.9 to 17.5)        | -49.6 (-57.7 to -39)            | -34 (-42.9 to -23.8)                     |
| 9 COVID-19                  | 9 Road injuries             | 42.6 (-19.2 to 142)          | -23.2 (-55.6 to 37.5)           | -24.8 (-56 to 30.9)                      |
| 10 COPD                     | 10 Diarrheal diseases       | -18.5 (-50.9 to 24.8)        | -56.2 (-72.9 to -32.4)          | -48 (-68.6 to -19.1)                     |
| 11 Road injuries            | 11 Low back pain            | 108 (83.2 to 132)            | 11.6 (5.33 to 17.8)             | -4.41 (-4.84 to -3.96)                   |
| 12 Tuberculosis             | 12 Chronic kidney disease   | 183 (98.4 to 285)            | 52.2 (5.37 to 116)              | 24.8 (-13.6 to 81.5)                     |
| 13 Pertussis                | 13 Other musculoskeletal    | 263 (219 to 311)             | 95.2 (83 to 107)                | 70.7 (65.9 to 74.2)                      |
| 14 Measles                  | 14 Headache disorders       | 97.9 (77.4 to 120)           | 6.38 (3.09 to 10.4)             | 0.741 (0.403 to 1.02)                    |
| 15 Drowning                 | 15 Depressive disorders     | 100 (78.8 to 123)            | 7.58 (3.59 to 11.7)             | -1.59 (-2.01 to -1.19)                   |
| 16 Low back pain            | 16 Anxiety disorders        | 98.7 (76.6 to 122)           | 6.79 (3.51 to 10.7)             | 1.49 (1.08 to 2.01)                      |
| 17 Asthma                   | 17 Age-related hearing loss | 139 (108 to 172)             | 28.4 (17.8 to 38.9)             | -1.24 (-1.52 to -0.958)                  |
| 18 Interpersonal violence   | 18 Pertussis                | 11.5 (-41.2 to 103)          | -40.1 (-68.8 to 5.75)           | -22.4 (-57.9 to 35.5)                    |
| 19 Headache disorders       | 19 Interpersonal violence   | 42.1 (19.4 to 71.5)          | -23.7 (-32.8 to -12.1)          | -26.3 (-34.5 to -15.7)                   |
| 20 Rheumatic heart disease  | 20 Dietary iron deficiency  | 50.5 (31.8 to 70.1)          | -19.2 (-21.8 to -16.8)          | -15.7 (-17.2 to -13.7)                   |
| 21 Dietary iron deficiency  | 23 Tuberculosis             |                              |                                 |                                          |
| 22 Depressive disorders     | 25 Drowning                 |                              |                                 |                                          |
| 23 Anxiety disorders        | 27 Asthma                   |                              |                                 |                                          |
| 24 Chronic kidney disease   | 32 Rheumatic heart disease  |                              |                                 |                                          |
| 29 Age-related hearing loss | 73 Measles                  |                              |                                 |                                          |
| 31 Other musculoskeletal    | 163 COVID-19                |                              |                                 |                                          |

### Southeast Asia, Reference scenario

**Legend:**  
Communicable, maternal, neonatal and nutritional  
Non-communicable  
Injuries

| Leading Causes 2022           | Leading Causes 2050           | Mean % change number of DALY | Mean % change all-age DALY rate | Mean % change age-standardized DALY rate |
|-------------------------------|-------------------------------|------------------------------|---------------------------------|------------------------------------------|
| 1 Stroke                      | 1 Stroke                      | 17.4 (1.6 to 34.4)           | 3.96 (-11.6 to 21.1)            | -41.6 (-51.2 to -30.9)                   |
| 2 Ischemic heart disease      | 2 Ischemic heart disease      | -4.67 (-29.1 to 26)          | -15.5 (-37.8 to 13.5)           | -51.2 (-64.9 to -30.6)                   |
| 3 Neonatal disorders          | 3 Diabetes                    | 76.6 (58.1 to 96.2)          | 56.4 (38.6 to 74.6)             | -6.82 (-17.6 to 5.01)                    |
| 4 Diabetes                    | 4 COPD                        | 92.8 (59.9 to 127)           | 70.8 (40.5 to 109)              | -14.9 (-31.1 to 9.49)                    |
| 5 Lower respiratory infect    | 5 Chronic kidney disease      | 99.4 (58.1 to 150)           | 76.7 (36.1 to 126)              | 13.8 (-13.1 to 54.4)                     |
| 6 Road injuries               | 6 Cirrhosis liver             | 39.9 (23.8 to 57.9)          | 23.9 (7.99 to 41.5)             | -9.6 (-20.9 to 5.12)                     |
| 7 Cirrhosis liver             | 7 Lower respiratory infect    | 3.43 (-8.61 to 14.9)         | -8.43 (-18.8 to 2.86)           | -45.1 (-51.5 to -36.5)                   |
| 8 COPD                        | 8 Other musculoskeletal       | 100 (87.5 to 114)            | 77.2 (69.2 to 86.4)             | 49.3 (46.6 to 51.7)                      |
| 9 COVID-19                    | 9 Age-related hearing loss    | 71.7 (58.5 to 86)            | 52 (42.8 to 61.7)               | -1.02 (-1.2 to -0.806)                   |
| 10 Tuberculosis               | 10 Hypertensive heart disease | 133 (74.8 to 203)            | 106 (51.9 to 174)               | 12.4 (-20.7 to 57.3)                     |
| 11 Chronic kidney disease     | 11 Low back pain              | 40.3 (30.1 to 50.1)          | 24.2 (19.2 to 30)               | -3.78 (-4.16 to -3.4)                    |
| 12 Low back pain              | 12 Alzheimer's disease        | 209 (167 to 251)             | 173 (137 to 210)                | 1.16 (-1.15 to 3.31)                     |
| 13 Headache disorders         | 13 Lung cancer                | 70.9 (30.7 to 110)           | 51.1 (21.3 to 82.8)             | -8.35 (-24.6 to 7.93)                    |
| 14 Age-related hearing loss   | 14 Road injuries              | -7.71 (-31.2 to 28.2)        | -18.2 (-40.3 to 13.8)           | -19.3 (-42.1 to 13.5)                    |
| 15 Congenital defects         | 15 Headache disorders         | 14.8 (7.39 to 26.3)          | 1.6 (-2.27 to 11.6)             | 0.202 (-0.128 to 0.762)                  |
| 16 Other musculoskeletal      | 16 Neonatal disorders         | -46.4 (-55.4 to -35.3)       | -52.5 (-60 to -42.1)            | -37.8 (-48.7 to -22.3)                   |
| 17 Lung cancer                | 17 Falls                      | 57 (39.6 to 72.7)            | 38.9 (26.1 to 50.7)             | -9.99 (-14.1 to -5.96)                   |
| 18 Diarrheal diseases         | 18 Blindness and vision loss  | 86.3 (69.3 to 103)           | 64.9 (52.1 to 77.1)             | -3.55 (-4.36 to -2.78)                   |
| 19 Hypertensive heart disease | 19 Colorectal cancer          | 91.7 (39.2 to 146)           | 69.5 (26.8 to 115)              | 4.87 (-19.2 to 31.7)                     |
| 20 Depressive disorders       | 20 Depressive disorders       | 24.8 (17.1 to 32.7)          | 10.4 (6.85 to 14.2)             | -1.7 (-2.23 to -1.2)                     |
| 21 Falls                      | 23 Tuberculosis               |                              |                                 |                                          |
| 24 Blindness and vision loss  | 24 Diarrheal diseases         |                              |                                 |                                          |
| 26 Colorectal cancer          | 30 Congenital defects         |                              |                                 |                                          |
| 27 Alzheimer's disease        | 167 COVID-19                  |                              |                                 |                                          |

### Central sub-Saharan Africa, Reference scenario

**Legend:**  
 Communicable, maternal, neonatal and nutritional  
 Non-communicable  
 Injuries

| Leading Causes 2022           | Leading Causes 2050           | Mean % change number of DALY | Mean % change all-age DALY rate | Mean % change age-standardized DALY rate |
|-------------------------------|-------------------------------|------------------------------|---------------------------------|------------------------------------------|
| 1 Neonatal disorders          | 1 Neonatal disorders          | -31.7 (-49.4 to -12.7)       | -61.9 (-69.6 to -52)            | -42.7 (-53.3 to -29.2)                   |
| 2 Malaria                     | 2 Road injuries               | 18 (-37.9 to 108)            | -33.9 (-65.6 to 22.9)           | -36.8 (-65.8 to 14.2)                    |
| 3 Lower respiratory infect    | 3 Lower respiratory infect    | 4.4 (-20.7 to 30.5)          | -41.7 (-53.2 to -30.3)          | -39.1 (-48.2 to -29.4)                   |
| 4 Road injuries               | 4 Malaria                     | -51.8 (-91.1 to 174)         | -73.4 (-94.1 to 53.7)           | -65.3 (-92.4 to 101)                     |
| 5 Tuberculosis                | 5 Diabetes                    | 194 (126 to 279)             | 63.9 (36.9 to 94.4)             | 2.48 (-13.2 to 18.4)                     |
| 6 HIV/AIDS                    | 6 Stroke                      | 59.3 (24.3 to 102)           | -11 (-27.1 to 8.91)             | -46.6 (-56.2 to -34.2)                   |
| 7 Diarrheal diseases          | 7 Depressive disorders        | 116 (73.5 to 157)            | 20.3 (14.6 to 27)               | -3.18 (-3.42 to -2.9)                    |
| 8 Congenital defects          | 8 Ischemic heart disease      | 62.7 (12.9 to 132)           | -8.99 (-37.5 to 33.9)           | -46.3 (-63.6 to -20.3)                   |
| 9 Stroke                      | 9 Tuberculosis                | -31.2 (-54.3 to 0.185)       | -61.5 (-74.5 to -39.8)          | -68.6 (-78.5 to -52.2)                   |
| 10 COVID-19                   | 10 Cirrhosis liver            | 78.9 (43.5 to 123)           | 0.0134 (-16.8 to 19)            | -28.5 (-39.2 to -16.1)                   |
| 11 Ischemic heart disease     | 11 Hypertensive heart disease | 214 (138 to 311)             | 75.6 (35 to 130)                | -4.88 (-27.8 to 23.9)                    |
| 12 Depressive disorders       | 12 Diarrheal diseases         | -11.3 (-38.6 to 30.8)        | -50.4 (-65.5 to -25)            | -43.8 (-59.8 to -19.8)                   |
| 13 Cirrhosis liver            | 13 Chronic kidney disease     | 145 (82 to 226)              | 37.2 (2.54 to 83.7)             | -3.27 (-26.9 to 29.3)                    |
| 14 Pertussis                  | 14 Low back pain              | 125 (81.2 to 171)            | 25.4 (18.4 to 32.9)             | -6.34 (-6.57 to -6.13)                   |
| 15 Diabetes                   | 15 Congenital defects         | -18.4 (-37.9 to 1.52)        | -54.5 (-61.4 to -46.3)          | -34.6 (-43.4 to -23.4)                   |
| 16 Maternal disorders         | 16 Other musculoskeletal      | 368 (286 to 460)             | 161 (142 to 180)                | 89.9 (82.2 to 95.5)                      |
| 17 Meningitis                 | 17 HIV/AIDS                   | -35.1 (-57.3 to 6.38)        | -63.8 (-75.3 to -44.3)          | -68.4 (-77.9 to -52.5)                   |
| 18 Measles                    | 18 Headache disorders         | 110 (71.1 to 150)            | 17.1 (11.5 to 28)               | 0.745 (0.401 to 1.03)                    |
| 19 Low back pain              | 19 COPD                       | 126 (75.3 to 193)            | 26.2 (0.233 to 58)              | -26.9 (-42.1 to -8.72)                   |
| 20 Chronic kidney disease     | 20 Anxiety disorders          | 102 (63.5 to 144)            | 12.8 (6.59 to 19.2)             | 1.43 (1.13 to 1.74)                      |
| 25 Headache disorders         | 24 Pertussis                  |                              |                                 |                                          |
| 26 Hypertensive heart disease | 32 Meningitis                 |                              |                                 |                                          |
| 30 Anxiety disorders          | 33 Maternal disorders         |                              |                                 |                                          |
| 32 COPD                       | 97 Measles                    |                              |                                 |                                          |
| 40 Other musculoskeletal      | 169 COVID-19                  |                              |                                 |                                          |

### Eastern sub-Saharan Africa, Reference scenario

**Legend:**  
Communicable, maternal, neonatal and nutritional  
Non-communicable  
Injuries

| Leading Causes 2022            | Leading Causes 2050            | Mean % change number of DALY | Mean % change all-age DALY rate | Mean % change age-standardized DALY rate |
|--------------------------------|--------------------------------|------------------------------|---------------------------------|------------------------------------------|
| 1 Neonatal disorders           | 1 Neonatal disorders           | -30.3 (-46.6 to -11.2)       | -61.3 (-68.8 to -51.6)          | -40.8 (-51.1 to -25.7)                   |
| 2 Lower respiratory infect     | 2 Lower respiratory infect     | -15.4 (-31.9 to -0.297)      | -53 (-60.7 to -43.3)            | -46.7 (-54.8 to -36.1)                   |
| 3 HIV/AIDS                     | 3 Diarrheal diseases           | -11.1 (-40.3 to 35)          | -50.6 (-66.9 to -25.3)          | -44.4 (-62.2 to -16.7)                   |
| 4 Diarrheal diseases           | 4 Stroke                       | 68.5 (42.8 to 99.2)          | -6.38 (-22 to 13.7)             | -45.3 (-54.5 to -33.1)                   |
| 5 Malaria                      | 5 Depressive disorders         | 126 (111 to 142)             | 25.6 (19 to 32.9)               | -2.81 (-3.19 to -2.46)                   |
| 6 Tuberculosis                 | 6 Diabetes                     | 152 (115 to 195)             | 39.9 (17.4 to 66.7)             | -15.2 (-28 to 0.132)                     |
| 7 Congenital defects           | 7 Chronic kidney disease       | 181 (113 to 271)             | 56.3 (18.4 to 108)              | 7.46 (-19.1 to 43.1)                     |
| 8 COVID-19                     | 8 Low back pain                | 131 (114 to 146)             | 28.2 (20.2 to 35.9)             | -6.92 (-7.13 to -6.71)                   |
| 9 Stroke                       | 9 Congenital defects           | -21.9 (-36.3 to -5.13)       | -56.7 (-62.7 to -48.6)          | -36.1 (-43.6 to -25.2)                   |
| 10 Road injuries               | 10 Other musculoskeletal       | 417 (377 to 452)             | 187 (168 to 208)                | 103 (97.2 to 107)                        |
| 11 Meningitis                  | 11 Cirrhosis liver             | 76.8 (52.2 to 107)           | -1.76 (-16.3 to 18.8)           | -35 (-44.2 to -22.7)                     |
| 12 Protein-energy malnutrition | 12 Ischemic heart disease      | 64.5 (11.1 to 141)           | -8.54 (-38.2 to 37.3)           | -47 (-64.1 to -20.9)                     |
| 13 Depressive disorders        | 13 Tuberculosis                | -30.9 (-54.5 to 6.66)        | -61.6 (-74.7 to -40)            | -70.5 (-80.3 to -55.2)                   |
| 14 Measles                     | 14 Road injuries               | 33.1 (-23 to 129)            | -26 (-56.1 to 28)               | -35.3 (-60.7 to 8.62)                    |
| 15 Ischemic heart disease      | 15 Age-related hearing loss    | 158 (139 to 175)             | 43.4 (32.5 to 53.1)             | -2.23 (-2.44 to -1.99)                   |
| 16 Cirrhosis liver             | 16 Anxiety disorders           | 105 (90.5 to 119)            | 13.8 (8.31 to 20.8)             | 1.74 (1.42 to 2.08)                      |
| 17 Diabetes                    | 17 Hypertensive heart disease  | 171 (109 to 245)             | 50.6 (15.7 to 97.5)             | -18.5 (-38.4 to 6.02)                    |
| 18 Low back pain               | 18 Interpersonal violence      | 51.6 (25.8 to 79.2)          | -15.9 (-28.4 to -0.0947)        | -24 (-33.6 to -11)                       |
| 19 Dietary iron deficiency     | 19 Headache disorders          | 112 (95.4 to 132)            | 17.6 (12.1 to 27.6)             | 0.401 (0.00315 to 0.688)                 |
| 20 Pertussis                   | 20 HIV/AIDS                    | -72.5 (-76.3 to -68.3)       | -84.7 (-86.8 to -82.5)          | -86.3 (-87.8 to -84.6)                   |
| 22 Interpersonal violence      | 21 Dietary iron deficiency     |                              |                                 |                                          |
| 23 Chronic kidney disease      | 27 Malaria                     |                              |                                 |                                          |
| 26 Anxiety disorders           | 29 Meningitis                  |                              |                                 |                                          |
| 27 Age-related hearing loss    | 34 Pertussis                   |                              |                                 |                                          |
| 29 Headache disorders          | 44 Protein-energy malnutrition |                              |                                 |                                          |
| 32 Hypertensive heart disease  | 94 Measles                     |                              |                                 |                                          |
| 39 Other musculoskeletal       | 170 COVID-19                   |                              |                                 |                                          |

### Southern sub-Saharan Africa, Reference scenario

**Legend:**  
 Communicable, maternal, neonatal and nutritional  
 Non-communicable  
 Injuries

| Leading Causes 2022           | Leading Causes 2050          | Mean % change number of DALY | Mean % change all-age DALY rate | Mean % change age-standardized DALY rate |
|-------------------------------|------------------------------|------------------------------|---------------------------------|------------------------------------------|
| 1 HIV/AIDS                    | 1 Diabetes                   | 82.9 (63.5 to 107)           | 50.4 (34.4 to 69.6)             | -11 (-20.5 to 0.0522)                    |
| 2 Neonatal disorders          | 2 HIV/AIDS                   | -70.3 (-74.2 to -65.9)       | -75.6 (-78.7 to -72.6)          | -78 (-80.4 to -75.5)                     |
| 3 Lower respiratory infect    | 3 Lower respiratory infect   | -7.15 (-20 to 6.2)           | -23.7 (-32.1 to -13.6)          | -36.3 (-42.4 to -28)                     |
| 4 COVID-19                    | 4 Neonatal disorders         | -24.3 (-38.1 to -7.59)       | -37.8 (-47.6 to -25.7)          | -15.1 (-27.1 to 0.329)                   |
| 5 Road injuries               | 5 Stroke                     | 23.1 (8.55 to 38.7)          | 1.23 (-10.2 to 15.5)            | -41.6 (-47.7 to -33.5)                   |
| 6 Tuberculosis                | 6 Road injuries              | -3.73 (-35.4 to 49.8)        | -20.7 (-45.6 to 23.6)           | -22.2 (-46.9 to 22.5)                    |
| 7 Interpersonal violence      | 7 Hypertensive heart disease | 135 (92.5 to 180)            | 93.5 (63.3 to 135)              | 8.14 (-11.8 to 30.4)                     |
| 8 Diarrheal diseases          | 8 Ischemic heart disease     | 17.8 (-10.5 to 52.9)         | -3 (-25.4 to 27.8)              | -43.1 (-57.4 to -24.4)                   |
| 9 Stroke                      | 9 Diarrheal diseases         | -20.7 (-43.6 to 11.1)        | -34.8 (-52.6 to -10.1)          | -37.9 (-54.9 to -12.1)                   |
| 10 Diabetes                   | 10 Interpersonal violence    | -27.2 (-36.8 to -17.4)       | -40.1 (-45.5 to -34.1)          | -38.5 (-44.3 to -32)                     |
| 11 Ischemic heart disease     | 11 Chronic kidney disease    | 109 (72 to 151)              | 72.2 (41.7 to 106)              | 12.9 (-6.97 to 39)                       |
| 12 Self-harm                  | 12 COPD                      | 86.5 (62.9 to 115)           | 53.4 (34.4 to 77.8)             | -12.5 (-23.8 to 1.31)                    |
| 13 Depressive disorders       | 13 Tuberculosis              | -44.5 (-58.9 to -25.8)       | -54.3 (-66.4 to -37.7)          | -62.6 (-73 to -48.3)                     |
| 14 Low back pain              | 14 Low back pain             | 55.5 (41 to 71.1)            | 27.8 (22.4 to 34.3)             | -3.34 (-3.59 to -3.05)                   |
| 15 Congenital defects         | 15 Depressive disorders      | 38 (25.3 to 50.9)            | 13.4 (8.74 to 18.6)             | -3.39 (-3.94 to -2.82)                   |
| 16 Hypertensive heart disease | 16 Self-harm                 | 5.71 (-11.1 to 22.6)         | -13.1 (-23.9 to 0.0608)         | -15.4 (-26.4 to -3.2)                    |
| 17 Chronic kidney disease     | 17 Other musculoskeletal     | 115 (92.9 to 136)            | 76.9 (67.5 to 87.7)             | 38.1 (35.7 to 40.3)                      |
| 18 COPD                       | 18 Headache disorders        | 29.3 (16.5 to 44)            | 6.27 (2.07 to 15.2)             | -0.0536 (-0.568 to 0.447)                |
| 19 Dietary iron deficiency    | 19 Cirrhosis liver           | 30.7 (15.3 to 47.1)          | 7.46 (-2.38 to 19.1)            | -21.4 (-28.2 to -13.1)                   |
| 20 Headache disorders         | 20 Blindness and vision loss | 65.8 (47 to 83.6)            | 36.2 (25.4 to 47.4)             | -5.38 (-6.02 to -4.9)                    |
| 22 Cirrhosis liver            | 28 Dietary iron deficiency   |                              |                                 |                                          |
| 26 Blindness and vision loss  | 31 Congenital defects        |                              |                                 |                                          |
| 29 Other musculoskeletal      | 164 COVID-19                 |                              |                                 |                                          |



### Western sub-Saharan Africa, Reference scenario

**Legend:**  
■ Communicable, maternal, neonatal and nutritional  
■ Non-communicable  
■ Injuries

| Leading Causes 2022         | Leading Causes 2050         | Mean % change number of DALY  | Mean % change all-age DALY rate | Mean % change age-standardized DALY rate |
|-----------------------------|-----------------------------|-------------------------------|---------------------------------|------------------------------------------|
| 1 Neonatal disorders        | 1 Neonatal disorders        | -17.6 (-33.9 to 1.62)         | <b>-57.7 (-65.4 to -47.2)</b>   | <b>-37.7 (-47.5 to -24.4)</b>            |
| 2 Malaria                   | 2 Malaria                   | -18.7 (-81.3 to 207)          | -58.1 (-90.5 to 54.3)           | -51.9 (-88 to 81.8)                      |
| 3 Lower respiratory infect  | 3 Lower respiratory infect  | <b>-25.9 (-38.5 to -12.3)</b> | <b>-61.9 (-68.3 to -54)</b>     | <b>-48.1 (-55.8 to -38.2)</b>            |
| 4 Diarrheal diseases        | 4 Diarrheal diseases        | <b>-36.8 (-57.3 to -6.48)</b> | <b>-67.5 (-78.1 to -50.8)</b>   | <b>-56.9 (-70.1 to -36.8)</b>            |
| 5 Congenital defects        | 5 Stroke                    | <b>66.5 (43.6 to 95)</b>      | -14.3 (-27.9 to 2.63)           | <b>-44.4 (-53 to -32.8)</b>              |
| 6 HIV/AIDS                  | 6 Congenital defects        | -12.6 (-26.4 to 4.77)         | <b>-55.1 (-61.2 to -46.3)</b>   | <b>-37.1 (-44.4 to -27.1)</b>            |
| 7 Stroke                    | 7 Diabetes                  | <b>208 (175 to 247)</b>       | <b>58.4 (38.6 to 82)</b>        | 3.34 (-9.13 to 17.8)                     |
| 8 Meningitis                | 8 Ischemic heart disease    | <b>75.1 (25.9 to 141)</b>     | -9.78 (-36 to 25.2)             | <b>-44.7 (-61.3 to -22.7)</b>            |
| 9 Tuberculosis              | 9 Chronic kidney disease    | <b>182 (118 to 262)</b>       | <b>45.2 (11.3 to 90.6)</b>      | 12.1 (-14.2 to 46.9)                     |
| 10 Dietary iron deficiency  | 10 Other musculoskeletal    | <b>418 (381 to 454)</b>       | <b>166 (152 to 180)</b>         | <b>101 (96.9 to 105)</b>                 |
| 11 Road injuries            | 11 Depressive disorders     | <b>134 (118 to 151)</b>       | <b>20.1 (15.3 to 25.6)</b>      | <b>-3.42 (-3.83 to -2.99)</b>            |
| 12 Ischemic heart disease   | 12 Low back pain            | <b>136 (120 to 152)</b>       | <b>21.3 (15.9 to 27.1)</b>      | <b>-6.6 (-6.9 to -6.28)</b>              |
| 13 Pertussis                | 13 Headache disorders       | <b>121 (103 to 141)</b>       | <b>13.8 (9.57 to 23.5)</b>      | <b>0.469 (0.11 to 0.737)</b>             |
| 14 Hemoglobinopathies       | 14 Dietary iron deficiency  | <b>44.6 (29.9 to 59.1)</b>    | <b>-25.7 (-27.4 to -23.8)</b>   | <b>-19.1 (-20 to -18.1)</b>              |
| 15 iNTS                     | 15 Road injuries            | <b>37.3 (-17.3 to 130)</b>    | <b>-29.3 (-58.3 to 20.7)</b>    | <b>-33.4 (-58.9 to 11.8)</b>             |
| 16 Maternal disorders       | 16 Hemoglobinopathies       | <b>27.8 (14.1 to 45.4)</b>    | <b>-34.3 (-39.6 to -29.3)</b>   | <b>-24.8 (-29 to -20.6)</b>              |
| 17 Measles                  | 17 Cirrhosis liver          | <b>59.1 (35.6 to 85)</b>      | <b>-18.1 (-31.1 to -1.19)</b>   | <b>-37.4 (-46.1 to -25.5)</b>            |
| 18 Diabetes                 | 18 Gynecological diseases   | <b>87.6 (57.1 to 123)</b>     | -3.42 (-20.9 to 13.6)           | <b>-21.7 (-34.4 to -7.05)</b>            |
| 19 Cirrhosis liver          | 19 Age-related hearing loss | <b>153 (133 to 177)</b>       | <b>30.1 (22.2 to 37.5)</b>      | <b>-2.09 (-2.31 to -1.9)</b>             |
| 20 COVID-19                 | 20 Anxiety disorders        | <b>113 (95.5 to 131)</b>      | <b>9.4 (5.31 to 13.8)</b>       | <b>1.56 (1.18 to 1.96)</b>               |
| 21 Headache disorders       | 21 Meningitis               |                               |                                 |                                          |
| 22 Depressive disorders     | 22 iNTS                     |                               |                                 |                                          |
| 23 Low back pain            | 23 Tuberculosis             |                               |                                 |                                          |
| 25 Chronic kidney disease   | 26 HIV/AIDS                 |                               |                                 |                                          |
| 27 Gynecological diseases   | 27 Pertussis                |                               |                                 |                                          |
| 29 Anxiety disorders        | 28 Maternal disorders       |                               |                                 |                                          |
| 32 Age-related hearing loss | 30 Measles                  |                               |                                 |                                          |

### Armenia, Reference scenario

**Legend:**  
Communicable, maternal, neonatal and nutritional  
Non-communicable  
Injuries

| Leading Causes 2022          | Leading Causes 2050          | Mean % change number of DEATH | Mean % change all-age DEATH rate | Mean % change age-standardized DEATH rate |
|------------------------------|------------------------------|-------------------------------|----------------------------------|-------------------------------------------|
| 1 Ischemic heart disease     | 1 Ischemic heart disease     | 3.62 (-31.6 to 48.6)          | 30.3 (-14.7 to 78.7)             | <b>-52.8 (-71.1 to -25.9)</b>             |
| 2 COVID-19                   | 2 Stroke                     | -9.61 (-31 to 19.1)           | 13.7 (-12.9 to 45.8)             | <b>-58.2 (-69.2 to -43.6)</b>             |
| 3 Stroke                     | 3 Alzheimer's disease        | <b>175 (99.9 to 262)</b>      | <b>246 (162 to 339)</b>          | <b>-8.53 (-11.1 to -6.35)</b>             |
| 4 Lung cancer                | 4 Lung cancer                | 28.3 (-8.21 to 80.8)          | <b>61.5 (12.7 to 121)</b>        | -12.8 (-36.7 to 16.5)                     |
| 5 Lower respiratory infect   | 5 Lower respiratory infect   | <b>66.2 (30.6 to 113)</b>     | <b>109 (65.2 to 155)</b>         | <b>-27.6 (-42.8 to -7.39)</b>             |
| 6 Alzheimer's disease        | 6 COPD                       | <b>118 (53.9 to 213)</b>      | <b>175 (100 to 277)</b>          | -6.33 (-34.5 to 30.7)                     |
| 7 Cirrhosis liver            | 7 Hypertensive heart disease | <b>92.5 (24.1 to 179)</b>     | <b>142 (54.5 to 252)</b>         | -13.4 (-45.5 to 36.8)                     |
| 8 Hypertensive heart disease | 8 Pancreatic cancer          | <b>103 (27.7 to 201)</b>      | <b>156 (66.4 to 290)</b>         | 27.2 (-10.8 to 78.4)                      |
| 9 Diabetes                   | 9 Colorectal cancer          | <b>58.3 (1.19 to 139)</b>     | <b>99.2 (29.1 to 210)</b>        | -5.24 (-34.5 to 37.1)                     |
| 10 COPD                      | 10 Cirrhosis liver           | <b>27.4 (5.52 to 53.7)</b>    | <b>60.2 (35.3 to 86.3)</b>       | -14.1 (-28.1 to 2.68)                     |
| 11 Colorectal cancer         | 11 Chronic kidney disease    | <b>89.8 (29.8 to 163)</b>     | <b>139 (65.5 to 231)</b>         | 3.38 (-31.2 to 51.9)                      |
| 12 Breast cancer             | 12 Breast cancer             | 45.1 (-2.94 to 108)           | <b>82.6 (23.7 to 161)</b>        | -7.94 (-31.1 to 20.8)                     |
| 13 Pancreatic cancer         | 13 Diabetes                  | 7.99 (-23.5 to 49.6)          | 35.9 (-1.54 to 81.9)             | <b>-38.5 (-56.1 to -16.2)</b>             |
| 14 Stomach cancer            | 14 Aortic aneurysm           | 35.2 (-0.794 to 82.7)         | <b>70.3 (32.1 to 133)</b>        | <b>-24.7 (-35.2 to -9.01)</b>             |
| 15 Chronic kidney disease    | 15 Liver cancer              | <b>70.9 (23.2 to 129)</b>     | <b>115 (59.3 to 179)</b>         | 11.8 (-19.5 to 53)                        |
| 16 Aortic aneurysm           | 16 Prostate cancer           | <b>77.6 (27.1 to 158)</b>     | <b>124 (61.9 to 213)</b>         | -4.19 (-22.1 to 18.6)                     |
| 17 Road injuries             | 17 Stomach cancer            | -4.53 (-22.3 to 14.2)         | <b>20.2 (1.24 to 45.7)</b>       | <b>-39.7 (-46.9 to -31.1)</b>             |
| 18 Liver cancer              | 18 Urinary diseases          | <b>109 (60.1 to 176)</b>      | <b>162 (103 to 238)</b>          | 5.09 (-18.3 to 35.6)                      |
| 19 Prostate cancer           | 19 Vascular intestinal       | <b>84.3 (36.1 to 134)</b>     | <b>132 (72.2 to 213)</b>         | -10 (-24.4 to 4)                          |
| 20 Upper digest diseases     | 20 Brain cancer              | <b>63.9 (33.4 to 101)</b>     | <b>106 (79.2 to 133)</b>         | <b>29.2 (18.4 to 40.1)</b>                |
| 21 Brain cancer              | 23 Road injuries             |                               |                                  |                                           |
| 23 Vascular intestinal       | 25 Upper digest diseases     |                               |                                  |                                           |
| 24 Urinary diseases          | 130 COVID-19                 |                               |                                  |                                           |

### Azerbaijan, Reference scenario

**Legend:**  
Communicable, maternal, neonatal and nutritional  
Non-communicable  
Injuries

| Leading Causes 2022          | Leading Causes 2050          | Mean % change number of DEATH | Mean % change all-age DEATH rate | Mean % change age-standardized DEATH rate |
|------------------------------|------------------------------|-------------------------------|----------------------------------|-------------------------------------------|
| 1 Ischemic heart disease     | 1 Ischemic heart disease     | 88 (19.6 to 161)              | 76.6 (15.7 to 140)               | -41.7 (-67 to -2.21)                      |
| 2 COVID-19                   | 2 Stroke                     | 96.3 (48.2 to 152)            | 84.2 (45.9 to 129)               | -38.4 (-55.2 to -16.5)                    |
| 3 Stroke                     | 3 Alzheimer's disease        | 388 (221 to 596)              | 357 (211 to 528)                 | 3.88 (1.54 to 6.62)                       |
| 4 Cirrhosis liver            | 4 Cirrhosis liver            | 100 (58.6 to 143)             | 88 (58.9 to 117)                 | -9.13 (-23.3 to 9.8)                      |
| 5 Lower respiratory infect   | 5 Hypertensive heart disease | 231 (103 to 390)              | 211 (97.1 to 352)                | 6.43 (-39 to 70)                          |
| 6 Diabetes                   | 6 COPD                       | 216 (131 to 311)              | 197 (119 to 279)                 | 0.401 (-30.7 to 43.1)                     |
| 7 Hypertensive heart disease | 7 Lung cancer                | 97.1 (22.4 to 181)            | 84.5 (22.6 to 170)               | -4.19 (-33.7 to 32.3)                     |
| 8 Lung cancer                | 8 Diabetes                   | 65.5 (12.2 to 130)            | 55.5 (9.09 to 110)               | -27.1 (-51.3 to 6.47)                     |
| 9 Neonatal disorders         | 9 Chronic kidney disease     | 182 (85.5 to 295)             | 165 (73.4 to 267)                | 23.2 (-24.7 to 89.7)                      |
| 10 Cardiomyopathy            | 10 Lower respiratory infect  | 4.05 (-24.3 to 40.1)          | -2.34 (-27.5 to 27.1)            | <b>-46.6 (-60.5 to -28.6)</b>             |
| 11 Stomach cancer            | 11 Liver cancer              | 176 (94.6 to 269)             | 159 (85.5 to 245)                | 24 (-10.2 to 75.2)                        |
| 12 Alzheimer's disease       | 12 Cardiomyopathy            | 50.9 (12.1 to 111)            | 41.5 (11.8 to 90.7)              | <b>-23.3 (-35.3 to -11.2)</b>             |
| 13 COPD                      | 13 Stomach cancer            | 52.7 (22 to 85.9)             | 43.2 (20 to 65.6)                | <b>-34.2 (-41.5 to -26.6)</b>             |
| 14 Chronic kidney disease    | 14 Colorectal cancer         | 135 (37.9 to 265)             | 120 (25.7 to 236)                | 3.44 (-33.9 to 50.6)                      |
| 15 Breast cancer             | 15 Breast cancer             | 79.1 (18.1 to 157)            | 67.7 (14.7 to 135)               | -4.19 (-31.5 to 28.9)                     |
| 16 Liver cancer              | 16 Pancreatic cancer         | 218 (88.1 to 380)             | 198 (72.6 to 364)                | 39.3 (-10 to 101)                         |
| 17 Colorectal cancer         | 17 Esophageal cancer         | 139 (101 to 192)              | 124 (93.3 to 160)                | 1.62 (-11.2 to 17.5)                      |
| 18 Road injuries             | 18 Parkinson's disease       | 297 (207 to 417)              | 273 (191 to 359)                 | 0.76 (-12.3 to 18)                        |
| 19 Esophageal cancer         | 19 Brain cancer              | 99.9 (67.7 to 135)            | 87.5 (69.8 to 110)               | <b>33 (23.6 to 44.3)</b>                  |
| 20 Brain cancer              | 20 Prostate cancer           | 204 (104 to 324)              | 185 (102 to 278)                 | 7.49 (-16.6 to 32.2)                      |
| 22 Pancreatic cancer         | 23 Road injuries             |                               |                                  |                                           |
| 28 Prostate cancer           | 24 Neonatal disorders        |                               |                                  |                                           |
| 33 Parkinson's disease       | 130 COVID-19                 |                               |                                  |                                           |

### Georgia, Reference scenario

**Legend:**

Communicable, maternal, neonatal and nutritional  
 Non-communicable  
 Injuries

| Leading Causes 2022          | Leading Causes 2050          | Mean % change number of DEATH | Mean % change all-age DEATH rate | Mean % change age-standardized DEATH rate |
|------------------------------|------------------------------|-------------------------------|----------------------------------|-------------------------------------------|
| 1 Stroke                     | 1 Stroke                     | -23 (-38.9 to -6.52)          | -17.5 (-35.7 to 1.93)            | -48.8 (-60.6 to -34.5)                    |
| 2 Ischemic heart disease     | 2 Ischemic heart disease     | -24.3 (-50 to 5.81)           | -18.7 (-47 to 11)                | -49.3 (-67.6 to -25.2)                    |
| 3 COVID-19                   | 3 Hypertensive heart disease | 43.5 (-5.98 to 102)           | 54.2 (-0.432 to 121)             | -6.52 (-42 to 45.4)                       |
| 4 Hypertensive heart disease | 4 Alzheimer's disease        | 113 (57.7 to 166)             | 128 (74.6 to 187)                | -1.52 (-3.95 to 1.08)                     |
| 5 Lower respiratory infect   | 5 Lung cancer                | 62.5 (14.9 to 117)            | 73.8 (27.1 to 124)               | 43.8 (9 to 89.7)                          |
| 6 Lung cancer                | 6 Lower respiratory infect   | 15 (-7.25 to 38.2)            | 23.3 (-0.226 to 49.1)            | -16.5 (-32 to 0.218)                      |
| 7 Alzheimer's disease        | 7 Cirrhosis liver            | 13 (-8.1 to 34.1)             | 21 (4.4 to 40.8)                 | 12.3 (-7.28 to 35.6)                      |
| 8 Cirrhosis liver            | 8 Chronic kidney disease     | 62.4 (12.4 to 118)            | 74.3 (16.4 to 135)               | 20 (-19.5 to 73.5)                        |
| 9 Diabetes                   | 9 Breast cancer              | 15.7 (-16.6 to 56.1)          | 23.7 (-11.5 to 66.7)             | -3.19 (-25.7 to 22.4)                     |
| 10 Breast cancer             | 10 Colorectal cancer         | 29.7 (-16.3 to 83.8)          | 38.7 (-10 to 98)                 | 5.61 (-26.5 to 46.1)                      |
| 11 Colorectal cancer         | 11 Diabetes                  | -3.27 (-31.6 to 25.4)         | 3.76 (-24.7 to 40.6)             | -25.6 (-46.1 to -1.75)                    |
| 12 Chronic kidney disease    | 12 COPD                      | 34.9 (-0.713 to 75)           | 44.7 (5.44 to 94.5)              | -5.85 (-31.1 to 24.7)                     |
| 13 Stomach cancer            | 13 Prostate cancer           | 38.5 (0.0289 to 84.9)         | 48.2 (7.4 to 95.4)               | 4.57 (-16.6 to 26.9)                      |
| 14 COPD                      | 14 Pancreatic cancer         | 67.2 (11.4 to 144)            | 78.7 (19.5 to 144)               | 38.9 (-2.16 to 92.3)                      |
| 15 Prostate cancer           | 15 Atrial fibrillation       | 67.1 (30.2 to 115)            | 79 (44.2 to 128)                 | -2.21 (-12.8 to 10.9)                     |
| 16 Road injuries             | 16 Stomach cancer            | -22.1 (-35.6 to -7.12)        | -16.6 (-27.9 to -2.3)            | -35.7 (-42.7 to -27.3)                    |
| 17 Falls                     | 17 Road injuries             | -12.2 (-42.6 to 32.5)         | -5.87 (-39.8 to 42)              | -9.44 (-43.8 to 39.1)                     |
| 18 Pancreatic cancer         | 18 Brain cancer              | 42.6 (19.3 to 64.8)           | 52.6 (39 to 70)                  | 33.8 (24.4 to 46.1)                       |
| 19 Cardiomyopathy            | 19 Falls                     | 9.72 (-10.8 to 31.5)          | 17.4 (-0.64 to 37.8)             | -13.2 (-25.6 to 0.327)                    |
| 20 Brain cancer              | 20 Skin cancer               | 82.3 (29.9 to 156)            | 95.3 (41.7 to 171)               | 18.1 (-2.08 to 47.2)                      |
| 21 Atrial fibrillation       | 25 Cardiomyopathy            |                               |                                  |                                           |
| 35 Skin cancer               | 130 COVID-19                 |                               |                                  |                                           |

### Kazakhstan, Reference scenario

**Legend:**

Communicable, maternal, neonatal and nutritional  
Non-communicable  
Injuries

| Leading Causes 2022           | Leading Causes 2050           | Mean % change number of DEATH | Mean % change all-age DEATH rate | Mean % change age-standardized DEATH rate |
|-------------------------------|-------------------------------|-------------------------------|----------------------------------|-------------------------------------------|
| 1 COVID-19                    | 1 Ischemic heart disease      | 42.5 (-1.63 to 88.8)          | 17.5 (-17.3 to 54.2)             | -48.1 (-68.7 to -19.5)                    |
| 2 Ischemic heart disease      | 2 Stroke                      | 33.1 (5.1 to 61.5)            | 9.73 (-11.7 to 30.5)             | -50.2 (-63 to -32.8)                      |
| 3 Stroke                      | 3 COPD                        | 122 (69.3 to 186)             | 83.1 (40.9 to 131)               | -7.53 (-35.6 to 25.7)                     |
| 4 Cardiomyopathy              | 4 Cirrhosis liver             | 41.9 (18.3 to 65.9)           | 16.9 (-0.983 to 32.9)            | -19.8 (-32.9 to -3.7)                     |
| 5 COPD                        | 5 Cardiomyopathy              | 38.9 (12.1 to 73.7)           | 14.3 (-6.46 to 39.1)             | -24 (-34.1 to -10.6)                      |
| 6 Cirrhosis liver             | 6 Alzheimer's disease         | 272 (157 to 394)              | 206 (124 to 295)                 | 4.26 (1.93 to 7.1)                        |
| 7 Lower respiratory infect    | 7 Lower respiratory infect    | 54.7 (27.1 to 85.8)           | 27.5 (8.09 to 53.7)              | -24.9 (-38.6 to -5.57)                    |
| 8 Self-harm                   | 8 Chronic kidney disease      | 175 (96 to 281)               | 127 (58.5 to 208)                | 27 (-17.7 to 88.4)                        |
| 9 Lung cancer                 | 9 Lung cancer                 | 55.8 (1.39 to 119)            | 28.1 (-13.6 to 72.5)             | -16.2 (-39.1 to 9.69)                     |
| 10 Road injuries              | 10 Self-harm                  | 13.2 (-12.1 to 40.3)          | -6.78 (-22.8 to 15.3)            | -13.5 (-29.1 to 10.7)                     |
| 11 Alzheimer's disease        | 11 Colorectal cancer          | 105 (27.2 to 208)             | 68.8 (2.98 to 144)               | -0.317 (-32.5 to 37.1)                    |
| 12 Chronic kidney disease     | 12 Hypertensive heart disease | 142 (64.1 to 236)             | 99.7 (32.9 to 180)               | -4.68 (-43.2 to 53.8)                     |
| 13 Stomach cancer             | 13 Pancreatic cancer          | 162 (63.9 to 290)             | 115 (35.2 to 210)                | 35.3 (-8.71 to 85)                        |
| 14 Colorectal cancer          | 14 Urinary diseases           | 130 (84.8 to 179)             | 89.2 (56 to 127)                 | 11.5 (-11.5 to 40.6)                      |
| 15 Neonatal disorders         | 15 Diabetes                   | 55.6 (13.9 to 105)            | 28.3 (-5.88 to 69.6)             | -27.7 (-49 to 0.207)                      |
| 16 Diabetes                   | 16 Stomach cancer             | 21.2 (0.914 to 42.7)          | -0.18 (-12.3 to 14.5)            | -36.8 (-43.4 to -28.9)                    |
| 17 Breast cancer              | 17 Breast cancer              | 62.8 (8.43 to 124)            | 33.8 (-7.42 to 82.5)             | -9.42 (-33.3 to 17.4)                     |
| 18 Asthma                     | 18 Road injuries              | 9.38 (-32.4 to 74.7)          | -9.78 (-43.7 to 41.7)            | -14.6 (-48.3 to 37.5)                     |
| 19 Congenital defects         | 19 Parkinson's disease        | 218 (156 to 285)              | 162 (114 to 211)                 | 4.84 (-10.7 to 19.1)                      |
| 20 Hypertensive heart disease | 20 Liver cancer               | 130 (71.7 to 200)             | 89.2 (42.8 to 143)               | 16.6 (-15.4 to 61.6)                      |
| 21 Urinary diseases           | 26 Asthma                     |                               |                                  |                                           |
| 23 Pancreatic cancer          | 37 Congenital defects         |                               |                                  |                                           |
| 25 Liver cancer               | 39 Neonatal disorders         |                               |                                  |                                           |
| 30 Parkinson's disease        | 130 COVID-19                  |                               |                                  |                                           |

### Kyrgyzstan, Reference scenario

**Legend:**

Communicable, maternal, neonatal and nutritional  
Non-communicable  
Injuries

| Leading Causes 2022           | Leading Causes 2050          | Mean % change number of DEATH | Mean % change all-age DEATH rate | Mean % change age-standardized DEATH rate |
|-------------------------------|------------------------------|-------------------------------|----------------------------------|-------------------------------------------|
| 1 COVID-19                    | 1 Ischemic heart disease     | 120 (45.3 to 211)             | 83.2 (25.4 to 152)               | -29.1 (-59.3 to 19.9)                     |
| 2 Ischemic heart disease      | 2 Stroke                     | 60 (19.8 to 103)              | 33.5 (4.14 to 71.6)              | -39.2 (-56.7 to -16.3)                    |
| 3 Stroke                      | 3 COPD                       | 244 (149 to 344)              | 187 (117 to 275)                 | 13.4 (-24.3 to 70.8)                      |
| 4 Cirrhosis liver             | 4 Cirrhosis liver            | 55.7 (21.3 to 89.9)           | 29.8 (7.4 to 54.4)               | -12.6 (-28.8 to 6.36)                     |
| 5 Neonatal disorders          | 5 Alzheimer's disease        | 347 (191 to 515)              | 272 (164 to 398)                 | 14.7 (11.2 to 18)                         |
| 6 COPD                        | 6 Hypertensive heart disease | 223 (103 to 373)              | 169 (69.6 to 295)                | 12.4 (-37.2 to 88.7)                      |
| 7 Road injuries               | 7 Lung cancer                | 165 (62.3 to 281)             | 120 (48 to 215)                  | 17.5 (-15.8 to 60.3)                      |
| 8 Lower respiratory infect    | 8 Chronic kidney disease     | 177 (77.6 to 294)             | 131 (47.1 to 237)                | 29.9 (-20.7 to 107)                       |
| 9 Stomach cancer              | 9 Stomach cancer             | 56.1 (22.3 to 92.6)           | 30 (11.6 to 51.1)                | -30.1 (-38.7 to -21.4)                    |
| 10 Hypertensive heart disease | 10 Road injuries             | 11.1 (-39.5 to 95.7)          | -7.31 (-46.2 to 61.1)            | -17 (-52.6 to 44.5)                       |
| 11 Alzheimer's disease        | 11 Lower respiratory infect  | 9.4 (-16.2 to 37.5)           | -8.77 (-28.8 to 11.3)            | -31.4 (-48.6 to -13.2)                    |
| 12 Self-harm                  | 12 Pancreatic cancer         | 249 (102 to 463)              | 190 (83.2 to 332)                | 49.1 (-0.677 to 114)                      |
| 13 Lung cancer                | 13 Neonatal disorders        | -41.3 (-72.3 to 7)            | -51.1 (-76.3 to -12.8)           | -33.1 (-67.7 to 16.1)                     |
| 14 Cardiomyopathy             | 14 Colorectal cancer         | 143 (39.6 to 281)             | 102 (23.7 to 201)                | 1.28 (-34 to 45.5)                        |
| 15 Chronic kidney disease     | 15 Self-harm                 | 17.2 (-14.3 to 50.8)          | -2.35 (-24.1 to 23.2)            | -16.6 (-35.9 to 7.74)                     |
| 16 Congenital defects         | 16 Cardiomyopathy            | 33.1 (-2.41 to 89.2)          | 10.8 (-14.5 to 45.2)             | -26.8 (-42.5 to -6.25)                    |
| 17 Diabetes                   | 17 Diabetes                  | 78.8 (22.5 to 149)            | 49 (2.09 to 98.3)                | -20.3 (-47.9 to 11.2)                     |
| 18 Breast cancer              | 18 Breast cancer             | 88.2 (23.5 to 170)            | 56.6 (8.18 to 114)               | -7.36 (-31.9 to 23)                       |
| 19 Colorectal cancer          | 19 Liver cancer              | 223 (120 to 343)              | 170 (87.5 to 279)                | 39.4 (-5.92 to 103)                       |
| 20 Alcohol use disorders      | 20 Urinary diseases          | 193 (105 to 279)              | 144 (80.8 to 224)                | 31.2 (-9.3 to 88.1)                       |
| 22 Pancreatic cancer          | 21 Alcohol use disorders     |                               |                                  |                                           |
| 29 Liver cancer               | 34 Congenital defects        |                               |                                  |                                           |
| 31 Urinary diseases           | 130 COVID-19                 |                               |                                  |                                           |

### Mongolia, Reference scenario

**Legend:**  
Communicable, maternal, neonatal and nutritional  
Non-communicable  
Injuries

| Leading Causes 2022           | Leading Causes 2050           | Mean % change number of DEATH | Mean % change all-age DEATH rate | Mean % change age-standardized DEATH rate |
|-------------------------------|-------------------------------|-------------------------------|----------------------------------|-------------------------------------------|
| 1 Ischemic heart disease      | 1 Ischemic heart disease      | 90.4 (27.3 to 160)            | 18.3 (-20 to 64.8)               | -46.7 (-70 to -9.42)                      |
| 2 Stroke                      | 2 Liver cancer                | 247 (148 to 360)              | 116 (52.5 to 197)                | 29.2 (-14.7 to 85.4)                      |
| 3 Liver cancer                | 3 Stroke                      | 92.2 (57.7 to 132)            | 19.3 (-5.26 to 46.5)             | -37.9 (-53.9 to -19.2)                    |
| 4 Cirrhosis liver             | 4 Cirrhosis liver             | 174 (126 to 220)              | 69.8 (38.4 to 105)               | 10.6 (-12.1 to 36)                        |
| 5 Stomach cancer              | 5 Stomach cancer              | 75.7 (45.6 to 102)            | 9.01 (-10.1 to 26.2)             | -35.2 (-42.4 to -27.5)                    |
| 6 Alcohol use disorders       | 6 Lung cancer                 | 176 (72.7 to 304)             | 71.2 (10.1 to 149)               | 1.4 (-29.5 to 36.8)                       |
| 7 Lower respiratory infect    | 7 Alzheimer's disease         | 433 (271 to 606)              | 230 (128 to 339)                 | 4.18 (1.51 to 7.06)                       |
| 8 Lung cancer                 | 8 Esophageal cancer           | 221 (175 to 271)              | 98.9 (69.3 to 132)               | 5.83 (-7.93 to 20.4)                      |
| 9 COVID-19                    | 9 COPD                        | 235 (154 to 333)              | 108 (53.4 to 167)                | -8.16 (-39.2 to 31.6)                     |
| 10 Road injuries              | 10 Chronic kidney disease     | 211 (108 to 332)              | 93.3 (30.2 to 174)               | 15.2 (-29.3 to 80.4)                      |
| 11 Self-harm                  | 11 Alcohol use disorders      | 46.8 (-1.57 to 106)           | -8.86 (-40.3 to 32.9)            | -9.25 (-41.1 to 35.8)                     |
| 12 Neonatal disorders         | 12 Self-harm                  | 74.6 (35.7 to 128)            | 8.36 (-15.9 to 41.8)             | 1.63 (-20.7 to 34.9)                      |
| 13 Tuberculosis               | 13 Cardiomyopathy             | 115 (74.2 to 168)             | 33.5 (7.57 to 70.6)              | -6.72 (-21.3 to 15.1)                     |
| 14 Cardiomyopathy             | 14 Road injuries              | 50.7 (-3.63 to 128)           | -6.39 (-39.9 to 46.7)            | -10.6 (-42.6 to 41.8)                     |
| 15 Esophageal cancer          | 15 Pancreatic cancer          | 289 (128 to 500)              | 141 (40.5 to 265)                | 45.2 (-5.1 to 111)                        |
| 16 COPD                       | 16 Lower respiratory infect   | 17.9 (-5.33 to 50.2)          | -26.8 (-42.4 to -8.22)           | -36.8 (-50.1 to -18.5)                    |
| 17 Chronic kidney disease     | 17 Hypertensive heart disease | 230 (107 to 372)              | 105 (24.5 to 204)                | -5.56 (-51.2 to 58.1)                     |
| 18 Alzheimer's disease        | 18 Colorectal cancer          | 171 (58.5 to 303)             | 67.9 (-2.86 to 151)              | -0.546 (-35.3 to 41.3)                    |
| 19 Congenital defects         | 19 Neonatal disorders         | -12.3 (-50.5 to 44.5)         | -45.6 (-70.2 to -11.7)           | -31.7 (-61 to 11)                         |
| 20 Diabetes                   | 20 Diabetes                   | 70.4 (18.6 to 123)            | 5.81 (-25.4 to 42.7)             | -33.4 (-56.6 to -6.19)                    |
| 22 Pancreatic cancer          | 22 Tuberculosis               |                               |                                  |                                           |
| 24 Colorectal cancer          | 35 Congenital defects         |                               |                                  |                                           |
| 26 Hypertensive heart disease | 129 COVID-19                  |                               |                                  |                                           |

### Tajikistan, Reference scenario

**Legend:**  
Communicable, maternal, neonatal and nutritional  
Non-communicable  
Injuries

| Leading Causes 2022          | Leading Causes 2050          | Mean % change number of DEATH | Mean % change all-age DEATH rate | Mean % change age-standardized DEATH rate |
|------------------------------|------------------------------|-------------------------------|----------------------------------|-------------------------------------------|
| 1 Ischemic heart disease     | 1 Ischemic heart disease     | 191 (90 to 298)               | 95.4 (25.4 to 182)               | -25.6 (-58.2 to 25.5)                     |
| 2 Stroke                     | 2 Stroke                     | 153 (88 to 216)               | 69.4 (28.4 to 107)               | -33.7 (-54.8 to -8.28)                    |
| 3 Lower respiratory infect   | 3 Hypertensive heart disease | 269 (126 to 436)              | 147 (47.8 to 273)                | -7.62 (-49.8 to 63.2)                     |
| 4 COVID-19                   | 4 COPD                       | 204 (117 to 300)              | 104 (46.8 to 160)                | -21 (-47.4 to 16.1)                       |
| 5 Neonatal disorders         | 5 Alzheimer's disease        | 439 (262 to 642)              | 260 (151 to 375)                 | 1.84 (-1.92 to 4.79)                      |
| 6 Cirrhosis liver            | 6 Lower respiratory infect   | -25.4 (-45.1 to -4.83)        | -50.1 (-61 to -34.6)             | -51.7 (-63.1 to -36.3)                    |
| 7 Hypertensive heart disease | 7 Cirrhosis liver            | 88.6 (45.3 to 131)            | 26.4 (-1.03 to 51.4)             | -21.5 (-38 to -4.42)                      |
| 8 Diarrheal diseases         | 8 Diabetes                   | 139 (60 to 244)               | 60.8 (5.25 to 131)               | -14.4 (-46.6 to 26.5)                     |
| 9 COPD                       | 9 Neonatal disorders         | -33.4 (-68.7 to 25.5)         | -55.3 (-78.8 to -12.6)           | -37.8 (-70.5 to 20.5)                     |
| 10 Diabetes                  | 10 Stomach cancer            | 81.9 (43.3 to 121)            | 21.6 (3.66 to 41.6)              | -38.1 (-44 to -31.4)                      |
| 11 Stomach cancer            | 11 Lung cancer               | 146 (47.3 to 274)             | 64.2 (6.37 to 140)               | -12.4 (-37.5 to 23.5)                     |
| 12 Congenital defects        | 12 Parkinson's disease       | 375 (256 to 523)              | 217 (158 to 290)                 | -4.48 (-17.3 to 10.9)                     |
| 13 Tuberculosis              | 13 Brain cancer              | 141 (99.5 to 192)             | 61.4 (45.5 to 81.1)              | 31.2 (20.5 to 44.1)                       |
| 14 Alzheimer's disease       | 14 Esophageal cancer         | 169 (119 to 219)              | 79.7 (57.5 to 108)               | -17.2 (-27.3 to -5.45)                    |
| 15 Road injuries             | 15 Breast cancer             | 129 (48.1 to 263)             | 53 (3.15 to 127)                 | -3.33 (-31.4 to 34.6)                     |
| 16 Drowning                  | 16 Liver cancer              | 238 (133 to 349)              | 127 (59.9 to 215)                | 13.3 (-22.4 to 59.2)                      |
| 17 Lung cancer               | 17 Road injuries             | 31.3 (-27.5 to 109)           | -11.8 (-50.4 to 49.4)            | -19.6 (-56 to 41.8)                       |
| 18 Idiopathic epilepsy       | 18 Urinary diseases          | 205 (119 to 286)              | 104 (47.2 to 156)                | 10.3 (-25.7 to 47.3)                      |
| 19 Falls                     | 19 Colorectal cancer         | 188 (55.7 to 379)             | 91.7 (15.4 to 202)               | -2.25 (-36.5 to 43.7)                     |
| 20 Brain cancer              | 20 Idiopathic epilepsy       | 30.5 (-25.5 to 112)           | -12.4 (-50.4 to 46.5)            | -11.5 (-50.9 to 49.7)                     |
| 21 Breast cancer             | 21 Falls                     |                               |                                  |                                           |
| 22 Esophageal cancer         | 24 Diarrheal diseases        |                               |                                  |                                           |
| 25 Colorectal cancer         | 26 Congenital defects        |                               |                                  |                                           |
| 27 Urinary diseases          | 27 Tuberculosis              |                               |                                  |                                           |
| 28 Liver cancer              | 28 Drowning                  |                               |                                  |                                           |
| 30 Parkinson's disease       | 130 COVID-19                 |                               |                                  |                                           |



### Turkmenistan, Reference scenario

**Legend:**

Communicable, maternal, neonatal and nutritional  
Non-communicable  
Injuries

| Leading Causes 2022          | Leading Causes 2050          | Mean % change number of DEATH | Mean % change all-age DEATH rate | Mean % change age-standardized DEATH rate |
|------------------------------|------------------------------|-------------------------------|----------------------------------|-------------------------------------------|
| 1 Ischemic heart disease     | 1 Ischemic heart disease     | 55.8 (-2.3 to 129)            | 23.7 (-22 to 80.2)               | <b>-46 (-71.2 to -3.81)</b>               |
| 2 Stroke                     | 2 Stroke                     | 30.2 (-2.45 to 79.2)          | 3.29 (-22.9 to 38.5)             | <b>-48.1 (-65.8 to -19.8)</b>             |
| 3 Cirrhosis liver            | 3 Cirrhosis liver            | <b>61.8 (27.8 to 106)</b>     | <b>28.4 (1.65 to 62.7)</b>       | -3.94 (-25.6 to 24.6)                     |
| 4 COVID-19                   | 4 Alzheimer's disease        | <b>287 (125 to 479)</b>       | <b>206 (81.6 to 342)</b>         | -1.06 (-4.04 to 1.7)                      |
| 5 Lower respiratory infect   | 5 Hypertensive heart disease | <b>168 (64.5 to 304)</b>      | <b>113 (29.5 to 227)</b>         | -0.954 (-49 to 75.7)                      |
| 6 Neonatal disorders         | 6 Chronic kidney disease     | <b>143 (54.3 to 282)</b>      | <b>93.3 (22.6 to 202)</b>        | 18.7 (-32.7 to 104)                       |
| 7 Diabetes                   | 7 Diabetes                   | 50.1 (-1.17 to 122)           | 19.3 (-21.4 to 74.5)             | -27.3 (-56.1 to 18.3)                     |
| 8 Chronic kidney disease     | 8 Urinary diseases           | <b>164 (87.5 to 252)</b>      | <b>109 (53.7 to 180)</b>         | 20.1 (-19.7 to 83.1)                      |
| 9 Hypertensive heart disease | 9 Lower respiratory infect   | <b>-32.8 (-48.9 to -11.6)</b> | <b>-46.7 (-60.4 to -30)</b>      | <b>-51.7 (-65.3 to -33.5)</b>             |
| 10 Cardiomyopathy            | 10 Cardiomyopathy            | <b>42.1 (11.1 to 84.8)</b>    | 12.4 (-8.21 to 37.3)             | <b>-24.3 (-34.4 to -12.1)</b>             |
| 11 Congenital defects        | 11 COPD                      | <b>120 (59.4 to 192)</b>      | <b>74.4 (27 to 130)</b>          | -17.5 (-50.3 to 30.7)                     |
| 12 Alzheimer's disease       | 12 Esophageal cancer         | <b>107 (66.8 to 148)</b>      | <b>64.2 (41.5 to 90.4)</b>       | -8.35 (-21.3 to 9.01)                     |
| 13 Self-harm                 | 13 Self-harm                 | 27 (-7.85 to 74.1)            | 0.825 (-26.5 to 37.8)            | -8.76 (-34.4 to 26.7)                     |
| 14 Urinary diseases          | 14 Lung cancer               | 63.8 (-5.45 to 155)           | 29.3 (-22.4 to 95.4)             | -19.9 (-46.8 to 13.4)                     |
| 15 Stomach cancer            | 15 Liver cancer              | <b>154 (54.1 to 280)</b>      | <b>102 (25.2 to 206)</b>         | 23.7 (-26.7 to 106)                       |
| 16 COPD                      | 16 Neonatal disorders        | -43.9 (-74.5 to 8.66)         | <b>-55.4 (-79.1 to -16.2)</b>    | -41.2 (-70.4 to 5.09)                     |
| 17 Lung cancer               | 17 Brain cancer              | <b>94.5 (63.3 to 124)</b>     | <b>54 (38.6 to 70.8)</b>         | <b>26.3 (16.5 to 36.2)</b>                |
| 18 Tuberculosis              | 18 Breast cancer             | <b>65.6 (1.85 to 155)</b>     | 30.8 (-15.6 to 91.5)             | -10.7 (-38.4 to 26)                       |
| 19 Esophageal cancer         | 19 Stomach cancer            | <b>29.4 (1.8 to 61.1)</b>     | 2.5 (-15.8 to 22.4)              | <b>-39.4 (-47 to -31.8)</b>               |
| 20 Road injuries             | 20 Colorectal cancer         | <b>114 (15.6 to 264)</b>      | 69.1 (-5.47 to 176)              | -4.02 (-40.2 to 45.3)                     |
| 21 Breast cancer             | 21 Road injuries             |                               |                                  |                                           |
| 22 Brain cancer              | 23 Congenital defects        |                               |                                  |                                           |
| 23 Liver cancer              | 30 Tuberculosis              |                               |                                  |                                           |
| 24 Colorectal cancer         | 130 COVID-19                 |                               |                                  |                                           |

### Uzbekistan, Reference scenario

**Legend:**

Communicable, maternal, neonatal and nutritional  
Non-communicable  
Injuries

| Leading Causes 2022          | Leading Causes 2050          | Mean % change number of DEATH | Mean % change all-age DEATH rate | Mean % change age-standardized DEATH rate |
|------------------------------|------------------------------|-------------------------------|----------------------------------|-------------------------------------------|
| 1 Ischemic heart disease     | 1 Ischemic heart disease     | 117 (33.3 to 231)             | 66.8 (8.88 to 124)               | -34.1 (-62.6 to 10.8)                     |
| 2 Stroke                     | 2 Stroke                     | 82.8 (27.4 to 151)            | 40.4 (9.8 to 71.6)               | -41.2 (-58.3 to -17.2)                    |
| 3 COVID-19                   | 3 Alzheimer's disease        | 385 (184 to 595)              | 273 (136 to 421)                 | 4.19 (1.63 to 6.98)                       |
| 4 Lower respiratory infect   | 4 Diabetes                   | 99 (28.4 to 211)              | 53 (6.18 to 122)                 | -15.8 (-44.6 to 33.1)                     |
| 5 Cirrhosis liver            | 5 Cirrhosis liver            | 58 (10.4 to 120)              | 21.4 (2.72 to 51.6)              | -15.4 (-31.9 to 8.11)                     |
| 6 Diabetes                   | 6 Chronic kidney disease     | 249 (113 to 438)              | 168 (79 to 268)                  | 42.2 (-15.4 to 128)                       |
| 7 Neonatal disorders         | 7 Hypertensive heart disease | 183 (63.4 to 336)             | 118 (39.3 to 220)                | -7.52 (-47.1 to 49.3)                     |
| 8 Hypertensive heart disease | 8 Lower respiratory infect   | -19.6 (-45.3 to 18.7)         | -38.3 (-51.3 to -18.2)           | -43.6 (-58 to -18.7)                      |
| 9 Road injuries              | 9 COPD                       | 220 (119 to 357)              | 146 (82.3 to 210)                | -3.72 (-37.2 to 42)                       |
| 10 Chronic kidney disease    | 10 Lung cancer               | 126 (32.4 to 232)             | 73.9 (7.42 to 153)               | -2.23 (-34.3 to 34)                       |
| 11 Self-harm                 | 11 Neonatal disorders        | -21 (-62.1 to 57.4)           | -39.5 (-67.6 to 3.75)            | -17.3 (-55.1 to 34.1)                     |
| 12 Alzheimer's disease       | 12 Road injuries             | 15.8 (-43.2 to 131)           | -11.2 (-52.3 to 67.9)            | -18.3 (-57 to 56.4)                       |
| 13 Congenital defects        | 13 Self-harm                 | 16.9 (-20.7 to 67.7)          | -10.3 (-31.2 to 19.4)            | -16.5 (-38.6 to 15)                       |
| 14 Stomach cancer            | 14 Breast cancer             | 85.9 (8.17 to 186)            | 43 (-6.17 to 102)                | -5.48 (-33.3 to 27.9)                     |
| 15 Lung cancer               | 15 Liver cancer              | 172 (68.4 to 338)             | 109 (39.1 to 204)                | 20.9 (-23.4 to 84.5)                      |
| 16 Breast cancer             | 16 Colorectal cancer         | 149 (38.5 to 293)             | 91.3 (14 to 199)                 | 4.15 (-32.7 to 52.4)                      |
| 17 COPD                      | 17 Stomach cancer            | 44.9 (3.33 to 89.5)           | 11.4 (-3.97 to 29.7)             | -38 (-44.3 to -31)                        |
| 18 Drowning                  | 18 Brain cancer              | 110 (53.2 to 172)             | 61.1 (45.7 to 78.6)              | 28.1 (18.5 to 38.4)                       |
| 19 Brain cancer              | 19 Esophageal cancer         | 134 (71.3 to 210)             | 80.1 (53 to 104)                 | -6.91 (-21.4 to 6.71)                     |
| 20 Rheumatic heart disease   | 20 Pancreatic cancer         | 246 (91 to 446)               | 166 (55.8 to 296)                | 42.1 (-7.67 to 106)                       |
| 22 Colorectal cancer         | 25 Congenital defects        |                               |                                  |                                           |
| 23 Liver cancer              | 26 Rheumatic heart disease   |                               |                                  |                                           |
| 25 Esophageal cancer         | 33 Drowning                  |                               |                                  |                                           |
| 33 Pancreatic cancer         | 130 COVID-19                 |                               |                                  |                                           |

### Albania, Reference scenario

**Legend:**  
Communicable, maternal, neonatal and nutritional  
Non-communicable  
Injuries

| Leading Causes 2022                                         | Leading Causes 2050                                         | Mean % change number of DEATH | Mean % change all-age DEATH rate | Mean % change age-standardized DEATH rate |
|-------------------------------------------------------------|-------------------------------------------------------------|-------------------------------|----------------------------------|-------------------------------------------|
| 1 Ischemic heart disease                                    | 1 Stroke                                                    | <b>39.7 (4.25 to 82.6)</b>    | <b>59.6 (24.9 to 94.2)</b>       | <b>-32.4 (-49.8 to -12.4)</b>             |
| 2 Stroke                                                    | 2 Ischemic heart disease                                    | 11.1 (-23.4 to 51.8)          | 27 (-8.56 to 72.3)               | <b>-43.6 (-63.9 to -11.2)</b>             |
| <span style="color: red;">3 COVID-19</span>                 | 3 Alzheimer's disease                                       | <b>165 (103 to 250)</b>       | <b>203 (135 to 275)</b>          | <b>14.3 (11.6 to 17.2)</b>                |
| 4 Lung cancer                                               | 4 Lung cancer                                               | <b>63.9 (15.2 to 115)</b>     | <b>87.4 (34.7 to 145)</b>        | 15.4 (-10.1 to 43.7)                      |
| 5 Alzheimer's disease                                       | 5 COPD                                                      | <b>111 (48.3 to 179)</b>      | <b>142 (79.6 to 218)</b>         | 8.84 (-21.5 to 48.8)                      |
| 6 COPD                                                      | 6 Chronic kidney disease                                    | <b>125 (65.1 to 208)</b>      | <b>157 (90.9 to 238)</b>         | 20.5 (-12.5 to 71.2)                      |
| <span style="color: red;">7 Lower respiratory infect</span> | <span style="color: red;">7 Lower respiratory infect</span> | <b>66.5 (25.5 to 111)</b>     | <b>90.3 (45.3 to 138)</b>        | <b>-21.4 (-37.8 to -4.12)</b>             |
| 8 Stomach cancer                                            | 8 Hypertensive heart disease                                | <b>113 (38.8 to 211)</b>      | <b>144 (60.4 to 253)</b>         | 5.91 (-32.5 to 64.1)                      |
| 9 Hypertensive heart disease                                | 9 Liver cancer                                              | <b>109 (58.6 to 171)</b>      | <b>138 (86 to 197)</b>           | <b>45.2 (13.6 to 89.4)</b>                |
| 10 Chronic kidney disease                                   | 10 Colorectal cancer                                        | <b>99.8 (21.6 to 199)</b>     | <b>128 (42.3 to 250)</b>         | 19.4 (-15.4 to 68.2)                      |
| 11 Liver cancer                                             | 11 Pancreatic cancer                                        | <b>136 (46 to 232)</b>        | <b>170 (68 to 270)</b>           | <b>55.4 (5.62 to 101)</b>                 |
| 12 Cardiomyopathy                                           | 12 Prostate cancer                                          | <b>88 (29.9 to 175)</b>       | <b>115 (56.6 to 197)</b>         | 3.79 (-16.9 to 31.4)                      |
| 13 Colorectal cancer                                        | 13 Cardiomyopathy                                           | <b>56.2 (12.3 to 115)</b>     | <b>78.4 (30 to 146)</b>          | <b>-18.2 (-31.3 to -2.93)</b>             |
| 14 Prostate cancer                                          | 14 Atrial fibrillation                                      | <b>191 (107 to 304)</b>       | <b>233 (145 to 346)</b>          | <b>25.1 (5.87 to 49.4)</b>                |
| 15 Other cardiovascular                                     | 15 Stomach cancer                                           | 16.6 (-6.55 to 54.7)          | <b>33.2 (9.21 to 64.3)</b>       | <b>-26.3 (-33.9 to -16.7)</b>             |
| 16 Cirrhosis liver                                          | 16 Parkinson's disease                                      | <b>98.7 (55.7 to 157)</b>     | <b>127 (79.3 to 181)</b>         | -0.55 (-15.9 to 16.1)                     |
| 17 Pancreatic cancer                                        | 17 Other cardiovascular                                     | <b>53.8 (15.5 to 96.8)</b>    | <b>75.8 (35.9 to 120)</b>        | -15.6 (-31.4 to 5.32)                     |
| 18 Parkinson's disease                                      | 18 Breast cancer                                            | <b>72.1 (15.8 to 150)</b>     | <b>96.7 (36.7 to 187)</b>        | 10.2 (-16 to 41.3)                        |
| 19 Breast cancer                                            | 19 Brain cancer                                             | <b>78.3 (48.7 to 117)</b>     | <b>104 (82.1 to 127)</b>         | <b>43 (33.3 to 54.7)</b>                  |
| 20 Diabetes                                                 | 20 Cirrhosis liver                                          | <b>26.5 (3.14 to 52.4)</b>    | <b>44.5 (22.3 to 66.6)</b>       | -3.02 (-16.2 to 13.6)                     |
| 22 Brain cancer                                             | 21 Diabetes                                                 |                               |                                  |                                           |
| 23 Atrial fibrillation                                      | 129 COVID-19                                                |                               |                                  |                                           |

### Bosnia and Herzegovina, Reference scenario

**Legend:**  
Communicable, maternal, neonatal and nutritional  
Non-communicable  
Injuries

| Leading Causes 2022           | Leading Causes 2050          | Mean % change number of DEATH | Mean % change all-age DEATH rate | Mean % change age-standardized DEATH rate |
|-------------------------------|------------------------------|-------------------------------|----------------------------------|-------------------------------------------|
| 1 Ischemic heart disease      | 1 Ischemic heart disease     | -9.71 (-42.3 to 36.4)         | 27.1 (-18.7 to 90.9)             | <b>-51.6 (-71.2 to -23.8)</b>             |
| 2 Stroke                      | 2 Stroke                     | -21.3 (-39.4 to 3.38)         | 10.8 (-17.8 to 47.2)             | <b>-56.2 (-67.9 to -39.5)</b>             |
| 3 COVID-19                    | 3 Alzheimer's disease        | <b>176 (90.8 to 272)</b>      | <b>288 (183 to 416)</b>          | <b>5.73 (2.81 to 8.64)</b>                |
| 4 Lung cancer                 | 4 Lung cancer                | 14.9 (-24.5 to 64)            | <b>61.1 (11 to 109)</b>          | -4.74 (-31 to 25.3)                       |
| 5 Diabetes                    | 5 Diabetes                   | 11 (-21.3 to 54.1)            | <b>56.1 (11.4 to 116)</b>        | -28.7 (-49.8 to 1.46)                     |
| 6 Alzheimer's disease         | 6 Colorectal cancer          | 47.7 (-10.2 to 130)           | <b>107 (29.4 to 204)</b>         | 3.86 (-31.4 to 43.5)                      |
| 7 Colorectal cancer           | 7 Hypertensive heart disease | <b>78.7 (9.85 to 186)</b>     | <b>152 (52.5 to 295)</b>         | -2.22 (-43.1 to 69.5)                     |
| 8 COPD                        | 8 COPD                       | <b>54.2 (7.89 to 113)</b>     | <b>117 (52.4 to 195)</b>         | -5.98 (-35.3 to 34.5)                     |
| 9 Cardiomyopathy              | 9 Cardiomyopathy             | 38.1 (-5.06 to 110)           | <b>93.7 (44.6 to 172)</b>        | <b>-23.2 (-35.6 to -6.74)</b>             |
| 10 Hypertensive heart disease | 10 Chronic kidney disease    | <b>84.1 (25.7 to 170)</b>     | <b>159 (66.8 to 276)</b>         | 10.6 (-30 to 71)                          |
| 11 Chronic kidney disease     | 11 Pancreatic cancer         | <b>88 (17.3 to 180)</b>       | <b>164 (69.2 to 275)</b>         | 41.2 (-2.74 to 96.4)                      |
| 12 Cirrhosis liver            | 12 Prostate cancer           | <b>73.8 (18.7 to 152)</b>     | <b>144 (77.3 to 244)</b>         | 8.48 (-14 to 32.3)                        |
| 13 Breast cancer              | 13 Breast cancer             | 27.6 (-18.7 to 92.5)          | <b>78.8 (20.6 to 160)</b>        | -4.2 (-28.9 to 29.1)                      |
| 14 Pancreatic cancer          | 14 Liver cancer              | <b>69.9 (24.3 to 139)</b>     | <b>139 (72.8 to 249)</b>         | 36.7 (-6.47 to 99.7)                      |
| 15 Stomach cancer             | 15 Atrial fibrillation       | <b>139 (77 to 224)</b>        | <b>236 (158 to 349)</b>          | 11.5 (-2.91 to 29.3)                      |
| 16 Lower respiratory infect   | 16 Lower respiratory infect  | <b>37.4 (6.22 to 78.2)</b>    | <b>93 (49.9 to 150)</b>          | <b>-23.5 (-38 to -1.73)</b>               |
| 17 Prostate cancer            | 17 Brain cancer              | <b>45.1 (16.9 to 72.4)</b>    | <b>104 (72.3 to 143)</b>         | <b>29.9 (19.2 to 41.5)</b>                |
| 18 Brain cancer               | 18 Parkinson's disease       | <b>69.4 (33.1 to 108)</b>     | <b>138 (94.6 to 187)</b>         | -2.51 (-14.9 to 13)                       |
| 19 Liver cancer               | 19 Cirrhosis liver           | -6.16 (-24.1 to 20)           | <b>31.9 (8.73 to 64.5)</b>       | -7.63 (-22.7 to 15.4)                     |
| 20 Self-harm                  | 20 Stomach cancer            | -11.8 (-30.8 to 7.32)         | <b>23.9 (3.38 to 49.6)</b>       | <b>-35.7 (-42.2 to -28)</b>               |
| 21 Parkinson's disease        | 25 Self-harm                 |                               |                                  |                                           |
| 24 Atrial fibrillation        | 130 COVID-19                 |                               |                                  |                                           |

### Bulgaria, Reference scenario

**Legend:**  
Communicable, maternal, neonatal and nutritional  
Non-communicable  
Injuries

| Leading Causes 2022          | Leading Causes 2050          | Mean % change number of DEATH | Mean % change all-age DEATH rate | Mean % change age-standardized DEATH rate |
|------------------------------|------------------------------|-------------------------------|----------------------------------|-------------------------------------------|
| 1 Ischemic heart disease     | 1 Hypertensive heart disease | 19.3 (-16.7 to 56.7)          | <b>64.4 (15.3 to 115)</b>        | 9.8 (-27.4 to 55.2)                       |
| 2 Stroke                     | 2 Ischemic heart disease     | <b>-42.4 (-57.2 to -24.1)</b> | -20.7 (-42 to 4.85)              | <b>-47.3 (-64.7 to -21.9)</b>             |
| 3 Hypertensive heart disease | 3 Stroke                     | <b>-43.9 (-53.7 to -33)</b>   | <b>-22.7 (-35.7 to -7.54)</b>    | <b>-48.6 (-60.1 to -35.5)</b>             |
| 4 COVID-19                   | 4 Colorectal cancer          | 1.51 (-30.9 to 44.4)          | <b>39.5 (0.143 to 101)</b>       | 3.62 (-22 to 40.2)                        |
| 5 Lung cancer                | 5 Lung cancer                | -19.4 (-40.7 to 3.9)          | 10.9 (-14.3 to 38.2)             | -10.2 (-30.6 to 10.4)                     |
| 6 Colorectal cancer          | 6 Alzheimer's disease        | 28.4 (-5.3 to 63.1)           | <b>76.6 (39.1 to 116)</b>        | 1.97 (-0.569 to 4.43)                     |
| 7 Cirrhosis liver            | 7 Chronic kidney disease     | 25 (-7.93 to 59.9)            | <b>72.1 (28.8 to 119)</b>        | 23.1 (-13 to 62.1)                        |
| 8 Alzheimer's disease        | 8 Cirrhosis liver            | <b>-21.3 (-34.7 to -7.95)</b> | 8.42 (-6.2 to 23.3)              | -0.945 (-14.9 to 14.9)                    |
| 9 Chronic kidney disease     | 9 COPD                       | -1.74 (-21.7 to 24)           | <b>35.3 (9.69 to 66.8)</b>       | -6.55 (-28.6 to 19.8)                     |
| 10 Diabetes                  | 10 Pancreatic cancer         | 24.9 (-15 to 71.9)            | <b>71.6 (24.5 to 136)</b>        | 33.9 (-0.593 to 76.9)                     |
| 11 COPD                      | 11 Diabetes                  | <b>-26.3 (-42.3 to -7.15)</b> | 1.52 (-18.3 to 24.5)             | <b>-28.2 (-44 to -6.92)</b>               |
| 12 Lower respiratory infect  | 12 Breast cancer             | -3.81 (-29.1 to 29.5)         | <b>32.2 (0.892 to 71.8)</b>      | 1.72 (-17.1 to 26.3)                      |
| 13 Breast cancer             | 13 Lower respiratory infect  | -8.49 (-24.7 to 11.7)         | <b>26 (7.9 to 48.7)</b>          | <b>-19.7 (-33.5 to -6.33)</b>             |
| 14 Stomach cancer            | 14 Prostate cancer           | 10.7 (-16.3 to 45.9)          | <b>52.3 (19.4 to 96.2)</b>       | 7.42 (-9.12 to 28.2)                      |
| 15 Pancreatic cancer         | 15 Atrial fibrillation       | 29.1 (-1.7 to 70.3)           | <b>77.4 (41.9 to 124)</b>        | 10.7 (-2.78 to 27.6)                      |
| 16 Other cardiovascular      | 16 Brain cancer              | <b>25.1 (7.31 to 43.5)</b>    | <b>72.2 (56 to 90.5)</b>         | <b>42 (30.6 to 53.2)</b>                  |
| 17 Prostate cancer           | 17 Other cardiovascular      | <b>-20.5 (-35.9 to -4.53)</b> | 9.43 (-8.56 to 29.1)             | <b>-19.8 (-31.7 to -6.49)</b>             |
| 18 Parkinson's disease       | 18 Parkinson's disease       | 10.9 (-9.8 to 36.2)           | <b>52.6 (25.4 to 82)</b>         | 1.29 (-13.5 to 16.3)                      |
| 19 Brain cancer              | 19 Stomach cancer            | <b>-36.4 (-47.1 to -23.6)</b> | <b>-12.5 (-23.8 to -0.0669)</b>  | <b>-33.3 (-39.8 to -26.4)</b>             |
| 20 Self-harm                 | 20 Bladder cancer            | -4.98 (-24.3 to 19.3)         | <b>30.7 (8.69 to 55.9)</b>       | -4.61 (-16.8 to 7.06)                     |
| 21 Atrial fibrillation       | 21 Self-harm                 |                               |                                  |                                           |
| 22 Bladder cancer            | 129 COVID-19                 |                               |                                  |                                           |

### Croatia, Reference scenario

**Legend:**

Communicable, maternal, neonatal and nutritional  
Non-communicable  
Injuries

| Leading Causes 2022          | Leading Causes 2050          | Mean % change number of DEATH | Mean % change all-age DEATH rate | Mean % change age-standardized DEATH rate |
|------------------------------|------------------------------|-------------------------------|----------------------------------|-------------------------------------------|
| 1 Ischemic heart disease     | 1 Ischemic heart disease     | -22.5 (-46.3 to 3.89)         | 10.3 (-21.2 to 48.2)             | <b>-48.1 (-64.8 to -25.3)</b>             |
| 2 Stroke                     | 2 Stroke                     | <b>-33.1 (-46.5 to -14.4)</b> | -4.84 (-23.3 to 18.3)            | <b>-52 (-61.5 to -39.7)</b>               |
| 3 COVID-19                   | 3 Alzheimer's disease        | <b>68.5 (31.6 to 105)</b>     | <b>140 (99.2 to 181)</b>         | <b>4.88 (2.33 to 7.75)</b>                |
| 4 Lung cancer                | 4 Lung cancer                | 8.13 (-17.6 to 38.3)          | <b>53.7 (23.5 to 96.5)</b>       | -0.9 (-18.8 to 23.9)                      |
| 5 Colorectal cancer          | 5 Colorectal cancer          | 27.8 (-12.3 to 79.7)          | <b>81.8 (24.5 to 150)</b>        | 1.62 (-26.5 to 33.9)                      |
| 6 Alzheimer's disease        | 6 COPD                       | <b>40 (4.53 to 79.3)</b>      | <b>99.4 (55.3 to 154)</b>        | 0.832 (-22.7 to 28.7)                     |
| 7 COPD                       | 7 Chronic kidney disease     | <b>78.4 (25.3 to 138)</b>     | <b>154 (85 to 234)</b>           | 27.5 (-6.71 to 73.1)                      |
| 8 Diabetes                   | 8 Hypertensive heart disease | <b>58.1 (8.44 to 135)</b>     | <b>125 (52.7 to 230)</b>         | 4.51 (-35.2 to 62.5)                      |
| 9 Hypertensive heart disease | 9 Falls                      | <b>38 (1.63 to 79.2)</b>      | <b>96.2 (57.4 to 150)</b>        | -7.7 (-22.4 to 10.1)                      |
| 10 Chronic kidney disease    | 10 Diabetes                  | -0.733 (-27.2 to 29.2)        | <b>41.3 (7.38 to 80)</b>         | <b>-26.8 (-44 to -5.51)</b>               |
| 11 Falls                     | 11 Prostate cancer           | <b>48.8 (9.35 to 92.8)</b>    | <b>112 (62.5 to 171)</b>         | 12.9 (-4.87 to 35)                        |
| 12 Cirrhosis liver           | 12 Pancreatic cancer         | <b>55.4 (8.61 to 110)</b>     | <b>121 (62.7 to 188)</b>         | <b>31.9 (0.405 to 67.5)</b>               |
| 13 Breast cancer             | 13 Urinary diseases          | <b>104 (49.8 to 176)</b>      | <b>190 (116 to 282)</b>          | <b>41.3 (7.46 to 85.4)</b>                |
| 14 Prostate cancer           | 14 Lower respiratory infect  | 24.7 (-1.03 to 54.7)          | <b>77.5 (45.1 to 117)</b>        | <b>-16.4 (-29.5 to -0.445)</b>            |
| 15 Lower respiratory infect  | 15 Breast cancer             | 13.1 (-20.6 to 52.3)          | <b>60.7 (19.9 to 111)</b>        | -7.87 (-26 to 14.5)                       |
| 16 Pancreatic cancer         | 16 Brain cancer              | <b>55.1 (28 to 86.4)</b>      | <b>121 (93.7 to 155)</b>         | <b>34 (23.3 to 45.5)</b>                  |
| 17 Cardiomyopathy            | 17 Cardiomyopathy            | 10.7 (-14.4 to 41.9)          | <b>57.5 (28.1 to 91.4)</b>       | <b>-17.9 (-29.7 to -3.39)</b>             |
| 18 Stomach cancer            | 18 Cirrhosis liver           | <b>-23.4 (-37.9 to -8.27)</b> | 9.01 (-4.54 to 23.7)             | <b>-21.9 (-31.9 to -11.1)</b>             |
| 19 Self-harm                 | 19 Nonrheum valv diseases    | <b>58.3 (17.6 to 107)</b>     | <b>125 (75.2 to 185)</b>         | 10.7 (-10 to 31.8)                        |
| 20 Urinary diseases          | 20 Parkinson's disease       | <b>38.3 (10.2 to 69.7)</b>    | <b>96.8 (64.6 to 133)</b>        | 1.41 (-12.5 to 17.3)                      |
| 21 Brain cancer              | 23 Stomach cancer            |                               |                                  |                                           |
| 23 Parkinson's disease       | 27 Self-harm                 |                               |                                  |                                           |
| 24 Nonrheum valv diseases    | 130 COVID-19                 |                               |                                  |                                           |

### Czechia, Reference scenario

**Legend:**

Communicable, maternal, neonatal and nutritional  
Non-communicable  
Injuries

| Leading Causes 2022           | Leading Causes 2050           | Mean % change number of DEATH | Mean % change all-age DEATH rate | Mean % change age-standardized DEATH rate |
|-------------------------------|-------------------------------|-------------------------------|----------------------------------|-------------------------------------------|
| 1 Ischemic heart disease      | 1 Ischemic heart disease      | -9.68 (-34.8 to 19.7)         | -0.545 (-26.8 to 33.3)           | <b>-50 (-65 to -28.1)</b>                 |
| 2 Stroke                      | 2 Alzheimer's disease         | <b>108 (68.6 to 156)</b>      | <b>128 (93.3 to 169)</b>         | 0.0795 (-2.54 to 3.01)                    |
| 3 Lung cancer                 | 3 Stroke                      | <b>-20.3 (-38.2 to -3.39)</b> | -12.3 (-30 to 5.57)              | <b>-53.4 (-64.5 to -42.1)</b>             |
| 4 COVID-19                    | 4 Lung cancer                 | 16.7 (-8.14 to 48.6)          | <b>28.4 (3.77 to 60.2)</b>       | -10.8 (-27.1 to 7.59)                     |
| 5 Alzheimer's disease         | 5 Colorectal cancer           | 39 (-4.45 to 96)              | <b>52.8 (10.8 to 113)</b>        | -4.52 (-29 to 26.4)                       |
| 6 Colorectal cancer           | 6 Diabetes                    | <b>33.3 (2.57 to 70.3)</b>    | <b>46.8 (15.9 to 84.7)</b>       | -18.6 (-37.6 to 4.53)                     |
| 7 Diabetes                    | 7 Lower respiratory infect    | <b>31.7 (4.42 to 63)</b>      | <b>44.9 (21.7 to 73.9)</b>       | <b>-22.7 (-36.7 to -7.23)</b>             |
| 8 Lower respiratory infect    | 8 COPD                        | <b>39.6 (7.59 to 77)</b>      | <b>53.7 (17.8 to 91.5)</b>       | -7.46 (-30.6 to 16)                       |
| 9 COPD                        | 9 Pancreatic cancer           | <b>67.3 (19.8 to 127)</b>     | <b>84.1 (34.1 to 141)</b>        | 24.2 (-7.23 to 62.3)                      |
| 10 Pancreatic cancer          | 10 Hypertensive heart disease | <b>78.9 (14.5 to 164)</b>     | <b>96.9 (29.9 to 189)</b>        | 2.91 (-35.1 to 57.6)                      |
| 11 Cirrhosis liver            | 11 Chronic kidney disease     | <b>150 (82.3 to 233)</b>      | <b>175 (109 to 264)</b>          | <b>46.4 (5.17 to 98.2)</b>                |
| 12 Hypertensive heart disease | 12 Prostate cancer            | <b>67.9 (25.8 to 124)</b>     | <b>84.7 (41.2 to 141)</b>        | 9.29 (-9.52 to 34.4)                      |
| 13 Falls                      | 13 Falls                      | <b>55.7 (20.5 to 94.6)</b>    | <b>71.2 (36.7 to 109)</b>        | -10.5 (-23.1 to 2.61)                     |
| 14 Breast cancer              | 14 Breast cancer              | 26.8 (-4.9 to 68.6)           | <b>39.5 (6.5 to 80.2)</b>        | -12 (-27 to 6.9)                          |
| 15 Prostate cancer            | 15 Atrial fibrillation        | <b>114 (68 to 170)</b>        | <b>136 (91.7 to 190)</b>         | 13.5 (-2.22 to 32.3)                      |
| 16 Chronic kidney disease     | 16 Cirrhosis liver            | -14.7 (-29.2 to 1.12)         | -6.14 (-19.3 to 9.01)            | <b>-18.2 (-30.3 to -4.6)</b>              |
| 17 Kidney cancer              | 17 Urinary diseases           | <b>147 (81.4 to 231)</b>      | <b>172 (107 to 262)</b>          | <b>40.4 (8.45 to 90.3)</b>                |
| 18 Self-harm                  | 18 Kidney cancer              | 39.5 (-1.44 to 96.2)          | <b>53.5 (9.08 to 120)</b>        | 2.92 (-24.4 to 44.5)                      |
| 19 Stomach cancer             | 19 Parkinson's disease        | <b>60.5 (29.9 to 92.5)</b>    | <b>76.5 (48.7 to 109)</b>        | 0.048 (-12.9 to 19.2)                     |
| 20 Parkinson's disease        | 20 Nonrheum valv diseases     | <b>78.5 (38.5 to 134)</b>     | <b>96.3 (58.2 to 156)</b>        | 5.08 (-12.2 to 29.9)                      |
| 21 Atrial fibrillation        | 25 Self-harm                  |                               |                                  |                                           |
| 24 Nonrheum valv diseases     | 27 Stomach cancer             |                               |                                  |                                           |
| 27 Urinary diseases           | 128 COVID-19                  |                               |                                  |                                           |

### Hungary, Reference scenario

**Legend:**  
Communicable, maternal, neonatal and nutritional  
Non-communicable  
Injuries

| Leading Causes 2022          | Leading Causes 2050          | Mean % change number of DEATH | Mean % change all-age DEATH rate | Mean % change age-standardized DEATH rate |
|------------------------------|------------------------------|-------------------------------|----------------------------------|-------------------------------------------|
| 1 Ischemic heart disease     | 1 Ischemic heart disease     | -27.2 (-48.1 to -1.88)        | -23.8 (-45 to -1.14)             | -51.5 (-66.5 to -28.5)                    |
| 2 Stroke                     | 2 Hypertensive heart disease | 63.7 (16.7 to 127)            | 71.3 (23.1 to 140)               | 14.4 (-23.3 to 71)                        |
| 3 COVID-19                   | 3 Lung cancer                | 1.71 (-23.4 to 31.1)          | 6.34 (-18 to 32)                 | -10.4 (-28.5 to 10.7)                     |
| 4 Lung cancer                | 4 Alzheimer's disease        | 89.4 (46.1 to 134)            | 98 (60.2 to 138)                 | 5.72 (3.07 to 8.22)                       |
| 5 Hypertensive heart disease | 5 Stroke                     | -33 (-47.3 to -13.1)          | -29.9 (-43.1 to -14.8)           | -52.9 (-62.2 to -41.3)                    |
| 6 COPD                       | 6 COPD                       | 16 (-12.3 to 48.8)            | 21.5 (-7.2 to 54.7)              | -10.6 (-32 to 18)                         |
| 7 Colorectal cancer          | 7 Colorectal cancer          | 27 (-14.7 to 78.6)            | 32.6 (-8.39 to 77.5)             | 1.64 (-26.1 to 31.5)                      |
| 8 Alzheimer's disease        | 8 Chronic kidney disease     | 89.3 (41.8 to 149)            | 98.1 (50.4 to 153)               | 28.2 (-6.37 to 77.2)                      |
| 9 Cirrhosis liver            | 9 Pancreatic cancer          | 56.6 (8.5 to 115)             | 63.8 (15.2 to 125)               | 31.4 (-2.63 to 75.4)                      |
| 10 Diabetes                  | 10 Cirrhosis liver           | -14.3 (-28.4 to 3.38)         | -10.4 (-22.7 to 6.45)            | -15.7 (-27.1 to -2.27)                    |
| 11 Breast cancer             | 11 Breast cancer             | 15.6 (-18.1 to 52.2)          | 20.8 (-12.6 to 59.9)             | -6.91 (-28.6 to 20.4)                     |
| 12 Pancreatic cancer         | 12 Diabetes                  | -7.33 (-26.8 to 17.2)         | -2.94 (-21.5 to 23.6)            | -30.5 (-45.5 to -11.4)                    |
| 13 Chronic kidney disease    | 13 Falls                     | 34.8 (6.53 to 70.9)           | 41 (14.1 to 68.3)                | -6.72 (-17.5 to 8.33)                     |
| 14 Cardiomyopathy            | 14 Nonrheum valv diseases    | 67.2 (24.7 to 124)            | 74.9 (34.9 to 130)               | 17.2 (-2.75 to 47.6)                      |
| 15 Falls                     | 15 Prostate cancer           | 54.8 (12.8 to 101)            | 61.7 (28 to 108)                 | 18.5 (-1.97 to 40.5)                      |
| 16 Self-harm                 | 16 Cardiomyopathy            | -4.87 (-26.5 to 21.9)         | -0.519 (-20 to 26.7)             | -22.6 (-38.5 to -3.88)                    |
| 17 Lower respiratory infect  | 17 Lower respiratory infect  | 19.6 (-4.5 to 49.2)           | 25.1 (2.94 to 51.2)              | -21.3 (-34.9 to -4.15)                    |
| 18 Prostate cancer           | 18 Atrial fibrillation       | 93.8 (47.5 to 153)            | 103 (60.8 to 154)                | 20 (2.04 to 39.1)                         |
| 19 Nonrheum valv diseases    | 19 Parkinson's disease       | 49.3 (23.8 to 79)             | 56.2 (36.2 to 78.9)              | 9.43 (-4.35 to 25.2)                      |
| 20 Stomach cancer            | 20 Self-harm                 | -11.3 (-27.4 to 8.05)         | -7.17 (-19.9 to 8.59)            | -18.6 (-31.4 to -2.15)                    |
| 22 Parkinson's disease       | 24 Stomach cancer            |                               |                                  |                                           |
| 25 Atrial fibrillation       | 129 COVID-19                 |                               |                                  |                                           |



### Montenegro, Reference scenario

**Legend:**  
Communicable, maternal, neonatal and nutritional  
Non-communicable  
Injuries

| Leading Causes 2022           | Leading Causes 2050           | Mean % change number of DEATH | Mean % change all-age DEATH rate | Mean % change age-standardized DEATH rate |
|-------------------------------|-------------------------------|-------------------------------|----------------------------------|-------------------------------------------|
| 1 Stroke                      | 1 Stroke                      | 9.28 (-13.5 to 35.1)          | <b>28.8 (6.43 to 55.2)</b>       | <b>-34 (-49.5 to -15.9)</b>               |
| 2 Ischemic heart disease      | 2 Ischemic heart disease      | -19.1 (-44.7 to 13.3)         | -4.71 (-30.9 to 28.7)            | <b>-48.6 (-66 to -24.9)</b>               |
| 3 COVID-19                    | 3 Lung cancer                 | 13.9 (-17.4 to 47.6)          | <b>34.1 (3.12 to 68.6)</b>       | -9.46 (-28.7 to 12.5)                     |
| 4 Lung cancer                 | 4 Chronic kidney disease      | <b>95.4 (45.6 to 153)</b>     | <b>130 (75 to 197)</b>           | 28.8 (-6.98 to 74.8)                      |
| 5 Cardiomyopathy              | 5 Atrial fibrillation         | <b>114 (62.5 to 170)</b>      | <b>152 (102 to 216)</b>          | <b>18.5 (0.0693 to 40.2)</b>              |
| 6 Diabetes                    | 6 Alzheimer's disease         | <b>90.8 (45.9 to 142)</b>     | <b>125 (84.3 to 173)</b>         | <b>3.58 (0.946 to 6.69)</b>               |
| 7 Colorectal cancer           | 7 Cardiomyopathy              | 18.6 (-9.8 to 56.3)           | <b>39.7 (9.25 to 78.9)</b>       | <b>-23.1 (-36.5 to -6.24)</b>             |
| 8 Chronic kidney disease      | 8 Colorectal cancer           | 47 (-3.33 to 111)             | <b>73 (16.9 to 137)</b>          | 3.92 (-27.6 to 37)                        |
| 9 Alzheimer's disease         | 9 Pancreatic cancer           | <b>83.2 (24 to 150)</b>       | <b>116 (47.4 to 189)</b>         | 36 (-1.37 to 77.6)                        |
| 10 Breast cancer              | 10 Hypertensive heart disease | <b>82.5 (25.5 to 155)</b>     | <b>115 (46.5 to 217)</b>         | 9.83 (-29.6 to 71.2)                      |
| 11 Atrial fibrillation        | 11 Breast cancer              | 33.1 (-8.18 to 80.6)          | <b>56.7 (14.6 to 109)</b>        | 0.279 (-22.7 to 30)                       |
| 12 Prostate cancer            | 12 Prostate cancer            | <b>67.3 (22.8 to 118)</b>     | <b>97 (50.9 to 151)</b>          | 8.28 (-11.3 to 30.7)                      |
| 13 Pancreatic cancer          | 13 Diabetes                   | 2.37 (-22.3 to 32.3)          | 20.6 (-9.02 to 54.4)             | <b>-30 (-47.8 to -9.35)</b>               |
| 14 Hypertensive heart disease | 14 Brain cancer               | <b>59.1 (34.4 to 91.1)</b>    | <b>87.4 (70.2 to 110)</b>        | <b>40.9 (29.9 to 53.4)</b>                |
| 15 Self-harm                  | 15 Liver cancer               | <b>68.5 (26.8 to 117)</b>     | <b>98.6 (56.3 to 149)</b>        | <b>29.4 (0.127 to 65.7)</b>               |
| 16 Aortic aneurysm            | 16 Parkinson's disease        | <b>75.9 (41.1 to 126)</b>     | <b>107 (70.9 to 151)</b>         | 2.46 (-14.6 to 20.6)                      |
| 17 Stomach cancer             | 17 Aortic aneurysm            | 20.7 (-9.74 to 60.4)          | <b>42 (13.1 to 78.5)</b>         | <b>-15 (-28.6 to -0.162)</b>              |
| 18 Brain cancer               | 18 Lower respiratory infect   | 25.7 (-1.66 to 58.6)          | <b>48.1 (19.3 to 79.7)</b>       | <b>-20.3 (-34.6 to -2.7)</b>              |
| 19 Lower respiratory infect   | 19 Self-harm                  | -12.6 (-27.7 to 5.79)         | 2.98 (-11.3 to 19.1)             | -15.4 (-28.3 to 1.13)                     |
| 20 Liver cancer               | 20 COPD                       | <b>47.8 (6.53 to 93.1)</b>    | <b>74.3 (32 to 123)</b>          | -3.94 (-30.3 to 28.1)                     |
| 22 Parkinson's disease        | 22 Stomach cancer             |                               |                                  |                                           |
| 24 COPD                       | 130 COVID-19                  |                               |                                  |                                           |

### North Macedonia, Reference scenario

**Legend:**  
Communicable, maternal, neonatal and nutritional  
Non-communicable  
Injuries

| Leading Causes 2022          | Leading Causes 2050          | Mean % change number of DEATH | Mean % change all-age DEATH rate | Mean % change age-standardized DEATH rate |
|------------------------------|------------------------------|-------------------------------|----------------------------------|-------------------------------------------|
| 1 COVID-19                   | 1 Stroke                     | 0.902 (-22.7 to 26.5)         | <b>25.5 (1.74 to 50.9)</b>       | <b>-45.8 (-58.2 to -31.5)</b>             |
| 2 Stroke                     | 2 Ischemic heart disease     | 4.09 (-25.9 to 40.6)          | 29.6 (-8.2 to 69.4)              | <b>-40.6 (-61.3 to -12)</b>               |
| 3 Ischemic heart disease     | 3 Hypertensive heart disease | <b>129 (51.3 to 223)</b>      | <b>184 (88.9 to 292)</b>         | 15.3 (-30.7 to 72.1)                      |
| 4 Lung cancer                | 4 Lung cancer                | 43.2 (-2.94 to 107)           | <b>77.3 (36.5 to 135)</b>        | 3.96 (-16.9 to 34.9)                      |
| 5 Hypertensive heart disease | 5 Diabetes                   | 27 (-13.6 to 71.1)            | <b>58 (12.9 to 104)</b>          | <b>-22 (-43.3 to -0.0753)</b>             |
| 6 Diabetes                   | 6 Colorectal cancer          | <b>74.3 (6.35 to 162)</b>     | <b>116 (47.8 to 209)</b>         | 11.4 (-19.5 to 53.3)                      |
| 7 Colorectal cancer          | 7 COPD                       | <b>89.2 (35.7 to 157)</b>     | <b>135 (78.1 to 200)</b>         | 7.95 (-21.2 to 42.6)                      |
| 8 Cardiomyopathy             | 8 Alzheimer's disease        | <b>146 (70.5 to 225)</b>      | <b>206 (145 to 284)</b>          | <b>16.5 (13 to 19.8)</b>                  |
| 9 COPD                       | 9 Cardiomyopathy             | 38.1 (-6.74 to 89)            | <b>71.5 (31.7 to 128)</b>        | <b>-21.3 (-35.9 to -1.27)</b>             |
| 10 Stomach cancer            | 10 Chronic kidney disease    | <b>114 (45.2 to 193)</b>      | <b>167 (93.1 to 245)</b>         | 30.6 (-8.1 to 82.8)                       |
| 11 Breast cancer             | 11 Pancreatic cancer         | <b>126 (43.9 to 231)</b>      | <b>180 (99.1 to 297)</b>         | <b>51.2 (9.9 to 107)</b>                  |
| 12 Chronic kidney disease    | 12 Breast cancer             | 48.5 (-1.54 to 113)           | <b>84 (37.8 to 149)</b>          | 1.19 (-21.3 to 34.2)                      |
| 13 Alzheimer's disease       | 13 Liver cancer              | <b>115 (62.3 to 177)</b>      | <b>167 (109 to 225)</b>          | <b>49.5 (13.8 to 100)</b>                 |
| 14 Pancreatic cancer         | 14 Stomach cancer            | 13.2 (-14.2 to 47.4)          | <b>40.7 (19.1 to 71.5)</b>       | <b>-25.6 (-34.9 to -13.8)</b>             |
| 15 Liver cancer              | 15 Prostate cancer           | <b>107 (40.2 to 184)</b>      | <b>156 (96.9 to 227)</b>         | <b>23 (1.35 to 45)</b>                    |
| 16 Cirrhosis liver           | 16 Brain cancer              | <b>82.9 (42.8 to 135)</b>     | <b>127 (103 to 157)</b>          | <b>42.2 (31.8 to 55.8)</b>                |
| 17 Brain cancer              | 17 Atrial fibrillation       | <b>171 (80.6 to 272)</b>      | <b>235 (155 to 331)</b>          | <b>27.9 (3.2 to 56.5)</b>                 |
| 18 Prostate cancer           | 18 Parkinson's disease       | <b>120 (56.5 to 198)</b>      | <b>173 (124 to 240)</b>          | 11.8 (-5.03 to 32.5)                      |
| 19 Self-harm                 | 19 Lower respiratory infect  | <b>71.5 (28.9 to 122)</b>     | <b>113 (71.1 to 169)</b>         | <b>-8.59 (-27.3 to 12.9)</b>              |
| 20 Lower respiratory infect  | 20 Bladder cancer            | <b>78.8 (31.6 to 135)</b>     | <b>122 (79.5 to 176)</b>         | 11.7 (-2.66 to 27.4)                      |
| 21 Parkinson's disease       | 21 Cirrhosis liver           |                               |                                  |                                           |
| 22 Bladder cancer            | 26 Self-harm                 |                               |                                  |                                           |
| 23 Atrial fibrillation       | 130 COVID-19                 |                               |                                  |                                           |

### Poland, Reference scenario

**Legend:**

Communicable, maternal, neonatal and nutritional  
Non-communicable  
Injuries

| Leading Causes 2022          | Leading Causes 2050          | Mean % change number of DEATH | Mean % change all-age DEATH rate | Mean % change age-standardized DEATH rate |
|------------------------------|------------------------------|-------------------------------|----------------------------------|-------------------------------------------|
| 1 Ischemic heart disease     | 1 Ischemic heart disease     | -15 (-40.1 to 13.3)           | 0.454 (-27.9 to 32.1)            | <b>-54.6 (-68.6 to -38.8)</b>             |
| 2 Stroke                     | 2 Lung cancer                | <b>41.6 (11 to 74.6)</b>      | <b>67.4 (35.7 to 107)</b>        | 6.12 (-14.8 to 28.2)                      |
| 3 COVID-19                   | 3 Alzheimer's disease        | <b>114 (82.6 to 151)</b>      | <b>153 (120 to 185)</b>          | -0.313 (-2.92 to 2.47)                    |
| 4 Lung cancer                | 4 Stroke                     | -19.4 (-34.9 to 0.482)        | -4.74 (-22.5 to 18.1)            | <b>-54.9 (-63.3 to -44.4)</b>             |
| 5 Colorectal cancer          | 5 Colorectal cancer          | <b>51.6 (10.2 to 105)</b>     | <b>79.3 (30.9 to 139)</b>        | -0.715 (-24.9 to 29.5)                    |
| 6 Lower respiratory infect   | 6 Lower respiratory infect   | <b>42.8 (12.4 to 76.1)</b>    | <b>68.9 (34.7 to 103)</b>        | <b>-18.2 (-31.9 to -2.85)</b>             |
| 7 Alzheimer's disease        | 7 Hypertensive heart disease | <b>88.7 (23.9 to 160)</b>     | <b>123 (47.9 to 203)</b>         | 4.76 (-30.4 to 43.6)                      |
| 8 Hypertensive heart disease | 8 Prostate cancer            | <b>72.1 (33.3 to 122)</b>     | <b>103 (59.3 to 154)</b>         | 8.62 (-7.02 to 28.7)                      |
| 9 Diabetes                   | 9 Cardiomyopathy             | <b>36.1 (3.42 to 75.2)</b>    | <b>60.8 (24.2 to 106)</b>        | <b>-19.3 (-32.4 to -3.4)</b>              |
| 10 Cirrhosis liver           | 10 Pancreatic cancer         | <b>79.7 (35.7 to 129)</b>     | <b>113 (59.3 to 177)</b>         | 28.5 (-0.167 to 67.6)                     |
| 11 Cardiomyopathy            | 11 COPD                      | <b>35.9 (1.85 to 77.5)</b>    | <b>60.5 (22.6 to 101)</b>        | -14.2 (-33.4 to 6.52)                     |
| 12 COPD                      | 12 Breast cancer             | 39.3 (-0.554 to 86.3)         | <b>64.7 (20.6 to 119)</b>        | -7.74 (-27 to 17.2)                       |
| 13 Breast cancer             | 13 Diabetes                  | 19.9 (-5.98 to 57.7)          | <b>41.8 (13.2 to 75.2)</b>       | <b>-27.7 (-42.5 to -10.8)</b>             |
| 14 Prostate cancer           | 14 Chronic kidney disease    | <b>120 (61.4 to 186)</b>      | <b>160 (91.4 to 246)</b>         | 25.5 (-6.71 to 59.3)                      |
| 15 Pancreatic cancer         | 15 Atrial fibrillation       | <b>131 (85.5 to 187)</b>      | <b>173 (122 to 238)</b>          | 12.3 (-5.06 to 32.7)                      |
| 16 Stomach cancer            | 16 Cirrhosis liver           | -4.83 (-18.4 to 9.64)         | 12.5 (-0.262 to 27.3)            | -6.03 (-17.8 to 6.21)                     |
| 17 Falls                     | 17 Falls                     | <b>51.8 (14.6 to 96.3)</b>    | <b>79.3 (43.4 to 129)</b>        | -11.4 (-24.3 to 1.88)                     |
| 18 Self-harm                 | 18 Urinary diseases          | <b>155 (87.3 to 238)</b>      | <b>201 (119 to 292)</b>          | <b>37.2 (5.9 to 72)</b>                   |
| 19 Bladder cancer            | 19 Bladder cancer            | <b>44.6 (19.7 to 74.4)</b>    | <b>70.9 (48.4 to 104)</b>        | -6.89 (-17.8 to 6.84)                     |
| 20 Chronic kidney disease    | 20 Parkinson's disease       | <b>67.6 (38 to 105)</b>       | <b>98.1 (68.6 to 134)</b>        | -0.462 (-14.4 to 13.9)                    |
| 22 Atrial fibrillation       | 24 Stomach cancer            |                               |                                  |                                           |
| 24 Parkinson's disease       | 27 Self-harm                 |                               |                                  |                                           |
| 29 Urinary diseases          | 129 COVID-19                 |                               |                                  |                                           |

### Romania, Reference scenario

**Legend:**  
Communicable, maternal, neonatal and nutritional  
Non-communicable  
Injuries

| Leading Causes 2022          | Leading Causes 2050          | Mean % change number of DEATH | Mean % change all-age DEATH rate | Mean % change age-standardized DEATH rate |
|------------------------------|------------------------------|-------------------------------|----------------------------------|-------------------------------------------|
| 1 Ischemic heart disease     | 1 Ischemic heart disease     | -27.9 (-47 to -2)             | -8.24 (-32.6 to 22.7)            | -49.7 (-65.9 to -23.1)                    |
| 2 Stroke                     | 2 Stroke                     | -32 (-47 to -17.2)            | -13.5 (-28.5 to 1.57)            | -51.2 (-61.8 to -36.3)                    |
| 3 Hypertensive heart disease | 3 Hypertensive heart disease | 55.5 (6.75 to 125)            | 97.9 (43.5 to 184)               | 9.18 (-27.2 to 79.2)                      |
| 4 COVID-19                   | 4 Alzheimer's disease        | 80.6 (29.3 to 133)            | 129 (73 to 184)                  | 1.78 (-0.93 to 4.4)                       |
| 5 Lung cancer                | 5 Lung cancer                | -3.74 (-32.6 to 31.3)         | 22.2 (-8.44 to 60.6)             | -8.05 (-29.8 to 18.7)                     |
| 6 Cirrhosis liver            | 6 Cardiomyopathy             | 7.67 (-16.1 to 39.7)          | 36.8 (14 to 65.9)                | -15.3 (-27.4 to -1.57)                    |
| 7 Cardiomyopathy             | 7 Colorectal cancer          | 24 (-24.1 to 77.4)            | 57.3 (3.84 to 122)               | 4.79 (-26.6 to 42.2)                      |
| 8 Alzheimer's disease        | 8 Cirrhosis liver            | -16.6 (-32.8 to 1.5)          | 6.03 (-7.48 to 23.5)             | -10.3 (-23.8 to 6.58)                     |
| 9 Colorectal cancer          | 9 COPD                       | 19.7 (-8.82 to 54.5)          | 52.3 (19.5 to 91.7)              | -7.36 (-29.4 to 20.6)                     |
| 10 Lower respiratory infect  | 10 Lower respiratory infect  | 3.06 (-17.3 to 26.7)          | 31 (10.9 to 53.1)                | -20.9 (-34.2 to -4.1)                     |
| 11 COPD                      | 11 Pancreatic cancer         | 50.7 (0.652 to 107)           | 91.2 (30.5 to 157)               | 36 (-4.42 to 75.4)                        |
| 12 Breast cancer             | 12 Chronic kidney disease    | 53.3 (15.4 to 103)            | 95.1 (46.3 to 160)               | 17.7 (-15.1 to 66.5)                      |
| 13 Stomach cancer            | 13 Breast cancer             | 11.5 (-25.7 to 53)            | 41.6 (3.86 to 90)                | -2.08 (-26.4 to 21.2)                     |
| 14 Pancreatic cancer         | 14 Prostate cancer           | 39.4 (-2.27 to 84)            | 76.9 (33.7 to 122)               | 9.35 (-10.9 to 30.3)                      |
| 15 Chronic kidney disease    | 15 Parkinson's disease       | 38.4 (9.99 to 68.6)           | 75.9 (48.1 to 104)               | 0.669 (-12.8 to 15.9)                     |
| 16 Prostate cancer           | 16 Stomach cancer            | -25.8 (-43.2 to -10.6)        | -5.75 (-18.3 to 9.25)            | -34.9 (-41.5 to -26.9)                    |
| 17 Diabetes                  | 17 Atrial fibrillation       | 87.1 (31.7 to 151)            | 138 (84.1 to 203)                | 15.8 (-1.18 to 34.8)                      |
| 18 Parkinson's disease       | 18 Diabetes                  | -5.98 (-29.6 to 26.6)         | 19.6 (-7.09 to 55.3)             | -26.1 (-44.2 to -0.349)                   |
| 19 Road injuries             | 19 Brain cancer              | 36 (12.1 to 62.5)             | 72.9 (56.2 to 93.3)              | 34.1 (24 to 45.2)                         |
| 20 Falls                     | 20 Bladder cancer            | 17 (-13.3 to 47.5)            | 48.6 (23.6 to 77.8)              | -4.79 (-17 to 8.54)                       |
| 22 Bladder cancer            | 21 Falls                     |                               |                                  |                                           |
| 24 Brain cancer              | 25 Road injuries             |                               |                                  |                                           |
| 26 Atrial fibrillation       | 130 COVID-19                 |                               |                                  |                                           |

### Serbia, Reference scenario

**Legend:**  
Communicable, maternal, neonatal and nutritional  
Non-communicable  
Injuries

| Leading Causes 2022          | Leading Causes 2050          | Mean % change number of DEATH | Mean % change all-age DEATH rate | Mean % change age-standardized DEATH rate |
|------------------------------|------------------------------|-------------------------------|----------------------------------|-------------------------------------------|
| 1 Ischemic heart disease     | 1 Ischemic heart disease     | <b>-30.7 (-50.7 to -8.07)</b> | -10.9 (-35.1 to 18.2)            | <b>-45.9 (-63.5 to -18.7)</b>             |
| 2 Stroke                     | 2 Stroke                     | <b>-36.7 (-51.1 to -20.2)</b> | <b>-18.8 (-32.7 to -0.651)</b>   | <b>-50.1 (-60.9 to -36.8)</b>             |
| 3 COVID-19                   | 3 Lung cancer                | 10 (-19.1 to 39.9)            | <b>41.3 (9.3 to 79.5)</b>        | -0.51 (-20.9 to 25.5)                     |
| 4 Lung cancer                | 4 Hypertensive heart disease | 51.6 (-0.95 to 109)           | <b>94.7 (33.9 to 161)</b>        | 16.7 (-24.9 to 73)                        |
| 5 Hypertensive heart disease | 5 Alzheimer's disease        | <b>63.7 (21.5 to 113)</b>     | <b>110 (60.9 to 163)</b>         | <b>16.8 (13.6 to 20.5)</b>                |
| 6 Diabetes                   | 6 Colorectal cancer          | 30.6 (-14.7 to 83.7)          | <b>67.7 (17.2 to 124)</b>        | 11.1 (-18.2 to 44.5)                      |
| 7 Colorectal cancer          | 7 Chronic kidney disease     | <b>59.6 (16 to 107)</b>       | <b>105 (57 to 164)</b>           | 29 (-8.23 to 74.5)                        |
| 8 COPD                       | 8 COPD                       | 23 (-6.34 to 57.4)            | <b>58 (21.8 to 96.1)</b>         | 0.381 (-24.6 to 29.1)                     |
| 9 Alzheimer's disease        | 9 Diabetes                   | -15.7 (-36.1 to 13.7)         | 8.2 (-15 to 36.7)                | <b>-30.2 (-46.5 to -5.62)</b>             |
| 10 Cardiomyopathy            | 10 Breast cancer             | 15.8 (-13.1 to 53.3)          | <b>48.8 (17 to 86.7)</b>         | -0.0366 (-18.7 to 23)                     |
| 11 Chronic kidney disease    | 11 Pancreatic cancer         | <b>71.4 (13.7 to 138)</b>     | <b>120 (61.5 to 196)</b>         | <b>49.1 (12.4 to 96.9)</b>                |
| 12 Breast cancer             | 12 Cardiomyopathy            | -1.54 (-22.6 to 24.7)         | <b>26.5 (3.17 to 56.9)</b>       | <b>-19.7 (-32.5 to -5.07)</b>             |
| 13 Pancreatic cancer         | 13 Prostate cancer           | <b>38.5 (3.96 to 73.1)</b>    | <b>78 (40.8 to 119)</b>          | 14.6 (-4.01 to 34.4)                      |
| 14 Self-harm                 | 14 Brain cancer              | <b>53.2 (28.9 to 80.2)</b>    | <b>96.8 (77.3 to 118)</b>        | <b>38.8 (26.4 to 52.7)</b>                |
| 15 Prostate cancer           | 15 Lower respiratory infect  | 11.6 (-11.3 to 42.2)          | <b>43.2 (20.5 to 72.3)</b>       | -12.4 (-25.5 to 5.88)                     |
| 16 Cirrhosis liver           | 16 Atrial fibrillation       | <b>76.3 (34 to 133)</b>       | <b>126 (82.1 to 184)</b>         | <b>30.6 (12.2 to 52.9)</b>                |
| 17 Lower respiratory infect  | 17 Nonrheum valv diseases    | <b>38.3 (5.84 to 80.4)</b>    | <b>77.6 (46.5 to 122)</b>        | 9.16 (-7.58 to 28.7)                      |
| 18 Stomach cancer            | 18 Liver cancer              | <b>46.8 (15.4 to 84.8)</b>    | <b>88.6 (50.5 to 131)</b>        | <b>31.4 (4.79 to 65.8)</b>                |
| 19 Nonrheum valv diseases    | 19 Cirrhosis liver           | -7.4 (-24.3 to 13)            | <b>18.9 (3.57 to 34.6)</b>       | -11.1 (-22.6 to 1.33)                     |
| 20 Brain cancer              | 20 Self-harm                 | -11.6 (-28.3 to 6.44)         | 13.6 (-1.77 to 32.3)             | -13.8 (-26.3 to 3.08)                     |
| 21 Liver cancer              | 23 Stomach cancer            |                               |                                  |                                           |
| 24 Atrial fibrillation       | 130 COVID-19                 |                               |                                  |                                           |

### Slovakia, Reference scenario

**Legend:**  
Communicable, maternal, neonatal and nutritional  
Non-communicable  
Injuries

| Leading Causes 2022          | Leading Causes 2050          | Mean % change number of DEATH | Mean % change all-age DEATH rate | Mean % change age-standardized DEATH rate |
|------------------------------|------------------------------|-------------------------------|----------------------------------|-------------------------------------------|
| 1 Ischemic heart disease     | 1 Ischemic heart disease     | 3.61 (-24.2 to 37.7)          | 12.8 (-14 to 46.6)               | <b>-45.9 (-61.6 to -20.9)</b>             |
| 2 Stroke                     | 2 Stroke                     | -7.89 (-25.9 to 11.4)         | 0.317 (-17.2 to 19.9)            | <b>-48.1 (-57.6 to -36.2)</b>             |
| 3 COVID-19                   | 3 Alzheimer's disease        | <b>151 (96.9 to 211)</b>      | <b>173 (117 to 232)</b>          | <b>9.26 (6.39 to 12.4)</b>                |
| 4 Lung cancer                | 4 Colorectal cancer          | <b>60.4 (8.74 to 121)</b>     | <b>74.4 (21.9 to 131)</b>        | 3.7 (-23.4 to 32.5)                       |
| 5 Colorectal cancer          | 5 Lung cancer                | 29.2 (-2.44 to 61.7)          | <b>40.6 (9.04 to 70)</b>         | -6.28 (-25.8 to 13.2)                     |
| 6 Alzheimer's disease        | 6 Lower respiratory infect   | <b>73.5 (37.2 to 117)</b>     | <b>88.9 (52.7 to 136)</b>        | -8.05 (-23.5 to 11.3)                     |
| 7 Lower respiratory infect   | 7 Hypertensive heart disease | <b>111 (49.9 to 201)</b>      | <b>130 (68 to 233)</b>           | 16.4 (-17.3 to 77.4)                      |
| 8 Cirrhosis liver            | 8 Chronic kidney disease     | <b>133 (76.8 to 210)</b>      | <b>154 (95.1 to 239)</b>         | <b>35.5 (0.571 to 85.2)</b>               |
| 9 Hypertensive heart disease | 9 Pancreatic cancer          | <b>91.5 (34.1 to 153)</b>     | <b>108 (50.5 to 176)</b>         | <b>32 (0.257 to 69.5)</b>                 |
| 10 Breast cancer             | 10 COPD                      | <b>72.6 (33.6 to 115)</b>     | <b>88 (46.4 to 135)</b>          | 2.09 (-20.3 to 32.9)                      |
| 11 Pancreatic cancer         | 11 Prostate cancer           | <b>100 (58.1 to 155)</b>      | <b>118 (72.9 to 170)</b>         | <b>20.7 (0.426 to 41.6)</b>               |
| 12 COPD                      | 12 Cirrhosis liver           | -2.11 (-16.7 to 15.2)         | 6.59 (-7.99 to 21)               | -13.1 (-26 to 0.398)                      |
| 13 Diabetes                  | 13 Breast cancer             | <b>40 (4.05 to 86)</b>        | <b>52.3 (17.3 to 96.4)</b>       | -4.85 (-22.8 to 17.8)                     |
| 14 Chronic kidney disease    | 14 Atrial fibrillation       | <b>159 (94.4 to 229)</b>      | <b>182 (116 to 248)</b>          | <b>23.6 (6.39 to 41.8)</b>                |
| 15 Falls                     | 15 Falls                     | <b>58.4 (20.1 to 97.7)</b>    | <b>72.4 (37.4 to 115)</b>        | -7.74 (-19.8 to 6.2)                      |
| 16 Stomach cancer            | 16 Diabetes                  | 16.4 (-12.4 to 49.7)          | 26.7 (-2.77 to 58.8)             | <b>-28.3 (-44.2 to -7.02)</b>             |
| 17 Prostate cancer           | 17 Stomach cancer            | 6.51 (-13.8 to 30.9)          | 15.9 (-2.57 to 37.1)             | <b>-30.2 (-38.6 to -20.3)</b>             |
| 18 Self-harm                 | 18 Parkinson's disease       | <b>97.4 (59.6 to 139)</b>     | <b>115 (79.2 to 151)</b>         | 8.35 (-6.16 to 24.1)                      |
| 19 Atrial fibrillation       | 19 Kidney cancer             | <b>53.9 (4.35 to 115)</b>     | <b>67.4 (16.9 to 122)</b>        | 9.44 (-19.8 to 42.5)                      |
| 20 Kidney cancer             | 20 Brain cancer              | <b>73 (49.8 to 97.7)</b>      | <b>88.4 (69.6 to 108)</b>        | <b>37.4 (26.1 to 48.4)</b>                |
| 23 Brain cancer              | 23 Self-harm                 |                               |                                  |                                           |
| 25 Parkinson's disease       | 129 COVID-19                 |                               |                                  |                                           |

### Slovenia, Reference scenario

**Legend:**

Communicable, maternal, neonatal and nutritional  
Non-communicable  
Injuries

| Leading Causes 2022          | Leading Causes 2050          | Mean % change number of DEATH | Mean % change all-age DEATH rate | Mean % change age-standardized DEATH rate |
|------------------------------|------------------------------|-------------------------------|----------------------------------|-------------------------------------------|
| 1 Ischemic heart disease     | 1 Alzheimer's disease        | 106 (74.2 to 143)             | 102 (77.9 to 131)                | -3.34 (-5.69 to -0.0539)                  |
| 2 Stroke                     | 2 Ischemic heart disease     | -7.26 (-37.8 to 28.3)         | -8.82 (-38.1 to 25.2)            | -52.8 (-66.8 to -35.5)                    |
| 3 COVID-19                   | 3 Hypertensive heart disease | 99.7 (24.5 to 200)            | 96.3 (22.2 to 191)               | -3.31 (-38.7 to 51.2)                     |
| 4 Lung cancer                | 4 Nonrheum valv diseases     | 139 (69.4 to 225)             | 135 (68.6 to 220)                | 15.5 (-11.3 to 51.6)                      |
| 5 Alzheimer's disease        | 5 Lung cancer                | 26.5 (-3.38 to 63.3)          | 24.3 (-1.24 to 54)               | -12.1 (-27.8 to 6.76)                     |
| 6 Hypertensive heart disease | 6 Stroke                     | -15.8 (-33.2 to 5.07)         | -17.3 (-34.2 to 2.91)            | -56.5 (-65.2 to -45.5)                    |
| 7 Colorectal cancer          | 7 Colorectal cancer          | 52.5 (2.77 to 117)            | 49.8 (3.64 to 110)               | -10.6 (-33.9 to 18.7)                     |
| 8 Falls                      | 8 Falls                      | 79.7 (37.1 to 128)            | 76.4 (42 to 115)                 | -10.7 (-24 to 3.69)                       |
| 9 Nonrheum valv diseases     | 9 COPD                       | 83 (35.1 to 147)              | 79.9 (33.8 to 141)               | -1.4 (-25.2 to 31)                        |
| 10 Cardiomyopathy            | 10 Prostate cancer           | 95 (49.8 to 155)              | 91.5 (48.8 to 145)               | 9.69 (-10.2 to 31.7)                      |
| 11 COPD                      | 11 Lower respiratory infect  | 72.1 (34.1 to 113)            | 69.2 (34.5 to 108)               | -14.3 (-28 to 5.89)                       |
| 12 Lower respiratory infect  | 12 Cardiomyopathy            | 48.6 (6.43 to 100)            | 46 (7.87 to 93.9)                | -25.8 (-38.7 to -7.1)                     |
| 13 Prostate cancer           | 13 Chronic kidney disease    | 140 (73.1 to 217)             | 136 (72.9 to 215)                | 21 (-10.4 to 68)                          |
| 14 Breast cancer             | 14 Pancreatic cancer         | 83 (29.8 to 153)              | 79.7 (28.1 to 141)               | 20.2 (-9.37 to 56.3)                      |
| 15 Diabetes                  | 15 Breast cancer             | 31.8 (-5.68 to 90)            | 29.5 (-7.39 to 79.6)             | -20.1 (-36.4 to 0.647)                    |
| 16 Cirrhosis liver           | 16 Atrial fibrillation       | 136 (84.3 to 205)             | 131 (86.9 to 193)                | 12.9 (-4.68 to 34.9)                      |
| 17 Pancreatic cancer         | 17 Diabetes                  | 8.27 (-17.1 to 39.1)          | 6.48 (-19.7 to 37.3)             | -38.7 (-52.8 to -21)                      |
| 18 Self-harm                 | 18 Parkinson's disease       | 71.2 (41.2 to 109)            | 68.2 (43.6 to 99.6)              | -3.62 (-16.6 to 11.8)                     |
| 19 Chronic kidney disease    | 19 Cirrhosis liver           | -8.12 (-21.2 to 5.89)         | -9.7 (-21.1 to 2.2)              | -28.5 (-37.5 to -18.9)                    |
| 20 Stomach cancer            | 20 Bladder cancer            | 57.3 (24.3 to 96.7)           | 54.5 (28.6 to 90.3)              | -8.42 (-20.3 to 6.89)                     |
| 22 Parkinson's disease       | 23 Self-harm                 |                               |                                  |                                           |
| 23 Bladder cancer            | 24 Stomach cancer            |                               |                                  |                                           |
| 24 Atrial fibrillation       | 129 COVID-19                 |                               |                                  |                                           |

### Belarus, Reference scenario

**Legend:**  
Communicable, maternal, neonatal and nutritional  
Non-communicable  
Injuries

| Leading Causes 2022         | Leading Causes 2050         | Mean % change number of DEATH | Mean % change all-age DEATH rate | Mean % change age-standardized DEATH rate |
|-----------------------------|-----------------------------|-------------------------------|----------------------------------|-------------------------------------------|
| 1 Ischemic heart disease    | 1 Ischemic heart disease    | -10.2 (-39.1 to 24.5)         | 1.74 (-31.4 to 37.6)             | <b>-45 (-67 to -11.8)</b>                 |
| 2 COVID-19                  | 2 Stroke                    | -20.7 (-41.4 to 1.47)         | -10.2 (-31.4 to 12)              | <b>-49.4 (-63 to -28.4)</b>               |
| 3 Stroke                    | 3 Alzheimer's disease       | <b>140 (46.8 to 237)</b>      | <b>170 (82.9 to 260)</b>         | <b>16.3 (13.3 to 19.8)</b>                |
| 4 Lung cancer               | 4 Colorectal cancer         | 53.3 (-16.4 to 147)           | <b>72.9 (0.335 to 165)</b>       | 10.1 (-25.7 to 61.1)                      |
| 5 Alzheimer's disease       | 5 Lung cancer               | 20.2 (-26.5 to 71.9)          | 35.6 (-8.15 to 84.9)             | -0.375 (-26.8 to 32.9)                    |
| 6 Colorectal cancer         | 6 Alcohol use disorders     | 22.2 (-20.3 to 70.1)          | 38.5 (-7.58 to 97.9)             | 7.47 (-28 to 59.1)                        |
| 7 Alcohol use disorders     | 7 Pancreatic cancer         | <b>86.4 (4.28 to 186)</b>     | <b>110 (29.2 to 213)</b>         | 45 (-4.87 to 107)                         |
| 8 Stomach cancer            | 8 Prostate cancer           | <b>84.6 (16.5 to 166)</b>     | <b>108 (41.3 to 188)</b>         | 28 (-1.81 to 62.5)                        |
| 9 Cirrhosis liver           | 9 COPD                      | <b>57.8 (13.2 to 110)</b>     | <b>78.7 (27.7 to 137)</b>        | 9.49 (-21.7 to 50.9)                      |
| 10 Self-harm                | 10 Stomach cancer           | -4.66 (-27.6 to 16.8)         | 7.83 (-10.7 to 25.2)             | <b>-26.7 (-34.6 to -19.7)</b>             |
| 11 Breast cancer            | 11 Self-harm                | -5.84 (-25 to 16)             | 6.63 (-12.5 to 26.6)             | -7.3 (-26.3 to 14.9)                      |
| 12 Cardiomyopathy           | 12 Breast cancer            | 28.2 (-21.6 to 90.4)          | 44.6 (-4.83 to 101)              | -1.08 (-27.2 to 28.4)                     |
| 13 COPD                     | 13 Cirrhosis liver          | -9.49 (-26 to 11.7)           | 2.53 (-14.4 to 21.2)             | -11.5 (-26.3 to 7.76)                     |
| 14 Falls                    | 14 Atrial fibrillation      | <b>156 (67.2 to 267)</b>      | <b>188 (96.9 to 286)</b>         | <b>30.1 (11.3 to 53)</b>                  |
| 15 Pancreatic cancer        | 15 Urinary diseases         | <b>121 (57.5 to 197)</b>      | <b>150 (93.9 to 219)</b>         | <b>47.9 (12.2 to 95.4)</b>                |
| 16 Prostate cancer          | 16 Parkinson's disease      | <b>104 (45.9 to 156)</b>      | <b>131 (81.6 to 185)</b>         | <b>19.7 (0.994 to 39.9)</b>               |
| 17 Lower respiratory infect | 17 Falls                    | 12.2 (-16.4 to 42.9)          | <b>26.9 (1.48 to 53.5)</b>       | -6.62 (-24.8 to 13)                       |
| 18 Road injuries            | 18 Peripheral artery        | <b>94.5 (19.9 to 190)</b>     | <b>119 (39.5 to 211)</b>         | 21.2 (-5.29 to 52.5)                      |
| 19 Parkinson's disease      | 19 Vascular intestinal      | <b>87.9 (18.1 to 159)</b>     | <b>112 (43 to 172)</b>           | 12.7 (-5.94 to 32.3)                      |
| 20 Urinary diseases         | 20 Kidney cancer            | 51.9 (-14.3 to 134)           | <b>71.3 (0.763 to 159)</b>       | 23.7 (-22.4 to 76.5)                      |
| 22 Peripheral artery        | 21 Cardiomyopathy           |                               |                                  |                                           |
| 23 Atrial fibrillation      | 23 Lower respiratory infect |                               |                                  |                                           |
| 24 Kidney cancer            | 28 Road injuries            |                               |                                  |                                           |
| 28 Vascular intestinal      | 129 COVID-19                |                               |                                  |                                           |



### Estonia, Reference scenario

**Legend:**  
Communicable, maternal, neonatal and nutritional  
Non-communicable  
Injuries

| Leading Causes 2022          | Leading Causes 2050          | Mean % change number of DEATH | Mean % change all-age DEATH rate | Mean % change age-standardized DEATH rate |
|------------------------------|------------------------------|-------------------------------|----------------------------------|-------------------------------------------|
| 1 Ischemic heart disease     | 1 Hypertensive heart disease | 39.6 (-7.14 to 90.6)          | <b>51.4 (1.45 to 109)</b>        | -9.28 (-42.6 to 36.7)                     |
| 2 Hypertensive heart disease | 2 Ischemic heart disease     | <b>-32.8 (-53.8 to -8.18)</b> | -27.2 (-48.3 to 0.93)            | <b>-60.2 (-73.7 to -38.7)</b>             |
| 3 COVID-19                   | 3 Alzheimer's disease        | <b>70 (34.8 to 111)</b>       | <b>84.1 (47.7 to 125)</b>        | -2.48 (-5.08 to 0.542)                    |
| 4 Stroke                     | 4 Chronic kidney disease     | <b>91.6 (35.9 to 154)</b>     | <b>108 (47.9 to 186)</b>         | 22.4 (-16 to 72.1)                        |
| 5 Alzheimer's disease        | 5 Colorectal cancer          | 34.3 (-15.6 to 96.7)          | 45.3 (-5.02 to 111)              | -3.77 (-32 to 29.7)                       |
| 6 Lung cancer                | 6 Lung cancer                | 7.03 (-22.9 to 42.3)          | 15.9 (-15.2 to 51.1)             | -17.5 (-37.5 to 5.38)                     |
| 7 Chronic kidney disease     | 7 Stroke                     | <b>-43.7 (-57.5 to -28.4)</b> | <b>-39 (-52.1 to -23.3)</b>      | <b>-63.6 (-71.5 to -52.6)</b>             |
| 8 Colorectal cancer          | 8 Prostate cancer            | <b>62.8 (20 to 119)</b>       | <b>76.4 (33.4 to 133)</b>        | 15.8 (-6.13 to 39.9)                      |
| 9 Prostate cancer            | 9 Pancreatic cancer          | <b>56.9 (9.11 to 126)</b>     | <b>69.9 (19.1 to 139)</b>        | 18.8 (-13.1 to 58.4)                      |
| 10 Diabetes                  | 10 Atrial fibrillation       | <b>74.2 (30.3 to 137)</b>     | <b>88.6 (44.1 to 147)</b>        | 0.631 (-14.9 to 19.6)                     |
| 11 Pancreatic cancer         | 11 Urinary diseases          | <b>101 (54.8 to 153)</b>      | <b>118 (71.8 to 173)</b>         | <b>29.9 (2.02 to 65.1)</b>                |
| 12 Cirrhosis liver           | 12 Breast cancer             | 11.6 (-21.6 to 63)            | 20.9 (-13.4 to 69.5)             | -17 (-36.2 to 7.87)                       |
| 13 Stomach cancer            | 13 COPD                      | 35.5 (-1.75 to 76.6)          | <b>46.8 (8.57 to 91.4)</b>       | -6.39 (-30.5 to 26.4)                     |
| 14 Breast cancer             | 14 Cirrhosis liver           | -13.6 (-27 to 1.24)           | -6.34 (-19.4 to 9.01)            | <b>-19.7 (-32.4 to -5.82)</b>             |
| 15 Cardiomyopathy            | 15 Diabetes                  | -21.1 (-39.5 to 1.36)         | -14.4 (-33.2 to 11)              | <b>-44.6 (-57 to -28.3)</b>               |
| 16 Lower respiratory infect  | 16 Lower respiratory infect  | 10.7 (-9.24 to 34.7)          | <b>19.9 (0.195 to 44)</b>        | <b>-24.4 (-37.8 to -9.35)</b>             |
| 17 Self-harm                 | 17 Parkinson's disease       | <b>47 (19 to 82.7)</b>        | <b>59.2 (35.6 to 91.3)</b>       | 1.94 (-13.2 to 19.5)                      |
| 18 Atrial fibrillation       | 18 Stomach cancer            | <b>-18.7 (-32.6 to -4.54)</b> | -12 (-23.8 to 1.26)              | <b>-38.7 (-45.2 to -32.1)</b>             |
| 19 COPD                      | 19 Cardiomyopathy            | -12.1 (-29 to 9.35)           | -4.79 (-20.5 to 16.7)            | <b>-31.9 (-43.9 to -17.1)</b>             |
| 20 Alcohol use disorders     | 20 Self-harm                 | -8.6 (-24.8 to 9.26)          | -0.994 (-15.6 to 15.7)           | <b>-20.4 (-33.8 to -5.79)</b>             |
| 21 Parkinson's disease       | 28 Alcohol use disorders     |                               |                                  |                                           |
| 22 Urinary diseases          | 129 COVID-19                 |                               |                                  |                                           |

### Latvia, Reference scenario

**Legend:**  
 Communicable, maternal, neonatal and nutritional  
 Non-communicable  
 Injuries

| Leading Causes 2022          | Leading Causes 2050          | Mean % change number of DEATH  | Mean % change all-age DEATH rate | Mean % change age-standardized DEATH rate |
|------------------------------|------------------------------|--------------------------------|----------------------------------|-------------------------------------------|
| 1 Ischemic heart disease     | 1 Ischemic heart disease     | <b>-31.9 (-52.9 to -9.59)</b>  | -6.1 (-36 to 25.1)               | <b>-50.4 (-67.6 to -27.9)</b>             |
| 2 Stroke                     | 2 Stroke                     | <b>-38 (-51.9 to -22.2)</b>    | -14.5 (-35.9 to 7.23)            | <b>-53.5 (-64.6 to -41)</b>               |
| 3 COVID-19                   | 3 Alzheimer's disease        | <b>68.7 (29 to 109)</b>        | <b>132 (85.1 to 190)</b>         | <b>7.59 (4.22 to 10.7)</b>                |
| 4 Alzheimer's disease        | 4 Hypertensive heart disease | 40.8 (-7.11 to 99.8)           | <b>94.2 (25.5 to 181)</b>        | 12.5 (-27.1 to 73.6)                      |
| 5 Hypertensive heart disease | 5 Lung cancer                | 0.224 (-25.2 to 31.1)          | <b>37.9 (6.13 to 75.9)</b>       | -4.33 (-23.2 to 20.4)                     |
| 6 Lung cancer                | 6 Colorectal cancer          | 17.6 (-24.4 to 73.6)           | <b>61.7 (6.3 to 128)</b>         | 2.12 (-25.2 to 39.7)                      |
| 7 Cardiomyopathy             | 7 Prostate cancer            | <b>46.2 (5.49 to 91.9)</b>     | <b>101 (54.1 to 155)</b>         | <b>24 (3.18 to 48.7)</b>                  |
| 8 Colorectal cancer          | 8 Cardiomyopathy             | <b>-25 (-41.7 to -7.13)</b>    | 3.23 (-12.6 to 25.6)             | <b>-21.7 (-35.1 to -4.96)</b>             |
| 9 Diabetes                   | 9 Pancreatic cancer          | 44.1 (-5.35 to 108)            | <b>98.2 (38.1 to 172)</b>        | 31.5 (-3.47 to 77.3)                      |
| 10 Prostate cancer           | 10 Chronic kidney disease    | <b>69.8 (25.7 to 129)</b>      | <b>134 (70.6 to 217)</b>         | 28.8 (-9.1 to 78.9)                       |
| 11 Pancreatic cancer         | 11 Urinary diseases          | <b>66.1 (30.5 to 112)</b>      | <b>129 (84.7 to 185)</b>         | <b>29.8 (5.02 to 56.9)</b>                |
| 12 Breast cancer             | 12 Breast cancer             | 1.87 (-28.6 to 39.7)           | <b>40.2 (3.02 to 92.7)</b>       | -8.6 (-27.1 to 14.9)                      |
| 13 Stomach cancer            | 13 Atrial fibrillation       | <b>88.4 (38.1 to 146)</b>      | <b>159 (100 to 236)</b>          | <b>24.6 (5.91 to 48.3)</b>                |
| 14 Cirrhosis liver           | 14 Diabetes                  | <b>-25.2 (-44.2 to -0.411)</b> | 2.98 (-21.5 to 30.7)             | <b>-38.7 (-52 to -20.8)</b>               |
| 15 Self-harm                 | 15 COPD                      | 18.5 (-8.95 to 51)             | <b>63.4 (22 to 106)</b>          | 2.45 (-23.3 to 27.5)                      |
| 16 Lower respiratory infect  | 16 Lower respiratory infect  | -2.1 (-23 to 20.7)             | <b>34.9 (8.69 to 59.5)</b>       | <b>-16.1 (-31.7 to -0.279)</b>            |
| 17 Chronic kidney disease    | 17 Cirrhosis liver           | <b>-22.4 (-34.8 to -10.6)</b>  | 6.87 (-8.74 to 21.7)             | -5.74 (-18.1 to 8.28)                     |
| 18 COPD                      | 18 Stomach cancer            | <b>-26.1 (-38.8 to -11.4)</b>  | 1.73 (-12.9 to 19.5)             | <b>-32.3 (-39.2 to -23.2)</b>             |
| 19 Urinary diseases          | 19 Parkinson's disease       | <b>36.1 (6.11 to 71.9)</b>     | <b>87.4 (54.3 to 132)</b>        | 8.36 (-6.79 to 26)                        |
| 20 Falls                     | 20 Falls                     | 7.41 (-14.5 to 37.4)           | <b>47.9 (18.8 to 80.7)</b>       | -10.1 (-20.9 to 4.01)                     |
| 21 Atrial fibrillation       | 22 Self-harm                 |                                |                                  |                                           |
| 22 Parkinson's disease       | 129 COVID-19                 |                                |                                  |                                           |

### Lithuania, Reference scenario

**Legend:**

Communicable, maternal, neonatal and nutritional  
Non-communicable  
Injuries

| Leading Causes 2022          | Leading Causes 2050          | Mean % change number of DEATH | Mean % change all-age DEATH rate | Mean % change age-standardized DEATH rate |
|------------------------------|------------------------------|-------------------------------|----------------------------------|-------------------------------------------|
| 1 Ischemic heart disease     | 1 Ischemic heart disease     | -28.4 (-53.2 to -0.63)        | 1.76 (-29.3 to 35.5)             | -50 (-67.4 to -24)                        |
| 2 COVID-19                   | 2 Stroke                     | -34.8 (-51 to -19)            | -7.37 (-27 to 16.1)              | -51.1 (-62.1 to -37.6)                    |
| 3 Stroke                     | 3 Alzheimer's disease        | 87.1 (45.8 to 138)            | 166 (112 to 217)                 | 19.4 (16.2 to 22.7)                       |
| 4 Alzheimer's disease        | 4 Lung cancer                | 6.02 (-24 to 42.8)            | 50.7 (10.3 to 101)               | 3.36 (-21.1 to 31.6)                      |
| 5 Lung cancer                | 5 Colorectal cancer          | 33.4 (-16.1 to 93.6)          | 89.6 (25.6 to 165)               | 11.7 (-22 to 47.8)                        |
| 6 Colorectal cancer          | 6 Hypertensive heart disease | 65 (9.9 to 136)               | 134 (57.4 to 224)                | 30.6 (-15.5 to 94.1)                      |
| 7 Cirrhosis liver            | 7 Pancreatic cancer          | 63.7 (7.67 to 131)            | 133 (57.7 to 228)                | 48.7 (5.47 to 95)                         |
| 8 Self-harm                  | 8 Prostate cancer            | 54.7 (9.59 to 113)            | 120 (60.9 to 195)                | 27.8 (3.13 to 53.6)                       |
| 9 Hypertensive heart disease | 9 COPD                       | 37 (0.071 to 76)              | 94.8 (49 to 167)                 | 9.98 (-16.3 to 43.8)                      |
| 10 Prostate cancer           | 10 Atrial fibrillation       | 121 (64.6 to 193)             | 214 (140 to 298)                 | 42.1 (19.6 to 69.5)                       |
| 11 Pancreatic cancer         | 11 Breast cancer             | 14.5 (-18.5 to 56.2)          | 62.8 (20.5 to 116)               | 0.289 (-20.8 to 24)                       |
| 12 Stomach cancer            | 12 Cirrhosis liver           | -16.9 (-31.7 to -1.04)        | 17.9 (3.97 to 33)                | 1.1 (-13.2 to 17)                         |
| 13 Breast cancer             | 13 Self-harm                 | -20.4 (-36.7 to -3.25)        | 13 (-4.6 to 32.6)                | -5.82 (-23.7 to 13.7)                     |
| 14 COPD                      | 14 Chronic kidney disease    | 76.1 (23.7 to 135)            | 150 (81.5 to 246)                | 37.4 (-2.63 to 90.9)                      |
| 15 Diabetes                  | 15 Falls                     | 14.5 (-12.1 to 48.2)          | 62.5 (30.7 to 102)               | -4.7 (-18.5 to 10.2)                      |
| 16 Cardiomyopathy            | 16 Stomach cancer            | -17 (-31.2 to 0.731)          | 17.9 (1.21 to 37.5)              | -25.6 (-33.1 to -17.3)                    |
| 17 Falls                     | 17 Urinary diseases          | 85.1 (42.2 to 140)            | 163 (110 to 244)                 | 42.1 (12.8 to 82)                         |
| 18 Lower respiratory infect  | 18 Parkinson's disease       | 57.6 (21.6 to 92.2)           | 124 (82.3 to 171)                | 18.3 (2.04 to 37.1)                       |
| 19 Chronic kidney disease    | 19 Vascular intestinal       | 50 (12.2 to 91.1)             | 113 (64.3 to 172)                | 12.3 (-2.87 to 30.8)                      |
| 20 Atrial fibrillation       | 20 Lower respiratory infect  | 2.12 (-17.2 to 26.9)          | 45 (21.2 to 72)                  | -12.1 (-26.6 to 8.23)                     |
| 21 Vascular intestinal       | 21 Diabetes                  |                               |                                  |                                           |
| 22 Parkinson's disease       | 22 Cardiomyopathy            |                               |                                  |                                           |
| 27 Urinary diseases          | 129 COVID-19                 |                               |                                  |                                           |

### Moldova, Reference scenario

**Legend:**  
Communicable, maternal, neonatal and nutritional  
Non-communicable  
Injuries

| Leading Causes 2022          | Leading Causes 2050          | Mean % change number of DEATH | Mean % change all-age DEATH rate | Mean % change age-standardized DEATH rate |
|------------------------------|------------------------------|-------------------------------|----------------------------------|-------------------------------------------|
| 1 Ischemic heart disease     | 1 Ischemic heart disease     | -6.64 (-39.5 to 45.9)         | 46.1 (-10.2 to 120)              | <b>-50.5 (-70.7 to -15.5)</b>             |
| 2 Stroke                     | 2 Stroke                     | -18.2 (-40.7 to 7.9)          | 27.8 (-4.01 to 69.5)             | <b>-49.9 (-63.3 to -29.1)</b>             |
| 3 Cirrhosis liver            | 3 Alzheimer's disease        | <b>194 (103 to 278)</b>       | <b>359 (226 to 470)</b>          | <b>-2.68 (-5.3 to -0.0639)</b>            |
| 4 Hypertensive heart disease | 4 Hypertensive heart disease | <b>75.9 (6.75 to 183)</b>     | <b>175 (68 to 337)</b>           | 3.33 (-38.3 to 81.7)                      |
| 5 COVID-19                   | 5 Cirrhosis liver            | -9.61 (-29.2 to 13.9)         | <b>41 (17.2 to 69.2)</b>         | -10.1 (-25.2 to 10.8)                     |
| 6 Alzheimer's disease        | 6 Colorectal cancer          | 30.4 (-24.4 to 94.7)          | <b>103 (21.3 to 202)</b>         | -3.11 (-38.4 to 37.8)                     |
| 7 Colorectal cancer          | 7 Lung cancer                | 12.9 (-29.8 to 64.3)          | <b>75.9 (14.6 to 143)</b>        | -5 (-34.1 to 27.7)                        |
| 8 Lung cancer                | 8 COPD                       | <b>67.7 (21.6 to 129)</b>     | <b>162 (84.2 to 257)</b>         | -0.74 (-29.7 to 48.2)                     |
| 9 Lower respiratory infect   | 9 Pancreatic cancer          | 66.4 (-3.73 to 153)           | <b>159 (55.8 to 270)</b>         | 32.3 (-15.4 to 86.4)                      |
| 10 COPD                      | 10 Lower respiratory infect  | -13.2 (-34.7 to 19.1)         | <b>35.3 (8.39 to 72.7)</b>       | <b>-22.2 (-38.6 to 5.37)</b>              |
| 11 Breast cancer             | 11 Breast cancer             | 6.53 (-32.1 to 52.5)          | <b>65.7 (9.95 to 126)</b>        | -12.6 (-36.1 to 15.9)                     |
| 12 Diabetes                  | 12 Urinary diseases          | <b>81.3 (32.6 to 133)</b>     | <b>183 (117 to 268)</b>          | 20.8 (-6.39 to 67.9)                      |
| 13 Self-harm                 | 13 Atrial fibrillation       | <b>149 (84.2 to 230)</b>      | <b>289 (184 to 380)</b>          | 3.74 (-9.79 to 19.7)                      |
| 14 Stomach cancer            | 14 Prostate cancer           | <b>58.2 (4.63 to 120)</b>     | <b>147 (70 to 227)</b>           | 8.13 (-17.9 to 32.3)                      |
| 15 Pancreatic cancer         | 15 Diabetes                  | -9.76 (-36.5 to 31.5)         | 41.1 (-0.0934 to 102)            | <b>-37.5 (-55.4 to -6.6)</b>              |
| 16 Cardiomyopathy            | 16 Stomach cancer            | -19.1 (-36.9 to 3.86)         | <b>26.1 (7.1 to 50.7)</b>        | <b>-34.4 (-42.2 to -25.4)</b>             |
| 17 Prostate cancer           | 17 Vascular intestinal       | <b>67.6 (14.7 to 127)</b>     | <b>161 (88.4 to 240)</b>         | -6.49 (-21.2 to 8.33)                     |
| 18 Alcohol use disorders     | 18 Self-harm                 | <b>-31.4 (-51.2 to -10.2)</b> | 6.59 (-12.7 to 32.7)             | <b>-10.3 (-27.7 to 14.3)</b>              |
| 19 Road injuries             | 19 Liver cancer              | <b>81.3 (25.4 to 153)</b>     | <b>183 (101 to 298)</b>          | 37.2 (-2.46 to 110)                       |
| 20 Pancreatitis              | 20 Parkinson's disease       | <b>80.9 (39.4 to 125)</b>     | <b>182 (131 to 244)</b>          | -1.14 (-14.1 to 11.1)                     |
| 21 Urinary diseases          | 21 Pancreatitis              |                               |                                  |                                           |
| 24 Vascular intestinal       | 25 Cardiomyopathy            |                               |                                  |                                           |
| 25 Atrial fibrillation       | 27 Alcohol use disorders     |                               |                                  |                                           |
| 32 Parkinson's disease       | 28 Road injuries             |                               |                                  |                                           |
| 33 Liver cancer              | 129 COVID-19                 |                               |                                  |                                           |

### Russia, Reference scenario

**Legend:**  
Communicable, maternal, neonatal and nutritional  
Non-communicable  
Injuries

| Leading Causes 2022           | Leading Causes 2050           | Mean % change number of DEATH | Mean % change all-age DEATH rate | Mean % change age-standardized DEATH rate |
|-------------------------------|-------------------------------|-------------------------------|----------------------------------|-------------------------------------------|
| 1 Ischemic heart disease      | 1 Ischemic heart disease      | -11.5 (-39.3 to 17.6)         | -5.81 (-33.1 to 19.9)            | <b>-51.3 (-67.5 to -30.9)</b>             |
| 2 Stroke                      | 2 Stroke                      | -16.2 (-33.5 to 2.46)         | -10.8 (-27.9 to 5.99)            | <b>-54.1 (-63.7 to -41.8)</b>             |
| 3 COVID-19                    | 3 Alzheimer's disease         | <b>148 (85.3 to 225)</b>      | <b>163 (103 to 227)</b>          | -0.117 (-3.21 to 3.01)                    |
| 4 Lung cancer                 | 4 Colorectal cancer           | 35.8 (-11.7 to 93.1)          | 44.2 (-2.07 to 97)               | -11.3 (-34.2 to 18.7)                     |
| 5 Cardiomyopathy              | 5 Lung cancer                 | 12 (-18.2 to 48.4)            | 19 (-8.85 to 51.2)               | -15.4 (-32.7 to 3.94)                     |
| 6 Alzheimer's disease         | 6 COPD                        | <b>63.9 (21.9 to 105)</b>     | <b>74.2 (32.4 to 111)</b>        | -2.04 (-26.4 to 26.8)                     |
| 7 Cirrhosis liver             | 7 Urinary diseases            | <b>154 (88.4 to 231)</b>      | <b>170 (107 to 250)</b>          | <b>42.9 (10.4 to 79.5)</b>                |
| 8 Colorectal cancer           | 8 Cardiomyopathy              | <b>-20.3 (-34.9 to -1.45)</b> | -15.2 (-28.7 to 2.01)            | <b>-30.9 (-42 to -16.6)</b>               |
| 9 Diabetes                    | 9 Cirrhosis liver             | -13.7 (-27.4 to 1.7)          | -8.18 (-18.1 to 5.17)            | <b>-19.1 (-30.4 to -5.68)</b>             |
| 10 Self-harm                  | 10 Diabetes                   | 4.03 (-23.4 to 38.1)          | 10.7 (-16.6 to 37.7)             | <b>-35.9 (-51.7 to -14.1)</b>             |
| 11 COPD                       | 11 Pancreatic cancer          | <b>78.8 (19 to 156)</b>       | <b>89.9 (32.3 to 160)</b>        | 27.4 (-5.58 to 68.9)                      |
| 12 Stomach cancer             | 12 Chronic kidney disease     | <b>122 (51.6 to 202)</b>      | <b>136 (65.6 to 204)</b>         | <b>41.8 (1.48 to 95.7)</b>                |
| 13 Breast cancer              | 13 Self-harm                  | -10.8 (-27.5 to 9.01)         | -5.12 (-19.3 to 10.4)            | -15 (-29.6 to 3.45)                       |
| 14 Lower respiratory infect   | 14 Hypertensive heart disease | <b>102 (33.7 to 176)</b>      | <b>115 (43.5 to 194)</b>         | 18.8 (-22.7 to 76.4)                      |
| 15 Pancreatic cancer          | 15 Lower respiratory infect   | 20.8 (-2.97 to 49.3)          | <b>28.5 (9.17 to 49.8)</b>       | <b>-17 (-31.1 to -1.22)</b>               |
| 16 Alcohol use disorders      | 16 Breast cancer              | 18.1 (-15.1 to 66.1)          | 25.5 (-6.62 to 70.1)             | -14.3 (-31.5 to 9.31)                     |
| 17 HIV/AIDS                   | 17 Stomach cancer             | -3.68 (-21.3 to 18.1)         | 2.41 (-13.1 to 18.9)             | <b>-32.8 (-40.9 to -24.7)</b>             |
| 18 Urinary diseases           | 18 Prostate cancer            | <b>91.4 (42.5 to 152)</b>     | <b>103 (56.1 to 157)</b>         | 19.8 (-1.09 to 44.8)                      |
| 19 Interpersonal violence     | 19 Atrial fibrillation        | <b>157 (89.7 to 242)</b>      | <b>173 (110 to 250)</b>          | 13.3 (-0.548 to 34.8)                     |
| 20 Road injuries              | 20 Vascular intestinal        | <b>79.3 (34.3 to 135)</b>     | <b>90.6 (48.6 to 146)</b>        | -0.579 (-16.2 to 16.8)                    |
| 21 Prostate cancer            | 21 Alcohol use disorders      |                               |                                  |                                           |
| 22 Hypertensive heart disease | 27 Road injuries              |                               |                                  |                                           |
| 23 Chronic kidney disease     | 29 HIV/AIDS                   |                               |                                  |                                           |
| 24 Vascular intestinal        | 35 Interpersonal violence     |                               |                                  |                                           |
| 29 Atrial fibrillation        | 129 COVID-19                  |                               |                                  |                                           |

### Ukraine, Reference scenario

**Legend:**

Communicable, maternal, neonatal and nutritional  
 Non-communicable  
 Injuries

| Leading Causes 2022           | Leading Causes 2050          | Mean % change number of DEATH | Mean % change all-age DEATH rate | Mean % change age-standardized DEATH rate |
|-------------------------------|------------------------------|-------------------------------|----------------------------------|-------------------------------------------|
| 1 Ischemic heart disease      | 1 Ischemic heart disease     | -5.98 (-37.2 to 36.4)         | 29.1 (-11.5 to 82.1)             | -36.3 (-61.7 to 7.19)                     |
| 2 Stroke                      | 2 Stroke                     | -19.2 (-44 to 7.6)            | 10.7 (-14.1 to 38.6)             | <b>-43.2 (-58.7 to -21.8)</b>             |
| 3 COVID-19                    | 3 Alzheimer's disease        | <b>102 (15.4 to 235)</b>      | <b>175 (63 to 309)</b>           | 9.93 (-0.446 to 14.2)                     |
| 4 Alzheimer's disease         | 4 Colorectal cancer          | 21.4 (-27.9 to 108)           | <b>65.1 (3.52 to 154)</b>        | -1 (-32.1 to 42.5)                        |
| 5 Cirrhosis liver             | 5 Cardiomyopathy             | -6.73 (-40.3 to 41.6)         | 27.2 (-10.7 to 72.7)             | -18.2 (-33 to 1.11)                       |
| 6 Cardiomyopathy              | 6 Lung cancer                | -1.23 (-40.2 to 50)           | 34.6 (-8.99 to 89.9)             | -12.9 (-38.4 to 18.4)                     |
| 7 Lung cancer                 | 7 Cirrhosis liver            | <b>-23.4 (-39.8 to -1.3)</b>  | 5.35 (-12.2 to 26.1)             | -9.77 (-26 to 8.44)                       |
| 8 Colorectal cancer           | 8 COPD                       | <b>46.8 (1.6 to 110)</b>      | <b>101 (48.4 to 173)</b>         | 6.25 (-24.5 to 44.2)                      |
| 9 Self-harm                   | 9 Hypertensive heart disease | <b>72.7 (16.6 to 148)</b>     | <b>138 (59.1 to 234)</b>         | 30 (-21.6 to 105)                         |
| 10 Stomach cancer             | 10 Breast cancer             | 7.69 (-33.1 to 66)            | <b>46.9 (4.56 to 105)</b>        | -5.91 (-28.2 to 24.7)                     |
| 11 Breast cancer              | 11 Self-harm                 | -19.8 (-40.2 to 2.46)         | 10.1 (-10.8 to 29.6)             | -3.7 (-23.4 to 19.4)                      |
| 12 COPD                       | 12 Pancreatic cancer         | 47.7 (-10.2 to 142)           | <b>101 (31.9 to 196)</b>         | 28.8 (-12.8 to 84.5)                      |
| 13 Lower respiratory infect   | 13 Atrial fibrillation       | <b>124 (28.6 to 253)</b>      | <b>205 (89.4 to 326)</b>         | <b>27 (7.06 to 50.7)</b>                  |
| 14 HIV/AIDS                   | 14 Prostate cancer           | 59.4 (-2.41 to 145)           | <b>117 (42.8 to 212)</b>         | 23.2 (-5.39 to 61.8)                      |
| 15 Hypertensive heart disease | 15 Stomach cancer            | -18.9 (-41.9 to 4.87)         | 11 (-6.92 to 27.9)               | <b>-29.3 (-37.8 to -22)</b>               |
| 16 Pancreatic cancer          | 16 Peripheral artery         | 88.1 (-1.61 to 237)           | <b>155 (38.9 to 305)</b>         | 16.3 (-10.5 to 48.2)                      |
| 17 Alcohol use disorders      | 17 Parkinson's disease       | <b>79.1 (21.9 to 148)</b>     | <b>145 (86.8 to 215)</b>         | <b>20.3 (5.01 to 40.7)</b>                |
| 18 Road injuries              | 18 Lower respiratory infect  | -23.1 (-42.7 to 0.569)        | 5.65 (-14.5 to 27.3)             | -19.1 (-37.1 to 0.0935)                   |
| 19 Prostate cancer            | 19 Alcohol use disorders     | -14.5 (-39.6 to 25.1)         | 17.9 (-21.2 to 69.1)             | 14.4 (-23.5 to 63.1)                      |
| 20 Interpersonal violence     | 20 Vascular intestinal       | 52.5 (-0.211 to 130)          | <b>108 (57.6 to 179)</b>         | 9.13 (-6.04 to 26.1)                      |
| 21 Atrial fibrillation        | 21 Road injuries             |                               |                                  |                                           |
| 22 Parkinson's disease        | 22 HIV/AIDS                  |                               |                                  |                                           |
| 23 Peripheral artery          | 37 Interpersonal violence    |                               |                                  |                                           |
| 26 Vascular intestinal        | 129 COVID-19                 |                               |                                  |                                           |

### Australia, Reference scenario

**Legend:**  
Communicable, maternal, neonatal and nutritional  
Non-communicable  
Injuries

| Leading Causes 2022        | Leading Causes 2050        | Mean % change number of DEATH | Mean % change all-age DEATH rate | Mean % change age-standardized DEATH rate |
|----------------------------|----------------------------|-------------------------------|----------------------------------|-------------------------------------------|
| 1 Ischemic heart disease   | 1 Alzheimer's disease      | <b>138 (115 to 167)</b>       | <b>78.1 (61.8 to 96.5)</b>       | -2.76 (-6.87 to 2.02)                     |
| 2 Alzheimer's disease      | 2 Ischemic heart disease   | 20.3 (-4.42 to 53.4)          | -10.1 (-29.2 to 15)              | <b>-49.8 (-62 to -33.6)</b>               |
| 3 Stroke                   | 3 COPD                     | <b>90.2 (60.2 to 126)</b>     | <b>42 (18.6 to 68.8)</b>         | -12.4 (-26.5 to 5.97)                     |
| 4 Lung cancer              | 4 Chronic kidney disease   | <b>242 (178 to 328)</b>       | <b>155 (112 to 216)</b>          | <b>39.6 (13.2 to 82.4)</b>                |
| 5 COPD                     | 5 Lung cancer              | <b>61.8 (29.3 to 97.5)</b>    | 20.8 (-0.863 to 45.2)            | -12.4 (-26.2 to 2.86)                     |
| 6 COVID-19                 | 6 Stroke                   | <b>25.4 (8.69 to 44.6)</b>    | -6.34 (-18.3 to 6.87)            | <b>-45.7 (-53.3 to -36.2)</b>             |
| 7 Colorectal cancer        | 7 Colorectal cancer        | <b>97.6 (52.1 to 150)</b>     | <b>47.5 (15.6 to 84.9)</b>       | -2.77 (-22.6 to 16.9)                     |
| 8 Chronic kidney disease   | 8 Atrial fibrillation      | <b>199 (159 to 238)</b>       | <b>123 (95.3 to 148)</b>         | <b>20.9 (10.1 to 31.9)</b>                |
| 9 Lower respiratory infect | 9 Lower respiratory infect | <b>126 (94.2 to 166)</b>      | <b>68.8 (46.5 to 97.4)</b>       | -12.6 (-25.1 to 0.836)                    |
| 10 Prostate cancer         | 10 Falls                   | <b>124 (92.8 to 160)</b>      | <b>67.5 (44.5 to 93.4)</b>       | -8.44 (-18.8 to 3.29)                     |
| 11 Falls                   | 11 Prostate cancer         | <b>110 (70.5 to 159)</b>      | <b>57 (29.9 to 88.4)</b>         | -3.63 (-16 to 10.4)                       |
| 12 Diabetes                | 12 Pancreatic cancer       | <b>137 (87.6 to 190)</b>      | <b>76.7 (39.6 to 113)</b>        | <b>26 (2.1 to 48.4)</b>                   |
| 13 Pancreatic cancer       | 13 Diabetes                | <b>75.3 (37.6 to 114)</b>     | <b>30.9 (3.27 to 60.5)</b>       | <b>-22.7 (-39.3 to -4.66)</b>             |
| 14 Atrial fibrillation     | 14 Breast cancer           | <b>74.5 (43.1 to 113)</b>     | <b>30.2 (8.15 to 57)</b>         | -7.8 (-20.8 to 8.19)                      |
| 15 Breast cancer           | 15 Urinary diseases        | <b>260 (206 to 329)</b>       | <b>169 (128 to 218)</b>          | <b>42 (21.4 to 70.4)</b>                  |
| 16 Self-harm               | 16 Nonrheum valv diseases  | <b>204 (163 to 251)</b>       | <b>127 (98.8 to 158)</b>         | <b>21 (9.21 to 33.1)</b>                  |
| 17 Parkinson's disease     | 17 Parkinson's disease     | <b>100 (75.9 to 124)</b>      | <b>49.3 (34.1 to 66.2)</b>       | -5.02 (-12.2 to 4.72)                     |
| 18 Liver cancer            | 18 Liver cancer            | <b>91.3 (65.1 to 118)</b>     | <b>42.8 (24.6 to 62.5)</b>       | 13.5 (-0.305 to 30.3)                     |
| 19 Leukemia                | 19 Endo/metab/blood/immune | <b>145 (105 to 188)</b>       | <b>82.8 (50.4 to 115)</b>        | <b>17 (2.44 to 32.3)</b>                  |
| 20 Lymphoma                | 20 Leukemia                | <b>79.7 (49 to 110)</b>       | <b>34.1 (12.9 to 52.7)</b>       | -8.19 (-19.2 to 2.12)                     |
| 22 Nonrheum valv diseases  | 21 Lymphoma                |                               |                                  |                                           |
| 25 Endo/metab/blood/immune | 22 Self-harm               |                               |                                  |                                           |
| 29 Urinary diseases        | 129 COVID-19               |                               |                                  |                                           |

### New Zealand, Reference scenario

**Legend:**  
Communicable, maternal, neonatal and nutritional  
Non-communicable  
Injuries

| Leading Causes 2022        | Leading Causes 2050        | Mean % change number of DEATH | Mean % change all-age DEATH rate | Mean % change age-standardized DEATH rate |
|----------------------------|----------------------------|-------------------------------|----------------------------------|-------------------------------------------|
| 1 Ischemic heart disease   | 1 Ischemic heart disease   | 27.9 (-4.44 to 61)            | -4.13 (-25.7 to 20.5)            | <b>-46.1 (-59.6 to -29.8)</b>             |
| 2 Stroke                   | 2 Alzheimer's disease      | <b>153 (123 to 183)</b>       | <b>89.6 (70.6 to 107)</b>        | 0.356 (-4.64 to 5.38)                     |
| 3 Alzheimer's disease      | 3 COPD                     | <b>110 (71.2 to 149)</b>      | <b>57.6 (29.6 to 85.7)</b>       | -3.45 (-20.2 to 17.7)                     |
| 4 COPD                     | 4 Colorectal cancer        | <b>108 (56.3 to 172)</b>      | <b>56.2 (18.6 to 103)</b>        | -0.461 (-21.3 to 23.7)                    |
| 5 Lung cancer              | 5 Stroke                   | <b>26.3 (6.74 to 46.8)</b>    | -5.32 (-18.4 to 7.93)            | <b>-46.1 (-54.1 to -36.2)</b>             |
| 6 Colorectal cancer        | 6 Lung cancer              | <b>65.7 (34.5 to 100)</b>     | <b>24.2 (3.1 to 51.3)</b>        | -8.04 (-21.9 to 8.2)                      |
| 7 COVID-19                 | 7 Chronic kidney disease   | <b>197 (137 to 260)</b>       | <b>123 (78.9 to 164)</b>         | <b>28.2 (1.17 to 58)</b>                  |
| 8 Lower respiratory infect | 8 Lower respiratory infect | <b>136 (103 to 170)</b>       | <b>76.9 (54.4 to 104)</b>        | <b>-13.4 (-25.1 to -0.563)</b>            |
| 9 Chronic kidney disease   | 9 Atrial fibrillation      | <b>203 (165 to 242)</b>       | <b>127 (100 to 153)</b>          | <b>17.8 (7.34 to 29.3)</b>                |
| 10 Prostate cancer         | 10 Prostate cancer         | <b>119 (74.2 to 170)</b>      | <b>64.3 (33.3 to 102)</b>        | -1.46 (-14.7 to 15.4)                     |
| 11 Breast cancer           | 11 Nonrheum valv diseases  | <b>221 (170 to 277)</b>       | <b>141 (104 to 178)</b>          | <b>25.9 (12.5 to 45)</b>                  |
| 12 Atrial fibrillation     | 12 Falls                   | <b>132 (93.7 to 170)</b>      | <b>74.1 (48.2 to 102)</b>        | <b>-8.48 (-18.4 to 3.34)</b>              |
| 13 Falls                   | 13 Pancreatic cancer       | <b>137 (88.9 to 199)</b>      | <b>77.5 (40.7 to 117)</b>        | <b>26.2 (2.28 to 52.3)</b>                |
| 14 Diabetes                | 14 Breast cancer           | <b>68.8 (37.1 to 104)</b>     | <b>26.5 (4.5 to 49.9)</b>        | -11.4 (-24.5 to 3.48)                     |
| 15 Pancreatic cancer       | 15 Diabetes                | <b>93.3 (51.7 to 150)</b>     | <b>44.9 (13.8 to 82.6)</b>       | -13.9 (-32.8 to 8.82)                     |
| 16 Self-harm               | 16 Parkinson's disease     | <b>123 (96.2 to 153)</b>      | <b>67 (49.5 to 86.2)</b>         | 0.189 (-7.99 to 9.29)                     |
| 17 Nonrheum valv diseases  | 17 Urinary diseases        | <b>275 (205 to 357)</b>       | <b>181 (139 to 237)</b>          | <b>47.1 (26.1 to 76.8)</b>                |
| 18 Parkinson's disease     | 18 Melanoma                | <b>105 (83.1 to 127)</b>      | <b>53.8 (39.4 to 70)</b>         | 6.51 (-1.47 to 15.9)                      |
| 19 Lymphoma                | 19 Lymphoma                | <b>81.4 (48.1 to 116)</b>     | <b>36 (12.9 to 58.5)</b>         | -6.17 (-19.5 to 8.3)                      |
| 20 Stomach cancer          | 20 Leukemia                | <b>81.1 (56.1 to 116)</b>     | <b>35.8 (16.8 to 57)</b>         | -8.71 (-18.5 to 3.66)                     |
| 23 Leukemia                | 24 Self-harm               |                               |                                  |                                           |
| 24 Melanoma                | 34 Stomach cancer          |                               |                                  |                                           |
| 35 Urinary diseases        | 127 COVID-19               |                               |                                  |                                           |



### Brunei, Reference scenario

**Legend:**

Communicable, maternal, neonatal and nutritional  
 Non-communicable  
 Injuries

| Leading Causes 2022           | Leading Causes 2050           | Mean % change number of DEATH | Mean % change all-age DEATH rate | Mean % change age-standardized DEATH rate |
|-------------------------------|-------------------------------|-------------------------------|----------------------------------|-------------------------------------------|
| 1 Ischemic heart disease      | 1 Chronic kidney disease      | 355 (263 to 481)              | 356 (265 to 477)                 | 22.9 (-6.02 to 65.9)                      |
| 2 Stroke                      | 2 Ischemic heart disease      | 67.3 (24 to 120)              | 68.1 (24.7 to 127)               | -48.2 (-62.5 to -25.4)                    |
| 3 Diabetes                    | 3 COPD                        | 413 (317 to 519)              | 415 (327 to 535)                 | 15.3 (-8.9 to 48.2)                       |
| 4 COVID-19                    | 4 Stroke                      | 111 (73 to 159)               | 112 (74.4 to 152)                | -42.6 (-54 to -27.3)                      |
| 5 Chronic kidney disease      | 5 Lower respiratory infect    | 327 (253 to 429)              | 329 (261 to 407)                 | -5.75 (-24.2 to 14.7)                     |
| 6 Lung cancer                 | 6 Diabetes                    | 106 (48.5 to 175)             | 107 (49.2 to 180)                | -36.1 (-54.9 to -9.48)                    |
| 7 Lower respiratory infect    | 7 Lung cancer                 | 266 (164 to 383)              | 267 (182 to 363)                 | 11.5 (-10.7 to 37.2)                      |
| 8 COPD                        | 8 Colorectal cancer           | 222 (119 to 346)              | 222 (129 to 324)                 | 5.29 (-21.4 to 37.9)                      |
| 9 Colorectal cancer           | 9 Alzheimer's disease         | 490 (372 to 627)              | 492 (389 to 602)                 | 3.16 (-2.2 to 9.06)                       |
| 10 Road injuries              | 10 Hypertensive heart disease | 420 (307 to 551)              | 422 (321 to 537)                 | 16.9 (-10.5 to 52.3)                      |
| 11 Breast cancer              | 11 Urinary diseases           | 557 (426 to 690)              | 559 (443 to 684)                 | 50.4 (27 to 87.4)                         |
| 12 Liver cancer               | 12 Liver cancer               | 258 (196 to 334)              | 259 (201 to 336)                 | 25.4 (3.71 to 57.9)                       |
| 13 Alzheimer's disease        | 13 Pancreatic cancer          | 363 (237 to 517)              | 364 (260 to 503)                 | 46.8 (17.3 to 85.7)                       |
| 14 Stomach cancer             | 14 Endo/metab/blood/immune    | 218 (157 to 285)              | 219 (169 to 275)                 | 27.3 (10.3 to 47.4)                       |
| 15 Cirrhosis liver            | 15 Atrial fibrillation        | 511 (394 to 649)              | 513 (420 to 625)                 | 29.2 (16.2 to 45.1)                       |
| 16 Hypertensive heart disease | 16 Prostate cancer            | 437 (291 to 594)              | 439 (318 to 584)                 | 29 (6.79 to 52.9)                         |
| 17 Endo/metab/blood/immune    | 17 Breast cancer              | 86 (36.3 to 143)              | 86.4 (44.3 to 126)               | -12 (-30.7 to 8.12)                       |
| 18 Congenital defects         | 18 Stomach cancer             | 113 (78.9 to 155)             | 114 (86.4 to 146)                | -28.4 (-33.9 to -21.6)                    |
| 19 Neonatal disorders         | 19 Lymphoma                   | 196 (111 to 285)              | 197 (116 to 267)                 | 3.87 (-19.3 to 26.2)                      |
| 20 Cardiomyopathy             | 20 Parkinson's disease        | 415 (321 to 517)              | 416 (351 to 484)                 | 14.1 (2.89 to 25.8)                       |
| 21 Lymphoma                   | 21 Cardiomyopathy             |                               |                                  |                                           |
| 22 Urinary diseases           | 22 Cirrhosis liver            |                               |                                  |                                           |
| 24 Pancreatic cancer          | 24 Road injuries              |                               |                                  |                                           |
| 32 Prostate cancer            | 53 Congenital defects         |                               |                                  |                                           |
| 34 Atrial fibrillation        | 65 Neonatal disorders         |                               |                                  |                                           |
| 37 Parkinson's disease        | 130 COVID-19                  |                               |                                  |                                           |

### Japan, Reference scenario

**Legend:**

Communicable, maternal, neonatal and nutritional  
 Non-communicable  
 Injuries

| Leading Causes 2022           | Leading Causes 2050           | Mean % change number of DEATH | Mean % change all-age DEATH rate | Mean % change age-standardized DEATH rate |
|-------------------------------|-------------------------------|-------------------------------|----------------------------------|-------------------------------------------|
| 1 Alzheimer's disease         | 1 Alzheimer's disease         | 38.6 (22.7 to 54.1)           | 62.4 (48.1 to 74.8)              | -9.31 (-13.7 to -4.39)                    |
| 2 Stroke                      | 2 Lower respiratory infect    | 26.3 (8.34 to 47.3)           | 48 (27.6 to 66.4)                | -12.4 (-23.6 to -1.47)                    |
| 3 Ischemic heart disease      | 3 Chronic kidney disease      | 94 (53.8 to 135)              | 127 (79.6 to 172)                | 29.6 (5.5 to 57.1)                        |
| 4 Lower respiratory infect    | 4 Lung cancer                 | 10.7 (-10.1 to 35.9)          | 29.7 (6.61 to 57.4)              | -12.7 (-25.5 to 1.08)                     |
| 5 Lung cancer                 | 5 Stroke                      | -29.9 (-40.7 to -19.3)        | -17.8 (-28.8 to -6.39)           | -45.6 (-52.9 to -37.4)                    |
| 6 Colorectal cancer           | 6 Colorectal cancer           | 22.5 (-2.96 to 50.6)          | 43.5 (14.2 to 74.2)              | -6.81 (-24.7 to 13)                       |
| 7 Stomach cancer              | 7 Ischemic heart disease      | -36.3 (-49.9 to -19.4)        | -25.3 (-40.6 to -5.47)           | -55.8 (-65.7 to -43.9)                    |
| 8 Chronic kidney disease      | 8 Pancreatic cancer           | 50 (20.2 to 83.8)             | 75.8 (43.4 to 109)               | 23.5 (1.46 to 44.9)                       |
| 9 Pancreatic cancer           | 9 Stomach cancer              | -15.3 (-24.4 to -4.44)        | -0.788 (-9.69 to 9.46)           | -35.8 (-40.2 to -30.1)                    |
| 10 COPD                       | 10 Liver cancer               | 41.8 (21.8 to 65)             | 66.2 (43.5 to 92.4)              | 25.5 (11.1 to 41.1)                       |
| 11 Liver cancer               | 11 Nonrheum valv diseases     | 97.3 (66.4 to 134)            | 131 (95.4 to 179)                | 23 (8.7 to 38.4)                          |
| 12 Interstitial lung disease  | 12 COPD                       | 24.8 (1.79 to 47.2)           | 46.2 (23.5 to 72.6)              | -12.7 (-26.2 to 1.68)                     |
| 13 Aortic aneurysm            | 13 Interstitial lung disease  | 34.2 (17 to 54.4)             | 57.2 (40 to 75.6)                | 8.17 (-2.02 to 19.1)                      |
| 14 Nonrheum valv diseases     | 14 Urinary diseases           | 126 (85.6 to 181)             | 164 (123 to 230)                 | 41.7 (22.5 to 69.2)                       |
| 15 Cirrhosis liver            | 15 Aortic aneurysm            | 8.77 (-6.63 to 25.1)          | 27.5 (11.2 to 45.8)              | -18.5 (-27.4 to -9.25)                    |
| 16 Gallbladder cancer         | 16 Hypertensive heart disease | 47.9 (12 to 94.9)             | 73.4 (31.9 to 126)               | -0.202 (-21.3 to 26.8)                    |
| 17 Self-harm                  | 17 Parkinson's disease        | 21.7 (9.97 to 36.1)           | 42.6 (31 to 57.2)                | -0.0456 (-7.51 to 8.69)                   |
| 18 Parkinson's disease        | 18 Atrial fibrillation        | 59.6 (40.2 to 82.4)           | 87.1 (67.1 to 108)               | 13.7 (4.35 to 23.8)                       |
| 19 COVID-19                   | 19 Cirrhosis liver            | 0.764 (-9.53 to 11.5)         | 18.1 (7.68 to 29.2)              | -2.53 (-10.4 to 7.36)                     |
| 20 Breast cancer              | 20 Prostate cancer            | 36.8 (9.02 to 69.5)           | 60.4 (28 to 98.5)                | 5.08 (-9.16 to 20.4)                      |
| 22 Prostate cancer            | 22 Gallbladder cancer         |                               |                                  |                                           |
| 23 Hypertensive heart disease | 25 Self-harm                  |                               |                                  |                                           |
| 26 Atrial fibrillation        | 26 Breast cancer              |                               |                                  |                                           |
| 27 Urinary diseases           | 128 COVID-19                  |                               |                                  |                                           |

### South Korea, Reference scenario

**Legend:**  
Communicable, maternal, neonatal and nutritional  
Non-communicable  
Injuries

| Leading Causes 2022           | Leading Causes 2050           | Mean % change number of DEATH | Mean % change all-age DEATH rate | Mean % change age-standardized DEATH rate |
|-------------------------------|-------------------------------|-------------------------------|----------------------------------|-------------------------------------------|
| 1 Stroke                      | 1 Alzheimer's disease         | 246 (206 to 290)              | 277 (242 to 316)                 | -17.3 (-21.7 to -12.5)                    |
| 2 Alzheimer's disease         | 2 Lower respiratory infect    | 227 (173 to 291)              | 256 (204 to 311)                 | -19.1 (-30.8 to -6.88)                    |
| 3 Ischemic heart disease      | 3 Stroke                      | 50.2 (29.6 to 72)             | 63.5 (41.5 to 84.6)              | -55.7 (-61.8 to -49.9)                    |
| 4 Lung cancer                 | 4 Lung cancer                 | 105 (67.3 to 144)             | 123 (86.1 to 164)                | -22.4 (-32.2 to -11.1)                    |
| 5 COVID-19                    | 5 Chronic kidney disease      | 319 (243 to 398)              | 355 (271 to 440)                 | 13.4 (-5.49 to 35.6)                      |
| 6 Lower respiratory infect    | 6 Ischemic heart disease      | 37.8 (8.98 to 66.9)           | 50 (19.2 to 81.1)                | -62.6 (-70.4 to -53.7)                    |
| 7 Liver cancer                | 7 COPD                        | 211 (154 to 279)              | 238 (181 to 304)                 | -20.5 (-33.1 to -5.71)                    |
| 8 Self-harm                   | 8 Liver cancer                | 132 (97.5 to 167)             | 152 (120 to 192)                 | 11.9 (-1.48 to 25.6)                      |
| 9 Stomach cancer              | 9 Colorectal cancer           | 166 (109 to 231)              | 189 (131 to 256)                 | -6.42 (-22.2 to 12.7)                     |
| 10 Colorectal cancer          | 10 Pancreatic cancer          | 182 (123 to 242)              | 206 (148 to 267)                 | 14 (-4.61 to 33)                          |
| 11 COPD                       | 11 Hypertensive heart disease | 312 (232 to 415)              | 348 (258 to 448)                 | -7.08 (-25.3 to 11.6)                     |
| 12 Diabetes                   | 12 Stomach cancer             | 62.2 (40.9 to 84.8)           | 76.4 (56.4 to 97.2)              | -40.1 (-44.6 to -35.1)                    |
| 13 Chronic kidney disease     | 13 Diabetes                   | 70 (34.1 to 113)              | 85 (47.2 to 131)                 | -46 (-56.1 to -34.1)                      |
| 14 Cirrhosis liver            | 14 Cirrhosis liver            | 59.1 (36.1 to 86.8)           | 73.1 (50.8 to 101)               | -12.9 (-23.1 to -2.9)                     |
| 15 Pancreatic cancer          | 15 Self-harm                  | 8.77 (-5.87 to 22.4)          | 18.4 (5.25 to 31.2)              | -21.9 (-29.6 to -13.2)                    |
| 16 Gallbladder cancer         | 16 Atrial fibrillation        | 333 (279 to 394)              | 371 (321 to 428)                 | 9.65 (0.24 to 19.3)                       |
| 17 Falls                      | 17 Falls                      | 173 (130 to 225)              | 198 (148 to 250)                 | -18 (-26.6 to -8.96)                      |
| 18 Hypertensive heart disease | 18 Parkinson's disease        | 204 (165 to 240)              | 231 (198 to 268)                 | -5.39 (-14.2 to 2.28)                     |
| 19 Road injuries              | 19 Urinary diseases           | 423 (317 to 553)              | 470 (357 to 606)                 | 23.9 (5.5 to 48.9)                        |
| 20 Parkinson's disease        | 20 Gallbladder cancer         | 82.2 (58.3 to 114)            | 98.3 (71.2 to 124)               | -35.8 (-41.1 to -29.2)                    |
| 21 Atrial fibrillation        | 24 Road injuries              |                               |                                  |                                           |
| 31 Urinary diseases           | 132 COVID-19                  |                               |                                  |                                           |

### Singapore, Reference scenario

**Legend:**  
Communicable, maternal, neonatal and nutritional  
Non-communicable  
Injuries

| Leading Causes 2022           | Leading Causes 2050          | Mean % change number of DEATH | Mean % change all-age DEATH rate | Mean % change age-standardized DEATH rate |
|-------------------------------|------------------------------|-------------------------------|----------------------------------|-------------------------------------------|
| 1 Lower respiratory infect    | 1 Lower respiratory infect   | 299 (247 to 354)              | 201 (163 to 245)                 | -16 (-26.3 to -1.96)                      |
| 2 Ischemic heart disease      | 2 Alzheimer's disease        | 399 (335 to 470)              | 276 (232 to 316)                 | -6.04 (-10.7 to -1.14)                    |
| 3 Alzheimer's disease         | 3 Ischemic heart disease     | 35.6 (3.05 to 78.9)           | 2.13 (-20.5 to 31.5)             | -63 (-71.1 to -50.4)                      |
| 4 Lung cancer                 | 4 Urinary diseases           | 619 (483 to 767)              | 442 (341 to 542)                 | 42.4 (15.7 to 71.7)                       |
| 5 Stroke                      | 5 Chronic kidney disease     | 348 (253 to 478)              | 238 (168 to 330)                 | 7.15 (-14.6 to 38.3)                      |
| 6 Colorectal cancer           | 6 Lung cancer                | 179 (121 to 240)              | 110 (68.5 to 159)                | -14.2 (-28.1 to 1.88)                     |
| 7 Chronic kidney disease      | 7 Colorectal cancer          | 232 (141 to 324)              | 150 (85.7 to 216)                | -1.95 (-23.7 to 21.5)                     |
| 8 COVID-19                    | 8 Hypertensive heart disease | 316 (215 to 436)              | 214 (144 to 299)                 | 10.9 (-15.9 to 43.8)                      |
| 9 Urinary diseases            | 9 COPD                       | 305 (225 to 392)              | 205 (151 to 265)                 | -8.64 (-23.4 to 10.9)                     |
| 10 Hypertensive heart disease | 10 Stroke                    | 70.7 (43.8 to 99.9)           | 28.7 (11.7 to 48)                | -53.3 (-59.7 to -44.2)                    |
| 11 COPD                       | 11 Pancreatic cancer         | 286 (194 to 379)              | 191 (123 to 256)                 | 27.6 (0.459 to 52.8)                      |
| 12 Liver cancer               | 12 Liver cancer              | 205 (155 to 264)              | 130 (97.7 to 168)                | 12.2 (-4.94 to 31.9)                      |
| 13 Breast cancer              | 13 Prostate cancer           | 337 (248 to 433)              | 229 (163 to 303)                 | 10.4 (-6.74 to 26.5)                      |
| 14 Pancreatic cancer          | 14 Breast cancer             | 111 (63.2 to 157)             | 59.3 (28.1 to 92.7)              | -10 (-26 to 7.24)                         |
| 15 Self-harm                  | 15 Parkinson's disease       | 306 (260 to 357)              | 206 (176 to 242)                 | 1.15 (-6.69 to 10.6)                      |
| 16 Stomach cancer             | 16 Stomach cancer            | 126 (96.6 to 155)             | 70.3 (51.9 to 88.7)              | -34.7 (-40.1 to -29.7)                    |
| 17 Prostate cancer            | 17 Falls                     | 234 (183 to 291)              | 152 (115 to 189)                 | -14 (-22.6 to -5.97)                      |
| 18 Parkinson's disease        | 18 Lymphoma                  | 189 (132 to 243)              | 118 (78.6 to 154)                | -6 (-22 to 8.54)                          |
| 19 Lymphoma                   | 19 Self-harm                 | 30.1 (11.4 to 49.5)           | -1.95 (-14 to 11.8)              | -25.3 (-36.6 to -13.7)                    |
| 20 Falls                      | 20 Aortic aneurysm           | 213 (161 to 278)              | 136 (99 to 174)                  | -13.5 (-24.6 to -0.618)                   |
| 23 Aortic aneurysm            | 127 COVID-19                 |                               |                                  |                                           |

### Canada, Reference scenario

**Legend:**  
Communicable, maternal, neonatal and nutritional  
Non-communicable  
Injuries

| Leading Causes 2022                                         | Leading Causes 2050                                         | Mean % change number of DEATH | Mean % change all-age DEATH rate | Mean % change age-standardized DEATH rate |
|-------------------------------------------------------------|-------------------------------------------------------------|-------------------------------|----------------------------------|-------------------------------------------|
| 1 Ischemic heart disease                                    | 1 Ischemic heart disease                                    | 17 (-8.01 to 44.1)            | -9.26 (-28.4 to 12.1)            | <b>-50.4 (-61.7 to -36.3)</b>             |
| 2 Lung cancer                                               | 2 Alzheimer's disease                                       | <b>153 (127 to 180)</b>       | <b>96.2 (77.4 to 115)</b>        | -3.11 (-7.76 to 1.18)                     |
| <span style="color: red;">3 COVID-19</span>                 | 3 Lung cancer                                               | <b>53.9 (27.1 to 82.9)</b>    | <b>19.3 (0.297 to 42)</b>        | -10.9 (-22.6 to 2.99)                     |
| 4 Alzheimer's disease                                       | 4 COPD                                                      | <b>101 (66.5 to 136)</b>      | <b>55.7 (31.3 to 81.4)</b>       | -7.09 (-22 to 8.51)                       |
| 5 Stroke                                                    | 5 Chronic kidney disease                                    | <b>261 (202 to 328)</b>       | <b>180 (133 to 230)</b>          | <b>44.7 (19.7 to 76.4)</b>                |
| 6 COPD                                                      | 6 Stroke                                                    | <b>27.8 (10.6 to 45.7)</b>    | -0.874 (-12.9 to 11.7)           | <b>-44 (-51.4 to -35.5)</b>               |
| 7 Colorectal cancer                                         | 7 Colorectal cancer                                         | <b>92.8 (54.3 to 138)</b>     | <b>49.5 (20.3 to 84.3)</b>       | -5.63 (-22.6 to 13.7)                     |
| <span style="color: red;">8 Lower respiratory infect</span> | <span style="color: red;">8 Lower respiratory infect</span> | <b>116 (89.1 to 149)</b>      | <b>67.8 (46.1 to 93)</b>         | <b>-13.4 (-23.7 to -0.536)</b>            |
| 9 Chronic kidney disease                                    | <span style="color: green;">9 Falls</span>                  | <b>134 (98.1 to 169)</b>      | <b>81.7 (55.1 to 108)</b>        | -7.68 (-18.1 to 1.67)                     |
| <span style="color: green;">10 Falls</span>                 | 10 Pancreatic cancer                                        | <b>125 (82.3 to 180)</b>      | <b>74.1 (44.4 to 117)</b>        | <b>25.3 (6.16 to 51.2)</b>                |
| 11 Diabetes                                                 | 11 Prostate cancer                                          | <b>129 (89.1 to 183)</b>      | <b>77.7 (46.8 to 123)</b>        | 2.39 (-9.55 to 17.4)                      |
| 12 Breast cancer                                            | 12 Atrial fibrillation                                      | <b>214 (171 to 252)</b>       | <b>144 (115 to 171)</b>          | <b>18.7 (8.88 to 28.6)</b>                |
| 13 Pancreatic cancer                                        | 13 Nonrheum valv diseases                                   | <b>241 (197 to 291)</b>       | <b>164 (131 to 210)</b>          | <b>26.5 (12.6 to 40.9)</b>                |
| 14 Prostate cancer                                          | 14 Diabetes                                                 | <b>73.1 (38.6 to 114)</b>     | <b>34.2 (6.21 to 62.9)</b>       | <b>-23.3 (-37.8 to -8.3)</b>              |
| 15 Cirrhosis liver                                          | 15 Breast cancer                                            | <b>72.3 (44.3 to 105)</b>     | <b>33.6 (13.4 to 55.1)</b>       | -7.36 (-17.8 to 6.62)                     |
| <span style="color: green;">16 Self-harm</span>             | 16 Urinary diseases                                         | <b>290 (217 to 366)</b>       | <b>202 (148 to 254)</b>          | <b>48.7 (25 to 73.2)</b>                  |
| 17 Parkinson's disease                                      | 17 Parkinson's disease                                      | <b>119 (95.7 to 147)</b>      | <b>69.9 (53.5 to 91.1)</b>       | 1.25 (-7.38 to 9.72)                      |
| 18 Atrial fibrillation                                      | 18 Liver cancer                                             | <b>110 (81.9 to 134)</b>      | <b>62.5 (43.7 to 82.9)</b>       | <b>30.8 (16.7 to 45.8)</b>                |
| 19 Drug use disorders                                       | 19 Interstitial lung disease                                | <b>115 (86.8 to 144)</b>      | <b>66.7 (44.9 to 87.8)</b>       | 5.43 (-5.11 to 15.4)                      |
| 20 Lymphoma                                                 | 20 Drug use disorders                                       | <b>85.9 (57.4 to 119)</b>     | <b>44.2 (22.6 to 68.4)</b>       | <b>38.7 (16.2 to 64.3)</b>                |
| 21 Nonrheum valv diseases                                   | 22 Lymphoma                                                 |                               |                                  |                                           |
| 22 Liver cancer                                             | 24 Cirrhosis liver                                          |                               |                                  |                                           |
| 24 Interstitial lung disease                                | 28 Self-harm                                                |                               |                                  |                                           |
| 29 Urinary diseases                                         | 128 COVID-19                                                |                               |                                  |                                           |

### Greenland, Reference scenario

**Legend:**  
Communicable, maternal, neonatal and nutritional  
Non-communicable  
Injuries

| Leading Causes 2022        | Leading Causes 2050        | Mean % change number of DEATH | Mean % change all-age DEATH rate | Mean % change age-standardized DEATH rate |
|----------------------------|----------------------------|-------------------------------|----------------------------------|-------------------------------------------|
| 1 Ischemic heart disease   | 1 Lung cancer              | 56.9 (23.3 to 96.9)           | 48.1 (17.3 to 82.3)              | -13.8 (-29.8 to 4.54)                     |
| 2 Lung cancer              | 2 COPD                     | 147 (89.9 to 222)             | 133 (77.4 to 201)                | -13.8 (-30.8 to 9.68)                     |
| 3 COVID-19                 | 3 Ischemic heart disease   | 28.9 (-9.38 to 75.9)          | 21.6 (-12.1 to 64.9)             | <b>-54.7 (-67.9 to -36.2)</b>             |
| 4 Stroke                   | 4 Stroke                   | 64.6 (24.6 to 106)            | 55.3 (21.3 to 92.8)              | <b>-49.2 (-59.2 to -37.1)</b>             |
| 5 Self-harm                | 5 Alzheimer's disease      | 423 (305 to 537)              | 394 (285 to 490)                 | <b>-8.16 (-12.4 to -2.85)</b>             |
| 6 COPD                     | 6 Lower respiratory infect | 226 (150 to 296)              | 208 (142 to 269)                 | <b>-15.9 (-30.9 to -2.32)</b>             |
| 7 Colorectal cancer        | 7 Colorectal cancer        | 102 (46.1 to 165)             | 90.8 (36.7 to 146)               | -10.6 (-34 to 14.5)                       |
| 8 Pancreatic cancer        | 8 Chronic kidney disease   | 272 (172 to 387)              | 251 (160 to 355)                 | 8.41 (-19.4 to 44.2)                      |
| 9 Lower respiratory infect | 9 Self-harm                | -14.7 (-29.3 to 1.21)         | <b>-19.5 (-29.8 to -4.56)</b>    | <b>-22.3 (-33.9 to -6.25)</b>             |
| 10 Alzheimer's disease     | 10 Pancreatic cancer       | 136 (77.6 to 203)             | 122 (69.9 to 184)                | 20.8 (-5.64 to 49.5)                      |
| 11 Falls                   | 11 Falls                   | 187 (128 to 248)              | 170 (121 to 221)                 | <b>-15.3 (-23.1 to -7.47)</b>             |
| 12 Alcohol use disorders   | 12 Atrial fibrillation     | 365 (259 to 466)              | 339 (252 to 411)                 | 4.35 (-3.46 to 15)                        |
| 13 Esophageal cancer       | 13 Urinary diseases        | 467 (304 to 637)              | 435 (290 to 580)                 | <b>36 (9.68 to 70.2)</b>                  |
| 14 Chronic kidney disease  | 14 Parkinson's disease     | 270 (195 to 343)              | 249 (191 to 312)                 | -4.59 (-12.4 to 4.22)                     |
| 15 Cirrhosis liver         | 15 Esophageal cancer       | 47.7 (22.6 to 70)             | 39.4 (22.5 to 56.5)              | <b>-14.4 (-22.6 to -6)</b>                |
| 16 Cardiomyopathy          | 16 Nonrheum valv diseases  | 354 (249 to 463)              | 328 (234 to 431)                 | 6.36 (-5.78 to 19.9)                      |
| 17 Stomach cancer          | 17 Diabetes                | 76.8 (21 to 133)              | 66.9 (16.5 to 118)               | <b>-28.2 (-47.5 to -6.04)</b>             |
| 18 Breast cancer           | 18 Prostate cancer         | 199 (118 to 292)              | 182 (118 to 258)                 | -0.677 (-16.3 to 13.6)                    |
| 19 Diabetes                | 19 Liver cancer            | 122 (79.7 to 166)             | 110 (75.9 to 148)                | 16.3 (-1.84 to 40.5)                      |
| 20 Interpersonal violence  | 20 Other digestive         | 269 (186 to 366)              | 248 (172 to 328)                 | <b>24.9 (1.97 to 53.5)</b>                |
| 21 Liver cancer            | 21 Breast cancer           |                               |                                  |                                           |
| 26 Atrial fibrillation     | 23 Cardiomyopathy          |                               |                                  |                                           |
| 27 Parkinson's disease     | 25 Alcohol use disorders   |                               |                                  |                                           |
| 29 Prostate cancer         | 26 Stomach cancer          |                               |                                  |                                           |
| 36 Urinary diseases        | 27 Cirrhosis liver         |                               |                                  |                                           |
| 38 Nonrheum valv diseases  | 50 Interpersonal violence  |                               |                                  |                                           |
| 39 Other digestive         | 127 COVID-19               |                               |                                  |                                           |

### USA, Reference scenario

**Legend:**

Communicable, maternal, neonatal and nutritional  
 Non-communicable  
 Injuries

| Leading Causes 2022           | Leading Causes 2050          | Mean % change number of DEATH | Mean % change all-age DEATH rate | Mean % change age-standardized DEATH rate |
|-------------------------------|------------------------------|-------------------------------|----------------------------------|-------------------------------------------|
| 1 Ischemic heart disease      | 1 Ischemic heart disease     | -5.57 (-22.1 to 12.6)         | -11 (-24.5 to 5.79)              | <b>-49 (-57.9 to -37.2)</b>               |
| 2 COVID-19                    | 2 Alzheimer's disease        | <b>118 (94.7 to 142)</b>      | <b>106 (87.2 to 124)</b>         | 2.5 (-1.69 to 6.91)                       |
| 3 COPD                        | 3 Chronic kidney disease     | <b>160 (123 to 200)</b>       | <b>145 (113 to 182)</b>          | <b>42.6 (21.5 to 67.8)</b>                |
| 4 Alzheimer's disease         | 4 COPD                       | <b>63 (40.7 to 88.1)</b>      | <b>53.6 (33.5 to 77.6)</b>       | -5.11 (-17.6 to 8.88)                     |
| 5 Stroke                      | 5 Lung cancer                | <b>30 (10.6 to 52.3)</b>      | <b>22.4 (4.99 to 43.9)</b>       | <b>-12.1 (-22.8 to -0.169)</b>            |
| 6 Lung cancer                 | 6 Stroke                     | 6.73 (-5.38 to 19.6)          | 0.569 (-9.34 to 9.23)            | <b>-40.3 (-46.8 to -33.5)</b>             |
| 7 Chronic kidney disease      | 7 Hypertensive heart disease | <b>107 (76.5 to 145)</b>      | <b>95.4 (65.4 to 134)</b>        | <b>22.8 (2.39 to 50.3)</b>                |
| 8 Colorectal cancer           | 8 Colorectal cancer          | <b>49.5 (21.5 to 84.3)</b>    | <b>40.9 (14.4 to 71.8)</b>       | -6.22 (-22.1 to 10.2)                     |
| 9 Diabetes                    | 9 Pancreatic cancer          | <b>87 (57.1 to 122)</b>       | <b>76.1 (48.5 to 113)</b>        | <b>26.5 (10.2 to 45.4)</b>                |
| 10 Drug use disorders         | 10 Lower respiratory infect  | <b>63.8 (42.1 to 84.7)</b>    | <b>54.3 (35.8 to 74.1)</b>       | <b>-10.4 (-20.7 to -0.465)</b>            |
| 11 Hypertensive heart disease | 11 Drug use disorders        | <b>47.1 (22.6 to 75.7)</b>    | <b>38.6 (18 to 62.2)</b>         | <b>34.8 (12.3 to 61.1)</b>                |
| 12 Cirrhosis liver            | 12 Atrial fibrillation       | <b>166 (132 to 208)</b>       | <b>150 (123 to 178)</b>          | <b>27.7 (16.6 to 37.8)</b>                |
| 13 Lower respiratory infect   | 13 Falls                     | <b>83.9 (58.9 to 111)</b>     | <b>73.3 (52.3 to 97.2)</b>       | -3.11 (-11.5 to 6.24)                     |
| 14 Pancreatic cancer          | 14 Endo/metab/blood/immune   | <b>113 (82 to 147)</b>        | <b>101 (74.5 to 128)</b>         | <b>30.2 (17.7 to 43.3)</b>                |
| 15 Breast cancer              | 15 Prostate cancer           | <b>85.5 (57.2 to 119)</b>     | <b>74.8 (50.5 to 103)</b>        | 5.48 (-5.32 to 17.4)                      |
| 16 Falls                      | 16 Nonrheum valv diseases    | <b>188 (152 to 235)</b>       | <b>172 (138 to 209)</b>          | <b>33.9 (21.1 to 49.5)</b>                |
| 17 Self-harm                  | 17 Diabetes                  | 6.07 (-12.3 to 25.1)          | -0.0285 (-16.7 to 18.6)          | <b>-35.7 (-46.1 to -24.9)</b>             |
| 18 Prostate cancer            | 18 Breast cancer             | <b>41.4 (19.6 to 62.9)</b>    | <b>33.2 (16.1 to 51.9)</b>       | -6.21 (-16.8 to 4.89)                     |
| 19 Endo/metab/blood/immune    | 19 Parkinson's disease       | <b>97.9 (76.1 to 121)</b>     | <b>86.5 (68.9 to 104)</b>        | 7.11 (-1.83 to 15.9)                      |
| 20 Road injuries              | 20 Cirrhosis liver           | 6.1 (-4.88 to 16.3)           | -0.0417 (-7.25 to 7.11)          | <b>-12.1 (-19.1 to -6.11)</b>             |
| 21 Parkinson's disease        | 23 Self-harm                 |                               |                                  |                                           |
| 22 Atrial fibrillation        | 24 Road injuries             |                               |                                  |                                           |
| 25 Nonrheum valv diseases     | 129 COVID-19                 |                               |                                  |                                           |

### Argentina, Reference scenario

**Legend:**  
Communicable, maternal, neonatal and nutritional  
Non-communicable  
Injuries

| Leading Causes 2022           | Leading Causes 2050          | Mean % change number of DEATH | Mean % change all-age DEATH rate | Mean % change age-standardized DEATH rate |
|-------------------------------|------------------------------|-------------------------------|----------------------------------|-------------------------------------------|
| 1 Lower respiratory infect    | 1 Lower respiratory infect   | 67 (41.6 to 98.1)             | 61.7 (43.4 to 82.5)              | -12.9 (-24.9 to -0.822)                   |
| 2 Ischemic heart disease      | 2 Chronic kidney disease     | 138 (91.2 to 196)             | 131 (87.7 to 170)                | 26.9 (0.888 to 53.7)                      |
| 3 Stroke                      | 3 Ischemic heart disease     | -1.24 (-24.9 to 24.9)         | -4.27 (-26.1 to 20.3)            | -47 (-60.5 to -29.2)                      |
| 4 COVID-19                    | 4 COPD                       | 81.5 (48.3 to 119)            | 75.9 (48.4 to 101)               | -3.98 (-20.9 to 12.3)                     |
| 5 Chronic kidney disease      | 5 Alzheimer's disease        | 108 (73.5 to 148)             | 101 (80.5 to 124)                | 1.22 (-3.92 to 6.46)                      |
| 6 COPD                        | 6 Stroke                     | 2.49 (-15.9 to 22.8)          | -0.718 (-13.8 to 13.2)           | -42.9 (-52.2 to -33.6)                    |
| 7 Alzheimer's disease         | 7 Lung cancer                | 87.6 (47.6 to 131)            | 81.5 (53.8 to 117)               | 7.32 (-7.76 to 26.2)                      |
| 8 Lung cancer                 | 8 Colorectal cancer          | 81.6 (33.2 to 137)            | 75.6 (37 to 123)                 | 1.38 (-18.2 to 26.2)                      |
| 9 Colorectal cancer           | 9 Hypertensive heart disease | 103 (57.9 to 151)             | 96.5 (64.1 to 131)               | 4.94 (-16.3 to 27.5)                      |
| 10 Diabetes                   | 10 Urinary diseases          | 175 (125 to 239)              | 166 (129 to 213)                 | 41.3 (19.1 to 64)                         |
| 11 Hypertensive heart disease | 11 Pancreatic cancer         | 150 (89.9 to 223)             | 142 (97.4 to 199)                | 41.6 (17.9 to 70)                         |
| 12 Breast cancer              | 12 Diabetes                  | 34.6 (3.32 to 69.4)           | 30.4 (3.32 to 62)                | -25.9 (-43.1 to -7.76)                    |
| 13 Cardiomyopathy             | 13 Breast cancer             | 68.5 (33.4 to 120)            | 63 (37.3 to 97.3)                | -1.9 (-15.7 to 16.3)                      |
| 14 Cirrhosis liver            | 14 Prostate cancer           | 101 (59.5 to 155)             | 94.9 (65.6 to 130)               | 7.97 (-6.91 to 24.2)                      |
| 15 Other cardiovascular       | 15 Cardiomyopathy            | 44.4 (20.1 to 74.1)           | 39.8 (24.1 to 60)                | -20.9 (-28.3 to -12.4)                    |
| 16 Pancreatic cancer          | 16 Other cardiovascular      | 54 (29.9 to 78.8)             | 49.1 (36.2 to 65.2)              | -17.6 (-24.7 to -9.2)                     |
| 17 Urinary diseases           | 17 Cirrhosis liver           | 33.9 (14.8 to 60.3)           | 29.7 (17 to 41.7)                | -16.5 (-24.6 to -9.32)                    |
| 18 Prostate cancer            | 18 Bacterial skin            | 227 (138 to 331)              | 217 (129 to 299)                 | 77.8 (25.4 to 130)                        |
| 19 Road injuries              | 19 Ileus & obstruction       | 91.8 (59.5 to 128)            | 85.7 (66.4 to 104)               | 2.26 (-11.1 to 13.9)                      |
| 20 Self-harm                  | 20 Parkinson's disease       | 99.5 (69.5 to 137)            | 93.2 (72.2 to 113)               | 4.5 (-4.2 to 13.7)                        |
| 22 Ileus & obstruction        | 23 Road injuries             |                               |                                  |                                           |
| 23 Parkinson's disease        | 26 Self-harm                 |                               |                                  |                                           |
| 35 Bacterial skin             | 133 COVID-19                 |                               |                                  |                                           |



### Chile, Reference scenario

**Legend:**

Communicable, maternal, neonatal and nutritional  
Non-communicable  
Injuries

| Leading Causes 2022           | Leading Causes 2050          | Mean % change number of DEATH | Mean % change all-age DEATH rate | Mean % change age-standardized DEATH rate |
|-------------------------------|------------------------------|-------------------------------|----------------------------------|-------------------------------------------|
| 1 COVID-19                    | 1 Chronic kidney disease     | 240 (181 to 319)              | 198 (147 to 259)                 | 16.5 (-3.26 to 41.9)                      |
| 2 Ischemic heart disease      | 2 Alzheimer's disease        | 213 (175 to 261)              | 174 (149 to 202)                 | -4.43 (-8.65 to 0.285)                    |
| 3 Stroke                      | 3 Lower respiratory infect   | 162 (122 to 211)              | 130 (95.6 to 164)                | <b>-16.5 (-28.4 to -4.44)</b>             |
| 4 Lower respiratory infect    | 4 Stroke                     | 28.7 (8.99 to 50)             | 12.7 (-2.09 to 27.8)             | <b>-51.7 (-58 to -44.5)</b>               |
| 5 Chronic kidney disease      | 5 COPD                       | 189 (139 to 259)              | 153 (115 to 206)                 | -5.57 (-20.8 to 14.1)                     |
| 6 Alzheimer's disease         | 6 Ischemic heart disease     | 16.2 (-9.53 to 49.8)          | 1.83 (-19 to 29.2)               | <b>-54.7 (-64.3 to -42.9)</b>             |
| 7 Cirrhosis liver             | 7 Hypertensive heart disease | 204 (137 to 278)              | 167 (110 to 219)                 | -0.5 (-20.3 to 20.6)                      |
| 8 COPD                        | 8 Urinary diseases           | 316 (248 to 401)              | 264 (212 to 325)                 | 35.7 (18 to 57.5)                         |
| 9 Stomach cancer              | 9 Colorectal cancer          | 128 (81.6 to 182)             | 100 (60.1 to 147)                | -1.74 (-19.6 to 17.3)                     |
| 10 Lung cancer                | 10 Lung cancer               | 99.9 (63.8 to 134)            | 75.2 (48 to 105)                 | -4.91 (-18.1 to 9.07)                     |
| 11 Colorectal cancer          | 11 Prostate cancer           | 169 (125 to 224)              | 136 (101 to 178)                 | 2.24 (-9.7 to 16.3)                       |
| 12 Hypertensive heart disease | 12 Cirrhosis liver           | 45.9 (31.9 to 63.3)           | 27.9 (17.8 to 38.2)              | <b>-14.8 (-21.3 to -8.23)</b>             |
| 13 Diabetes                   | 13 Interstitial lung disease | 156 (122 to 197)              | 124 (100 to 149)                 | -0.138 (-8.03 to 8.33)                    |
| 14 Prostate cancer            | 14 Diabetes                  | 89.8 (46.7 to 142)            | 66.3 (31.5 to 105)               | <b>-28.8 (-42.7 to -12.5)</b>             |
| 15 Interstitial lung disease  | 15 Stomach cancer            | 41.8 (23.6 to 63.5)           | 24.3 (14.1 to 37.5)              | <b>-36.8 (-41.3 to -31.2)</b>             |
| 16 Urinary diseases           | 16 Pancreatic cancer         | 182 (125 to 240)              | 148 (99.5 to 199)                | 31 (8.77 to 56)                           |
| 17 Road injuries              | 17 Breast cancer             | 99.8 (62.8 to 137)            | 75.1 (43.7 to 107)               | -6.67 (-20.8 to 7.96)                     |
| 18 Self-harm                  | 18 Falls                     | 153 (112 to 199)              | 121 (91.2 to 156)                | <b>-11.5 (-20.5 to -0.956)</b>            |
| 19 Gallbladder cancer         | 19 Atrial fibrillation       | 249 (203 to 293)              | 205 (176 to 239)                 | 8.29 (0.575 to 17.2)                      |
| 20 Pancreatic cancer          | 20 Parkinson's disease       | 167 (130 to 201)              | 134 (109 to 160)                 | -3.05 (-11 to 6.54)                       |
| 21 Breast cancer              | 21 Gallbladder cancer        |                               |                                  |                                           |
| 22 Falls                      | 24 Road injuries             |                               |                                  |                                           |
| 23 Parkinson's disease        | 25 Self-harm                 |                               |                                  |                                           |
| 24 Atrial fibrillation        | 131 COVID-19                 |                               |                                  |                                           |

### Uruguay, Reference scenario

**Legend:**  
Communicable, maternal, neonatal and nutritional  
Non-communicable  
Injuries

| Leading Causes 2022           | Leading Causes 2050           | Mean % change number of DEATH | Mean % change all-age DEATH rate | Mean % change age-standardized DEATH rate |
|-------------------------------|-------------------------------|-------------------------------|----------------------------------|-------------------------------------------|
| 1 Ischemic heart disease      | 1 COPD                        | 29.7 (6.03 to 57.8)           | 39.3 (17.7 to 61.9)              | -10.6 (-24 to 5.39)                       |
| 2 Stroke                      | 2 Ischemic heart disease      | -30.7 (-47 to -10.6)          | -25.5 (-41.8 to -5.82)           | -51.6 (-62.8 to -35.7)                    |
| 3 COPD                        | 3 Stroke                      | -31 (-43.8 to -18.2)          | -25.9 (-35.7 to -15.7)           | -50.8 (-58.1 to -42.5)                    |
| 4 COVID-19                    | 4 Colorectal cancer           | 42.3 (9.81 to 77.2)           | 53 (21.6 to 89.7)                | 1.07 (-18.8 to 22.1)                      |
| 5 Lung cancer                 | 5 Lung cancer                 | 29.2 (3.98 to 59.4)           | 38.8 (17.7 to 63.7)              | -5.07 (-18.8 to 9.29)                     |
| 6 Lower respiratory infect    | 6 Alzheimer's disease         | 47.5 (23.6 to 73.4)           | 58.5 (43.8 to 73.2)              | -1.29 (-6.6 to 3.84)                      |
| 7 Colorectal cancer           | 7 Lower respiratory infect    | 22.9 (1.65 to 49.3)           | 32 (15.4 to 50.2)                | -16.2 (-26.8 to -3.12)                    |
| 8 Alzheimer's disease         | 8 Chronic kidney disease      | 71.4 (39 to 111)              | 84.1 (53.5 to 117)               | 17.5 (-4.45 to 43.9)                      |
| 9 Chronic kidney disease      | 9 Urinary diseases            | 107 (64.7 to 150)             | 122 (87.7 to 162)                | 39.3 (17.3 to 67.6)                       |
| 10 Diabetes                   | 10 Pancreatic cancer          | 86.6 (45.2 to 134)            | 101 (61.3 to 142)                | 35.8 (12.1 to 64)                         |
| 11 Breast cancer              | 11 Prostate cancer            | 46.2 (18.5 to 76.8)           | 57.1 (35.2 to 82.6)              | 2.98 (-9.98 to 16.3)                      |
| 12 Prostate cancer            | 12 Breast cancer              | 31.2 (5.33 to 59.8)           | 41 (17.3 to 66.6)                | -3.84 (-18.6 to 11.4)                     |
| 13 Hypertensive heart disease | 13 Hypertensive heart disease | 41.2 (12 to 78.5)             | 51.7 (25.4 to 85.9)              | -1.12 (-20.8 to 23.6)                     |
| 14 Pancreatic cancer          | 14 Diabetes                   | 16.8 (-11.3 to 51.7)          | 25.5 (-4.05 to 57.1)             | -19.3 (-38.5 to 3.36)                     |
| 15 Urinary diseases           | 15 Nonrheum valv diseases     | 75.1 (42.9 to 108)            | 88.2 (65.9 to 114)               | 17.9 (6.24 to 31)                         |
| 16 Self-harm                  | 16 Self-harm                  | -11.8 (-26.1 to 1.95)         | -5.19 (-14.2 to 5.42)            | -12.4 (-23.2 to -0.0293)                  |
| 17 Stomach cancer             | 17 Parkinson's disease        | 42.9 (18.2 to 70.7)           | 53.5 (39.3 to 70.2)              | 0.136 (-8.47 to 9.06)                     |
| 18 Road injuries              | 18 Stomach cancer             | -12.5 (-26.6 to 1.78)         | -5.95 (-14.1 to 1.74)            | -36.9 (-41.1 to -32.5)                    |
| 19 Nonrheum valv diseases     | 19 Road injuries              | -5.01 (-26.4 to 25.2)         | 2.02 (-17.5 to 28)               | -2.58 (-22.9 to 25.8)                     |
| 20 Cirrhosis liver            | 20 Kidney cancer              | 42.1 (12.1 to 77.6)           | 52.8 (27.5 to 85.3)              | 8.34 (-8.68 to 30.6)                      |
| 21 Parkinson's disease        | 23 Cirrhosis liver            |                               |                                  |                                           |
| 22 Kidney cancer              | 129 COVID-19                  |                               |                                  |                                           |

### Andorra, Reference scenario

**Legend:**  
Communicable, maternal, neonatal and nutritional  
Non-communicable  
Injuries

| Leading Causes 2022           | Leading Causes 2050          | Mean % change number of DEATH | Mean % change all-age DEATH rate | Mean % change age-standardized DEATH rate |
|-------------------------------|------------------------------|-------------------------------|----------------------------------|-------------------------------------------|
| 1 Ischemic heart disease      | 1 Alzheimer's disease        | 205 (136 to 283)              | 260 (198 to 330)                 | 1.62 (-3.81 to 7.08)                      |
| 2 Alzheimer's disease         | 2 Ischemic heart disease     | 40.9 (-5.61 to 97.4)          | 66.6 (14.1 to 131)               | -47.9 (-64 to -26.5)                      |
| 3 COVID-19                    | 3 COPD                       | 164 (94.3 to 242)             | 212 (136 to 297)                 | -3.08 (-22.5 to 25)                       |
| 4 Lung cancer                 | 4 Chronic kidney disease     | 312 (195 to 445)              | 387 (264 to 529)                 | 42.5 (5.9 to 84.2)                        |
| 5 Stroke                      | 5 Lung cancer                | 60.9 (15.5 to 118)            | 90 (46.9 to 141)                 | -19.6 (-36 to -2.37)                      |
| 6 COPD                        | 6 Colorectal cancer          | 119 (44.7 to 218)             | 158 (77.4 to 245)                | -8.17 (-32.9 to 17)                       |
| 7 Colorectal cancer           | 7 Stroke                     | 42.7 (4.25 to 88)             | 68.7 (27 to 113)                 | -45.8 (-57.4 to -29.5)                    |
| 8 Chronic kidney disease      | 8 Hypertensive heart disease | 219 (135 to 309)              | 277 (182 to 392)                 | 14.1 (-15.2 to 52.3)                      |
| 9 Pancreatic cancer           | 9 Prostate cancer            | 178 (97.3 to 273)             | 229 (146 to 325)                 | 1.58 (-16.8 to 20.8)                      |
| 10 Liver cancer               | 10 Pancreatic cancer         | 163 (83.1 to 266)             | 210 (128 to 310)                 | 23.9 (-3.57 to 55.5)                      |
| 11 Prostate cancer            | 11 Lower respiratory infect  | 180 (104 to 261)              | 231 (155 to 320)                 | -3.23 (-20.6 to 17.8)                     |
| 12 Lower respiratory infect   | 12 Liver cancer              | 142 (86.8 to 205)             | 186 (131 to 252)                 | 23.6 (2.37 to 47.9)                       |
| 13 Diabetes                   | 13 Diabetes                  | 100 (38.2 to 176)             | 137 (63.8 to 223)                | -25.4 (-45.3 to 0.81)                     |
| 14 Hypertensive heart disease | 14 Falls                     | 151 (81.3 to 220)             | 196 (126 to 267)                 | -10 (-20.1 to 1.38)                       |
| 15 Breast cancer              | 15 Breast cancer             | 76.7 (26.4 to 141)            | 109 (53 to 170)                  | -6.63 (-26.9 to 13.2)                     |
| 16 Cirrhosis liver            | 16 Atrial fibrillation       | 251 (179 to 338)              | 315 (245 to 398)                 | 18.6 (9.58 to 29)                         |
| 17 Stomach cancer             | 17 Urinary diseases          | 342 (213 to 485)              | 422 (298 to 595)                 | 50.7 (18.6 to 90.9)                       |
| 18 Falls                      | 18 Cardiomyopathy            | 108 (57.7 to 173)             | 146 (102 to 204)                 | -21.3 (-29.3 to -13.2)                    |
| 19 Cardiomyopathy             | 19 Parkinson's disease       | 193 (136 to 257)              | 246 (198 to 305)                 | 3.67 (-5.32 to 13.4)                      |
| 20 Brain cancer               | 20 Brain cancer              | 104 (69.5 to 148)             | 142 (113 to 176)                 | 41.7 (31 to 51.7)                         |
| 23 Atrial fibrillation        | 21 Stomach cancer            |                               |                                  |                                           |
| 27 Parkinson's disease        | 26 Cirrhosis liver           |                               |                                  |                                           |
| 30 Urinary diseases           | 126 COVID-19                 |                               |                                  |                                           |

### Austria, Reference scenario

**Legend:**  
Communicable, maternal, neonatal and nutritional  
Non-communicable  
Injuries

| Leading Causes 2022          | Leading Causes 2050          | Mean % change number of DEATH | Mean % change all-age DEATH rate | Mean % change age-standardized DEATH rate |
|------------------------------|------------------------------|-------------------------------|----------------------------------|-------------------------------------------|
| 1 Ischemic heart disease     | 1 Ischemic heart disease     | -1.67 (-21.8 to 21)           | -9.94 (-28.9 to 8.84)            | <b>-51.1 (-62.6 to -38.1)</b>             |
| 2 Alzheimer's disease        | 2 Alzheimer's disease        | <b>93 (67.7 to 117)</b>       | <b>76.6 (63 to 91.9)</b>         | <b>-7.99 (-12.2 to -3.78)</b>             |
| 3 Stroke                     | 3 Chronic kidney disease     | <b>190 (135 to 244)</b>       | <b>165 (116 to 215)</b>          | <b>36.6 (10.1 to 64.5)</b>                |
| 4 COVID-19                   | 4 Hypertensive heart disease | <b>106 (69.8 to 148)</b>      | <b>89.1 (58 to 125)</b>          | -0.131 (-18.8 to 23.1)                    |
| 5 Lung cancer                | 5 COPD                       | <b>60.8 (32.9 to 88.6)</b>    | <b>47.3 (24.5 to 69.6)</b>       | -11.8 (-25.4 to 3.64)                     |
| 6 Chronic kidney disease     | 6 Lung cancer                | <b>22.2 (0.686 to 44.7)</b>   | 11.8 (-4.82 to 32)               | <b>-19.1 (-30.3 to -5.69)</b>             |
| 7 COPD                       | 7 Stroke                     | -6.22 (-19.6 to 8.66)         | <b>-14.1 (-25.5 to -3.11)</b>    | <b>-51.3 (-58 to -44.3)</b>               |
| 8 Hypertensive heart disease | 8 Atrial fibrillation        | <b>129 (95.4 to 164)</b>      | <b>109 (85.8 to 134)</b>         | 8.41 (-0.5 to 18.3)                       |
| 9 Colorectal cancer          | 9 Colorectal cancer          | <b>58.2 (22.4 to 102)</b>     | <b>44.7 (16 to 77.3)</b>         | -12.5 (-27.8 to 4.86)                     |
| 10 Diabetes                  | 10 Pancreatic cancer         | <b>89.5 (56 to 136)</b>       | <b>73.4 (44.2 to 110)</b>        | 15.8 (-3.3 to 38.6)                       |
| 11 Pancreatic cancer         | 11 Falls                     | <b>77.6 (48.7 to 109)</b>     | <b>62.6 (42.2 to 86.8)</b>       | <b>-11.1 (-19.6 to -1.94)</b>             |
| 12 Falls                     | 12 Nonrheum valv diseases    | <b>148 (112 to 195)</b>       | <b>127 (94.9 to 157)</b>         | <b>16.2 (3.74 to 29.2)</b>                |
| 13 Breast cancer             | 13 Prostate cancer           | <b>93.5 (57 to 140)</b>       | <b>77.2 (46.9 to 114)</b>        | 1.06 (-12.4 to 15)                        |
| 14 Atrial fibrillation       | 14 Diabetes                  | <b>40.6 (9.69 to 78.2)</b>    | <b>28.8 (2.43 to 62)</b>         | <b>-29.1 (-45.6 to -13.8)</b>             |
| 15 Cardiomyopathy            | 15 Lower respiratory infect  | <b>66.1 (45 to 97.5)</b>      | <b>52.1 (35 to 77.2)</b>         | <b>-17.5 (-28 to -5.6)</b>                |
| 16 Cirrhosis liver           | 16 Breast cancer             | <b>39.7 (16.4 to 67.6)</b>    | <b>27.8 (7.5 to 53.5)</b>        | <b>-17.7 (-28.4 to -4.56)</b>             |
| 17 Prostate cancer           | 17 Cardiomyopathy            | <b>44 (20.6 to 73.2)</b>      | <b>31.8 (14 to 54.3)</b>         | <b>-26.6 (-33.3 to -18.2)</b>             |
| 18 Lower respiratory infect  | 18 Parkinson's disease       | <b>86.3 (60.7 to 111)</b>     | <b>70.5 (52.4 to 86.2)</b>       | -2.3 (-11.1 to 6.16)                      |
| 19 Nonrheum valv diseases    | 19 Cirrhosis liver           | <b>12.3 (1.01 to 24.8)</b>    | 2.81 (-4.7 to 10.9)              | <b>-18 (-24.6 to -11.9)</b>               |
| 20 Self-harm                 | 20 Liver cancer              | <b>91 (66.1 to 123)</b>       | <b>74.9 (52 to 101)</b>          | <b>24.5 (9.56 to 39.5)</b>                |
| 21 Parkinson's disease       | 23 Self-harm                 |                               |                                  |                                           |
| 22 Liver cancer              | 129 COVID-19                 |                               |                                  |                                           |

### Belgium, Reference scenario

**Legend:**  
Communicable, maternal, neonatal and nutritional  
Non-communicable  
Injuries

| Leading Causes 2022        | Leading Causes 2050        | Mean % change number of DEATH | Mean % change all-age DEATH rate | Mean % change age-standardized DEATH rate |
|----------------------------|----------------------------|-------------------------------|----------------------------------|-------------------------------------------|
| 1 Ischemic heart disease   | 1 Alzheimer's disease      | 75.9 (54.2 to 96.7)           | 56.8 (42 to 69.2)                | -7.24 (-11.7 to -3)                       |
| 2 Alzheimer's disease      | 2 Lower respiratory infect | 57 (34.3 to 83.1)             | 40 (21 to 63.9)                  | -14.9 (-26.5 to -0.945)                   |
| 3 Stroke                   | 3 Ischemic heart disease   | -16.8 (-33.7 to 5.8)          | -25.8 (-40.6 to -7.13)           | -53.7 (-63.8 to -40.9)                    |
| 4 Lung cancer              | 4 Chronic kidney disease   | 187 (131 to 250)              | 156 (115 to 206)                 | 49.4 (22 to 81.9)                         |
| 5 Lower respiratory infect | 5 COPD                     | 40.6 (18.4 to 66.4)           | 25.3 (7.02 to 43.9)              | -16.6 (-28.4 to -2.43)                    |
| 6 COPD                     | 6 Lung cancer              | 15.2 (-4.97 to 38.2)          | 2.66 (-13.1 to 21.7)             | -19.4 (-29.6 to -6.14)                    |
| 7 COVID-19                 | 7 Stroke                   | -7.03 (-21.7 to 8.08)         | -17.1 (-27.6 to -6.72)           | -45.6 (-52.9 to -37.9)                    |
| 8 Colorectal cancer        | 8 Colorectal cancer        | 54.2 (20.5 to 93.3)           | 37.4 (8.36 to 66.6)              | -6.19 (-23.9 to 13.7)                     |
| 9 Chronic kidney disease   | 9 Nonrheum valv diseases   | 141 (106 to 182)              | 115 (88.1 to 145)                | 24.4 (12.5 to 39.6)                       |
| 10 Falls                   | 10 Falls                   | 57.9 (35.3 to 83.2)           | 40.8 (22.5 to 60.4)              | -11.8 (-20 to -3.44)                      |
| 11 Breast cancer           | 11 Pancreatic cancer       | 84.3 (47.7 to 127)            | 64.3 (34.6 to 96.2)              | 23 (1.75 to 43)                           |
| 12 Pancreatic cancer       | 12 Prostate cancer         | 80.9 (49.1 to 119)            | 61.2 (35.1 to 94.9)              | 4.48 (-7.73 to 19)                        |
| 13 Prostate cancer         | 13 Breast cancer           | 35.8 (11.8 to 65.5)           | 21.1 (1.43 to 44.7)              | -10.2 (-22.6 to 4.45)                     |
| 14 Nonrheum valv diseases  | 14 Urinary diseases        | 166 (121 to 225)              | 137 (99.8 to 181)                | 39.5 (18.9 to 65.7)                       |
| 15 Self-harm               | 15 Atrial fibrillation     | 136 (102 to 174)              | 110 (85.8 to 136)                | 23.5 (13.6 to 34.5)                       |
| 16 Cirrhosis liver         | 16 Diarrheal diseases      | 206 (78 to 395)               | 173 (58.2 to 341)                | 56.8 (-10.3 to 158)                       |
| 17 Diabetes                | 17 Parkinson's disease     | 69.8 (49 to 89.3)             | 51.4 (36.8 to 66.3)              | 0.658 (-7.58 to 9.79)                     |
| 18 Atrial fibrillation     | 18 Self-harm               | -4.81 (-17.5 to 7.89)         | -15.1 (-23.1 to -5.54)           | -21.4 (-30 to -12.7)                      |
| 19 Parkinson's disease     | 19 Endocarditis            | 141 (86.7 to 214)             | 115 (62.1 to 176)                | 36.4 (4.7 to 73.7)                        |
| 20 Urinary diseases        | 20 Diabetes                | 17.4 (-9.86 to 48.2)          | 4.67 (-17.4 to 27.3)             | -34.2 (-48.2 to -17.8)                    |
| 24 Diarrheal diseases      | 23 Cirrhosis liver         |                               |                                  |                                           |
| 32 Endocarditis            | 128 COVID-19               |                               |                                  |                                           |

### Cyprus, Reference scenario

**Legend:**  
Communicable, maternal, neonatal and nutritional  
Non-communicable  
Injuries

| Leading Causes 2022           | Leading Causes 2050          | Mean % change number of DEATH | Mean % change all-age DEATH rate | Mean % change age-standardized DEATH rate |
|-------------------------------|------------------------------|-------------------------------|----------------------------------|-------------------------------------------|
| 1 Ischemic heart disease      | 1 Ischemic heart disease     | 13.4 (-20 to 49.3)            | 2.68 (-24 to 37.1)               | <b>-53.3 (-67.5 to -35)</b>               |
| 2 Stroke                      | 2 Chronic kidney disease     | <b>251 (166 to 352)</b>       | <b>218 (143 to 298)</b>          | 28.6 (-2.05 to 69.4)                      |
| 3 Diabetes                    | 3 COPD                       | <b>147 (87 to 217)</b>        | <b>124 (81.5 to 179)</b>         | -5.01 (-25.9 to 21.1)                     |
| 4 COVID-19                    | 4 Alzheimer's disease        | <b>145 (104 to 191)</b>       | <b>122 (93.2 to 151)</b>         | <b>-7.93 (-12.1 to -3.98)</b>             |
| 5 COPD                        | 5 Stroke                     | <b>27 (1.88 to 53.7)</b>      | 15 (-4.85 to 37.9)               | <b>-52.3 (-61.2 to -40.5)</b>             |
| 6 Alzheimer's disease         | 6 Diabetes                   | <b>59 (14.1 to 114)</b>       | <b>44 (5.61 to 90.2)</b>         | <b>-35.1 (-53.2 to -10.8)</b>             |
| 7 Lung cancer                 | 7 Hypertensive heart disease | <b>201 (126 to 271)</b>       | <b>173 (117 to 236)</b>          | -0.798 (-25.2 to 35.4)                    |
| 8 Chronic kidney disease      | 8 Lung cancer                | <b>51.4 (13.5 to 91.3)</b>    | <b>37 (4.79 to 70.6)</b>         | <b>-20.4 (-36.8 to -4.14)</b>             |
| 9 Colorectal cancer           | 9 Colorectal cancer          | <b>107 (42.1 to 188)</b>      | <b>86.9 (33.8 to 148)</b>        | -6.37 (-28.3 to 17.9)                     |
| 10 Hypertensive heart disease | 10 Nonrheum valv diseases    | <b>234 (167 to 309)</b>       | <b>202 (152 to 260)</b>          | <b>20.9 (6.84 to 37.2)</b>                |
| 11 Breast cancer              | 11 Lower respiratory infect  | <b>148 (101 to 207)</b>       | <b>125 (87.4 to 172)</b>         | -14.3 (-29.2 to 3.78)                     |
| 12 Lower respiratory infect   | 12 Urinary diseases          | <b>289 (199 to 375)</b>       | <b>252 (179 to 315)</b>          | <b>37.8 (8.68 to 66.1)</b>                |
| 13 Prostate cancer            | 13 Prostate cancer           | <b>115 (63.1 to 178)</b>      | <b>94.4 (51.3 to 149)</b>        | -2.66 (-18.7 to 17)                       |
| 14 Nonrheum valv diseases     | 14 Atrial fibrillation       | <b>230 (157 to 311)</b>       | <b>199 (147 to 270)</b>          | <b>10.6 (0.185 to 24.2)</b>               |
| 15 Falls                      | 15 Breast cancer             | <b>79.5 (33.7 to 129)</b>     | <b>62.5 (26.8 to 102)</b>        | -12.9 (-29.3 to 4.07)                     |
| 16 Pancreatic cancer          | 16 Pancreatic cancer         | <b>158 (85.9 to 243)</b>      | <b>133 (73.2 to 200)</b>         | 26.5 (-1.69 to 54.4)                      |
| 17 Atrial fibrillation        | 17 Falls                     | <b>128 (82.1 to 184)</b>      | <b>106 (68.8 to 150)</b>         | <b>-13.2 (-22.7 to -2.11)</b>             |
| 18 Urinary diseases           | 18 Parkinson's disease       | <b>118 (82.2 to 160)</b>      | <b>97.5 (70.2 to 127)</b>        | -6.59 (-14.9 to 3.79)                     |
| 19 Stomach cancer             | 19 Interstitial lung disease | <b>110 (77.3 to 150)</b>      | <b>90.5 (60.9 to 126)</b>        | -4.63 (-13.7 to 6.74)                     |
| 20 Cirrhosis liver            | 20 Leukemia                  | <b>90.4 (36.9 to 143)</b>     | <b>72.4 (34.3 to 121)</b>        | -7.46 (-24.5 to 11.1)                     |
| 21 Leukemia                   | 25 Stomach cancer            |                               |                                  |                                           |
| 22 Parkinson's disease        | 26 Cirrhosis liver           |                               |                                  |                                           |
| 23 Interstitial lung disease  | 129 COVID-19                 |                               |                                  |                                           |

### Denmark, Reference scenario

**Legend:**

Communicable, maternal, neonatal and nutritional  
 Non-communicable  
 Injuries

| Leading Causes 2022        | Leading Causes 2050        | Mean % change number of DEATH | Mean % change all-age DEATH rate | Mean % change age-standardized DEATH rate |
|----------------------------|----------------------------|-------------------------------|----------------------------------|-------------------------------------------|
| 1 Ischemic heart disease   | 1 COPD                     | 42.2 (20.4 to 70.6)           | 28.3 (9.51 to 50.6)              | -11 (-24.2 to 3.98)                       |
| 2 COVID-19                 | 2 Alzheimer's disease      | 74.3 (54 to 96)               | 57.2 (45.3 to 70.6)              | -4.47 (-8.77 to 0.836)                    |
| 3 COPD                     | 3 Lung cancer              | 18.8 (1.27 to 37.5)           | 7.15 (-6.16 to 21.6)             | -13.6 (-22.7 to -3.44)                    |
| 4 Lung cancer              | 4 Chronic kidney disease   | 150 (109 to 199)              | 126 (93.8 to 167)                | 41.5 (19.6 to 68.4)                       |
| 5 Stroke                   | 5 Lower respiratory infect | 61.3 (35.9 to 88.8)           | 45.5 (27.8 to 66.2)              | -11 (-21.6 to 0.4)                        |
| 6 Alzheimer's disease      | 6 Ischemic heart disease   | -26.8 (-39.2 to -9.96)        | -33.9 (-45.1 to -19.4)           | -57 (-65 to -47)                          |
| 7 Lower respiratory infect | 7 Colorectal cancer        | 37.7 (9.47 to 71.7)           | 24.2 (1.81 to 49.8)              | -9.5 (-24.2 to 5.84)                      |
| 8 Colorectal cancer        | 8 Stroke                   | -19.6 (-29.3 to -8.26)        | -27.4 (-35.6 to -20)             | -51 (-56.2 to -44.7)                      |
| 9 Prostate cancer          | 9 Prostate cancer          | 68.6 (39.1 to 98.8)           | 52.1 (28.2 to 79.4)              | 4.96 (-6.47 to 18.9)                      |
| 10 Chronic kidney disease  | 10 Pancreatic cancer       | 66.5 (38.6 to 101)            | 50.1 (25.6 to 72.9)              | 20.3 (3.21 to 37)                         |
| 11 Diabetes                | 11 Atrial fibrillation     | 108 (82.1 to 135)             | 87.8 (69.2 to 106)               | 14.2 (4.76 to 23)                         |
| 12 Breast cancer           | 12 Urinary diseases        | 179 (131 to 243)              | 151 (113 to 197)                 | 50.6 (26.7 to 76.2)                       |
| 13 Pancreatic cancer       | 13 Breast cancer           | 34.3 (12.1 to 62)             | 21.1 (3.49 to 42.1)              | -10.5 (-20.6 to 2.09)                     |
| 14 Falls                   | 14 Diabetes                | 19.7 (-1.98 to 48.9)          | 7.91 (-9.81 to 29.5)             | -28.9 (-40.8 to -14.8)                    |
| 15 Atrial fibrillation     | 15 Falls                   | 63.2 (40 to 90.7)             | 47.2 (29.4 to 67.7)              | -6.25 (-14.7 to 3.23)                     |
| 16 Cirrhosis liver         | 16 Nonrheum valv diseases  | 123 (90.7 to 161)             | 101 (77.2 to 128)                | 22.9 (11.3 to 39.4)                       |
| 17 Nonrheum valv diseases  | 17 Diarrheal diseases      | 234 (118 to 427)              | 201 (94.1 to 368)                | 81.1 (13.7 to 187)                        |
| 18 Parkinson's disease     | 18 Parkinson's disease     | 67 (45.3 to 90.4)             | 50.6 (34.3 to 67)                | 4.42 (-6.09 to 14.2)                      |
| 19 Urinary diseases        | 19 Brain cancer            | 71 (54 to 90.3)               | 54.3 (44.7 to 64.2)              | 33.4 (26.4 to 40.3)                       |
| 20 Self-harm               | 20 Leukemia                | 33.4 (15.6 to 56.1)           | 20.3 (7.83 to 34.8)              | -10.8 (-18.3 to -2.69)                    |
| 21 Leukemia                | 24 Cirrhosis liver         |                               |                                  |                                           |
| 27 Brain cancer            | 26 Self-harm               |                               |                                  |                                           |
| 31 Diarrheal diseases      | 128 COVID-19               |                               |                                  |                                           |

### Finland, Reference scenario

**Legend:**  
Communicable, maternal, neonatal and nutritional  
Non-communicable  
Injuries

| Leading Causes 2022          | Leading Causes 2050          | Mean % change number of DEATH | Mean % change all-age DEATH rate | Mean % change age-standardized DEATH rate |
|------------------------------|------------------------------|-------------------------------|----------------------------------|-------------------------------------------|
| 1 Ischemic heart disease     | 1 Ischemic heart disease     | -20.3 (-37.3 to -1.79)        | -18.3 (-35.9 to -0.332)          | -54.7 (-65.4 to -42.6)                    |
| 2 COVID-19                   | 2 Alzheimer's disease        | 92.8 (66.4 to 118)            | 97.5 (79.4 to 115)               | 3.79 (-1.38 to 8.38)                      |
| 3 Stroke                     | 3 Hypertensive heart disease | 88.1 (50.4 to 134)            | 92.7 (56.7 to 133)               | 7.62 (-12 to 32.1)                        |
| 4 Alzheimer's disease        | 4 Stroke                     | -19.8 (-30.6 to -5.71)        | -17.9 (-26.9 to -7.25)           | -49.9 (-56.1 to -42)                      |
| 5 Lung cancer                | 5 Lung cancer                | 14.6 (-7.19 to 36.7)          | 17.3 (-1.86 to 38.8)             | -8.91 (-22.4 to 5.05)                     |
| 6 Hypertensive heart disease | 6 Pancreatic cancer          | 75.1 (34.8 to 115)            | 79.3 (45.2 to 117)               | 32.9 (11.5 to 54.4)                       |
| 7 Colorectal cancer          | 7 Falls                      | 59.6 (33 to 92.6)             | 63.5 (38.3 to 87.7)              | -6.04 (-16 to 4.12)                       |
| 8 Pancreatic cancer          | 8 Nonrheum valv diseases     | 127 (90.6 to 169)             | 133 (103 to 165)                 | 24.3 (11.5 to 38.5)                       |
| 9 COPD                       | 9 Colorectal cancer          | 42.2 (11.9 to 77.4)           | 45.6 (18.2 to 79.3)              | -1.35 (-18.3 to 18.1)                     |
| 10 Falls                     | 10 COPD                      | 41.7 (18.4 to 68)             | 45.2 (25.7 to 68)                | -4.86 (-17.2 to 9.92)                     |
| 11 Prostate cancer           | 11 Chronic kidney disease    | 149 (99.4 to 211)             | 156 (105 to 211)                 | 34.3 (7.92 to 63.9)                       |
| 12 Breast cancer             | 12 Prostate cancer           | 70.6 (35.8 to 111)            | 74.7 (43.4 to 111)               | 11.1 (-2.45 to 26.3)                      |
| 13 Cirrhosis liver           | 13 Atrial fibrillation       | 113 (78.1 to 146)             | 118 (92.5 to 144)                | 17.3 (8.94 to 27.3)                       |
| 14 Nonrheum valv diseases    | 14 Breast cancer             | 31 (5 to 62.9)                | 34.1 (13.5 to 56.9)              | -6.7 (-19.1 to 7.82)                      |
| 15 Self-harm                 | 15 Lower respiratory infect  | 66.5 (39.1 to 102)            | 70.5 (46 to 96.6)                | -8.04 (-19.5 to 4.26)                     |
| 16 Chronic kidney disease    | 16 Parkinson's disease       | 52.5 (29.1 to 74.1)           | 56.1 (40.7 to 71)                | 3.92 (-3.99 to 12.7)                      |
| 17 Parkinson's disease       | 17 Cirrhosis liver           | -12.9 (-23.8 to -0.914)       | -10.8 (-17.4 to -3.47)           | -18.6 (-25.5 to -11.4)                    |
| 18 Lower respiratory infect  | 18 Liver cancer              | 48.9 (27.2 to 74.9)           | 52.5 (35.8 to 72)                | 20.1 (7.31 to 35.3)                       |
| 19 Atrial fibrillation       | 19 Urinary diseases          | 176 (125 to 233)              | 183 (135 to 241)                 | 46.1 (28.6 to 68.9)                       |
| 20 Diabetes                  | 20 Self-harm                 | -13.1 (-23.9 to -3.24)        | -11 (-17.5 to -3.24)             | -21.6 (-29.6 to -13.5)                    |
| 22 Liver cancer              | 25 Diabetes                  |                               |                                  |                                           |
| 39 Urinary diseases          | 128 COVID-19                 |                               |                                  |                                           |



### France, Reference scenario

**Legend:**

Communicable, maternal, neonatal and nutritional  
 Non-communicable  
 Injuries

| Leading Causes 2022            | Leading Causes 2050            | Mean % change number of DEATH | Mean % change all-age DEATH rate | Mean % change age-standardized DEATH rate |
|--------------------------------|--------------------------------|-------------------------------|----------------------------------|-------------------------------------------|
| 1 Ischemic heart disease       | 1 Alzheimer's disease          | 75.2 (53 to 96.9)             | 80.4 (67.4 to 94.4)              | -4.67 (-9.27 to -0.597)                   |
| 2 Alzheimer's disease          | 2 Ischemic heart disease       | -11.4 (-31 to 8.53)           | -8.77 (-27.1 to 11.7)            | -51.4 (-61.3 to -40.1)                    |
| 3 Stroke                       | 3 Lung cancer                  | 25.3 (3.85 to 47.3)           | 29 (11.3 to 49.1)                | -3.62 (-16.3 to 9.29)                     |
| 4 COVID-19                     | 4 Chronic kidney disease       | 175 (125 to 246)              | 183 (136 to 239)                 | 45.2 (22.4 to 75.4)                       |
| 5 Lung cancer                  | 5 Lower respiratory infect     | 69.9 (40.9 to 98.5)           | 75 (49.5 to 99.7)                | -10.1 (-22.7 to 2.46)                     |
| 6 Colorectal cancer            | 6 Stroke                       | -8.79 (-21.8 to 5.5)          | -6.1 (-16.4 to 6.1)              | -46.9 (-52.7 to -39.7)                    |
| 7 Lower respiratory infect     | 7 Colorectal cancer            | 52.2 (20.5 to 90.4)           | 56.7 (29.3 to 95.7)              | -5.99 (-20.4 to 11.8)                     |
| 8 Falls                        | 8 Falls                        | 58.9 (32 to 89.9)             | 63.6 (41.8 to 88.5)              | -9.56 (-18.6 to -0.122)                   |
| 9 COPD                         | 9 Pancreatic cancer            | 87.2 (52.2 to 127)            | 92.7 (62 to 127)                 | 29.7 (9.8 to 50.1)                        |
| 10 Breast cancer               | 10 COPD                        | 63 (37.1 to 99.3)             | 67.8 (41 to 96.5)                | -7.06 (-20.3 to 6.72)                     |
| 11 Chronic kidney disease      | 11 Nonrheum valv diseases      | 144 (103 to 189)              | 151 (114 to 192)                 | 27.1 (11.1 to 44.3)                       |
| 12 Pancreatic cancer           | 12 Prostate cancer             | 76.5 (42.5 to 111)            | 81.8 (51.8 to 116)               | 3.42 (-9.47 to 16.8)                      |
| 13 Prostate cancer             | 13 Atrial fibrillation         | 115 (85.7 to 142)             | 121 (97.9 to 145)                | 15.4 (4.05 to 25.5)                       |
| 14 Diabetes                    | 14 Breast cancer               | 30.4 (6.98 to 55.7)           | 34.3 (14.4 to 58.9)              | -12.1 (-22.8 to -0.381)                   |
| 15 Atrial fibrillation         | 15 Diabetes                    | 44.2 (14.7 to 83.8)           | 48.4 (21.8 to 89)                | -20.6 (-33.5 to -0.159)                   |
| 16 Nonrheum valv diseases      | 16 Hypertensive heart disease  | 94.7 (55.7 to 136)            | 100 (63.1 to 142)                | 4.64 (-14.2 to 25.4)                      |
| 17 Hypertensive heart disease  | 17 Liver cancer                | 62.4 (39.9 to 85.5)           | 67.2 (47.7 to 87.6)              | 23 (8.52 to 36.5)                         |
| 18 Self-harm                   | 18 Parkinson's disease         | 60.8 (41.8 to 84)             | 65.6 (51.1 to 81.7)              | -2.85 (-9.85 to 4.31)                     |
| 19 Cirrhosis liver             | 19 Other cardiovascular        | 48.7 (29.9 to 69.6)           | 53.1 (37.5 to 69.9)              | -17.3 (-25.2 to -8.73)                    |
| 20 Liver cancer                | 20 Protein-energy malnutrition | 140 (46 to 246)               | 148 (51.9 to 268)                | 16.7 (-28.2 to 71.2)                      |
| 21 Other cardiovascular        | 28 Cirrhosis liver             |                               |                                  |                                           |
| 22 Parkinson's disease         | 31 Self-harm                   |                               |                                  |                                           |
| 31 Protein-energy malnutrition | 130 COVID-19                   |                               |                                  |                                           |

### Germany, Reference scenario

**Legend:**

Communicable, maternal, neonatal and nutritional  
Non-communicable  
Injuries

| Leading Causes 2022          | Leading Causes 2050          | Mean % change number of DEATH | Mean % change all-age DEATH rate | Mean % change age-standardized DEATH rate |
|------------------------------|------------------------------|-------------------------------|----------------------------------|-------------------------------------------|
| 1 Ischemic heart disease     | 1 Alzheimer's disease        | 61.9 (40.1 to 82.5)           | 61 (49.3 to 72.6)                | -0.675 (-4.72 to 4.44)                    |
| 2 Alzheimer's disease        | 2 Ischemic heart disease     | -24.5 (-39.8 to -8.32)        | -24.9 (-39.7 to -12)             | -51.2 (-60.7 to -41)                      |
| 3 Stroke                     | 3 Chronic kidney disease     | 139 (97 to 186)               | 138 (96.6 to 182)                | 46 (21.3 to 73.9)                         |
| 4 Lung cancer                | 4 Hypertensive heart disease | 78.5 (47.7 to 115)            | 77.5 (48.9 to 106)               | 9.89 (-9.75 to 29.8)                      |
| 5 COVID-19                   | 5 Lung cancer                | 4.97 (-10.6 to 22.7)          | 4.41 (-7.91 to 19.1)             | -14.4 (-23.6 to -3.48)                    |
| 6 Chronic kidney disease     | 6 COPD                       | 31.4 (12.4 to 51.8)           | 30.7 (14.9 to 46.6)              | -7.26 (-18.5 to 4.73)                     |
| 7 COPD                       | 7 Stroke                     | -25.8 (-35.6 to -13.9)        | -26.2 (-34.3 to -17.9)           | -48.5 (-54.5 to -42.5)                    |
| 8 Hypertensive heart disease | 8 Atrial fibrillation        | 95.6 (67.5 to 124)            | 94.5 (75.3 to 119)               | 19.5 (9.81 to 29.8)                       |
| 9 Colorectal cancer          | 9 Colorectal cancer          | 32.4 (8.52 to 62)             | 31.7 (11.2 to 55.3)              | -5.92 (-18.2 to 9.74)                     |
| 10 Lower respiratory infect  | 10 Nonrheum valv diseases    | 110 (77 to 148)               | 109 (83.7 to 140)                | 27.4 (13.1 to 44)                         |
| 11 Falls                     | 11 Pancreatic cancer         | 61.6 (34.7 to 93.4)           | 60.8 (38.9 to 86.7)              | 24.7 (9.27 to 42.6)                       |
| 12 Pancreatic cancer         | 12 Falls                     | 49.4 (24 to 75.8)             | 48.6 (27.9 to 71.7)              | -5.31 (-14.7 to 5.32)                     |
| 13 Diabetes                  | 13 Lower respiratory infect  | 39.8 (15.4 to 65)             | 39 (21.4 to 58)                  | -9.85 (-20.1 to 1.27)                     |
| 14 Atrial fibrillation       | 14 Prostate cancer           | 54.4 (28.1 to 83.9)           | 53.6 (31.4 to 78.8)              | 6.85 (-5.23 to 19.7)                      |
| 15 Breast cancer             | 15 Breast cancer             | 20.8 (0.938 to 45.9)          | 20.1 (4.51 to 44.3)              | -9.9 (-19 to 2.99)                        |
| 16 Prostate cancer           | 16 Diabetes                  | 8.86 (-13 to 36.3)            | 8.2 (-13.1 to 30.9)              | -30.1 (-42.6 to -16.6)                    |
| 17 Nonrheum valv diseases    | 17 Parkinson's disease       | 50.5 (30.7 to 71.2)           | 49.7 (37.2 to 64.1)              | 4.72 (-2.76 to 13.2)                      |
| 18 Cirrhosis liver           | 18 Urinary diseases          | 139 (95.3 to 182)             | 138 (102 to 178)                 | 49.9 (28.4 to 71.5)                       |
| 19 Parkinson's disease       | 19 Cirrhosis liver           | 1.08 (-11 to 14.2)            | 0.533 (-6.2 to 7.41)             | -8.71 (-14.8 to -1.58)                    |
| 20 Stomach cancer            | 20 Liver cancer              | 67.9 (46.7 to 89.9)           | 67 (49.9 to 83.8)                | 37.3 (22.2 to 49.5)                       |
| 24 Liver cancer              | 25 Stomach cancer            |                               |                                  |                                           |
| 27 Urinary diseases          | 128 COVID-19                 |                               |                                  |                                           |

### Greece, Reference scenario

**Legend:**  
■ Communicable, maternal, neonatal and nutritional  
■ Non-communicable  
■ Injuries

| Leading Causes 2022           | Leading Causes 2050          | Mean % change number of DEATH | Mean % change all-age DEATH rate | Mean % change age-standardized DEATH rate |
|-------------------------------|------------------------------|-------------------------------|----------------------------------|-------------------------------------------|
| 1 Ischemic heart disease      | 1 Ischemic heart disease     | -33.7 (-50.7 to -16.3)        | -15.9 (-35 to 0.472)             | -50.5 (-63.7 to -37.9)                    |
| 2 Stroke                      | 2 Alzheimer's disease        | 42.9 (20.2 to 68.7)           | 81 (62.2 to 101)                 | 2.9 (-1.69 to 8.47)                       |
| 3 COVID-19                    | 3 Chronic kidney disease     | 73.4 (37.7 to 116)            | 120 (78.3 to 164)                | 25.1 (0.929 to 50.7)                      |
| 4 Alzheimer's disease         | 4 Stroke                     | -28.7 (-40.8 to -14.8)        | -9.62 (-21.6 to 3.2)             | -46.1 (-53.5 to -39.3)                    |
| 5 Lung cancer                 | 5 Lung cancer                | 4.82 (-16 to 29.2)            | 32.8 (12.6 to 57.5)              | -11.7 (-24.7 to 2.82)                     |
| 6 Lower respiratory infect    | 6 Lower respiratory infect   | 21 (-1.01 to 44.5)            | 53.4 (34.5 to 74.1)              | -13.9 (-24.9 to -0.905)                   |
| 7 Chronic kidney disease      | 7 COPD                       | 26.3 (1.09 to 51)             | 60.1 (33.5 to 89.7)              | -8.94 (-26.1 to 6.8)                      |
| 8 COPD                        | 8 Colorectal cancer          | 34.8 (3.05 to 70.5)           | 70.7 (35.8 to 114)               | 4.1 (-15.5 to 27.2)                       |
| 9 Colorectal cancer           | 9 Hypertensive heart disease | 48.5 (16.9 to 83.8)           | 88.4 (50.4 to 124)               | 7.52 (-14.8 to 30.6)                      |
| 10 Hypertensive heart disease | 10 Pancreatic cancer         | 73.2 (35.7 to 116)            | 119 (79.1 to 172)                | 41.2 (19.5 to 69)                         |
| 11 Breast cancer              | 11 Breast cancer             | 26.4 (-1.34 to 58.6)          | 60.1 (33.2 to 92.7)              | -0.847 (-14.7 to 15.3)                    |
| 12 Pancreatic cancer          | 12 Prostate cancer           | 33 (6.63 to 65.8)             | 68.5 (41.5 to 102)               | 2.13 (-10.3 to 16.4)                      |
| 13 Prostate cancer            | 13 Nonrheum valv diseases    | 82.1 (47 to 122)              | 131 (97.2 to 170)                | 28.2 (14.4 to 44.9)                       |
| 14 Stomach cancer             | 14 Urinary diseases          | 123 (69.9 to 182)             | 182 (126 to 246)                 | 55.6 (27.3 to 88.7)                       |
| 15 Parkinson's disease        | 15 Atrial fibrillation       | 57.4 (29.5 to 88.1)           | 99.5 (74.9 to 128)               | 11.9 (3.69 to 22.1)                       |
| 16 Bladder cancer             | 16 Parkinson's disease       | 32.2 (9.1 to 56.6)            | 67.5 (49.4 to 87.2)              | 2.12 (-6.17 to 11.8)                      |
| 17 Diabetes                   | 17 Brain cancer              | 60 (34.2 to 84.7)             | 103 (85 to 117)                  | 44.7 (37.6 to 50.3)                       |
| 18 Leukemia                   | 18 Bladder cancer            | 20.4 (-0.462 to 43.1)         | 52.5 (34.1 to 74.6)              | -6.81 (-15.1 to 2.69)                     |
| 19 Atrial fibrillation        | 19 Leukemia                  | 21.1 (-0.452 to 45.9)         | 53.3 (34.7 to 75.1)              | -2.7 (-11.7 to 7.42)                      |
| 20 Nonrheum valv diseases     | 20 Diabetes                  | 4.81 (-21.1 to 35.6)          | 32.9 (4.58 to 66)                | -22.7 (-39.2 to -3.77)                    |
| 21 Brain cancer               | 22 Stomach cancer            |                               |                                  |                                           |
| 24 Urinary diseases           | 130 COVID-19                 |                               |                                  |                                           |

### Iceland, Reference scenario

**Legend:**

Communicable, maternal, neonatal and nutritional  
Non-communicable  
Injuries

| Leading Causes 2022           | Leading Causes 2050           | Mean % change number of DEATH | Mean % change all-age DEATH rate | Mean % change age-standardized DEATH rate |
|-------------------------------|-------------------------------|-------------------------------|----------------------------------|-------------------------------------------|
| 1 Ischemic heart disease      | 1 Ischemic heart disease      | 15.5 (-13.1 to 48.5)          | -16.9 (-35.3 to 6.72)            | -53.7 (-64.2 to -38.7)                    |
| 2 Alzheimer's disease         | 2 Alzheimer's disease         | 145 (112 to 177)              | 76.5 (57.3 to 95.7)              | -8.34 (-12.8 to -3.57)                    |
| 3 Lung cancer                 | 3 Lower respiratory infect    | 119 (83.9 to 165)             | 57.6 (34.7 to 87.6)              | -16 (-28 to -2.59)                        |
| 4 Stroke                      | 4 COPD                        | 109 (70.8 to 157)             | 50.7 (23.1 to 82.5)              | -12.6 (-28.1 to 7.55)                     |
| 5 COVID-19                    | 5 Lung cancer                 | 56.1 (27.7 to 83.1)           | 12.3 (-7.35 to 33.6)             | -18.1 (-30.5 to -5.43)                    |
| 6 COPD                        | 6 Stroke                      | 22.6 (3.3 to 50.1)            | -11.8 (-24 to 1.36)              | -49.5 (-56.4 to -41.5)                    |
| 7 Lower respiratory infect    | 7 Prostate cancer             | 137 (90.3 to 191)             | 70.7 (38.6 to 115)               | 0.468 (-12.9 to 15.7)                     |
| 8 Colorectal cancer           | 8 Atrial fibrillation         | 206 (160 to 253)              | 120 (92.8 to 150)                | 15.2 (6.18 to 26)                         |
| 9 Prostate cancer             | 9 Chronic kidney disease      | 239 (173 to 312)              | 144 (100 to 200)                 | 30.7 (8.07 to 59)                         |
| 10 Pancreatic cancer          | 10 Colorectal cancer          | 89.8 (49.4 to 137)            | 36.6 (8.6 to 72)                 | -12 (-29 to 6.94)                         |
| 11 Falls                      | 11 Pancreatic cancer          | 131 (81.9 to 180)             | 66.1 (30.1 to 102)               | 15.3 (-6.59 to 37.2)                      |
| 12 Breast cancer              | 12 Falls                      | 128 (91.1 to 175)             | 64 (43.2 to 96.7)                | -9.19 (-19.1 to 2.34)                     |
| 13 Atrial fibrillation        | 13 Nonrheum valv diseases     | 205 (162 to 253)              | 119 (89.4 to 151)                | 17.4 (4.48 to 31.1)                       |
| 14 Self-harm                  | 14 Parkinson's disease        | 129 (100 to 161)              | 64.5 (46.5 to 85.1)              | -2.98 (-11.1 to 6.52)                     |
| 15 Parkinson's disease        | 15 Breast cancer              | 64.8 (34.2 to 95.6)           | 18.6 (-2.35 to 40.9)             | -16.7 (-28.7 to -3.52)                    |
| 16 Chronic kidney disease     | 16 Urinary diseases           | 249 (191 to 323)              | 151 (113 to 193)                 | 32.4 (14 to 53.6)                         |
| 17 Nonrheum valv diseases     | 17 Hypertensive heart disease | 167 (112 to 234)              | 92.4 (54.6 to 138)               | 5.23 (-16.2 to 28)                        |
| 18 Brain cancer               | 18 Brain cancer               | 115 (93.9 to 139)             | 54.9 (44.9 to 66.8)              | 27.8 (22.7 to 34.1)                       |
| 19 Kidney cancer              | 19 Self-harm                  | 29.5 (11.6 to 50)             | -6.87 (-16.8 to 3.89)            | -16.8 (-26.9 to -5.16)                    |
| 20 Diabetes                   | 20 Liver cancer               | 127 (90.1 to 167)             | 63.1 (40 to 87.7)                | 24.3 (10.3 to 40.9)                       |
| 22 Liver cancer               | 21 Kidney cancer              |                               |                                  |                                           |
| 23 Hypertensive heart disease | 23 Diabetes                   |                               |                                  |                                           |
| 29 Urinary diseases           | 127 COVID-19                  |                               |                                  |                                           |

### Ireland, Reference scenario

**Legend:**

Communicable, maternal, neonatal and nutritional  
Non-communicable  
Injuries

| Leading Causes 2022          | Leading Causes 2050          | Mean % change number of DEATH | Mean % change all-age DEATH rate | Mean % change age-standardized DEATH rate |
|------------------------------|------------------------------|-------------------------------|----------------------------------|-------------------------------------------|
| 1 Ischemic heart disease     | 1 Alzheimer's disease        | 182 (149 to 221)              | 124 (102 to 143)                 | -8.27 (-12.3 to -3.78)                    |
| 2 Alzheimer's disease        | 2 Ischemic heart disease     | 18.7 (-3.76 to 41.6)          | -5.99 (-21.5 to 12.3)            | -57.1 (-63.1 to -48.5)                    |
| 3 COPD                       | 3 COPD                       | 118 (84.8 to 161)             | 72.8 (46.9 to 102)               | -18.4 (-29.5 to -7.38)                    |
| 4 Lung cancer                | 4 Lower respiratory infect   | 154 (116 to 197)              | 101 (75.8 to 135)                | -19.5 (-29.1 to -8.57)                    |
| 5 Stroke                     | 5 Lung cancer                | 54.1 (30.2 to 81.5)           | 22.1 (6.15 to 40.7)              | -23.4 (-31.5 to -15.4)                    |
| 6 COVID-19                   | 6 Chronic kidney disease     | 274 (215 to 339)              | 197 (152 to 249)                 | 28.5 (9.2 to 52.3)                        |
| 7 Lower respiratory infect   | 7 Colorectal cancer          | 106 (68 to 143)               | 63.4 (34 to 88.9)                | -11 (-25 to 0.697)                        |
| 8 Colorectal cancer          | 8 Stroke                     | 26.2 (8.93 to 45.1)           | -0.0177 (-11.8 to 12.9)          | -54.1 (-58.6 to -48.5)                    |
| 9 Chronic kidney disease     | 9 Prostate cancer            | 153 (106 to 197)              | 100 (69.5 to 132)                | -1.48 (-13.3 to 9.84)                     |
| 10 Breast cancer             | 10 Pancreatic cancer         | 151 (111 to 198)              | 98.5 (65.9 to 129)               | 17.5 (1.35 to 31.9)                       |
| 11 Prostate cancer           | 11 Atrial fibrillation       | 238 (194 to 294)              | 168 (138 to 207)                 | 9.7 (-0.14 to 19.3)                       |
| 12 Pancreatic cancer         | 12 Breast cancer             | 77 (48.5 to 106)              | 40.2 (20.7 to 59.6)              | -13 (-23.1 to -3.22)                      |
| 13 Atrial fibrillation       | 13 Urinary diseases          | 328 (254 to 410)              | 239 (185 to 302)                 | 42.2 (22 to 64.1)                         |
| 14 Esophageal cancer         | 14 Parkinson's disease       | 146 (117 to 183)              | 94.8 (76 to 117)                 | -2.85 (-10.6 to 7.91)                     |
| 15 Diabetes                  | 15 Interstitial lung disease | 127 (97 to 155)               | 80.1 (62.5 to 98.2)              | -2.66 (-10.7 to 4.85)                     |
| 16 Self-harm                 | 16 Nonrheum valv diseases    | 239 (187 to 301)              | 168 (134 to 211)                 | 15.7 (4.32 to 29.4)                       |
| 17 Interstitial lung disease | 17 Diabetes                  | 103 (61.3 to 144)             | 61.2 (33.4 to 92.1)              | -25.9 (-37.5 to -11)                      |
| 18 Parkinson's disease       | 18 Falls                     | 141 (110 to 174)              | 90.7 (66 to 113)                 | -11.8 (-20.5 to -3.55)                    |
| 19 Stomach cancer            | 19 Brain cancer              | 116 (89.5 to 139)             | 71.1 (59.9 to 82.2)              | 26.4 (20.5 to 33.2)                       |
| 20 Falls                     | 20 Cardiomyopathy            | 95.6 (68.5 to 123)            | 55 (35.4 to 78.3)                | -27.3 (-33.3 to -19.7)                    |
| 21 Cardiomyopathy            | 21 Esophageal cancer         |                               |                                  |                                           |
| 22 Brain cancer              | 29 Stomach cancer            |                               |                                  |                                           |
| 26 Urinary diseases          | 32 Self-harm                 |                               |                                  |                                           |
| 28 Nonrheum valv diseases    | 128 COVID-19                 |                               |                                  |                                           |

### Israel, Reference scenario

**Legend:**  
Communicable, maternal, neonatal and nutritional  
Non-communicable  
Injuries

| Leading Causes 2022        | Leading Causes 2050        | Mean % change number of DEATH | Mean % change all-age DEATH rate | Mean % change age-standardized DEATH rate |
|----------------------------|----------------------------|-------------------------------|----------------------------------|-------------------------------------------|
| 1 Ischemic heart disease   | 1 Chronic kidney disease   | 230 (164 to 307)              | 142 (99.1 to 187)                | 31.7 (4.82 to 60.7)                       |
| 2 Alzheimer's disease      | 2 Alzheimer's disease      | 136 (101 to 173)              | 73 (58.1 to 88.5)                | -9.67 (-13.7 to -5.57)                    |
| 3 COVID-19                 | 3 Ischemic heart disease   | 17.1 (-17.2 to 51.1)          | -14.2 (-35.6 to 9.57)            | -51.8 (-64.4 to -37.2)                    |
| 4 Chronic kidney disease   | 4 Diabetes                 | 79.5 (37.5 to 132)            | 31.6 (5.08 to 58.6)              | -25.4 (-41.5 to -7.6)                     |
| 5 Stroke                   | 5 Colorectal cancer        | 118 (59.8 to 191)             | 59.9 (26.2 to 101)               | -1.26 (-19.7 to 22.4)                     |
| 6 Diabetes                 | 6 Lung cancer              | 59.4 (27.5 to 98.7)           | 16.8 (-2.25 to 42)               | -19.3 (-31.1 to -3.41)                    |
| 7 Lung cancer              | 7 Lower respiratory infect | 103 (64 to 146)               | 48.7 (28.5 to 69.2)              | -19 (-29.9 to -5.39)                      |
| 8 Lower respiratory infect | 8 Stroke                   | 22.7 (-0.995 to 49.7)         | -10.1 (-21.2 to 2.77)            | -47.3 (-54.8 to -38.5)                    |
| 9 Colorectal cancer        | 9 COPD                     | 95 (52.2 to 136)              | 42.9 (18.8 to 67.1)              | -16.7 (-31.1 to -1.87)                    |
| 10 COPD                    | 10 Pancreatic cancer       | 150 (91.1 to 216)             | 83 (47 to 122)                   | 23.1 (1.66 to 47.1)                       |
| 11 Breast cancer           | 11 Urinary diseases        | 245 (175 to 327)              | 153 (114 to 204)                 | 34 (12.9 to 63.2)                         |
| 12 Pancreatic cancer       | 12 Breast cancer           | 83 (43.9 to 125)              | 34 (11.5 to 59)                  | -11.3 (-24 to 2.83)                       |
| 13 Urinary diseases        | 13 Atrial fibrillation     | 182 (134 to 234)              | 107 (83 to 132)                  | 8.94 (-0.517 to 18.5)                     |
| 14 Atrial fibrillation     | 14 Nonrheum valv diseases  | 190 (138 to 245)              | 113 (88 to 145)                  | 13.4 (1.84 to 27.1)                       |
| 15 Lymphoma                | 15 Endo/metab/blood/immune | 144 (95.6 to 197)             | 79 (54.5 to 113)                 | 11.7 (-1.49 to 27.5)                      |
| 16 Nonrheum valv diseases  | 16 Prostate cancer         | 128 (76.9 to 196)             | 66.7 (36.6 to 107)               | -1.22 (-14.4 to 13.3)                     |
| 17 Leukemia                | 17 Parkinson's disease     | 118 (85.8 to 155)             | 59.5 (45.8 to 74.9)              | -4.58 (-12.1 to 4.27)                     |
| 18 Stomach cancer          | 18 Lymphoma                | 85.7 (47.4 to 127)            | 36.1 (14.7 to 59)                | -9.65 (-21.8 to 4.25)                     |
| 19 Prostate cancer         | 19 Diarrheal diseases      | 272 (93.1 to 514)             | 172 (44.8 to 361)                | 44.4 (-24 to 144)                         |
| 20 Parkinson's disease     | 20 Leukemia                | 83.7 (44.4 to 131)            | 34.6 (10.9 to 63)                | -11.4 (-23.7 to 4.31)                     |
| 21 Endo/metab/blood/immune | 26 Stomach cancer          |                               |                                  |                                           |
| 33 Diarrheal diseases      | 129 COVID-19               |                               |                                  |                                           |

### Italy, Reference scenario

**Legend:**

Communicable, maternal, neonatal and nutritional  
 Non-communicable  
 Injuries

| Leading Causes 2022          | Leading Causes 2050          | Mean % change number of DEATH | Mean % change all-age DEATH rate | Mean % change age-standardized DEATH rate |
|------------------------------|------------------------------|-------------------------------|----------------------------------|-------------------------------------------|
| 1 Ischemic heart disease     | 1 Alzheimer's disease        | <b>60.9 (41.6 to 81.2)</b>    | <b>92.6 (76.8 to 108)</b>        | -1.89 (-6.66 to 3.25)                     |
| 2 Alzheimer's disease        | 2 Ischemic heart disease     | -14.9 (-33.3 to 5.62)         | 2.03 (-18 to 24.6)               | <b>-47.5 (-59 to -33.5)</b>               |
| 3 Stroke                     | 3 Hypertensive heart disease | <b>76.5 (42.2 to 108)</b>     | <b>112 (66.5 to 151)</b>         | 8.7 (-14.9 to 32.4)                       |
| 4 COVID-19                   | 4 Stroke                     | <b>-17.2 (-27.6 to -4.4)</b>  | -0.796 (-12.9 to 12.9)           | <b>-47.1 (-54.5 to -39.7)</b>             |
| 5 Lung cancer                | 5 COPD                       | <b>58.2 (32.4 to 84.3)</b>    | <b>89.5 (59.9 to 120)</b>        | -2.74 (-20.5 to 12.4)                     |
| 6 Hypertensive heart disease | 6 Chronic kidney disease     | <b>122 (87.3 to 169)</b>      | <b>166 (122 to 215)</b>          | <b>32.5 (7.66 to 59.3)</b>                |
| 7 COPD                       | 7 Lung cancer                | 17.9 (-1.6 to 42)             | <b>41.2 (21.2 to 68.4)</b>       | <b>-13.6 (-24.5 to -0.393)</b>            |
| 8 Colorectal cancer          | 8 Colorectal cancer          | <b>38.9 (8.5 to 79.3)</b>     | <b>66.2 (32.5 to 110)</b>        | -5.51 (-22.5 to 16.8)                     |
| 9 Chronic kidney disease     | 9 Pancreatic cancer          | <b>79.7 (48 to 117)</b>       | <b>115 (77.1 to 159)</b>         | <b>30.5 (8.29 to 52.8)</b>                |
| 10 Diabetes                  | 10 Diabetes                  | 19.4 (-4.77 to 48.3)          | <b>43 (14 to 75.8)</b>           | <b>-26 (-40.6 to -8.65)</b>               |
| 11 Pancreatic cancer         | 11 Lower respiratory infect  | <b>46.4 (22.5 to 72.9)</b>    | <b>75.5 (51.9 to 104)</b>        | -10.8 (-21.7 to 0.435)                    |
| 12 Breast cancer             | 12 Atrial fibrillation       | <b>94.1 (69.2 to 124)</b>     | <b>132 (110 to 159)</b>          | <b>17.4 (7.96 to 27.3)</b>                |
| 13 Lower respiratory infect  | 13 Falls                     | <b>52.3 (27.9 to 78.3)</b>    | <b>82.4 (58.2 to 110)</b>        | -6.28 (-15.2 to 3.64)                     |
| 14 Falls                     | 14 Prostate cancer           | <b>69.8 (43.4 to 111)</b>     | <b>103 (74 to 147)</b>           | 9.14 (-3.68 to 23.6)                      |
| 15 Stomach cancer            | 15 Breast cancer             | 19.6 (-1.62 to 42.7)          | <b>43.2 (21.7 to 70.7)</b>       | -12.8 (-22.9 to 1.11)                     |
| 16 Prostate cancer           | 16 Parkinson's disease       | <b>57.6 (38.2 to 78.4)</b>    | <b>88.7 (70.5 to 107)</b>        | 2.59 (-5.72 to 11.4)                      |
| 17 Atrial fibrillation       | 17 Nonrheum valv diseases    | <b>99 (68.3 to 132)</b>       | <b>138 (105 to 171)</b>          | <b>21.4 (8.79 to 36.4)</b>                |
| 18 Cirrhosis liver           | 18 Bladder cancer            | <b>48 (28.6 to 73.8)</b>      | <b>77.2 (56.9 to 101)</b>        | -3.65 (-12.2 to 5.7)                      |
| 19 Parkinson's disease       | 19 Stomach cancer            | -3.08 (-13.8 to 10.6)         | <b>16.1 (5.41 to 27.7)</b>       | <b>-34.3 (-39.4 to -28.8)</b>             |
| 20 Bladder cancer            | 20 Liver cancer              | <b>50.6 (28.6 to 75.6)</b>    | <b>80.4 (58.2 to 102)</b>        | <b>18.9 (4.58 to 33.8)</b>                |
| 22 Nonrheum valv diseases    | 22 Cirrhosis liver           |                               |                                  |                                           |
| 23 Liver cancer              | 128 COVID-19                 |                               |                                  |                                           |

### Luxembourg, Reference scenario

**Legend:**  
Communicable, maternal, neonatal and nutritional  
Non-communicable  
Injuries

| Leading Causes 2022           | Leading Causes 2050           | Mean % change number of DEATH | Mean % change all-age DEATH rate | Mean % change age-standardized DEATH rate |
|-------------------------------|-------------------------------|-------------------------------|----------------------------------|-------------------------------------------|
| 1 Ischemic heart disease      | 1 Ischemic heart disease      | 22.3 (-1.06 to 56.8)          | -18.6 (-33 to 4.46)              | <b>-49.5 (-58.3 to -32.9)</b>             |
| 2 Stroke                      | 2 Alzheimer's disease         | <b>161 (128 to 195)</b>       | <b>73.6 (55.3 to 93.9)</b>       | 2.29 (-2.17 to 7.03)                      |
| 3 Lung cancer                 | 3 Chronic kidney disease      | <b>250 (192 to 338)</b>       | <b>133 (97.4 to 182)</b>         | <b>39.6 (19.8 to 72.9)</b>                |
| 4 Alzheimer's disease         | 4 Lung cancer                 | <b>88.9 (52.9 to 119)</b>     | <b>25.9 (1.02 to 44.1)</b>       | -8.29 (-24.2 to 2.23)                     |
| 5 COVID-19                    | 5 COPD                        | <b>133 (94.5 to 180)</b>      | <b>55.4 (32.5 to 82.6)</b>       | -3.17 (-15.8 to 15.4)                     |
| 6 COPD                        | 6 Stroke                      | <b>29.2 (10.6 to 50.7)</b>    | <b>-13.9 (-23.9 to -0.571)</b>   | <b>-46 (-51.9 to -37.6)</b>               |
| 7 Colorectal cancer           | 7 Colorectal cancer           | <b>120 (65 to 166)</b>        | <b>46.2 (11.8 to 72.6)</b>       | -3.54 (-23.3 to 15.2)                     |
| 8 Chronic kidney disease      | 8 Lower respiratory infect    | <b>140 (104 to 182)</b>       | <b>59.6 (37.6 to 85.5)</b>       | -4.25 (-15.4 to 11.7)                     |
| 9 Lower respiratory infect    | 9 Pancreatic cancer           | <b>178 (125 to 222)</b>       | <b>85.2 (51.3 to 114)</b>        | <b>29.7 (7.63 to 48.1)</b>                |
| 10 Breast cancer              | 10 Nonrheum valv diseases     | <b>202 (156 to 255)</b>       | <b>101 (70.5 to 133)</b>         | <b>20.4 (4.76 to 35.4)</b>                |
| 11 Falls                      | 11 Atrial fibrillation        | <b>191 (149 to 230)</b>       | <b>93.9 (69.4 to 118)</b>        | <b>15 (3.96 to 26.3)</b>                  |
| 12 Pancreatic cancer          | 12 Falls                      | <b>132 (98.2 to 170)</b>      | <b>54.3 (30.8 to 77.8)</b>       | -4.67 (-14.1 to 5.43)                     |
| 13 Atrial fibrillation        | 13 Prostate cancer            | <b>165 (113 to 221)</b>       | <b>76.7 (45.9 to 110)</b>        | 9.47 (-4.51 to 23.4)                      |
| 14 Nonrheum valv diseases     | 14 Breast cancer              | <b>96.3 (58.6 to 129)</b>     | <b>30.7 (6.74 to 47.7)</b>       | -6.14 (-20.4 to 4.55)                     |
| 15 Prostate cancer            | 15 Hypertensive heart disease | <b>161 (113 to 228)</b>       | <b>74 (44.6 to 115)</b>          | 6.09 (-11.1 to 36.1)                      |
| 16 Cirrhosis liver            | 16 Parkinson's disease        | <b>154 (122 to 194)</b>       | <b>69.5 (50.9 to 94.7)</b>       | 5.22 (-3.02 to 15.4)                      |
| 17 Diabetes                   | 17 Diabetes                   | <b>91.5 (52.9 to 134)</b>     | <b>27.6 (3.32 to 54.9)</b>       | <b>-21.5 (-34.8 to -4.53)</b>             |
| 18 Hypertensive heart disease | 18 Cirrhosis liver            | <b>50.6 (35.4 to 68.3)</b>    | 0.283 (-7.93 to 9.6)             | <b>-17.2 (-23.1 to -10.5)</b>             |
| 19 Parkinson's disease        | 19 Leukemia                   | <b>110 (79.2 to 140)</b>      | <b>39.8 (20.6 to 56.6)</b>       | -4.72 (-15.4 to 3.57)                     |
| 20 Self-harm                  | 20 Endocarditis               | <b>254 (174 to 361)</b>       | <b>136 (81.1 to 207)</b>         | <b>48.2 (17 to 95.2)</b>                  |
| 21 Leukemia                   | 28 Self-harm                  |                               |                                  |                                           |
| 31 Endocarditis               | 127 COVID-19                  |                               |                                  |                                           |



### Malta, Reference scenario

**Legend:**

Communicable, maternal, neonatal and nutritional  
Non-communicable  
Injuries

| Leading Causes 2022           | Leading Causes 2050           | Mean % change number of DEATH | Mean % change all-age DEATH rate | Mean % change age-standardized DEATH rate |
|-------------------------------|-------------------------------|-------------------------------|----------------------------------|-------------------------------------------|
| 1 Ischemic heart disease      | 1 Alzheimer's disease         | 138 (97.2 to 186)             | 93.1 (64.5 to 127)               | -3.83 (-9.23 to 0.98)                     |
| 2 COVID-19                    | 2 Ischemic heart disease      | -12.9 (-36.7 to 17.7)         | -29.4 (-47.6 to -7.57)           | -57.4 (-68.5 to -41.7)                    |
| 3 Alzheimer's disease         | 3 Chronic kidney disease      | 167 (103 to 240)              | 116 (70.7 to 172)                | 20.7 (-3.34 to 55.5)                      |
| 4 Stroke                      | 4 Lower respiratory infect    | 89.5 (54.7 to 126)            | 53.6 (28.6 to 81.8)              | -19.4 (-30.4 to -5.03)                    |
| 5 Lower respiratory infect    | 5 Lung cancer                 | 37.7 (4.17 to 71.4)           | 11.6 (-11.3 to 36.8)             | -2.3 (-20.9 to 17.7)                      |
| 6 Lung cancer                 | 6 Stroke                      | -5.02 (-23.8 to 14.4)         | -23 (-35.3 to -8.81)             | -51.6 (-59.5 to -40.4)                    |
| 7 Diabetes                    | 7 Colorectal cancer           | 64.5 (18.1 to 114)            | 33.2 (-1.16 to 70.5)             | -0.429 (-22.7 to 21)                      |
| 8 Chronic kidney disease      | 8 Pancreatic cancer           | 103 (51.9 to 156)             | 64.3 (24.6 to 104)               | 34.8 (6.17 to 65.8)                       |
| 9 Colorectal cancer           | 9 COPD                        | 70.8 (32.8 to 109)            | 38.3 (10.9 to 70.3)              | -11.1 (-26.6 to 8.1)                      |
| 10 COPD                       | 10 Diabetes                   | 19 (-11.3 to 55.2)            | -3.62 (-25.8 to 24.8)            | -37.7 (-51.4 to -19.1)                    |
| 11 Breast cancer              | 11 Atrial fibrillation        | 163 (118 to 216)              | 113 (83.2 to 144)                | 13.5 (4.88 to 24.3)                       |
| 12 Pancreatic cancer          | 12 Hypertensive heart disease | 126 (67.3 to 191)             | 82.8 (38.3 to 138)               | 2.67 (-19.6 to 32.3)                      |
| 13 Falls                      | 13 Breast cancer              | 42.9 (11.6 to 80.6)           | 15.8 (-6.91 to 40)               | -7.83 (-24 to 9.34)                       |
| 14 Hypertensive heart disease | 14 Urinary diseases           | 210 (147 to 292)              | 151 (103 to 209)                 | 36.2 (12.6 to 65.8)                       |
| 15 Atrial fibrillation        | 15 Falls                      | 92 (57.7 to 133)              | 55.6 (29.3 to 86.1)              | -11.2 (-20 to -1.67)                      |
| 16 Parkinson's disease        | 16 Prostate cancer            | 97.2 (48.6 to 154)            | 59.8 (23.2 to 103)               | 10.4 (-7.54 to 27.2)                      |
| 17 Prostate cancer            | 17 Parkinson's disease        | 75.5 (46.7 to 105)            | 42.2 (25.9 to 61.5)              | -0.177 (-8.86 to 8.7)                     |
| 18 Interstitial lung disease  | 18 Interstitial lung disease  | 69.9 (38.6 to 98.5)           | 37.6 (20.1 to 57.4)              | 1.51 (-8.21 to 11.5)                      |
| 19 Stomach cancer             | 19 Nonrheum valv diseases     | 145 (99.7 to 208)             | 98.2 (67.3 to 136)               | 15.7 (3.85 to 31.8)                       |
| 20 Bladder cancer             | 20 Bladder cancer             | 64.2 (35.2 to 95.8)           | 33.1 (14.3 to 54.8)              | -6.41 (-15.8 to 2.39)                     |
| 21 Urinary diseases           | 26 Stomach cancer             |                               |                                  |                                           |
| 27 Nonrheum valv diseases     | 129 COVID-19                  |                               |                                  |                                           |

### Monaco, Reference scenario

**Legend:**  
Communicable, maternal, neonatal and nutritional  
Non-communicable  
Injuries

| Leading Causes 2022           | Leading Causes 2050           | Mean % change number of DEATH | Mean % change all-age DEATH rate | Mean % change age-standardized DEATH rate |
|-------------------------------|-------------------------------|-------------------------------|----------------------------------|-------------------------------------------|
| 1 Lung cancer                 | 1 Lung cancer                 | -3.94 (-22.5 to 16.6)         | <b>25.5 (4.18 to 49.4)</b>       | -6.8 (-23 to 10.2)                        |
| 2 Ischemic heart disease      | 2 Alzheimer's disease         | <b>51.1 (26.9 to 79.6)</b>    | <b>97.2 (70.2 to 127)</b>        | 3.83 (-1.36 to 9.55)                      |
| 3 Stroke                      | 3 Ischemic heart disease      | <b>-34.3 (-50.9 to -12.2)</b> | -14.2 (-34.5 to 13.9)            | <b>-50.7 (-62.2 to -34.9)</b>             |
| 4 Alzheimer's disease         | 4 Stroke                      | <b>-34.9 (-48.4 to -18.9)</b> | -15.1 (-30.6 to 2.15)            | <b>-49.7 (-57.5 to -39.9)</b>             |
| 5 COVID-19                    | 5 Lower respiratory infect    | <b>34.2 (6.12 to 67.7)</b>    | <b>75.2 (45.1 to 108)</b>        | -4.91 (-18.5 to 11.7)                     |
| 6 Colorectal cancer           | 6 Colorectal cancer           | 17.7 (-11.4 to 50)            | <b>53.6 (18.7 to 88.3)</b>       | -1.48 (-22.6 to 20.1)                     |
| 7 Lower respiratory infect    | 7 Chronic kidney disease      | <b>98.8 (46.5 to 156)</b>     | <b>160 (108 to 231)</b>          | <b>41.4 (15.7 to 81)</b>                  |
| 8 Breast cancer               | 8 Pancreatic cancer           | <b>46.4 (17.7 to 80.5)</b>    | <b>91.3 (53.5 to 128)</b>        | <b>33.6 (9.14 to 55.7)</b>                |
| 9 COPD                        | 9 COPD                        | <b>33.2 (1.51 to 67.5)</b>    | <b>74.1 (34.8 to 113)</b>        | 1.69 (-16.7 to 22.6)                      |
| 10 Pancreatic cancer          | 10 Breast cancer              | 5.2 (-16.6 to 33.5)           | <b>37.4 (11.5 to 68.6)</b>       | -3.07 (-17.5 to 11.7)                     |
| 11 Prostate cancer            | 11 Prostate cancer            | <b>33.6 (7.44 to 68)</b>      | <b>74.5 (42.6 to 108)</b>        | 4.88 (-10 to 20.2)                        |
| 12 Chronic kidney disease     | 12 Hypertensive heart disease | <b>59.4 (14.1 to 114)</b>     | <b>108 (60.2 to 171)</b>         | 16.9 (-5.93 to 50.6)                      |
| 13 Hypertensive heart disease | 13 Parkinson's disease        | <b>35.8 (14.3 to 58.9)</b>    | <b>77.4 (56.2 to 101)</b>        | 5.23 (-4.61 to 13.8)                      |
| 14 Leukemia                   | 14 Atrial fibrillation        | <b>75.1 (43.5 to 114)</b>     | <b>129 (96.5 to 161)</b>         | <b>22.6 (12.1 to 32.9)</b>                |
| 15 Cardiomyopathy             | 15 Liver cancer               | <b>31.8 (8.82 to 57.8)</b>    | <b>72.2 (49.4 to 100)</b>        | <b>33.2 (17.6 to 51.8)</b>                |
| 16 Parkinson's disease        | 16 Leukemia                   | 8.63 (-9.9 to 29.2)           | <b>41.9 (18.4 to 64.6)</b>       | -2.98 (-14.4 to 7.98)                     |
| 17 Liver cancer               | 17 Cardiomyopathy             | 3.49 (-13.3 to 25.3)          | <b>35.1 (16.6 to 57.5)</b>       | <b>-20.2 (-26.8 to -11.4)</b>             |
| 18 Cirrhosis liver            | 18 Bladder cancer             | <b>17.4 (0.0935 to 39)</b>    | <b>53.4 (33.2 to 74.2)</b>       | -5.64 (-15 to 4.87)                       |
| 19 Stomach cancer             | 19 Adverse medical treatment  | 26.8 (-10.4 to 66.6)          | <b>65.6 (21 to 123)</b>          | 7.04 (-16.7 to 38.2)                      |
| 20 Bladder cancer             | 20 Aortic aneurysm            | 8.61 (-10.7 to 30.5)          | <b>41.9 (18.3 to 66.1)</b>       | <b>-11.5 (-22 to -1.55)</b>               |
| 21 Atrial fibrillation        | 21 Stomach cancer             |                               |                                  |                                           |
| 22 Aortic aneurysm            | 23 Cirrhosis liver            |                               |                                  |                                           |
| 25 Adverse medical treatment  | 127 COVID-19                  |                               |                                  |                                           |

### Netherlands, Reference scenario

**Legend:**  
Communicable, maternal, neonatal and nutritional  
Non-communicable  
Injuries

| Leading Causes 2022        | Leading Causes 2050        | Mean % change number of DEATH | Mean % change all-age DEATH rate | Mean % change age-standardized DEATH rate |
|----------------------------|----------------------------|-------------------------------|----------------------------------|-------------------------------------------|
| 1 Ischemic heart disease   | 1 Alzheimer's disease      | 85.3 (63.6 to 111)            | 74.5 (62.2 to 88.7)              | -2.99 (-7.4 to 2.35)                      |
| 2 Stroke                   | 2 COPD                     | 56.5 (33.7 to 83.3)           | 47.4 (26.7 to 72.8)              | -8.8 (-21.5 to 6.63)                      |
| 3 Lung cancer              | 3 Chronic kidney disease   | 194 (143 to 252)              | 177 (133 to 227)                 | 52.8 (26.3 to 83.8)                       |
| 4 Alzheimer's disease      | 4 Lung cancer              | 13 (-3.79 to 31)              | 6.38 (-5.87 to 21.6)             | -17.3 (-26.4 to -7.14)                    |
| 5 COPD                     | 5 Ischemic heart disease   | -13.8 (-32 to 2.7)            | -18.7 (-33.2 to -2.92)           | -52 (-61.4 to -42)                        |
| 6 Colorectal cancer        | 6 Stroke                   | -7.2 (-19.8 to 6.92)          | -12.6 (-22 to -2.37)             | -47.7 (-53.8 to -40.9)                    |
| 7 Lower respiratory infect | 7 Lower respiratory infect | 68.6 (43 to 96.2)             | 58.9 (36.9 to 81.7)              | -11.4 (-23.2 to 0.608)                    |
| 8 Falls                    | 8 Colorectal cancer        | 43 (14.7 to 73.8)             | 34.6 (12.1 to 59.3)              | -6.76 (-21.6 to 8.01)                     |
| 9 Chronic kidney disease   | 9 Falls                    | 82.2 (54.7 to 112)            | 71.6 (50.7 to 94.3)              | -4.45 (-13.9 to 6.05)                     |
| 10 Breast cancer           | 10 Nonrheum valv diseases  | 145 (115 to 189)              | 131 (105 to 160)                 | 25.8 (14.5 to 40.2)                       |
| 11 Prostate cancer         | 11 Urinary diseases        | 197 (146 to 252)              | 179 (135 to 236)                 | 53.4 (29.1 to 82.5)                       |
| 12 Nonrheum valv diseases  | 12 Atrial fibrillation     | 142 (109 to 172)              | 128 (104 to 150)                 | 25.8 (15.4 to 36.4)                       |
| 13 Pancreatic cancer       | 13 Prostate cancer         | 66.5 (38.4 to 97.1)           | 56.8 (35.2 to 78.8)              | 2.1 (-10.3 to 14.8)                       |
| 14 Diabetes                | 14 Pancreatic cancer       | 73.5 (42.4 to 107)            | 63.4 (36.8 to 90)                | 22.5 (4.31 to 40.9)                       |
| 15 COVID-19                | 15 Breast cancer           | 37.8 (14.8 to 58.5)           | 29.8 (10.3 to 47.6)              | -6.5 (-17.4 to 5.58)                      |
| 16 Atrial fibrillation     | 16 Diabetes                | 26.1 (-0.653 to 55.3)         | 18.8 (-3.54 to 45.2)             | -30.5 (-42.5 to -15.3)                    |
| 17 Urinary diseases        | 17 Parkinson's disease     | 84.5 (62.2 to 116)            | 73.8 (55.5 to 92.4)              | 5.34 (-2.97 to 14.2)                      |
| 18 Esophageal cancer       | 18 Endocarditis            | 173 (112 to 247)              | 157 (104 to 217)                 | 49.9 (19 to 84.4)                         |
| 19 Parkinson's disease     | 19 Bacterial skin          | 272 (187 to 389)              | 250 (167 to 369)                 | 100 (55.5 to 164)                         |
| 20 Self-harm               | 20 Esophageal cancer       | 17.2 (4.19 to 31.9)           | 10.4 (0.221 to 21.6)             | -14 (-20.5 to -6.49)                      |
| 26 Endocarditis            | 31 Self-harm               |                               |                                  |                                           |
| 45 Bacterial skin          | 128 COVID-19               |                               |                                  |                                           |

### Norway, Reference scenario

**Legend:**  
Communicable, maternal, neonatal and nutritional  
Non-communicable  
Injuries

| Leading Causes 2022        | Leading Causes 2050        | Mean % change number of DEATH | Mean % change all-age DEATH rate | Mean % change age-standardized DEATH rate |
|----------------------------|----------------------------|-------------------------------|----------------------------------|-------------------------------------------|
| 1 Ischemic heart disease   | 1 Alzheimer's disease      | 94.5 (70.8 to 116)            | 68.4 (56.1 to 78.7)              | -4.59 (-9.36 to 0.349)                    |
| 2 Alzheimer's disease      | 2 COPD                     | 67.5 (44.7 to 89.3)           | 45 (27.6 to 63)                  | -11.1 (-21.1 to 0.0418)                   |
| 3 COPD                     | 3 Ischemic heart disease   | -14.2 (-27.8 to 2.4)          | -25.8 (-35.8 to -12.7)           | -56.5 (-62.7 to -48.7)                    |
| 4 Stroke                   | 4 Lower respiratory infect | 90.9 (62.2 to 123)            | 65.2 (42.9 to 90.1)              | -6.77 (-19 to 6.92)                       |
| 5 Lung cancer              | 5 Colorectal cancer        | 65.3 (39.1 to 91.2)           | 43.1 (22.8 to 62.1)              | -8.97 (-20.7 to 2.18)                     |
| 6 COVID-19                 | 6 Lung cancer              | 29.4 (12.4 to 46.6)           | 12 (-0.249 to 24.6)              | -21.3 (-28.7 to -12.9)                    |
| 7 Lower respiratory infect | 7 Falls                    | 95.3 (70 to 129)              | 69 (48.1 to 91.8)                | -3.62 (-13.6 to 7.79)                     |
| 8 Colorectal cancer        | 8 Prostate cancer          | 115 (77.1 to 151)             | 85.8 (56.3 to 111)               | 9.25 (-4.25 to 20.8)                      |
| 9 Falls                    | 9 Stroke                   | -6.7 (-17.9 to 4.9)           | -19.3 (-26.9 to -11.9)           | -51.3 (-55.8 to -46.5)                    |
| 10 Prostate cancer         | 10 Nonrheum valv diseases  | 172 (134 to 213)              | 135 (107 to 167)                 | 31.4 (16.9 to 46.4)                       |
| 11 Pancreatic cancer       | 11 Chronic kidney disease  | 176 (135 to 227)              | 139 (110 to 178)                 | 35.1 (18.1 to 58.9)                       |
| 12 Nonrheum valv diseases  | 12 Pancreatic cancer       | 96.4 (71.8 to 122)            | 70 (48.5 to 90.8)                | 16.5 (2.5 to 29.7)                        |
| 13 Chronic kidney disease  | 13 Atrial fibrillation     | 140 (111 to 174)              | 108 (89.3 to 131)                | 17.2 (6.82 to 27.5)                       |
| 14 Atrial fibrillation     | 14 Urinary diseases        | 231 (176 to 294)              | 187 (144 to 235)                 | 60.2 (36.6 to 84.4)                       |
| 15 Breast cancer           | 15 Diarrheal diseases      | 301 (172 to 494)              | 247 (133 to 404)                 | 94 (28.1 to 187)                          |
| 16 Parkinson's disease     | 16 Parkinson's disease     | 93.1 (72.7 to 118)            | 67.1 (54.8 to 82.9)              | 2.55 (-4.79 to 11.6)                      |
| 17 Diabetes                | 17 Bacterial skin          | 364 (250 to 505)              | 301 (211 to 413)                 | 126 (79.9 to 186)                         |
| 18 Self-harm               | 18 Breast cancer           | 48.6 (27.4 to 72)             | 28.6 (12.9 to 47.2)              | -11.7 (-20.8 to -2.54)                    |
| 19 Urinary diseases        | 19 Aortic aneurysm         | 50.9 (31.6 to 73.1)           | 30.6 (16.1 to 47.7)              | -19.9 (-27.6 to -10.5)                    |
| 20 Aortic aneurysm         | 20 Diabetes                | 25.1 (3.08 to 48.2)           | 8.22 (-11 to 26.9)               | -36.6 (-46.6 to -26.7)                    |
| 24 Diarrheal diseases      | 28 Self-harm               |                               |                                  |                                           |
| 38 Bacterial skin          | 128 COVID-19               |                               |                                  |                                           |

### Portugal, Reference scenario

**Legend:**  
Communicable, maternal, neonatal and nutritional  
Non-communicable  
Injuries

| Leading Causes 2022           | Leading Causes 2050           | Mean % change number of DEATH | Mean % change all-age DEATH rate | Mean % change age-standardized DEATH rate |
|-------------------------------|-------------------------------|-------------------------------|----------------------------------|-------------------------------------------|
| 1 Stroke                      | 1 Alzheimer's disease         | 72.5 (47 to 101)              | 75.7 (60.5 to 92)                | -9.95 (-14.3 to -5.85)                    |
| 2 Ischemic heart disease      | 2 Lower respiratory infect    | 55.1 (31.5 to 84.5)           | 58.1 (39 to 82.1)                | -19.1 (-30.3 to -7.79)                    |
| 3 Alzheimer's disease         | 3 Stroke                      | -24.7 (-37.7 to -8.05)        | -23.3 (-33.9 to -12)             | -57.1 (-63.3 to -50.1)                    |
| 4 COVID-19                    | 4 Chronic kidney disease      | 93.3 (55.3 to 134)            | 97 (61.2 to 132)                 | -0.0999 (-19.5 to 23.1)                   |
| 5 Lower respiratory infect    | 5 COPD                        | 60.2 (31.5 to 93.6)           | 63.2 (35.7 to 92.1)              | -14.5 (-29.6 to 2.5)                      |
| 6 COPD                        | 6 Ischemic heart disease      | -28.9 (-46.4 to -9.11)        | -27.5 (-42.8 to -10.6)           | -58.9 (-68.4 to -47.5)                    |
| 7 Chronic kidney disease      | 7 Colorectal cancer           | 51.2 (15 to 94.3)             | 54.1 (21.4 to 90.6)              | -3.21 (-21.6 to 18.7)                     |
| 8 Colorectal cancer           | 8 Lung cancer                 | 28.4 (5.28 to 58.3)           | 30.9 (8.66 to 59.4)              | -4.87 (-19.6 to 12.5)                     |
| 9 Lung cancer                 | 9 Urinary diseases            | 146 (101 to 200)              | 151 (109 to 198)                 | 27.4 (4.23 to 50.1)                       |
| 10 Diabetes                   | 10 Diabetes                   | 21.4 (-5.18 to 59.4)          | 23.6 (-2.07 to 55.7)             | -32 (-46.7 to -14.9)                      |
| 11 Stomach cancer             | 11 Prostate cancer            | 60.1 (28.6 to 101)            | 63.1 (38.4 to 97.9)              | -3.82 (-14.7 to 10.2)                     |
| 12 Prostate cancer            | 12 Pancreatic cancer          | 85.4 (46.1 to 135)            | 88.8 (54.7 to 132)               | 30.1 (8.28 to 57.8)                       |
| 13 Hypertensive heart disease | 13 Hypertensive heart disease | 64.1 (28.2 to 105)            | 67.2 (31.5 to 102)               | -14.7 (-34 to 4.09)                       |
| 14 Breast cancer              | 14 Breast cancer              | 33.3 (8.39 to 63.5)           | 35.8 (12.1 to 60.2)              | -11.3 (-23.7 to 3.45)                     |
| 15 Urinary diseases           | 15 Nonrheum valv diseases     | 93 (62.1 to 132)              | 96.6 (70.3 to 125)               | 4.03 (-6.39 to 15.9)                      |
| 16 Pancreatic cancer          | 16 Stomach cancer             | -10 (-22.4 to 3.68)           | -8.32 (-17 to 1.18)              | -40.4 (-44.3 to -36)                      |
| 17 Cirrhosis liver            | 17 Falls                      | 53.4 (28.8 to 80)             | 56.4 (36.6 to 78.3)              | -12.6 (-20.3 to -3.38)                    |
| 18 Falls                      | 18 Atrial fibrillation        | 86.6 (58.1 to 118)            | 90.1 (69 to 116)                 | -2.96 (-11 to 6.22)                       |
| 19 Nonrheum valv diseases     | 19 Parkinson's disease        | 47.9 (27 to 71.8)             | 50.6 (37 to 66.4)                | -9.83 (-17.4 to -2.54)                    |
| 20 Parkinson's disease        | 20 Liver cancer               | 67.2 (41.1 to 94.5)           | 70.4 (47.4 to 92.1)              | 36 (19.4 to 53.6)                         |
| 23 Atrial fibrillation        | 21 Cirrhosis liver            |                               |                                  |                                           |
| 24 Liver cancer               | 129 COVID-19                  |                               |                                  |                                           |

### San Marino, Reference scenario

**Legend:**  
Communicable, maternal, neonatal and nutritional  
Non-communicable  
Injuries

| Leading Causes 2022           | Leading Causes 2050          | Mean % change number of DEATH | Mean % change all-age DEATH rate | Mean % change age-standardized DEATH rate |
|-------------------------------|------------------------------|-------------------------------|----------------------------------|-------------------------------------------|
| 1 COVID-19                    | 1 Alzheimer's disease        | <b>170 (104 to 243)</b>       | <b>200 (148 to 262)</b>          | 4.06 (-1.33 to 9.33)                      |
| 2 Alzheimer's disease         | 2 Ischemic heart disease     | 19.6 (-22.2 to 69.5)          | 33.2 (-5.96 to 85.9)             | <b>-51.7 (-65.6 to -29.9)</b>             |
| 3 Ischemic heart disease      | 3 Stroke                     | 19.4 (-14.9 to 56.5)          | <b>32.8 (0.621 to 71.9)</b>      | <b>-48.2 (-58.6 to -34.9)</b>             |
| 4 Stroke                      | 4 Lower respiratory infect   | <b>141 (77.4 to 214)</b>      | <b>169 (104 to 238)</b>          | -7.06 (-22.4 to 12)                       |
| 5 Lung cancer                 | 5 Colorectal cancer          | <b>102 (38.5 to 185)</b>      | <b>124 (60.8 to 200)</b>         | -1.6 (-25.5 to 24.5)                      |
| 6 Colorectal cancer           | 6 Lung cancer                | <b>43.1 (5.48 to 98.6)</b>    | <b>58.9 (19.3 to 107)</b>        | -13 (-31.7 to 5.36)                       |
| 7 Lower respiratory infect    | 7 Hypertensive heart disease | <b>189 (97 to 301)</b>        | <b>221 (135 to 335)</b>          | 17.3 (-9.11 to 56.1)                      |
| 8 Stomach cancer              | 8 Chronic kidney disease     | <b>261 (143 to 391)</b>       | <b>302 (193 to 436)</b>          | <b>39.9 (6.64 to 82.6)</b>                |
| 9 COPD                        | 9 COPD                       | <b>133 (62.3 to 212)</b>      | <b>160 (93.3 to 249)</b>         | -0.916 (-21.9 to 31.1)                    |
| 10 Hypertensive heart disease | 10 Atrial fibrillation       | <b>217 (140 to 315)</b>       | <b>252 (186 to 337)</b>          | <b>21.1 (11.2 to 32.1)</b>                |
| 11 Other cardiovascular       | 11 Prostate cancer           | <b>112 (47.6 to 189)</b>      | <b>136 (73.8 to 220)</b>         | -3.24 (-20.2 to 11.3)                     |
| 12 Cirrhosis liver            | 12 Other cardiovascular      | <b>105 (53.2 to 167)</b>      | <b>128 (82.3 to 179)</b>         | -12.2 (-22.5 to 1.81)                     |
| 13 Prostate cancer            | 13 Stomach cancer            | 35.2 (-0.313 to 73.6)         | <b>50.2 (26.9 to 80)</b>         | <b>-33.4 (-38.9 to -28.1)</b>             |
| 14 Pancreatic cancer          | 14 Pancreatic cancer         | <b>136 (64.4 to 233)</b>      | <b>162 (95.9 to 241)</b>         | <b>32.1 (4.03 to 62.4)</b>                |
| 15 Chronic kidney disease     | 15 Cirrhosis liver           | <b>47.7 (11 to 88.1)</b>      | <b>64.2 (36.9 to 95)</b>         | -9.29 (-19.9 to 3.66)                     |
| 16 Breast cancer              | 16 Breast cancer             | <b>75 (20.2 to 147)</b>       | <b>94.3 (41.2 to 164)</b>        | -0.81 (-22.4 to 24.5)                     |
| 17 Atrial fibrillation        | 17 Bladder cancer            | <b>96.7 (43.2 to 161)</b>     | <b>119 (73.9 to 173)</b>         | -8.43 (-18.1 to 3.52)                     |
| 18 Diabetes                   | 18 Cardiomyopathy            | <b>92.2 (44.9 to 162)</b>     | <b>114 (67.5 to 172)</b>         | <b>-18.2 (-26.6 to -10.2)</b>             |
| 19 Lymphoma                   | 19 Diabetes                  | <b>77 (15.3 to 146)</b>       | <b>97 (38 to 174)</b>            | <b>-27.2 (-47.5 to -0.643)</b>            |
| 20 Bladder cancer             | 20 Brain cancer              | <b>87.5 (52.7 to 132)</b>     | <b>109 (83.4 to 138)</b>         | <b>41.6 (34.1 to 48.6)</b>                |
| 21 Cardiomyopathy             | 21 Lymphoma                  |                               |                                  |                                           |
| 22 Brain cancer               | 128 COVID-19                 |                               |                                  |                                           |

### Spain, Reference scenario

**Legend:**

Communicable, maternal, neonatal and nutritional  
Non-communicable  
Injuries

| Leading Causes 2022           | Leading Causes 2050           | Mean % change number of DEATH | Mean % change all-age DEATH rate | Mean % change age-standardized DEATH rate |
|-------------------------------|-------------------------------|-------------------------------|----------------------------------|-------------------------------------------|
| 1 Ischemic heart disease      | 1 Alzheimer's disease         | 81.4 (61.8 to 103)            | 60.7 (45.9 to 74.8)              | -6.05 (-11.4 to -1.47)                    |
| 2 Alzheimer's disease         | 2 COPD                        | 76.8 (45.5 to 109)            | 56.5 (33.1 to 82.3)              | -9.42 (-23.6 to 7.03)                     |
| 3 COVID-19                    | 3 Chronic kidney disease      | 175 (118 to 235)              | 143 (103 to 191)                 | 38.1 (11.2 to 71.4)                       |
| 4 Stroke                      | 4 Ischemic heart disease      | -5.46 (-25.6 to 16.6)         | -16.3 (-33.4 to 2.62)            | -50.4 (-62.2 to -37)                      |
| 5 COPD                        | 5 Stroke                      | 3.23 (-12.9 to 20.1)          | -8.59 (-20 to 3.68)              | -44.1 (-52.5 to -34.8)                    |
| 6 Lung cancer                 | 6 Colorectal cancer           | 64.4 (29.8 to 108)            | 45.6 (15.9 to 82.5)              | -7.76 (-23.8 to 11.4)                     |
| 7 Colorectal cancer           | 7 Lung cancer                 | 14.3 (-4.43 to 36.1)          | 1.2 (-15.5 to 19.6)              | -27.4 (-37.8 to -15.8)                    |
| 8 Chronic kidney disease      | 8 Lower respiratory infect    | 68.1 (43.3 to 97.2)           | 48.9 (29.7 to 67.7)              | -13.8 (-23.9 to -2.81)                    |
| 9 Lower respiratory infect    | 9 Urinary diseases            | 183 (137 to 236)              | 150 (114 to 193)                 | 43.6 (23 to 68.9)                         |
| 10 Hypertensive heart disease | 10 Hypertensive heart disease | 88.2 (45.6 to 129)            | 66.7 (31.9 to 97.7)              | -1.59 (-21.5 to 22.1)                     |
| 11 Diabetes                   | 11 Pancreatic cancer          | 106 (65 to 149)               | 82.3 (47.5 to 122)               | 24.5 (3.12 to 48.9)                       |
| 12 Pancreatic cancer          | 12 Atrial fibrillation        | 132 (103 to 167)              | 106 (83.6 to 133)                | 19.3 (8.94 to 29.2)                       |
| 13 Breast cancer              | 13 Nonrheum valv diseases     | 130 (98.8 to 169)             | 104 (81 to 133)                  | 18.6 (6.2 to 31.5)                        |
| 14 Prostate cancer            | 14 Prostate cancer            | 96.6 (64.3 to 137)            | 74.2 (47 to 106)                 | 5.78 (-7.31 to 20)                        |
| 15 Urinary diseases           | 15 Diabetes                   | 42.6 (9.23 to 78.4)           | 26.3 (-0.539 to 54.2)            | -27 (-44.2 to -8.67)                      |
| 16 Atrial fibrillation        | 16 Parkinson's disease        | 86.8 (60 to 113)              | 65.4 (47.7 to 83.6)              | 0.977 (-7.47 to 10.7)                     |
| 17 Nonrheum valv diseases     | 17 Breast cancer              | 40.5 (18.2 to 67.7)           | 24.5 (4.12 to 46.9)              | -13.8 (-25.2 to 0.474)                    |
| 18 Stomach cancer             | 18 Interstitial lung disease  | 84.9 (59.3 to 112)            | 63.8 (45 to 83.7)                | 1.63 (-6.78 to 11.3)                      |
| 19 Cirrhosis liver            | 19 Bladder cancer             | 62.9 (39.3 to 88.3)           | 44.3 (26.2 to 64.9)              | -11.1 (-20.1 to -2.01)                    |
| 20 Parkinson's disease        | 20 Liver cancer               | 65.1 (40.1 to 88.9)           | 46.2 (27.6 to 65.3)              | 5.07 (-8.07 to 18.5)                      |
| 21 Bladder cancer             | 23 Stomach cancer             |                               |                                  |                                           |
| 22 Interstitial lung disease  | 24 Cirrhosis liver            |                               |                                  |                                           |
| 24 Liver cancer               | 131 COVID-19                  |                               |                                  |                                           |

### Sweden, Reference scenario

**Legend:**  
Communicable, maternal, neonatal and nutritional  
Non-communicable  
Injuries

| Leading Causes 2022           | Leading Causes 2050           | Mean % change number of DEATH | Mean % change all-age DEATH rate | Mean % change age-standardized DEATH rate |
|-------------------------------|-------------------------------|-------------------------------|----------------------------------|-------------------------------------------|
| 1 Ischemic heart disease      | 1 Alzheimer's disease         | 79.8 (54 to 102)              | 39.9 (25.3 to 55.6)              | -2.83 (-7.55 to 2.41)                     |
| 2 Alzheimer's disease         | 2 Ischemic heart disease      | -19.1 (-33.8 to -0.815)       | -37.1 (-48.6 to -23.7)           | -54.7 (-63.1 to -43.6)                    |
| 3 Stroke                      | 3 Chronic kidney disease      | 162 (114 to 215)              | 103 (69.8 to 143)                | 41 (18 to 68.5)                           |
| 4 COVID-19                    | 4 Atrial fibrillation         | 126 (91.2 to 165)             | 75.6 (53.8 to 101)               | 20.2 (10.2 to 32.5)                       |
| 5 Lung cancer                 | 5 Stroke                      | -15.2 (-26.5 to -1.93)        | -34.1 (-41.3 to -24.7)           | -50 (-56.3 to -42.1)                      |
| 6 COPD                        | 6 COPD                        | 52.8 (27.2 to 79.4)           | 18.9 (1.96 to 40.6)              | -6.51 (-19.5 to 11.9)                     |
| 7 Colorectal cancer           | 7 Lung cancer                 | 34.5 (13.3 to 60.1)           | 4.66 (-9.17 to 19.9)             | -7.66 (-18.7 to 3.77)                     |
| 8 Atrial fibrillation         | 8 Colorectal cancer           | 53 (21.3 to 85.6)             | 19 (-3.81 to 43.5)               | -4.89 (-20.1 to 11.8)                     |
| 9 Prostate cancer             | 9 Prostate cancer             | 80 (47.7 to 123)              | 40 (18.4 to 67.8)                | 7.03 (-5.97 to 20.7)                      |
| 10 Chronic kidney disease     | 10 Pancreatic cancer          | 88.7 (52.5 to 128)            | 46.8 (20.5 to 72.6)              | 26.1 (8.19 to 45.1)                       |
| 11 Lower respiratory infect   | 11 Lower respiratory infect   | 54.3 (26.2 to 83.4)           | 20 (3.37 to 38.4)                | -14.3 (-26.7 to -1.17)                    |
| 12 Pancreatic cancer          | 12 Hypertensive heart disease | 96.5 (53.7 to 148)            | 52.8 (23.3 to 89.6)              | 6.9 (-13.8 to 32.2)                       |
| 13 Falls                      | 13 Falls                      | 71.9 (42.4 to 102)            | 33.8 (14.9 to 53.6)              | -5.27 (-14.2 to 4.95)                     |
| 14 Diabetes                   | 14 Nonrheum valv diseases     | 143 (103 to 188)              | 89.1 (63.1 to 122)               | 29.5 (16 to 45.8)                         |
| 15 Hypertensive heart disease | 15 Diarrheal diseases         | 216 (93.2 to 390)             | 146 (48.8 to 275)                | 70.4 (1.57 to 169)                        |
| 16 Breast cancer              | 16 Diabetes                   | 19.4 (-8.24 to 48.8)          | -7.12 (-29.2 to 14.6)            | -32.2 (-45.8 to -17)                      |
| 17 Nonrheum valv diseases     | 17 Breast cancer              | 44.3 (18.2 to 73.2)           | 12.2 (-6.09 to 31.6)             | -7.43 (-19 to 5.28)                       |
| 18 Self-harm                  | 18 Parkinson's disease        | 66.7 (43.5 to 90.8)           | 29.7 (17.3 to 45.6)              | 3.11 (-4.33 to 12.5)                      |
| 19 Parkinson's disease        | 19 Bacterial skin             | 310 (204 to 420)              | 219 (142 to 304)                 | 128 (75.5 to 196)                         |
| 20 Aortic aneurysm            | 20 Urinary diseases           | 187 (136 to 245)              | 124 (86.1 to 168)                | 54.8 (29.6 to 79.6)                       |
| 22 Diarrheal diseases         | 21 Self-harm                  |                               |                                  |                                           |
| 33 Urinary diseases           | 23 Aortic aneurysm            |                               |                                  |                                           |
| 40 Bacterial skin             | 128 COVID-19                  |                               |                                  |                                           |



### Switzerland, Reference scenario

**Legend:**  
Communicable, maternal, neonatal and nutritional  
Non-communicable  
Injuries

| Leading Causes 2022          | Leading Causes 2050          | Mean % change number of DEATH | Mean % change all-age DEATH rate | Mean % change age-standardized DEATH rate |
|------------------------------|------------------------------|-------------------------------|----------------------------------|-------------------------------------------|
| 1 Ischemic heart disease     | 1 Alzheimer's disease        | 113 (86.3 to 141)             | 89.2 (75.6 to 103)               | -4.49 (-9 to 0.0862)                      |
| 2 Alzheimer's disease        | 2 Ischemic heart disease     | 4.61 (-11.7 to 23.6)          | -7.16 (-20.5 to 6.98)            | <b>-53 (-59.6 to -44.6)</b>               |
| 3 Stroke                     | 3 Chronic kidney disease     | 221 (161 to 278)              | 185 (141 to 228)                 | 39.4 (19.7 to 61.6)                       |
| 4 Lung cancer                | 4 Hypertensive heart disease | 149 (104 to 196)              | 121 (87.3 to 157)                | 11.7 (-4.77 to 29.3)                      |
| 5 Chronic kidney disease     | 5 Lung cancer                | 37.4 (17.2 to 56.7)           | 21.8 (6.94 to 36.1)              | <b>-18.2 (-26.5 to -10)</b>               |
| 6 COPD                       | 6 COPD                       | 94.4 (67 to 126)              | 72.5 (51.1 to 98.6)              | -4.71 (-13.7 to 7.93)                     |
| 7 Hypertensive heart disease | 7 Falls                      | 104 (73.3 to 137)             | 81.3 (57.1 to 103)               | -4.66 (-15 to 6.37)                       |
| 8 Falls                      | 8 Stroke                     | 6.84 (-7.64 to 21.6)          | -5.24 (-15.8 to 5.95)            | <b>-48.8 (-53.9 to -42.2)</b>             |
| 9 Colorectal cancer          | 9 Prostate cancer            | 124 (89.3 to 166)             | 99.1 (70.4 to 131)               | 6.14 (-6.07 to 18.3)                      |
| 10 COVID-19                  | 10 Lower respiratory infect  | 98.5 (68.6 to 132)            | 76.1 (53.7 to 99.4)              | -10.9 (-21.8 to 0.991)                    |
| 11 Lower respiratory infect  | 11 Colorectal cancer         | 71 (38.9 to 103)              | 51.7 (26.9 to 74.7)              | <b>-11.9 (-24.2 to -0.88)</b>             |
| 12 Prostate cancer           | 12 Pancreatic cancer         | 106 (68.2 to 139)             | 82.4 (56.1 to 105)               | 15.9 (1.45 to 30.6)                       |
| 13 Pancreatic cancer         | 13 Endocarditis              | 244 (180 to 334)              | 205 (154 to 281)                 | 57.1 (32.6 to 91.1)                       |
| 14 Breast cancer             | 14 Nonrheum valv diseases    | 186 (140 to 233)              | 154 (118 to 191)                 | 25.5 (10.3 to 41.3)                       |
| 15 Diabetes                  | 15 Breast cancer             | 48.6 (22.6 to 77.5)           | 31.8 (13.3 to 50.4)              | <b>-15.9 (-25.5 to -6.11)</b>             |
| 16 Self-harm                 | 16 Atrial fibrillation       | 165 (131 to 207)              | 135 (112 to 162)                 | 17.1 (8.37 to 27.4)                       |
| 17 Parkinson's disease       | 17 Parkinson's disease       | 111 (82.6 to 141)             | 86.9 (69.4 to 107)               | 3.63 (-4.18 to 12.7)                      |
| 18 Nonrheum valv diseases    | 18 Urinary diseases          | 244 (195 to 310)              | 205 (161 to 257)                 | 51.2 (29.6 to 72.4)                       |
| 19 Endocarditis              | 19 Diabetes                  | 50.2 (19 to 85.1)             | 33.3 (6.18 to 61.5)              | <b>-31.6 (-42.6 to -18.7)</b>             |
| 20 Atrial fibrillation       | 20 Other digestive           | 219 (162 to 273)              | 183 (143 to 225)                 | 46.1 (29.1 to 70.5)                       |
| 28 Urinary diseases          | 26 Self-harm                 |                               |                                  |                                           |
| 30 Other digestive           | 128 COVID-19                 |                               |                                  |                                           |

### UK, Reference scenario

**Legend:**

Communicable, maternal, neonatal and nutritional  
Non-communicable  
Injuries

| Leading Causes 2022          | Leading Causes 2050          | Mean % change number of DEATH | Mean % change all-age DEATH rate | Mean % change age-standardized DEATH rate |
|------------------------------|------------------------------|-------------------------------|----------------------------------|-------------------------------------------|
| 1 Ischemic heart disease     | 3 Ischemic heart disease     | -18.5 (-34.3 to -0.182)       | -24.5 (-39.4 to -6.11)           | -53.8 (-63.4 to -40.6)                    |
| 2 Lower respiratory infect   | 2 Lower respiratory infect   | 69.2 (47.4 to 91.6)           | 56.6 (35.9 to 77.6)              | -11.5 (-22.7 to 1.18)                     |
| 3 Stroke                     | 7 Stroke                     | -12 (-22.6 to -2.56)          | -18.6 (-29.8 to -9.8)            | -50.2 (-56.8 to -43.7)                    |
| 4 COPD                       | 4 COPD                       | 49.2 (26.6 to 73.1)           | 38.1 (15.9 to 61.1)              | -12.7 (-27.3 to 1.59)                     |
| 5 Lung cancer                | 5 Lung cancer                | 41.6 (16 to 70.2)             | 31 (8.74 to 51.9)                | -9.6 (-22.7 to 4.29)                      |
| 6 Alzheimer's disease        | 1 Alzheimer's disease        | 90.8 (74.1 to 107)            | 76.6 (63.4 to 91.7)              | -0.762 (-5.29 to 4.26)                    |
| 7 COVID-19                   | 128 COVID-19                 |                               |                                  |                                           |
| 8 Colorectal cancer          | 6 Colorectal cancer          | 61.2 (26.9 to 102)            | 49 (19.9 to 83.9)                | -4.03 (-20.6 to 15.3)                     |
| 9 Prostate cancer            | 8 Prostate cancer            | 81.4 (50.2 to 120)            | 67.8 (41.3 to 103)               | 2.77 (-10.6 to 18.6)                      |
| 10 Breast cancer             | 9 Pancreatic cancer          | 99.3 (58.1 to 144)            | 84.3 (51.8 to 120)               | 27.2 (6.81 to 50.5)                       |
| 11 Pancreatic cancer         | 10 Chronic kidney disease    | 133 (93.1 to 171)             | 116 (77 to 150)                  | 22.5 (-0.172 to 46)                       |
| 12 Falls                     | 11 Urinary diseases          | 189 (146 to 240)              | 167 (126 to 219)                 | 49.8 (25.6 to 76.1)                       |
| 13 Chronic kidney disease    | 12 Breast cancer             | 50.4 (25 to 79)               | 39.1 (19.3 to 62.9)              | -6.34 (-18.3 to 7.43)                     |
| 14 Esophageal cancer         | 13 Atrial fibrillation       | 109 (86 to 136)               | 93.4 (74.7 to 117)               | 8.61 (0.0549 to 18.7)                     |
| 15 Atrial fibrillation       | 14 Falls                     | 69.7 (46.6 to 94.2)           | 57 (37.3 to 79.7)                | -7.91 (-15.6 to 2.36)                     |
| 16 Cirrhosis liver           | 15 Nonrheum valv diseases    | 143 (107 to 176)              | 125 (97.6 to 152)                | 26.6 (13.9 to 40.6)                       |
| 17 Interstitial lung disease | 16 Interstitial lung disease | 77.9 (56.3 to 102)            | 64.6 (46.4 to 83.8)              | 6.3 (-2.89 to 17)                         |
| 18 Parkinson's disease       | 17 Parkinson's disease       | 77 (57.4 to 97.5)             | 63.8 (48.8 to 81)                | 2.65 (-6.49 to 11.8)                      |
| 19 Urinary diseases          | 18 Other digestive           | 163 (125 to 208)              | 144 (111 to 185)                 | 43.6 (24.1 to 68.4)                       |
| 20 Liver cancer              | 19 Esophageal cancer         | 27.1 (12.5 to 39.8)           | 17.6 (6.67 to 29.8)              | -16.2 (-23.3 to -9.3)                     |
| 21 Nonrheum valv diseases    | 20 Liver cancer              | 67.6 (47.6 to 87.8)           | 55.1 (37.3 to 72.7)              | 12.2 (0.308 to 23.9)                      |
| 30 Other digestive           | 26 Cirrhosis liver           |                               |                                  |                                           |

### Bolivia, Reference scenario

**Legend:**

Communicable, maternal, neonatal and nutritional  
Non-communicable  
Injuries

| Leading Causes 2022           | Leading Causes 2050           | Mean % change number of DEATH | Mean % change all-age DEATH rate | Mean % change age-standardized DEATH rate |
|-------------------------------|-------------------------------|-------------------------------|----------------------------------|-------------------------------------------|
| 1 COVID-19                    | 1 Chronic kidney disease      | 217 (103 to 349)              | 142 (64.9 to 232)                | 38.1 (-8.15 to 101)                       |
| 2 Ischemic heart disease      | 2 Lower respiratory infect    | 77.1 (32.4 to 120)            | 35.5 (5.76 to 66.6)              | -21.3 (-37.9 to -1.38)                    |
| 3 Lower respiratory infect    | 3 Ischemic heart disease      | 58.4 (-4.03 to 147)           | 21.3 (-25.2 to 84.2)             | -34.1 (-61.5 to 4.51)                     |
| 4 Stroke                      | 4 Stroke                      | 49.7 (9.9 to 91.9)            | 14.6 (-11.8 to 43.6)             | -36.2 (-52.2 to -17.3)                    |
| 5 Chronic kidney disease      | 5 Diabetes                    | 77.4 (23 to 141)              | 35.8 (-2.35 to 86.8)             | -22 (-46.3 to 6.54)                       |
| 6 Diabetes                    | 6 Cirrhosis liver             | 93.6 (58.2 to 137)            | 48.2 (27.4 to 71.2)              | -10.5 (-24.1 to 3.97)                     |
| 7 Cirrhosis liver             | 7 COPD                        | 167 (91.7 to 258)             | 104 (47.5 to 174)                | 3.9 (-31 to 40.2)                         |
| 8 Stomach cancer              | 8 Stomach cancer              | 59.4 (24.7 to 97.6)           | 21.9 (2.3 to 45.4)               | -30.2 (-38.7 to -20.5)                    |
| 9 Neonatal disorders          | 9 Lung cancer                 | 158 (70.8 to 268)             | 96.9 (39.8 to 171)               | 12.3 (-17.6 to 49.7)                      |
| 10 Road injuries              | 10 Colorectal cancer          | 151 (53.2 to 279)             | 92 (24.2 to 184)                 | 8.41 (-27.4 to 53.1)                      |
| 11 COPD                       | 11 Prostate cancer            | 196 (87.7 to 347)             | 126 (48.4 to 229)                | 16.5 (-12.9 to 55.9)                      |
| 12 Congenital defects         | 12 Hypertensive heart disease | 161 (72.6 to 264)             | 99.8 (39.1 to 174)               | 2.55 (-34 to 45.8)                        |
| 13 Tuberculosis               | 13 Alzheimer's disease        | 212 (115 to 312)              | 139 (77.4 to 202)                | 8.08 (4.17 to 11.8)                       |
| 14 Lung cancer                | 14 Road injuries              | 33.1 (-18.8 to 105)           | 1.99 (-35.8 to 51.2)             | -20.8 (-50.8 to 21.6)                     |
| 15 Colorectal cancer          | 15 Pancreatic cancer          | 252 (104 to 478)              | 169 (64.4 to 326)                | 52.2 (-7.91 to 132)                       |
| 16 Cervical cancer            | 16 Interstitial lung disease  | 172 (109 to 242)              | 108 (66.3 to 149)                | 10.3 (-6.69 to 32)                        |
| 17 Hypertensive heart disease | 17 Breast cancer              | 112 (46.3 to 201)             | 62.4 (16.2 to 127)               | 0.987 (-24.7 to 37.5)                     |
| 18 Prostate cancer            | 18 Cervical cancer            | 65.2 (27.8 to 103)            | 26.5 (2.36 to 52.8)              | -20.7 (-36.3 to -4.67)                    |
| 19 Alzheimer's disease        | 19 Urinary diseases           | 233 (151 to 330)              | 155 (95.7 to 226)                | 37.3 (2.06 to 80.3)                       |
| 20 Breast cancer              | 20 Falls                      | 91.3 (50.3 to 145)            | 46.3 (20.2 to 80.6)              | -7.45 (-18.7 to 4.97)                     |
| 21 Interstitial lung disease  | 24 Neonatal disorders         |                               |                                  |                                           |
| 22 Falls                      | 27 Tuberculosis               |                               |                                  |                                           |
| 27 Pancreatic cancer          | 29 Congenital defects         |                               |                                  |                                           |
| 36 Urinary diseases           | 134 COVID-19                  |                               |                                  |                                           |

### Ecuador, Reference scenario

**Legend:**  
Communicable, maternal, neonatal and nutritional  
Non-communicable  
Injuries

| Leading Causes 2022           | Leading Causes 2050          | Mean % change number of DEATH | Mean % change all-age DEATH rate | Mean % change age-standardized DEATH rate |
|-------------------------------|------------------------------|-------------------------------|----------------------------------|-------------------------------------------|
| 1 Ischemic heart disease      | 1 Chronic kidney disease     | 240 (134 to 374)              | 173 (91.1 to 267)                | 36.6 (-5.97 to 100)                       |
| 2 COVID-19                    | 2 Ischemic heart disease     | 71.7 (8.45 to 143)            | 37.8 (-10.1 to 94.3)             | -35.5 (-60.1 to 1.01)                     |
| 3 Chronic kidney disease      | 3 Lower respiratory infect   | 115 (63.8 to 178)             | 71.9 (33.9 to 113)               | -20.5 (-37.4 to 0.653)                    |
| 4 Stroke                      | 4 Stroke                     | 60.3 (19.8 to 103)            | 28.5 (1.3 to 60.8)               | -36 (-52 to -16.4)                        |
| 5 Lower respiratory infect    | 5 Diabetes                   | 109 (52.3 to 167)             | 67.5 (24.8 to 115)               | -15.8 (-39.4 to 14.5)                     |
| 6 Diabetes                    | 6 COPD                       | 201 (111 to 311)              | 142 (75.5 to 214)                | 0.108 (-30.2 to 39.5)                     |
| 7 Road injuries               | 7 Cirrhosis liver            | 90.8 (55.8 to 123)            | 53 (35.1 to 72.8)                | -12.4 (-21.8 to -0.753)                   |
| 8 Cirrhosis liver             | 8 Alzheimer's disease        | 215 (139 to 305)              | 152 (103 to 207)                 | 3.58 (-0.129 to 6.91)                     |
| 9 Stomach cancer              | 9 Hypertensive heart disease | 211 (112 to 330)              | 149 (72.2 to 236)                | 7.53 (-30.2 to 61.9)                      |
| 10 COPD                       | 10 Road injuries             | 20.9 (-19.7 to 73.8)          | -2.9 (-35.4 to 41.8)             | -18.2 (-47.3 to 19.7)                     |
| 11 Alzheimer's disease        | 11 Stomach cancer            | 56.4 (21.9 to 97.3)           | 25.4 (7.26 to 49.3)              | -34.4 (-41.1 to -25.7)                    |
| 12 Hypertensive heart disease | 12 Prostate cancer           | 184 (80.1 to 322)             | 128 (51.6 to 226)                | 3.01 (-23 to 33.1)                        |
| 13 Neonatal disorders         | 13 Colorectal cancer         | 170 (65 to 320)               | 116 (42.2 to 221)                | 11.8 (-23.8 to 59.3)                      |
| 14 Prostate cancer            | 14 Lung cancer               | 172 (83.9 to 292)             | 117 (54.7 to 199)                | 12.4 (-12.9 to 46.9)                      |
| 15 Colorectal cancer          | 15 Interstitial lung disease | 185 (120 to 265)              | 128 (83.2 to 177)                | 4.73 (-10.3 to 21.6)                      |
| 16 Self-harm                  | 16 Falls                     | 112 (61.8 to 170)             | 69.9 (40.3 to 105)               | -10.5 (-21.2 to 1.79)                     |
| 17 Interpersonal violence     | 17 Pancreatic cancer         | 242 (97.9 to 461)             | 173 (60.6 to 325)                | 43 (-11.1 to 117)                         |
| 18 Lung cancer                | 18 Breast cancer             | 118 (49.9 to 204)             | 74.1 (23.9 to 134)               | 0.759 (-25.5 to 33)                       |
| 19 Falls                      | 19 Urinary diseases          | 279 (172 to 399)              | 204 (133 to 285)                 | 36.1 (6.72 to 71.3)                       |
| 20 Congenital defects         | 20 Atrial fibrillation       | 272 (172 to 398)              | 198 (132 to 290)                 | 20 (-2.01 to 42.5)                        |
| 21 Interstitial lung disease  | 22 Self-harm                 |                               |                                  |                                           |
| 22 Breast cancer              | 31 Interpersonal violence    |                               |                                  |                                           |
| 26 Pancreatic cancer          | 33 Neonatal disorders        |                               |                                  |                                           |
| 31 Urinary diseases           | 41 Congenital defects        |                               |                                  |                                           |
| 32 Atrial fibrillation        | 134 COVID-19                 |                               |                                  |                                           |

### Peru, Reference scenario

**Legend:**

Communicable, maternal, neonatal and nutritional  
Non-communicable  
Injuries

| Leading Causes 2022           | Leading Causes 2050           | Mean % change number of DEATH | Mean % change all-age DEATH rate | Mean % change age-standardized DEATH rate |
|-------------------------------|-------------------------------|-------------------------------|----------------------------------|-------------------------------------------|
| 1 Lower respiratory infect    | 1 Lower respiratory infect    | 114 (66.3 to 164)             | 88.7 (50.3 to 133)               | -24.2 (-38.2 to -5.43)                    |
| 2 COVID-19                    | 2 Chronic kidney disease      | 275 (156 to 415)              | 231 (134 to 350)                 | 39.3 (1.79 to 91.3)                       |
| 3 Ischemic heart disease      | 3 Ischemic heart disease      | 66.1 (0.662 to 156)           | 46.8 (-7.38 to 124)              | -40.4 (-61.6 to -5.51)                    |
| 4 Chronic kidney disease      | 4 Stroke                      | 50 (14 to 91.5)               | 32.6 (4.28 to 66.5)              | -40.3 (-53.6 to -24.5)                    |
| 5 Stroke                      | 5 Alzheimer's disease         | 224 (152 to 301)              | 187 (133 to 247)                 | -1.99 (-5.49 to 1.32)                     |
| 6 Cirrhosis liver             | 6 Cirrhosis liver             | 86 (54.3 to 117)              | 64.4 (40.7 to 85.7)              | -13.8 (-25.2 to -1.71)                    |
| 7 Stomach cancer              | 7 Interstitial lung disease   | 192 (139 to 260)              | 158 (115 to 213)                 | 1.48 (-12.8 to 17.7)                      |
| 8 Diabetes                    | 8 Diabetes                    | 95.7 (45.4 to 157)            | 73 (28 to 120)                   | -24 (-42.3 to -0.629)                     |
| 9 Road injuries               | 9 Stomach cancer              | 56.3 (30.2 to 85.5)           | 38.1 (16.5 to 60.8)              | -37.7 (-44.1 to -30.2)                    |
| 10 Alzheimer's disease        | 10 Lung cancer                | 145 (82.2 to 223)             | 116 (60.9 to 175)                | -1.08 (-23.2 to 23.7)                     |
| 11 Interstitial lung disease  | 11 COPD                       | 191 (108 to 309)              | 157 (89.3 to 250)                | -5.31 (-31 to 29.4)                       |
| 12 Lung cancer                | 12 Prostate cancer            | 188 (102 to 309)              | 154 (81 to 256)                  | -1.4 (-25.5 to 27.4)                      |
| 13 Neonatal disorders         | 13 Colorectal cancer          | 145 (60.5 to 262)             | 116 (41 to 214)                  | -4.39 (-34.4 to 31.1)                     |
| 14 Colorectal cancer          | 14 Urinary diseases           | 274 (179 to 384)              | 230 (159 to 312)                 | 26.5 (-1.03 to 55.6)                      |
| 15 COPD                       | 15 Pancreatic cancer          | 223 (103 to 383)              | 185 (72.4 to 320)                | 30.2 (-17.4 to 90)                        |
| 16 Prostate cancer            | 16 Road injuries              | 15 (-23.6 to 70.5)            | 1.69 (-31.2 to 48.6)             | -20.8 (-46.8 to 18)                       |
| 17 Cervical cancer            | 17 Hypertensive heart disease | 176 (92.9 to 296)             | 144 (72.2 to 243)                | -2.54 (-31.3 to 38.7)                     |
| 18 Tuberculosis               | 18 Parkinson's disease        | 173 (116 to 239)              | 141 (98.7 to 188)                | -8.65 (-21.5 to 6.21)                     |
| 19 Foreign body               | 19 Atrial fibrillation        | 262 (179 to 370)              | 220 (156 to 309)                 | 14.3 (-3.23 to 37)                        |
| 20 Breast cancer              | 20 Breast cancer              | 89.6 (39.9 to 154)            | 67.5 (26.2 to 121)               | -11 (-30.3 to 11.3)                       |
| 22 Pancreatic cancer          | 21 Cervical cancer            |                               |                                  |                                           |
| 24 Urinary diseases           | 28 Foreign body               |                               |                                  |                                           |
| 25 Hypertensive heart disease | 34 Tuberculosis               |                               |                                  |                                           |
| 26 Parkinson's disease        | 36 Neonatal disorders         |                               |                                  |                                           |
| 35 Atrial fibrillation        | 134 COVID-19                  |                               |                                  |                                           |

### Antigua and Barbuda, Reference scenario

**Legend:**  
Communicable, maternal, neonatal and nutritional  
Non-communicable  
Injuries

| Leading Causes 2022          | Leading Causes 2050          | Mean % change number of DEATH | Mean % change all-age DEATH rate | Mean % change age-standardized DEATH rate |
|------------------------------|------------------------------|-------------------------------|----------------------------------|-------------------------------------------|
| 1 Stroke                     | 1 Chronic kidney disease     | 148 (68.7 to 243)             | 147 (80.9 to 243)                | 19.7 (-18.3 to 81.5)                      |
| 2 Ischemic heart disease     | 2 Hypertensive heart disease | 164 (87.4 to 262)             | 163 (90.6 to 248)                | 13.8 (-23.8 to 69.6)                      |
| 3 Diabetes                   | 3 Diabetes                   | 65.7 (17.2 to 122)            | 65.1 (24 to 111)                 | -23.4 (-44.3 to 6.19)                     |
| 4 Chronic kidney disease     | 4 Stroke                     | 31.2 (-0.0512 to 66.9)        | 30.7 (2.81 to 61.9)              | <b>-41.8 (-57.3 to -20.8)</b>             |
| 5 Hypertensive heart disease | 5 Ischemic heart disease     | 25 (-23.4 to 86.4)            | 24.6 (-22.3 to 85.2)             | <b>-45 (-68.4 to -9.18)</b>               |
| 6 Lower respiratory infect   | 6 Prostate cancer            | 148 (53.5 to 257)             | 147 (62.1 to 249)                | 0.784 (-26.6 to 34)                       |
| 7 COVID-19                   | 7 Lower respiratory infect   | 116 (71.6 to 169)             | 115 (80.2 to 154)                | -13.8 (-32.9 to 14.9)                     |
| 8 Prostate cancer            | 8 Alzheimer's disease        | 204 (134 to 266)              | 203 (137 to 263)                 | 8.02 (4.11 to 11.9)                       |
| 9 Breast cancer              | 9 Breast cancer              | 97.5 (27.2 to 180)            | 96.7 (34.5 to 170)               | 6.71 (-22.4 to 38.9)                      |
| 10 Colorectal cancer         | 10 Colorectal cancer         | 128 (31.2 to 246)             | 127 (33.3 to 255)                | 6.71 (-31.1 to 54.3)                      |
| 11 Cirrhosis liver           | 11 Endo/metab/blood/immune   | 148 (104 to 206)              | 148 (110 to 189)                 | 24.5 (3.57 to 49.7)                       |
| 12 Alzheimer's disease       | 12 Lung cancer               | 108 (34.1 to 184)             | 107 (42 to 177)                  | 6.33 (-24.5 to 36.8)                      |
| 13 Stomach cancer            | 13 Cirrhosis liver           | 51.7 (26.8 to 79.6)           | 51.1 (32.9 to 71.4)              | -12.2 (-24.1 to 3.18)                     |
| 14 Lung cancer               | 14 Urinary diseases          | 228 (151 to 306)              | 227 (171 to 302)                 | 39.7 (7.03 to 96.1)                       |
| 15 Endo/metab/blood/immune   | 15 COPD                      | 143 (77 to 213)               | 142 (83.8 to 204)                | 4.16 (-27.9 to 46)                        |
| 16 Other cardiovascular      | 16 Atrial fibrillation       | 235 (153 to 324)              | 234 (162 to 325)                 | 18.2 (-0.226 to 44.2)                     |
| 17 HIV/AIDS                  | 17 Pancreatic cancer         | 182 (55 to 349)               | 181 (53.5 to 344)                | 38.3 (-16.5 to 110)                       |
| 18 COPD                      | 18 Other cardiovascular      | 74.1 (41.7 to 109)            | 73.4 (48 to 106)                 | <b>-19.3 (-34.3 to -2.61)</b>             |
| 19 Alcohol use disorders     | 19 Parkinson's disease       | 162 (103 to 232)              | 161 (114 to 213)                 | 0.212 (-14.8 to 17.3)                     |
| 20 Cardiomyopathy            | 20 Stomach cancer            | 36.1 (8.11 to 63.4)           | 35.6 (15.3 to 57.9)              | <b>-33.9 (-42.8 to -24.3)</b>             |
| 21 Pancreatic cancer         | 22 Cardiomyopathy            |                               |                                  |                                           |
| 24 Parkinson's disease       | 23 Alcohol use disorders     |                               |                                  |                                           |
| 25 Urinary diseases          | 41 HIV/AIDS                  |                               |                                  |                                           |
| 26 Atrial fibrillation       | 130 COVID-19                 |                               |                                  |                                           |

### The Bahamas, Reference scenario

**Legend:**  
Communicable, maternal, neonatal and nutritional  
Non-communicable  
Injuries

| Leading Causes 2022          | Leading Causes 2050          | Mean % change number of DEATH | Mean % change all-age DEATH rate | Mean % change age-standardized DEATH rate |
|------------------------------|------------------------------|-------------------------------|----------------------------------|-------------------------------------------|
| 1 Ischemic heart disease     | 1 Hypertensive heart disease | 197 (104 to 309)              | 172 (93.5 to 274)                | 19.2 (-19.3 to 78.6)                      |
| 2 Hypertensive heart disease | 2 Chronic kidney disease     | 193 (100 to 315)              | 168 (92 to 272)                  | 31.5 (-11.2 to 96)                        |
| 3 Stroke                     | 3 Ischemic heart disease     | 45 (-9.21 to 120)             | 32.9 (-15.6 to 104)              | <b>-41.1 (-65.2 to -1.37)</b>             |
| 4 Chronic kidney disease     | 4 Stroke                     | 53.5 (12.2 to 96.3)           | 40.6 (7.62 to 77.3)              | <b>-38.7 (-54.1 to -17.2)</b>             |
| 5 Diabetes                   | 5 Prostate cancer            | 176 (79.5 to 319)             | 152 (68.8 to 287)                | -4.62 (-28.6 to 29.6)                     |
| 6 COVID-19                   | 6 Lower respiratory infect   | 153 (90.2 to 223)             | 131 (87.9 to 180)                | -10.7 (-30.1 to 13.5)                     |
| 7 Interpersonal violence     | 7 Diabetes                   | 69 (22.8 to 123)              | 54.8 (17.2 to 104)               | <b>-28.8 (-48.1 to -2.27)</b>             |
| 8 HIV/AIDS                   | 8 Alzheimer's disease        | 267 (175 to 377)              | 236 (163 to 308)                 | 3.57 (0.278 to 6.97)                      |
| 9 Lower respiratory infect   | 9 Breast cancer              | 81.9 (22.1 to 171)            | 66.4 (14.3 to 135)               | -8.17 (-33.5 to 22)                       |
| 10 Prostate cancer           | 10 Colorectal cancer         | 119 (27 to 254)               | 100 (18.7 to 214)                | -5.48 (-38.4 to 38.8)                     |
| 11 Breast cancer             | 11 Endo/metab/blood/immune   | 141 (88.8 to 197)             | 121 (85 to 164)                  | 20.1 (-0.106 to 42.6)                     |
| 12 Colorectal cancer         | 12 Urinary diseases          | 273 (173 to 383)              | 241 (164 to 322)                 | 37.8 (6.25 to 78.6)                       |
| 13 Cirrhosis liver           | 13 Lung cancer               | 106 (38.6 to 199)             | 88.7 (29.1 to 168)               | -2.07 (-30.1 to 28.6)                     |
| 14 Lung cancer               | 14 COPD                      | 179 (99.8 to 275)             | 155 (92.6 to 232)                | 3.38 (-25.5 to 40.8)                      |
| 15 Road injuries             | 15 Cirrhosis liver           | 36.6 (11.2 to 61.1)           | 25.1 (9.02 to 43.2)              | <b>-22.5 (-32.1 to -9.91)</b>             |
| 16 Endo/metab/blood/immune   | 16 Atrial fibrillation       | 301 (195 to 430)              | 267 (183 to 360)                 | 17 (-2.71 to 37.7)                        |
| 17 Alzheimer's disease       | 17 Interpersonal violence    | -41.1 (-69.1 to 18.6)         | -46 (-71.1 to 5.81)              | -39 (-68.6 to 26.2)                       |
| 18 Cardiomyopathy            | 18 Road injuries             | 12 (-32.2 to 77.9)            | 2.66 (-37.3 to 68.6)             | -3.32 (-41.9 to 64.3)                     |
| 19 COPD                      | 19 Other cardiovascular      | 87.3 (47.8 to 129)            | 71.5 (41.7 to 104)               | -17.5 (-32.1 to 0.516)                    |
| 20 Stomach cancer            | 20 Cardiomyopathy            | 42.7 (13.3 to 72.9)           | 30.6 (13.2 to 50.1)              | <b>-26.8 (-33.4 to -19.4)</b>             |
| 21 Other cardiovascular      | 25 Stomach cancer            |                               |                                  |                                           |
| 22 Urinary diseases          | 29 HIV/AIDS                  |                               |                                  |                                           |
| 29 Atrial fibrillation       | 130 COVID-19                 |                               |                                  |                                           |

### Barbados, Reference scenario

**Legend:**  
Communicable, maternal, neonatal and nutritional  
Non-communicable  
Injuries

| Leading Causes 2022           | Leading Causes 2050          | Mean % change number of DEATH | Mean % change all-age DEATH rate | Mean % change age-standardized DEATH rate |
|-------------------------------|------------------------------|-------------------------------|----------------------------------|-------------------------------------------|
| 1 COVID-19                    | 1 Diabetes                   | 24.1 (-14.8 to 83.8)          | 41.3 (-0.848 to 107)             | -23.6 (-47.3 to 14.3)                     |
| 2 Stroke                      | 2 Stroke                     | -3.2 (-30.5 to 33.3)          | 10.1 (-20.2 to 51.8)             | <b>-39.8 (-56.2 to -15.4)</b>             |
| 3 Ischemic heart disease      | 3 Chronic kidney disease     | <b>112 (38.3 to 221)</b>      | <b>141 (61 to 264)</b>           | 37 (-7.72 to 116)                         |
| 4 Diabetes                    | 4 Ischemic heart disease     | -1.91 (-40.8 to 60.7)         | 11.8 (-32.2 to 76.6)             | -40.1 (-64.7 to 1.26)                     |
| 5 Lower respiratory infect    | 5 Lower respiratory infect   | <b>58 (20.5 to 111)</b>       | <b>79.8 (37.9 to 130)</b>        | -13.2 (-32.4 to 15)                       |
| 6 Chronic kidney disease      | 6 Prostate cancer            | 68 (-1.94 to 152)             | <b>90.6 (11.8 to 177)</b>        | -1.59 (-31.5 to 31.3)                     |
| 7 Colorectal cancer           | 7 Colorectal cancer          | 54.1 (-13.3 to 148)           | 74.7 (-1.14 to 166)              | 0.73 (-36.5 to 45.4)                      |
| 8 Prostate cancer             | 8 Urinary diseases           | <b>136 (77.5 to 230)</b>      | <b>168 (103 to 250)</b>          | <b>36.6 (1.64 to 90.1)</b>                |
| 9 Breast cancer               | 9 Hypertensive heart disease | <b>83.4 (23.6 to 166)</b>     | <b>109 (39.8 to 206)</b>         | 13.5 (-25.8 to 69.2)                      |
| 10 Hypertensive heart disease | 10 Alzheimer's disease       | <b>96.8 (40.4 to 152)</b>     | <b>124 (69 to 175)</b>           | 2.03 (-2.22 to 5.3)                       |
| 11 Alzheimer's disease        | 11 Breast cancer             | 36 (-14.2 to 96)              | 54.3 (-1.6 to 121)               | -1.85 (-31.7 to 33.7)                     |
| 12 Urinary diseases           | 12 Decubitus ulcer           | 48.8 (-17.1 to 137)           | 68.9 (-3.88 to 148)              | -20 (-44.4 to 6.79)                       |
| 13 Decubitus ulcer            | 13 Pancreatic cancer         | <b>95.1 (3.54 to 227)</b>     | <b>121 (17.9 to 256)</b>         | 35.2 (-22.3 to 109)                       |
| 14 Stomach cancer             | 14 Bacterial skin            | <b>211 (87.2 to 447)</b>      | <b>254 (110 to 500)</b>          | <b>92.1 (7.24 to 239)</b>                 |
| 15 Lung cancer                | 15 Atrial fibrillation       | <b>147 (67.3 to 240)</b>      | <b>181 (103 to 269)</b>          | <b>24.3 (2.78 to 47.7)</b>                |
| 16 Pancreatic cancer          | 16 Endo/metab/blood/immune   | <b>85 (46.5 to 141)</b>       | <b>111 (69.7 to 170)</b>         | 20.3 (-0.345 to 47.3)                     |
| 17 COPD                       | 17 Peripheral artery         | <b>131 (27.9 to 257)</b>      | <b>162 (52.7 to 279)</b>         | 24.9 (-10.9 to 63.4)                      |
| 18 Endo/metab/blood/immune    | 18 Lung cancer               | 35.5 (-15 to 95.1)            | 53.8 (-0.4 to 108)               | -2.42 (-31.9 to 28.4)                     |
| 19 Cirrhosis liver            | 19 COPD                      | <b>57.9 (12.3 to 129)</b>     | <b>79.6 (26.3 to 148)</b>        | -5.19 (-35.4 to 40.6)                     |
| 20 Cardiomyopathy             | 20 Parkinson's disease       | <b>74.2 (33.2 to 131)</b>     | <b>98.2 (56.2 to 154)</b>        | -2.48 (-18.4 to 12.7)                     |
| 23 Atrial fibrillation        | 21 Stomach cancer            |                               |                                  |                                           |
| 24 Peripheral artery          | 22 Cardiomyopathy            |                               |                                  |                                           |
| 25 Parkinson's disease        | 23 Cirrhosis liver           |                               |                                  |                                           |
| 31 Bacterial skin             | 130 COVID-19                 |                               |                                  |                                           |



### Belize, Reference scenario

**Legend:**

Communicable, maternal, neonatal and nutritional  
Non-communicable  
Injuries

| Leading Causes 2022          | Leading Causes 2050          | Mean % change number of DEATH | Mean % change all-age DEATH rate | Mean % change age-standardized DEATH rate |
|------------------------------|------------------------------|-------------------------------|----------------------------------|-------------------------------------------|
| 1 COVID-19                   | 1 Chronic kidney disease     | 265 (152 to 403)              | 146 (71.5 to 255)                | 28.1 (-14.5 to 93.3)                      |
| 2 Ischemic heart disease     | 2 Ischemic heart disease     | 112 (29.9 to 224)             | 42.5 (-13.1 to 121)              | -34.3 (-62.5 to 13.4)                     |
| 3 Diabetes                   | 3 Diabetes                   | 119 (55.6 to 200)             | 47.4 (7.38 to 100)               | -26.6 (-48.9 to 5.04)                     |
| 4 Stroke                     | 4 Stroke                     | 104 (49.2 to 169)             | 37.4 (3.9 to 77.7)               | <b>-36.6 (-55.7 to -12.6)</b>             |
| 5 Chronic kidney disease     | 5 Lower respiratory infect   | 143 (87.6 to 206)             | 63.1 (30.2 to 103)               | <b>-22.8 (-40.8 to -0.161)</b>            |
| 6 Lower respiratory infect   | 6 Hypertensive heart disease | 224 (132 to 347)              | 118 (52.1 to 209)                | 0.814 (-31.2 to 50.9)                     |
| 7 Interpersonal violence     | 7 COPD                       | 192 (113 to 283)              | 96.1 (46.5 to 166)               | -12.6 (-39 to 21.2)                       |
| 8 HIV/AIDS                   | 8 Cirrhosis liver            | 127 (88.3 to 169)             | 52.7 (31.9 to 76.2)              | -10.2 (-22.8 to 6.94)                     |
| 9 Hypertensive heart disease | 9 Alzheimer's disease        | 302 (197 to 398)              | 170 (109 to 224)                 | 0.738 (-2.44 to 4.08)                     |
| 10 Cirrhosis liver           | 10 Prostate cancer           | 229 (90.2 to 396)             | 120 (40.2 to 226)                | -7.94 (-35 to 26.4)                       |
| 11 Road injuries             | 11 Road injuries             | 64.8 (1.08 to 171)            | 10.9 (-30.5 to 83.1)             | -0.79 (-39.3 to 68.2)                     |
| 12 COPD                      | 12 Lung cancer               | 191 (87.1 to 308)             | 95 (29.2 to 166)                 | 1.48 (-28.8 to 34.2)                      |
| 13 Neonatal disorders        | 13 Interpersonal violence    | 7.34 (-40 to 93.4)            | -28.2 (-59.5 to 26.3)            | -28 (-60 to 27.6)                         |
| 14 Prostate cancer           | 14 Colorectal cancer         | 213 (77.1 to 373)             | 110 (21.9 to 225)                | 4.24 (-31.3 to 52.1)                      |
| 15 Alzheimer's disease       | 15 Urinary diseases          | 299 (208 to 398)              | 168 (118 to 224)                 | 26.2 (-2.45 to 65.5)                      |
| 16 Lung cancer               | 16 Pancreatic cancer         | 336 (132 to 589)              | 192 (58.6 to 380)                | 48.3 (-14.5 to 130)                       |
| 17 Cervical cancer           | 17 HIV/AIDS                  | -15.2 (-60.1 to 59)           | -43.1 (-72.7 to 2.45)            | <b>-53 (-77.6 to -13.9)</b>               |
| 18 Stomach cancer            | 18 Endo/metab/blood/immune   | 182 (129 to 240)              | 89.5 (63.1 to 125)               | 16.8 (-2.57 to 43.3)                      |
| 19 Colorectal cancer         | 19 Cervical cancer           | 105 (62.9 to 165)             | 37.8 (10.7 to 69.5)              | -15.6 (-31.9 to 6.94)                     |
| 20 Endo/metab/blood/immune   | 20 Breast cancer             | 169 (81.2 to 280)             | 80.2 (25.8 to 146)               | 3.62 (-24.4 to 37.1)                      |
| 21 Breast cancer             | 21 Stomach cancer            |                               |                                  |                                           |
| 26 Urinary diseases          | 28 Neonatal disorders        |                               |                                  |                                           |
| 27 Pancreatic cancer         | 132 COVID-19                 |                               |                                  |                                           |

### Bermuda, Reference scenario

**Legend:**  
Communicable, maternal, neonatal and nutritional  
Non-communicable  
Injuries

| Leading Causes 2022                | Leading Causes 2050               | Mean % change number of DEATH | Mean % change all-age DEATH rate | Mean % change age-standardized DEATH rate |
|------------------------------------|-----------------------------------|-------------------------------|----------------------------------|-------------------------------------------|
| 1 Ischemic heart disease           | 1 Ischemic heart disease          | 7.26 (-38.7 to 69.7)          | 29 (-23.1 to 97.6)               | <b>-51.3 (-68.8 to -19.2)</b>             |
| 2 Stroke                           | 2 Alzheimer's disease             | <b>150 (90.2 to 209)</b>      | <b>200 (142 to 256)</b>          | <b>-7.02 (-10.3 to -3.19)</b>             |
| <b>3 COVID-19</b>                  | 3 Chronic kidney disease          | <b>132 (45 to 252)</b>        | <b>179 (86.7 to 314)</b>         | 12.3 (-21.7 to 66.1)                      |
| 4 Lung cancer                      | 4 Prostate cancer                 | <b>87.5 (19.8 to 156)</b>     | <b>125 (50.9 to 210)</b>         | -5.43 (-29.8 to 21.1)                     |
| 5 Prostate cancer                  | 5 Colorectal cancer               | <b>73.8 (2.76 to 161)</b>     | <b>109 (28.1 to 204)</b>         | -10.6 (-39.8 to 24.5)                     |
| 6 Alzheimer's disease              | 6 Stroke                          | -5.28 (-35 to 31.2)           | 13.8 (-19.3 to 54.5)             | <b>-53.8 (-64.1 to -37.5)</b>             |
| 7 Colorectal cancer                | 7 Lung cancer                     | 38 (-3.51 to 87.5)            | <b>65.8 (16.7 to 121)</b>        | -15 (-37.1 to 7.89)                       |
| 8 Diabetes                         | <b>8 Lower respiratory infect</b> | <b>103 (46.6 to 164)</b>      | <b>143 (85.5 to 208)</b>         | -18.3 (-34.7 to 1.98)                     |
| 9 Chronic kidney disease           | 9 Diabetes                        | 27.9 (-11.2 to 72.8)          | <b>53.7 (6.38 to 107)</b>        | <b>-36.8 (-53.6 to -15.3)</b>             |
| <b>10 Lower respiratory infect</b> | 10 Hypertensive heart disease     | <b>115 (34.8 to 222)</b>      | <b>159 (63.8 to 273)</b>         | 0.625 (-33.5 to 48.4)                     |
| 11 Breast cancer                   | 11 COPD                           | <b>95.3 (34.4 to 170)</b>     | <b>135 (66.7 to 225)</b>         | -10.3 (-31.8 to 24)                       |
| 12 Hypertensive heart disease      | 12 Pancreatic cancer              | <b>112 (11.2 to 237)</b>      | <b>154 (38.2 to 303)</b>         | 19.1 (-26.1 to 77.2)                      |
| 13 COPD                            | 13 Breast cancer                  | 51.3 (-4.72 to 124)           | <b>81.7 (18 to 165)</b>          | -19 (-40.3 to 8.62)                       |
| 14 Pancreatic cancer               | 14 Atrial fibrillation            | <b>195 (116 to 286)</b>       | <b>254 (173 to 355)</b>          | 6.7 (-10.2 to 27)                         |
| 15 Other cardiovascular            | 15 Endo/metab/blood/immune        | <b>133 (72.6 to 208)</b>      | <b>180 (112 to 256)</b>          | 9.91 (-6.77 to 32.5)                      |
| 16 Cardiomyopathy                  | 16 Other cardiovascular           | <b>65 (23.7 to 122)</b>       | <b>98.4 (54.9 to 158)</b>        | <b>-25.8 (-37.9 to -9.54)</b>             |
| 17 Cirrhosis liver                 | 17 Nonrheum valv diseases         | <b>119 (71.2 to 176)</b>      | <b>163 (109 to 221)</b>          | 2.56 (-11 to 17.1)                        |
| 18 Endo/metab/blood/immune         | 18 Peripheral artery              | <b>175 (78.2 to 284)</b>      | <b>230 (117 to 339)</b>          | 6.1 (-17.4 to 32.6)                       |
| 19 Atrial fibrillation             | 19 Parkinson's disease            | <b>92 (43.1 to 138)</b>       | <b>131 (79.7 to 178)</b>         | -11.1 (-27.1 to 4.06)                     |
| 20 Stomach cancer                  | 20 Urinary diseases               | <b>210 (120 to 308)</b>       | <b>273 (174 to 398)</b>          | <b>26.9 (0.132 to 61.7)</b>               |
| 23 Parkinson's disease             | 22 Cardiomyopathy                 |                               |                                  |                                           |
| 24 Nonrheum valv diseases          | 27 Cirrhosis liver                |                               |                                  |                                           |
| 30 Peripheral artery               | 28 Stomach cancer                 |                               |                                  |                                           |
| 35 Urinary diseases                | 128 COVID-19                      |                               |                                  |                                           |

### Cuba, Reference scenario

**Legend:**  
Communicable, maternal, neonatal and nutritional  
Non-communicable  
Injuries

| Leading Causes 2022           | Leading Causes 2050           | Mean % change number of DEATH | Mean % change all-age DEATH rate | Mean % change age-standardized DEATH rate |
|-------------------------------|-------------------------------|-------------------------------|----------------------------------|-------------------------------------------|
| 1 Ischemic heart disease      | 1 Ischemic heart disease      | 10.1 (-29.6 to 56.8)          | 32.1 (-12 to 87.4)               | <b>-41.2 (-61.7 to -8.79)</b>             |
| 2 Stroke                      | 2 Lower respiratory infect    | <b>55.3 (22.7 to 94.5)</b>    | <b>85.9 (53.9 to 127)</b>        | <b>-23.3 (-38 to -2.73)</b>               |
| 3 Lower respiratory infect    | 3 Stroke                      | 3.55 (-21.2 to 30.4)          | 24.2 (-5.21 to 53.6)             | <b>-43.9 (-56.6 to -27.9)</b>             |
| 4 Lung cancer                 | 4 Lung cancer                 | 35 (-6.68 to 84.1)            | <b>61.3 (18.2 to 110)</b>        | -10.2 (-30.2 to 13.4)                     |
| 5 COPD                        | 5 Falls                       | <b>104 (52.1 to 157)</b>      | <b>145 (94.8 to 203)</b>         | -2.42 (-16.6 to 14.3)                     |
| 6 Falls                       | 6 Alzheimer's disease         | <b>124 (73.4 to 173)</b>      | <b>168 (120 to 212)</b>          | -2.55 (-6.19 to 0.604)                    |
| 7 Prostate cancer             | 7 COPD                        | <b>55.7 (16.2 to 99.8)</b>    | <b>86.6 (38.5 to 138)</b>        | -13.9 (-36.3 to 14)                       |
| 8 Colorectal cancer           | 8 Chronic kidney disease      | <b>105 (50 to 178)</b>        | <b>146 (82.2 to 225)</b>         | 19.6 (-12.1 to 67)                        |
| 9 Alzheimer's disease         | 9 Prostate cancer             | <b>83.4 (22.6 to 160)</b>     | <b>119 (49.1 to 199)</b>         | -3.64 (-26.4 to 21.9)                     |
| 10 Chronic kidney disease     | 10 Hypertensive heart disease | <b>101 (42.5 to 168)</b>      | <b>141 (69.2 to 233)</b>         | 12.3 (-19.5 to 58.2)                      |
| 11 Hypertensive heart disease | 11 Colorectal cancer          | <b>75.7 (11.5 to 169)</b>     | <b>110 (42.7 to 207)</b>         | 0.688 (-26.4 to 39.8)                     |
| 12 Cirrhosis liver            | 12 Breast cancer              | <b>53.1 (2.12 to 106)</b>     | <b>83 (26.6 to 143)</b>          | -2.25 (-25.6 to 22.6)                     |
| 13 Diabetes                   | 13 Atrial fibrillation        | <b>161 (87.6 to 241)</b>      | <b>212 (138 to 295)</b>          | 13 (-8.87 to 35)                          |
| 14 Breast cancer              | 14 Diabetes                   | 31.9 (-1.51 to 70.6)          | <b>58.1 (19.4 to 98.2)</b>       | <b>-25.9 (-43.5 to -3.35)</b>             |
| 15 Self-harm                  | 15 Cirrhosis liver            | 1.13 (-15.2 to 20.2)          | <b>21.1 (8 to 37.5)</b>          | -8.43 (-18.4 to 2.88)                     |
| 16 Cardiomyopathy             | 16 Pancreatic cancer          | <b>96.4 (19.3 to 200)</b>     | <b>135 (45.1 to 259)</b>         | 28.3 (-16.6 to 83.2)                      |
| 17 Atrial fibrillation        | 17 Parkinson's disease        | <b>96.3 (54 to 147)</b>       | <b>135 (91.3 to 185)</b>         | -3.99 (-18.8 to 11.5)                     |
| 18 Pancreatic cancer          | 18 Self-harm                  | 2.17 (-17.7 to 24.7)          | <b>22.4 (2.57 to 44.3)</b>       | -11.2 (-26.1 to 5.88)                     |
| 19 Road injuries              | 19 Peripheral artery          | <b>123 (55.7 to 199)</b>      | <b>166 (95.5 to 240)</b>         | 8.35 (-10.6 to 28.7)                      |
| 20 Stomach cancer             | 20 Cardiomyopathy             | 15.5 (-8.72 to 44.8)          | <b>38.1 (14.2 to 67.4)</b>       | <b>-20 (-31.8 to -4.93)</b>               |
| 22 Parkinson's disease        | 22 Road injuries              |                               |                                  |                                           |
| 32 Peripheral artery          | 27 Stomach cancer             |                               |                                  |                                           |

### Dominica, Reference scenario

**Legend:**

Communicable, maternal, neonatal and nutritional  
Non-communicable  
Injuries

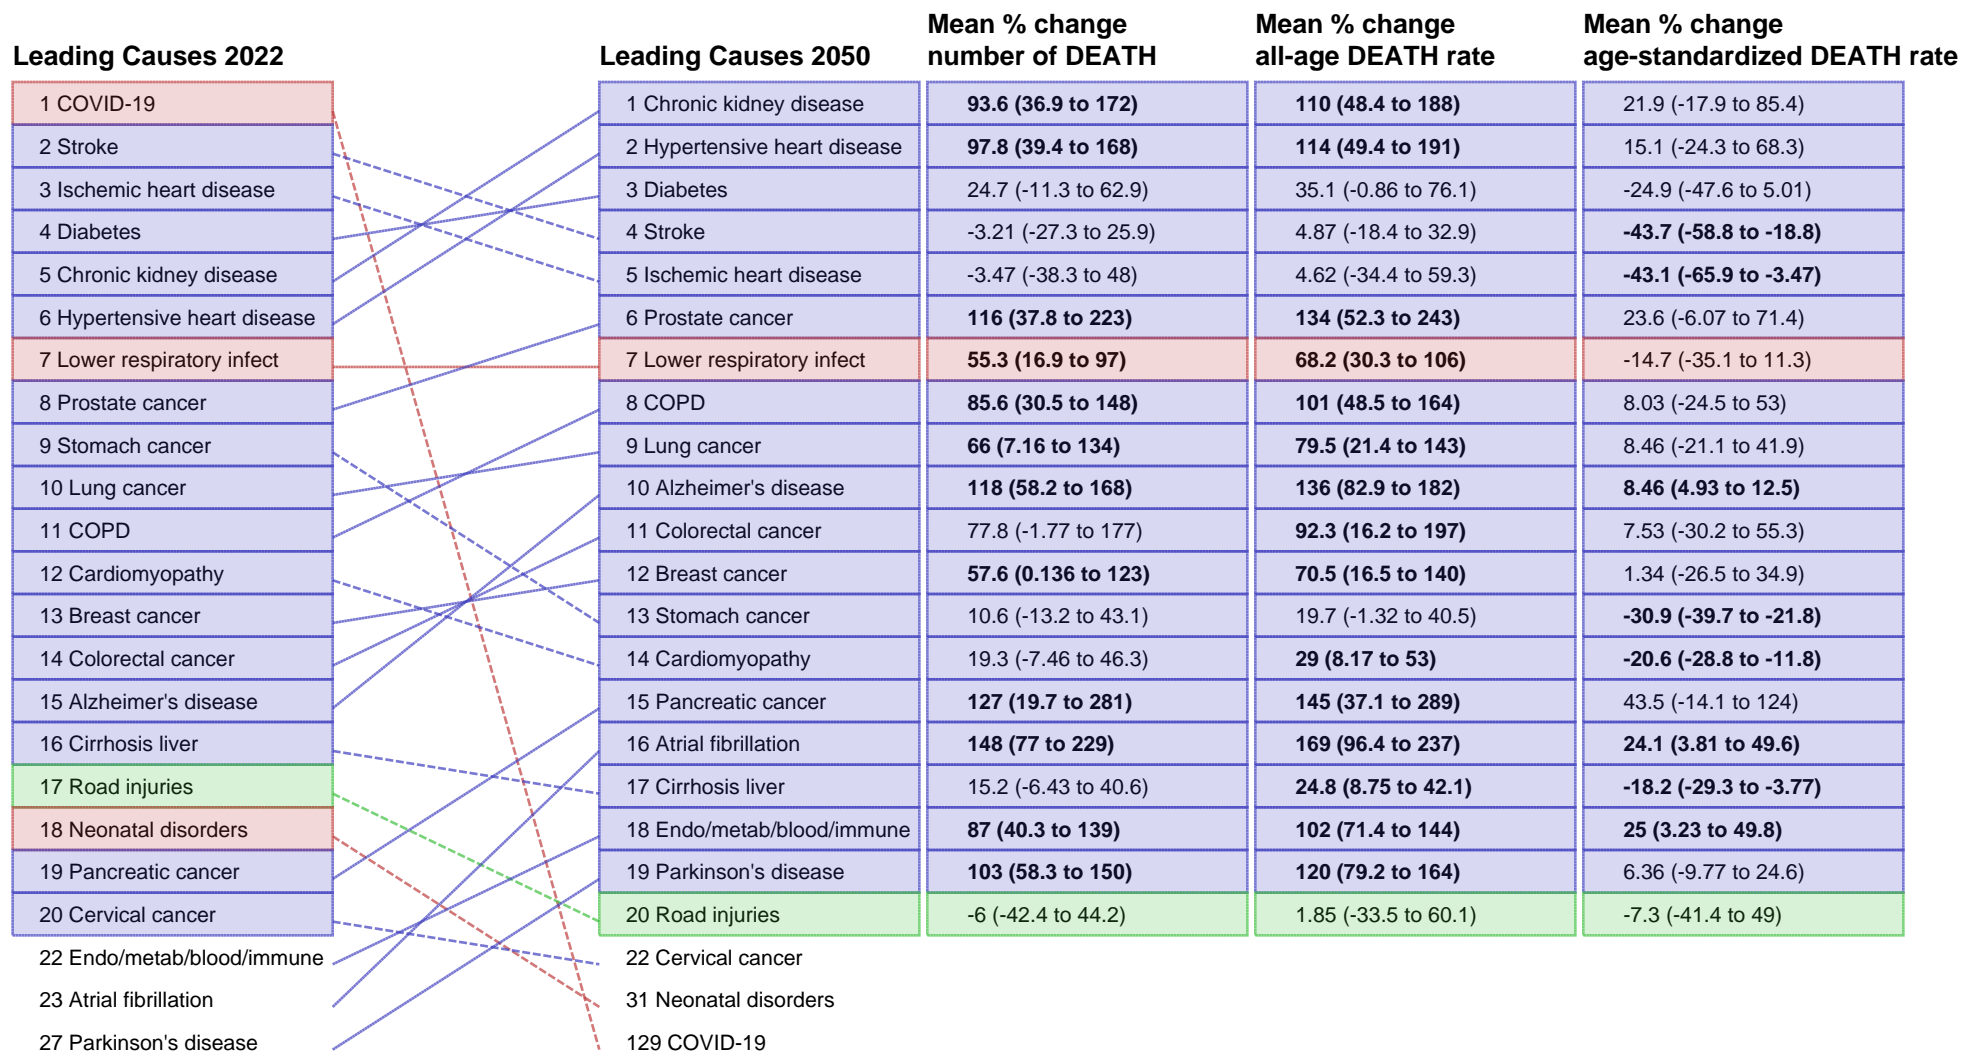

### Dominican Republic, Reference scenario

**Legend:**  
Communicable, maternal, neonatal and nutritional  
Non-communicable  
Injuries

| Leading Causes 2022          | Leading Causes 2050          | Mean % change number of DEATH | Mean % change all-age DEATH rate | Mean % change age-standardized DEATH rate |
|------------------------------|------------------------------|-------------------------------|----------------------------------|-------------------------------------------|
| 1 Ischemic heart disease     | 1 Ischemic heart disease     | 49.6 (-8.52 to 124)           | 30 (-17.4 to 93.1)               | -38 (-63.7 to 0.0948)                     |
| 2 Stroke                     | 2 Stroke                     | <b>42.2 (5.53 to 81.4)</b>    | 23.5 (-3.59 to 52)               | <b>-39.2 (-53.6 to -22.4)</b>             |
| 3 Neonatal disorders         | 3 Chronic kidney disease     | <b>193 (96.6 to 307)</b>      | <b>154 (81.7 to 242)</b>         | 30.7 (-8.78 to 86.6)                      |
| 4 Diabetes                   | 4 Diabetes                   | <b>99.2 (41 to 164)</b>       | <b>73.1 (28.3 to 123)</b>        | -12.8 (-38.2 to 18.5)                     |
| 5 Cirrhosis liver            | 5 Alzheimer's disease        | <b>214 (128 to 297)</b>       | <b>173 (106 to 244)</b>          | <b>3.58 (0.307 to 7.52)</b>               |
| 6 Chronic kidney disease     | 6 Hypertensive heart disease | <b>148 (63.5 to 250)</b>      | <b>116 (55 to 199)</b>           | 1.88 (-29.5 to 49)                        |
| 7 Road injuries              | 7 Cirrhosis liver            | <b>68.5 (36.7 to 100)</b>     | <b>46.4 (29.6 to 67.5)</b>       | <b>-16 (-27.1 to -2.44)</b>               |
| 8 Lower respiratory infect   | 8 Prostate cancer            | <b>174 (69.1 to 321)</b>      | <b>138 (52.2 to 261)</b>         | 2.57 (-25.3 to 33.9)                      |
| 9 Hypertensive heart disease | 9 Lower respiratory infect   | <b>89.7 (44 to 150)</b>       | <b>64.8 (29.1 to 108)</b>        | <b>-24.3 (-37.7 to -6.84)</b>             |
| 10 Interpersonal violence    | 10 Lung cancer               | <b>141 (61.4 to 230)</b>      | <b>109 (42.4 to 189)</b>         | 8.73 (-18.9 to 41.4)                      |
| 11 Alzheimer's disease       | 11 COPD                      | <b>106 (40 to 175)</b>        | <b>79.1 (30.2 to 143)</b>        | -20.4 (-45 to 13.7)                       |
| 12 Lung cancer               | 12 Road injuries             | 4.59 (-35.5 to 56.1)          | -9.28 (-40 to 35.3)              | -19.5 (-48.3 to 23.9)                     |
| 13 Prostate cancer           | 13 Colorectal cancer         | <b>164 (51.9 to 308)</b>      | <b>130 (41.4 to 253)</b>         | 13.6 (-23.5 to 59.8)                      |
| 14 COPD                      | 14 Pancreatic cancer         | <b>236 (85.5 to 428)</b>      | <b>192 (66.1 to 357)</b>         | 50.7 (-4.52 to 126)                       |
| 15 COVID-19                  | 15 Breast cancer             | <b>129 (50.7 to 224)</b>      | <b>99.1 (36.2 to 175)</b>        | 10.4 (-18 to 45.8)                        |
| 16 Colorectal cancer         | 16 Atrial fibrillation       | <b>259 (142 to 372)</b>       | <b>212 (124 to 303)</b>          | <b>20.3 (0.192 to 44.1)</b>               |
| 17 Breast cancer             | 17 Neonatal disorders        | <b>-44.7 (-63.3 to -23.6)</b> | <b>-52.1 (-62.6 to -37.3)</b>    | <b>-26.4 (-41.9 to -7.29)</b>             |
| 18 HIV/AIDS                  | 18 Interpersonal violence    | -34.2 (-63.1 to 11)           | <b>-42.7 (-65 to -1.44)</b>      | -40 (-63.8 to 3.87)                       |
| 19 Stomach cancer            | 19 Parkinson's disease       | <b>167 (101 to 237)</b>       | <b>132 (86.3 to 186)</b>         | -1.48 (-15.3 to 13.4)                     |
| 20 Tuberculosis              | 20 Endo/metab/blood/immune   | <b>92.4 (45.2 to 145)</b>     | <b>67.3 (33.5 to 109)</b>        | 3.41 (-13.7 to 21.9)                      |
| 23 Pancreatic cancer         | 21 Stomach cancer            |                               |                                  |                                           |
| 24 Endo/metab/blood/immune   | 39 Tuberculosis              |                               |                                  |                                           |
| 28 Atrial fibrillation       | 58 HIV/AIDS                  |                               |                                  |                                           |
| 29 Parkinson's disease       | 132 COVID-19                 |                               |                                  |                                           |

### Grenada, Reference scenario

**Legend:**

Communicable, maternal, neonatal and nutritional  
 Non-communicable  
 Injuries

| Leading Causes 2022          | Leading Causes 2050          | Mean % change number of DEATH | Mean % change all-age DEATH rate | Mean % change age-standardized DEATH rate |
|------------------------------|------------------------------|-------------------------------|----------------------------------|-------------------------------------------|
| 1 Ischemic heart disease     | 1 Chronic kidney disease     | 110 (40.6 to 189)             | 133 (57.3 to 226)                | 20.7 (-20.9 to 78.9)                      |
| 2 Diabetes                   | 2 Diabetes                   | 45.4 (5.05 to 95.6)           | 61.2 (16.5 to 118)               | -21.9 (-48 to 11.9)                       |
| 3 Stroke                     | 3 Ischemic heart disease     | 8.06 (-34.4 to 64.9)          | 20 (-25.5 to 83.4)               | -41.7 (-67 to 1.45)                       |
| 4 COVID-19                   | 4 Stroke                     | 11.4 (-17.4 to 44.2)          | 23.4 (-6.52 to 56.9)             | <b>-43.3 (-60.4 to -17.6)</b>             |
| 5 Chronic kidney disease     | 5 Lower respiratory infect   | 77.3 (39.8 to 117)            | 96.2 (58.9 to 133)               | -17 (-36.7 to 9.09)                       |
| 6 Lower respiratory infect   | 6 Prostate cancer            | 149 (49.4 to 270)             | 174 (72.6 to 304)                | 29.5 (-8.57 to 77.3)                      |
| 7 Hypertensive heart disease | 7 Hypertensive heart disease | 107 (48.7 to 179)             | 129 (62.2 to 217)                | 5.53 (-30.3 to 62.9)                      |
| 8 Prostate cancer            | 8 Colorectal cancer          | 99.9 (13.9 to 227)            | 120 (27.6 to 232)                | 8.54 (-31.8 to 53.8)                      |
| 9 Breast cancer              | 9 Breast cancer              | 65.9 (6.41 to 139)            | 82.9 (19.4 to 165)               | 0.401 (-28.6 to 35.3)                     |
| 10 Colorectal cancer         | 10 Alzheimer's disease       | 155 (87.9 to 231)             | 182 (117 to 253)                 | -0.237 (-4.31 to 4.22)                    |
| 11 Cirrhosis liver           | 11 Pancreatic cancer         | 156 (34.1 to 334)             | 181 (53.3 to 372)                | 46.1 (-13.5 to 129)                       |
| 12 Cardiomyopathy            | 12 COPD                      | 97.2 (47.7 to 161)            | 119 (61.5 to 185)                | 2.62 (-33 to 43.5)                        |
| 13 COPD                      | 13 Lung cancer               | 79.3 (11.6 to 170)            | 97.5 (23.6 to 180)               | 7.1 (-27.2 to 46.4)                       |
| 14 Lung cancer               | 14 Bacterial skin            | 243 (91 to 466)               | 281 (109 to 538)                 | 84.1 (-6.52 to 256)                       |
| 15 Alzheimer's disease       | 15 Cirrhosis liver           | 26.9 (3.76 to 53.4)           | 40.5 (19.3 to 65)                | -13.1 (-27.2 to 3.41)                     |
| 16 Lymphoma                  | 16 Endo/metab/blood/immune   | 93.9 (58.7 to 133)            | 115 (79.5 to 157)                | 18.1 (-3.84 to 44.4)                      |
| 17 Pancreatic cancer         | 17 Cardiomyopathy            | 28.5 (1.18 to 63.4)           | 42 (22 to 69.9)                  | <b>-23.3 (-30.7 to -14.1)</b>             |
| 18 Endo/metab/blood/immune   | 18 Lymphoma                  | 50 (0.107 to 110)             | 65.3 (16.2 to 124)               | -1.81 (-27.6 to 27.1)                     |
| 19 Cervical cancer           | 19 Atrial fibrillation       | 195 (115 to 293)              | 225 (145 to 317)                 | <b>18.4 (1.87 to 39.5)</b>                |
| 20 Neonatal disorders        | 20 Falls                     | 103 (45.1 to 186)             | 124 (69.4 to 186)                | 0.856 (-14 to 17.5)                       |
| 23 Falls                     | 25 Cervical cancer           |                               |                                  |                                           |
| 27 Bacterial skin            | 50 Neonatal disorders        |                               |                                  |                                           |
| 30 Atrial fibrillation       | 130 COVID-19                 |                               |                                  |                                           |

### Guyana, Reference scenario

**Legend:**  
Communicable, maternal, neonatal and nutritional  
Non-communicable  
Injuries

| Leading Causes 2022          | Leading Causes 2050          | Mean % change number of DEATH | Mean % change all-age DEATH rate | Mean % change age-standardized DEATH rate |
|------------------------------|------------------------------|-------------------------------|----------------------------------|-------------------------------------------|
| 1 COVID-19                   | 1 Stroke                     | -3.41 (-30.5 to 30.8)         | 19.6 (-13.3 to 62.7)             | <b>-52.8 (-64.3 to -36.3)</b>             |
| 2 Ischemic heart disease     | 2 Ischemic heart disease     | -16.1 (-49.4 to 30.8)         | 4.17 (-33.9 to 60.8)             | <b>-58.1 (-74.7 to -31.7)</b>             |
| 3 Stroke                     | 3 Hypertensive heart disease | <b>87.4 (26 to 166)</b>       | <b>132 (59 to 233)</b>           | -8.93 (-36.9 to 32)                       |
| 4 Diabetes                   | 4 Diabetes                   | 15.1 (-21.5 to 64.5)          | <b>42.5 (1.65 to 101)</b>        | <b>-37.5 (-53.9 to -14.9)</b>             |
| 5 Chronic kidney disease     | 5 Chronic kidney disease     | <b>63 (7.66 to 135)</b>       | <b>102 (38.1 to 196)</b>         | -3.99 (-33.8 to 39)                       |
| 6 Hypertensive heart disease | 6 Lower respiratory infect   | <b>67.6 (21.2 to 126)</b>     | <b>107 (54.4 to 180)</b>         | <b>-22 (-37.4 to -1.06)</b>               |
| 7 Lower respiratory infect   | 7 Prostate cancer            | <b>141 (47.8 to 260)</b>      | <b>198 (93 to 343)</b>           | 1.35 (-24.7 to 31.1)                      |
| 8 Self-harm                  | 8 Cirrhosis liver            | 4.66 (-20.1 to 30.2)          | <b>29.2 (9.09 to 53.1)</b>       | <b>-18.4 (-29.6 to -5.33)</b>             |
| 9 Cirrhosis liver            | 9 Alzheimer's disease        | <b>251 (139 to 378)</b>       | <b>334 (204 to 459)</b>          | 1.2 (-2.38 to 4.37)                       |
| 10 Neonatal disorders        | 10 Self-harm                 | -17 (-39.6 to 13.1)           | 2.25 (-21.6 to 27.3)             | -10.3 (-31.2 to 11.8)                     |
| 11 HIV/AIDS                  | 11 Colorectal cancer         | <b>94.3 (8.12 to 197)</b>     | <b>139 (47.5 to 255)</b>         | 7.43 (-28.3 to 51.9)                      |
| 12 Interpersonal violence    | 12 Breast cancer             | <b>56.7 (0.958 to 118)</b>    | <b>93.2 (37.1 to 164)</b>        | 8.26 (-20.7 to 46.6)                      |
| 13 Prostate cancer           | 13 COPD                      | <b>77.5 (25.2 to 147)</b>     | <b>120 (54 to 201)</b>           | -15.7 (-39.2 to 13.3)                     |
| 14 Road injuries             | 14 Falls                     | <b>99.7 (35.2 to 182)</b>     | <b>146 (80.7 to 246)</b>         | -10.4 (-23.1 to 4.85)                     |
| 15 Breast cancer             | 15 Endo/metab/blood/immune   | <b>64.9 (24.3 to 115)</b>     | <b>104 (65.8 to 149)</b>         | 15.8 (-3.02 to 35.6)                      |
| 16 Colorectal cancer         | 16 Pancreatic cancer         | <b>174 (47.9 to 340)</b>      | <b>237 (93 to 443)</b>           | <b>61.6 (0.12 to 149)</b>                 |
| 17 Cardiomyopathy            | 17 Cardiomyopathy            | 18.3 (-9.78 to 48.1)          | <b>46 (22.1 to 75.6)</b>         | <b>-22.4 (-29.1 to -15.5)</b>             |
| 18 Malaria                   | 18 Lung cancer               | <b>82.9 (14.5 to 159)</b>     | <b>126 (54.7 to 204)</b>         | 14.1 (-15.6 to 45.9)                      |
| 19 COPD                      | 19 Interpersonal violence    | <b>-45.8 (-70.5 to -11.6)</b> | -33.5 (-57.6 to 3.28)            | -31.5 (-56.7 to 10.9)                     |
| 20 Endo/metab/blood/immune   | 20 Urinary diseases          | <b>148 (78.8 to 234)</b>      | <b>207 (126 to 324)</b>          | 18.8 (-8.13 to 51)                        |
| 21 Falls                     | 21 Road injuries             |                               |                                  |                                           |
| 22 Alzheimer's disease       | 24 Neonatal disorders        |                               |                                  |                                           |
| 27 Lung cancer               | 26 Malaria                   |                               |                                  |                                           |
| 33 Urinary diseases          | 38 HIV/AIDS                  |                               |                                  |                                           |
| 34 Pancreatic cancer         | 132 COVID-19                 |                               |                                  |                                           |

### Haiti, Reference scenario

**Legend:**

Communicable, maternal, neonatal and nutritional  
 Non-communicable  
 Injuries

| Leading Causes 2022           | Leading Causes 2050          | Mean % change number of DEATH | Mean % change all-age DEATH rate | Mean % change age-standardized DEATH rate |
|-------------------------------|------------------------------|-------------------------------|----------------------------------|-------------------------------------------|
| 1 Ischemic heart disease      | 1 Ischemic heart disease     | 69.7 (-2.5 to 162)            | 35.3 (-17.7 to 111)              | -32.8 (-63.3 to 18.5)                     |
| 2 Stroke                      | 2 Stroke                     | <b>49.9 (0.643 to 107)</b>    | 19.4 (-11 to 58.6)               | <b>-39.5 (-59.5 to -9.16)</b>             |
| 3 Nature disaster             | 3 Nature disaster            | inf (-100 to nan)             | inf (-100 to nan)                | inf (-100 to nan)                         |
| 4 Lower respiratory infect    | 4 Diabetes                   | <b>76.2 (15.2 to 164)</b>     | 40.4 (-5.83 to 97)               | -26.3 (-53.9 to 13.3)                     |
| 5 Neonatal disorders          | 5 Lower respiratory infect   | 2.39 (-27.3 to 39.2)          | -18.5 (-36.3 to 4.55)            | <b>-38.2 (-53.8 to -20.9)</b>             |
| 6 Diabetes                    | 6 Chronic kidney disease     | <b>163 (68.7 to 280)</b>      | <b>110 (44.4 to 211)</b>         | 18.5 (-24.7 to 83.8)                      |
| 7 HIV/AIDS                    | 7 Hypertensive heart disease | <b>146 (62.2 to 247)</b>      | <b>96.2 (39.6 to 172)</b>        | -8.65 (-43.2 to 36.9)                     |
| 8 Diarrheal diseases          | 8 Cirrhosis liver            | <b>54.2 (16.2 to 97.4)</b>    | <b>22.9 (2.35 to 51.2)</b>       | <b>-28.2 (-42 to -10.8)</b>               |
| 9 Congenital defects          | 9 Prostate cancer            | <b>210 (68.1 to 397)</b>      | <b>146 (44.1 to 284)</b>         | 1.42 (-26.1 to 38.3)                      |
| 10 Road injuries              | 10 COPD                      | <b>81.5 (23.2 to 156)</b>     | <b>44.6 (5.83 to 96)</b>         | <b>-33.7 (-54.9 to -4.69)</b>             |
| 11 Interpersonal violence     | 11 Road injuries             | 1.04 (-44.3 to 78.8)          | -19.5 (-52.3 to 36.1)            | -24.9 (-55.3 to 27)                       |
| 12 Cirrhosis liver            | 12 Neonatal disorders        | <b>-51.8 (-70.1 to -24.6)</b> | <b>-61.7 (-73.8 to -45.4)</b>    | <b>-37.8 (-54.9 to -12.8)</b>             |
| 13 COVID-19                   | 13 Diarrheal diseases        | -39.1 (-69.9 to 9.04)         | <b>-51.5 (-74 to -14.9)</b>      | <b>-45.3 (-70.2 to -1.87)</b>             |
| 14 Chronic kidney disease     | 14 Colorectal cancer         | <b>160 (35.4 to 336)</b>      | <b>107 (19.3 to 248)</b>         | 4.31 (-33.8 to 58.3)                      |
| 15 Hypertensive heart disease | 15 Breast cancer             | <b>112 (26.1 to 224)</b>      | <b>68.4 (8.16 to 149)</b>        | 0.237 (-32.2 to 38.7)                     |
| 16 COPD                       | 16 Interpersonal violence    | -22.4 (-57 to 34.3)           | -38.3 (-63.1 to 6.5)             | -39.3 (-63.6 to 5.11)                     |
| 17 Tuberculosis               | 17 Congenital defects        | <b>-41.4 (-57.8 to -20.6)</b> | <b>-53.4 (-62.5 to -42.7)</b>    | <b>-30 (-40 to -17.2)</b>                 |
| 18 Drowning                   | 18 Cervical cancer           | <b>46.8 (8.05 to 96.8)</b>    | 17.1 (-7.41 to 48.3)             | <b>-25 (-41.6 to -5.14)</b>               |
| 19 Maternal disorders         | 19 Stomach cancer            | <b>54.4 (16.2 to 99.5)</b>    | <b>23 (2.61 to 49.7)</b>         | <b>-36.2 (-43.6 to -28.2)</b>             |
| 20 Pertussis                  | 20 Alzheimer's disease       | <b>237 (103 to 404)</b>       | <b>168 (78.3 to 280)</b>         | 2.14 (-1.18 to 5.07)                      |
| 21 Cervical cancer            | 26 HIV/AIDS                  |                               |                                  |                                           |
| 22 Stomach cancer             | 28 Tuberculosis              |                               |                                  |                                           |
| 23 Prostate cancer            | 30 Drowning                  |                               |                                  |                                           |
| 24 Breast cancer              | 39 Maternal disorders        |                               |                                  |                                           |
| 27 Colorectal cancer          | 46 Pertussis                 |                               |                                  |                                           |
| 36 Alzheimer's disease        | 131 COVID-19                 |                               |                                  |                                           |



### Jamaica, Reference scenario

**Legend:**  
Communicable, maternal, neonatal and nutritional  
Non-communicable  
Injuries

| Leading Causes 2022          | Leading Causes 2050          | Mean % change number of DEATH | Mean % change all-age DEATH rate | Mean % change age-standardized DEATH rate |
|------------------------------|------------------------------|-------------------------------|----------------------------------|-------------------------------------------|
| 1 Stroke                     | 1 Diabetes                   | <b>71.2 (20.4 to 140)</b>     | <b>89.8 (36.3 to 157)</b>        | -13.8 (-38.5 to 20.7)                     |
| 2 Diabetes                   | 2 Stroke                     | 24.2 (-5.89 to 67.2)          | <b>37.7 (5.63 to 82.2)</b>       | <b>-35.7 (-51 to -9.19)</b>               |
| 3 COVID-19                   | 3 Chronic kidney disease     | <b>143 (63.1 to 252)</b>      | <b>170 (86.7 to 288)</b>         | 34 (-7.6 to 100)                          |
| 4 Ischemic heart disease     | 4 Hypertensive heart disease | <b>118 (47.6 to 217)</b>      | <b>142 (66 to 238)</b>           | 16 (-21.1 to 73.1)                        |
| 5 Hypertensive heart disease | 5 Ischemic heart disease     | 30 (-23.8 to 111)             | 44.2 (-10.7 to 138)              | -33.3 (-58.8 to 12.7)                     |
| 6 Chronic kidney disease     | 6 Prostate cancer            | <b>108 (33.3 to 193)</b>      | <b>130 (52.4 to 222)</b>         | 0.678 (-25.9 to 29.2)                     |
| 7 Prostate cancer            | 7 Alzheimer's disease        | <b>110 (45.5 to 184)</b>      | <b>132 (73.7 to 192)</b>         | 3.35 (-0.209 to 6.82)                     |
| 8 Interpersonal violence     | 8 Colorectal cancer          | <b>97.5 (19.7 to 196)</b>     | <b>118 (35.7 to 222)</b>         | 3.93 (-32.2 to 43.3)                      |
| 9 Alzheimer's disease        | 9 Lung cancer                | <b>85.4 (18.8 to 160)</b>     | <b>105 (35.6 to 189)</b>         | -0.354 (-29.5 to 29.3)                    |
| 10 Lung cancer               | 10 Breast cancer             | <b>72.2 (18.2 to 132)</b>     | <b>90.6 (33.2 to 159)</b>        | 0.707 (-26 to 30.1)                       |
| 11 Colorectal cancer         | 11 COPD                      | <b>70.6 (21.8 to 152)</b>     | <b>89.1 (41.2 to 167)</b>        | -13.9 (-35.2 to 24.2)                     |
| 12 COPD                      | 12 Lower respiratory infect  | <b>47.8 (9.71 to 101)</b>     | <b>63.8 (25.1 to 109)</b>        | <b>-24.6 (-40.1 to -1.11)</b>             |
| 13 Breast cancer             | 13 Urinary diseases          | <b>171 (95.2 to 274)</b>      | <b>200 (127 to 294)</b>          | <b>35.4 (5.09 to 83.5)</b>                |
| 14 Lower respiratory infect  | 14 Interpersonal violence    | <b>-39 (-60.8 to -3.03)</b>   | -32.6 (-54.7 to 5.69)            | <b>-39.7 (-59.8 to -6.55)</b>             |
| 15 HIV/AIDS                  | 15 Atrial fibrillation       | <b>142 (65.6 to 228)</b>      | <b>167 (101 to 247)</b>          | <b>16.8 (0.678 to 40)</b>                 |
| 16 Neonatal disorders        | 16 Pancreatic cancer         | <b>159 (51.4 to 315)</b>      | <b>186 (68.7 to 345)</b>         | 37.9 (-16.1 to 109)                       |
| 17 Stomach cancer            | 17 Stomach cancer            | 23.7 (-1.39 to 59.2)          | <b>37.1 (15.2 to 68)</b>         | <b>-34.3 (-42.2 to -25)</b>               |
| 18 Cervical cancer           | 18 Parkinson's disease       | <b>112 (62.7 to 184)</b>      | <b>134 (87.6 to 195)</b>         | 0.683 (-13.9 to 16.5)                     |
| 19 Urinary diseases          | 19 Cervical cancer           | <b>30.6 (2.41 to 64.2)</b>    | <b>44.7 (20.3 to 75.4)</b>       | -18.3 (-33.6 to 0.916)                    |
| 20 Atrial fibrillation       | 20 Decubitus ulcer           | 61.8 (-4.04 to 141)           | <b>78.8 (7.29 to 160)</b>        | -20.4 (-40 to 1.64)                       |
| 22 Decubitus ulcer           | 37 HIV/AIDS                  |                               |                                  |                                           |
| 25 Parkinson's disease       | 44 Neonatal disorders        |                               |                                  |                                           |
| 26 Pancreatic cancer         | 130 COVID-19                 |                               |                                  |                                           |

### Puerto Rico, Reference scenario

**Legend:**

Communicable, maternal, neonatal and nutritional  
 Non-communicable  
 Injuries

| Leading Causes 2022           | Leading Causes 2050          | Mean % change number of DEATH | Mean % change all-age DEATH rate | Mean % change age-standardized DEATH rate |
|-------------------------------|------------------------------|-------------------------------|----------------------------------|-------------------------------------------|
| 1 Ischemic heart disease      | 1 Chronic kidney disease     | 91.6 (40.8 to 163)            | 169 (95.8 to 269)                | 14.4 (-13.6 to 53.2)                      |
| 2 Diabetes                    | 2 Alzheimer's disease        | 109 (66.2 to 158)             | 193 (140 to 257)                 | -6.23 (-8.89 to -3.4)                     |
| 3 Chronic kidney disease      | 3 Ischemic heart disease     | -19.9 (-45.6 to 15.4)         | 12.6 (-23.6 to 59.2)             | -53.5 (-67.3 to -33.7)                    |
| 4 COVID-19                    | 4 Diabetes                   | -5.05 (-25 to 21.8)           | 33.4 (1.18 to 68.6)              | -40.8 (-53.1 to -25.2)                    |
| 5 Alzheimer's disease         | 5 COPD                       | 79.8 (36 to 127)              | 153 (79 to 224)                  | -3.97 (-26 to 23.1)                       |
| 6 Stroke                      | 6 Hypertensive heart disease | 74.6 (19.9 to 136)            | 145 (71.1 to 235)                | 2.86 (-23.4 to 39.2)                      |
| 7 COPD                        | 7 Lower respiratory infect   | 46.4 (8.69 to 87.4)           | 106 (54.4 to 169)                | -19.3 (-33.8 to -1.39)                    |
| 8 Lower respiratory infect    | 8 Colorectal cancer          | 29.6 (-15.1 to 84)            | 81.7 (27 to 152)                 | -11.2 (-35.5 to 17.4)                     |
| 9 Colorectal cancer           | 9 Endo/metab/blood/immune    | 86.5 (48.8 to 136)            | 162 (109 to 224)                 | 14.2 (1.63 to 30)                         |
| 10 Hypertensive heart disease | 10 Stroke                    | -18.6 (-34.7 to -0.187)       | 14.3 (-7.41 to 41.1)             | -49 (-57.9 to -37.6)                      |
| 11 Cirrhosis liver            | 11 Urinary diseases          | 157 (90.4 to 234)             | 261 (165 to 379)                 | 31.1 (4.4 to 60.1)                        |
| 12 Prostate cancer            | 12 Prostate cancer           | 50.1 (1.67 to 107)            | 110 (49.2 to 198)                | -8.02 (-26.4 to 12)                       |
| 13 Lung cancer                | 13 Lung cancer               | 30.1 (-4.86 to 70.4)          | 82.5 (44.1 to 140)               | -5.16 (-22.1 to 15.8)                     |
| 14 Endo/metab/blood/immune    | 14 Atrial fibrillation       | 115 (61.9 to 176)             | 201 (132 to 278)                 | 5.22 (-10.5 to 26.2)                      |
| 15 Interpersonal violence     | 15 Bacterial skin            | 207 (102 to 362)              | 332 (176 to 546)                 | 75.2 (17.7 to 166)                        |
| 16 Breast cancer              | 16 Pancreatic cancer         | 60.8 (3.8 to 129)             | 125 (51.8 to 223)                | 18.9 (-14.7 to 67)                        |
| 17 Pancreatic cancer          | 17 Cirrhosis liver           | -8.94 (-21.4 to 5.72)         | 27.8 (12 to 44.5)                | -20.7 (-28.6 to -13.3)                    |
| 18 Urinary diseases           | 18 Breast cancer             | 15.8 (-16.9 to 56.8)          | 62.3 (22.9 to 115)               | -13.3 (-28.1 to 5.67)                     |
| 19 Atrial fibrillation        | 19 Parkinson's disease       | 48.1 (17.1 to 80.9)           | 108 (67.1 to 160)                | -8.95 (-21.6 to 6.22)                     |
| 20 Parkinson's disease        | 20 Falls                     | 52.1 (11.9 to 97.7)           | 113 (65.1 to 180)                | -16.1 (-27 to -2.3)                       |
| 21 Falls                      | 38 Interpersonal violence    |                               |                                  |                                           |
| 26 Bacterial skin             | 129 COVID-19                 |                               |                                  |                                           |

### Saint Kitts and Nevis, Reference scenario

**Legend:**  
Communicable, maternal, neonatal and nutritional  
Non-communicable  
Injuries

| Leading Causes 2022          | Leading Causes 2050          | Mean % change number of DEATH | Mean % change all-age DEATH rate | Mean % change age-standardized DEATH rate |
|------------------------------|------------------------------|-------------------------------|----------------------------------|-------------------------------------------|
| 1 Stroke                     | 1 Chronic kidney disease     | 142 (55.3 to 257)             | 174 (94.2 to 294)                | 11.2 (-24.9 to 71.6)                      |
| 2 Ischemic heart disease     | 2 Stroke                     | 21.3 (-14.9 to 66.6)          | 37.5 (1.11 to 82.1)              | <b>-51.3 (-66.3 to -27.6)</b>             |
| 3 Chronic kidney disease     | 3 Ischemic heart disease     | 15.9 (-34.6 to 80.1)          | 31.5 (-22.3 to 99.1)             | <b>-51.8 (-73.5 to -19.6)</b>             |
| 4 COVID-19                   | 4 Prostate cancer            | 192 (74.2 to 359)             | 231 (106 to 382)                 | 5.3 (-28.8 to 41.6)                       |
| 5 Diabetes                   | 5 Diabetes                   | 58.6 (4.43 to 126)            | 79.7 (25.9 to 147)               | -30.6 (-52.4 to 2.15)                     |
| 6 Lower respiratory infect   | 6 Hypertensive heart disease | 165 (74.6 to 285)             | 201 (103 to 309)                 | 4.62 (-33 to 62.7)                        |
| 7 Prostate cancer            | 7 Lower respiratory infect   | 120 (64.7 to 197)             | 149 (102 to 212)                 | -20.2 (-39.1 to 6.86)                     |
| 8 Hypertensive heart disease | 8 Colorectal cancer          | 117 (22.3 to 245)             | 146 (43.9 to 268)                | -2.33 (-37 to 41.9)                       |
| 9 HIV/AIDS                   | 9 COPD                       | 140 (61.5 to 240)             | 172 (101 to 268)                 | -4.43 (-33 to 42.2)                       |
| 10 Cirrhosis liver           | 10 Alzheimer's disease       | 237 (141 to 352)              | 281 (199 to 366)                 | 2.43 (-1.13 to 6.24)                      |
| 11 Breast cancer             | 11 Breast cancer             | 83.3 (15.8 to 172)            | 107 (37.9 to 187)                | -5.29 (-30.9 to 25)                       |
| 12 Alcohol use disorders     | 12 Urinary diseases          | 233 (143 to 358)              | 277 (192 to 420)                 | 32.9 (-3.89 to 91.2)                      |
| 13 Colorectal cancer         | 13 Cirrhosis liver           | 19.3 (-6.35 to 51)            | 35.2 (14.5 to 57.1)              | <b>-26.8 (-37.6 to -14.5)</b>             |
| 14 COPD                      | 14 Pancreatic cancer         | 185 (46.1 to 396)             | 222 (72.8 to 446)                | 34.1 (-24.2 to 113)                       |
| 15 Interpersonal violence    | 15 Parkinson's disease       | 211 (130 to 290)              | 252 (185 to 320)                 | -1.66 (-17.3 to 15.3)                     |
| 16 Cardiomyopathy            | 16 Lung cancer               | 84.7 (20.4 to 178)            | 109 (36.6 to 196)                | -5.59 (-33.3 to 27.4)                     |
| 17 Lung cancer               | 17 Atrial fibrillation       | 278 (155 to 413)              | 328 (219 to 444)                 | 10.4 (-8.13 to 33.1)                      |
| 18 Alzheimer's disease       | 18 Alcohol use disorders     | 5.48 (-21.7 to 46)            | 19.5 (-6.4 to 58.1)              | -18.9 (-35.9 to 5.81)                     |
| 19 Urinary diseases          | 19 Cardiomyopathy            | 43.4 (9.84 to 84.7)           | 62.3 (34.8 to 97.6)              | <b>-29 (-36.1 to -22.2)</b>               |
| 20 Stomach cancer            | 20 Endo/metab/blood/immune   | 136 (70.5 to 218)             | 167 (120 to 230)                 | 13.9 (-6.61 to 40.9)                      |
| 21 Pancreatic cancer         | 23 Stomach cancer            |                               |                                  |                                           |
| 25 Parkinson's disease       | 32 HIV/AIDS                  |                               |                                  |                                           |
| 26 Endo/metab/blood/immune   | 41 Interpersonal violence    |                               |                                  |                                           |
| 30 Atrial fibrillation       | 128 COVID-19                 |                               |                                  |                                           |

### Saint Lucia, Reference scenario

**Legend:**

Communicable, maternal, neonatal and nutritional  
 Non-communicable  
 Injuries

| Leading Causes 2022          | Leading Causes 2050          | Mean % change number of DEATH | Mean % change all-age DEATH rate | Mean % change age-standardized DEATH rate |
|------------------------------|------------------------------|-------------------------------|----------------------------------|-------------------------------------------|
| 1 COVID-19                   | 1 Stroke                     | 20.7 (-16.7 to 69.5)          | 23.2 (-14.3 to 70.4)             | <b>-47.5 (-64 to -21.8)</b>               |
| 2 Stroke                     | 2 Chronic kidney disease     | 124 (40.9 to 219)             | 129 (49 to 228)                  | 8.65 (-30.4 to 74.5)                      |
| 3 Diabetes                   | 3 Diabetes                   | 53 (-2.18 to 115)             | 56.2 (6.95 to 121)               | -30.3 (-54 to 10.5)                       |
| 4 Ischemic heart disease     | 4 Hypertensive heart disease | 127 (52 to 225)               | 132 (58.1 to 233)                | -1.61 (-37.3 to 54.4)                     |
| 5 Chronic kidney disease     | 5 Prostate cancer            | 130 (32.5 to 254)             | 133 (43.2 to 262)                | -7.56 (-34.6 to 22.9)                     |
| 6 Hypertensive heart disease | 6 Ischemic heart disease     | 22.4 (-33.3 to 97.9)          | 25 (-25.9 to 107)                | <b>-46 (-70.6 to -5.25)</b>               |
| 7 Prostate cancer            | 7 COPD                       | 95.4 (40.4 to 160)            | 99.5 (47.8 to 176)               | -14.8 (-40.5 to 27.6)                     |
| 8 Lower respiratory infect   | 8 Lower respiratory infect   | 81.2 (37.2 to 136)            | 84.7 (46.3 to 126)               | -26.9 (-45.4 to 0.562)                    |
| 9 COPD                       | 9 Alzheimer's disease        | 159 (93.4 to 233)             | 164 (108 to 221)                 | <b>-6.83 (-9.79 to -3.52)</b>             |
| 10 Cirrhosis liver           | 10 Colorectal cancer         | 106 (7.06 to 246)             | 110 (18.3 to 242)                | -4.09 (-40.2 to 41.8)                     |
| 11 Alzheimer's disease       | 11 Breast cancer             | 67.7 (1.73 to 149)            | 70.6 (8.71 to 147)               | -8.83 (-36.3 to 25.5)                     |
| 12 Breast cancer             | 12 Lung cancer               | 84 (9.88 to 167)              | 87.1 (20.4 to 164)               | -4.81 (-33.6 to 28.3)                     |
| 13 Cardiomyopathy            | 13 Cirrhosis liver           | 32.7 (7.79 to 62)             | 35.4 (13.7 to 59.5)              | <b>-19.5 (-31.3 to -2.44)</b>             |
| 14 Interpersonal violence    | 14 Atrial fibrillation       | 198 (113 to 297)              | 203 (132 to 286)                 | 4.09 (-15 to 25.9)                        |
| 15 Lung cancer               | 15 Pancreatic cancer         | 168 (31.2 to 354)             | 172 (42.3 to 358)                | 32.6 (-24.5 to 109)                       |
| 16 Colorectal cancer         | 16 Urinary diseases          | 191 (101 to 298)              | 196 (124 to 282)                 | 21.8 (-10.2 to 63.3)                      |
| 17 Stomach cancer            | 17 Cardiomyopathy            | 36.2 (5.12 to 70.9)           | 38.7 (16.8 to 65.9)              | <b>-28.1 (-34.9 to -20.9)</b>             |
| 18 Road injuries             | 18 Stomach cancer            | 27.5 (0.318 to 60.5)          | 30 (8.08 to 54)                  | <b>-37.8 (-44.7 to -30.2)</b>             |
| 19 Other cardiovascular      | 19 Parkinson's disease       | 136 (79.6 to 199)             | 140 (95 to 193)                  | -10.3 (-25.8 to 4.36)                     |
| 20 Neonatal disorders        | 20 Other cardiovascular      | 62.5 (21.5 to 107)            | 65.6 (31.9 to 107)               | <b>-25.6 (-41 to -4.44)</b>               |
| 21 Pancreatic cancer         | 28 Road injuries             |                               |                                  |                                           |
| 22 Atrial fibrillation       | 35 Interpersonal violence    |                               |                                  |                                           |
| 24 Urinary diseases          | 53 Neonatal disorders        |                               |                                  |                                           |
| 25 Parkinson's disease       | 131 COVID-19                 |                               |                                  |                                           |

### Saint Vincent and the Grenadines, Reference scenario

**Legend:**  
Communicable, maternal, neonatal and nutritional  
Non-communicable  
Injuries

| Leading Causes 2022          | Leading Causes 2050          | Mean % change number of DEATH | Mean % change all-age DEATH rate | Mean % change age-standardized DEATH rate |
|------------------------------|------------------------------|-------------------------------|----------------------------------|-------------------------------------------|
| 1 Ischemic heart disease     | 1 Hypertensive heart disease | <b>93.3 (29.7 to 159)</b>     | <b>128 (54 to 206)</b>           | 9.46 (-31 to 69.9)                        |
| 2 Stroke                     | 2 Ischemic heart disease     | 9.18 (-34.7 to 64.9)          | 28.6 (-22.2 to 96)               | -38.7 (-67.6 to 9.38)                     |
| 3 COVID-19                   | 3 Diabetes                   | 35.2 (-4.14 to 89.3)          | <b>59.2 (14.7 to 112)</b>        | -18 (-45.1 to 21.5)                       |
| 4 Diabetes                   | 4 Stroke                     | 4.6 (-20.7 to 39.8)           | 23.2 (-3.92 to 58.6)             | <b>-39.7 (-57.2 to -12.4)</b>             |
| 5 Hypertensive heart disease | 5 Chronic kidney disease     | <b>91.3 (30.7 to 164)</b>     | <b>125 (57.3 to 206)</b>         | 20.6 (-23.6 to 83.3)                      |
| 6 Chronic kidney disease     | 6 Prostate cancer            | <b>81.7 (8.58 to 176)</b>     | <b>113 (29 to 224)</b>           | -4.44 (-31.7 to 31.1)                     |
| 7 Prostate cancer            | 7 Lower respiratory infect   | <b>53.4 (19.8 to 86.3)</b>    | <b>80.5 (43 to 113)</b>          | -20.7 (-39.7 to 4.48)                     |
| 8 Lower respiratory infect   | 8 Alzheimer's disease        | <b>127 (67.8 to 178)</b>      | <b>167 (107 to 230)</b>          | <b>5.6 (2.56 to 9.1)</b>                  |
| 9 Interpersonal violence     | 9 Breast cancer              | <b>62.3 (0.923 to 136)</b>    | <b>90.6 (22.9 to 189)</b>        | 12 (-22.2 to 53.6)                        |
| 10 Breast cancer             | 10 Colorectal cancer         | <b>84.9 (4.18 to 183)</b>     | <b>117 (26.5 to 233)</b>         | 11.9 (-27.5 to 63.3)                      |
| 11 Cirrhosis liver           | 11 Urinary diseases          | <b>140 (85.9 to 204)</b>      | <b>182 (123 to 264)</b>          | 32.2 (-3.48 to 78)                        |
| 12 HIV/AIDS                  | 12 Cirrhosis liver           | 18.1 (-3.61 to 43.1)          | <b>39 (18.4 to 64.7)</b>         | -3.99 (-19 to 16.4)                       |
| 13 Colorectal cancer         | 13 COPD                      | <b>60.4 (16.2 to 118)</b>     | <b>88.7 (40 to 148)</b>          | -10.9 (-38.5 to 29.7)                     |
| 14 Alzheimer's disease       | 14 Endo/metab/blood/immune   | <b>78.4 (38.4 to 118)</b>     | <b>110 (72.5 to 148)</b>         | 19 (-6.57 to 43.8)                        |
| 15 Other cardiovascular      | 15 Atrial fibrillation       | <b>163 (87.7 to 250)</b>      | <b>209 (133 to 307)</b>          | 19.2 (-2.43 to 44.1)                      |
| 16 COPD                      | 16 Lung cancer               | <b>60.9 (0.563 to 133)</b>    | <b>89 (21.3 to 170)</b>          | 6.81 (-25.5 to 44.1)                      |
| 17 Stomach cancer            | 17 Pancreatic cancer         | <b>128 (14.6 to 267)</b>      | <b>168 (43.7 to 336)</b>         | 47.7 (-13.8 to 134)                       |
| 18 Lung cancer               | 18 Other cardiovascular      | 27.9 (-0.282 to 57.5)         | <b>50.4 (22.3 to 84.6)</b>       | -21.8 (-37.9 to 0.556)                    |
| 19 Endo/metab/blood/immune   | 19 Falls                     | <b>66.8 (10.3 to 126)</b>     | <b>96 (41 to 156)</b>            | -7.62 (-25.2 to 8.98)                     |
| 20 Cervical cancer           | 20 Stomach cancer            | 4.31 (-16.3 to 27.2)          | <b>22.7 (4.2 to 44.3)</b>        | <b>-34.1 (-42.1 to -25.4)</b>             |
| 21 Urinary diseases          | 22 Cervical cancer           |                               |                                  |                                           |
| 22 Falls                     | 24 Interpersonal violence    |                               |                                  |                                           |
| 27 Pancreatic cancer         | 53 HIV/AIDS                  |                               |                                  |                                           |
| 28 Atrial fibrillation       | 129 COVID-19                 |                               |                                  |                                           |

### Suriname, Reference scenario

**Legend:**  
Communicable, maternal, neonatal and nutritional  
Non-communicable  
Injuries

| Leading Causes 2022          | Leading Causes 2050          | Mean % change number of DEATH | Mean % change all-age DEATH rate | Mean % change age-standardized DEATH rate |
|------------------------------|------------------------------|-------------------------------|----------------------------------|-------------------------------------------|
| 1 Stroke                     | 1 Ischemic heart disease     | 39.3 (-21.9 to 113)           | 23.1 (-29.5 to 89.4)             | -38.7 (-64.5 to 5.04)                     |
| 2 Ischemic heart disease     | 2 Stroke                     | 32.2 (-0.18 to 75.8)          | 16.7 (-12.8 to 54.3)             | <b>-41.4 (-57.6 to -19)</b>               |
| 3 COVID-19                   | 3 Chronic kidney disease     | <b>156 (67.9 to 263)</b>      | <b>126 (48.7 to 216)</b>         | 22.8 (-18.3 to 78.7)                      |
| 4 Diabetes                   | 4 Diabetes                   | <b>61.4 (16.9 to 117)</b>     | <b>42.4 (6.15 to 97.2)</b>       | -23.6 (-46.3 to 8.86)                     |
| 5 Chronic kidney disease     | 5 Lower respiratory infect   | <b>94.3 (44.7 to 149)</b>     | <b>71.3 (26.7 to 120)</b>        | <b>-26.4 (-42.3 to -7.25)</b>             |
| 6 Lower respiratory infect   | 6 Alzheimer's disease        | <b>257 (131 to 386)</b>       | <b>214 (118 to 317)</b>          | 0.0721 (-3.27 to 3.64)                    |
| 7 Self-harm                  | 7 Hypertensive heart disease | <b>144 (60.1 to 250)</b>      | <b>116 (40.7 to 205)</b>         | 4.72 (-30.8 to 57.9)                      |
| 8 Hypertensive heart disease | 8 Prostate cancer            | <b>180 (55.6 to 333)</b>      | <b>146 (41 to 281)</b>           | 6.13 (-27.3 to 44.7)                      |
| 9 Neonatal disorders         | 9 COPD                       | <b>118 (55.6 to 200)</b>      | <b>92.6 (37.5 to 164)</b>        | -10.9 (-36.9 to 29)                       |
| 10 Cirrhosis liver           | 10 Colorectal cancer         | <b>118 (23.6 to 247)</b>      | <b>91.5 (11.7 to 195)</b>        | 2.51 (-33.3 to 47.6)                      |
| 11 Road injuries             | 11 Lung cancer               | <b>88 (18.9 to 177)</b>       | <b>65.2 (11 to 136)</b>          | -2.17 (-28.6 to 32.2)                     |
| 12 HIV/AIDS                  | 12 Cirrhosis liver           | <b>35.3 (11 to 62.5)</b>      | <b>19.3 (2.24 to 39.3)</b>       | <b>-17.5 (-30.4 to -4.29)</b>             |
| 13 COPD                      | 13 Self-harm                 | 13.5 (-12.2 to 45.1)          | 0.0655 (-19.9 to 25.2)           | -11.5 (-31.7 to 14)                       |
| 14 Prostate cancer           | 14 Urinary diseases          | <b>223 (134 to 350)</b>       | <b>184 (109 to 269)</b>          | 28.1 (-2.69 to 66.4)                      |
| 15 Alzheimer's disease       | 15 Breast cancer             | <b>81.7 (13.3 to 168)</b>     | <b>59.6 (6.49 to 127)</b>        | -1.95 (-29.9 to 34.1)                     |
| 16 Lung cancer               | 16 Atrial fibrillation       | <b>268 (137 to 410)</b>       | <b>224 (125 to 329)</b>          | 10.9 (-4.43 to 34.7)                      |
| 17 Colorectal cancer         | 17 Pancreatic cancer         | <b>177 (43.2 to 371)</b>      | <b>143 (32 to 313)</b>           | 39.1 (-19 to 116)                         |
| 18 Breast cancer             | 18 Road injuries             | 5.16 (-38 to 66.9)            | -7 (-42.8 to 51.2)               | -11.8 (-47.4 to 45.9)                     |
| 19 Interpersonal violence    | 19 Falls                     | <b>148 (75.6 to 228)</b>      | <b>118 (61.5 to 182)</b>         | -8.83 (-20.5 to 4.46)                     |
| 20 Cervical cancer           | 20 Ileus & obstruction       | <b>124 (68.7 to 196)</b>      | <b>97.2 (49.7 to 156)</b>        | -3.4 (-27.5 to 28.9)                      |
| 22 Urinary diseases          | 23 Cervical cancer           |                               |                                  |                                           |
| 23 Pancreatic cancer         | 24 Neonatal disorders        |                               |                                  |                                           |
| 26 Ileus & obstruction       | 31 HIV/AIDS                  |                               |                                  |                                           |
| 28 Falls                     | 36 Interpersonal violence    |                               |                                  |                                           |
| 29 Atrial fibrillation       | 131 COVID-19                 |                               |                                  |                                           |

### Trinidad and Tobago, Reference scenario

**Legend:**  
 Communicable, maternal, neonatal and nutritional  
 Non-communicable  
 Injuries

| Leading Causes 2022          | Leading Causes 2050          | Mean % change number of DEATH | Mean % change all-age DEATH rate | Mean % change age-standardized DEATH rate |
|------------------------------|------------------------------|-------------------------------|----------------------------------|-------------------------------------------|
| 1 COVID-19                   | 1 Diabetes                   | 18.8 (-18.4 to 58.6)          | 62.6 (21.1 to 111)               | -35.2 (-51.9 to -15.5)                    |
| 2 Ischemic heart disease     | 2 Ischemic heart disease     | 3.66 (-31.9 to 58.4)          | 41.9 (-7.75 to 120)              | -48.1 (-66.4 to -18.6)                    |
| 3 Diabetes                   | 3 Chronic kidney disease     | 101 (37.5 to 186)             | 175 (97.6 to 279)                | 14.2 (-17.3 to 61.1)                      |
| 4 Stroke                     | 4 Stroke                     | 4.75 (-23.4 to 36.4)          | 43.3 (13.7 to 82)                | -48.3 (-59.4 to -34.7)                    |
| 5 Chronic kidney disease     | 5 Prostate cancer            | 95.6 (21.7 to 206)            | 167 (68.4 to 290)                | -8.12 (-31.1 to 18.1)                     |
| 6 Prostate cancer            | 6 Alzheimer's disease        | 195 (110 to 305)              | 303 (190 to 424)                 | -5.53 (-8.66 to -2.25)                    |
| 7 Interpersonal violence     | 7 Hypertensive heart disease | 124 (54.2 to 217)             | 206 (110 to 335)                 | 7.37 (-25.5 to 51.4)                      |
| 8 Hypertensive heart disease | 8 Lower respiratory infect   | 90.1 (39.2 to 164)            | 160 (97.5 to 235)                | -19.9 (-35.6 to 0.499)                    |
| 9 Lower respiratory infect   | 9 Colorectal cancer          | 60.5 (-1.34 to 148)           | 119 (36.1 to 225)                | -8.29 (-36.8 to 25.9)                     |
| 10 Colorectal cancer         | 10 COPD                      | 89.6 (30 to 163)              | 159 (87.5 to 246)                | -8.92 (-30.7 to 18.9)                     |
| 11 Alzheimer's disease       | 11 Breast cancer             | 33 (-12.2 to 91.6)            | 81.5 (25.9 to 147)               | -12.3 (-34 to 8.56)                       |
| 12 Breast cancer             | 12 Atrial fibrillation       | 234 (128 to 358)              | 356 (228 to 505)                 | 8.83 (-9.41 to 30)                        |
| 13 COPD                      | 13 Urinary diseases          | 162 (85.3 to 265)             | 258 (175 to 359)                 | 20.8 (-2.57 to 47.7)                      |
| 14 Road injuries             | 14 Lung cancer               | 37.2 (-5.52 to 90.1)          | 87.4 (33.7 to 149)               | -10.9 (-31.5 to 13.8)                     |
| 15 HIV/AIDS                  | 15 Endo/metab/blood/immune   | 80.1 (36.5 to 134)            | 146 (100 to 198)                 | 10.4 (-5.32 to 28.8)                      |
| 16 Lung cancer               | 16 Pancreatic cancer         | 102 (15.2 to 229)             | 175 (61 to 333)                  | 22.3 (-22.8 to 76.1)                      |
| 17 Self-harm                 | 17 Falls                     | 103 (36.6 to 179)             | 176 (99.1 to 269)                | -14.5 (-25.9 to -1.75)                    |
| 18 Cirrhosis liver           | 18 Cirrhosis liver           | -3.69 (-21.1 to 16.4)         | 31.8 (15.5 to 50.6)              | -20 (-27.9 to -8.21)                      |
| 19 Endo/metab/blood/immune   | 19 Parkinson's disease       | 111 (60.9 to 174)             | 189 (131 to 251)                 | -8.23 (-21.5 to 6.71)                     |
| 20 Cervical cancer           | 20 Self-harm                 | -21.5 (-38 to -3.39)          | 7.44 (-9.21 to 27.6)             | -8.65 (-24 to 12.1)                       |
| 21 Urinary diseases          | 21 Road injuries             |                               |                                  |                                           |
| 22 Pancreatic cancer         | 23 Interpersonal violence    |                               |                                  |                                           |
| 23 Atrial fibrillation       | 26 Cervical cancer           |                               |                                  |                                           |
| 27 Falls                     | 45 HIV/AIDS                  |                               |                                  |                                           |
| 30 Parkinson's disease       | 131 COVID-19                 |                               |                                  |                                           |

### Virgin Islands, Reference scenario

**Legend:**  
Communicable, maternal, neonatal and nutritional  
Non-communicable  
Injuries

| Leading Causes 2022          | Leading Causes 2050          | Mean % change number of DEATH | Mean % change all-age DEATH rate | Mean % change age-standardized DEATH rate |
|------------------------------|------------------------------|-------------------------------|----------------------------------|-------------------------------------------|
| 1 COVID-19                   | 1 Ischemic heart disease     | 37 (-20.6 to 133)             | 77.1 (3.35 to 193)               | -42.9 (-65.6 to -9.77)                    |
| 2 Ischemic heart disease     | 2 Chronic kidney disease     | 168 (84.9 to 315)             | 246 (136 to 445)                 | 30.2 (-8.75 to 94.8)                      |
| 3 Stroke                     | 3 Alzheimer's disease        | 213 (141 to 289)              | 305 (212 to 411)                 | 5.42 (1.33 to 9.01)                       |
| 4 Diabetes                   | 4 Stroke                     | 24 (-10.2 to 67)              | 60.2 (18.6 to 115)               | -40.4 (-53.4 to -24.8)                    |
| 5 Chronic kidney disease     | 5 Diabetes                   | 40.3 (-1.85 to 94.4)          | 81.3 (25.3 to 147)               | -29.1 (-47.2 to -6.57)                    |
| 6 Prostate cancer            | 6 Hypertensive heart disease | 155 (64.4 to 280)             | 230 (110 to 388)                 | 15.1 (-21 to 65.6)                        |
| 7 Hypertensive heart disease | 7 Prostate cancer            | 122 (27.5 to 247)             | 187 (74.4 to 331)                | 5.71 (-23.2 to 38.1)                      |
| 8 Alzheimer's disease        | 8 Lower respiratory infect   | 156 (87.5 to 254)             | 231 (140 to 351)                 | -9.07 (-28.6 to 10.6)                     |
| 9 Interpersonal violence     | 9 Colorectal cancer          | 82.1 (4.41 to 185)            | 135 (36.4 to 258)                | 0.328 (-35 to 41.5)                       |
| 10 Colorectal cancer         | 10 Atrial fibrillation       | 356 (213 to 541)              | 489 (316 to 705)                 | 22.2 (1.32 to 47.4)                       |
| 11 Lung cancer               | 11 Lung cancer               | 50 (-0.453 to 110)            | 93.5 (35.7 to 162)               | 4.52 (-22.7 to 33.4)                      |
| 12 Lower respiratory infect  | 12 COPD                      | 139 (59.9 to 257)             | 209 (113 to 359)                 | 3.55 (-25.1 to 43.7)                      |
| 13 Breast cancer             | 13 Breast cancer             | 59.9 (-0.252 to 125)          | 106 (30.7 to 185)                | -1.68 (-25.1 to 23.1)                     |
| 14 Cirrhosis liver           | 14 Urinary diseases          | 310 (180 to 516)              | 429 (262 to 678)                 | 45.9 (15 to 93.4)                         |
| 15 COPD                      | 15 Parkinson's disease       | 120 (61.9 to 203)             | 184 (121 to 276)                 | 1.53 (-14.3 to 20.4)                      |
| 16 Road injuries             | 16 Pancreatic cancer         | 110 (14.1 to 242)             | 171 (49.4 to 321)                | 35.7 (-17.4 to 99.7)                      |
| 17 Stomach cancer            | 17 Cirrhosis liver           | 1.93 (-16.2 to 22.3)          | 31.6 (10.2 to 54.3)              | -15.3 (-24.4 to -4.5)                     |
| 18 Parkinson's disease       | 18 Endo/metab/blood/immune   | 147 (77 to 239)               | 219 (133 to 324)                 | 20 (0.16 to 40)                           |
| 19 Cardiomyopathy            | 19 Peripheral artery         | 323 (159 to 512)              | 447 (245 to 701)                 | 29.9 (1.11 to 66)                         |
| 20 Pancreatic cancer         | 20 Falls                     | 170 (92.4 to 270)             | 249 (156 to 368)                 | -8.64 (-20.4 to 5.44)                     |
| 21 Atrial fibrillation       | 21 Cardiomyopathy            |                               |                                  |                                           |
| 23 Endo/metab/blood/immune   | 23 Stomach cancer            |                               |                                  |                                           |
| 24 Urinary diseases          | 24 Interpersonal violence    |                               |                                  |                                           |
| 27 Falls                     | 27 Road injuries             |                               |                                  |                                           |
| 39 Peripheral artery         | 127 COVID-19                 |                               |                                  |                                           |



### Colombia, Reference scenario

**Legend:**  
Communicable, maternal, neonatal and nutritional  
Non-communicable  
Injuries

| Leading Causes 2022           | Leading Causes 2050           | Mean % change number of DEATH | Mean % change all-age DEATH rate | Mean % change age-standardized DEATH rate |
|-------------------------------|-------------------------------|-------------------------------|----------------------------------|-------------------------------------------|
| 1 Ischemic heart disease      | 1 Ischemic heart disease      | 62.7 (2.4 to 149)             | 44.1 (-13.4 to 128)              | -44.4 (-67 to -8.54)                      |
| 2 COVID-19                    | 2 COPD                        | 175 (103 to 252)              | 144 (75.7 to 213)                | -15.3 (-40.1 to 19.8)                     |
| 3 COPD                        | 3 Alzheimer's disease         | 263 (187 to 346)              | 221 (152 to 281)                 | -3.46 (-6.96 to -0.0157)                  |
| 4 Stroke                      | 4 Chronic kidney disease      | 214 (120 to 332)              | 178 (93.7 to 301)                | 13.6 (-21.1 to 67.5)                      |
| 5 Interpersonal violence      | 5 Stroke                      | 45.1 (9.85 to 83.5)           | 28.4 (-2.23 to 64.4)             | -45.8 (-59.4 to -27.2)                    |
| 6 Alzheimer's disease         | 6 Lower respiratory infect    | 100 (59 to 150)               | 77.1 (40.6 to 119)               | -28 (-42.7 to -8.55)                      |
| 7 Lower respiratory infect    | 7 Lung cancer                 | 127 (58.2 to 218)             | 101 (40.5 to 167)                | -5.47 (-28.9 to 24.5)                     |
| 8 Chronic kidney disease      | 8 Colorectal cancer           | 133 (40.9 to 260)             | 106 (29.7 to 194)                | -3.19 (-36.5 to 39.8)                     |
| 9 Stomach cancer              | 9 Diabetes                    | 82.5 (37.4 to 136)            | 61.5 (23 to 107)                 | -30.3 (-47.4 to -8.28)                    |
| 10 Road injuries              | 10 Hypertensive heart disease | 197 (105 to 309)              | 163 (79.7 to 278)                | -2.96 (-34.5 to 41.4)                     |
| 11 Diabetes                   | 11 Prostate cancer            | 168 (76 to 273)               | 137 (61.7 to 228)                | -4.07 (-28.3 to 23.7)                     |
| 12 Lung cancer                | 12 Urinary diseases           | 270 (195 to 370)              | 227 (157 to 315)                 | 22.6 (-4.52 to 51.3)                      |
| 13 Colorectal cancer          | 13 Stomach cancer             | 42.1 (19.1 to 73.7)           | 25.6 (7.52 to 49.2)              | -40.2 (-47 to -32.5)                      |
| 14 Hypertensive heart disease | 14 Atrial fibrillation        | 284 (196 to 374)              | 239 (162 to 323)                 | 11.5 (-8.88 to 33.4)                      |
| 15 Breast cancer              | 15 Breast cancer              | 89 (28.8 to 154)              | 66.9 (14.4 to 123)               | -9.78 (-32.7 to 16.4)                     |
| 16 Prostate cancer            | 16 Interpersonal violence     | -41.7 (-68.6 to 0.427)        | -48.6 (-70.8 to -13.6)           | -45.8 (-70.1 to -4.57)                    |
| 17 Cirrhosis liver            | 17 Pancreatic cancer          | 207 (71 to 377)               | 171 (50.9 to 315)                | 30.4 (-21.5 to 92.3)                      |
| 18 Self-harm                  | 18 Road injuries              | 1.56 (-29.3 to 45)            | -10.1 (-36.4 to 31.7)            | -23.8 (-47.3 to 13.1)                     |
| 19 Urinary diseases           | 19 Parkinson's disease        | 174 (129 to 234)              | 142 (103 to 189)                 | -8.58 (-22.2 to 5.1)                      |
| 20 Neonatal disorders         | 20 Cirrhosis liver            | 64.7 (43.2 to 86.6)           | 45.6 (26.4 to 65.2)              | -20.9 (-29 to -11.8)                      |
| 22 Pancreatic cancer          | 33 Self-harm                  |                               |                                  |                                           |
| 23 Atrial fibrillation        | 56 Neonatal disorders         |                               |                                  |                                           |
| 27 Parkinson's disease        | 135 COVID-19                  |                               |                                  |                                           |

### Costa Rica, Reference scenario

**Legend:**

Communicable, maternal, neonatal and nutritional  
 Non-communicable  
 Injuries

| Leading Causes 2022           | Leading Causes 2050          | Mean % change number of DEATH | Mean % change all-age DEATH rate | Mean % change age-standardized DEATH rate |
|-------------------------------|------------------------------|-------------------------------|----------------------------------|-------------------------------------------|
| 1 Ischemic heart disease      | 1 Chronic kidney disease     | 169 (89.5 to 273)             | 155 (80.6 to 245)                | 5.64 (-26 to 50.1)                        |
| 2 COVID-19                    | 2 Ischemic heart disease     | 37.8 (-15.4 to 116)           | 30.4 (-19.9 to 99.8)             | -50 (-69.4 to -22.4)                      |
| 3 Chronic kidney disease      | 3 Alzheimer's disease        | 250 (187 to 329)              | 231 (182 to 277)                 | -1.72 (-5.06 to 1.14)                     |
| 4 Stroke                      | 4 COPD                       | 186 (98.8 to 287)             | 171 (92 to 264)                  | -11 (-37.6 to 26.8)                       |
| 5 COPD                        | 5 Stroke                     | 45.1 (7.54 to 86.9)           | 37.4 (5.45 to 73.7)              | -47.6 (-60.9 to -32.3)                    |
| 6 Alzheimer's disease         | 6 Lower respiratory infect   | 123 (74 to 173)               | 111 (67.9 to 153)                | -22.3 (-37.4 to -4.42)                    |
| 7 Diabetes                    | 7 Colorectal cancer          | 124 (42.3 to 242)             | 112 (33.4 to 217)                | -4.67 (-35.5 to 35.8)                     |
| 8 Stomach cancer              | 8 Diabetes                   | 82.3 (30.3 to 142)            | 72.6 (30.7 to 121)               | -30.4 (-47 to -8.91)                      |
| 9 Road injuries               | 9 Hypertensive heart disease | 215 (107 to 338)              | 198 (103 to 306)                 | 2.94 (-30.1 to 52.1)                      |
| 10 Cirrhosis liver            | 10 Prostate cancer           | 171 (86.5 to 288)             | 156 (77.7 to 262)                | -3.96 (-26.4 to 27.5)                     |
| 11 Lower respiratory infect   | 11 Cirrhosis liver           | 55.5 (31.7 to 80.5)           | 47.2 (30 to 64.4)                | -16.3 (-26.3 to -5.86)                    |
| 12 Colorectal cancer          | 12 Stomach cancer            | 46.4 (21.5 to 74.9)           | 38.6 (18.6 to 63)                | -37.7 (-44.2 to -29.1)                    |
| 13 Interpersonal violence     | 13 Falls                     | 152 (99 to 221)               | 138 (96.2 to 190)                | -10.8 (-22.1 to 2.94)                     |
| 14 Hypertensive heart disease | 14 Breast cancer             | 98 (41.4 to 179)              | 87.4 (35 to 154)                 | -6.08 (-29 to 23.6)                       |
| 15 Prostate cancer            | 15 Road injuries             | 8.5 (-25.2 to 58.7)           | 2.66 (-28.6 to 48.3)             | -9.85 (-37.8 to 31.7)                     |
| 16 Breast cancer              | 16 Pancreatic cancer         | 202 (81.5 to 370)             | 186 (68.3 to 342)                | 32.1 (-17.1 to 96.8)                      |
| 17 Self-harm                  | 17 Urinary diseases          | 282 (182 to 395)              | 261 (179 to 362)                 | 30.2 (-1.68 to 71.1)                      |
| 18 Lung cancer                | 18 Atrial fibrillation       | 280 (197 to 389)              | 259 (192 to 338)                 | 8.55 (-7.5 to 27.6)                       |
| 19 Falls                      | 19 Lung cancer               | 118 (54.2 to 208)             | 106 (49.2 to 177)                | -6.02 (-30.1 to 22.9)                     |
| 20 Liver cancer               | 20 Liver cancer              | 150 (88.3 to 210)             | 136 (88.7 to 187)                | 12.3 (-10.2 to 38.7)                      |
| 21 Pancreatic cancer          | 22 Self-harm                 |                               |                                  |                                           |
| 23 Atrial fibrillation        | 30 Interpersonal violence    |                               |                                  |                                           |
| 24 Urinary diseases           | 134 COVID-19                 |                               |                                  |                                           |

### El Salvador, Reference scenario

**Legend:**  
Communicable, maternal, neonatal and nutritional  
Non-communicable  
Injuries

| Leading Causes 2022           | Leading Causes 2050           | Mean % change number of DEATH | Mean % change all-age DEATH rate | Mean % change age-standardized DEATH rate |
|-------------------------------|-------------------------------|-------------------------------|----------------------------------|-------------------------------------------|
| 1 Ischemic heart disease      | 1 Chronic kidney disease      | <b>125 (55.4 to 203)</b>      | <b>176 (84.6 to 282)</b>         | 30.5 (-15.5 to 85.9)                      |
| 2 Chronic kidney disease      | 2 Ischemic heart disease      | 33.2 (-18.4 to 106)           | <b>63.7 (2.11 to 149)</b>        | -28.1 (-59.1 to 18.5)                     |
| 3 COVID-19                    | 3 Diabetes                    | 41.4 (-1.11 to 94.5)          | <b>73.9 (28.2 to 137)</b>        | -21.3 (-43.8 to 7.99)                     |
| 4 Interpersonal violence      | 4 Alzheimer's disease         | <b>128 (60.3 to 203)</b>      | <b>179 (104 to 263)</b>          | <b>9.82 (5.74 to 13.7)</b>                |
| 5 Diabetes                    | 5 Lower respiratory infect    | <b>44.8 (12 to 87.1)</b>      | <b>78.1 (41.7 to 129)</b>        | -18.2 (-35.4 to 3.66)                     |
| 6 Stroke                      | 6 Stroke                      | 22.7 (-9.44 to 64)            | <b>50.9 (15.3 to 92.1)</b>       | <b>-32.4 (-49.1 to -10.1)</b>             |
| 7 Lower respiratory infect    | 7 COPD                        | <b>87.9 (33.1 to 154)</b>     | <b>131 (70.4 to 207)</b>         | -4.46 (-32.4 to 33.2)                     |
| 8 Cirrhosis liver             | 8 Interpersonal violence      | <b>-47.2 (-73.9 to -3.48)</b> | -35.8 (-65.8 to 16)              | -34.4 (-66.2 to 22.7)                     |
| 9 Alzheimer's disease         | 9 Cirrhosis liver             | 22.6 (-6.05 to 49.9)          | <b>50.5 (27.7 to 76.7)</b>       | <b>-16 (-26.2 to -4.88)</b>               |
| 10 COPD                       | 10 Stomach cancer             | 17.9 (-8.43 to 46.7)          | <b>44.8 (20.4 to 75.1)</b>       | <b>-33 (-40.3 to -25)</b>                 |
| 11 Road injuries              | 11 Lung cancer                | <b>106 (37.3 to 203)</b>      | <b>152 (72.3 to 257)</b>         | 15.7 (-10.7 to 51.9)                      |
| 12 Stomach cancer             | 12 Prostate cancer            | <b>90.9 (17.8 to 201)</b>     | <b>134 (49.6 to 264)</b>         | -2.81 (-28.6 to 32.7)                     |
| 13 Alcohol use disorders      | 13 Atrial fibrillation        | <b>164 (73.5 to 258)</b>      | <b>224 (130 to 341)</b>          | <b>28.5 (9.51 to 58.7)</b>                |
| 14 Prostate cancer            | 14 Road injuries              | -15.2 (-48.8 to 32.7)         | 3.99 (-33.4 to 62.9)             | -23.1 (-54.1 to 27.2)                     |
| 15 Lung cancer                | 15 Colorectal cancer          | <b>88.6 (12.5 to 198)</b>     | <b>132 (39 to 263)</b>           | 6.94 (-28.1 to 54.6)                      |
| 16 Cervical cancer            | 16 Alcohol use disorders      | 10.2 (-22.2 to 48.3)          | <b>35 (6.63 to 67.3)</b>         | -5.09 (-25.2 to 17.8)                     |
| 17 Self-harm                  | 17 Pancreatic cancer          | <b>175 (49.2 to 366)</b>      | <b>237 (84.8 to 445)</b>         | 55.2 (-9.87 to 135)                       |
| 18 Colorectal cancer          | 18 Urinary diseases           | <b>133 (77.4 to 197)</b>      | <b>187 (128 to 256)</b>          | 26.4 (-0.301 to 61.1)                     |
| 19 Breast cancer              | 19 Breast cancer              | <b>64.4 (7.96 to 142)</b>     | <b>102 (38.8 to 189)</b>         | 1.11 (-25.6 to 34.4)                      |
| 20 Neonatal disorders         | 20 Hypertensive heart disease | <b>90.3 (32.2 to 171)</b>     | <b>134 (62.9 to 220)</b>         | 0.788 (-32.4 to 51.6)                     |
| 21 Atrial fibrillation        | 21 Cervical cancer            |                               |                                  |                                           |
| 23 Hypertensive heart disease | 24 Self-harm                  |                               |                                  |                                           |
| 24 Urinary diseases           | 54 Neonatal disorders         |                               |                                  |                                           |
| 30 Pancreatic cancer          | 132 COVID-19                  |                               |                                  |                                           |

### Guatemala, Reference scenario

**Legend:**  
Communicable, maternal, neonatal and nutritional  
Non-communicable  
Injuries

| Leading Causes 2022            | Leading Causes 2050            | Mean % change number of DEATH | Mean % change all-age DEATH rate | Mean % change age-standardized DEATH rate |
|--------------------------------|--------------------------------|-------------------------------|----------------------------------|-------------------------------------------|
| 1 Lower respiratory infect     | 1 Chronic kidney disease       | 237 (143 to 364)              | 180 (106 to 289)                 | 37.9 (-3.63 to 103)                       |
| 2 Ischemic heart disease       | 2 Ischemic heart disease       | 107 (36.2 to 195)             | 72.3 (16.2 to 152)               | -30.1 (-59.9 to 19.1)                     |
| 3 Diabetes                     | 3 Lower respiratory infect     | 49.7 (22.3 to 82)             | 24.7 (0.48 to 56.3)              | -37.7 (-49.4 to -23.4)                    |
| 4 Chronic kidney disease       | 4 Diabetes                     | 64.2 (21.4 to 111)            | 36.8 (3.13 to 72.8)              | -33 (-52.4 to -8.47)                      |
| 5 Cirrhosis liver              | 5 Cirrhosis liver              | 47.5 (27.9 to 68.7)           | 22.8 (8.08 to 39.3)              | -29.3 (-37.2 to -20.3)                    |
| 6 Stroke                       | 6 Stroke                       | 67.4 (34.6 to 105)            | 39.3 (12.2 to 72.8)              | -39.4 (-54.9 to -19.1)                    |
| 7 Interpersonal violence       | 7 Alzheimer's disease          | 227 (153 to 307)              | 172 (111 to 232)                 | -4.34 (-7.29 to -0.269)                   |
| 8 COVID-19                     | 8 Stomach cancer               | 50.9 (27.2 to 79.5)           | 25.7 (5.12 to 47)                | -39.5 (-46.3 to -33.2)                    |
| 9 Stomach cancer               | 9 COPD                         | 114 (66.1 to 186)             | 78 (36.5 to 137)                 | -30.6 (-50.8 to 0.104)                    |
| 10 Diarrheal diseases          | 10 Interpersonal violence      | -22.6 (-60.3 to 48.3)         | -35.7 (-66.8 to 24.6)            | -39 (-68.2 to 20.6)                       |
| 11 Neonatal disorders          | 11 Prostate cancer             | 176 (80 to 315)               | 130 (48.8 to 243)                | -6.59 (-29.8 to 24.6)                     |
| 12 Road injuries               | 12 Road injuries               | -9.63 (-46 to 43.1)           | -24.8 (-53.3 to 19.8)            | -35.8 (-61.1 to 4.68)                     |
| 13 COPD                        | 13 Diarrheal diseases          | -21.6 (-52 to 12)             | -34.7 (-59.1 to -3.73)           | -59.3 (-76 to -35.7)                      |
| 14 Alzheimer's disease         | 14 Alcohol use disorders       | 51.7 (19.8 to 93.4)           | 26.3 (1.47 to 60.3)              | -14.6 (-31.9 to 7.31)                     |
| 15 Congenital defects          | 15 Protein-energy malnutrition | 78.6 (9.17 to 166)            | 48.9 (-10 to 123)                | -33 (-65.7 to 19.7)                       |
| 16 Alcohol use disorders       | 16 Colorectal cancer           | 150 (58.2 to 277)             | 108 (29.8 to 209)                | -0.613 (-34.8 to 41.3)                    |
| 17 Protein-energy malnutrition | 17 Falls                       | 85 (49.1 to 126)              | 54 (25.2 to 83.6)                | -18.6 (-28.1 to -6.61)                    |
| 18 Prostate cancer             | 18 Atrial fibrillation         | 316 (214 to 435)              | 246 (171 to 355)                 | 20.2 (1.85 to 42.9)                       |
| 19 Falls                       | 19 Lung cancer                 | 136 (70.1 to 216)             | 96.1 (37.6 to 163)               | -5.75 (-29.5 to 20.8)                     |
| 20 Cervical cancer             | 20 Cervical cancer             | 55 (29.3 to 86.3)             | 29.1 (8.34 to 54.8)              | -28.8 (-41.3 to -14.7)                    |
| 23 Colorectal cancer           | 31 Neonatal disorders          |                               |                                  |                                           |
| 25 Lung cancer                 | 34 Congenital defects          |                               |                                  |                                           |
| 39 Atrial fibrillation         | 133 COVID-19                   |                               |                                  |                                           |

### Honduras, Reference scenario

**Legend:**  
■ Communicable, maternal, neonatal and nutritional  
■ Non-communicable  
■ Injuries

| Leading Causes 2022          | Leading Causes 2050          | Mean % change number of DEATH | Mean % change all-age DEATH rate | Mean % change age-standardized DEATH rate |
|------------------------------|------------------------------|-------------------------------|----------------------------------|-------------------------------------------|
| 1 Ischemic heart disease     | 1 Ischemic heart disease     | 70.9 (9.07 to 150)            | 30.5 (-15.5 to 86.6)             | -30.8 (-62.7 to 17.9)                     |
| 2 Stroke                     | 2 Stroke                     | 55.2 (20.2 to 90.3)           | 18.4 (-8.01 to 46.2)             | -36.7 (-54.6 to -13.4)                    |
| 3 COVID-19                   | 3 COPD                       | 100 (55.6 to 159)             | 52.7 (16.8 to 92.8)              | -21.7 (-46.6 to 13.5)                     |
| 4 Interpersonal violence     | 4 Chronic kidney disease     | 211 (119 to 328)              | 137 (66.2 to 233)                | 31.8 (-12.8 to 99)                        |
| 5 COPD                       | 5 Hypertensive heart disease | 144 (76.6 to 229)             | 85.9 (33.4 to 146)               | -6.57 (-39.2 to 37)                       |
| 6 Cirrhosis liver            | 6 Cirrhosis liver            | 69 (39.4 to 96.7)             | 29 (9.81 to 50)                  | -26.1 (-35.8 to -14.8)                    |
| 7 Lower respiratory infect   | 7 Lung cancer                | 148 (64.3 to 245)             | 89.3 (33.5 to 165)               | 1.98 (-25.9 to 37.9)                      |
| 8 Diabetes                   | 8 Interpersonal violence     | -5.14 (-42.1 to 60.3)         | -27.7 (-52.8 to 26.6)            | -39.9 (-60.6 to 6.05)                     |
| 9 Hypertensive heart disease | 9 Lower respiratory infect   | 61.5 (27.8 to 98.4)           | 23.2 (1.28 to 49.3)              | -27.1 (-44.6 to -6.13)                    |
| 10 Road injuries             | 10 Diabetes                  | 70.9 (22.6 to 129)            | 30.4 (-4.04 to 71.9)             | -27.6 (-49.3 to 3.39)                     |
| 11 Chronic kidney disease    | 11 Alzheimer's disease       | 203 (125 to 292)              | 131 (77.2 to 196)                | 6.2 (3.07 to 9.76)                        |
| 12 Lung cancer               | 12 Road injuries             | 43.2 (-12.2 to 130)           | 9.34 (-33.7 to 74.9)             | -25.3 (-54.1 to 20.3)                     |
| 13 Stomach cancer            | 13 Stomach cancer            | 64.5 (36.4 to 94)             | 25.5 (6.92 to 47.1)              | -31.6 (-38.8 to -24.1)                    |
| 14 Neonatal disorders        | 14 Other digestive           | 162 (91.4 to 236)             | 99.9 (44.9 to 163)               | 15.7 (-16.9 to 60.2)                      |
| 15 Diarrheal diseases        | 15 Urinary diseases          | 194 (135 to 259)              | 124 (80.5 to 167)                | 21.4 (-7.75 to 53.6)                      |
| 16 Nature disaster           | 16 Diarrheal diseases        | 14.9 (-30.7 to 75.2)          | -12.3 (-45.3 to 34.8)            | -40.4 (-65 to -0.318)                     |
| 17 Alzheimer's disease       | 17 Pancreatic cancer         | 277 (111 to 516)              | 187 (71.7 to 370)                | 54.1 (-6.19 to 136)                       |
| 18 Congenital defects        | 18 Prostate cancer           | 178 (75.5 to 315)             | 112 (35.9 to 213)                | 4.62 (-25.8 to 43.2)                      |
| 19 Upper digest diseases     | 19 Parkinson's disease       | 161 (108 to 218)              | 99 (63 to 136)                   | -1.84 (-19 to 16.6)                       |
| 20 Other digestive           | 20 Breast cancer             | 140 (69.2 to 237)             | 83.3 (25.3 to 155)               | 4.48 (-22.8 to 37.6)                      |
| 22 Urinary diseases          | 22 Nature disaster           |                               |                                  |                                           |
| 25 Breast cancer             | 25 Upper digest diseases     |                               |                                  |                                           |
| 26 Parkinson's disease       | 41 Neonatal disorders        |                               |                                  |                                           |
| 27 Prostate cancer           | 43 Congenital defects        |                               |                                  |                                           |
| 33 Pancreatic cancer         | 133 COVID-19                 |                               |                                  |                                           |

### Mexico, Reference scenario

**Legend:**

Communicable, maternal, neonatal and nutritional  
Non-communicable  
Injuries

| Leading Causes 2022           | Leading Causes 2050           | Mean % change number of DEATH | Mean % change all-age DEATH rate | Mean % change age-standardized DEATH rate |
|-------------------------------|-------------------------------|-------------------------------|----------------------------------|-------------------------------------------|
| 1 Ischemic heart disease      | 1 Ischemic heart disease      | 60.2 (13.6 to 118)            | 41.2 (-1.64 to 92)               | -38.5 (-62.8 to -5.55)                    |
| 2 COVID-19                    | 2 Chronic kidney disease      | 170 (109 to 256)              | 138 (82.2 to 211)                | 23.7 (-11.2 to 69.9)                      |
| 3 Diabetes                    | 3 Diabetes                    | 68.8 (33.3 to 109)            | 48.7 (17.4 to 85.6)              | -26 (-44.3 to -4.93)                      |
| 4 Chronic kidney disease      | 4 Cirrhosis liver             | 74.6 (55.1 to 94.9)           | 53.8 (40 to 68.6)                | -2.65 (-12.9 to 8.63)                     |
| 5 Cirrhosis liver             | 5 COPD                        | 143 (89.8 to 202)             | 114 (66.4 to 166)                | -14.5 (-39.9 to 20.9)                     |
| 6 Interpersonal violence      | 6 Lower respiratory infect    | 89.2 (59.6 to 130)            | 66.6 (42.3 to 99.3)              | -22.4 (-36.9 to -6.91)                    |
| 7 Stroke                      | 7 Stroke                      | 46.9 (20.1 to 75.8)           | 29.4 (7.33 to 54.9)              | -40.4 (-53.9 to -24.7)                    |
| 8 Lower respiratory infect    | 8 Alzheimer's disease         | 226 (154 to 306)              | 186 (128 to 249)                 | 2.78 (-1.23 to 6.34)                      |
| 9 COPD                        | 9 Urinary diseases            | 217 (163 to 279)              | 179 (134 to 234)                 | 30.3 (5.51 to 59.1)                       |
| 10 Road injuries              | 10 Interpersonal violence     | -26.1 (-59.1 to 30.5)         | -35.1 (-62.2 to 13.2)            | -35.8 (-63.4 to 12.3)                     |
| 11 Alzheimer's disease        | 11 Hypertensive heart disease | 202 (128 to 285)              | 166 (102 to 249)                 | 7.93 (-25.9 to 55.9)                      |
| 12 Stomach cancer             | 12 Colorectal cancer          | 135 (49.1 to 247)             | 107 (35.6 to 202)                | 8.19 (-26.9 to 48.8)                      |
| 13 Colorectal cancer          | 13 Prostate cancer            | 172 (74.5 to 286)             | 139 (59.7 to 230)                | 0.164 (-25.7 to 30.2)                     |
| 14 Neonatal disorders         | 14 Lung cancer                | 133 (61.2 to 225)             | 105 (47.3 to 181)                | 2.63 (-22.1 to 33.3)                      |
| 15 Urinary diseases           | 15 Pancreatic cancer          | 227 (87.6 to 408)             | 187 (70 to 342)                  | 48.4 (-6.84 to 121)                       |
| 16 Breast cancer              | 16 Road injuries              | 11.3 (-24.5 to 62.2)          | -1.87 (-36.2 to 42.8)            | -15.5 (-45 to 24.7)                       |
| 17 Lung cancer                | 17 Atrial fibrillation        | 273 (191 to 380)              | 228 (165 to 320)                 | 20.2 (2.25 to 40)                         |
| 18 Prostate cancer            | 18 Breast cancer              | 100 (47.1 to 164)             | 76.1 (31.8 to 140)               | 3.85 (-18.5 to 32.9)                      |
| 19 Hypertensive heart disease | 19 Stomach cancer             | 48.8 (25.4 to 73.5)           | 31 (12.3 to 51.4)                | -33 (-40.6 to -24.5)                      |
| 20 Congenital defects         | 20 Endo/metab/blood/immune    | 161 (121 to 200)              | 130 (102 to 162)                 | 23.8 (5.8 to 41.5)                        |
| 23 Pancreatic cancer          | 44 Congenital defects         |                               |                                  |                                           |
| 25 Endo/metab/blood/immune    | 45 Neonatal disorders         |                               |                                  |                                           |
| 29 Atrial fibrillation        | 133 COVID-19                  |                               |                                  |                                           |

### Nicaragua, Reference scenario

**Legend:**

Communicable, maternal, neonatal and nutritional  
 Non-communicable  
 Injuries

| Leading Causes 2022           | Leading Causes 2050          | Mean % change number of DEATH | Mean % change all-age DEATH rate | Mean % change age-standardized DEATH rate |
|-------------------------------|------------------------------|-------------------------------|----------------------------------|-------------------------------------------|
| 1 Ischemic heart disease      | 1 Chronic kidney disease     | 277 (148 to 459)              | 230 (126 to 358)                 | 40.6 (-7.8 to 103)                        |
| 2 Chronic kidney disease      | 2 Ischemic heart disease     | 182 (67.1 to 333)             | 147 (56.5 to 258)                | -20.6 (-54.7 to 31.9)                     |
| 3 Stroke                      | 3 Diabetes                   | 137 (64 to 241)               | 107 (59 to 172)                  | -17.7 (-41.4 to 15.3)                     |
| 4 Diabetes                    | 4 Stroke                     | 130 (71 to 209)               | 101 (56.6 to 159)                | <b>-29.6 (-48.2 to -3.59)</b>             |
| 5 Cirrhosis liver             | 5 Alzheimer's disease        | 392 (275 to 516)              | 332 (242 to 431)                 | 17.5 (12.9 to 21.7)                       |
| 6 Lower respiratory infect    | 6 COPD                       | 258 (153 to 390)              | 214 (131 to 301)                 | -4.9 (-36.1 to 36.1)                      |
| 7 COPD                        | 7 Cirrhosis liver            | 93.8 (56.6 to 138)            | 69.7 (49.1 to 93.4)              | <b>-11.7 (-21.9 to -0.0669)</b>           |
| 8 Neonatal disorders          | 8 Hypertensive heart disease | 292 (164 to 453)              | 244 (133 to 359)                 | 10.1 (-29.2 to 63.9)                      |
| 9 Alzheimer's disease         | 9 Lower respiratory infect   | 93.7 (52.2 to 148)            | 69.8 (37.9 to 111)               | <b>-31 (-44.9 to -14.8)</b>               |
| 10 Road injuries              | 10 Prostate cancer           | 288 (161 to 479)              | 240 (116 to 427)                 | 16.2 (-14.8 to 58)                        |
| 11 COVID-19                   | 11 Stomach cancer            | 99.3 (56.1 to 149)            | 74.7 (45.5 to 110)               | <b>-28.8 (-36.5 to -19.4)</b>             |
| 12 Interpersonal violence     | 12 Colorectal cancer         | 210 (95.4 to 377)             | 172 (56.5 to 329)                | 10.3 (-27.1 to 58.1)                      |
| 13 Stomach cancer             | 13 Atrial fibrillation       | 501 (327 to 685)              | 427 (295 to 574)                 | <b>37.6 (14.4 to 69.9)</b>                |
| 14 Hypertensive heart disease | 14 Lung cancer               | 219 (117 to 367)              | 180 (91.4 to 309)                | 14.5 (-15.6 to 56.7)                      |
| 15 Congenital defects         | 15 Road injuries             | 17.6 (-29.9 to 90.4)          | 2.73 (-34.3 to 54.6)             | -19.3 (-48.5 to 26)                       |
| 16 Self-harm                  | 16 Pancreatic cancer         | 350 (157 to 655)              | 295 (113 to 564)                 | 62.2 (-2.05 to 152)                       |
| 17 Cervical cancer            | 17 Falls                     | 185 (123 to 278)              | 150 (91.7 to 222)                | -4.28 (-15.6 to 10.5)                     |
| 18 Nature disaster            | 18 Cervical cancer           | 86 (40.8 to 142)              | 63 (30.9 to 102)                 | <b>-19.8 (-33.7 to -0.0227)</b>           |
| 19 Alcohol use disorders      | 19 Breast cancer             | 144 (64.5 to 247)             | 114 (53.9 to 202)                | 2.09 (-24.3 to 37.2)                      |
| 20 Colorectal cancer          | 20 Parkinson's disease       | 289 (207 to 389)              | 241 (184 to 308)                 | 9.52 (-5.14 to 23.7)                      |
| 21 Prostate cancer            | 21 Alcohol use disorders     |                               |                                  |                                           |
| 22 Breast cancer              | 22 Nature disaster           |                               |                                  |                                           |
| 23 Lung cancer                | 24 Self-harm                 |                               |                                  |                                           |
| 24 Falls                      | 26 Interpersonal violence    |                               |                                  |                                           |
| 30 Pancreatic cancer          | 31 Neonatal disorders        |                               |                                  |                                           |
| 31 Atrial fibrillation        | 46 Congenital defects        |                               |                                  |                                           |
| 32 Parkinson's disease        | 133 COVID-19                 |                               |                                  |                                           |

### Panama, Reference scenario

**Legend:**

Communicable, maternal, neonatal and nutritional  
 Non-communicable  
 Injuries

| Leading Causes 2022           | Leading Causes 2050           | Mean % change number of DEATH | Mean % change all-age DEATH rate | Mean % change age-standardized DEATH rate |
|-------------------------------|-------------------------------|-------------------------------|----------------------------------|-------------------------------------------|
| 1 Ischemic heart disease      | 1 Chronic kidney disease      | 196 (100 to 315)              | 115 (46.2 to 196)                | 13.6 (-22.5 to 59.2)                      |
| 2 Stroke                      | 2 Ischemic heart disease      | 45.5 (-12.3 to 127)           | 5.65 (-33.7 to 66)               | -49.9 (-70.4 to -21.4)                    |
| 3 COVID-19                    | 3 Alzheimer's disease         | 272 (194 to 363)              | 170 (119 to 225)                 | 5.48 (2.55 to 8.83)                       |
| 4 Chronic kidney disease      | 4 Stroke                      | 47.8 (10.6 to 93.5)           | 7.33 (-17.7 to 38.2)             | -47.2 (-59.9 to -30)                      |
| 5 Diabetes                    | 5 Diabetes                    | 104 (45.8 to 170)             | 48.1 (5.31 to 93.8)              | -23.7 (-45.5 to 1.48)                     |
| 6 Alzheimer's disease         | 6 COPD                        | 190 (105 to 299)              | 111 (50.8 to 191)                | -7.91 (-36.2 to 28.7)                     |
| 7 Lower respiratory infect    | 7 Lower respiratory infect    | 116 (62.3 to 181)             | 57 (20.8 to 98.2)                | -24.4 (-39.3 to -5.62)                    |
| 8 COPD                        | 8 Colorectal cancer           | 166 (70.6 to 312)             | 93 (24.3 to 192)                 | 6.09 (-28.5 to 48.2)                      |
| 9 Interpersonal violence      | 9 Prostate cancer             | 194 (92.4 to 330)             | 113 (41.8 to 213)                | 1.06 (-24.7 to 34.1)                      |
| 10 HIV/AIDS                   | 10 Hypertensive heart disease | 211 (108 to 361)              | 126 (48.9 to 224)                | 6.5 (-30.4 to 50.5)                       |
| 11 Road injuries              | 11 Lung cancer                | 154 (82.3 to 262)             | 84.2 (35.3 to 157)               | 3.03 (-20.6 to 35.5)                      |
| 12 Colorectal cancer          | 12 Atrial fibrillation        | 289 (187 to 413)              | 182 (120 to 265)                 | 11.6 (-6.56 to 33.2)                      |
| 13 Stomach cancer             | 13 Cirrhosis liver            | 88.1 (54.2 to 124)            | 36.5 (18.4 to 54.6)              | -9.81 (-20.5 to 2.59)                     |
| 14 Cirrhosis liver            | 14 Breast cancer              | 130 (63.9 to 222)             | 67.1 (23.5 to 135)               | 4.12 (-21 to 40.9)                        |
| 15 Prostate cancer            | 15 Stomach cancer             | 61.7 (27.8 to 98.6)           | 17.4 (-2.25 to 41.7)             | -35.7 (-43.3 to -28.5)                    |
| 16 Lung cancer                | 16 Road injuries              | 35.1 (-16.1 to 113)           | -1.83 (-39.8 to 49.6)            | -15.8 (-48.6 to 30.9)                     |
| 17 Hypertensive heart disease | 17 Pancreatic cancer          | 255 (114 to 478)              | 158 (60 to 329)                  | 44 (-4.48 to 124)                         |
| 18 Congenital defects         | 18 Urinary diseases           | 282 (182 to 402)              | 177 (109 to 254)                 | 29 (-1.46 to 59.8)                        |
| 19 Breast cancer              | 19 Parkinson's disease        | 193 (119 to 267)              | 112 (72.4 to 152)                | -2.53 (-18 to 14)                         |
| 20 Neonatal disorders         | 20 Interpersonal violence     | -9.97 (-46.1 to 74.1)         | -34.7 (-60.2 to 23.7)            | -36.3 (-62.8 to 23.4)                     |
| 22 Atrial fibrillation        | 35 Congenital defects         |                               |                                  |                                           |
| 25 Parkinson's disease        | 37 HIV/AIDS                   |                               |                                  |                                           |
| 27 Pancreatic cancer          | 41 Neonatal disorders         |                               |                                  |                                           |
| 28 Urinary diseases           | 134 COVID-19                  |                               |                                  |                                           |



### Venezuela, Reference scenario

**Legend:**

Communicable, maternal, neonatal and nutritional  
Non-communicable  
Injuries

| Leading Causes 2022           | Leading Causes 2050          | Mean % change number of DEATH | Mean % change all-age DEATH rate | Mean % change age-standardized DEATH rate |
|-------------------------------|------------------------------|-------------------------------|----------------------------------|-------------------------------------------|
| 1 Ischemic heart disease      | 1 Ischemic heart disease     | 72.7 (-42.7 to 311)           | 105 (-36 to 438)                 | 43.8 (-74.5 to 340)                       |
| 2 COVID-19                    | 2 Chronic kidney disease     | <b>167 (59.5 to 309)</b>      | <b>209 (72.1 to 423)</b>         | 91.1 (-19.5 to 305)                       |
| 3 Stroke                      | 3 Stroke                     | 54.5 (-8.59 to 146)           | <b>78.8 (1.96 to 213)</b>        | 12.8 (-57.5 to 173)                       |
| 4 Diabetes                    | 4 Diabetes                   | <b>88.9 (4.77 to 214)</b>     | <b>120 (16 to 298)</b>           | 37.2 (-50.8 to 230)                       |
| 5 Chronic kidney disease      | 5 Alzheimer's disease        | 161 (-49 to 393)              | 186 (-33.2 to 393)               | <b>9.94 (5.99 to 13.5)</b>                |
| 6 Interpersonal violence      | 6 Hypertensive heart disease | <b>120 (37.6 to 230)</b>      | <b>153 (50.7 to 288)</b>         | 45.9 (-45.5 to 245)                       |
| 7 Road injuries               | 7 COPD                       | <b>87.6 (31 to 168)</b>       | <b>113 (48.7 to 190)</b>         | 17 (-46.9 to 141)                         |
| 8 Lower respiratory infect    | 8 Lower respiratory infect   | 67.7 (-6.44 to 141)           | <b>88.3 (20.2 to 143)</b>        | 0.921 (-31.7 to 59.3)                     |
| 9 COPD                        | 9 Road injuries              | 8.33 (-62.2 to 156)           | 29 (-57.2 to 228)                | 23.3 (-60.5 to 220)                       |
| 10 Hypertensive heart disease | 10 Lung cancer               | 47.5 (-63.4 to 183)           | 62.1 (-52.3 to 193)              | -14.7 (-59.6 to 40.5)                     |
| 11 Alzheimer's disease        | 11 Prostate cancer           | 97.9 (-60 to 332)             | 117 (-49.5 to 324)               | -10.3 (-56.5 to 40)                       |
| 12 Lung cancer                | 12 Interpersonal violence    | -50.7 (-87 to 22.9)           | -46.2 (-82.7 to 33.9)            | -42.7 (-83.1 to 46.3)                     |
| 13 Cirrhosis liver            | 13 Cirrhosis liver           | 10.3 (-13.1 to 36.5)          | <b>25.3 (5.19 to 52.2)</b>       | -13.2 (-31.8 to 14.4)                     |
| 14 Neonatal disorders         | 14 Breast cancer             | 31.7 (-60.4 to 153)           | 45.1 (-46.1 to 159)              | -10.7 (-52.7 to 41.2)                     |
| 15 Prostate cancer            | 15 Colorectal cancer         | 42.2 (-73.5 to 209)           | 55.5 (-64.8 to 209)              | -21.5 (-69.8 to 39.1)                     |
| 16 Stomach cancer             | 16 Stomach cancer            | 14.5 (-42.7 to 69.6)          | 28.1 (-25.9 to 68.6)             | <b>-28.9 (-36.8 to -18.1)</b>             |
| 17 Breast cancer              | 17 Atrial fibrillation       | 200 (-25.2 to 424)            | 231 (-3.92 to 449)               | <b>33.5 (8.4 to 60.3)</b>                 |
| 18 Colorectal cancer          | 18 Cervical cancer           | 15.2 (-11 to 49)              | <b>31.7 (2.26 to 71.9)</b>       | -3.28 (-34.5 to 47.2)                     |
| 19 Cervical cancer            | 19 Pancreatic cancer         | 77.4 (-72.9 to 321)           | 93.5 (-64 to 326)                | -1.82 (-71.4 to 99.1)                     |
| 20 Self-harm                  | 20 Diarrheal diseases        | 57.2 (-35.1 to 241)           | 85.5 (-25.7 to 346)              | 33.9 (-67.1 to 313)                       |
| 23 Diarrheal diseases         | 24 Self-harm                 |                               |                                  |                                           |
| 25 Pancreatic cancer          | 25 Neonatal disorders        |                               |                                  |                                           |
| 28 Atrial fibrillation        | 136 COVID-19                 |                               |                                  |                                           |

### Brazil, Reference scenario

**Legend:**

Communicable, maternal, neonatal and nutritional  
 Non-communicable  
 Injuries

| Leading Causes 2022           | Leading Causes 2050          | Mean % change number of DEATH | Mean % change all-age DEATH rate | Mean % change age-standardized DEATH rate |
|-------------------------------|------------------------------|-------------------------------|----------------------------------|-------------------------------------------|
| 1 Ischemic heart disease      | 1 Lower respiratory infect   | 111 (63.6 to 156)             | 88.1 (51.5 to 126)               | -23.6 (-44.5 to 0.193)                    |
| 2 Stroke                      | 2 Ischemic heart disease     | 25 (-27 to 94.2)              | 11.7 (-34.4 to 81.6)             | -44.4 (-68.1 to -5.07)                    |
| 3 Lower respiratory infect    | 3 Alzheimer's disease        | 207 (137 to 283)              | 174 (126 to 225)                 | -7.3 (-9.94 to -4.85)                     |
| 4 COVID-19                    | 4 Stroke                     | 29 (-10.2 to 72.6)            | 15.1 (-16.1 to 54.3)             | -45.4 (-62 to -22)                        |
| 5 Diabetes                    | 5 COPD                       | 108 (40.1 to 177)             | 85.9 (30.4 to 154)               | -20.4 (-45.6 to 18.1)                     |
| 6 COPD                        | 6 Chronic kidney disease     | 185 (82.9 to 300)             | 154 (69.8 to 265)                | 19.6 (-24.1 to 83.1)                      |
| 7 Alzheimer's disease         | 7 Diabetes                   | 79 (24.3 to 138)              | 59.8 (15.7 to 115)               | -23.9 (-47.5 to 8.7)                      |
| 8 Interpersonal violence      | 8 Urinary diseases           | 268 (185 to 371)              | 229 (156 to 302)                 | 28.5 (-3.53 to 74.3)                      |
| 9 Chronic kidney disease      | 9 Hypertensive heart disease | 166 (74.2 to 265)             | 138 (58.7 to 229)                | 4.56 (-34.2 to 60.5)                      |
| 10 Road injuries              | 10 Lung cancer               | 83.3 (16.4 to 166)            | 63.2 (7.52 to 129)               | -13.4 (-39.4 to 15.3)                     |
| 11 Lung cancer                | 11 Colorectal cancer         | 105 (13.6 to 231)             | 82.6 (6.45 to 183)               | -5.12 (-40.3 to 38.3)                     |
| 12 Cirrhosis liver            | 12 Prostate cancer           | 171 (65.5 to 308)             | 142 (51.6 to 261)                | 3.53 (-26.9 to 39.3)                      |
| 13 Urinary diseases           | 13 Falls                     | 130 (78.8 to 197)             | 105 (62.1 to 151)                | -12 (-23 to 2.2)                          |
| 14 Hypertensive heart disease | 14 Pancreatic cancer         | 181 (42.8 to 378)             | 150 (32.1 to 313)                | 30.3 (-25.3 to 101)                       |
| 15 Colorectal cancer          | 15 Breast cancer             | 77 (14.1 to 154)              | 57.5 (6.02 to 128)               | -6.63 (-32.8 to 26.9)                     |
| 16 Stomach cancer             | 16 Cirrhosis liver           | 33.7 (8.94 to 58.3)           | 19.3 (0.729 to 38.9)             | -17.7 (-30.8 to -1.44)                    |
| 17 Breast cancer              | 17 Interpersonal violence    | -25.9 (-61.4 to 34)           | -34.1 (-64.9 to 24.7)            | -27.5 (-62.6 to 42.1)                     |
| 18 Falls                      | 18 Atrial fibrillation       | 256 (172 to 363)              | 217 (157 to 297)                 | 9.51 (-5.36 to 31.5)                      |
| 19 Prostate cancer            | 19 Road injuries             | 5.59 (-34.9 to 62.5)          | -5.67 (-37.3 to 45.2)            | -10.9 (-42.2 to 42.6)                     |
| 20 Neonatal disorders         | 20 Bacterial skin            | 338 (129 to 603)              | 292 (111 to 556)                 | 81.6 (-8.21 to 225)                       |
| 23 Pancreatic cancer          | 21 Stomach cancer            |                               |                                  |                                           |
| 28 Atrial fibrillation        | 54 Neonatal disorders        |                               |                                  |                                           |
| 37 Bacterial skin             | 136 COVID-19                 |                               |                                  |                                           |

### Paraguay, Reference scenario

**Legend:**  
Communicable, maternal, neonatal and nutritional  
Non-communicable  
Injuries

| Leading Causes 2022               | Leading Causes 2050               | Mean % change number of DEATH | Mean % change all-age DEATH rate | Mean % change age-standardized DEATH rate |
|-----------------------------------|-----------------------------------|-------------------------------|----------------------------------|-------------------------------------------|
| 1 Ischemic heart disease          | 1 Ischemic heart disease          | 41.2 (-19.1 to 117)           | 28.9 (-18.6 to 111)              | <b>-42 (-65.9 to -1.93)</b>               |
| 2 Stroke                          | 2 Diabetes                        | <b>80.9 (19.2 to 158)</b>     | <b>65.2 (18.9 to 134)</b>        | -23.4 (-45.6 to 13.7)                     |
| <b>3 COVID-19</b>                 | 3 Stroke                          | 42.2 (-1.46 to 94.6)          | 29.7 (-4.42 to 74.3)             | <b>-41.9 (-57.8 to -16.2)</b>             |
| 4 Diabetes                        | 4 Chronic kidney disease          | <b>216 (94.5 to 367)</b>      | <b>188 (92.7 to 313)</b>         | 33.8 (-11.5 to 104)                       |
| <b>5 Lower respiratory infect</b> | 5 Alzheimer's disease             | <b>206 (110 to 303)</b>       | <b>179 (105 to 250)</b>          | <b>3.75 (0.764 to 6.98)</b>               |
| 6 Chronic kidney disease          | <b>6 Lower respiratory infect</b> | <b>95.8 (40.8 to 167)</b>     | <b>78.7 (39.3 to 130)</b>        | -19.6 (-36 to 7.45)                       |
| <b>7 Road injuries</b>            | 7 Hypertensive heart disease      | <b>190 (80.9 to 322)</b>      | <b>164 (74.7 to 274)</b>         | 13.1 (-26.5 to 70.1)                      |
| 8 Alzheimer's disease             | 8 COPD                            | <b>117 (47.9 to 202)</b>      | <b>98 (44.7 to 169)</b>          | -15.9 (-39.3 to 20.2)                     |
| 9 Hypertensive heart disease      | 9 Lung cancer                     | <b>120 (32.1 to 211)</b>      | <b>101 (31.9 to 179)</b>         | -3.1 (-31.8 to 27.5)                      |
| 10 COPD                           | 10 Prostate cancer                | <b>192 (63.2 to 336)</b>      | <b>166 (61.7 to 295)</b>         | 11.9 (-22.9 to 48.3)                      |
| 11 Lung cancer                    | <b>11 Road injuries</b>           | 15.6 (-26.2 to 81.8)          | 5.4 (-29.8 to 63.2)              | <b>-10.3 (-43 to 41.9)</b>                |
| <b>12 Interpersonal violence</b>  | 12 Colorectal cancer              | <b>158 (44.7 to 285)</b>      | <b>135 (40.6 to 254)</b>         | 10.9 (-28.6 to 56.7)                      |
| <b>13 Neonatal disorders</b>      | 13 Breast cancer                  | <b>122 (29.7 to 210)</b>      | <b>102 (37 to 184)</b>           | 5.69 (-25.9 to 42.6)                      |
| 14 Cirrhosis liver                | 14 Cirrhosis liver                | <b>75.9 (31.8 to 126)</b>     | <b>60.4 (30.5 to 98.1)</b>       | -8.55 (-23.2 to 12.9)                     |
| 15 Colorectal cancer              | 15 Pancreatic cancer              | <b>255 (75.3 to 469)</b>      | <b>224 (73.1 to 415)</b>         | 52.4 (-9.76 to 137)                       |
| 16 Breast cancer                  | 16 Atrial fibrillation            | <b>261 (152 to 385)</b>       | <b>229 (137 to 320)</b>          | <b>22.2 (2.8 to 44)</b>                   |
| 17 Prostate cancer                | 17 Endo/metab/blood/immune        | <b>168 (102 to 244)</b>       | <b>144 (95.8 to 204)</b>         | <b>28.1 (9.03 to 59.6)</b>                |
| 18 Cervical cancer                | 18 Urinary diseases               | <b>206 (135 to 295)</b>       | <b>179 (122 to 244)</b>          | 19.6 (-0.172 to 44.6)                     |
| 19 Stomach cancer                 | 19 Cervical cancer                | <b>58.4 (13.2 to 102)</b>     | <b>44.4 (14.7 to 82.1)</b>       | -18.5 (-33.5 to 3.86)                     |
| 20 Congenital defects             | 20 Stomach cancer                 | <b>60.9 (24.3 to 106)</b>     | <b>46.8 (22.5 to 76.5)</b>       | <b>-30 (-38.2 to -19.4)</b>               |
| 22 Pancreatic cancer              | 23 Interpersonal violence         |                               |                                  |                                           |
| 23 Endo/metab/blood/immune        | 33 Neonatal disorders             |                               |                                  |                                           |
| 25 Atrial fibrillation            | 49 Congenital defects             |                               |                                  |                                           |
| 28 Urinary diseases               | 133 COVID-19                      |                               |                                  |                                           |

### Afghanistan, Reference scenario

**Legend:**  
Communicable, maternal, neonatal and nutritional  
Non-communicable  
Injuries

| Leading Causes 2022           | Leading Causes 2050          | Mean % change number of DEATH | Mean % change all-age DEATH rate | Mean % change age-standardized DEATH rate |
|-------------------------------|------------------------------|-------------------------------|----------------------------------|-------------------------------------------|
| 1 Ischemic heart disease      | 1 Ischemic heart disease     | 113 (20.9 to 262)             | -0.603 (-43.4 to 66.6)           | -37.4 (-67.9 to 15.3)                     |
| 2 Neonatal disorders          | 2 Stroke                     | 85.8 (16.6 to 181)            | -13.4 (-41.7 to 20)              | <b>-44.4 (-66.2 to -12.9)</b>             |
| 3 Congenital defects          | 3 Chronic kidney disease     | 266 (133 to 428)              | 70.9 (13.9 to 141)               | 10.2 (-31 to 68.7)                        |
| 4 Stroke                      | 4 Hypertensive heart disease | 202 (81.2 to 342)             | 40.8 (-7.63 to 104)              | -20.2 (-52.5 to 30)                       |
| 5 Lower respiratory infect    | 5 Congenital defects         | -9 (-41.1 to 25.4)            | <b>-57.8 (-64.2 to -49.4)</b>    | <b>-39.6 (-47.2 to -29)</b>               |
| 6 COVID-19                    | 6 Lower respiratory infect   | -8.92 (-38.6 to 29.2)         | <b>-57.6 (-65.9 to -47.4)</b>    | <b>-46.8 (-60.3 to -30.9)</b>             |
| 7 Tuberculosis                | 7 Neonatal disorders         | -29.5 (-62.6 to 14.3)         | <b>-67.2 (-79.8 to -48.1)</b>    | <b>-50.4 (-68.7 to -24.5)</b>             |
| 8 Conflict & terror           | 8 Road injuries              | 50.6 (-19.3 to 170)           | -29.6 (-62.4 to 22.9)            | -39.4 (-66.9 to 6.25)                     |
| 9 Road injuries               | 9 Diabetes                   | 140 (36.7 to 266)             | 12.1 (-31.6 to 70.8)             | -28.4 (-59 to 21.6)                       |
| 10 Hypertensive heart disease | 10 Cirrhosis liver           | 96.8 (37.4 to 162)            | -8.38 (-23.9 to 10.2)            | <b>-39 (-51 to -23.5)</b>                 |
| 11 Chronic kidney disease     | 11 COPD                      | 99.9 (23.7 to 189)            | -6.82 (-37.3 to 27.6)            | <b>-45.1 (-66.1 to -15.3)</b>             |
| 12 Pertussis                  | 12 Stomach cancer            | 116 (43.4 to 201)             | 0.168 (-15 to 15)                | <b>-36.8 (-43.5 to -28.5)</b>             |
| 13 Diarrheal diseases         | 13 Tuberculosis              | -20.9 (-55.4 to 30.5)         | <b>-63 (-78.3 to -38.4)</b>      | <b>-71.3 (-83.9 to -50.8)</b>             |
| 14 Cirrhosis liver            | 14 Conflict & terror         | 111 (-94.6 to 1330)           | -1.9 (-97.4 to 471)              | 10.6 (-98.4 to 653)                       |
| 15 COPD                       | 15 Alzheimer's disease       | 285 (125 to 500)              | 78.7 (23.1 to 133)               | 7.08 (1.73 to 12)                         |
| 16 Maternal disorders         | 16 Interpersonal violence    | 61.4 (-16.1 to 154)           | -25.2 (-50.7 to 14.7)            | <b>-33.5 (-54.9 to -2.22)</b>             |
| 17 Diabetes                   | 17 Colorectal cancer         | 293 (99.6 to 566)             | 81.9 (9.44 to 183)               | 15.2 (-22.3 to 71.2)                      |
| 18 Interpersonal violence     | 18 Leukemia                  | 156 (55 to 297)               | 18.5 (-10.7 to 61)               | -0.648 (-21.7 to 29)                      |
| 19 Stomach cancer             | 19 Falls                     | 84.3 (18.4 to 174)            | -14.6 (-32.4 to 10)              | -10.7 (-21.4 to 3.99)                     |
| 20 Falls                      | 20 Lung cancer               | 284 (107 to 553)              | 77.9 (14.4 to 166)               | 9.87 (-23.1 to 52.3)                      |
| 24 Leukemia                   | 21 Pertussis                 |                               |                                  |                                           |
| 29 Alzheimer's disease        | 23 Maternal disorders        |                               |                                  |                                           |
| 31 Colorectal cancer          | 43 Diarrheal diseases        |                               |                                  |                                           |
| 34 Lung cancer                | 132 COVID-19                 |                               |                                  |                                           |

### Algeria, Reference scenario

**Legend:**

Communicable, maternal, neonatal and nutritional  
Non-communicable  
Injuries

| Leading Causes 2022          | Leading Causes 2050          | Mean % change number of DEATH | Mean % change all-age DEATH rate | Mean % change age-standardized DEATH rate |
|------------------------------|------------------------------|-------------------------------|----------------------------------|-------------------------------------------|
| 1 Ischemic heart disease     | 1 Ischemic heart disease     | 82.3 (20.1 to 170)            | 46.8 (0.333 to 115)              | -47 (-68.4 to -7.9)                       |
| 2 Stroke                     | 2 Stroke                     | 84.5 (42 to 140)              | 48.6 (16.1 to 86.7)              | -49.3 (-63.8 to -20.8)                    |
| 3 Hypertensive heart disease | 3 Hypertensive heart disease | 265 (161 to 381)              | 194 (109 to 283)                 | -0.999 (-35.1 to 46.3)                    |
| 4 Chronic kidney disease     | 4 Chronic kidney disease     | 295 (179 to 444)              | 218 (132 to 333)                 | 16.4 (-23.3 to 83.4)                      |
| 5 Road injuries              | 5 Alzheimer's disease        | 338 (225 to 476)              | 252 (177 to 334)                 | 5.04 (1.73 to 8.25)                       |
| 6 Neonatal disorders         | 6 COPD                       | 230 (153 to 319)              | 166 (103 to 238)                 | -11.4 (-37.9 to 25.2)                     |
| 7 Lower respiratory infect   | 7 Lower respiratory infect   | 162 (96.5 to 235)             | 111 (69 to 166)                  | -20.7 (-39.6 to 4.81)                     |
| 8 Alzheimer's disease        | 8 Diabetes                   | 169 (86.6 to 262)             | 116 (58.1 to 198)                | -14.5 (-43 to 30.3)                       |
| 9 Diabetes                   | 9 Road injuries              | 9.67 (-29.1 to 73)            | -11.7 (-40.2 to 35.4)            | -30.8 (-54 to 10.8)                       |
| 10 Congenital defects        | 10 Cirrhosis liver           | 108 (63.1 to 154)             | 67.2 (43.2 to 92.6)              | -28.1 (-39.3 to -12.1)                    |
| 11 COPD                      | 11 Lung cancer               | 200 (90.1 to 336)             | 141 (58.3 to 241)                | 5.62 (-23.2 to 41.2)                      |
| 12 COVID-19                  | 12 Atrial fibrillation       | 446 (255 to 683)              | 339 (193 to 488)                 | 20 (-3.54 to 46.5)                        |
| 13 Cirrhosis liver           | 13 Colorectal cancer         | 270 (113 to 473)              | 197 (76.2 to 354)                | 19.8 (-19.5 to 65.7)                      |
| 14 Lung cancer               | 14 Other cardiovascular      | 140 (79.8 to 208)             | 93.4 (55.4 to 151)               | -23.7 (-40.2 to -2.17)                    |
| 15 Other cardiovascular      | 15 Parkinson's disease       | 275 (181 to 386)              | 202 (135 to 284)                 | -6.66 (-24.6 to 10.8)                     |
| 16 Asthma                    | 16 Breast cancer             | 153 (56.9 to 267)             | 103 (31.8 to 182)                | 7.43 (-20.9 to 43.3)                      |
| 17 Breast cancer             | 17 Falls                     | 137 (64.6 to 226)             | 90.3 (41.9 to 157)               | -12.3 (-23.6 to 0.791)                    |
| 18 Falls                     | 18 Neonatal disorders        | -52.4 (-71.2 to -22.3)        | -61.8 (-74.7 to -38.3)           | -40.5 (-60.4 to -8.31)                    |
| 19 Tuberculosis              | 19 Urinary diseases          | 350 (226 to 499)              | 261 (180 to 383)                 | 20 (-12.3 to 68.1)                        |
| 20 Colorectal cancer         | 20 Pancreatic cancer         | 399 (210 to 664)              | 301 (149 to 480)                 | 65.5 (15.7 to 123)                        |
| 22 Parkinson's disease       | 21 Asthma                    |                               |                                  |                                           |
| 24 Atrial fibrillation       | 22 Congenital defects        |                               |                                  |                                           |
| 30 Urinary diseases          | 32 Tuberculosis              |                               |                                  |                                           |
| 39 Pancreatic cancer         | 131 COVID-19                 |                               |                                  |                                           |

### Bahrain, Reference scenario

**Legend:**  
Communicable, maternal, neonatal and nutritional  
Non-communicable  
Injuries

| Leading Causes 2022           | Leading Causes 2050          | Mean % change number of DEATH | Mean % change all-age DEATH rate | Mean % change age-standardized DEATH rate |
|-------------------------------|------------------------------|-------------------------------|----------------------------------|-------------------------------------------|
| 1 Ischemic heart disease      | 1 Diabetes                   | 424 (270 to 631)              | 265 (152 to 410)                 | -18.3 (-48 to 25.3)                       |
| 2 Diabetes                    | 2 Ischemic heart disease     | 162 (69.4 to 280)             | 82.9 (16.6 to 171)               | <b>-56 (-75.1 to -22.1)</b>               |
| 3 Stroke                      | 3 Chronic kidney disease     | 597 (386 to 835)              | 386 (241 to 571)                 | 10 (-31.7 to 70.8)                        |
| 4 Chronic kidney disease      | 4 COPD                       | 700 (471 to 912)              | 457 (300 to 625)                 | 2.9 (-32.9 to 55.7)                       |
| 5 COVID-19                    | 5 Lung cancer                | 592 (302 to 907)              | 381 (188 to 591)                 | 24.3 (-16.3 to 70.3)                      |
| 6 Road injuries               | 6 Stroke                     | 201 (116 to 304)              | 110 (52.4 to 177)                | <b>-57.1 (-71.6 to -33.1)</b>             |
| 7 Lung cancer                 | 7 Hypertensive heart disease | 688 (446 to 961)              | 449 (281 to 642)                 | 0.219 (-36.2 to 50.8)                     |
| 8 COPD                        | 8 Alzheimer's disease        | 827 (600 to 1060)             | 544 (396 to 729)                 | 3.21 (-0.123 to 6.98)                     |
| 9 Cirrhosis liver             | 9 Lower respiratory infect   | 476 (338 to 635)              | 301 (208 to 412)                 | -12.4 (-35.8 to 20.2)                     |
| 10 Hypertensive heart disease | 10 Cirrhosis liver           | 282 (215 to 340)              | 166 (117 to 210)                 | <b>-30.4 (-42.6 to -14.8)</b>             |
| 11 Lower respiratory infect   | 11 Bacterial skin            | 848 (561 to 1270)             | 560 (365 to 836)                 | 36.4 (-20.8 to 117)                       |
| 12 Breast cancer              | 12 Colorectal cancer         | 526 (247 to 825)              | 335 (156 to 545)                 | 14.1 (-24.1 to 62.3)                      |
| 13 Colorectal cancer          | 13 Prostate cancer           | 958 (530 to 1530)             | 635 (349 to 1010)                | 28.7 (-12 to 80.8)                        |
| 14 Alzheimer's disease        | 14 Pancreatic cancer         | 727 (392 to 1100)             | 475 (270 to 711)                 | <b>49.7 (5.5 to 111)</b>                  |
| 15 Self-harm                  | 15 Urinary diseases          | 629 (437 to 872)              | 407 (287 to 566)                 | -5.67 (-23.8 to 17.7)                     |
| 16 Endo/metab/blood/immune    | 16 Breast cancer             | 210 (87.6 to 347)             | 116 (39.6 to 207)                | -21 (-44.2 to 10.7)                       |
| 17 Bacterial skin             | 17 Road injuries             | 69.6 (9.77 to 154)            | 18.2 (-21.7 to 83.6)             | -21.2 (-50.7 to 29.7)                     |
| 18 Pancreatic cancer          | 18 Endo/metab/blood/immune   | 379 (272 to 511)              | 233 (159 to 326)                 | 10 (-12.3 to 43.8)                        |
| 19 Urinary diseases           | 19 Liver cancer              | 560 (416 to 721)              | 359 (269 to 481)                 | 21.8 (-5.98 to 61.6)                      |
| 20 Stomach cancer             | 20 Parkinson's disease       | 898 (641 to 1210)             | 593 (427 to 805)                 | 0.902 (-21.3 to 22.8)                     |
| 23 Prostate cancer            | 23 Stomach cancer            |                               |                                  |                                           |
| 24 Liver cancer               | 42 Self-harm                 |                               |                                  |                                           |
| 37 Parkinson's disease        | 129 COVID-19                 |                               |                                  |                                           |

### Egypt, Reference scenario

**Legend:**

Communicable, maternal, neonatal and nutritional  
Non-communicable  
Injuries

| Leading Causes 2022          | Leading Causes 2050          | Mean % change number of DEATH | Mean % change all-age DEATH rate | Mean % change age-standardized DEATH rate |
|------------------------------|------------------------------|-------------------------------|----------------------------------|-------------------------------------------|
| 1 Ischemic heart disease     | 1 Ischemic heart disease     | 77 (20.4 to 149)              | 18 (-19.2 to 68.6)               | -30.9 (-59.4 to 11.8)                     |
| 2 Stroke                     | 2 Chronic kidney disease     | 300 (200 to 421)              | 167 (103 to 253)                 | 55.9 (4.16 to 128)                        |
| 3 Cirrhosis liver            | 3 Stroke                     | 63.8 (27.8 to 110)            | 9.14 (-13.4 to 37.5)             | -40.6 (-57.2 to -15.6)                    |
| 4 Chronic kidney disease     | 4 Cirrhosis liver            | 60.6 (34.9 to 86.1)           | 6.96 (-7.7 to 22)                | -35.9 (-46.1 to -23.9)                    |
| 5 COVID-19                   | 5 Diabetes                   | 156 (92.7 to 229)             | 70.5 (29.3 to 121)               | 5.89 (-29.3 to 48.1)                      |
| 6 Diabetes                   | 6 Hypertensive heart disease | 168 (96.2 to 255)             | 78.9 (37.7 to 140)               | -4.69 (-36.1 to 42.1)                     |
| 7 Hypertensive heart disease | 7 Lower respiratory infect   | 42.1 (13.3 to 75.2)           | -5.39 (-21 to 14.9)              | -31.5 (-44.4 to -13.8)                    |
| 8 Lower respiratory infect   | 8 Liver cancer               | 147 (109 to 194)              | 64.3 (41.2 to 96.1)              | 2.87 (-16.4 to 23.5)                      |
| 9 Liver cancer               | 9 Lung cancer                | 181 (85.6 to 296)             | 86.8 (20.5 to 163)               | 18.6 (-14.7 to 53.4)                      |
| 10 Congenital defects        | 10 COPD                      | 136 (81.1 to 208)             | 57.5 (23.8 to 106)               | -13.9 (-40.6 to 24.5)                     |
| 11 Road injuries             | 11 Alzheimer's disease       | 276 (159 to 404)              | 150 (77.1 to 229)                | 14.7 (10.8 to 18.1)                       |
| 12 COPD                      | 12 Breast cancer             | 159 (66.3 to 261)             | 72.1 (13.5 to 143)               | 19.1 (-18.2 to 58.4)                      |
| 13 Lung cancer               | 13 Colorectal cancer         | 199 (84.4 to 342)             | 98.9 (23.1 to 199)               | 25.4 (-14.7 to 72.9)                      |
| 14 Other cardiovascular      | 14 Pancreatic cancer         | 334 (183 to 531)              | 189 (78 to 311)                  | 78.5 (24.5 to 139)                        |
| 15 Alzheimer's disease       | 15 Brain cancer              | 182 (143 to 226)              | 88.1 (67.3 to 111)               | 38.4 (30.6 to 47.1)                       |
| 16 Breast cancer             | 16 Road injuries             | 13.7 (-32.2 to 88.8)          | -24.2 (-53.8 to 27.1)            | -33.1 (-59.8 to 14.2)                     |
| 17 Neonatal disorders        | 17 Other cardiovascular      | 53.5 (27.2 to 87.7)           | 2.24 (-13.9 to 20.1)             | -28.3 (-42.5 to -14.5)                    |
| 18 Colorectal cancer         | 18 Leukemia                  | 118 (67 to 184)               | 45.4 (12.7 to 90.8)              | 5.23 (-13.4 to 28.6)                      |
| 19 Brain cancer              | 19 Congenital defects        | -33.2 (-46.4 to -18.5)        | -55.6 (-61.8 to -48.5)           | -43.3 (-50.7 to -35.4)                    |
| 20 Leukemia                  | 20 Stomach cancer            | 61.2 (28.8 to 93.4)           | 7.34 (-12.3 to 27.9)             | -32.9 (-40.6 to -23.7)                    |
| 21 Stomach cancer            | 27 Neonatal disorders        |                               |                                  |                                           |
| 22 Pancreatic cancer         | 132 COVID-19                 |                               |                                  |                                           |

### Iran, Reference scenario

**Legend:**

Communicable, maternal, neonatal and nutritional  
 Non-communicable  
 Injuries

| Leading Causes 2022          | Leading Causes 2050          | Mean % change number of DEATH | Mean % change all-age DEATH rate | Mean % change age-standardized DEATH rate |
|------------------------------|------------------------------|-------------------------------|----------------------------------|-------------------------------------------|
| 1 Ischemic heart disease     | 1 Ischemic heart disease     | 70.6 (11.6 to 150)            | 46.2 (-4.17 to 122)              | -51.7 (-71.8 to -19.9)                    |
| 2 Stroke                     | 2 Hypertensive heart disease | 292 (181 to 412)              | 236 (144 to 360)                 | 4.68 (-29.8 to 57.2)                      |
| 3 Hypertensive heart disease | 3 Alzheimer's disease        | 373 (257 to 492)              | 304 (215 to 394)                 | 4.14 (1.21 to 6.9)                        |
| 4 COVID-19                   | 4 Stroke                     | 59.8 (21 to 108)              | 36.9 (1.74 to 82.1)              | -56.6 (-69.9 to -36)                      |
| 5 Road injuries              | 5 Chronic kidney disease     | 326 (202 to 463)              | 265 (162 to 400)                 | 20.1 (-17.9 to 80.9)                      |
| 6 Alzheimer's disease        | 6 Diabetes                   | 196 (113 to 303)              | 154 (80.6 to 248)                | -14.4 (-42.4 to 27.8)                     |
| 7 Diabetes                   | 7 COPD                       | 245 (155 to 338)              | 196 (119 to 291)                 | -7.28 (-37.6 to 35.6)                     |
| 8 Chronic kidney disease     | 8 Lung cancer                | 237 (122 to 384)              | 188 (92.3 to 309)                | 8.63 (-20.8 to 45.1)                      |
| 9 COPD                       | 9 Lower respiratory infect   | 165 (115 to 217)              | 127 (82.9 to 168)                | -24.8 (-41.3 to -3.76)                    |
| 10 Lower respiratory infect  | 10 Road injuries             | 18 (-22.2 to 81.7)            | 1.13 (-34.5 to 56.4)             | -19.6 (-49.1 to 30.2)                     |
| 11 Stomach cancer            | 11 Stomach cancer            | 105 (73.1 to 144)             | 75.7 (51.8 to 106)               | -35.7 (-42.7 to -27.2)                    |
| 12 Lung cancer               | 12 Colorectal cancer         | 231 (100 to 387)              | 183 (76.8 to 313)                | 6.04 (-27.5 to 46.1)                      |
| 13 Cirrhosis liver           | 13 Cirrhosis liver           | 135 (101 to 166)              | 101 (76 to 130)                  | -20.3 (-31.8 to -3.64)                    |
| 14 Colorectal cancer         | 14 Prostate cancer           | 288 (137 to 467)              | 231 (106 to 380)                 | -3.07 (-30.7 to 32.3)                     |
| 15 Other cardiovascular      | 15 Pancreatic cancer         | 369 (197 to 570)              | 300 (161 to 456)                 | 49.2 (3.65 to 98.2)                       |
| 16 Breast cancer             | 16 Brain cancer              | 201 (160 to 246)              | 157 (131 to 182)                 | 29.9 (22.8 to 36.3)                       |
| 17 Brain cancer              | 17 Other cardiovascular      | 153 (108 to 203)              | 117 (82.2 to 157)                | -25 (-40.3 to -6.9)                       |
| 18 Leukemia                  | 18 Atrial fibrillation       | 415 (273 to 567)              | 341 (224 to 471)                 | 12.7 (-7.12 to 33.2)                      |
| 19 Self-harm                 | 19 Parkinson's disease       | 272 (204 to 352)              | 218 (163 to 292)                 | -8.84 (-23.8 to 8.64)                     |
| 20 Prostate cancer           | 20 Leukemia                  | 141 (79.6 to 222)             | 106 (55.7 to 165)                | -3.94 (-22 to 16.1)                       |
| 24 Pancreatic cancer         | 21 Breast cancer             |                               |                                  |                                           |
| 26 Parkinson's disease       | 31 Self-harm                 |                               |                                  |                                           |
| 32 Atrial fibrillation       | 132 COVID-19                 |                               |                                  |                                           |



### Iraq, Reference scenario

**Legend:**

Communicable, maternal, neonatal and nutritional  
 Non-communicable  
 Injuries

| Leading Causes 2022          | Leading Causes 2050          | Mean % change number of DEATH | Mean % change all-age DEATH rate | Mean % change age-standardized DEATH rate |
|------------------------------|------------------------------|-------------------------------|----------------------------------|-------------------------------------------|
| 1 Ischemic heart disease     | 1 Ischemic heart disease     | 65.2 (-6.65 to 166)           | 12.1 (-30.8 to 73.5)             | <b>-52.1 (-73.3 to -16.4)</b>             |
| 2 Stroke                     | 2 Stroke                     | 60.3 (-0.583 to 134)          | 8.74 (-22.2 to 50.8)             | <b>-54.9 (-70.3 to -29.8)</b>             |
| 3 Conflict & terror          | 3 Chronic kidney disease     | <b>269 (116 to 444)</b>       | <b>151 (77.1 to 253)</b>         | 9.16 (-28.7 to 73.9)                      |
| 4 COVID-19                   | 4 Conflict & terror          | 618 (-96.2 to 4310)           | 400 (-97.7 to 2830)              | 413 (-97.7 to 2900)                       |
| 5 Diabetes                   | 5 Diabetes                   | <b>130 (40.6 to 244)</b>      | <b>56.2 (11.6 to 126)</b>        | -29.8 (-53.8 to 12.8)                     |
| 6 Chronic kidney disease     | 6 Hypertensive heart disease | <b>266 (124 to 417)</b>       | <b>148 (73.9 to 243)</b>         | -4.56 (-39.6 to 49.1)                     |
| 7 Neonatal disorders         | 7 Alzheimer's disease        | <b>378 (183 to 597)</b>       | <b>223 (127 to 318)</b>          | <b>4.06 (1.28 to 7.01)</b>                |
| 8 Hypertensive heart disease | 8 Lung cancer                | <b>231 (78.5 to 433)</b>      | <b>124 (40.6 to 217)</b>         | 1.13 (-28.6 to 36.8)                      |
| 9 Road injuries              | 9 Road injuries              | 38.4 (-19.8 to 120)           | -5.92 (-40.5 to 49.4)            | -25.6 (-54.1 to 19)                       |
| 10 Lung cancer               | 10 Cirrhosis liver           | <b>129 (56.6 to 198)</b>      | <b>55 (29.3 to 83.5)</b>         | <b>-24.1 (-36.2 to -6.57)</b>             |
| 11 Congenital defects        | 11 COPD                      | <b>217 (100 to 357)</b>       | <b>115 (58.3 to 200)</b>         | -14.2 (-42.6 to 27.8)                     |
| 12 Interpersonal violence    | 12 Breast cancer             | <b>156 (51.5 to 290)</b>      | <b>73.1 (15.1 to 137)</b>        | 0.0411 (-29.3 to 32.2)                    |
| 13 Mechanical forces         | 13 Pancreatic cancer         | <b>396 (172 to 692)</b>       | <b>235 (111 to 384)</b>          | <b>56.2 (9.34 to 116)</b>                 |
| 14 Lower respiratory infect  | 14 Lower respiratory infect  | <b>58.6 (6.52 to 114)</b>     | 7.65 (-14 to 36.1)               | <b>-30.4 (-45.9 to -8)</b>                |
| 15 Alzheimer's disease       | 15 Brain cancer              | <b>219 (118 to 306)</b>       | <b>116 (91.3 to 139)</b>         | <b>36.9 (30.2 to 44.6)</b>                |
| 16 Cirrhosis liver           | 16 Mechanical forces         | 20.8 (-19.9 to 70.2)          | -18 (-35.6 to 8.92)              | <b>-30.4 (-44.7 to -5.69)</b>             |
| 17 Breast cancer             | 17 Colorectal cancer         | <b>239 (76.7 to 436)</b>      | <b>128 (38.1 to 235)</b>         | 8.33 (-27 to 49.5)                        |
| 18 COPD                      | 18 Interpersonal violence    | -0.927 (-49 to 72.6)          | -33.1 (-59.6 to 12.5)            | -39.9 (-64.1 to 1.87)                     |
| 19 Self-harm                 | 19 Liver cancer              | <b>247 (122 to 366)</b>       | <b>135 (86.3 to 192)</b>         | 12.4 (-13.7 to 46.2)                      |
| 20 Brain cancer              | 20 Parkinson's disease       | <b>322 (168 to 522)</b>       | <b>185 (118 to 263)</b>          | -2.33 (-19.1 to 17)                       |
| 22 Colorectal cancer         | 24 Neonatal disorders        |                               |                                  |                                           |
| 26 Pancreatic cancer         | 26 Self-harm                 |                               |                                  |                                           |
| 27 Liver cancer              | 28 Congenital defects        |                               |                                  |                                           |
| 31 Parkinson's disease       | 131 COVID-19                 |                               |                                  |                                           |

### Jordan, Reference scenario

**Legend:**

Communicable, maternal, neonatal and nutritional  
Non-communicable  
Injuries

| Leading Causes 2022          | Leading Causes 2050          | Mean % change number of DEATH | Mean % change all-age DEATH rate | Mean % change age-standardized DEATH rate |
|------------------------------|------------------------------|-------------------------------|----------------------------------|-------------------------------------------|
| 1 Ischemic heart disease     | 1 Ischemic heart disease     | 142 (57.4 to 252)             | 34.2 (-14.2 to 102)              | <b>-52.9 (-71.6 to -21.2)</b>             |
| 2 Stroke                     | 2 Hypertensive heart disease | 477 (304 to 678)              | 220 (122 to 331)                 | -3.57 (-36.4 to 42)                       |
| 3 COVID-19                   | 3 Chronic kidney disease     | 457 (294 to 652)              | 209 (118 to 331)                 | 5.64 (-28.7 to 54.6)                      |
| 4 Diabetes                   | 4 Stroke                     | 138 (76.3 to 206)             | 32.1 (-3.51 to 70.5)             | <b>-58.6 (-70.8 to -45.2)</b>             |
| 5 Chronic kidney disease     | 5 Diabetes                   | 233 (143 to 342)              | 84.6 (30.6 to 144)               | <b>-34.3 (-55.1 to -8.97)</b>             |
| 6 Hypertensive heart disease | 6 Alzheimer's disease        | 703 (520 to 927)              | 345 (247 to 450)                 | -0.723 (-3.28 to 1.77)                    |
| 7 Road injuries              | 7 COPD                       | 431 (284 to 582)              | 195 (116 to 285)                 | -7.62 (-34.1 to 30.2)                     |
| 8 Neonatal disorders         | 8 Lung cancer                | 283 (157 to 432)              | 112 (47.3 to 194)                | -5.59 (-31 to 24.8)                       |
| 9 Lower respiratory infect   | 9 Lower respiratory infect   | 213 (146 to 298)              | 73.7 (36 to 129)                 | <b>-31.1 (-44.8 to -10.6)</b>             |
| 10 Alzheimer's disease       | 10 Colorectal cancer         | 325 (153 to 537)              | 135 (45.3 to 249)                | -3.16 (-33.2 to 34.2)                     |
| 11 Congenital defects        | 11 Road injuries             | 65.4 (8.62 to 151)            | -8.14 (-39.7 to 39.9)            | -24.5 (-51.7 to 19.1)                     |
| 12 Lung cancer               | 12 Breast cancer             | 194 (99.3 to 300)             | 62.9 (11.1 to 118)               | -15.9 (-38.9 to 12.1)                     |
| 13 Breast cancer             | 13 Cirrhosis liver           | 219 (174 to 275)              | 77 (50.6 to 105)                 | <b>-28 (-39.2 to -14.1)</b>               |
| 14 Colorectal cancer         | 14 Leukemia                  | 222 (159 to 294)              | 78.7 (51 to 115)                 | -3.92 (-13.6 to 7.8)                      |
| 15 COPD                      | 15 Pancreatic cancer         | 469 (265 to 713)              | 216 (104 to 345)                 | 32.4 (-3.47 to 81.3)                      |
| 16 Cirrhosis liver           | 16 Prostate cancer           | 519 (274 to 851)              | 243 (113 to 419)                 | -1.72 (-28.7 to 36.7)                     |
| 17 Leukemia                  | 17 Parkinson's disease       | 503 (362 to 656)              | 234 (164 to 318)                 | -12.1 (-27.6 to 6.93)                     |
| 18 Interpersonal violence    | 18 Brain cancer              | 270 (230 to 316)              | 105 (85.7 to 124)                | <b>23.4 (15.8 to 30.2)</b>                |
| 19 Lymphoma                  | 19 Lymphoma                  | 218 (116 to 338)              | 76.3 (23.6 to 141)               | -12.1 (-34.2 to 14.2)                     |
| 20 Brain cancer              | 20 Atrial fibrillation       | 779 (526 to 1040)             | 387 (255 to 536)                 | 6.21 (-9.26 to 26.6)                      |
| 22 Pancreatic cancer         | 21 Neonatal disorders        |                               |                                  |                                           |
| 24 Prostate cancer           | 24 Congenital defects        |                               |                                  |                                           |
| 26 Parkinson's disease       | 35 Interpersonal violence    |                               |                                  |                                           |
| 39 Atrial fibrillation       | 132 COVID-19                 |                               |                                  |                                           |

### Kuwait, Reference scenario

**Legend:**

Communicable, maternal, neonatal and nutritional  
Non-communicable  
Injuries

| Leading Causes 2022          | Leading Causes 2050          | Mean % change number of DEATH | Mean % change all-age DEATH rate | Mean % change age-standardized DEATH rate |
|------------------------------|------------------------------|-------------------------------|----------------------------------|-------------------------------------------|
| 1 Ischemic heart disease     | 1 Ischemic heart disease     | 193 (97.2 to 342)             | 97.3 (31.4 to 196)               | -47.2 (-65.1 to -16.2)                    |
| 2 Stroke                     | 2 Alzheimer's disease        | 744 (594 to 909)              | 468 (388 to 542)                 | 8.67 (5.43 to 11.6)                       |
| 3 Lower respiratory infect   | 3 Chronic kidney disease     | 877 (575 to 1280)             | 558 (352 to 810)                 | 53 (3.8 to 128)                           |
| 4 Diabetes                   | 4 Hypertensive heart disease | 892 (615 to 1310)             | 568 (381 to 829)                 | 38.6 (-4.66 to 108)                       |
| 5 Alzheimer's disease        | 5 Lower respiratory infect   | 445 (313 to 610)              | 267 (190 to 366)                 | -15.1 (-34.1 to 10.7)                     |
| 6 Road injuries              | 6 Diabetes                   | 430 (290 to 634)              | 257 (162 to 390)                 | -23.4 (-43.8 to 10.6)                     |
| 7 Chronic kidney disease     | 7 Stroke                     | 207 (133 to 305)              | 107 (62.7 to 170)                | -53.4 (-64.3 to -35.1)                    |
| 8 Hypertensive heart disease | 8 Colorectal cancer          | 445 (233 to 685)              | 266 (133 to 416)                 | -5.62 (-35.2 to 24.4)                     |
| 9 Colorectal cancer          | 9 Lung cancer                | 494 (289 to 761)              | 300 (169 to 459)                 | -4.59 (-31.7 to 26.1)                     |
| 10 Lung cancer               | 10 Pancreatic cancer         | 657 (401 to 958)              | 409 (245 to 577)                 | 30 (-7.23 to 68.2)                        |
| 11 COVID-19                  | 11 Road injuries             | 94.3 (34.3 to 193)            | 30.9 (-9.64 to 98.1)             | -13.6 (-42.8 to 38.7)                     |
| 12 Congenital defects        | 12 Prostate cancer           | 621 (343 to 975)              | 385 (208 to 591)                 | -12.2 (-40 to 19.5)                       |
| 13 Cirrhosis liver           | 13 Cirrhosis liver           | 325 (245 to 416)              | 186 (147 to 232)                 | -27.1 (-36.4 to -13.5)                    |
| 14 Breast cancer             | 14 Breast cancer             | 297 (152 to 451)              | 167 (78.4 to 262)                | 3.19 (-25.2 to 32.4)                      |
| 15 Falls                     | 15 Urinary diseases          | 887 (593 to 1210)             | 565 (382 to 786)                 | 41.7 (-1.56 to 103)                       |
| 16 Pancreatic cancer         | 16 Atrial fibrillation       | 822 (615 to 1060)             | 520 (402 to 657)                 | 26.1 (4.47 to 53.6)                       |
| 17 Neonatal disorders        | 17 Parkinson's disease       | 677 (515 to 877)              | 422 (325 to 539)                 | -7.51 (-23.7 to 12.9)                     |
| 18 Prostate cancer           | 18 Falls                     | 256 (173 to 353)              | 139 (87.1 to 189)                | -18.1 (-29.8 to -4.83)                    |
| 19 Self-harm                 | 19 Bladder cancer            | 510 (375 to 692)              | 310 (224 to 405)                 | -11.8 (-25.4 to 4.12)                     |
| 20 Lymphoma                  | 20 COPD                      | 617 (410 to 921)              | 383 (251 to 556)                 | -3.25 (-34.4 to 37.9)                     |
| 22 Parkinson's disease       | 21 Lymphoma                  |                               |                                  |                                           |
| 23 Bladder cancer            | 40 Self-harm                 |                               |                                  |                                           |
| 25 Atrial fibrillation       | 42 Congenital defects        |                               |                                  |                                           |
| 27 Urinary diseases          | 54 Neonatal disorders        |                               |                                  |                                           |
| 28 COPD                      | 129 COVID-19                 |                               |                                  |                                           |

### Lebanon, Reference scenario

**Legend:**  
Communicable, maternal, neonatal and nutritional  
Non-communicable  
Injuries

| Leading Causes 2022           | Leading Causes 2050          | Mean % change number of DEATH | Mean % change all-age DEATH rate | Mean % change age-standardized DEATH rate |
|-------------------------------|------------------------------|-------------------------------|----------------------------------|-------------------------------------------|
| 1 Ischemic heart disease      | 1 Ischemic heart disease     | 19.1 (-25.6 to 84.4)          | 13.5 (-26.1 to 74.6)             | -41.6 (-67.4 to 0.608)                    |
| 2 COVID-19                    | 2 Chronic kidney disease     | 158 (75.8 to 253)             | 146 (74.7 to 255)                | 24.9 (-19.1 to 104)                       |
| 3 Stroke                      | 3 Alzheimer's disease        | 137 (71.6 to 208)             | 126 (75.2 to 176)                | 10 (7.01 to 13.4)                         |
| 4 Chronic kidney disease      | 4 Lung cancer                | 135 (51 to 233)               | 123 (52.3 to 206)                | 9.44 (-20.1 to 43.8)                      |
| 5 Lower respiratory infect    | 5 Lower respiratory infect   | 69.2 (25.9 to 115)            | 61.1 (31.1 to 96)                | -17.2 (-36.9 to 6.77)                     |
| 6 Diabetes                    | 6 Diabetes                   | 69.8 (14.1 to 125)            | 61.7 (17.3 to 111)               | -19.3 (-43.9 to 17.7)                     |
| 7 Alzheimer's disease         | 7 Stroke                     | 11.1 (-21.2 to 51.7)          | 5.86 (-21.1 to 40.6)             | -45.3 (-62.1 to -18.7)                    |
| 8 Lung cancer                 | 8 COPD                       | 110 (44.5 to 188)             | 100 (46.8 to 168)                | 0.547 (-34.5 to 52.4)                     |
| 9 COPD                        | 9 Hypertensive heart disease | 111 (39.5 to 192)             | 101 (42.7 to 169)                | 2.03 (-34.5 to 55.6)                      |
| 10 Hypertensive heart disease | 10 Colorectal cancer         | 129 (38.2 to 246)             | 118 (40.4 to 218)                | 8.06 (-25.9 to 49.7)                      |
| 11 Cirrhosis liver            | 11 Breast cancer             | 95 (19.4 to 190)              | 85.5 (21.2 to 171)               | -4.34 (-33 to 29)                         |
| 12 Colorectal cancer          | 12 Cirrhosis liver           | 60.2 (29.3 to 91)             | 52.7 (32.1 to 73.2)              | -20.6 (-33.7 to -4.41)                    |
| 13 Breast cancer              | 13 Prostate cancer           | 92.3 (19 to 191)              | 83.1 (17.7 to 172)               | -9.95 (-35.2 to 22.8)                     |
| 14 Prostate cancer            | 14 Bladder cancer            | 102 (49.6 to 173)             | 92.6 (49.4 to 148)               | -4.7 (-19.6 to 13.6)                      |
| 15 Bladder cancer             | 15 Urinary diseases          | 169 (104 to 253)              | 156 (95.7 to 225)                | 28.7 (-7.27 to 76.6)                      |
| 16 Road injuries              | 16 Pancreatic cancer         | 216 (94.6 to 366)             | 200 (91.7 to 330)                | 47.5 (-0.363 to 104)                      |
| 17 Falls                      | 17 Lymphoma                  | 91.3 (28.9 to 166)            | 82.2 (30 to 149)                 | -4.82 (-27.8 to 20.5)                     |
| 18 Lymphoma                   | 18 Falls                     | 75 (28.2 to 130)              | 66.5 (27.8 to 112)               | -9.55 (-21.9 to 0.873)                    |
| 19 Urinary diseases           | 19 Atrial fibrillation       | 150 (80.1 to 233)             | 138 (75.2 to 201)                | 16.8 (-3.84 to 43.2)                      |
| 20 Stomach cancer             | 20 Leukemia                  | 88.8 (33.3 to 159)            | 79.8 (31.4 to 140)               | -1.85 (-22.5 to 22)                       |
| 21 Leukemia                   | 22 Road injuries             |                               |                                  |                                           |
| 22 Pancreatic cancer          | 24 Stomach cancer            |                               |                                  |                                           |
| 26 Atrial fibrillation        | 132 COVID-19                 |                               |                                  |                                           |

### Libya, Reference scenario

**Legend:**  
Communicable, maternal, neonatal and nutritional  
Non-communicable  
Injuries

| Leading Causes 2022          | Leading Causes 2050          | Mean % change number of DEATH | Mean % change all-age DEATH rate | Mean % change age-standardized DEATH rate |
|------------------------------|------------------------------|-------------------------------|----------------------------------|-------------------------------------------|
| 1 Ischemic heart disease     | 1 Ischemic heart disease     | 82.4 (6.91 to 170)            | 84.5 (13.9 to 183)               | -37.1 (-63.9 to 8.24)                     |
| 2 COVID-19                   | 2 Chronic kidney disease     | 319 (181 to 467)              | 323 (201 to 501)                 | 40.7 (-4.6 to 118)                        |
| 3 Stroke                     | 3 Hypertensive heart disease | 332 (187 to 479)              | 336 (203 to 483)                 | 29.9 (-16 to 95.9)                        |
| 4 Road injuries              | 4 Stroke                     | 67.9 (13.7 to 140)            | 69.5 (22.2 to 140)               | <b>-44.9 (-62.9 to -12.9)</b>             |
| 5 Chronic kidney disease     | 5 Alzheimer's disease        | 355 (199 to 509)              | 357 (234 to 479)                 | <b>23.7 (20.3 to 27.1)</b>                |
| 6 Hypertensive heart disease | 6 Lung cancer                | 241 (100 to 379)              | 242 (123 to 387)                 | 14.5 (-19.7 to 53.1)                      |
| 7 Lung cancer                | 7 COPD                       | 255 (152 to 379)              | 258 (161 to 388)                 | 9.41 (-24.6 to 66.8)                      |
| 8 Diabetes                   | 8 Diabetes                   | 153 (65.8 to 267)             | 156 (75.9 to 284)                | -14.3 (-43.3 to 38.4)                     |
| 9 Conflict & terror          | 9 Road injuries              | 7.08 (-34 to 73.1)            | 8.26 (-31.6 to 81.4)             | -14 (-46.6 to 47.6)                       |
| 10 Cirrhosis liver           | 10 Lower respiratory infect  | 154 (93 to 214)               | 156 (107 to 216)                 | -9.97 (-31 to 27)                         |
| 11 Alzheimer's disease       | 11 Colorectal cancer         | 248 (95.3 to 429)             | 249 (118 to 433)                 | 19.6 (-16.8 to 67.9)                      |
| 12 Lower respiratory infect  | 12 Cirrhosis liver           | 109 (59.9 to 158)             | 111 (73.8 to 152)                | <b>-22.4 (-34.9 to -2.9)</b>              |
| 13 COPD                      | 13 Pancreatic cancer         | 380 (182 to 613)              | 382 (213 to 612)                 | <b>63 (13.4 to 120)</b>                   |
| 14 Congenital defects        | 14 Liver cancer              | 242 (157 to 333)              | 245 (176 to 334)                 | <b>26.2 (0.187 to 66.2)</b>               |
| 15 Colorectal cancer         | 15 Conflict & terror         | inf (-100 to nan)             | inf (-100 to nan)                | inf (-100 to nan)                         |
| 16 Neonatal disorders        | 16 Prostate cancer           | 320 (131 to 548)              | 320 (152 to 528)                 | 8.01 (-25.1 to 47.2)                      |
| 17 Other cardiovascular      | 17 Bladder cancer            | 265 (141 to 417)              | 267 (167 to 378)                 | 7.45 (-12.6 to 30.5)                      |
| 18 Breast cancer             | 18 Lymphoma                  | 175 (71.9 to 292)             | 176 (82.7 to 290)                | 7.54 (-23.6 to 37.5)                      |
| 19 Liver cancer              | 19 Breast cancer             | 144 (42.5 to 270)             | 145 (56.7 to 261)                | 11 (-23.7 to 51.7)                        |
| 20 Pancreatic cancer         | 20 Parkinson's disease       | 298 (192 to 412)              | 301 (225 to 397)                 | 3.72 (-12.9 to 26.8)                      |
| 23 Lymphoma                  | 22 Other cardiovascular      |                               |                                  |                                           |
| 28 Bladder cancer            | 38 Congenital defects        |                               |                                  |                                           |
| 29 Prostate cancer           | 57 Neonatal disorders        |                               |                                  |                                           |
| 30 Parkinson's disease       | 131 COVID-19                 |                               |                                  |                                           |

### Morocco, Reference scenario

**Legend:**  
Communicable, maternal, neonatal and nutritional  
Non-communicable  
Injuries

| Leading Causes 2022          | Leading Causes 2050          | Mean % change number of DEATH | Mean % change all-age DEATH rate | Mean % change age-standardized DEATH rate |
|------------------------------|------------------------------|-------------------------------|----------------------------------|-------------------------------------------|
| 1 Ischemic heart disease     | 1 Ischemic heart disease     | 46.6 (-3.43 to 117)           | 38.2 (-7.38 to 101)              | -34.2 (-62.8 to 18.7)                     |
| 2 Stroke                     | 2 Stroke                     | 40.2 (6.69 to 86.8)           | 32 (1.79 to 72.2)                | -39.8 (-60.3 to -8.18)                    |
| 3 COVID-19                   | 3 Chronic kidney disease     | 210 (125 to 308)              | 192 (121 to 277)                 | 38.6 (-10.3 to 113)                       |
| 4 Hypertensive heart disease | 4 Hypertensive heart disease | 125 (65.7 to 192)             | 112 (56.4 to 176)                | -6.51 (-40.7 to 45.5)                     |
| 5 Chronic kidney disease     | 5 Alzheimer's disease        | 223 (106 to 371)              | 203 (97.9 to 320)                | 10.1 (7.05 to 13.3)                       |
| 6 Road injuries              | 6 Diabetes                   | 90.5 (36.2 to 157)            | 79.3 (30.3 to 144)               | -10.5 (-41.3 to 33.8)                     |
| 7 Diabetes                   | 7 COPD                       | 96.8 (48.6 to 151)            | 85.2 (43 to 131)                 | -17.2 (-45.7 to 24.5)                     |
| 8 Lower respiratory infect   | 8 Lower respiratory infect   | 59.4 (27.8 to 92.2)           | 49.9 (24.1 to 75.7)              | -28.2 (-46 to -2.98)                      |
| 9 COPD                       | 9 Lung cancer                | 101 (21.5 to 203)             | 88.3 (16.9 to 178)               | -2.25 (-33 to 35)                         |
| 10 Alzheimer's disease       | 10 Road injuries             | -8.42 (-42.6 to 46.5)         | -13.7 (-43.6 to 34.6)            | -34.5 (-59.6 to 6.8)                      |
| 11 Cirrhosis liver           | 11 Cirrhosis liver           | 45 (22.7 to 71.3)             | 36.3 (19.1 to 56.1)              | -30.4 (-42 to -15.7)                      |
| 12 Lung cancer               | 12 Colorectal cancer         | 153 (45 to 314)               | 137 (36.9 to 281)                | 20.5 (-19.3 to 70.2)                      |
| 13 Neonatal disorders        | 13 Parkinson's disease       | 160 (92.2 to 251)             | 144 (90.3 to 202)                | -1.02 (-17.3 to 19.2)                     |
| 14 Asthma                    | 14 Other cardiovascular      | 64.8 (32.5 to 104)            | 54.8 (32.9 to 82)                | -25.2 (-41.5 to -4.95)                    |
| 15 Tuberculosis              | 15 Atrial fibrillation       | 260 (134 to 456)              | 237 (121 to 382)                 | 23.3 (2.98 to 45.1)                       |
| 16 Colorectal cancer         | 16 Breast cancer             | 93.6 (26.3 to 198)            | 81.2 (20 to 163)                 | 11.9 (-18.6 to 51.6)                      |
| 17 Other cardiovascular      | 17 Falls                     | 75.5 (26.3 to 139)            | 64.7 (23.1 to 108)               | -13.2 (-22.4 to -3.4)                     |
| 18 Breast cancer             | 18 Lymphoma                  | 119 (37.6 to 223)             | 106 (34.7 to 195)                | 9.23 (-19.3 to 43.3)                      |
| 19 Falls                     | 19 Asthma                    | -11.7 (-29.6 to 10.5)         | -17.1 (-29.7 to 0.793)           | -61.4 (-69.8 to -49.4)                    |
| 20 Parkinson's disease       | 20 Urinary diseases          | 174 (111 to 253)              | 158 (112 to 229)                 | 13.7 (-17.8 to 57.6)                      |
| 23 Lymphoma                  | 24 Tuberculosis              |                               |                                  |                                           |
| 25 Atrial fibrillation       | 29 Neonatal disorders        |                               |                                  |                                           |
| 27 Urinary diseases          | 131 COVID-19                 |                               |                                  |                                           |

### Oman, Reference scenario

**Legend:**

Communicable, maternal, neonatal and nutritional  
Non-communicable  
Injuries

| Leading Causes 2022          | Leading Causes 2050          | Mean % change number of DEATH | Mean % change all-age DEATH rate | Mean % change age-standardized DEATH rate |
|------------------------------|------------------------------|-------------------------------|----------------------------------|-------------------------------------------|
| 1 Ischemic heart disease     | 1 Ischemic heart disease     | 246 (132 to 410)              | 136 (56.8 to 253)                | -41 (-65.7 to 0.337)                      |
| 2 Road injuries              | 2 Chronic kidney disease     | 751 (549 to 1010)             | 480 (327 to 681)                 | 45 (-2.96 to 119)                         |
| 3 Stroke                     | 3 Hypertensive heart disease | 779 (551 to 1040)             | 499 (337 to 692)                 | 31.1 (-15.6 to 93.4)                      |
| 4 Diabetes                   | 4 Diabetes                   | 472 (323 to 657)              | 289 (178 to 413)                 | 0.142 (-32 to 59.1)                       |
| 5 Chronic kidney disease     | 5 Stroke                     | 224 (144 to 329)              | 121 (67.9 to 206)                | <b>-46.7 (-63.9 to -16.5)</b>             |
| 6 Hypertensive heart disease | 6 Lower respiratory infect   | 412 (309 to 538)              | 249 (176 to 340)                 | 2.53 (-22.8 to 41.7)                      |
| 7 Lower respiratory infect   | 7 Road injuries              | 78 (13.1 to 178)              | 21.4 (-24.2 to 91.6)             | -17.3 (-50.7 to 40.5)                     |
| 8 COVID-19                   | 8 Alzheimer's disease        | 774 (547 to 1030)             | 494 (341 to 656)                 | 17 (13.6 to 21)                           |
| 9 Neonatal disorders         | 9 COPD                       | 641 (446 to 849)              | 405 (267 to 564)                 | 12.3 (-28 to 62.9)                        |
| 10 Other cardiovascular      | 10 Other cardiovascular      | 339 (261 to 431)              | 199 (150 to 265)                 | -14.5 (-34.2 to 13)                       |
| 11 Cirrhosis liver           | 11 Cirrhosis liver           | 320 (248 to 399)              | 186 (136 to 233)                 | <b>-21.5 (-34.5 to -2.94)</b>             |
| 12 Alzheimer's disease       | 12 Lung cancer               | 608 (337 to 893)              | 381 (209 to 580)                 | 19.8 (-17.9 to 63.6)                      |
| 13 Congenital defects        | 13 Liver cancer              | 625 (459 to 798)              | 394 (285 to 513)                 | <b>34.4 (5.35 to 74.2)</b>                |
| 14 COPD                      | 14 Parkinson's disease       | 769 (543 to 1060)             | 491 (345 to 662)                 | 21.3 (-2.64 to 52.7)                      |
| 15 Falls                     | 15 Cardiomyopathy            | 351 (275 to 447)              | 206 (161 to 264)                 | <b>-11.9 (-21.2 to -0.693)</b>            |
| 16 Cardiomyopathy            | 16 Urinary diseases          | 748 (545 to 1050)             | 478 (334 to 670)                 | 44.9 (-3.02 to 131)                       |
| 17 Stomach cancer            | 17 Colorectal cancer         | 644 (329 to 1020)             | 406 (208 to 656)                 | 30.3 (-17.2 to 83.8)                      |
| 18 Upper respiratory infect  | 18 Upper respiratory infect  | 417 (307 to 539)              | 252 (186 to 332)                 | 5.94 (-3.13 to 13.2)                      |
| 19 Lung cancer               | 19 Falls                     | 232 (146 to 325)              | 125 (72.1 to 189)                | -4.01 (-17.3 to 12.1)                     |
| 20 Lymphoma                  | 20 Lymphoma                  | 417 (216 to 621)              | 251 (122 to 393)                 | 9.76 (-24.8 to 47.7)                      |
| 21 Liver cancer              | 22 Stomach cancer            |                               |                                  |                                           |
| 26 Colorectal cancer         | 34 Neonatal disorders        |                               |                                  |                                           |
| 27 Parkinson's disease       | 37 Congenital defects        |                               |                                  |                                           |
| 30 Urinary diseases          | 133 COVID-19                 |                               |                                  |                                           |

### Palestine, Reference scenario

**Legend:**  
Communicable, maternal, neonatal and nutritional  
Non-communicable  
Injuries

| Leading Causes 2022          | Leading Causes 2050          | Mean % change number of DEATH | Mean % change all-age DEATH rate | Mean % change age-standardized DEATH rate |
|------------------------------|------------------------------|-------------------------------|----------------------------------|-------------------------------------------|
| 1 Ischemic heart disease     | 1 Ischemic heart disease     | 110 (39.1 to 204)             | 52.7 (1.67 to 126)               | -36.8 (-63.8 to 7.06)                     |
| 2 COVID-19                   | 2 Chronic kidney disease     | 375 (257 to 527)              | 245 (158 to 368)                 | 45.6 (-2.77 to 120)                       |
| 3 Stroke                     | 3 Stroke                     | 105 (60.6 to 158)             | 49.1 (15.1 to 87.6)              | <b>-42.4 (-60.5 to -17.4)</b>             |
| 4 Diabetes                   | 4 Diabetes                   | 204 (126 to 299)              | 121 (62.2 to 193)                | -8.92 (-38.2 to 27.4)                     |
| 5 Conflict & terror          | 5 Hypertensive heart disease | 286 (197 to 425)              | 181 (109 to 284)                 | 1.51 (-35.5 to 59.8)                      |
| 6 Chronic kidney disease     | 6 Lung cancer                | 214 (108 to 360)              | 128 (49.8 to 226)                | 1.06 (-27.9 to 34.3)                      |
| 7 Hypertensive heart disease | 7 Alzheimer's disease        | 337 (225 to 469)              | 217 (142 to 300)                 | <b>4.85 (1.66 to 8.14)</b>                |
| 8 Neonatal disorders         | 8 Conflict & terror          | 2350 (-98.6 to 20300)         | 1660 (-98.9 to 13500)            | 1680 (-98.9 to 13600)                     |
| 9 Lower respiratory infect   | 9 Lower respiratory infect   | 118 (78.7 to 171)             | 58.4 (31.1 to 92)                | -20.7 (-38.2 to 3.3)                      |
| 10 Lung cancer               | 10 Colorectal cancer         | 252 (116 to 446)              | 155 (53.9 to 282)                | 11 (-25.5 to 56.1)                        |
| 11 Congenital defects        | 11 COPD                      | 233 (154 to 309)              | 142 (84.6 to 200)                | -6.55 (-36.5 to 34.1)                     |
| 12 Colorectal cancer         | 12 Breast cancer             | 181 (85.1 to 301)             | 104 (36.4 to 185)                | 0.476 (-29.3 to 36.4)                     |
| 13 Alzheimer's disease       | 13 Brain cancer              | 245 (196 to 297)              | 150 (124 to 180)                 | <b>42 (34.6 to 50.7)</b>                  |
| 14 Road injuries             | 14 Cirrhosis liver           | 145 (112 to 186)              | 78.2 (55.5 to 106)               | <b>-23.8 (-36.1 to -6.17)</b>             |
| 15 Breast cancer             | 15 Pancreatic cancer         | 388 (204 to 627)              | 255 (124 to 414)                 | <b>53 (5.17 to 111)</b>                   |
| 16 Cirrhosis liver           | 16 Prostate cancer           | 341 (171 to 565)              | 220 (102 to 382)                 | 16.2 (-17.4 to 58.8)                      |
| 17 COPD                      | 17 Liver cancer              | 262 (205 to 334)              | 163 (124 to 218)                 | 16.7 (-6.8 to 48.6)                       |
| 18 Interpersonal violence    | 18 Road injuries             | 31.6 (-18.4 to 105)           | -4.34 (-40.9 to 51.5)            | -25.5 (-55.6 to 22.7)                     |
| 19 Brain cancer              | 19 Leukemia                  | 121 (88.8 to 160)             | 60.7 (43.3 to 82.2)              | <b>-9.24 (-15.1 to -1.23)</b>             |
| 20 Leukemia                  | 20 Atrial fibrillation       | 384 (247 to 565)              | 251 (150 to 366)                 | 19.8 (-0.704 to 45.5)                     |
| 21 Liver cancer              | 25 Neonatal disorders        |                               |                                  |                                           |
| 24 Prostate cancer           | 26 Congenital defects        |                               |                                  |                                           |
| 25 Pancreatic cancer         | 29 Interpersonal violence    |                               |                                  |                                           |
| 34 Atrial fibrillation       | 131 COVID-19                 |                               |                                  |                                           |



### Qatar, Reference scenario

**Legend:**  
Communicable, maternal, neonatal and nutritional  
Non-communicable  
Injuries

| Leading Causes 2022           | Leading Causes 2050          | Mean % change number of DEATH | Mean % change all-age DEATH rate | Mean % change age-standardized DEATH rate |
|-------------------------------|------------------------------|-------------------------------|----------------------------------|-------------------------------------------|
| 1 Ischemic heart disease      | 1 Diabetes                   | 1090 (765 to 1560)            | 417 (267 to 640)                 | -18.6 (-42.9 to 19.7)                     |
| 2 Road injuries               | 2 Ischemic heart disease     | 591 (342 to 886)              | 201 (98.2 to 334)                | -46.3 (-66.4 to -12.3)                    |
| 3 Diabetes                    | 3 Chronic kidney disease     | 1790 (1260 to 2530)           | 721 (498 to 1020)                | 35 (-7.42 to 110)                         |
| 4 Stroke                      | 4 Stroke                     | 678 (496 to 889)              | 239 (160 to 332)                 | -46.6 (-59.4 to -28.1)                    |
| 5 COVID-19                    | 5 Liver cancer               | 1700 (1370 to 2060)           | 683 (535 to 848)                 | 36 (10.2 to 69.1)                         |
| 6 Chronic kidney disease      | 6 Alzheimer's disease        | 2040 (1580 to 2550)           | 832 (642 to 1030)                | 12.1 (8.05 to 16.1)                       |
| 7 Cirrhosis liver             | 7 Road injuries              | 228 (114 to 396)              | 42.6 (-5.55 to 120)              | -13.6 (-44.3 to 37.6)                     |
| 8 Liver cancer                | 8 Lung cancer                | 1180 (815 to 1700)            | 456 (303 to 684)                 | 6.27 (-22.9 to 39.8)                      |
| 9 Lung cancer                 | 9 Hypertensive heart disease | 2050 (1410 to 2780)           | 836 (554 to 1150)                | 29.5 (-15.4 to 89.4)                      |
| 10 Lower respiratory infect   | 10 Cirrhosis liver           | 822 (660 to 977)              | 301 (230 to 366)                 | -22.8 (-33.3 to -10.8)                    |
| 11 Self-harm                  | 11 Lower respiratory infect  | 972 (738 to 1230)             | 366 (271 to 476)                 | -5.94 (-26.4 to 21.8)                     |
| 12 Falls                      | 12 Prostate cancer           | 2420 (1590 to 3480)           | 997 (643 to 1410)                | 28.9 (-5.44 to 76.9)                      |
| 13 Breast cancer              | 13 Colorectal cancer         | 1140 (692 to 1670)            | 441 (243 to 653)                 | 1.52 (-31.2 to 42)                        |
| 14 Colorectal cancer          | 14 COPD                      | 1690 (1210 to 2230)           | 677 (473 to 933)                 | 6.9 (-22.3 to 49.7)                       |
| 15 Alzheimer's disease        | 15 Pancreatic cancer         | 1630 (1040 to 2210)           | 652 (401 to 880)                 | 35.9 (-5.65 to 74.9)                      |
| 16 Hypertensive heart disease | 16 Breast cancer             | 672 (402 to 968)              | 235 (122 to 376)                 | -19.8 (-42.1 to 11.6)                     |
| 17 Congenital defects         | 17 Parkinson's disease       | 2230 (1740 to 2810)           | 914 (715 to 1150)                | 10.6 (-9.66 to 37.6)                      |
| 18 Mechanical forces          | 18 Falls                     | 452 (300 to 654)              | 140 (75.5 to 223)                | -4.41 (-19.6 to 18.9)                     |
| 19 COPD                       | 19 Brain cancer              | 958 (741 to 1270)             | 360 (274 to 487)                 | 42.7 (29.2 to 61.2)                       |
| 20 Pancreatic cancer          | 20 Bacterial skin            | 3140 (2080 to 4590)           | 1310 (847 to 1880)               | 115 (36.4 to 251)                         |
| 21 Prostate cancer            | 32 Self-harm                 |                               |                                  |                                           |
| 25 Brain cancer               | 39 Mechanical forces         |                               |                                  |                                           |
| 32 Parkinson's disease        | 51 Congenital defects        |                               |                                  |                                           |
| 44 Bacterial skin             | 129 COVID-19                 |                               |                                  |                                           |

### Saudi Arabia, Reference scenario

**Legend:**  
Communicable, maternal, neonatal and nutritional  
Non-communicable  
Injuries

| Leading Causes 2022          | Leading Causes 2050          | Mean % change number of DEATH | Mean % change all-age DEATH rate | Mean % change age-standardized DEATH rate |
|------------------------------|------------------------------|-------------------------------|----------------------------------|-------------------------------------------|
| 1 Ischemic heart disease     | 1 Chronic kidney disease     | 537 (349 to 781)              | 431 (281 to 634)                 | 32.4 (-6.9 to 100)                        |
| 2 Road injuries              | 2 Ischemic heart disease     | 141 (52.2 to 261)             | 101 (31.6 to 199)                | -43.5 (-65.2 to -8.43)                    |
| 3 Stroke                     | 3 Hypertensive heart disease | 655 (425 to 924)              | 529 (347 to 741)                 | 25 (-17 to 82.7)                          |
| 4 Chronic kidney disease     | 4 Stroke                     | 172 (96.5 to 279)             | 127 (69.5 to 205)                | -48 (-62.9 to -22.1)                      |
| 5 Hypertensive heart disease | 5 Road injuries              | 50.1 (-5.57 to 130)           | 25.3 (-17.8 to 90.5)             | -8.4 (-41.8 to 50)                        |
| 6 Cirrhosis liver            | 6 Lower respiratory infect   | 333 (231 to 482)              | 261 (181 to 360)                 | -5.27 (-28 to 26.8)                       |
| 7 Diabetes                   | 7 Diabetes                   | 294 (179 to 440)              | 229 (140 to 337)                 | -11.8 (-38.5 to 24.9)                     |
| 8 Lower respiratory infect   | 8 Cirrhosis liver            | 245 (177 to 326)              | 187 (139 to 238)                 | -22.9 (-33.2 to -8.69)                    |
| 9 Interpersonal violence     | 9 COPD                       | 540 (356 to 774)              | 434 (295 to 623)                 | 9.9 (-26.8 to 58.6)                       |
| 10 Self-harm                 | 10 Alzheimer's disease       | 910 (613 to 1210)             | 740 (552 to 946)                 | 13.1 (9.87 to 15.8)                       |
| 11 COPD                      | 11 Colorectal cancer         | 416 (202 to 653)              | 329 (171 to 510)                 | 20.9 (-17.1 to 61.8)                      |
| 12 Alzheimer's disease       | 12 Liver cancer              | 576 (432 to 776)              | 463 (360 to 586)                 | 28.2 (2.94 to 61.4)                       |
| 13 Colorectal cancer         | 13 Lung cancer               | 452 (239 to 667)              | 359 (204 to 519)                 | 14.1 (-19.5 to 50.3)                      |
| 14 COVID-19                  | 14 Parkinson's disease       | 731 (533 to 995)              | 592 (451 to 745)                 | 0.511 (-19.7 to 24.4)                     |
| 15 Fire & heat               | 15 Urinary diseases          | 725 (473 to 1040)             | 588 (390 to 796)                 | 43.2 (-1.16 to 116)                       |
| 16 Mechanical forces         | 16 Interstitial lung disease | 473 (342 to 639)              | 378 (281 to 488)                 | 12.2 (-1.76 to 29.7)                      |
| 17 Breast cancer             | 17 Pancreatic cancer         | 642 (363 to 937)              | 517 (299 to 764)                 | 57 (9.44 to 109)                          |
| 18 Lung cancer               | 18 Endo/metab/blood/immune   | 314 (212 to 444)              | 245 (174 to 332)                 | 26.8 (4.41 to 54.1)                       |
| 19 Congenital defects        | 19 Other cardiovascular      | 263 (180 to 364)              | 202 (143 to 268)                 | -15.4 (-32 to 2.57)                       |
| 20 Asthma                    | 20 Lymphoma                  | 289 (146 to 447)              | 224 (117 to 349)                 | 5.24 (-23.1 to 34.8)                      |
| 21 Liver cancer              | 21 Breast cancer             |                               |                                  |                                           |
| 23 Other cardiovascular      | 22 Self-harm                 |                               |                                  |                                           |
| 24 Endo/metab/blood/immune   | 26 Interpersonal violence    |                               |                                  |                                           |
| 26 Lymphoma                  | 31 Asthma                    |                               |                                  |                                           |
| 31 Interstitial lung disease | 41 Fire & heat               |                               |                                  |                                           |
| 33 Parkinson's disease       | 42 Mechanical forces         |                               |                                  |                                           |
| 34 Urinary diseases          | 50 Congenital defects        |                               |                                  |                                           |

### Sudan, Reference scenario

**Legend:**

Communicable, maternal, neonatal and nutritional  
Non-communicable  
Injuries

| Leading Causes 2022          | Leading Causes 2050          | Mean % change number of DEATH | Mean % change all-age DEATH rate | Mean % change age-standardized DEATH rate |
|------------------------------|------------------------------|-------------------------------|----------------------------------|-------------------------------------------|
| 1 Ischemic heart disease     | 1 Ischemic heart disease     | <b>98.7 (9.52 to 213)</b>     | 32.3 (-24.6 to 112)              | -39.5 (-69.8 to 9.04)                     |
| 2 Stroke                     | 2 HIV/AIDS                   | 514 (-31.5 to 3590)           | 312 (-56.4 to 2300)              | 186 (-67.8 to 1650)                       |
| 3 COVID-19                   | 3 Stroke                     | <b>85.1 (24 to 155)</b>       | 23.2 (-15.4 to 70.5)             | <b>-44 (-64.1 to -13.3)</b>               |
| 4 Neonatal disorders         | 4 Hypertensive heart disease | <b>245 (121 to 374)</b>       | <b>129 (49.7 to 212)</b>         | -3.26 (-40.7 to 50.1)                     |
| 5 Congenital defects         | 5 Chronic kidney disease     | <b>313 (159 to 488)</b>       | <b>174 (83.5 to 294)</b>         | 29.7 (-20.2 to 106)                       |
| 6 Malaria                    | 6 Road injuries              | 54.8 (-7.43 to 155)           | 3.09 (-38 to 68.6)               | -30.7 (-58.2 to 12.6)                     |
| 7 Hypertensive heart disease | 7 Alzheimer's disease        | <b>311 (167 to 481)</b>       | <b>173 (79.5 to 274)</b>         | <b>5.34 (2 to 8.53)</b>                   |
| 8 Lower respiratory infect   | 8 Lower respiratory infect   | 32.1 (-7.76 to 71.2)          | -12.2 (-36.6 to 9.56)            | <b>-35.3 (-52.3 to -13.6)</b>             |
| 9 Road injuries              | 9 COPD                       | <b>139 (64.8 to 224)</b>      | <b>58.9 (10.2 to 117)</b>        | -30.4 (-54.7 to 7.97)                     |
| 10 HIV/AIDS                  | 10 Diabetes                  | <b>148 (60.6 to 267)</b>      | <b>65.5 (8.27 to 144)</b>        | -22.1 (-51.2 to 30.1)                     |
| 11 Chronic kidney disease    | 11 Cirrhosis liver           | <b>93.1 (54.2 to 132)</b>     | <b>28.4 (5.88 to 52.1)</b>       | <b>-36 (-47.7 to -18.1)</b>               |
| 12 Cirrhosis liver           | 12 Neonatal disorders        | <b>-54.4 (-75 to -24.1)</b>   | <b>-69.7 (-82.8 to -49.2)</b>    | <b>-46.6 (-68 to -10.5)</b>               |
| 13 COPD                      | 13 Congenital defects        | <b>-41.4 (-55.9 to -23.8)</b> | <b>-61.2 (-68.1 to -52.7)</b>    | <b>-35.4 (-44.3 to -25.3)</b>             |
| 14 Diabetes                  | 14 Stomach cancer            | <b>99.3 (59.3 to 151)</b>     | <b>32.4 (9.52 to 56.5)</b>       | <b>-38 (-45.6 to -29.2)</b>               |
| 15 Stomach cancer            | 15 Malaria                   | 49.3 (-48.1 to 89.4)          | -1.21 (-66.5 to 13.5)            | -2.6 (-79.3 to 9.4)                       |
| 16 Alzheimer's disease       | 16 Lung cancer               | <b>189 (85.1 to 335)</b>      | <b>91.4 (21.6 to 186)</b>        | -12.2 (-37.9 to 19)                       |
| 17 Maternal disorders        | 17 Colorectal cancer         | <b>251 (110 to 466)</b>       | <b>133 (43.5 to 263)</b>         | 9.77 (-26.7 to 52.3)                      |
| 18 Diarrheal diseases        | 18 Leukemia                  | <b>115 (50.9 to 201)</b>      | <b>42.6 (5.07 to 95.2)</b>       | -1.18 (-23.9 to 27.2)                     |
| 19 Asthma                    | 19 Brain cancer              | <b>216 (155 to 277)</b>       | <b>110 (87.8 to 138)</b>         | <b>38.7 (30.1 to 47.5)</b>                |
| 20 Conflict & terror         | 20 Other cardiovascular      | <b>71.7 (26 to 114)</b>       | 14.1 (-11.6 to 40.9)             | <b>-31.5 (-47.5 to -8.9)</b>              |
| 22 Other cardiovascular      | 26 Asthma                    |                               |                                  |                                           |
| 23 Lung cancer               | 29 Conflict & terror         |                               |                                  |                                           |
| 24 Leukemia                  | 41 Diarrheal diseases        |                               |                                  |                                           |
| 27 Colorectal cancer         | 44 Maternal disorders        |                               |                                  |                                           |
| 33 Brain cancer              | 134 COVID-19                 |                               |                                  |                                           |

### Syria, Reference scenario

**Legend:**  
Communicable, maternal, neonatal and nutritional  
Non-communicable  
Injuries

| Leading Causes 2022          | Leading Causes 2050          | Mean % change number of DEATH | Mean % change all-age DEATH rate | Mean % change age-standardized DEATH rate |
|------------------------------|------------------------------|-------------------------------|----------------------------------|-------------------------------------------|
| 1 Ischemic heart disease     | 1 Ischemic heart disease     | 56.6 (-2.54 to 123)           | 36.5 (-12.8 to 91)               | -26 (-60.7 to 29.7)                       |
| 2 Conflict & terror          | 2 Conflict & terror          | inf (-100 to 1.51e+06)        | inf (-100 to 1.19e+06)           | inf (-100 to 1.11e+06)                    |
| 3 Stroke                     | 3 Chronic kidney disease     | <b>215 (132 to 311)</b>       | <b>174 (104 to 257)</b>          | 44.6 (-7.27 to 118)                       |
| 4 Chronic kidney disease     | 4 Stroke                     | <b>47.2 (2.97 to 93)</b>      | 27.9 (-7.07 to 66.7)             | -34.8 (-58.6 to 1.68)                     |
| 5 Hypertensive heart disease | 5 Hypertensive heart disease | <b>192 (114 to 279)</b>       | <b>154 (89.6 to 228)</b>         | 18.2 (-22.7 to 82.5)                      |
| 6 COPD                       | 6 Alzheimer's disease        | <b>229 (113 to 411)</b>       | <b>184 (91.7 to 322)</b>         | <b>9.55 (6.62 to 12.9)</b>                |
| 7 COVID-19                   | 7 COPD                       | <b>113 (51.1 to 181)</b>      | <b>84.7 (35.4 to 142)</b>        | -9.83 (-42.1 to 31.6)                     |
| 8 Lower respiratory infect   | 8 Diabetes                   | <b>99.1 (42.3 to 184)</b>     | <b>73.3 (25.1 to 139)</b>        | -3.8 (-37.8 to 51.4)                      |
| 9 Diabetes                   | 9 Lower respiratory infect   | <b>58.6 (19.3 to 104)</b>     | <b>37.7 (6.72 to 77.1)</b>       | -24.8 (-43.4 to 5.91)                     |
| 10 Cirrhosis liver           | 10 Cirrhosis liver           | <b>43 (9.6 to 75.1)</b>       | <b>24.1 (2.65 to 46.4)</b>       | <b>-29.6 (-42.3 to -11.1)</b>             |
| 11 Road injuries             | 11 Lung cancer               | 70 (-2.61 to 194)             | 46.7 (-13.4 to 141)              | -12.2 (-39 to 21.4)                       |
| 12 Alzheimer's disease       | 12 Urinary diseases          | <b>236 (143 to 348)</b>       | <b>192 (115 to 287)</b>          | 40.5 (-6.11 to 101)                       |
| 13 Lung cancer               | 13 Brain cancer              | <b>129 (77.5 to 199)</b>      | <b>98.7 (65.3 to 136)</b>        | <b>35.9 (27.1 to 44.7)</b>                |
| 14 Other cardiovascular      | 14 Road injuries             | 3.53 (-36.6 to 61.8)          | -9.81 (-42.6 to 40)              | -25.5 (-54.5 to 25.5)                     |
| 15 Asthma                    | 15 Other cardiovascular      | <b>79 (32.3 to 136)</b>       | <b>55.3 (21.2 to 93.3)</b>       | -17.8 (-35.2 to 8.79)                     |
| 16 Brain cancer              | 16 Colorectal cancer         | <b>110 (10.6 to 254)</b>      | <b>81.6 (1.94 to 213)</b>        | 2.55 (-30.6 to 45.4)                      |
| 17 Leukemia                  | 17 Parkinson's disease       | <b>184 (92.8 to 306)</b>      | <b>146 (72.1 to 231)</b>         | -4.09 (-22.4 to 15.4)                     |
| 18 Breast cancer             | 18 Liver cancer              | <b>107 (57.2 to 158)</b>      | <b>79.7 (43.4 to 122)</b>        | 10.7 (-14.4 to 48.7)                      |
| 19 Colorectal cancer         | 19 Breast cancer             | <b>72.7 (1.41 to 177)</b>     | 49 (-10 to 138)                  | 5.44 (-27.7 to 49.5)                      |
| 20 Congenital defects        | 20 Leukemia                  | <b>68.3 (7.48 to 157)</b>     | 45.3 (-1.99 to 111)              | -7.45 (-28.9 to 19.6)                     |
| 22 Liver cancer              | 26 Asthma                    |                               |                                  |                                           |
| 24 Urinary diseases          | 32 Congenital defects        |                               |                                  |                                           |
| 27 Parkinson's disease       | 132 COVID-19                 |                               |                                  |                                           |

### Tunisia, Reference scenario

**Legend:**  
Communicable, maternal, neonatal and nutritional  
Non-communicable  
Injuries

| Leading Causes 2022          | Leading Causes 2050          | Mean % change number of DEATH | Mean % change all-age DEATH rate | Mean % change age-standardized DEATH rate |
|------------------------------|------------------------------|-------------------------------|----------------------------------|-------------------------------------------|
| 1 Ischemic heart disease     | 1 Ischemic heart disease     | 47 (-9.52 to 115)             | 46.8 (-3.6 to 116)               | -45 (-65.6 to -12.7)                      |
| 2 COVID-19                   | 2 Stroke                     | 43.3 (5.82 to 95.6)           | 43.1 (8.56 to 93.3)              | -48.5 (-62.9 to -27.2)                    |
| 3 Stroke                     | 3 Hypertensive heart disease | 199 (105 to 318)              | 198 (106 to 301)                 | 5.45 (-28.2 to 53.6)                      |
| 4 Hypertensive heart disease | 4 Chronic kidney disease     | 223 (122 to 354)              | 222 (124 to 337)                 | 20.5 (-17.6 to 85.1)                      |
| 5 Chronic kidney disease     | 5 Alzheimer's disease        | 278 (155 to 408)              | 277 (172 to 394)                 | 7.9 (5.02 to 10.8)                        |
| 6 Alzheimer's disease        | 6 COPD                       | 145 (71.6 to 245)             | 145 (77.2 to 232)                | -13.8 (-39.3 to 23.4)                     |
| 7 Road injuries              | 7 Diabetes                   | 120 (54 to 203)               | 120 (62.8 to 197)                | -11.3 (-34.5 to 24)                       |
| 8 Lung cancer                | 8 Lung cancer                | 86.5 (28 to 165)              | 86.1 (32.9 to 147)               | -8.42 (-30.1 to 17.5)                     |
| 9 Diabetes                   | 9 Lower respiratory infect   | 113 (61.9 to 178)             | 112 (68.1 to 169)                | -23.8 (-39.5 to -2.43)                    |
| 10 COPD                      | 10 Cirrhosis liver           | 81 (46.5 to 117)              | 80.6 (55.5 to 107)               | -21.1 (-30.9 to -9.35)                    |
| 11 Lower respiratory infect  | 11 Colorectal cancer         | 170 (60.7 to 312)             | 169 (70.7 to 292)                | 16.2 (-19.5 to 56.9)                      |
| 12 Cirrhosis liver           | 12 Road injuries             | 3.38 (-30.6 to 51.4)          | 3.35 (-28.4 to 56.1)             | -20.3 (-44.7 to 19.7)                     |
| 13 Colorectal cancer         | 13 Atrial fibrillation       | 327 (180 to 498)              | 326 (198 to 498)                 | 16.6 (-1.61 to 39.5)                      |
| 14 Breast cancer             | 14 Breast cancer             | 105 (36.5 to 180)             | 104 (42.3 to 176)                | 8.18 (-18.6 to 35.2)                      |
| 15 Other cardiovascular      | 15 Other cardiovascular      | 107 (58.1 to 166)             | 107 (61.4 to 160)                | -21.8 (-35.2 to -6.03)                    |
| 16 Asthma                    | 16 Parkinson's disease       | 191 (112 to 281)              | 190 (123 to 267)                 | -4.52 (-20.5 to 15.7)                     |
| 17 Neonatal disorders        | 17 Pancreatic cancer         | 251 (117 to 413)              | 250 (131 to 406)                 | 57.4 (12.1 to 110)                        |
| 18 Congenital defects        | 18 Prostate cancer           | 190 (75 to 327)               | 189 (88.1 to 315)                | 0.55 (-25.3 to 34.5)                      |
| 19 Stomach cancer            | 19 Lymphoma                  | 118 (44.6 to 199)             | 117 (56.7 to 192)                | 3.67 (-19.2 to 29.8)                      |
| 20 Lymphoma                  | 20 Falls                     | 117 (57 to 192)               | 116 (62.2 to 187)                | -10.6 (-19.6 to 0.086)                    |
| 21 Falls                     | 23 Asthma                    |                               |                                  |                                           |
| 22 Parkinson's disease       | 24 Stomach cancer            |                               |                                  |                                           |
| 23 Atrial fibrillation       | 46 Congenital defects        |                               |                                  |                                           |
| 26 Prostate cancer           | 49 Neonatal disorders        |                               |                                  |                                           |
| 27 Pancreatic cancer         | 131 COVID-19                 |                               |                                  |                                           |

### Türkiye, Reference scenario

**Legend:**

Communicable, maternal, neonatal and nutritional  
Non-communicable  
Injuries

| Leading Causes 2022          | Leading Causes 2050          | Mean % change number of DEATH | Mean % change all-age DEATH rate | Mean % change age-standardized DEATH rate |
|------------------------------|------------------------------|-------------------------------|----------------------------------|-------------------------------------------|
| 1 Ischemic heart disease     | 1 Ischemic heart disease     | 5.13 (-30.3 to 53)            | 5.36 (-29.4 to 53.3)             | <b>-58.4 (-74.9 to -30.8)</b>             |
| 2 Stroke                     | 2 COPD                       | <b>140 (80.3 to 215)</b>      | <b>140 (80.8 to 215)</b>         | -8.01 (-34.5 to 29.2)                     |
| 3 COPD                       | 3 Stroke                     | 20.7 (-4.68 to 51)            | 20.9 (-4.44 to 47.9)             | <b>-53.8 (-65.2 to -35.6)</b>             |
| 4 Lung cancer                | 4 Chronic kidney disease     | <b>162 (100 to 254)</b>       | <b>163 (96.5 to 265)</b>         | 3.87 (-27.4 to 58.7)                      |
| 5 COVID-19                   | 5 Alzheimer's disease        | <b>236 (143 to 335)</b>       | <b>235 (160 to 318)</b>          | <b>9.57 (6.5 to 13)</b>                   |
| 6 Chronic kidney disease     | 6 Hypertensive heart disease | <b>207 (123 to 312)</b>       | <b>208 (131 to 323)</b>          | 9.42 (-24.9 to 67.5)                      |
| 7 Diabetes                   | 7 Lung cancer                | <b>80 (21.2 to 143)</b>       | <b>79.9 (28.9 to 134)</b>        | -11.5 (-35.1 to 10.5)                     |
| 8 Hypertensive heart disease | 8 Diabetes                   | <b>78.8 (35 to 135)</b>       | <b>79.1 (35 to 138)</b>          | -27.5 (-46.1 to 6.13)                     |
| 9 Alzheimer's disease        | 9 Lower respiratory infect   | <b>108 (68.5 to 160)</b>      | <b>108 (73.7 to 162)</b>         | -21.4 (-36.8 to 4.55)                     |
| 10 Lower respiratory infect  | 10 Colorectal cancer         | <b>154 (54.8 to 269)</b>      | <b>154 (62.2 to 254)</b>         | 13.1 (-20.6 to 50.5)                      |
| 11 Colorectal cancer         | 11 Pancreatic cancer         | <b>229 (108 to 357)</b>       | <b>229 (125 to 359)</b>          | <b>51.9 (8.94 to 100)</b>                 |
| 12 Stomach cancer            | 12 Prostate cancer           | <b>197 (85.4 to 324)</b>      | <b>196 (93.5 to 333)</b>         | 10.9 (-18.2 to 46.3)                      |
| 13 Road injuries             | 13 Stomach cancer            | <b>45.2 (19.6 to 81)</b>      | <b>45.2 (21.9 to 72.8)</b>       | <b>-33.6 (-41.3 to -23.9)</b>             |
| 14 Cirrhosis liver           | 14 Brain cancer              | <b>154 (111 to 191)</b>       | <b>154 (126 to 184)</b>          | <b>37.4 (28.8 to 46.5)</b>                |
| 15 Pancreatic cancer         | 15 Cirrhosis liver           | <b>63.5 (35 to 99.1)</b>      | <b>63.7 (39 to 94.6)</b>         | <b>-25.1 (-38.3 to -7.06)</b>             |
| 16 Breast cancer             | 16 Falls                     | <b>121 (62.8 to 182)</b>      | <b>121 (66.6 to 168)</b>         | <b>-15.5 (-26.7 to -2.09)</b>             |
| 17 Prostate cancer           | 17 Parkinson's disease       | <b>193 (124 to 271)</b>       | <b>193 (129 to 264)</b>          | 1.72 (-16.5 to 21.9)                      |
| 18 Falls                     | 18 Breast cancer             | <b>90 (22.1 to 176)</b>       | <b>89.7 (28.5 to 164)</b>        | -1.86 (-27.8 to 28.1)                     |
| 19 Brain cancer              | 19 Atrial fibrillation       | <b>268 (164 to 412)</b>       | <b>267 (181 to 396)</b>          | <b>18.8 (1.95 to 39.2)</b>                |
| 20 Leukemia                  | 20 Leukemia                  | <b>97.9 (41.7 to 165)</b>     | <b>97.8 (52.6 to 157)</b>        | -0.472 (-19.1 to 17.9)                    |
| 23 Parkinson's disease       | 23 Road injuries             |                               |                                  |                                           |
| 28 Atrial fibrillation       | 131 COVID-19                 |                               |                                  |                                           |

### United Arab Emirates, Reference scenario

**Legend:**  
Communicable, maternal, neonatal and nutritional  
Non-communicable  
Injuries

| Leading Causes 2022          | Leading Causes 2050          | Mean % change number of DEATH | Mean % change all-age DEATH rate | Mean % change age-standardized DEATH rate |
|------------------------------|------------------------------|-------------------------------|----------------------------------|-------------------------------------------|
| 1 Ischemic heart disease     | 1 Ischemic heart disease     | 747 (455 to 1200)             | 316 (171 to 523)                 | -55.2 (-71.5 to -24)                      |
| 2 Stroke                     | 2 Chronic kidney disease     | 2050 (1310 to 2950)           | 958 (621 to 1380)                | 2.76 (-31.5 to 47)                        |
| 3 Road injuries              | 3 Stroke                     | 890 (638 to 1260)             | 386 (264 to 547)                 | -57.6 (-67.8 to -41.8)                    |
| 4 COVID-19                   | 4 Hypertensive heart disease | 2510 (1580 to 3770)           | 1180 (769 to 1770)               | 9.96 (-23.8 to 71.8)                      |
| 5 Diabetes                   | 5 Lower respiratory infect   | 1830 (1350 to 2360)           | 847 (634 to 1100)                | -23.5 (-41.4 to 0.105)                    |
| 6 Chronic kidney disease     | 6 Diabetes                   | 1050 (708 to 1500)            | 463 (314 to 684)                 | -36 (-53.5 to -14.1)                      |
| 7 Lower respiratory infect   | 7 COPD                       | 1620 (1090 to 2300)           | 744 (510 to 1070)                | -14.8 (-38.9 to 19.6)                     |
| 8 Hypertensive heart disease | 8 Alzheimer's disease        | 3060 (2210 to 3990)           | 1450 (1090 to 1930)              | 2.33 (-2.59 to 7.56)                      |
| 9 COPD                       | 9 Pancreatic cancer          | 1540 (897 to 2360)            | 707 (410 to 1060)                | 13.6 (-25.3 to 55.3)                      |
| 10 Liver cancer              | 10 Liver cancer              | 1130 (841 to 1430)            | 502 (382 to 665)                 | 16.3 (-2.6 to 38.8)                       |
| 11 Lung cancer               | 11 Lung cancer               | 1130 (693 to 1610)            | 502 (314 to 722)                 | -9.9 (-36 to 17.1)                        |
| 12 Cirrhosis liver           | 12 Road injuries             | 277 (145 to 507)              | 84.9 (24.4 to 185)               | -10.3 (-41.9 to 43.1)                     |
| 13 Colorectal cancer         | 13 Colorectal cancer         | 1100 (592 to 1640)            | 488 (267 to 761)                 | -19.8 (-48.5 to 15.4)                     |
| 14 Breast cancer             | 14 Prostate cancer           | 2660 (1650 to 3790)           | 1250 (812 to 1780)               | 10.2 (-22.9 to 48.2)                      |
| 15 Pancreatic cancer         | 15 Cirrhosis liver           | 838 (638 to 1080)             | 361 (277 to 463)                 | -38.5 (-46.9 to -27.4)                    |
| 16 Brain cancer              | 16 Breast cancer             | 750 (411 to 1180)             | 317 (166 to 509)                 | -24.8 (-48.4 to 3.1)                      |
| 17 Falls                     | 17 Brain cancer              | 852 (600 to 1150)             | 367 (260 to 493)                 | 33.2 (19 to 46.2)                         |
| 18 Leukemia                  | 18 Cardiomyopathy            | 919 (661 to 1190)             | 400 (292 to 523)                 | -31.2 (-41.5 to -20.6)                    |
| 19 Self-harm                 | 19 Stomach cancer            | 788 (568 to 1040)             | 336 (247 to 445)                 | -42 (-50.7 to -30)                        |
| 20 Congenital defects        | 20 Ovarian cancer            | 1260 (827 to 1790)            | 566 (355 to 810)                 | -11 (-34.1 to 12)                         |
| 21 Alzheimer's disease       | 21 Falls                     |                               |                                  |                                           |
| 22 Stomach cancer            | 23 Leukemia                  |                               |                                  |                                           |
| 23 Cardiomyopathy            | 43 Self-harm                 |                               |                                  |                                           |
| 28 Prostate cancer           | 55 Congenital defects        |                               |                                  |                                           |
| 29 Ovarian cancer            | 128 COVID-19                 |                               |                                  |                                           |

### Yemen, Reference scenario

**Legend:**

Communicable, maternal, neonatal and nutritional  
Non-communicable  
Injuries

| Leading Causes 2022          | Leading Causes 2050          | Mean % change number of DEATH | Mean % change all-age DEATH rate | Mean % change age-standardized DEATH rate |
|------------------------------|------------------------------|-------------------------------|----------------------------------|-------------------------------------------|
| 1 Ischemic heart disease     | 1 Ischemic heart disease     | 116 (22.5 to 257)             | 36.4 (-20.2 to 115)              | -33.7 (-67.8 to 22.4)                     |
| 2 Stroke                     | 2 Stroke                     | 101 (34.8 to 178)             | 26.9 (-9.56 to 70.6)             | <b>-38.4 (-62.6 to -4.95)</b>             |
| 3 Neonatal disorders         | 3 Hypertensive heart disease | 206 (105 to 331)              | 92.7 (32.6 to 160)               | -14.1 (-49.8 to 41.3)                     |
| 4 Malaria                    | 4 Malaria                    | 104 (-42.3 to 156)            | 28.3 (-60.4 to 52.5)             | -4.65 (-74.2 to 3.57)                     |
| 5 Road injuries              | 5 Road injuries              | 30.2 (-29.3 to 125)           | -17.9 (-52.7 to 38.6)            | -36.1 (-64 to 9.63)                       |
| 6 Congenital defects         | 6 Chronic kidney disease     | 314 (172 to 490)              | 161 (81.5 to 260)                | 30.4 (-21.1 to 109)                       |
| 7 COVID-19                   | 7 Lower respiratory infect   | 28.8 (-12.5 to 69)            | -18.8 (-42.2 to 2.87)            | <b>-34.8 (-52.8 to -9.35)</b>             |
| 8 Conflict & terror          | 8 Conflict & terror          | inf (-100 to 185000)          | inf (-100 to 102000)             | inf (-100 to 149000)                      |
| 9 Hypertensive heart disease | 9 COPD                       | 149 (73.8 to 238)             | 56.6 (14.3 to 109)               | -26.7 (-54 to 15.7)                       |
| 10 Lower respiratory infect  | 10 Alzheimer's disease       | 325 (164 to 557)              | 168 (65.2 to 294)                | 8.38 (5.76 to 11.2)                       |
| 11 COPD                      | 11 Neonatal disorders        | <b>-61.1 (-80.6 to -32.6)</b> | <b>-75.6 (-87 to -57.8)</b>      | <b>-54.7 (-73.5 to -27.2)</b>             |
| 12 Cirrhosis liver           | 12 Cirrhosis liver           | 95.1 (52.9 to 142)            | 22.9 (2.06 to 47)                | <b>-36.7 (-49.1 to -20.2)</b>             |
| 13 Stomach cancer            | 13 Congenital defects        | <b>-44.1 (-61.4 to -24.6)</b> | <b>-65 (-72.9 to -55.6)</b>      | <b>-38.9 (-47.7 to -28.1)</b>             |
| 14 Chronic kidney disease    | 14 Stomach cancer            | 114 (64.6 to 170)             | 34.6 (9.37 to 65.5)              | <b>-33.5 (-42.2 to -24.6)</b>             |
| 15 Diabetes                  | 15 Diabetes                  | 176 (78.5 to 312)             | 74.1 (19.8 to 147)               | -11 (-45.7 to 43)                         |
| 16 Maternal disorders        | 16 Lung cancer               | 253 (108 to 457)              | 122 (35.5 to 251)                | 7.56 (-23.6 to 50.4)                      |
| 17 Alzheimer's disease       | 17 Colorectal cancer         | 296 (121 to 530)              | 150 (45.1 to 310)                | 23 (-20.8 to 76.9)                        |
| 18 Asthma                    | 18 Leukemia                  | 152 (83.4 to 253)             | 58.5 (15.6 to 120)               | 5.87 (-16.1 to 38)                        |
| 19 Diarrheal diseases        | 19 Other cardiovascular      | 90.9 (45.8 to 141)            | 20.3 (-0.913 to 48.4)            | <b>-29 (-44.5 to -9.44)</b>               |
| 20 Pertussis                 | 20 Brain cancer              | 254 (192 to 329)              | 123 (92.3 to 154)                | 44.4 (37 to 53.6)                         |
| 21 Lung cancer               | 24 Asthma                    |                               |                                  |                                           |
| 22 Other cardiovascular      | 34 Maternal disorders        |                               |                                  |                                           |
| 24 Leukemia                  | 47 Pertussis                 |                               |                                  |                                           |
| 29 Colorectal cancer         | 54 Diarrheal diseases        |                               |                                  |                                           |
| 33 Brain cancer              | 133 COVID-19                 |                               |                                  |                                           |



### Bangladesh, Reference scenario

**Legend:**  
Communicable, maternal, neonatal and nutritional  
Non-communicable  
Injuries

| Leading Causes 2022           | Leading Causes 2050          | Mean % change number of DEATH | Mean % change all-age DEATH rate | Mean % change age-standardized DEATH rate |
|-------------------------------|------------------------------|-------------------------------|----------------------------------|-------------------------------------------|
| 1 Stroke                      | 1 Stroke                     | 53.8 (10.3 to 101)            | 43.5 (5.97 to 82.5)              | -43.5 (-61.8 to -17.3)                    |
| 2 Ischemic heart disease      | 2 Ischemic heart disease     | 35.7 (-16.5 to 112)           | 27 (-24.1 to 102)                | -45.5 (-70.9 to -4.77)                    |
| 3 COPD                        | 3 COPD                       | 84.5 (31.2 to 155)            | 72.4 (22.9 to 138)               | -33.2 (-56.5 to -0.0404)                  |
| 4 Neonatal disorders          | 4 Diabetes                   | 130 (61.4 to 214)             | 115 (51.1 to 188)                | -21.3 (-49.9 to 23.7)                     |
| 5 Diabetes                    | 5 Hypertensive heart disease | 176 (91.8 to 276)             | 158 (76.9 to 247)                | -8.42 (-44.2 to 42.2)                     |
| 6 Lower respiratory infect    | 6 Alzheimer's disease        | 260 (132 to 390)              | 235 (131 to 342)                 | -0.32 (-5.46 to 6.51)                     |
| 7 Cirrhosis liver             | 7 Diarrheal diseases         | 85.5 (31.3 to 154)            | 73.3 (24.3 to 131)               | -33.2 (-57.4 to 0.801)                    |
| 8 Diarrheal diseases          | 8 Chronic kidney disease     | 244 (145 to 371)              | 221 (123 to 330)                 | 36.8 (-14.2 to 110)                       |
| 9 Tuberculosis                | 9 Lower respiratory infect   | 23.2 (-7.27 to 60.5)          | 14.8 (-11.9 to 46.2)             | -47.3 (-59.1 to -31.9)                    |
| 10 Hypertensive heart disease | 10 Cirrhosis liver           | 37.8 (8.21 to 68.9)           | 28.6 (4.92 to 52.7)              | -35.8 (-48.3 to -19.1)                    |
| 11 Rheumatic heart disease    | 11 Rheumatic heart disease   | 12.1 (-18.4 to 56)            | 4.76 (-25.4 to 39.6)             | -52.1 (-67.9 to -29.2)                    |
| 12 COVID-19                   | 12 Atrial fibrillation       | 373 (191 to 615)              | 340 (203 to 506)                 | 25 (3.35 to 54.8)                         |
| 13 Alzheimer's disease        | 13 Urinary diseases          | 201 (140 to 284)              | 181 (130 to 247)                 | 14.9 (-11 to 48.6)                        |
| 14 Chronic kidney disease     | 14 Tuberculosis              | -32.8 (-58 to -0.717)         | -37.2 (-62.1 to -4.56)           | -69.6 (-83 to -49.1)                      |
| 15 Asthma                     | 15 Lung cancer               | 116 (37.5 to 220)             | 101 (29.2 to 190)                | -6.1 (-33.5 to 23.8)                      |
| 16 Road injuries              | 16 Cardiomyopathy            | 102 (54.4 to 160)             | 88.3 (50.4 to 135)               | -19.9 (-26 to -12.7)                      |
| 17 Congenital defects         | 17 Parkinson's disease       | 183 (101 to 297)              | 164 (106 to 253)                 | -8.7 (-26.9 to 16.2)                      |
| 18 Cardiomyopathy             | 18 Colorectal cancer         | 158 (47 to 303)               | 139 (40.2 to 253)                | 7.87 (-28.7 to 51.4)                      |
| 19 Drowning                   | 19 Lip oral cavity cancer    | 73.8 (40.6 to 108)            | 62.1 (36.6 to 88.6)              | -21.8 (-31.8 to -11.3)                    |
| 20 Lung cancer                | 20 Falls                     | 110 (45.2 to 204)             | 95.4 (39.4 to 169)               | -19.1 (-30 to -6.01)                      |
| 24 Lip oral cavity cancer     | 21 Asthma                    |                               |                                  |                                           |
| 25 Urinary diseases           | 25 Neonatal disorders        |                               |                                  |                                           |
| 29 Falls                      | 26 Road injuries             |                               |                                  |                                           |
| 30 Parkinson's disease        | 52 Congenital defects        |                               |                                  |                                           |
| 31 Colorectal cancer          | 54 Drowning                  |                               |                                  |                                           |
| 33 Atrial fibrillation        | 133 COVID-19                 |                               |                                  |                                           |

### Bhutan, Reference scenario

**Legend:**

Communicable, maternal, neonatal and nutritional  
Non-communicable  
Injuries

| Leading Causes 2022           | Leading Causes 2050          | Mean % change number of DEATH | Mean % change all-age DEATH rate | Mean % change age-standardized DEATH rate |
|-------------------------------|------------------------------|-------------------------------|----------------------------------|-------------------------------------------|
| 1 Ischemic heart disease      | 1 COPD                       | 97.2 (40.5 to 157)            | 73.5 (20.9 to 131)               | -26.6 (-53.3 to 16)                       |
| 2 COVID-19                    | 2 Ischemic heart disease     | 34.5 (-20.5 to 110)           | 18.5 (-31.7 to 94.3)             | -46.8 (-72.7 to 1.14)                     |
| 3 COPD                        | 3 Stroke                     | 38.7 (-1.39 to 86.4)          | 22.1 (-12.9 to 65.1)             | <b>-46.8 (-66.7 to -18.6)</b>             |
| 4 Stroke                      | 4 Chronic kidney disease     | 190 (96.5 to 293)             | 155 (64.9 to 258)                | 19.1 (-27.2 to 92.2)                      |
| 5 Neonatal disorders          | 5 Diabetes                   | 85.4 (29.6 to 165)            | 63.2 (10.2 to 133)               | -27.4 (-54.5 to 17)                       |
| 6 Diabetes                    | 6 Alzheimer's disease        | 215 (117 to 305)              | 177 (100 to 261)                 | 7.55 (0.739 to 13.6)                      |
| 7 Cirrhosis liver             | 7 Falls                      | 131 (71.3 to 193)             | 103 (56.9 to 153)                | -8.71 (-19.1 to 4.25)                     |
| 8 Diarrheal diseases          | 8 Cirrhosis liver            | 43.7 (18.8 to 76.6)           | 26.4 (2.59 to 57.5)              | <b>-32.6 (-46.6 to -13.5)</b>             |
| 9 Lower respiratory infect    | 9 Hypertensive heart disease | 128 (60.5 to 199)             | 101 (36.6 to 166)                | -15.2 (-48.7 to 32.2)                     |
| 10 Chronic kidney disease     | 10 Lower respiratory infect  | 34.6 (0.841 to 72)            | 18.4 (-10.3 to 54)               | <b>-41.5 (-57.6 to -20.6)</b>             |
| 11 Falls                      | 11 Diarrheal diseases        | 0.915 (-26.4 to 34.3)         | -11.3 (-35.8 to 15.8)            | <b>-58.3 (-73.1 to -36.2)</b>             |
| 12 Tuberculosis               | 12 Urinary diseases          | 203 (145 to 275)              | 166 (116 to 235)                 | 22 (-9.75 to 63.3)                        |
| 13 Hypertensive heart disease | 13 Lung cancer               | 187 (76.8 to 318)             | 152 (63.7 to 260)                | 13 (-19.1 to 55.7)                        |
| 14 Alzheimer's disease        | 14 Parkinson's disease       | 184 (118 to 259)              | 149 (101 to 213)                 | 3.43 (-15.3 to 30.4)                      |
| 15 Rheumatic heart disease    | 15 Colorectal cancer         | 205 (63.7 to 367)             | 167 (50.9 to 319)                | 20.6 (-24.6 to 72.4)                      |
| 16 Road injuries              | 16 Atrial fibrillation       | 266 (161 to 379)              | 221 (136 to 313)                 | <b>27.2 (7.94 to 46.6)</b>                |
| 17 Asthma                     | 17 Rheumatic heart disease   | -5.54 (-36.4 to 32.6)         | -16.9 (-45.4 to 19.3)            | <b>-58 (-75 to -30.7)</b>                 |
| 18 Urinary diseases           | 18 Cardiomyopathy            | 109 (65.8 to 163)             | 83.3 (52.3 to 121)               | <b>-12.9 (-19.1 to -4.13)</b>             |
| 19 Mechanical forces          | 19 Breast cancer             | 149 (51.1 to 257)             | 118 (40.1 to 214)                | 11.2 (-22.2 to 53.3)                      |
| 20 Self-harm                  | 20 Liver cancer              | 169 (119 to 227)              | 136 (88 to 183)                  | 10.3 (-10.7 to 37.7)                      |
| 24 Cardiomyopathy             | 21 Tuberculosis              |                               |                                  |                                           |
| 26 Lung cancer                | 22 Asthma                    |                               |                                  |                                           |
| 27 Parkinson's disease        | 24 Road injuries             |                               |                                  |                                           |
| 31 Breast cancer              | 27 Self-harm                 |                               |                                  |                                           |
| 32 Colorectal cancer          | 36 Neonatal disorders        |                               |                                  |                                           |
| 33 Liver cancer               | 37 Mechanical forces         |                               |                                  |                                           |
| 36 Atrial fibrillation        | 133 COVID-19                 |                               |                                  |                                           |

### India, Reference scenario

**Legend:**  
Communicable, maternal, neonatal and nutritional  
Non-communicable  
Injuries

| Leading Causes 2022           | Leading Causes 2050           | Mean % change number of DEATH | Mean % change all-age DEATH rate | Mean % change age-standardized DEATH rate |
|-------------------------------|-------------------------------|-------------------------------|----------------------------------|-------------------------------------------|
| 1 Ischemic heart disease      | 1 COPD                        | <b>82.3 (35.4 to 134)</b>     | <b>64.8 (23.5 to 117)</b>        | -34.4 (-55.7 to 1.02)                     |
| 2 COPD                        | 2 Ischemic heart disease      | 14.9 (-31.6 to 73.1)          | 3.97 (-35.2 to 58.7)             | <b>-53 (-74.3 to -16.4)</b>               |
| 3 Stroke                      | 3 Stroke                      | 25.7 (-1.31 to 59.4)          | 13.6 (-11.6 to 45.1)             | <b>-49.7 (-64.5 to -31.6)</b>             |
| 4 Diarrheal diseases          | 4 Diarrheal diseases          | <b>34 (2.57 to 68.3)</b>      | 21.1 (-8.35 to 57.4)             | <b>-52.1 (-68.8 to -25.4)</b>             |
| 5 Lower respiratory infect    | 5 Lower respiratory infect    | <b>33.5 (8.81 to 61.9)</b>    | 20.5 (-1.03 to 44.9)             | <b>-43 (-53.3 to -28.3)</b>               |
| 6 Tuberculosis                | 6 Diabetes                    | <b>76.6 (30.7 to 124)</b>     | <b>59.5 (18 to 109)</b>          | -30 (-53.5 to 5.24)                       |
| 7 Neonatal disorders          | 7 Falls                       | <b>138 (76.7 to 212)</b>      | <b>114 (74.2 to 165)</b>         | <b>-12.6 (-21.5 to -0.904)</b>            |
| 8 Diabetes                    | 8 Alzheimer's disease         | <b>257 (145 to 386)</b>       | <b>222 (143 to 322)</b>          | <b>-6.21 (-11.9 to -1.45)</b>             |
| 9 Cirrhosis liver             | 9 Cirrhosis liver             | <b>61.5 (30.3 to 94.2)</b>    | <b>45.9 (21 to 73.6)</b>         | -15.3 (-30.5 to 5.51)                     |
| 10 Falls                      | 10 Chronic kidney disease     | <b>143 (73.1 to 227)</b>      | <b>119 (58.9 to 202)</b>         | 2.45 (-31.3 to 52.1)                      |
| 11 Road injuries              | 11 Hypertensive heart disease | <b>144 (74.9 to 219)</b>      | <b>121 (64.3 to 199)</b>         | -12 (-42.8 to 35.4)                       |
| 12 COVID-19                   | 12 Tuberculosis               | -29.6 (-57.6 to 5.44)         | <b>-36.3 (-60.5 to -1.91)</b>    | <b>-64.5 (-79.2 to -40.1)</b>             |
| 13 Asthma                     | 13 Road injuries              | 13.6 (-27.9 to 65.1)          | 2.74 (-31.4 to 59)               | -21.7 (-50.5 to 24.7)                     |
| 14 Self-harm                  | 14 Urinary diseases           | <b>191 (143 to 247)</b>       | <b>163 (128 to 209)</b>          | 17 (-4.27 to 44.9)                        |
| 15 Chronic kidney disease     | 15 Self-harm                  | 6.61 (-18.9 to 35.4)          | -3.76 (-24.2 to 23)              | -18 (-37 to 7.85)                         |
| 16 Rheumatic heart disease    | 16 Asthma                     | -8.64 (-26.8 to 11.4)         | <b>-17.5 (-31 to -2.35)</b>      | <b>-63.6 (-71.4 to -51.9)</b>             |
| 17 Hypertensive heart disease | 17 Breast cancer              | <b>114 (31.6 to 219)</b>      | <b>92.6 (26.4 to 168)</b>        | 5.35 (-27.9 to 41.6)                      |
| 18 Alzheimer's disease        | 18 Rheumatic heart disease    | -0.898 (-33.5 to 37.7)        | -10.4 (-39 to 28.4)              | <b>-54.5 (-71.9 to -29.1)</b>             |
| 19 Breast cancer              | 19 Lip oral cavity cancer     | <b>121 (83.1 to 160)</b>      | <b>99.3 (77.6 to 122)</b>        | 3.07 (-6.59 to 15.2)                      |
| 20 Urinary diseases           | 20 Lung cancer                | <b>101 (28.3 to 190)</b>      | <b>81.4 (22.4 to 152)</b>        | -7.56 (-33.6 to 20.8)                     |
| 21 Lung cancer                | 23 Neonatal disorders         |                               |                                  |                                           |
| 23 Lip oral cavity cancer     | 133 COVID-19                  |                               |                                  |                                           |

### Nepal, Reference scenario

**Legend:**

Communicable, maternal, neonatal and nutritional  
Non-communicable  
Injuries

| Leading Causes 2022           | Leading Causes 2050          | Mean % change number of DEATH | Mean % change all-age DEATH rate | Mean % change age-standardized DEATH rate |
|-------------------------------|------------------------------|-------------------------------|----------------------------------|-------------------------------------------|
| 1 Ischemic heart disease      | 1 COPD                       | 42.8 (-1.12 to 94.1)          | 37.2 (-3.31 to 81.5)             | <b>-47.8 (-65.3 to -21.1)</b>             |
| 2 COPD                        | 2 Ischemic heart disease     | 13.2 (-33.9 to 80.9)          | 8.9 (-34.3 to 71.6)              | <b>-54.6 (-74.9 to -18.1)</b>             |
| 3 Stroke                      | 3 Stroke                     | 19.3 (-12.5 to 57.1)          | 14.7 (-16.6 to 50.2)             | <b>-53.4 (-68.6 to -31.3)</b>             |
| 4 Neonatal disorders          | 4 Diabetes                   | <b>90.3 (32.1 to 167)</b>     | <b>82.8 (29 to 146)</b>          | -24.8 (-49.5 to 18.2)                     |
| 5 Lower respiratory infect    | 5 Chronic kidney disease     | <b>143 (65.9 to 245)</b>      | <b>134 (58.7 to 220)</b>         | 2.62 (-31.1 to 62.9)                      |
| 6 Tuberculosis                | 6 Hypertensive heart disease | <b>150 (75.8 to 237)</b>      | <b>140 (67.4 to 218)</b>         | -13.1 (-45.6 to 34.6)                     |
| 7 Diabetes                    | 7 Cirrhosis liver            | <b>46.4 (11.4 to 84.6)</b>    | <b>40.8 (9.51 to 73.4)</b>       | <b>-25 (-41.4 to -2.02)</b>               |
| 8 Cirrhosis liver             | 8 Alzheimer's disease        | <b>261 (147 to 395)</b>       | <b>247 (134 to 361)</b>          | -2.66 (-8.58 to 4.18)                     |
| 9 Asthma                      | 9 Lower respiratory infect   | 1.93 (-25.7 to 35.7)          | -1.99 (-27.9 to 29.1)            | <b>-51.4 (-62.4 to -35.6)</b>             |
| 10 Chronic kidney disease     | 10 Falls                     | <b>109 (45.2 to 190)</b>      | <b>101 (44.6 to 182)</b>         | <b>-18 (-27.7 to -3.5)</b>                |
| 11 Self-harm                  | 11 Self-harm                 | 20.2 (-5.88 to 57.7)          | 15.5 (-6.84 to 45.2)             | -13.4 (-32.8 to 15.1)                     |
| 12 Diarrheal diseases         | 12 Asthma                    | -13.6 (-32.3 to 9.99)         | -16.9 (-33.9 to 2.98)            | <b>-64.4 (-73.3 to -53.1)</b>             |
| 13 Hypertensive heart disease | 13 Urinary diseases          | <b>191 (131 to 277)</b>       | <b>180 (129 to 242)</b>          | 15.9 (-12.7 to 54.9)                      |
| 14 Rheumatic heart disease    | 14 Diarrheal diseases        | 3.38 (-28 to 36.6)            | -0.566 (-31.5 to 33.8)           | <b>-59.7 (-73.8 to -40.1)</b>             |
| 15 COVID-19                   | 15 Tuberculosis              | <b>-40.5 (-64.7 to -8.96)</b> | <b>-42.8 (-66.5 to -10.9)</b>    | <b>-71.8 (-83.8 to -51.1)</b>             |
| 16 Falls                      | 16 Rheumatic heart disease   | -6.08 (-38.8 to 34)           | -9.74 (-41.6 to 27.9)            | <b>-57.1 (-73.4 to -30.7)</b>             |
| 17 Alzheimer's disease        | 17 Interstitial lung disease | <b>169 (116 to 225)</b>       | <b>159 (117 to 204)</b>          | 7.67 (-5.36 to 20.2)                      |
| 18 Upper digest diseases      | 18 Breast cancer             | <b>146 (56.5 to 266)</b>      | <b>136 (52.5 to 246)</b>         | 19.6 (-16.6 to 68.1)                      |
| 19 Road injuries              | 19 Upper digest diseases     | 25.3 (-3.78 to 57.7)          | 20.4 (-3.08 to 47.3)             | <b>-46.6 (-58.6 to -27.5)</b>             |
| 20 Drowning                   | 20 Parkinson's disease       | <b>201 (115 to 310)</b>       | <b>189 (120 to 283)</b>          | -1.38 (-19.6 to 21)                       |
| 21 Urinary diseases           | 27 Road injuries             |                               |                                  |                                           |
| 27 Breast cancer              | 31 Neonatal disorders        |                               |                                  |                                           |
| 30 Interstitial lung disease  | 37 Drowning                  |                               |                                  |                                           |
| 39 Parkinson's disease        | 133 COVID-19                 |                               |                                  |                                           |

### Pakistan, Reference scenario

**Legend:**

Communicable, maternal, neonatal and nutritional  
Non-communicable  
Injuries

| Leading Causes 2022           | Leading Causes 2050          | Mean % change number of DEATH | Mean % change all-age DEATH rate | Mean % change age-standardized DEATH rate |
|-------------------------------|------------------------------|-------------------------------|----------------------------------|-------------------------------------------|
| 1 Ischemic heart disease      | 1 Ischemic heart disease     | 56.1 (-10.2 to 140)           | 27.1 (-27.8 to 106)              | <b>-44.9 (-71.9 to -2.93)</b>             |
| 2 Neonatal disorders          | 2 Stroke                     | <b>70.2 (25.4 to 124)</b>     | <b>38.5 (3.48 to 92.4)</b>       | <b>-43 (-61.9 to -15)</b>                 |
| 3 Stroke                      | 3 COPD                       | <b>96.5 (43.4 to 161)</b>     | <b>59.9 (17.4 to 117)</b>        | <b>-41 (-62.6 to -8.15)</b>               |
| 4 Lower respiratory infect    | 4 Chronic kidney disease     | <b>258 (144 to 405)</b>       | <b>191 (98.5 to 318)</b>         | 38.6 (-14 to 123)                         |
| 5 COPD                        | 5 Diabetes                   | <b>115 (50 to 196)</b>        | <b>74.8 (21.3 to 140)</b>        | -25.8 (-55.5 to 16.9)                     |
| 6 Tuberculosis                | 6 Neonatal disorders         | <b>-66.1 (-79.1 to -49.8)</b> | <b>-72.6 (-80.6 to -63)</b>      | <b>-48.1 (-59.4 to -31.6)</b>             |
| 7 Diabetes                    | 7 Hypertensive heart disease | <b>194 (110 to 292)</b>       | <b>139 (75 to 224)</b>           | -11.6 (-45.4 to 34.5)                     |
| 8 Cirrhosis liver             | 8 Cirrhosis liver            | <b>34.9 (12.3 to 62.3)</b>    | 9.7 (-10.1 to 33.8)              | <b>-39.1 (-50.4 to -23.3)</b>             |
| 9 Diarrheal diseases          | 9 Breast cancer              | <b>163 (58.1 to 271)</b>      | <b>113 (30.5 to 219)</b>         | 10.4 (-26.3 to 53.9)                      |
| 10 Road injuries              | 10 Alzheimer's disease       | <b>296 (167 to 453)</b>       | <b>222 (127 to 333)</b>          | -2.33 (-11.2 to 5.55)                     |
| 11 COVID-19                   | 11 Diarrheal diseases        | 25.1 (-22.1 to 74.9)          | 1.74 (-33.9 to 42.9)             | <b>-41 (-63.7 to -6.04)</b>               |
| 12 Chronic kidney disease     | 12 Lower respiratory infect  | <b>-37 (-54.5 to -13.4)</b>   | <b>-48.8 (-62.1 to -29.7)</b>    | <b>-52.4 (-65.1 to -35.8)</b>             |
| 13 Rheumatic heart disease    | 13 Lip oral cavity cancer    | <b>127 (93.1 to 165)</b>      | <b>84.2 (58.9 to 110)</b>        | -10.1 (-20.5 to 1.25)                     |
| 14 Hypertensive heart disease | 14 Tuberculosis              | <b>-37.8 (-62.9 to -2.41)</b> | <b>-49.4 (-69.7 to -16.3)</b>    | <b>-71.1 (-83.9 to -49.7)</b>             |
| 15 Breast cancer              | 15 Lung cancer               | <b>128 (43.8 to 238)</b>      | <b>84.7 (16.2 to 166)</b>        | -18.5 (-43.7 to 12.8)                     |
| 16 Congenital defects         | 16 Road injuries             | -4.18 (-40.8 to 49.1)         | -22 (-50.9 to 30.4)              | -38.2 (-61.4 to 3.26)                     |
| 17 Lip oral cavity cancer     | 17 Urinary diseases          | <b>195 (138 to 273)</b>       | <b>140 (93 to 191)</b>           | 14.4 (-13.8 to 57.7)                      |
| 18 Lung cancer                | 18 Falls                     | <b>121 (58.7 to 205)</b>      | <b>79.8 (30.1 to 151)</b>        | -15.8 (-30.3 to 2.77)                     |
| 19 Drowning                   | 19 Colorectal cancer         | <b>217 (84.6 to 401)</b>      | <b>157 (52.1 to 300)</b>         | 13.5 (-24.8 to 66.6)                      |
| 20 Self-harm                  | 20 Rheumatic heart disease   | -10.3 (-39.9 to 33.4)         | -27 (-53 to 11.1)                | <b>-59.3 (-75.3 to -33.2)</b>             |
| 22 Falls                      | 29 Self-harm                 |                               |                                  |                                           |
| 24 Alzheimer's disease        | 44 Congenital defects        |                               |                                  |                                           |
| 25 Urinary diseases           | 47 Drowning                  |                               |                                  |                                           |
| 35 Colorectal cancer          | 132 COVID-19                 |                               |                                  |                                           |

### China, Reference scenario

**Legend:**

Communicable, maternal, neonatal and nutritional  
Non-communicable  
Injuries

| Leading Causes 2022          | Leading Causes 2050          | Mean % change number of DEATH | Mean % change all-age DEATH rate | Mean % change age-standardized DEATH rate |
|------------------------------|------------------------------|-------------------------------|----------------------------------|-------------------------------------------|
| 1 Stroke                     | 1 Stroke                     | 27.9 (2.71 to 57.8)           | 47 (20.1 to 84.5)                | -48 (-58.5 to -32.3)                      |
| 2 Ischemic heart disease     | 2 COPD                       | 124 (74 to 179)               | 157 (103 to 219)                 | -22.2 (-41.5 to 4.72)                     |
| 3 COPD                       | 3 Ischemic heart disease     | 17.3 (-16.1 to 57.2)          | 34.8 (-3.19 to 85.9)             | -56.4 (-70.9 to -36.6)                    |
| 4 Lung cancer                | 4 Alzheimer's disease        | 232 (161 to 320)              | 280 (213 to 362)                 | -0.968 (-4.91 to 3.13)                    |
| 5 Alzheimer's disease        | 5 Lung cancer                | 79.6 (27.4 to 145)            | 106 (50.9 to 173)                | -7.48 (-26.4 to 15.8)                     |
| 6 Stomach cancer             | 6 Hypertensive heart disease | 194 (115 to 297)              | 238 (150 to 371)                 | 6.19 (-26.6 to 54.7)                      |
| 7 Hypertensive heart disease | 7 Colorectal cancer          | 130 (51.8 to 223)             | 163 (84.6 to 264)                | 16.1 (-13.4 to 49.5)                      |
| 8 Esophageal cancer          | 8 Esophageal cancer          | 79.8 (51.8 to 110)            | 107 (80.6 to 136)                | -0.499 (-10.9 to 10.6)                    |
| 9 Colorectal cancer          | 9 Stomach cancer             | 18.6 (-1.36 to 41.6)          | 36.1 (17.2 to 59)                | -37.4 (-42.5 to -32.5)                    |
| 10 Road injuries             | 10 Chronic kidney disease    | 142 (83 to 203)               | 178 (115 to 260)                 | 6.86 (-21.8 to 45.2)                      |
| 11 Chronic kidney disease    | 11 Lower respiratory infect  | 123 (85 to 165)               | 156 (114 to 196)                 | -29.9 (-39.5 to -17.5)                    |
| 12 Lower respiratory infect  | 12 Falls                     | 118 (64.9 to 176)             | 150 (99.4 to 209)                | -13.4 (-21.4 to -4.6)                     |
| 13 Diabetes                  | 13 Pancreatic cancer         | 151 (72.9 to 235)             | 187 (108 to 286)                 | 38.5 (4.52 to 76.1)                       |
| 14 Liver cancer              | 14 Liver cancer              | 71.8 (26.7 to 127)            | 97.5 (47 to 161)                 | 10.8 (-20.4 to 56.1)                      |
| 15 Cirrhosis liver           | 15 Atrial fibrillation       | 327 (231 to 449)              | 390 (289 to 519)                 | 20.3 (7.28 to 33.9)                       |
| 16 Falls                     | 16 Diabetes                  | 57.5 (22.2 to 102)            | 81.1 (42.5 to 144)               | -28.7 (-46.8 to -1.77)                    |
| 17 Self-harm                 | 17 Parkinson's disease       | 171 (124 to 226)              | 211 (168 to 261)                 | -2.04 (-10.2 to 7.72)                     |
| 18 Pancreatic cancer         | 18 Cirrhosis liver           | 23.2 (-2.78 to 55.9)          | 41.6 (13.9 to 80.2)              | -20.6 (-37.3 to 2.17)                     |
| 19 COVID-19                  | 19 Road injuries             | -19.5 (-44.2 to 14.6)         | -7.31 (-36.6 to 34.1)            | -21.8 (-50.1 to 23.3)                     |
| 20 Parkinson's disease       | 20 Self-harm                 | 27.8 (3.24 to 53.4)           | 46.9 (23.4 to 74.7)              | -14.8 (-29.8 to 4.32)                     |
| 24 Atrial fibrillation       | 132 COVID-19                 |                               |                                  |                                           |

### North Korea, Reference scenario

**Legend:**  
Communicable, maternal, neonatal and nutritional  
Non-communicable  
Injuries

| Leading Causes 2022          | Leading Causes 2050          | Mean % change number of DEATH | Mean % change all-age DEATH rate | Mean % change age-standardized DEATH rate |
|------------------------------|------------------------------|-------------------------------|----------------------------------|-------------------------------------------|
| 1 Stroke                     | 1 Stroke                     | 16.9 (-8.56 to 50.1)          | 27.4 (1.53 to 59.7)              | -38 (-52.9 to -15.3)                      |
| 2 Ischemic heart disease     | 2 COPD                       | 106 (55.1 to 168)             | 124 (75.5 to 183)                | -5.34 (-33.4 to 38.4)                     |
| 3 COPD                       | 3 Ischemic heart disease     | 38.7 (-4.22 to 97.3)          | 51.3 (5.89 to 112)               | -28.5 (-54 to 14.1)                       |
| 4 Tuberculosis               | 4 Hypertensive heart disease | 118 (49.7 to 210)             | 137 (62.2 to 226)                | 2.44 (-34.6 to 57.5)                      |
| 5 Lung cancer                | 5 Alzheimer's disease        | 148 (69.5 to 231)             | 170 (90.2 to 246)                | -3.79 (-8.53 to 1.85)                     |
| 6 Road injuries              | 6 Lung cancer                | 56.2 (6.48 to 117)            | 69.8 (23.5 to 121)               | -4.25 (-24.4 to 16.8)                     |
| 7 Hypertensive heart disease | 7 Lower respiratory infect   | 65.6 (29.6 to 109)            | 80.3 (49.5 to 116)               | -26.4 (-40.2 to -9.38)                    |
| 8 Stomach cancer             | 8 Chronic kidney disease     | 106 (53 to 170)               | 125 (73.3 to 190)                | 18.9 (-11.9 to 65.1)                      |
| 9 Lower respiratory infect   | 9 Tuberculosis               | -28.7 (-50.7 to -1.93)        | -22.2 (-44.7 to 8.67)            | -53.3 (-68 to -31.4)                      |
| 10 Alzheimer's disease       | 10 Stomach cancer            | 7.92 (-11.1 to 31.6)          | 17.5 (2.8 to 33.8)               | -32 (-37.6 to -25.7)                      |
| 11 Cirrhosis liver           | 11 Road injuries             | -14.5 (-46 to 37.1)           | -6.63 (-37.7 to 50.3)            | -13.6 (-45.4 to 42.4)                     |
| 12 Diabetes                  | 12 Diabetes                  | 34.5 (-5.49 to 81.1)          | 46.7 (6.28 to 93.1)              | -24.2 (-46.2 to 8.62)                     |
| 13 Chronic kidney disease    | 13 Colorectal cancer         | 65.7 (6.46 to 137)            | 80.1 (21.5 to 159)               | 0.115 (-24.5 to 32.2)                     |
| 14 Colorectal cancer         | 14 Esophageal cancer         | 68.4 (35.8 to 103)            | 83.3 (61.6 to 108)               | 7.23 (-6.13 to 20.3)                      |
| 15 Esophageal cancer         | 15 Cirrhosis liver           | 8.28 (-16.2 to 42)            | 18.1 (-7.06 to 51.9)             | -23.5 (-40.6 to -2.12)                    |
| 16 Self-harm                 | 16 Liver cancer              | 67.8 (17.4 to 143)            | 83.1 (30 to 163)                 | 16.2 (-19.4 to 75.8)                      |
| 17 Liver cancer              | 17 Atrial fibrillation       | 190 (91.1 to 303)             | 215 (114 to 325)                 | 11.7 (-3.16 to 32.8)                      |
| 18 Falls                     | 18 Parkinson's disease       | 137 (84.9 to 193)             | 158 (118 to 205)                 | 8.97 (-3.16 to 20.1)                      |
| 19 Breast cancer             | 19 Falls                     | 64 (19.2 to 121)              | 78.4 (37.1 to 133)               | -9.77 (-18.6 to -0.535)                   |
| 20 Upper digest diseases     | 20 Self-harm                 | 6.69 (-16.1 to 35.1)          | 16.3 (-5.52 to 43.9)             | -12.1 (-29.2 to 10.3)                     |
| 23 Parkinson's disease       | 22 Breast cancer             |                               |                                  |                                           |
| 27 Atrial fibrillation       | 23 Upper digest diseases     |                               |                                  |                                           |

### Taiwan (Province of China), Reference scenario

**Legend:**  
Communicable, maternal, neonatal and nutritional  
Non-communicable  
Injuries

| Leading Causes 2022           | Leading Causes 2050           | Mean % change number of DEATH | Mean % change all-age DEATH rate | Mean % change age-standardized DEATH rate |
|-------------------------------|-------------------------------|-------------------------------|----------------------------------|-------------------------------------------|
| 1 Lower respiratory infect    | 1 Lower respiratory infect    | 119 (86.9 to 154)             | 152 (122 to 185)                 | -18.1 (-27.2 to -6.38)                    |
| 2 Ischemic heart disease      | 2 Chronic kidney disease      | 239 (181 to 308)              | 291 (228 to 366)                 | 34.2 (9 to 64)                            |
| 3 Stroke                      | 3 Alzheimer's disease         | 201 (159 to 248)              | 246 (209 to 281)                 | 2.23 (-1.35 to 6.16)                      |
| 4 Lung cancer                 | 4 Lung cancer                 | 88.9 (51.2 to 122)            | 117 (79.1 to 151)                | -0.962 (-15.4 to 11.2)                    |
| 5 Diabetes                    | 5 Colorectal cancer           | 111 (62.7 to 164)             | 142 (92.4 to 185)                | 3.86 (-15.4 to 21.2)                      |
| 6 Alzheimer's disease         | 6 COPD                        | 132 (92.9 to 184)             | 168 (123 to 222)                 | -14.9 (-30.6 to 2.87)                     |
| 7 Colorectal cancer           | 7 Stroke                      | 13 (-2.09 to 33.1)            | 30 (14.5 to 50)                  | -47.6 (-54.6 to -39.2)                    |
| 8 Chronic kidney disease      | 8 Diabetes                    | 44.9 (17.9 to 75.5)           | 66.8 (37 to 97.8)                | -36.1 (-46.6 to -23.3)                    |
| 9 COPD                        | 9 Urinary diseases            | 291 (223 to 374)              | 350 (282 to 432)                 | 41.7 (21.8 to 67.1)                       |
| 10 Cirrhosis liver            | 10 Ischemic heart disease     | -1.61 (-22.3 to 25.6)         | 13.3 (-10.9 to 45.2)             | -57 (-66.7 to -42.3)                      |
| 11 COVID-19                   | 11 Hypertensive heart disease | 176 (117 to 256)              | 218 (147 to 314)                 | 13.7 (-11.6 to 52.1)                      |
| 12 Hypertensive heart disease | 12 Pancreatic cancer          | 136 (84.7 to 194)             | 171 (121 to 220)                 | 35.1 (12 to 56.7)                         |
| 13 Liver cancer               | 13 Liver cancer               | 75.8 (49.1 to 108)            | 102 (74.6 to 140)                | 13.8 (-3.29 to 36.3)                      |
| 14 Urinary diseases           | 14 Atrial fibrillation        | 252 (200 to 324)              | 305 (247 to 368)                 | 18.3 (6.79 to 31)                         |
| 15 Stomach cancer             | 15 Cirrhosis liver            | 9.35 (-4.81 to 26.1)          | 25.8 (10.9 to 40.2)              | -23.1 (-30.9 to -12.3)                    |
| 16 Self-harm                  | 16 Parkinson's disease        | 140 (106 to 176)              | 176 (149 to 206)                 | -2.82 (-11.8 to 7.65)                     |
| 17 Road injuries              | 17 Stomach cancer             | 33.6 (15 to 55.6)             | 53.7 (35 to 74.8)                | -35.3 (-41.5 to -28.6)                    |
| 18 Pancreatic cancer          | 18 Prostate cancer            | 131 (86.6 to 179)             | 166 (125 to 207)                 | 0.199 (-11.3 to 10.5)                     |
| 19 Esophageal cancer          | 19 Falls                      | 84.7 (52.9 to 114)            | 112 (83.6 to 140)                | -13.2 (-20.7 to -5.42)                    |
| 20 Breast cancer              | 20 Esophageal cancer          | 22 (7.64 to 38.5)             | 40.3 (25.7 to 55.8)              | -4.9 (-14.5 to 6.95)                      |
| 21 Falls                      | 21 Breast cancer              |                               |                                  |                                           |
| 23 Parkinson's disease        | 22 Self-harm                  |                               |                                  |                                           |
| 24 Prostate cancer            | 23 Road injuries              |                               |                                  |                                           |
| 25 Atrial fibrillation        | 131 COVID-19                  |                               |                                  |                                           |



### American Samoa, Reference scenario

**Legend:**

Communicable, maternal, neonatal and nutritional  
 Non-communicable  
 Injuries

| Leading Causes 2022           | Leading Causes 2050           | Mean % change number of DEATH | Mean % change all-age DEATH rate | Mean % change age-standardized DEATH rate |
|-------------------------------|-------------------------------|-------------------------------|----------------------------------|-------------------------------------------|
| 1 Ischemic heart disease      | 1 Ischemic heart disease      | 1.63 (-28.7 to 41.3)          | -18.1 (-42.8 to 15.6)            | <b>-45.4 (-63.3 to -18.7)</b>             |
| 2 Diabetes                    | 2 Chronic kidney disease      | <b>130 (77.6 to 194)</b>      | <b>85.1 (42.5 to 140)</b>        | 24.4 (-8.37 to 68.3)                      |
| 3 Stroke                      | 3 Diabetes                    | 27.6 (-2.05 to 59.1)          | 2.72 (-20.5 to 29.5)             | <b>-30.4 (-47.7 to -6.92)</b>             |
| 4 Chronic kidney disease      | 4 Stroke                      | 24.1 (-0.0677 to 49.1)        | -0.118 (-19 to 22.5)             | <b>-37.8 (-51.5 to -21.1)</b>             |
| 5 COPD                        | 5 COPD                        | <b>122 (79.3 to 172)</b>      | <b>78.8 (38.8 to 123)</b>        | -0.268 (-24.8 to 34.5)                    |
| 6 Lung cancer                 | 6 Lung cancer                 | <b>112 (55.3 to 180)</b>      | <b>69.9 (26.8 to 116)</b>        | 15.8 (-7.06 to 39.8)                      |
| 7 Lower respiratory infect    | 7 Prostate cancer             | <b>152 (85.4 to 225)</b>      | <b>102 (48.1 to 161)</b>         | 6.09 (-10.2 to 24.4)                      |
| 8 Breast cancer               | 8 Lower respiratory infect    | <b>74.3 (47.4 to 102)</b>     | <b>40.2 (19.8 to 61.4)</b>       | <b>-14.1 (-24.6 to -0.965)</b>            |
| 9 Prostate cancer             | 9 Alzheimer's disease         | <b>188 (113 to 263)</b>       | <b>131 (76 to 177)</b>           | <b>5.6 (1.67 to 9.89)</b>                 |
| 10 Endo/metab/blood/immune    | 10 Breast cancer              | <b>81.4 (28.9 to 145)</b>     | <b>45.7 (4.43 to 90.8)</b>       | 8.14 (-16.4 to 35.1)                      |
| 11 Stomach cancer             | 11 Endo/metab/blood/immune    | <b>124 (92.8 to 156)</b>      | <b>80 (59.9 to 105)</b>          | <b>29.5 (15.8 to 47.2)</b>                |
| 12 Colorectal cancer          | 12 Colorectal cancer          | <b>99.4 (40 to 169)</b>       | <b>60.1 (14.1 to 113)</b>        | 6.75 (-17.6 to 32)                        |
| 13 Alzheimer's disease        | 13 Diarrheal diseases         | <b>136 (73 to 210)</b>        | <b>90.1 (36.8 to 155)</b>        | 2.56 (-30.2 to 54.9)                      |
| 14 Cirrhosis liver            | 14 Hypertensive heart disease | <b>106 (51.8 to 179)</b>      | <b>66 (19.1 to 130)</b>          | 8.97 (-25.6 to 56.3)                      |
| 15 Hypertensive heart disease | 15 Stomach cancer             | <b>28 (7.02 to 50.7)</b>      | 2.96 (-11.9 to 19.9)             | <b>-30.6 (-35.2 to -25.1)</b>             |
| 16 Diarrheal diseases         | 16 Urinary diseases           | <b>198 (142 to 263)</b>       | <b>140 (93.8 to 184)</b>         | <b>40.3 (13.8 to 72.8)</b>                |
| 17 Road injuries              | 17 Bacterial skin             | <b>183 (91.9 to 304)</b>      | <b>128 (52.3 to 237)</b>         | <b>67 (11.9 to 147)</b>                   |
| 18 Self-harm                  | 18 Cirrhosis liver            | 10.9 (-5.92 to 30.6)          | -10.7 (-24.6 to 6.64)            | <b>-24.3 (-35.9 to -10.4)</b>             |
| 19 Drowning                   | 19 Pancreatic cancer          | <b>167 (92.1 to 265)</b>      | <b>115 (55.4 to 179)</b>         | <b>47.6 (14.1 to 84.9)</b>                |
| 20 Asthma                     | 20 Liver cancer               | <b>92.2 (47.9 to 156)</b>     | <b>54.8 (17.9 to 108)</b>        | 19.6 (-10.9 to 63.4)                      |
| 22 Liver cancer               | 23 Road injuries              |                               |                                  |                                           |
| 24 Urinary diseases           | 25 Self-harm                  |                               |                                  |                                           |
| 26 Bacterial skin             | 30 Asthma                     |                               |                                  |                                           |
| 29 Pancreatic cancer          | 31 Drowning                   |                               |                                  |                                           |

### Cook Islands, Reference scenario

**Legend:**  
Communicable, maternal, neonatal and nutritional  
Non-communicable  
Injuries

| Leading Causes 2022          | Leading Causes 2050          | Mean % change number of DEATH | Mean % change all-age DEATH rate | Mean % change age-standardized DEATH rate |
|------------------------------|------------------------------|-------------------------------|----------------------------------|-------------------------------------------|
| 1 Diabetes                   | 1 Diabetes                   | 17.3 (-7.53 to 47.6)          | 18.1 (-7.16 to 46.2)             | <b>-31.2 (-46 to -7.44)</b>               |
| 2 Ischemic heart disease     | 2 Hypertensive heart disease | <b>90.6 (35.8 to 166)</b>     | <b>91.9 (36.2 to 164)</b>        | 14.1 (-22.3 to 65.5)                      |
| 3 Stroke                     | 3 Ischemic heart disease     | -17.3 (-41.9 to 13.5)         | -16.8 (-38 to 13.5)              | <b>-52.4 (-68 to -29.3)</b>               |
| 4 Hypertensive heart disease | 4 Stroke                     | 7.13 (-13 to 32.2)            | 7.77 (-10.1 to 30.3)             | <b>-38.2 (-50.5 to -20.7)</b>             |
| 5 Lower respiratory infect   | 5 Lower respiratory infect   | <b>47 (24 to 78.8)</b>        | <b>47.7 (27.1 to 68.8)</b>       | <b>-25.7 (-35.6 to -12.7)</b>             |
| 6 Lung cancer                | 6 Alzheimer's disease        | <b>148 (91.5 to 224)</b>      | <b>149 (95.9 to 215)</b>         | 3.06 (-1.22 to 7.08)                      |
| 7 Prostate cancer            | 7 COPD                       | <b>96.6 (51.6 to 152)</b>     | <b>97.8 (56.4 to 152)</b>        | -4.26 (-31.3 to 37.8)                     |
| 8 COPD                       | 8 Prostate cancer            | <b>66.3 (21.9 to 122)</b>     | <b>67 (22.7 to 112)</b>          | -15.1 (-31.4 to 1.06)                     |
| 9 Chronic kidney disease     | 9 Chronic kidney disease     | <b>102 (54.1 to 162)</b>      | <b>104 (60.4 to 166)</b>         | 15.8 (-13.7 to 61.3)                      |
| 10 Alzheimer's disease       | 10 Lung cancer               | <b>36.5 (0.566 to 82.6)</b>   | <b>37 (0.949 to 74.8)</b>        | -10.7 (-28.3 to 10.1)                     |
| 11 Breast cancer             | 11 Breast cancer             | <b>81.8 (27.5 to 148)</b>     | <b>82.5 (30.3 to 146)</b>        | 12.4 (-12.1 to 38.5)                      |
| 12 Road injuries             | 12 Liver cancer              | <b>66 (24.4 to 128)</b>       | <b>67.1 (28.2 to 129)</b>        | 27.2 (-5.68 to 77)                        |
| 13 Liver cancer              | 13 Atrial fibrillation       | <b>183 (115 to 282)</b>       | <b>185 (120 to 254)</b>          | <b>20.9 (10.2 to 33.1)</b>                |
| 14 Self-harm                 | 14 Road injuries             | 1.38 (-32.8 to 50.1)          | 2.14 (-33.3 to 55.1)             | -5.63 (-39.5 to 45.9)                     |
| 15 Stomach cancer            | 15 Colorectal cancer         | <b>83.3 (25.9 to 162)</b>     | <b>83.9 (32 to 153)</b>          | 7.63 (-17.8 to 36.8)                      |
| 16 Colorectal cancer         | 16 Endo/metab/blood/immune   | <b>93.9 (60.2 to 134)</b>     | <b>95 (63.9 to 128)</b>          | <b>17.7 (3.81 to 33)</b>                  |
| 17 Atrial fibrillation       | 17 Self-harm                 | 9.48 (-11 to 34.6)            | 10.1 (-6.38 to 30.5)             | -1.02 (-18.7 to 24)                       |
| 18 Endo/metab/blood/immune   | 18 Pancreatic cancer         | <b>86.2 (35.6 to 148)</b>     | <b>87 (36.5 to 144)</b>          | 26.2 (-3.94 to 60.9)                      |
| 19 Asthma                    | 19 Parkinson's disease       | <b>82.1 (51.2 to 118)</b>     | <b>83 (57.4 to 109)</b>          | -7.1 (-16.4 to 1.63)                      |
| 20 Parkinson's disease       | 20 Falls                     | <b>72 (34.6 to 121)</b>       | <b>72.9 (37.6 to 111)</b>        | -10 (-19.4 to 0.66)                       |
| 21 Pancreatic cancer         | 21 Stomach cancer            |                               |                                  |                                           |
| 23 Falls                     | 23 Asthma                    |                               |                                  |                                           |

### Fiji, Reference scenario

**Legend:**

Communicable, maternal, neonatal and nutritional  
Non-communicable  
Injuries

| Leading Causes 2022           | Leading Causes 2050          | Mean % change number of DEATH | Mean % change all-age DEATH rate | Mean % change age-standardized DEATH rate |
|-------------------------------|------------------------------|-------------------------------|----------------------------------|-------------------------------------------|
| 1 Diabetes                    | 1 Diabetes                   | 28.5 (-6.64 to 74.7)          | 32.1 (-0.613 to 76.3)            | -24.6 (-45.3 to 5.24)                     |
| 2 Ischemic heart disease      | 2 Ischemic heart disease     | -0.785 (-31.6 to 46.8)        | 1.98 (-27.6 to 45.6)             | <b>-43 (-61.9 to -13.1)</b>               |
| 3 Stroke                      | 3 Stroke                     | 23.2 (-4.45 to 64.3)          | 26.6 (-0.619 to 63.1)            | <b>-35.8 (-51.4 to -13.1)</b>             |
| 4 COVID-19                    | 4 Chronic kidney disease     | <b>126 (71.5 to 207)</b>      | <b>132 (75 to 207)</b>           | 32 (-4.69 to 81.3)                        |
| 5 Chronic kidney disease      | 5 COPD                       | <b>106 (53.5 to 187)</b>      | <b>111 (60.5 to 183)</b>         | -2.8 (-29.3 to 33.4)                      |
| 6 Lower respiratory infect    | 6 Hypertensive heart disease | <b>104 (45.6 to 192)</b>      | <b>110 (49.2 to 194)</b>         | 7.58 (-27.8 to 55.3)                      |
| 7 Asthma                      | 7 Lower respiratory infect   | <b>38.3 (9.16 to 77)</b>      | <b>42.1 (14.7 to 72.7)</b>       | -18 (-31.5 to 1.22)                       |
| 8 COPD                        | 8 Breast cancer              | <b>61.5 (9.61 to 127)</b>     | <b>65.6 (15.5 to 120)</b>        | 2.71 (-20.6 to 29.5)                      |
| 9 Breast cancer               | 9 Alzheimer's disease        | <b>203 (90.1 to 336)</b>      | <b>211 (105 to 318)</b>          | 3.68 (-0.572 to 7.93)                     |
| 10 Hypertensive heart disease | 10 Asthma                    | -14.7 (-33.4 to 13)           | -12.4 (-31.5 to 11.1)            | <b>-55.5 (-63.4 to -44.6)</b>             |
| 11 Diarrheal diseases         | 11 Diarrheal diseases        | 43.4 (-0.37 to 107)           | <b>47.3 (1.44 to 107)</b>        | -29.7 (-55.9 to 9.3)                      |
| 12 Neonatal disorders         | 12 Lung cancer               | <b>109 (39.1 to 197)</b>      | <b>114 (46.4 to 186)</b>         | 20.8 (-6.37 to 49.1)                      |
| 13 Cervical cancer            | 13 Colorectal cancer         | <b>95.2 (21.9 to 187)</b>     | <b>100 (31.1 to 179)</b>         | 10.7 (-16.6 to 42.1)                      |
| 14 Road injuries              | 14 Prostate cancer           | <b>157 (57.4 to 288)</b>      | <b>164 (59.6 to 262)</b>         | 17.8 (-6.14 to 42.5)                      |
| 15 Self-harm                  | 15 Cervical cancer           | 19.7 (-6.16 to 52.9)          | 23 (-0.811 to 55)                | -18.3 (-35.2 to 2.89)                     |
| 16 Congenital defects         | 16 Atrial fibrillation       | <b>205 (105 to 331)</b>       | <b>213 (120 to 319)</b>          | <b>18.7 (7.67 to 31.8)</b>                |
| 17 Alzheimer's disease        | 17 Self-harm                 | -7.87 (-30.7 to 23.8)         | -5.4 (-26.1 to 16.2)             | -13.9 (-33.3 to 8.17)                     |
| 18 Lung cancer                | 18 Neonatal disorders        | <b>-40.4 (-62.1 to -8.68)</b> | <b>-38.9 (-61.2 to -7.59)</b>    | -22.3 (-48.7 to 14.1)                     |
| 19 Cirrhosis liver            | 19 Road injuries             | -10.3 (-44.8 to 54)           | -7.8 (-44.1 to 51.9)             | -15.5 (-49.6 to 41.2)                     |
| 20 Colorectal cancer          | 20 Liver cancer              | <b>88.8 (31.2 to 165)</b>     | <b>94.1 (39 to 170)</b>          | 23.8 (-13.8 to 80.4)                      |
| 24 Prostate cancer            | 21 Cirrhosis liver           |                               |                                  |                                           |
| 27 Liver cancer               | 29 Congenital defects        |                               |                                  |                                           |
| 35 Atrial fibrillation        | 131 COVID-19                 |                               |                                  |                                           |

### Guam, Reference scenario

**Legend:**

Communicable, maternal, neonatal and nutritional  
 Non-communicable  
 Injuries

| Leading Causes 2022           | Leading Causes 2050          | Mean % change number of DEATH | Mean % change all-age DEATH rate | Mean % change age-standardized DEATH rate |
|-------------------------------|------------------------------|-------------------------------|----------------------------------|-------------------------------------------|
| 1 Ischemic heart disease      | 1 Ischemic heart disease     | 11.1 (-22 to 53.3)            | 15.4 (-18.9 to 64.5)             | <b>-41.8 (-58.7 to -18.4)</b>             |
| 2 COVID-19                    | 2 Alzheimer's disease        | <b>287 (231 to 341)</b>       | <b>301 (243 to 359)</b>          | <b>-9.51 (-12.6 to -6.25)</b>             |
| 3 Stroke                      | 3 Chronic kidney disease     | <b>136 (79 to 201)</b>        | <b>145 (84.2 to 221)</b>         | 28.1 (-1.45 to 65.1)                      |
| 4 Lung cancer                 | 4 Stroke                     | 16.3 (-6.53 to 40.2)          | 20.6 (-4.99 to 52.8)             | <b>-33.7 (-44.3 to -20)</b>               |
| 5 Chronic kidney disease      | 5 Lung cancer                | <b>42.9 (7.74 to 78.4)</b>    | <b>47.8 (15.5 to 82.9)</b>       | -7.86 (-23.5 to 8.35)                     |
| 6 Alzheimer's disease         | 6 COPD                       | <b>141 (83.6 to 200)</b>      | <b>150 (90.7 to 223)</b>         | -4.43 (-23.4 to 22.4)                     |
| 7 Diabetes                    | 7 Lower respiratory infect   | <b>72.9 (41.8 to 107)</b>     | <b>79.2 (46.6 to 111)</b>        | <b>-21 (-30 to -11.2)</b>                 |
| 8 Lower respiratory infect    | 8 Hypertensive heart disease | <b>96.2 (41.4 to 158)</b>     | <b>104 (50.4 to 184)</b>         | 20.1 (-11.3 to 60.1)                      |
| 9 COPD                        | 9 Diabetes                   | 8.85 (-15.9 to 37.1)          | 13 (-12.3 to 45.5)               | <b>-37.9 (-49.7 to -21)</b>               |
| 10 Cirrhosis liver            | 10 Colorectal cancer         | <b>56.4 (10.5 to 101)</b>     | <b>61.7 (19.8 to 110)</b>        | -10.6 (-31.4 to 11.1)                     |
| 11 Self-harm                  | 11 Prostate cancer           | <b>141 (84.2 to 210)</b>      | <b>149 (91.9 to 212)</b>         | -3.29 (-16.5 to 10.7)                     |
| 12 Hypertensive heart disease | 12 Cirrhosis liver           | -7.81 (-23.6 to 8.19)         | -4.49 (-19.3 to 15.7)            | <b>-21.9 (-31 to -8.5)</b>                |
| 13 Colorectal cancer          | 13 Diarrheal diseases        | <b>283 (149 to 508)</b>       | <b>298 (147 to 545)</b>          | 25.1 (-13.8 to 81.6)                      |
| 14 Road injuries              | 14 Self-harm                 | -14 (-32.6 to 4.94)           | -11.1 (-25.4 to 4.25)            | -8.34 (-24.5 to 9.41)                     |
| 15 Neonatal disorders         | 15 Liver cancer              | <b>57.6 (19.5 to 94.9)</b>    | <b>63.6 (23.9 to 106)</b>        | 18.1 (-11 to 53.9)                        |
| 16 Breast cancer              | 16 Atrial fibrillation       | <b>244 (182 to 304)</b>       | <b>256 (194 to 319)</b>          | <b>9.31 (1.95 to 17.1)</b>                |
| 17 Prostate cancer            | 17 Bacterial skin            | <b>197 (108 to 324)</b>       | <b>209 (109 to 346)</b>          | <b>79.8 (31.2 to 147)</b>                 |
| 18 Liver cancer               | 18 Breast cancer             | 7.16 (-19.7 to 33.5)          | 10.7 (-13.4 to 37.6)             | -13.5 (-32 to 5.08)                       |
| 19 Stomach cancer             | 19 Urinary diseases          | <b>217 (136 to 319)</b>       | <b>229 (151 to 331)</b>          | <b>25.1 (5.94 to 48.2)</b>                |
| 20 Tuberculosis               | 20 Pancreatic cancer         | <b>75.2 (33 to 119)</b>       | <b>81.2 (40 to 125)</b>          | 22.1 (-1.78 to 50.2)                      |
| 21 Pancreatic cancer          | 21 Road injuries             |                               |                                  |                                           |
| 22 Diarrheal diseases         | 22 Neonatal disorders        |                               |                                  |                                           |
| 25 Bacterial skin             | 23 Stomach cancer            |                               |                                  |                                           |
| 28 Atrial fibrillation        | 33 Tuberculosis              |                               |                                  |                                           |
| 33 Urinary diseases           | 130 COVID-19                 |                               |                                  |                                           |

### Kiribati, Reference scenario

**Legend:**

Communicable, maternal, neonatal and nutritional  
Non-communicable  
Injuries

| Leading Causes 2022            | Leading Causes 2050            | Mean % change number of DEATH | Mean % change all-age DEATH rate | Mean % change age-standardized DEATH rate |
|--------------------------------|--------------------------------|-------------------------------|----------------------------------|-------------------------------------------|
| 1 Ischemic heart disease       | 1 Diabetes                     | 53.2 (15.9 to 95.8)           | 32.2 (2.79 to 69.6)              | -19.9 (-39.6 to 9.42)                     |
| 2 Diabetes                     | 2 Ischemic heart disease       | 35.3 (-3.89 to 85.8)          | 16.7 (-16.5 to 59.7)             | -29 (-53 to 4.38)                         |
| 3 Stroke                       | 3 Stroke                       | 29.4 (2.78 to 55.2)           | 11.6 (-6.7 to 35.1)              | -34.2 (-47.9 to -14.9)                    |
| 4 Tuberculosis                 | 4 COPD                         | 98.9 (55.1 to 153)            | 71.6 (35.9 to 113)               | -10.1 (-32.5 to 26)                       |
| 5 Neonatal disorders           | 5 Chronic kidney disease       | 171 (108 to 249)              | 133 (88.4 to 203)                | 47.3 (10.7 to 99.6)                       |
| 6 Diarrheal diseases           | 6 Diarrheal diseases           | 78.9 (27.3 to 138)            | 54.3 (14.1 to 104)               | -4.94 (-39.6 to 43.6)                     |
| 7 COPD                         | 7 Tuberculosis                 | -29.8 (-51.3 to 3.17)         | -39.5 (-57.1 to -11.9)           | -59 (-72.4 to -37.7)                      |
| 8 Chronic kidney disease       | 8 Lower respiratory infect     | 15.3 (-6.42 to 38.2)          | -0.681 (-15 to 16.5)             | -27.5 (-38.2 to -14.3)                    |
| 9 Lower respiratory infect     | 9 Cervical cancer              | 39.6 (13.1 to 67.5)           | 20.4 (0.342 to 42.9)             | -22.2 (-34.7 to -8.83)                    |
| 10 Cirrhosis liver             | 10 Breast cancer               | 81.5 (28.2 to 150)            | 56.4 (12 to 110)                 | -1.28 (-22.4 to 24.9)                     |
| 11 Self-harm                   | 11 Cirrhosis liver             | 7.67 (-11 to 31.3)            | -7.11 (-22.9 to 12.4)            | -32.7 (-43.2 to -18.7)                    |
| 12 Cervical cancer             | 12 Lung cancer                 | 101 (39 to 174)               | 73.1 (24.7 to 133)               | 2.28 (-18.1 to 24.6)                      |
| 13 Asthma                      | 13 Self-harm                   | 7.85 (-16.2 to 39.6)          | -7.15 (-25.2 to 12)              | -12.1 (-28.9 to 6.15)                     |
| 14 Congenital defects          | 14 Alzheimer's disease         | 192 (100 to 292)              | 151 (75.9 to 237)                | 5.92 (0.763 to 10.2)                      |
| 15 Stomach cancer              | 15 Neonatal disorders          | -52.7 (-70.4 to -26.4)        | -59.4 (-73.2 to -38.4)           | -40.5 (-59.7 to -13.7)                    |
| 16 Road injuries               | 16 Stomach cancer              | 28.9 (5.34 to 55.9)           | 11.1 (-7.71 to 28.3)             | -30.7 (-35.9 to -25.1)                    |
| 17 Breast cancer               | 17 Hypertensive heart disease  | 116 (57.2 to 190)             | 86.7 (32.1 to 150)               | 3.49 (-30.4 to 47.8)                      |
| 18 Protein-energy malnutrition | 18 Bacterial skin              | 207 (109 to 333)              | 165 (82.4 to 280)                | 83.2 (21.3 to 182)                        |
| 19 Lung cancer                 | 19 Road injuries               | 17.8 (-19.6 to 84.3)          | 1.49 (-31.6 to 50.4)             | -9.94 (-40 to 36.8)                       |
| 20 Upper digest diseases       | 20 Protein-energy malnutrition | 15.2 (-31.3 to 81.6)          | -0.719 (-38.5 to 55.9)           | -19.9 (-56.1 to 41.1)                     |
| 23 Hypertensive heart disease  | 22 Asthma                      |                               |                                  |                                           |
| 25 Alzheimer's disease         | 24 Upper digest diseases       |                               |                                  |                                           |
| 28 Bacterial skin              | 27 Congenital defects          |                               |                                  |                                           |

### Marshall Islands, Reference scenario

**Legend:**  
Communicable, maternal, neonatal and nutritional  
Non-communicable  
Injuries

| Leading Causes 2022           | Leading Causes 2050          | Mean % change number of DEATH | Mean % change all-age DEATH rate | Mean % change age-standardized DEATH rate |
|-------------------------------|------------------------------|-------------------------------|----------------------------------|-------------------------------------------|
| 1 Ischemic heart disease      | 1 Ischemic heart disease     | 60.6 (5.59 to 139)            | 25.4 (-14.9 to 81.4)             | -27.2 (-56.5 to 16.5)                     |
| 2 Stroke                      | 2 Stroke                     | 66.7 (25.5 to 120)            | 30 (3.6 to 62.8)                 | -28 (-48.1 to -1.32)                      |
| 3 Diabetes                    | 3 Diabetes                   | 58.1 (12.1 to 114)            | 23.3 (-7.9 to 63.9)              | -25 (-48.5 to 9.18)                       |
| 4 Tuberculosis                | 4 Chronic kidney disease     | 189 (109 to 300)              | 125 (69.5 to 202)                | 40.6 (-3.51 to 104)                       |
| 5 Lower respiratory infect    | 5 COPD                       | 144 (85 to 206)               | 90.4 (48.6 to 138)               | -7.36 (-34.2 to 25.8)                     |
| 6 Chronic kidney disease      | 6 Lower respiratory infect   | 58.2 (23.5 to 95.4)           | 23.2 (3.18 to 46.6)              | -19.1 (-34.2 to -1.71)                    |
| 7 COPD                        | 7 Tuberculosis               | -25 (-50 to 9.2)              | -41.5 (-59.4 to -16.5)           | -60.9 (-74.3 to -41)                      |
| 8 Self-harm                   | 8 Lung cancer                | 144 (62.7 to 252)             | 89.5 (31.7 to 166)               | 8.34 (-15 to 34.3)                        |
| 9 Cirrhosis liver             | 9 Hypertensive heart disease | 138 (64.2 to 230)             | 85.5 (34.2 to 155)               | 1.52 (-35.3 to 53)                        |
| 10 Road injuries              | 10 HIV/AIDS                  | 604 (257 to 1020)             | 448 (184 to 778)                 | 441 (182 to 765)                          |
| 11 Lung cancer                | 11 Self-harm                 | 16.9 (-13.3 to 53.1)          | -8.78 (-31.9 to 20.6)            | -12.8 (-34.9 to 15.3)                     |
| 12 Hypertensive heart disease | 12 Cirrhosis liver           | 26.4 (-1.09 to 57.1)          | -1.4 (-18.3 to 22.1)             | -27.6 (-41.1 to -9.76)                    |
| 13 Neonatal disorders         | 13 Breast cancer             | 115 (41.5 to 226)             | 67 (13 to 134)                   | 12.3 (-18.2 to 48.6)                      |
| 14 Drowning                   | 14 Road injuries             | 27.3 (-24.2 to 119)           | -0.528 (-40.3 to 70.2)           | -17.7 (-53.1 to 46.9)                     |
| 15 Breast cancer              | 15 Alzheimer's disease       | 321 (165 to 524)              | 227 (119 to 356)                 | 10.7 (6.2 to 14.5)                        |
| 16 Stomach cancer             | 16 Colorectal cancer         | 145 (57.8 to 273)             | 90.2 (24.6 to 184)               | 11.1 (-19.1 to 45.4)                      |
| 17 Asthma                     | 17 Prostate cancer           | 213 (103 to 352)              | 143 (62.5 to 242)                | 2.41 (-12.8 to 20.6)                      |
| 18 Rheumatic heart disease    | 18 Stomach cancer            | 43.2 (10.1 to 82.6)           | 11.5 (-6.21 to 33.3)             | -31.5 (-37.1 to -25.1)                    |
| 19 Diarrheal diseases         | 19 Diarrheal diseases        | 55.5 (5.45 to 115)            | 21.2 (-17.2 to 63.9)             | -32.4 (-59.2 to 13)                       |
| 20 Congenital defects         | 20 Cervical cancer           | 59.1 (24.5 to 97.2)           | 24.2 (-0.443 to 52.7)            | -11 (-31.6 to 12.5)                       |
| 21 Colorectal cancer          | 21 Neonatal disorders        |                               |                                  |                                           |
| 22 Cervical cancer            | 22 Drowning                  |                               |                                  |                                           |
| 25 Prostate cancer            | 24 Asthma                    |                               |                                  |                                           |
| 26 Alzheimer's disease        | 30 Rheumatic heart disease   |                               |                                  |                                           |
| 27 HIV/AIDS                   | 32 Congenital defects        |                               |                                  |                                           |

### Federated States of Micronesia, Reference scenario

**Legend:**  
Communicable, maternal, neonatal and nutritional  
Non-communicable  
Injuries

| Leading Causes 2022          | Leading Causes 2050          | Mean % change number of DEATH | Mean % change all-age DEATH rate | Mean % change age-standardized DEATH rate |
|------------------------------|------------------------------|-------------------------------|----------------------------------|-------------------------------------------|
| 1 Ischemic heart disease     | 1 Ischemic heart disease     | 31.8 (-12.7 to 86.3)          | 33.1 (-7.74 to 84.4)             | -23 (-50.3 to 16.3)                       |
| 2 Stroke                     | 2 Stroke                     | <b>35.7 (1.86 to 72.3)</b>    | <b>36.9 (5.88 to 71.6)</b>       | <b>-24.6 (-42.8 to -1.99)</b>             |
| 3 Diabetes                   | 3 Diabetes                   | 37.5 (-1.94 to 75.1)          | <b>38.8 (4.93 to 83.1)</b>       | -17.3 (-40.4 to 13.9)                     |
| 4 Chronic kidney disease     | 4 Chronic kidney disease     | <b>170 (89 to 254)</b>        | <b>173 (105 to 254)</b>          | <b>63.8 (17.7 to 126)</b>                 |
| 5 COPD                       | 5 COPD                       | <b>102 (45.7 to 159)</b>      | <b>104 (49.1 to 164)</b>         | 0.171 (-25.9 to 34.8)                     |
| 6 Lower respiratory infect   | 6 Lower respiratory infect   | <b>37.5 (5.01 to 74.4)</b>    | <b>38.6 (11.5 to 69)</b>         | <b>-18.5 (-31.9 to -2.1)</b>              |
| 7 Lung cancer                | 7 Lung cancer                | <b>91.8 (29.8 to 180)</b>     | <b>93.3 (34.6 to 171)</b>        | 14.6 (-8.88 to 41.3)                      |
| 8 Hypertensive heart disease | 8 Hypertensive heart disease | <b>91.5 (32.1 to 165)</b>     | <b>93.4 (37.7 to 165)</b>        | 4.21 (-30.8 to 52.2)                      |
| 9 Self-harm                  | 9 HIV/AIDS                   | <b>492 (261 to 878)</b>       | <b>496 (261 to 837)</b>          | <b>480 (254 to 809)</b>                   |
| 10 Road injuries             | 10 Alzheimer's disease       | <b>195 (97.4 to 343)</b>      | <b>197 (97.2 to 311)</b>         | <b>9.16 (4.89 to 13.3)</b>                |
| 11 Cirrhosis liver           | 11 Breast cancer             | <b>55.8 (2.99 to 128)</b>     | <b>57 (6.91 to 118)</b>          | -1.12 (-24.7 to 25.8)                     |
| 12 Breast cancer             | 12 Road injuries             | 2.72 (-39.8 to 61.5)          | 3.53 (-34.2 to 64.6)             | -16.4 (-49.4 to 38.9)                     |
| 13 Tuberculosis              | 13 Self-harm                 | -11 (-35.1 to 19)             | -10.4 (-28.3 to 13.5)            | -14.6 (-32.7 to 7.98)                     |
| 14 Stomach cancer            | 14 Cirrhosis liver           | -1.18 (-24.5 to 25.2)         | -0.405 (-16.4 to 19.4)           | <b>-27 (-38.1 to -10.7)</b>               |
| 15 Asthma                    | 15 Prostate cancer           | <b>175 (77.1 to 328)</b>      | <b>177 (81.4 to 300)</b>         | <b>25.4 (8.27 to 46.6)</b>                |
| 16 Neonatal disorders        | 16 Colorectal cancer         | <b>87.3 (19.5 to 184)</b>     | <b>88.7 (22 to 184)</b>          | 8.66 (-17.2 to 38.6)                      |
| 17 Drowning                  | 17 Stomach cancer            | 14.7 (-12.8 to 44.6)          | 15.7 (-8.84 to 42.4)             | <b>-30.3 (-35.5 to -24.2)</b>             |
| 18 Interpersonal violence    | 18 Diarrheal diseases        | <b>55.8 (5.64 to 109)</b>     | <b>57.3 (8.77 to 112)</b>        | -22.1 (-50.8 to 24.9)                     |
| 19 Diarrheal diseases        | 19 Endo/metab/blood/immune   | <b>97 (56.1 to 150)</b>       | <b>98.5 (65.9 to 134)</b>        | <b>24.6 (10.4 to 43.5)</b>                |
| 20 Colorectal cancer         | 20 Atrial fibrillation       | <b>203 (111 to 324)</b>       | <b>206 (113 to 323)</b>          | <b>26.2 (15.7 to 37.4)</b>                |
| 21 Alzheimer's disease       | 21 Asthma                    |                               |                                  |                                           |
| 25 Endo/metab/blood/immune   | 26 Drowning                  |                               |                                  |                                           |
| 26 Prostate cancer           | 29 Tuberculosis              |                               |                                  |                                           |
| 29 HIV/AIDS                  | 31 Interpersonal violence    |                               |                                  |                                           |
| 33 Atrial fibrillation       | 32 Neonatal disorders        |                               |                                  |                                           |

### Nauru, Reference scenario

**Legend:**

Communicable, maternal, neonatal and nutritional  
Non-communicable  
Injuries

| Leading Causes 2022           | Leading Causes 2050           | Mean % change number of DEATH | Mean % change all-age DEATH rate | Mean % change age-standardized DEATH rate |
|-------------------------------|-------------------------------|-------------------------------|----------------------------------|-------------------------------------------|
| 1 Ischemic heart disease      | 1 Ischemic heart disease      | 45.5 (-9.54 to 110)           | -1.51 (-34.9 to 50.9)            | -29.5 (-57.5 to 20.9)                     |
| 2 Stroke                      | 2 Stroke                      | <b>52.4 (12.3 to 95.7)</b>    | 3.08 (-19.9 to 31.4)             | -27.3 (-47.9 to 3.39)                     |
| 3 Diabetes                    | 3 Diabetes                    | <b>67.1 (18.1 to 124)</b>     | 13.1 (-15.8 to 57)               | -14.7 (-41.7 to 28.9)                     |
| 4 Lower respiratory infect    | 4 Chronic kidney disease      | <b>185 (107 to 276)</b>       | <b>92.6 (46.9 to 151)</b>        | 45.9 (-0.196 to 117)                      |
| 5 Road injuries               | 5 COPD                        | <b>92.4 (40 to 147)</b>       | 30.1 (-0.435 to 64.9)            | -7.33 (-35.4 to 33.2)                     |
| 6 Chronic kidney disease      | 6 Lower respiratory infect    | 18.1 (-7.14 to 45.7)          | <b>-20.2 (-32.3 to -4.14)</b>    | <b>-25.1 (-40 to -6.99)</b>               |
| 7 COPD                        | 7 Road injuries               | 41.3 (-25.1 to 142)           | -4.38 (-47.2 to 75)              | -12.7 (-51.5 to 56.7)                     |
| 8 Self-harm                   | 8 Lung cancer                 | <b>123 (42.5 to 207)</b>      | <b>50.5 (0.529 to 115)</b>       | 4.9 (-20 to 33.5)                         |
| 9 Neonatal disorders          | 9 Self-harm                   | <b>43.9 (3.91 to 91.8)</b>    | -2.68 (-25.8 to 25.9)            | -9.57 (-30.5 to 16.1)                     |
| 10 Lung cancer                | 10 Hypertensive heart disease | <b>123 (47.8 to 205)</b>      | <b>50.6 (8.15 to 113)</b>        | 2.75 (-33.9 to 59)                        |
| 11 Tuberculosis               | 11 Breast cancer              | <b>106 (32.6 to 190)</b>      | 39.4 (-6.4 to 104)               | 5.29 (-21.9 to 38.1)                      |
| 12 Cirrhosis liver            | 12 Cirrhosis liver            | <b>54.8 (21.6 to 90.6)</b>    | 4.78 (-13.8 to 27.4)             | <b>-21.4 (-36.2 to -0.411)</b>            |
| 13 Hypertensive heart disease | 13 Neonatal disorders         | -16.4 (-53.5 to 34.4)         | <b>-43.6 (-66.6 to -9.96)</b>    | -23 (-53.5 to 23.9)                       |
| 14 Drowning                   | 14 Colorectal cancer          | <b>122 (36.1 to 217)</b>      | 50.3 (-5.56 to 123)              | 7.13 (-21.9 to 38.4)                      |
| 15 Breast cancer              | 15 Drowning                   | 0.548 (-34.7 to 48.9)         | <b>-32 (-54.4 to -1.79)</b>      | <b>-35.1 (-55.6 to -4.93)</b>             |
| 16 Congenital defects         | 16 Stomach cancer             | <b>32.8 (4.6 to 60.7)</b>     | -10.2 (-23.8 to 5.38)            | <b>-34.1 (-38.9 to -27.6)</b>             |
| 17 Stomach cancer             | 17 Alzheimer's disease        | <b>137 (52.9 to 223)</b>      | <b>60 (9.74 to 124)</b>          | <b>9.1 (4.92 to 13.3)</b>                 |
| 18 Interpersonal violence     | 18 Tuberculosis               | -26.4 (-53.1 to 8.87)         | <b>-50.1 (-66.3 to -24.2)</b>    | <b>-61 (-74.4 to -39.8)</b>               |
| 19 Asthma                     | 19 Endo/metab/blood/immune    | <b>136 (94 to 180)</b>        | <b>59.3 (38.7 to 81)</b>         | <b>24.6 (6.39 to 46.4)</b>                |
| 20 Colorectal cancer          | 20 Interpersonal violence     | 10.4 (-15 to 43.2)            | <b>-25.3 (-40.9 to -5.22)</b>    | <b>-31.5 (-44.5 to -13)</b>               |
| 24 Alzheimer's disease        | 22 Congenital defects         |                               |                                  |                                           |
| 26 Endo/metab/blood/immune    | 26 Asthma                     |                               |                                  |                                           |



### Niue, Reference scenario

**Legend:**

Communicable, maternal, neonatal and nutritional  
Non-communicable  
Injuries

| Leading Causes 2022          | Leading Causes 2050          | Mean % change number of DEATH | Mean % change all-age DEATH rate | Mean % change age-standardized DEATH rate |
|------------------------------|------------------------------|-------------------------------|----------------------------------|-------------------------------------------|
| 1 Ischemic heart disease     | 1 Ischemic heart disease     | <b>-28.2 (-47.4 to -1.93)</b> | -27.5 (-47.1 to 0.338)           | <b>-44.9 (-62.6 to -18.6)</b>             |
| 2 Stroke                     | 2 Diabetes                   | 3.24 (-20 to 30)              | 4.2 (-19.5 to 31.3)              | -21.3 (-40.8 to 5.02)                     |
| 3 Diabetes                   | 3 Stroke                     | -16.7 (-32.5 to 3.04)         | -16 (-30.5 to 2.85)              | <b>-38.1 (-50.4 to -21.2)</b>             |
| 4 Chronic kidney disease     | 4 Chronic kidney disease     | <b>60.1 (24.3 to 104)</b>     | <b>61.5 (26.4 to 108)</b>        | 23.2 (-10.7 to 67.9)                      |
| 5 Neonatal disorders         | 5 COPD                       | <b>43.6 (17 to 84.9)</b>      | <b>44.8 (16.5 to 79.5)</b>       | 2.04 (-22.3 to 37.1)                      |
| 6 COPD                       | 6 Lower respiratory infect   | 14.4 (-3.98 to 40.6)          | 15.3 (-1.45 to 34.7)             | <b>-17.5 (-29.9 to -3.18)</b>             |
| 7 Lower respiratory infect   | 7 Lung cancer                | <b>52.5 (6.77 to 99.2)</b>    | <b>53.5 (12 to 98.7)</b>         | 17.2 (-5.91 to 41.8)                      |
| 8 Lung cancer                | 8 Alzheimer's disease        | <b>62.3 (24.2 to 105)</b>     | <b>63.5 (27.4 to 100)</b>        | <b>9.22 (5.73 to 13.3)</b>                |
| 9 Hypertensive heart disease | 9 Hypertensive heart disease | <b>43.6 (6.09 to 94.5)</b>    | <b>45 (1.03 to 98.9)</b>         | 8.9 (-23.9 to 59.5)                       |
| 10 Alzheimer's disease       | 10 Neonatal disorders        | <b>-34.3 (-55.3 to -3.18)</b> | <b>-33.7 (-55.4 to -4.08)</b>    | -28.8 (-49.7 to 0.805)                    |
| 11 Breast cancer             | 11 Breast cancer             | 36.8 (-7.89 to 84.1)          | 37.7 (-0.273 to 80.1)            | 5.27 (-19.5 to 32.9)                      |
| 12 Congenital defects        | 12 Prostate cancer           | <b>68.9 (18.1 to 120)</b>     | <b>70 (23.8 to 121)</b>          | 15.9 (-2.61 to 33.6)                      |
| 13 Road injuries             | 13 Colorectal cancer         | 48.9 (-1.28 to 110)           | <b>49.9 (4.43 to 100)</b>        | 12.2 (-14.5 to 41.7)                      |
| 14 Cirrhosis liver           | 14 Road injuries             | -14.5 (-42.8 to 39.4)         | -13.7 (-43.8 to 34.3)            | -12.5 (-45.7 to 42.6)                     |
| 15 Colorectal cancer         | 15 Cirrhosis liver           | -15.1 (-28.8 to 2.12)         | -14.3 (-26.5 to 1.11)            | <b>-24.8 (-35.8 to -10.9)</b>             |
| 16 Self-harm                 | 16 Atrial fibrillation       | <b>68 (31.4 to 108)</b>       | <b>69.2 (39.4 to 108)</b>        | <b>14.8 (4.1 to 26.2)</b>                 |
| 17 Prostate cancer           | 17 Endo/metab/blood/immune   | <b>54.3 (28.8 to 87)</b>      | <b>55.5 (38.6 to 77.3)</b>       | <b>22 (8.27 to 37.2)</b>                  |
| 18 Stomach cancer            | 18 Congenital defects        | <b>-34.4 (-45.8 to -18.8)</b> | <b>-33.9 (-42.6 to -21.4)</b>    | <b>-25.2 (-35.6 to -12.2)</b>             |
| 19 Asthma                    | 19 Diarrheal diseases        | 8.8 (-21.2 to 50)             | 9.78 (-20.9 to 51.7)             | -22.8 (-49.2 to 22.6)                     |
| 20 Diarrheal diseases        | 20 Pancreatic cancer         | <b>107 (42 to 186)</b>        | <b>108 (48.1 to 175)</b>         | <b>58.2 (23.1 to 100)</b>                 |
| 22 Endo/metab/blood/immune   | 21 Stomach cancer            |                               |                                  |                                           |
| 24 Atrial fibrillation       | 22 Self-harm                 |                               |                                  |                                           |
| 29 Pancreatic cancer         | 26 Asthma                    |                               |                                  |                                           |

### Northern Mariana Islands, Reference scenario

**Legend:**  
Communicable, maternal, neonatal and nutritional  
Non-communicable  
Injuries

| Leading Causes 2022           | Leading Causes 2050           | Mean % change number of DEATH | Mean % change all-age DEATH rate | Mean % change age-standardized DEATH rate |
|-------------------------------|-------------------------------|-------------------------------|----------------------------------|-------------------------------------------|
| 1 Ischemic heart disease      | 1 Ischemic heart disease      | 35.2 (0.64 to 82.3)           | 30.6 (-6.03 to 78)               | -37.7 (-58.1 to -7.6)                     |
| 2 Stroke                      | 2 Chronic kidney disease      | 214 (151 to 287)              | 203 (145 to 275)                 | 43.7 (10.5 to 93.8)                       |
| 3 Diabetes                    | 3 Stroke                      | 74.4 (44.1 to 110)            | 68.4 (40 to 101)                 | -30.3 (-43.7 to -11.7)                    |
| 4 Chronic kidney disease      | 4 COPD                        | 206 (154 to 271)              | 196 (145 to 254)                 | 3.91 (-18.9 to 36)                        |
| 5 Lung cancer                 | 5 Diabetes                    | 63 (31.5 to 101)              | 57.4 (24.1 to 94.1)              | -23.7 (-42.2 to -1.11)                    |
| 6 COPD                        | 6 Lung cancer                 | 95.6 (44.4 to 153)            | 88.5 (43 to 133)                 | -4.22 (-21.6 to 15)                       |
| 7 Cirrhosis liver             | 7 Alzheimer's disease         | 336 (240 to 438)              | 320 (226 to 411)                 | 3.52 (-0.219 to 6.83)                     |
| 8 Lower respiratory infect    | 8 Lower respiratory infect    | 135 (106 to 172)              | 127 (100 to 159)                 | -12.6 (-22 to -1.24)                      |
| 9 Self-harm                   | 9 Diarrheal diseases          | 423 (284 to 584)              | 405 (271 to 570)                 | 55.1 (4.82 to 129)                        |
| 10 Breast cancer              | 10 Colorectal cancer          | 110 (39.1 to 187)             | 102 (37.4 to 169)                | -4.17 (-26.7 to 18.2)                     |
| 11 Colorectal cancer          | 11 Prostate cancer            | 214 (128 to 304)              | 202 (125 to 289)                 | -1.86 (-16.7 to 16.5)                     |
| 12 Road injuries              | 12 Cirrhosis liver            | 11.5 (-5.34 to 28.6)          | 7.7 (-9.26 to 25.1)              | -26.2 (-36.2 to -10.6)                    |
| 13 Stomach cancer             | 13 Breast cancer              | 75.6 (26.5 to 136)            | 69.3 (20.8 to 125)               | -6.29 (-25.5 to 16.7)                     |
| 14 Alzheimer's disease        | 14 Pancreatic cancer          | 191 (95.6 to 292)             | 181 (93.1 to 263)                | 36.1 (4.59 to 71.6)                       |
| 15 Tuberculosis               | 15 Bacterial skin             | 307 (172 to 480)              | 293 (162 to 476)                 | 84.8 (21.2 to 180)                        |
| 16 Prostate cancer            | 16 Urinary diseases           | 309 (240 to 384)              | 295 (226 to 369)                 | 47.1 (21 to 79.2)                         |
| 17 Drowning                   | 17 Atrial fibrillation        | 331 (232 to 423)              | 315 (229 to 398)                 | 19.5 (9.16 to 29.6)                       |
| 18 Diarrheal diseases         | 18 Stomach cancer             | 45.5 (20.1 to 69)             | 40.4 (19.4 to 58.4)              | -32.6 (-38.1 to -26.9)                    |
| 19 Cervical cancer            | 19 Hypertensive heart disease | 177 (101 to 280)              | 167 (90.3 to 272)                | 17 (-21.7 to 70.2)                        |
| 20 Pancreatic cancer          | 20 Self-harm                  | -0.114 (-17.1 to 18.1)        | -3.59 (-19.2 to 13.5)            | -15.6 (-30.1 to 1.28)                     |
| 23 Hypertensive heart disease | 22 Road injuries              |                               |                                  |                                           |
| 25 Bacterial skin             | 27 Cervical cancer            |                               |                                  |                                           |
| 26 Urinary diseases           | 30 Tuberculosis               |                               |                                  |                                           |
| 29 Atrial fibrillation        | 40 Drowning                   |                               |                                  |                                           |

### Palau, Reference scenario

**Legend:**

Communicable, maternal, neonatal and nutritional  
Non-communicable  
Injuries

| Leading Causes 2022           | Leading Causes 2050           | Mean % change number of DEATH | Mean % change all-age DEATH rate | Mean % change age-standardized DEATH rate |
|-------------------------------|-------------------------------|-------------------------------|----------------------------------|-------------------------------------------|
| 1 Ischemic heart disease      | 1 Ischemic heart disease      | 6.36 (-25.7 to 48.4)          | 22.4 (-13.4 to 66.2)             | <b>-37.8 (-57.5 to -10.4)</b>             |
| 2 Stroke                      | 2 Stroke                      | 24.4 (-5.71 to 59.2)          | <b>43 (14.9 to 77.6)</b>         | <b>-31.3 (-45.5 to -14.2)</b>             |
| 3 Diabetes                    | 3 Diabetes                    | <b>37.7 (1.82 to 79.8)</b>    | <b>58.5 (22.7 to 102)</b>        | -19.3 (-38.6 to 4.22)                     |
| 4 COPD                        | 4 COPD                        | <b>145 (84.5 to 206)</b>      | <b>182 (118 to 245)</b>          | 2.83 (-20.4 to 35.8)                      |
| 5 Lung cancer                 | 5 Chronic kidney disease      | <b>154 (88.4 to 236)</b>      | <b>193 (124 to 276)</b>          | <b>44.8 (8.45 to 94.1)</b>                |
| 6 Chronic kidney disease      | 6 Lung cancer                 | <b>93.7 (35.5 to 163)</b>     | <b>123 (58.2 to 187)</b>         | 12.7 (-10.1 to 36.6)                      |
| 7 Lower respiratory infect    | 7 Lower respiratory infect    | <b>76.7 (39.7 to 122)</b>     | <b>103 (66 to 145)</b>           | <b>-17.6 (-29.4 to -3.82)</b>             |
| 8 Breast cancer               | 8 Diarrheal diseases          | <b>167 (90.1 to 252)</b>      | <b>207 (126 to 307)</b>          | -1.34 (-32 to 40.5)                       |
| 9 Stomach cancer              | 9 Alzheimer's disease         | <b>238 (147 to 341)</b>       | <b>288 (192 to 398)</b>          | 3.67 (-0.905 to 8.67)                     |
| 10 Cirrhosis liver            | 10 Prostate cancer            | <b>199 (108 to 308)</b>       | <b>244 (143 to 342)</b>          | <b>23.3 (5.35 to 42.2)</b>                |
| 11 Road injuries              | 11 Breast cancer              | 47.9 (-0.233 to 106)          | <b>70.1 (17.7 to 128)</b>        | -11.1 (-32.2 to 11.6)                     |
| 12 Diarrheal diseases         | 12 Lip oral cavity cancer     | <b>60.8 (33.8 to 100)</b>     | <b>85 (60.1 to 114)</b>          | 7.07 (-2.18 to 15.9)                      |
| 13 Asthma                     | 13 Pancreatic cancer          | <b>166 (69 to 281)</b>        | <b>205 (102 to 324)</b>          | 28.8 (-2.84 to 64.3)                      |
| 14 Lip oral cavity cancer     | 14 Colorectal cancer          | <b>71.2 (9.51 to 144)</b>     | <b>96.8 (30.6 to 163)</b>        | -11.9 (-32.7 to 12.5)                     |
| 15 Cervical cancer            | 15 Falls                      | <b>86.4 (36.3 to 142)</b>     | <b>114 (64.3 to 169)</b>         | <b>-19.1 (-27.6 to -9.58)</b>             |
| 16 Self-harm                  | 16 Stomach cancer             | 8.5 (-12.2 to 34.4)           | <b>24.7 (2.85 to 46.8)</b>       | <b>-34 (-39.6 to -27.6)</b>               |
| 17 Colorectal cancer          | 17 Cervical cancer            | 14 (-9.33 to 39.7)            | <b>31.2 (7.45 to 58.8)</b>       | <b>-25.2 (-36.5 to -9.93)</b>             |
| 18 Prostate cancer            | 18 Hypertensive heart disease | <b>91 (34.8 to 158)</b>       | <b>120 (55.4 to 205)</b>         | 6.55 (-26.3 to 53.4)                      |
| 19 Falls                      | 19 Cirrhosis liver            | -16.5 (-32.6 to 2.56)         | -3.9 (-18.4 to 14.6)             | <b>-20.7 (-32.7 to -5.05)</b>             |
| 20 Alzheimer's disease        | 20 Liver cancer               | <b>56.5 (9.27 to 118)</b>     | <b>80.2 (32.2 to 150)</b>        | 37.3 (-1.65 to 92.4)                      |
| 21 Pancreatic cancer          | 21 Road injuries              |                               |                                  |                                           |
| 22 Liver cancer               | 22 Asthma                     |                               |                                  |                                           |
| 25 Hypertensive heart disease | 24 Self-harm                  |                               |                                  |                                           |

### Papua New Guinea, Reference scenario

**Legend:**  
Communicable, maternal, neonatal and nutritional  
Non-communicable  
Injuries

| Leading Causes 2022           | Leading Causes 2050           | Mean % change number of DEATH | Mean % change all-age DEATH rate | Mean % change age-standardized DEATH rate |
|-------------------------------|-------------------------------|-------------------------------|----------------------------------|-------------------------------------------|
| 1 Stroke                      | 1 Stroke                      | 149 (91.4 to 214)             | 23.4 (-4.68 to 49.5)             | -25.5 (-44.1 to -1.99)                    |
| 2 Lower respiratory infect    | 2 Ischemic heart disease      | 157 (65.2 to 281)             | 27.4 (-17 to 86)                 | -18.4 (-49.7 to 25.3)                     |
| 3 Ischemic heart disease      | 3 COPD                        | 153 (85.3 to 230)             | 25.3 (-5.52 to 65)               | -31.6 (-51.7 to -4.29)                    |
| 4 COPD                        | 4 Diabetes                    | 182 (101 to 264)              | 39.7 (4.28 to 80.1)              | -6.63 (-33.4 to 28.4)                     |
| 5 Diabetes                    | 5 Lower respiratory infect    | -17.5 (-34.5 to 0.724)        | -59.2 (-66.7 to -49.9)           | -49.9 (-59.6 to -38.5)                    |
| 6 Neonatal disorders          | 6 Malaria                     | 142 (-83.9 to 482)            | 20.9 (-91.3 to 191)              | 9.43 (-87.6 to 163)                       |
| 7 Malaria                     | 7 Diarrheal diseases          | 33.1 (-13 to 89.9)            | -34.1 (-56.5 to -3.68)           | -36.8 (-62.1 to 0.314)                    |
| 8 Diarrheal diseases          | 8 Chronic kidney disease      | 338 (203 to 486)              | 117 (56.8 to 187)                | 59.6 (8.59 to 126)                        |
| 9 Tuberculosis                | 9 Lung cancer                 | 216 (113 to 333)              | 56 (9.85 to 111)                 | -2.65 (-23.2 to 21.6)                     |
| 10 Congenital defects         | 10 Neonatal disorders         | -30.5 (-60 to 11.3)           | -65.7 (-79.4 to -46.9)           | -51.4 (-69.5 to -26.8)                    |
| 11 COVID-19                   | 11 Road injuries              | 51.7 (-13.4 to 153)           | -24.9 (-56 to 29.6)              | -31.8 (-59.6 to 17.1)                     |
| 12 Road injuries              | 12 Congenital defects         | -6.14 (-26.3 to 19.6)         | -53.6 (-61.7 to -42.7)           | -37.6 (-46.6 to -26.4)                    |
| 13 Asthma                     | 13 Hypertensive heart disease | 189 (94.7 to 302)             | 43 (-0.639 to 103)               | -12.4 (-44.7 to 30.9)                     |
| 14 Pertussis                  | 14 Tuberculosis               | -10.8 (-41.1 to 24.8)         | -55.8 (-70.2 to -35.8)           | -67.2 (-79 to -49.9)                      |
| 15 Rheumatic heart disease    | 15 Alzheimer's disease        | 399 (252 to 611)              | 146 (76.8 to 223)                | 7.78 (3.92 to 11.4)                       |
| 16 Measles                    | 16 Asthma                     | 29.9 (3.26 to 61.2)           | -35.8 (-48 to -21.9)             | -60.2 (-68.7 to -50.3)                    |
| 17 Drowning                   | 17 Breast cancer              | 177 (89.7 to 294)             | 36.8 (-5.2 to 88.2)              | 9.26 (-19.1 to 42.9)                      |
| 18 Lung cancer                | 18 Prostate cancer            | 312 (175 to 469)              | 104 (40.1 to 171)                | 3.72 (-13.2 to 21.3)                      |
| 19 Interpersonal violence     | 19 Stomach cancer             | 97.1 (57.5 to 143)            | -2.55 (-16.7 to 14.3)            | -35.2 (-40.3 to -29.5)                    |
| 20 HIV/AIDS                   | 20 Interpersonal violence     | 44.4 (16.7 to 81.8)           | -28.6 (-39.4 to -14.7)           | -33 (-42.3 to -19.4)                      |
| 21 Hypertensive heart disease | 21 Pertussis                  |                               |                                  |                                           |
| 23 Chronic kidney disease     | 22 Drowning                   |                               |                                  |                                           |
| 24 Stomach cancer             | 24 Rheumatic heart disease    |                               |                                  |                                           |
| 25 Breast cancer              | 29 HIV/AIDS                   |                               |                                  |                                           |
| 29 Alzheimer's disease        | 65 Measles                    |                               |                                  |                                           |
| 34 Prostate cancer            | 132 COVID-19                  |                               |                                  |                                           |

### Samoa, Reference scenario

**Legend:**

Communicable, maternal, neonatal and nutritional  
 Non-communicable  
 Injuries

| Leading Causes 2022          | Leading Causes 2050          | Mean % change number of DEATH | Mean % change all-age DEATH rate | Mean % change age-standardized DEATH rate |
|------------------------------|------------------------------|-------------------------------|----------------------------------|-------------------------------------------|
| 1 Ischemic heart disease     | 1 Ischemic heart disease     | 40 (1.2 to 90.8)              | -4.87 (-31.4 to 29.2)            | -24.8 (-50.8 to 10.7)                     |
| 2 Stroke                     | 2 Stroke                     | 38.8 (10.7 to 69.7)           | -5.73 (-19.9 to 13.4)            | -28 (-43.7 to -6.7)                       |
| 3 Diabetes                   | 3 Diabetes                   | 48.6 (17.1 to 84.2)           | 0.962 (-17.6 to 24.7)            | -18.2 (-36.7 to 7.76)                     |
| 4 Measles                    | 4 Chronic kidney disease     | 194 (123 to 271)              | 99.9 (55.4 to 153)               | 61.4 (16.9 to 119)                        |
| 5 COPD                       | 5 COPD                       | 72 (36.7 to 111)              | 16.8 (-4.58 to 41.9)             | -15.1 (-38.2 to 16)                       |
| 6 Lower respiratory infect   | 6 Lower respiratory infect   | 32.3 (10.6 to 57.4)           | -10.2 (-22.9 to 1.18)            | -25.3 (-36.1 to -12.2)                    |
| 7 Chronic kidney disease     | 7 Hypertensive heart disease | 96.6 (41.7 to 163)            | 33.5 (-0.939 to 80.1)            | 2.42 (-31.8 to 51.4)                      |
| 8 Hypertensive heart disease | 8 HIV/AIDS                   | 619 (271 to 1140)             | 387 (147 to 754)                 | 358 (138 to 703)                          |
| 9 Neonatal disorders         | 9 Alzheimer's disease        | 129 (67.2 to 211)             | 55.6 (17.9 to 101)               | 0.486 (-4.27 to 4.55)                     |
| 10 Road injuries             | 10 Road injuries             | 36.6 (-18 to 128)             | -7.3 (-41.6 to 54.2)             | -15.3 (-46.5 to 39.8)                     |
| 11 Self-harm                 | 11 Self-harm                 | 40.5 (9.3 to 77.2)            | -4.67 (-22.9 to 16.4)            | -12.7 (-28.5 to 6.88)                     |
| 12 Alzheimer's disease       | 12 Breast cancer             | 71.4 (21.6 to 134)            | 16.3 (-16 to 49.9)               | -1.57 (-25.5 to 22.1)                     |
| 13 Cirrhosis liver           | 13 Cirrhosis liver           | 17.4 (-6.02 to 42.3)          | -20.3 (-33.9 to -5.37)           | -28.8 (-40.8 to -14.1)                    |
| 14 Asthma                    | 14 Neonatal disorders        | -23.6 (-51.3 to 15.5)         | -48.2 (-67 to -22.1)             | -38.5 (-59.5 to -11)                      |
| 15 Breast cancer             | 15 Colorectal cancer         | 90.6 (32 to 175)              | 29.4 (-9.65 to 79.5)             | 1.87 (-21.9 to 28.6)                      |
| 16 Stomach cancer            | 16 Endo/metab/blood/immune   | 118 (82.2 to 149)             | 48 (31.5 to 65.3)                | 23.1 (8.59 to 36.7)                       |
| 17 Congenital defects        | 17 Measles                   | -73.7 (-94.6 to 39.5)         | -82.3 (-96.2 to -20)             | -78.9 (-95.4 to -9.96)                    |
| 18 Tuberculosis              | 18 Lung cancer               | 69.2 (26.5 to 126)            | 14.9 (-15.1 to 49.9)             | -6.36 (-25.1 to 13)                       |
| 19 Drowning                  | 19 Diarrheal diseases        | 109 (54.8 to 173)             | 42.3 (2.69 to 91.5)              | 8.04 (-30.5 to 64.2)                      |
| 20 Colorectal cancer         | 20 Prostate cancer           | 149 (83.1 to 245)             | 69.5 (25.2 to 127)               | 19.6 (0.92 to 38.2)                       |
| 21 Lung cancer               | 22 Stomach cancer            |                               |                                  |                                           |
| 22 Endo/metab/blood/immune   | 24 Asthma                    |                               |                                  |                                           |
| 26 Diarrheal diseases        | 29 Drowning                  |                               |                                  |                                           |
| 29 HIV/AIDS                  | 30 Congenital defects        |                               |                                  |                                           |
| 32 Prostate cancer           | 37 Tuberculosis              |                               |                                  |                                           |

### Solomon Islands, Reference scenario

**Legend:**  
 Communicable, maternal, neonatal and nutritional  
 Non-communicable  
 Injuries

| Leading Causes 2022           | Leading Causes 2050           | Mean % change number of DEATH | Mean % change all-age DEATH rate | Mean % change age-standardized DEATH rate |
|-------------------------------|-------------------------------|-------------------------------|----------------------------------|-------------------------------------------|
| 1 Ischemic heart disease      | 1 Ischemic heart disease      | 73.8 (13 to 158)              | 21.1 (-16.3 to 73)               | -20.7 (-51.2 to 21.7)                     |
| 2 Stroke                      | 2 Stroke                      | 64.7 (23.1 to 109)            | 14.7 (-8.71 to 40)               | -27.3 (-45.3 to -4.44)                    |
| 3 Lower respiratory infect    | 3 Diabetes                    | 120 (54.7 to 190)             | 53.3 (16.6 to 98.2)              | 6.23 (-23.9 to 49.4)                      |
| 4 Diabetes                    | 4 Lower respiratory infect    | 26.8 (1.27 to 57.4)           | -11.8 (-25.6 to 2.13)            | -31.4 (-41.6 to -17.8)                    |
| 5 Malaria                     | 5 Malaria                     | 164 (-55 to 369)              | 80.8 (-71.8 to 219)              | 24.2 (-73.8 to 125)                       |
| 6 COPD                        | 6 COPD                        | 91.8 (39.6 to 152)            | 33.5 (4.03 to 66)                | -22 (-43.1 to 8.54)                       |
| 7 Self-harm                   | 7 Chronic kidney disease      | 220 (124 to 337)              | 123 (65.7 to 197)                | 63.5 (15.8 to 129)                        |
| 8 Cirrhosis liver             | 8 HIV/AIDS                    | 623 (280 to 1040)             | 401 (176 to 640)                 | 388 (167 to 617)                          |
| 9 Road injuries               | 9 Lung cancer                 | 152 (75.6 to 254)             | 75 (24.8 to 141)                 | 14.4 (-10.2 to 42.6)                      |
| 10 Neonatal disorders         | 10 Self-harm                  | 36.8 (2.39 to 81.1)           | -4.77 (-23.8 to 22.1)            | -14.1 (-31.4 to 9.5)                      |
| 11 Chronic kidney disease     | 11 Road injuries              | 37.6 (-23.2 to 143)           | -4.11 (-43.2 to 68.1)            | -17.7 (-50.1 to 42.3)                     |
| 12 Drowning                   | 12 Cirrhosis liver            | 19.5 (-7.79 to 49.9)          | -16.8 (-31 to 0.182)             | -36.3 (-48.2 to -21.2)                    |
| 13 Tuberculosis               | 13 Hypertensive heart disease | 113 (42.8 to 195)             | 48.4 (6.67 to 101)               | -7.97 (-40.9 to 36.4)                     |
| 14 Lung cancer                | 14 Alzheimer's disease        | 207 (110 to 326)              | 113 (49 to 182)                  | 14.8 (9.88 to 19.3)                       |
| 15 Congenital defects         | 15 Breast cancer              | 122 (53.2 to 230)             | 54.6 (7.84 to 121)               | 15.8 (-12.6 to 50.6)                      |
| 16 Diarrheal diseases         | 16 Stomach cancer             | 41.3 (14 to 71.7)             | -1.71 (-16.9 to 12.5)            | -32.5 (-37.6 to -26.4)                    |
| 17 Stomach cancer             | 17 Colorectal cancer          | 162 (73.2 to 292)             | 82.2 (20.6 to 172)               | 20 (-10.4 to 56.5)                        |
| 18 Maternal disorders         | 18 Drowning                   | 6.29 (-27.4 to 52.7)          | -26 (-47.4 to 5.75)              | -30.4 (-50.6 to -1.6)                     |
| 19 Hypertensive heart disease | 19 Prostate cancer            | 178 (80.7 to 304)             | 93.3 (29.4 to 168)               | 4.64 (-13.3 to 25.2)                      |
| 20 Asthma                     | 20 Diarrheal diseases         | 3.01 (-29.4 to 48.2)          | -28.3 (-49.3 to -1.21)           | -42 (-64.9 to -8.66)                      |
| 21 Breast cancer              | 24 Neonatal disorders         |                               |                                  |                                           |
| 26 Alzheimer's disease        | 26 Congenital defects         |                               |                                  |                                           |
| 27 Colorectal cancer          | 27 Tuberculosis               |                               |                                  |                                           |
| 30 HIV/AIDS                   | 28 Asthma                     |                               |                                  |                                           |
| 31 Prostate cancer            | 29 Maternal disorders         |                               |                                  |                                           |

### Tokelau, Reference scenario

**Legend:**

Communicable, maternal, neonatal and nutritional  
 Non-communicable  
 Injuries

| Leading Causes 2022           | Leading Causes 2050           | Mean % change number of DEATH | Mean % change all-age DEATH rate | Mean % change age-standardized DEATH rate |
|-------------------------------|-------------------------------|-------------------------------|----------------------------------|-------------------------------------------|
| 1 Ischemic heart disease      | 1 Ischemic heart disease      | -23.3 (-47.2 to 8.97)         | -29.2 (-50.6 to 3.82)            | <b>-49.9 (-66.9 to -22.8)</b>             |
| 2 Stroke                      | 2 Stroke                      | -7.36 (-27 to 16)             | -14.4 (-32.3 to 9.54)            | <b>-39.8 (-54.1 to -16.6)</b>             |
| 3 Diabetes                    | 3 Diabetes                    | 13.9 (-18 to 52)              | 5.23 (-22.5 to 42.7)             | -26.6 (-48 to 4.02)                       |
| 4 Neonatal disorders          | 4 COPD                        | <b>48.8 (13.5 to 88.3)</b>    | <b>37.4 (8.88 to 78.5)</b>       | -5.72 (-31.3 to 30.3)                     |
| 5 COPD                        | 5 Chronic kidney disease      | <b>72.2 (26.9 to 124)</b>     | <b>59.1 (23.5 to 112)</b>        | 14.9 (-18 to 59.9)                        |
| 6 Lower respiratory infect    | 6 Lung cancer                 | <b>85.5 (29.5 to 148)</b>     | <b>71 (22.5 to 120)</b>          | 18.5 (-6.08 to 43.6)                      |
| 7 Chronic kidney disease      | 7 Lower respiratory infect    | 16.1 (-4.18 to 39.4)          | 7.18 (-9.44 to 29.4)             | <b>-24.7 (-37 to -8.75)</b>               |
| 8 Congenital defects          | 8 Alzheimer's disease         | <b>70.4 (31 to 122)</b>       | <b>57.1 (23.2 to 93)</b>         | <b>7.8 (3.67 to 11.8)</b>                 |
| 9 Alzheimer's disease         | 9 Neonatal disorders          | <b>-45.4 (-65.4 to -19.2)</b> | <b>-49.5 (-66.9 to -22.6)</b>    | <b>-41.4 (-61.1 to -15.6)</b>             |
| 10 Lung cancer                | 10 Hypertensive heart disease | <b>49.9 (0.606 to 108)</b>    | 38.6 (-3.54 to 102)              | -2.42 (-35.4 to 46.6)                     |
| 11 Hypertensive heart disease | 11 Breast cancer              | <b>59.3 (12 to 113)</b>       | <b>46.8 (3.97 to 92.8)</b>       | 3.74 (-20.3 to 30)                        |
| 12 Diarrheal diseases         | 12 Prostate cancer            | <b>84.2 (28.9 to 151)</b>     | <b>69.8 (22 to 117)</b>          | 12.3 (-8.42 to 32.3)                      |
| 13 Road injuries              | 13 Colorectal cancer          | <b>77.5 (19.4 to 144)</b>     | <b>63.6 (13.2 to 119)</b>        | 13.8 (-13.4 to 43.4)                      |
| 14 Breast cancer              | 14 Congenital defects         | <b>-43.2 (-53.4 to -29.6)</b> | <b>-47.6 (-55.2 to -35.1)</b>    | <b>-33.9 (-43.5 to -22.2)</b>             |
| 15 Self-harm                  | 15 Cirrhosis liver            | 11.7 (-11.4 to 35.9)          | 3.19 (-16.3 to 26.1)             | -19.3 (-33.9 to 0.523)                    |
| 16 Prostate cancer            | 16 Road injuries              | -16.8 (-49.4 to 41.2)         | -23.2 (-51.5 to 27.9)            | -19 (-49.4 to 43.1)                       |
| 17 Cirrhosis liver            | 17 Atrial fibrillation        | <b>84.2 (44.9 to 139)</b>     | <b>69.8 (35.4 to 111)</b>        | <b>16.5 (4.9 to 28.2)</b>                 |
| 18 Asthma                     | 18 Diarrheal diseases         | -25.1 (-47.1 to 2.58)         | <b>-30.9 (-50.2 to -6.53)</b>    | <b>-50.2 (-65.2 to -25.4)</b>             |
| 19 Stomach cancer             | 19 Self-harm                  | -8.42 (-28.9 to 20.4)         | -15.5 (-34.3 to 9.66)            | -13.7 (-32.9 to 14.8)                     |
| 20 Colorectal cancer          | 20 Endo/metab/blood/immune    | <b>68.2 (44.1 to 95.7)</b>    | <b>55.2 (35.7 to 78.4)</b>       | 15.4 (-0.187 to 32.2)                     |
| 22 Atrial fibrillation        | 21 Stomach cancer             |                               |                                  |                                           |
| 24 Endo/metab/blood/immune    | 26 Asthma                     |                               |                                  |                                           |

### Tonga, Reference scenario

**Legend:**  
Communicable, maternal, neonatal and nutritional  
Non-communicable  
Injuries

| Leading Causes 2022           | Leading Causes 2050           | Mean % change number of DEATH | Mean % change all-age DEATH rate | Mean % change age-standardized DEATH rate |
|-------------------------------|-------------------------------|-------------------------------|----------------------------------|-------------------------------------------|
| 1 Ischemic heart disease      | 1 Ischemic heart disease      | 9.49 (-22.9 to 57)            | -16.1 (-41.9 to 18)              | <b>-36.4 (-57.1 to -6.03)</b>             |
| 2 Diabetes                    | 2 Diabetes                    | <b>32.4 (0.324 to 83.9)</b>   | 1.51 (-23.7 to 34.1)             | -23.5 (-44.6 to 3.45)                     |
| 3 Stroke                      | 3 Stroke                      | 16.9 (-7.41 to 47.7)          | -10.4 (-30.1 to 11.5)            | <b>-35.2 (-50.1 to -15.8)</b>             |
| 4 Lower respiratory infect    | 4 COPD                        | <b>55 (18.8 to 104)</b>       | 18.8 (-6.62 to 50.3)             | -16.6 (-37.9 to 10.3)                     |
| 5 COPD                        | 5 Lower respiratory infect    | <b>23.8 (0.473 to 54)</b>     | -5.17 (-20.5 to 13.8)            | <b>-26.6 (-36.9 to -11.2)</b>             |
| 6 Lung cancer                 | 6 Chronic kidney disease      | <b>168 (95.2 to 264)</b>      | <b>105 (52.9 to 178)</b>         | <b>56.3 (13 to 119)</b>                   |
| 7 Cirrhosis liver             | 7 Lung cancer                 | <b>73.2 (27 to 129)</b>       | 32.5 (-2.7 to 71.5)              | -1.18 (-20.6 to 20.1)                     |
| 8 Alzheimer's disease         | 8 Alzheimer's disease         | <b>105 (48.2 to 166)</b>      | <b>57.3 (15.2 to 102)</b>        | <b>4.74 (0.864 to 9.07)</b>               |
| 9 Liver cancer                | 9 Liver cancer                | <b>86.5 (34.6 to 162)</b>     | <b>42.9 (5.23 to 100)</b>        | 18.4 (-12.2 to 65.7)                      |
| 10 Breast cancer              | 10 Breast cancer              | <b>65.7 (16.9 to 124)</b>     | 26.8 (-10.3 to 67.7)             | 2.7 (-19.1 to 29.3)                       |
| 11 Chronic kidney disease     | 11 Prostate cancer            | <b>108 (50.4 to 171)</b>      | <b>59.5 (15.7 to 110)</b>        | 8.06 (-9.56 to 25.6)                      |
| 12 Neonatal disorders         | 12 Cirrhosis liver            | 14.2 (-7.34 to 38.2)          | -12.5 (-26 to 4.86)              | <b>-24.1 (-35.8 to -9.07)</b>             |
| 13 Stomach cancer             | 13 Stomach cancer             | 13.7 (-8.9 to 38)             | -13 (-26.7 to 1.96)              | <b>-34.1 (-39.3 to -28.7)</b>             |
| 14 Prostate cancer            | 14 Road injuries              | 12.4 (-30.1 to 91)            | -13.8 (-44.3 to 46.8)            | -21.5 (-50 to 32.9)                       |
| 15 Road injuries              | 15 Pancreatic cancer          | <b>160 (83.7 to 256)</b>      | <b>98.9 (41.5 to 159)</b>        | <b>49.3 (14.1 to 88.8)</b>                |
| 16 Upper digest diseases      | 16 Endo/metab/blood/immune    | <b>101 (64.9 to 145)</b>      | <b>53.8 (34.4 to 79.2)</b>       | <b>22.9 (8 to 39.1)</b>                   |
| 17 Asthma                     | 17 Colorectal cancer          | <b>88 (29.7 to 158)</b>       | 43.8 (-1.18 to 94.5)             | 6.76 (-16.4 to 33.8)                      |
| 18 Cervical cancer            | 18 Cervical cancer            | <b>30.6 (2.45 to 66.3)</b>    | 0.0338 (-19.9 to 22.5)           | -18.6 (-32.9 to 1.45)                     |
| 19 Endo/metab/blood/immune    | 19 Hypertensive heart disease | <b>78.2 (24.3 to 153)</b>     | 36.7 (-3.63 to 97.3)             | 2.15 (-30.9 to 49.9)                      |
| 20 Hypertensive heart disease | 20 Neonatal disorders         | -24.2 (-49.1 to 12.4)         | <b>-42 (-58.7 to -16.6)</b>      | -31.3 (-51.5 to 0.0261)                   |
| 22 Colorectal cancer          | 23 Upper digest diseases      |                               |                                  |                                           |
| 25 Pancreatic cancer          | 28 Asthma                     |                               |                                  |                                           |



### Tuvalu, Reference scenario

**Legend:**

Communicable, maternal, neonatal and nutritional  
Non-communicable  
Injuries

| Leading Causes 2022          | Leading Causes 2050          | Mean % change number of DEATH | Mean % change all-age DEATH rate | Mean % change age-standardized DEATH rate |
|------------------------------|------------------------------|-------------------------------|----------------------------------|-------------------------------------------|
| 1 Ischemic heart disease     | 1 Ischemic heart disease     | 27.1 (-12.7 to 76.2)          | -5.05 (-32.3 to 36.5)            | -25.9 (-52.5 to 13.1)                     |
| 2 Stroke                     | 2 Stroke                     | <b>29.4 (0.252 to 57.6)</b>   | -3.42 (-21.6 to 17)              | <b>-25.5 (-43.5 to -2.41)</b>             |
| 3 Diabetes                   | 3 Diabetes                   | <b>35.1 (1.88 to 71.1)</b>    | 0.786 (-20.9 to 27.7)            | -17 (-40.1 to 15.4)                       |
| 4 Lower respiratory infect   | 4 Chronic kidney disease     | <b>149 (89.5 to 216)</b>      | <b>85.6 (43.9 to 143)</b>        | <b>50.2 (11 to 112)</b>                   |
| 5 COPD                       | 5 COPD                       | <b>71 (34.6 to 109)</b>       | <b>27.6 (4.29 to 51.8)</b>       | -4.78 (-29.8 to 29.9)                     |
| 6 Tuberculosis               | 6 Lower respiratory infect   | <b>22.7 (1.84 to 43.8)</b>    | -8.51 (-21.1 to 5.29)            | <b>-25.2 (-36.7 to -10.7)</b>             |
| 7 Chronic kidney disease     | 7 Lung cancer                | <b>93.6 (32.1 to 161)</b>     | <b>44.3 (2.58 to 92.1)</b>       | 18 (-6.59 to 42.6)                        |
| 8 Lung cancer                | 8 Hypertensive heart disease | <b>70.5 (22.6 to 125)</b>     | 27.3 (-6.98 to 73.3)             | -2.87 (-34 to 51.8)                       |
| 9 Hypertensive heart disease | 9 Alzheimer's disease        | <b>127 (59.1 to 208)</b>      | <b>69.1 (18.1 to 124)</b>        | <b>8.1 (2.96 to 13.1)</b>                 |
| 10 Road injuries             | 10 Road injuries             | 10.5 (-34.3 to 79.7)          | -17.5 (-51.7 to 38.2)            | -22.6 (-54.6 to 30.7)                     |
| 11 Self-harm                 | 11 Breast cancer             | <b>69.2 (11.1 to 146)</b>     | 26.1 (-13.3 to 74.1)             | 1.87 (-22.4 to 32.9)                      |
| 12 Cirrhosis liver           | 12 Tuberculosis              | <b>-41.1 (-58.4 to -19.8)</b> | <b>-56 (-68 to -38)</b>          | <b>-62.8 (-73.7 to -45.1)</b>             |
| 13 Neonatal disorders        | 13 Self-harm                 | 20.1 (-4.59 to 50.6)          | -10.5 (-26.3 to 10.9)            | -14.4 (-29.5 to 5.98)                     |
| 14 Alzheimer's disease       | 14 Cirrhosis liver           | 15.1 (-8.54 to 37.2)          | -14.1 (-27.9 to 3.47)            | <b>-27.5 (-39 to -13.3)</b>               |
| 15 Breast cancer             | 15 Prostate cancer           | <b>118 (37.8 to 206)</b>      | <b>62.5 (8.81 to 122)</b>        | 16.5 (-4.34 to 42.1)                      |
| 16 Stomach cancer            | 16 Colorectal cancer         | <b>90.9 (22.1 to 178)</b>     | 42.2 (-7.87 to 94.9)             | 13.1 (-14.5 to 44.5)                      |
| 17 Asthma                    | 17 Stomach cancer            | 11.4 (-9.37 to 35.7)          | <b>-17 (-30.9 to -4.49)</b>      | <b>-32.6 (-37.9 to -27.1)</b>             |
| 18 Diarrheal diseases        | 18 Diarrheal diseases        | 16.3 (-14.7 to 52.4)          | -13.2 (-35.5 to 12)              | -33.2 (-57.6 to 7.85)                     |
| 19 Colorectal cancer         | 19 Endo/metab/blood/immune   | <b>96.9 (69.8 to 130)</b>     | <b>46.8 (28.8 to 67.1)</b>       | <b>19.8 (6.66 to 37.9)</b>                |
| 20 Drowning                  | 20 Atrial fibrillation       | <b>151 (82.4 to 228)</b>      | <b>86.8 (39.8 to 141)</b>        | <b>25.9 (13.6 to 39.1)</b>                |
| 21 Prostate cancer           | 22 Neonatal disorders        |                               |                                  |                                           |
| 28 Endo/metab/blood/immune   | 24 Asthma                    |                               |                                  |                                           |
| 30 Atrial fibrillation       | 28 Drowning                  |                               |                                  |                                           |

### Vanuatu, Reference scenario

**Legend:**  
■ Communicable, maternal, neonatal and nutritional  
■ Non-communicable  
■ Injuries

| Leading Causes 2022           | Leading Causes 2050          | Mean % change number of DEATH | Mean % change all-age DEATH rate | Mean % change age-standardized DEATH rate |
|-------------------------------|------------------------------|-------------------------------|----------------------------------|-------------------------------------------|
| 1 Ischemic heart disease      | 1 Ischemic heart disease     | 67 (17.7 to 132)              | 6.69 (-23.8 to 53)               | -29.6 (-55.4 to 10.2)                     |
| 2 COVID-19                    | 2 Stroke                     | 55.5 (25.8 to 85.9)           | -0.679 (-19.3 to 22)             | <b>-36.4 (-53 to -15.2)</b>               |
| 3 Stroke                      | 3 Diabetes                   | 96.3 (53.1 to 148)            | 25.4 (-3.89 to 59.9)             | -14.8 (-42 to 21.5)                       |
| 4 Diabetes                    | 4 COPD                       | 98.1 (61.8 to 147)            | <b>26.5 (3.23 to 60)</b>         | -25.3 (-45.1 to 1.82)                     |
| 5 Lower respiratory infect    | 5 Chronic kidney disease     | 207 (132 to 295)              | <b>95.8 (51.5 to 154)</b>        | 34.5 (-8 to 89.2)                         |
| 6 COPD                        | 6 Lower respiratory infect   | 15.8 (0.702 to 32.1)          | <b>-26.1 (-35.1 to -17.5)</b>    | <b>-38.3 (-47.8 to -24.4)</b>             |
| 7 Neonatal disorders          | 7 HIV/AIDS                   | 735 (356 to 1220)             | <b>433 (188 to 754)</b>          | <b>409 (172 to 714)</b>                   |
| 8 Road injuries               | 8 Hypertensive heart disease | 137 (70.7 to 210)             | <b>51.2 (12.2 to 104)</b>        | -6.49 (-40.3 to 43.3)                     |
| 9 Chronic kidney disease      | 9 Road injuries              | 26.6 (-25.7 to 112)           | -19.1 (-52.1 to 46.3)            | -27.7 (-57.3 to 30.8)                     |
| 10 Cirrhosis liver            | 10 Self-harm                 | <b>42.5 (12.4 to 80.2)</b>    | -9.02 (-27.3 to 15.5)            | -17.6 (-33.7 to 3.85)                     |
| 11 Self-harm                  | 11 Cirrhosis liver           | 27 (5.14 to 52.5)             | <b>-18.9 (-33.1 to -0.23)</b>    | <b>-37.4 (-48.7 to -21.5)</b>             |
| 12 Hypertensive heart disease | 12 Lung cancer               | 122 (56.1 to 205)             | <b>41.4 (1.42 to 91.7)</b>       | -7.9 (-28.4 to 13.5)                      |
| 13 Diarrheal diseases         | 13 Alzheimer's disease       | 262 (167 to 379)              | <b>130 (70.4 to 204)</b>         | <b>6.55 (2.9 to 10.4)</b>                 |
| 14 Tuberculosis               | 14 Diarrheal diseases        | 58.2 (10.8 to 106)            | 0.979 (-27.3 to 34)              | -26.5 (-54 to 16.3)                       |
| 15 Asthma                     | 15 Breast cancer             | 139 (62.4 to 233)             | <b>52.6 (7.87 to 108)</b>        | 10.1 (-18.1 to 39.5)                      |
| 16 Lung cancer                | 16 Colorectal cancer         | 162 (71.2 to 270)             | <b>66.9 (11.2 to 132)</b>        | 9.83 (-18 to 41)                          |
| 17 Drowning                   | 17 Neonatal disorders        | <b>-42 (-64.2 to -9.59)</b>   | <b>-63 (-77.1 to -44.5)</b>      | <b>-48.1 (-66.8 to -21.8)</b>             |
| 18 Rheumatic heart disease    | 18 Stomach cancer            | 48 (23.9 to 73.7)             | -5.63 (-18.6 to 7.8)             | <b>-35.8 (-41.4 to -30.6)</b>             |
| 19 Stomach cancer             | 19 Prostate cancer           | 190 (98.1 to 307)             | <b>85 (31.2 to 156)</b>          | -1.41 (-15.3 to 16.1)                     |
| 20 Congenital defects         | 20 Asthma                    | -3.43 (-19.9 to 20.4)         | <b>-38.4 (-49.4 to -23.5)</b>    | <b>-59 (-66.8 to -47.2)</b>               |
| 22 Breast cancer              | 21 Drowning                  |                               |                                  |                                           |
| 23 Alzheimer's disease        | 25 Tuberculosis              |                               |                                  |                                           |
| 24 Colorectal cancer          | 27 Rheumatic heart disease   |                               |                                  |                                           |
| 26 Prostate cancer            | 28 Congenital defects        |                               |                                  |                                           |
| 27 HIV/AIDS                   | 130 COVID-19                 |                               |                                  |                                           |

### Cambodia, Reference scenario

**Legend:**

Communicable, maternal, neonatal and nutritional  
 Non-communicable  
 Injuries

| Leading Causes 2022          | Leading Causes 2050          | Mean % change number of DEATH | Mean % change all-age DEATH rate | Mean % change age-standardized DEATH rate |
|------------------------------|------------------------------|-------------------------------|----------------------------------|-------------------------------------------|
| 1 Stroke                     | 1 Stroke                     | 49.6 (15.4 to 92.4)           | 19.2 (-2.31 to 43.5)             | -39.9 (-53.7 to -23.8)                    |
| 2 Lower respiratory infect   | 2 Lower respiratory infect   | 28.7 (2.21 to 62.6)           | 2.49 (-14.8 to 21.1)             | -41.3 (-49.8 to -30.7)                    |
| 3 Ischemic heart disease     | 3 Ischemic heart disease     | 37.9 (-6.42 to 94.2)          | 9.98 (-21.6 to 48.2)             | -42.7 (-62.1 to -13.3)                    |
| 4 Cirrhosis liver            | 4 Cirrhosis liver            | 87.8 (51.4 to 126)            | 49.7 (26 to 76.1)                | -5.72 (-19.2 to 11.1)                     |
| 5 Tuberculosis               | 5 Chronic kidney disease     | 188 (115 to 283)              | 129 (79.6 to 190)                | 33.8 (-0.0973 to 81.4)                    |
| 6 COPD                       | 6 COPD                       | 92.8 (44 to 151)              | 53.6 (20.6 to 89.7)              | -27.5 (-45.6 to -5.5)                     |
| 7 Neonatal disorders         | 7 Hypertensive heart disease | 134 (61.9 to 228)             | 86.7 (36.8 to 147)               | -7.89 (-36.4 to 33.5)                     |
| 8 Diabetes                   | 8 Diabetes                   | 80.2 (32 to 137)              | 43.6 (9.22 to 78.3)              | -19.9 (-40.7 to 3.85)                     |
| 9 Hypertensive heart disease | 9 Lung cancer                | 126 (60 to 203)               | 79.6 (34.5 to 131)               | 0.888 (-19.5 to 23.2)                     |
| 10 Lung cancer               | 10 Alzheimer's disease       | 251 (152 to 364)              | 179 (114 to 263)                 | 8.86 (4.72 to 12.8)                       |
| 11 Road injuries             | 11 Falls                     | 113 (62 to 181)               | 69.7 (37.7 to 108)               | -6.18 (-16.1 to 4.76)                     |
| 12 Chronic kidney disease    | 12 Colorectal cancer         | 180 (89.7 to 290)             | 123 (55.4 to 204)                | 25.5 (-4.75 to 57.4)                      |
| 13 Upper digest diseases     | 13 Tuberculosis              | -36.4 (-55.7 to -10.1)        | -49.3 (-63.1 to -28.9)           | -68.9 (-79.3 to -53.5)                    |
| 14 Falls                     | 14 Breast cancer             | 132 (59.5 to 206)             | 84.4 (36.6 to 132)               | 15 (-10.8 to 43.1)                        |
| 15 Congenital defects        | 15 Road injuries             | 13.6 (-21 to 59.2)            | -9.4 (-36 to 32.1)               | -24 (-47.6 to 12.9)                       |
| 16 Colorectal cancer         | 16 Upper digest diseases     | 18.6 (-7.14 to 54.1)          | -5.48 (-23.3 to 17)              | -49.1 (-59.6 to -35.3)                    |
| 17 Alzheimer's disease       | 17 Liver cancer              | 167 (93.7 to 259)             | 113 (62.6 to 183)                | 22.2 (-9.32 to 67)                        |
| 18 Breast cancer             | 18 Stomach cancer            | 49.1 (22.6 to 84.7)           | 18.8 (2.64 to 37.7)              | -32.5 (-37.5 to -26.3)                    |
| 19 Stomach cancer            | 19 Pancreatic cancer         | 299 (171 to 453)              | 218 (128 to 327)                 | 79.2 (36.6 to 129)                        |
| 20 Asthma                    | 20 Ileus & obstruction       | 78.6 (34.9 to 129)            | 42.3 (10.1 to 75.8)              | -13.3 (-29.4 to 8.09)                     |
| 24 Ileus & obstruction       | 25 Neonatal disorders        |                               |                                  |                                           |
| 25 Liver cancer              | 28 Congenital defects        |                               |                                  |                                           |
| 38 Pancreatic cancer         | 30 Asthma                    |                               |                                  |                                           |

### Indonesia, Reference scenario

**Legend:**

Communicable, maternal, neonatal and nutritional  
Non-communicable  
Injuries

| Leading Causes 2022            | Leading Causes 2050            | Mean % change number of DEATH | Mean % change all-age DEATH rate | Mean % change age-standardized DEATH rate |
|--------------------------------|--------------------------------|-------------------------------|----------------------------------|-------------------------------------------|
| 1 Stroke                       | 1 Stroke                       | 43 (19.2 to 72.4)             | 28 (6.95 to 55.3)                | -49.7 (-58.9 to -38)                      |
| 2 Ischemic heart disease       | 2 Ischemic heart disease       | 21.6 (-12.4 to 55.4)          | 8.93 (-20.7 to 44.1)             | -54.4 (-68.4 to -34.9)                    |
| 3 Cirrhosis liver              | 3 COPD                         | 167 (114 to 233)              | 139 (93.9 to 199)                | -14 (-32.6 to 10.8)                       |
| 4 COPD                         | 4 Hypertensive heart disease   | 178 (102 to 264)              | 149 (82.1 to 232)                | -6.01 (-35.4 to 33.3)                     |
| 5 Tuberculosis                 | 5 Cirrhosis liver              | 61.5 (36.8 to 84.7)           | 44.5 (28.5 to 63.4)              | -27.4 (-35.3 to -17.5)                    |
| 6 COVID-19                     | 6 Chronic kidney disease       | 163 (105 to 225)              | 136 (88.3 to 200)                | 18.1 (-10 to 56.6)                        |
| 7 Diabetes                     | 7 Lung cancer                  | 141 (78.5 to 216)             | 115 (63.9 to 171)                | 0.671 (-18.1 to 20.5)                     |
| 8 Hypertensive heart disease   | 8 Diabetes                     | 85.3 (45.8 to 130)            | 65.9 (34.8 to 107)               | -25.8 (-42.7 to -4.99)                    |
| 9 Lung cancer                  | 9 Alzheimer's disease          | 349 (248 to 493)              | 301 (219 to 415)                 | 2.9 (-1.75 to 7.7)                        |
| 10 Chronic kidney disease      | 10 Diarrheal diseases          | 109 (41.6 to 205)             | 87.5 (25.7 to 175)               | -30.6 (-53.5 to 5.22)                     |
| 11 Diarrheal diseases          | 11 Lower respiratory infect    | 118 (85.4 to 162)             | 95 (69.4 to 127)                 | -24.6 (-34.4 to -13.7)                    |
| 12 Lower respiratory infect    | 12 Tuberculosis                | -9.28 (-34.4 to 17.4)         | -18.7 (-39.4 to 6.45)            | -60.6 (-72.2 to -44.3)                    |
| 13 Road injuries               | 13 Colorectal cancer           | 151 (74.5 to 241)             | 124 (61.5 to 200)                | 2.72 (-20.9 to 27.9)                      |
| 14 Neonatal disorders          | 14 Protein-energy malnutrition | 196 (93.4 to 340)             | 165 (78.7 to 290)                | -18.7 (-53.3 to 43.9)                     |
| 15 Colorectal cancer           | 15 Breast cancer               | 94.4 (42.1 to 160)            | 73.6 (29 to 127)                 | 1.3 (-20.5 to 24.3)                       |
| 16 Asthma                      | 16 Falls                       | 140 (86.2 to 206)             | 115 (69.8 to 160)                | -12.7 (-20.6 to -2.28)                    |
| 17 Breast cancer               | 17 Road injuries               | 3.75 (-23.8 to 43.9)          | -7.06 (-32.4 to 28.3)            | -23.1 (-46.3 to 5.68)                     |
| 18 Alzheimer's disease         | 18 Ileus & obstruction         | 165 (118 to 238)              | 138 (95.5 to 204)                | -3.43 (-21.7 to 18.4)                     |
| 19 Falls                       | 19 Atrial fibrillation         | 404 (288 to 591)              | 350 (246 to 477)                 | 12.9 (0.84 to 24)                         |
| 20 Protein-energy malnutrition | 20 Prostate cancer             | 265 (168 to 380)              | 226 (145 to 317)                 | 10.7 (-6.59 to 28.6)                      |
| 22 Ileus & obstruction         | 25 Asthma                      |                               |                                  |                                           |
| 27 Prostate cancer             | 31 Neonatal disorders          |                               |                                  |                                           |
| 34 Atrial fibrillation         | 133 COVID-19                   |                               |                                  |                                           |

### Laos, Reference scenario

**Legend:**

Communicable, maternal, neonatal and nutritional  
Non-communicable  
Injuries

| Leading Causes 2022           | Leading Causes 2050          | Mean % change number of DEATH | Mean % change all-age DEATH rate | Mean % change age-standardized DEATH rate |
|-------------------------------|------------------------------|-------------------------------|----------------------------------|-------------------------------------------|
| 1 Stroke                      | 1 Stroke                     | 45.1 (15.4 to 84.8)           | 13.6 (-9.89 to 37.7)             | -49.3 (-61.5 to -34.7)                    |
| 2 Ischemic heart disease      | 2 Ischemic heart disease     | 38.5 (-2.65 to 90.6)          | 8.45 (-23.7 to 46.5)             | -51.2 (-67.4 to -27)                      |
| 3 COVID-19                    | 3 Chronic kidney disease     | 207 (134 to 306)              | 141 (79.7 to 209)                | 20 (-11 to 59.2)                          |
| 4 Lower respiratory infect    | 4 COPD                       | 137 (88.8 to 193)             | 85.8 (45.3 to 126)               | -24.9 (-43.5 to -4.6)                     |
| 5 Neonatal disorders          | 5 Lower respiratory infect   | 24.6 (0.822 to 61.8)          | -2.49 (-19.4 to 23)              | -43.6 (-51.7 to -33.8)                    |
| 6 COPD                        | 6 Hypertensive heart disease | 167 (86.9 to 273)             | 109 (47.2 to 184)                | -12 (-41.8 to 29.4)                       |
| 7 Chronic kidney disease      | 7 Lung cancer                | 180 (100 to 264)              | 119 (62.6 to 182)                | 3.32 (-17.9 to 25.1)                      |
| 8 Tuberculosis                | 8 Diabetes                   | 70.1 (24.1 to 120)            | 33.3 (-2.4 to 73)                | -36.9 (-54.8 to -15.5)                    |
| 9 Diabetes                    | 9 Cirrhosis liver            | 73.9 (46 to 109)              | 36.2 (14.1 to 61)                | -23.6 (-35 to -9.7)                       |
| 10 Cirrhosis liver            | 10 Alzheimer's disease       | 314 (199 to 429)              | 224 (148 to 300)                 | 8.12 (4.66 to 11.9)                       |
| 11 Hypertensive heart disease | 11 Colorectal cancer         | 221 (118 to 339)              | 151 (76.1 to 240)                | 21 (-7.98 to 55.8)                        |
| 12 Congenital defects         | 12 Breast cancer             | 162 (86.9 to 240)             | 105 (51.1 to 159)                | 15.2 (-11.5 to 45.2)                      |
| 13 Road injuries              | 13 Road injuries             | 11 (-27 to 67.6)              | -13.1 (-42 to 28.9)              | -27.4 (-51.9 to 11.2)                     |
| 14 Lung cancer                | 14 Tuberculosis              | -31.4 (-53.1 to -1.91)        | -46.2 (-63.3 to -25.4)           | -70 (-79.7 to -56)                        |
| 15 Diarrheal diseases         | 15 Falls                     | 119 (76.7 to 170)             | 71.4 (40.8 to 102)               | -8.34 (-16.5 to 0.0707)                   |
| 16 Asthma                     | 16 Liver cancer              | 175 (97.7 to 270)             | 116 (52.8 to 184)                | 10.2 (-24.6 to 50.5)                      |
| 17 Upper digest diseases      | 17 Upper digest diseases     | 41.7 (9.36 to 81.9)           | 10.9 (-13.8 to 37.5)             | -48.8 (-60.1 to -35.2)                    |
| 18 Colorectal cancer          | 18 Neonatal disorders        | -74 (-82.6 to -61.4)          | -79.7 (-85.9 to -70.6)           | -61.4 (-72.8 to -46.6)                    |
| 19 Interpersonal violence     | 19 Pancreatic cancer         | 386 (237 to 552)              | 280 (166 to 398)                 | 82 (41.3 to 133)                          |
| 20 Alzheimer's disease        | 20 Stomach cancer            | 77.9 (46.8 to 112)            | 39.2 (19 to 60.4)                | -32.2 (-37 to -26.7)                      |
| 21 Breast cancer              | 21 Asthma                    |                               |                                  |                                           |
| 22 Falls                      | 27 Congenital defects        |                               |                                  |                                           |
| 25 Stomach cancer             | 28 Diarrheal diseases        |                               |                                  |                                           |
| 26 Liver cancer               | 29 Interpersonal violence    |                               |                                  |                                           |
| 42 Pancreatic cancer          | 133 COVID-19                 |                               |                                  |                                           |

### Malaysia, Reference scenario

**Legend:**  
Communicable, maternal, neonatal and nutritional  
Non-communicable  
Injuries

| Leading Causes 2022           | Leading Causes 2050           | Mean % change number of DEATH | Mean % change all-age DEATH rate | Mean % change age-standardized DEATH rate |
|-------------------------------|-------------------------------|-------------------------------|----------------------------------|-------------------------------------------|
| 1 Ischemic heart disease      | 1 Lower respiratory infect    | 114 (82.3 to 145)             | 75.9 (55.4 to 97.5)              | -21.8 (-34 to -8.48)                      |
| 2 Stroke                      | 2 Ischemic heart disease      | 3.38 (-25.9 to 41.7)          | -14.9 (-38 to 15.3)              | -59.3 (-71.6 to -41.2)                    |
| 3 Lower respiratory infect    | 3 Stroke                      | 33 (8.47 to 64.5)             | 9.55 (-10.9 to 33.3)             | -49 (-59.7 to -35.1)                      |
| 4 COVID-19                    | 4 Chronic kidney disease      | 168 (105 to 246)              | 120 (71.6 to 179)                | 9.12 (-16.5 to 43.1)                      |
| 5 Chronic kidney disease      | 5 Alzheimer's disease         | 270 (200 to 356)              | 205 (153 to 255)                 | 5.15 (1.37 to 9.03)                       |
| 6 Road injuries               | 6 COPD                        | 130 (83.7 to 195)             | 89.2 (49.2 to 134)               | -17.4 (-36.9 to 8.84)                     |
| 7 COPD                        | 7 Colorectal cancer           | 160 (86 to 256)               | 114 (56.6 to 183)                | 7.49 (-16 to 34.2)                        |
| 8 Diabetes                    | 8 Lung cancer                 | 147 (87.5 to 219)             | 103 (58.1 to 159)                | 6.35 (-13.1 to 29.9)                      |
| 9 Lung cancer                 | 9 Road injuries               | 24.9 (-10.8 to 80.5)          | 2.86 (-26.3 to 47.6)             | -18.6 (-42 to 20.3)                       |
| 10 Cirrhosis liver            | 10 Cirrhosis liver            | 81.5 (53.2 to 119)            | 49.5 (26.1 to 74.2)              | -15.1 (-27.7 to 0.483)                    |
| 11 Colorectal cancer          | 11 Breast cancer              | 115 (61.7 to 181)             | 77.1 (34.8 to 123)               | 3.55 (-18.8 to 27.9)                      |
| 12 Alzheimer's disease        | 12 Diabetes                   | 51.5 (18.2 to 94.3)           | 24.8 (-1.15 to 54.3)             | -37.3 (-51.8 to -18.4)                    |
| 13 Breast cancer              | 13 Urinary diseases           | 202 (147 to 256)              | 148 (112 to 188)                 | 10.3 (-0.956 to 25.7)                     |
| 14 Urinary diseases           | 14 Liver cancer               | 161 (97.8 to 256)             | 115 (61.8 to 190)                | 17.8 (-14.1 to 63.2)                      |
| 15 Tuberculosis               | 15 Atrial fibrillation        | 316 (244 to 405)              | 243 (191 to 313)                 | 15.1 (3.51 to 28.2)                       |
| 16 HIV/AIDS                   | 16 Hypertensive heart disease | 152 (87 to 247)               | 107 (50.9 to 190)                | -3.8 (-31.4 to 41.3)                      |
| 17 Stomach cancer             | 17 Prostate cancer            | 195 (128 to 275)              | 143 (93.8 to 203)                | 5.96 (-9.63 to 20.6)                      |
| 18 Self-harm                  | 18 Falls                      | 117 (79.9 to 157)             | 78.7 (55.6 to 105)               | -10.6 (-18 to -2.38)                      |
| 19 Liver cancer               | 19 Decubitus ulcer            | 167 (61.2 to 303)             | 119 (29.6 to 220)                | -9.2 (-38.8 to 23.3)                      |
| 20 Falls                      | 20 Parkinson's disease        | 210 (161 to 260)              | 155 (126 to 183)                 | 3.87 (-5.7 to 14)                         |
| 21 Hypertensive heart disease | 26 Stomach cancer             |                               |                                  |                                           |
| 25 Decubitus ulcer            | 32 Self-harm                  |                               |                                  |                                           |
| 27 Prostate cancer            | 38 HIV/AIDS                   |                               |                                  |                                           |
| 31 Parkinson's disease        | 39 Tuberculosis               |                               |                                  |                                           |
| 37 Atrial fibrillation        | 131 COVID-19                  |                               |                                  |                                           |

### Maldives, Reference scenario

**Legend:**  
Communicable, maternal, neonatal and nutritional  
Non-communicable  
Injuries

| Leading Causes 2022           | Leading Causes 2050          | Mean % change number of DEATH | Mean % change all-age DEATH rate | Mean % change age-standardized DEATH rate |
|-------------------------------|------------------------------|-------------------------------|----------------------------------|-------------------------------------------|
| 1 Ischemic heart disease      | 1 Stroke                     | 170 (113 to 235)              | 79.7 (41.7 to 125)               | -48.3 (-60.8 to -30.2)                    |
| 2 Stroke                      | 2 Ischemic heart disease     | 147 (70.5 to 252)             | 64.9 (12.7 to 135)               | -51 (-68 to -24.5)                        |
| 3 COPD                        | 3 Chronic kidney disease     | 408 (275 to 543)              | 238 (153 to 332)                 | 6.96 (-20.1 to 45.4)                      |
| 4 Chronic kidney disease      | 4 COPD                       | 390 (274 to 502)              | 226 (149 to 311)                 | -14.7 (-39.1 to 15.4)                     |
| 5 COVID-19                    | 5 Alzheimer's disease        | 474 (360 to 597)              | 282 (210 to 347)                 | -5.81 (-9.23 to -2.26)                    |
| 6 Diabetes                    | 6 Diabetes                   | 230 (149 to 320)              | 120 (66.9 to 180)                | -33.7 (-50.5 to -11.4)                    |
| 7 Lower respiratory infect    | 7 Lower respiratory infect   | 224 (169 to 276)              | 116 (85.7 to 143)                | -35.7 (-45.3 to -22.4)                    |
| 8 Alzheimer's disease         | 8 Lung cancer                | 437 (284 to 620)              | 256 (163 to 361)                 | 4.48 (-16.8 to 31.6)                      |
| 9 Neonatal disorders          | 9 Hypertensive heart disease | 332 (198 to 504)              | 188 (98.2 to 304)                | -20 (-46.4 to 22.7)                       |
| 10 Cirrhosis liver            | 10 Liver cancer              | 457 (319 to 656)              | 271 (169 to 407)                 | 13.2 (-19.4 to 58)                        |
| 11 Hypertensive heart disease | 11 Endo/metab/blood/immune   | 332 (205 to 426)              | 187 (103 to 241)                 | 7.79 (-5.56 to 26.4)                      |
| 12 Lung cancer                | 12 Cirrhosis liver           | 126 (76.4 to 179)             | 50.7 (22.4 to 82.9)              | -38.5 (-48.5 to -25.4)                    |
| 13 Tuberculosis               | 13 Colorectal cancer         | 398 (234 to 610)              | 231 (121 to 361)                 | 2.37 (-24.9 to 33.7)                      |
| 14 Endo/metab/blood/immune    | 14 Atrial fibrillation       | 560 (409 to 718)              | 339 (251 to 425)                 | 9.5 (-3.18 to 21.9)                       |
| 15 Falls                      | 15 Prostate cancer           | 570 (387 to 760)              | 345 (241 to 447)                 | 13.3 (-7.25 to 32.5)                      |
| 16 Congenital defects         | 16 Urinary diseases          | 510 (383 to 630)              | 306 (227 to 377)                 | 18.4 (-6.21 to 54)                        |
| 17 Drowning                   | 17 Parkinson's disease       | 439 (358 to 532)              | 259 (217 to 313)                 | -8.59 (-18.3 to 1.66)                     |
| 18 Liver cancer               | 18 Falls                     | 202 (94.2 to 276)             | 101 (31.4 to 147)                | -21.6 (-31.5 to -14)                      |
| 19 Breast cancer              | 19 Interstitial lung disease | 349 (259 to 444)              | 199 (140 to 253)                 | -5.66 (-15.7 to 6.14)                     |
| 20 Road injuries              | 20 Pancreatic cancer         | 644 (410 to 903)              | 394 (239 to 542)                 | 50.1 (9.39 to 89.7)                       |
| 21 Colorectal cancer          | 21 Breast cancer             |                               |                                  |                                           |
| 25 Interstitial lung disease  | 28 Tuberculosis              |                               |                                  |                                           |
| 26 Parkinson's disease        | 35 Neonatal disorders        |                               |                                  |                                           |
| 27 Atrial fibrillation        | 38 Road injuries             |                               |                                  |                                           |
| 28 Urinary diseases           | 43 Drowning                  |                               |                                  |                                           |
| 31 Prostate cancer            | 48 Congenital defects        |                               |                                  |                                           |
| 39 Pancreatic cancer          | 129 COVID-19                 |                               |                                  |                                           |

### Mauritius, Reference scenario

**Legend:**  
Communicable, maternal, neonatal and nutritional  
Non-communicable  
Injuries

| Leading Causes 2022          | Leading Causes 2050          | Mean % change number of DEATH | Mean % change all-age DEATH rate | Mean % change age-standardized DEATH rate |
|------------------------------|------------------------------|-------------------------------|----------------------------------|-------------------------------------------|
| 1 Diabetes                   | 1 Chronic kidney disease     | <b>80.6 (42.8 to 132)</b>     | <b>110 (70.1 to 151)</b>         | 1.87 (-20.4 to 28.6)                      |
| 2 Ischemic heart disease     | 2 Diabetes                   | 15.8 (-6.11 to 44.2)          | <b>34.6 (8.8 to 60)</b>          | <b>-34.5 (-47.8 to -18.2)</b>             |
| 3 Chronic kidney disease     | 3 Ischemic heart disease     | -9.8 (-31.4 to 19.3)          | 4.93 (-20.9 to 36)               | <b>-58.5 (-71.3 to -40.8)</b>             |
| 4 Stroke                     | 4 Stroke                     | -13.1 (-27.6 to 4.72)         | 1.06 (-15.1 to 19.6)             | <b>-55.7 (-63 to -46.2)</b>               |
| 5 Hypertensive heart disease | 5 Alzheimer's disease        | <b>204 (139 to 265)</b>       | <b>253 (194 to 308)</b>          | <b>-4.43 (-7.6 to -0.998)</b>             |
| 6 Lower respiratory infect   | 6 Hypertensive heart disease | <b>90.2 (42.2 to 165)</b>     | <b>121 (64.2 to 205)</b>         | -14.7 (-39.5 to 25.7)                     |
| 7 Alzheimer's disease        | 7 Lower respiratory infect   | <b>91.7 (62.5 to 125)</b>     | <b>123 (95.7 to 150)</b>         | <b>-19.1 (-28.7 to -7.75)</b>             |
| 8 COPD                       | 8 COPD                       | <b>130 (90.7 to 183)</b>      | <b>168 (124 to 216)</b>          | -9.6 (-27.9 to 15.1)                      |
| 9 Colorectal cancer          | 9 Colorectal cancer          | <b>71.9 (24.5 to 128)</b>     | <b>99.5 (50.4 to 155)</b>        | -1.54 (-22 to 22.5)                       |
| 10 Breast cancer             | 10 Interstitial lung disease | <b>104 (69.3 to 144)</b>      | <b>137 (108 to 166)</b>          | -4.72 (-11.9 to 4.33)                     |
| 11 Cirrhosis liver           | 11 Lung cancer               | <b>68.7 (30.6 to 114)</b>     | <b>96 (53.1 to 142)</b>          | 2.85 (-14.6 to 21.2)                      |
| 12 Road injuries             | 12 Breast cancer             | <b>35.4 (4.19 to 72)</b>      | <b>57.2 (28.2 to 96.5)</b>       | -7.26 (-23.6 to 12.3)                     |
| 13 Lung cancer               | 13 Prostate cancer           | <b>121 (73.2 to 181)</b>      | <b>157 (109 to 213)</b>          | 2.12 (-9.73 to 16.7)                      |
| 14 Stomach cancer            | 14 Atrial fibrillation       | <b>215 (159 to 278)</b>       | <b>266 (213 to 332)</b>          | -3.07 (-12.2 to 6.31)                     |
| 15 Interstitial lung disease | 15 Pancreatic cancer         | <b>123 (62.8 to 189)</b>      | <b>159 (96 to 229)</b>           | <b>38.1 (8.3 to 68.7)</b>                 |
| 16 Self-harm                 | 16 Cirrhosis liver           | -6.7 (-20.3 to 11)            | 8.49 (-4.73 to 21)               | <b>-26.7 (-36.4 to -17)</b>               |
| 17 Prostate cancer           | 17 Stomach cancer            | 2.57 (-14.3 to 20.3)          | <b>19.2 (5.74 to 31.4)</b>       | <b>-38.9 (-43.3 to -34.5)</b>             |
| 18 Asthma                    | 18 Urinary diseases          | <b>169 (120 to 222)</b>       | <b>213 (169 to 260)</b>          | <b>20.3 (2.08 to 43)</b>                  |
| 19 COVID-19                  | 19 Parkinson's disease       | <b>128 (88.4 to 168)</b>      | <b>165 (135 to 200)</b>          | -8.56 (-15.7 to 0.656)                    |
| 20 Pancreatic cancer         | 20 Road injuries             | <b>-23.8 (-44.5 to 3.64)</b>  | <b>-11.3 (-32.4 to 18.8)</b>     | <b>-19.1 (-40.5 to 8.91)</b>              |
| 23 Atrial fibrillation       | 22 Self-harm                 |                               |                                  |                                           |
| 25 Parkinson's disease       | 25 Asthma                    |                               |                                  |                                           |
| 28 Urinary diseases          | 132 COVID-19                 |                               |                                  |                                           |



### Myanmar, Reference scenario

**Legend:**  
Communicable, maternal, neonatal and nutritional  
Non-communicable  
Injuries

| Leading Causes 2022          | Leading Causes 2050          | Mean % change number of DEATH | Mean % change all-age DEATH rate | Mean % change age-standardized DEATH rate |
|------------------------------|------------------------------|-------------------------------|----------------------------------|-------------------------------------------|
| 1 Stroke                     | 1 Stroke                     | 25.2 (-3.01 to 60.1)          | 11.8 (-10.3 to 35.3)             | -43.3 (-57.2 to -27)                      |
| 2 Ischemic heart disease     | 2 COPD                       | 74.4 (28.4 to 123)            | 55.7 (17.6 to 91.2)              | -30 (-48.9 to -6)                         |
| 3 COPD                       | 3 Ischemic heart disease     | 22.6 (-16.3 to 69.4)          | 9.45 (-20.9 to 46.5)             | -45.9 (-64.8 to -18.7)                    |
| 4 Diabetes                   | 4 Diabetes                   | 38.2 (1.72 to 82.1)           | 23.3 (-5.76 to 53.2)             | -34.3 (-51.7 to -13.4)                    |
| 5 Lower respiratory infect   | 5 Chronic kidney disease     | 156 (87.9 to 234)             | 129 (73.6 to 189)                | 27.6 (-8.63 to 71.7)                      |
| 6 Tuberculosis               | 6 Hypertensive heart disease | 122 (55.7 to 209)             | 98.6 (39 to 167)                 | -2.77 (-35.1 to 40.2)                     |
| 7 Neonatal disorders         | 7 Lower respiratory infect   | 12.3 (-9.6 to 37.6)           | 0.24 (-15.2 to 17)               | -41.7 (-49.9 to -32)                      |
| 8 Cirrhosis liver            | 8 Cirrhosis liver            | 80.1 (45.6 to 120)            | 60.9 (34.7 to 85.8)              | 20.2 (0.658 to 40.5)                      |
| 9 Hypertensive heart disease | 9 Alzheimer's disease        | 206 (115 to 309)              | 173 (101 to 260)                 | 3.73 (-0.489 to 8.09)                     |
| 10 Chronic kidney disease    | 10 Lung cancer               | 74.8 (23.9 to 132)            | 56 (15.2 to 108)                 | -12.9 (-28 to 8.18)                       |
| 11 Asthma                    | 11 Colorectal cancer         | 120 (47.5 to 207)             | 96 (34.4 to 170)                 | 8.53 (-19.3 to 35.9)                      |
| 12 Lung cancer               | 12 Falls                     | 90.1 (49.6 to 140)            | 69.6 (36.5 to 107)               | -6.88 (-15.1 to 1.64)                     |
| 13 Congenital defects        | 13 Tuberculosis              | -35.1 (-54.6 to -9.66)        | -42 (-58.3 to -20.3)             | -64.9 (-76.2 to -48.2)                    |
| 14 Road injuries             | 14 Breast cancer             | 75.6 (29.7 to 136)            | 56.8 (14.5 to 105)               | 2.95 (-19.7 to 29.9)                      |
| 15 Alzheimer's disease       | 15 Asthma                    | -14.1 (-32.3 to 9.5)          | -23.3 (-36.6 to -9.67)           | -61.6 (-68.5 to -53)                      |
| 16 Falls                     | 16 Road injuries             | 7.1 (-25 to 52.2)             | -4.36 (-32.4 to 39.6)            | -16.1 (-40.9 to 24.1)                     |
| 17 Alcohol use disorders     | 17 Alcohol use disorders     | 30.1 (-3.26 to 65.6)          | 16.2 (-12.8 to 45.1)             | -4.45 (-27.4 to 20.6)                     |
| 18 Colorectal cancer         | 18 Atrial fibrillation       | 276 (164 to 410)              | 235 (142 to 334)                 | 26.8 (14.6 to 40.4)                       |
| 19 Breast cancer             | 19 Neonatal disorders        | -60.5 (-72.5 to -42)          | -64.8 (-75.5 to -49.3)           | -43.9 (-61 to -20)                        |
| 20 Diarrheal diseases        | 20 Urinary diseases          | 175 (114 to 240)              | 145 (99.4 to 199)                | 26.4 (1.59 to 52)                         |
| 31 Urinary diseases          | 21 Diarrheal diseases        |                               |                                  |                                           |
| 37 Atrial fibrillation       | 29 Congenital defects        |                               |                                  |                                           |

### Philippines, Reference scenario

**Legend:**

Communicable, maternal, neonatal and nutritional  
 Non-communicable  
 Injuries

| Leading Causes 2022          | Leading Causes 2050          | Mean % change number of DEATH | Mean % change all-age DEATH rate | Mean % change age-standardized DEATH rate |
|------------------------------|------------------------------|-------------------------------|----------------------------------|-------------------------------------------|
| 1 Ischemic heart disease     | 1 Ischemic heart disease     | 35.6 (-1.42 to 78.4)          | 2.59 (-25 to 31.3)               | -50 (-63.5 to -31.4)                      |
| 2 Stroke                     | 2 Lower respiratory infect   | 107 (72.4 to 145)             | 56.7 (36.4 to 79.1)              | -28.4 (-37.3 to -18.2)                    |
| 3 Lower respiratory infect   | 3 Stroke                     | 43 (20.5 to 70.7)             | 8.13 (-6.68 to 23.5)             | -46.4 (-54.5 to -37)                      |
| 4 Chronic kidney disease     | 4 Chronic kidney disease     | 195 (135 to 268)              | 123 (80.7 to 170)                | 21.1 (-3.73 to 55.6)                      |
| 5 Diabetes                   | 5 Hypertensive heart disease | 202 (127 to 297)              | 128 (69.8 to 191)                | 7.56 (-22.8 to 46.6)                      |
| 6 Tuberculosis               | 6 Diabetes                   | 76.7 (41.4 to 111)            | 33.7 (8.76 to 60.2)              | -30 (-44.2 to -13.5)                      |
| 7 Hypertensive heart disease | 7 COPD                       | 119 (72.5 to 170)             | 65.8 (32.5 to 95.6)              | -25.9 (-40.3 to -7.93)                    |
| 8 COPD                       | 8 Alzheimer's disease        | 286 (209 to 367)              | 192 (142 to 243)                 | -0.459 (-5.03 to 4.15)                    |
| 9 Neonatal disorders         | 9 Lung cancer                | 113 (67.3 to 166)             | 61 (29.6 to 92.4)                | -12.3 (-26.4 to 1.96)                     |
| 10 Interpersonal violence    | 10 Colorectal cancer         | 157 (92.4 to 231)             | 94.2 (46.6 to 144)               | 6.2 (-14.6 to 28)                         |
| 11 Cirrhosis liver           | 11 Cirrhosis liver           | 77 (51.3 to 107)              | 33.9 (18.9 to 48.5)              | -16.7 (-25.1 to -6.87)                    |
| 12 COVID-19                  | 12 Breast cancer             | 123 (67.3 to 183)             | 68.5 (34.9 to 109)               | 2.96 (-16.1 to 25.8)                      |
| 13 Lung cancer               | 13 Tuberculosis              | -16.9 (-38.3 to 11.7)         | -37.1 (-54.3 to -17.4)           | -62.5 (-73.4 to -47.9)                    |
| 14 Road injuries             | 14 Urinary diseases          | 238 (179 to 312)              | 156 (123 to 201)                 | 29.5 (13 to 48.1)                         |
| 15 Breast cancer             | 15 Road injuries             | 24.5 (-7.52 to 70.6)          | -5.75 (-30 to 29)                | -18.2 (-40.6 to 13.4)                     |
| 16 Alzheimer's disease       | 16 Prostate cancer           | 248 (164 to 343)              | 163 (106 to 226)                 | 14.6 (-2.98 to 33.6)                      |
| 17 Colorectal cancer         | 17 Liver cancer              | 167 (111 to 228)              | 102 (62.8 to 145)                | 17.7 (-5.82 to 47)                        |
| 18 Asthma                    | 18 Interpersonal violence    | -6.5 (-37.3 to 45.4)          | -29.4 (-51.4 to 6.35)            | -36.9 (-56.7 to -6.23)                    |
| 19 Congenital defects        | 19 Atrial fibrillation       | 354 (262 to 452)              | 243 (182 to 305)                 | 16.4 (5.48 to 30)                         |
| 20 Upper digest diseases     | 20 Neonatal disorders        | -44.6 (-58.5 to -27.8)        | -58.1 (-67.3 to -46.4)           | -38.7 (-51.9 to -21.9)                    |
| 22 Liver cancer              | 23 Upper digest diseases     |                               |                                  |                                           |
| 24 Urinary diseases          | 24 Asthma                    |                               |                                  |                                           |
| 26 Prostate cancer           | 37 Congenital defects        |                               |                                  |                                           |
| 37 Atrial fibrillation       | 133 COVID-19                 |                               |                                  |                                           |

### Seychelles, Reference scenario

**Legend:**

Communicable, maternal, neonatal and nutritional  
Non-communicable  
Injuries

| Leading Causes 2022          | Leading Causes 2050          | Mean % change number of DEATH | Mean % change all-age DEATH rate | Mean % change age-standardized DEATH rate |
|------------------------------|------------------------------|-------------------------------|----------------------------------|-------------------------------------------|
| 1 Ischemic heart disease     | 1 Lower respiratory infect   | 117 (82.4 to 151)             | 65.9 (45.3 to 86.3)              | -16.9 (-27.8 to -4.52)                    |
| 2 Stroke                     | 2 Hypertensive heart disease | 182 (100 to 285)              | 115 (58.9 to 190)                | 10.1 (-21.8 to 56.4)                      |
| 3 Lower respiratory infect   | 3 Chronic kidney disease     | 157 (99 to 228)               | 96.3 (58.3 to 142)               | 12 (-12.9 to 47.5)                        |
| 4 COVID-19                   | 4 Stroke                     | 29 (3.47 to 58.6)             | -1.49 (-17.2 to 18.2)            | -47.6 (-57.8 to -34.8)                    |
| 5 Hypertensive heart disease | 5 Ischemic heart disease     | 13.3 (-21.6 to 60.8)          | -13.5 (-36.9 to 19.5)            | -53.4 (-67.9 to -31.9)                    |
| 6 Chronic kidney disease     | 6 Prostate cancer            | 209 (134 to 298)              | 136 (83 to 189)                  | 13.9 (-4.62 to 30.7)                      |
| 7 Cirrhosis liver            | 7 COPD                       | 162 (98.6 to 224)             | 99.9 (59.4 to 141)               | -3.36 (-24.9 to 23)                       |
| 8 Diabetes                   | 8 Alzheimer's disease        | 229 (165 to 307)              | 151 (110 to 192)                 | 3.67 (0.091 to 7.31)                      |
| 9 COPD                       | 9 Colorectal cancer          | 143 (75.8 to 234)             | 85.5 (37.8 to 141)               | 8.12 (-15.1 to 34.7)                      |
| 10 Colorectal cancer         | 10 Diabetes                  | 70.1 (30.4 to 109)            | 29.9 (6.72 to 59.3)              | -27.3 (-43.1 to -7.88)                    |
| 11 Prostate cancer           | 11 Cirrhosis liver           | 44.5 (19.6 to 67.1)           | 10.3 (-2.99 to 23.5)             | -17.1 (-26.4 to -5.07)                    |
| 12 Alzheimer's disease       | 12 Lung cancer               | 130 (74 to 204)               | 75.4 (36.2 to 125)               | 4.96 (-14.7 to 26.8)                      |
| 13 Lung cancer               | 13 Urinary diseases          | 229 (167 to 289)              | 151 (114 to 193)                 | 28.8 (8.06 to 59.5)                       |
| 14 Breast cancer             | 14 Breast cancer             | 91.8 (48 to 156)              | 46.4 (14.4 to 83.7)              | 2.2 (-17.2 to 25.6)                       |
| 15 Road injuries             | 15 Pancreatic cancer         | 222 (138 to 326)              | 145 (84.5 to 216)                | 50.5 (19.8 to 85.3)                       |
| 16 Urinary diseases          | 16 Parkinson's disease       | 209 (157 to 265)              | 136 (108 to 164)                 | 2.97 (-6.66 to 13.1)                      |
| 17 Neonatal disorders        | 17 Atrial fibrillation       | 275 (190 to 373)              | 186 (133 to 232)                 | 15 (1.64 to 26.8)                         |
| 18 Drowning                  | 18 Lip oral cavity cancer    | 121 (81.8 to 166)             | 68.8 (43.5 to 90.6)              | 8.25 (-4.47 to 21.3)                      |
| 19 Cervical cancer           | 19 Cardiomyopathy            | 110 (71.1 to 153)             | 59.9 (38.1 to 88.7)              | -13.3 (-20.1 to -5.69)                    |
| 20 Lip oral cavity cancer    | 20 Road injuries             | 17.4 (-20.9 to 69.8)          | -10.4 (-38.2 to 26.4)            | -19.5 (-45.6 to 16.6)                     |
| 21 Cardiomyopathy            | 24 Cervical cancer           |                               |                                  |                                           |
| 23 Pancreatic cancer         | 33 Drowning                  |                               |                                  |                                           |
| 27 Parkinson's disease       | 40 Neonatal disorders        |                               |                                  |                                           |
| 36 Atrial fibrillation       | 130 COVID-19                 |                               |                                  |                                           |

### Sri Lanka, Reference scenario

**Legend:**  
Communicable, maternal, neonatal and nutritional  
Non-communicable  
Injuries

| Leading Causes 2022          | Leading Causes 2050          | Mean % change number of DEATH | Mean % change all-age DEATH rate | Mean % change age-standardized DEATH rate |
|------------------------------|------------------------------|-------------------------------|----------------------------------|-------------------------------------------|
| 1 Stroke                     | 1 Stroke                     | 45.3 (8.74 to 95.4)           | 56.9 (22.2 to 106)               | -48.5 (-58.3 to -36.2)                    |
| 2 Ischemic heart disease     | 2 COPD                       | 167 (92 to 269)               | 188 (115 to 289)                 | -4.12 (-26.1 to 25.8)                     |
| 3 Diabetes                   | 3 Ischemic heart disease     | 16.7 (-20.7 to 72.8)          | 26.2 (-14 to 78.3)               | -50.4 (-66.8 to -27.2)                    |
| 4 COPD                       | 4 Diabetes                   | 65.1 (19.5 to 124)            | 78.5 (32.2 to 134)               | -27.1 (-44.5 to 0.427)                    |
| 5 Chronic kidney disease     | 5 Chronic kidney disease     | 173 (98.7 to 278)             | 195 (119 to 295)                 | 21.9 (-8.1 to 66.5)                       |
| 6 Lower respiratory infect   | 6 Alzheimer's disease        | 278 (151 to 441)              | 307 (187 to 475)                 | 4.95 (1.52 to 8.81)                       |
| 7 Hypertensive heart disease | 7 Hypertensive heart disease | 146 (65.2 to 241)             | 166 (83 to 264)                  | 4.75 (-26.5 to 53.4)                      |
| 8 Alzheimer's disease        | 8 Lower respiratory infect   | 75.6 (33.8 to 138)            | 89.6 (49 to 141)                 | -28.8 (-37.1 to -15.5)                    |
| 9 Self-harm                  | 9 Urinary diseases           | 156 (89.3 to 265)             | 177 (113 to 281)                 | 8.19 (-6 to 26.5)                         |
| 10 Cirrhosis liver           | 10 Cirrhosis liver           | 35.2 (10.5 to 70.2)           | 46.1 (20.7 to 75.6)              | -16.4 (-27.3 to -2.94)                    |
| 11 Road injuries             | 11 Self-harm                 | 4.32 (-15.6 to 31)            | 12.7 (-4.17 to 32.5)             | -15 (-28 to -0.0403)                      |
| 12 Lung cancer               | 12 Atrial fibrillation       | 353 (207 to 567)              | 388 (242 to 586)                 | 14.8 (4.8 to 26.9)                        |
| 13 Urinary diseases          | 13 Lung cancer               | 65.9 (17.9 to 126)            | 78.8 (32.6 to 132)               | -5.62 (-23.7 to 14.3)                     |
| 14 COVID-19                  | 14 Falls                     | 98.7 (49.4 to 169)            | 114 (65.8 to 176)                | -10.2 (-18.2 to -1.74)                    |
| 15 Asthma                    | 15 Breast cancer             | 64.7 (19.5 to 129)            | 77.5 (29.2 to 135)               | -4.22 (-24.6 to 14.8)                     |
| 16 Nature disaster           | 16 Parkinson's disease       | 185 (118 to 272)              | 208 (146 to 288)                 | 2.81 (-7.4 to 13.5)                       |
| 17 Breast cancer             | 17 Lip oral cavity cancer    | 126 (79.8 to 187)             | 143 (99.2 to 205)                | 18.5 (5.28 to 31.8)                       |
| 18 Falls                     | 18 Road injuries             | -3.5 (-29.3 to 33)            | 4.41 (-25.6 to 45.6)             | -16.2 (-41.4 to 22.4)                     |
| 19 Conflict & terror         | 19 Colorectal cancer         | 103 (33.3 to 188)             | 118 (47.6 to 194)                | 1.2 (-21.5 to 26.2)                       |
| 20 Colorectal cancer         | 20 Asthma                    | 4.89 (-23.9 to 47)            | 13.3 (-13.1 to 53.7)             | -59.1 (-65.2 to -49.9)                    |
| 21 Lip oral cavity cancer    | 22 Nature disaster           |                               |                                  |                                           |
| 23 Parkinson's disease       | 24 Conflict & terror         |                               |                                  |                                           |
| 28 Atrial fibrillation       | 131 COVID-19                 |                               |                                  |                                           |

### Thailand, Reference scenario

**Legend:**  
Communicable, maternal, neonatal and nutritional  
Non-communicable  
Injuries

| Leading Causes 2022        | Leading Causes 2050        | Mean % change number of DEATH | Mean % change all-age DEATH rate | Mean % change age-standardized DEATH rate |
|----------------------------|----------------------------|-------------------------------|----------------------------------|-------------------------------------------|
| 1 Stroke                   | 1 Stroke                   | 15.1 (-13.1 to 50.3)          | 33.7 (4.1 to 69.4)               | -49 (-59.8 to -36.8)                      |
| 2 Ischemic heart disease   | 2 Chronic kidney disease   | 134 (70 to 223)               | 172 (106 to 260)                 | 2.3 (-22.3 to 32.2)                       |
| 3 Lower respiratory infect | 3 Alzheimer's disease      | 223 (145 to 327)              | 276 (204 to 356)                 | -7.67 (-11 to -4.23)                      |
| 4 Chronic kidney disease   | 4 Lower respiratory infect | 84.2 (44.4 to 133)            | 114 (79.5 to 157)                | -33.1 (-41.6 to -22.3)                    |
| 5 Lung cancer              | 5 Ischemic heart disease   | 2.85 (-33.4 to 47.5)          | 19.6 (-17.9 to 63.3)             | -58 (-71.2 to -41.8)                      |
| 6 Diabetes                 | 6 COPD                     | 121 (63.4 to 195)             | 157 (98.4 to 230)                | -19.7 (-35.8 to 1.69)                     |
| 7 Alzheimer's disease      | 7 Lung cancer              | 67.3 (21.9 to 129)            | 94.3 (53.7 to 143)               | -12.1 (-27.1 to 3.38)                     |
| 8 COPD                     | 8 Urinary diseases         | 253 (164 to 375)              | 310 (220 to 433)                 | 21.8 (3.44 to 49.7)                       |
| 9 Road injuries            | 9 Diabetes                 | 32.1 (-3.86 to 76.9)          | 53.5 (16.2 to 104)               | -36.1 (-49.1 to -17)                      |
| 10 Cirrhosis liver         | 10 Colorectal cancer       | 84.6 (28.3 to 155)            | 114 (58.1 to 178)                | -3.34 (-24.5 to 22.6)                     |
| 11 Colorectal cancer       | 11 Cirrhosis liver         | 25.4 (2.21 to 55.3)           | 45.8 (24.6 to 68.1)              | -3.92 (-17.1 to 9.21)                     |
| 12 HIV/AIDS                | 12 Liver cancer            | 100 (50.9 to 169)             | 133 (80.6 to 203)                | 27.5 (-0.989 to 68.3)                     |
| 13 COVID-19                | 13 Atrial fibrillation     | 277 (181 to 407)              | 338 (249 to 439)                 | 3.07 (-6.86 to 13.3)                      |
| 14 Liver cancer            | 14 Diarrheal diseases      | 144 (57 to 274)               | 184 (89.1 to 318)                | -17.5 (-42.8 to 19)                       |
| 15 Urinary diseases        | 15 Road injuries           | -27.6 (-47.3 to 0.773)        | -15.8 (-35.5 to 12.2)            | -17.7 (-39.7 to 12.1)                     |
| 16 Tuberculosis            | 16 Parkinson's disease     | 160 (109 to 234)              | 202 (158 to 251)                 | -7.3 (-14.9 to 2.42)                      |
| 17 Breast cancer           | 17 Bacterial skin          | 304 (159 to 483)              | 370 (215 to 576)                 | 84.6 (32.5 to 159)                        |
| 18 Self-harm               | 18 Pancreatic cancer       | 133 (69.5 to 218)             | 170 (108 to 245)                 | 32.4 (4.33 to 65.2)                       |
| 19 Stomach cancer          | 19 Breast cancer           | 33.8 (-1.68 to 75.7)          | 55.4 (23.4 to 92.1)              | -8.92 (-27.1 to 12.9)                     |
| 20 Gallbladder cancer      | 20 Prostate cancer         | 143 (83.6 to 228)             | 182 (119 to 252)                 | -1.8 (-15.3 to 11.8)                      |
| 21 Diarrheal diseases      | 26 Gallbladder cancer      |                               |                                  |                                           |
| 23 Parkinson's disease     | 27 Stomach cancer          |                               |                                  |                                           |
| 24 Pancreatic cancer       | 28 Tuberculosis            |                               |                                  |                                           |
| 25 Atrial fibrillation     | 32 Self-harm               |                               |                                  |                                           |
| 27 Prostate cancer         | 55 HIV/AIDS                |                               |                                  |                                           |
| 37 Bacterial skin          | 133 COVID-19               |                               |                                  |                                           |

### Timor-Leste, Reference scenario

**Legend:**  
Communicable, maternal, neonatal and nutritional  
Non-communicable  
Injuries

| Leading Causes 2022          | Leading Causes 2050          | Mean % change number of DEATH | Mean % change all-age DEATH rate | Mean % change age-standardized DEATH rate |
|------------------------------|------------------------------|-------------------------------|----------------------------------|-------------------------------------------|
| 1 Stroke                     | 1 Stroke                     | 27.8 (1.56 to 62.7)           | -8.79 (-27.6 to 14.4)            | -40.4 (-54.1 to -20.8)                    |
| 2 Ischemic heart disease     | 2 Ischemic heart disease     | 32.2 (-8.79 to 92.1)          | -5.59 (-36.6 to 34.4)            | -39.4 (-62.5 to -5.06)                    |
| 3 Lower respiratory infect   | 3 Chronic kidney disease     | 173 (108 to 271)              | 95 (45.5 to 157)                 | 32.7 (-1.5 to 87.7)                       |
| 4 Tuberculosis               | 4 Lower respiratory infect   | -4.99 (-23.5 to 19.3)         | -32.2 (-44.9 to -16.3)           | -42.9 (-52.2 to -32.7)                    |
| 5 Neonatal disorders         | 5 COPD                       | 64.3 (25.8 to 113)            | 17.3 (-12.4 to 51.4)             | -26.9 (-45.1 to -1.35)                    |
| 6 COPD                       | 6 Hypertensive heart disease | 92.9 (37.1 to 162)            | 37.8 (-5.71 to 90.6)             | -13.1 (-42.9 to 36.5)                     |
| 7 Chronic kidney disease     | 7 Tuberculosis               | -37.7 (-56.5 to -10.7)        | -55.5 (-70.7 to -35.3)           | -67.5 (-77.9 to -50.5)                    |
| 8 Hypertensive heart disease | 8 Alzheimer's disease        | 223 (115 to 344)              | 130 (58.3 to 212)                | 14.8 (10.6 to 19.2)                       |
| 9 Congenital defects         | 9 Lung cancer                | 138 (61.6 to 218)             | 69.4 (15.9 to 130)               | 16.6 (-10.2 to 45.1)                      |
| 10 Diabetes                  | 10 Cirrhosis liver           | 54.1 (28.2 to 91.9)           | 10 (-9.51 to 33.2)               | -24.2 (-35.5 to -7.79)                    |
| 11 Cirrhosis liver           | 11 Diabetes                  | 51.6 (13.7 to 104)            | 8.24 (-21.4 to 44.6)             | -25.7 (-47.2 to 5.28)                     |
| 12 Road injuries             | 12 Colorectal cancer         | 169 (71.7 to 283)             | 91.6 (25.9 to 180)               | 29.4 (-5.45 to 68.1)                      |
| 13 Diarrheal diseases        | 13 Road injuries             | 11.4 (-31 to 70.9)            | -20.6 (-47.4 to 23.2)            | -30.3 (-54.7 to 10.8)                     |
| 14 Upper digest diseases     | 14 Neonatal disorders        | -67 (-79.7 to -50.3)          | -76.6 (-84.4 to -66)             | -61.1 (-73 to -43.8)                      |
| 15 Lung cancer               | 15 Breast cancer             | 145 (68.8 to 247)             | 74.4 (23.9 to 133)               | 18.5 (-10.2 to 51.5)                      |
| 16 HIV/AIDS                  | 16 Falls                     | 83.1 (42.6 to 131)            | 30.5 (6.36 to 60.8)              | -7.06 (-15.4 to 1.08)                     |
| 17 Asthma                    | 17 Upper digest diseases     | 15 (-10.3 to 44.5)            | -17.9 (-36.4 to 0.669)           | -45.7 (-58.1 to -28.1)                    |
| 18 COVID-19                  | 18 Congenital defects        | -46.2 (-63.5 to -27.1)        | -61.9 (-69.8 to -53.3)           | -41.4 (-49.2 to -31.6)                    |
| 19 Alzheimer's disease       | 19 Stomach cancer            | 49.6 (22 to 81.5)             | 6.74 (-9.32 to 25.7)             | -27.6 (-33.3 to -21.2)                    |
| 20 Drowning                  | 20 Asthma                    | -22.7 (-37.6 to -3.67)        | -44.9 (-53.6 to -32.6)           | -61.6 (-68 to -53)                        |
| 21 Falls                     | 22 Diarrheal diseases        |                               |                                  |                                           |
| 22 Colorectal cancer         | 34 Drowning                  |                               |                                  |                                           |
| 25 Stomach cancer            | 55 HIV/AIDS                  |                               |                                  |                                           |
| 26 Breast cancer             | 132 COVID-19                 |                               |                                  |                                           |

### Viet Nam, Reference scenario

**Legend:**

Communicable, maternal, neonatal and nutritional  
Non-communicable  
Injuries

| Leading Causes 2022           | Leading Causes 2050          | Mean % change number of DEATH | Mean % change all-age DEATH rate | Mean % change age-standardized DEATH rate |
|-------------------------------|------------------------------|-------------------------------|----------------------------------|-------------------------------------------|
| 1 Stroke                      | 1 Stroke                     | 61.8 (31.7 to 94.8)           | 45.8 (20.4 to 72.9)              | -33.7 (-47.4 to -19.6)                    |
| 2 Ischemic heart disease      | 2 Ischemic heart disease     | 36.7 (-3.13 to 81.6)          | 23.1 (-11 to 64.4)               | -44.8 (-62.1 to -20.6)                    |
| 3 COPD                        | 3 Chronic kidney disease     | 221 (141 to 305)              | 189 (127 to 258)                 | 39.5 (6.14 to 85.2)                       |
| 4 Diabetes                    | 4 COPD                       | 122 (77.1 to 179)             | 100 (61.4 to 149)                | -16.9 (-34.5 to 12.3)                     |
| 5 Cirrhosis liver             | 5 Cirrhosis liver            | 179 (135 to 232)              | 151 (116 to 188)                 | 56.2 (33 to 79.4)                         |
| 6 Chronic kidney disease      | 6 Alzheimer's disease        | 231 (153 to 311)              | 198 (137 to 268)                 | 6.38 (2.55 to 10.2)                       |
| 7 Road injuries               | 7 Diabetes                   | 85.6 (42.1 to 137)            | 67.2 (27.7 to 109)               | -22.5 (-41.9 to 2.94)                     |
| 8 Lung cancer                 | 8 Hypertensive heart disease | 182 (99.3 to 277)             | 154 (86.5 to 235)                | 10.6 (-24.5 to 57.4)                      |
| 9 Lower respiratory infect    | 9 Liver cancer               | 246 (151 to 373)              | 212 (130 to 334)                 | 91 (38.9 to 171)                          |
| 10 COVID-19                   | 10 Lung cancer               | 93.4 (42.7 to 146)            | 74.1 (31.1 to 119)               | -1.06 (-20.4 to 19.3)                     |
| 11 Tuberculosis               | 11 Falls                     | 141 (77.5 to 210)             | 117 (65.3 to 175)                | -1.21 (-11 to 11.6)                       |
| 12 Hypertensive heart disease | 12 Lower respiratory infect  | 70 (41.5 to 101)              | 53.1 (32.7 to 79.5)              | -33 (-42.4 to -21.5)                      |
| 13 Alzheimer's disease        | 13 Colorectal cancer         | 184 (93.4 to 279)             | 156 (79.8 to 235)                | 37.4 (4.33 to 73.6)                       |
| 14 Falls                      | 14 Road injuries             | 29.7 (-7.05 to 79.6)          | 16.9 (-13.6 to 61.4)             | -5.51 (-31 to 32.3)                       |
| 15 Liver cancer               | 15 Atrial fibrillation       | 332 (229 to 450)              | 289 (200 to 391)                 | 35.8 (22.8 to 51.3)                       |
| 16 Colorectal cancer          | 16 Tuberculosis              | -11.9 (-36.3 to 19.2)         | -20.6 (-41 to 6.67)              | -59.8 (-71.3 to -41.7)                    |
| 17 Self-harm                  | 17 Breast cancer             | 119 (63.5 to 190)             | 97.1 (51.5 to 153)               | 21.5 (-2.3 to 51.2)                       |
| 18 Drowning                   | 18 Parkinson's disease       | 208 (153 to 269)              | 178 (136 to 220)                 | 5.24 (-4.55 to 14.5)                      |
| 19 Stomach cancer             | 19 Self-harm                 | 56.3 (29 to 82.8)             | 40.8 (19.6 to 63.6)              | 9.73 (-7.36 to 30.1)                      |
| 20 Neonatal disorders         | 20 Stomach cancer            | 34.2 (12.3 to 58.6)           | 20.9 (2.94 to 38.4)              | -32.2 (-37.4 to -26.6)                    |
| 22 Breast cancer              | 28 Drowning                  |                               |                                  |                                           |
| 24 Parkinson's disease        | 48 Neonatal disorders        |                               |                                  |                                           |
| 26 Atrial fibrillation        | 132 COVID-19                 |                               |                                  |                                           |

### Angola, Reference scenario

**Legend:**

Communicable, maternal, neonatal and nutritional  
Non-communicable  
Injuries

| Leading Causes 2022            | Leading Causes 2050            | Mean % change number of DEATH | Mean % change all-age DEATH rate | Mean % change age-standardized DEATH rate |
|--------------------------------|--------------------------------|-------------------------------|----------------------------------|-------------------------------------------|
| 1 Neonatal disorders           | 1 Lower respiratory infect     | 74.3 (38 to 115)              | -13.6 (-29.2 to 4.57)            | -30 (-38.8 to -19.4)                      |
| 2 HIV/AIDS                     | 2 Stroke                       | 90.3 (42.9 to 139)            | -5.7 (-26.3 to 17)               | -49 (-58.8 to -37)                        |
| 3 Lower respiratory infect     | 3 Ischemic heart disease       | 69.9 (19.3 to 131)            | -15.8 (-40 to 14.3)              | -54.4 (-68.7 to -35.1)                    |
| 4 Malaria                      | 4 Hypertensive heart disease   | 250 (168 to 340)              | 73.3 (36.1 to 115)               | -14.1 (-32.2 to 8.61)                     |
| 5 Stroke                       | 5 HIV/AIDS                     | -10.9 (-45.7 to 57.4)         | -55.8 (-73.2 to -23.5)           | -63.6 (-77.7 to -39.7)                    |
| 6 Tuberculosis                 | 6 Neonatal disorders           | -32.4 (-52.4 to -5.63)        | -66.6 (-75 to -57)               | -48.3 (-60.3 to -35.2)                    |
| 7 Road injuries                | 7 Road injuries                | 32.4 (-31 to 147)             | -34.5 (-66 to 19.4)              | -42.6 (-67.9 to 3.87)                     |
| 8 Ischemic heart disease       | 8 Chronic kidney disease       | 247 (162 to 347)              | 71.8 (30 to 117)                 | 5.79 (-17 to 34.4)                        |
| 9 Diarrheal diseases           | 9 Cirrhosis liver              | 117 (77.3 to 163)             | 7.64 (-12.2 to 27.3)             | -26.4 (-38.1 to -10.9)                    |
| 10 Cirrhosis liver             | 10 Diabetes                    | 130 (70.3 to 198)             | 14.2 (-11.7 to 45.9)             | -32.3 (-47.6 to -11.9)                    |
| 11 Congenital defects          | 11 Tuberculosis                | -19.7 (-44.1 to 12.6)         | -60.2 (-72.8 to -43.7)           | -71.1 (-78.9 to -60.4)                    |
| 12 COVID-19                    | 12 Diarrheal diseases          | 2.38 (-29.4 to 38.5)          | -49.3 (-64.3 to -30.7)           | -54.4 (-65.2 to -41)                      |
| 13 Hypertensive heart disease  | 13 Alzheimer's disease         | 431 (282 to 583)              | 163 (93.7 to 244)                | 2.46 (-0.876 to 5.52)                     |
| 14 Diabetes                    | 14 Malaria                     | -39.2 (-95.8 to 286)          | -69.4 (-97.9 to 94.2)            | -68.9 (-97.6 to 139)                      |
| 15 Chronic kidney disease      | 15 COPD                        | 157 (101 to 217)              | 27.3 (0.393 to 55)               | -33.8 (-46 to -17.4)                      |
| 16 Pertussis                   | 16 Self-harm                   | 141 (93.2 to 201)             | 19.3 (-3.28 to 44.2)             | -16.7 (-29.9 to -2.64)                    |
| 17 Meningitis                  | 17 Breast cancer               | 273 (186 to 382)              | 84.6 (43.7 to 139)               | 23.8 (2.48 to 49.8)                       |
| 18 Protein-energy malnutrition | 18 Lung cancer                 | 240 (155 to 331)              | 68.6 (28.7 to 114)               | 4.88 (-14.3 to 25.2)                      |
| 19 Self-harm                   | 19 Cardiomyopathy              | 150 (106 to 199)              | 24.1 (7.19 to 43.4)              | -20.5 (-23.7 to -17.1)                    |
| 20 COPD                        | 20 Congenital defects          | -18.6 (-38.8 to 6.04)         | -59.8 (-67.6 to -49.3)           | -40.5 (-50.4 to -27)                      |
| 25 Cardiomyopathy              | 24 Pertussis                   |                               |                                  |                                           |
| 26 Alzheimer's disease         | 28 Meningitis                  |                               |                                  |                                           |
| 27 Breast cancer               | 34 Protein-energy malnutrition |                               |                                  |                                           |
| 28 Lung cancer                 | 136 COVID-19                   |                               |                                  |                                           |



### Central African Republic, Reference scenario

**Legend:**  
■ Communicable, maternal, neonatal and nutritional  
■ Non-communicable  
■ Injuries

| Leading Causes 2022            | Leading Causes 2050            | Mean % change number of DEATH | Mean % change all-age DEATH rate | Mean % change age-standardized DEATH rate |
|--------------------------------|--------------------------------|-------------------------------|----------------------------------|-------------------------------------------|
| 1 Tuberculosis                 | 1 Lower respiratory infect     | 8.62 (-21 to 43.7)            | -14.2 (-30.8 to 6.49)            | <b>-22.1 (-33.5 to -9.84)</b>             |
| 2 COVID-19                     | 2 Tuberculosis                 | <b>-42.8 (-63.7 to -14.7)</b> | <b>-54.8 (-69 to -33.8)</b>      | <b>-65.7 (-76.7 to -49.7)</b>             |
| 3 Neonatal disorders           | 3 Ischemic heart disease       | <b>62.2 (2.27 to 136)</b>     | 28.4 (-13.5 to 76)               | -23.5 (-50.4 to 14.5)                     |
| 4 Malaria                      | 4 Stroke                       | 29 (-6.72 to 75)              | 1.92 (-19.5 to 25.2)             | <b>-41.1 (-54.9 to -25.1)</b>             |
| 5 Lower respiratory infect     | 5 Diarrheal diseases           | -5.34 (-40.5 to 36.9)         | -25.2 (-48.4 to 5.31)            | -17 (-40.4 to 17.1)                       |
| 6 Diarrheal diseases           | 6 Malaria                      | -35.7 (-95.3 to 180)          | -48.5 (-96.1 to 143)             | -43.6 (-95 to 164)                        |
| 7 HIV/AIDS                     | 7 Road injuries                | -17.4 (-60.9 to 48.1)         | -34.6 (-66.1 to 18.4)            | -41.4 (-68.3 to 2.01)                     |
| 8 Road injuries                | 8 Diabetes                     | <b>97.1 (37 to 167)</b>       | <b>55.8 (19 to 98.6)</b>         | -3.67 (-28.5 to 29.2)                     |
| 9 Stroke                       | 9 Neonatal disorders           | <b>-59.4 (-74.3 to -41.9)</b> | <b>-68.1 (-76.8 to -56.6)</b>    | <b>-45.1 (-58.3 to -28.9)</b>             |
| 10 Ischemic heart disease      | 10 Hypertensive heart disease  | <b>118 (55.1 to 196)</b>      | <b>71.9 (34.2 to 117)</b>        | -15.4 (-36.1 to 10.3)                     |
| 11 Cirrhosis liver             | 11 Cirrhosis liver             | 12.6 (-19.3 to 44.6)          | -11.2 (-24.8 to 3.5)             | <b>-38.5 (-47.9 to -27.8)</b>             |
| 12 Congenital defects          | 12 Chronic kidney disease      | <b>100 (40.6 to 172)</b>      | <b>58.3 (21.2 to 98.5)</b>       | 3.6 (-22.2 to 34.6)                       |
| 13 Diabetes                    | 13 COPD                        | <b>60.6 (16.5 to 110)</b>     | <b>26.9 (1.44 to 56.7)</b>       | <b>-31.2 (-45.4 to -12.4)</b>             |
| 14 Hypertensive heart disease  | 14 Self-harm                   | 36.6 (-1.42 to 77.2)          | 7.68 (-12.4 to 27.4)             | <b>-21.4 (-34.8 to -6.66)</b>             |
| 15 Protein-energy malnutrition | 15 Cervical cancer             | <b>46.5 (3.74 to 90.6)</b>    | 15.6 (-6.12 to 38.6)             | <b>-20.9 (-35.6 to -3.84)</b>             |
| 16 Chronic kidney disease      | 16 Alzheimer's disease         | <b>222 (106 to 376)</b>       | <b>153 (76.5 to 234)</b>         | 2.97 (-2.55 to 7.98)                      |
| 17 Maternal disorders          | 17 Congenital defects          | <b>-52 (-66.5 to -33.1)</b>   | <b>-62.3 (-69.4 to -53)</b>      | <b>-40.1 (-49.3 to -27)</b>               |
| 18 Meningitis                  | 18 Meningitis                  | <b>-34.8 (-59.2 to -3.2)</b>  | <b>-48.4 (-65.6 to -22.5)</b>    | <b>-46.1 (-62.3 to -21.5)</b>             |
| 19 Pertussis                   | 19 Breast cancer               | <b>128 (44 to 225)</b>        | <b>79.5 (32 to 135)</b>          | 20.2 (-0.13 to 45.9)                      |
| 20 COPD                        | 20 Cardiomyopathy              | <b>50.1 (3.08 to 101)</b>     | 18.1 (-0.216 to 40.6)            | <b>-21.2 (-25.1 to -17)</b>               |
| 22 Self-harm                   | 22 Pertussis                   |                               |                                  |                                           |
| 25 Cervical cancer             | 23 Protein-energy malnutrition |                               |                                  |                                           |
| 29 Cardiomyopathy              | 24 Maternal disorders          |                               |                                  |                                           |
| 34 Breast cancer               | 29 HIV/AIDS                    |                               |                                  |                                           |
| 40 Alzheimer's disease         | 136 COVID-19                   |                               |                                  |                                           |

### Congo (Brazzaville), Reference scenario

**Legend:**  
Communicable, maternal, neonatal and nutritional  
Non-communicable  
Injuries

| Leading Causes 2022           | Leading Causes 2050          | Mean % change number of DEATH | Mean % change all-age DEATH rate | Mean % change age-standardized DEATH rate |
|-------------------------------|------------------------------|-------------------------------|----------------------------------|-------------------------------------------|
| 1 HIV/AIDS                    | 1 Ischemic heart disease     | 67.9 (18.5 to 123)            | 17.8 (-15.2 to 61.9)             | -43.8 (-61.2 to -18.1)                    |
| 2 Ischemic heart disease      | 2 Stroke                     | 76.2 (35.4 to 123)            | 23.6 (2.25 to 51)                | -42.6 (-53.4 to -28.5)                    |
| 3 Stroke                      | 3 Hypertensive heart disease | 247 (165 to 350)              | 143 (97.4 to 203)                | 5.71 (-16.1 to 32.8)                      |
| 4 Malaria                     | 4 Lower respiratory infect   | 117 (75.9 to 170)             | 52.1 (30.3 to 76.7)              | -17.1 (-26.6 to -4.05)                    |
| 5 Lower respiratory infect    | 5 Chronic kidney disease     | 217 (138 to 311)              | 123 (77.7 to 174)                | 21.1 (-3.7 to 51.5)                       |
| 6 Road injuries               | 6 Diabetes                   | 105 (54.1 to 163)             | 43.7 (13 to 80.9)                | -24.1 (-39.7 to -3.91)                    |
| 7 Tuberculosis                | 7 Cirrhosis liver            | 89.8 (54 to 135)              | 33.2 (12.5 to 58)                | -17.8 (-28.9 to -3.44)                    |
| 8 Neonatal disorders          | 8 Road injuries              | 28.1 (-27.3 to 108)           | -10.1 (-48.5 to 55.7)            | -23.9 (-56.4 to 34.3)                     |
| 9 Diabetes                    | 9 COPD                       | 185 (124 to 260)              | 100 (65.5 to 144)                | -9.21 (-25.3 to 12.4)                     |
| 10 Cirrhosis liver            | 10 Tuberculosis              | -13.1 (-39 to 17)             | -39 (-55.2 to -16.7)             | -61.4 (-72.3 to -46.3)                    |
| 11 Hypertensive heart disease | 11 Diarrheal diseases        | 37.1 (-5.05 to 84.6)          | -3.71 (-33.8 to 29.5)            | -31.2 (-48.5 to -5.65)                    |
| 12 Chronic kidney disease     | 12 Alzheimer's disease       | 291 (184 to 412)              | 174 (116 to 239)                 | 2.67 (-1.03 to 6.74)                      |
| 13 Diarrheal diseases         | 13 Breast cancer             | 161 (82 to 244)               | 82.7 (38.5 to 137)               | 9.32 (-11.5 to 30.7)                      |
| 14 COVID-19                   | 14 Neonatal disorders        | -36.6 (-54.3 to -14.2)        | -55.6 (-65.4 to -42.2)           | -31.3 (-44.9 to -12.4)                    |
| 15 COPD                       | 15 Lung cancer               | 190 (100 to 290)              | 103 (53 to 163)                  | 7.1 (-11.2 to 28.4)                       |
| 16 Self-harm                  | 16 Self-harm                 | 89.9 (51.5 to 136)            | 33.2 (11.9 to 57.9)              | -9.03 (-23.1 to 8.7)                      |
| 17 Cervical cancer            | 17 HIV/AIDS                  | -76.7 (-86.4 to -63.4)        | -83.7 (-90.2 to -74.5)           | -86.3 (-91.7 to -79)                      |
| 18 Breast cancer              | 18 Prostate cancer           | 299 (157 to 453)              | 179 (93.1 to 290)                | 19.2 (-3.55 to 45.4)                      |
| 19 Congenital defects         | 19 Cervical cancer           | 78.2 (40.2 to 121)            | 25 (3.97 to 48.1)                | -21.6 (-33.3 to -7.44)                    |
| 20 Maternal disorders         | 20 Esophageal cancer         | 188 (133 to 253)              | 102 (70.3 to 135)                | 5.86 (-5.64 to 18.2)                      |
| 22 Alzheimer's disease        | 22 Malaria                   |                               |                                  |                                           |
| 23 Lung cancer                | 35 Congenital defects        |                               |                                  |                                           |
| 26 Esophageal cancer          | 43 Maternal disorders        |                               |                                  |                                           |
| 31 Prostate cancer            | 135 COVID-19                 |                               |                                  |                                           |

### DR Congo, Reference scenario

**Legend:**

Communicable, maternal, neonatal and nutritional  
 Non-communicable  
 Injuries

| Leading Causes 2022           | Leading Causes 2050          | Mean % change number of DEATH | Mean % change all-age DEATH rate | Mean % change age-standardized DEATH rate |
|-------------------------------|------------------------------|-------------------------------|----------------------------------|-------------------------------------------|
| 1 Malaria                     | 1 Lower respiratory infect   | 74.6 (21.8 to 132)            | -0.81 (-20.3 to 16.9)            | -29.8 (-39.4 to -20.6)                    |
| 2 Neonatal disorders          | 2 Stroke                     | 72.4 (17.2 to 134)            | -1.93 (-23 to 20.2)              | -47.2 (-58 to -33.4)                      |
| 3 Tuberculosis                | 3 Ischemic heart disease     | 87.1 (19.8 to 182)            | 6.62 (-27.8 to 56.2)             | -42.6 (-61 to -13.5)                      |
| 4 Lower respiratory infect    | 4 Hypertensive heart disease | 234 (121 to 371)              | 90.1 (45.2 to 141)               | -8.62 (-29.1 to 20.3)                     |
| 5 Stroke                      | 5 Road injuries              | 30.8 (-28.2 to 125)           | -25.4 (-58.7 to 36)              | -35.4 (-62.3 to 15.3)                     |
| 6 Road injuries               | 6 Tuberculosis               | -9.78 (-40.9 to 30.2)         | -48.6 (-63.8 to -24.7)           | -64.8 (-74.6 to -48.3)                    |
| 7 Ischemic heart disease      | 7 Chronic kidney disease     | 199 (104 to 316)              | 70.1 (31.6 to 123)               | 1.76 (-21.4 to 34.2)                      |
| 8 COVID-19                    | 8 Diabetes                   | 145 (58.3 to 249)             | 39.1 (4.08 to 82.3)              | -19.4 (-38.7 to 4.34)                     |
| 9 Cirrhosis liver             | 9 Cirrhosis liver            | 99.7 (41.4 to 168)            | 13.7 (-5.73 to 35.7)             | -26.4 (-37.3 to -14.6)                    |
| 10 Hypertensive heart disease | 10 Malaria                   | -58.9 (-98.3 to 220)          | -77.2 (-98.9 to 80.6)            | -71.2 (-98.6 to 118)                      |
| 11 Diarrheal diseases         | 11 COPD                      | 136 (62.6 to 231)             | 34.4 (5.95 to 66.8)              | -30.4 (-43.9 to -14)                      |
| 12 Diabetes                   | 12 Neonatal disorders        | -41.7 (-63.7 to -16.1)        | -66.9 (-75.1 to -54.9)           | -49 (-60.5 to -34.8)                      |
| 13 Chronic kidney disease     | 13 Alzheimer's disease       | 322 (156 to 512)              | 140 (71.5 to 206)                | 0.079 (-3.39 to 3.99)                     |
| 14 COPD                       | 14 Diarrheal diseases        | 38.6 (-13.9 to 109)           | -21 (-49.3 to 15.7)              | -30 (-48 to -2.86)                        |
| 15 Maternal disorders         | 15 Self-harm                 | 122 (50.9 to 197)             | 26.1 (4.23 to 50.1)              | -11.8 (-25.2 to 2.41)                     |
| 16 Congenital defects         | 16 Cervical cancer           | 110 (40.4 to 182)             | 19.7 (-0.397 to 49.5)            | -25.1 (-36.2 to -8.94)                    |
| 17 Measles                    | 17 Breast cancer             | 206 (88.4 to 348)             | 73.2 (27.3 to 117)               | 6.26 (-13 to 26.7)                        |
| 18 Self-harm                  | 18 Cardiomyopathy            | 135 (66.5 to 211)             | 33.7 (13.8 to 52.8)              | -19.5 (-24.7 to -14.2)                    |
| 19 Meningitis                 | 19 Prostate cancer           | 348 (163 to 605)              | 154 (75.6 to 244)                | 27.8 (1.29 to 53.5)                       |
| 20 Pertussis                  | 20 Esophageal cancer         | 196 (104 to 302)              | 68 (43.3 to 98)                  | -3.61 (-14.8 to 7.54)                     |
| 21 Cervical cancer            | 22 Congenital defects        |                               |                                  |                                           |
| 24 Alzheimer's disease        | 26 Maternal disorders        |                               |                                  |                                           |
| 25 Cardiomyopathy             | 28 Meningitis                |                               |                                  |                                           |
| 30 Breast cancer              | 31 Pertussis                 |                               |                                  |                                           |
| 34 Esophageal cancer          | 81 Measles                   |                               |                                  |                                           |
| 41 Prostate cancer            | 136 COVID-19                 |                               |                                  |                                           |

### Equatorial Guinea, Reference scenario

**Legend:**

Communicable, maternal, neonatal and nutritional  
Non-communicable  
Injuries

| Leading Causes 2022           | Leading Causes 2050          | Mean % change number of DEATH | Mean % change all-age DEATH rate | Mean % change age-standardized DEATH rate |
|-------------------------------|------------------------------|-------------------------------|----------------------------------|-------------------------------------------|
| 1 HIV/AIDS                    | 1 Lower respiratory infect   | 203 (149 to 257)              | 48.5 (24.3 to 77.2)              | -18.4 (-29 to -4.49)                      |
| 2 Malaria                     | 2 Ischemic heart disease     | 118 (50.7 to 200)             | 7.07 (-25.4 to 48.3)             | -51.6 (-66.4 to -31.8)                    |
| 3 Neonatal disorders          | 3 HIV/AIDS                   | -42.5 (-61.2 to -13.4)        | -71.8 (-80.7 to -58.3)           | -78.6 (-85.1 to -68.8)                    |
| 4 Ischemic heart disease      | 4 Chronic kidney disease     | 334 (226 to 449)              | 113 (67.1 to 164)                | 14.1 (-10.1 to 45.6)                      |
| 5 Road injuries               | 5 Stroke                     | 148 (93.5 to 210)             | 21.9 (-2.05 to 49.7)             | -45.3 (-55.9 to -29.3)                    |
| 6 Lower respiratory infect    | 6 Hypertensive heart disease | 416 (307 to 549)              | 153 (102 to 208)                 | 10.8 (-11.5 to 39.2)                      |
| 7 Stroke                      | 7 Diabetes                   | 231 (146 to 329)              | 62.6 (23.5 to 107)               | -21.7 (-39.2 to -0.0243)                  |
| 8 Diabetes                    | 8 Road injuries              | 84.3 (7.99 to 239)            | -9.48 (-48.2 to 71.3)            | -23.2 (-54.5 to 43.4)                     |
| 9 COVID-19                    | 9 Cirrhosis liver            | 302 (235 to 374)              | 97.5 (61.4 to 137)               | 1.47 (-13.4 to 20.5)                      |
| 10 Chronic kidney disease     | 10 Neonatal disorders        | 18 (-14.3 to 58.1)            | -42.3 (-54.3 to -24.2)           | -17.9 (-34.5 to 5.87)                     |
| 11 Tuberculosis               | 11 Malaria                   | -24.5 (-95.6 to 299)          | -63.3 (-97.9 to 97.6)            | -67.3 (-97.7 to 69.9)                     |
| 12 Hypertensive heart disease | 12 Alzheimer's disease       | 407 (271 to 578)              | 148 (82.4 to 224)                | 6 (2.6 to 10.1)                           |
| 13 Cirrhosis liver            | 13 COPD                      | 315 (222 to 412)              | 103 (61.9 to 148)                | -7.27 (-25.7 to 14.6)                     |
| 14 Congenital defects         | 14 Breast cancer             | 324 (224 to 453)              | 108 (61 to 161)                  | 8.52 (-9.02 to 28.1)                      |
| 15 Mechanical forces          | 15 Lung cancer               | 386 (266 to 533)              | 138 (77.7 to 199)                | 10.1 (-9.63 to 31.7)                      |
| 16 Diarrheal diseases         | 16 Self-harm                 | 208 (144 to 275)              | 51.2 (25 to 84.1)                | -3.3 (-20 to 18.1)                        |
| 17 Self-harm                  | 17 Tuberculosis              | 61 (16.3 to 123)              | -21 (-43.3 to 8.74)              | -56.1 (-67.1 to -40.2)                    |
| 18 COPD                       | 18 Colorectal cancer         | 417 (282 to 594)              | 153 (85.1 to 237)                | 20.1 (-2.17 to 45.2)                      |
| 19 Maternal disorders         | 19 Mechanical forces         | 97.4 (52.3 to 150)            | -3.17 (-22.8 to 24.1)            | -22.6 (-36.3 to -1.45)                    |
| 20 Meningitis                 | 20 Esophageal cancer         | 418 (330 to 512)              | 154 (113 to 200)                 | 11.6 (1.25 to 23.2)                       |
| 21 Breast cancer              | 27 Diarrheal diseases        |                               |                                  |                                           |
| 22 Alzheimer's disease        | 28 Congenital defects        |                               |                                  |                                           |
| 26 Lung cancer                | 29 Meningitis                |                               |                                  |                                           |
| 30 Colorectal cancer          | 34 Maternal disorders        |                               |                                  |                                           |
| 31 Esophageal cancer          | 134 COVID-19                 |                               |                                  |                                           |

### Gabon, Reference scenario

**Legend:**  
Communicable, maternal, neonatal and nutritional  
Non-communicable  
Injuries

| Leading Causes 2022           | Leading Causes 2050          | Mean % change number of DEATH | Mean % change all-age DEATH rate | Mean % change age-standardized DEATH rate |
|-------------------------------|------------------------------|-------------------------------|----------------------------------|-------------------------------------------|
| 1 Ischemic heart disease      | 1 Chronic kidney disease     | 165 (108 to 232)              | 72.2 (39.7 to 111)               | 6.59 (-14 to 32.4)                        |
| 2 HIV/AIDS                    | 2 Lower respiratory infect   | 95.6 (64.1 to 132)            | 27.2 (9.15 to 52.2)              | -19.8 (-29.6 to -8.79)                    |
| 3 Stroke                      | 3 Hypertensive heart disease | 192 (129 to 266)              | 89.7 (53.2 to 136)               | 1.41 (-19.5 to 26.9)                      |
| 4 Lower respiratory infect    | 4 Stroke                     | 47.8 (19.8 to 78.3)           | -3.95 (-20.4 to 15.8)            | -46.3 (-55.6 to -33.8)                    |
| 5 Malaria                     | 5 Ischemic heart disease     | 25 (-9.77 to 67)              | -18.7 (-39.8 to 7.21)            | -53.2 (-67.1 to -36.4)                    |
| 6 Diabetes                    | 6 Diabetes                   | 83.3 (43.4 to 127)            | 19.1 (-4.19 to 44.4)             | -26 (-39.7 to -8.32)                      |
| 7 Chronic kidney disease      | 7 Road injuries              | 34 (-22.7 to 136)             | -13 (-48.6 to 57.4)              | -26.1 (-55.1 to 32.7)                     |
| 8 Road injuries               | 8 Cirrhosis liver            | 71.7 (44.2 to 103)            | 11.7 (-7.15 to 30.9)             | -24.8 (-34.3 to -12.5)                    |
| 9 Neonatal disorders          | 9 Alzheimer's disease        | 234 (159 to 323)              | 117 (71.2 to 182)                | 3.95 (0.434 to 7.7)                       |
| 10 Hypertensive heart disease | 10 COPD                      | 168 (113 to 226)              | 74.4 (44.3 to 117)               | -1.19 (-19 to 21.3)                       |
| 11 COVID-19                   | 11 Lung cancer               | 167 (102 to 238)              | 73.7 (31.1 to 118)               | 9.59 (-8.58 to 29.3)                      |
| 12 Cirrhosis liver            | 12 Breast cancer             | 170 (106 to 247)              | 75.4 (35.2 to 124)               | 13.4 (-5.83 to 33.4)                      |
| 13 Tuberculosis               | 13 Neonatal disorders        | -25.6 (-47.6 to 3.21)         | -51.9 (-63 to -37.5)             | -26.2 (-40.2 to -9.37)                    |
| 14 COPD                       | 14 Tuberculosis              | -11.1 (-35.2 to 18.3)         | -42.2 (-56.7 to -22.1)           | -61.1 (-71.1 to -47.2)                    |
| 15 Alzheimer's disease        | 15 Colorectal cancer         | 183 (112 to 269)              | 83.8 (35.1 to 146)               | 13.5 (-7.35 to 36.2)                      |
| 16 Diarrheal diseases         | 16 Self-harm                 | 85.4 (52.5 to 120)            | 20.5 (3.79 to 43)                | -13.2 (-24.7 to 0.501)                    |
| 17 Self-harm                  | 17 HIV/AIDS                  | -68.1 (-78.6 to -57.6)        | -79.3 (-86 to -72.5)             | -82.7 (-88.6 to -77.7)                    |
| 18 Lung cancer                | 18 Prostate cancer           | 198 (110 to 304)              | 93.5 (37.7 to 168)               | 8.68 (-13.1 to 32.5)                      |
| 19 Breast cancer              | 19 Liver cancer              | 148 (90.8 to 213)             | 61.2 (26.1 to 102)               | 2.09 (-17.6 to 28.9)                      |
| 20 Colorectal cancer          | 20 Esophageal cancer         | 140 (106 to 176)              | 55.9 (31.8 to 82.8)              | -3.45 (-11.3 to 5.52)                     |
| 24 Liver cancer               | 21 Malaria                   |                               |                                  |                                           |
| 25 Esophageal cancer          | 28 Diarrheal diseases        |                               |                                  |                                           |
| 27 Prostate cancer            | 135 COVID-19                 |                               |                                  |                                           |

### Burundi, Reference scenario

**Legend:**  
■ Communicable, maternal, neonatal and nutritional  
■ Non-communicable  
■ Injuries

| Leading Causes 2022            | Leading Causes 2050            | Mean % change number of DEATH | Mean % change all-age DEATH rate | Mean % change age-standardized DEATH rate |
|--------------------------------|--------------------------------|-------------------------------|----------------------------------|-------------------------------------------|
| 1 COVID-19                     | 1 Stroke                       | 99.2 (51.2 to 154)            | 8.26 (-17.2 to 31.2)             | -34.8 (-48.2 to -17.8)                    |
| 2 Malaria                      | 2 Lower respiratory infect     | 54.9 (19.6 to 96.5)           | -15.9 (-31.9 to 0.613)           | -28.6 (-38.4 to -16.8)                    |
| 3 Neonatal disorders           | 3 Ischemic heart disease       | 148 (63.1 to 252)             | 34.8 (-8.99 to 99.1)             | -14.6 (-44 to 31.5)                       |
| 4 Tuberculosis                 | 4 Diarrheal diseases           | 51.3 (-0.72 to 116)           | -17.7 (-44.5 to 18.8)            | -21.4 (-44 to 14.9)                       |
| 5 Lower respiratory infect     | 5 Tuberculosis                 | -17.9 (-44 to 17.3)           | -55.4 (-68.6 to -35.9)           | -68.6 (-77.6 to -55.2)                    |
| 6 Stroke                       | 6 Neonatal disorders           | -41.5 (-58.9 to -19.5)        | -68.3 (-75.6 to -58.8)           | -49.3 (-59.1 to -36.5)                    |
| 7 Diarrheal diseases           | 7 Chronic kidney disease       | 230 (147 to 315)              | 79.3 (37.9 to 130)               | 15.6 (-10.8 to 51.4)                      |
| 8 Ischemic heart disease       | 8 Diabetes                     | 139 (71.9 to 202)             | 29.9 (-2.2 to 65.3)              | -17.6 (-38.1 to 7.63)                     |
| 9 Road injuries                | 9 Cirrhosis liver              | 64 (31.8 to 98.4)             | -10.8 (-24.9 to 4.72)            | -42.7 (-51.3 to -32.4)                    |
| 10 Cirrhosis liver             | 10 Road injuries               | 46.7 (-11.3 to 147)           | -20.2 (-51.6 to 28.6)            | -39.1 (-60.2 to -5.43)                    |
| 11 Conflict & terror           | 11 Hypertensive heart disease  | 145 (80.5 to 210)             | 33.4 (1.02 to 69.4)              | -27.2 (-44.1 to -3.7)                     |
| 12 Congenital defects          | 12 COPD                        | 126 (74 to 179)               | 23 (-2.23 to 51.1)               | -30.8 (-43.4 to -12.3)                    |
| 13 Diabetes                    | 13 Alzheimer's disease         | 260 (146 to 385)              | 95.7 (37.5 to 150)               | 1.23 (-1.81 to 4.53)                      |
| 14 Chronic kidney disease      | 14 Self-harm                   | 97.7 (59.3 to 142)            | 7.4 (-11.5 to 26.6)              | -24.4 (-36.1 to -12)                      |
| 15 HIV/AIDS                    | 15 Congenital defects          | -24.8 (-42.8 to -4.52)        | -59.2 (-66.5 to -49.7)           | -39 (-48.3 to -28.1)                      |
| 16 Protein-energy malnutrition | 16 Falls                       | 162 (96.3 to 235)             | 42.1 (14.8 to 73.1)              | -5.82 (-10.5 to -0.274)                   |
| 17 COPD                        | 17 Urinary diseases            | 208 (155 to 275)              | 67.1 (44.4 to 93.8)              | 8.25 (-3.85 to 23.1)                      |
| 18 Maternal disorders          | 18 Cervical cancer             | 124 (73.2 to 173)             | 22.1 (-1.42 to 48.2)             | -20.5 (-33.5 to -3.95)                    |
| 19 Hypertensive heart disease  | 19 Breast cancer               | 217 (127 to 316)              | 72 (29.8 to 119)                 | 10.7 (-6.22 to 34)                        |
| 20 Meningitis                  | 20 Ileus & obstruction         | 143 (87.3 to 206)             | 32.2 (5.49 to 58.9)              | -9.66 (-26.9 to 10.6)                     |
| 21 Self-harm                   | 21 Malaria                     |                               |                                  |                                           |
| 22 Cervical cancer             | 26 Meningitis                  |                               |                                  |                                           |
| 24 Falls                       | 27 Protein-energy malnutrition |                               |                                  |                                           |
| 27 Ileus & obstruction         | 28 Maternal disorders          |                               |                                  |                                           |
| 28 Alzheimer's disease         | 29 Conflict & terror           |                               |                                  |                                           |
| 30 Urinary diseases            | 55 HIV/AIDS                    |                               |                                  |                                           |
| 33 Breast cancer               | 134 COVID-19                   |                               |                                  |                                           |

### Comoros, Reference scenario

**Legend:**  
Communicable, maternal, neonatal and nutritional  
Non-communicable  
Injuries

| Leading Causes 2022           | Leading Causes 2050          | Mean % change number of DEATH | Mean % change all-age DEATH rate | Mean % change age-standardized DEATH rate |
|-------------------------------|------------------------------|-------------------------------|----------------------------------|-------------------------------------------|
| 1 Stroke                      | 1 Stroke                     | 40.9 (1.56 to 93.8)           | 20.8 (-8.38 to 54.4)             | -44.4 (-56.9 to -27.5)                    |
| 2 Lower respiratory infect    | 2 Chronic kidney disease     | 193 (112 to 302)              | 151 (88.2 to 223)                | 22.7 (-6.04 to 60.5)                      |
| 3 Neonatal disorders          | 3 Lower respiratory infect   | 26.7 (-3.18 to 64.8)          | 8.69 (-13.2 to 31.6)             | -38.7 (-48.2 to -26.1)                    |
| 4 Tuberculosis                | 4 Ischemic heart disease     | 45.6 (-7.61 to 125)           | 24.7 (-16.7 to 79.7)             | -41.6 (-62.1 to -11.2)                    |
| 5 Ischemic heart disease      | 5 Hypertensive heart disease | 147 (76.6 to 240)             | 111 (60.9 to 164)                | -8.44 (-29.8 to 17.6)                     |
| 6 Diabetes                    | 6 Diabetes                   | 92.3 (37.8 to 174)            | 64.8 (20.1 to 117)               | -20.2 (-40.7 to 7.64)                     |
| 7 Chronic kidney disease      | 7 Alzheimer's disease        | 218 (109 to 321)              | 173 (104 to 242)                 | 1.48 (-1.61 to 4.37)                      |
| 8 Road injuries               | 8 Tuberculosis               | -21 (-45 to 12.9)             | -32.4 (-51.2 to -8.92)           | -62.8 (-73.4 to -47.9)                    |
| 9 Cirrhosis liver             | 9 Cirrhosis liver            | 45.3 (9.27 to 92.2)           | 24.6 (0.616 to 52.1)             | -30.7 (-42 to -15.7)                      |
| 10 Hypertensive heart disease | 10 Road injuries             | 18.6 (-25.1 to 83.4)          | 1.47 (-32.6 to 51.7)             | -29.3 (-54.8 to 10.4)                     |
| 11 Diarrheal diseases         | 11 COPD                      | 92.4 (37.5 to 160)            | 65 (26.9 to 106)                 | -28 (-42.5 to -8.76)                      |
| 12 COPD                       | 12 Diarrheal diseases        | 12 (-25.2 to 65.6)            | -3.97 (-31.3 to 30.7)            | -40.6 (-57 to -16.5)                      |
| 13 Congenital defects         | 13 Urinary diseases          | 173 (103 to 248)              | 134 (87.5 to 182)                | 16.4 (1.51 to 33.9)                       |
| 14 Meningitis                 | 14 Breast cancer             | 118 (54 to 185)               | 87.4 (40.6 to 141)               | 3.73 (-14.6 to 24.3)                      |
| 15 Alzheimer's disease        | 15 Prostate cancer           | 216 (104 to 326)              | 171 (82.4 to 261)                | 15.2 (-9.35 to 41.1)                      |
| 16 Interpersonal violence     | 16 Neonatal disorders        | -63.5 (-76.6 to -45.9)        | -69 (-77.8 to -58.5)             | -44.5 (-55.8 to -28.2)                    |
| 17 Malaria                    | 17 Esophageal cancer         | 101 (57.7 to 153)             | 72.3 (42.9 to 98.6)              | -13.6 (-24.7 to -1.31)                    |
| 18 Cervical cancer            | 18 Colorectal cancer         | 178 (85.5 to 281)             | 139 (70.3 to 218)                | 16.8 (-6.14 to 42.2)                      |
| 19 Breast cancer              | 19 Falls                     | 135 (69.2 to 202)             | 102 (62.2 to 145)                | -5.66 (-10.2 to -0.781)                   |
| 20 Esophageal cancer          | 20 Ileus & obstruction       | 105 (47.7 to 175)             | 75.8 (36.6 to 118)               | -1.77 (-21.2 to 25.2)                     |
| 22 Urinary diseases           | 21 Cervical cancer           |                               |                                  |                                           |
| 23 Falls                      | 23 Interpersonal violence    |                               |                                  |                                           |
| 25 Ileus & obstruction        | 26 Meningitis                |                               |                                  |                                           |
| 27 Prostate cancer            | 35 Congenital defects        |                               |                                  |                                           |
| 28 Colorectal cancer          | 70 Malaria                   |                               |                                  |                                           |

### Djibouti, Reference scenario

**Legend:**

Communicable, maternal, neonatal and nutritional  
 Non-communicable  
 Injuries

| Leading Causes 2022           | Leading Causes 2050          | Mean % change number of DEATH | Mean % change all-age DEATH rate | Mean % change age-standardized DEATH rate |
|-------------------------------|------------------------------|-------------------------------|----------------------------------|-------------------------------------------|
| 1 HIV/AIDS                    | 1 Stroke                     | 131 (65.8 to 209)             | 49.8 (17.4 to 97.4)              | -43.5 (-55.7 to -25.3)                    |
| 2 Stroke                      | 2 Lower respiratory infect   | 145 (83.2 to 209)             | 59.1 (28.1 to 94.9)              | -24.8 (-35.4 to -10.5)                    |
| 3 Lower respiratory infect    | 3 Chronic kidney disease     | 349 (223 to 497)              | 191 (127 to 269)                 | 21.5 (-4.93 to 56.8)                      |
| 4 Ischemic heart disease      | 4 Ischemic heart disease     | 91.3 (18.8 to 192)            | 24.1 (-15.7 to 82.7)             | -51.1 (-68.1 to -25.1)                    |
| 5 Tuberculosis                | 5 Hypertensive heart disease | 262 (161 to 369)              | 135 (85.5 to 190)                | -21.7 (-38.6 to 0.077)                    |
| 6 Neonatal disorders          | 6 Diabetes                   | 151 (70 to 254)               | 62.6 (16.4 to 117)               | -32.3 (-49.8 to -5.72)                    |
| 7 Cirrhosis liver             | 7 Cirrhosis liver            | 92.4 (44.9 to 147)            | 25 (1.84 to 54.3)                | -36.6 (-46.9 to -23.1)                    |
| 8 Diabetes                    | 8 Alzheimer's disease        | 520 (342 to 749)              | 302 (198 to 419)                 | 0.509 (-2.76 to 3.83)                     |
| 9 Chronic kidney disease      | 9 Tuberculosis               | -7.43 (-37.2 to 28.6)         | -39.9 (-55.8 to -20.7)           | -69.6 (-77.8 to -59.2)                    |
| 10 Diarrheal diseases         | 10 HIV/AIDS                  | -60.5 (-84.1 to -17.8)        | -74.3 (-88.7 to -45.5)           | -79.5 (-91.1 to -55.9)                    |
| 11 Road injuries              | 11 COPD                      | 256 (159 to 367)              | 131 (81.5 to 190)                | -18.4 (-34.1 to 2.89)                     |
| 12 Hypertensive heart disease | 12 Breast cancer             | 261 (169 to 362)              | 135 (86 to 196)                  | 16.3 (-1.41 to 34.7)                      |
| 13 Interpersonal violence     | 13 Colorectal cancer         | 321 (195 to 471)              | 174 (99.6 to 267)                | 16.3 (-7.17 to 39.1)                      |
| 14 Malaria                    | 14 Road injuries             | 53 (-5.58 to 152)             | -0.677 (-34.6 to 59.9)           | -37.4 (-59.7 to 1.4)                      |
| 15 Maternal disorders         | 15 Prostate cancer           | 358 (210 to 553)              | 197 (107 to 313)                 | 4.89 (-17.8 to 29.4)                      |
| 16 COVID-19                   | 16 Diarrheal diseases        | 35.7 (-7.85 to 92)            | -12 (-36.2 to 21.7)              | -50.1 (-62.4 to -31.6)                    |
| 17 Pertussis                  | 17 Urinary diseases          | 292 (201 to 397)              | 154 (107 to 209)                 | 9.01 (-6.7 to 26.5)                       |
| 18 Meningitis                 | 18 Neonatal disorders        | -29.1 (-52.8 to -1.99)        | -54.2 (-66.1 to -40)             | -20.1 (-34.4 to 1.68)                     |
| 19 Congenital defects         | 19 Esophageal cancer         | 204 (137 to 275)              | 97.6 (66.2 to 137)               | -13.7 (-23.2 to -3.01)                    |
| 20 COPD                       | 20 Lung cancer               | 275 (172 to 402)              | 143 (83.2 to 211)                | 7.2 (-13.8 to 30.3)                       |
| 21 Breast cancer              | 22 Interpersonal violence    |                               |                                  |                                           |
| 24 Esophageal cancer          | 29 Meningitis                |                               |                                  |                                           |
| 26 Colorectal cancer          | 35 Malaria                   |                               |                                  |                                           |
| 27 Urinary diseases           | 41 Maternal disorders        |                               |                                  |                                           |
| 28 Alzheimer's disease        | 43 Congenital defects        |                               |                                  |                                           |
| 30 Lung cancer                | 60 Pertussis                 |                               |                                  |                                           |
| 31 Prostate cancer            | 133 COVID-19                 |                               |                                  |                                           |



### Eritrea, Reference scenario

**Legend:**

Communicable, maternal, neonatal and nutritional  
Non-communicable  
Injuries

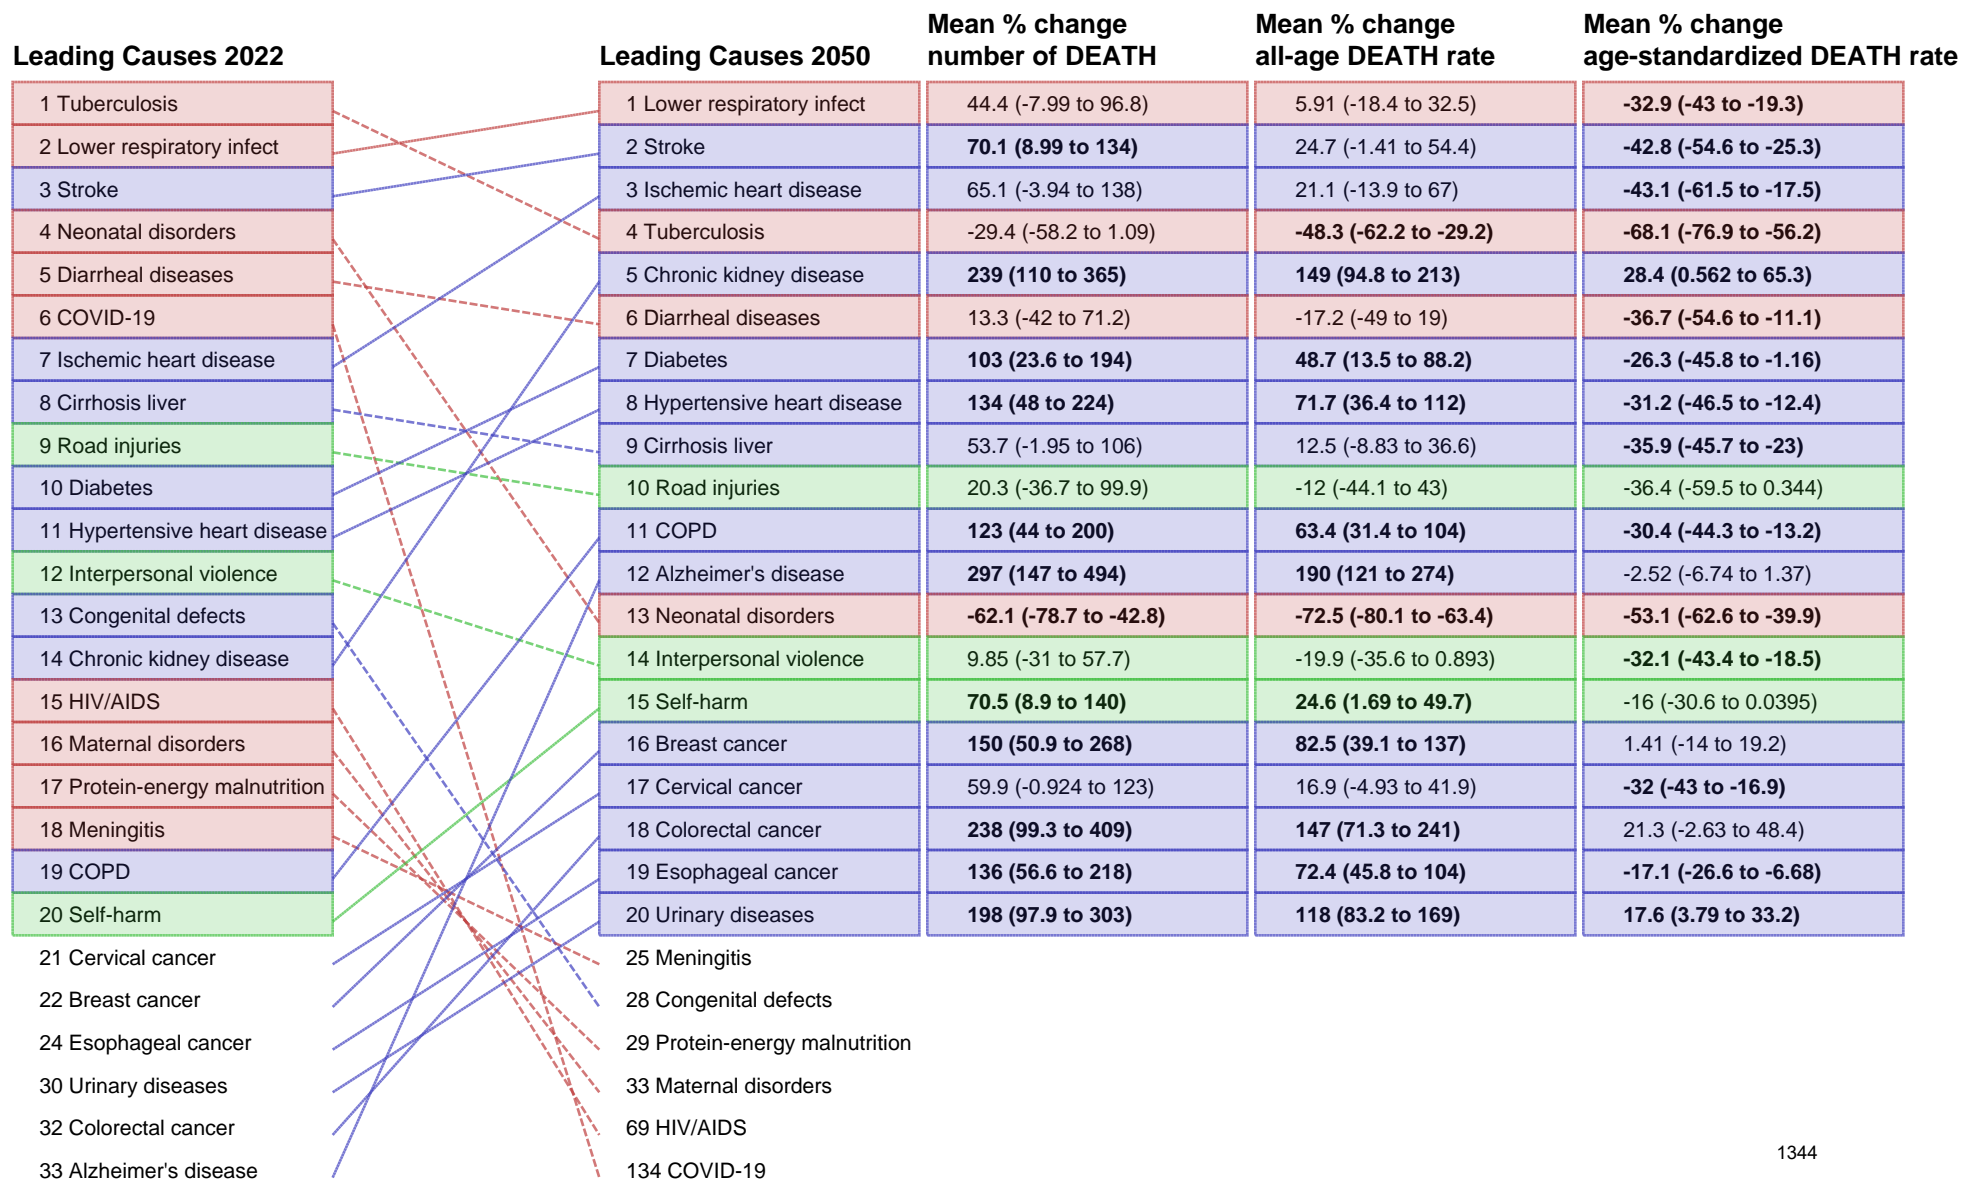

### Ethiopia, Reference scenario

**Legend:**

Communicable, maternal, neonatal and nutritional  
 Non-communicable  
 Injuries

| Leading Causes 2022            | Leading Causes 2050            | Mean % change number of DEATH | Mean % change all-age DEATH rate | Mean % change age-standardized DEATH rate |
|--------------------------------|--------------------------------|-------------------------------|----------------------------------|-------------------------------------------|
| 1 Neonatal disorders           | 1 Chronic kidney disease       | 290 (196 to 392)              | 107 (62.9 to 157)                | 19.3 (-8.63 to 53.7)                      |
| 2 Lower respiratory infect     | 2 Lower respiratory infect     | 31.1 (7.74 to 59.8)           | -30.6 (-40.7 to -19.7)           | -46.4 (-54.1 to -37.6)                    |
| 3 Diarrheal diseases           | 3 Stroke                       | 85.5 (45.3 to 129)            | -1.73 (-19.8 to 18.9)            | -47.7 (-58.2 to -33.7)                    |
| 4 COVID-19                     | 4 Neonatal disorders           | -49.1 (-65.2 to -30.5)        | -73.1 (-80.2 to -65.4)           | -54.5 (-64.6 to -41.2)                    |
| 5 Stroke                       | 5 Diarrheal diseases           | 3.55 (-28.8 to 46.6)          | -45.1 (-61.5 to -26.2)           | -56 (-68.3 to -37.1)                      |
| 6 Tuberculosis                 | 6 Cirrhosis liver              | 113 (72.9 to 161)             | 12.8 (-3.81 to 34.2)             | -34.7 (-44.9 to -21.7)                    |
| 7 Ischemic heart disease       | 7 Ischemic heart disease       | 61.1 (4.23 to 134)            | -14.6 (-42.9 to 23.2)            | -54.2 (-70.7 to -29)                      |
| 8 Chronic kidney disease       | 8 Alzheimer's disease          | 317 (230 to 406)              | 121 (80.1 to 168)                | 0.391 (-3.7 to 4.92)                      |
| 9 Cirrhosis liver              | 9 Hypertensive heart disease   | 149 (91.1 to 216)             | 31.8 (3.04 to 66)                | -33.3 (-49.2 to -10.6)                    |
| 10 Congenital defects          | 10 Colorectal cancer           | 323 (192 to 474)              | 124 (65.3 to 199)                | 20.7 (-6.22 to 50.1)                      |
| 11 Diabetes                    | 11 Diabetes                    | 74.1 (31.4 to 127)            | -7.77 (-27.6 to 16.9)            | -48.9 (-61.3 to -32.3)                    |
| 12 HIV/AIDS                    | 12 Urinary diseases            | 250 (195 to 314)              | 85.5 (64.1 to 107)               | 6.85 (-5.87 to 20.4)                      |
| 13 Meningitis                  | 13 Tuberculosis                | -20.9 (-44.8 to 11.7)         | -58.1 (-70.2 to -42)             | -74 (-81.4 to -63.3)                      |
| 14 Road injuries               | 14 Breast cancer               | 286 (190 to 412)              | 105 (59.9 to 160)                | 19.4 (-1.5 to 39.9)                       |
| 15 Hypertensive heart disease  | 15 Falls                       | 209 (151 to 271)              | 63.5 (38.9 to 88)                | -5.64 (-11.2 to -0.206)                   |
| 16 Protein-energy malnutrition | 16 Road injuries               | 51.7 (-8.89 to 152)           | -19.6 (-49.4 to 34.7)            | -42 (-63.3 to -5.93)                      |
| 17 Interpersonal violence      | 17 COPD                        | 87.8 (46.6 to 129)            | -0.501 (-19 to 18.9)             | -49 (-59.8 to -37.3)                      |
| 18 COPD                        | 18 Self-harm                   | 127 (81.9 to 177)             | 20.3 (0.999 to 42)               | -20.1 (-33.5 to -5.26)                    |
| 19 Pertussis                   | 19 Interpersonal violence      | 74.3 (35.2 to 118)            | -7.75 (-22.8 to 10.1)            | -28 (-38.4 to -14.5)                      |
| 20 Maternal disorders          | 20 Meningitis                  | -2.1 (-27.6 to 34.6)          | -48.1 (-61.9 to -30.1)           | -54.1 (-65.6 to -36.8)                    |
| 21 Alzheimer's disease         | 26 Congenital defects          |                               |                                  |                                           |
| 23 Self-harm                   | 33 Protein-energy malnutrition |                               |                                  |                                           |
| 24 Urinary diseases            | 35 HIV/AIDS                    |                               |                                  |                                           |
| 25 Colorectal cancer           | 36 Pertussis                   |                               |                                  |                                           |
| 26 Falls                       | 38 Maternal disorders          |                               |                                  |                                           |
| 28 Breast cancer               | 135 COVID-19                   |                               |                                  |                                           |

### Kenya, Reference scenario

**Legend:**

Communicable, maternal, neonatal and nutritional  
 Non-communicable  
 Injuries

| Leading Causes 2022           | Leading Causes 2050          | Mean % change number of DEATH | Mean % change all-age DEATH rate | Mean % change age-standardized DEATH rate |
|-------------------------------|------------------------------|-------------------------------|----------------------------------|-------------------------------------------|
| 1 HIV/AIDS                    | 1 Lower respiratory infect   | 88.8 (61.4 to 115)            | 31.4 (10.4 to 51.6)              | -28.9 (-37.2 to -18.9)                    |
| 2 Tuberculosis                | 2 Stroke                     | 80.3 (51.3 to 109)            | 25.4 (4.46 to 49.4)              | -45.7 (-55.4 to -33.9)                    |
| 3 Lower respiratory infect    | 3 Chronic kidney disease     | 259 (187 to 334)              | 150 (97.8 to 206)                | 19.1 (-5.77 to 49.9)                      |
| 4 Stroke                      | 4 Cirrhosis liver            | 100 (73.1 to 129)             | 39.1 (18.5 to 61.3)              | -30 (-38.8 to -18.6)                      |
| 5 Neonatal disorders          | 5 Tuberculosis               | -3.11 (-29.3 to 25.2)         | -32.6 (-50 to -10.7)             | -63.3 (-73 to -50.5)                      |
| 6 COVID-19                    | 6 Hypertensive heart disease | 231 (163 to 304)              | 130 (82 to 184)                  | -10.3 (-29.7 to 13.3)                     |
| 7 Cirrhosis liver             | 7 Ischemic heart disease     | 72.8 (25.1 to 127)            | 20.2 (-14.7 to 61.7)             | -47.2 (-63.4 to -27)                      |
| 8 Diarrheal diseases          | 8 Diabetes                   | 125 (82.8 to 172)             | 56.8 (26.6 to 90.9)              | -27 (-41.9 to -9.62)                      |
| 9 Ischemic heart disease      | 9 Diarrheal diseases         | 31.8 (-6.56 to 88)            | -8.33 (-34.4 to 28.8)            | -35.9 (-51.3 to -11.1)                    |
| 10 Chronic kidney disease     | 10 COPD                      | 146 (103 to 190)              | 71.2 (40.3 to 102)               | -27.5 (-40.3 to -14.6)                    |
| 11 Diabetes                   | 11 Alzheimer's disease       | 311 (218 to 408)              | 186 (124 to 260)                 | -3.24 (-8.38 to 1.63)                     |
| 12 Hypertensive heart disease | 12 Urinary diseases          | 253 (206 to 302)              | 145 (111 to 183)                 | 20.5 (8.45 to 34.7)                       |
| 13 COPD                       | 13 Road injuries             | 61.4 (15.3 to 123)            | 12.3 (-18.8 to 57.5)             | -28.9 (-49.2 to 2.09)                     |
| 14 Road injuries              | 14 Neonatal disorders        | -44.8 (-60.2 to -27.5)        | -61.8 (-71 to -51.1)             | -36.5 (-47.7 to -22.6)                    |
| 15 Interpersonal violence     | 15 Breast cancer             | 196 (132 to 264)              | 106 (60.7 to 154)                | 4.45 (-10.5 to 22.2)                      |
| 16 Meningitis                 | 16 Falls                     | 192 (141 to 249)              | 103 (65.5 to 147)                | -6.57 (-10.9 to -1.35)                    |
| 17 Malaria                    | 17 Ileus & obstruction       | 169 (118 to 211)              | 87.2 (53.8 to 126)               | -1.67 (-18.9 to 17.6)                     |
| 18 Congenital defects         | 18 Esophageal cancer         | 163 (128 to 195)              | 82.9 (60.5 to 106)               | -15.8 (-24.7 to -6.83)                    |
| 19 Self-harm                  | 19 Self-harm                 | 105 (74.3 to 136)             | 42.5 (21.5 to 66.9)              | -14.7 (-25.2 to -2.28)                    |
| 20 Maternal disorders         | 20 Interpersonal violence    | 35 (13.6 to 61.9)             | -6.18 (-22 to 9.47)              | -30.3 (-39.2 to -19.9)                    |
| 22 Alzheimer's disease        | 21 HIV/AIDS                  |                               |                                  |                                           |
| 23 Falls                      | 23 Meningitis                |                               |                                  |                                           |
| 24 Breast cancer              | 39 Congenital defects        |                               |                                  |                                           |
| 25 Ileus & obstruction        | 47 Maternal disorders        |                               |                                  |                                           |
| 26 Esophageal cancer          | 93 Malaria                   |                               |                                  |                                           |
| 27 Urinary diseases           | 135 COVID-19                 |                               |                                  |                                           |

### Madagascar, Reference scenario

**Legend:**

Communicable, maternal, neonatal and nutritional  
Non-communicable  
Injuries

| Leading Causes 2022             | Leading Causes 2050             | Mean % change number of DEATH | Mean % change all-age DEATH rate | Mean % change age-standardized DEATH rate |
|---------------------------------|---------------------------------|-------------------------------|----------------------------------|-------------------------------------------|
| 1 COVID-19                      | 1 Stroke                        | 88.9 (55 to 133)              | 11 (-8.93 to 38.1)               | -43.5 (-53.4 to -30.8)                    |
| 2 Stroke                        | 2 Lower respiratory infect      | 40.9 (18.1 to 71.3)           | -17.1 (-30.2 to -1.67)           | -32.3 (-40.6 to -21.7)                    |
| 3 Lower respiratory infect      | 3 Hypertensive heart disease    | 219 (150 to 310)              | 87.2 (47.2 to 142)               | -15.5 (-32.9 to 7.98)                     |
| 4 Diarrheal diseases            | 4 Diarrheal diseases            | 29.8 (-15.5 to 102)           | -23.7 (-50.1 to 14.3)            | -19 (-40.1 to 11.4)                       |
| 5 Neonatal disorders            | 5 Ischemic heart disease        | 99.3 (40.5 to 177)            | 17.1 (-19.5 to 70.1)             | -40.1 (-57.8 to -14.5)                    |
| 6 Tuberculosis                  | 6 COPD                          | 177 (120 to 250)              | 62.6 (28.6 to 102)               | -26.7 (-40.7 to -9.57)                    |
| 7 Ischemic heart disease        | 7 Tuberculosis                  | -2.54 (-28.5 to 36)           | -42.7 (-58.4 to -20.3)           | -63.4 (-72.5 to -49.9)                    |
| 8 Hypertensive heart disease    | 8 Chronic kidney disease        | 263 (181 to 368)              | 113 (60.3 to 173)                | 18.7 (-8.1 to 52.3)                       |
| 9 Malaria                       | 9 Cirrhosis liver               | 90.9 (61.7 to 126)            | 12.2 (-4.76 to 33)               | -33.7 (-43 to -21.5)                      |
| 10 Protein-energy malnutrition  | 10 Diabetes                     | 134 (85.2 to 206)             | 37.6 (6.45 to 81.5)              | -25.5 (-42.1 to -3.37)                    |
| 11 Cirrhosis liver              | 11 Neonatal disorders           | -48 (-60.6 to -32.6)          | -69.5 (-75.5 to -61.8)           | -51.9 (-61.4 to -40.4)                    |
| 12 Congenital defects           | 12 Road injuries                | 39.8 (-7.83 to 130)           | -17.8 (-46.6 to 30.6)            | -37.2 (-57 to -6.06)                      |
| 13 COPD                         | 13 Alzheimer's disease          | 376 (243 to 548)              | 179 (104 to 262)                 | -0.445 (-4.09 to 2.81)                    |
| 14 Road injuries                | 14 Protein-energy malnutrition  | -15 (-45.7 to 27.3)           | -50 (-68 to -23.6)               | -45.4 (-64 to -16.6)                      |
| 15 Diabetes                     | 15 Breast cancer                | 195 (124 to 275)              | 73.5 (33.3 to 115)               | 3.57 (-13.1 to 22.8)                      |
| 16 Measles                      | 16 Self-harm                    | 102 (71 to 140)               | 18.6 (-0.631 to 38.7)            | -18.6 (-29.2 to -4.17)                    |
| 17 HIV/AIDS                     | 17 Cervical cancer              | 105 (73.6 to 150)             | 20.3 (-0.466 to 48)              | -25.1 (-35.7 to -10.1)                    |
| 18 Meningitis                   | 18 Esophageal cancer            | 162 (125 to 208)              | 54.2 (34.2 to 77.2)              | -17.9 (-27.5 to -7.93)                    |
| 19 Chronic kidney disease       | 19 Ileus & obstruction          | 158 (110 to 223)              | 51.8 (26 to 85.2)                | -4.67 (-21.2 to 16.5)                     |
| 20 Maternal disorders           | 20 Other unspecified infectious | 71.6 (19 to 149)              | 0.842 (-31.3 to 44.5)            | -3.81 (-33.1 to 38.2)                     |
| 23 Self-harm                    | 22 Congenital defects           |                               |                                  |                                           |
| 25 Cervical cancer              | 24 Meningitis                   |                               |                                  |                                           |
| 26 Other unspecified infectious | 30 Malaria                      |                               |                                  |                                           |
| 27 Breast cancer                | 33 Maternal disorders           |                               |                                  |                                           |
| 28 Esophageal cancer            | 55 HIV/AIDS                     |                               |                                  |                                           |
| 29 Ileus & obstruction          | 82 Measles                      |                               |                                  |                                           |
| 36 Alzheimer's disease          | 133 COVID-19                    |                               |                                  |                                           |

### Malawi, Reference scenario

**Legend:**  
■ Communicable, maternal, neonatal and nutritional  
■ Non-communicable  
■ Injuries

| Leading Causes 2022            | Leading Causes 2050            | Mean % change number of DEATH | Mean % change all-age DEATH rate | Mean % change age-standardized DEATH rate |
|--------------------------------|--------------------------------|-------------------------------|----------------------------------|-------------------------------------------|
| 1 HIV/AIDS                     | 1 Stroke                       | 64.2 (34 to 97.2)             | 0.315 (-19.6 to 25.2)            | -45 (-57.3 to -27)                        |
| 2 COVID-19                     | 2 Lower respiratory infect     | 41.7 (19.9 to 67.7)           | -13.5 (-28.3 to 2.21)            | -30.7 (-41.1 to -18.4)                    |
| 3 Lower respiratory infect     | 3 Diarrheal diseases           | 45.4 (3.6 to 102)             | -11.2 (-37.4 to 25.7)            | -25.6 (-47.2 to 8.38)                     |
| 4 Neonatal disorders           | 4 Chronic kidney disease       | 193 (132 to 261)              | 79.2 (35.9 to 127)               | 8.95 (-16.9 to 44)                        |
| 5 Stroke                       | 5 Ischemic heart disease       | 73.4 (18.8 to 157)            | 6.01 (-31.1 to 61.2)             | -42.2 (-63 to -10.3)                      |
| 6 Diarrheal diseases           | 6 Cirrhosis liver              | 98.9 (69 to 133)              | 21.4 (0.787 to 45.6)             | -30.8 (-41.6 to -17.3)                    |
| 7 Malaria                      | 7 Diabetes                     | 110 (61.6 to 165)             | 28.1 (-4.02 to 64)               | -26.6 (-44.5 to -2.49)                    |
| 8 Tuberculosis                 | 8 Esophageal cancer            | 193 (156 to 233)              | 79.1 (56.1 to 105)               | -6.66 (-16.3 to 1.78)                     |
| 9 Ischemic heart disease       | 9 Tuberculosis                 | -9.97 (-37 to 28.4)           | -45 (-63.3 to -19.1)             | -65.3 (-76.2 to -48.6)                    |
| 10 Cirrhosis liver             | 10 Hypertensive heart disease  | 162 (108 to 225)              | 59.9 (25.8 to 106)               | -19.7 (-39.5 to 7.2)                      |
| 11 Diabetes                    | 11 Neonatal disorders          | -46.3 (-63.1 to -24)          | -67.4 (-75.5 to -55.7)           | -45 (-56.3 to -30.8)                      |
| 12 Chronic kidney disease      | 12 Road injuries               | 44.2 (-10.1 to 130)           | -11.9 (-45.6 to 43.8)            | -35.3 (-58.8 to 2.13)                     |
| 13 Road injuries               | 13 COPD                        | 119 (78 to 163)               | 33.5 (7.32 to 64.3)              | -28.8 (-43.5 to -10.6)                    |
| 14 Congenital defects          | 14 Self-harm                   | 112 (77.1 to 153)             | 29.5 (6.15 to 54.7)              | -14.8 (-28 to -1.14)                      |
| 15 Meningitis                  | 15 Lymphoma                    | 152 (80 to 226)               | 53.5 (12.1 to 101)               | 6.43 (-13.3 to 28.4)                      |
| 16 Hypertensive heart disease  | 16 Alzheimer's disease         | 247 (162 to 333)              | 112 (53.2 to 167)                | 0.298 (-4.52 to 4.63)                     |
| 17 Esophageal cancer           | 17 Cervical cancer             | 120 (83 to 160)               | 34.2 (7.99 to 67.5)              | -22.9 (-35.8 to -5.62)                    |
| 18 COPD                        | 18 Breast cancer               | 224 (149 to 314)              | 97.7 (51.9 to 147)               | 11.6 (-6.74 to 32)                        |
| 19 Self-harm                   | 19 Falls                       | 147 (101 to 194)              | 50.6 (21.6 to 79.4)              | -6.31 (-11.2 to -0.774)                   |
| 20 Protein-energy malnutrition | 20 HIV/AIDS                    | -83.8 (-88.9 to -78)          | -90.1 (-93.1 to -86.8)           | -90.7 (-93.8 to -87.4)                    |
| 21 Cervical cancer             | 21 Meningitis                  |                               |                                  |                                           |
| 23 Lymphoma                    | 25 Congenital defects          |                               |                                  |                                           |
| 24 Falls                       | 29 Protein-energy malnutrition |                               |                                  |                                           |
| 27 Alzheimer's disease         | 30 Malaria                     |                               |                                  |                                           |
| 28 Breast cancer               | 134 COVID-19                   |                               |                                  |                                           |

### Mozambique, Reference scenario

**Legend:**  
Communicable, maternal, neonatal and nutritional  
Non-communicable  
Injuries

| Leading Causes 2022            | Leading Causes 2050            | Mean % change number of DEATH | Mean % change all-age DEATH rate | Mean % change age-standardized DEATH rate |
|--------------------------------|--------------------------------|-------------------------------|----------------------------------|-------------------------------------------|
| 1 HIV/AIDS                     | 1 Stroke                       | 54.3 (25.3 to 88.8)           | -14.6 (-33.6 to 3.39)            | -48.9 (-58.1 to -37.9)                    |
| 2 Neonatal disorders           | 2 Lower respiratory infect     | 30.4 (10.4 to 51.7)           | -27.9 (-39.8 to -15.9)           | -39 (-46.7 to -30.2)                      |
| 3 Stroke                       | 3 Hypertensive heart disease   | 164 (102 to 240)              | 46.2 (9.05 to 82.1)              | -23.8 (-41.4 to -2.74)                    |
| 4 Malaria                      | 4 Tuberculosis                 | -26.3 (-46.6 to 1.1)          | -59.2 (-70.9 to -42)             | -72.1 (-79.5 to -61.4)                    |
| 5 Tuberculosis                 | 5 Diabetes                     | 133 (80.2 to 189)             | 28.7 (-2.73 to 62.5)             | -18.6 (-37.1 to 4.5)                      |
| 6 Lower respiratory infect     | 6 Neonatal disorders           | -54.7 (-67.8 to -39.3)        | -75 (-80.4 to -67.4)             | -58.3 (-66.5 to -47.9)                    |
| 7 COVID-19                     | 7 Chronic kidney disease       | 202 (134 to 279)              | 67.4 (26.3 to 109)               | 12.6 (-12.5 to 44)                        |
| 8 Diarrheal diseases           | 8 HIV/AIDS                     | -79.2 (-84.2 to -74.2)        | -88.5 (-91.2 to -85.8)           | -90.1 (-92.8 to -87.5)                    |
| 9 Congenital defects           | 9 Diarrheal diseases           | -10.1 (-38.6 to 22.9)         | -50.2 (-65.7 to -30.6)           | -51.1 (-62.4 to -33.3)                    |
| 10 Road injuries               | 10 Liver cancer                | 199 (135 to 272)              | 65.6 (27.3 to 100)               | -1.16 (-20.5 to 23.5)                     |
| 11 Hypertensive heart disease  | 11 Road injuries               | 27.4 (-17.6 to 99.1)          | -29.4 (-56.5 to 14.1)            | -46.7 (-64.8 to -16.3)                    |
| 12 Diabetes                    | 12 Malaria                     | -64.3 (-98 to 69.2)           | -80.2 (-98.9 to -3.06)           | -81.4 (-98.6 to 1.8)                      |
| 13 Ischemic heart disease      | 13 Self-harm                   | 128 (90.3 to 173)             | 26.3 (6.67 to 49.1)              | -14 (-24.8 to -1.78)                      |
| 14 Chronic kidney disease      | 14 Ischemic heart disease      | 54.5 (4.91 to 109)            | -14.4 (-42.8 to 18.2)            | -49.2 (-66.1 to -28.2)                    |
| 15 Cirrhosis liver             | 15 Cirrhosis liver             | 106 (74.6 to 149)             | 14.3 (-4.17 to 34.3)             | -28 (-38 to -15.8)                        |
| 16 Self-harm                   | 16 Breast cancer               | 266 (166 to 364)              | 102 (52.5 to 151)                | 28.4 (8.46 to 51.1)                       |
| 17 Protein-energy malnutrition | 17 Alzheimer's disease         | 299 (186 to 473)              | 120 (61.1 to 207)                | 3.52 (-0.082 to 6.73)                     |
| 18 Liver cancer                | 18 Cervical cancer             | 113 (77.6 to 153)             | 18.1 (-0.721 to 41.1)            | -23.9 (-34.6 to -9.51)                    |
| 19 Maternal disorders          | 19 Urinary diseases            | 187 (144 to 242)              | 58.6 (37.8 to 86.5)              | 5.46 (-5.43 to 19.3)                      |
| 20 Cervical cancer             | 20 Ileus & obstruction         | 128 (83.8 to 179)             | 26.1 (2.53 to 56.3)              | -12.7 (-27.9 to 5.03)                     |
| 25 Ileus & obstruction         | 21 Congenital defects          |                               |                                  |                                           |
| 26 Urinary diseases            | 30 Maternal disorders          |                               |                                  |                                           |
| 28 Breast cancer               | 33 Protein-energy malnutrition |                               |                                  |                                           |
| 31 Alzheimer's disease         | 133 COVID-19                   |                               |                                  |                                           |

### Rwanda, Reference scenario

**Legend:**  
Communicable, maternal, neonatal and nutritional  
Non-communicable  
Injuries

| Leading Causes 2022           | Leading Causes 2050          | Mean % change number of DEATH | Mean % change all-age DEATH rate | Mean % change age-standardized DEATH rate |
|-------------------------------|------------------------------|-------------------------------|----------------------------------|-------------------------------------------|
| 1 Stroke                      | 1 Stroke                     | 74.2 (40.3 to 111)            | -6.61 (-23 to 11.1)              | -50.8 (-59.3 to -40.6)                    |
| 2 Neonatal disorders          | 2 Lower respiratory infect   | 62.2 (34.4 to 95.3)           | -13 (-27.2 to 5.28)              | -38.9 (-46.6 to -29.7)                    |
| 3 Lower respiratory infect    | 3 Chronic kidney disease     | 253 (169 to 348)              | 89.2 (48.9 to 137)               | 7.15 (-16.3 to 39)                        |
| 4 HIV/AIDS                    | 4 Ischemic heart disease     | 70.2 (19.8 to 136)            | -8.69 (-36 to 26.5)              | -52 (-66.8 to -29.3)                      |
| 5 Tuberculosis                | 5 Cirrhosis liver            | 81.7 (53.5 to 116)            | -2.6 (-16.5 to 12.9)             | -40.9 (-48.7 to -32.1)                    |
| 6 Ischemic heart disease      | 6 Hypertensive heart disease | 187 (124 to 264)              | 54 (21.4 to 89.5)                | -27.8 (-43 to -8.39)                      |
| 7 Road injuries               | 7 Diabetes                   | 117 (69.3 to 173)             | 16.6 (-8.87 to 45.8)             | -35.3 (-48.6 to -18.9)                    |
| 8 Cirrhosis liver             | 8 Road injuries              | 70 (15.4 to 150)              | -8.79 (-38.6 to 31.4)            | -31.9 (-53.7 to -1.22)                    |
| 9 Malaria                     | 9 Alzheimer's disease        | 366 (229 to 509)              | 149 (86.3 to 219)                | -2.3 (-5.25 to 0.673)                     |
| 10 Conflict & terror          | 10 COPD                      | 137 (84.4 to 194)             | 27 (-1.26 to 51.4)               | -36.1 (-48.4 to -22.1)                    |
| 11 Diarrheal diseases         | 11 Diarrheal diseases        | 31.4 (-19.3 to 94.1)          | -29.6 (-55.4 to 1.87)            | -38.4 (-57 to -13.4)                      |
| 12 Diabetes                   | 12 Neonatal disorders        | -42.2 (-57.7 to -24.8)        | -69.1 (-76 to -60.6)             | -46.6 (-57.4 to -34.2)                    |
| 13 COVID-19                   | 13 Tuberculosis              | -7.71 (-32.6 to 24.6)         | -50.5 (-64.2 to -33)             | -68.8 (-77.2 to -57.9)                    |
| 14 Chronic kidney disease     | 14 Breast cancer             | 223 (136 to 318)              | 72.7 (36.4 to 115)               | 2.41 (-12.7 to 22)                        |
| 15 Hypertensive heart disease | 15 Urinary diseases          | 267 (206 to 344)              | 96.6 (64.4 to 126)               | 13.9 (3.21 to 27.3)                       |
| 16 Congenital defects         | 16 Falls                     | 223 (149 to 301)              | 72.7 (40 to 107)                 | -6.36 (-10.7 to -1.77)                    |
| 17 COPD                       | 17 Prostate cancer           | 336 (198 to 474)              | 133 (72.8 to 203)                | 17.5 (-4.93 to 42.2)                      |
| 18 Meningitis                 | 18 Self-harm                 | 114 (79.9 to 158)             | 14.9 (-2.86 to 33.9)             | -21.2 (-32.2 to -8.87)                    |
| 19 Self-harm                  | 19 Colorectal cancer         | 284 (162 to 417)              | 105 (50.1 to 162)                | 13.7 (-8.66 to 37.5)                      |
| 20 Breast cancer              | 20 Esophageal cancer         | 164 (124 to 214)              | 41.6 (24.2 to 59.4)              | -21.8 (-29.3 to -13.5)                    |
| 23 Alzheimer's disease        | 24 HIV/AIDS                  |                               |                                  |                                           |
| 25 Esophageal cancer          | 27 Meningitis                |                               |                                  |                                           |
| 26 Falls                      | 28 Congenital defects        |                               |                                  |                                           |
| 27 Urinary diseases           | 68 Conflict & terror         |                               |                                  |                                           |
| 32 Colorectal cancer          | 71 Malaria                   |                               |                                  |                                           |
| 33 Prostate cancer            | 134 COVID-19                 |                               |                                  |                                           |

### Somalia, Reference scenario

**Legend:**  
■ Communicable, maternal, neonatal and nutritional  
■ Non-communicable  
■ Injuries

| Leading Causes 2022            | Leading Causes 2050            | Mean % change number of DEATH | Mean % change all-age DEATH rate | Mean % change age-standardized DEATH rate |
|--------------------------------|--------------------------------|-------------------------------|----------------------------------|-------------------------------------------|
| 1 Neonatal disorders           | 1 Lower respiratory infect     | 50.3 (-3.85 to 114)           | <b>-26.4 (-41.3 to -7.82)</b>    | -9.79 (-24.8 to 12.3)                     |
| 2 Tuberculosis                 | 2 Neonatal disorders           | -1.14 (-39.1 to 60.7)         | <b>-51.6 (-65.1 to -27.7)</b>    | <b>-33.8 (-52 to -1.83)</b>               |
| 3 Measles                      | 3 Diarrheal diseases           | 18 (-37.6 to 132)             | -42.2 (-64.7 to 7.35)            | -27 (-52.2 to 40.8)                       |
| 4 Lower respiratory infect     | 4 Tuberculosis                 | -8.23 (-48.6 to 67.4)         | <b>-54.9 (-72 to -21)</b>        | <b>-61.8 (-75.8 to -30)</b>               |
| 5 Diarrheal diseases           | 5 Stroke                       | <b>129 (45.7 to 246)</b>      | 12.3 (-13.9 to 51)               | -19.2 (-44.9 to 28.6)                     |
| 6 Stroke                       | 6 Ischemic heart disease       | <b>172 (31.6 to 491)</b>      | 33.7 (-26.6 to 168)              | -6.59 (-52.4 to 103)                      |
| 7 Congenital defects           | 7 Chronic kidney disease       | <b>220 (106 to 383)</b>       | <b>57.2 (18.8 to 119)</b>        | 20.6 (-13.3 to 81)                        |
| 8 Meningitis                   | 8 Cirrhosis liver              | <b>92.2 (27.5 to 180)</b>     | -5.67 (-23.4 to 20.4)            | <b>-28.8 (-43.7 to -6.38)</b>             |
| 9 Pertussis                    | 9 Diabetes                     | <b>186 (65.2 to 395)</b>      | 40.2 (-6.47 to 121)              | 6.92 (-33.7 to 85.7)                      |
| 10 Cirrhosis liver             | 10 Road injuries               | 103 (-8.84 to 315)            | -0.278 (-48.1 to 99.1)           | -18.7 (-54.7 to 53.9)                     |
| 11 Protein-energy malnutrition | 11 Pertussis                   | 29.8 (-27.3 to 117)           | -36.6 (-60.4 to 2.37)            | -19.8 (-48.7 to 27.3)                     |
| 12 Maternal disorders          | 12 Interpersonal violence      | <b>74.2 (2.1 to 160)</b>      | -14.7 (-37.4 to 10.5)            | <b>-23.6 (-41.1 to -3.31)</b>             |
| 13 Road injuries               | 13 Hypertensive heart disease  | <b>162 (63.9 to 303)</b>      | 28.4 (-0.311 to 80.5)            | -18.7 (-43.2 to 30.9)                     |
| 14 COVID-19                    | 14 COPD                        | <b>190 (91.7 to 311)</b>      | <b>42.8 (13.4 to 80.3)</b>       | -5.35 (-28.8 to 36.8)                     |
| 15 Ischemic heart disease      | 15 Meningitis                  | 6.58 (-42 to 76.9)            | <b>-47.6 (-66.6 to -17.3)</b>    | <b>-43.4 (-60.9 to -14.7)</b>             |
| 16 Interpersonal violence      | 16 Congenital defects          | -0.116 (-36.5 to 44.6)        | <b>-51.1 (-60.7 to -37.9)</b>    | <b>-34.7 (-47.5 to -18.2)</b>             |
| 17 Tetanus                     | 17 Maternal disorders          | -5.62 (-51.8 to 72.6)         | <b>-53.7 (-73 to -19.7)</b>      | <b>-58.6 (-74.5 to -29.5)</b>             |
| 18 Diabetes                    | 18 Cervical cancer             | <b>99.7 (26.1 to 186)</b>     | -2.09 (-22.3 to 23.8)            | <b>-26 (-41.7 to -6.17)</b>               |
| 19 Conflict & terror           | 19 Conflict & terror           | 82.3 (-91 to 829)             | -10.2 (-95.9 to 362)             | -11.8 (-96 to 351)                        |
| 20 Chronic kidney disease      | 20 Protein-energy malnutrition | -34.4 (-74.5 to 82.4)         | <b>-67.7 (-86 to -13.6)</b>      | -53.2 (-78 to 20.1)                       |
| 22 Hypertensive heart disease  | 21 Measles                     |                               |                                  |                                           |
| 25 COPD                        | 36 Tetanus                     |                               |                                  |                                           |
| 26 Cervical cancer             | 134 COVID-19                   |                               |                                  |                                           |



### South Sudan, Reference scenario

**Legend:**  
Communicable, maternal, neonatal and nutritional  
Non-communicable  
Injuries

| Leading Causes 2022           | Leading Causes 2050            | Mean % change number of DEATH | Mean % change all-age DEATH rate | Mean % change age-standardized DEATH rate |
|-------------------------------|--------------------------------|-------------------------------|----------------------------------|-------------------------------------------|
| 1 Neonatal disorders          | 1 Diarrheal diseases           | 10.4 (-47.8 to 100)           | <b>-50.5 (-74.7 to -9.03)</b>    | -33.7 (-67.3 to 32.5)                     |
| 2 Diarrheal diseases          | 2 Neonatal disorders           | -22.3 (-52.4 to 25.2)         | <b>-65.3 (-77.4 to -44.3)</b>    | <b>-54.1 (-69.9 to -26.1)</b>             |
| 3 Lower respiratory infect    | 3 Lower respiratory infect     | 7.21 (-21.3 to 32.6)          | <b>-52.1 (-61.9 to -40.8)</b>    | <b>-39.4 (-51.1 to -23.7)</b>             |
| 4 Malaria                     | 4 Stroke                       | <b>91.9 (35.1 to 164)</b>     | -14.2 (-37 to 16)                | -32 (-55.7 to 10.1)                       |
| 5 Tuberculosis                | 5 Chronic kidney disease       | <b>256 (135 to 410)</b>       | <b>59.2 (10.3 to 124)</b>        | 36.3 (-16.3 to 119)                       |
| 6 Stroke                      | 6 Ischemic heart disease       | 95.5 (-7.13 to 280)           | -12.5 (-56.3 to 76.7)            | -29.8 (-69.9 to 54.6)                     |
| 7 HIV/AIDS                    | 7 Diabetes                     | <b>132 (52.3 to 237)</b>      | 3.9 (-28.4 to 53.5)              | -11.6 (-44.8 to 49.9)                     |
| 8 Congenital defects          | 8 Malaria                      | -54.4 (-95.6 to 147)          | -78.8 (-97.9 to 12.1)            | -75.9 (-97 to 44.4)                       |
| 9 Protein-energy malnutrition | 9 Tuberculosis                 | -30.1 (-64.7 to 31.4)         | <b>-68.7 (-83.8 to -39.6)</b>    | <b>-70.1 (-85.1 to -39.9)</b>             |
| 10 Ischemic heart disease     | 10 Cirrhosis liver             | <b>68.7 (29.9 to 113)</b>     | <b>-24.6 (-39.4 to -5.83)</b>    | <b>-36.6 (-50.5 to -16.7)</b>             |
| 11 Meningitis                 | 11 Congenital defects          | 2.43 (-26.3 to 33.2)          | <b>-54.3 (-64.3 to -40.8)</b>    | <b>-42.3 (-53.7 to -25)</b>               |
| 12 Cirrhosis liver            | 12 Interpersonal violence      | <b>72.4 (31.1 to 118)</b>     | <b>-23 (-36.2 to -6.58)</b>      | <b>-29.1 (-40.1 to -14.5)</b>             |
| 13 Chronic kidney disease     | 13 Hypertensive heart disease  | <b>122 (43.2 to 225)</b>      | -0.718 (-32.5 to 45.4)           | -26.8 (-55.1 to 22.6)                     |
| 14 Diabetes                   | 14 Road injuries               | 26.5 (-38.4 to 149)           | -43.4 (-70.8 to 22.1)            | -47.8 (-72.3 to 7.23)                     |
| 15 Maternal disorders         | 15 Maternal disorders          | 7.05 (-39.9 to 82)            | <b>-52.1 (-71.8 to -17.7)</b>    | <b>-57.9 (-75 to -30.3)</b>               |
| 16 Road injuries              | 16 COPD                        | <b>76.5 (25.8 to 134)</b>     | -21.2 (-39.9 to 0.473)           | <b>-42.6 (-61.1 to -14.6)</b>             |
| 17 Interpersonal violence     | 17 Meningitis                  | -20.1 (-51.8 to 36.4)         | <b>-64.3 (-77.1 to -37.1)</b>    | <b>-54.9 (-69.9 to -24.9)</b>             |
| 18 Conflict & terror          | 18 Self-harm                   | <b>107 (58.7 to 165)</b>      | -7.4 (-25.4 to 17.2)             | <b>-22.5 (-37.6 to -1.78)</b>             |
| 19 STIs                       | 19 Urinary diseases            | <b>170 (119 to 231)</b>       | <b>20.6 (3.93 to 40.1)</b>       | 1.81 (-16 to 24.9)                        |
| 20 Hypertensive heart disease | 20 Alzheimer's disease         | <b>264 (102 to 446)</b>       | 62.3 (-5.81 to 133)              | <b>8.35 (4.16 to 13.3)</b>                |
| 21 COPD                       | 22 Protein-energy malnutrition |                               |                                  |                                           |
| 24 Self-harm                  | 31 STIs                        |                               |                                  |                                           |
| 29 Urinary diseases           | 32 HIV/AIDS                    |                               |                                  |                                           |
| 37 Alzheimer's disease        | 35 Conflict & terror           |                               |                                  |                                           |

### Uganda, Reference scenario

**Legend:**

Communicable, maternal, neonatal and nutritional  
 Non-communicable  
 Injuries

| Leading Causes 2022            | Leading Causes 2050            | Mean % change number of DEATH | Mean % change all-age DEATH rate | Mean % change age-standardized DEATH rate |
|--------------------------------|--------------------------------|-------------------------------|----------------------------------|-------------------------------------------|
| 1 Neonatal disorders           | 1 Lower respiratory infect     | 46.6 (16 to 77.1)             | -27.2 (-40.6 to -13.6)           | -40.7 (-48.8 to -32.2)                    |
| 2 HIV/AIDS                     | 2 Stroke                       | 63.8 (24.9 to 104)            | -18.7 (-33.9 to -2.3)            | -54.3 (-63 to -44.9)                      |
| 3 Malaria                      | 3 Neonatal disorders           | -40 (-56.7 to -19.4)          | -70.3 (-76.7 to -61.7)           | -52.8 (-62.5 to -41.4)                    |
| 4 Lower respiratory infect     | 4 Chronic kidney disease       | 220 (136 to 315)              | 59 (24 to 103)                   | -3.35 (-23.5 to 23.4)                     |
| 5 COVID-19                     | 5 Ischemic heart disease       | 65.8 (12.6 to 130)            | -17.7 (-43 to 19.5)              | -54.1 (-67.8 to -35.9)                    |
| 6 Stroke                       | 6 Diabetes                     | 123 (65.1 to 178)             | 10.5 (-16.3 to 39.1)             | -36.4 (-51.4 to -19.4)                    |
| 7 Tuberculosis                 | 7 Diarrheal diseases           | 32.8 (-14.9 to 85.6)          | -34 (-56.6 to -6.52)             | -38.7 (-54.1 to -16)                      |
| 8 Ischemic heart disease       | 8 Cirrhosis liver              | 93 (56.8 to 133)              | -4.11 (-19.3 to 13.6)            | -41 (-49.2 to -31.3)                      |
| 9 Diarrheal diseases           | 9 Road injuries                | 63 (3.44 to 160)              | -19.1 (-46.2 to 19.4)            | -37.4 (-56.4 to -8.01)                    |
| 10 Congenital defects          | 10 Tuberculosis                | -9.36 (-36.5 to 25.8)         | -55 (-68.6 to -38.5)             | -69.9 (-77.6 to -58.7)                    |
| 11 Road injuries               | 11 Hypertensive heart disease  | 200 (123 to 275)              | 49.1 (16.7 to 86.3)              | -24.2 (-40.8 to -3.97)                    |
| 12 Diabetes                    | 12 Prostate cancer             | 328 (214 to 463)              | 113 (56.6 to 169)                | 13.9 (-9.45 to 41.1)                      |
| 13 Cirrhosis liver             | 13 Breast cancer               | 280 (201 to 373)              | 88.7 (50.3 to 133)               | 12.5 (-5.5 to 31.1)                       |
| 14 Measles                     | 14 Alzheimer's disease         | 339 (220 to 450)              | 118 (62.8 to 162)                | 0.476 (-2.98 to 4.05)                     |
| 15 Chronic kidney disease      | 15 HIV/AIDS                    | -70.2 (-77.5 to -61.4)        | -85.2 (-88.4 to -81.1)           | -88.8 (-91.3 to -84.9)                    |
| 16 Meningitis                  | 16 COPD                        | 114 (66.3 to 165)             | 6.34 (-14.9 to 28.4)             | -42.8 (-53.2 to -28.5)                    |
| 17 Hypertensive heart disease  | 17 Esophageal cancer           | 189 (141 to 237)              | 43.5 (25.1 to 59.2)              | -19.5 (-27.2 to -12)                      |
| 18 COPD                        | 18 Colorectal cancer           | 320 (207 to 445)              | 109 (57.9 to 165)                | 19.5 (-4.38 to 45.8)                      |
| 19 Protein-energy malnutrition | 19 Self-harm                   | 138 (93.2 to 189)             | 18.3 (-0.673 to 39.9)            | -19.8 (-30.9 to -7.61)                    |
| 20 STIs                        | 20 Urinary diseases            | 259 (197 to 329)              | 78.4 (52.6 to 103)               | 12.6 (0.933 to 25.1)                      |
| 22 Self-harm                   | 22 Congenital defects          |                               |                                  |                                           |
| 23 Breast cancer               | 25 Malaria                     |                               |                                  |                                           |
| 25 Prostate cancer             | 26 Meningitis                  |                               |                                  |                                           |
| 26 Esophageal cancer           | 35 Protein-energy malnutrition |                               |                                  |                                           |
| 29 Alzheimer's disease         | 48 STIs                        |                               |                                  |                                           |
| 31 Urinary diseases            | 88 Measles                     |                               |                                  |                                           |
| 36 Colorectal cancer           | 136 COVID-19                   |                               |                                  |                                           |

### Tanzania, Reference scenario

**Legend:**

Communicable, maternal, neonatal and nutritional  
Non-communicable  
Injuries

| Leading Causes 2022            | Leading Causes 2050            | Mean % change number of DEATH | Mean % change all-age DEATH rate | Mean % change age-standardized DEATH rate |
|--------------------------------|--------------------------------|-------------------------------|----------------------------------|-------------------------------------------|
| 1 HIV/AIDS                     | 1 Stroke                       | 66.2 (31.6 to 107)            | -4.81 (-24.1 to 14.1)            | -48.3 (-57.4 to -36.1)                    |
| 2 Neonatal disorders           | 2 Lower respiratory infect     | 26 (2.37 to 51.2)             | -27.8 (-40.7 to -14.9)           | -38.4 (-46.2 to -28.3)                    |
| 3 Lower respiratory infect     | 3 Ischemic heart disease       | 66.5 (13.8 to 129)            | -4.54 (-32.8 to 34.9)            | -46.9 (-63.9 to -24.8)                    |
| 4 Stroke                       | 4 Chronic kidney disease       | 251 (163 to 348)              | 101 (55.3 to 152)                | 19.2 (-5.15 to 49.8)                      |
| 5 Ischemic heart disease       | 5 Hypertensive heart disease   | 191 (118 to 266)              | 66.6 (29 to 106)                 | -16.2 (-34 to 6.2)                        |
| 6 Diarrheal diseases           | 6 Diarrheal diseases           | 25.6 (-9.48 to 72.1)          | -28.1 (-49 to -2.39)             | -39.6 (-55.8 to -18)                      |
| 7 Tuberculosis                 | 7 Diabetes                     | 139 (85.3 to 203)             | 37 (6.26 to 69.6)                | -19.9 (-35.9 to 1.81)                     |
| 8 Malaria                      | 8 Cirrhosis liver              | 98.1 (64.9 to 136)            | 13.5 (-2.84 to 34.3)             | -30.8 (-40.3 to -18.6)                    |
| 9 Congenital defects           | 9 Neonatal disorders           | -44.8 (-58.2 to -29.4)        | -68.5 (-74.9 to -60.6)           | -49.7 (-58.9 to -37.1)                    |
| 10 Cirrhosis liver             | 10 Alzheimer's disease         | 280 (179 to 389)              | 117 (65.5 to 164)                | -0.0245 (-3.06 to 3.3)                    |
| 11 Chronic kidney disease      | 11 Tuberculosis                | -17.6 (-43.2 to 11.3)         | -52.8 (-65.6 to -34.6)           | -68.3 (-77 to -55.5)                      |
| 12 Diabetes                    | 12 Breast cancer               | 231 (144 to 338)              | 89.3 (48.5 to 136)               | 15.9 (-2.6 to 36.9)                       |
| 13 Hypertensive heart disease  | 13 HIV/AIDS                    | -66.4 (-78.2 to -52)          | -80.7 (-87 to -72.8)             | -83.4 (-88.9 to -76.7)                    |
| 14 Road injuries               | 14 Road injuries               | 37.2 (-10 to 107)             | -21.3 (-46.5 to 26.8)            | -39.5 (-58 to -4.24)                      |
| 15 Maternal disorders          | 15 COPD                        | 110 (68.1 to 161)             | 20 (-3.71 to 46.1)               | -36.6 (-48.5 to -22.2)                    |
| 16 Meningitis                  | 16 Urinary diseases            | 217 (161 to 280)              | 81.3 (54.8 to 106)               | 11.9 (-0.524 to 25.2)                     |
| 17 COPD                        | 17 Colorectal cancer           | 272 (160 to 389)              | 112 (56.8 to 179)                | 21.7 (-4.08 to 48.7)                      |
| 18 Protein-energy malnutrition | 18 Falls                       | 158 (104 to 222)              | 47.9 (22.3 to 74.2)              | -8.77 (-13.9 to -3.36)                    |
| 19 STIs                        | 19 Prostate cancer             | 264 (155 to 382)              | 108 (50.4 to 164)                | 10.5 (-9.15 to 31.6)                      |
| 20 Alzheimer's disease         | 20 Congenital defects          | -30.7 (-46.7 to -11.8)        | -60.4 (-66.5 to -50.5)           | -39.9 (-48.4 to -26.3)                    |
| 21 Breast cancer               | 28 Meningitis                  |                               |                                  |                                           |
| 25 Falls                       | 33 Maternal disorders          |                               |                                  |                                           |
| 29 Urinary diseases            | 36 Protein-energy malnutrition |                               |                                  |                                           |
| 31 Colorectal cancer           | 51 STIs                        |                               |                                  |                                           |
| 33 Prostate cancer             | 62 Malaria                     |                               |                                  |                                           |

### Zambia, Reference scenario

**Legend:**

Communicable, maternal, neonatal and nutritional  
 Non-communicable  
 Injuries

| Leading Causes 2022           | Leading Causes 2050          | Mean % change number of DEATH | Mean % change all-age DEATH rate | Mean % change age-standardized DEATH rate |
|-------------------------------|------------------------------|-------------------------------|----------------------------------|-------------------------------------------|
| 1 HIV/AIDS                    | 1 Stroke                     | 93.2 (55.1 to 137)            | 5.53 (-11.4 to 27)               | -44.5 (-53.2 to -32.4)                    |
| 2 Neonatal disorders          | 2 Chronic kidney disease     | 287 (191 to 401)              | 111 (66.3 to 167)                | 27.6 (1.39 to 60.4)                       |
| 3 Stroke                      | 3 Lower respiratory infect   | 51.4 (20.4 to 83.7)           | -17.3 (-30.2 to -1.99)           | -33.5 (-40.8 to -24.7)                    |
| 4 COVID-19                    | 4 Hypertensive heart disease | 251 (168 to 349)              | 91.9 (52 to 141)                 | -6.08 (-26.4 to 20.1)                     |
| 5 Lower respiratory infect    | 5 Ischemic heart disease     | 90.4 (32.6 to 162)            | 4.01 (-26.7 to 38.5)             | -45 (-61.4 to -23.1)                      |
| 6 Malaria                     | 6 Cirrhosis liver            | 119 (75.5 to 160)             | 19.4 (0.2 to 38.7)               | -29.8 (-38.9 to -17.9)                    |
| 7 Ischemic heart disease      | 7 HIV/AIDS                   | -63.8 (-72.3 to -53.1)        | -80.2 (-84.1 to -74.9)           | -83.5 (-87 to -78.1)                      |
| 8 Diarrheal diseases          | 8 Diabetes                   | 134 (82.8 to 198)             | 27.7 (1.88 to 55.1)              | -28.3 (-42.9 to -9.63)                    |
| 9 Cirrhosis liver             | 9 Neonatal disorders         | -31 (-48.1 to -9.52)          | -62.4 (-69.9 to -52.5)           | -42.4 (-53 to -30.1)                      |
| 10 Chronic kidney disease     | 10 Diarrheal diseases        | 13.5 (-22.8 to 58.9)          | -38.1 (-56.6 to -15.9)           | -42.6 (-57.7 to -22.5)                    |
| 11 Congenital defects         | 11 Breast cancer             | 239 (162 to 346)              | 84.9 (44.3 to 133)               | 11 (-6.63 to 29.4)                        |
| 12 Hypertensive heart disease | 12 Road injuries             | 69.1 (11.5 to 167)            | -7.64 (-39 to 46.4)              | -31.6 (-53.2 to 4.07)                     |
| 13 Diabetes                   | 13 Prostate cancer           | 288 (186 to 411)              | 112 (63.4 to 167)                | 4.57 (-14.4 to 23.5)                      |
| 14 Tuberculosis               | 14 COPD                      | 151 (99.4 to 218)             | 37.1 (11.9 to 69.2)              | -30.3 (-42.6 to -15.7)                    |
| 15 Road injuries              | 15 Idiopathic epilepsy       | 116 (60 to 188)               | 17.8 (-9.93 to 56.9)             | -3.87 (-25.3 to 27.7)                     |
| 16 Meningitis                 | 16 Esophageal cancer         | 215 (160 to 275)              | 72.3 (47.4 to 103)               | -9.87 (-20.4 to -1.06)                    |
| 17 Interpersonal violence     | 17 Self-harm                 | 125 (82.6 to 174)             | 23.1 (5.57 to 46.5)              | -16.7 (-27.9 to -3.65)                    |
| 18 Idiopathic epilepsy        | 18 Colorectal cancer         | 291 (175 to 416)              | 114 (55.2 to 175)                | 17 (-7.47 to 42.7)                        |
| 19 Self-harm                  | 19 Urinary diseases          | 241 (181 to 309)              | 86.1 (62.4 to 117)               | 11.3 (0.74 to 22.5)                       |
| 20 COPD                       | 20 Cervical cancer           | 145 (98.1 to 196)             | 33.7 (13 to 59.1)                | -21.4 (-31.1 to -8.09)                    |
| 21 Breast cancer              | 22 Interpersonal violence    |                               |                                  |                                           |
| 22 Cervical cancer            | 24 Tuberculosis              |                               |                                  |                                           |
| 24 Esophageal cancer          | 25 Congenital defects        |                               |                                  |                                           |
| 28 Urinary diseases           | 28 Meningitis                |                               |                                  |                                           |
| 29 Prostate cancer            | 38 Malaria                   |                               |                                  |                                           |
| 30 Colorectal cancer          | 136 COVID-19                 |                               |                                  |                                           |

### Botswana, Reference scenario

**Legend:**

Communicable, maternal, neonatal and nutritional  
Non-communicable  
Injuries

| Leading Causes 2022           | Leading Causes 2050          | Mean % change number of DEATH | Mean % change all-age DEATH rate | Mean % change age-standardized DEATH rate |
|-------------------------------|------------------------------|-------------------------------|----------------------------------|-------------------------------------------|
| 1 HIV/AIDS                    | 1 Lower respiratory infect   | 80.5 (47.9 to 121)            | 41.7 (21.8 to 65.3)              | -27.8 (-36.1 to -18.6)                    |
| 2 COVID-19                    | 2 Stroke                     | 69.4 (32.2 to 107)            | 33 (10.7 to 54.7)                | -49.2 (-56.9 to -40.2)                    |
| 3 Stroke                      | 3 Hypertensive heart disease | 237 (154 to 321)              | 165 (106 to 230)                 | -2.54 (-23.5 to 22.5)                     |
| 4 Lower respiratory infect    | 4 Diabetes                   | 121 (70.6 to 179)             | 73.7 (39.6 to 109)               | -29 (-42.6 to -12.6)                      |
| 5 Ischemic heart disease      | 5 Ischemic heart disease     | 64.6 (13.5 to 114)            | 29.3 (-7.96 to 70.9)             | -48.5 (-63.3 to -29.6)                    |
| 6 Neonatal disorders          | 6 Chronic kidney disease     | 245 (163 to 330)              | 171 (114 to 234)                 | 16.8 (-4.24 to 46.4)                      |
| 7 Tuberculosis                | 7 COPD                       | 202 (131 to 264)              | 137 (93.4 to 184)                | -10.7 (-25.3 to 7.71)                     |
| 8 Diabetes                    | 8 HIV/AIDS                   | -80.9 (-86.2 to -73.6)        | -85 (-88.6 to -79.5)             | -88.1 (-90.8 to -84.5)                    |
| 9 Diarrheal diseases          | 9 Alzheimer's disease        | 347 (234 to 464)              | 250 (173 to 314)                 | 3.32 (-0.279 to 7.26)                     |
| 10 Hypertensive heart disease | 10 Prostate cancer           | 299 (192 to 428)              | 212 (139 to 293)                 | 17.8 (-3.65 to 41.8)                      |
| 11 Road injuries              | 11 Lung cancer               | 189 (113 to 266)              | 127 (72.3 to 177)                | 0.476 (-16.5 to 17.7)                     |
| 12 COPD                       | 12 Tuberculosis              | -28.9 (-48.1 to -5.83)        | -44.1 (-59.3 to -25.3)           | -67.3 (-76.2 to -55.3)                    |
| 13 Chronic kidney disease     | 13 Neonatal disorders        | -35 (-51.7 to -16)            | -49.1 (-59.5 to -36.1)           | -16.8 (-31.5 to -0.748)                   |
| 14 Cirrhosis liver            | 14 Cirrhosis liver           | 79.7 (48.5 to 113)            | 41.1 (20.4 to 62.3)              | -26 (-34.5 to -15.7)                      |
| 15 Self-harm                  | 15 Breast cancer             | 175 (103 to 256)              | 116 (68.3 to 174)                | 4.73 (-11 to 22.3)                        |
| 16 Interpersonal violence     | 16 Colorectal cancer         | 248 (148 to 354)              | 173 (108 to 246)                 | 17.1 (-2.92 to 38.1)                      |
| 17 Lung cancer                | 17 Diarrheal diseases        | -36.6 (-56.9 to -12.1)        | -50.2 (-64.7 to -31.1)           | -66.1 (-74.8 to -52.7)                    |
| 18 Breast cancer              | 18 Road injuries             | 8.47 (-30.6 to 64.3)          | -14.7 (-44.9 to 36.4)            | -28.8 (-56 to 21.5)                       |
| 19 Asthma                     | 19 Esophageal cancer         | 180 (130 to 238)              | 120 (93.5 to 152)                | -3.4 (-12.2 to 5.6)                       |
| 20 Prostate cancer            | 20 Cardiomyopathy            | 144 (97.4 to 192)             | 91.7 (60.5 to 118)               | -18.9 (-23.5 to -14)                      |
| 21 Alzheimer's disease        | 22 Self-harm                 |                               |                                  |                                           |
| 23 Cardiomyopathy             | 27 Asthma                    |                               |                                  |                                           |
| 25 Colorectal cancer          | 28 Interpersonal violence    |                               |                                  |                                           |
| 26 Esophageal cancer          | 132 COVID-19                 |                               |                                  |                                           |

### Eswatini, Reference scenario

**Legend:**

Communicable, maternal, neonatal and nutritional  
 Non-communicable  
 Injuries

| Leading Causes 2022           | Leading Causes 2050          | Mean % change number of DEATH | Mean % change all-age DEATH rate | Mean % change age-standardized DEATH rate |
|-------------------------------|------------------------------|-------------------------------|----------------------------------|-------------------------------------------|
| 1 HIV/AIDS                    | 1 Lower respiratory infect   | 16.1 (-5.39 to 43.7)          | 1.98 (-13.8 to 20.9)             | -32 (-39.7 to -23)                        |
| 2 COVID-19                    | 2 Stroke                     | 25.3 (-1.92 to 54.9)          | 10 (-10.3 to 34)                 | -47 (-55.6 to -37.6)                      |
| 3 Lower respiratory infect    | 3 Diabetes                   | <b>41.3 (7.47 to 77.2)</b>    | 24.2 (-3.51 to 57.9)             | -37.5 (-49.9 to -22.8)                    |
| 4 Stroke                      | 4 HIV/AIDS                   | <b>-73.1 (-78.7 to -65.4)</b> | <b>-76.4 (-80.2 to -70.4)</b>    | <b>-79.8 (-82.9 to -75.8)</b>             |
| 5 Tuberculosis                | 5 Chronic kidney disease     | <b>168 (110 to 242)</b>       | <b>136 (86.5 to 196)</b>         | <b>28.6 (4.6 to 58.6)</b>                 |
| 6 Diabetes                    | 6 Hypertensive heart disease | <b>139 (83.1 to 205)</b>      | <b>110 (64.1 to 168)</b>         | -3.9 (-25.4 to 20)                        |
| 7 Road injuries               | 7 Ischemic heart disease     | 28.4 (-7.32 to 73.8)          | 12.9 (-17.7 to 52.1)             | <b>-45 (-60.3 to -24.4)</b>               |
| 8 Ischemic heart disease      | 8 Road injuries              | -1.98 (-37.8 to 58.3)         | -13.7 (-46.8 to 40.1)            | -28.6 (-56.3 to 17.2)                     |
| 9 Neonatal disorders          | 9 COPD                       | <b>79.5 (38.7 to 117)</b>     | <b>57.7 (25.1 to 93.1)</b>       | <b>-23.1 (-36.6 to -7.41)</b>             |
| 10 Diarrheal diseases         | 10 Tuberculosis              | <b>-40.8 (-56.6 to -20.5)</b> | <b>-48 (-62.2 to -31.4)</b>      | <b>-66 (-74.9 to -54.2)</b>               |
| 11 Chronic kidney disease     | 11 Cirrhosis liver           | <b>40 (15.8 to 70)</b>        | <b>23 (5.51 to 42.5)</b>         | <b>-28 (-35.2 to -19.5)</b>               |
| 12 Hypertensive heart disease | 12 Liver cancer              | <b>123 (71.1 to 185)</b>      | <b>96.1 (55.7 to 148)</b>        | 8.95 (-12.1 to 35.2)                      |
| 13 COPD                       | 13 Neonatal disorders        | <b>-36.2 (-53.2 to -15.6)</b> | <b>-44.1 (-55.8 to -29)</b>      | -11.6 (-27.8 to 7.42)                     |
| 14 Interpersonal violence     | 14 Self-harm                 | 17.8 (-5.37 to 41.6)          | 3.39 (-12.3 to 20)               | <b>-18 (-30.4 to -2.62)</b>               |
| 15 Cirrhosis liver            | 15 Lung cancer               | <b>97.1 (49.8 to 157)</b>     | <b>72.8 (36.5 to 117)</b>        | -10.2 (-24.7 to 5.48)                     |
| 16 Self-harm                  | 16 Diarrheal diseases        | <b>-42.9 (-61.1 to -19.6)</b> | <b>-49.8 (-65.8 to -30.4)</b>    | <b>-54.9 (-66.6 to -37.9)</b>             |
| 17 Cervical cancer            | 17 Esophageal cancer         | <b>107 (63.3 to 151)</b>      | <b>81.9 (50.2 to 117)</b>        | -7.77 (-18 to 1.38)                       |
| 18 Liver cancer               | 18 Breast cancer             | <b>111 (58.1 to 182)</b>      | <b>84.9 (44.2 to 135)</b>        | 1.28 (-13.4 to 15.8)                      |
| 19 Lung cancer                | 19 Cervical cancer           | <b>50.9 (19.2 to 83.7)</b>    | <b>32.5 (11.5 to 58.6)</b>       | <b>-26.2 (-35 to -15)</b>                 |
| 20 Asthma                     | 20 Colorectal cancer         | <b>141 (70.5 to 239)</b>      | <b>111 (58.7 to 183)</b>         | 9.93 (-10.5 to 33.7)                      |
| 21 Esophageal cancer          | 21 Interpersonal violence    |                               |                                  |                                           |
| 22 Breast cancer              | 27 Asthma                    |                               |                                  |                                           |
| 25 Colorectal cancer          | 132 COVID-19                 |                               |                                  |                                           |

### Lesotho, Reference scenario

**Legend:**  
Communicable, maternal, neonatal and nutritional  
Non-communicable  
Injuries

| Leading Causes 2022           | Leading Causes 2050          | Mean % change number of DEATH | Mean % change all-age DEATH rate | Mean % change age-standardized DEATH rate |
|-------------------------------|------------------------------|-------------------------------|----------------------------------|-------------------------------------------|
| 1 HIV/AIDS                    | 1 Lower respiratory infect   | 16.2 (-1.38 to 35.7)          | -1.95 (-17.9 to 14.1)            | <b>-20.3 (-28.4 to -10.4)</b>             |
| 2 Tuberculosis                | 2 Stroke                     | 6.47 (-16.7 to 28.7)          | -10.1 (-28.4 to 6.85)            | <b>-37.2 (-46.8 to -25.7)</b>             |
| 3 Stroke                      | 3 Tuberculosis               | <b>-36.6 (-53.6 to -15.2)</b> | <b>-46.4 (-60.6 to -27.9)</b>    | <b>-61.2 (-71.2 to -48.1)</b>             |
| 4 Lower respiratory infect    | 4 Diabetes                   | <b>34 (3.77 to 68)</b>        | 13.2 (-12.6 to 42)               | -17.6 (-33.1 to 2.34)                     |
| 5 Diarrheal diseases          | 5 Diarrheal diseases         | -13.7 (-39.8 to 18)           | -27 (-50.4 to 3.85)              | -27.3 (-47.3 to 0.642)                    |
| 6 Neonatal disorders          | 6 Hypertensive heart disease | <b>78.7 (35.3 to 126)</b>     | <b>51 (13.9 to 91)</b>           | -2.62 (-23 to 21.2)                       |
| 7 Diabetes                    | 7 Road injuries              | 6.6 (-30.8 to 66.7)           | -9.85 (-43.2 to 43.2)            | -26 (-53.3 to 17.5)                       |
| 8 COVID-19                    | 8 Chronic kidney disease     | <b>119 (71.9 to 174)</b>      | <b>84.9 (43.5 to 131)</b>        | <b>36 (8.69 to 69.4)</b>                  |
| 9 Road injuries               | 9 Ischemic heart disease     | 19.9 (-14.9 to 62.9)          | 1.33 (-29.1 to 37.1)             | <b>-31.1 (-51.4 to -5.13)</b>             |
| 10 Ischemic heart disease     | 10 COPD                      | <b>50.3 (18.3 to 83.7)</b>    | 26.9 (-0.00231 to 54)            | -9 (-24.8 to 10.7)                        |
| 11 Interpersonal violence     | 11 HIV/AIDS                  | <b>-87.8 (-92.1 to -83.7)</b> | <b>-89.7 (-92.9 to -86.4)</b>    | <b>-89.9 (-93.2 to -86.7)</b>             |
| 12 Hypertensive heart disease | 12 Neonatal disorders        | <b>-44.2 (-58.2 to -27.9)</b> | <b>-53 (-63.5 to -40.8)</b>      | <b>-30.2 (-42.5 to -15.9)</b>             |
| 13 COPD                       | 13 Cirrhosis liver           | <b>27.9 (8.1 to 49.6)</b>     | 7.96 (-9.12 to 24.5)             | <b>-27.8 (-35.4 to -19.2)</b>             |
| 14 Cirrhosis liver            | 14 Interpersonal violence    | -20.3 (-34.1 to 2.01)         | <b>-32.9 (-40.3 to -23.7)</b>    | <b>-37.5 (-44.2 to -27.9)</b>             |
| 15 Chronic kidney disease     | 15 Lung cancer               | <b>98.1 (49.3 to 156)</b>     | <b>66.8 (27.9 to 108)</b>        | 12.2 (-6.61 to 32.1)                      |
| 16 Self-harm                  | 16 Self-harm                 | <b>20.3 (1.36 to 43.3)</b>    | 1.54 (-14.7 to 17.6)             | <b>-20.1 (-30.2 to -8.72)</b>             |
| 17 Cervical cancer            | 17 Cervical cancer           | <b>37 (15.1 to 59.1)</b>      | 15.6 (-1.78 to 32.5)             | <b>-23.3 (-32 to -13.7)</b>               |
| 18 Asthma                     | 18 Liver cancer              | <b>91.6 (49.2 to 140)</b>     | <b>61.8 (24.9 to 103)</b>        | 9.17 (-11.9 to 35.7)                      |
| 19 Lung cancer                | 19 Esophageal cancer         | <b>91 (56.7 to 136)</b>       | <b>61.1 (36 to 90.8)</b>         | 2.63 (-7.43 to 13.5)                      |
| 20 Liver cancer               | 20 Breast cancer             | <b>81 (38.8 to 130)</b>       | <b>52.5 (17.3 to 93)</b>         | 4.09 (-12.3 to 20.2)                      |
| 21 Esophageal cancer          | 26 Asthma                    |                               |                                  |                                           |
| 23 Breast cancer              | 130 COVID-19                 |                               |                                  |                                           |

### Namibia, Reference scenario

**Legend:**

Communicable, maternal, neonatal and nutritional  
Non-communicable  
Injuries

| Leading Causes 2022           | Leading Causes 2050          | Mean % change number of DEATH | Mean % change all-age DEATH rate | Mean % change age-standardized DEATH rate |
|-------------------------------|------------------------------|-------------------------------|----------------------------------|-------------------------------------------|
| 1 HIV/AIDS                    | 1 Stroke                     | 50 (22 to 86.2)               | 7.16 (-9.56 to 26.9)             | -46.5 (-53.9 to -37.7)                    |
| 2 COVID-19                    | 2 Lower respiratory infect   | 67.9 (37 to 106)              | 19.9 (1.2 to 39)                 | -26.6 (-33.5 to -18.4)                    |
| 3 Stroke                      | 3 Hypertensive heart disease | 216 (146 to 302)              | 126 (81.3 to 178)                | 7.53 (-15.6 to 35.4)                      |
| 4 Lower respiratory infect    | 4 Ischemic heart disease     | 39.1 (2.29 to 88.1)           | -0.624 (-24.8 to 30.8)           | -48.8 (-61.9 to -30.3)                    |
| 5 Ischemic heart disease      | 5 Diabetes                   | 68.4 (32.3 to 115)            | 20.3 (-2.55 to 50.1)             | -36 (-46.9 to -22.2)                      |
| 6 Tuberculosis                | 6 COPD                       | 114 (72.7 to 166)             | 53.3 (25.2 to 82.4)              | -22.8 (-35.1 to -7.86)                    |
| 7 Diabetes                    | 7 Road injuries              | 34.3 (-14.3 to 108)           | -4.04 (-36.2 to 45)              | -20.8 (-48.8 to 21.2)                     |
| 8 Diarrheal diseases          | 8 Chronic kidney disease     | 195 (126 to 270)              | 111 (69.5 to 160)                | 15.7 (-6.05 to 41.5)                      |
| 9 Neonatal disorders          | 9 Cirrhosis liver            | 114 (73.9 to 155)             | 52.9 (32.7 to 76.2)              | -8.13 (-18.3 to 4.74)                     |
| 10 Road injuries              | 10 Tuberculosis              | -21.8 (-43.6 to 2.8)          | -44.2 (-57.5 to -24.9)           | -63.5 (-72.4 to -50.8)                    |
| 11 Hypertensive heart disease | 11 Diarrheal diseases        | -12.7 (-40.5 to 23.5)         | -37.6 (-56.3 to -9.87)           | -49.5 (-63.3 to -29.3)                    |
| 12 COPD                       | 12 Breast cancer             | 148 (90.4 to 214)             | 76.9 (41.4 to 121)               | 4.35 (-9.35 to 20.4)                      |
| 13 Cirrhosis liver            | 13 Neonatal disorders        | -25.9 (-44.5 to -5.74)        | -47.1 (-58.4 to -33.5)           | -21.3 (-35.3 to -3.21)                    |
| 14 Interpersonal violence     | 14 Alzheimer's disease       | 242 (157 to 358)              | 144 (92.3 to 219)                | -0.681 (-4.02 to 2.22)                    |
| 15 Chronic kidney disease     | 15 Self-harm                 | 64.7 (31.4 to 100)            | 17.6 (1.81 to 35.5)              | -7.07 (-17.6 to 8.95)                     |
| 16 Self-harm                  | 16 Prostate cancer           | 198 (120 to 289)              | 113 (61.1 to 178)                | 6.95 (-12.5 to 26.9)                      |
| 17 Breast cancer              | 17 HIV/AIDS                  | -84 (-89.3 to -74.6)          | -88.6 (-92 to -81.6)             | -90.2 (-92.8 to -85.1)                    |
| 18 Asthma                     | 18 Interpersonal violence    | 0.666 (-17.7 to 24.7)         | -28.1 (-38.1 to -17.5)           | -31.6 (-40.6 to -22)                      |
| 19 Alzheimer's disease        | 19 Cardiomyopathy            | 113 (75.5 to 161)             | 52.5 (31.2 to 78.2)              | -18.6 (-23.3 to -13.8)                    |
| 20 Cardiomyopathy             | 20 Ileus & obstruction       | 131 (85.4 to 186)             | 64.7 (36.5 to 95.6)              | -2.32 (-17.1 to 13.8)                     |
| 21 Prostate cancer            | 24 Asthma                    |                               |                                  |                                           |
| 26 Ileus & obstruction        | 132 COVID-19                 |                               |                                  |                                           |



### South Africa, Reference scenario

**Legend:**  
Communicable, maternal, neonatal and nutritional  
Non-communicable  
Injuries

| Leading Causes 2022           | Leading Causes 2050          | Mean % change number of DEATH | Mean % change all-age DEATH rate | Mean % change age-standardized DEATH rate |
|-------------------------------|------------------------------|-------------------------------|----------------------------------|-------------------------------------------|
| 1 HIV/AIDS                    | 1 Diabetes                   | 57.7 (34.1 to 88)             | 36.6 (20 to 57.4)                | -29.9 (-39.3 to -18.1)                    |
| 2 COVID-19                    | 2 Lower respiratory infect   | 53 (31.2 to 73.2)             | 32.5 (20.5 to 43.1)              | -23.4 (-29.4 to -17.1)                    |
| 3 Stroke                      | 3 Stroke                     | 25.4 (8.55 to 43.5)           | 8.61 (-2.28 to 20)               | -47.6 (-53.3 to -41.3)                    |
| 4 Lower respiratory infect    | 4 Hypertensive heart disease | 162 (114 to 211)              | 127 (95 to 164)                  | 6.44 (-11.2 to 26.6)                      |
| 5 Diabetes                    | 5 Ischemic heart disease     | 23.1 (-3.48 to 53)            | 6.67 (-15.3 to 32.1)             | -47.1 (-59 to -31.1)                      |
| 6 Ischemic heart disease      | 6 Chronic kidney disease     | 163 (117 to 211)              | 128 (95.2 to 161)                | 19.9 (1.99 to 41.1)                       |
| 7 Road injuries               | 7 COPD                       | 109 (78.2 to 142)             | 81.2 (60.8 to 105)               | -12.2 (-22.5 to -1.25)                    |
| 8 Tuberculosis                | 8 HIV/AIDS                   | -73.5 (-78.4 to -68.8)        | -77.1 (-80.1 to -74.2)           | -79.6 (-82.1 to -77.4)                    |
| 9 Interpersonal violence      | 9 Road injuries              | 1.18 (-28.6 to 45.2)          | -12.3 (-37 to 28.7)              | -18.2 (-42 to 22.8)                       |
| 10 Hypertensive heart disease | 10 Diarrheal diseases        | 32.8 (1.09 to 68.4)           | 15.1 (-10.6 to 43.1)             | -27.4 (-44.4 to -4.48)                    |
| 11 Neonatal disorders         | 11 Alzheimer's disease       | 189 (141 to 230)              | 150 (125 to 175)                 | -1.01 (-4.07 to 1.98)                     |
| 12 Diarrheal diseases         | 12 Lung cancer               | 77.9 (43.7 to 112)            | 54 (29.7 to 76.3)                | -15 (-26.4 to -3.55)                      |
| 13 Chronic kidney disease     | 13 Prostate cancer           | 184 (130 to 247)              | 146 (102 to 193)                 | 17.1 (0.771 to 34.7)                      |
| 14 COPD                       | 14 Tuberculosis              | -30.4 (-46.1 to -11.8)        | -39.7 (-51.8 to -23.9)           | -59.8 (-68.3 to -48.2)                    |
| 15 Lung cancer                | 15 Interpersonal violence    | -27.2 (-39.3 to -15.6)        | -37 (-43.2 to -30.2)             | -36.4 (-43.2 to -29.2)                    |
| 16 Self-harm                  | 16 Neonatal disorders        | -15 (-31.5 to 5.55)           | -26.5 (-39 to -12.9)             | 5.64 (-11.8 to 23)                        |
| 17 Cirrhosis liver            | 17 Breast cancer             | 90.3 (53.8 to 125)            | 64.7 (37.6 to 88.9)              | -5.83 (-18.4 to 6.44)                     |
| 18 Breast cancer              | 18 Cirrhosis liver           | 56.2 (35.6 to 76.7)           | 35.3 (24.5 to 45.9)              | -15.4 (-22.3 to -9.13)                    |
| 19 Alzheimer's disease        | 19 Colorectal cancer         | 127 (73.7 to 176)             | 96.1 (61.1 to 131)               | 4.33 (-12 to 21)                          |
| 20 Cervical cancer            | 20 Endo/metab/blood/immune   | 97.3 (70.8 to 127)            | 70.8 (54.6 to 84.5)              | 15.4 (6.64 to 23.9)                       |
| 21 Prostate cancer            | 22 Self-harm                 |                               |                                  |                                           |
| 22 Endo/metab/blood/immune    | 26 Cervical cancer           |                               |                                  |                                           |
| 26 Colorectal cancer          | 132 COVID-19                 |                               |                                  |                                           |

### Zimbabwe, Reference scenario

**Legend:**  
Communicable, maternal, neonatal and nutritional  
Non-communicable  
Injuries

| Leading Causes 2022            | Leading Causes 2050            | Mean % change number of DEATH | Mean % change all-age DEATH rate | Mean % change age-standardized DEATH rate |
|--------------------------------|--------------------------------|-------------------------------|----------------------------------|-------------------------------------------|
| 1 HIV/AIDS                     | 1 Lower respiratory infect     | 32.3 (10.9 to 60)             | -6.16 (-18.5 to 12.6)            | -20.7 (-30 to -8.39)                      |
| 2 Lower respiratory infect     | 2 Stroke                       | 50.2 (15.6 to 84.6)           | 6.62 (-14.1 to 30.4)             | -33.4 (-46.5 to -14.2)                    |
| 3 COVID-19                     | 3 Ischemic heart disease       | 75.2 (21 to 145)              | 24.4 (-12.4 to 75.8)             | -22.5 (-47.1 to 13.5)                     |
| 4 Tuberculosis                 | 4 Tuberculosis                 | -27.9 (-50.2 to -0.229)       | -48.8 (-63.2 to -27)             | -61.1 (-71.7 to -44.5)                    |
| 5 Neonatal disorders           | 5 Chronic kidney disease       | 188 (118 to 263)              | 104 (61.9 to 162)                | 39.6 (10.5 to 81.5)                       |
| 6 Stroke                       | 6 Diabetes                     | 79.5 (34.1 to 130)            | 27.5 (-1.34 to 65.5)             | -16 (-36.3 to 11.2)                       |
| 7 Ischemic heart disease       | 7 Diarrheal diseases           | 34.1 (-20.7 to 92.1)          | -4.95 (-40 to 38)                | -6.66 (-31.2 to 28.2)                     |
| 8 Diarrheal diseases           | 8 Hypertensive heart disease   | 145 (88.6 to 207)             | 73.8 (38.6 to 120)               | 2.54 (-20.1 to 30.7)                      |
| 9 Diabetes                     | 9 Neonatal disorders           | -50.8 (-64.6 to -31.7)        | -65.2 (-72.8 to -53.3)           | -51.4 (-60.5 to -37.7)                    |
| 10 Malaria                     | 10 Self-harm                   | 38.9 (8.49 to 73.5)           | -1.51 (-17.1 to 21.3)            | -19.8 (-31.8 to -3.51)                    |
| 11 Road injuries               | 11 Road injuries               | 22.6 (-28.9 to 106)           | -12.9 (-46.7 to 51.1)            | -28.6 (-54.2 to 17.7)                     |
| 12 Protein-energy malnutrition | 12 Cirrhosis liver             | 36.5 (11.2 to 61.9)           | -3.15 (-17.6 to 14.5)            | -33.7 (-42.2 to -22.3)                    |
| 13 Self-harm                   | 13 HIV/AIDS                    | -82.3 (-86.4 to -77.1)        | -87.4 (-89.8 to -83.8)           | -87.8 (-90.4 to -84.1)                    |
| 14 Chronic kidney disease      | 14 COPD                        | 115 (71.1 to 163)             | 52.9 (24.6 to 86.7)              | -9 (-25.5 to 11.9)                        |
| 15 Hypertensive heart disease  | 15 Prostate cancer             | 170 (86.5 to 266)             | 91.5 (32.7 to 158)               | 6.82 (-16.1 to 29.6)                      |
| 16 Cirrhosis liver             | 16 Cervical cancer             | 53.4 (20.9 to 86.8)           | 8.93 (-9.92 to 33.2)             | -25 (-35.6 to -11.3)                      |
| 17 Cervical cancer             | 17 Breast cancer               | 107 (49.1 to 175)             | 46.7 (8.72 to 88.4)              | 1.1 (-18.8 to 20.8)                       |
| 18 Interpersonal violence      | 18 Liver cancer                | 123 (69.5 to 183)             | 58 (24.9 to 103)                 | 4.22 (-16.9 to 36.8)                      |
| 19 Congenital defects          | 19 Esophageal cancer           | 110 (66.9 to 149)             | 48.9 (28.2 to 72.9)              | -7.38 (-15.3 to 3.35)                     |
| 20 Asthma                      | 20 Lung cancer                 | 138 (74.5 to 211)             | 68.9 (25.5 to 117)               | 7.96 (-12.1 to 27.8)                      |
| 22 COPD                        | 21 Protein-energy malnutrition |                               |                                  |                                           |
| 24 Breast cancer               | 28 Interpersonal violence      |                               |                                  |                                           |
| 25 Esophageal cancer           | 29 Asthma                      |                               |                                  |                                           |
| 26 Liver cancer                | 31 Congenital defects          |                               |                                  |                                           |
| 27 Prostate cancer             | 46 Malaria                     |                               |                                  |                                           |
| 29 Lung cancer                 | 133 COVID-19                   |                               |                                  |                                           |

### Benin, Reference scenario

**Legend:**  
Communicable, maternal, neonatal and nutritional  
Non-communicable  
Injuries

| Leading Causes 2022           | Leading Causes 2050           | Mean % change number of DEATH | Mean % change all-age DEATH rate | Mean % change age-standardized DEATH rate |
|-------------------------------|-------------------------------|-------------------------------|----------------------------------|-------------------------------------------|
| 1 Malaria                     | 1 Malaria                     | 58 (-85.4 to 677)             | -23.4 (-92.7 to 288)             | -22.7 (-91.7 to 283)                      |
| 2 Neonatal disorders          | 2 Stroke                      | 83 (41.7 to 126)              | -12.9 (-30 to 5.48)              | -44.4 (-54.2 to -30.5)                    |
| 3 Lower respiratory infect    | 3 Neonatal disorders          | -23.9 (-43.7 to -1.63)        | -63.9 (-71.5 to -53.3)           | -43.9 (-54.9 to -28.2)                    |
| 4 Stroke                      | 4 Lower respiratory infect    | 28 (3.81 to 56.9)             | -39.1 (-49.6 to -26.4)           | -38.6 (-47.3 to -26.4)                    |
| 5 Diarrheal diseases          | 5 Chronic kidney disease      | 304 (217 to 410)              | 92.2 (48 to 142)                 | 36.6 (9.85 to 74.2)                       |
| 6 Ischemic heart disease      | 6 Ischemic heart disease      | 84.1 (32.9 to 154)            | -12.4 (-37.7 to 15.9)            | -44.3 (-60.5 to -24.3)                    |
| 7 Congenital defects          | 7 Diabetes                    | 130 (78.7 to 189)             | 9.53 (-17.5 to 36.4)             | -26.7 (-43.7 to -7.86)                    |
| 8 Measles                     | 8 Diarrheal diseases          | -7.73 (-39.1 to 36.4)         | -56.1 (-70.7 to -38.3)           | -58.6 (-68.3 to -45.4)                    |
| 9 Road injuries               | 9 Cirrhosis liver             | 86.6 (55.8 to 127)            | -11.2 (-25.7 to 6.81)            | -37.5 (-45.9 to -25.5)                    |
| 10 Chronic kidney disease     | 10 Road injuries              | 50.1 (-8.08 to 155)           | -28.5 (-56.5 to 16)              | -38.2 (-60.1 to -2.48)                    |
| 11 HIV/AIDS                   | 11 Hypertensive heart disease | 159 (103 to 231)              | 23.5 (-5.49 to 56.9)             | -24.8 (-40.4 to -4.47)                    |
| 12 Cirrhosis liver            | 12 Congenital defects         | -14.6 (-32.9 to 10)           | -59.5 (-65.7 to -50.1)           | -40.6 (-48.3 to -30.6)                    |
| 13 Tuberculosis               | 13 Hemoglobinopathies         | 38.7 (7.35 to 74.5)           | -34.2 (-46.5 to -21.1)           | -27.1 (-35.8 to -18.5)                    |
| 14 Diabetes                   | 14 Liver cancer               | 185 (117 to 261)              | 35.6 (6.05 to 70.8)              | -7.55 (-27.6 to 18.2)                     |
| 15 Hemoglobinopathies         | 15 Alzheimer's disease        | 282 (190 to 373)              | 81.9 (40.3 to 119)               | 3.25 (-0.587 to 6.81)                     |
| 16 Meningitis                 | 16 Prostate cancer            | 291 (170 to 420)              | 86.1 (25.6 to 144)               | 14.6 (-10.5 to 43.9)                      |
| 17 Maternal disorders         | 17 Falls                      | 165 (112 to 221)              | 25.8 (4.6 to 49)                 | -7.04 (-12.9 to -0.948)                   |
| 18 Hypertensive heart disease | 18 Self-harm                  | 127 (86.2 to 180)             | 8.28 (-10 to 31.2)               | -19.6 (-32 to -5.18)                      |
| 19 COPD                       | 19 COPD                       | 69.7 (31.9 to 109)            | -19.3 (-37.6 to -1.32)           | -49.2 (-59 to -37.7)                      |
| 20 Pertussis                  | 20 Breast cancer              | 280 (181 to 383)              | 80.5 (38.3 to 125)               | 24 (1.68 to 50.7)                         |
| 24 Liver cancer               | 21 Tuberculosis               |                               |                                  |                                           |
| 25 Self-harm                  | 22 Meningitis                 |                               |                                  |                                           |
| 26 Falls                      | 27 Maternal disorders         |                               |                                  |                                           |
| 30 Alzheimer's disease        | 33 Pertussis                  |                               |                                  |                                           |
| 31 Prostate cancer            | 38 HIV/AIDS                   |                               |                                  |                                           |
| 37 Breast cancer              | 83 Measles                    |                               |                                  |                                           |

### Burkina Faso, Reference scenario

**Legend:**  
Communicable, maternal, neonatal and nutritional  
Non-communicable  
Injuries

| Leading Causes 2022            | Leading Causes 2050            | Mean % change number of DEATH | Mean % change all-age DEATH rate | Mean % change age-standardized DEATH rate |
|--------------------------------|--------------------------------|-------------------------------|----------------------------------|-------------------------------------------|
| 1 Malaria                      | 1 Malaria                      | 10.9 (-94.8 to 523)           | -48.9 (-97.7 to 193)             | -50.2 (-96.6 to 221)                      |
| 2 Lower respiratory infect     | 2 Lower respiratory infect     | <b>23.3 (1.2 to 48.5)</b>     | <b>-44.7 (-53.2 to -34.1)</b>    | <b>-30.6 (-40.2 to -19.1)</b>             |
| 3 Neonatal disorders           | 3 Neonatal disorders           | -8.53 (-31 to 19)             | <b>-59 (-68.5 to -47.4)</b>      | <b>-41.5 (-52.8 to -27.9)</b>             |
| 4 Diarrheal diseases           | 4 Stroke                       | <b>60 (27.4 to 92.9)</b>      | <b>-28.2 (-44.2 to -14)</b>      | <b>-41.3 (-52.7 to -28.5)</b>             |
| 5 Stroke                       | 5 Diarrheal diseases           | 11.7 (-27.9 to 68)            | <b>-49.9 (-67.3 to -24.5)</b>    | <b>-35.5 (-54.5 to -8.5)</b>              |
| 6 Ischemic heart disease       | 6 Ischemic heart disease       | <b>68 (14.4 to 131)</b>       | -24.6 (-49 to 4.86)              | <b>-40.3 (-58.7 to -17.4)</b>             |
| 7 Congenital defects           | 7 Chronic kidney disease       | <b>169 (99.9 to 238)</b>      | 20.7 (-8.2 to 49.6)              | 3.97 (-20.2 to 31.6)                      |
| 8 Tuberculosis                 | 8 Road injuries                | 49.2 (-8.05 to 143)           | -33.1 (-59.5 to 10.9)            | <b>-39.8 (-60.6 to -4.53)</b>             |
| 9 Road injuries                | 9 Hypertensive heart disease   | <b>115 (57.6 to 174)</b>      | -3.47 (-27.3 to 21.8)            | <b>-27.9 (-44.3 to -6.96)</b>             |
| 10 Chronic kidney disease      | 10 Congenital defects          | -2.76 (-21.1 to 19.1)         | <b>-56.5 (-62.8 to -48.6)</b>    | <b>-40.2 (-47.9 to -30.5)</b>             |
| 11 Meningitis                  | 11 Diabetes                    | <b>139 (84.6 to 199)</b>      | 6.98 (-18.8 to 33.7)             | -10.5 (-30.2 to 13.9)                     |
| 12 COVID-19                    | 12 Cirrhosis liver             | <b>79.9 (45.5 to 112)</b>     | <b>-19.3 (-33.3 to -5.22)</b>    | <b>-35 (-44.6 to -24.5)</b>               |
| 13 Hypertensive heart disease  | 13 Liver cancer                | <b>159 (111 to 214)</b>       | 16.4 (-5.53 to 41.2)             | -6.62 (-23.8 to 17.2)                     |
| 14 iNTS                        | 14 Tuberculosis                | -15.8 (-42.9 to 20.1)         | <b>-62.2 (-74.9 to -45.3)</b>    | <b>-67.4 (-77.1 to -54.1)</b>             |
| 15 Cirrhosis liver             | 15 iNTS                        | 27.7 (-29.9 to 105)           | <b>-42.8 (-67.2 to -10.6)</b>    | -34 (-60.6 to 2.96)                       |
| 16 Hemoglobinopathies          | 16 Hemoglobinopathies          | 22.8 (-10 to 62.1)            | <b>-45 (-59.2 to -27.5)</b>      | <b>-34.4 (-48.4 to -17.9)</b>             |
| 17 Diabetes                    | 17 Breast cancer               | <b>236 (152 to 341)</b>       | <b>50.4 (12.4 to 94.6)</b>       | <b>24.8 (2.84 to 53.3)</b>                |
| 18 Protein-energy malnutrition | 18 Interpersonal violence      | <b>81.1 (48.9 to 124)</b>     | <b>-18.9 (-31.3 to -3.76)</b>    | <b>-27 (-36.7 to -15.8)</b>               |
| 19 HIV/AIDS                    | 19 Meningitis                  | 4.1 (-29.2 to 53.8)           | <b>-53.3 (-69.2 to -31.1)</b>    | <b>-46.7 (-61 to -26.6)</b>               |
| 20 Interpersonal violence      | 20 Falls                       | <b>135 (89.6 to 181)</b>      | 5.42 (-12.4 to 22.2)             | <b>-6.99 (-12 to -1.98)</b>               |
| 22 Liver cancer                | 36 Protein-energy malnutrition |                               |                                  |                                           |
| 26 Falls                       | 62 HIV/AIDS                    |                               |                                  |                                           |
| 29 Breast cancer               | 134 COVID-19                   |                               |                                  |                                           |

### Cabo Verde, Reference scenario

**Legend:**  
Communicable, maternal, neonatal and nutritional  
Non-communicable  
Injuries

| Leading Causes 2022          | Leading Causes 2050          | Mean % change number of DEATH | Mean % change all-age DEATH rate | Mean % change age-standardized DEATH rate |
|------------------------------|------------------------------|-------------------------------|----------------------------------|-------------------------------------------|
| 1 Ischemic heart disease     | 1 Ischemic heart disease     | 40 (0.921 to 91.2)            | 30.6 (-3.3 to 76.6)              | -44 (-60.7 to -23.2)                      |
| 2 Stroke                     | 2 Stroke                     | 37.3 (9.9 to 68)              | 28 (5.37 to 56.4)                | -44.6 (-54.2 to -29.9)                    |
| 3 Lower respiratory infect   | 3 Lower respiratory infect   | 64.3 (33.9 to 93.4)           | 53.2 (32.9 to 85.4)              | -31 (-38.5 to -21.5)                      |
| 4 Diabetes                   | 4 Chronic kidney disease     | 202 (136 to 273)              | 182 (130 to 249)                 | 28 (1.88 to 58.8)                         |
| 5 COVID-19                   | 5 Diabetes                   | 89.9 (47 to 138)              | 77.1 (41.9 to 122)               | -23 (-40.1 to -1.14)                      |
| 6 Chronic kidney disease     | 6 Prostate cancer            | 205 (127 to 301)              | 184 (109 to 262)                 | 14.7 (-5.23 to 41.8)                      |
| 7 Cirrhosis liver            | 7 Lung cancer                | 180 (120 to 259)              | 161 (102 to 218)                 | 12.2 (-5.92 to 31.3)                      |
| 8 Stomach cancer             | 8 Hypertensive heart disease | 124 (72.1 to 177)             | 109 (68 to 161)                  | -9.63 (-27.7 to 14.2)                     |
| 9 Hypertensive heart disease | 9 Alzheimer's disease        | 159 (109 to 224)              | 142 (98.4 to 185)                | 3.97 (1.19 to 7.62)                       |
| 10 Self-harm                 | 10 Pancreatic cancer         | 328 (213 to 466)              | 299 (199 to 416)                 | 72.4 (33.1 to 113)                        |
| 11 Interpersonal violence    | 11 Stomach cancer            | 70.2 (40.4 to 102)            | 58.6 (35.3 to 79.8)              | -31.3 (-36.3 to -26.2)                    |
| 12 Lung cancer               | 12 Esophageal cancer         | 132 (92.7 to 177)             | 116 (83.3 to 153)                | -3.24 (-13.4 to 7.63)                     |
| 13 Prostate cancer           | 13 Cirrhosis liver           | 40.3 (14.5 to 68.4)           | 30.7 (9.45 to 56.9)              | -33.3 (-42.6 to -20.8)                    |
| 14 Esophageal cancer         | 14 Liver cancer              | 133 (78.1 to 200)             | 117 (69.1 to 176)                | 2.42 (-20.7 to 32.1)                      |
| 15 Alzheimer's disease       | 15 COPD                      | 109 (66.6 to 150)             | 94.4 (59.5 to 136)               | -17.9 (-31.8 to -0.254)                   |
| 16 Neonatal disorders        | 16 Colorectal cancer         | 216 (133 to 317)              | 194 (123 to 275)                 | 26.3 (4.24 to 51)                         |
| 17 COPD                      | 17 Self-harm                 | 32 (7.05 to 58.4)             | 23 (2.82 to 43.7)                | -19.6 (-30.5 to -6.33)                    |
| 18 Liver cancer              | 18 Breast cancer             | 147 (92.3 to 219)             | 130 (80 to 187)                  | 11.4 (-6.07 to 30.4)                      |
| 19 Tuberculosis              | 19 Atrial fibrillation       | 214 (152 to 296)              | 193 (136 to 254)                 | 25.9 (19.2 to 34.4)                       |
| 20 Drowning                  | 20 Interpersonal violence    | -23.9 (-42.1 to -4.1)         | -29.2 (-42.4 to -14)             | -36.8 (-49.6 to -22.7)                    |
| 24 Pancreatic cancer         | 26 Drowning                  |                               |                                  |                                           |
| 25 Breast cancer             | 27 Tuberculosis              |                               |                                  |                                           |
| 26 Colorectal cancer         | 44 Neonatal disorders        |                               |                                  |                                           |
| 31 Atrial fibrillation       | 131 COVID-19                 |                               |                                  |                                           |

### Cameroon, Reference scenario

**Legend:**  
Communicable, maternal, neonatal and nutritional  
Non-communicable  
Injuries

| Leading Causes 2022           | Leading Causes 2050          | Mean % change number of DEATH | Mean % change all-age DEATH rate | Mean % change age-standardized DEATH rate |
|-------------------------------|------------------------------|-------------------------------|----------------------------------|-------------------------------------------|
| 1 Malaria                     | 1 Stroke                     | 91.1 (41.1 to 146)            | 10.8 (-10.5 to 36.6)             | -40.9 (-51.8 to -26.9)                    |
| 2 Neonatal disorders          | 2 Lower respiratory infect   | 49.7 (13.3 to 87.5)           | -13.1 (-27.8 to 4.73)            | -27.5 (-37.1 to -16.2)                    |
| 3 Lower respiratory infect    | 3 Chronic kidney disease     | 328 (201 to 459)              | 148 (96.2 to 214)                | 49.3 (18.4 to 89.2)                       |
| 4 HIV/AIDS                    | 4 Ischemic heart disease     | 105 (38.2 to 187)             | 19 (-14.7 to 58.6)               | -37.8 (-56.1 to -10.9)                    |
| 5 Stroke                      | 5 Neonatal disorders         | -19.3 (-44.6 to 12.3)         | -53.4 (-63.9 to -40.7)           | -25.4 (-38.5 to -10.2)                    |
| 6 Ischemic heart disease      | 6 Diabetes                   | 176 (92.4 to 259)             | 60.3 (22.8 to 99.7)              | -9.18 (-28.6 to 14.7)                     |
| 7 Road injuries               | 7 Malaria                    | -41.2 (-97 to 225)            | -65.8 (-98.3 to 83.3)            | -68.4 (-97.7 to 73)                       |
| 8 Diarrheal diseases          | 8 Road injuries              | 57.3 (-1.48 to 150)           | -8.81 (-38.3 to 48.6)            | -28.1 (-50 to 15)                         |
| 9 Chronic kidney disease      | 9 Hypertensive heart disease | 210 (118 to 310)              | 79.6 (37.7 to 122)               | -9.29 (-29.5 to 14.3)                     |
| 10 Congenital defects         | 10 Cirrhosis liver           | 85.6 (39.4 to 128)            | 7.67 (-9.52 to 27)               | -33.8 (-42.7 to -22.3)                    |
| 11 Diabetes                   | 11 Diarrheal diseases        | -0.828 (-40.9 to 47.3)        | -42.5 (-65.2 to -14.8)           | -44.8 (-61.1 to -22.9)                    |
| 12 Tuberculosis               | 12 Liver cancer              | 207 (131 to 286)              | 78.3 (48.3 to 111)               | 4.14 (-12.3 to 26.1)                      |
| 13 Cirrhosis liver            | 13 COPD                      | 128 (61.8 to 185)             | 31.9 (3.97 to 62.5)              | -31.4 (-43.5 to -15.8)                    |
| 14 Hypertensive heart disease | 14 Prostate cancer           | 278 (160 to 416)              | 119 (55.3 to 199)                | 8.49 (-12.8 to 32.1)                      |
| 15 Maternal disorders         | 15 Tuberculosis              | -1.46 (-33.6 to 38.7)         | -42.9 (-61.1 to -22.5)           | -63.3 (-73.8 to -50.4)                    |
| 16 Meningitis                 | 16 Self-harm                 | 105 (54.5 to 158)             | 19 (0.439 to 40.1)               | -18.5 (-29.3 to -4.84)                    |
| 17 Pertussis                  | 17 Alzheimer's disease       | 313 (193 to 466)              | 140 (78.8 to 207)                | 6.03 (2.48 to 10.2)                       |
| 18 COPD                       | 18 Breast cancer             | 238 (144 to 346)              | 96.2 (45.6 to 153)               | 16.6 (-3.57 to 37.4)                      |
| 19 Self-harm                  | 19 Congenital defects        | -25.4 (-45.6 to 2.06)         | -56.9 (-64.2 to -47.8)           | -37.2 (-45.3 to -25.4)                    |
| 20 Measles                    | 20 Falls                     | 165 (102 to 237)              | 53.5 (27.9 to 90.2)              | -7.33 (-12.5 to -2.61)                    |
| 21 Liver cancer               | 24 HIV/AIDS                  |                               |                                  |                                           |
| 26 Falls                      | 27 Meningitis                |                               |                                  |                                           |
| 28 Breast cancer              | 32 Maternal disorders        |                               |                                  |                                           |
| 30 Prostate cancer            | 37 Pertussis                 |                               |                                  |                                           |
| 35 Alzheimer's disease        | 93 Measles                   |                               |                                  |                                           |

### Chad, Reference scenario

**Legend:**

Communicable, maternal, neonatal and nutritional  
 Non-communicable  
 Injuries

| Leading Causes 2022            | Leading Causes 2050            | Mean % change number of DEATH | Mean % change all-age DEATH rate | Mean % change age-standardized DEATH rate |
|--------------------------------|--------------------------------|-------------------------------|----------------------------------|-------------------------------------------|
| 1 Diarrheal diseases           | 1 Neonatal disorders           | 9.87 (-16.5 to 45.9)          | -61.4 (-70.1 to -50.9)           | -47.7 (-59.3 to -33)                      |
| 2 Neonatal disorders           | 2 Diarrheal diseases           | -7.16 (-41.5 to 46.8)         | -67.4 (-79.3 to -50.8)           | -49.3 (-64.7 to -25.6)                    |
| 3 Lower respiratory infect     | 3 Lower respiratory infect     | 5.05 (-16.8 to 33.6)          | -63.1 (-69 to -55.1)             | -42.5 (-50.4 to -32.4)                    |
| 4 Malaria                      | 4 Stroke                       | <b>90.4 (47.7 to 138)</b>     | -33 (-46 to -18.2)               | -36.9 (-52.2 to -17.4)                    |
| 5 Stroke                       | 5 Ischemic heart disease       | <b>98.9 (30.5 to 189)</b>     | -30.1 (-53.4 to 0.404)           | -36.3 (-60.5 to -2.8)                     |
| 6 Tuberculosis                 | 6 Cirrhosis liver              | <b>135 (93.1 to 193)</b>      | -17.3 (-30.5 to -1.4)            | -27.2 (-39.2 to -11.6)                    |
| 7 Congenital defects           | 7 Malaria                      | -39.4 (-97 to 79.9)           | -77.3 (-98.9 to -36)             | -77.8 (-97.8 to -7.25)                    |
| 8 Ischemic heart disease       | 8 Congenital defects           | <b>29.3 (1.78 to 64.3)</b>    | -54.5 (-62.2 to -45.8)           | -39.9 (-49.6 to -29)                      |
| 9 Maternal disorders           | 9 Chronic kidney disease       | <b>216 (134 to 322)</b>       | 11.2 (-15.8 to 43.4)             | 10.2 (-18.1 to 46.1)                      |
| 10 Meningitis                  | 10 Road injuries               | 71.3 (-3.41 to 200)           | -39.7 (-66.8 to 5.69)            | -43.1 (-65.3 to -8.42)                    |
| 11 Measles                     | 11 Tuberculosis                | -24.5 (-51.4 to 18.9)         | -73.4 (-82.7 to -59.1)           | -72.7 (-82 to -60)                        |
| 12 Cirrhosis liver             | 12 Maternal disorders          | 17.4 (-27.2 to 77.8)          | -58.7 (-72.9 to -35.6)           | -64.7 (-76.6 to -47.3)                    |
| 13 Pertussis                   | 13 Diabetes                    | <b>139 (77.5 to 218)</b>      | -15.8 (-35.8 to 8.19)            | -18.5 (-39.6 to 10.9)                     |
| 14 Road injuries               | 14 Hypertensive heart disease  | <b>148 (84.2 to 237)</b>      | -12.8 (-33.6 to 14.8)            | -26 (-46.7 to 0.523)                      |
| 15 HIV/AIDS                    | 15 Pertussis                   | 12.5 (-32.5 to 83.9)          | -60.5 (-76.1 to -37.1)           | -50.8 (-70.2 to -22.8)                    |
| 16 Diabetes                    | 16 Meningitis                  | -16.2 (-47.1 to 34.1)         | -70.5 (-81.7 to -54.7)           | -59.6 (-72.2 to -41.4)                    |
| 17 Chronic kidney disease      | 17 Interpersonal violence      | <b>132 (81.7 to 200)</b>      | -18.4 (-33.1 to 1.33)            | -24.2 (-36.7 to -8.72)                    |
| 18 Protein-energy malnutrition | 18 Self-harm                   | <b>175 (123 to 236)</b>       | -3.21 (-18 to 15.2)              | -17.1 (-29.3 to -3.48)                    |
| 19 Hypertensive heart disease  | 19 Liver cancer                | <b>187 (118 to 273)</b>       | 1.11 (-19.5 to 28.8)             | -9.29 (-31.2 to 19.4)                     |
| 20 Drowning                    | 20 COPD                        | <b>70.5 (32.5 to 112)</b>     | -40.1 (-50.9 to -28.6)           | -46.5 (-57.3 to -33.1)                    |
| 21 COPD                        | 25 Drowning                    |                               |                                  |                                           |
| 22 Interpersonal violence      | 33 HIV/AIDS                    |                               |                                  |                                           |
| 24 Self-harm                   | 43 Protein-energy malnutrition |                               |                                  |                                           |
| 30 Liver cancer                | 62 Measles                     |                               |                                  |                                           |

### Côte d'Ivoire, Reference scenario

**Legend:**

Communicable, maternal, neonatal and nutritional  
 Non-communicable  
 Injuries

| Leading Causes 2022           | Leading Causes 2050          | Mean % change number of DEATH | Mean % change all-age DEATH rate | Mean % change age-standardized DEATH rate |
|-------------------------------|------------------------------|-------------------------------|----------------------------------|-------------------------------------------|
| 1 Malaria                     | 1 Lower respiratory infect   | 39.4 (12.7 to 68.9)           | -18.5 (-32.7 to -0.808)          | -34.8 (-44.4 to -21.6)                    |
| 2 Neonatal disorders          | 2 Stroke                     | 77 (36.5 to 124)              | 3.52 (-17.3 to 27.4)             | -50.1 (-59.6 to -36.8)                    |
| 3 Lower respiratory infect    | 3 Ischemic heart disease     | 90.9 (29.2 to 162)            | 11.7 (-21.3 to 52.8)             | -47.8 (-63.5 to -24.2)                    |
| 4 Stroke                      | 4 Malaria                    | -30.5 (-97.2 to 286)          | -58.2 (-98.3 to 144)             | -60.2 (-98.1 to 122)                      |
| 5 Ischemic heart disease      | 5 Chronic kidney disease     | 271 (181 to 369)              | 117 (70.7 to 169)                | 17.1 (-7.39 to 50.7)                      |
| 6 HIV/AIDS                    | 6 Neonatal disorders         | -48.9 (-62.7 to -31.9)        | -70.2 (-77.2 to -61.5)           | -51.2 (-61.3 to -38.3)                    |
| 7 Diarrheal diseases          | 7 Diabetes                   | 164 (103 to 234)              | 54.5 (21.2 to 95)                | -22.3 (-38.5 to 2.02)                     |
| 8 Congenital defects          | 8 Hypertensive heart disease | 203 (128 to 292)              | 77.4 (38.3 to 127)               | -19.1 (-37.5 to 6.59)                     |
| 9 Tuberculosis                | 9 Prostate cancer            | 358 (207 to 529)              | 167 (82.7 to 262)                | 12 (-10.7 to 39.4)                        |
| 10 COVID-19                   | 10 Cirrhosis liver           | 77.7 (43.1 to 117)            | 3.96 (-12.7 to 24.4)             | -37.5 (-47 to -25.4)                      |
| 11 Chronic kidney disease     | 11 Road injuries             | 39.8 (-13.6 to 122)           | -18.1 (-46.3 to 36.9)            | -38.3 (-58.8 to 0.666)                    |
| 12 Cirrhosis liver            | 12 Diarrheal diseases        | -5.9 (-40.6 to 35.2)          | -45 (-65.1 to -20.8)             | -51.5 (-64.6 to -31.3)                    |
| 13 Road injuries              | 13 Breast cancer             | 276 (164 to 379)              | 120 (63.9 to 182)                | 24.1 (-1.72 to 52)                        |
| 14 Diabetes                   | 14 Alzheimer's disease       | 390 (237 to 529)              | 186 (121 to 251)                 | 3.38 (-0.743 to 7.01)                     |
| 15 Hypertensive heart disease | 15 COPD                      | 119 (68.7 to 173)             | 27.8 (2.45 to 56.2)              | -42.4 (-53.9 to -28.5)                    |
| 16 Maternal disorders         | 16 Tuberculosis              | -7.77 (-34.1 to 24.9)         | -46 (-60.9 to -27.1)             | -66.9 (-76 to -54.3)                      |
| 17 Meningitis                 | 17 Self-harm                 | 106 (67.1 to 151)             | 20.2 (0.643 to 42.4)             | -20 (-32.1 to -4.9)                       |
| 18 Interpersonal violence     | 18 Falls                     | 194 (133 to 268)              | 71.6 (42.6 to 103)               | -6.01 (-11.2 to 0.287)                    |
| 19 iNTS                       | 19 Congenital defects        | -29 (-44 to -11.6)            | -58.6 (-65.2 to -49)             | -38.4 (-46.9 to -26.6)                    |
| 20 Self-harm                  | 20 Interpersonal violence    | 45.1 (15.4 to 80.6)           | -15.2 (-31.2 to 5.35)            | -31.6 (-43.4 to -17.9)                    |
| 21 COPD                       | 22 Meningitis                |                               |                                  |                                           |
| 22 Prostate cancer            | 25 Maternal disorders        |                               |                                  |                                           |
| 24 Breast cancer              | 28 iNTS                      |                               |                                  |                                           |
| 25 Falls                      | 31 HIV/AIDS                  |                               |                                  |                                           |
| 30 Alzheimer's disease        | 136 COVID-19                 |                               |                                  |                                           |



### The Gambia, Reference scenario

**Legend:**  
■ Communicable, maternal, neonatal and nutritional  
■ Non-communicable  
■ Injuries

| Leading Causes 2022           | Leading Causes 2050          | Mean % change number of DEATH | Mean % change all-age DEATH rate | Mean % change age-standardized DEATH rate |
|-------------------------------|------------------------------|-------------------------------|----------------------------------|-------------------------------------------|
| 1 Neonatal disorders          | 1 Stroke                     | 38.9 (10.8 to 72.5)           | -8.58 (-24.6 to 10.2)            | -48.8 (-58.4 to -36.1)                    |
| 2 Lower respiratory infect    | 2 Lower respiratory infect   | 32 (8.71 to 56.8)             | -13.1 (-24.3 to -0.169)          | -39.7 (-47.3 to -31)                      |
| 3 Stroke                      | 3 Ischemic heart disease     | 47.4 (5.77 to 96.9)           | -3.01 (-30.3 to 33.9)            | -46.5 (-62.7 to -24.9)                    |
| 4 HIV/AIDS                    | 4 Chronic kidney disease     | 206 (140 to 285)              | 101 (58.7 to 152)                | 24.3 (-3.22 to 56.9)                      |
| 5 Ischemic heart disease      | 5 Liver cancer               | 156 (90.7 to 234)             | 68.7 (30.8 to 115)               | -3 (-26.6 to 27)                          |
| 6 Tuberculosis                | 6 HIV/AIDS                   | -21.8 (-51.5 to 45.6)         | -48.4 (-66 to 2.45)              | -62.1 (-74.9 to -24.6)                    |
| 7 Diarrheal diseases          | 7 Hypertensive heart disease | 142 (86.1 to 205)             | 59.5 (25.1 to 98.2)              | -16.9 (-35.9 to 5.08)                     |
| 8 COVID-19                    | 8 Neonatal disorders         | -53.1 (-66.4 to -37.5)        | -69.2 (-76.3 to -61.9)           | -45.2 (-55.8 to -33.1)                    |
| 9 Chronic kidney disease      | 9 Diabetes                   | 88.5 (48.1 to 138)            | 24.1 (-3.04 to 53.5)             | -28.2 (-44.1 to -7.44)                    |
| 10 Diabetes                   | 10 Cirrhosis liver           | 63.5 (35.4 to 98.3)           | 7.66 (-10.1 to 30.3)             | -36.1 (-45.8 to -24.5)                    |
| 11 Liver cancer               | 11 Road injuries             | 26.5 (-17.6 to 84.5)          | -16.8 (-43.2 to 28)              | -39.2 (-57.9 to -8.04)                    |
| 12 Road injuries              | 12 Tuberculosis              | -29.5 (-48.9 to -8.14)        | -53.6 (-65.8 to -37.5)           | -70.6 (-78.8 to -61)                      |
| 13 Malaria                    | 13 COPD                      | 60.7 (29.7 to 97.8)           | 5.78 (-13.2 to 26.4)             | -42.4 (-52.5 to -29.7)                    |
| 14 Hypertensive heart disease | 14 Falls                     | 121 (79.2 to 168)             | 45.8 (18.1 to 75.6)              | -6.7 (-11.5 to -1.19)                     |
| 15 Cirrhosis liver            | 15 Diarrheal diseases        | -32.4 (-53.7 to -6.09)        | -55.5 (-69.1 to -37.7)           | -59.2 (-69.5 to -43.7)                    |
| 16 Maternal disorders         | 16 Alzheimer's disease       | 196 (117 to 293)              | 95.1 (46.9 to 155)               | 4.01 (1.07 to 7.79)                       |
| 17 Congenital defects         | 17 Self-harm                 | 73.3 (41 to 109)              | 14 (-3.43 to 33.9)               | -22.8 (-33.5 to -9.86)                    |
| 18 COPD                       | 18 Ileus & obstruction       | 117 (71.6 to 163)             | 42.6 (16.7 to 71.3)              | -8.05 (-24.1 to 10.6)                     |
| 19 Meningitis                 | 19 Cervical cancer           | 99.9 (64.7 to 141)            | 31.5 (12.2 to 57.3)              | -21.9 (-33.5 to -6.25)                    |
| 20 Falls                      | 20 Congenital defects        | -32.2 (-46.3 to -14.2)        | -55.5 (-61.7 to -47.2)           | -34.2 (-41.8 to -23.5)                    |
| 22 Self-harm                  | 22 Meningitis                |                               |                                  |                                           |
| 25 Alzheimer's disease        | 26 Maternal disorders        |                               |                                  |                                           |
| 28 Cervical cancer            | 37 Malaria                   |                               |                                  |                                           |
| 29 Ileus & obstruction        | 135 COVID-19                 |                               |                                  |                                           |

### Ghana, Reference scenario

**Legend:**

Communicable, maternal, neonatal and nutritional  
 Non-communicable  
 Injuries

| Leading Causes 2022           | Leading Causes 2050          | Mean % change number of DEATH | Mean % change all-age DEATH rate | Mean % change age-standardized DEATH rate |
|-------------------------------|------------------------------|-------------------------------|----------------------------------|-------------------------------------------|
| 1 Stroke                      | 1 Stroke                     | 59.5 (26.1 to 96.1)           | 3.81 (-19.2 to 27.2)             | -46.7 (-57.8 to -33.6)                    |
| 2 Neonatal disorders          | 2 Lower respiratory infect   | 125 (89 to 175)               | 46.7 (22.1 to 72.5)              | -9.71 (-20.5 to 3.5)                      |
| 3 Malaria                     | 3 Chronic kidney disease     | 238 (162 to 330)              | 120 (65.4 to 172)                | 24.7 (-3.47 to 58.8)                      |
| 4 Lower respiratory infect    | 4 Ischemic heart disease     | 68.4 (14.3 to 130)            | 9.64 (-25 to 52.6)               | -44.3 (-62.1 to -20.7)                    |
| 5 HIV/AIDS                    | 5 Malaria                    | 7.23 (-95.7 to 484)           | -30.4 (-97.3 to 287)             | -32.6 (-97.2 to 274)                      |
| 6 Ischemic heart disease      | 6 Diabetes                   | 134 (78.6 to 194)             | 52.5 (16.3 to 92.2)              | -17.8 (-35.3 to 4.79)                     |
| 7 Tuberculosis                | 7 Hypertensive heart disease | 205 (131 to 283)              | 98.8 (52.4 to 155)               | -1.38 (-24.5 to 29.3)                     |
| 8 Chronic kidney disease      | 8 Cirrhosis liver            | 84.4 (48 to 126)              | 20 (0.488 to 45)                 | -29.6 (-39.4 to -16.3)                    |
| 9 Diabetes                    | 9 Neonatal disorders         | -39.7 (-57 to -20.6)          | -61 (-69.4 to -50.4)             | -36.7 (-48.1 to -23.1)                    |
| 10 Road injuries              | 10 Diarrheal diseases        | 80.5 (28.2 to 143)            | 17.5 (-16.6 to 61.2)             | -19.8 (-42.4 to 10.5)                     |
| 11 Cirrhosis liver            | 11 Tuberculosis              | 13.5 (-19.4 to 58.3)          | -26.2 (-47.2 to 2.68)            | -57.2 (-69.8 to -40.9)                    |
| 12 Diarrheal diseases         | 12 Road injuries             | 36.8 (-18.1 to 134)           | -11 (-47 to 50.6)                | -26.8 (-54.9 to 22.1)                     |
| 13 COVID-19                   | 13 Alzheimer's disease       | 302 (187 to 441)              | 162 (93.8 to 240)                | 8.03 (4.54 to 12.1)                       |
| 14 Hypertensive heart disease | 14 Breast cancer             | 189 (115 to 273)              | 88 (41.1 to 140)                 | 12.7 (-7.58 to 37.1)                      |
| 15 Congenital defects         | 15 Prostate cancer           | 239 (130 to 366)              | 120 (52.3 to 194)                | 3.61 (-18.4 to 24)                        |
| 16 Meningitis                 | 16 Cardiomyopathy            | 115 (77.7 to 159)             | 39.9 (17.5 to 59.7)              | -20.3 (-25.3 to -16.2)                    |
| 17 Hemoglobinopathies         | 17 Falls                     | 163 (106 to 229)              | 70.9 (39 to 106)                 | -6.07 (-9.9 to -1.24)                     |
| 18 Cardiomyopathy             | 18 COPD                      | 151 (93.4 to 209)             | 63.6 (29.7 to 99.2)              | -18.3 (-34.7 to -0.259)                   |
| 19 Breast cancer              | 19 Liver cancer              | 193 (118 to 281)              | 90.7 (45.1 to 145)               | 10.4 (-12.6 to 46.2)                      |
| 20 Falls                      | 20 Meningitis                | 21.7 (-12.4 to 81.1)          | -20.8 (-42.4 to 13)              | -36.8 (-53.9 to -5)                       |
| 23 COPD                       | 21 Hemoglobinopathies        |                               |                                  |                                           |
| 25 Prostate cancer            | 25 HIV/AIDS                  |                               |                                  |                                           |
| 28 Alzheimer's disease        | 31 Congenital defects        |                               |                                  |                                           |
| 30 Liver cancer               | 134 COVID-19                 |                               |                                  |                                           |

### Guinea, Reference scenario

**Legend:**

Communicable, maternal, neonatal and nutritional  
 Non-communicable  
 Injuries

| Leading Causes 2022           | Leading Causes 2050           | Mean % change number of DEATH | Mean % change all-age DEATH rate | Mean % change age-standardized DEATH rate |
|-------------------------------|-------------------------------|-------------------------------|----------------------------------|-------------------------------------------|
| 1 Malaria                     | 1 Malaria                     | 24.5 (-90.6 to 527)           | -32.5 (-95.2 to 239)             | -19.5 (-94.7 to 261)                      |
| 2 Lower respiratory infect    | 2 Lower respiratory infect    | 11 (-10.6 to 34.2)            | <b>-42.3 (-52.7 to -31.2)</b>    | <b>-38.9 (-47.5 to -28.5)</b>             |
| 3 Neonatal disorders          | 3 Stroke                      | <b>49.9 (16.1 to 80.7)</b>    | <b>-22.1 (-36.1 to -4.34)</b>    | <b>-44.2 (-54.2 to -29.3)</b>             |
| 4 Stroke                      | 4 Ischemic heart disease      | <b>55.1 (8.2 to 110)</b>      | -19.4 (-43.2 to 10.7)            | <b>-43.3 (-61.4 to -18.4)</b>             |
| 5 Ischemic heart disease      | 5 Neonatal disorders          | <b>-38.8 (-52.7 to -20.8)</b> | <b>-68.2 (-74.9 to -59.8)</b>    | <b>-51.4 (-61.2 to -37.9)</b>             |
| 6 Diarrheal diseases          | 6 Chronic kidney disease      | <b>197 (126 to 269)</b>       | <b>54.5 (22.5 to 95.3)</b>       | 18.8 (-6.18 to 53.3)                      |
| 7 COVID-19                    | 7 Diabetes                    | <b>110 (58.2 to 164)</b>      | 9.06 (-13.8 to 39.3)             | -19.7 (-37.3 to 6.92)                     |
| 8 Congenital defects          | 8 Diarrheal diseases          | -7.74 (-35.2 to 24.7)         | <b>-52.1 (-66.6 to -35.7)</b>    | <b>-55.8 (-67.5 to -39.1)</b>             |
| 9 Tuberculosis                | 9 Cirrhosis liver             | <b>59.9 (30.5 to 90.1)</b>    | <b>-16.9 (-29.4 to -0.868)</b>   | <b>-39.4 (-49.5 to -27.8)</b>             |
| 10 HIV/AIDS                   | 10 Hypertensive heart disease | <b>116 (66.1 to 167)</b>      | 12.5 (-10.6 to 41.7)             | <b>-24.7 (-41.3 to -2.64)</b>             |
| 11 Cirrhosis liver            | 11 Liver cancer               | <b>135 (78.2 to 204)</b>      | 22.4 (-4.33 to 61.1)             | -11.9 (-32.1 to 18.1)                     |
| 12 Meningitis                 | 12 Congenital defects         | -19.5 (-34.9 to 2.05)         | <b>-58.2 (-64 to -51.1)</b>      | <b>-39.9 (-47.4 to -30.1)</b>             |
| 13 Pertussis                  | 13 Road injuries              | 16.3 (-28.5 to 88.7)          | <b>-39.5 (-62.9 to -3.1)</b>     | <b>-47.2 (-65.9 to -18.1)</b>             |
| 14 Road injuries              | 14 Tuberculosis               | -25.4 (-48.2 to 2.25)         | <b>-61.2 (-72.4 to -45.4)</b>    | <b>-70.5 (-79.1 to -58.9)</b>             |
| 15 Diabetes                   | 15 COPD                       | <b>57.9 (25.3 to 90.8)</b>    | <b>-17.9 (-32.8 to -0.85)</b>    | <b>-42.7 (-53.3 to -28.1)</b>             |
| 16 Maternal disorders         | 16 Cervical cancer            | <b>104 (63.4 to 147)</b>      | 6.02 (-12.3 to 26.5)             | <b>-21.9 (-33.6 to -9.81)</b>             |
| 17 Chronic kidney disease     | 17 Pertussis                  | -11.4 (-50.4 to 42.4)         | <b>-54.1 (-72.9 to -28.4)</b>    | -34.6 (-60.7 to 1.94)                     |
| 18 iNTS                       | 18 Breast cancer              | <b>250 (157 to 351)</b>       | <b>81.7 (35.8 to 135)</b>        | <b>30.8 (5.53 to 58)</b>                  |
| 19 Hypertensive heart disease | 19 Alzheimer's disease        | <b>203 (118 to 292)</b>       | <b>57.1 (15.5 to 102)</b>        | <b>3.9 (0.357 to 7.88)</b>                |
| 20 Measles                    | 20 iNTS                       | -1.43 (-49.9 to 64.1)         | <b>-48.8 (-70.9 to -13.7)</b>    | -38.4 (-64 to 3.65)                       |
| 21 COPD                       | 21 Maternal disorders         |                               |                                  |                                           |
| 23 Liver cancer               | 22 Meningitis                 |                               |                                  |                                           |
| 25 Cervical cancer            | 39 HIV/AIDS                   |                               |                                  |                                           |
| 32 Alzheimer's disease        | 92 Measles                    |                               |                                  |                                           |
| 35 Breast cancer              | 135 COVID-19                  |                               |                                  |                                           |

### Guinea-Bissau, Reference scenario

**Legend:**  
Communicable, maternal, neonatal and nutritional  
Non-communicable  
Injuries

| Leading Causes 2022           | Leading Causes 2050          | Mean % change number of DEATH | Mean % change all-age DEATH rate | Mean % change age-standardized DEATH rate |
|-------------------------------|------------------------------|-------------------------------|----------------------------------|-------------------------------------------|
| 1 COVID-19                    | 1 Stroke                     | 61.9 (28.1 to 107)            | -8.67 (-26.4 to 11.9)            | -47 (-59 to -32.6)                        |
| 2 Neonatal disorders          | 2 Lower respiratory infect   | 52.2 (23.7 to 89.4)           | -14.2 (-28.2 to 0.806)           | -35.9 (-44.6 to -26)                      |
| 3 HIV/AIDS                    | 3 Ischemic heart disease     | 78.3 (20.2 to 156)            | 0.666 (-30.7 to 41.2)            | -44.1 (-62.6 to -18.3)                    |
| 4 Stroke                      | 4 Chronic kidney disease     | 213 (136 to 309)              | 76.4 (39.2 to 119)               | 13.9 (-14.2 to 43)                        |
| 5 Lower respiratory infect    | 5 HIV/AIDS                   | -39 (-59.6 to -10)            | -65.7 (-76.7 to -51)             | -71.3 (-80.6 to -57.5)                    |
| 6 Ischemic heart disease      | 6 Neonatal disorders         | -49.9 (-64.3 to -32.8)        | -71.8 (-78.3 to -64.4)           | -51.2 (-61 to -39.7)                      |
| 7 Tuberculosis                | 7 Diabetes                   | 130 (69.4 to 205)             | 30 (-0.0185 to 64)               | -21.8 (-41.7 to 2.04)                     |
| 8 Measles                     | 8 Hypertensive heart disease | 168 (104 to 247)              | 51.1 (18.2 to 93.2)              | -20.8 (-39.4 to 3.88)                     |
| 9 Road injuries               | 9 Road injuries              | 34.9 (-27.4 to 138)           | -23.8 (-56.8 to 35)              | -35.4 (-62.8 to 11.4)                     |
| 10 Diarrheal diseases         | 10 Cirrhosis liver           | 71.3 (37.2 to 113)            | -3.34 (-21 to 15.6)              | -38.9 (-49.3 to -26.5)                    |
| 11 Cirrhosis liver            | 11 Diarrheal diseases        | 15.1 (-21.2 to 63.6)          | -35 (-53 to -14.1)               | -41.2 (-56.9 to -17.4)                    |
| 12 Congenital defects         | 12 Tuberculosis              | -22.7 (-46.3 to 10.5)         | -56.4 (-68.9 to -40.2)           | -70.5 (-79 to -58.6)                      |
| 13 Diabetes                   | 13 Liver cancer              | 181 (107 to 278)              | 58.7 (20.4 to 104)               | -4.32 (-28.1 to 25.3)                     |
| 14 Chronic kidney disease     | 14 COPD                      | 105 (61.5 to 155)             | 15.8 (-7.07 to 40.6)             | -37.1 (-49.4 to -21.1)                    |
| 15 Malaria                    | 15 Self-harm                 | 102 (62 to 148)               | 13.9 (-7.26 to 36)               | -20.7 (-34 to -5.78)                      |
| 16 Hypertensive heart disease | 16 Cervical cancer           | 115 (72.1 to 166)             | 21.5 (-2.75 to 44.8)             | -22.5 (-34.9 to -8.52)                    |
| 17 Meningitis                 | 17 Interpersonal violence    | 49.1 (12.8 to 87.8)           | -16.1 (-30.5 to 3.31)            | -30 (-41.1 to -15.5)                      |
| 18 Interpersonal violence     | 18 Breast cancer             | 227 (129 to 325)              | 84.3 (35.6 to 138)               | 17.3 (-5.4 to 41.3)                       |
| 19 COPD                       | 19 Congenital defects        | -19.3 (-37 to 3.56)           | -54.6 (-61.3 to -46.3)           | -33 (-40.8 to -22.5)                      |
| 20 Pertussis                  | 20 Falls                     | 153 (97.7 to 208)             | 42.6 (18 to 68)                  | -7.03 (-11 to -2.1)                       |
| 21 Self-harm                  | 21 Meningitis                |                               |                                  |                                           |
| 22 Cervical cancer            | 35 Pertussis                 |                               |                                  |                                           |
| 24 Liver cancer               | 47 Measles                   |                               |                                  |                                           |
| 30 Falls                      | 69 Malaria                   |                               |                                  |                                           |
| 31 Breast cancer              | 134 COVID-19                 |                               |                                  |                                           |

### Liberia, Reference scenario

**Legend:**

Communicable, maternal, neonatal and nutritional  
 Non-communicable  
 Injuries

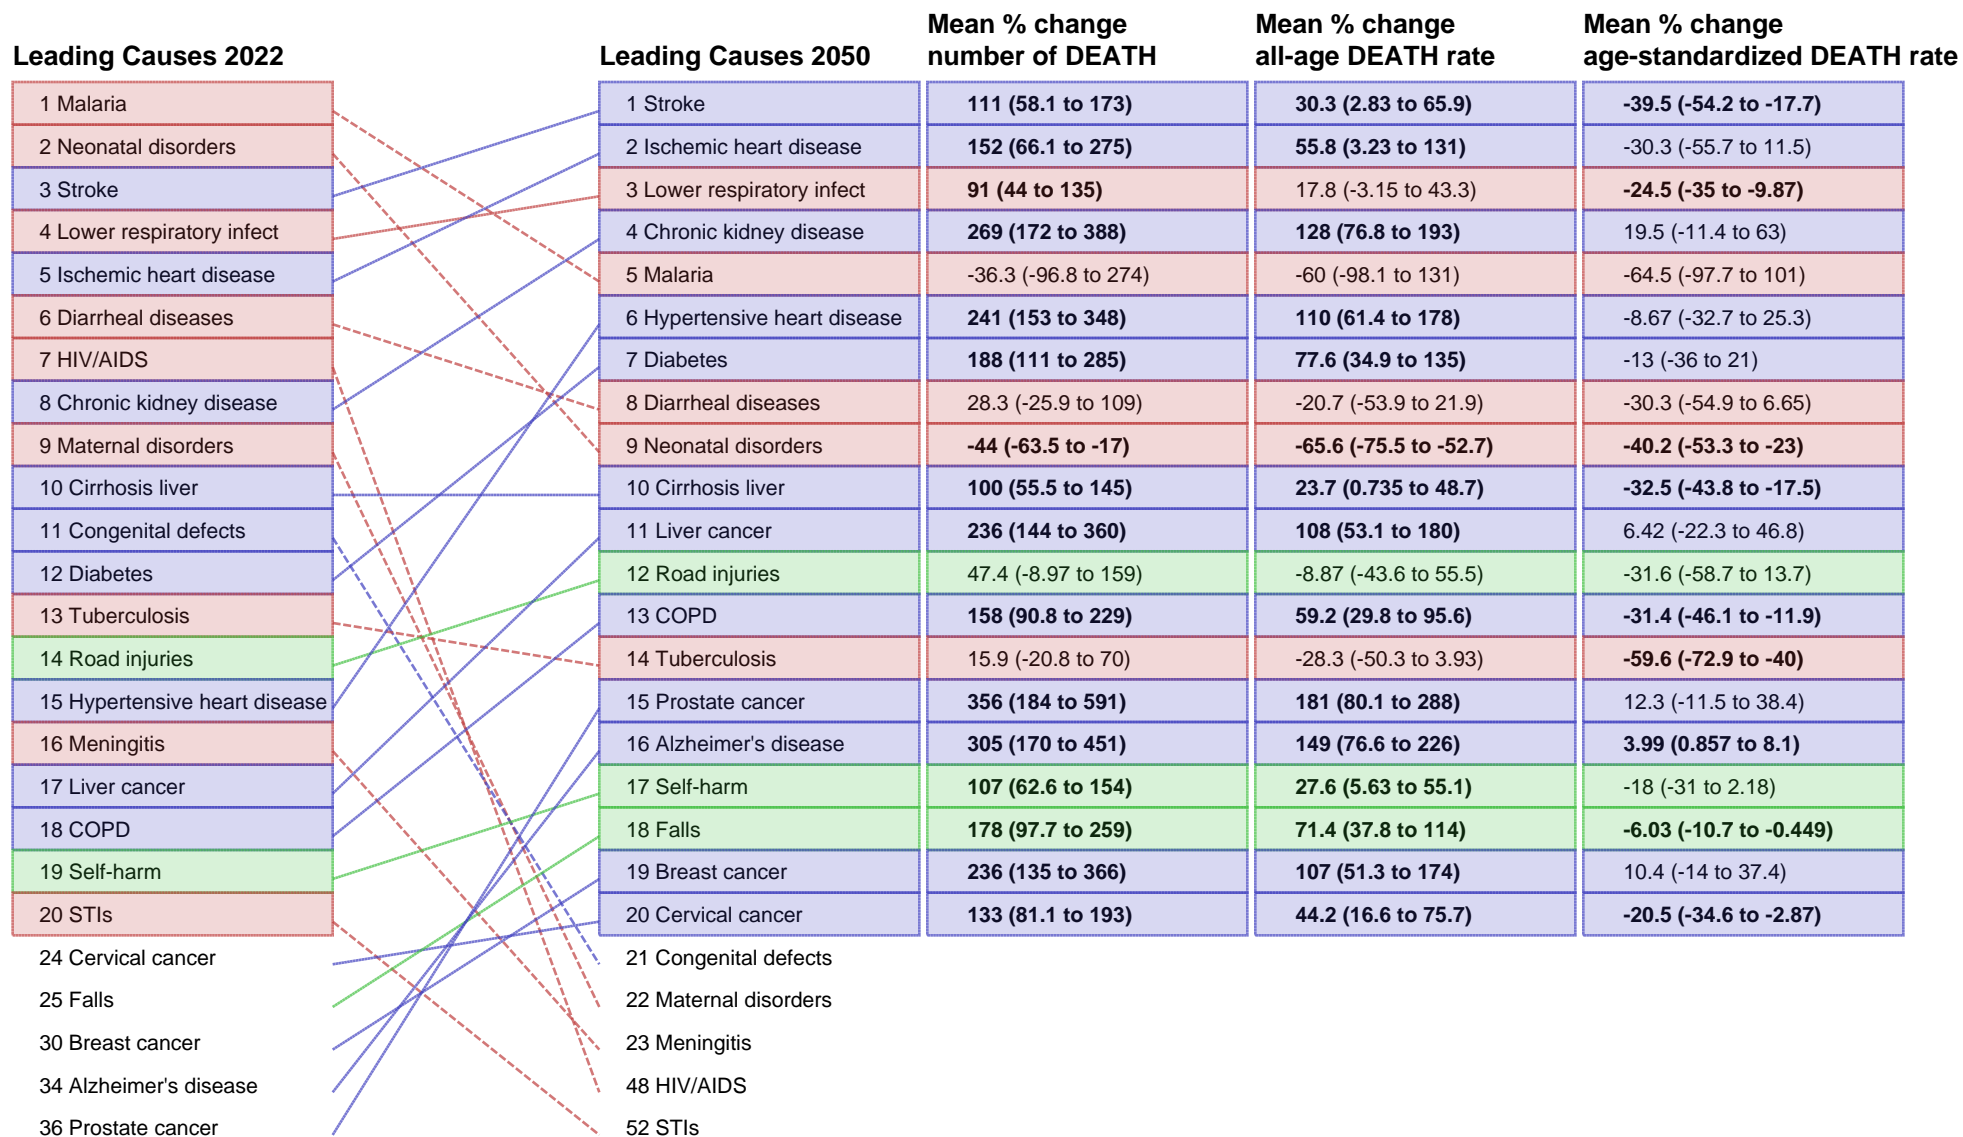

### Mali, Reference scenario

**Legend:**  
Communicable, maternal, neonatal and nutritional  
Non-communicable  
Injuries

| Leading Causes 2022           | Leading Causes 2050            | Mean % change number of DEATH | Mean % change all-age DEATH rate | Mean % change age-standardized DEATH rate |
|-------------------------------|--------------------------------|-------------------------------|----------------------------------|-------------------------------------------|
| 1 Neonatal disorders          | 1 Neonatal disorders           | -10.8 (-33.8 to 20.1)         | <b>-62.4 (-71.5 to -49.7)</b>    | <b>-48.2 (-60.7 to -31.3)</b>             |
| 2 Malaria                     | 2 Stroke                       | <b>93.5 (45 to 148)</b>       | <b>-18.3 (-35.7 to -2.39)</b>    | <b>-34 (-48.4 to -16.8)</b>               |
| 3 Lower respiratory infect    | 3 Lower respiratory infect     | 21.4 (-3.76 to 53.9)          | <b>-48.7 (-57.2 to -39.4)</b>    | <b>-34.3 (-42.8 to -23.3)</b>             |
| 4 Stroke                      | 4 Malaria                      | -48.9 (-97 to 229)            | -77.1 (-98.6 to 39.5)            | -74.8 (-97.3 to 45.8)                     |
| 5 Diarrheal diseases          | 5 Ischemic heart disease       | <b>114 (37.4 to 205)</b>      | -9.61 (-39 to 26.7)              | -30 (-54.6 to 4.22)                       |
| 6 Congenital defects          | 6 Chronic kidney disease       | <b>250 (156 to 352)</b>       | <b>47.9 (13.3 to 84.4)</b>       | 24.8 (-4.34 to 62.8)                      |
| 7 Protein-energy malnutrition | 7 Diabetes                     | <b>179 (104 to 264)</b>       | 17.6 (-11.1 to 46)               | -2.92 (-26.5 to 26.7)                     |
| 8 Ischemic heart disease      | 8 Congenital defects           | 7.8 (-18 to 37.9)             | <b>-54.5 (-61.9 to -44.2)</b>    | <b>-39.4 (-48.7 to -28.5)</b>             |
| 9 Tuberculosis                | 9 Diarrheal diseases           | -2.95 (-40.8 to 48.6)         | <b>-59 (-73.7 to -40.8)</b>      | <b>-52.5 (-67.5 to -33.1)</b>             |
| 10 HIV/AIDS                   | 10 Liver cancer                | <b>160 (90.6 to 243)</b>      | 9.71 (-14.1 to 37.5)             | -9.56 (-31.1 to 16)                       |
| 11 COVID-19                   | 11 COPD                        | <b>98.3 (51.7 to 152)</b>     | -16.2 (-33.4 to 0.442)           | <b>-35.8 (-50 to -19.2)</b>               |
| 12 iNTS                       | 12 Cirrhosis liver             | <b>74.7 (36.9 to 117)</b>     | <b>-26.2 (-37.6 to -12.2)</b>    | <b>-38.8 (-48.1 to -26.9)</b>             |
| 13 Road injuries              | 13 Road injuries               | 43.5 (-13.1 to 132)           | <b>-39.4 (-62.9 to -2.77)</b>    | <b>-44.1 (-63.6 to -15.2)</b>             |
| 14 Measles                    | 14 Hypertensive heart disease  | <b>141 (75.9 to 214)</b>      | 1.86 (-23.5 to 30.2)             | <b>-24 (-42.5 to -0.873)</b>              |
| 15 Cirrhosis liver            | 15 iNTS                        | 8.1 (-45 to 94.1)             | <b>-54.4 (-76.7 to -19.4)</b>    | <b>-48.9 (-71.1 to -13.1)</b>             |
| 16 Meningitis                 | 16 Tuberculosis                | -20 (-46.9 to 11.8)           | <b>-66.2 (-76 to -53.4)</b>      | <b>-71.4 (-79.5 to -59.8)</b>             |
| 17 Diabetes                   | 17 Alzheimer's disease         | <b>308 (194 to 442)</b>       | <b>72.1 (25.1 to 118)</b>        | <b>4.63 (1.46 to 8.48)</b>                |
| 18 COPD                       | 18 Protein-energy malnutrition | <b>-51.8 (-77.8 to -6.67)</b> | <b>-79.7 (-90.3 to -60.8)</b>    | <b>-68.9 (-83.5 to -44.8)</b>             |
| 19 Chronic kidney disease     | 19 Meningitis                  | 0.329 (-32.9 to 51.7)         | <b>-57.6 (-72 to -37.4)</b>      | <b>-52.8 (-65.4 to -34.7)</b>             |
| 20 Maternal disorders         | 20 Interpersonal violence      | <b>79.9 (40.4 to 134)</b>     | <b>-24 (-37.2 to -5.06)</b>      | <b>-29.5 (-39.8 to -14)</b>               |
| 21 Liver cancer               | 23 Maternal disorders          |                               |                                  |                                           |
| 22 Hypertensive heart disease | 62 Measles                     |                               |                                  |                                           |
| 25 Interpersonal violence     | 63 HIV/AIDS                    |                               |                                  |                                           |
| 36 Alzheimer's disease        | 134 COVID-19                   |                               |                                  |                                           |

### Mauritania, Reference scenario

**Legend:**

Communicable, maternal, neonatal and nutritional  
Non-communicable  
Injuries

| Leading Causes 2022           | Leading Causes 2050          | Mean % change number of DEATH | Mean % change all-age DEATH rate | Mean % change age-standardized DEATH rate |
|-------------------------------|------------------------------|-------------------------------|----------------------------------|-------------------------------------------|
| 1 Stroke                      | 1 Stroke                     | 51.8 (17.8 to 85.5)           | -10.8 (-28.4 to 10.1)            | -45.1 (-57.1 to -28.3)                    |
| 2 Neonatal disorders          | 2 Lower respiratory infect   | 72.5 (42.1 to 103)            | 1.31 (-13.6 to 21.1)             | -22.9 (-33.5 to -9.26)                    |
| 3 Ischemic heart disease      | 3 Ischemic heart disease     | 50.2 (5.74 to 105)            | -11.7 (-37 to 21.4)              | -45.7 (-63.5 to -20.9)                    |
| 4 Lower respiratory infect    | 4 Chronic kidney disease     | 251 (176 to 340)              | 106 (62.8 to 155)                | 33.3 (5.23 to 70.4)                       |
| 5 COVID-19                    | 5 Hypertensive heart disease | 158 (100 to 227)              | 51.5 (19.4 to 84.6)              | -8.36 (-29.1 to 16.4)                     |
| 6 Road injuries               | 6 Road injuries              | 42.8 (-19.3 to 148)           | -16.2 (-50.1 to 46.2)            | -28.1 (-56 to 21.5)                       |
| 7 Chronic kidney disease      | 7 Neonatal disorders         | -25.1 (-44.2 to 2.78)         | -56.2 (-65.1 to -44.1)           | -32.8 (-44.9 to -18.1)                    |
| 8 Malaria                     | 8 Diabetes                   | 89.6 (43 to 143)              | 11.4 (-12.7 to 41.6)             | -28.6 (-45.8 to -3.16)                    |
| 9 Diarrheal diseases          | 9 Liver cancer               | 171 (109 to 259)              | 59.3 (26.7 to 107)               | 4.35 (-19.8 to 40.9)                      |
| 10 Diabetes                   | 10 Cirrhosis liver           | 70.6 (40 to 106)              | 0.242 (-15.6 to 19.7)            | -32.8 (-43.2 to -19.2)                    |
| 11 Hypertensive heart disease | 11 Alzheimer's disease       | 228 (140 to 341)              | 92.8 (43.9 to 154)               | 5.16 (2.33 to 8.89)                       |
| 12 Cirrhosis liver            | 12 Prostate cancer           | 206 (113 to 340)              | 80 (26.2 to 155)                 | 6.55 (-14.9 to 30.4)                      |
| 13 Maternal disorders         | 13 COPD                      | 114 (69.5 to 160)             | 25.6 (2 to 52.7)                 | -24.1 (-37.8 to -4.75)                    |
| 14 Congenital defects         | 14 Breast cancer             | 196 (121 to 290)              | 73.6 (31.5 to 129)               | 15.2 (-4.2 to 40.1)                       |
| 15 Liver cancer               | 15 Diarrheal diseases        | -13.9 (-41.7 to 19.7)         | -49.5 (-65.8 to -29.1)           | -54.9 (-67.3 to -38.4)                    |
| 16 Tuberculosis               | 16 Falls                     | 150 (95.3 to 213)             | 46.7 (18.5 to 80.1)              | -4.49 (-9.64 to 1.09)                     |
| 17 COPD                       | 17 Colorectal cancer         | 234 (143 to 362)              | 96.1 (44.5 to 165)               | 23.2 (1.27 to 50)                         |
| 18 Prostate cancer            | 18 Cervical cancer           | 104 (67.2 to 145)             | 20.2 (0.228 to 45.9)             | -19.5 (-31.7 to -4.38)                    |
| 19 Meningitis                 | 19 Lung cancer               | 175 (102 to 271)              | 61.2 (19.2 to 112)               | 2.25 (-16.6 to 22.9)                      |
| 20 Alzheimer's disease        | 20 Pancreatic cancer         | 390 (251 to 588)              | 188 (107 to 290)                 | 82.1 (38.3 to 129)                        |
| 22 Cervical cancer            | 21 Tuberculosis              |                               |                                  |                                           |
| 23 Falls                      | 22 Congenital defects        |                               |                                  |                                           |
| 24 Breast cancer              | 24 Maternal disorders        |                               |                                  |                                           |
| 30 Lung cancer                | 32 Malaria                   |                               |                                  |                                           |
| 33 Colorectal cancer          | 33 Meningitis                |                               |                                  |                                           |
| 41 Pancreatic cancer          | 134 COVID-19                 |                               |                                  |                                           |

### Niger, Reference scenario

**Legend:**  
Communicable, maternal, neonatal and nutritional  
Non-communicable  
Injuries

| Leading Causes 2022           | Leading Causes 2050           | Mean % change number of DEATH | Mean % change all-age DEATH rate | Mean % change age-standardized DEATH rate |
|-------------------------------|-------------------------------|-------------------------------|----------------------------------|-------------------------------------------|
| 1 Malaria                     | 1 Neonatal disorders          | 46.2 (13.3 to 86.1)           | -48.1 (-59.1 to -35.1)           | -35.7 (-48.3 to -20.5)                    |
| 2 Neonatal disorders          | 2 Malaria                     | 26.5 (-96.5 to 653)           | -54.4 (-98.7 to 164)             | -52.5 (-97.5 to 164)                      |
| 3 Lower respiratory infect    | 3 Lower respiratory infect    | 53.5 (20.3 to 93.4)           | -45.5 (-54.5 to -32.3)           | -22.7 (-32.9 to -10.3)                    |
| 4 Diarrheal diseases          | 4 Stroke                      | 174 (111 to 244)              | -2.78 (-21.3 to 19.6)            | 3.22 (-16.7 to 26.8)                      |
| 5 Measles                     | 5 Diarrheal diseases          | 30.6 (-12.7 to 81.5)          | -53.7 (-68.8 to -34.9)           | -36.2 (-54.2 to -11.3)                    |
| 6 Stroke                      | 6 Ischemic heart disease      | 267 (158 to 388)              | 30.3 (-5.01 to 70.5)             | 38.2 (-2.54 to 96.6)                      |
| 7 Tuberculosis                | 7 Diabetes                    | 399 (286 to 517)              | 77.2 (42.7 to 117)               | 94.3 (51.4 to 142)                        |
| 8 Congenital defects          | 8 Chronic kidney disease      | 327 (229 to 446)              | 51.5 (17.5 to 86.8)              | 64 (25.5 to 109)                          |
| 9 Ischemic heart disease      | 9 Congenital defects          | 37.5 (9.01 to 72.2)           | -51.2 (-58.8 to -40.7)           | -39.4 (-48.2 to -27.7)                    |
| 10 Meningitis                 | 10 Cirrhosis liver            | 95.9 (58.1 to 136)            | -30.5 (-40.1 to -19.1)           | -33.5 (-43 to -21.9)                      |
| 11 Maternal disorders         | 11 iNTS                       | 77.3 (-2.8 to 191)            | -37 (-64.7 to -0.776)            | -33.1 (-61.2 to 2.78)                     |
| 12 Cirrhosis liver            | 12 Tuberculosis               | -1.82 (-34.7 to 45.4)         | -65.1 (-76.2 to -48.8)           | -65.1 (-75.6 to -50.5)                    |
| 13 iNTS                       | 13 Maternal disorders         | 51.8 (2.26 to 119)            | -46.1 (-63.4 to -22.1)           | -55.1 (-68.6 to -36.5)                    |
| 14 COVID-19                   | 14 Meningitis                 | 27.4 (-21.4 to 102)           | -54.7 (-71.5 to -26.9)           | -45.4 (-61.2 to -20.1)                    |
| 15 Pertussis                  | 15 Pertussis                  | 90.7 (6.91 to 194)            | -32.5 (-59.5 to 2.7)             | -20.6 (-50.5 to 19.9)                     |
| 16 Road injuries              | 16 Road injuries              | 103 (19.9 to 229)             | -27.8 (-55.5 to 17.3)            | -30.9 (-53.7 to 4.96)                     |
| 17 Chronic kidney disease     | 17 Hypertensive heart disease | 148 (89 to 211)               | -11.8 (-30.5 to 9.6)             | -18.3 (-37.4 to 3.87)                     |
| 18 Diabetes                   | 18 COPD                       | 141 (92.2 to 194)             | -14.6 (-30 to 2.81)              | -17.6 (-32.9 to 1.46)                     |
| 19 Hypertensive heart disease | 19 Interpersonal violence     | 103 (61.9 to 152)             | -27.9 (-40.1 to -13.3)           | -30.3 (-40 to -18.3)                      |
| 20 COPD                       | 20 Falls                      | 150 (92.1 to 215)             | -11.3 (-26.3 to 5.75)            | -6.22 (-12 to -0.598)                     |
| 23 Interpersonal violence     | 26 Measles                    |                               |                                  |                                           |
| 24 Falls                      | 135 COVID-19                  |                               |                                  |                                           |



### Nigeria, Reference scenario

**Legend:**

Communicable, maternal, neonatal and nutritional  
 Non-communicable  
 Injuries

| Leading Causes 2022           | Leading Causes 2050          | Mean % change number of DEATH  | Mean % change all-age DEATH rate | Mean % change age-standardized DEATH rate |
|-------------------------------|------------------------------|--------------------------------|----------------------------------|-------------------------------------------|
| 1 Neonatal disorders          | 1 Malaria                    | -19.5 (-96.1 to 442)           | -56 (-97.9 to 198)               | -56.3 (-97.4 to 194)                      |
| 2 Malaria                     | 2 Neonatal disorders         | <b>-28.7 (-48.4 to -8.03)</b>  | <b>-62.1 (-70 to -53.3)</b>      | <b>-39.2 (-49.7 to -25.7)</b>             |
| 3 Lower respiratory infect    | 3 Lower respiratory infect   | 0.809 (-18.9 to 25.1)          | <b>-46.2 (-55.8 to -35.1)</b>    | <b>-38 (-45.5 to -29)</b>                 |
| 4 Diarrheal diseases          | 4 Ischemic heart disease     | <b>95.2 (40.1 to 162)</b>      | 4.21 (-27.2 to 39.8)             | <b>-48.2 (-62.9 to -28.2)</b>             |
| 5 HIV/AIDS                    | 5 Stroke                     | <b>88.3 (53.8 to 126)</b>      | 0.509 (-17.7 to 18.5)            | <b>-49.2 (-57.9 to -39.1)</b>             |
| 6 Ischemic heart disease      | 6 Chronic kidney disease     | <b>303 (219 to 410)</b>        | <b>115 (70.6 to 167)</b>         | 20 (-5.19 to 51.2)                        |
| 7 Stroke                      | 7 Diarrheal diseases         | <b>-40.4 (-61.6 to -10.4)</b>  | <b>-68.2 (-80 to -53.4)</b>      | <b>-60.1 (-72 to -45)</b>                 |
| 8 Congenital defects          | 8 Diabetes                   | <b>140 (89.4 to 198)</b>       | <b>28.2 (0.149 to 56.1)</b>      | <b>-32.1 (-44.8 to -15.9)</b>             |
| 9 Tuberculosis                | 9 Hypertensive heart disease | <b>232 (159 to 318)</b>        | <b>77.2 (37.2 to 120)</b>        | -11.6 (-28.9 to 12.7)                     |
| 10 Meningitis                 | 10 Prostate cancer           | <b>305 (184 to 443)</b>        | <b>116 (52.1 to 187)</b>         | -2.63 (-25.7 to 22.3)                     |
| 11 Cirrhosis liver            | 11 Cirrhosis liver           | <b>86.3 (54.5 to 123)</b>      | -0.601 (-17 to 17.6)             | <b>-37 (-45 to -26.3)</b>                 |
| 12 Diabetes                   | 12 Breast cancer             | <b>246 (150 to 345)</b>        | <b>84.7 (42.1 to 134)</b>        | 12.7 (-8.68 to 36.5)                      |
| 13 Chronic kidney disease     | 13 Tuberculosis              | 2.54 (-26.8 to 40.8)           | <b>-45.2 (-61.1 to -25.7)</b>    | <b>-63.4 (-72.4 to -49.5)</b>             |
| 14 Maternal disorders         | 14 Alzheimer's disease       | <b>376 (266 to 491)</b>        | <b>153 (103 to 206)</b>          | <b>5.53 (0.329 to 10.4)</b>               |
| 15 Road injuries              | 15 HIV/AIDS                  | <b>-44 (-60.4 to -33.1)</b>    | <b>-70.2 (-78 to -65)</b>        | <b>-76.3 (-82.3 to -72.3)</b>             |
| 16 Pertussis                  | 16 Congenital defects        | <b>-23.4 (-43.1 to -0.897)</b> | <b>-59.3 (-66.8 to -49.9)</b>    | <b>-38.7 (-47.2 to -26.2)</b>             |
| 17 iNTS                       | 17 Road injuries             | <b>63.9 (12.5 to 142)</b>      | -12.5 (-41.1 to 30.8)            | <b>-34.5 (-54.3 to -1.25)</b>             |
| 18 Hypertensive heart disease | 18 COPD                      | <b>155 (103 to 209)</b>        | <b>36.3 (11.9 to 63.1)</b>       | <b>-33.9 (-46 to -19.2)</b>               |
| 19 Interpersonal violence     | 19 Falls                     | <b>197 (137 to 268)</b>        | <b>58.5 (31.8 to 88.6)</b>       | <b>-8.15 (-13.3 to -3.13)</b>             |
| 20 Breast cancer              | 20 Interpersonal violence    | <b>58.9 (29 to 94.1)</b>       | -15.4 (-27.3 to 0.063)           | <b>-28.7 (-37.8 to -18)</b>               |
| 21 Prostate cancer            | 21 Meningitis                |                                |                                  |                                           |
| 23 COPD                       | 23 Maternal disorders        |                                |                                  |                                           |
| 26 Falls                      | 26 iNTS                      |                                |                                  |                                           |
| 27 Alzheimer's disease        | 30 Pertussis                 |                                |                                  |                                           |

### São Tomé and Príncipe, Reference scenario

**Legend:**  
 Communicable, maternal, neonatal and nutritional  
 Non-communicable  
 Injuries

| Leading Causes 2022           | Leading Causes 2050          | Mean % change number of DEATH | Mean % change all-age DEATH rate | Mean % change age-standardized DEATH rate |
|-------------------------------|------------------------------|-------------------------------|----------------------------------|-------------------------------------------|
| 1 Stroke                      | 1 Chronic kidney disease     | 222 (148 to 298)              | 198 (137 to 277)                 | 27.5 (0.753 to 62.5)                      |
| 2 Lower respiratory infect    | 2 Lower respiratory infect   | 68.9 (35.2 to 99.7)           | 56.6 (33.4 to 89.3)              | -31.1 (-39.4 to -21.5)                    |
| 3 Ischemic heart disease      | 3 Stroke                     | 48.4 (16.7 to 80.7)           | 37.7 (10.3 to 70.2)              | -45.6 (-55.7 to -31.3)                    |
| 4 Chronic kidney disease      | 4 Ischemic heart disease     | 67.6 (18.8 to 119)            | 55.5 (14.7 to 115)               | -39.5 (-57.2 to -16.1)                    |
| 5 Cirrhosis liver             | 5 COPD                       | 131 (84.5 to 185)             | 115 (73.3 to 159)                | -21.3 (-35.2 to -4.78)                    |
| 6 COPD                        | 6 Cirrhosis liver            | 52.4 (16.9 to 84.9)           | 41.3 (13.7 to 73.5)              | -32.1 (-42.1 to -20.8)                    |
| 7 Neonatal disorders          | 7 Lung cancer                | 185 (123 to 265)              | 164 (104 to 235)                 | 3.54 (-13.2 to 22.8)                      |
| 8 Asthma                      | 8 Hypertensive heart disease | 162 (98.3 to 232)             | 143 (91.7 to 211)                | -6.71 (-26.4 to 17.5)                     |
| 9 Road injuries               | 9 Colorectal cancer          | 238 (155 to 350)              | 214 (130 to 308)                 | 22.1 (-2.15 to 48.4)                      |
| 10 Lung cancer                | 10 Diabetes                  | 99.9 (55.6 to 155)            | 85.4 (45.7 to 138)               | -24.6 (-40.1 to -4.25)                    |
| 11 Other cardiovascular       | 11 Alzheimer's disease       | 224 (173 to 287)              | 200 (148 to 255)                 | 3.85 (0.573 to 7.24)                      |
| 12 Tuberculosis               | 12 Other cardiovascular      | 96.7 (61.6 to 136)            | 82.6 (50.8 to 114)               | -23.3 (-33 to -11.6)                      |
| 13 Diabetes                   | 13 Falls                     | 118 (75.8 to 169)             | 102 (62.7 to 158)                | -7.55 (-13.8 to -1.12)                    |
| 14 Hypertensive heart disease | 14 Prostate cancer           | 275 (180 to 392)              | 248 (155 to 350)                 | 19.3 (-3.57 to 43.5)                      |
| 15 Cervical cancer            | 15 Stomach cancer            | 89.7 (56.7 to 122)            | 75.9 (50.8 to 107)               | -30.5 (-35.2 to -25.9)                    |
| 16 Stomach cancer             | 16 Breast cancer             | 135 (82.6 to 205)             | 118 (67.6 to 175)                | 5.23 (-13 to 26.3)                        |
| 17 Falls                      | 17 Road injuries             | 17 (-28 to 77.7)              | 8.38 (-28.6 to 64.4)             | -28.9 (-52.4 to 7.16)                     |
| 18 Diarrheal diseases         | 18 Cervical cancer           | 66 (31.6 to 102)              | 53.9 (26.8 to 83.6)              | -22.9 (-32.7 to -11.6)                    |
| 19 Congenital defects         | 19 Asthma                    | -5.73 (-24.9 to 15.9)         | -12.6 (-26.8 to 2.81)            | -59.9 (-65.3 to -53.3)                    |
| 20 Breast cancer              | 20 Urinary diseases          | 170 (113 to 222)              | 151 (113 to 193)                 | 13.2 (2.68 to 24.3)                       |
| 21 Alzheimer's disease        | 23 Tuberculosis              |                               |                                  |                                           |
| 22 Colorectal cancer          | 28 Neonatal disorders        |                               |                                  |                                           |
| 25 Prostate cancer            | 30 Diarrheal diseases        |                               |                                  |                                           |
| 28 Urinary diseases           | 37 Congenital defects        |                               |                                  |                                           |

### Senegal, Reference scenario

**Legend:**  
Communicable, maternal, neonatal and nutritional  
Non-communicable  
Injuries

| Leading Causes 2022           | Leading Causes 2050          | Mean % change number of DEATH | Mean % change all-age DEATH rate | Mean % change age-standardized DEATH rate |
|-------------------------------|------------------------------|-------------------------------|----------------------------------|-------------------------------------------|
| 1 Stroke                      | 1 Stroke                     | 34.8 (7.75 to 66.8)           | -19.4 (-33.4 to -2.66)           | -54.3 (-61.6 to -44.7)                    |
| 2 Neonatal disorders          | 2 Ischemic heart disease     | 35 (-3.07 to 78.8)            | -19.2 (-41.2 to 5.97)            | -55 (-68.1 to -37.4)                      |
| 3 Ischemic heart disease      | 3 Lower respiratory infect   | 37.6 (12.1 to 64)             | -17.7 (-29.5 to -4.57)           | -35.5 (-44.1 to -25.5)                    |
| 4 Lower respiratory infect    | 4 Chronic kidney disease     | 147 (86.3 to 208)             | 48 (17.6 to 84.5)                | -11.6 (-28.2 to 12.3)                     |
| 5 Malaria                     | 5 Diabetes                   | 96.2 (51.5 to 145)            | 17.4 (-5.88 to 49.8)             | -31.6 (-45.5 to -13.7)                    |
| 6 Diabetes                    | 6 Hypertensive heart disease | 138 (83.1 to 195)             | 42.6 (14.1 to 75.8)              | -22.2 (-38 to 1.08)                       |
| 7 Chronic kidney disease      | 7 Neonatal disorders         | -45.4 (-59.8 to -28.2)        | -67.4 (-74 to -59.2)             | -46 (-54.9 to -34.6)                      |
| 8 Diarrheal diseases          | 8 Cirrhosis liver            | 63.8 (35.2 to 94.2)           | -2 (-16.6 to 16.3)               | -37.6 (-46.6 to -27)                      |
| 9 Tuberculosis                | 9 Alzheimer's disease        | 267 (178 to 384)              | 119 (66.5 to 183)                | 1.91 (-1.4 to 4.82)                       |
| 10 COVID-19                   | 10 COPD                      | 104 (58.7 to 151)             | 22.2 (1.05 to 45.6)              | -33.1 (-45.3 to -18.5)                    |
| 11 Road injuries              | 11 Road injuries             | 28.9 (-18.3 to 105)           | -22.9 (-48.3 to 21.1)            | -40 (-59.3 to -7.88)                      |
| 12 Cirrhosis liver            | 12 Prostate cancer           | 240 (143 to 359)              | 104 (48.6 to 168)                | 7.91 (-11.9 to 27.3)                      |
| 13 Congenital defects         | 13 Diarrheal diseases        | -1.38 (-28 to 29.6)           | -41 (-57 to -22.1)               | -53.5 (-65 to -37.9)                      |
| 14 Hypertensive heart disease | 14 Falls                     | 158 (109 to 215)              | 54.6 (26.1 to 82.3)              | -6.95 (-11.6 to -2.02)                    |
| 15 COPD                       | 15 Self-harm                 | 92.6 (57.9 to 125)            | 15.2 (-1.59 to 33.4)             | -20.6 (-31.4 to -9.53)                    |
| 16 Maternal disorders         | 16 Breast cancer             | 212 (140 to 295)              | 86.7 (45.7 to 138)               | 16.3 (-1.02 to 38.6)                      |
| 17 Meningitis                 | 17 Tuberculosis              | -23.6 (-45.4 to -0.204)       | -54.3 (-65.8 to -39.7)           | -70.9 (-78.5 to -59.9)                    |
| 18 Self-harm                  | 18 Liver cancer              | 165 (110 to 221)              | 58.3 (28.6 to 94.7)              | -3.14 (-21.4 to 22.9)                     |
| 19 HIV/AIDS                   | 19 Lung cancer               | 191 (120 to 267)              | 74 (31.9 to 120)                 | 2.15 (-16 to 20.7)                        |
| 20 Falls                      | 20 Cervical cancer           | 102 (69.8 to 143)             | 21.1 (5.71 to 42.8)              | -22.8 (-33.1 to -11.9)                    |
| 21 Alzheimer's disease        | 22 Congenital defects        |                               |                                  |                                           |
| 22 Prostate cancer            | 27 Meningitis                |                               |                                  |                                           |
| 23 Cervical cancer            | 33 Maternal disorders        |                               |                                  |                                           |
| 25 Liver cancer               | 42 Malaria                   |                               |                                  |                                           |
| 27 Breast cancer              | 64 HIV/AIDS                  |                               |                                  |                                           |
| 32 Lung cancer                | 135 COVID-19                 |                               |                                  |                                           |

### Sierra Leone, Reference scenario

**Legend:**  
Communicable, maternal, neonatal and nutritional  
Non-communicable  
Injuries

| Leading Causes 2022           | Leading Causes 2050            | Mean % change number of DEATH | Mean % change all-age DEATH rate | Mean % change age-standardized DEATH rate |
|-------------------------------|--------------------------------|-------------------------------|----------------------------------|-------------------------------------------|
| 1 Malaria                     | 1 Malaria                      | -30.1 (-96.6 to 235)          | -57.1 (-98 to 106)               | -55.7 (-97.3 to 101)                      |
| 2 Neonatal disorders          | 2 Lower respiratory infect     | <b>40.8 (15.6 to 65.8)</b>    | <b>-17.2 (-33.5 to -1.79)</b>    | <b>-30.4 (-40 to -19.6)</b>               |
| 3 Lower respiratory infect    | 3 Stroke                       | <b>43.8 (12.2 to 77.4)</b>    | -15.5 (-33.7 to 5.5)             | <b>-49.2 (-59.8 to -35.6)</b>             |
| 4 Stroke                      | 4 Ischemic heart disease       | <b>58.7 (7.8 to 119)</b>      | -6.62 (-37.7 to 29.5)            | <b>-46 (-64.1 to -21.7)</b>               |
| 5 Ischemic heart disease      | 5 Neonatal disorders           | <b>-50.5 (-64.1 to -31.7)</b> | <b>-70.9 (-78.2 to -60.1)</b>    | <b>-50.2 (-61.7 to -32.7)</b>             |
| 6 Protein-energy malnutrition | 6 Diarrheal diseases           | 38.5 (-6.95 to 95.8)          | -18.6 (-44.9 to 16.4)            | -26.6 (-47.4 to 2.14)                     |
| 7 Diarrheal diseases          | 7 Chronic kidney disease       | <b>188 (119 to 261)</b>       | <b>69.1 (26.8 to 112)</b>        | 9.4 (-15.5 to 40.6)                       |
| 8 Tuberculosis                | 8 Diabetes                     | <b>124 (68.5 to 184)</b>      | 31.9 (-1.05 to 67.1)             | -19.2 (-39.5 to 3.05)                     |
| 9 Congenital defects          | 9 Hypertensive heart disease   | <b>147 (90.8 to 210)</b>      | <b>45.1 (11.6 to 81.6)</b>       | -20.3 (-38.7 to 3.97)                     |
| 10 HIV/AIDS                   | 10 Cirrhosis liver             | <b>58 (30 to 83.1)</b>        | -7.13 (-22.4 to 11.6)            | <b>-41.2 (-50.2 to -30)</b>               |
| 11 Road injuries              | 11 Tuberculosis                | -16.9 (-42.2 to 15.9)         | <b>-51.1 (-66.3 to -31.4)</b>    | <b>-65.6 (-76.2 to -52.4)</b>             |
| 12 Maternal disorders         | 12 Road injuries               | 32.9 (-14.5 to 106)           | -21.8 (-49.7 to 18.6)            | -34.7 (-55.8 to 0.493)                    |
| 13 Cirrhosis liver            | 13 Protein-energy malnutrition | <b>-50.9 (-72.8 to -18.9)</b> | <b>-71.1 (-83.8 to -51)</b>      | <b>-60.5 (-76.9 to -34.2)</b>             |
| 14 Diabetes                   | 14 Congenital defects          | <b>-34.1 (-50.2 to -17.6)</b> | <b>-61.3 (-68.1 to -52.5)</b>    | <b>-39.8 (-48.7 to -27.5)</b>             |
| 15 Chronic kidney disease     | 15 COPD                        | <b>78.5 (40.5 to 117)</b>     | 4.87 (-17.9 to 25.8)             | <b>-40.5 (-52 to -26.2)</b>               |
| 16 Meningitis                 | 16 Prostate cancer             | <b>250 (136 to 372)</b>       | <b>105 (45.3 to 174)</b>         | 15.4 (-6.3 to 40.9)                       |
| 17 Hypertensive heart disease | 17 Alzheimer's disease         | <b>232 (146 to 341)</b>       | <b>94.5 (49 to 150)</b>          | 1.05 (-2.99 to 5.56)                      |
| 18 iNTS                       | 18 Falls                       | <b>135 (85.3 to 201)</b>      | <b>37.9 (15 to 64)</b>           | <b>-7.84 (-12.9 to -1.35)</b>             |
| 19 COPD                       | 19 Liver cancer                | <b>161 (102 to 225)</b>       | <b>53.5 (21.5 to 93)</b>         | -5.69 (-26.3 to 20.6)                     |
| 20 Hemoglobinopathies         | 20 Maternal disorders          | -24.7 (-50.7 to 11.1)         | <b>-55.9 (-70.1 to -37)</b>      | <b>-59 (-72.4 to -41.6)</b>               |
| 25 Falls                      | 24 Meningitis                  |                               |                                  |                                           |
| 26 Liver cancer               | 26 iNTS                        |                               |                                  |                                           |
| 30 Prostate cancer            | 31 Hemoglobinopathies          |                               |                                  |                                           |
| 31 Alzheimer's disease        | 45 HIV/AIDS                    |                               |                                  |                                           |

### Togo, Reference scenario

**Legend:**

Communicable, maternal, neonatal and nutritional  
Non-communicable  
Injuries

| Leading Causes 2022           | Leading Causes 2050          | Mean % change number of DEATH | Mean % change all-age DEATH rate | Mean % change age-standardized DEATH rate |
|-------------------------------|------------------------------|-------------------------------|----------------------------------|-------------------------------------------|
| 1 Malaria                     | 1 Lower respiratory infect   | 76.1 (40.7 to 113)            | 13.8 (-3.81 to 33.8)             | -28.8 (-38.6 to -16.1)                    |
| 2 Stroke                      | 2 Stroke                     | 62.5 (23.4 to 103)            | 5.12 (-16.5 to 33)               | -50.1 (-60.3 to -34.7)                    |
| 3 Lower respiratory infect    | 3 Ischemic heart disease     | 72.5 (17.8 to 148)            | 11.7 (-24.7 to 62.3)             | -48 (-66.1 to -19.6)                      |
| 4 Neonatal disorders          | 4 Chronic kidney disease     | 254 (173 to 352)              | 129 (79.5 to 195)                | 18.8 (-7.78 to 57.4)                      |
| 5 Ischemic heart disease      | 5 Malaria                    | -28.2 (-95.8 to 233)          | -53.8 (-97.4 to 116)             | -60.2 (-97.4 to 83.4)                     |
| 6 Diarrheal diseases          | 6 Diarrheal diseases         | 31.2 (-12.4 to 88.2)          | -15.1 (-43.5 to 20.8)            | -34.3 (-52.6 to -7.38)                    |
| 7 Tuberculosis                | 7 Hypertensive heart disease | 200 (129 to 295)              | 94.3 (49.4 to 151)               | -13 (-34.3 to 13.3)                       |
| 8 HIV/AIDS                    | 8 Diabetes                   | 148 (85 to 218)               | 60.5 (23.5 to 105)               | -19.6 (-39.1 to 7.19)                     |
| 9 Road injuries               | 9 Cirrhosis liver            | 67.3 (34.5 to 105)            | 8.22 (-10 to 30)                 | -36.1 (-46.4 to -23.2)                    |
| 10 Cirrhosis liver            | 10 Neonatal disorders        | -54.1 (-66.8 to -38.6)        | -70.4 (-76.9 to -61.5)           | -48.7 (-58.4 to -34.8)                    |
| 11 COVID-19                   | 11 Road injuries             | 15.4 (-27.9 to 94.4)          | -25.1 (-54.9 to 29.6)            | -35.7 (-60.3 to 7.9)                      |
| 12 Chronic kidney disease     | 12 Tuberculosis              | -1.82 (-29.6 to 38.7)         | -36.4 (-53.4 to -10.1)           | -63.2 (-73.7 to -47.3)                    |
| 13 Diabetes                   | 13 COPD                      | 102 (54.3 to 150)             | 30.9 (4.75 to 64.1)              | -40.9 (-52.9 to -25.3)                    |
| 14 Congenital defects         | 14 Alzheimer's disease       | 381 (243 to 554)              | 210 (121 to 307)                 | 1.72 (-1.61 to 5.55)                      |
| 15 Hypertensive heart disease | 15 Prostate cancer           | 352 (183 to 584)              | 191 (87.9 to 313)                | 22.6 (-7.07 to 49.3)                      |
| 16 Hemoglobinopathies         | 16 Hemoglobinopathies        | 25.8 (1.5 to 55.9)            | -18.8 (-28.1 to -7.9)            | -26.5 (-32.9 to -19.8)                    |
| 17 COPD                       | 17 Self-harm                 | 97.3 (61.6 to 144)            | 27.6 (8.1 to 54.4)               | -15.2 (-28.7 to 1.03)                     |
| 18 iNTS                       | 18 Breast cancer             | 201 (116 to 307)              | 93.9 (44.6 to 152)               | 10.8 (-11.1 to 31.8)                      |
| 19 Self-harm                  | 19 Falls                     | 186 (118 to 275)              | 84.4 (44.9 to 126)               | -6.85 (-12.5 to -1.29)                    |
| 20 Meningitis                 | 20 Cervical cancer           | 93.3 (57 to 132)              | 25.1 (6.02 to 49.2)              | -26.4 (-37.3 to -12.2)                    |
| 22 Cervical cancer            | 26 Congenital defects        |                               |                                  |                                           |
| 25 Breast cancer              | 30 Meningitis                |                               |                                  |                                           |
| 26 Falls                      | 31 iNTS                      |                               |                                  |                                           |
| 35 Alzheimer's disease        | 41 HIV/AIDS                  |                               |                                  |                                           |
| 36 Prostate cancer            | 134 COVID-19                 |                               |                                  |                                           |

### Global, Reference scenario

**Legend:**

Communicable, maternal, neonatal and nutritional  
Non-communicable  
Injuries

| Leading Causes 2022           | Leading Causes 2050          | Mean % change number of DEATH | Mean % change all-age DEATH rate | Mean % change age-standardized DEATH rate |
|-------------------------------|------------------------------|-------------------------------|----------------------------------|-------------------------------------------|
| 1 Ischemic heart disease      | 1 Ischemic heart disease     | 20.6 (-12.7 to 64)            | 2.69 (-27 to 44.4)               | <b>-44.8 (-64.3 to -15.4)</b>             |
| 2 Stroke                      | 2 Stroke                     | <b>28.5 (7.89 to 51.1)</b>    | 9.27 (-7.5 to 30.9)              | <b>-41.3 (-53.4 to -25.9)</b>             |
| 3 COPD                        | 3 COPD                       | <b>102 (66.1 to 141)</b>      | <b>71.8 (40.1 to 113)</b>        | -13.7 (-34.3 to 15.6)                     |
| 4 Lower respiratory infect    | 4 Alzheimer's disease        | <b>173 (124 to 222)</b>       | <b>132 (95 to 168)</b>           | <b>-3.48 (-5.38 to -1.07)</b>             |
| 5 COVID-19                    | 5 Chronic kidney disease     | <b>182 (126 to 245)</b>       | <b>140 (90.5 to 202)</b>         | 33.1 (-0.751 to 79)                       |
| 6 Lung cancer                 | 6 Lower respiratory infect   | <b>56.7 (42.3 to 69.5)</b>    | <b>33.3 (20.1 to 46.5)</b>       | <b>-26.6 (-36.8 to -13.3)</b>             |
| 7 Alzheimer's disease         | 7 Hypertensive heart disease | <b>165 (105 to 232)</b>       | <b>126 (74.3 to 192)</b>         | 17.1 (-16.5 to 61)                        |
| 8 Neonatal disorders          | 8 Lung cancer                | <b>68.1 (24.5 to 117)</b>     | <b>42.7 (8.87 to 80.4)</b>       | -17 (-31.9 to 0.776)                      |
| 9 Diabetes                    | 9 Diabetes                   | <b>76.2 (43.2 to 115)</b>     | <b>49.9 (18.6 to 89.6)</b>       | -13.9 (-33.8 to 14.9)                     |
| 10 Chronic kidney disease     | 10 Cirrhosis liver           | <b>50.7 (34.5 to 67)</b>      | <b>28.2 (12.6 to 45.3)</b>       | -9.06 (-20.9 to 6.14)                     |
| 11 Cirrhosis liver            | 11 Colorectal cancer         | <b>103 (41.1 to 177)</b>      | <b>72.1 (23.7 to 131)</b>        | -3.02 (-24.8 to 23.1)                     |
| 12 Hypertensive heart disease | 12 Falls                     | <b>113 (82.1 to 146)</b>      | <b>81.3 (58.4 to 107)</b>        | <b>-5.34 (-10.6 to -0.215)</b>            |
| 13 Road injuries              | 13 Diarrheal diseases        | 30.9 (-0.247 to 68.6)         | 11.4 (-16.5 to 47.9)             | -34 (-54.1 to 0.13)                       |
| 14 Tuberculosis               | 14 Road injuries             | 9.8 (-24.3 to 61.4)           | -6.52 (-36.1 to 41.6)            | -18.1 (-46.7 to 28.6)                     |
| 15 Diarrheal diseases         | 15 Pancreatic cancer         | <b>140 (72.1 to 219)</b>      | <b>104 (50.3 to 169)</b>         | 18.1 (-6.89 to 46.9)                      |
| 16 Colorectal cancer          | 16 Breast cancer             | <b>81.8 (36.1 to 137)</b>     | <b>54.4 (17.9 to 96.1)</b>       | 1.42 (-18.9 to 24.8)                      |
| 17 Stomach cancer             | 17 Stomach cancer            | <b>24.7 (12.6 to 37)</b>      | 5.99 (-3.94 to 16.1)             | <b>-38.1 (-41.6 to -34.4)</b>             |
| 18 Falls                      | 18 Atrial fibrillation       | <b>229 (177 to 278)</b>       | <b>179 (143 to 216)</b>          | <b>17.3 (11.9 to 22.5)</b>                |
| 19 Self-harm                  | 19 Urinary diseases          | <b>203 (176 to 225)</b>       | <b>158 (133 to 182)</b>          | <b>33.5 (11.4 to 60)</b>                  |
| 20 Malaria                    | 20 Prostate cancer           | <b>145 (86 to 209)</b>        | <b>108 (60.6 to 158)</b>         | 5.51 (-8.93 to 23)                        |
| 22 Breast cancer              | 24 Neonatal disorders        |                               |                                  |                                           |
| 25 Pancreatic cancer          | 25 Tuberculosis              |                               |                                  |                                           |
| 27 Prostate cancer            | 26 Self-harm                 |                               |                                  |                                           |
| 32 Urinary diseases           | 30 Malaria                   |                               |                                  |                                           |
| 34 Atrial fibrillation        | 137 COVID-19                 |                               |                                  |                                           |

### Central Europe, Eastern Europe, and Central Asia, Reference scenario

**Legend:**  
Communicable, maternal, neonatal and nutritional  
Non-communicable  
Injuries

| Leading Causes 2022          | Leading Causes 2050          | Mean % change number of DEATH | Mean % change all-age DEATH rate | Mean % change age-standardized DEATH rate |
|------------------------------|------------------------------|-------------------------------|----------------------------------|-------------------------------------------|
| 1 Ischemic heart disease     | 1 Ischemic heart disease     | -0.47 (-27 to 32.5)           | 4.5 (-25.2 to 38.7)              | <b>-43.9 (-63.5 to -17.4)</b>             |
| 2 Stroke                     | 2 Stroke                     | -11.9 (-26.5 to 0.831)        | -7.48 (-21.9 to 7.03)            | <b>-49.3 (-59.9 to -35.9)</b>             |
| 3 COVID-19                   | 3 Alzheimer's disease        | <b>134 (78.5 to 192)</b>      | <b>146 (92 to 204)</b>           | <b>2.34 (0.461 to 4.02)</b>               |
| 4 Lung cancer                | 4 Lung cancer                | 19.5 (-9.5 to 52.5)           | 25.3 (-2.74 to 57.3)             | -13 (-30.2 to 7)                          |
| 5 Alzheimer's disease        | 5 Hypertensive heart disease | <b>78.8 (26.8 to 142)</b>     | <b>87.8 (32.4 to 153)</b>        | 2.02 (-34.8 to 53.8)                      |
| 6 Cirrhosis liver            | 6 Colorectal cancer          | 38.7 (-5.66 to 93.2)          | 45.4 (-1.37 to 102)              | -9.89 (-34 to 20.2)                       |
| 7 Colorectal cancer          | 7 COPD                       | <b>62.8 (31.2 to 94.1)</b>    | <b>70.9 (37 to 105)</b>          | -1.32 (-24.1 to 26.8)                     |
| 8 Cardiomyopathy             | 8 Cirrhosis liver            | 1.03 (-10.2 to 14.8)          | 6.05 (-5.39 to 19.4)             | -10.9 (-22.6 to 4.5)                      |
| 9 Hypertensive heart disease | 9 Lower respiratory infect   | <b>15.5 (2.77 to 29.4)</b>    | <b>21.2 (6.77 to 36.2)</b>       | <b>-29.6 (-42.1 to -11.5)</b>             |
| 10 Lower respiratory infect  | 10 Cardiomyopathy            | -2.54 (-15.5 to 11.7)         | 2.23 (-10.1 to 14.6)             | <b>-28.1 (-34.8 to -21.2)</b>             |
| 11 COPD                      | 11 Chronic kidney disease    | <b>115 (56.4 to 176)</b>      | <b>125 (64.2 to 189)</b>         | 35.3 (-8.93 to 96.2)                      |
| 12 Diabetes                  | 12 Diabetes                  | 15.2 (-9.51 to 43.8)          | 20.9 (-6.07 to 50.1)             | <b>-26.1 (-44.2 to -0.425)</b>            |
| 13 Self-harm                 | 13 Pancreatic cancer         | <b>77 (25.8 to 142)</b>       | <b>85.5 (32.1 to 150)</b>        | 23.4 (-7.68 to 61.1)                      |
| 14 Stomach cancer            | 14 Breast cancer             | 23.9 (-8.05 to 65.8)          | 29.9 (-2.28 to 69.9)             | -12.7 (-30.1 to 8.68)                     |
| 15 Breast cancer             | 15 Prostate cancer           | <b>74.8 (36.3 to 116)</b>     | <b>83.3 (44.2 to 125)</b>        | 7.14 (-7.15 to 22.7)                      |
| 16 Pancreatic cancer         | 16 Urinary diseases          | <b>139 (99.7 to 184)</b>      | <b>151 (107 to 197)</b>          | <b>38.6 (8.69 to 72.3)</b>                |
| 17 Chronic kidney disease    | 17 Stomach cancer            | -3.46 (-13.3 to 6.53)         | 1.27 (-8.48 to 10.5)             | <b>-32.3 (-36.3 to -28.6)</b>             |
| 18 Prostate cancer           | 18 Atrial fibrillation       | <b>136 (94.6 to 181)</b>      | <b>147 (106 to 194)</b>          | <b>10.2 (2.04 to 20.6)</b>                |
| 19 Road injuries             | 19 Self-harm                 | -10.3 (-21.4 to 1.76)         | -5.89 (-17.7 to 6.39)            | <b>-14.8 (-27.5 to -1.11)</b>             |
| 20 Alcohol use disorders     | 20 Parkinson's disease       | <b>87.4 (64.2 to 109)</b>     | <b>96.5 (76.1 to 117)</b>        | 4.11 (-3.6 to 11.2)                       |
| 22 Urinary diseases          | 24 Alcohol use disorders     |                               |                                  |                                           |
| 23 Parkinson's disease       | 26 Road injuries             |                               |                                  |                                           |
| 24 Atrial fibrillation       | 131 COVID-19                 |                               |                                  |                                           |

### High income, Reference scenario

**Legend:**  
Communicable, maternal, neonatal and nutritional  
Non-communicable  
Injuries

| Leading Causes 2022           | Leading Causes 2050          | Mean % change number of DEATH | Mean % change all-age DEATH rate | Mean % change age-standardized DEATH rate |
|-------------------------------|------------------------------|-------------------------------|----------------------------------|-------------------------------------------|
| 1 Ischemic heart disease      | 1 Alzheimer's disease        | 88 (73.7 to 99.9)             | 81.8 (69.2 to 93.5)              | -3.91 (-5.84 to -1.82)                    |
| 2 Alzheimer's disease         | 2 Ischemic heart disease     | -10.6 (-25.7 to 5.95)         | -13.5 (-28.1 to 3.08)            | -50.3 (-60.1 to -37.9)                    |
| 3 Stroke                      | 3 Chronic kidney disease     | 155 (122 to 187)              | 146 (115 to 180)                 | 38.5 (18.2 to 62.4)                       |
| 4 COVID-19                    | 4 COPD                       | 63.8 (45.5 to 82.7)           | 58.4 (40.8 to 76)                | -4.94 (-17 to 7.66)                       |
| 5 Lung cancer                 | 5 Lung cancer                | 29.6 (10.8 to 49.6)           | 25.4 (7.73 to 46)                | -12.7 (-23.1 to -2)                       |
| 6 COPD                        | 6 Stroke                     | -6 (-14.5 to 2.42)            | -9.08 (-17 to -0.913)            | -45.4 (-51.5 to -38.8)                    |
| 7 Lower respiratory infect    | 7 Lower respiratory infect   | 66.5 (55.1 to 78.2)           | 61.1 (50 to 72.3)                | -10.3 (-17.9 to -2.67)                    |
| 8 Chronic kidney disease      | 8 Colorectal cancer          | 53.1 (24.3 to 86.6)           | 48 (21.6 to 79.4)                | -5.62 (-20.8 to 12.1)                     |
| 9 Colorectal cancer           | 9 Hypertensive heart disease | 97.9 (71.3 to 127)            | 91.4 (64.5 to 121)               | 13.9 (-3.56 to 34.6)                      |
| 10 Pancreatic cancer          | 10 Pancreatic cancer         | 86.4 (55 to 120)              | 80.3 (51.5 to 113)               | 24.5 (7.51 to 43.4)                       |
| 11 Hypertensive heart disease | 11 Atrial fibrillation       | 132 (119 to 147)              | 124 (112 to 135)                 | 20.2 (16.3 to 24.1)                       |
| 12 Diabetes                   | 12 Falls                     | 73.8 (61.4 to 85.1)           | 68.1 (56.8 to 79)                | -5.57 (-9.13 to -2.05)                    |
| 13 Breast cancer              | 13 Prostate cancer           | 82.1 (60.4 to 107)            | 76.1 (55.2 to 100)               | 6.3 (-2.49 to 15.6)                       |
| 14 Falls                      | 14 Nonrheum valv diseases    | 143 (129 to 163)              | 135 (121 to 152)                 | 23.3 (17.8 to 29)                         |
| 15 Cirrhosis liver            | 15 Urinary diseases          | 186 (162 to 205)              | 177 (156 to 194)                 | 50.1 (37.5 to 63.1)                       |
| 16 Prostate cancer            | 16 Diabetes                  | 24.3 (7.37 to 41.2)           | 20.2 (3.88 to 38.4)              | -28.6 (-38.8 to -17)                      |
| 17 Stomach cancer             | 17 Breast cancer             | 36.9 (18.5 to 55.3)           | 32.4 (15.7 to 50.8)              | -8.64 (-18.4 to 1.99)                     |
| 18 Self-harm                  | 18 Parkinson's disease       | 77.8 (68.7 to 86.3)           | 71.9 (63.2 to 80.4)              | 4.07 (-0.2 to 7.73)                       |
| 19 Atrial fibrillation        | 19 Liver cancer              | 69.5 (54.2 to 84.5)           | 63.9 (49.3 to 79)                | 19.2 (8.02 to 30.3)                       |
| 20 Parkinson's disease        | 20 Cirrhosis liver           | 9.12 (1.99 to 15.7)           | 5.54 (-1.15 to 11.6)             | -12 (-17.5 to -7.01)                      |
| 21 Nonrheum valv diseases     | 23 Stomach cancer            |                               |                                  |                                           |
| 22 Liver cancer               | 26 Self-harm                 |                               |                                  |                                           |
| 25 Urinary diseases           | 135 COVID-19                 |                               |                                  |                                           |



### Latin America and Caribbean, Reference scenario

**Legend:**  
Communicable, maternal, neonatal and nutritional  
Non-communicable  
Injuries

| Leading Causes 2022           | Leading Causes 2050          | Mean % change number of DEATH | Mean % change all-age DEATH rate | Mean % change age-standardized DEATH rate |
|-------------------------------|------------------------------|-------------------------------|----------------------------------|-------------------------------------------|
| 1 Ischemic heart disease      | 1 Ischemic heart disease     | 48.3 (-8.2 to 122)            | 32.8 (-18.2 to 106)              | -38.3 (-65.4 to 5.11)                     |
| 2 COVID-19                    | 2 Chronic kidney disease     | 185 (105 to 267)              | 154 (84.6 to 243)                | 27.4 (-13.6 to 85.9)                      |
| 3 Stroke                      | 3 Lower respiratory infect   | 95.5 (67.8 to 123)            | 74.6 (52.1 to 101)               | <b>-24.4 (-39.5 to -5.34)</b>             |
| 4 Diabetes                    | 4 Diabetes                   | 73.6 (30.2 to 115)            | 55.2 (17.7 to 98.3)              | -23 (-44 to 6.77)                         |
| 5 Lower respiratory infect    | 5 Stroke                     | 37.3 (5.05 to 69.1)           | 22.7 (-5.51 to 57.9)             | <b>-41.5 (-57.9 to -19.6)</b>             |
| 6 Chronic kidney disease      | 6 Alzheimer's disease        | 210 (146 to 272)              | 176 (122 to 228)                 | <b>-2.97 (-5.08 to -0.975)</b>            |
| 7 COPD                        | 7 COPD                       | 125 (71.9 to 179)             | 101 (51.8 to 155)                | -16.3 (-41.6 to 17.7)                     |
| 8 Interpersonal violence      | 8 Cirrhosis liver            | 57.6 (42.1 to 71)             | 40.8 (28.2 to 55.5)              | -9.17 (-19.1 to 2.86)                     |
| 9 Alzheimer's disease         | 9 Hypertensive heart disease | 164 (83.9 to 239)             | 136 (66.6 to 217)                | 3.37 (-33.2 to 55.4)                      |
| 10 Cirrhosis liver            | 10 Urinary diseases          | 249 (190 to 310)              | 211 (162 to 263)                 | <b>30.4 (2.79 to 70.4)</b>                |
| 11 Road injuries              | 11 Lung cancer               | 95.7 (27.8 to 174)            | 74.5 (18 to 140)                 | -9.82 (-34.6 to 18.6)                     |
| 12 Lung cancer                | 12 Prostate cancer           | 159 (66.3 to 264)             | 131 (53.4 to 226)                | -0.786 (-27.1 to 27.6)                    |
| 13 Stomach cancer             | 13 Colorectal cancer         | 115 (28.3 to 227)             | 91.3 (18.1 to 190)               | -2.56 (-35.4 to 37.3)                     |
| 14 Hypertensive heart disease | 14 Road injuries             | 8.42 (-30.7 to 66.9)          | -2.96 (-38.1 to 54.3)            | -13.2 (-45.3 to 40)                       |
| 15 Colorectal cancer          | 15 Pancreatic cancer         | 193 (59.3 to 378)             | 161 (46.1 to 324)                | 34.7 (-19.5 to 105)                       |
| 16 Neonatal disorders         | 16 Interpersonal violence    | -29.9 (-62 to 22.6)           | -37.6 (-64.1 to 9.88)            | -34.5 (-64 to 16.3)                       |
| 17 Prostate cancer            | 17 Breast cancer             | 82.8 (24.6 to 157)            | 63 (13.1 to 128)                 | -5.13 (-29.6 to 26.3)                     |
| 18 Breast cancer              | 18 Stomach cancer            | 41.6 (26.2 to 54.9)           | 26.4 (16.3 to 38.2)              | <b>-34.5 (-37.8 to -30.7)</b>             |
| 19 Urinary diseases           | 19 Falls                     | 118 (80.3 to 157)             | 94.4 (62.4 to 129)               | <b>-12 (-18.9 to -3.27)</b>               |
| 20 Falls                      | 20 Atrial fibrillation       | 253 (187 to 317)              | 215 (165 to 262)                 | 14.3 (5.18 to 25.2)                       |
| 24 Pancreatic cancer          | 43 Neonatal disorders        |                               |                                  |                                           |
| 26 Atrial fibrillation        | 136 COVID-19                 |                               |                                  |                                           |

### North Africa and Middle East, Reference scenario

**Legend:**  
Communicable, maternal, neonatal and nutritional  
Non-communicable  
Injuries

| Leading Causes 2022          | Leading Causes 2050          | Mean % change number of DEATH | Mean % change all-age DEATH rate | Mean % change age-standardized DEATH rate |
|------------------------------|------------------------------|-------------------------------|----------------------------------|-------------------------------------------|
| 1 Ischemic heart disease     | 1 Ischemic heart disease     | 72 (18.4 to 151)              | 27.3 (-15.2 to 90.5)             | -43.2 (-65.1 to -5.62)                    |
| 2 Stroke                     | 2 Stroke                     | 67.4 (31.6 to 108)            | 23.8 (-3.03 to 58.2)             | -47.5 (-62.4 to -25)                      |
| 3 COVID-19                   | 3 Chronic kidney disease     | 301 (204 to 415)              | 197 (124 to 292)                 | 32.2 (-7.37 to 95)                        |
| 4 Chronic kidney disease     | 4 Hypertensive heart disease | 252 (166 to 354)              | 160 (96.8 to 242)                | 5.42 (-29.7 to 57)                        |
| 5 Hypertensive heart disease | 5 Alzheimer's disease        | 326 (224 to 422)              | 215 (145 to 288)                 | 7.14 (4.55 to 9.29)                       |
| 6 Diabetes                   | 6 Diabetes                   | 160 (101 to 235)              | 92.5 (48.8 to 152)               | -12.9 (-37.9 to 26.9)                     |
| 7 Road injuries              | 7 COPD                       | 181 (122 to 248)              | 108 (64 to 166)                  | -15.3 (-40.7 to 21.2)                     |
| 8 Lower respiratory infect   | 8 Lower respiratory infect   | 98.2 (73.4 to 125)            | 46.5 (27.6 to 71.3)              | -25.2 (-39.2 to -3.57)                    |
| 9 Cirrhosis liver            | 9 Lung cancer                | 154 (72 to 255)               | 87.4 (30.5 to 160)               | -9.99 (-33.1 to 17.9)                     |
| 10 COPD                      | 10 Cirrhosis liver           | 91 (69.5 to 112)              | 41.1 (25 to 58.8)                | -30.3 (-39.4 to -17.7)                    |
| 11 Neonatal disorders        | 11 Road injuries             | 29.1 (-14.4 to 99.4)          | -4.42 (-38.4 to 50.6)            | -22.3 (-51.4 to 25.6)                     |
| 12 Lung cancer               | 12 Colorectal cancer         | 220 (105 to 375)              | 136 (51.6 to 248)                | 11.5 (-22.4 to 53.7)                      |
| 13 Alzheimer's disease       | 13 Pancreatic cancer         | 342 (184 to 537)              | 226 (116 to 368)                 | 52.8 (8.53 to 105)                        |
| 14 Congenital defects        | 14 Liver cancer              | 219 (172 to 272)              | 136 (101 to 181)                 | 19.7 (-1.22 to 48.6)                      |
| 15 Conflict & terror         | 15 Conflict & terror         | 96.3 (-79.9 to 677)           | 45.4 (-85.4 to 487)              | 30.8 (-87 to 379)                         |
| 16 Stomach cancer            | 16 Breast cancer             | 145 (65.9 to 245)             | 80.9 (22.8 to 151)               | 4.77 (-25 to 39.5)                        |
| 17 Colorectal cancer         | 17 Stomach cancer            | 88.8 (66.3 to 114)            | 39.4 (24.3 to 52.7)              | -32.9 (-37 to -28.7)                      |
| 18 Breast cancer             | 18 Brain cancer              | 200 (175 to 229)              | 122 (103 to 139)                 | 34.9 (29.9 to 40.3)                       |
| 19 Other cardiovascular      | 19 Prostate cancer           | 275 (139 to 446)              | 176 (77.3 to 302)                | 3.23 (-25.2 to 33.9)                      |
| 20 Leukemia                  | 20 Other cardiovascular      | 110 (87.5 to 136)             | 55.5 (36.9 to 72.9)              | -24.2 (-37 to -9.45)                      |
| 22 Liver cancer              | 22 Leukemia                  |                               |                                  |                                           |
| 24 Brain cancer              | 26 Congenital defects        |                               |                                  |                                           |
| 27 Pancreatic cancer         | 27 Neonatal disorders        |                               |                                  |                                           |
| 30 Prostate cancer           | 134 COVID-19                 |                               |                                  |                                           |

### South Asia, Reference scenario

**Legend:**

Communicable, maternal, neonatal and nutritional  
 Non-communicable  
 Injuries

| Leading Causes 2022           | Leading Causes 2050           | Mean % change number of DEATH | Mean % change all-age DEATH rate | Mean % change age-standardized DEATH rate |
|-------------------------------|-------------------------------|-------------------------------|----------------------------------|-------------------------------------------|
| 1 Ischemic heart disease      | 1 Ischemic heart disease      | 20.3 (-28.1 to 82.5)          | 7.66 (-33.7 to 67.1)             | -51.4 (-73.7 to -13.5)                    |
| 2 COPD                        | 2 COPD                        | 82.2 (35.4 to 132)            | 62.9 (22.4 to 115)               | -35.4 (-56.4 to -0.966)                   |
| 3 Stroke                      | 3 Stroke                      | 34.3 (5.35 to 67.3)           | 20 (-5.93 to 54.8)               | -47.9 (-63.4 to -27.9)                    |
| 4 Neonatal disorders          | 4 Diabetes                    | 85.9 (41.1 to 138)            | 66.2 (21.8 to 120)               | -28.3 (-52.4 to 8.8)                      |
| 5 Lower respiratory infect    | 5 Diarrheal diseases          | 36 (5.18 to 69.7)             | 21.6 (-7.11 to 57.1)             | -50.8 (-68 to -22.7)                      |
| 6 Diarrheal diseases          | 6 Lower respiratory infect    | 23.8 (1.89 to 49.3)           | 10.5 (-7.04 to 31.3)             | -44.8 (-54.6 to -30.8)                    |
| 7 Tuberculosis                | 7 Falls                       | 136 (80.8 to 203)             | 110 (71.5 to 158)                | -13.6 (-22.2 to -3.72)                    |
| 8 Diabetes                    | 8 Chronic kidney disease      | 165 (91.5 to 254)             | 137 (72.7 to 227)                | 11.1 (-26.9 to 66.6)                      |
| 9 Cirrhosis liver             | 9 Alzheimer's disease         | 260 (150 to 374)              | 221 (136 to 322)                 | -5.4 (-9.86 to -1.27)                     |
| 10 Road injuries              | 10 Cirrhosis liver            | 55.9 (29.7 to 82.9)           | 39.3 (16.6 to 66.9)              | -20.4 (-35.2 to -1.77)                    |
| 11 Falls                      | 11 Hypertensive heart disease | 153 (83.8 to 229)             | 126 (68.2 to 206)                | -11.3 (-42.6 to 35.8)                     |
| 12 COVID-19                   | 12 Tuberculosis               | -31.1 (-57.8 to 2.2)          | -38.3 (-61.9 to -3.83)           | -65.7 (-80 to -42.6)                      |
| 13 Chronic kidney disease     | 13 Road injuries              | 9.76 (-29.8 to 61.5)          | -1.8 (-35.7 to 53.2)             | -24.7 (-52.8 to 20.1)                     |
| 14 Asthma                     | 14 Urinary diseases           | 192 (152 to 239)              | 161 (129 to 199)                 | 16.8 (-5.24 to 46)                        |
| 15 Self-harm                  | 15 Breast cancer              | 121 (35.5 to 230)             | 97 (32.2 to 177)                 | 8.62 (-25 to 44.1)                        |
| 16 Rheumatic heart disease    | 16 Self-harm                  | 7.1 (-15.4 to 35.2)           | -4.32 (-24.5 to 20.9)            | -19.3 (-37.8 to 6.07)                     |
| 17 Hypertensive heart disease | 17 Lip oral cavity cancer     | 118 (87.7 to 149)             | 94.9 (77.3 to 112)               | 0.811 (-8.34 to 11.4)                     |
| 18 Alzheimer's disease        | 18 Rheumatic heart disease    | -0.941 (-32.4 to 36.6)        | -11.4 (-39.6 to 26.3)            | -54.9 (-71.8 to -29.7)                    |
| 19 Breast cancer              | 19 Asthma                     | -8.57 (-24 to 9.39)           | -18.3 (-31.7 to -3.89)           | -63.9 (-71.4 to -52.6)                    |
| 20 Congenital defects         | 20 Lung cancer                | 106 (30.4 to 198)             | 84 (22.2 to 155)                 | -7.66 (-33.7 to 22.5)                     |
| 21 Lung cancer                | 21 Neonatal disorders         |                               |                                  |                                           |
| 22 Lip oral cavity cancer     | 52 Congenital defects         |                               |                                  |                                           |
| 23 Urinary diseases           | 133 COVID-19                  |                               |                                  |                                           |

### Southeast Asia, East Asia, and Oceania, Reference scenario

**Legend:**  
Communicable, maternal, neonatal and nutritional  
Non-communicable  
Injuries

| Leading Causes 2022          | Leading Causes 2050          | Mean % change number of DEATH | Mean % change all-age DEATH rate | Mean % change age-standardized DEATH rate |
|------------------------------|------------------------------|-------------------------------|----------------------------------|-------------------------------------------|
| 1 Stroke                     | 1 Stroke                     | 31.4 (10 to 56.1)             | 36.8 (15.4 to 68)                | -45.2 (-55.5 to -30.7)                    |
| 2 Ischemic heart disease     | 2 COPD                       | 124 (77.6 to 172)             | 134 (87.9 to 185)                | -21.1 (-38.7 to 4.9)                      |
| 3 COPD                       | 3 Ischemic heart disease     | 19.1 (-12.9 to 58.8)          | 24.1 (-9.33 to 66.3)             | <b>-53.1 (-68.2 to -33.2)</b>             |
| 4 Lung cancer                | 4 Alzheimer's disease        | 236 (172 to 312)              | 249 (189 to 323)                 | -0.986 (-4.87 to 2.62)                    |
| 5 Alzheimer's disease        | 5 Lung cancer                | 83.9 (31.3 to 145)            | 91.1 (41.7 to 149)               | -8.7 (-27.1 to 12.8)                      |
| 6 Stomach cancer             | 6 Hypertensive heart disease | 186 (115 to 275)              | 198 (121 to 298)                 | 10.5 (-23.1 to 55.9)                      |
| 7 Hypertensive heart disease | 7 Chronic kidney disease     | 157 (104 to 217)              | 167 (112 to 237)                 | 21.8 (-6.94 to 60.7)                      |
| 8 Lower respiratory infect   | 8 Lower respiratory infect   | 101 (77.5 to 124)             | 110 (85.4 to 130)                | <b>-27.6 (-36 to -16.9)</b>               |
| 9 Diabetes                   | 9 Colorectal cancer          | 131 (57.7 to 218)             | 140 (69.4 to 228)                | 13.6 (-14.5 to 44.7)                      |
| 10 Chronic kidney disease    | 10 Diabetes                  | 63.1 (32.5 to 99.4)           | 69.8 (35.4 to 111)               | -21.1 (-38.7 to 4.25)                     |
| 11 Colorectal cancer         | 11 Stomach cancer            | 20.7 (2.54 to 40.3)           | 25.5 (8.31 to 44.7)              | <b>-39.7 (-44.5 to -34.1)</b>             |
| 12 Road injuries             | 12 Esophageal cancer         | 79.9 (55.9 to 106)            | 87.2 (64.4 to 113)               | -7.23 (-16.4 to 2.76)                     |
| 13 Cirrhosis liver           | 13 Cirrhosis liver           | 50.8 (31.3 to 73.5)           | 57 (35.9 to 83.3)                | -2.19 (-15.4 to 16.1)                     |
| 14 Esophageal cancer         | 14 Falls                     | 117 (75.5 to 164)             | 126 (88.4 to 168)                | <b>-10.8 (-16.9 to -4.52)</b>             |
| 15 COVID-19                  | 15 Liver cancer              | 89.8 (47 to 149)              | 97.8 (50.2 to 162)               | 14.3 (-15.8 to 57.4)                      |
| 16 Liver cancer              | 16 Pancreatic cancer         | 162 (84.1 to 250)             | 172 (97.8 to 262)                | <b>37.4 (5.12 to 72.7)</b>                |
| 17 Tuberculosis              | 17 Atrial fibrillation       | 326 (244 to 426)              | 343 (265 to 436)                 | <b>20.5 (11.2 to 31)</b>                  |
| 18 Falls                     | 18 Parkinson's disease       | 182 (145 to 226)              | 193 (160 to 230)                 | -0.573 (-7.68 to 6.95)                    |
| 19 Self-harm                 | 19 Road injuries             | -10.2 (-34.3 to 26.4)         | -6.37 (-32.6 to 32.1)            | -19.5 (-44.3 to 19.1)                     |
| 20 Breast cancer             | 20 Breast cancer             | 66.2 (23.1 to 113)            | 72.8 (30.8 to 119)               | 8.33 (-14.2 to 33.9)                      |
| 21 Pancreatic cancer         | 21 Self-harm                 |                               |                                  |                                           |
| 23 Parkinson's disease       | 24 Tuberculosis              |                               |                                  |                                           |
| 25 Atrial fibrillation       | 134 COVID-19                 |                               |                                  |                                           |

### Sub-Saharan Africa, Reference scenario

**Legend:**  
Communicable, maternal, neonatal and nutritional  
Non-communicable  
Injuries

| Leading Causes 2022            | Leading Causes 2050            | Mean % change number of DEATH | Mean % change all-age DEATH rate | Mean % change age-standardized DEATH rate |
|--------------------------------|--------------------------------|-------------------------------|----------------------------------|-------------------------------------------|
| 1 Neonatal disorders           | 1 Lower respiratory infect     | 35 (19.2 to 52.1)             | -25.8 (-35.4 to -14.7)           | -33.6 (-40.8 to -24.7)                    |
| 2 Lower respiratory infect     | 2 Stroke                       | 73 (48.6 to 99.7)             | -4.9 (-20.5 to 12.2)             | -46.2 (-55.7 to -34.2)                    |
| 3 Malaria                      | 3 Ischemic heart disease       | 78.7 (30.6 to 141)            | -1.74 (-29.7 to 34.5)            | -44.8 (-61.5 to -22)                      |
| 4 HIV/AIDS                     | 4 Neonatal disorders           | -30.4 (-46.1 to -11.2)        | -61.8 (-69.3 to -51.4)           | -42.7 (-54 to -28.4)                      |
| 5 Stroke                       | 5 Chronic kidney disease       | 244 (180 to 318)              | 88.9 (51.3 to 131)               | 17 (-7.92 to 48)                          |
| 6 Diarrheal diseases           | 6 Malaria                      | -30.1 (-80.4 to 149)          | -61.7 (-89.3 to 34.8)            | -61.1 (-88.7 to 32.5)                     |
| 7 Tuberculosis                 | 7 Diarrheal diseases           | 0.153 (-28.6 to 40.7)         | -44.9 (-61.3 to -24)             | -44.6 (-58.7 to -21.9)                    |
| 8 Ischemic heart disease       | 8 Diabetes                     | 119 (80.5 to 161)             | 20.5 (-2.67 to 47.6)             | -28.5 (-42.9 to -10.6)                    |
| 9 COVID-19                     | 9 Hypertensive heart disease   | 191 (141 to 253)              | 60 (30.5 to 95.3)                | -14.7 (-33.3 to 7.57)                     |
| 10 Road injuries               | 10 Cirrhosis liver             | 90 (68.2 to 115)              | 4.41 (-10.2 to 21.6)             | -31.9 (-40.8 to -20.5)                    |
| 11 Congenital defects          | 11 Tuberculosis                | -13.2 (-37.1 to 20.7)         | -52.3 (-65.2 to -33)             | -66.6 (-75.5 to -53.6)                    |
| 12 Diabetes                    | 12 Road injuries               | 39.8 (-11.3 to 126)           | -23.1 (-52 to 24.4)              | -36.8 (-58.9 to -0.937)                   |
| 13 Cirrhosis liver             | 13 COPD                        | 123 (95.1 to 156)             | 22.7 (5.38 to 43.2)              | -32.7 (-44.1 to -18.3)                    |
| 14 Chronic kidney disease      | 14 Alzheimer's disease         | 302 (227 to 377)              | 121 (80.9 to 159)                | 2.07 (-0.615 to 4.16)                     |
| 15 Hypertensive heart disease  | 15 Breast cancer               | 218 (148 to 283)              | 74.6 (37.2 to 112)               | 11.6 (-6.23 to 30.7)                      |
| 16 Meningitis                  | 16 Prostate cancer             | 274 (174 to 364)              | 105 (51.4 to 157)                | 7.56 (-11.3 to 26.8)                      |
| 17 Maternal disorders          | 17 HIV/AIDS                    | -67.4 (-72.4 to -62.5)        | -82.1 (-85 to -79.2)             | -84.8 (-87 to -82.5)                      |
| 18 COPD                        | 18 Congenital defects          | -19.6 (-33.6 to -1.63)        | -55.9 (-61.9 to -47.2)           | -37.4 (-44.8 to -26.4)                    |
| 19 Interpersonal violence      | 19 Self-harm                   | 101 (79.4 to 129)             | 10.7 (-3.99 to 27.5)             | -19.3 (-29.1 to -7.47)                    |
| 20 Protein-energy malnutrition | 20 Falls                       | 173 (131 to 212)              | 49.6 (27.6 to 68.9)              | -5.52 (-8.63 to -2.79)                    |
| 22 Self-harm                   | 23 Interpersonal violence      |                               |                                  |                                           |
| 24 Breast cancer               | 24 Meningitis                  |                               |                                  |                                           |
| 26 Alzheimer's disease         | 31 Maternal disorders          |                               |                                  |                                           |
| 28 Falls                       | 40 Protein-energy malnutrition |                               |                                  |                                           |
| 31 Prostate cancer             | 136 COVID-19                   |                               |                                  |                                           |

### Central Asia, Reference scenario

**Legend:**  
Communicable, maternal, neonatal and nutritional  
Non-communicable  
Injuries

| Leading Causes 2022          | Leading Causes 2050          | Mean % change number of DEATH | Mean % change all-age DEATH rate | Mean % change age-standardized DEATH rate |
|------------------------------|------------------------------|-------------------------------|----------------------------------|-------------------------------------------|
| 1 Ischemic heart disease     | 1 Ischemic heart disease     | 87.9 (27.6 to 160)            | 50.1 (1.61 to 104)               | -35.3 (-62.1 to 2.98)                     |
| 2 COVID-19                   | 2 Stroke                     | 55.5 (24.8 to 87.9)           | 24.2 (0.947 to 49.3)             | -44.6 (-60.1 to -23.9)                    |
| 3 Stroke                     | 3 Cirrhosis liver            | 61 (34.4 to 91.4)             | 28.6 (9.26 to 49.9)              | -12.4 (-28.2 to 7.75)                     |
| 4 Cirrhosis liver            | 4 Alzheimer's disease        | 305 (179 to 439)              | 223 (128 to 330)                 | 2.38 (0.77 to 3.98)                       |
| 5 Lower respiratory infect   | 5 COPD                       | 157 (97.2 to 224)             | 105 (59.6 to 151)                | -8.04 (-35.7 to 29.9)                     |
| 6 Neonatal disorders         | 6 Hypertensive heart disease | 161 (69 to 272)               | 109 (36.6 to 201)                | -8.64 (-48 to 49.7)                       |
| 7 COPD                       | 7 Chronic kidney disease     | 192 (98.3 to 309)             | 133 (57.4 to 224)                | 29.1 (-20.5 to 104)                       |
| 8 Diabetes                   | 8 Diabetes                   | 76.6 (20.6 to 148)            | 41.1 (0.99 to 96.5)              | -19 (-44.9 to 23.7)                       |
| 9 Hypertensive heart disease | 9 Lower respiratory infect   | -0.231 (-17.7 to 21.2)        | -20.3 (-32.5 to -5.18)           | -42.9 (-55.5 to -23.7)                    |
| 10 Cardiomyopathy            | 10 Lung cancer               | 87.1 (24.4 to 161)            | 49.3 (1.66 to 101)               | -12.4 (-36.8 to 16.2)                     |
| 11 Lung cancer               | 11 Liver cancer              | 182 (104 to 293)              | 126 (62.8 to 206)                | 32.7 (-9.67 to 90)                        |
| 12 Alzheimer's disease       | 12 Cardiomyopathy            | 43 (20.2 to 72.4)             | 14.1 (-1.83 to 30.3)             | -28.4 (-34.5 to -20.7)                    |
| 13 Road injuries             | 13 Colorectal cancer         | 111 (28.9 to 211)             | 68.6 (2.99 to 148)               | -8.09 (-37.3 to 30.6)                     |
| 14 Chronic kidney disease    | 14 Stomach cancer            | 39.8 (21.1 to 58.3)           | 11.6 (1.75 to 21.6)              | -35.7 (-39 to -31.9)                      |
| 15 Stomach cancer            | 15 Breast cancer             | 69 (14.5 to 133)              | 34.8 (-6.29 to 82.3)             | -14 (-37.4 to 14.5)                       |
| 16 Self-harm                 | 16 Road injuries             | 13.9 (-33.8 to 103)           | -8.91 (-46.2 to 57.9)            | -16.1 (-51.9 to 47.5)                     |
| 17 Congenital defects        | 17 Self-harm                 | 18.8 (-5.23 to 49.2)          | -5.12 (-24.1 to 17.5)            | -13.9 (-31.6 to 8.39)                     |
| 18 Breast cancer             | 18 Pancreatic cancer         | 184 (75.1 to 318)             | 126 (42.4 to 224)                | 25.7 (-13.5 to 72.9)                      |
| 19 Colorectal cancer         | 19 Neonatal disorders        | -35.1 (-65.8 to 15.7)         | -48.2 (-72 to -10.3)             | -31.6 (-62.2 to 13.6)                     |
| 20 Liver cancer              | 20 Esophageal cancer         | 128 (101 to 157)              | 82 (68.2 to 96)                  | 0.875 (-8.8 to 12.8)                      |
| 23 Esophageal cancer         | 30 Congenital defects        |                               |                                  |                                           |
| 25 Pancreatic cancer         | 131 COVID-19                 |                               |                                  |                                           |

### Central Europe, Reference scenario

**Legend:**  
Communicable, maternal, neonatal and nutritional  
Non-communicable  
Injuries

| Leading Causes 2022          | Leading Causes 2050          | Mean % change number of DEATH | Mean % change all-age DEATH rate | Mean % change age-standardized DEATH rate |
|------------------------------|------------------------------|-------------------------------|----------------------------------|-------------------------------------------|
| 1 Ischemic heart disease     | 1 Ischemic heart disease     | -21.5 (-40.3 to 2.82)         | -4.73 (-28.7 to 22.9)            | <b>-51.1 (-65.7 to -30.5)</b>             |
| 2 Stroke                     | 2 Stroke                     | <b>-27.4 (-36.7 to -16.1)</b> | -11.9 (-23.2 to 0.614)           | <b>-52.5 (-60.6 to -42.9)</b>             |
| 3 COVID-19                   | 3 Lung cancer                | 18.7 (-6.01 to 45.3)          | <b>43.9 (16.4 to 77.8)</b>       | -0.765 (-19 to 18.4)                      |
| 4 Lung cancer                | 4 Alzheimer's disease        | <b>96 (63.3 to 126)</b>       | <b>138 (100 to 173)</b>          | <b>3 (1.35 to 4.73)</b>                   |
| 5 Hypertensive heart disease | 5 Hypertensive heart disease | <b>56 (13.4 to 108)</b>       | <b>89.3 (38.7 to 153)</b>        | 1.05 (-30.6 to 45.4)                      |
| 6 Colorectal cancer          | 6 Colorectal cancer          | 36.3 (-3.51 to 84.6)          | <b>65.2 (16.8 to 122)</b>        | 1.64 (-25.3 to 32.4)                      |
| 7 Alzheimer's disease        | 7 Lower respiratory infect   | <b>29.2 (13.1 to 45.4)</b>    | <b>56.7 (36.6 to 76.1)</b>       | <b>-17.5 (-29.7 to -5.38)</b>             |
| 8 Lower respiratory infect   | 8 COPD                       | <b>29.3 (3.58 to 53.9)</b>    | <b>56.9 (27.4 to 87.1)</b>       | -8.94 (-29 to 12.1)                       |
| 9 COPD                       | 9 Chronic kidney disease     | <b>84.5 (43.1 to 127)</b>     | <b>124 (72.2 to 179)</b>         | 22.9 (-7.38 to 63.5)                      |
| 10 Cirrhosis liver           | 10 Pancreatic cancer         | <b>65.2 (21.5 to 117)</b>     | <b>100 (48.6 to 156)</b>         | <b>32 (1.71 to 69.8)</b>                  |
| 11 Diabetes                  | 11 Diabetes                  | 6.4 (-11.2 to 28.4)           | <b>29.1 (7.7 to 53.9)</b>        | <b>-26.6 (-40.6 to -10.3)</b>             |
| 12 Cardiomyopathy            | 12 Cardiomyopathy            | 16.2 (-0.284 to 34.6)         | <b>40.9 (22.6 to 63.2)</b>       | <b>-19.6 (-25.8 to -13.1)</b>             |
| 13 Breast cancer             | 13 Prostate cancer           | <b>57.9 (27.5 to 89.7)</b>    | <b>91.4 (55.4 to 127)</b>        | 11.6 (-3.37 to 28)                        |
| 14 Pancreatic cancer         | 14 Breast cancer             | 23.5 (-5.19 to 55.2)          | <b>49.7 (14.8 to 88.9)</b>       | -5.47 (-22.5 to 13)                       |
| 15 Chronic kidney disease    | 15 Cirrhosis liver           | <b>-13 (-23 to -1.78)</b>     | 5.56 (-5.34 to 17.5)             | <b>-12.5 (-22.6 to -0.762)</b>            |
| 16 Prostate cancer           | 16 Atrial fibrillation       | <b>107 (73.1 to 137)</b>      | <b>151 (114 to 182)</b>          | <b>17.1 (8.87 to 26.8)</b>                |
| 17 Stomach cancer            | 17 Falls                     | <b>39.3 (18 to 58.9)</b>      | <b>68.9 (45.1 to 92.2)</b>       | <b>-9.34 (-16.2 to -2.23)</b>             |
| 18 Falls                     | 18 Parkinson's disease       | <b>52.2 (38.4 to 67.6)</b>    | <b>84.6 (69.5 to 103)</b>        | 1.48 (-5.39 to 8.78)                      |
| 19 Self-harm                 | 19 Bladder cancer            | <b>32.2 (15.7 to 49.1)</b>    | <b>60.3 (43.6 to 79.8)</b>       | -4.1 (-11.2 to 3.25)                      |
| 20 Bladder cancer            | 20 Brain cancer              | <b>52.9 (42.8 to 63.6)</b>    | <b>85.5 (76.3 to 96.1)</b>       | <b>34.4 (29.6 to 39.7)</b>                |
| 21 Parkinson's disease       | 22 Stomach cancer            |                               |                                  |                                           |
| 22 Atrial fibrillation       | 25 Self-harm                 |                               |                                  |                                           |
| 23 Brain cancer              | 130 COVID-19                 |                               |                                  |                                           |

### Eastern Europe, Reference scenario

**Legend:**  
Communicable, maternal, neonatal and nutritional  
Non-communicable  
Injuries

| Leading Causes 2022           | Leading Causes 2050           | Mean % change number of DEATH   | Mean % change all-age DEATH rate | Mean % change age-standardized DEATH rate |
|-------------------------------|-------------------------------|---------------------------------|----------------------------------|-------------------------------------------|
| 1 Ischemic heart disease      | 1 Ischemic heart disease      | -10.3 (-36.1 to 15.3)           | 1.64 (-27.2 to 32.7)             | <b>-47.9 (-66.1 to -24)</b>               |
| 2 Stroke                      | 2 Stroke                      | <b>-17.7 (-34.6 to -2.91)</b>   | -6.78 (-23.5 to 9.3)             | <b>-51.6 (-62.3 to -38.3)</b>             |
| 3 COVID-19                    | 3 Alzheimer's disease         | <b>135 (71.2 to 207)</b>        | <b>165 (98.1 to 234)</b>         | 2.42 (-0.721 to 5.23)                     |
| 4 Lung cancer                 | 4 Colorectal cancer           | 33.2 (-13.7 to 94.9)            | <b>50.5 (0.731 to 110)</b>       | -7.5 (-32.9 to 25.8)                      |
| 5 Alzheimer's disease         | 5 Lung cancer                 | 9.52 (-20.3 to 47.6)            | 23.8 (-7.26 to 60.1)             | -13.6 (-31.8 to 8.53)                     |
| 6 Cardiomyopathy              | 6 COPD                        | <b>59.5 (22.5 to 95)</b>        | <b>80.6 (39.9 to 117)</b>        | 0.698 (-23.2 to 30.5)                     |
| 7 Cirrhosis liver             | 7 Cirrhosis liver             | <b>-15.7 (-27.3 to -2.37)</b>   | -4.48 (-15.2 to 7.58)            | <b>-16.7 (-27.7 to -2.98)</b>             |
| 8 Colorectal cancer           | 8 Cardiomyopathy              | <b>-17.9 (-31.7 to -0.0851)</b> | -7.06 (-21 to 8.58)              | <b>-27.8 (-37.8 to -17.3)</b>             |
| 9 Self-harm                   | 9 Pancreatic cancer           | <b>72.3 (17.3 to 139)</b>       | <b>94.7 (35.8 to 166)</b>        | 29.1 (-4.17 to 73.2)                      |
| 10 Diabetes                   | 10 Urinary diseases           | <b>141 (84.9 to 201)</b>        | <b>173 (117 to 245)</b>          | <b>46.1 (14.1 to 83.6)</b>                |
| 11 Stomach cancer             | 11 Hypertensive heart disease | <b>85.1 (26.3 to 145)</b>       | <b>110 (45.5 to 180)</b>         | 14.3 (-26.3 to 72.9)                      |
| 12 COPD                       | 12 Diabetes                   | 1.2 (-24.1 to 31.9)             | 14.6 (-13.5 to 44)               | <b>-34 (-50.9 to -10.3)</b>               |
| 13 Breast cancer              | 13 Self-harm                  | <b>-13.1 (-26 to 1.54)</b>      | <b>-1.57 (-15 to 13.3)</b>       | <b>-12.4 (-25.7 to 4.07)</b>              |
| 14 Lower respiratory infect   | 14 Breast cancer              | 15.5 (-16.3 to 61.8)            | 30.6 (-3.38 to 74.6)             | -11.8 (-30.4 to 12.5)                     |
| 15 Alcohol use disorders      | 15 Prostate cancer            | <b>81.1 (35.8 to 140)</b>       | <b>105 (57.1 to 159)</b>         | <b>20.1 (0.3 to 41.8)</b>                 |
| 16 Pancreatic cancer          | 16 Stomach cancer             | -7.37 (-22.1 to 8.9)            | 4.79 (-8.79 to 17.2)             | <b>-31.5 (-37.6 to -25.7)</b>             |
| 17 Hypertensive heart disease | 17 Atrial fibrillation        | <b>147 (88 to 224)</b>          | <b>179 (117 to 259)</b>          | <b>16.4 (4.16 to 33.7)</b>                |
| 18 HIV/AIDS                   | 18 Chronic kidney disease     | <b>109 (46.8 to 177)</b>        | <b>136 (68.3 to 205)</b>         | 40.2 (-1.02 to 95.9)                      |
| 19 Road injuries              | 19 Lower respiratory infect   | 10.9 (-6.93 to 33.3)            | <b>25.5 (7.55 to 45.3)</b>       | <b>-17.3 (-30.8 to -1.24)</b>             |
| 20 Prostate cancer            | 20 Vascular intestinal        | <b>73.8 (30.9 to 122)</b>       | <b>96.5 (54.1 to 146)</b>        | 2.64 (-10.3 to 18.5)                      |
| 22 Urinary diseases           | 21 Alcohol use disorders      |                                 |                                  |                                           |
| 23 Chronic kidney disease     | 26 Road injuries              |                                 |                                  |                                           |
| 24 Vascular intestinal        | 30 HIV/AIDS                   |                                 |                                  |                                           |
| 27 Atrial fibrillation        | 129 COVID-19                  |                                 |                                  |                                           |



### Australasia, Reference scenario

**Legend:**  
Communicable, maternal, neonatal and nutritional  
Non-communicable  
Injuries

| Leading Causes 2022        | Leading Causes 2050        | Mean % change number of DEATH | Mean % change all-age DEATH rate | Mean % change age-standardized DEATH rate |
|----------------------------|----------------------------|-------------------------------|----------------------------------|-------------------------------------------|
| 1 Ischemic heart disease   | 1 Alzheimer's disease      | 141 (118 to 166)              | 79.9 (63.1 to 96.4)              | -2.21 (-5.86 to 1.92)                     |
| 2 Alzheimer's disease      | 2 Ischemic heart disease   | 21.7 (-2.98 to 55.3)          | -9.02 (-28.5 to 13.8)            | <b>-48.9 (-61 to -33.5)</b>               |
| 3 Stroke                   | 3 COPD                     | 93.7 (62.8 to 128)            | 44.7 (21.6 to 70.2)              | -10.7 (-24.7 to 7.46)                     |
| 4 Lung cancer              | 4 Chronic kidney disease   | 235 (177 to 308)              | 150 (108 to 205)                 | 37.6 (11.9 to 77)                         |
| 5 COPD                     | 5 Lung cancer              | 62.5 (32.2 to 97)             | 21.4 (0.776 to 44.5)             | -11.7 (-25.6 to 2.21)                     |
| 6 COVID-19                 | 6 Stroke                   | 25.5 (10 to 43.8)             | -6.18 (-17.5 to 6.36)            | <b>-45.7 (-53.4 to -36.1)</b>             |
| 7 Colorectal cancer        | 7 Colorectal cancer        | 99.6 (55.8 to 152)            | 49.1 (16.7 to 88.1)              | -2.2 (-21.9 to 18.1)                      |
| 8 Chronic kidney disease   | 8 Lower respiratory infect | 128 (99.2 to 164)             | 70.2 (50.6 to 93.1)              | <b>-12.7 (-24 to -0.982)</b>              |
| 9 Lower respiratory infect | 9 Atrial fibrillation      | 200 (165 to 234)              | 124 (98.8 to 145)                | 20.5 (10.9 to 29.2)                       |
| 10 Prostate cancer         | 10 Falls                   | 125 (95.7 to 158)             | 68.5 (49.1 to 90.7)              | -8.49 (-17.3 to 1.94)                     |
| 11 Falls                   | 11 Prostate cancer         | 112 (72.4 to 156)             | 58.2 (30.9 to 87.9)              | -3.26 (-15.1 to 10.5)                     |
| 12 Diabetes                | 12 Pancreatic cancer       | 137 (88.9 to 191)             | 76.9 (40.5 to 113)               | 26 (3.19 to 48.3)                         |
| 13 Atrial fibrillation     | 13 Diabetes                | 77.7 (41.8 to 115)            | 32.8 (6.54 to 62.4)              | <b>-21.5 (-36.4 to -3.42)</b>             |
| 14 Pancreatic cancer       | 14 Breast cancer           | 73.5 (42.6 to 111)            | 29.6 (8.32 to 55.8)              | -8.41 (-21.1 to 6.62)                     |
| 15 Breast cancer           | 15 Nonrheum valv diseases  | 208 (172 to 248)              | 130 (105 to 156)                 | 22.6 (13 to 32.2)                         |
| 16 Self-harm               | 16 Urinary diseases        | 262 (213 to 327)              | 170 (133 to 216)                 | 42.6 (23 to 69.2)                         |
| 17 Parkinson's disease     | 17 Parkinson's disease     | 104 (85.5 to 126)             | 52.1 (39.7 to 67.4)              | -4.15 (-10.6 to 4.11)                     |
| 18 Leukemia                | 18 Liver cancer            | 91.6 (69.9 to 117)            | 43.2 (26 to 62.2)                | 13.6 (-0.269 to 30)                       |
| 19 Liver cancer            | 19 Endo/metab/blood/immune | 142 (106 to 180)              | 80.5 (52 to 108)                 | 16.8 (4.54 to 29.7)                       |
| 20 Lymphoma                | 20 Leukemia                | 80 (51.5 to 110)              | 34.4 (14.5 to 53.5)              | -8.34 (-19 to 2.77)                       |
| 21 Nonrheum valv diseases  | 21 Lymphoma                |                               |                                  |                                           |
| 26 Endo/metab/blood/immune | 22 Self-harm               |                               |                                  |                                           |
| 29 Urinary diseases        | 129 COVID-19               |                               |                                  |                                           |

### High-income Asia Pacific, Reference scenario

**Legend:**  
Communicable, maternal, neonatal and nutritional  
Non-communicable  
Injuries

| Leading Causes 2022           | Leading Causes 2050           | Mean % change number of DEATH | Mean % change all-age DEATH rate | Mean % change age-standardized DEATH rate |
|-------------------------------|-------------------------------|-------------------------------|----------------------------------|-------------------------------------------|
| 1 Alzheimer's disease         | 1 Alzheimer's disease         | 68.2 (53.2 to 85.2)           | 89.7 (75.9 to 104)               | -11.2 (-14.4 to -7.48)                    |
| 2 Stroke                      | 2 Lower respiratory infect    | 64.6 (47 to 84.6)             | 85.6 (66.2 to 108)               | -9.57 (-19.1 to 0.408)                    |
| 3 Ischemic heart disease      | 3 Stroke                      | -13 (-23 to -1.17)            | -1.88 (-13.5 to 10.7)            | -46.6 (-52.8 to -39.4)                    |
| 4 Lower respiratory infect    | 4 Lung cancer                 | 31.5 (8.64 to 57.1)           | 48.3 (22.5 to 73.8)              | -15.1 (-26.6 to -2.02)                    |
| 5 Lung cancer                 | 5 Chronic kidney disease      | 133 (89.5 to 175)             | 162 (115 to 211)                 | 26 (3.39 to 52.3)                         |
| 6 Colorectal cancer           | 6 Colorectal cancer           | 46.3 (15.5 to 82.4)           | 65.1 (32.4 to 103)               | -8.08 (-25.3 to 10.3)                     |
| 7 Stomach cancer              | 7 Ischemic heart disease      | -21.9 (-37.7 to -3.88)        | -11.9 (-29.6 to 9.57)            | -56 (-65.5 to -44.5)                      |
| 8 Chronic kidney disease      | 8 Pancreatic cancer           | 71.5 (38.9 to 107)            | 93.3 (60.2 to 129)               | 17 (-3.35 to 36)                          |
| 9 Pancreatic cancer           | 9 Liver cancer                | 70.6 (50 to 93.5)             | 92.5 (69.1 to 117)               | 22.5 (8.92 to 36.1)                       |
| 10 Liver cancer               | 10 COPD                       | 74.7 (49.4 to 101)            | 97.1 (71.6 to 129)               | -3.46 (-16.7 to 11.7)                     |
| 11 COPD                       | 11 Stomach cancer             | -0.953 (-10.6 to 8.7)         | 11.7 (2.54 to 21.3)              | -38.3 (-42.2 to -34.1)                    |
| 12 COVID-19                   | 12 Nonrheum valv diseases     | 113 (86.7 to 150)             | 140 (108 to 182)                 | 6.73 (-4.23 to 18)                        |
| 13 Self-harm                  | 13 Hypertensive heart disease | 116 (69.8 to 165)             | 144 (94.5 to 200)                | 18.1 (-5.08 to 46.7)                      |
| 14 Cirrhosis liver            | 14 Urinary diseases           | 184 (143 to 238)              | 221 (174 to 278)                 | 45.7 (26.5 to 70.6)                       |
| 15 Gallbladder cancer         | 15 Interstitial lung disease  | 45 (27.6 to 62.1)             | 63.5 (47.3 to 80.2)              | -5.44 (-14 to 3.14)                       |
| 16 Interstitial lung disease  | 16 Atrial fibrillation        | 113 (95.3 to 135)             | 140 (121 to 163)                 | 20.2 (12.4 to 29.8)                       |
| 17 Aortic aneurysm            | 17 Cirrhosis liver            | 17.8 (6.54 to 31.5)           | 32.9 (20.3 to 45.8)              | -6.26 (-14.2 to 2.56)                     |
| 18 Nonrheum valv diseases     | 18 Falls                      | 65.5 (44.2 to 86.1)           | 86.7 (66.1 to 107)               | -8.38 (-15.2 to -0.809)                   |
| 19 Parkinson's disease        | 19 Parkinson's disease        | 55.1 (43.4 to 69.2)           | 75 (62.8 to 87.8)                | -0.313 (-5.9 to 7.03)                     |
| 20 Falls                      | 20 Prostate cancer            | 71.7 (39.7 to 107)            | 93.7 (57.1 to 130)               | 4.92 (-8.83 to 19.6)                      |
| 21 Hypertensive heart disease | 21 Self-harm                  |                               |                                  |                                           |
| 24 Prostate cancer            | 22 Aortic aneurysm            |                               |                                  |                                           |
| 26 Atrial fibrillation        | 23 Gallbladder cancer         |                               |                                  |                                           |
| 28 Urinary diseases           | 132 COVID-19                  |                               |                                  |                                           |

### High-income North America, Reference scenario

**Legend:**  
Communicable, maternal, neonatal and nutritional  
Non-communicable  
Injuries

| Leading Causes 2022           | Leading Causes 2050          | Mean % change number of DEATH | Mean % change all-age DEATH rate | Mean % change age-standardized DEATH rate |
|-------------------------------|------------------------------|-------------------------------|----------------------------------|-------------------------------------------|
| 1 Ischemic heart disease      | 1 Ischemic heart disease     | -3.8 (-20.1 to 14.6)          | -11.3 (-24.8 to 5.89)            | <b>-49.4 (-58.3 to -37.5)</b>             |
| 2 COVID-19                    | 2 Alzheimer's disease        | 121 (98.7 to 142)             | 104 (87 to 122)                  | 1.41 (-2.5 to 5.34)                       |
| 3 COPD                        | 3 Chronic kidney disease     | 166 (128 to 208)              | 145 (113 to 181)                 | 41.6 (21.1 to 65.4)                       |
| 4 Alzheimer's disease         | 4 COPD                       | 65.7 (43.2 to 89.9)           | 52.8 (33.4 to 76.4)              | -5.71 (-17.7 to 7.89)                     |
| 5 Stroke                      | 5 Lung cancer                | 32.6 (13.6 to 53.8)           | 22.3 (5.06 to 43.8)              | <b>-12 (-22.5 to -0.336)</b>              |
| 6 Lung cancer                 | 6 Stroke                     | 8.47 (-3.32 to 20)            | 0.0221 (-9.48 to 8.55)           | <b>-40.8 (-47 to -33.8)</b>               |
| 7 Chronic kidney disease      | 7 Hypertensive heart disease | 109 (77.4 to 147)             | 92.4 (63.1 to 130)               | 21 (1.2 to 48.1)                          |
| 8 Colorectal cancer           | 8 Colorectal cancer          | 54.9 (26.5 to 90.3)           | 42.9 (16.4 to 73.6)              | -5.91 (-21.1 to 10.6)                     |
| 9 Diabetes                    | 9 Lower respiratory infect   | 70.2 (49 to 90.3)             | 56.9 (39.6 to 73.8)              | <b>-10.6 (-20.3 to -1.24)</b>             |
| 10 Drug use disorders         | 10 Pancreatic cancer         | 90.5 (60.2 to 125)            | 75.6 (47.9 to 112)               | 26.3 (10.1 to 45.4)                       |
| 11 Lower respiratory infect   | 11 Drug use disorders        | 49 (24.8 to 76.2)             | 37.3 (17.9 to 60)                | 33.5 (12.6 to 58.5)                       |
| 12 Cirrhosis liver            | 12 Falls                     | 90.5 (68 to 114)              | 75.7 (56.5 to 95.2)              | -3.3 (-10.7 to 4.85)                      |
| 13 Hypertensive heart disease | 13 Atrial fibrillation       | 170 (140 to 209)              | 149 (124 to 176)                 | 26.4 (16.7 to 34.7)                       |
| 14 Pancreatic cancer          | 14 Endo/metab/blood/immune   | 116 (84.1 to 147)             | 98.8 (73 to 125)                 | 28.7 (17.3 to 41)                         |
| 15 Breast cancer              | 15 Prostate cancer           | 90.4 (64.2 to 122)            | 75.6 (52.6 to 103)               | 5.21 (-4.77 to 16.6)                      |
| 16 Falls                      | 16 Nonrheum valv diseases    | 194 (160 to 239)              | 171 (138 to 206)                 | 32.8 (20.7 to 46.5)                       |
| 17 Self-harm                  | 17 Diabetes                  | 11.5 (-6.21 to 30.6)          | 2.81 (-13.6 to 20.5)             | <b>-34.8 (-44.8 to -24.3)</b>             |
| 18 Prostate cancer            | 18 Breast cancer             | 44.6 (23.6 to 66.8)           | 33.3 (15.6 to 52.1)              | -6.38 (-16.7 to 4.66)                     |
| 19 Endo/metab/blood/immune    | 19 Parkinson's disease       | 100 (79.7 to 121)             | 84.4 (67.3 to 101)               | 6.3 (-2.27 to 14.3)                       |
| 20 Road injuries              | 20 Urinary diseases          | 200 (163 to 241)              | 176 (140 to 210)                 | 50.6 (33.9 to 68.9)                       |
| 21 Parkinson's disease        | 21 Cirrhosis liver           |                               |                                  |                                           |
| 22 Atrial fibrillation        | 23 Self-harm                 |                               |                                  |                                           |
| 24 Nonrheum valv diseases     | 26 Road injuries             |                               |                                  |                                           |
| 29 Urinary diseases           | 129 COVID-19                 |                               |                                  |                                           |

### Southern Latin America, Reference scenario

**Legend:**  
Communicable, maternal, neonatal and nutritional  
Non-communicable  
Injuries

| Leading Causes 2022           | Leading Causes 2050          | Mean % change number of DEATH | Mean % change all-age DEATH rate | Mean % change age-standardized DEATH rate |
|-------------------------------|------------------------------|-------------------------------|----------------------------------|-------------------------------------------|
| 1 Lower respiratory infect    | 1 Lower respiratory infect   | 76.1 (54.8 to 101)            | 66.5 (48.8 to 86.3)              | -17.5 (-27.5 to -7)                       |
| 2 Ischemic heart disease      | 2 Chronic kidney disease     | 160 (116 to 205)              | 145 (104 to 188)                 | 23.4 (0.722 to 47.7)                      |
| 3 Stroke                      | 3 Ischemic heart disease     | 0.157 (-20.7 to 27)           | -5.25 (-25.3 to 19.7)            | -50.6 (-62.5 to -35.2)                    |
| 4 COVID-19                    | 4 Alzheimer's disease        | 132 (104 to 164)              | 120 (100 to 140)                 | -1.66 (-4.78 to 2.15)                     |
| 5 Chronic kidney disease      | 5 COPD                       | 98.7 (67.3 to 128)            | 87.9 (61.7 to 118)               | -6.22 (-20.8 to 9.11)                     |
| 6 COPD                        | 6 Stroke                     | 6.47 (-8.34 to 22.1)          | 0.685 (-11.4 to 13.9)            | -46.2 (-54.1 to -38.3)                    |
| 7 Alzheimer's disease         | 7 Lung cancer                | 84.4 (51.6 to 122)            | 74.2 (48.7 to 105)               | 2.63 (-11.7 to 18.5)                      |
| 8 Lung cancer                 | 8 Colorectal cancer          | 87.7 (45.5 to 139)            | 77.3 (38.8 to 120)               | -1.26 (-20.2 to 21.8)                     |
| 9 Colorectal cancer           | 9 Hypertensive heart disease | 125 (82.2 to 165)             | 112 (77.7 to 149)                | 2.71 (-17.2 to 24)                        |
| 10 Diabetes                   | 10 Urinary diseases          | 204 (164 to 249)              | 188 (156 to 228)                 | 37.5 (20.2 to 57)                         |
| 11 Hypertensive heart disease | 11 Pancreatic cancer         | 151 (93.7 to 214)             | 137 (94.7 to 193)                | 36.9 (14.5 to 64.6)                       |
| 12 Cirrhosis liver            | 12 Diabetes                  | 45.5 (19.3 to 76.3)           | 37.7 (12.6 to 69.2)              | -26.3 (-41.4 to -9.73)                    |
| 13 Breast cancer              | 13 Prostate cancer           | 117 (79.1 to 159)             | 105 (77.6 to 139)                | 6.16 (-4.95 to 18.3)                      |
| 14 Stomach cancer             | 14 Breast cancer             | 70.7 (42 to 108)              | 61.3 (37.4 to 92.4)              | -4.67 (-17.7 to 11.5)                     |
| 15 Prostate cancer            | 15 Cirrhosis liver           | 38 (23.3 to 55)               | 30.5 (20.1 to 40.8)              | -14.7 (-21.1 to -8.72)                    |
| 16 Urinary diseases           | 16 Stomach cancer            | 24.9 (11.9 to 40.7)           | 18.1 (9.77 to 27.4)              | -33.8 (-37.6 to -29.6)                    |
| 17 Pancreatic cancer          | 17 Cardiomyopathy            | 44.8 (25.9 to 67.9)           | 36.8 (23.1 to 54)                | -25.1 (-30.9 to -18.8)                    |
| 18 Road injuries              | 18 Other cardiovascular      | 56.4 (39 to 77.5)             | 47.9 (36.1 to 61.2)              | -22.4 (-28 to -15.8)                      |
| 19 Cardiomyopathy             | 19 Interstitial lung disease | 123 (100 to 149)              | 111 (94.8 to 130)                | 9.47 (2.88 to 16.8)                       |
| 20 Self-harm                  | 20 Parkinson's disease       | 114 (90.1 to 139)             | 102 (84.8 to 120)                | 1.58 (-4.42 to 7.97)                      |
| 21 Other cardiovascular       | 24 Road injuries             |                               |                                  |                                           |
| 22 Parkinson's disease        | 27 Self-harm                 |                               |                                  |                                           |
| 23 Interstitial lung disease  | 134 COVID-19                 |                               |                                  |                                           |

### Western Europe, Reference scenario

**Legend:**  
 Communicable, maternal, neonatal and nutritional  
 Non-communicable  
 Injuries

| Leading Causes 2022           | Leading Causes 2050          | Mean % change number of DEATH | Mean % change all-age DEATH rate | Mean % change age-standardized DEATH rate |
|-------------------------------|------------------------------|-------------------------------|----------------------------------|-------------------------------------------|
| 1 Ischemic heart disease      | 1 Alzheimer's disease        | 74.3 (62.7 to 84.9)           | 69.6 (59.5 to 79.3)              | -3.72 (-5.72 to -1.7)                     |
| 2 Alzheimer's disease         | 2 Ischemic heart disease     | -16.9 (-30.6 to -2.24)        | -19.1 (-32.6 to -4.75)           | -52.2 (-61.6 to -41)                      |
| 3 Stroke                      | 3 Chronic kidney disease     | 149 (118 to 181)              | 142 (112 to 177)                 | 35.9 (16.3 to 59.7)                       |
| 4 COVID-19                    | 4 COPD                       | 54 (36.1 to 70.1)             | 49.9 (33.2 to 67.2)              | -8.62 (-20.3 to 2.44)                     |
| 5 Lung cancer                 | 5 Lung cancer                | 20.9 (5.04 to 36.8)           | 17.6 (2.56 to 34.2)              | -14.1 (-23.7 to -4.23)                    |
| 6 COPD                        | 6 Stroke                     | -14.1 (-21.6 to -6.74)        | -16.4 (-23.9 to -8.67)           | -48.8 (-54.6 to -43.2)                    |
| 7 Lower respiratory infect    | 7 Lower respiratory infect   | 61.2 (50.3 to 72.4)           | 56.9 (45.7 to 67.8)              | -10.7 (-18.9 to -2.49)                    |
| 8 Colorectal cancer           | 8 Colorectal cancer          | 49.7 (22.5 to 78.1)           | 45.6 (21.2 to 75.4)              | -5.72 (-19.8 to 10.5)                     |
| 9 Chronic kidney disease      | 9 Hypertensive heart disease | 83.1 (58.7 to 107)            | 78.2 (54.5 to 102)               | 2.36 (-14.5 to 19.8)                      |
| 10 Hypertensive heart disease | 10 Pancreatic cancer         | 83.7 (54.4 to 115)            | 78.7 (50.4 to 109)               | 25.4 (7.57 to 44.4)                       |
| 11 Breast cancer              | 11 Atrial fibrillation       | 110 (98.3 to 124)             | 105 (93.9 to 119)                | 15.3 (11.6 to 19)                         |
| 12 Pancreatic cancer          | 12 Prostate cancer           | 74.4 (54.5 to 98.7)           | 69.7 (50.2 to 93.7)              | 4.64 (-4.15 to 14.1)                      |
| 13 Falls                      | 13 Falls                     | 61.1 (49 to 72.1)             | 56.7 (45.7 to 66.9)              | -8.34 (-12.3 to -4.54)                    |
| 14 Diabetes                   | 14 Nonrheum valv diseases    | 127 (113 to 143)              | 121 (107 to 135)                 | 24.1 (18.2 to 30.6)                       |
| 15 Prostate cancer            | 15 Breast cancer             | 33 (15.6 to 50.1)             | 29.4 (12.9 to 48.2)              | -11.1 (-20.5 to -0.967)                   |
| 16 Atrial fibrillation        | 16 Diabetes                  | 28 (9.8 to 46)                | 24.6 (8.05 to 43)                | -27.1 (-38 to -14.8)                      |
| 17 Nonrheum valv diseases     | 17 Urinary diseases          | 171 (150 to 192)              | 164 (144 to 185)                 | 47.9 (35.2 to 63.8)                       |
| 18 Cirrhosis liver            | 18 Parkinson's disease       | 66.2 (57.6 to 74.5)           | 61.8 (54.8 to 69)                | 1.54 (-2.14 to 5)                         |
| 19 Parkinson's disease        | 19 Bladder cancer            | 52.1 (41.3 to 64.8)           | 48 (37.6 to 59.7)                | -7.19 (-11.1 to -2.24)                    |
| 20 Stomach cancer             | 20 Liver cancer              | 64.6 (49.4 to 77.5)           | 60.2 (45.8 to 72.4)              | 19.6 (7.68 to 30)                         |
| 21 Bladder cancer             | 21 Cirrhosis liver           |                               |                                  |                                           |
| 24 Liver cancer               | 24 Stomach cancer            |                               |                                  |                                           |
| 25 Urinary diseases           | 131 COVID-19                 |                               |                                  |                                           |

### Andean Latin America, Reference scenario

**Legend:**  
Communicable, maternal, neonatal and nutritional  
Non-communicable  
Injuries

| Leading Causes 2022           | Leading Causes 2050           | Mean % change number of DEATH | Mean % change all-age DEATH rate | Mean % change age-standardized DEATH rate |
|-------------------------------|-------------------------------|-------------------------------|----------------------------------|-------------------------------------------|
| 1 COVID-19                    | 1 Chronic kidney disease      | 250 (146 to 362)              | 193 (114 to 285)                 | 36.9 (-4.83 to 95)                        |
| 2 Lower respiratory infect    | 2 Lower respiratory infect    | 108 (67 to 150)               | 73.8 (42.7 to 108)               | -23.3 (-36.7 to -6.66)                    |
| 3 Ischemic heart disease      | 3 Ischemic heart disease      | 66 (4.47 to 145)              | 39.1 (-8.39 to 103)              | -37.9 (-61 to -1.69)                      |
| 4 Chronic kidney disease      | 4 Stroke                      | 52.4 (19.8 to 89.5)           | 27.6 (0.997 to 55.2)             | -38.4 (-51.6 to -22.1)                    |
| 5 Stroke                      | 5 Diabetes                    | 94.6 (44.2 to 147)            | 63 (23.2 to 105)                 | -21.7 (-42.1 to 2.34)                     |
| 6 Diabetes                    | 6 Cirrhosis liver             | 88.3 (62.4 to 113)            | 57.7 (39.6 to 75.7)              | -13 (-23.3 to -1.93)                      |
| 7 Cirrhosis liver             | 7 Alzheimer's disease         | 220 (155 to 282)              | 168 (117 to 214)                 | 0.402 (-2.42 to 2.86)                     |
| 8 Stomach cancer              | 8 COPD                        | 187 (117 to 272)              | 141 (85.4 to 210)                | -2.54 (-30.4 to 30.3)                     |
| 9 Road injuries               | 9 Stomach cancer              | 56.5 (36.2 to 77.8)           | 31 (18.1 to 46.2)                | -35.5 (-40.3 to -30.5)                    |
| 10 Alzheimer's disease        | 10 Interstitial lung disease  | 188 (145 to 239)              | 141 (108 to 179)                 | 3.7 (-7.3 to 17.3)                        |
| 11 Neonatal disorders         | 11 Lung cancer                | 153 (83.9 to 247)             | 111 (55.7 to 177)                | 4.27 (-20.3 to 31.8)                      |
| 12 COPD                       | 12 Prostate cancer            | 187 (102 to 301)              | 140 (74.2 to 226)                | 2.31 (-20.9 to 29.2)                      |
| 13 Interstitial lung disease  | 13 Colorectal cancer          | 152 (68 to 271)               | 111 (44 to 203)                  | 2.15 (-29.1 to 41.8)                      |
| 14 Lung cancer                | 14 Hypertensive heart disease | 186 (105 to 275)              | 140 (72.2 to 223)                | 2.73 (-31.7 to 46.5)                      |
| 15 Colorectal cancer          | 15 Road injuries              | 20.1 (-19.3 to 77.1)          | 0.645 (-32 to 47.5)              | -19.5 (-47 to 21.1)                       |
| 16 Prostate cancer            | 16 Pancreatic cancer          | 232 (104 to 415)              | 178 (69.4 to 322)                | 37.3 (-14.1 to 105)                       |
| 17 Congenital defects         | 17 Urinary diseases           | 268 (190 to 352)              | 208 (155 to 267)                 | 29.9 (5.13 to 59.3)                       |
| 18 Hypertensive heart disease | 18 Breast cancer              | 102 (49.3 to 170)             | 68.7 (25.5 to 128)               | -4.9 (-26.3 to 24.3)                      |
| 19 Cervical cancer            | 19 Parkinson's disease        | 172 (127 to 230)              | 127 (95.2 to 165)                | -5.75 (-16.2 to 5.33)                     |
| 20 Tuberculosis               | 20 Falls                      | 99.3 (68.3 to 140)            | 66.8 (46.3 to 92.2)              | -12.1 (-18.5 to -4.99)                    |
| 21 Breast cancer              | 22 Cervical cancer            |                               |                                  |                                           |
| 22 Falls                      | 34 Neonatal disorders         |                               |                                  |                                           |
| 24 Pancreatic cancer          | 37 Tuberculosis               |                               |                                  |                                           |
| 29 Parkinson's disease        | 40 Congenital defects         |                               |                                  |                                           |
| 30 Urinary diseases           | 135 COVID-19                  |                               |                                  |                                           |

### Caribbean, Reference scenario

**Legend:**

Communicable, maternal, neonatal and nutritional  
 Non-communicable  
 Injuries

| Leading Causes 2022          | Leading Causes 2050          | Mean % change number of DEATH | Mean % change all-age DEATH rate | Mean % change age-standardized DEATH rate |
|------------------------------|------------------------------|-------------------------------|----------------------------------|-------------------------------------------|
| 1 Ischemic heart disease     | 1 Ischemic heart disease     | 30 (-17.2 to 84.7)            | 25.5 (-20.4 to 86.3)             | -32.9 (-59 to 6.6)                        |
| 2 Stroke                     | 2 Stroke                     | 25.7 (-1.76 to 52.9)          | 21.3 (-4.83 to 50.2)             | <b>-32.7 (-49.2 to -13.5)</b>             |
| 3 Diabetes                   | 3 Chronic kidney disease     | <b>132 (71.5 to 209)</b>      | <b>124 (65.1 to 212)</b>         | 25.1 (-12.1 to 80.3)                      |
| 4 Lower respiratory infect   | 4 Diabetes                   | <b>51.8 (13.6 to 90.1)</b>    | <b>46.5 (9.46 to 92.7)</b>       | -17.5 (-42.1 to 15.8)                     |
| 5 COVID-19                   | 5 Lower respiratory infect   | <b>43.5 (20.8 to 71.7)</b>    | <b>38.5 (18.5 to 65.2)</b>       | <b>-30.6 (-43.1 to -14.8)</b>             |
| 6 Chronic kidney disease     | 6 Hypertensive heart disease | <b>120 (56.4 to 186)</b>      | <b>112 (50.6 to 184)</b>         | 13.7 (-21.6 to 60.4)                      |
| 7 Nature disaster            | 7 Alzheimer's disease        | <b>149 (97.9 to 197)</b>      | <b>140 (93.5 to 177)</b>         | -0.891 (-3.54 to 1.29)                    |
| 8 Hypertensive heart disease | 8 Prostate cancer            | <b>117 (42.9 to 199)</b>      | <b>110 (46.2 to 177)</b>         | 3.21 (-22 to 29.6)                        |
| 9 COPD                       | 9 COPD                       | <b>73 (34.4 to 115)</b>       | <b>67 (29.5 to 111)</b>          | -16.6 (-38.7 to 11.7)                     |
| 10 Lung cancer               | 10 Lung cancer               | <b>60.6 (10.1 to 116)</b>     | <b>54.9 (8.11 to 108)</b>        | -11.5 (-34.1 to 14.2)                     |
| 11 Neonatal disorders        | 11 Colorectal cancer         | <b>91.6 (16.4 to 186)</b>     | <b>84.7 (17.7 to 176)</b>        | -0.302 (-31.6 to 40.7)                    |
| 12 Cirrhosis liver           | 12 Nature disaster           | 16800 (-100 to 166000)        | 15600 (-100 to 162000)           | 16200 (-100 to 164000)                    |
| 13 Prostate cancer           | 13 Cirrhosis liver           | <b>37.4 (18.4 to 55.2)</b>    | <b>32.6 (16.6 to 51.3)</b>       | -9.58 (-21.2 to 5.89)                     |
| 14 Alzheimer's disease       | 14 Falls                     | <b>104 (60.2 to 147)</b>      | <b>96.5 (59.4 to 136)</b>        | -9.85 (-19.9 to 1.2)                      |
| 15 Colorectal cancer         | 15 Breast cancer             | <b>72.6 (16.2 to 130)</b>     | <b>66.3 (15.8 to 121)</b>        | 2.08 (-25.3 to 32.6)                      |
| 16 Interpersonal violence    | 16 Road injuries             | 1.95 (-32.6 to 53.7)          | -1.56 (-34.8 to 51.9)            | -6.9 (-40 to 45.9)                        |
| 17 Road injuries             | 17 Atrial fibrillation       | <b>185 (127 to 240)</b>       | <b>175 (123 to 223)</b>          | <b>16.6 (6.29 to 27.8)</b>                |
| 18 HIV/AIDS                  | 18 Pancreatic cancer         | <b>143 (37.5 to 280)</b>      | <b>135 (40.1 to 263)</b>         | 34.3 (-14.8 to 99.8)                      |
| 19 Breast cancer             | 19 Parkinson's disease       | <b>116 (86.1 to 151)</b>      | <b>109 (83.6 to 135)</b>         | -1.61 (-9.72 to 8.31)                     |
| 20 Diarrheal diseases        | 20 Stomach cancer            | <b>26.8 (11.8 to 46.6)</b>    | <b>22.3 (9.6 to 34.7)</b>        | <b>-27.2 (-32.1 to -21.5)</b>             |
| 21 Falls                     | 23 Neonatal disorders        |                               |                                  |                                           |
| 24 Stomach cancer            | 24 Interpersonal violence    |                               |                                  |                                           |
| 27 Pancreatic cancer         | 27 Diarrheal diseases        |                               |                                  |                                           |
| 28 Atrial fibrillation       | 41 HIV/AIDS                  |                               |                                  |                                           |
| 30 Parkinson's disease       | 136 COVID-19                 |                               |                                  |                                           |

### Central Latin America, Reference scenario

**Legend:**  
Communicable, maternal, neonatal and nutritional  
Non-communicable  
Injuries

| Leading Causes 2022           | Leading Causes 2050          | Mean % change number of DEATH | Mean % change all-age DEATH rate | Mean % change age-standardized DEATH rate |
|-------------------------------|------------------------------|-------------------------------|----------------------------------|-------------------------------------------|
| 1 Ischemic heart disease      | 1 Ischemic heart disease     | 65.6 (2.12 to 151)            | 49 (-8.9 to 132)                 | -34.2 (-65.2 to 15.3)                     |
| 2 COVID-19                    | 2 Chronic kidney disease     | 178 (108 to 265)              | 150 (84.7 to 237)                | 27.2 (-14 to 81)                          |
| 3 Diabetes                    | 3 Diabetes                   | 72 (34.8 to 113)              | 54.5 (19.6 to 98.9)              | -23.5 (-44.8 to 4.54)                     |
| 4 Chronic kidney disease      | 4 COPD                       | 145 (92.9 to 202)             | 120 (69.8 to 168)                | -13.1 (-38.8 to 24.8)                     |
| 5 Stroke                      | 5 Stroke                     | 50.2 (19.1 to 84.5)           | 34.9 (5.62 to 73)                | -37.7 (-55.8 to -13.6)                    |
| 6 Interpersonal violence      | 6 Alzheimer's disease        | 227 (143 to 311)              | 193 (122 to 264)                 | 1.05 (-3.28 to 3.87)                      |
| 7 Lower respiratory infect    | 7 Lower respiratory infect   | 81.1 (56 to 104)              | 62.5 (42.3 to 86)                | -25.1 (-38.3 to -11.2)                    |
| 8 Cirrhosis liver             | 8 Cirrhosis liver            | 65.9 (51.9 to 81.2)           | 49 (35.6 to 64.1)                | -6.29 (-15.9 to 5.43)                     |
| 9 COPD                        | 9 Hypertensive heart disease | 175 (99.6 to 253)             | 148 (76.6 to 232)                | 3.03 (-34.1 to 54.1)                      |
| 10 Road injuries              | 10 Urinary diseases          | 221 (178 to 270)              | 188 (144 to 231)                 | 29.6 (4.68 to 61.3)                       |
| 11 Alzheimer's disease        | 11 Lung cancer               | 115 (40.4 to 210)             | 92.3 (27.1 to 176)               | -3.88 (-29.9 to 29.6)                     |
| 12 Stomach cancer             | 12 Interpersonal violence    | -32.4 (-61.6 to 20.9)         | -39.6 (-63.9 to 4.7)             | -39 (-65.2 to 5.26)                       |
| 13 Lung cancer                | 13 Colorectal cancer         | 124 (37.1 to 238)             | 100 (25 to 203)                  | 1.24 (-31.1 to 42.2)                      |
| 14 Colorectal cancer          | 14 Prostate cancer           | 157 (62.3 to 268)             | 130 (47.9 to 227)                | -3.41 (-29.6 to 26.6)                     |
| 15 Hypertensive heart disease | 15 Road injuries             | 8.88 (-32.8 to 76)            | -1.98 (-41.1 to 63.4)            | -14.6 (-48.7 to 45.3)                     |
| 16 Neonatal disorders         | 16 Stomach cancer            | 43.7 (24.9 to 63.2)           | 28.9 (14.5 to 43.9)              | -34.9 (-39.4 to -30.2)                    |
| 17 Prostate cancer            | 17 Atrial fibrillation       | 267 (189 to 352)              | 229 (165 to 302)                 | 18.6 (8.29 to 32.3)                       |
| 18 Breast cancer              | 18 Pancreatic cancer         | 207 (72.3 to 396)             | 175 (58.5 to 341)                | 40.3 (-13.1 to 112)                       |
| 19 Self-harm                  | 19 Breast cancer             | 88.1 (28.2 to 160)            | 68.4 (18.6 to 135)               | -3.23 (-27.3 to 27)                       |
| 20 Urinary diseases           | 20 Falls                     | 108 (64.7 to 148)             | 86.6 (50.4 to 122)               | -9.87 (-16.4 to -0.743)                   |
| 22 Falls                      | 29 Self-harm                 |                               |                                  |                                           |
| 24 Pancreatic cancer          | 43 Neonatal disorders        |                               |                                  |                                           |
| 29 Atrial fibrillation        | 136 COVID-19                 |                               |                                  |                                           |



### Tropical Latin America, Reference scenario

**Legend:**  
 Communicable, maternal, neonatal and nutritional  
 Non-communicable  
 Injuries

| Leading Causes 2022           | Leading Causes 2050          | Mean % change number of DEATH | Mean % change all-age DEATH rate | Mean % change age-standardized DEATH rate |
|-------------------------------|------------------------------|-------------------------------|----------------------------------|-------------------------------------------|
| 1 Ischemic heart disease      | 1 Lower respiratory infect   | 111 (63.8 to 156)             | 87.9 (51.4 to 125)               | -23.6 (-44.3 to 0.175)                    |
| 2 Stroke                      | 2 Ischemic heart disease     | 25.5 (-26.7 to 94.5)          | 12.2 (-34.1 to 82.2)             | -44.3 (-67.9 to -4.94)                    |
| 3 Lower respiratory infect    | 3 Alzheimer's disease        | 207 (136 to 281)              | 174 (126 to 224)                 | -7.1 (-9.72 to -4.65)                     |
| 4 COVID-19                    | 4 Stroke                     | 29.4 (-9.71 to 72)            | 15.5 (-15.4 to 54.7)             | -45.2 (-61.8 to -21.9)                    |
| 5 Diabetes                    | 5 Chronic kidney disease     | 186 (85.3 to 300)             | 155 (70.5 to 266)                | 20.1 (-23.7 to 83.6)                      |
| 6 COPD                        | 6 COPD                       | 108 (40 to 177)               | 86 (31 to 153)                   | -20.4 (-45.5 to 18)                       |
| 7 Alzheimer's disease         | 7 Diabetes                   | 79.1 (26.2 to 139)            | 60 (16.2 to 114)                 | -23.7 (-47.3 to 9.39)                     |
| 8 Interpersonal violence      | 8 Urinary diseases           | 268 (185 to 367)              | 228 (156 to 301)                 | 28.4 (-3.47 to 74.4)                      |
| 9 Chronic kidney disease      | 9 Hypertensive heart disease | 167 (74.8 to 264)             | 138 (59.7 to 231)                | 4.88 (-33.6 to 60.9)                      |
| 10 Road injuries              | 10 Lung cancer               | 84.2 (17.7 to 167)            | 64 (8.12 to 130)                 | -13.1 (-39.3 to 15.7)                     |
| 11 Lung cancer                | 11 Colorectal cancer         | 106 (14.5 to 232)             | 83.6 (7.15 to 184)               | -4.81 (-40.1 to 38.4)                     |
| 12 Cirrhosis liver            | 12 Prostate cancer           | 172 (65.5 to 306)             | 142 (51.9 to 261)                | 3.78 (-26.8 to 39.5)                      |
| 13 Hypertensive heart disease | 13 Falls                     | 130 (78.8 to 196)             | 106 (62.9 to 151)                | -12 (-22.8 to 1.99)                       |
| 14 Urinary diseases           | 14 Pancreatic cancer         | 183 (44.6 to 379)             | 152 (33.4 to 317)                | 30.7 (-25.2 to 102)                       |
| 15 Colorectal cancer          | 15 Breast cancer             | 78 (14.4 to 155)              | 58.5 (6.8 to 130)                | -6.3 (-32.7 to 27.5)                      |
| 16 Stomach cancer             | 16 Cirrhosis liver           | 34.6 (9.93 to 59.7)           | 20.2 (1.76 to 39.8)              | -17.4 (-30.6 to -1.07)                    |
| 17 Breast cancer              | 17 Road injuries             | 5.95 (-34.3 to 62.5)          | -5.3 (-36.9 to 45.4)             | -10.8 (-41.6 to 42.3)                     |
| 18 Prostate cancer            | 18 Atrial fibrillation       | 256 (173 to 359)              | 218 (156 to 297)                 | 9.76 (-4.88 to 31.2)                      |
| 19 Falls                      | 19 Interpersonal violence    | -25.9 (-61.6 to 33.8)         | -34.1 (-64.6 to 24.5)            | -27.6 (-62.5 to 42)                       |
| 20 Neonatal disorders         | 20 Bacterial skin            | 339 (129 to 603)              | 292 (111 to 556)                 | 81.6 (-8.22 to 224)                       |
| 23 Pancreatic cancer          | 21 Stomach cancer            |                               |                                  |                                           |
| 28 Atrial fibrillation        | 54 Neonatal disorders        |                               |                                  |                                           |
| 37 Bacterial skin             | 136 COVID-19                 |                               |                                  |                                           |

### North Africa and Middle East, Reference scenario

**Legend:**  
Communicable, maternal, neonatal and nutritional  
Non-communicable  
Injuries

| Leading Causes 2022          | Leading Causes 2050          | Mean % change number of DEATH | Mean % change all-age DEATH rate | Mean % change age-standardized DEATH rate |
|------------------------------|------------------------------|-------------------------------|----------------------------------|-------------------------------------------|
| 1 Ischemic heart disease     | 1 Ischemic heart disease     | 72 (18.4 to 151)              | 27.3 (-15.2 to 90.5)             | -43.2 (-65.1 to -5.62)                    |
| 2 Stroke                     | 2 Stroke                     | 67.4 (31.6 to 108)            | 23.8 (-3.03 to 58.2)             | -47.5 (-62.4 to -25)                      |
| 3 COVID-19                   | 3 Chronic kidney disease     | 301 (204 to 415)              | 197 (124 to 292)                 | 32.2 (-7.37 to 95)                        |
| 4 Chronic kidney disease     | 4 Hypertensive heart disease | 252 (166 to 354)              | 160 (96.8 to 242)                | 5.42 (-29.7 to 57)                        |
| 5 Hypertensive heart disease | 5 Alzheimer's disease        | 326 (224 to 422)              | 215 (145 to 288)                 | 7.14 (4.55 to 9.29)                       |
| 6 Diabetes                   | 6 Diabetes                   | 160 (101 to 235)              | 92.5 (48.8 to 152)               | -12.9 (-37.9 to 26.9)                     |
| 7 Road injuries              | 7 COPD                       | 181 (122 to 248)              | 108 (64 to 166)                  | -15.3 (-40.7 to 21.2)                     |
| 8 Lower respiratory infect   | 8 Lower respiratory infect   | 98.2 (73.4 to 125)            | 46.5 (27.6 to 71.3)              | -25.2 (-39.2 to -3.57)                    |
| 9 Cirrhosis liver            | 9 Lung cancer                | 154 (72 to 255)               | 87.4 (30.5 to 160)               | -9.99 (-33.1 to 17.9)                     |
| 10 COPD                      | 10 Cirrhosis liver           | 91 (69.5 to 112)              | 41.1 (25 to 58.8)                | -30.3 (-39.4 to -17.7)                    |
| 11 Neonatal disorders        | 11 Road injuries             | 29.1 (-14.4 to 99.4)          | -4.42 (-38.4 to 50.6)            | -22.3 (-51.4 to 25.6)                     |
| 12 Lung cancer               | 12 Colorectal cancer         | 220 (105 to 375)              | 136 (51.6 to 248)                | 11.5 (-22.4 to 53.7)                      |
| 13 Alzheimer's disease       | 13 Pancreatic cancer         | 342 (184 to 537)              | 226 (116 to 368)                 | 52.8 (8.53 to 105)                        |
| 14 Congenital defects        | 14 Liver cancer              | 219 (172 to 272)              | 136 (101 to 181)                 | 19.7 (-1.22 to 48.6)                      |
| 15 Conflict & terror         | 15 Conflict & terror         | 96.3 (-79.9 to 677)           | 45.4 (-85.4 to 487)              | 30.8 (-87 to 379)                         |
| 16 Stomach cancer            | 16 Breast cancer             | 145 (65.9 to 245)             | 80.9 (22.8 to 151)               | 4.77 (-25 to 39.5)                        |
| 17 Colorectal cancer         | 17 Stomach cancer            | 88.8 (66.3 to 114)            | 39.4 (24.3 to 52.7)              | -32.9 (-37 to -28.7)                      |
| 18 Breast cancer             | 18 Brain cancer              | 200 (175 to 229)              | 122 (103 to 139)                 | 34.9 (29.9 to 40.3)                       |
| 19 Other cardiovascular      | 19 Prostate cancer           | 275 (139 to 446)              | 176 (77.3 to 302)                | 3.23 (-25.2 to 33.9)                      |
| 20 Leukemia                  | 20 Other cardiovascular      | 110 (87.5 to 136)             | 55.5 (36.9 to 72.9)              | -24.2 (-37 to -9.45)                      |
| 22 Liver cancer              | 22 Leukemia                  |                               |                                  |                                           |
| 24 Brain cancer              | 26 Congenital defects        |                               |                                  |                                           |
| 27 Pancreatic cancer         | 27 Neonatal disorders        |                               |                                  |                                           |
| 30 Prostate cancer           | 134 COVID-19                 |                               |                                  |                                           |

### South Asia, Reference scenario

**Legend:**

Communicable, maternal, neonatal and nutritional  
 Non-communicable  
 Injuries

| Leading Causes 2022           | Leading Causes 2050           | Mean % change number of DEATH | Mean % change all-age DEATH rate | Mean % change age-standardized DEATH rate |
|-------------------------------|-------------------------------|-------------------------------|----------------------------------|-------------------------------------------|
| 1 Ischemic heart disease      | 1 Ischemic heart disease      | 20.3 (-28.1 to 82.5)          | 7.66 (-33.7 to 67.1)             | -51.4 (-73.7 to -13.5)                    |
| 2 COPD                        | 2 COPD                        | 82.2 (35.4 to 132)            | 62.9 (22.4 to 115)               | -35.4 (-56.4 to -0.966)                   |
| 3 Stroke                      | 3 Stroke                      | 34.3 (5.35 to 67.3)           | 20 (-5.93 to 54.8)               | -47.9 (-63.4 to -27.9)                    |
| 4 Neonatal disorders          | 4 Diabetes                    | 85.9 (41.1 to 138)            | 66.2 (21.8 to 120)               | -28.3 (-52.4 to 8.8)                      |
| 5 Lower respiratory infect    | 5 Diarrheal diseases          | 36 (5.18 to 69.7)             | 21.6 (-7.11 to 57.1)             | -50.8 (-68 to -22.7)                      |
| 6 Diarrheal diseases          | 6 Lower respiratory infect    | 23.8 (1.89 to 49.3)           | 10.5 (-7.04 to 31.3)             | -44.8 (-54.6 to -30.8)                    |
| 7 Tuberculosis                | 7 Falls                       | 136 (80.8 to 203)             | 110 (71.5 to 158)                | -13.6 (-22.2 to -3.72)                    |
| 8 Diabetes                    | 8 Chronic kidney disease      | 165 (91.5 to 254)             | 137 (72.7 to 227)                | 11.1 (-26.9 to 66.6)                      |
| 9 Cirrhosis liver             | 9 Alzheimer's disease         | 260 (150 to 374)              | 221 (136 to 322)                 | -5.4 (-9.86 to -1.27)                     |
| 10 Road injuries              | 10 Cirrhosis liver            | 55.9 (29.7 to 82.9)           | 39.3 (16.6 to 66.9)              | -20.4 (-35.2 to -1.77)                    |
| 11 Falls                      | 11 Hypertensive heart disease | 153 (83.8 to 229)             | 126 (68.2 to 206)                | -11.3 (-42.6 to 35.8)                     |
| 12 COVID-19                   | 12 Tuberculosis               | -31.1 (-57.8 to 2.2)          | -38.3 (-61.9 to -3.83)           | -65.7 (-80 to -42.6)                      |
| 13 Chronic kidney disease     | 13 Road injuries              | 9.76 (-29.8 to 61.5)          | -1.8 (-35.7 to 53.2)             | -24.7 (-52.8 to 20.1)                     |
| 14 Asthma                     | 14 Urinary diseases           | 192 (152 to 239)              | 161 (129 to 199)                 | 16.8 (-5.24 to 46)                        |
| 15 Self-harm                  | 15 Breast cancer              | 121 (35.5 to 230)             | 97 (32.2 to 177)                 | 8.62 (-25 to 44.1)                        |
| 16 Rheumatic heart disease    | 16 Self-harm                  | 7.1 (-15.4 to 35.2)           | -4.32 (-24.5 to 20.9)            | -19.3 (-37.8 to 6.07)                     |
| 17 Hypertensive heart disease | 17 Lip oral cavity cancer     | 118 (87.7 to 149)             | 94.9 (77.3 to 112)               | 0.811 (-8.34 to 11.4)                     |
| 18 Alzheimer's disease        | 18 Rheumatic heart disease    | -0.941 (-32.4 to 36.6)        | -11.4 (-39.6 to 26.3)            | -54.9 (-71.8 to -29.7)                    |
| 19 Breast cancer              | 19 Asthma                     | -8.57 (-24 to 9.39)           | -18.3 (-31.7 to -3.89)           | -63.9 (-71.4 to -52.6)                    |
| 20 Congenital defects         | 20 Lung cancer                | 106 (30.4 to 198)             | 84 (22.2 to 155)                 | -7.66 (-33.7 to 22.5)                     |
| 21 Lung cancer                | 21 Neonatal disorders         |                               |                                  |                                           |
| 22 Lip oral cavity cancer     | 52 Congenital defects         |                               |                                  |                                           |
| 23 Urinary diseases           | 133 COVID-19                  |                               |                                  |                                           |

### East Asia, Reference scenario

**Legend:**

Communicable, maternal, neonatal and nutritional  
Non-communicable  
Injuries

| Leading Causes 2022          | Leading Causes 2050          | Mean % change number of DEATH | Mean % change all-age DEATH rate | Mean % change age-standardized DEATH rate |
|------------------------------|------------------------------|-------------------------------|----------------------------------|-------------------------------------------|
| 1 Stroke                     | 1 Stroke                     | 27.5 (2.84 to 56.9)           | 46.4 (19.9 to 83.5)              | -47.6 (-58.1 to -32)                      |
| 2 Ischemic heart disease     | 2 COPD                       | 123 (74.8 to 177)             | 156 (103 to 218)                 | -21.6 (-40.8 to 5.22)                     |
| 3 COPD                       | 3 Ischemic heart disease     | 17.5 (-15.7 to 57.8)          | 35 (-2.83 to 86.1)               | -55.7 (-70.3 to -35.8)                    |
| 4 Lung cancer                | 4 Alzheimer's disease        | 230 (161 to 316)              | 278 (212 to 360)                 | -0.575 (-4.32 to 3.49)                    |
| 5 Alzheimer's disease        | 5 Lung cancer                | 79.5 (27.7 to 144)            | 106 (50.8 to 171)                | -7.25 (-26.2 to 15.8)                     |
| 6 Stomach cancer             | 6 Hypertensive heart disease | 192 (114 to 293)              | 235 (148 to 366)                 | 6.55 (-26.1 to 54.8)                      |
| 7 Hypertensive heart disease | 7 Colorectal cancer          | 128 (51.5 to 219)             | 161 (84.2 to 260)                | 15.4 (-13.6 to 47.7)                      |
| 8 Esophageal cancer          | 8 Esophageal cancer          | 79.1 (52.1 to 109)            | 105 (80.1 to 135)                | -0.257 (-10.6 to 10.6)                    |
| 9 Colorectal cancer          | 9 Chronic kidney disease     | 145 (86.1 to 203)             | 182 (120 to 262)                 | 7.97 (-20.7 to 46)                        |
| 10 Road injuries             | 10 Stomach cancer            | 18.5 (-1.2 to 40.7)           | 35.9 (17.3 to 57.9)              | -37.2 (-42.2 to -32.2)                    |
| 11 Lower respiratory infect  | 11 Lower respiratory infect  | 121 (85 to 160)               | 153 (113 to 191)                 | -29.7 (-39.2 to -18.1)                    |
| 12 Chronic kidney disease    | 12 Pancreatic cancer         | 150 (73.3 to 234)             | 186 (108 to 283)                 | 38.4 (4.77 to 75.8)                       |
| 13 Diabetes                  | 13 Falls                     | 116 (65 to 173)               | 148 (99.1 to 206)                | -13 (-20.9 to -4.4)                       |
| 14 Liver cancer              | 14 Liver cancer              | 71.8 (27.4 to 126)            | 97.3 (47.8 to 161)               | 10.9 (-19.8 to 55.6)                      |
| 15 Cirrhosis liver           | 15 Diabetes                  | 56.2 (22.6 to 99.3)           | 79.3 (41.3 to 140)               | -29.2 (-47 to -2.96)                      |
| 16 Falls                     | 16 Atrial fibrillation       | 322 (231 to 442)              | 384 (288 to 507)                 | 20.4 (8.12 to 33.7)                       |
| 17 Self-harm                 | 17 Parkinson's disease       | 170 (124 to 223)              | 210 (168 to 257)                 | -1.8 (-9.83 to 7.67)                      |
| 18 Pancreatic cancer         | 18 Cirrhosis liver           | 22.2 (-3.18 to 53.5)          | 40.3 (13.8 to 78.2)              | -20.6 (-37.2 to 1.83)                     |
| 19 COVID-19                  | 19 Road injuries             | -19 (-43.6 to 15.5)           | -6.9 (-36.1 to 34.2)             | -21.3 (-49.1 to 24.1)                     |
| 20 Parkinson's disease       | 20 Self-harm                 | 26.5 (2.98 to 51.1)           | 45.2 (22.4 to 72.3)              | -14.8 (-29.5 to 4.11)                     |
| 24 Atrial fibrillation       | 133 COVID-19                 |                               |                                  |                                           |

### Oceania, Reference scenario

**Legend:**

Communicable, maternal, neonatal and nutritional  
Non-communicable  
Injuries

| Leading Causes 2022           | Leading Causes 2050           | Mean % change number of DEATH | Mean % change all-age DEATH rate | Mean % change age-standardized DEATH rate |
|-------------------------------|-------------------------------|-------------------------------|----------------------------------|-------------------------------------------|
| 1 Ischemic heart disease      | 1 Ischemic heart disease      | 106 (38.8 to 197)             | 10.9 (-25.2 to 59.2)             | -27.5 (-55.1 to 11.8)                     |
| 2 Stroke                      | 2 Stroke                      | 122 (71.6 to 170)             | 19.2 (-5.08 to 44.3)             | -25.3 (-43.7 to -3.67)                    |
| 3 Lower respiratory infect    | 3 Diabetes                    | 126 (69.8 to 184)             | 21.5 (-5.8 to 53.6)              | -17.4 (-40.3 to 13.1)                     |
| 4 Diabetes                    | 4 COPD                        | 147 (87.5 to 213)             | 32.8 (2.51 to 73.4)              | -23.8 (-44.7 to 3.62)                     |
| 5 COPD                        | 5 Lower respiratory infect    | -10.7 (-26.5 to 5.76)         | -51.9 (-59.8 to -42.3)           | -47 (-56.8 to -35.9)                      |
| 6 Neonatal disorders          | 6 Chronic kidney disease      | 248 (155 to 352)              | 87 (39.1 to 148)                 | 31.7 (-6.09 to 87.9)                      |
| 7 Malaria                     | 7 Malaria                     | 141 (-82.9 to 534)            | 30.3 (-90.1 to 221)              | 18.1 (-86.5 to 201)                       |
| 8 COVID-19                    | 8 Diarrheal diseases          | 35.6 (-9.14 to 89.2)          | -27 (-51.1 to 5.36)              | -33.2 (-58.7 to 1.46)                     |
| 9 Diarrheal diseases          | 9 Lung cancer                 | 181 (92.5 to 287)             | 51.2 (8.21 to 105)               | -0.674 (-21.4 to 25.9)                    |
| 10 Tuberculosis               | 10 Hypertensive heart disease | 162 (79.2 to 259)             | 40.9 (0.535 to 94.5)             | -10.8 (-42.8 to 36.6)                     |
| 11 Congenital defects         | 11 Road injuries              | 45.9 (-15.4 to 143)           | -21.4 (-53.8 to 36.3)            | -27.6 (-57 to 24.2)                       |
| 12 Road injuries              | 12 Neonatal disorders         | -31.3 (-60 to 8.3)            | -63.1 (-77.8 to -43.2)           | -49.3 (-68 to -23.9)                      |
| 13 Asthma                     | 13 Alzheimer's disease        | 327 (210 to 461)              | 130 (72.4 to 191)                | 3.59 (-0.84 to 7.87)                      |
| 14 Chronic kidney disease     | 14 Tuberculosis               | -12.9 (-41.1 to 21.7)         | -53.1 (-68.2 to -32.4)           | -64 (-76.4 to -46.1)                      |
| 15 Lung cancer                | 15 Congenital defects         | -7.97 (-25.9 to 15.1)         | -50.6 (-59.1 to -40)             | -35.4 (-44.3 to -25.1)                    |
| 16 Hypertensive heart disease | 16 Asthma                     | 21.5 (-1.08 to 48.6)          | -34.6 (-45.1 to -21.5)           | -58.1 (-66.5 to -49.4)                    |
| 17 Drowning                   | 17 Breast cancer              | 140 (66.7 to 232)             | 29.1 (-8.39 to 81.2)             | -0.663 (-25 to 28.2)                      |
| 18 Rheumatic heart disease    | 18 Prostate cancer            | 263 (148 to 408)              | 94.9 (36.2 to 163)               | 3.93 (-13 to 23.2)                        |
| 19 Pertussis                  | 19 Stomach cancer             | 79.4 (50.1 to 114)            | -3.6 (-15.8 to 9.85)             | -33.8 (-38.1 to -28.7)                    |
| 20 Measles                    | 20 Cirrhosis liver            | 45.4 (19.4 to 75.5)           | -21.8 (-34.3 to -4.23)           | -37.6 (-49.1 to -21.9)                    |
| 22 Breast cancer              | 22 Drowning                   |                               |                                  |                                           |
| 23 Stomach cancer             | 24 Pertussis                  |                               |                                  |                                           |
| 24 Cirrhosis liver            | 27 Rheumatic heart disease    |                               |                                  |                                           |
| 27 Alzheimer's disease        | 67 Measles                    |                               |                                  |                                           |
| 33 Prostate cancer            | 132 COVID-19                  |                               |                                  |                                           |

### Southeast Asia, Reference scenario

**Legend:**  
Communicable, maternal, neonatal and nutritional  
Non-communicable  
Injuries

| Leading Causes 2022           | Leading Causes 2050          | Mean % change number of DEATH | Mean % change all-age DEATH rate | Mean % change age-standardized DEATH rate |
|-------------------------------|------------------------------|-------------------------------|----------------------------------|-------------------------------------------|
| 1 Stroke                      | 1 Stroke                     | 42.1 (23 to 62.4)             | 25.9 (7 to 45.3)                 | -43.6 (-53.3 to -32.6)                    |
| 2 Ischemic heart disease      | 2 Ischemic heart disease     | 22.7 (-7.77 to 56.7)          | 8.75 (-18.8 to 40.5)             | -50.2 (-64.9 to -30.3)                    |
| 3 Lower respiratory infect    | 3 COPD                       | 131 (92.3 to 168)             | 105 (71.7 to 141)                | -17.6 (-34.8 to 3.99)                     |
| 4 COPD                        | 4 Chronic kidney disease     | 171 (121 to 229)              | 140 (92.1 to 200)                | 18.3 (-8.38 to 58)                        |
| 5 Diabetes                    | 5 Lower respiratory infect   | 87 (69.9 to 106)              | 65.5 (50.4 to 81.2)              | -30.8 (-38.4 to -21.2)                    |
| 6 Cirrhosis liver             | 6 Hypertensive heart disease | 174 (108 to 244)              | 142 (82.3 to 211)                | 7.82 (-23.6 to 47.6)                      |
| 7 Chronic kidney disease      | 7 Alzheimer's disease        | 268 (201 to 339)              | 225 (172 to 283)                 | -0.0147 (-3.01 to 2.64)                   |
| 8 Tuberculosis                | 8 Cirrhosis liver            | 75.7 (55.8 to 95)             | 55.5 (37.4 to 73.1)              | -7.36 (-18.4 to 6.24)                     |
| 9 Lung cancer                 | 9 Diabetes                   | 67.7 (38.3 to 101)            | 48.6 (20.9 to 77.9)              | -28.9 (-44.4 to -9.82)                    |
| 10 Hypertensive heart disease | 10 Lung cancer               | 110 (56.4 to 161)             | 85.4 (46 to 129)                 | -3.87 (-20.9 to 12.9)                     |
| 11 COVID-19                   | 11 Colorectal cancer         | 141 (71.4 to 213)             | 113 (55.9 to 174)                | 8.37 (-15.8 to 34.3)                      |
| 12 Road injuries              | 12 Diarrheal diseases        | 95.8 (35.8 to 174)            | 73.5 (19.6 to 145)               | -26.8 (-49.4 to 10)                       |
| 13 Alzheimer's disease        | 13 Tuberculosis              | -15.1 (-36.9 to 8.27)         | -24.8 (-44.3 to -2.54)           | -59.5 (-70.9 to -43.3)                    |
| 14 Neonatal disorders         | 14 Road injuries             | 6.69 (-18.9 to 43.2)          | -5.47 (-29.3 to 30.6)            | -20.3 (-42.1 to 10.9)                     |
| 15 Colorectal cancer          | 15 Breast cancer             | 93.2 (47 to 144)              | 70.8 (29.6 to 112)               | 5.62 (-14.8 to 29.1)                      |
| 16 Diarrheal diseases         | 16 Falls                     | 121 (80.2 to 157)             | 95.4 (62.2 to 124)               | -10.4 (-15.1 to -5.75)                    |
| 17 Breast cancer              | 17 Liver cancer              | 161 (110 to 232)              | 132 (80.6 to 198)                | 31.2 (0.553 to 76.3)                      |
| 18 Asthma                     | 18 Urinary diseases          | 223 (188 to 262)              | 186 (154 to 222)                 | 21.2 (3.44 to 44.3)                       |
| 19 Falls                      | 19 Atrial fibrillation       | 338 (259 to 416)              | 287 (223 to 350)                 | 17 (10.7 to 23.3)                         |
| 20 Liver cancer               | 20 Parkinson's disease       | 226 (186 to 268)              | 189 (159 to 217)                 | 1.94 (-3.38 to 8.31)                      |
| 24 Urinary diseases           | 25 Asthma                    |                               |                                  |                                           |
| 32 Parkinson's disease        | 35 Neonatal disorders        |                               |                                  |                                           |
| 35 Atrial fibrillation        | 134 COVID-19                 |                               |                                  |                                           |

### Central sub-Saharan Africa, Reference scenario

**Legend:**  
 Communicable, maternal, neonatal and nutritional  
 Non-communicable  
 Injuries

| Leading Causes 2022           | Leading Causes 2050          | Mean % change number of DEATH | Mean % change all-age DEATH rate | Mean % change age-standardized DEATH rate |
|-------------------------------|------------------------------|-------------------------------|----------------------------------|-------------------------------------------|
| 1 Malaria                     | 1 Lower respiratory infect   | 72.1 (35.2 to 115)            | -3.93 (-19.3 to 11.6)            | -29.8 (-38.3 to -19.9)                    |
| 2 Neonatal disorders          | 2 Stroke                     | 73.9 (33 to 123)              | -2.85 (-20.9 to 18.2)            | -47.6 (-57.8 to -34.3)                    |
| 3 Tuberculosis                | 3 Ischemic heart disease     | 79.6 (25.3 to 157)            | 0.42 (-29.2 to 42.3)             | -45.7 (-62.8 to -20.5)                    |
| 4 Lower respiratory infect    | 4 Hypertensive heart disease | 233 (153 to 332)              | 86.1 (47.3 to 131)               | -9.45 (-29.3 to 16.8)                     |
| 5 Stroke                      | 5 Road injuries              | 28.4 (-27.7 to 120)           | -28 (-59.6 to 28.9)              | -37.3 (-63.1 to 6.73)                     |
| 6 Road injuries               | 6 Chronic kidney disease     | 205 (134 to 302)              | 70.5 (32.4 to 118)               | 2.9 (-19.5 to 32.7)                       |
| 7 Ischemic heart disease      | 7 Tuberculosis               | -15 (-40 to 18.1)             | -52.5 (-66.3 to -32)             | -66.7 (-75.9 to -52.1)                    |
| 8 COVID-19                    | 8 Diabetes                   | 136 (76.3 to 215)             | 31.8 (2.13 to 68.5)              | -23.1 (-40.5 to 0.0808)                   |
| 9 HIV/AIDS                    | 9 Cirrhosis liver            | 98.3 (58.3 to 149)            | 10.8 (-5.91 to 29.7)             | -26.8 (-36.8 to -14.4)                    |
| 10 Diarrheal diseases         | 10 Neonatal disorders        | -39.6 (-57.4 to -19.7)        | -66.3 (-74.5 to -55.7)           | -48.3 (-59.6 to -34.9)                    |
| 11 Cirrhosis liver            | 11 Malaria                   | -53.7 (-94.8 to 176)          | -74.4 (-97.3 to 56.1)            | -70 (-96.4 to 78.5)                       |
| 12 Hypertensive heart disease | 12 COPD                      | 139 (82.2 to 207)             | 33.3 (7.17 to 62.7)              | -30.7 (-43.9 to -14.9)                    |
| 13 Diabetes                   | 13 Diarrheal diseases        | 21.9 (-15.4 to 75.5)          | -31.9 (-52.2 to -4.59)           | -37.9 (-52.8 to -15.4)                    |
| 14 Chronic kidney disease     | 14 Alzheimer's disease       | 338 (207 to 488)              | 144 (82.2 to 202)                | 0.369 (-2.54 to 3.87)                     |
| 15 Congenital defects         | 15 Self-harm                 | 120 (72.1 to 173)             | 22.6 (3.01 to 43.2)              | -13.7 (-26.9 to 0.115)                    |
| 16 COPD                       | 16 HIV/AIDS                  | -41.2 (-62.6 to -1.47)        | -67.2 (-78.1 to -47)             | -73.1 (-81.5 to -57.7)                    |
| 17 Maternal disorders         | 17 Breast cancer             | 214 (117 to 332)              | 75.2 (30.4 to 119)               | 10.6 (-9.2 to 31.2)                       |
| 18 Pertussis                  | 18 Cervical cancer           | 107 (62.1 to 159)             | 15.7 (-1.87 to 41)               | -25.5 (-36.3 to -9.66)                    |
| 19 Meningitis                 | 19 Cardiomyopathy            | 133 (83.2 to 186)             | 30.2 (14.1 to 46.4)              | -19.9 (-23.7 to -16)                      |
| 20 Self-harm                  | 20 Prostate cancer           | 337 (181 to 554)              | 143 (68.1 to 226)                | 21.3 (-2.92 to 47.8)                      |
| 22 Cervical cancer            | 23 Congenital defects        |                               |                                  |                                           |
| 26 Alzheimer's disease        | 27 Meningitis                |                               |                                  |                                           |
| 27 Cardiomyopathy             | 28 Pertussis                 |                               |                                  |                                           |
| 29 Breast cancer              | 29 Maternal disorders        |                               |                                  |                                           |
| 41 Prostate cancer            | 136 COVID-19                 |                               |                                  |                                           |

### Eastern sub-Saharan Africa, Reference scenario

**Legend:**  
Communicable, maternal, neonatal and nutritional  
Non-communicable  
Injuries

| Leading Causes 2022            | Leading Causes 2050            | Mean % change number of DEATH | Mean % change all-age DEATH rate | Mean % change age-standardized DEATH rate |
|--------------------------------|--------------------------------|-------------------------------|----------------------------------|-------------------------------------------|
| 1 Neonatal disorders           | 1 Stroke                       | 77.8 (49.7 to 109)            | -1.18 (-17.6 to 18.8)            | -46.4 (-56.3 to -33.3)                    |
| 2 Lower respiratory infect     | 2 Lower respiratory infect     | 42.3 (23.1 to 60.5)           | -20.9 (-32.3 to -8.87)           | -36.8 (-44.4 to -27.6)                    |
| 3 HIV/AIDS                     | 3 Chronic kidney disease       | 254 (185 to 332)              | 96.6 (55.1 to 147)               | 16.1 (-10.1 to 49.3)                      |
| 4 Stroke                       | 4 Ischemic heart disease       | 76.7 (21.2 to 149)            | -1.75 (-32.3 to 43.3)            | -46.7 (-64.4 to -20.8)                    |
| 5 Tuberculosis                 | 5 Diarrheal diseases           | 18.8 (-16.7 to 70.5)          | -34 (-54.1 to -7.03)             | -41.8 (-57.9 to -16.1)                    |
| 6 COVID-19                     | 6 Neonatal disorders           | -41.4 (-58 to -23.8)          | -67.5 (-74.9 to -57.8)           | -48.7 (-59.8 to -33.7)                    |
| 7 Diarrheal diseases           | 7 Hypertensive heart disease   | 184 (131 to 246)              | 57.8 (27.2 to 97.4)              | -21.3 (-39.2 to 0.797)                    |
| 8 Malaria                      | 8 Cirrhosis liver              | 97.9 (73.3 to 128)            | 10 (-5.75 to 30.1)               | -34 (-42.8 to -22)                        |
| 9 Ischemic heart disease       | 9 Diabetes                     | 118 (74.4 to 169)             | 21.1 (-4.19 to 53.5)             | -31.4 (-46.9 to -12.3)                    |
| 10 Cirrhosis liver             | 10 Tuberculosis                | -14.3 (-38.5 to 20.6)         | -52.4 (-65.8 to -31.2)           | -68.9 (-77.6 to -55.8)                    |
| 11 Congenital defects          | 11 Alzheimer's disease         | 306 (227 to 370)              | 125 (85.5 to 165)                | -0.573 (-2.69 to 1.25)                    |
| 12 Diabetes                    | 12 Road injuries               | 52.1 (-2.67 to 143)           | -15.4 (-46.4 to 36.2)            | -37 (-58.6 to -1.86)                      |
| 13 Chronic kidney disease      | 13 COPD                        | 122 (90.5 to 155)             | 23.5 (3.26 to 44.5)              | -35.9 (-47.3 to -21.5)                    |
| 14 Road injuries               | 14 Breast cancer               | 240 (168 to 311)              | 88.6 (48.1 to 133)               | 13.1 (-4.05 to 33)                        |
| 15 Hypertensive heart disease  | 15 Urinary diseases            | 232 (204 to 266)              | 84.5 (65.9 to 103)               | 10.6 (-1.58 to 23.3)                      |
| 16 Meningitis                  | 16 Self-harm                   | 117 (88.1 to 148)             | 20.5 (4.17 to 40.3)              | -18.1 (-28.2 to -5.44)                    |
| 17 Protein-energy malnutrition | 17 Colorectal cancer           | 289 (175 to 386)              | 116 (56.3 to 183)                | 19.3 (-5.41 to 45)                        |
| 18 COPD                        | 18 Falls                       | 182 (137 to 220)              | 56.5 (32.5 to 78.7)              | -7.11 (-10.2 to -4)                       |
| 19 Maternal disorders          | 19 Esophageal cancer           | 175 (151 to 196)              | 52.7 (36.5 to 68.8)              | -16.3 (-22.9 to -9.24)                    |
| 20 Measles                     | 20 Cervical cancer             | 121 (90.3 to 157)             | 22.6 (4.55 to 47.5)              | -24.8 (-35.6 to -9.74)                    |
| 22 Self-harm                   | 21 HIV/AIDS                    |                               |                                  |                                           |
| 24 Cervical cancer             | 22 Congenital defects          |                               |                                  |                                           |
| 25 Alzheimer's disease         | 25 Meningitis                  |                               |                                  |                                           |
| 26 Breast cancer               | 31 Protein-energy malnutrition |                               |                                  |                                           |
| 27 Urinary diseases            | 32 Malaria                     |                               |                                  |                                           |
| 28 Falls                       | 34 Maternal disorders          |                               |                                  |                                           |
| 31 Esophageal cancer           | 89 Measles                     |                               |                                  |                                           |



### Southern sub-Saharan Africa, Reference scenario

**Legend:**

Communicable, maternal, neonatal and nutritional  
Non-communicable  
Injuries

| Leading Causes 2022           | Leading Causes 2050          | Mean % change number of DEATH | Mean % change all-age DEATH rate | Mean % change age-standardized DEATH rate |
|-------------------------------|------------------------------|-------------------------------|----------------------------------|-------------------------------------------|
| 1 HIV/AIDS                    | 1 Lower respiratory infect   | 46.8 (29.1 to 64.2)           | 20.7 (9.74 to 32.1)              | -23.2 (-29.6 to -15.6)                    |
| 2 COVID-19                    | 2 Stroke                     | 30.3 (15 to 47)               | 7.17 (-5.26 to 20.9)             | -45.5 (-51.8 to -37.5)                    |
| 3 Stroke                      | 3 Diabetes                   | 60.3 (37.5 to 85.9)           | 31.9 (15.4 to 52.4)              | -28.9 (-38.8 to -15.5)                    |
| 4 Lower respiratory infect    | 4 Hypertensive heart disease | 160 (119 to 204)              | 114 (83.6 to 150)                | 5.21 (-13.2 to 26.2)                      |
| 5 Diabetes                    | 5 Ischemic heart disease     | 32.3 (2.72 to 66.4)           | 8.91 (-14.4 to 39.9)             | -43.6 (-57.4 to -25.8)                    |
| 6 Ischemic heart disease      | 6 Chronic kidney disease     | 168 (125 to 210)              | 120 (87.7 to 157)                | 22.3 (2.63 to 45.4)                       |
| 7 Tuberculosis                | 7 COPD                       | 109 (83.6 to 137)             | 72.1 (53.7 to 94.8)              | -12.5 (-23.2 to -0.344)                   |
| 8 Neonatal disorders          | 8 HIV/AIDS                   | -76 (-79.8 to -72.4)          | -80.3 (-82.7 to -78)             | -82.8 (-84.7 to -81.1)                    |
| 9 Road injuries               | 9 Diarrheal diseases         | 26.1 (-7.15 to 64.2)          | 3.74 (-22.7 to 33.3)             | -26.2 (-43.5 to -2.19)                    |
| 10 Interpersonal violence     | 10 Road injuries             | 4.4 (-27.6 to 56.1)           | -14.1 (-39.6 to 29.6)            | -22.5 (-45.3 to 18.4)                     |
| 11 Diarrheal diseases         | 11 Tuberculosis              | -30.1 (-45.6 to -11.5)        | -42.5 (-55.6 to -25.1)           | -59.9 (-69.4 to -47.5)                    |
| 12 Hypertensive heart disease | 12 Alzheimer's disease       | 191 (149 to 226)              | 139 (114 to 166)                 | -0.438 (-3.19 to 2.32)                    |
| 13 Chronic kidney disease     | 13 Prostate cancer           | 183 (128 to 242)              | 133 (90.1 to 180)                | 16.3 (-1.38 to 33.9)                      |
| 14 COPD                       | 14 Lung cancer               | 86.2 (52.8 to 119)            | 53 (27.2 to 76.4)                | -12.8 (-24.5 to -0.838)                   |
| 15 Self-harm                  | 15 Neonatal disorders        | -28.7 (-43.4 to -11.4)        | -41.4 (-52.1 to -28.9)           | -17.8 (-30.9 to -1.07)                    |
| 16 Cirrhosis liver            | 16 Interpersonal violence    | -24.9 (-35.3 to -15.4)        | -38.3 (-43.9 to -32.4)           | -39.3 (-44.9 to -33.1)                    |
| 17 Lung cancer                | 17 Cirrhosis liver           | 53 (35.8 to 71.3)             | 25.8 (14.7 to 37.4)              | -19 (-25.7 to -11.6)                      |
| 18 Breast cancer              | 18 Breast cancer             | 96.1 (55.2 to 132)            | 61.1 (34.3 to 86.7)              | -3.65 (-15.8 to 9.05)                     |
| 19 Cervical cancer            | 19 Self-harm                 | 17 (1.2 to 32.5)              | -3.78 (-14.7 to 8.39)            | -14.8 (-24.2 to -3.91)                    |
| 20 Alzheimer's disease        | 20 Colorectal cancer         | 130 (78.1 to 181)             | 89 (51.5 to 128)                 | 5.37 (-11.9 to 23.6)                      |
| 22 Prostate cancer            | 24 Cervical cancer           |                               |                                  |                                           |
| 26 Colorectal cancer          | 133 COVID-19                 |                               |                                  |                                           |

### Western sub-Saharan Africa, Reference scenario

**Legend:**  
■ Communicable, maternal, neonatal and nutritional  
■ Non-communicable  
■ Injuries

| Leading Causes 2022           | Leading Causes 2050          | Mean % change number of DEATH | Mean % change all-age DEATH rate | Mean % change age-standardized DEATH rate |
|-------------------------------|------------------------------|-------------------------------|----------------------------------|-------------------------------------------|
| 1 Neonatal disorders          | 1 Lower respiratory infect   | 21.6 (5.36 to 39.6)           | -37.4 (-45.6 to -27.3)           | -34.1 (-42 to -24.6)                      |
| 2 Malaria                     | 2 Malaria                    | -14.4 (-81.1 to 221)          | -55.9 (-89.7 to 62.5)            | -57.3 (-89.6 to 56.1)                     |
| 3 Lower respiratory infect    | 3 Stroke                     | 80 (54.7 to 109)              | -7.31 (-22.2 to 8.77)            | -46.1 (-55.7 to -34.2)                    |
| 4 Diarrheal diseases          | 4 Neonatal disorders         | -22.6 (-38.3 to -3.08)        | -60.2 (-67.7 to -49.2)           | -41.2 (-52.2 to -27.2)                    |
| 5 Stroke                      | 5 Ischemic heart disease     | 91 (40.9 to 152)              | -1.63 (-28.3 to 32.4)            | -44 (-60.5 to -21.8)                      |
| 6 Ischemic heart disease      | 6 Chronic kidney disease     | 267 (203 to 341)              | 89.1 (52.2 to 132)               | 20.3 (-4.57 to 52.7)                      |
| 7 HIV/AIDS                    | 7 Diarrheal diseases         | -17.5 (-42.7 to 18.3)         | -57.5 (-70.9 to -41)             | -51.4 (-64.4 to -32.2)                    |
| 8 Congenital defects          | 8 Diabetes                   | 149 (107 to 196)              | 28.1 (3.03 to 52.9)              | -22.4 (-38.1 to -3.55)                    |
| 9 Tuberculosis                | 9 Hypertensive heart disease | 192 (135 to 260)              | 50.2 (22.1 to 86.5)              | -15.6 (-33.9 to 7.46)                     |
| 10 Cirrhosis liver            | 10 Cirrhosis liver           | 84.4 (60.6 to 113)            | -5.04 (-18.5 to 10.7)            | -35.7 (-44.1 to -24.7)                    |
| 11 Road injuries              | 11 Road injuries             | 52.5 (-1.5 to 141)            | -21.4 (-49.5 to 26)              | -35.5 (-56.9 to 1.1)                      |
| 12 Diabetes                   | 12 Tuberculosis              | -3.99 (-29.5 to 32.4)         | -50.5 (-64.6 to -31.4)           | -64.8 (-74.1 to -51)                      |
| 13 Chronic kidney disease     | 13 Prostate cancer           | 286 (181 to 397)              | 98.7 (43.6 to 151)               | 4.06 (-15.2 to 23.8)                      |
| 14 Meningitis                 | 14 Congenital defects        | -14.6 (-29.1 to 3.84)         | -56.1 (-62.4 to -47.7)           | -38.4 (-45.7 to -27.6)                    |
| 15 Maternal disorders         | 15 Breast cancer             | 241 (155 to 324)              | 75.4 (35.8 to 121)               | 16.9 (-4.65 to 39.3)                      |
| 16 Hypertensive heart disease | 16 Alzheimer's disease       | 327 (248 to 414)              | 119 (79.6 to 163)                | 4.89 (1.75 to 7.74)                       |
| 17 COVID-19                   | 17 COPD                      | 124 (92.5 to 159)             | 15.4 (-3.15 to 35.2)             | -35.3 (-47.1 to -20.8)                    |
| 18 iNTS                       | 18 Falls                     | 173 (131 to 221)              | 40.6 (19.7 to 61.3)              | -8.51 (-11.7 to -4.99)                    |
| 19 Pertussis                  | 19 HIV/AIDS                  | -59 (-68.7 to -52.1)          | -78.9 (-83.6 to -75.6)           | -82.1 (-86.1 to -79.5)                    |
| 20 COPD                       | 20 Liver cancer              | 185 (138 to 242)              | 47 (20.3 to 80.8)                | -5.88 (-23.6 to 18.2)                     |
| 25 Breast cancer              | 21 Meningitis                |                               |                                  |                                           |
| 27 Prostate cancer            | 24 Maternal disorders        |                               |                                  |                                           |
| 29 Falls                      | 26 iNTS                      |                               |                                  |                                           |
| 30 Liver cancer               | 31 Pertussis                 |                               |                                  |                                           |
| 31 Alzheimer's disease        | 136 COVID-19                 |                               |                                  |                                           |

Central Europe,  
Eastern Europe, And  
Central Asia

Global

High Income

Latin America And  
Caribbean

1410

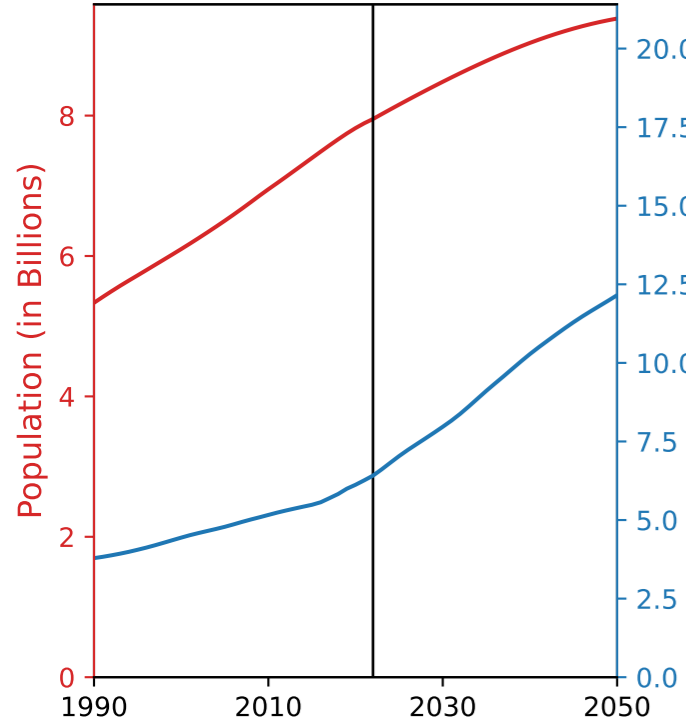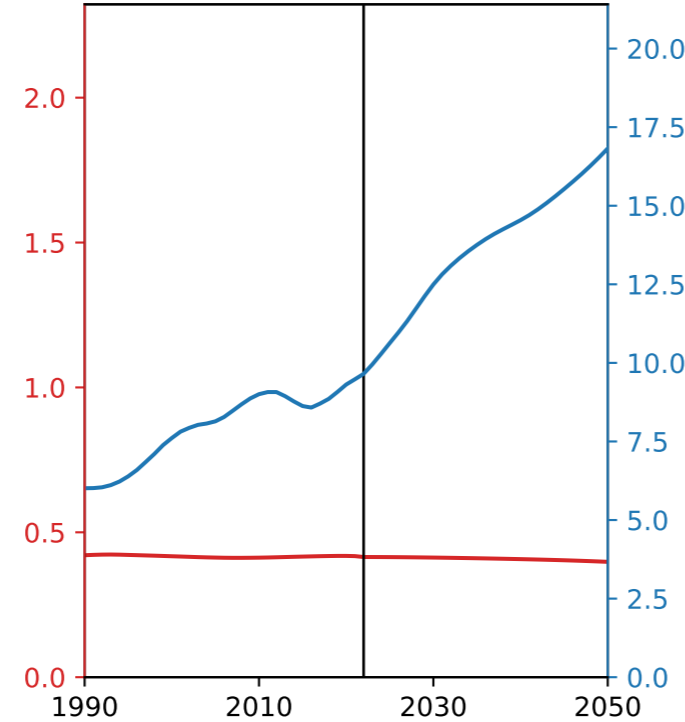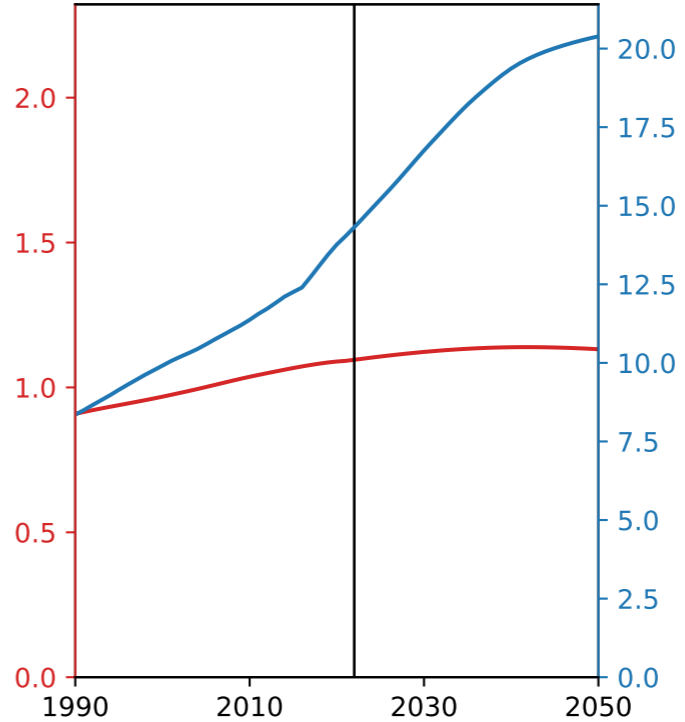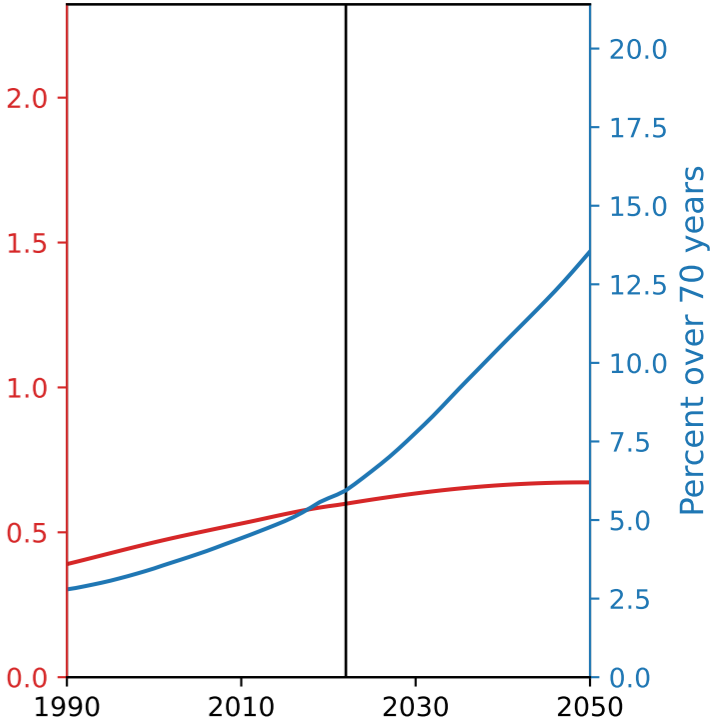

North Africa And  
Middle East

South Asia

Southeast Asia, East  
Asia, And Oceania

Sub-Saharan Africa

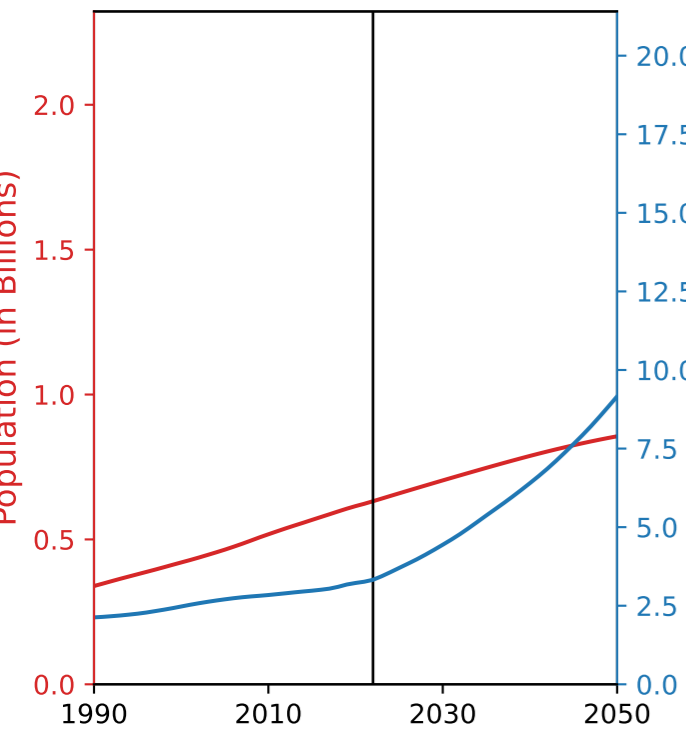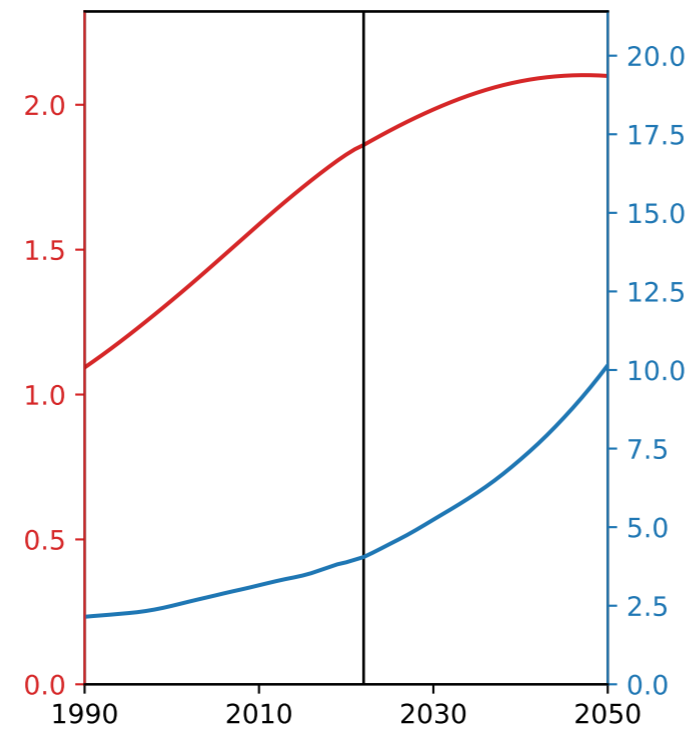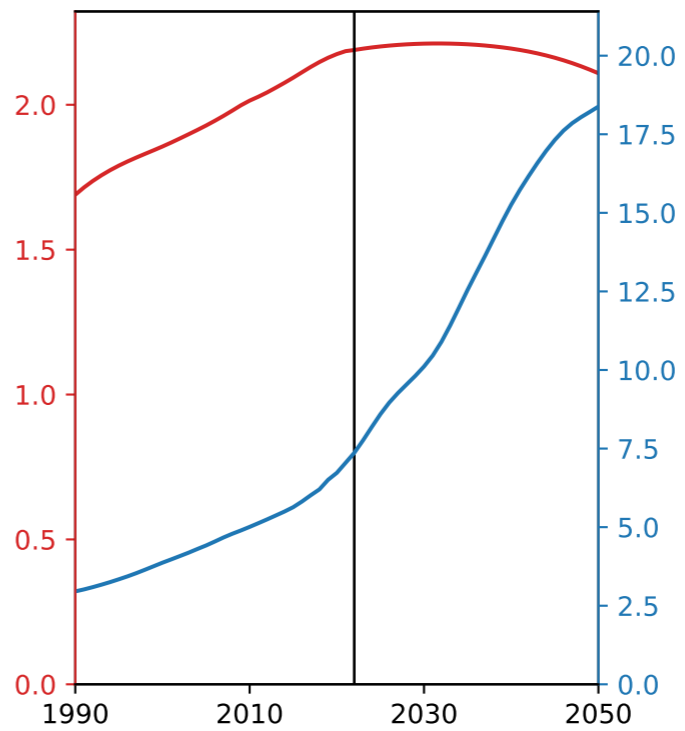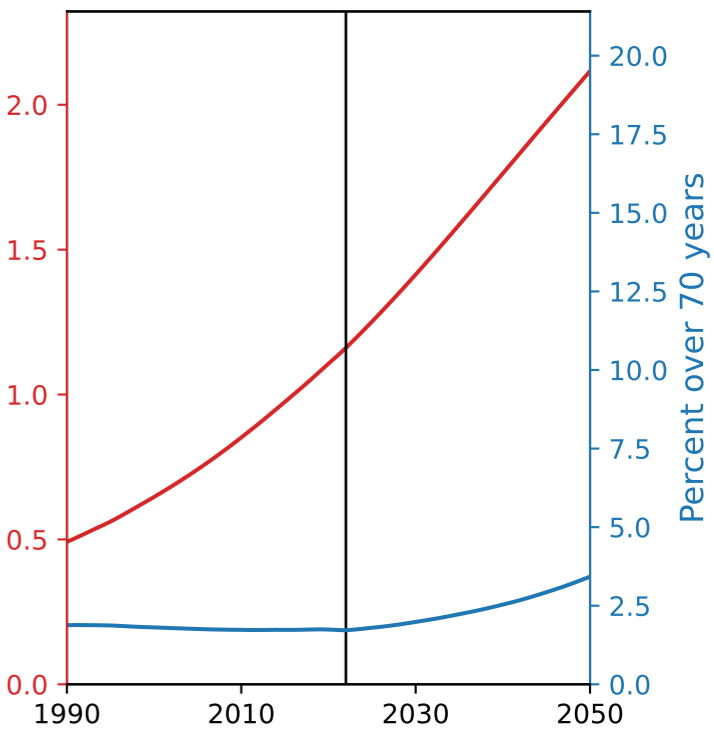

Percent over 70 years

Percent over 70 years

# Armenia

Supplemental Results Figure S10. All-cause age standardised DALY rates (A) and all age DALY counts (B), for the past and for five future scenarios, 1990–2050

1411

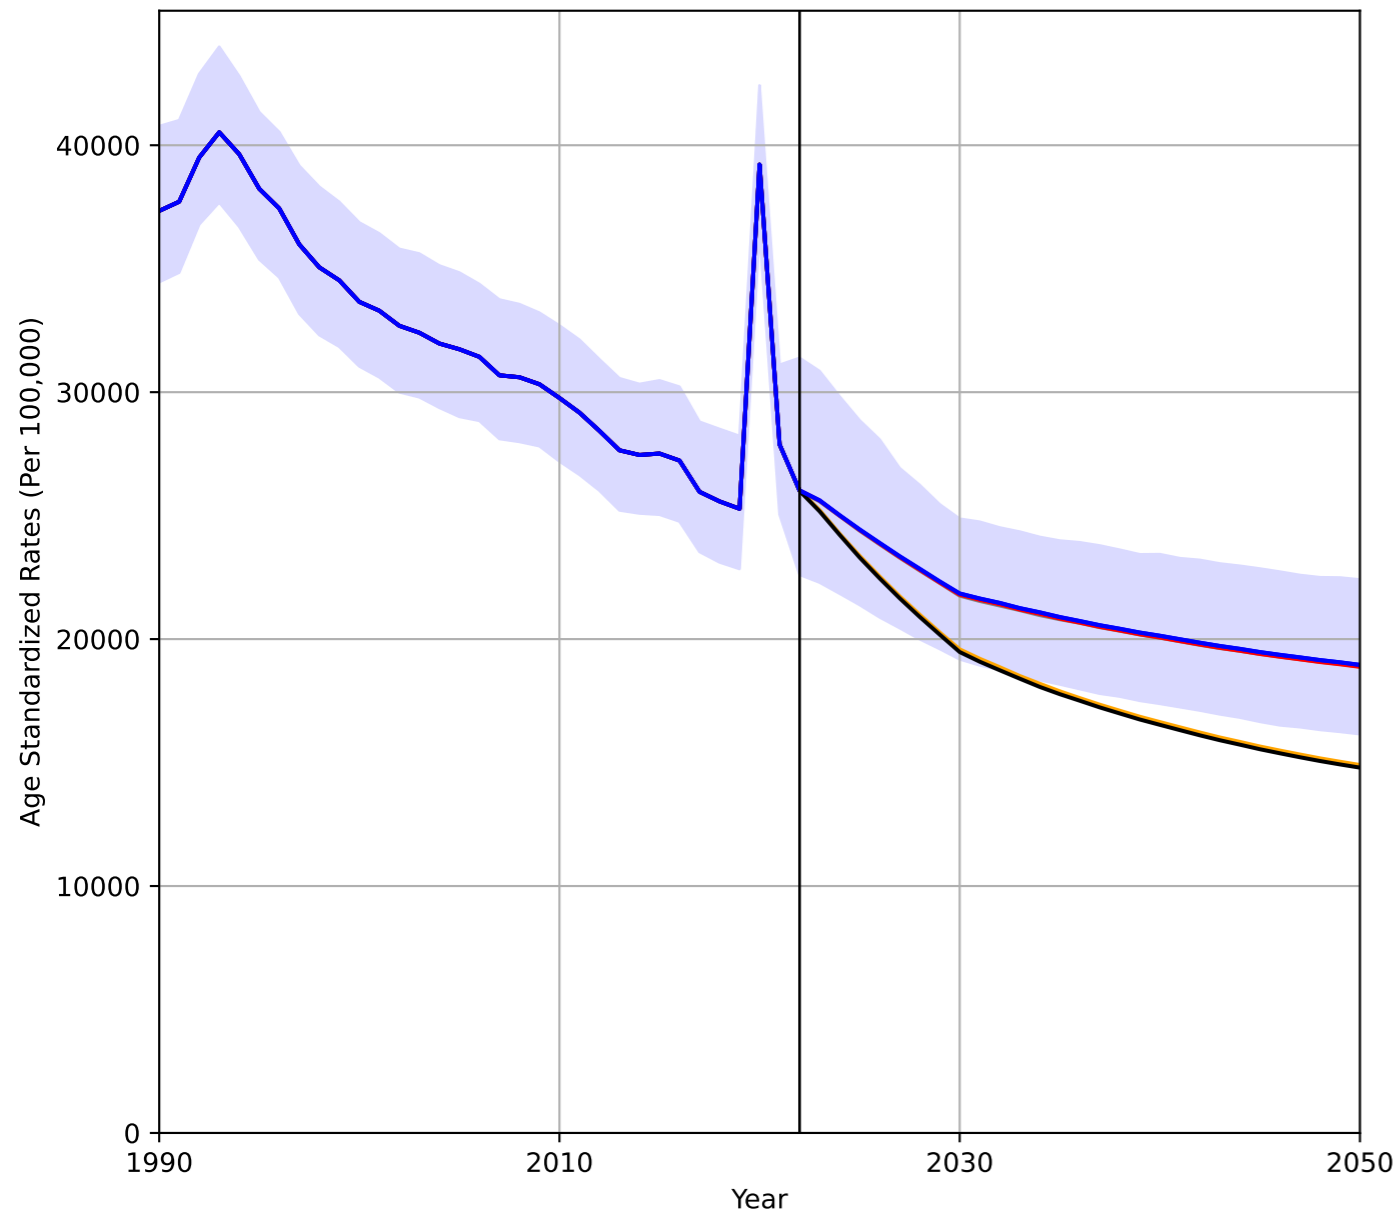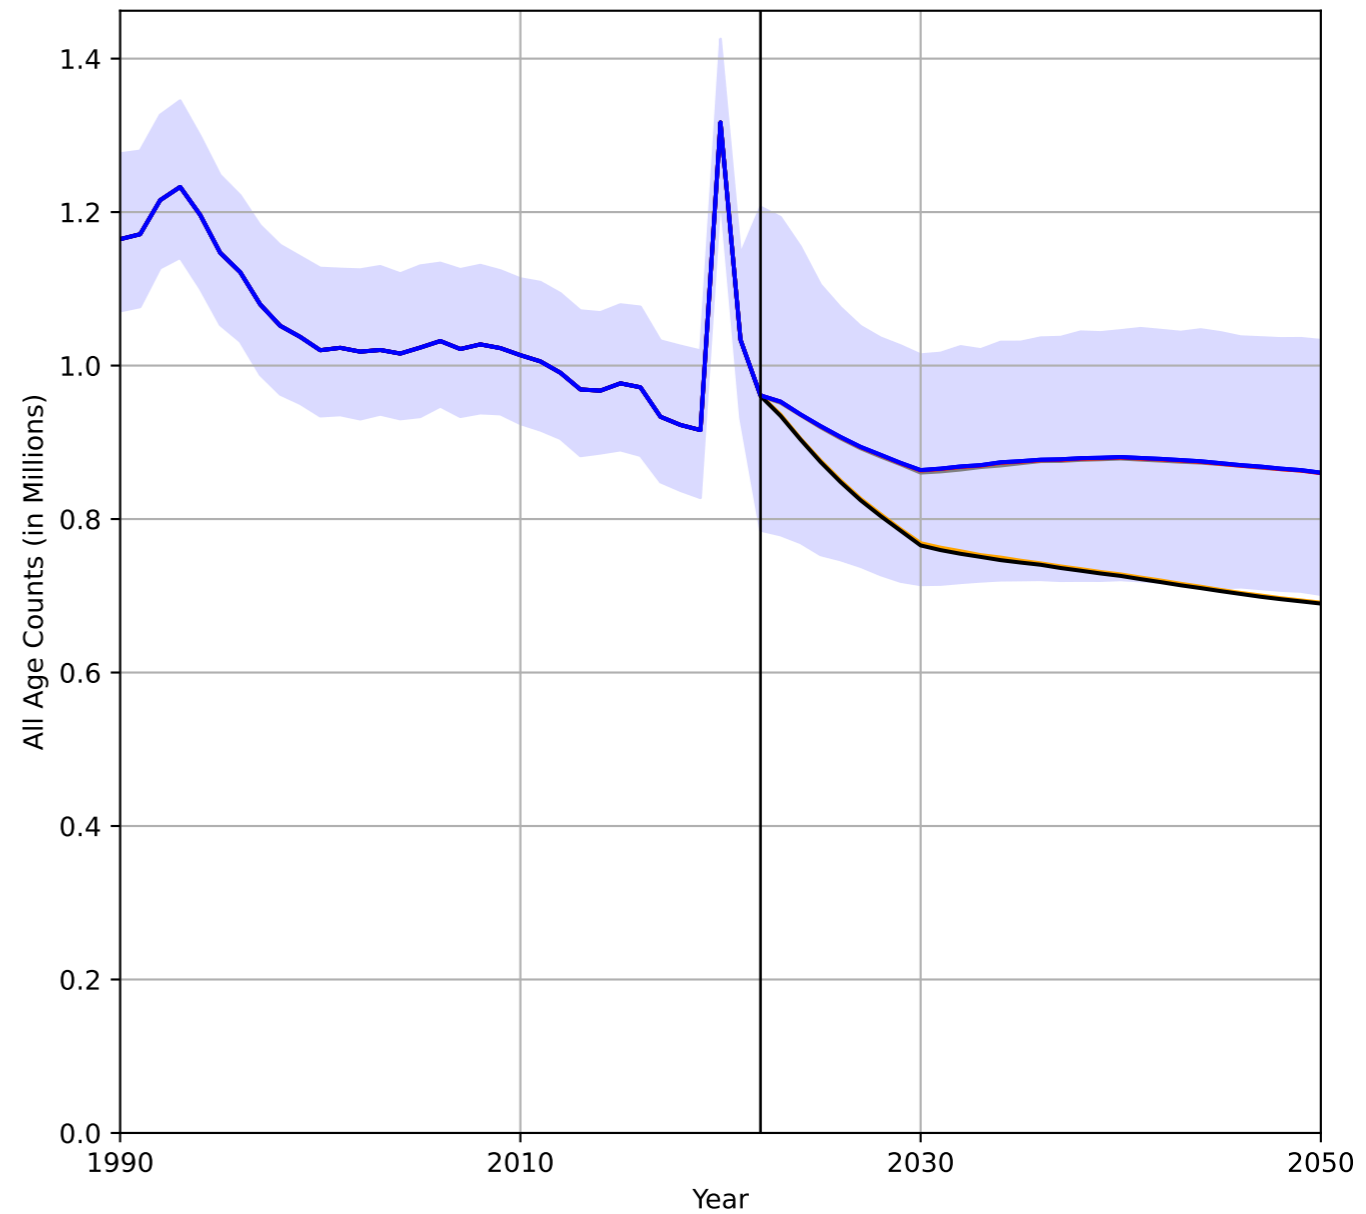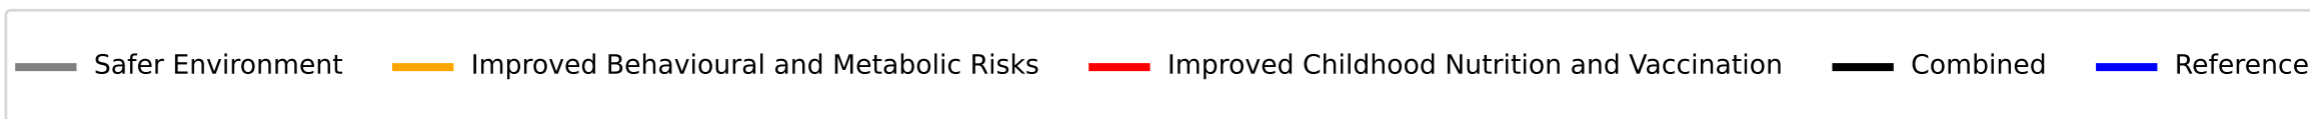

# Azerbaijan

Supplemental Results Figure S10. All-cause age standardised DALY rates (A) and all age DALY counts (B), for the past and for five future scenarios, 1990–2050

1412

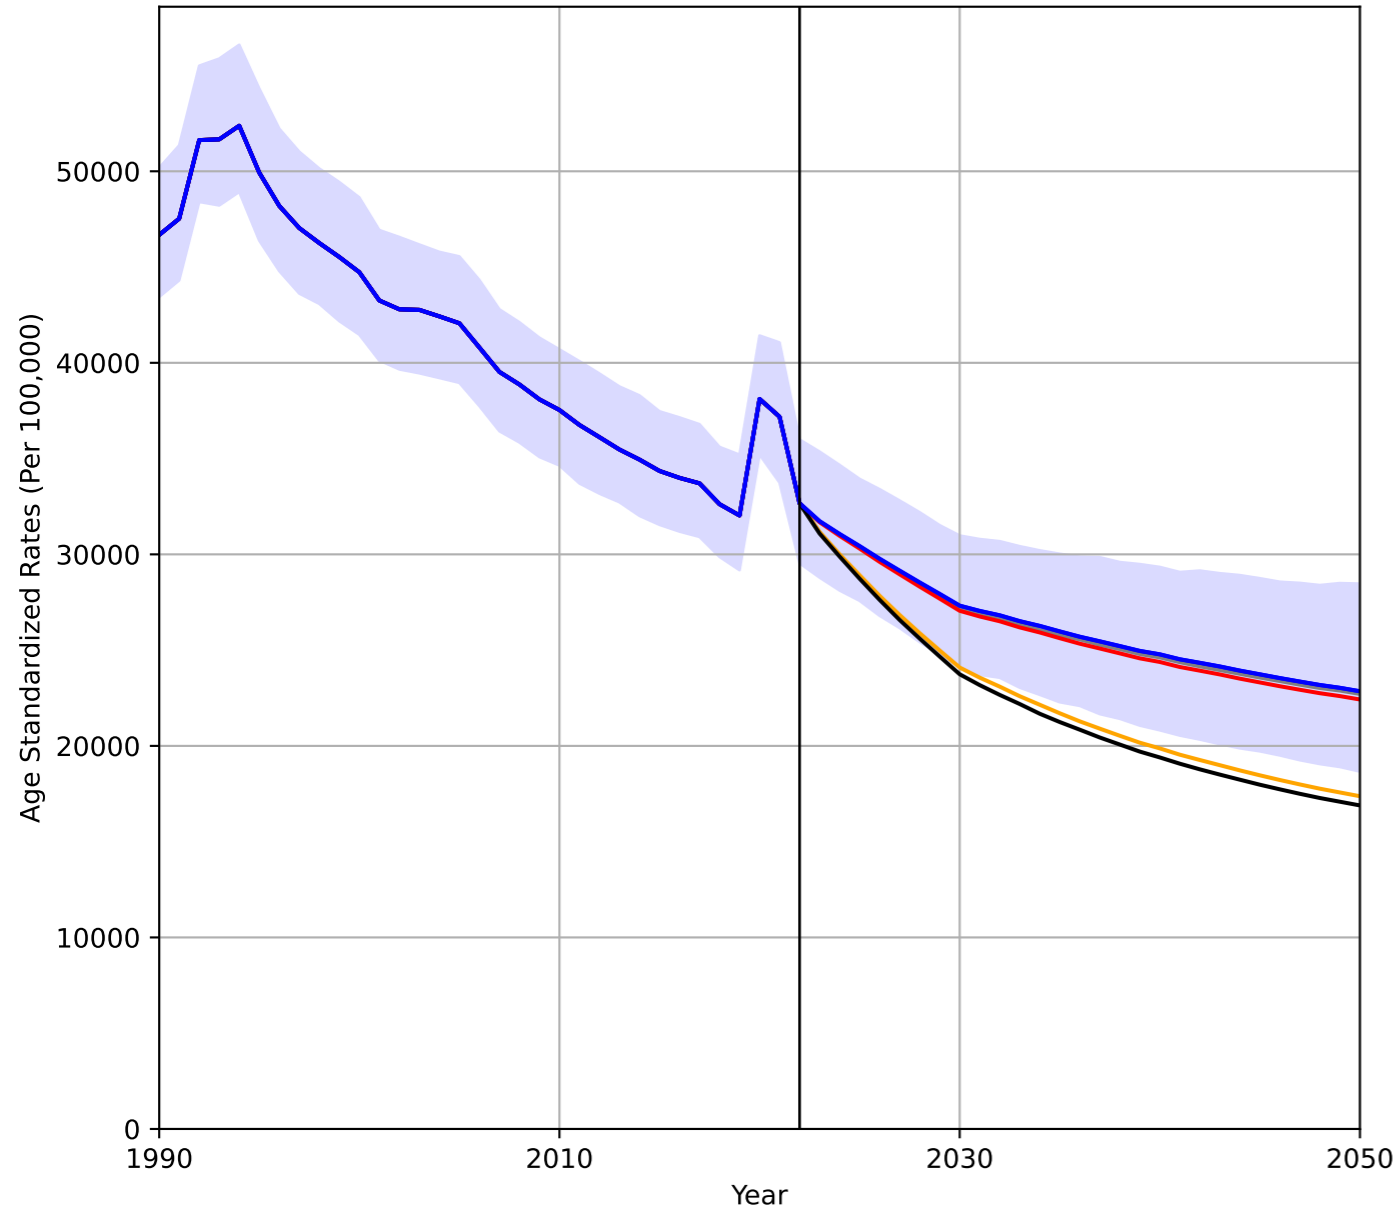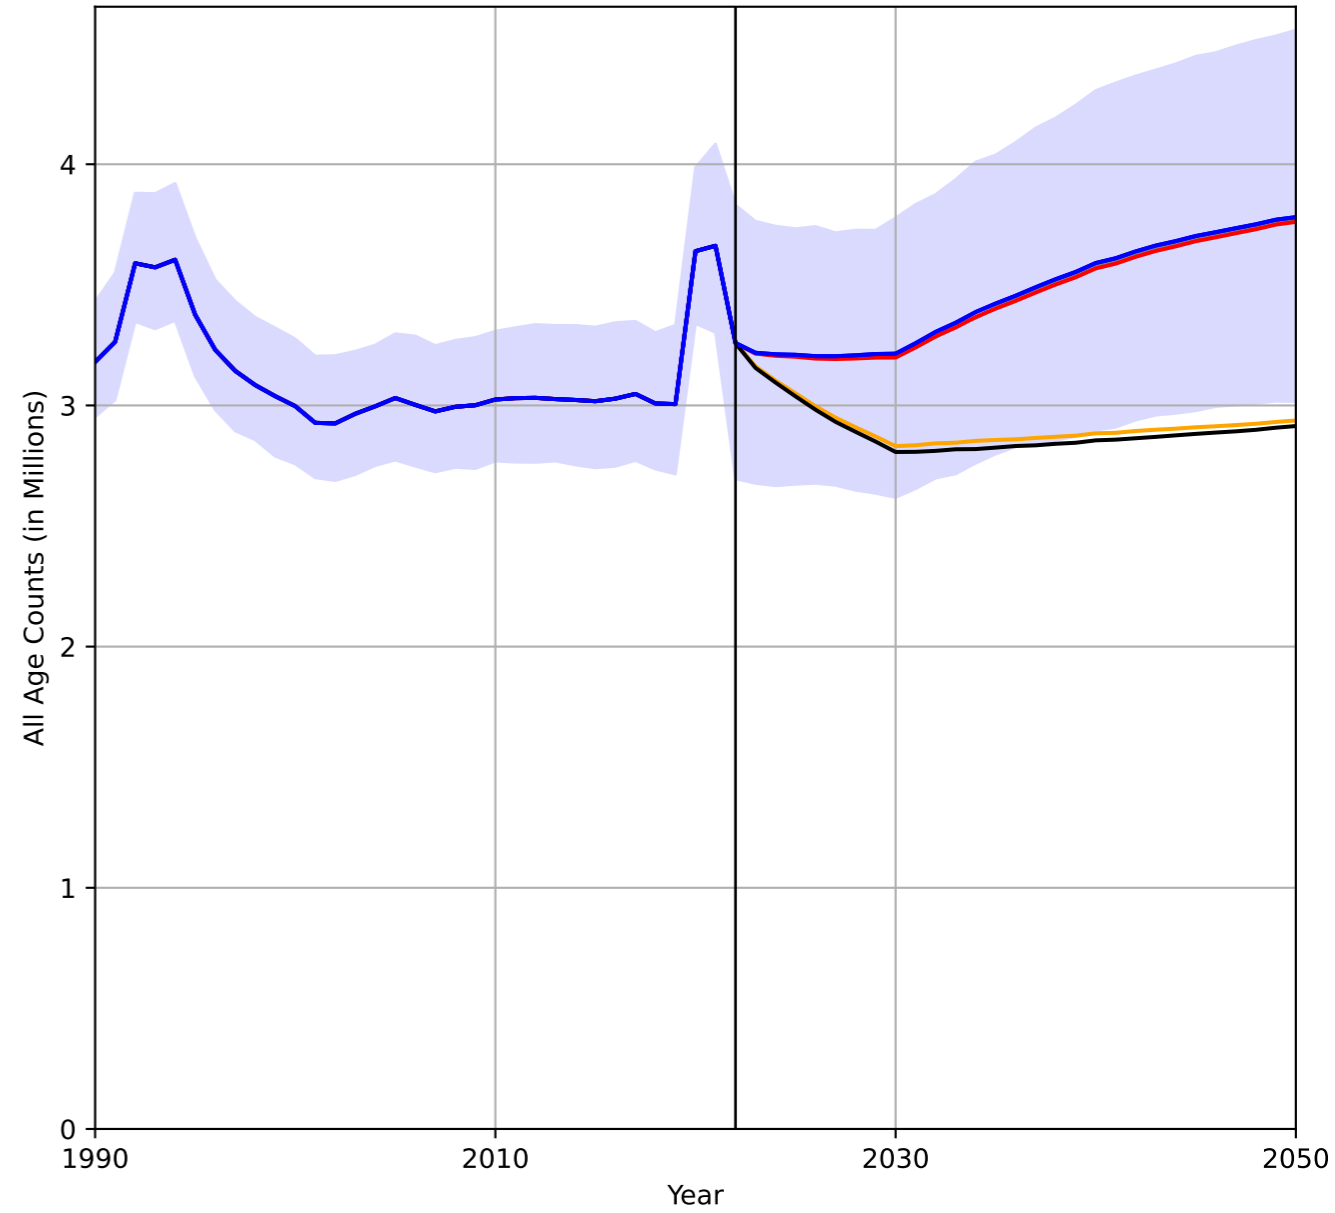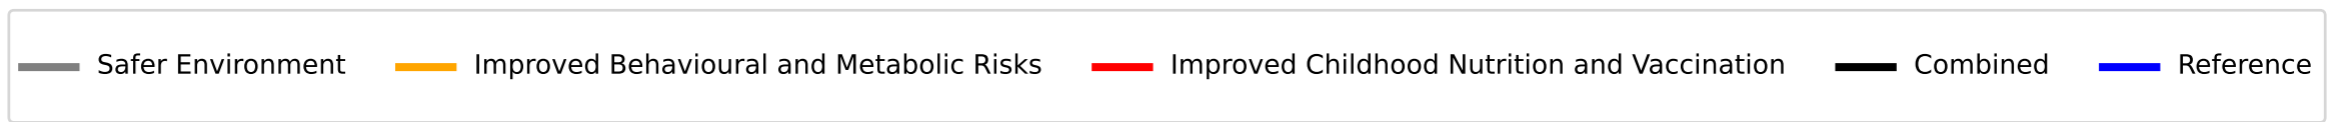

# Georgia

Supplemental Results Figure S10. All-cause age standardised DALY rates (A) and all age DALY counts (B), for the past and for five future scenarios, 1990–2050

1413

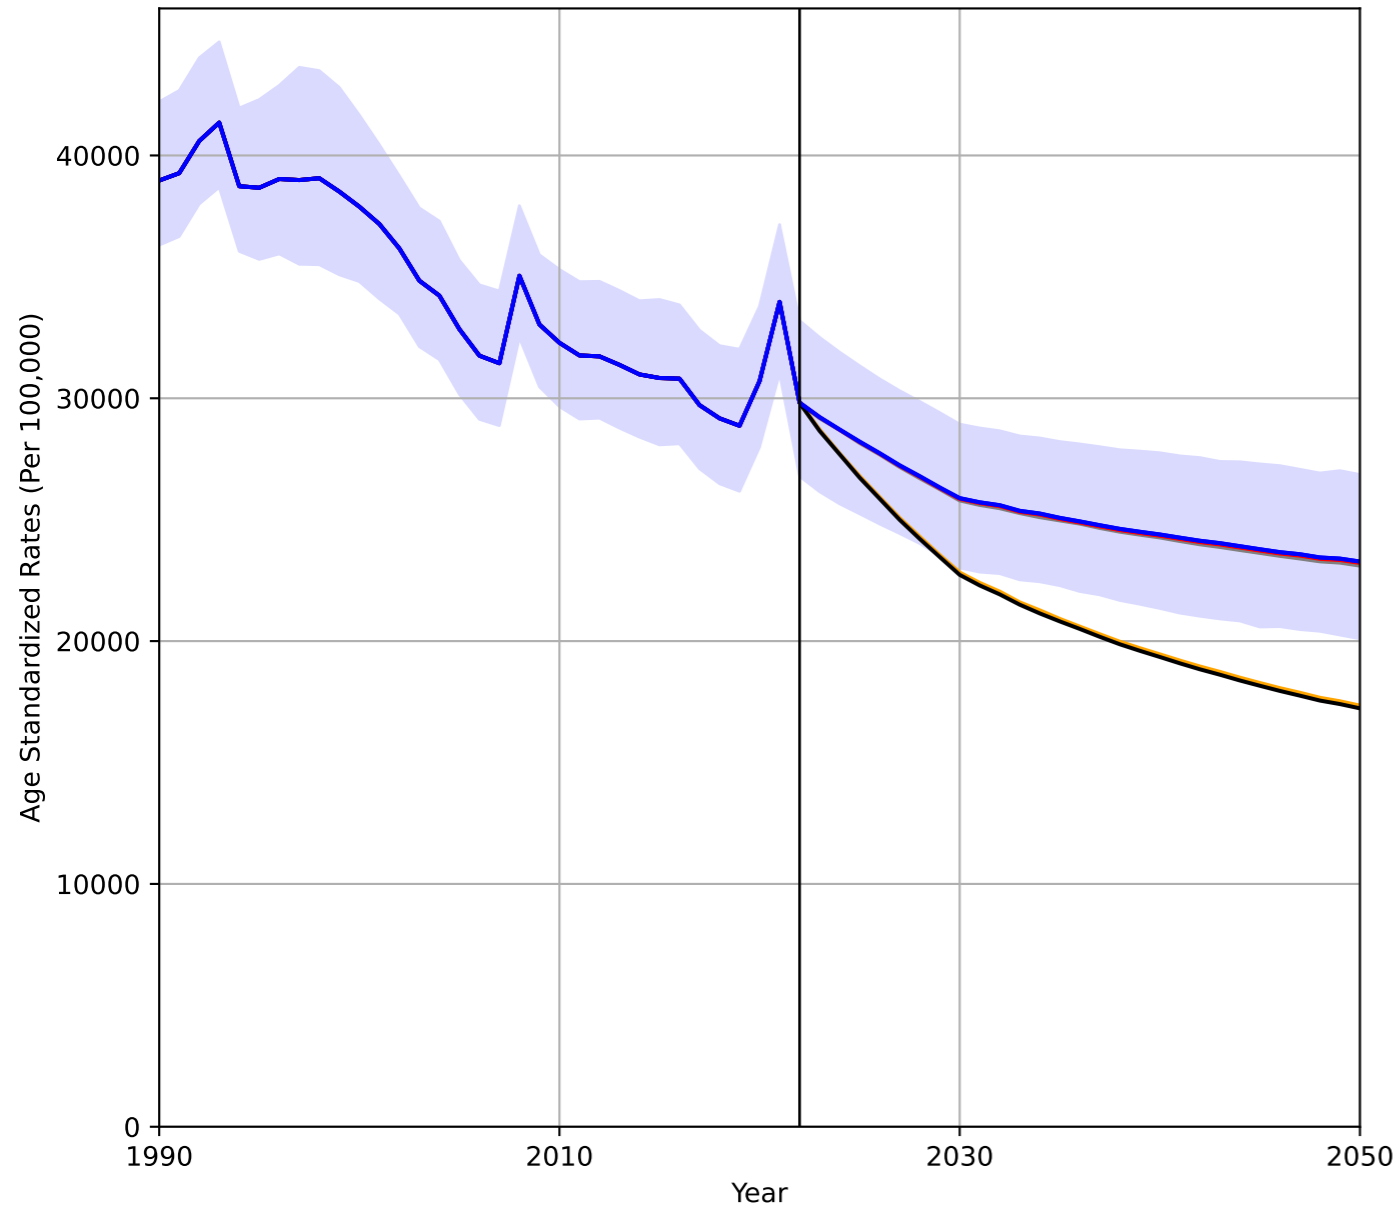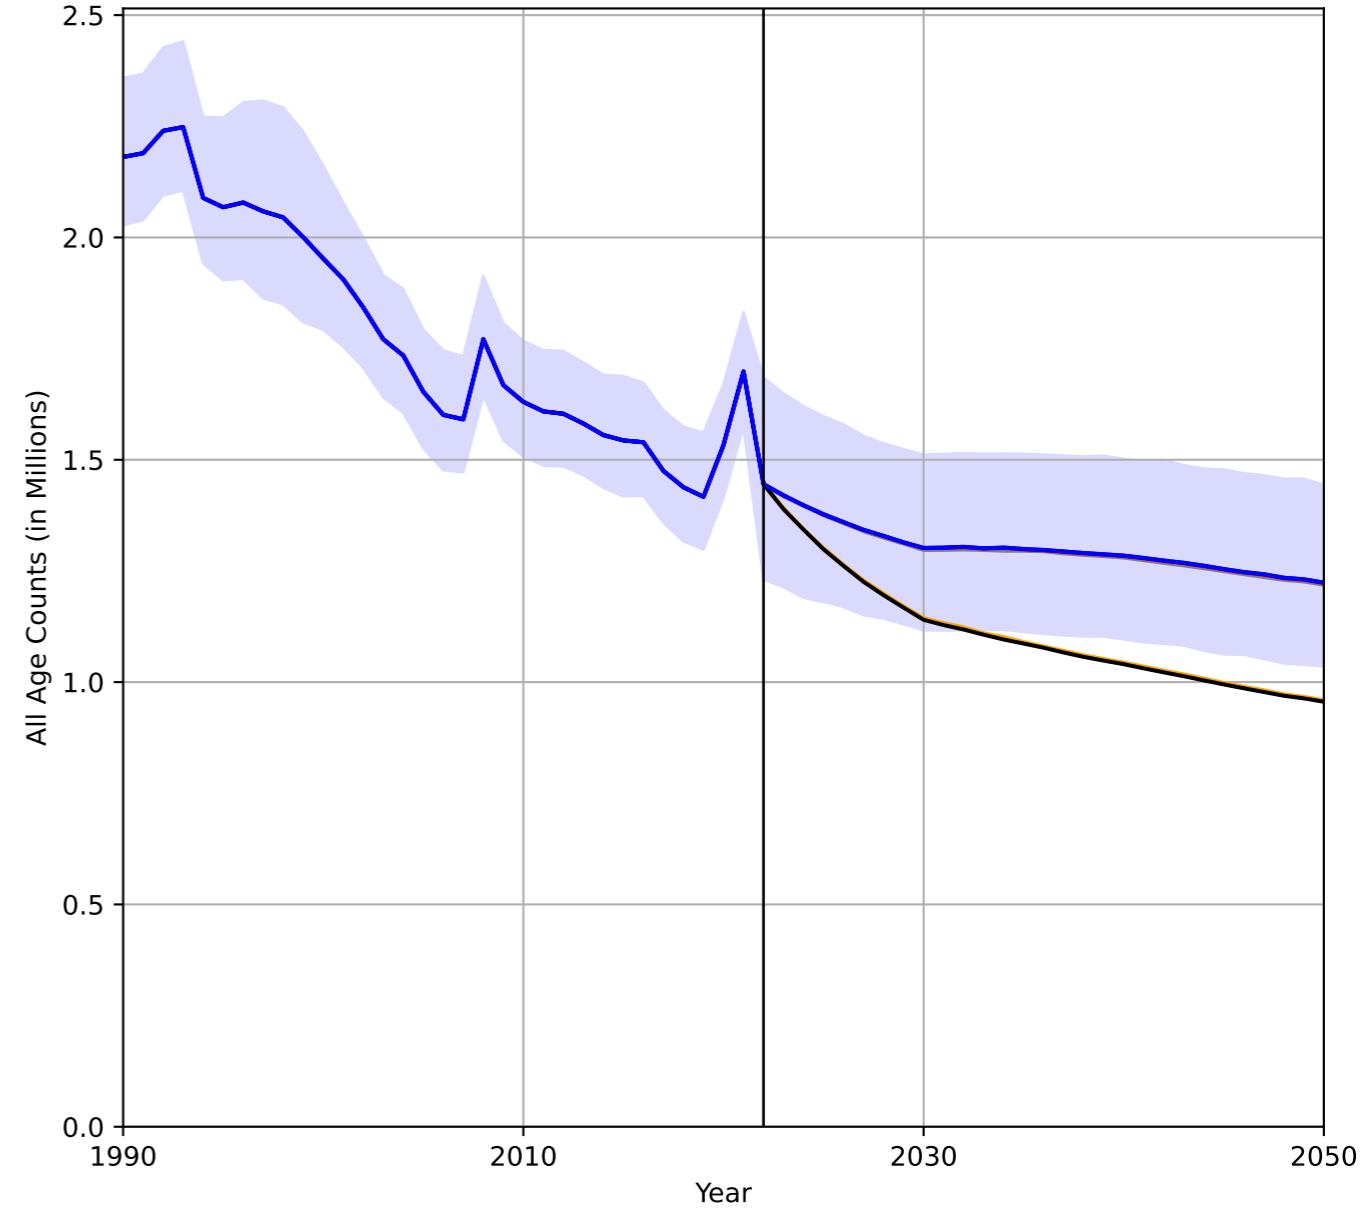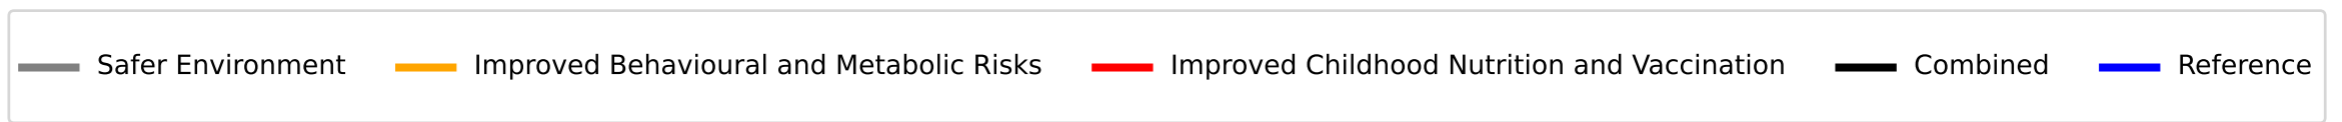

# Kazakhstan

Supplemental Results Figure S10. All-cause age standardised DALY rates (A) and all age DALY counts (B), for the past and for five future scenarios, 1990–2050

1414

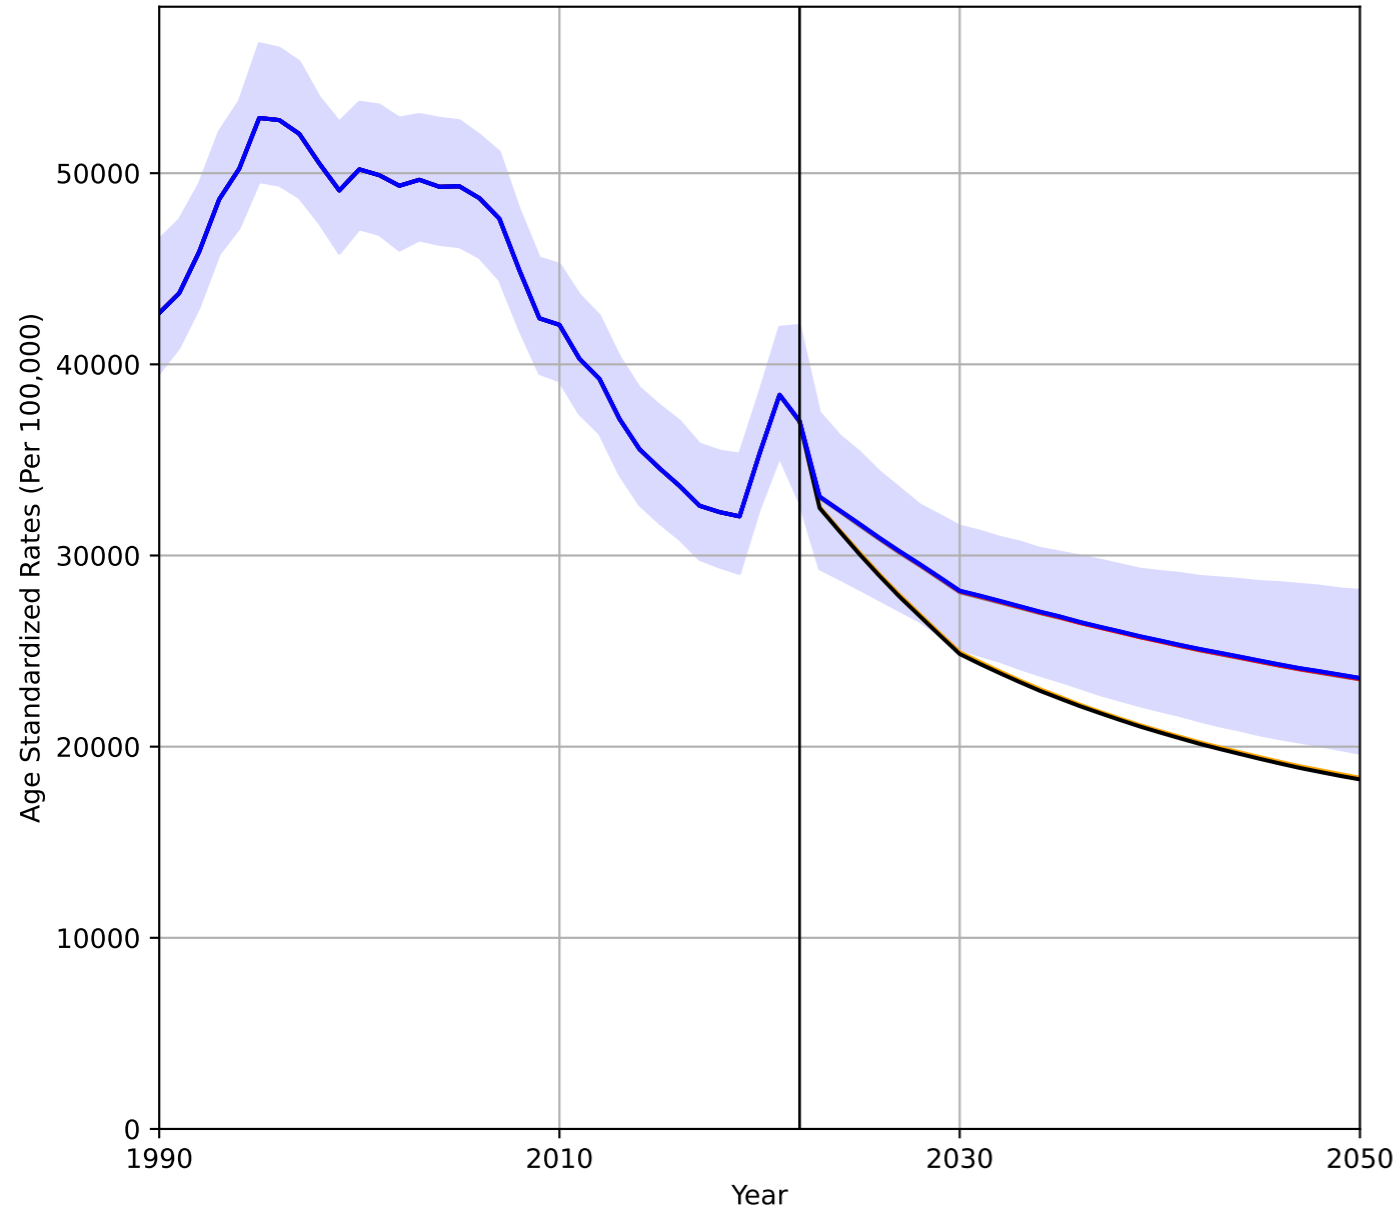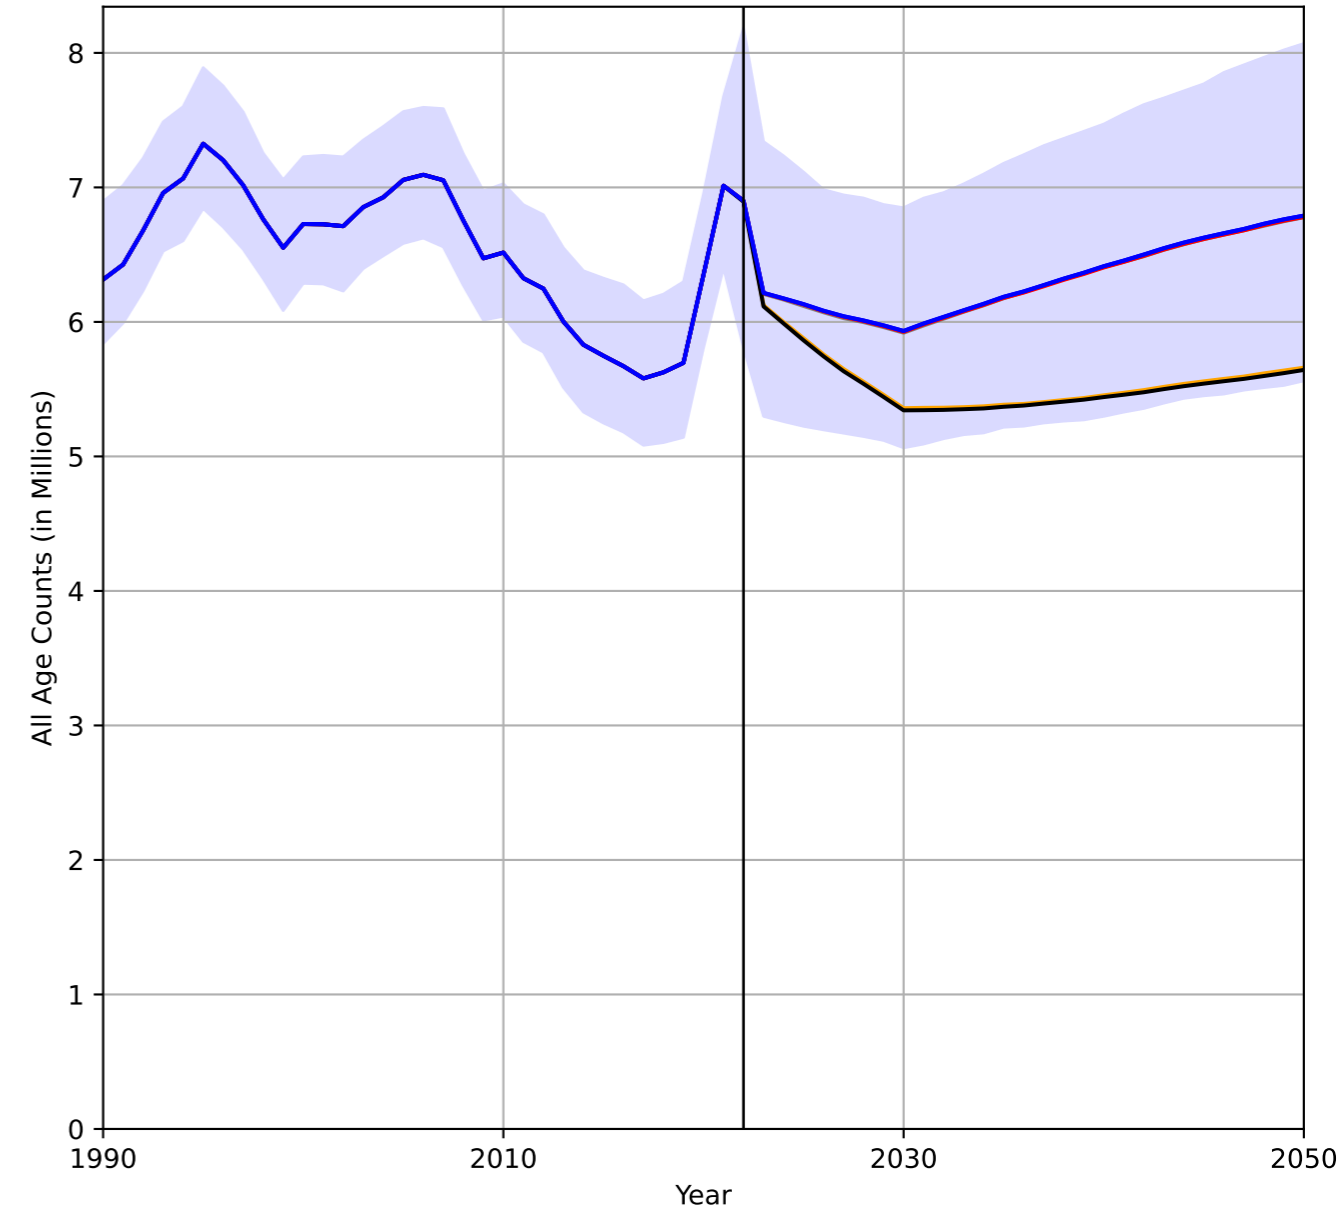

# Kyrgyzstan

Supplemental Results Figure S10. All-cause age standardised DALY rates (A) and all age DALY counts (B), for the past and for five future scenarios, 1990–2050

1415

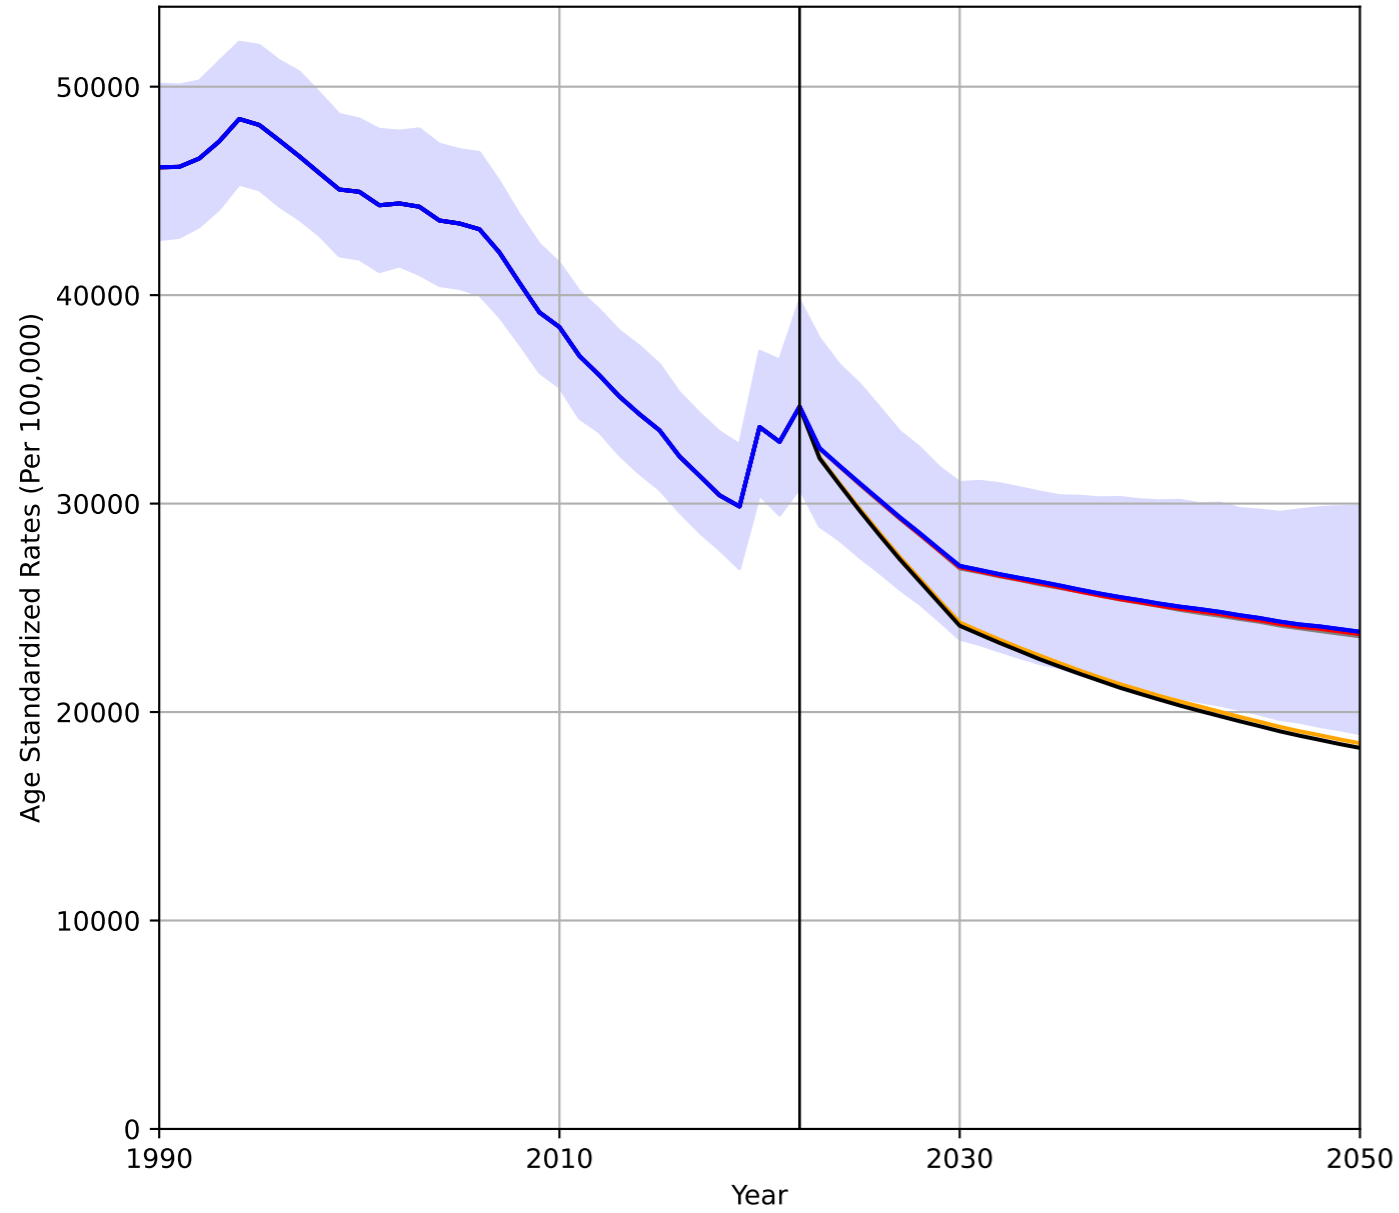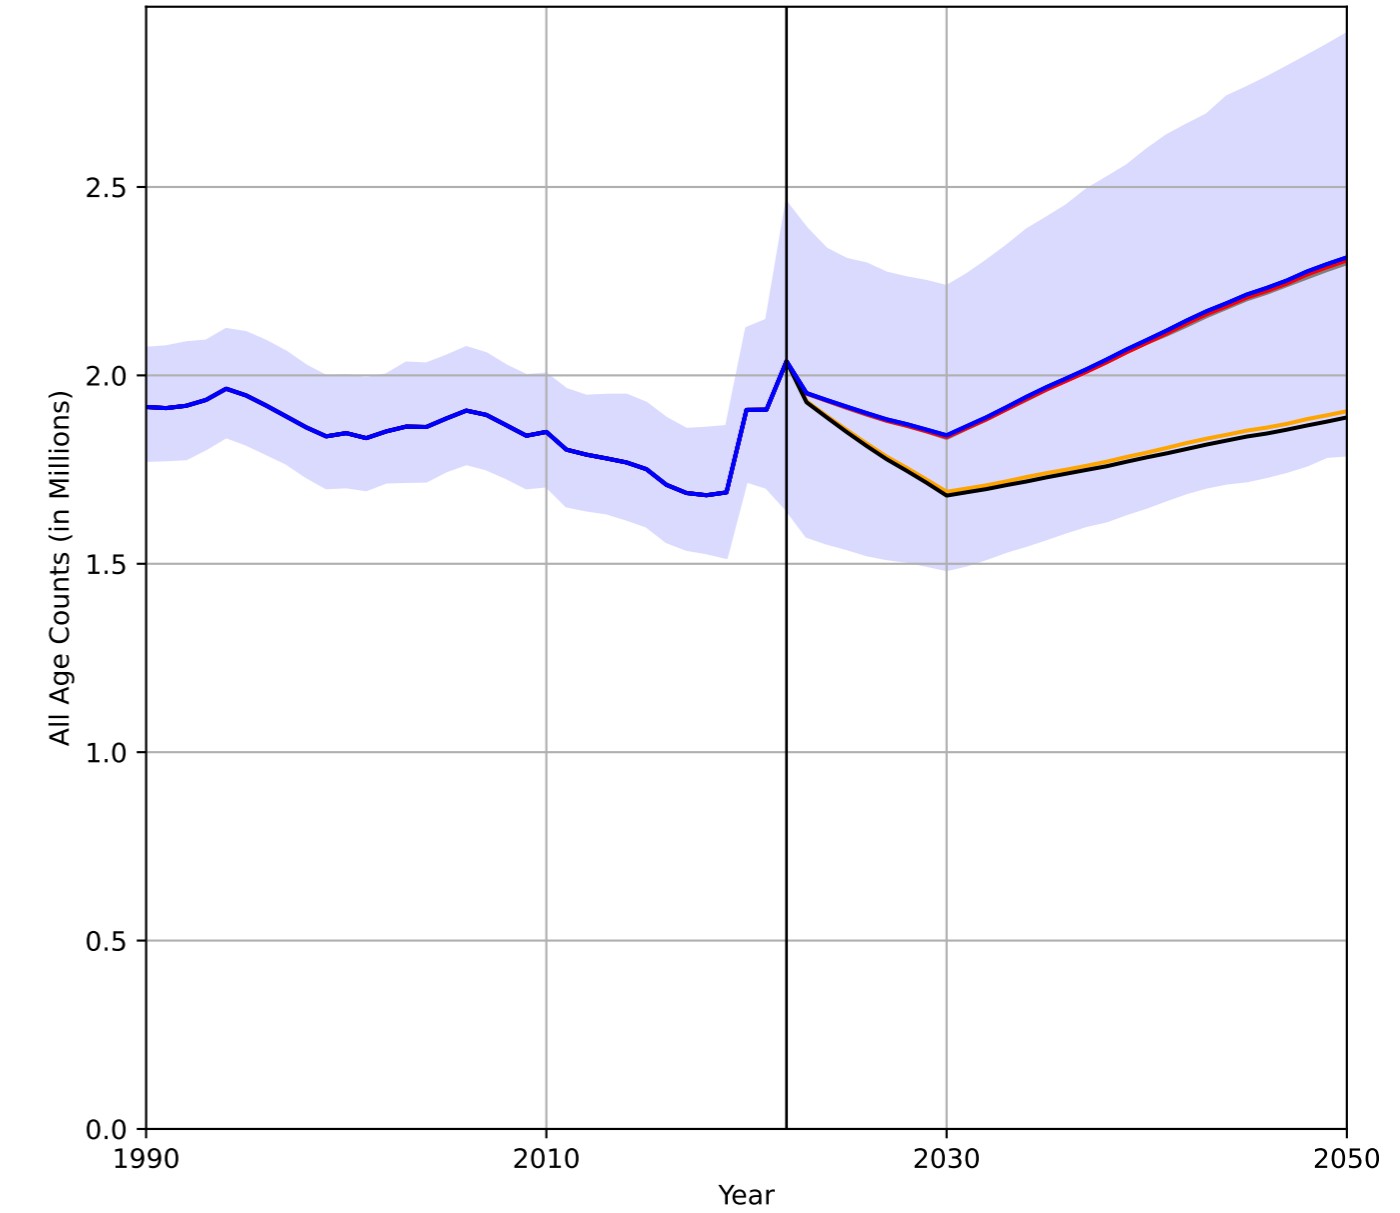



# Mongolia

Supplemental Results Figure S10. All-cause age standardised DALY rates (A) and all age DALY counts (B), for the past and for five future scenarios, 1990–2050

1416

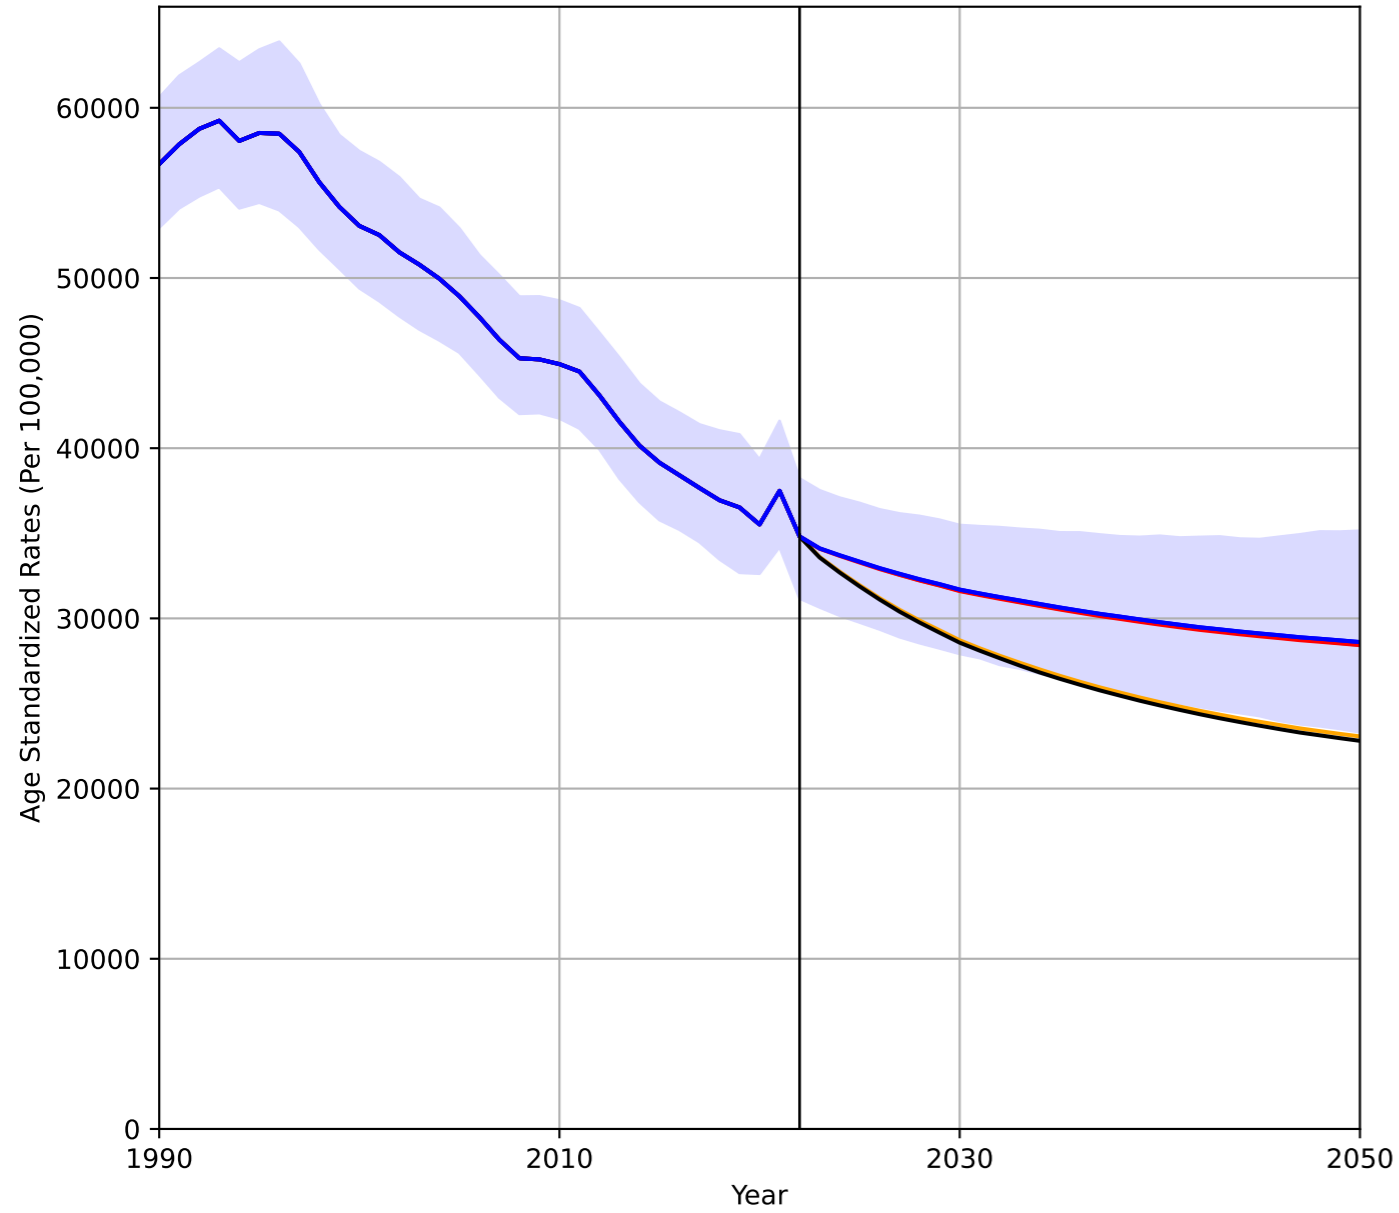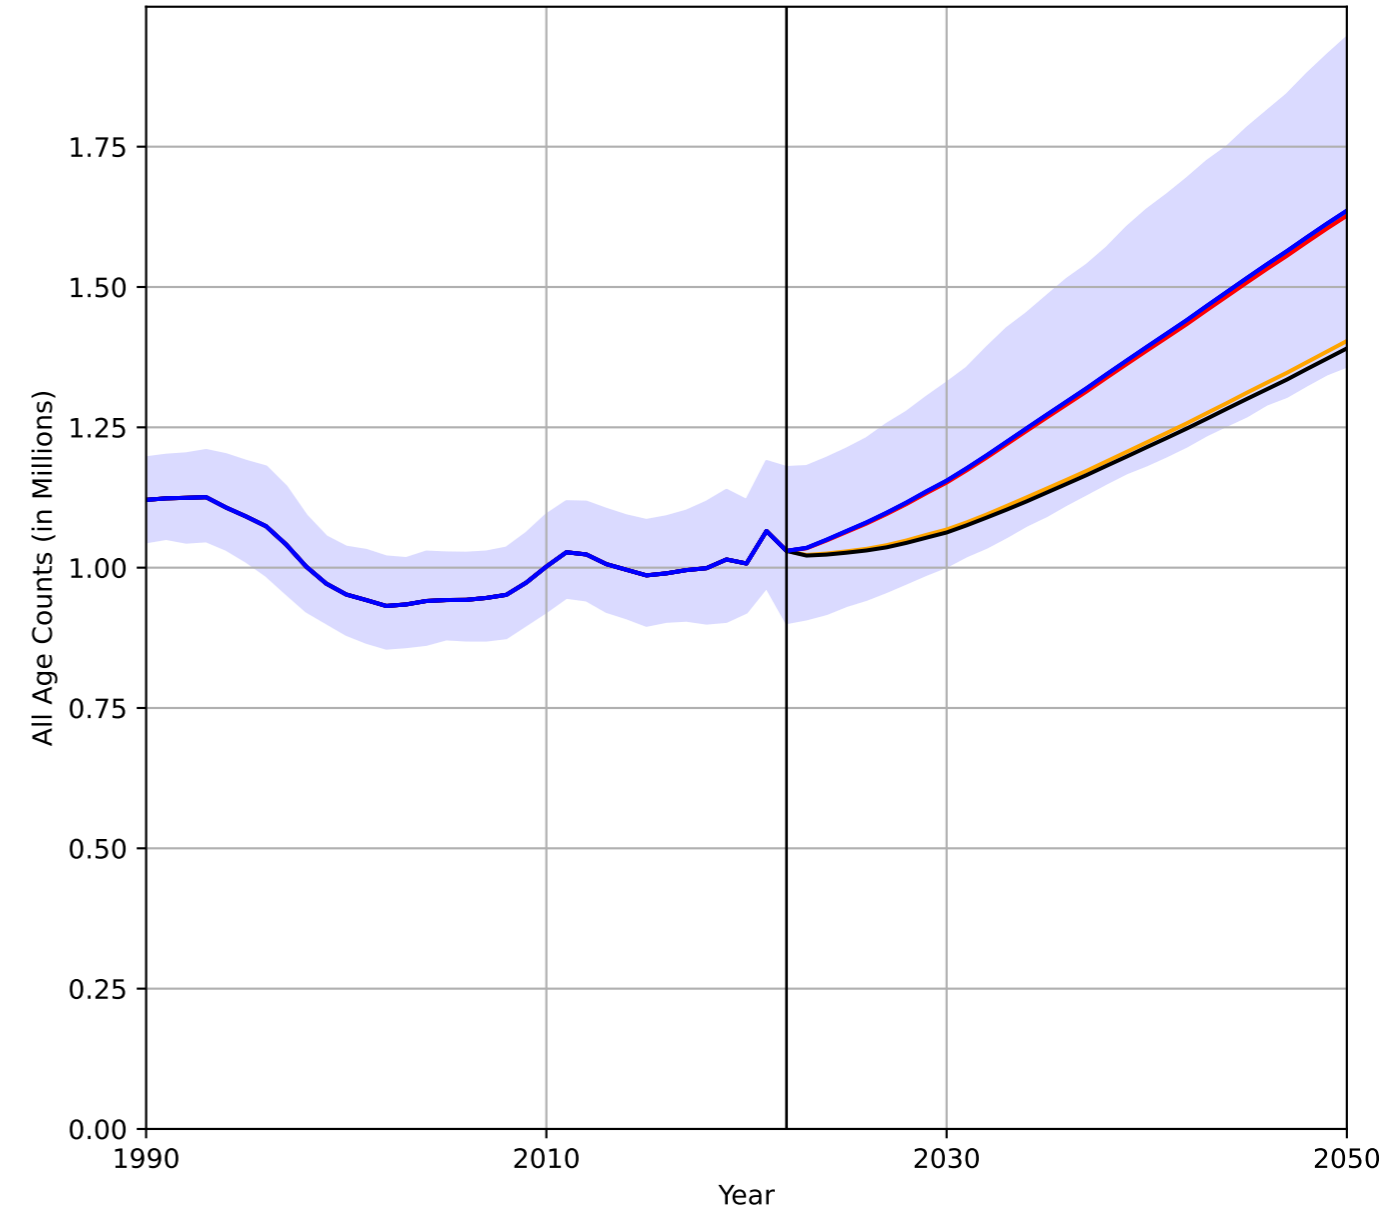

# Tajikistan

Supplemental Results Figure S10. All-cause age standardised DALY rates (A) and all age DALY counts (B), for the past and for five future scenarios, 1990–2050

1417

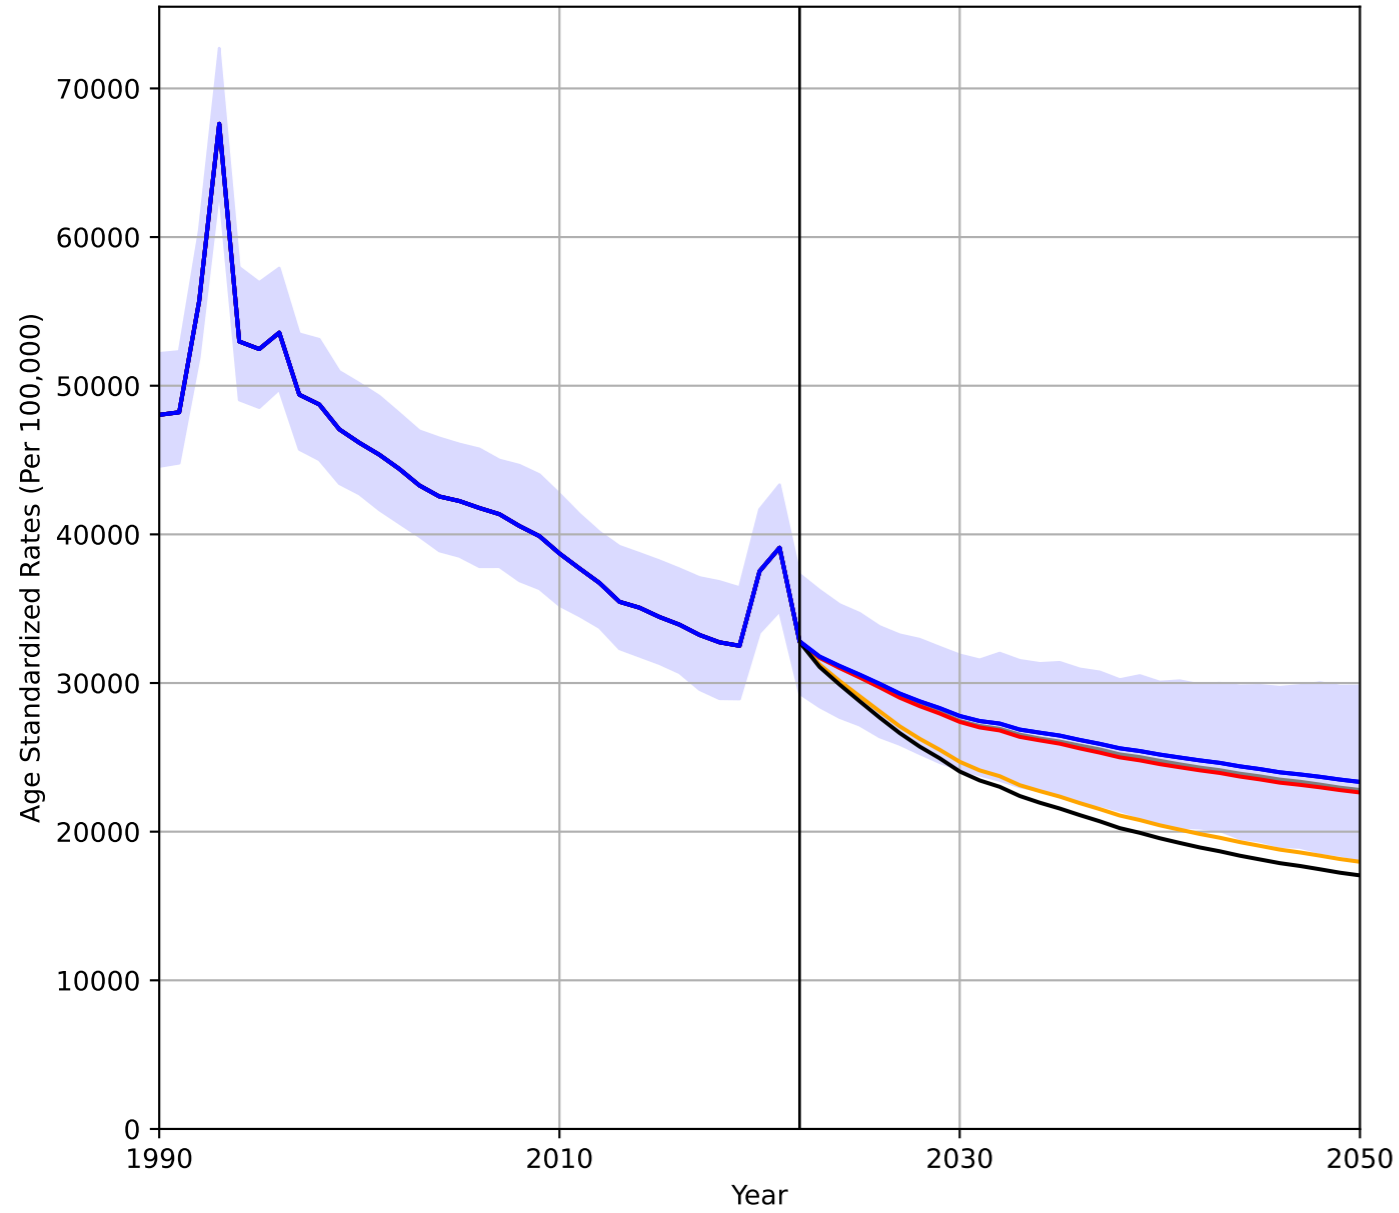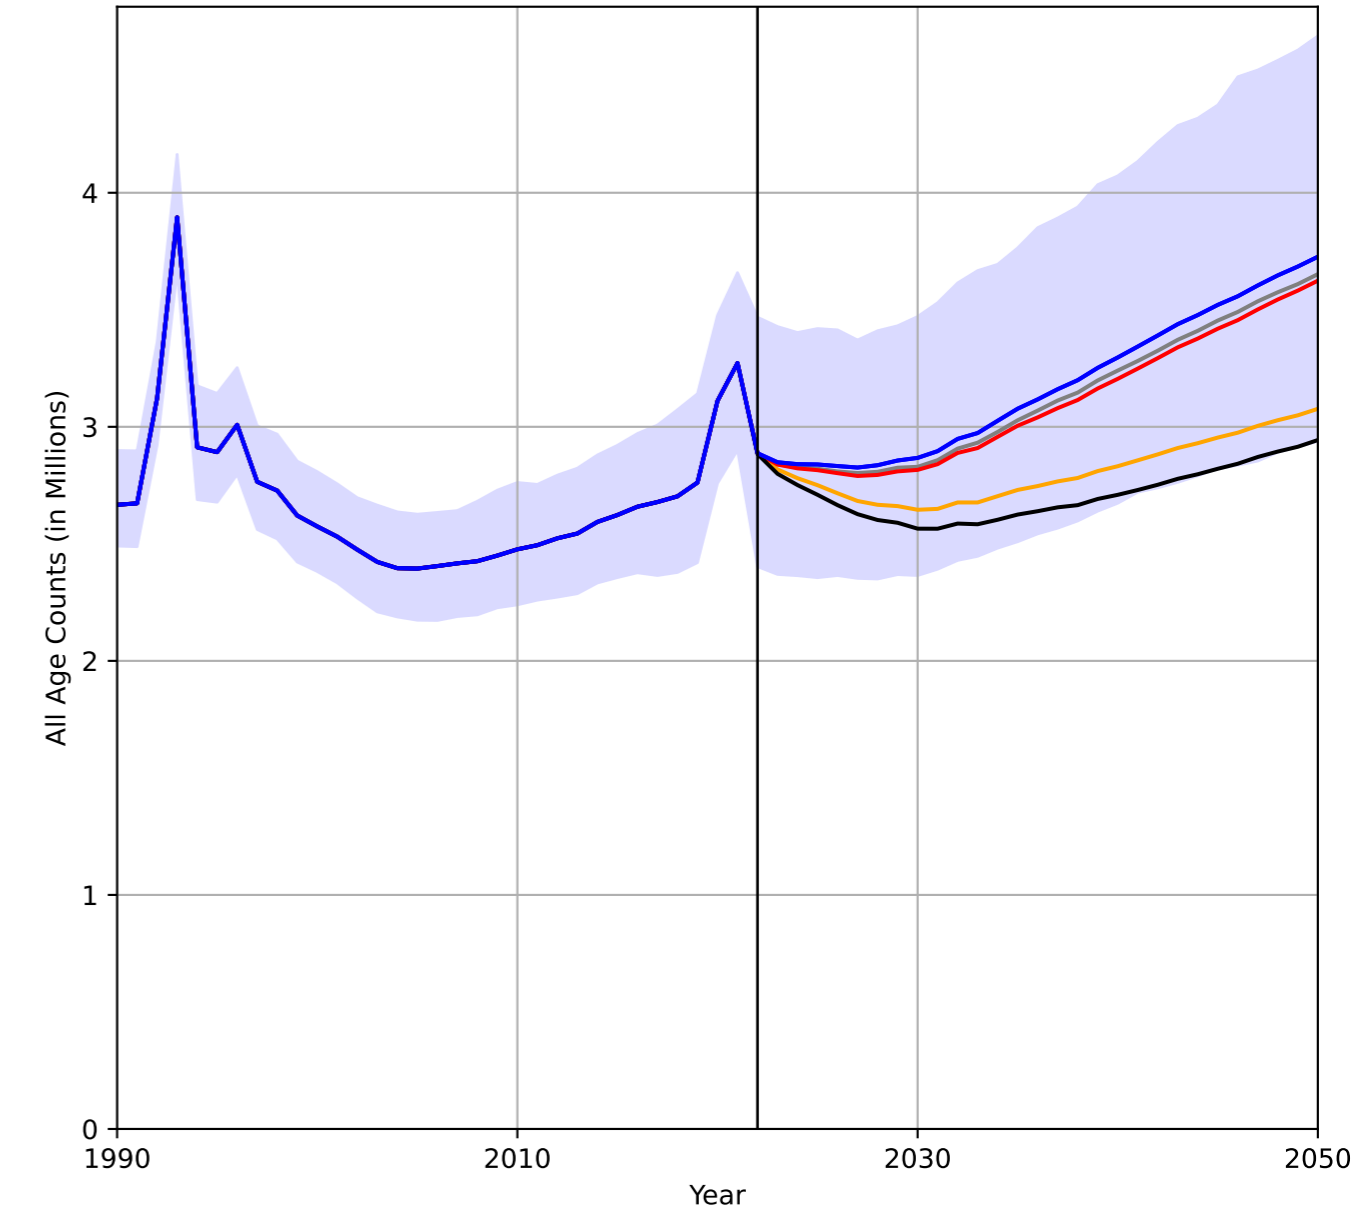

# Turkmenistan

Supplemental Results Figure S10. All-cause age standardised DALY rates (A) and all age DALY counts (B), for the past and for five future scenarios, 1990–2050

1418

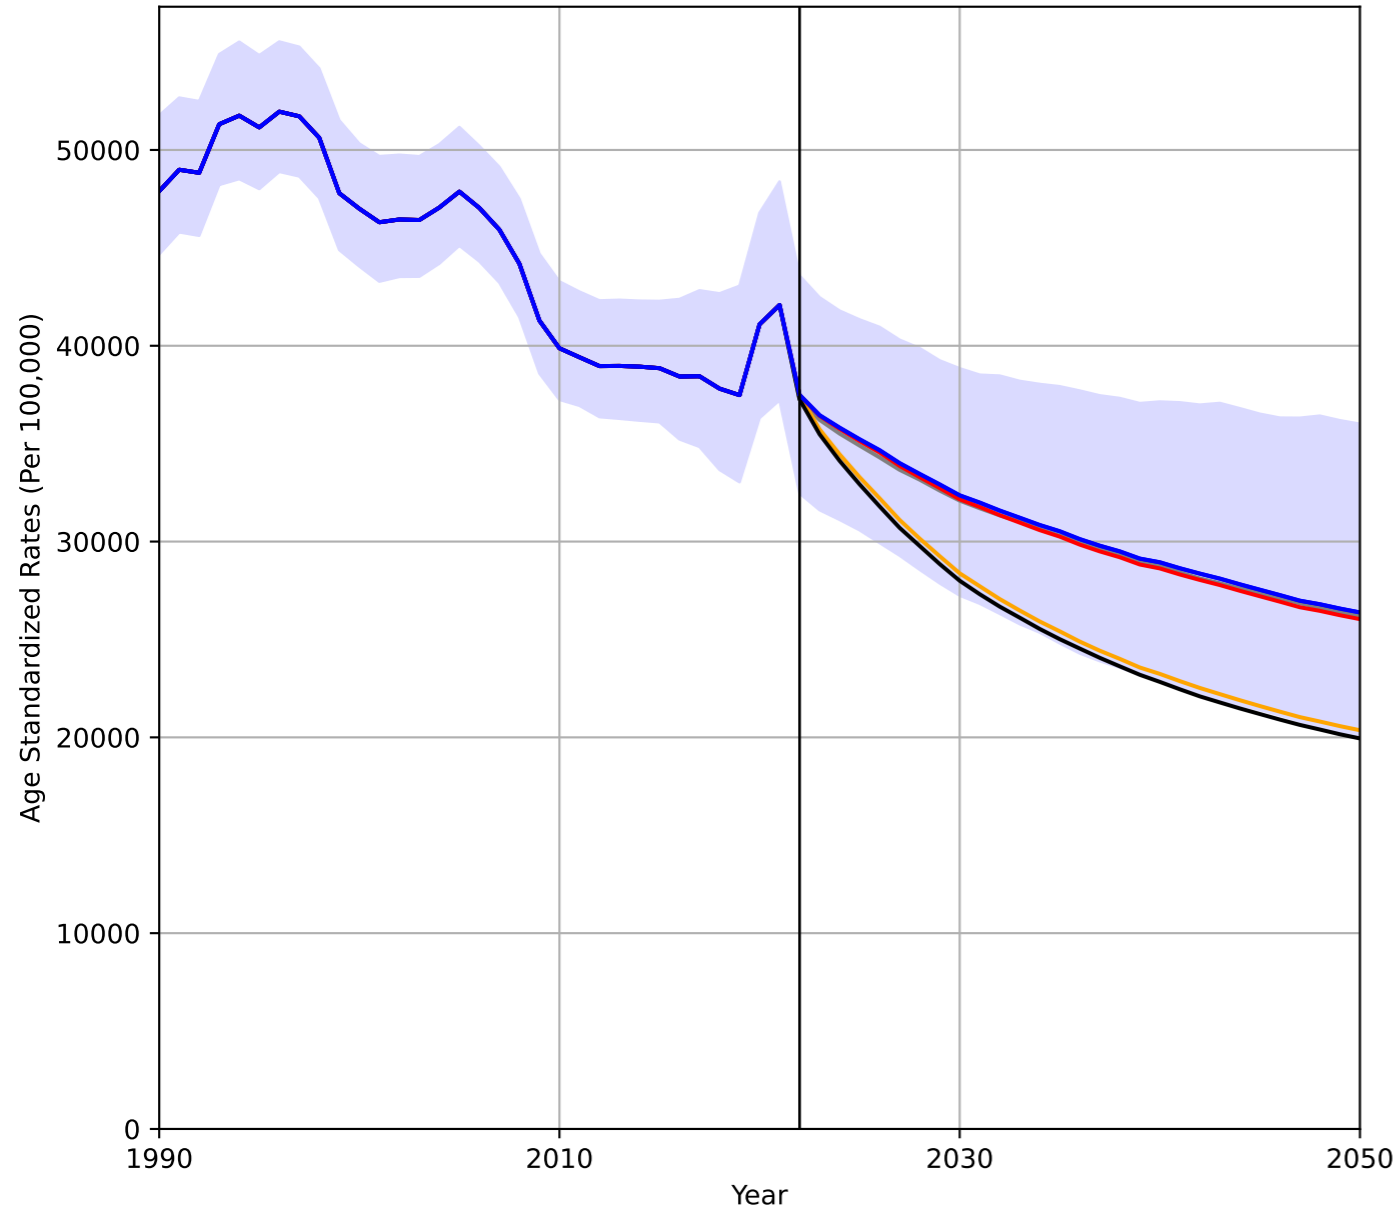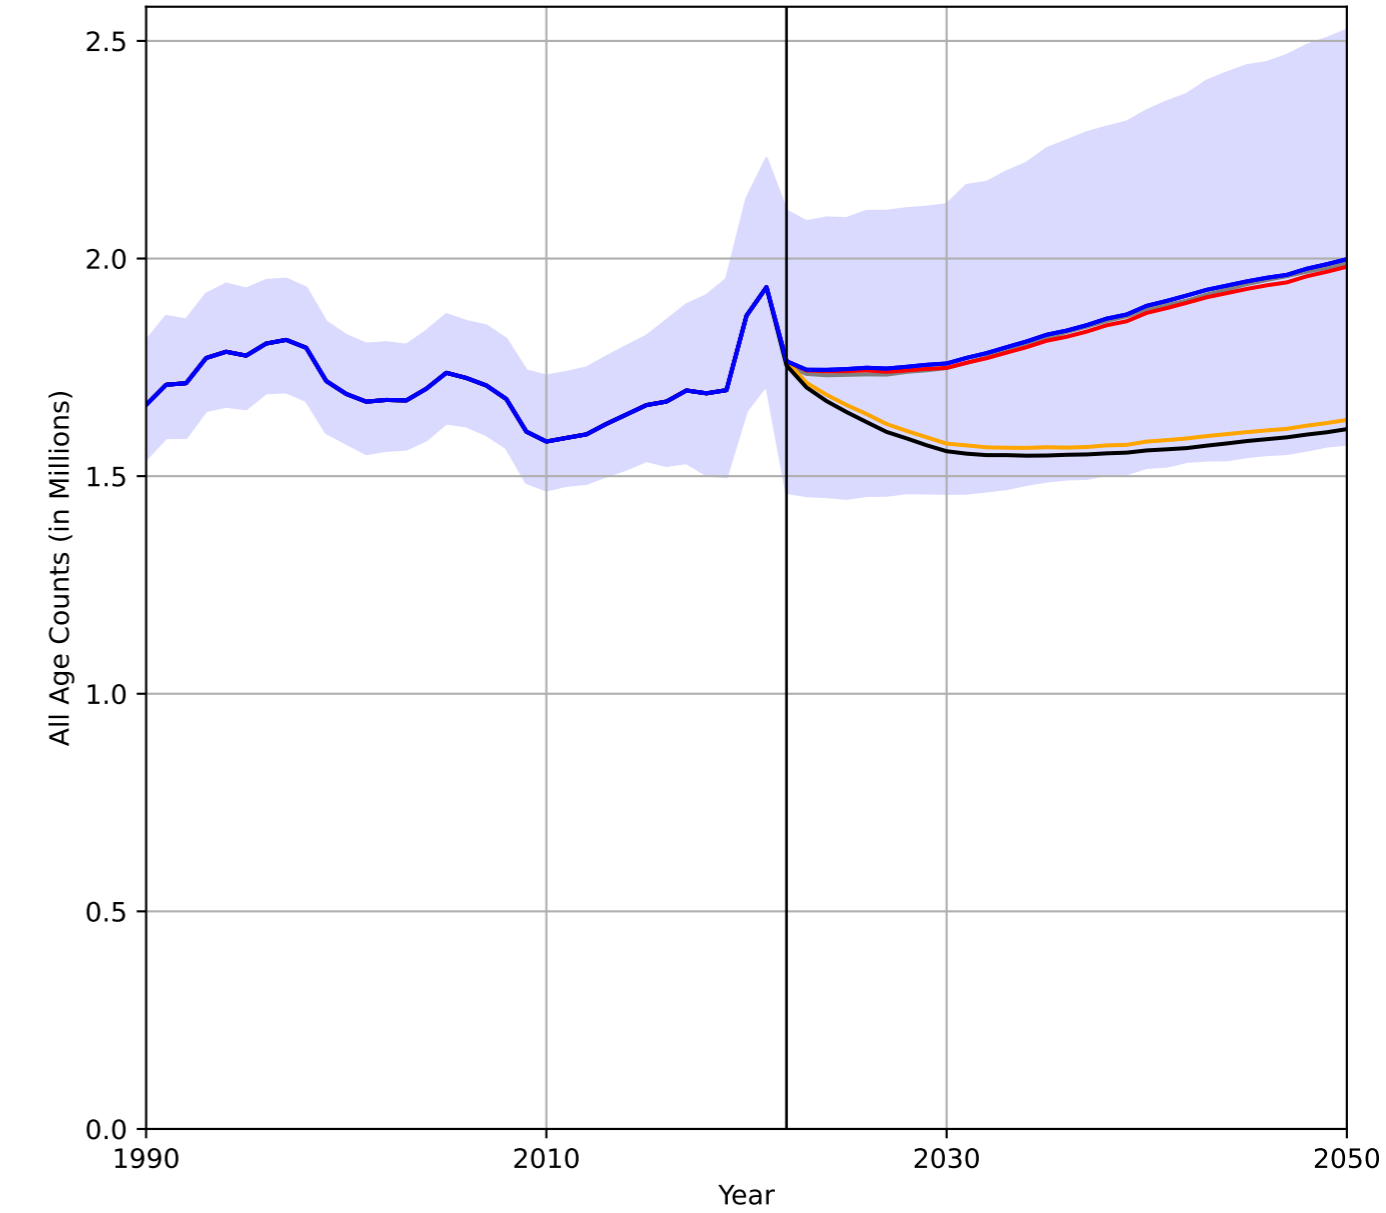

# Uzbekistan

Supplemental Results Figure S10. All-cause age standardised DALY rates (A) and all age DALY counts (B), for the past and for five future scenarios, 1990–2050

1419

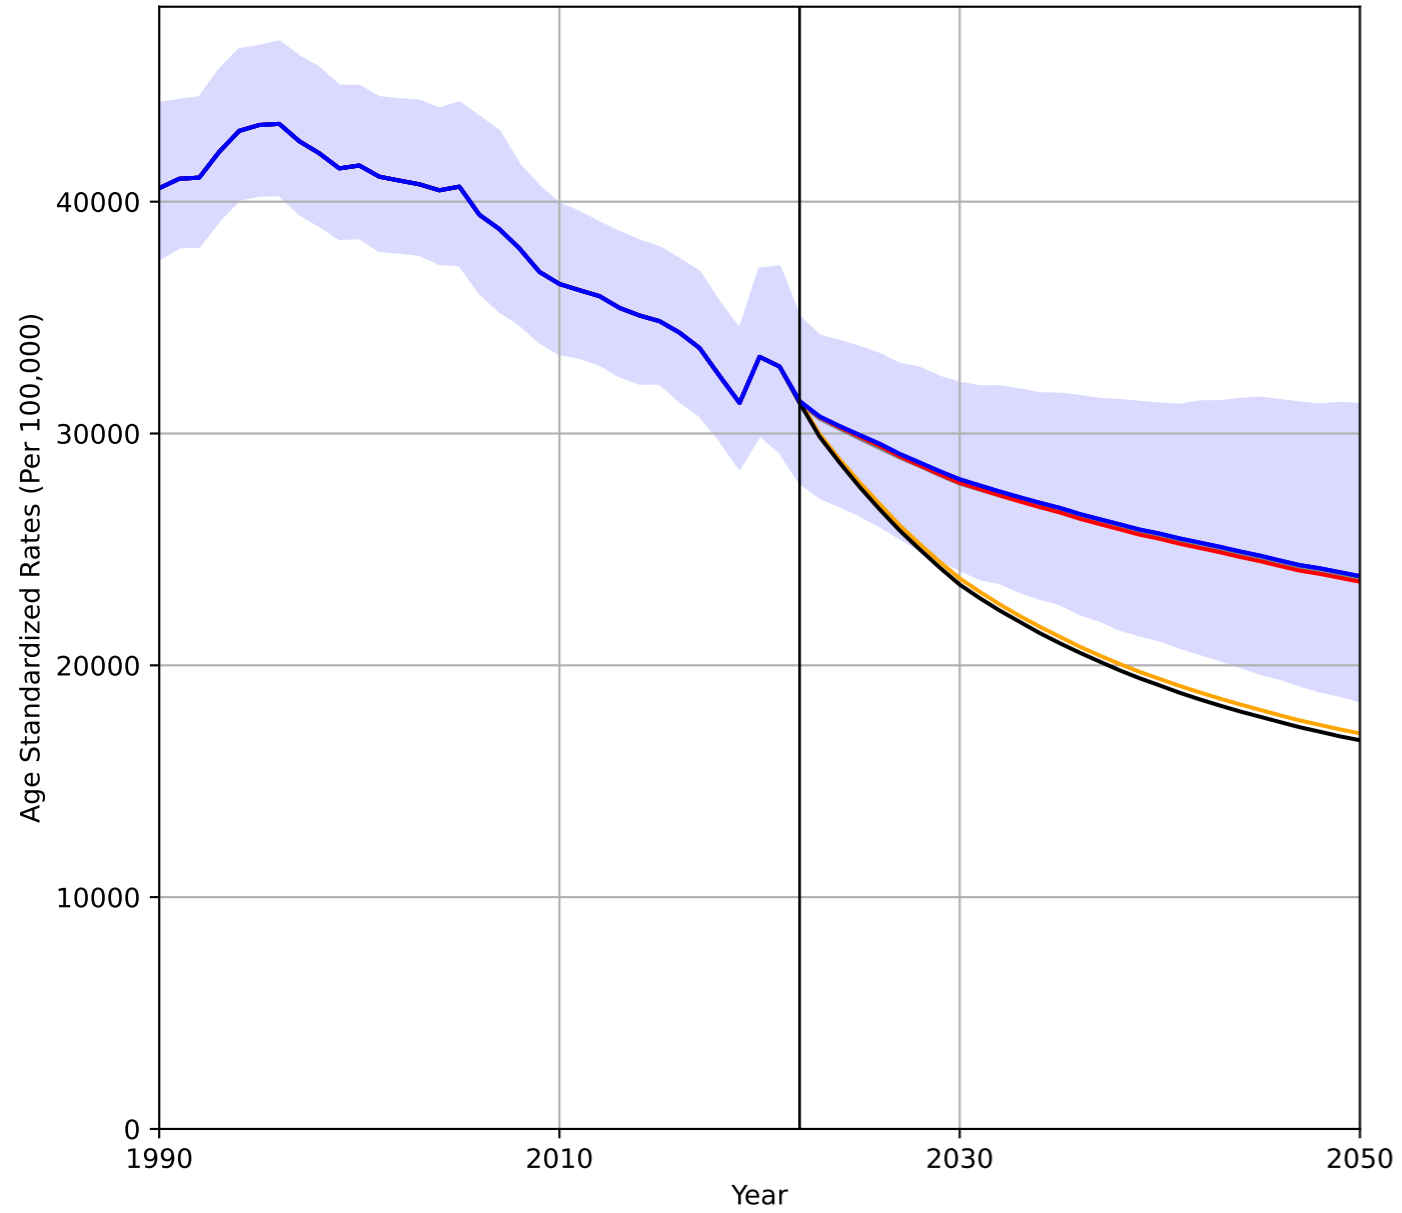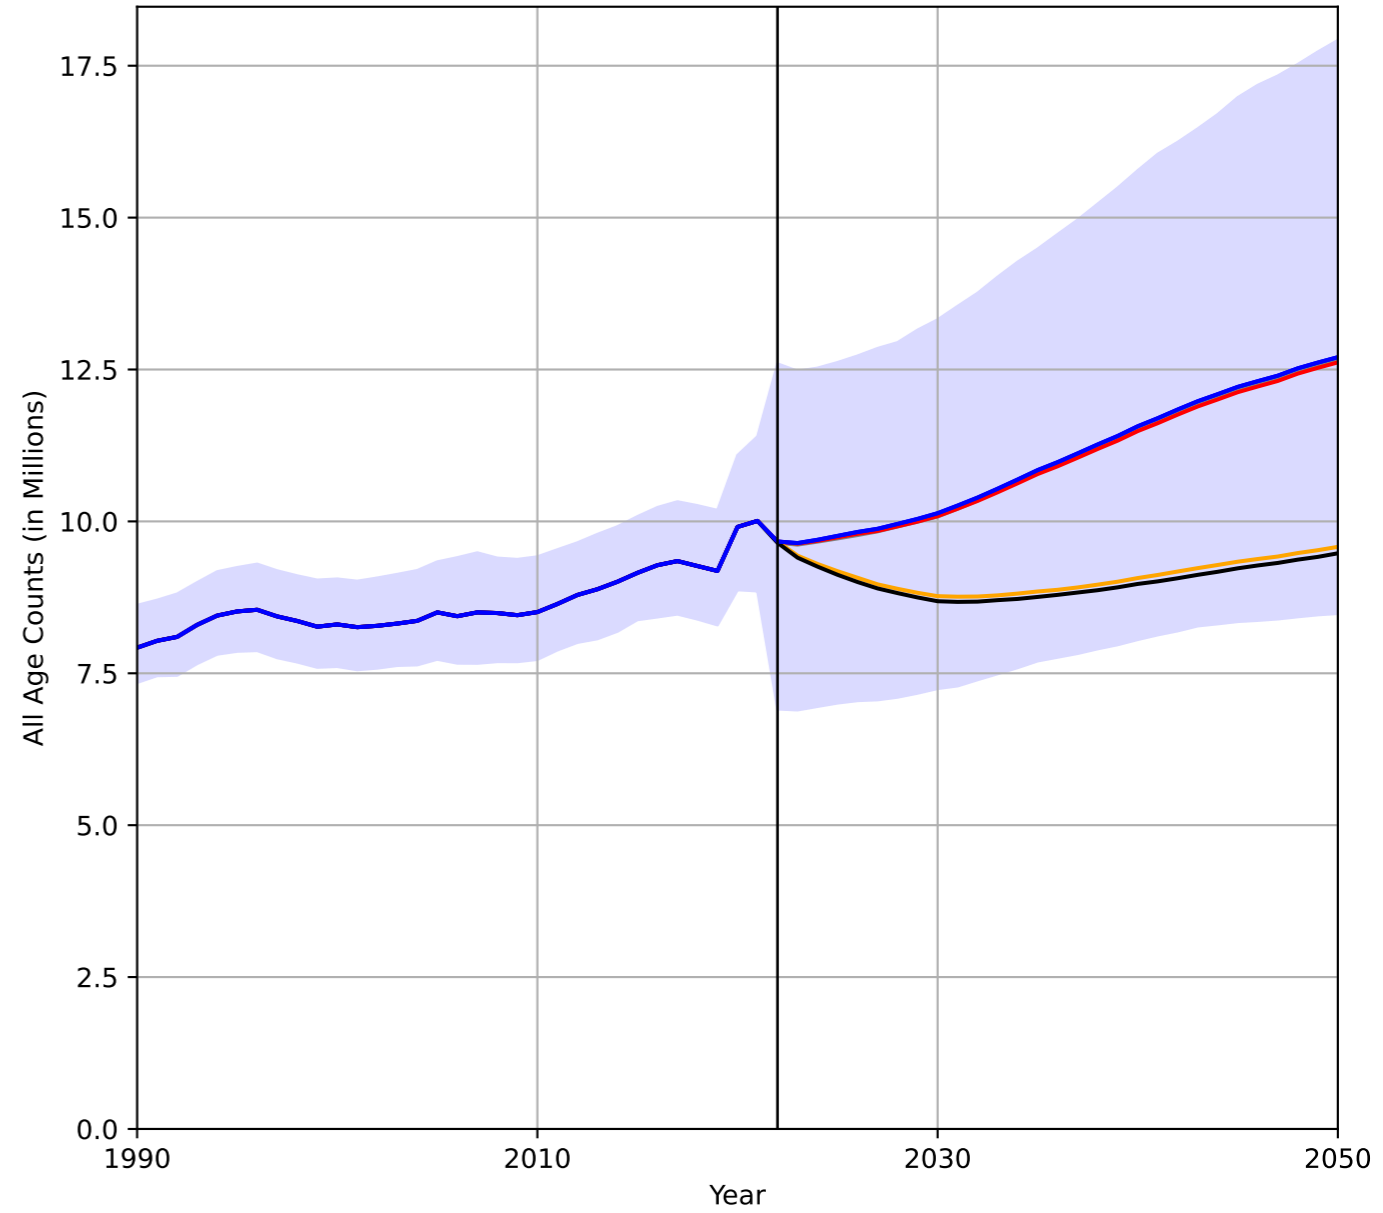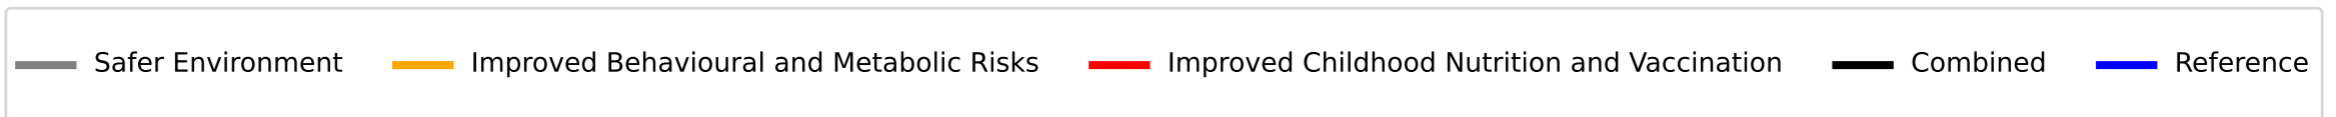

# Albania

Supplemental Results Figure S10. All-cause age standardised DALY rates (A) and all age DALY counts (B), for the past and for five future scenarios, 1990–2050

1420

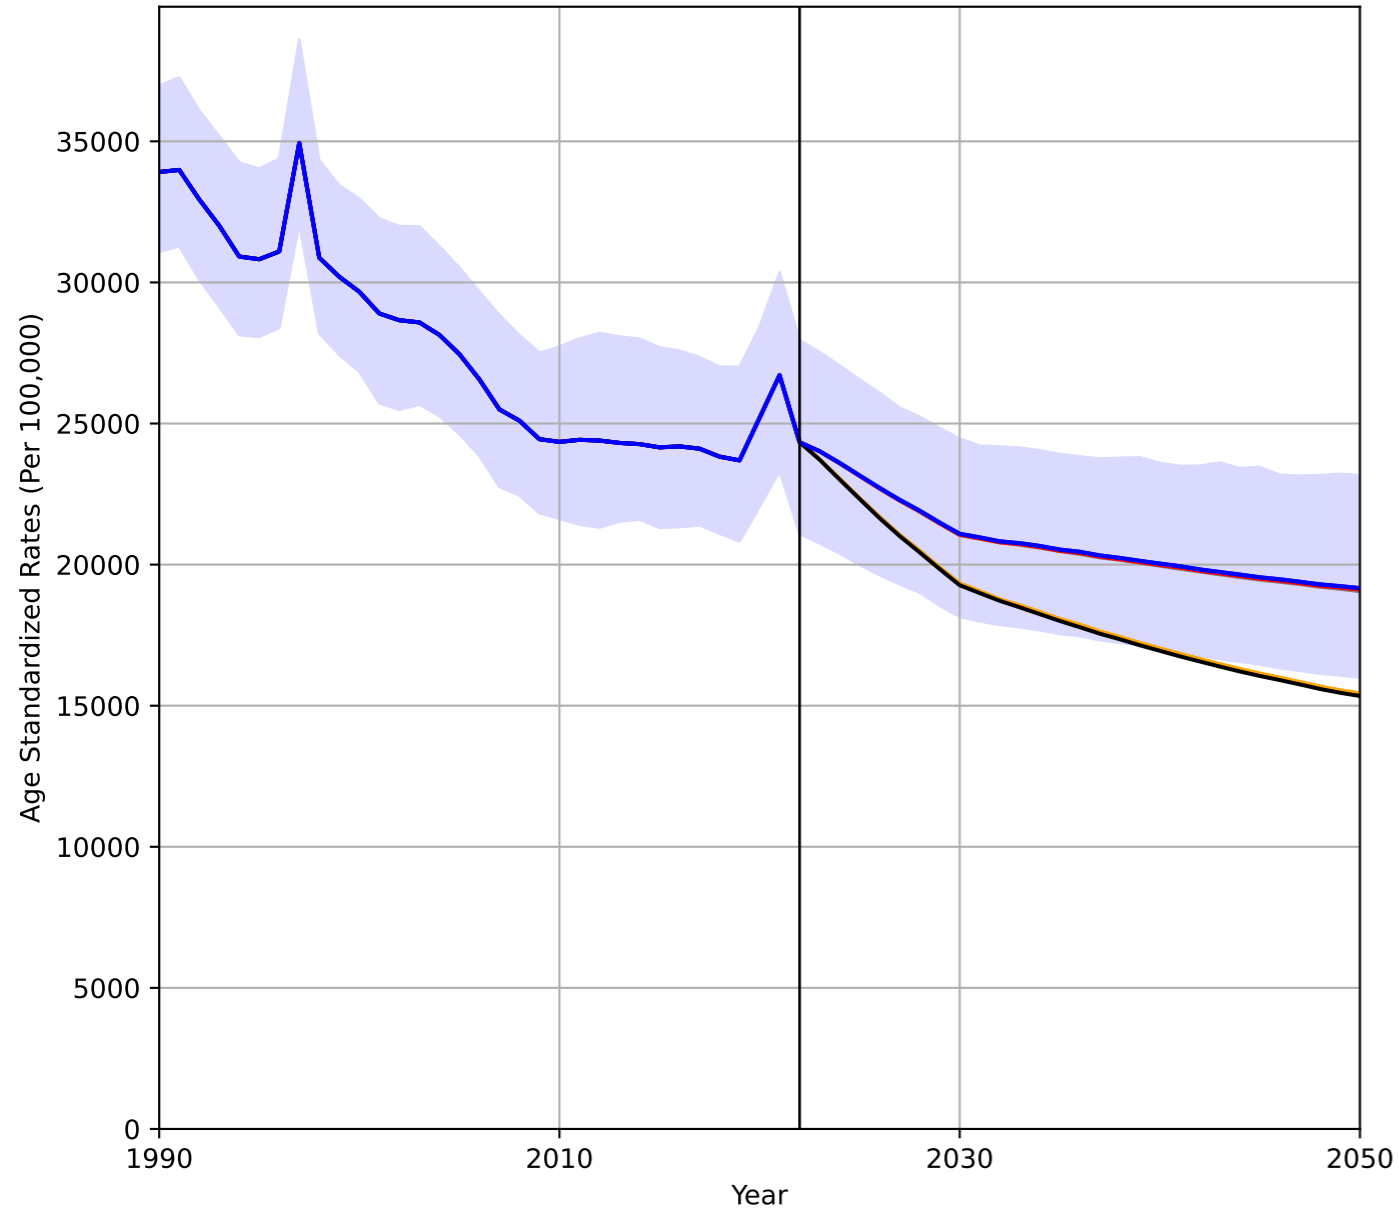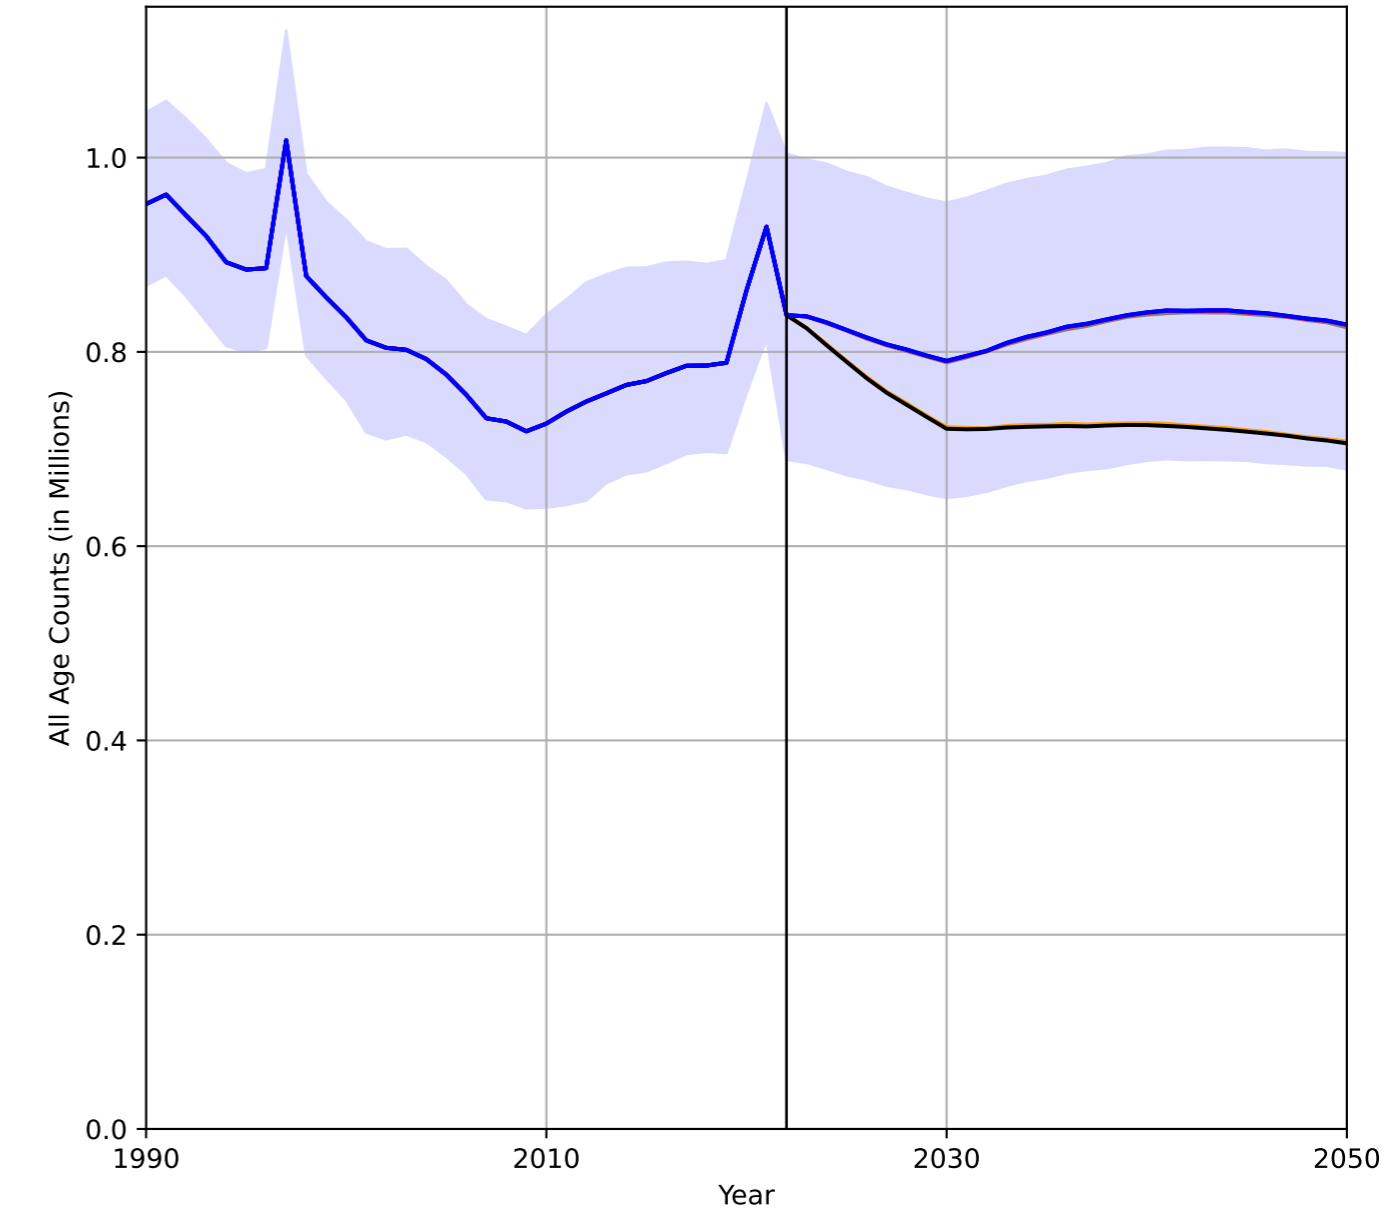

# Bosnia And Herzegovina

Supplemental Results Figure S10. All-cause age standardised DALY rates (A) and all age DALY counts (B), for the past and for five future scenarios, 1990–2050

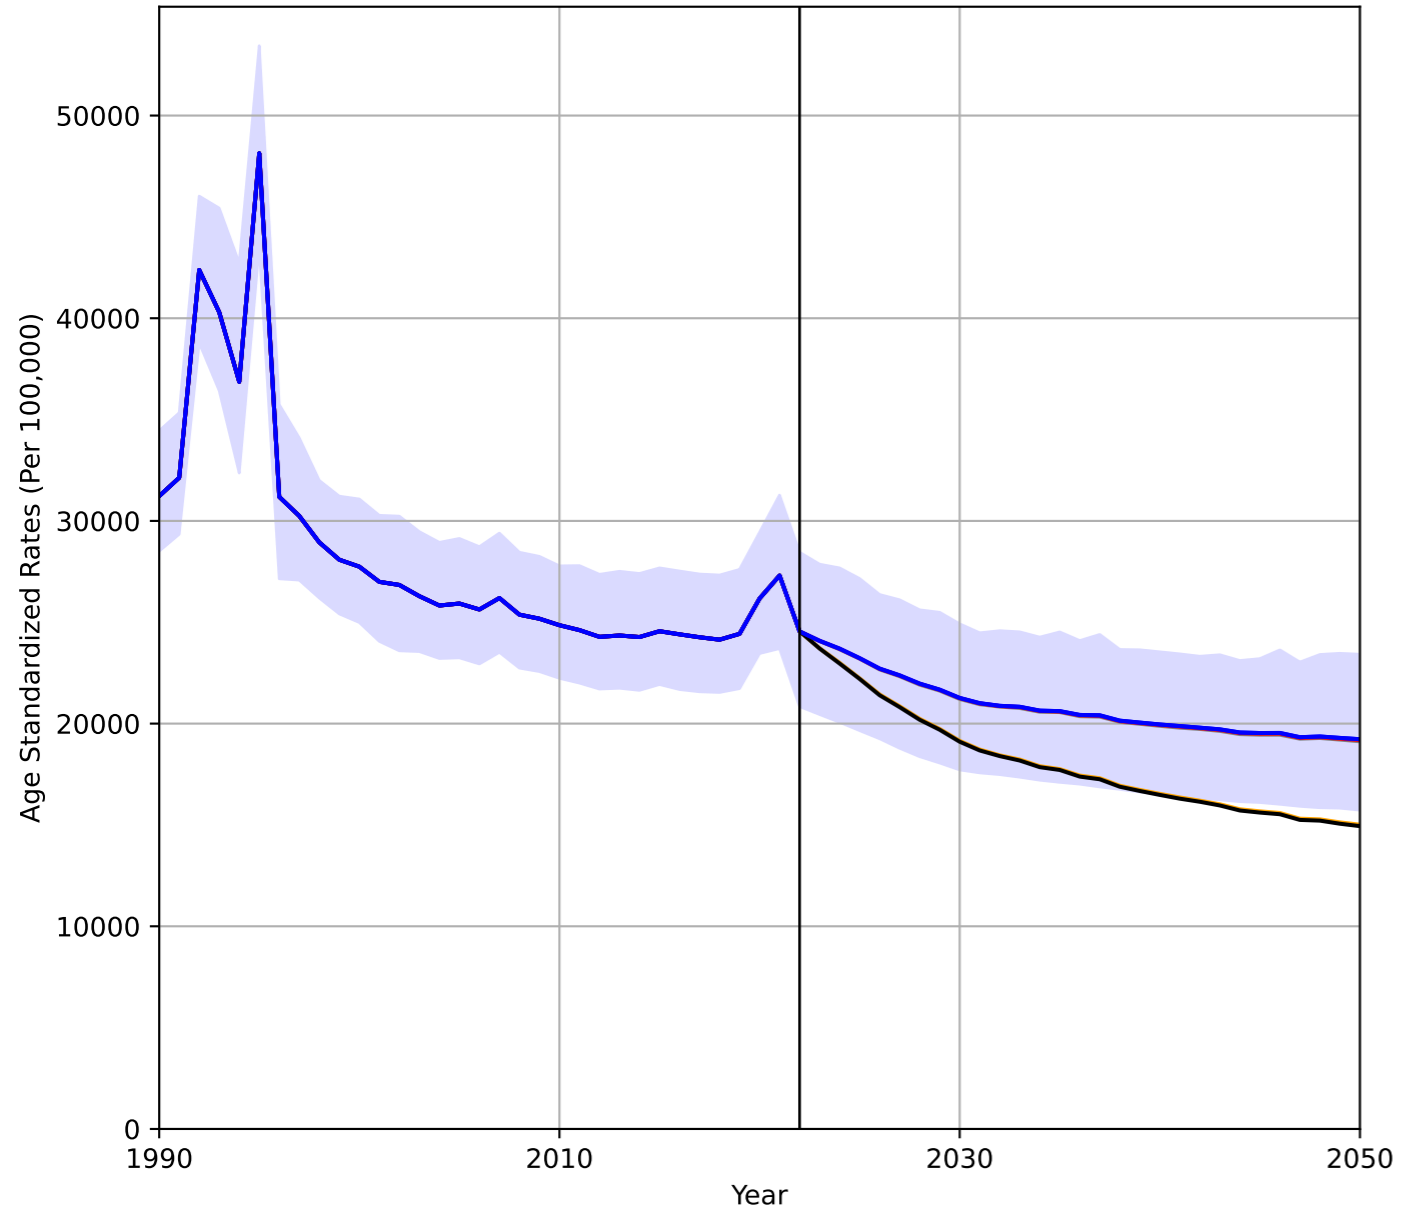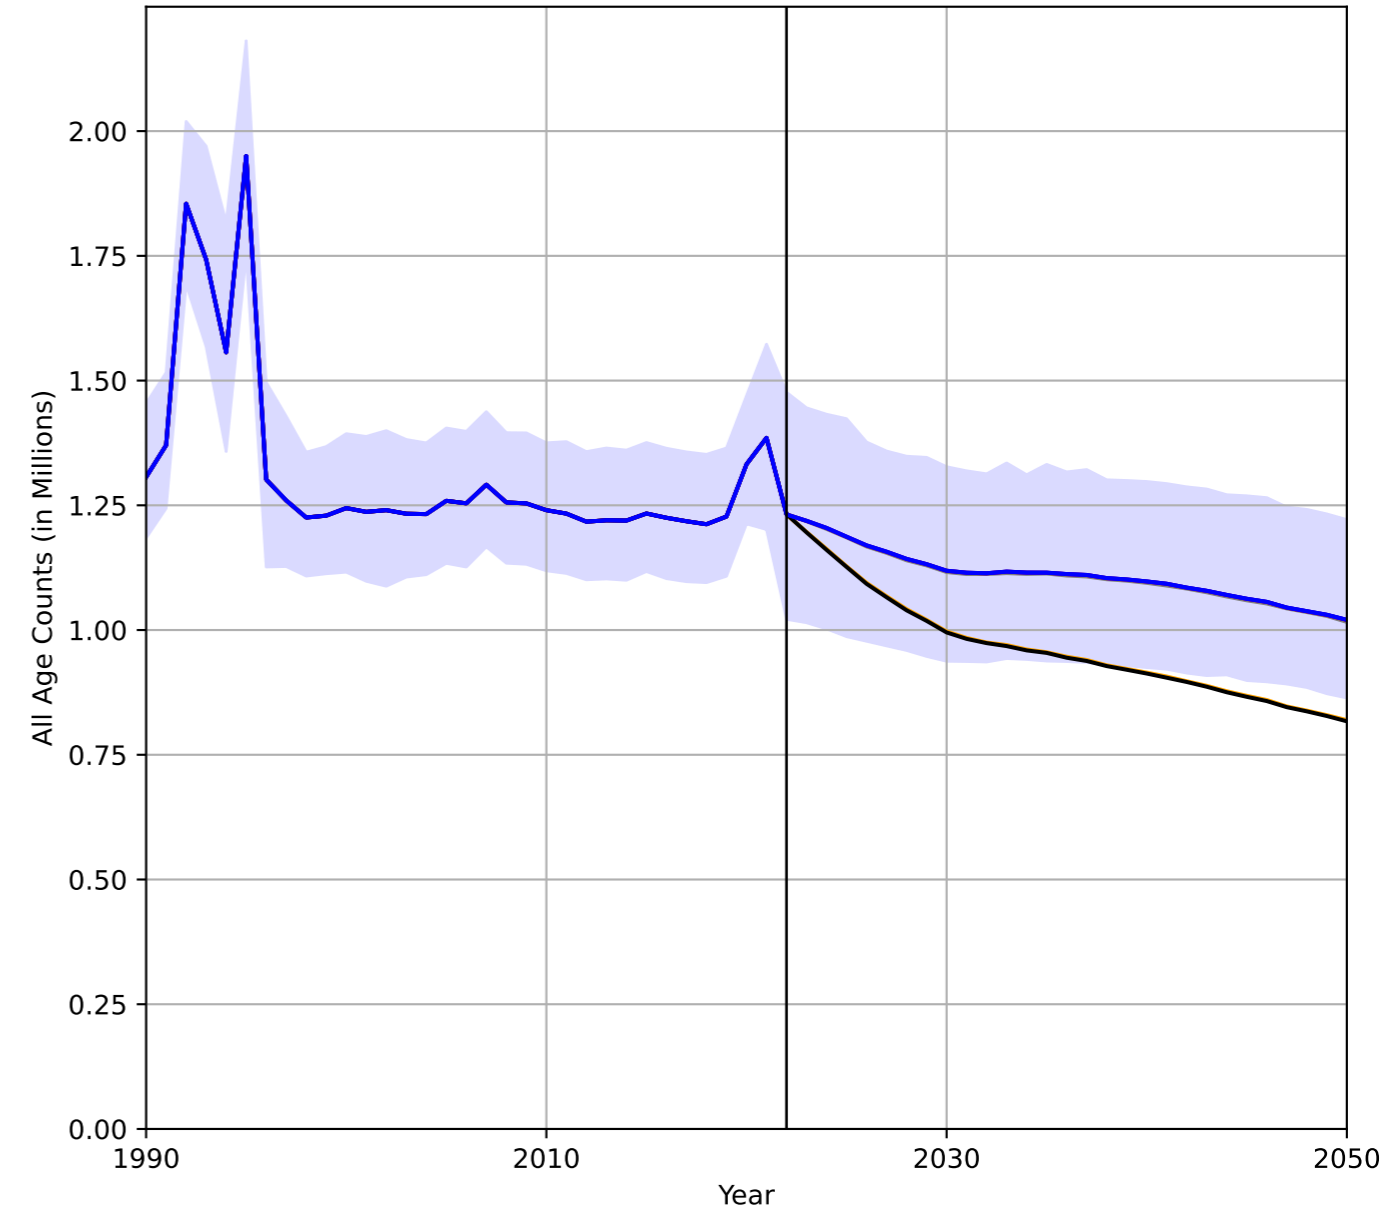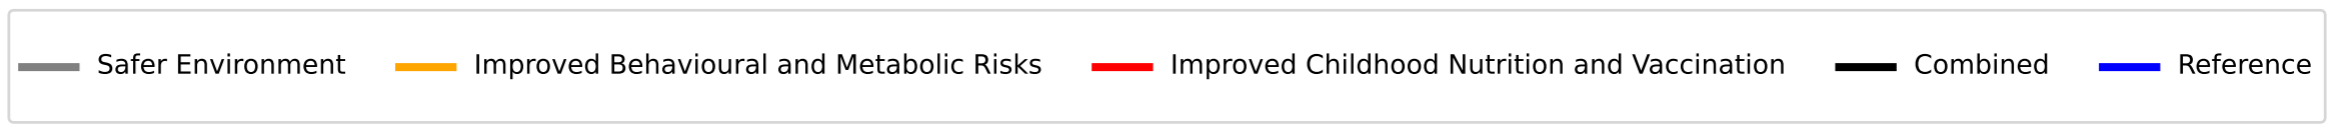

# Bulgaria

Supplemental Results Figure S10. All-cause age standardised DALY rates (A) and all age DALY counts (B), for the past and for five future scenarios, 1990–2050

1422

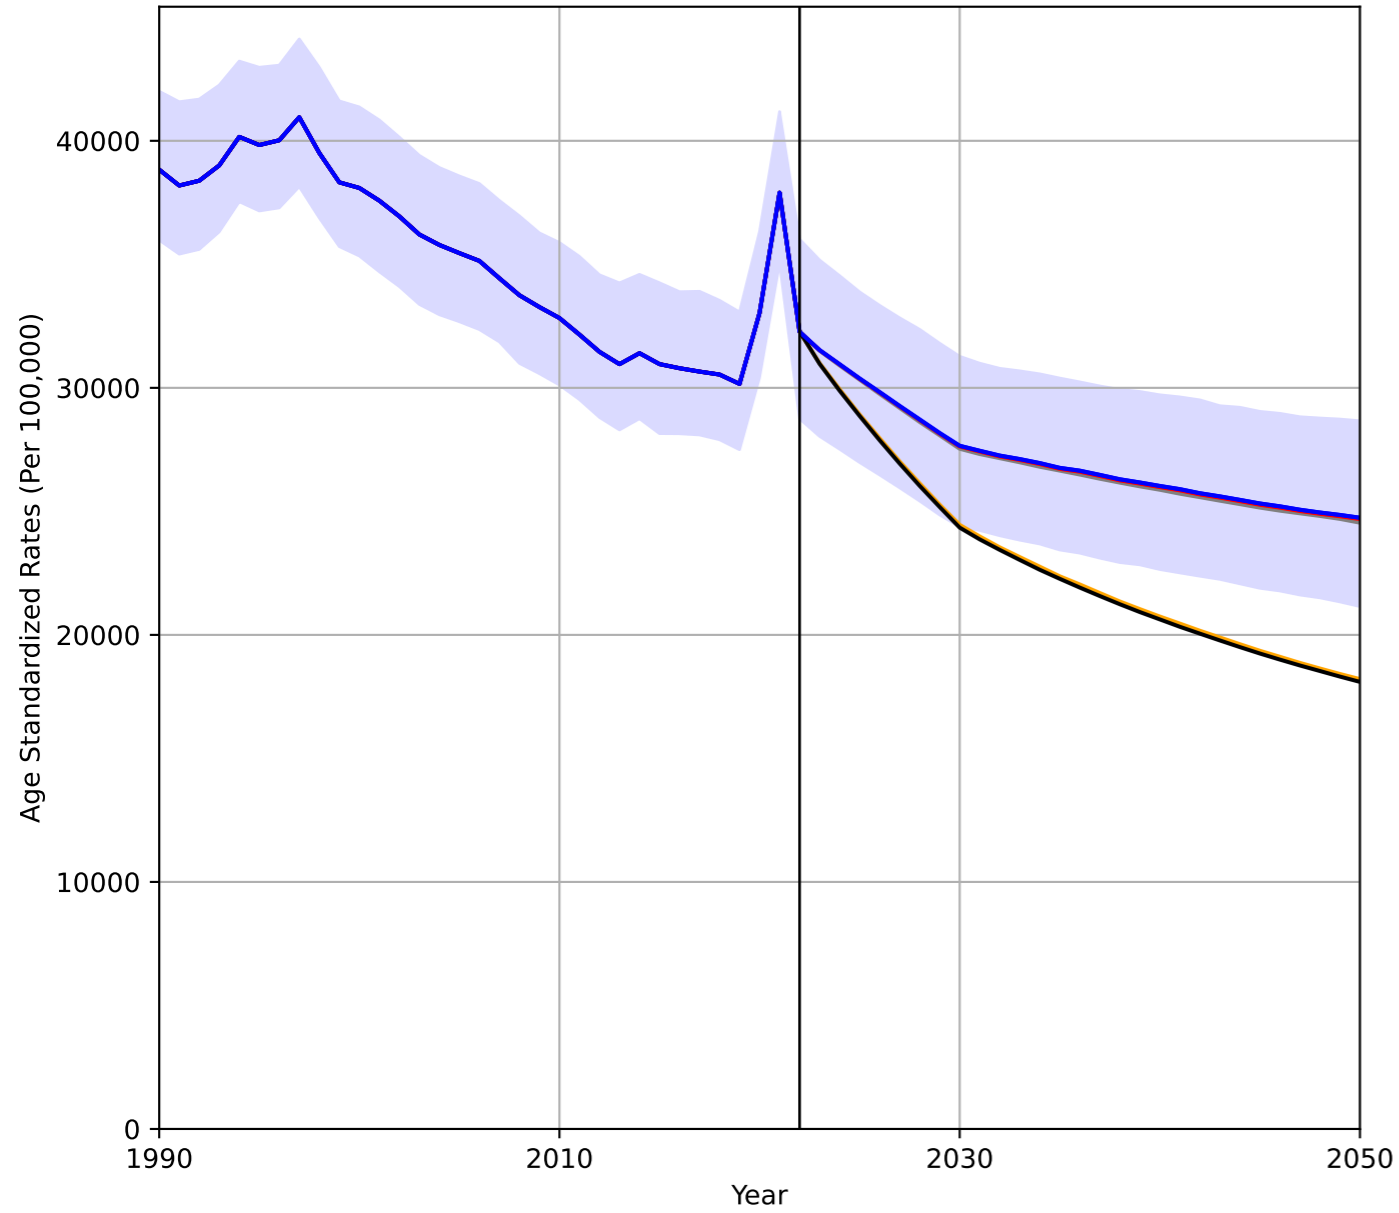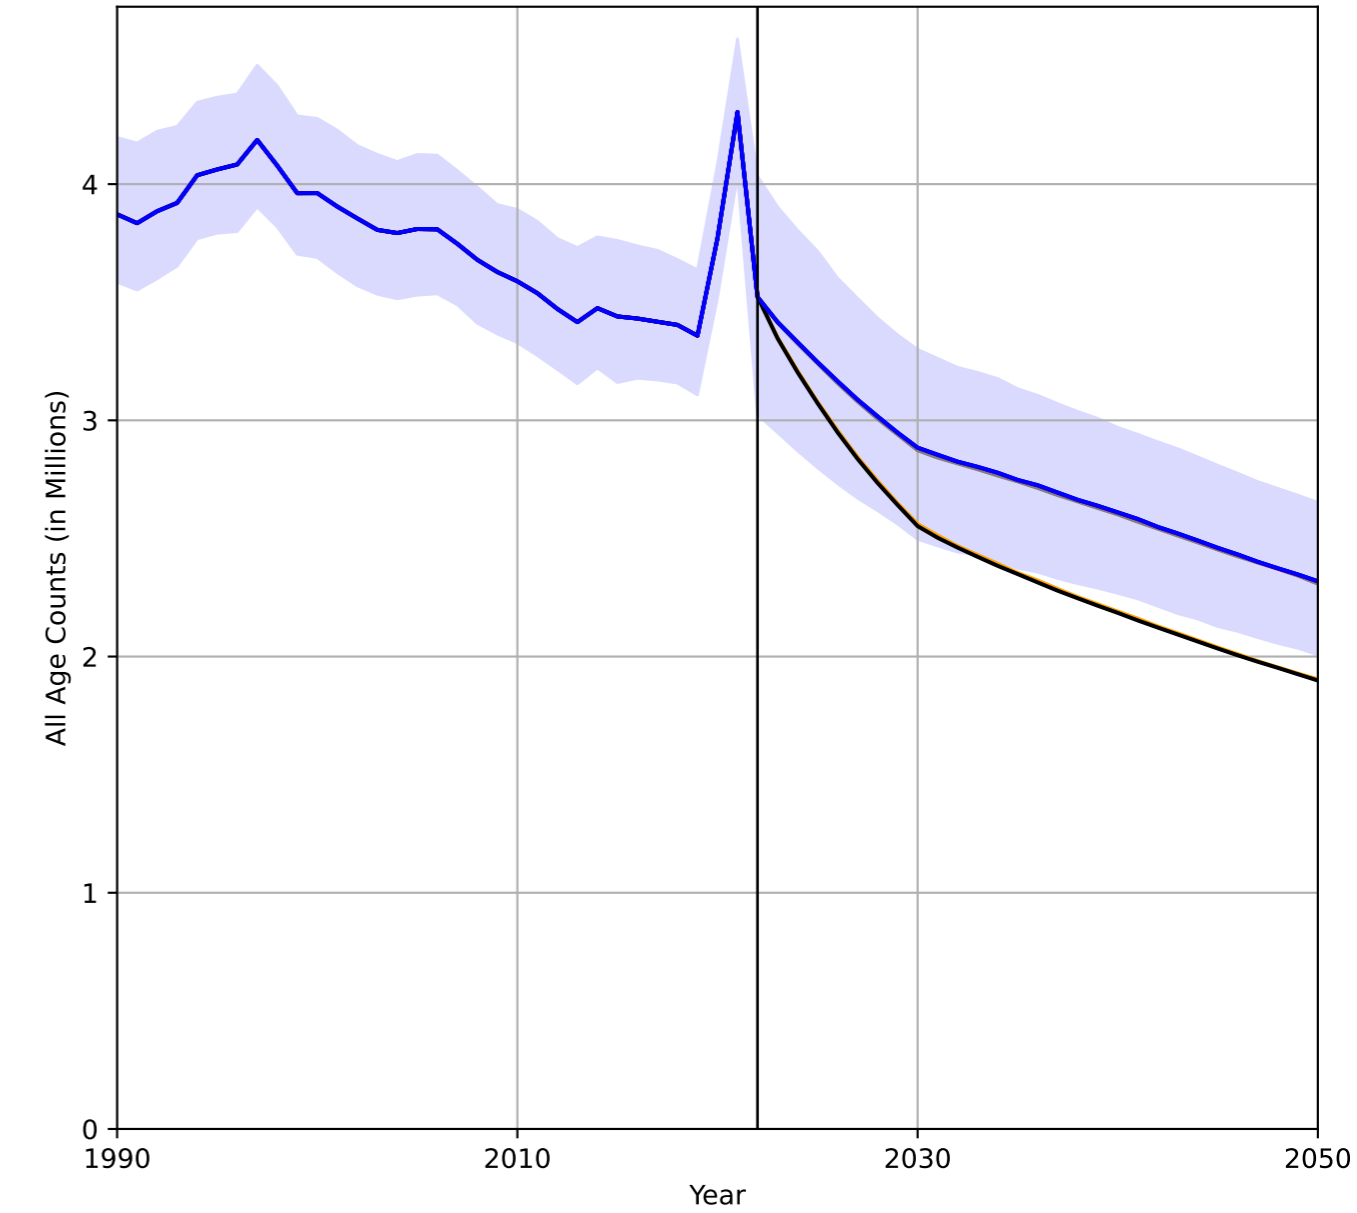

# Croatia

Supplemental Results Figure S10. All-cause age standardised DALY rates (A) and all age DALY counts (B), for the past and for five future scenarios, 1990–2050

1423

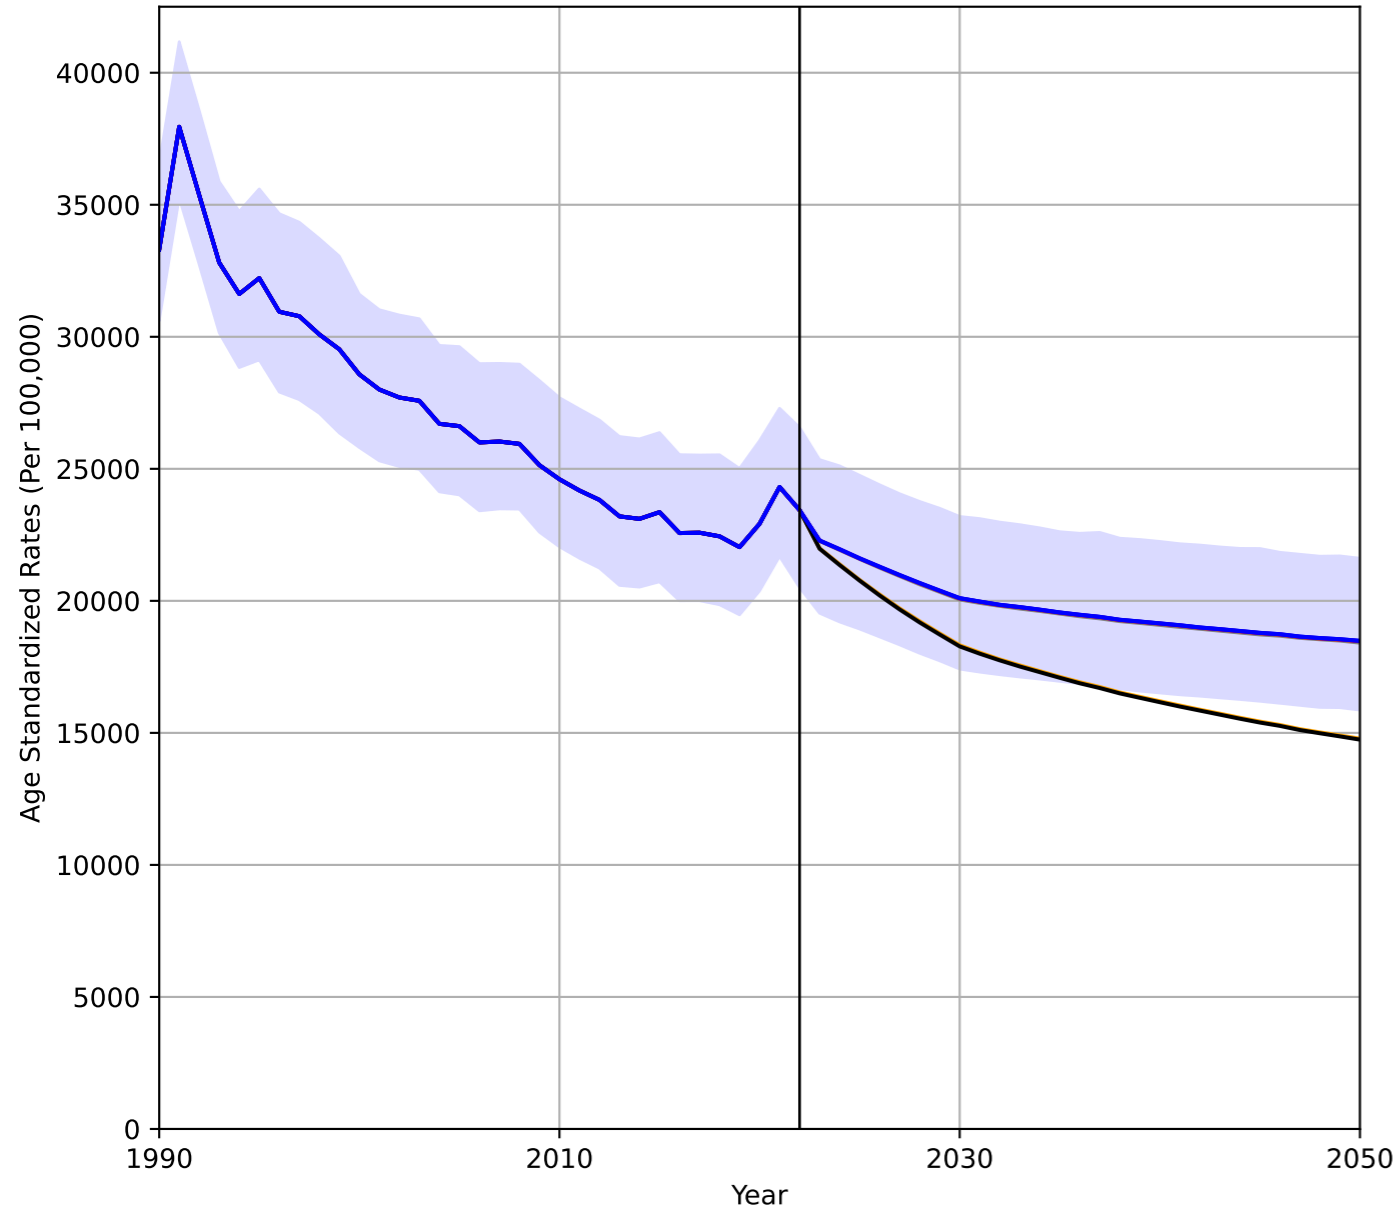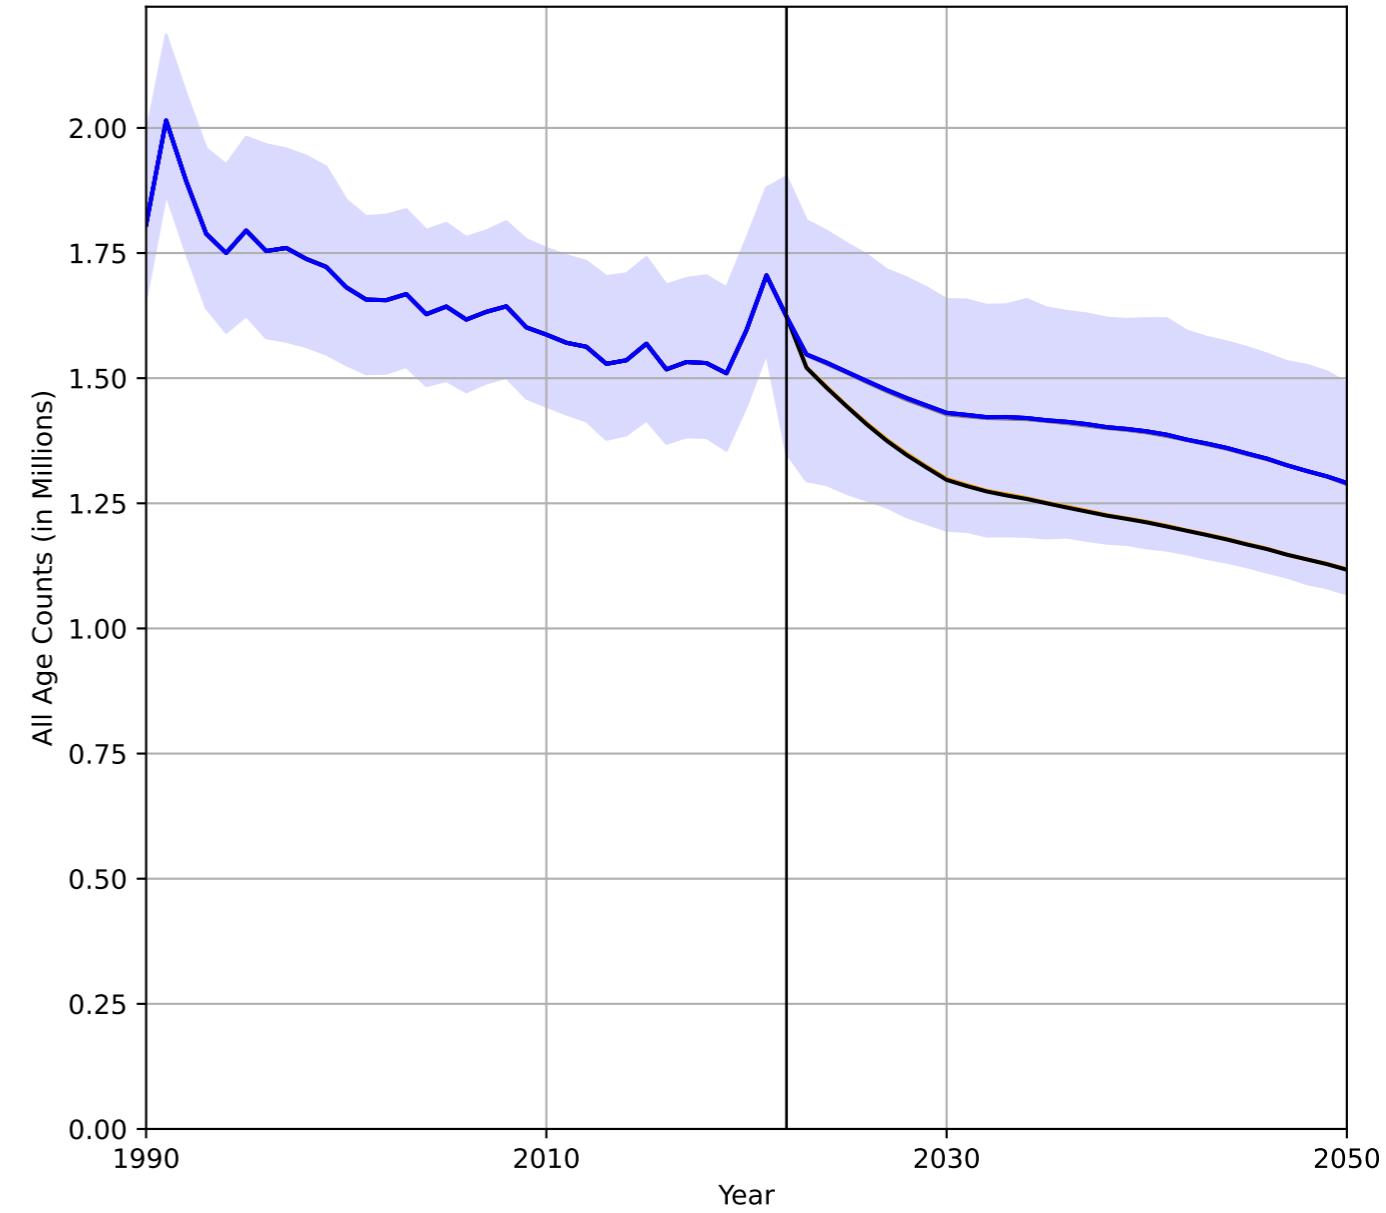



# Czechia

Supplemental Results Figure S10. All-cause age standardised DALY rates (A) and all age DALY counts (B), for the past and for five future scenarios, 1990–2050

1424

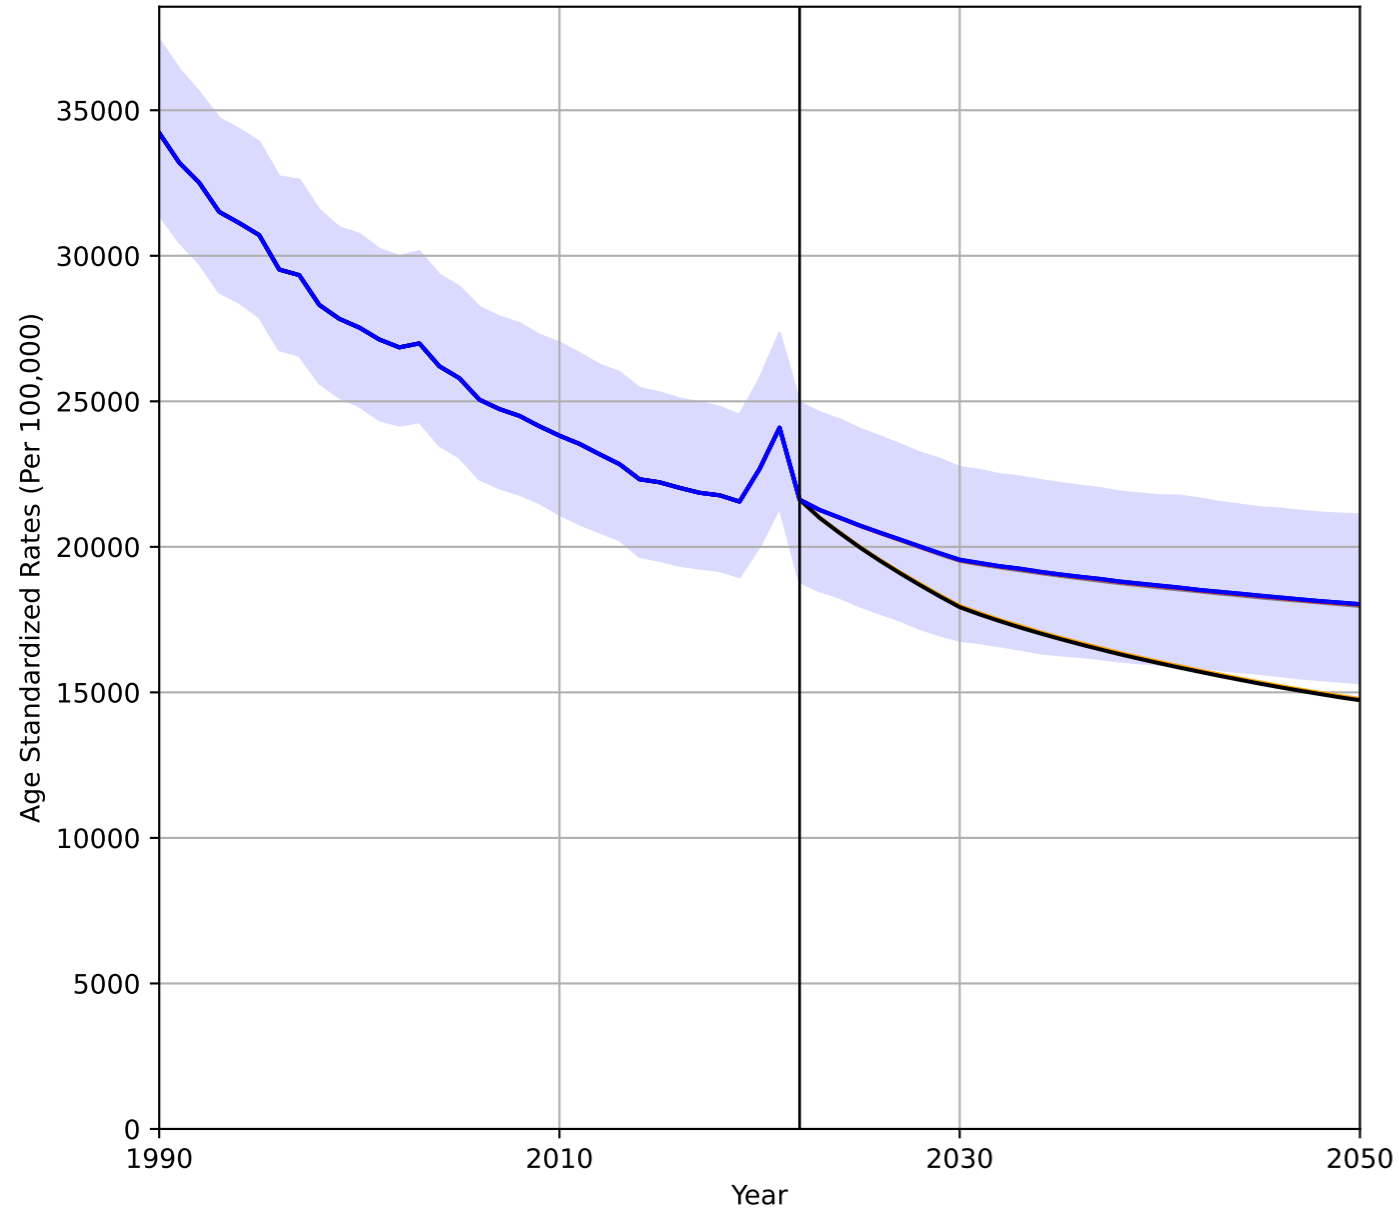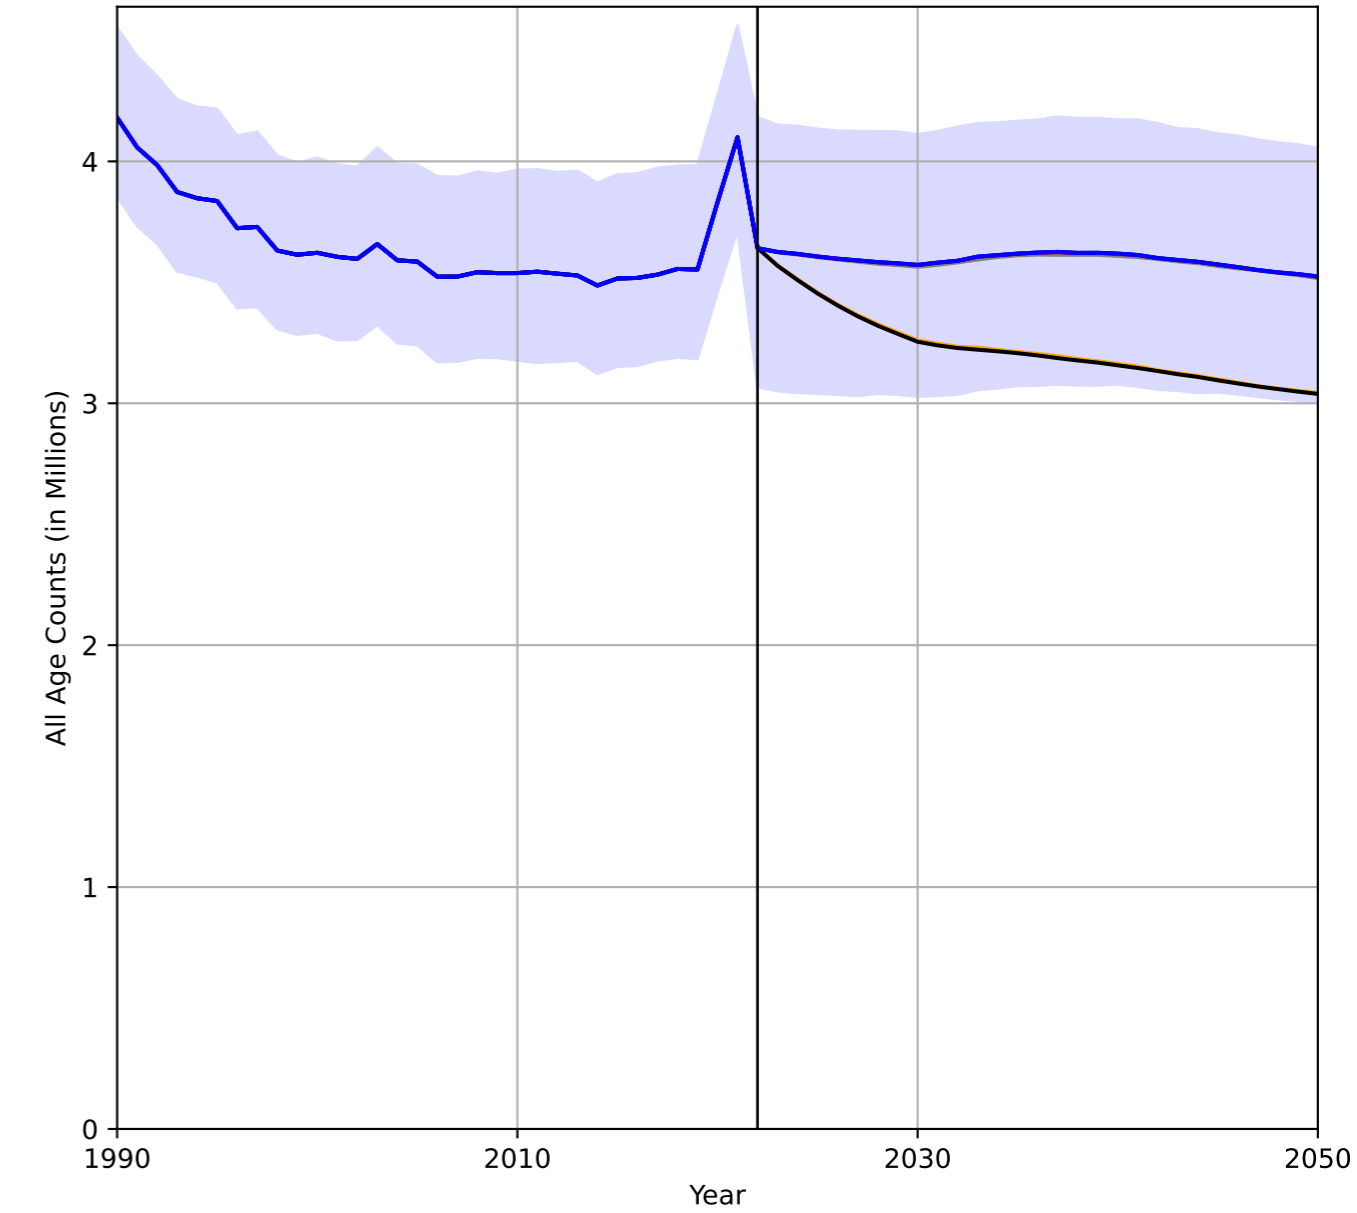

# Hungary

Supplemental Results Figure S10. All-cause age standardised DALY rates (A) and all age DALY counts (B), for the past and for five future scenarios, 1990–2050

1425

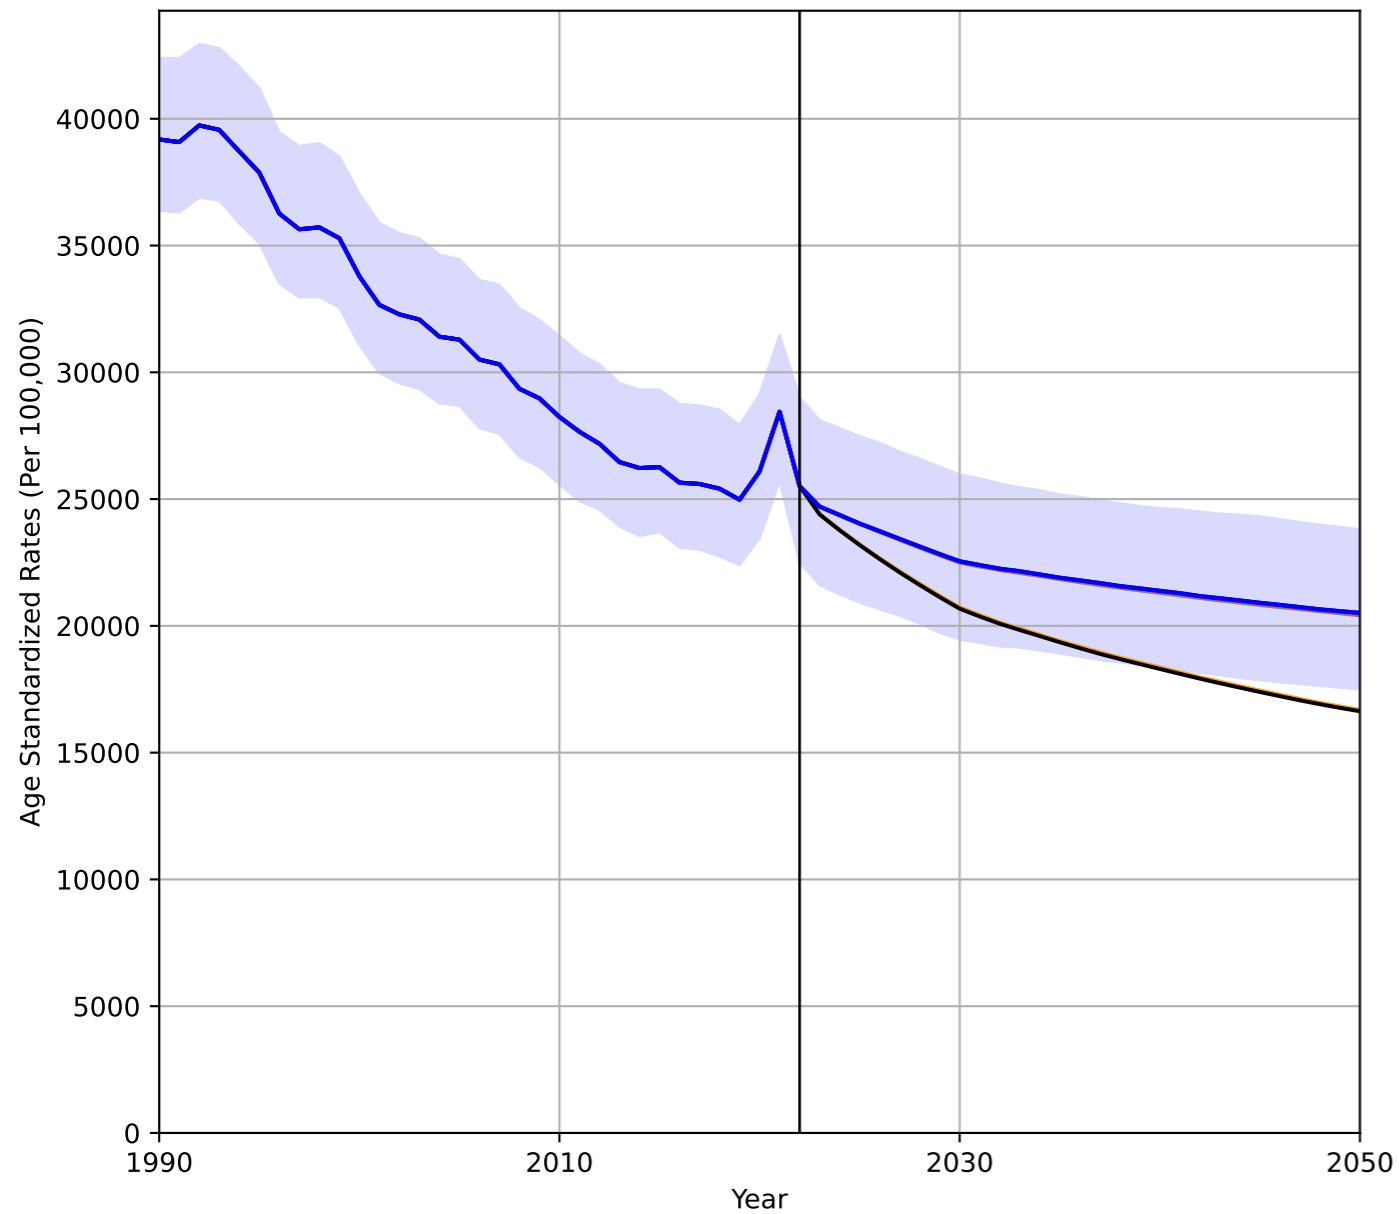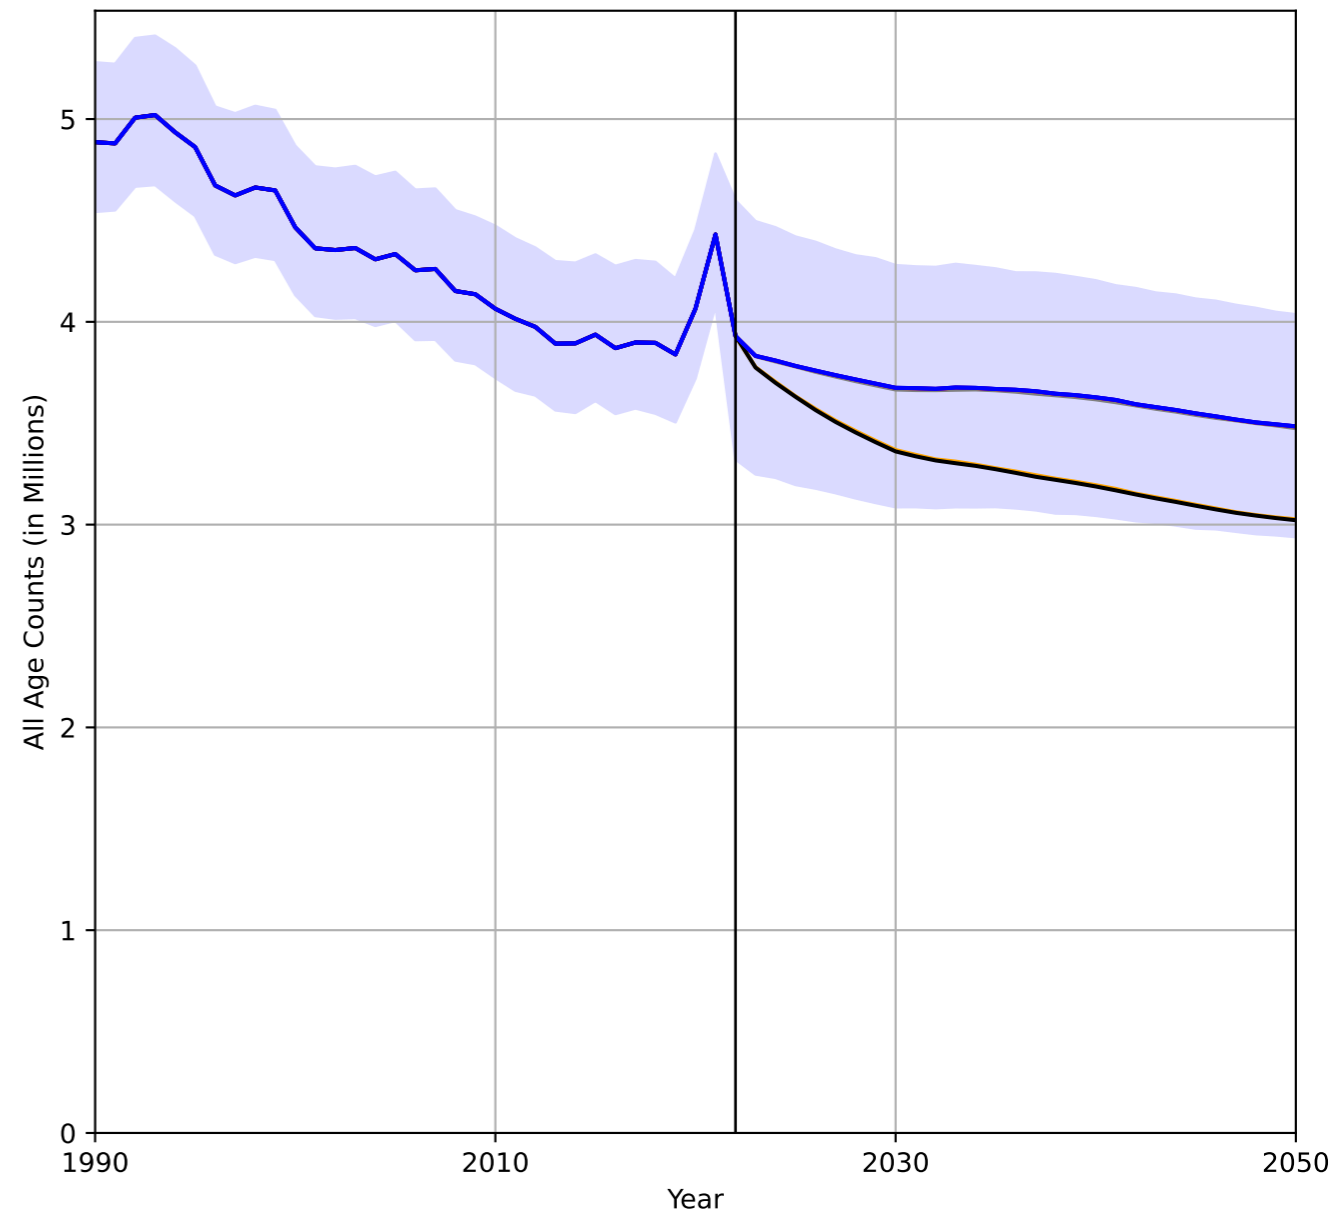

# Montenegro

Supplemental Results Figure S10. All-cause age standardised DALY rates (A) and all age DALY counts (B), for the past and for five future scenarios, 1990–2050

1426

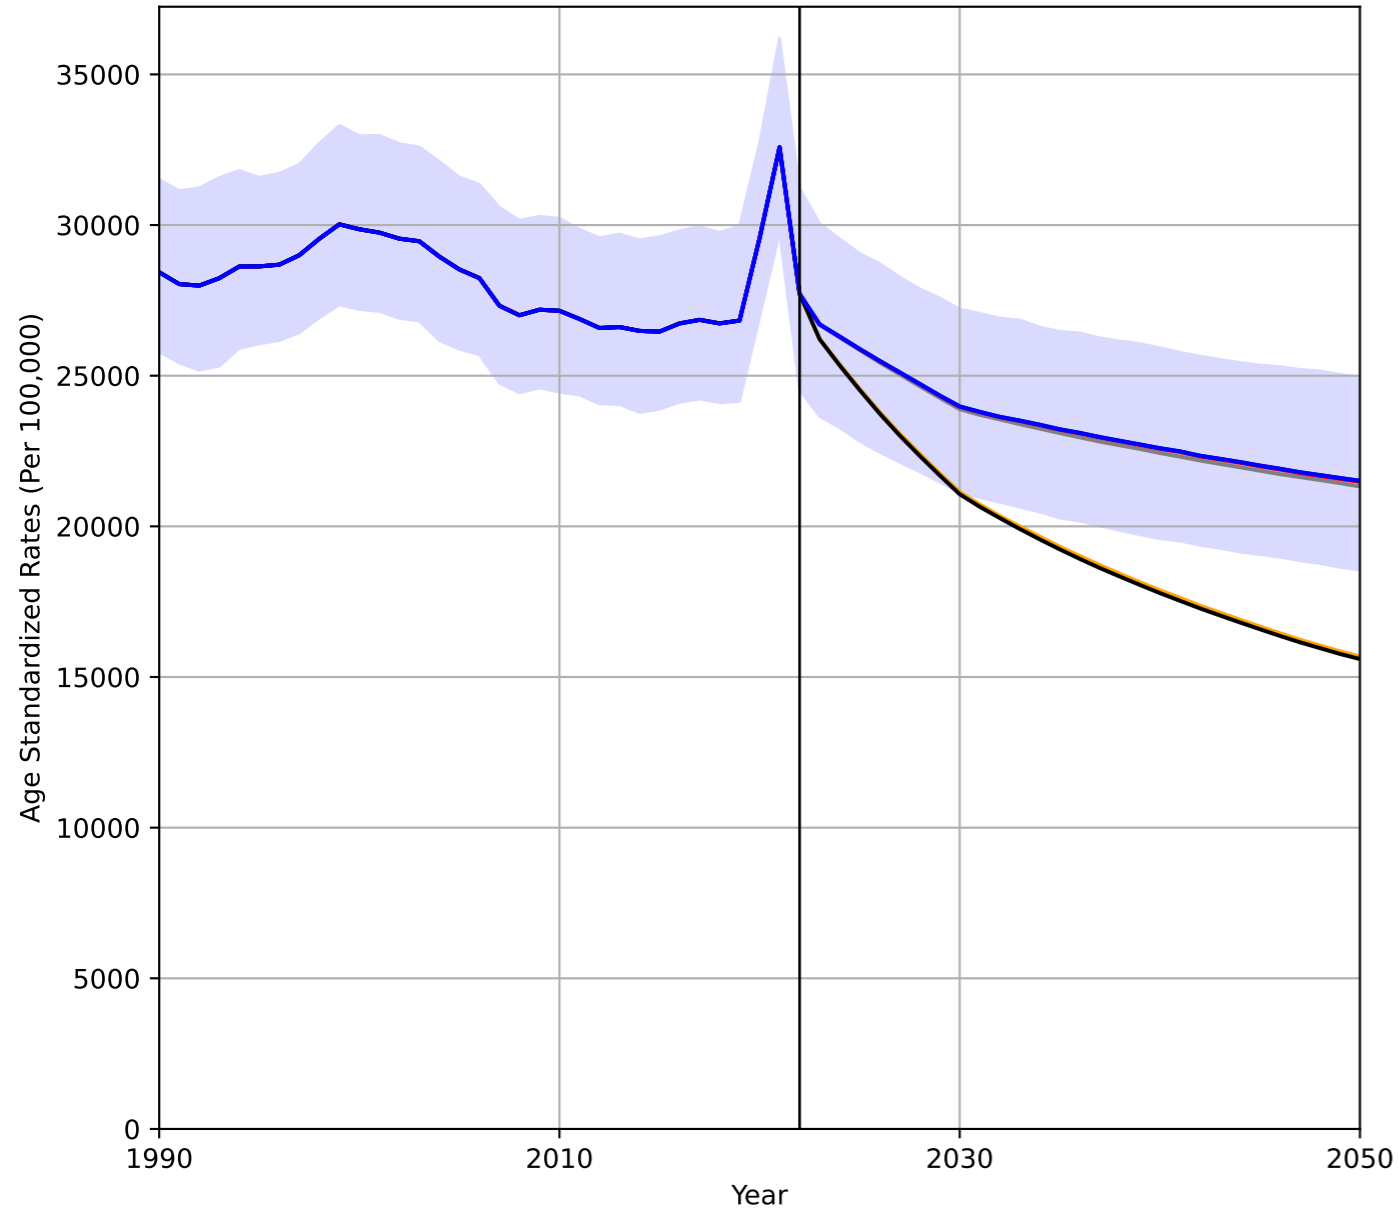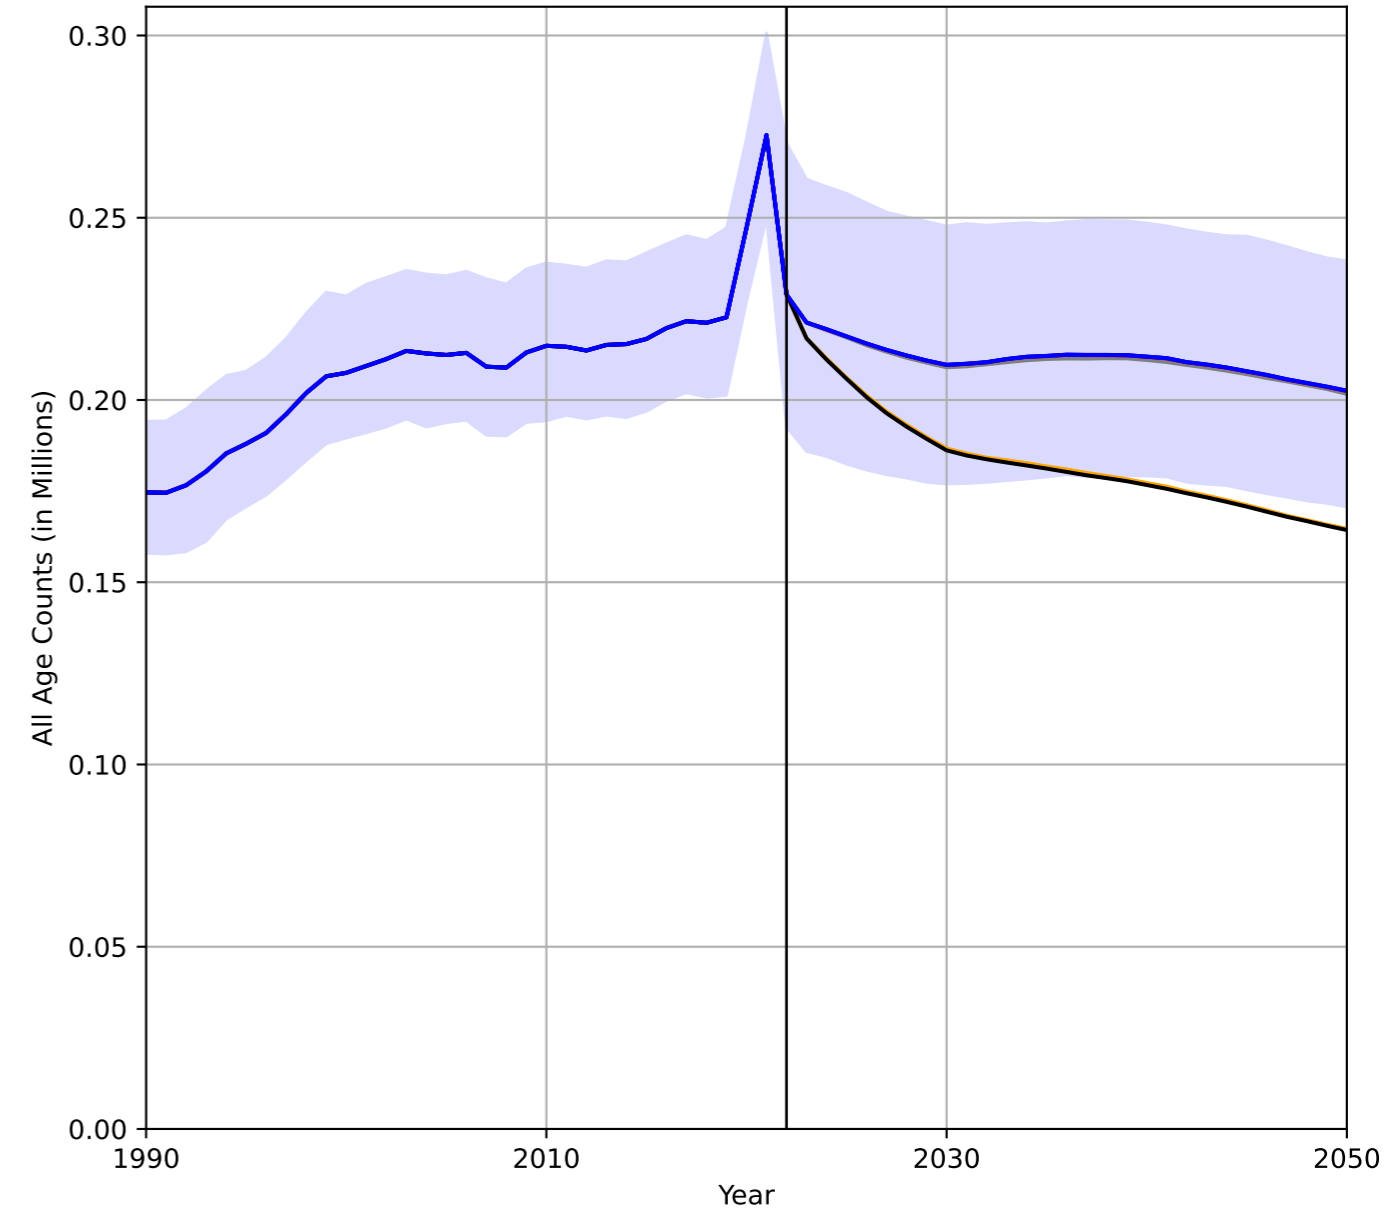

# North Macedonia

1427

Supplemental Results Figure S10. All-cause age standardised DALY rates (A) and all age DALY counts (B), for the past and for five future scenarios, 1990–2050

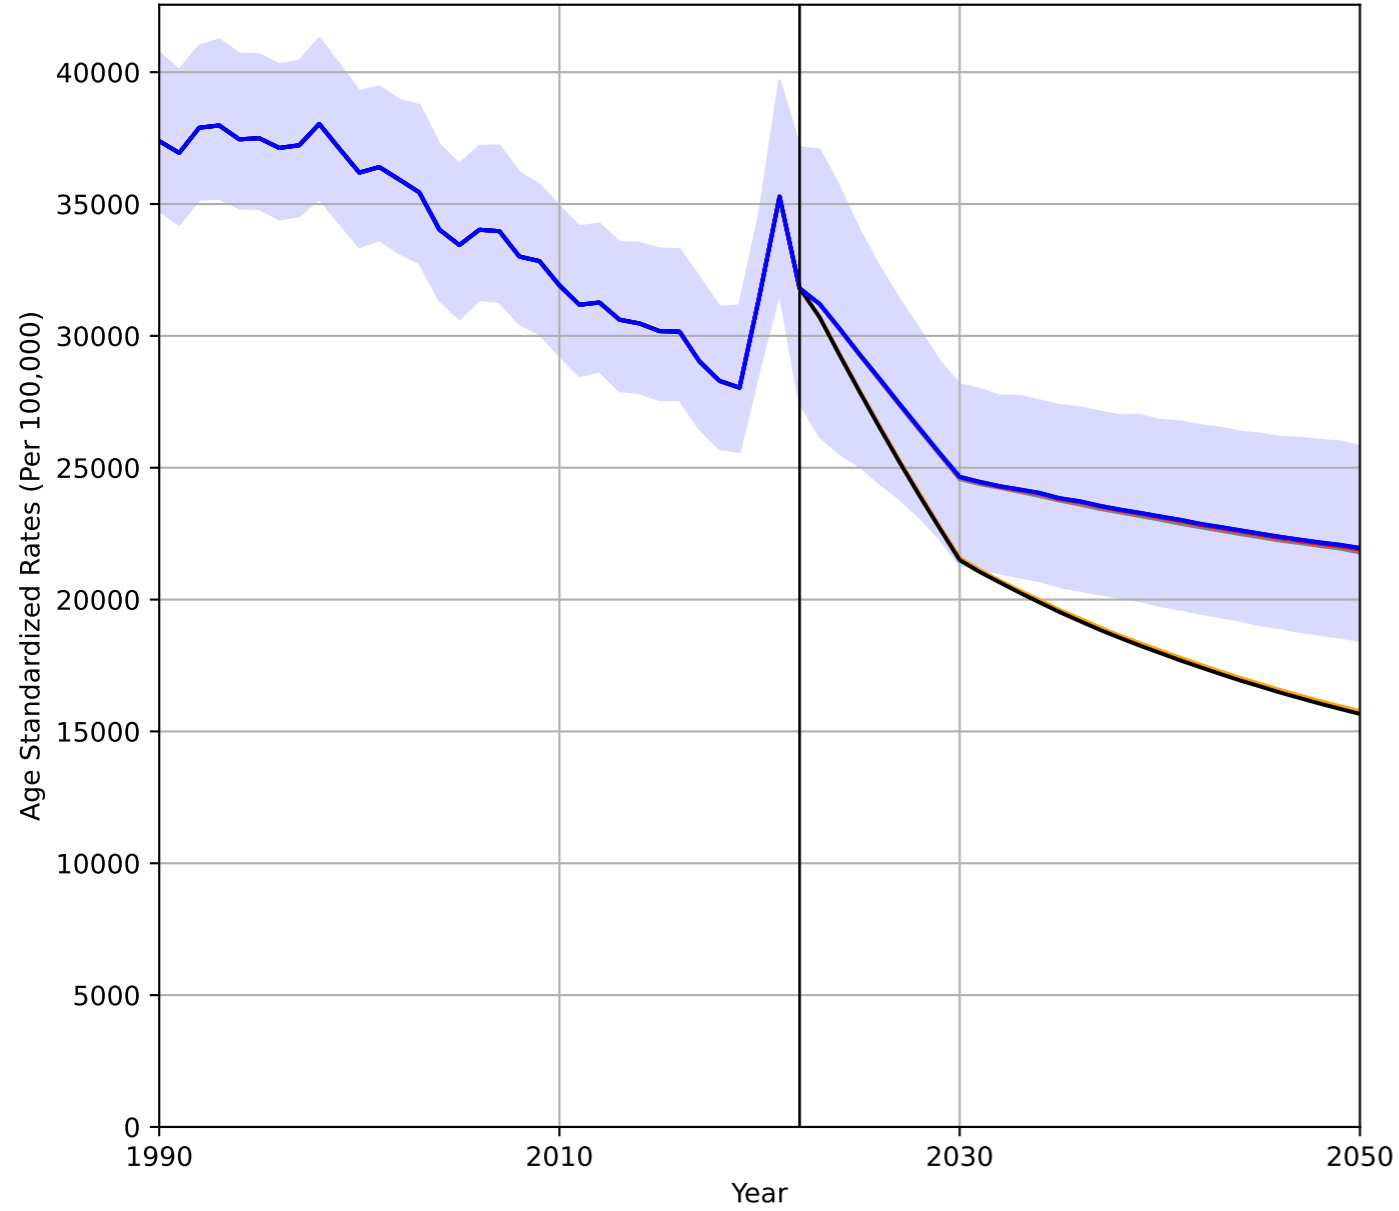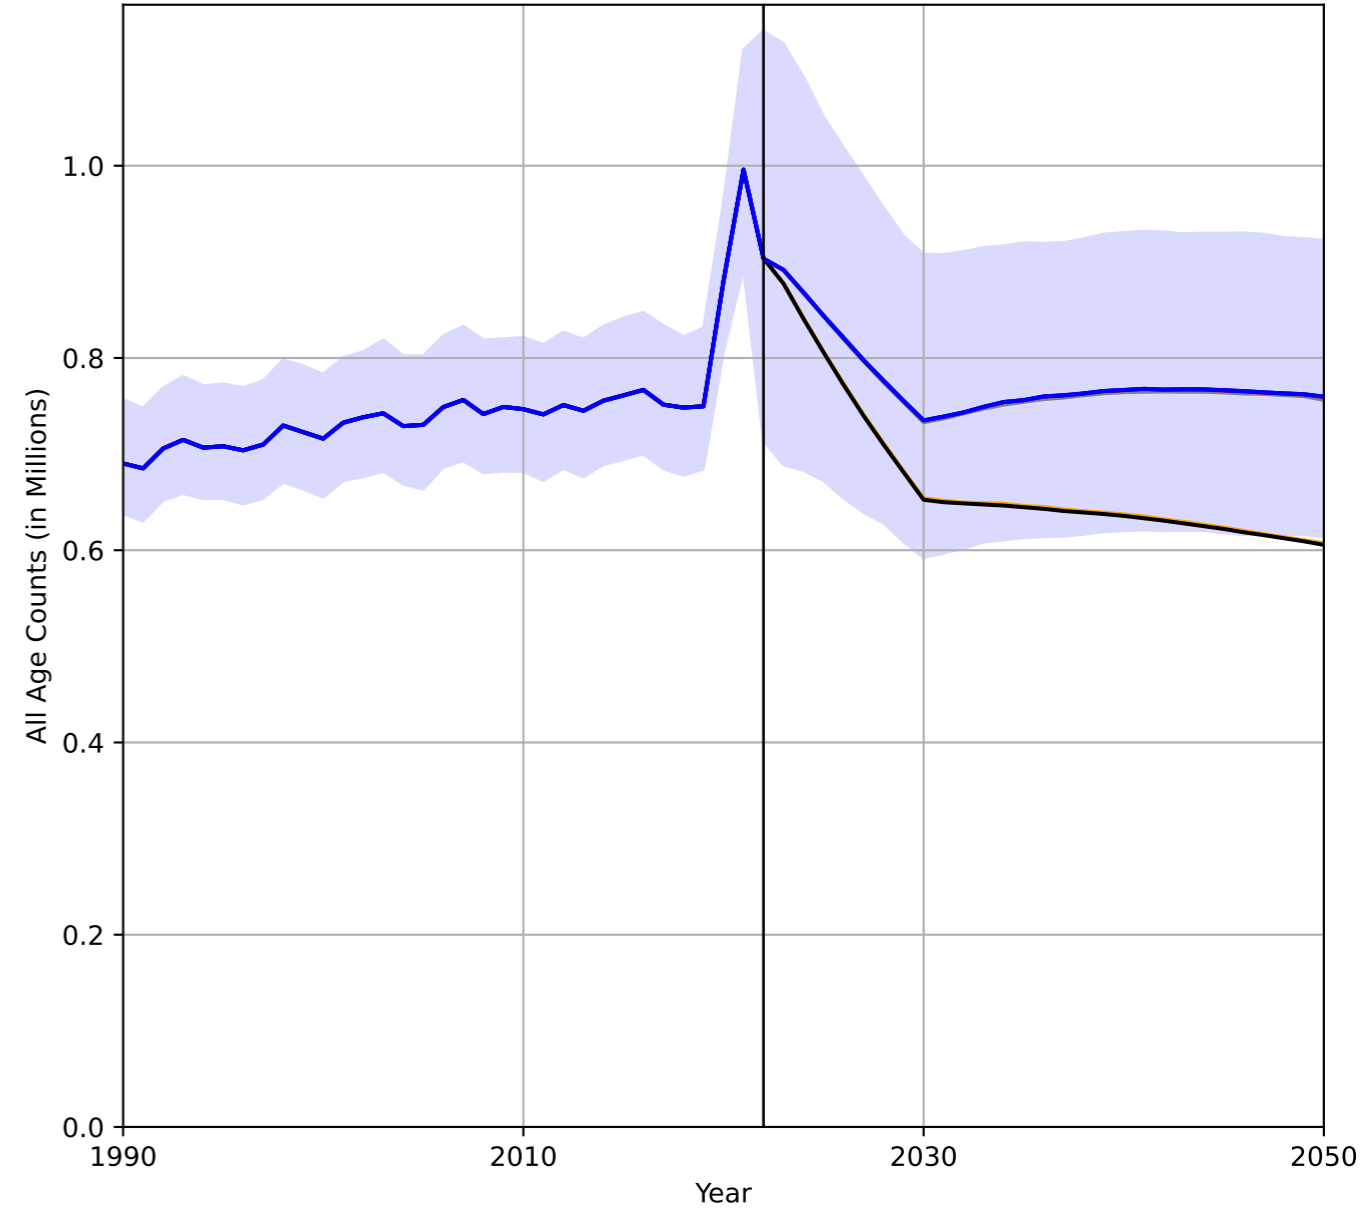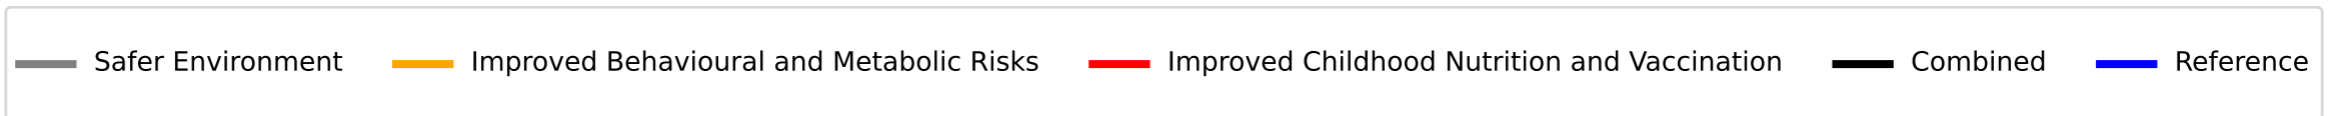

# Poland

Supplemental Results Figure S10. All-cause age standardised DALY rates (A) and all age DALY counts (B), for the past and for five future scenarios, 1990–2050

1428

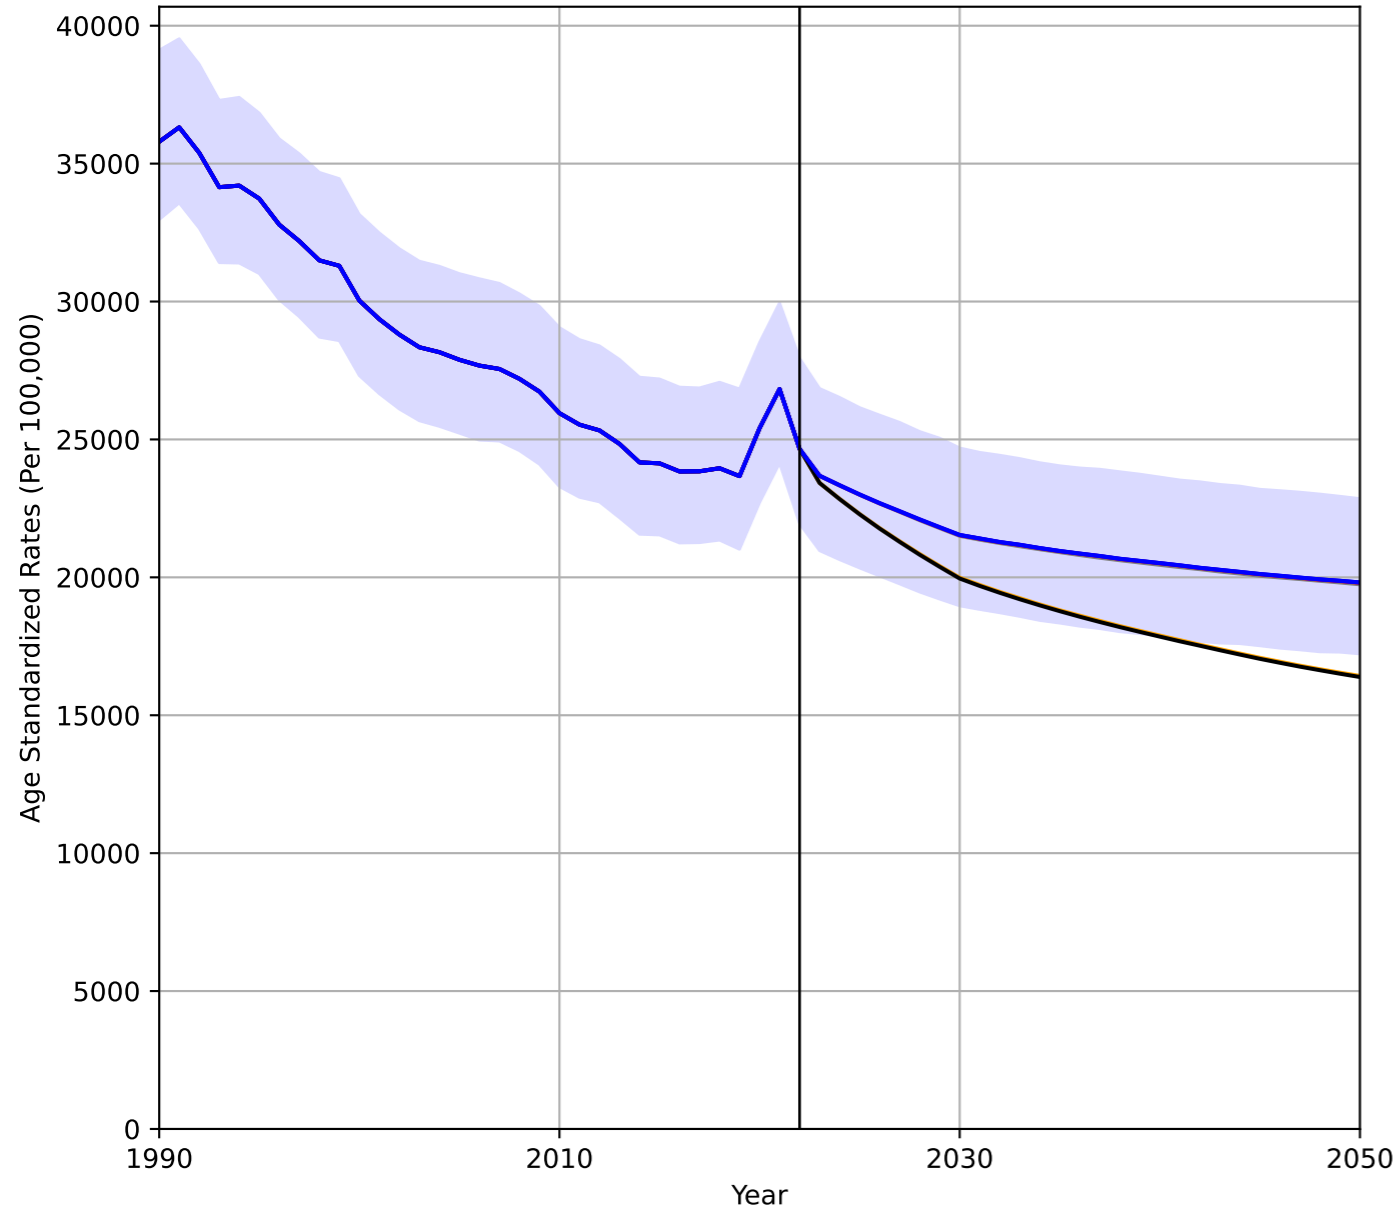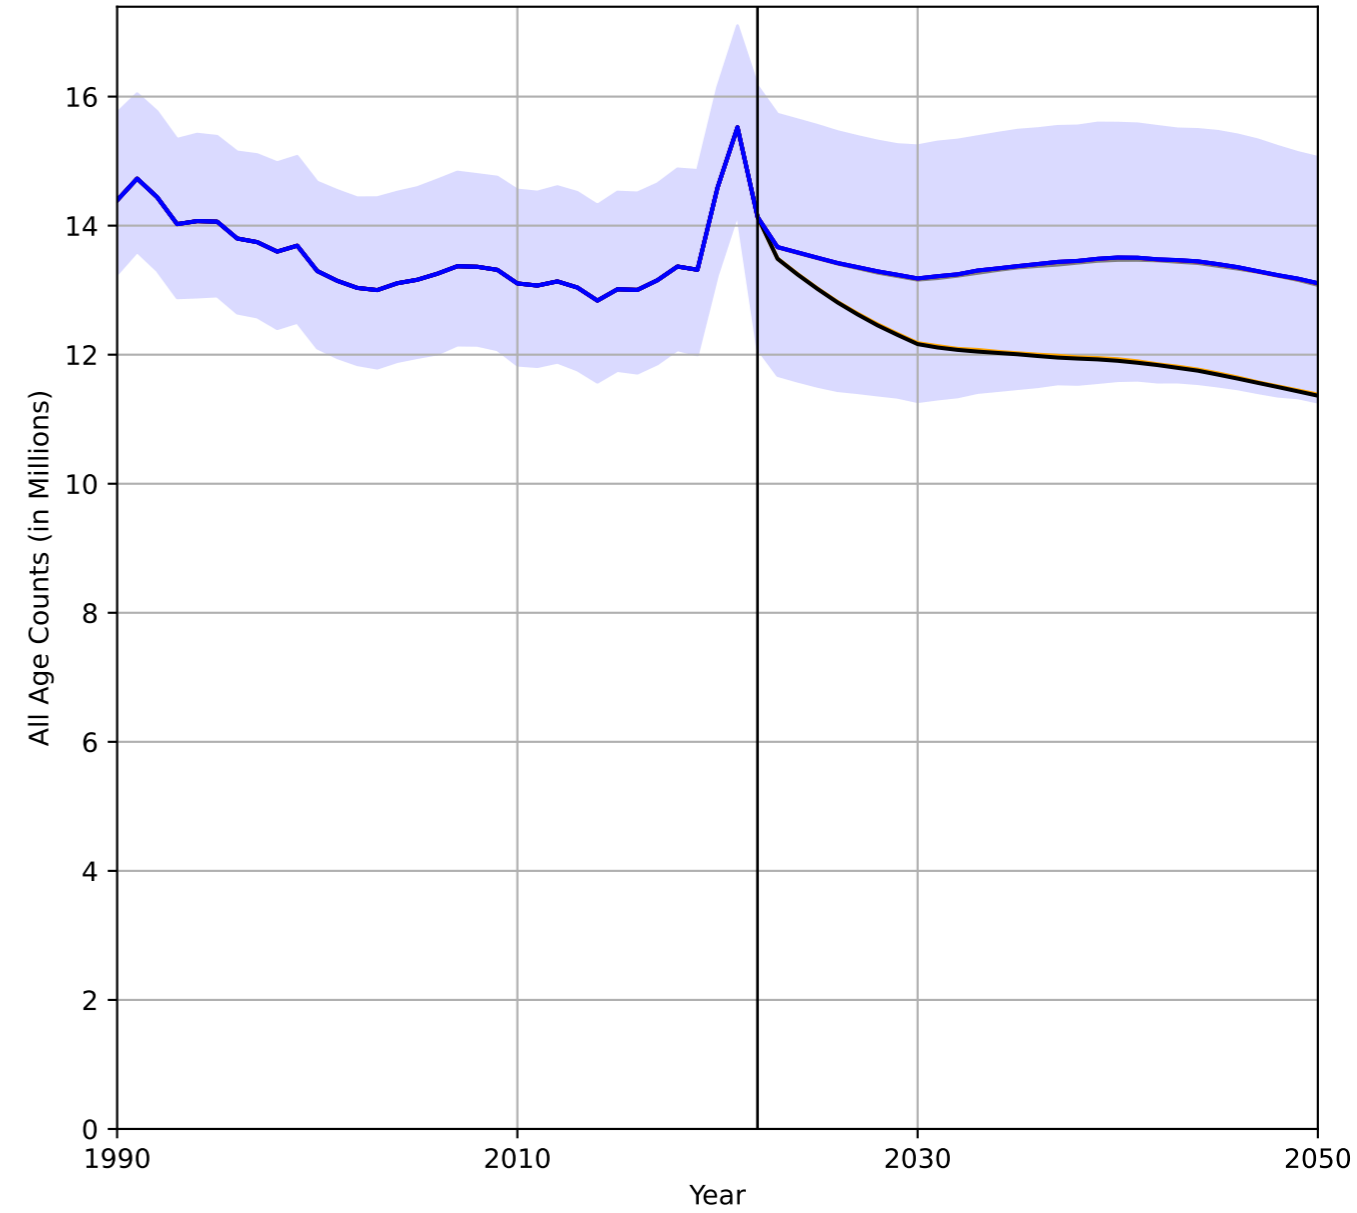

# Romania

Supplemental Results Figure S10. All-cause age standardised DALY rates (A) and all age DALY counts (B), for the past and for five future scenarios, 1990–2050

1429

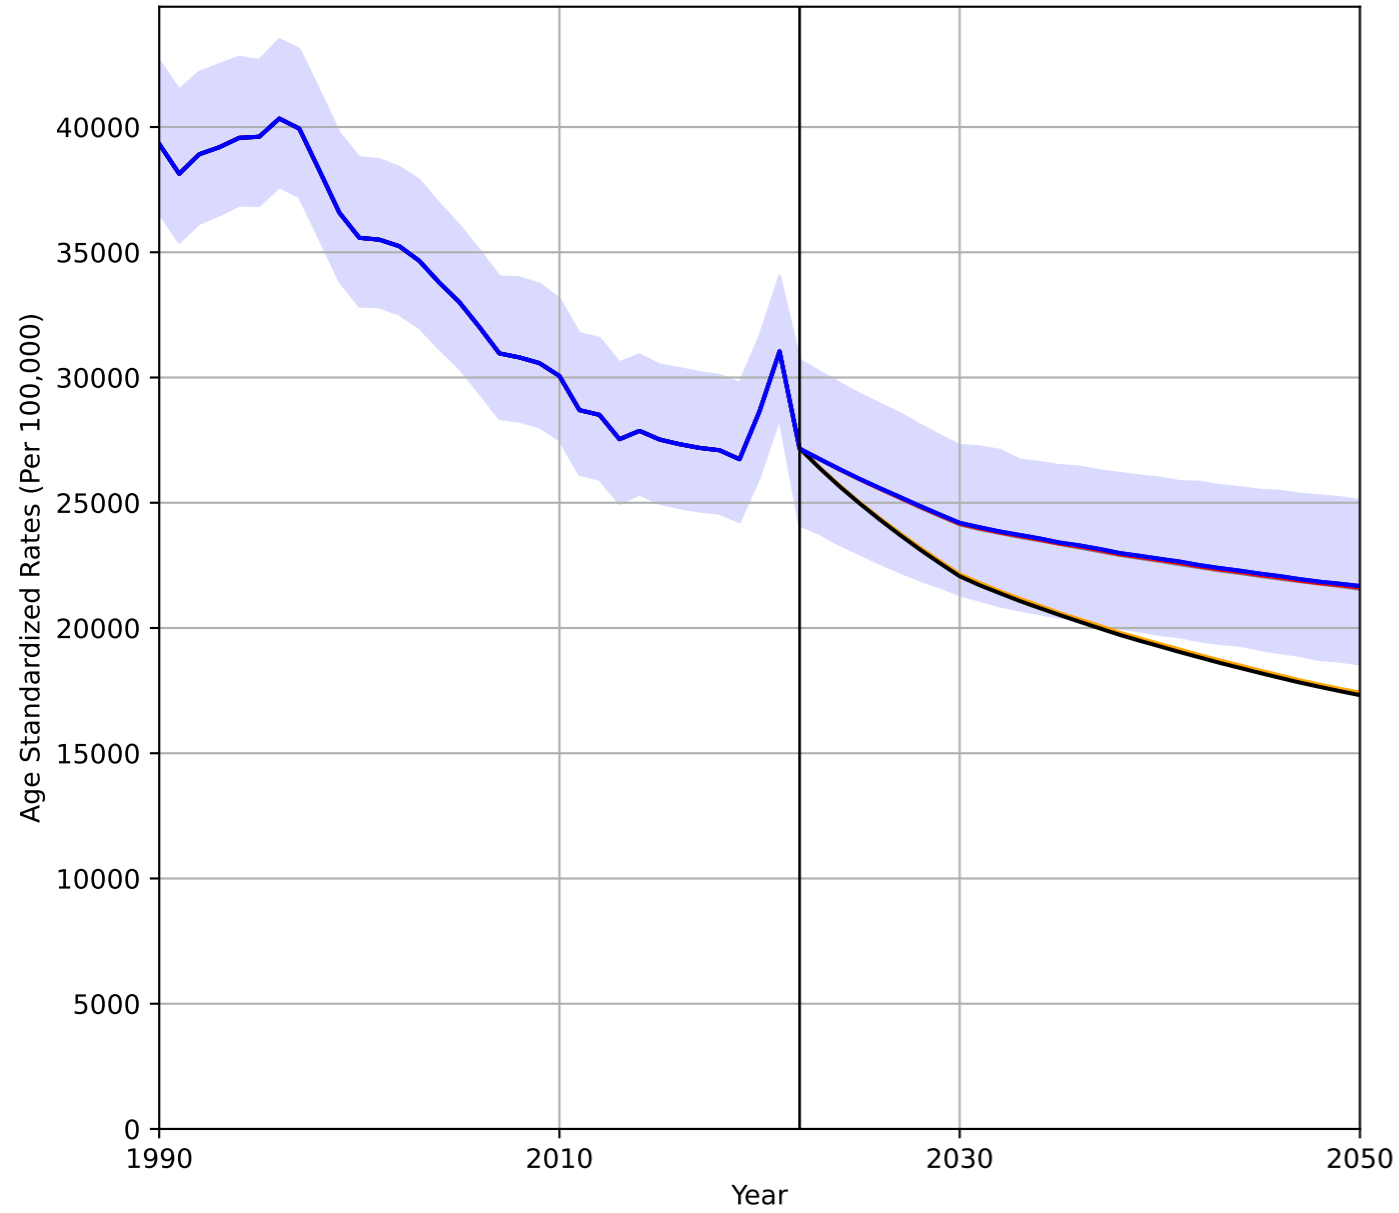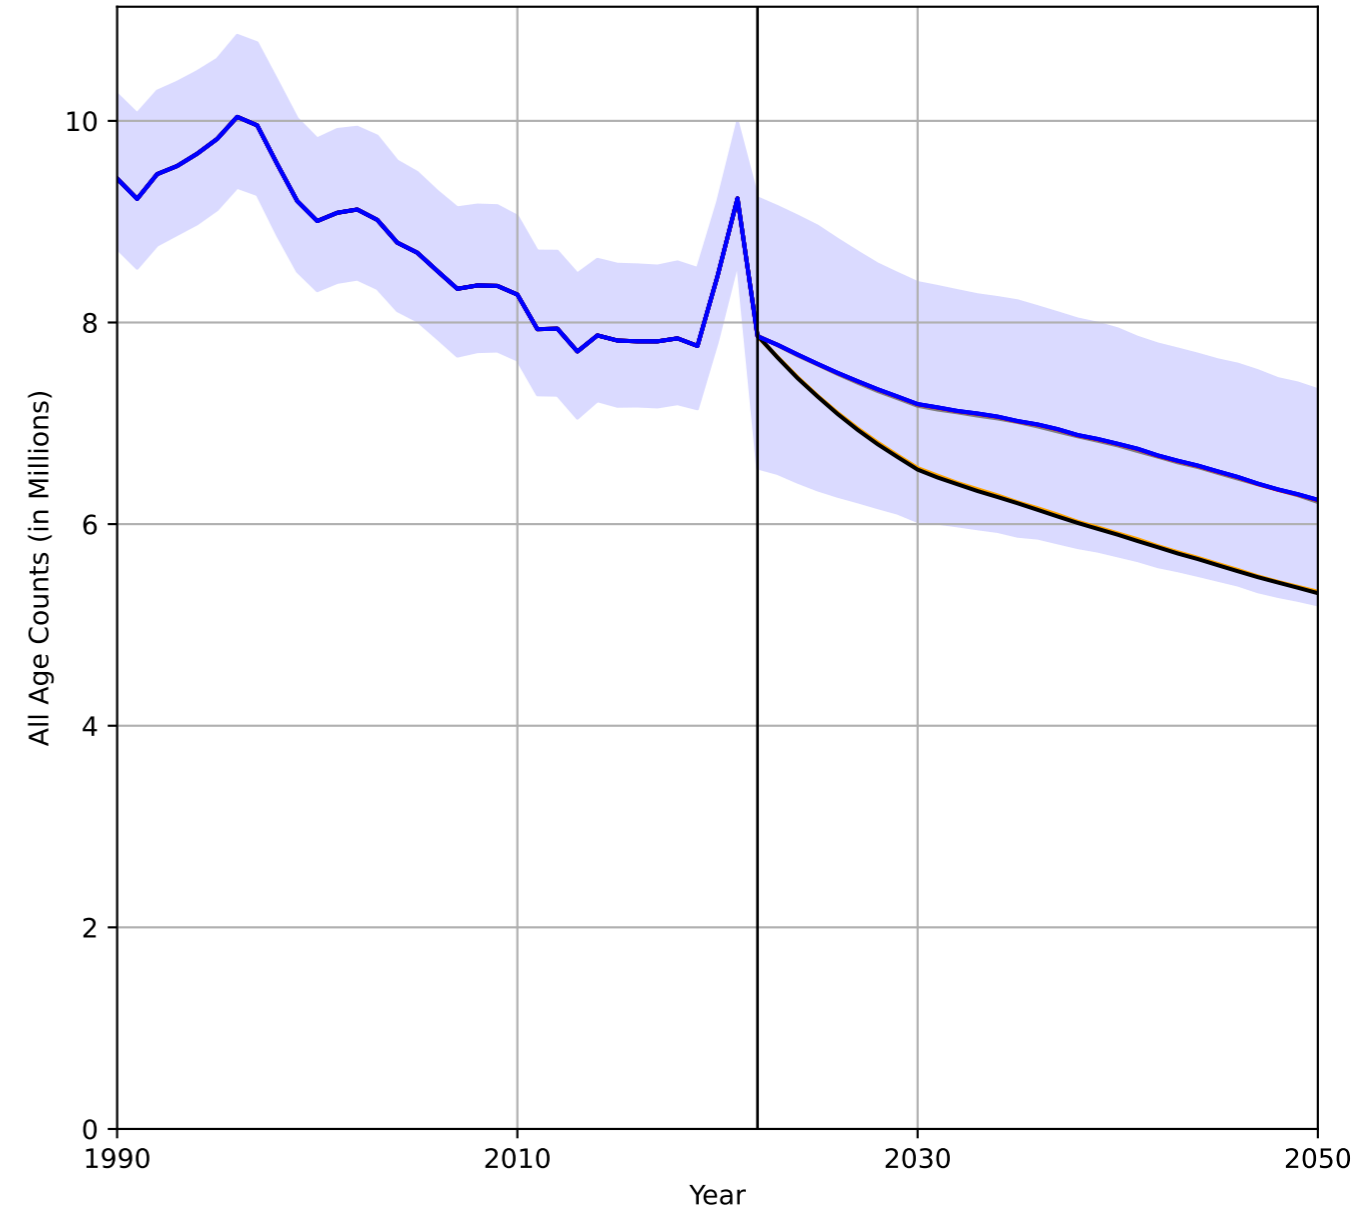

# Serbia

Supplemental Results Figure S10. All-cause age standardised DALY rates (A) and all age DALY counts (B), for the past and for five future scenarios, 1990–2050

1430

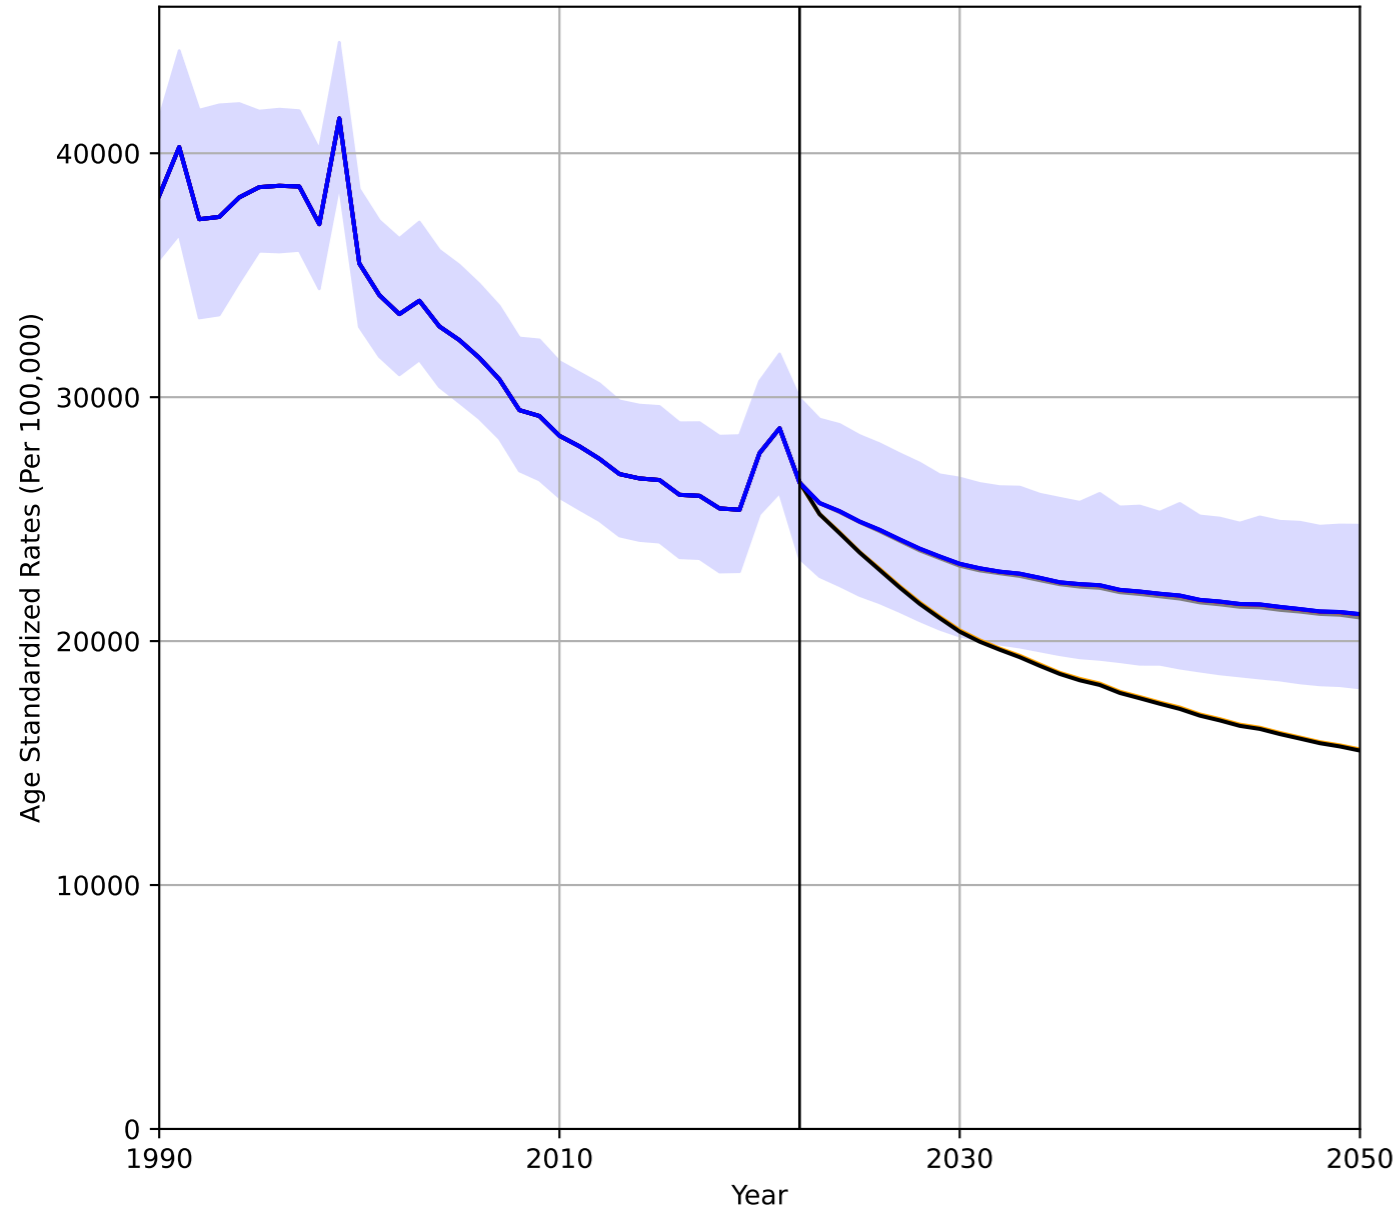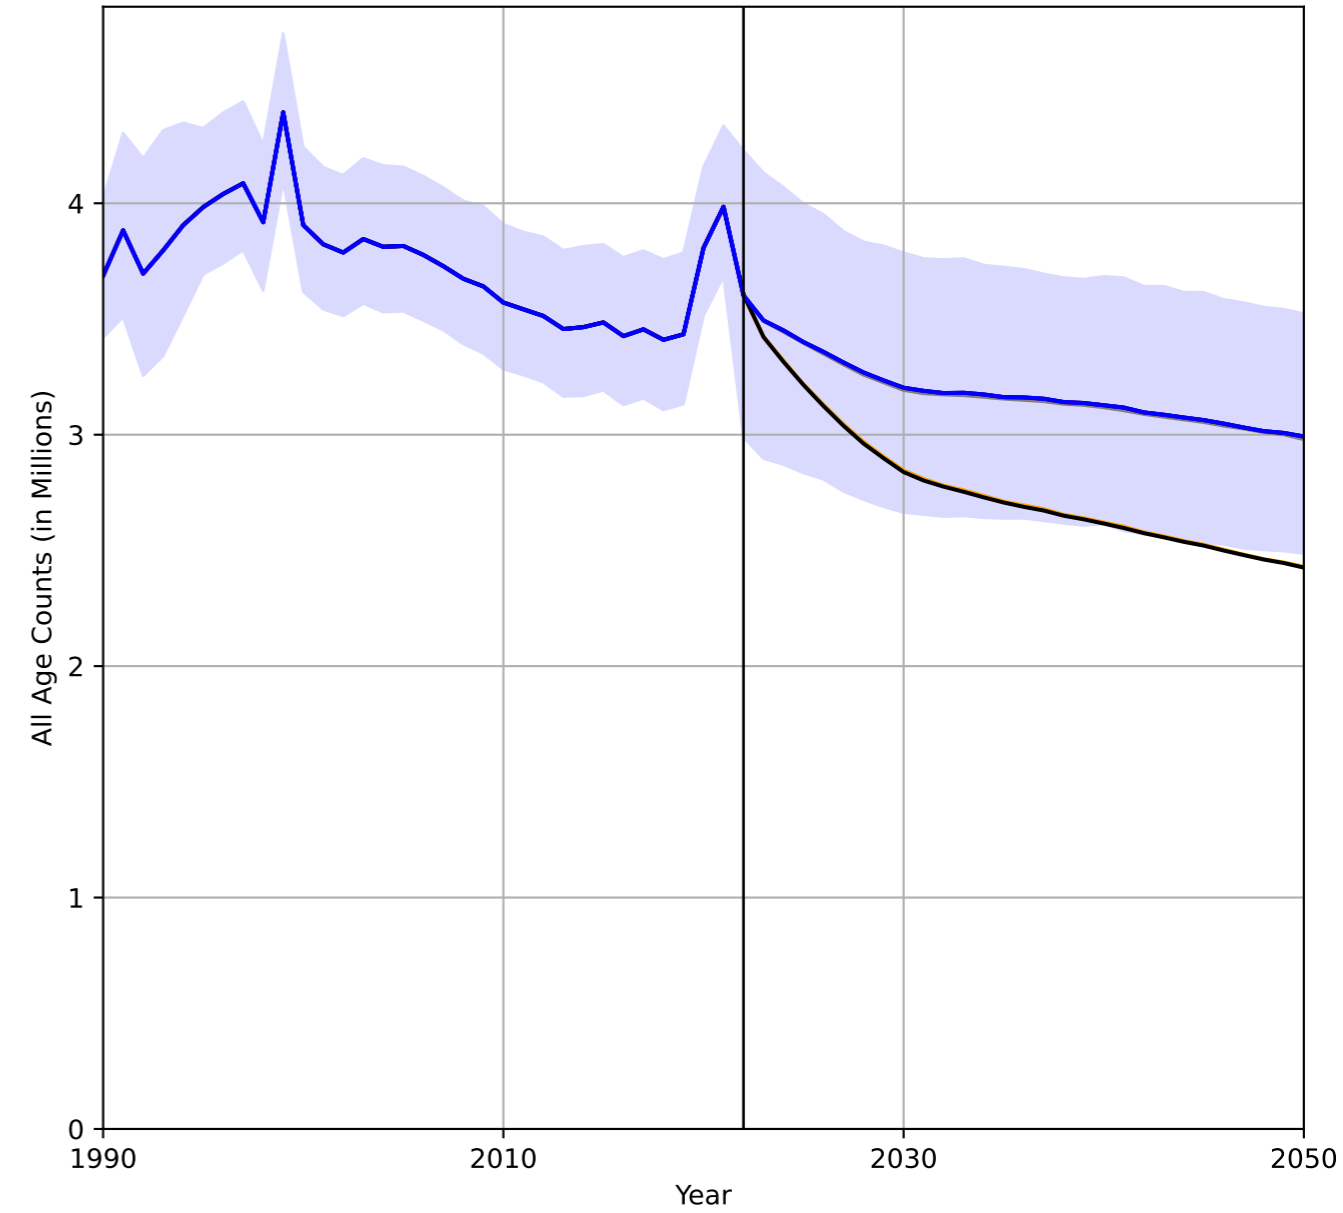

# Slovakia

Supplemental Results Figure S10. All-cause age standardised DALY rates (A) and all age DALY counts (B), for the past and for five future scenarios, 1990–2050

1431

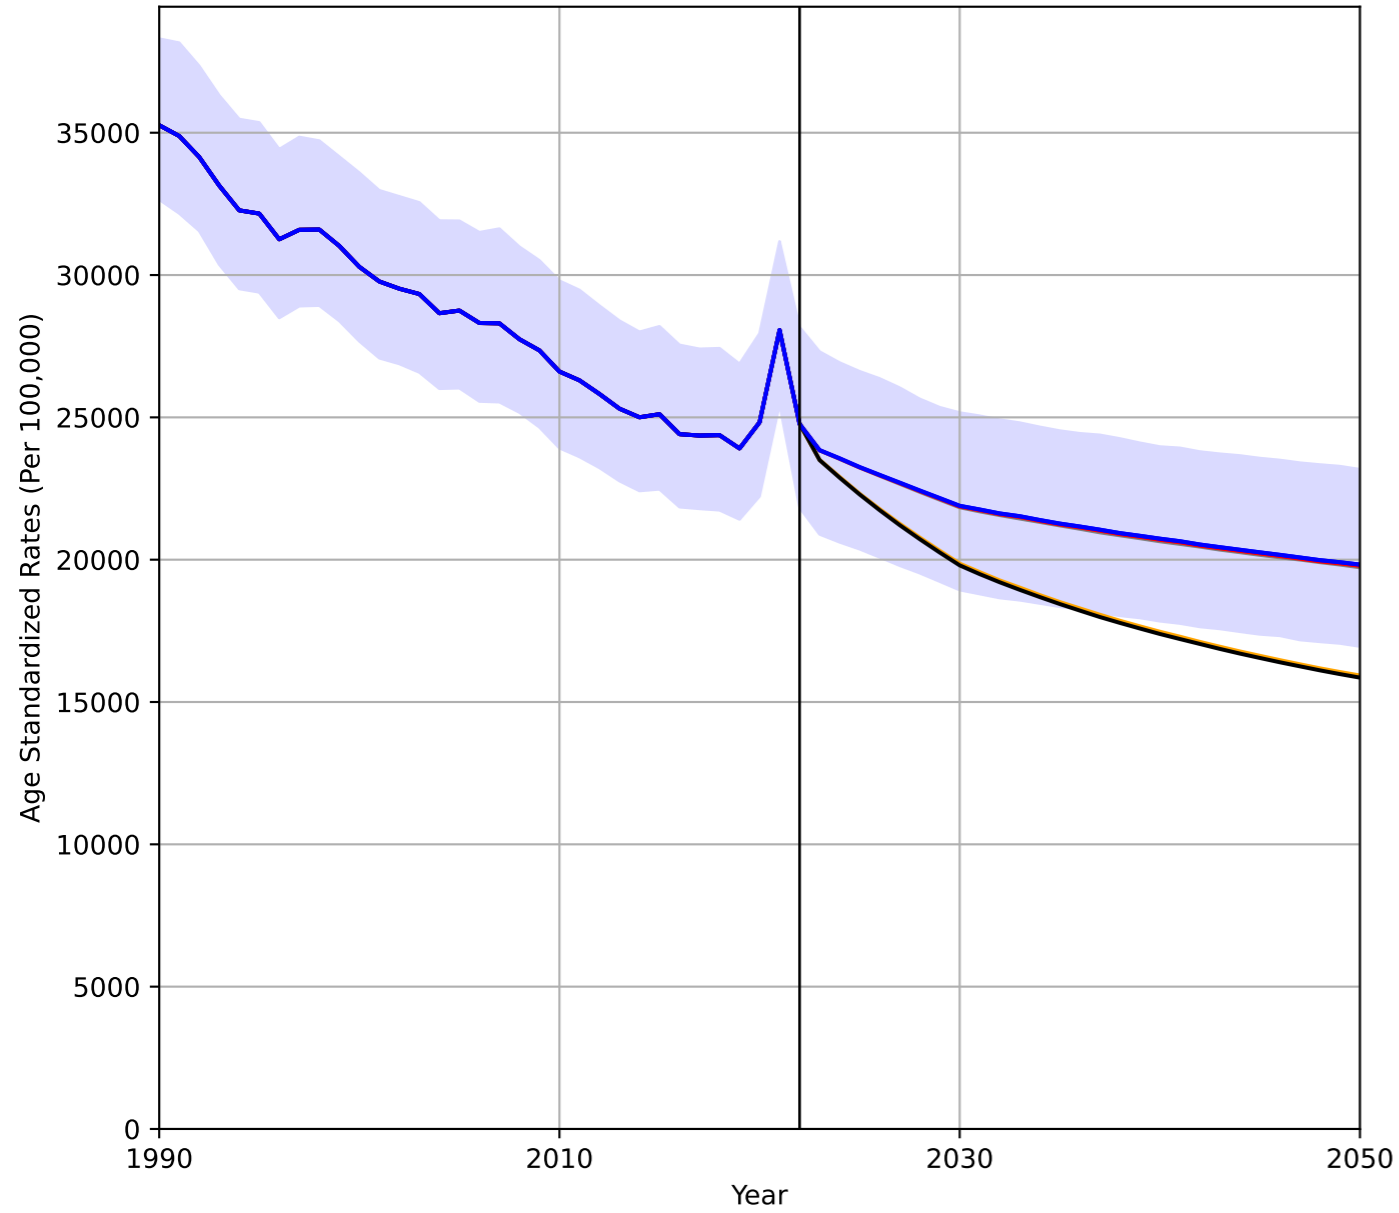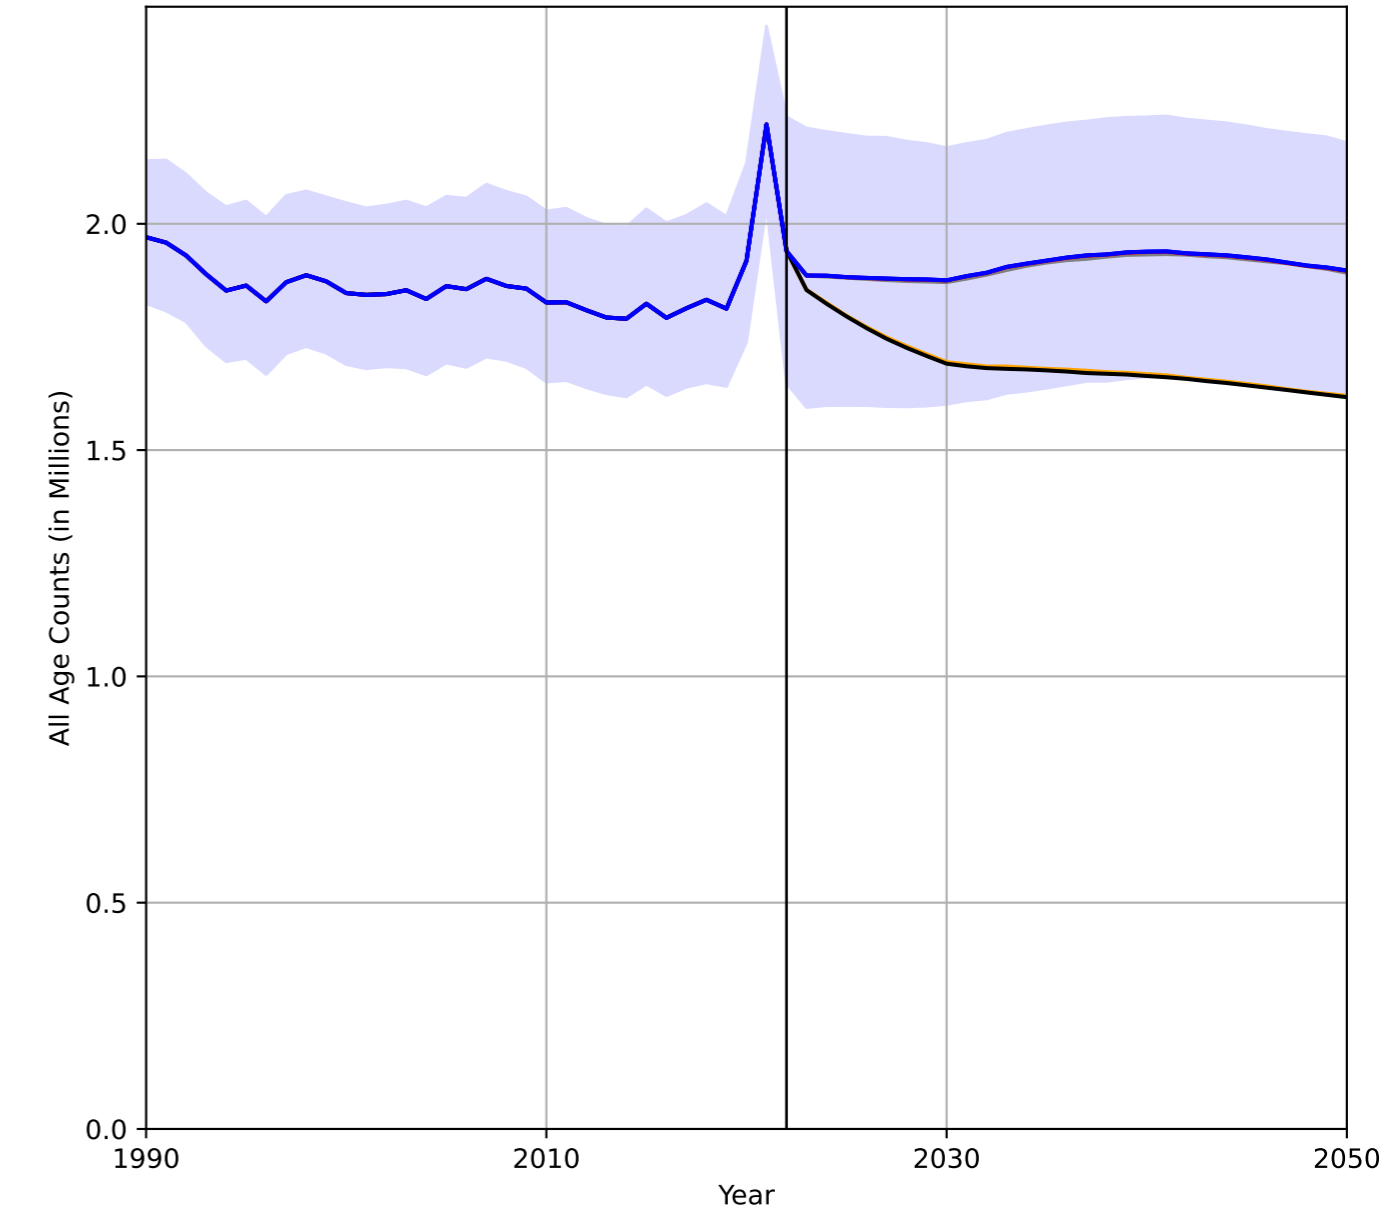



# Slovenia

Supplemental Results Figure S10. All-cause age standardised DALY rates (A) and all age DALY counts (B), for the past and for five future scenarios, 1990–2050

1432

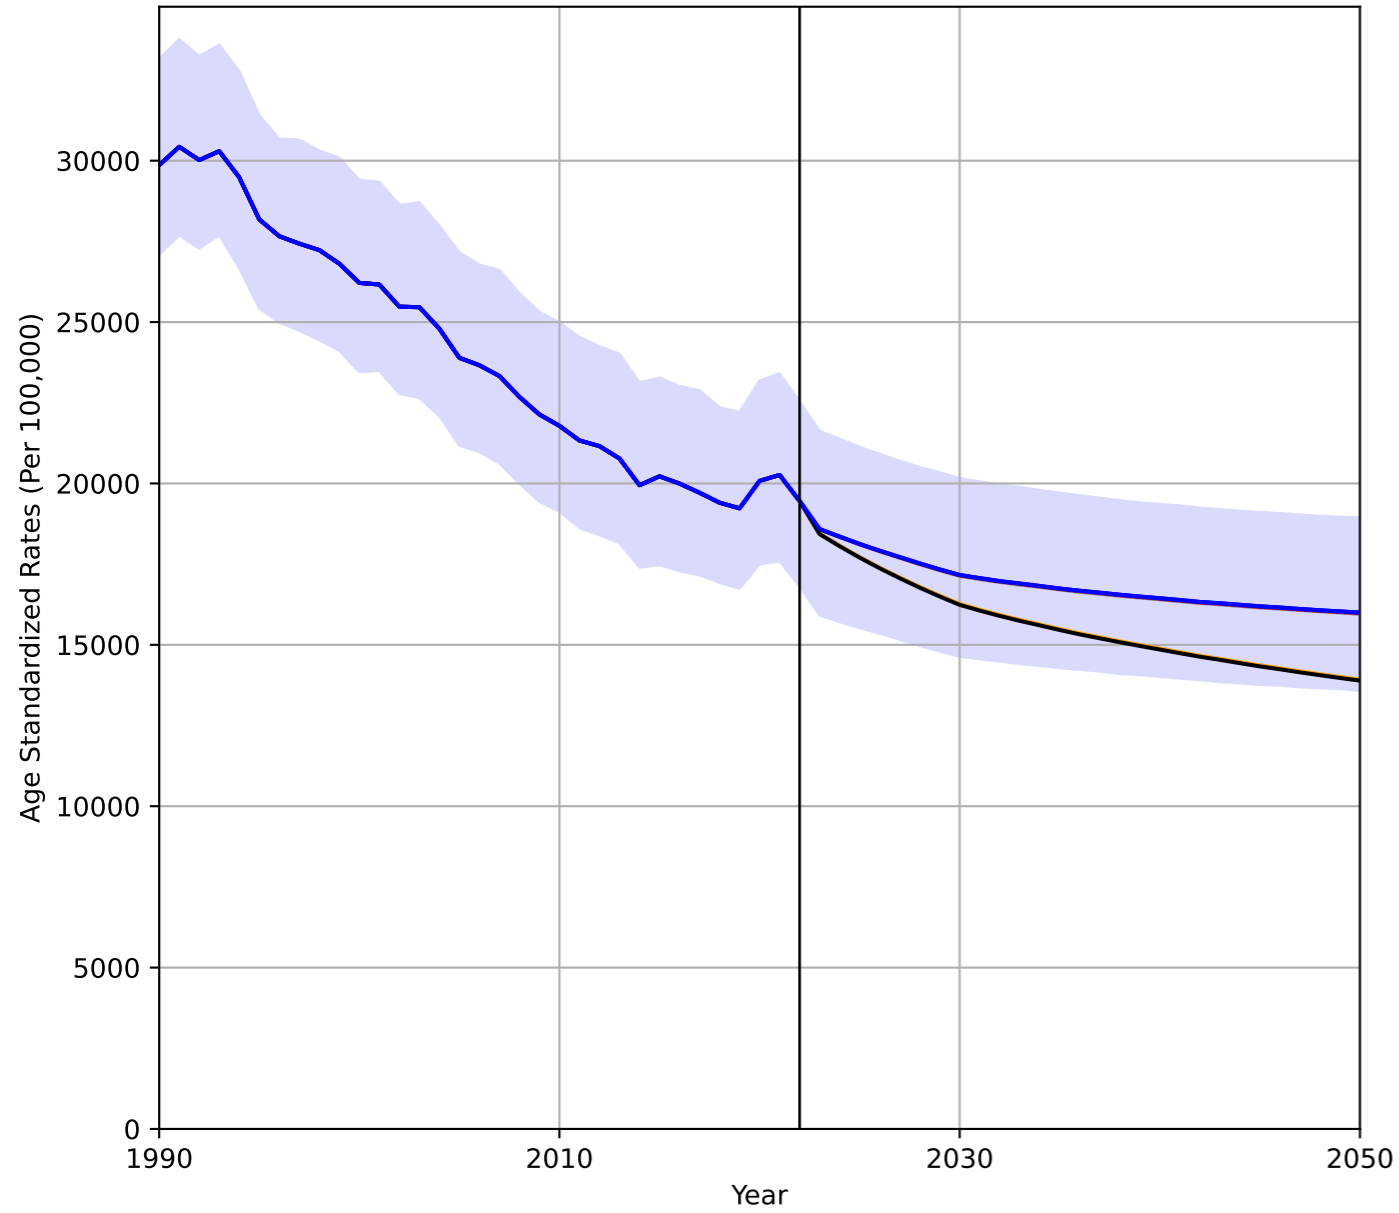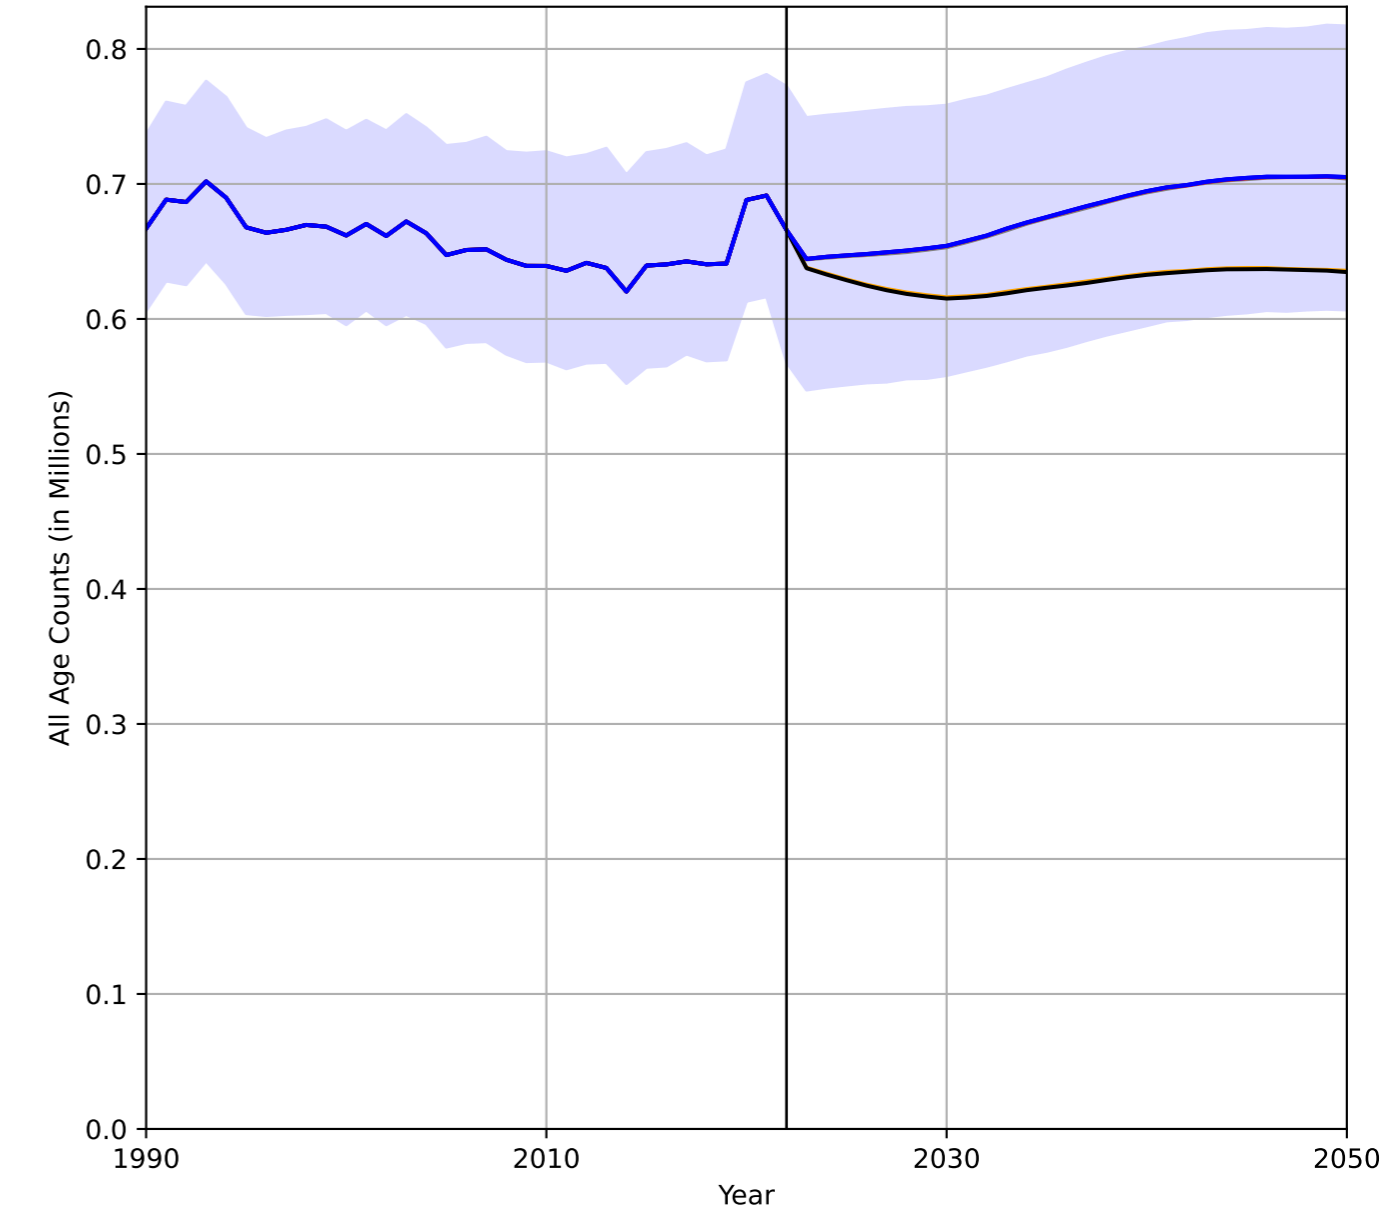

# Belarus

Supplemental Results Figure S10. All-cause age standardised DALY rates (A) and all age DALY counts (B), for the past and for five future scenarios, 1990–2050

1433

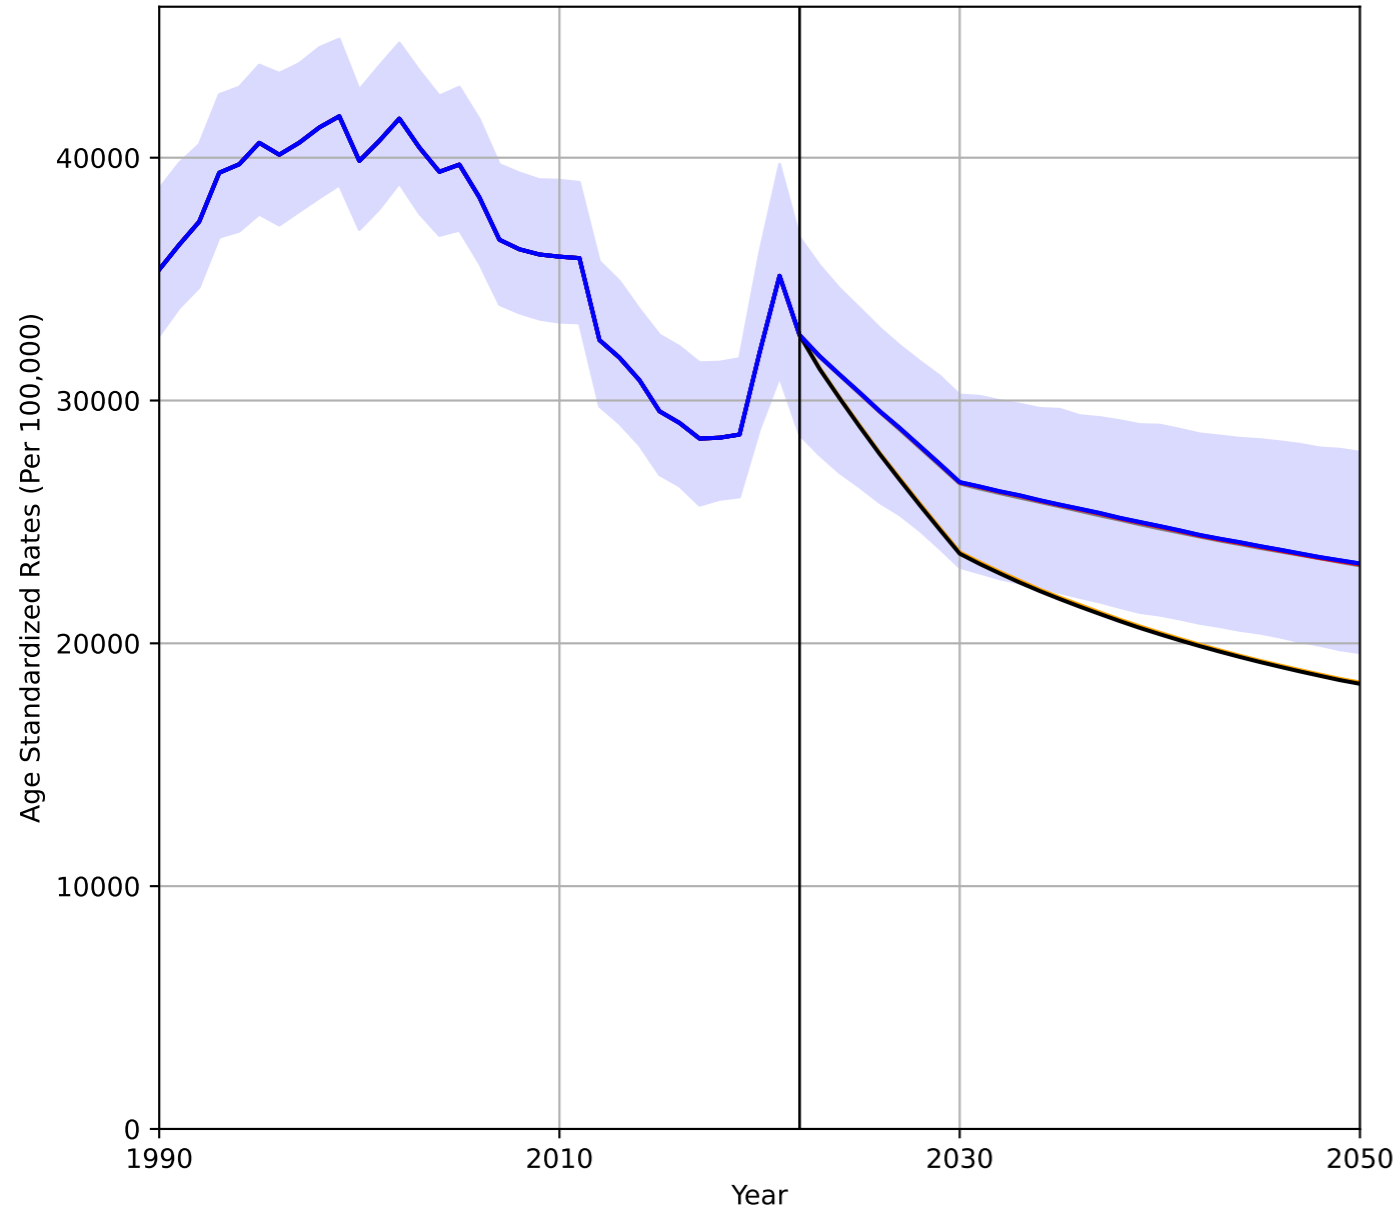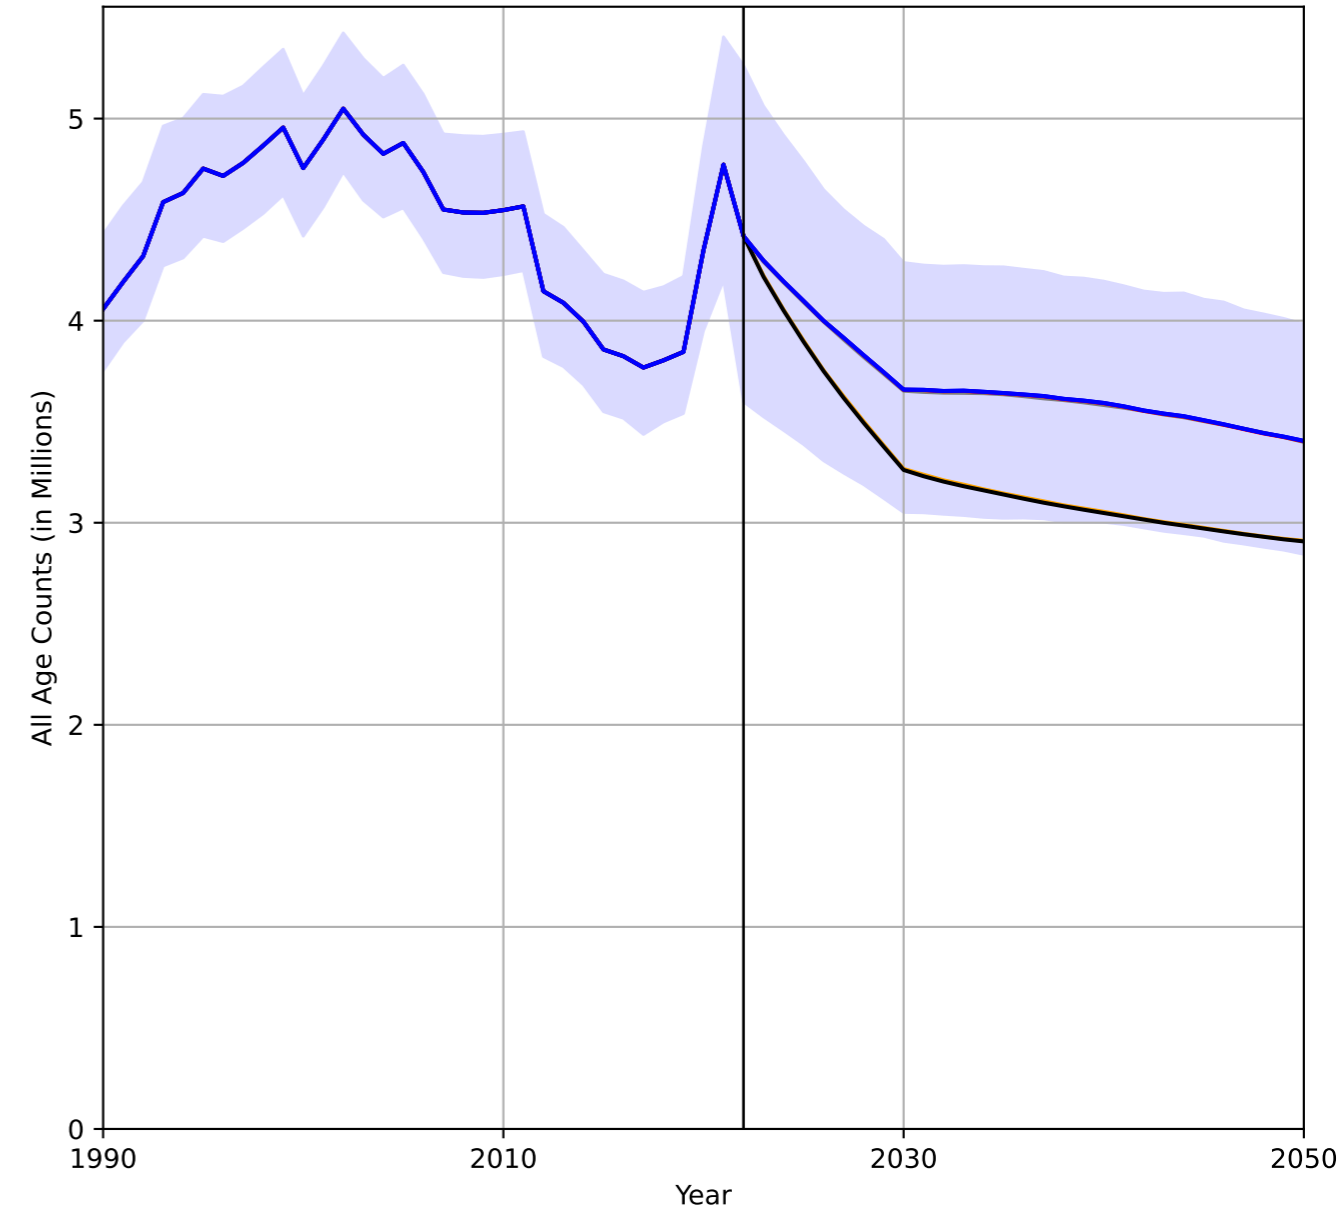

# Estonia

Supplemental Results Figure S10. All-cause age standardised DALY rates (A) and all age DALY counts (B), for the past and for five future scenarios, 1990–2050

1434

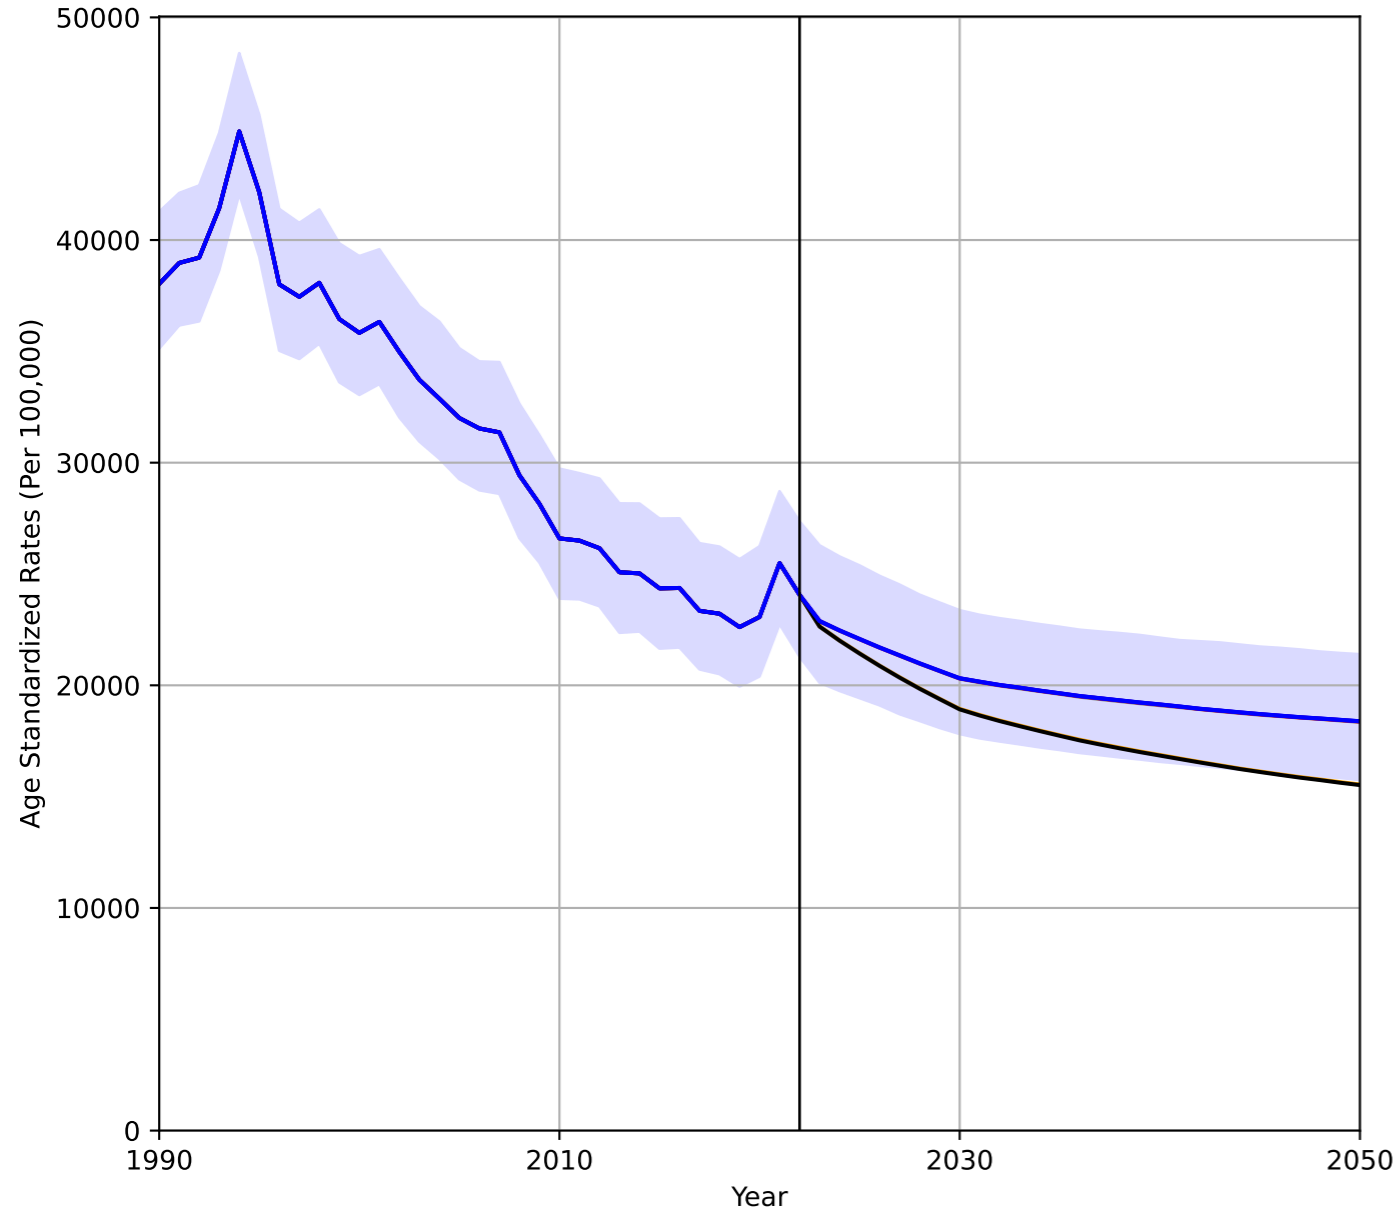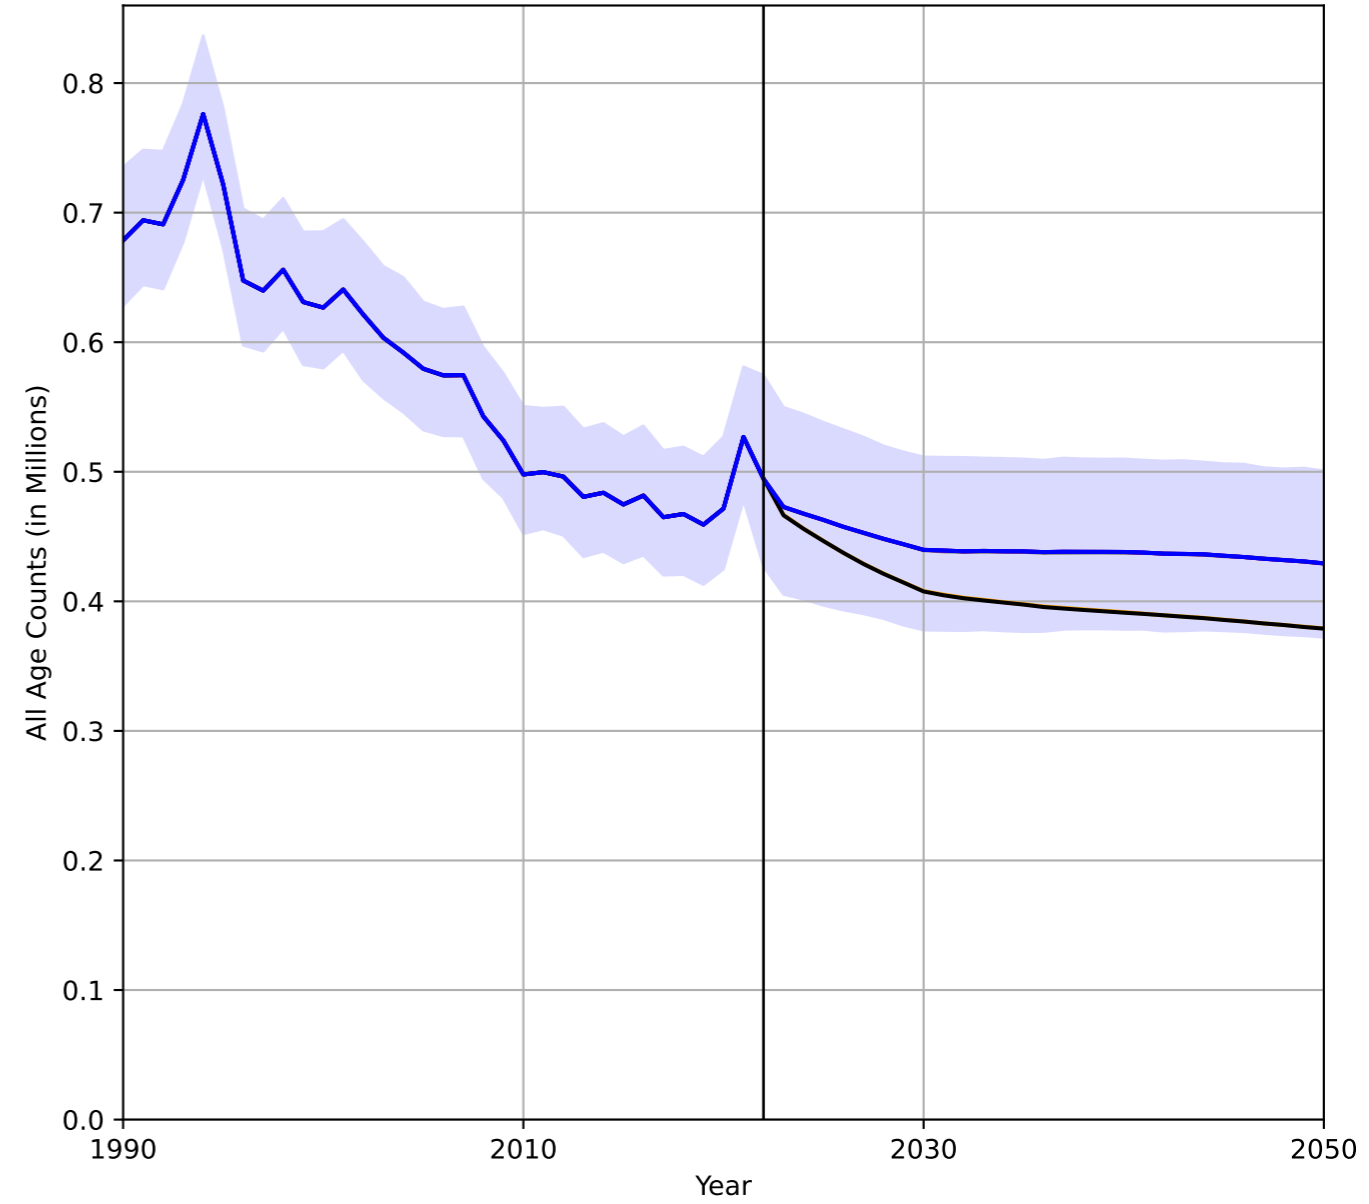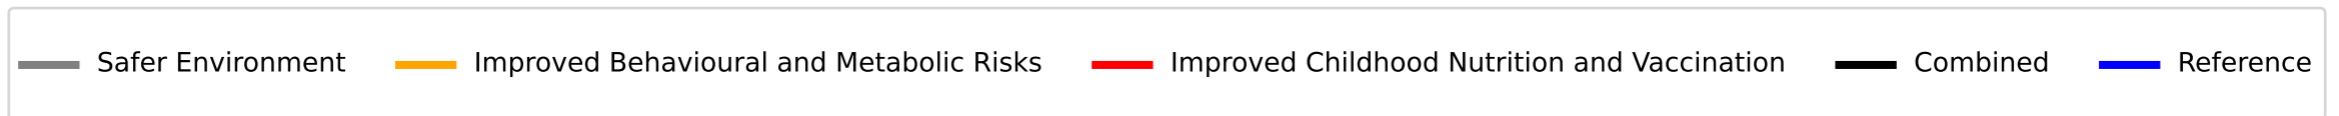

# Latvia

Supplemental Results Figure S10. All-cause age standardised DALY rates (A) and all age DALY counts (B), for the past and for five future scenarios, 1990–2050

1435

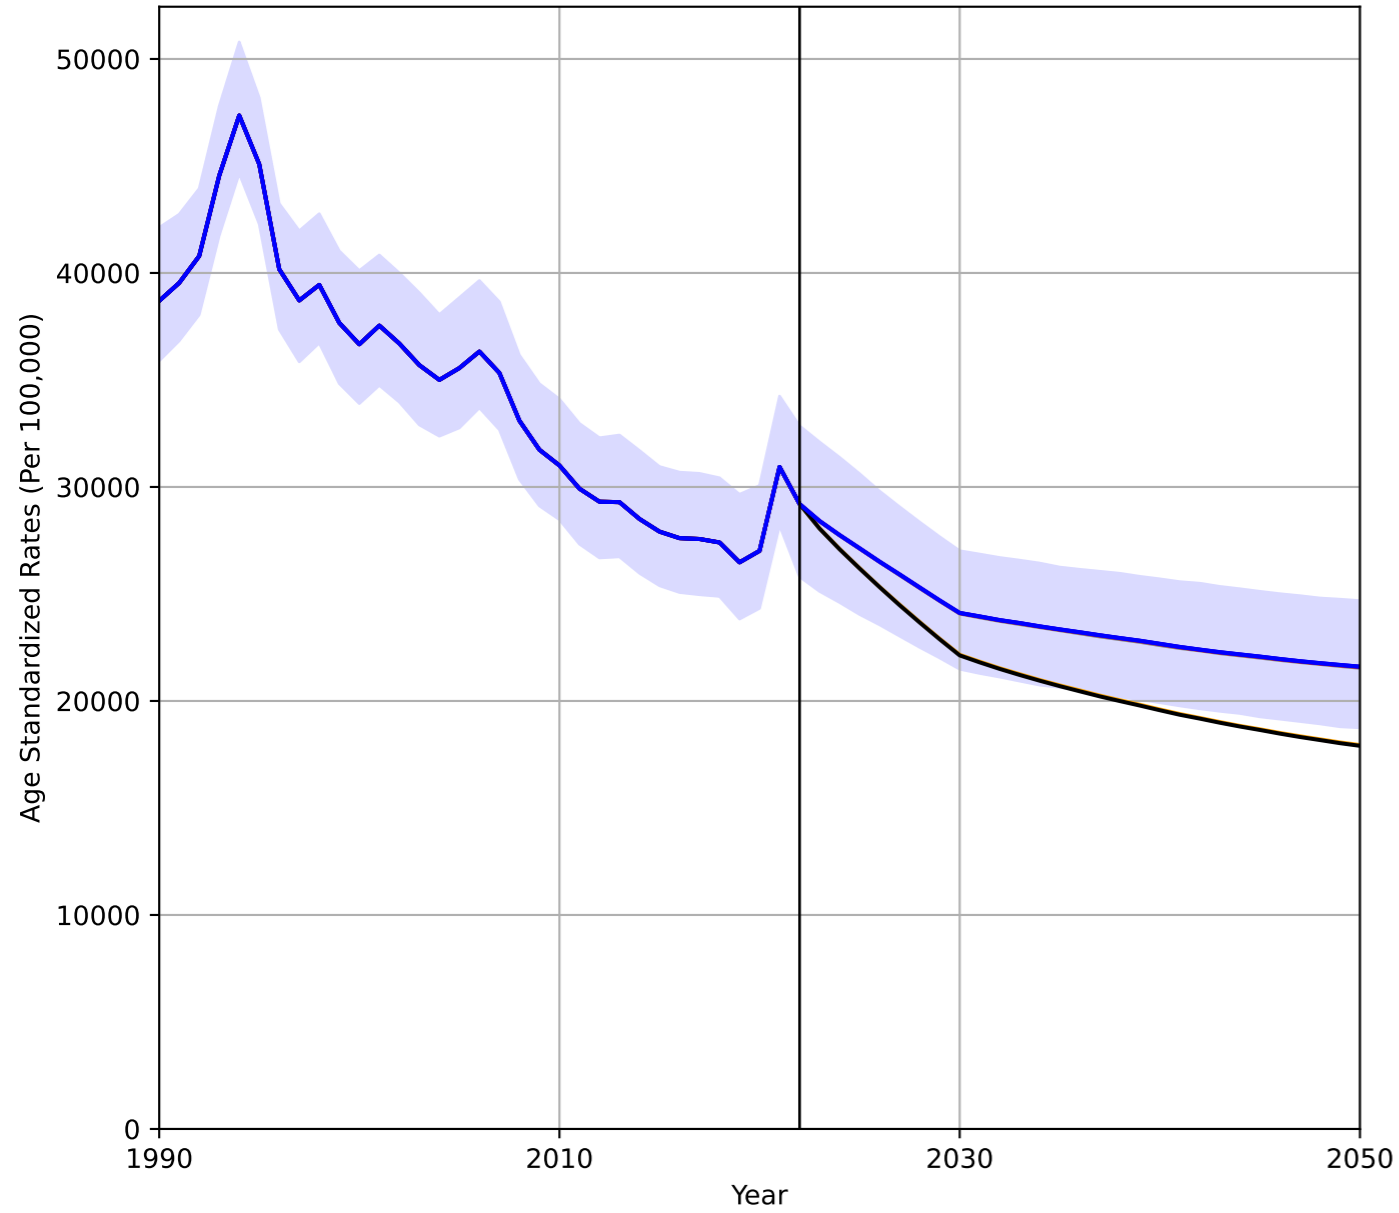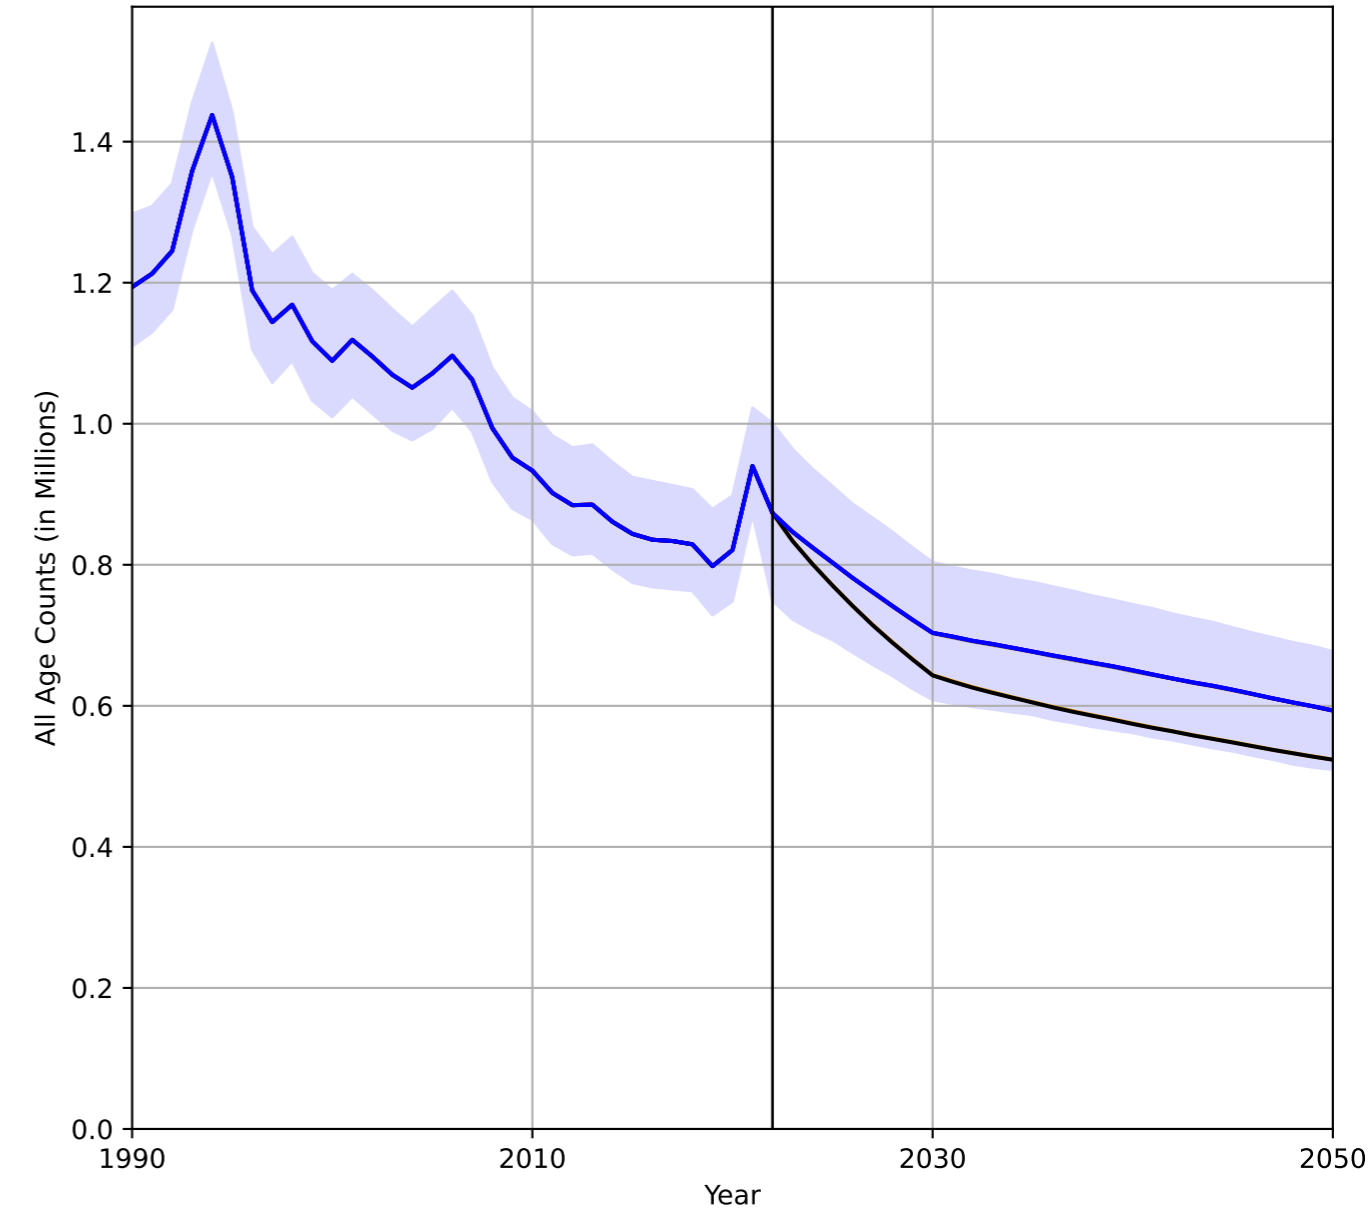

# Lithuania

Supplemental Results Figure S10. All-cause age standardised DALY rates (A) and all age DALY counts (B), for the past and for five future scenarios, 1990–2050

1436

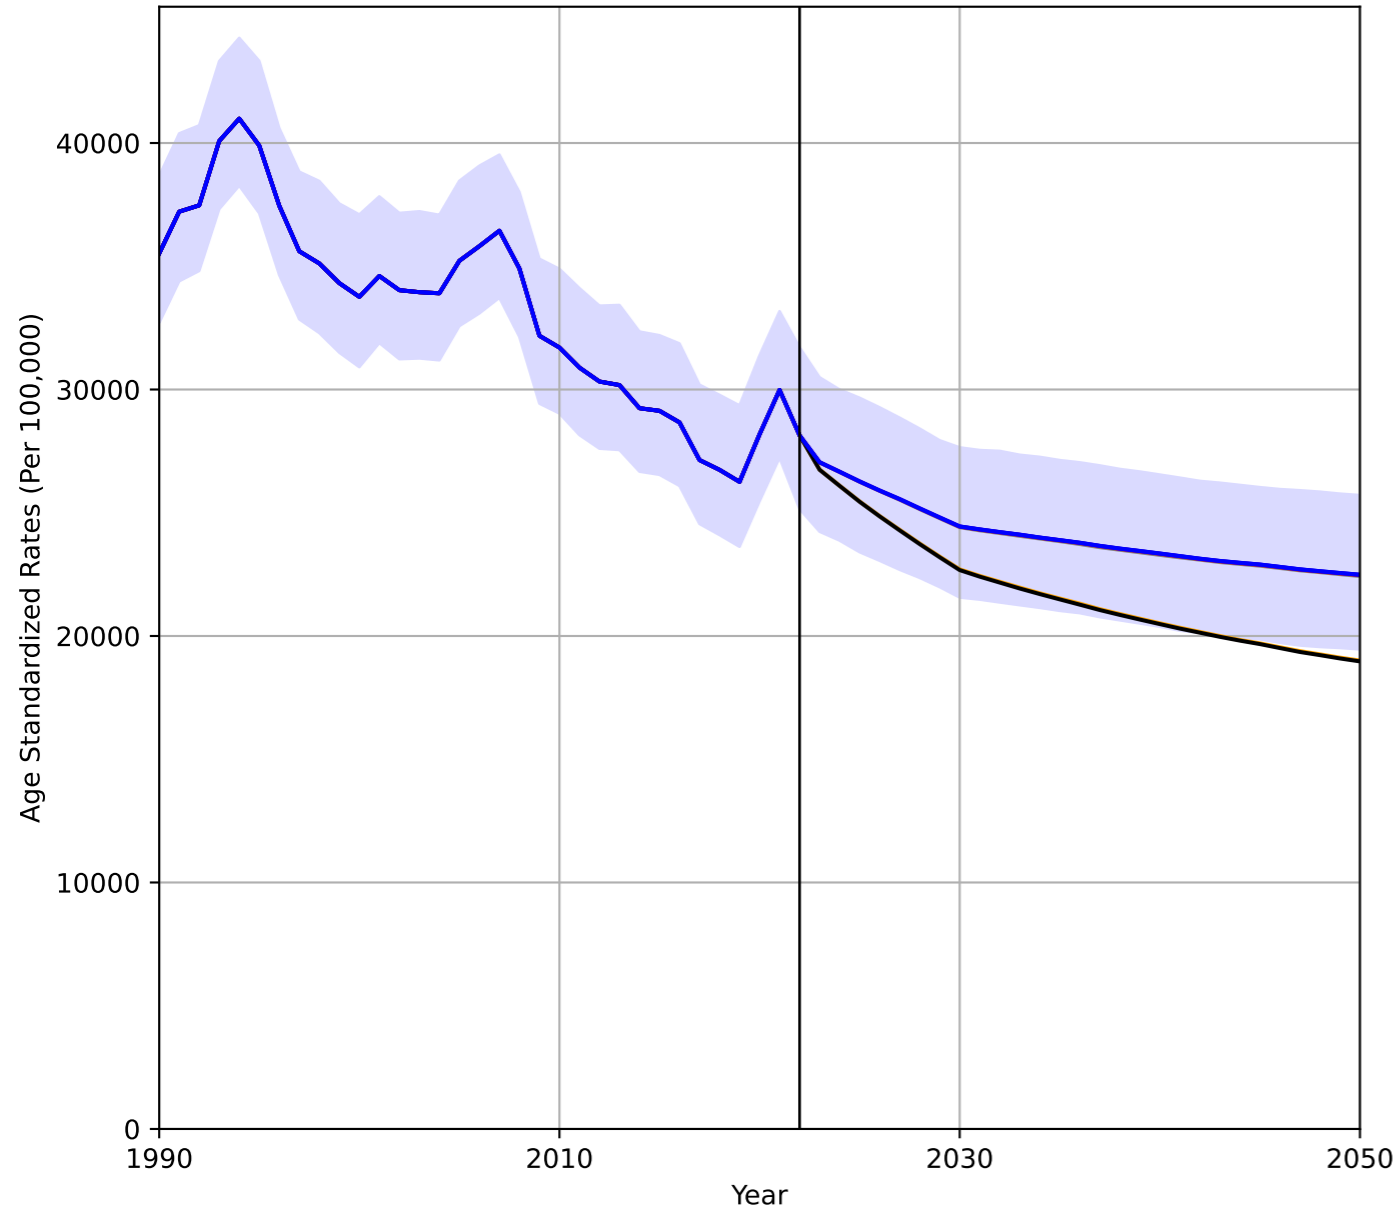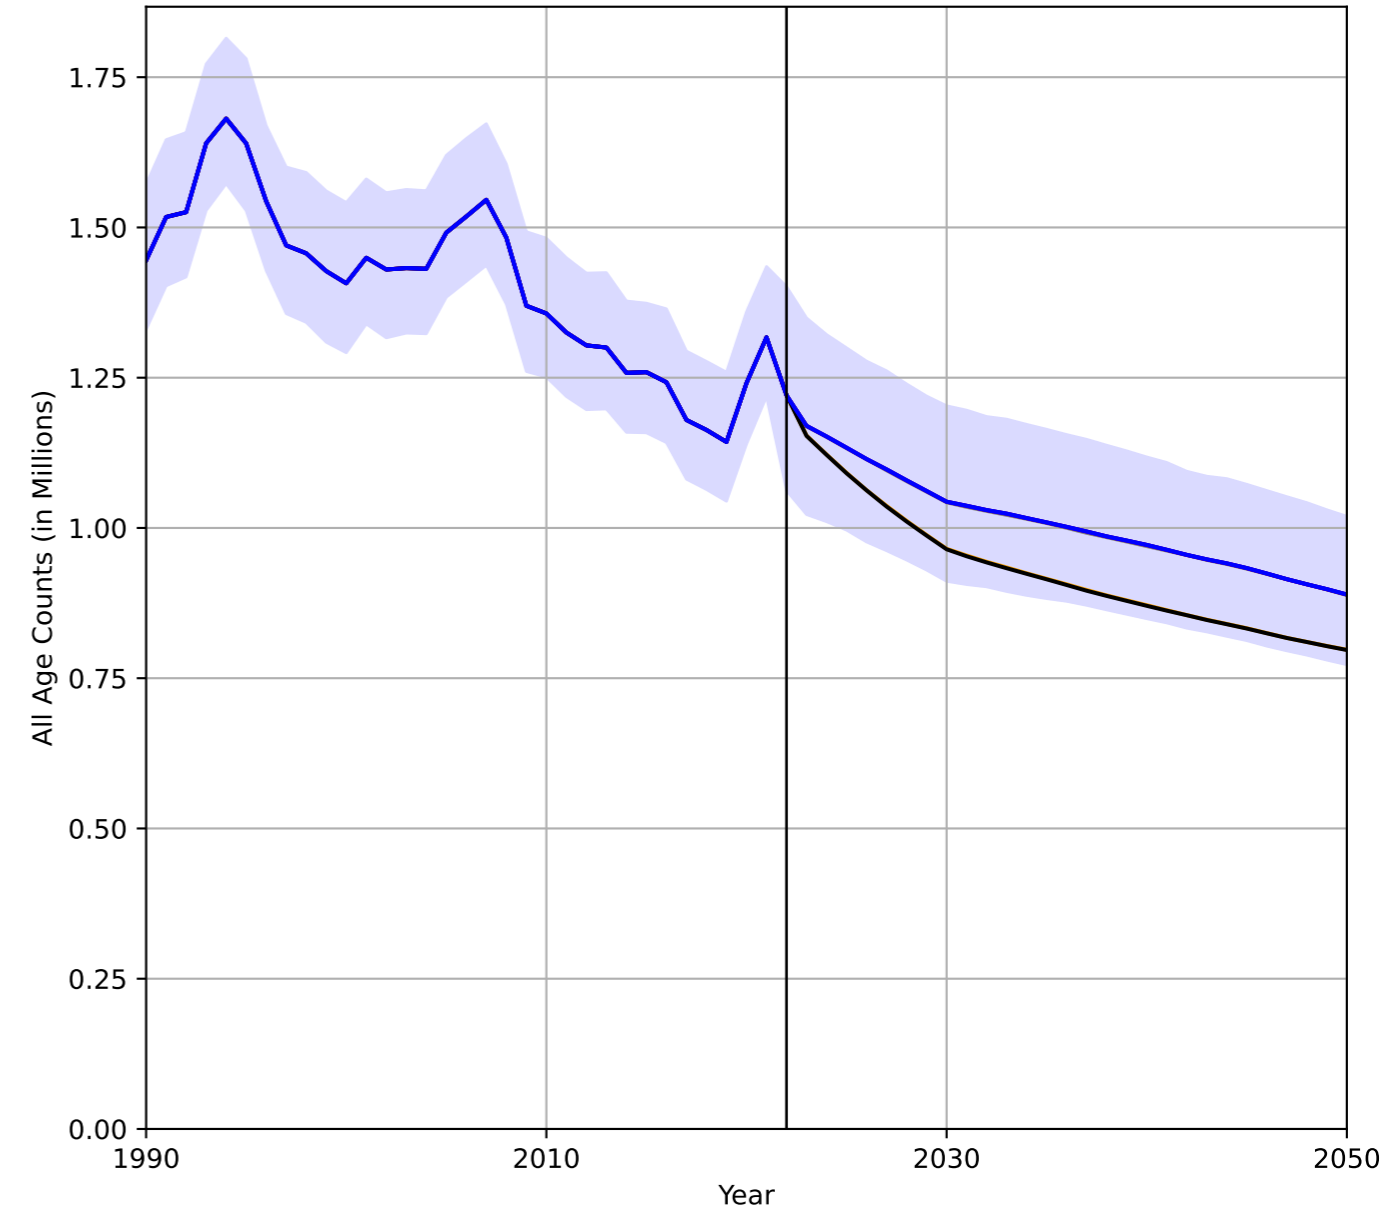

# Moldova

Supplemental Results Figure S10. All-cause age standardised DALY rates (A) and all age DALY counts (B), for the past and for five future scenarios, 1990–2050

1437

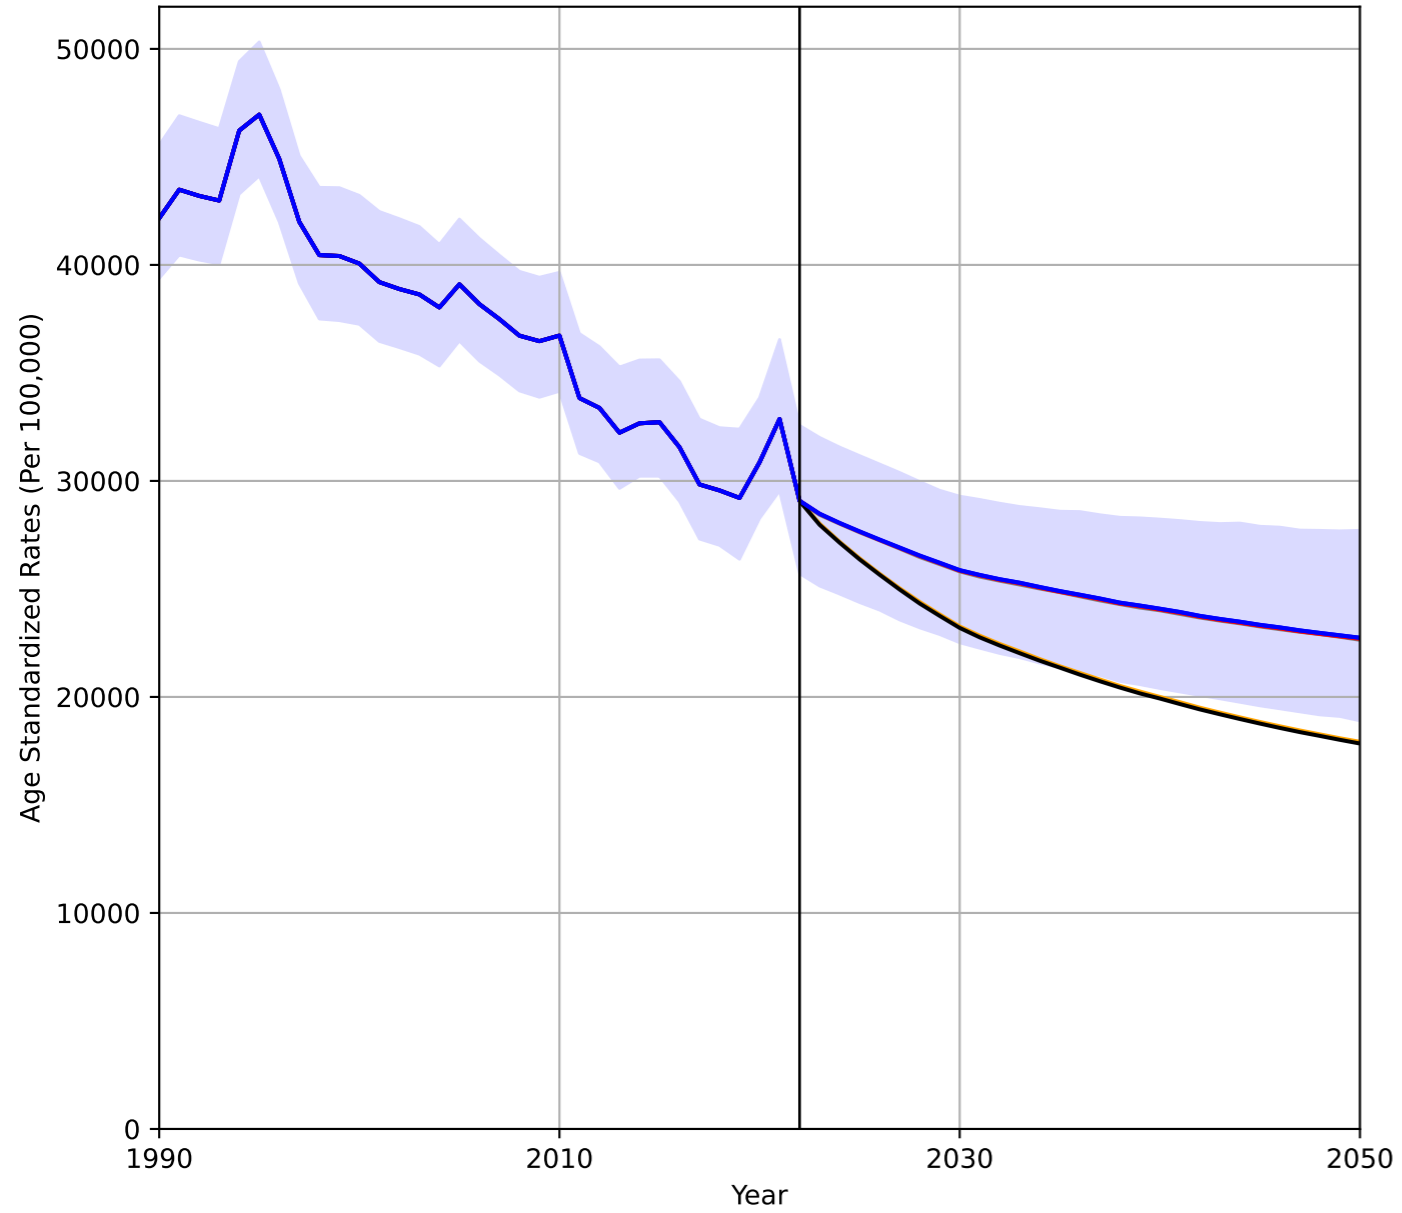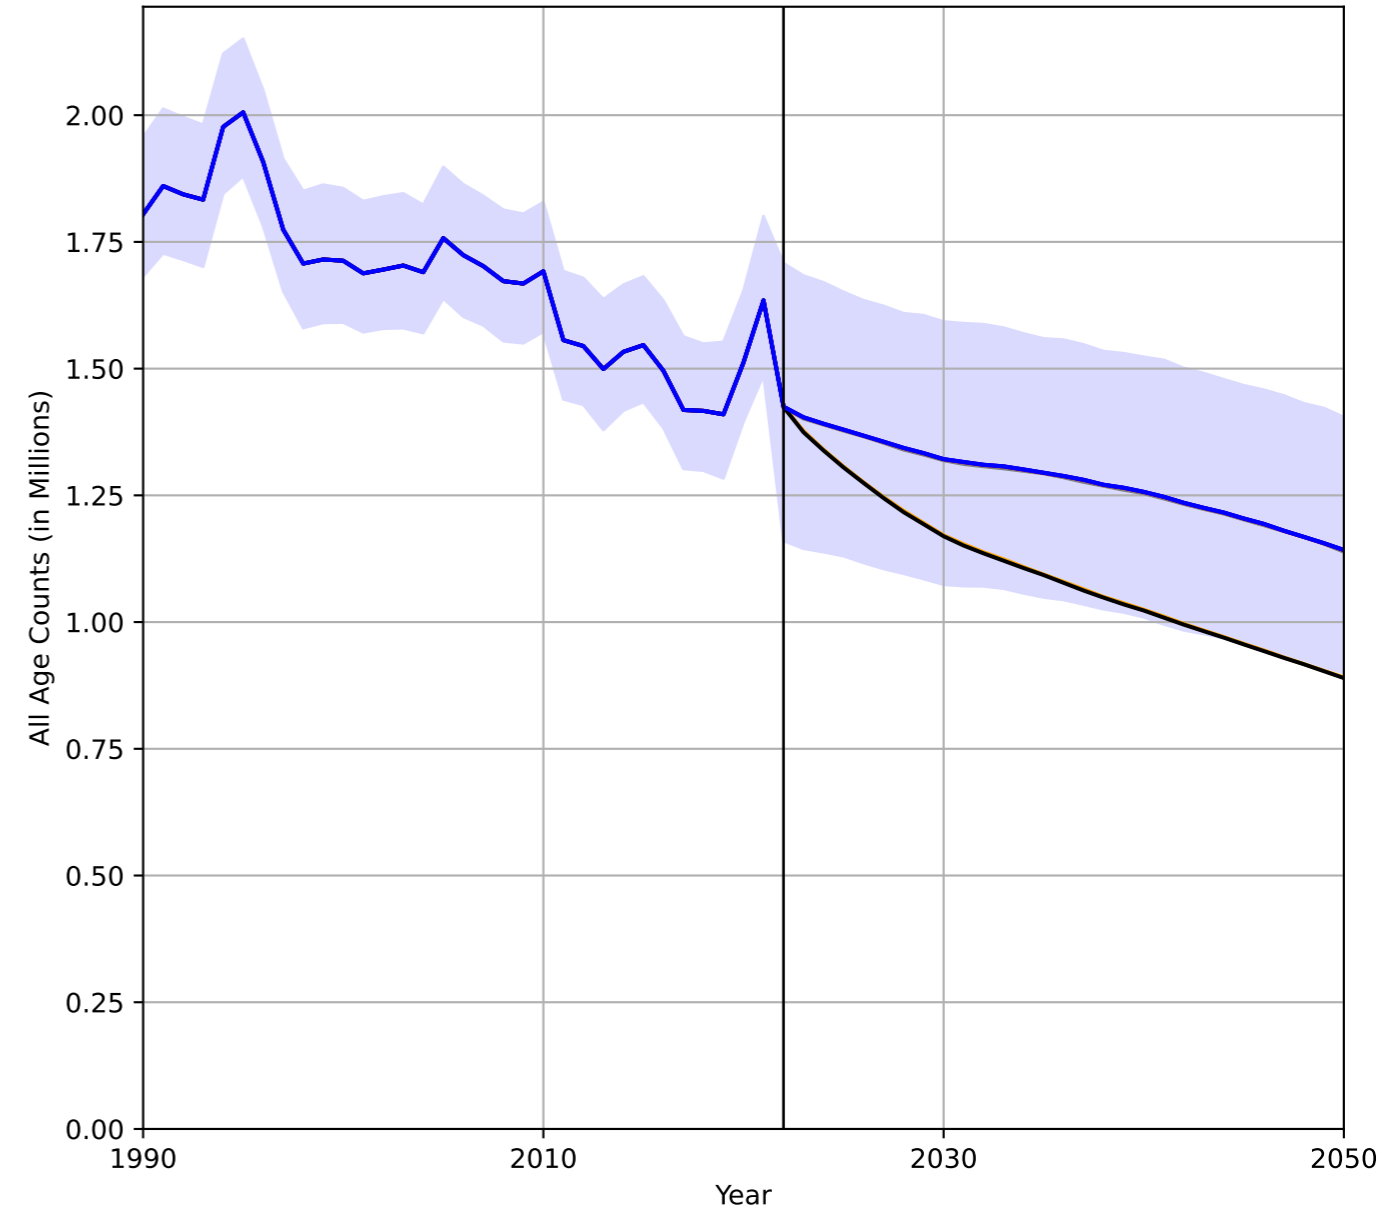

# Russia

Supplemental Results Figure S10. All-cause age standardised DALY rates (A) and all age DALY counts (B), for the past and for five future scenarios, 1990–2050

1438

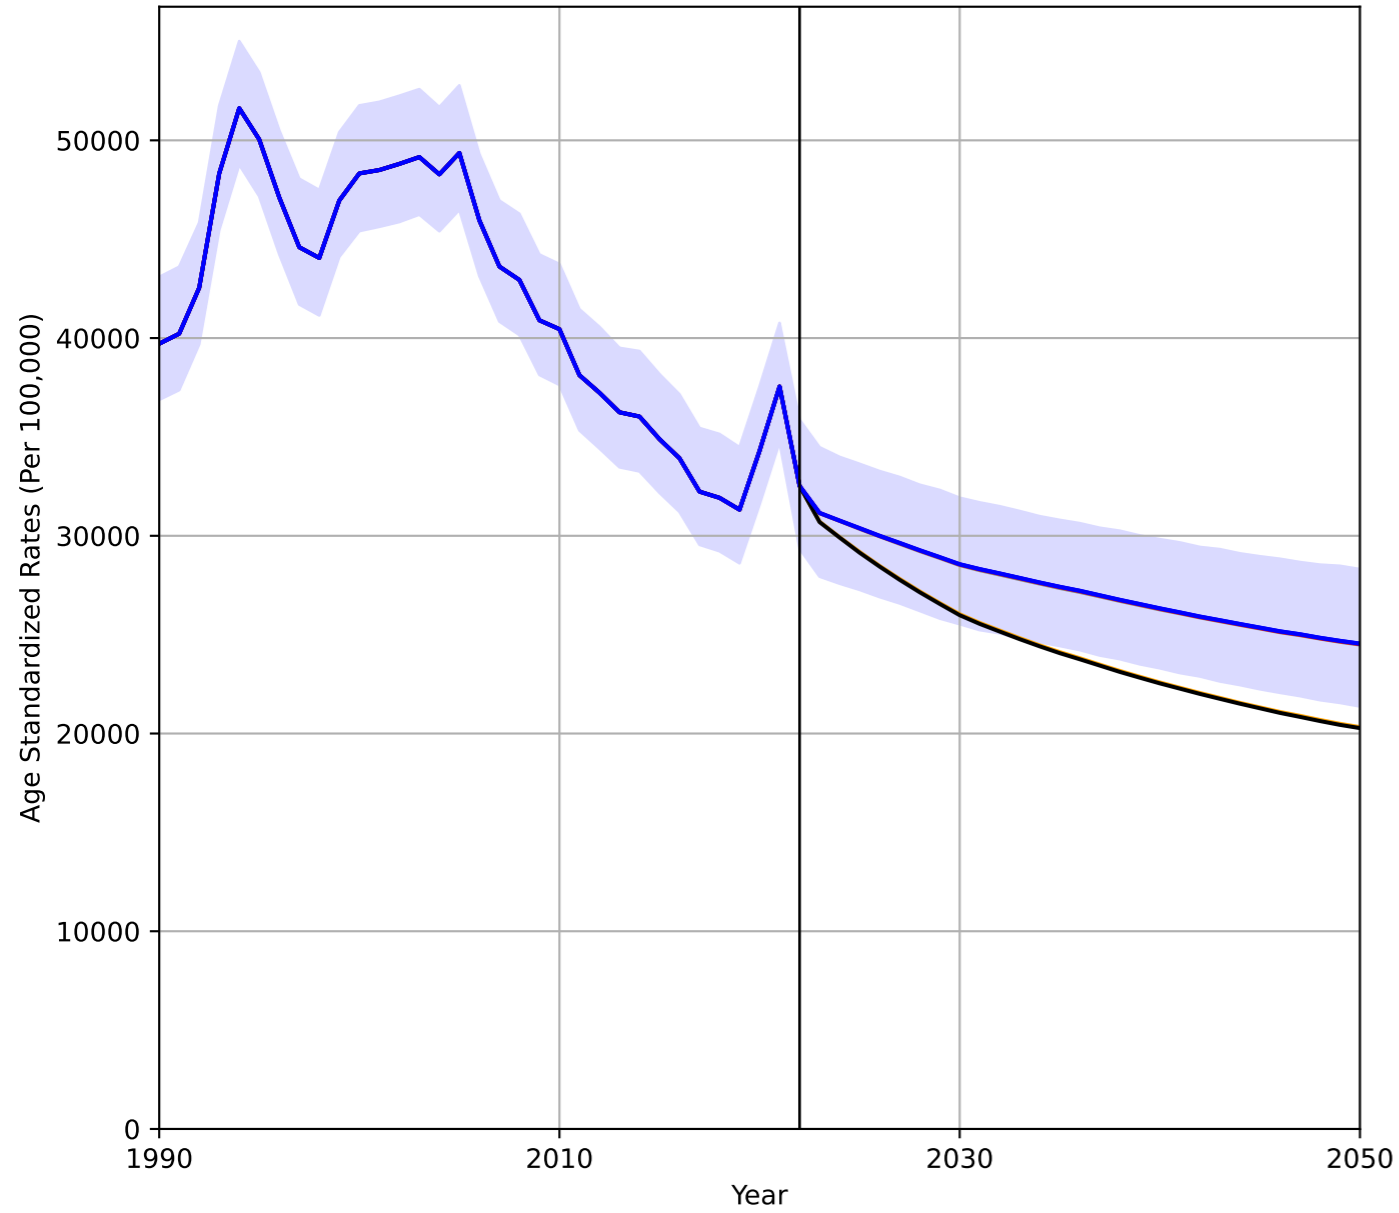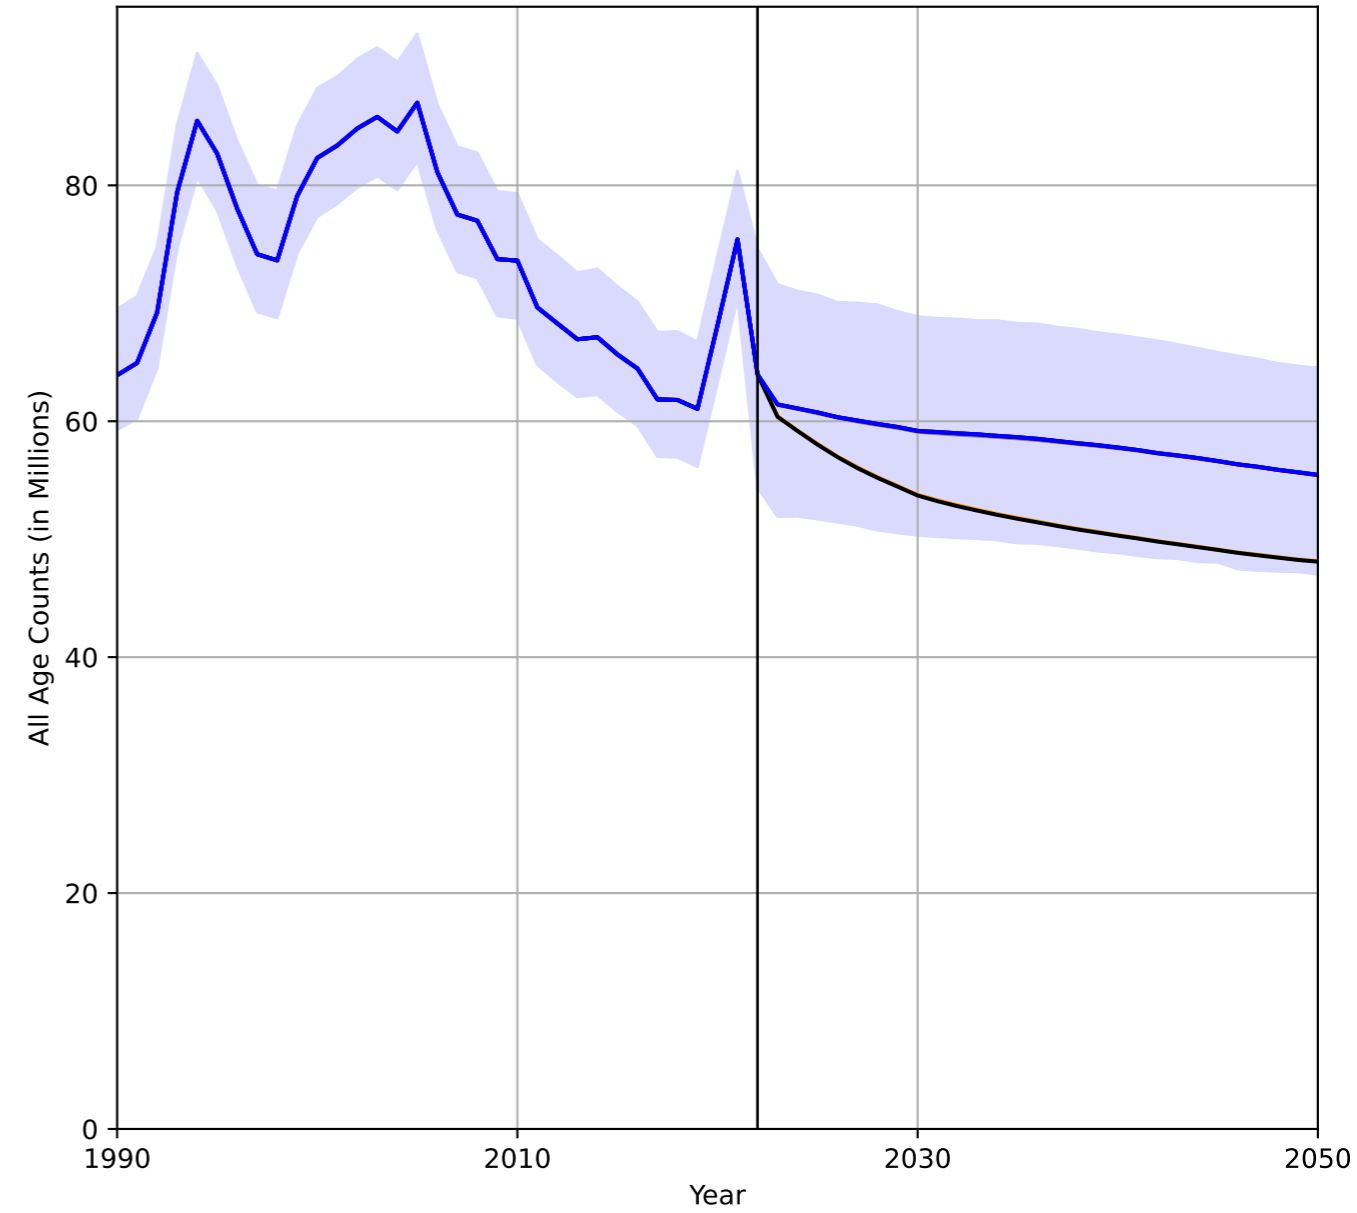

# Ukraine

Supplemental Results Figure S10. All-cause age standardised DALY rates (A) and all age DALY counts (B), for the past and for five future scenarios, 1990–2050

1439

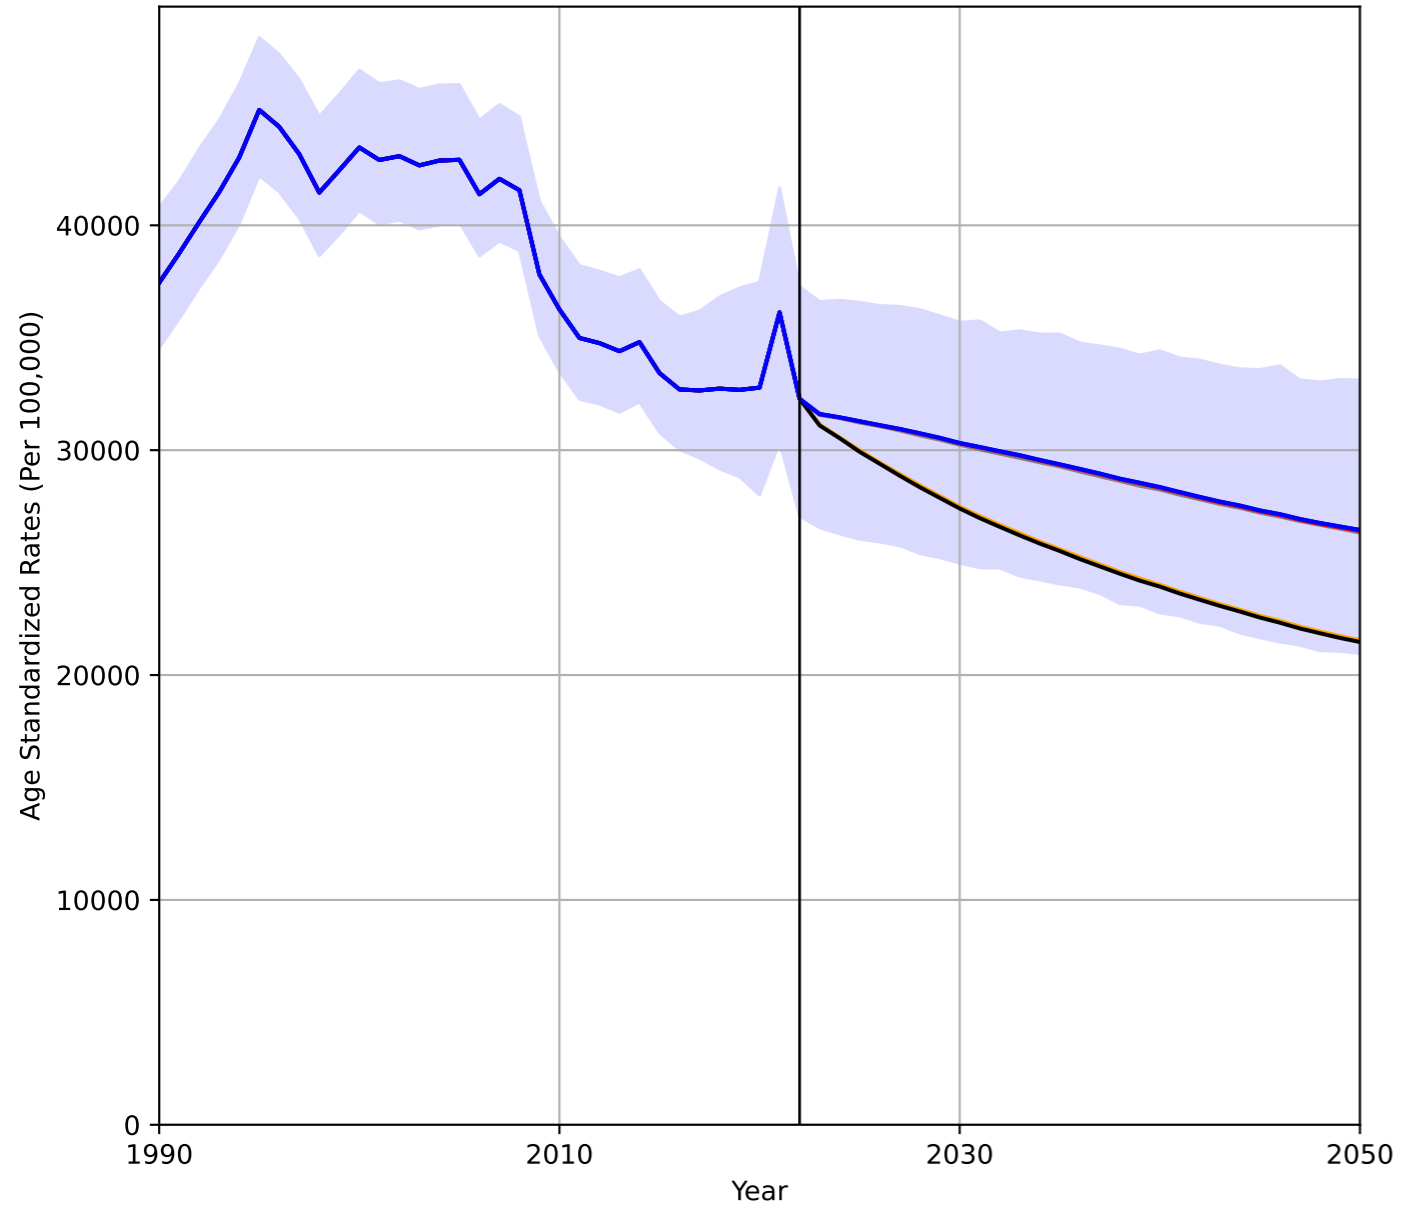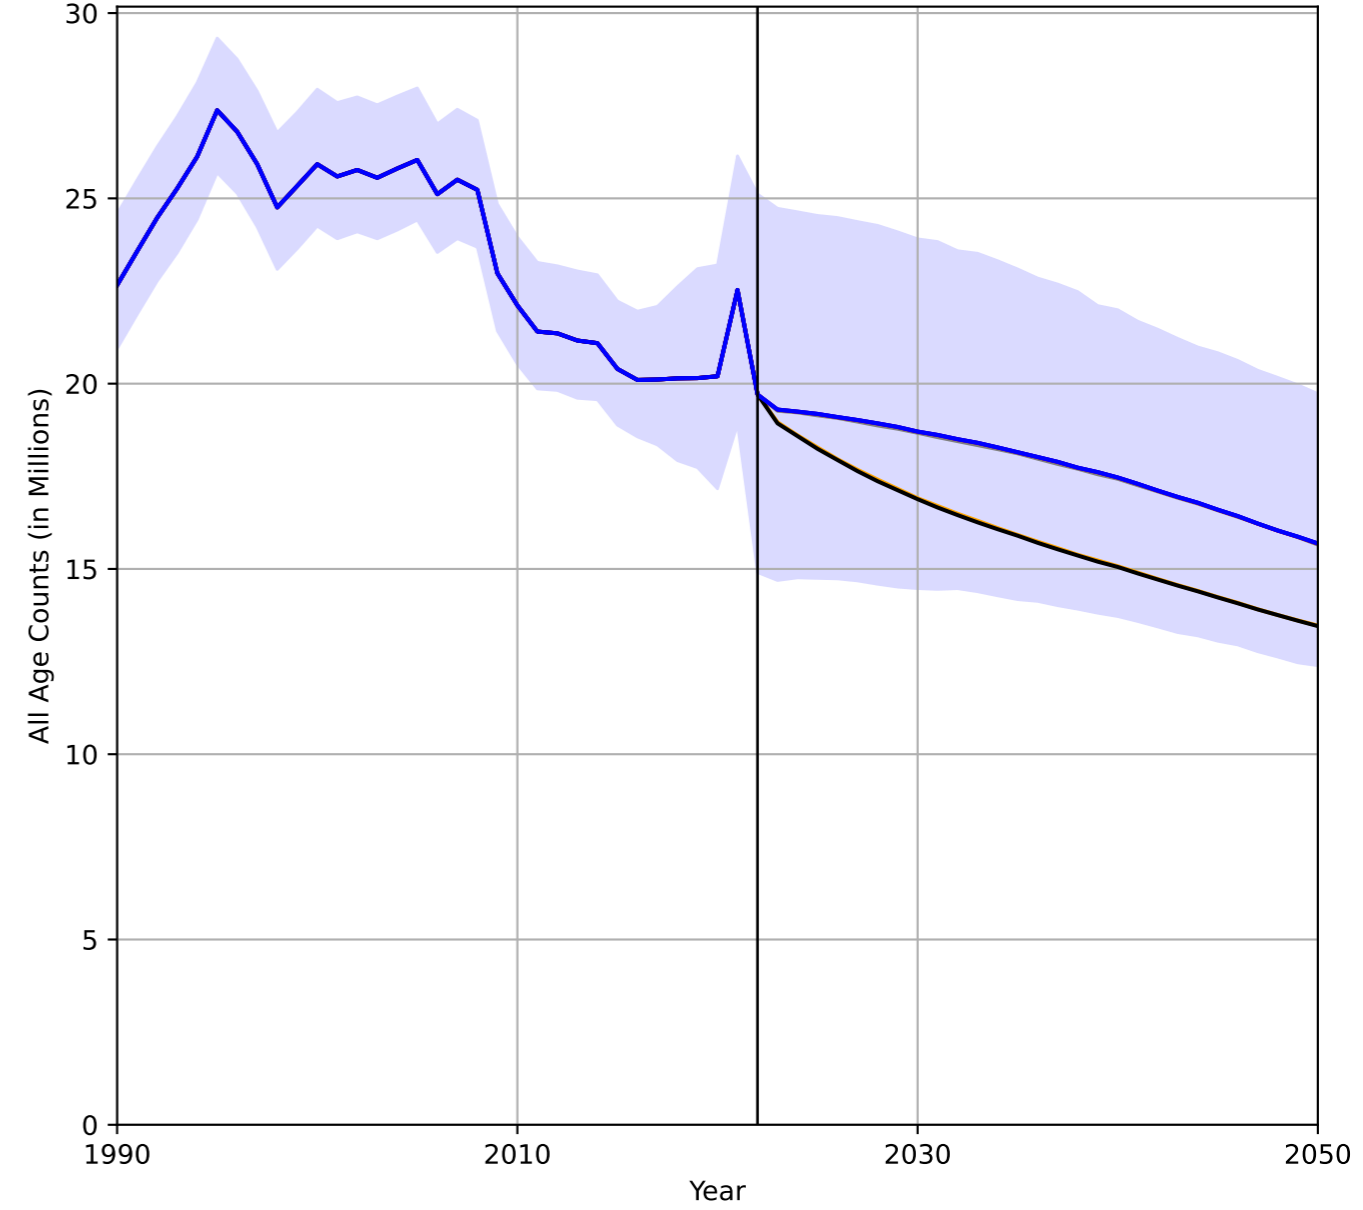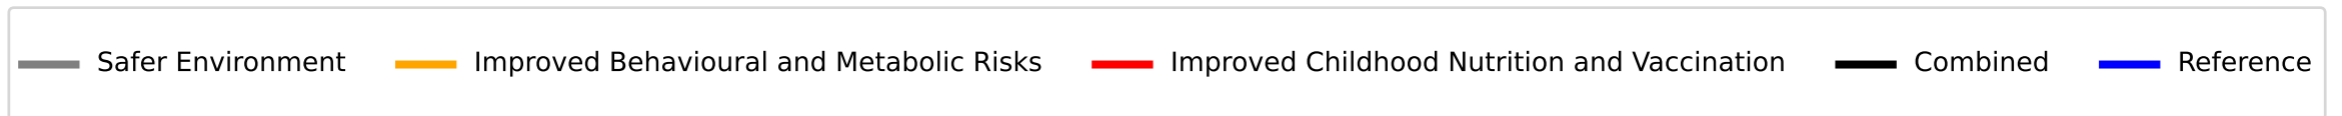



# Australia

Supplemental Results Figure S10. All-cause age standardised DALY rates (A) and all age DALY counts (B), for the past and for five future scenarios, 1990–2050

1440

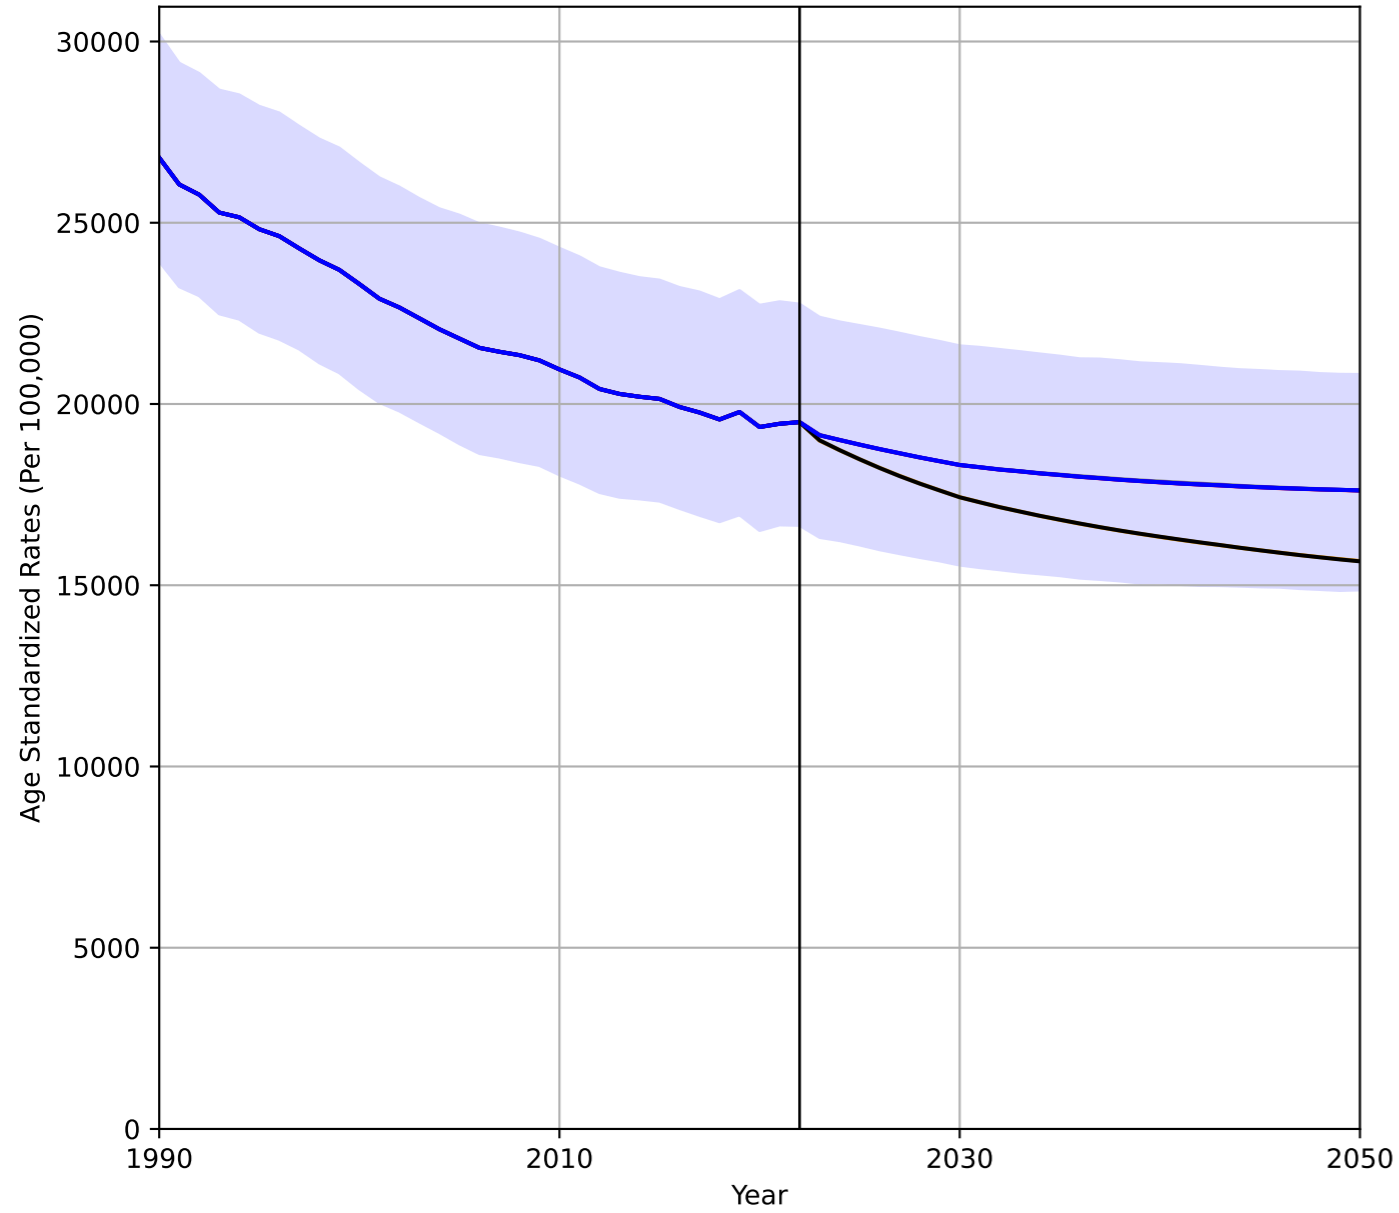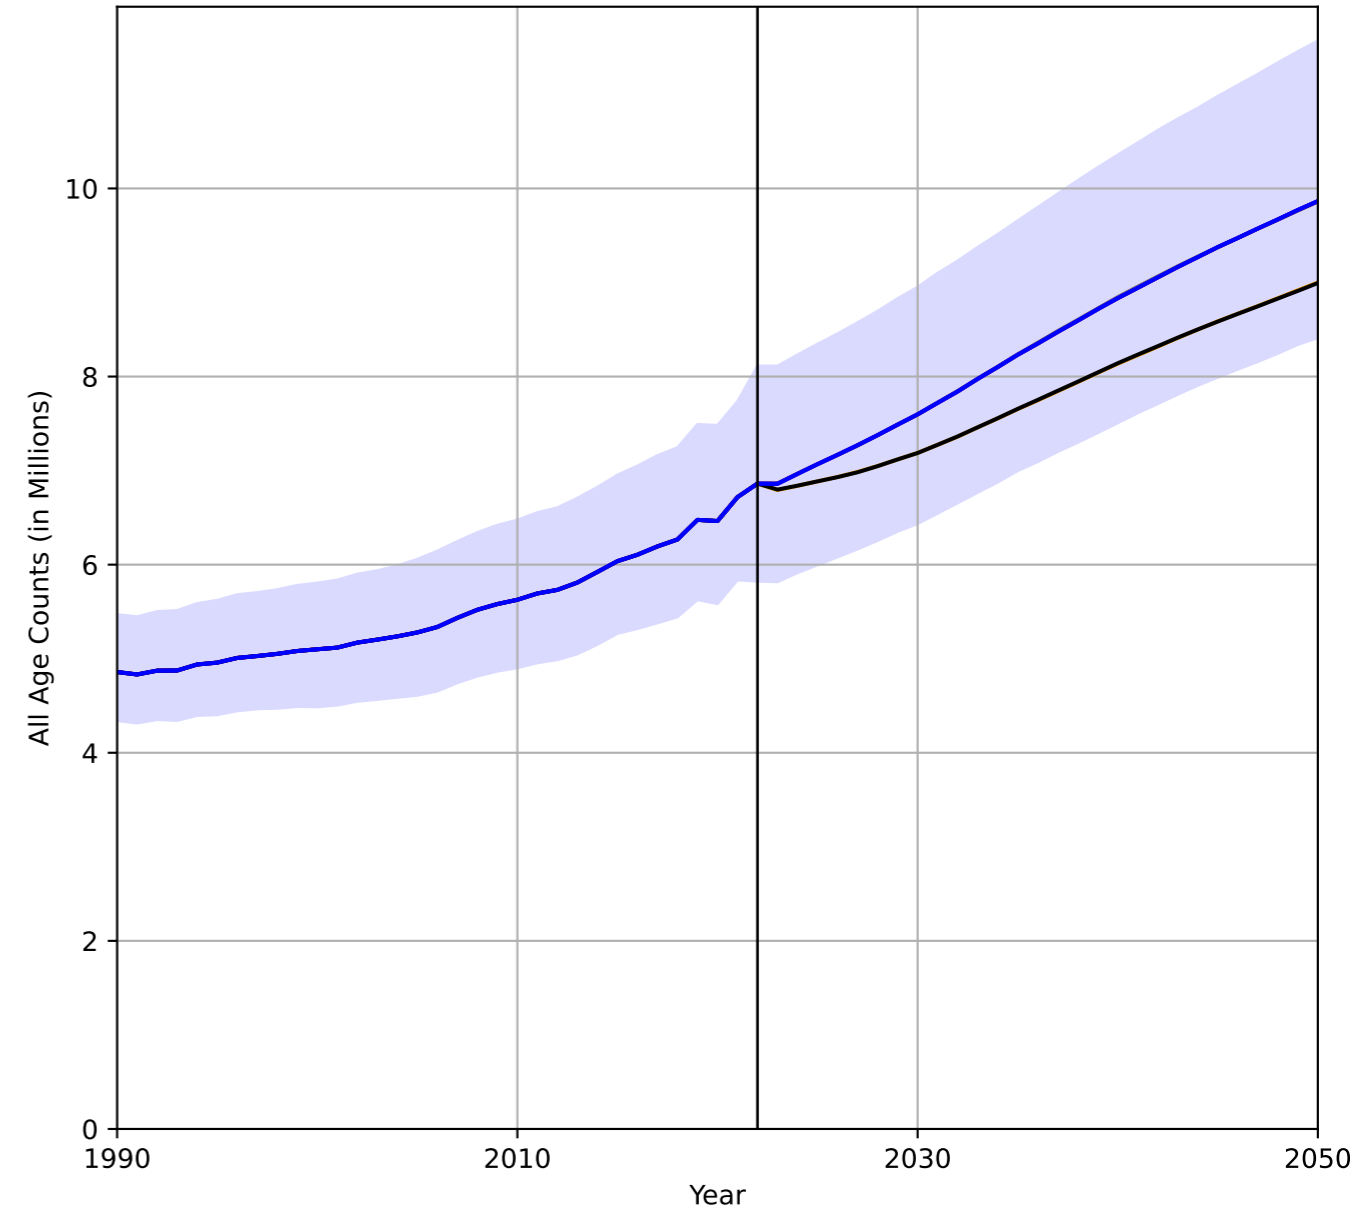

# New Zealand

Supplemental Results Figure S10. All-cause age standardised DALY rates (A) and all age DALY counts (B), for the past and for five future scenarios, 1990–2050

1441

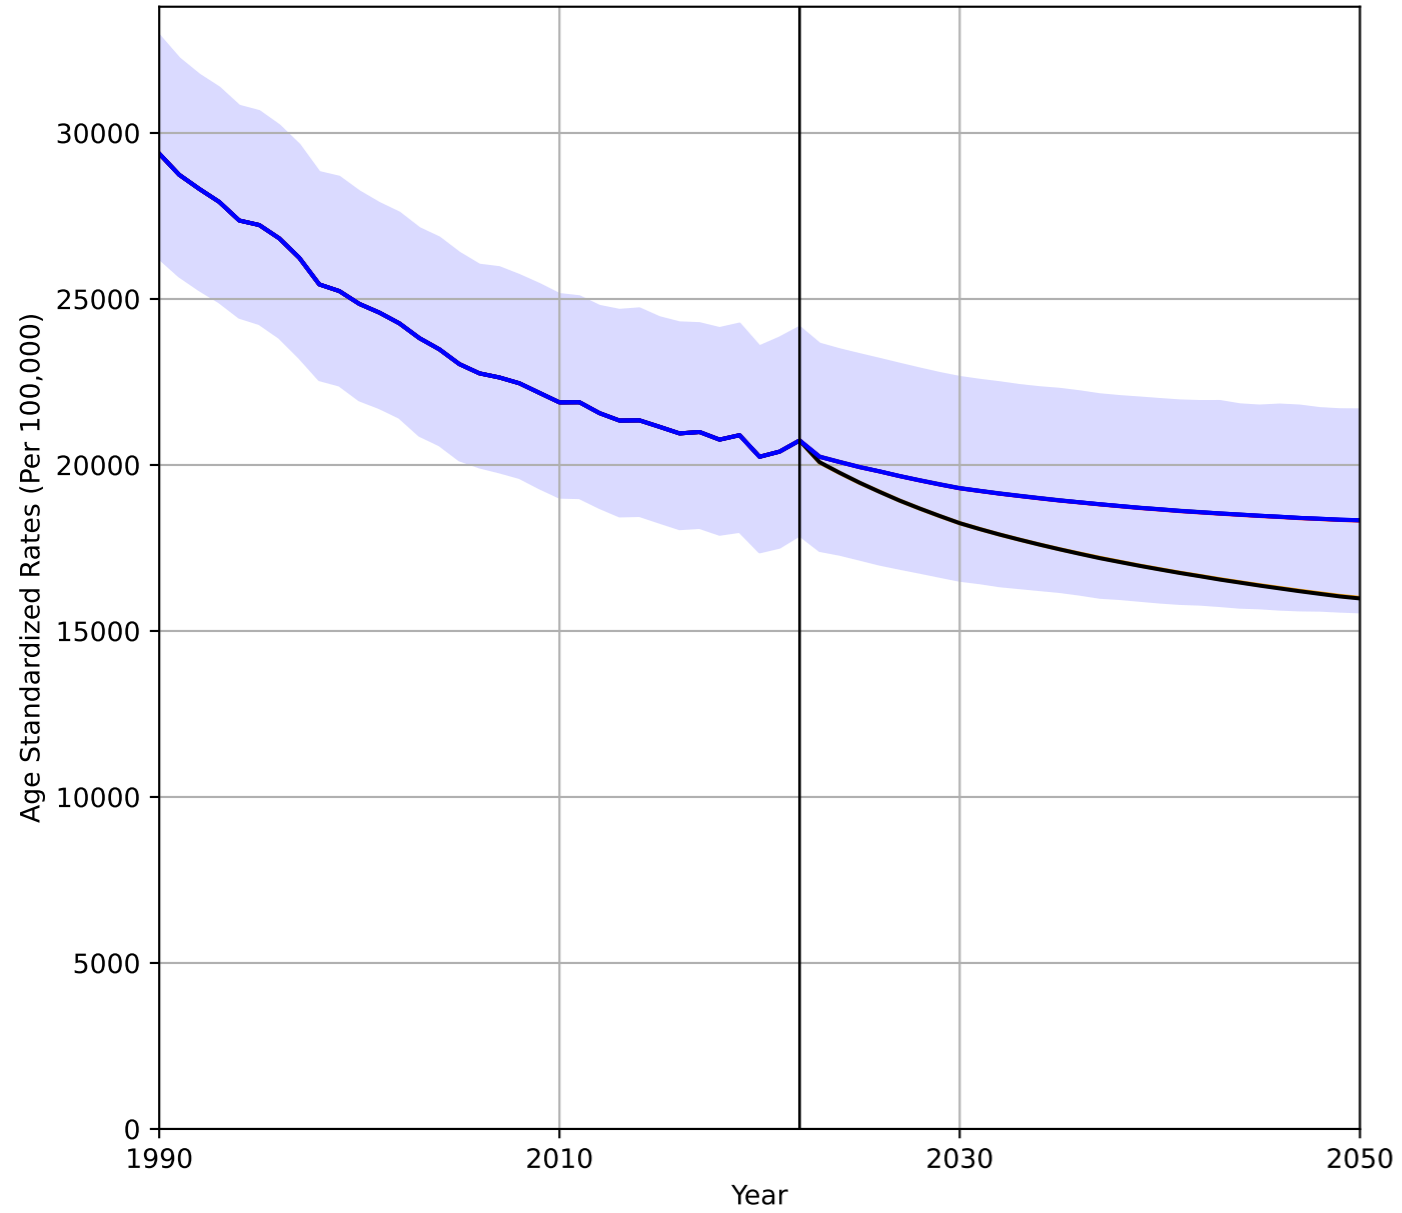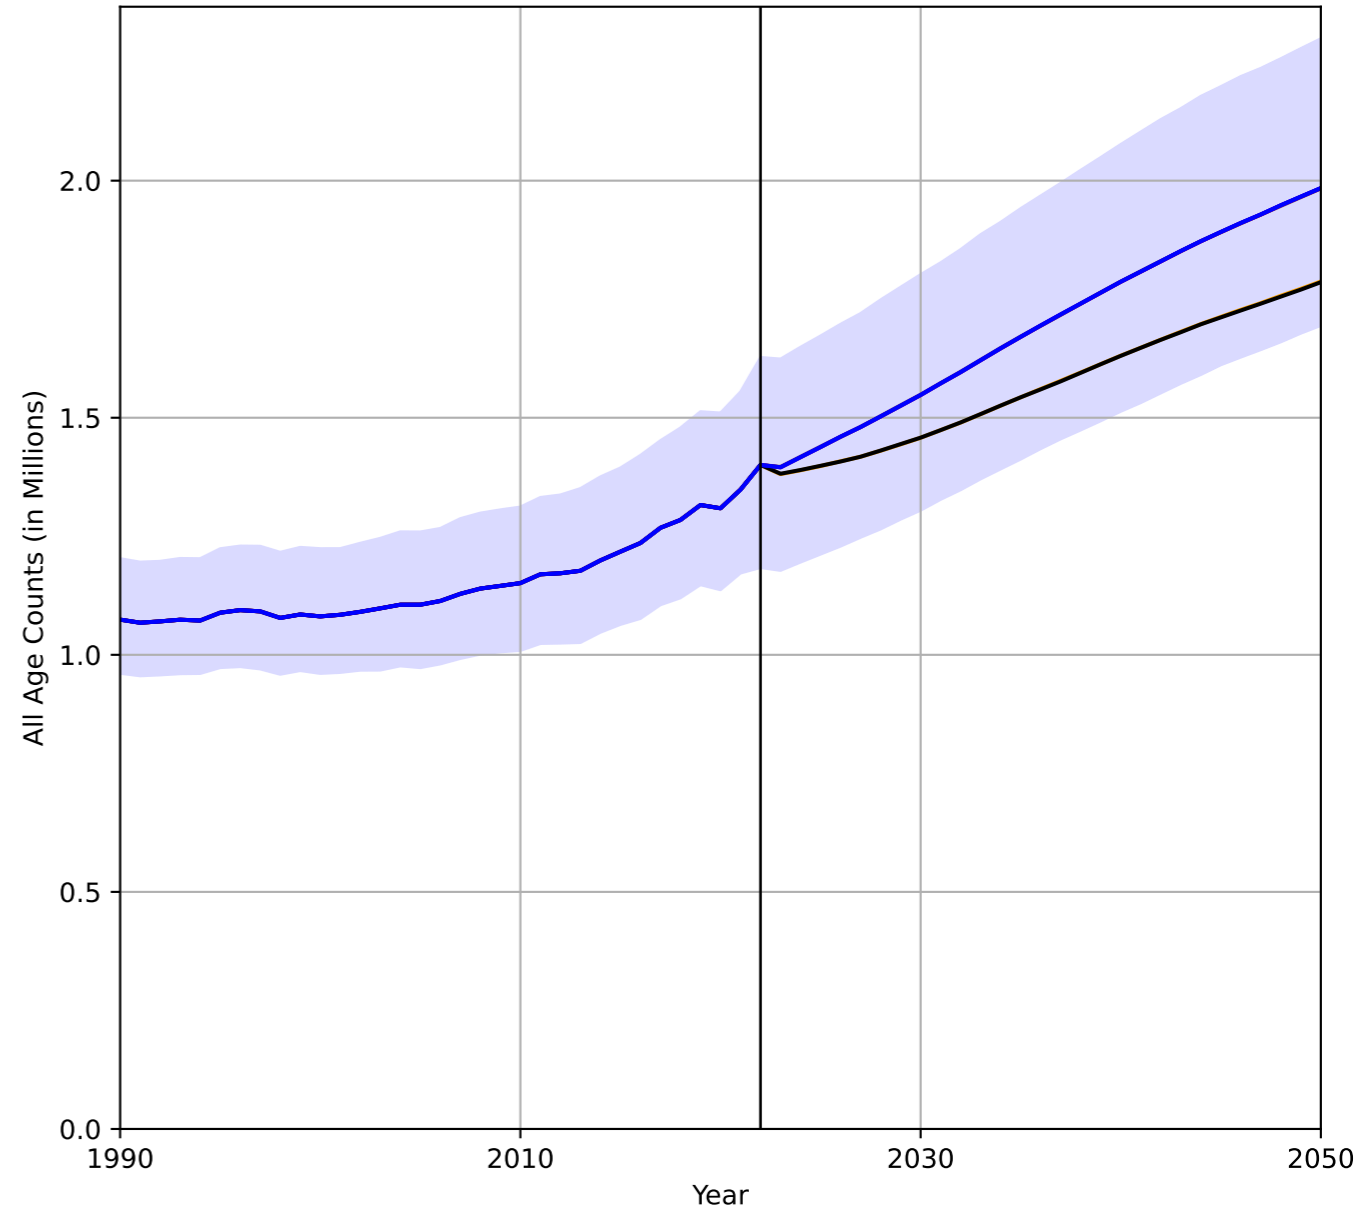

# Brunei

Supplemental Results Figure S10. All-cause age standardised DALY rates (A) and all age DALY counts (B), for the past and for five future scenarios, 1990–2050

1442

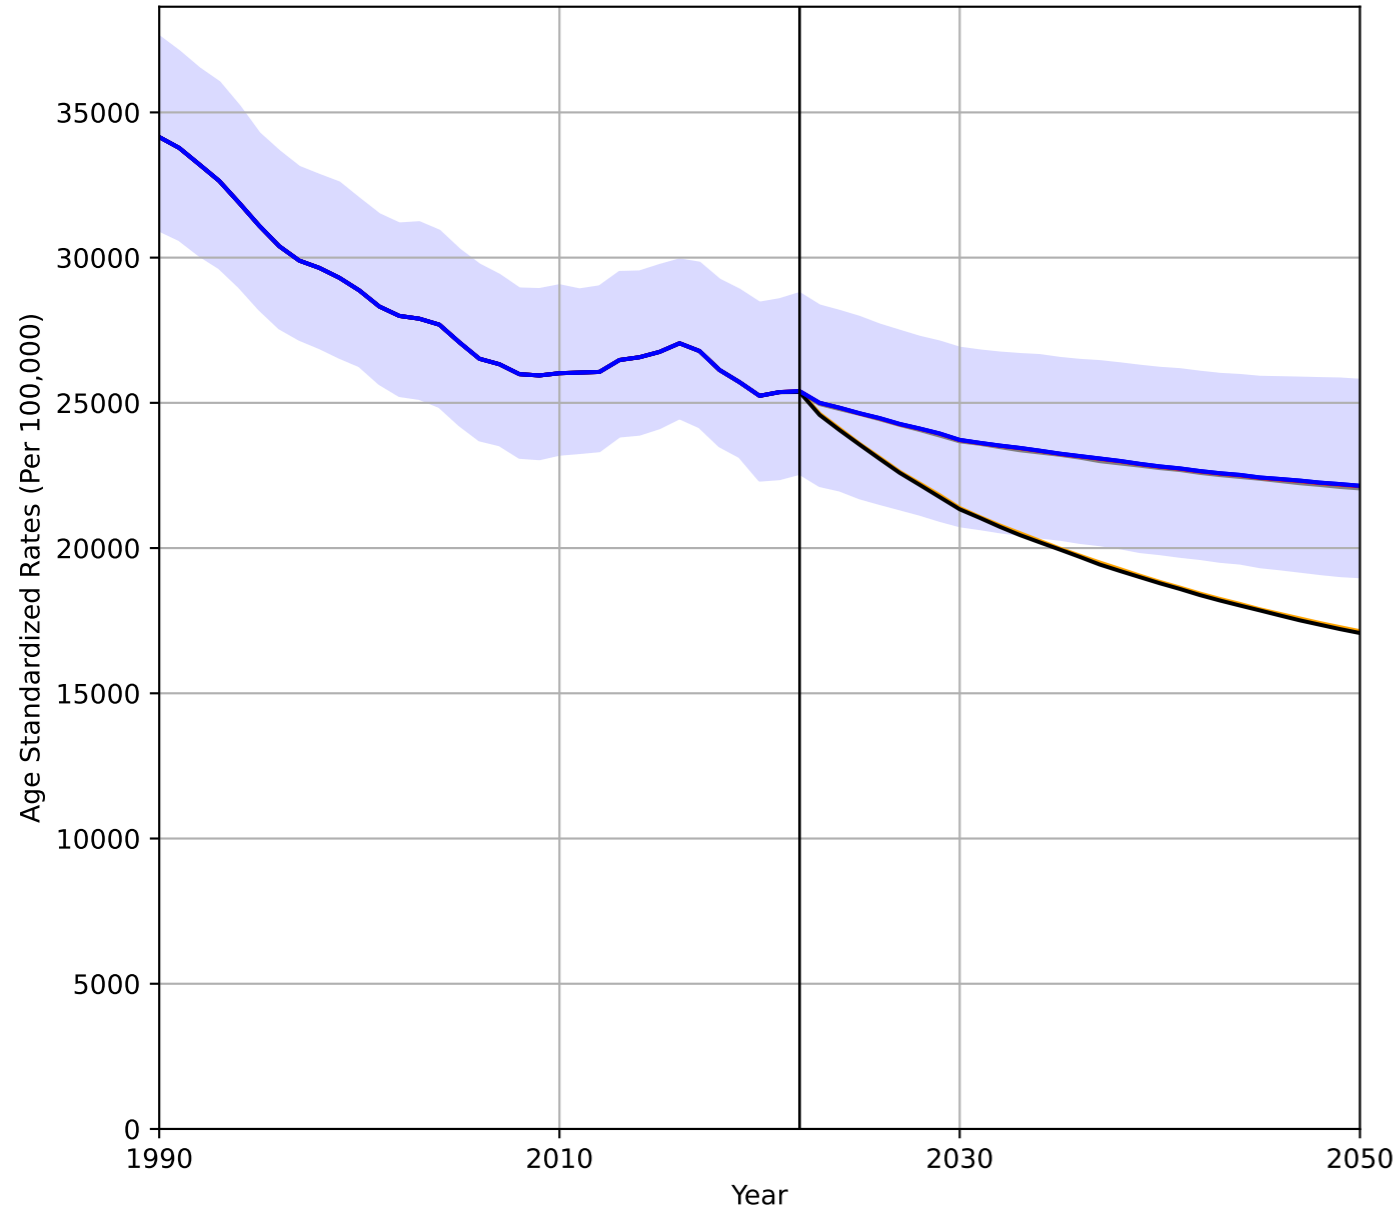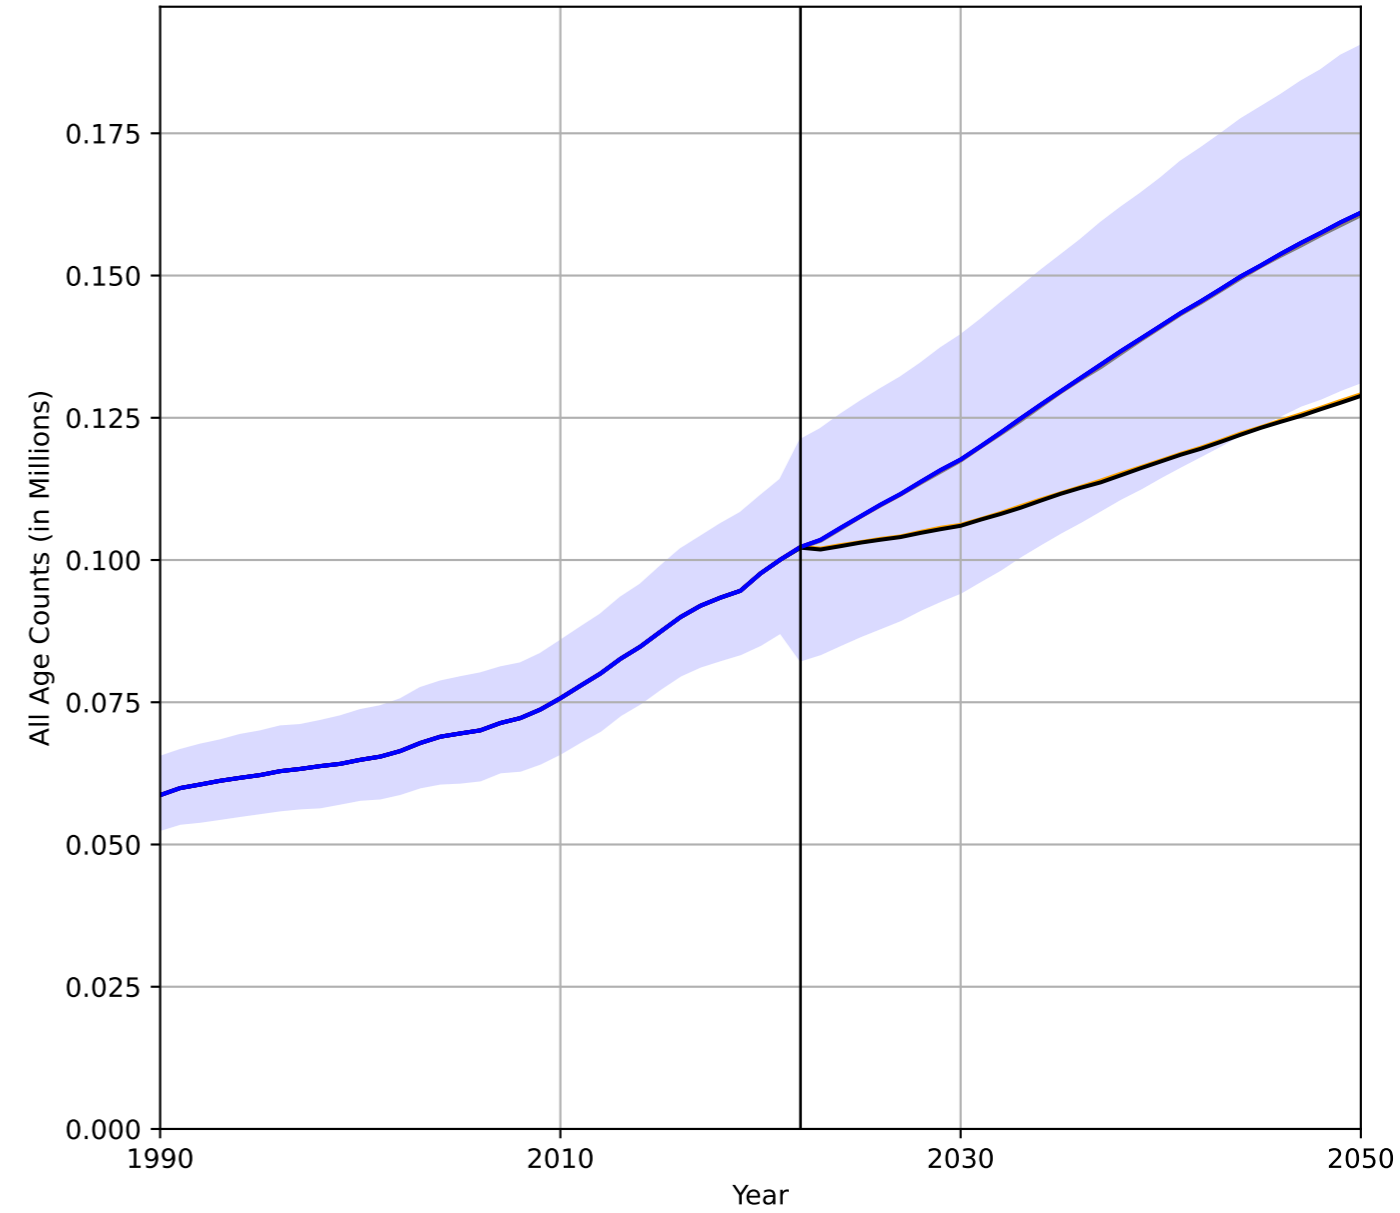

# Japan

Supplemental Results Figure S10. All-cause age standardised DALY rates (A) and all age DALY counts (B), for the past and for five future scenarios, 1990–2050

1443

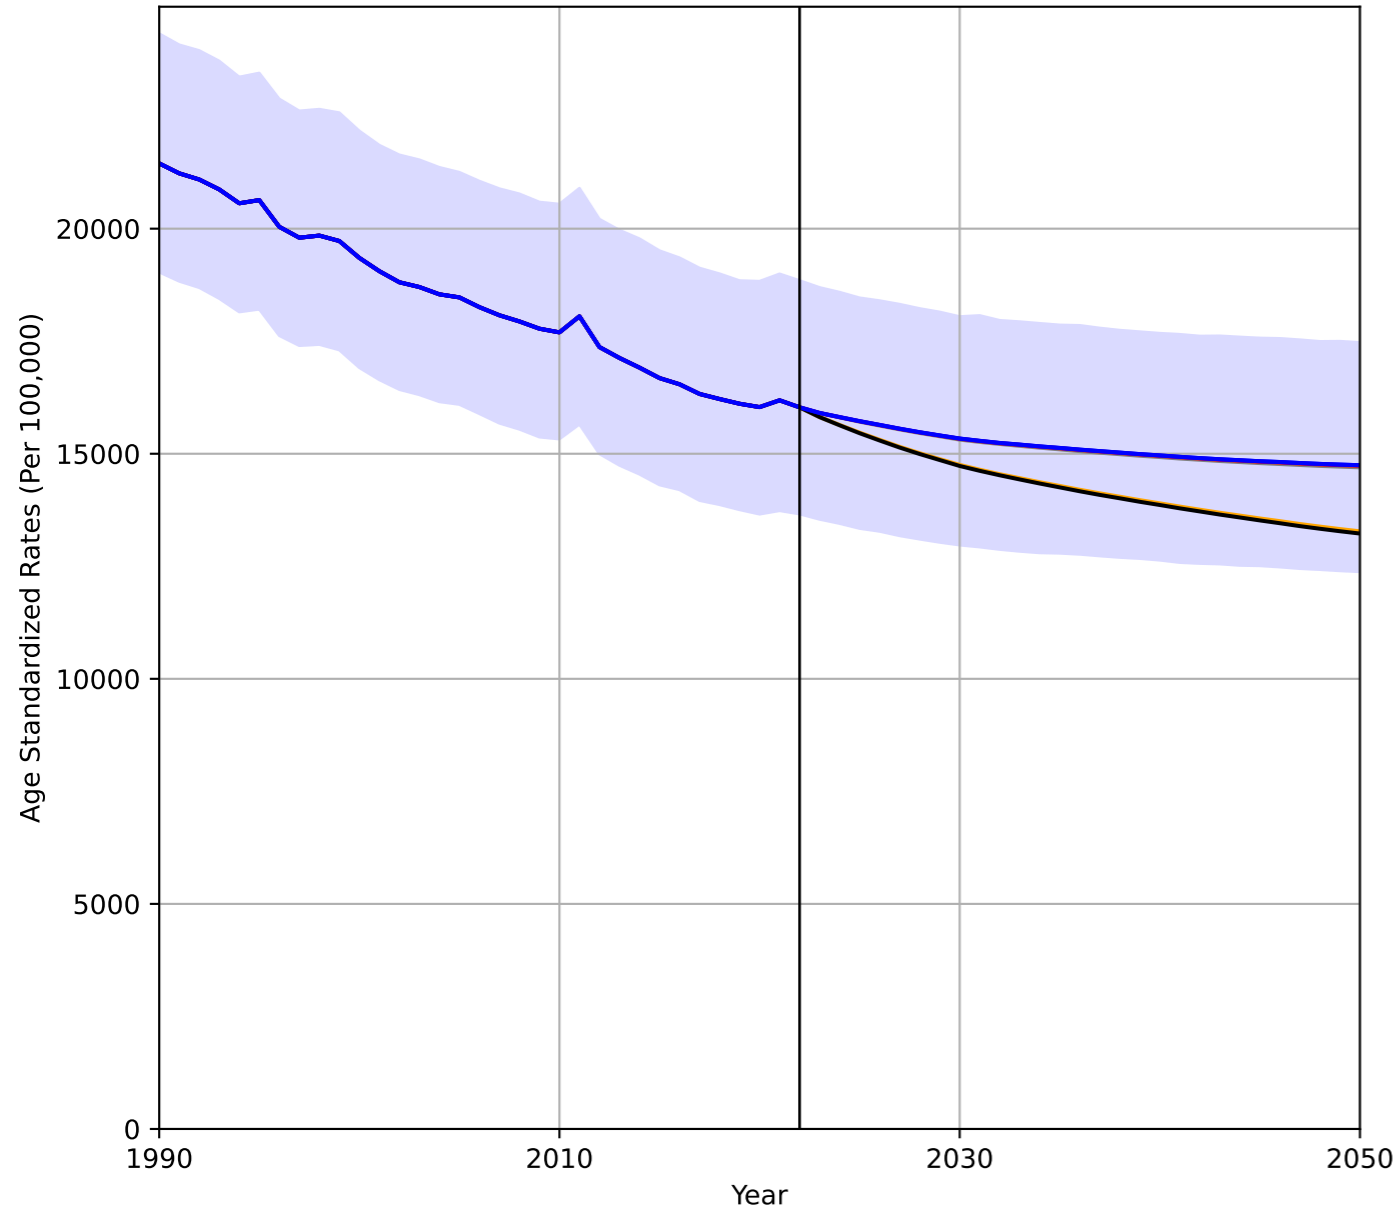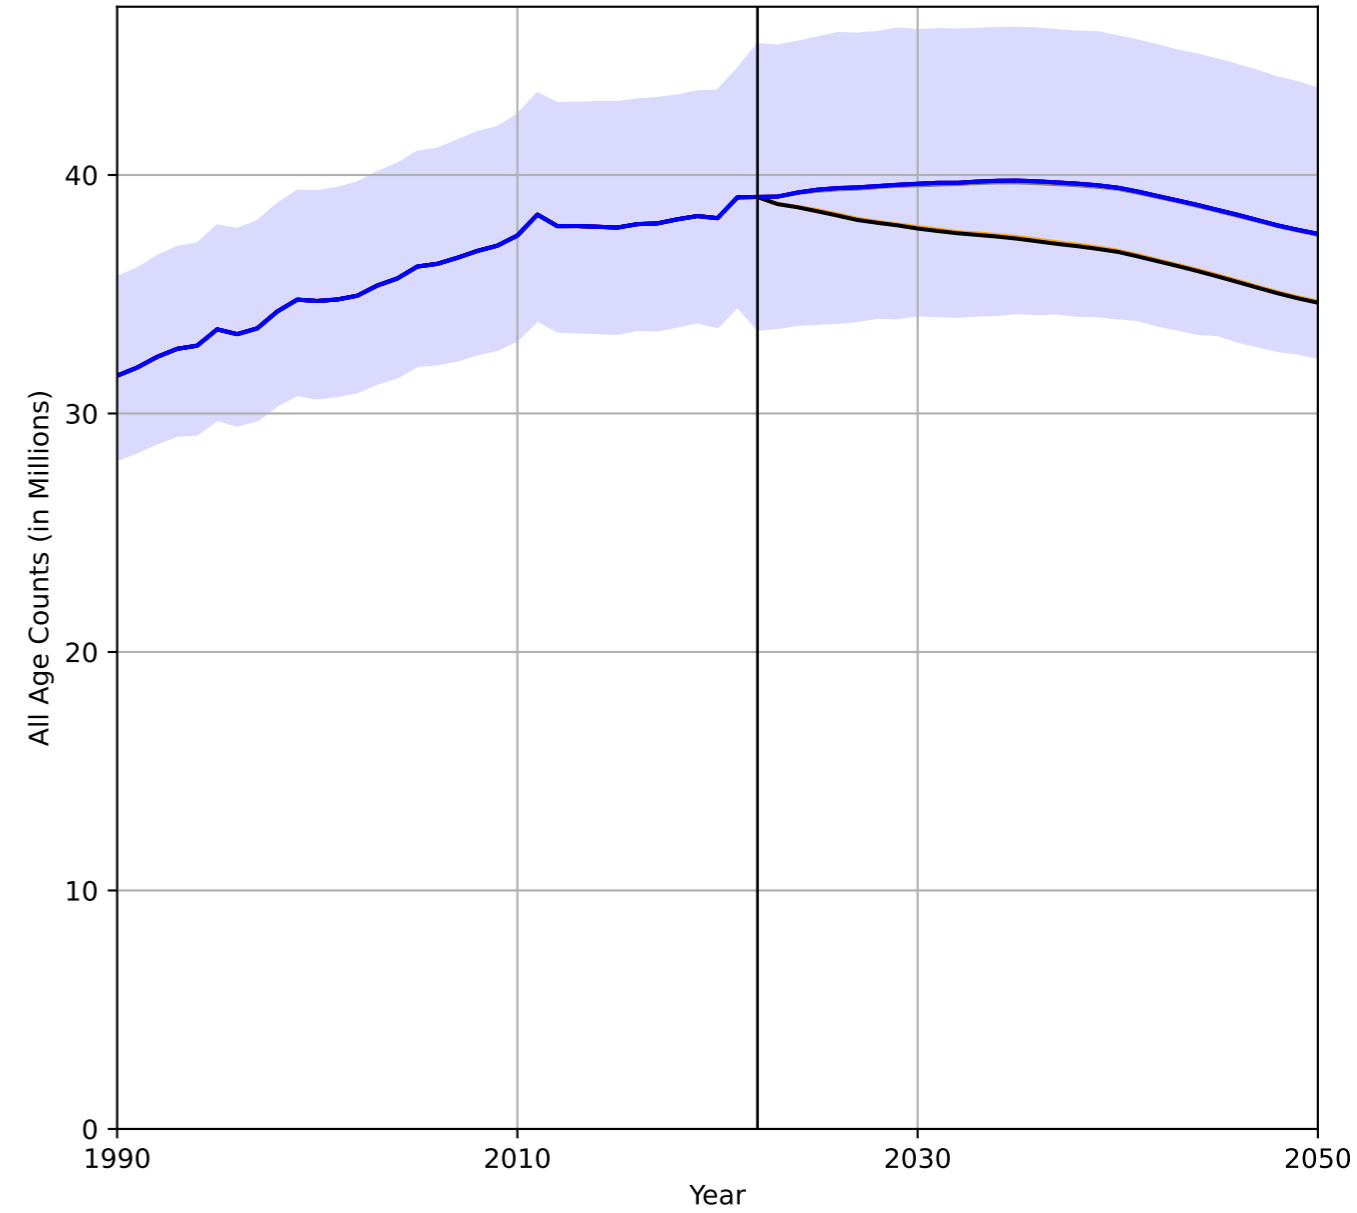

# South Korea

Supplemental Results Figure S10. All-cause age standardised DALY rates (A) and all age DALY counts (B), for the past and for five future scenarios, 1990–2050

1444

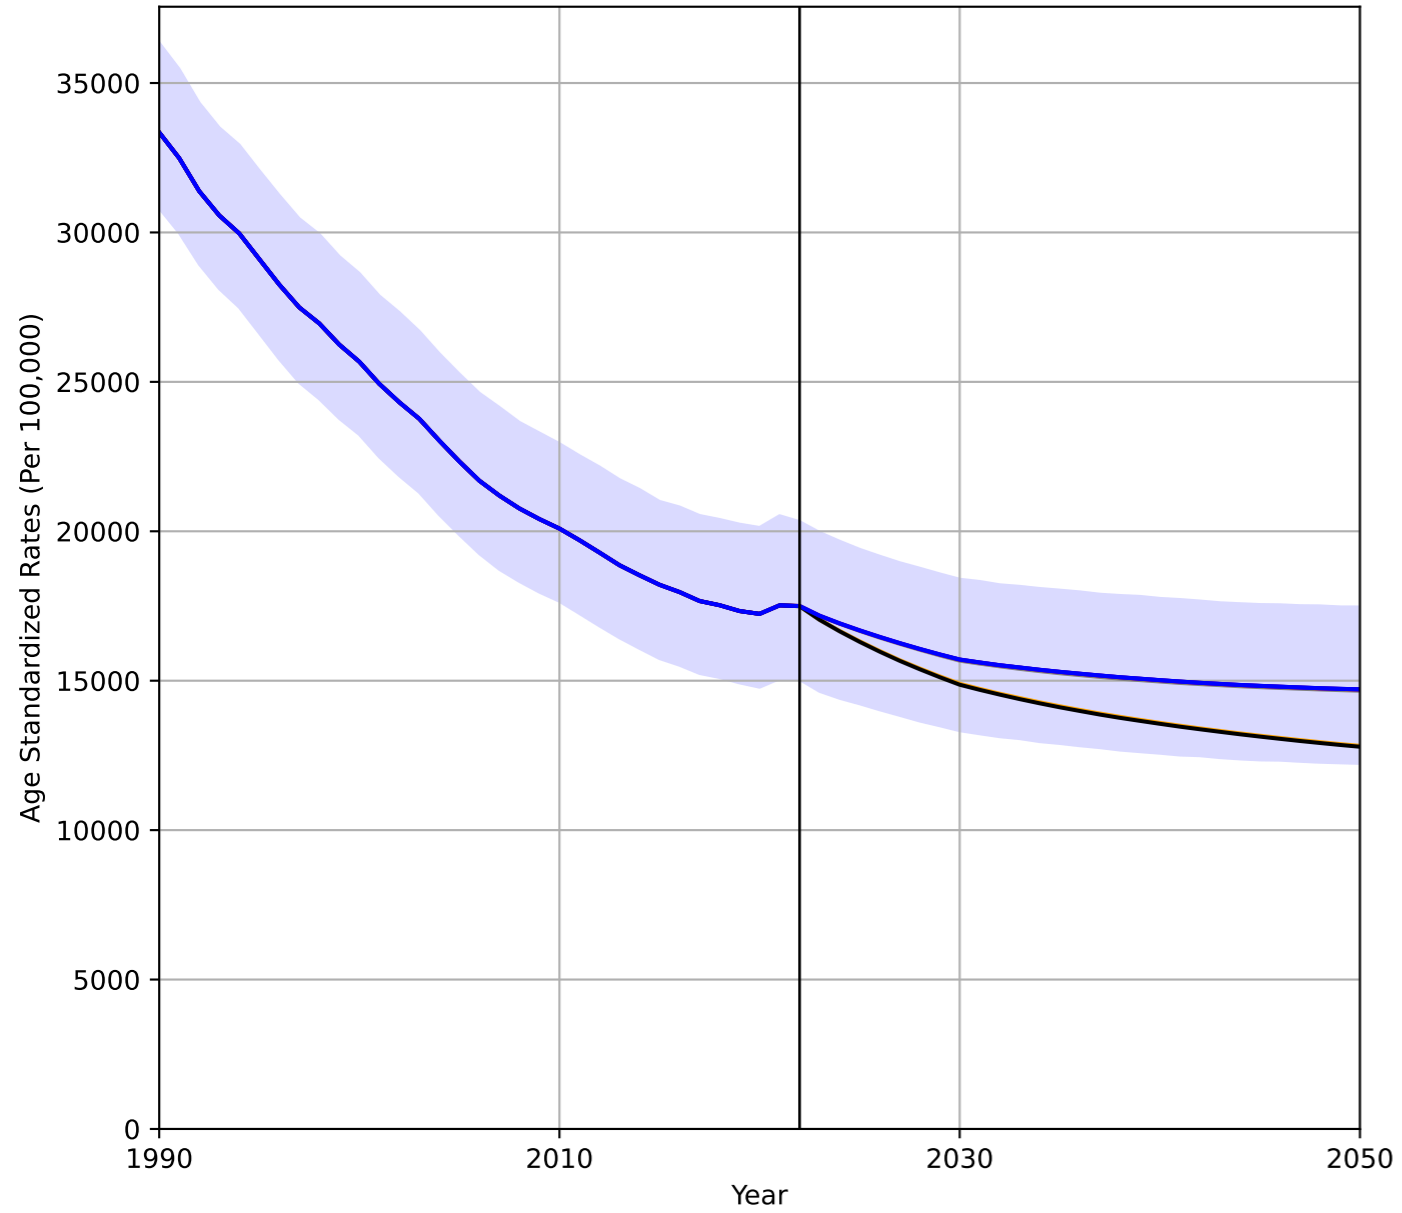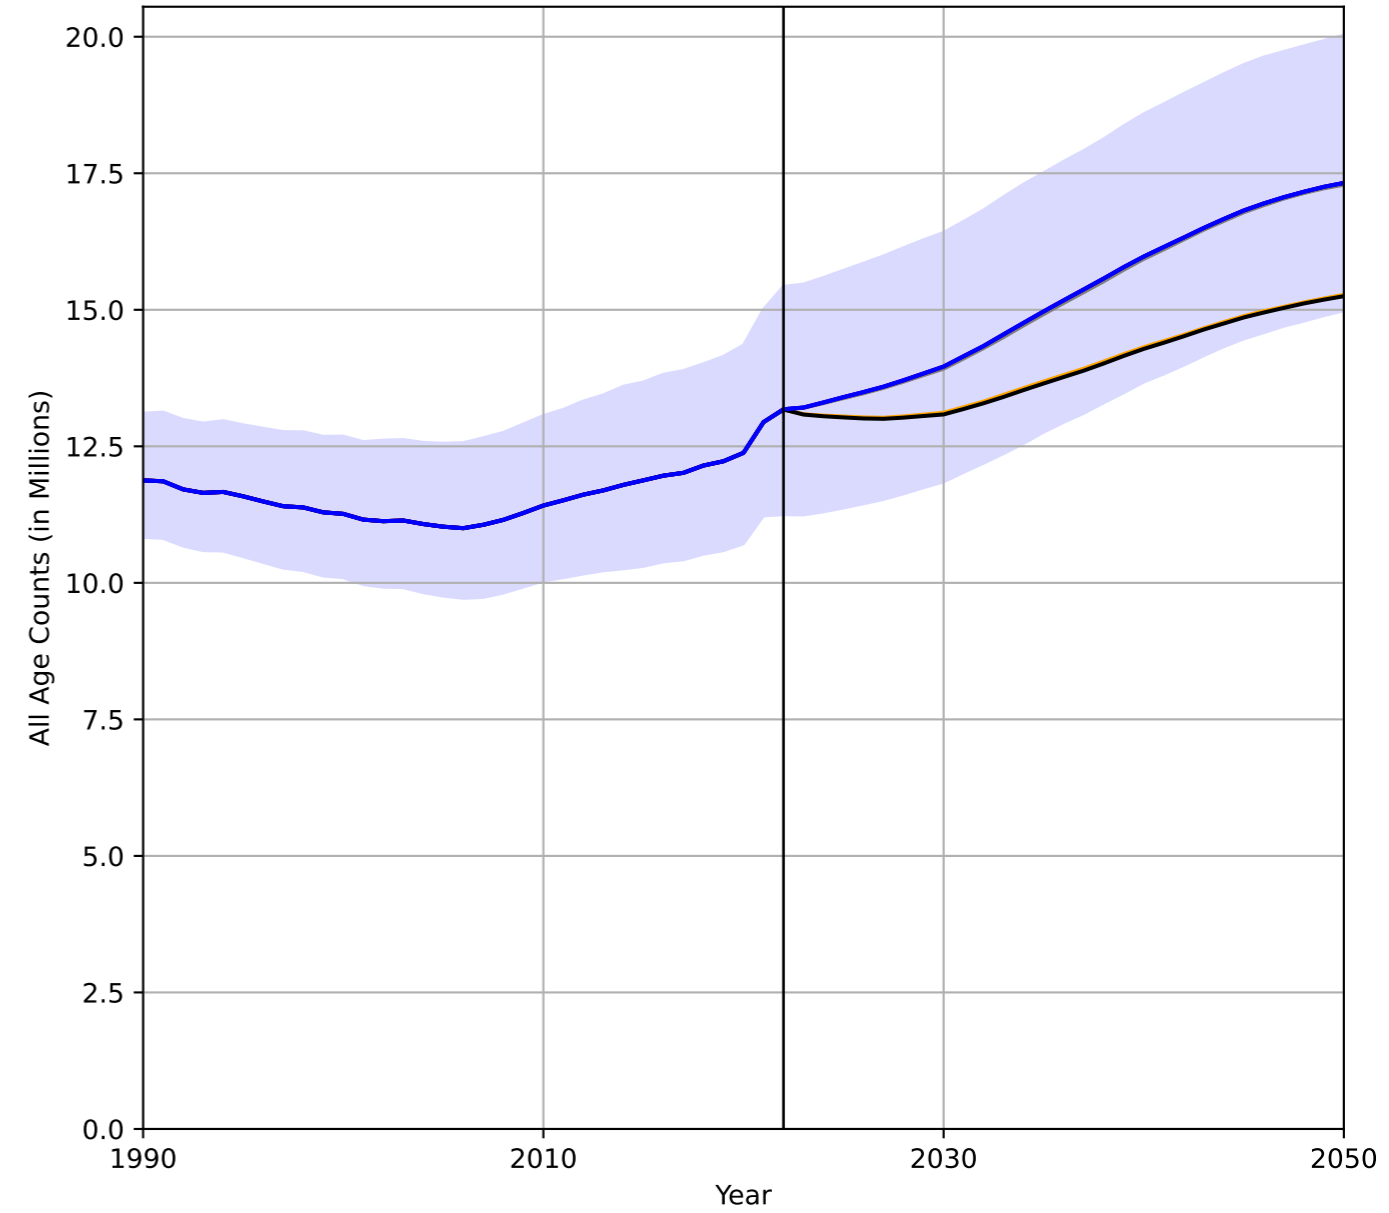

# Singapore

Supplemental Results Figure S10. All-cause age standardised DALY rates (A) and all age DALY counts (B), for the past and for five future scenarios, 1990–2050

1445

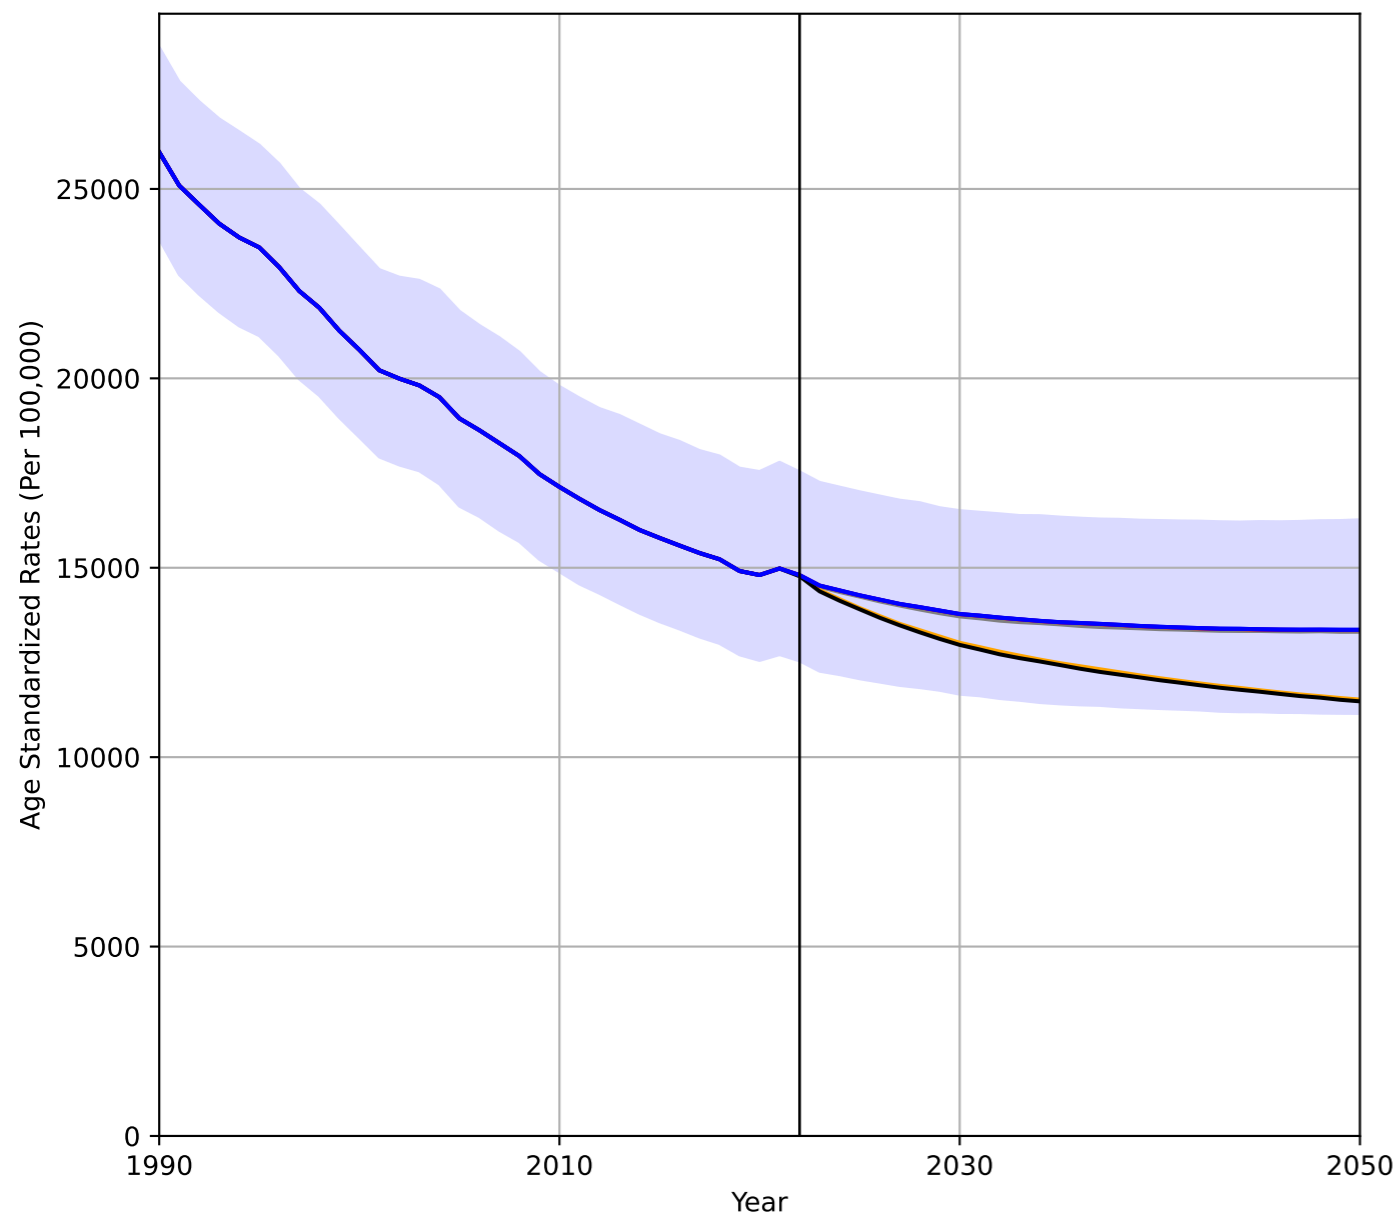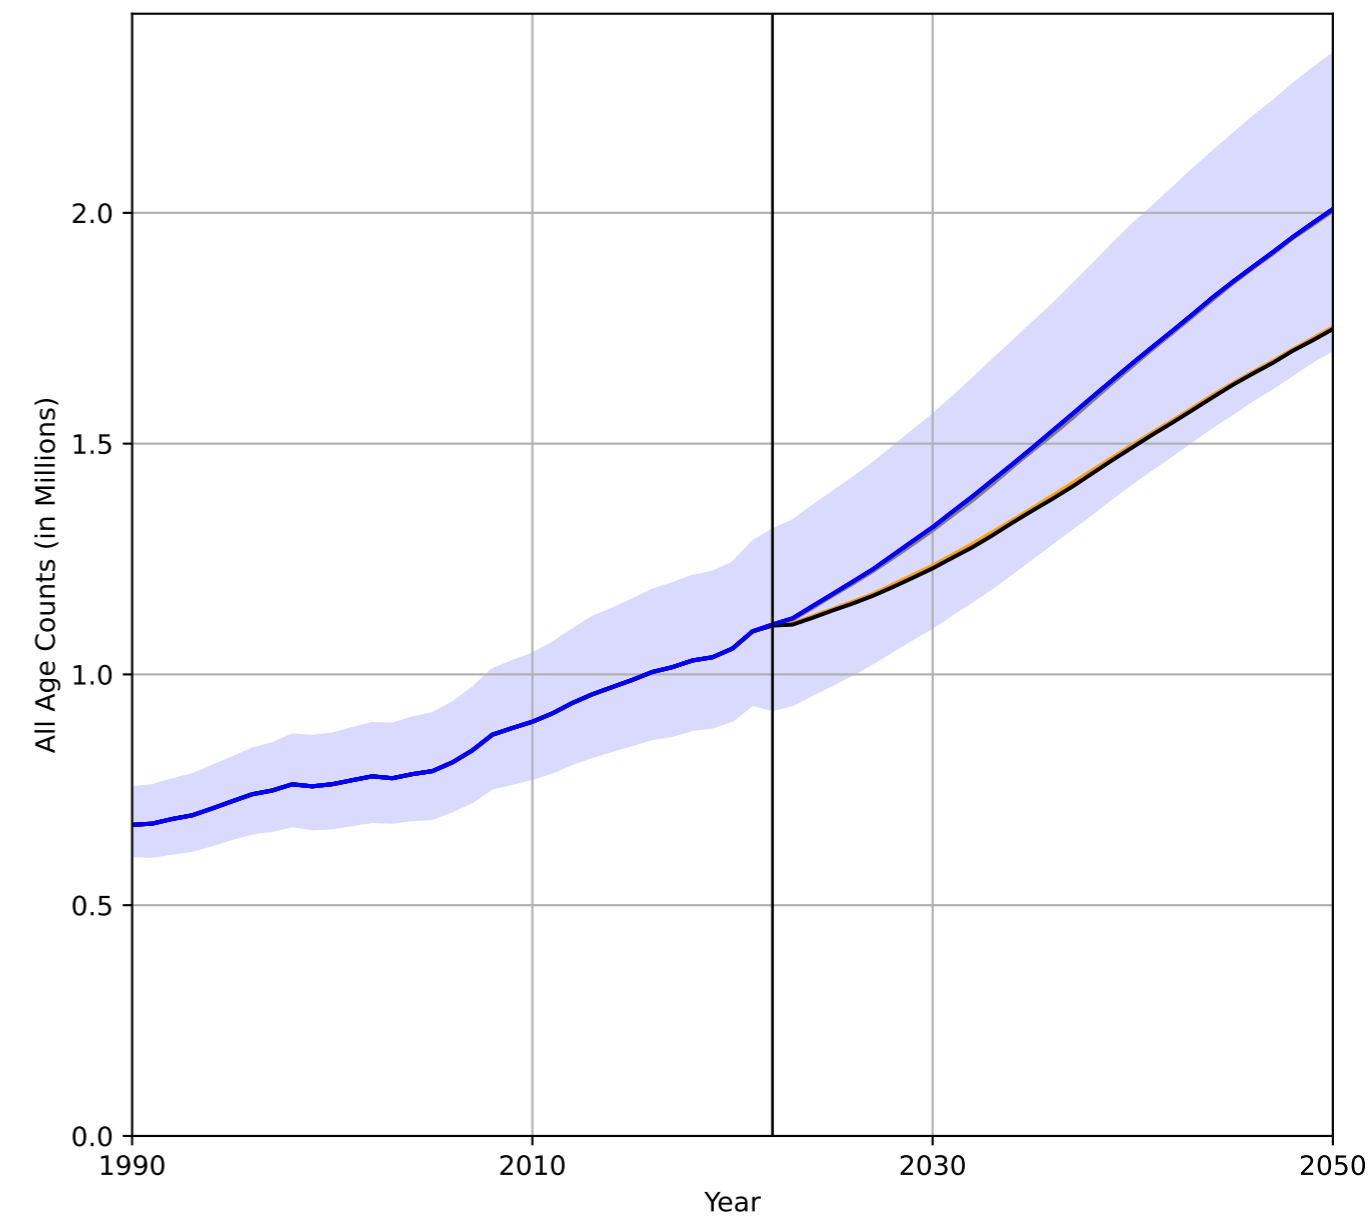

# Canada

Supplemental Results Figure S10. All-cause age standardised DALY rates (A) and all age DALY counts (B), for the past and for five future scenarios, 1990–2050

1446

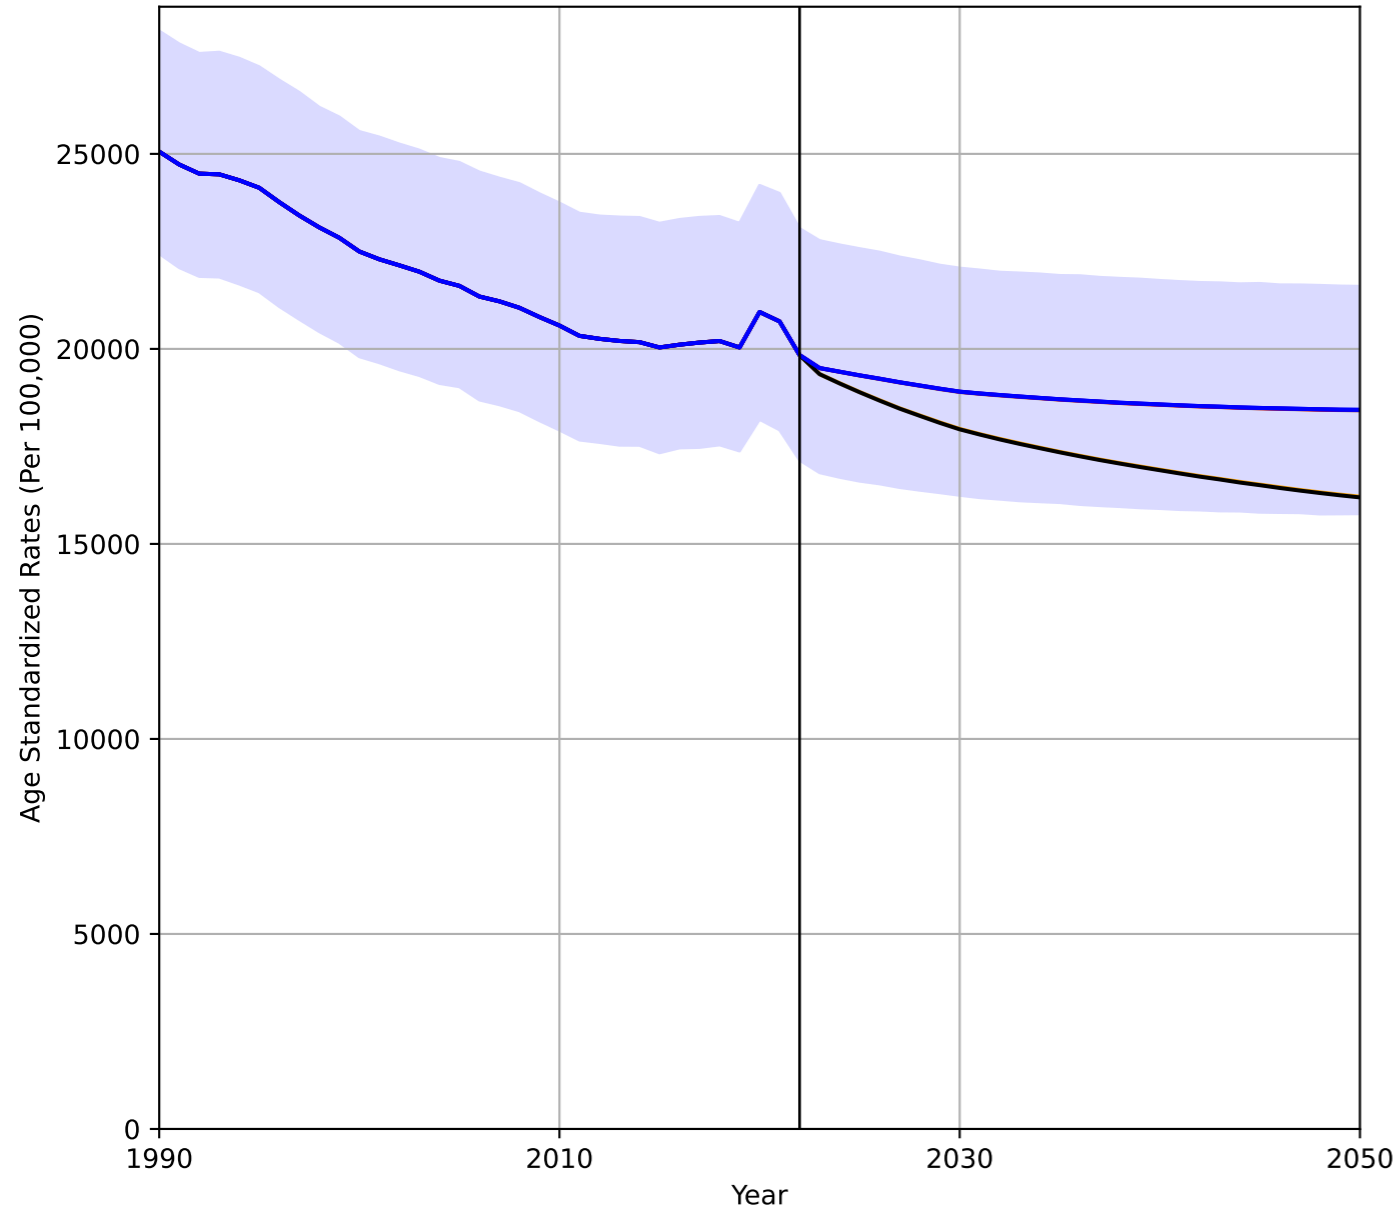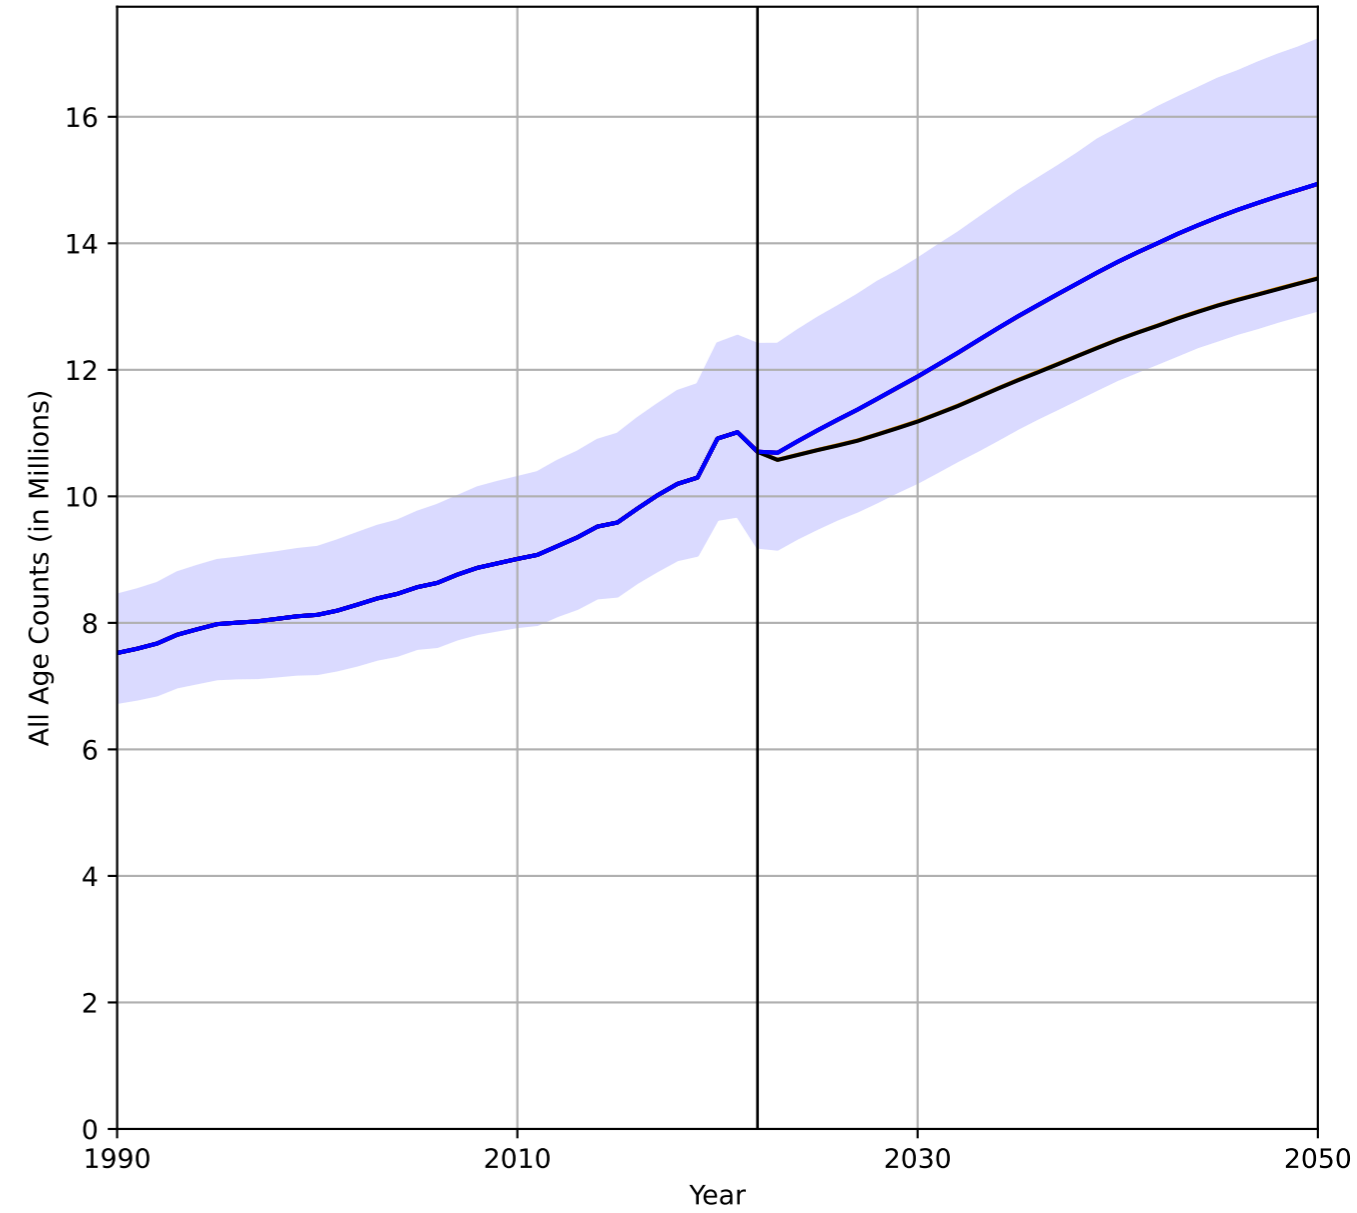

# Greenland

Supplemental Results Figure S10. All-cause age standardised DALY rates (A) and all age DALY counts (B), for the past and for five future scenarios, 1990–2050

1447

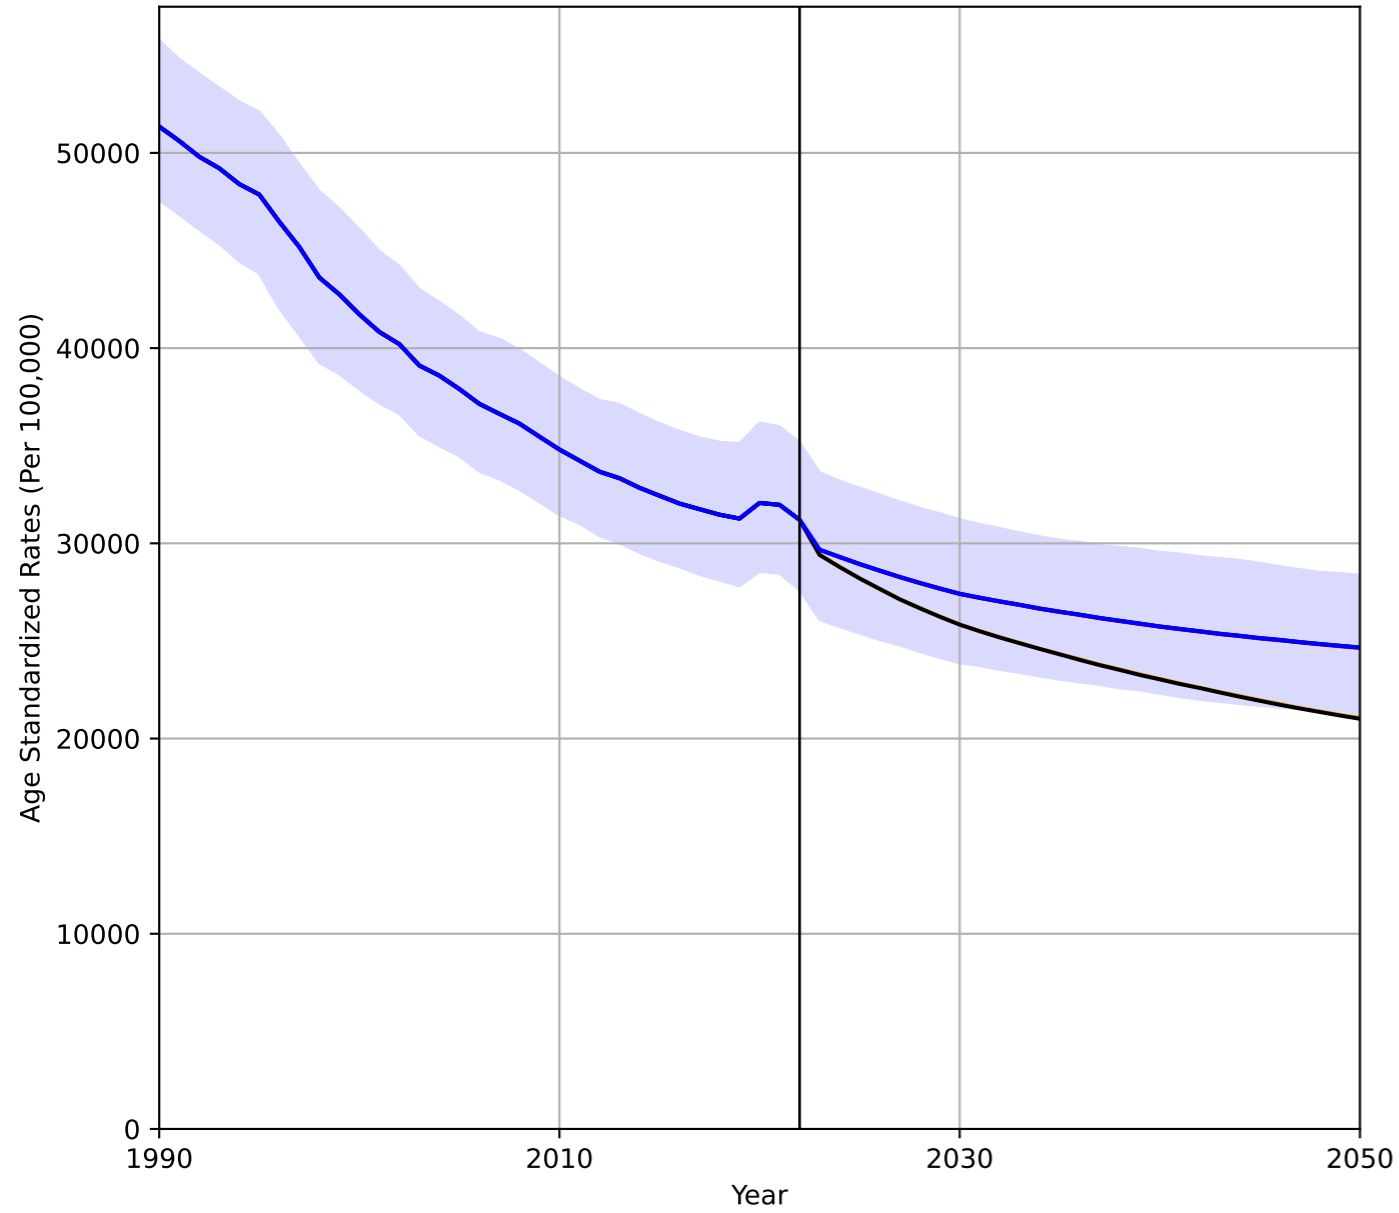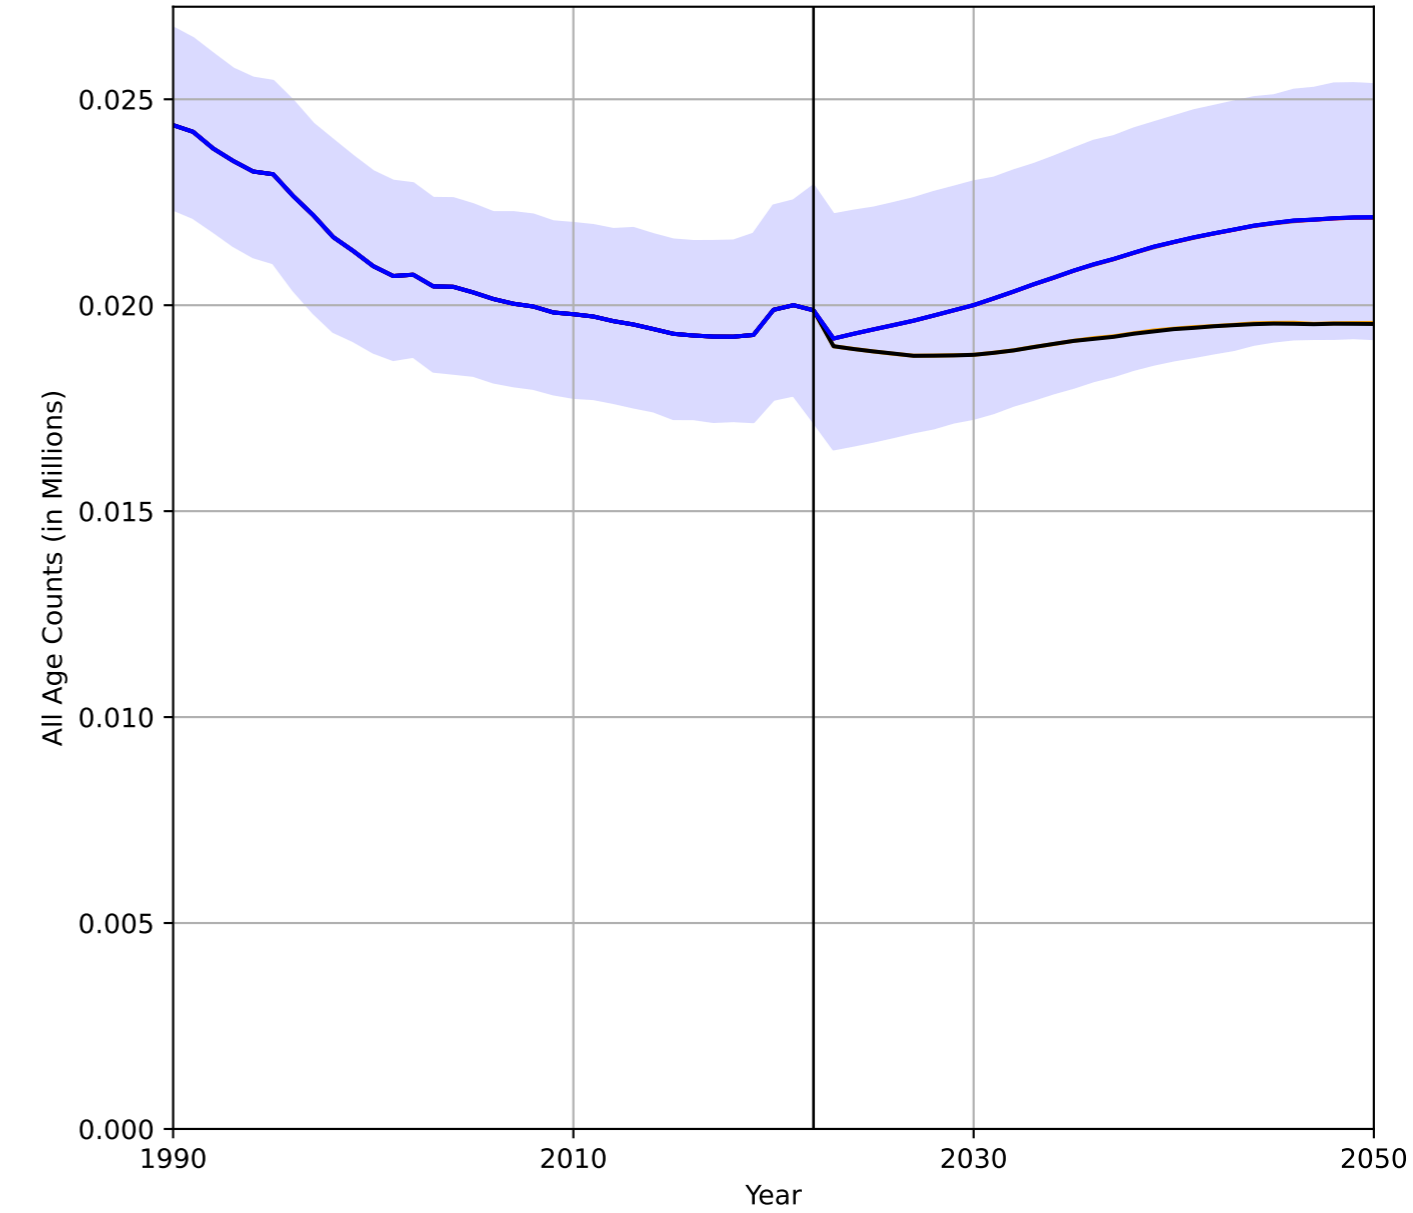



# USA

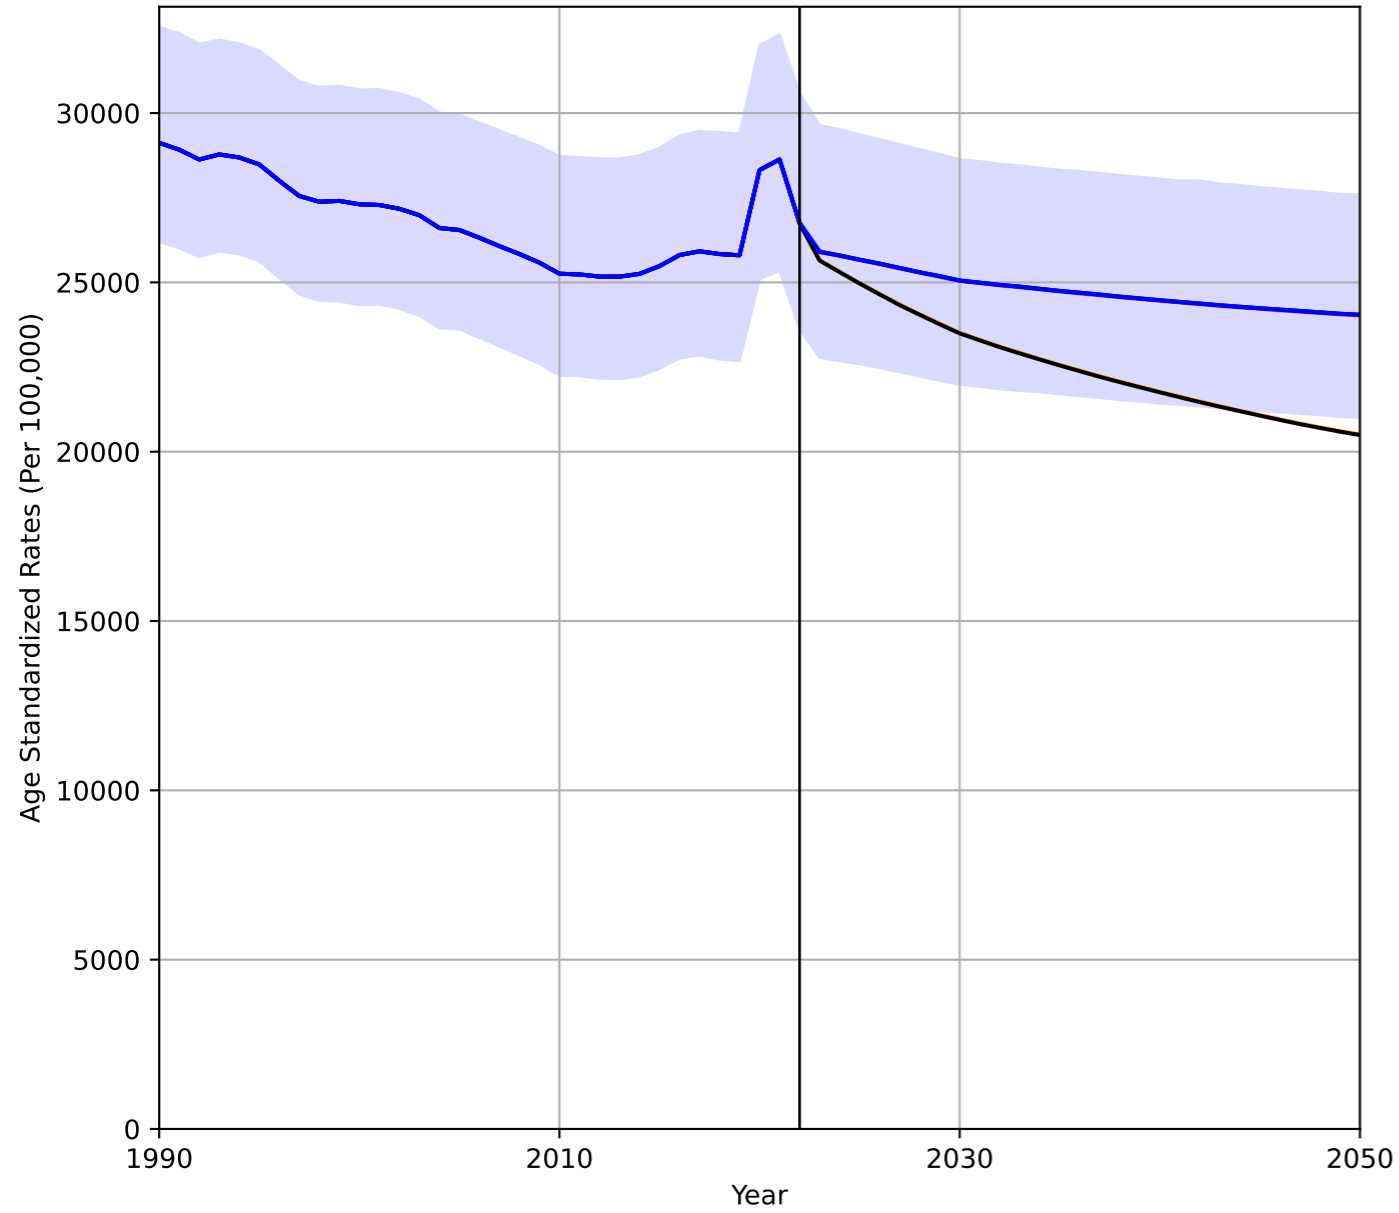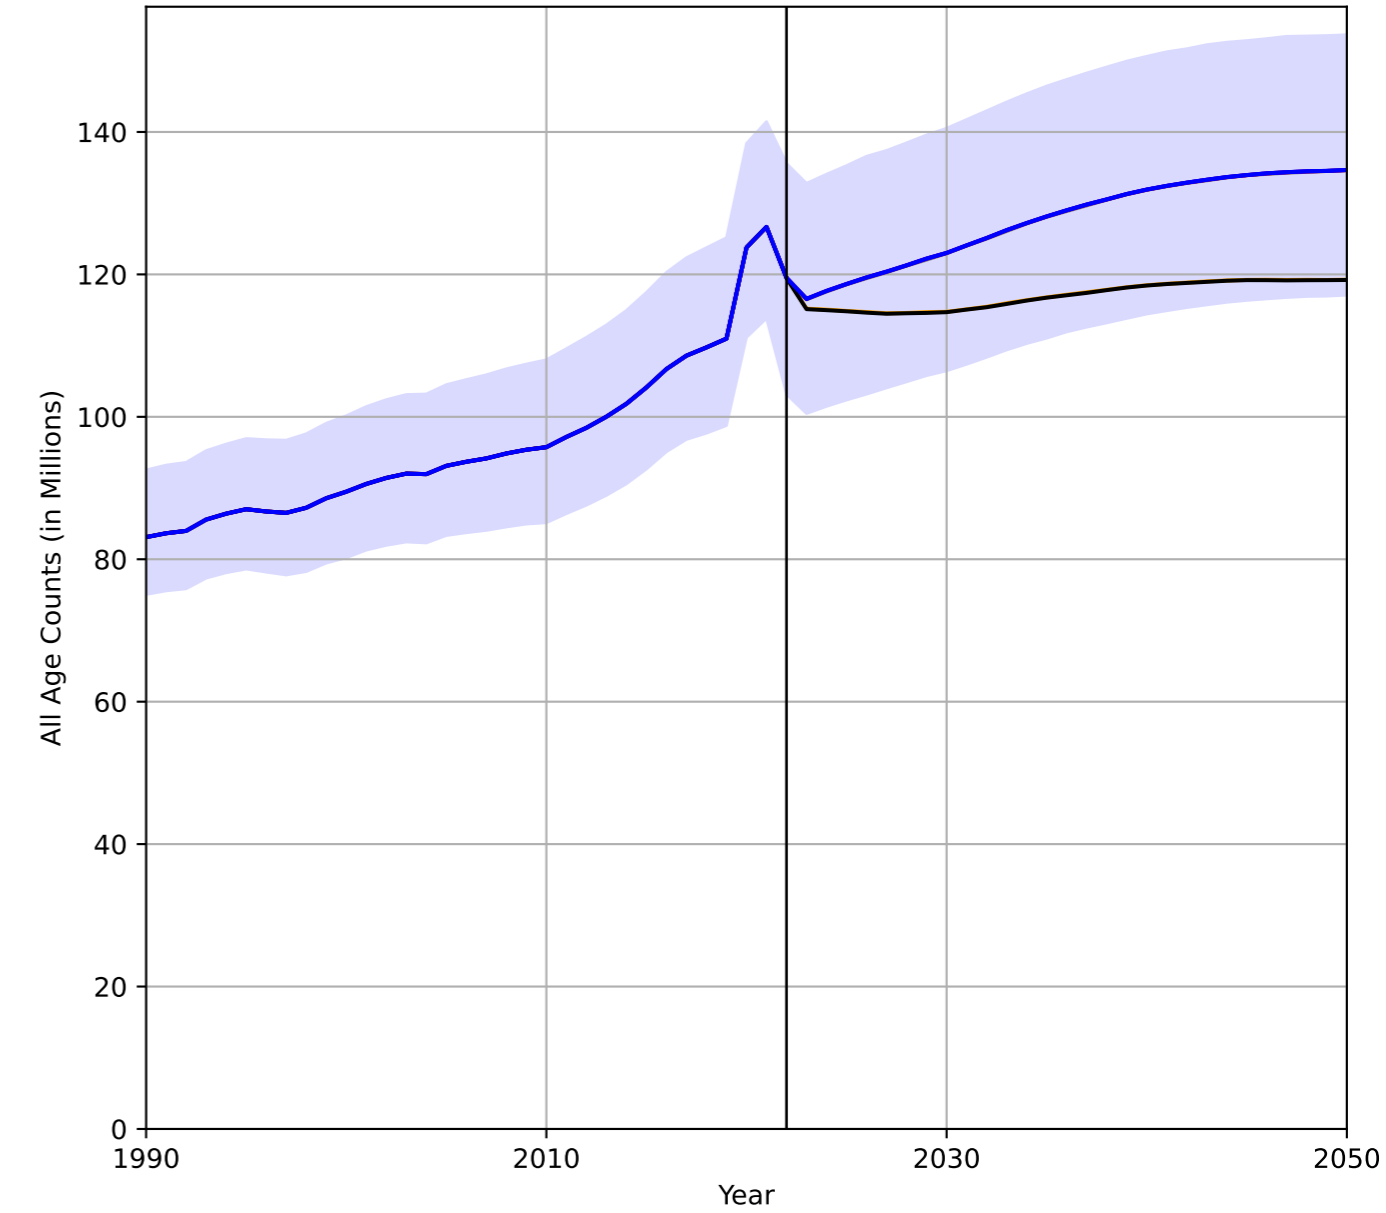

# Argentina

Supplemental Results Figure S10. All-cause age standardised DALY rates (A) and all age DALY counts (B), for the past and for five future scenarios, 1990–2050

1449

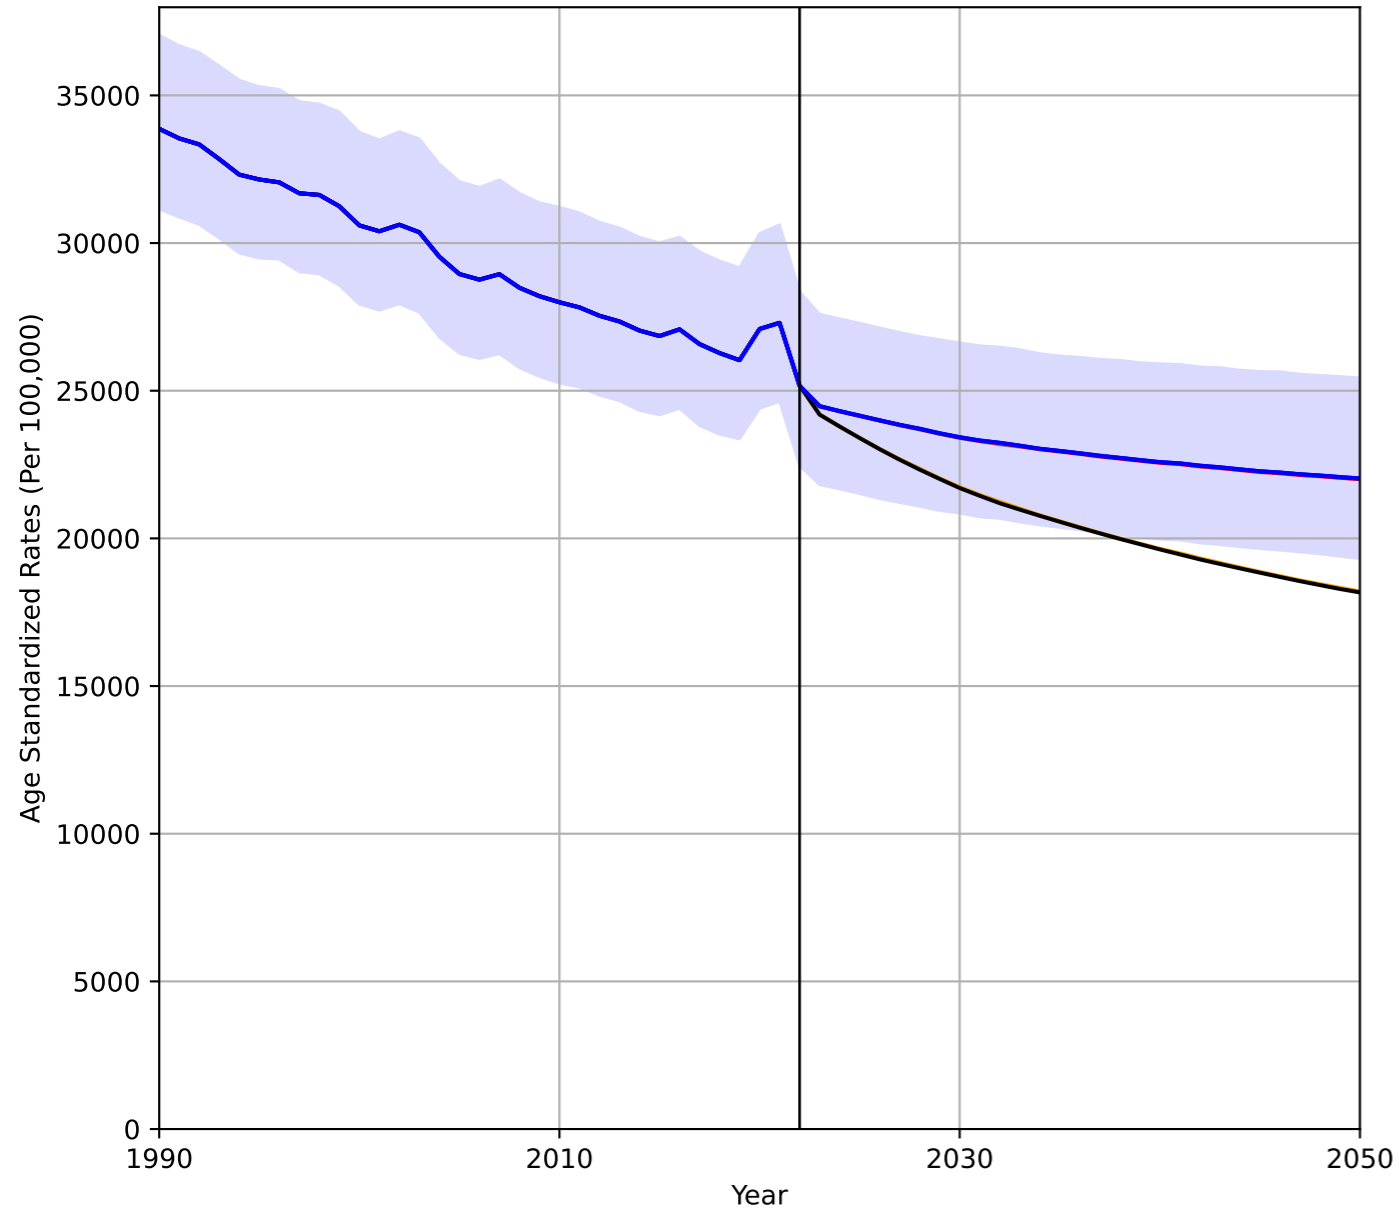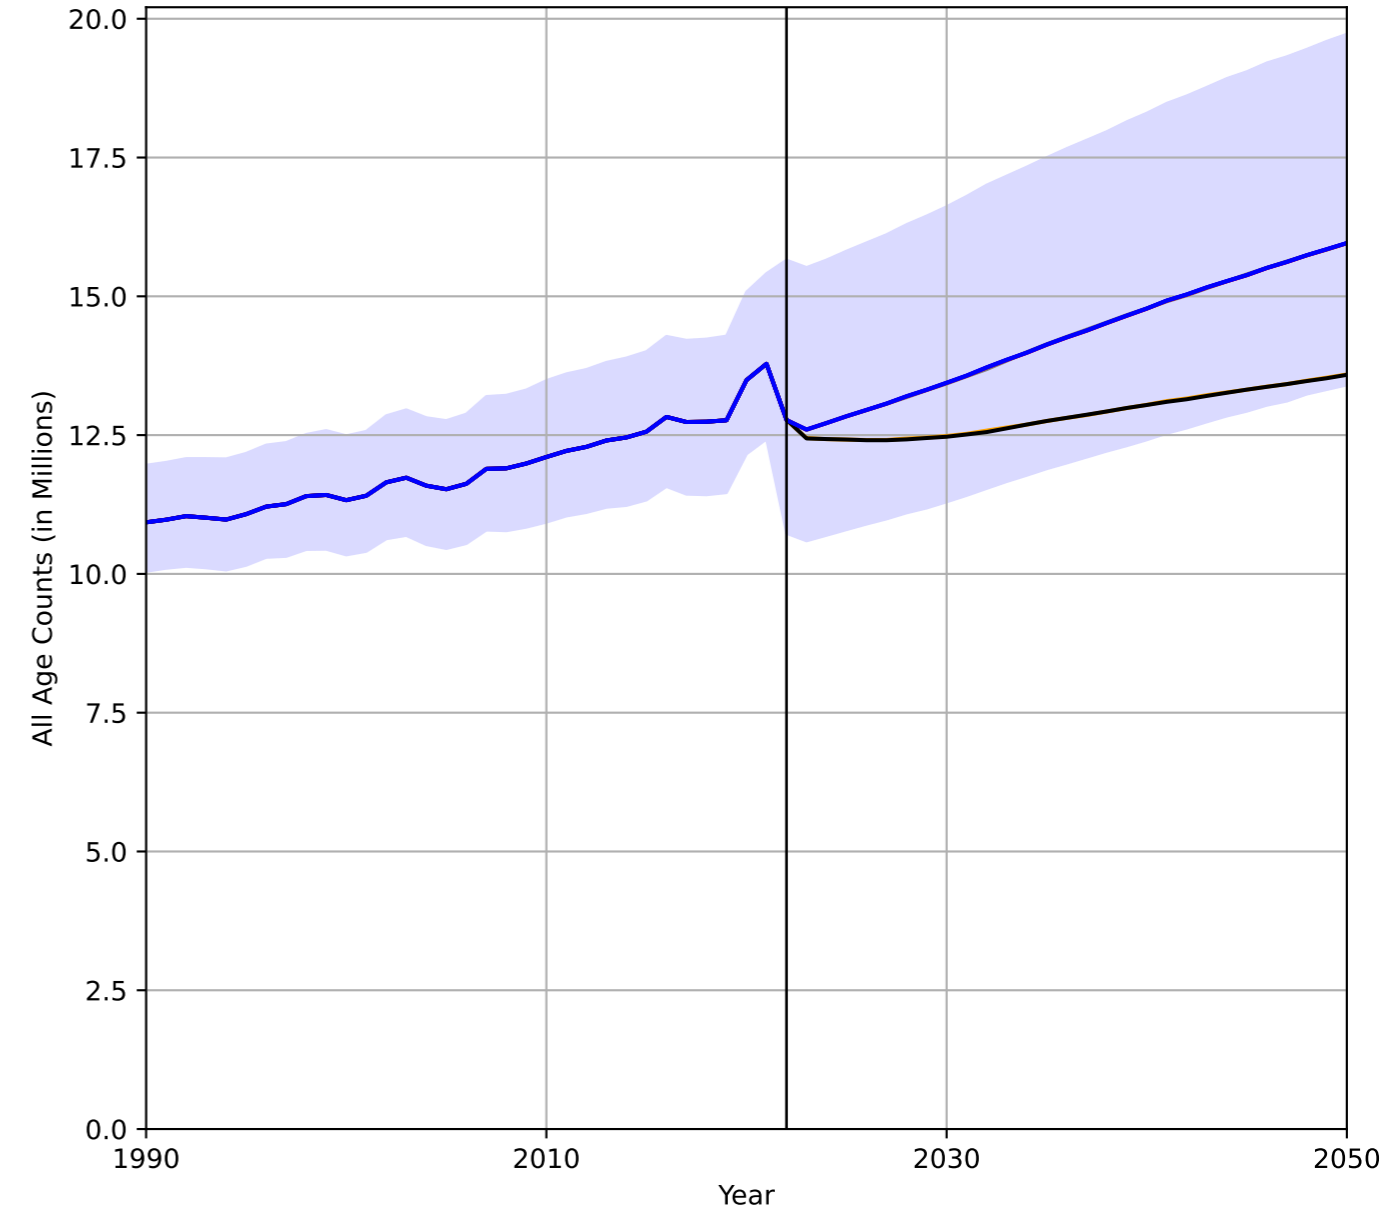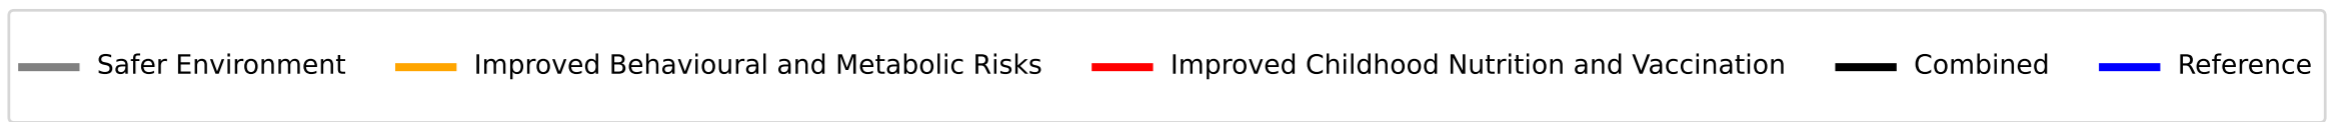

# Chile

Supplemental Results Figure S10. All-cause age standardised DALY rates (A) and all age DALY counts (B), for the past and for five future scenarios, 1990–2050

1450

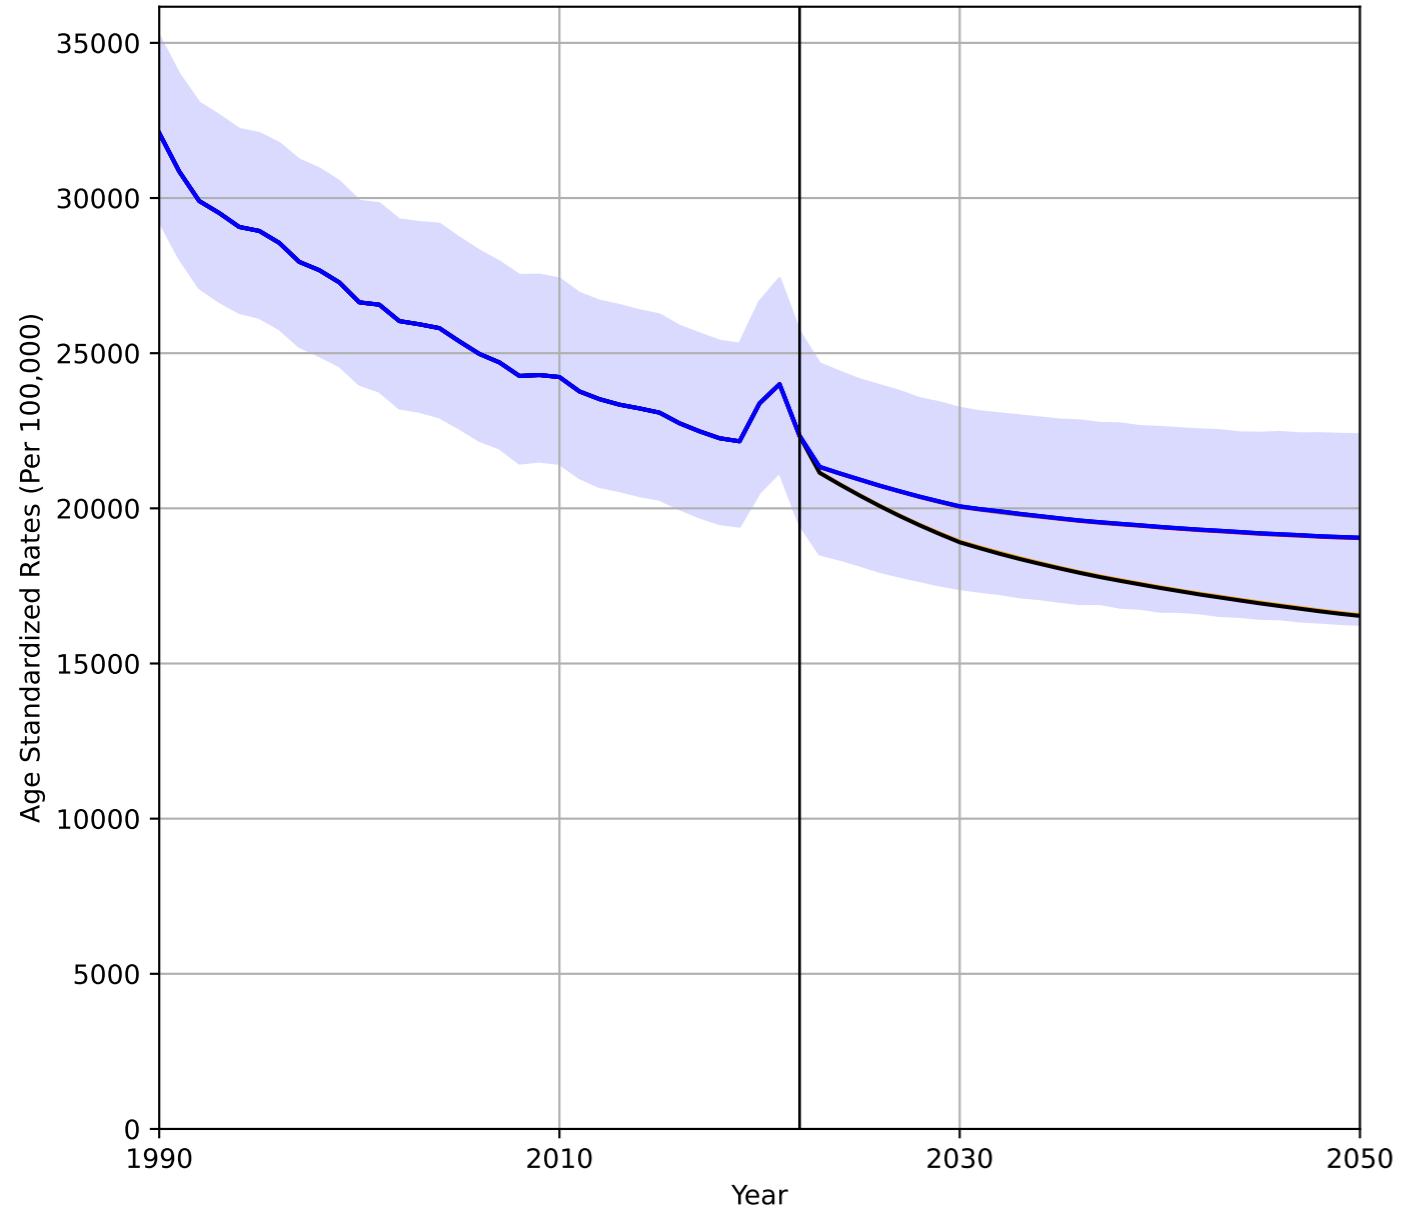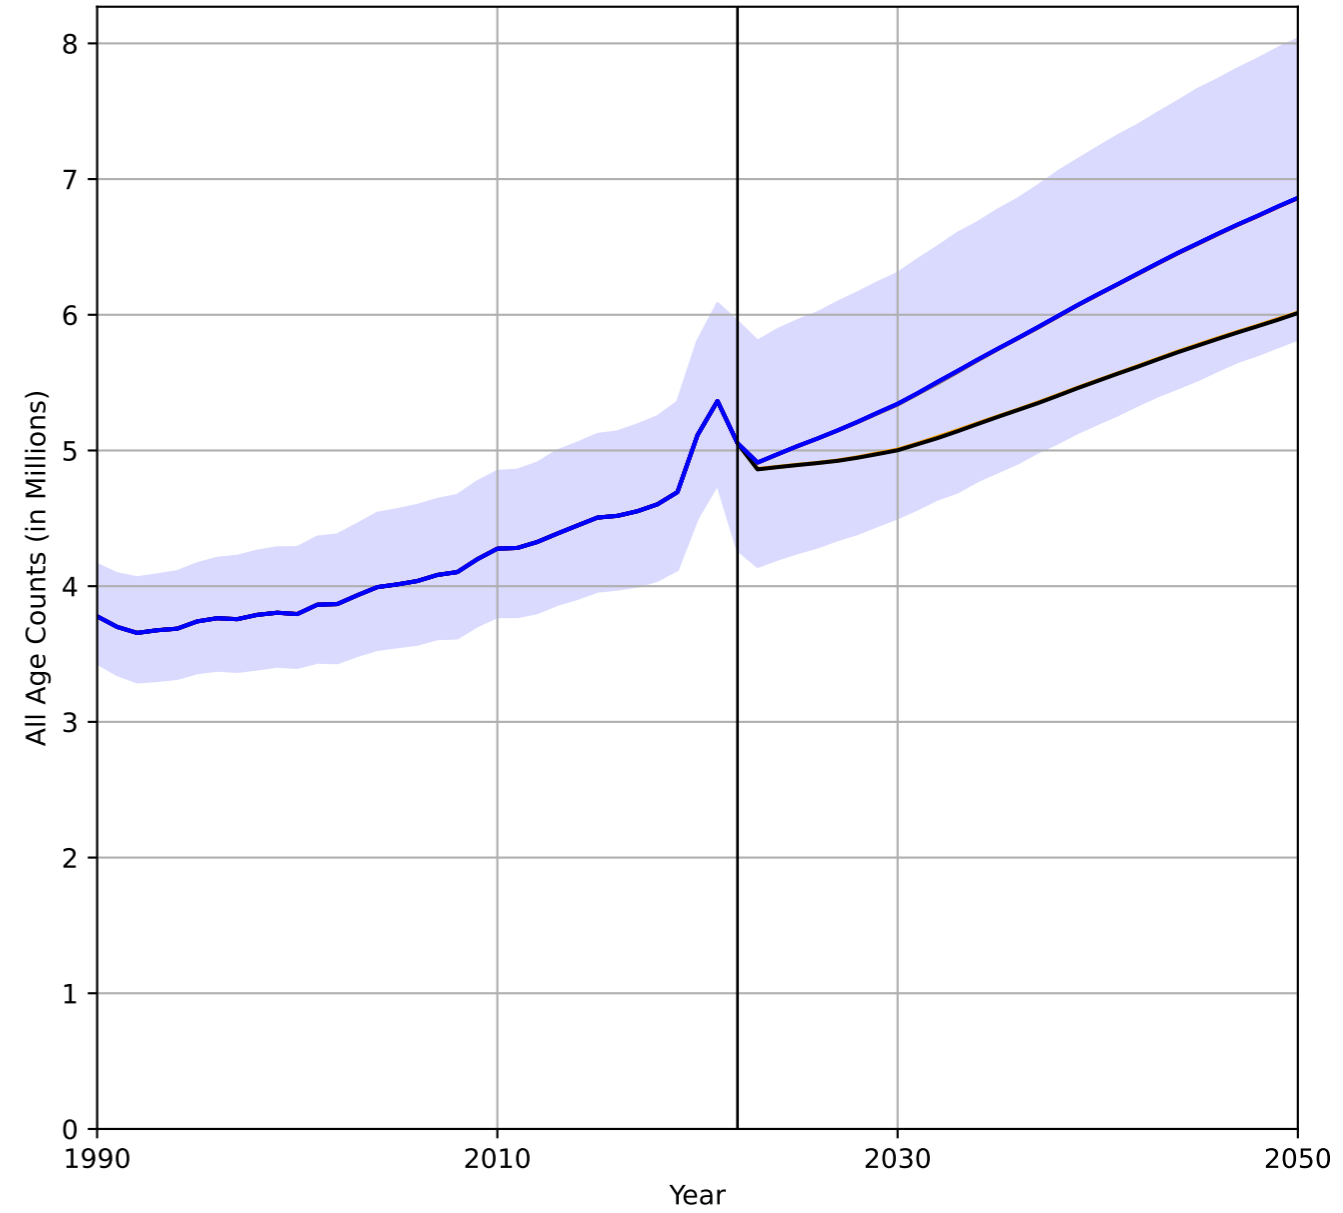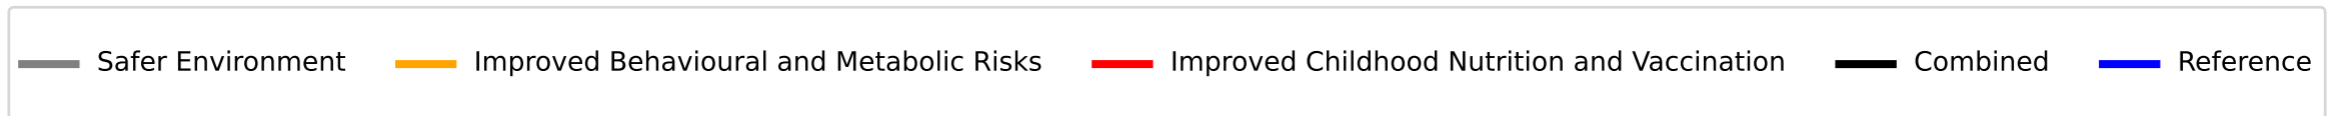

# Uruguay

Supplemental Results Figure S10. All-cause age standardised DALY rates (A) and all age DALY counts (B), for the past and for five future scenarios, 1990–2050

1451

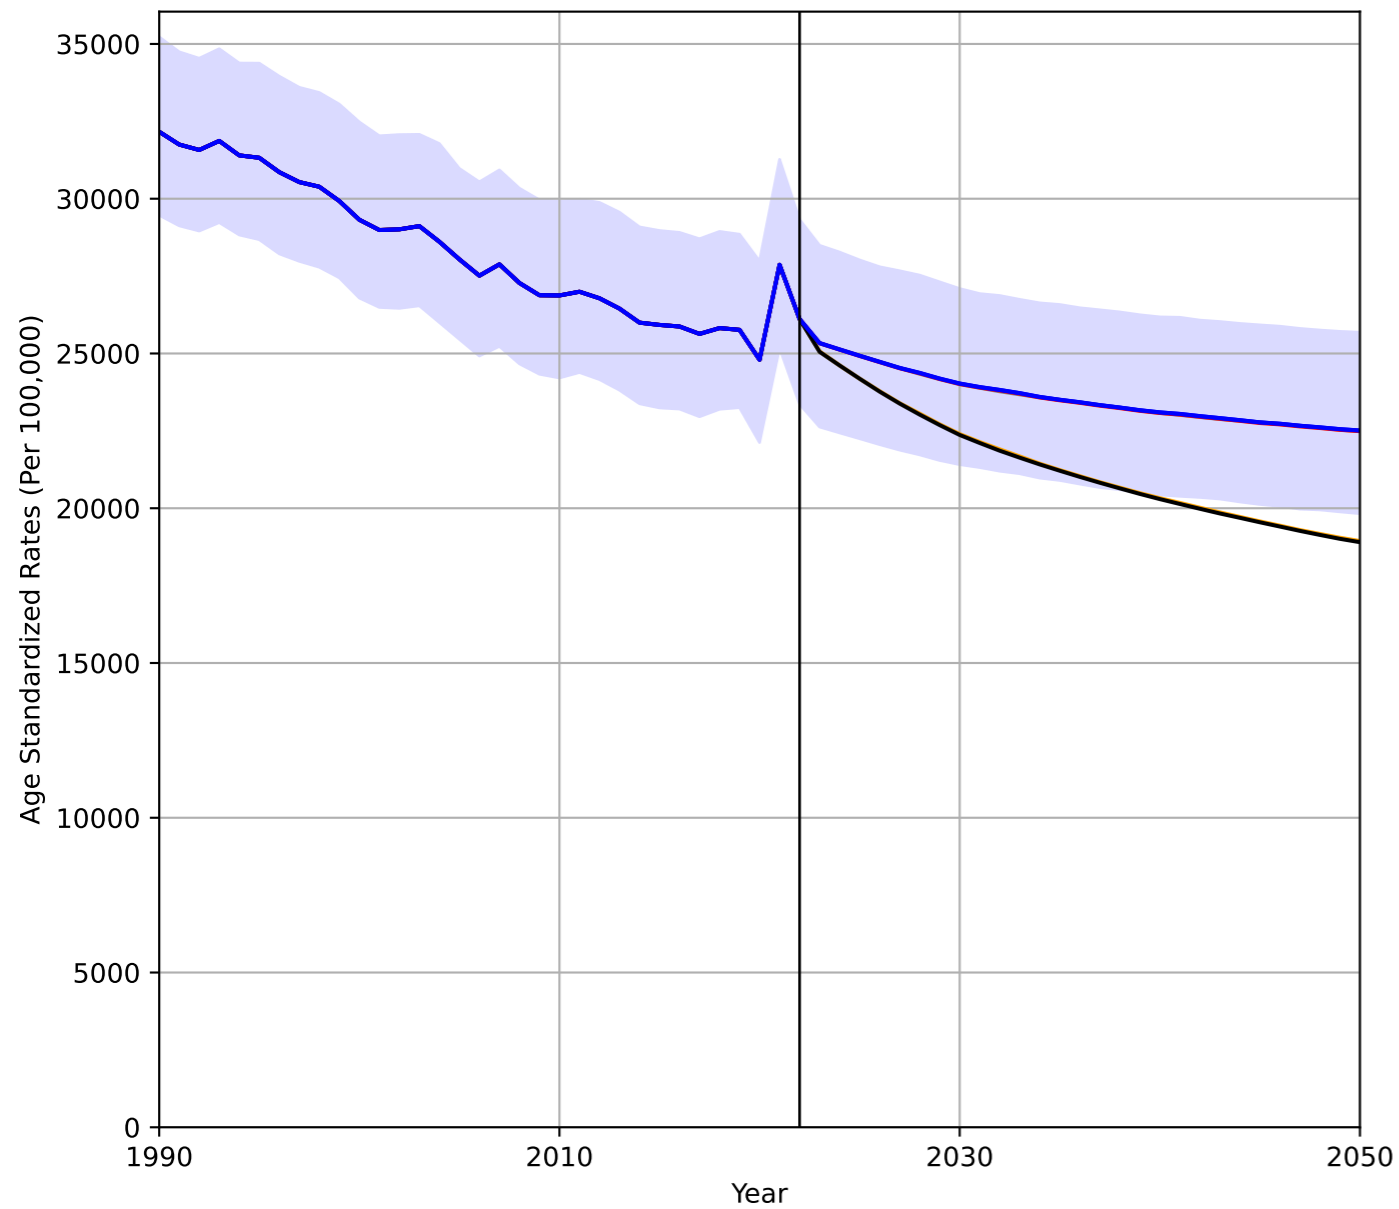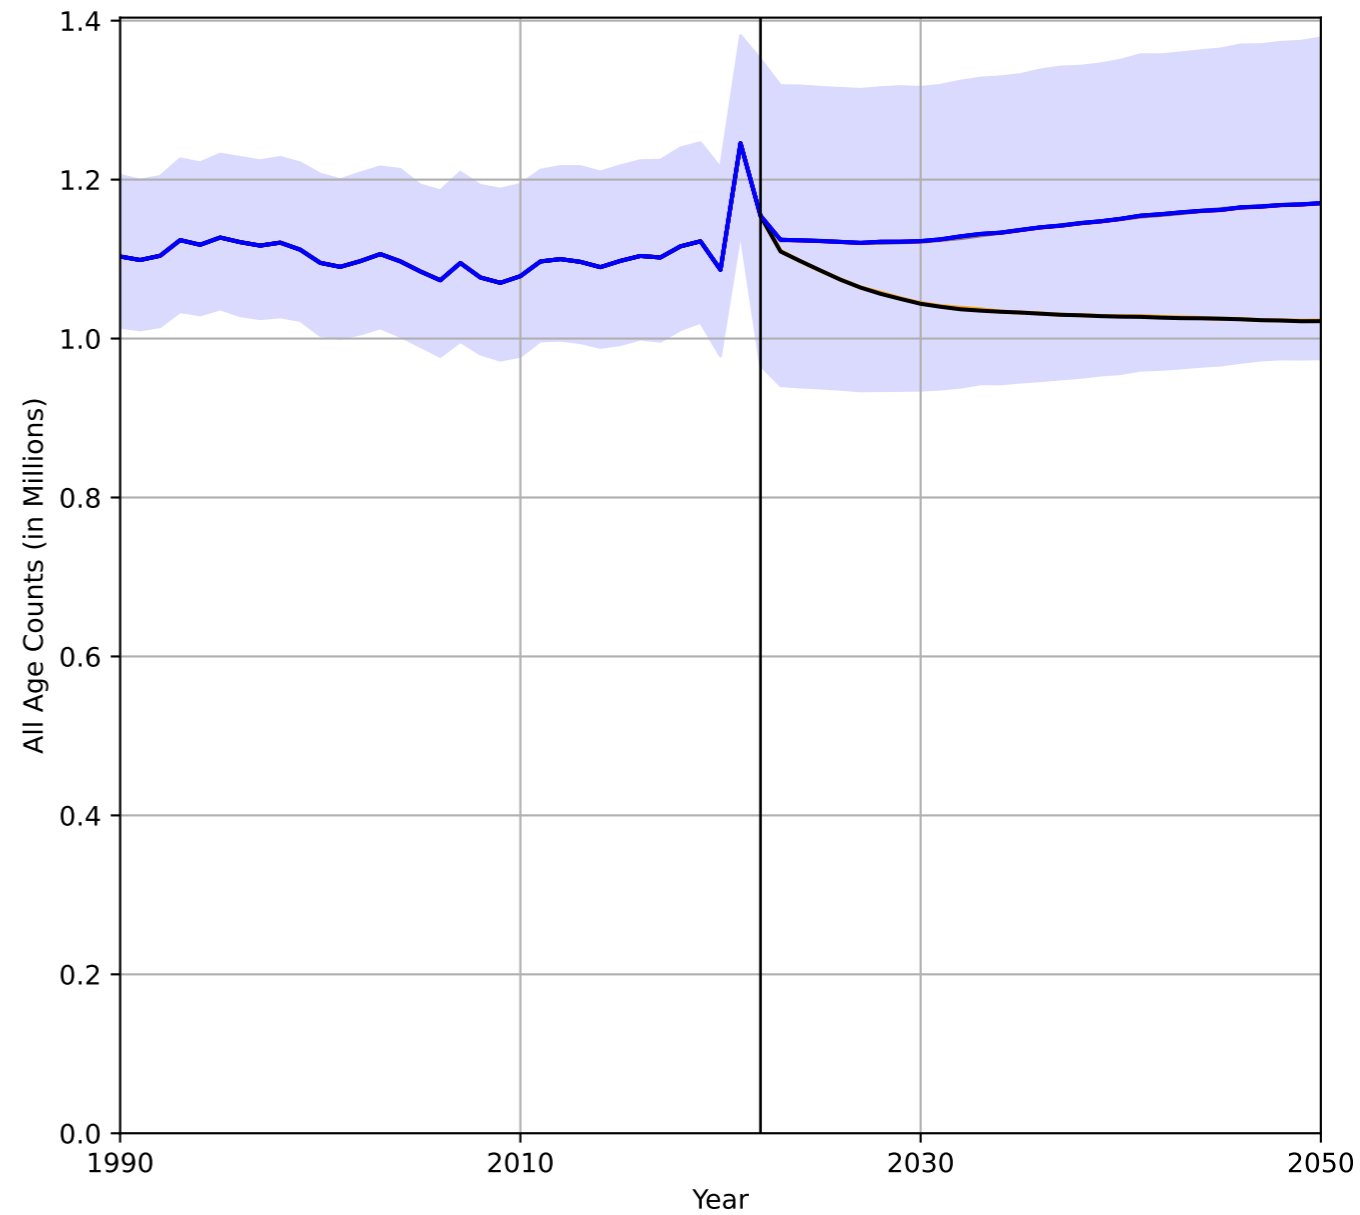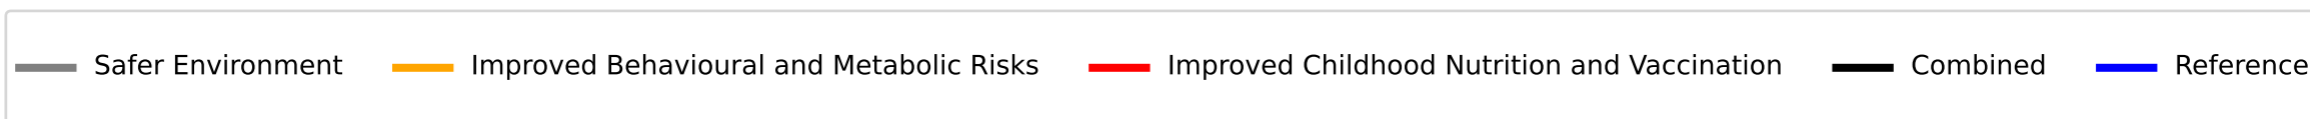

# Andorra

Supplemental Results Figure S10. All-cause age standardised DALY rates (A) and all age DALY counts (B), for the past and for five future scenarios, 1990–2050

1452

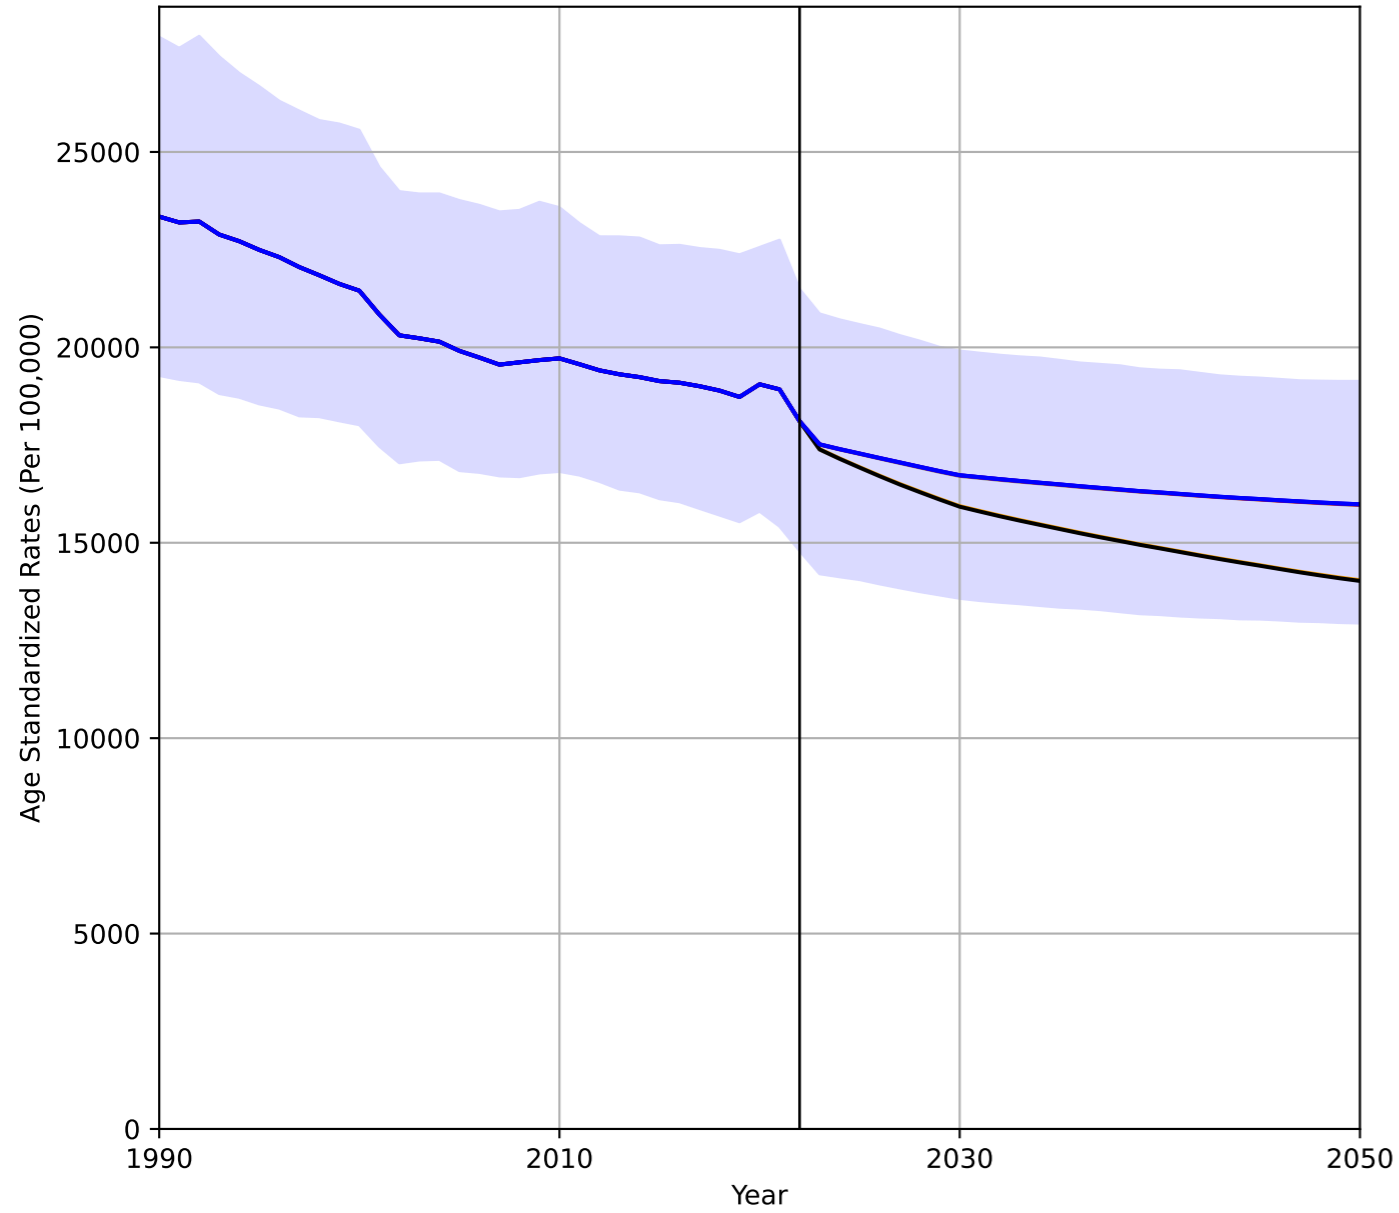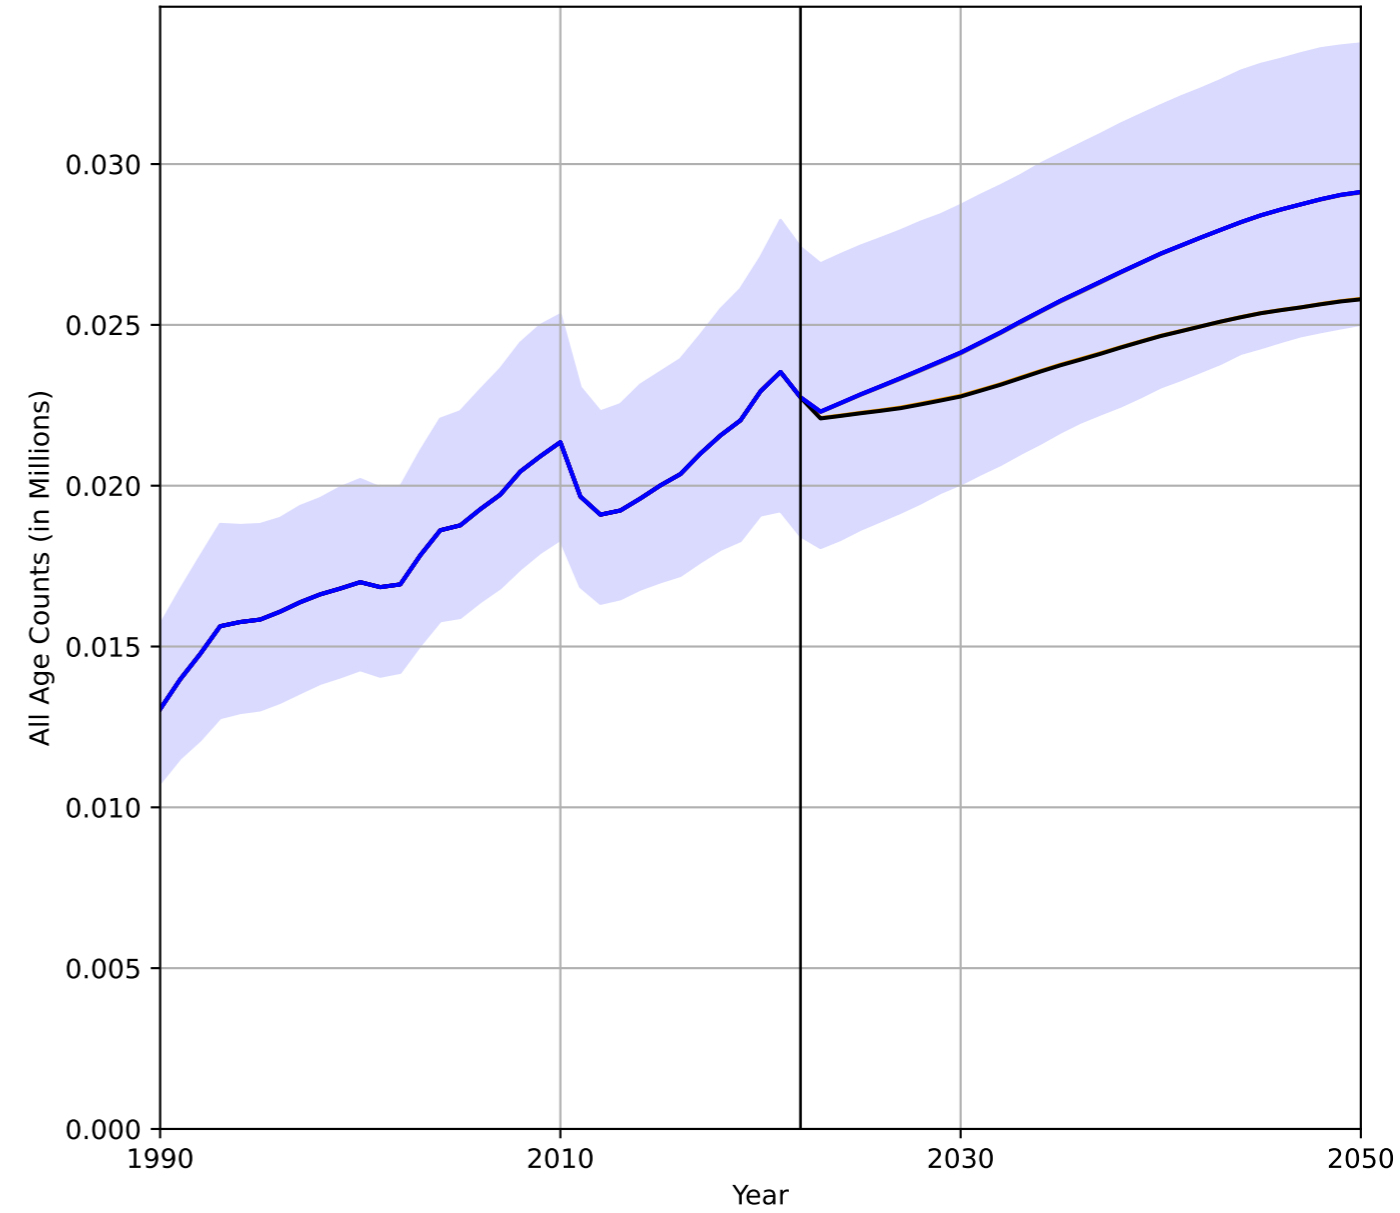

# Austria

Supplemental Results Figure S10. All-cause age standardised DALY rates (A) and all age DALY counts (B), for the past and for five future scenarios, 1990–2050

1453

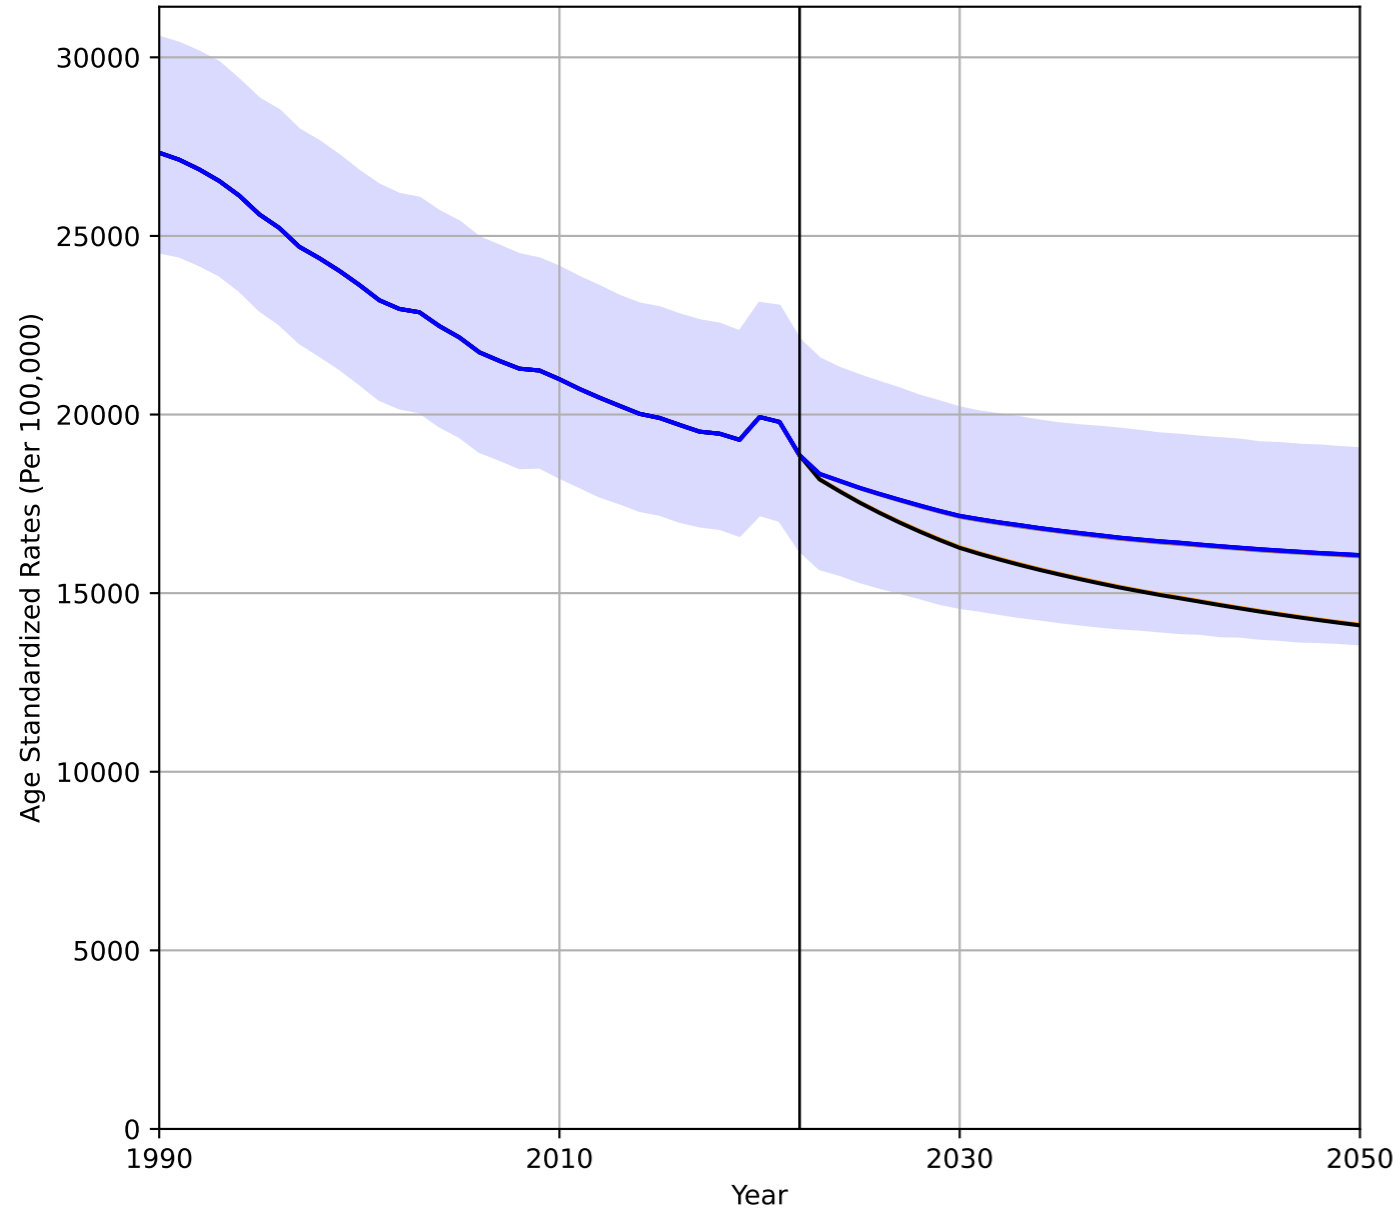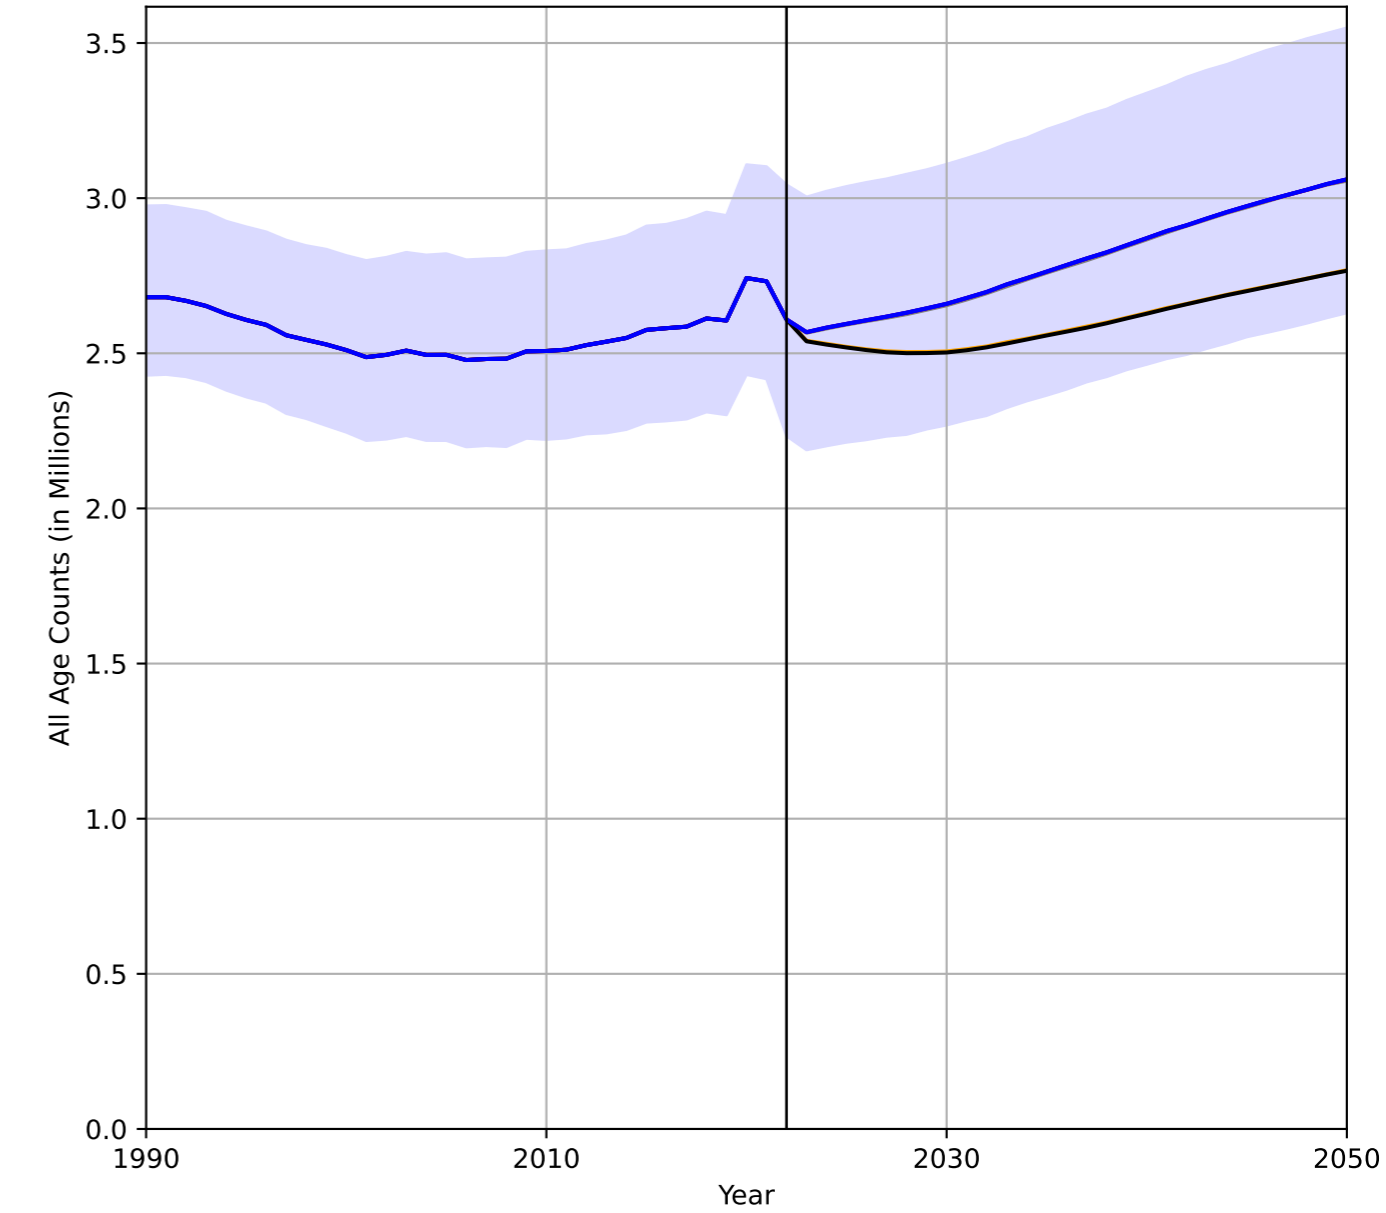

# Belgium

Supplemental Results Figure S10. All-cause age standardised DALY rates (A) and all age DALY counts (B), for the past and for five future scenarios, 1990–2050

1454

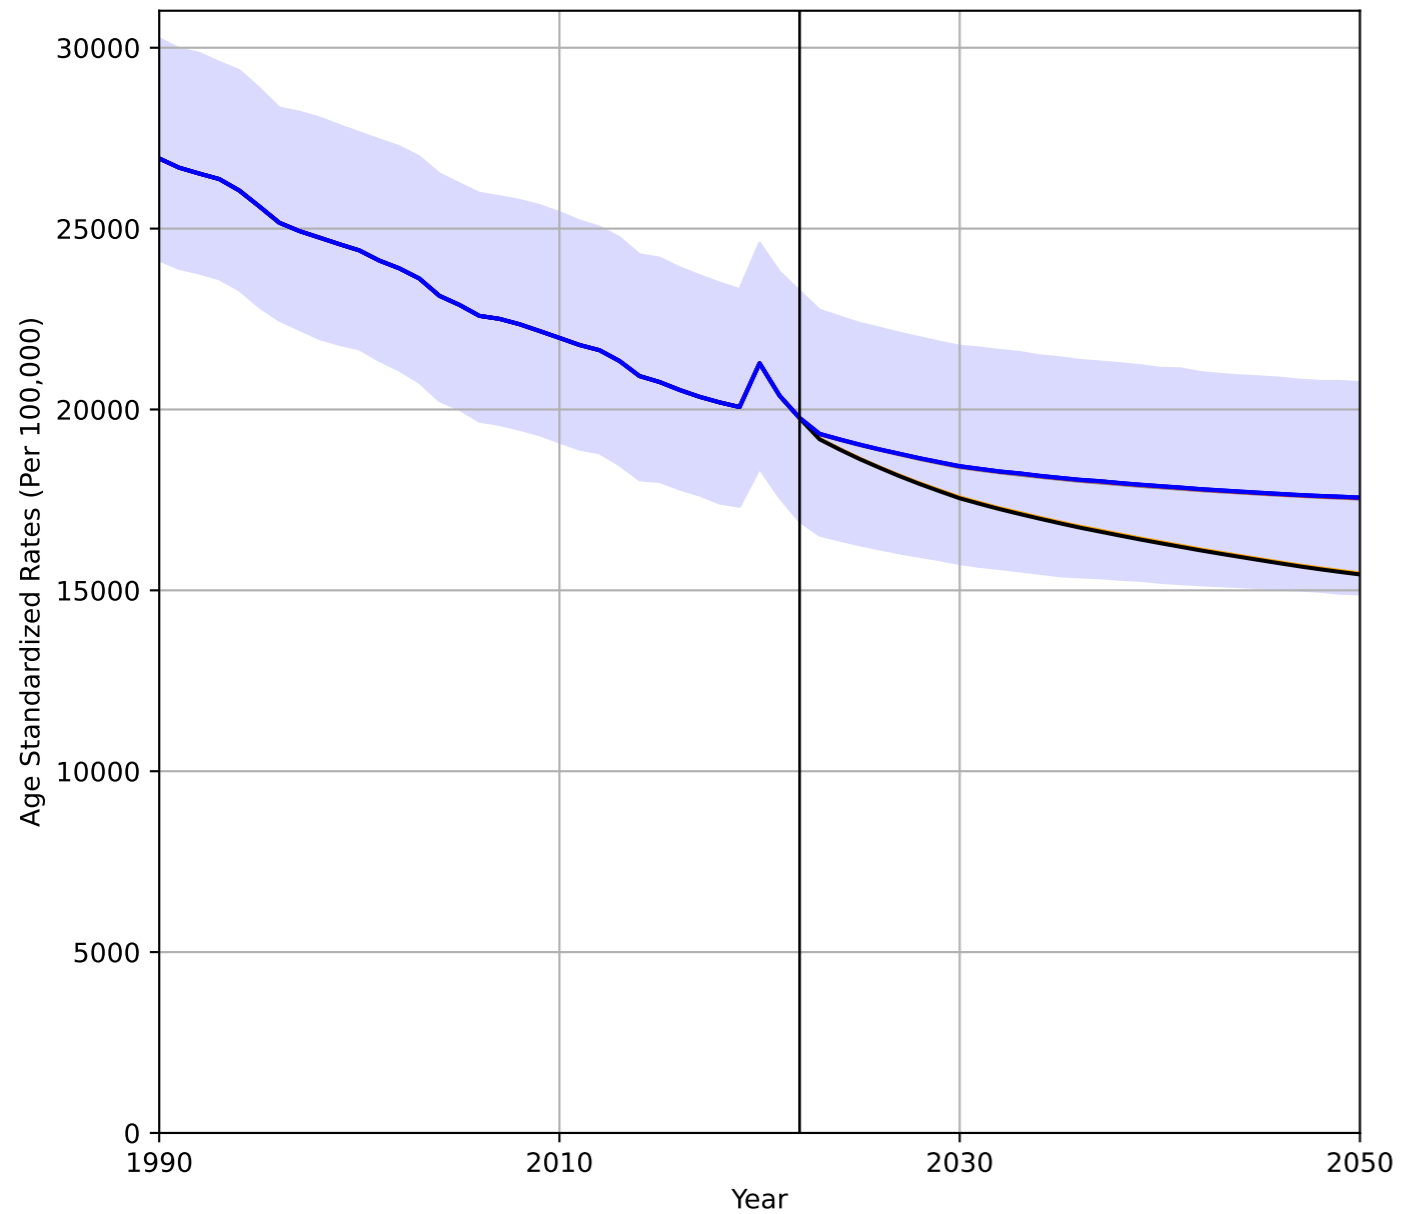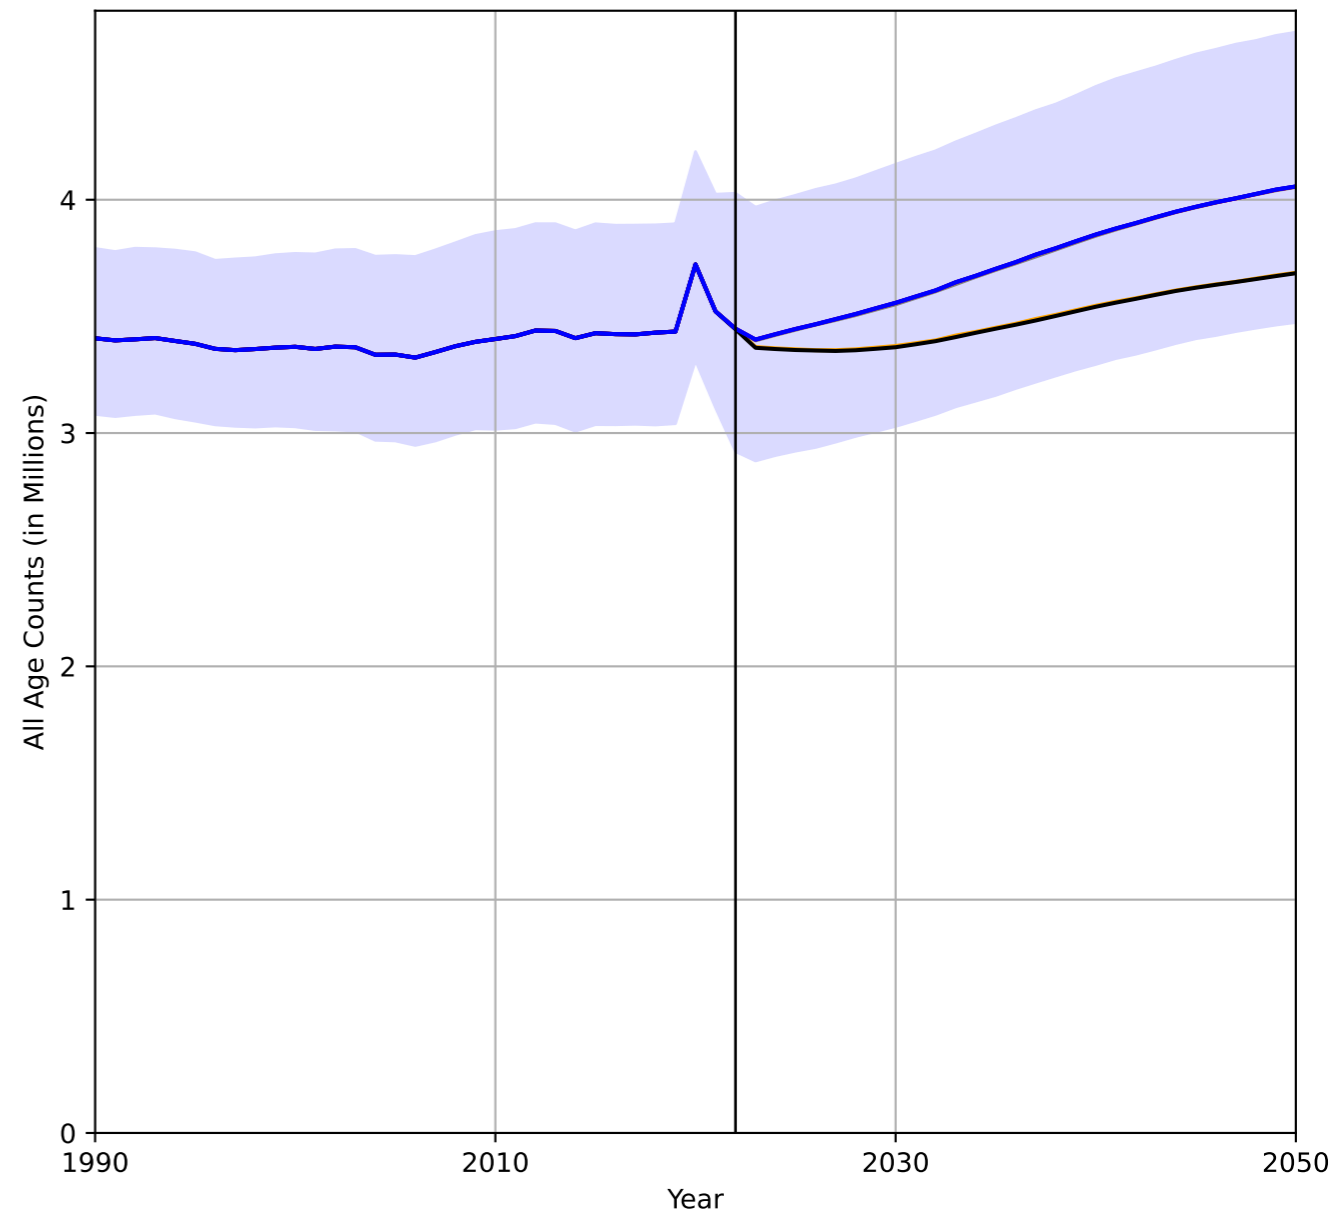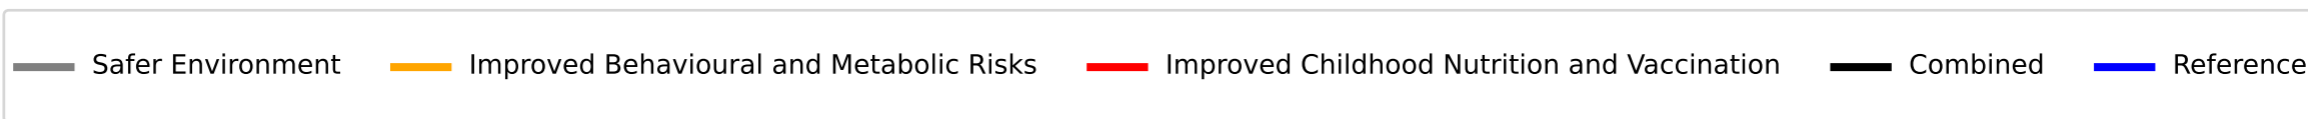

# Cyprus

Supplemental Results Figure S10. All-cause age standardised DALY rates (A) and all age DALY counts (B), for the past and for five future scenarios, 1990–2050

1455

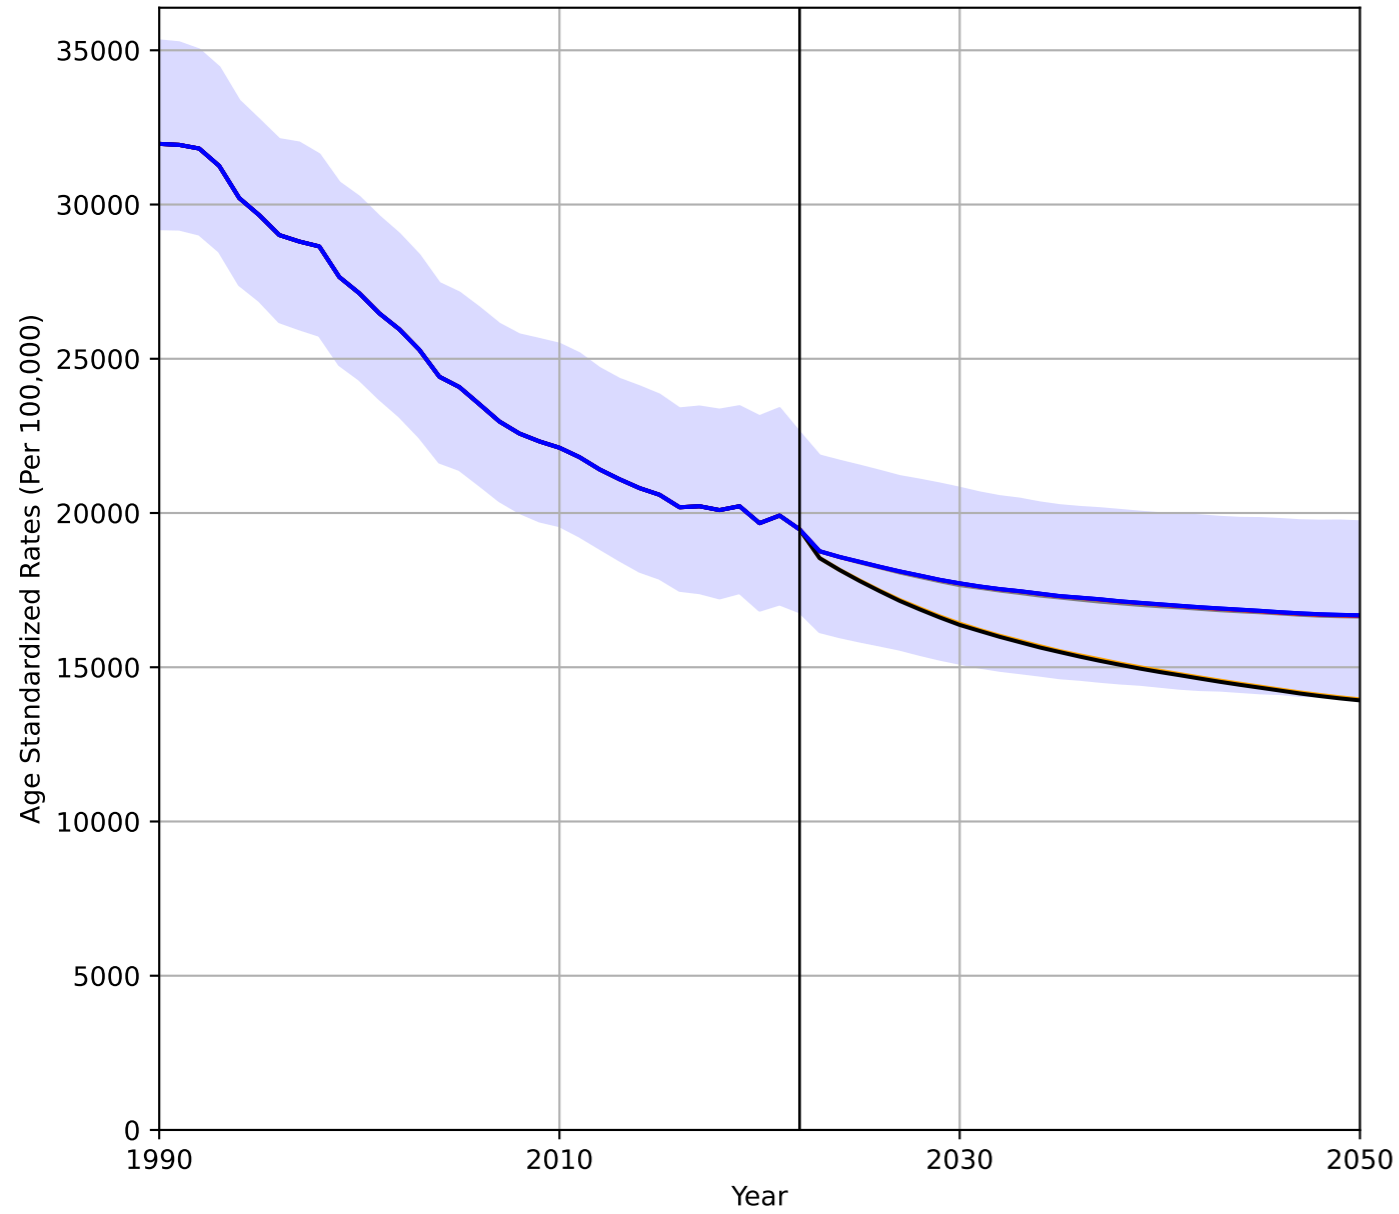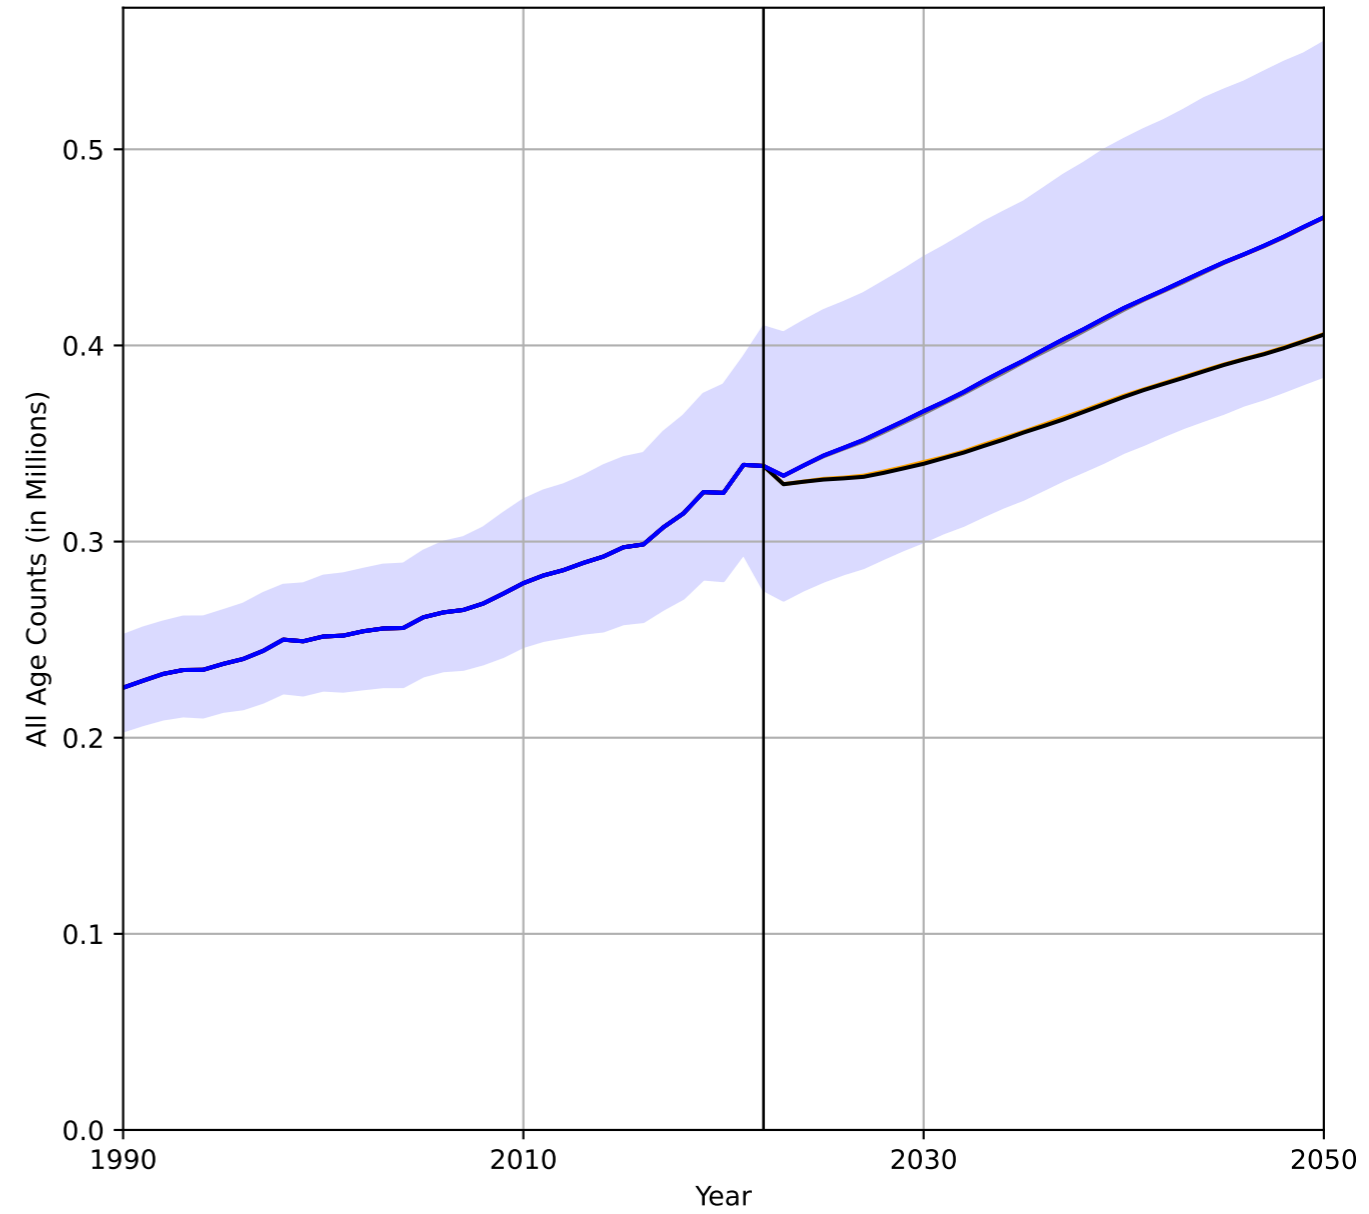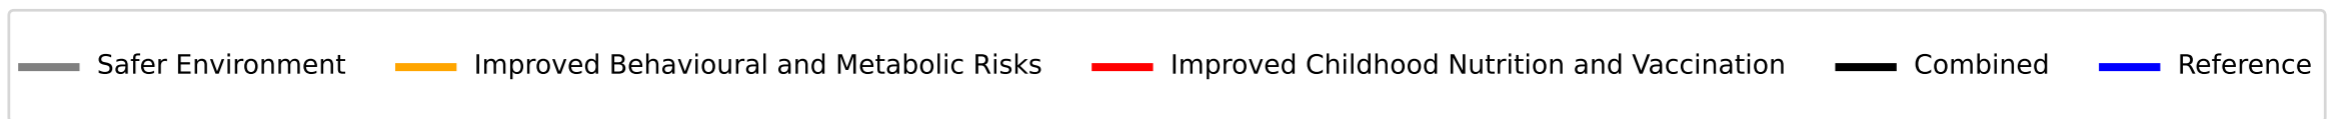



# Denmark

Supplemental Results Figure S10. All-cause age standardised DALY rates (A) and all age DALY counts (B), for the past and for five future scenarios, 1990–2050

1456

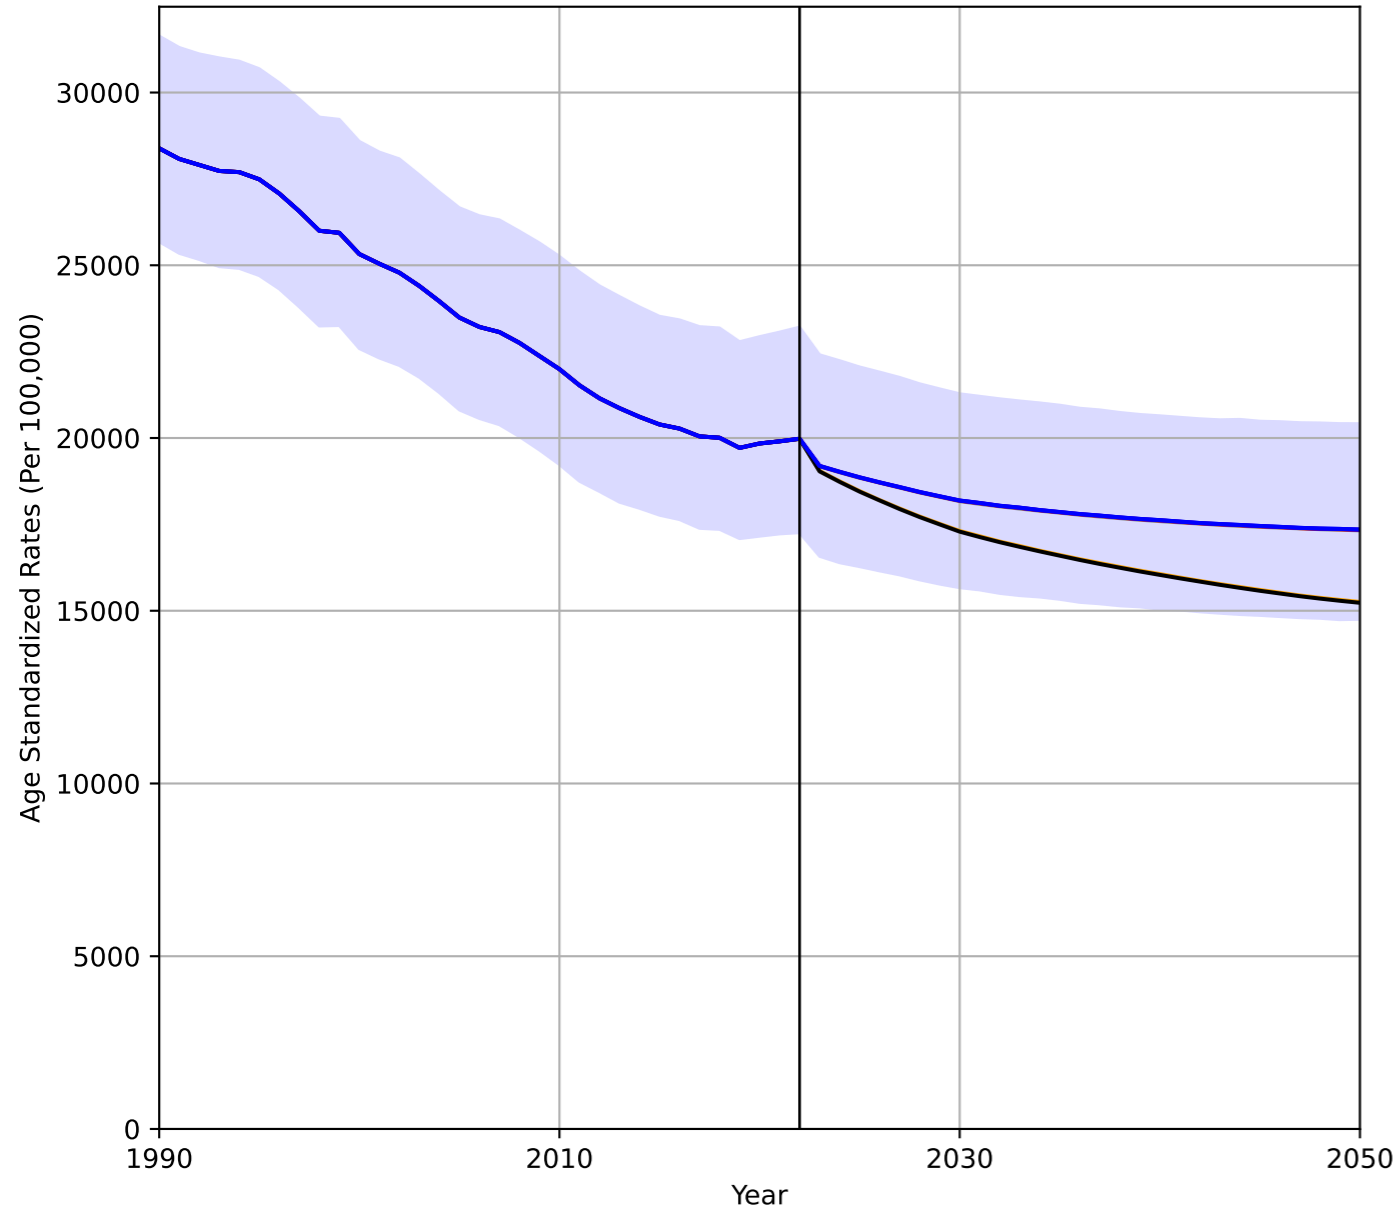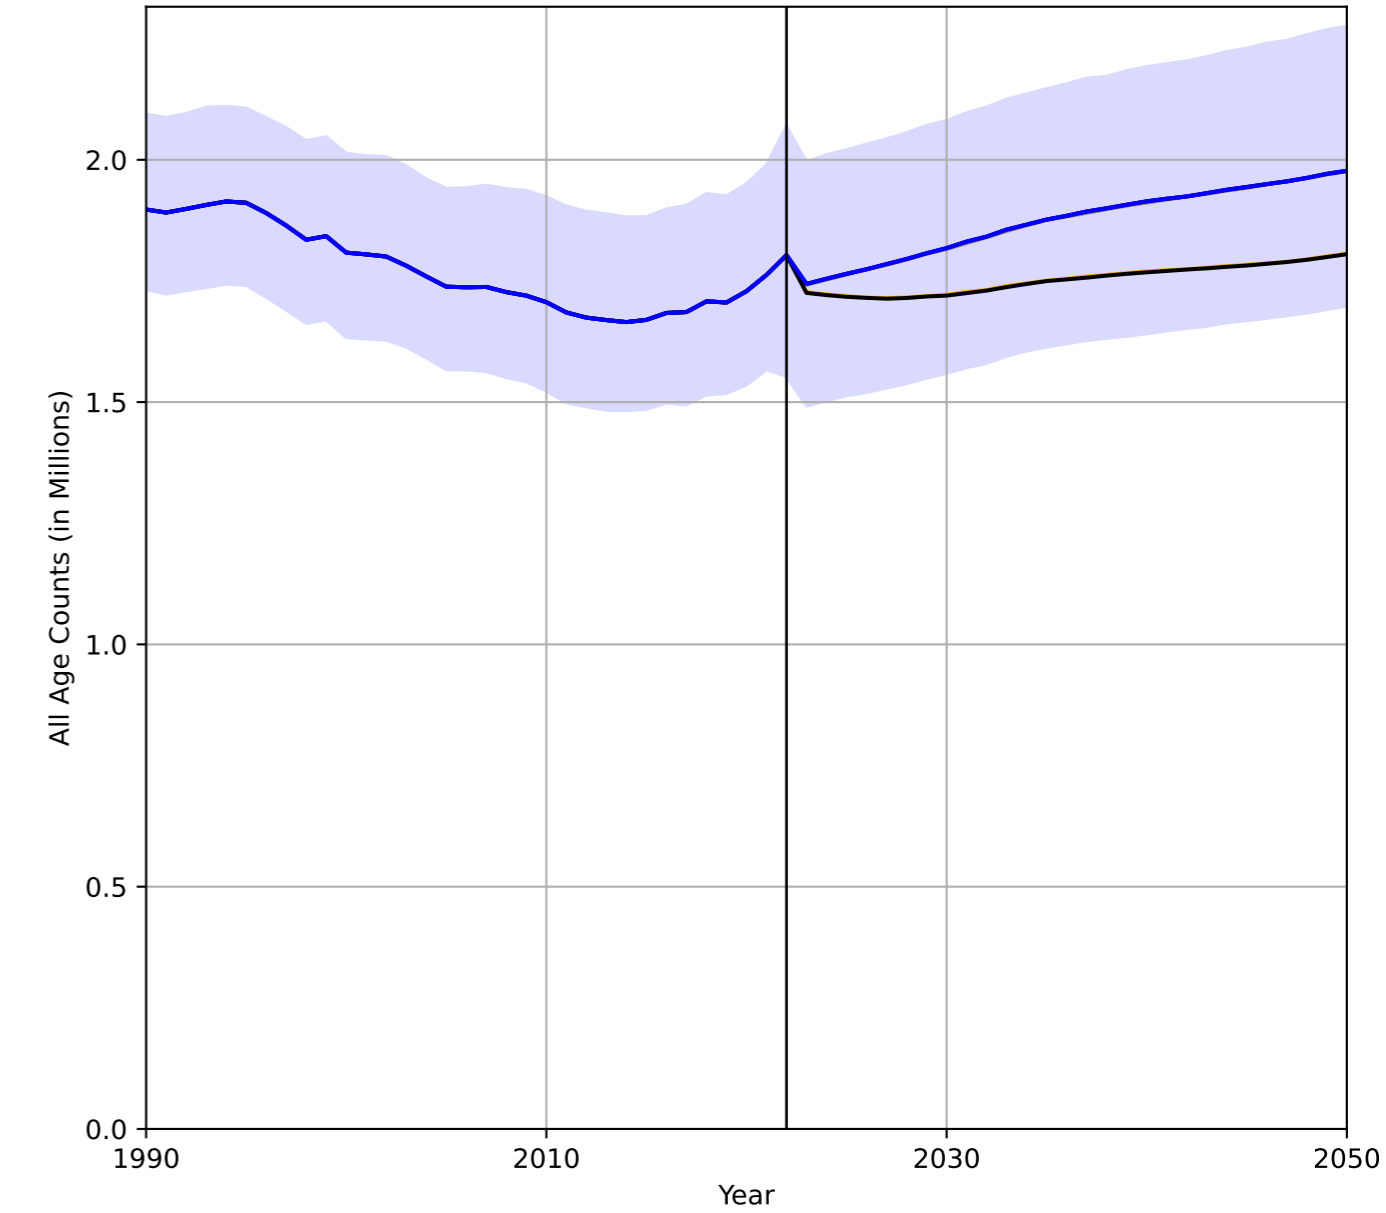

# Finland

Supplemental Results Figure S10. All-cause age standardised DALY rates (A) and all age DALY counts (B), for the past and for five future scenarios, 1990–2050

1457

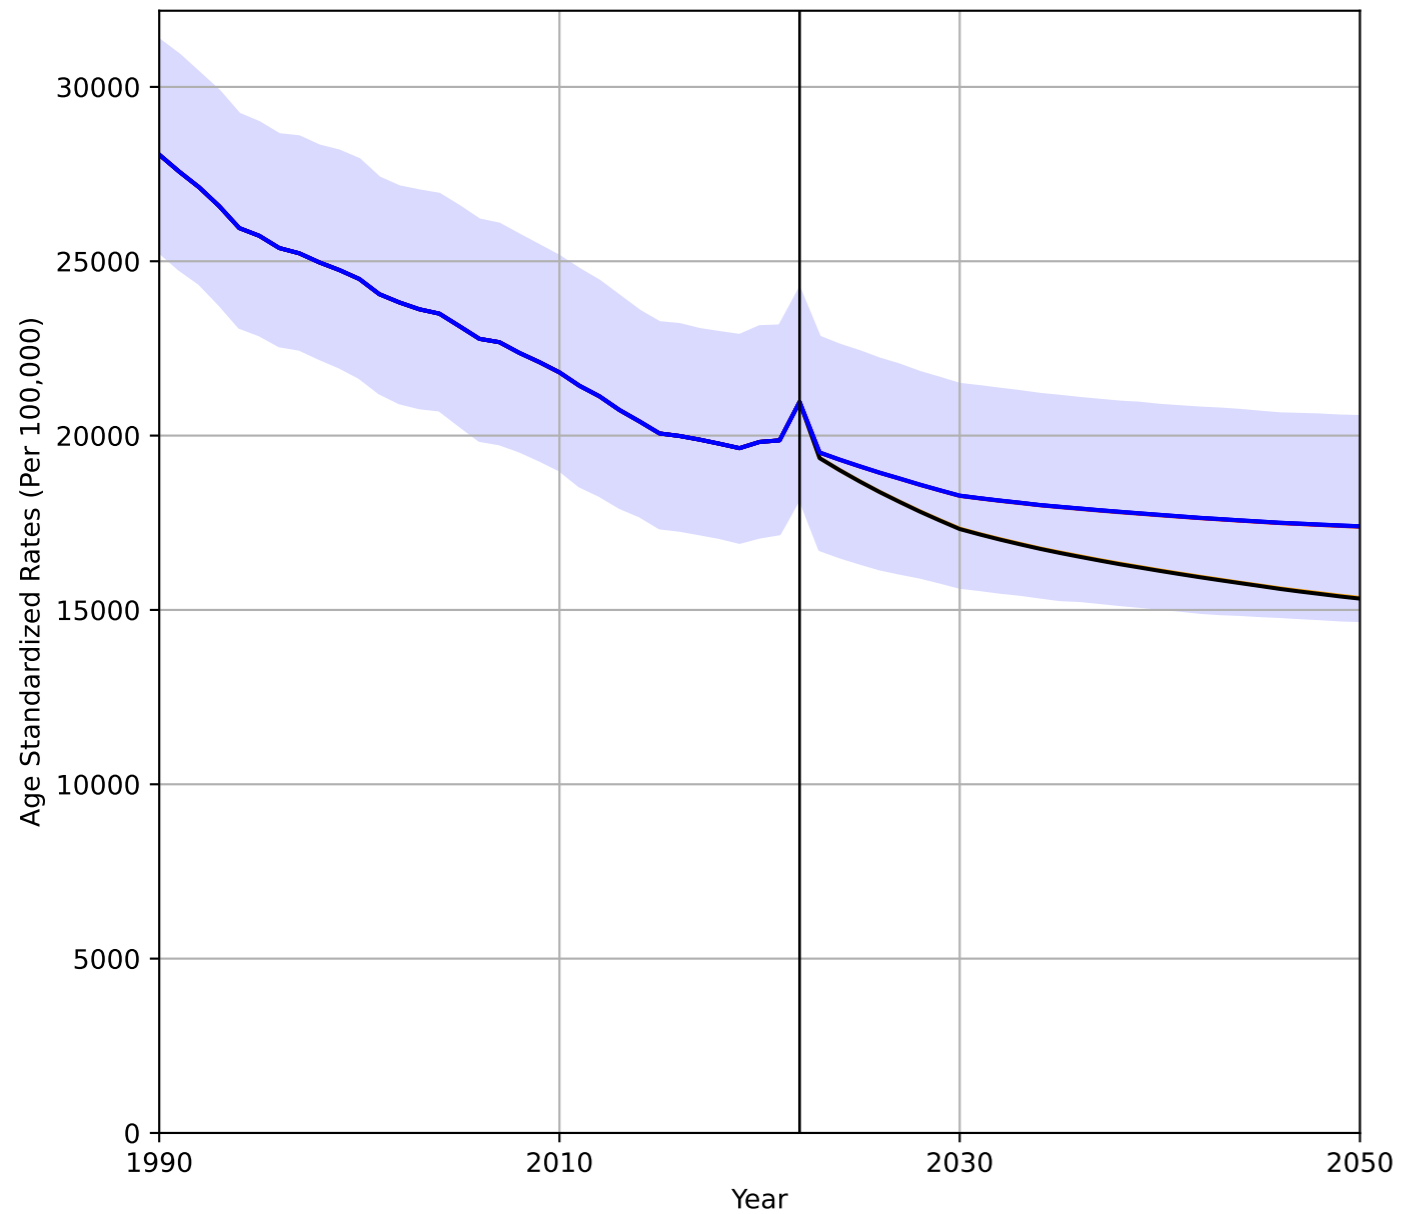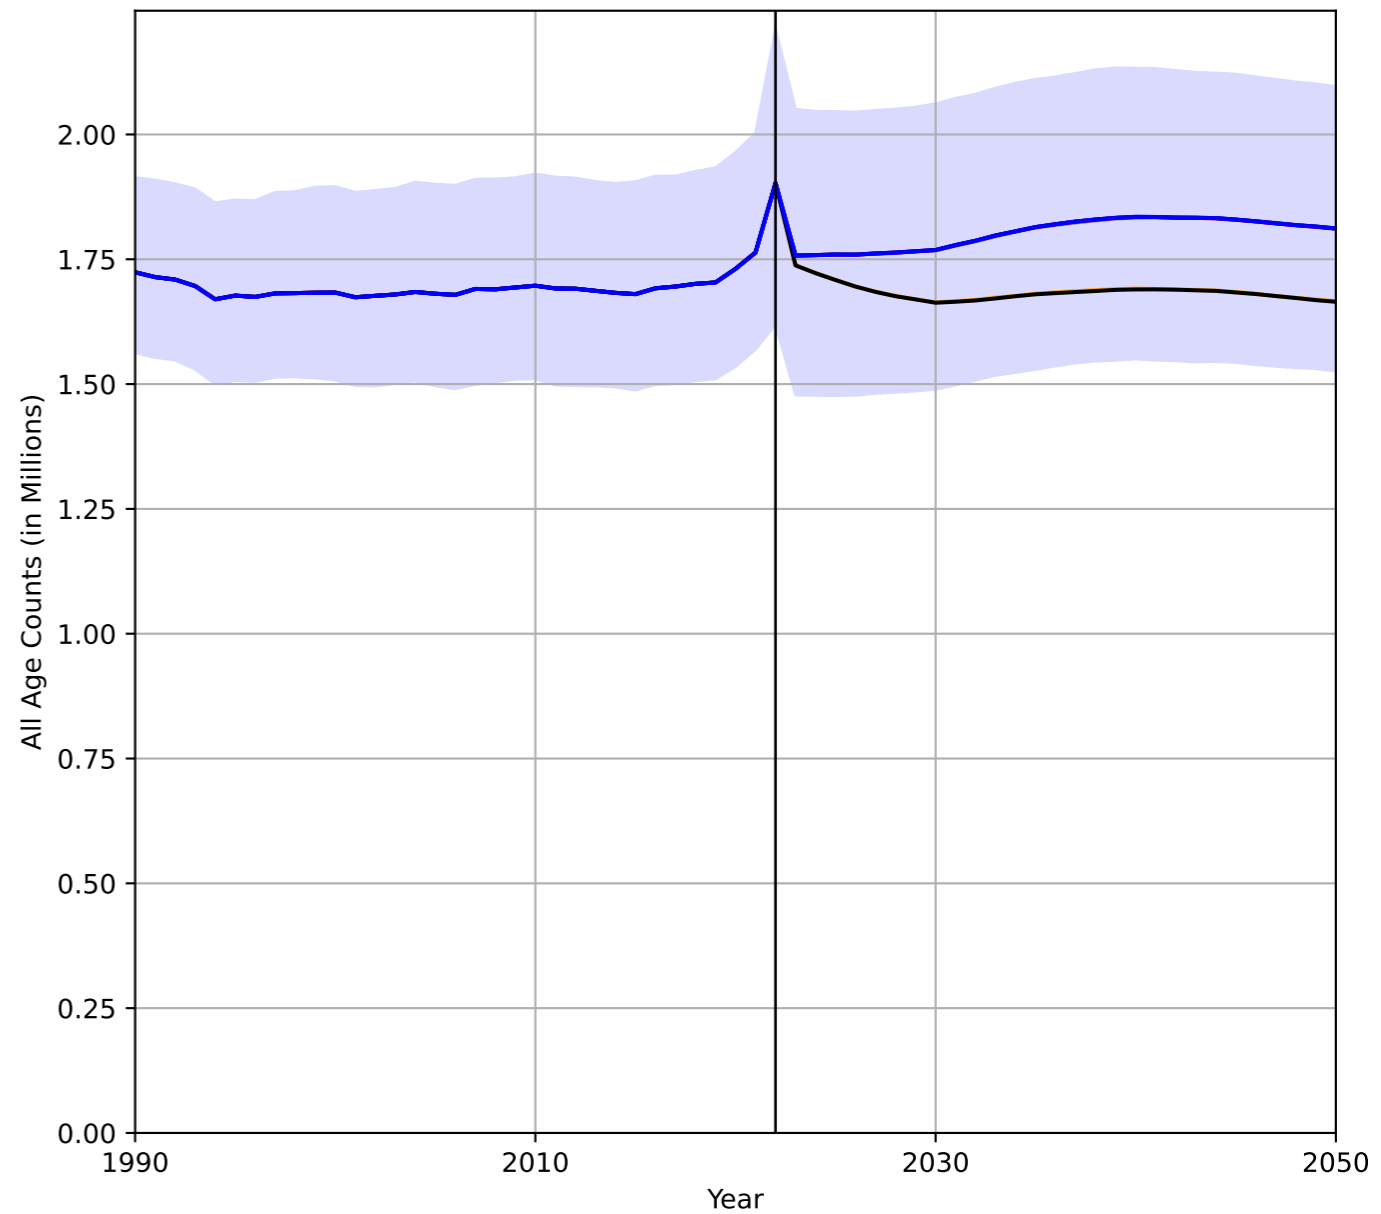

# France

Supplemental Results Figure S10. All-cause age standardised DALY rates (A) and all age DALY counts (B), for the past and for five future scenarios, 1990–2050

1458

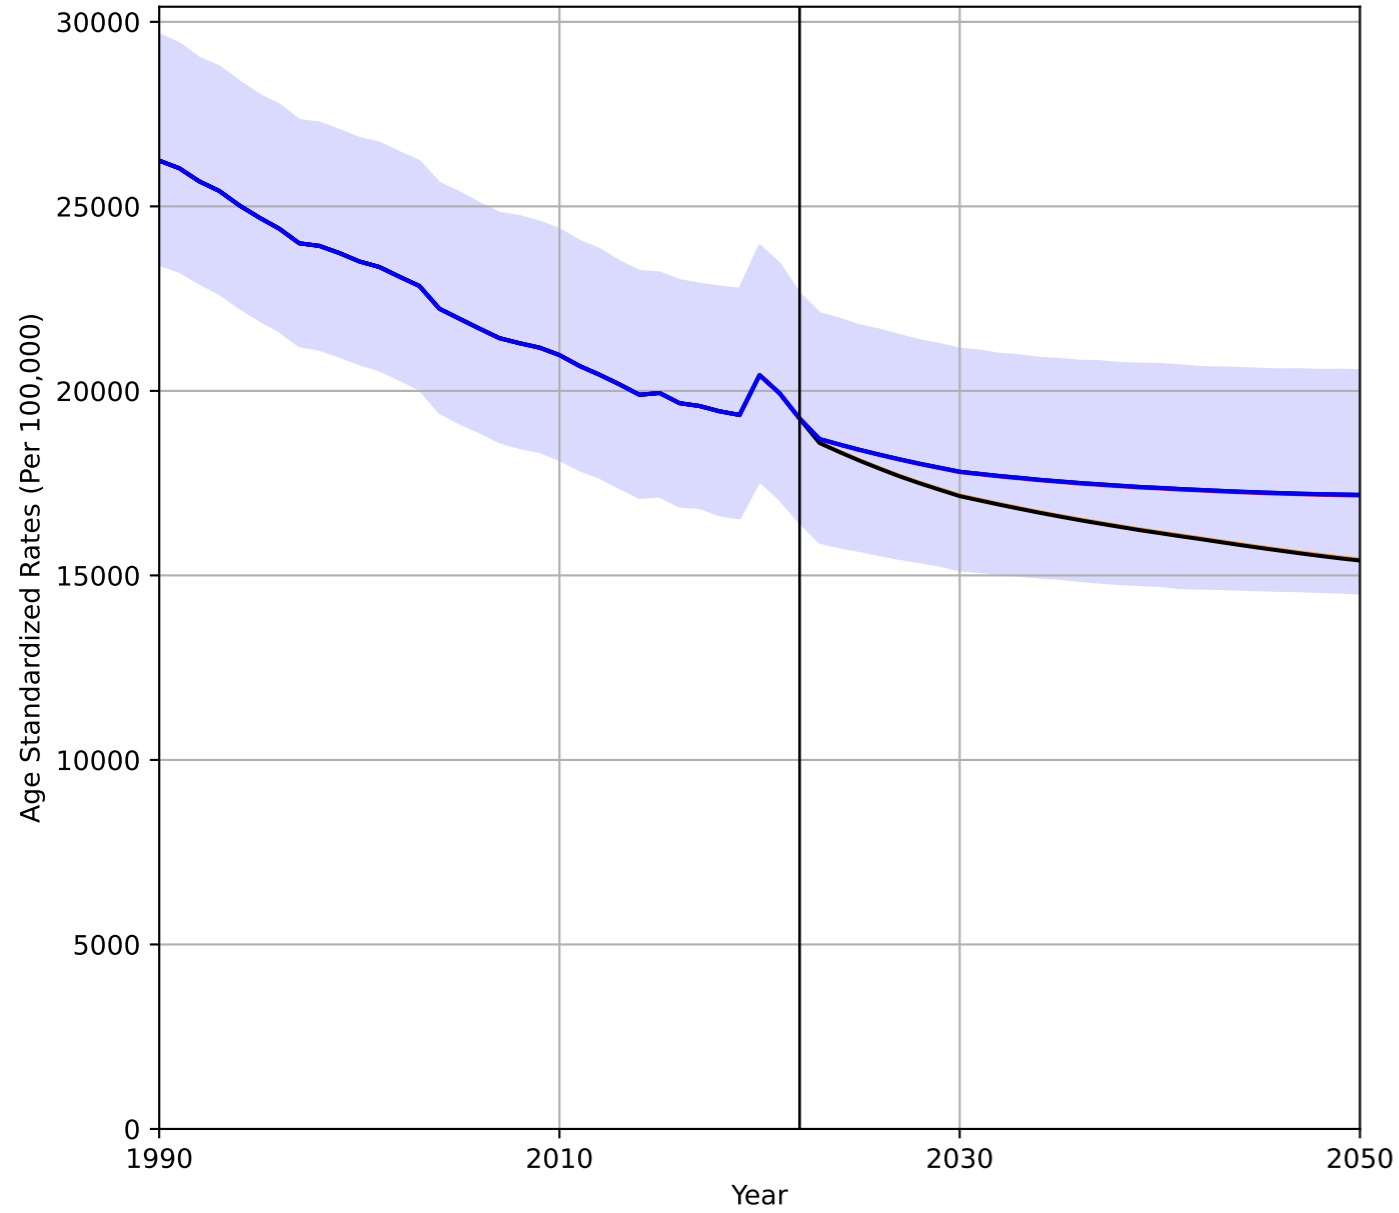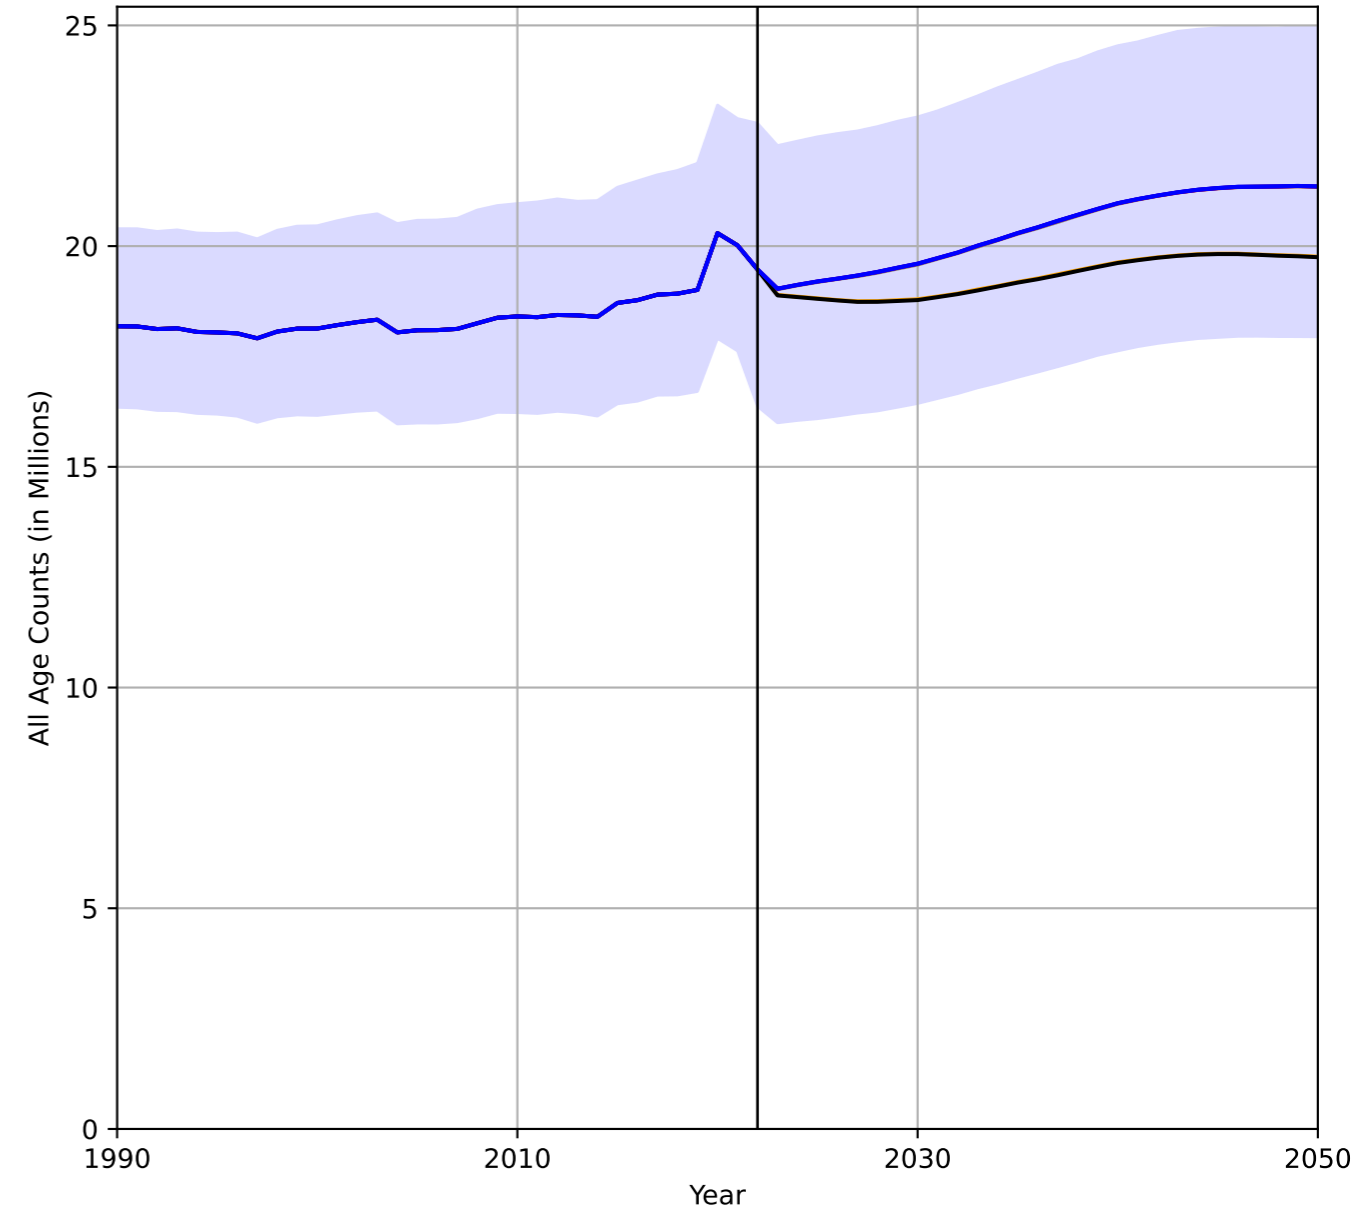

# Germany

Supplemental Results Figure S10. All-cause age standardised DALY rates (A) and all age DALY counts (B), for the past and for five future scenarios, 1990–2050

1459

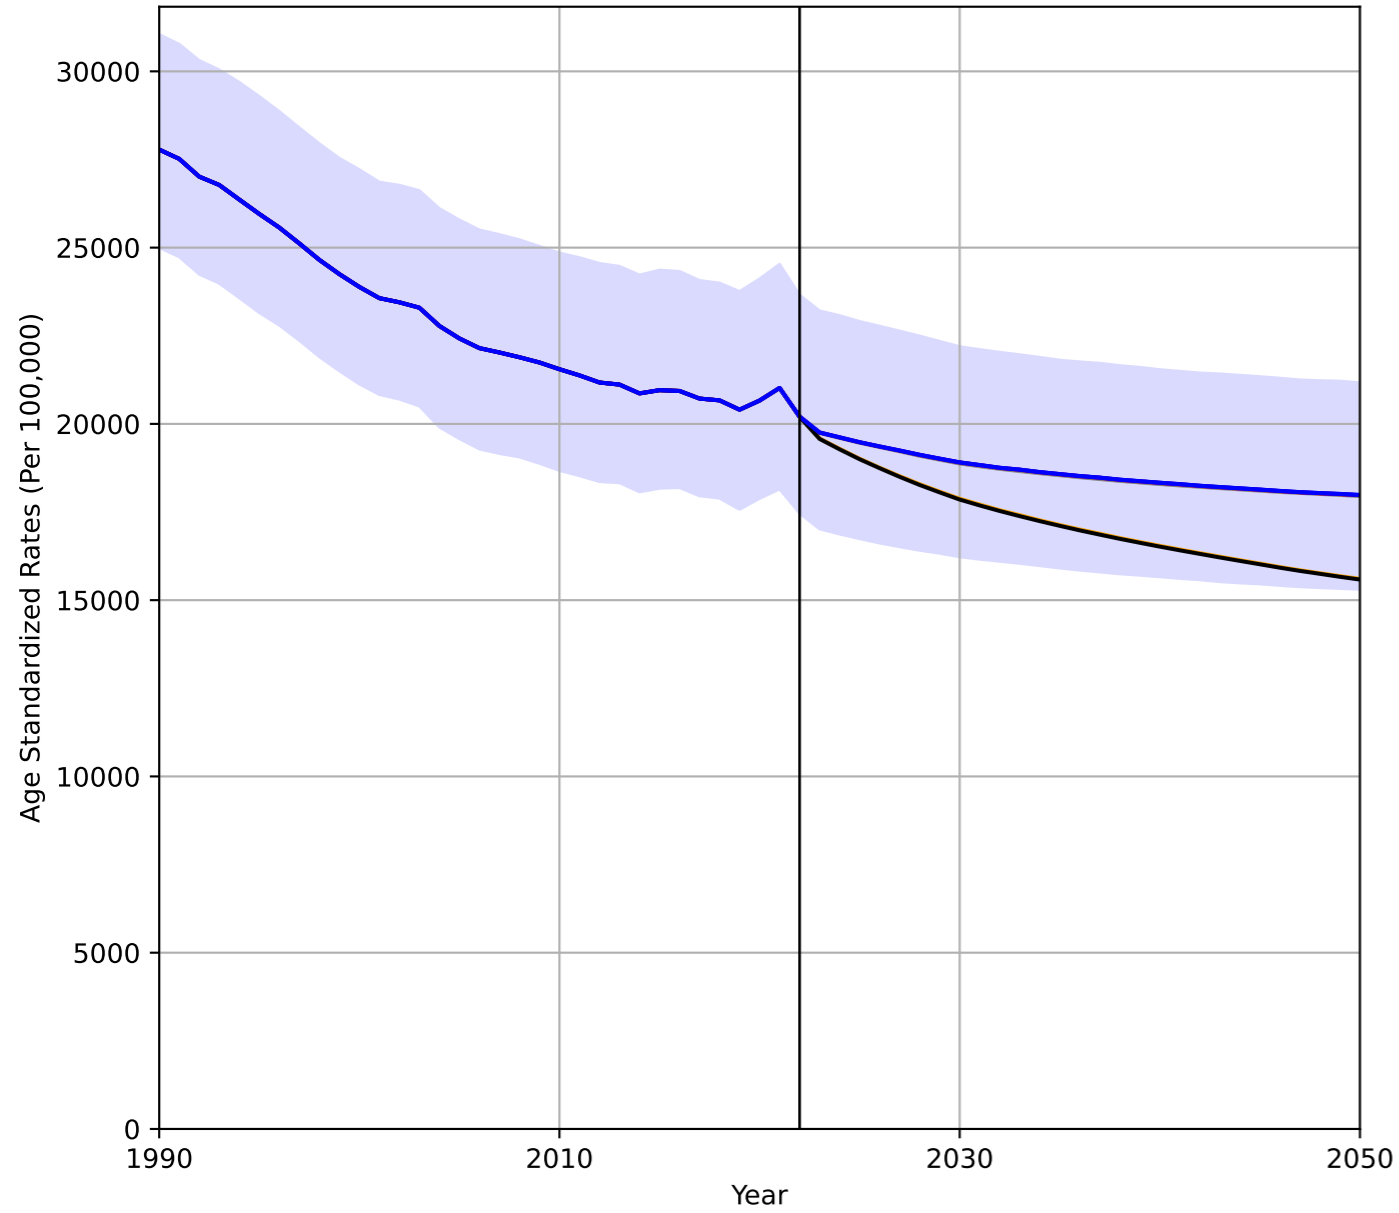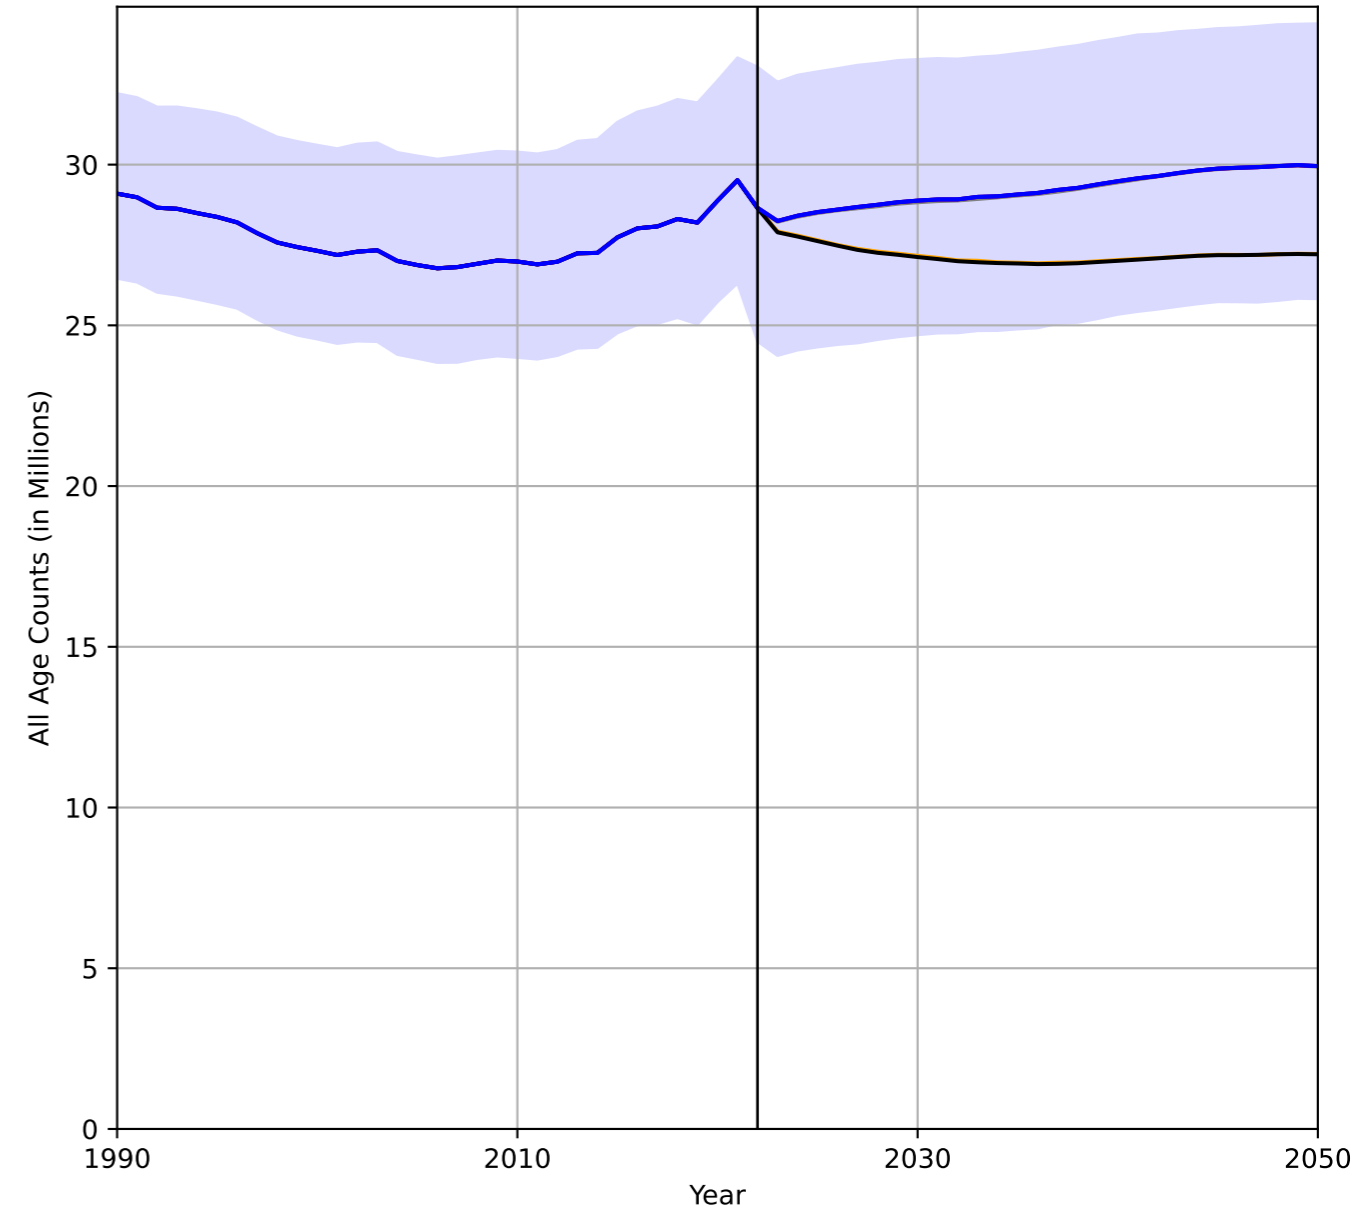

# Greece

Supplemental Results Figure S10. All-cause age standardised DALY rates (A) and all age DALY counts (B), for the past and for five future scenarios, 1990–2050

1460

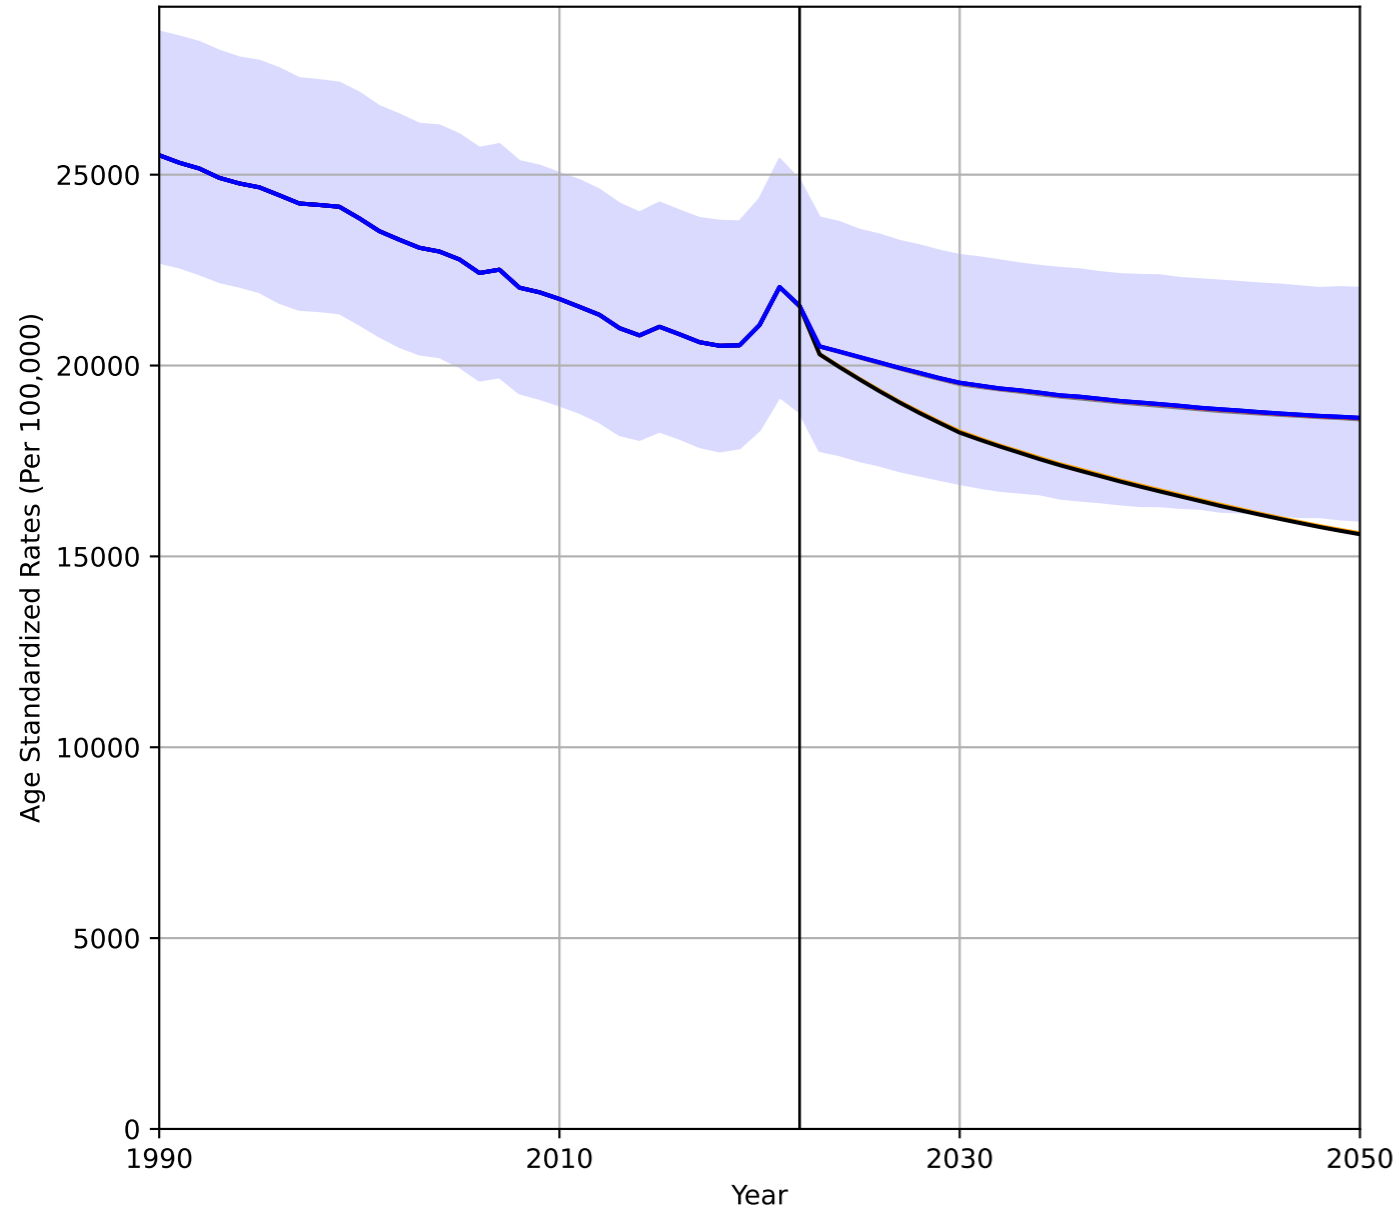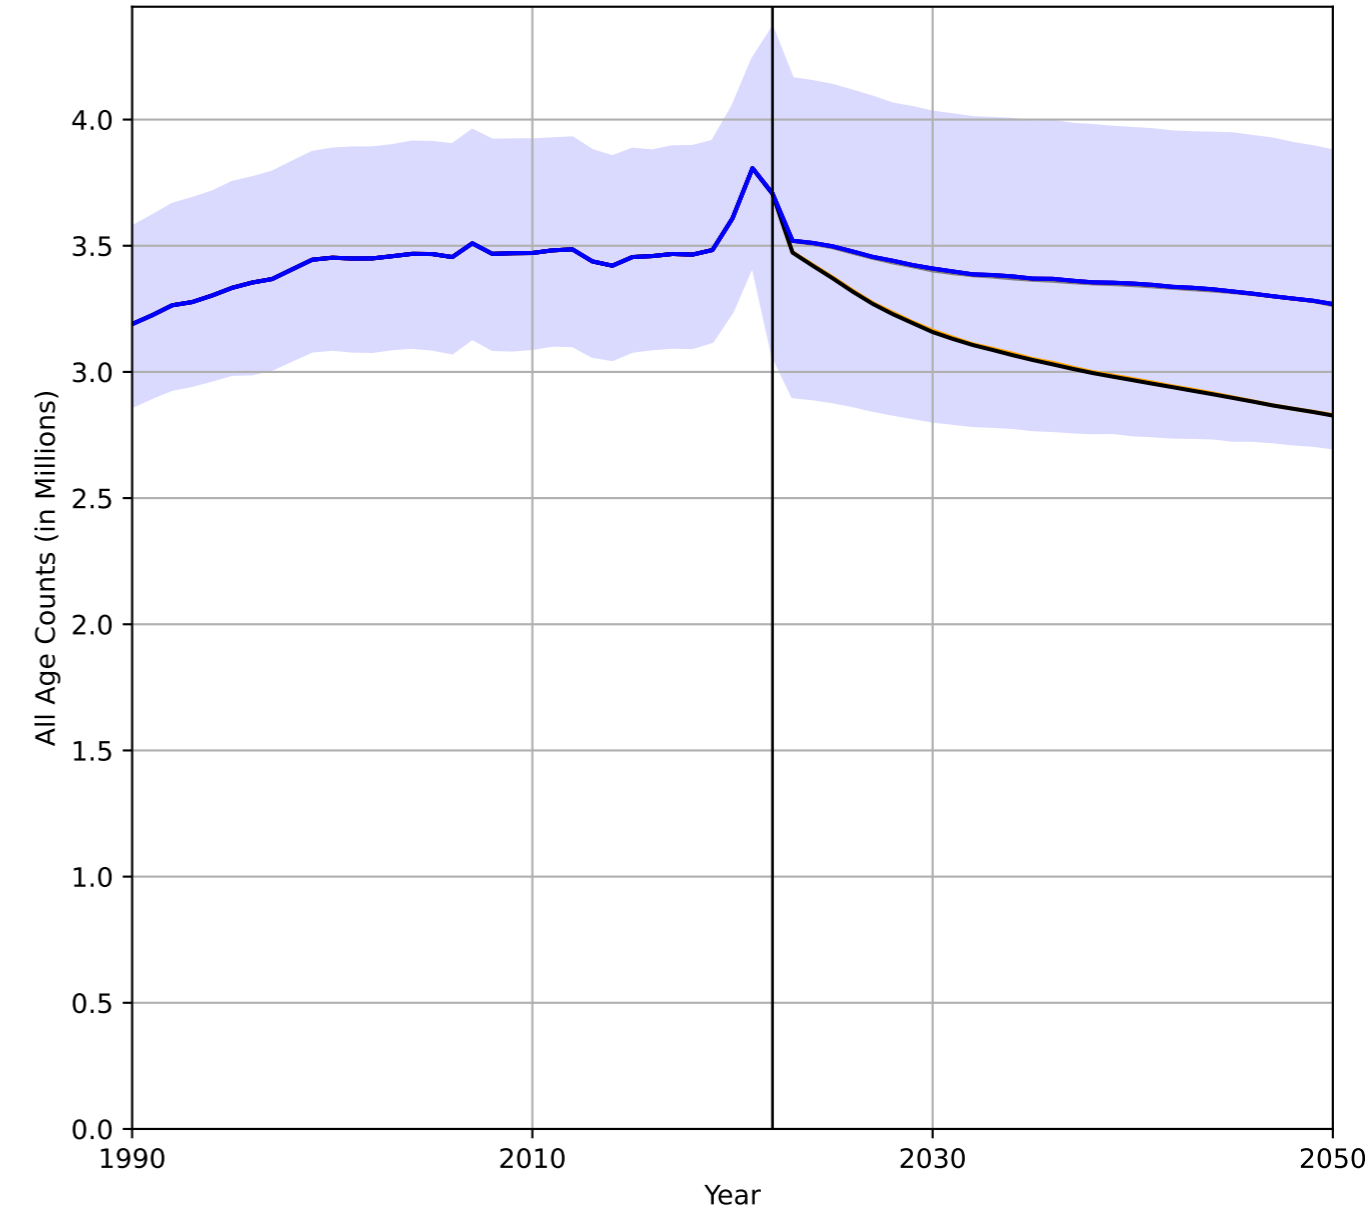

# Iceland

Supplemental Results Figure S10. All-cause age standardised DALY rates (A) and all age DALY counts (B), for the past and for five future scenarios, 1990–2050

1461

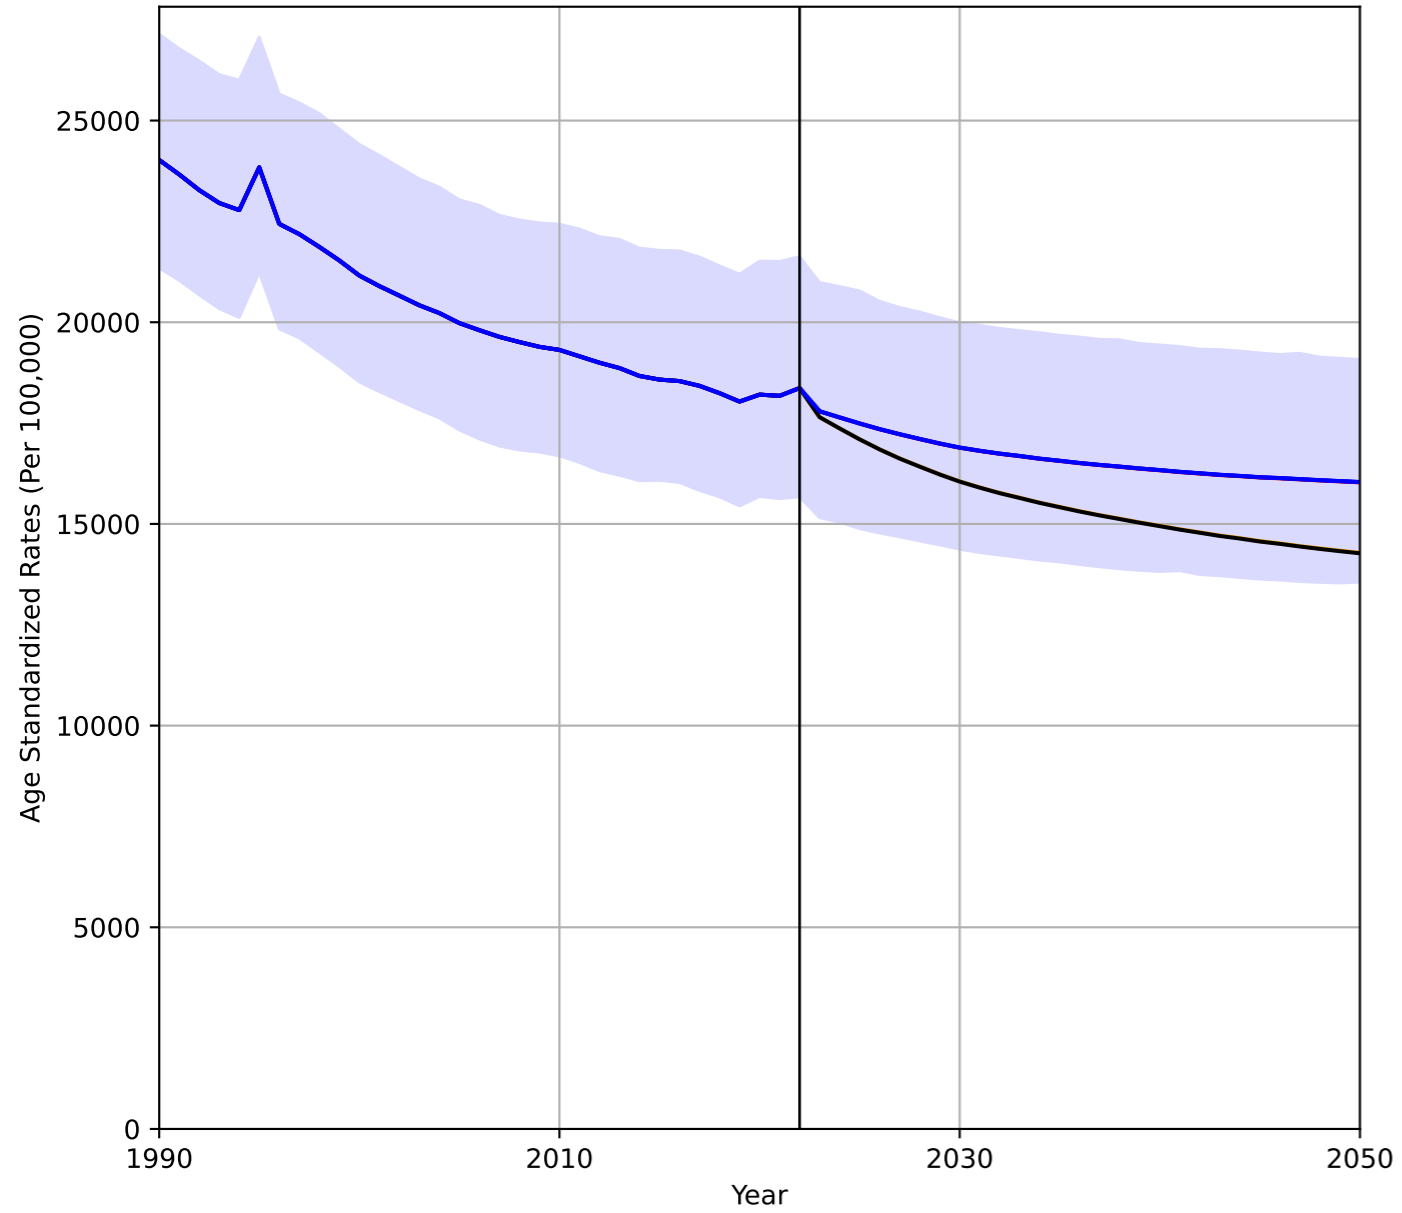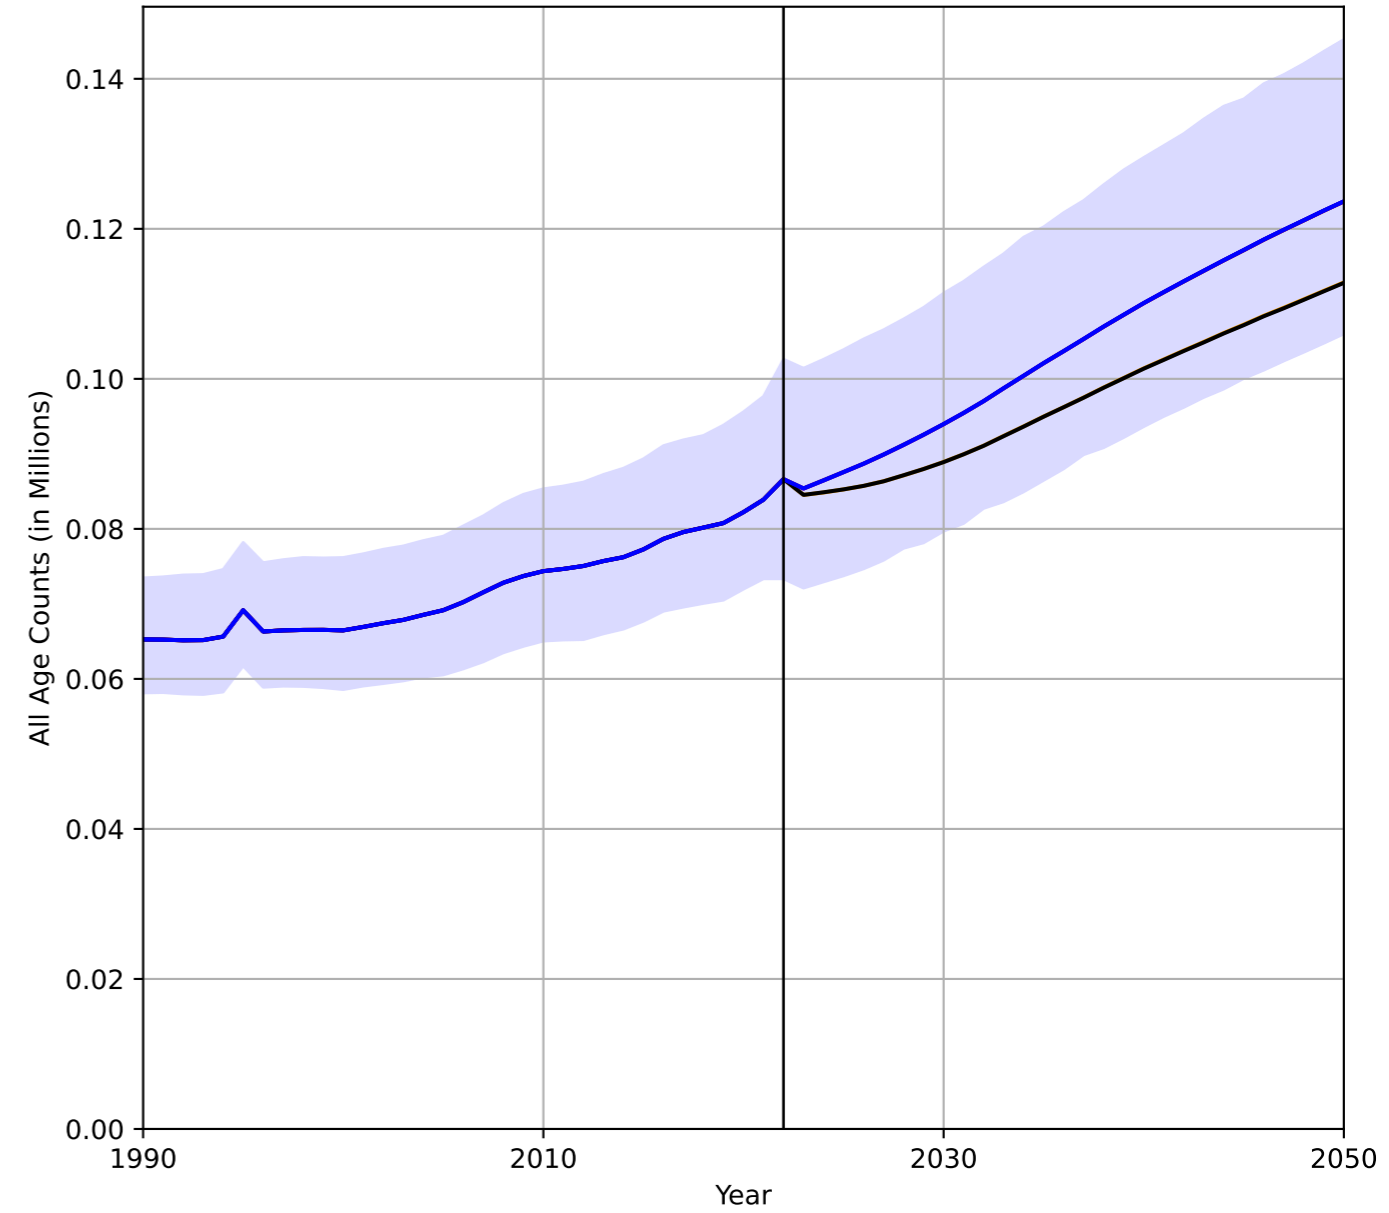

# Ireland

Supplemental Results Figure S10. All-cause age standardised DALY rates (A) and all age DALY counts (B), for the past and for five future scenarios, 1990–2050

1462

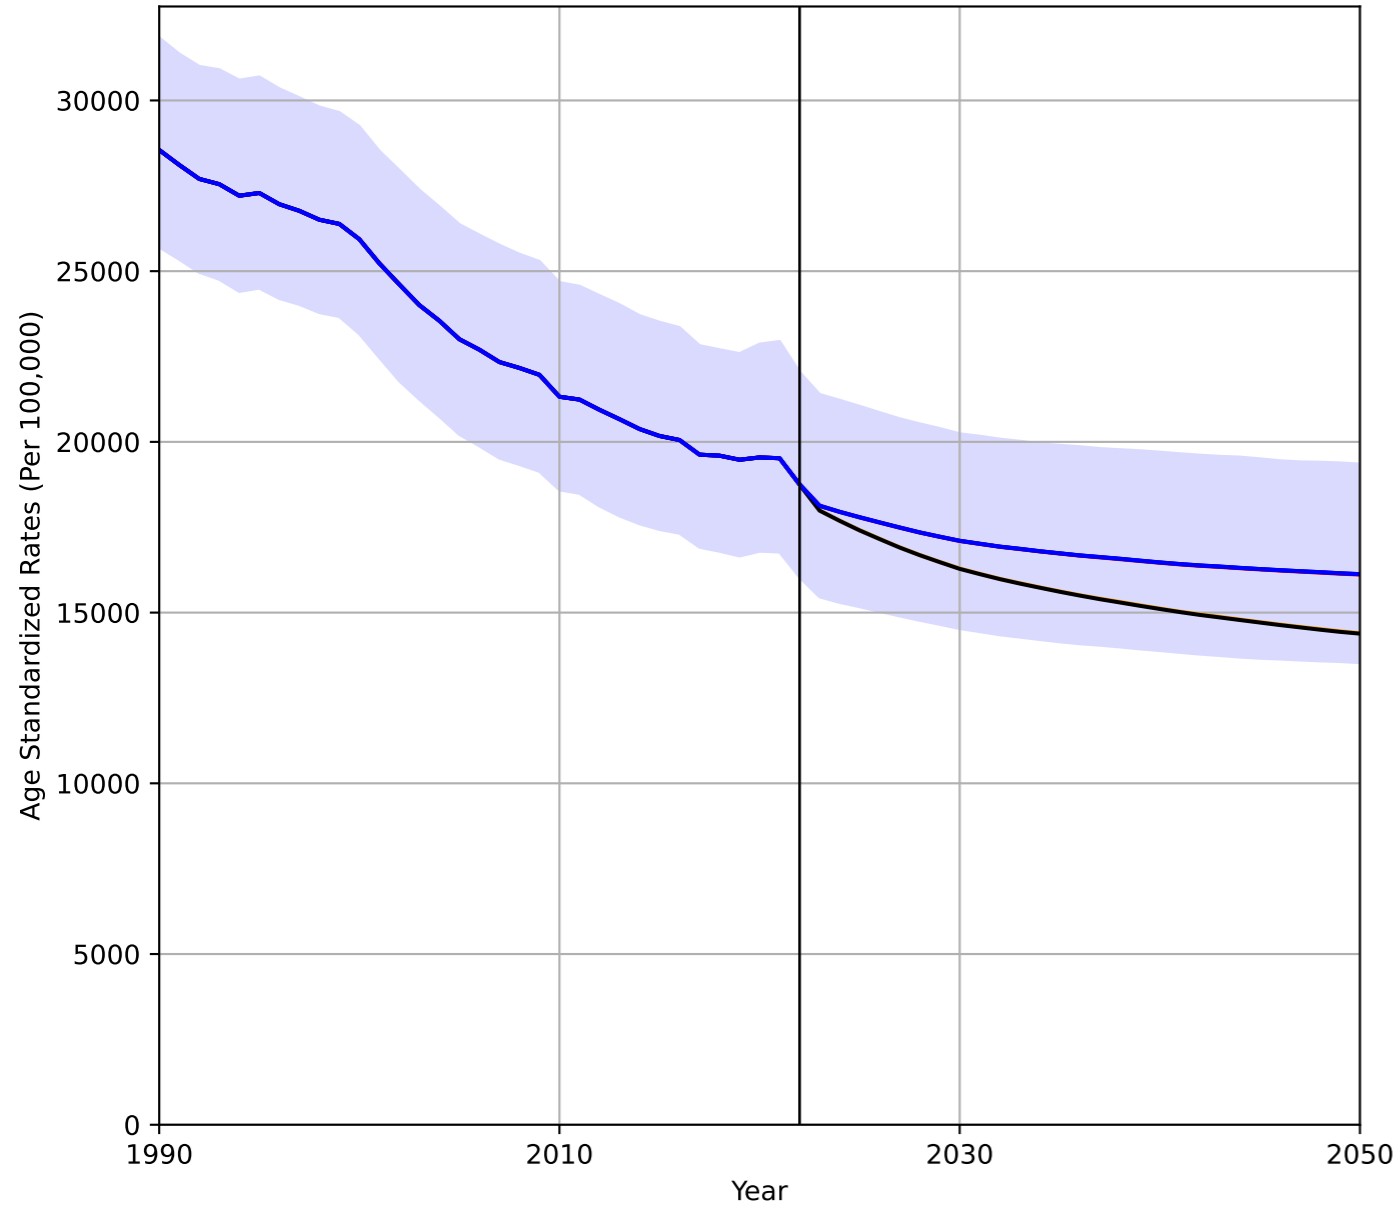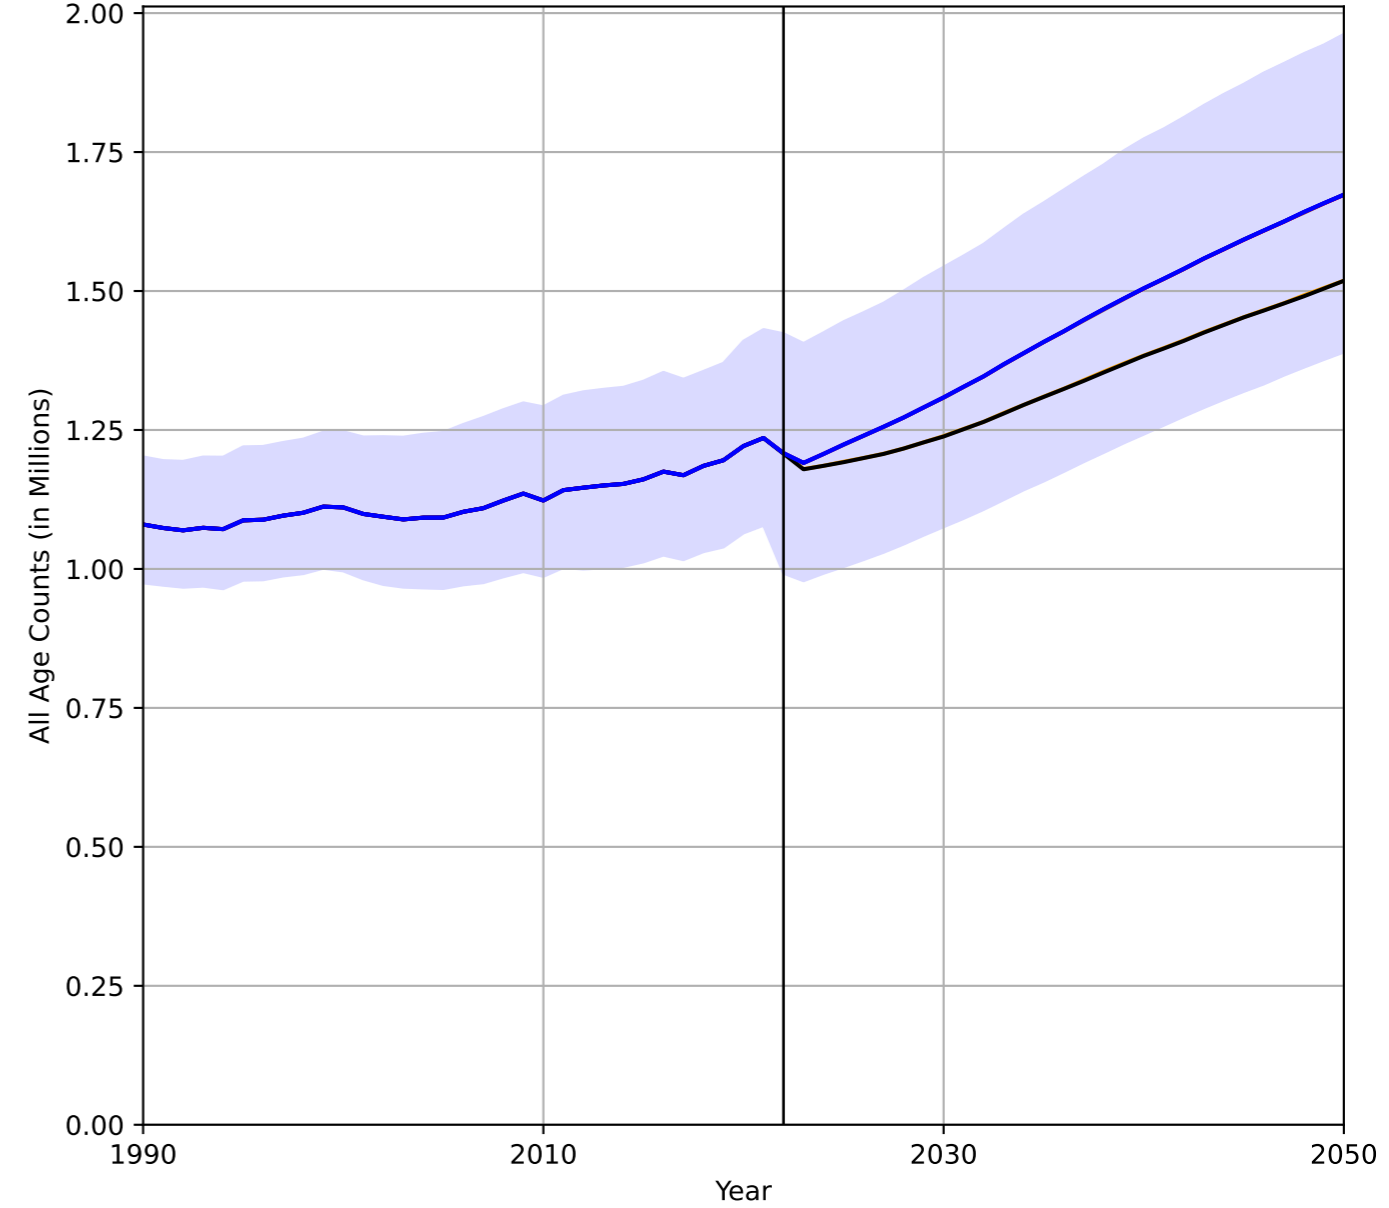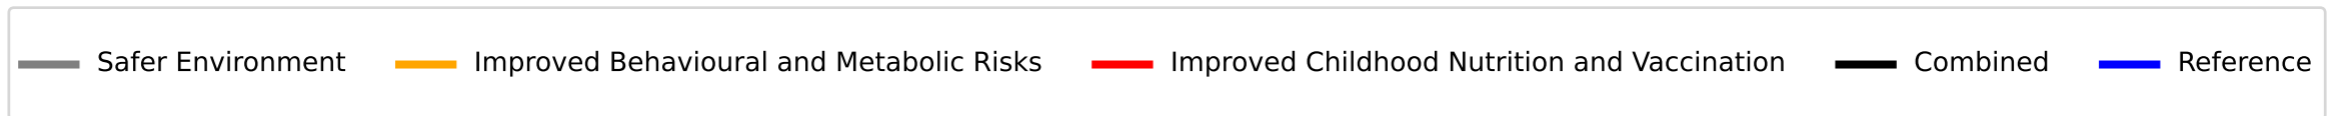

# Israel

Supplemental Results Figure S10. All-cause age standardised DALY rates (A) and all age DALY counts (B), for the past and for five future scenarios, 1990–2050

1463

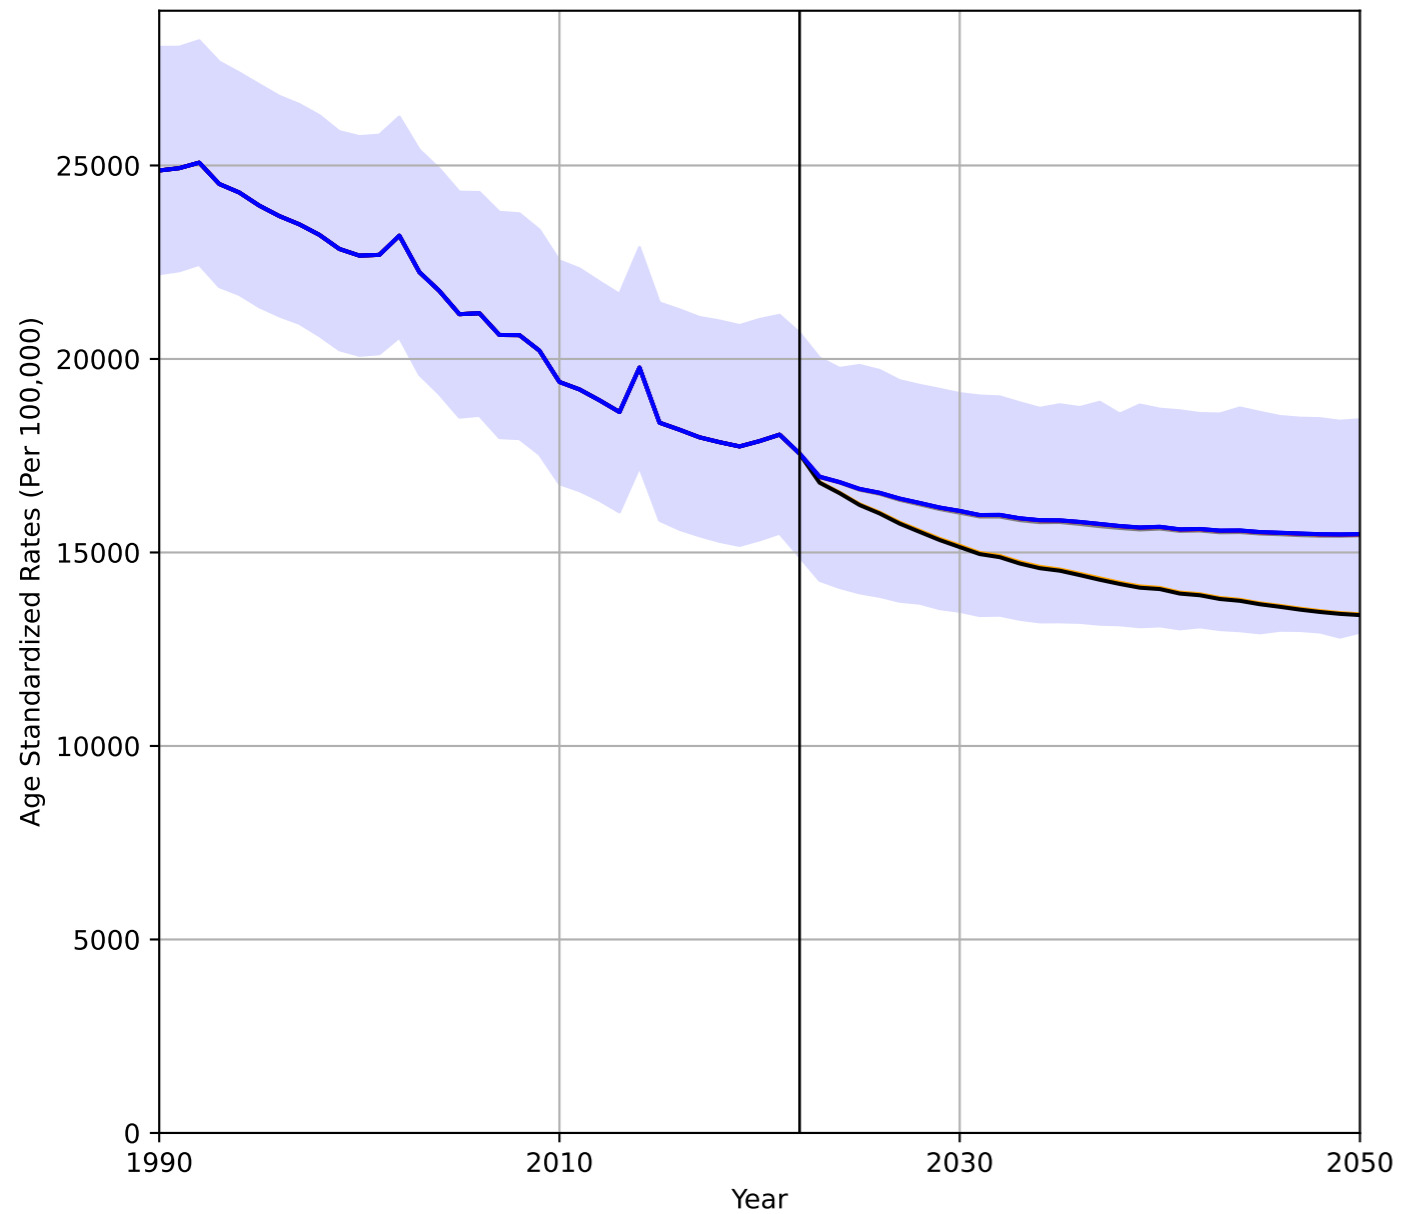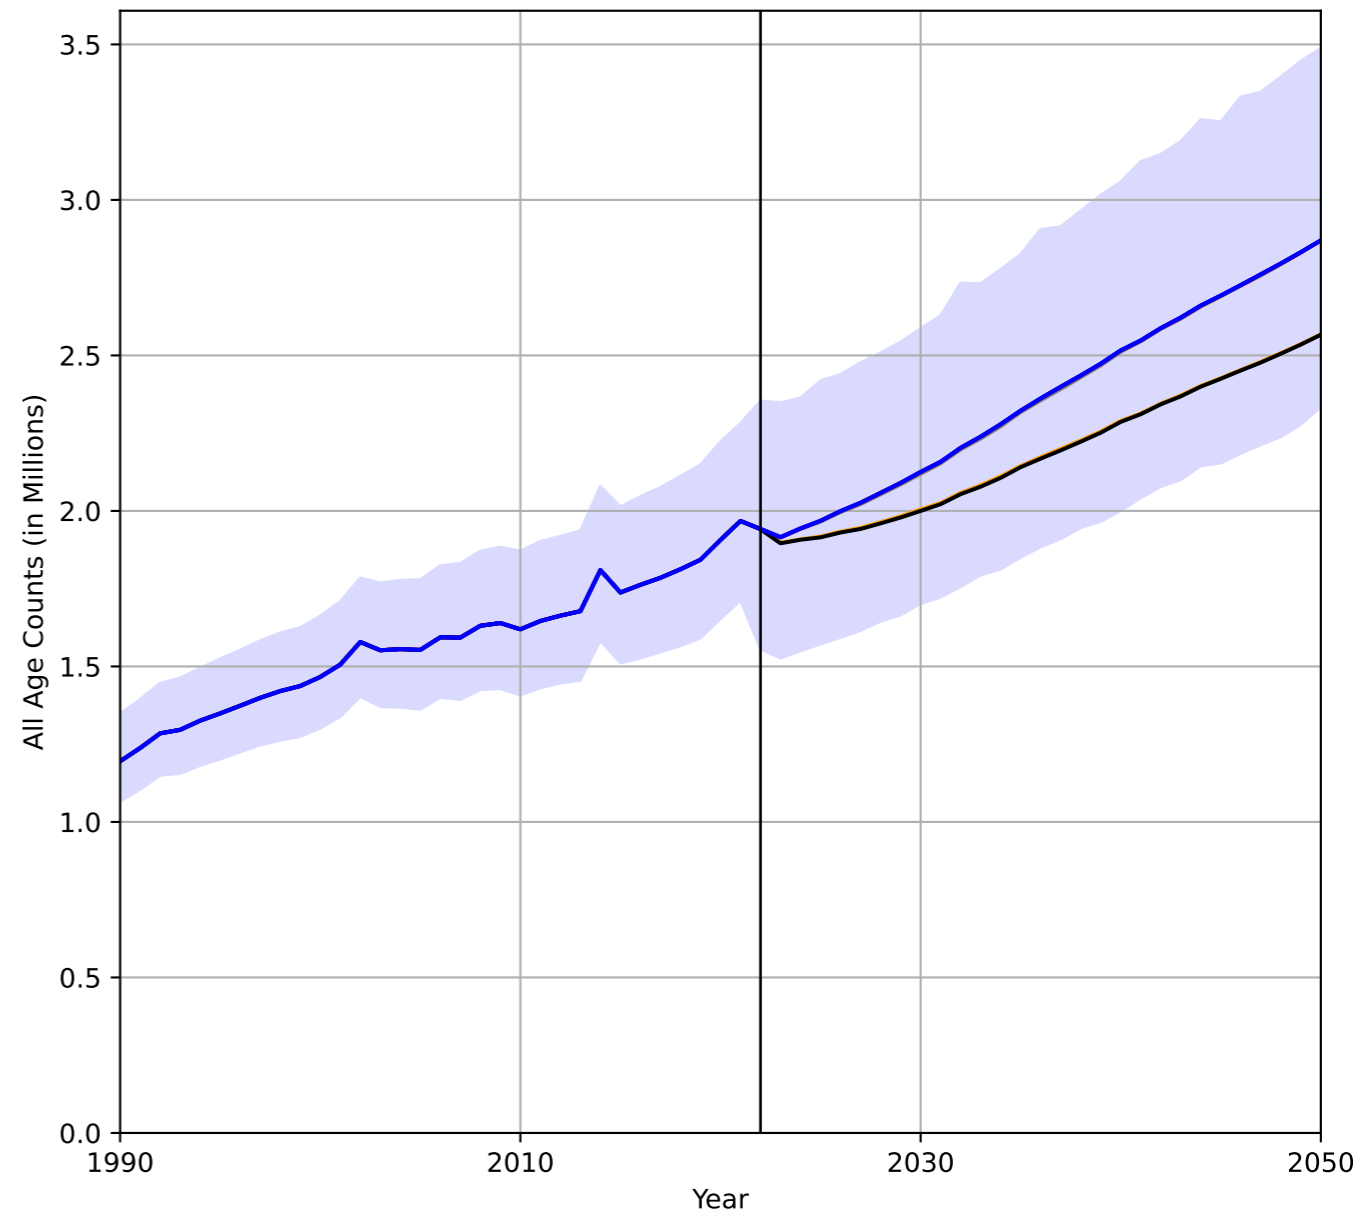



# Italy

Supplemental Results Figure S10. All-cause age standardised DALY rates (A) and all age DALY counts (B), for the past and for five future scenarios, 1990–2050

1464

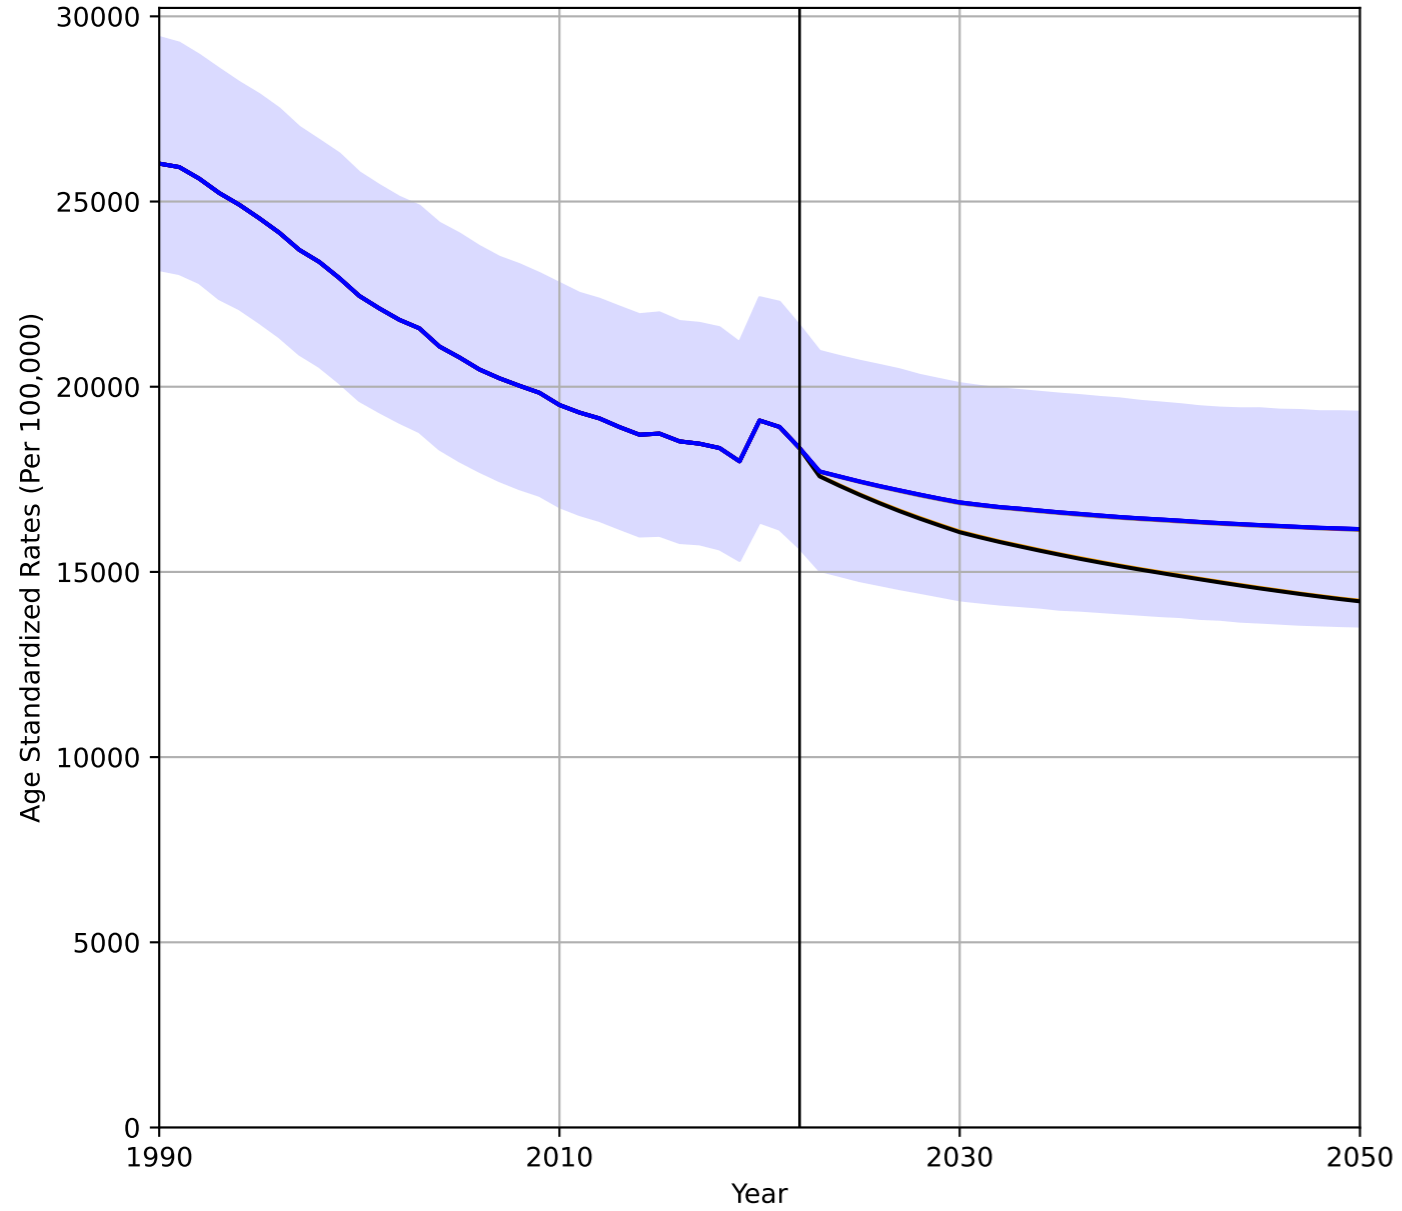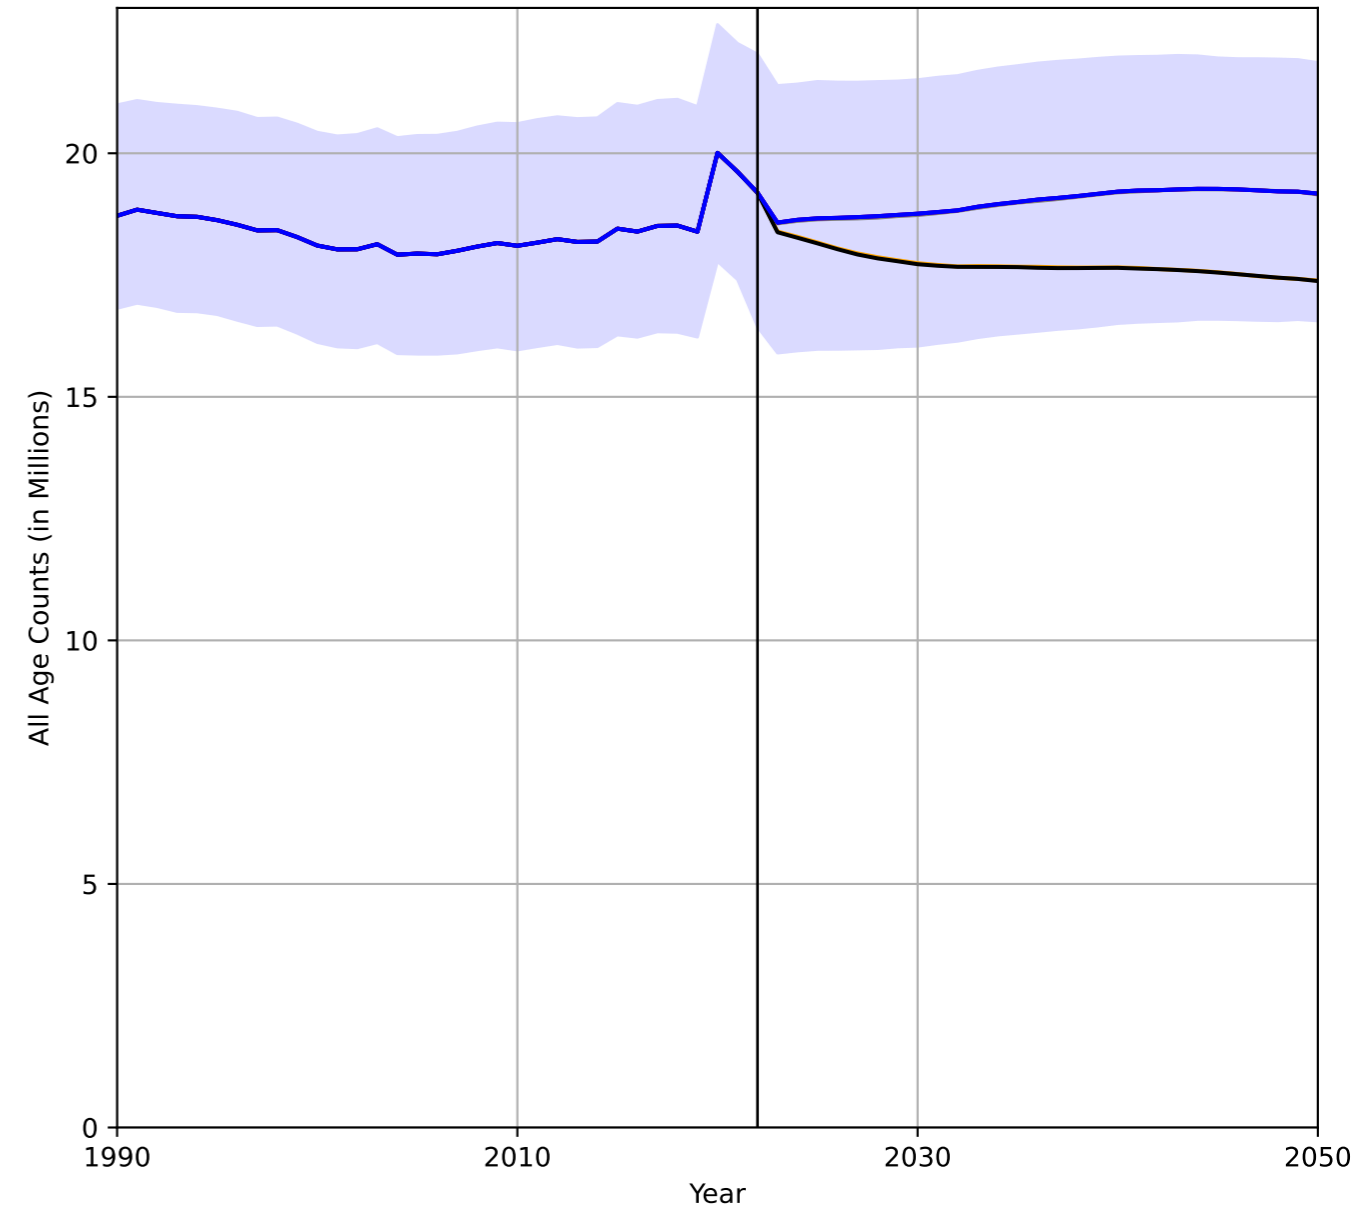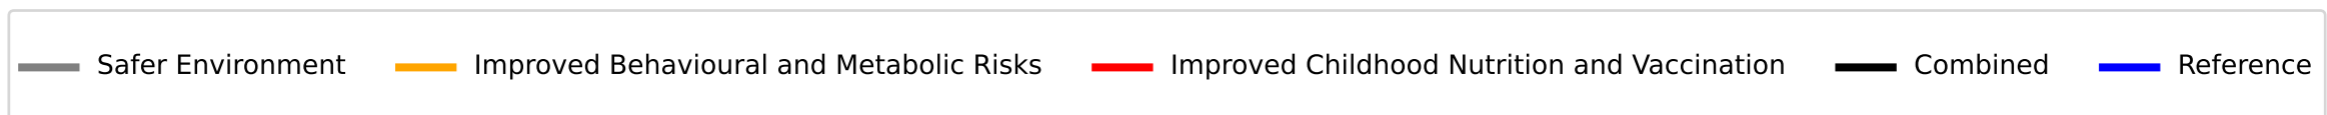

# Luxembourg

Supplemental Results Figure S10. All-cause age standardised DALY rates (A) and all age DALY counts (B), for the past and for five future scenarios, 1990–2050

1465

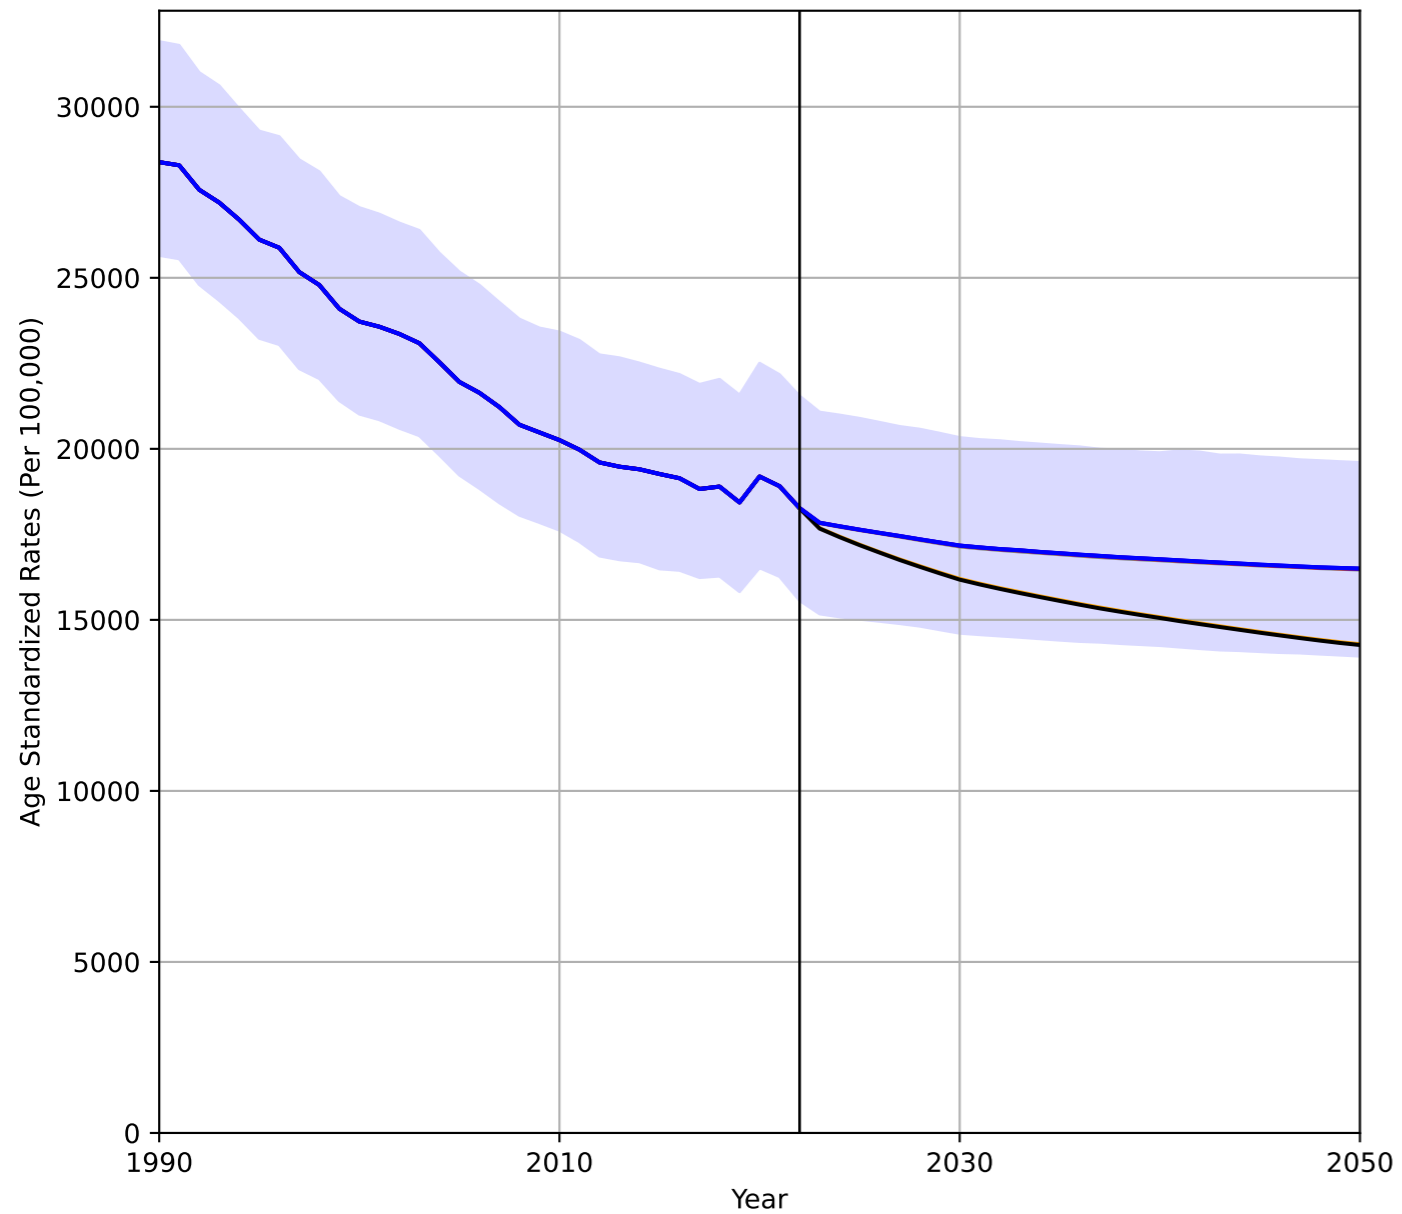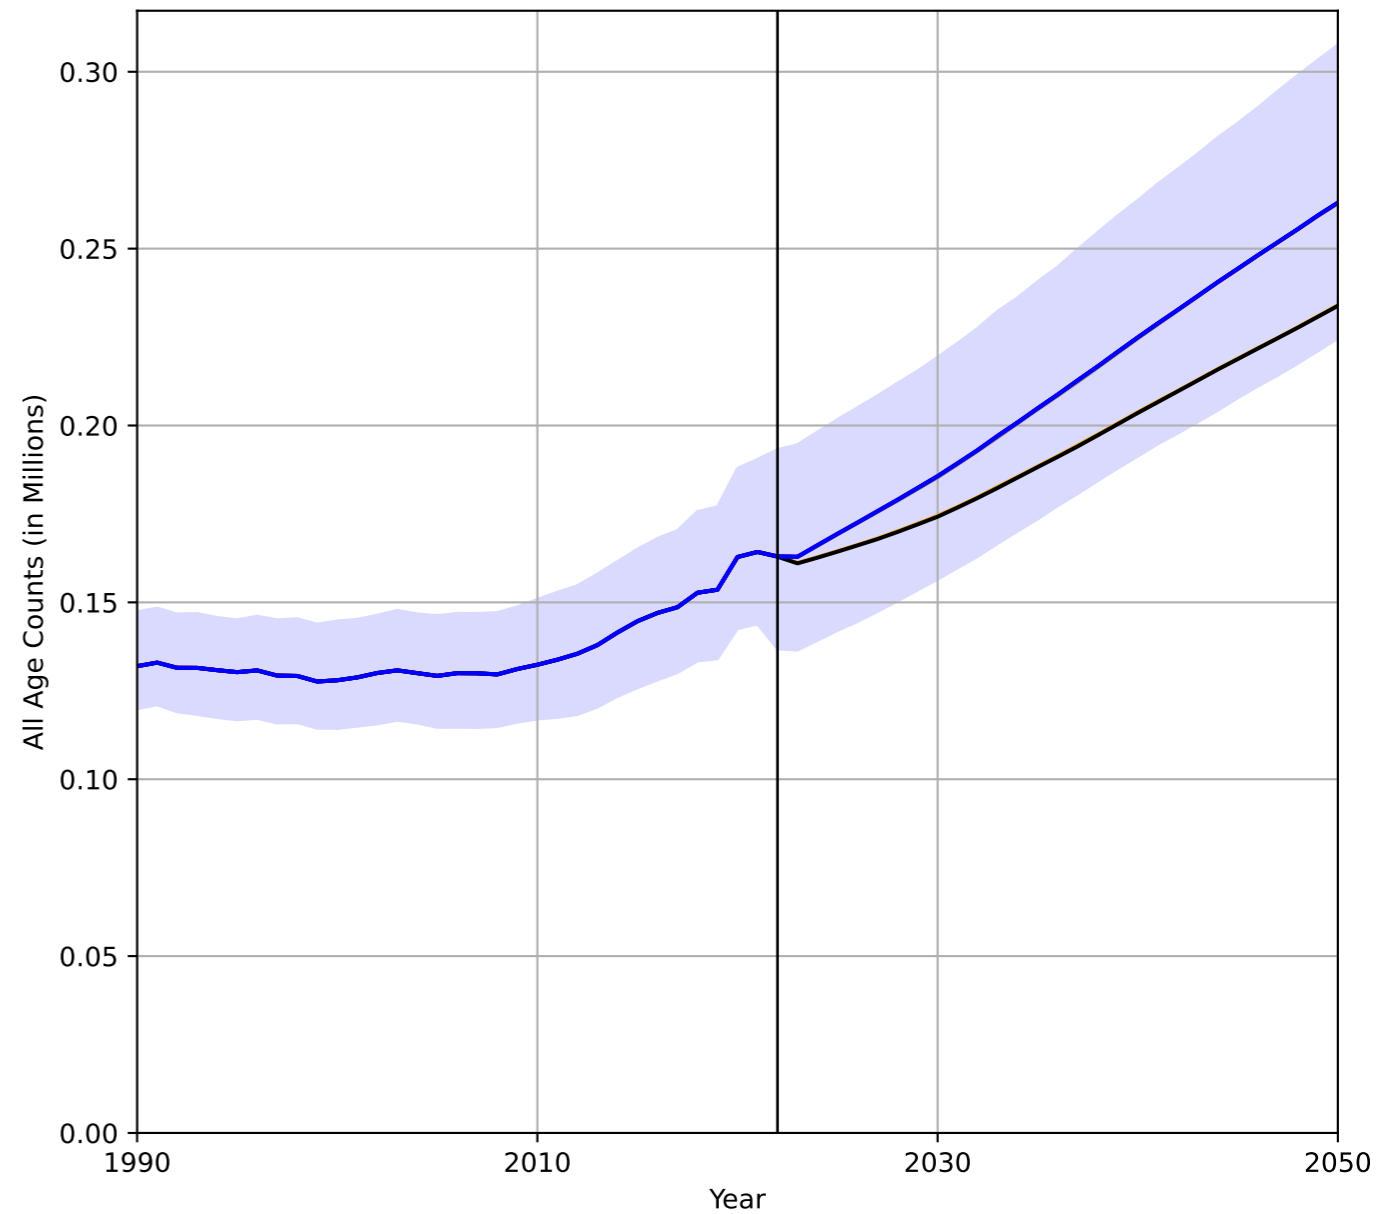

# Malta

Supplemental Results Figure S10. All-cause age standardised DALY rates (A) and all age DALY counts (B), for the past and for five future scenarios, 1990–2050

1466

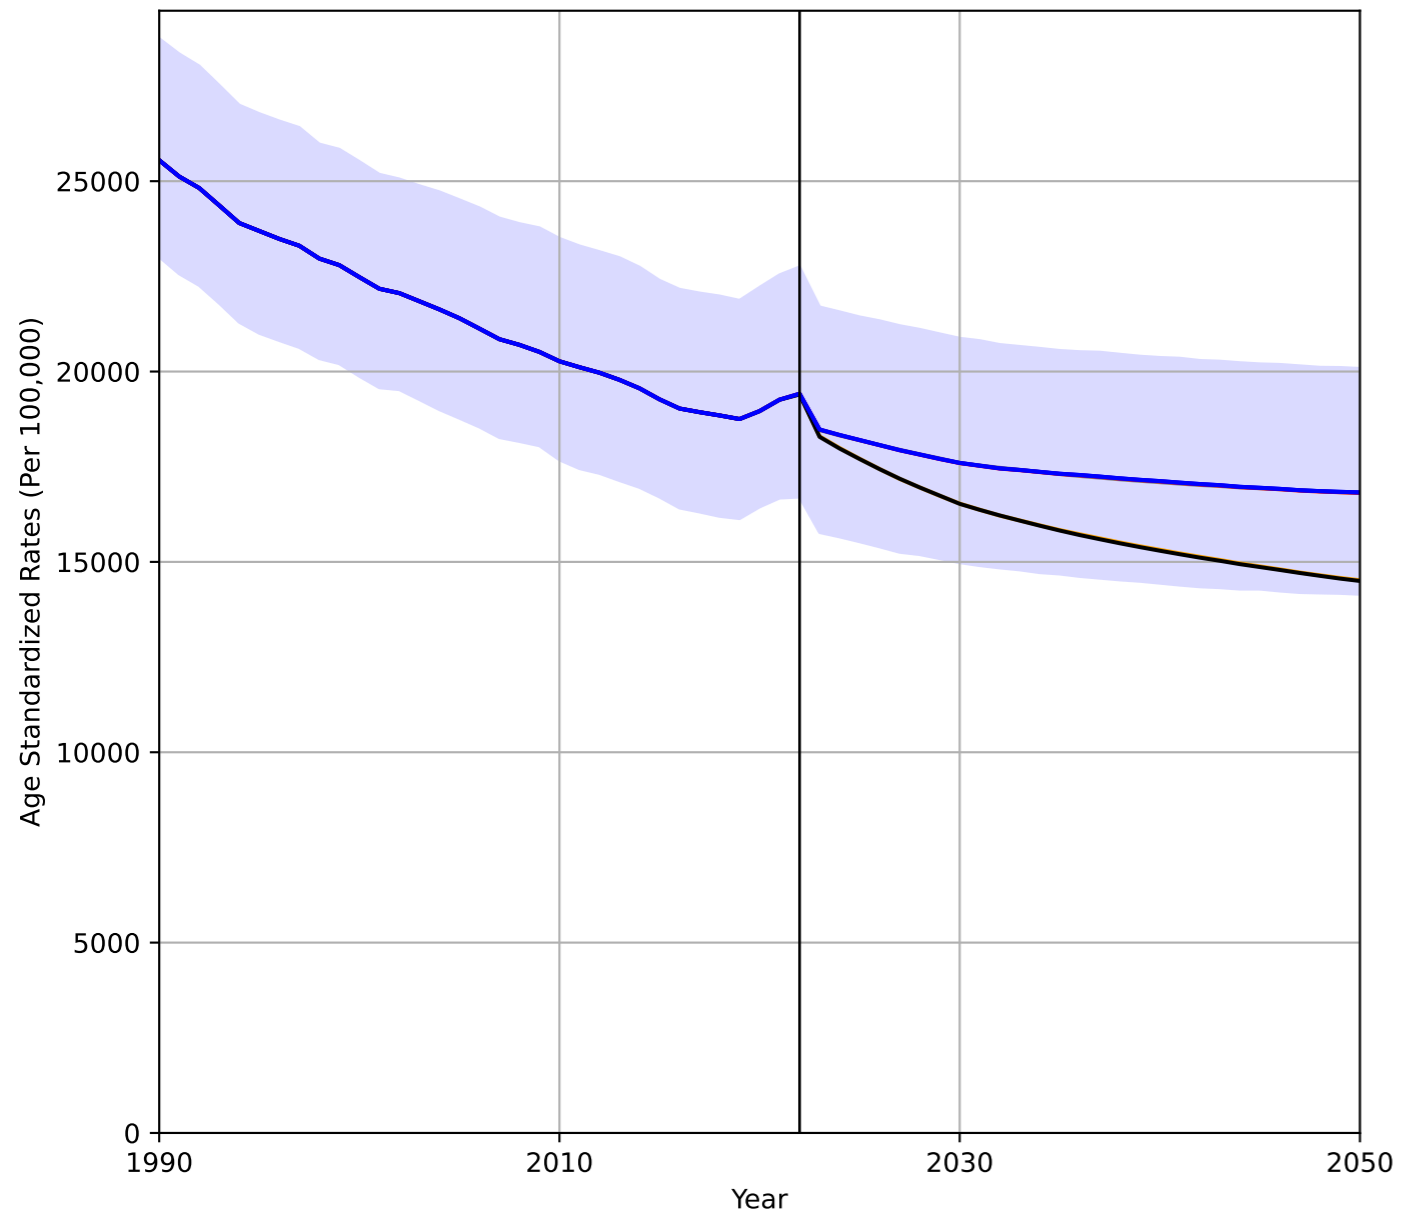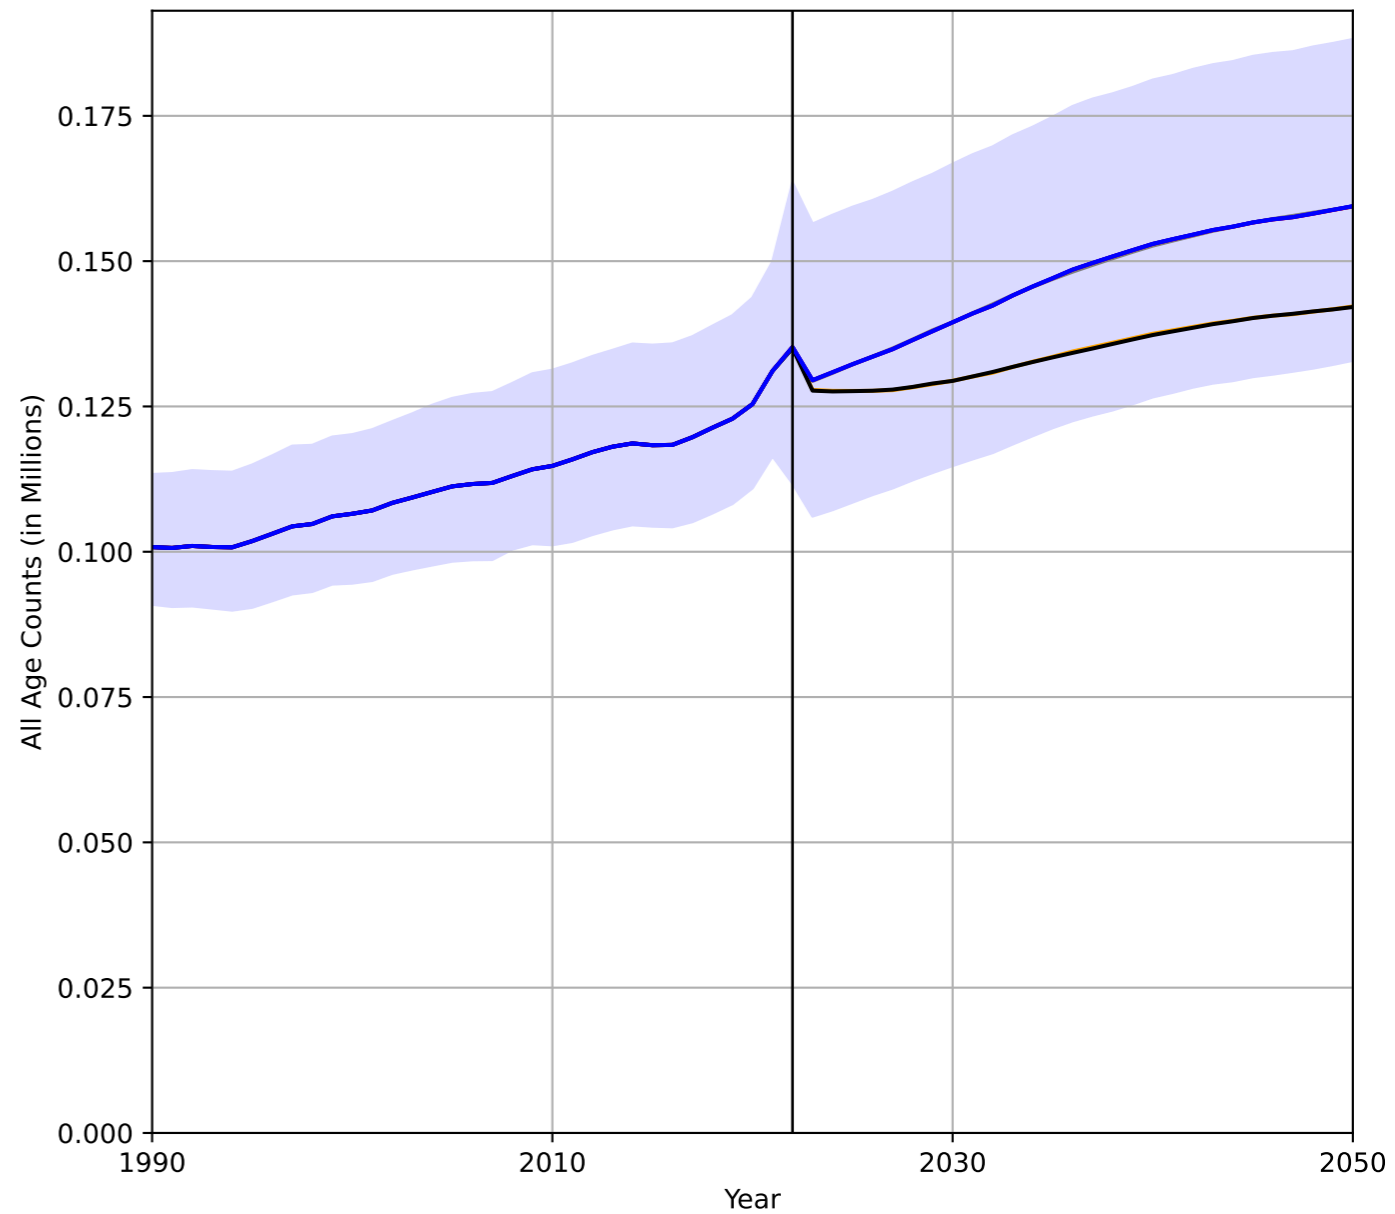

# Monaco

Supplemental Results Figure S10. All-cause age standardised DALY rates (A) and all age DALY counts (B), for the past and for five future scenarios, 1990–2050

1467

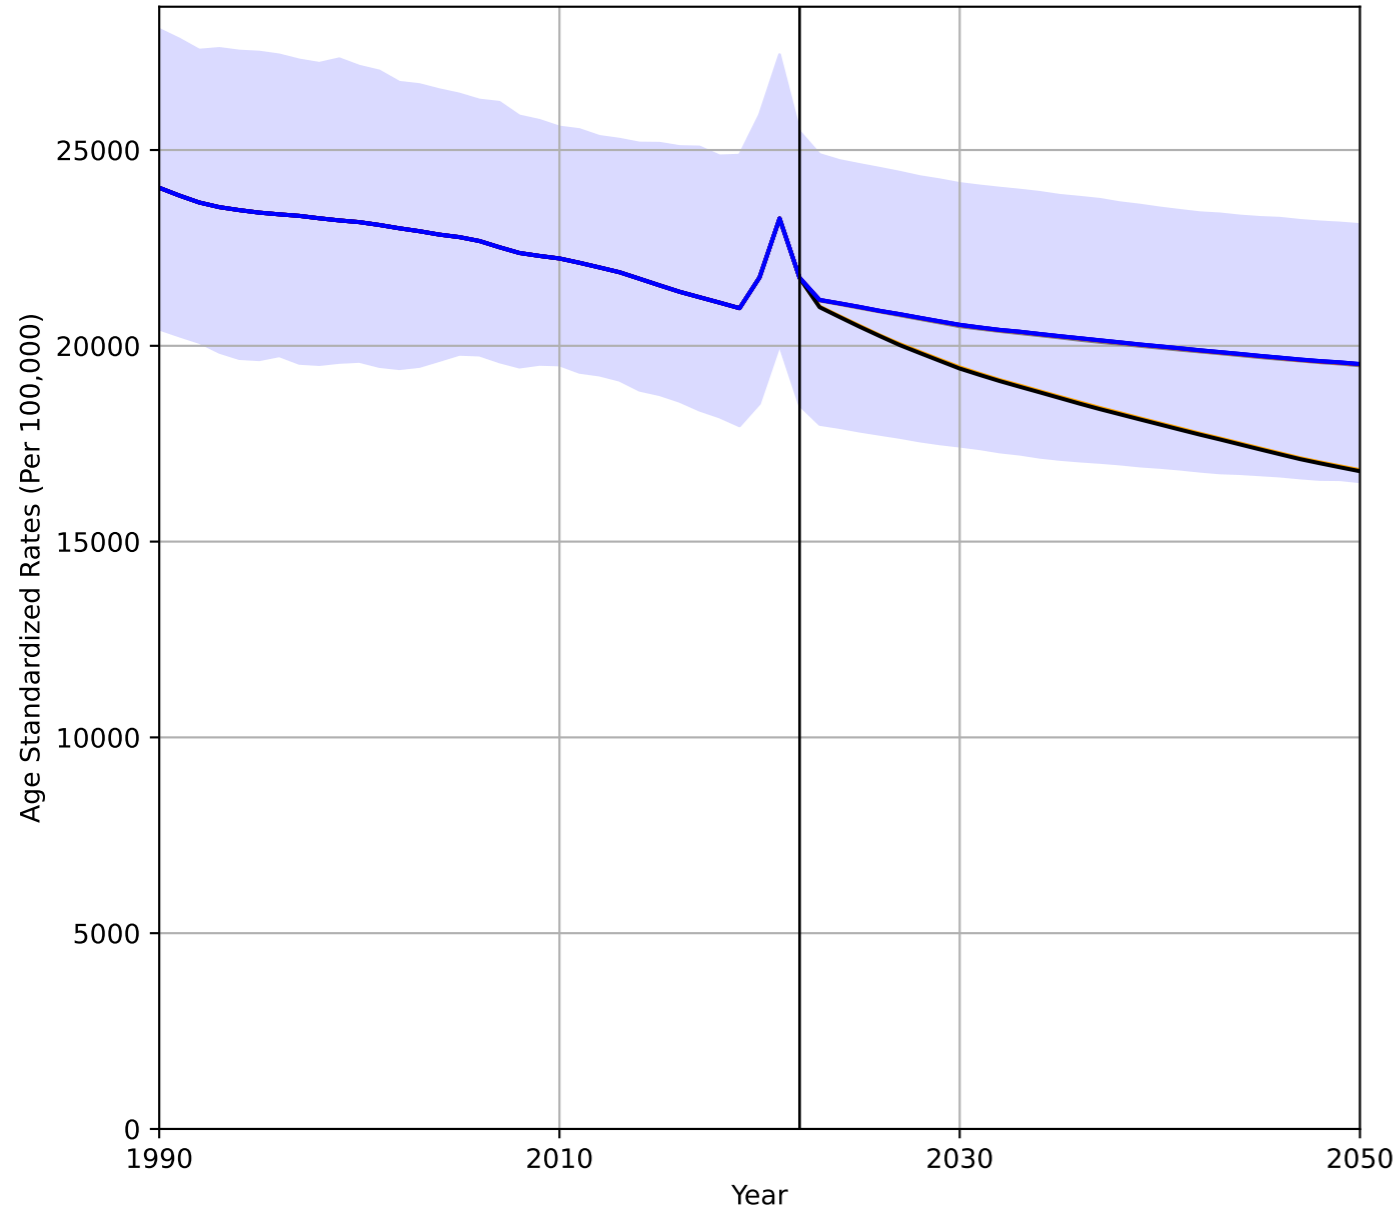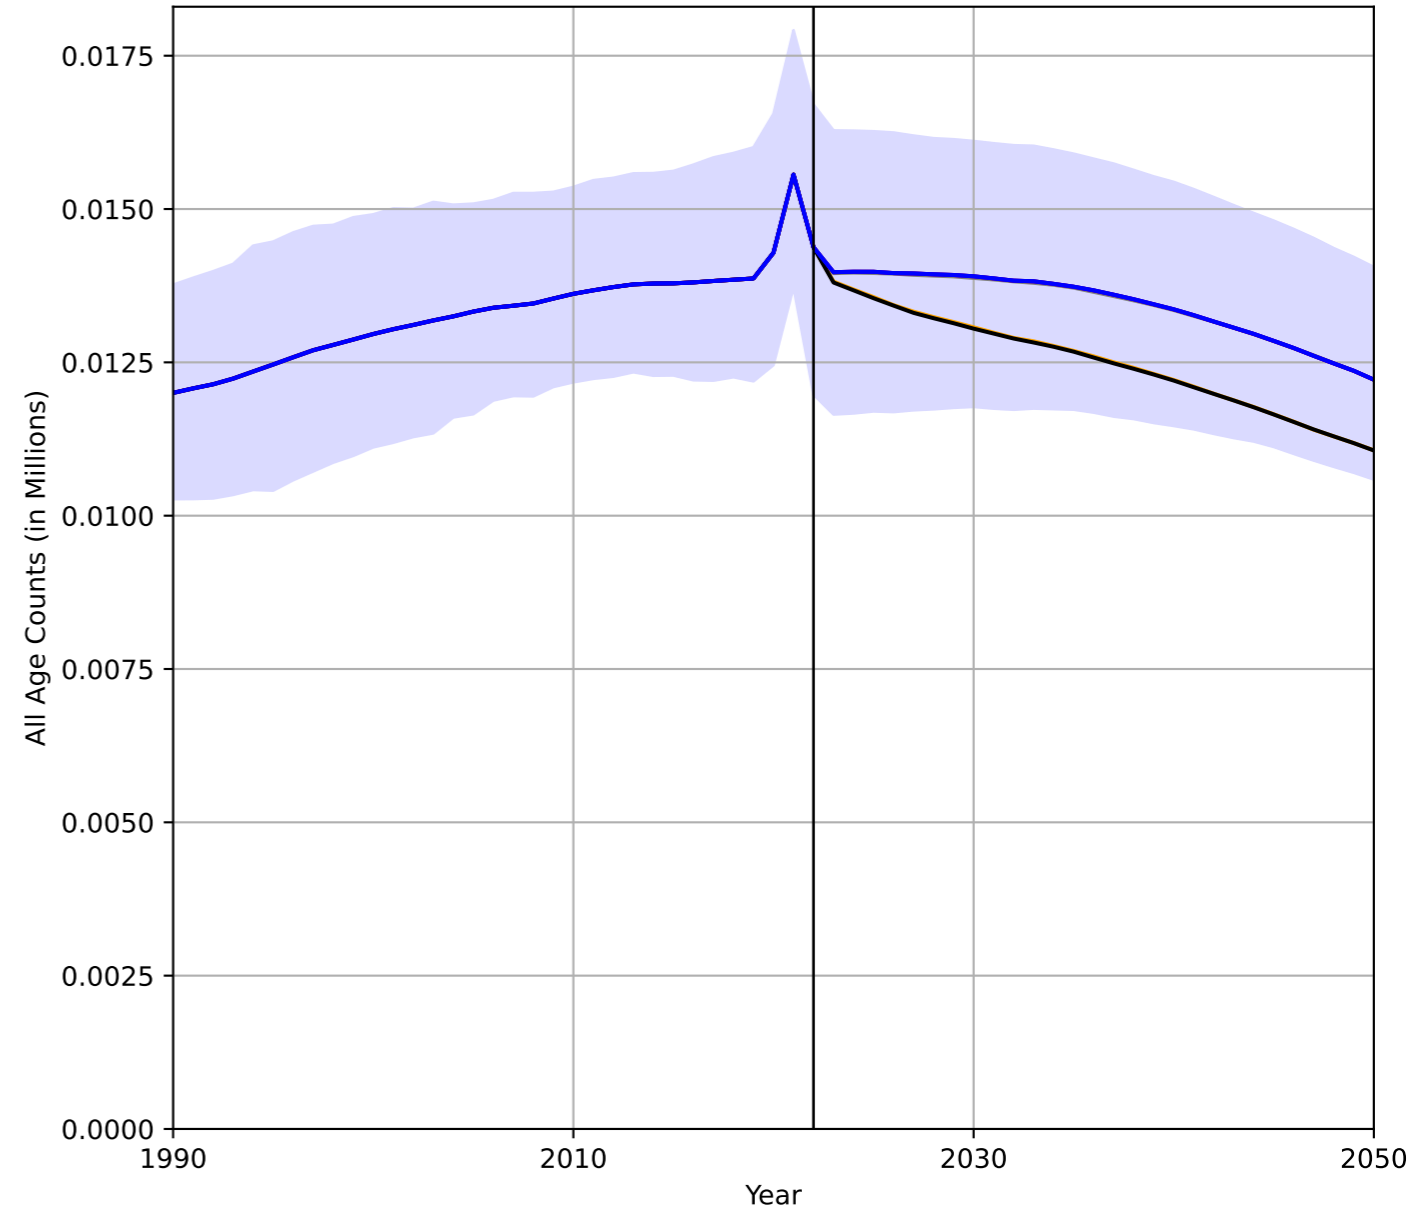

# Netherlands

Supplemental Results Figure S10. All-cause age standardised DALY rates (A) and all age DALY counts (B), for the past and for five future scenarios, 1990–2050

1468

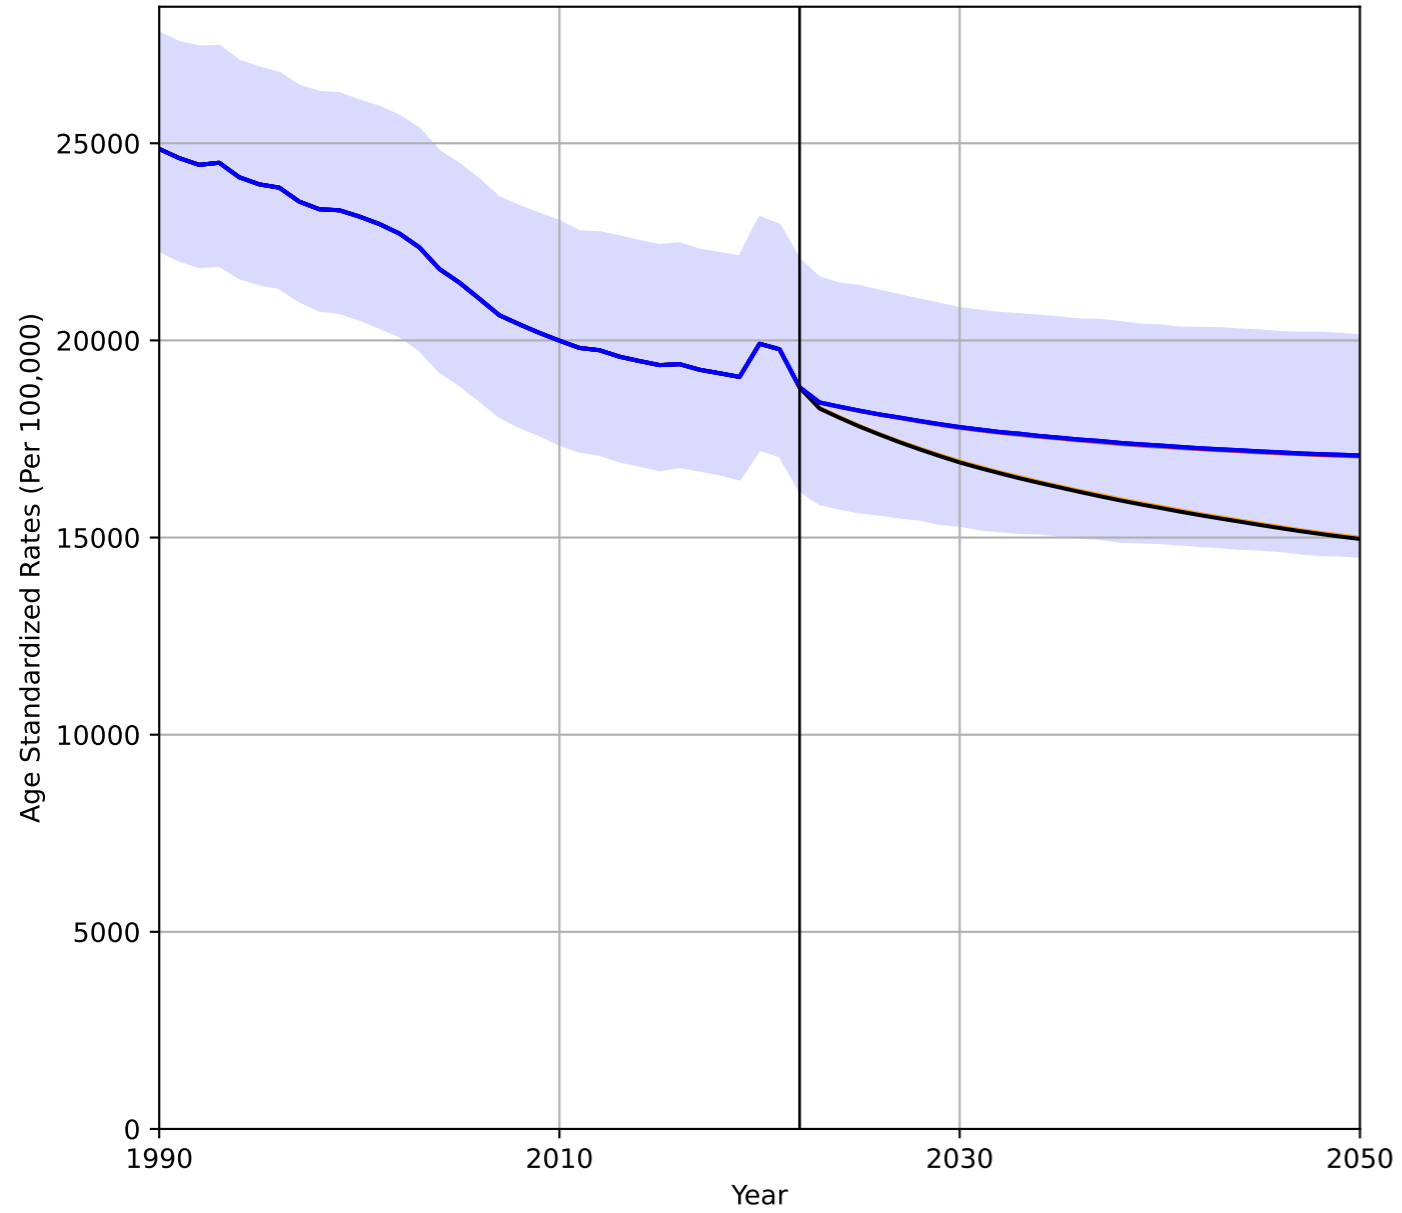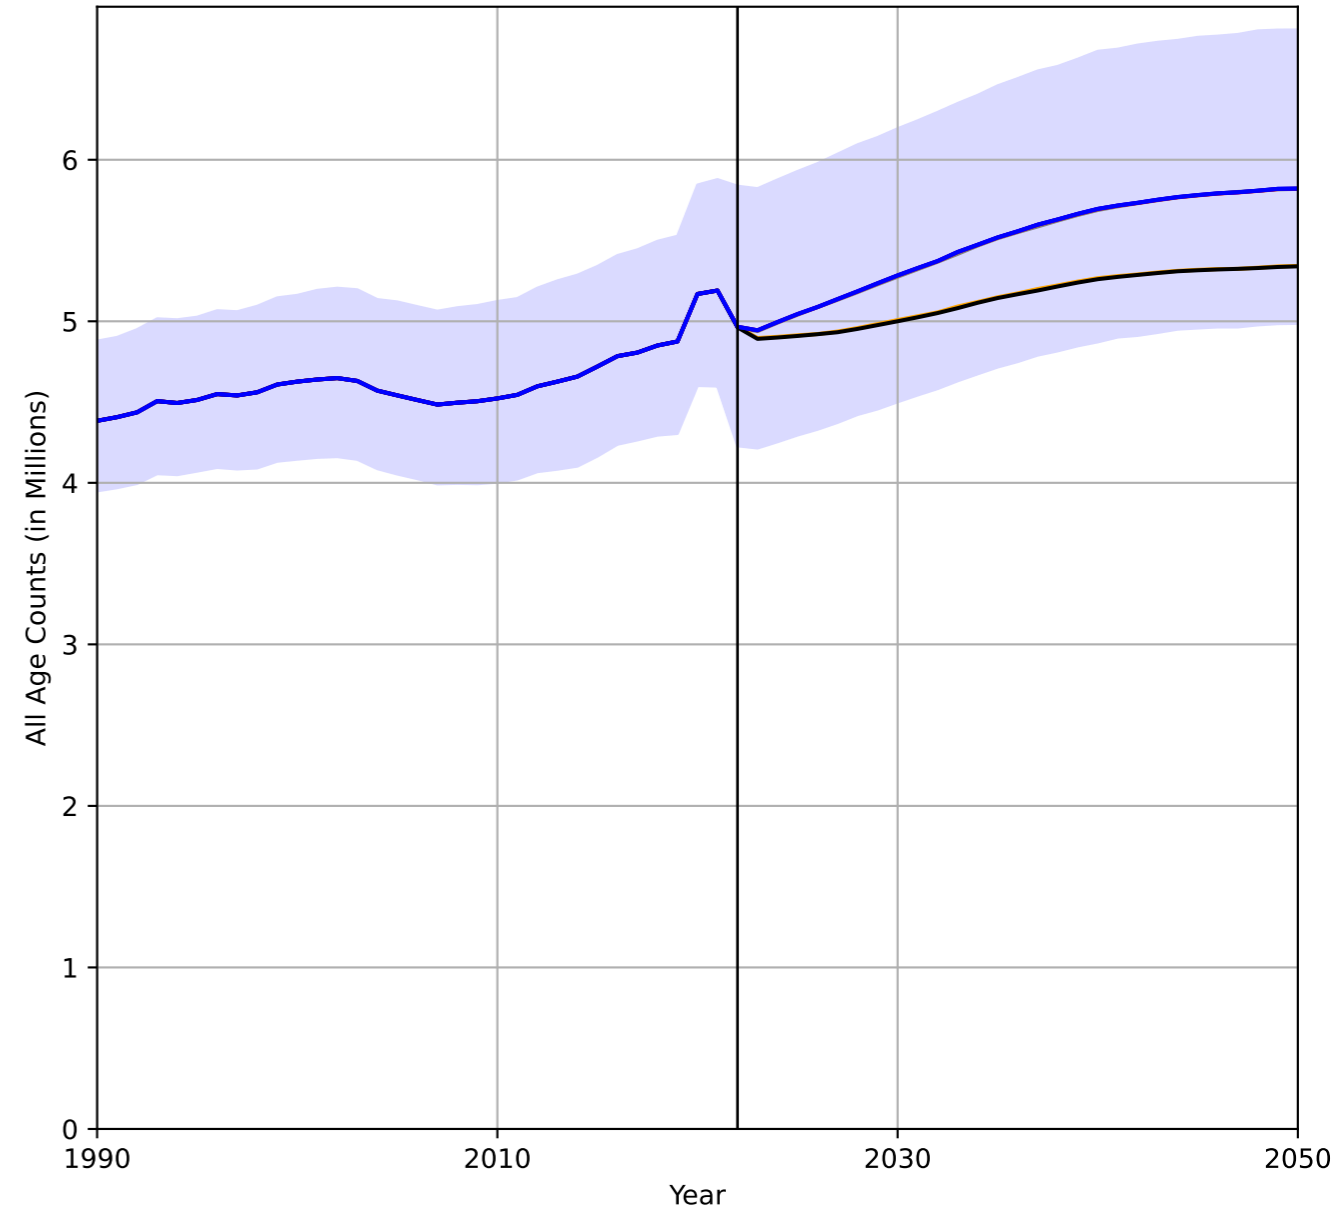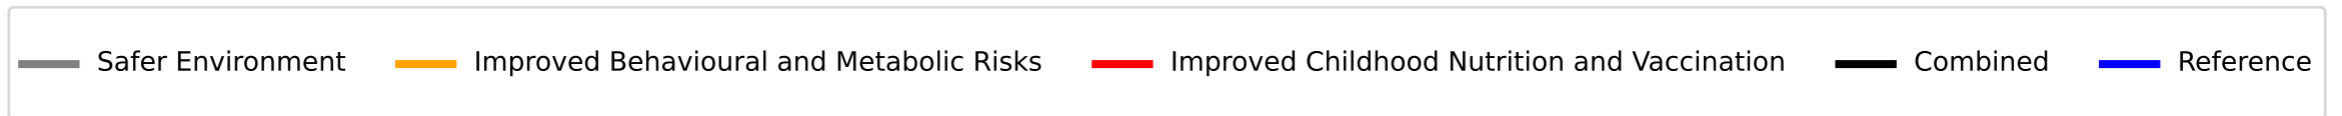

# Norway

Supplemental Results Figure S10. All-cause age standardised DALY rates (A) and all age DALY counts (B), for the past and for five future scenarios, 1990–2050

1469

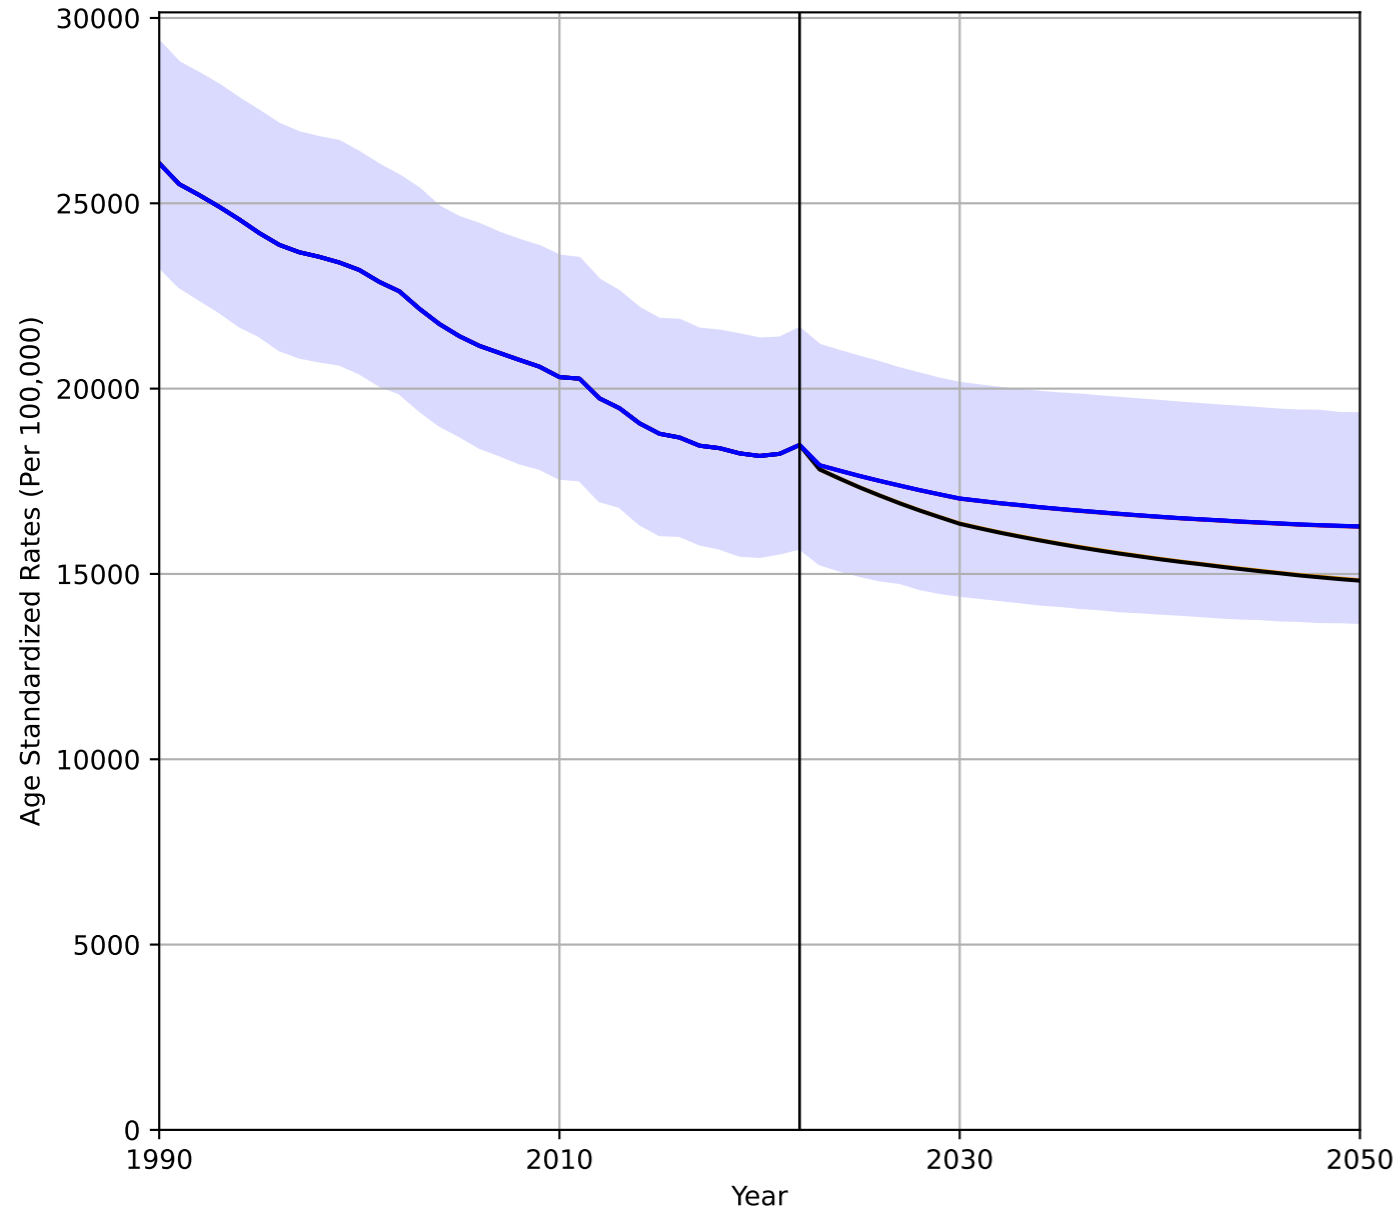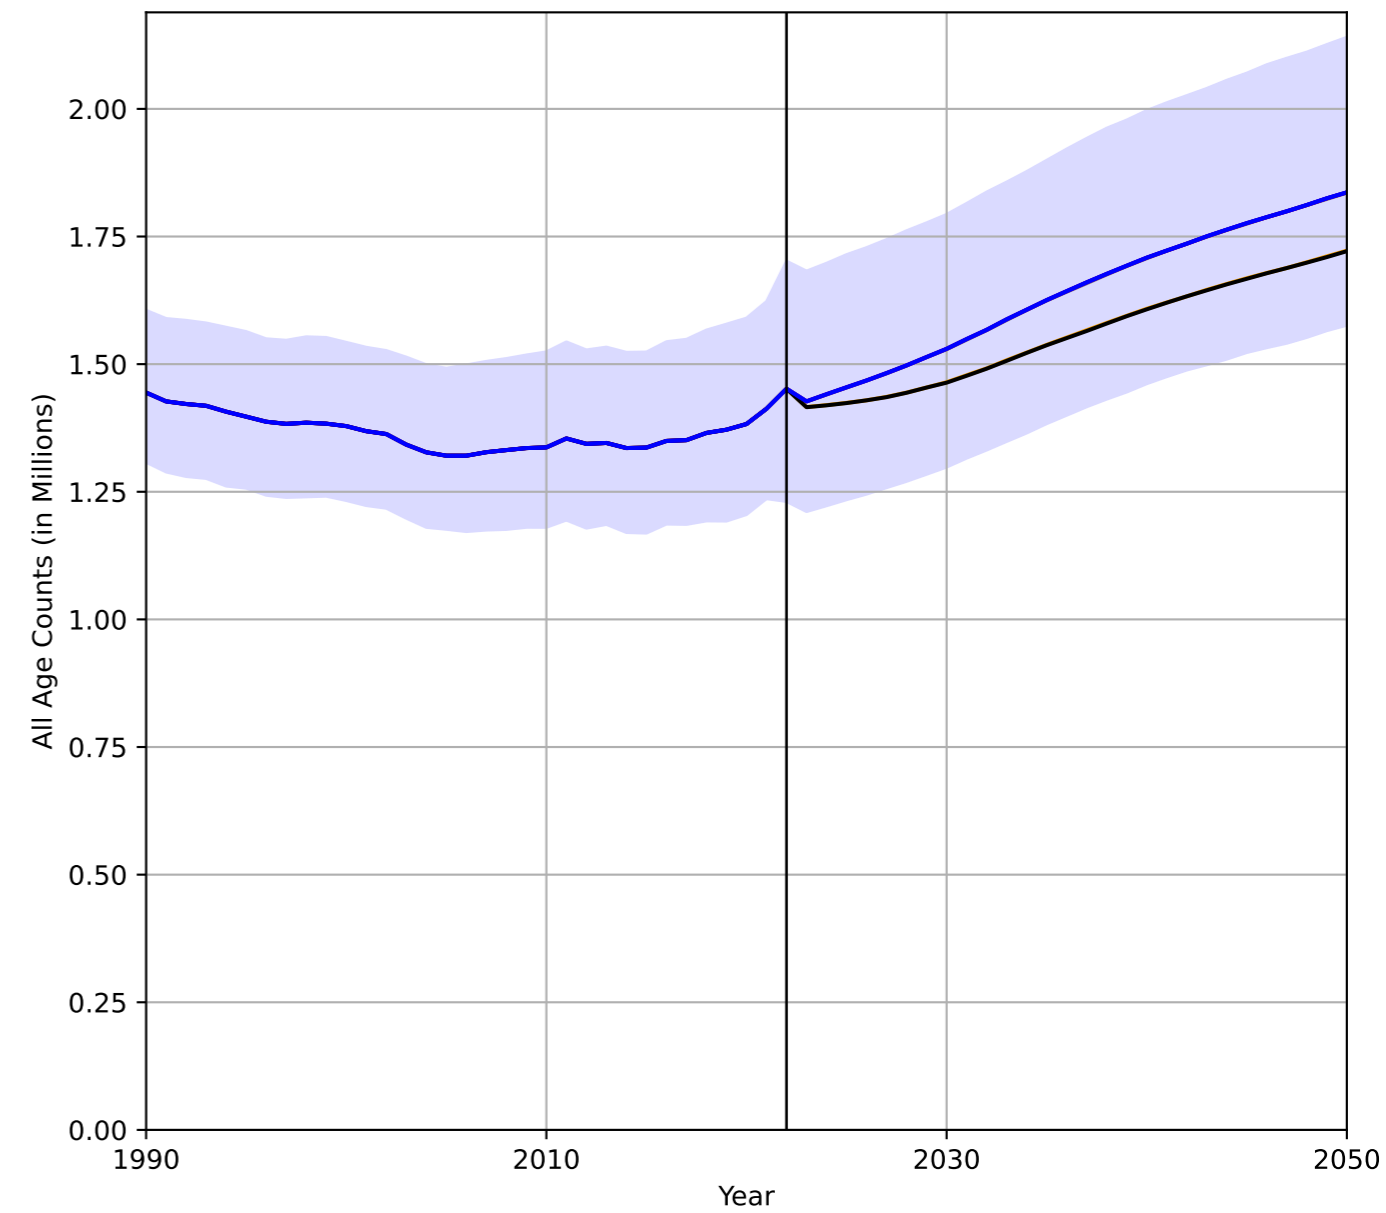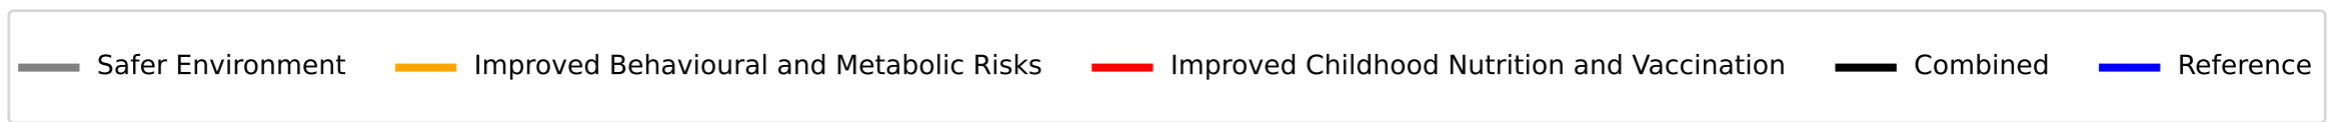

# Portugal

Supplemental Results Figure S10. All-cause age standardised DALY rates (A) and all age DALY counts (B), for the past and for five future scenarios, 1990–2050

1470

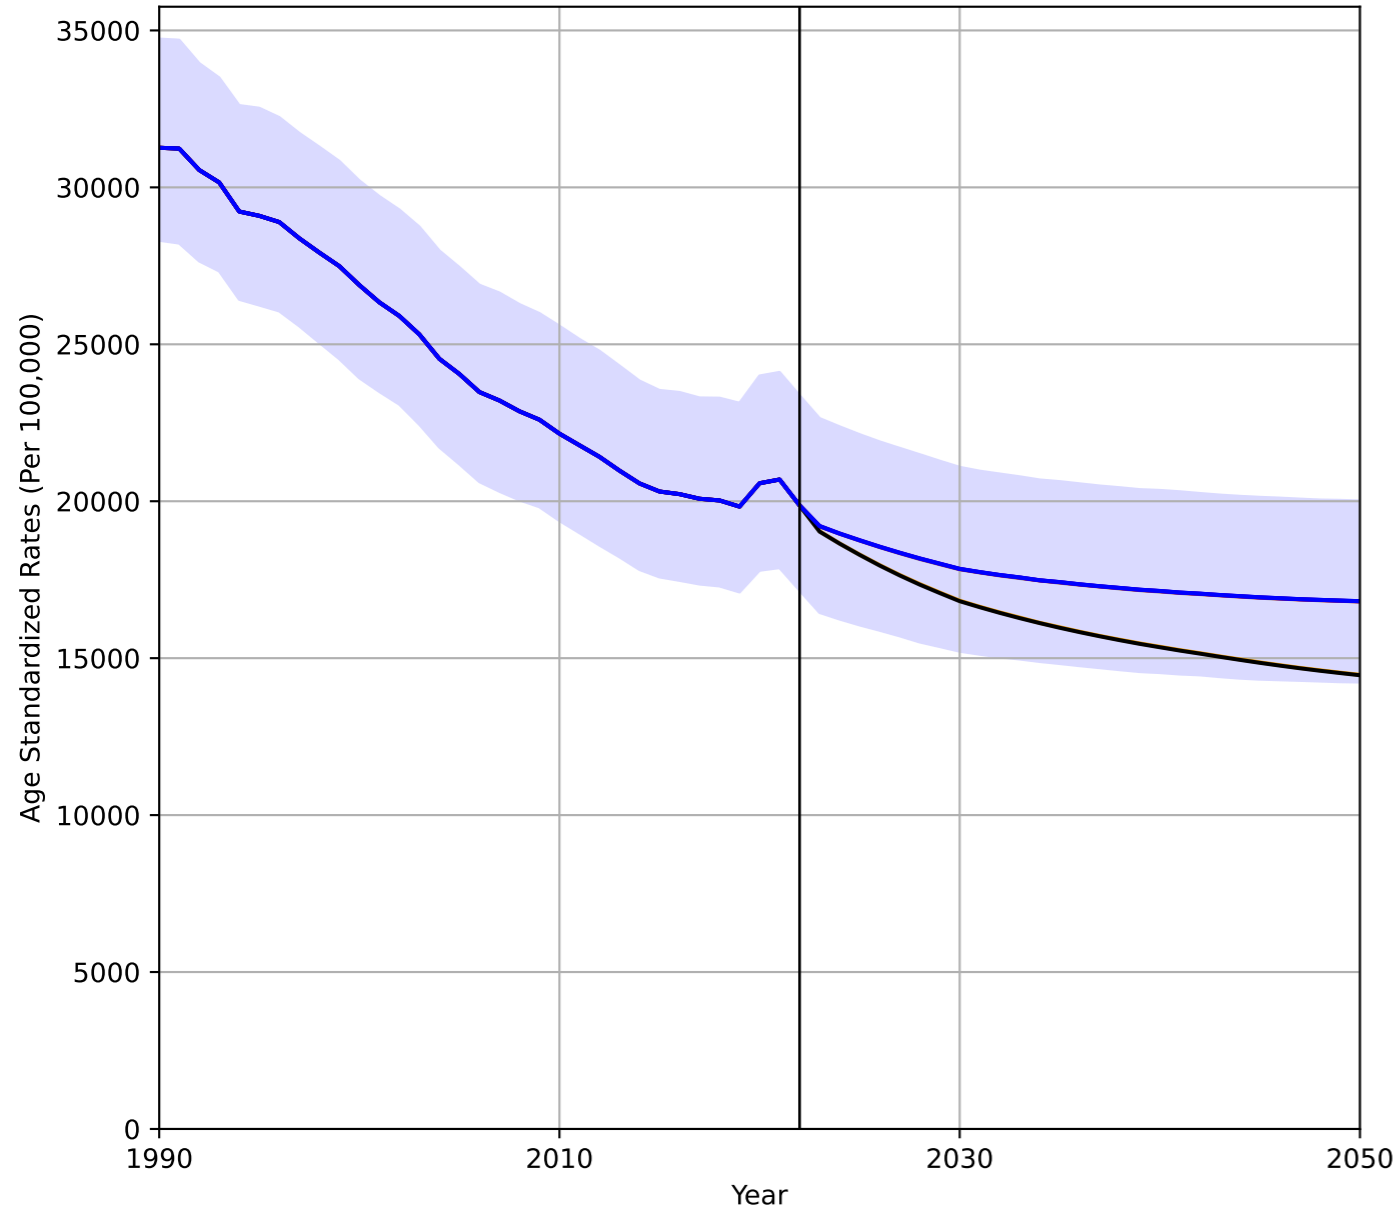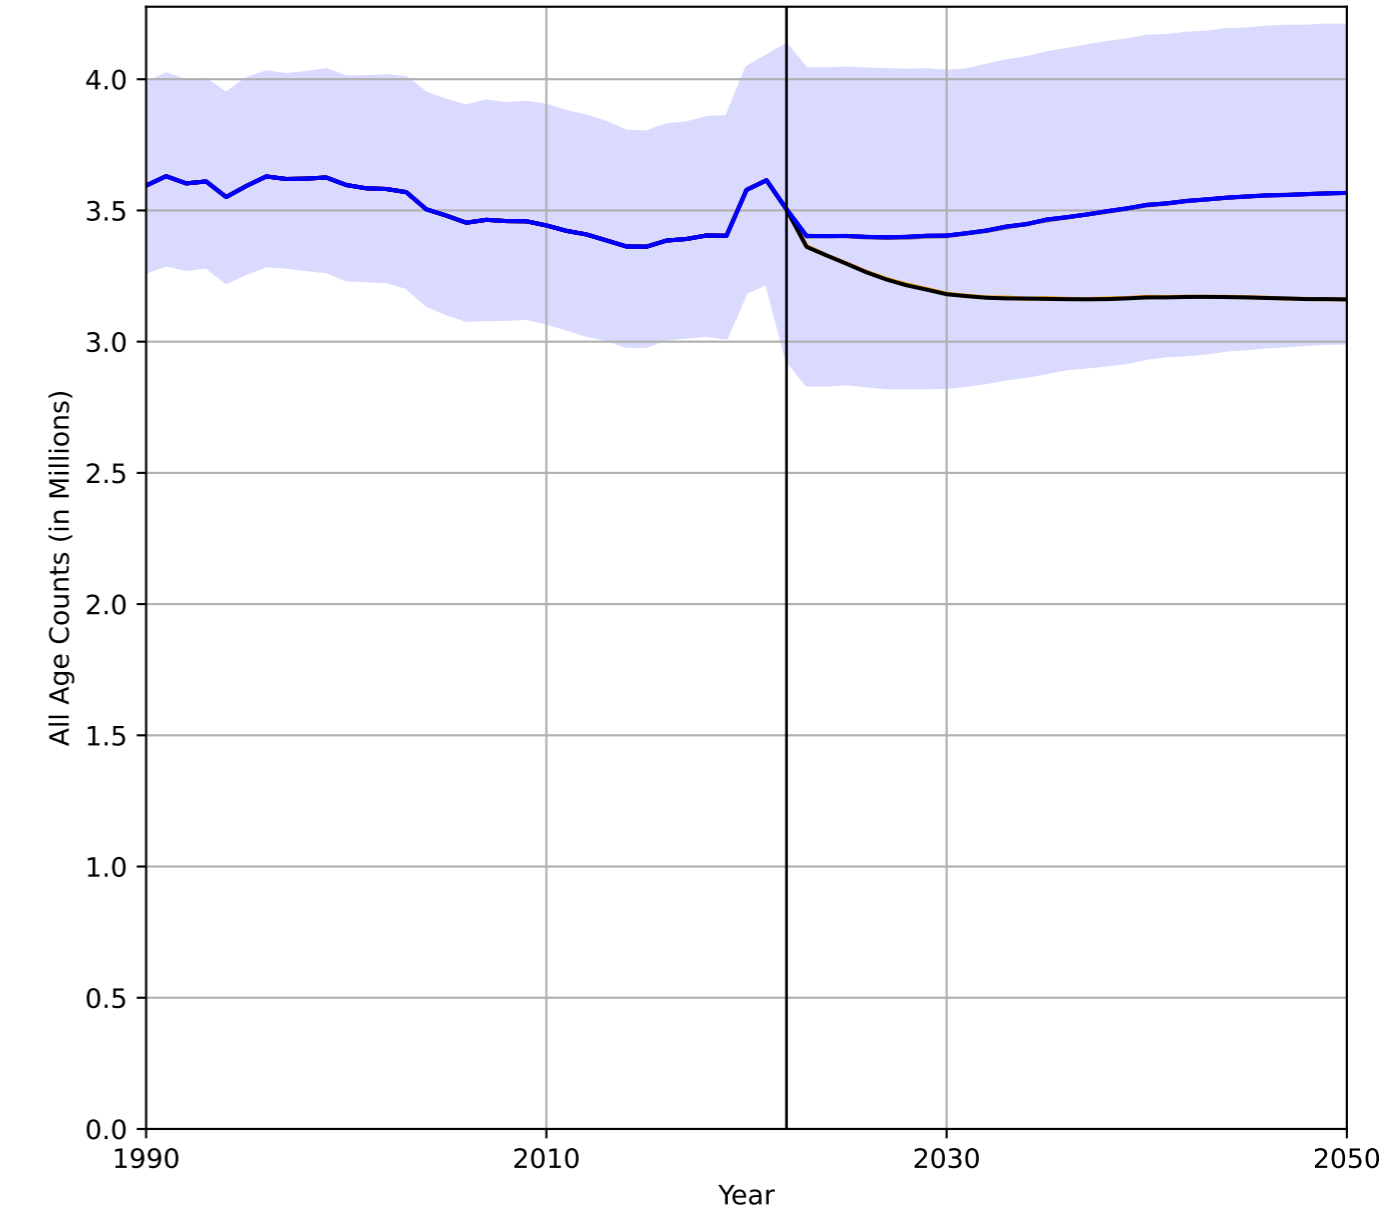

# San Marino

Supplemental Results Figure S10. All-cause age standardised DALY rates (A) and all age DALY counts (B), for the past and for five future scenarios, 1990–2050

1471

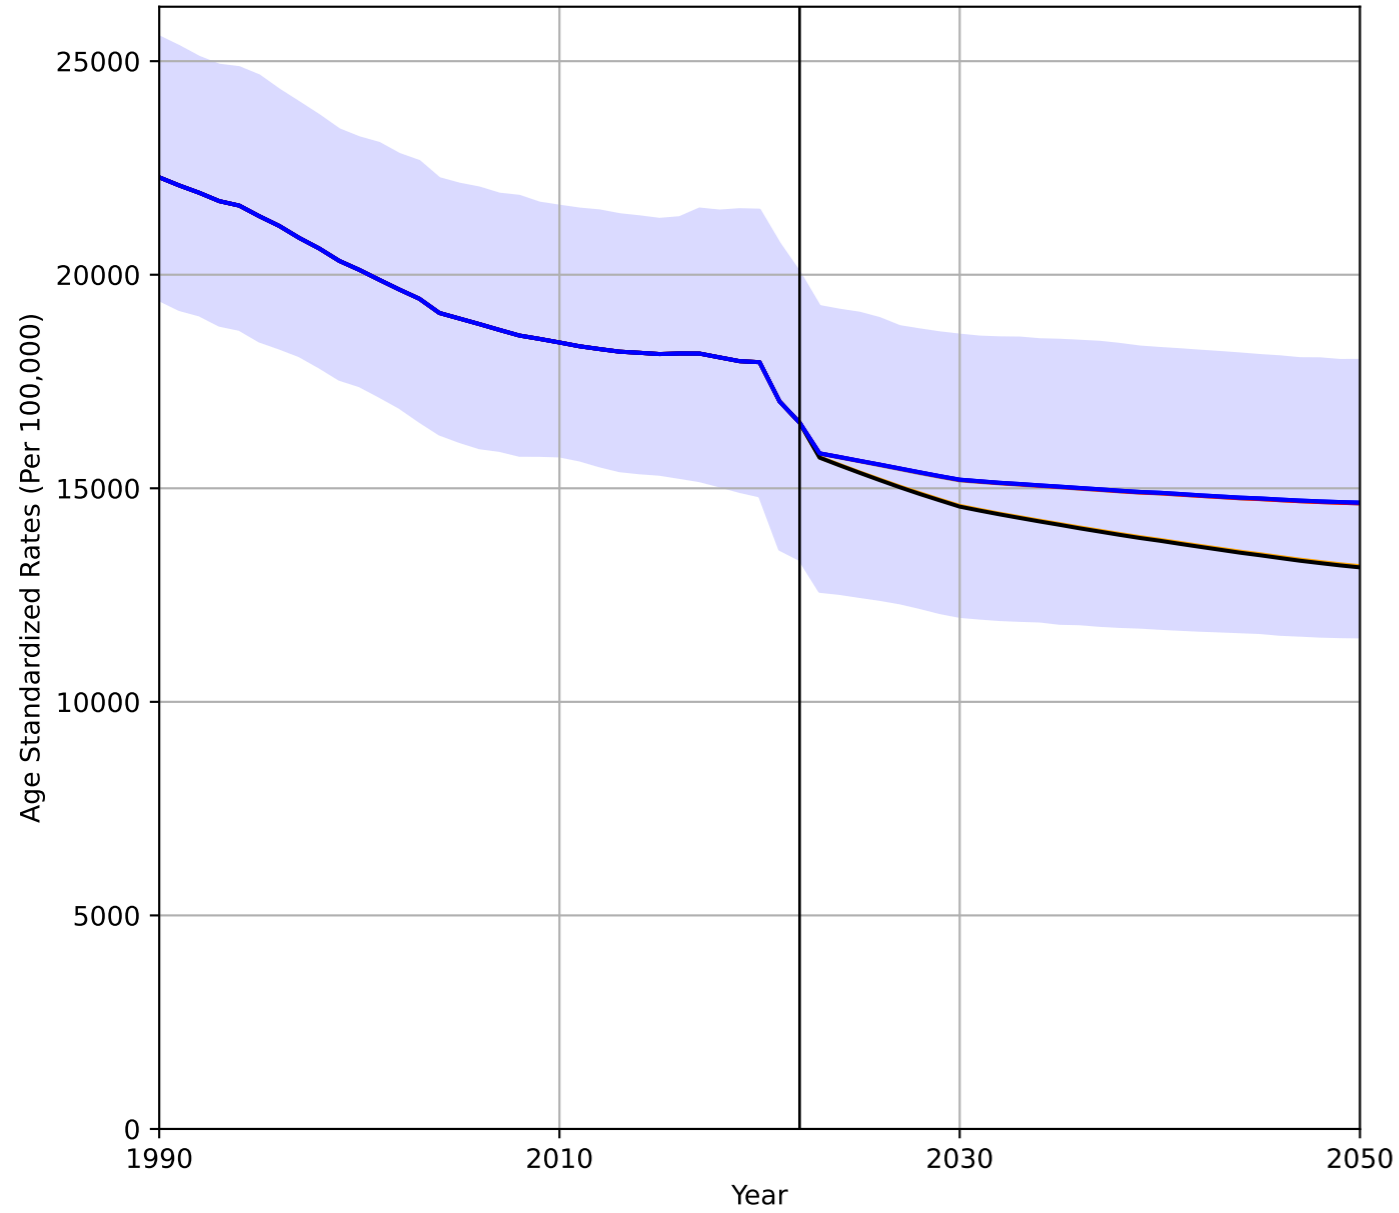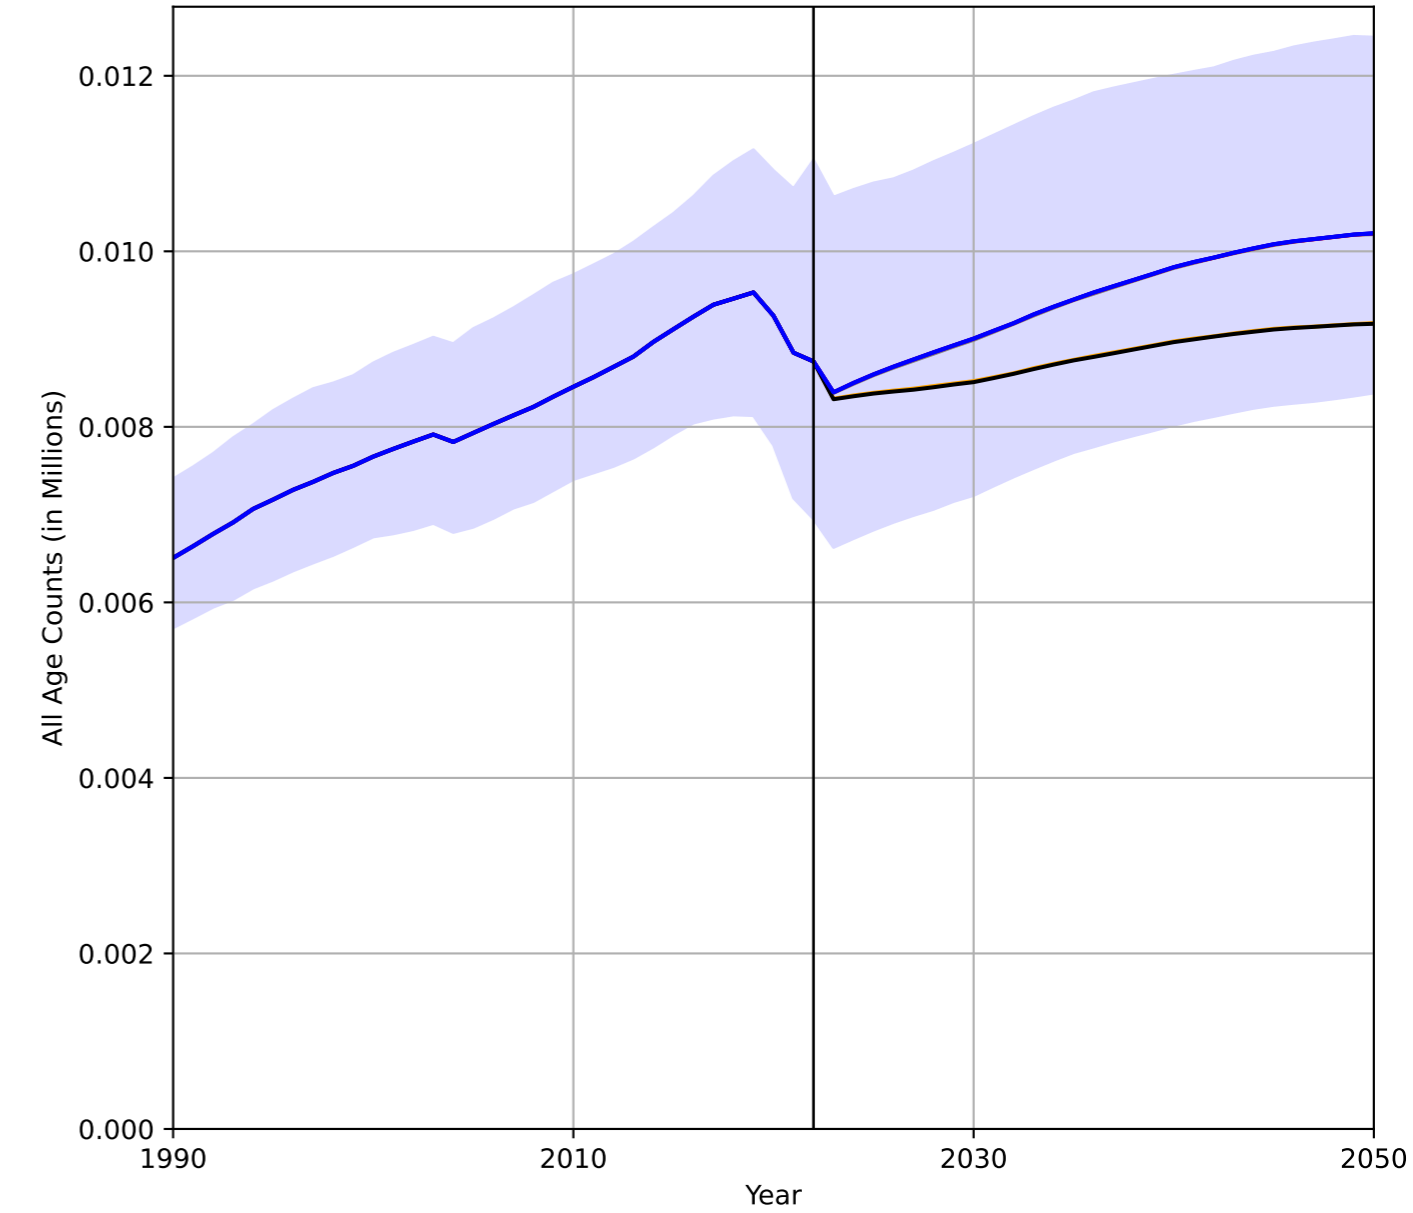



# Spain

Supplemental Results Figure S10. All-cause age standardised DALY rates (A) and all age DALY counts (B), for the past and for five future scenarios, 1990–2050

1472

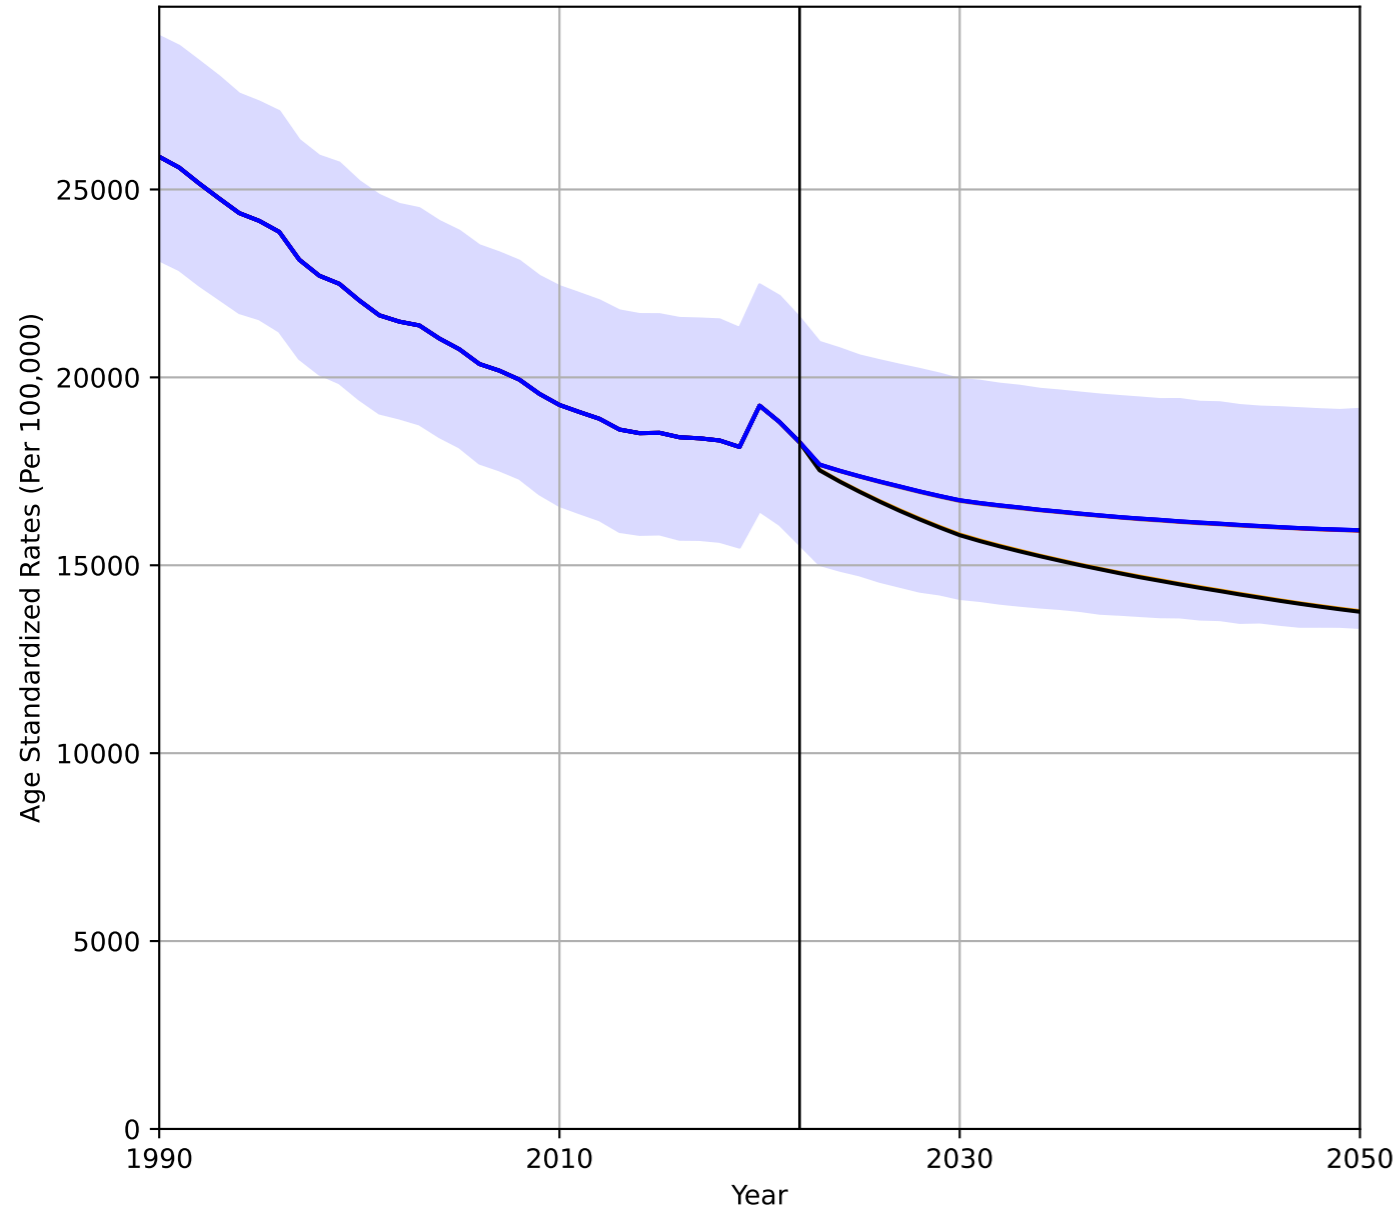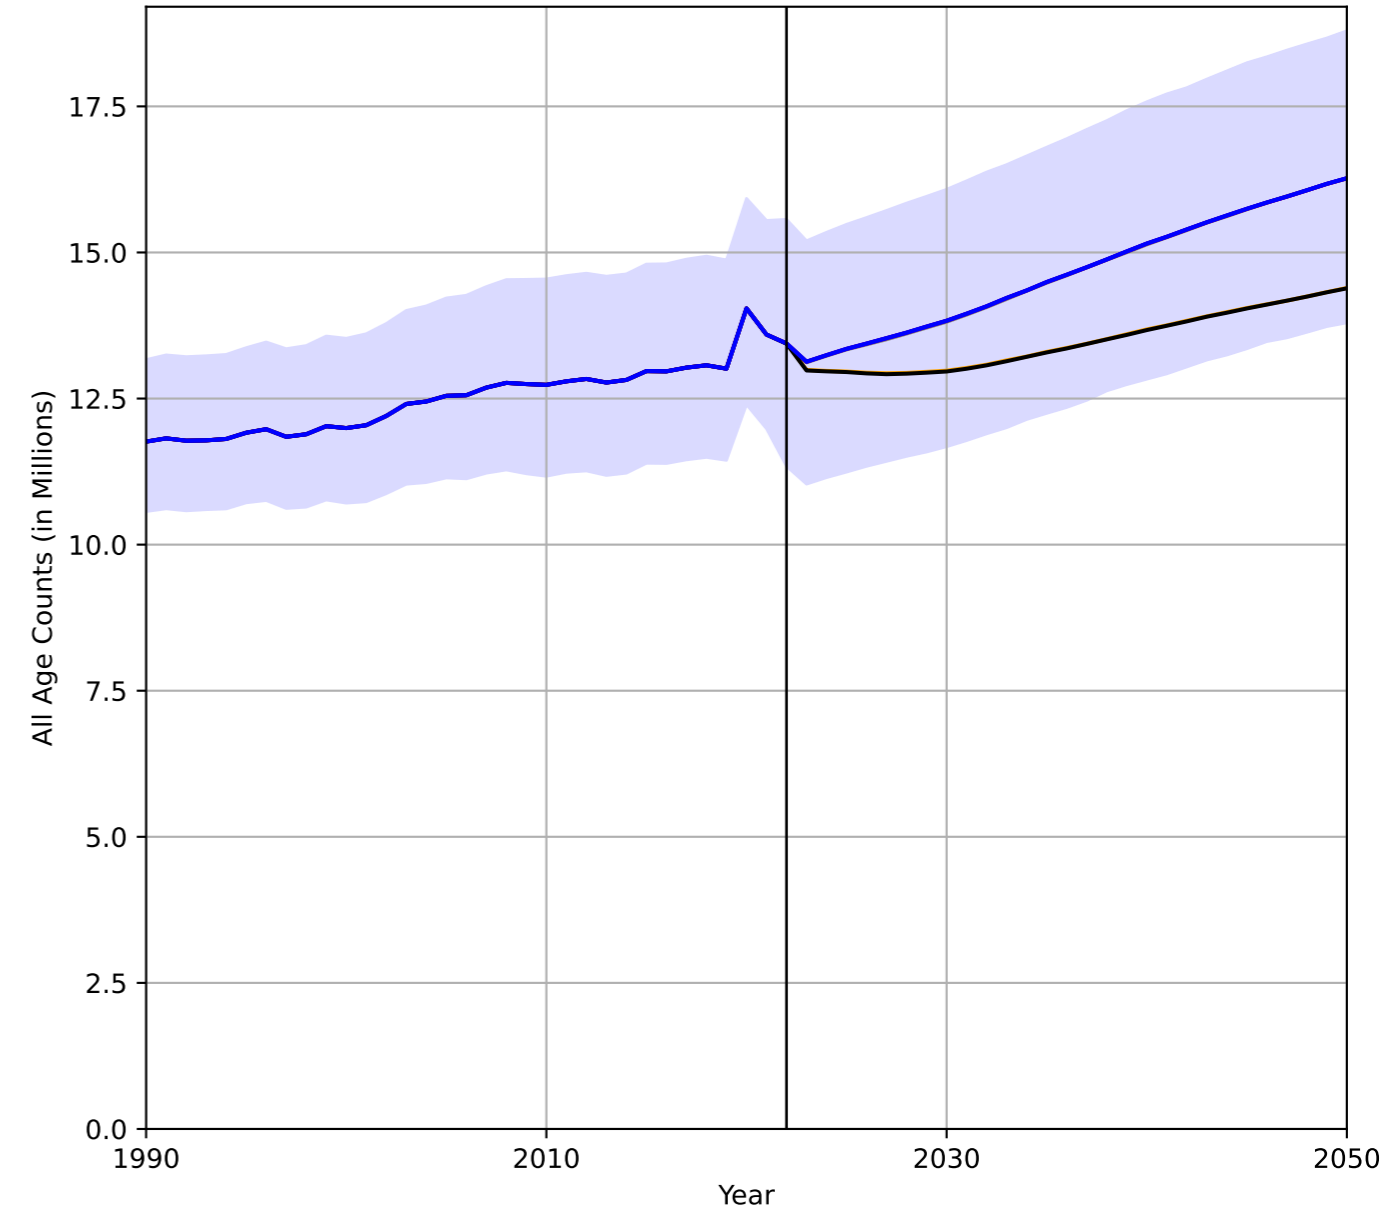

# Sweden

Supplemental Results Figure S10. All-cause age standardised DALY rates (A) and all age DALY counts (B), for the past and for five future scenarios, 1990–2050

1473

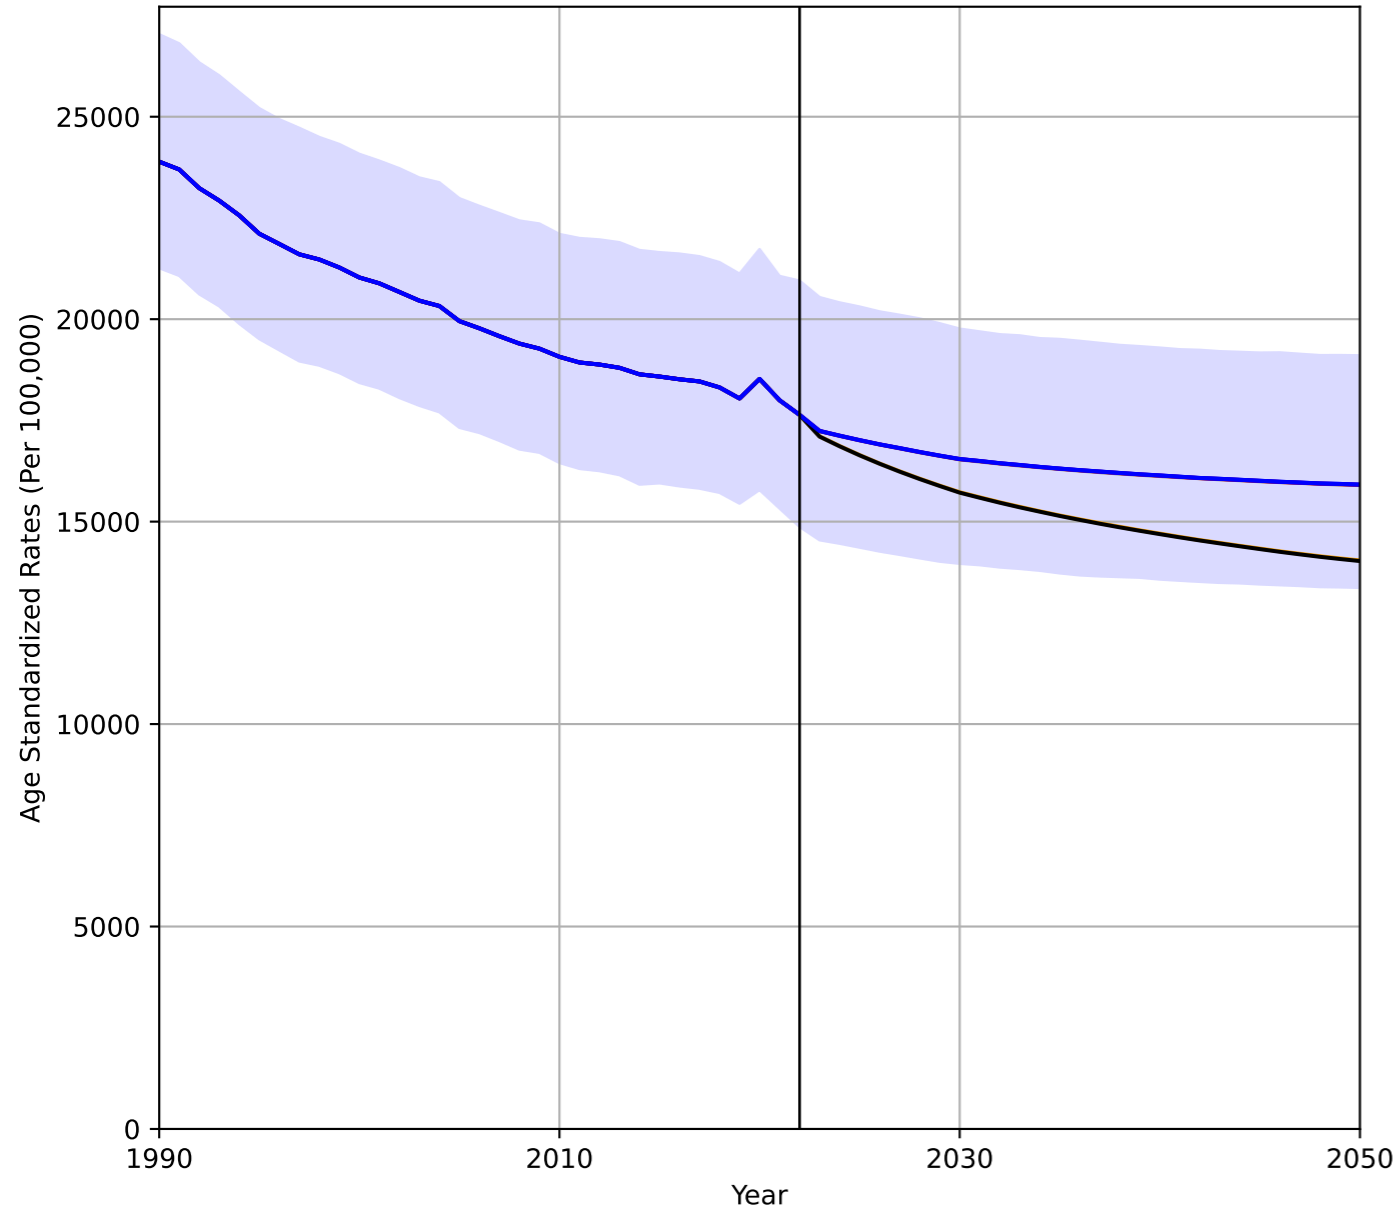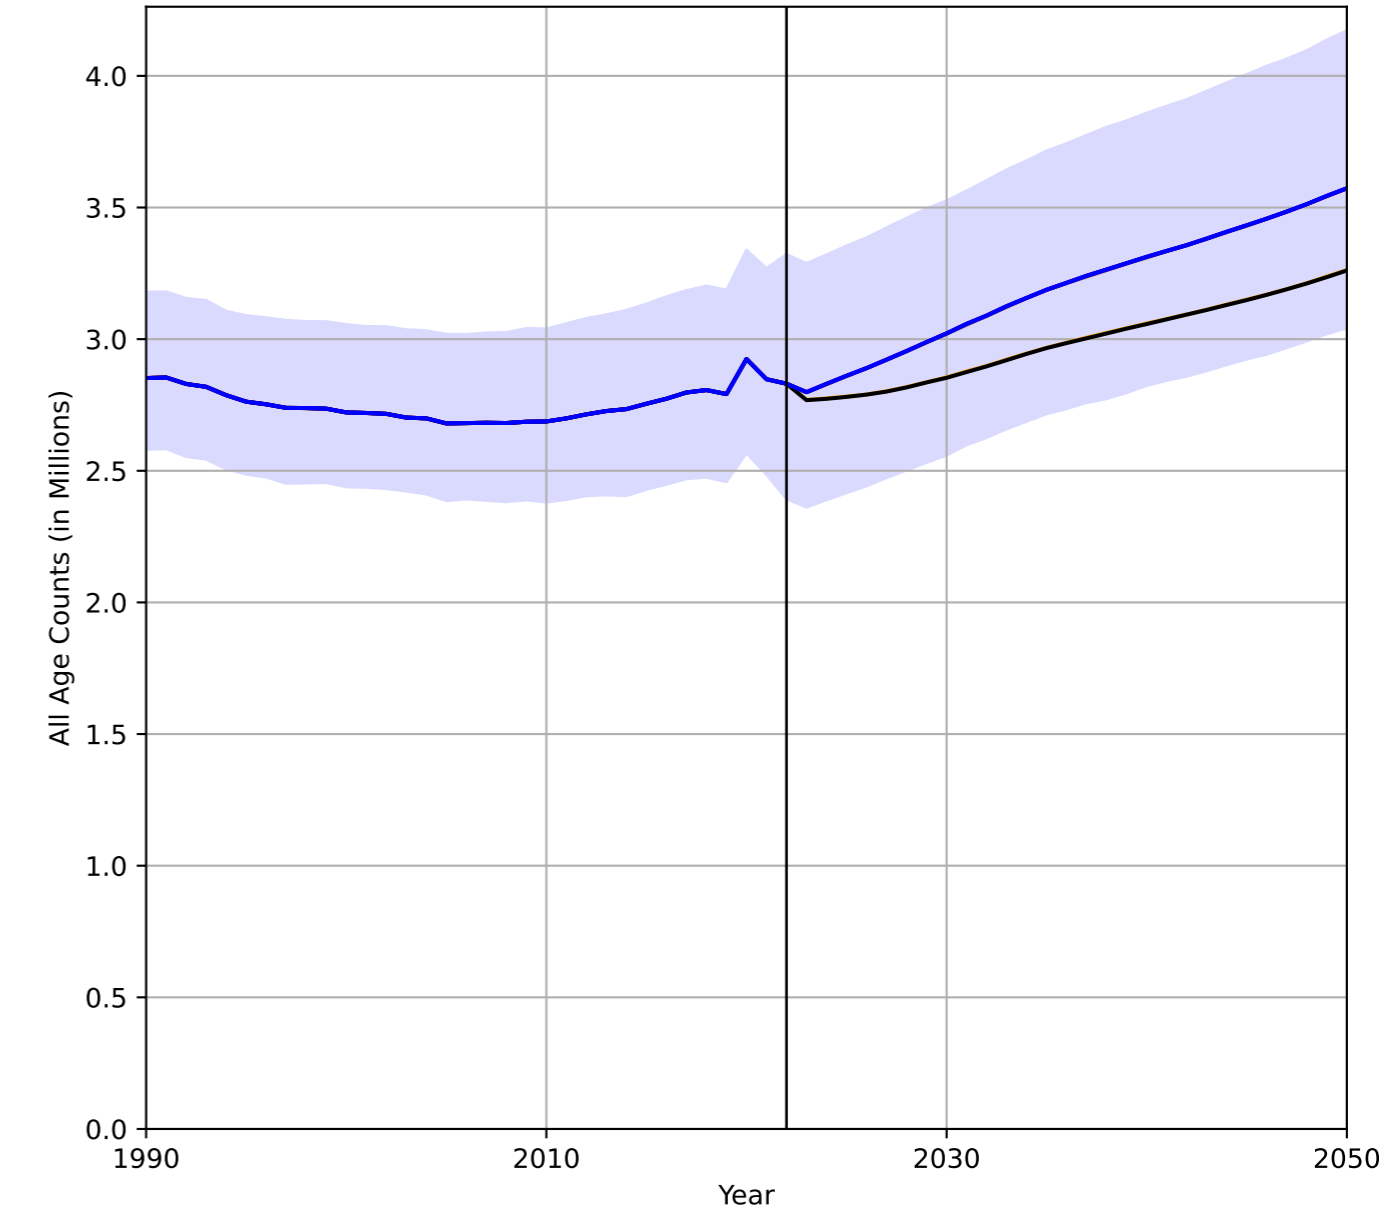

# Switzerland

Supplemental Results Figure S10. All-cause age standardised DALY rates (A) and all age DALY counts (B), for the past and for five future scenarios, 1990–2050

1474

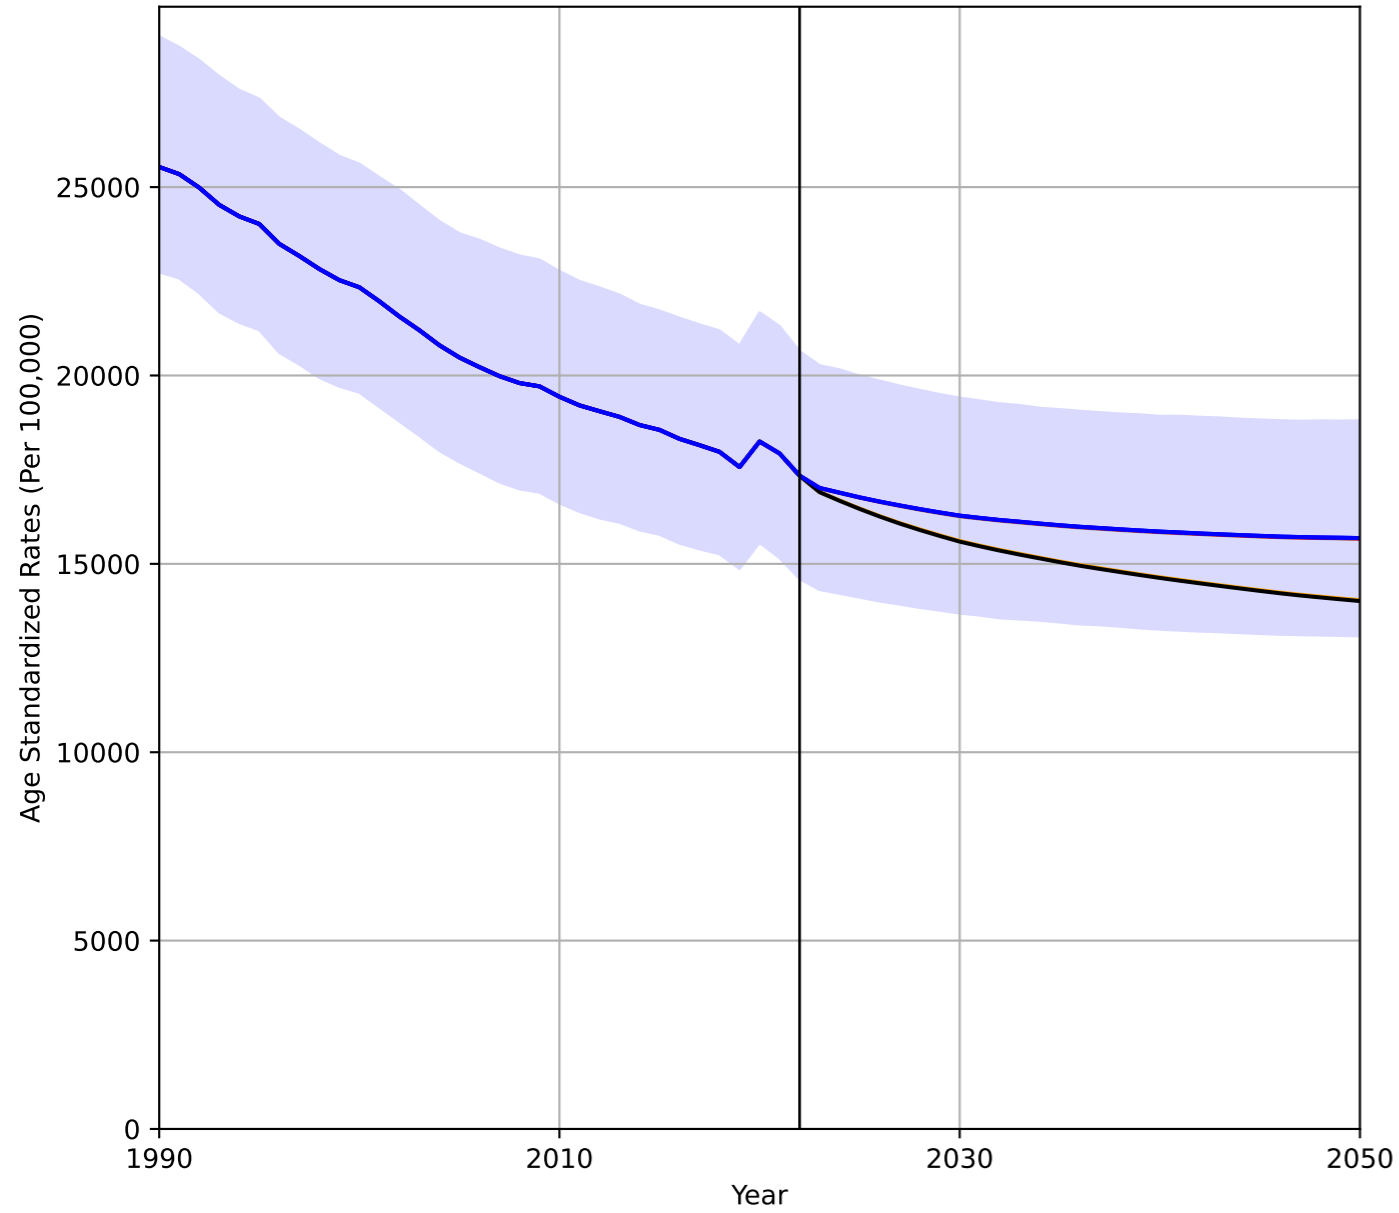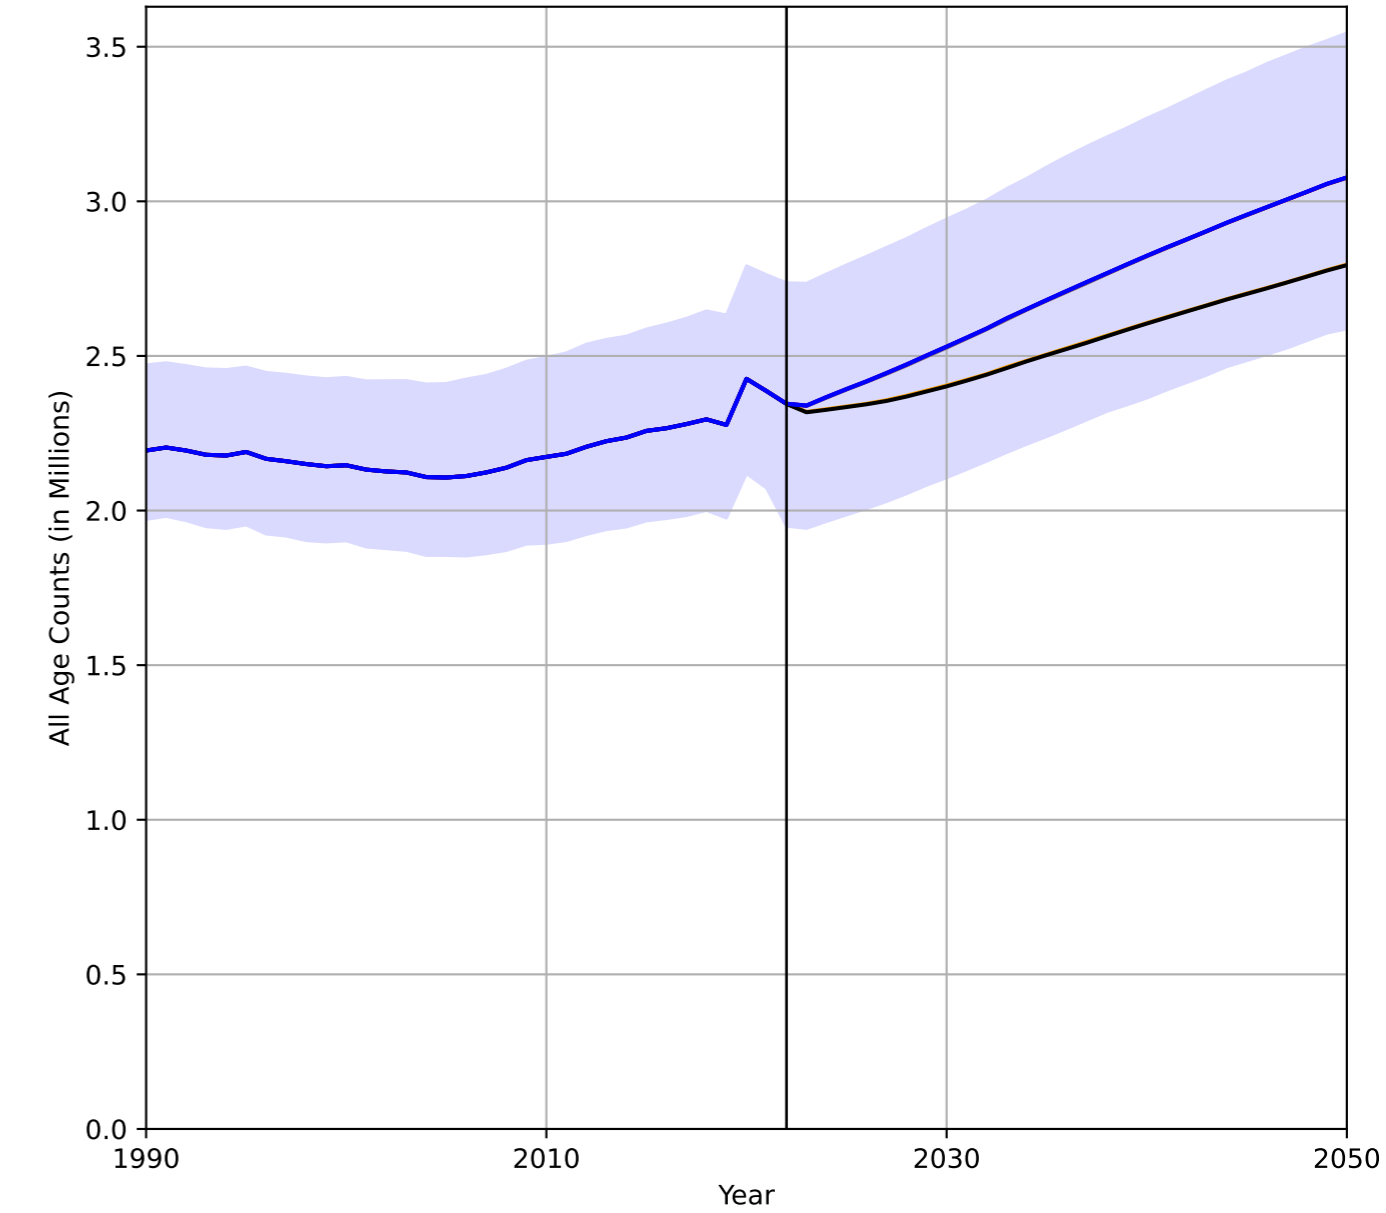

# UK

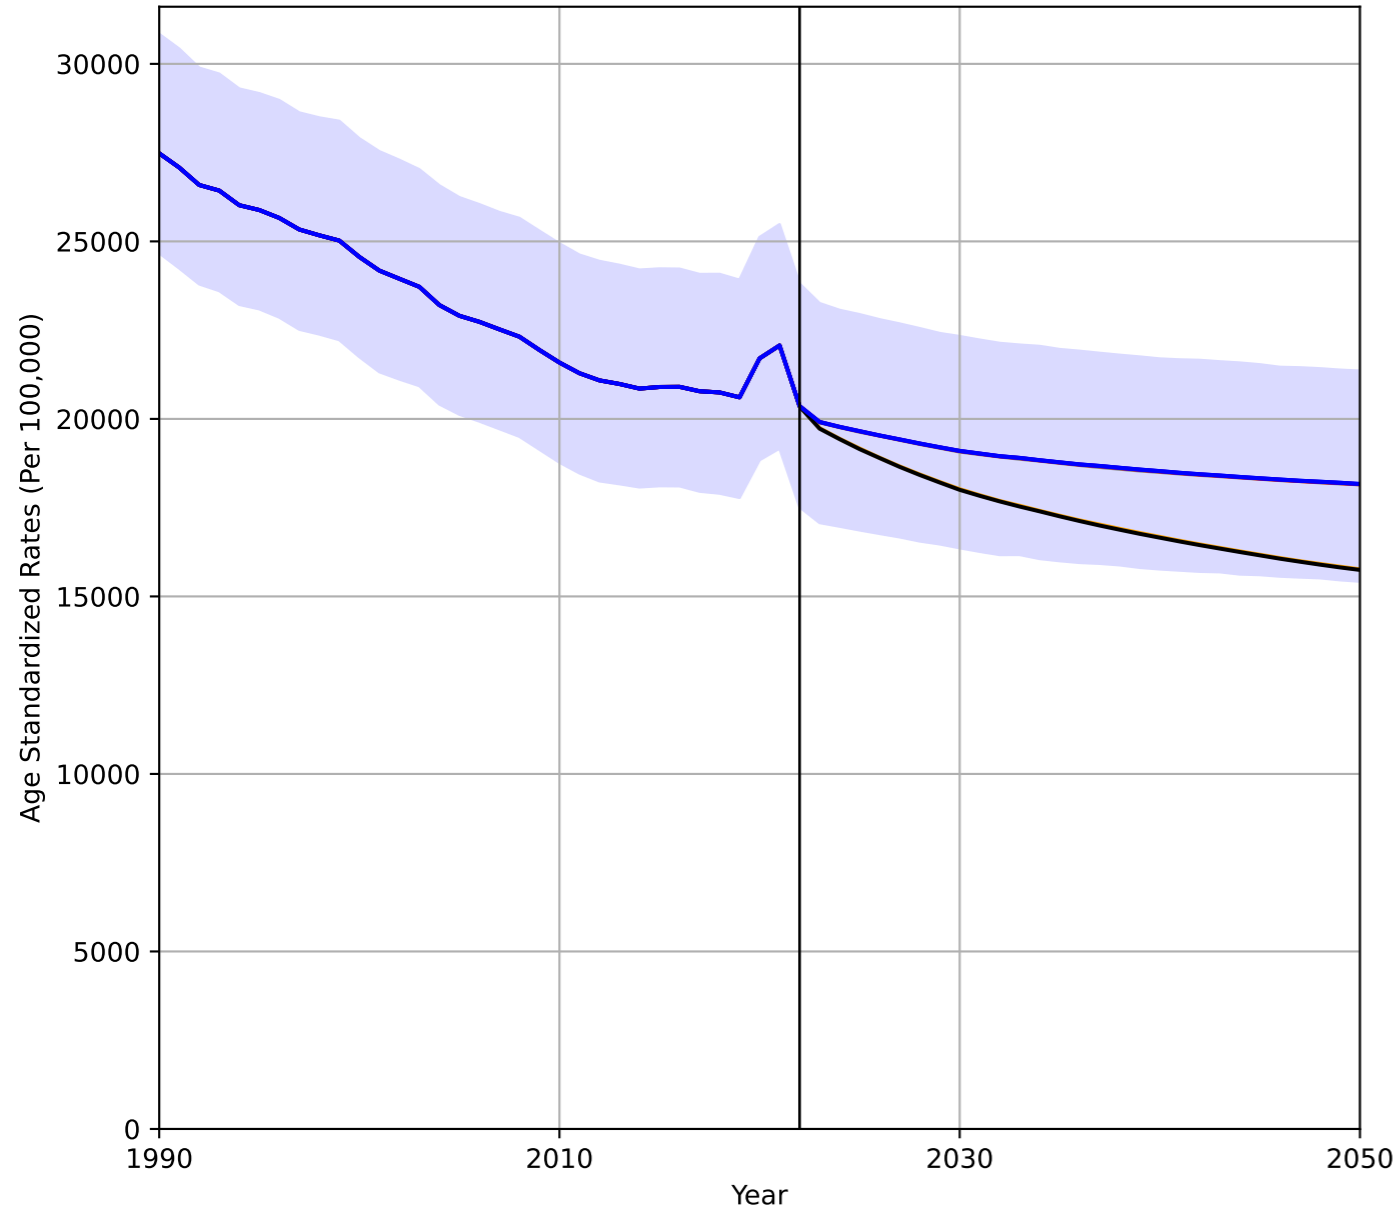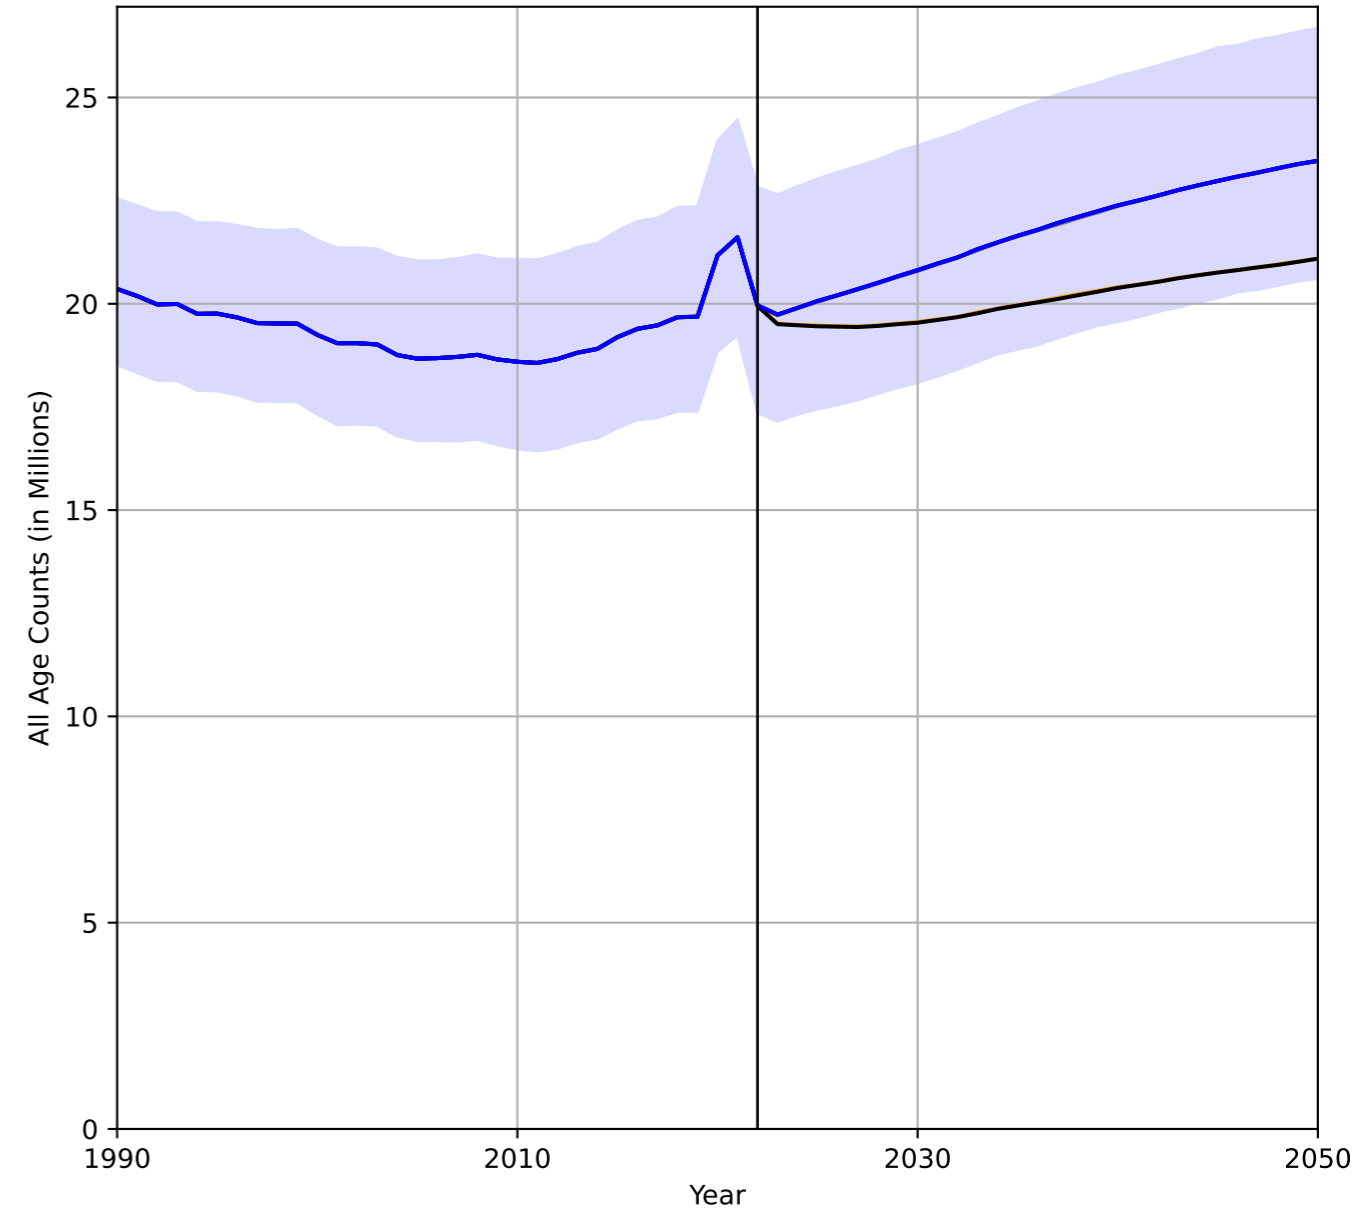

# Bolivia

Supplemental Results Figure S10. All-cause age standardised DALY rates (A) and all age DALY counts (B), for the past and for five future scenarios, 1990–2050

1476

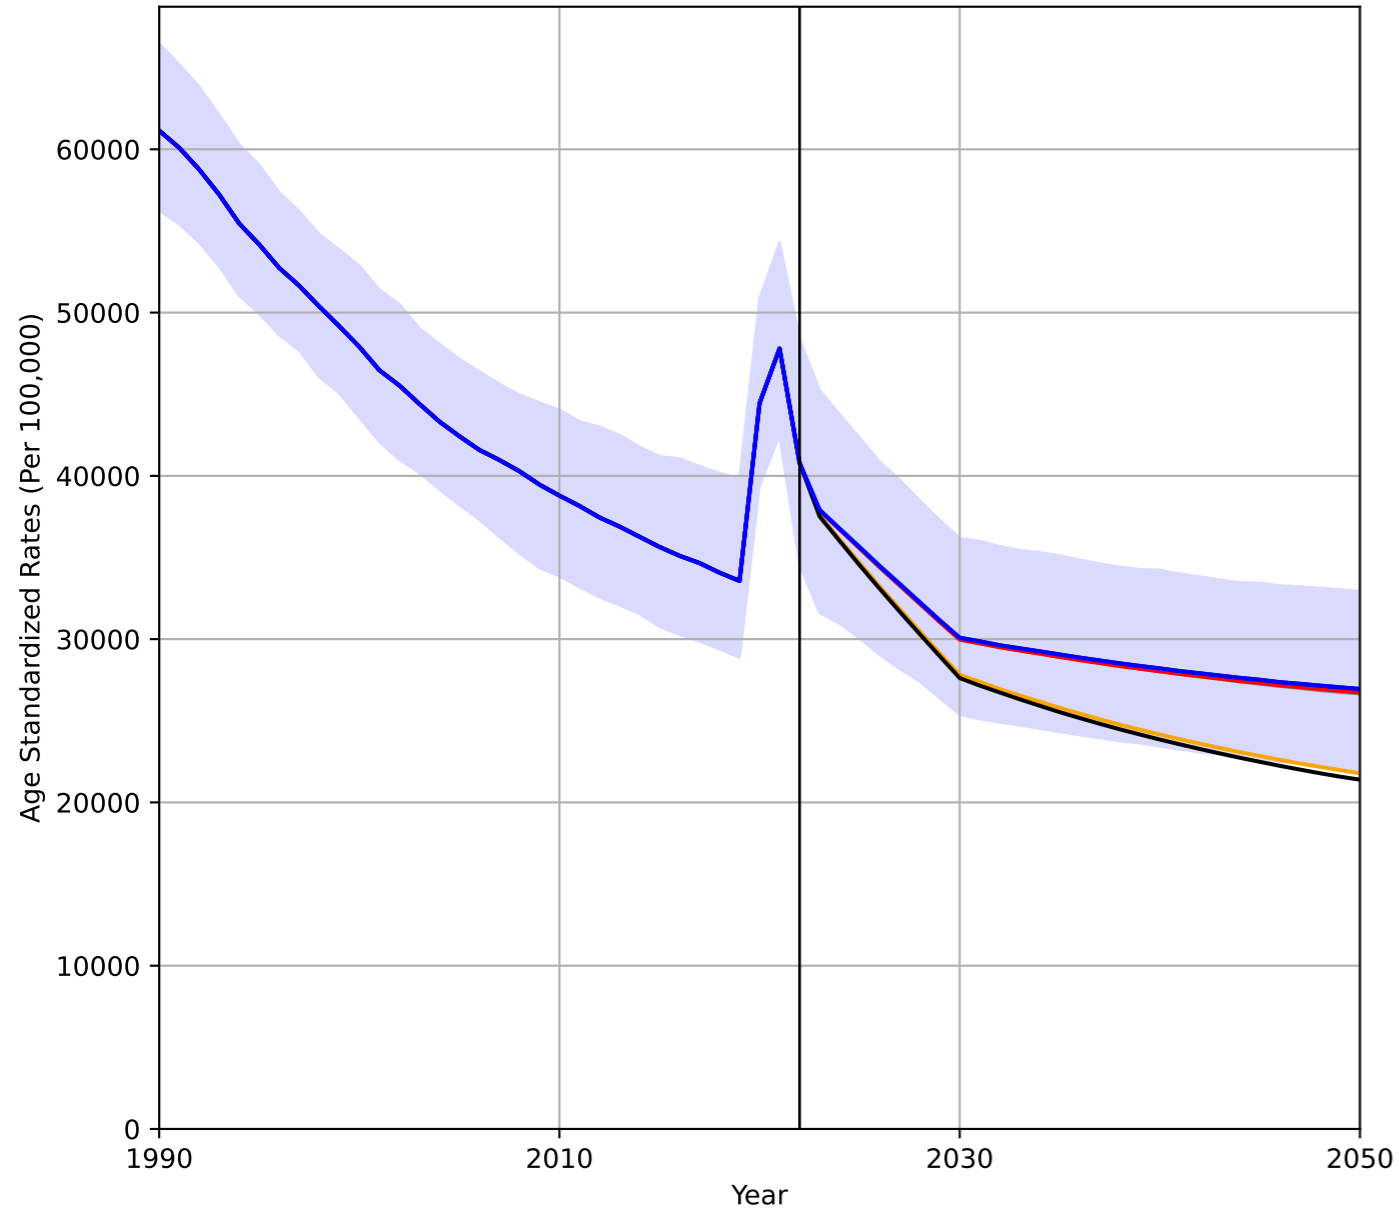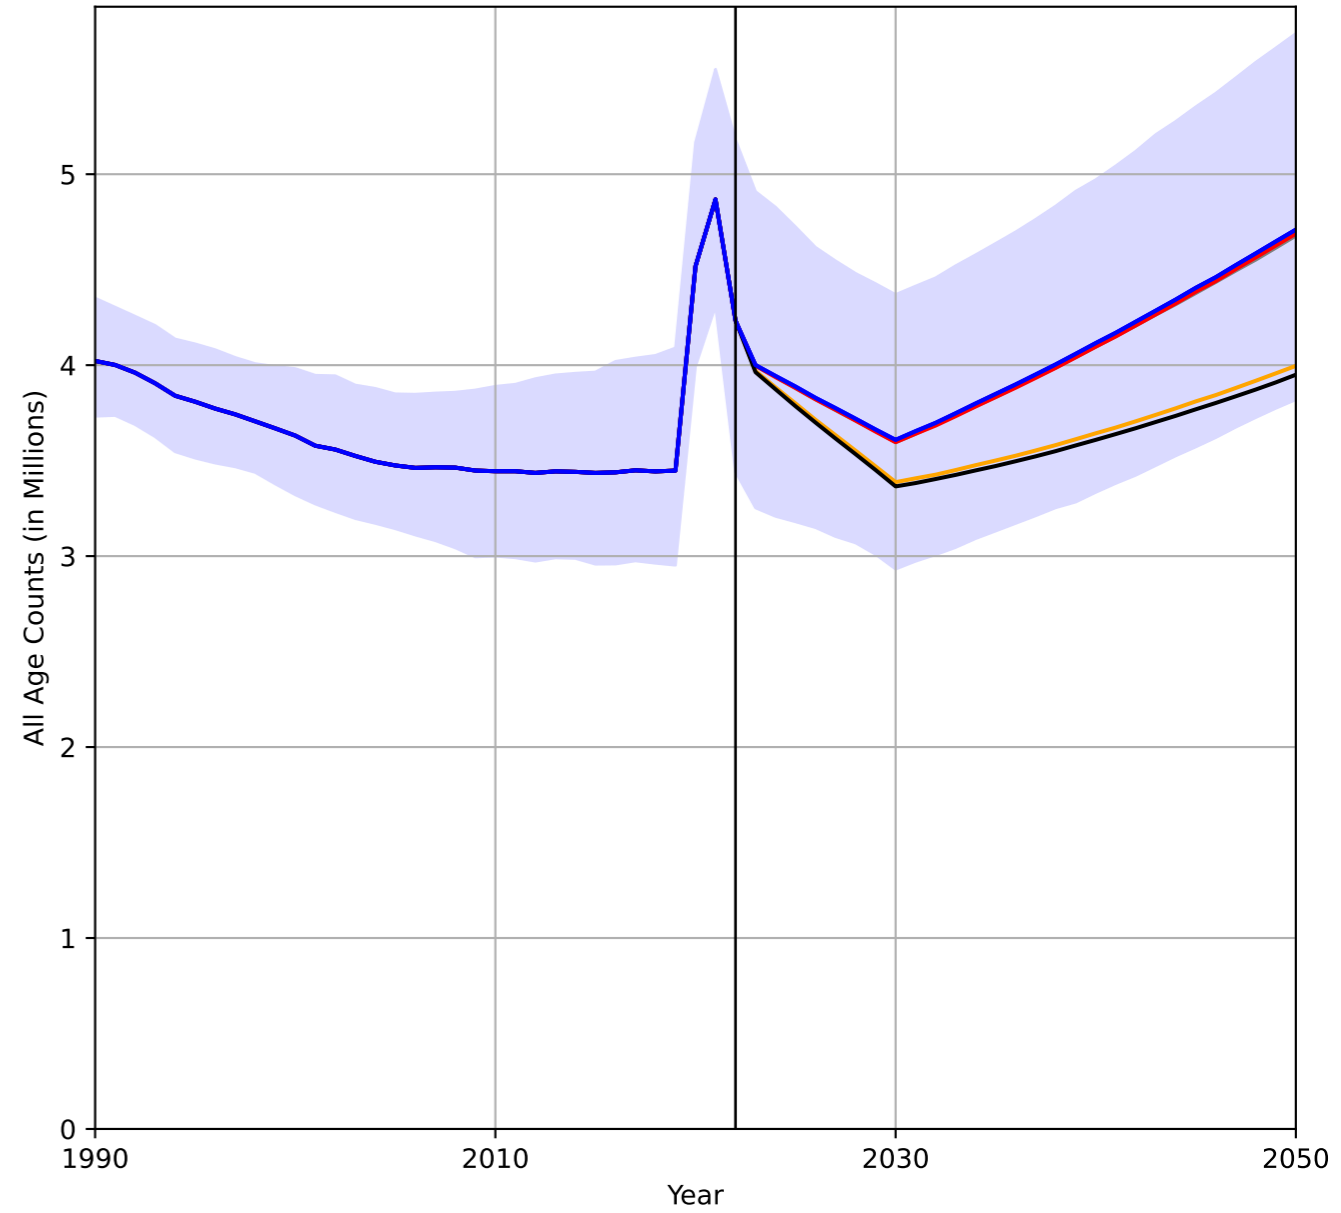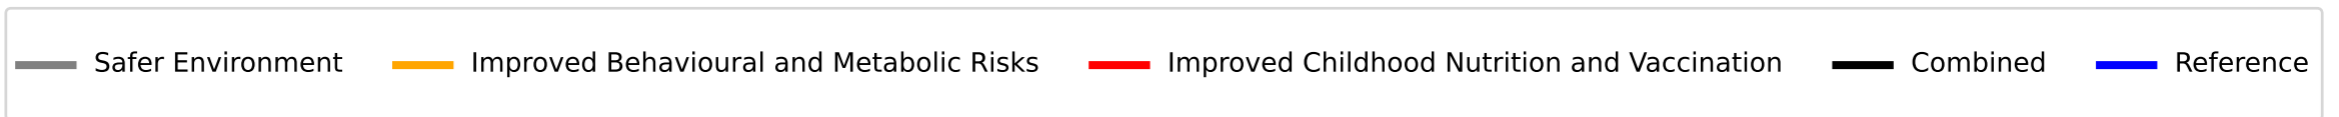

# Ecuador

Supplemental Results Figure S10. All-cause age standardised DALY rates (A) and all age DALY counts (B), for the past and for five future scenarios, 1990–2050

1477

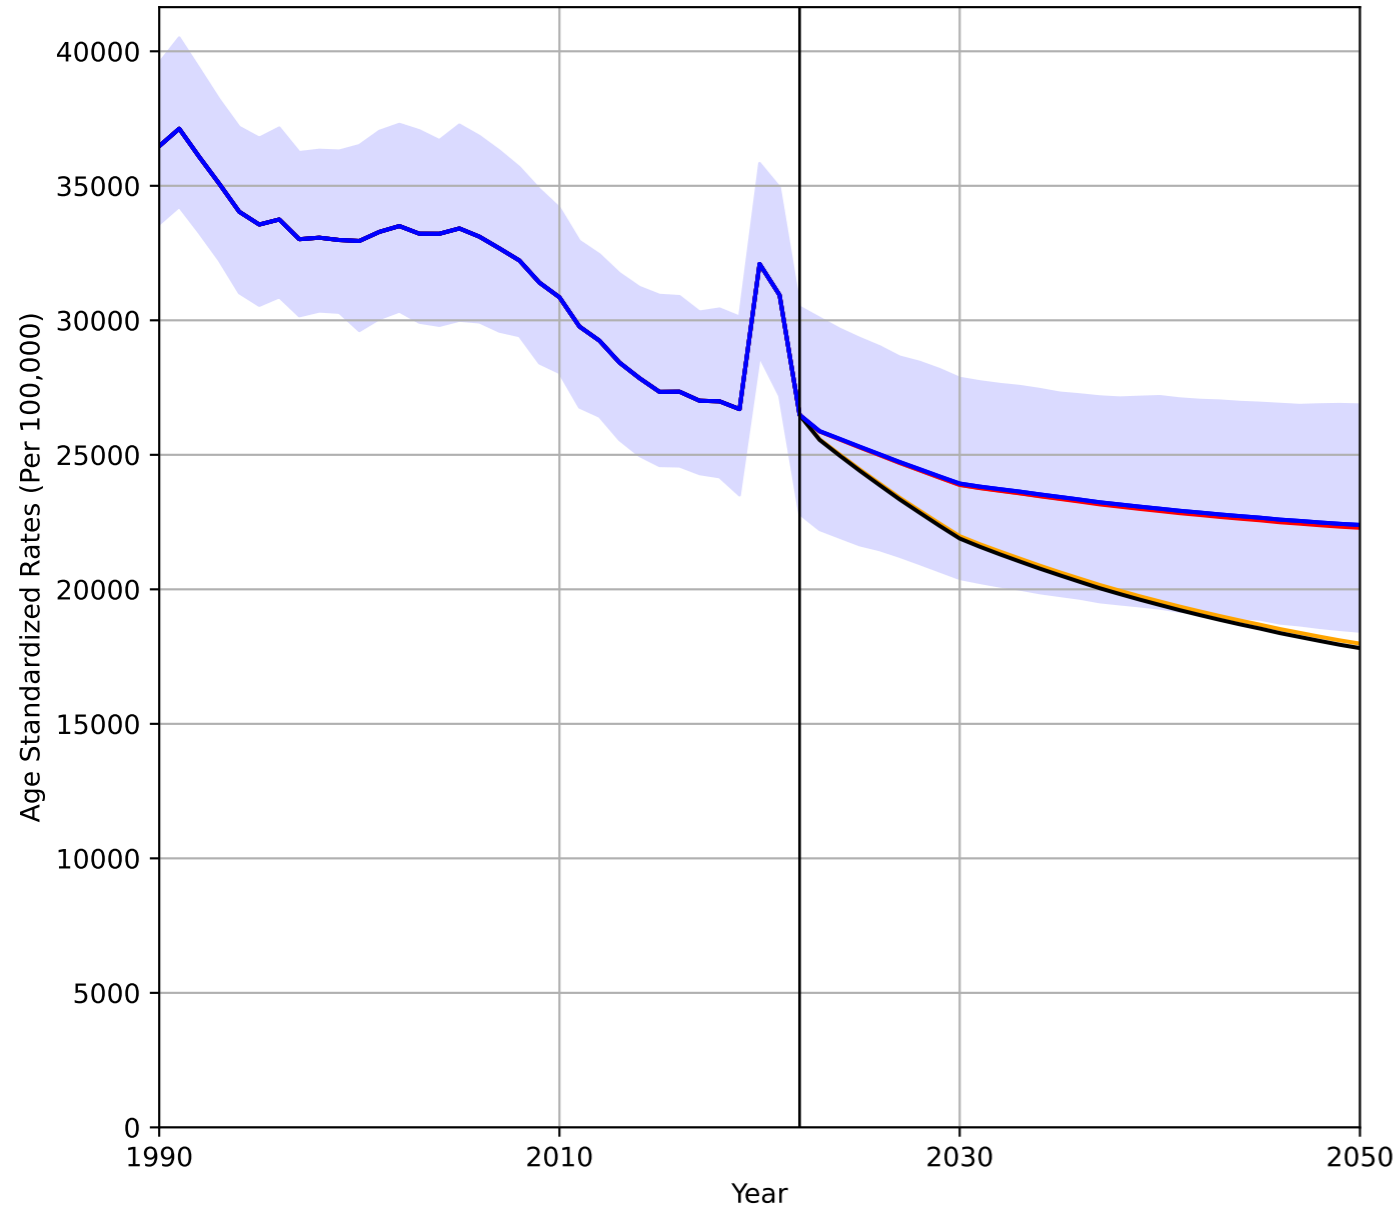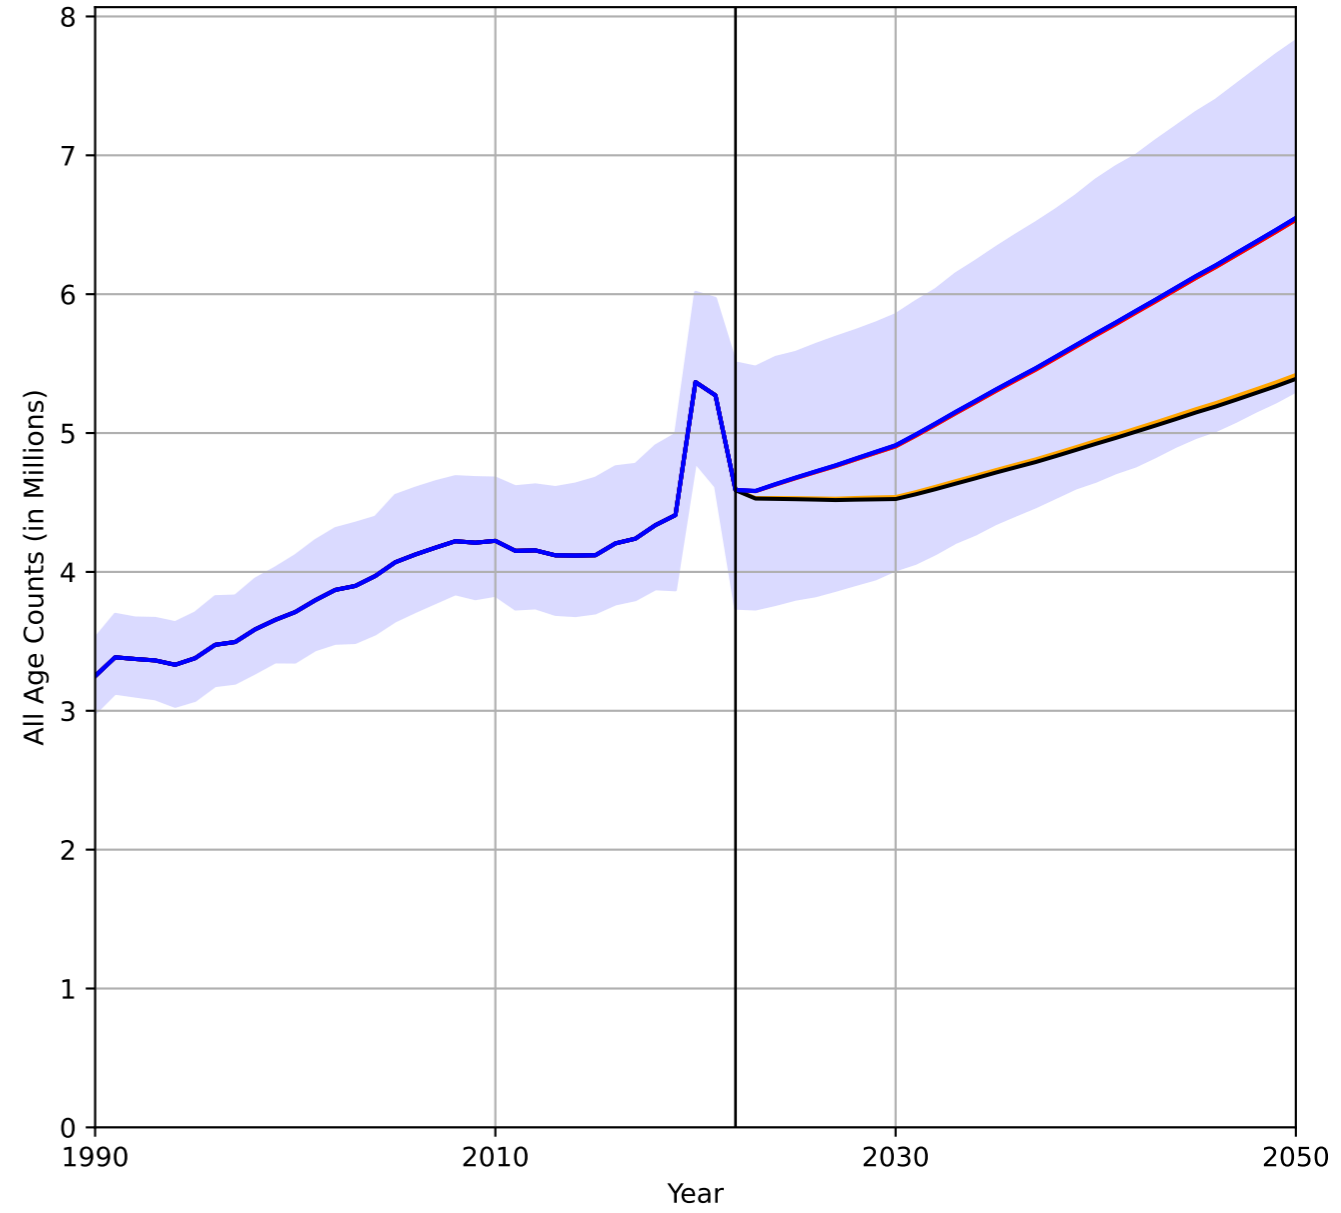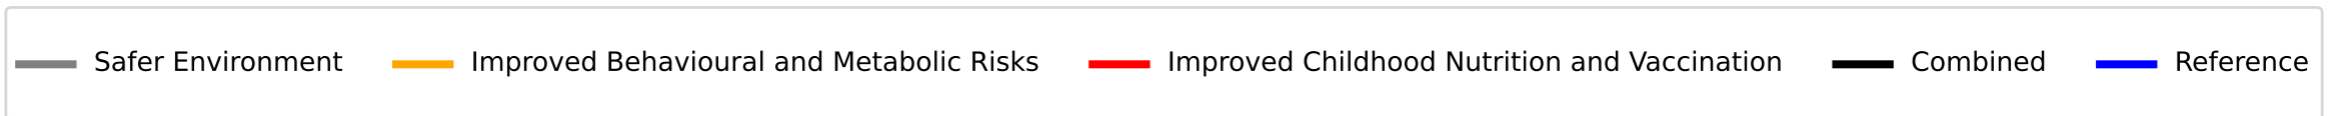

# Peru

Supplemental Results Figure S10. All-cause age standardised DALY rates (A) and all age DALY counts (B), for the past and for five future scenarios, 1990–2050

1478

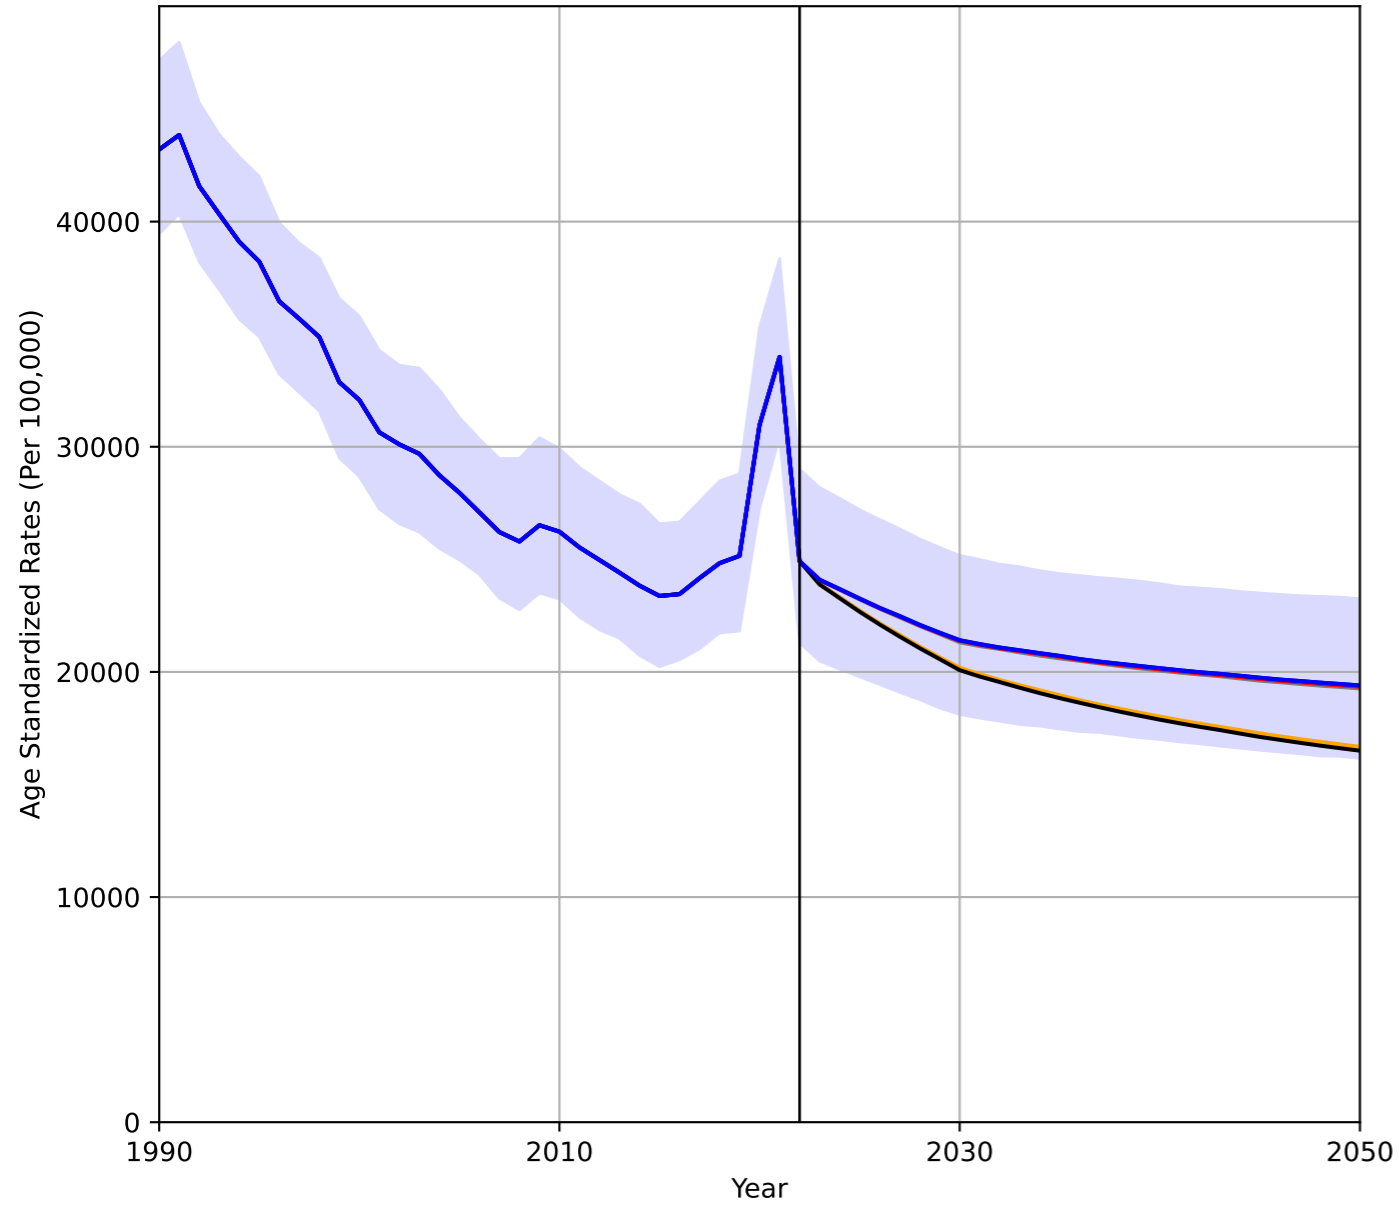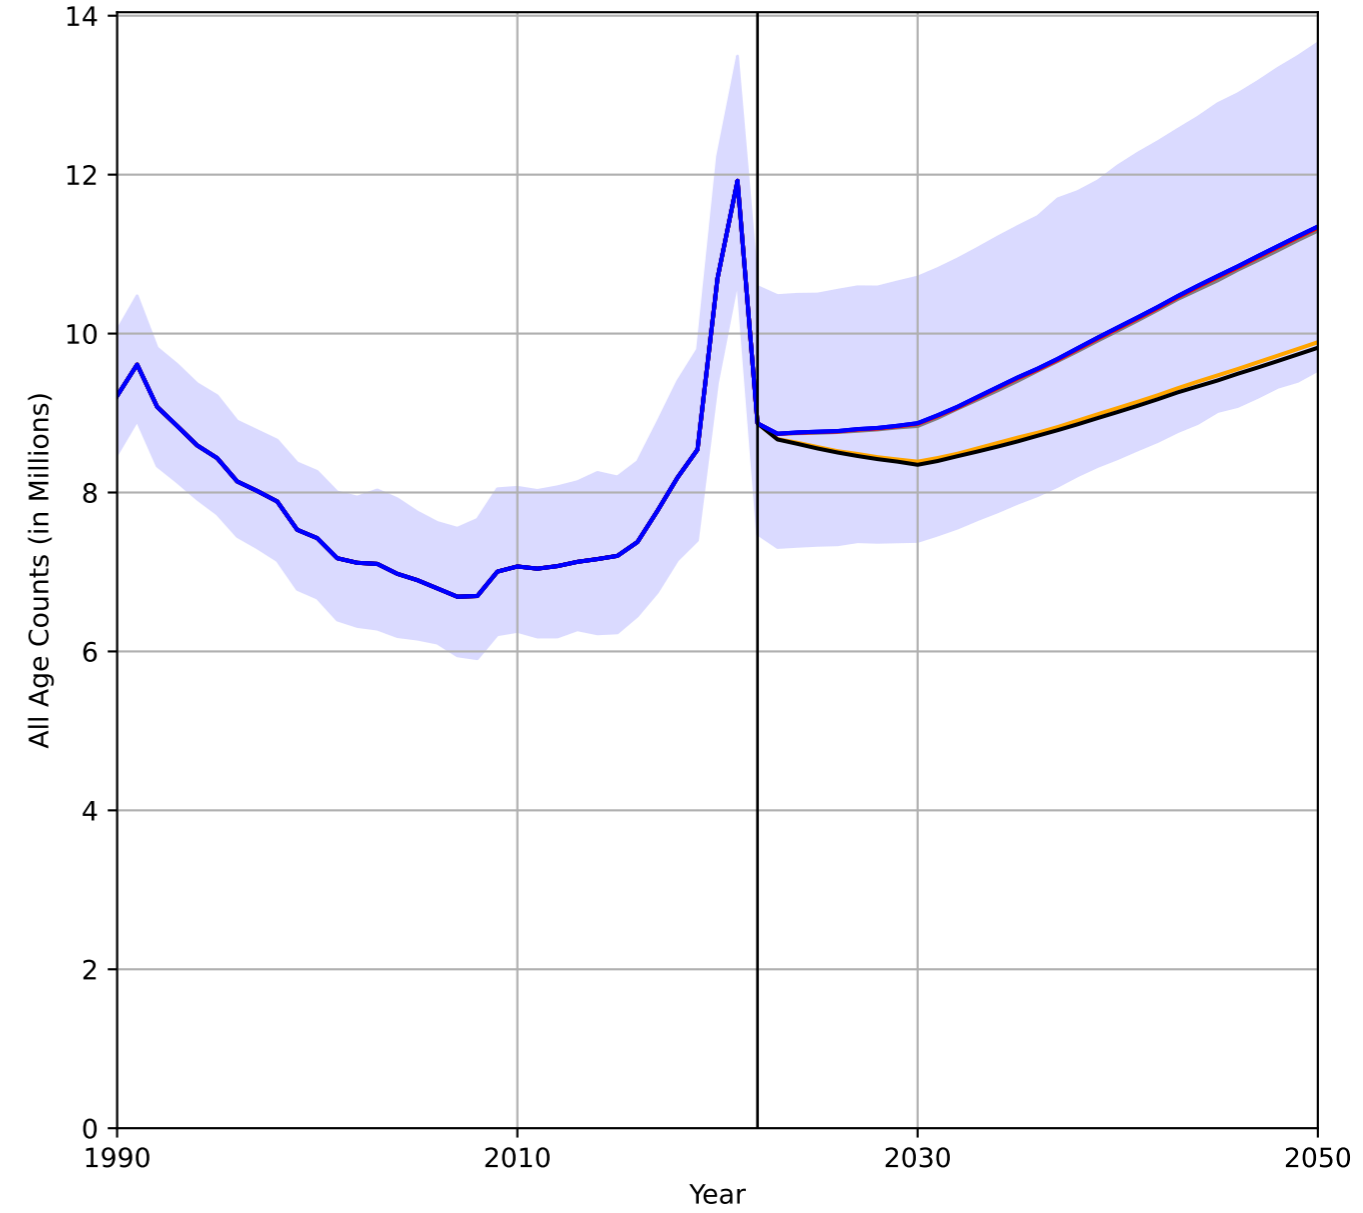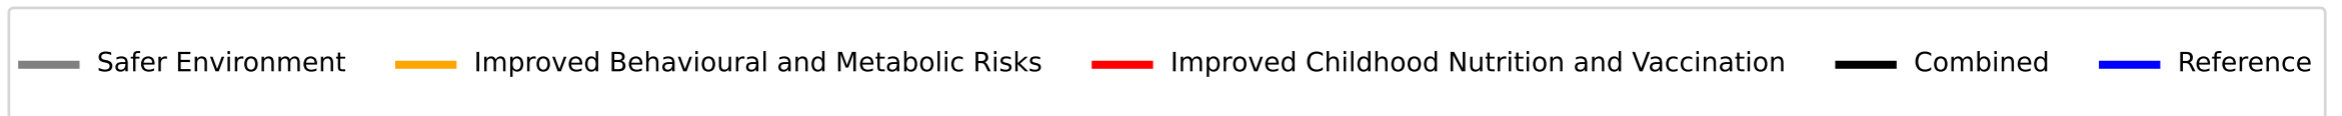

# Antigua And Barbuda

Supplemental Results Figure S10. All-cause age standardised DALY rates (A) and all age DALY counts (B), for the past and for five future scenarios, 1990–2050

1479

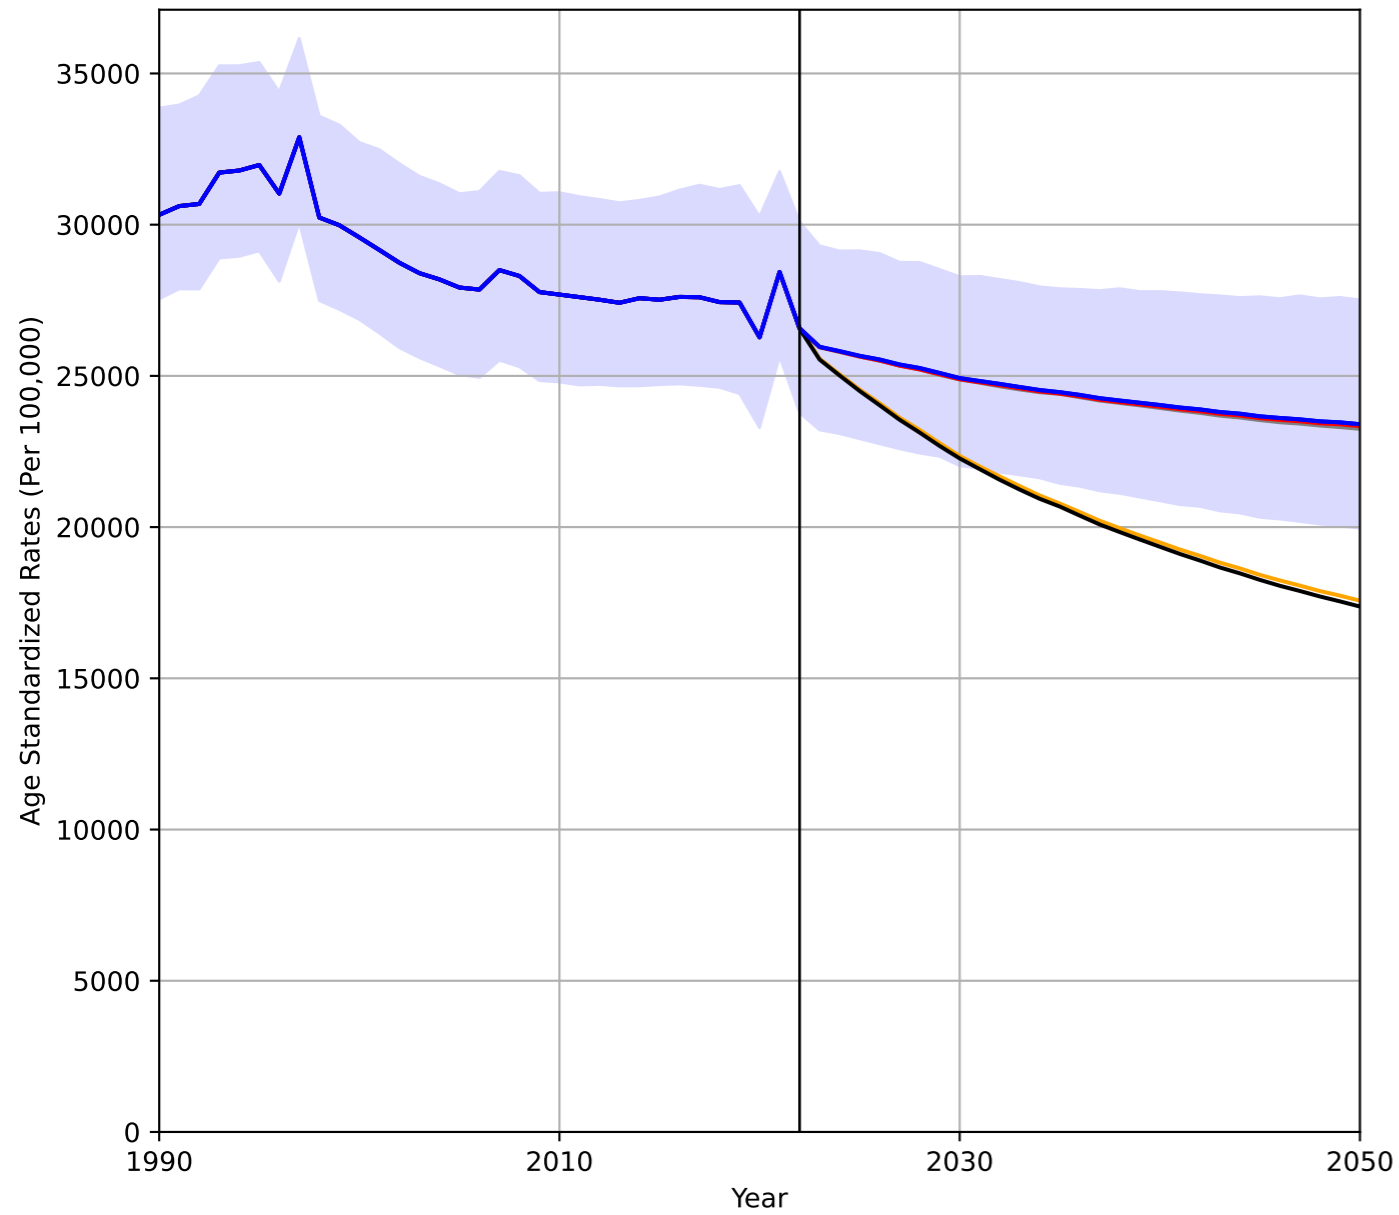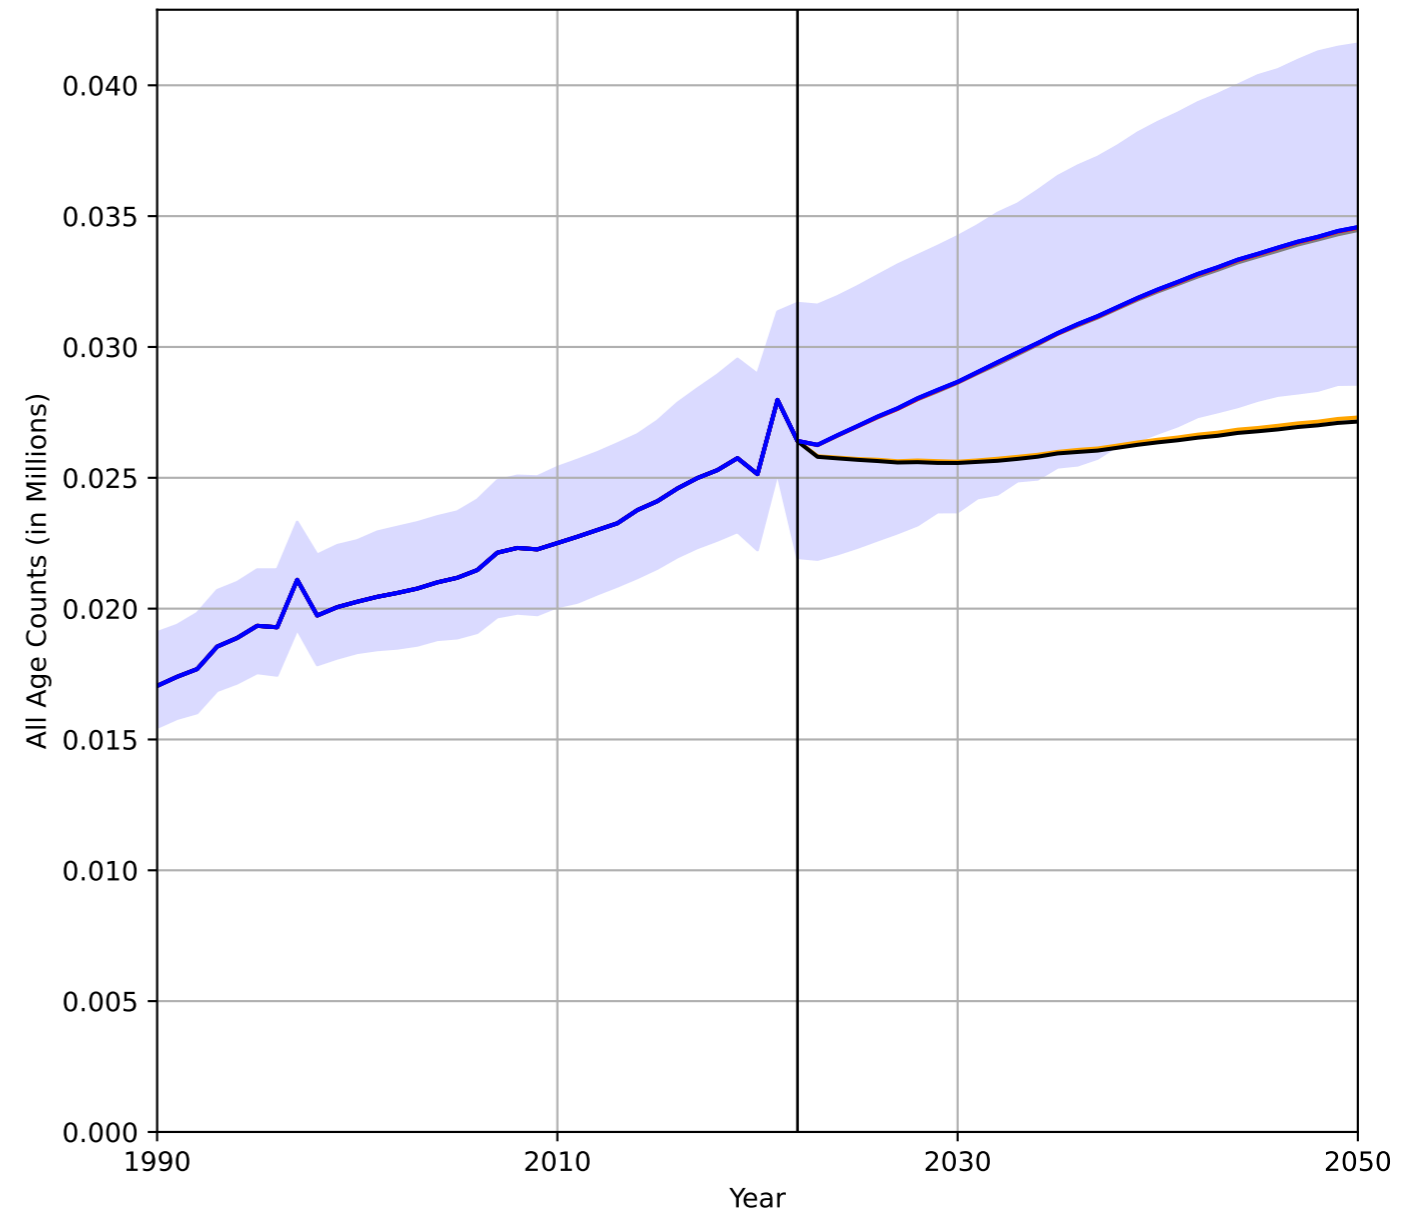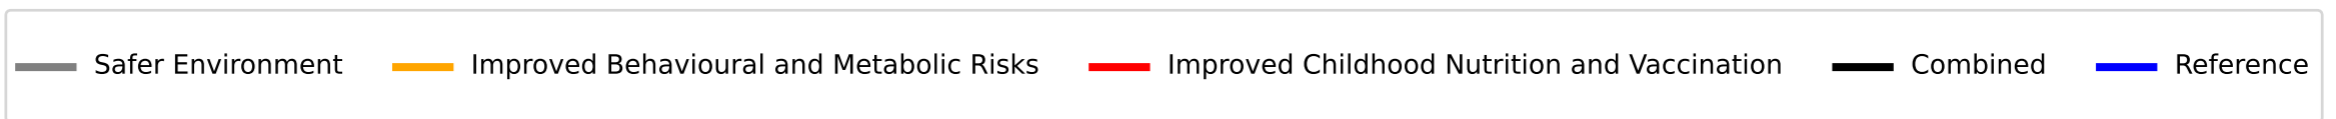



# The Bahamas

Supplemental Results Figure S10. All-cause age standardised DALY rates (A) and all age DALY counts (B), for the past and for five future scenarios, 1990–2050

1480

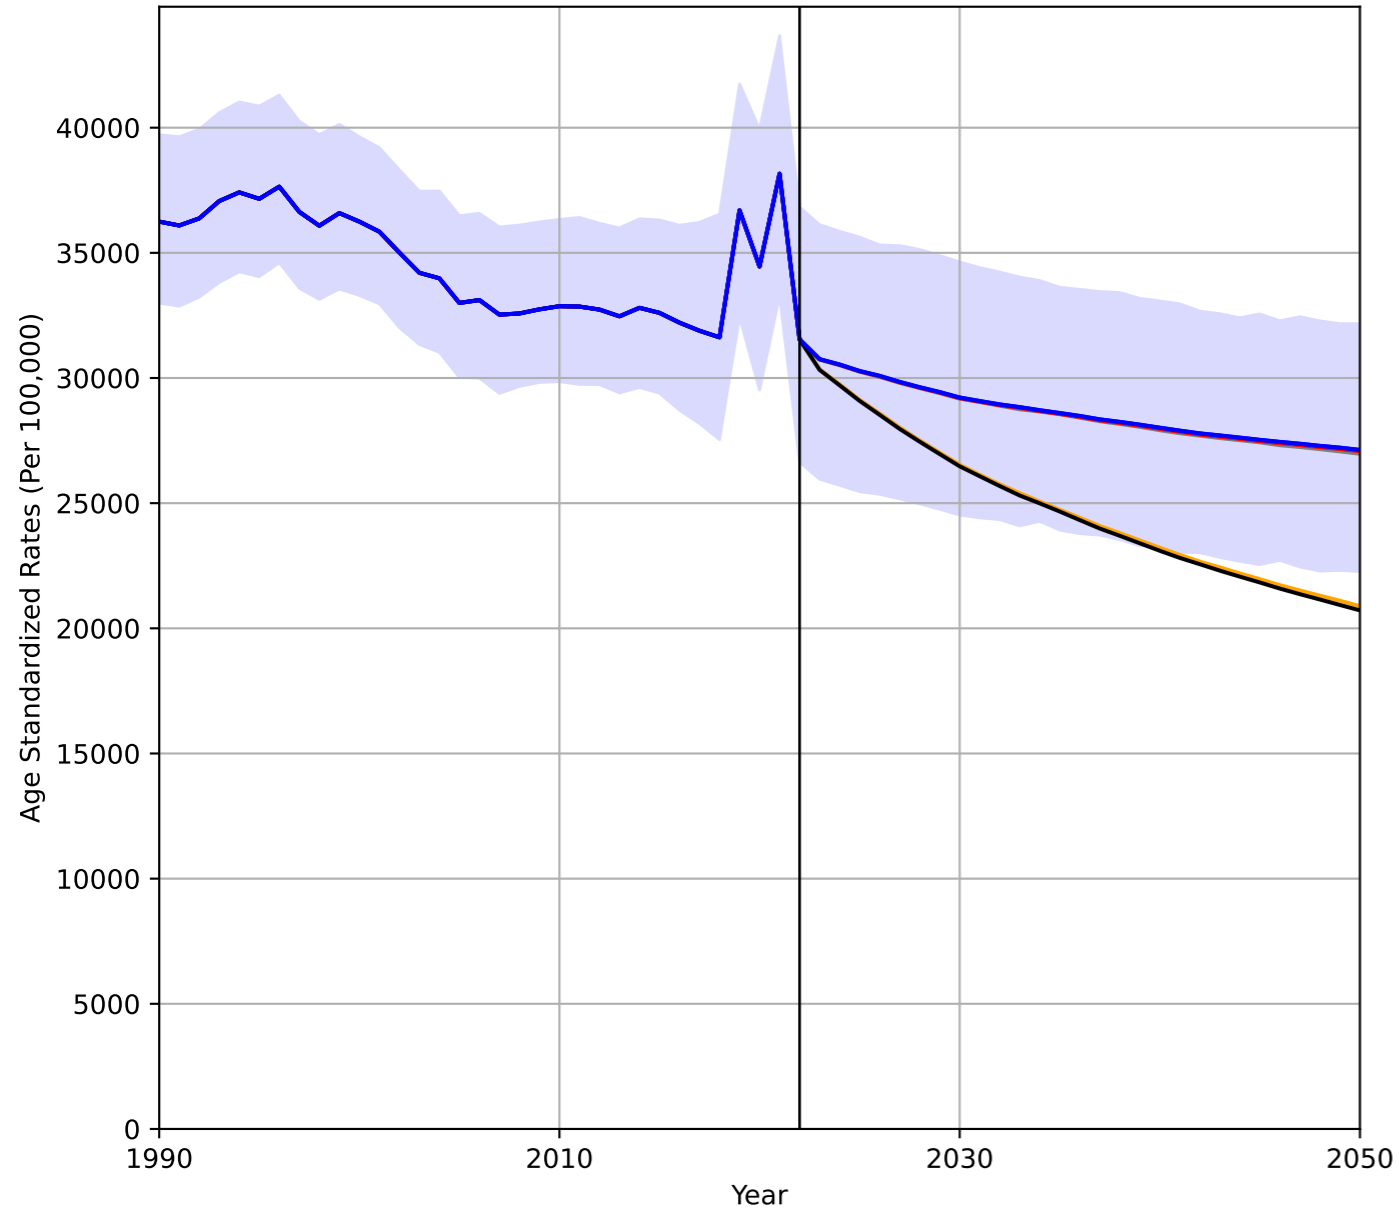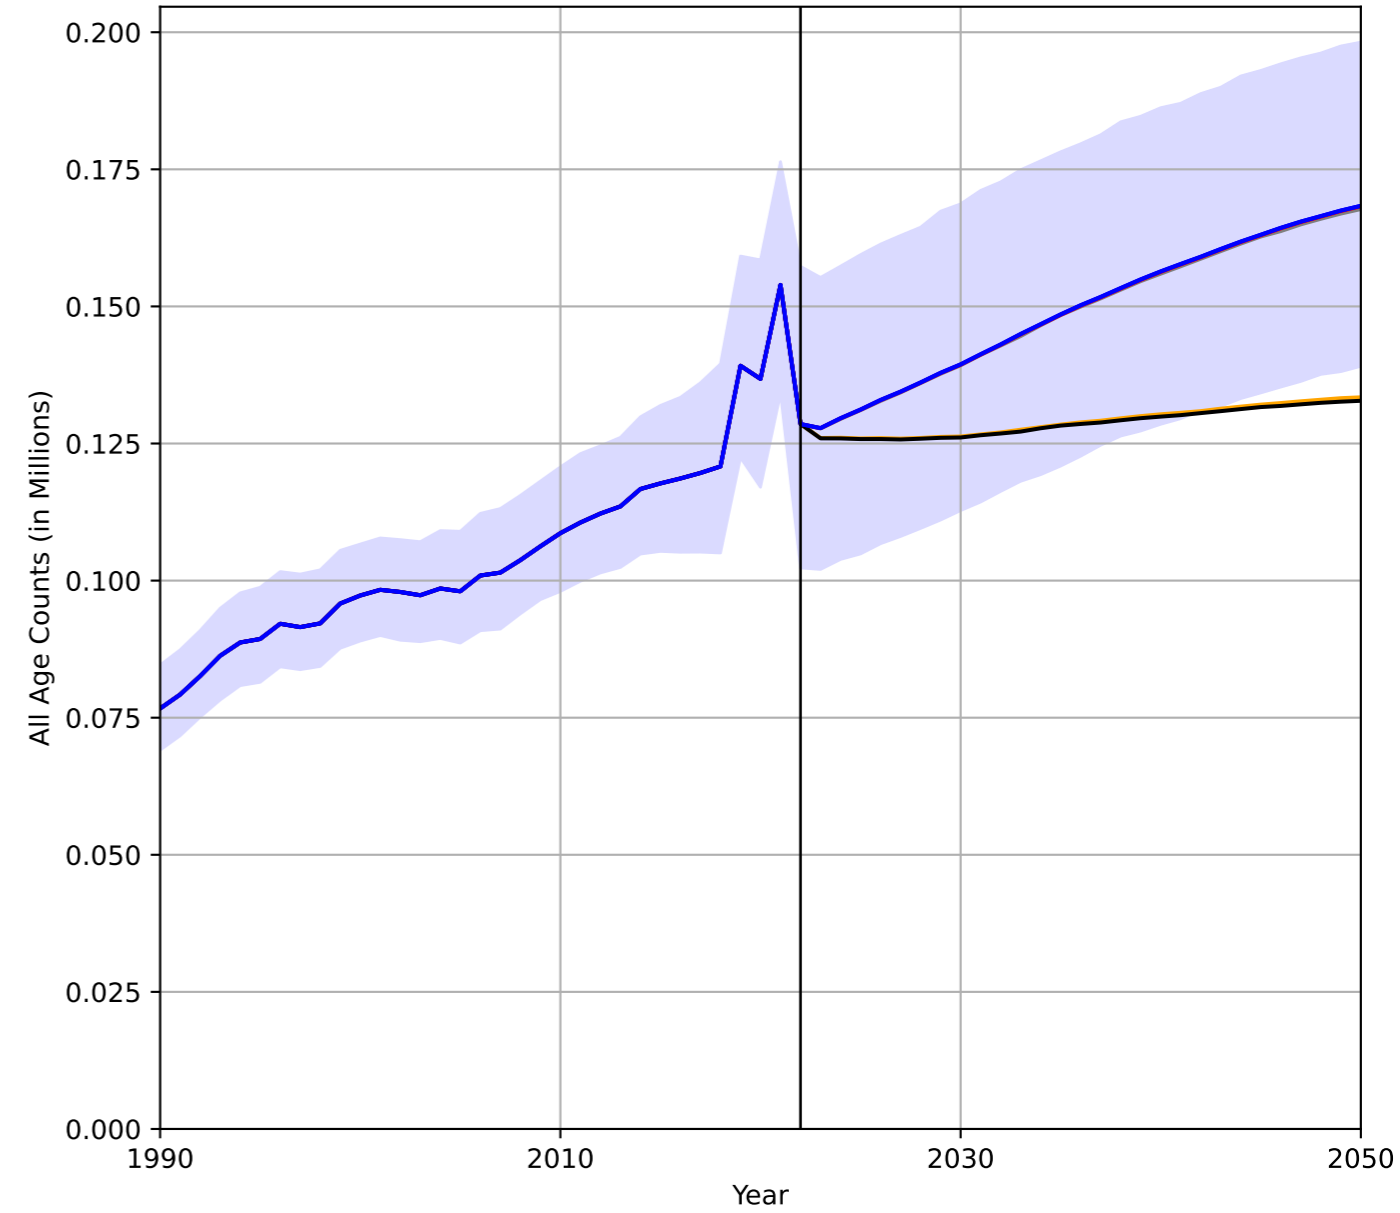

# Barbados

Supplemental Results Figure S10. All-cause age standardised DALY rates (A) and all age DALY counts (B), for the past and for five future scenarios, 1990–2050

1481

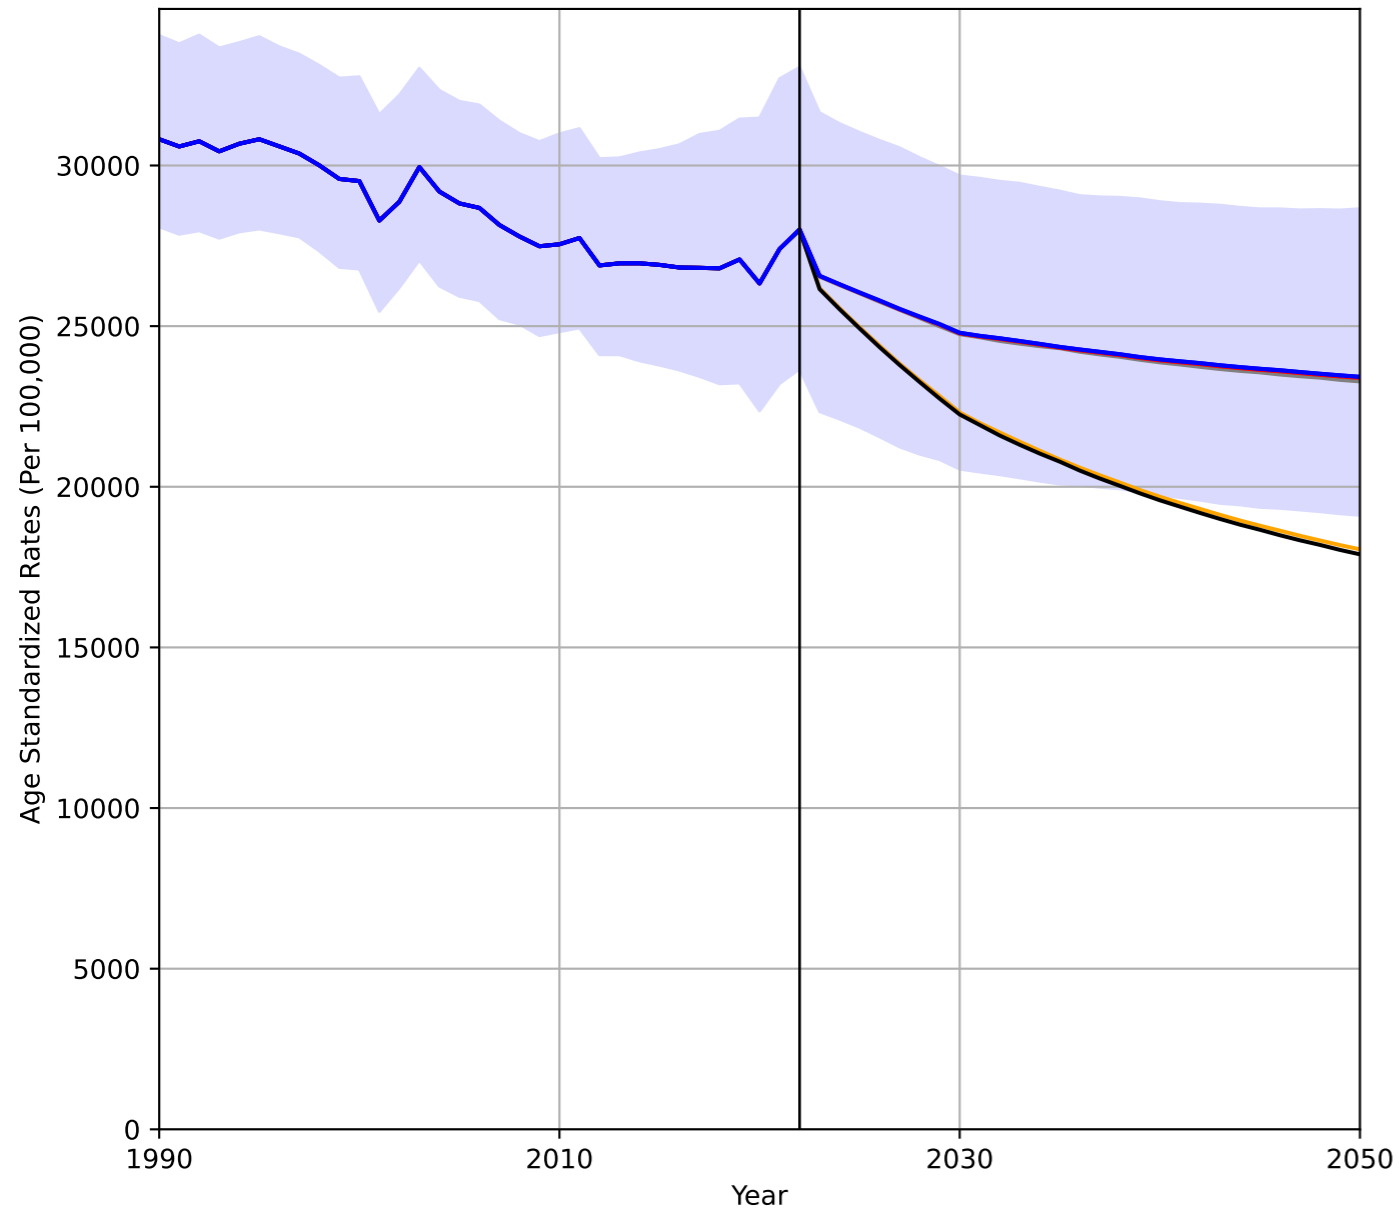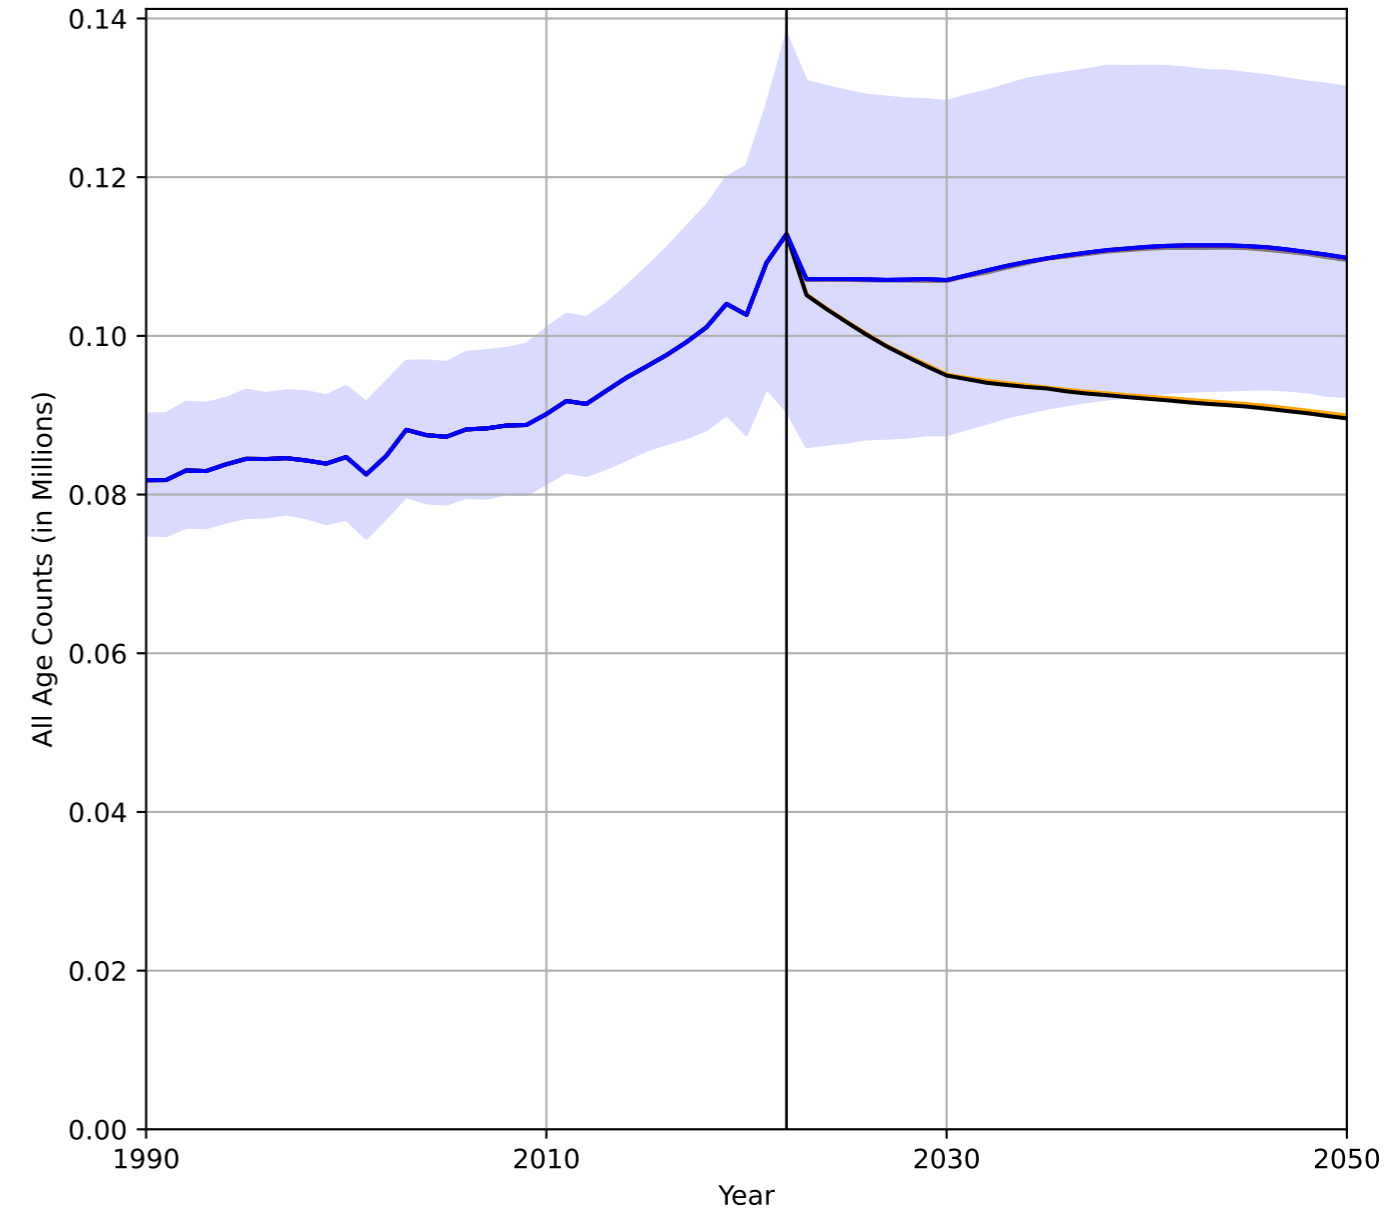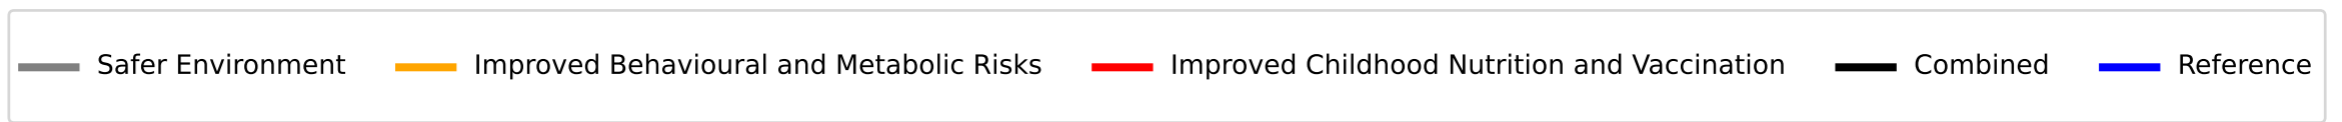

# Belize

Supplemental Results Figure S10. All-cause age standardised DALY rates (A) and all age DALY counts (B), for the past and for five future scenarios, 1990–2050

1482

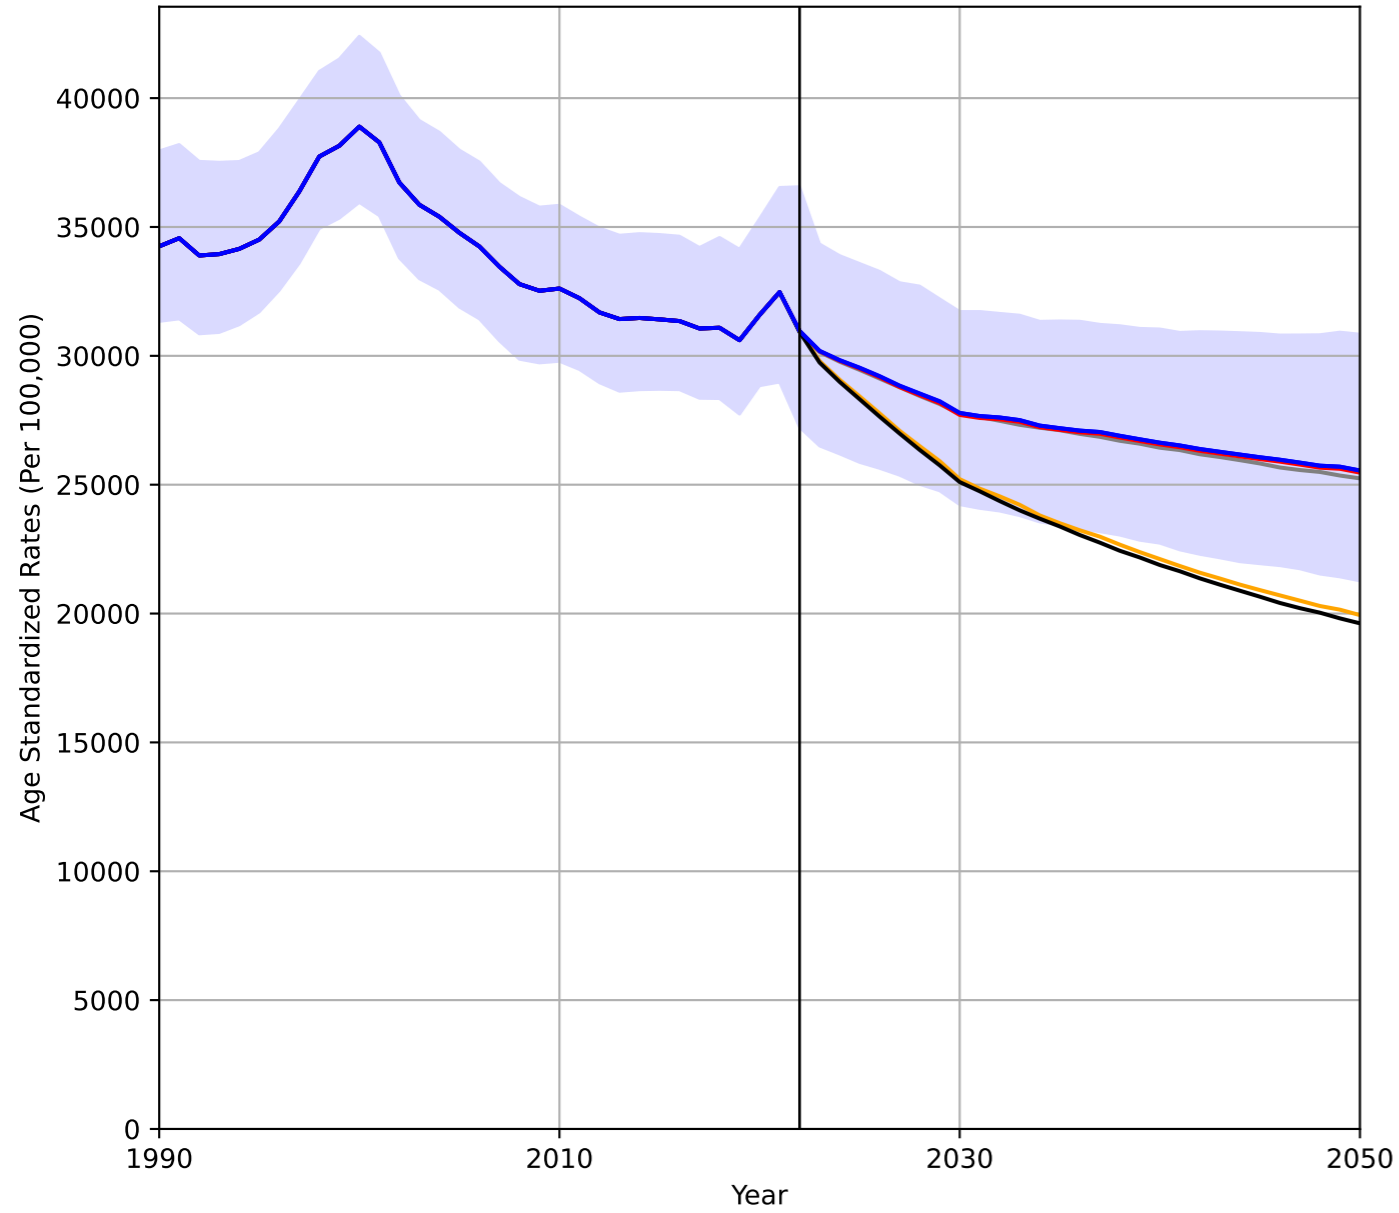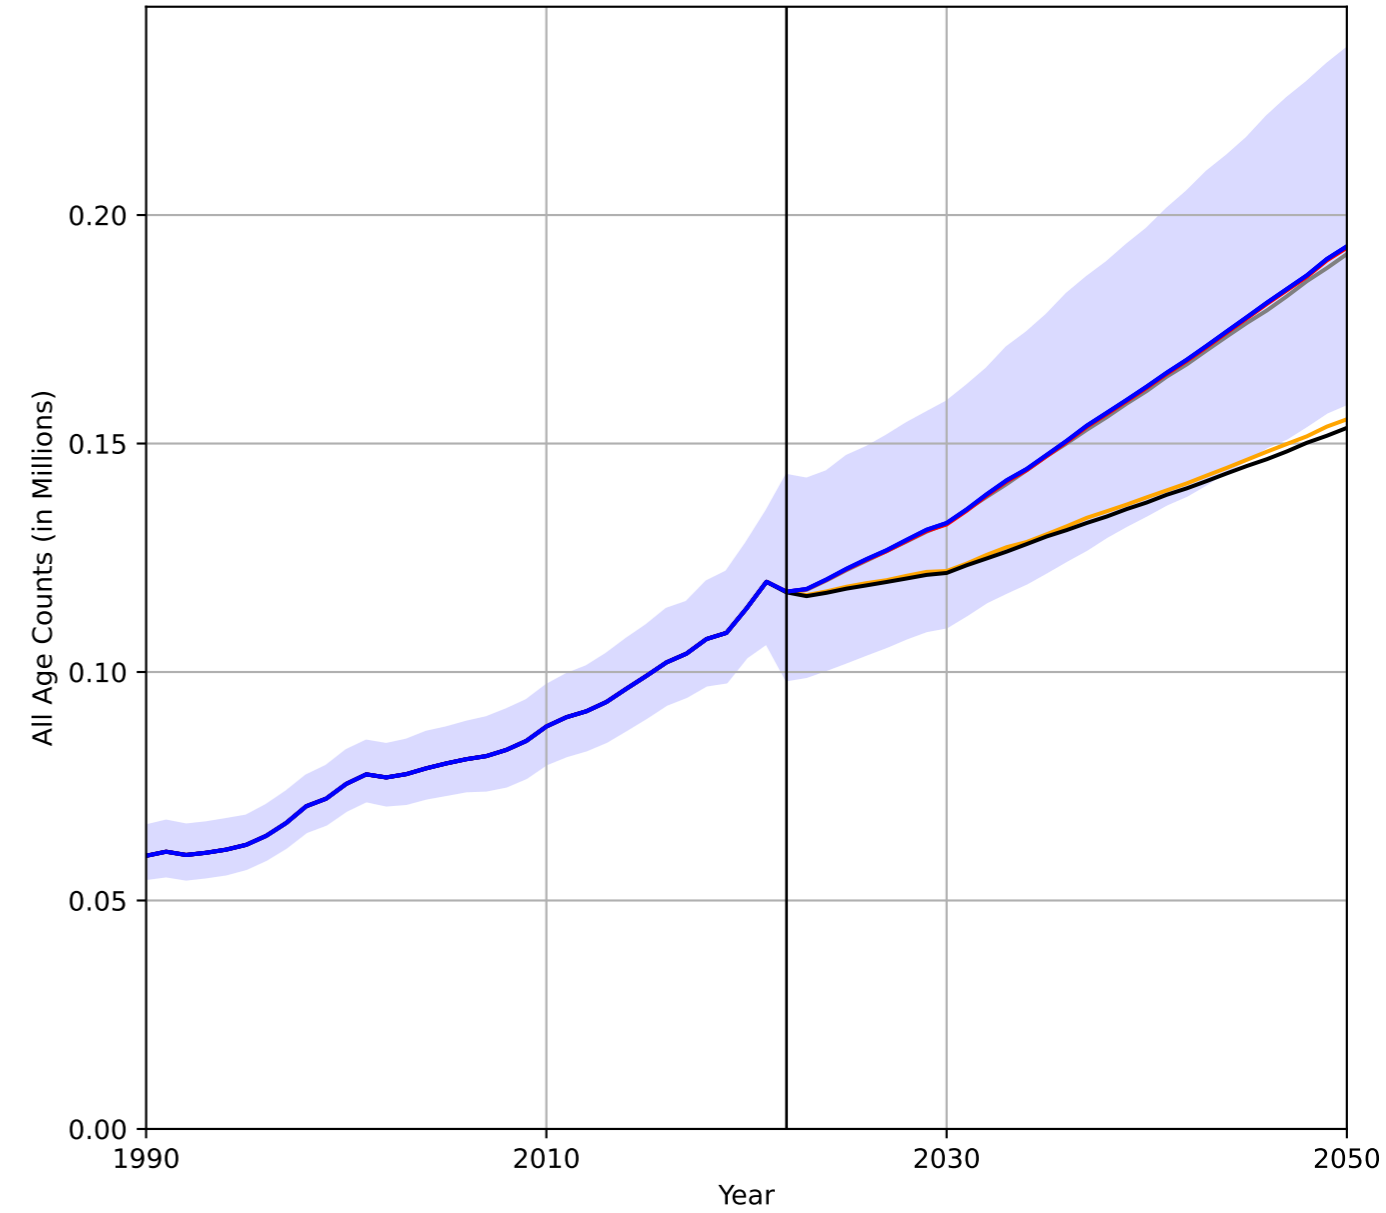

# Bermuda

Supplemental Results Figure S10. All-cause age standardised DALY rates (A) and all age DALY counts (B), for the past and for five future scenarios, 1990–2050

1483

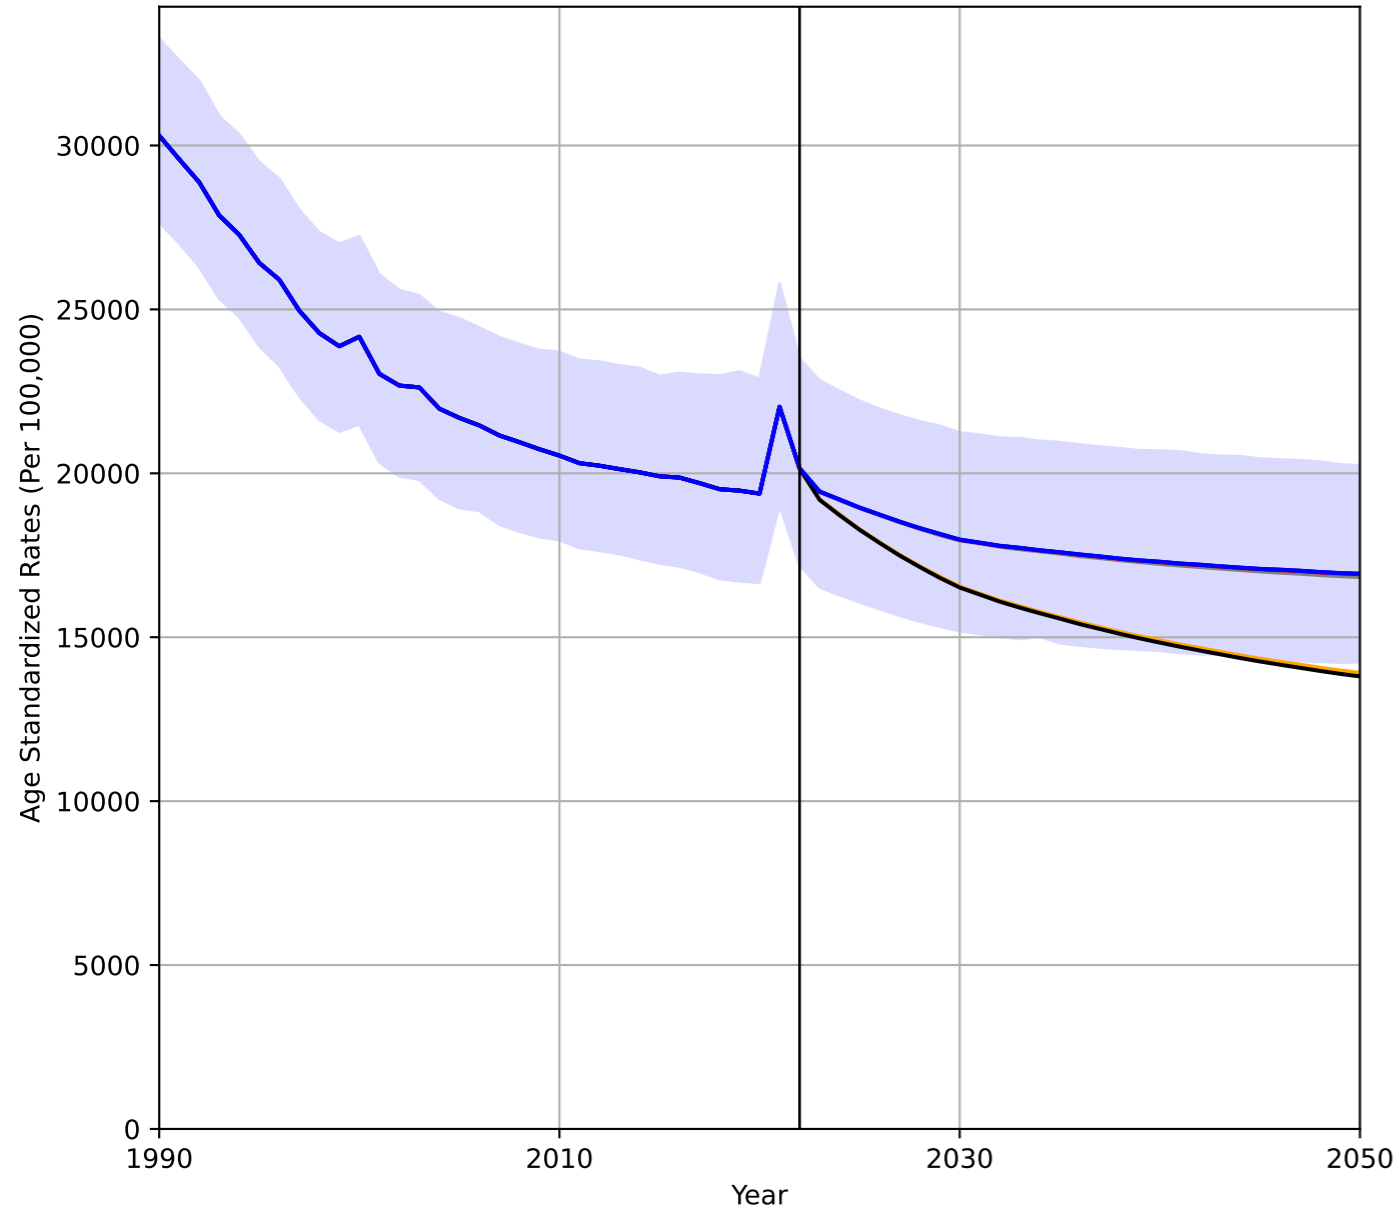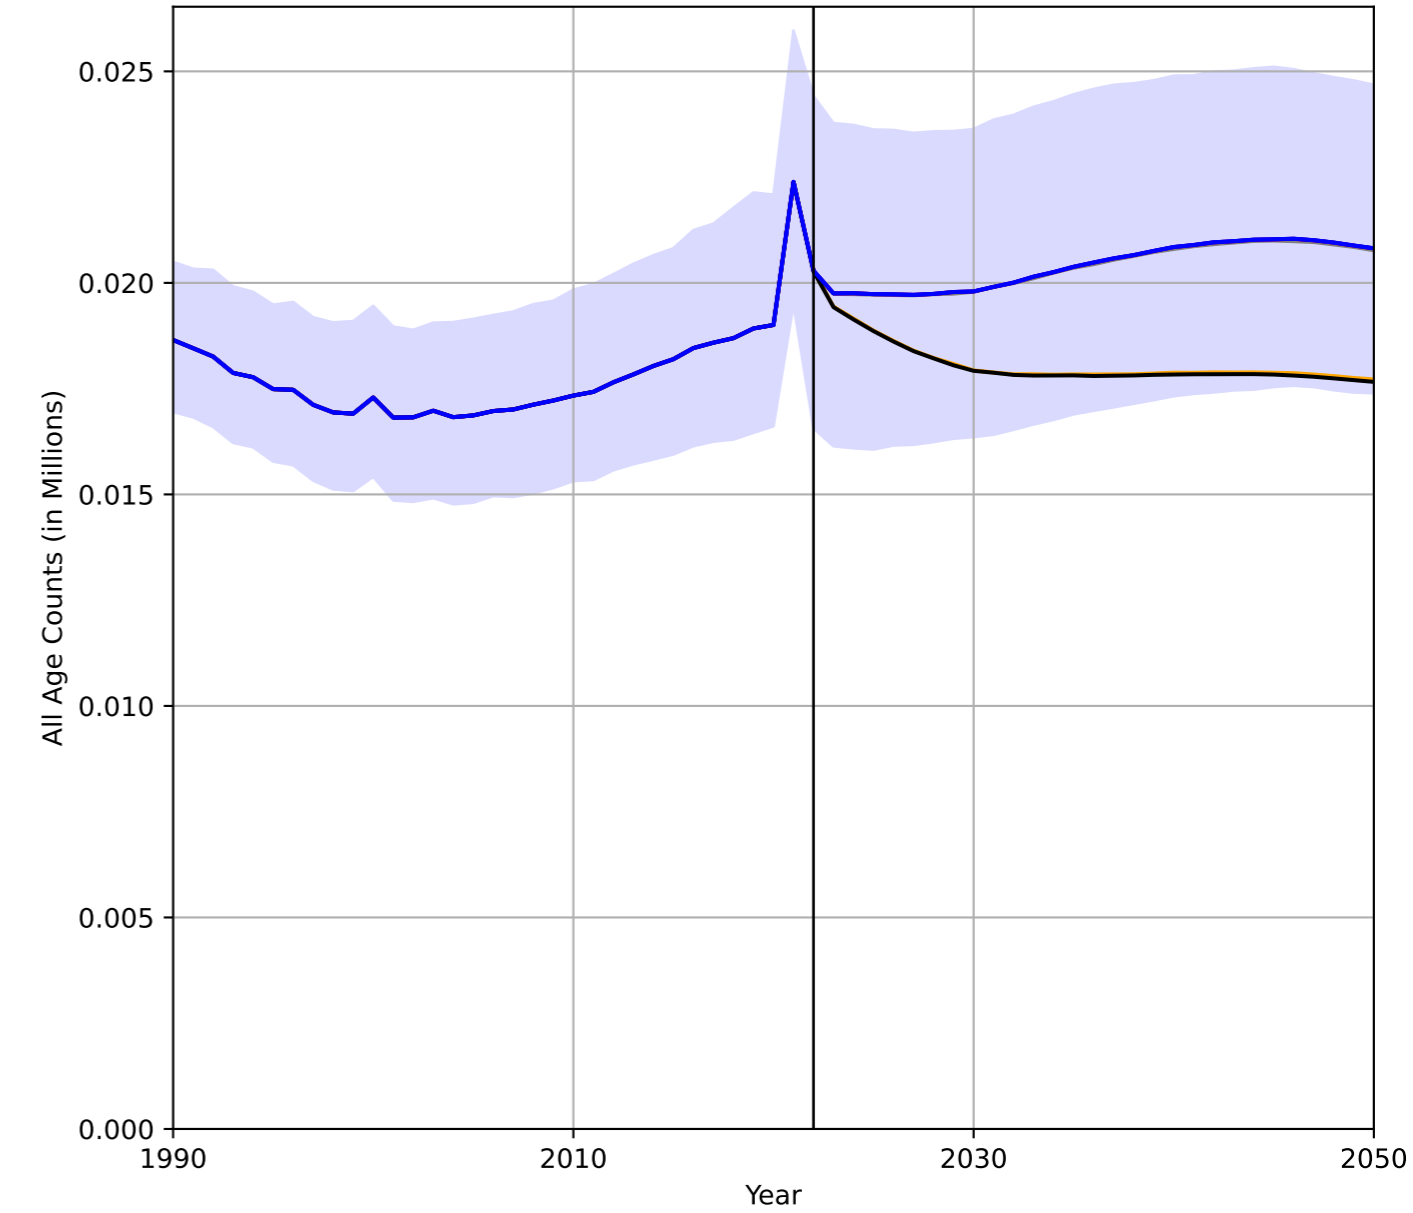

# Cuba

Supplemental Results Figure S10. All-cause age standardised DALY rates (A) and all age DALY counts (B), for the past and for five future scenarios, 1990–2050

1484

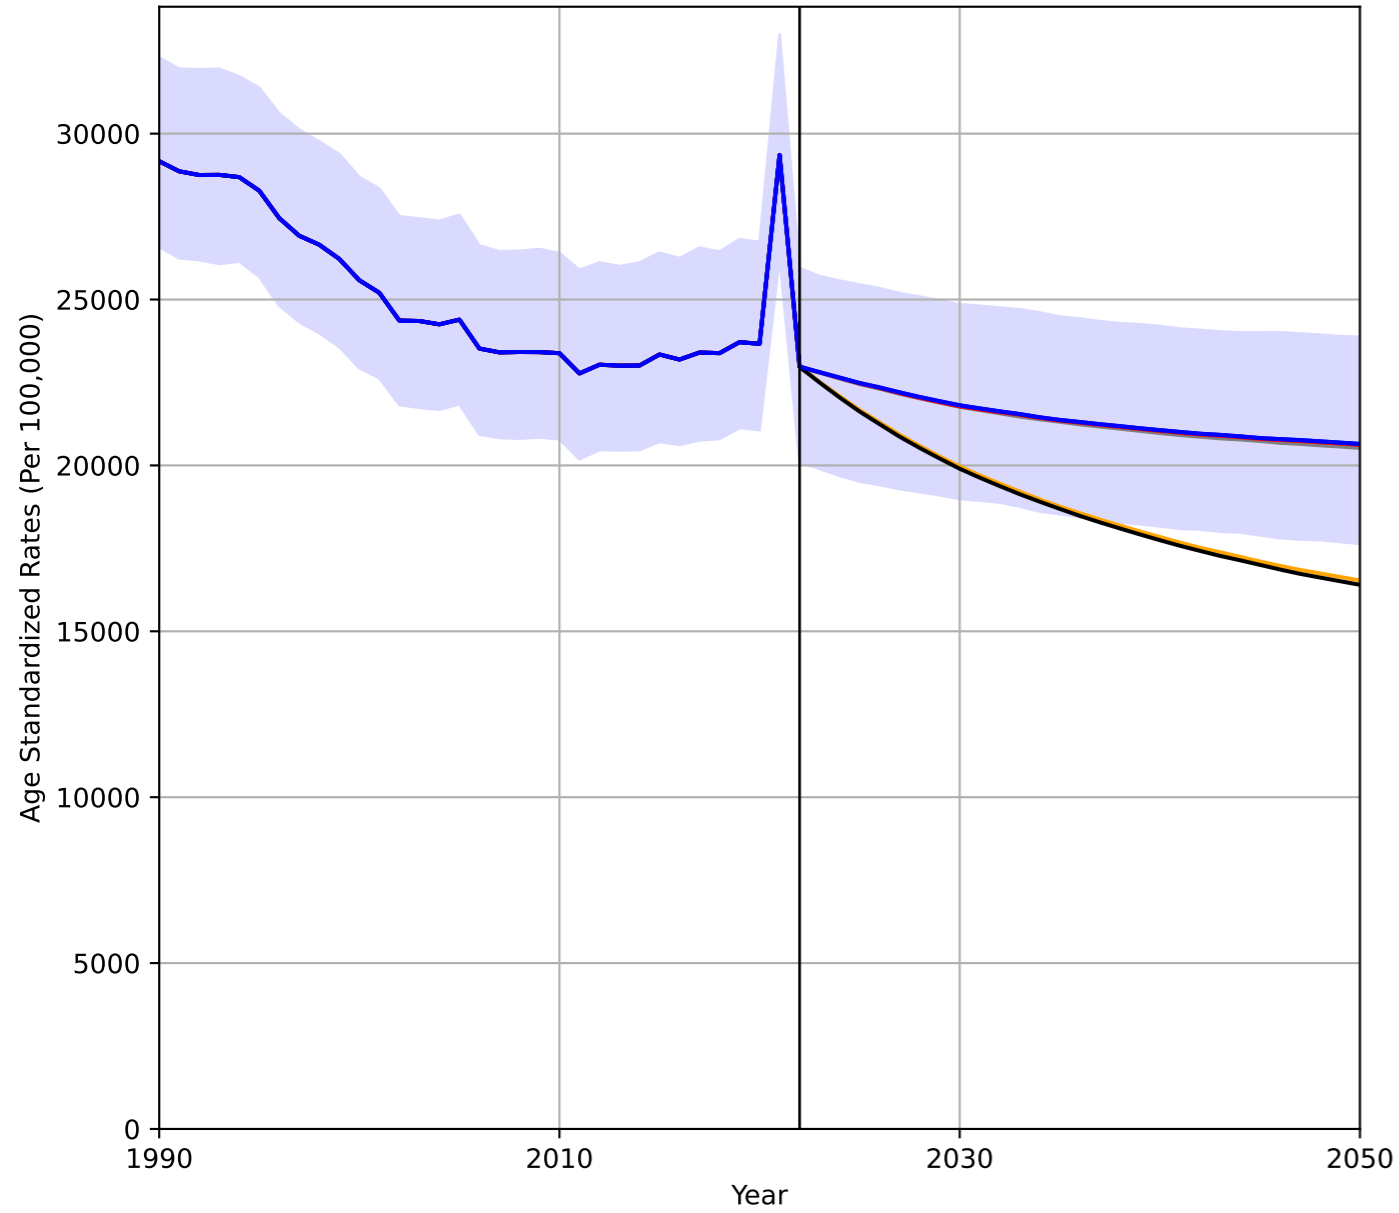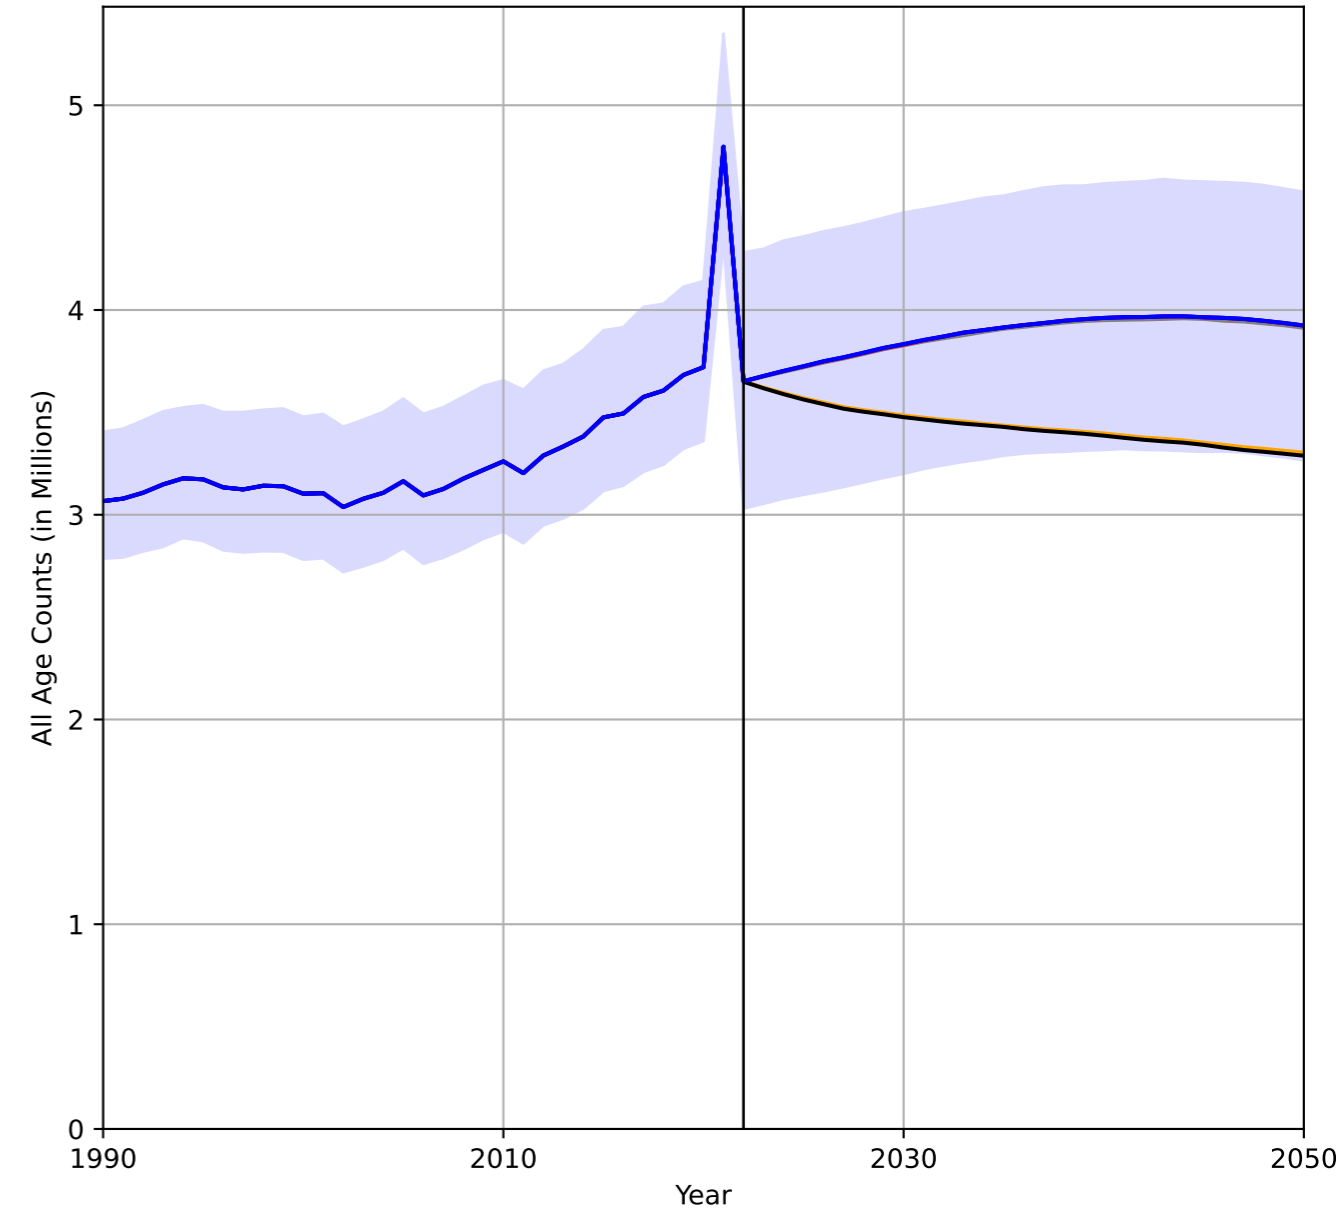

# Dominica

Supplemental Results Figure S10. All-cause age standardised DALY rates (A) and all age DALY counts (B), for the past and for five future scenarios, 1990–2050

1485

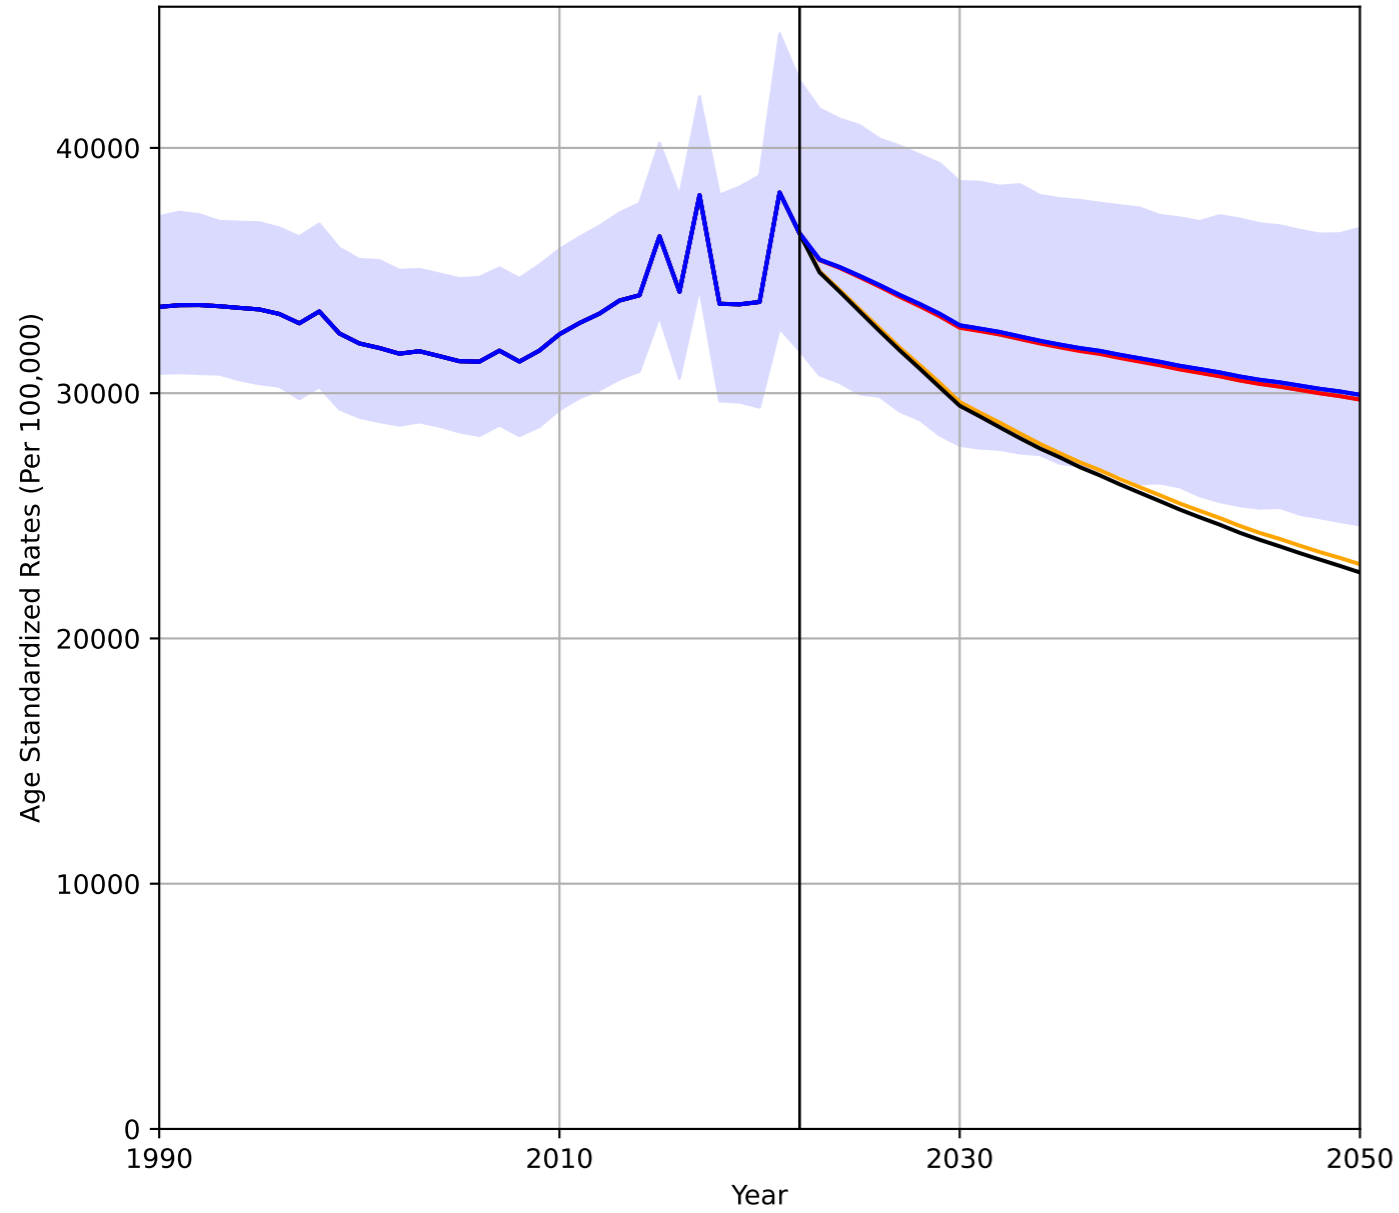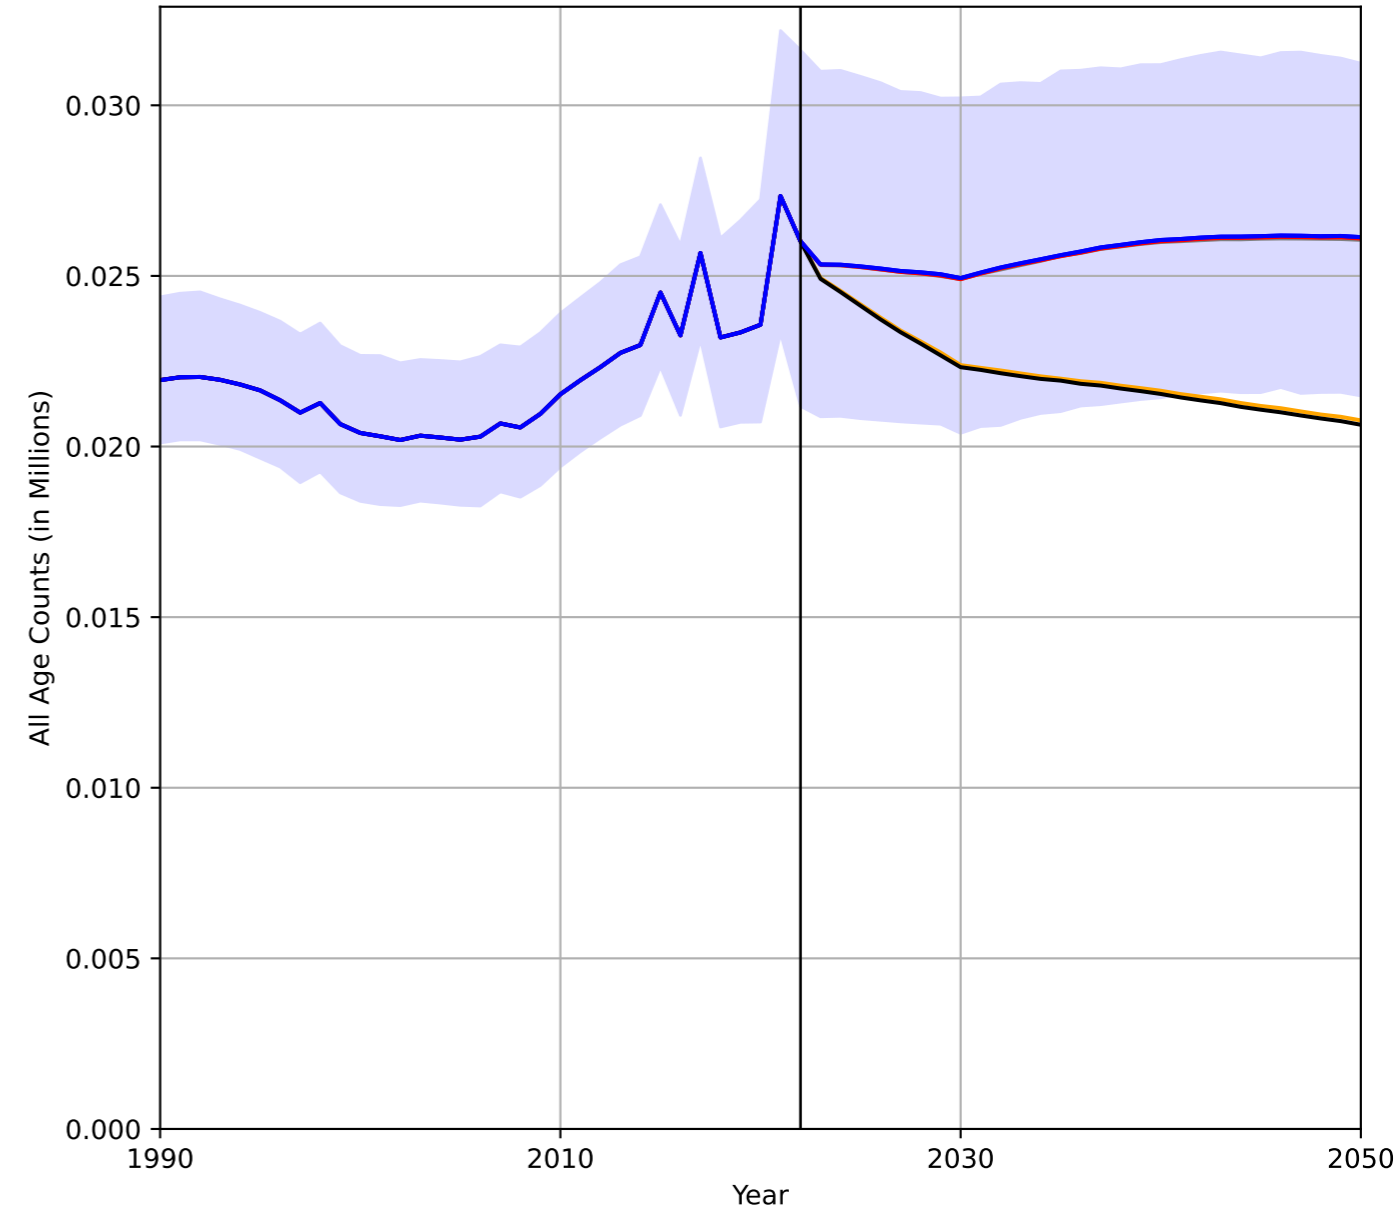

# Dominican Republic

Supplemental Results Figure S10. All-cause age standardised DALY rates (A) and all age DALY counts (B), for the past and for five future scenarios, 1990–2050

1486

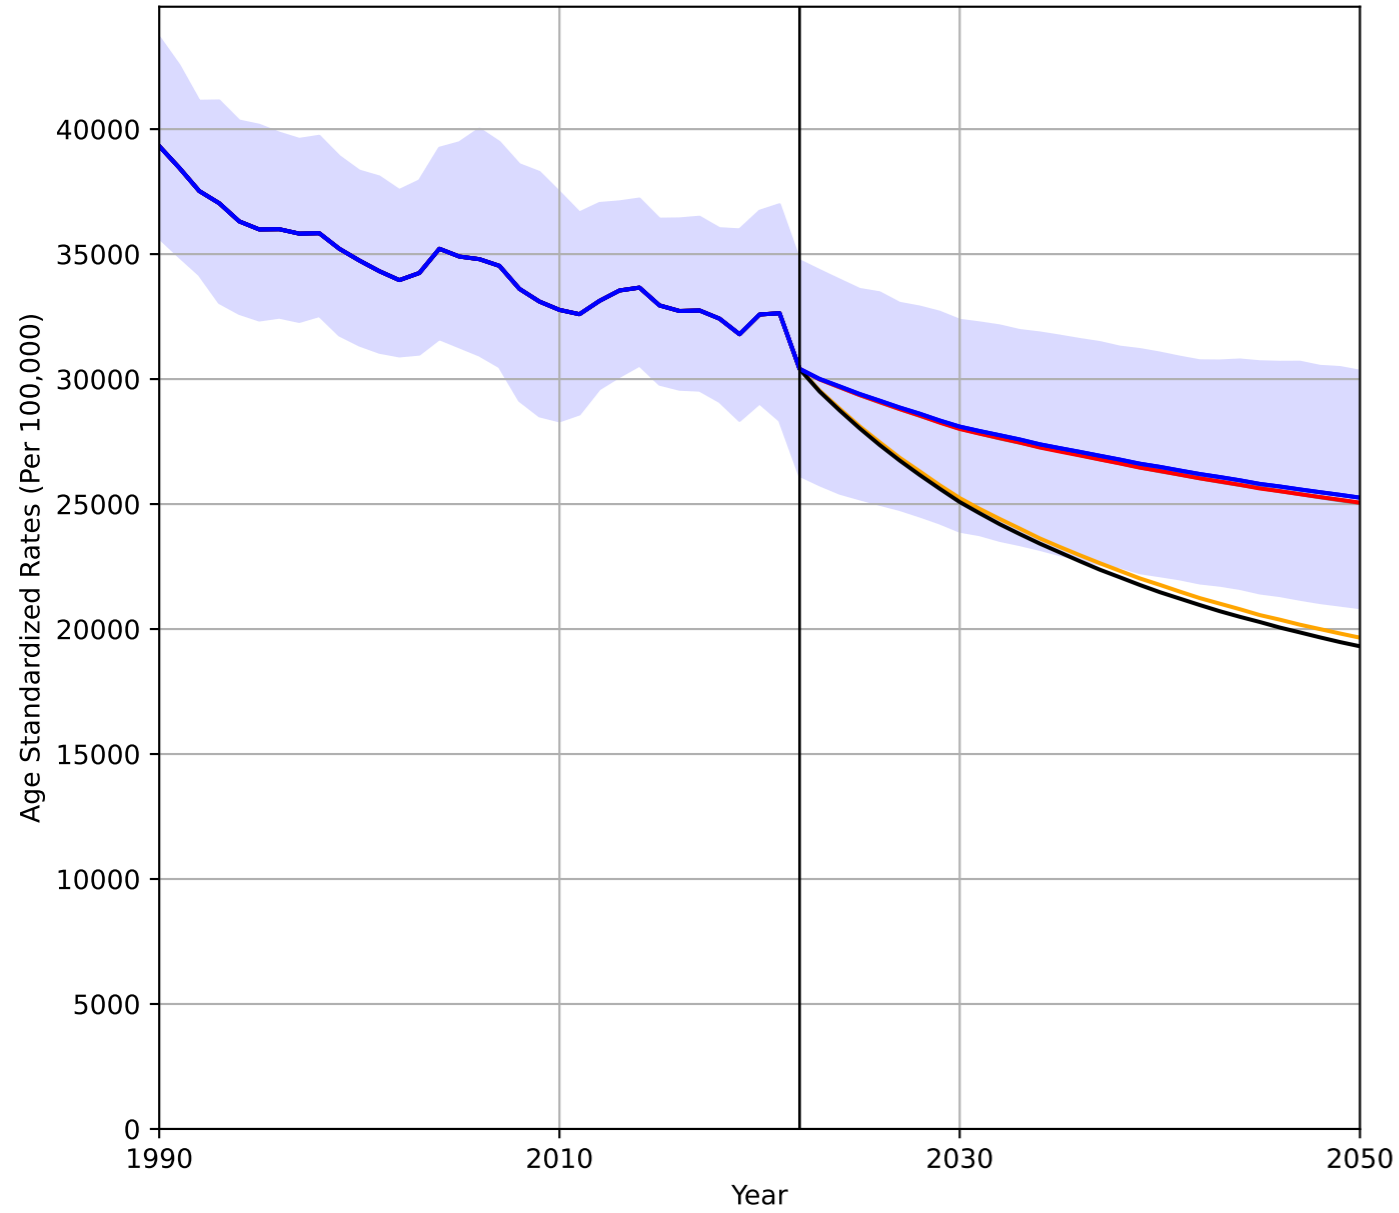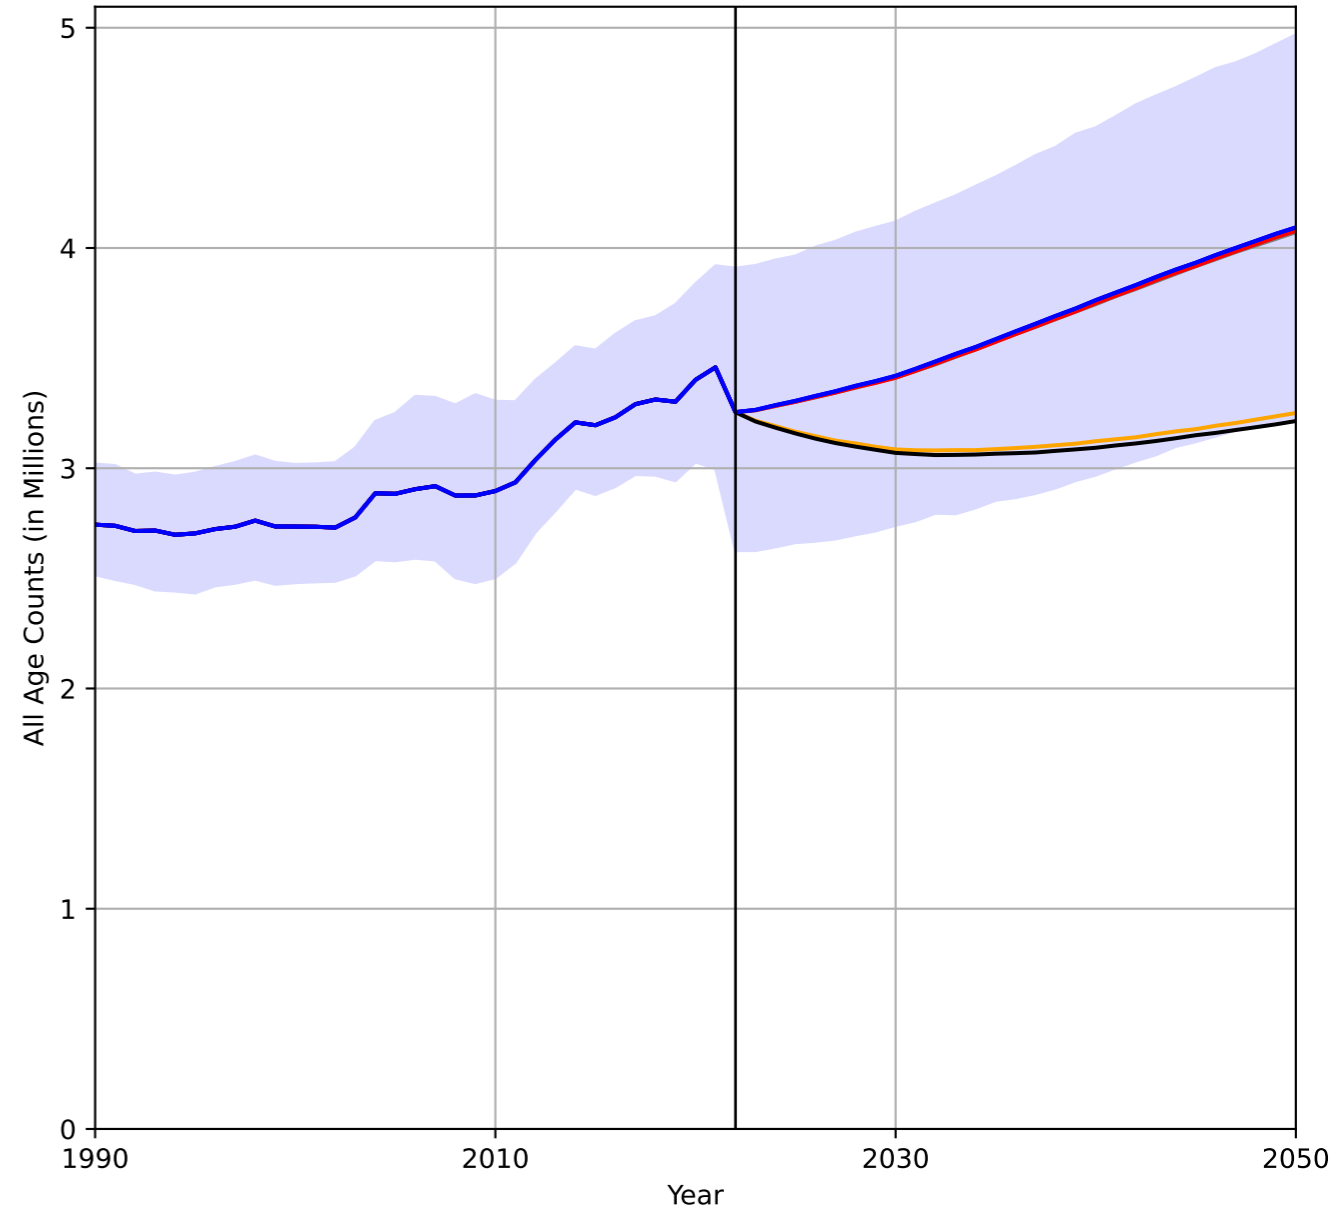

# Grenada

Supplemental Results Figure S10. All-cause age standardised DALY rates (A) and all age DALY counts (B), for the past and for five future scenarios, 1990–2050

1487

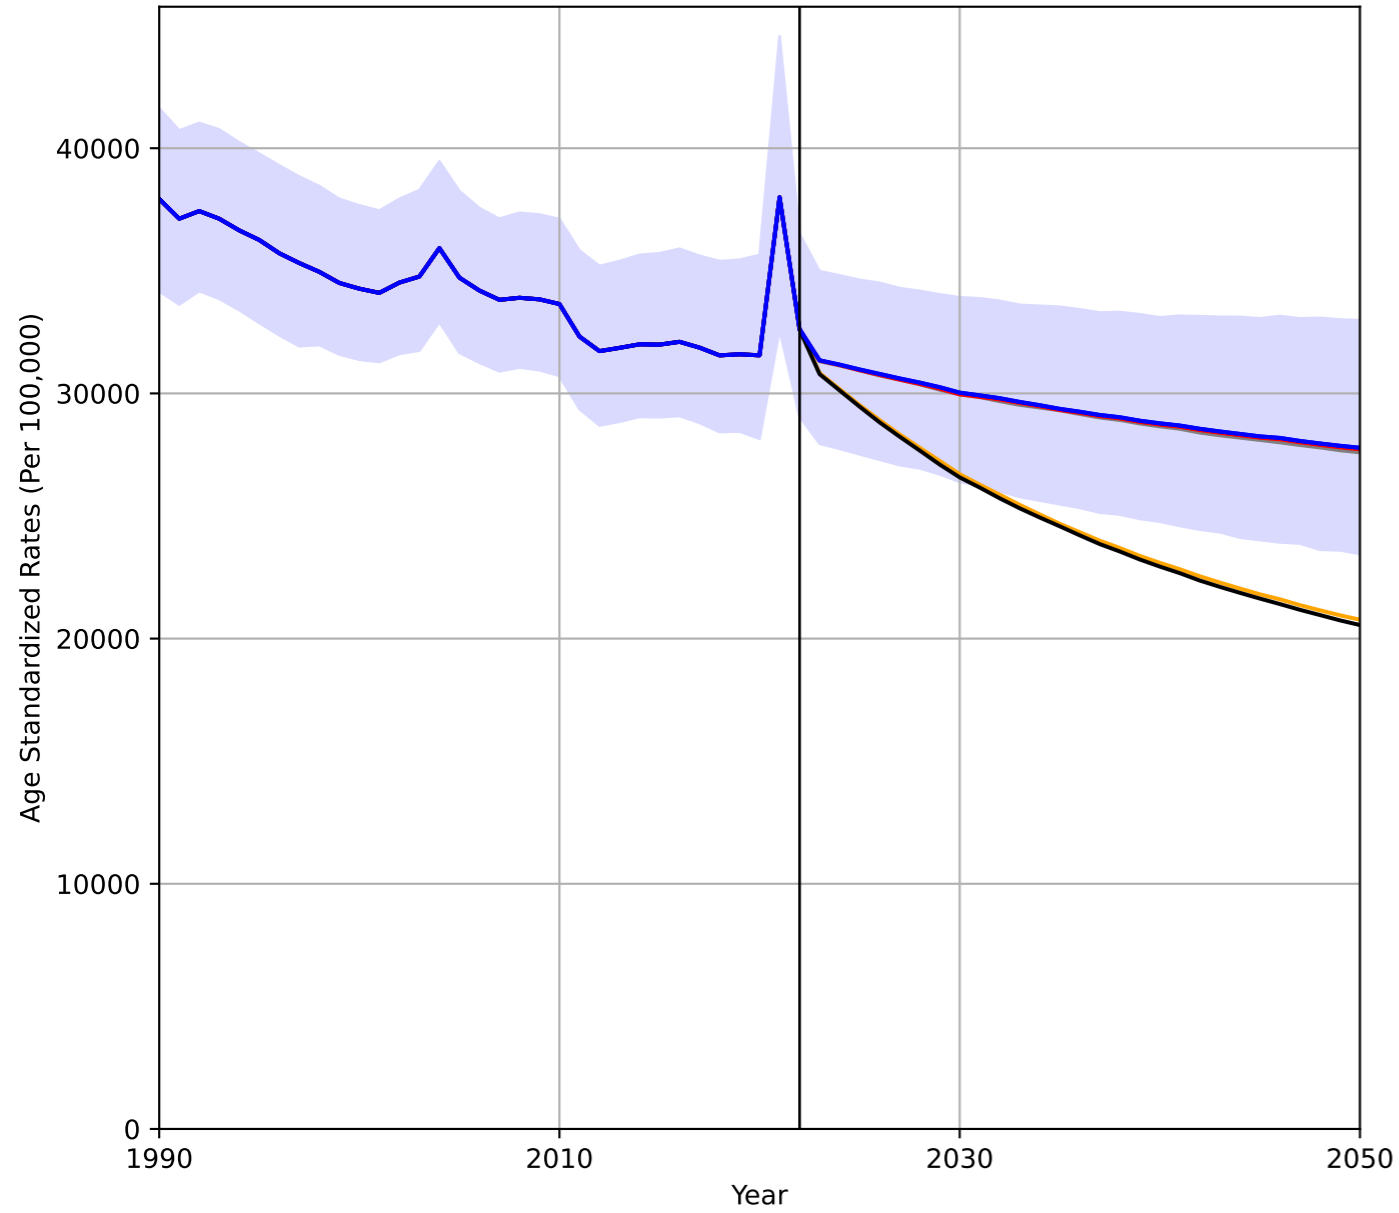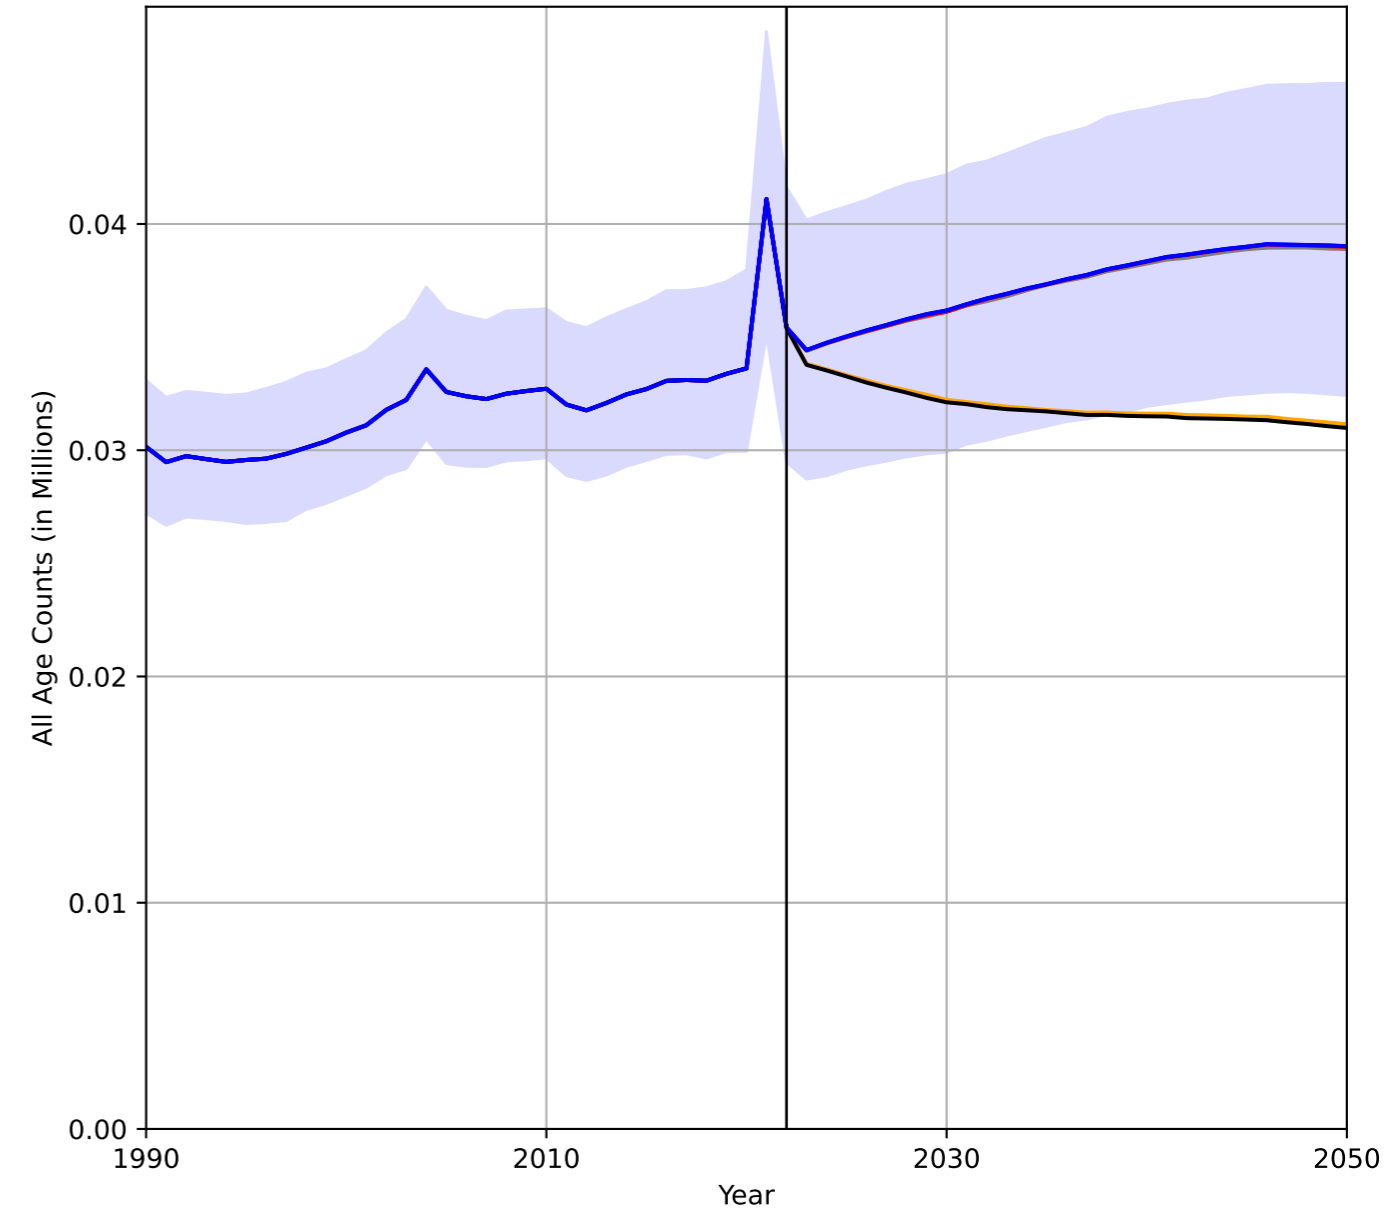



# Guyana

Supplemental Results Figure S10. All-cause age standardised DALY rates (A) and all age DALY counts (B), for the past and for five future scenarios, 1990–2050

1488

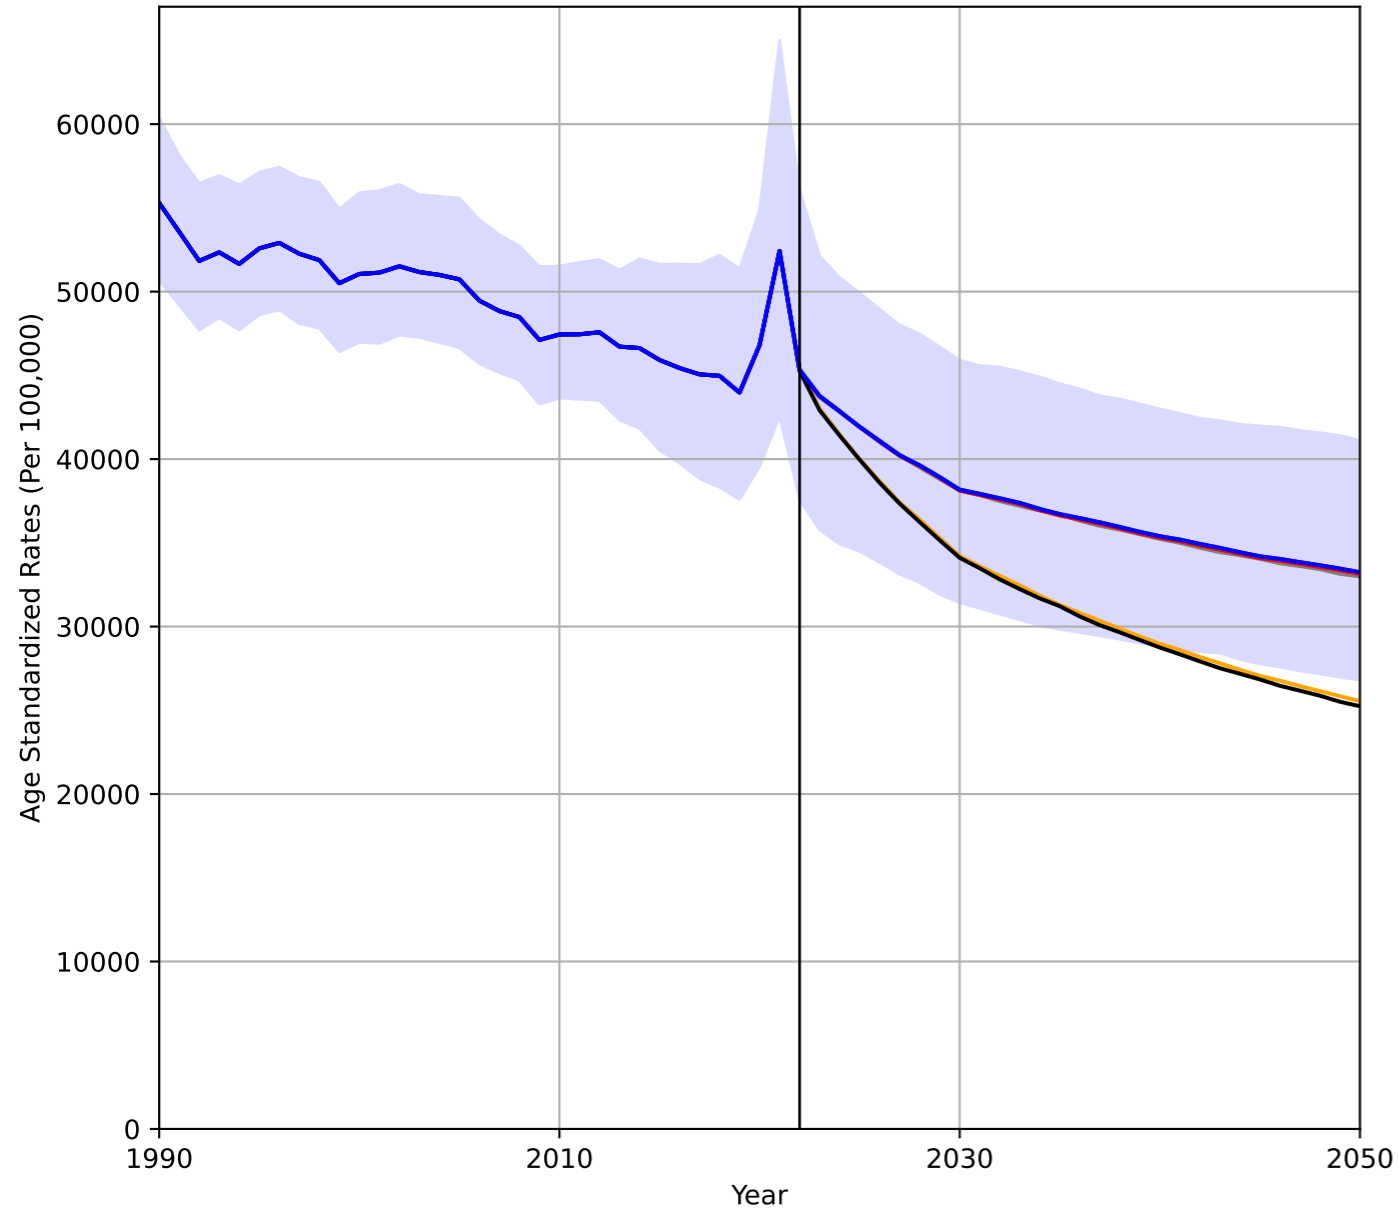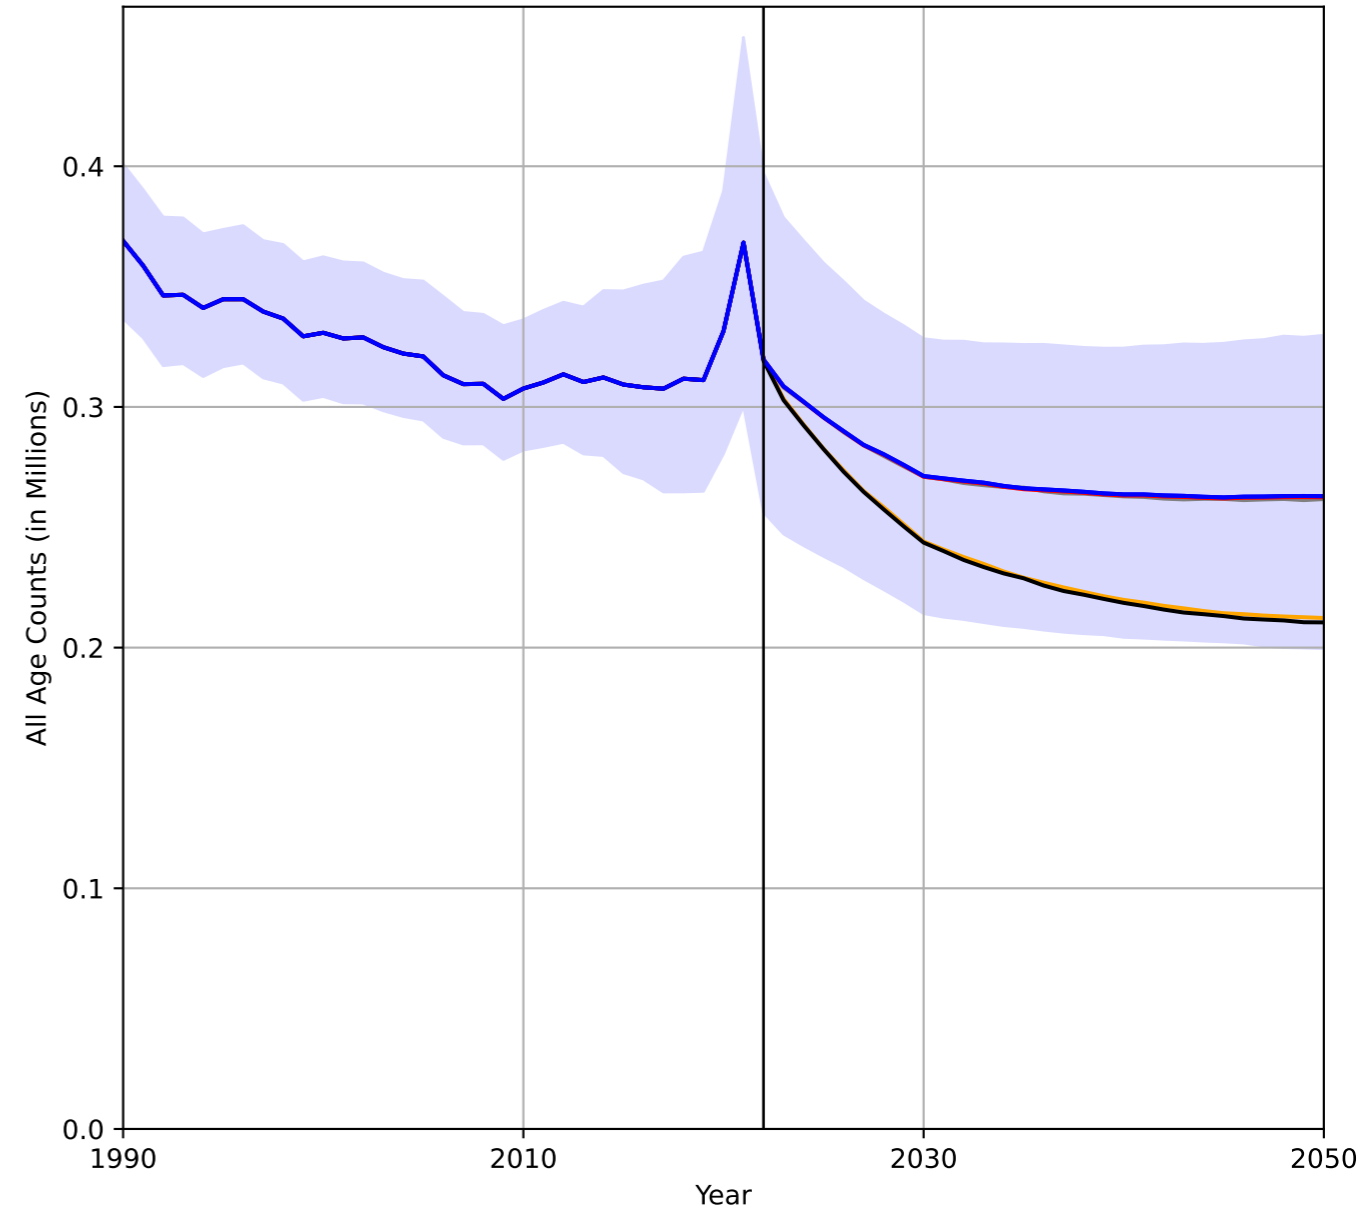

# Haiti

Supplemental Results Figure S10. All-cause age standardised DALY rates (A) and all age DALY counts (B), for the past and for five future scenarios, 1990–2050

1489

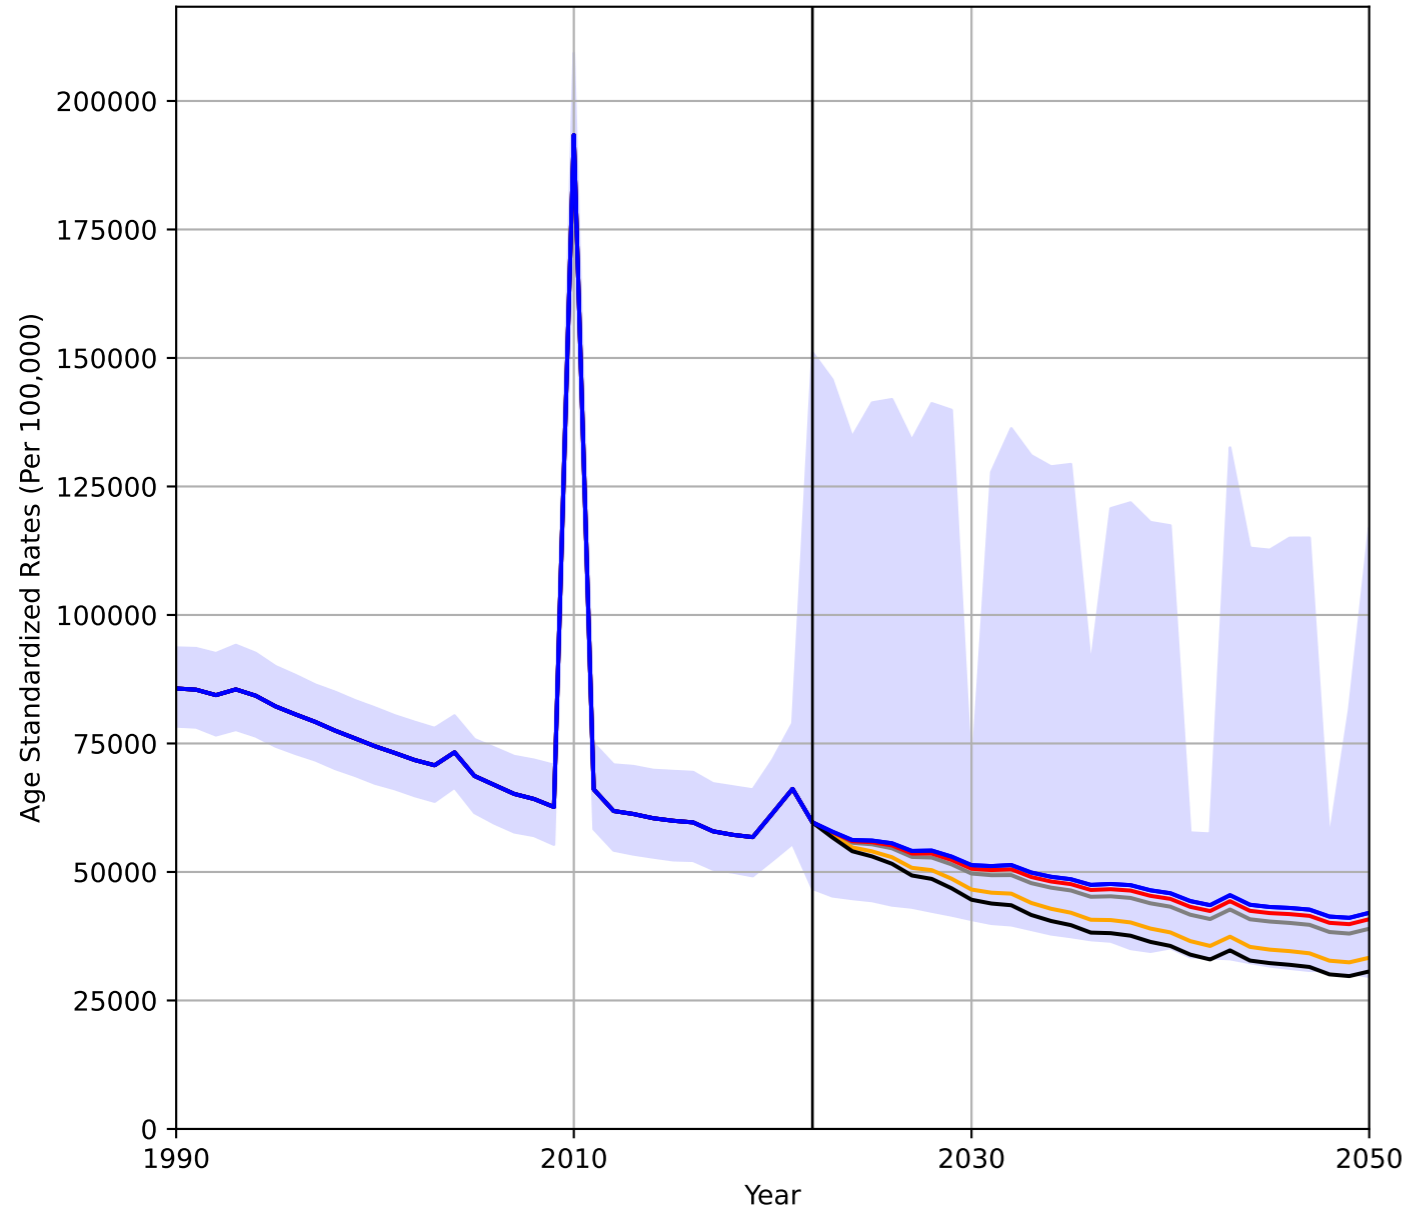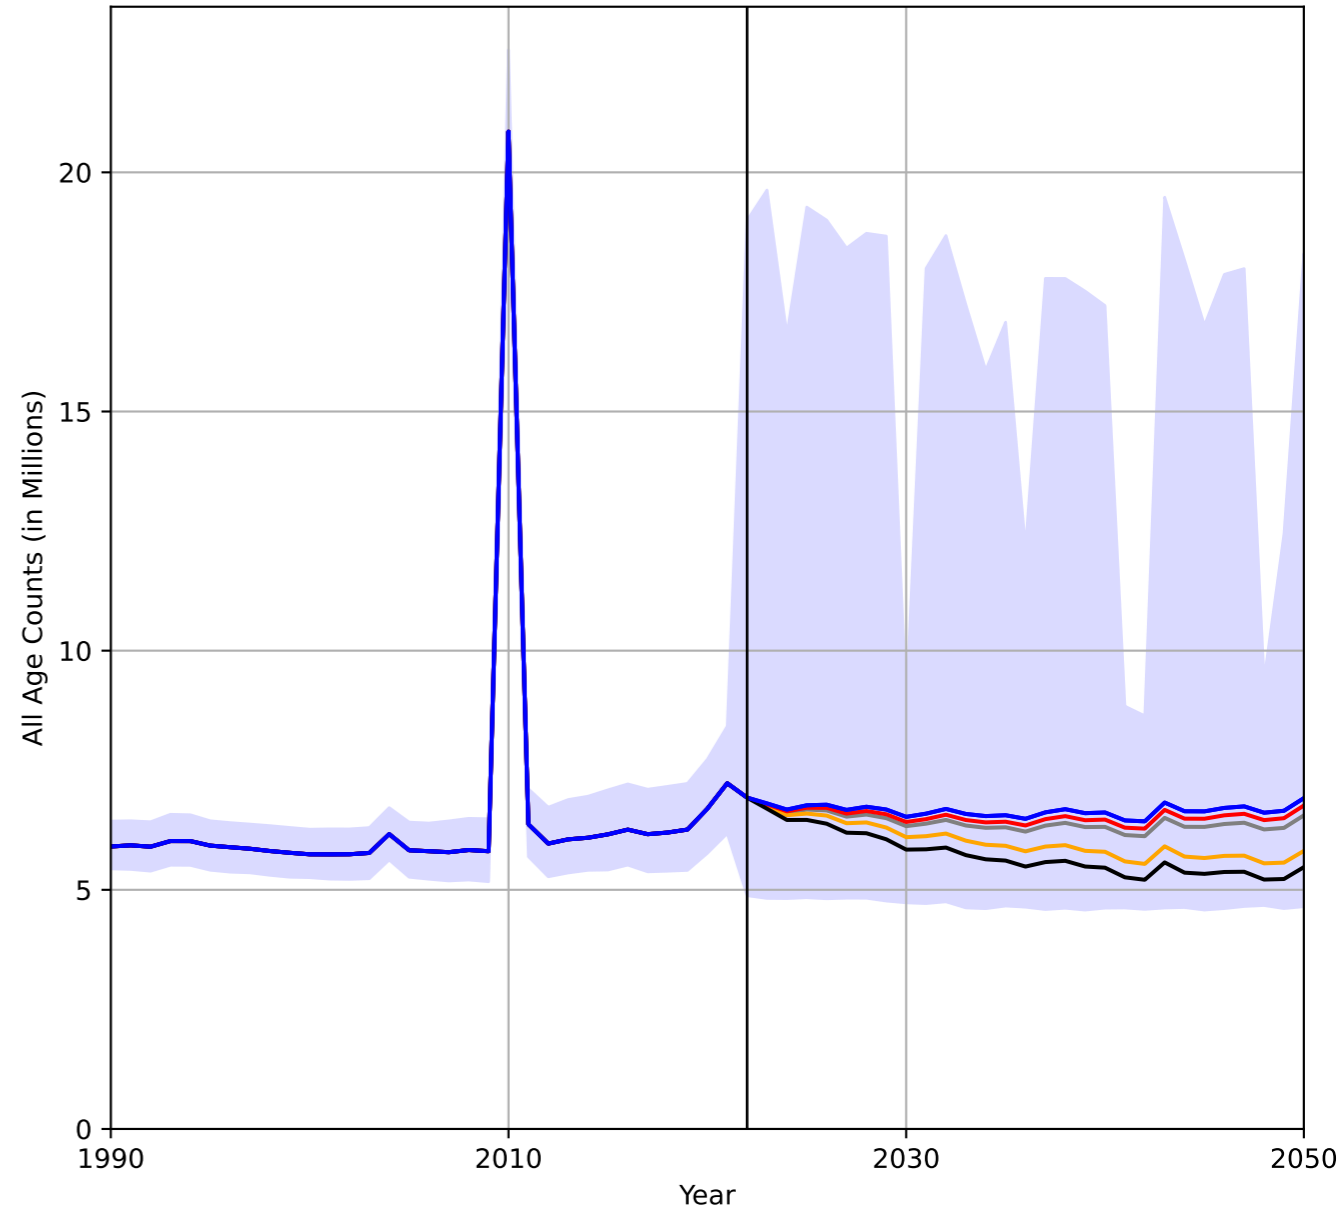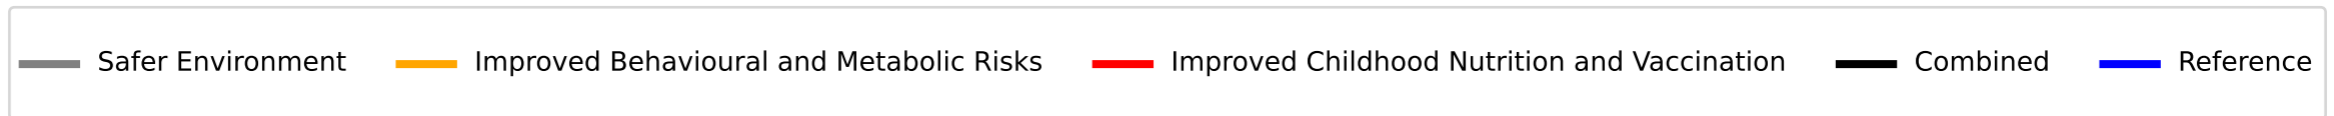

# Jamaica

Supplemental Results Figure S10. All-cause age standardised DALY rates (A) and all age DALY counts (B), for the past and for five future scenarios, 1990–2050

1490

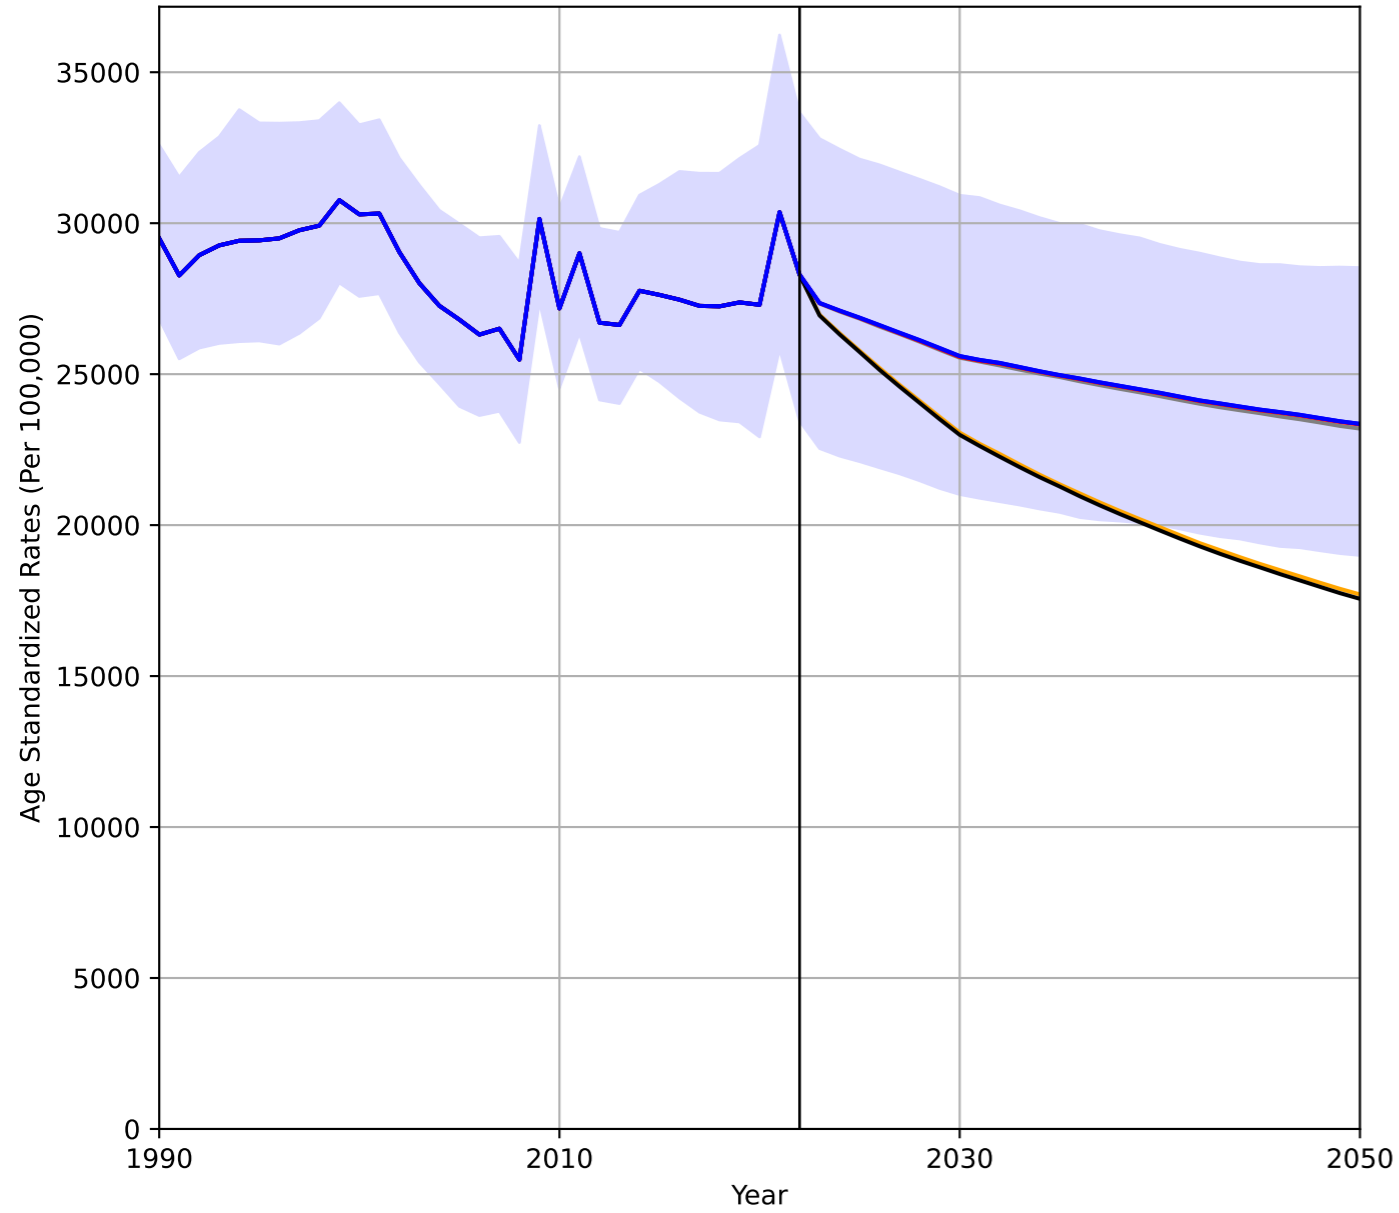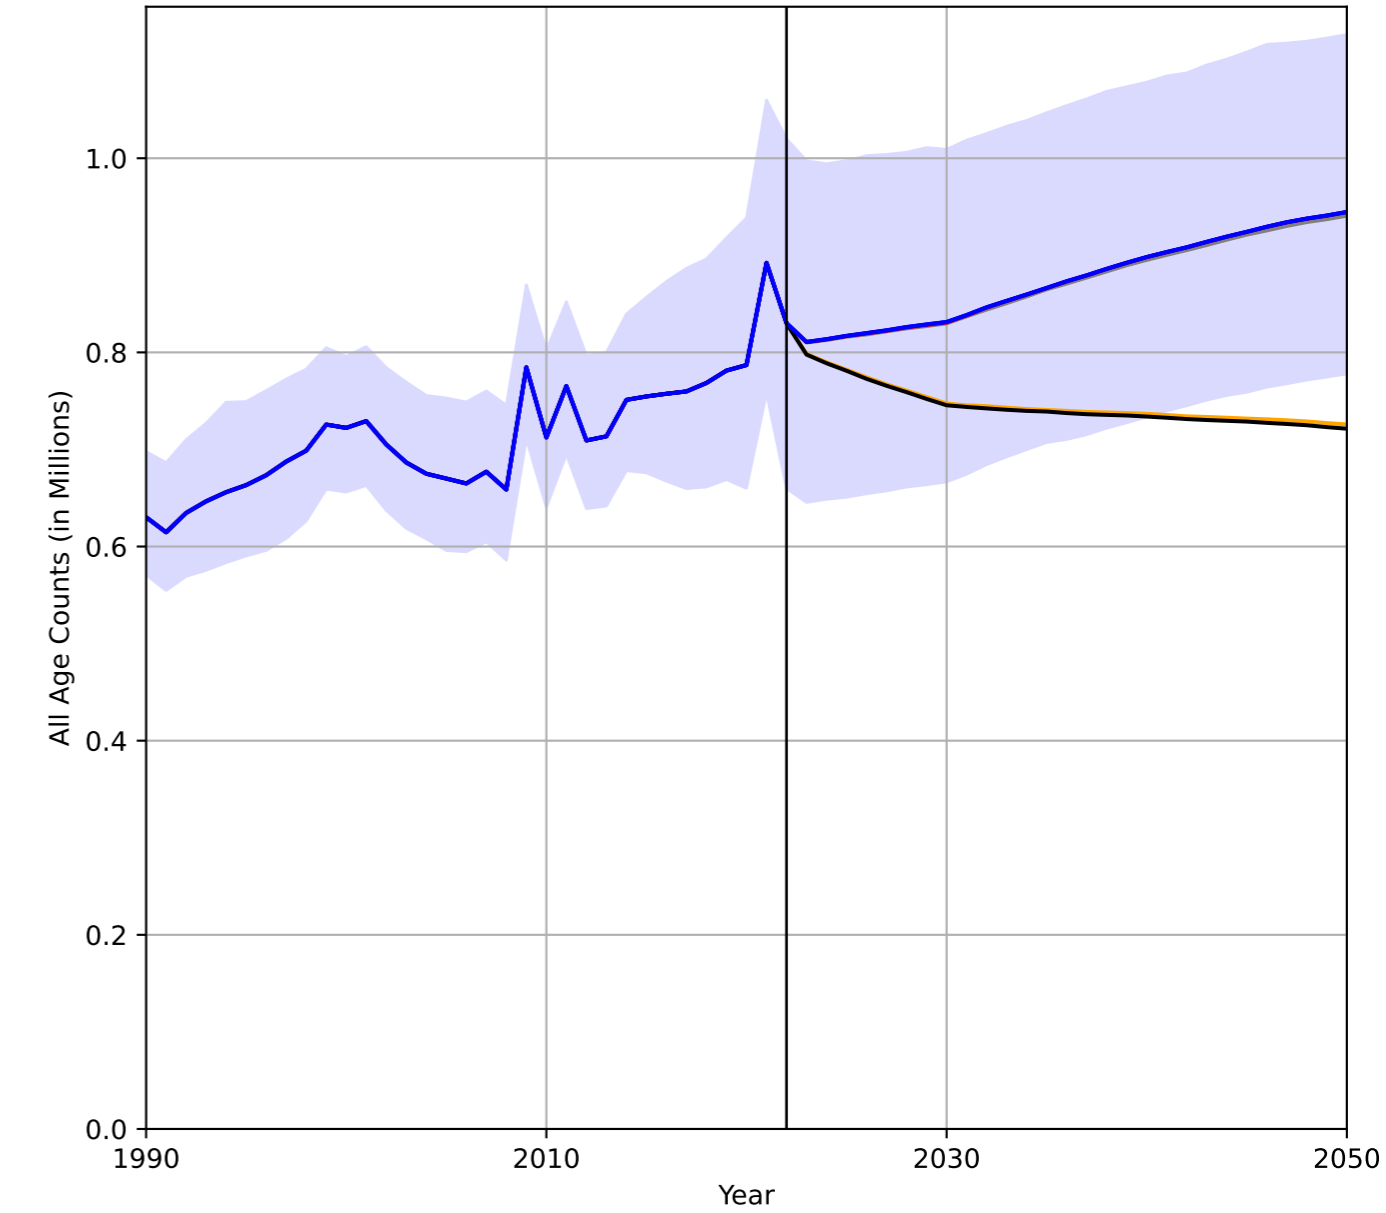

# Puerto Rico

Supplemental Results Figure S10. All-cause age standardised DALY rates (A) and all age DALY counts (B), for the past and for five future scenarios, 1990–2050

1491

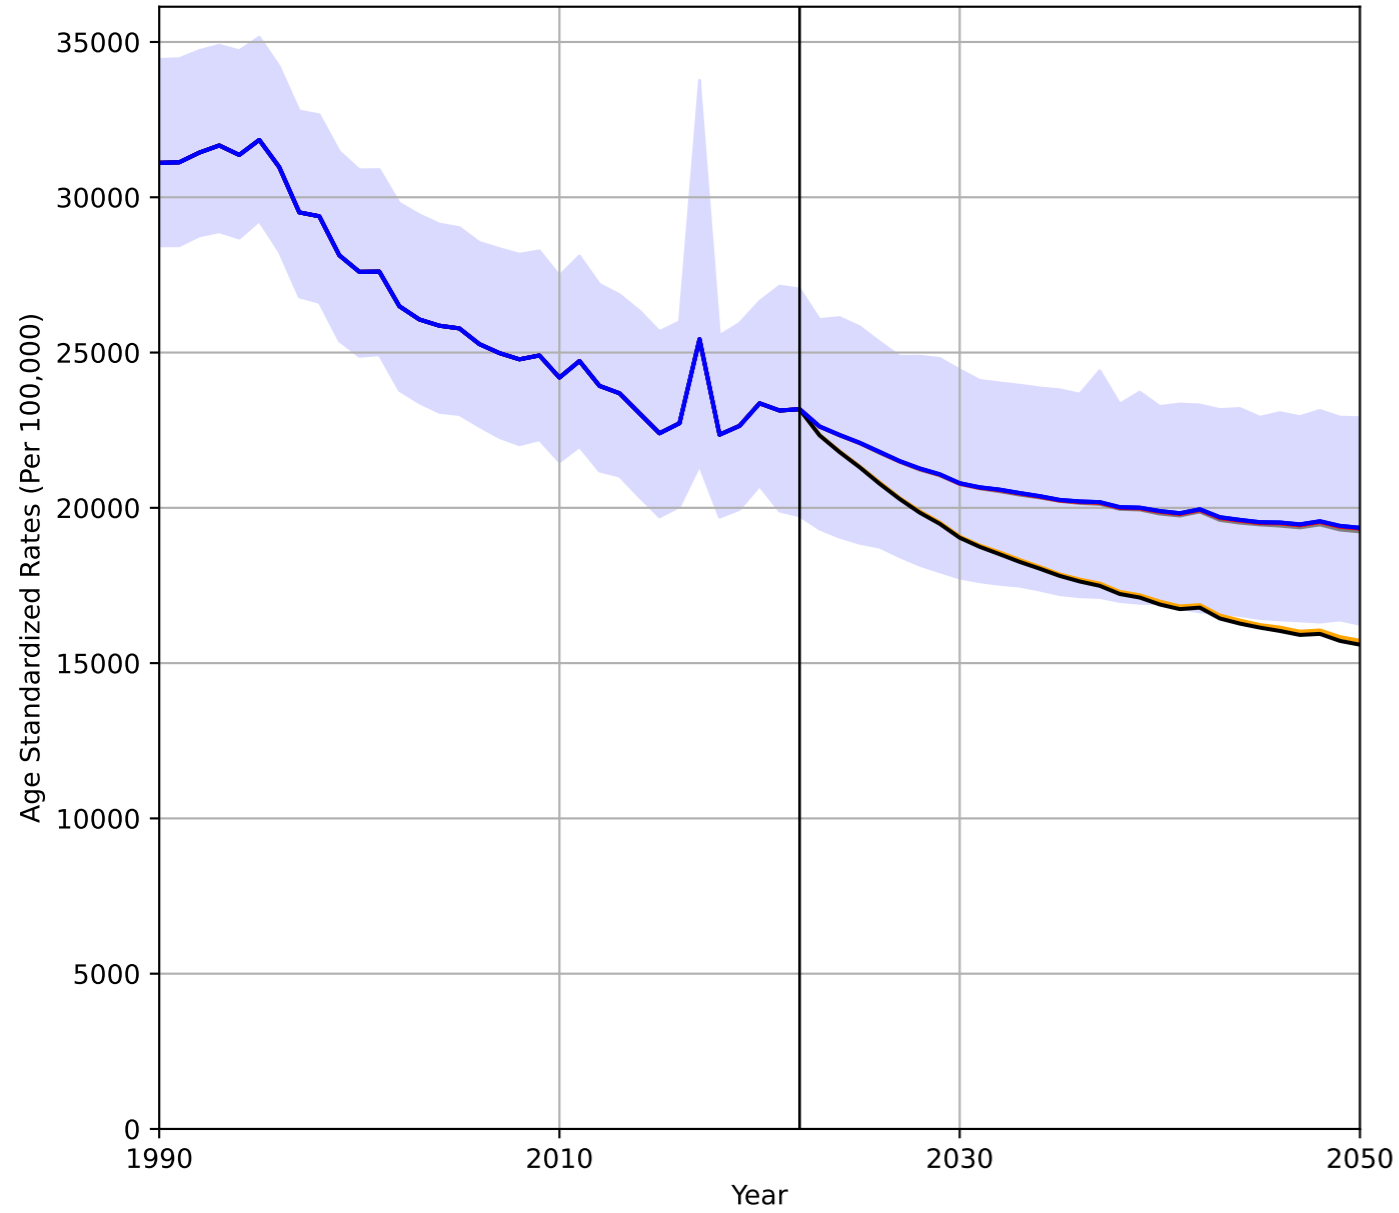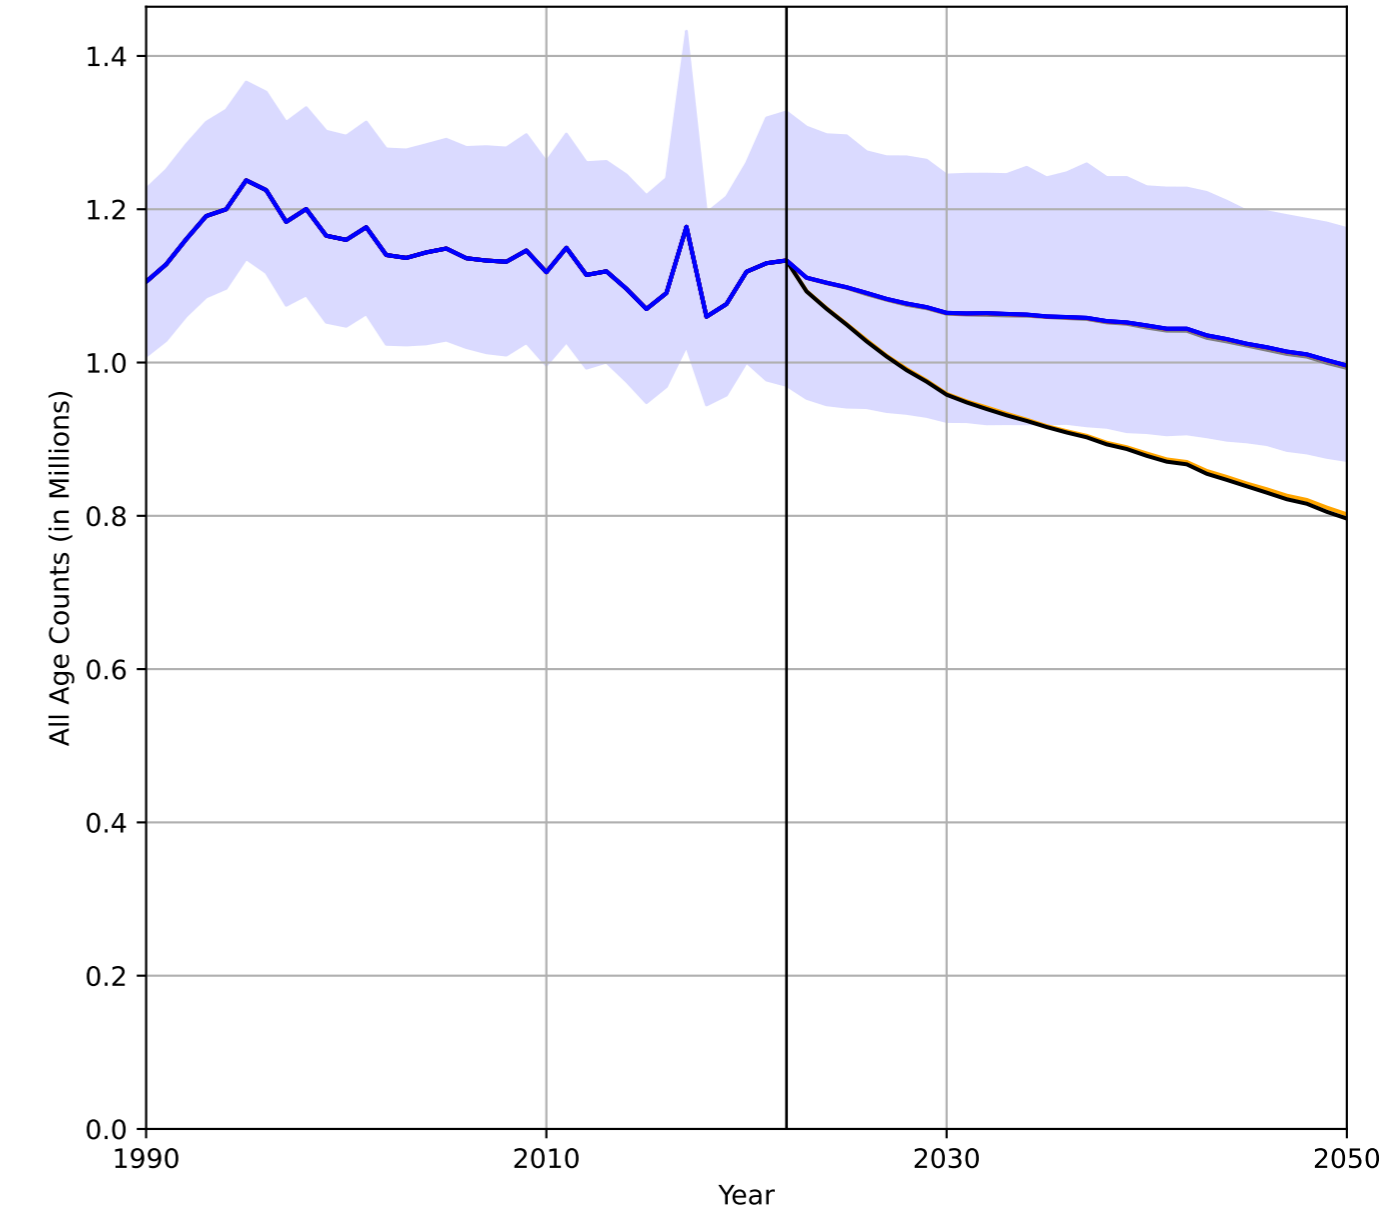

# Saint Kitts And Nevis

1492

Supplemental Results Figure S10. All-cause age standardised DALY rates (A) and all age DALY counts (B), for the past and for five future scenarios, 1990–2050

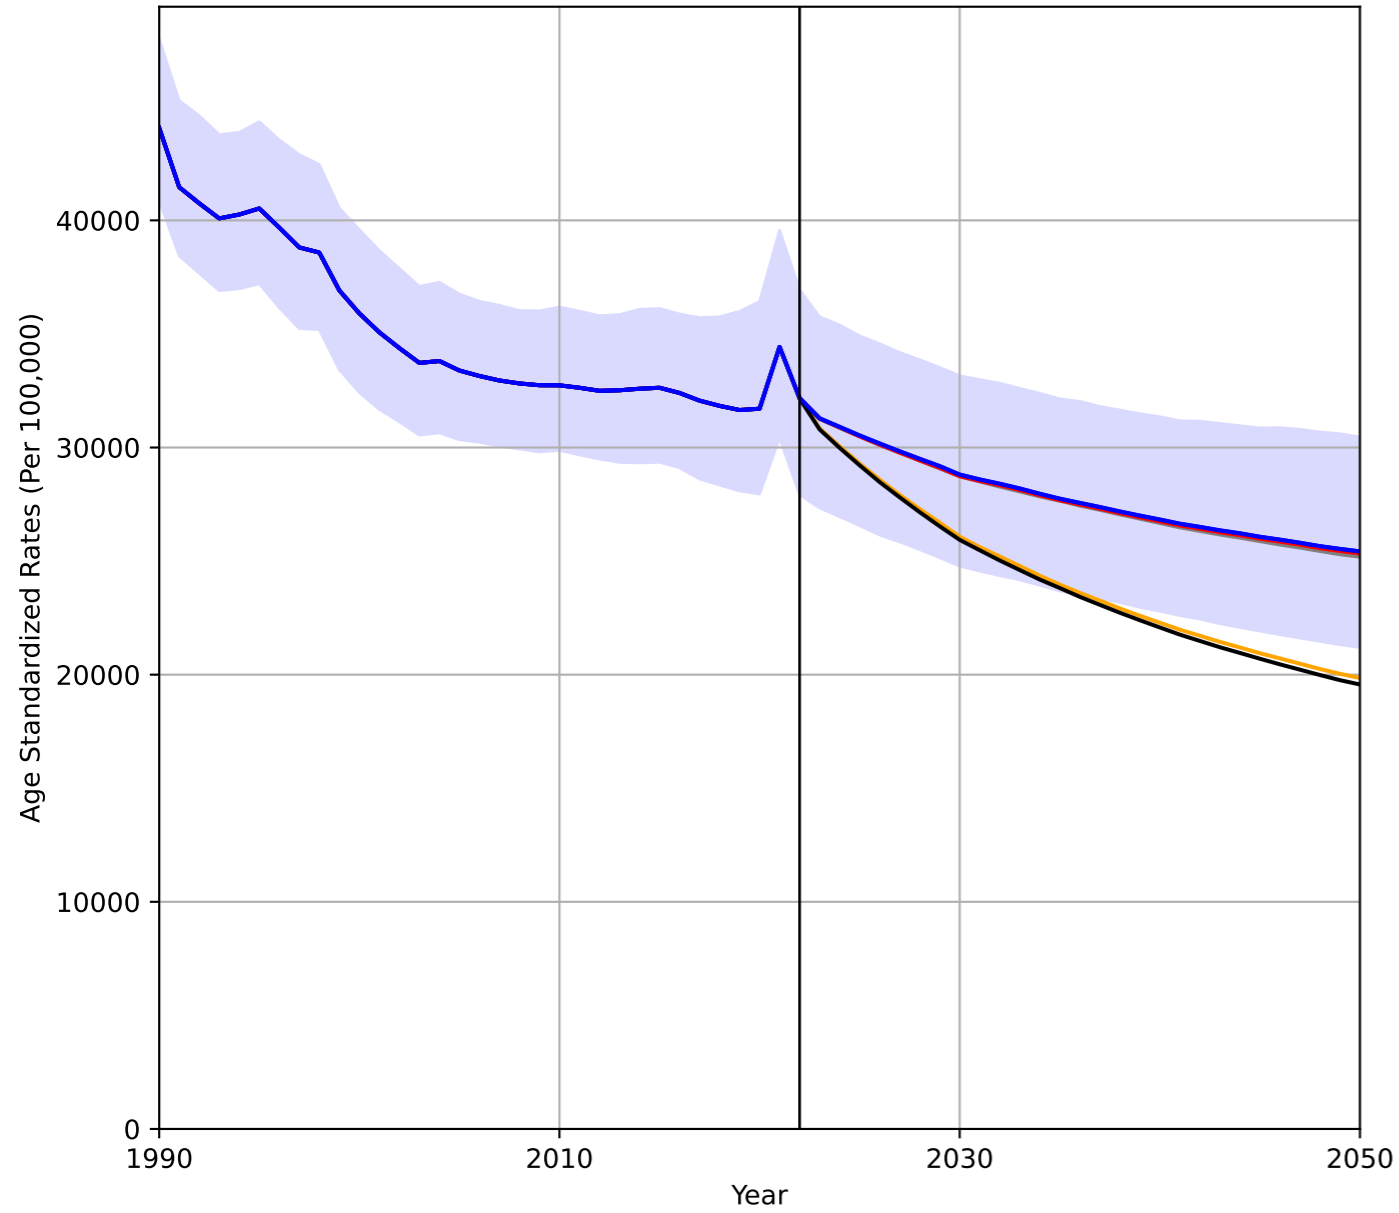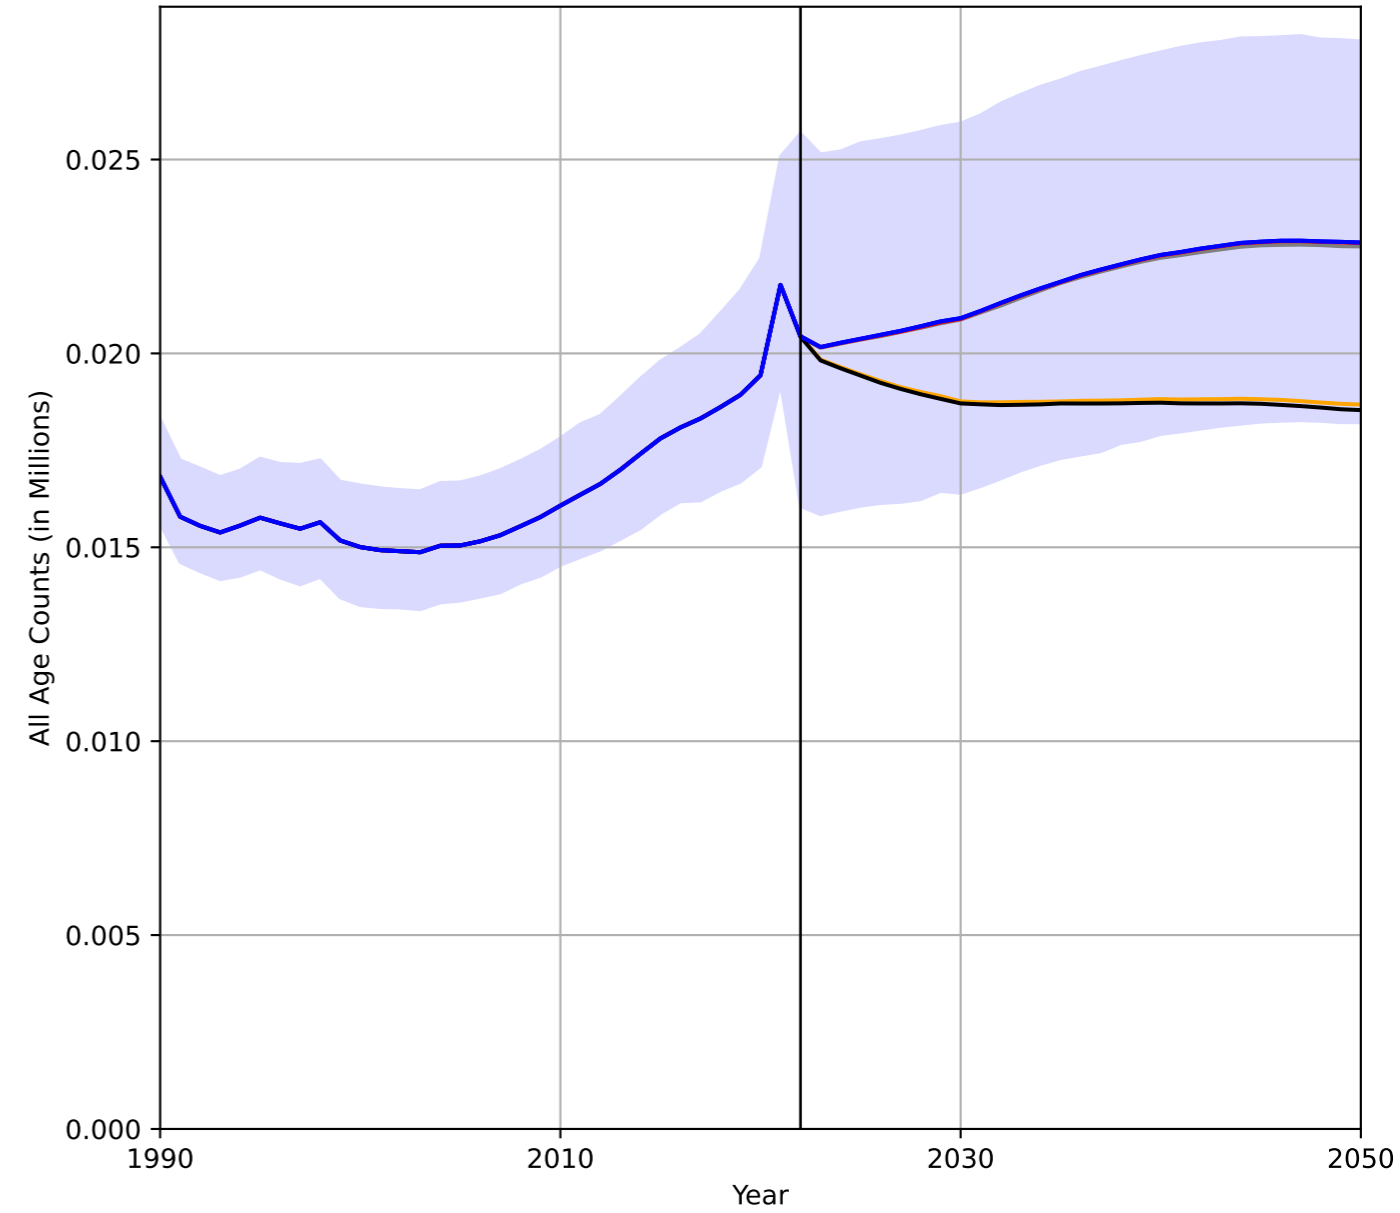

# Saint Lucia

Supplemental Results Figure S10. All-cause age standardised DALY rates (A) and all age DALY counts (B), for the past and for five future scenarios, 1990–2050

1493

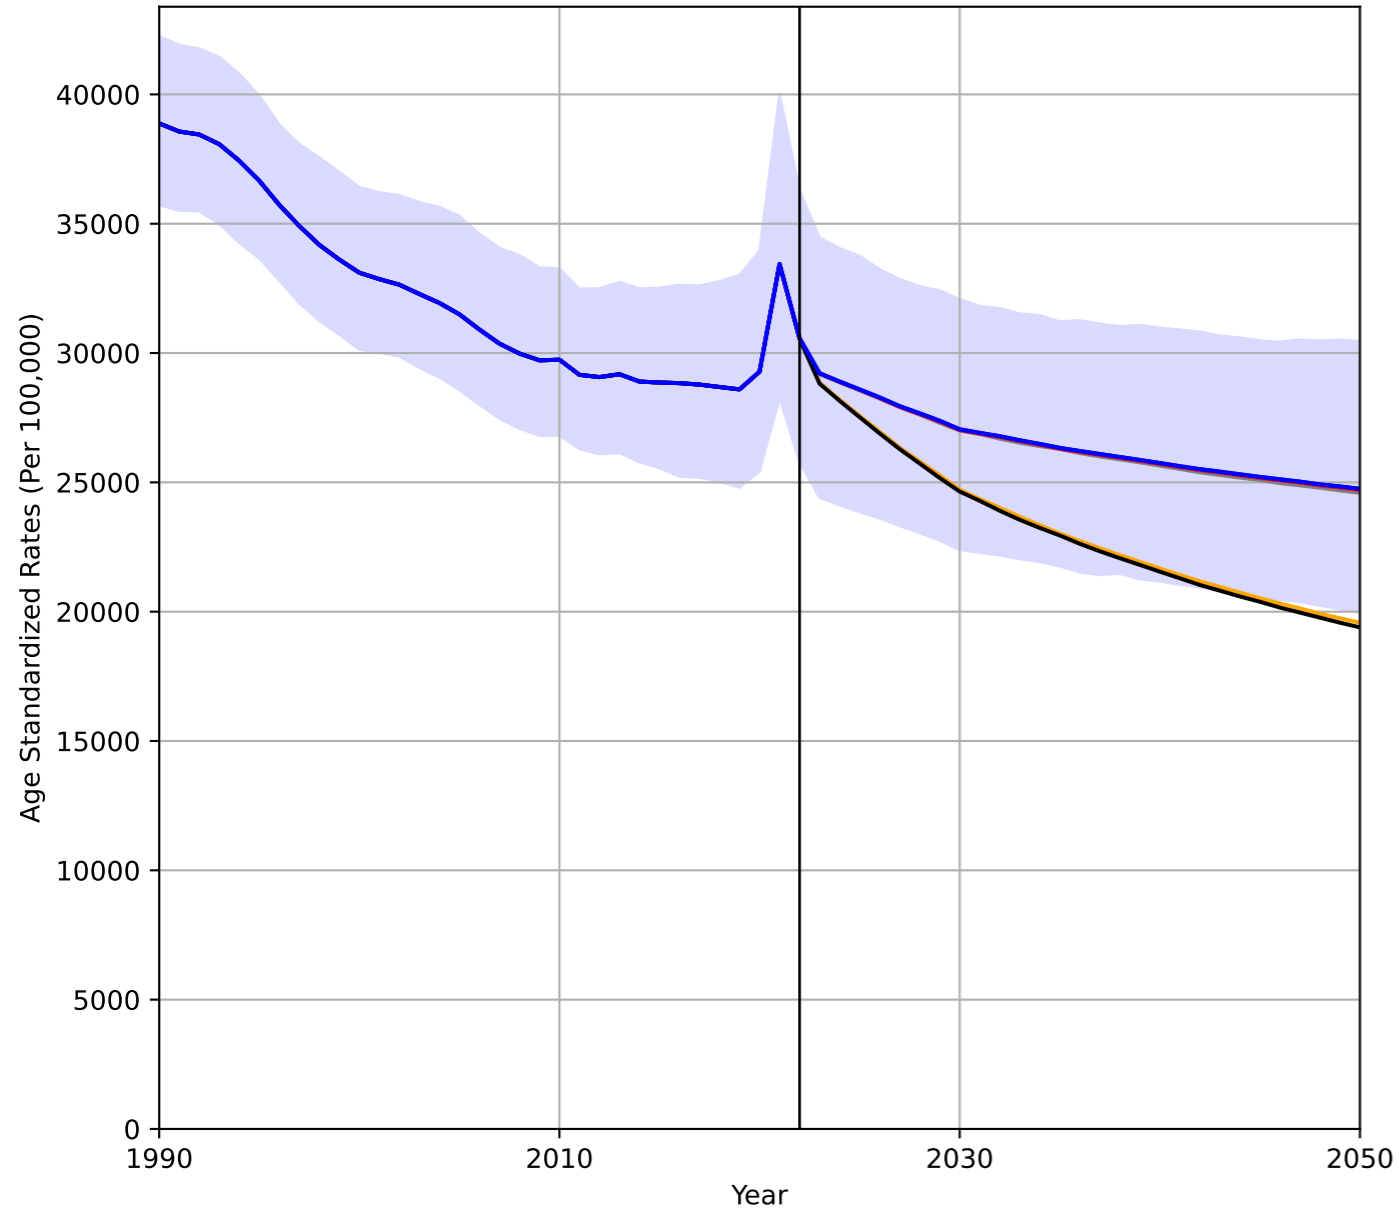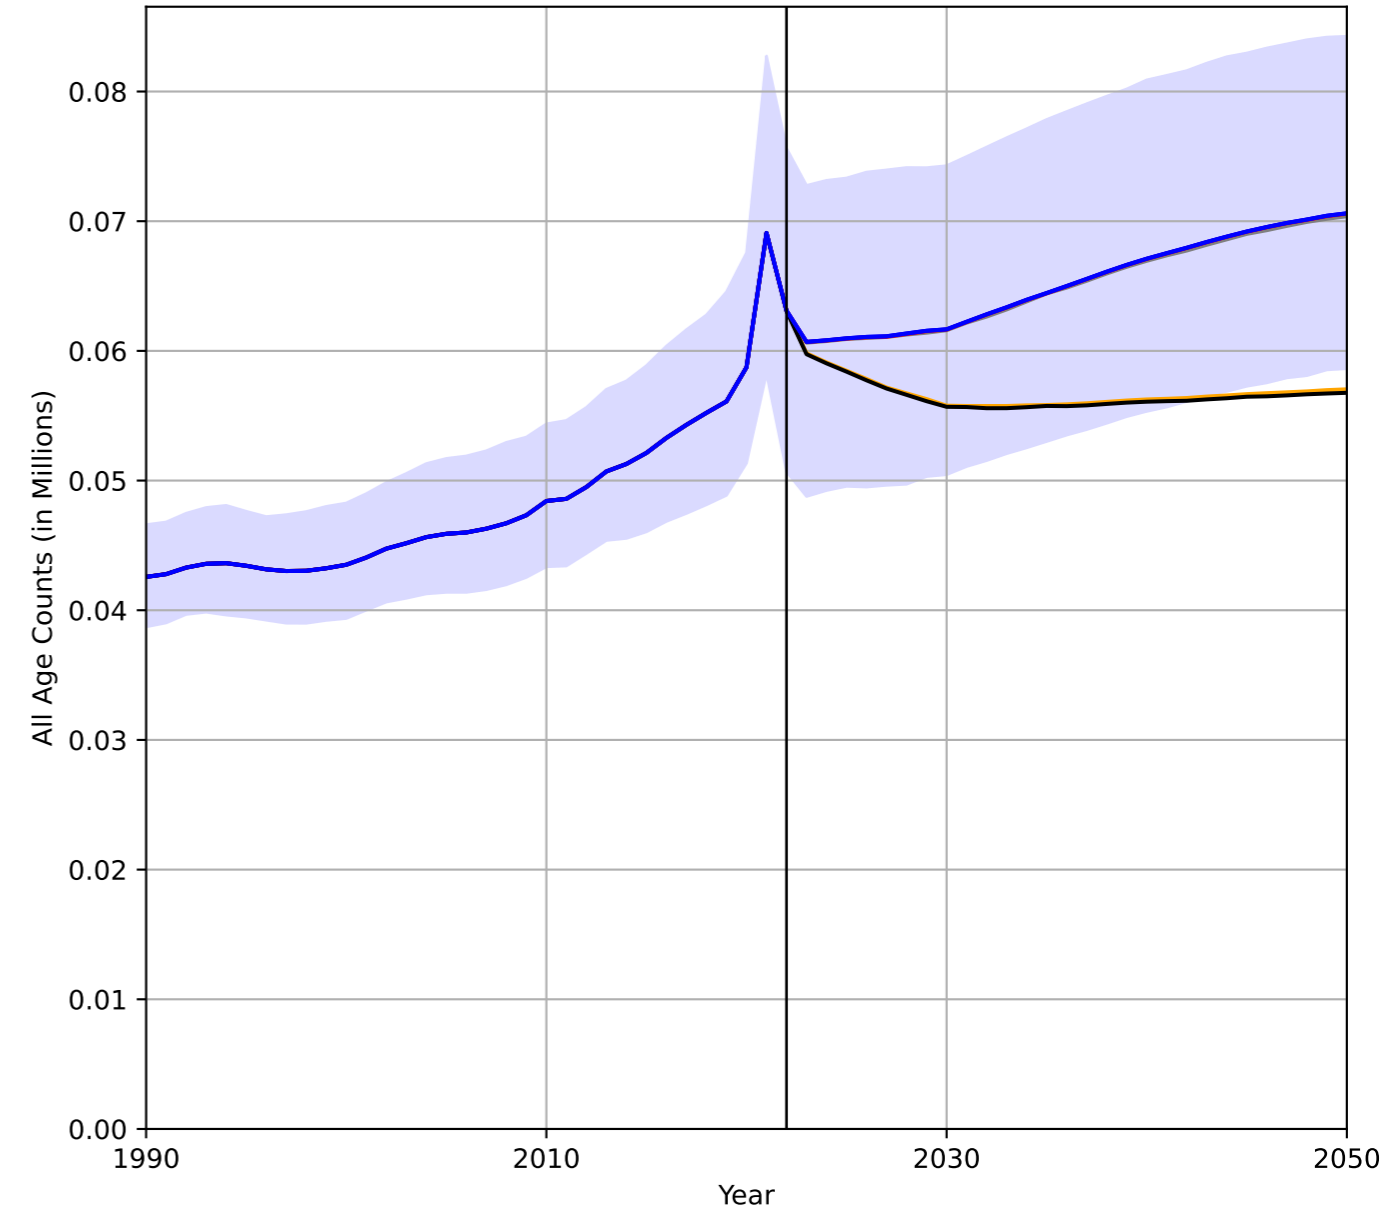

# Saint Vincent And The Grenadines

Supplemental Results Figure S10. All-cause age standardised DALY rates (A) and all age DALY counts (B), for the past and for five future scenarios, 1990–2050

1494

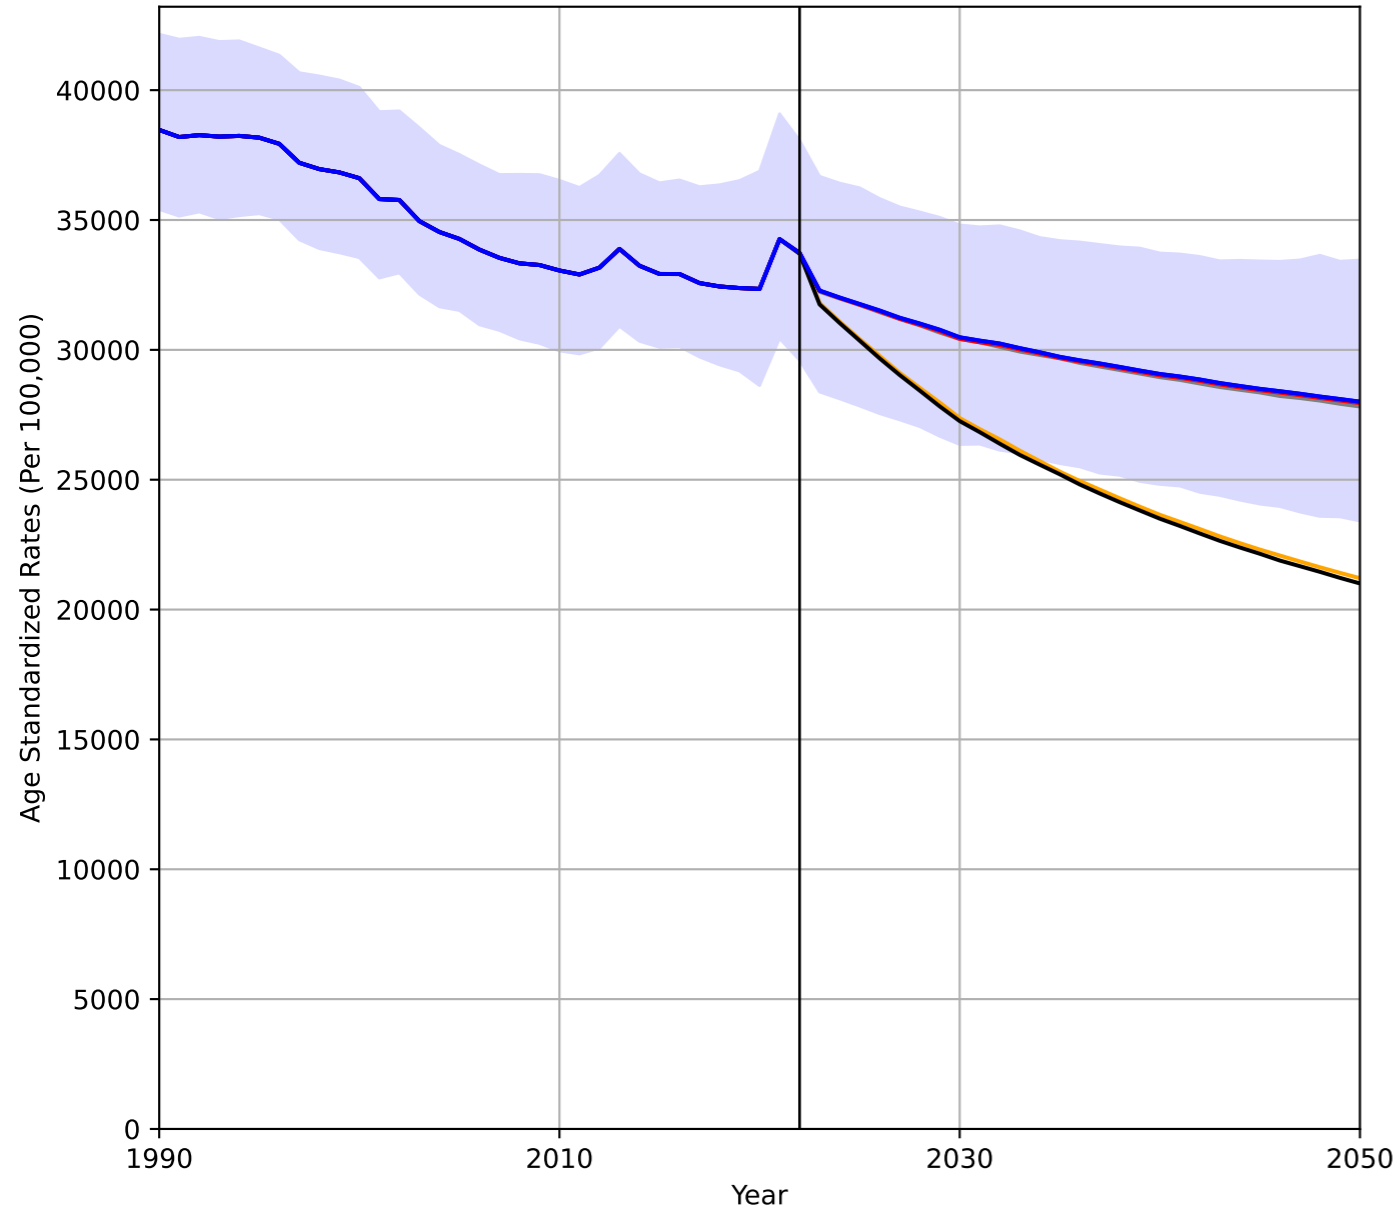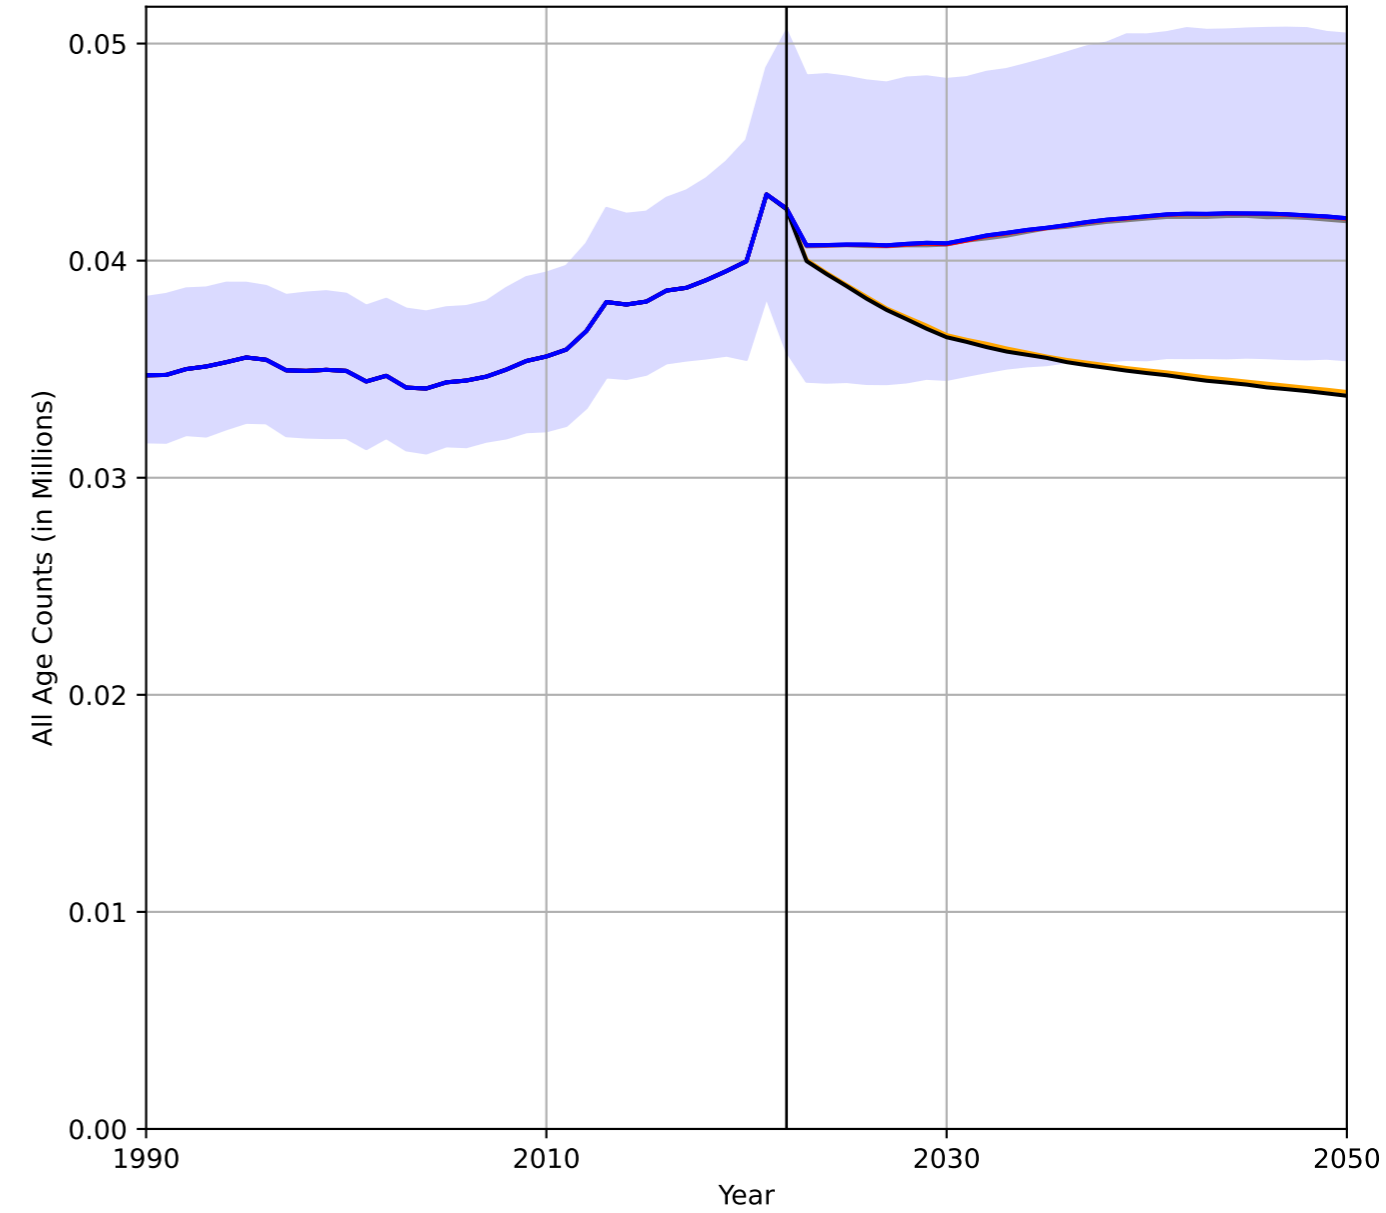

# Suriname

Supplemental Results Figure S10. All-cause age standardised DALY rates (A) and all age DALY counts (B), for the past and for five future scenarios, 1990–2050

1495

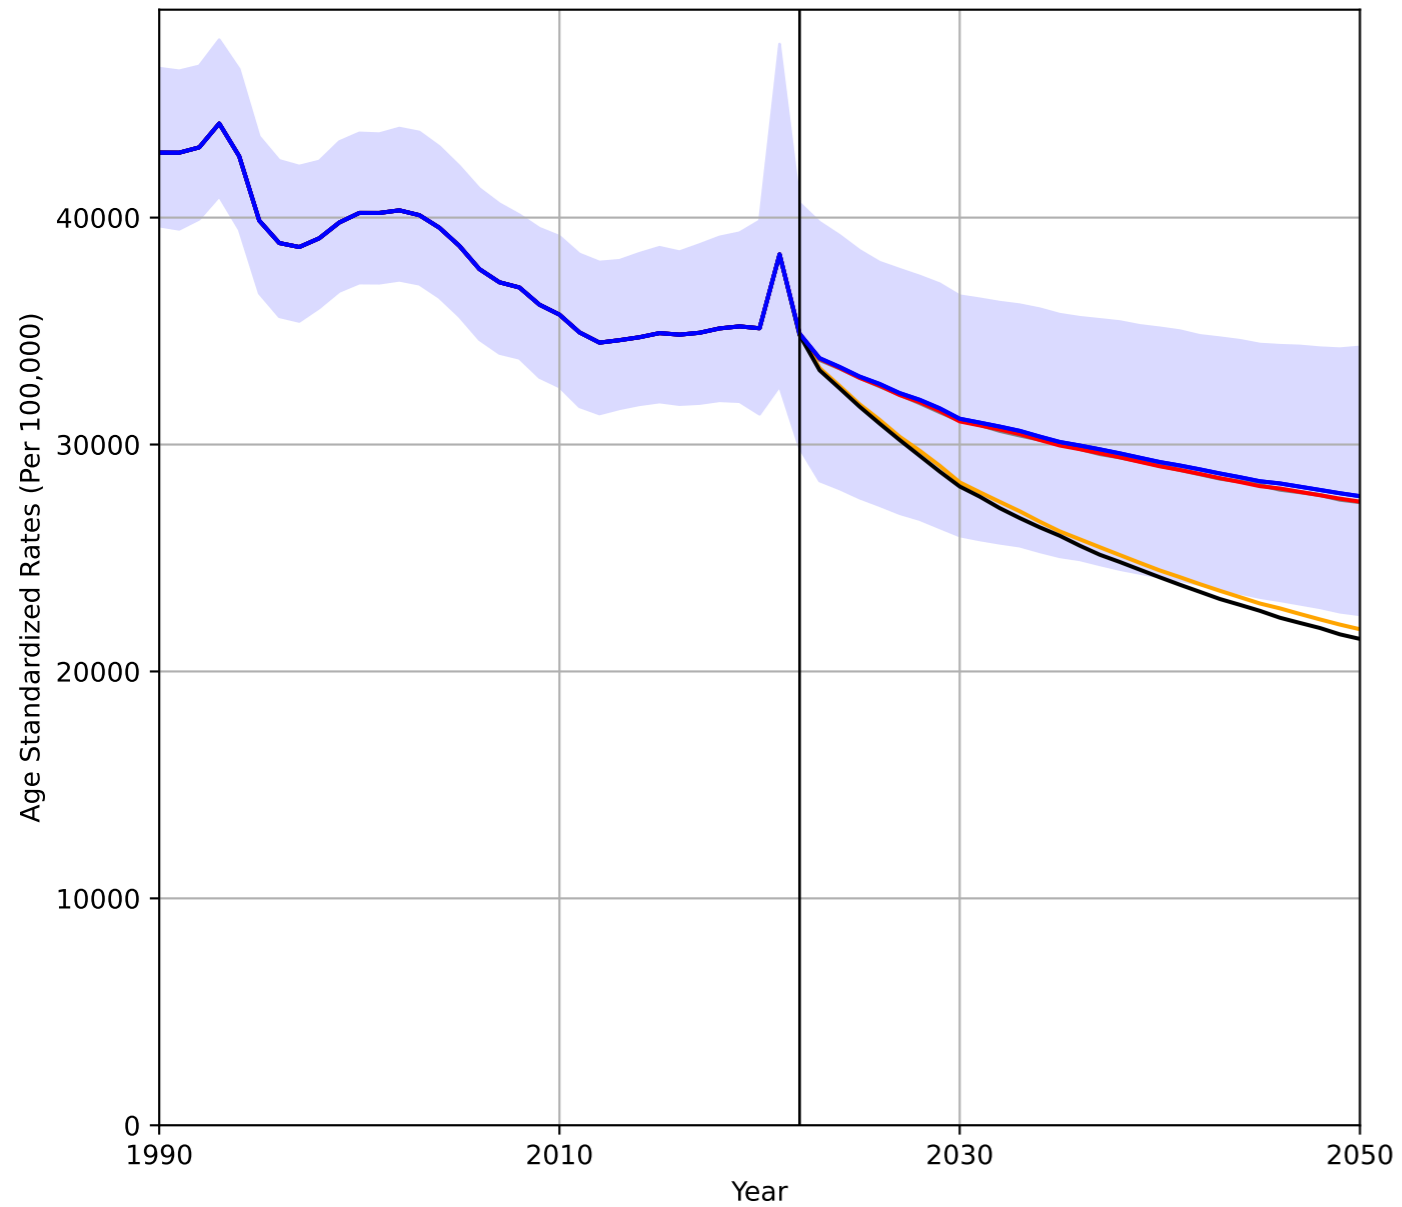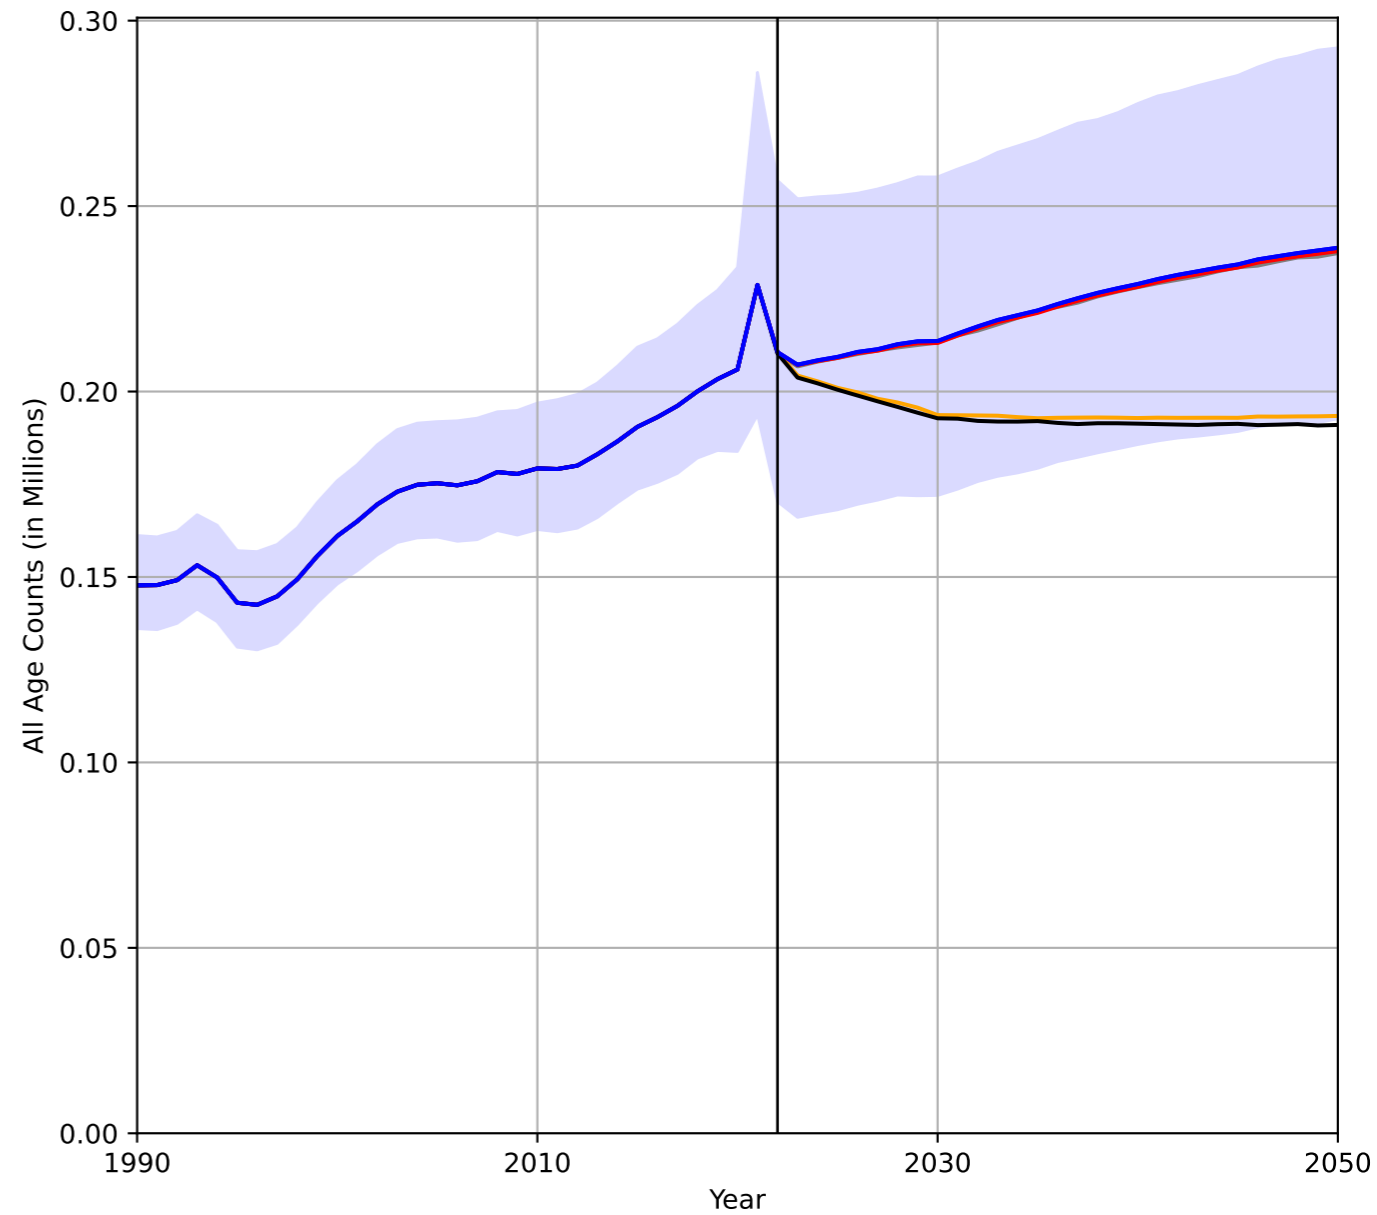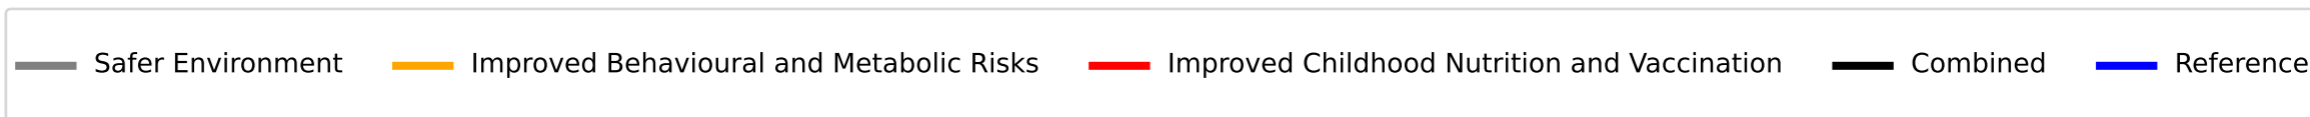



# Trinidad And Tobago

Supplemental Results Figure S10. All-cause age standardised DALY rates (A) and all age DALY counts (B), for the past and for five future scenarios, 1990–2050

1496

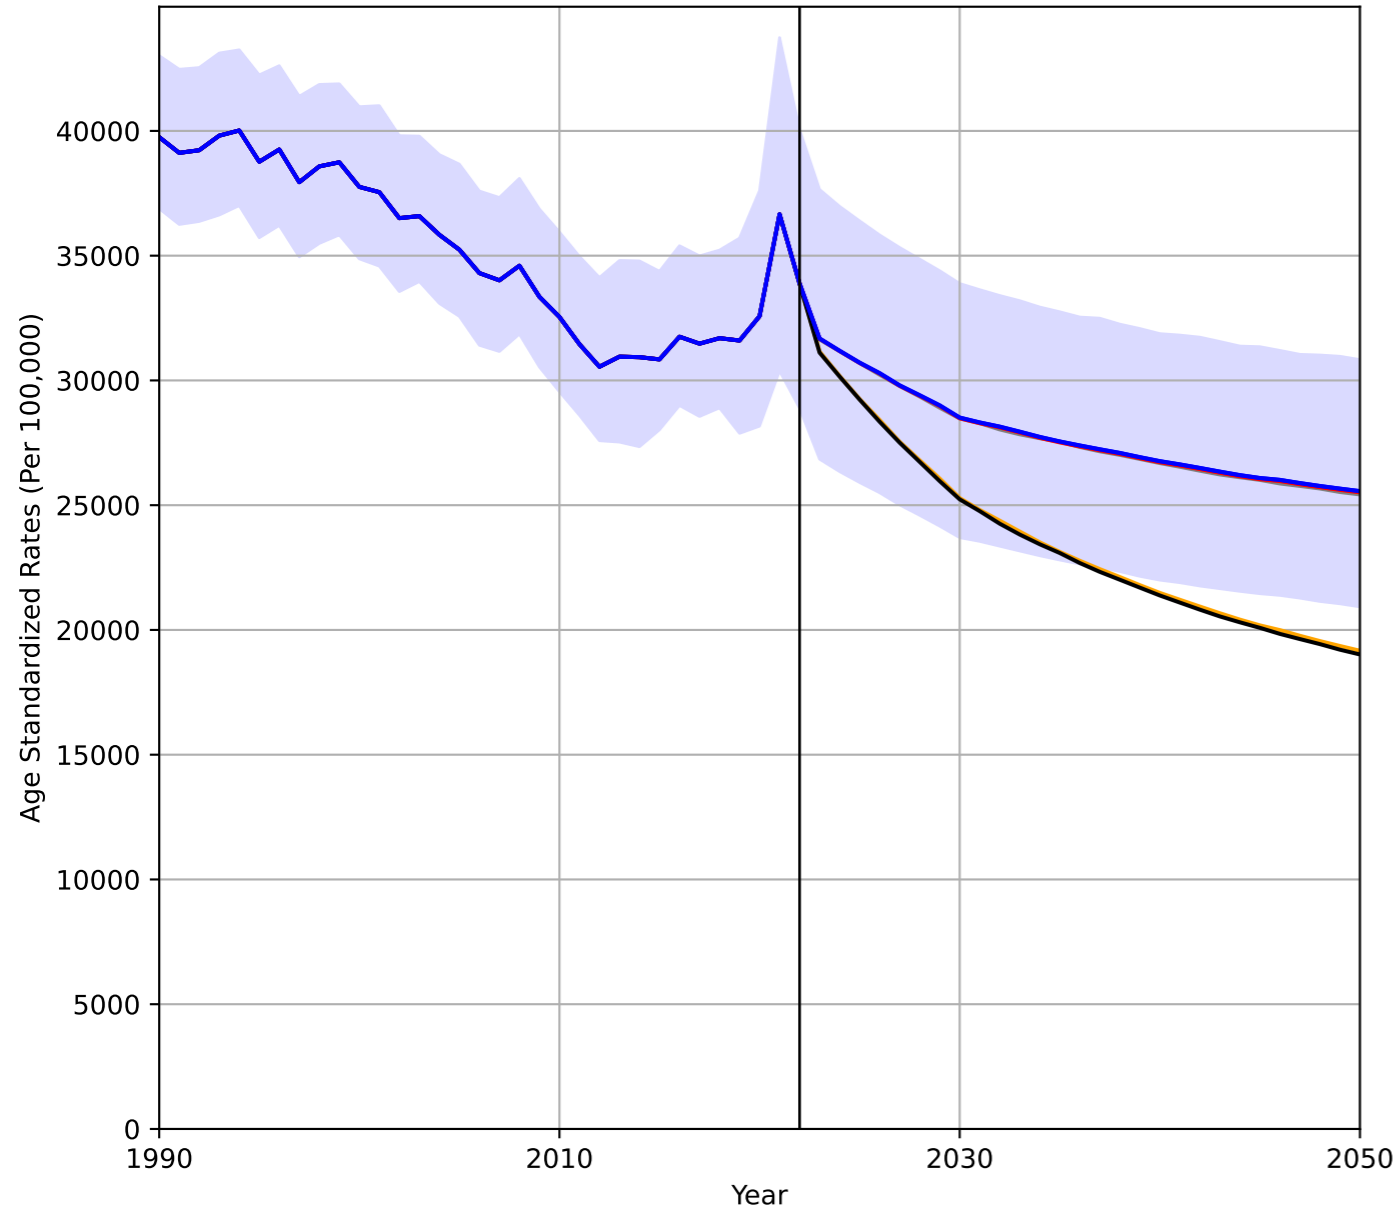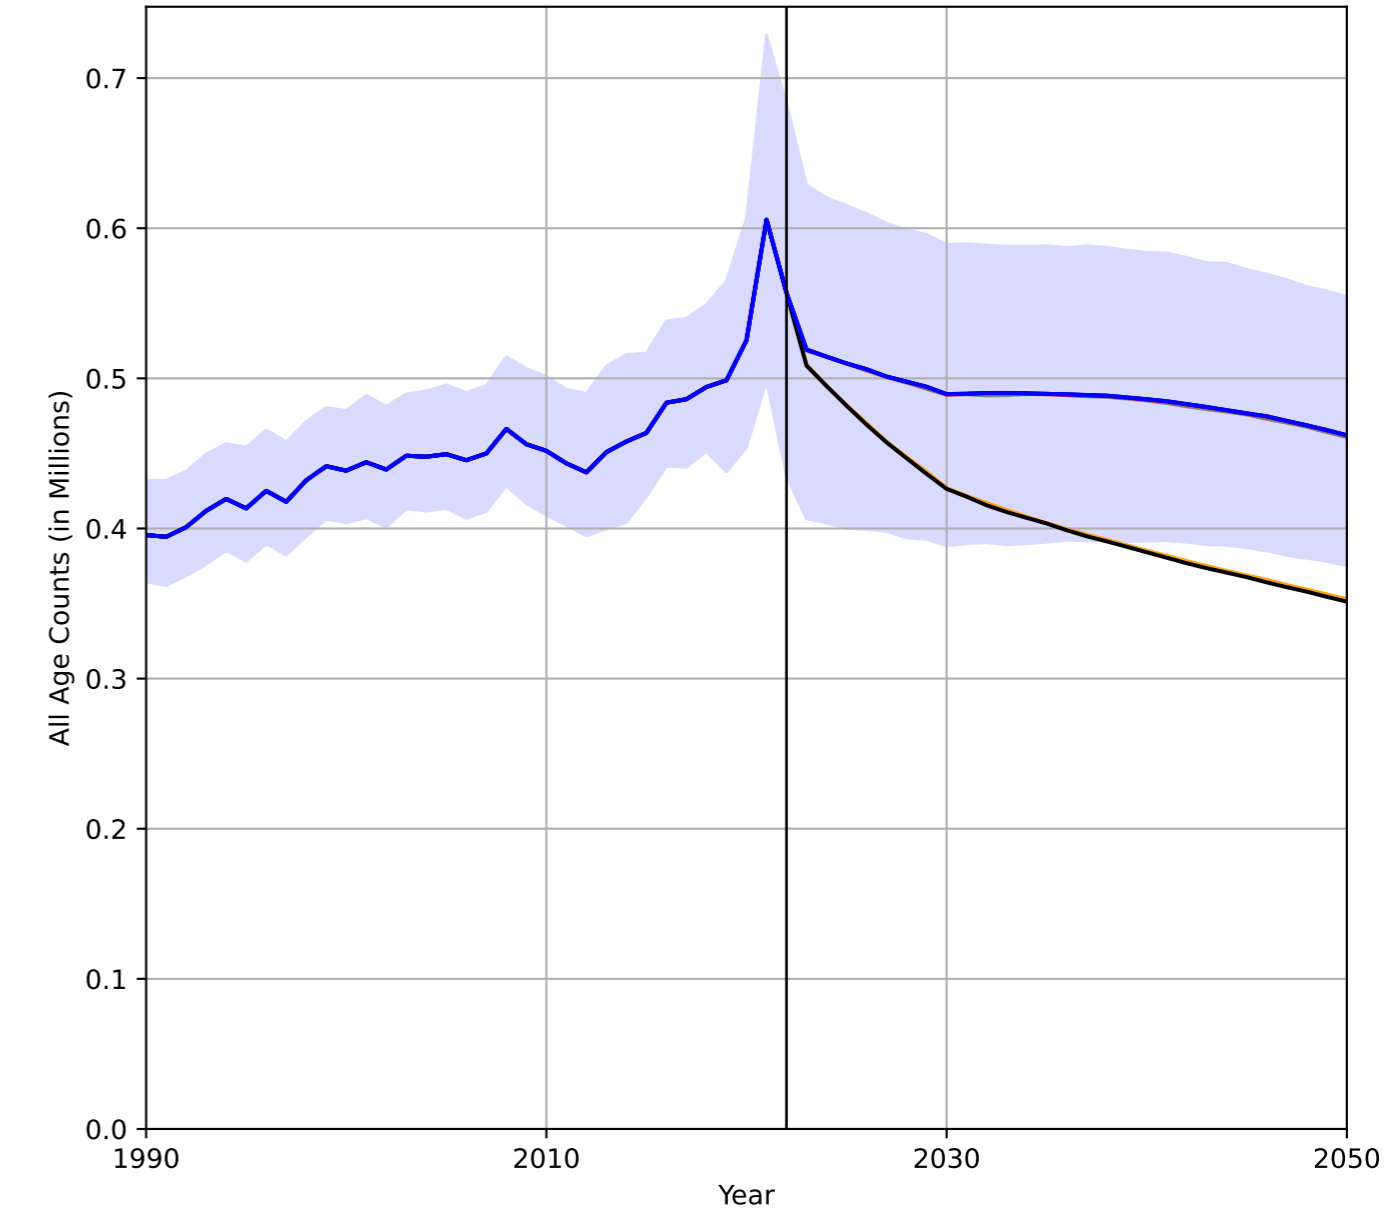

# Virgin Islands

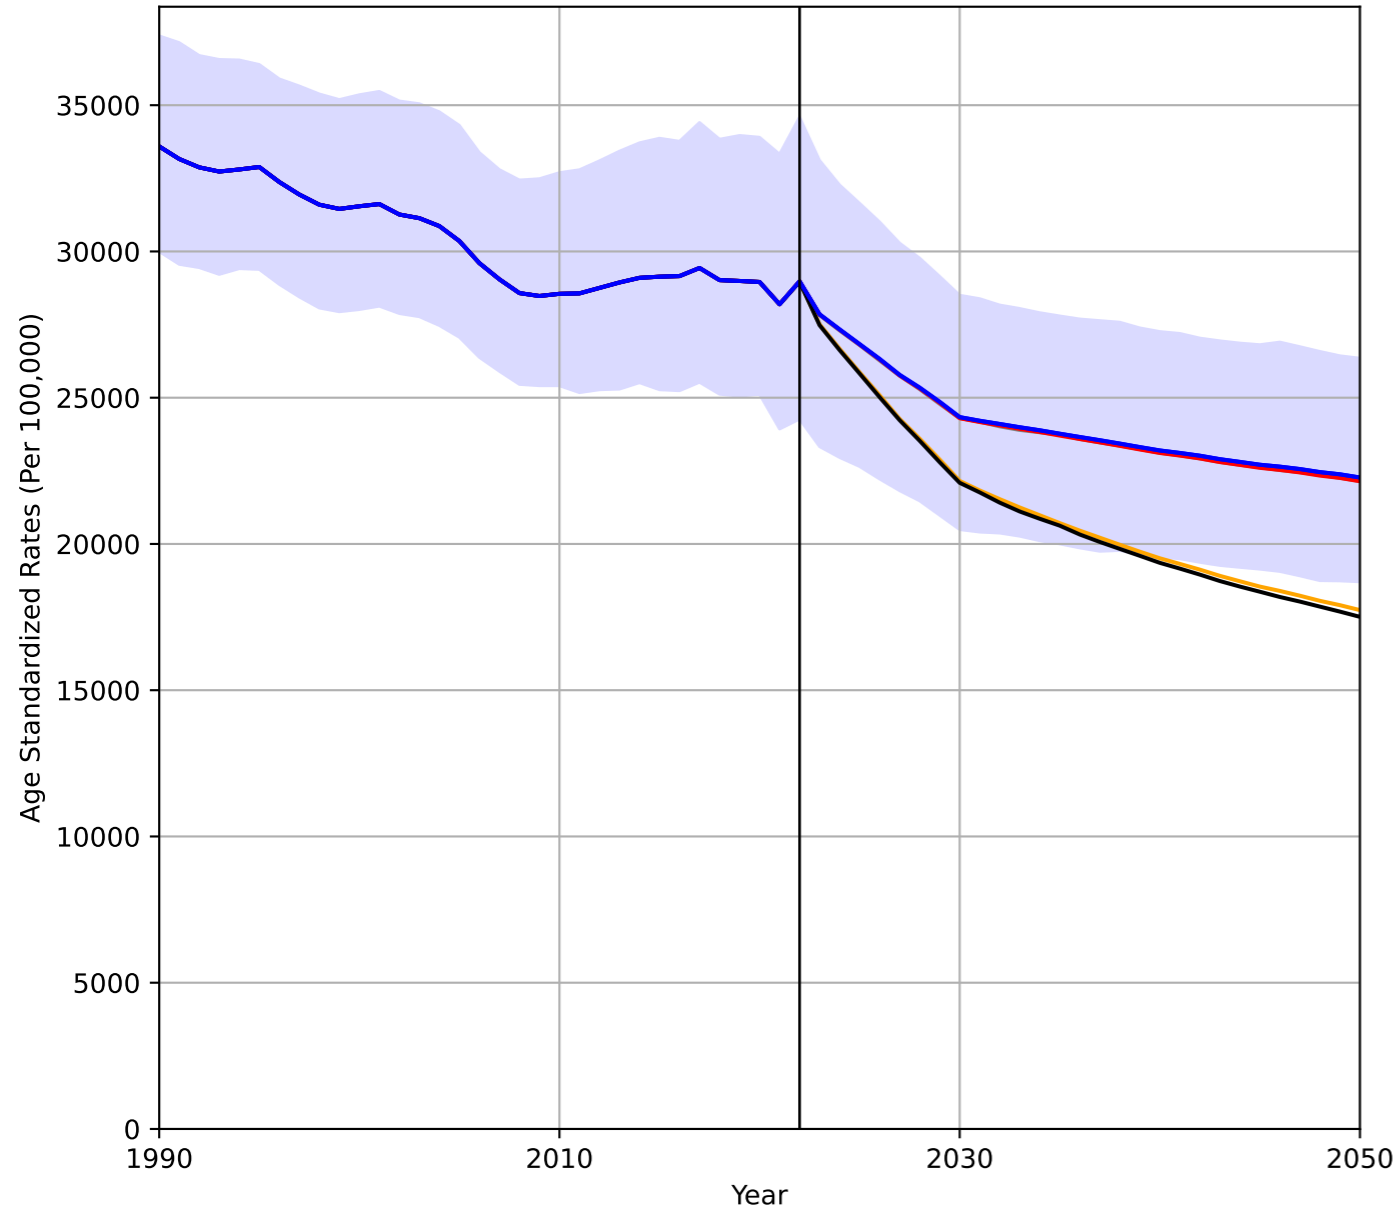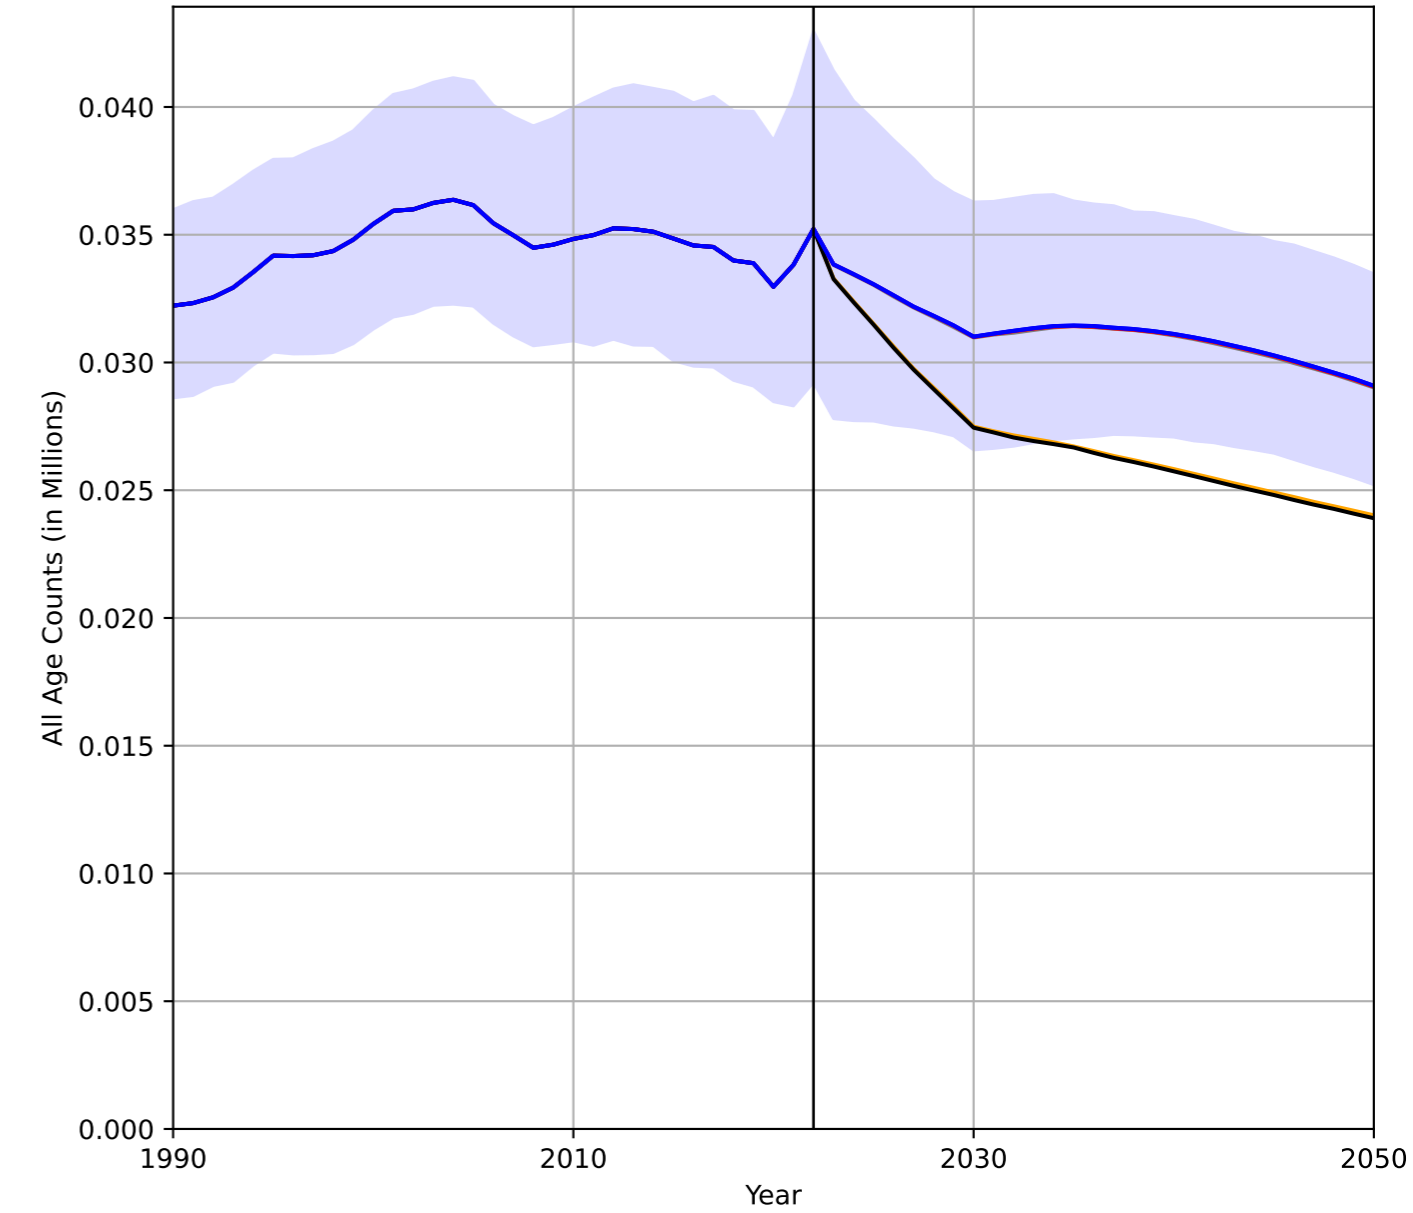

# Colombia

Supplemental Results Figure S10. All-cause age standardised DALY rates (A) and all age DALY counts (B), for the past and for five future scenarios, 1990–2050

1498

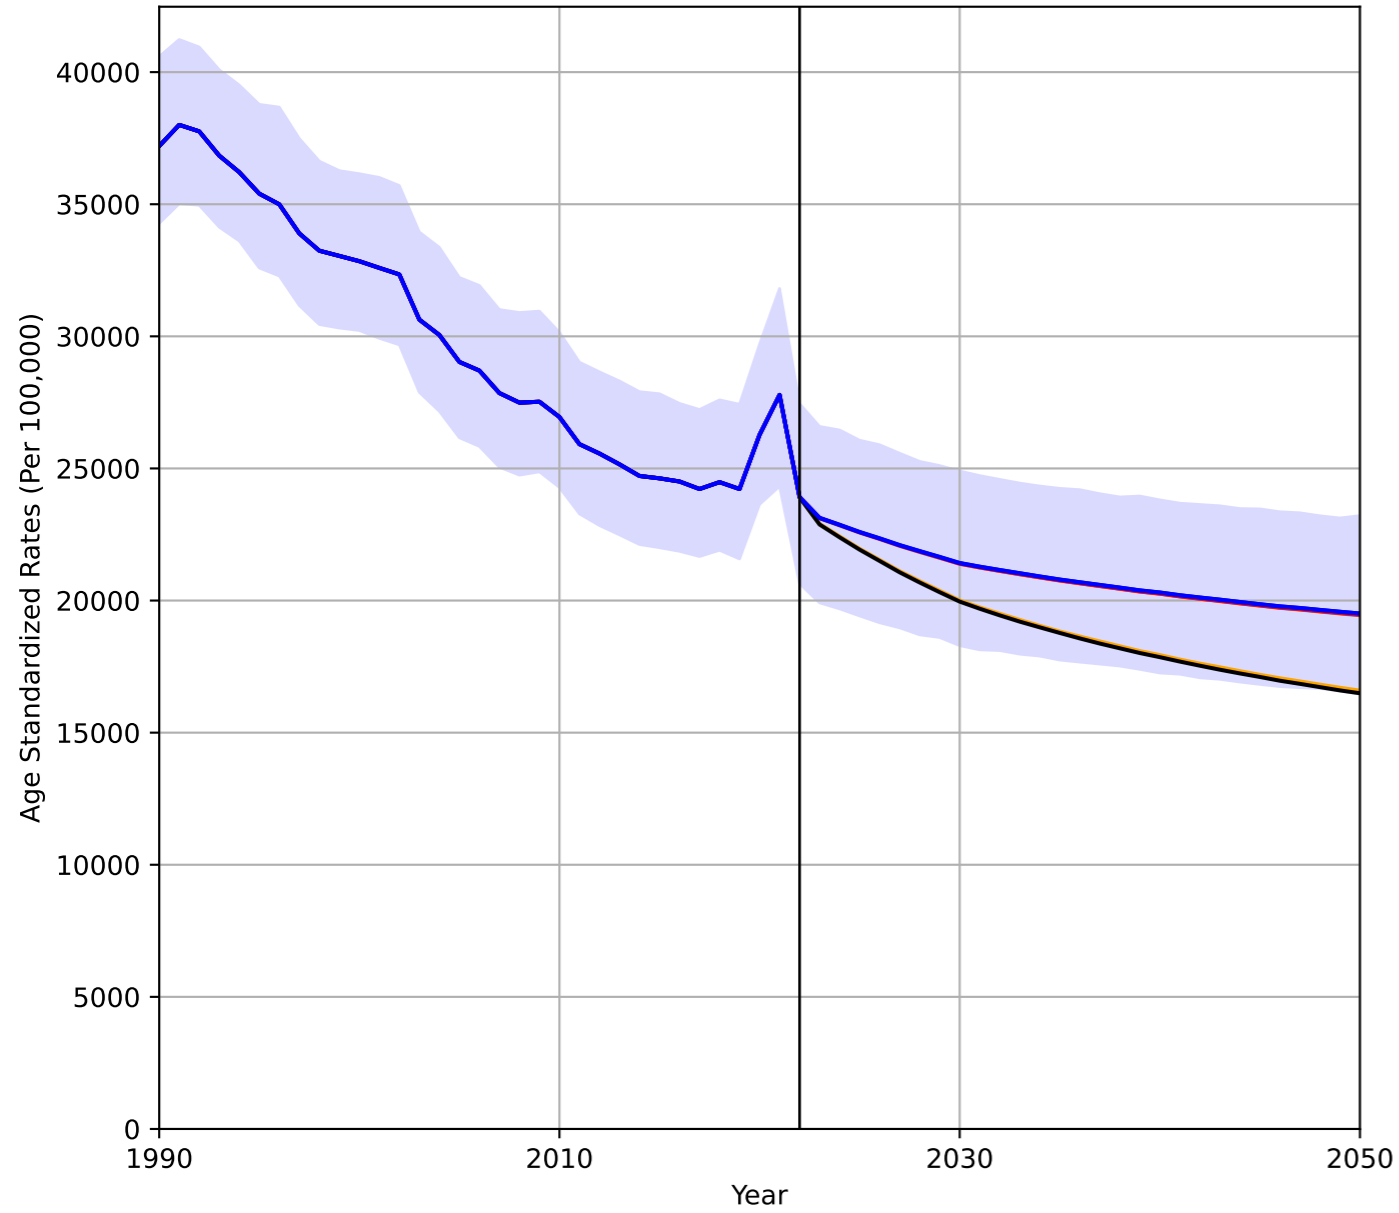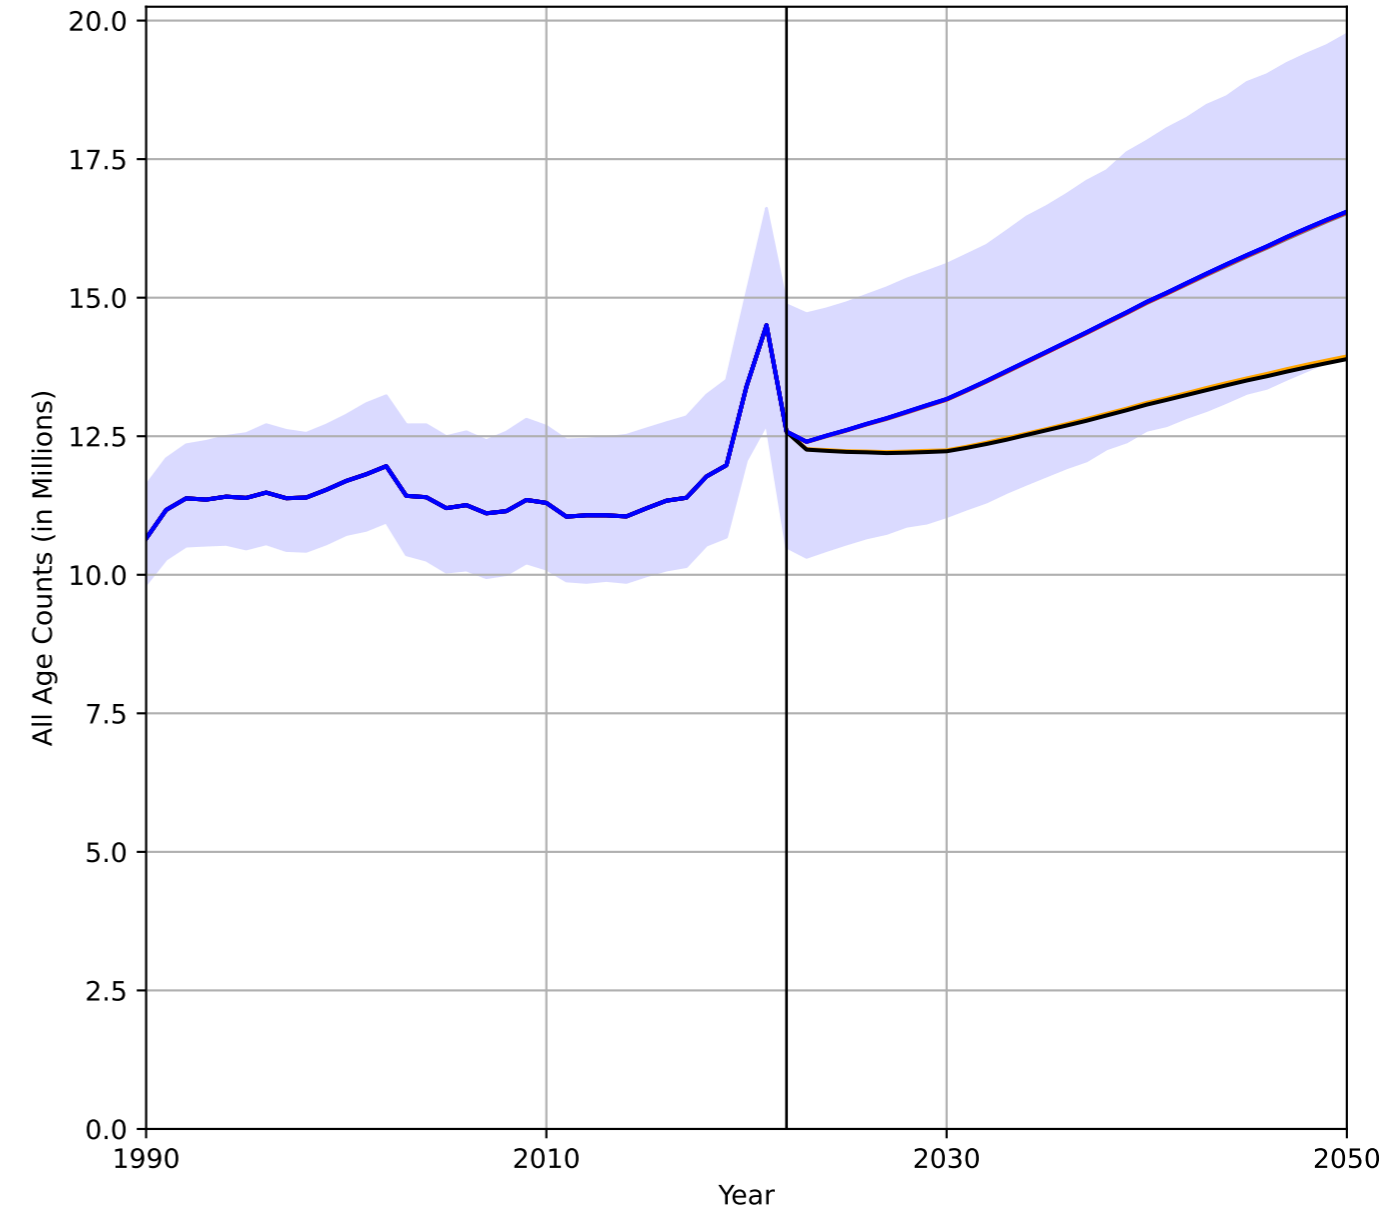

# Costa Rica

Supplemental Results Figure S10. All-cause age standardised DALY rates (A) and all age DALY counts (B), for the past and for five future scenarios, 1990–2050

1499

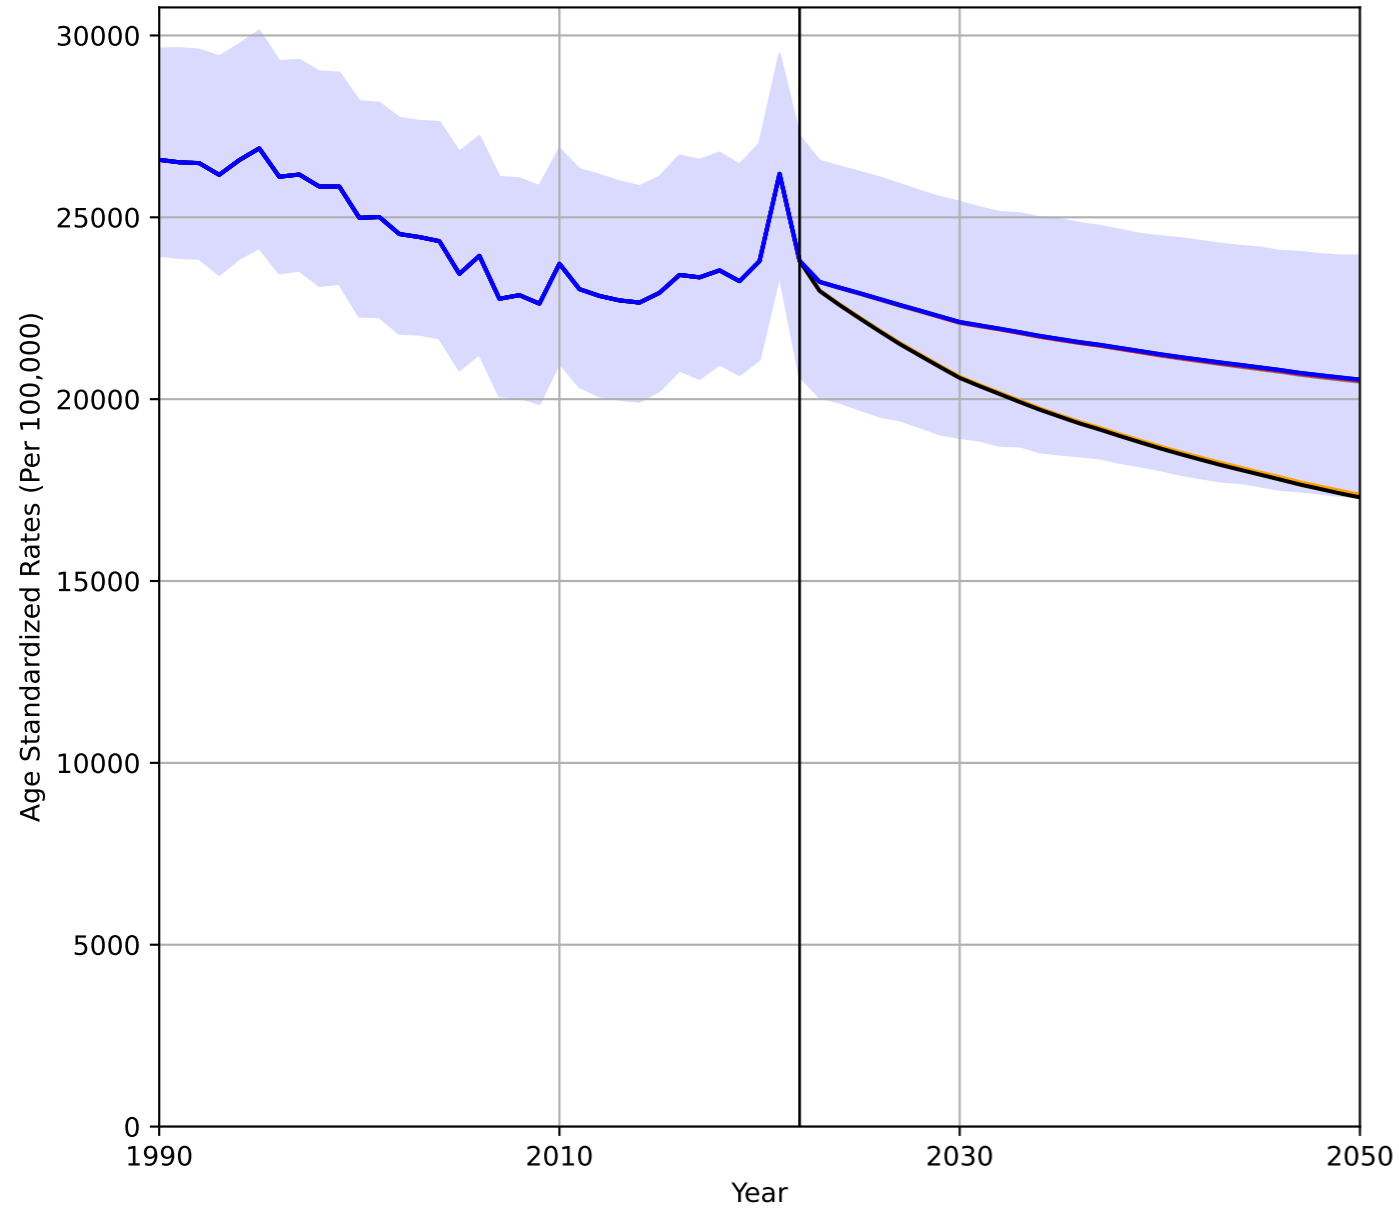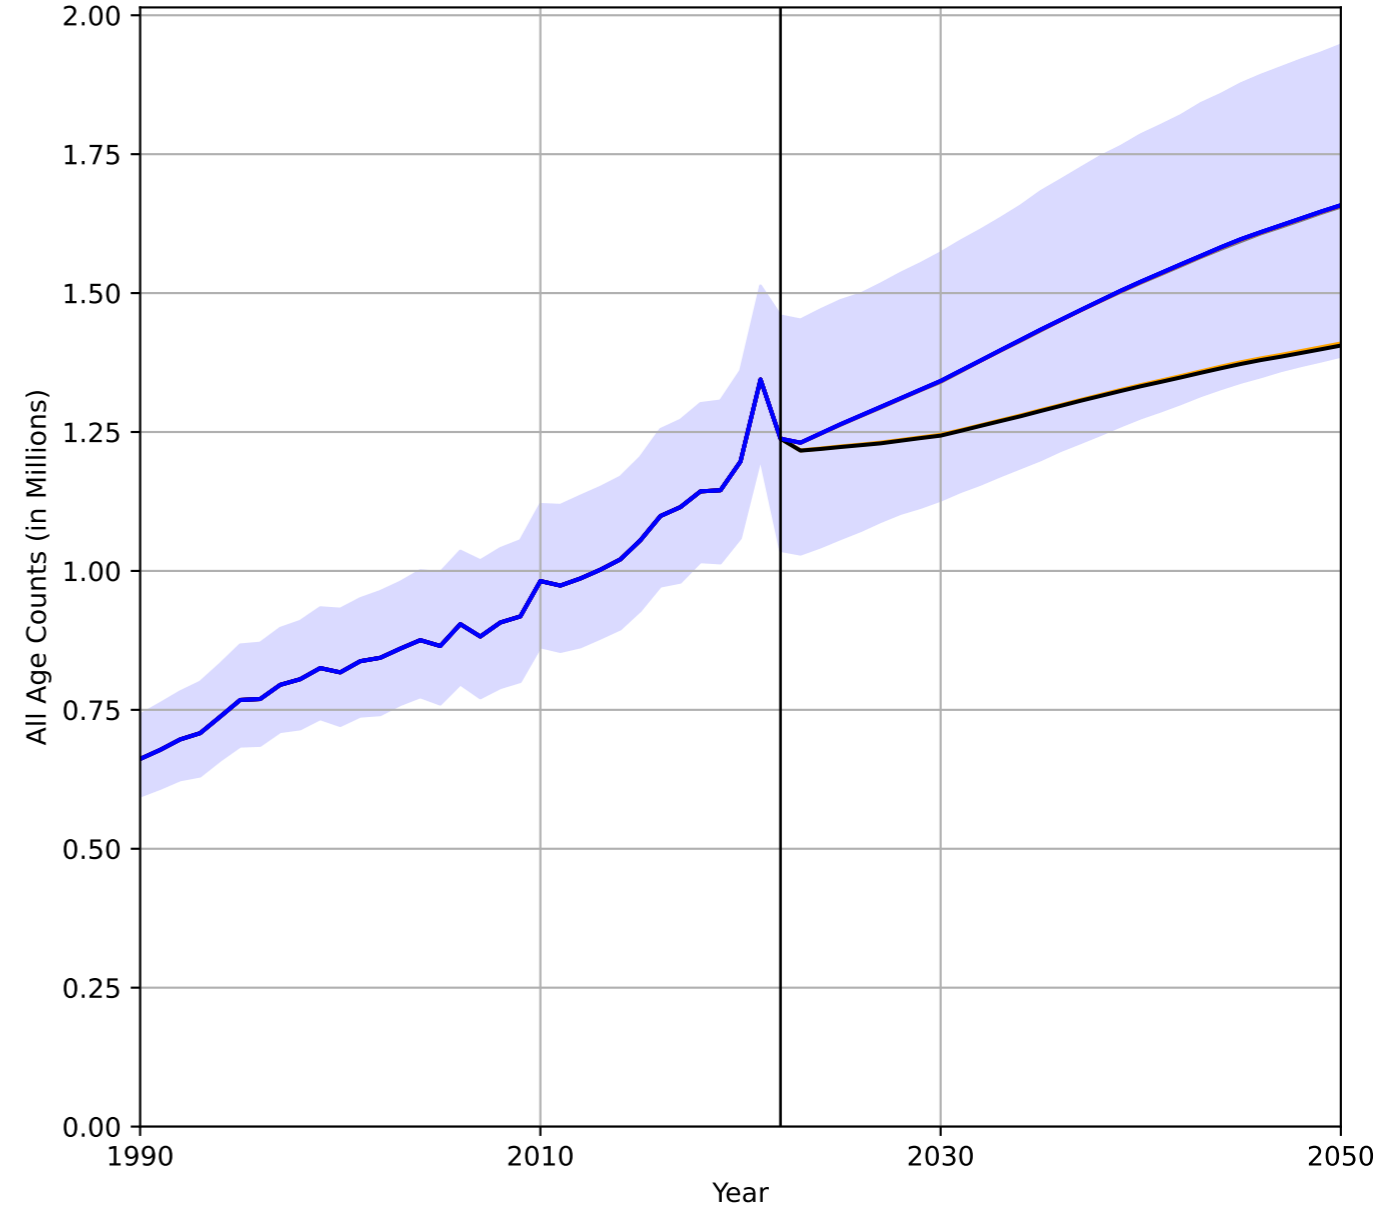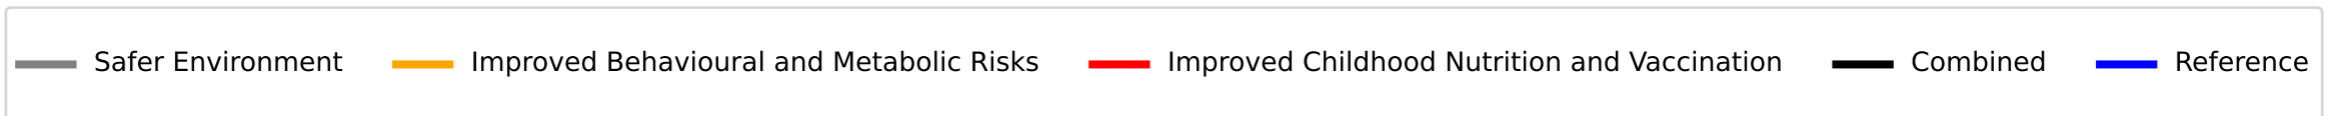

# El Salvador

Supplemental Results Figure S10. All-cause age standardised DALY rates (A) and all age DALY counts (B), for the past and for five future scenarios, 1990–2050

1500

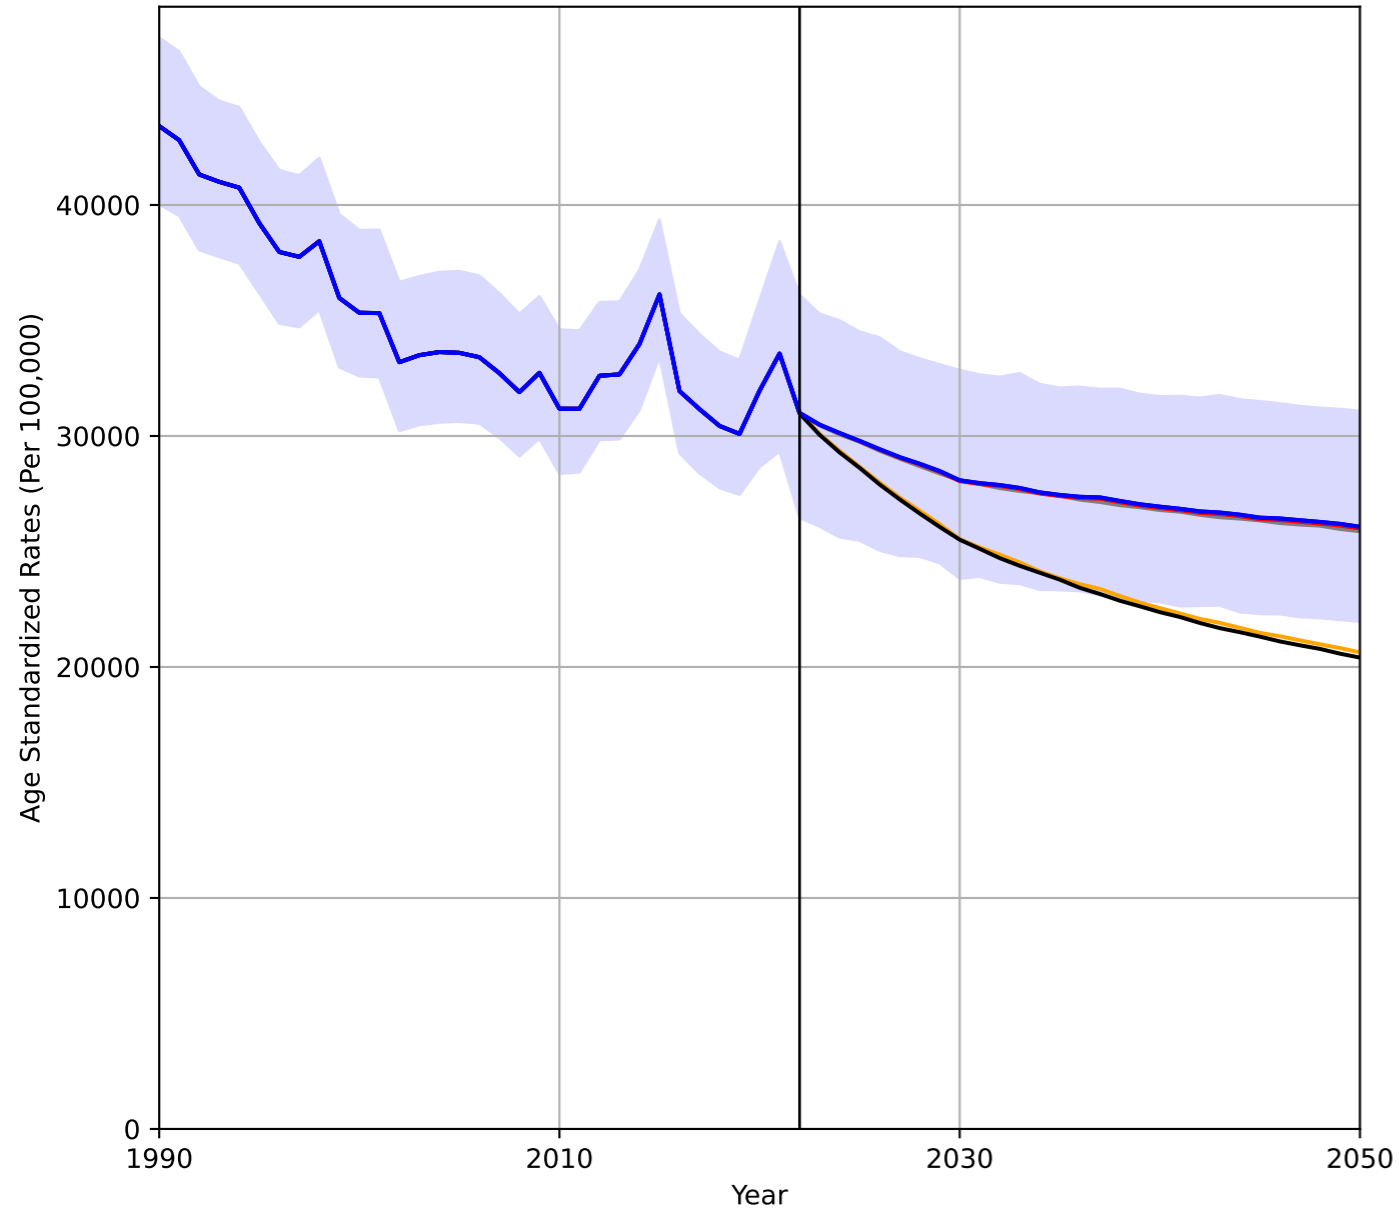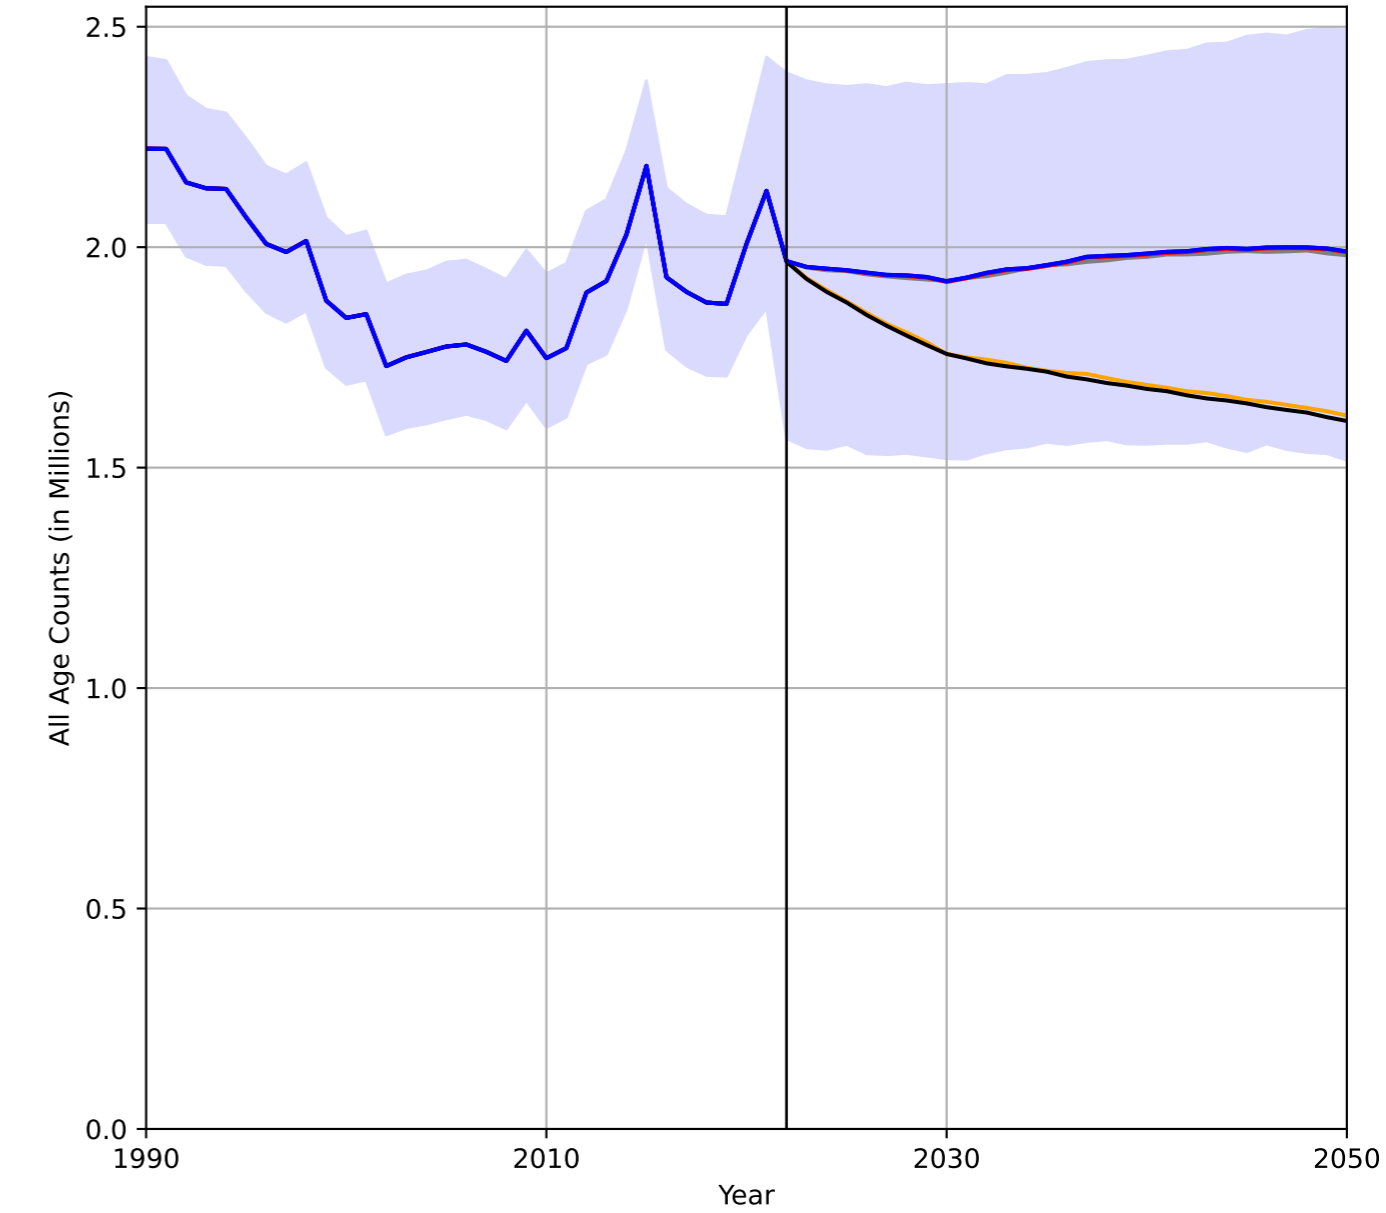

# Guatemala

Supplemental Results Figure S10. All-cause age standardised DALY rates (A) and all age DALY counts (B), for the past and for five future scenarios, 1990–2050

1501

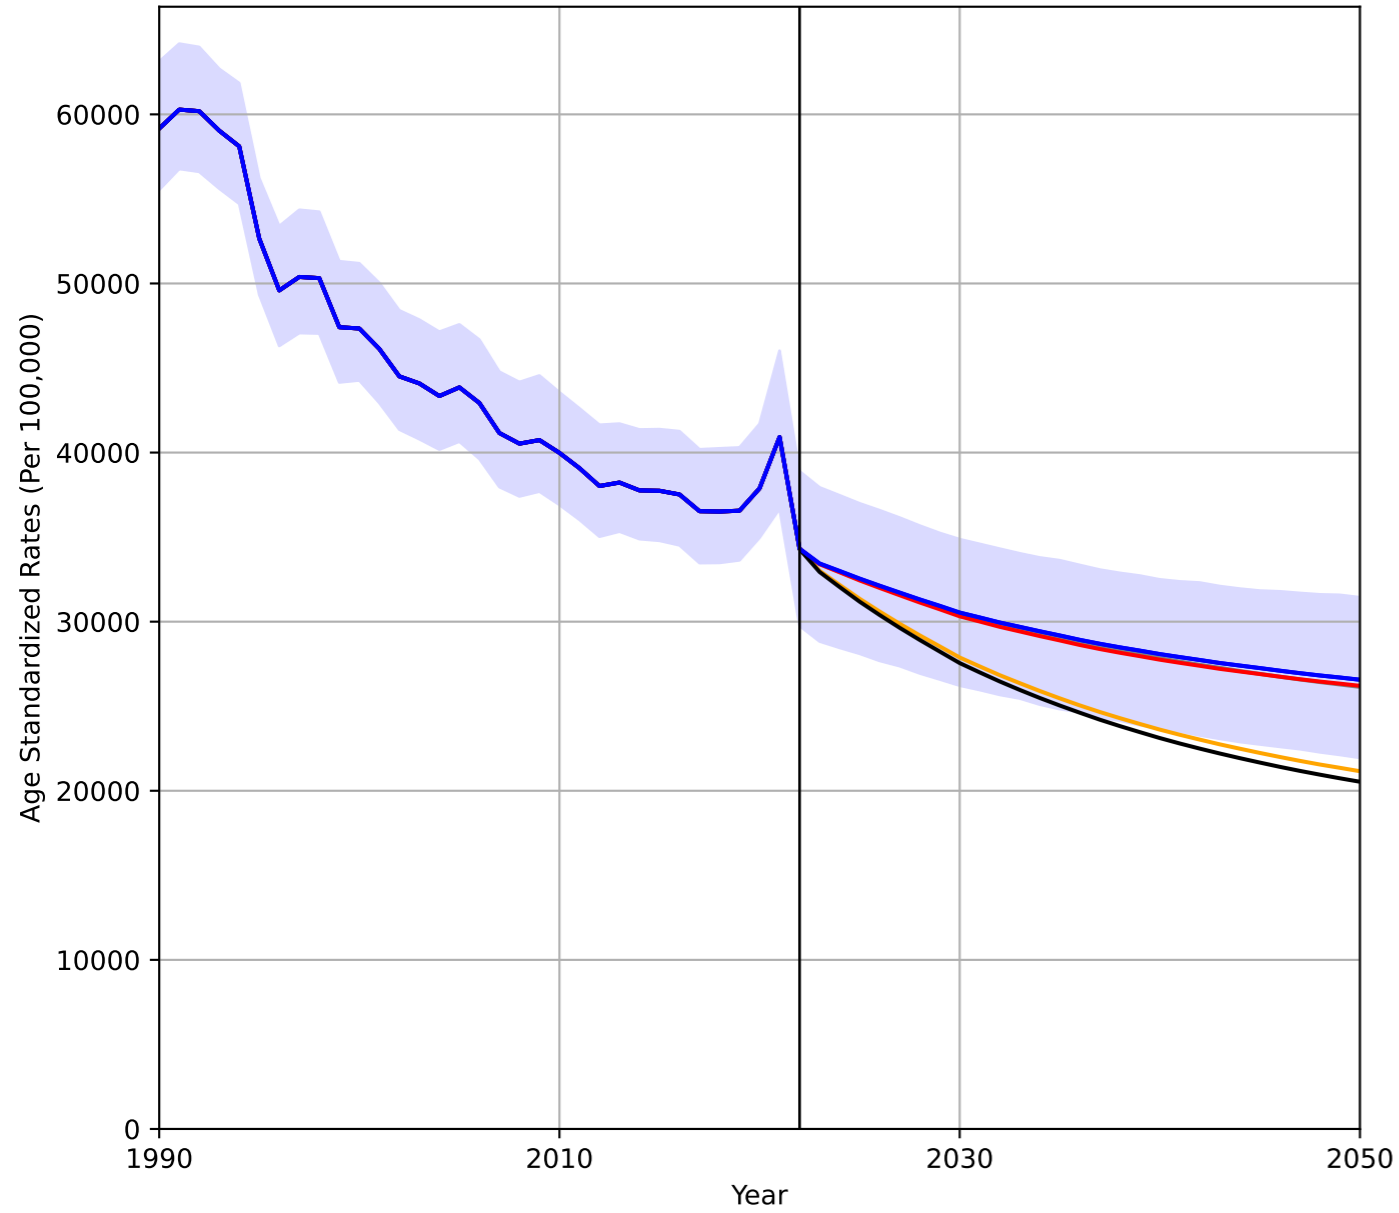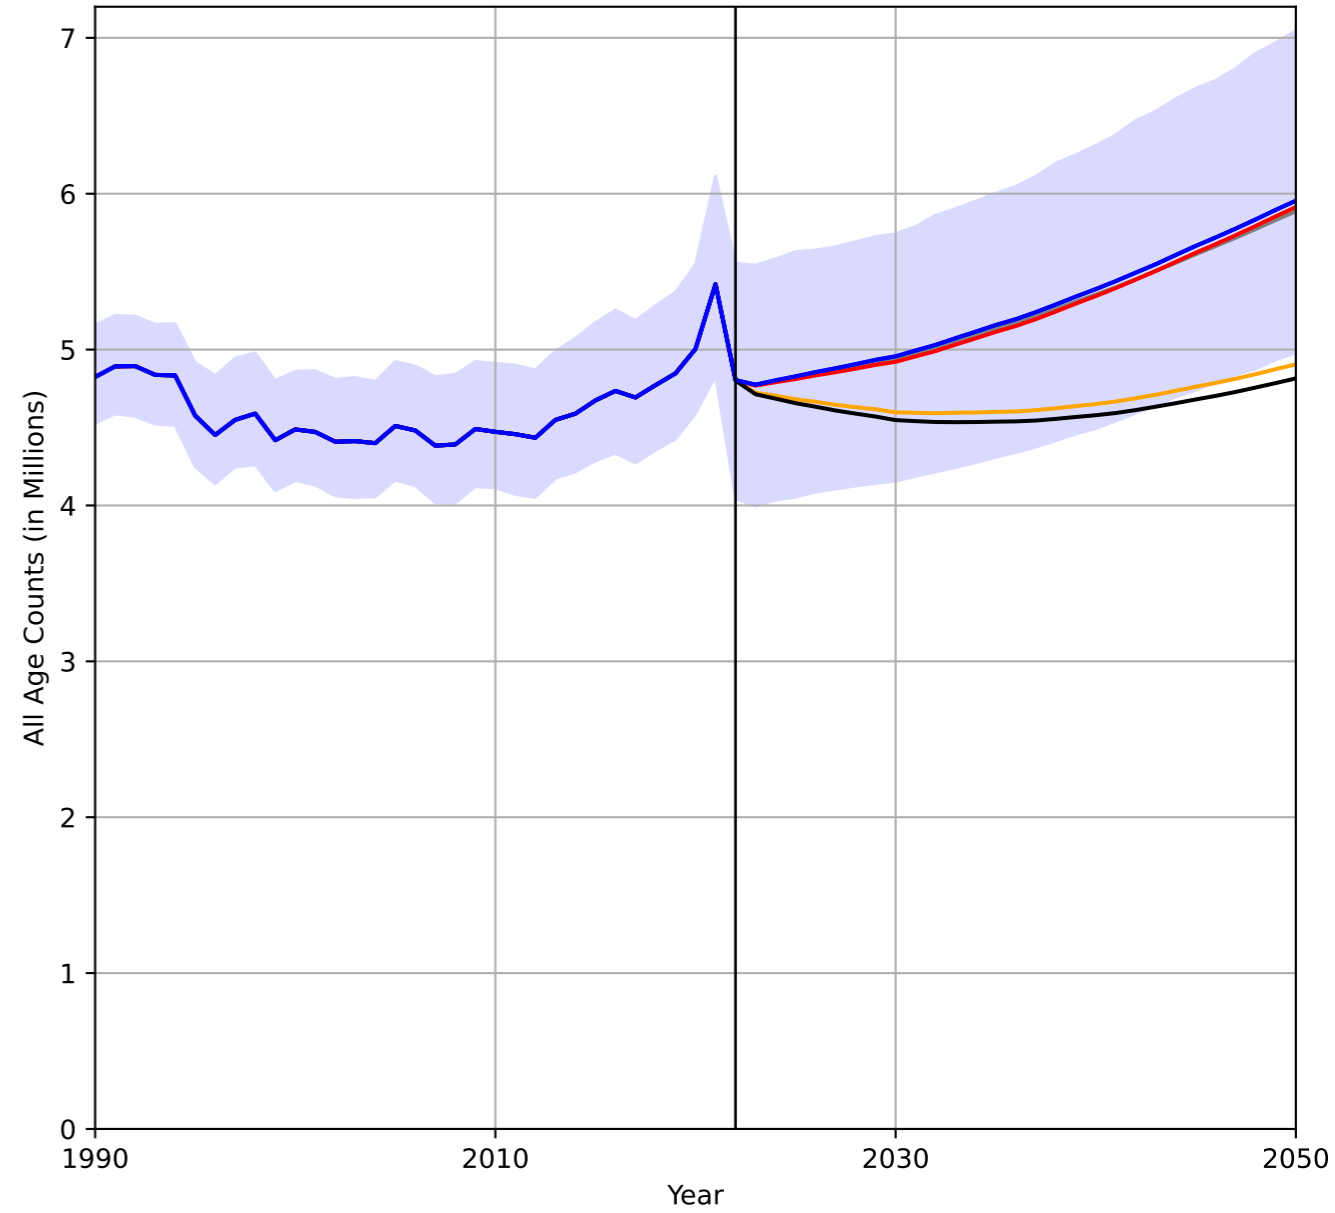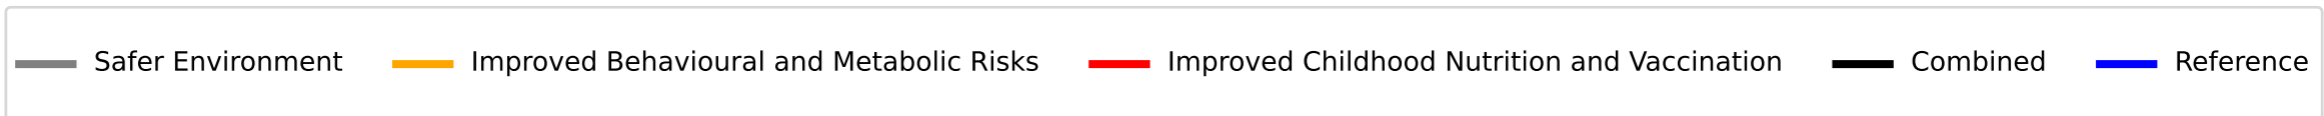

# Honduras

Supplemental Results Figure S10. All-cause age standardised DALY rates (A) and all age DALY counts (B), for the past and for five future scenarios, 1990–2050

1502

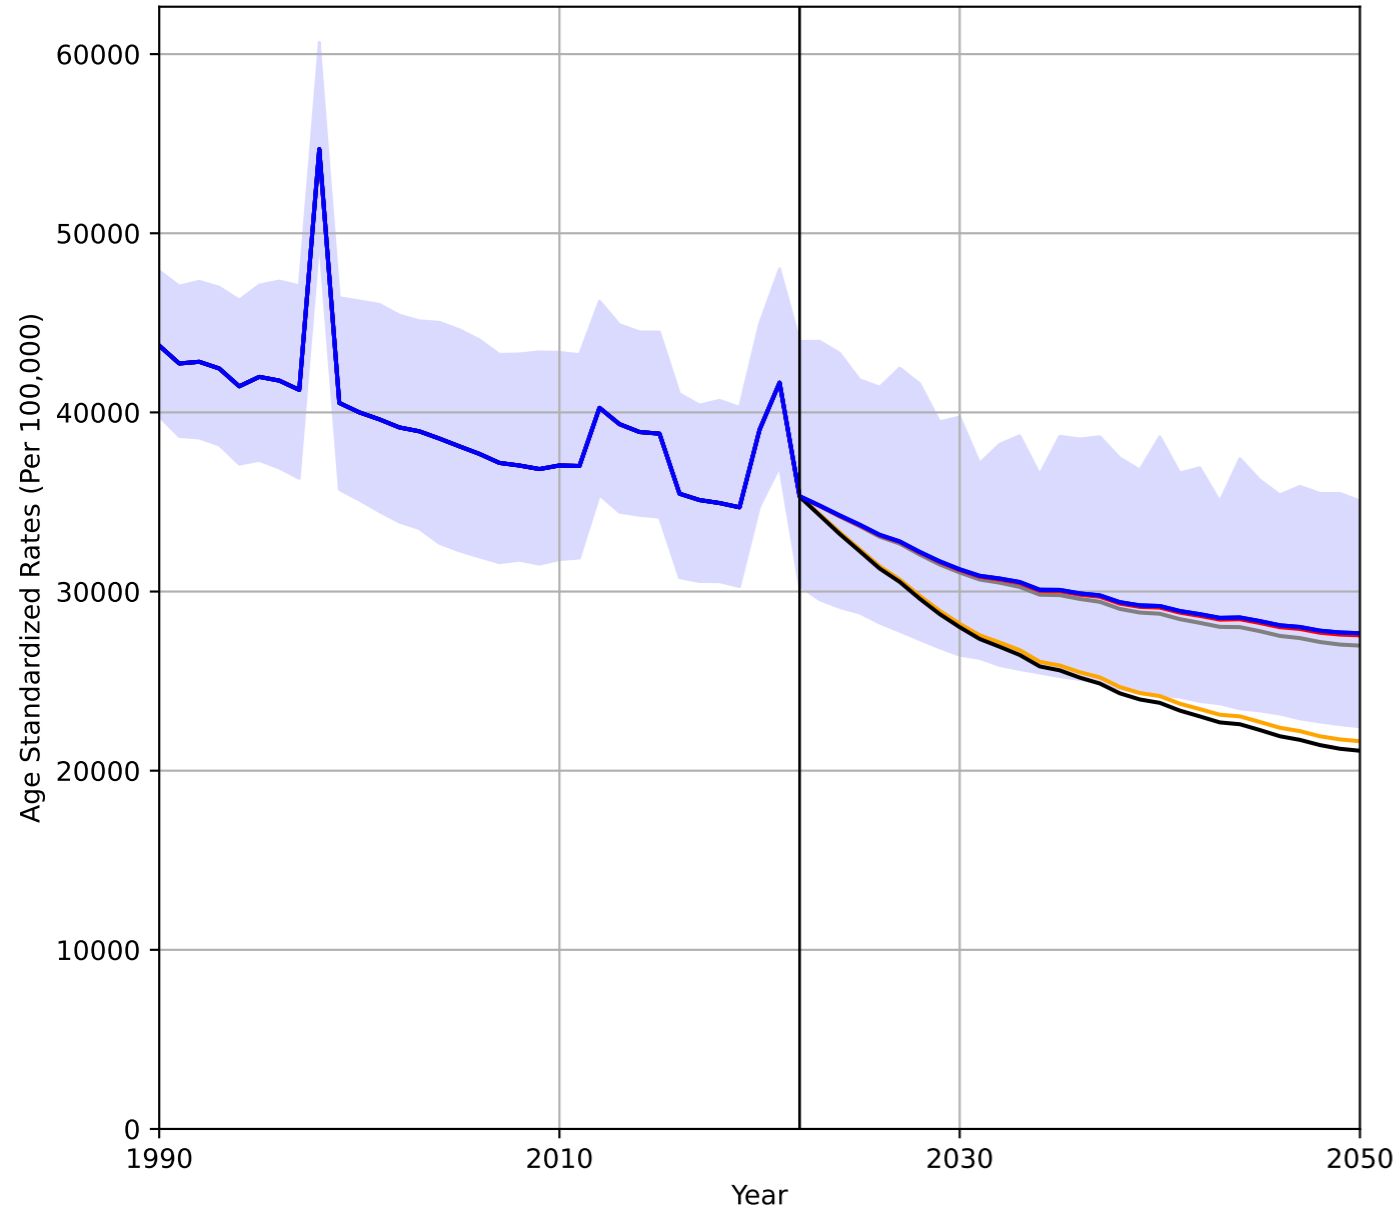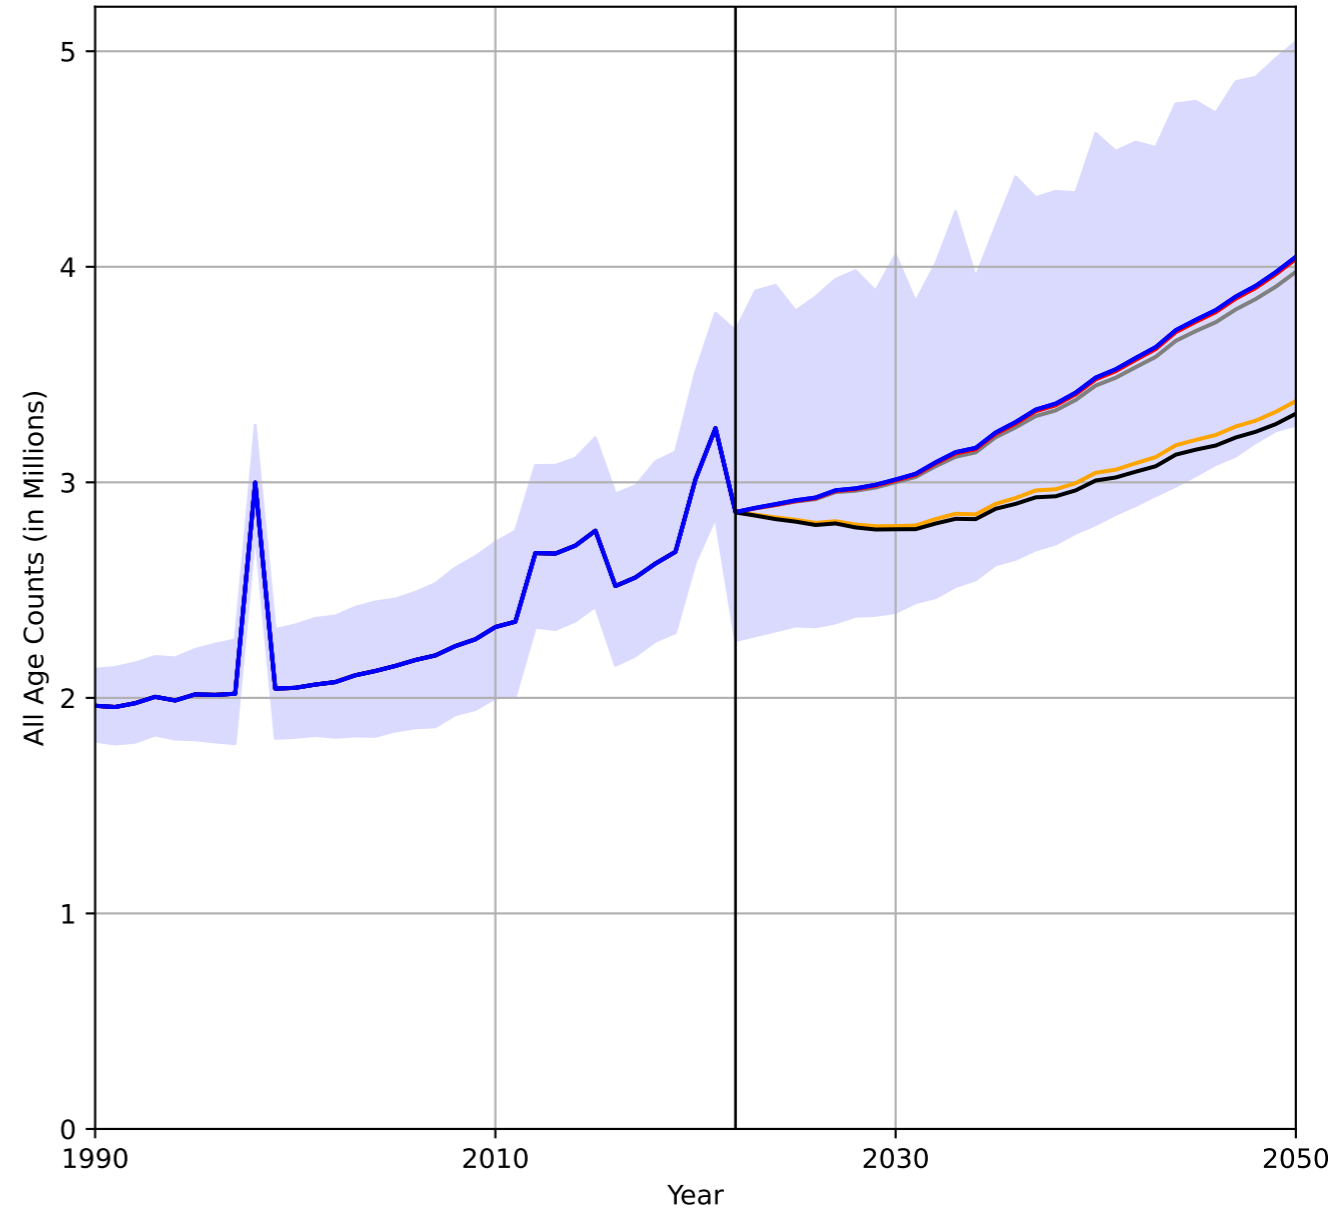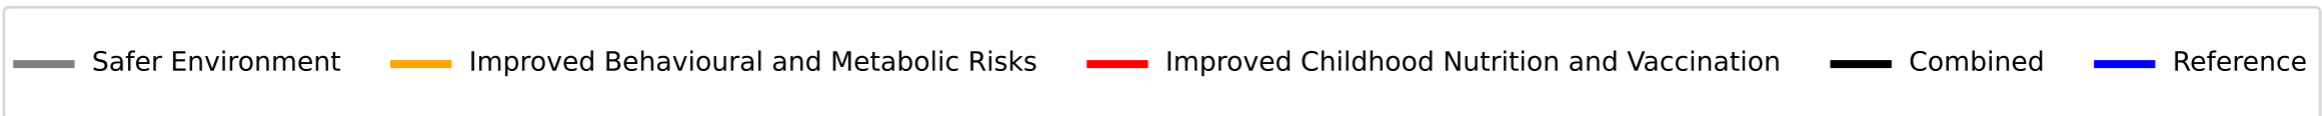

# Mexico

Supplemental Results Figure S10. All-cause age standardised DALY rates (A) and all age DALY counts (B), for the past and for five future scenarios, 1990–2050

1503

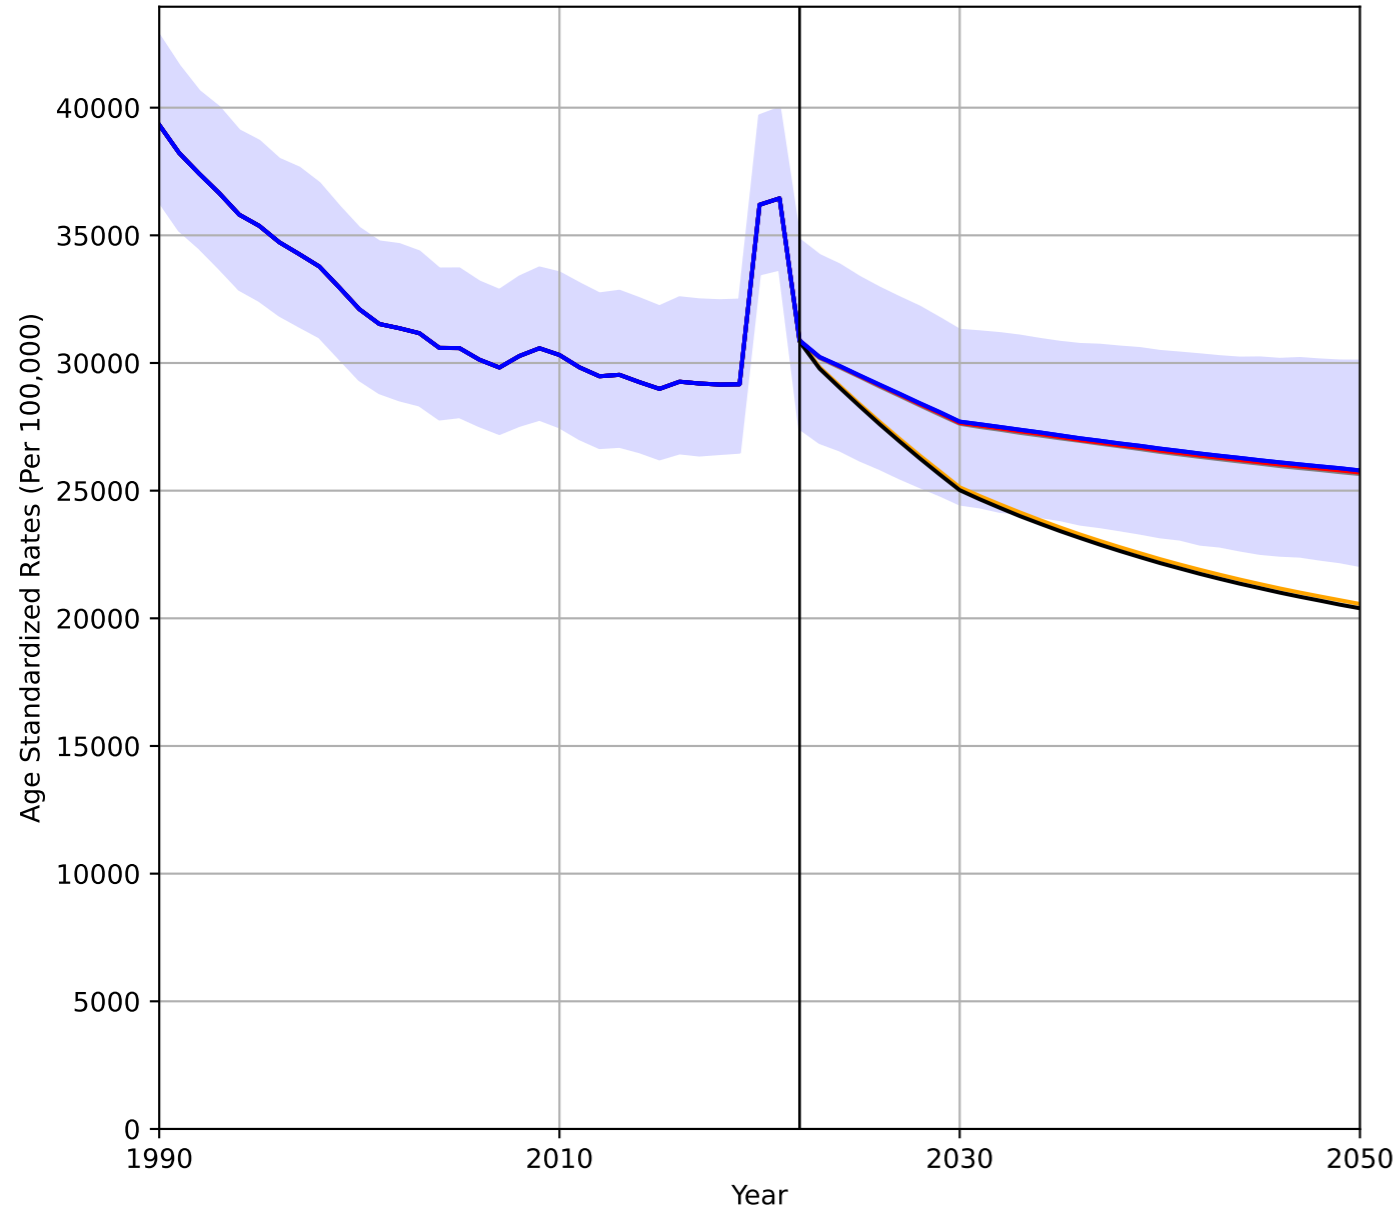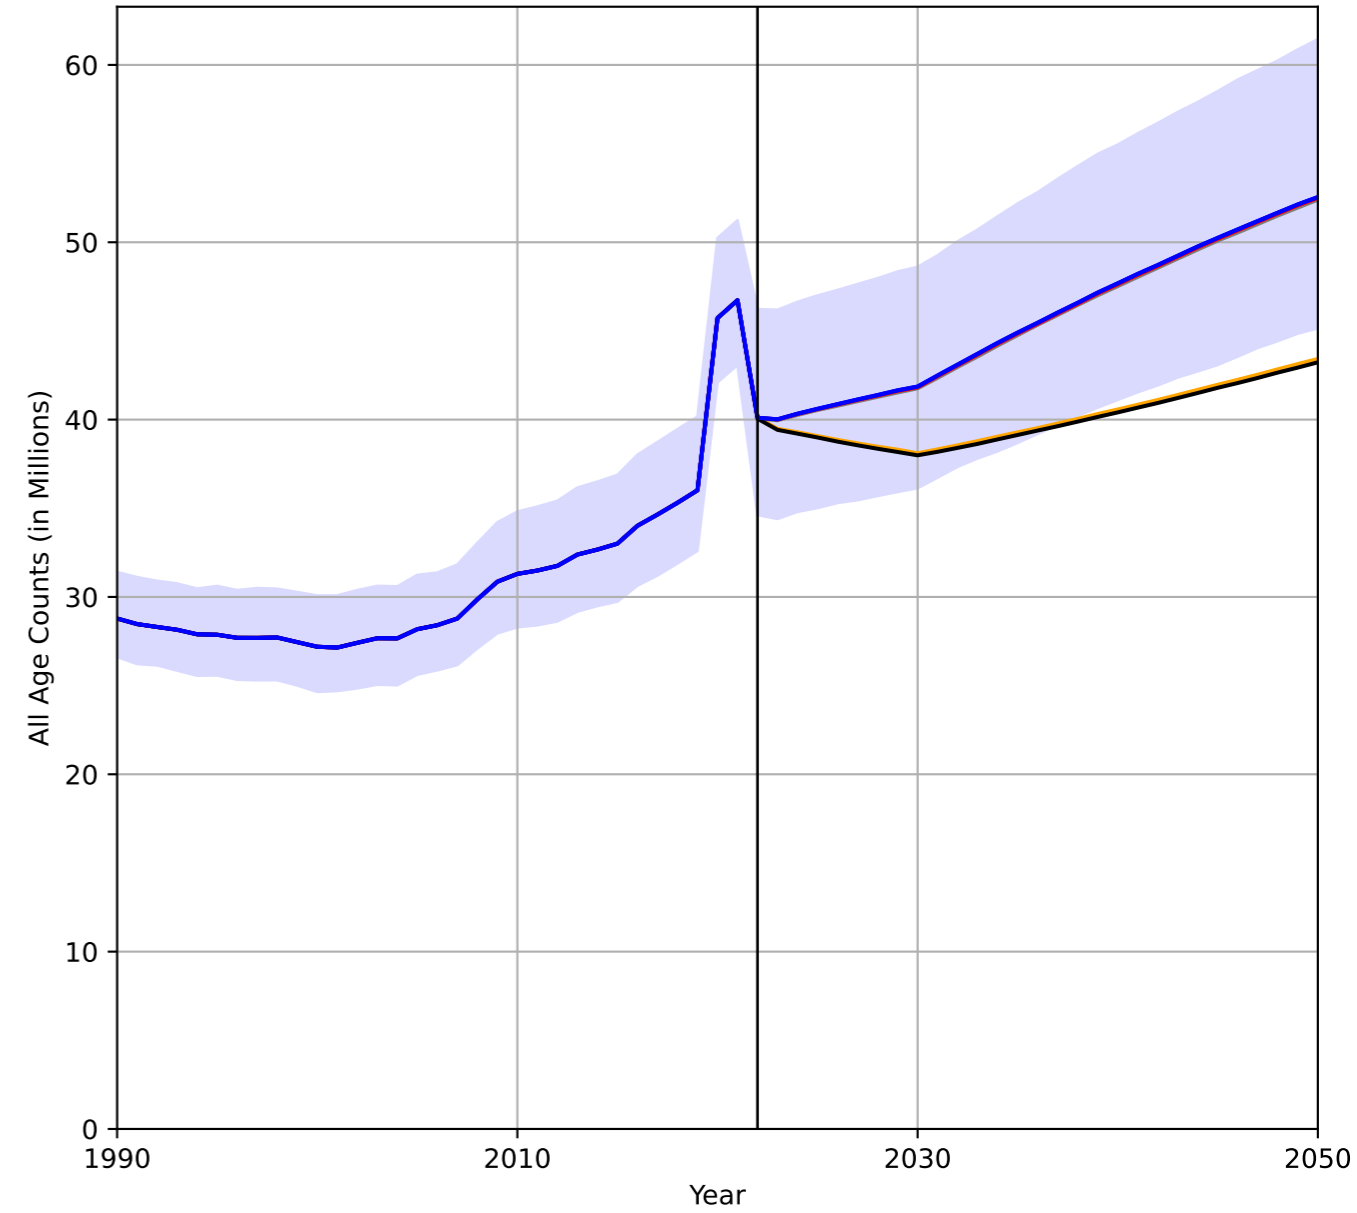



# Nicaragua

Supplemental Results Figure S10. All-cause age standardised DALY rates (A) and all age DALY counts (B), for the past and for five future scenarios, 1990–2050

1504

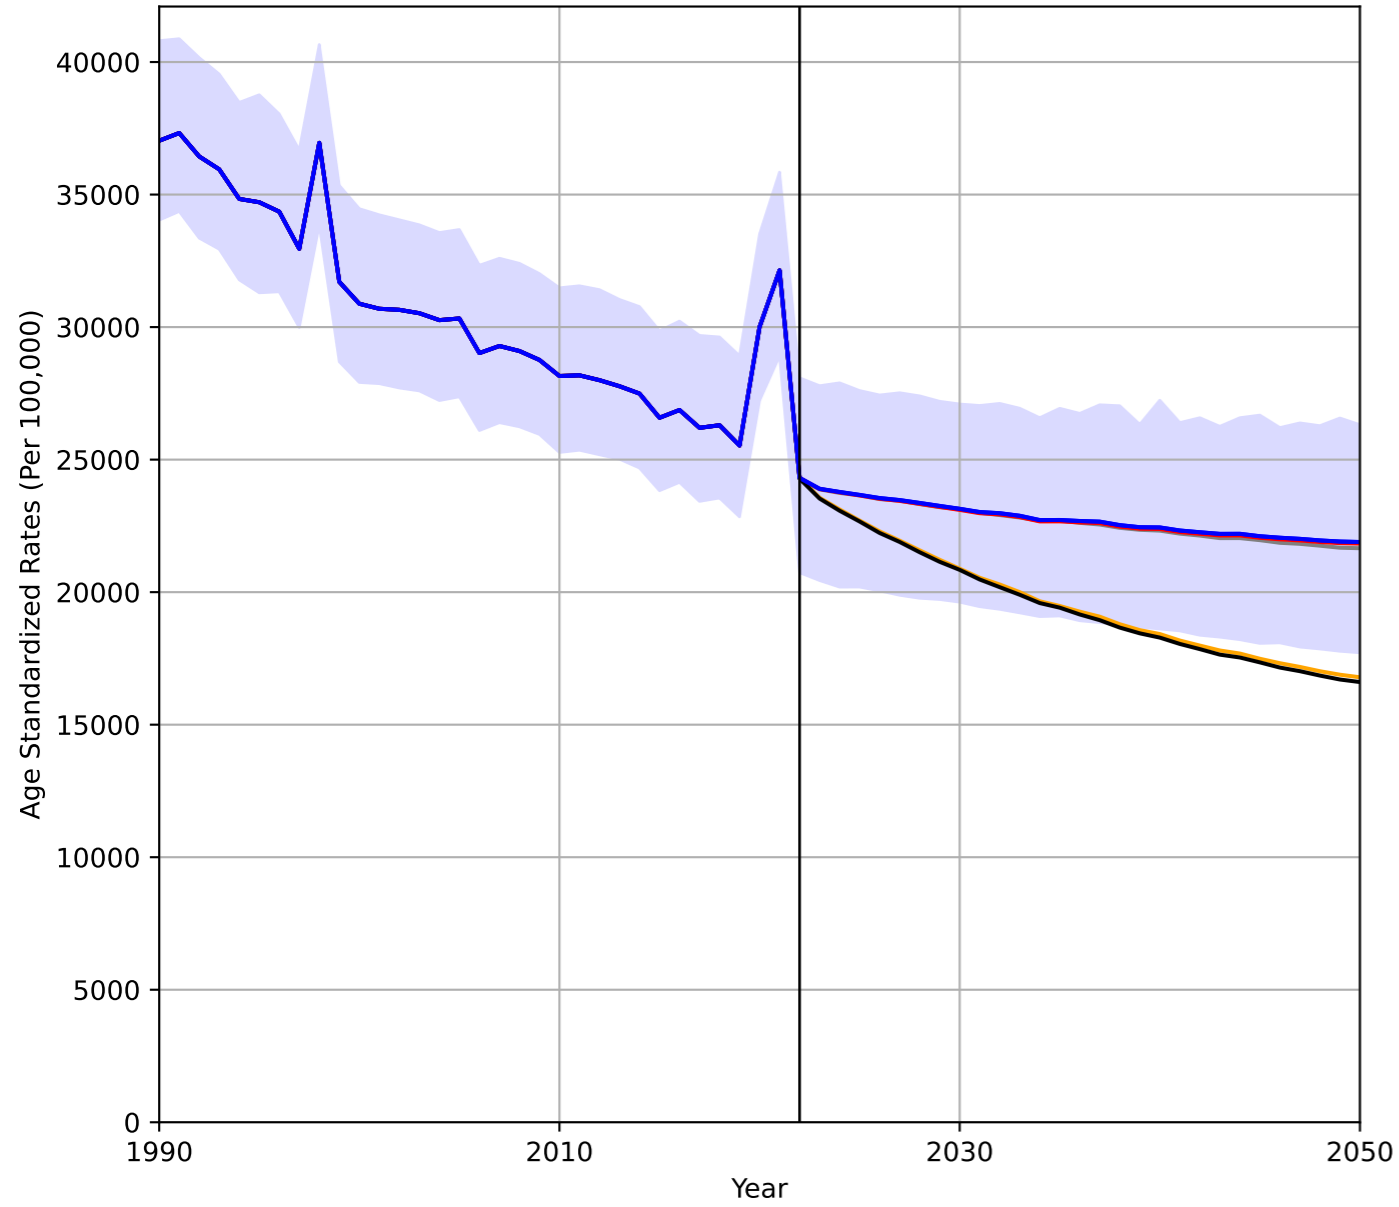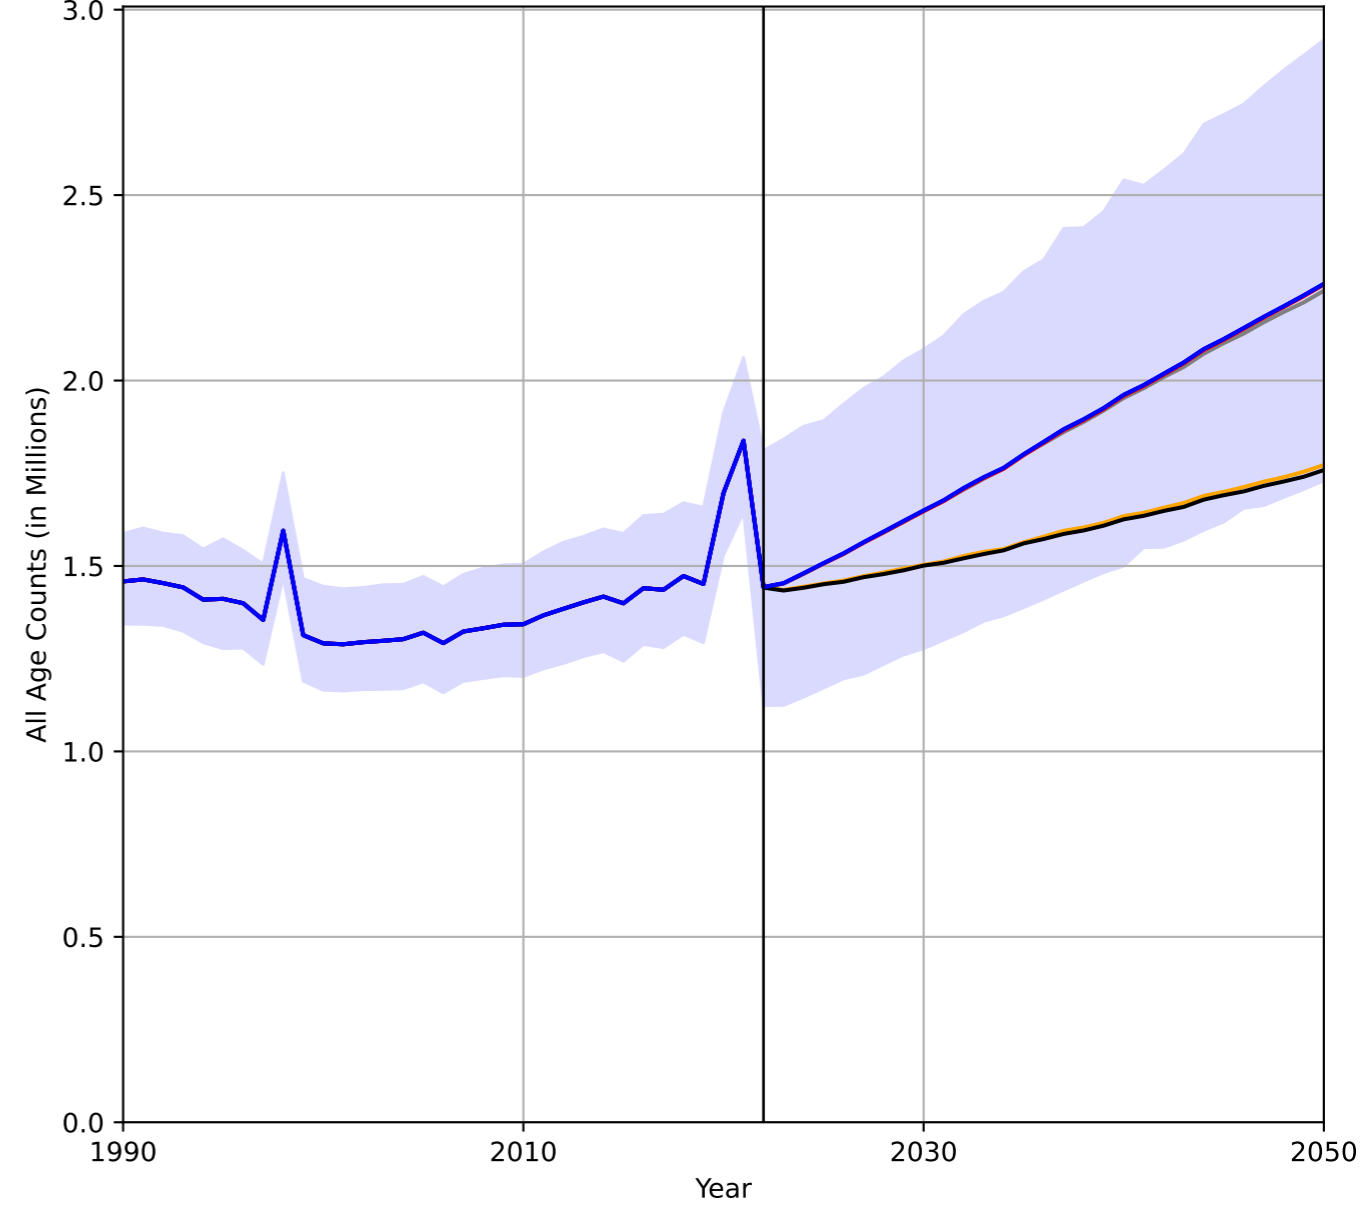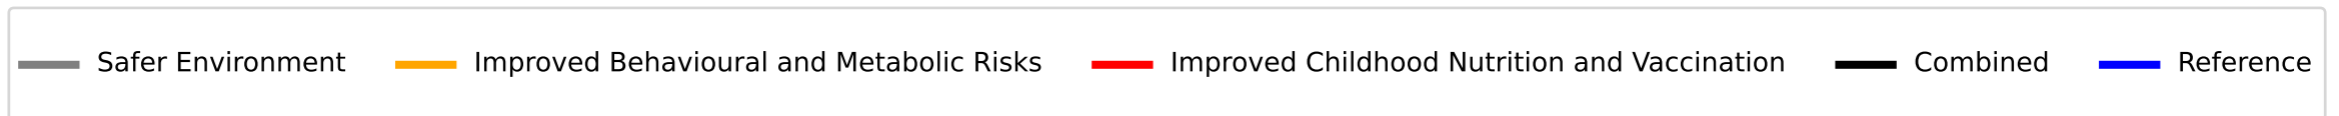

# Panama

Supplemental Results Figure S10. All-cause age standardised DALY rates (A) and all age DALY counts (B), for the past and for five future scenarios, 1990–2050

1505

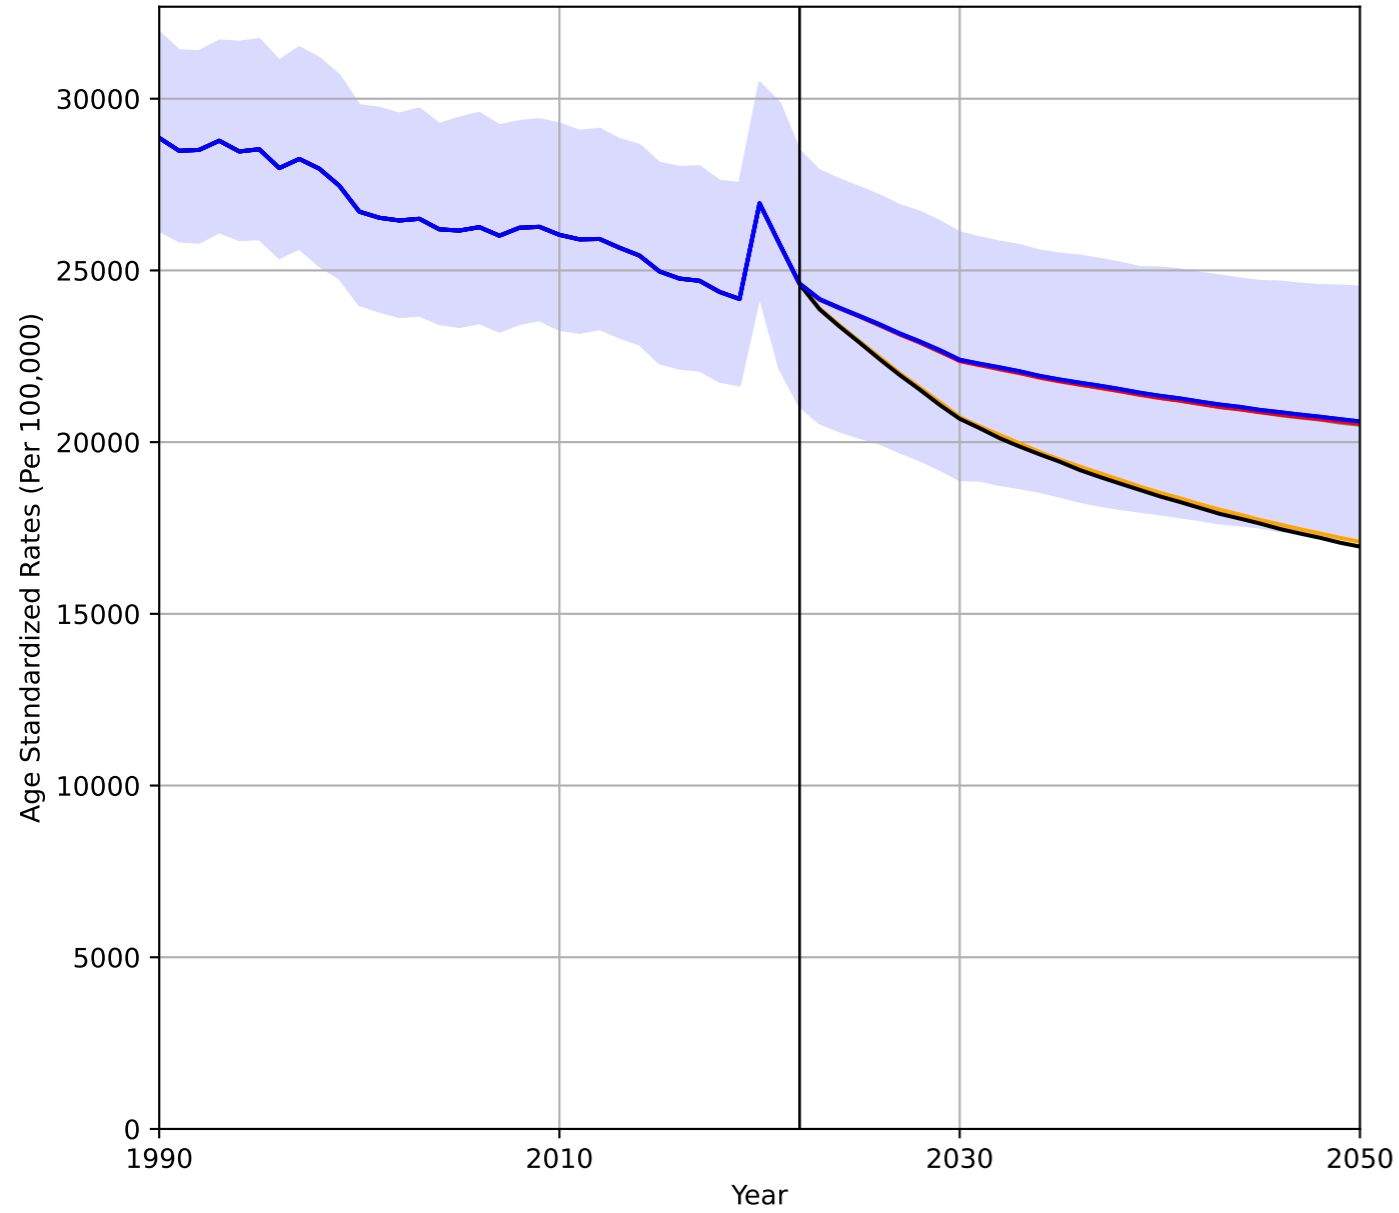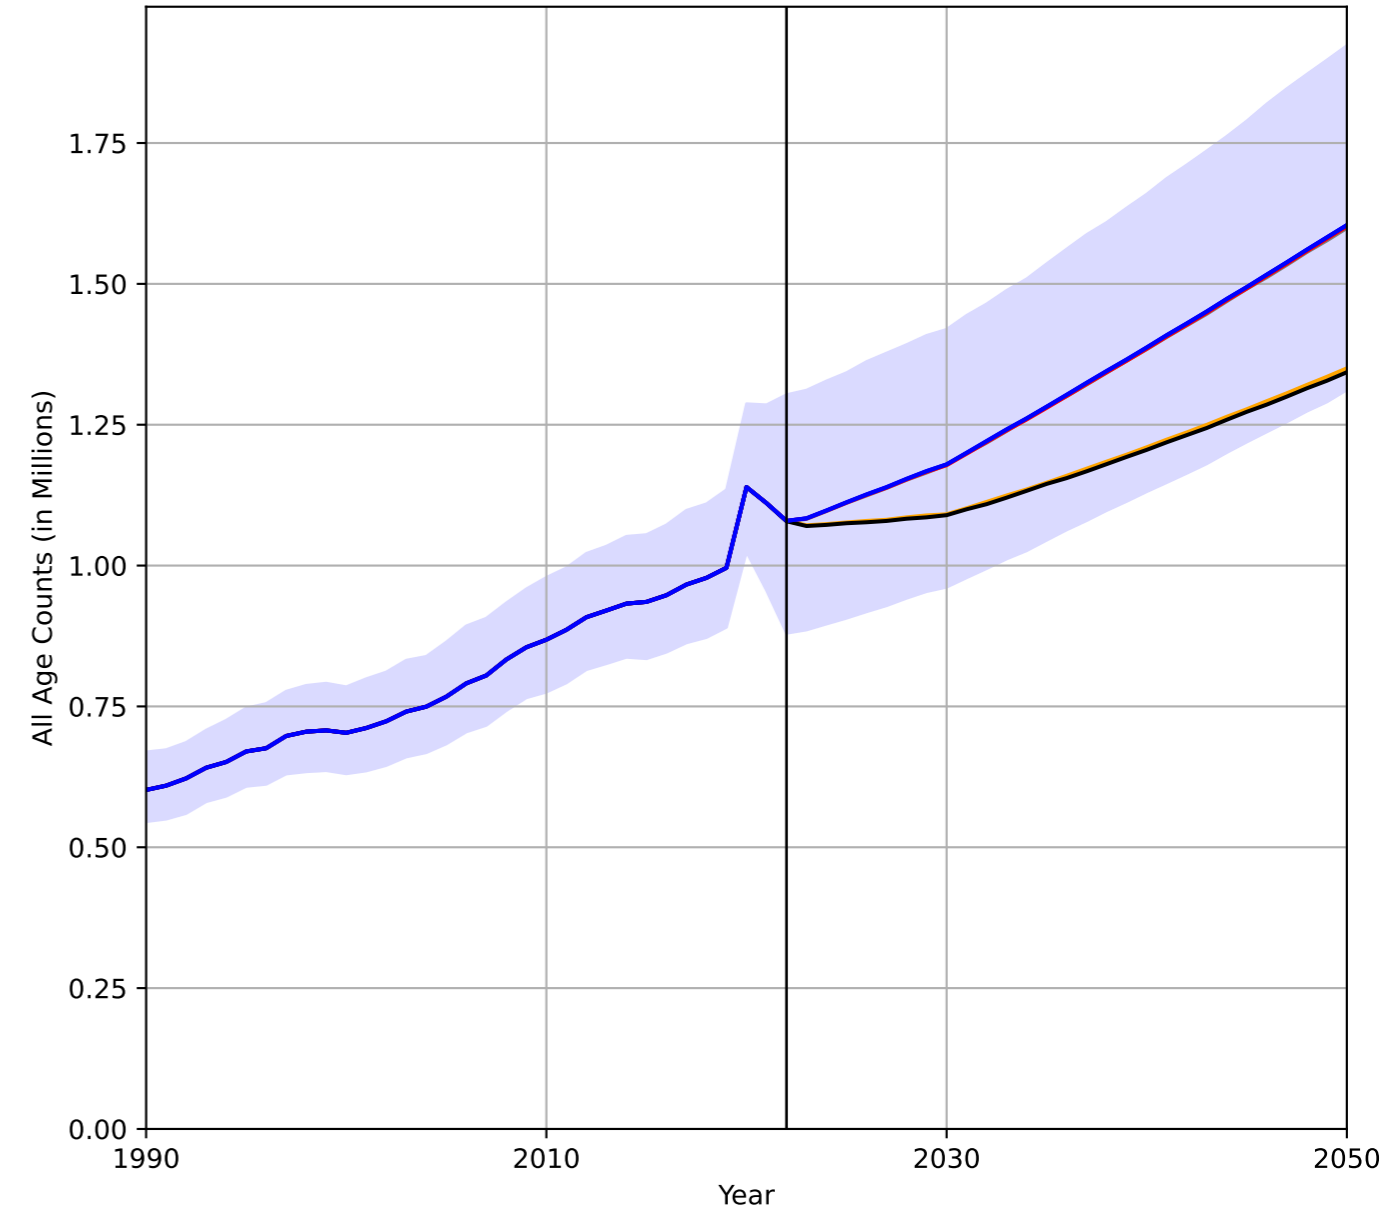

# Venezuela

Supplemental Results Figure S10. All-cause age standardised DALY rates (A) and all age DALY counts (B), for the past and for five future scenarios, 1990–2050

1506

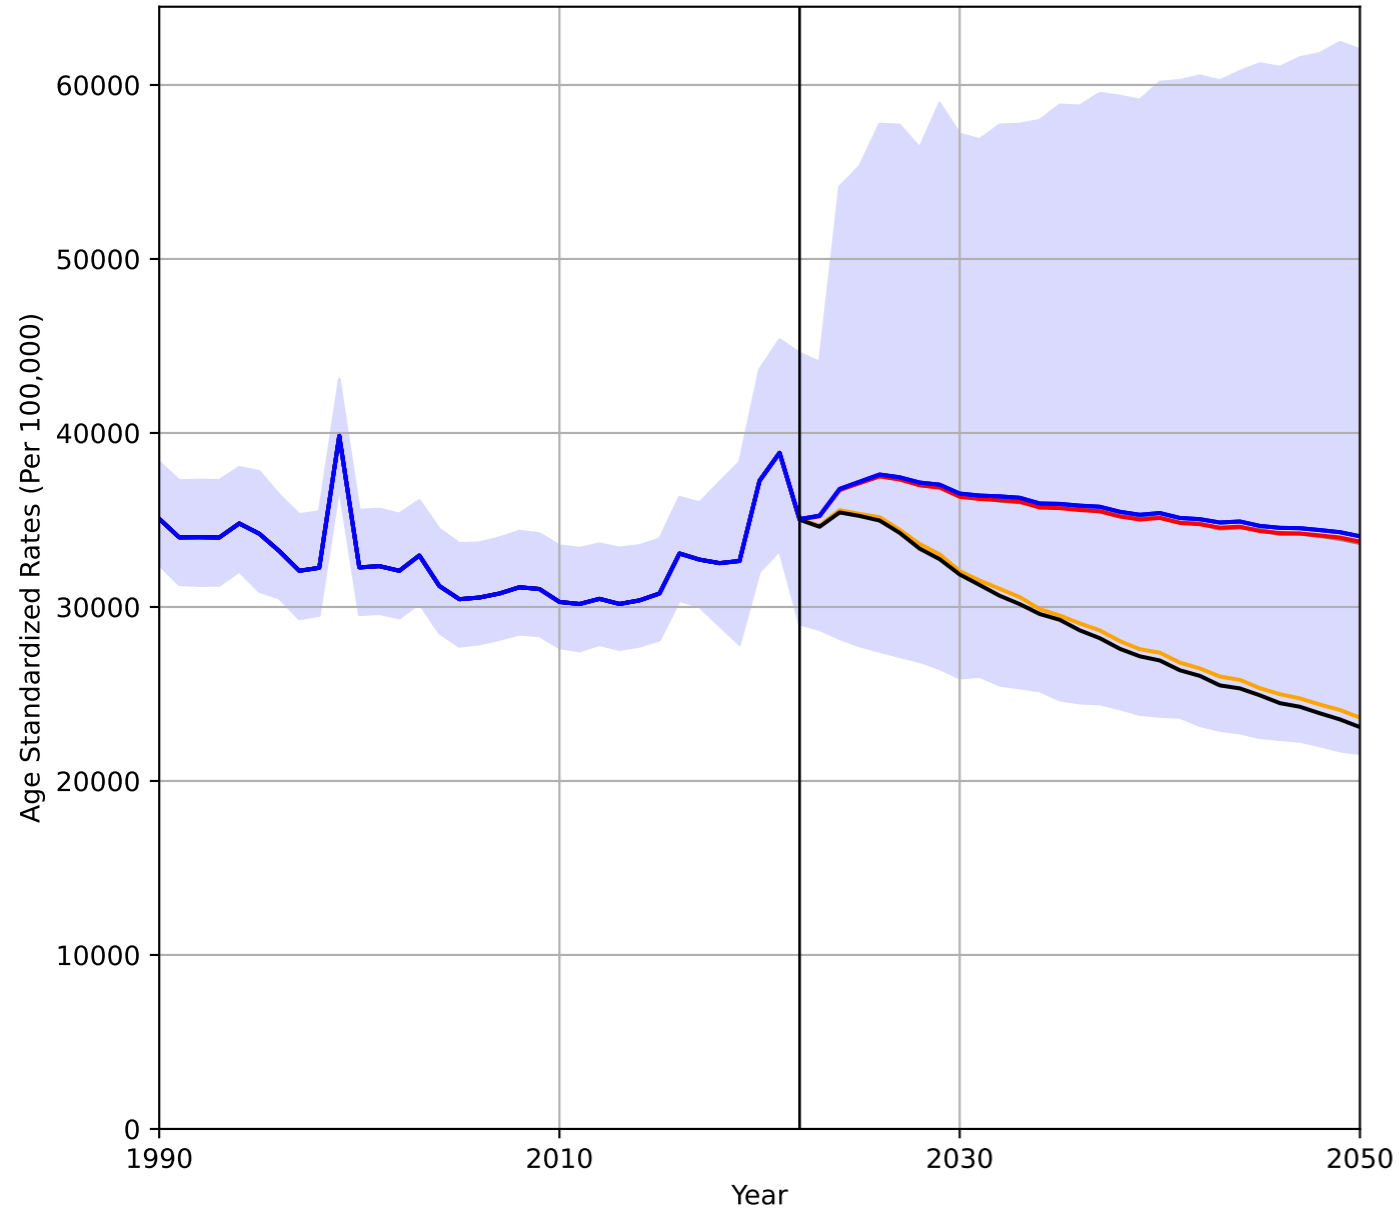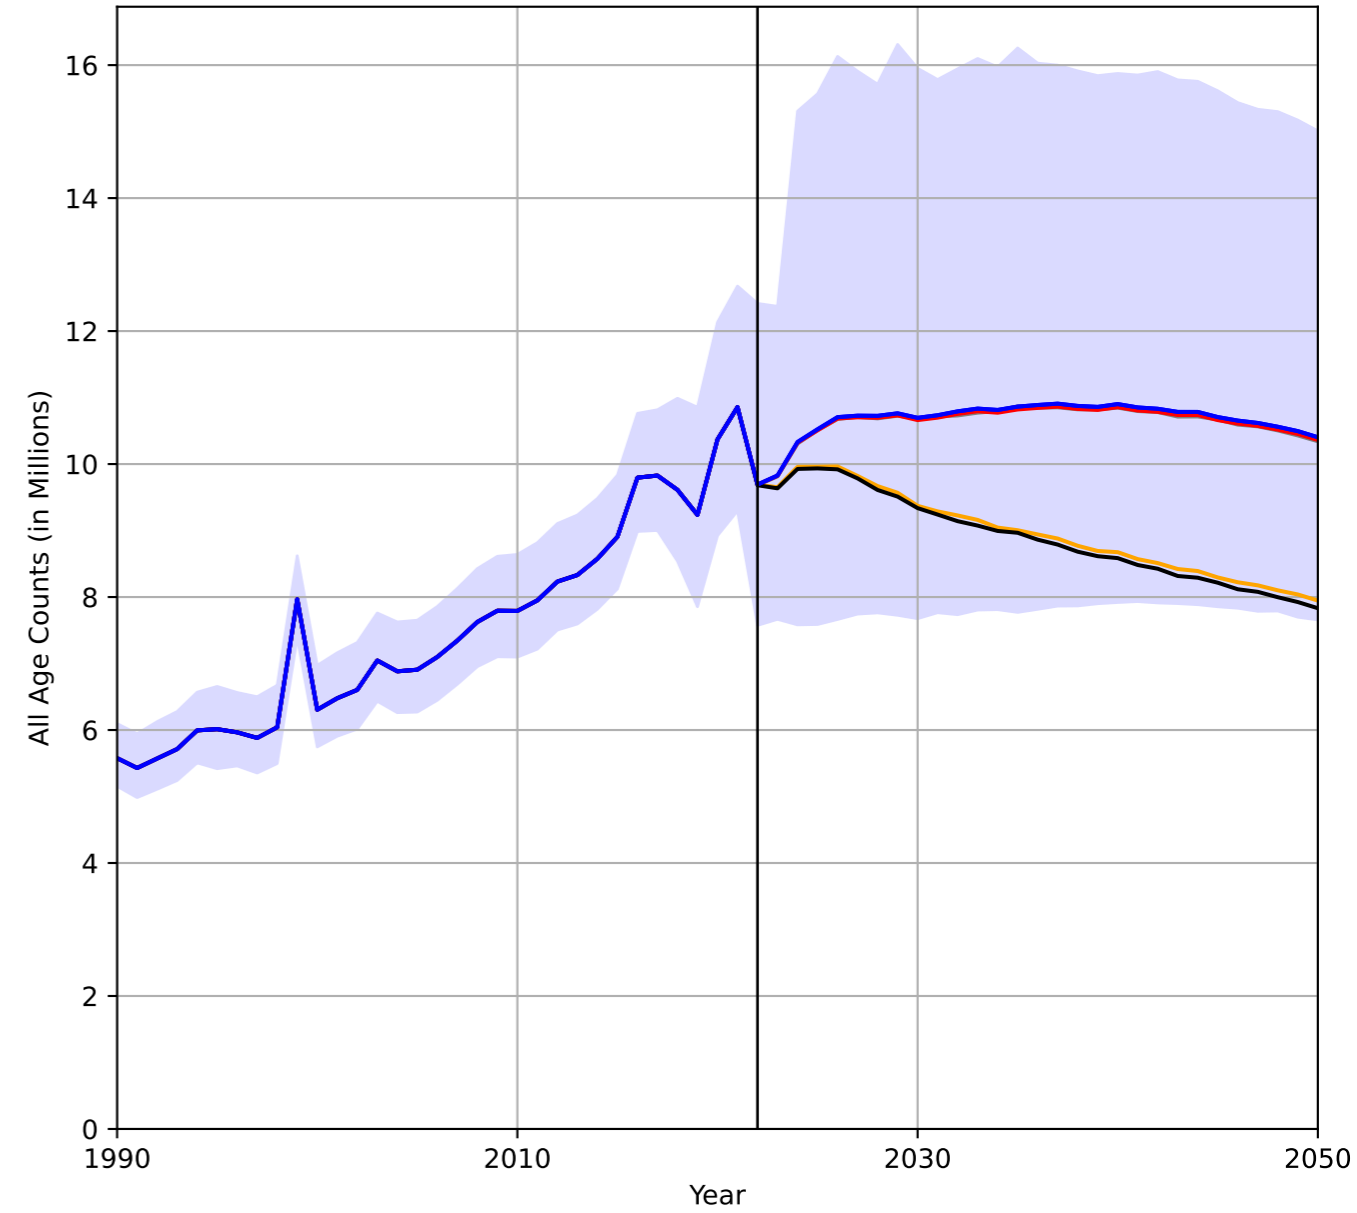

# Brazil

Supplemental Results Figure S10. All-cause age standardised DALY rates (A) and all age DALY counts (B), for the past and for five future scenarios, 1990–2050

1507

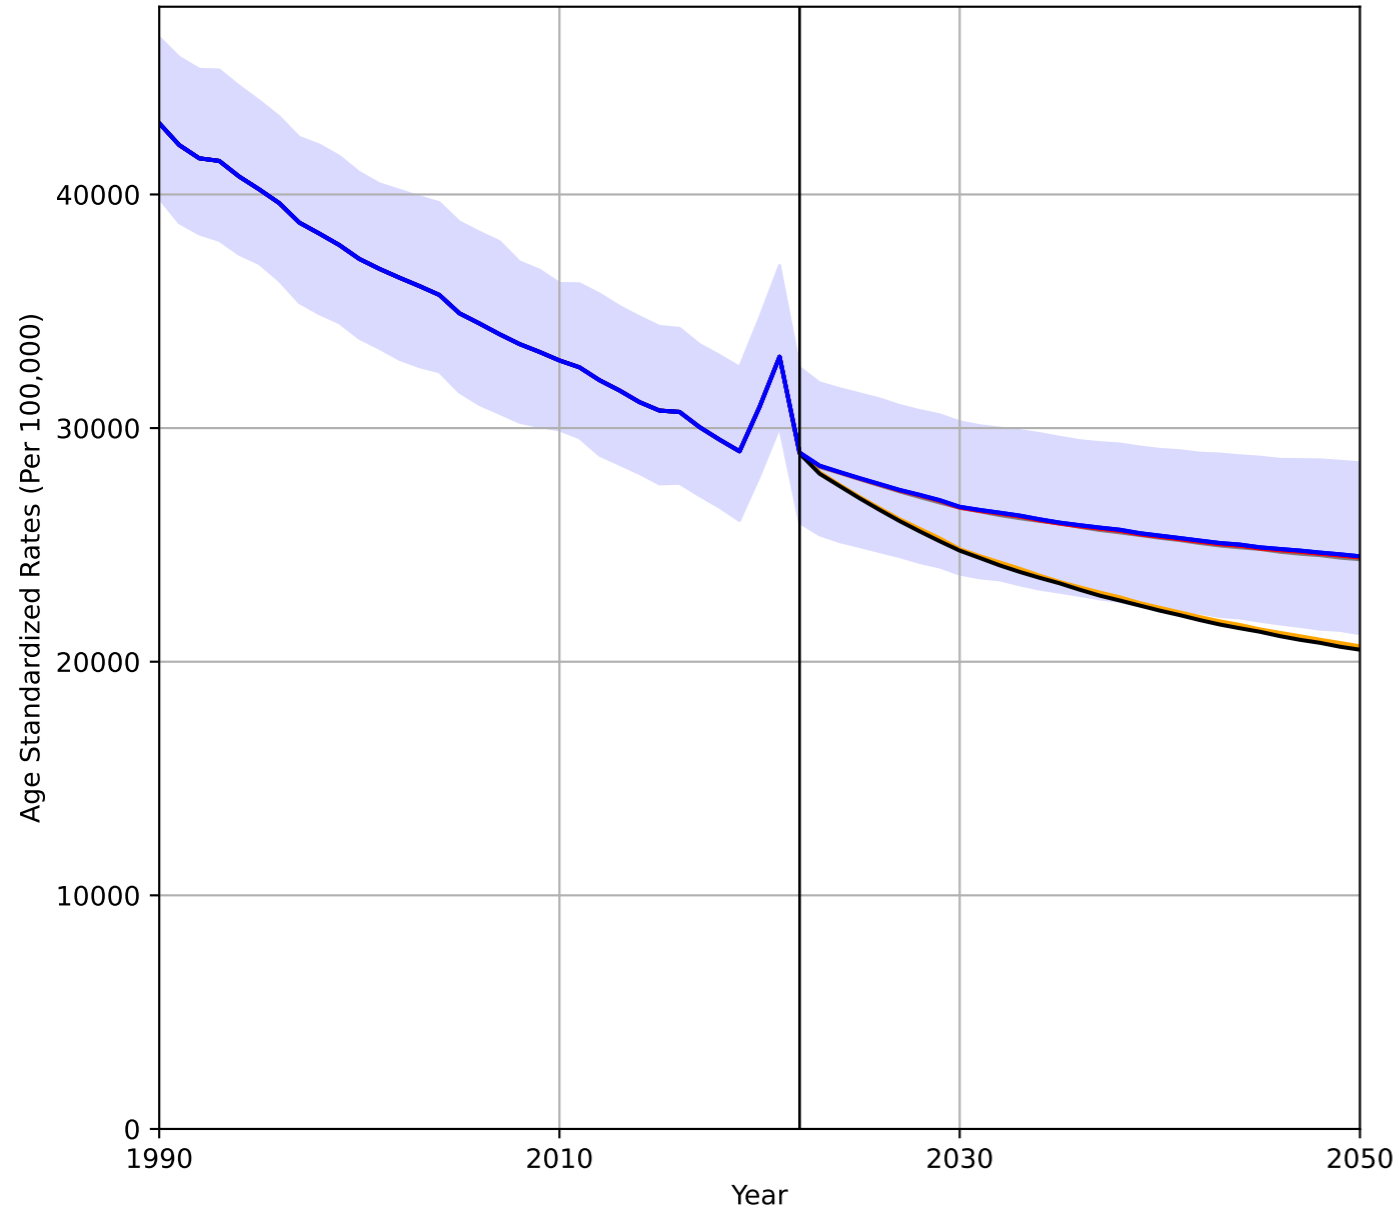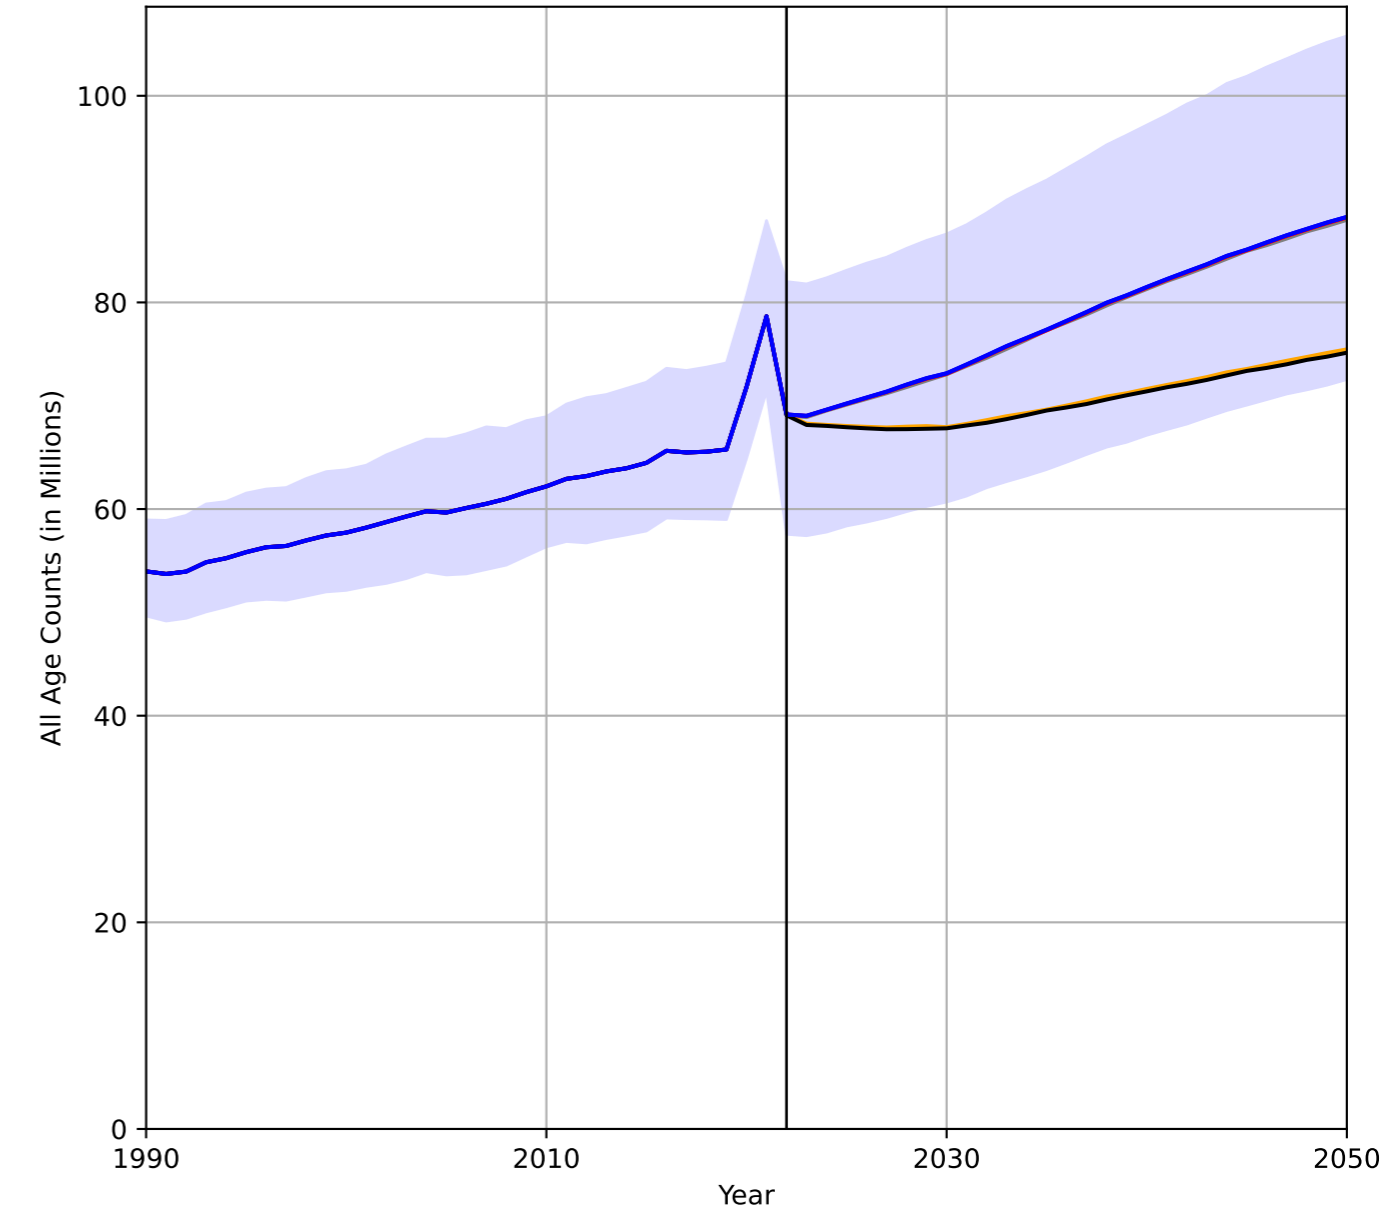

# Paraguay

Supplemental Results Figure S10. All-cause age standardised DALY rates (A) and all age DALY counts (B), for the past and for five future scenarios, 1990–2050

1508

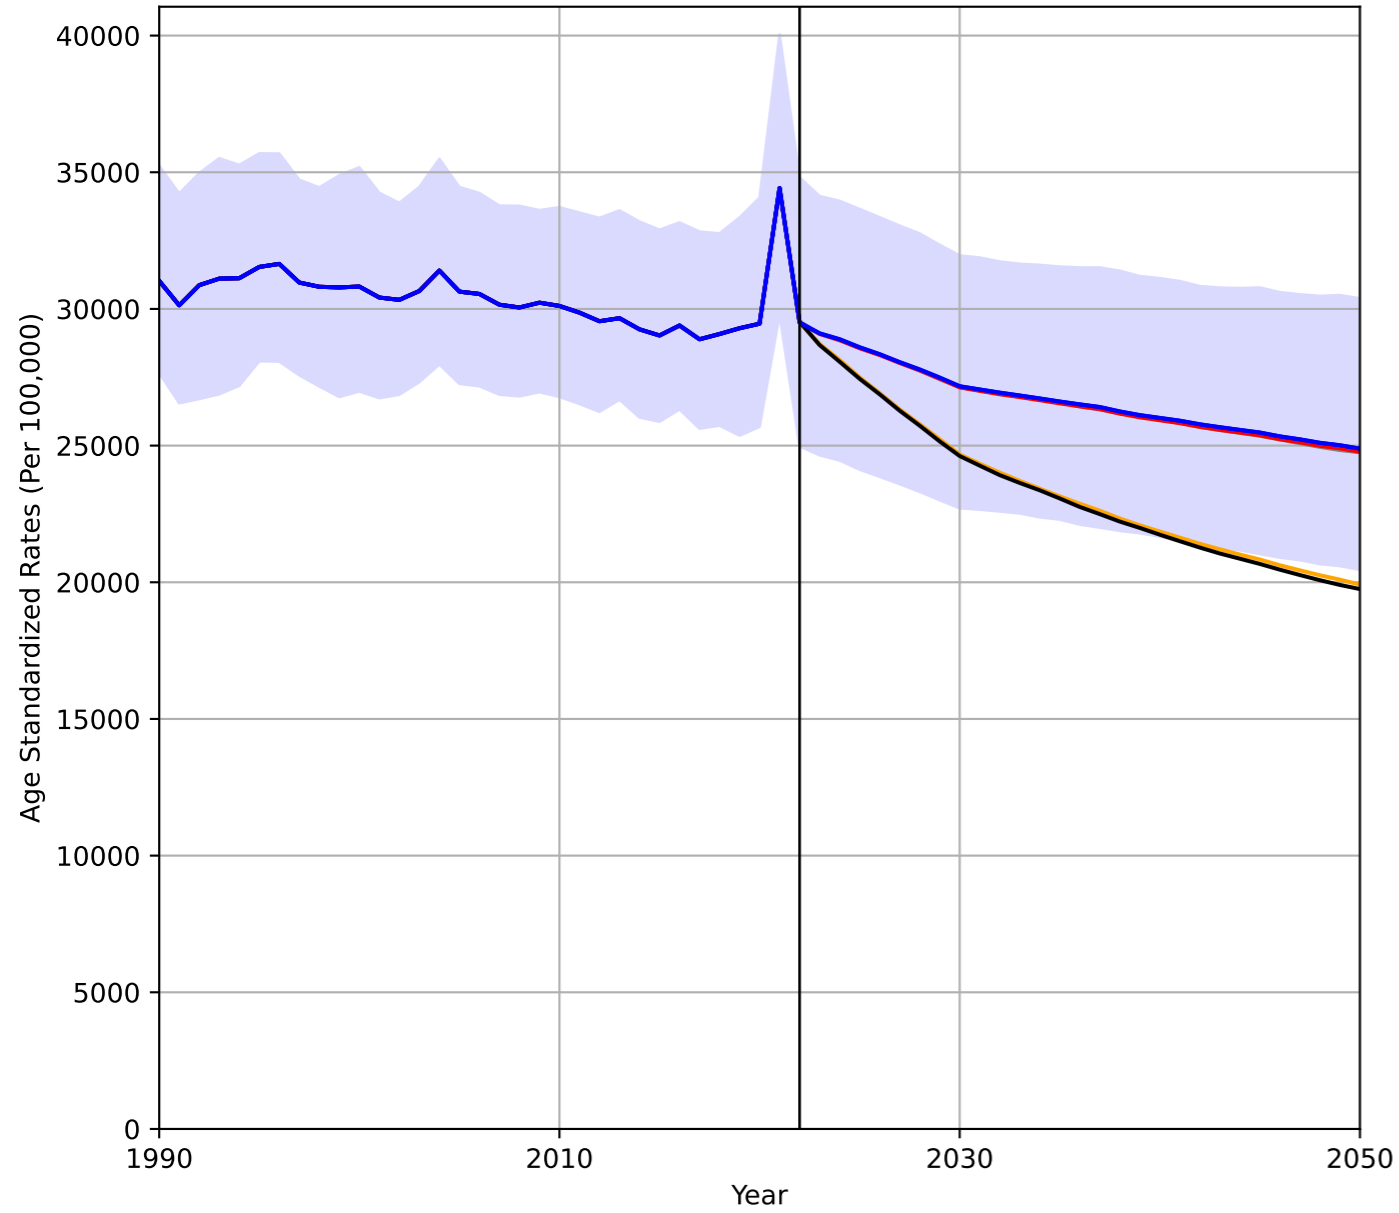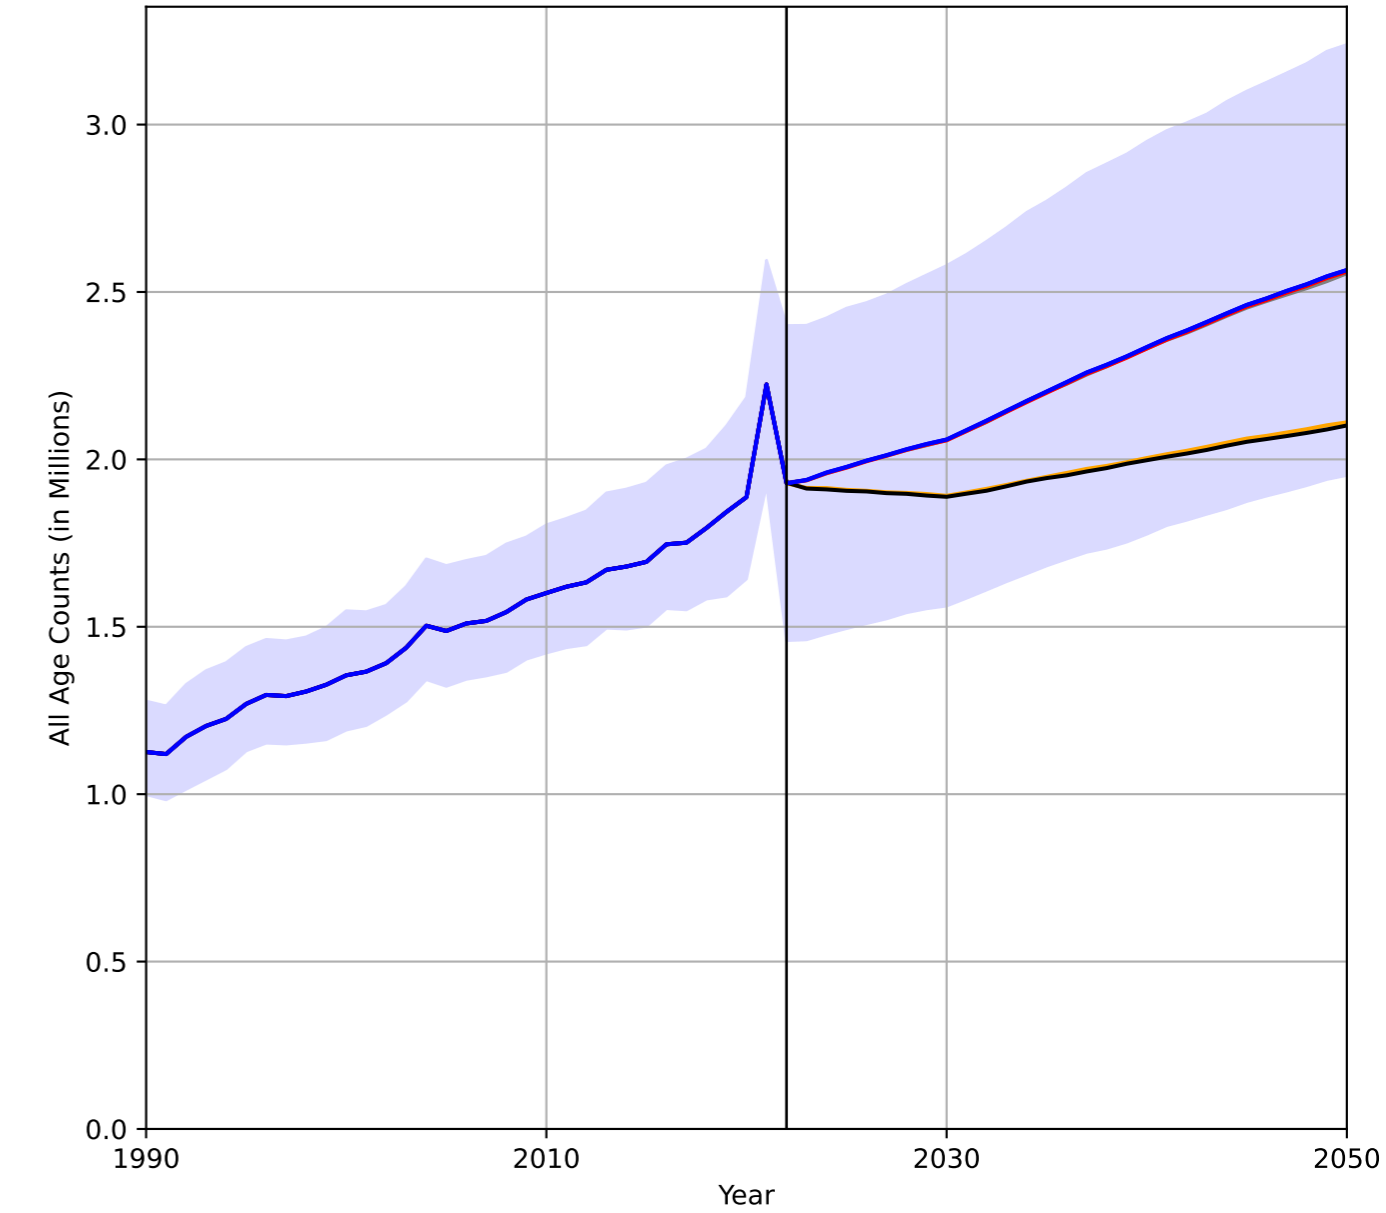

# Afghanistan

Supplemental Results Figure S10. All-cause age standardised DALY rates (A) and all age DALY counts (B), for the past and for five future scenarios, 1990–2050

1509

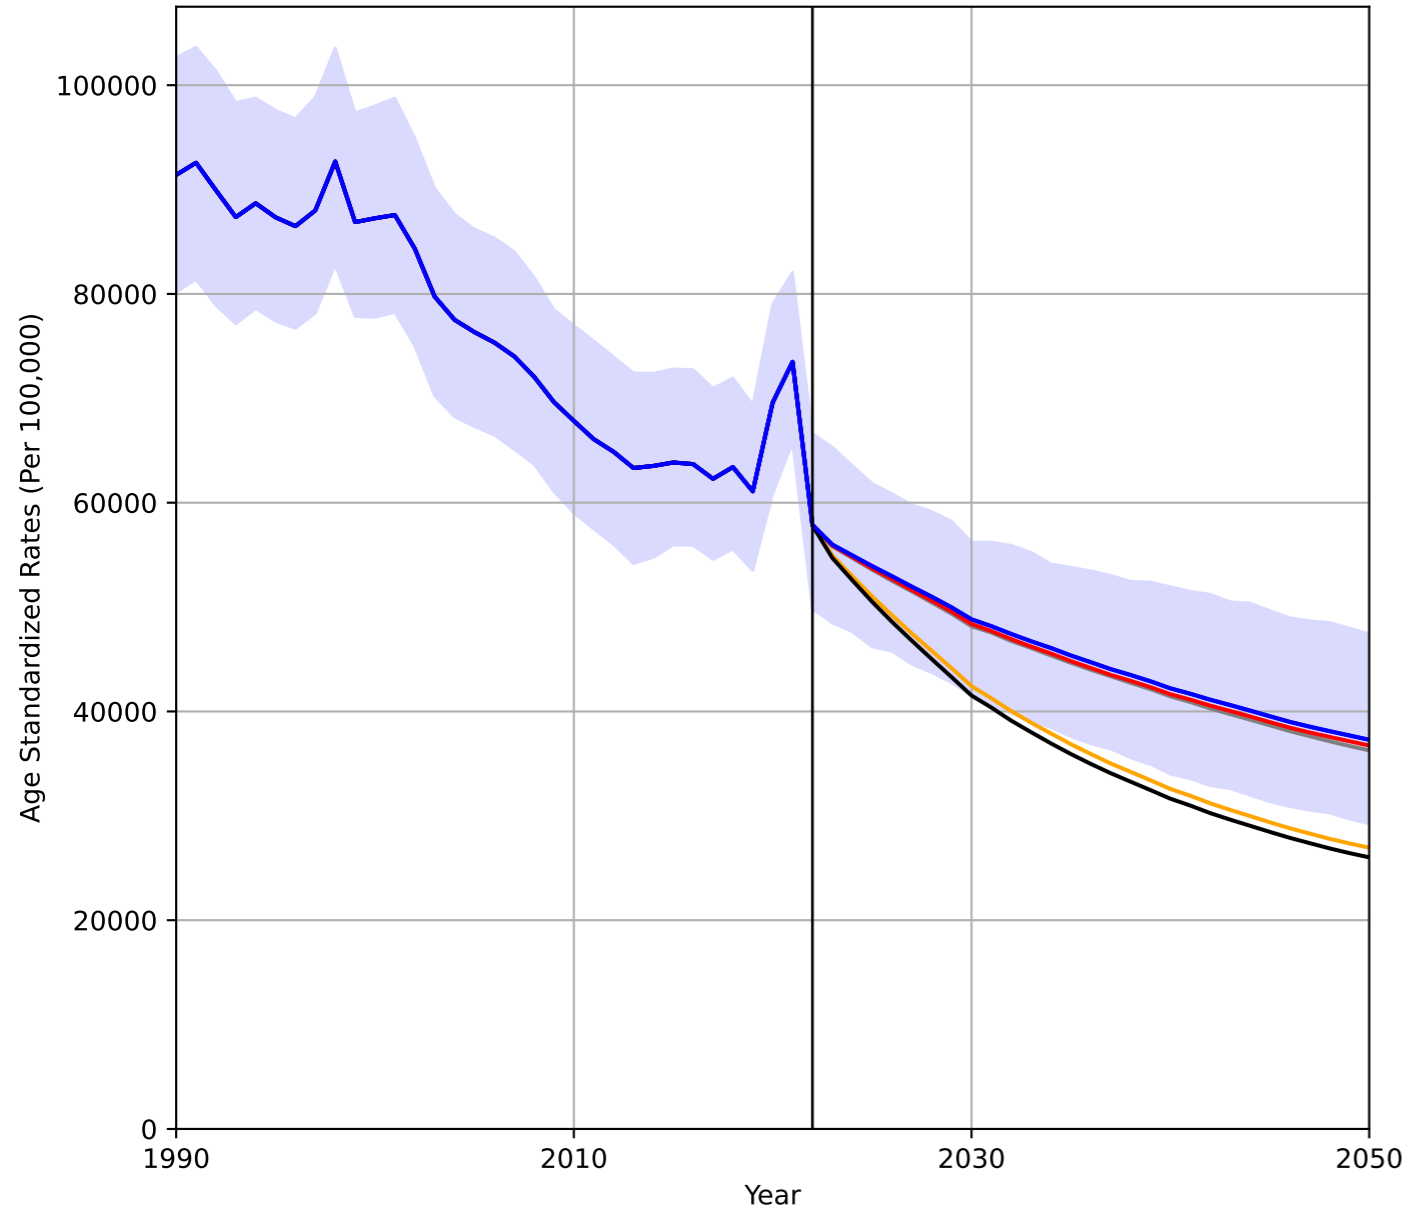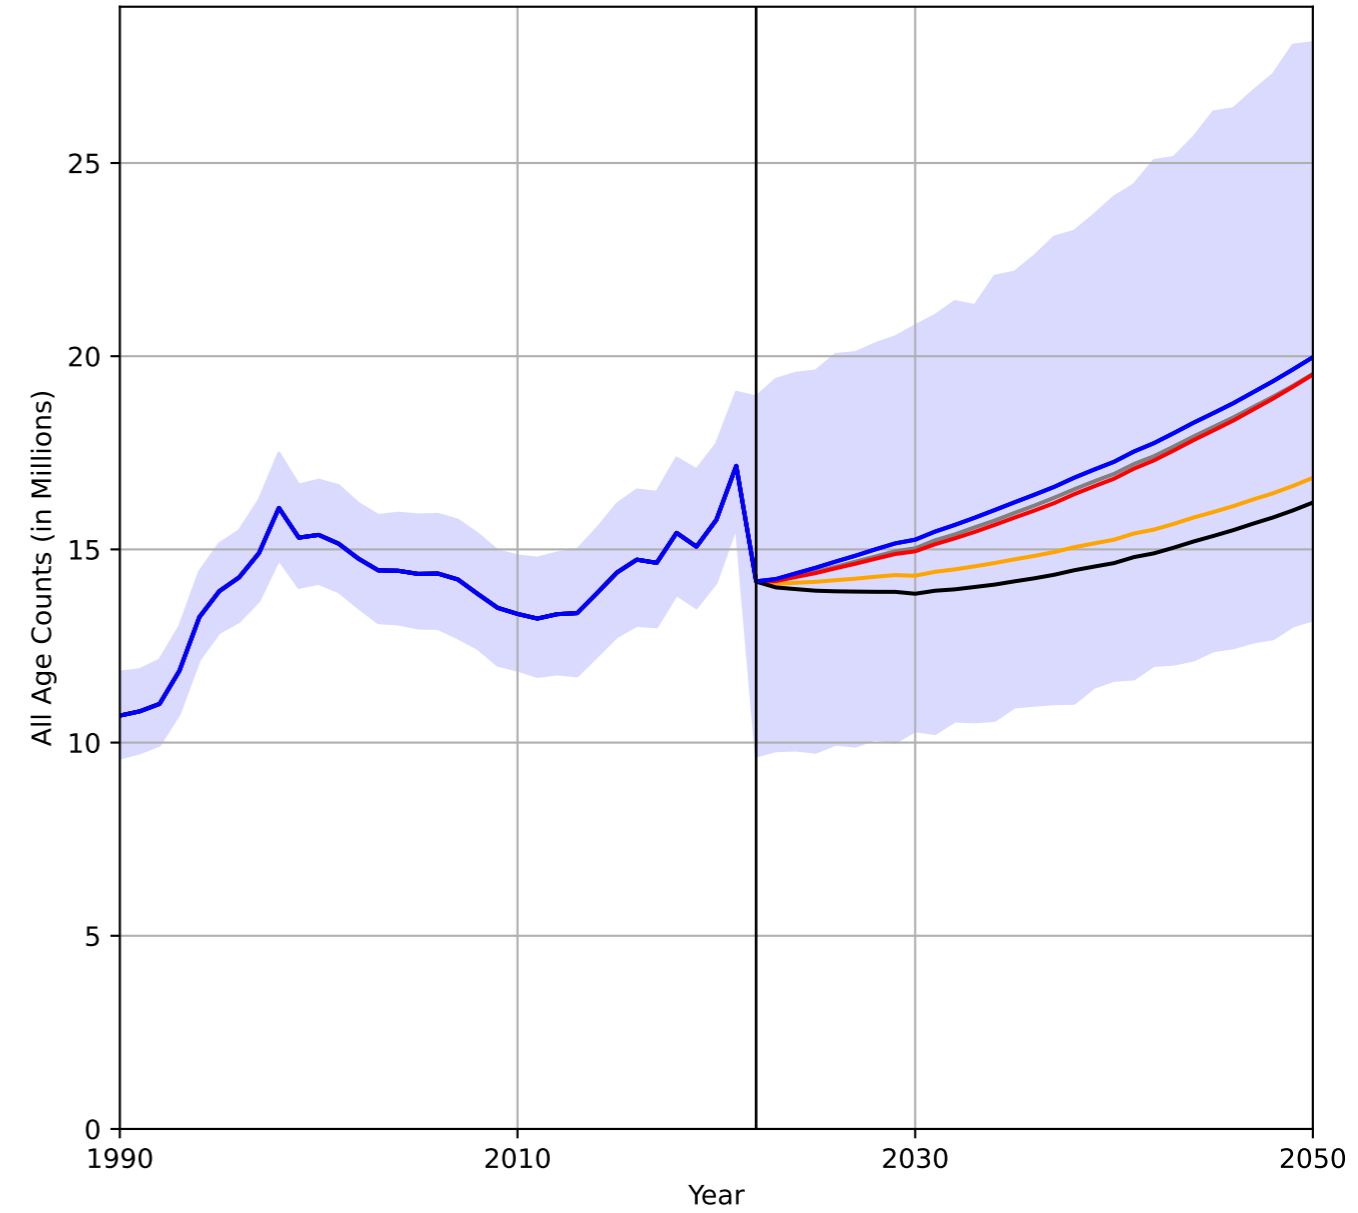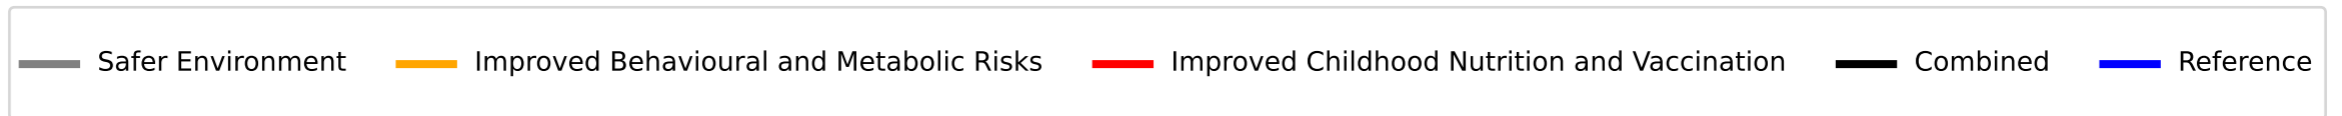

# Algeria

Supplemental Results Figure S10. All-cause age standardised DALY rates (A) and all age DALY counts (B), for the past and for five future scenarios, 1990–2050

1510

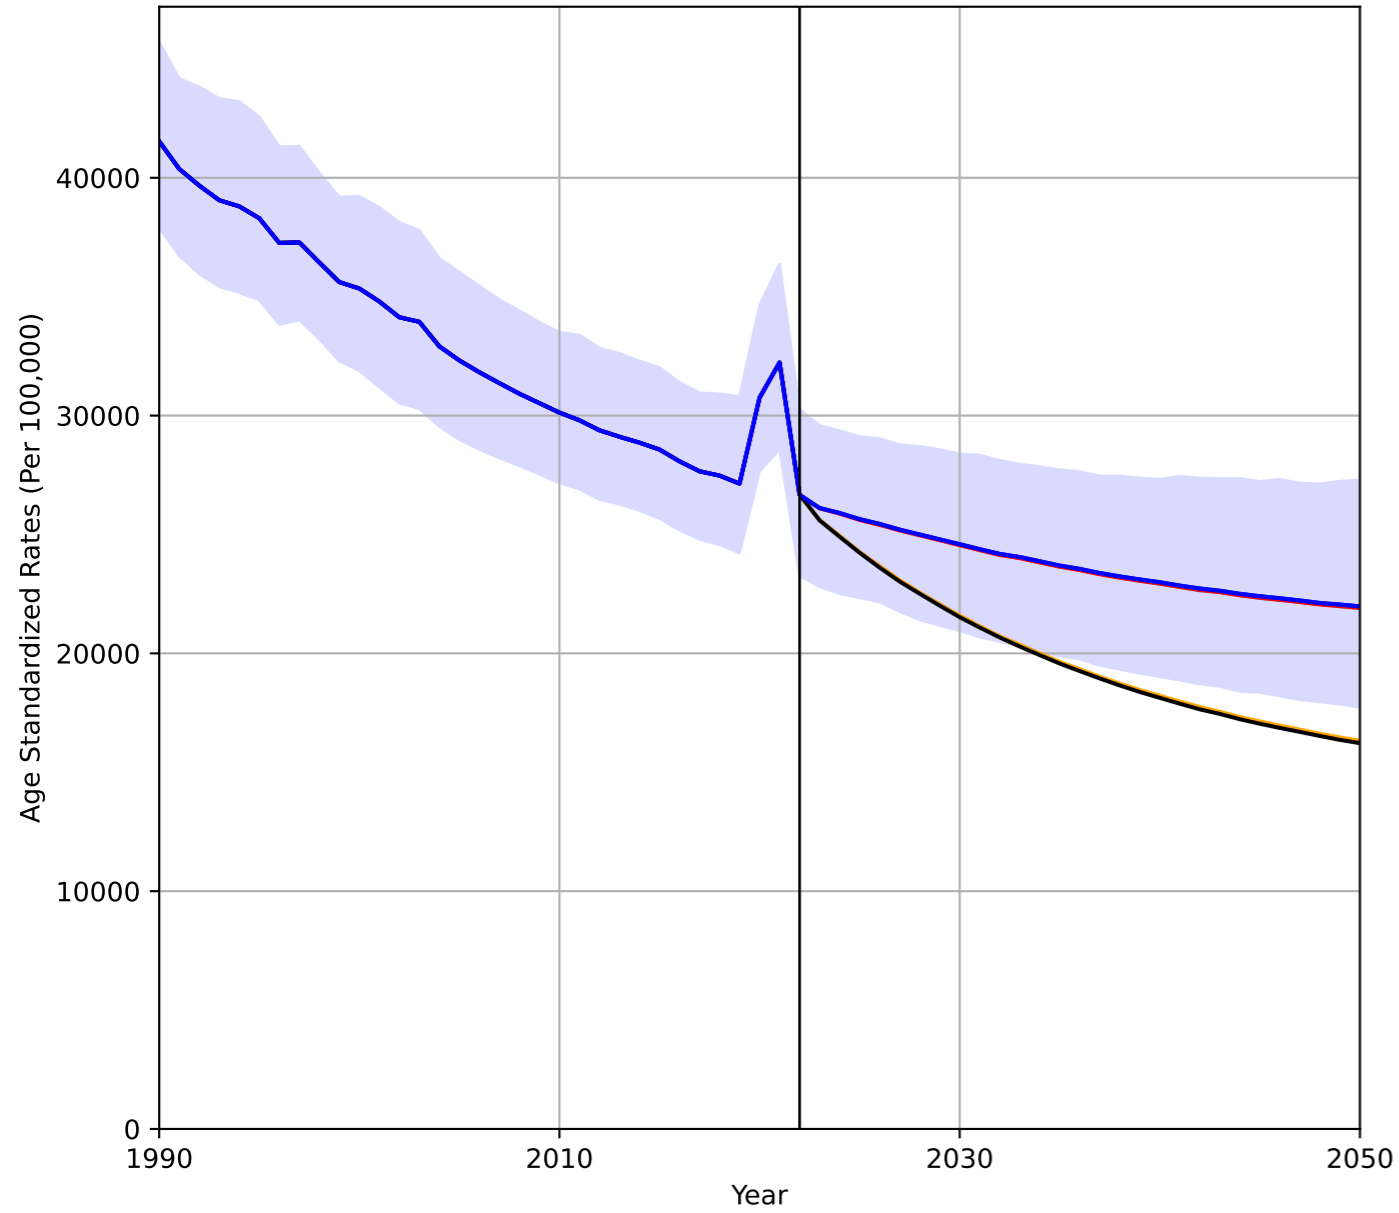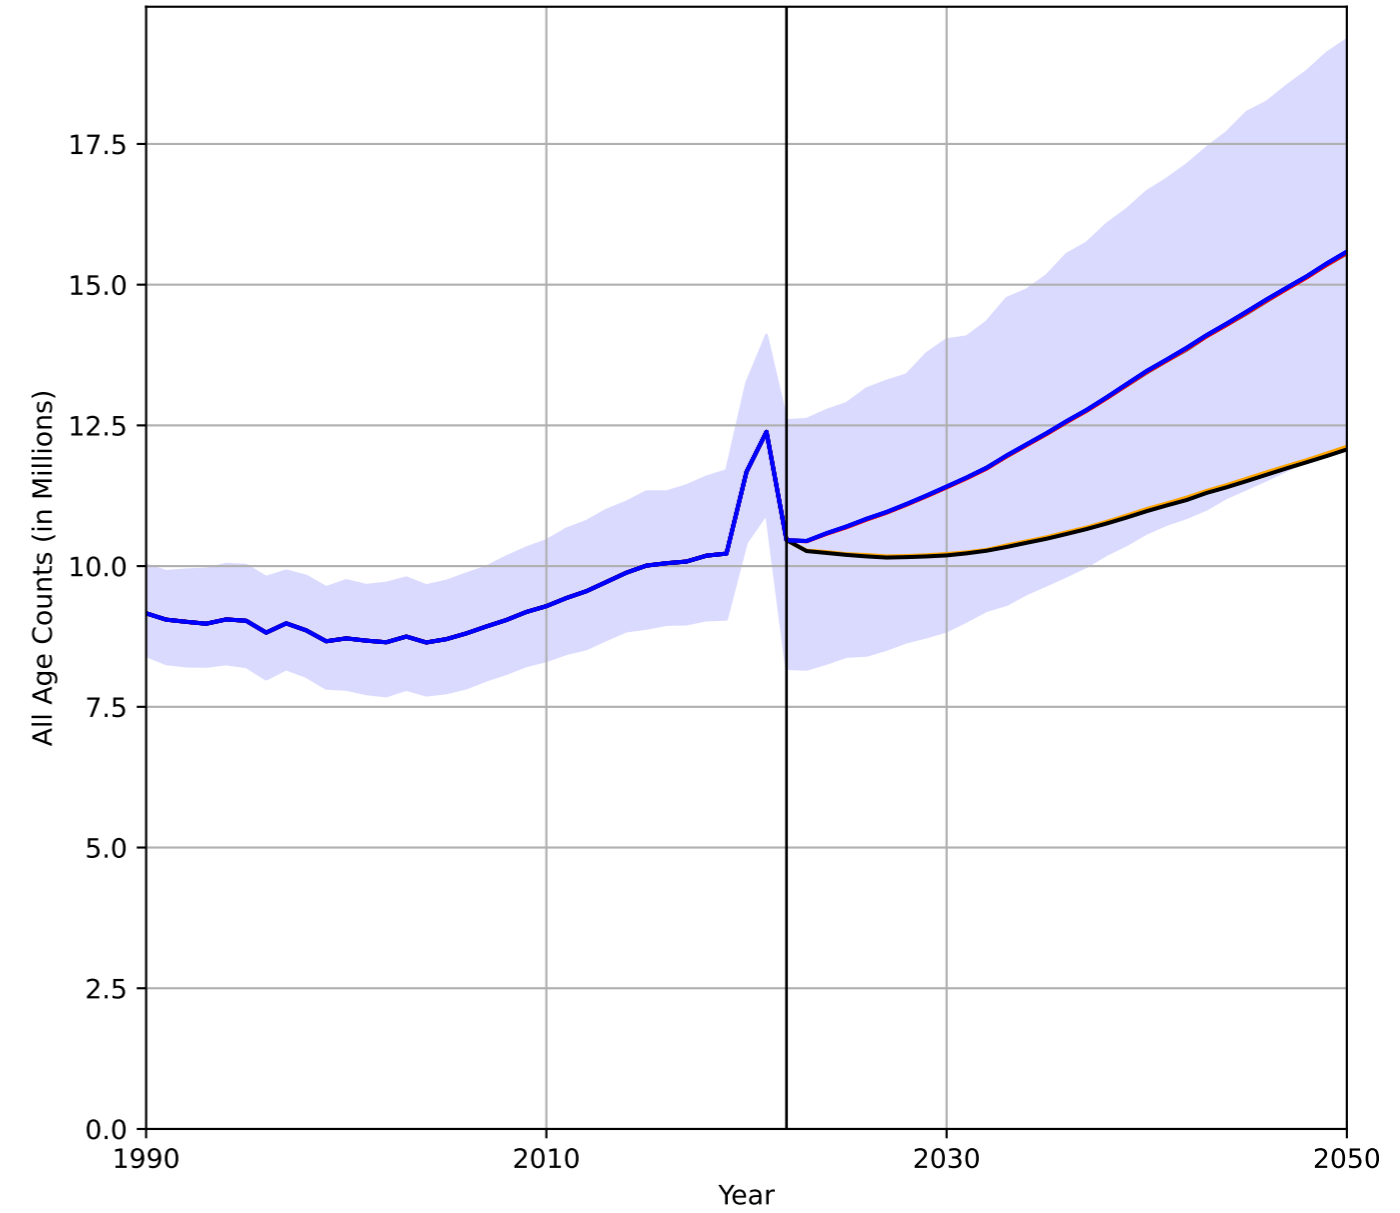

# Bahrain

Supplemental Results Figure S10. All-cause age standardised DALY rates (A) and all age DALY counts (B), for the past and for five future scenarios, 1990–2050

1511

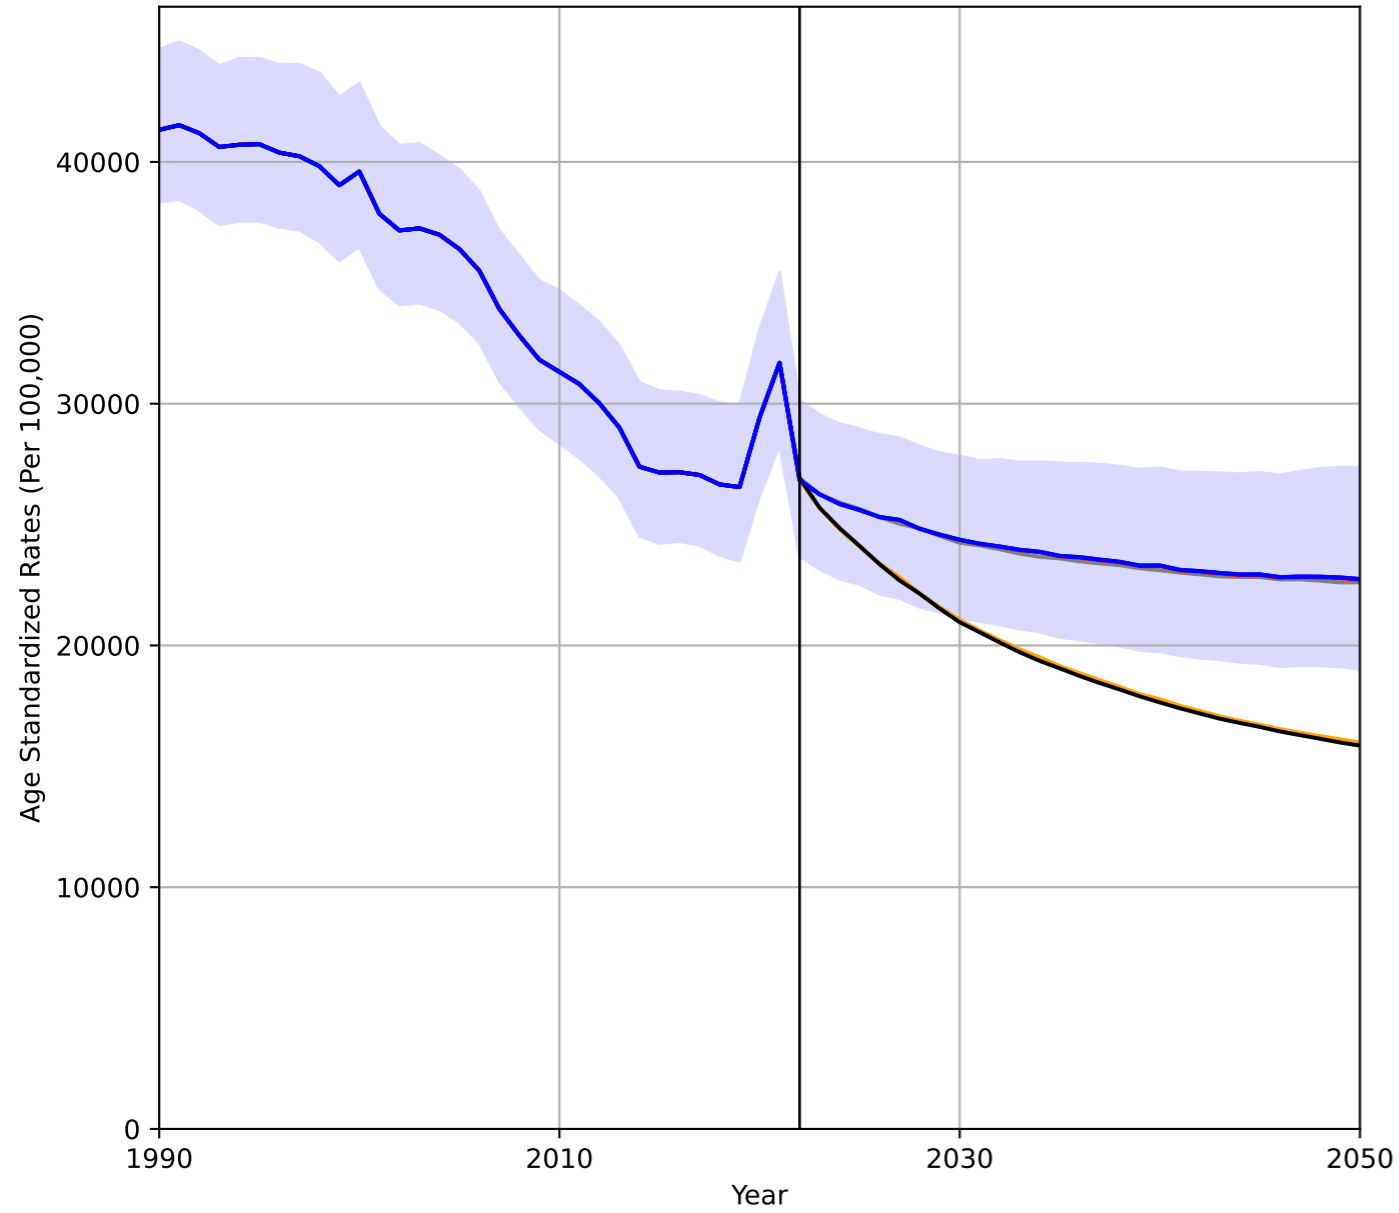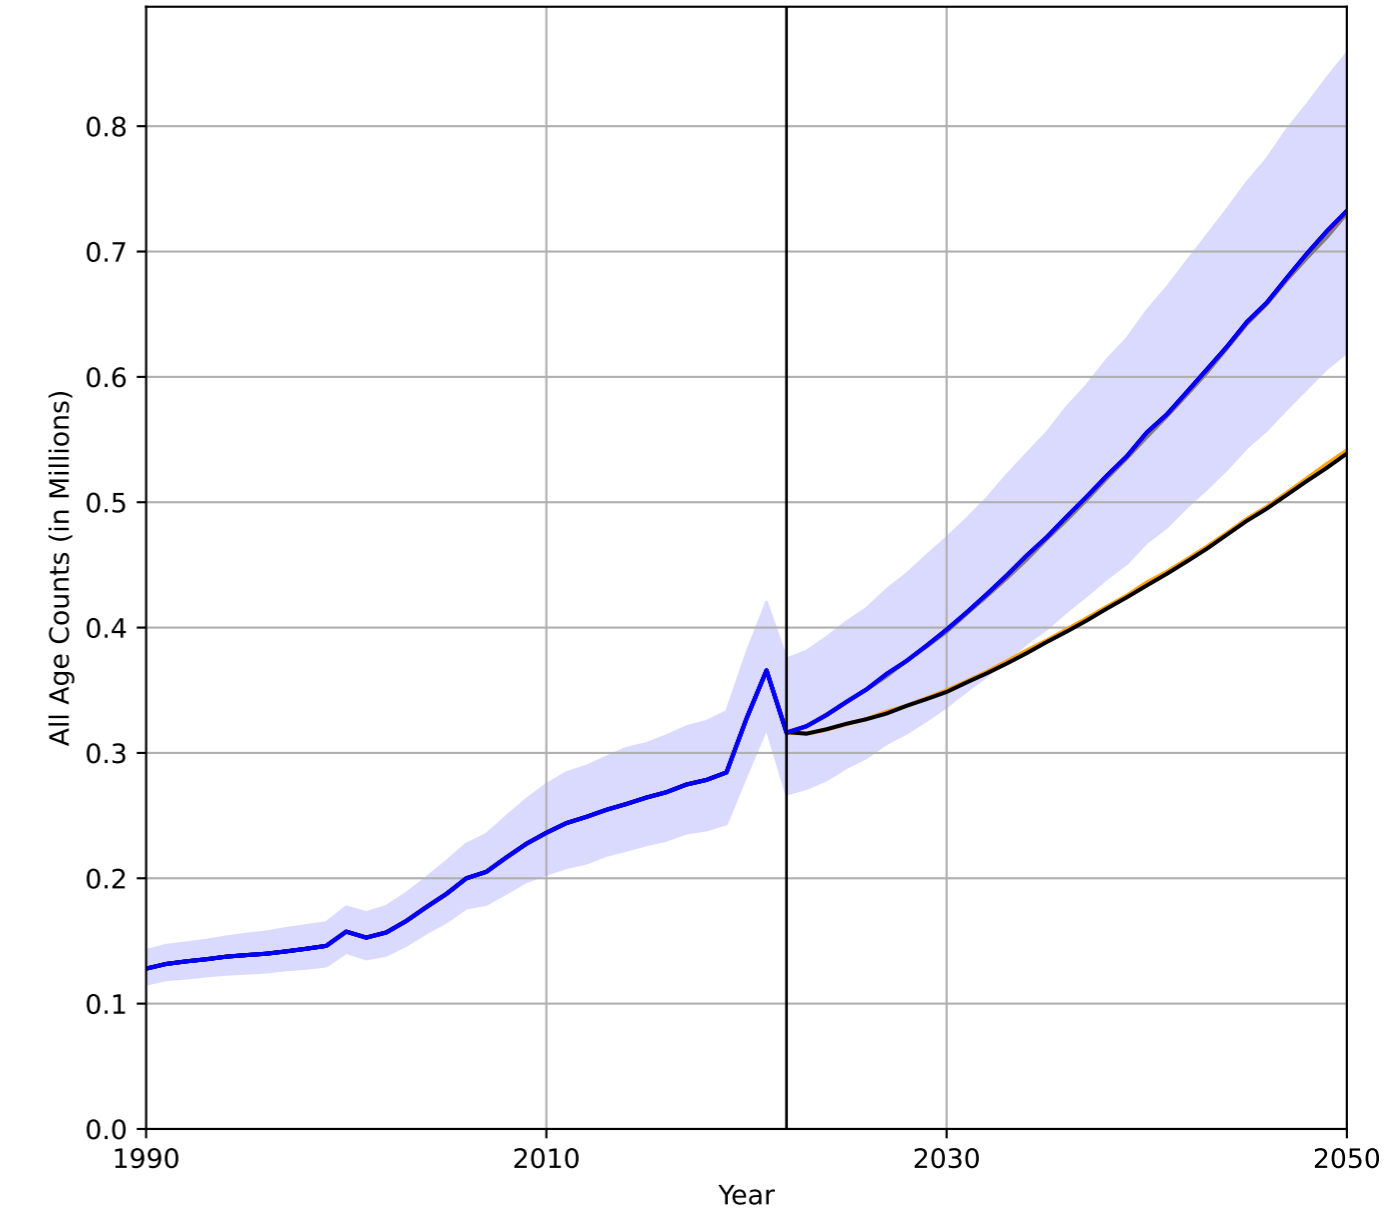



# Egypt

Supplemental Results Figure S10. All-cause age standardised DALY rates (A) and all age DALY counts (B), for the past and for five future scenarios, 1990–2050

1512

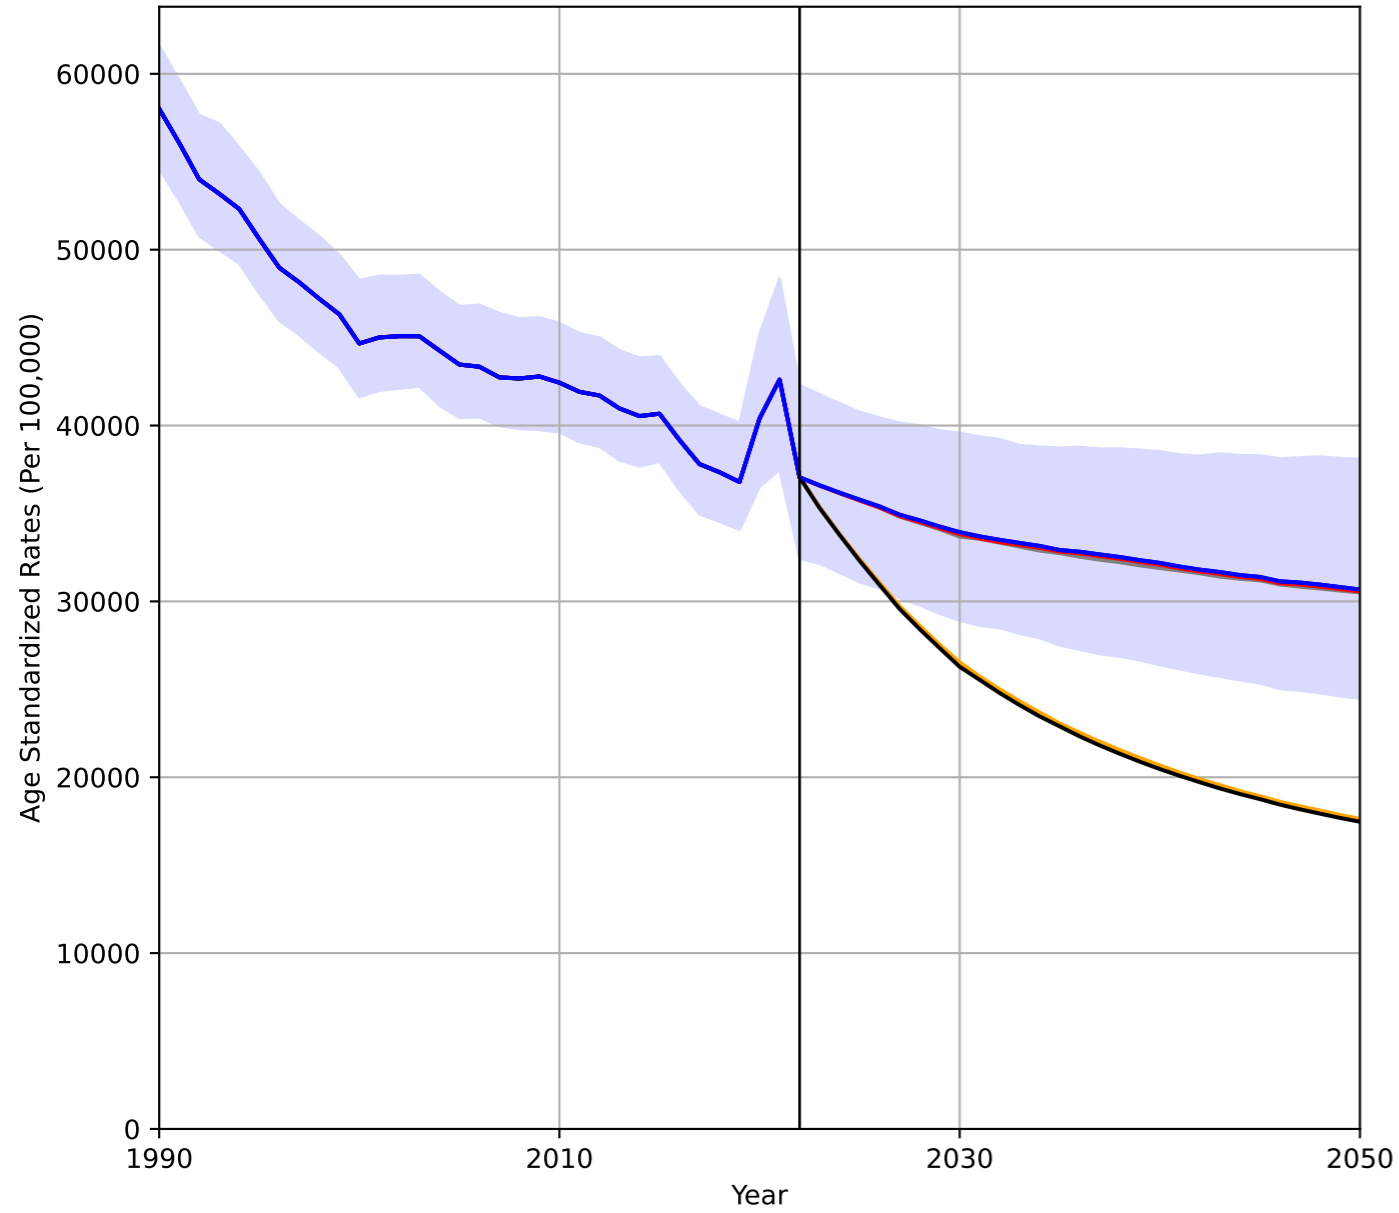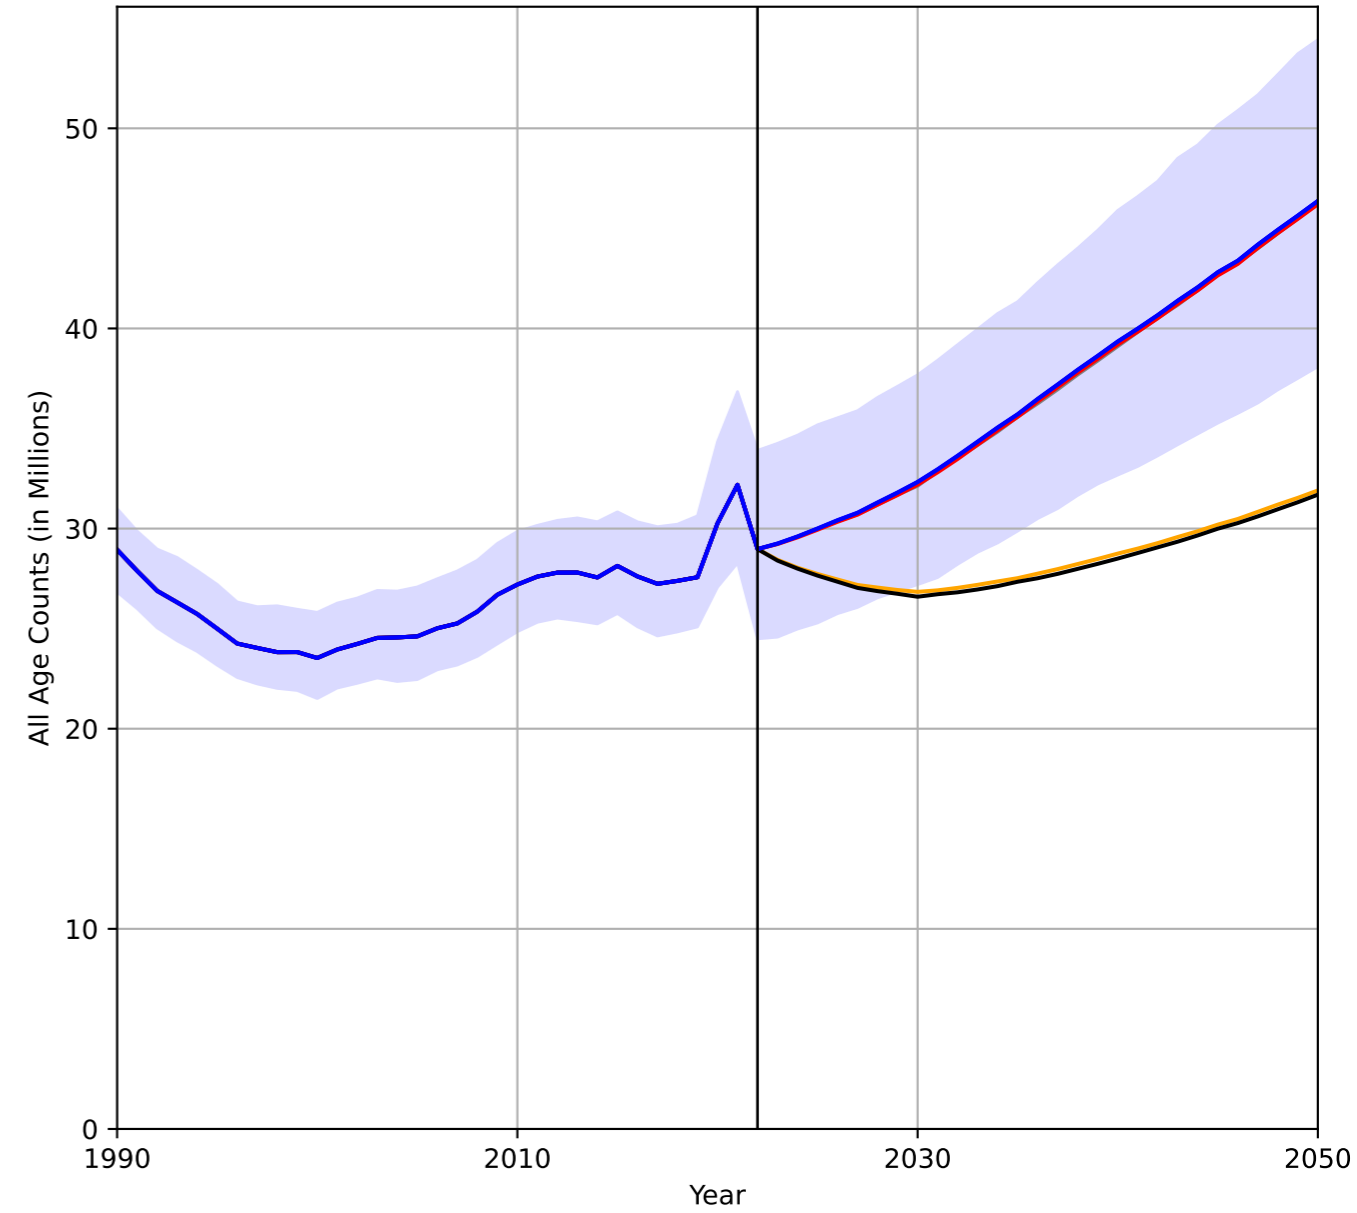

# Iran

Supplemental Results Figure S10. All-cause age standardised DALY rates (A) and all age DALY counts (B), for the past and for five future scenarios, 1990–2050

1513

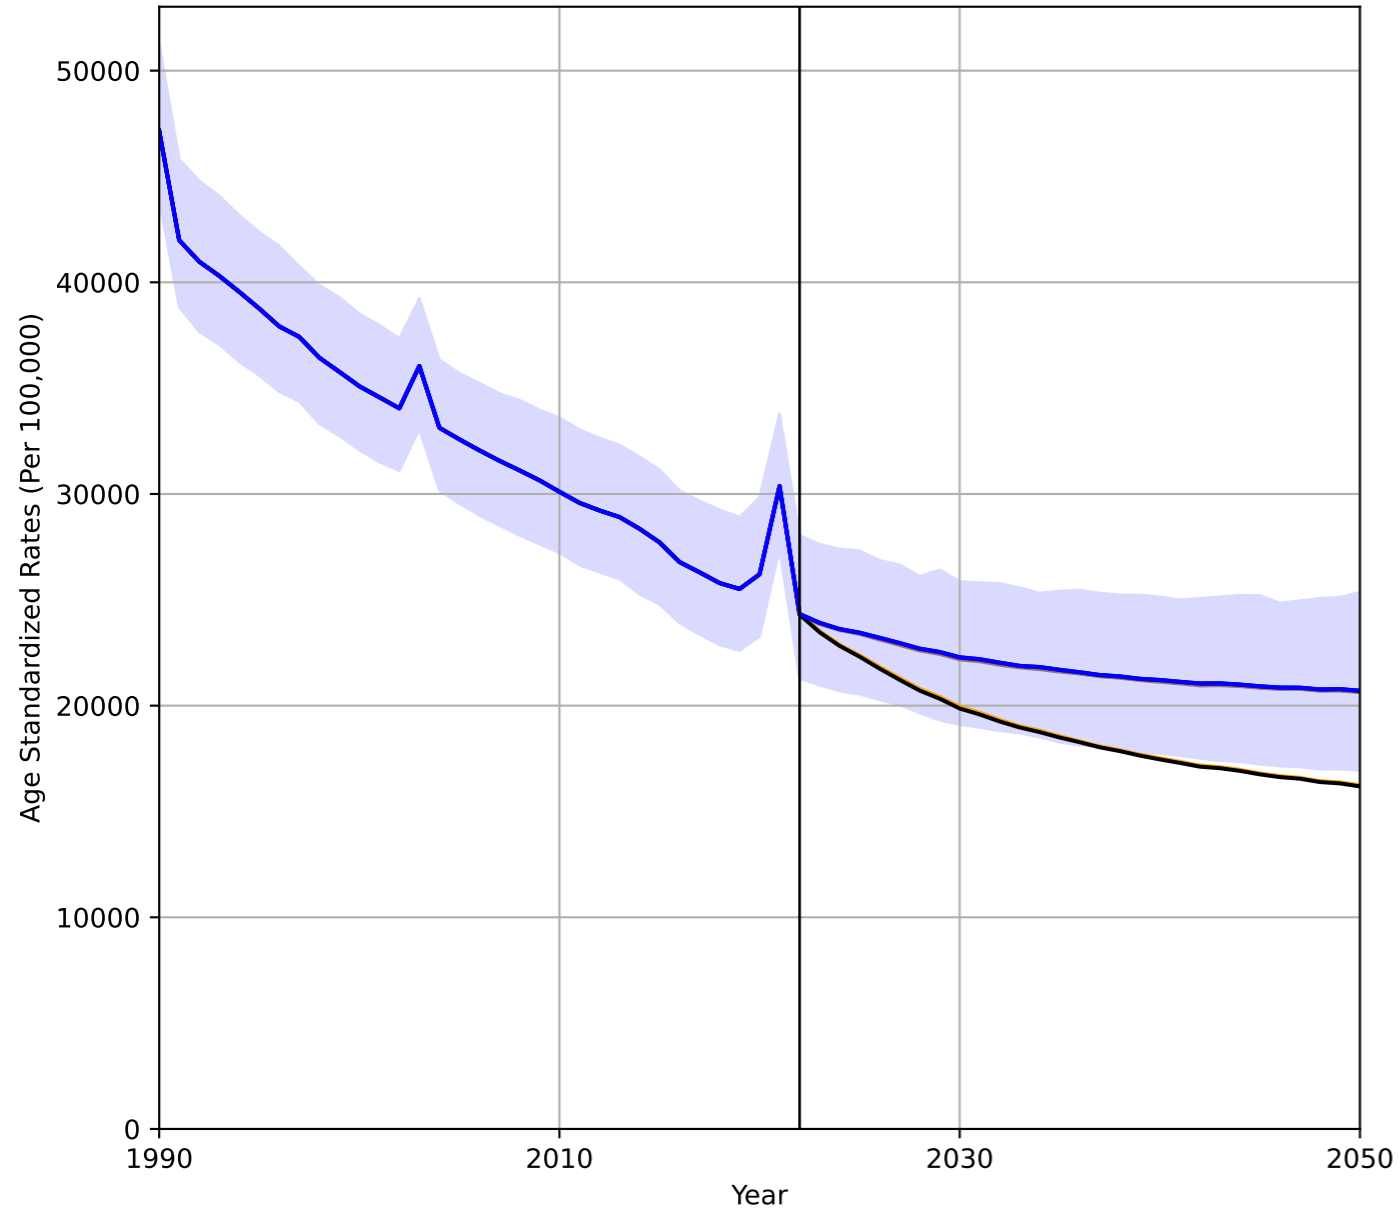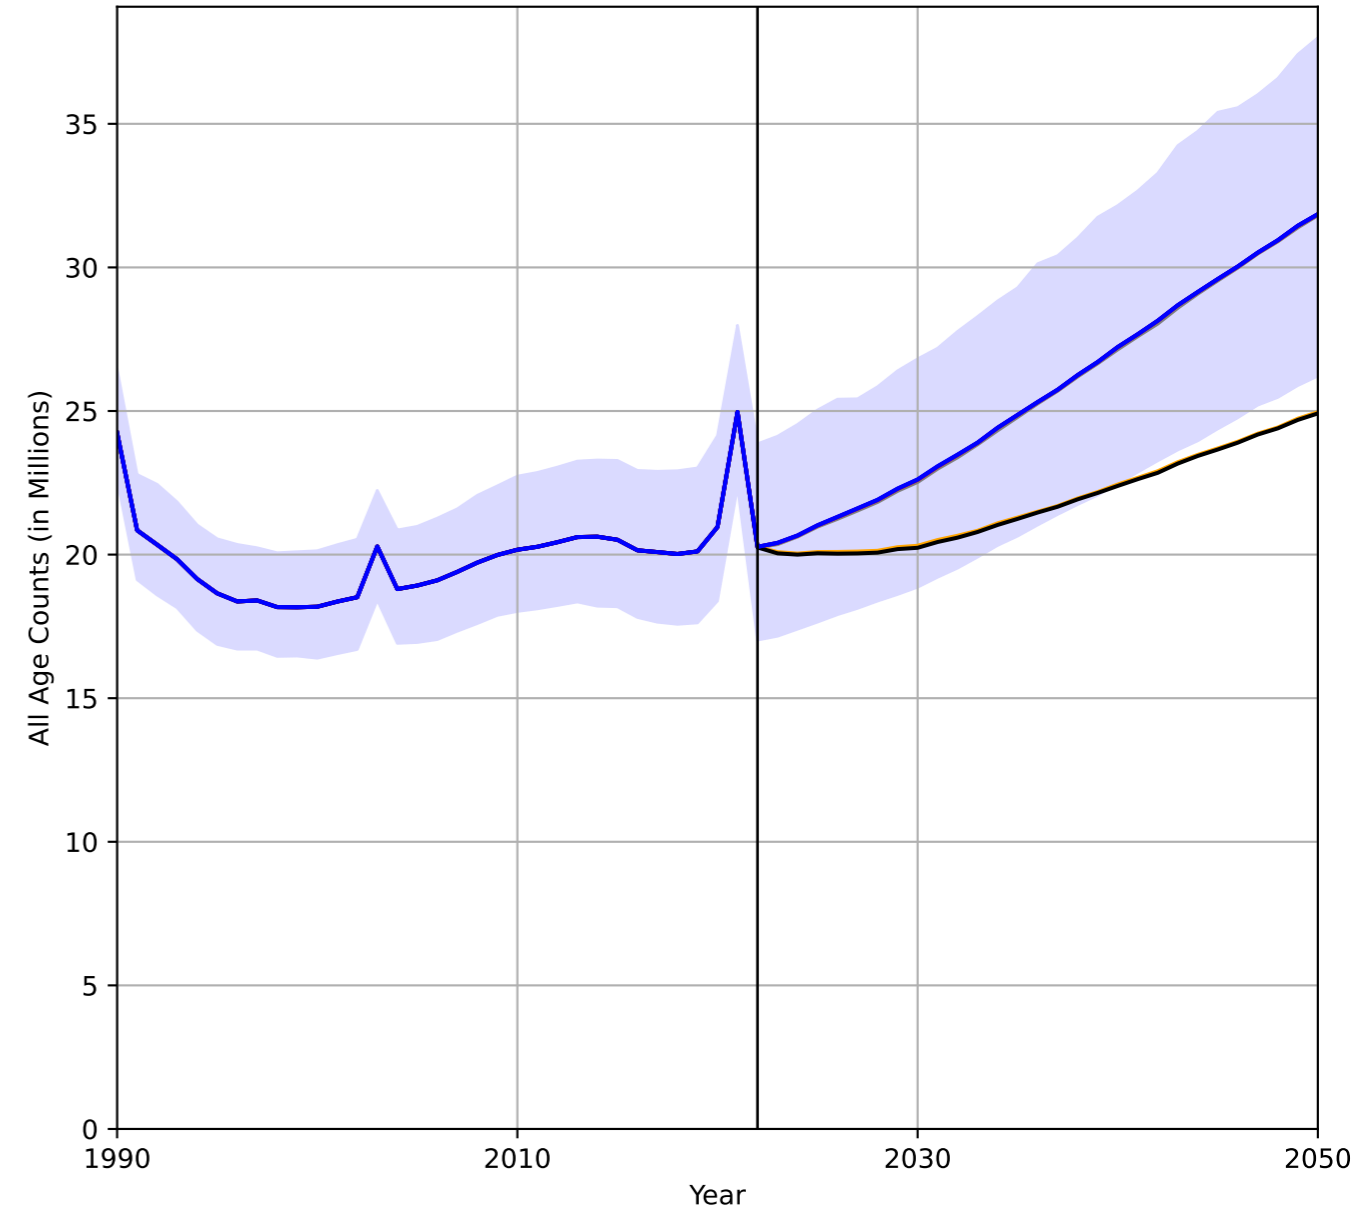

# Iraq

Supplemental Results Figure S10. All-cause age standardised DALY rates (A) and all age DALY counts (B), for the past and for five future scenarios, 1990–2050

1514

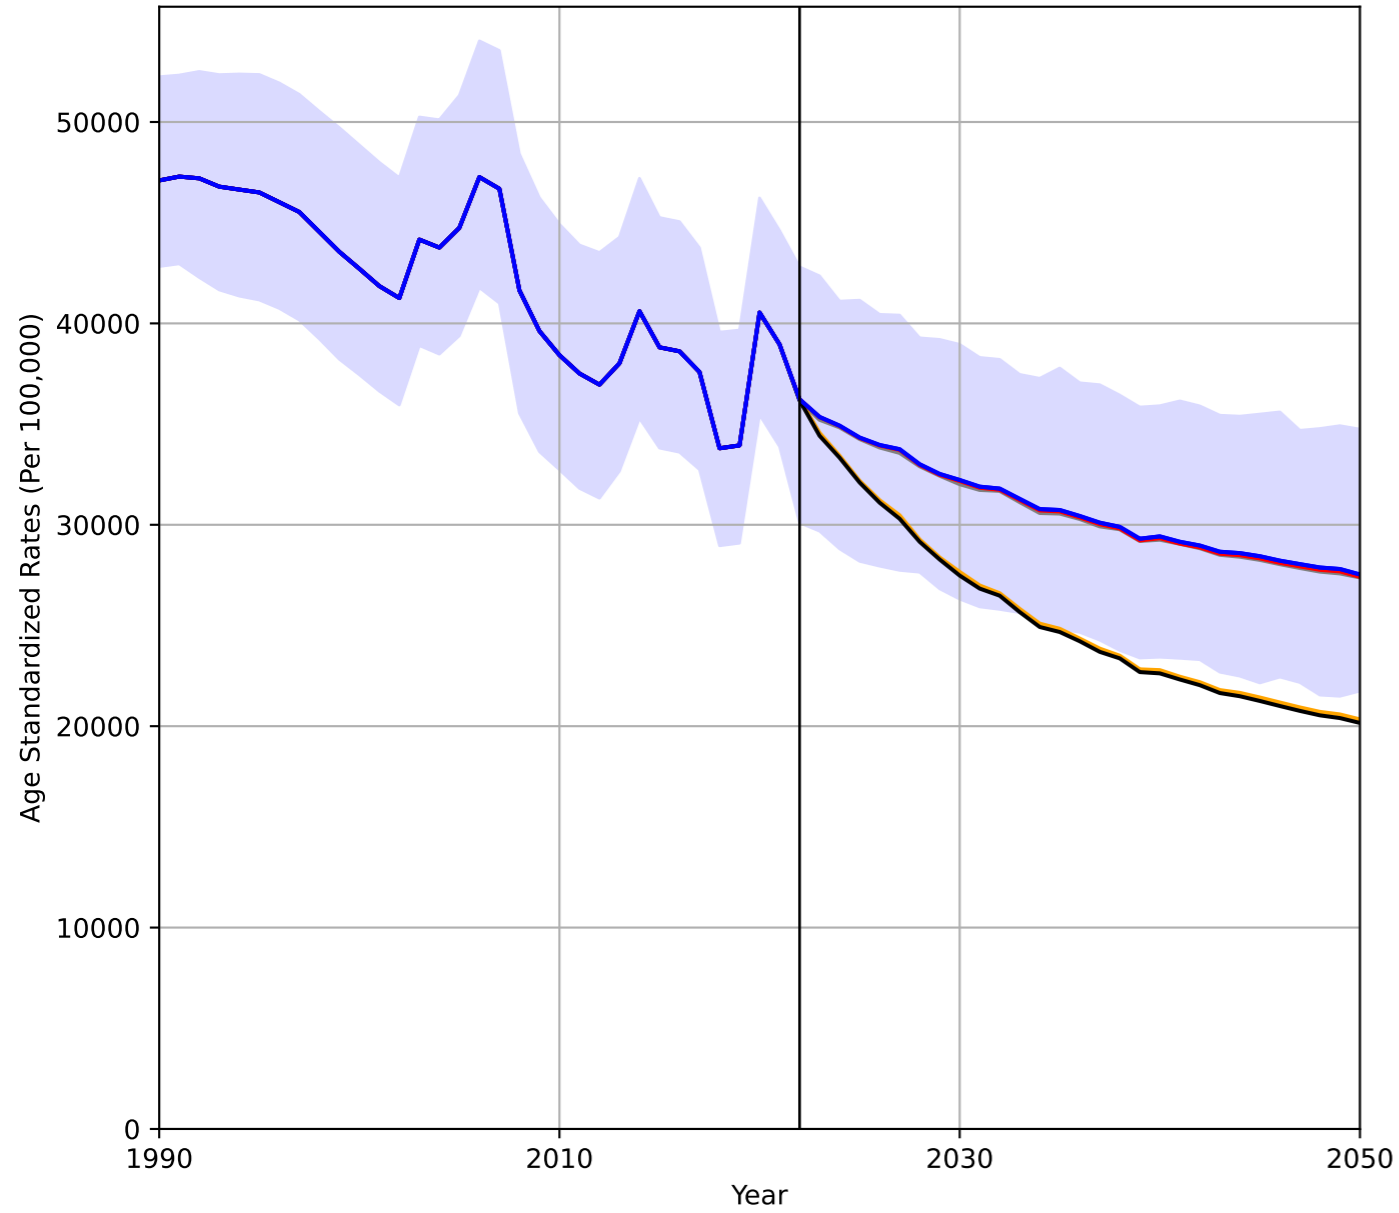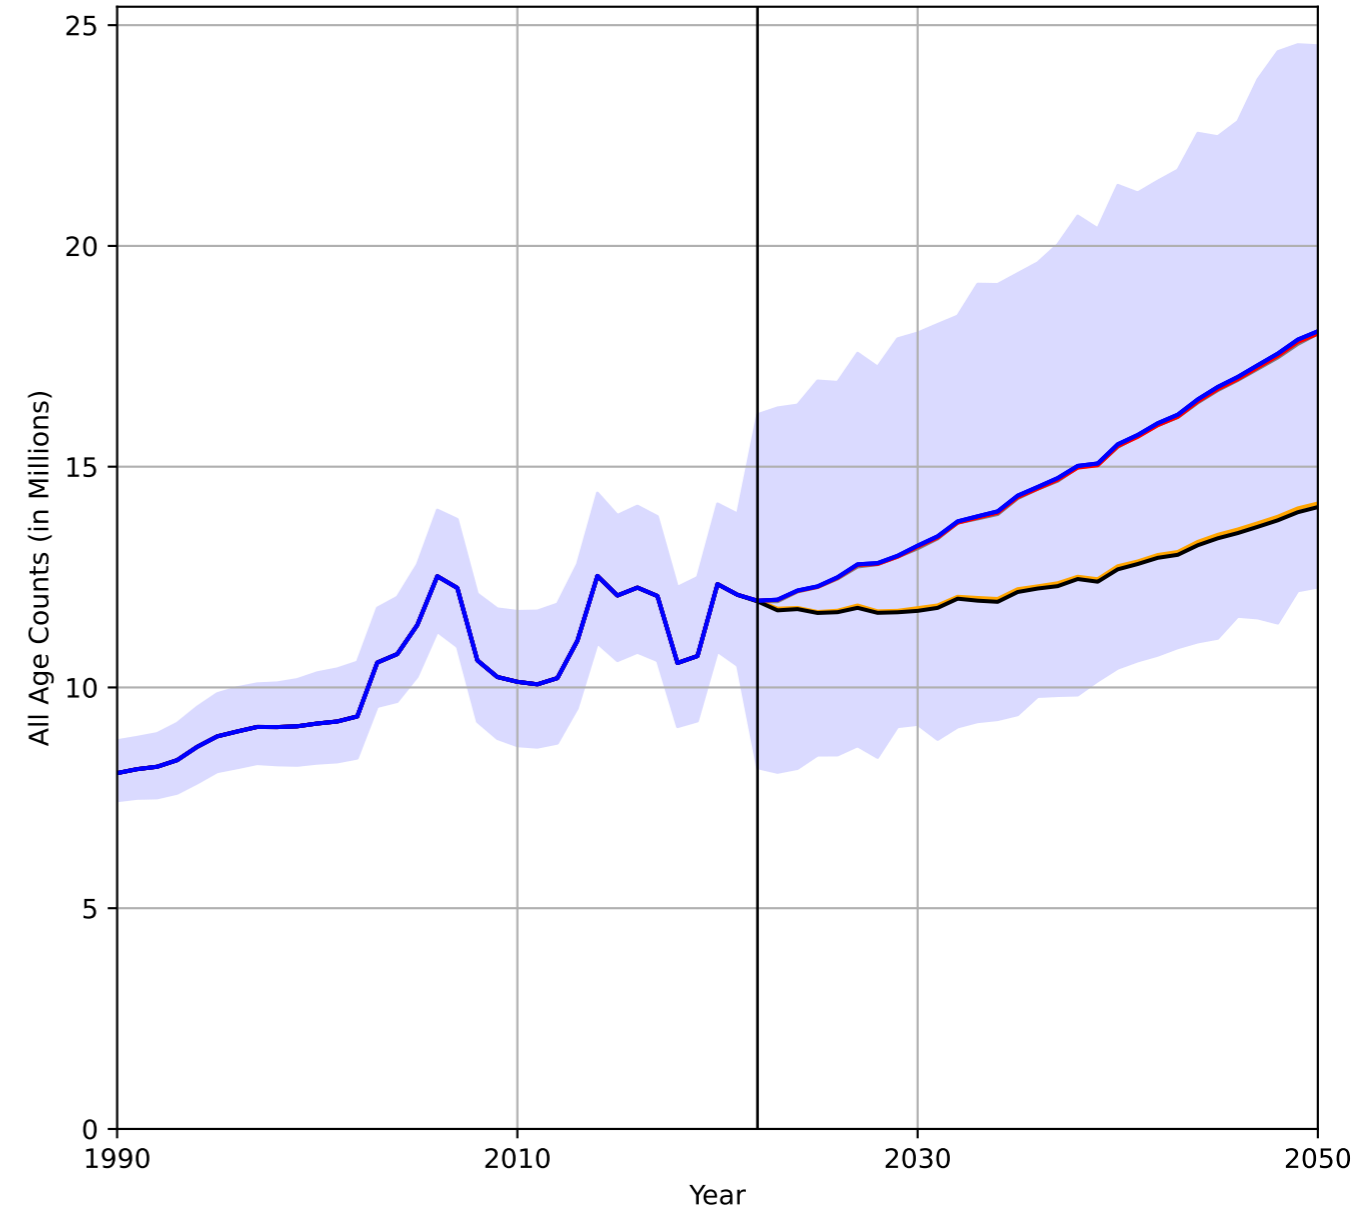

# Jordan

Supplemental Results Figure S10. All-cause age standardised DALY rates (A) and all age DALY counts (B), for the past and for five future scenarios, 1990–2050

1515

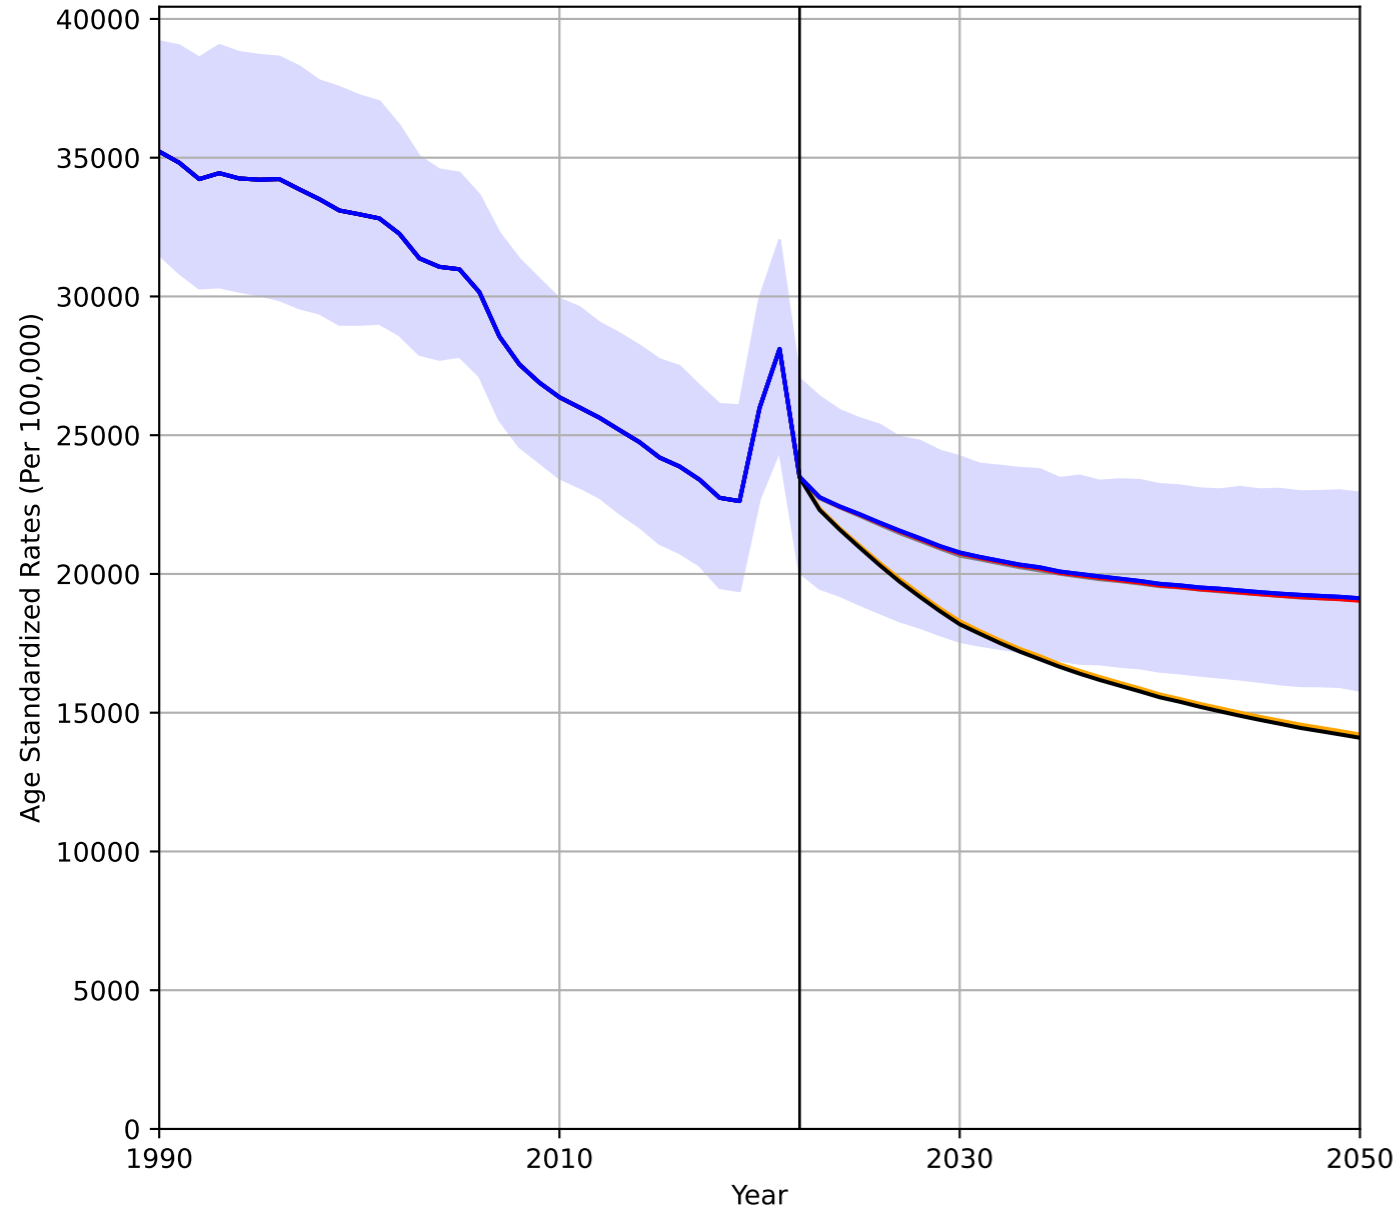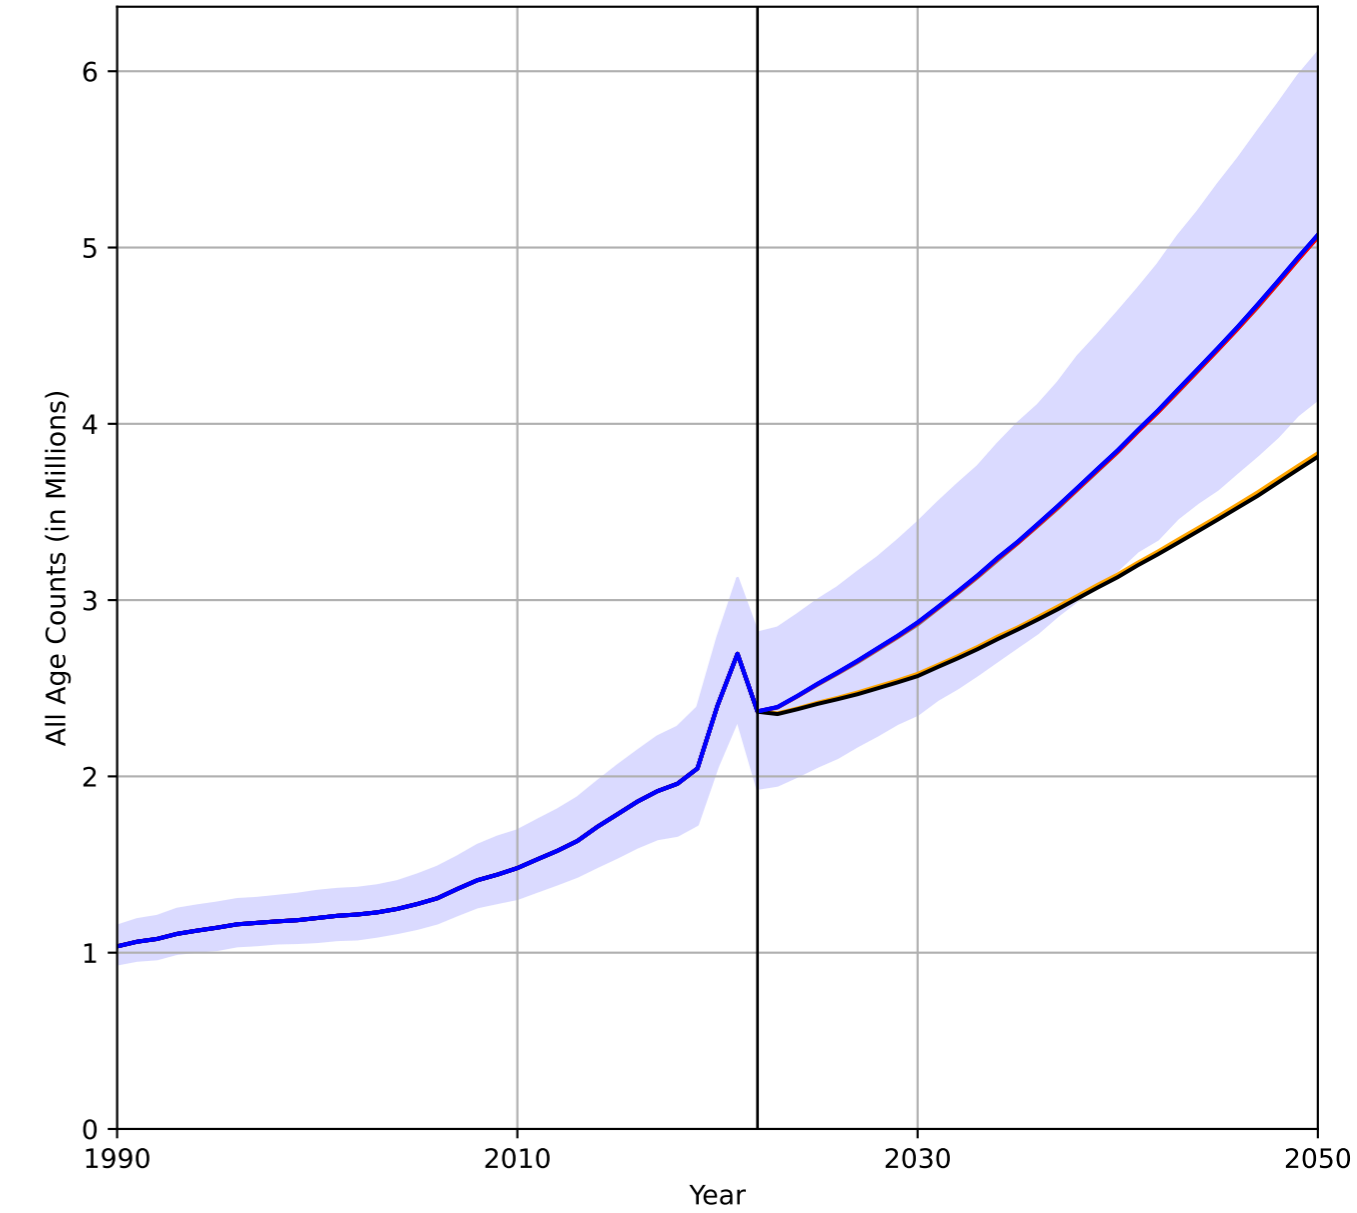

# Kuwait

Supplemental Results Figure S10. All-cause age standardised DALY rates (A) and all age DALY counts (B), for the past and for five future scenarios, 1990–2050

1516

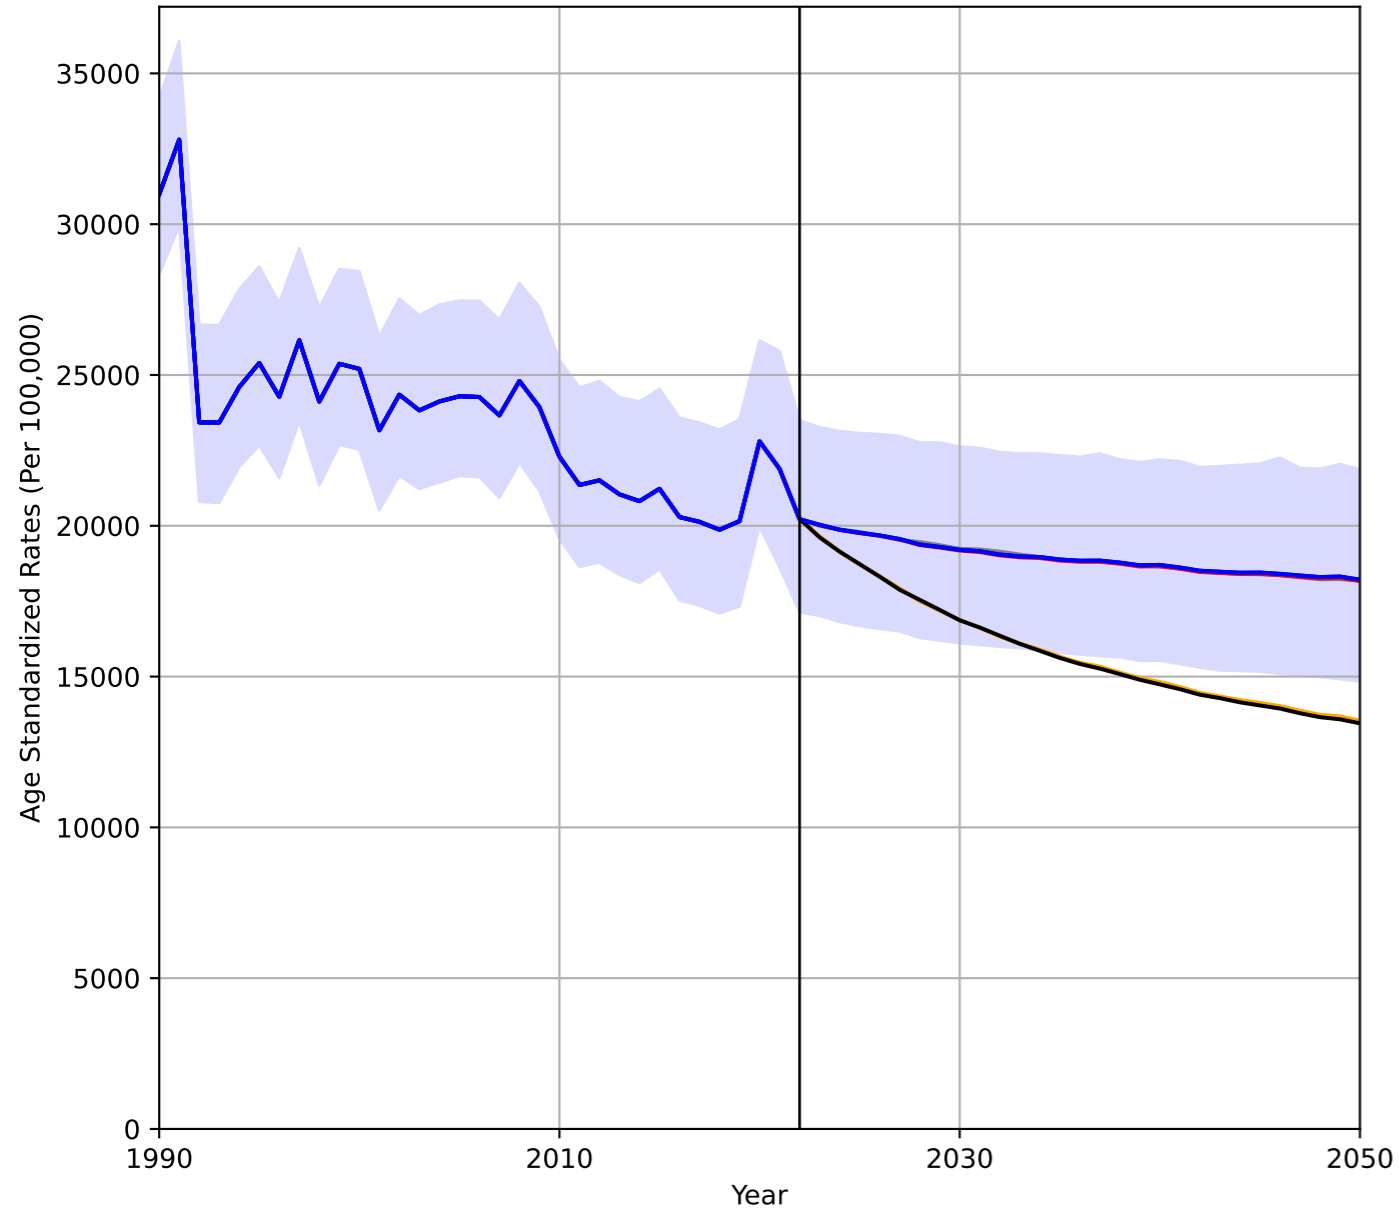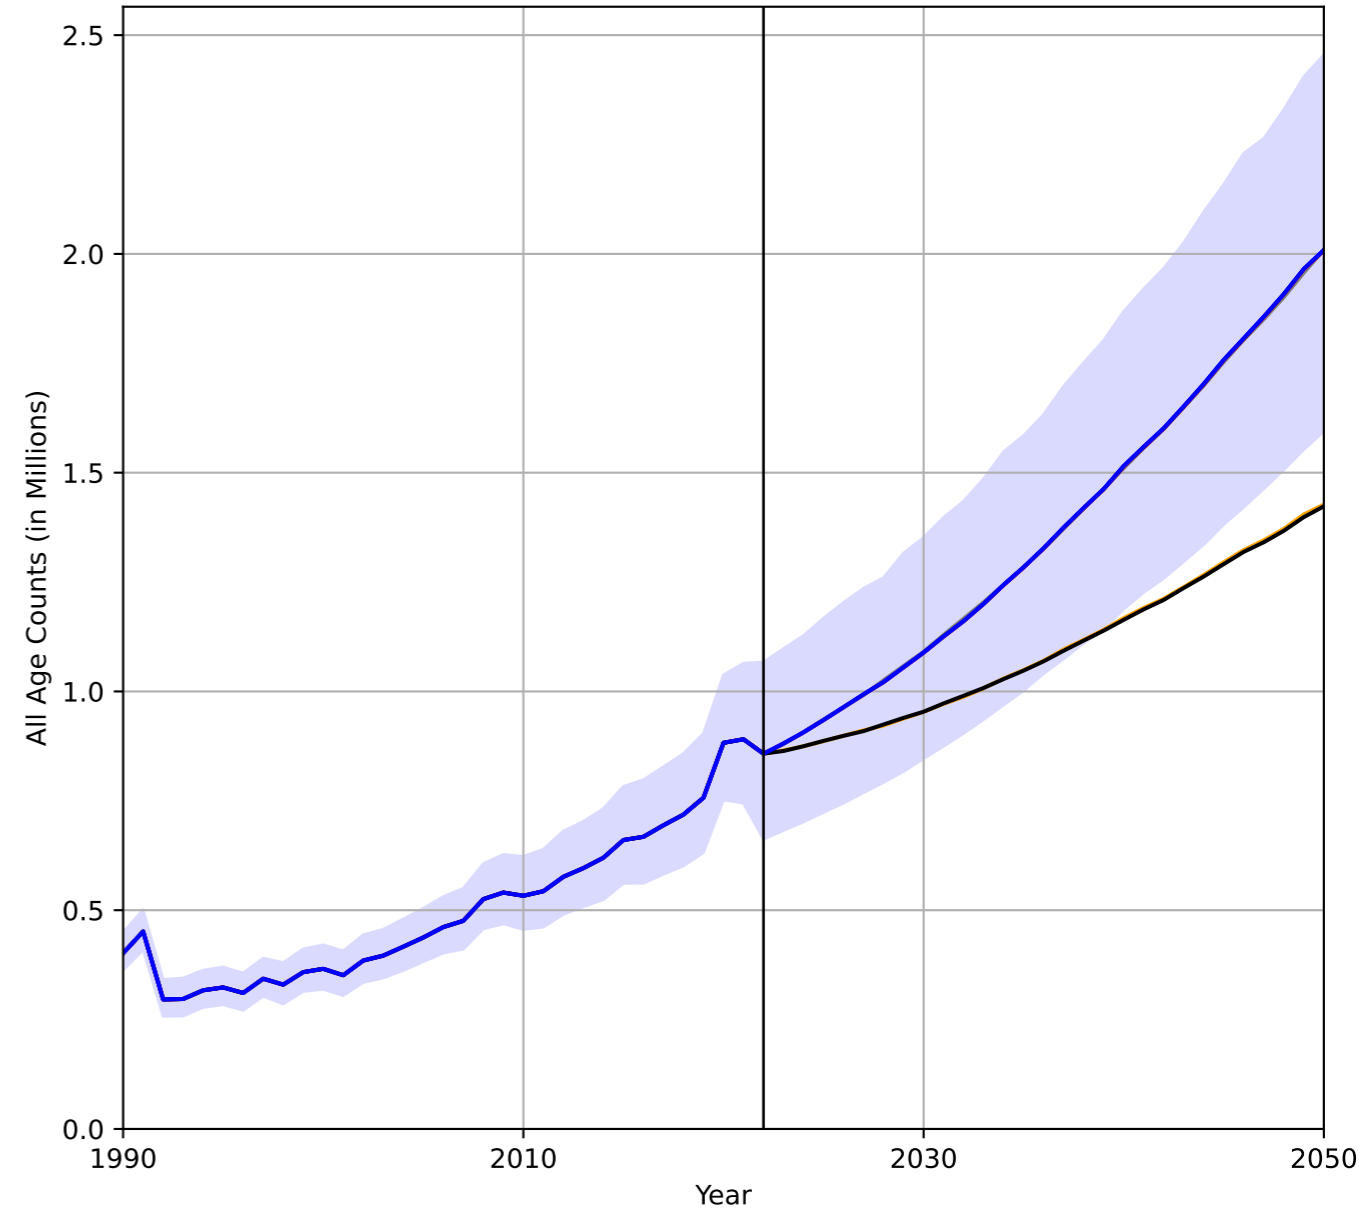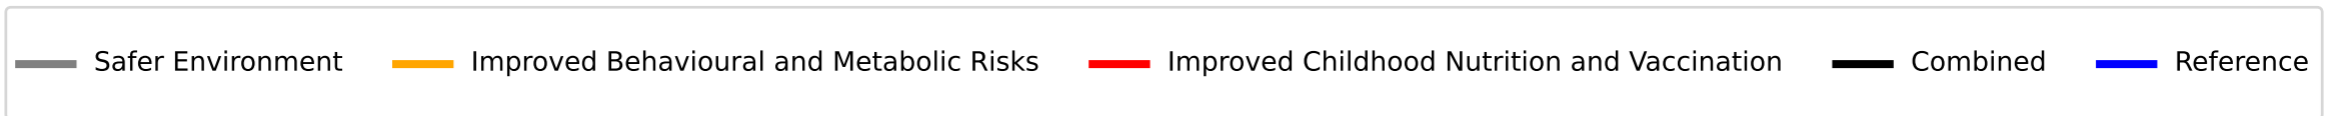

# Lebanon

Supplemental Results Figure S10. All-cause age standardised DALY rates (A) and all age DALY counts (B), for the past and for five future scenarios, 1990–2050

1517

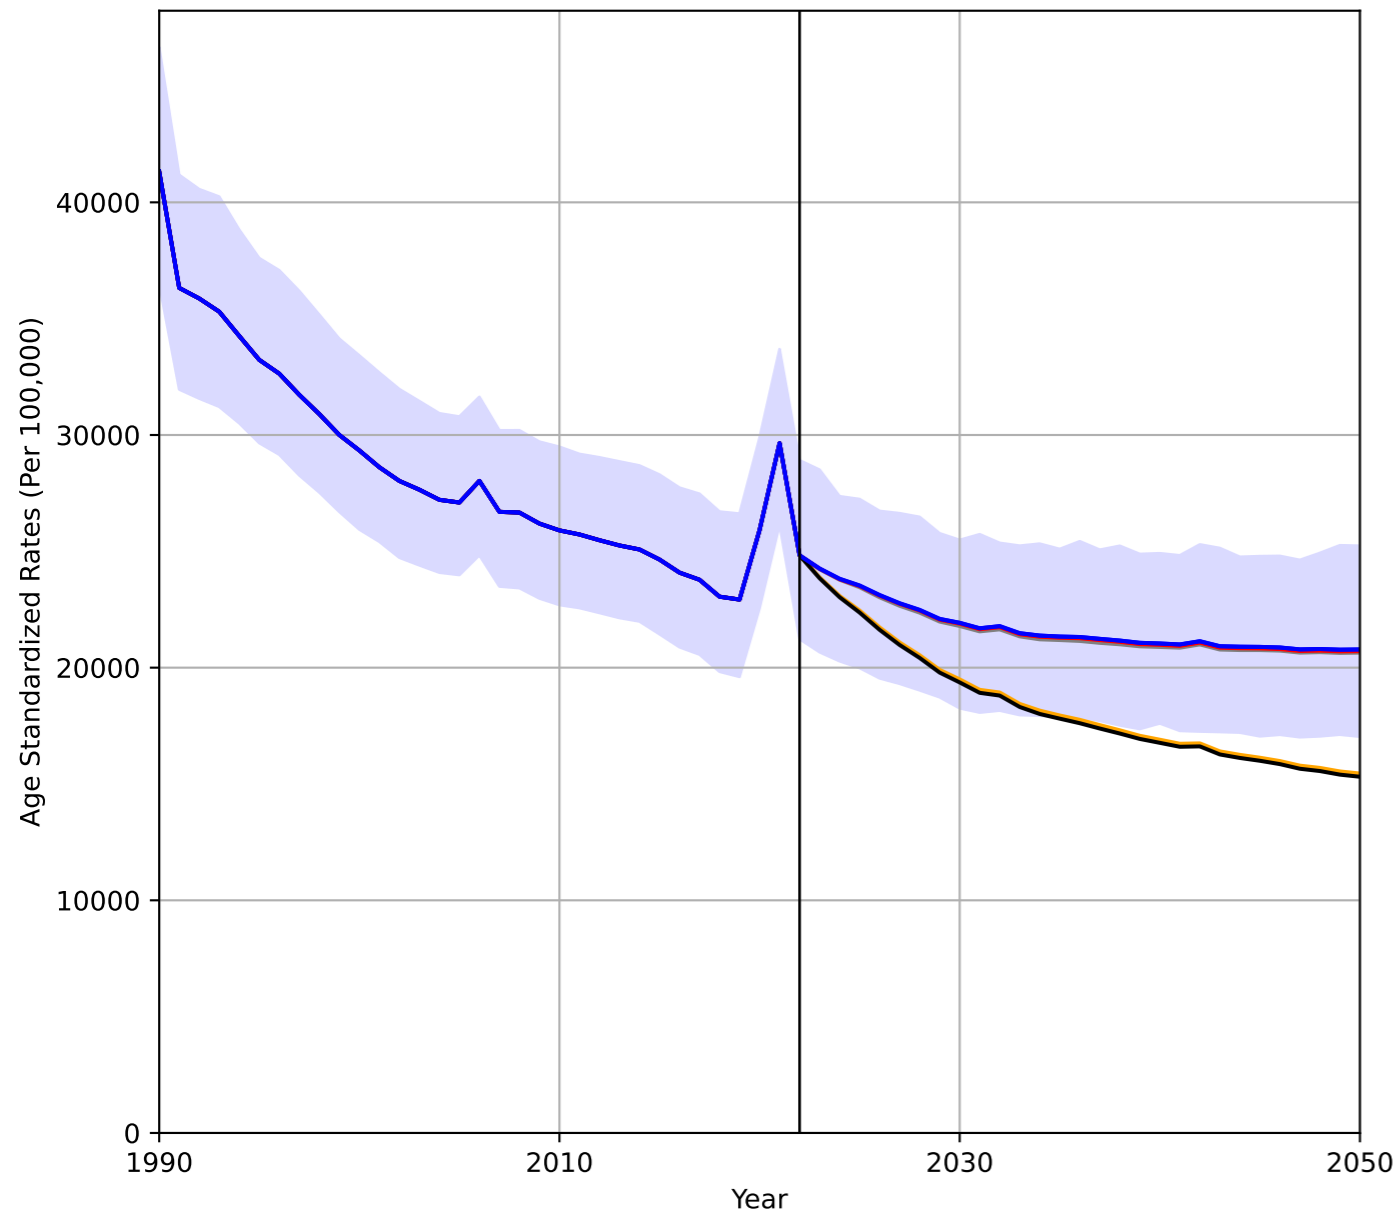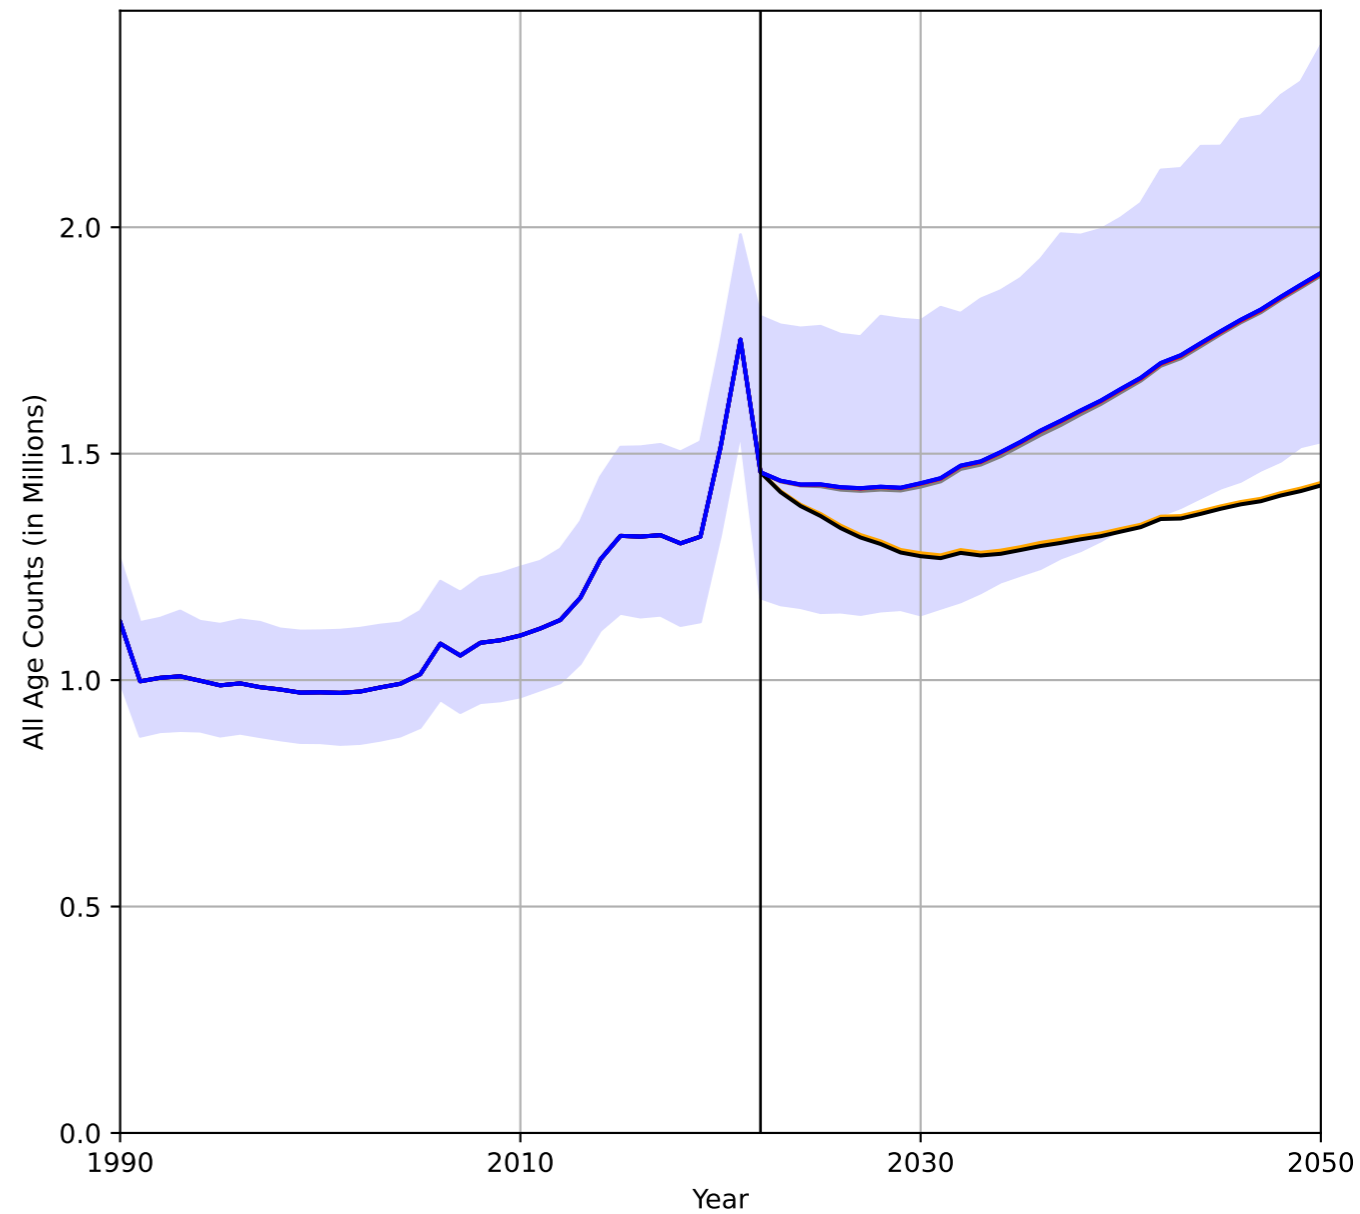

# Libya

Supplemental Results Figure S10. All-cause age standardised DALY rates (A) and all age DALY counts (B), for the past and for five future scenarios, 1990–2050

1518

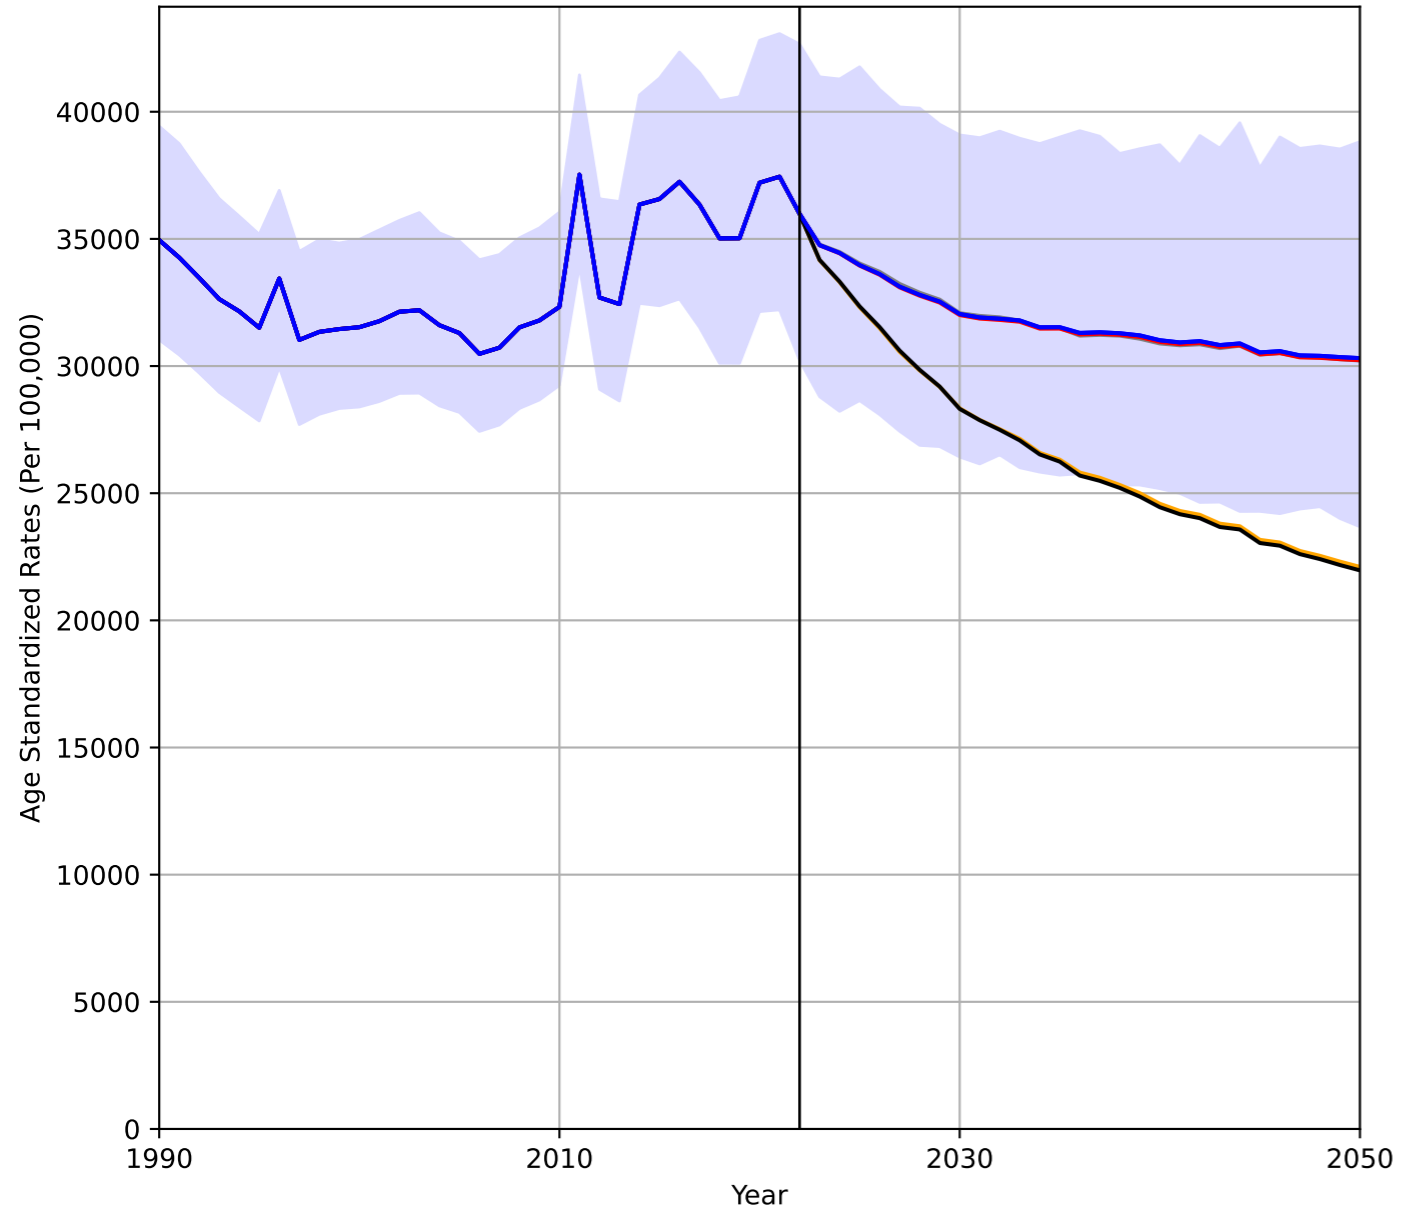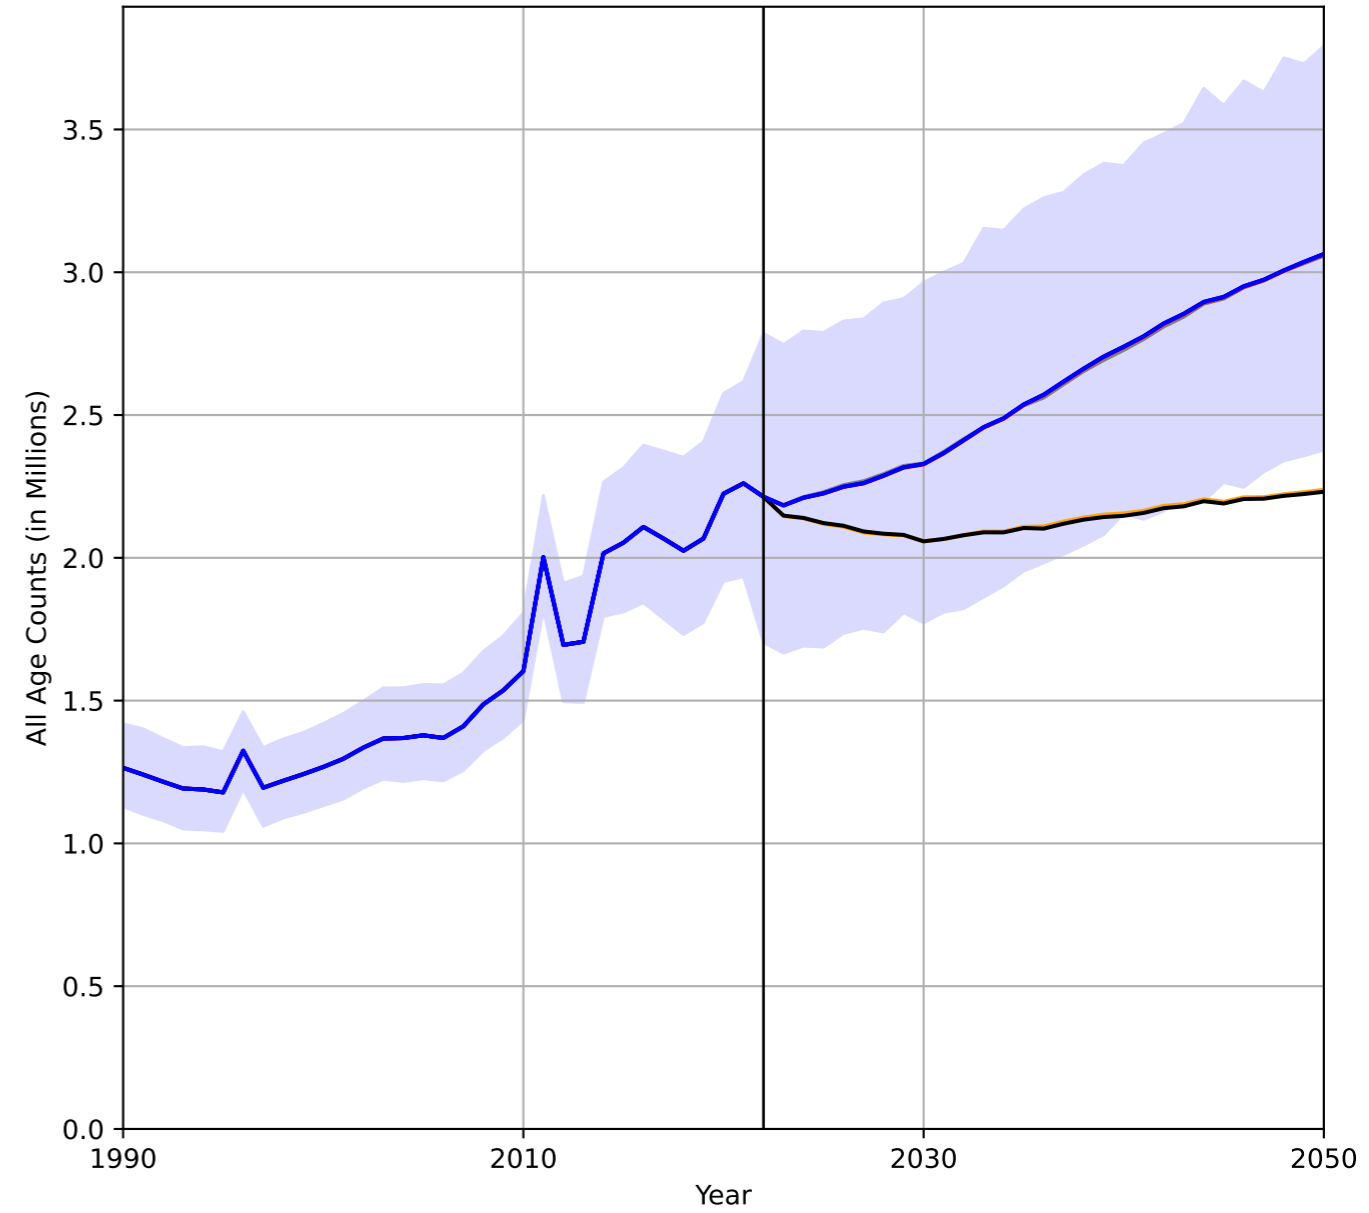

# Morocco

Supplemental Results Figure S10. All-cause age standardised DALY rates (A) and all age DALY counts (B), for the past and for five future scenarios, 1990–2050

1519

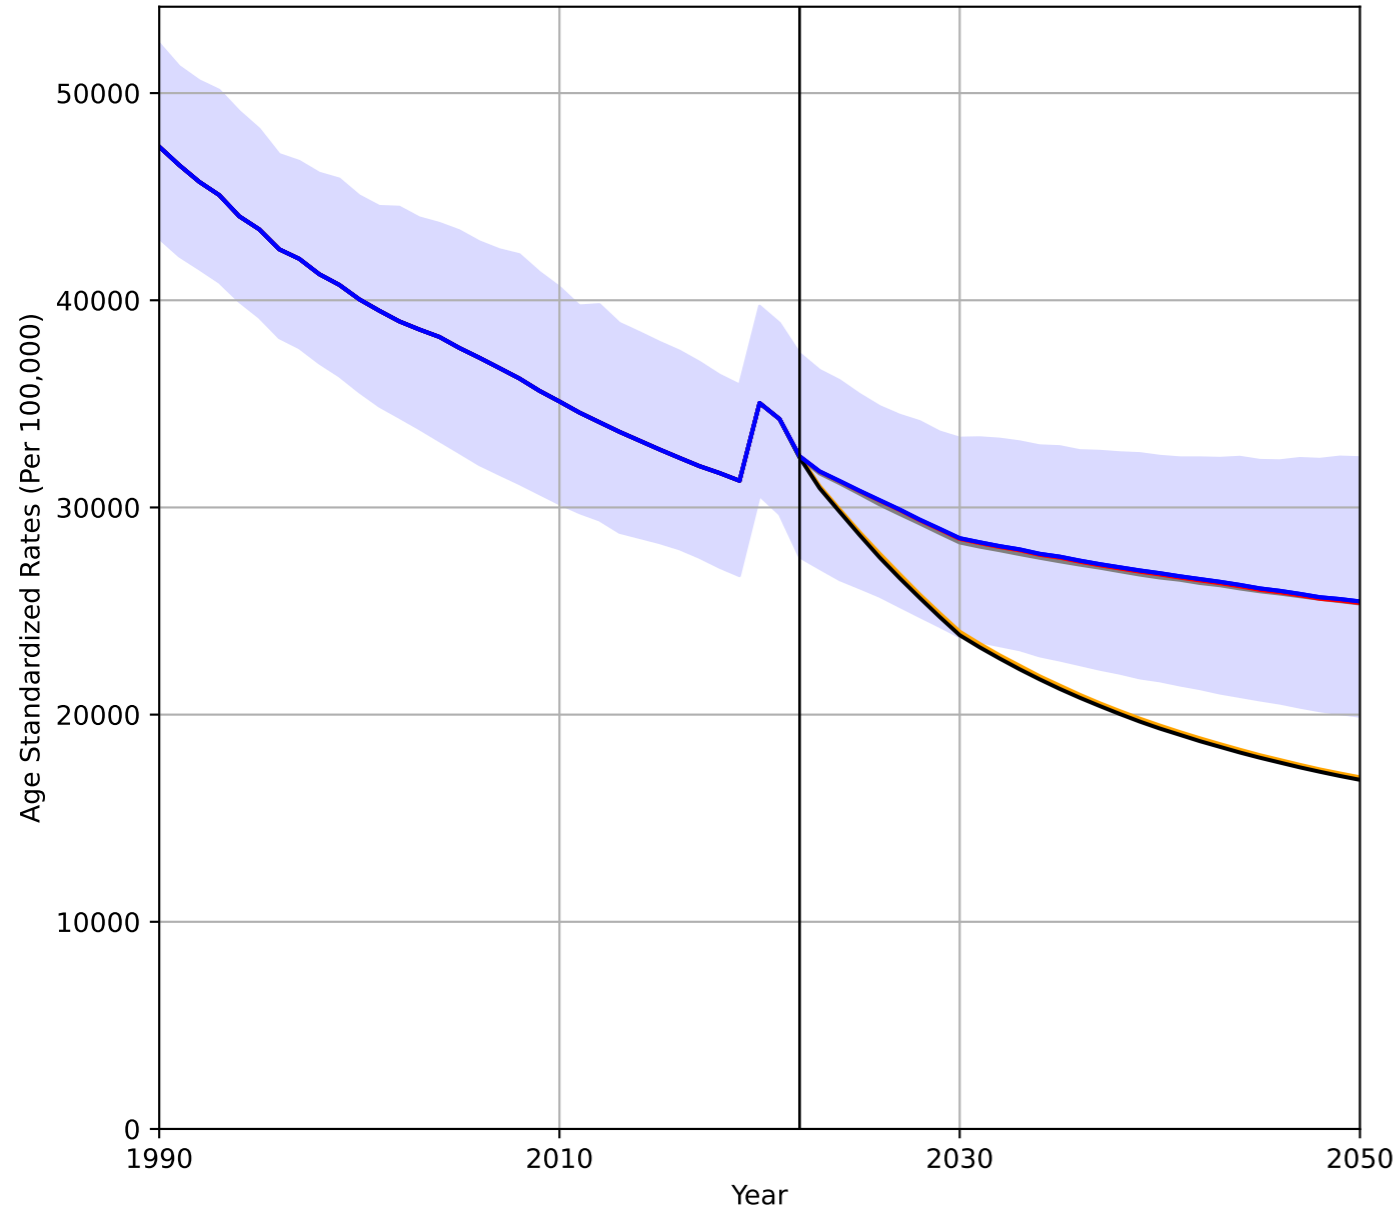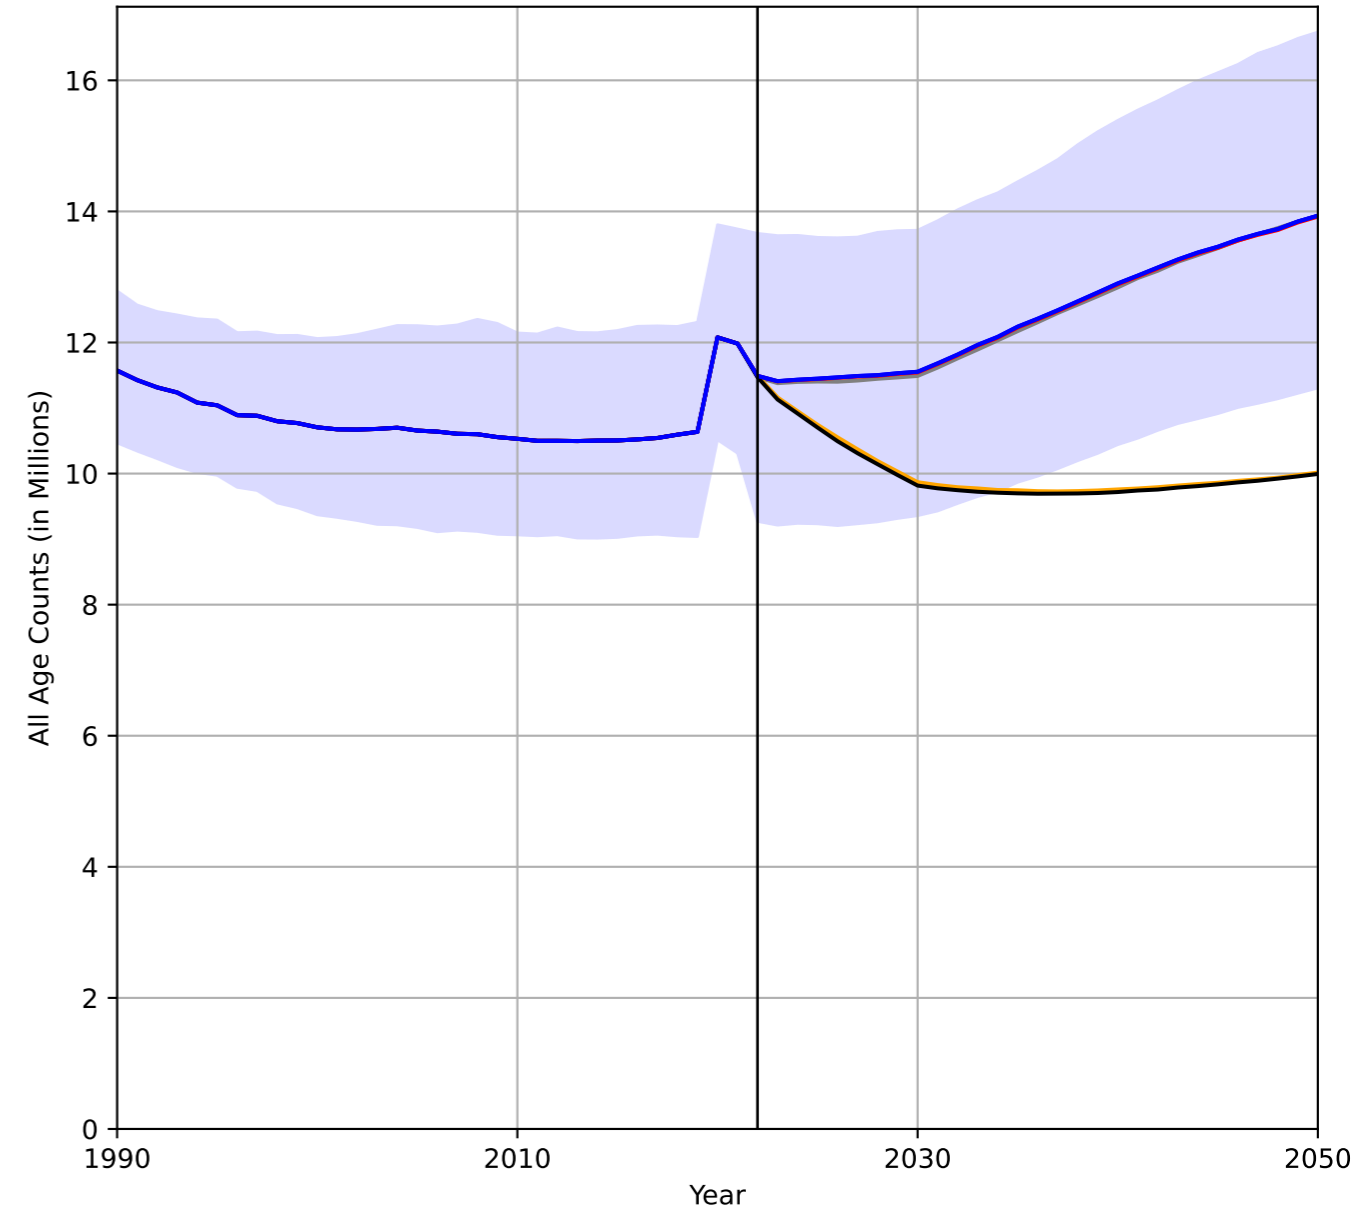



# Oman

Supplemental Results Figure S10. All-cause age standardised DALY rates (A) and all age DALY counts (B), for the past and for five future scenarios, 1990–2050

1520

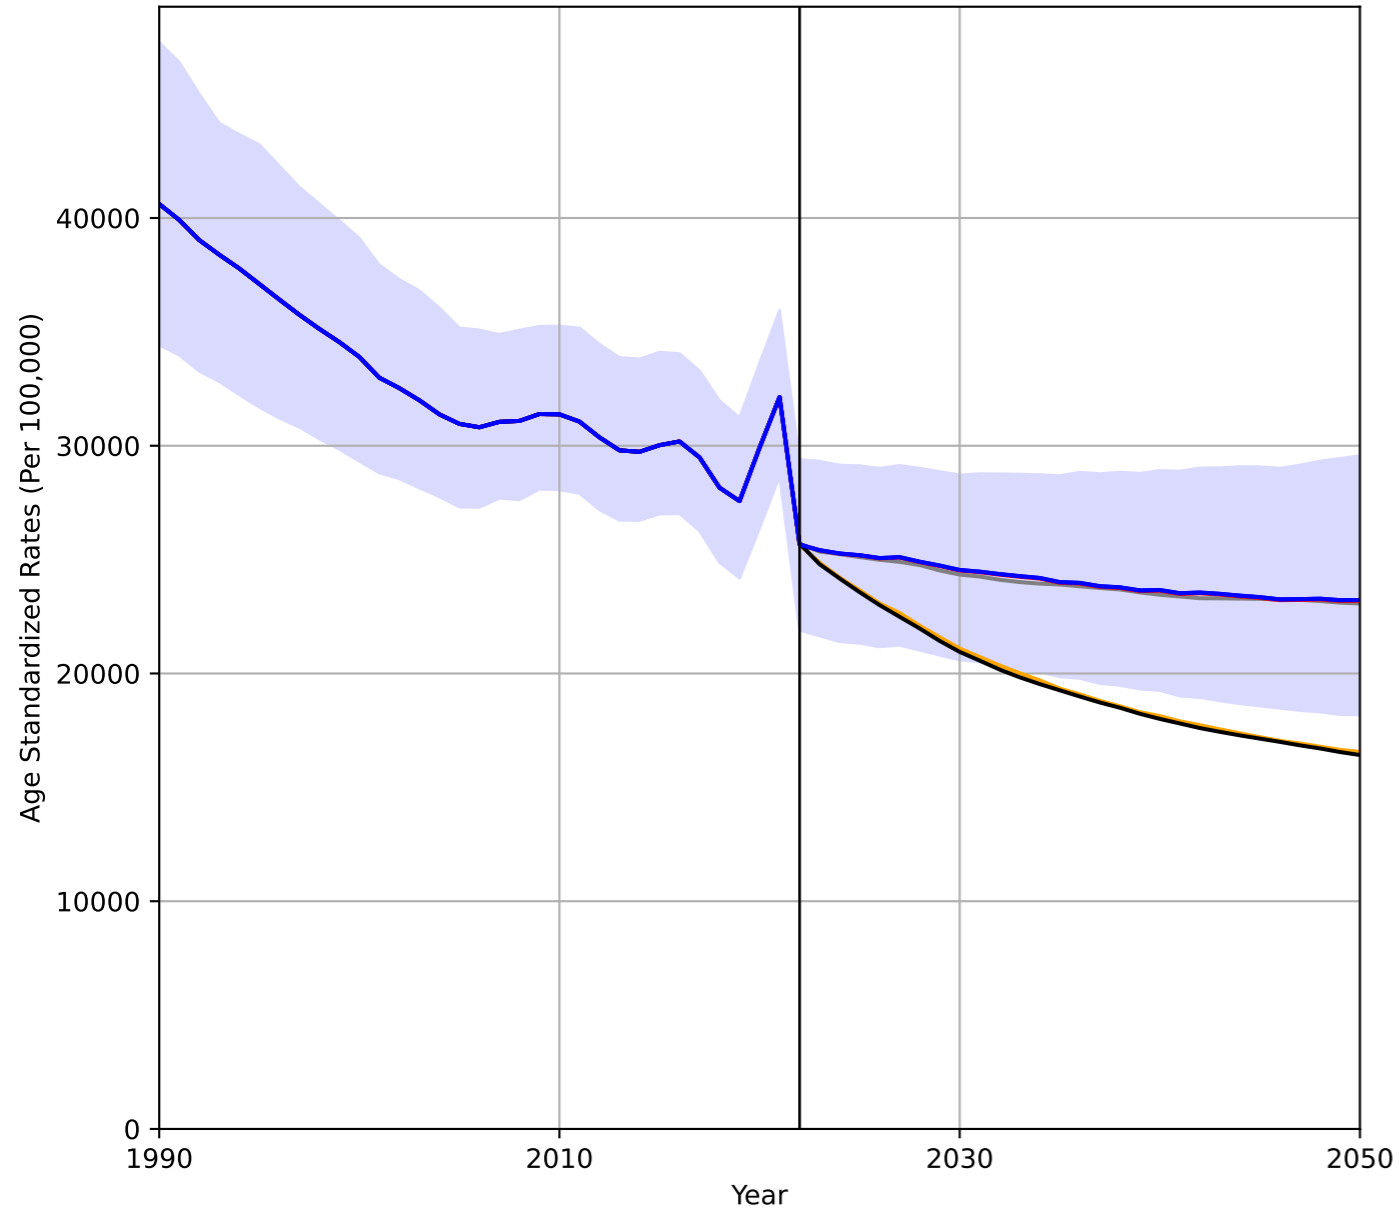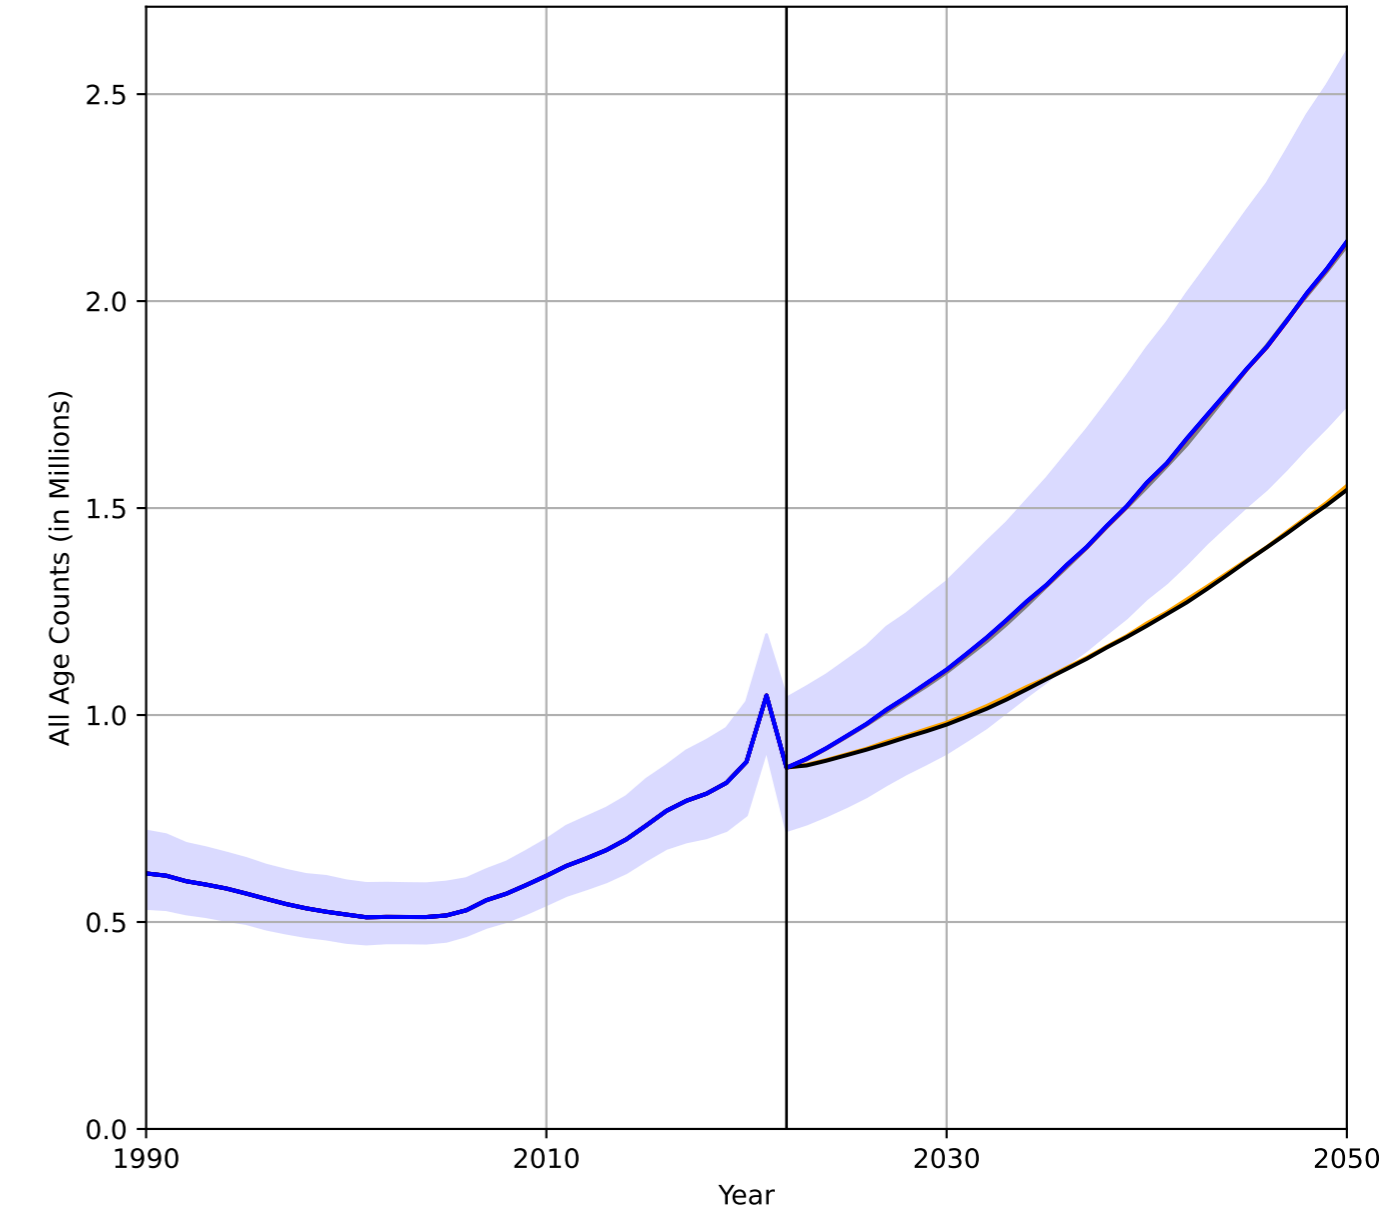

# Palestine

Supplemental Results Figure S10. All-cause age standardised DALY rates (A) and all age DALY counts (B), for the past and for five future scenarios, 1990–2050

1521

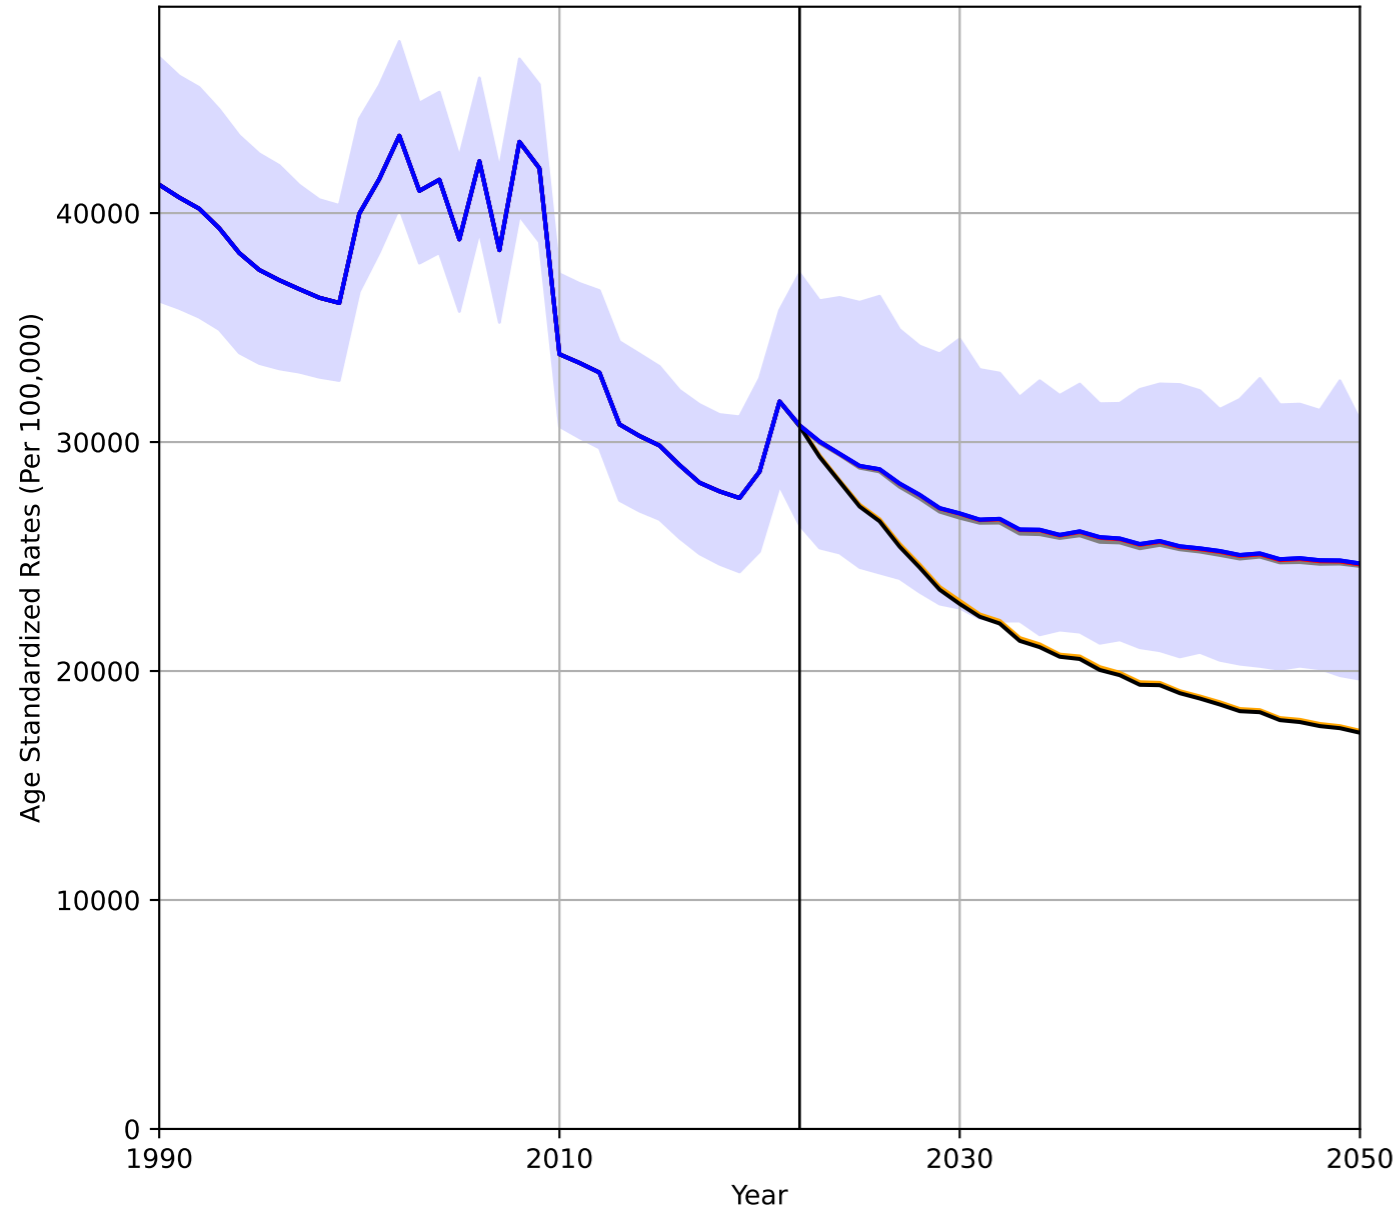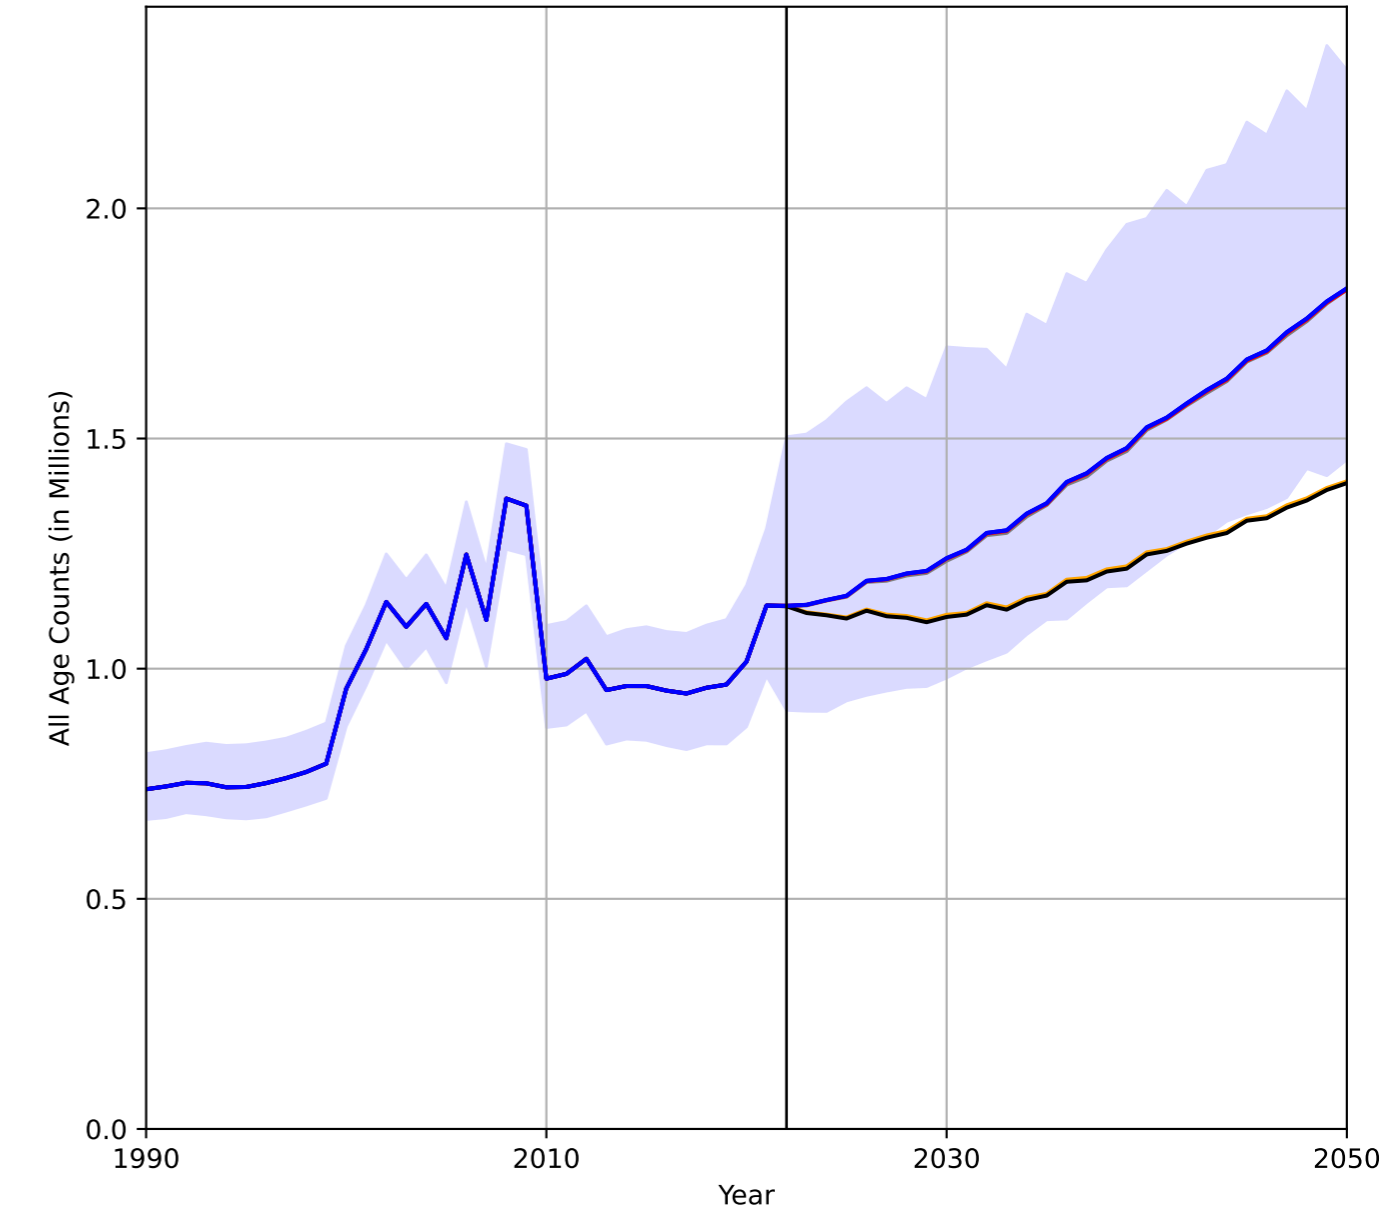

# Qatar

Supplemental Results Figure S10. All-cause age standardised DALY rates (A) and all age DALY counts (B), for the past and for five future scenarios, 1990–2050

1522

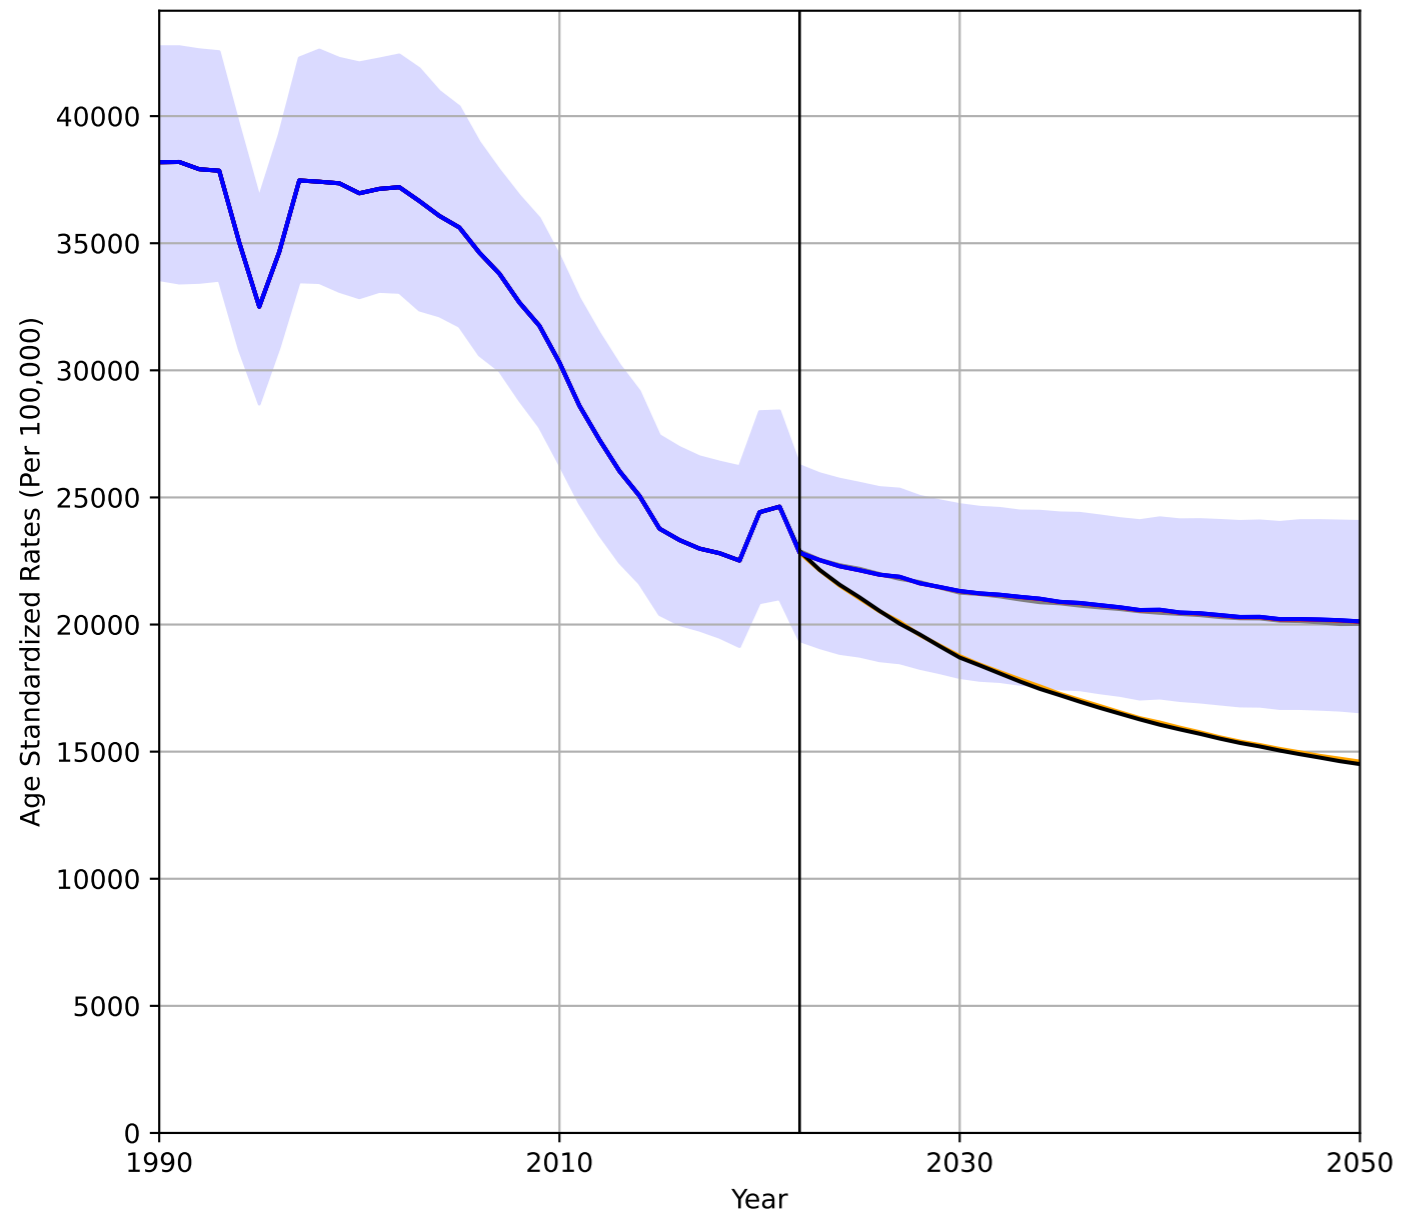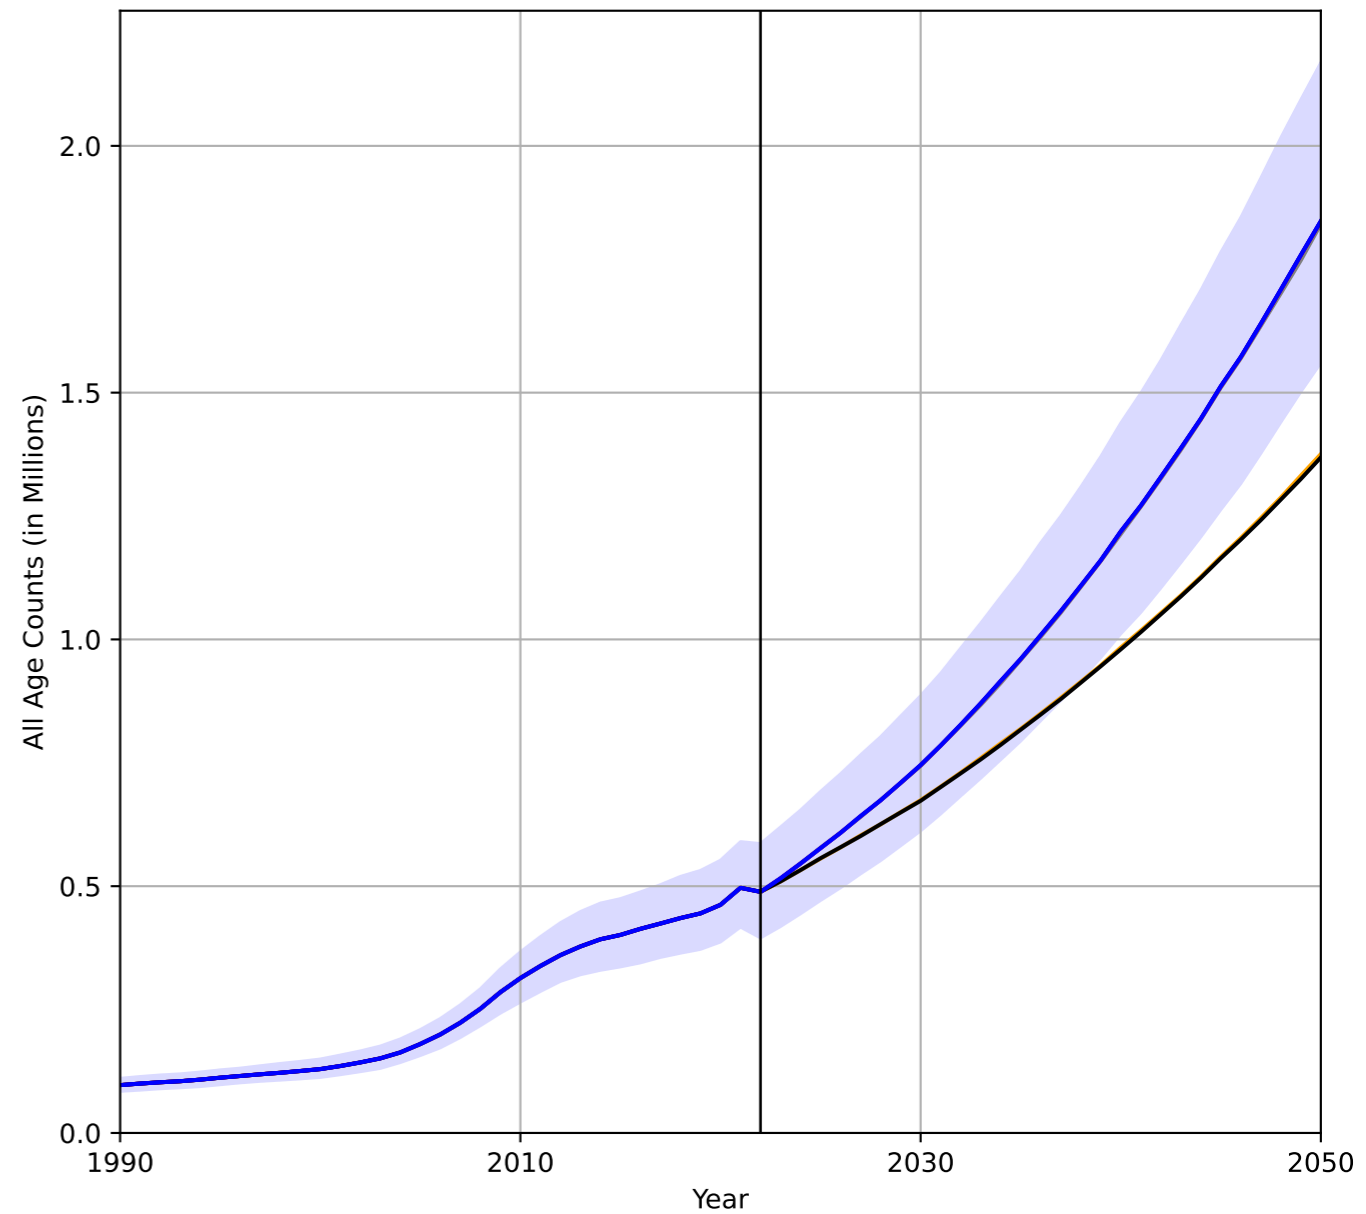

# Saudi Arabia

Supplemental Results Figure S10. All-cause age standardised DALY rates (A) and all age DALY counts (B), for the past and for five future scenarios, 1990–2050

1523

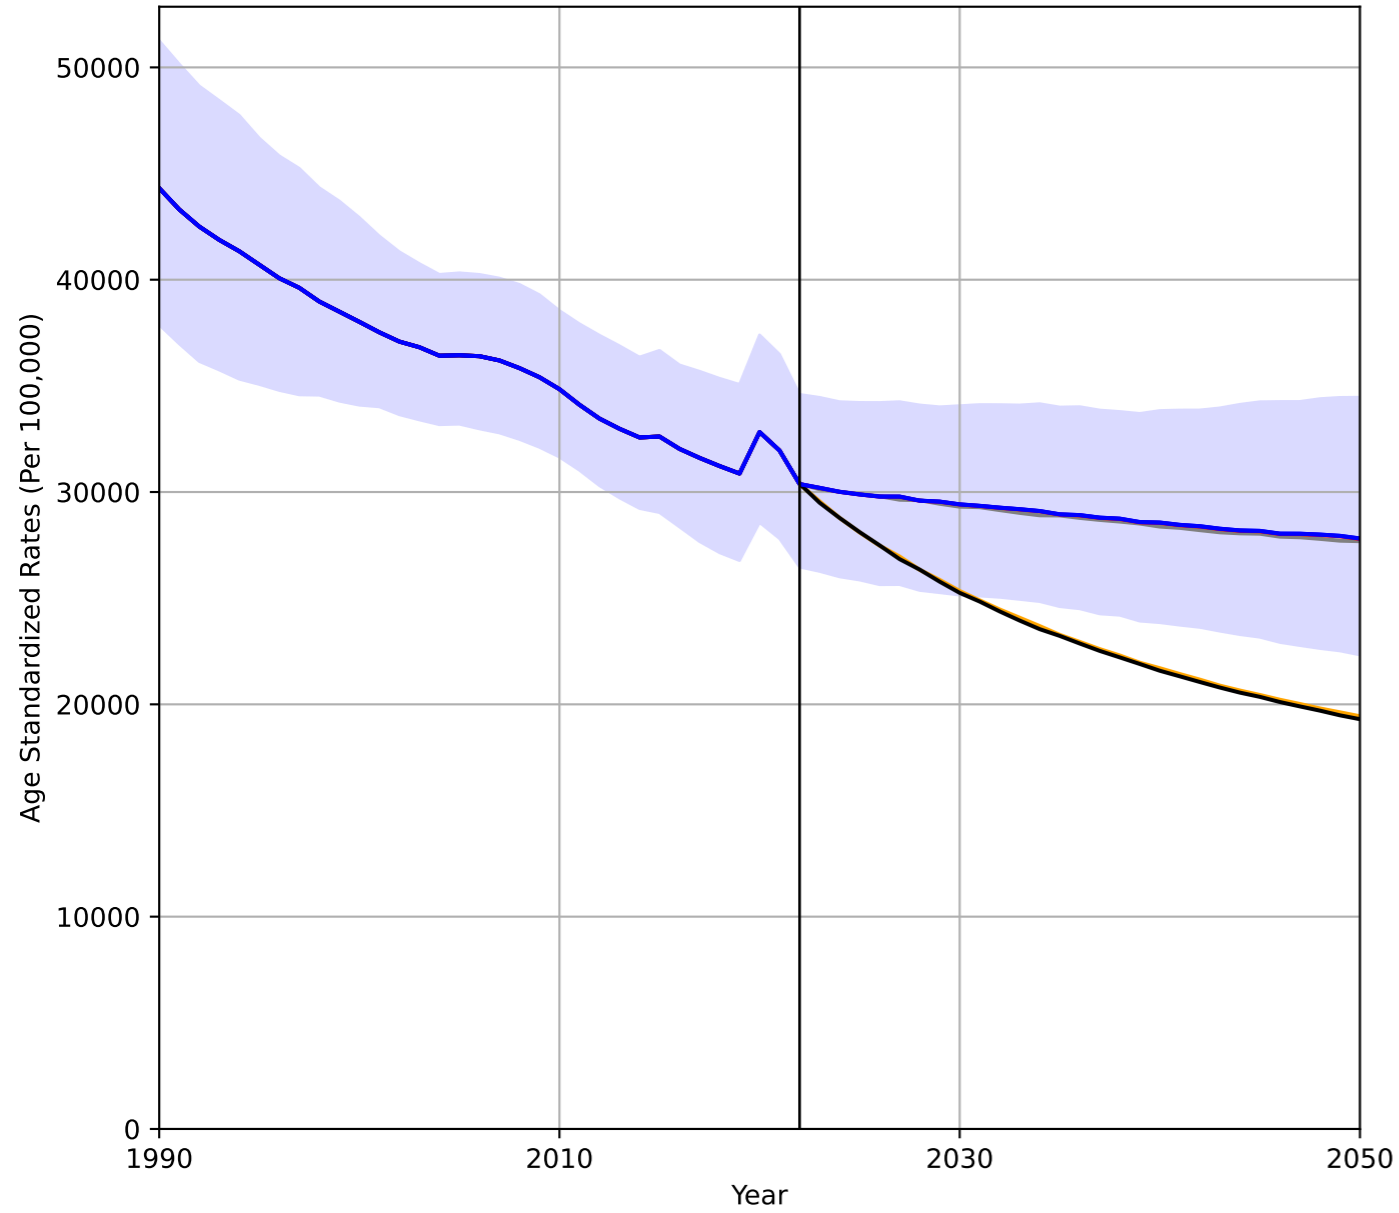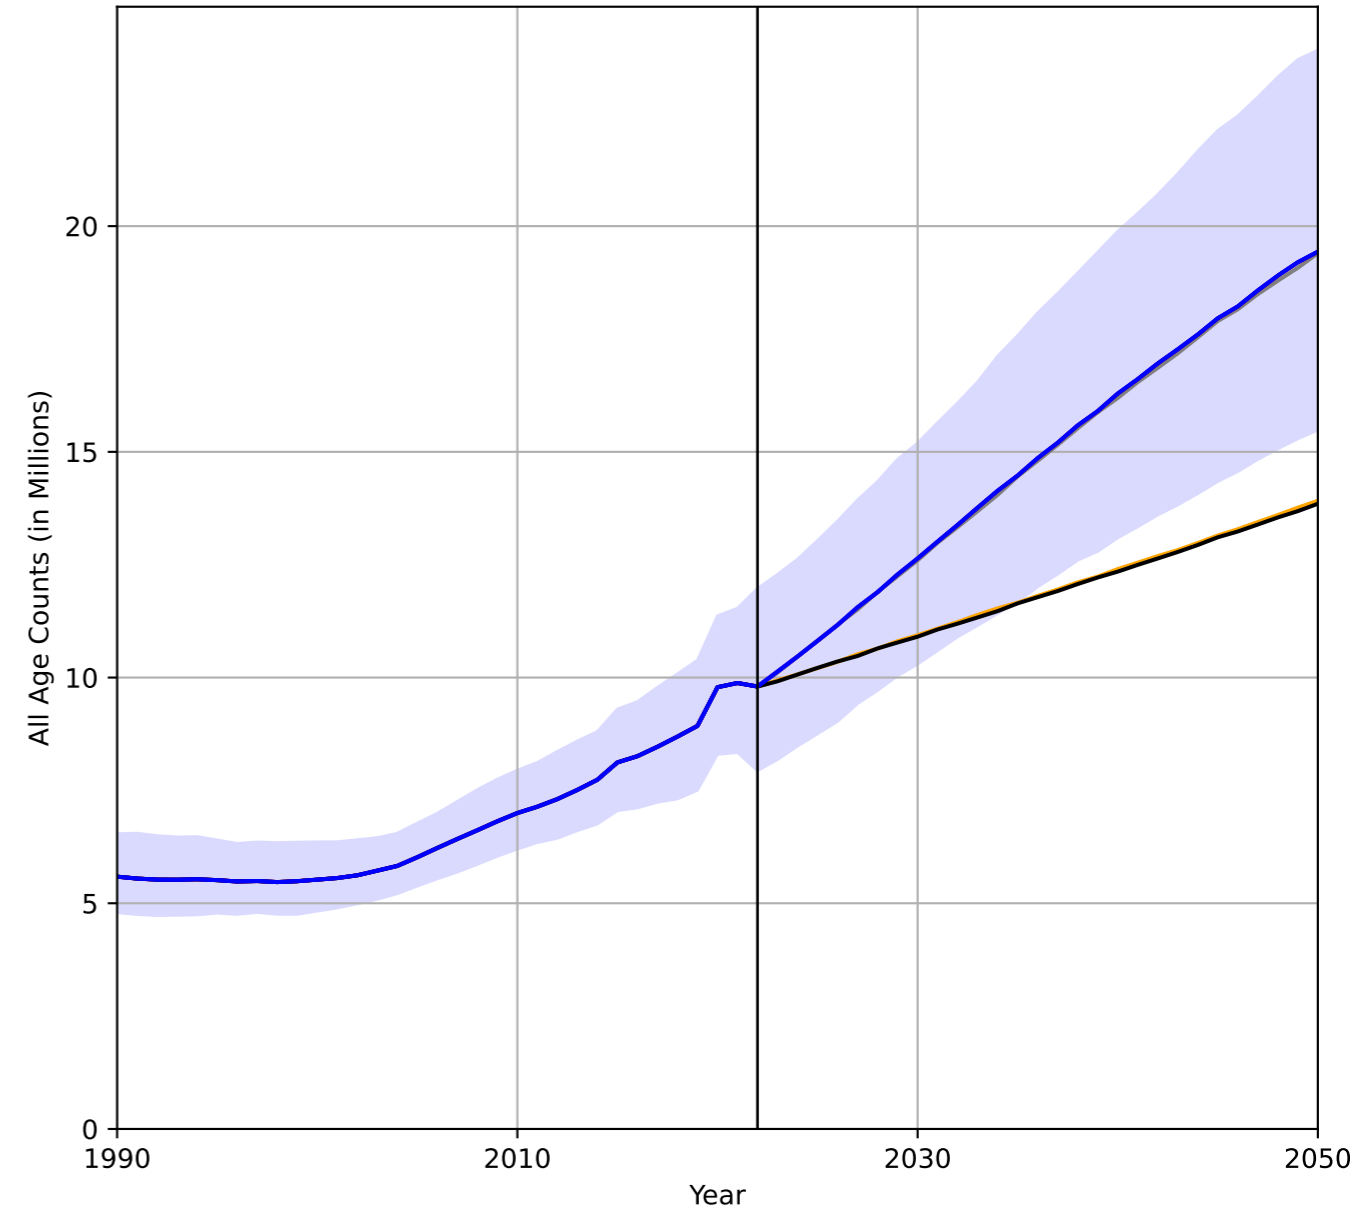

# Sudan

Supplemental Results Figure S10. All-cause age standardised DALY rates (A) and all age DALY counts (B), for the past and for five future scenarios, 1990–2050

1524

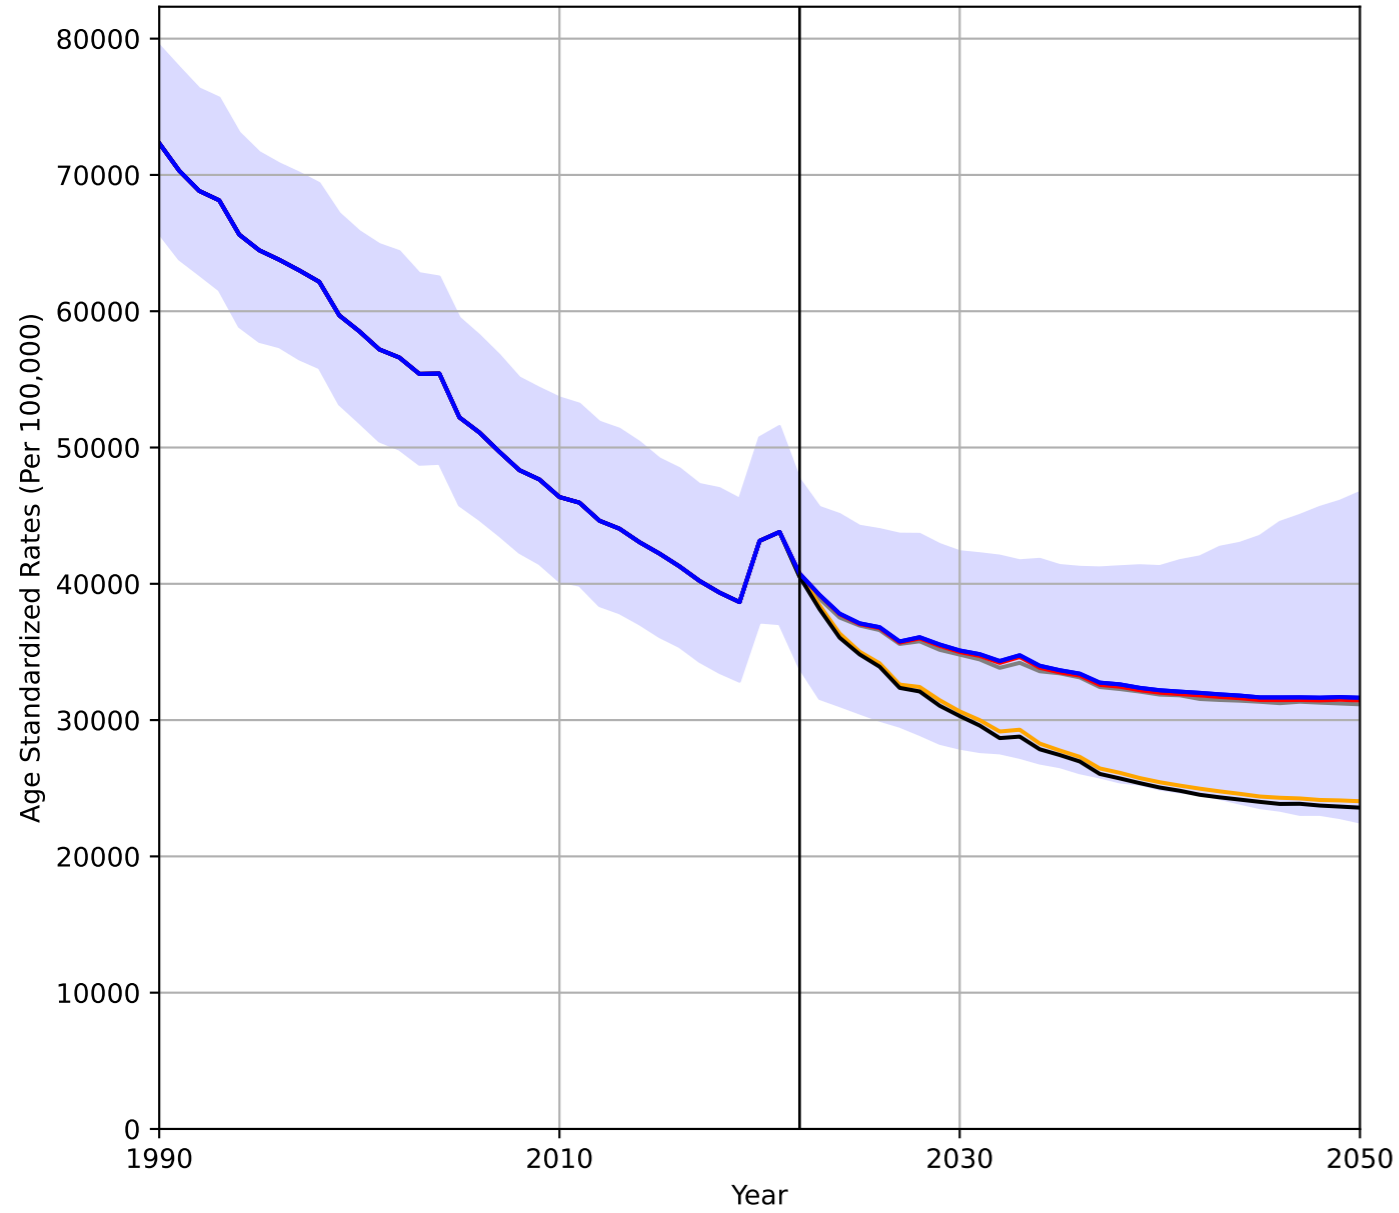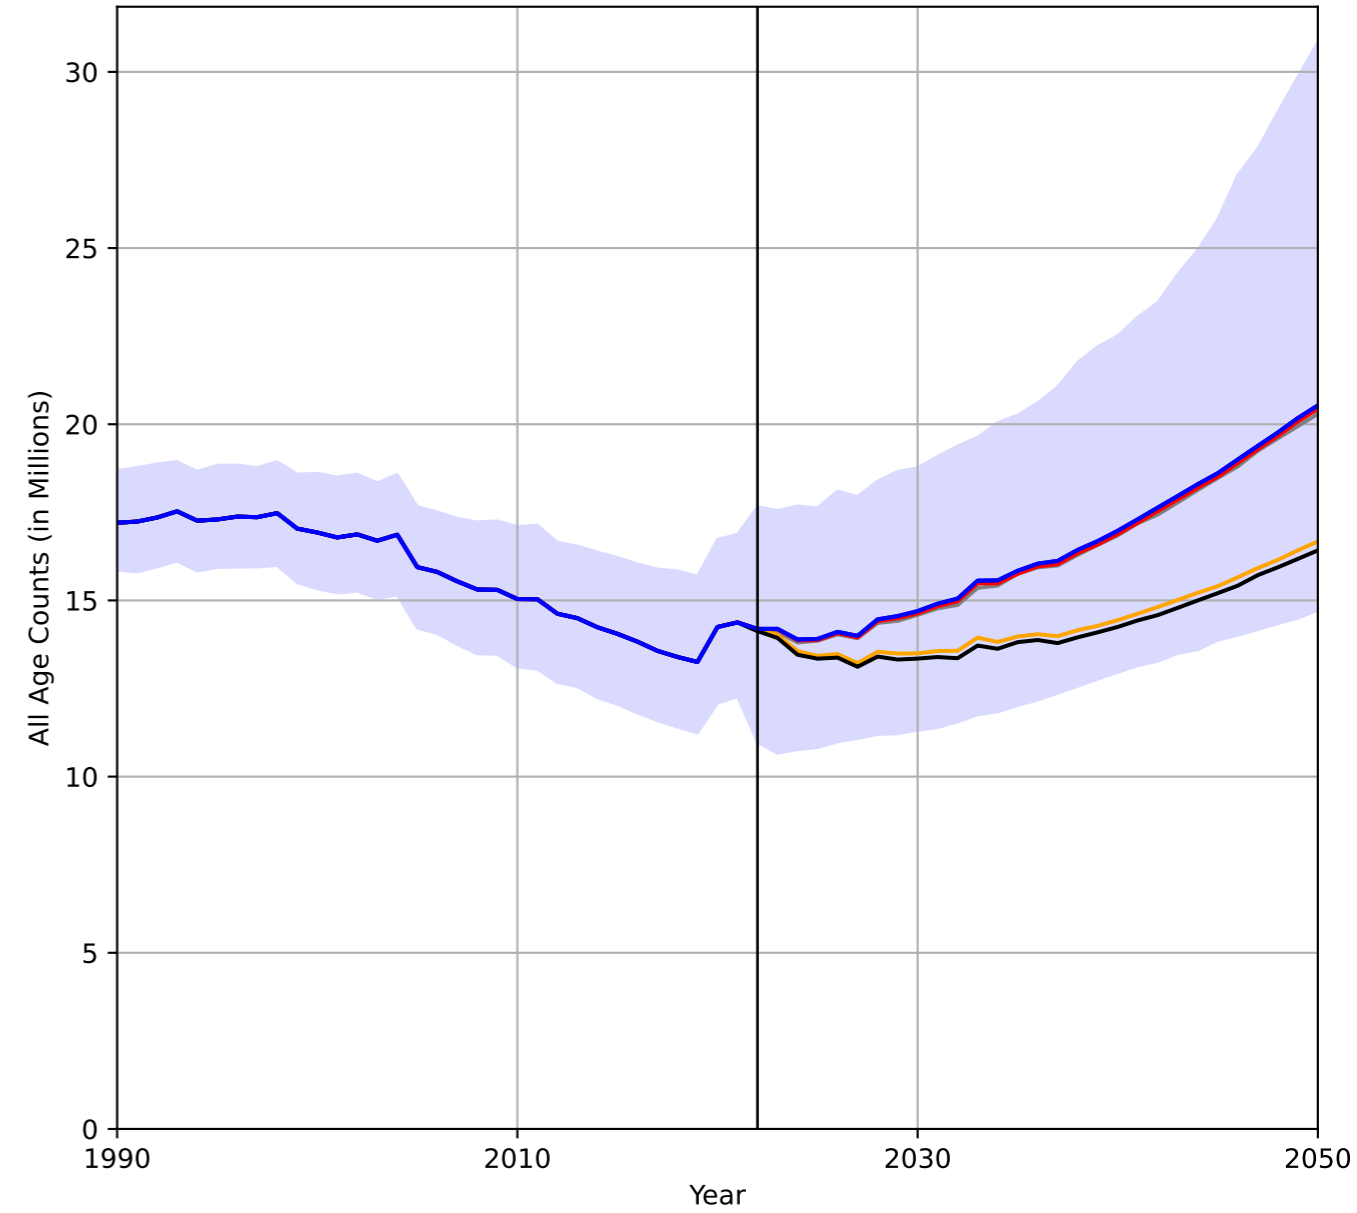

# Syria

Supplemental Results Figure S10. All-cause age standardised DALY rates (A) and all age DALY counts (B), for the past and for five future scenarios, 1990–2050

1525

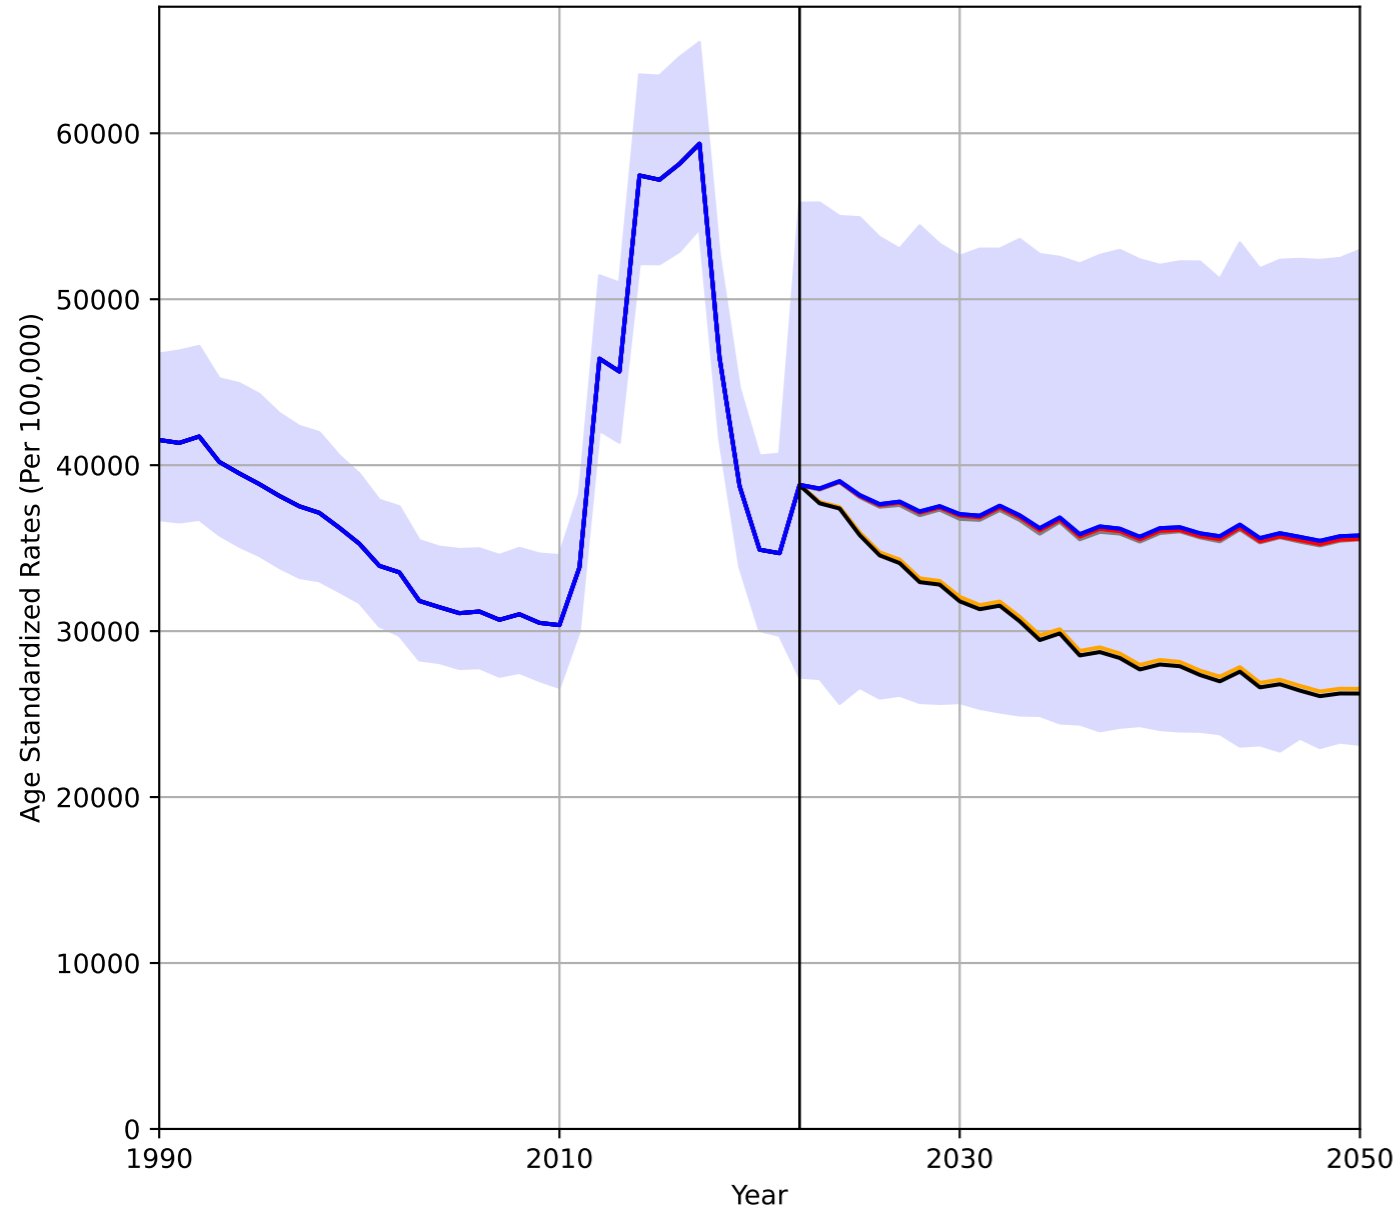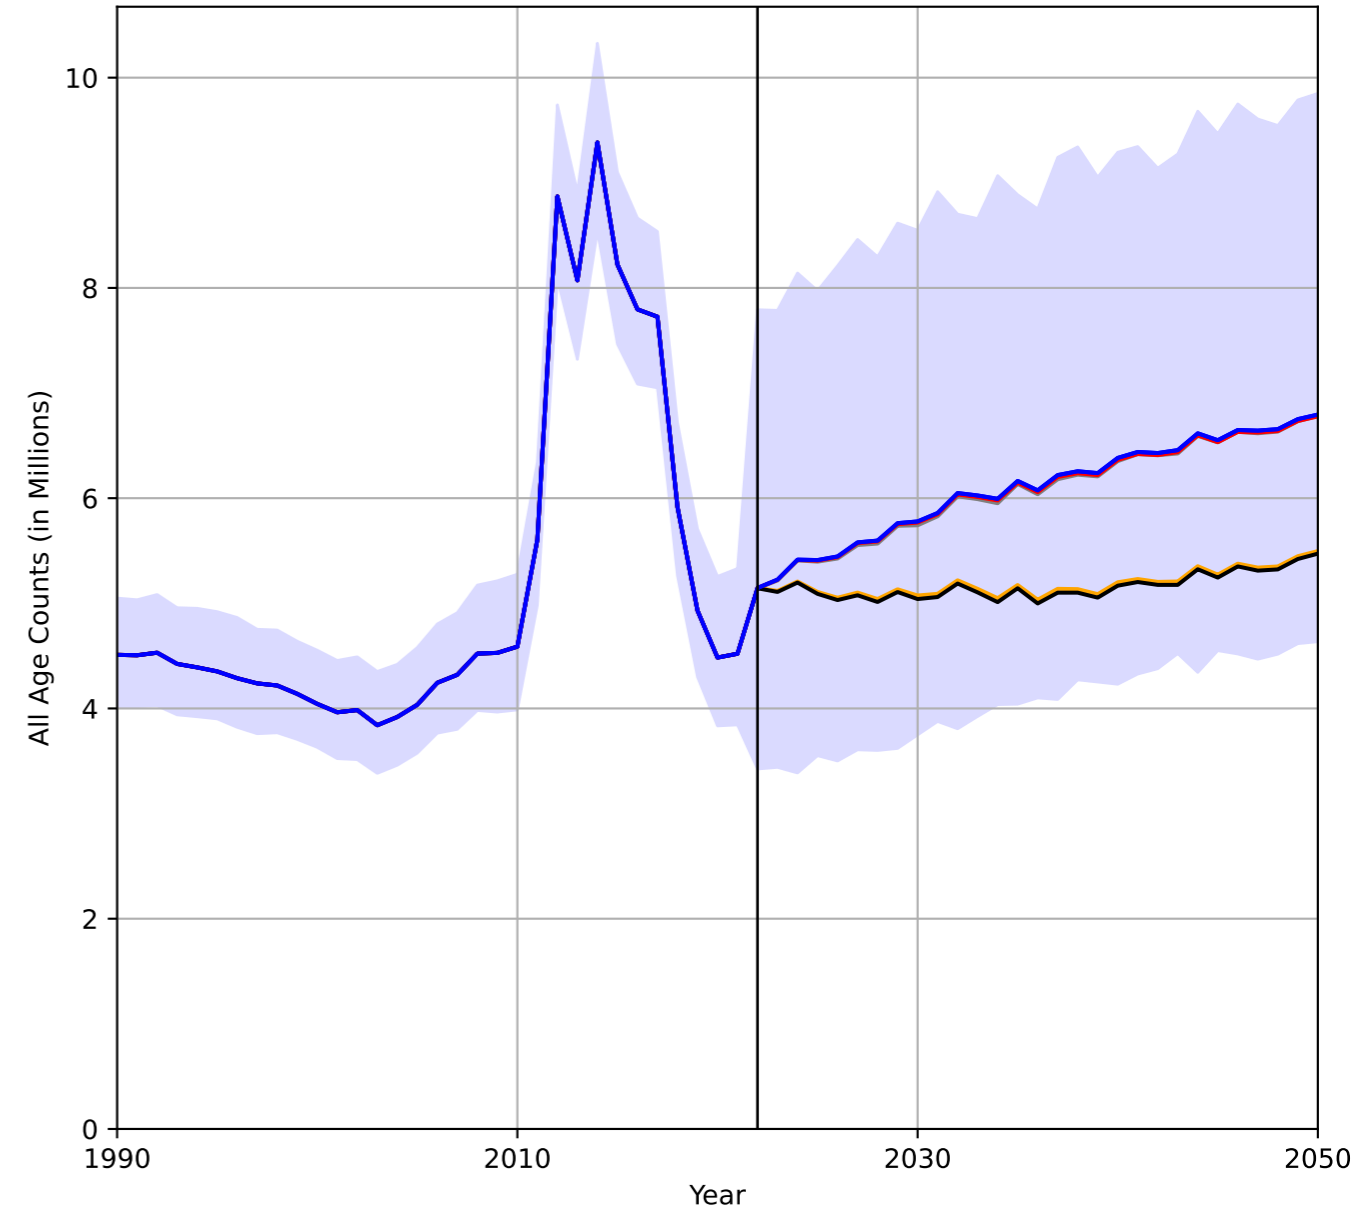

# Tunisia

Supplemental Results Figure S10. All-cause age standardised DALY rates (A) and all age DALY counts (B), for the past and for five future scenarios, 1990–2050

1526

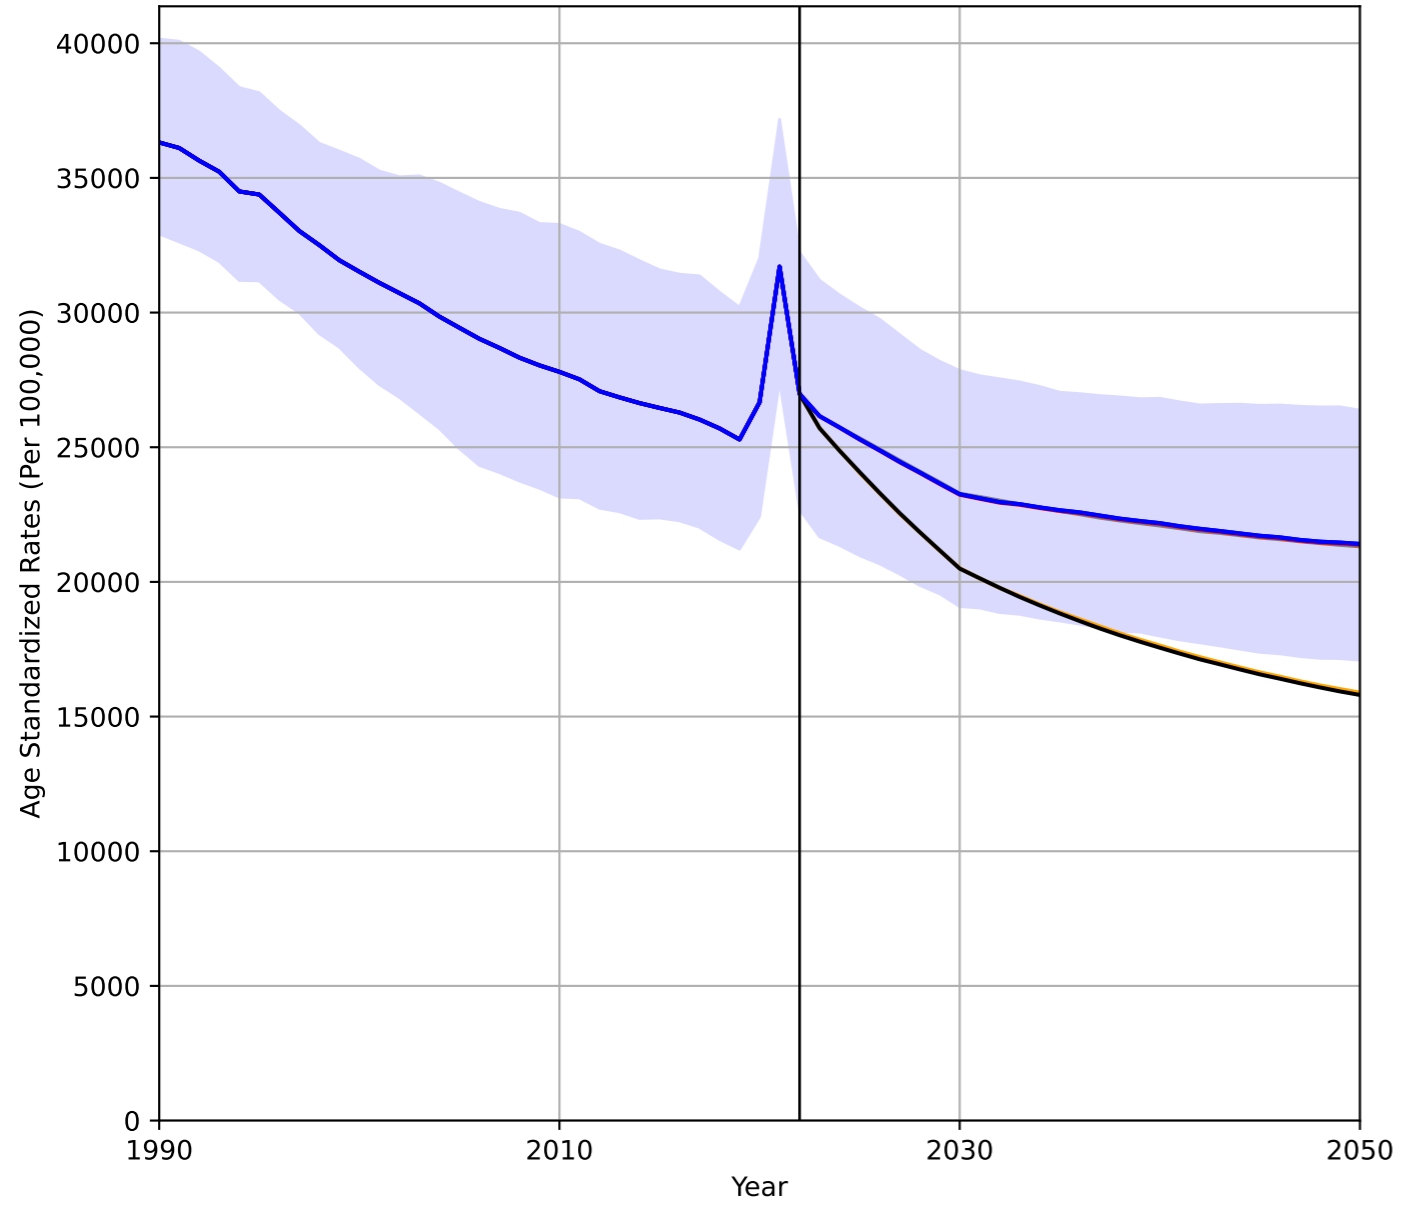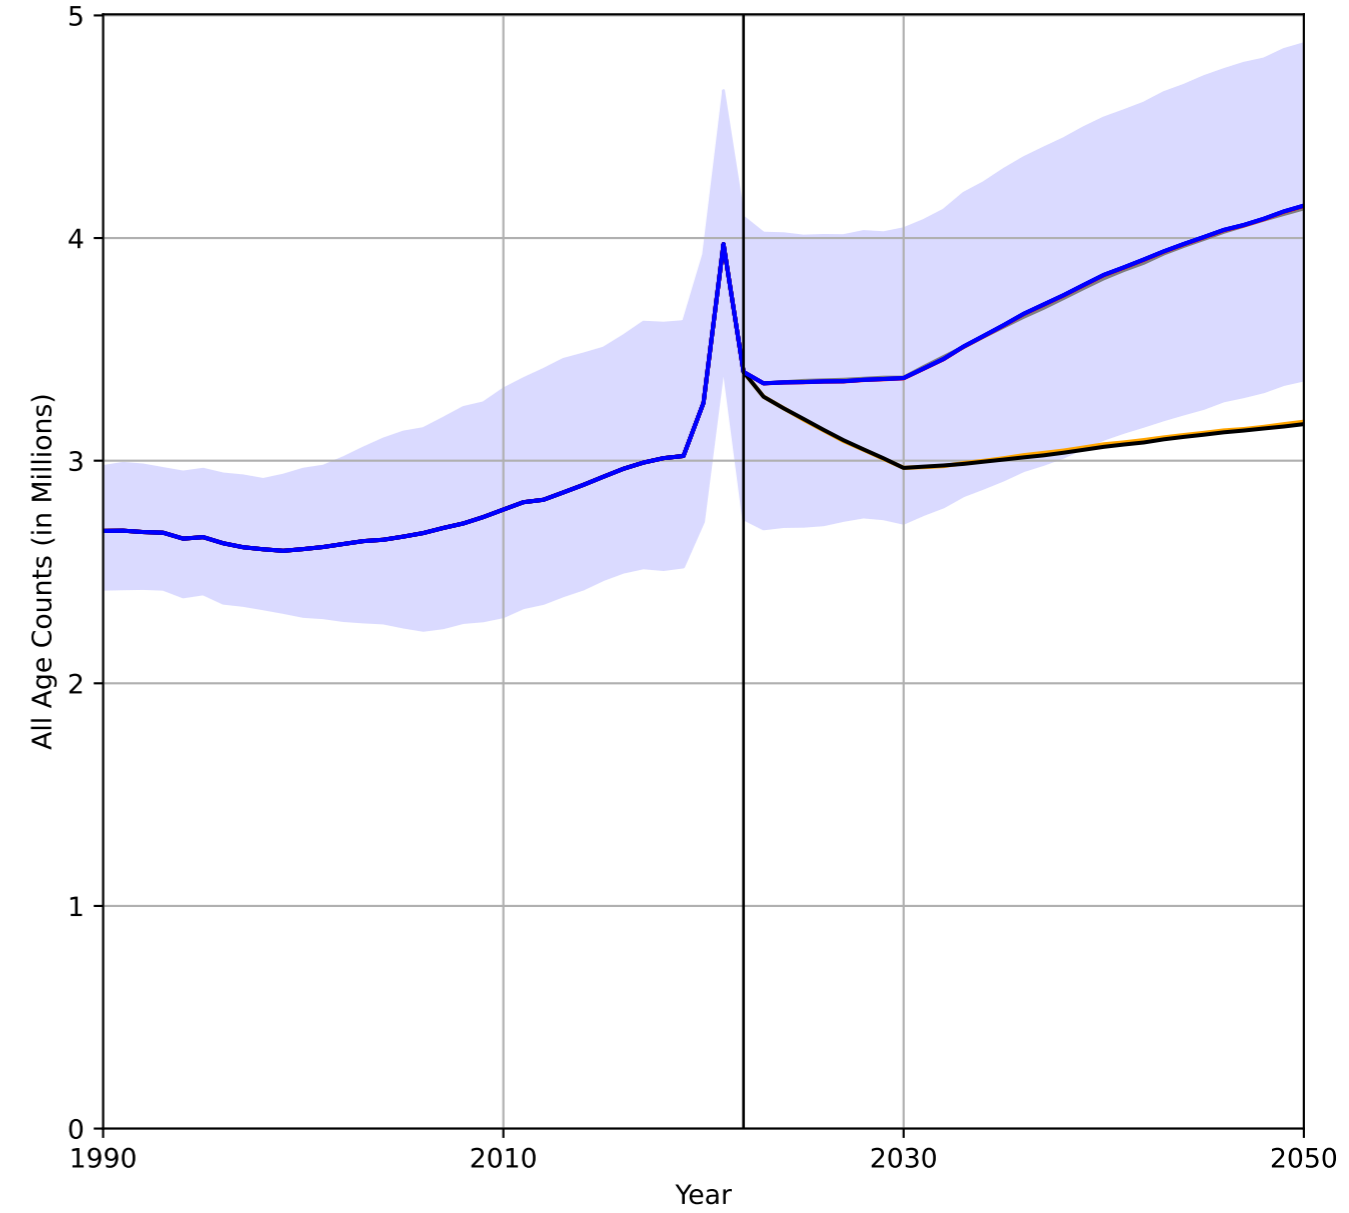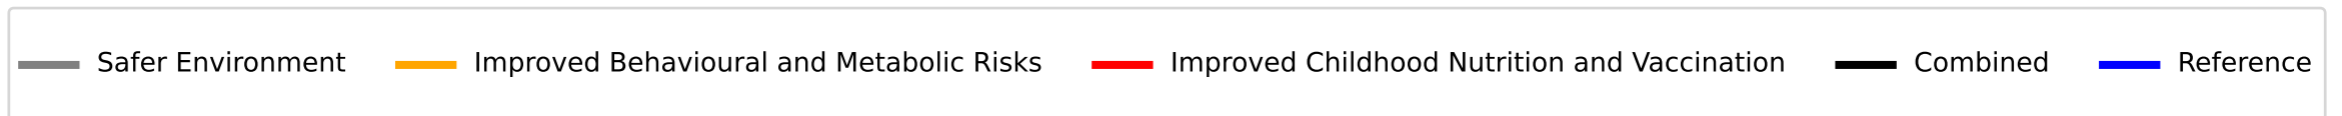

# Türkiye

Supplemental Results Figure S10. All-cause age standardised DALY rates (A) and all age DALY counts (B), for the past and for five future scenarios, 1990–2050

1527

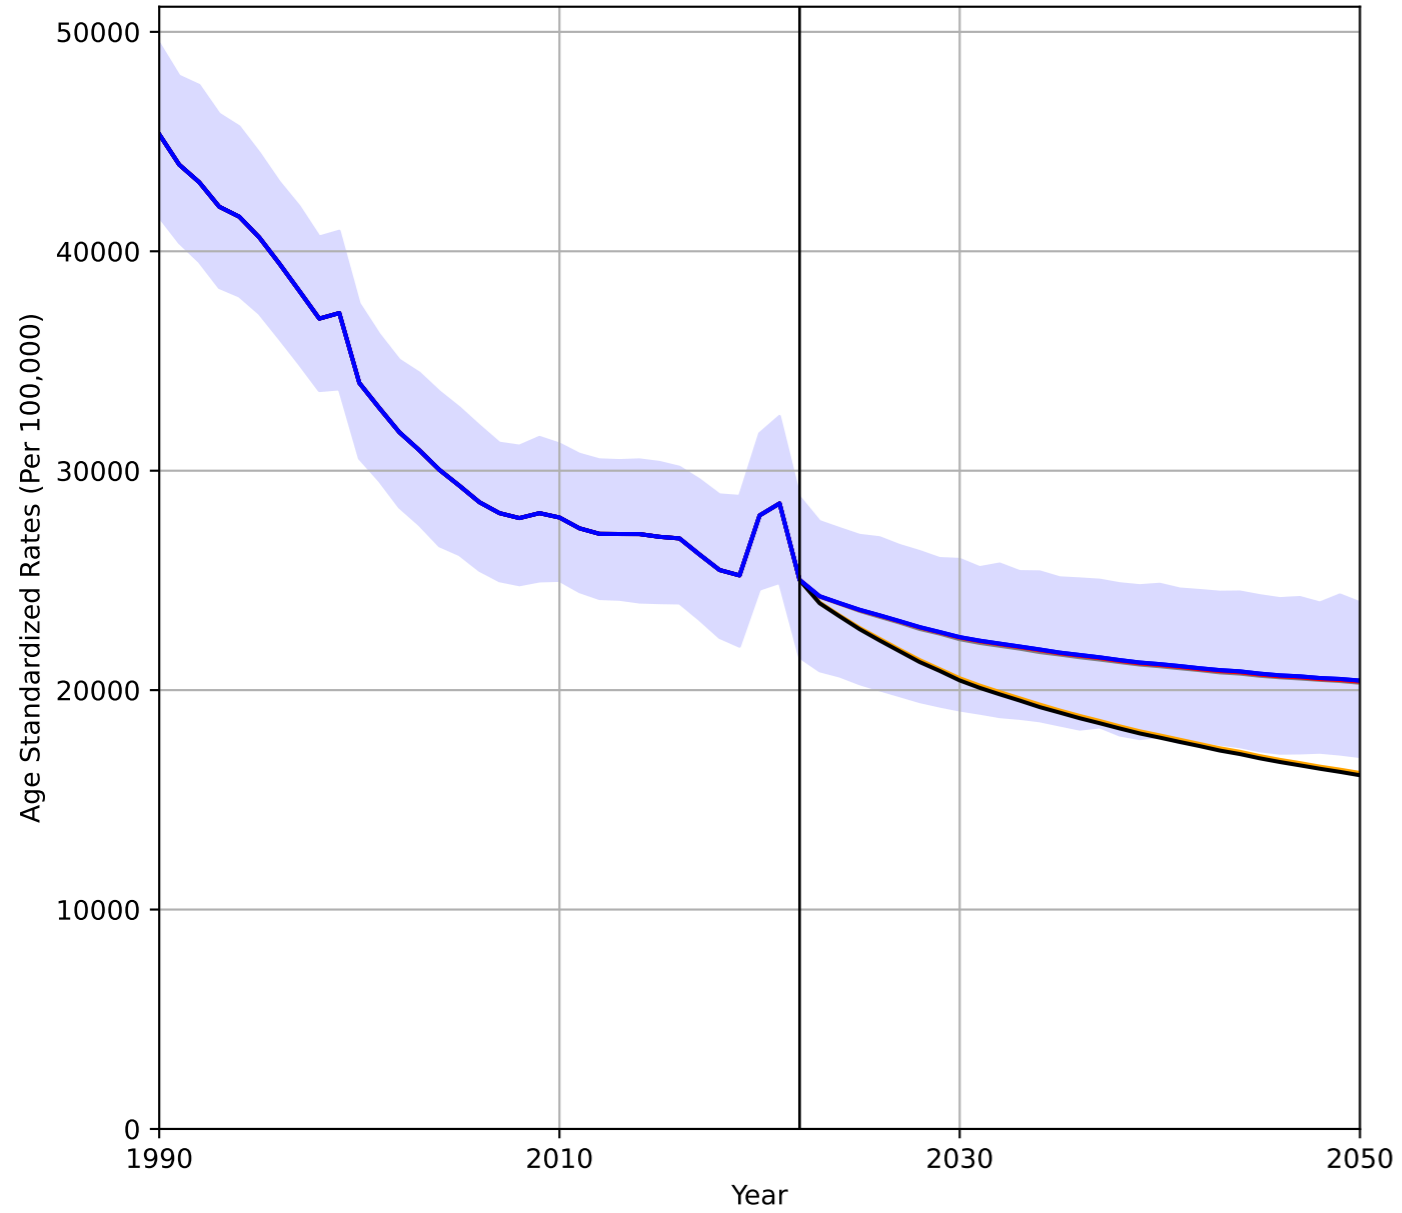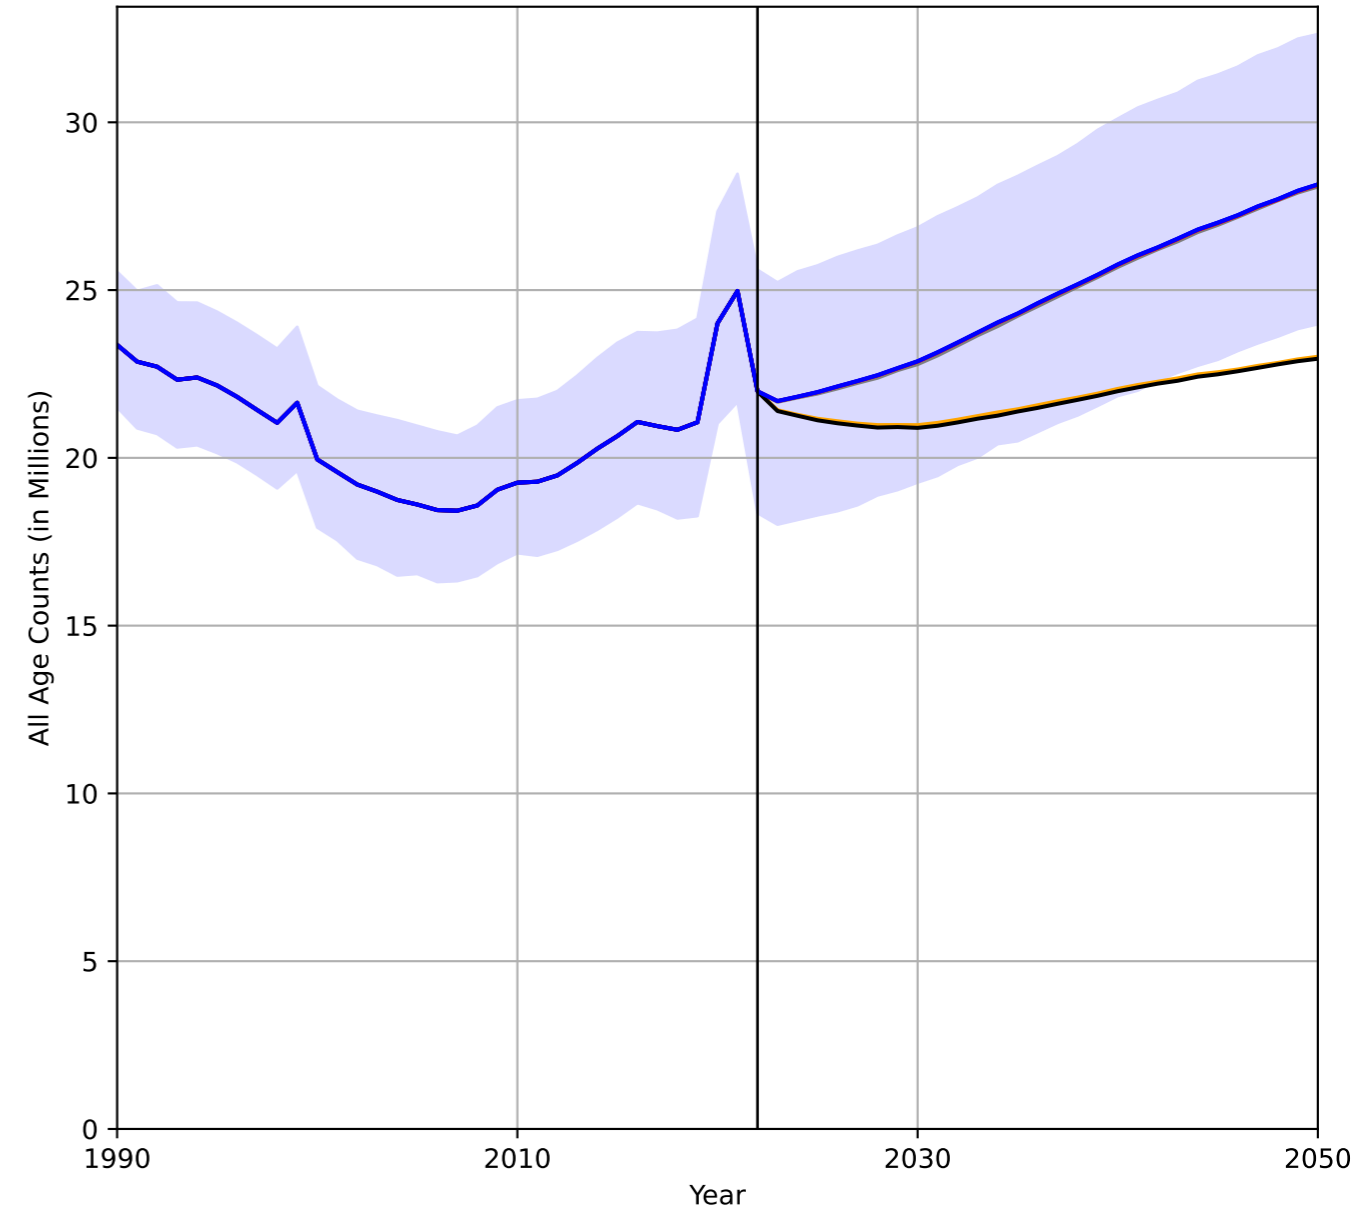



# United Arab Emirates

1528

Supplemental Results Figure S10. All-cause age standardised DALY rates (A) and all age DALY counts (B), for the past and for five future scenarios, 1990–2050

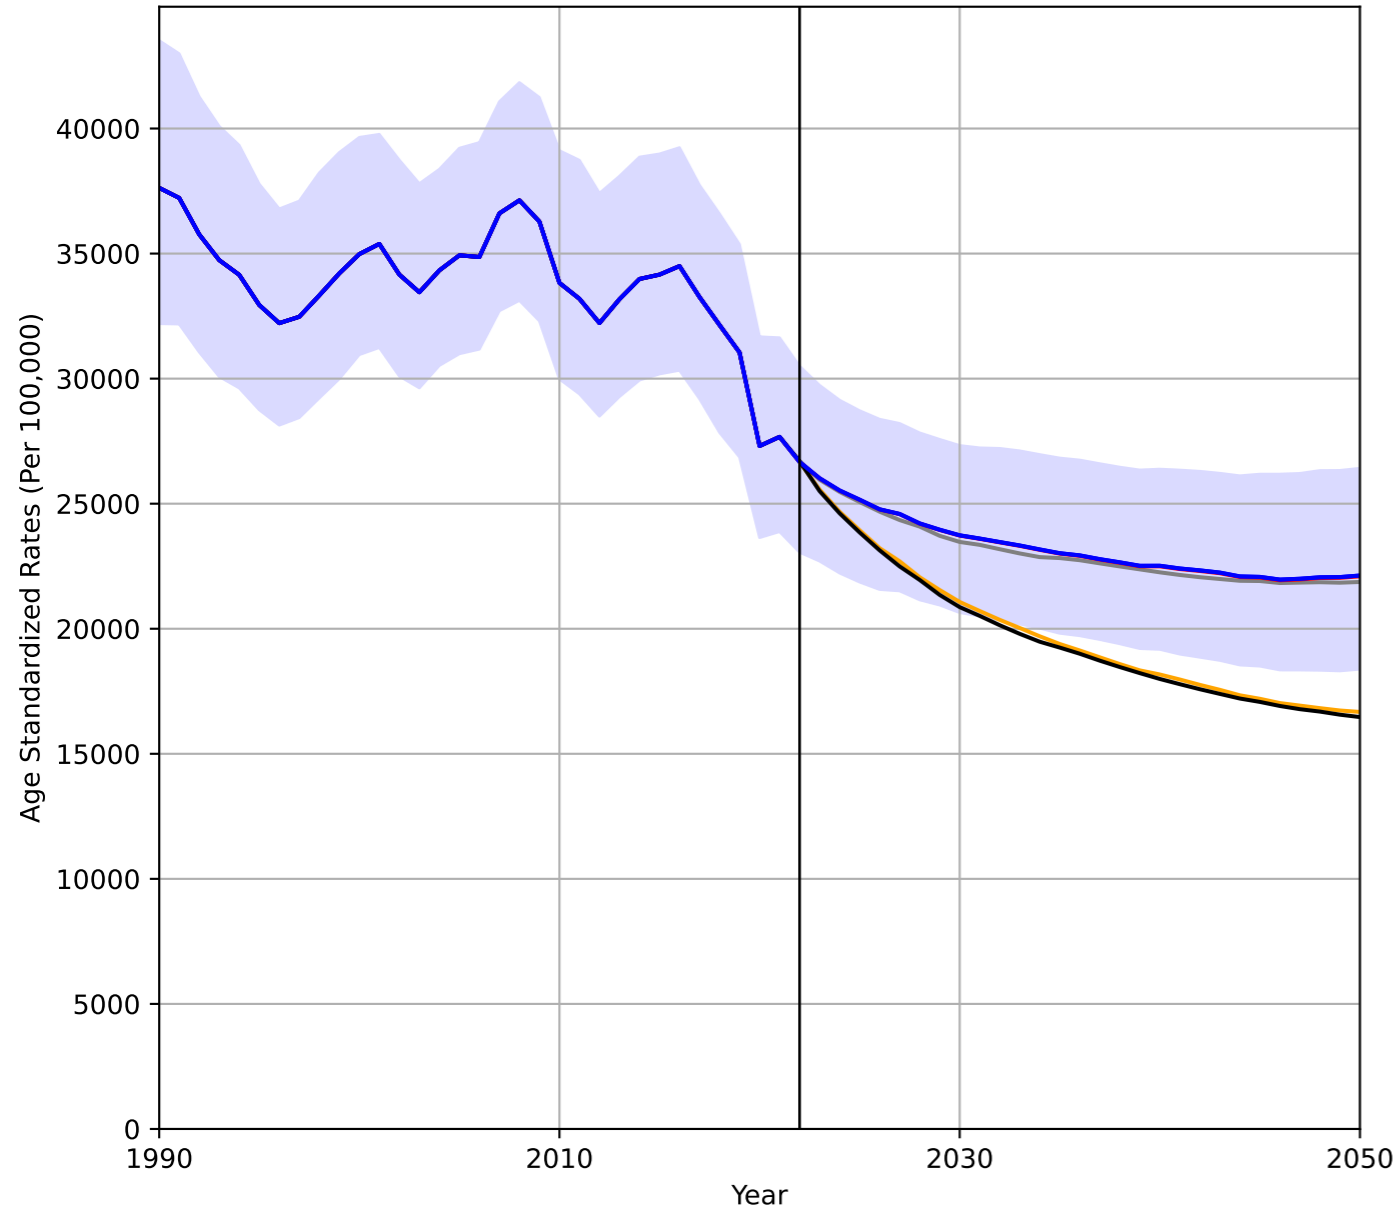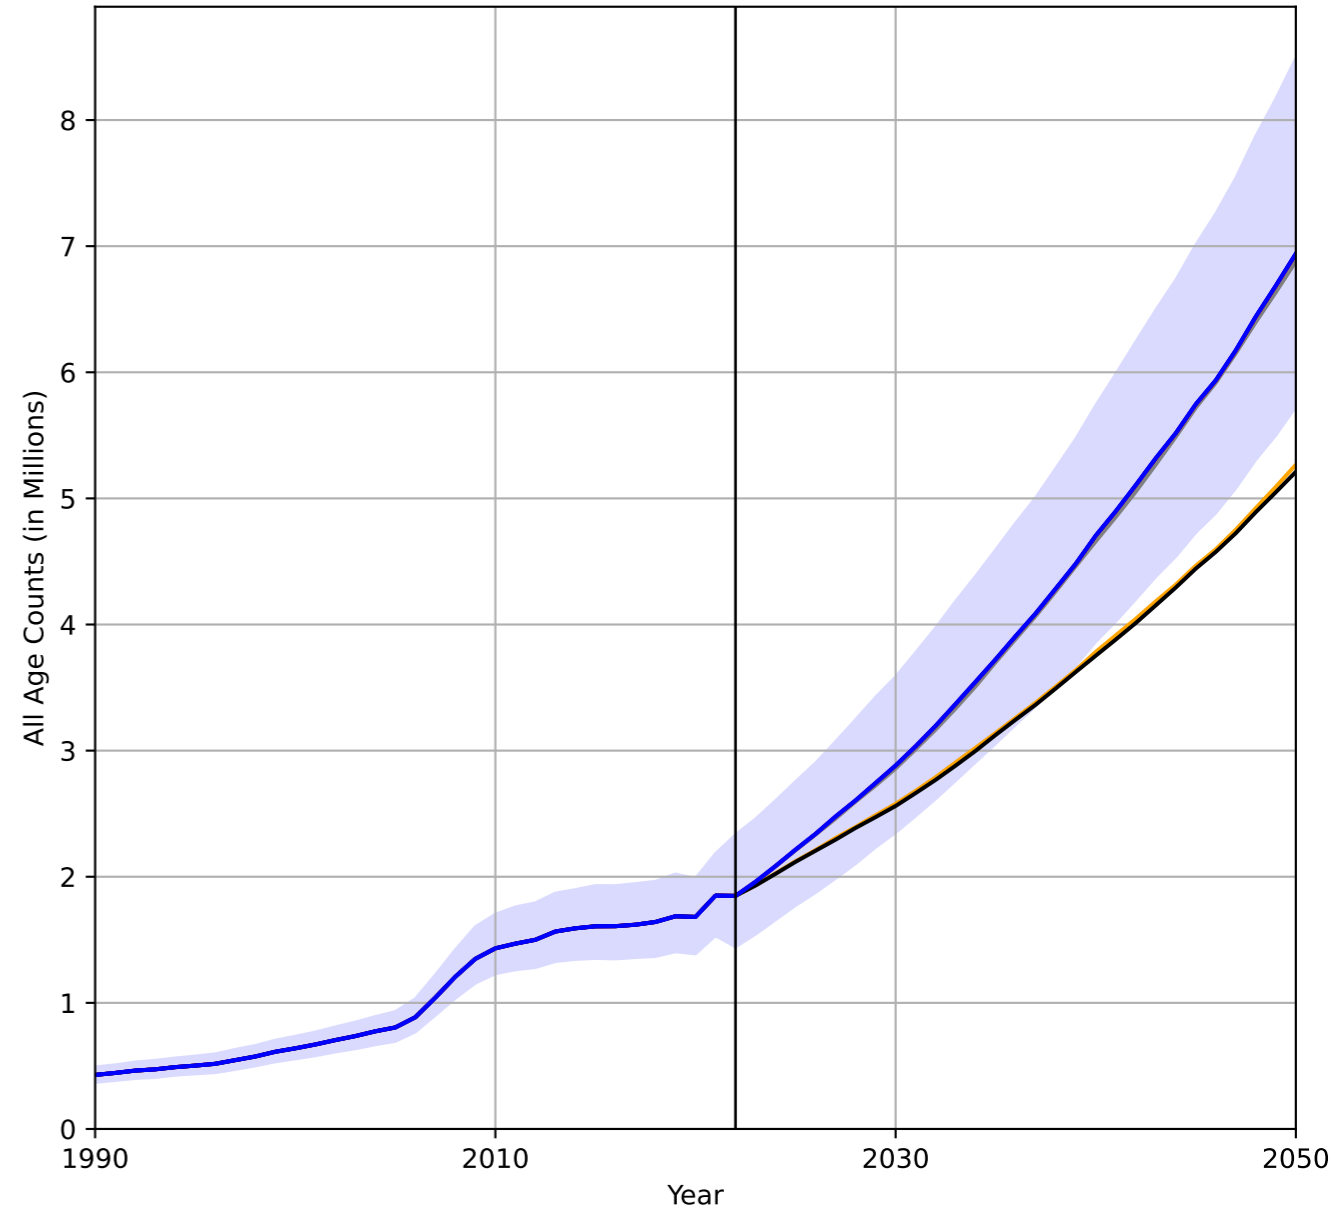

# Yemen

Supplemental Results Figure S10. All-cause age standardised DALY rates (A) and all age DALY counts (B), for the past and for five future scenarios, 1990–2050

1529

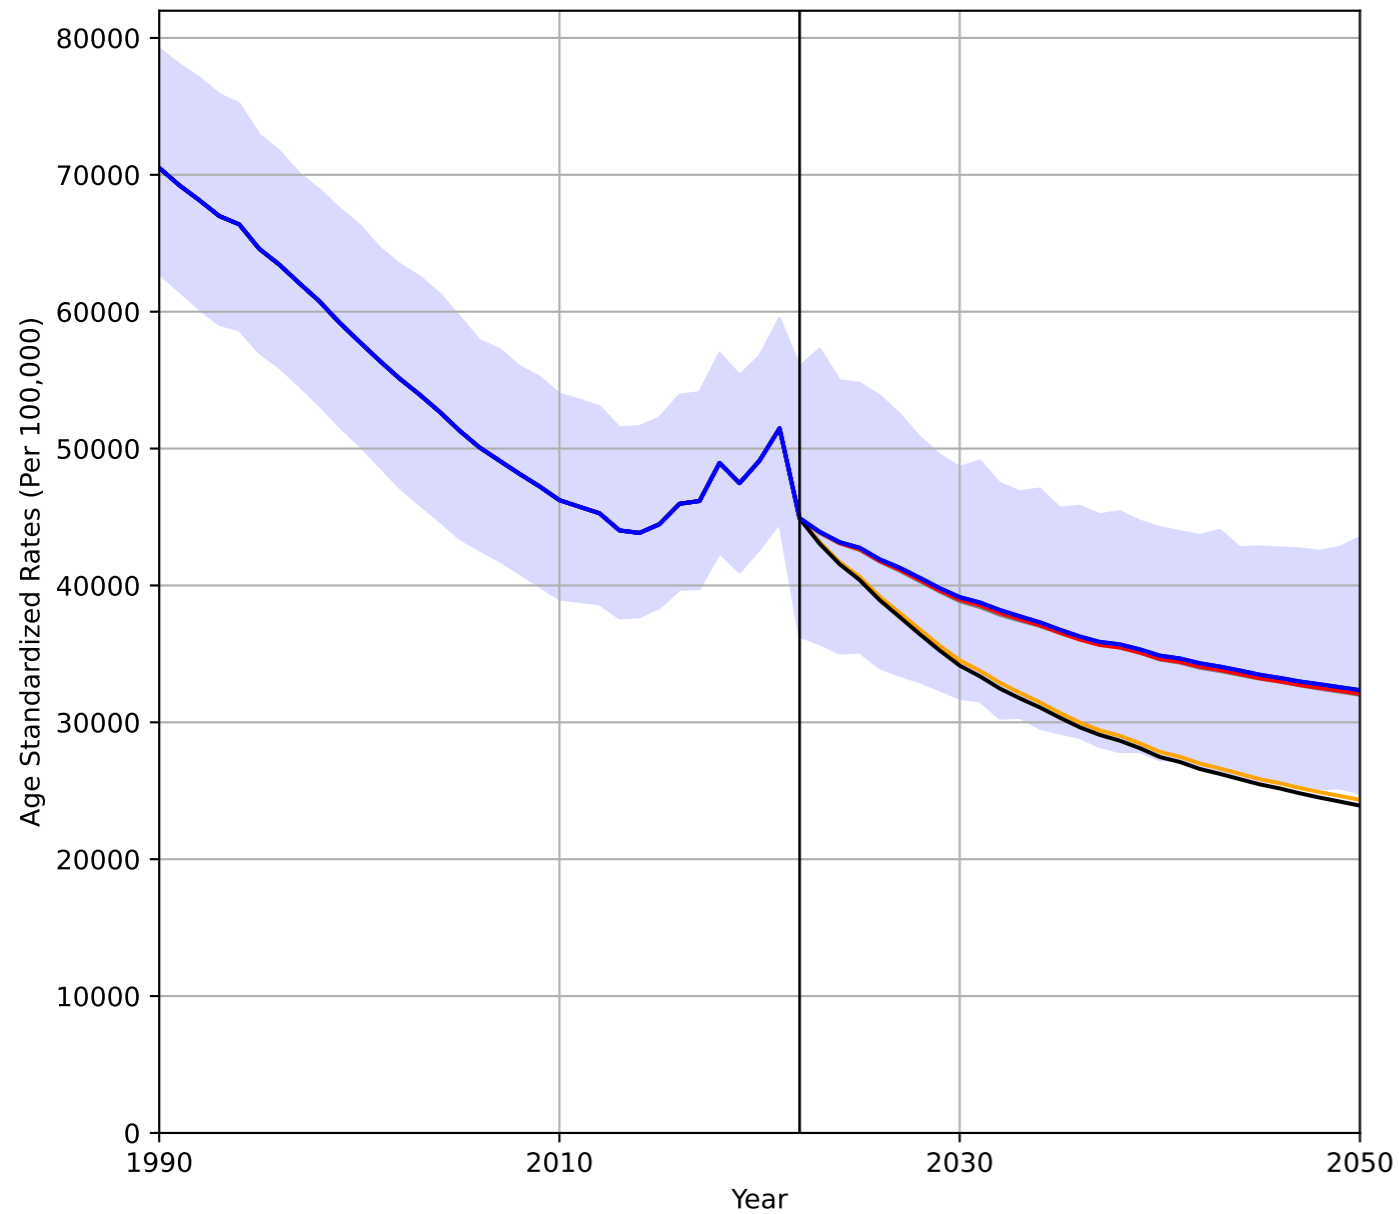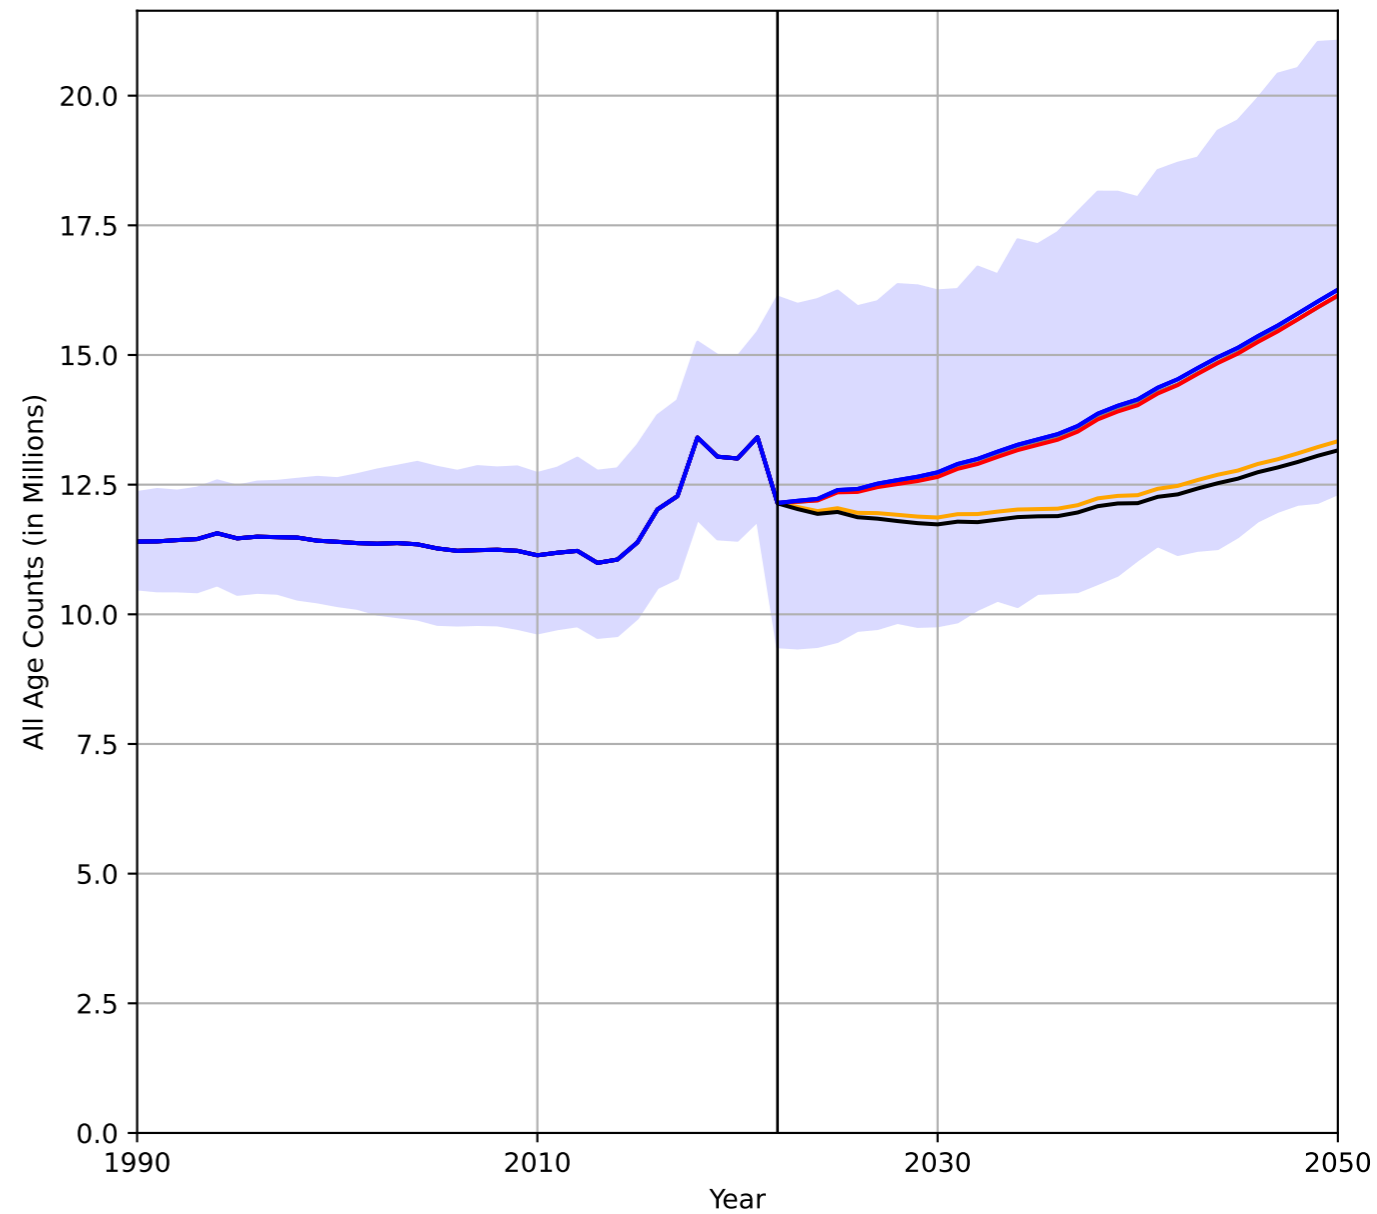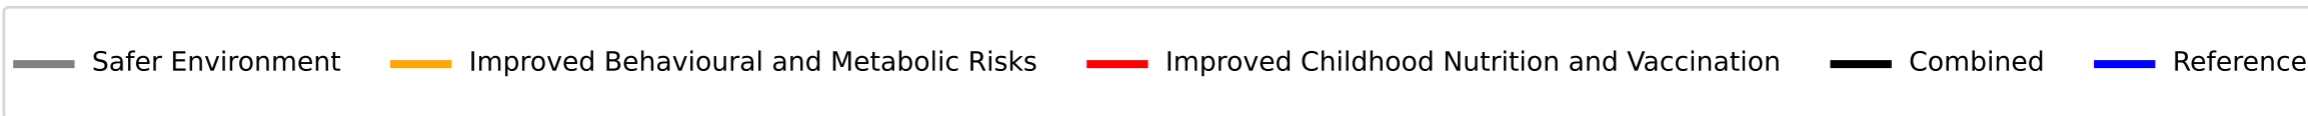

# Bangladesh

Supplemental Results Figure S10. All-cause age standardised DALY rates (A) and all age DALY counts (B), for the past and for five future scenarios, 1990–2050

1530

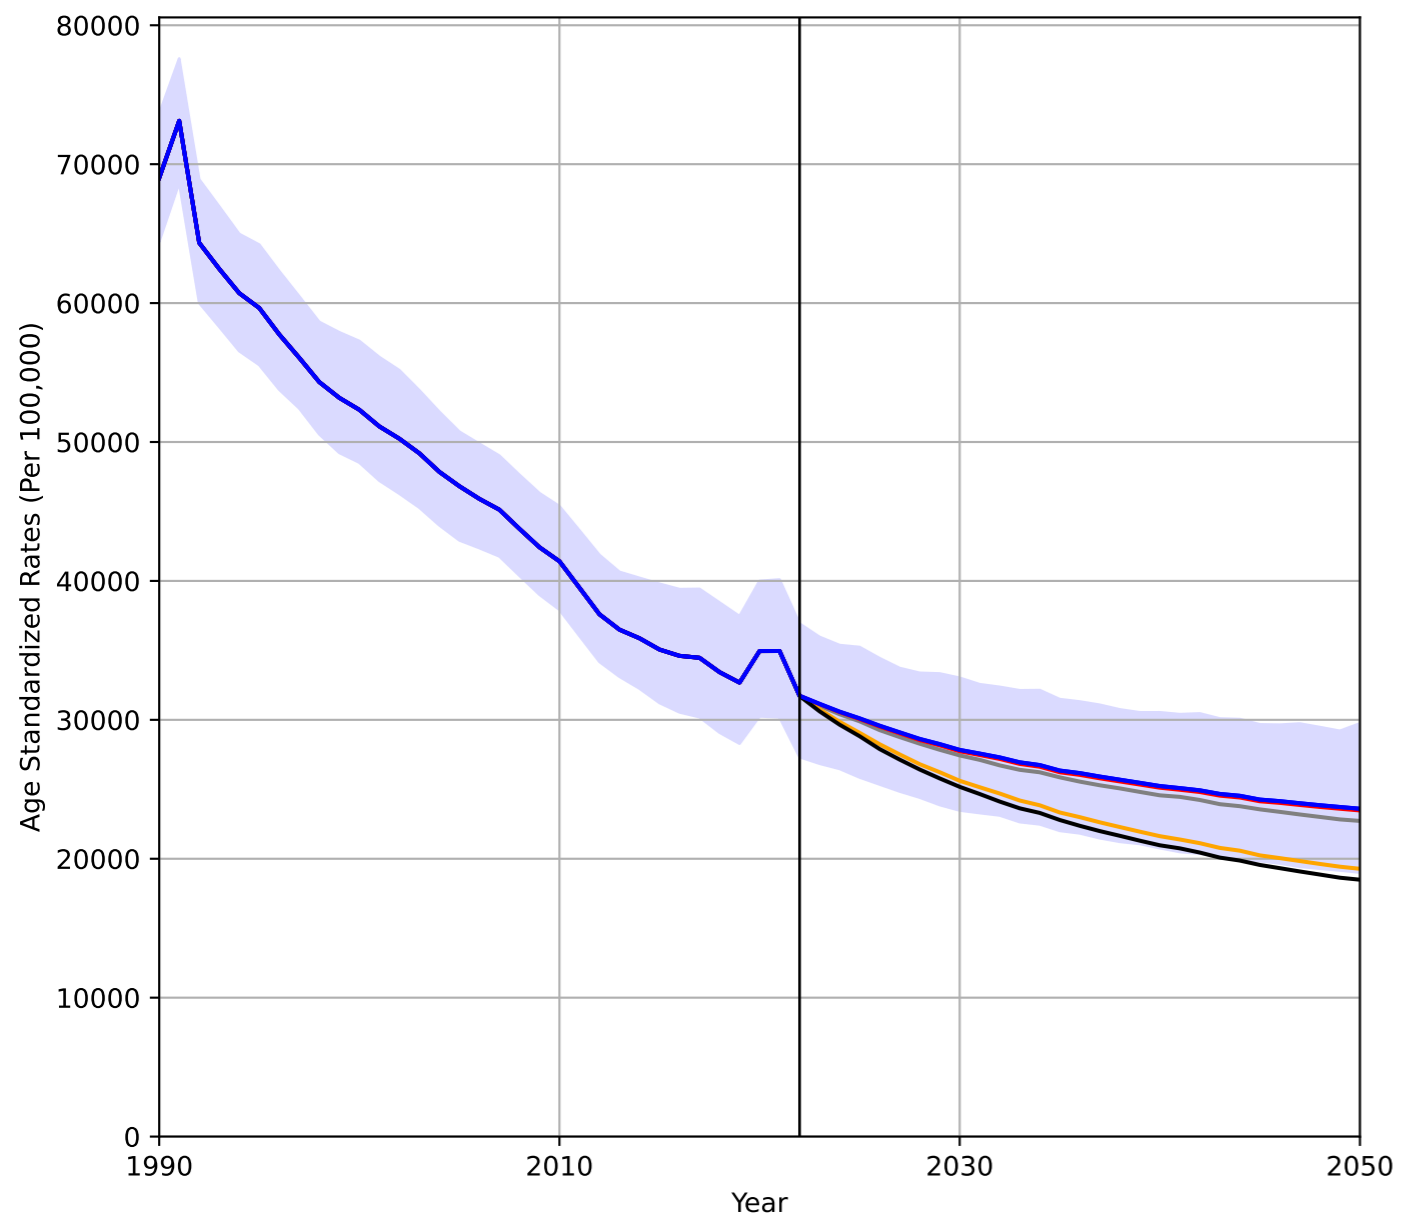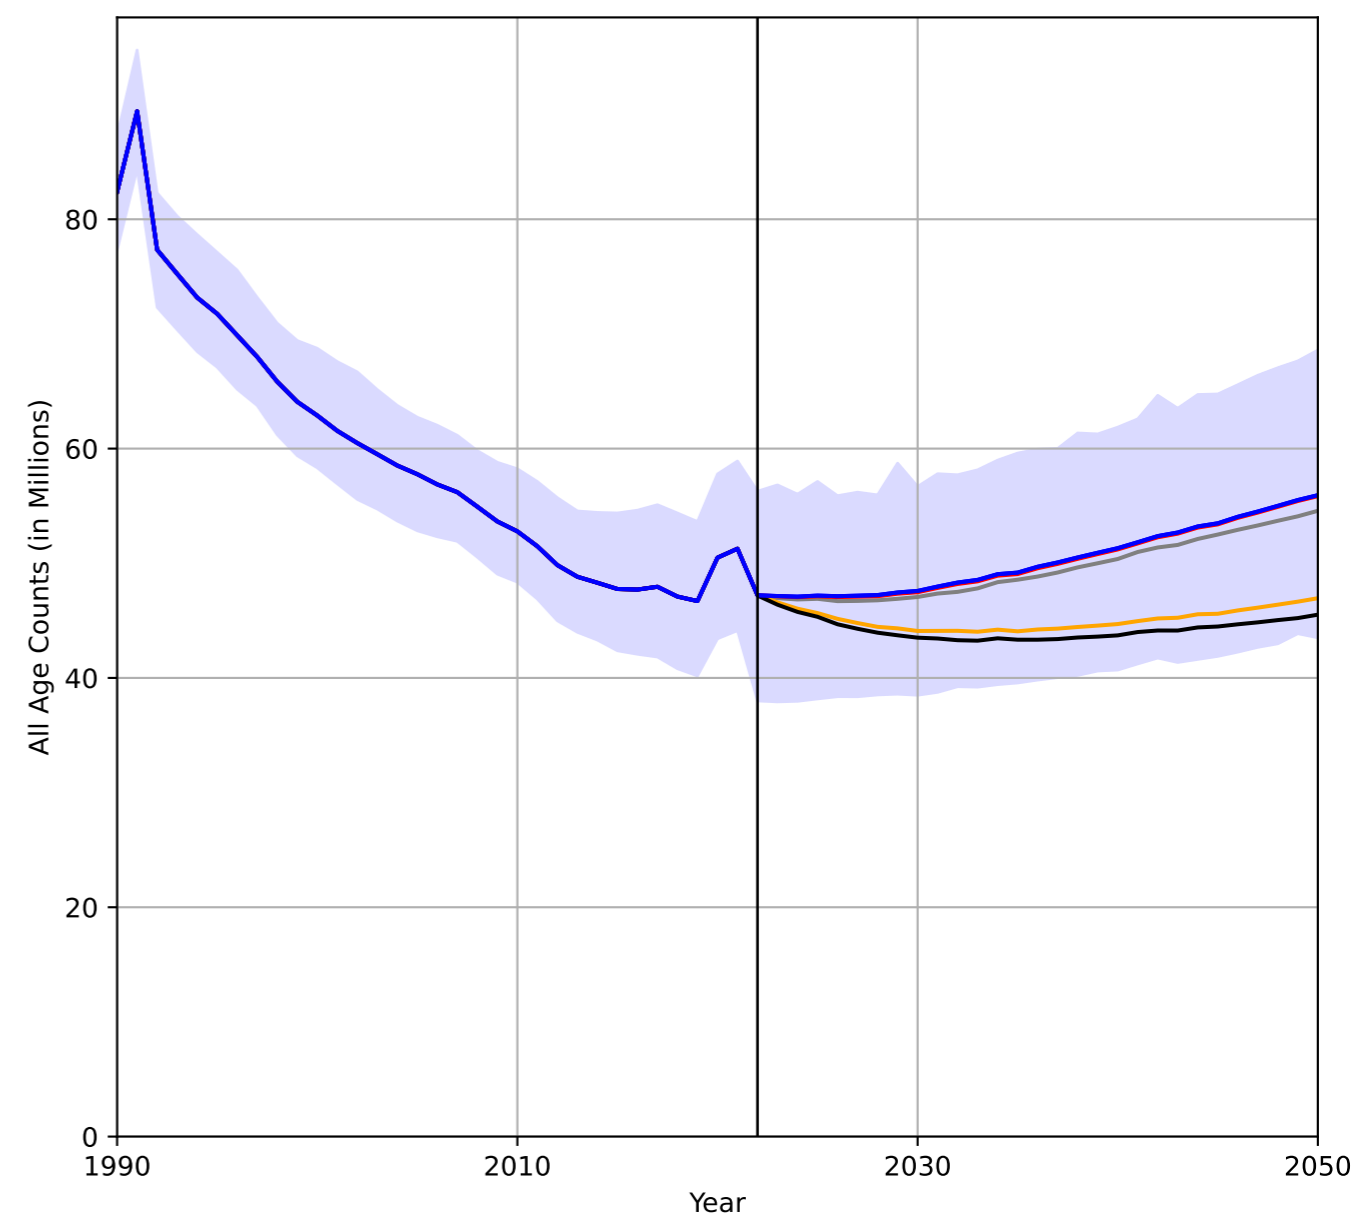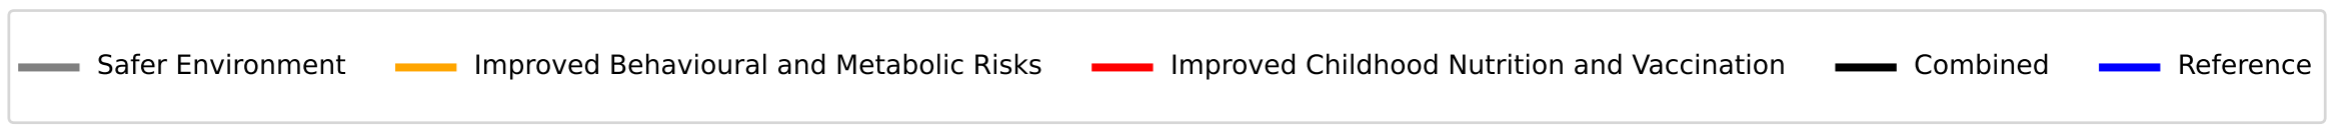

# Bhutan

Supplemental Results Figure S10. All-cause age standardised DALY rates (A) and all age DALY counts (B), for the past and for five future scenarios, 1990–2050

1531

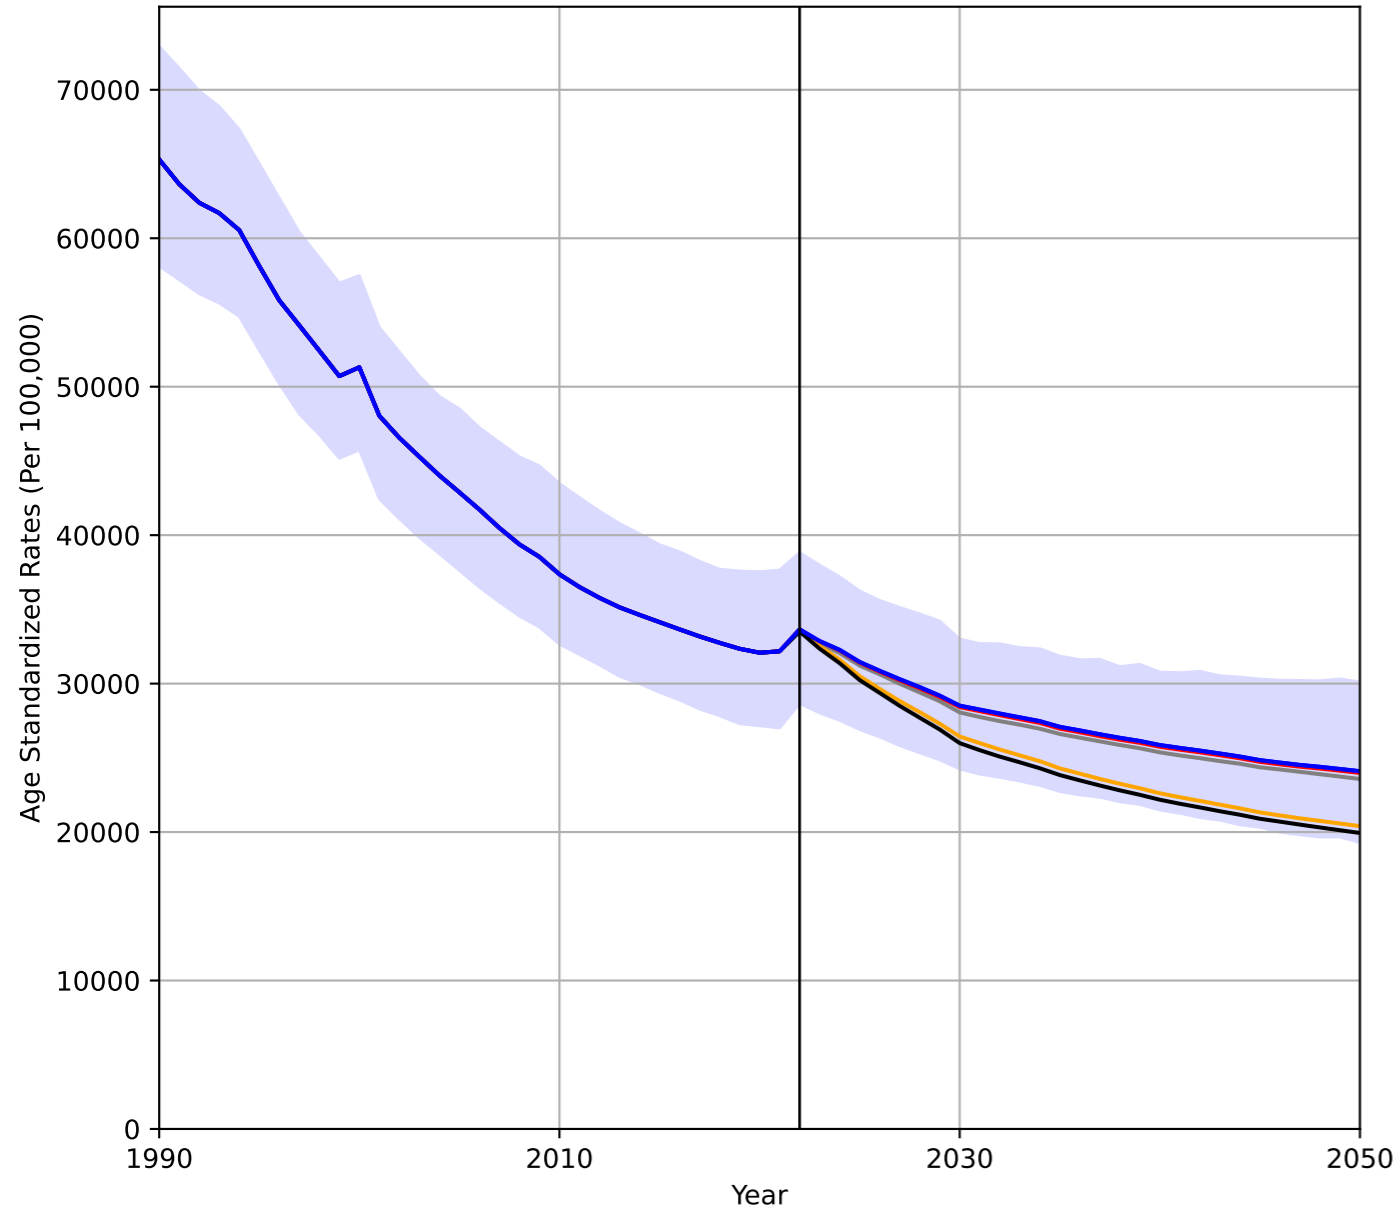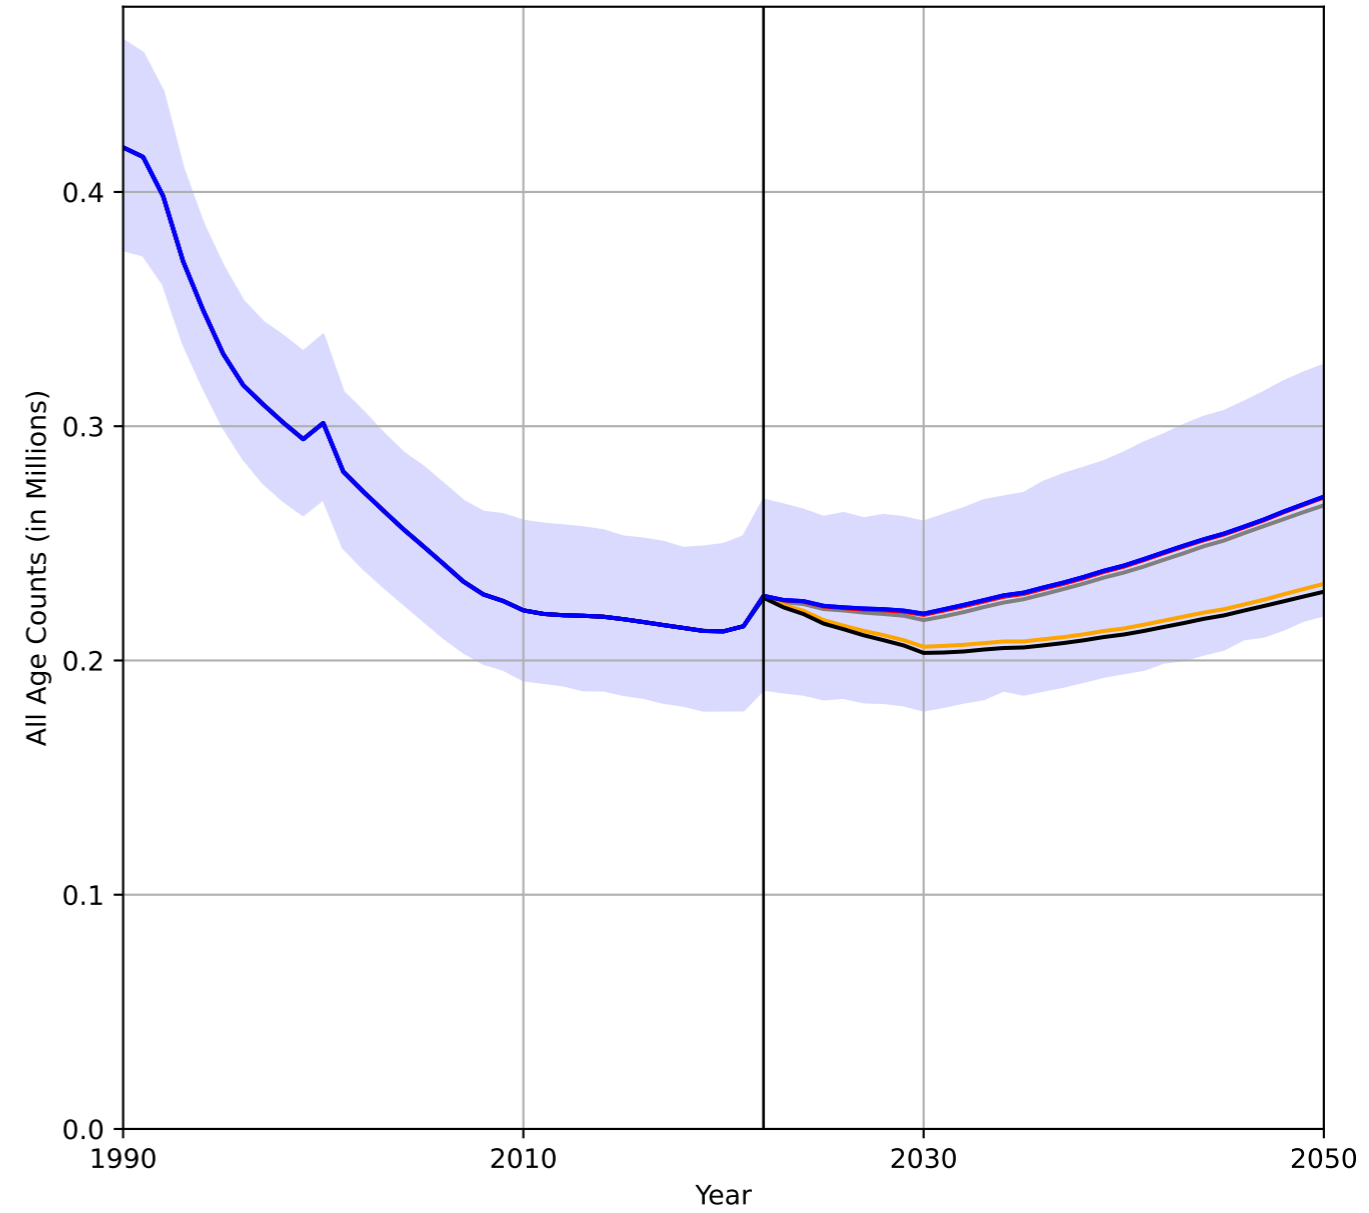

# India

Supplemental Results Figure S10. All-cause age standardised DALY rates (A) and all age DALY counts (B), for the past and for five future scenarios, 1990–2050

1532

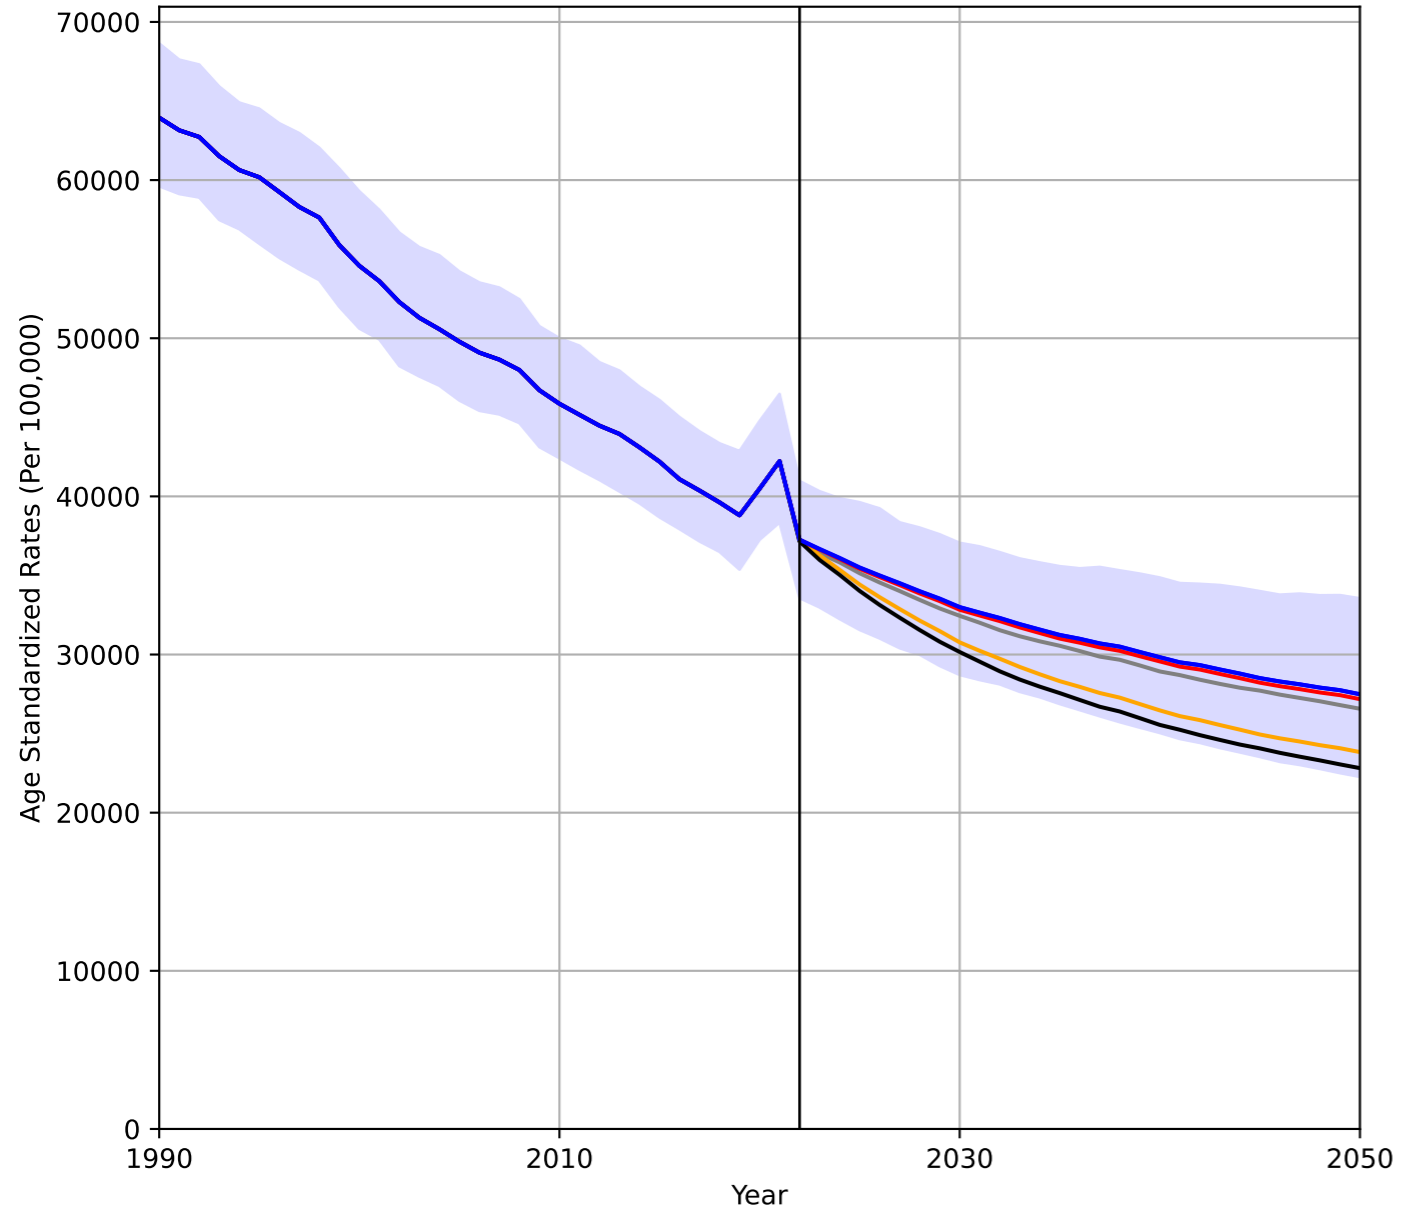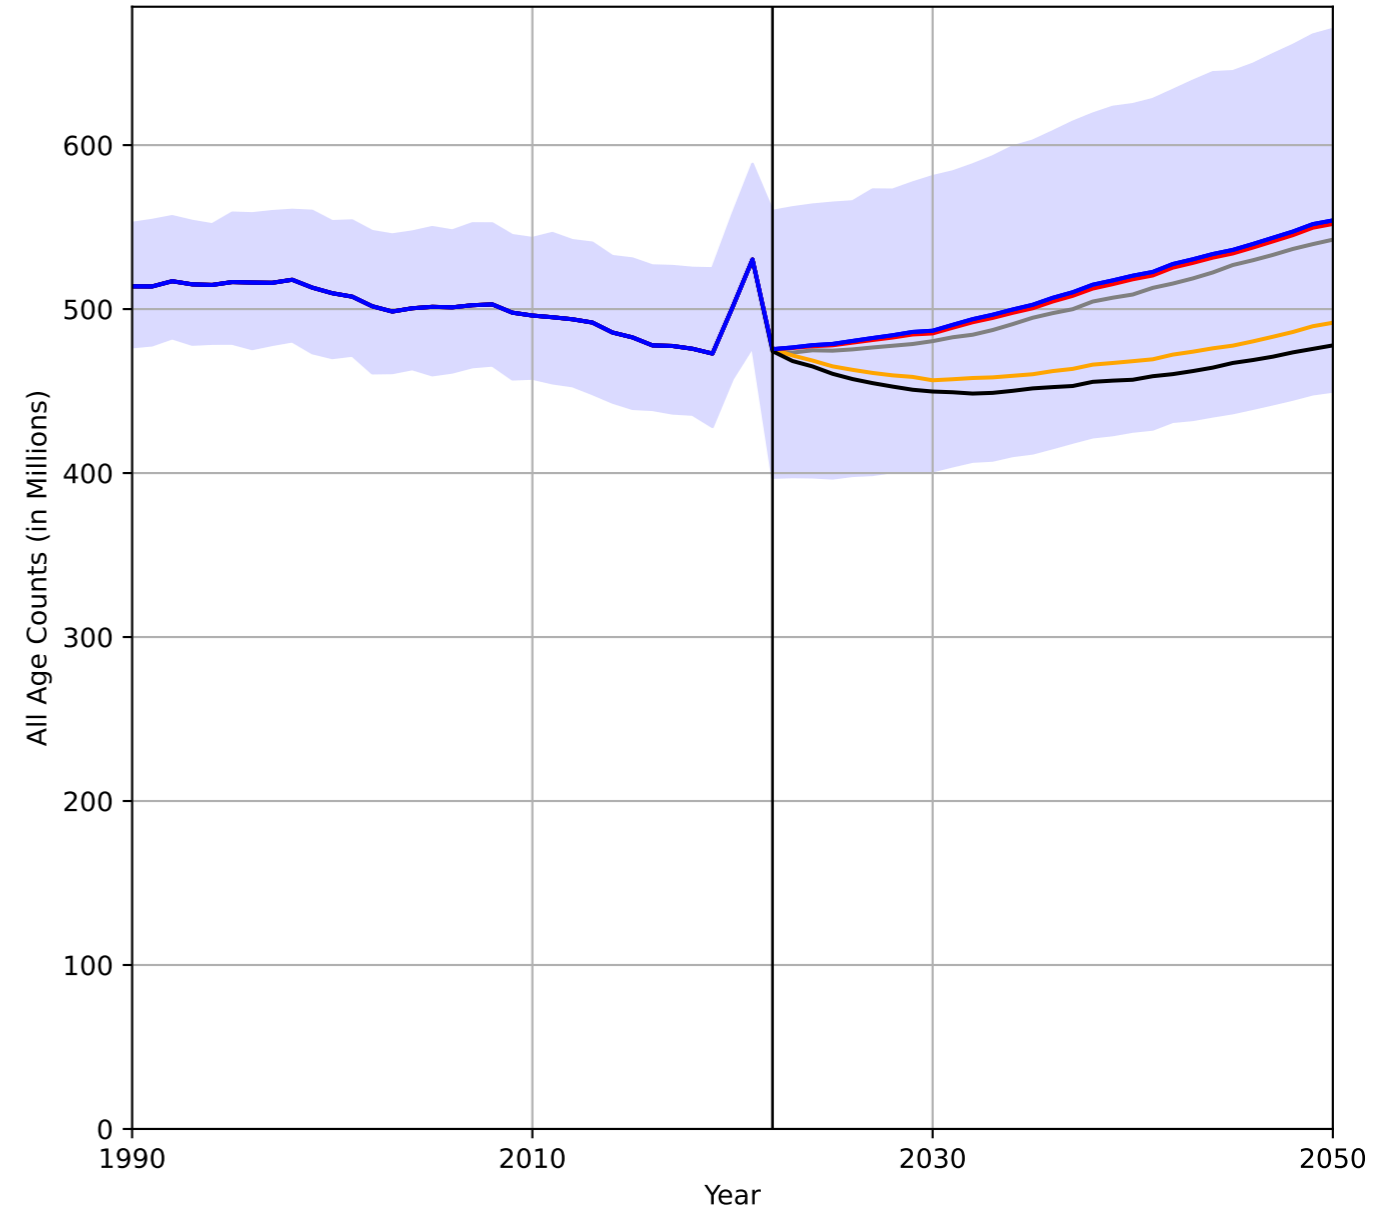

# Nepal

Supplemental Results Figure S10. All-cause age standardised DALY rates (A) and all age DALY counts (B), for the past and for five future scenarios, 1990–2050

1533

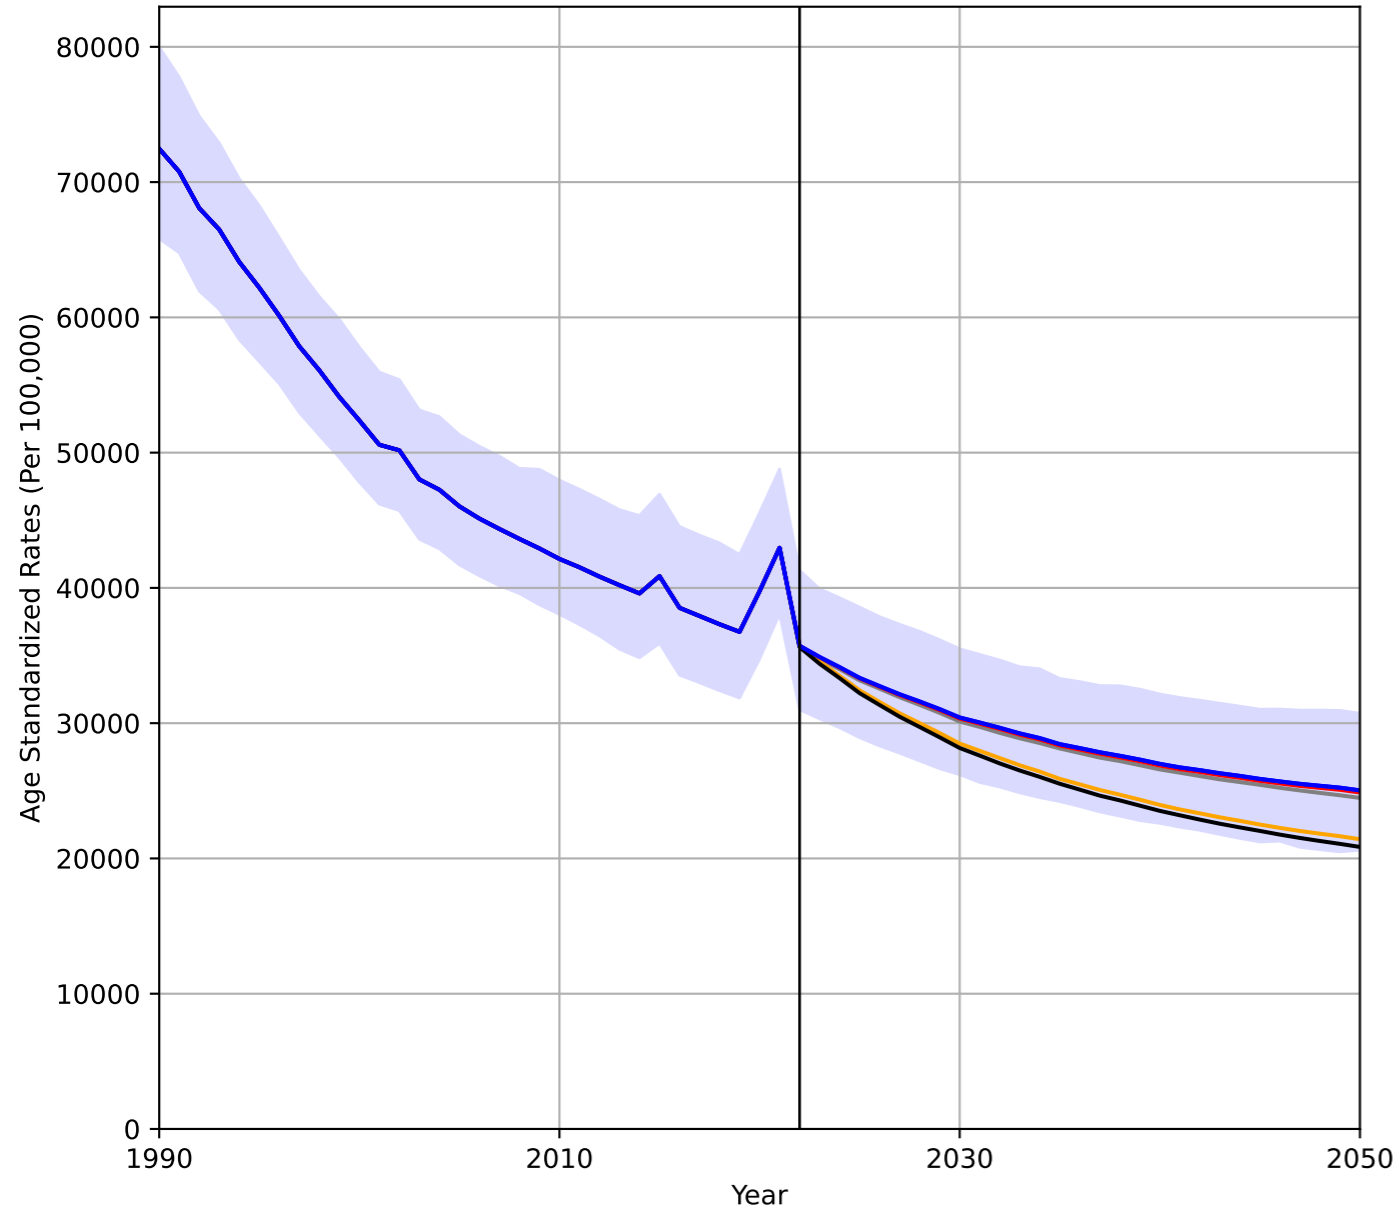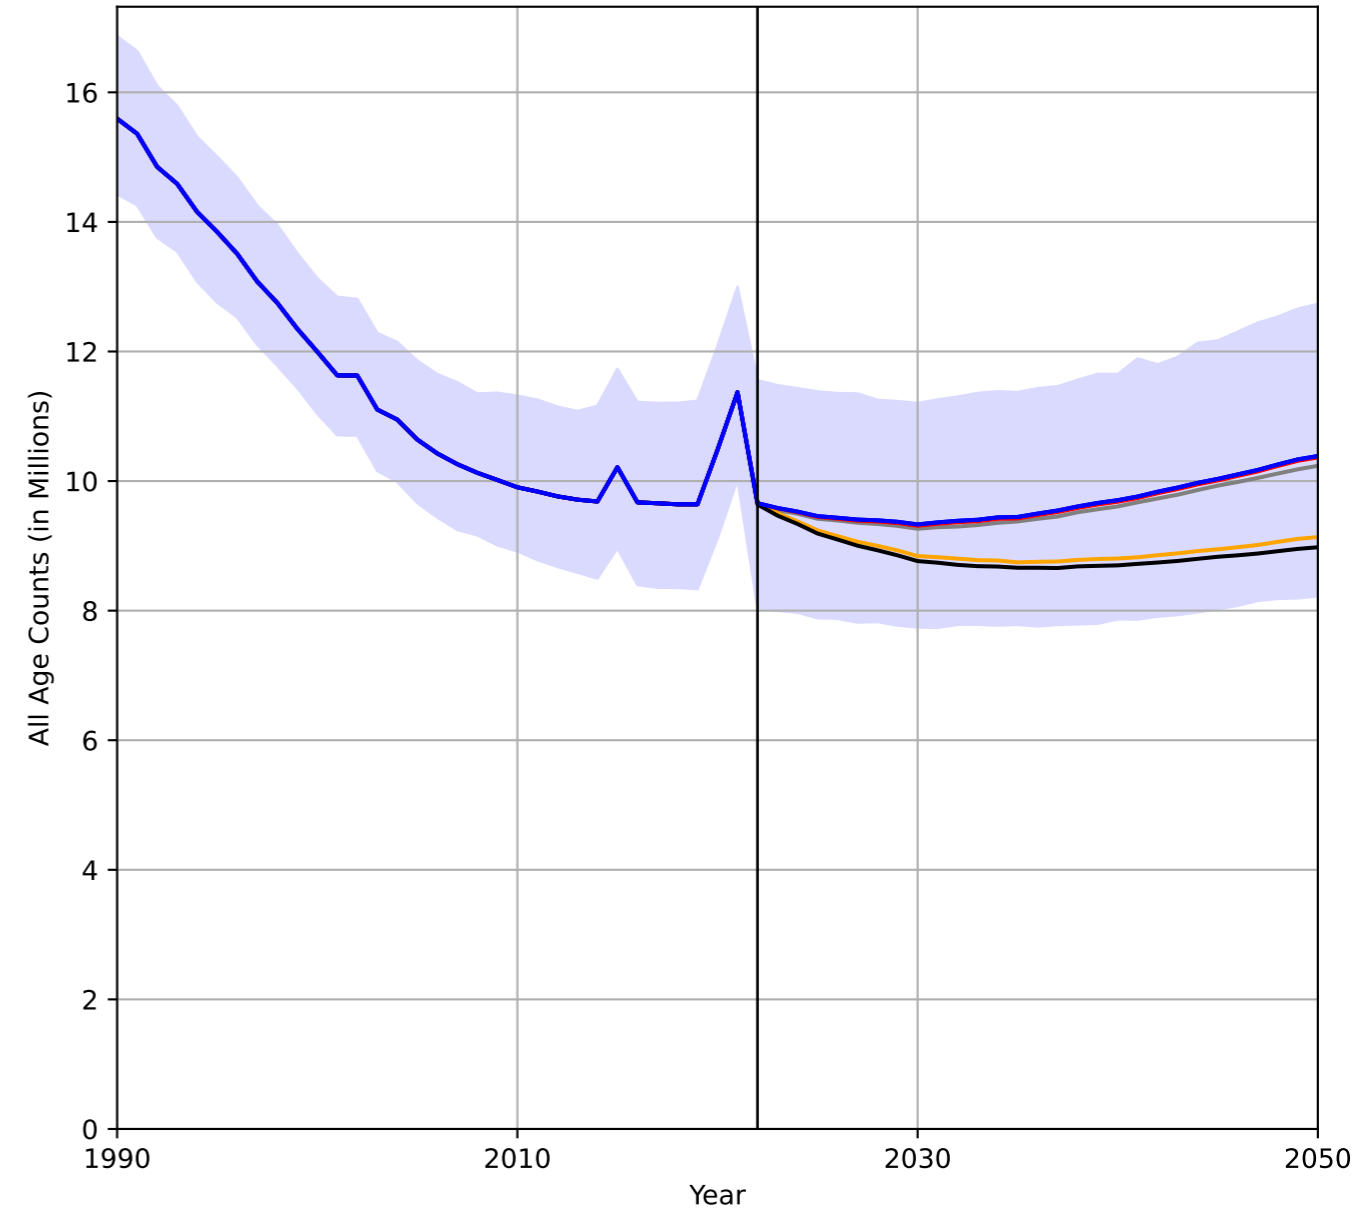

# Pakistan

Supplemental Results Figure S10. All-cause age standardised DALY rates (A) and all age DALY counts (B), for the past and for five future scenarios, 1990–2050

1534

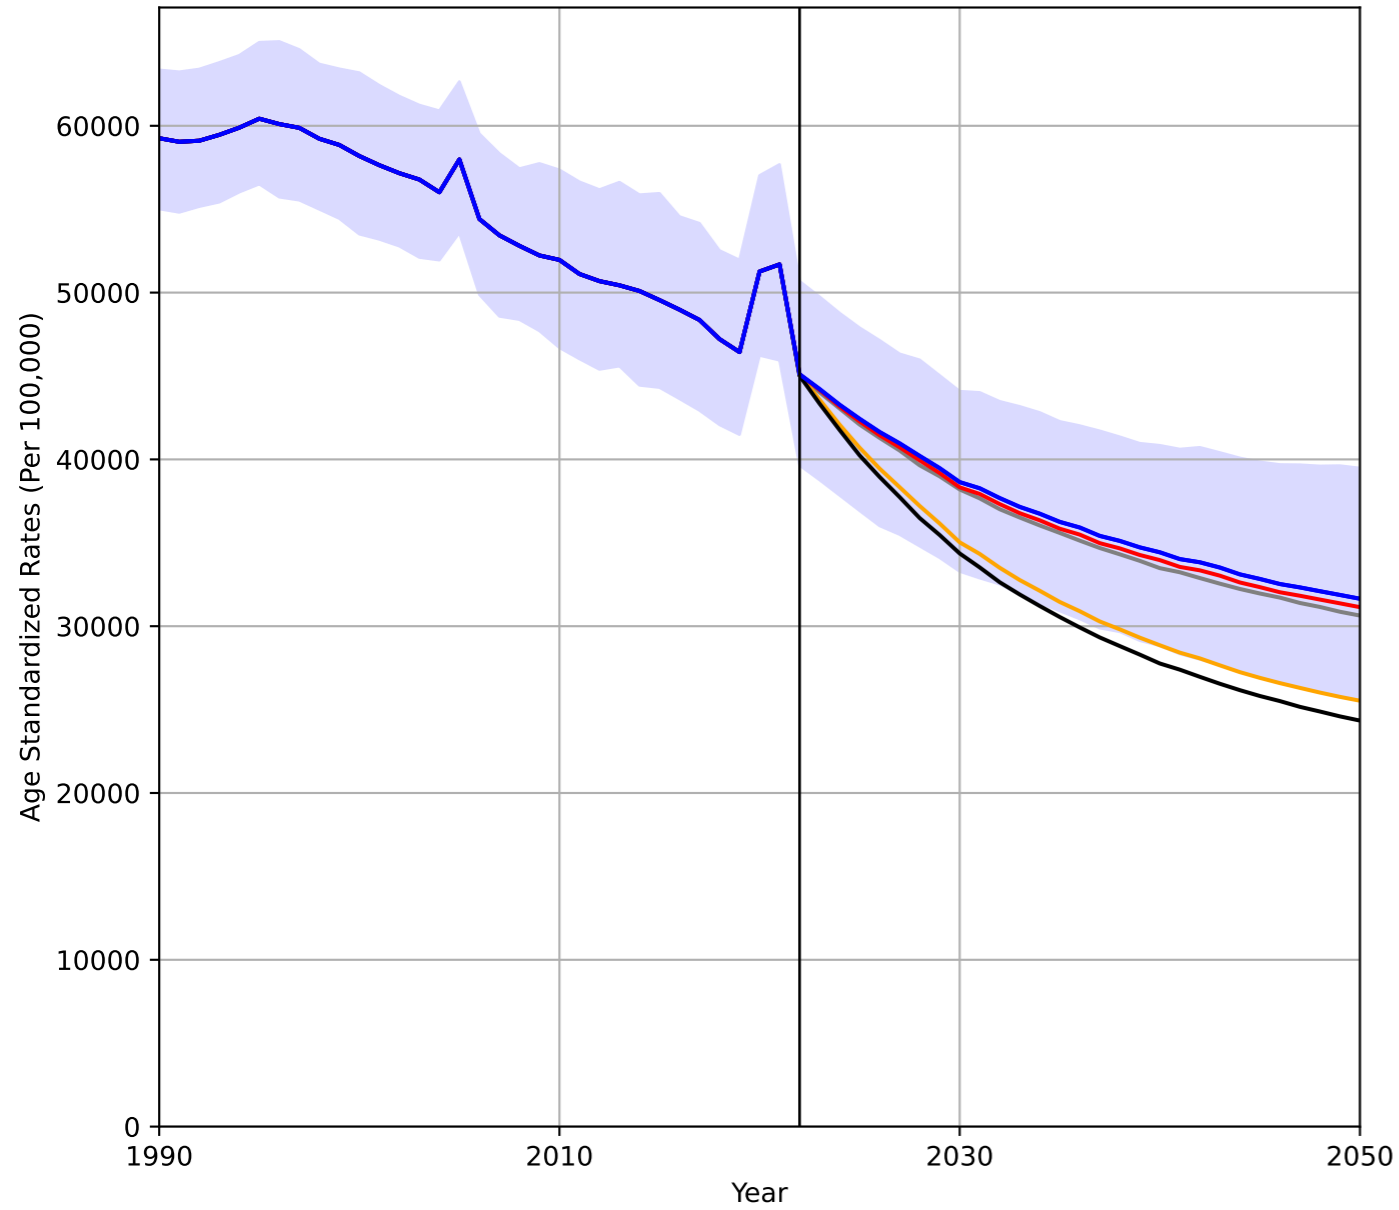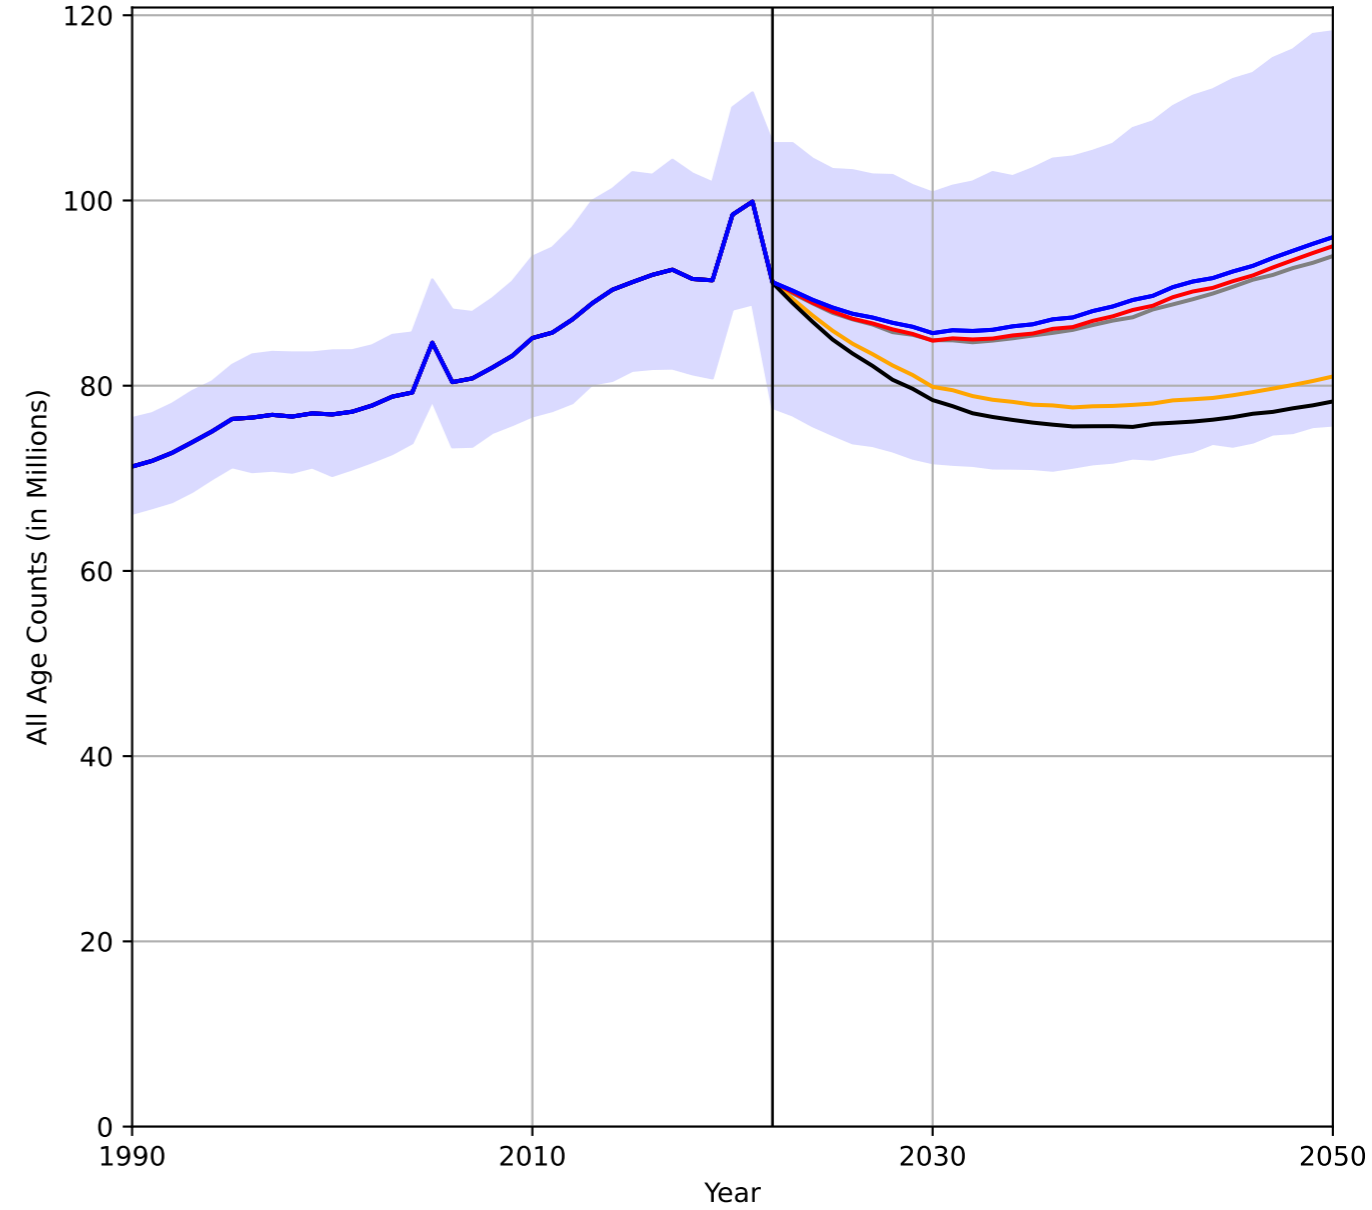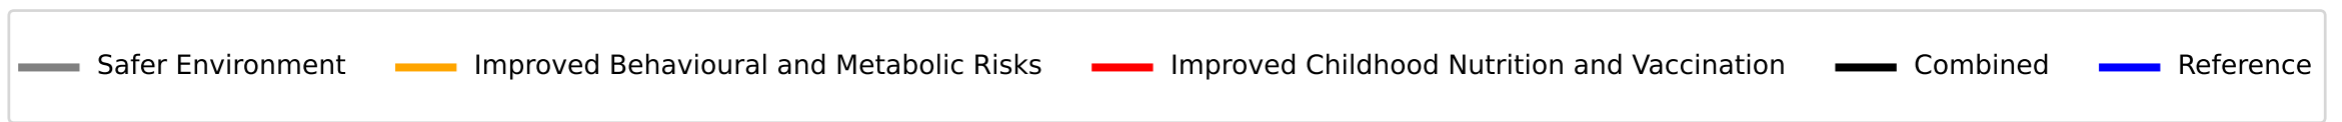

# China

Supplemental Results Figure S10. All-cause age standardised DALY rates (A) and all age DALY counts (B), for the past and for five future scenarios, 1990–2050

1535

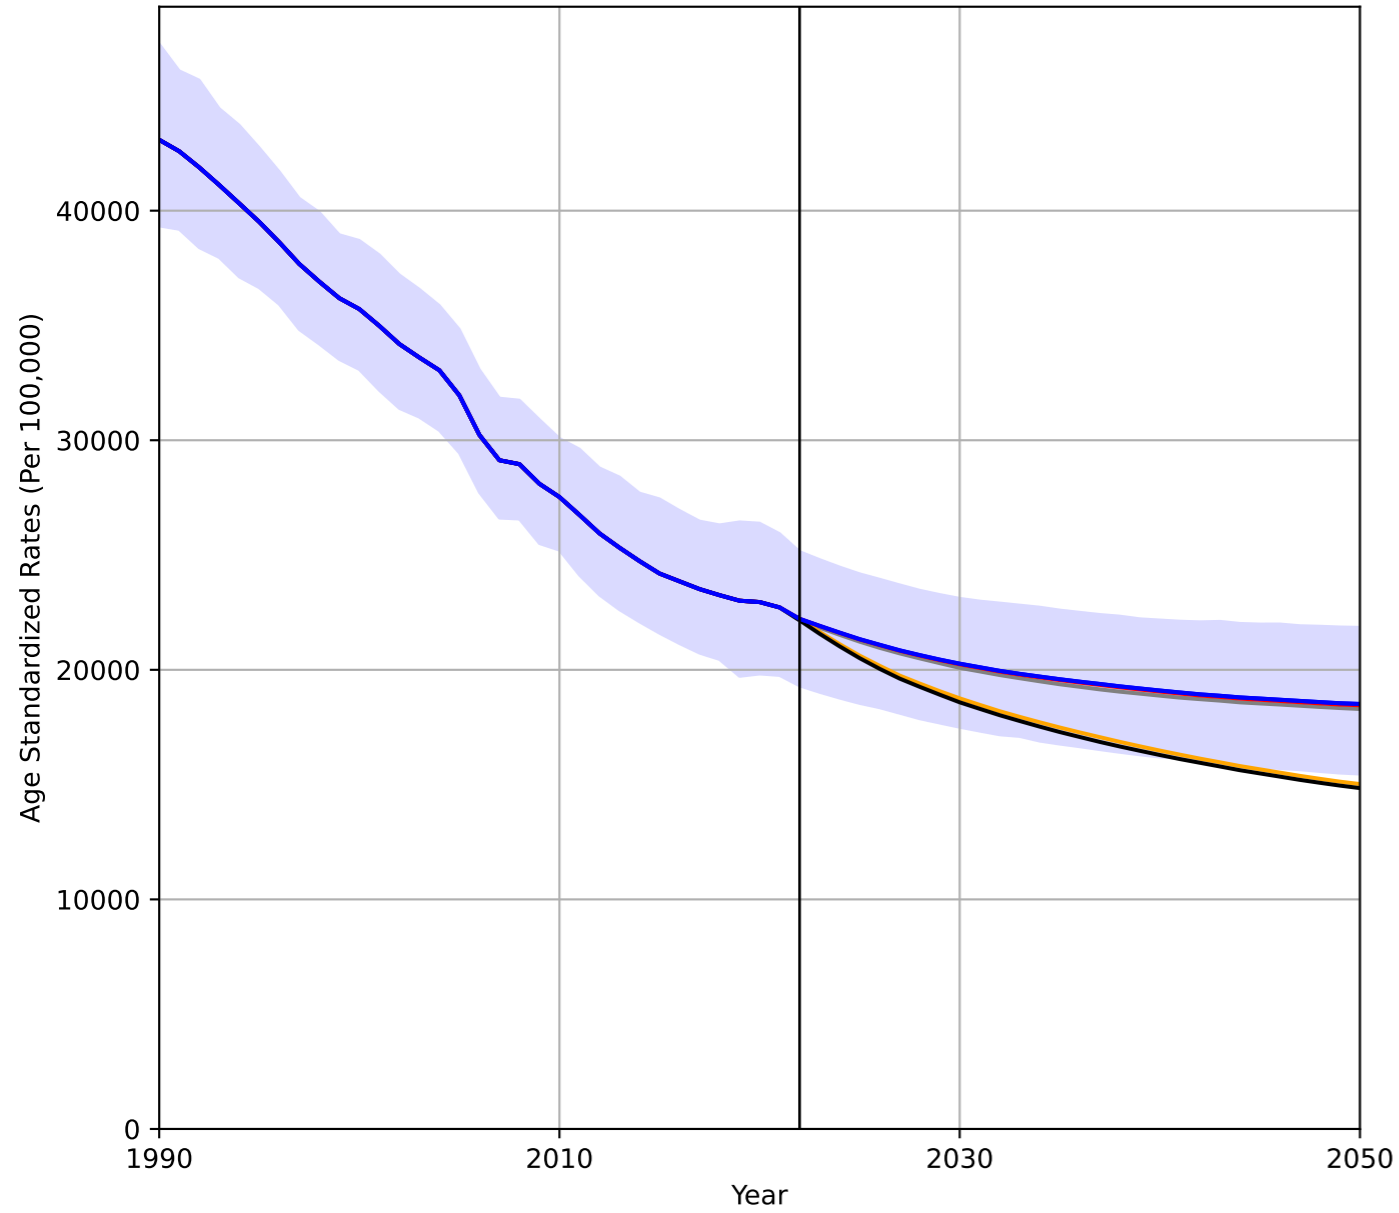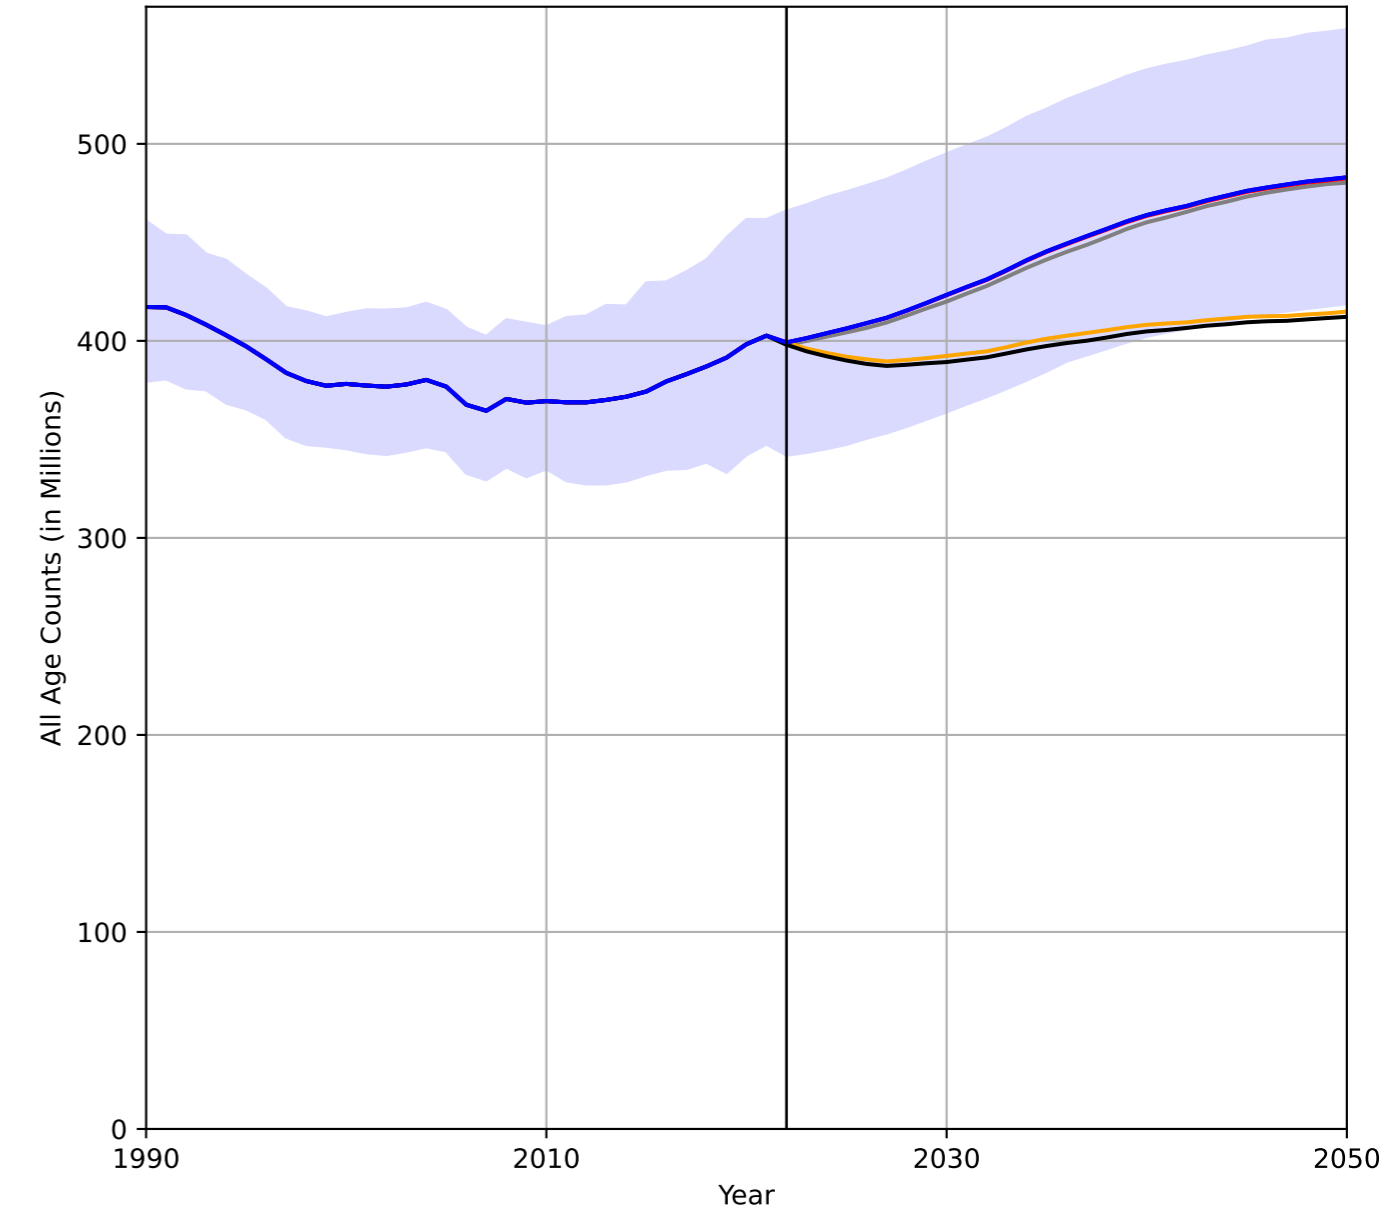



# North Korea

Supplemental Results Figure S10. All-cause age standardised DALY rates (A) and all age DALY counts (B), for the past and for five future scenarios, 1990–2050

1536

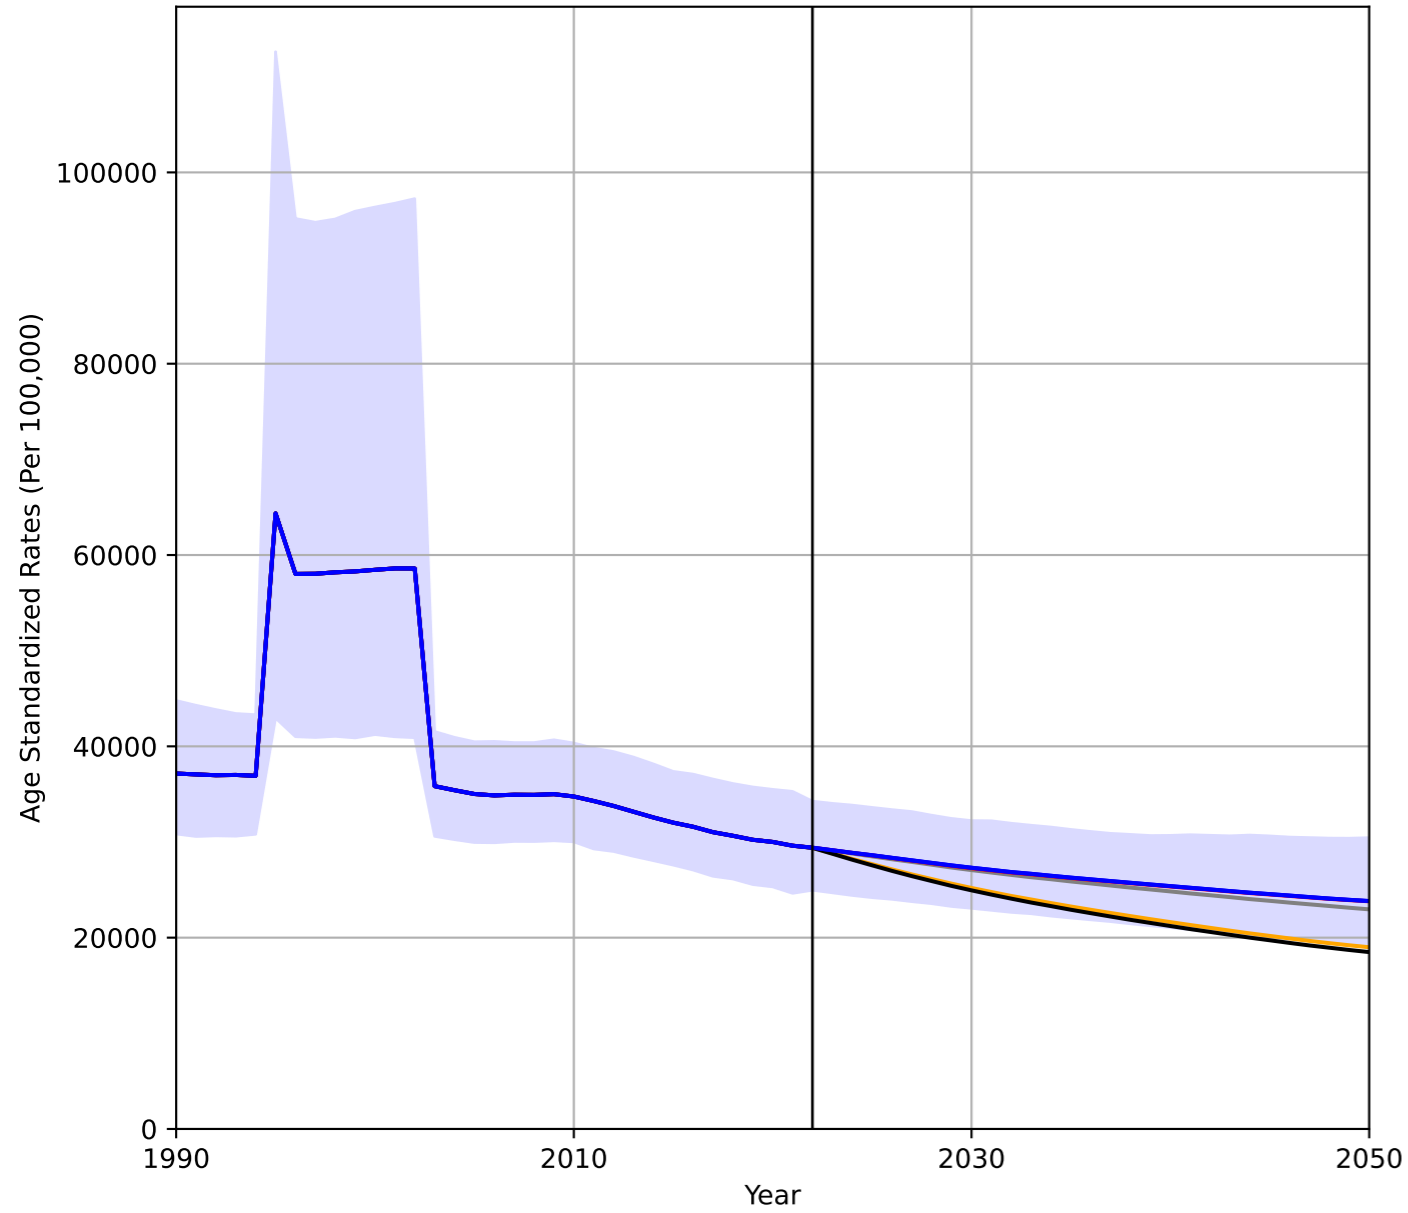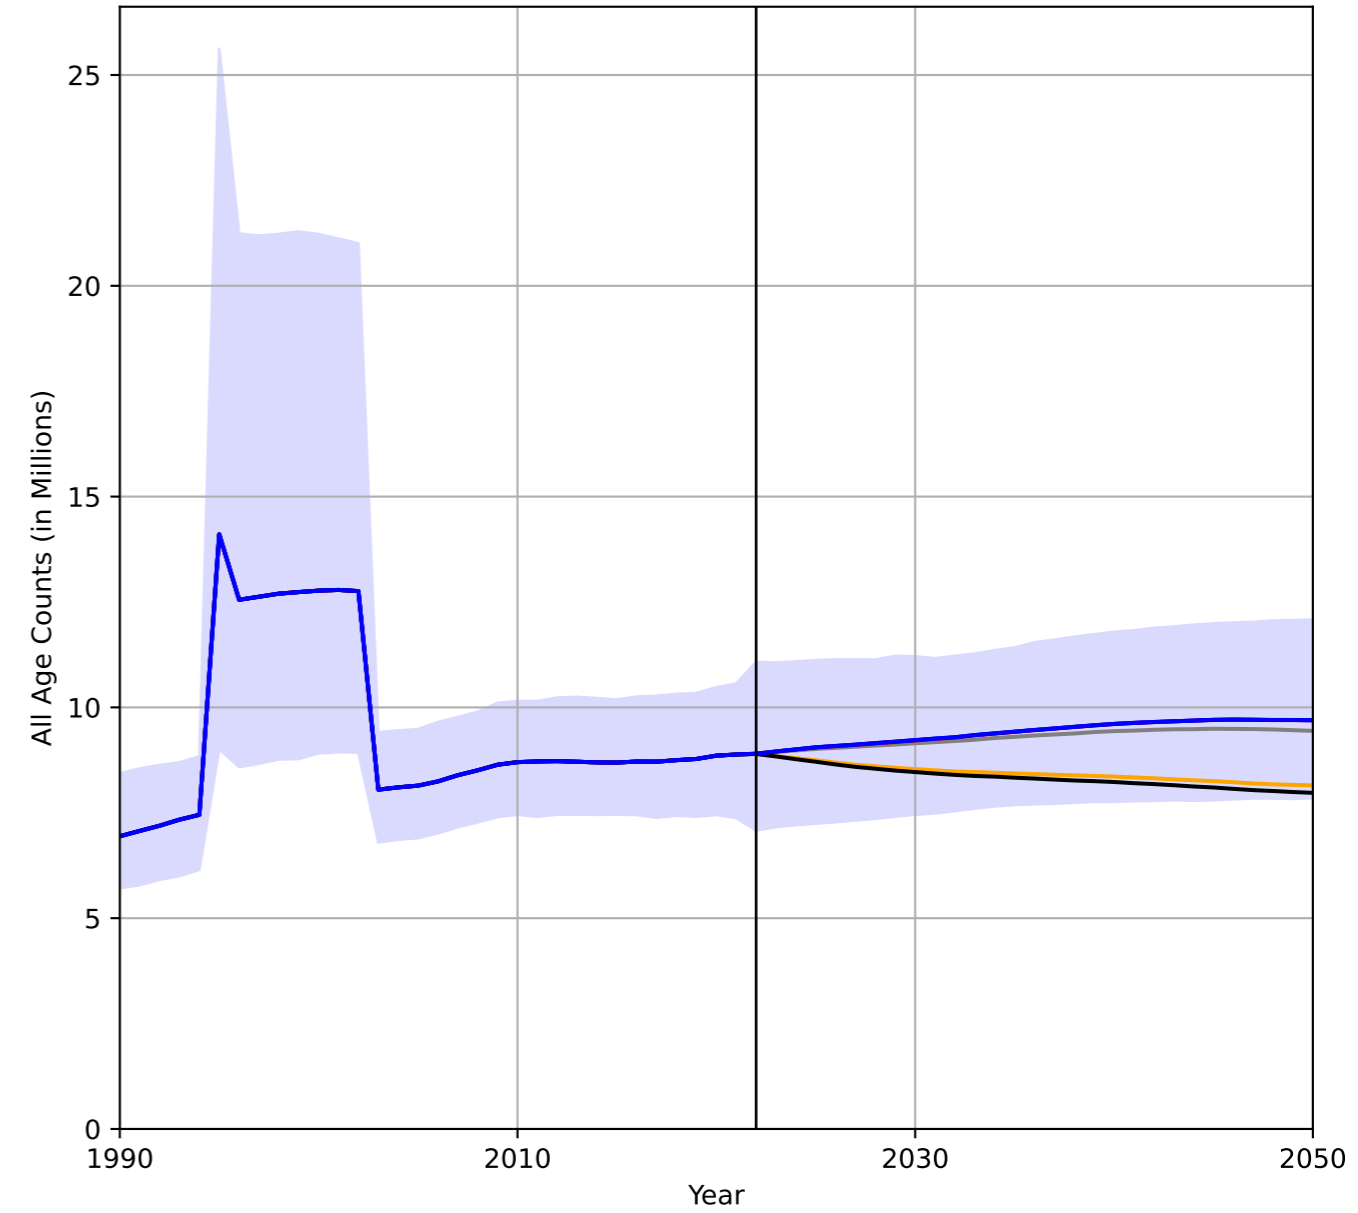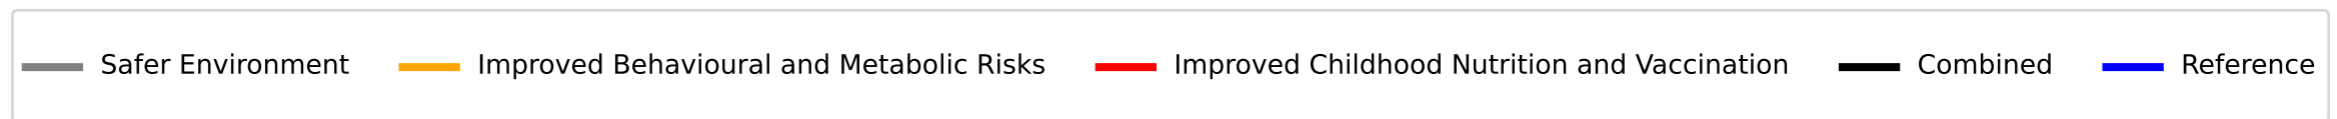

# Taiwan (Province Of China)

Supplemental Results Figure S10. All-cause age standardised DALY rates (A) and all age DALY counts (B), for the past and for five future scenarios, 1990–2050

1537

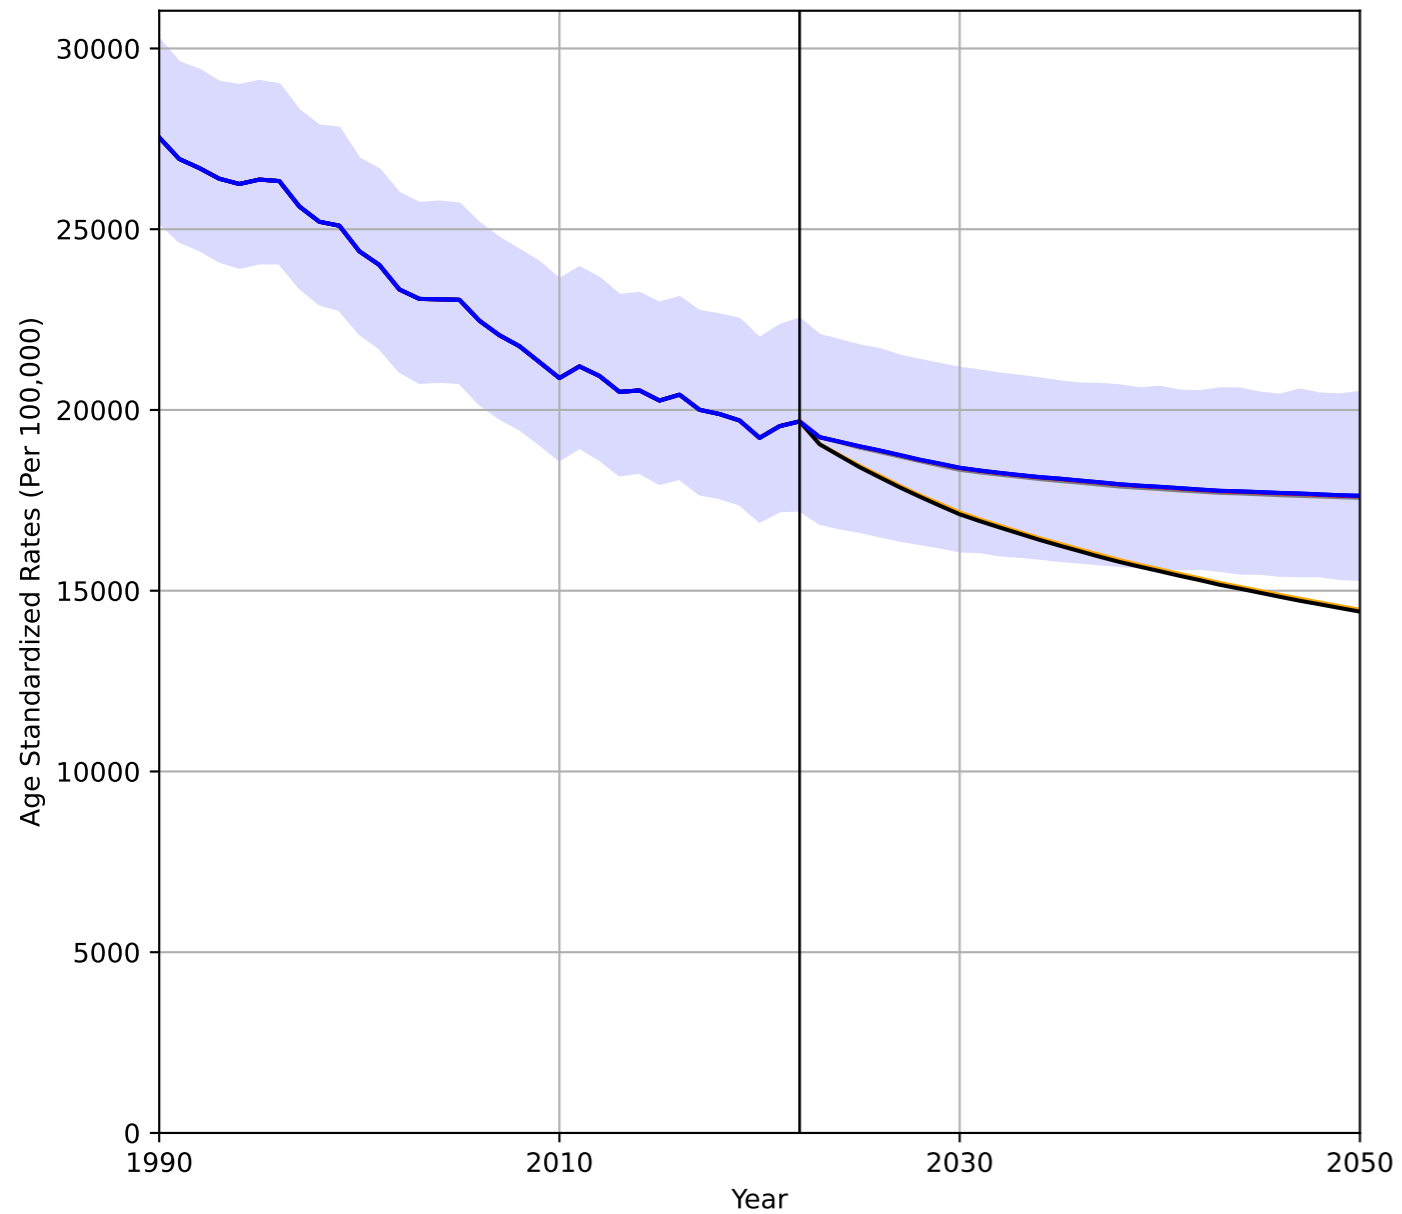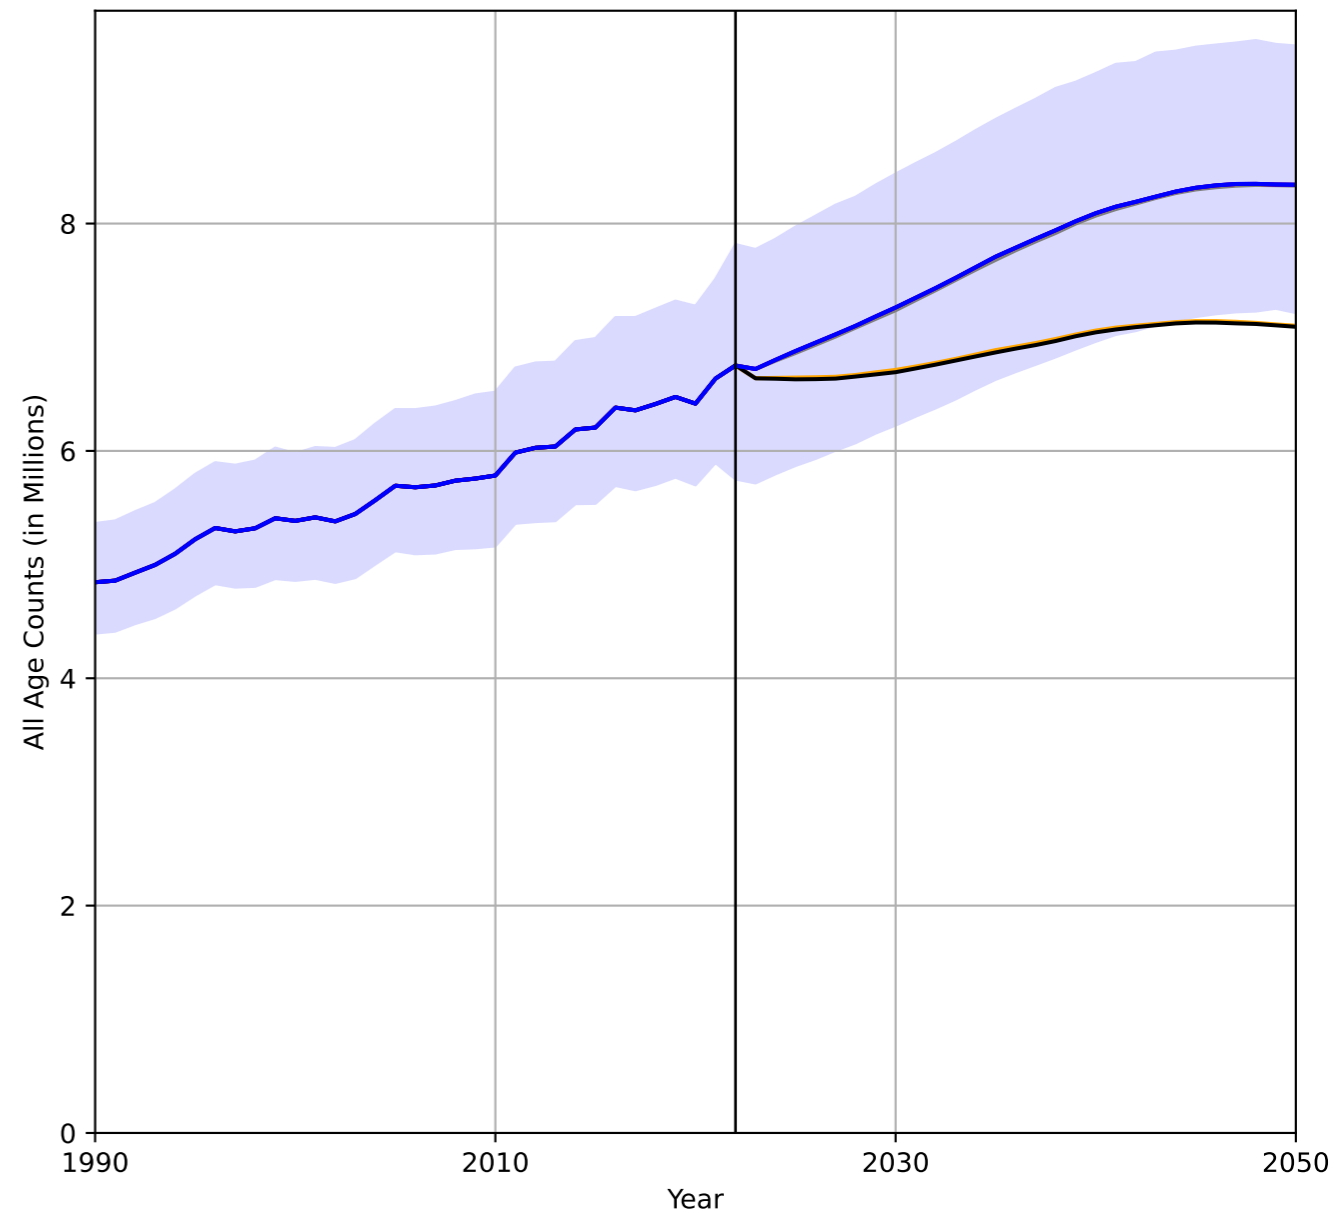

# American Samoa

Supplemental Results Figure S10. All-cause age standardised DALY rates (A) and all age DALY counts (B), for the past and for five future scenarios, 1990–2050

1538

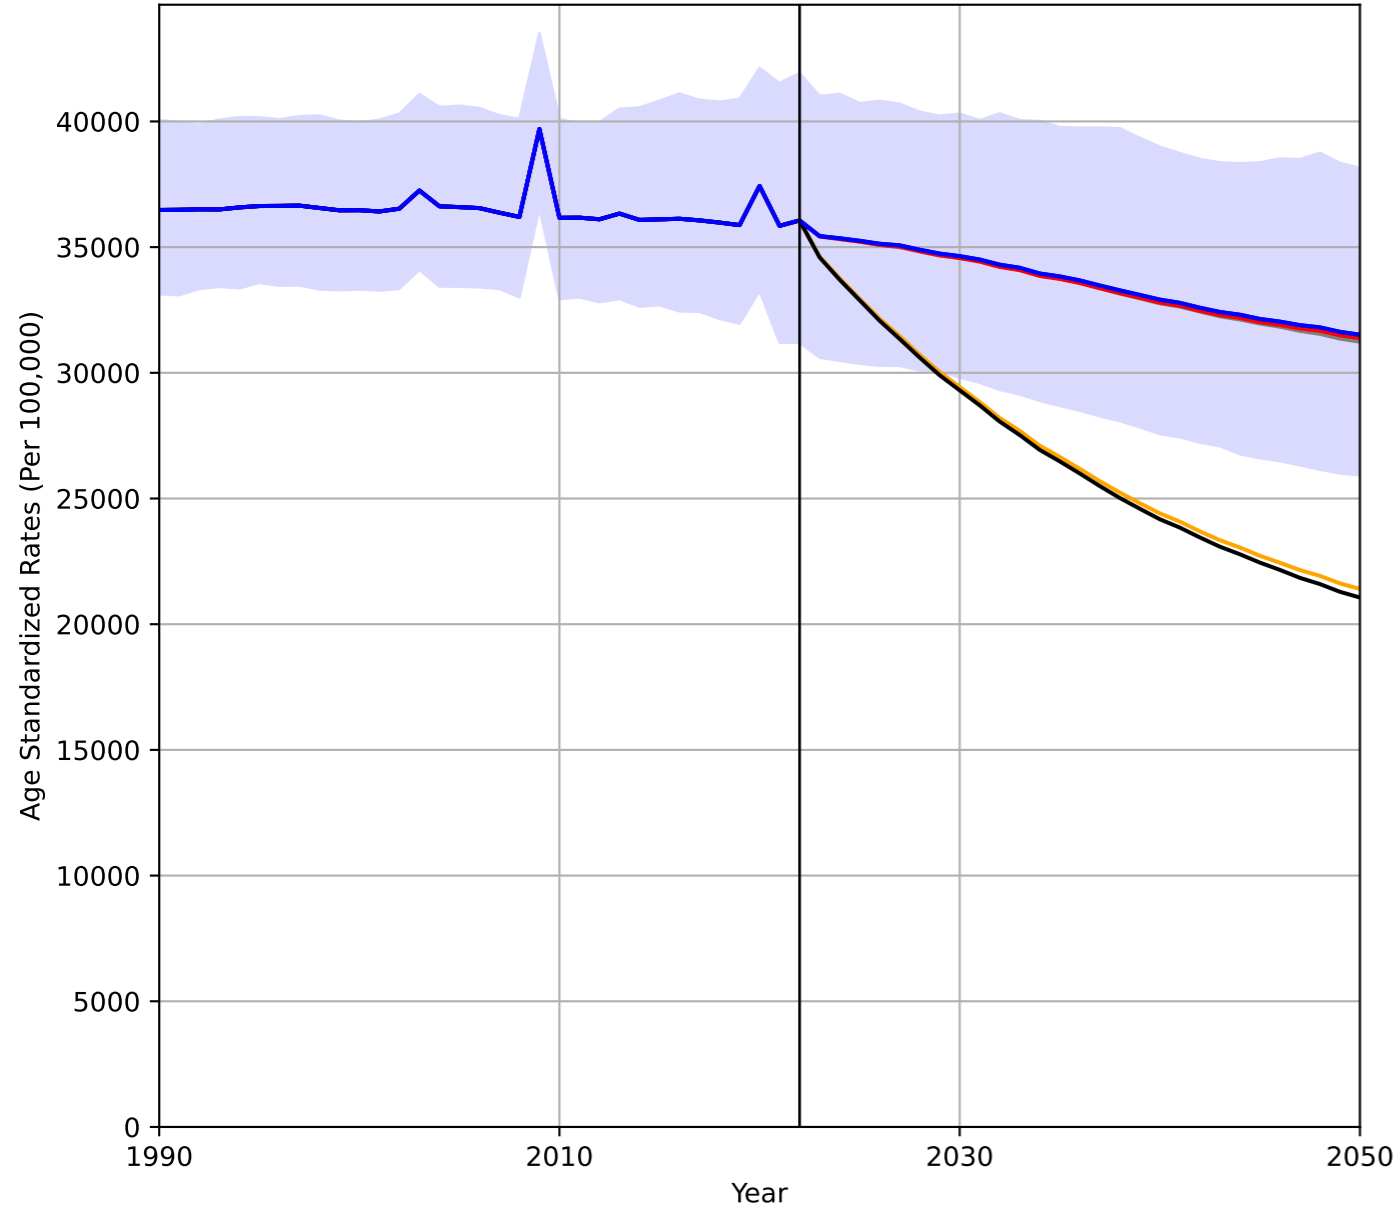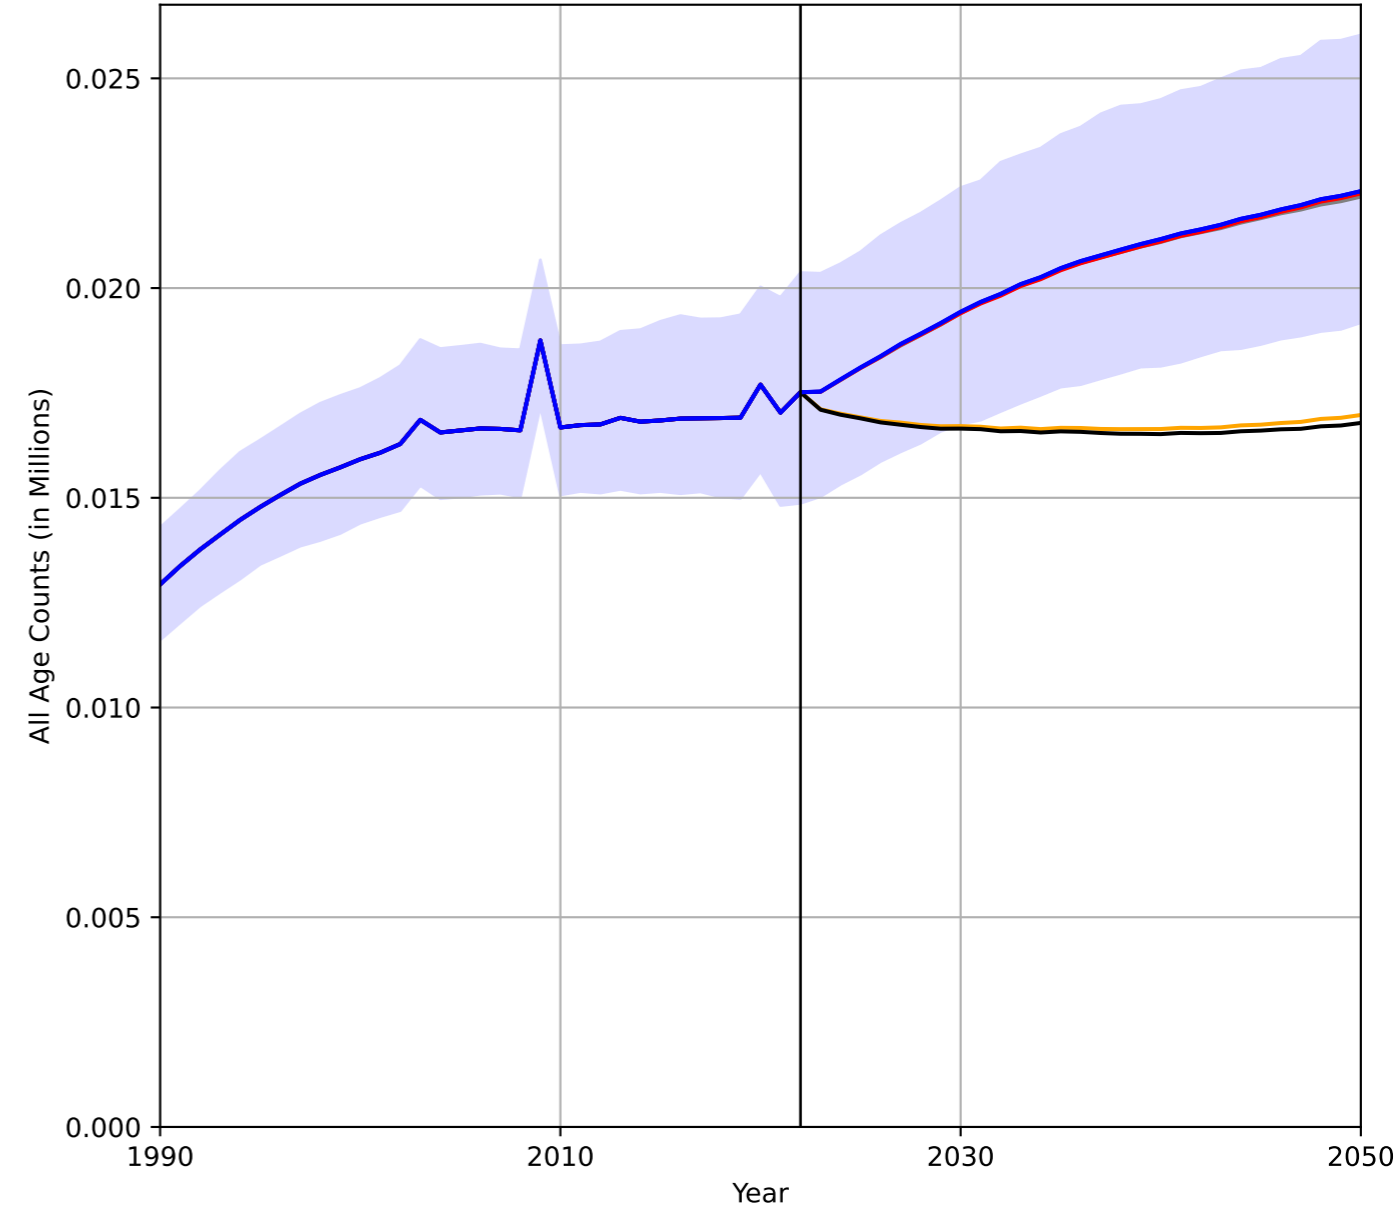

# Cook Islands

Supplemental Results Figure S10. All-cause age standardised DALY rates (A) and all age DALY counts (B), for the past and for five future scenarios, 1990–2050

1539

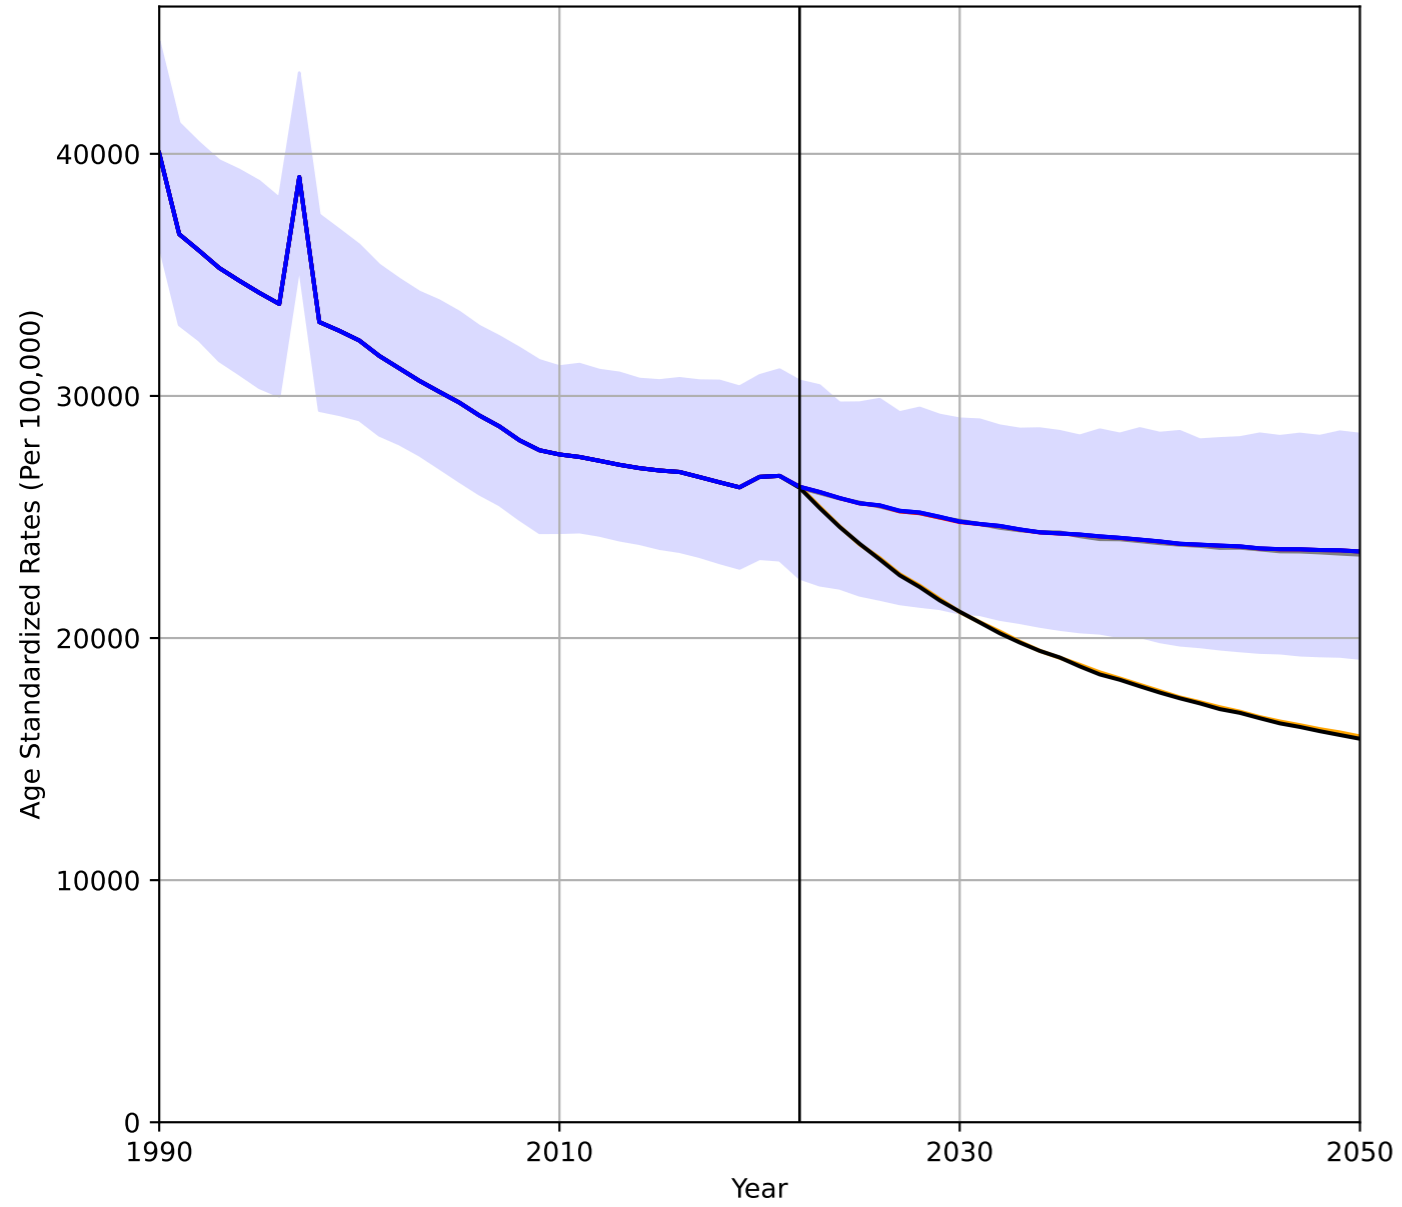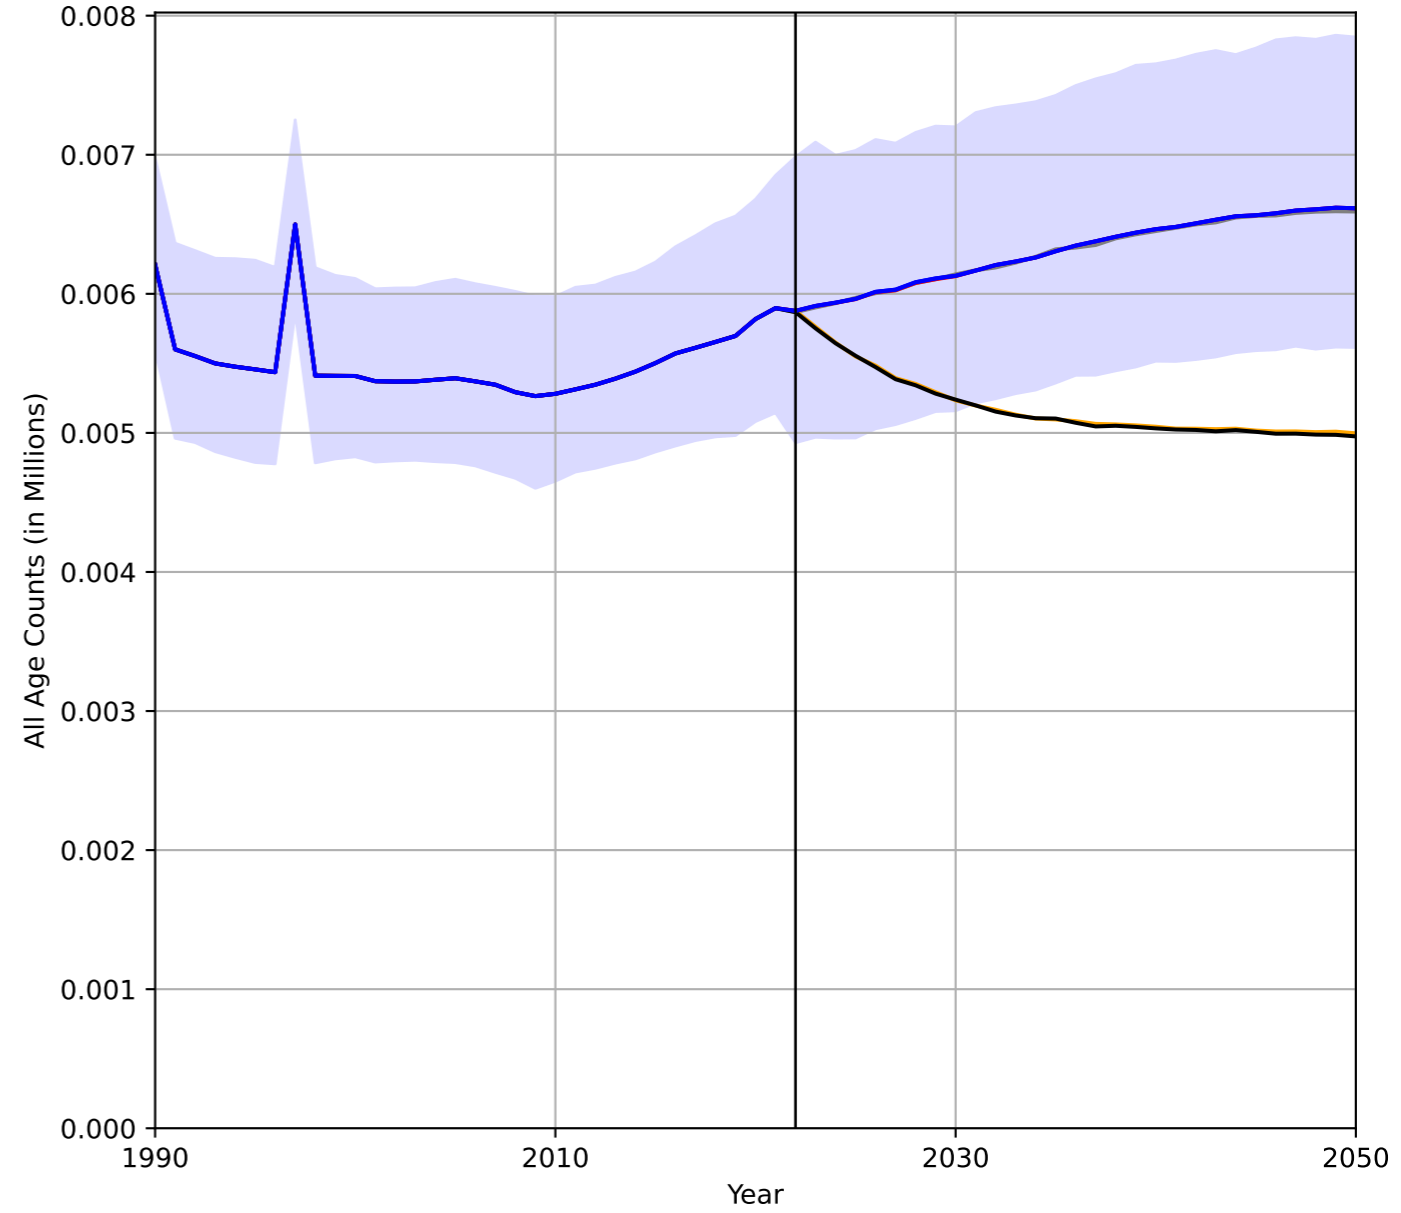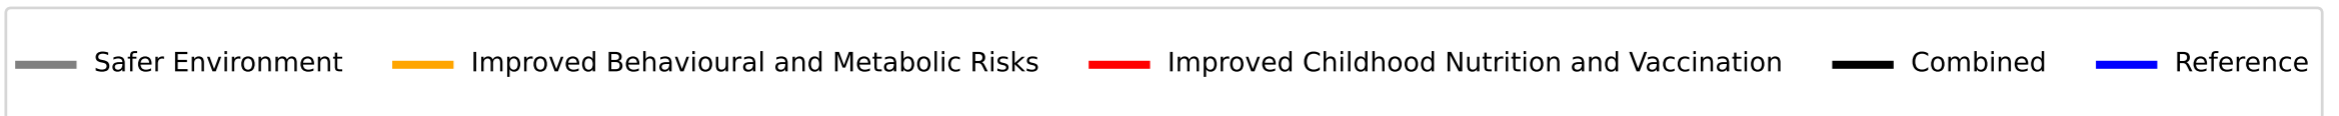

# Fiji

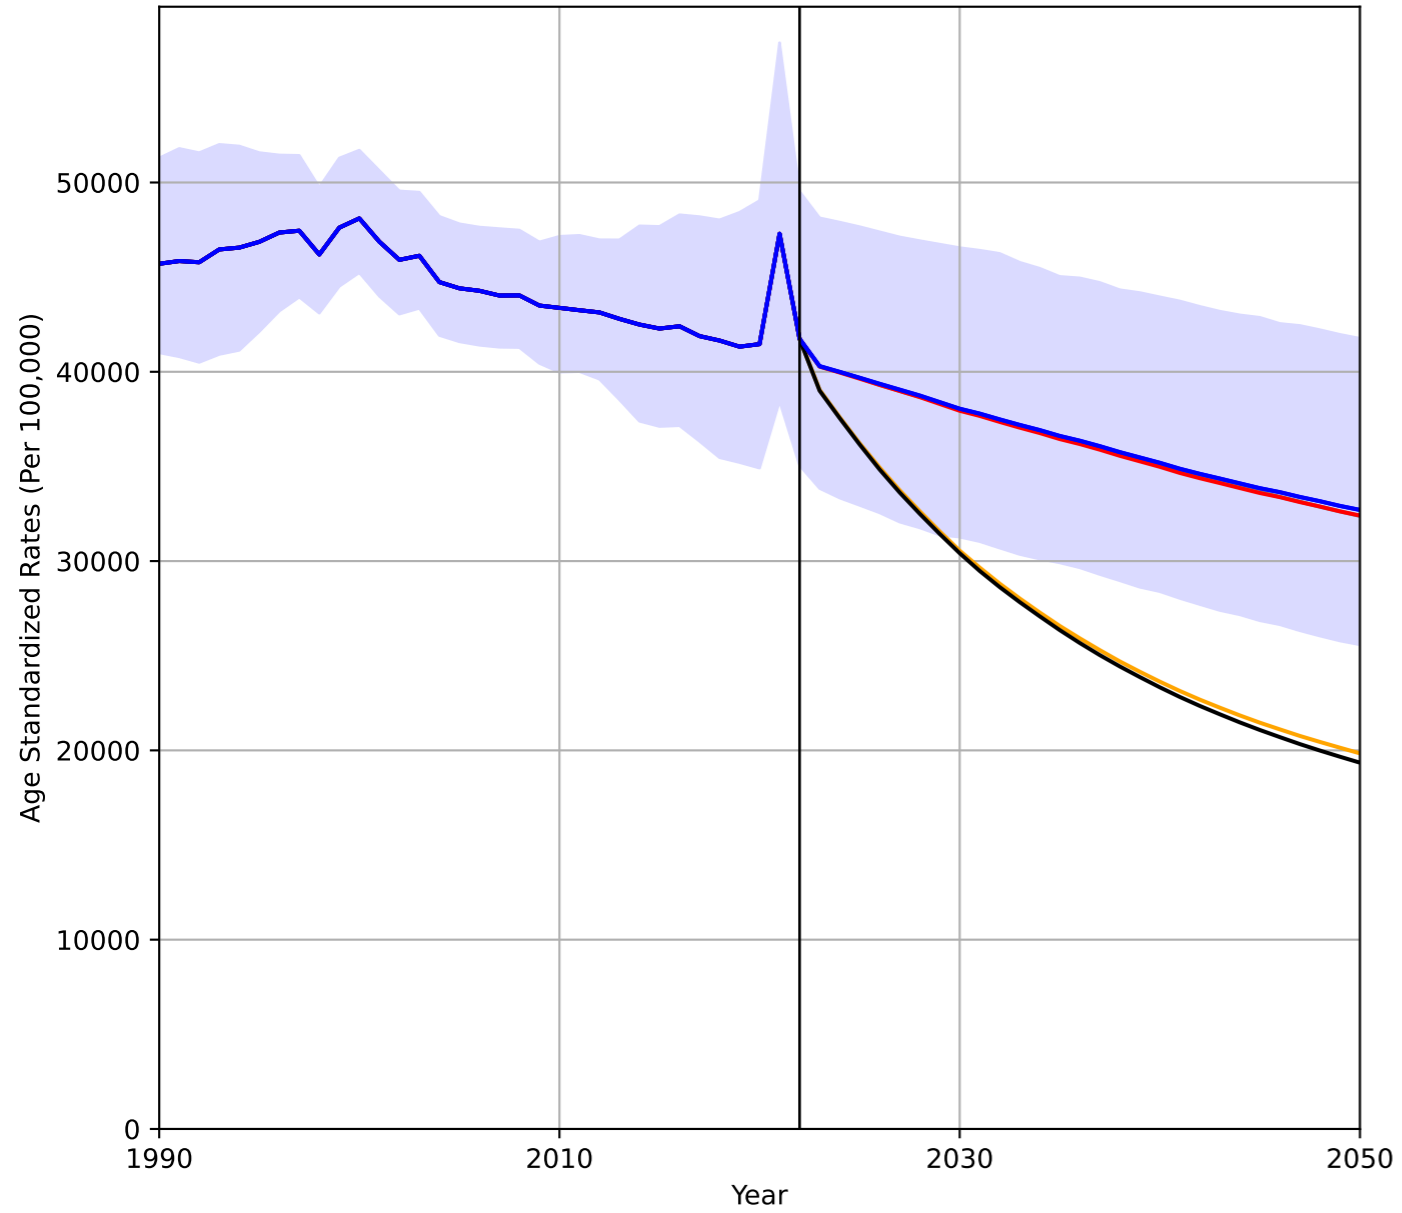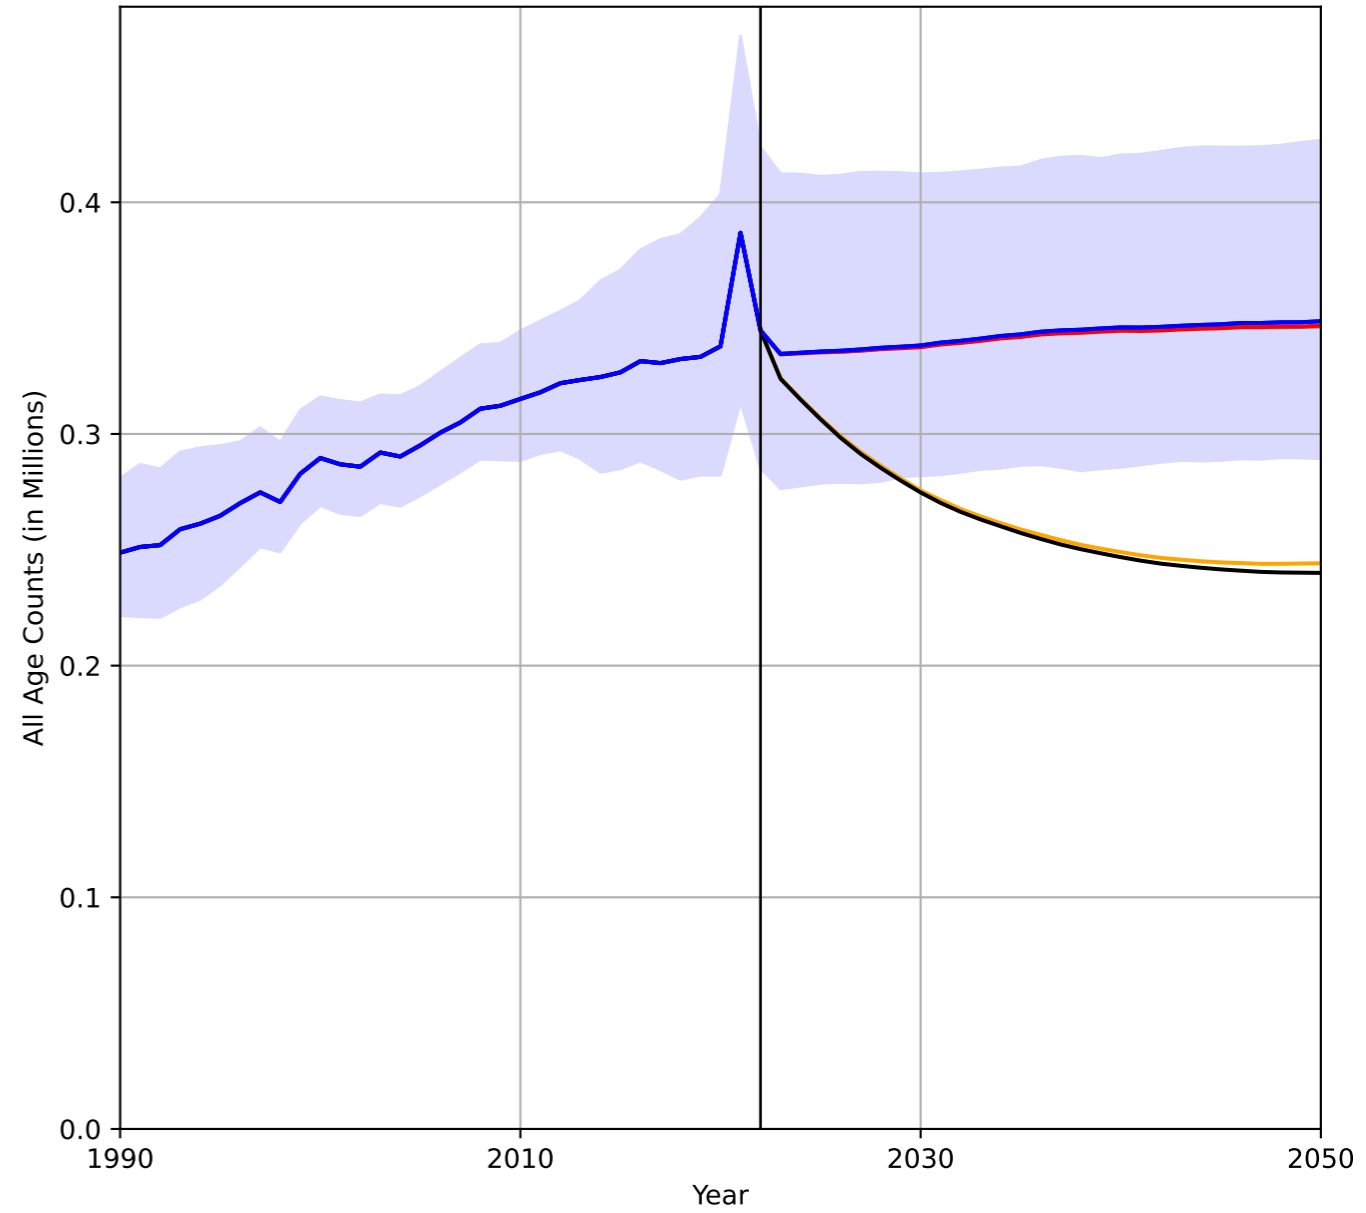

# Guam

Supplemental Results Figure S10. All-cause age standardised DALY rates (A) and all age DALY counts (B), for the past and for five future scenarios, 1990–2050

1541

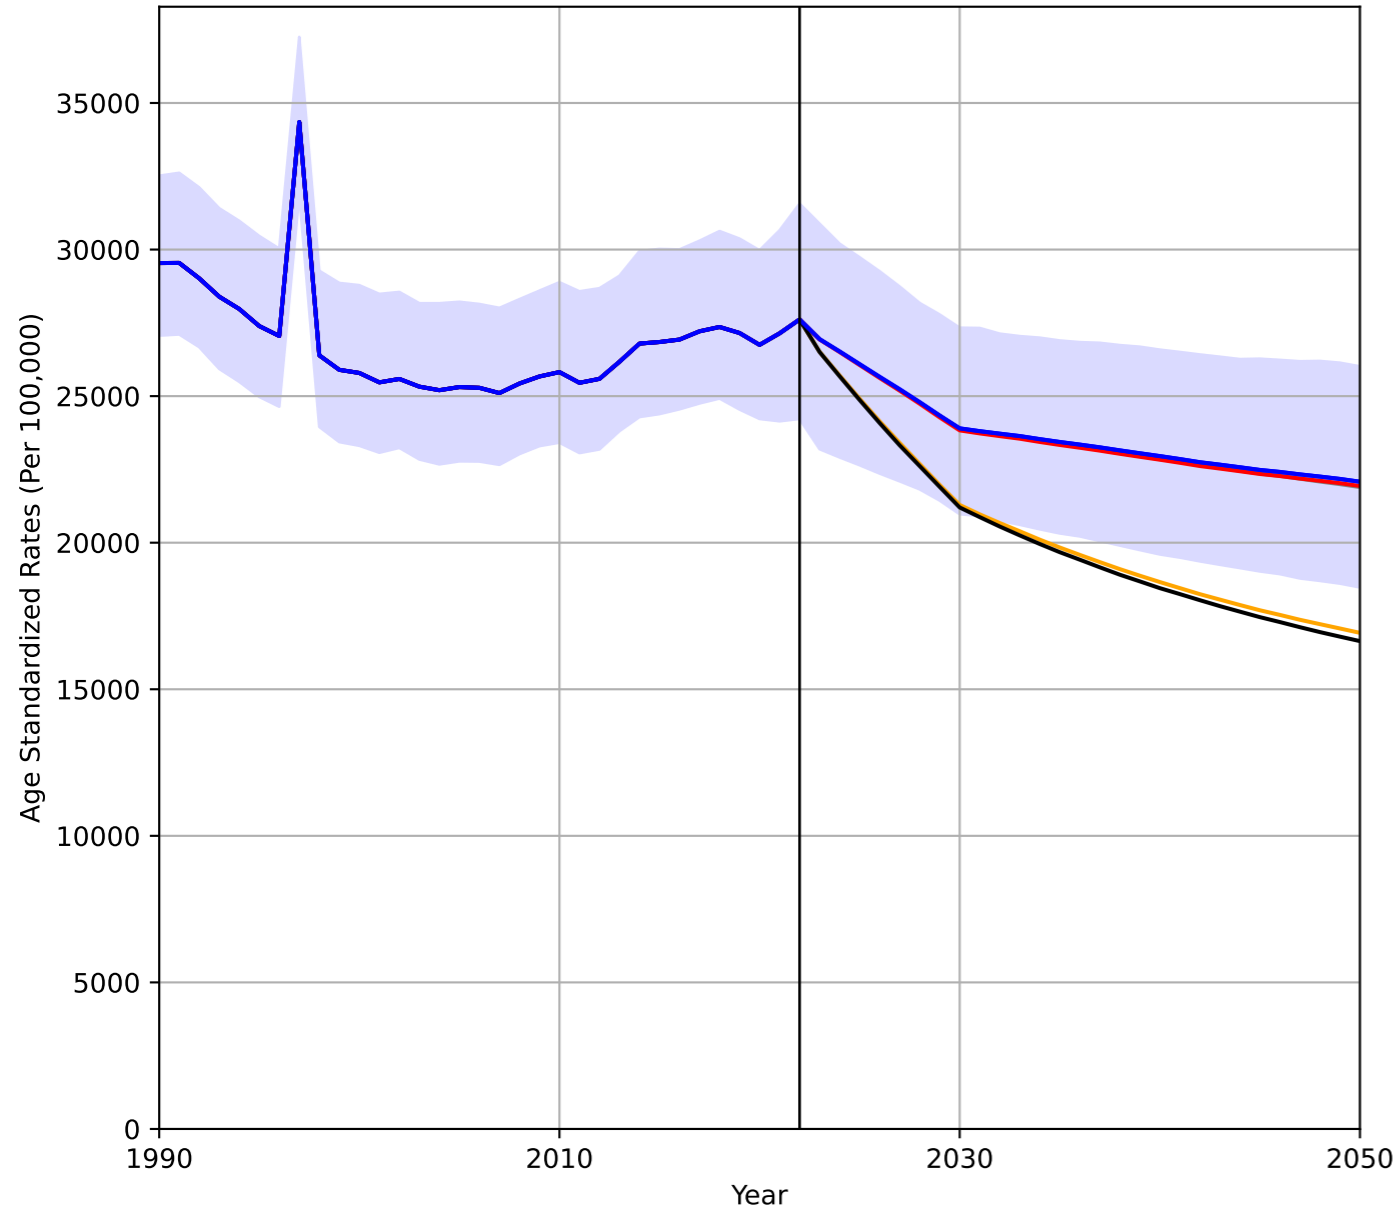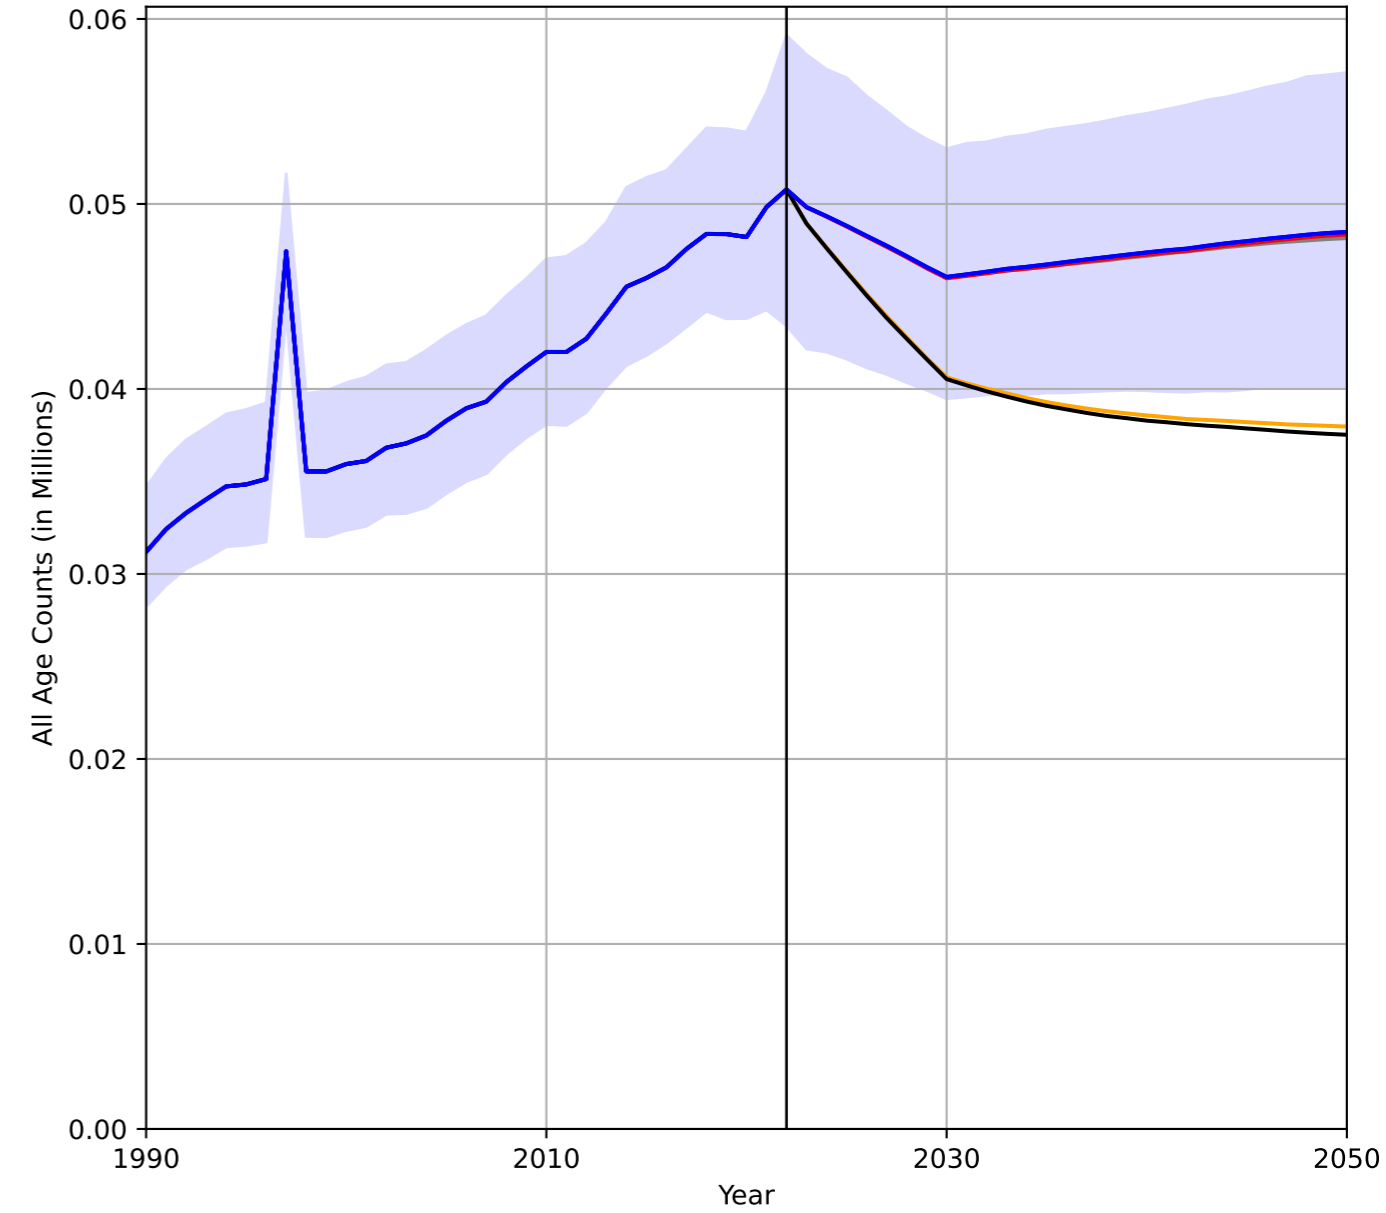

# Kiribati

Supplemental Results Figure S10. All-cause age standardised DALY rates (A) and all age DALY counts (B), for the past and for five future scenarios, 1990–2050

1542

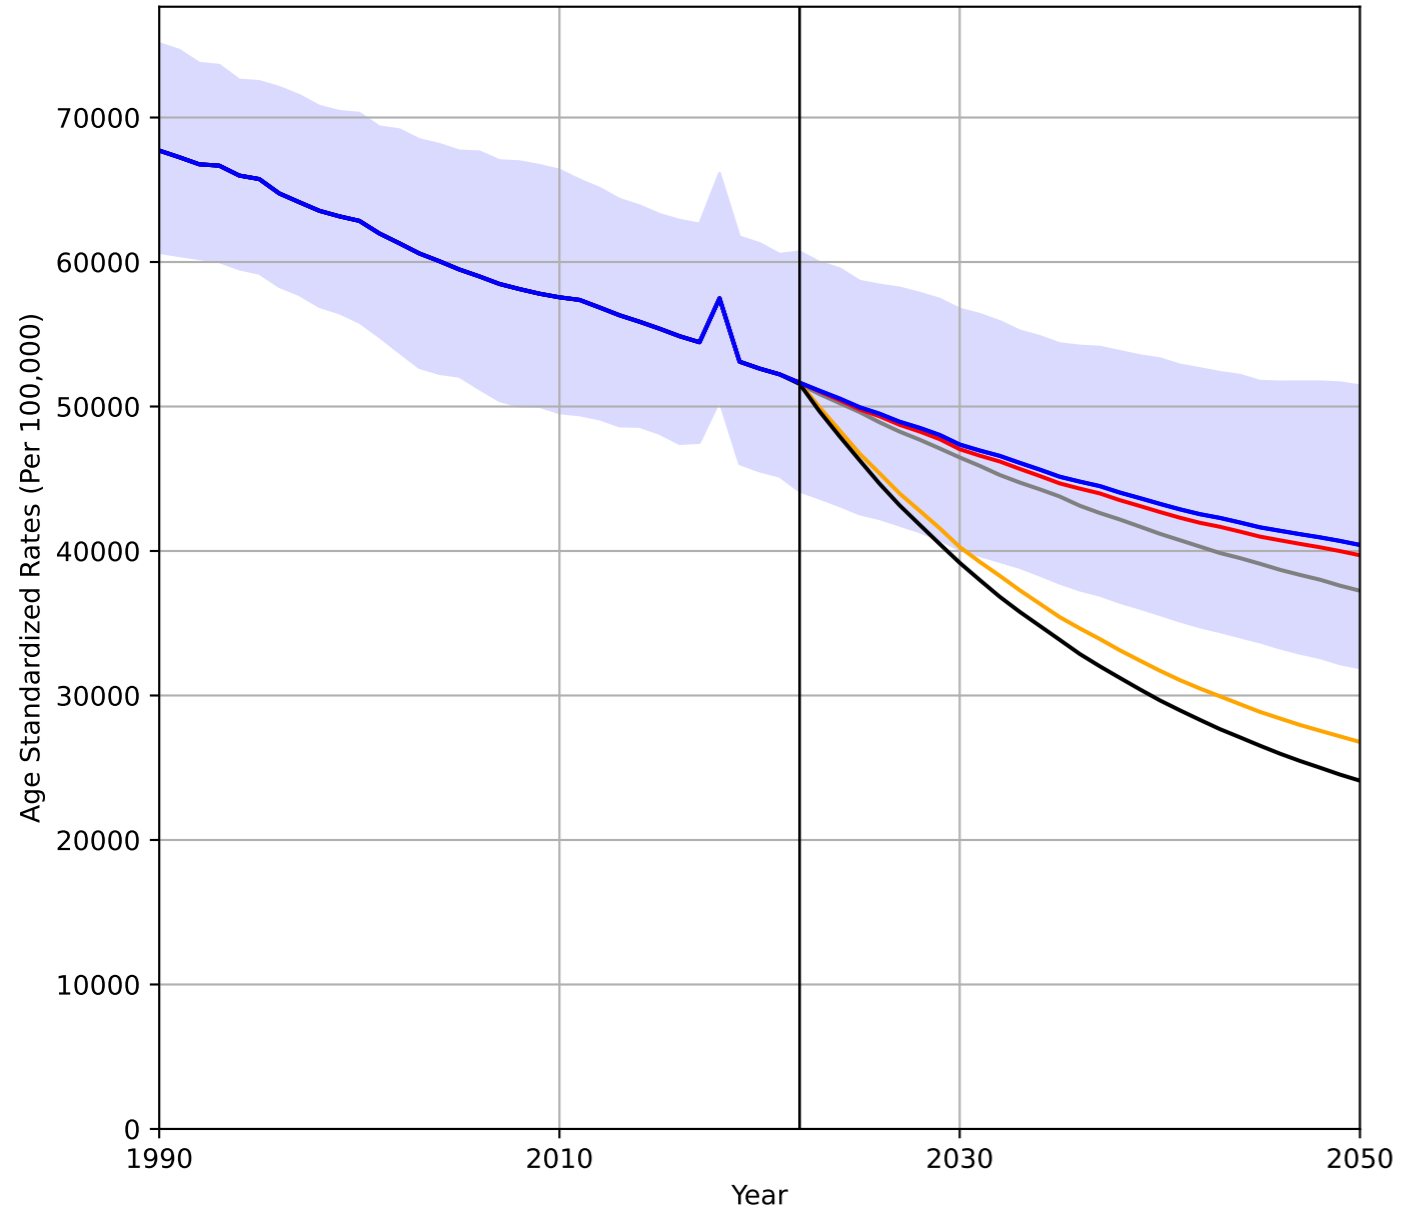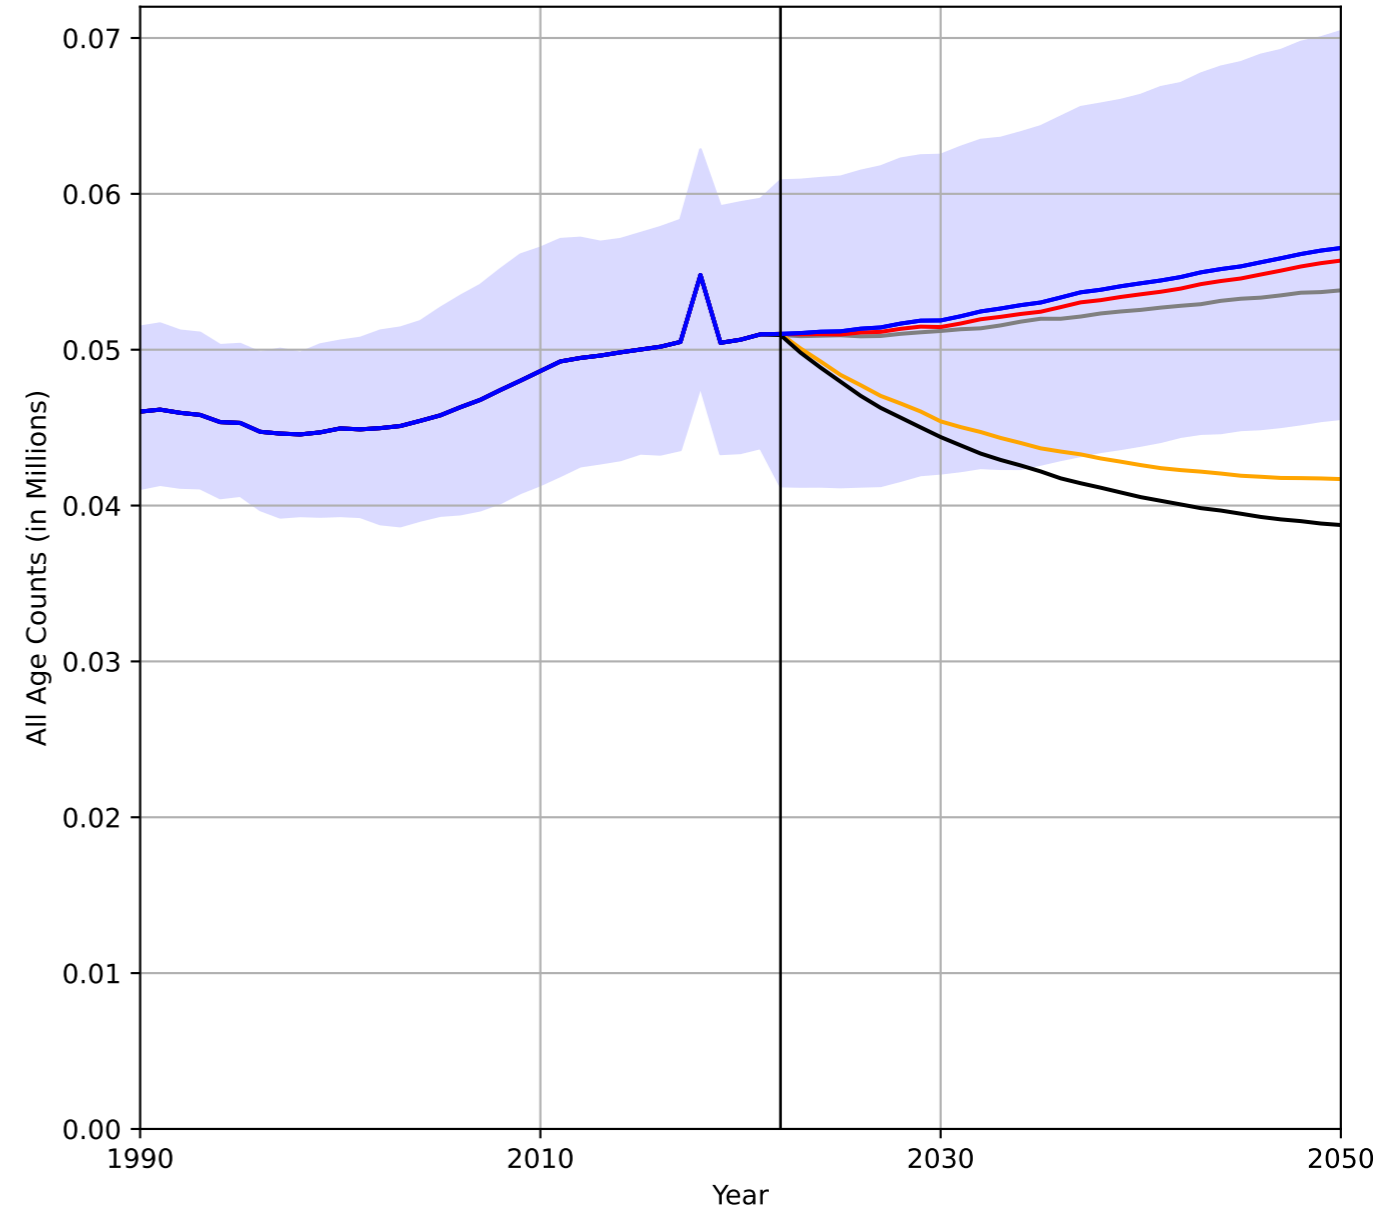

# Marshall Islands

Supplemental Results Figure S10. All-cause age standardised DALY rates (A) and all age DALY counts (B), for the past and for five future scenarios, 1990–2050

1543

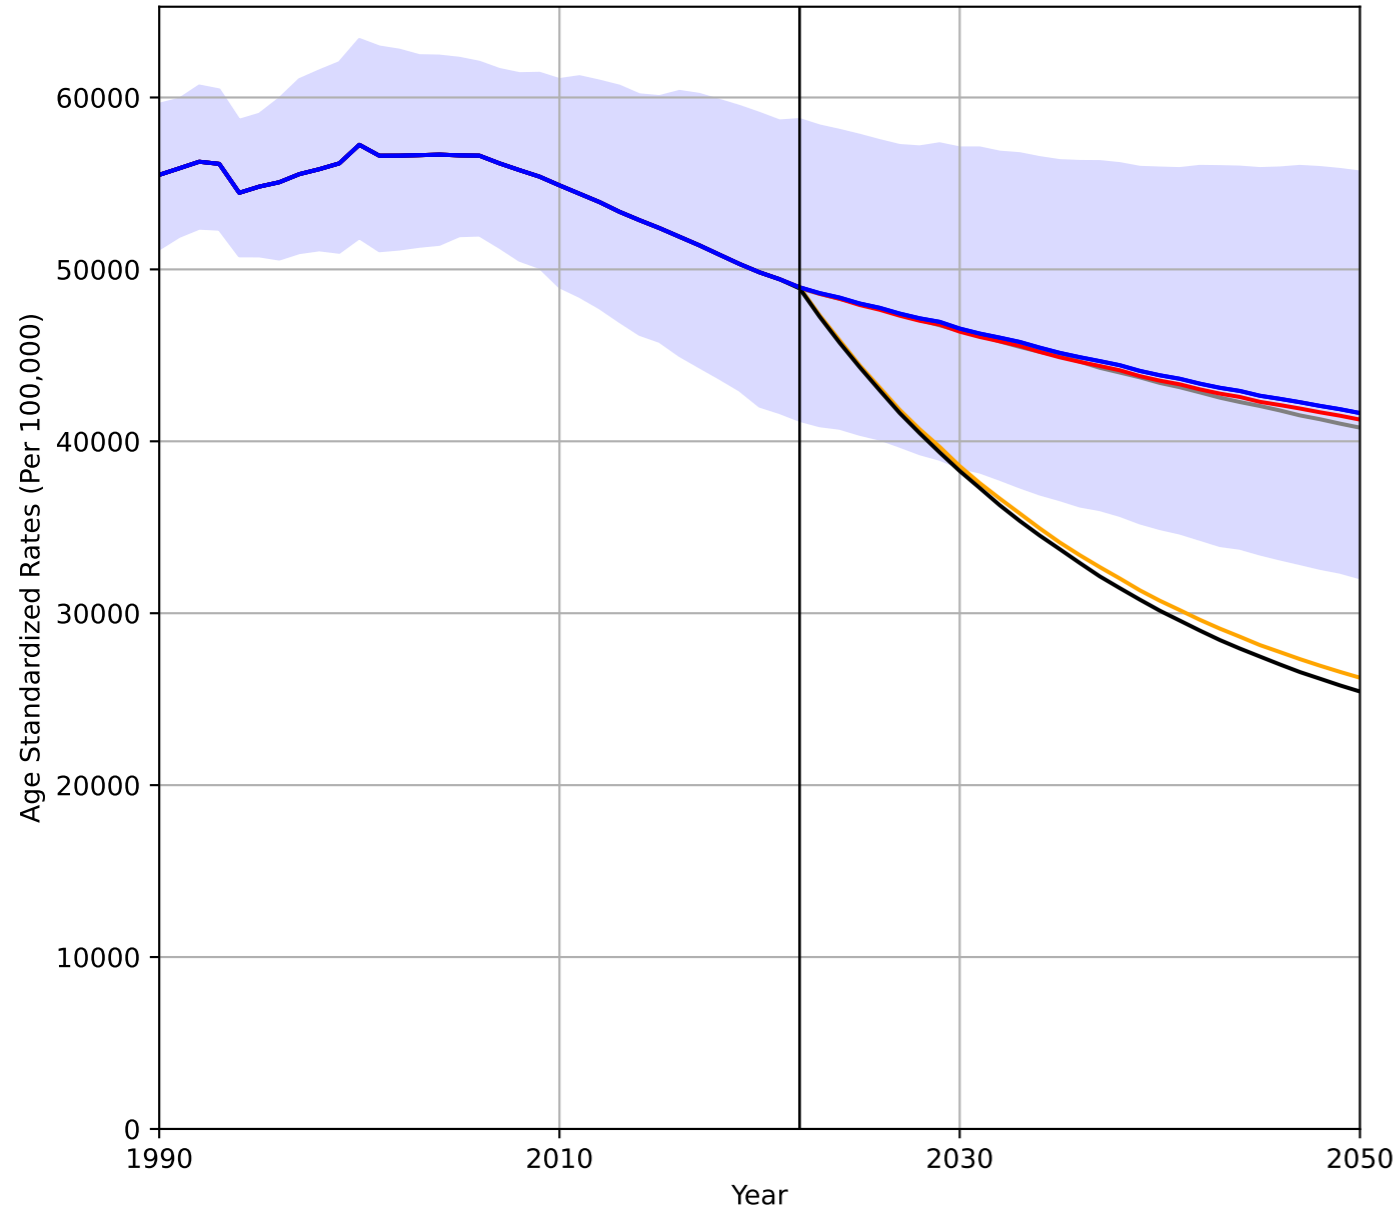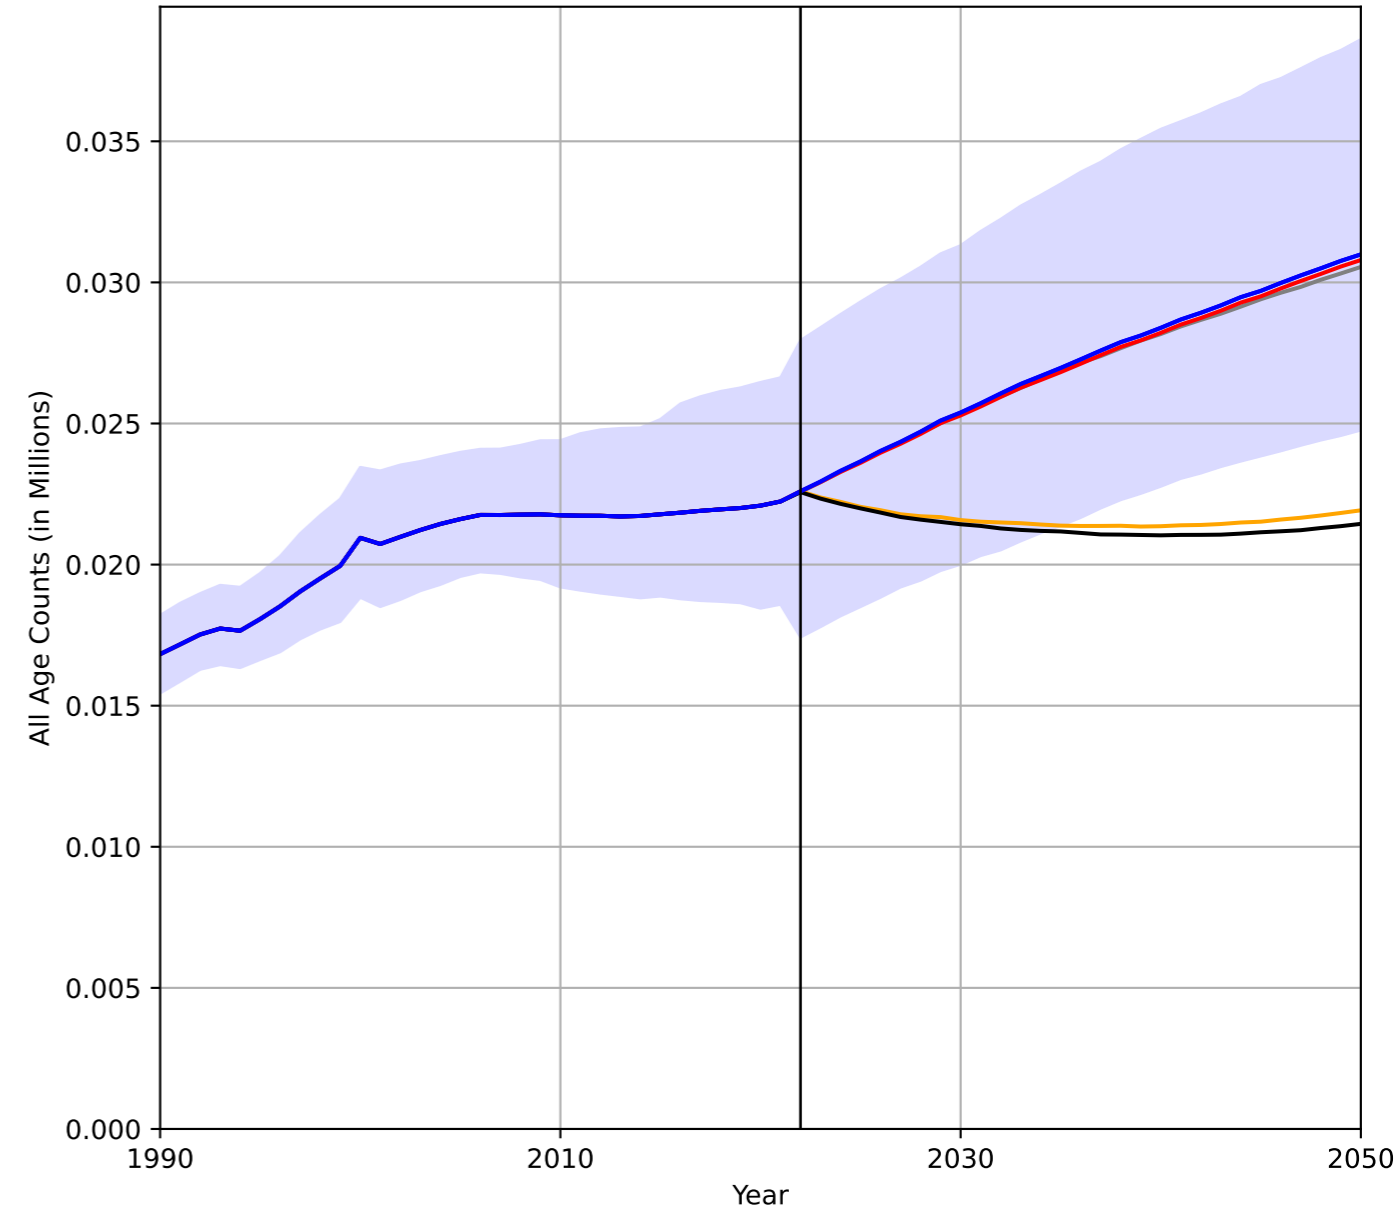



# Federated States Of Micronesia

Supplemental Results Figure S10. All-cause age standardised DALY rates (A) and all age DALY counts (B), for the past and for five future scenarios, 1990–2050

1544

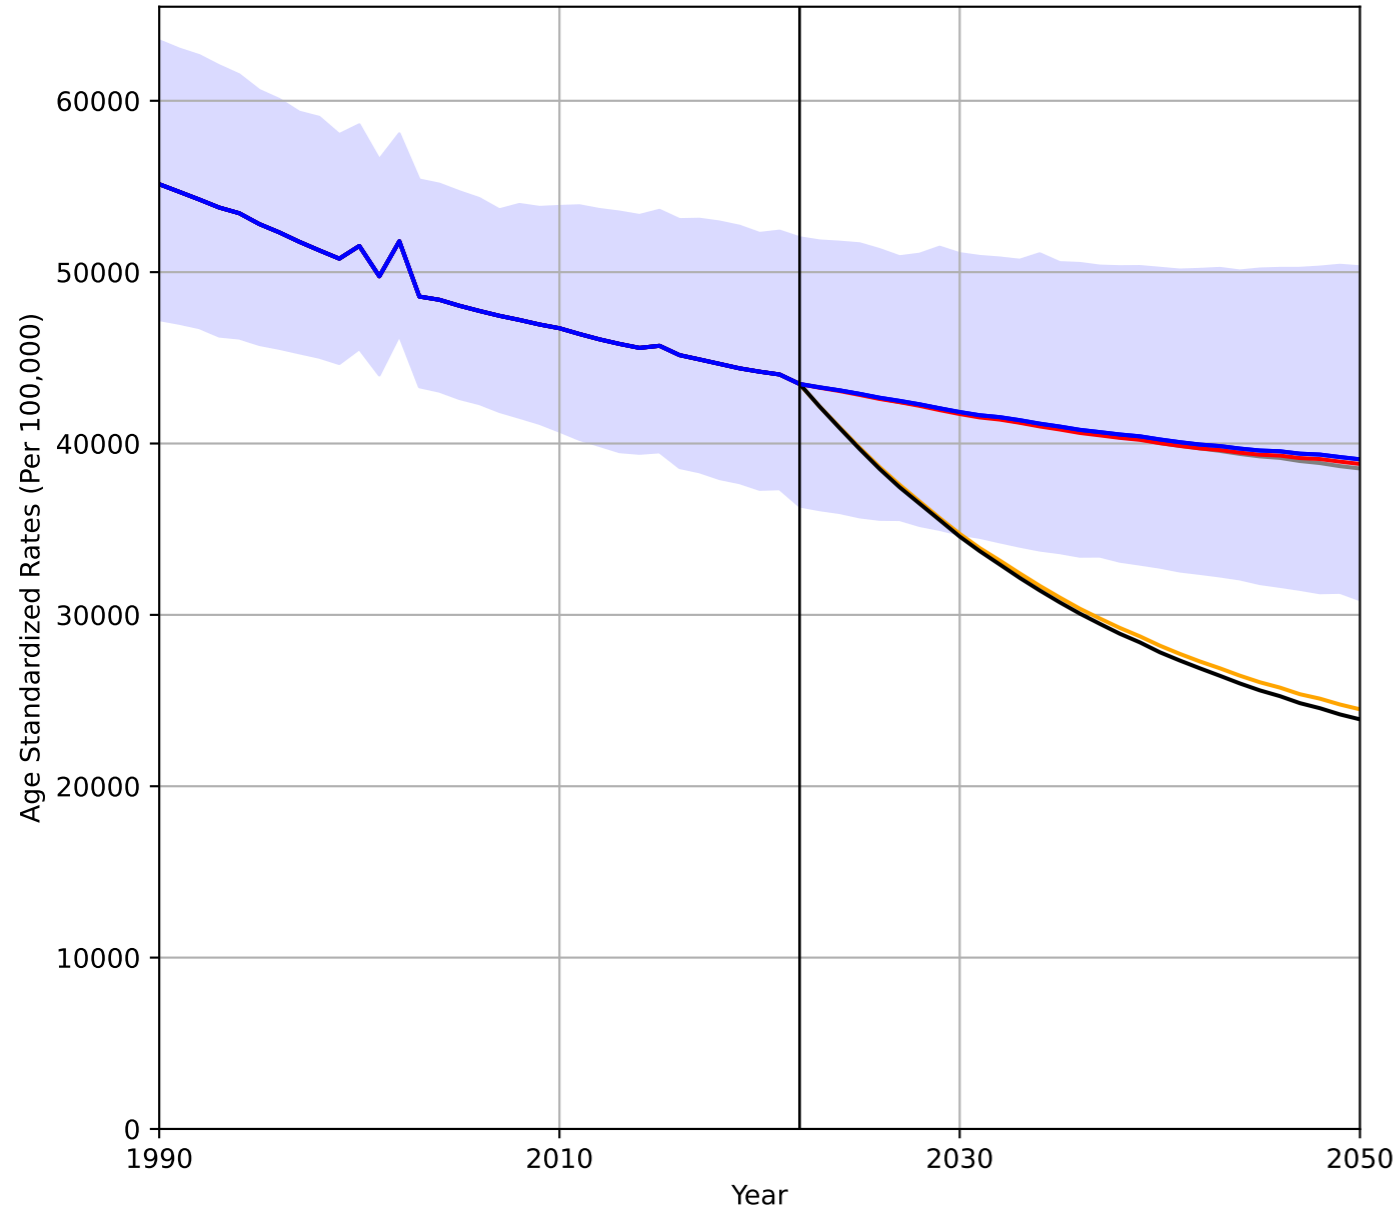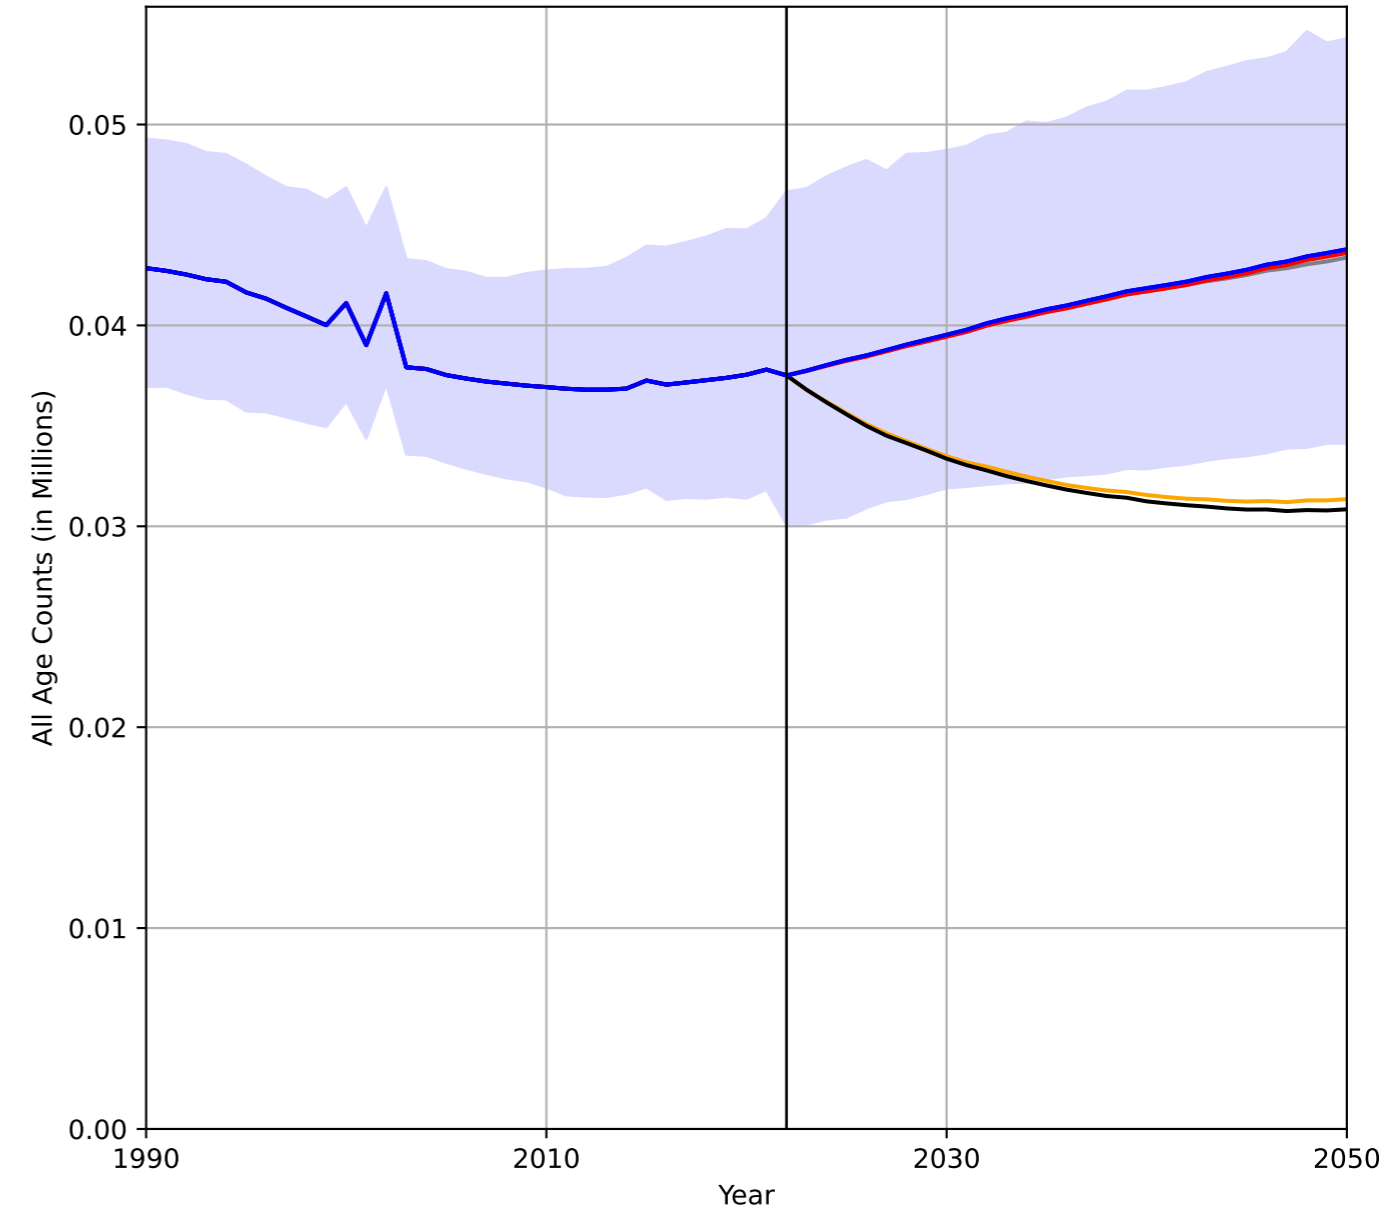

# Nauru

Supplemental Results Figure S10. All-cause age standardised DALY rates (A) and all age DALY counts (B), for the past and for five future scenarios, 1990–2050

1545

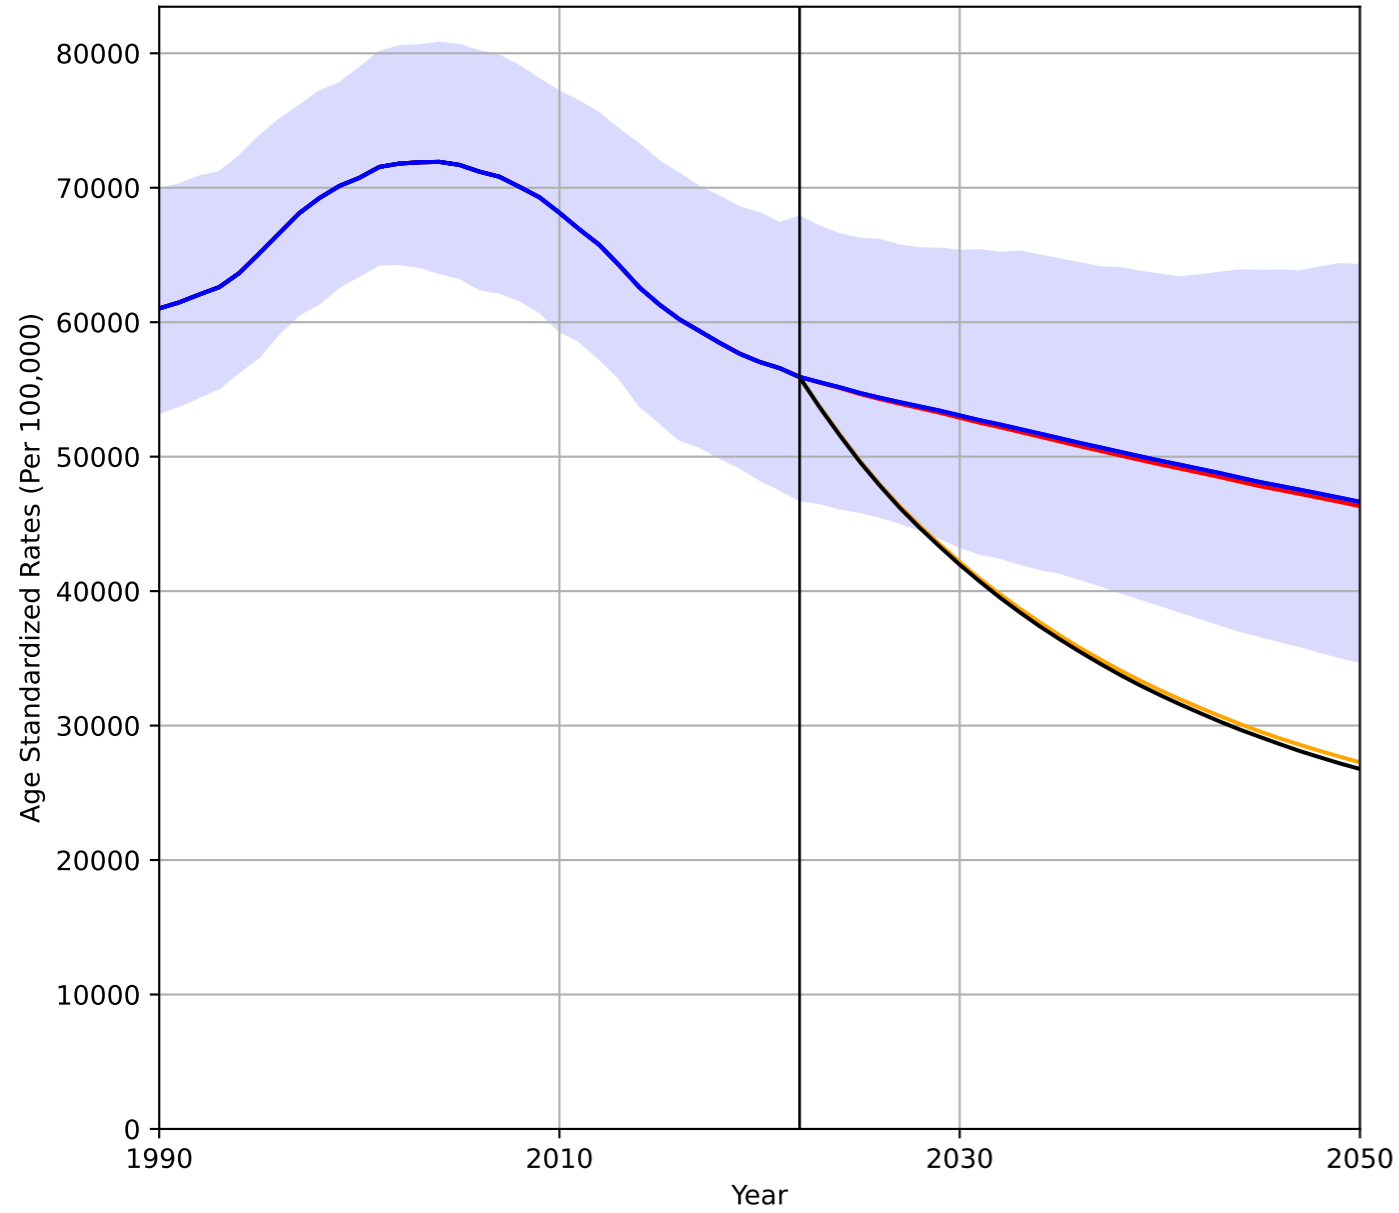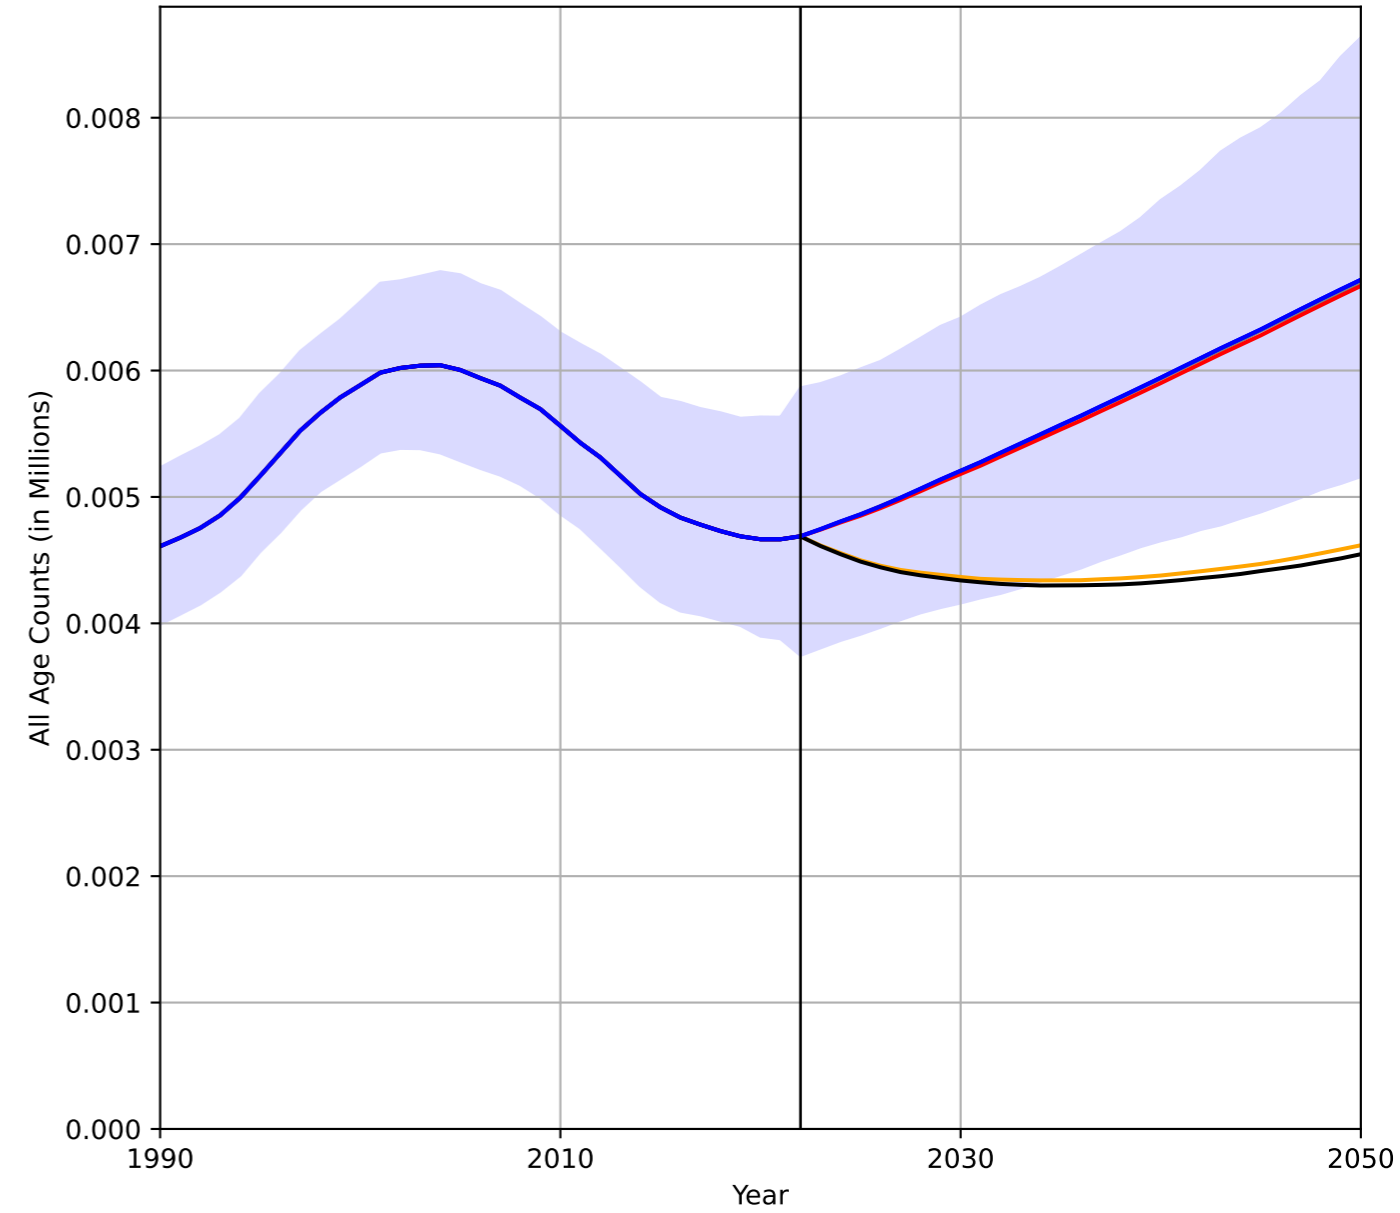

# Niue

Supplemental Results Figure S10. All-cause age standardised DALY rates (A) and all age DALY counts (B), for the past and for five future scenarios, 1990–2050

1546

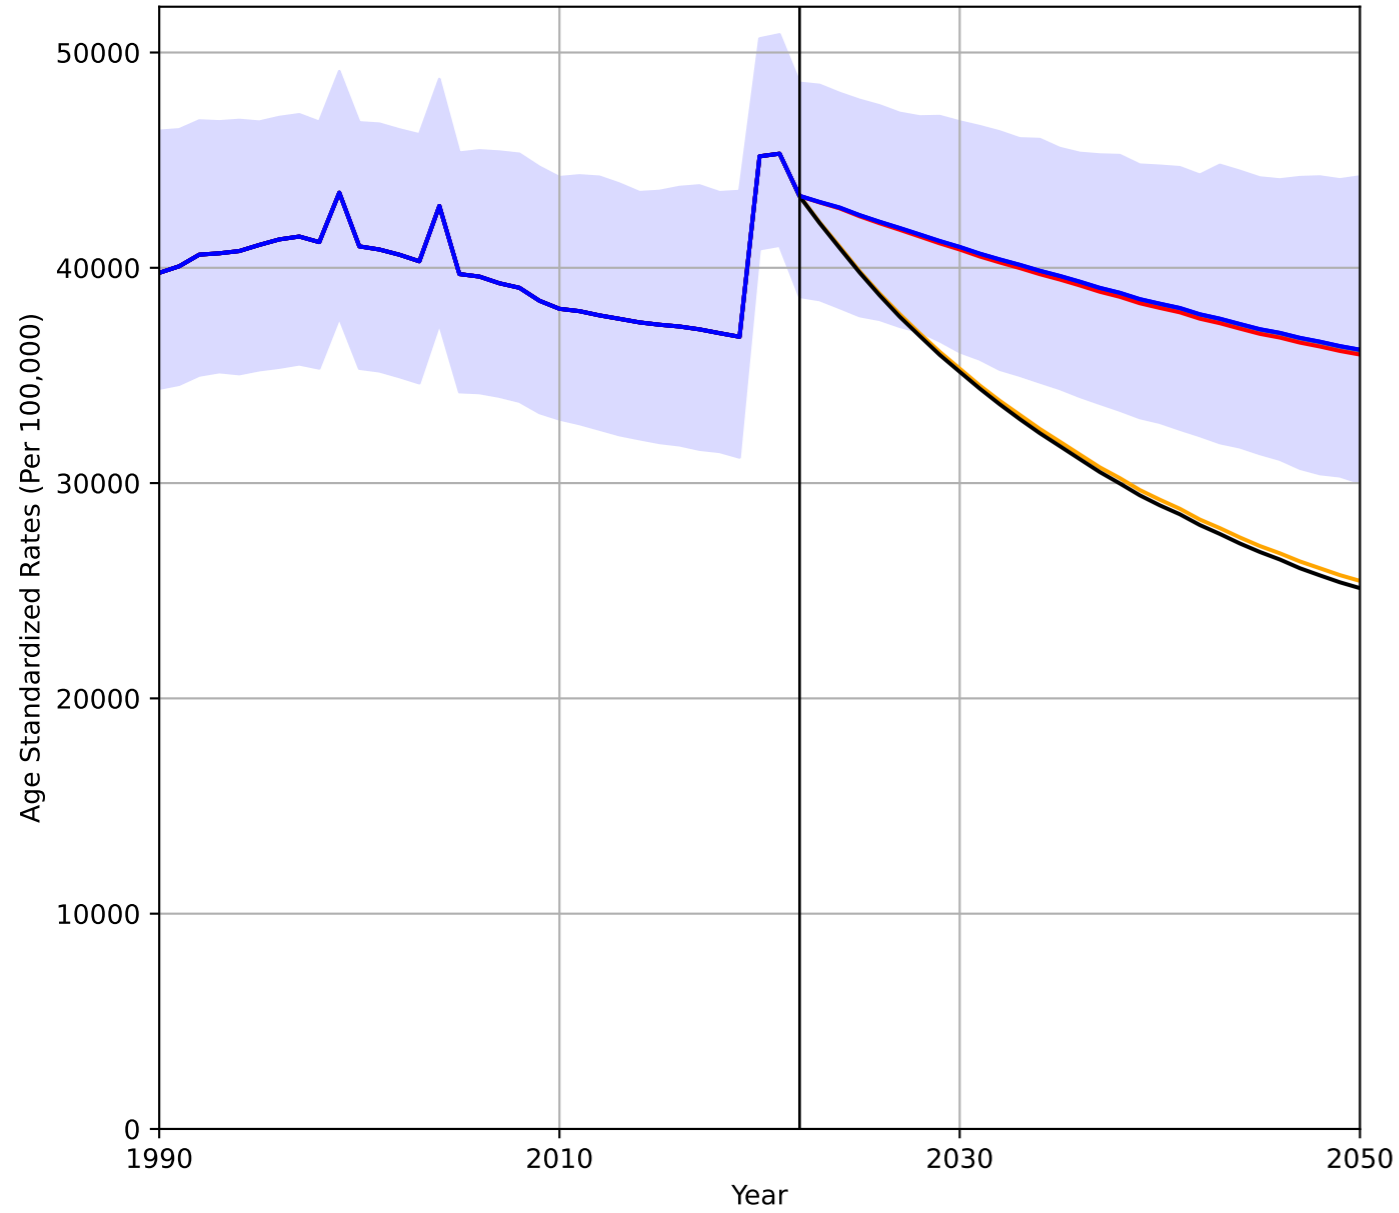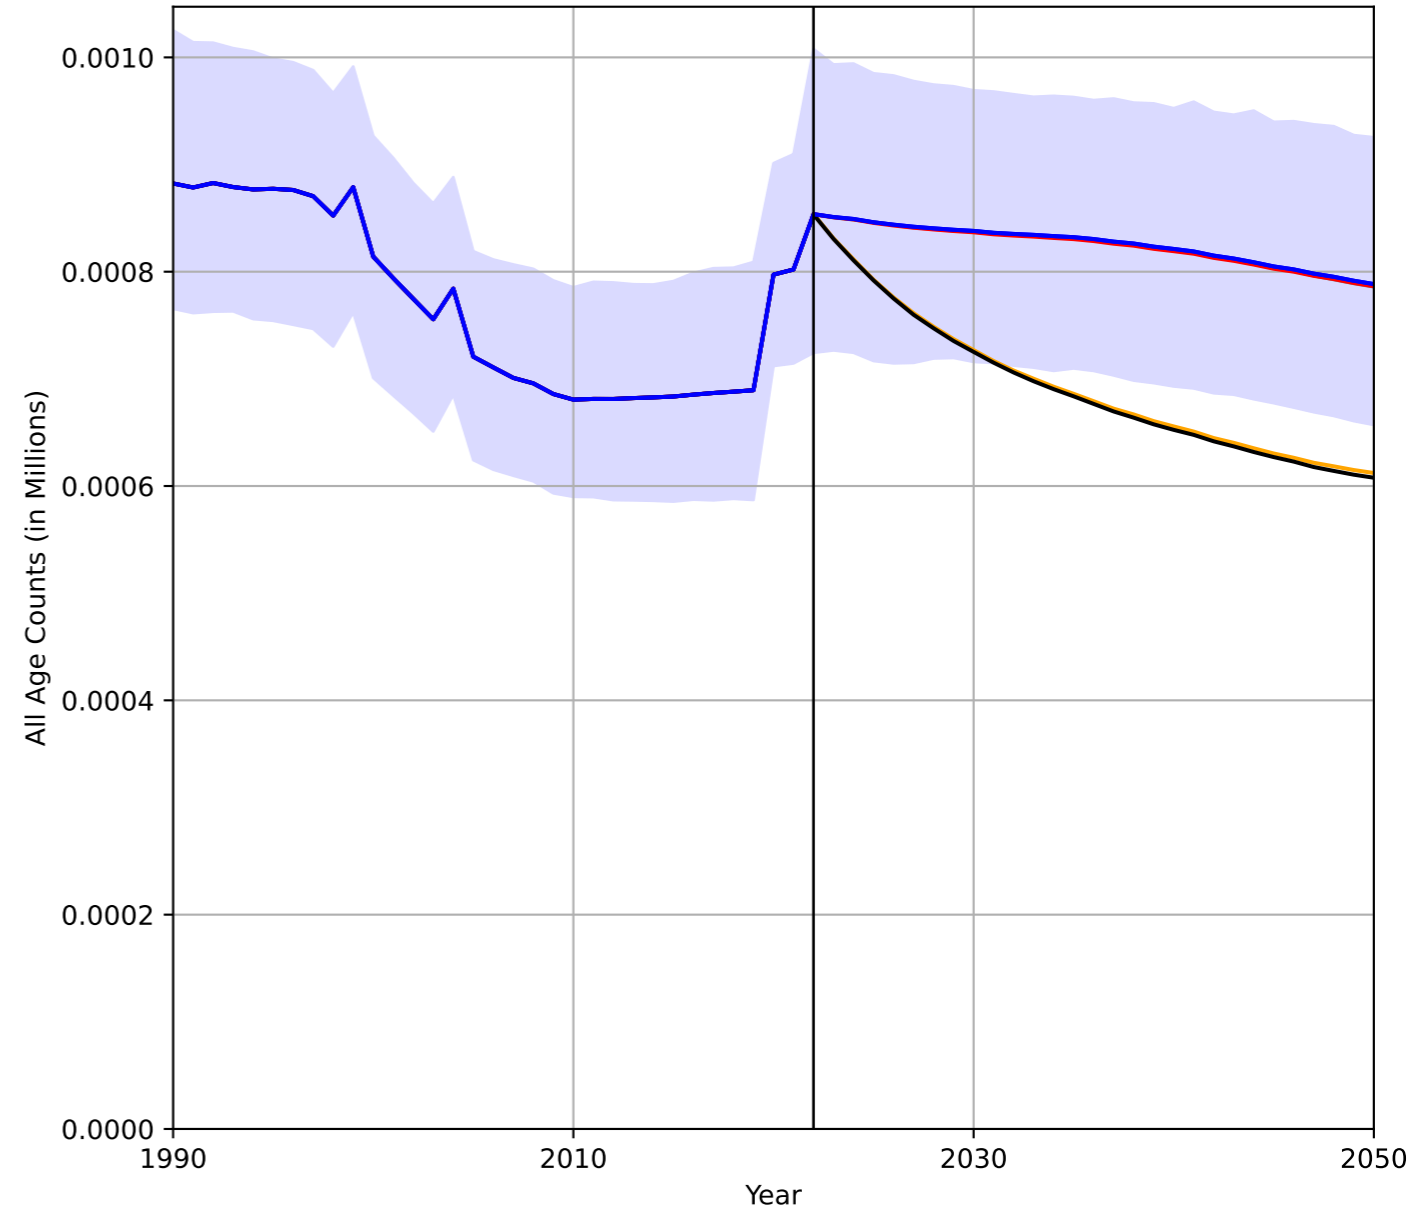

# Northern Mariana Islands

1547

Supplemental Results Figure S10. All-cause age standardised DALY rates (A) and all age DALY counts (B), for the past and for five future scenarios, 1990–2050

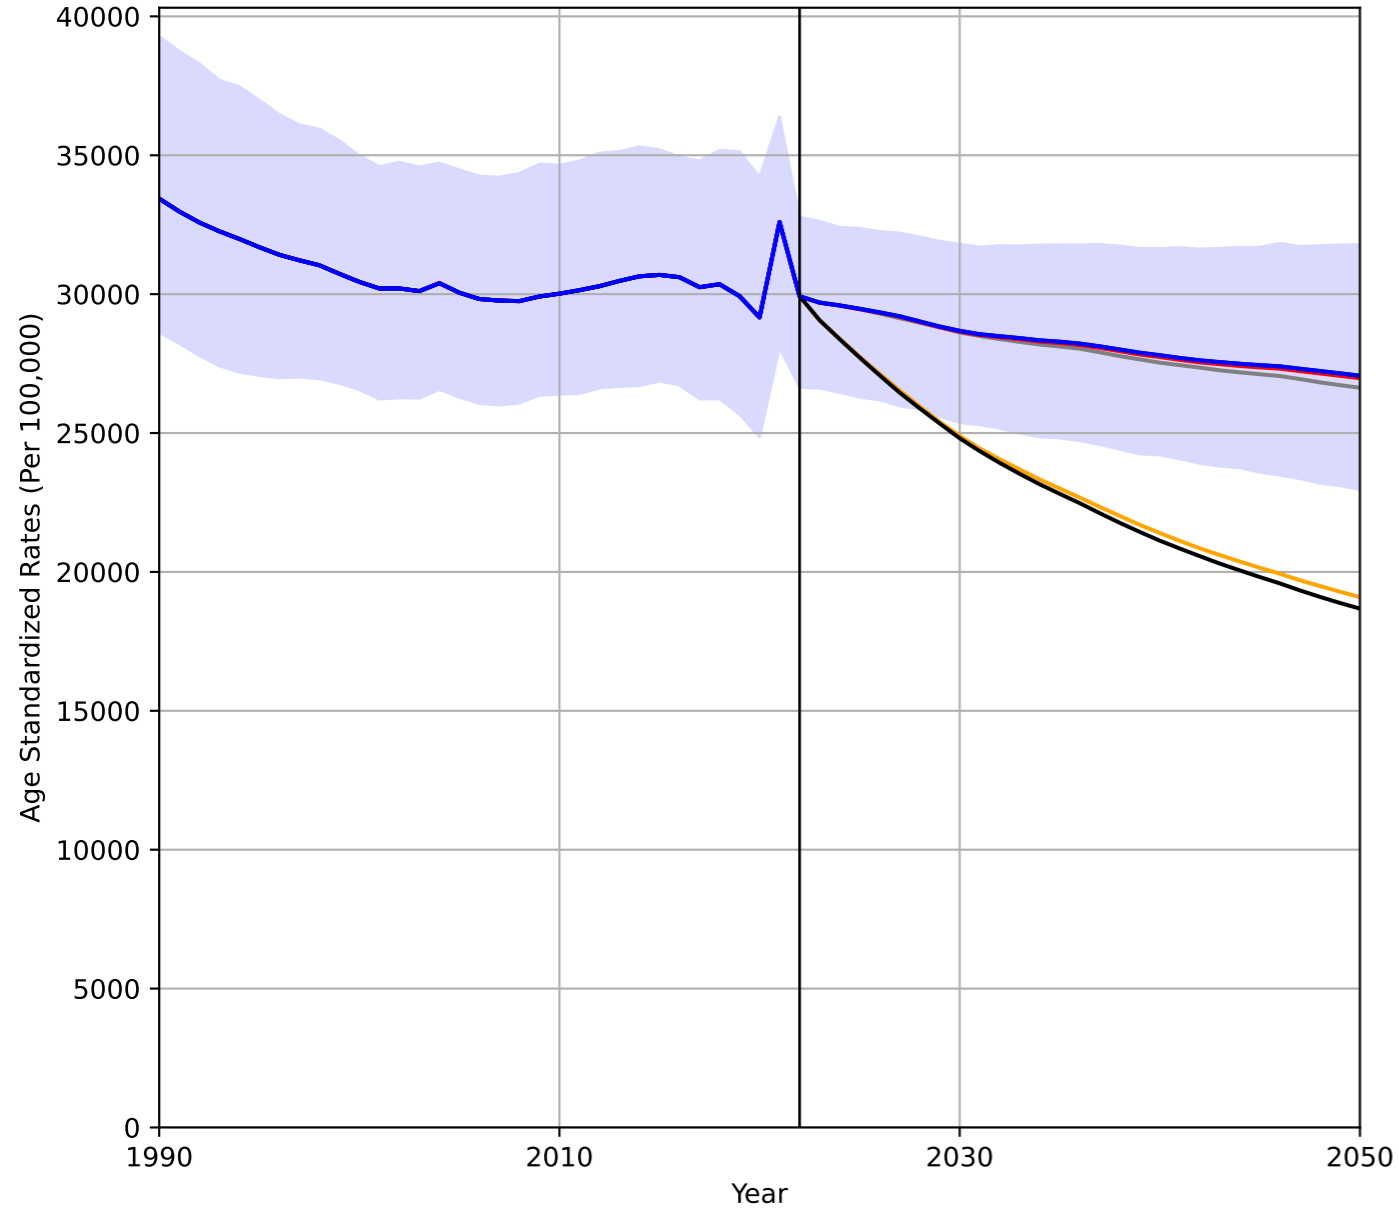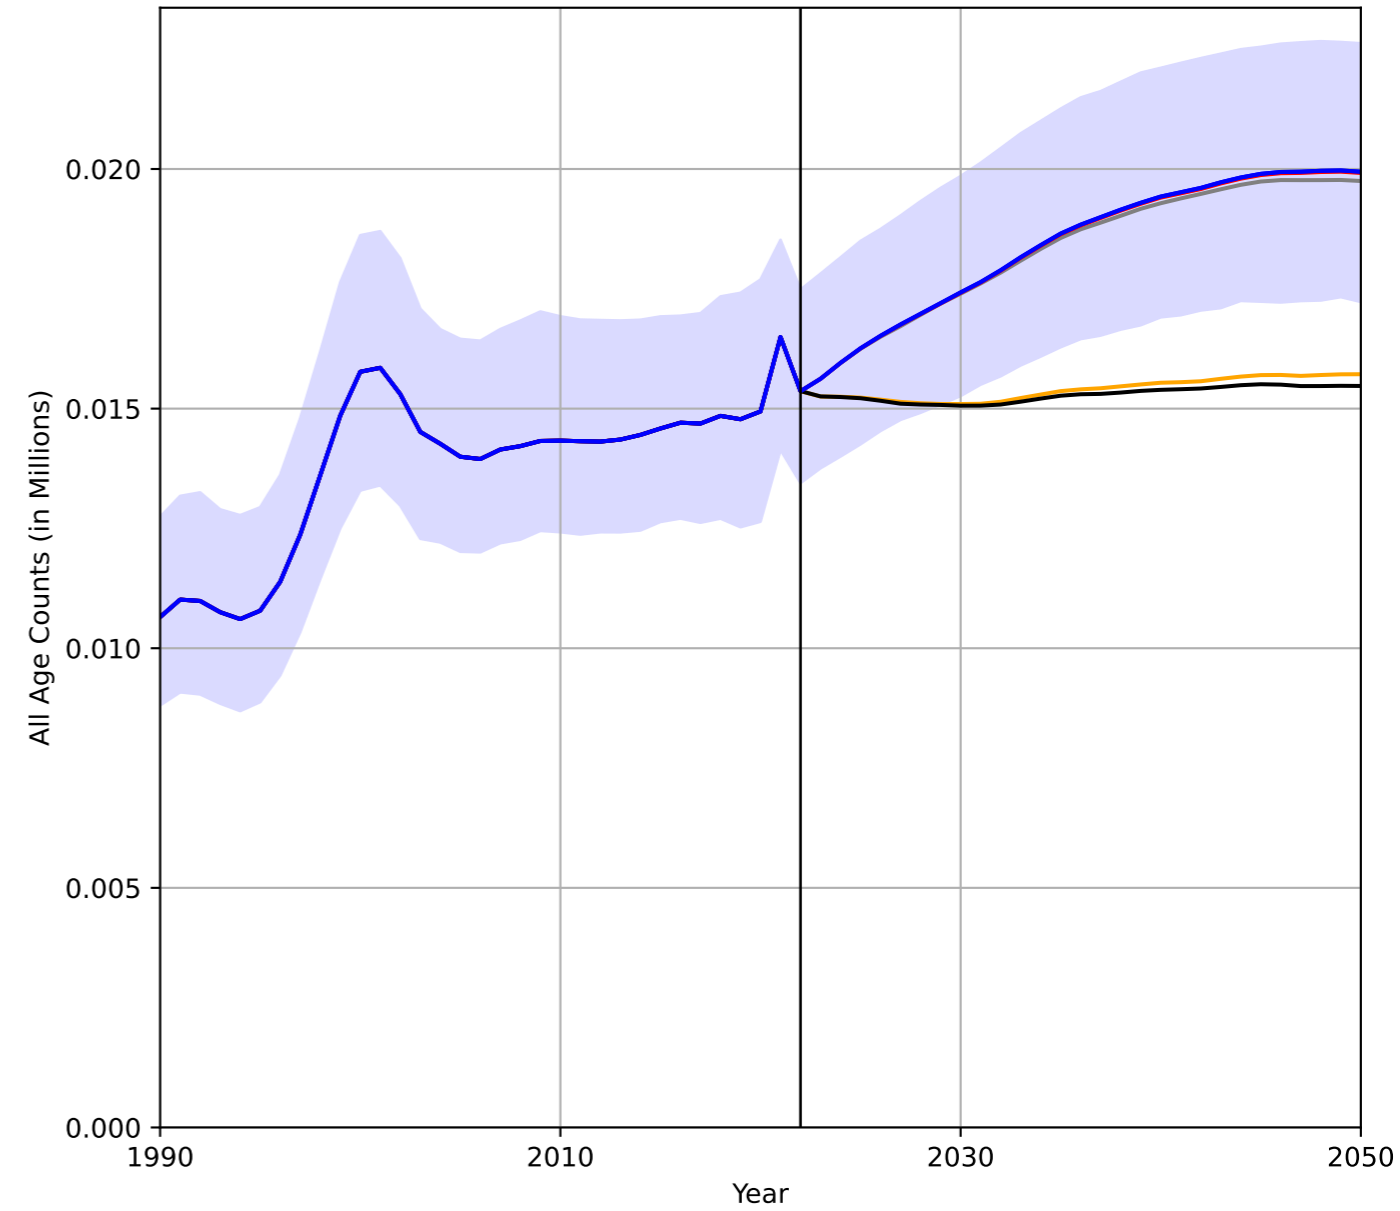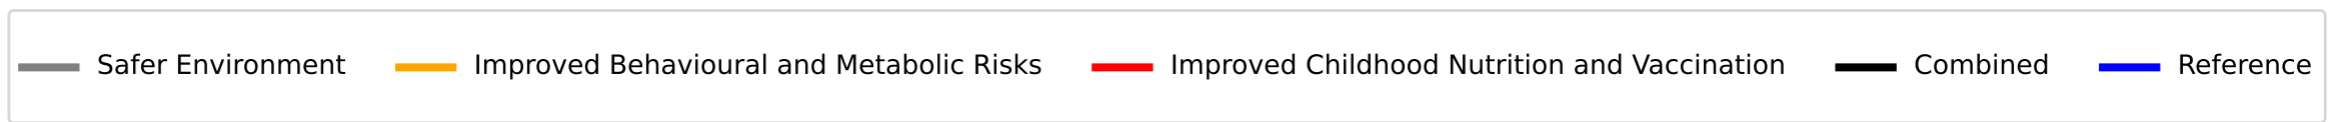

# Palau

Supplemental Results Figure S10. All-cause age standardised DALY rates (A) and all age DALY counts (B), for the past and for five future scenarios, 1990–2050

1548

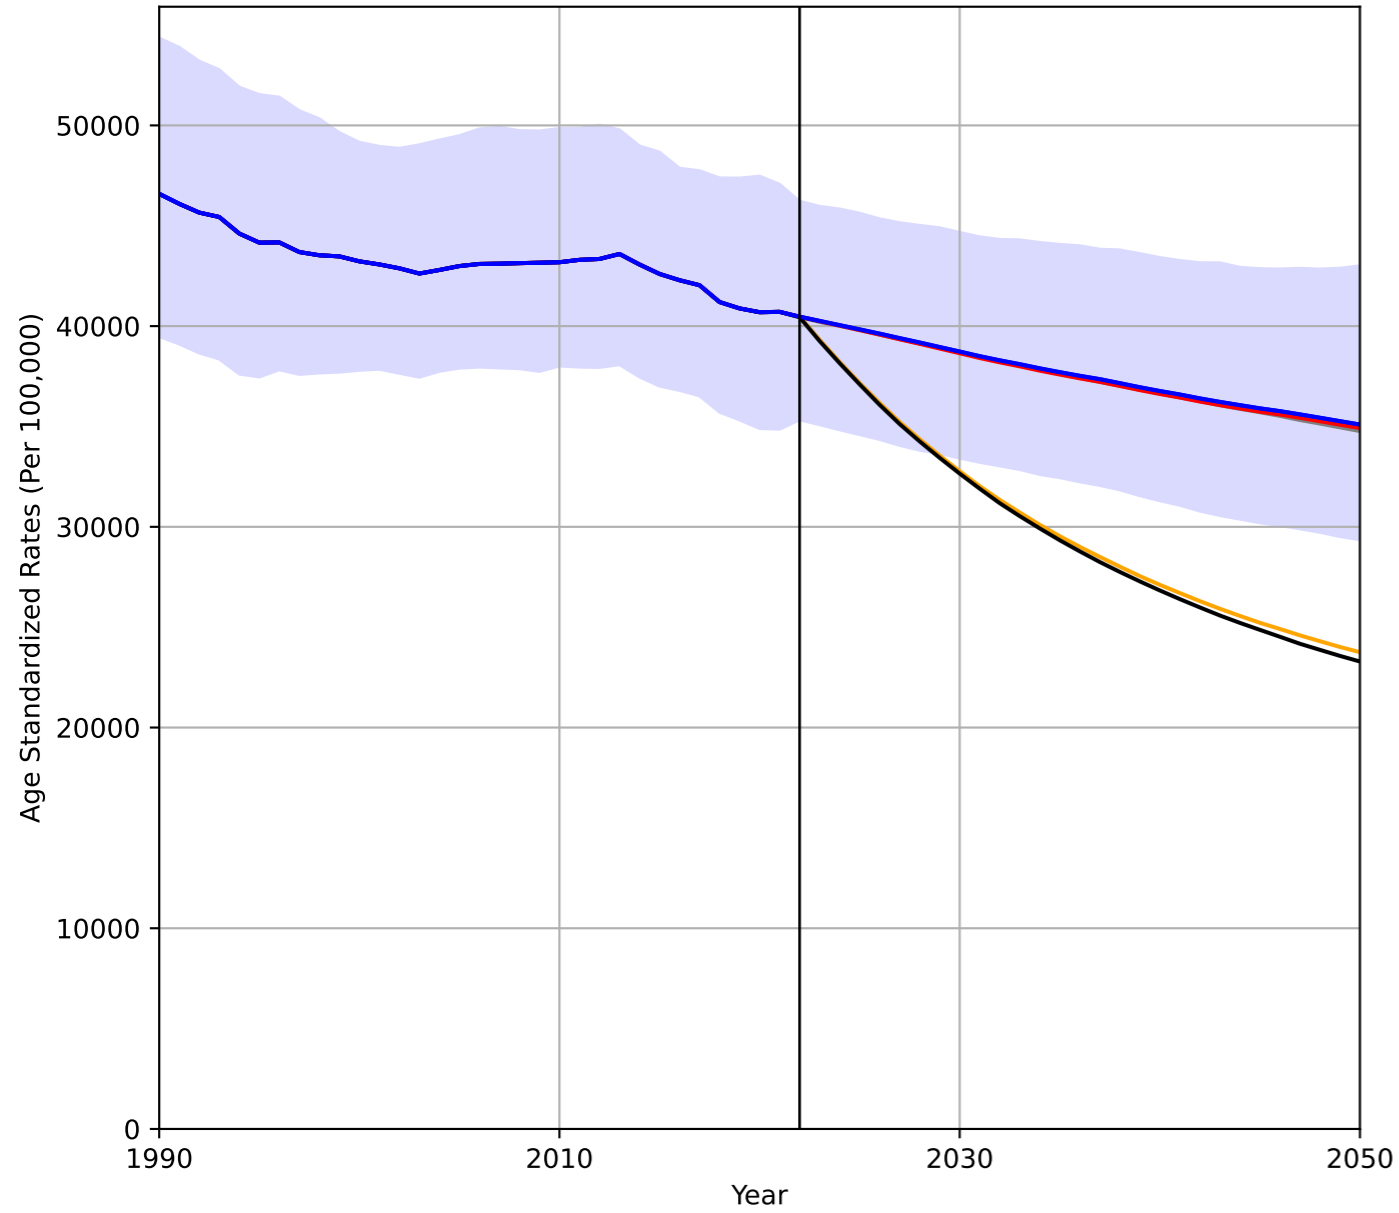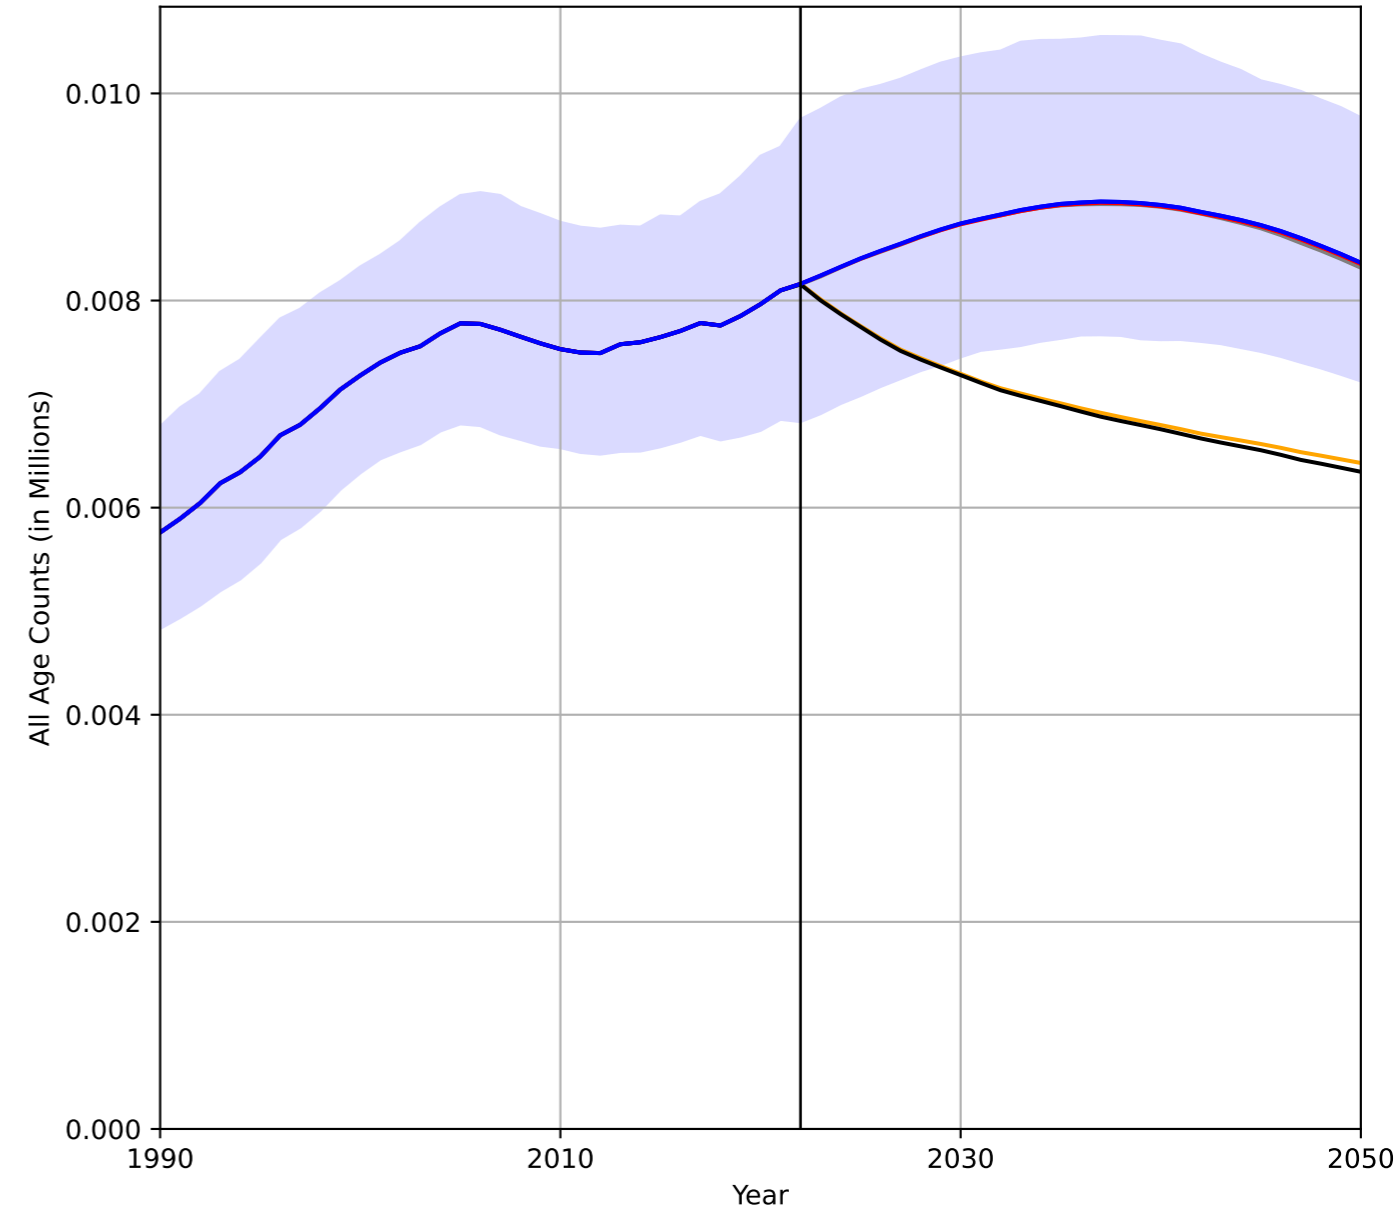

# Papua New Guinea

Supplemental Results Figure S10. All-cause age standardised DALY rates (A) and all age DALY counts (B), for the past and for five future scenarios, 1990–2050

1549

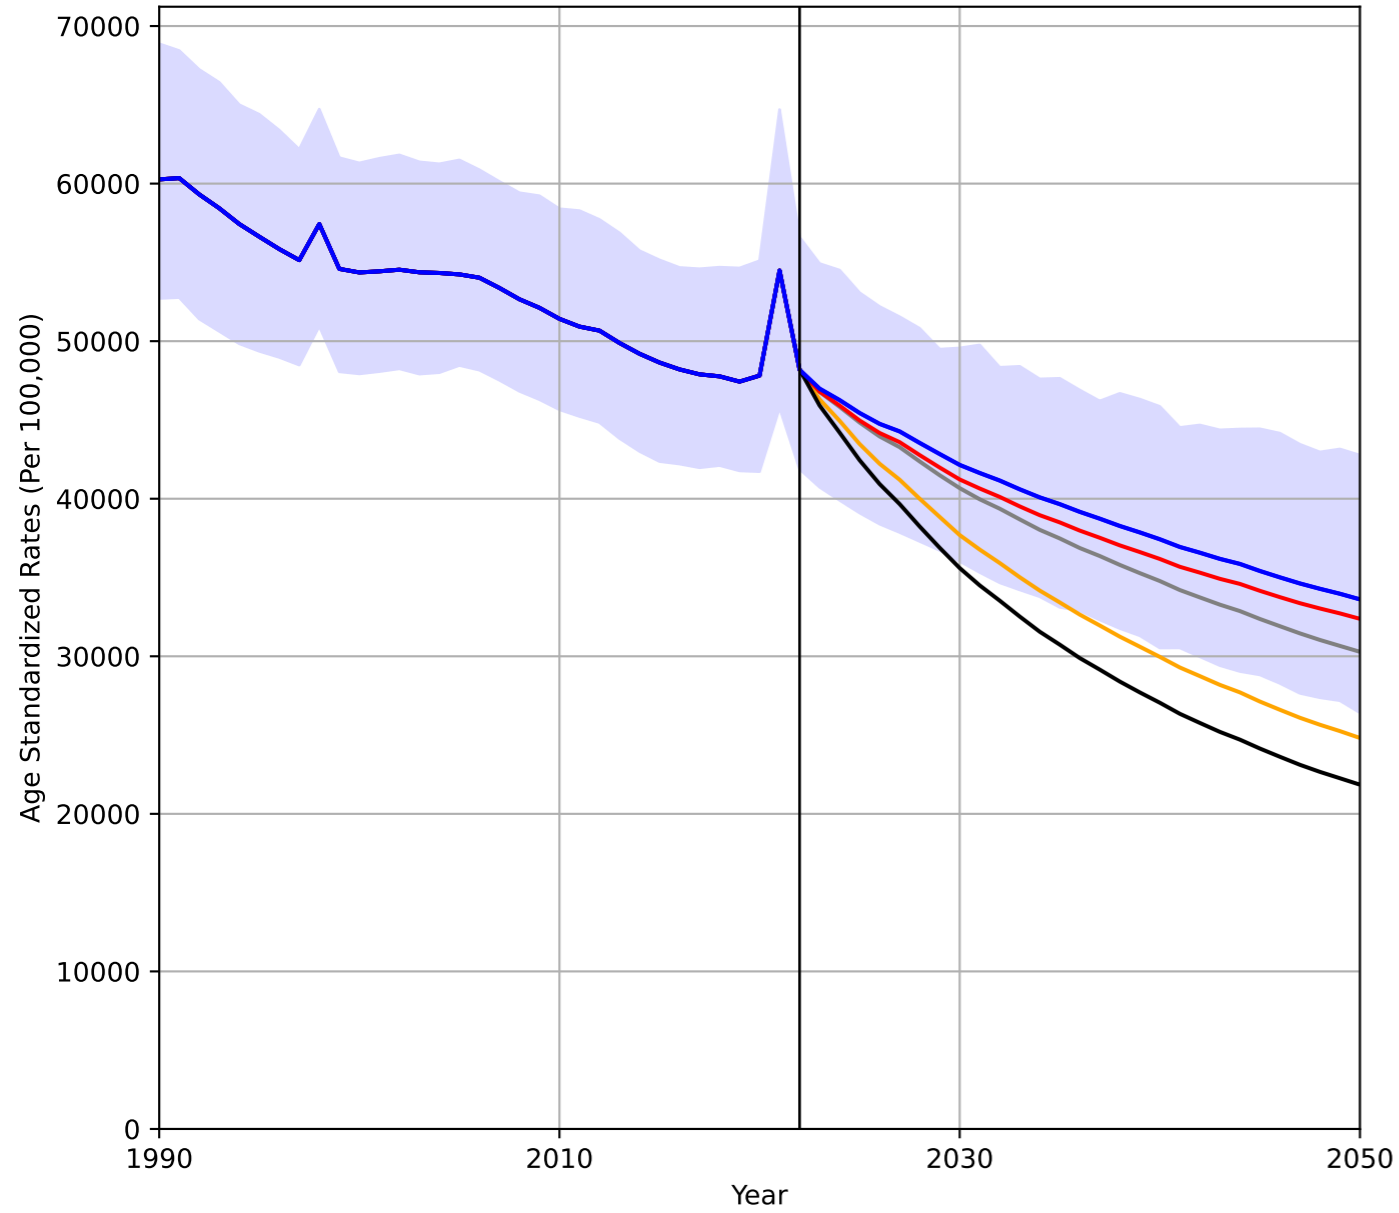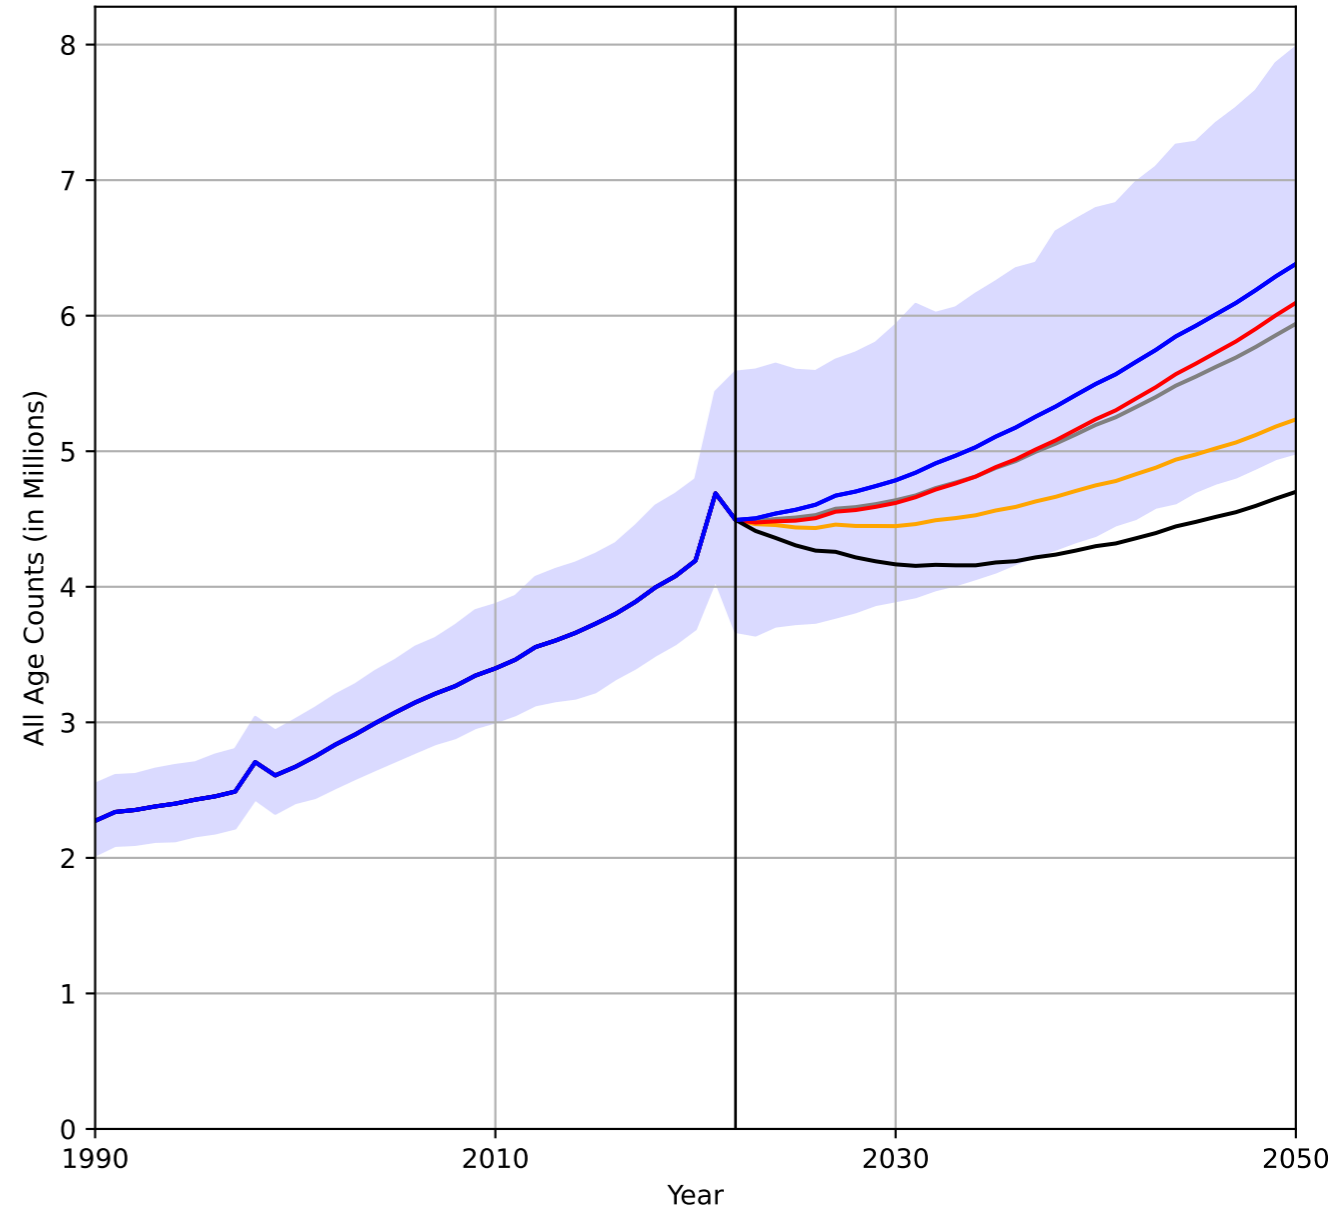

# Samoa

Supplemental Results Figure S10. All-cause age standardised DALY rates (A) and all age DALY counts (B), for the past and for five future scenarios, 1990–2050

1550

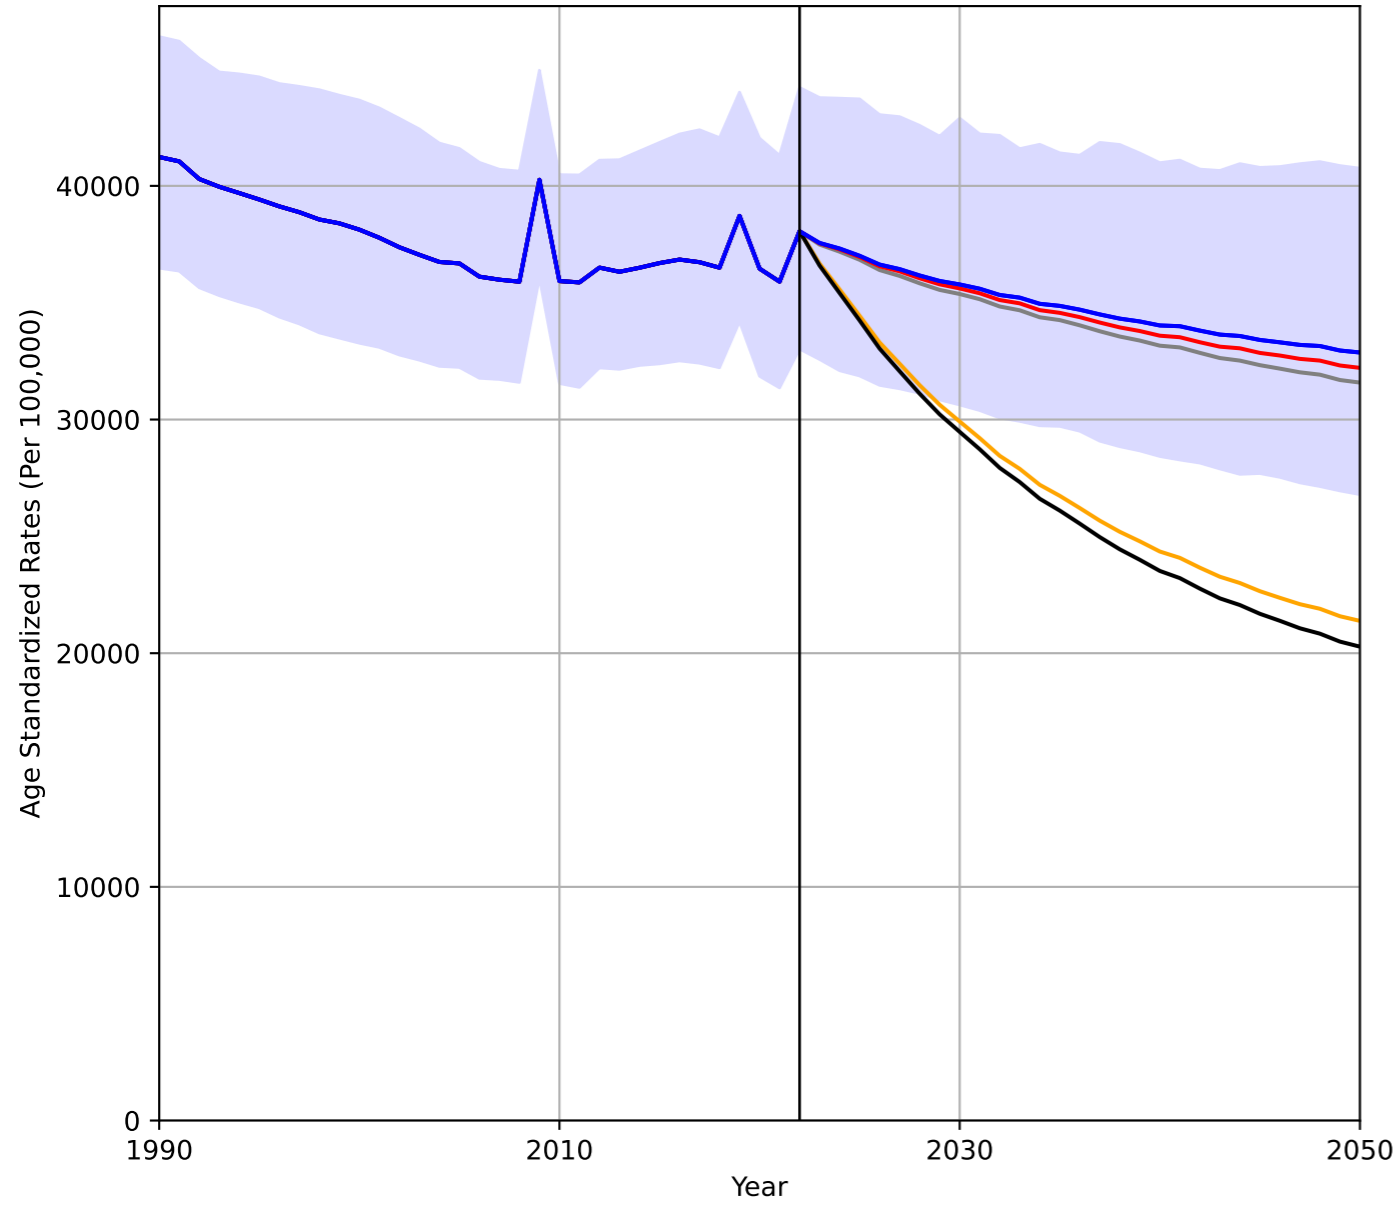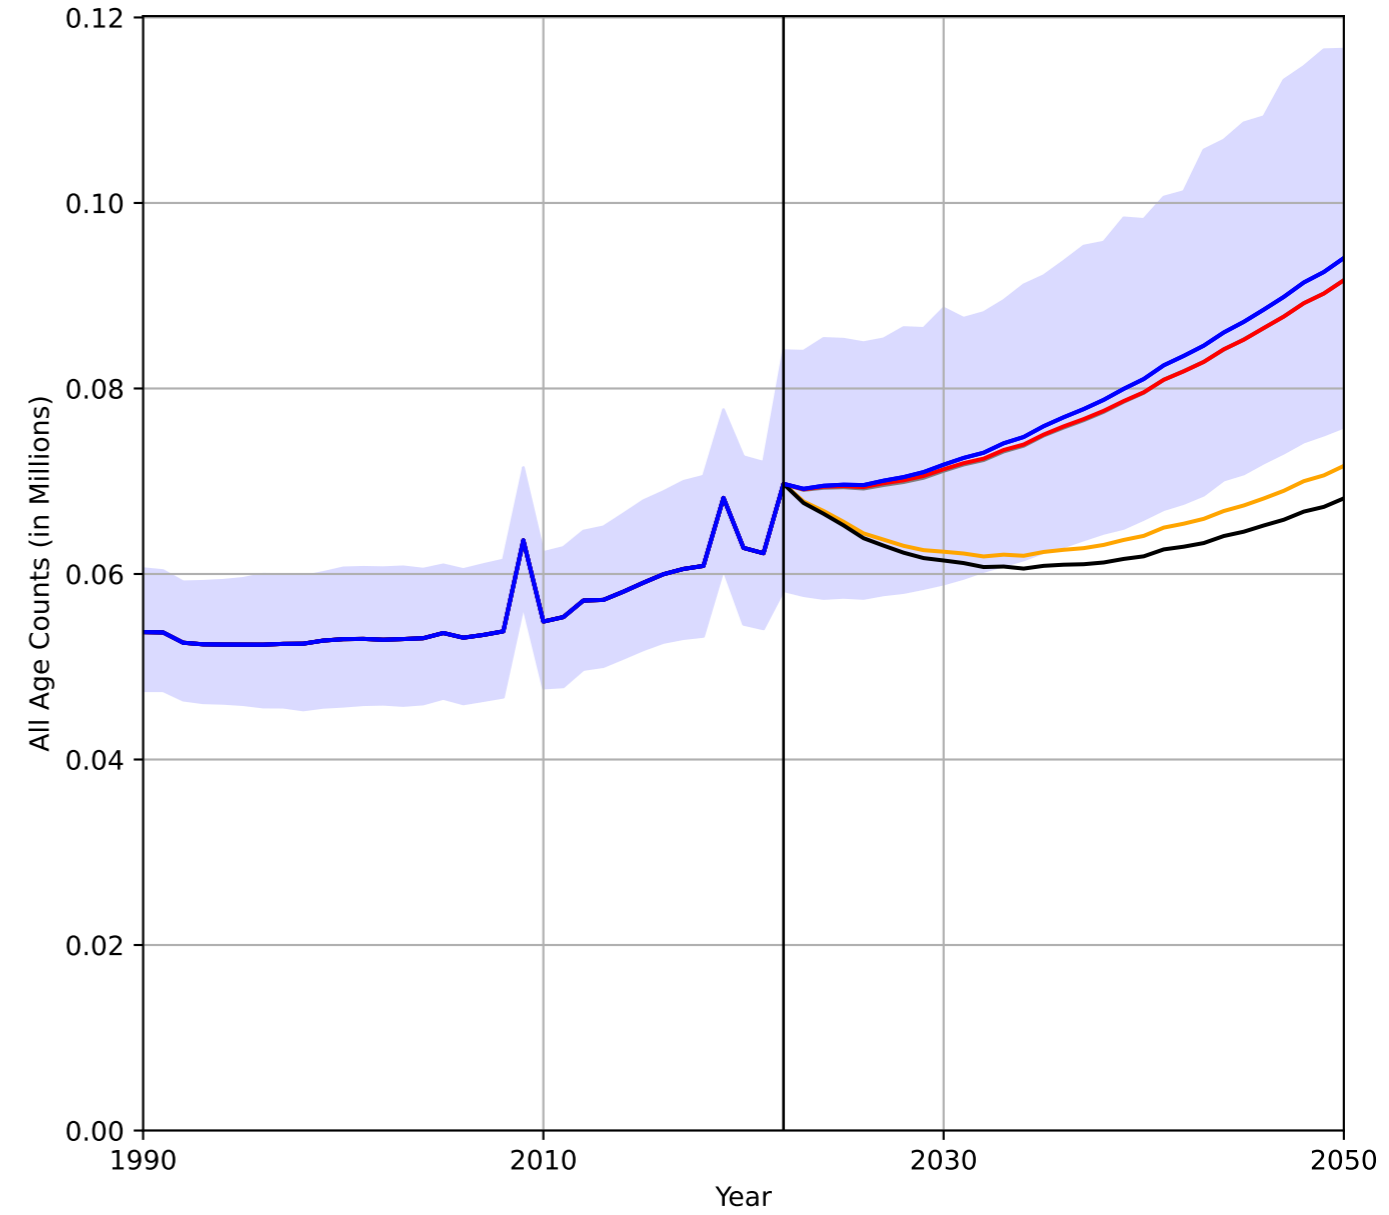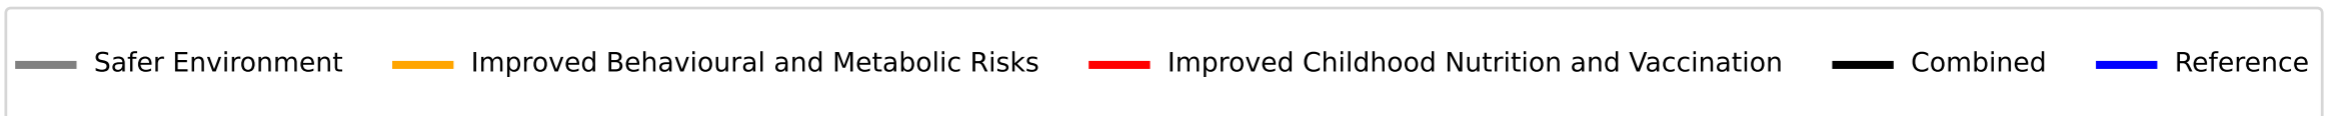

# Solomon Islands

Supplemental Results Figure S10. All-cause age standardised DALY rates (A) and all age DALY counts (B), for the past and for five future scenarios, 1990–2050

1551

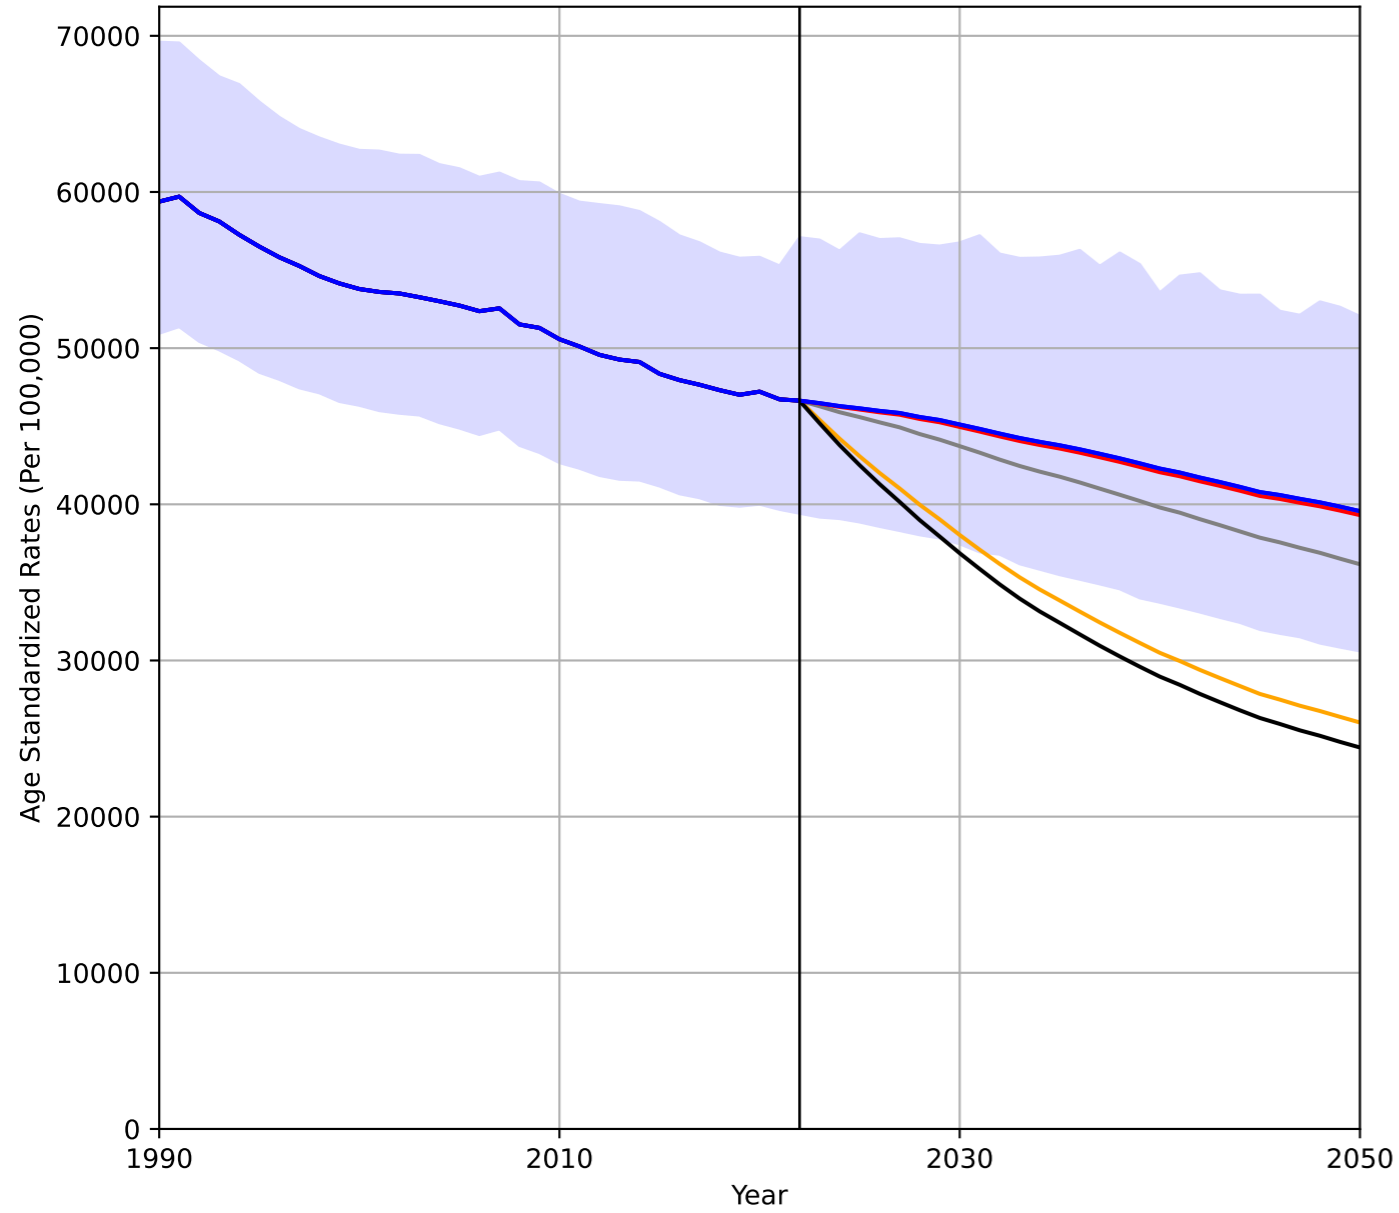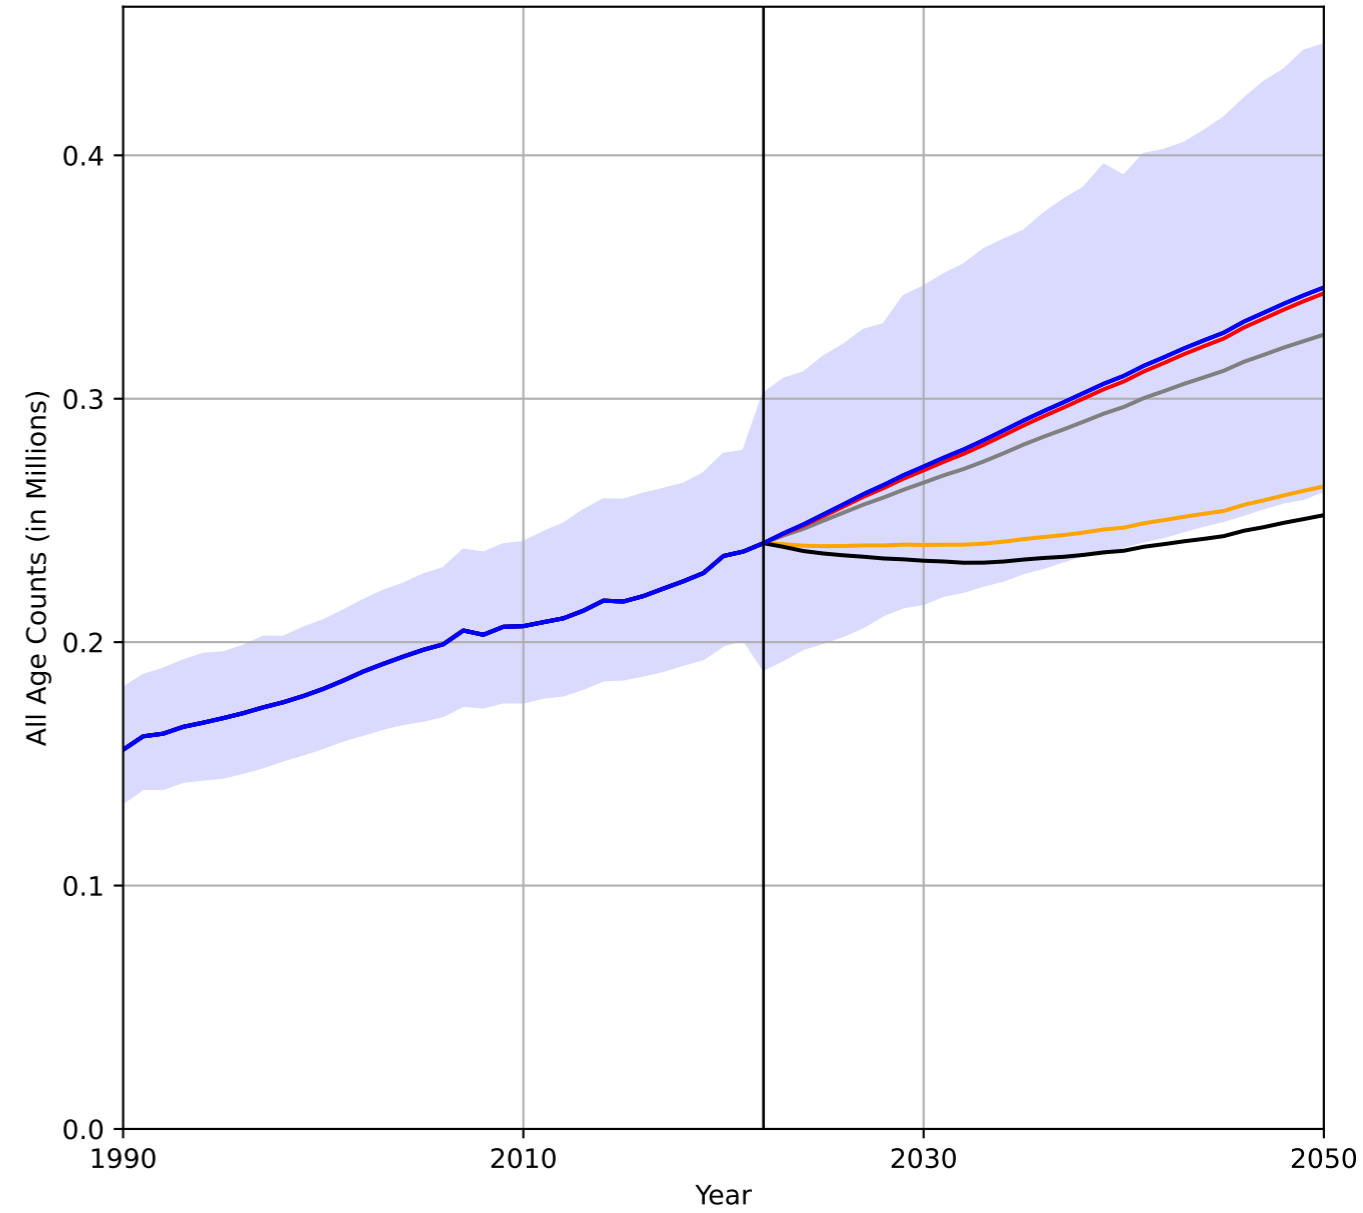



# Tokelau

Supplemental Results Figure S10. All-cause age standardised DALY rates (A) and all age DALY counts (B), for the past and for five future scenarios, 1990–2050

1552

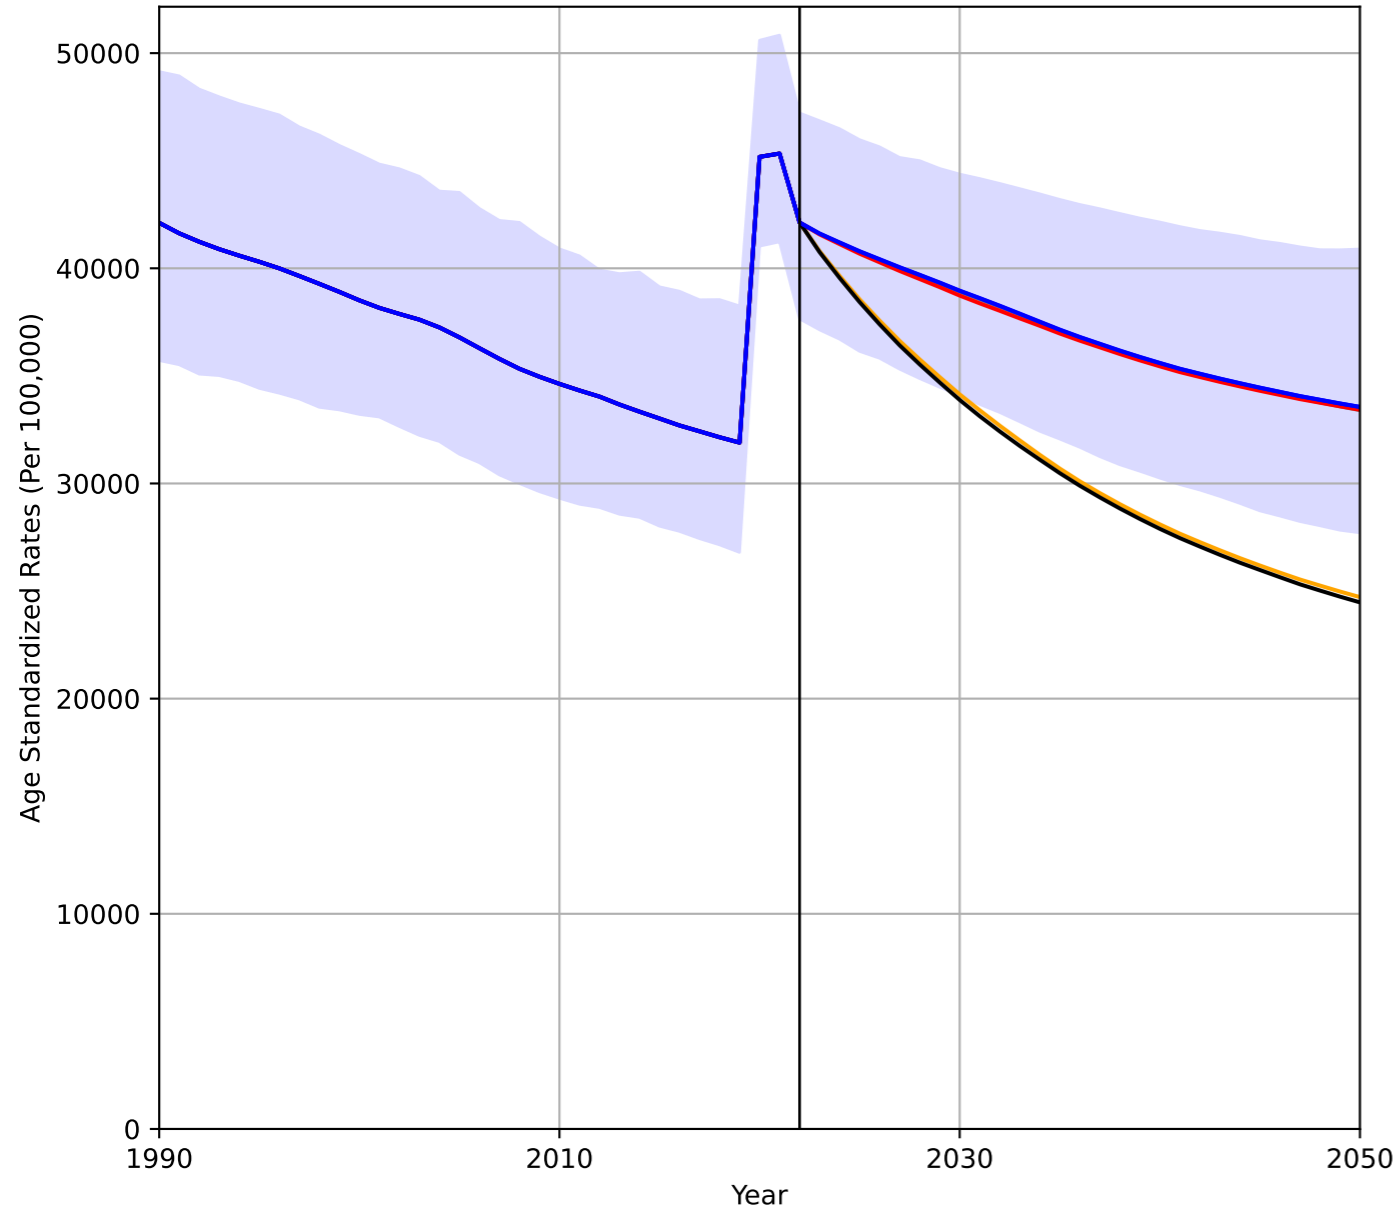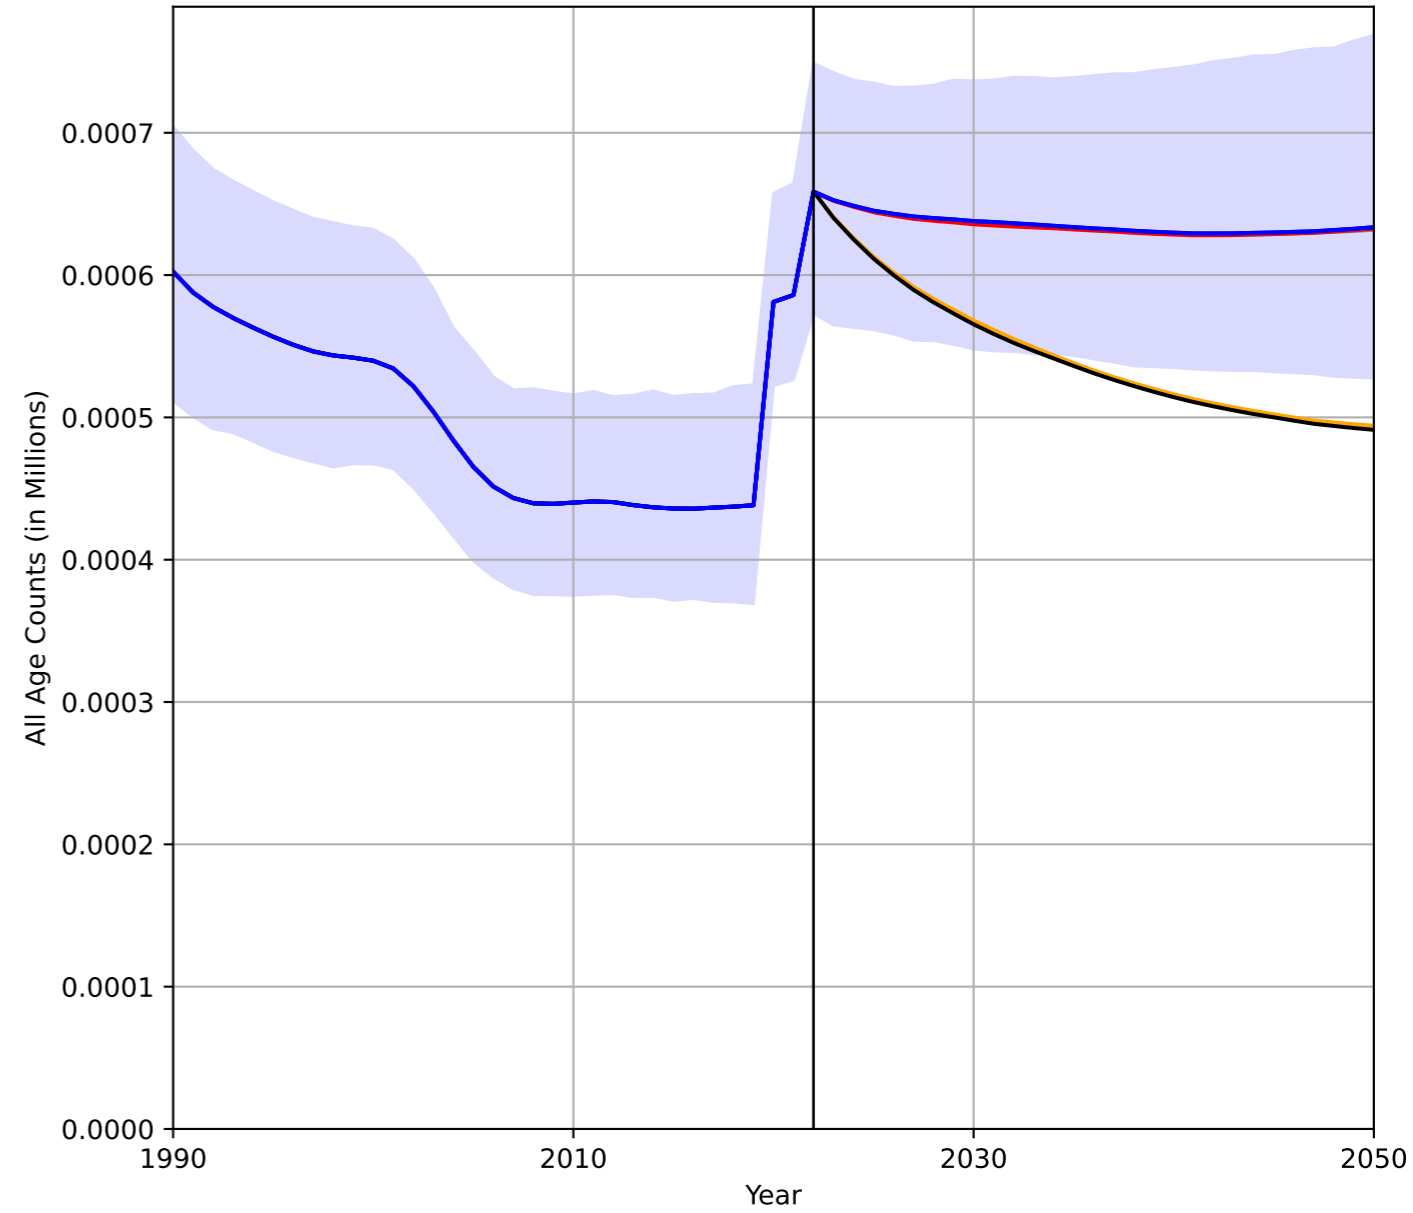

# Tonga

Supplemental Results Figure S10. All-cause age standardised DALY rates (A) and all age DALY counts (B), for the past and for five future scenarios, 1990–2050

1553

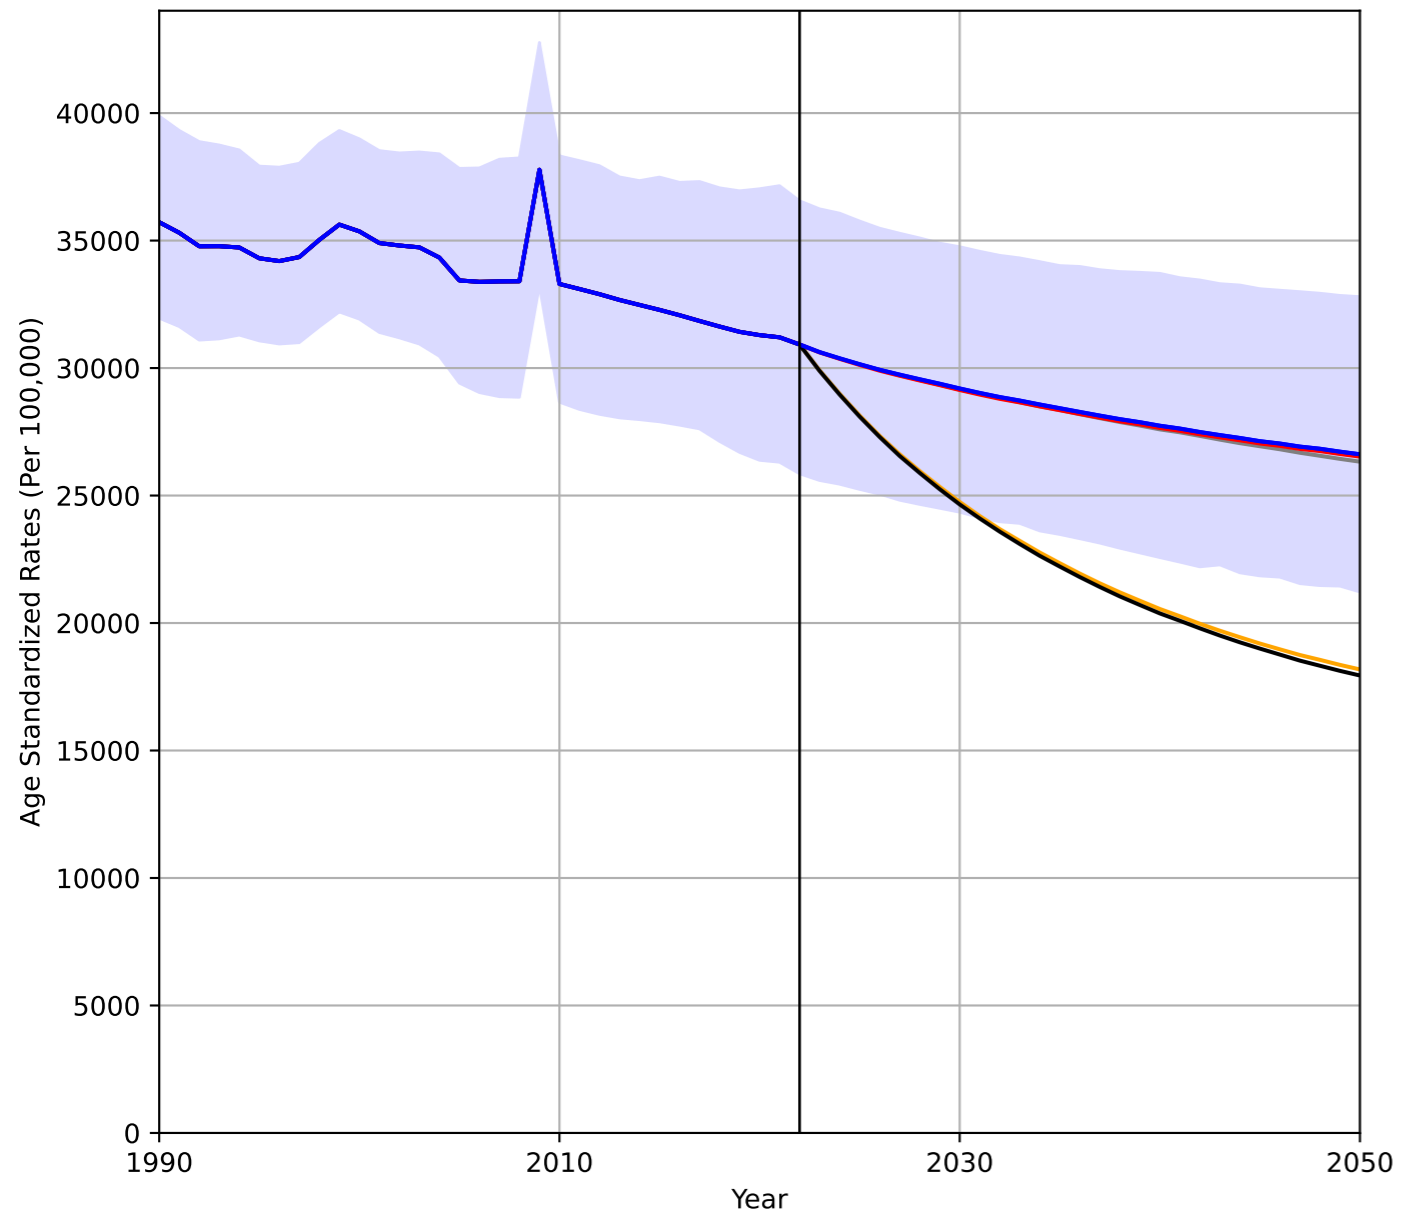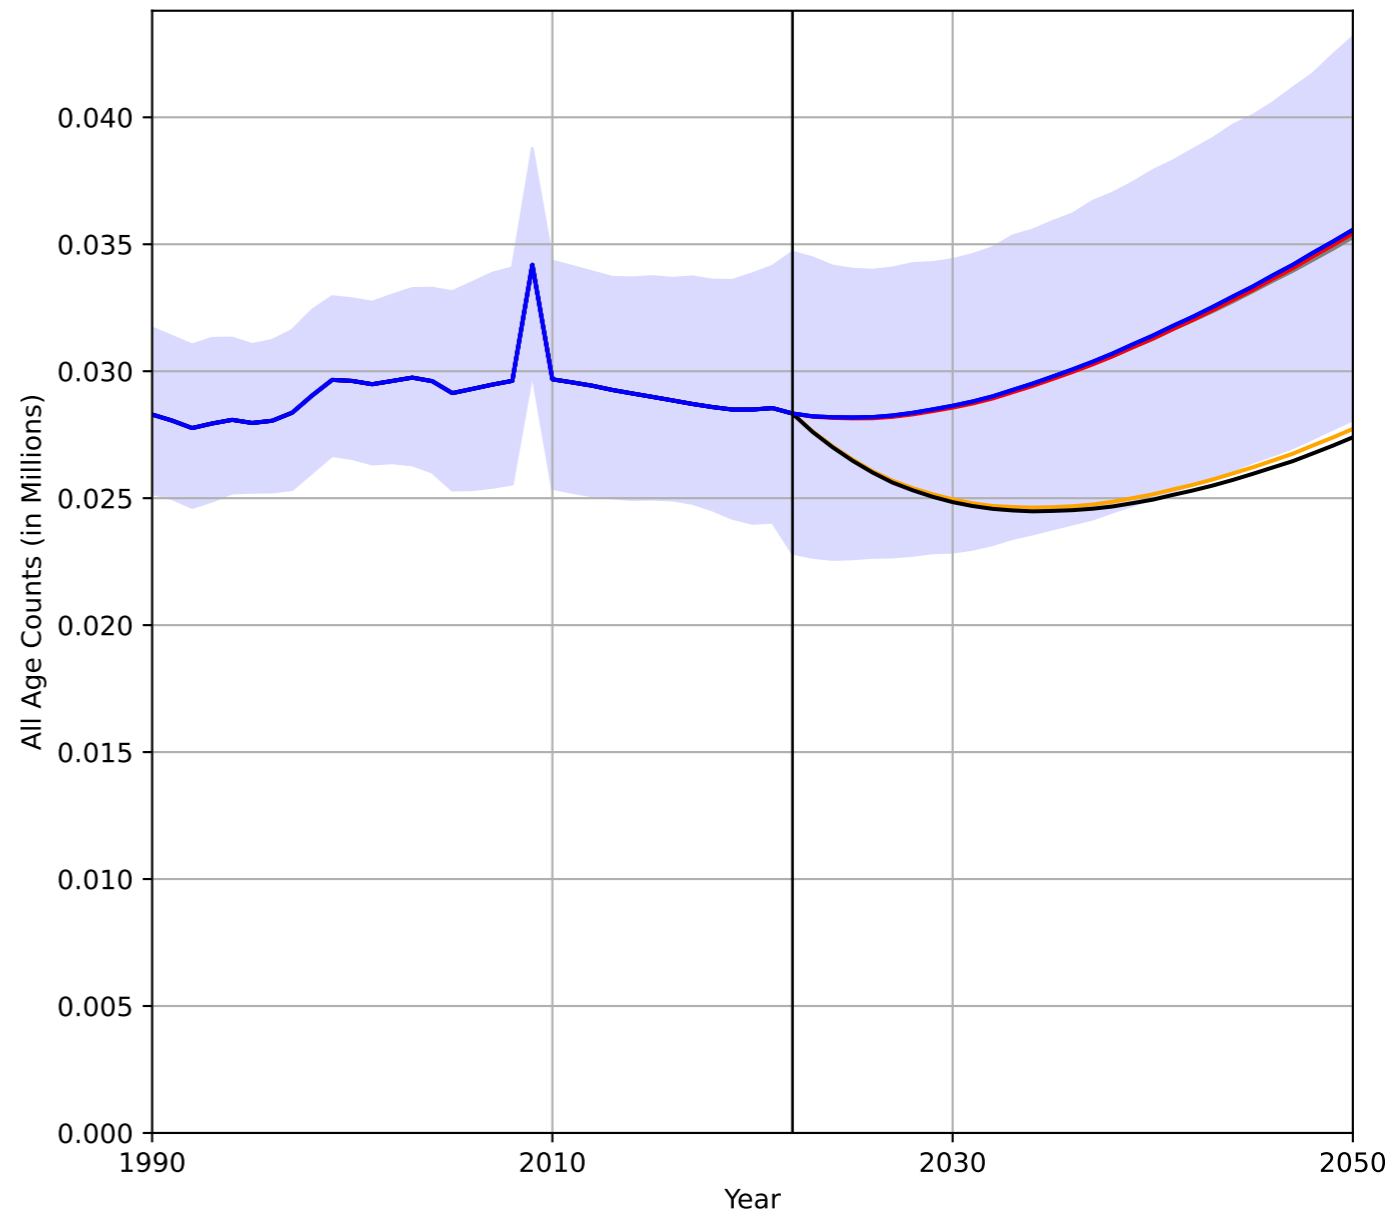

# Tuvalu

Supplemental Results Figure S10. All-cause age standardised DALY rates (A) and all age DALY counts (B), for the past and for five future scenarios, 1990–2050

1554

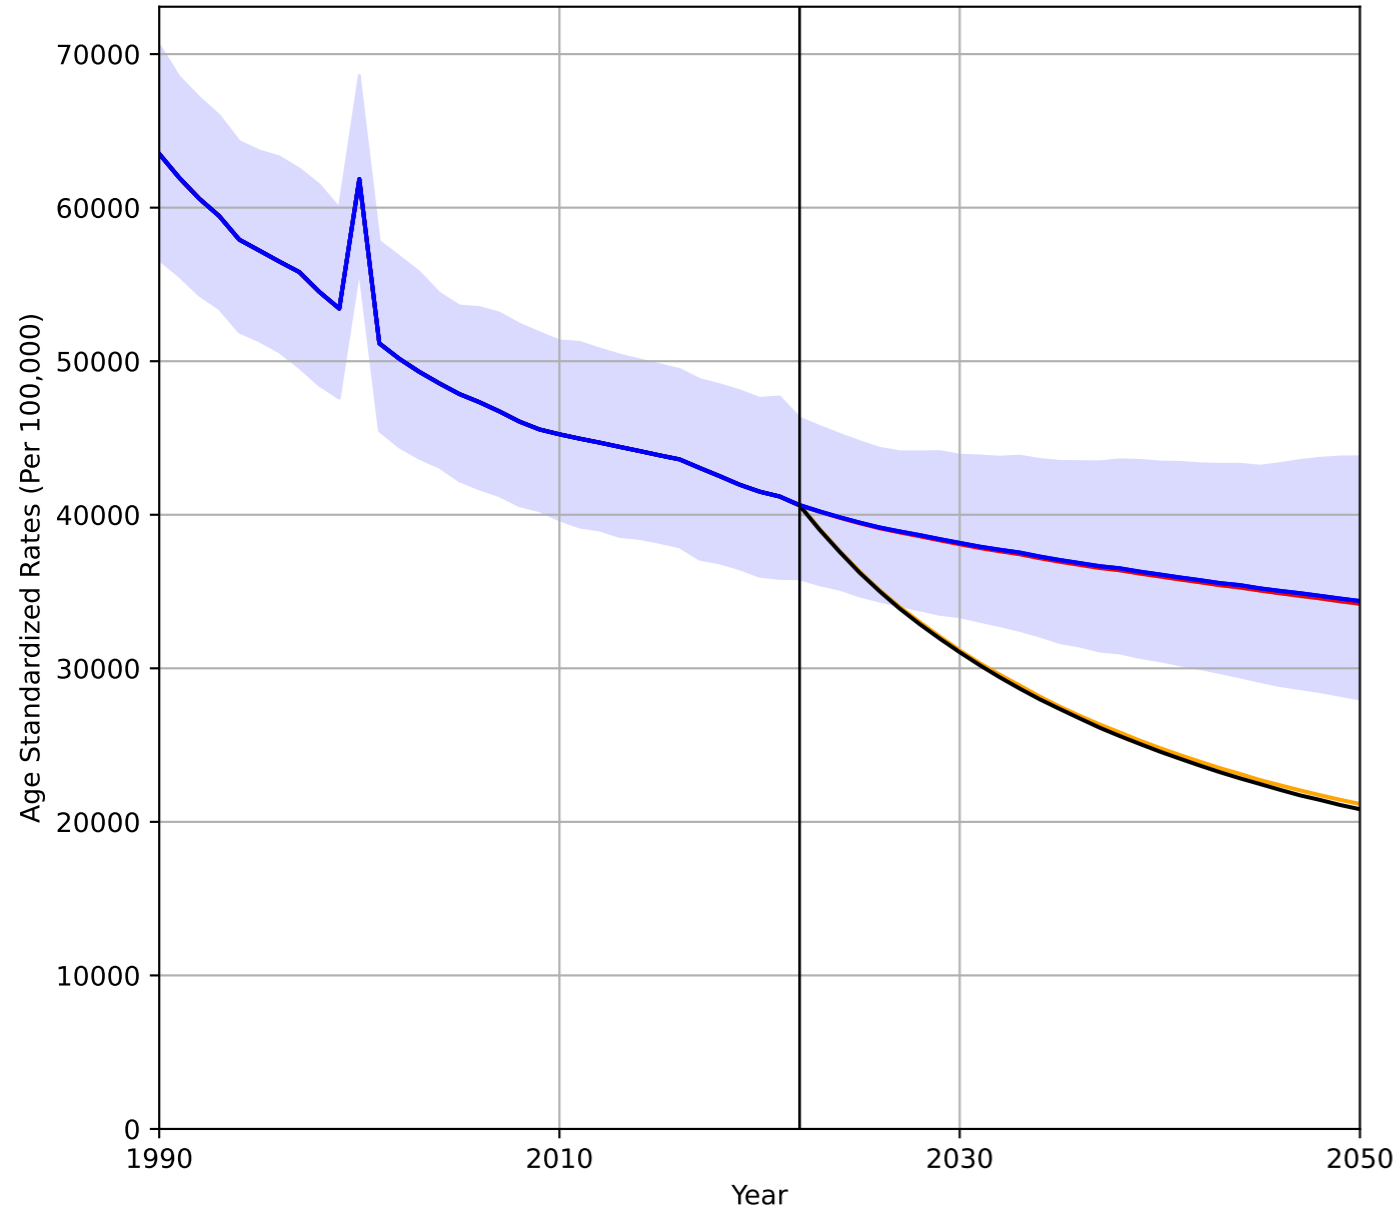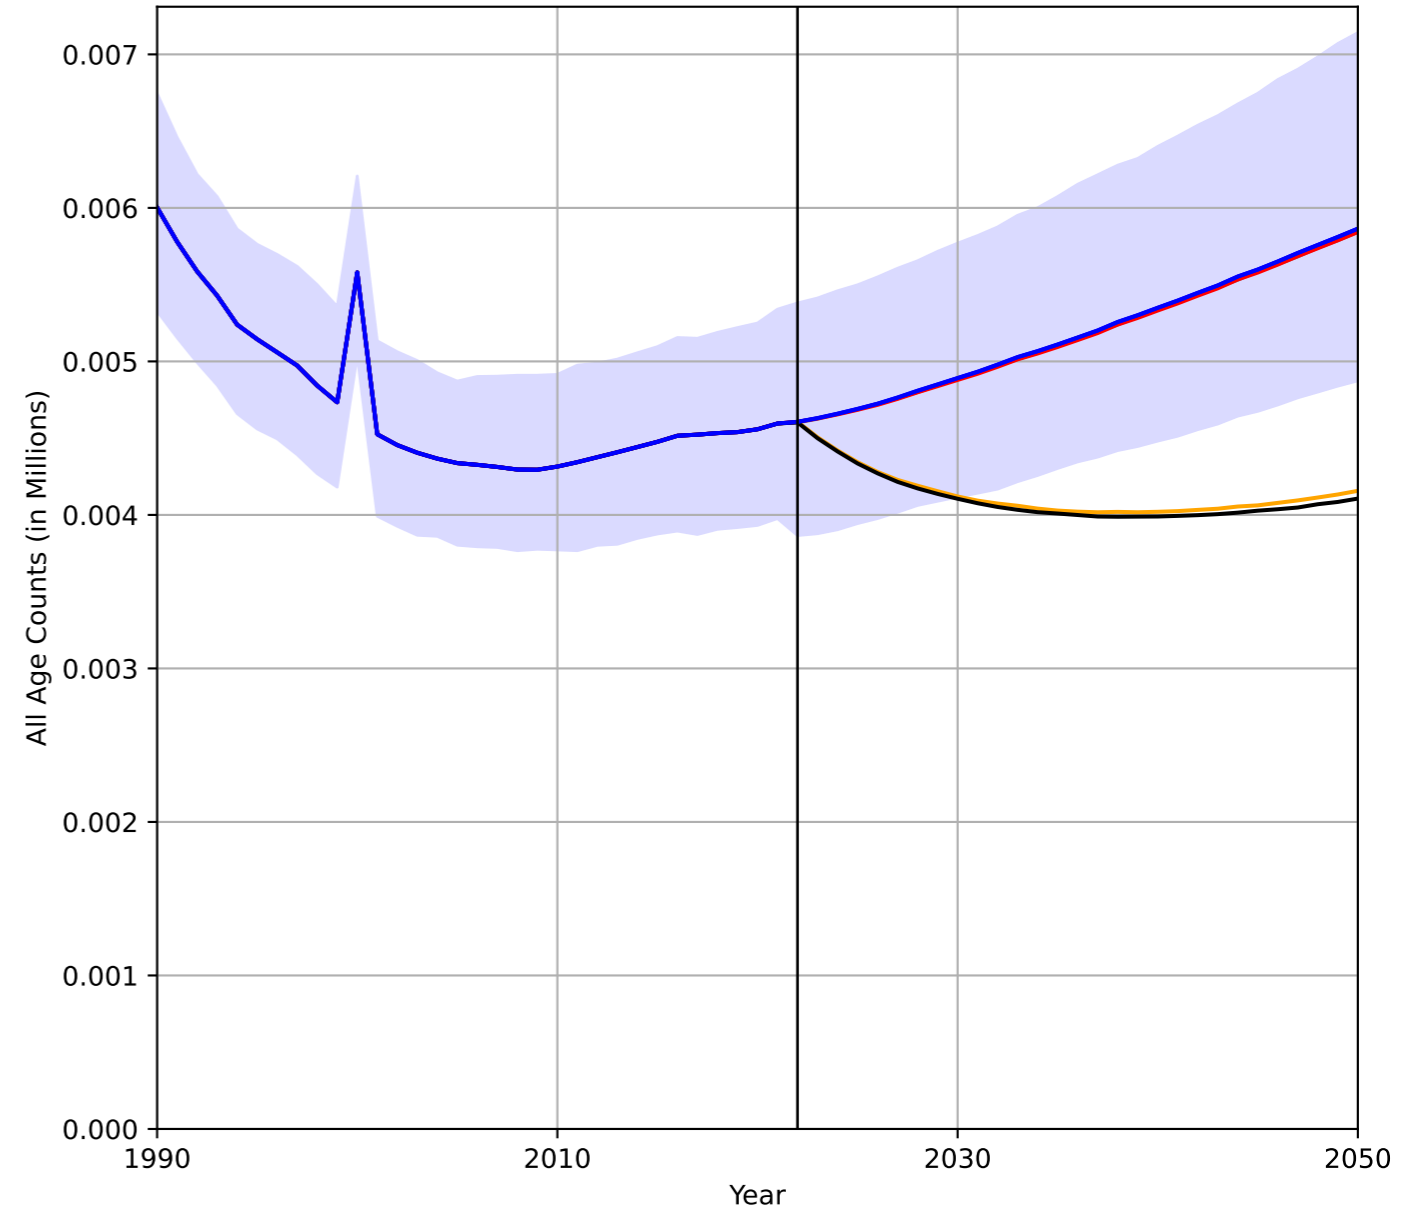

# Vanuatu

Supplemental Results Figure S10. All-cause age standardised DALY rates (A) and all age DALY counts (B), for the past and for five future scenarios, 1990–2050

1555

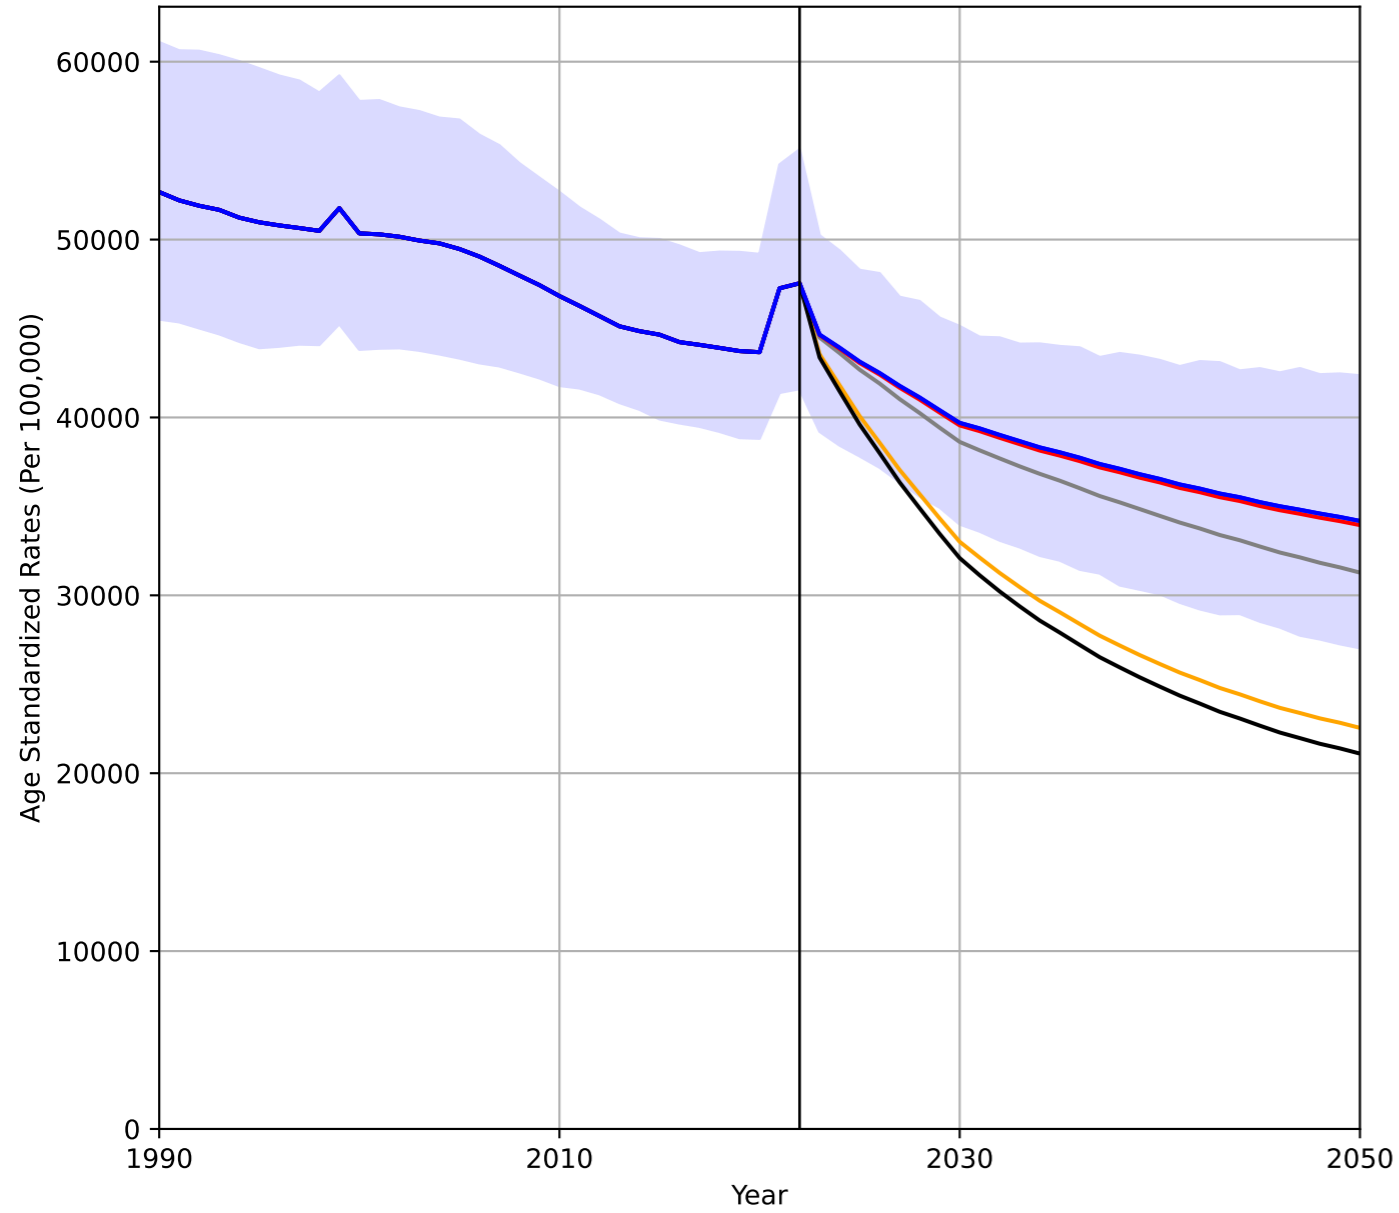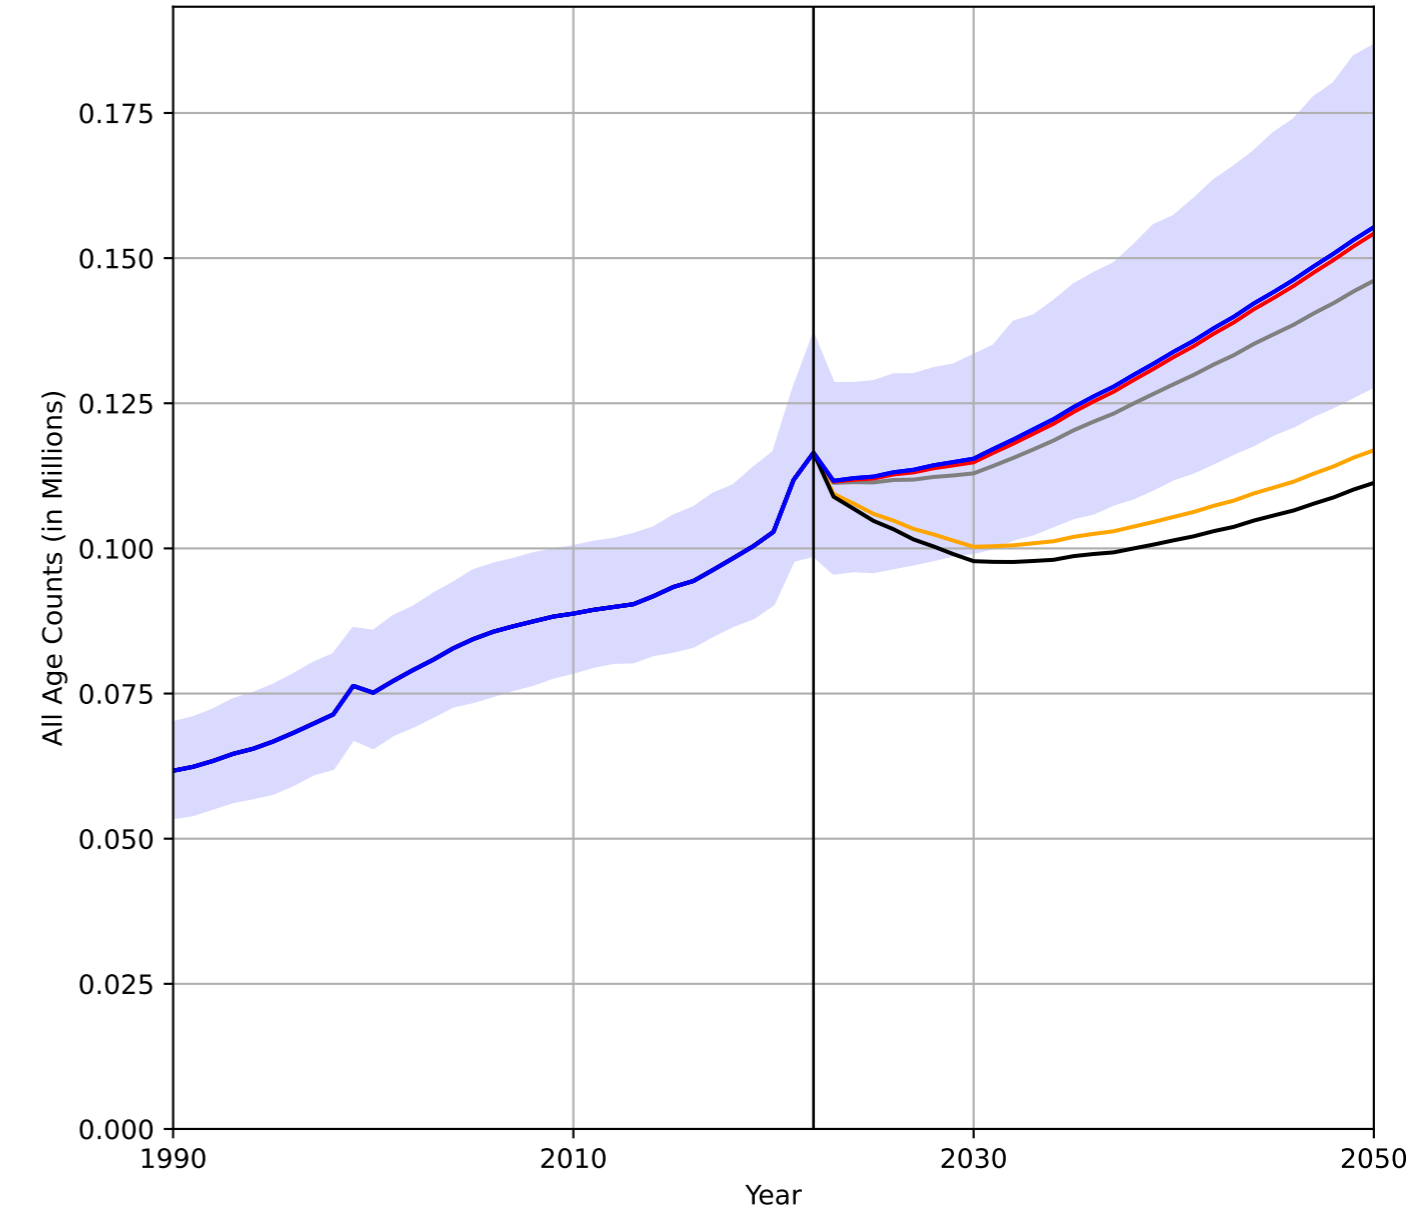

# Cambodia

Supplemental Results Figure S10. All-cause age standardised DALY rates (A) and all age DALY counts (B), for the past and for five future scenarios, 1990–2050

1556

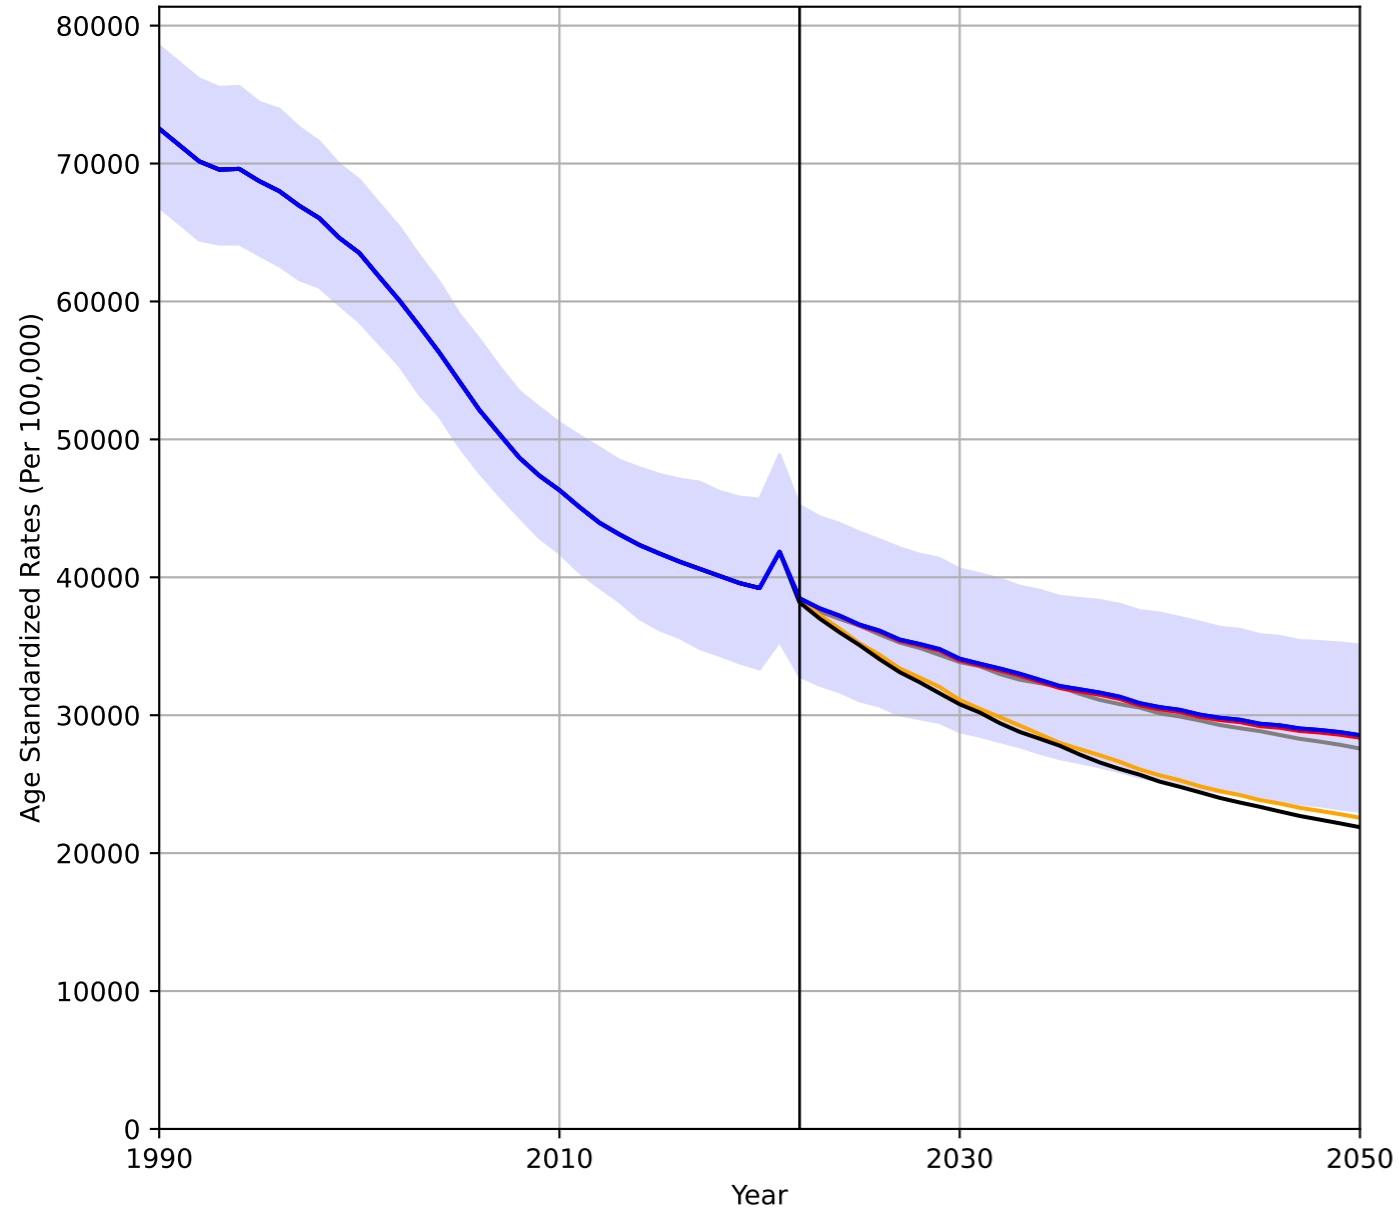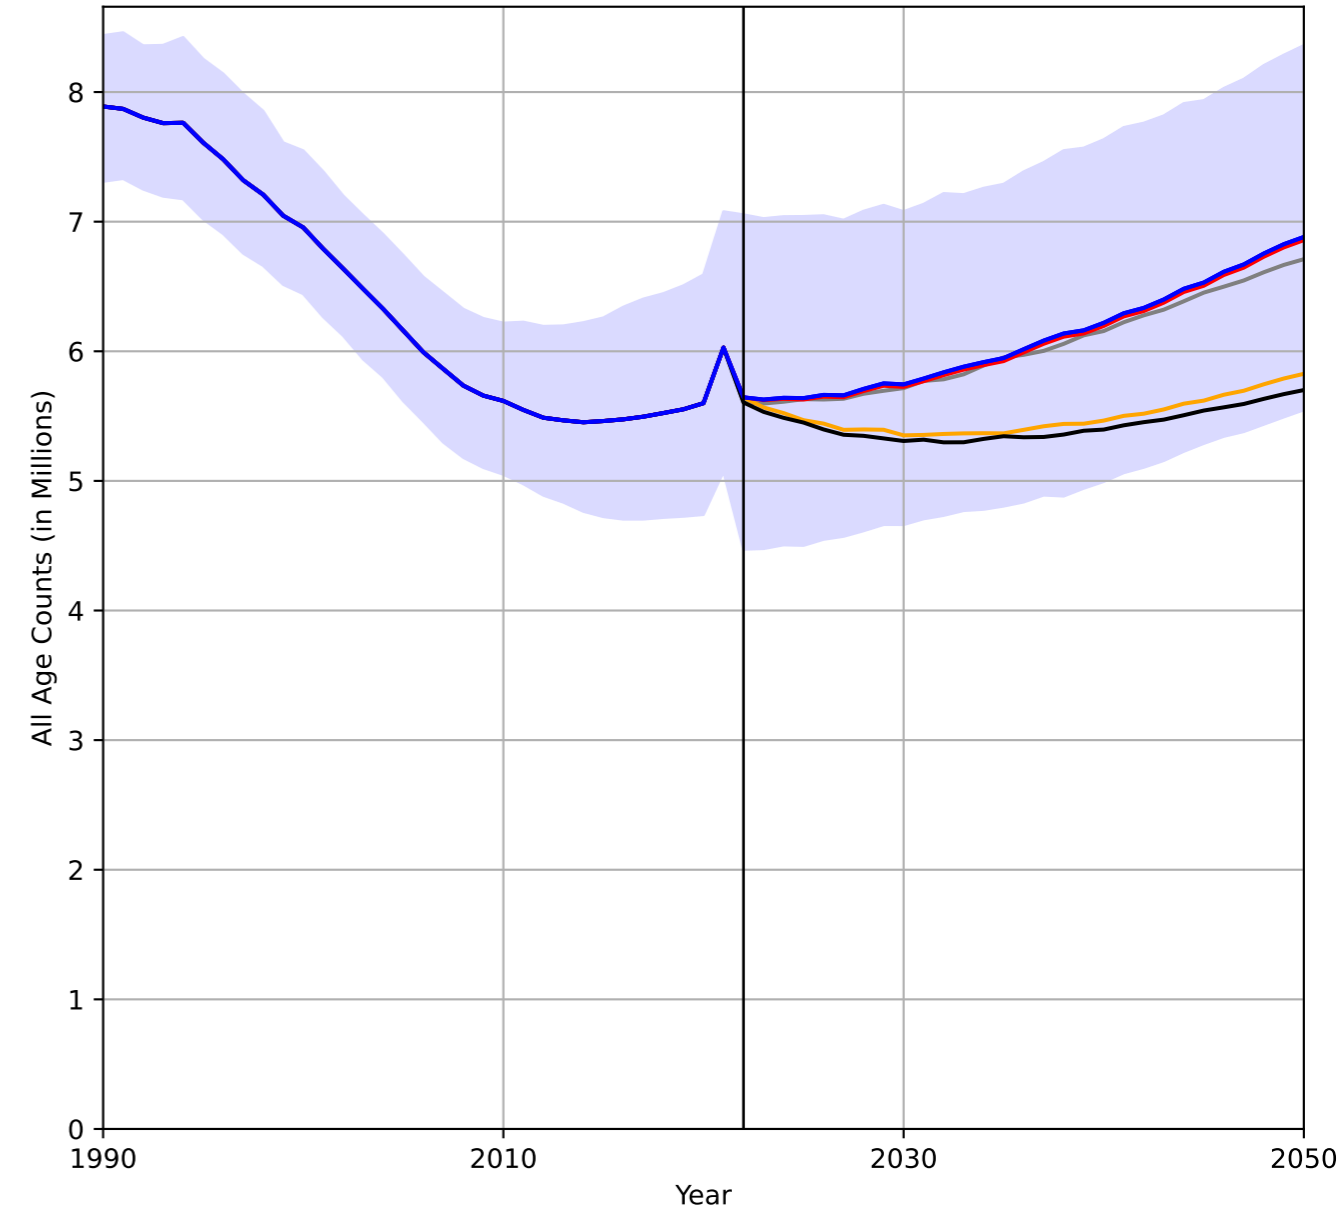

# Indonesia

Supplemental Results Figure S10. All-cause age standardised DALY rates (A) and all age DALY counts (B), for the past and for five future scenarios, 1990–2050

1557

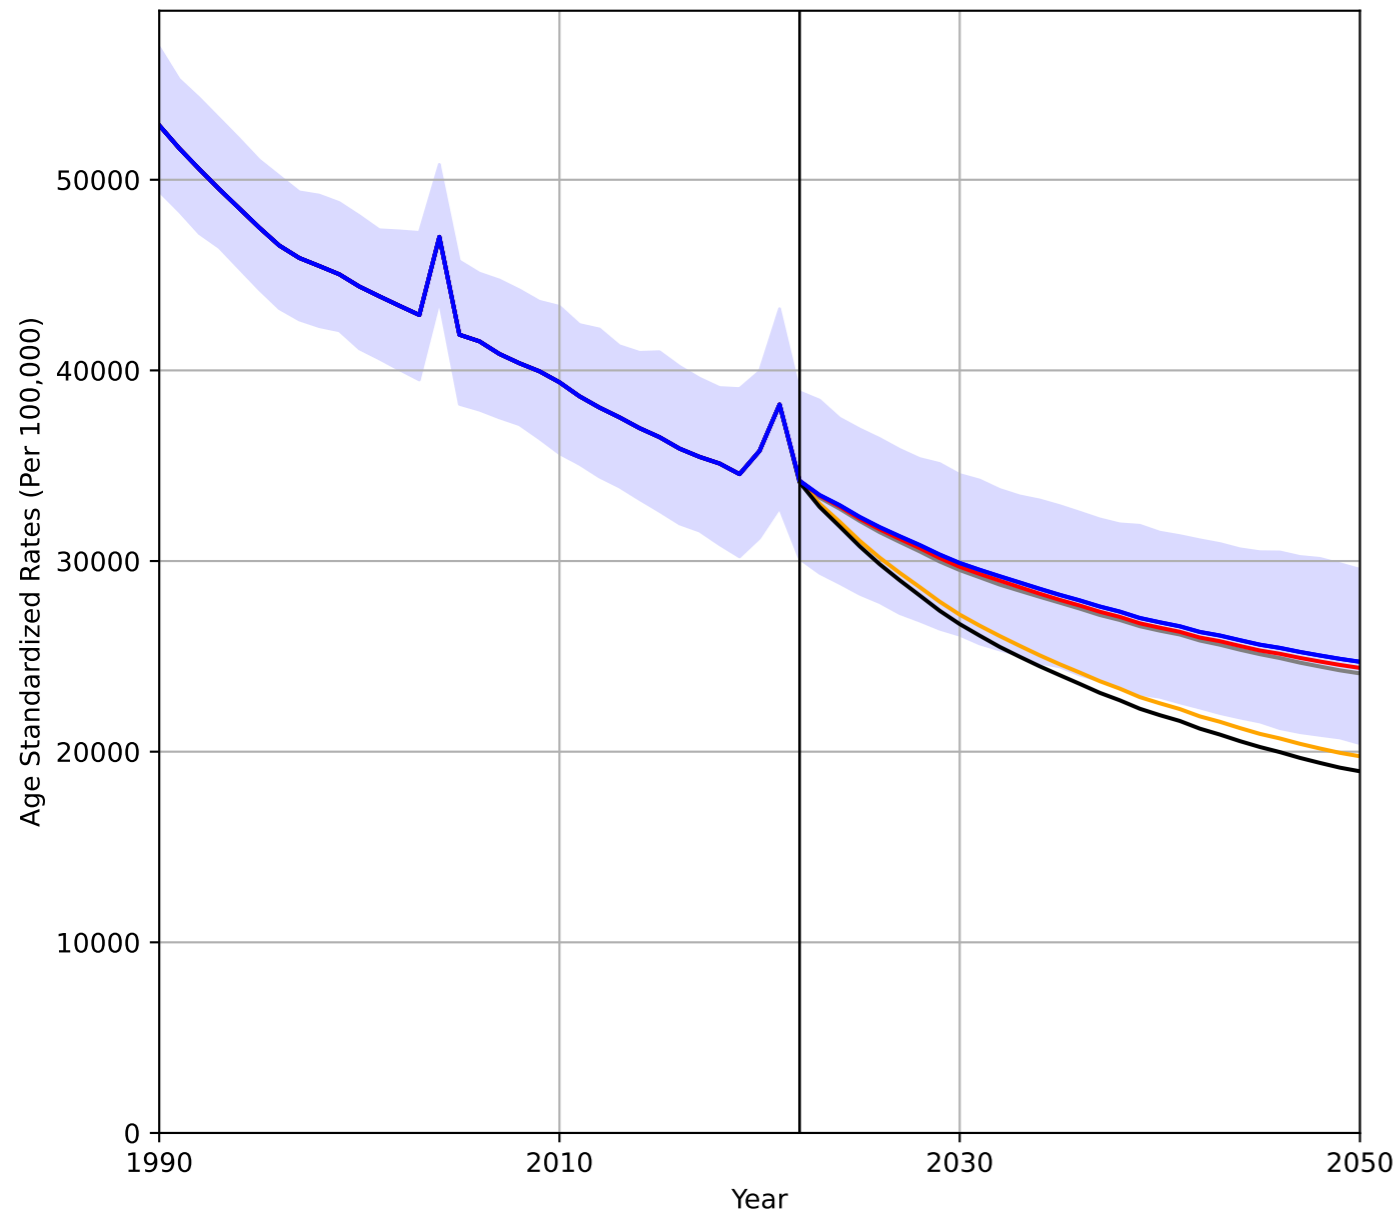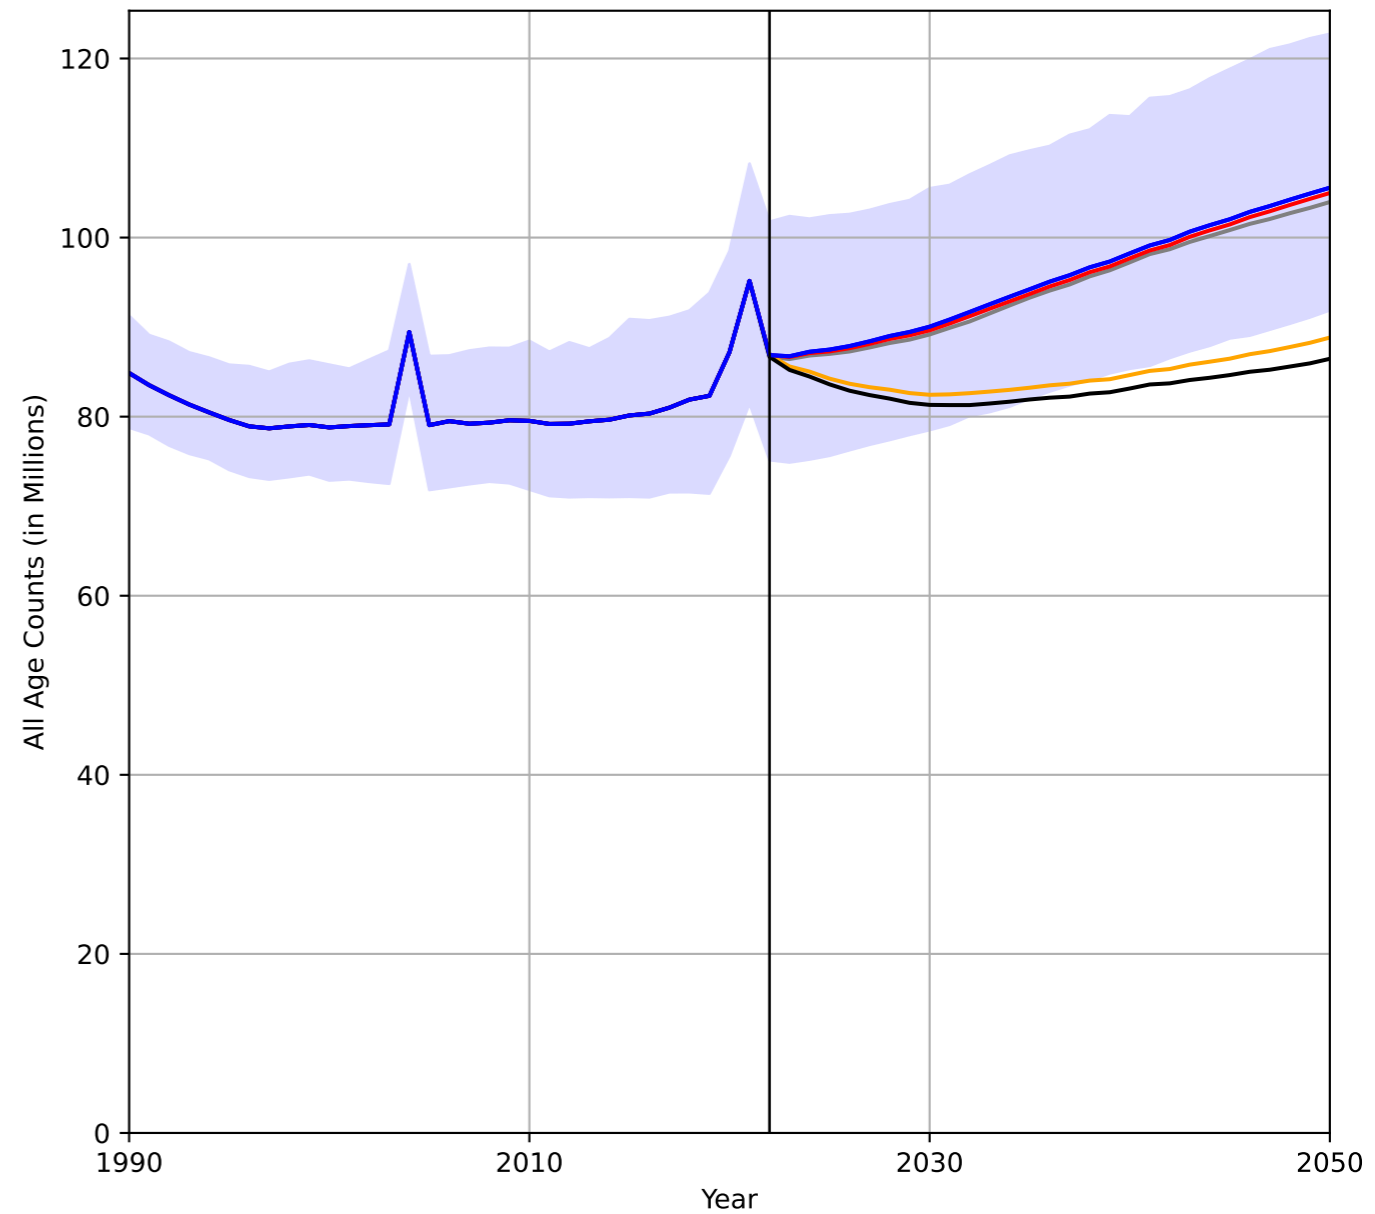

# Laos

Supplemental Results Figure S10. All-cause age standardised DALY rates (A) and all age DALY counts (B), for the past and for five future scenarios, 1990–2050

1558

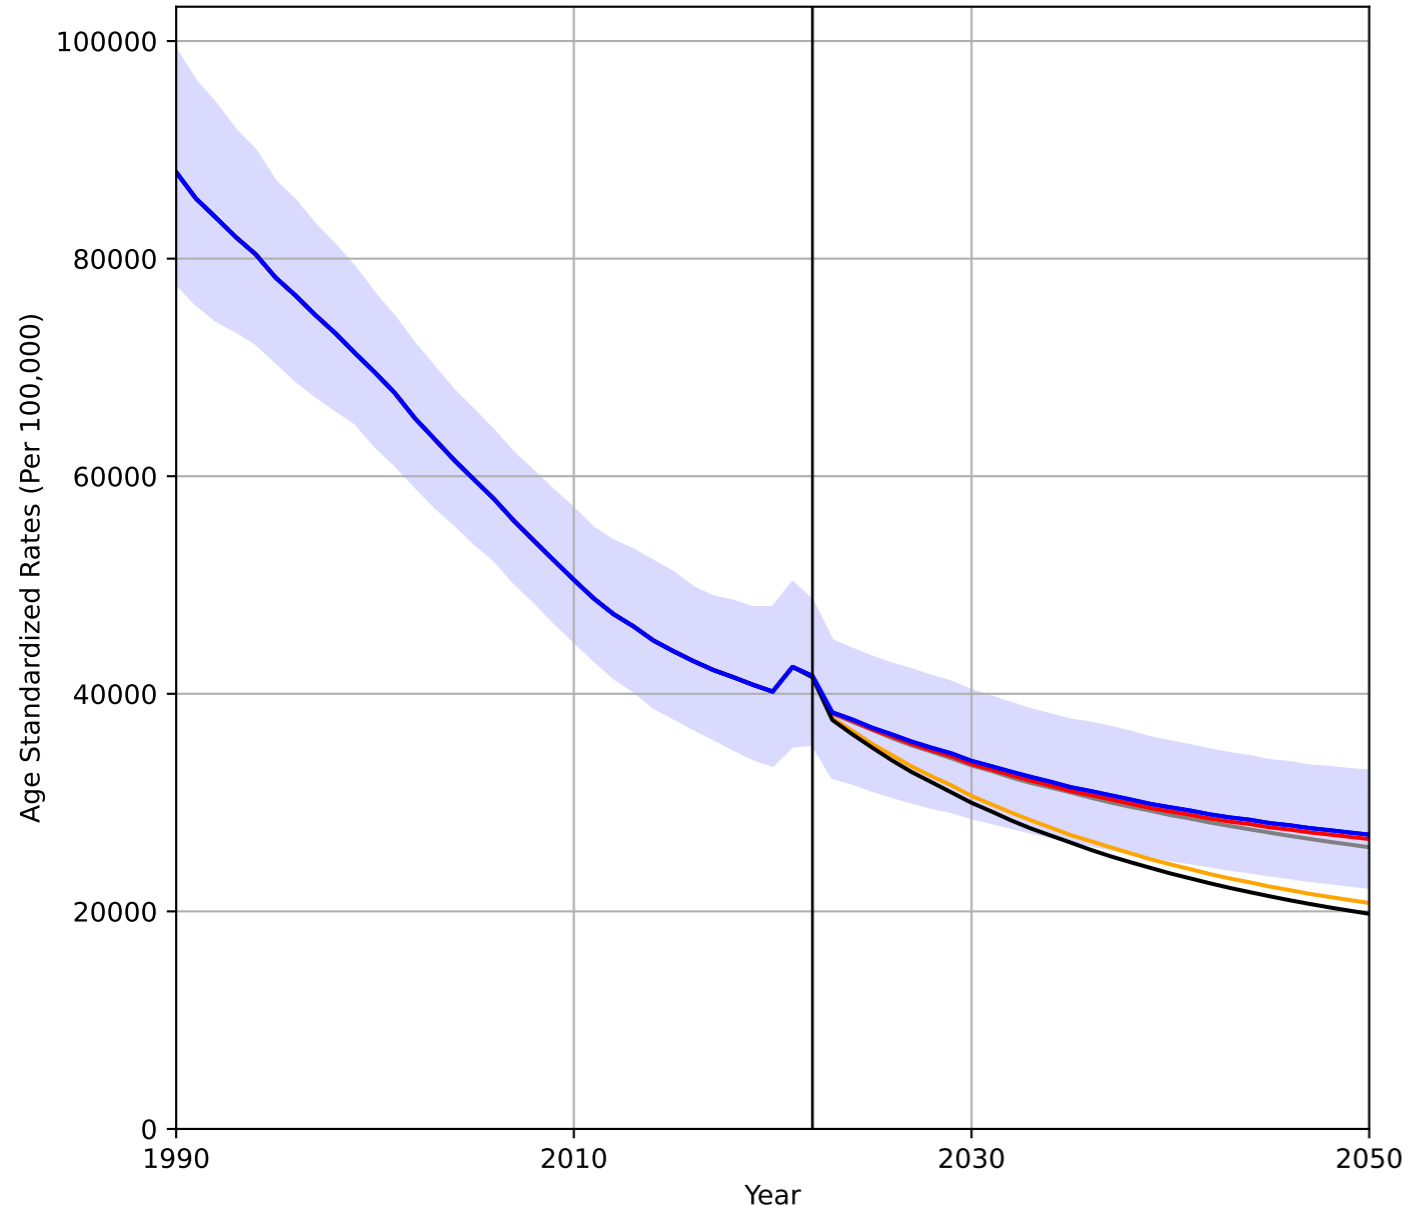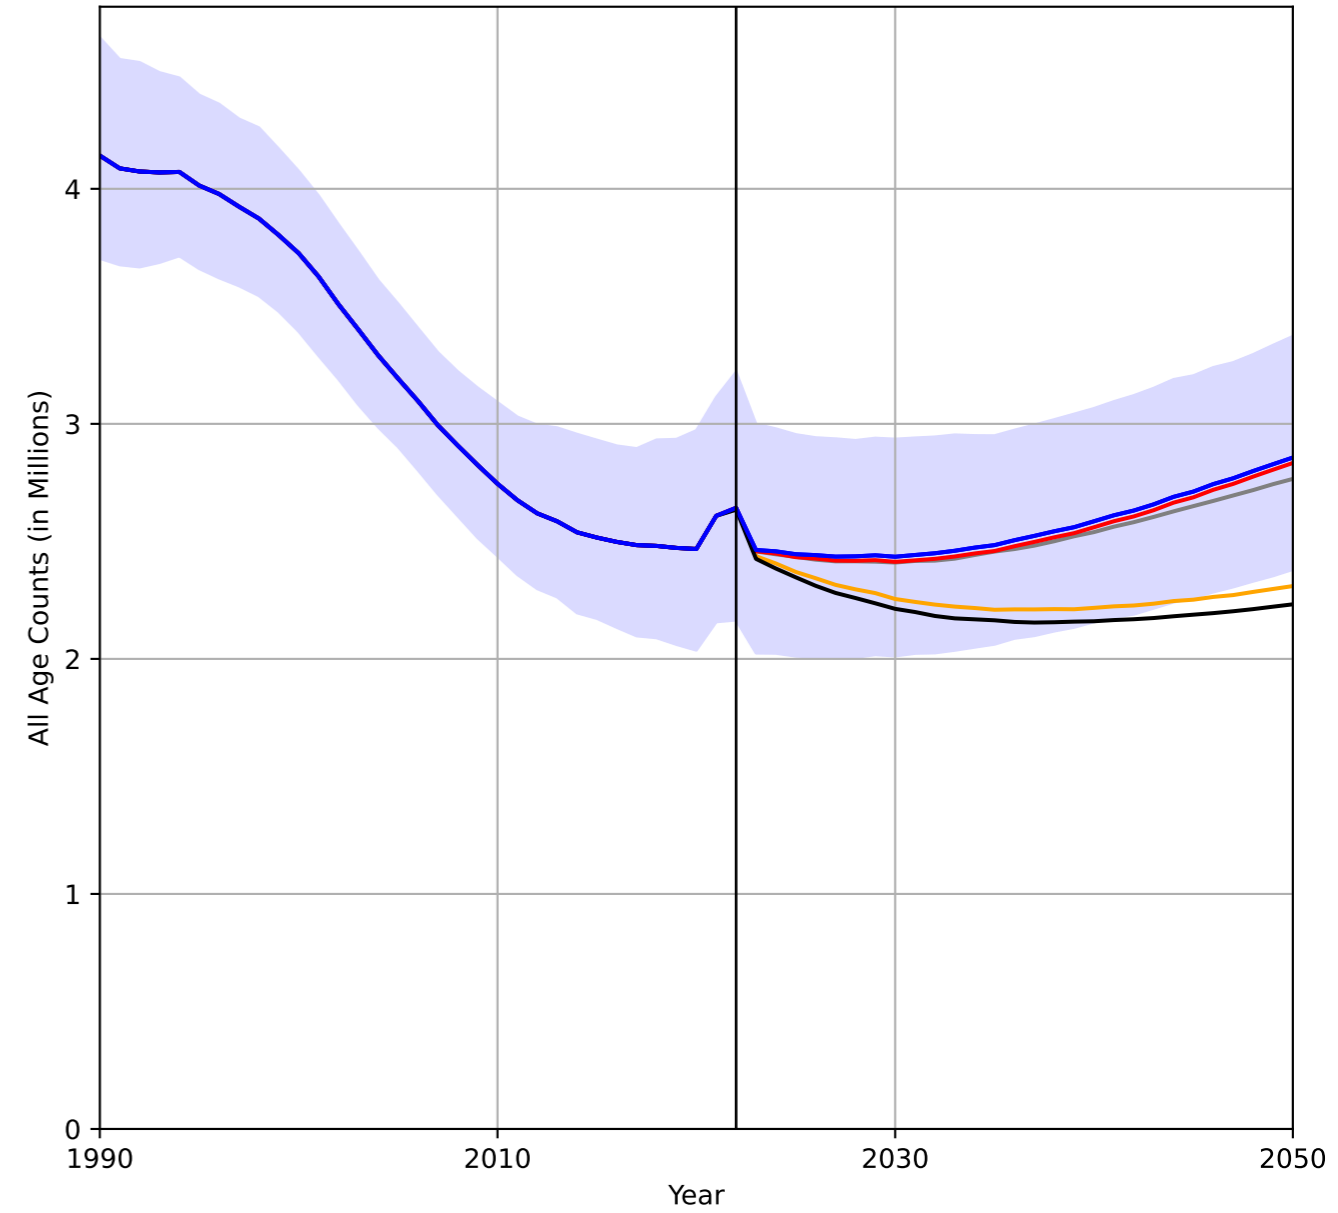

# Malaysia

Supplemental Results Figure S10. All-cause age standardised DALY rates (A) and all age DALY counts (B), for the past and for five future scenarios, 1990–2050

1559

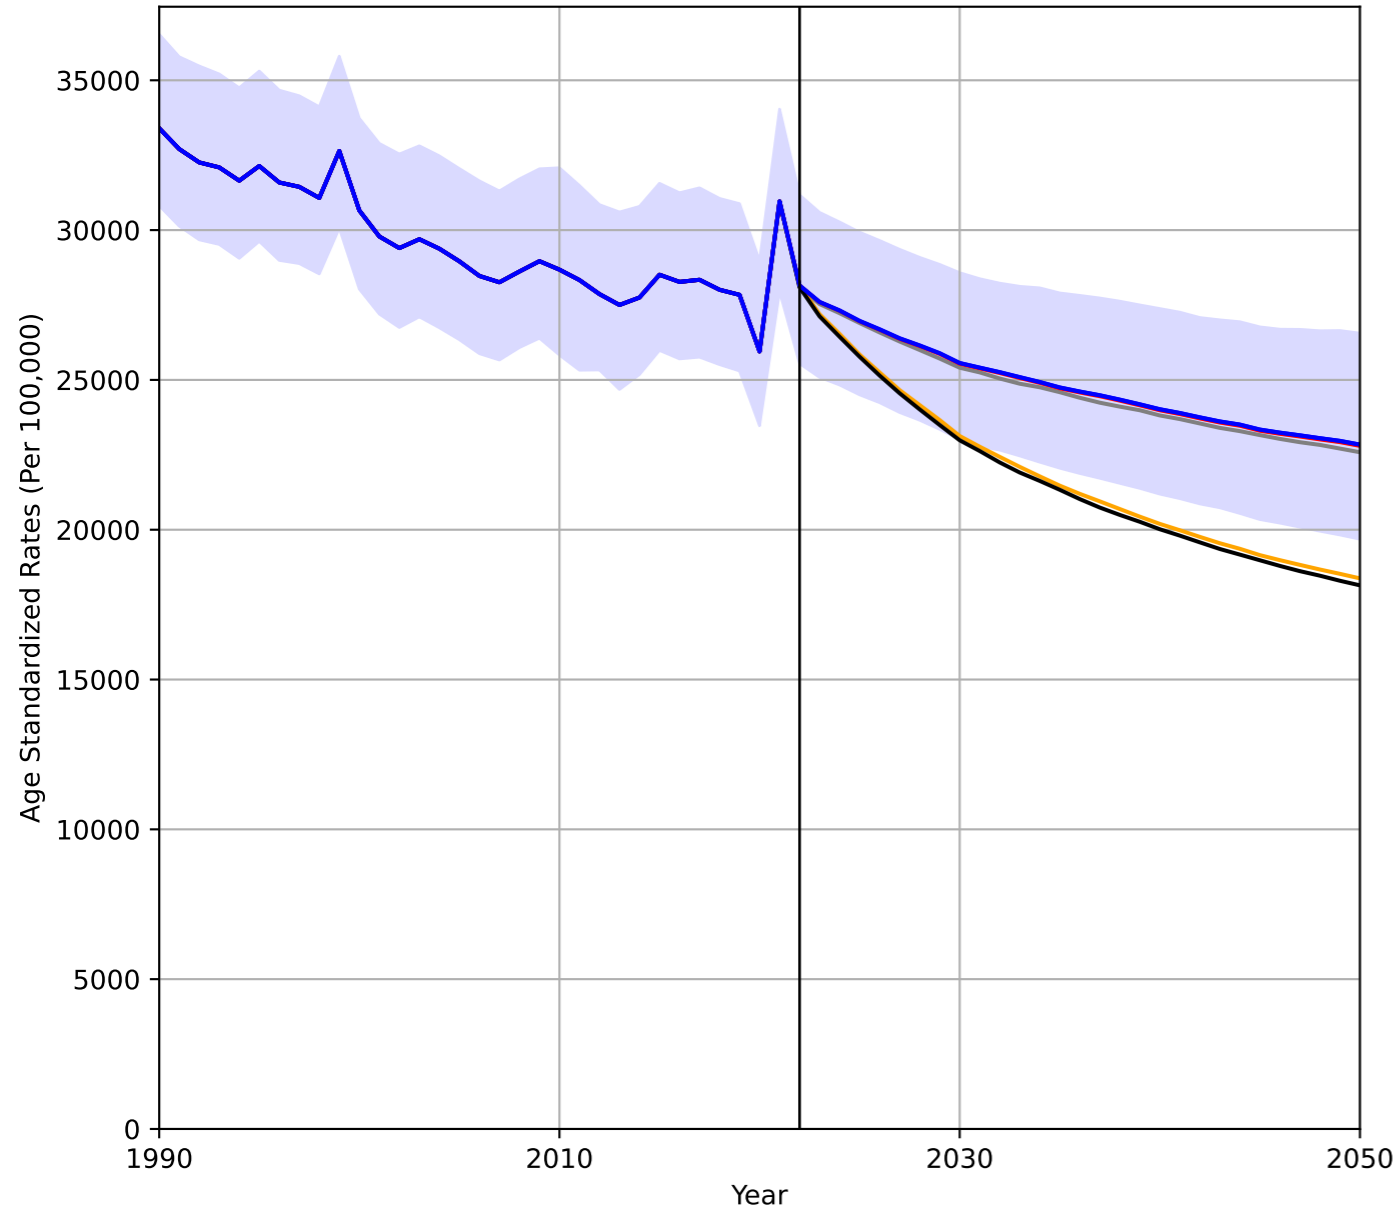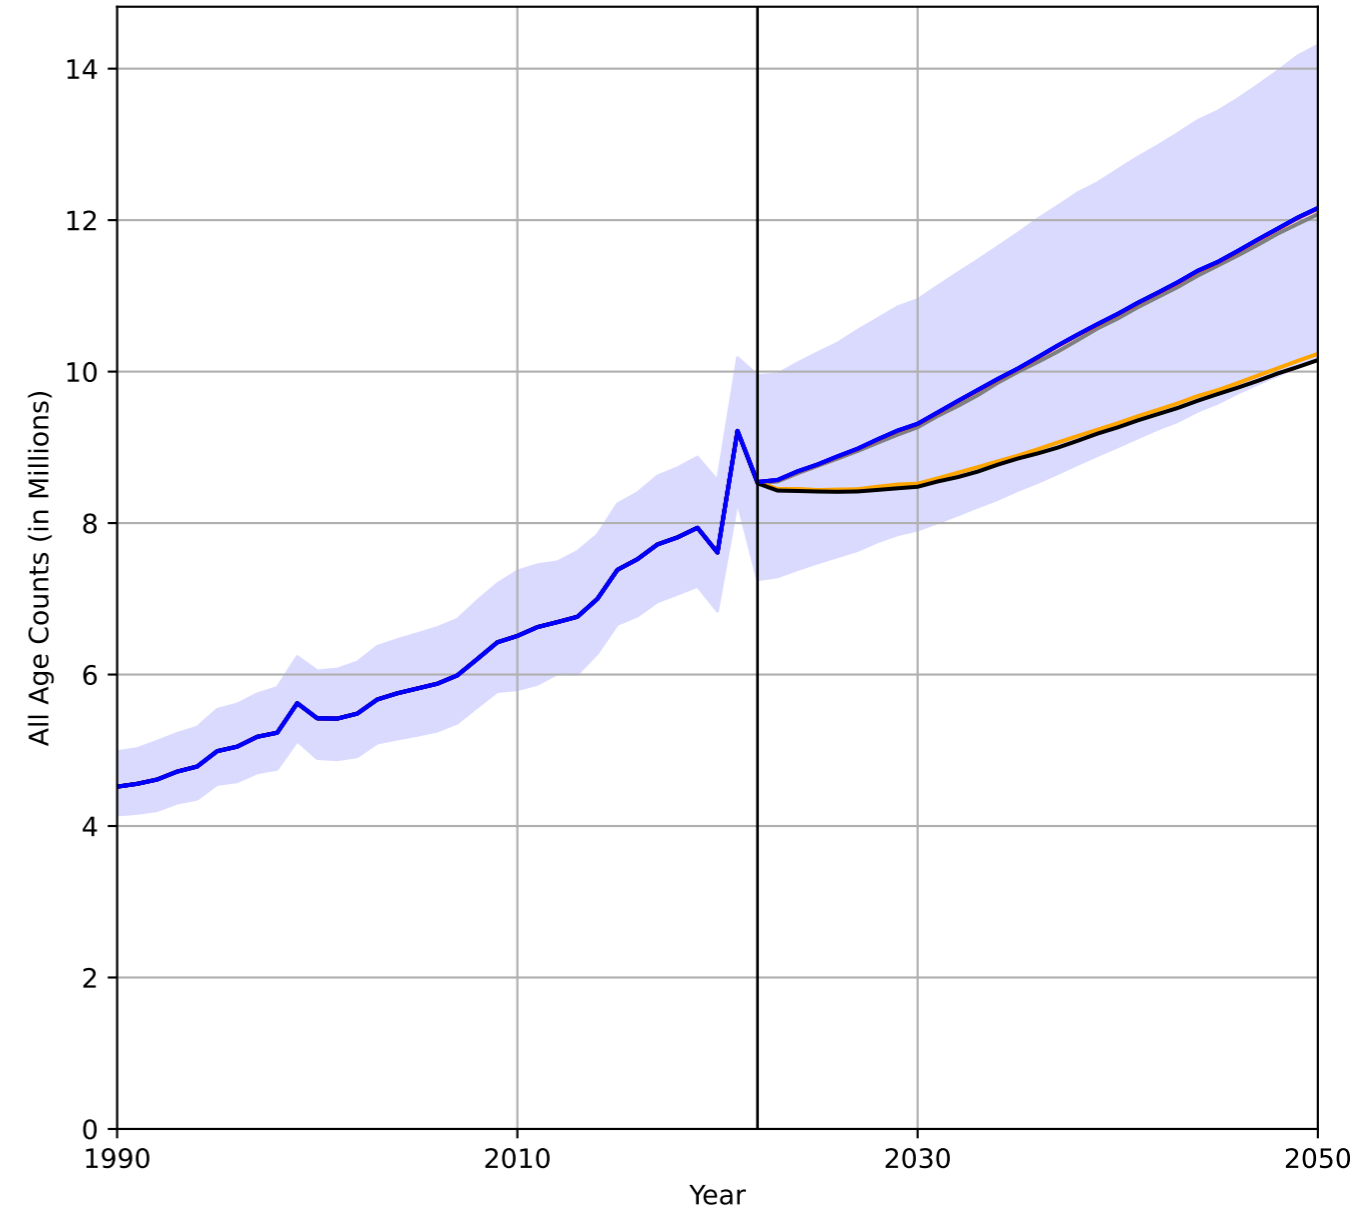



# Maldives

Supplemental Results Figure S10. All-cause age standardised DALY rates (A) and all age DALY counts (B), for the past and for five future scenarios, 1990–2050

1560

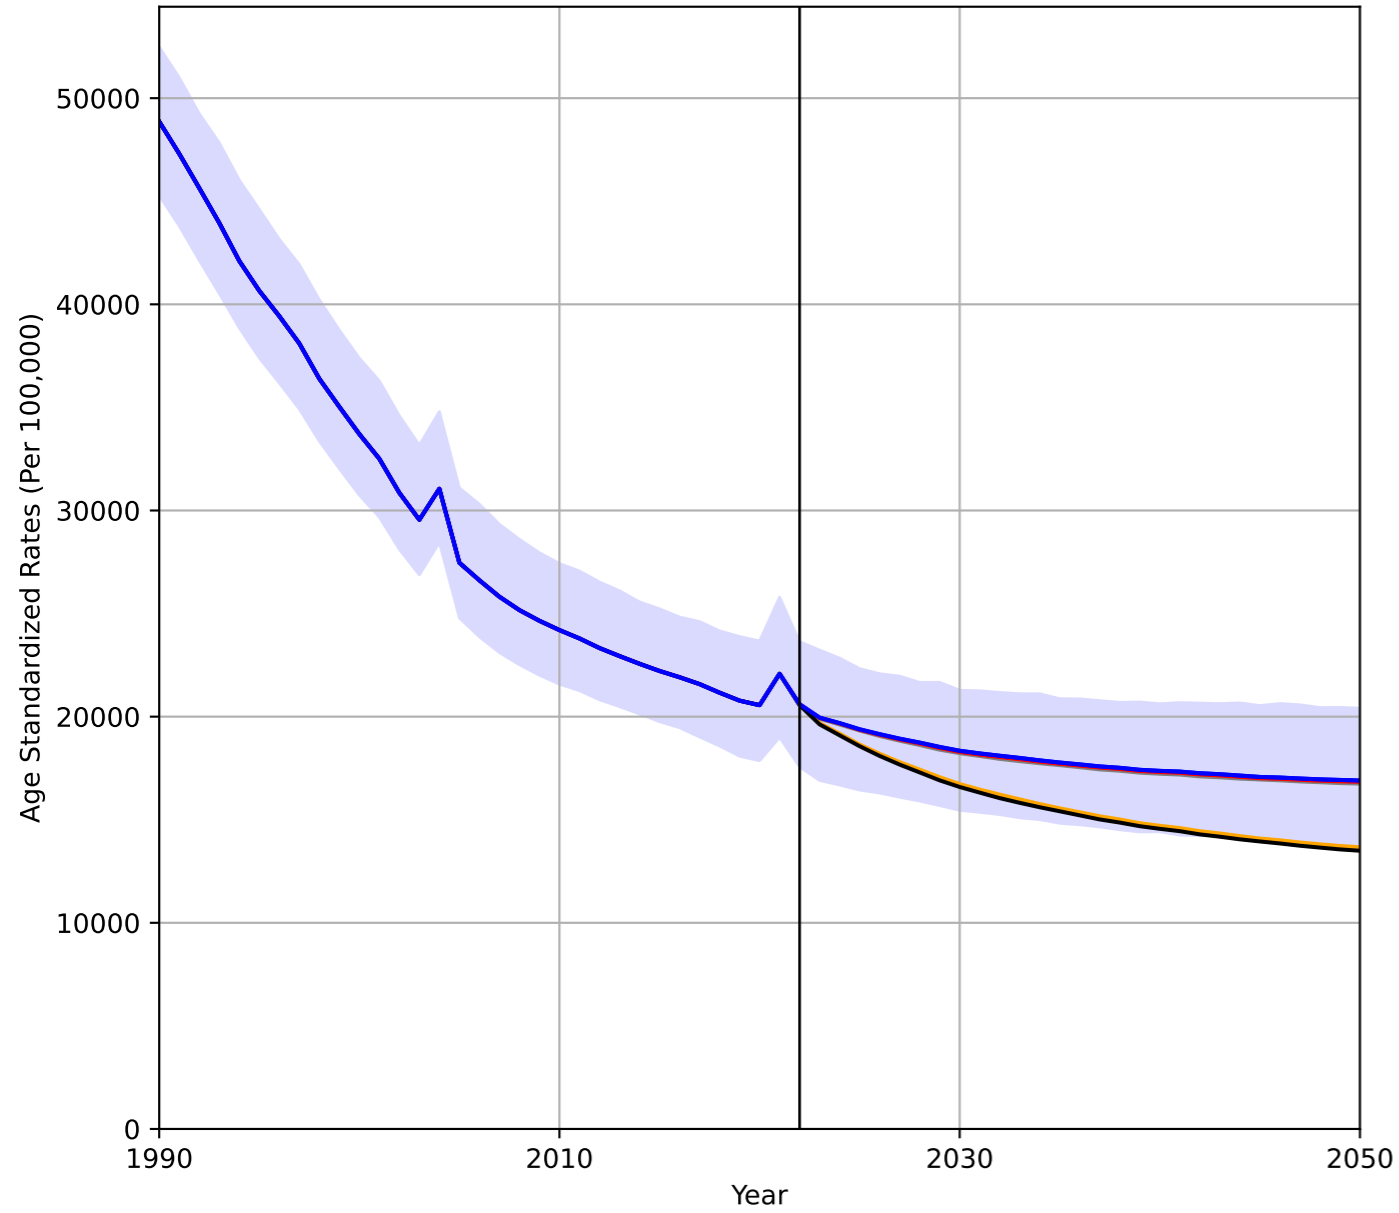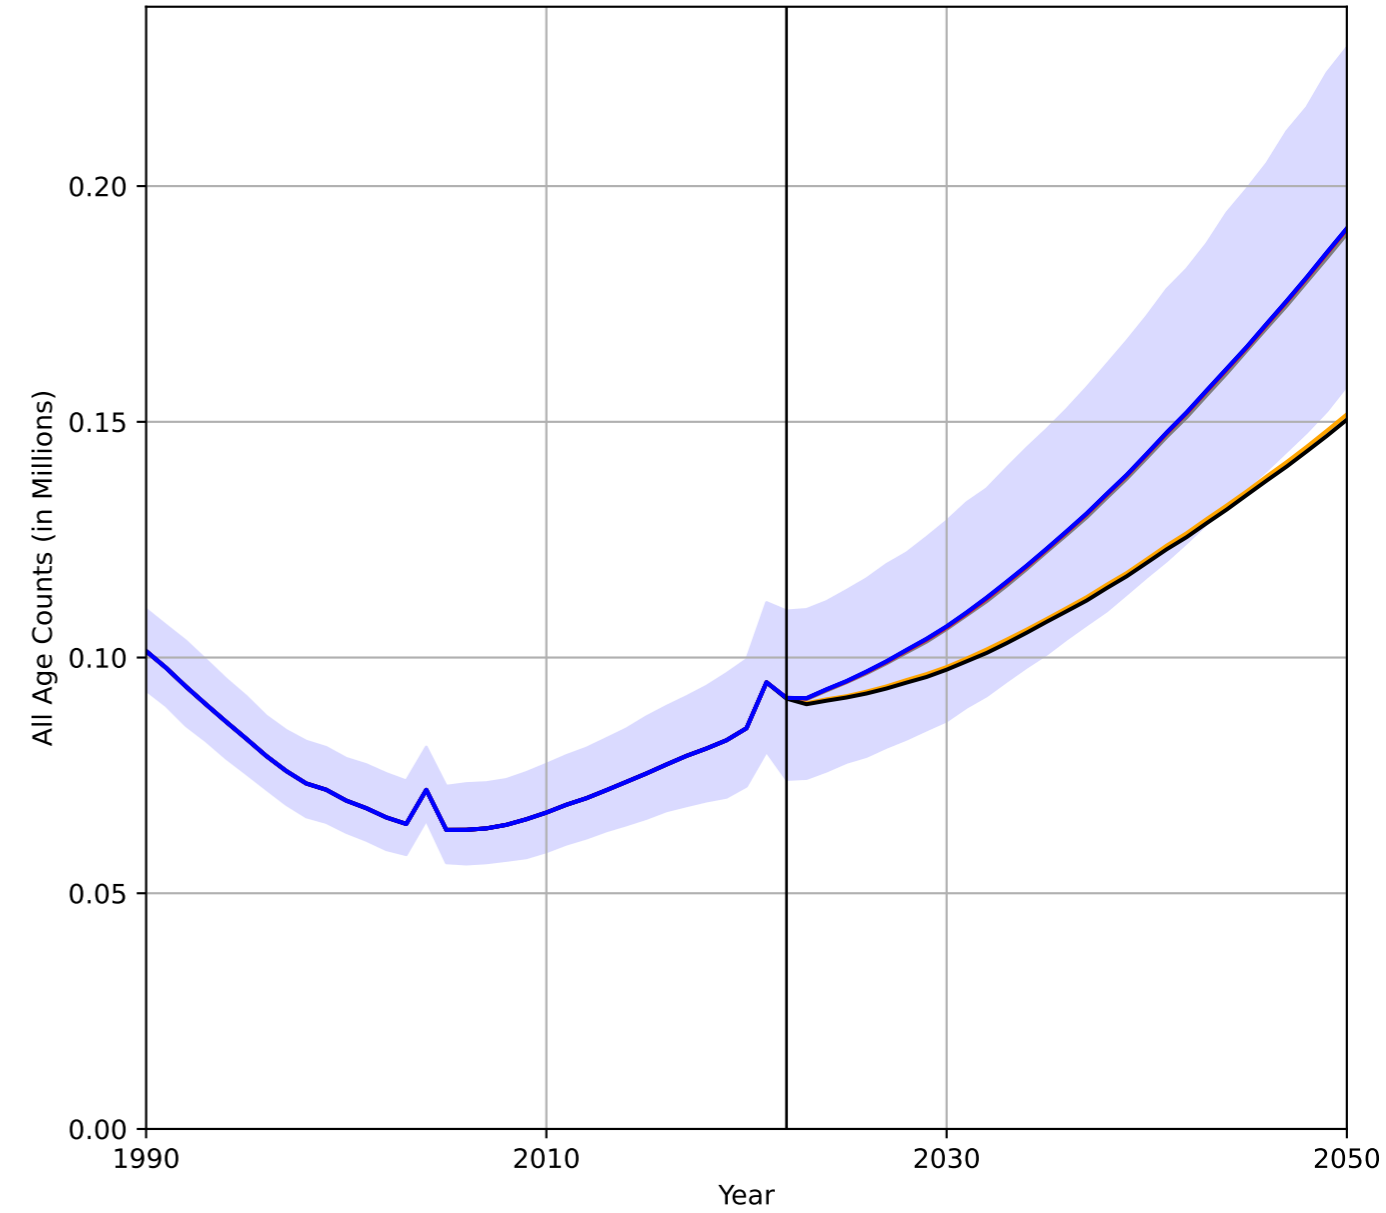

# Mauritius

Supplemental Results Figure S10. All-cause age standardised DALY rates (A) and all age DALY counts (B), for the past and for five future scenarios, 1990–2050

1561

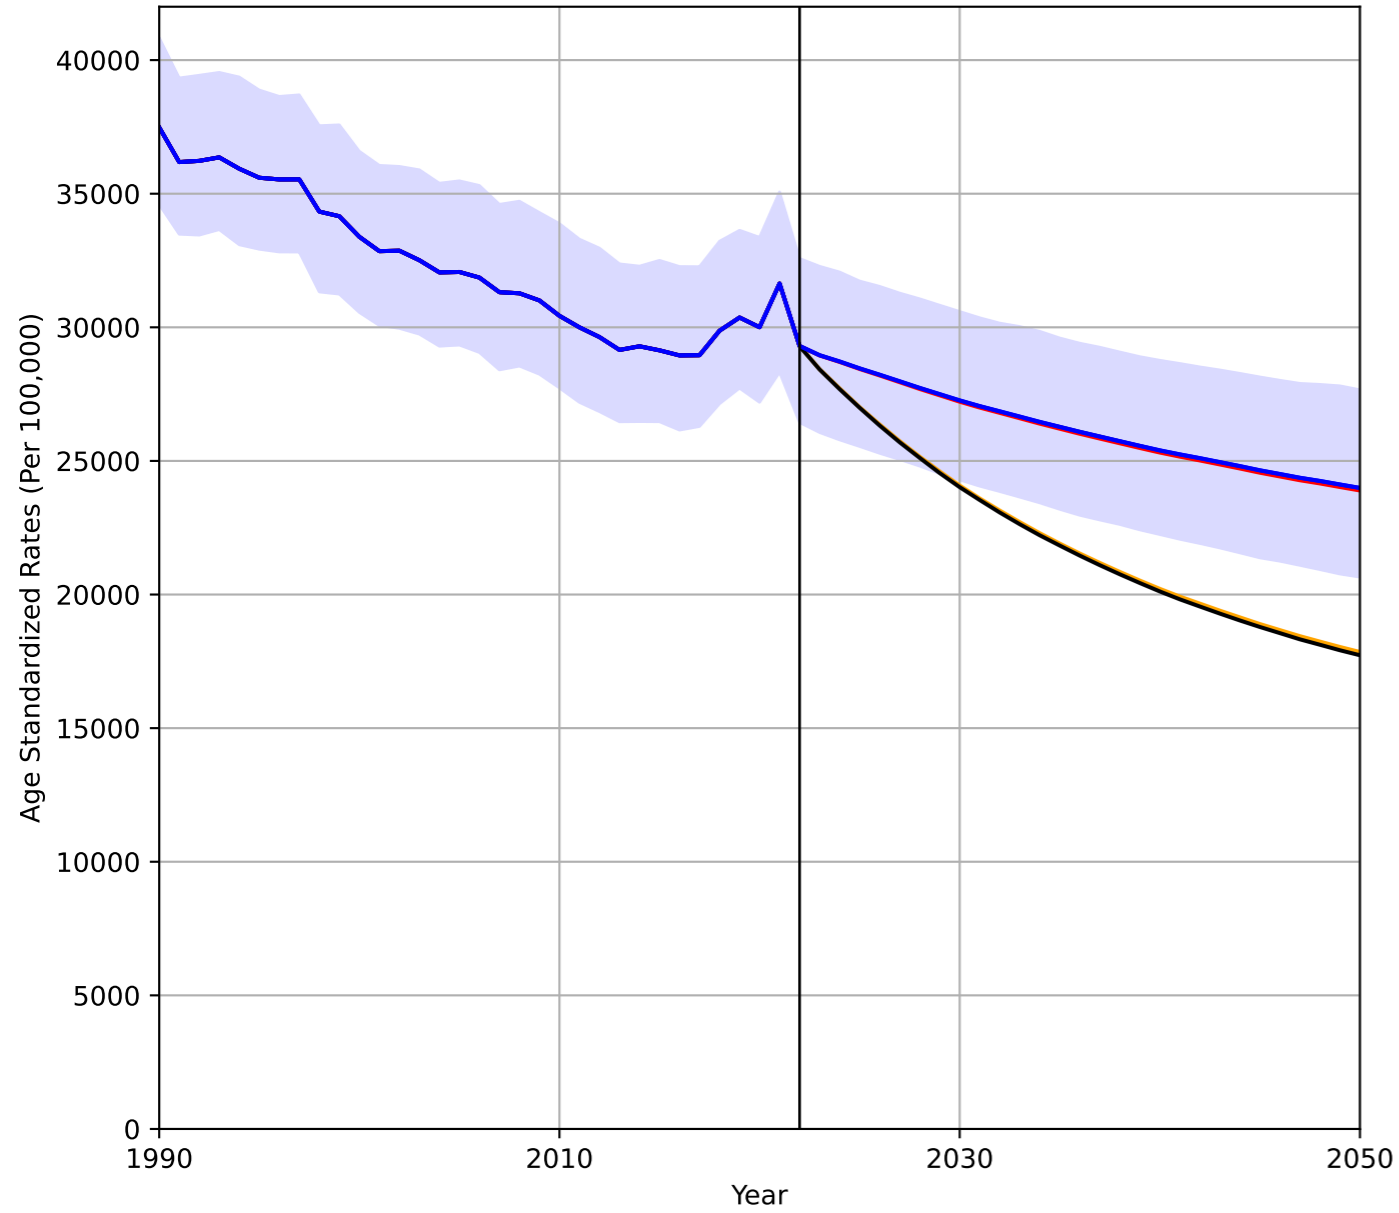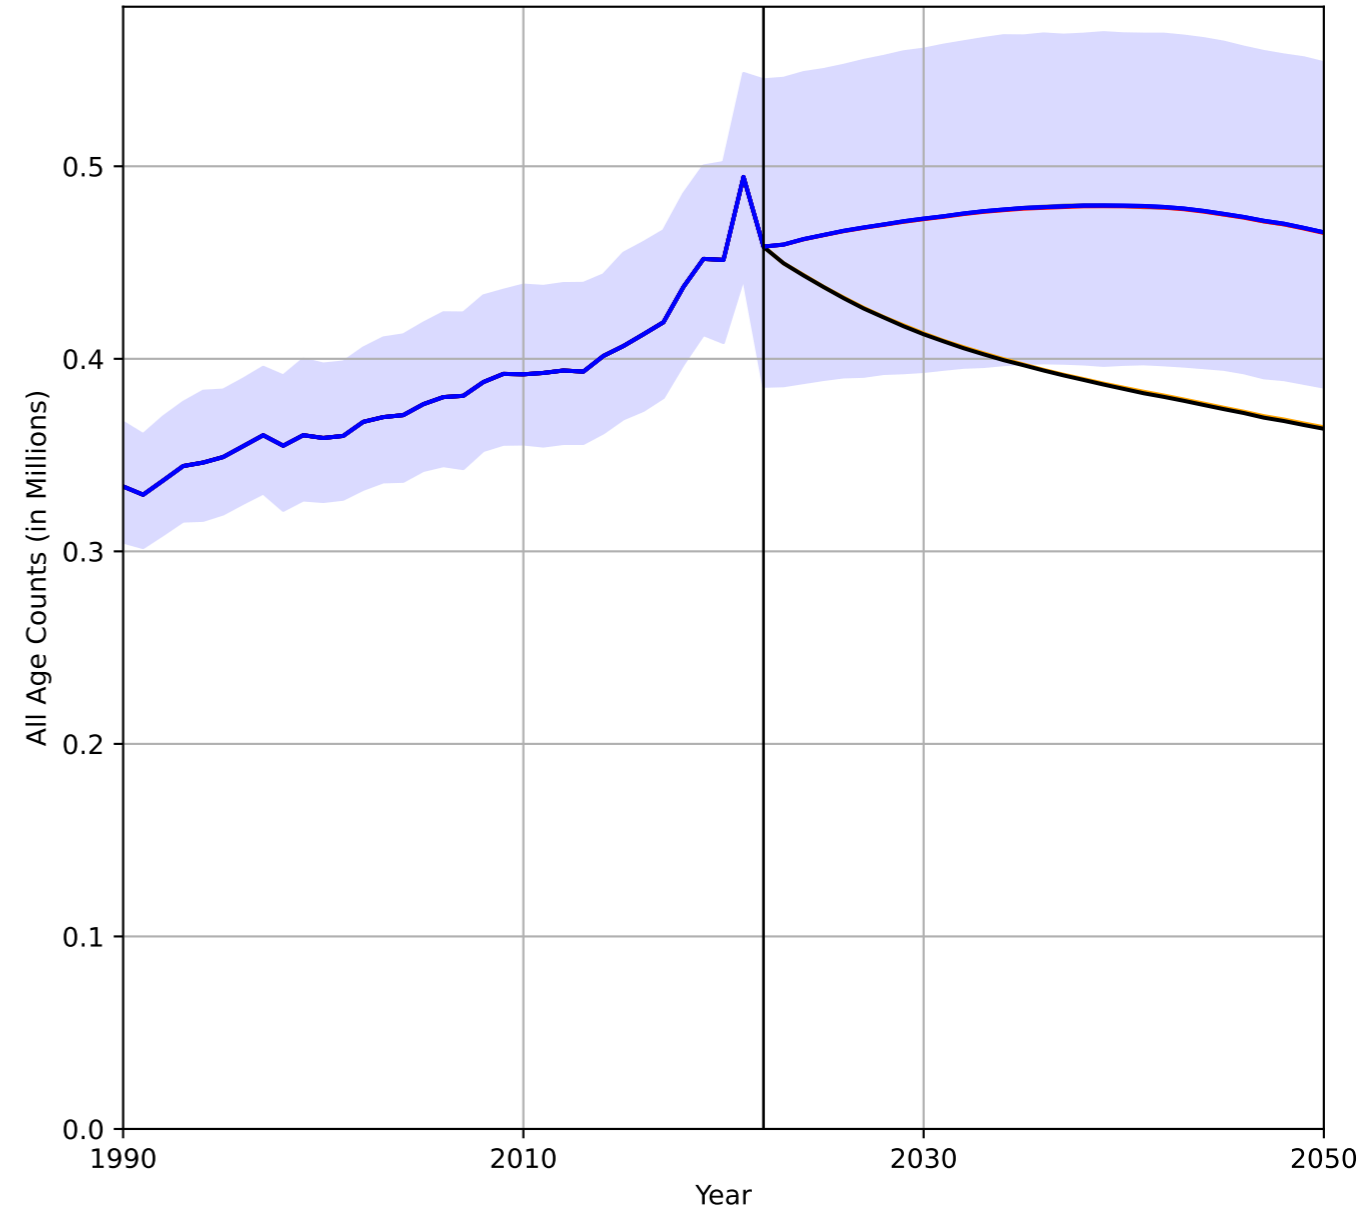

# Myanmar

Supplemental Results Figure S10. All-cause age standardised DALY rates (A) and all age DALY counts (B), for the past and for five future scenarios, 1990–2050

1562

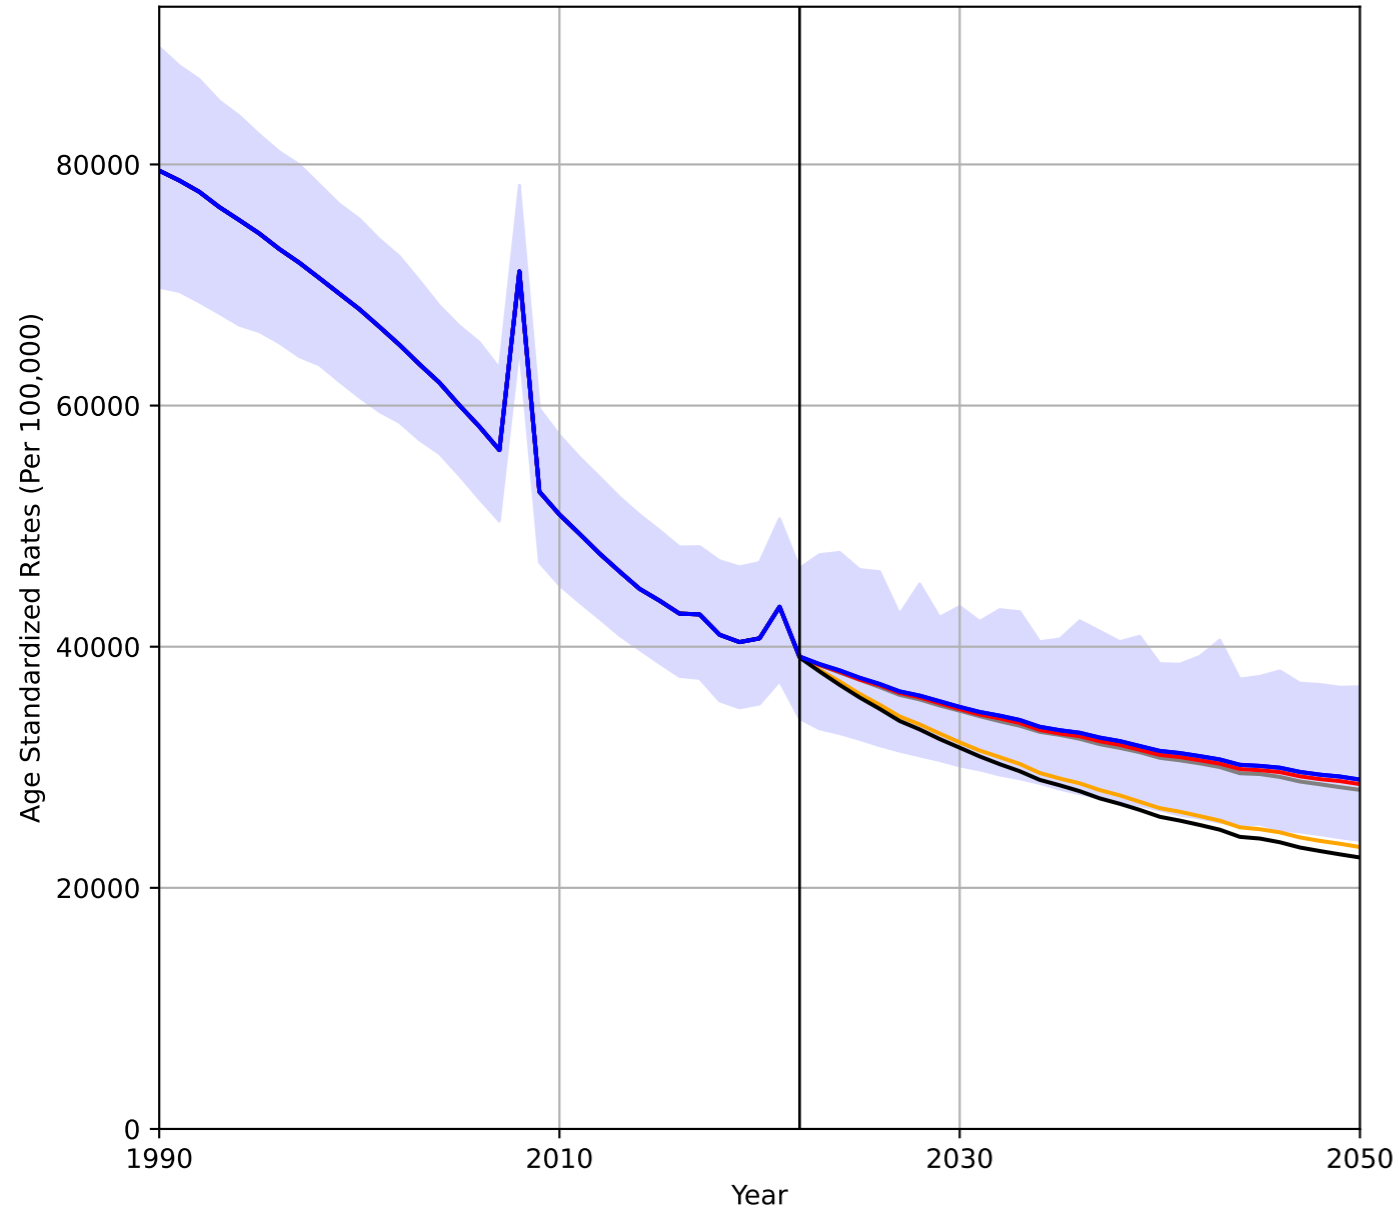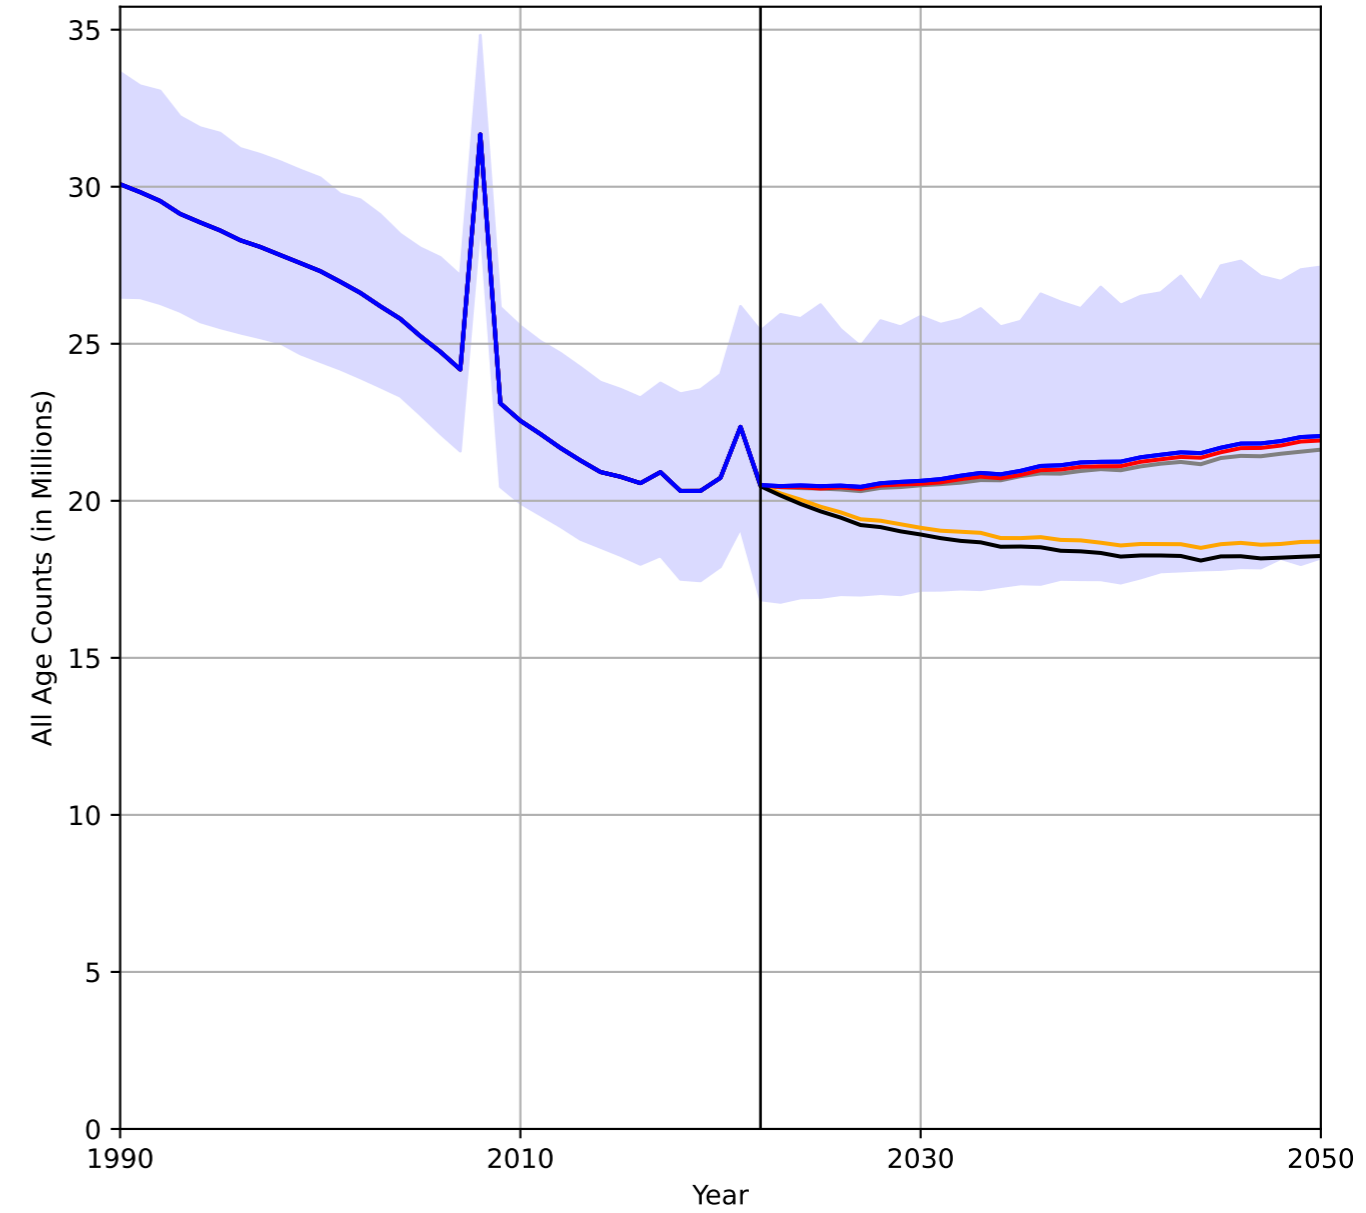

# Philippines

Supplemental Results Figure S10. All-cause age standardised DALY rates (A) and all age DALY counts (B), for the past and for five future scenarios, 1990–2050

1563

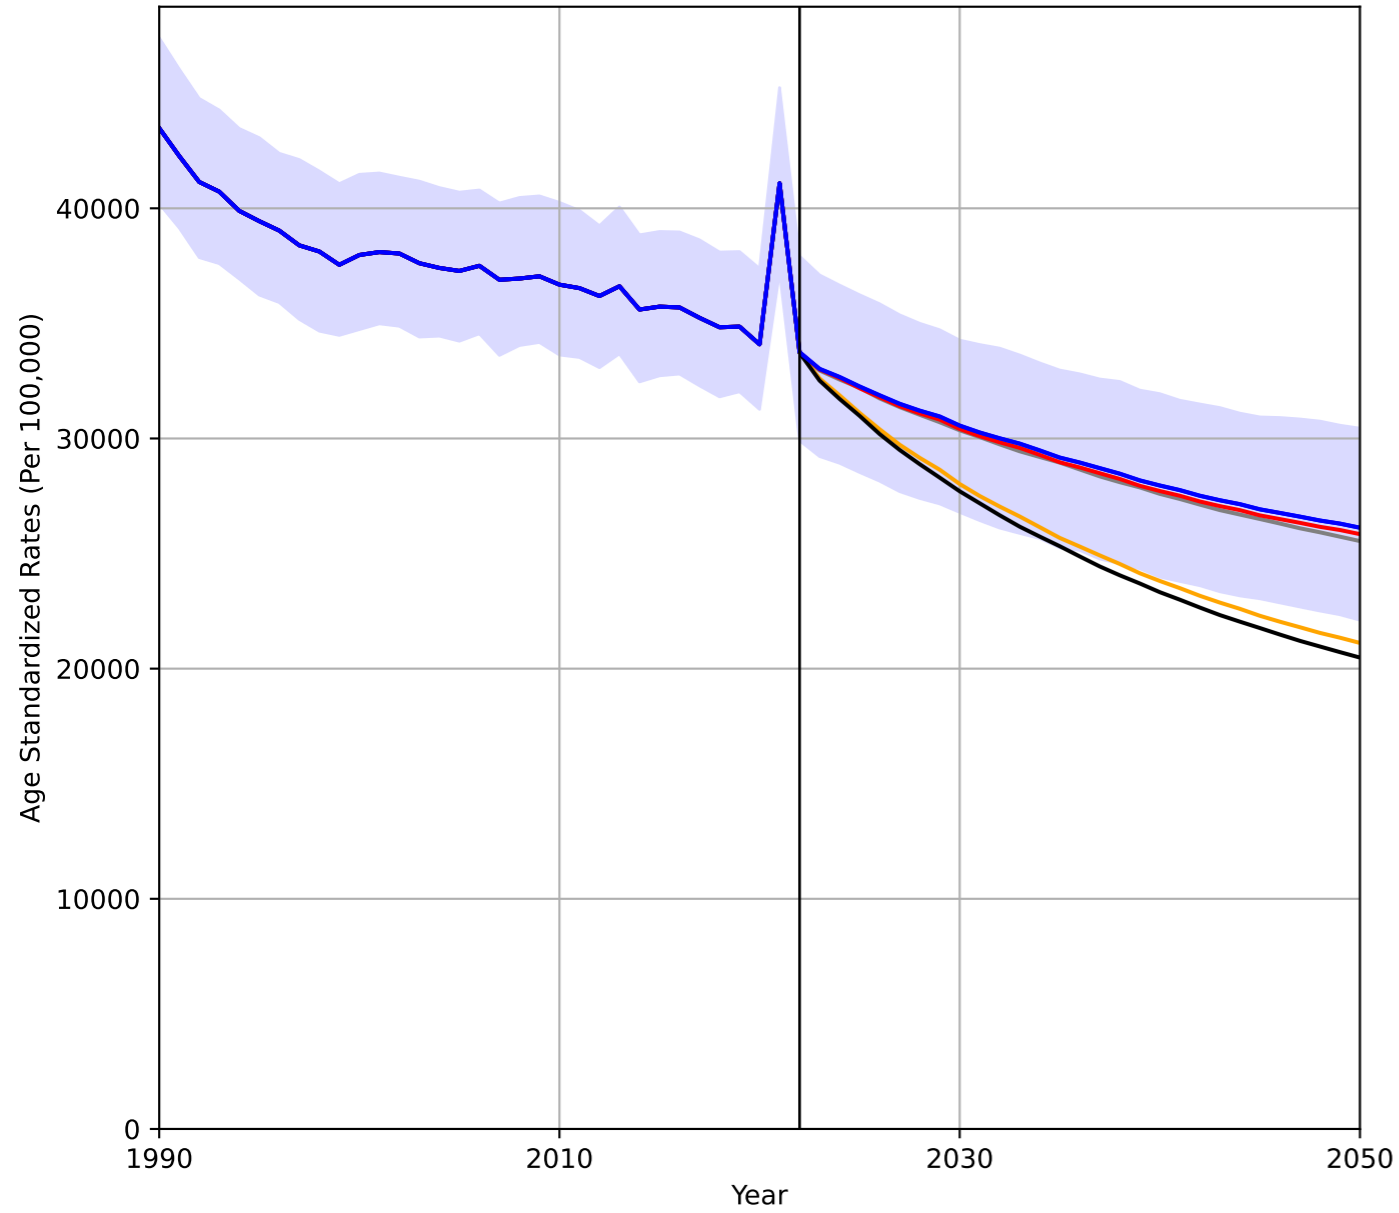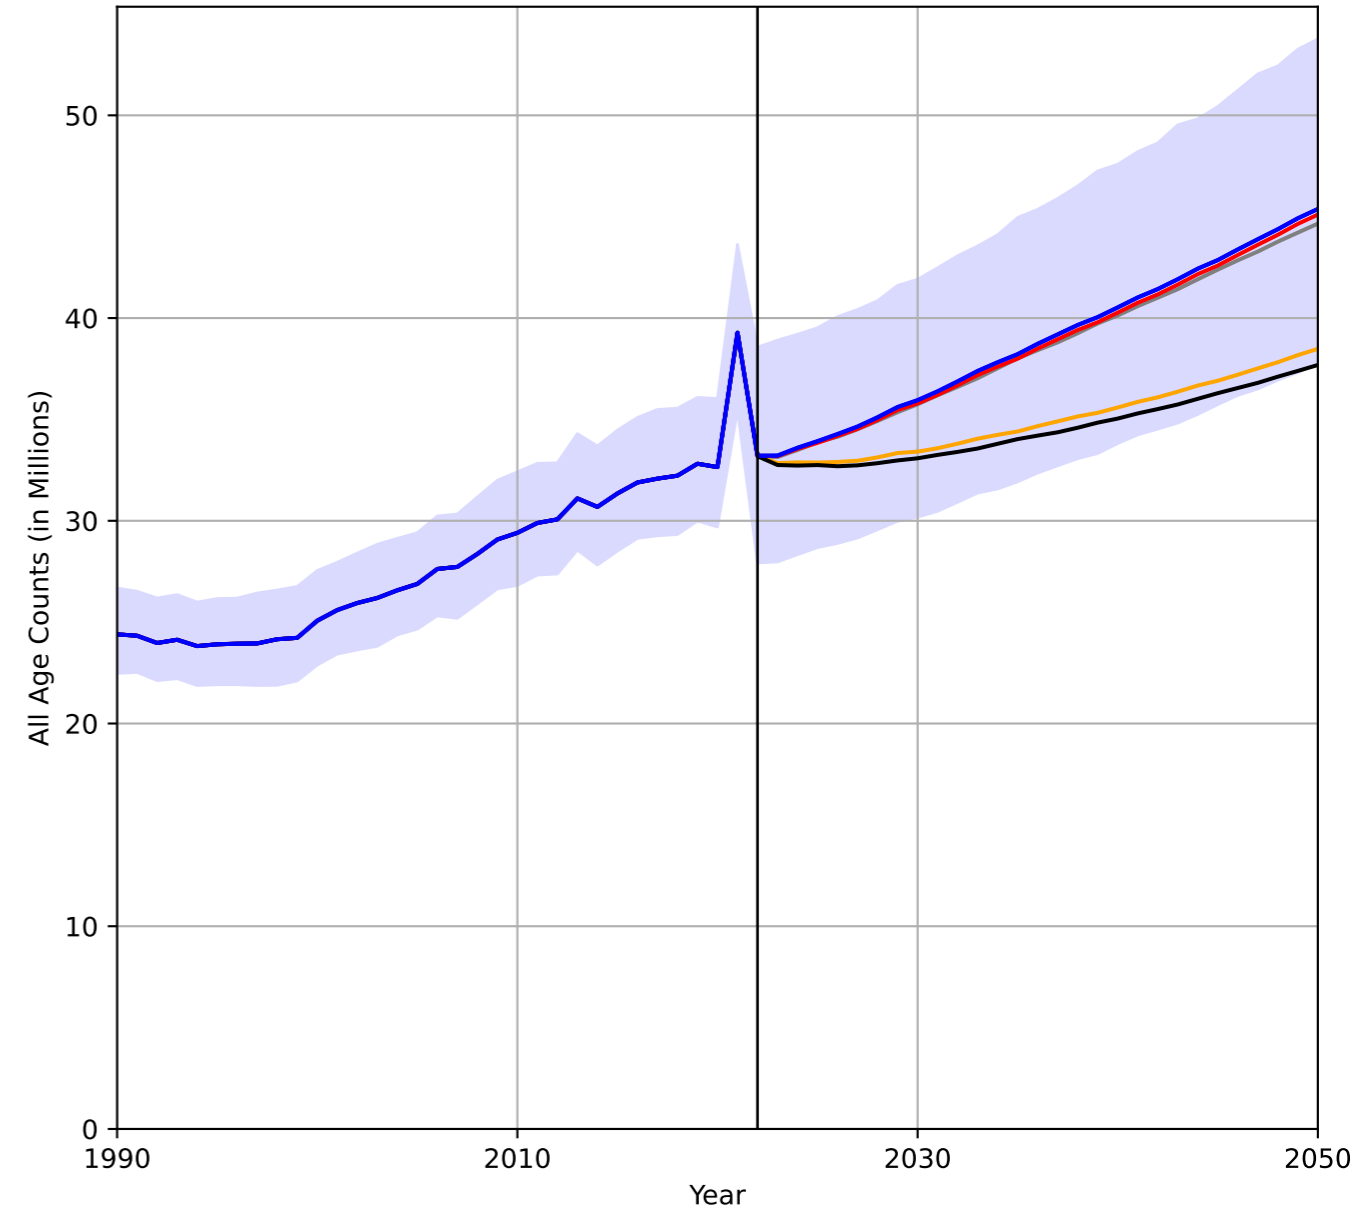

# Seychelles

Supplemental Results Figure S10. All-cause age standardised DALY rates (A) and all age DALY counts (B), for the past and for five future scenarios, 1990–2050

1564

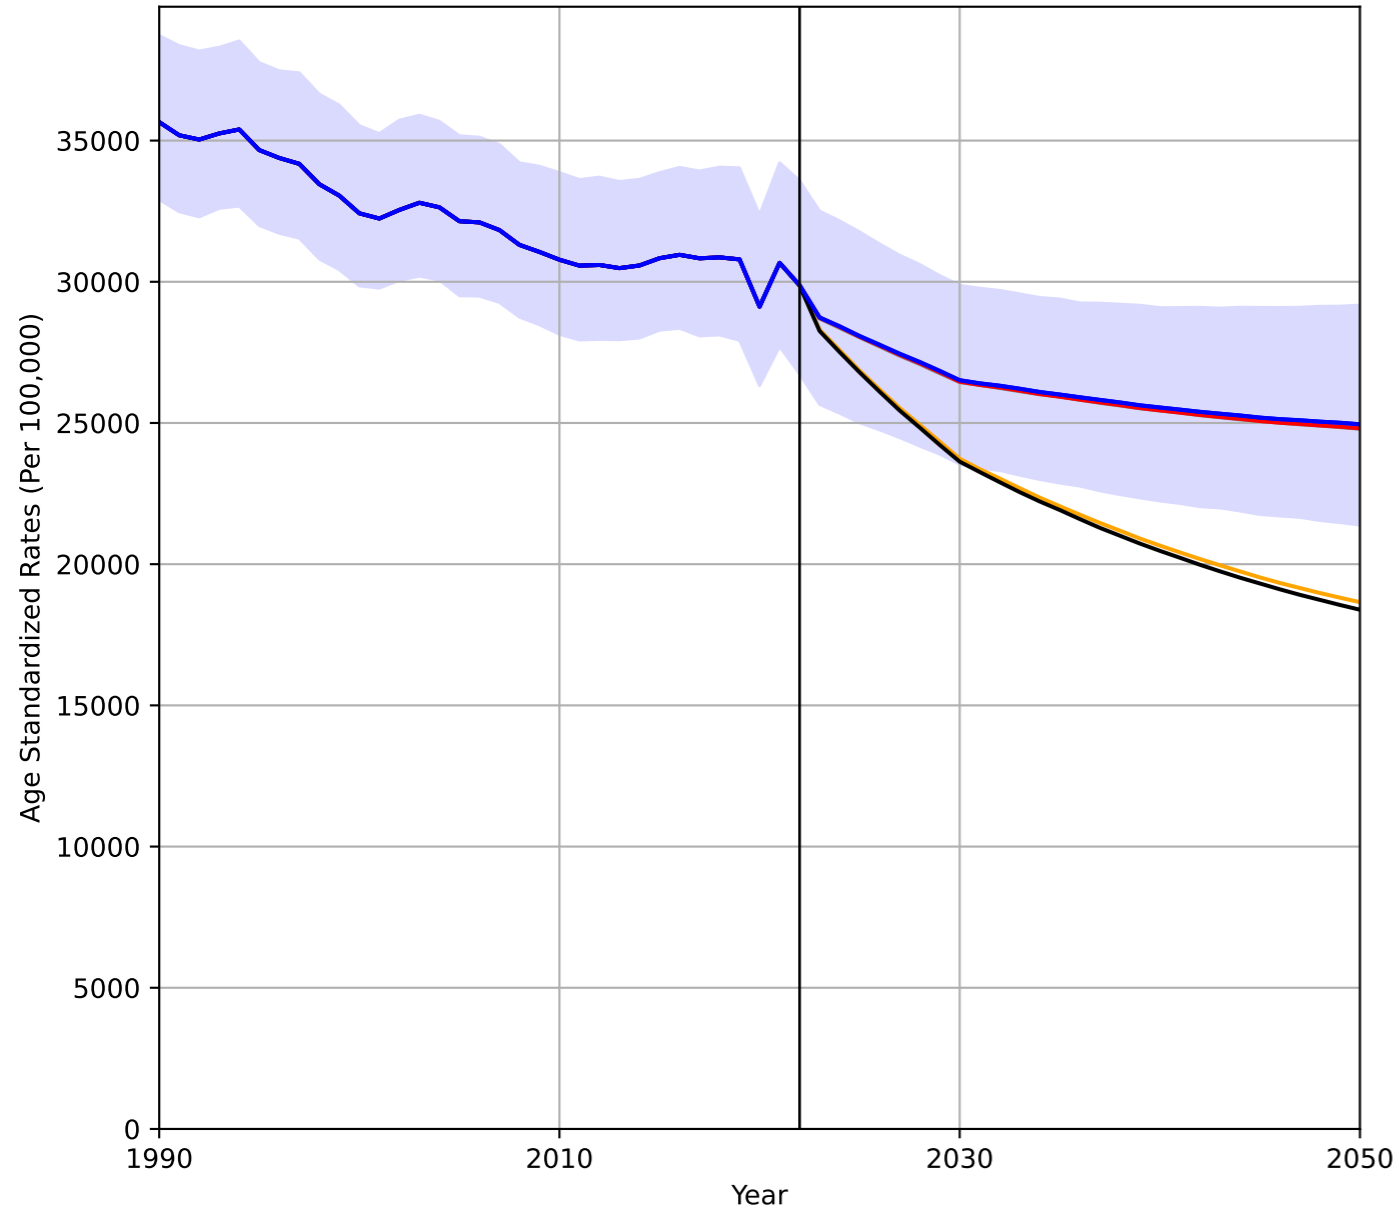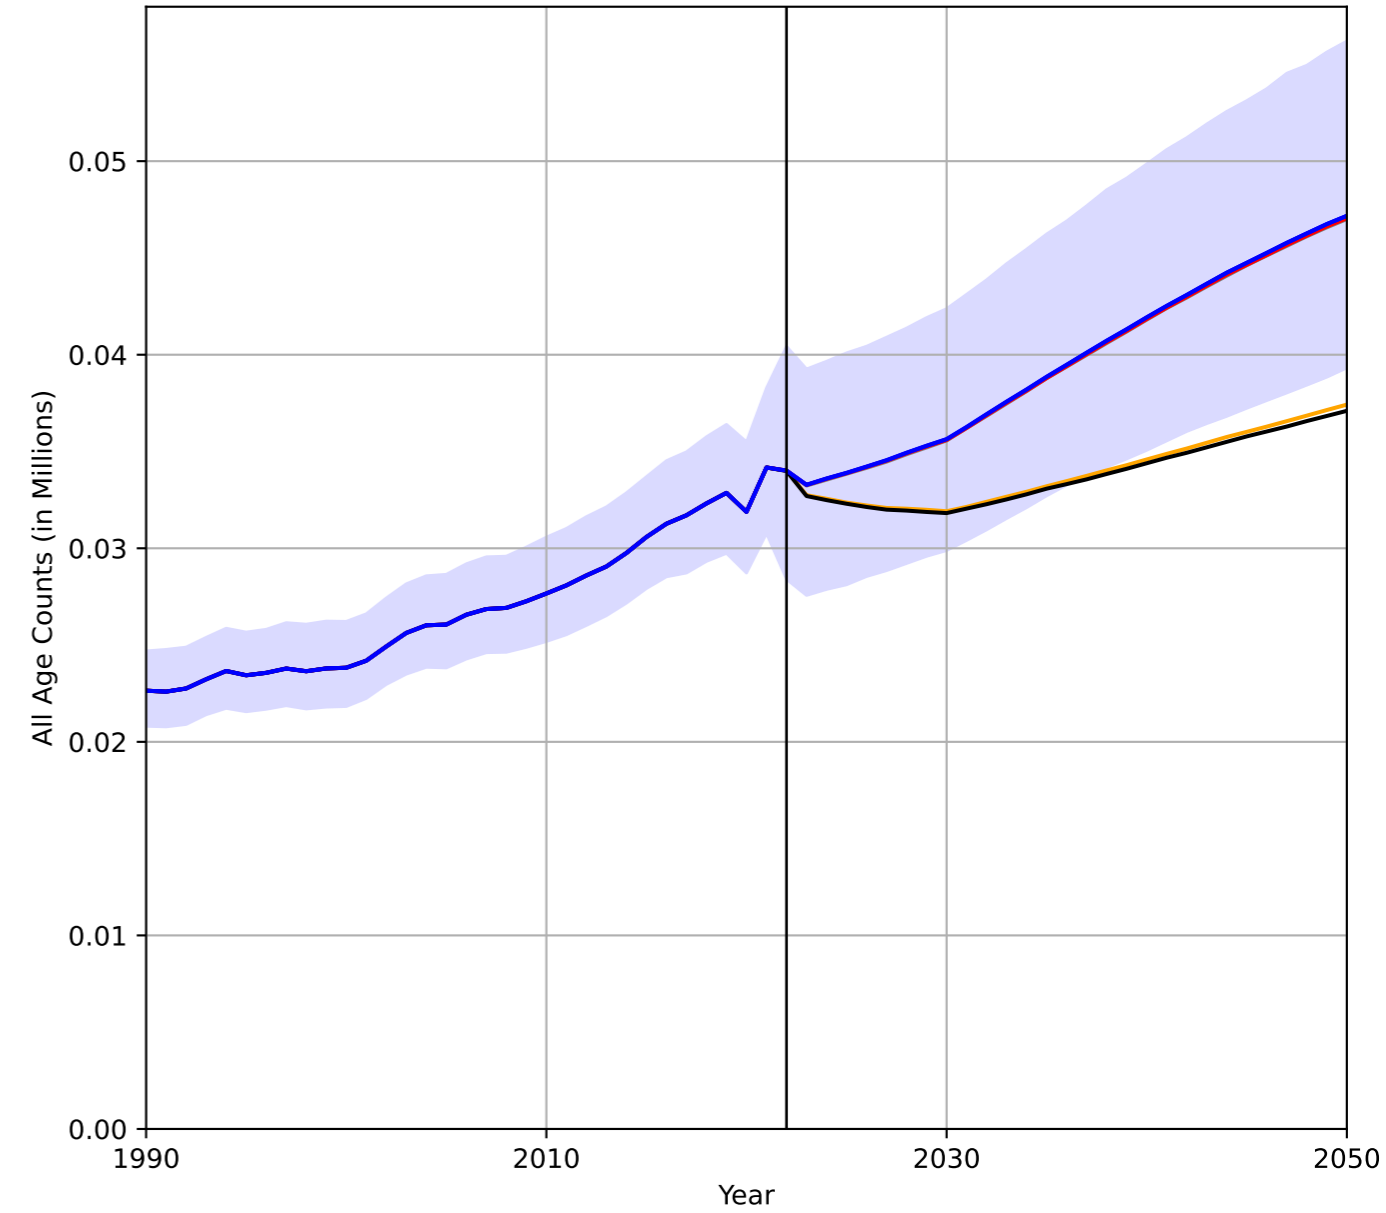

# Sri Lanka

Supplemental Results Figure S10. All-cause age standardised DALY rates (A) and all age DALY counts (B), for the past and for five future scenarios, 1990–2050

1565

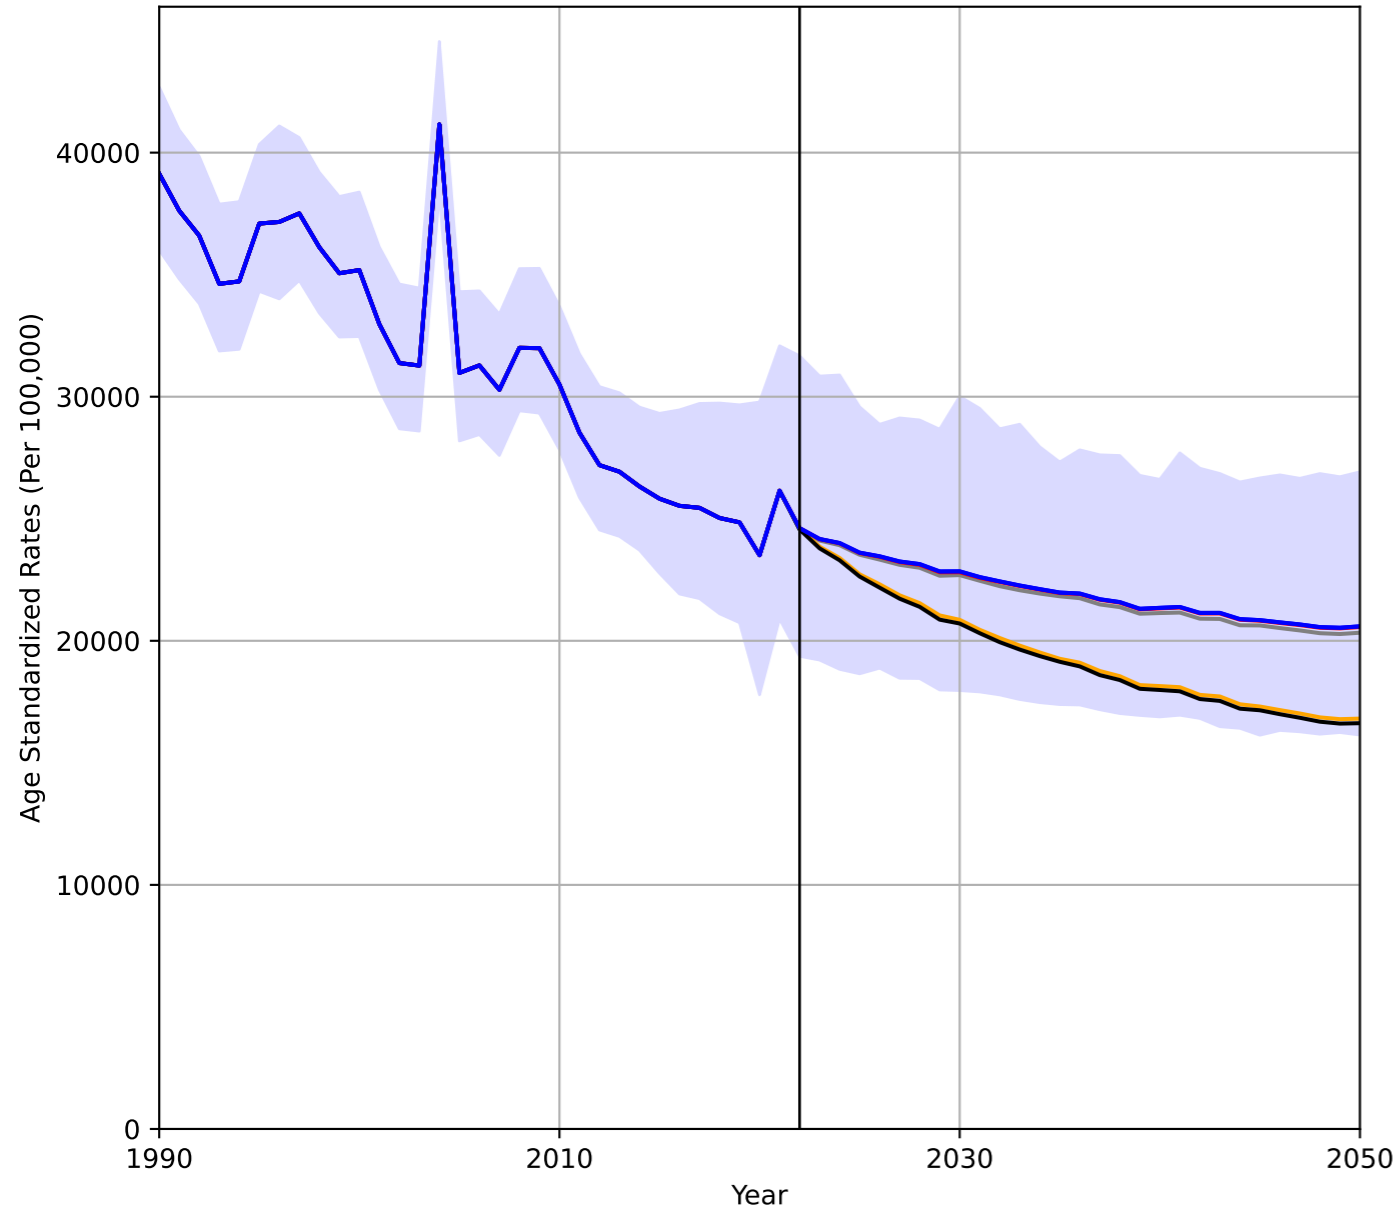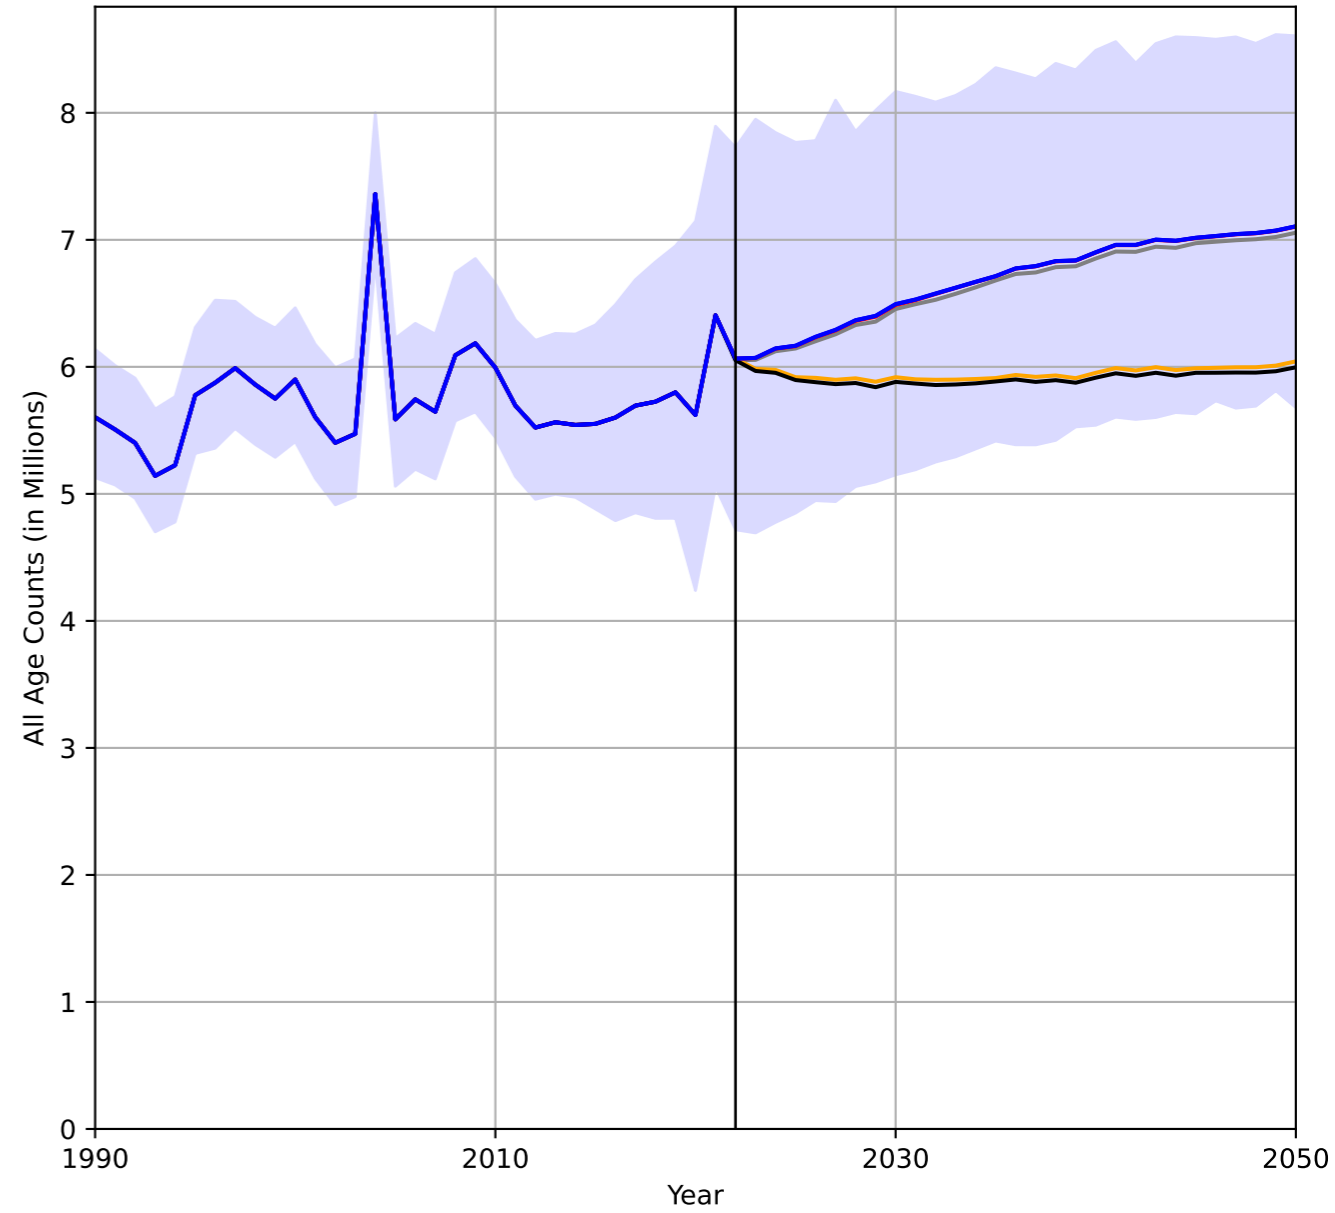

# Thailand

Supplemental Results Figure S10. All-cause age standardised DALY rates (A) and all age DALY counts (B), for the past and for five future scenarios, 1990–2050

1566

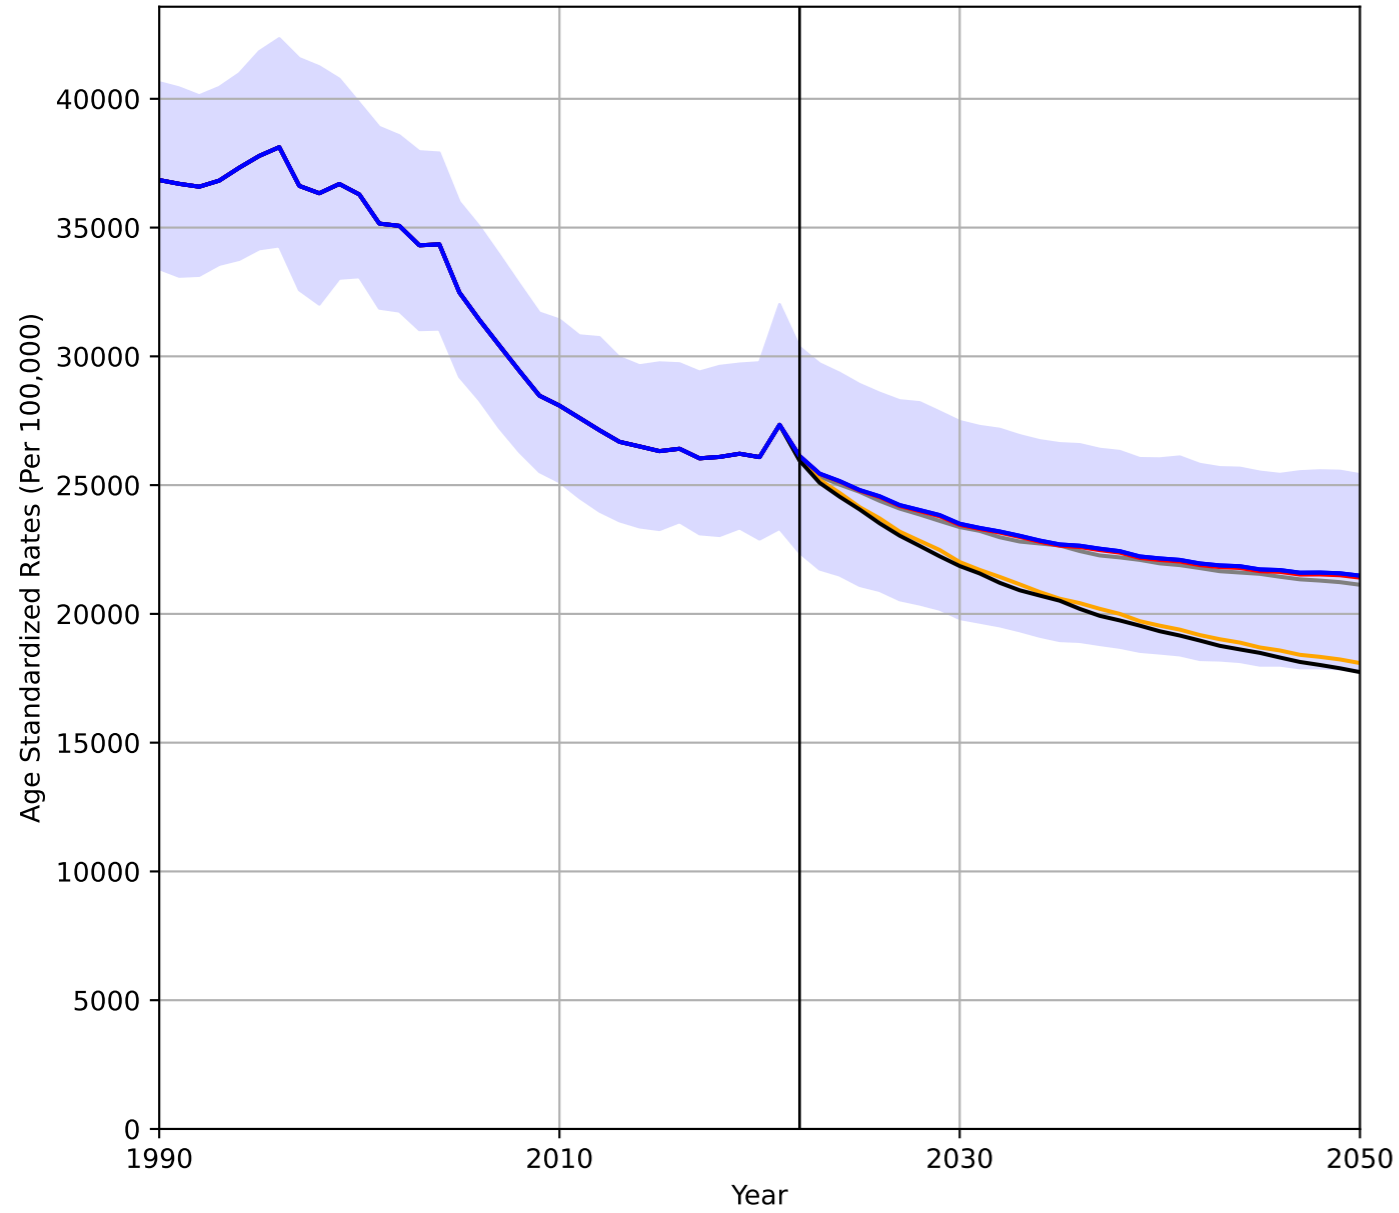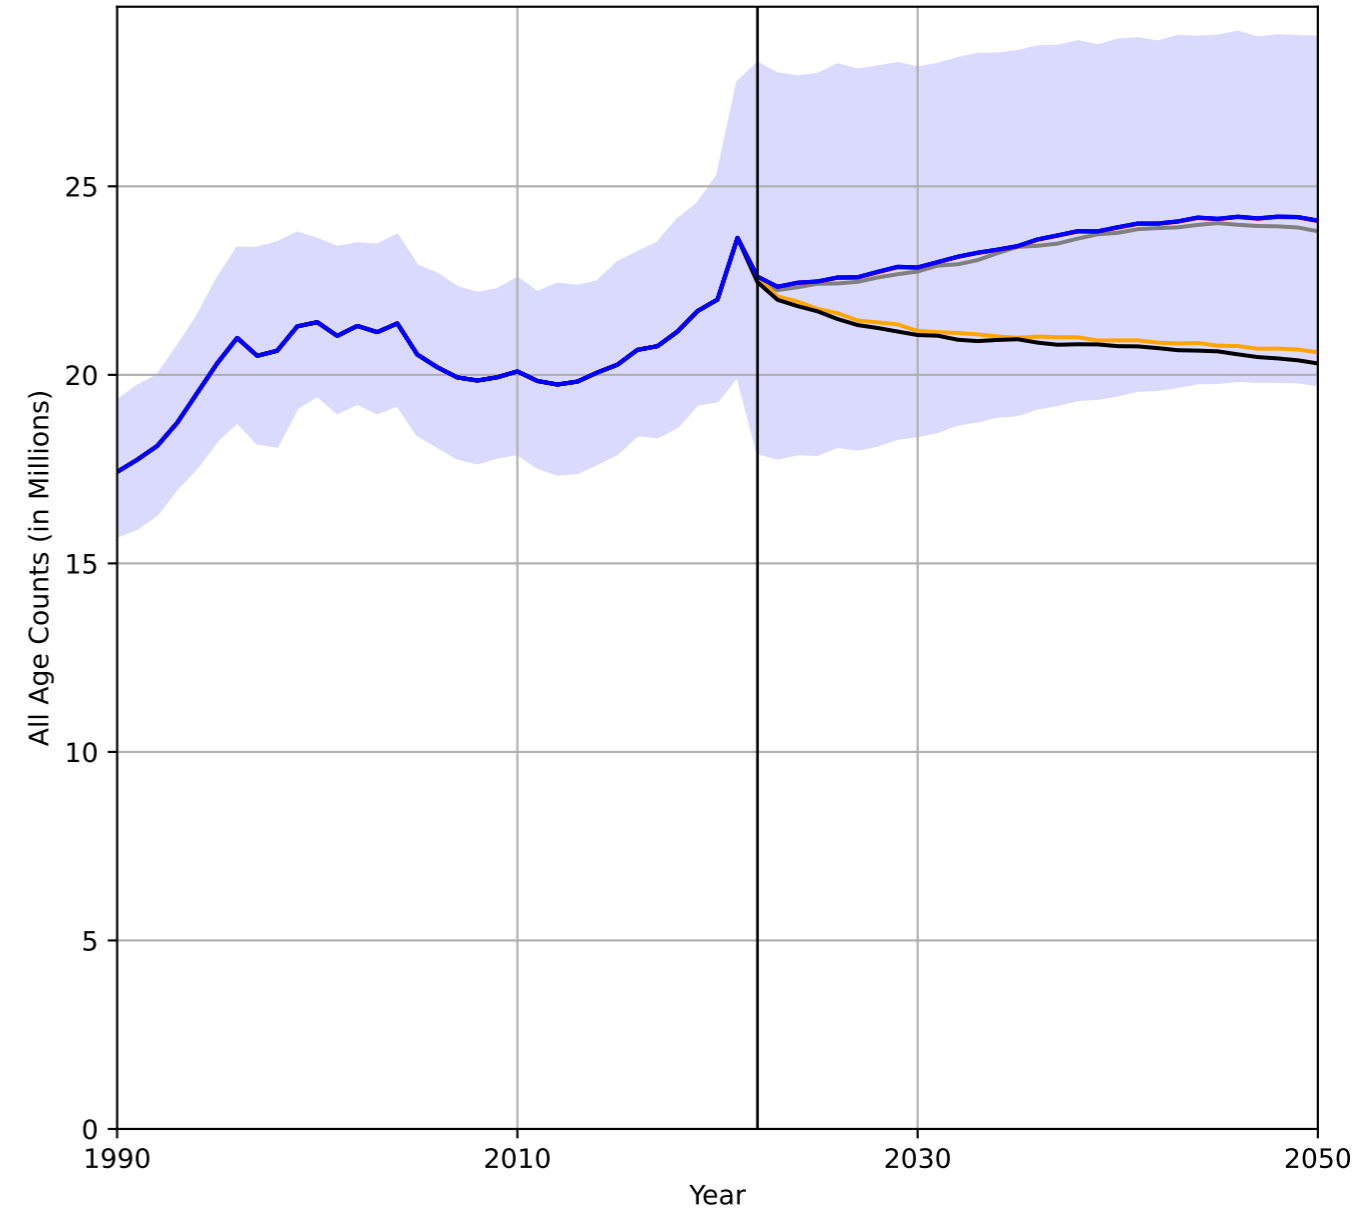

# Timor-Leste

Supplemental Results Figure S10. All-cause age standardised DALY rates (A) and all age DALY counts (B), for the past and for five future scenarios, 1990–2050

1567

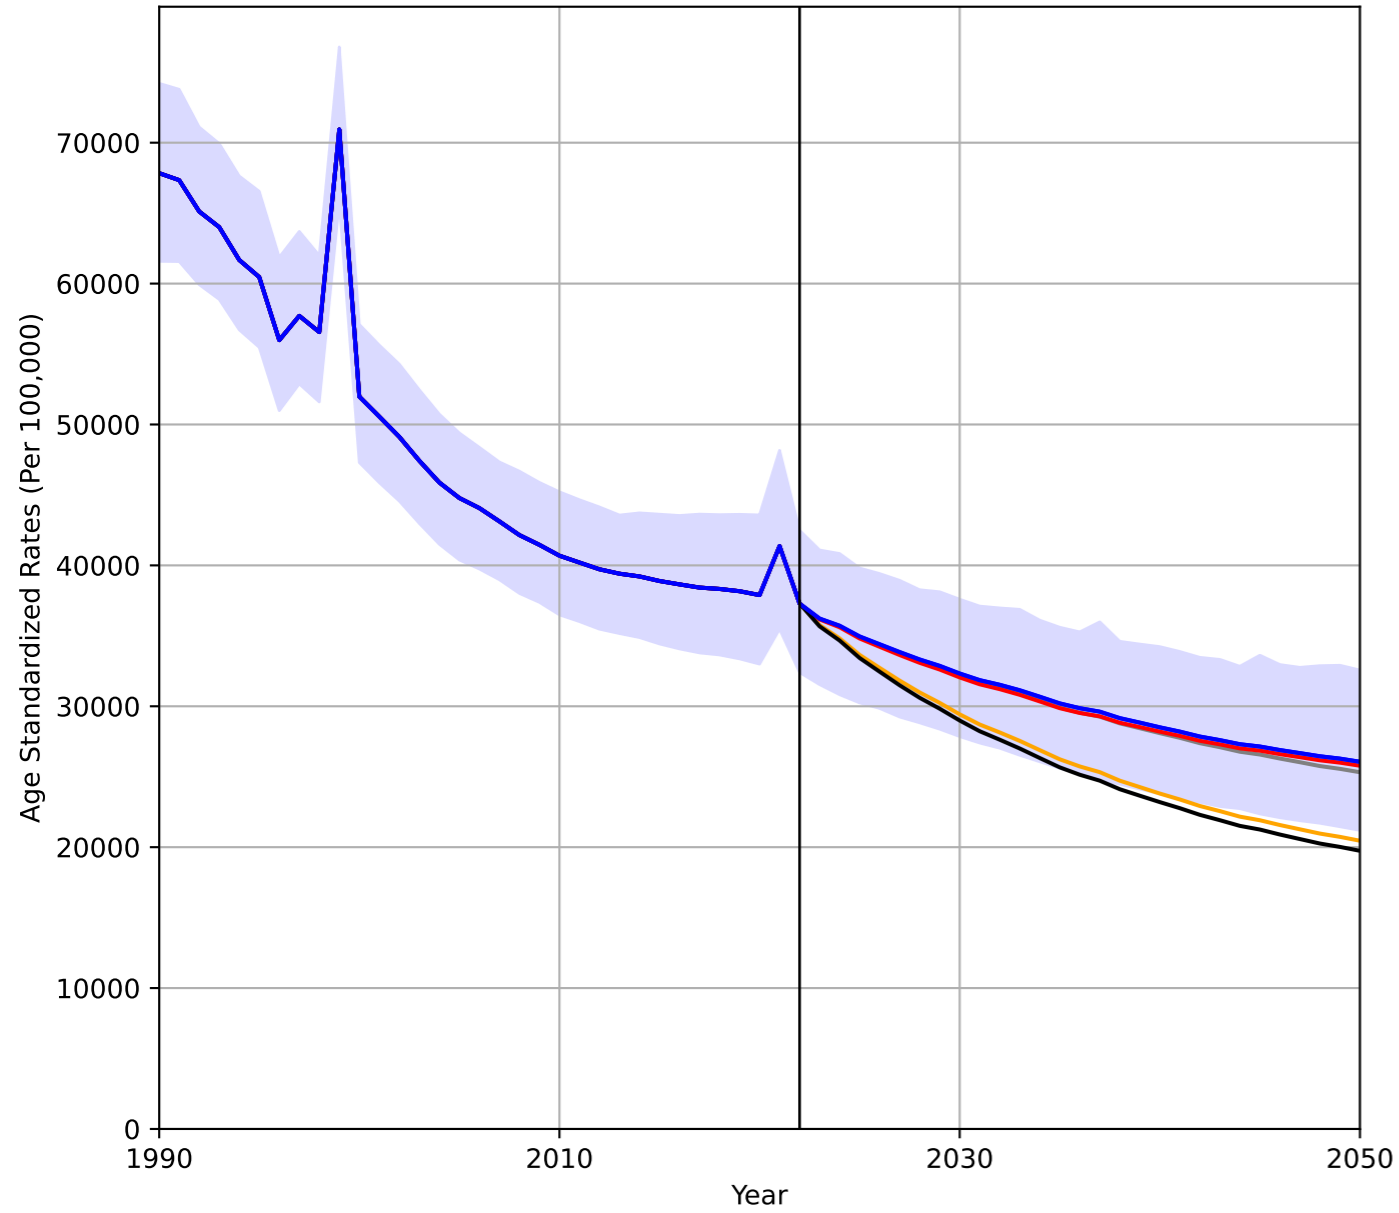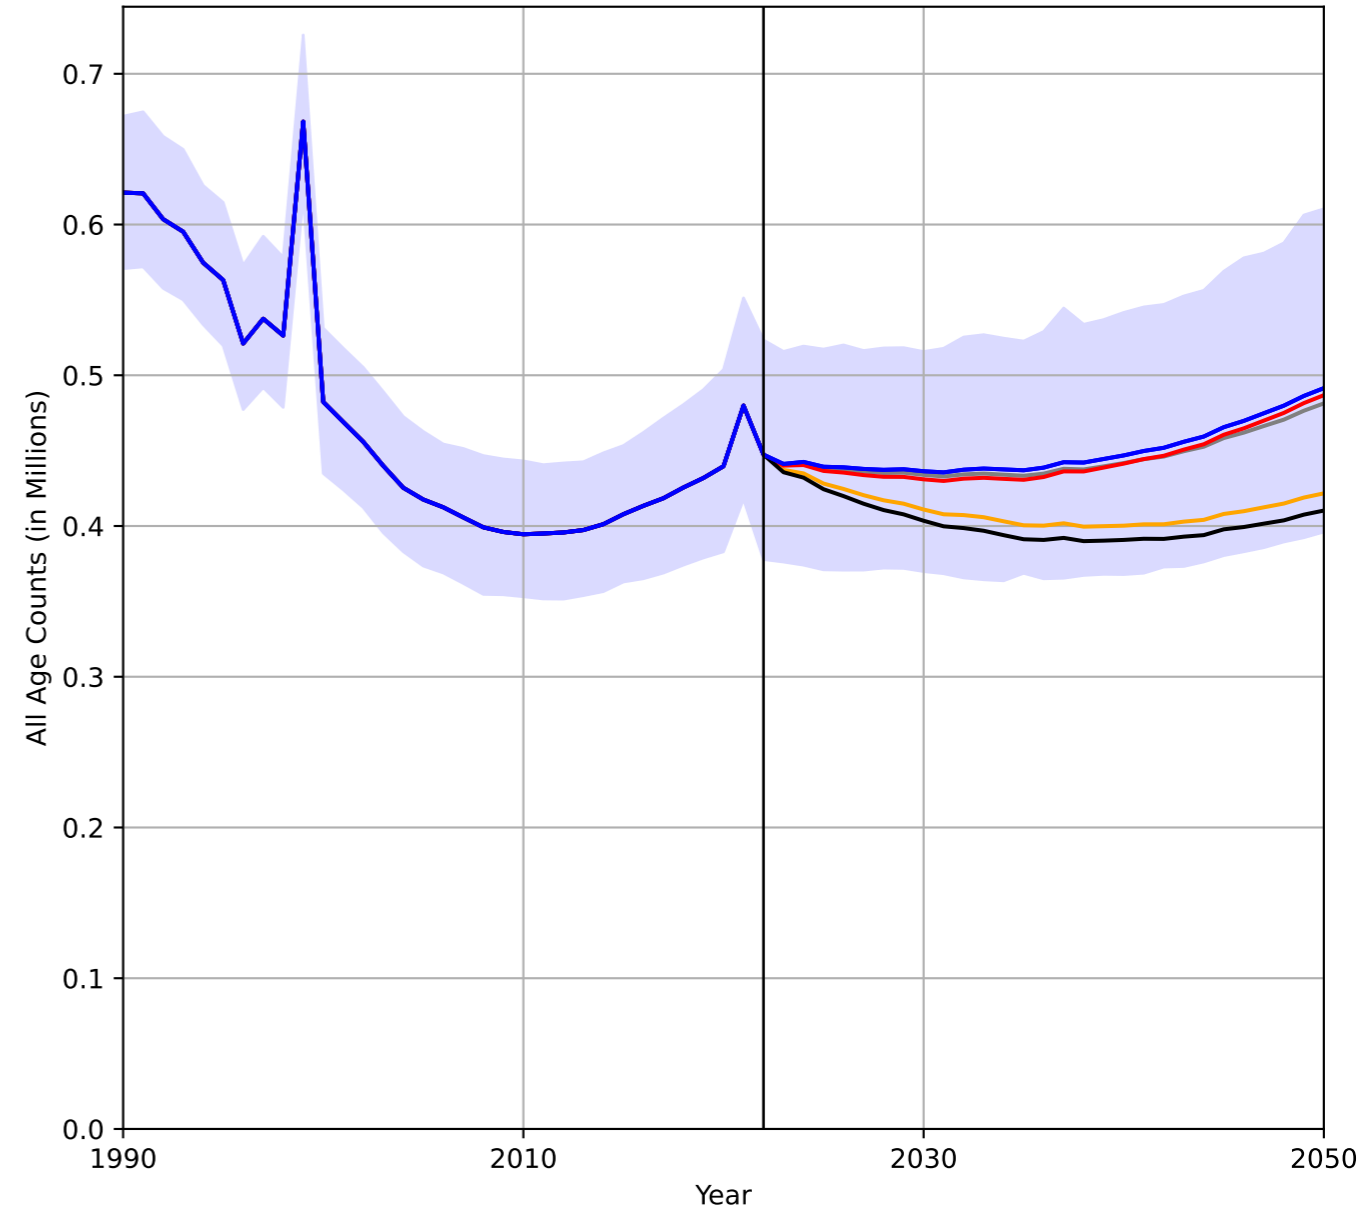



# Viet Nam

Supplemental Results Figure S10. All-cause age standardised DALY rates (A) and all age DALY counts (B), for the past and for five future scenarios, 1990–2050

1568

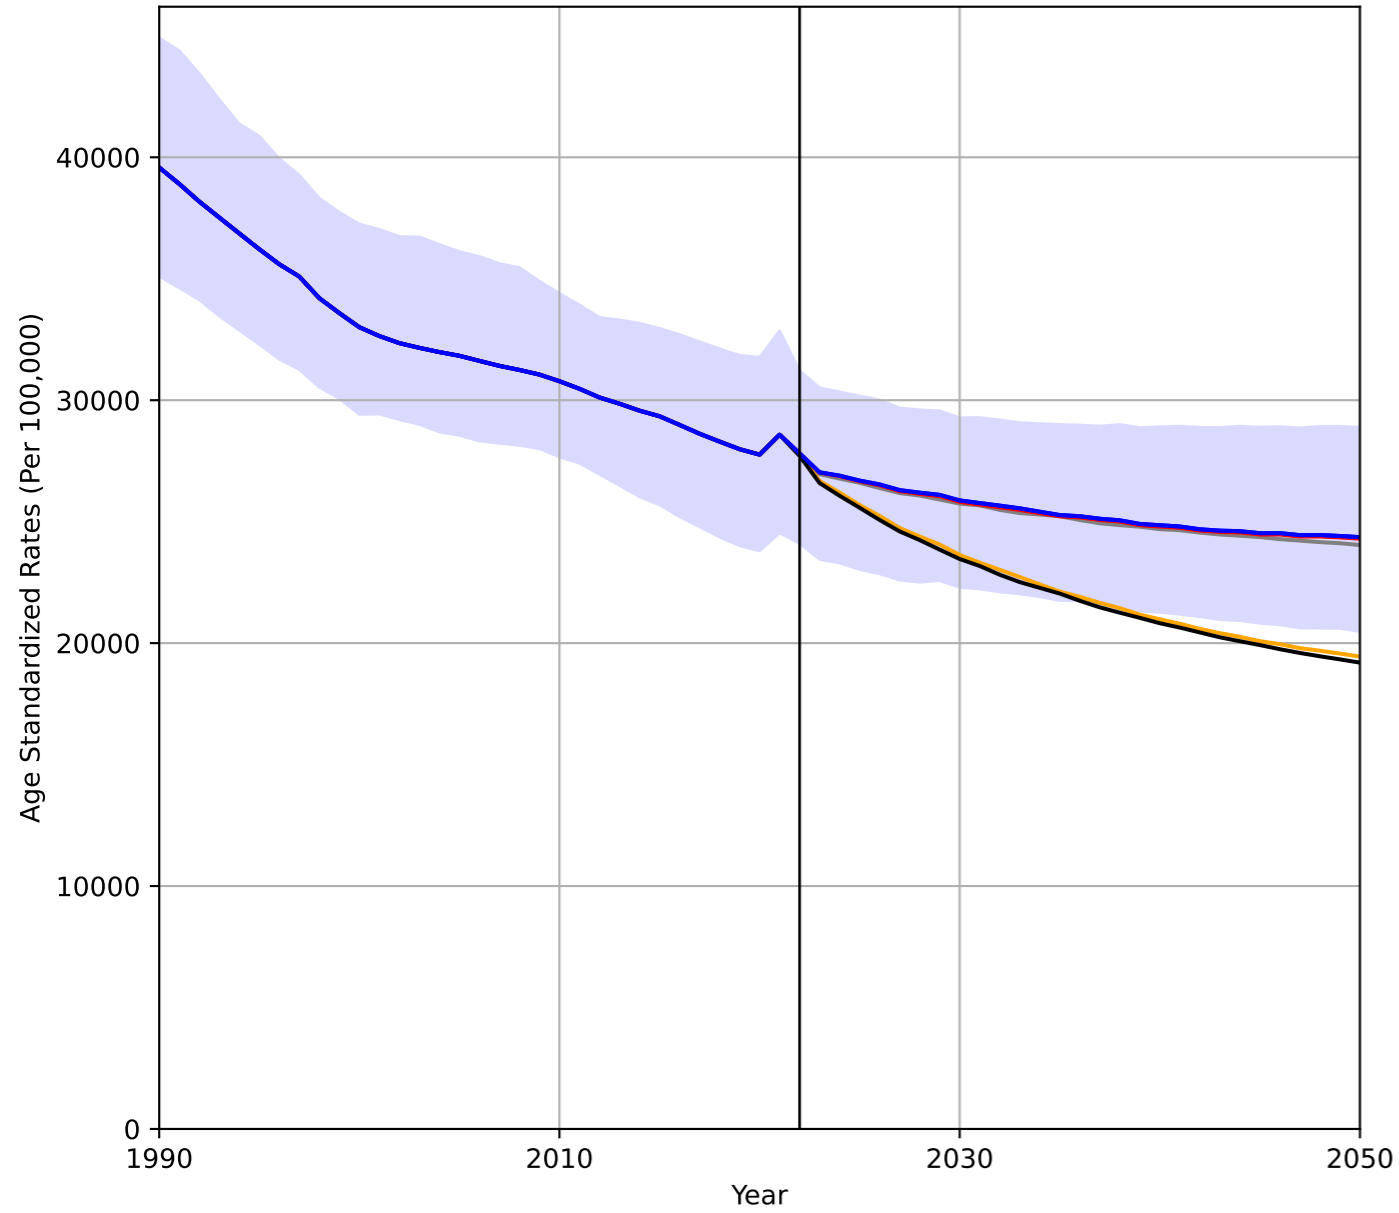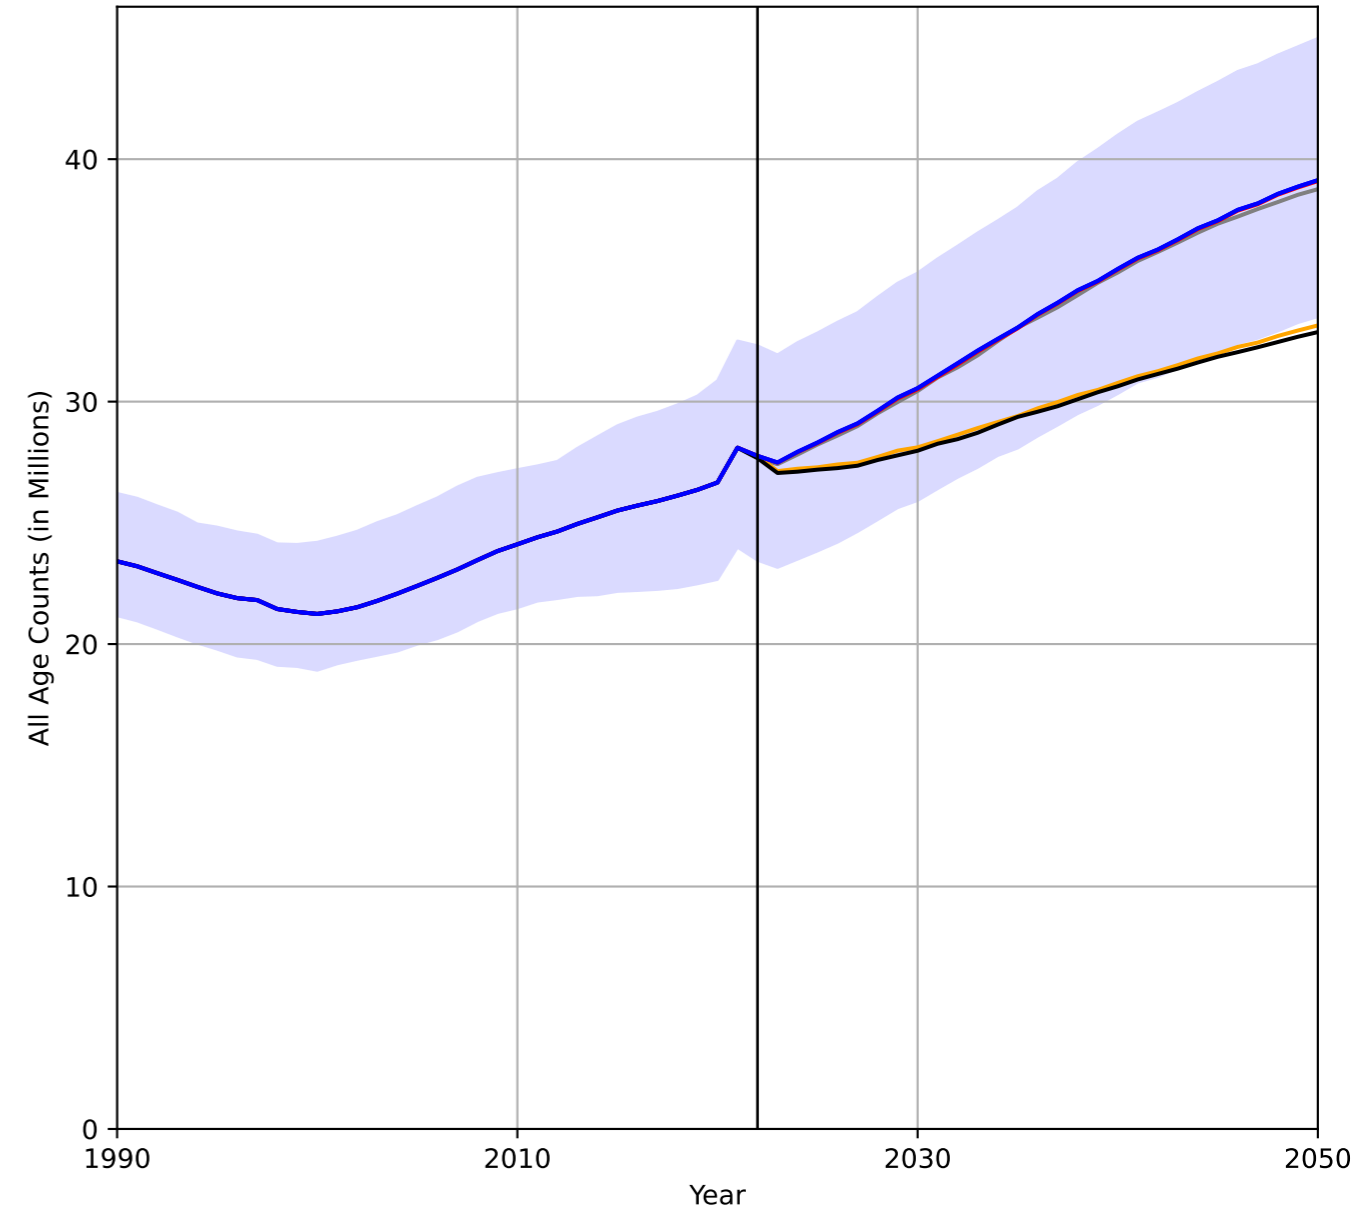

# Angola

Supplemental Results Figure S10. All-cause age standardised DALY rates (A) and all age DALY counts (B), for the past and for five future scenarios, 1990–2050

1569

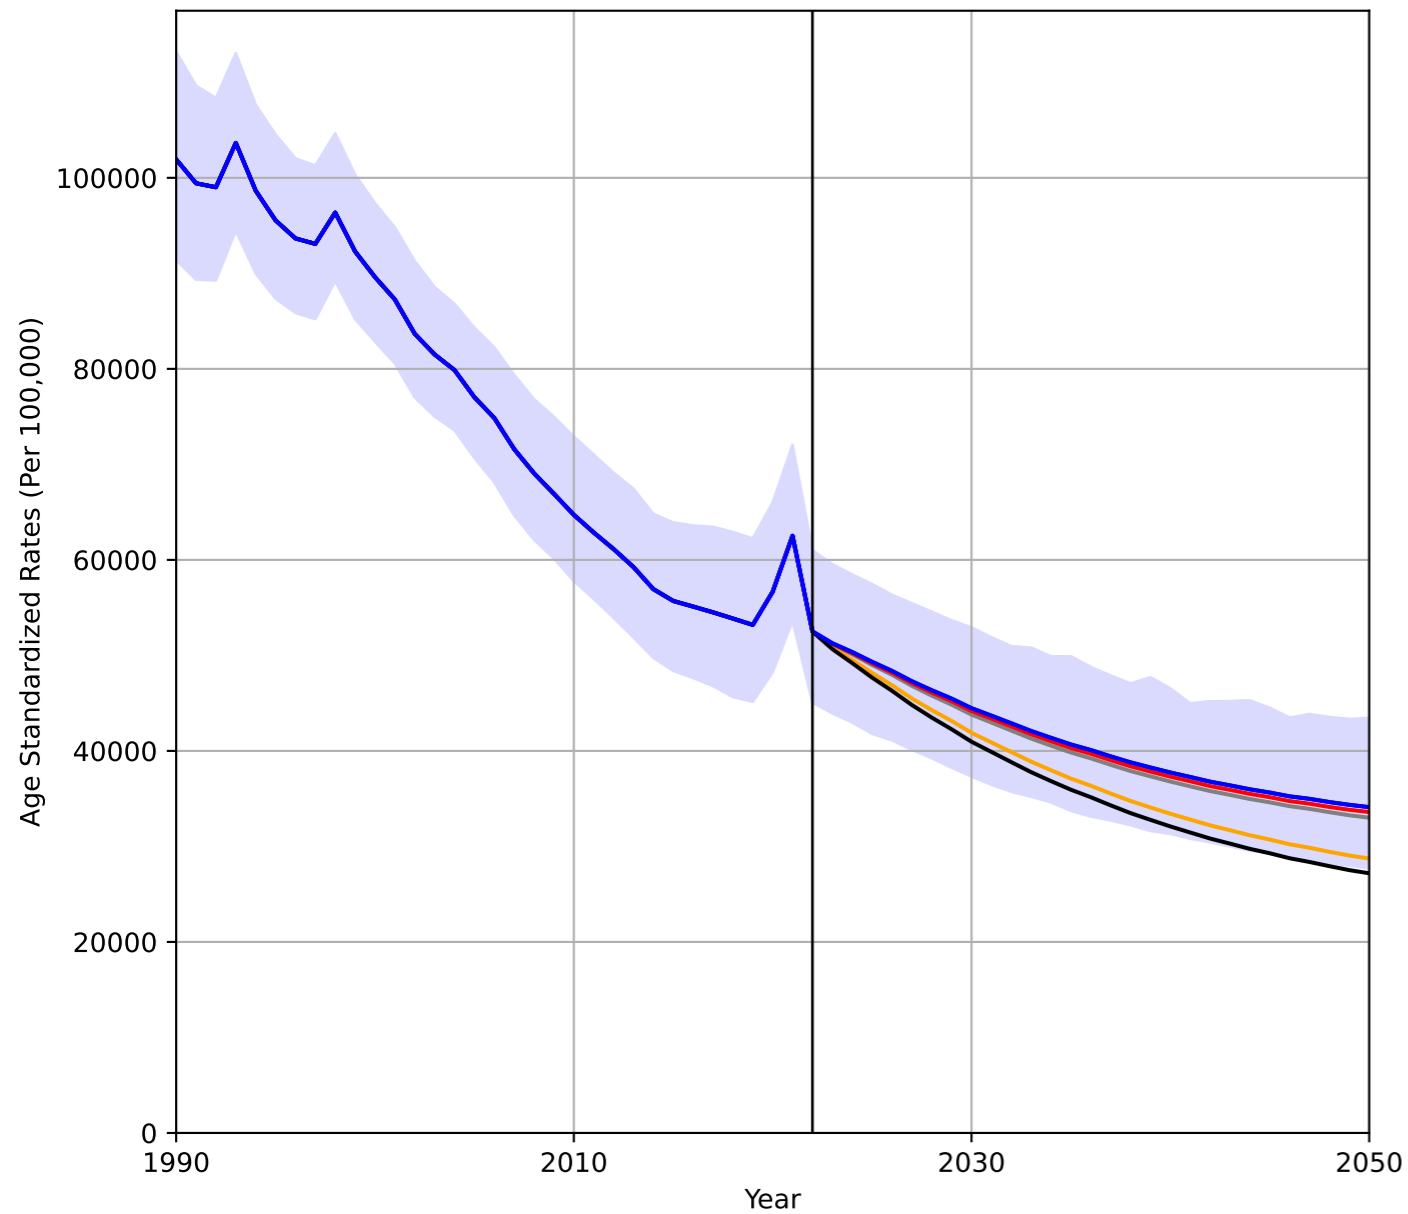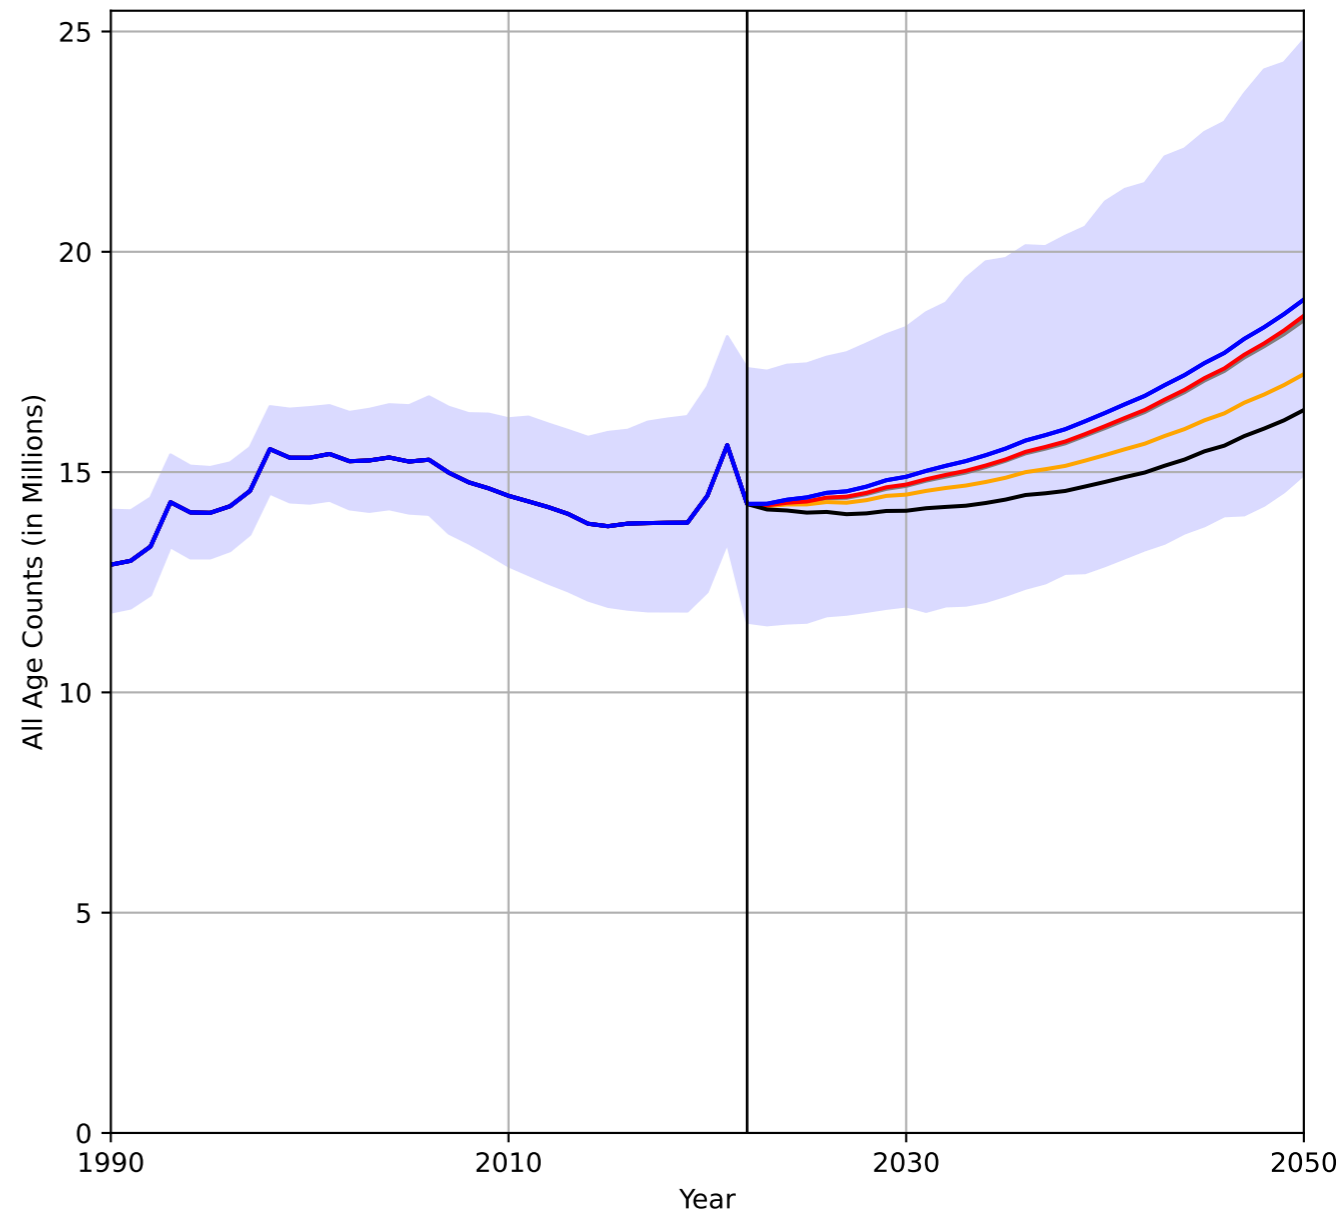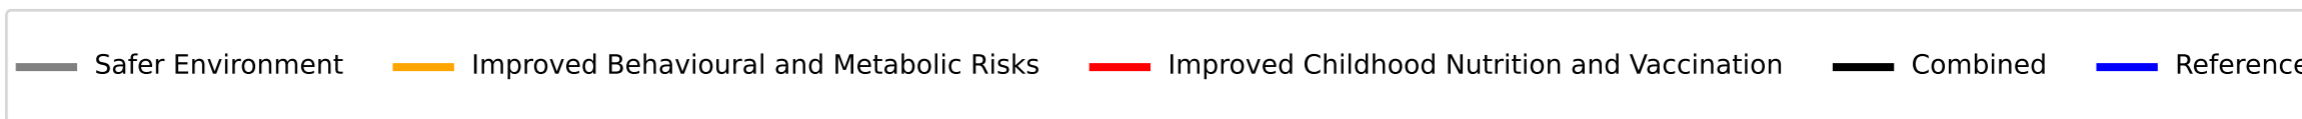

# Central African Republic

Supplemental Results Figure S10. All-cause age standardised DALY rates (A) and all age DALY counts (B), for the past and for five future scenarios, 1990–2050

1570

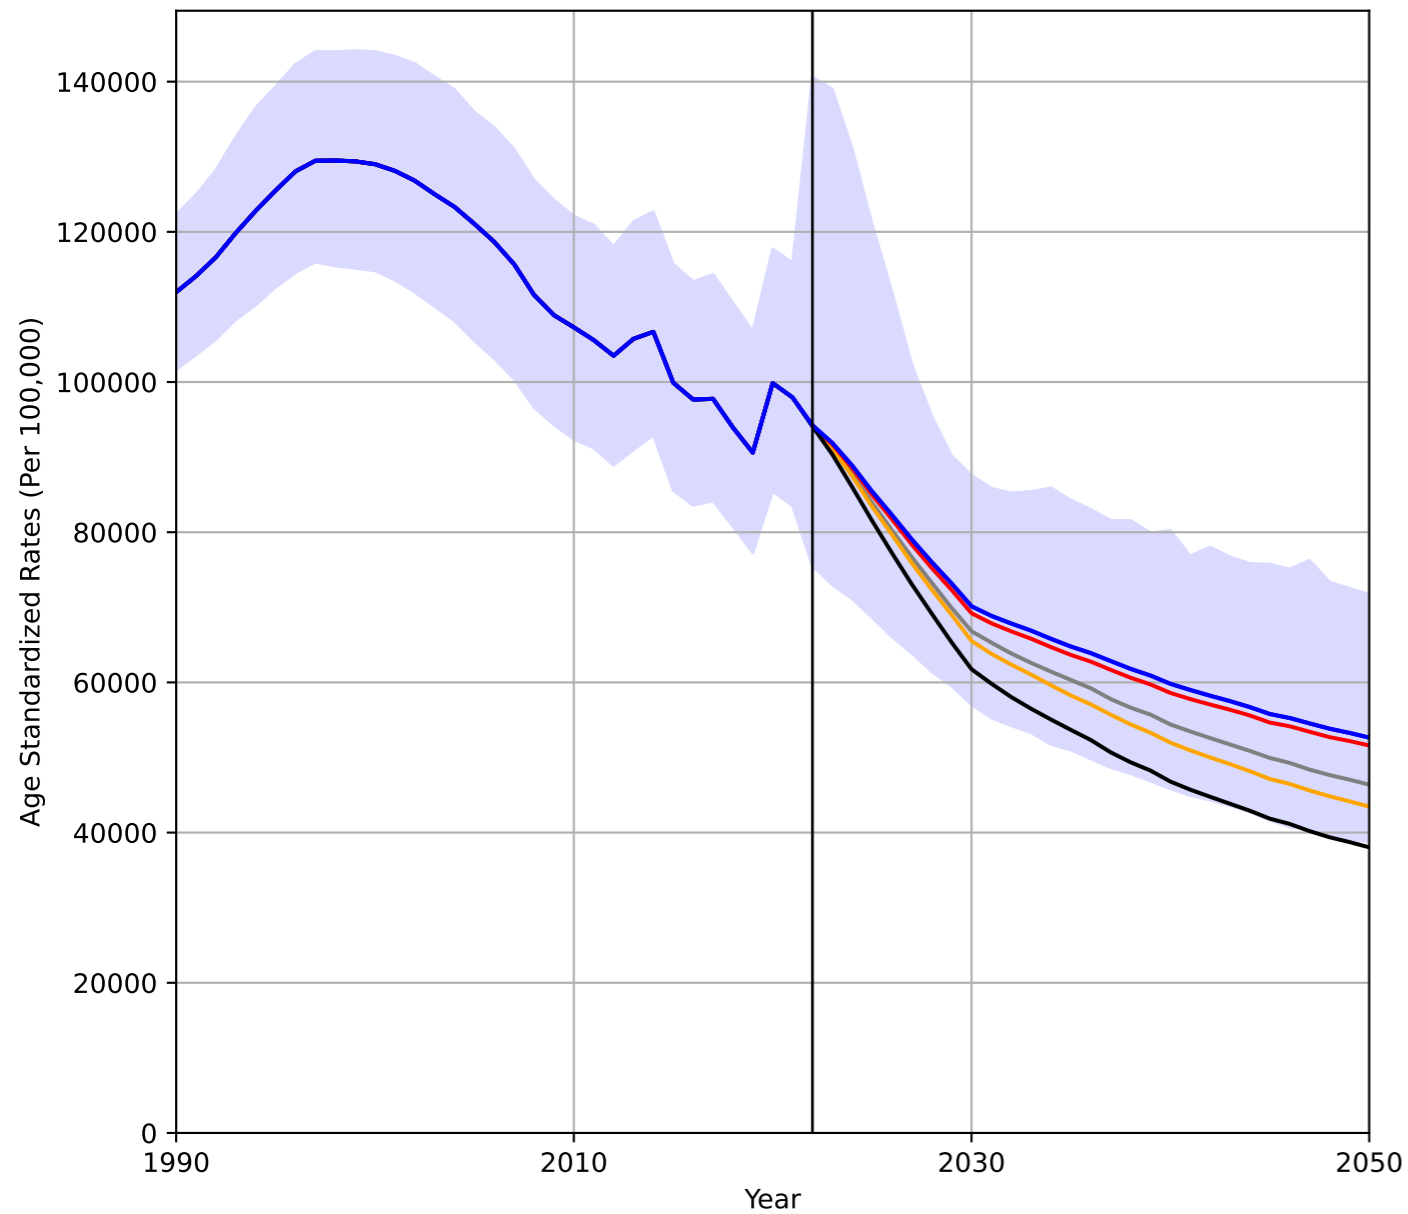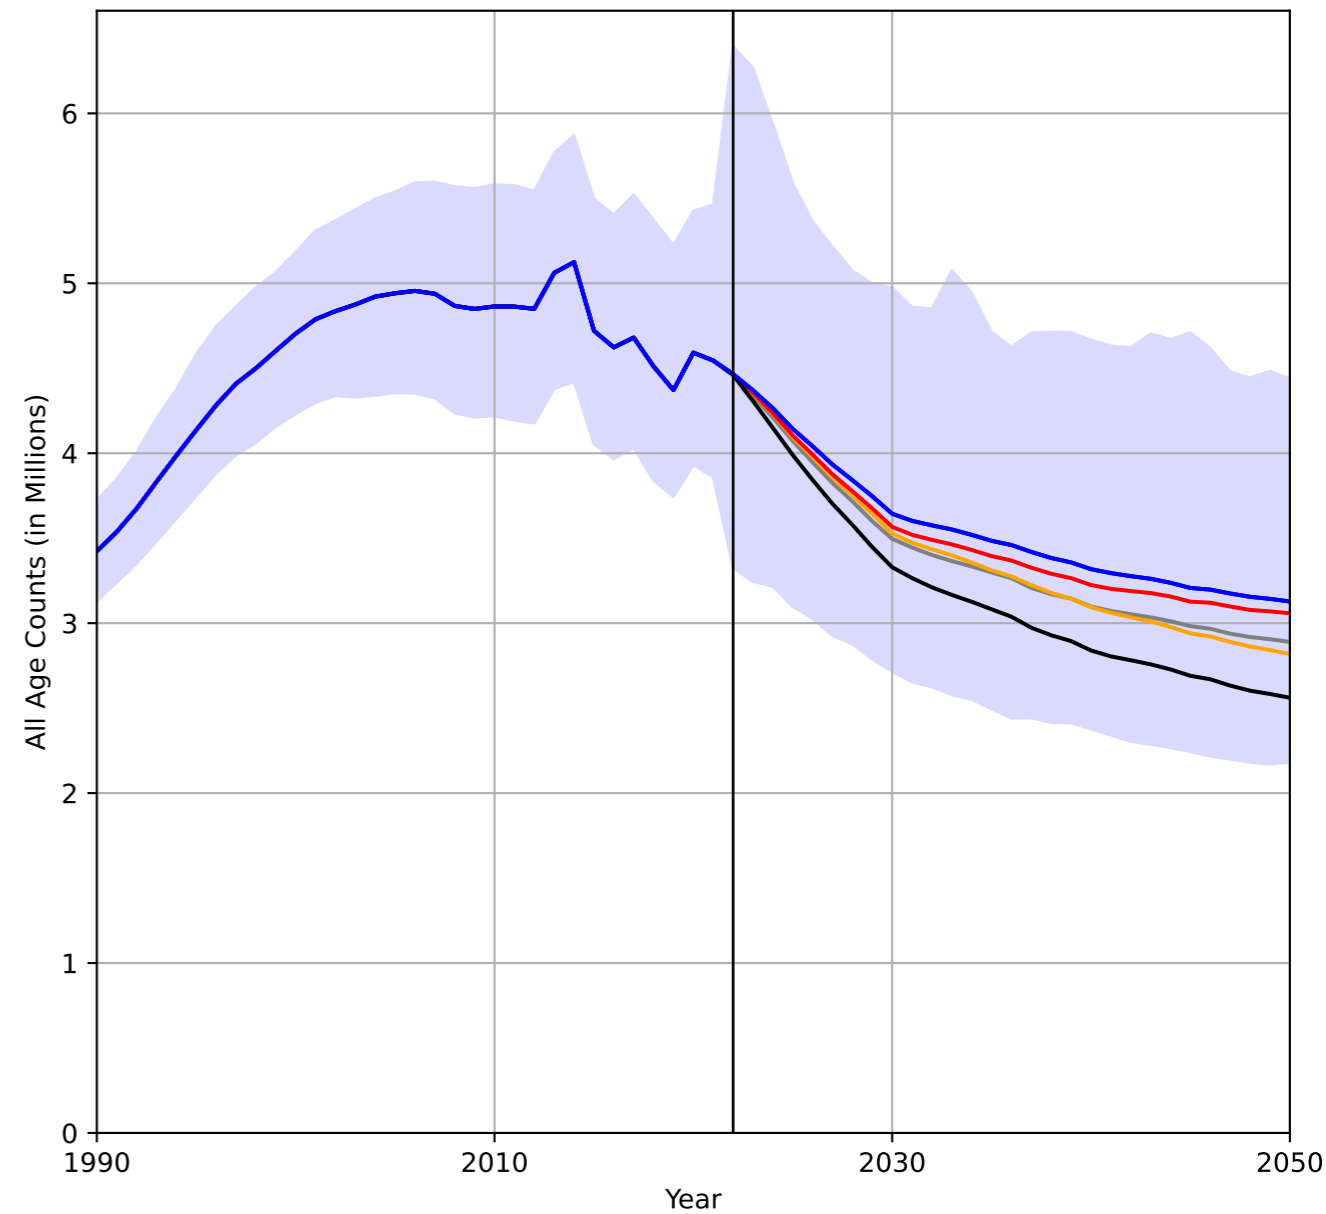

# Congo (Brazzaville)

Supplemental Results Figure S10. All-cause age standardised DALY rates (A) and all age DALY counts (B), for the past and for five future scenarios, 1990–2050

1571

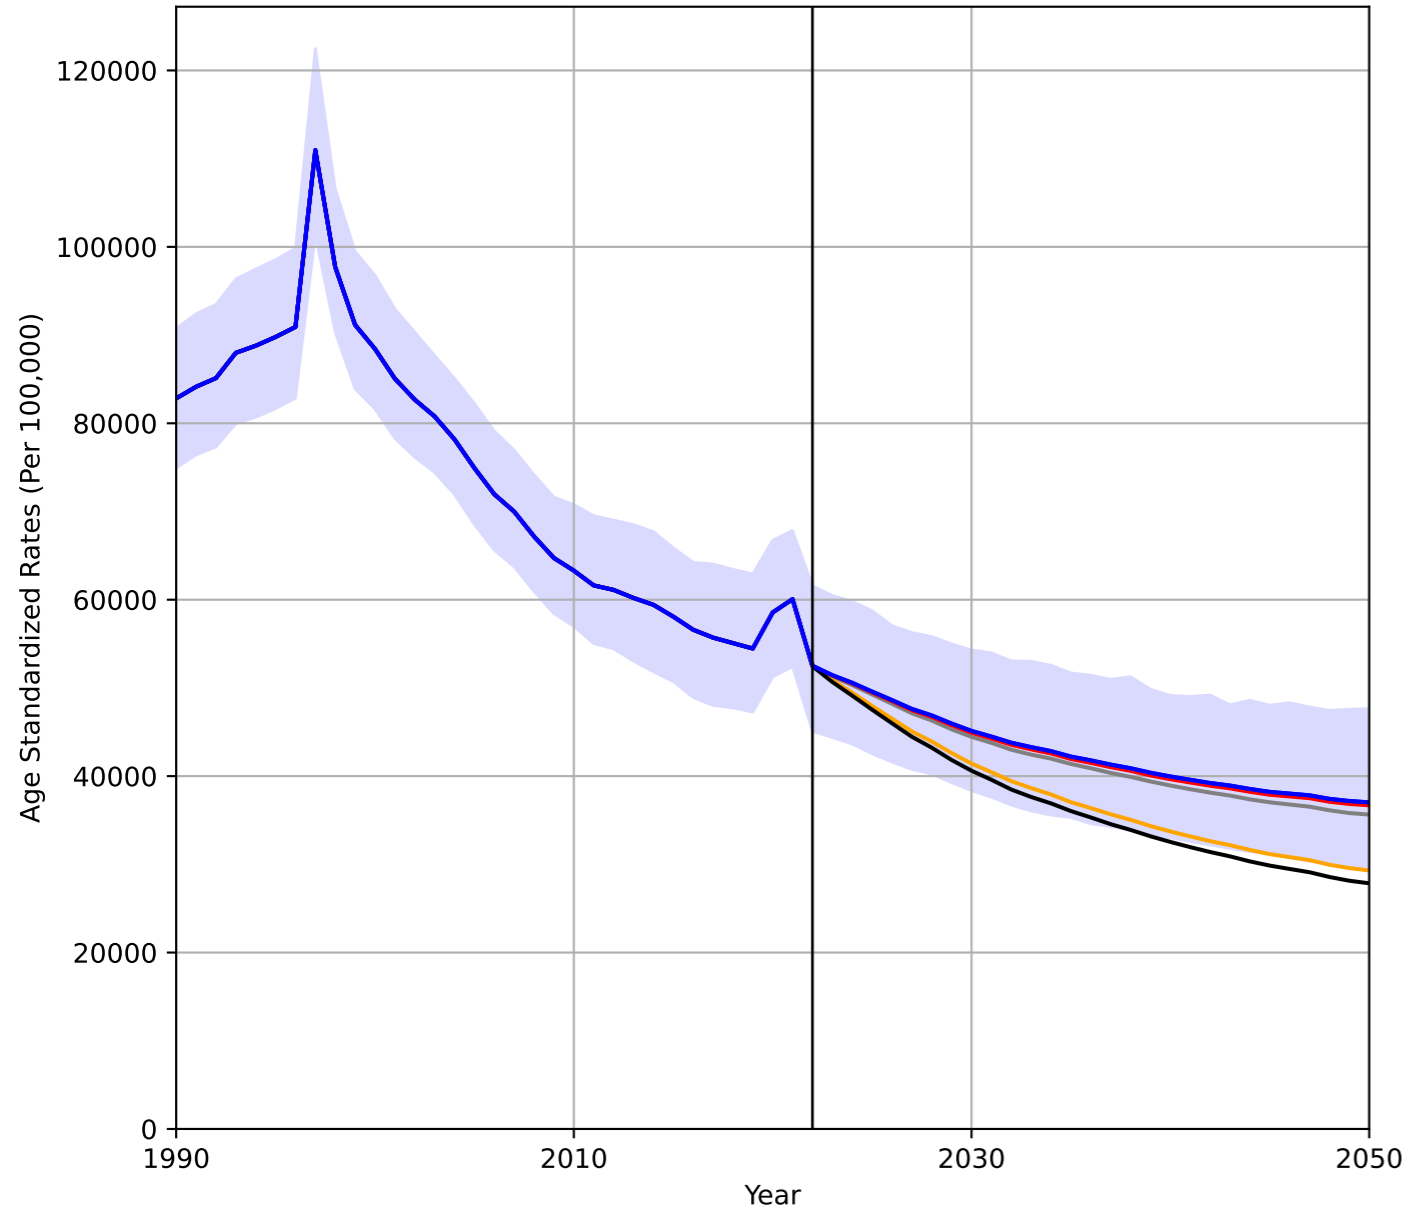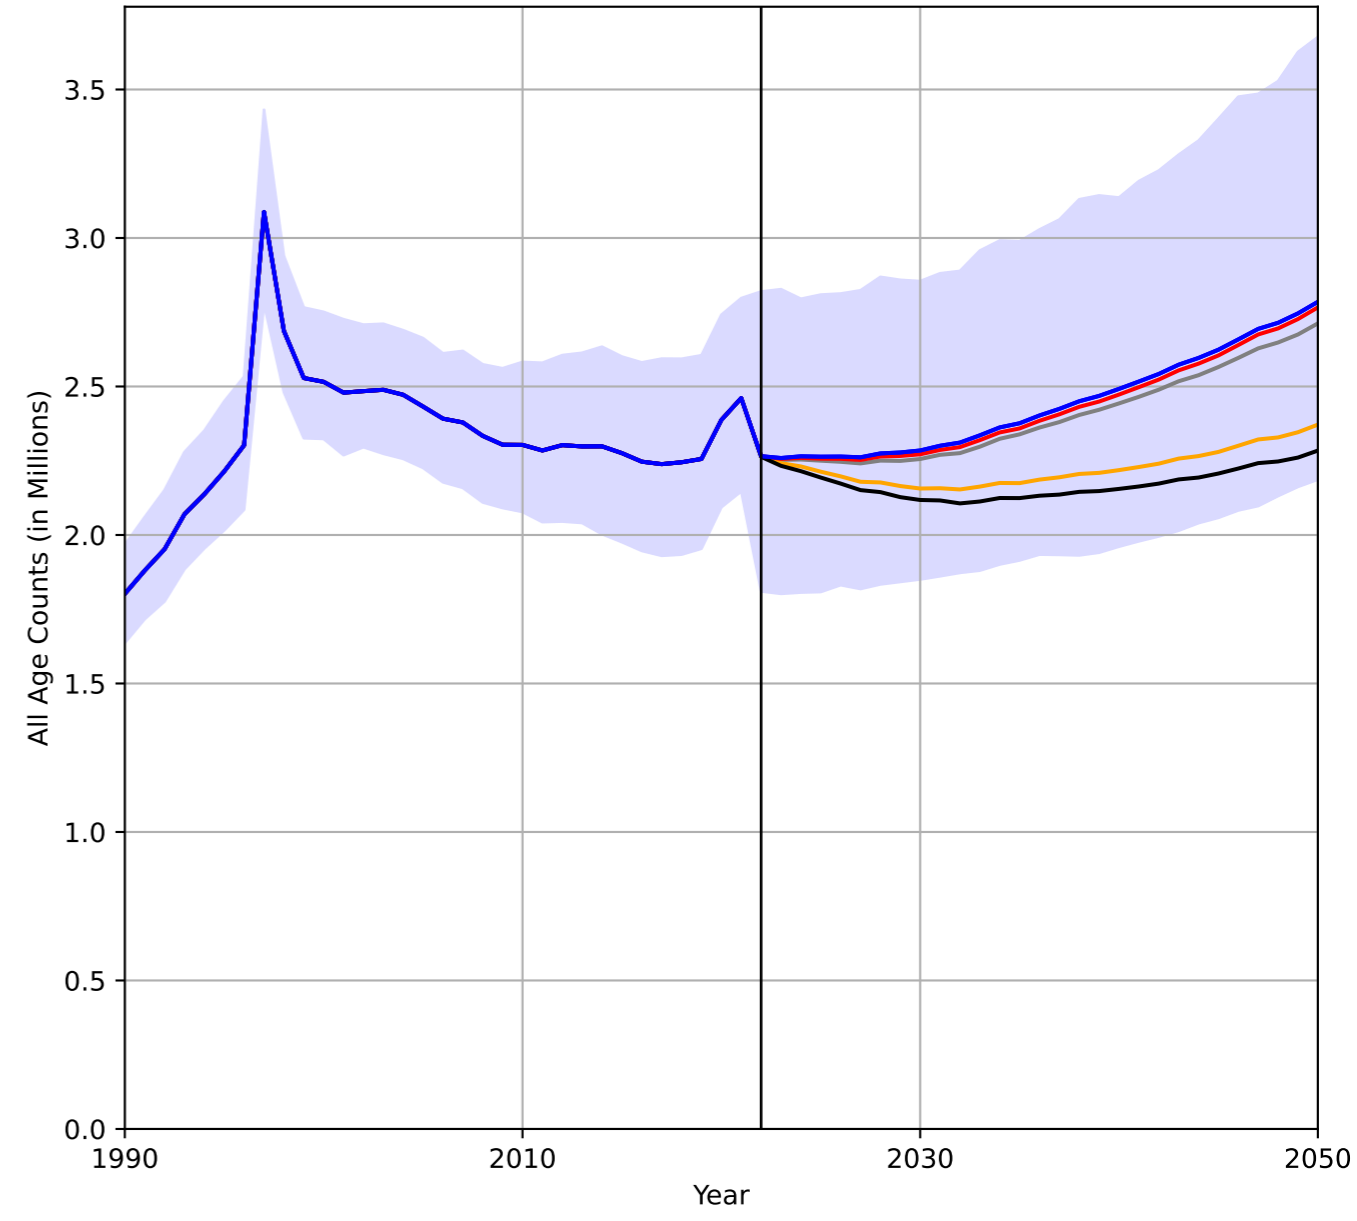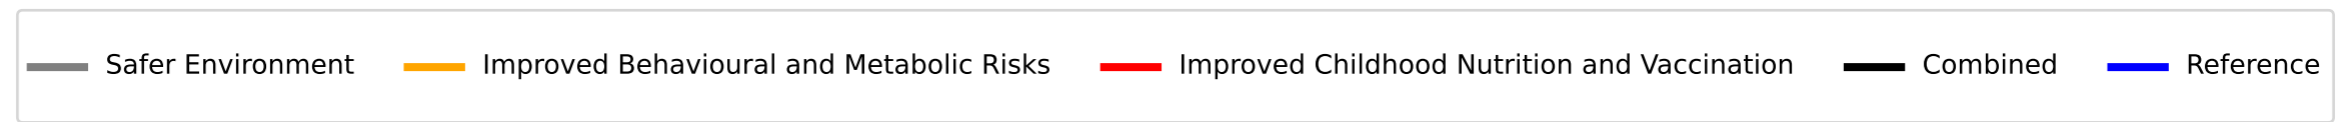

# DR Congo

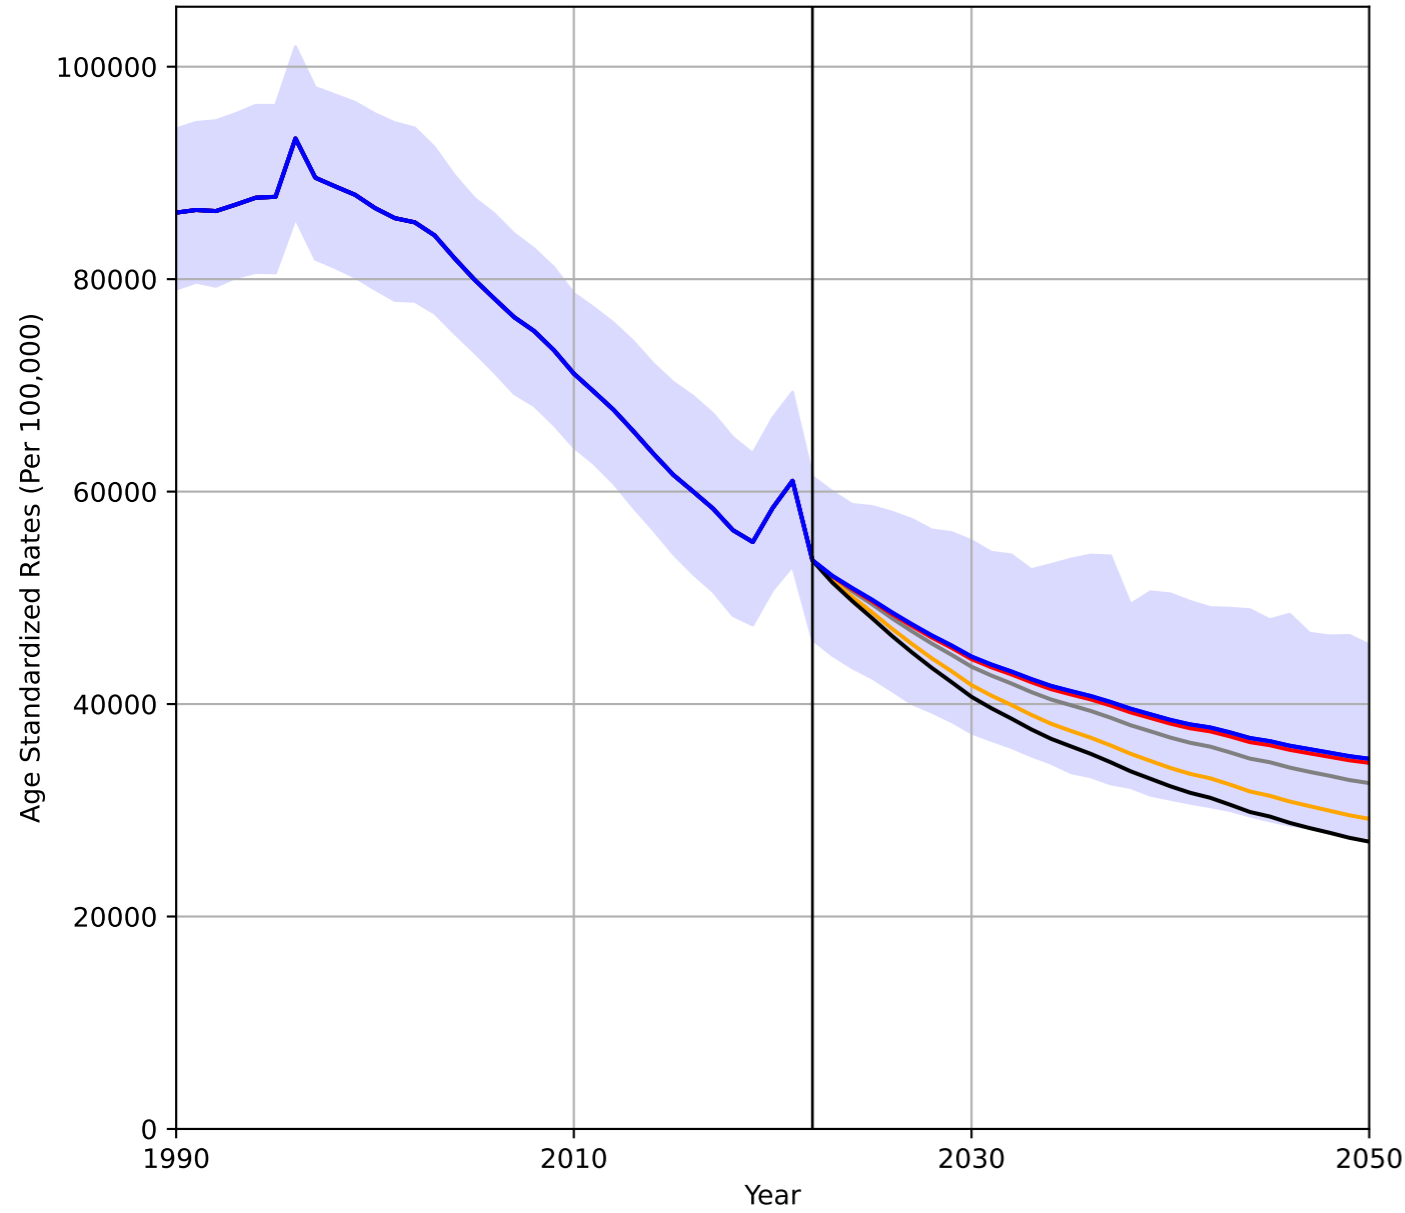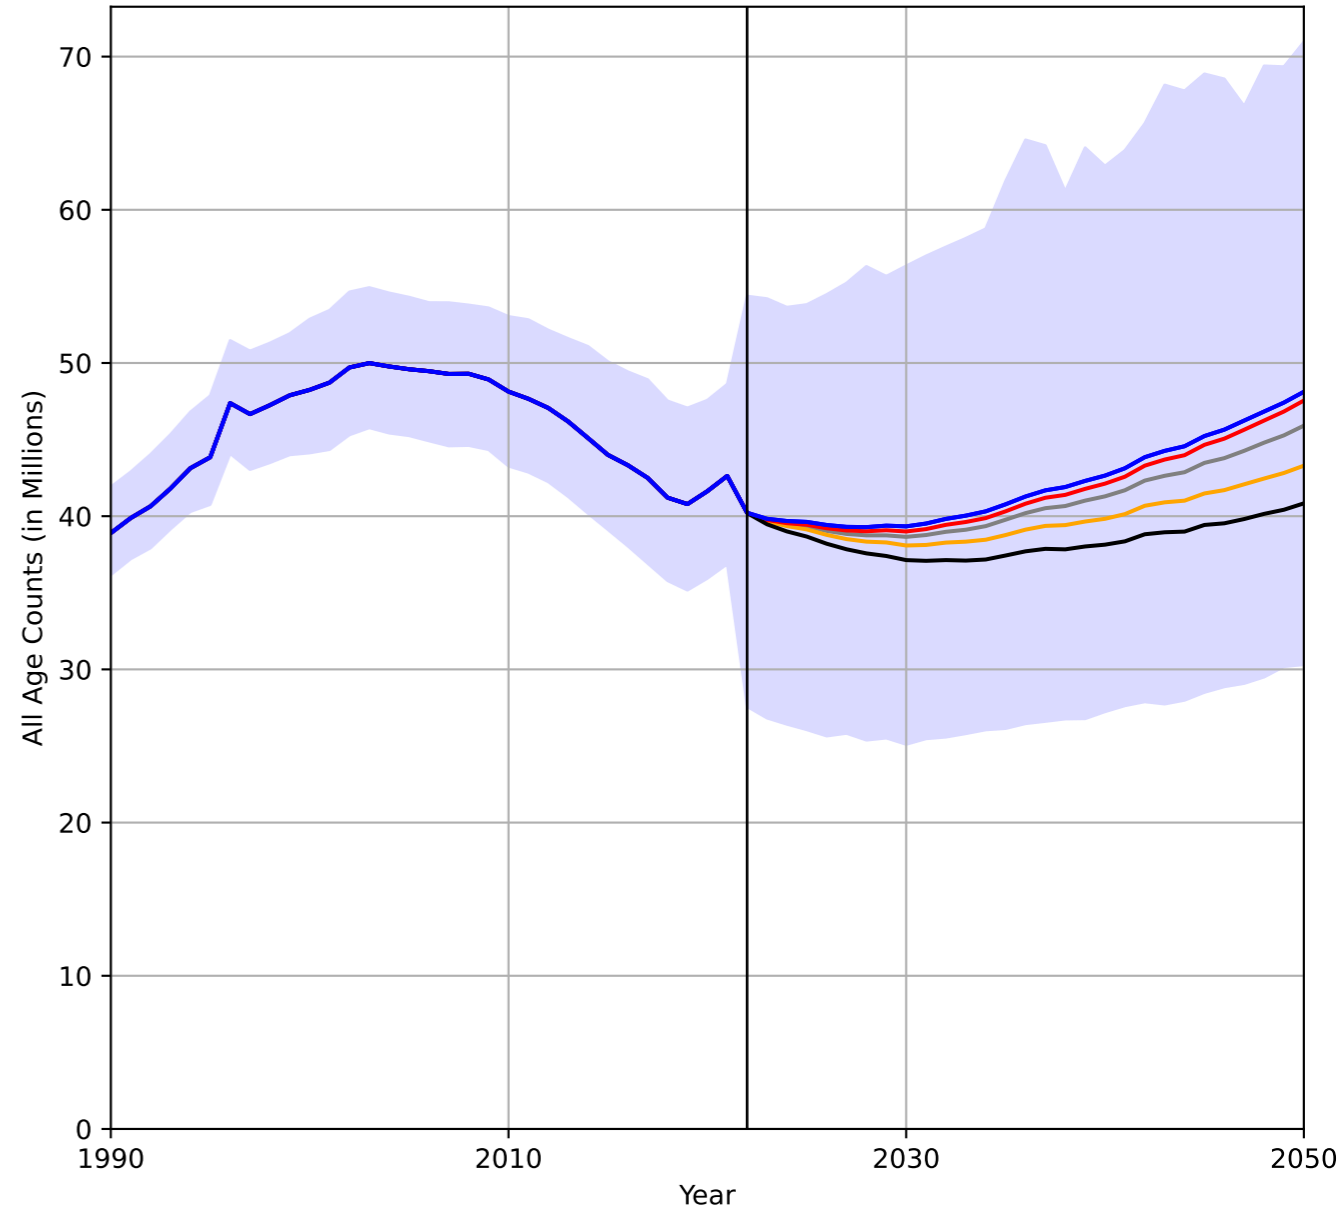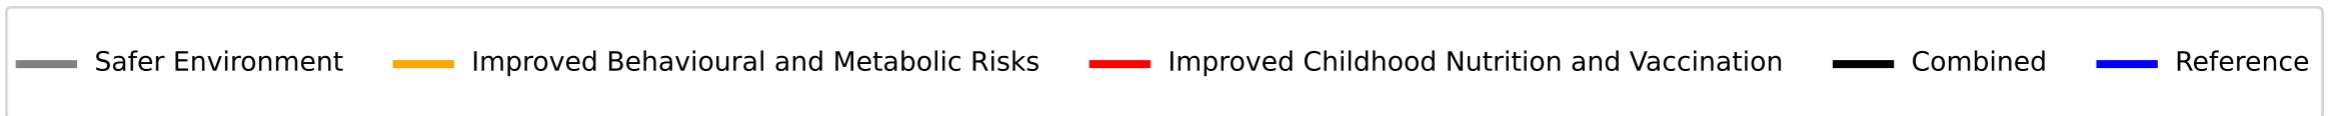

# Equatorial Guinea

Supplemental Results Figure S10. All-cause age standardised DALY rates (A) and all age DALY counts (B), for the past and for five future scenarios, 1990–2050

1573

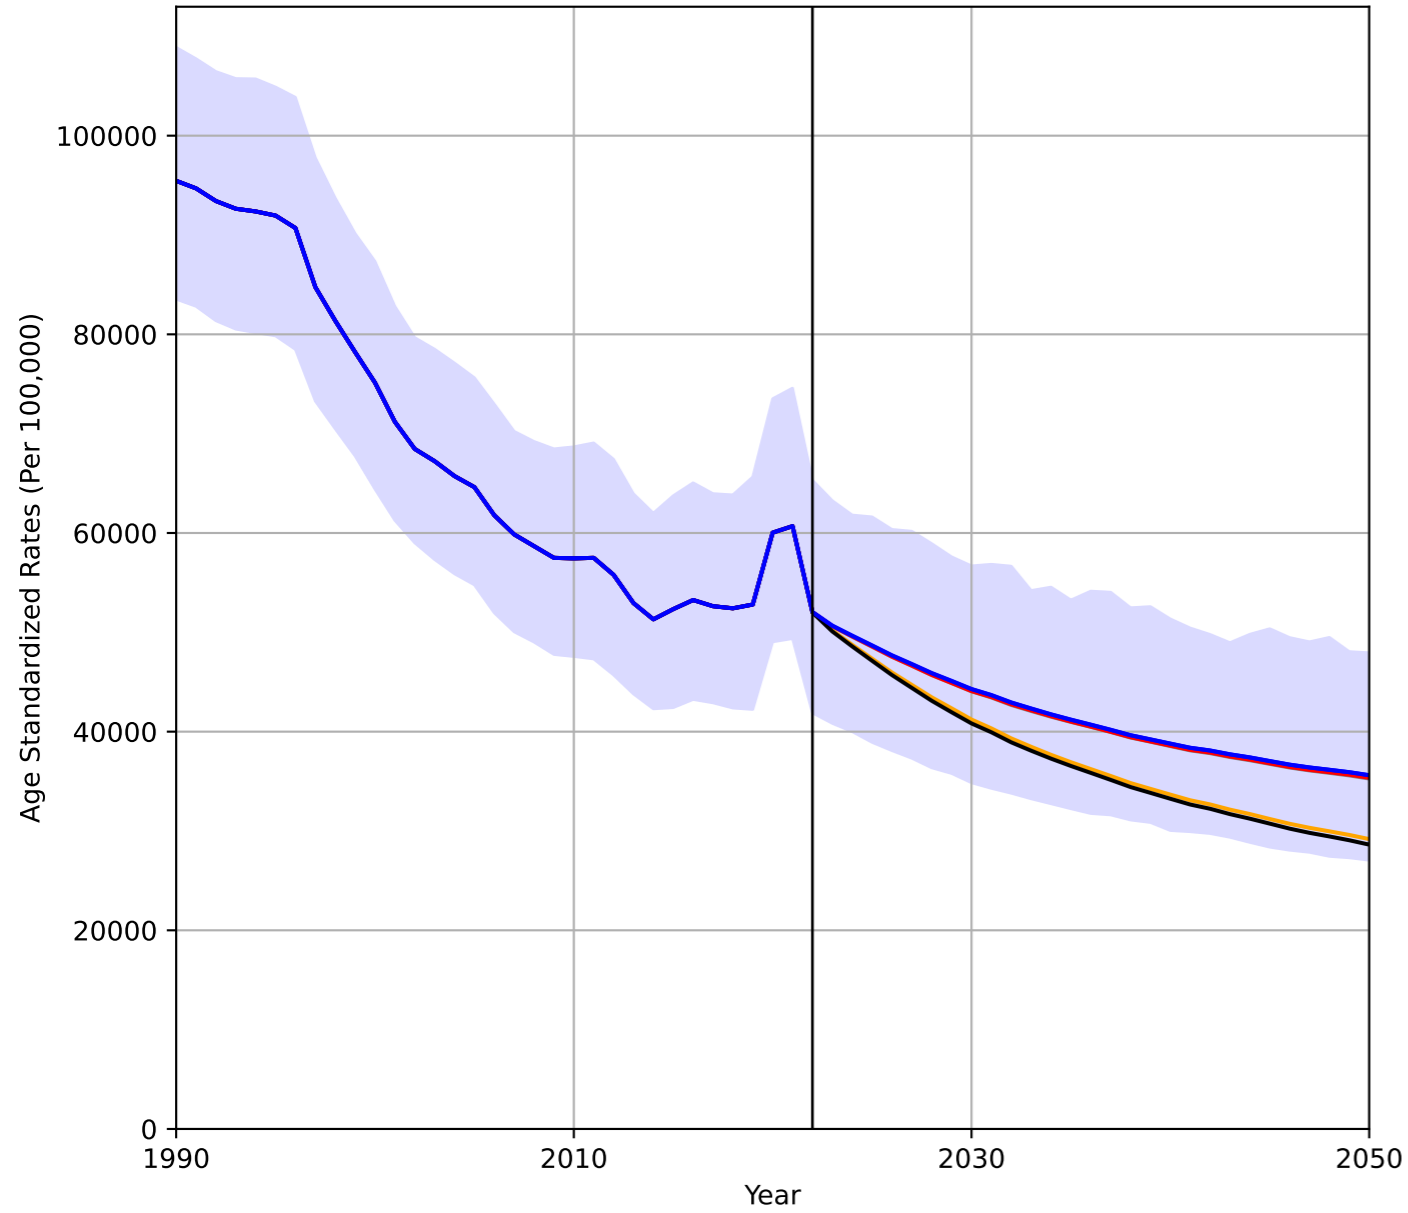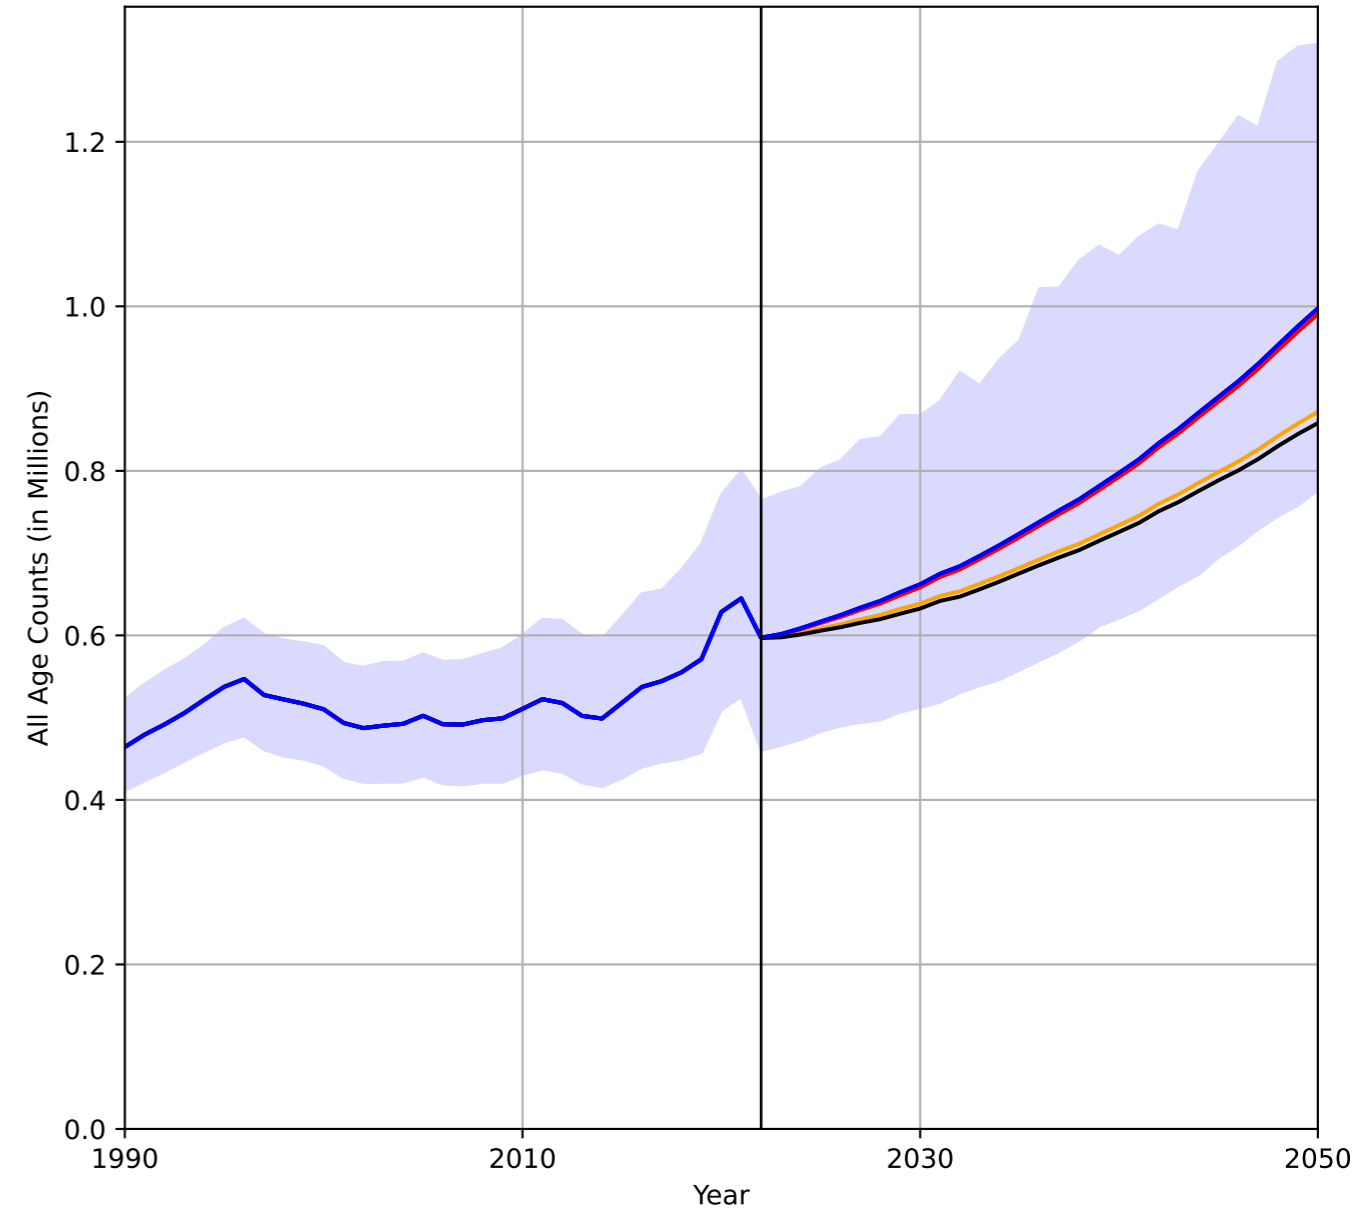

# Gabon

Supplemental Results Figure S10. All-cause age standardised DALY rates (A) and all age DALY counts (B), for the past and for five future scenarios, 1990–2050

1574

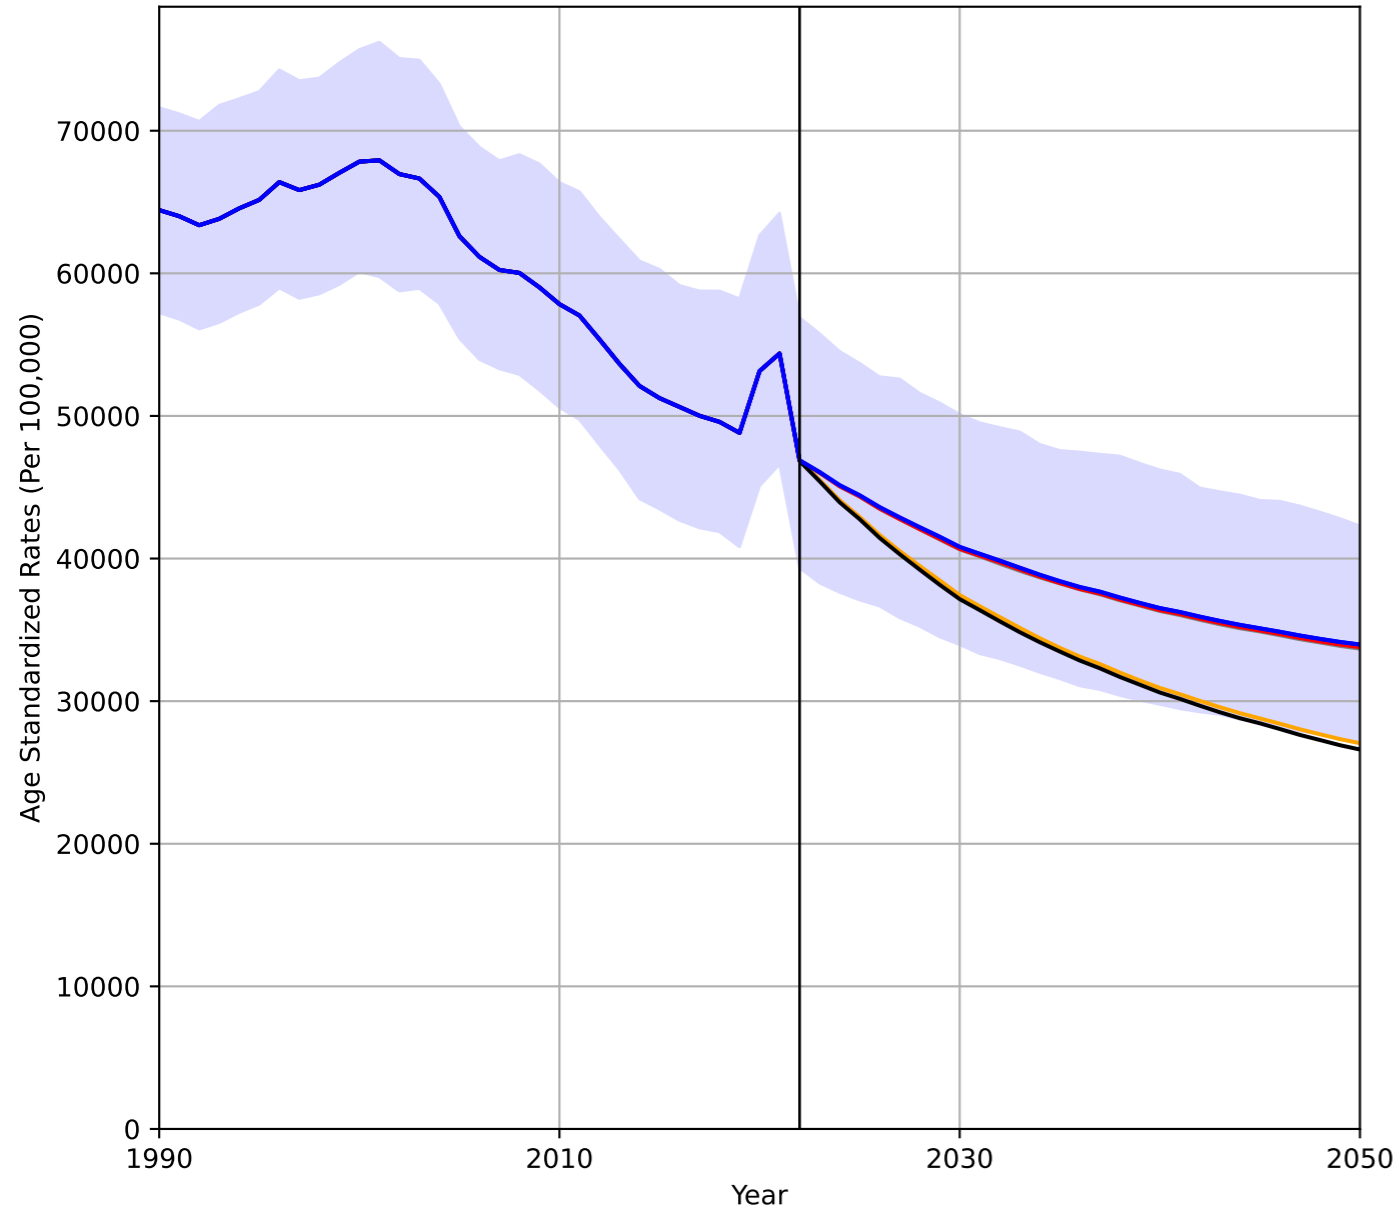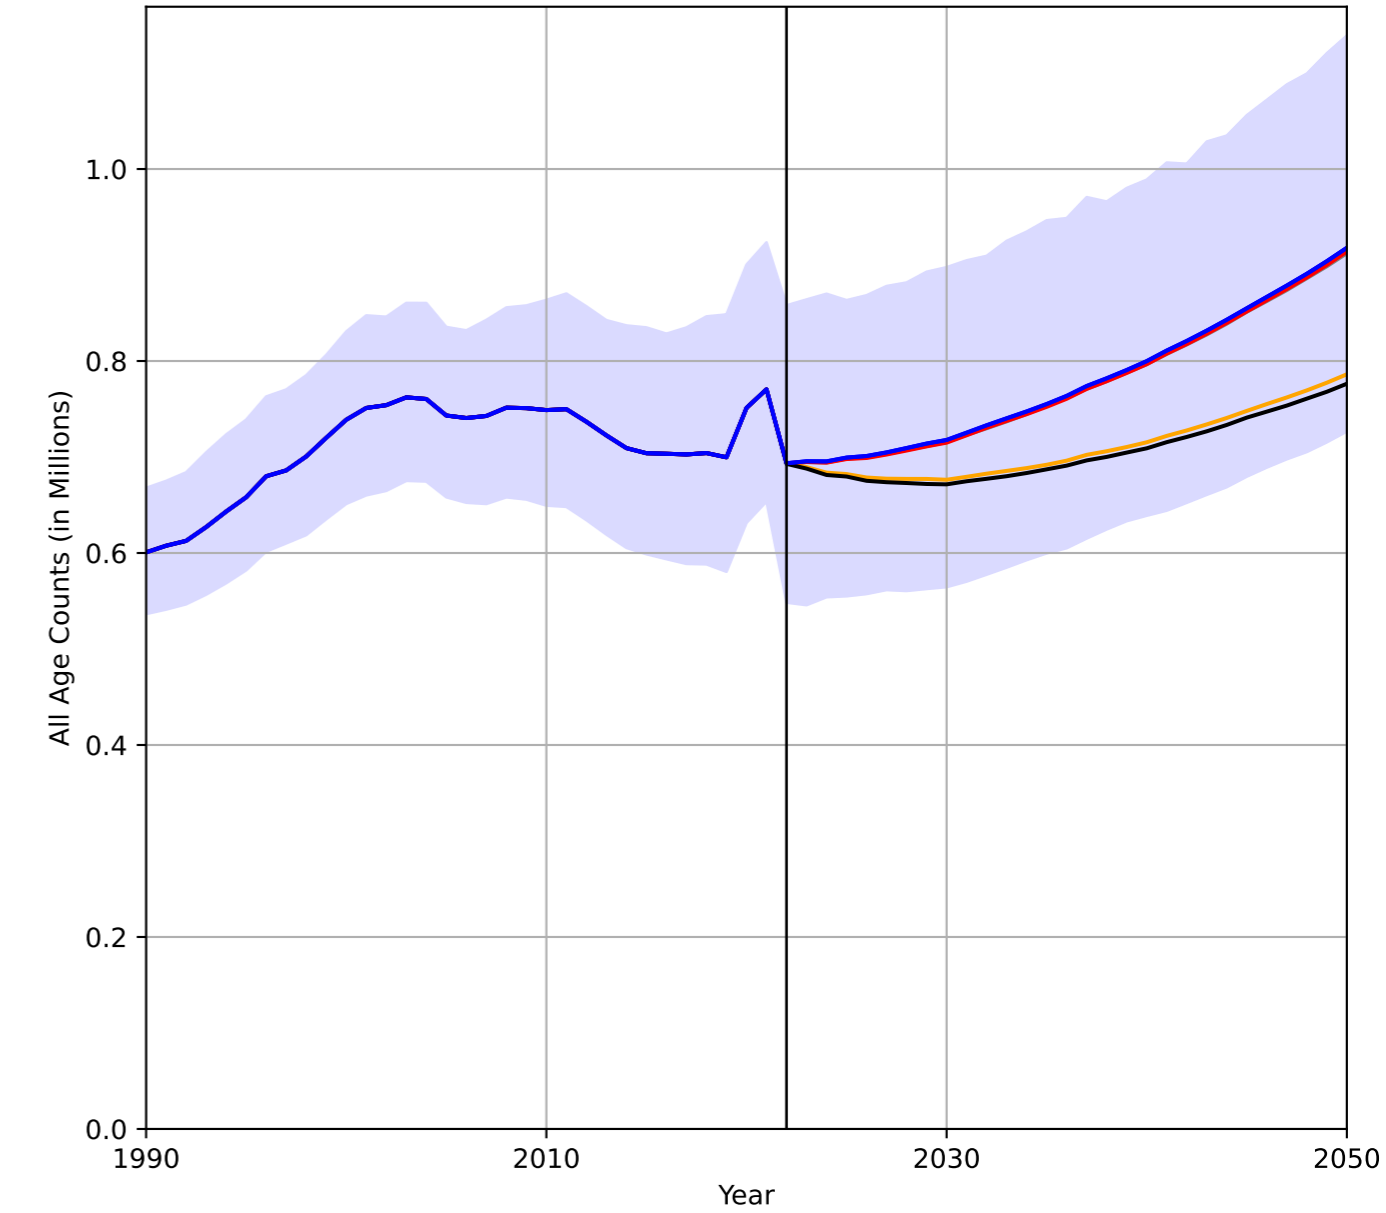

# Burundi

Supplemental Results Figure S10. All-cause age standardised DALY rates (A) and all age DALY counts (B), for the past and for five future scenarios, 1990–2050

1575

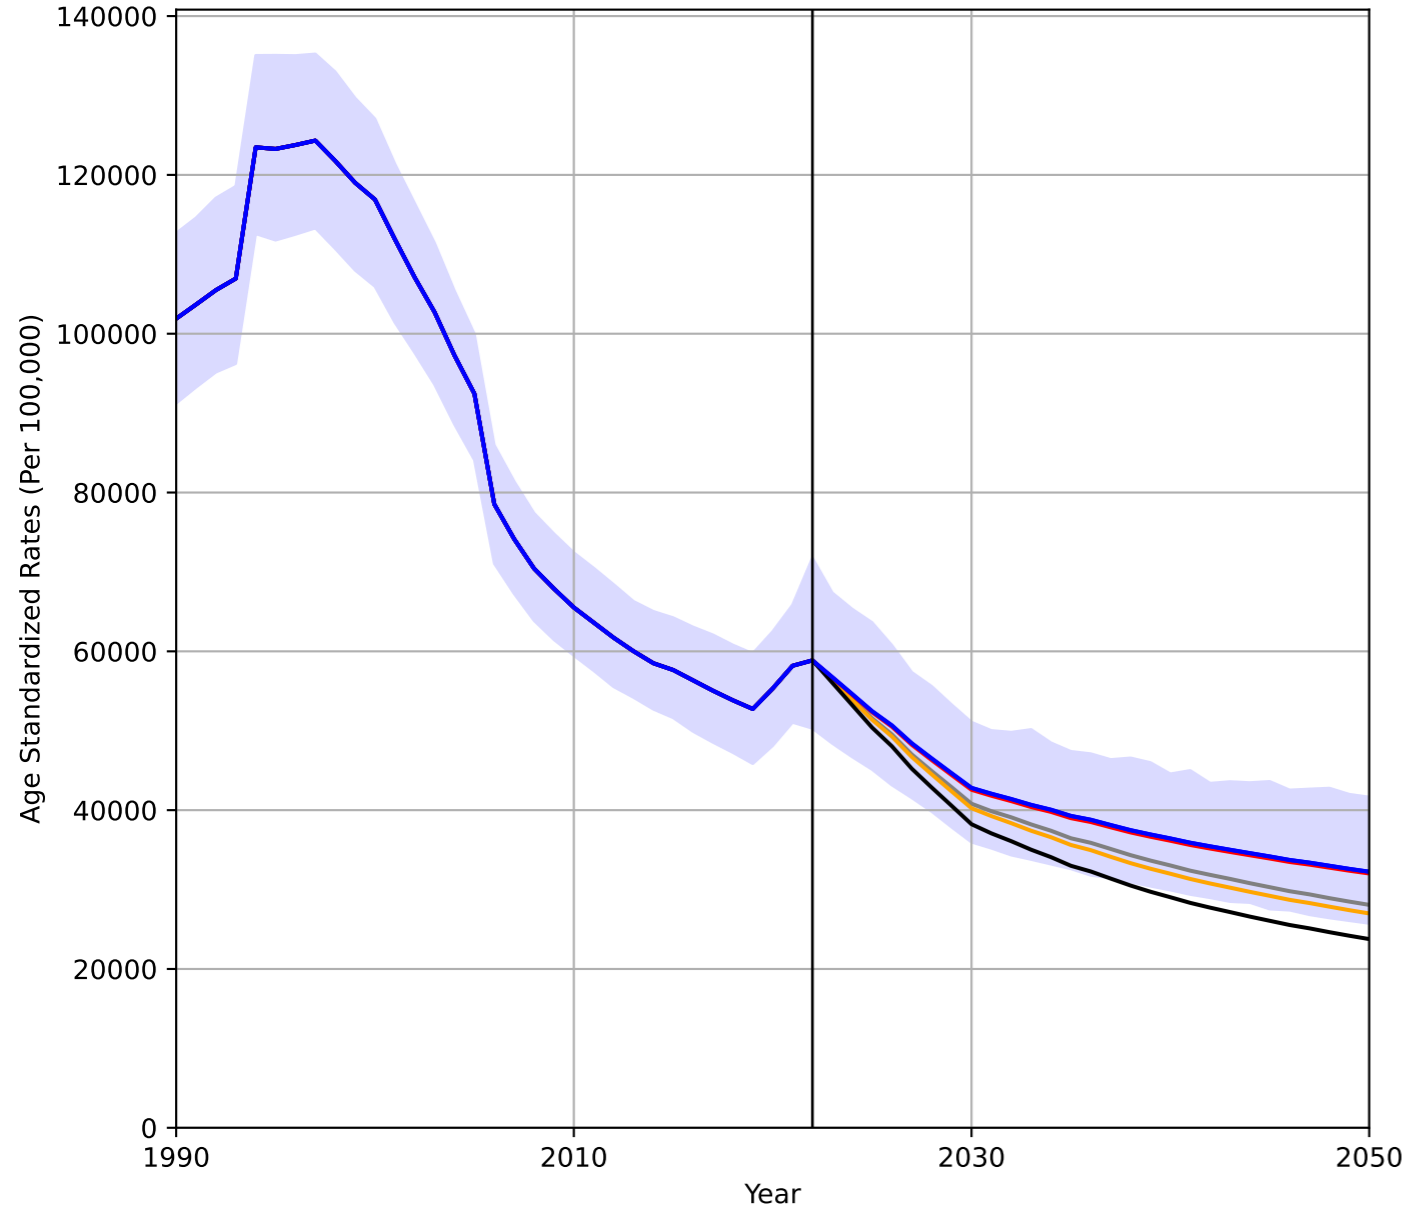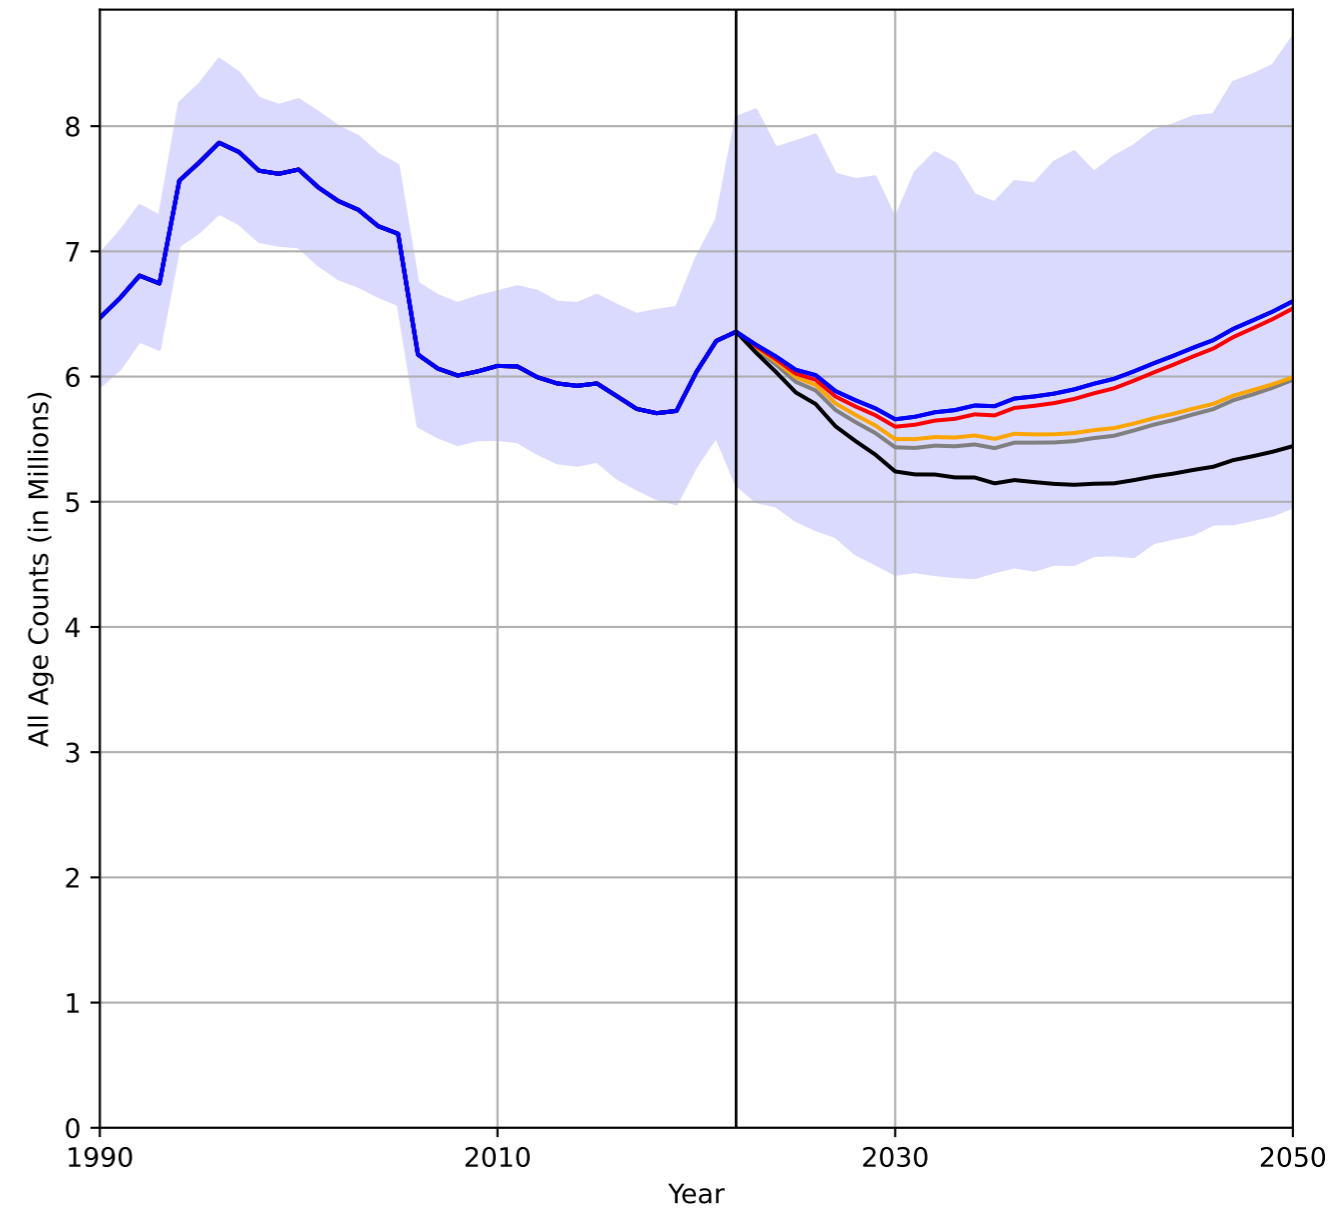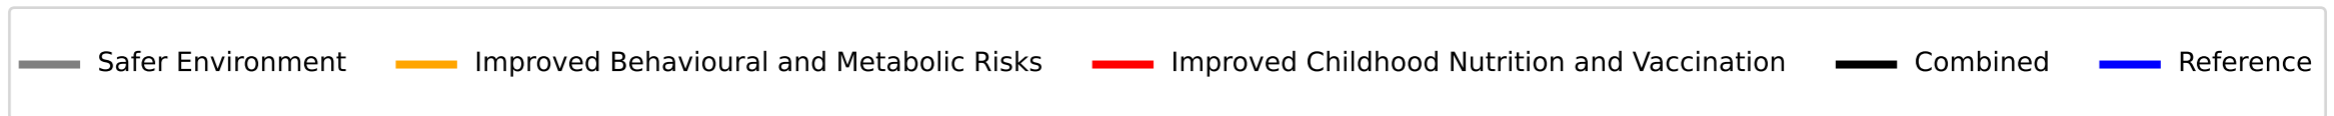



# Comoros

Supplemental Results Figure S10. All-cause age standardised DALY rates (A) and all age DALY counts (B), for the past and for five future scenarios, 1990–2050

1576

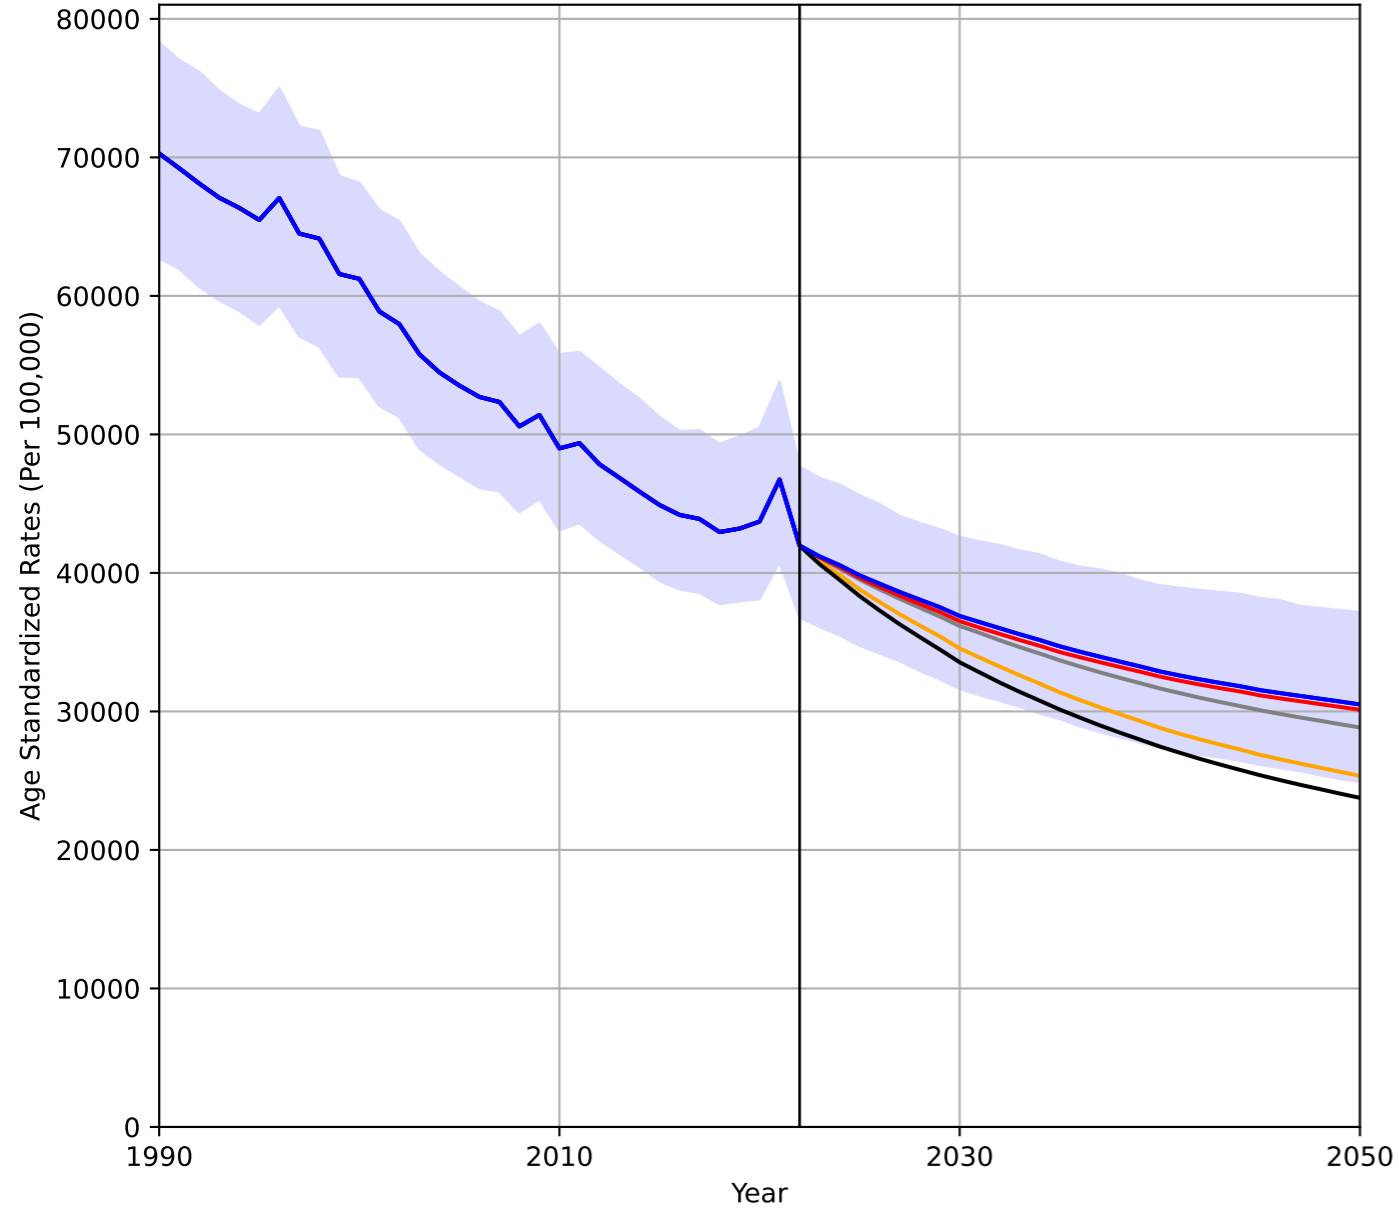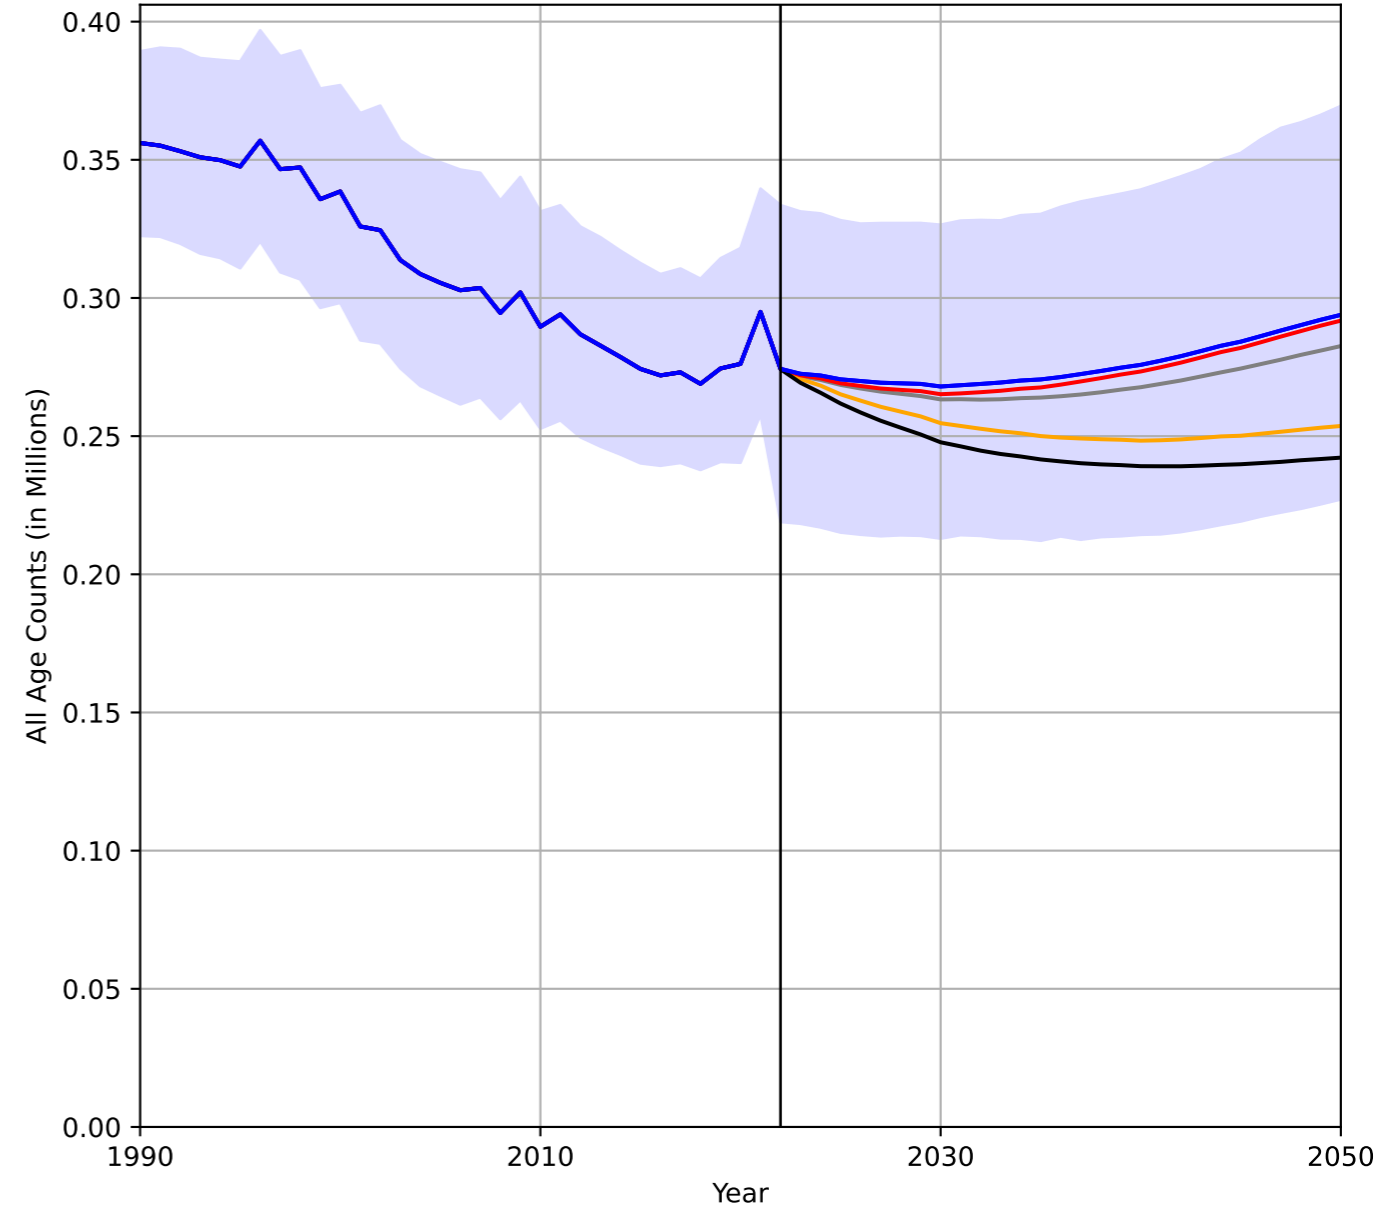

# Djibouti

Supplemental Results Figure S10. All-cause age standardised DALY rates (A) and all age DALY counts (B), for the past and for five future scenarios, 1990–2050

1577

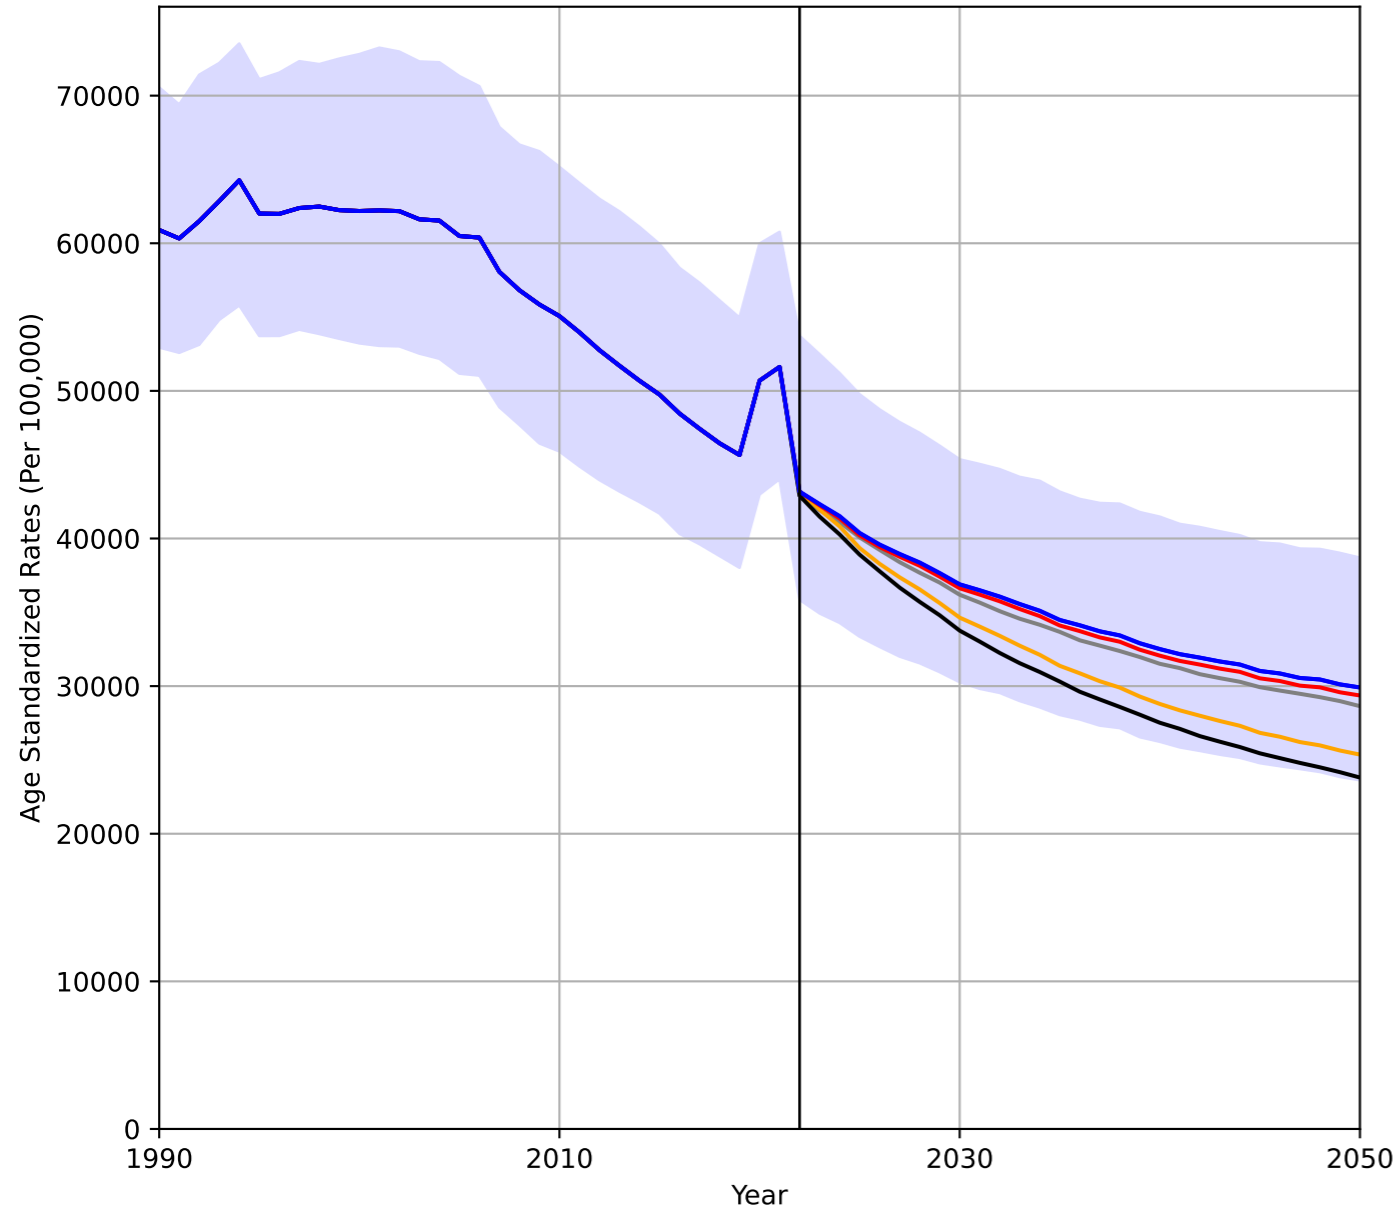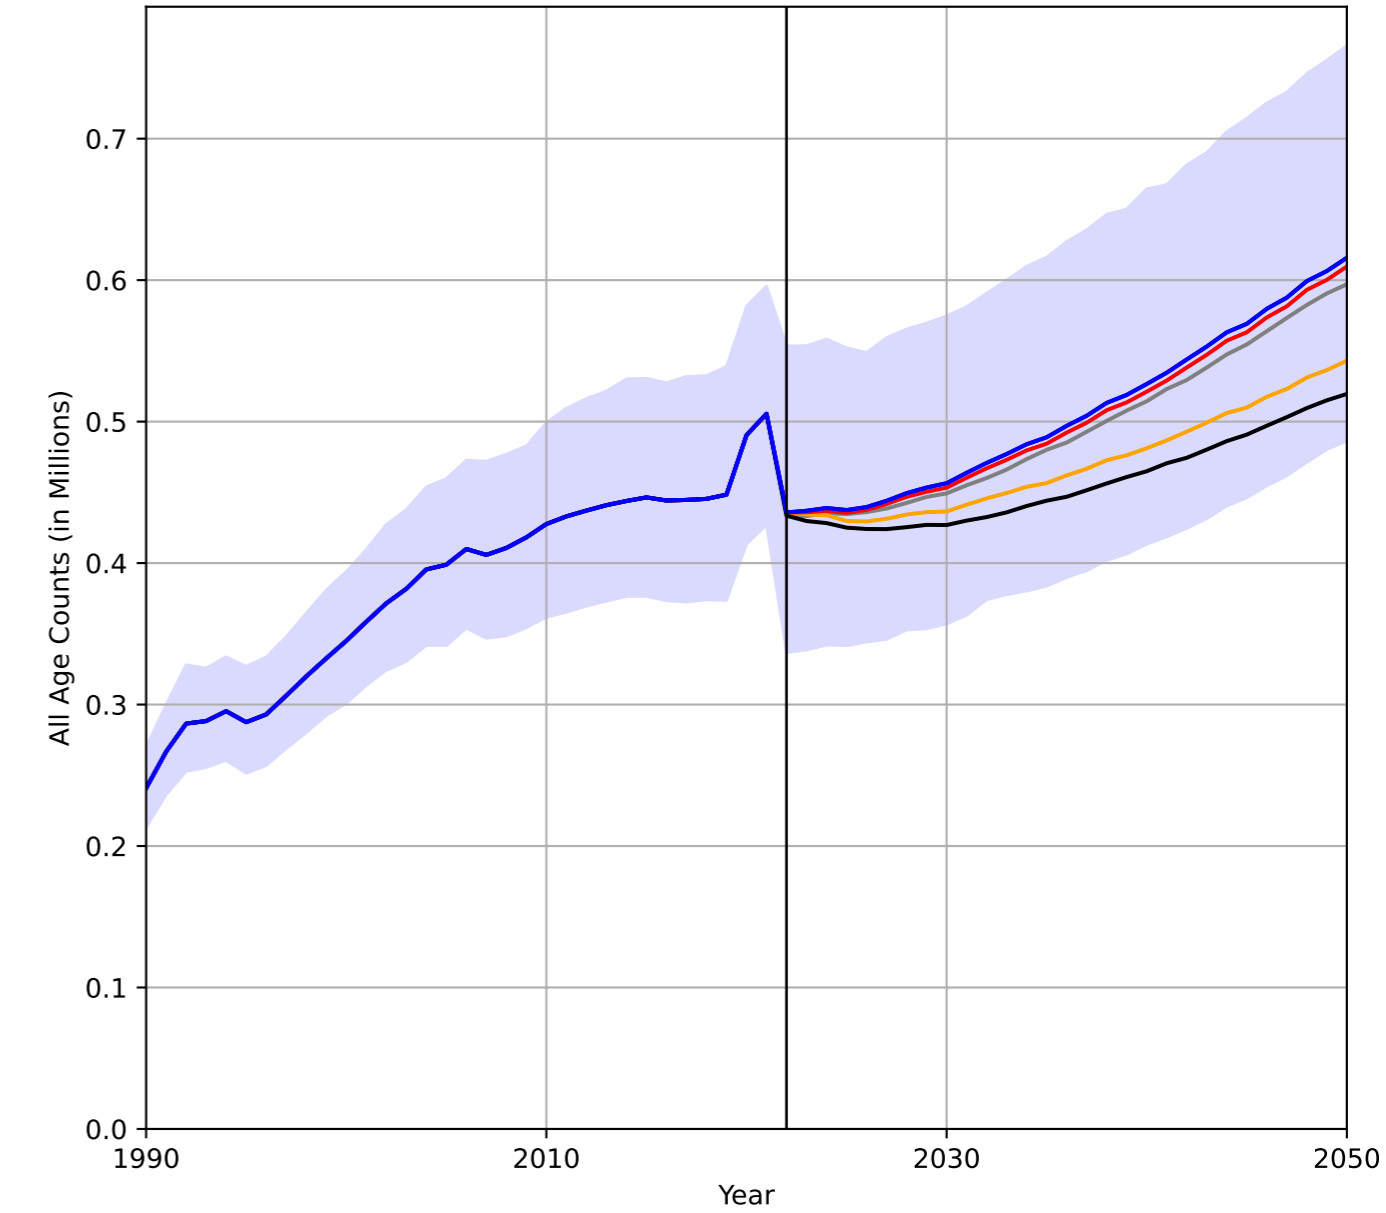

# Eritrea

Supplemental Results Figure S10. All-cause age standardised DALY rates (A) and all age DALY counts (B), for the past and for five future scenarios, 1990–2050

1578

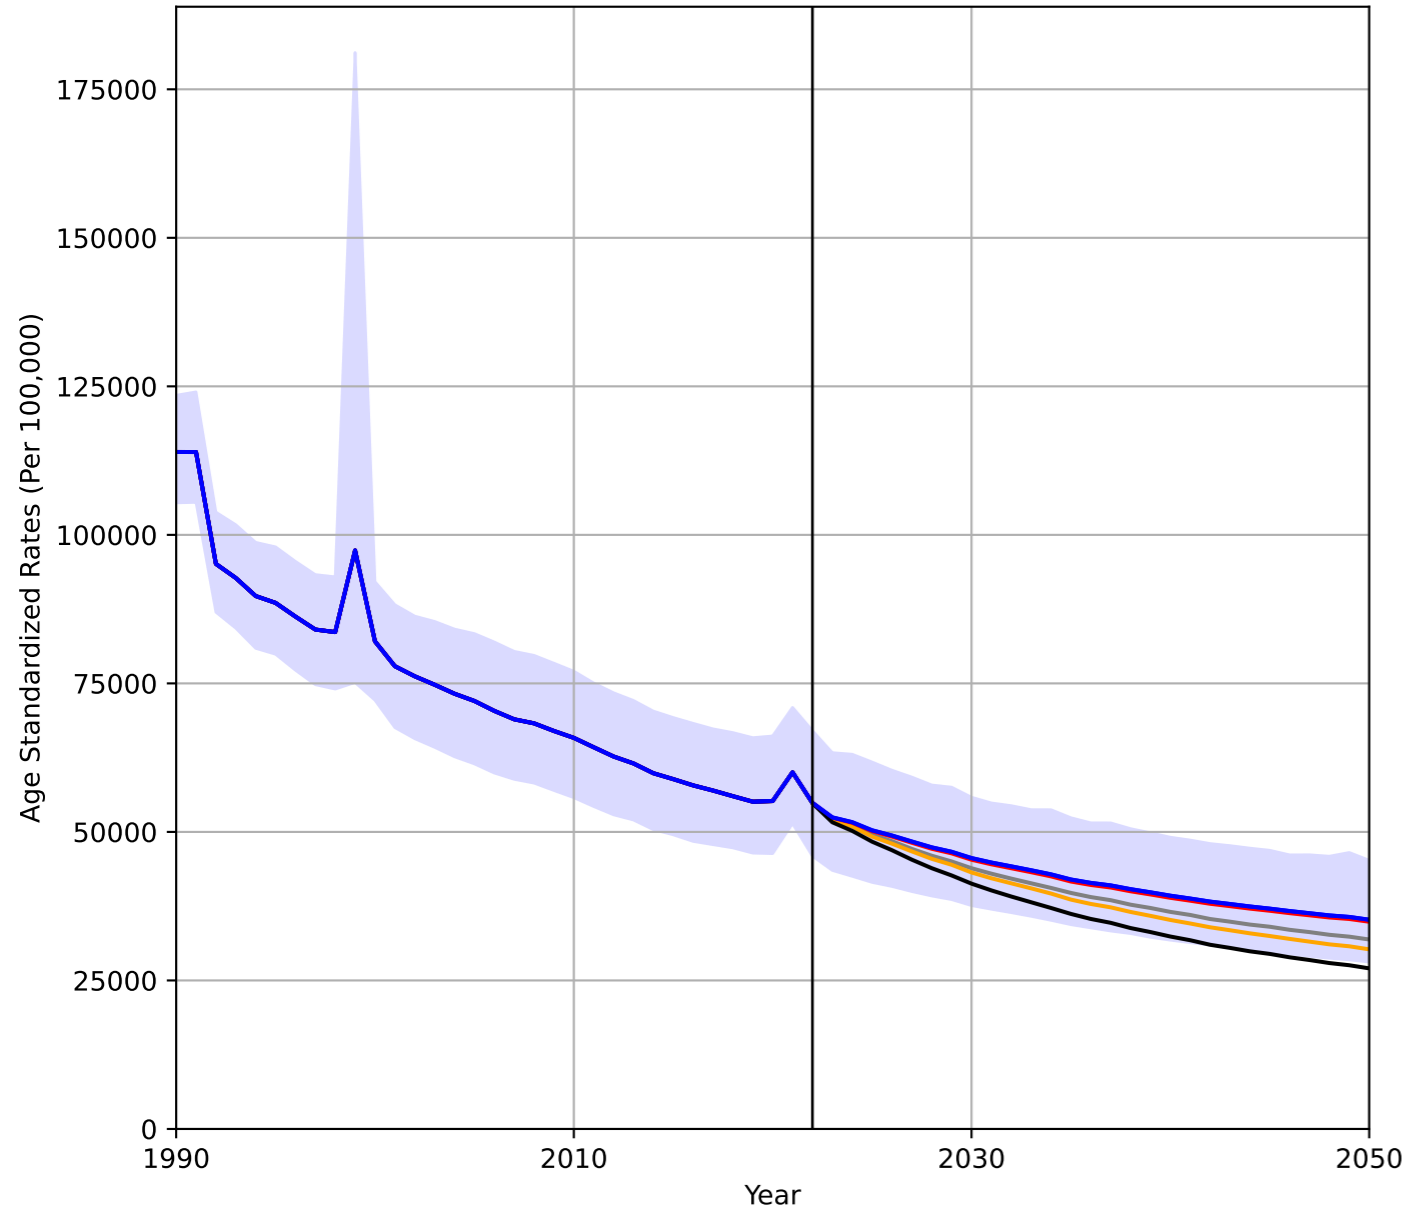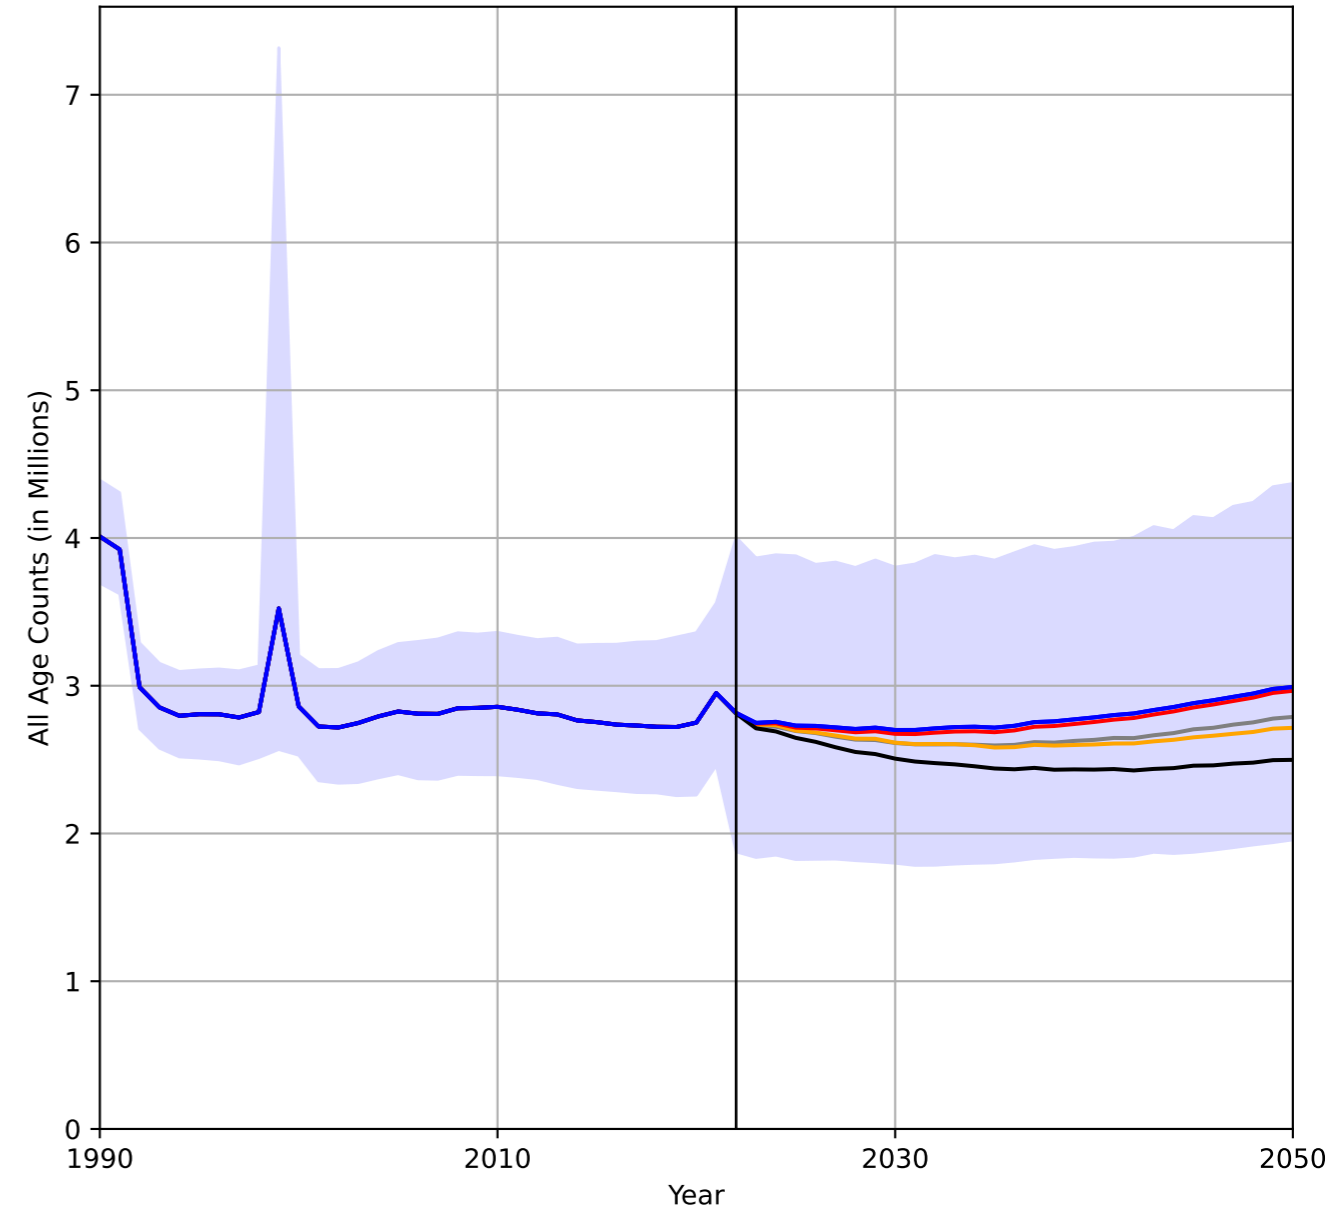

# Ethiopia

Supplemental Results Figure S10. All-cause age standardised DALY rates (A) and all age DALY counts (B), for the past and for five future scenarios, 1990–2050

1579

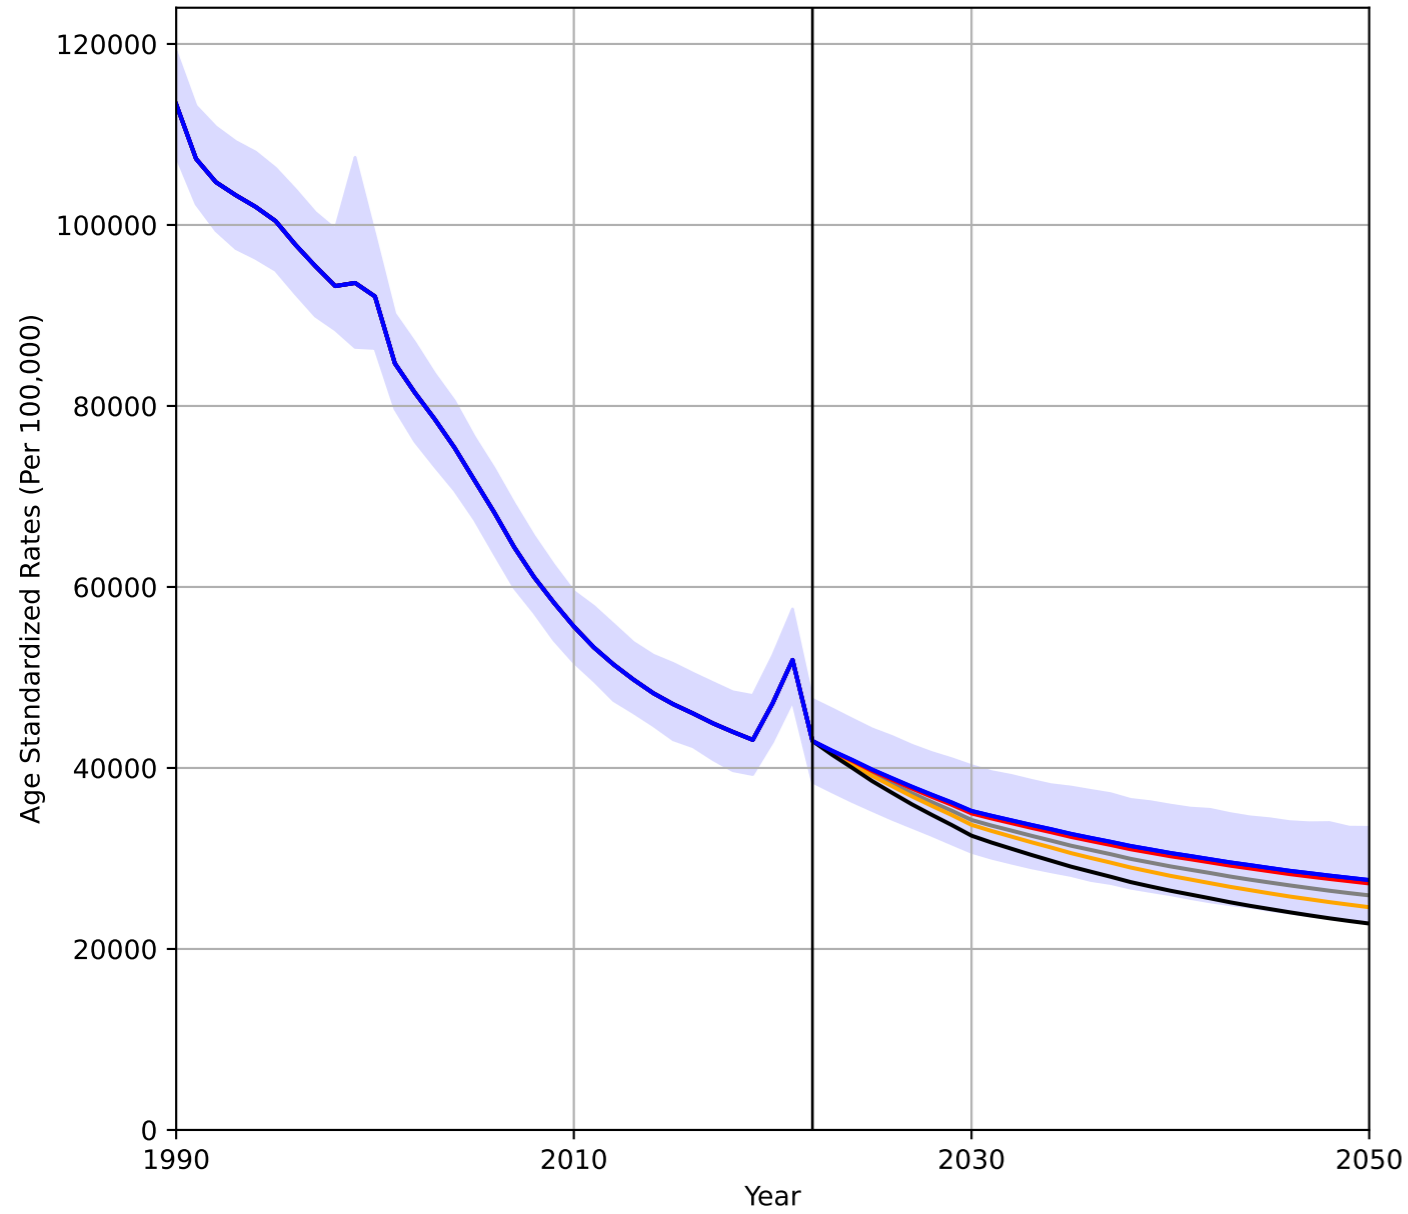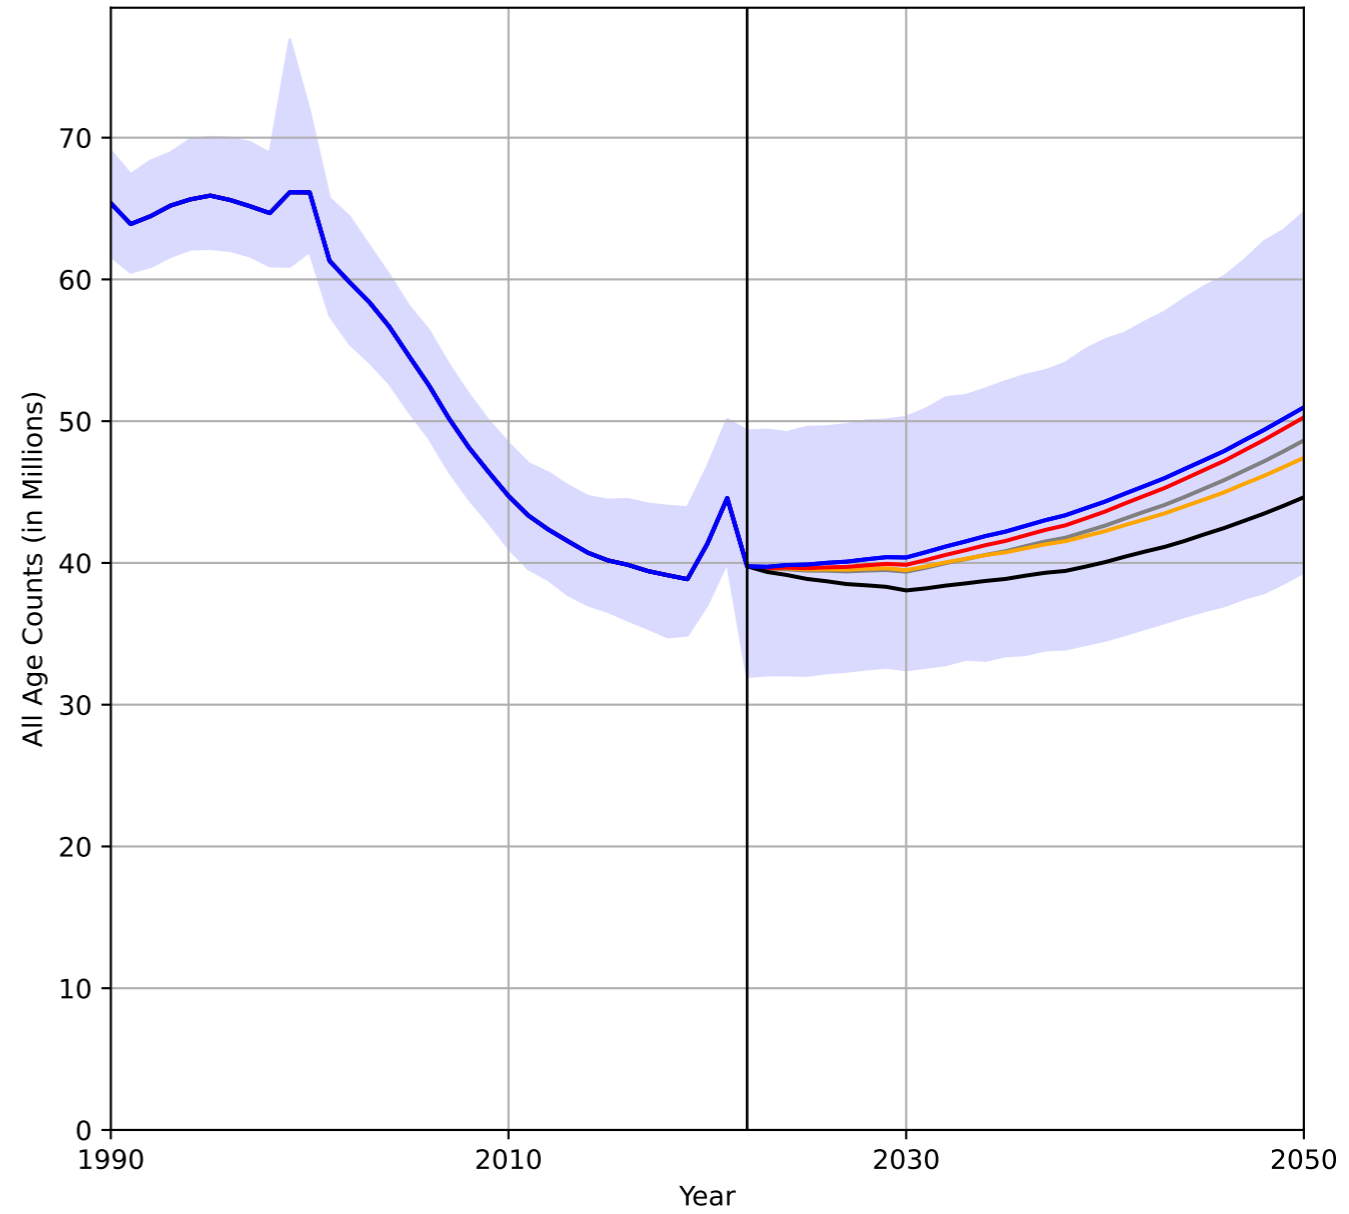

# Kenya

Supplemental Results Figure S10. All-cause age standardised DALY rates (A) and all age DALY counts (B), for the past and for five future scenarios, 1990–2050

1580

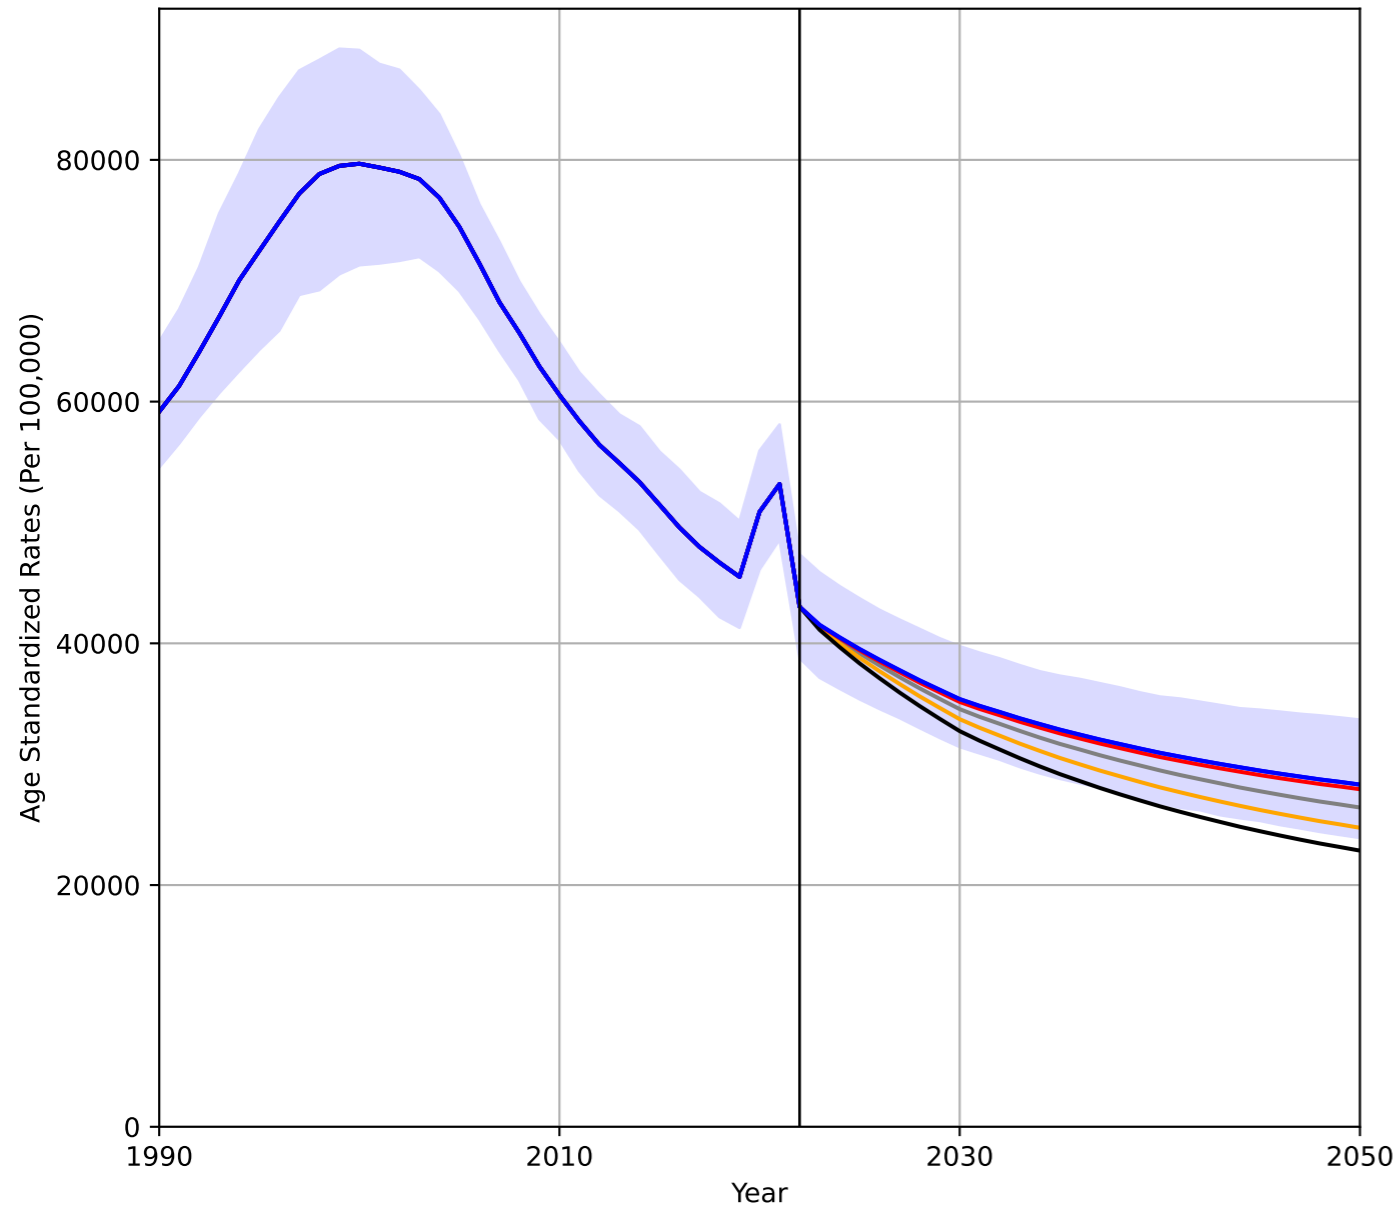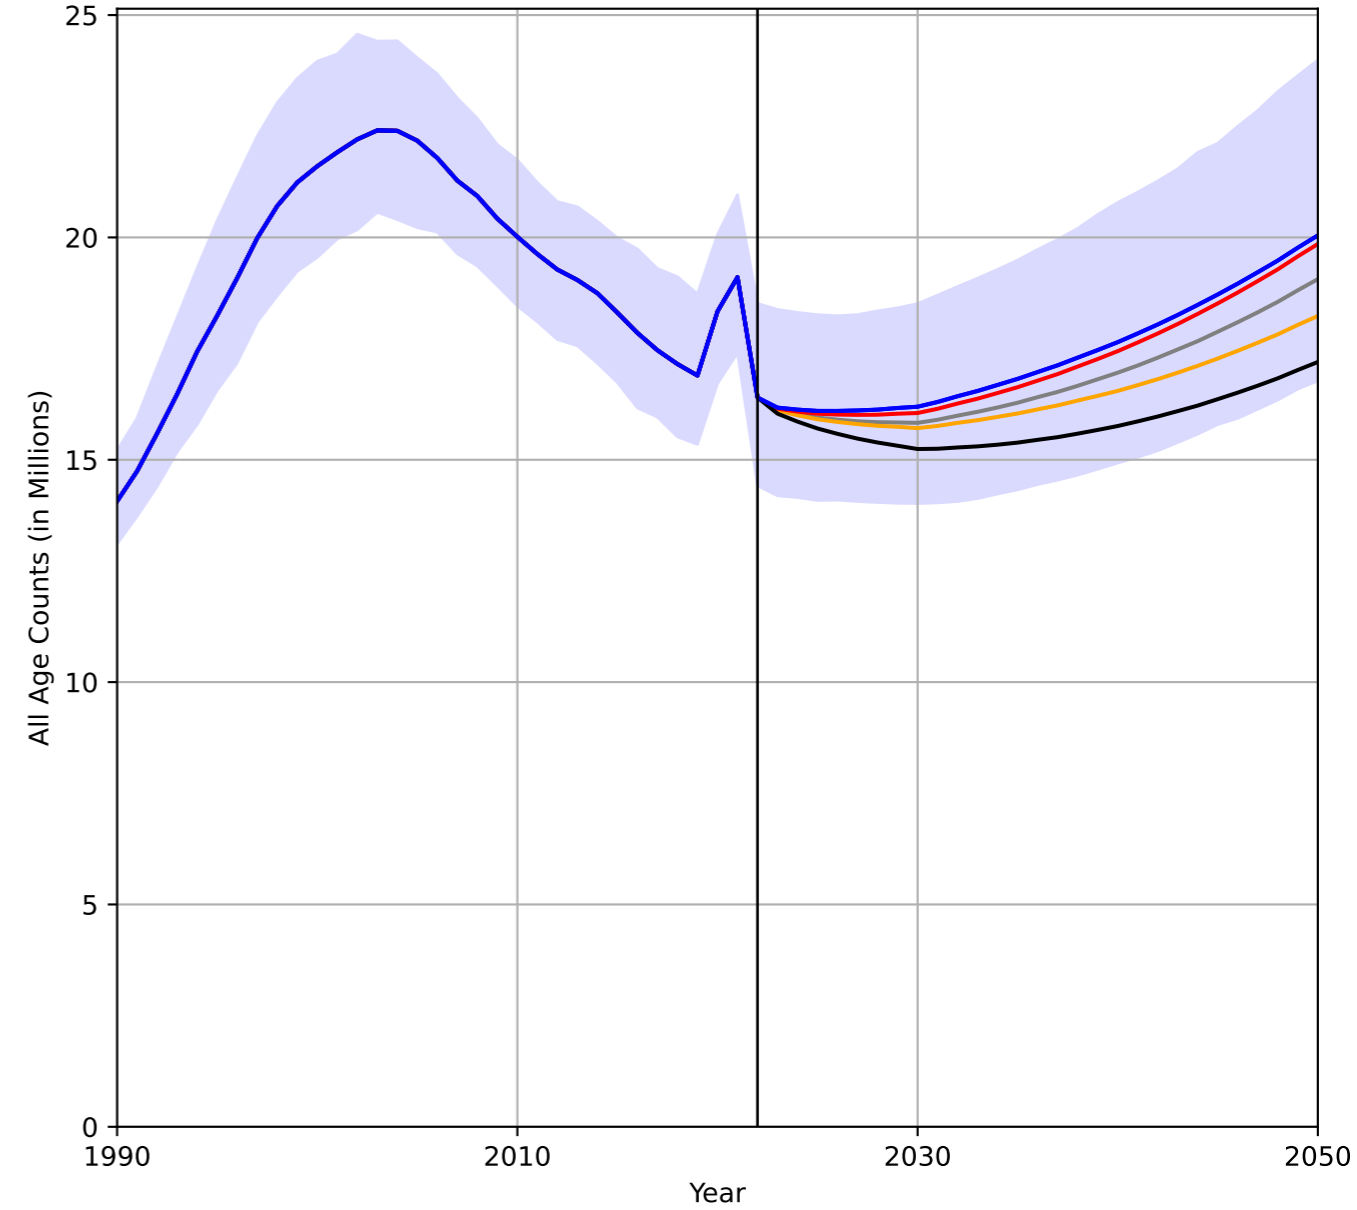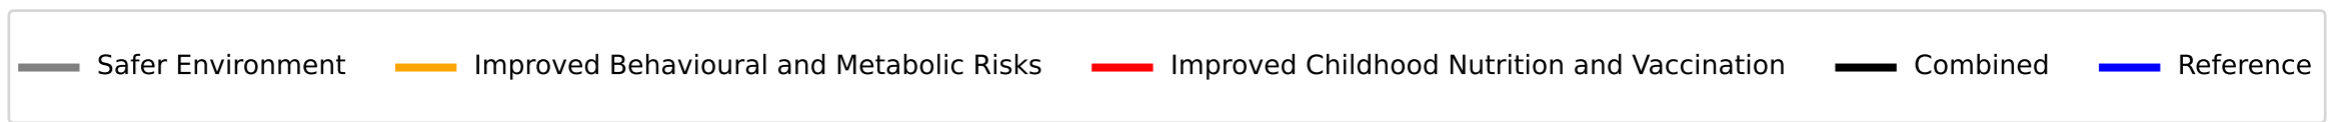

# Madagascar

Supplemental Results Figure S10. All-cause age standardised DALY rates (A) and all age DALY counts (B), for the past and for five future scenarios, 1990–2050

1581

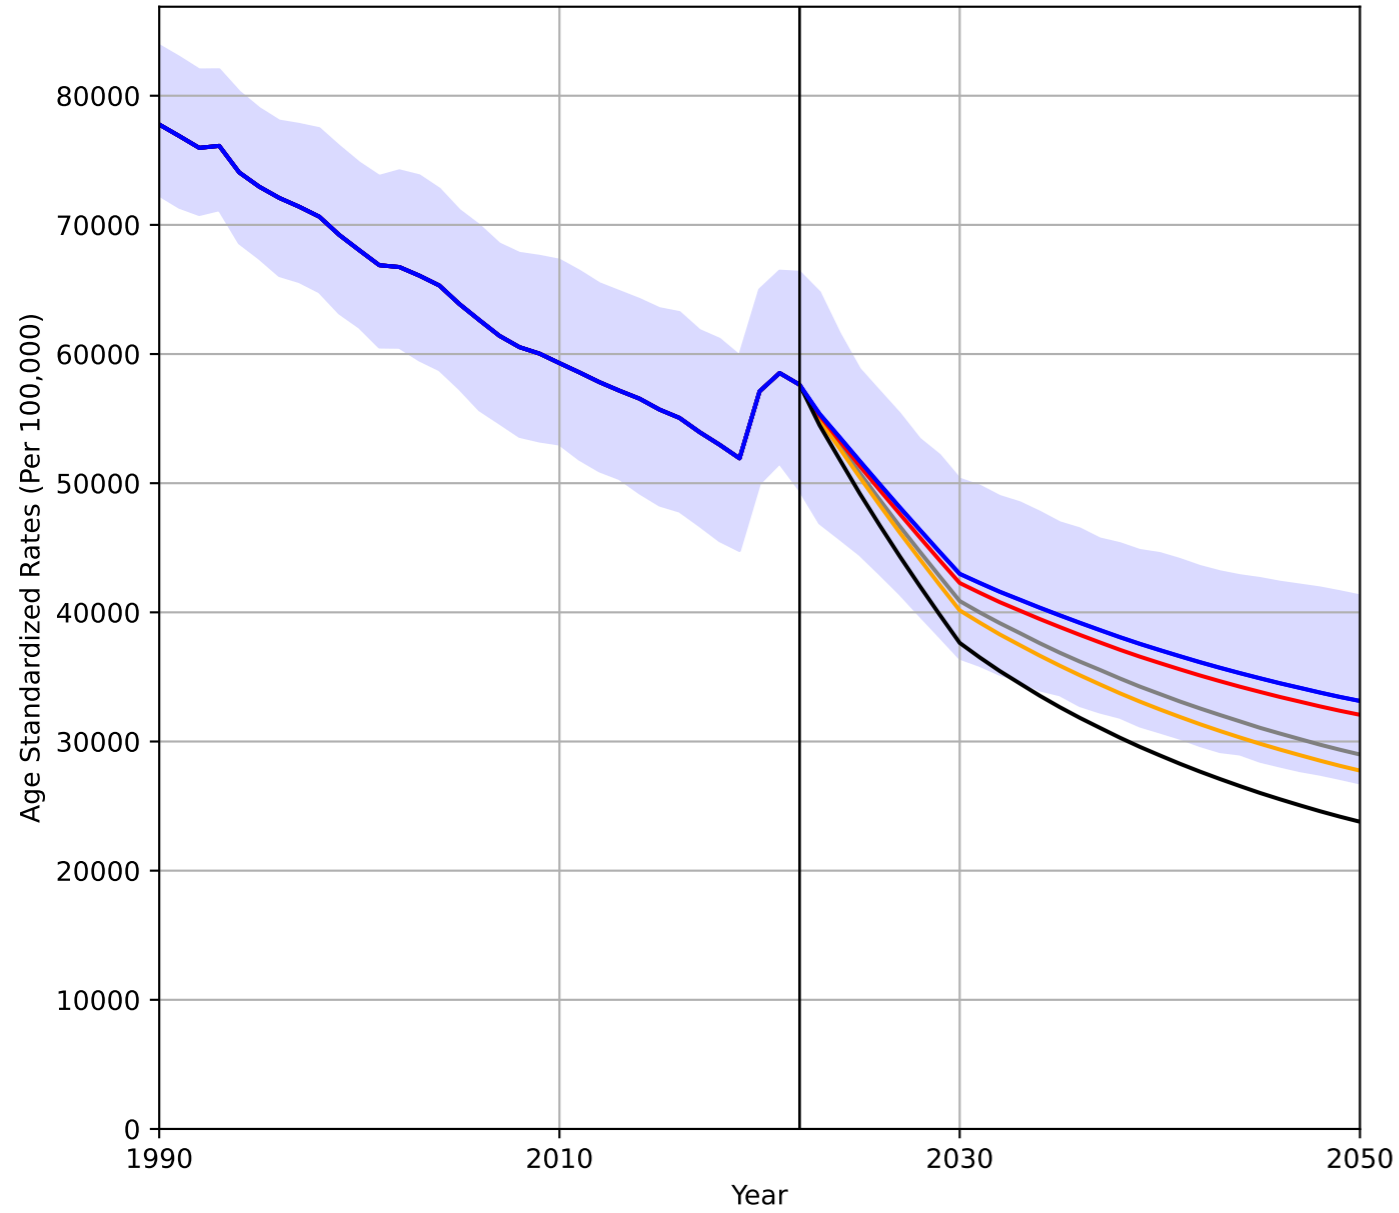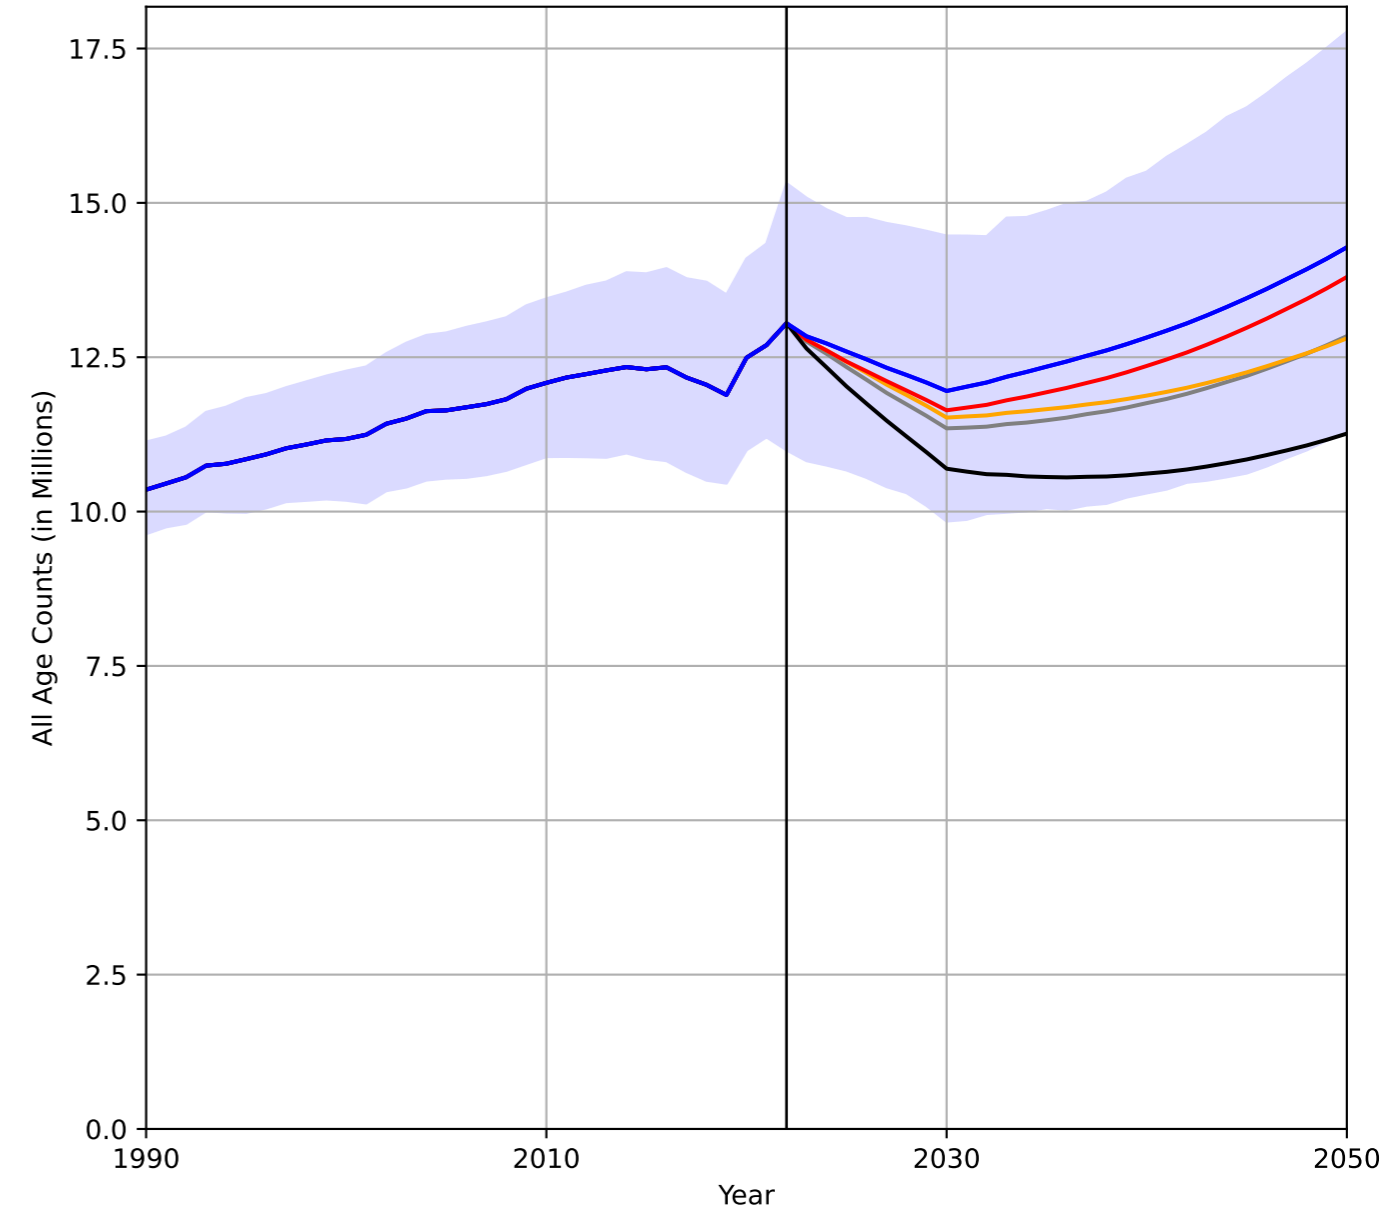

# Malawi

Supplemental Results Figure S10. All-cause age standardised DALY rates (A) and all age DALY counts (B), for the past and for five future scenarios, 1990–2050

1582

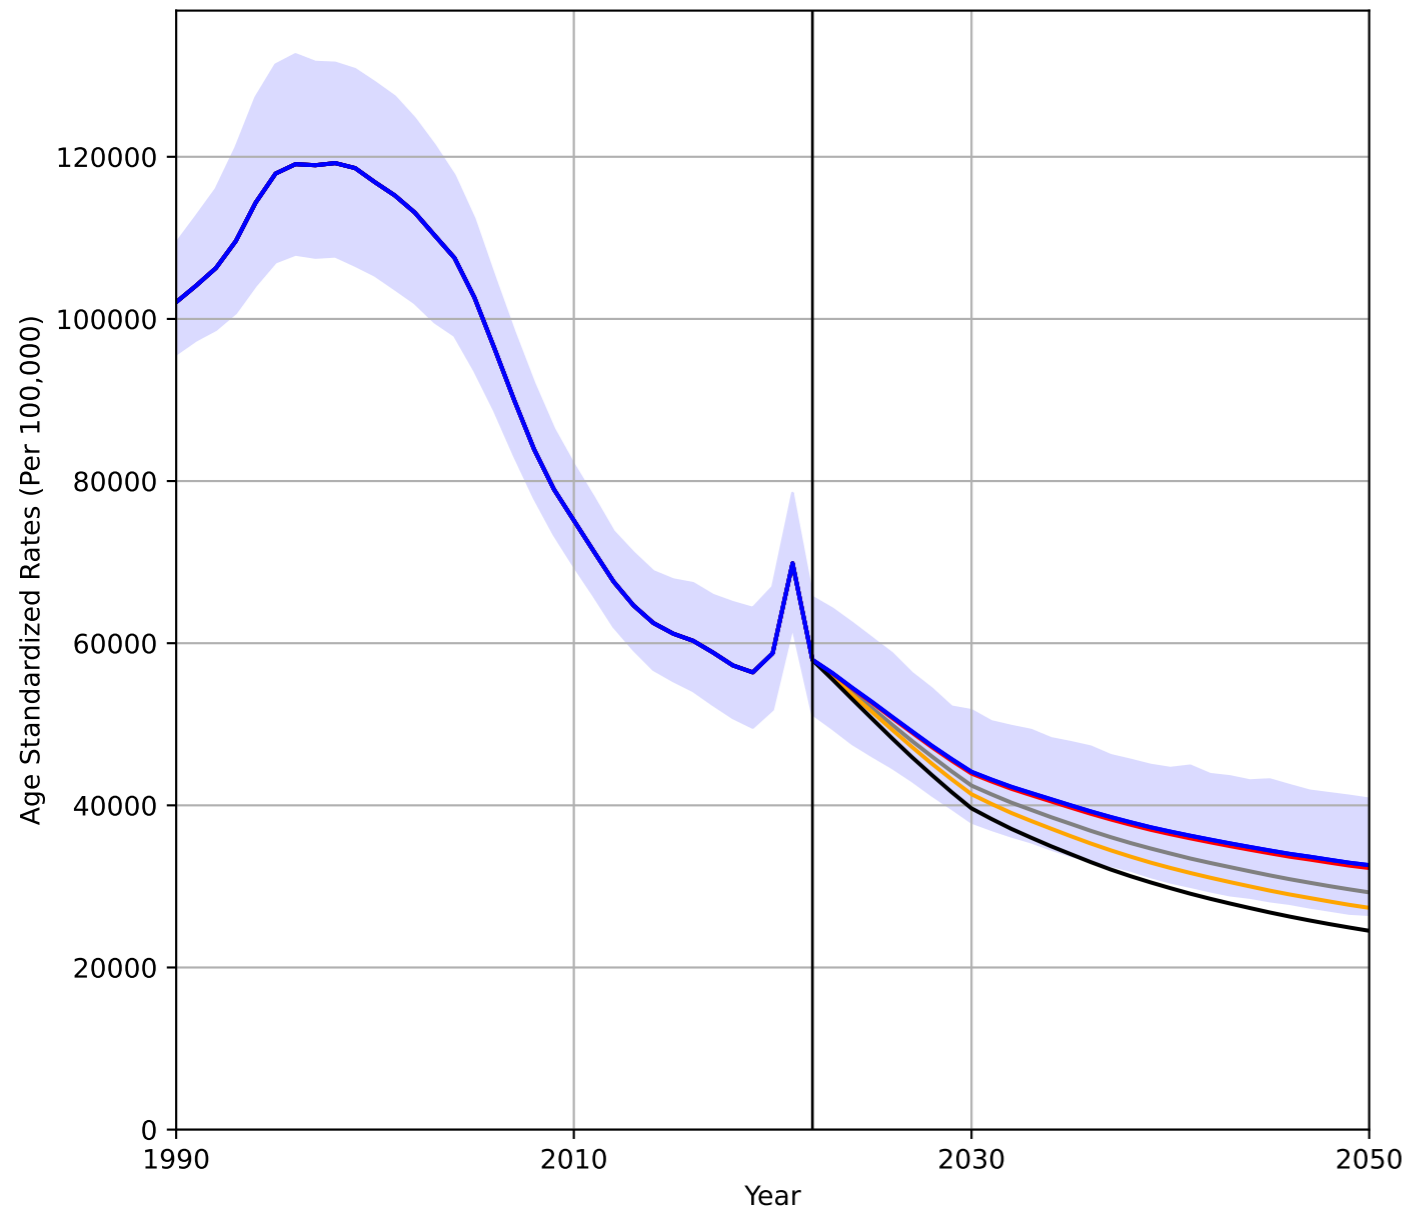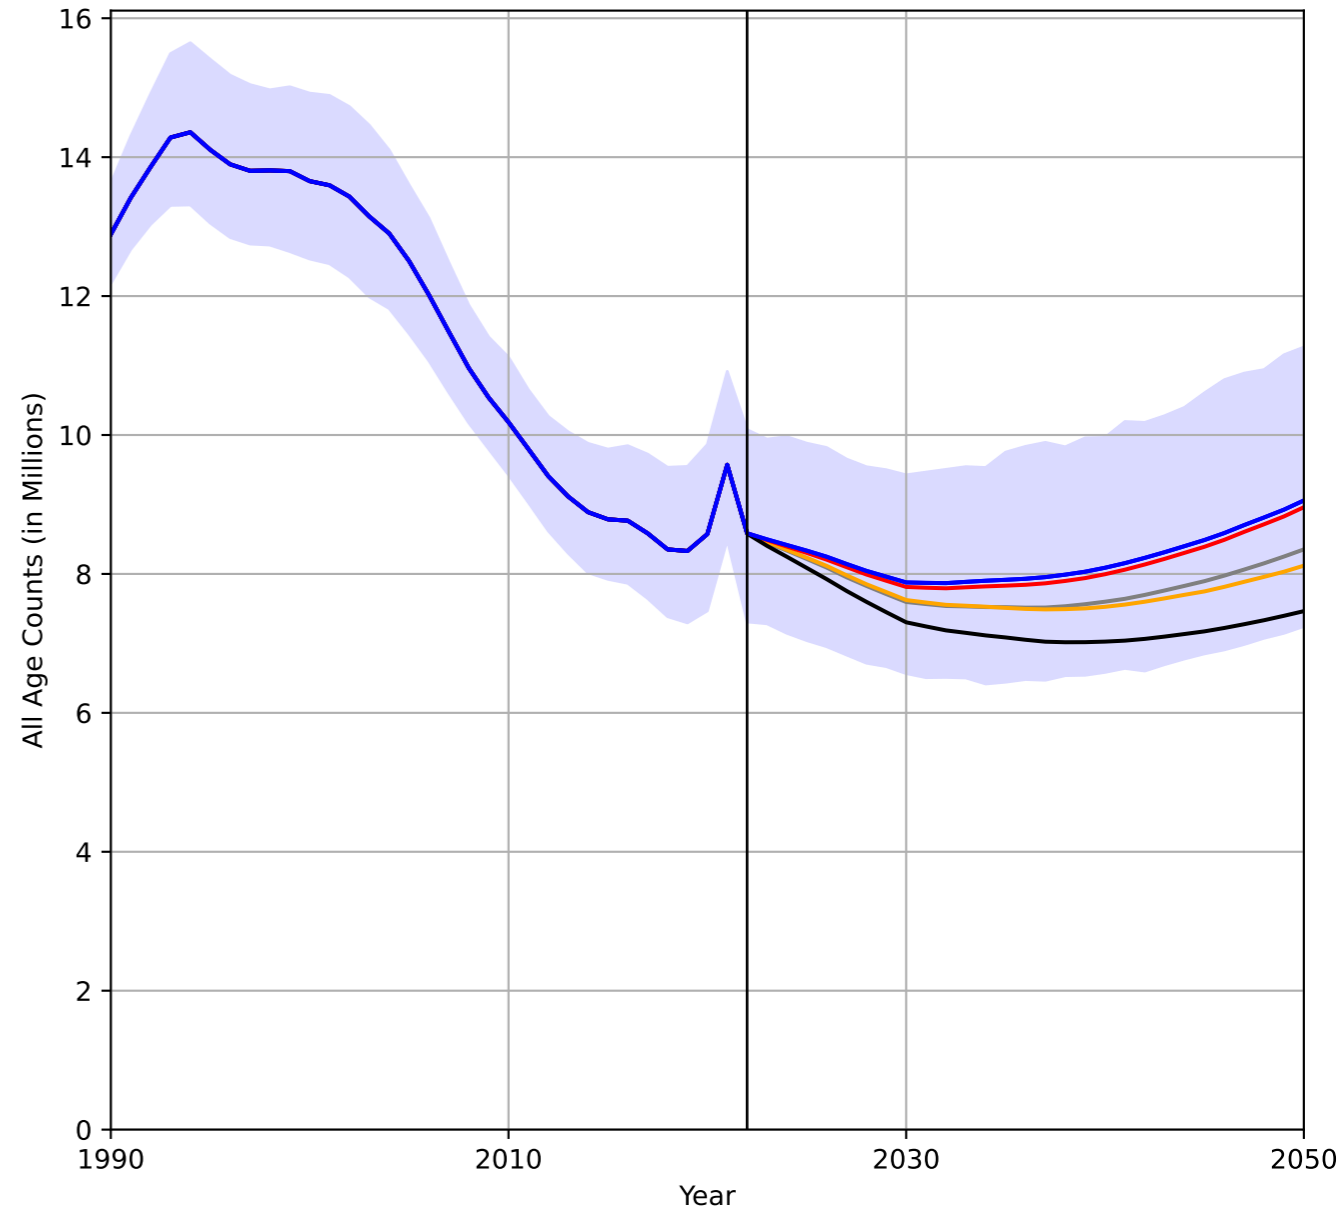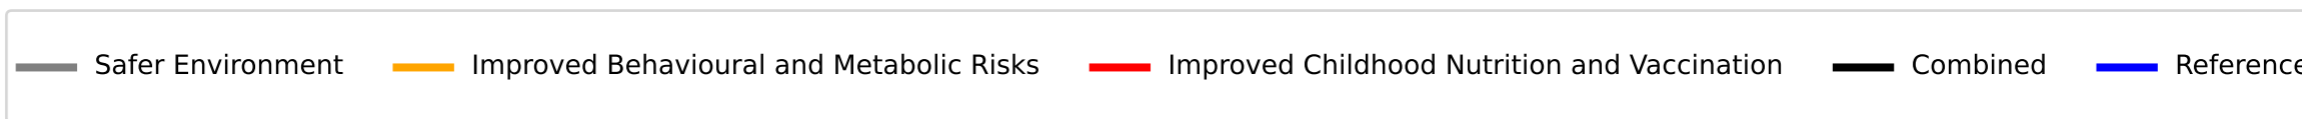

# Mozambique

Supplemental Results Figure S10. All-cause age standardised DALY rates (A) and all age DALY counts (B), for the past and for five future scenarios, 1990–2050

1583

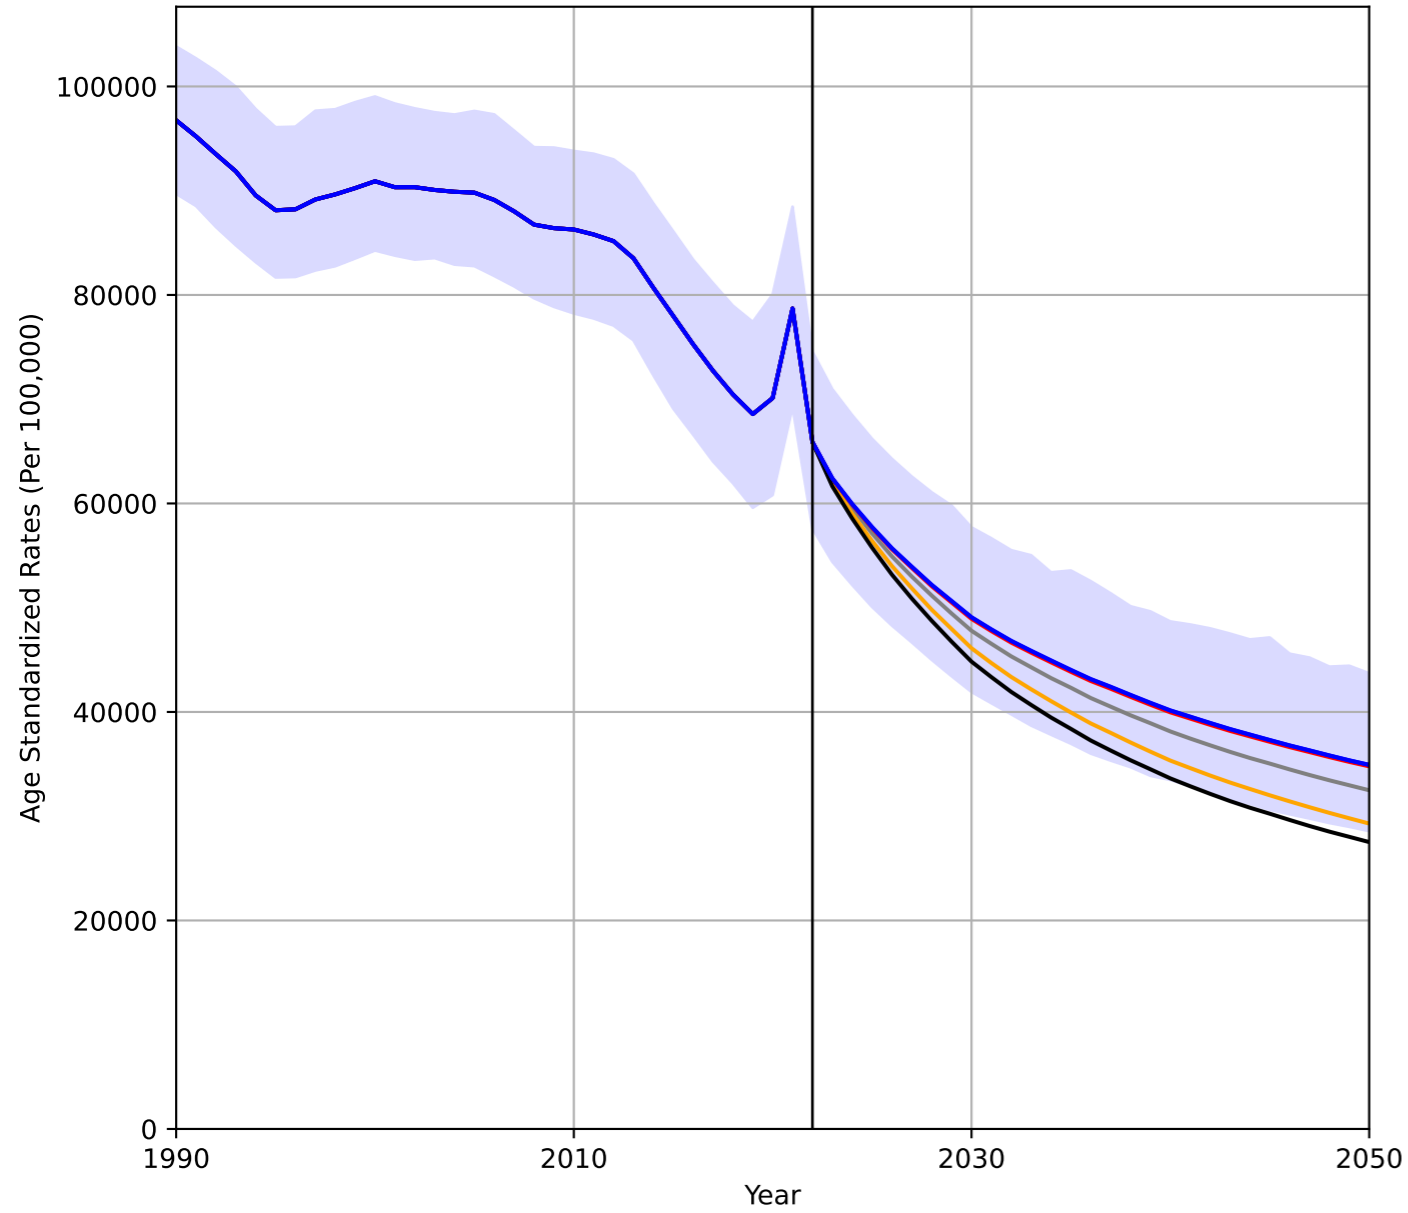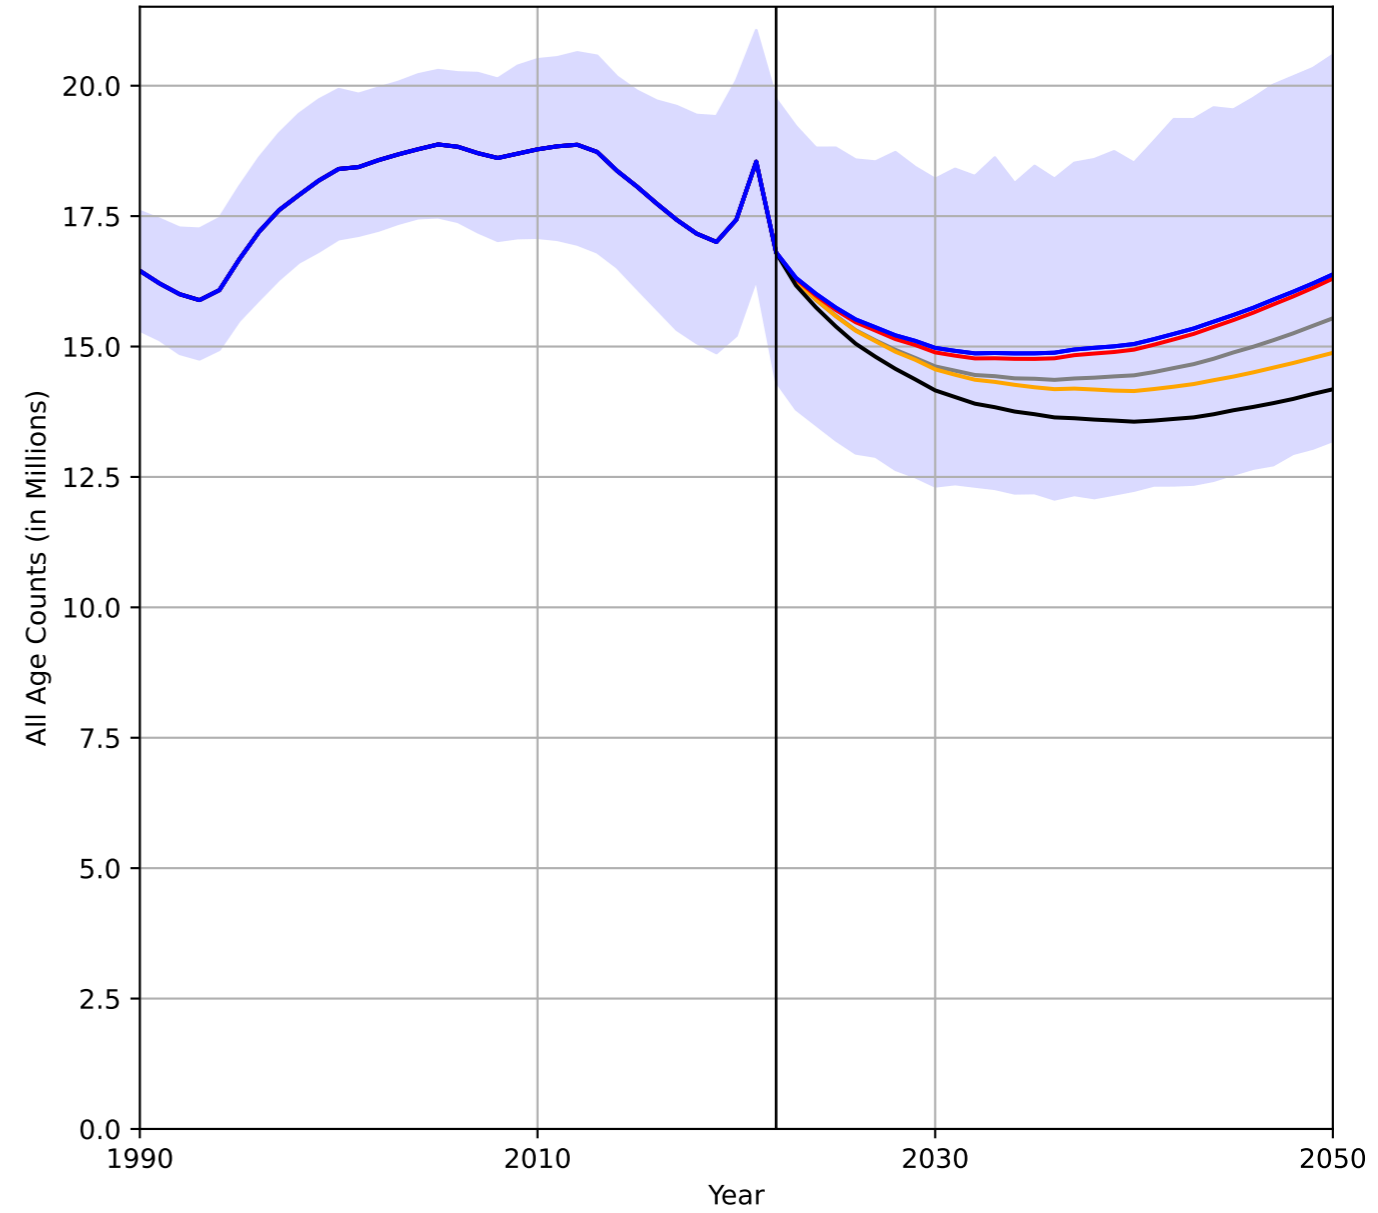



# Rwanda

Supplemental Results Figure S10. All-cause age standardised DALY rates (A) and all age DALY counts (B), for the past and for five future scenarios, 1990–2050

1584

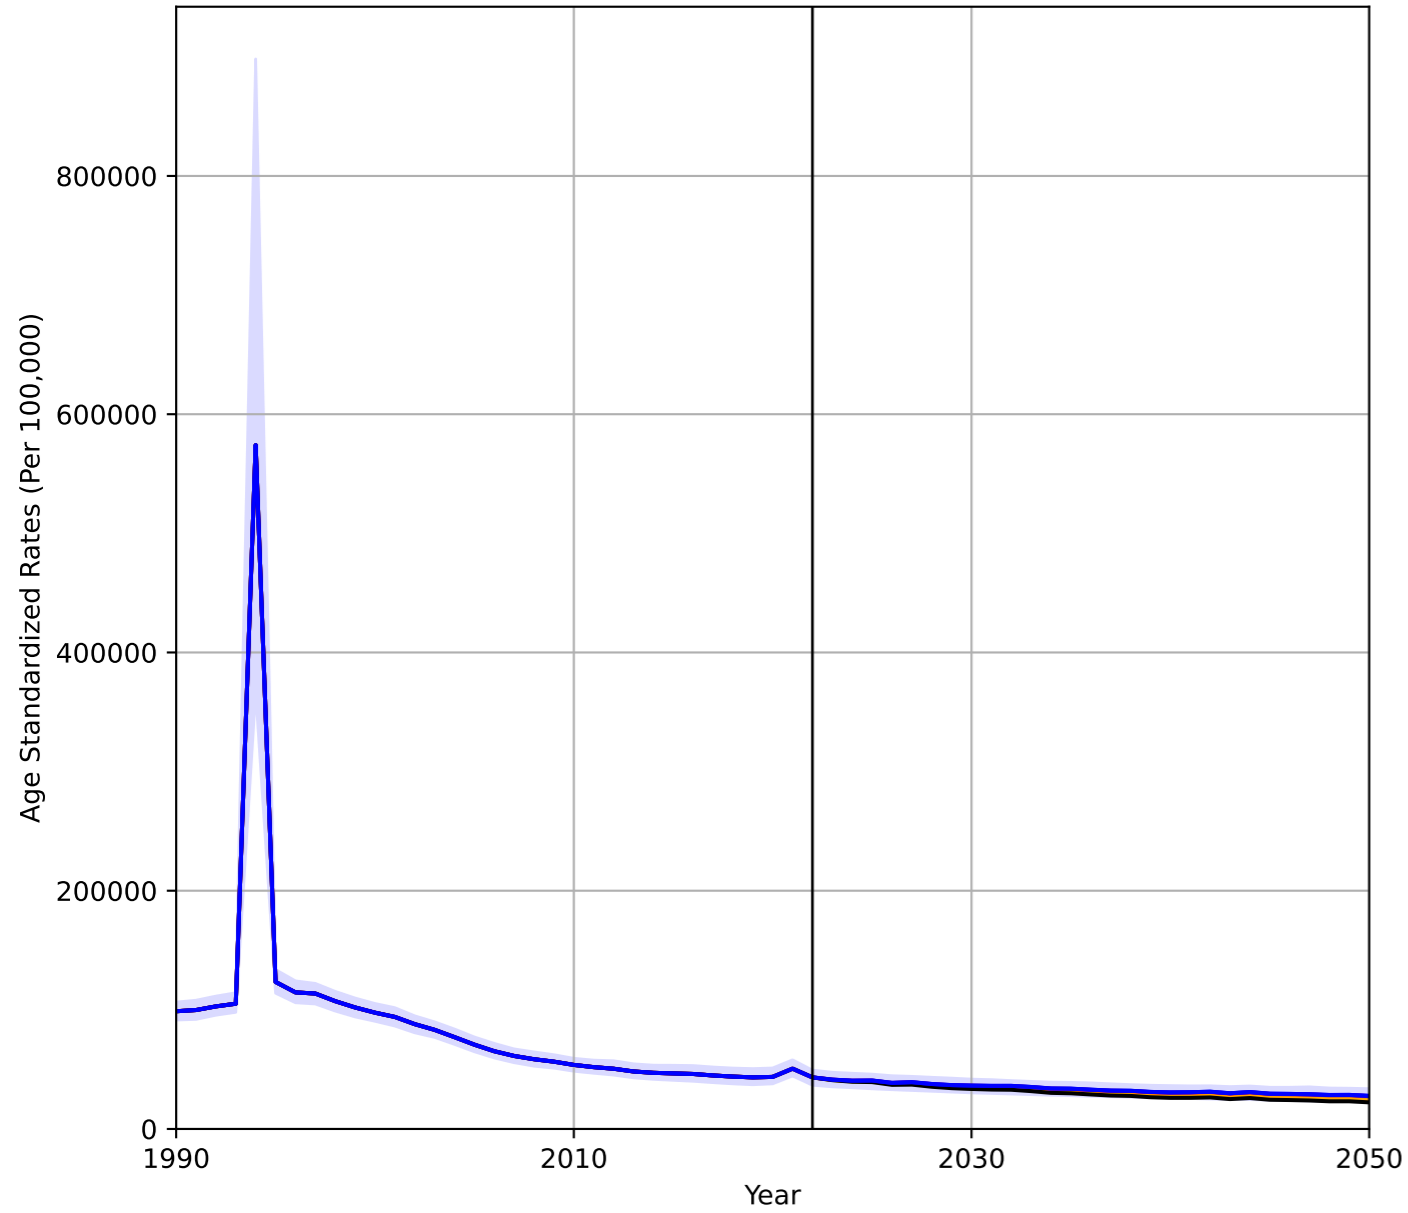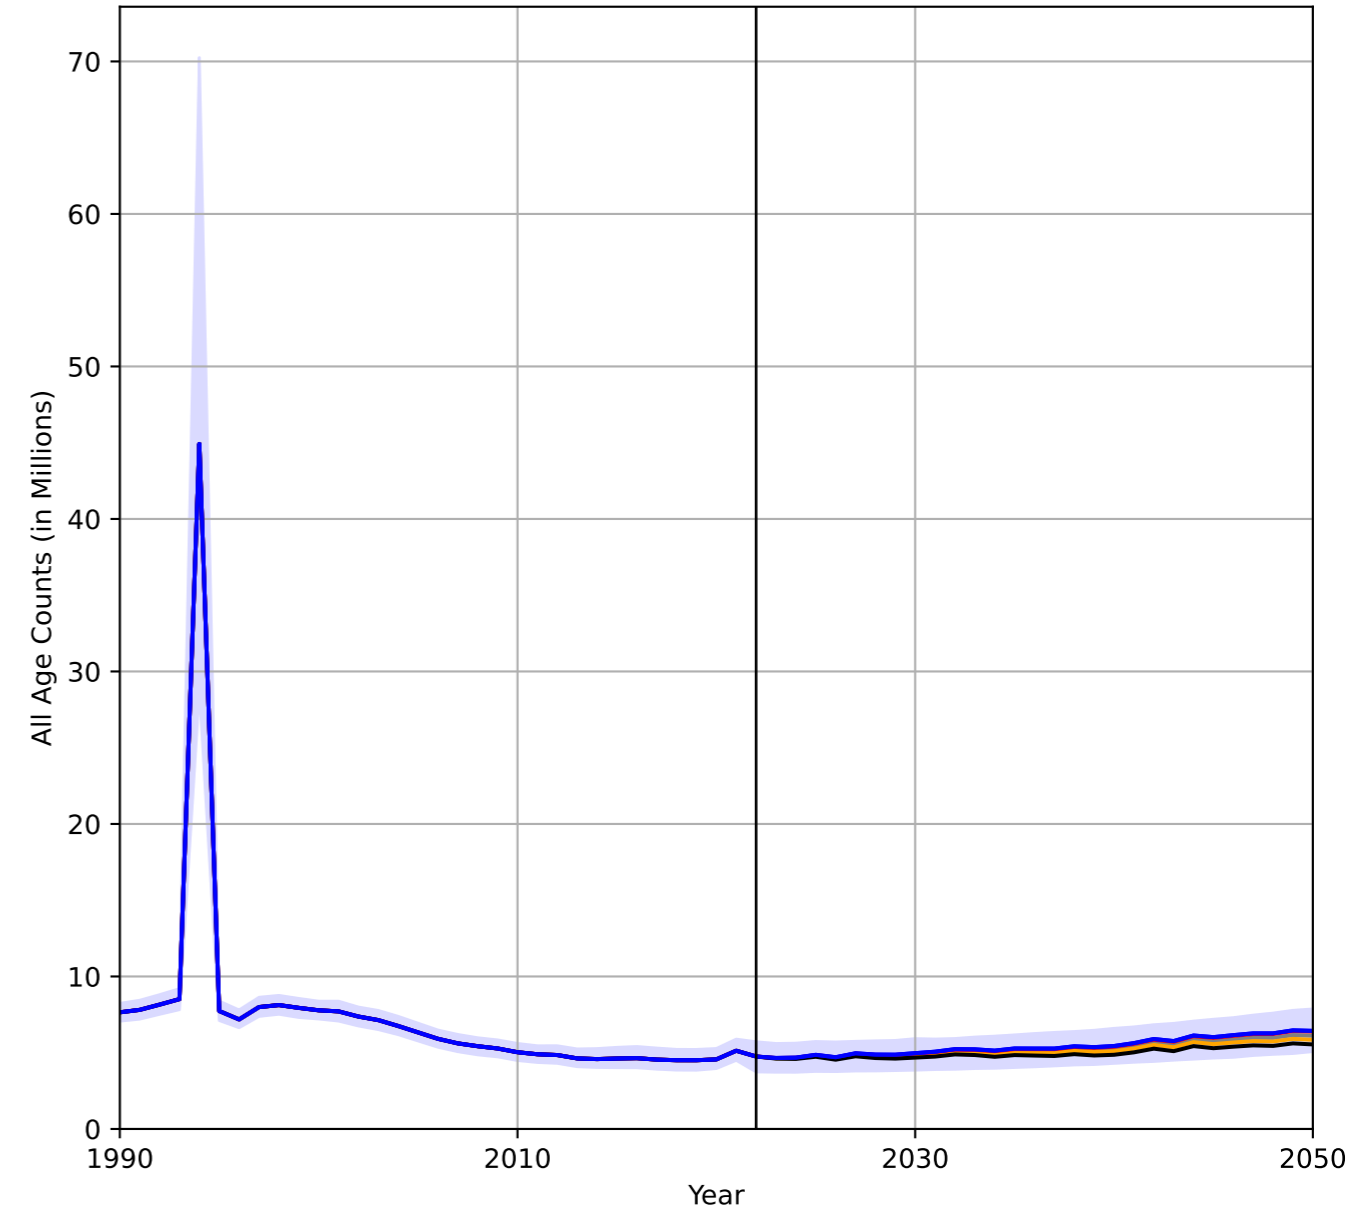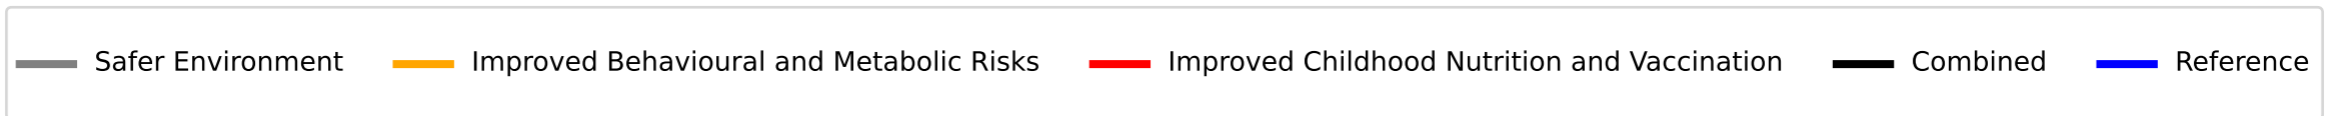

# Somalia

Supplemental Results Figure S10. All-cause age standardised DALY rates (A) and all age DALY counts (B), for the past and for five future scenarios, 1990–2050

1585

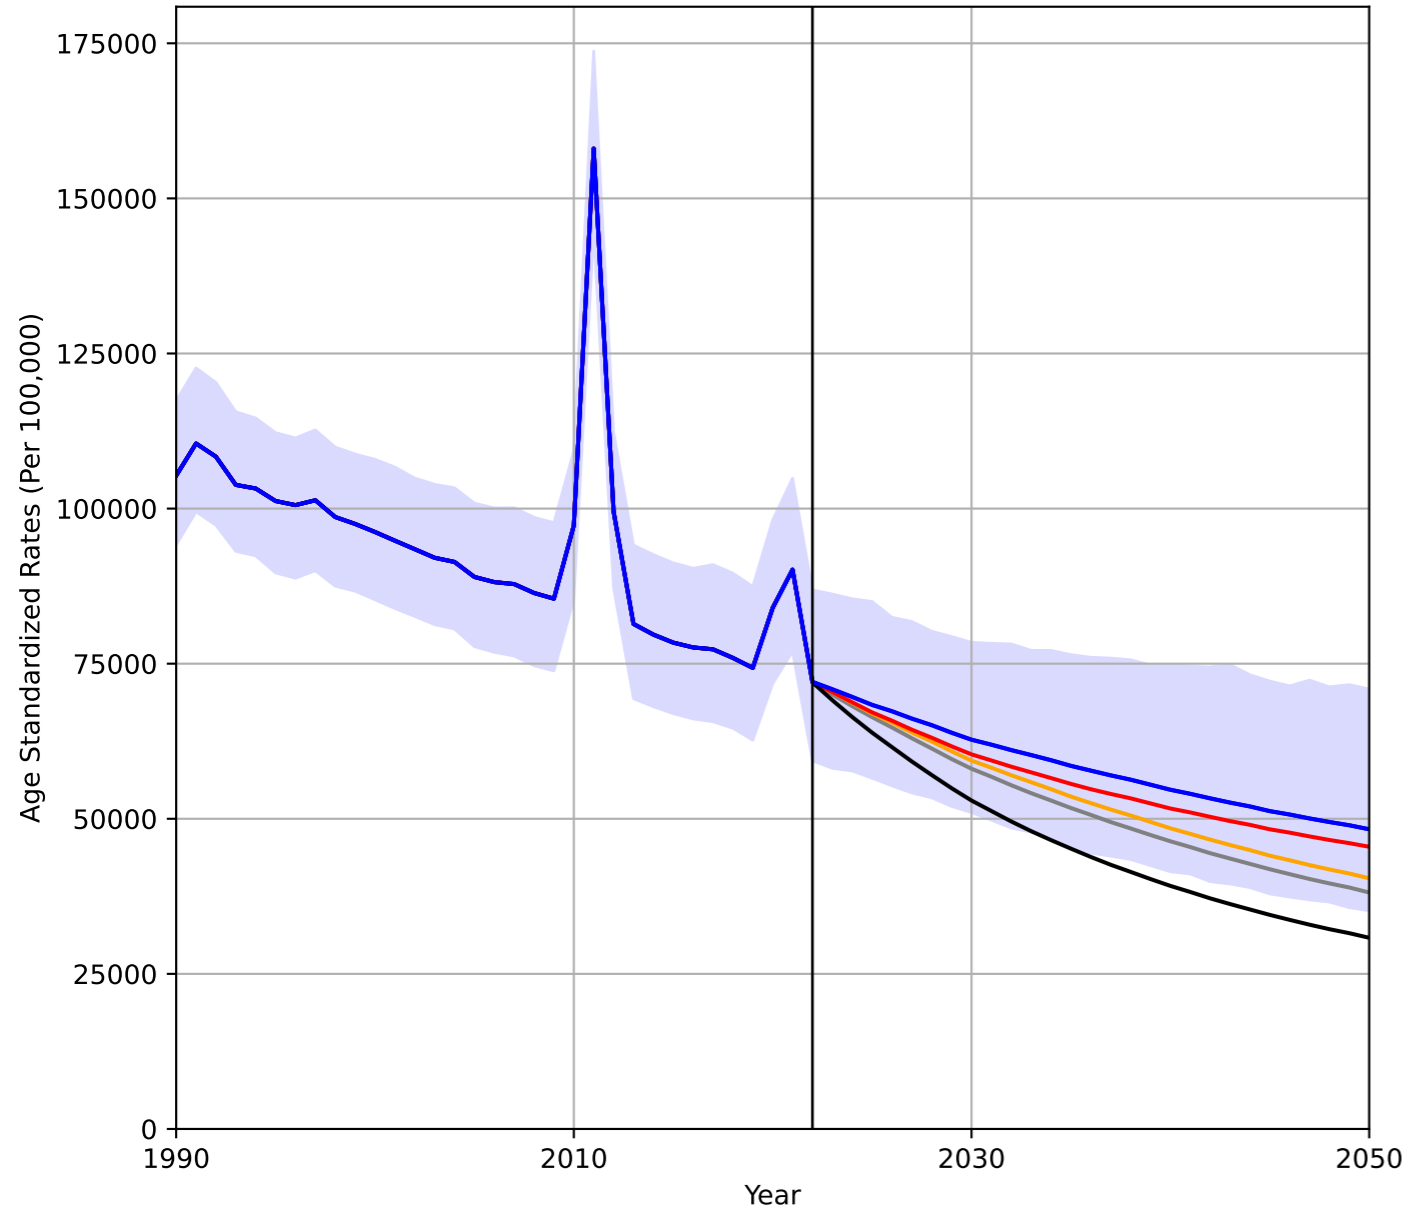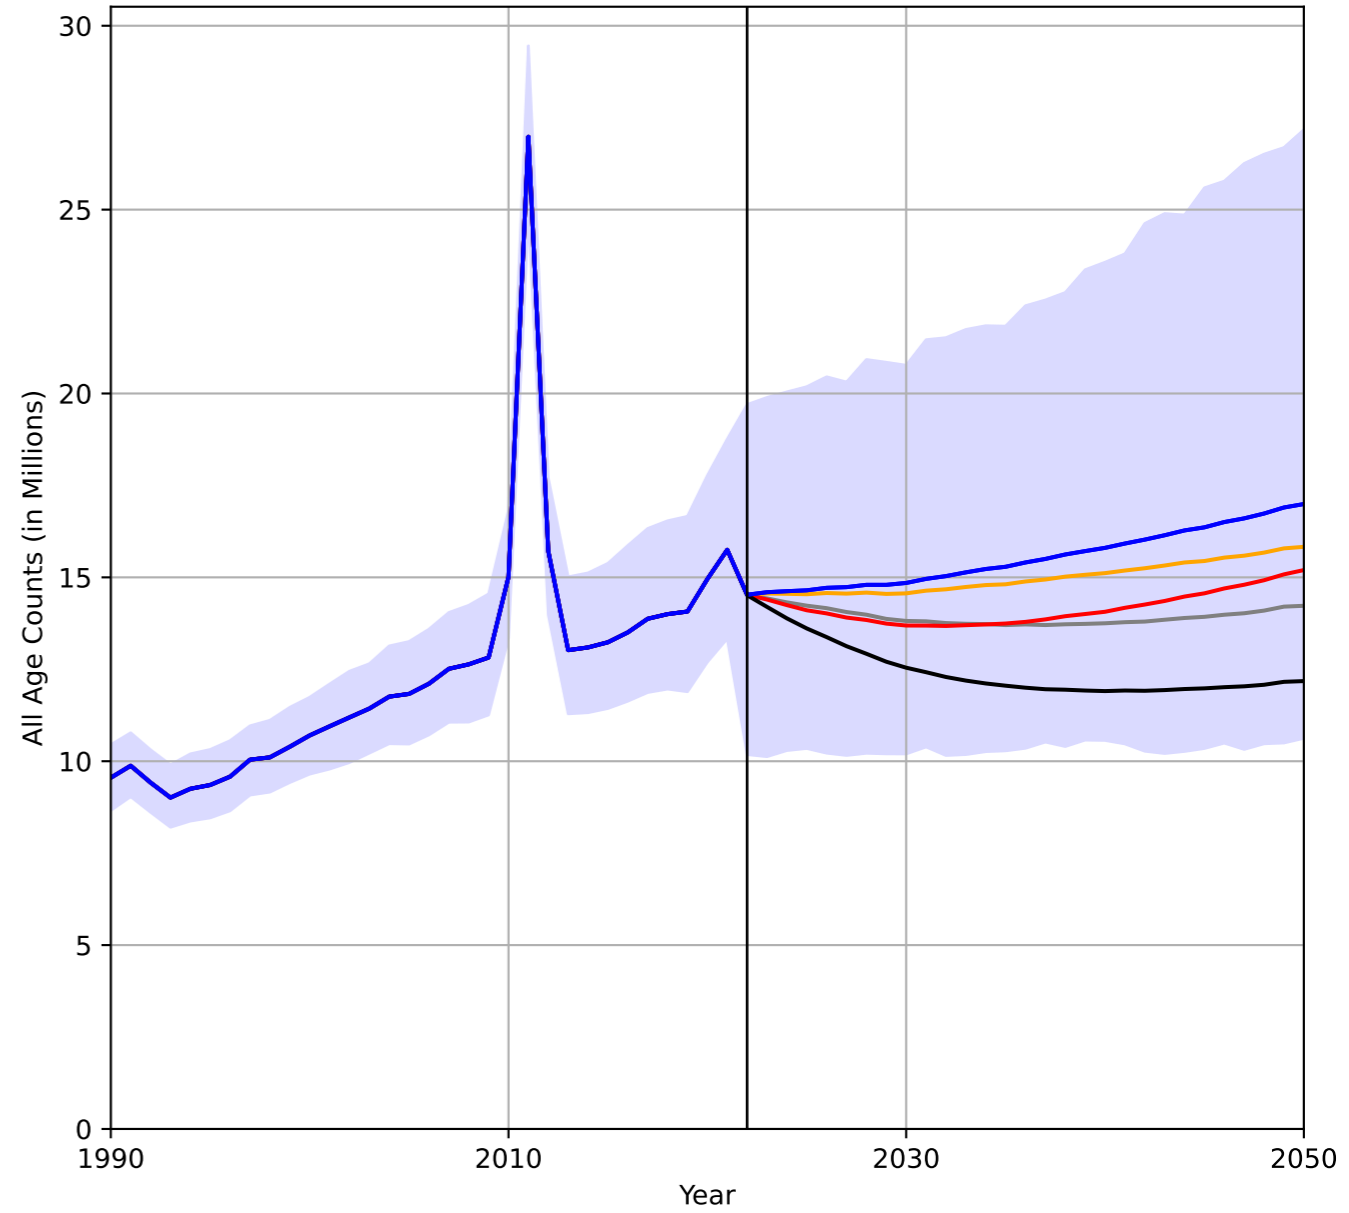

# South Sudan

Supplemental Results Figure S10. All-cause age standardised DALY rates (A) and all age DALY counts (B), for the past and for five future scenarios, 1990–2050

1586

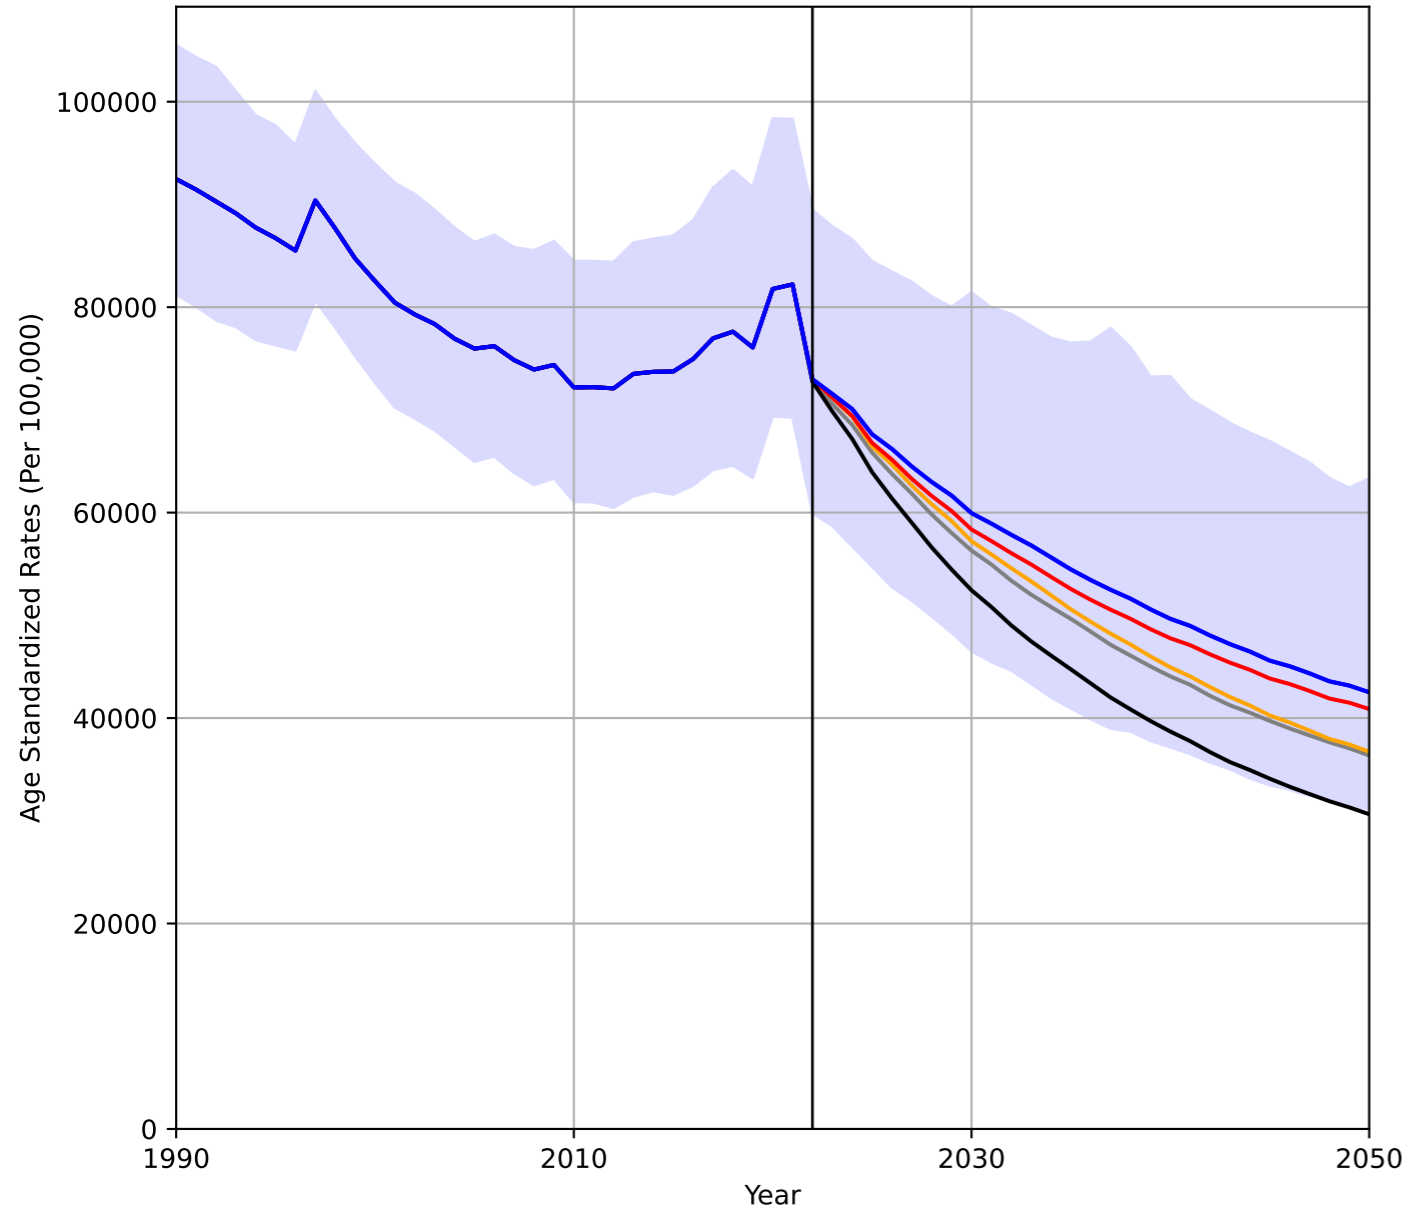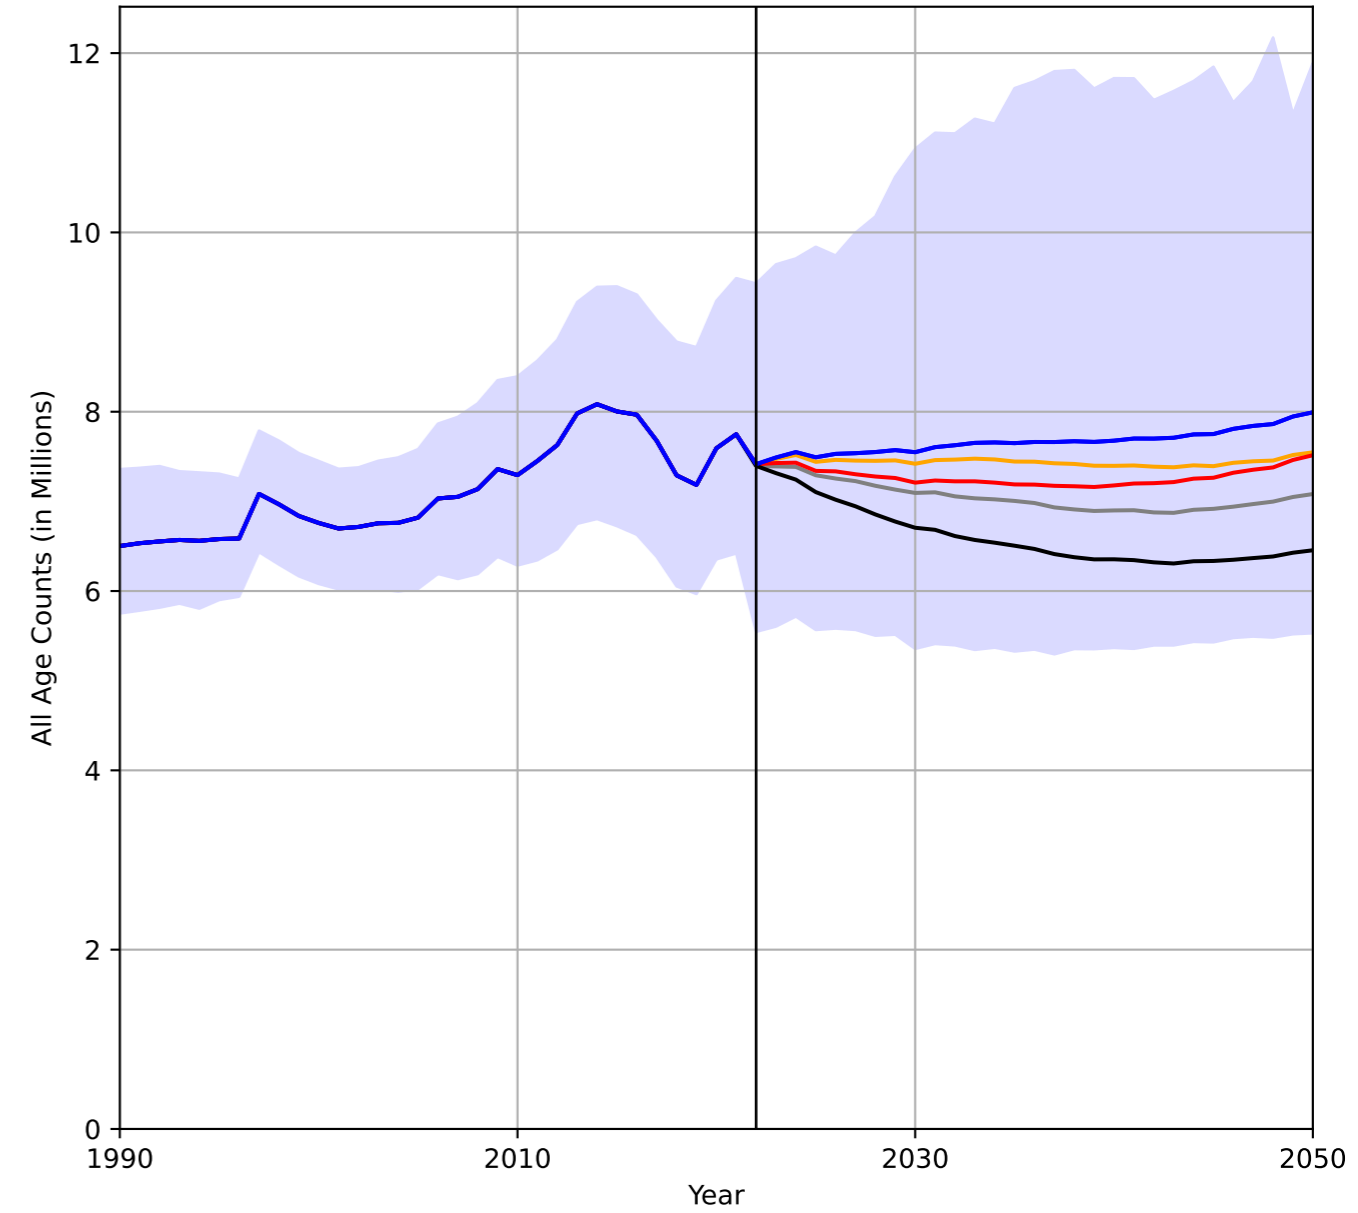

# Uganda

Supplemental Results Figure S10. All-cause age standardised DALY rates (A) and all age DALY counts (B), for the past and for five future scenarios, 1990–2050

1587

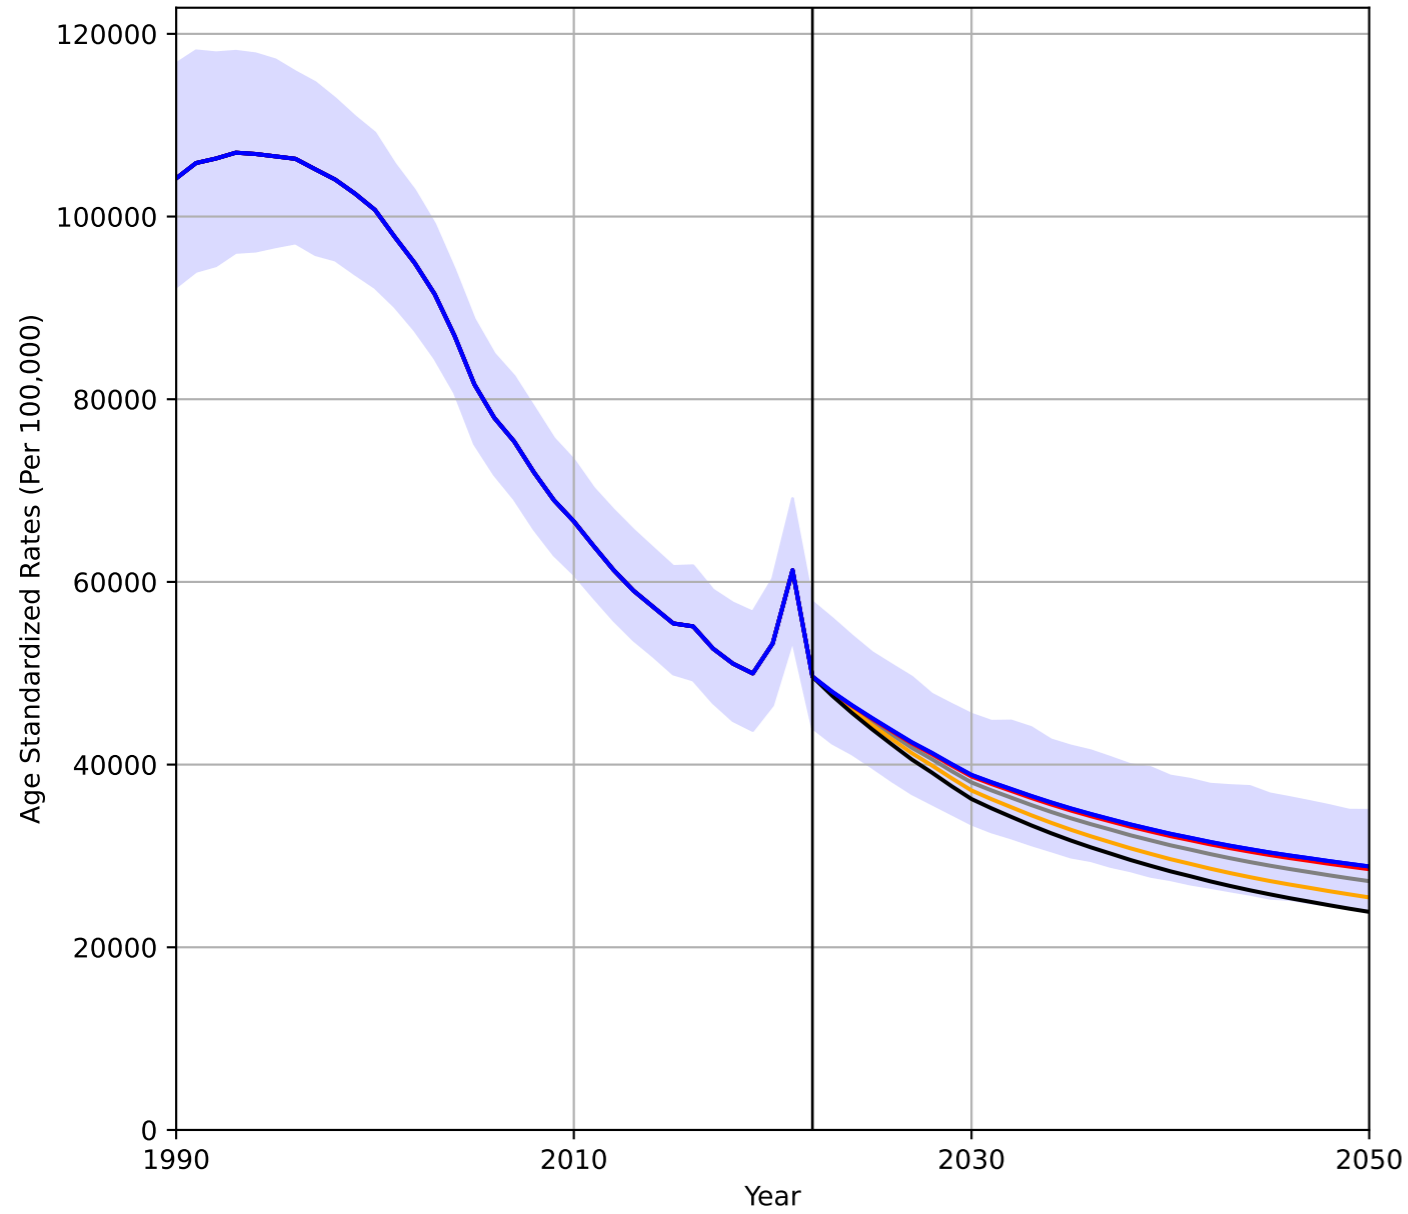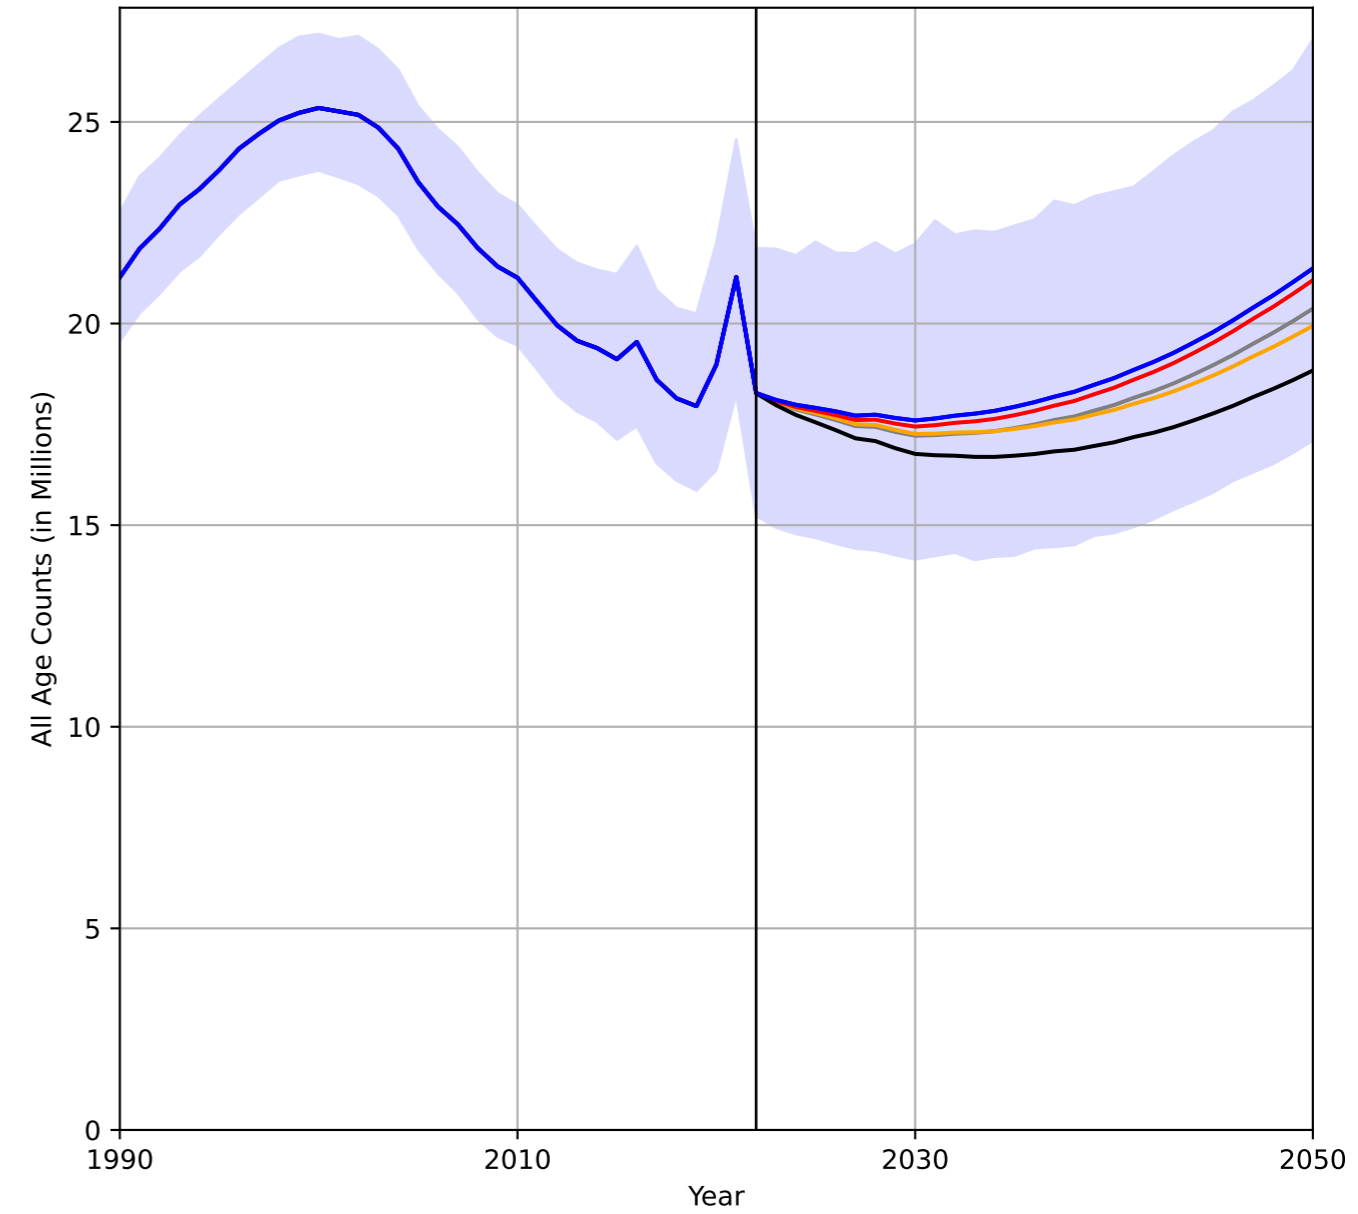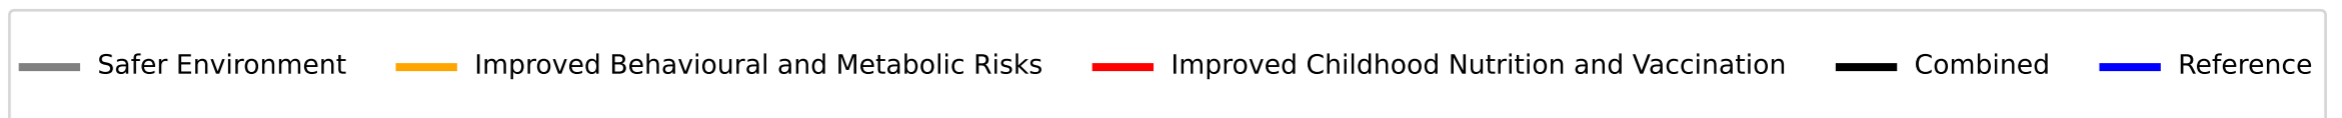

# Tanzania

Supplemental Results Figure S10. All-cause age standardised DALY rates (A) and all age DALY counts (B), for the past and for five future scenarios, 1990–2050

1588

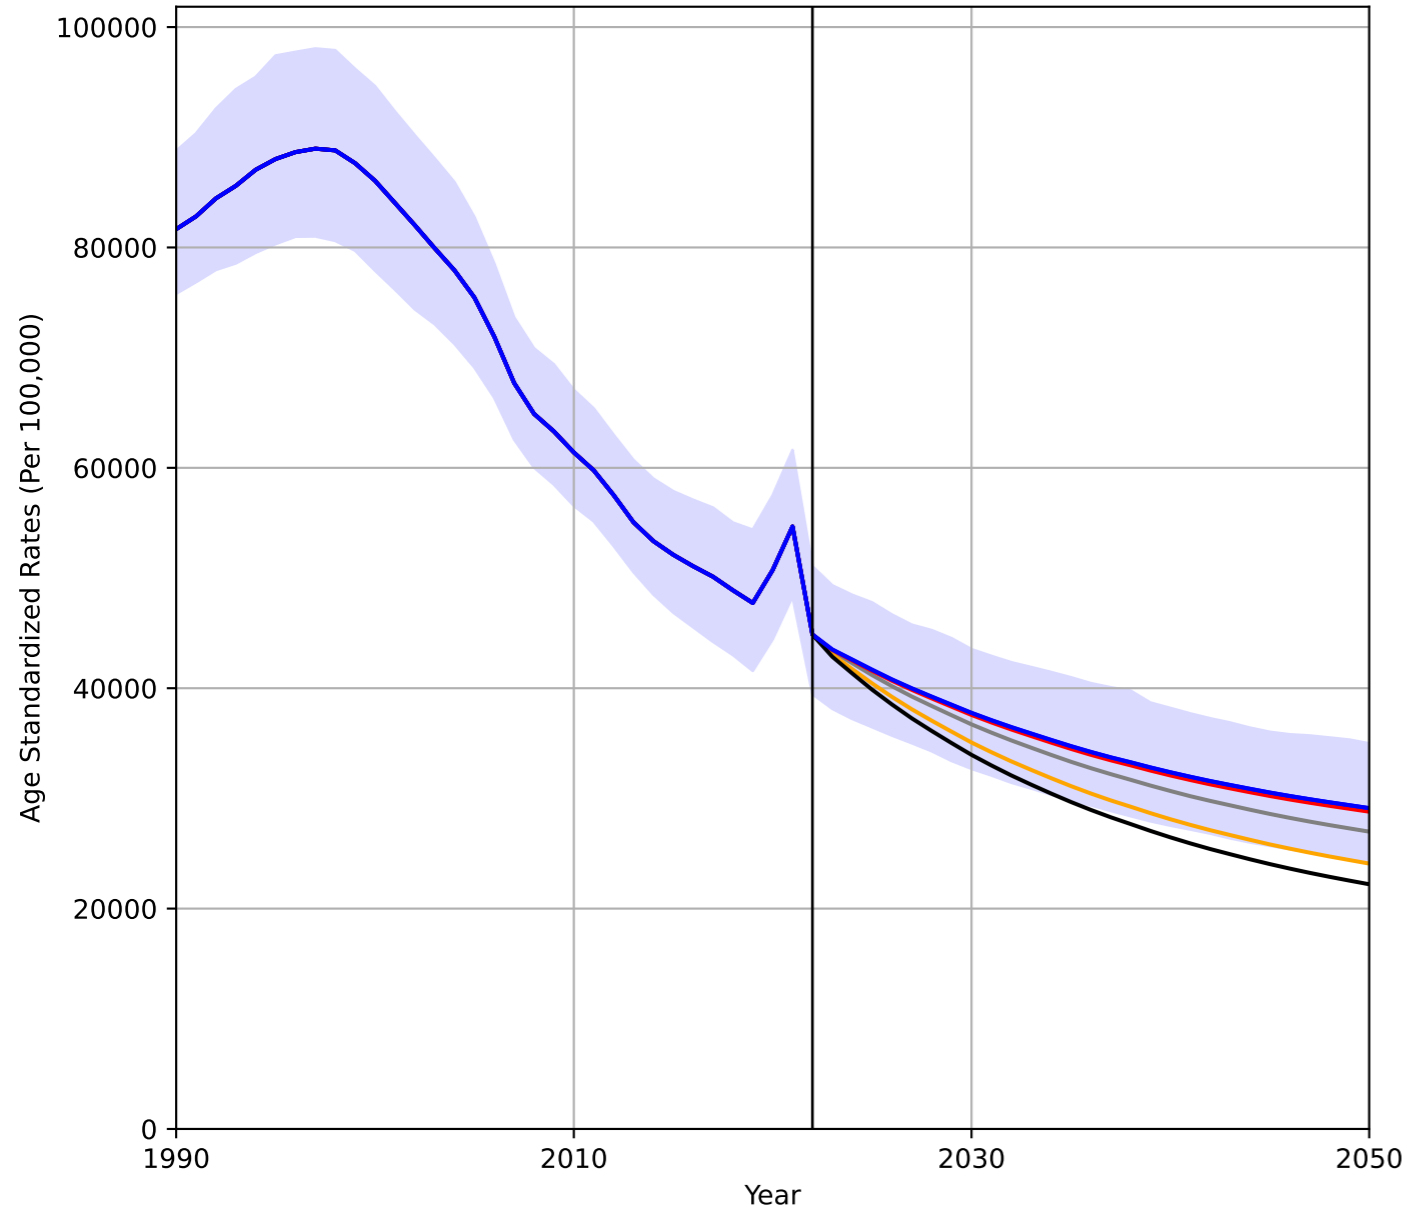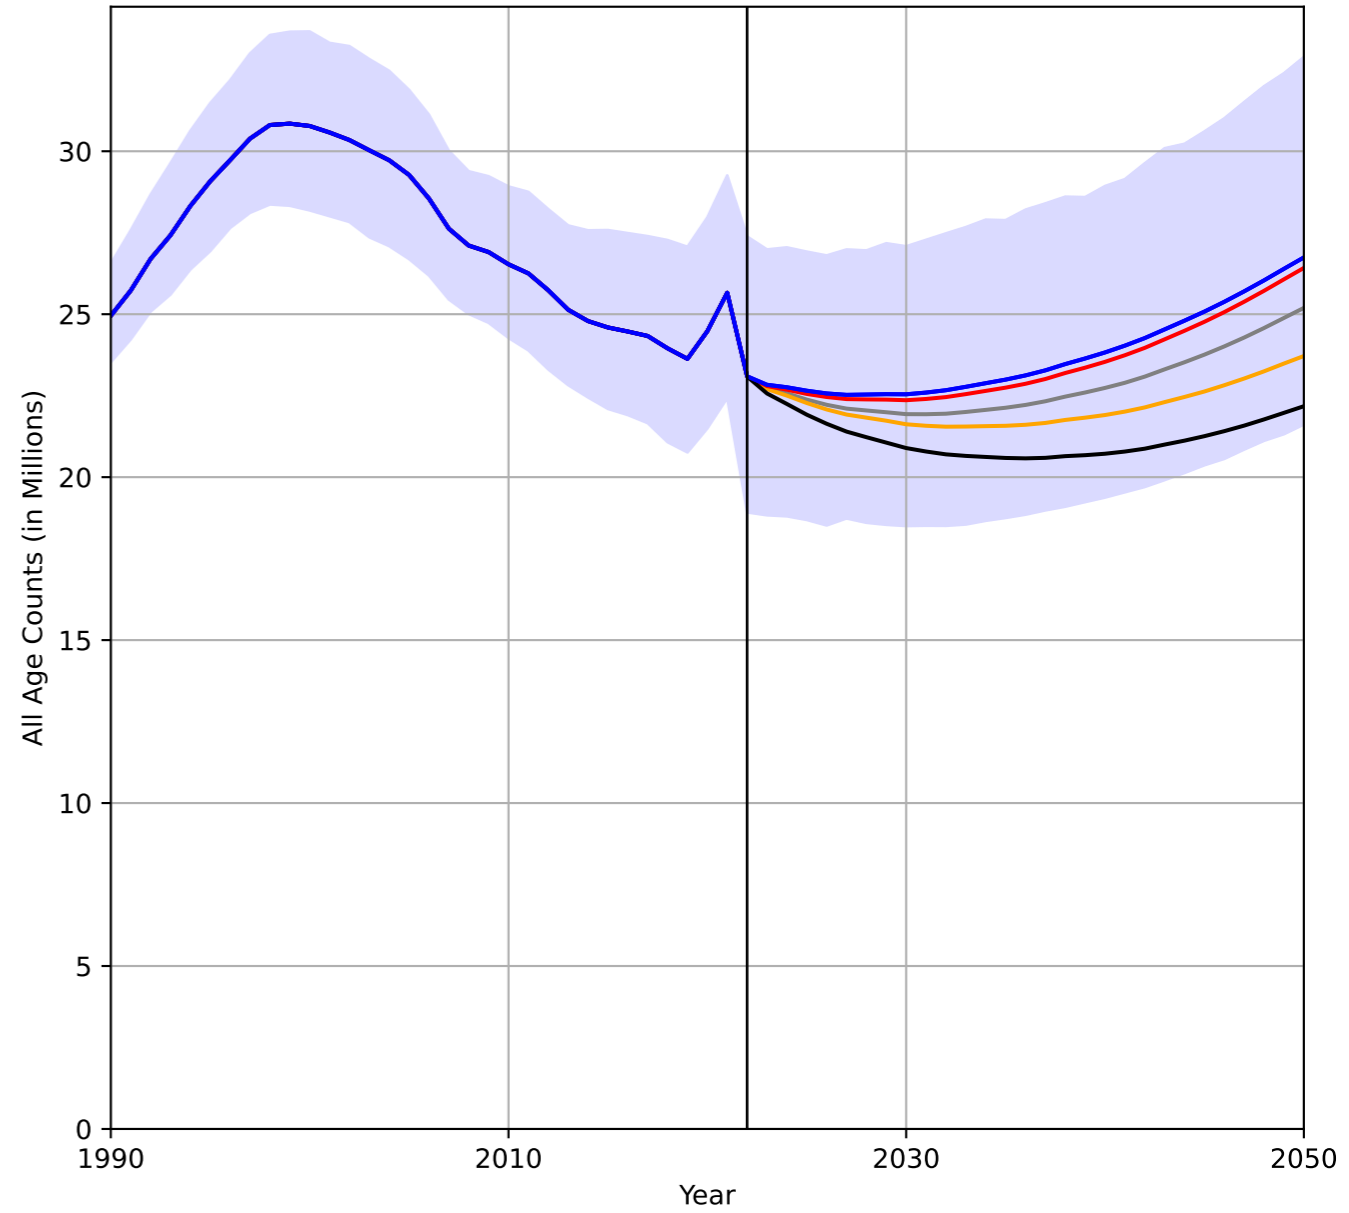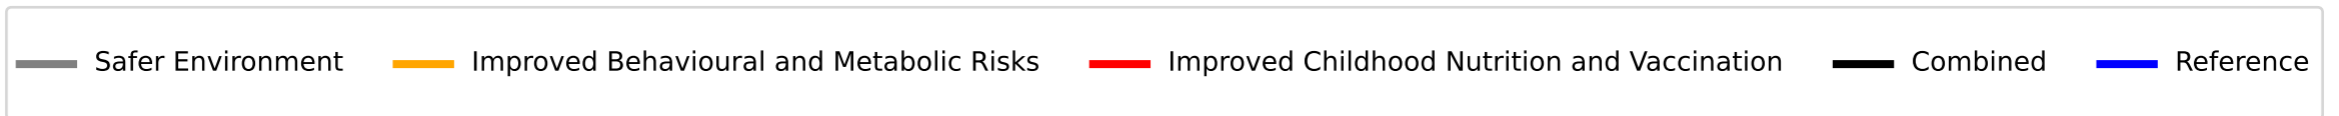

# Zambia

Supplemental Results Figure S10. All-cause age standardised DALY rates (A) and all age DALY counts (B), for the past and for five future scenarios, 1990–2050

1589

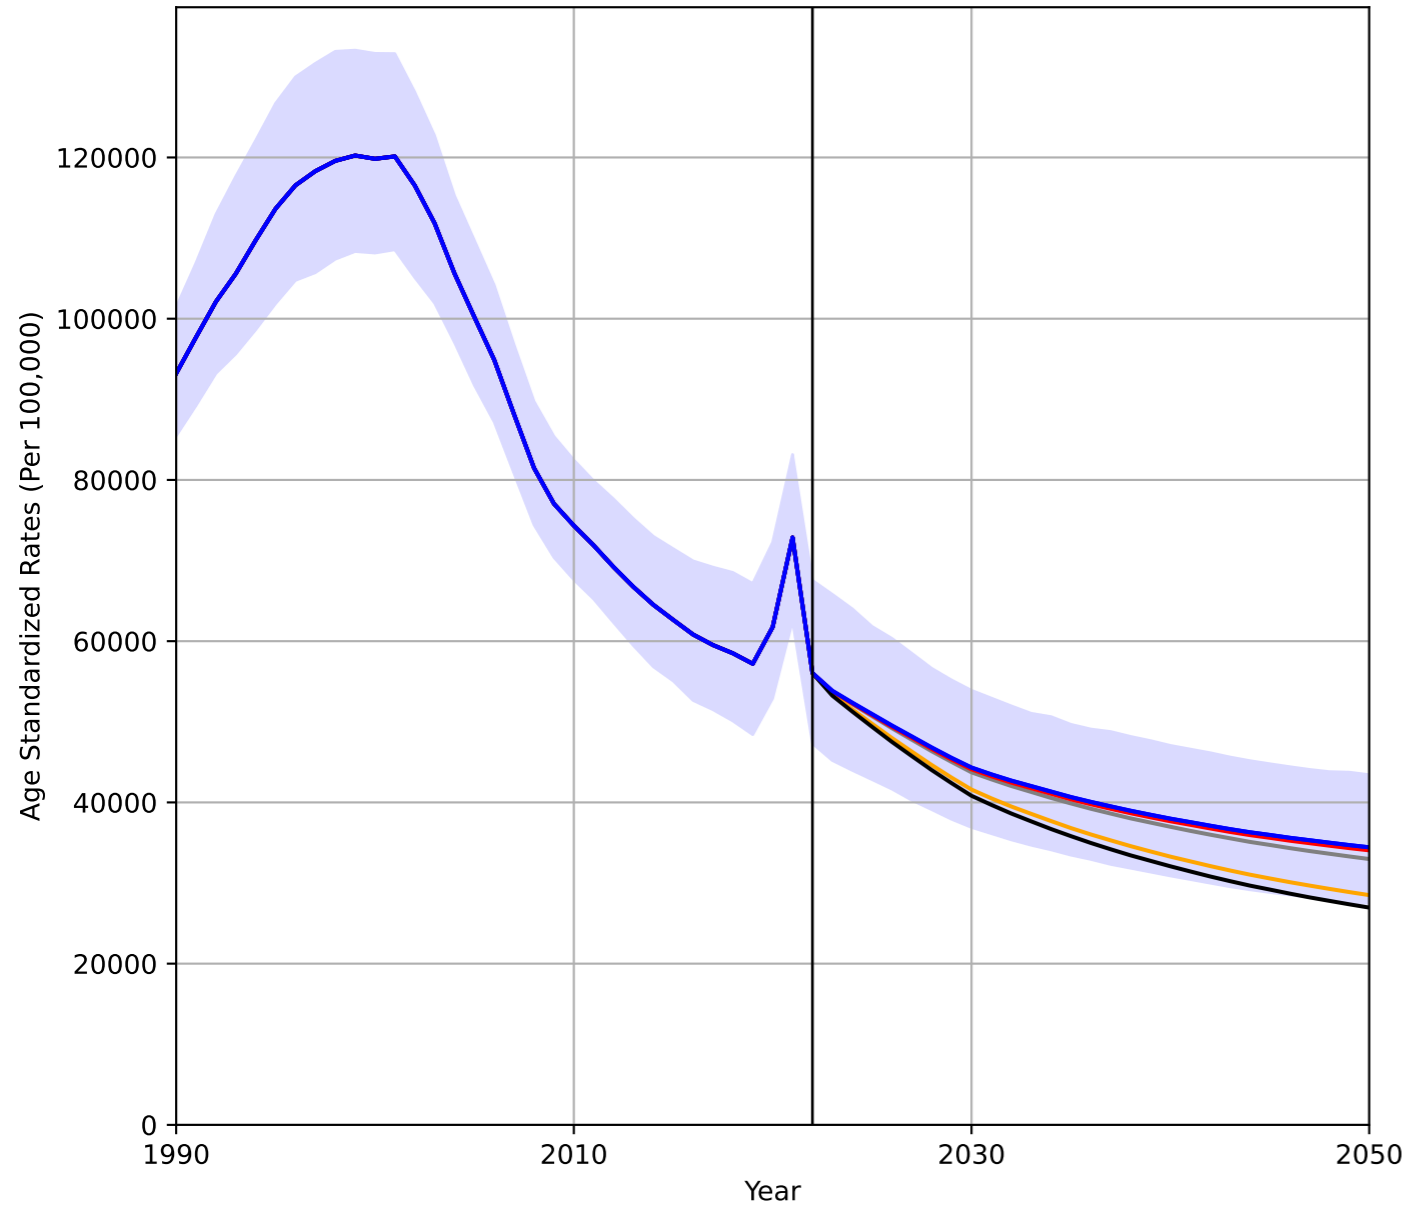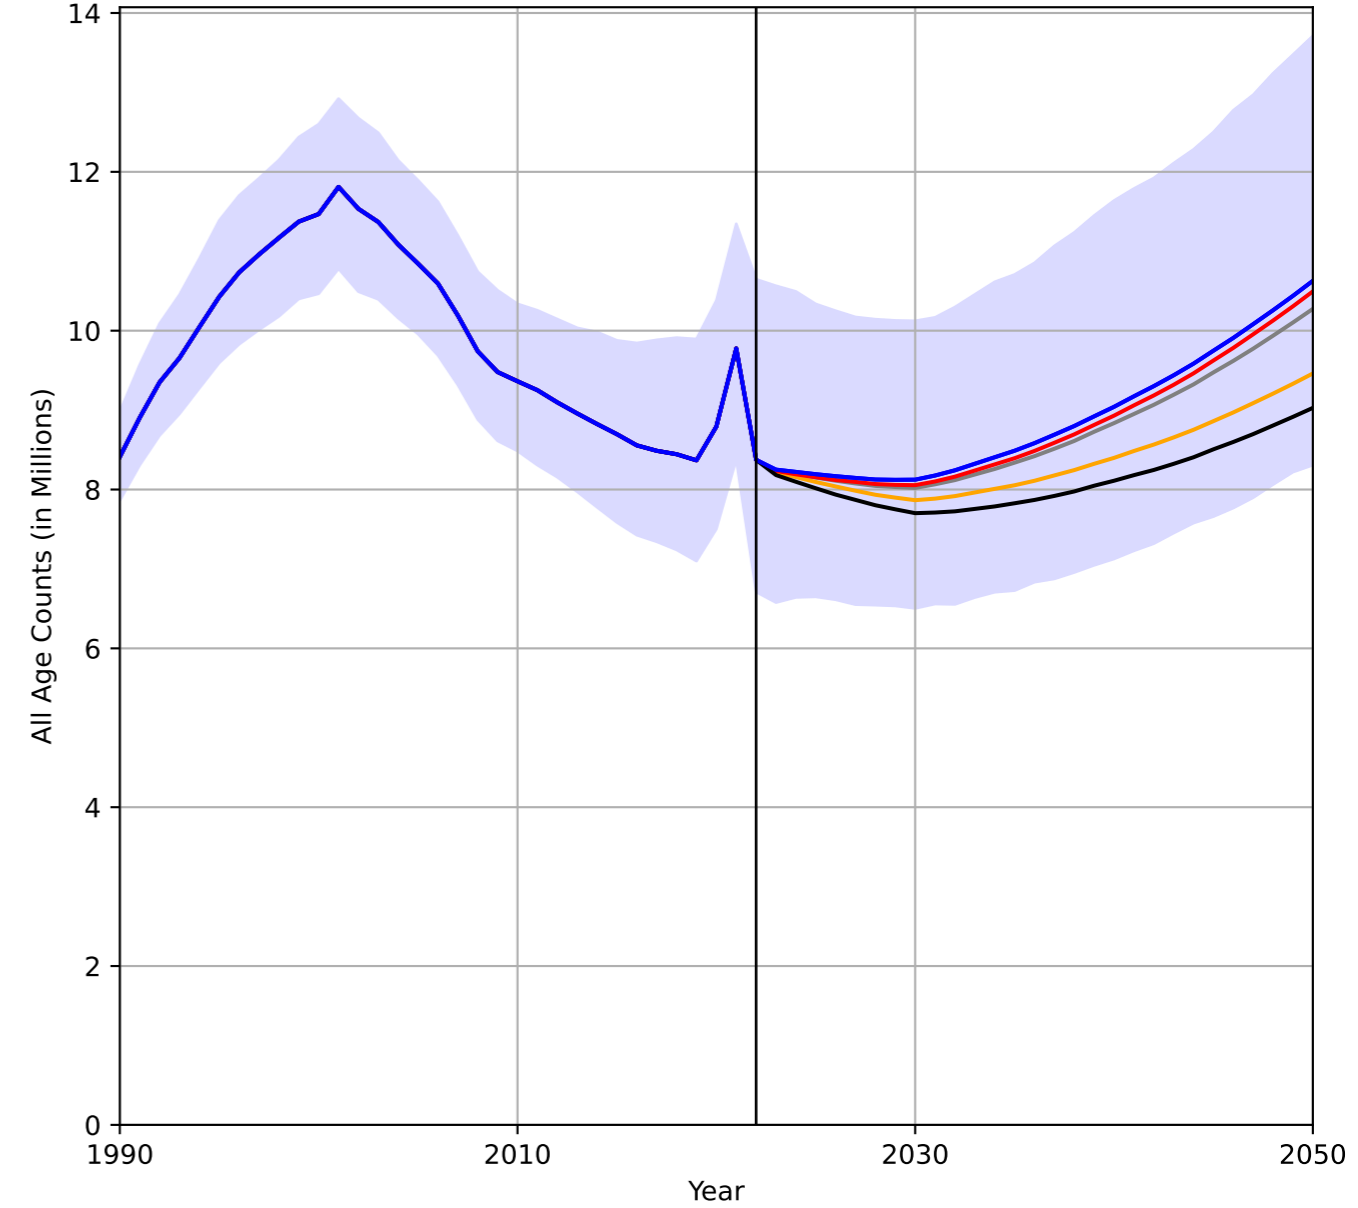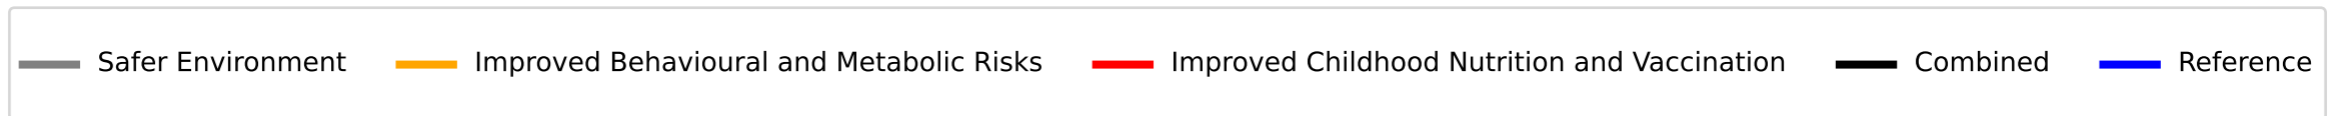

# Botswana

Supplemental Results Figure S10. All-cause age standardised DALY rates (A) and all age DALY counts (B), for the past and for five future scenarios, 1990–2050

1590

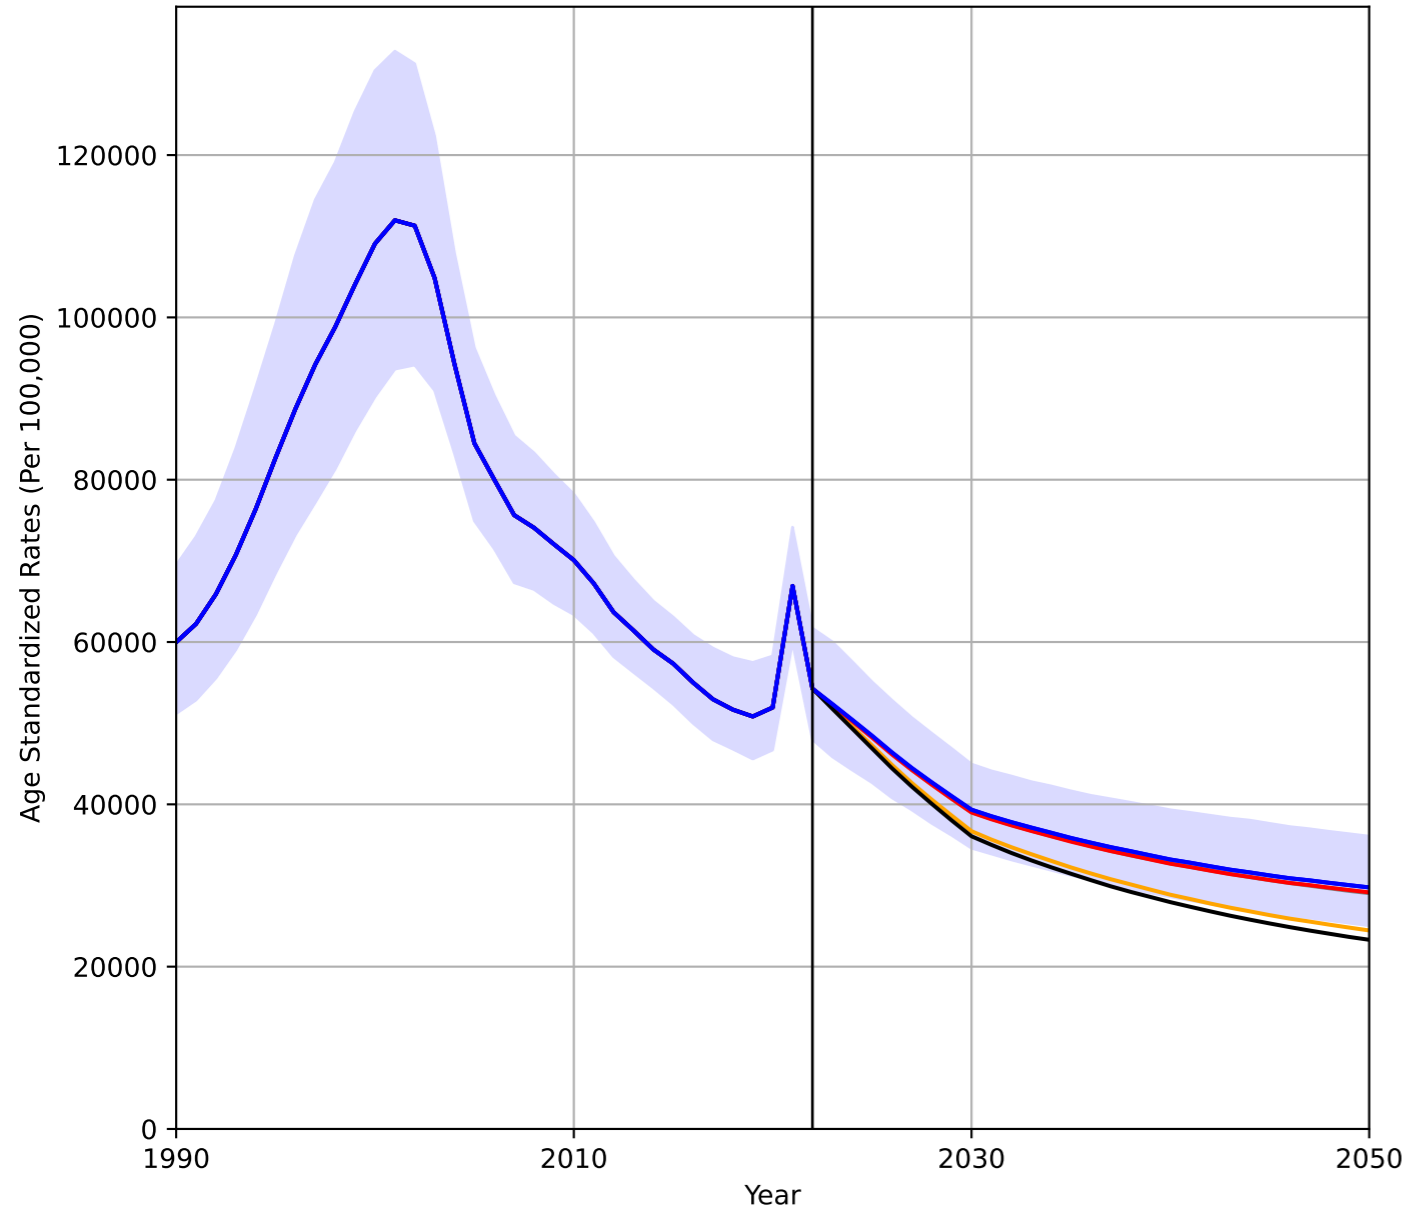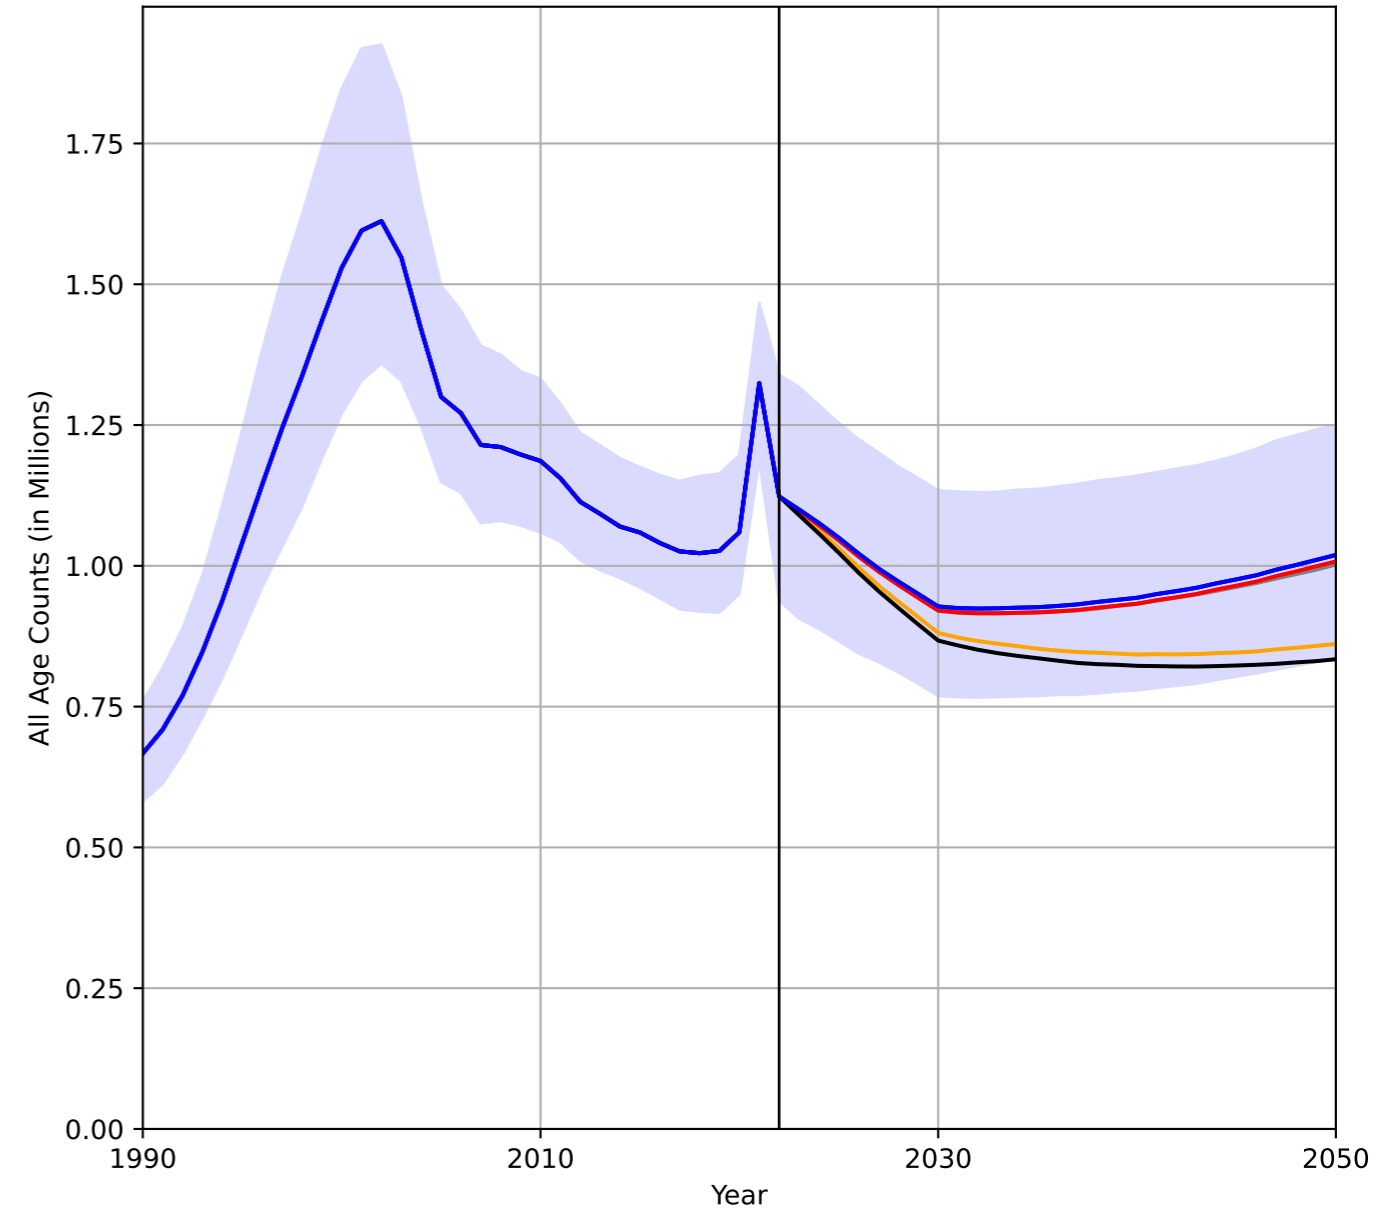

# Eswatini

Supplemental Results Figure S10. All-cause age standardised DALY rates (A) and all age DALY counts (B), for the past and for five future scenarios, 1990–2050

1591

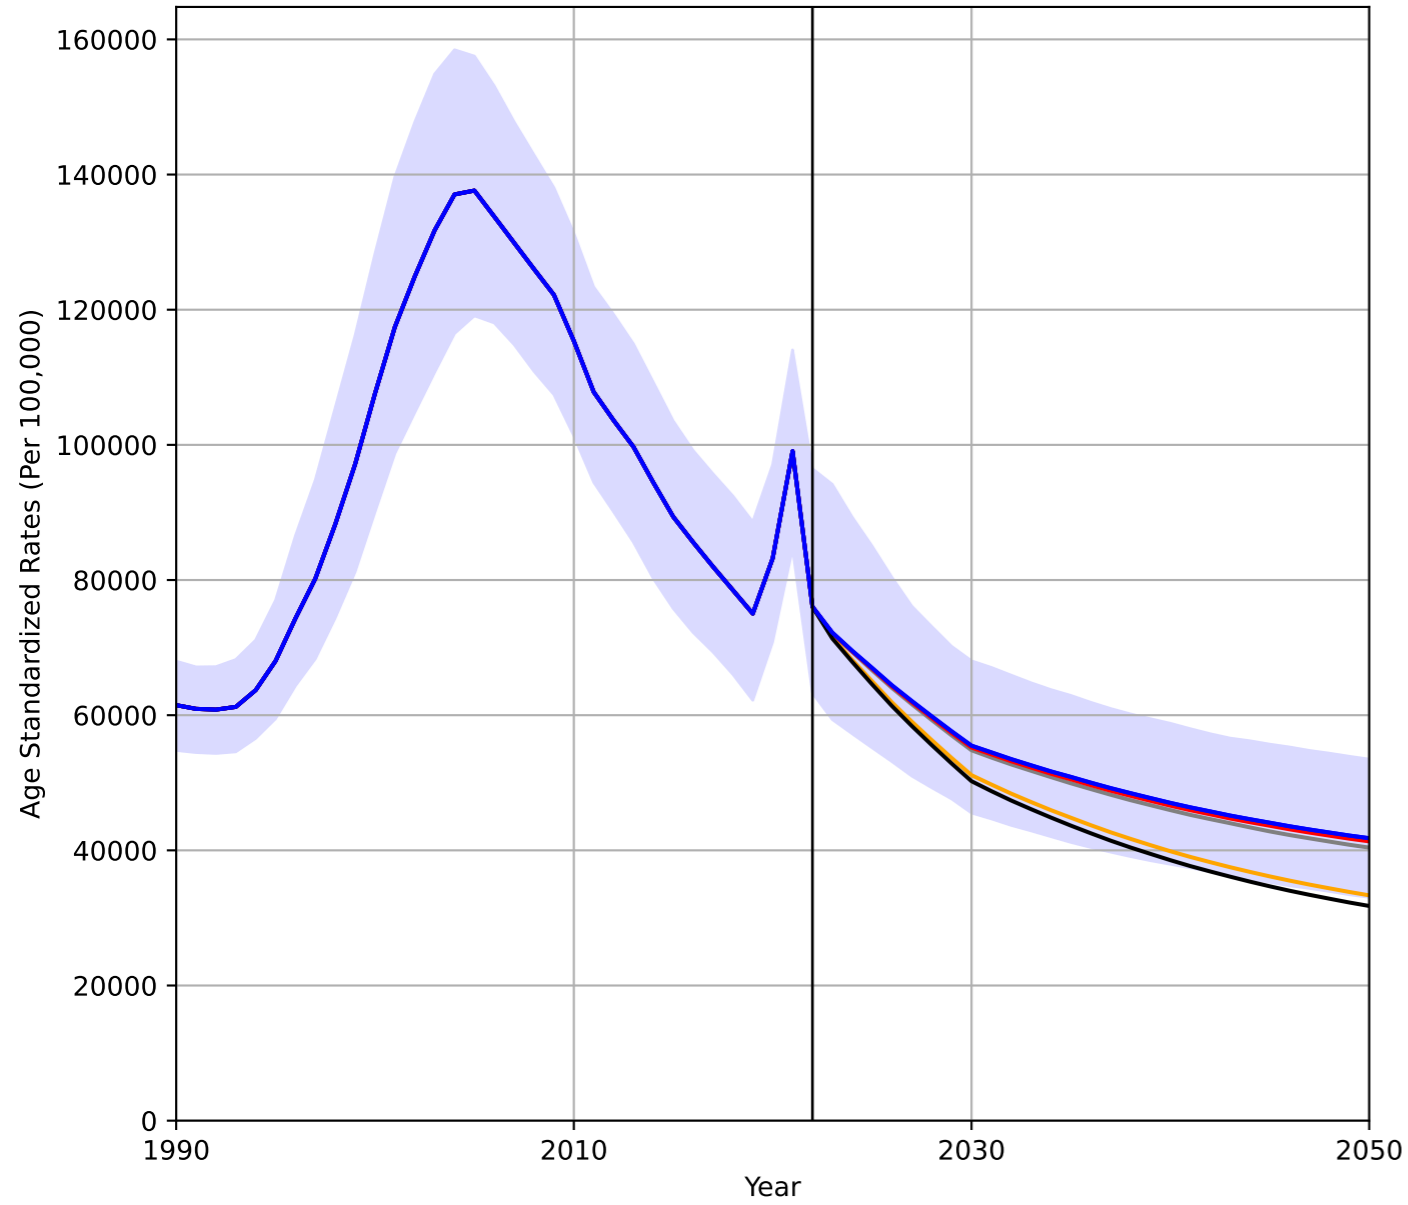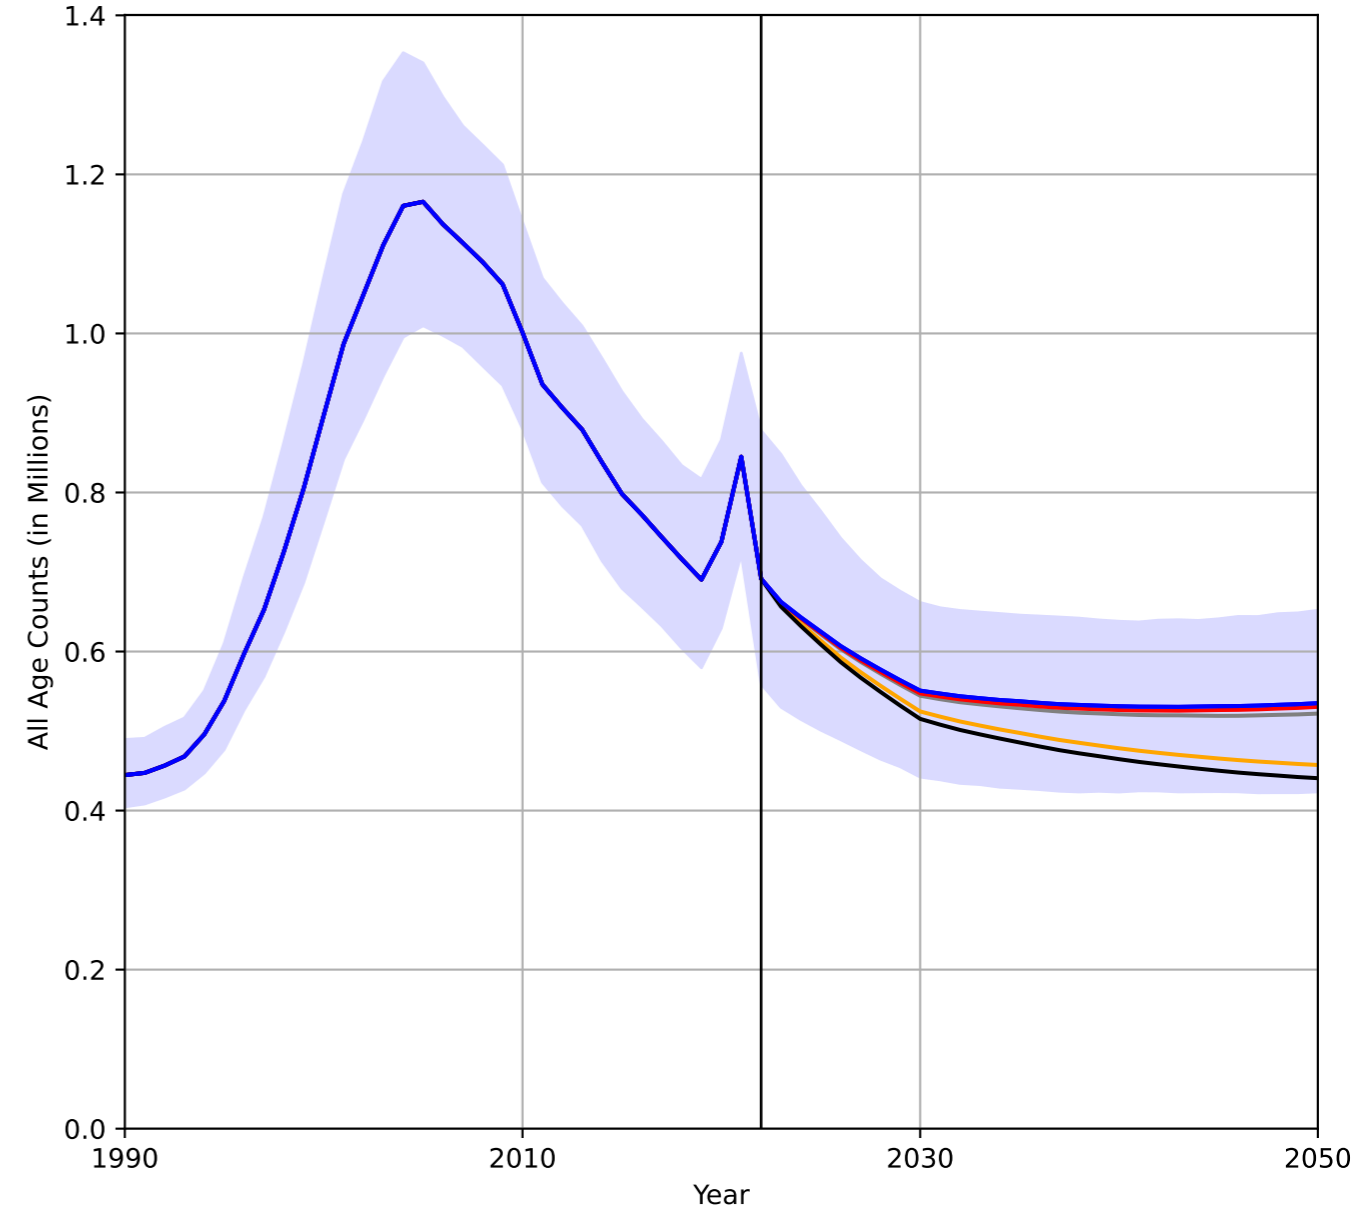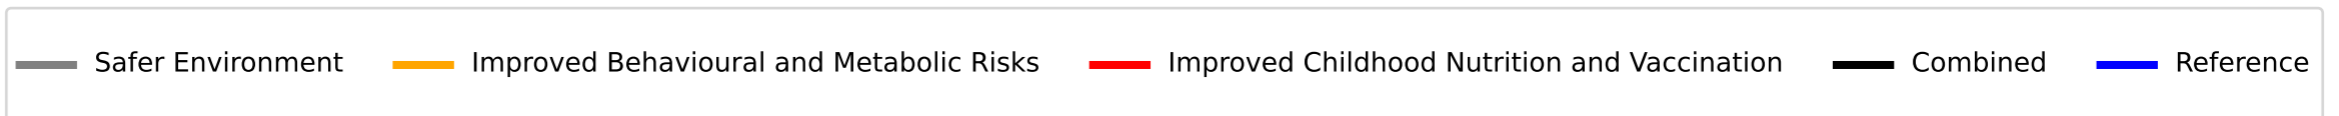



# Lesotho

Supplemental Results Figure S10. All-cause age standardised DALY rates (A) and all age DALY counts (B), for the past and for five future scenarios, 1990–2050

1592

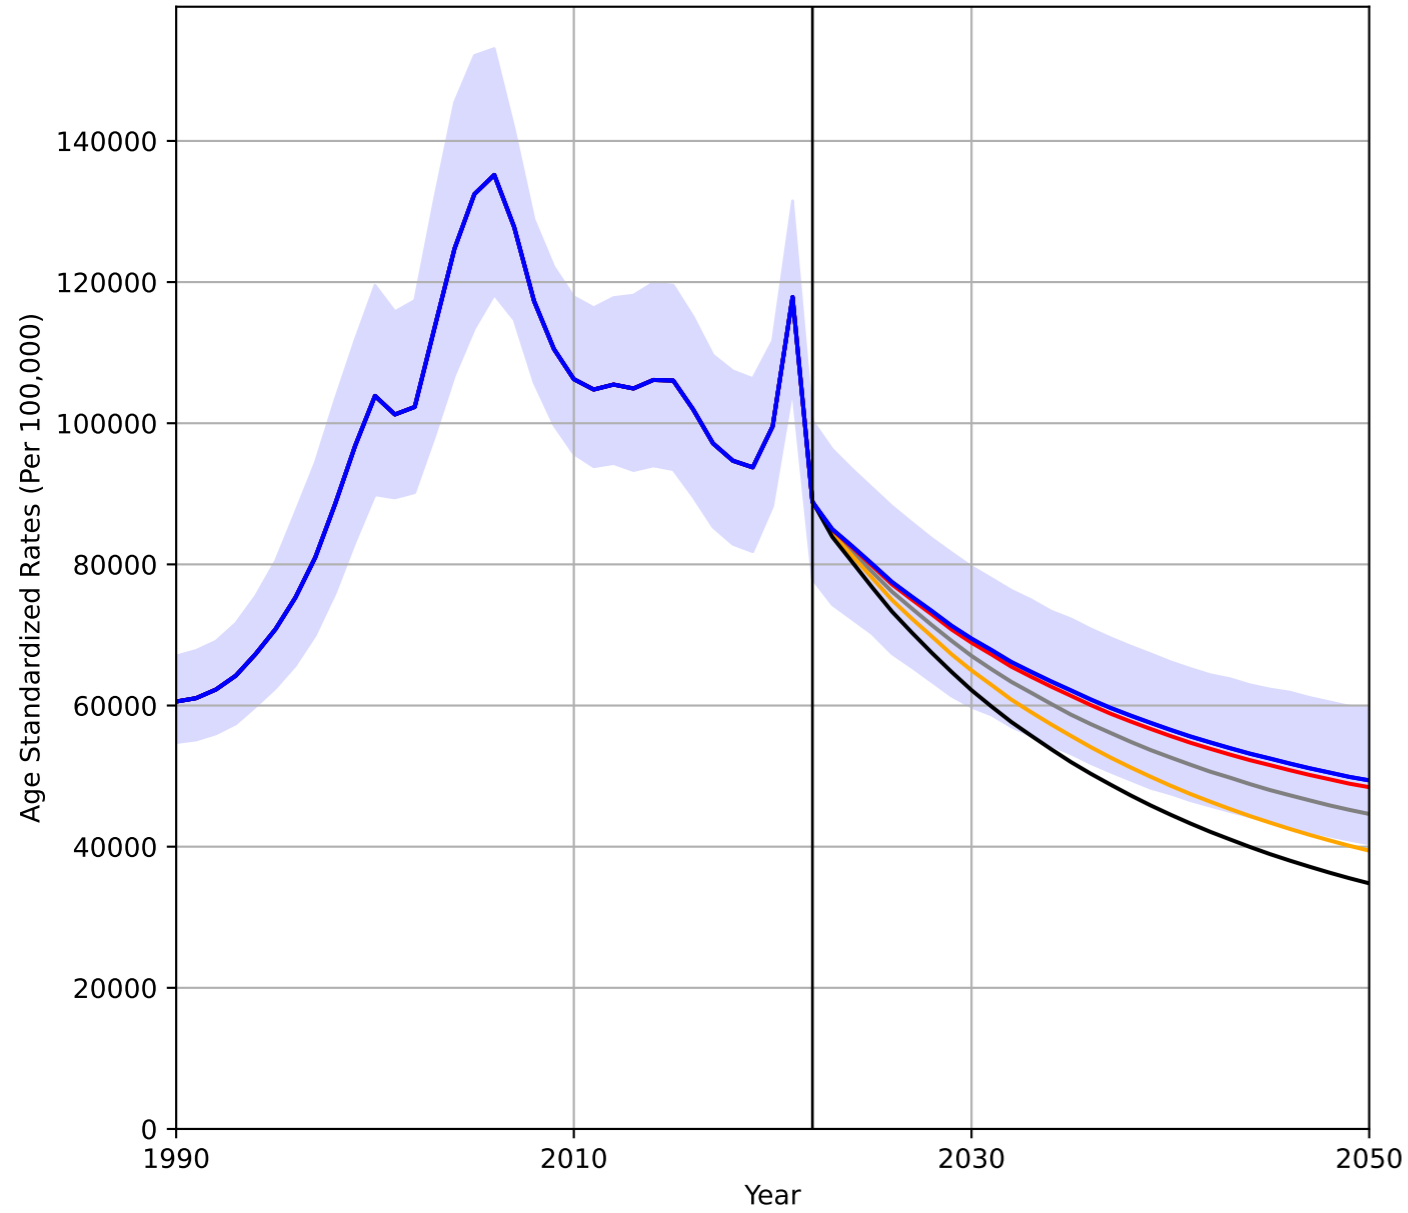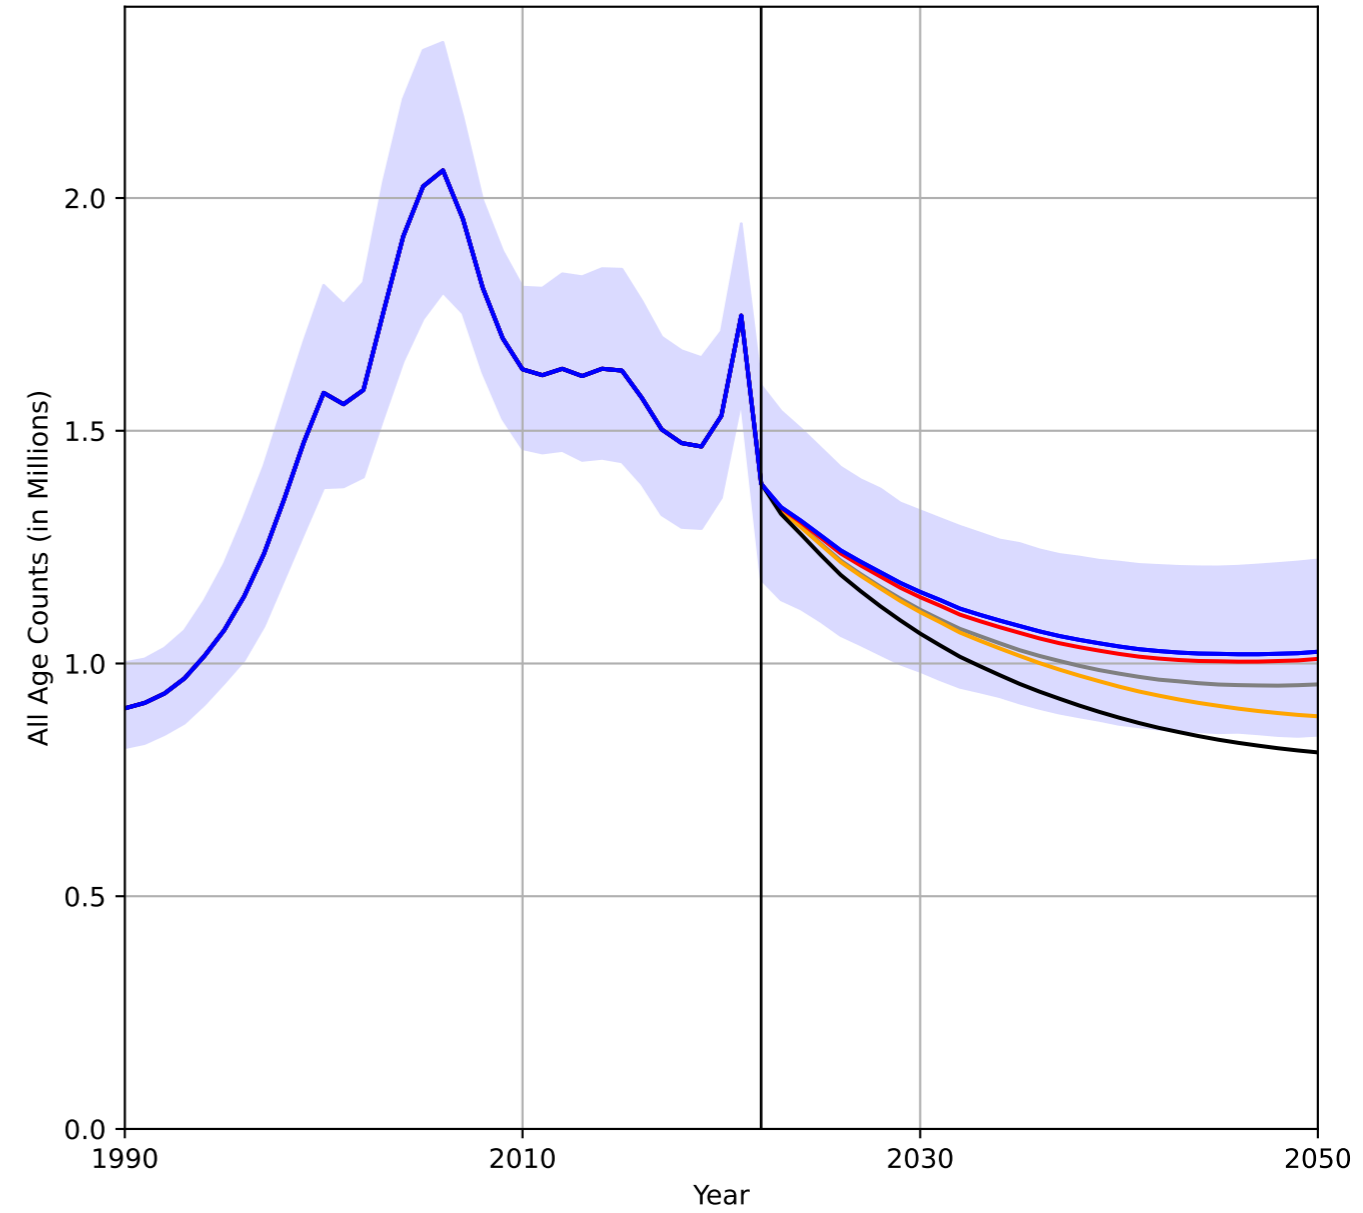

# Namibia

Supplemental Results Figure S10. All-cause age standardised DALY rates (A) and all age DALY counts (B), for the past and for five future scenarios, 1990–2050

1593

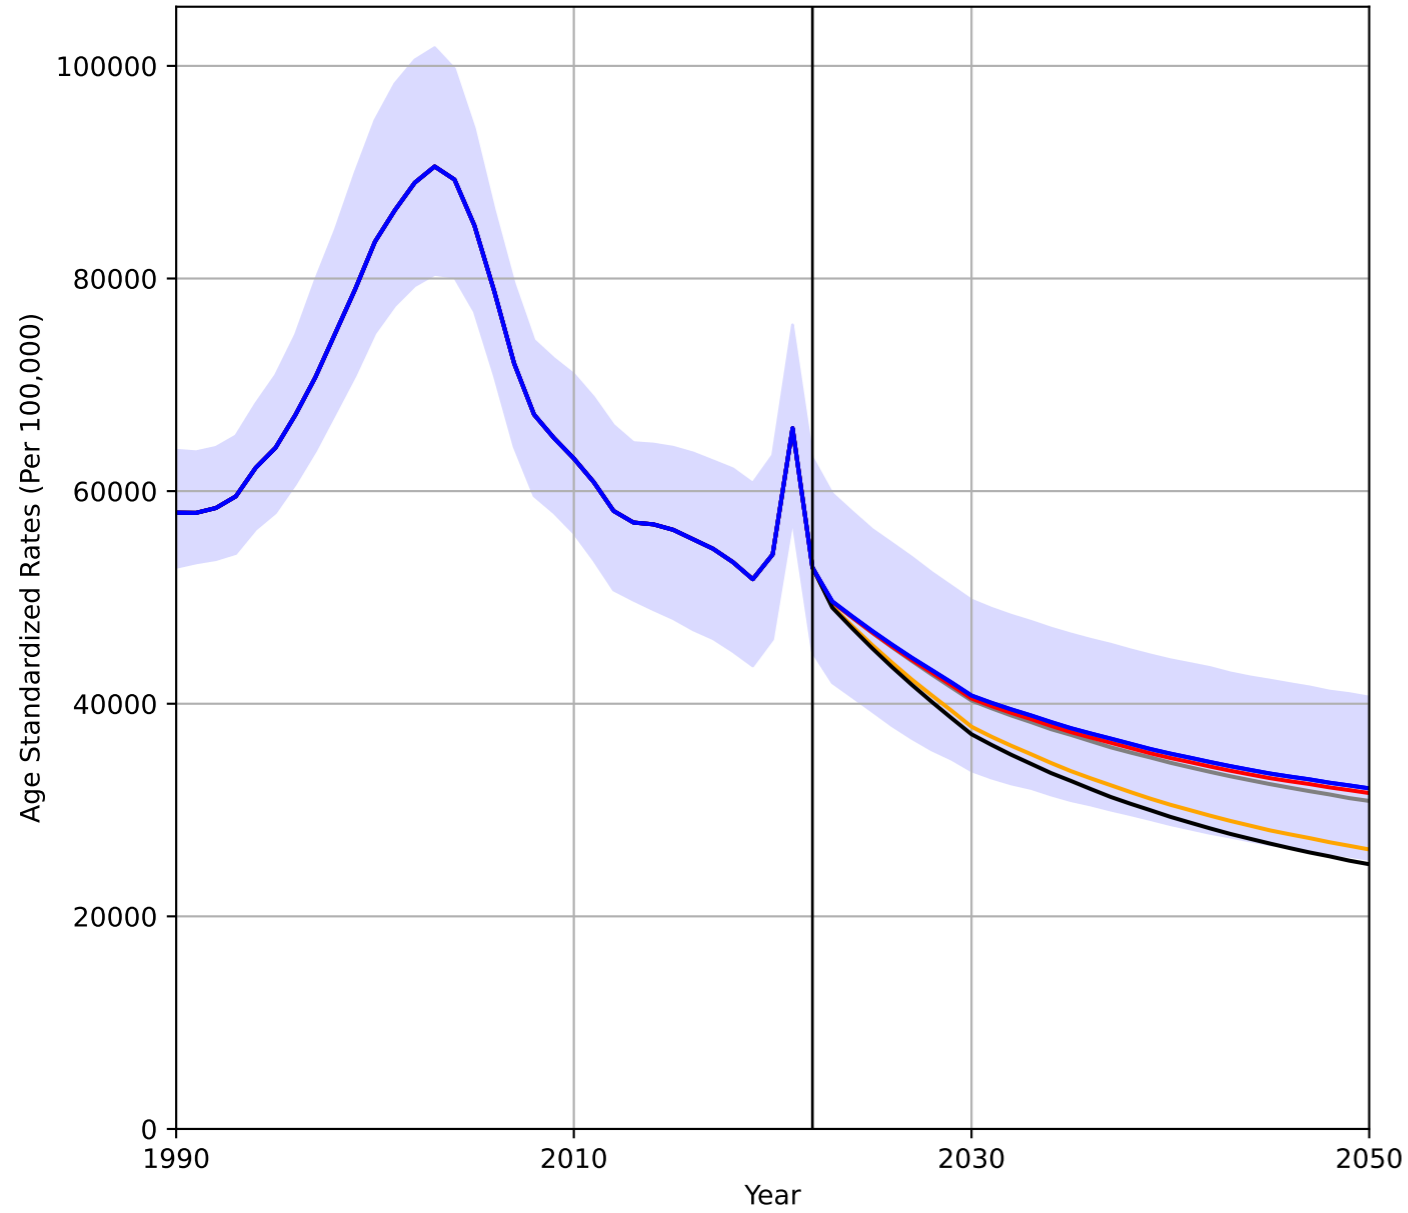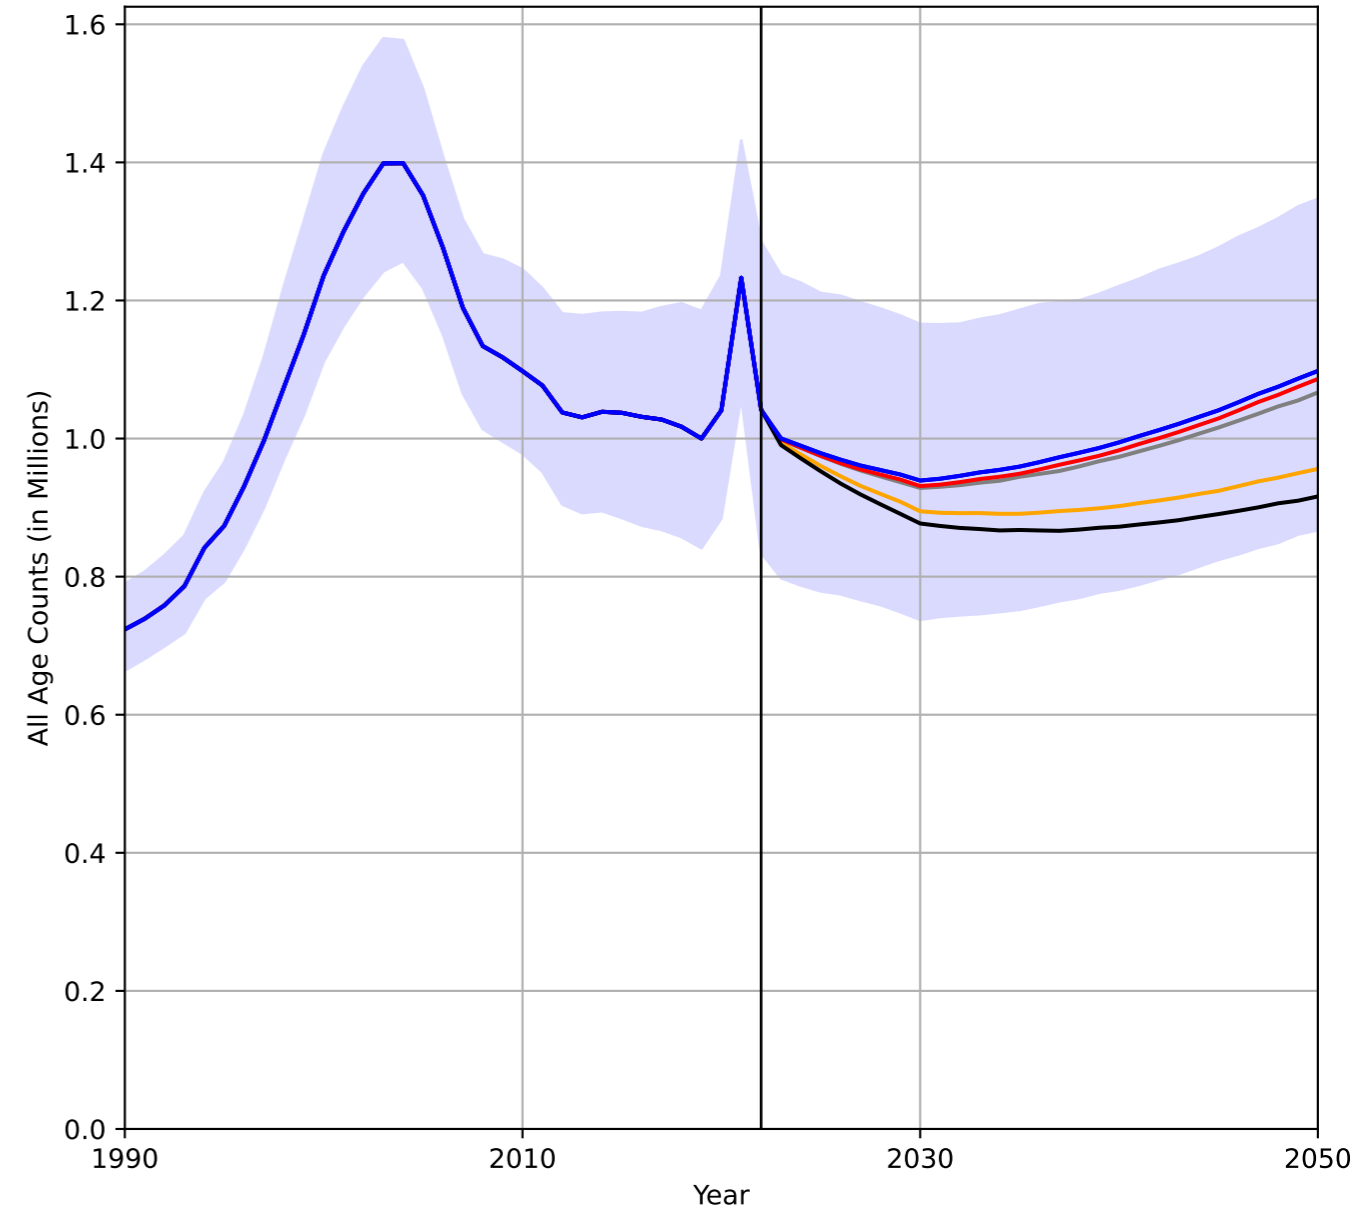

# South Africa

Supplemental Results Figure S10. All-cause age standardised DALY rates (A) and all age DALY counts (B), for the past and for five future scenarios, 1990–2050

1594

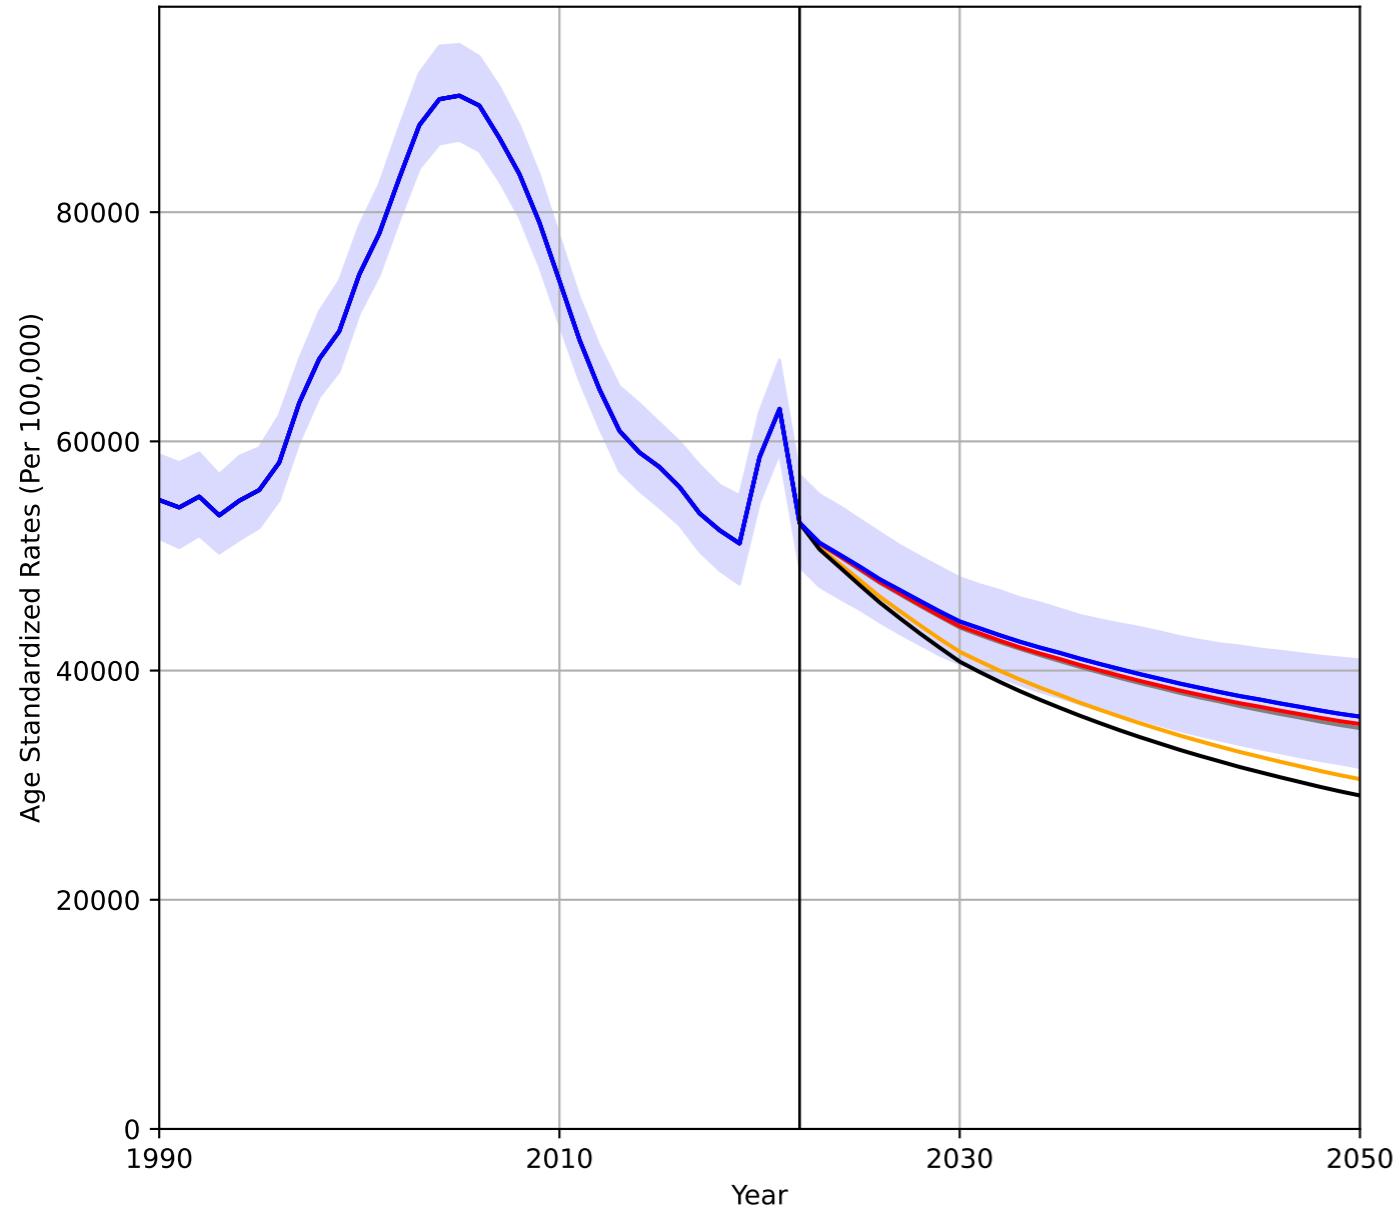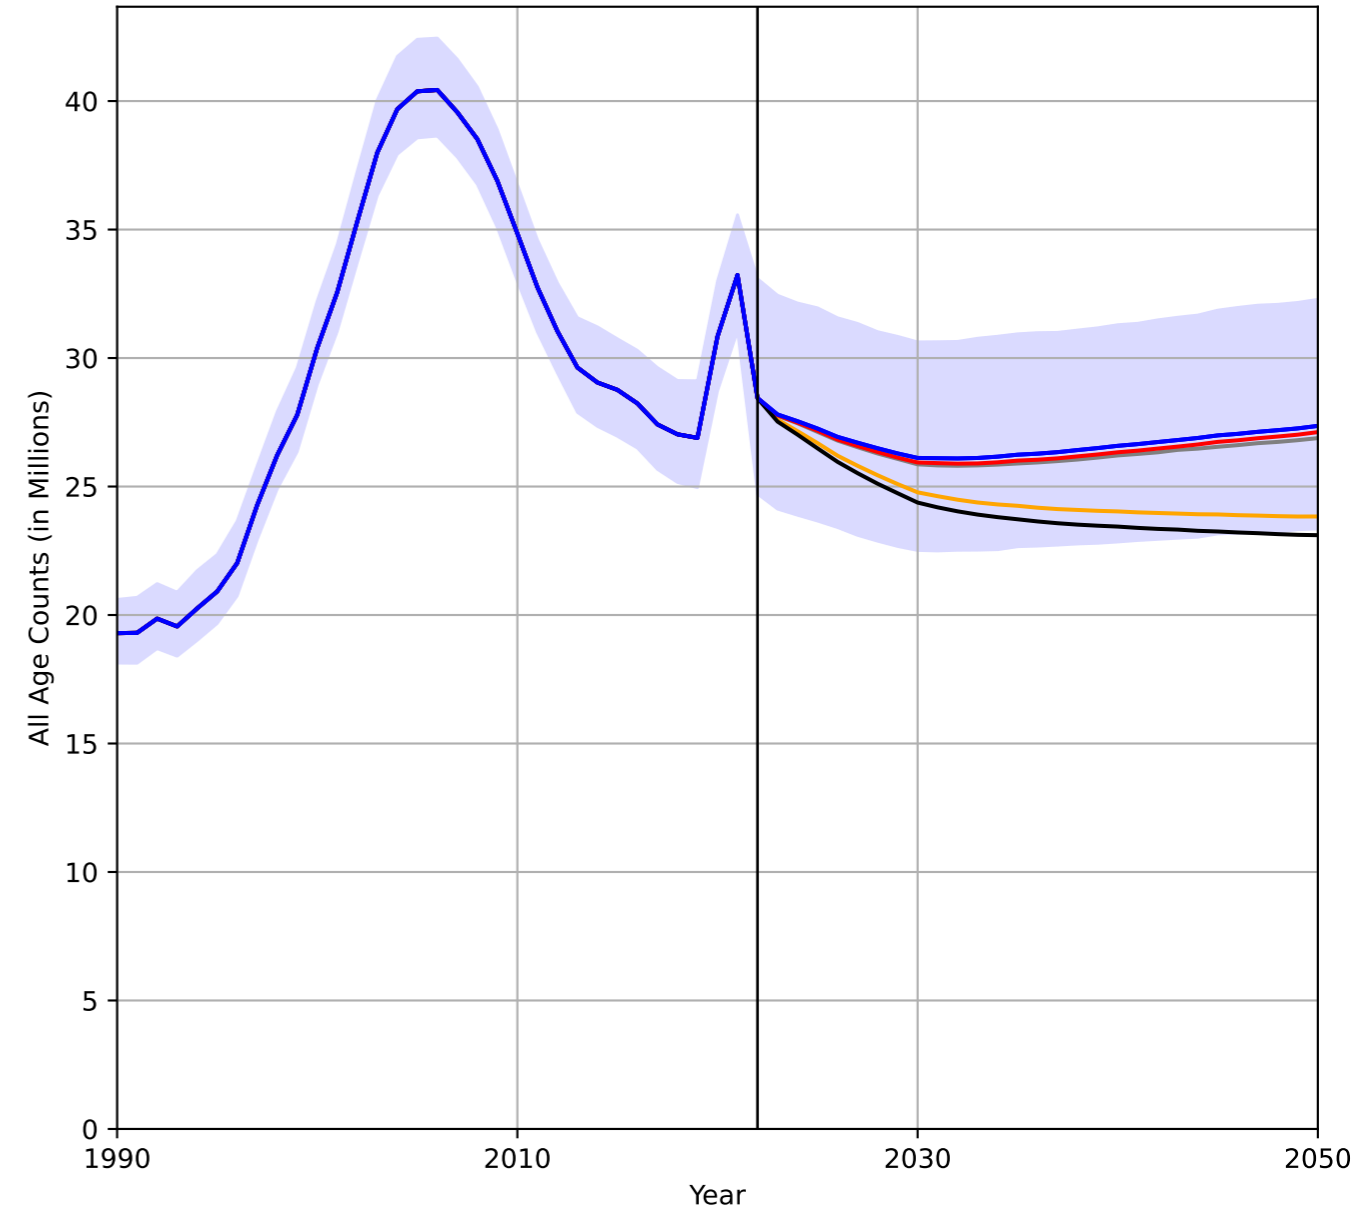

# Zimbabwe

Supplemental Results Figure S10. All-cause age standardised DALY rates (A) and all age DALY counts (B), for the past and for five future scenarios, 1990–2050

1595

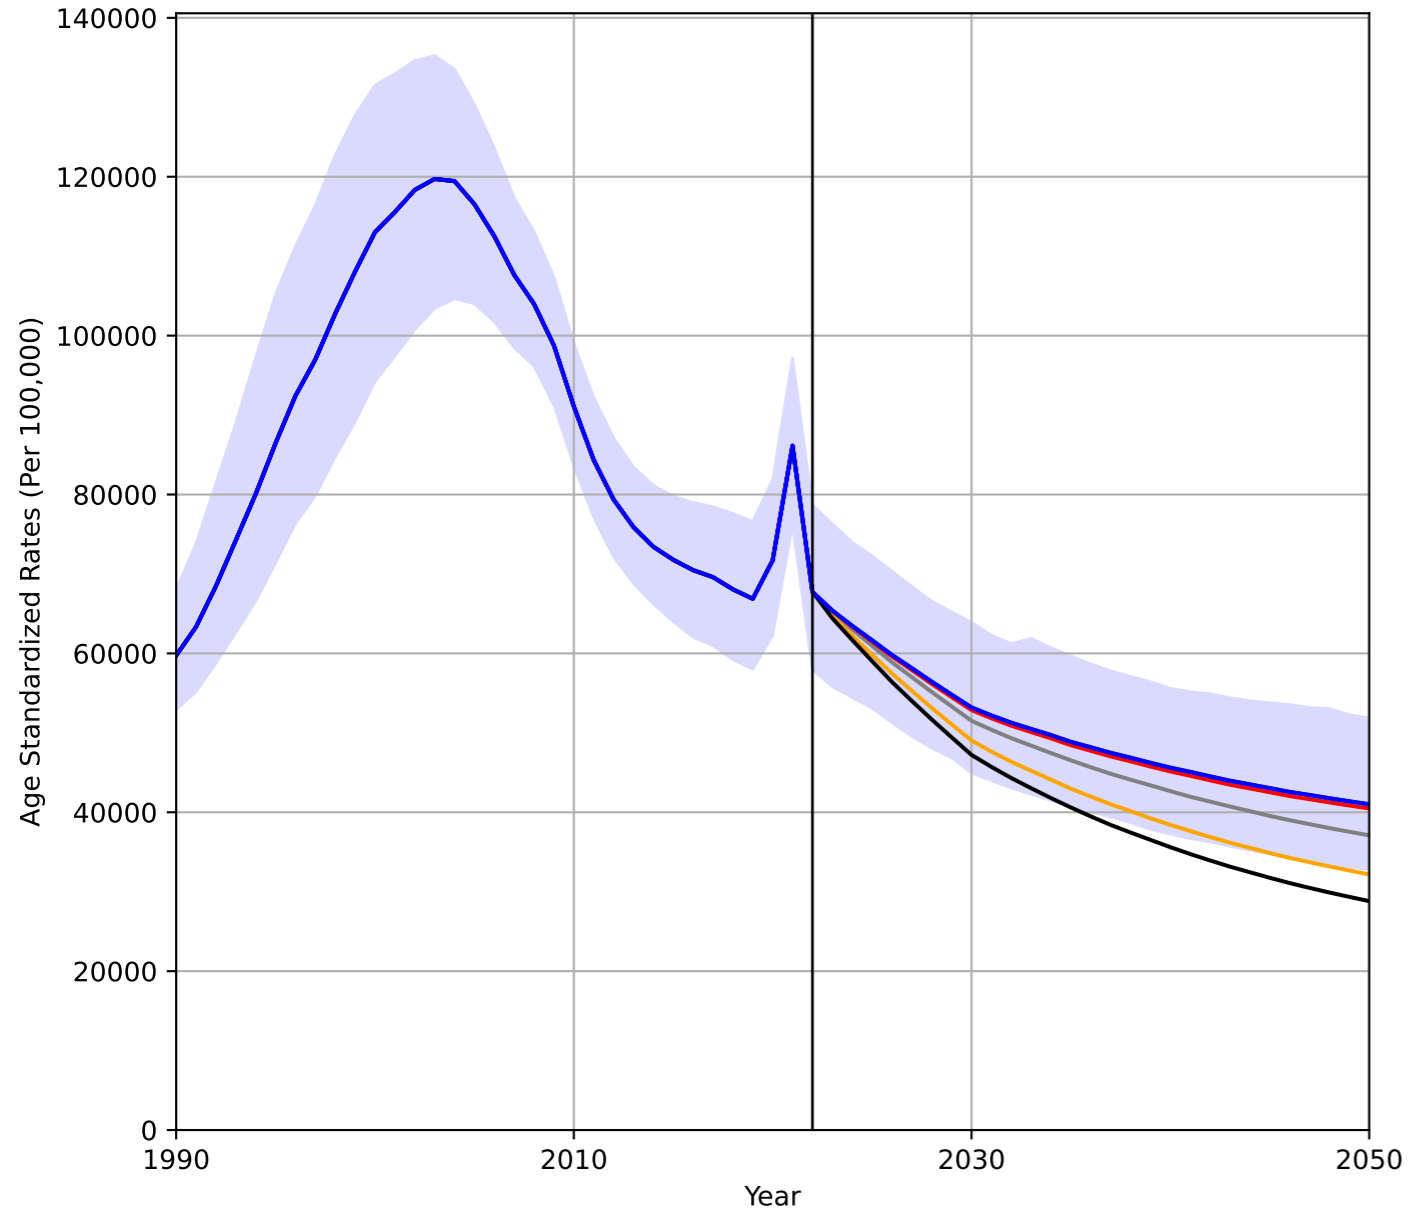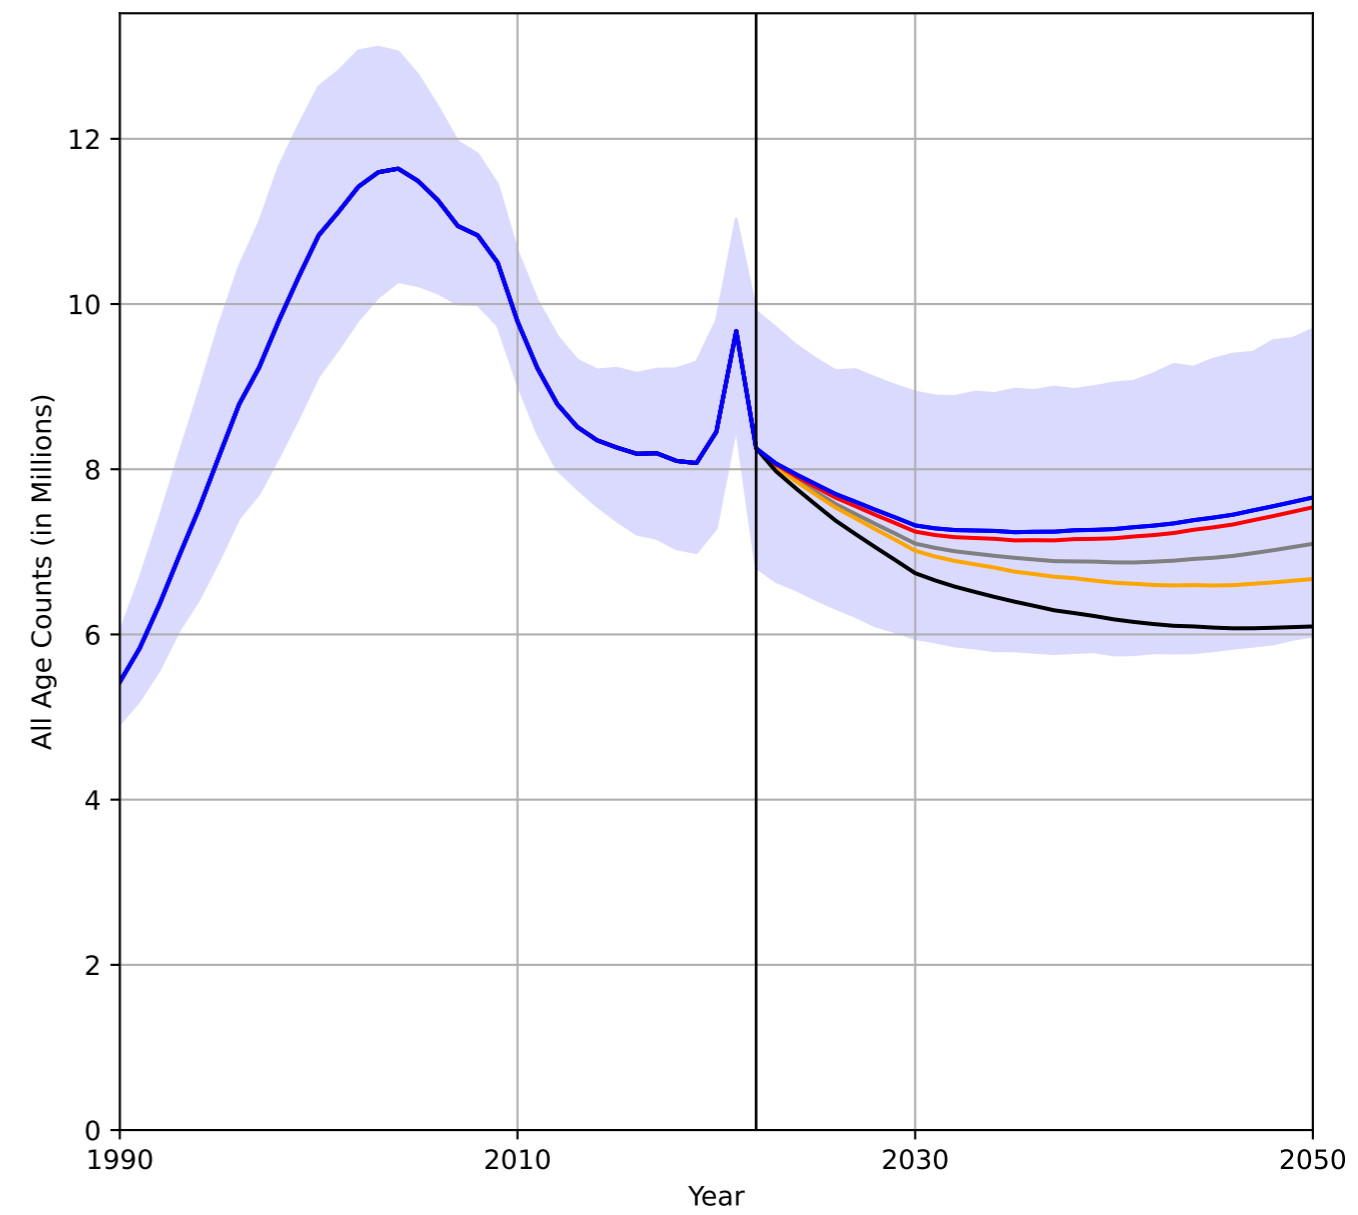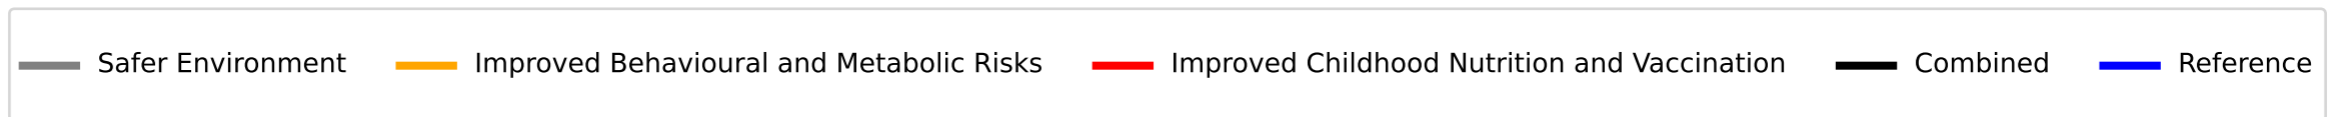

# Benin

Supplemental Results Figure S10. All-cause age standardised DALY rates (A) and all age DALY counts (B), for the past and for five future scenarios, 1990–2050

1596

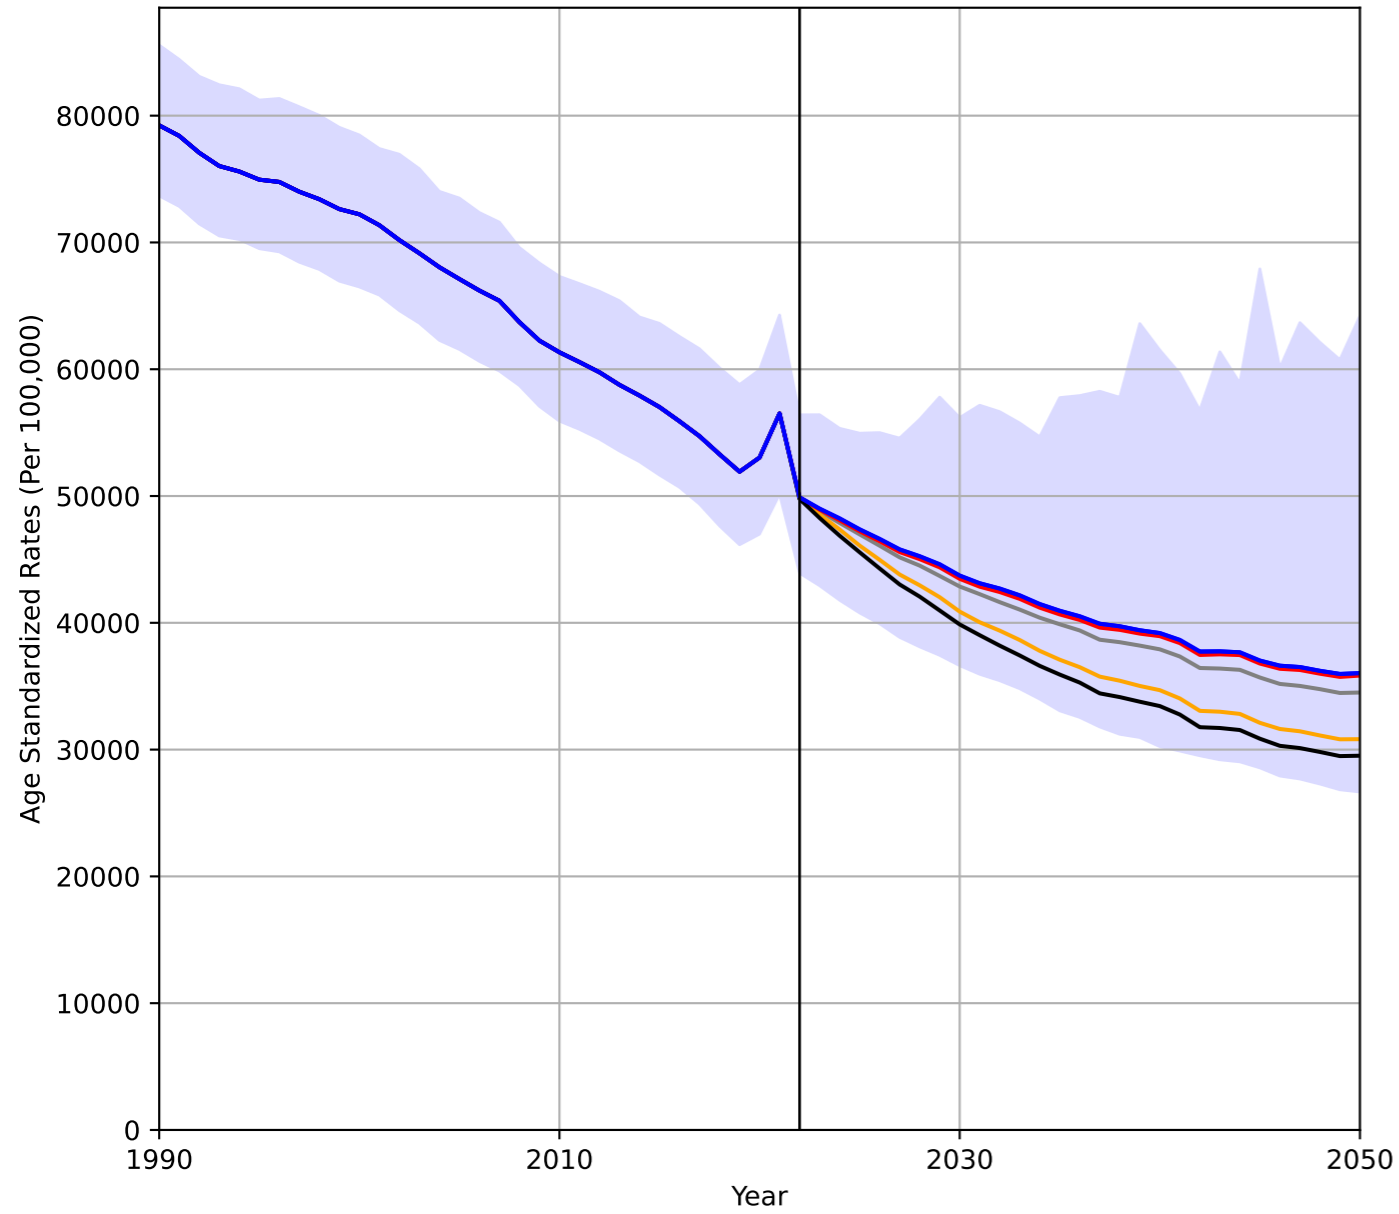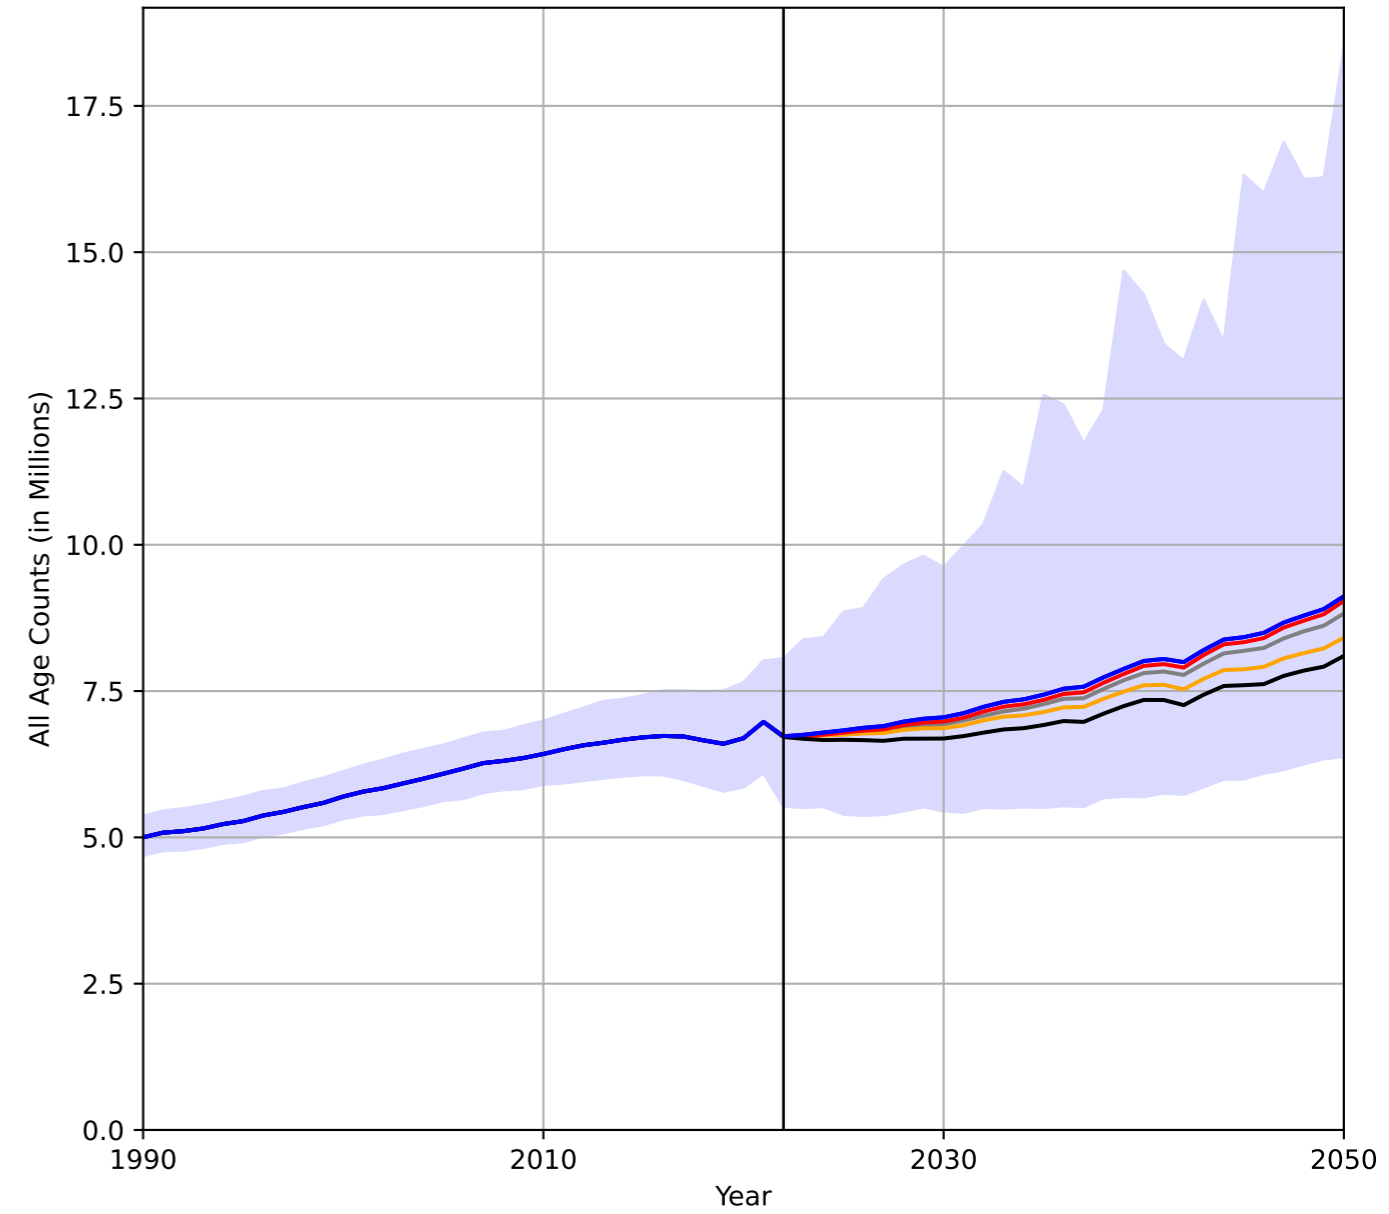

# Burkina Faso

Supplemental Results Figure S10. All-cause age standardised DALY rates (A) and all age DALY counts (B), for the past and for five future scenarios, 1990–2050

1597

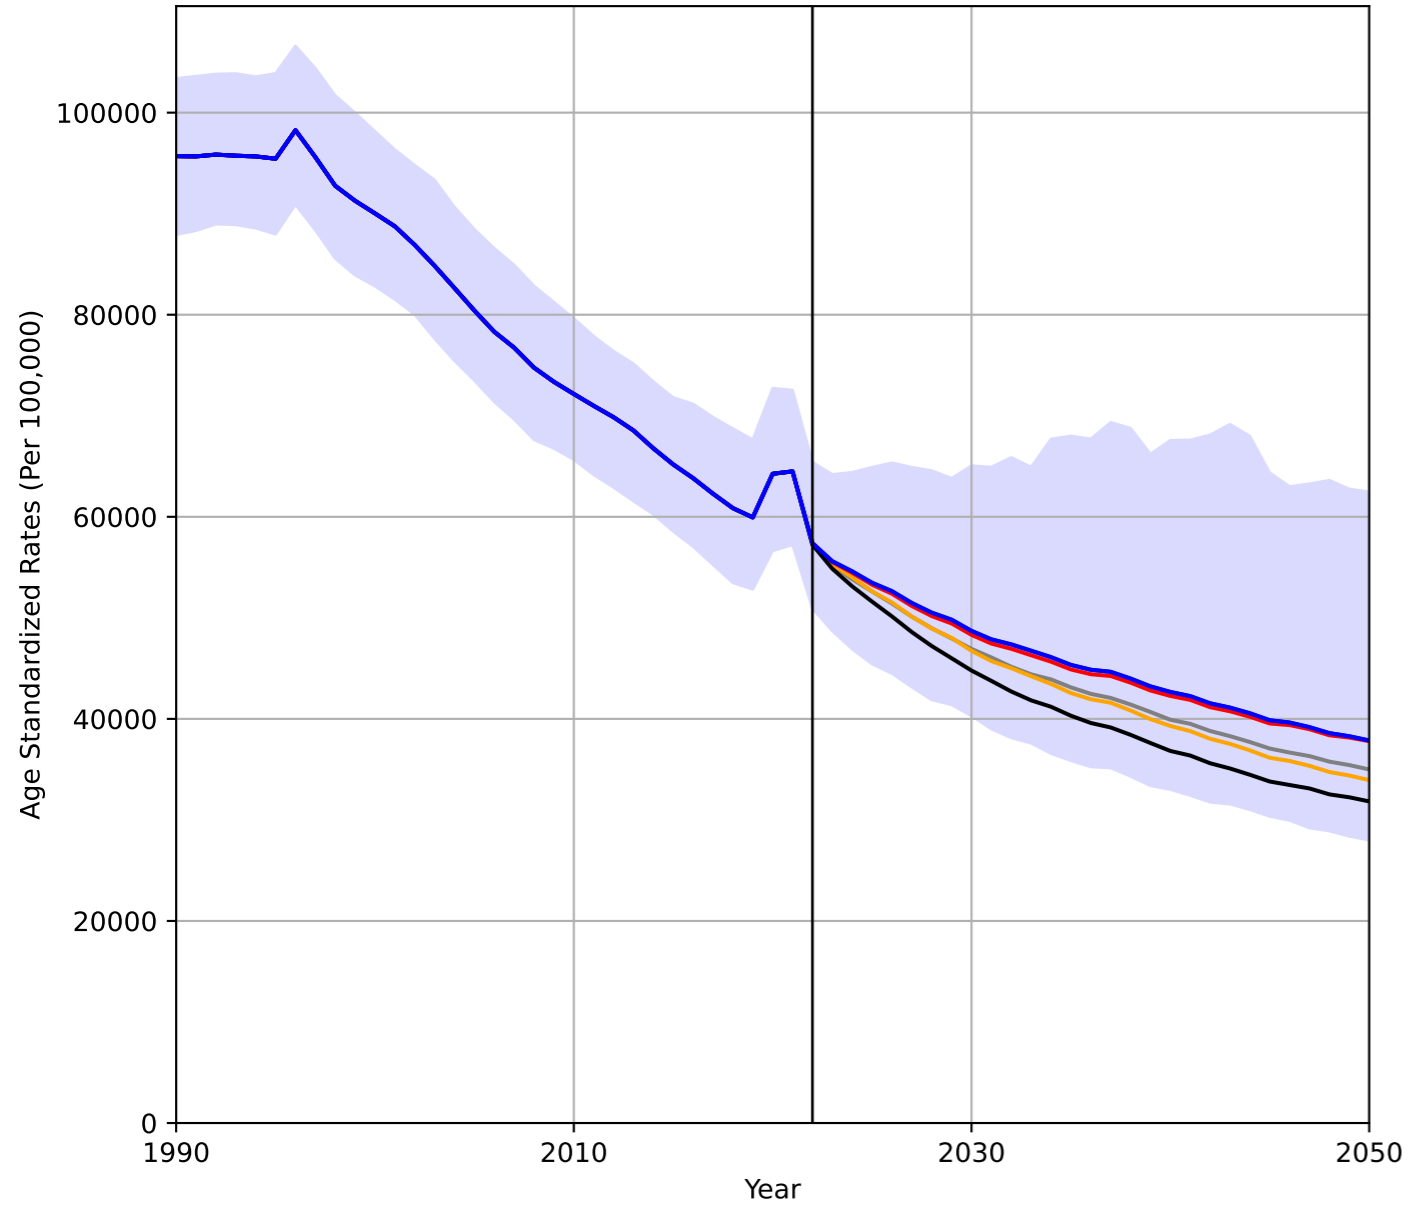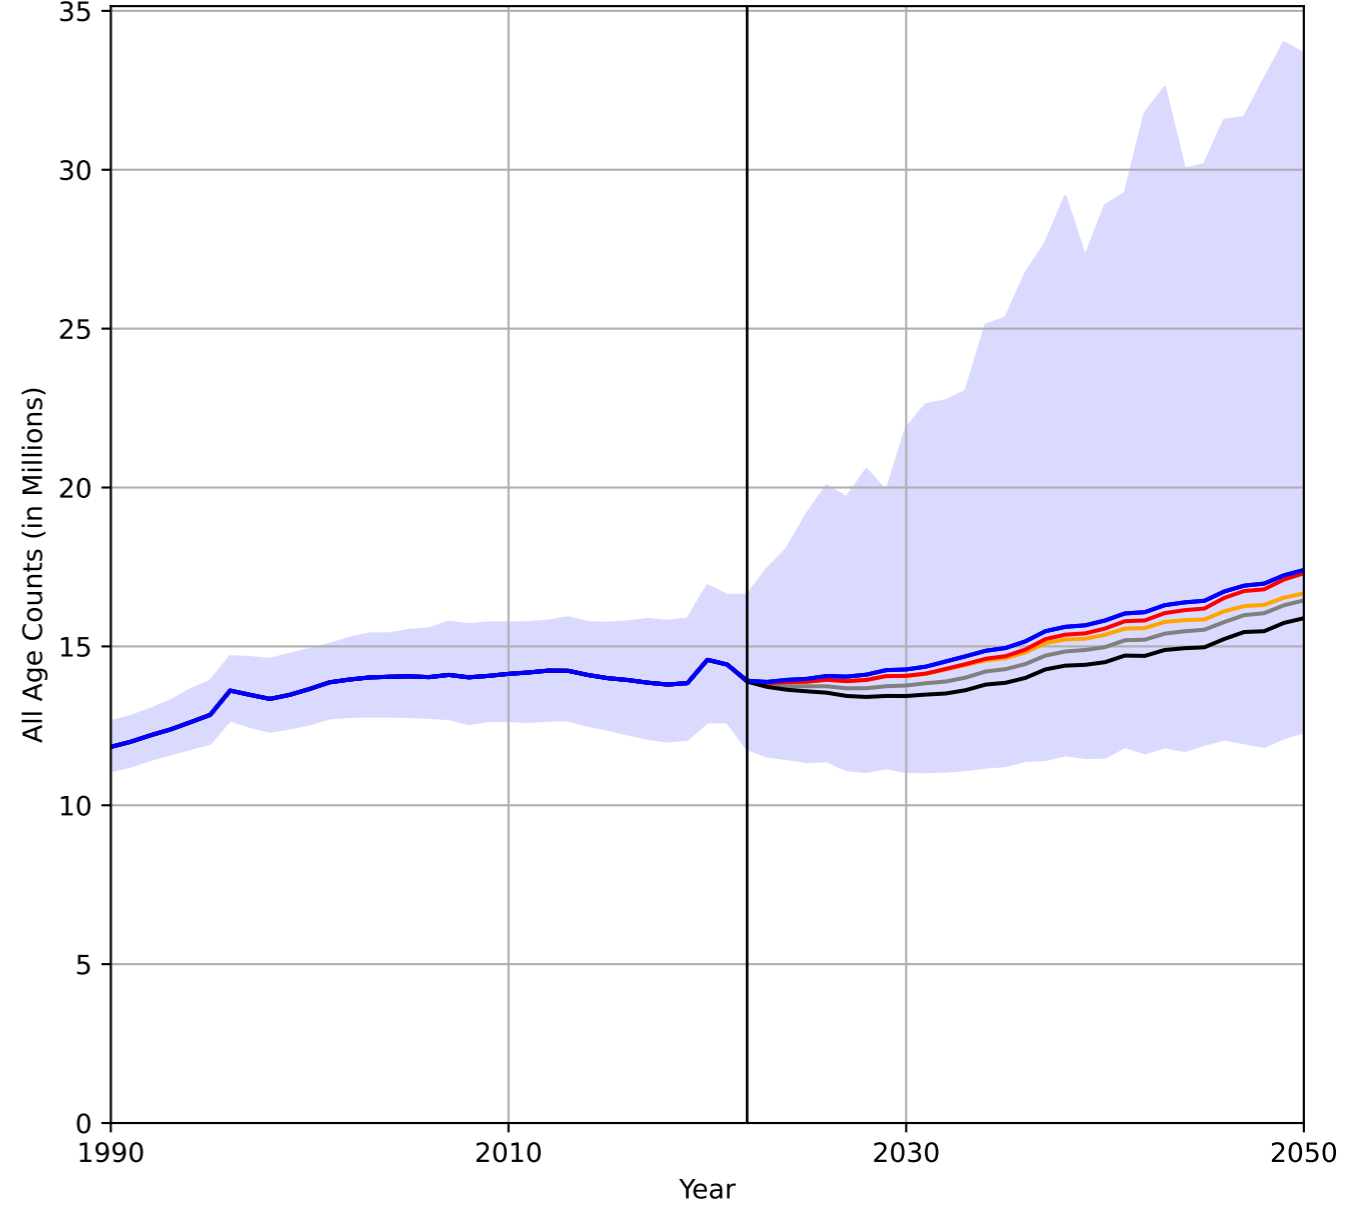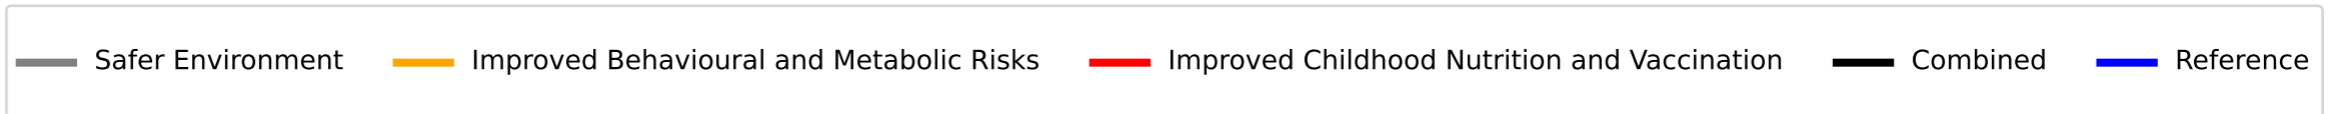

# Cabo Verde

Supplemental Results Figure S10. All-cause age standardised DALY rates (A) and all age DALY counts (B), for the past and for five future scenarios, 1990–2050

1598

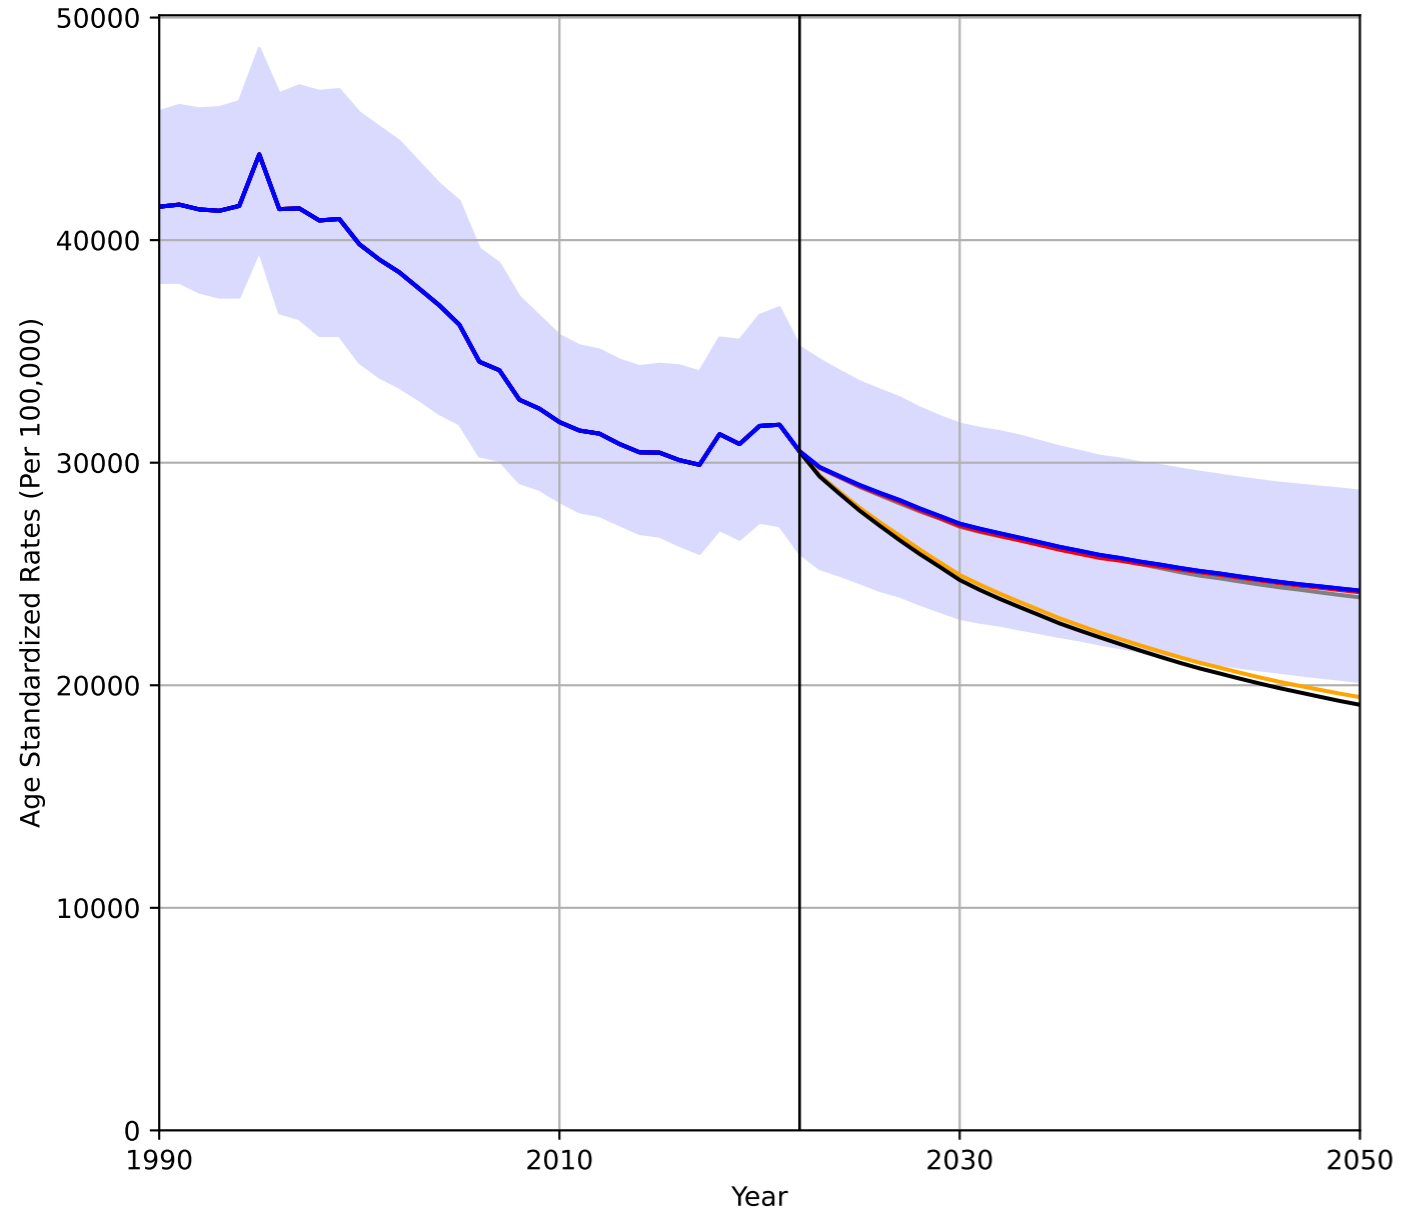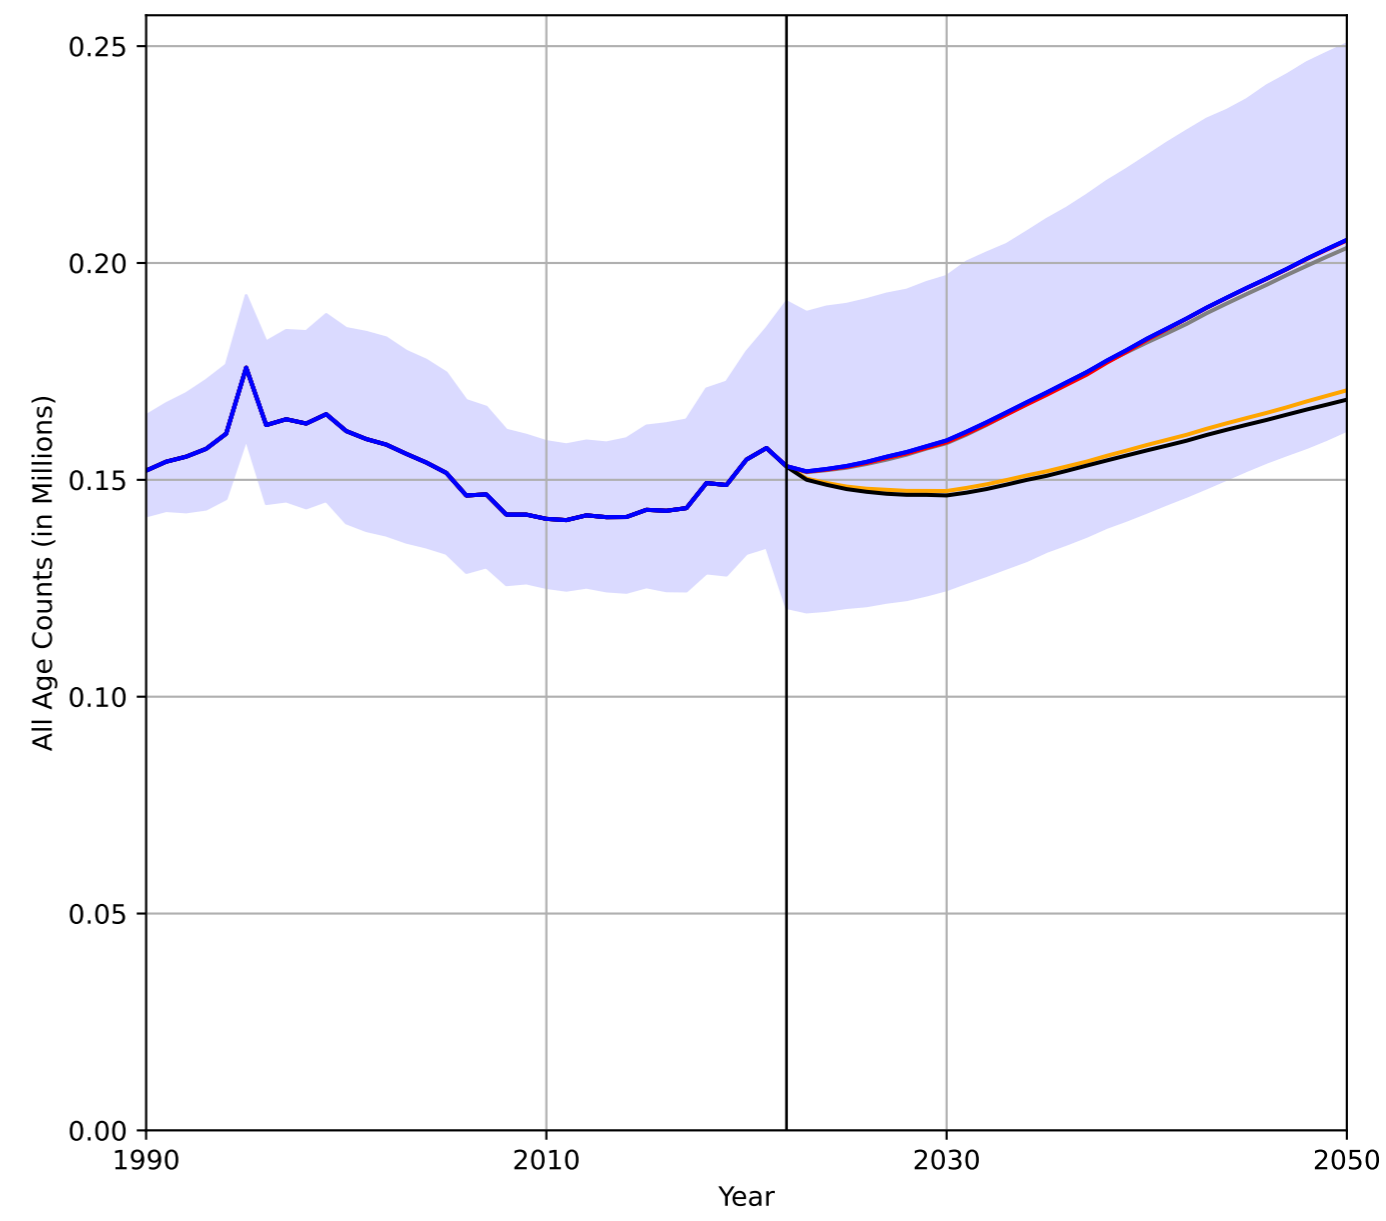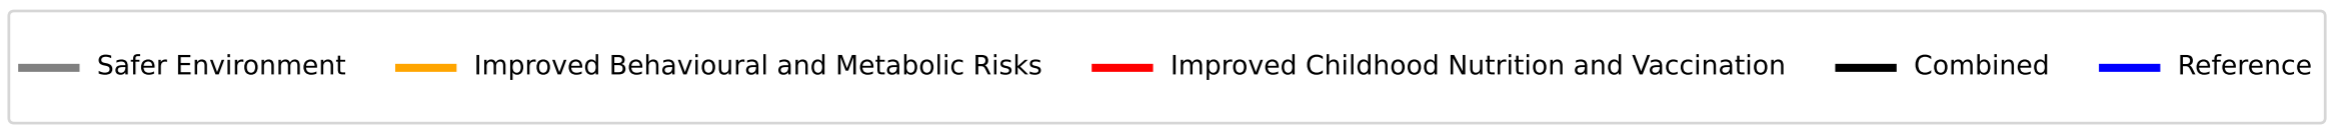

# Cameroon

Supplemental Results Figure S10. All-cause age standardised DALY rates (A) and all age DALY counts (B), for the past and for five future scenarios, 1990–2050

1599

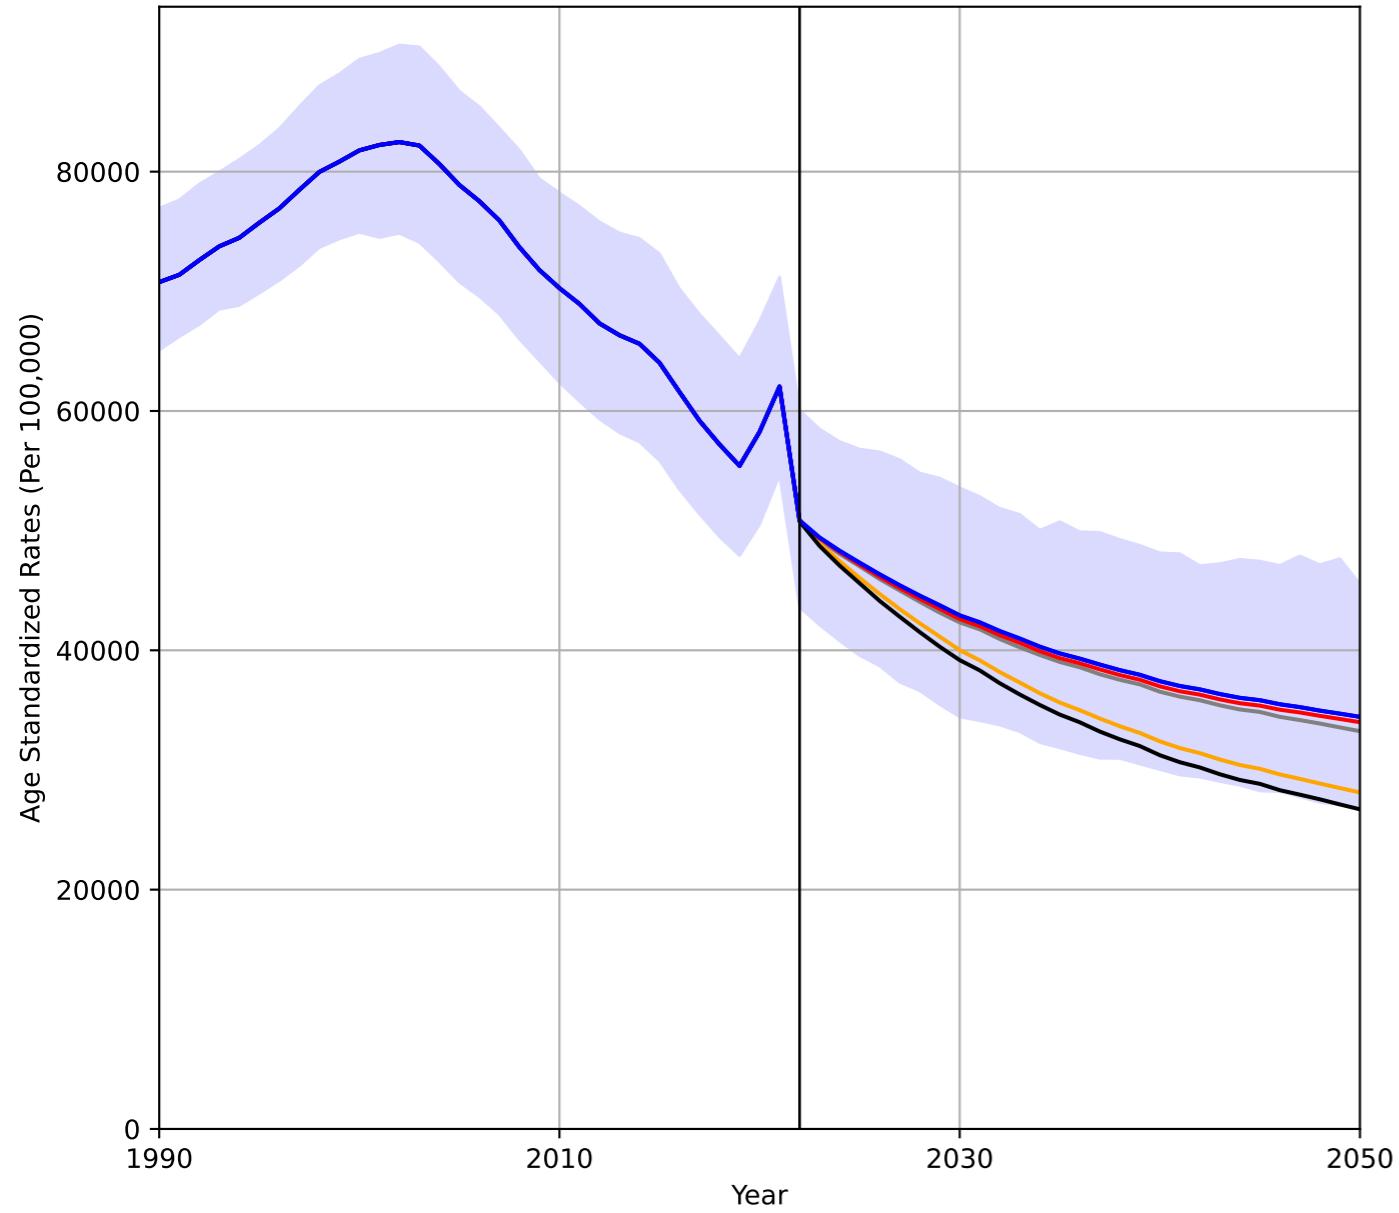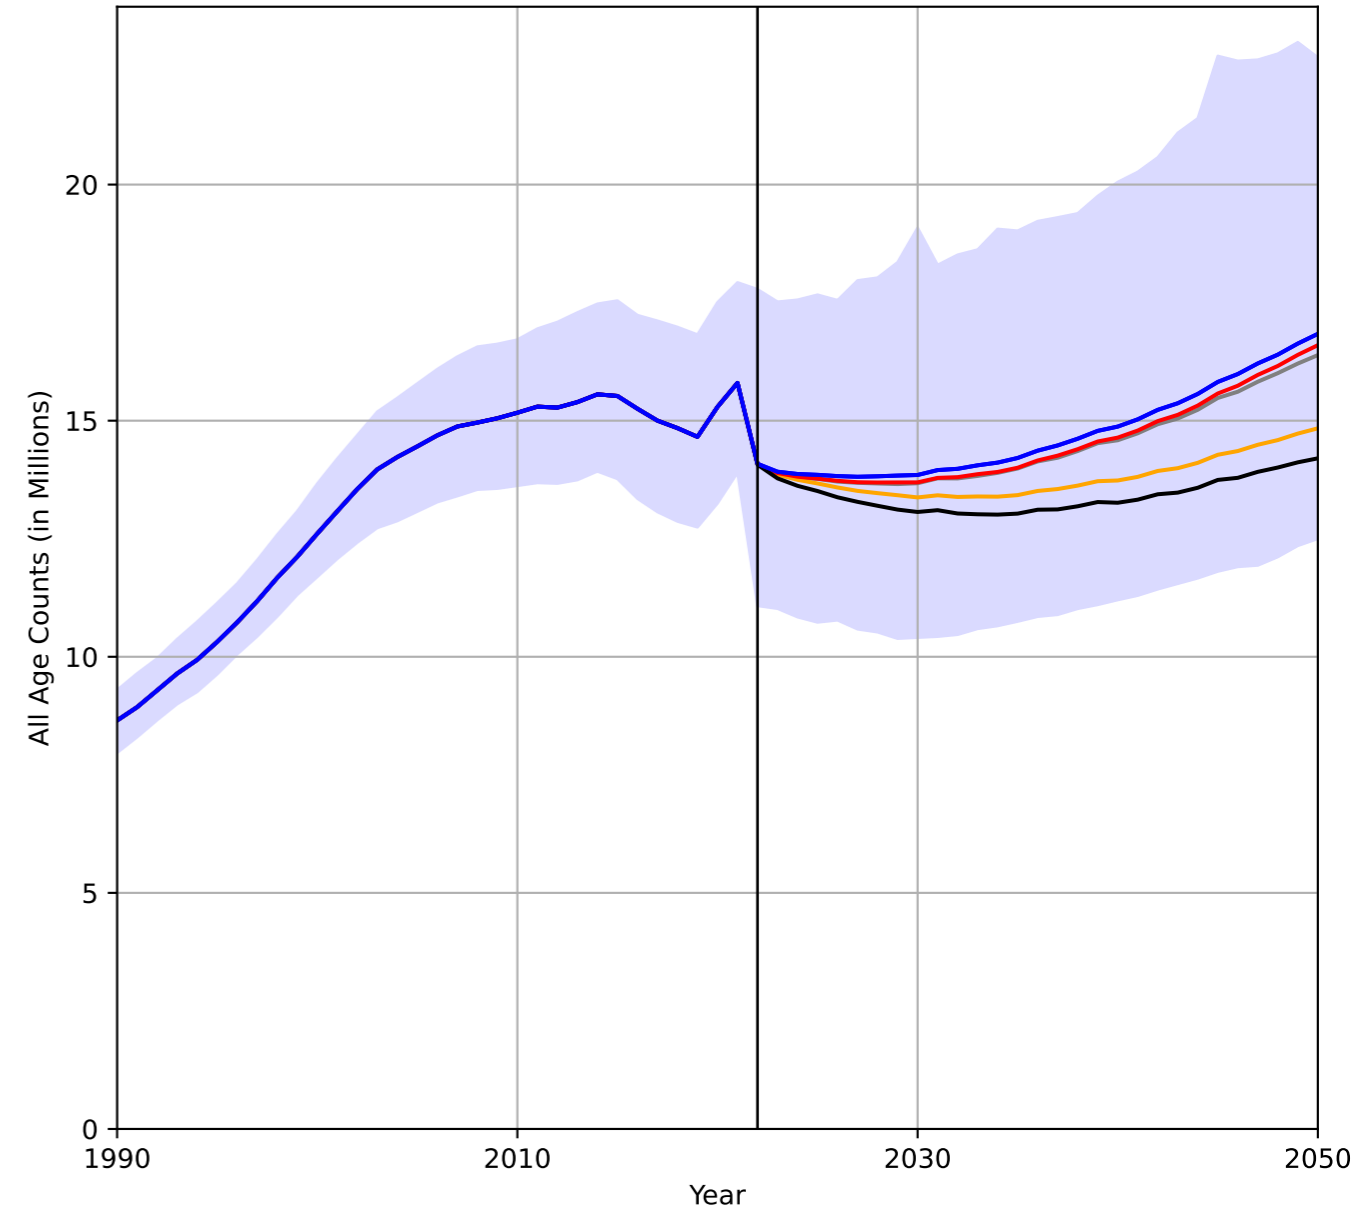



# Chad

Supplemental Results Figure S10. All-cause age standardised DALY rates (A) and all age DALY counts (B), for the past and for five future scenarios, 1990–2050

1600

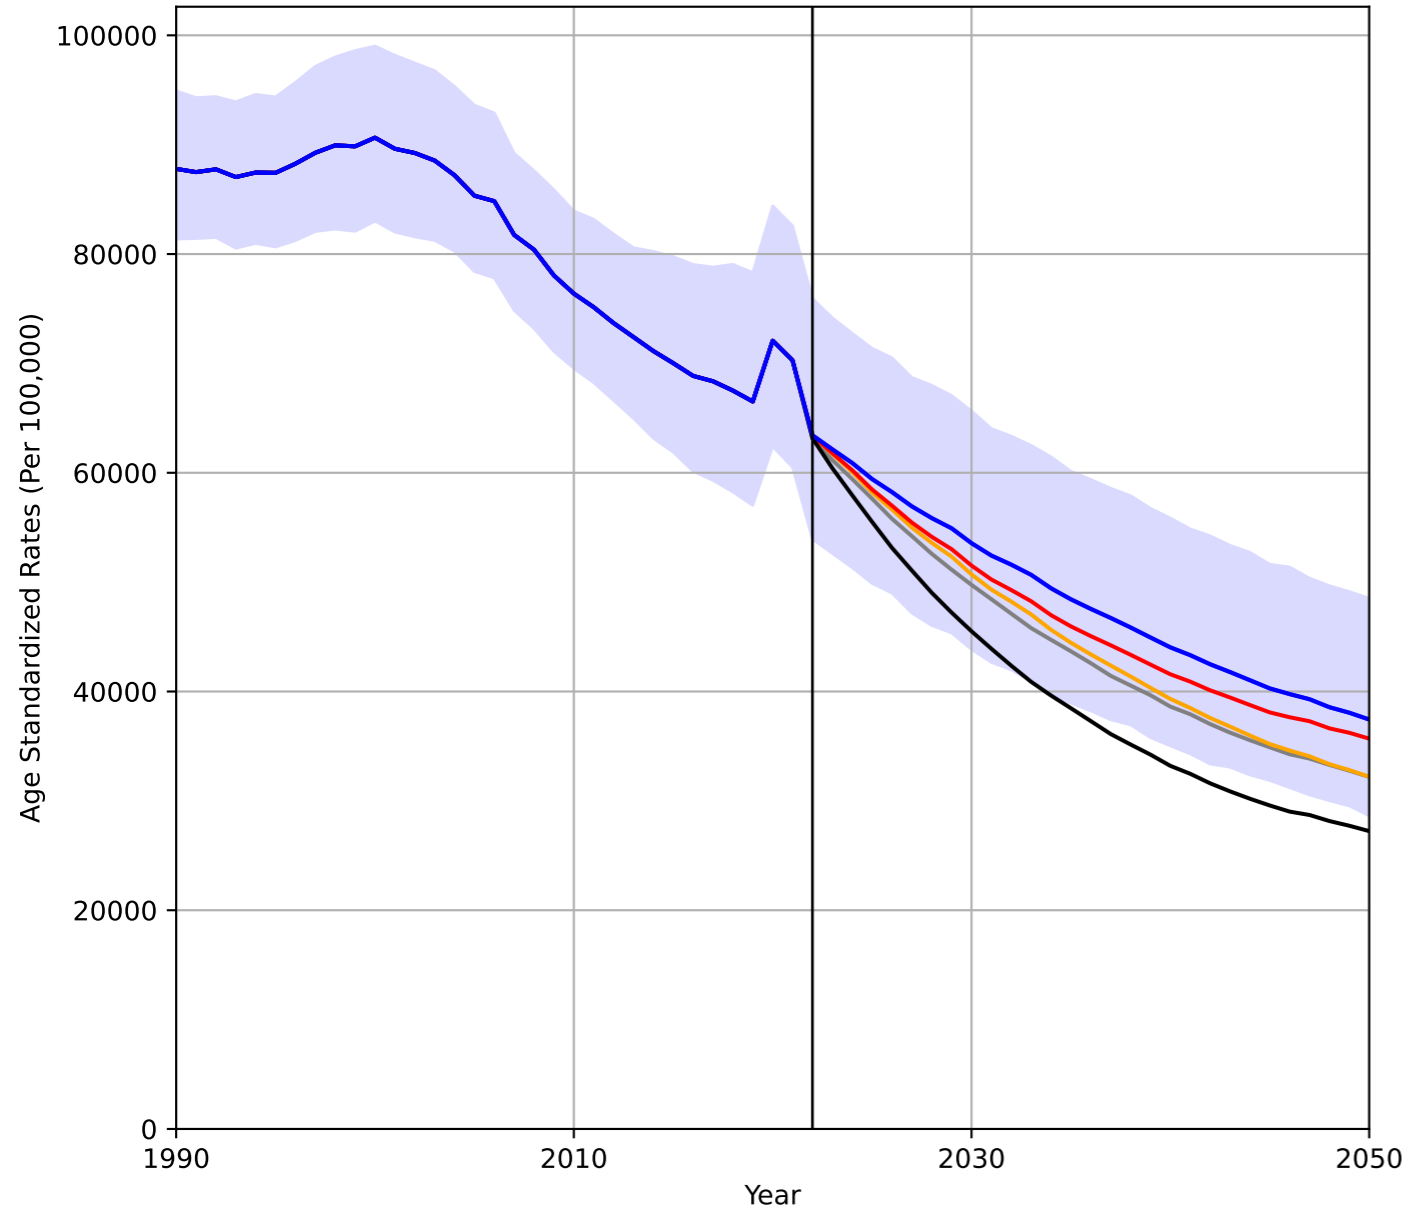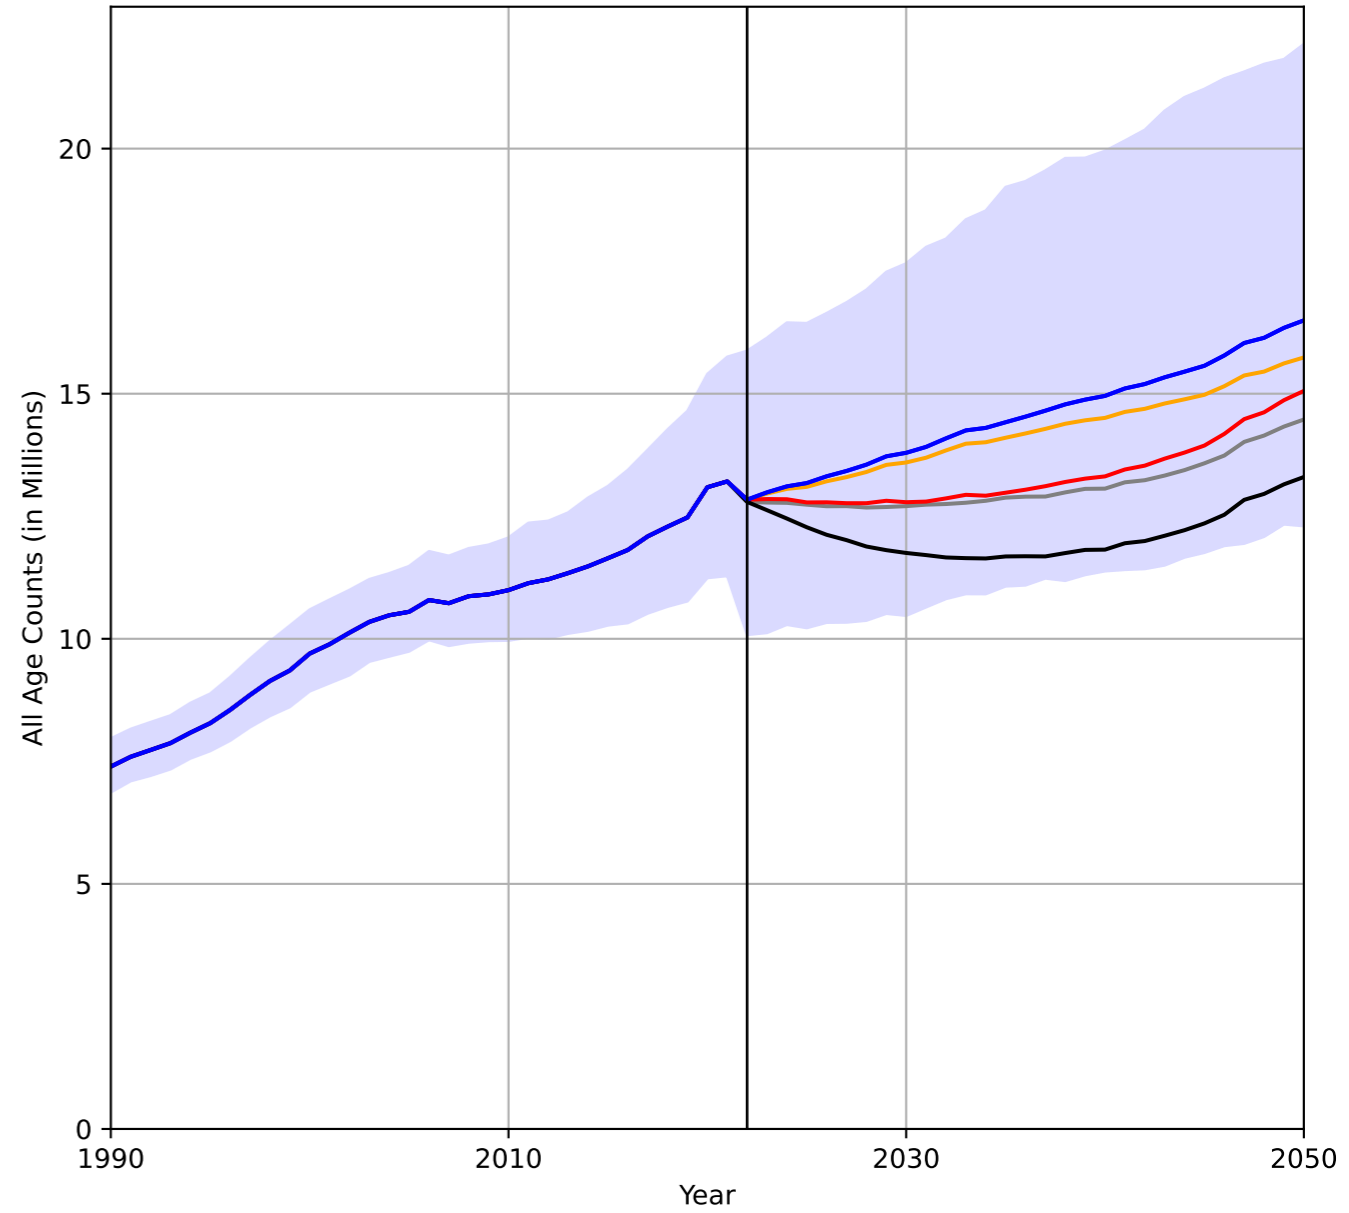

# Côte D'Ivoire

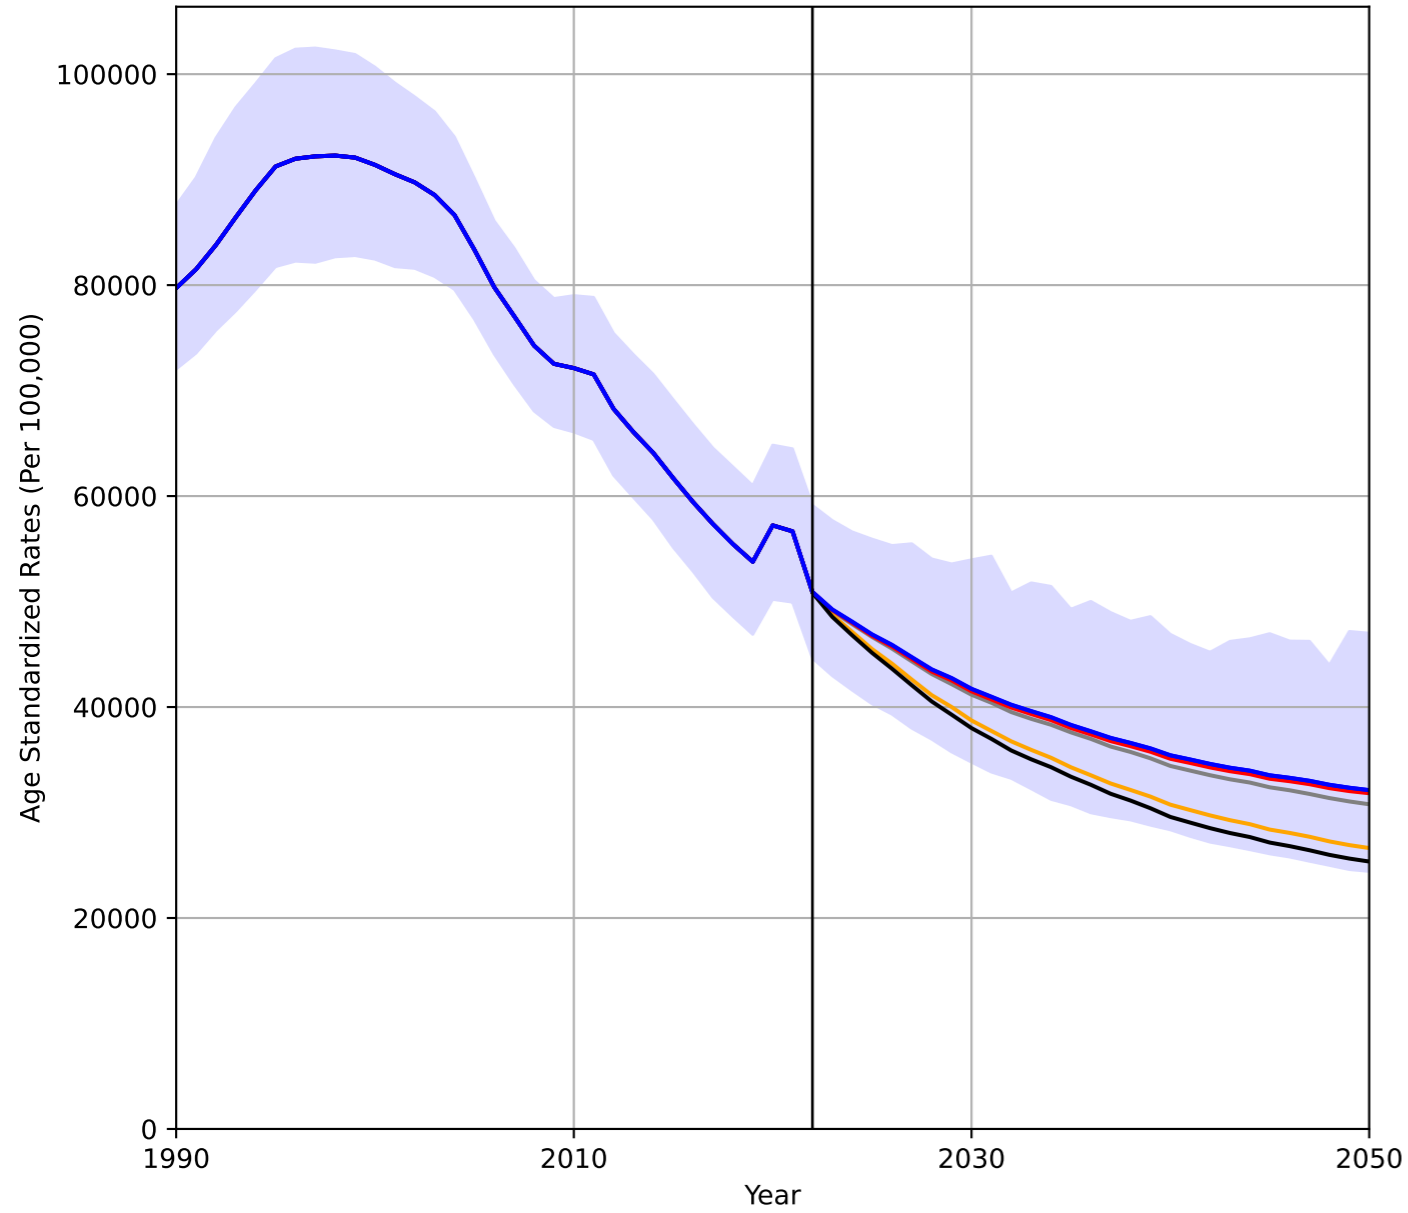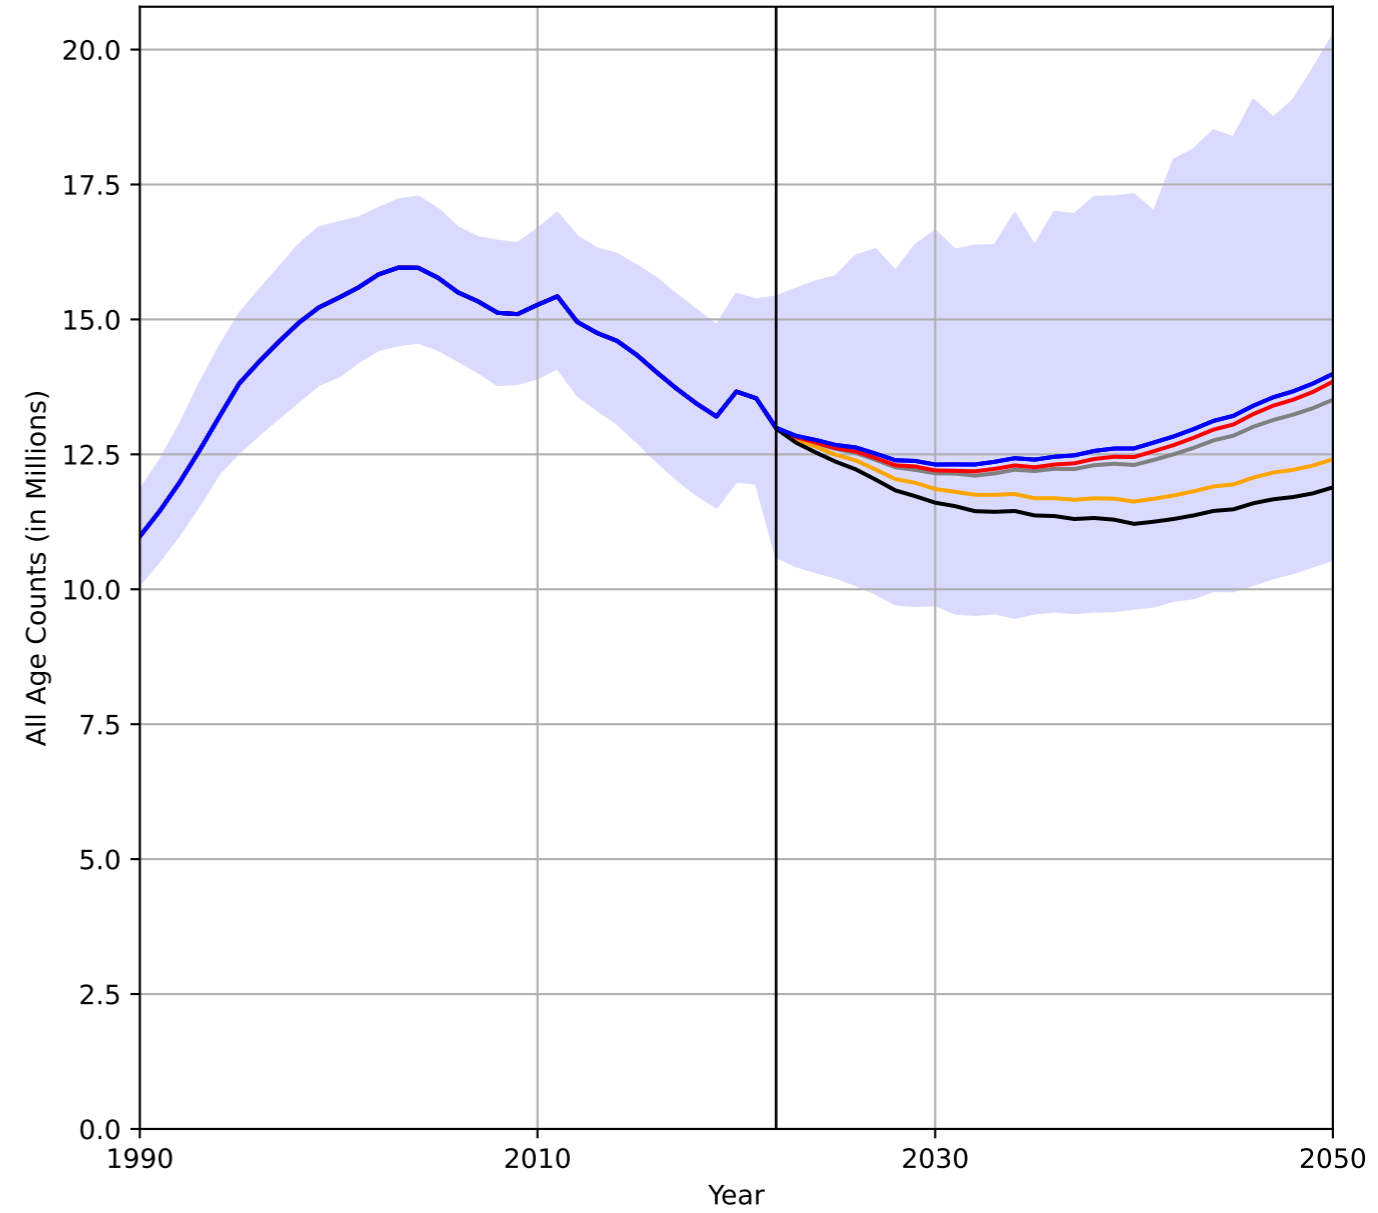

# The Gambia

Supplemental Results Figure S10. All-cause age standardised DALY rates (A) and all age DALY counts (B), for the past and for five future scenarios, 1990–2050

1602

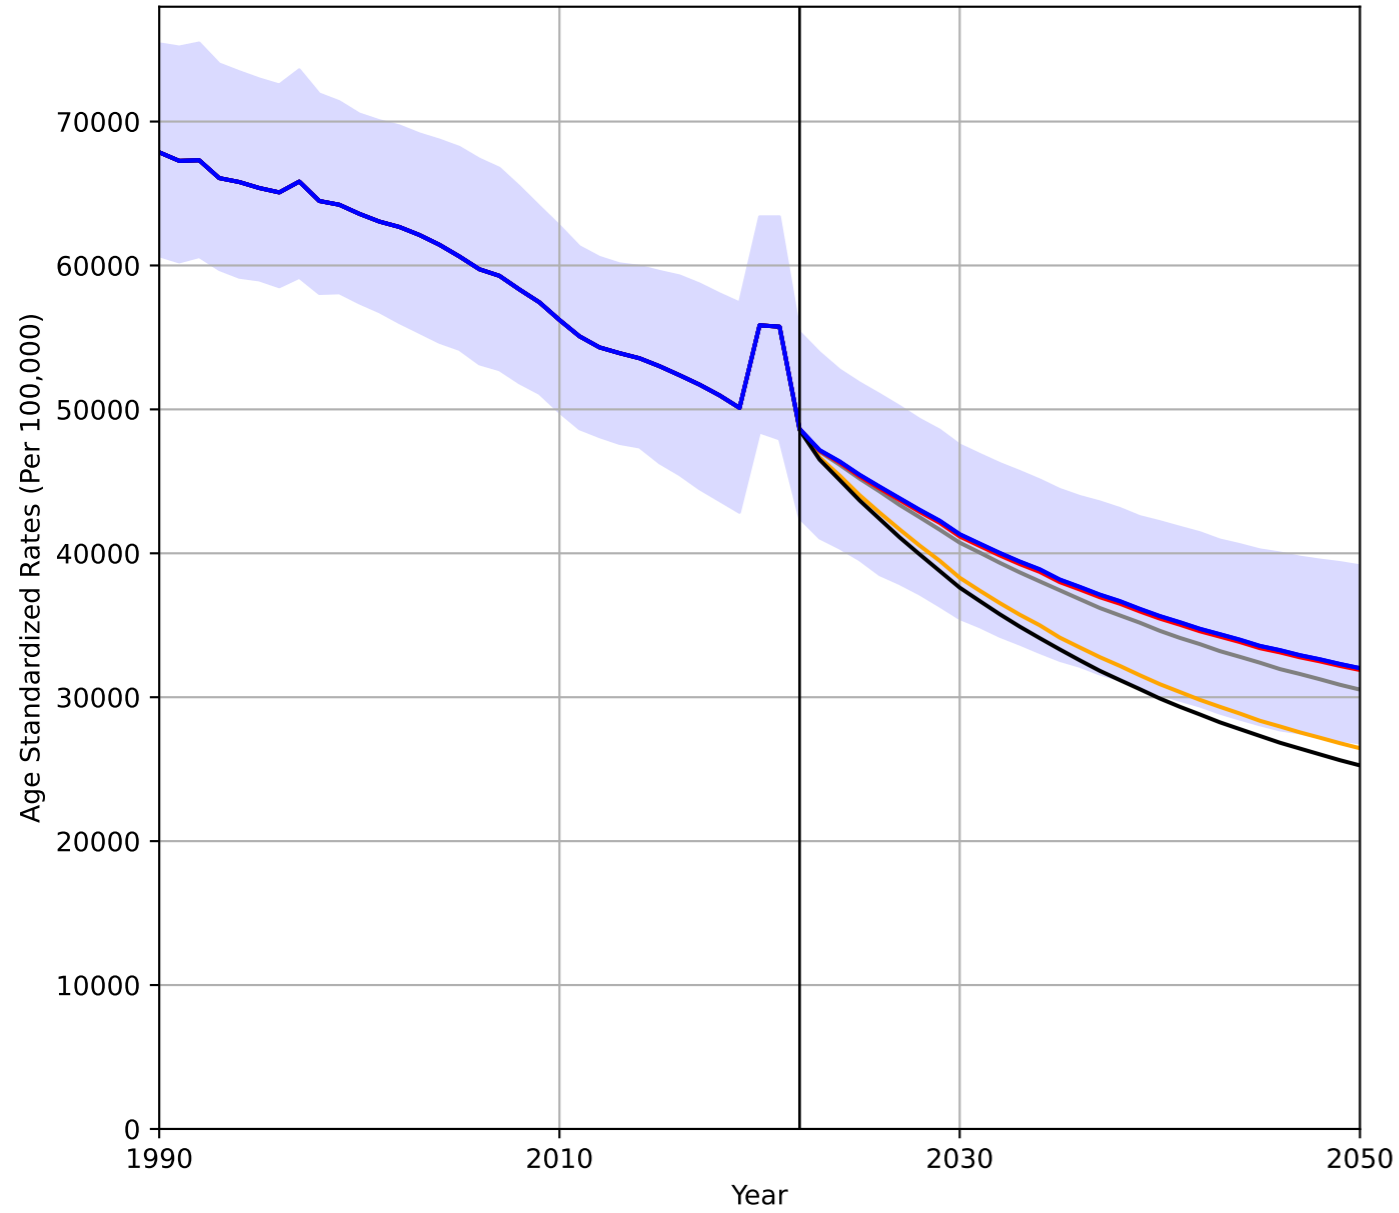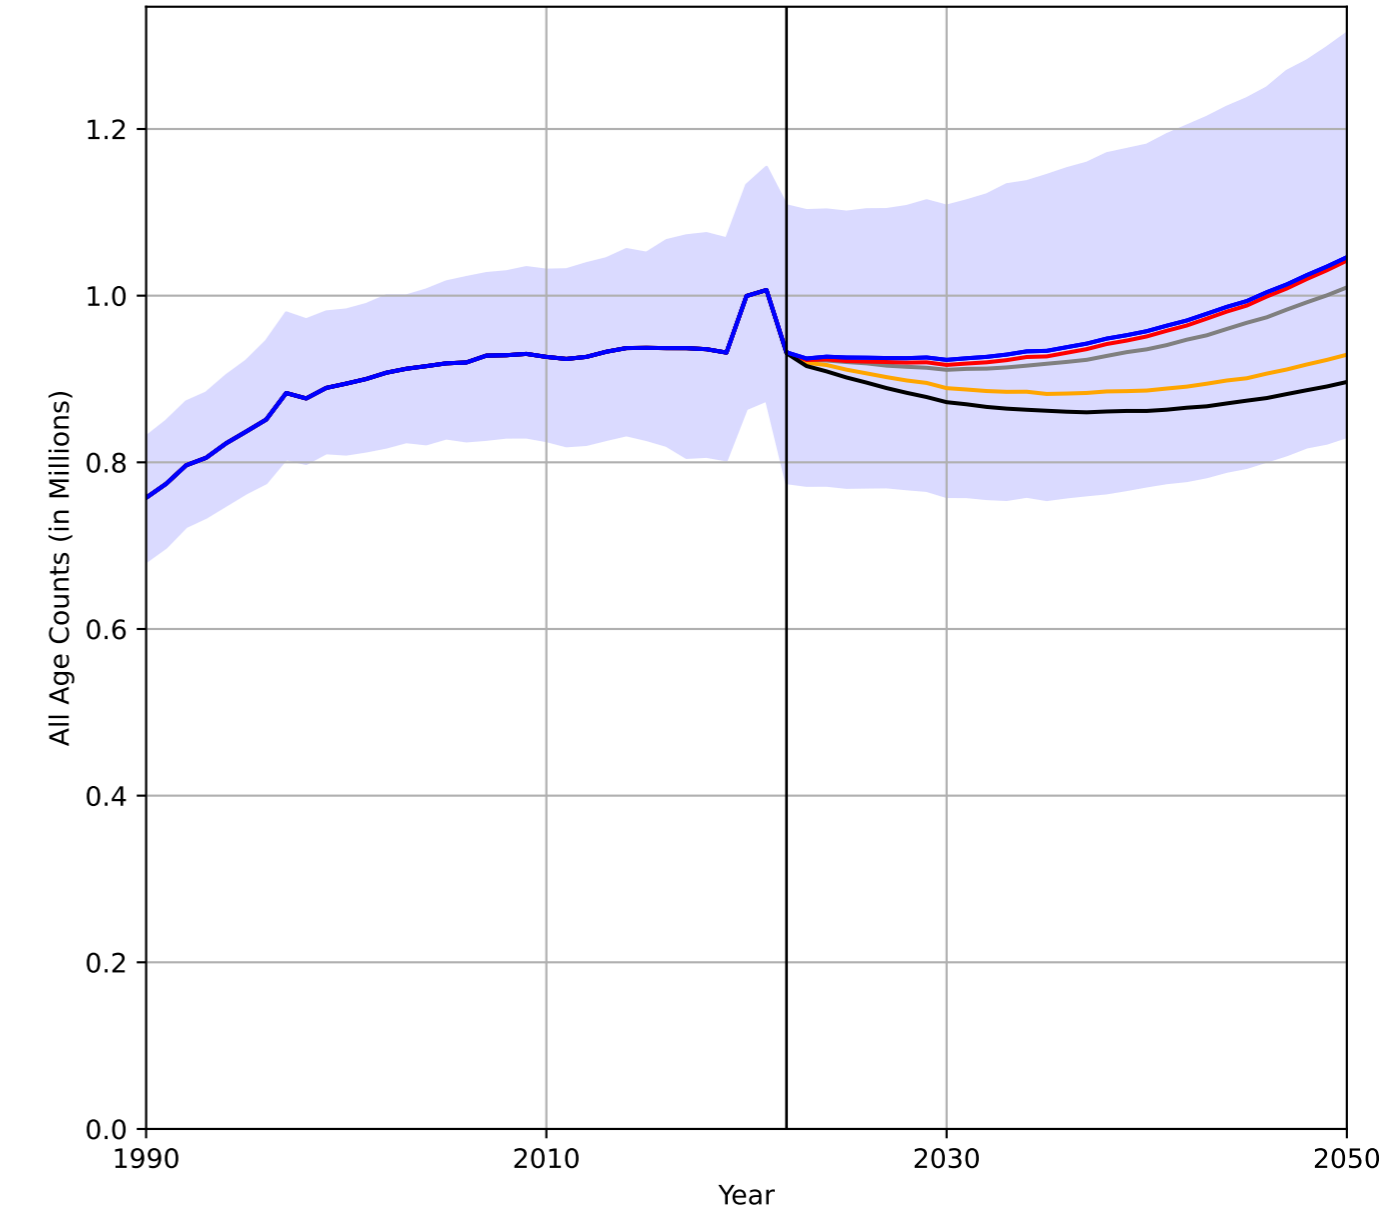

# Ghana

Supplemental Results Figure S10. All-cause age standardised DALY rates (A) and all age DALY counts (B), for the past and for five future scenarios, 1990–2050

1603

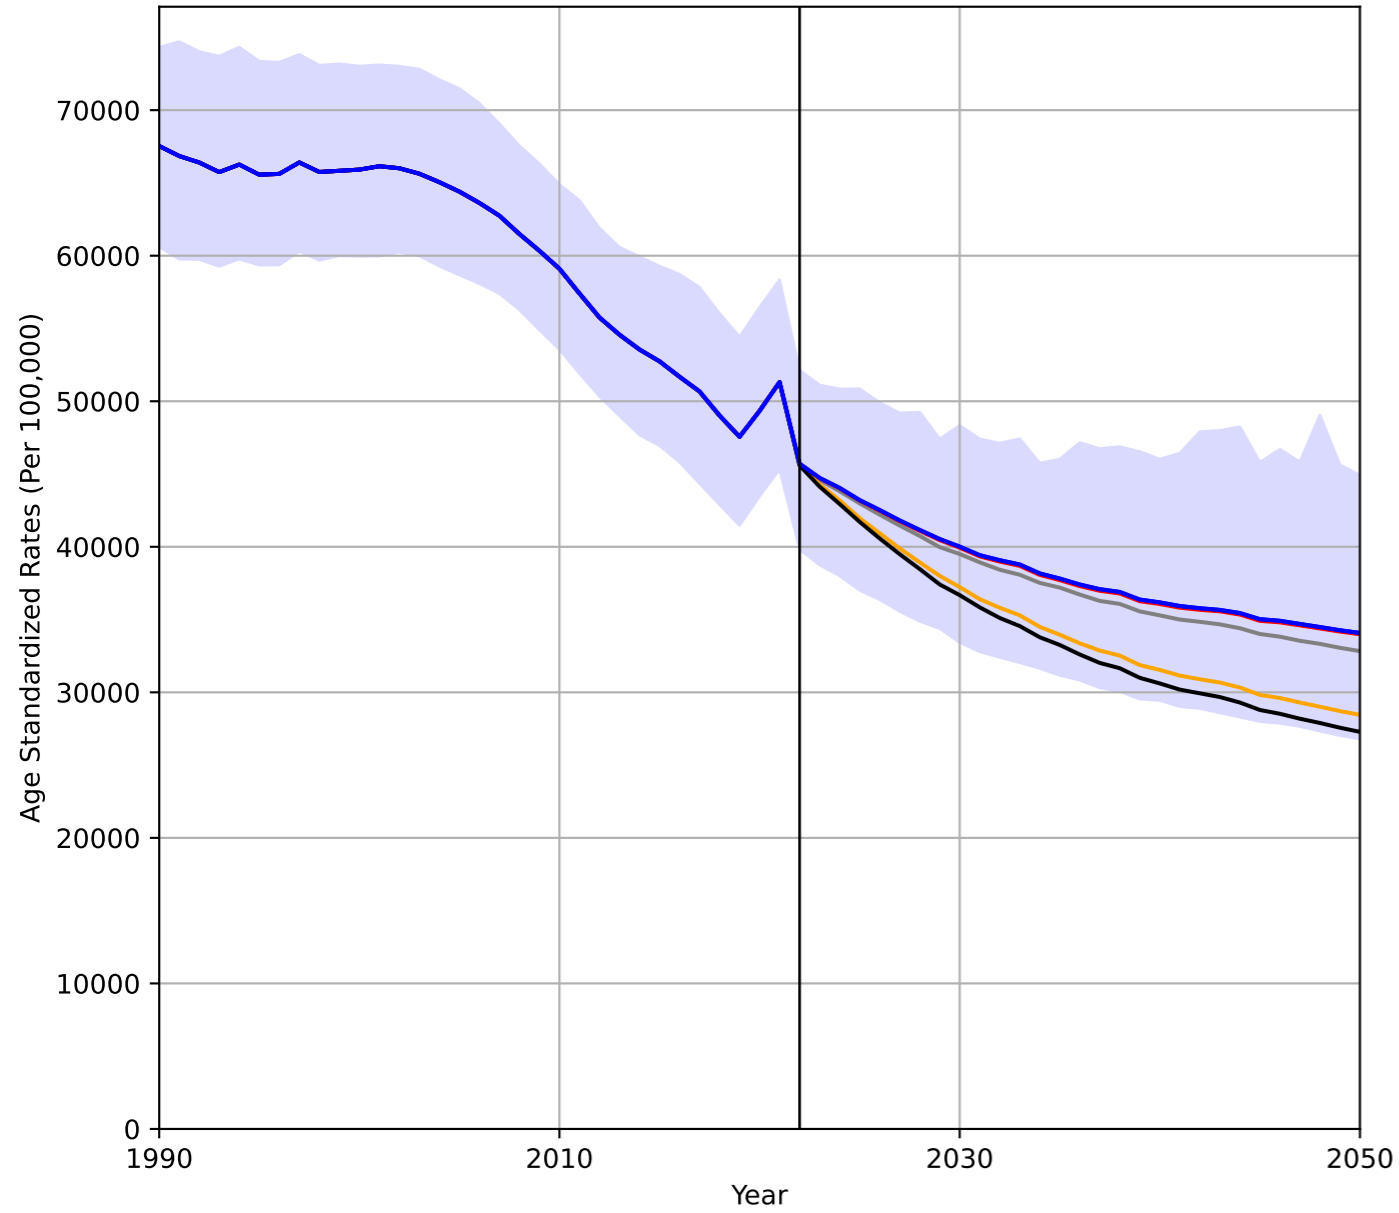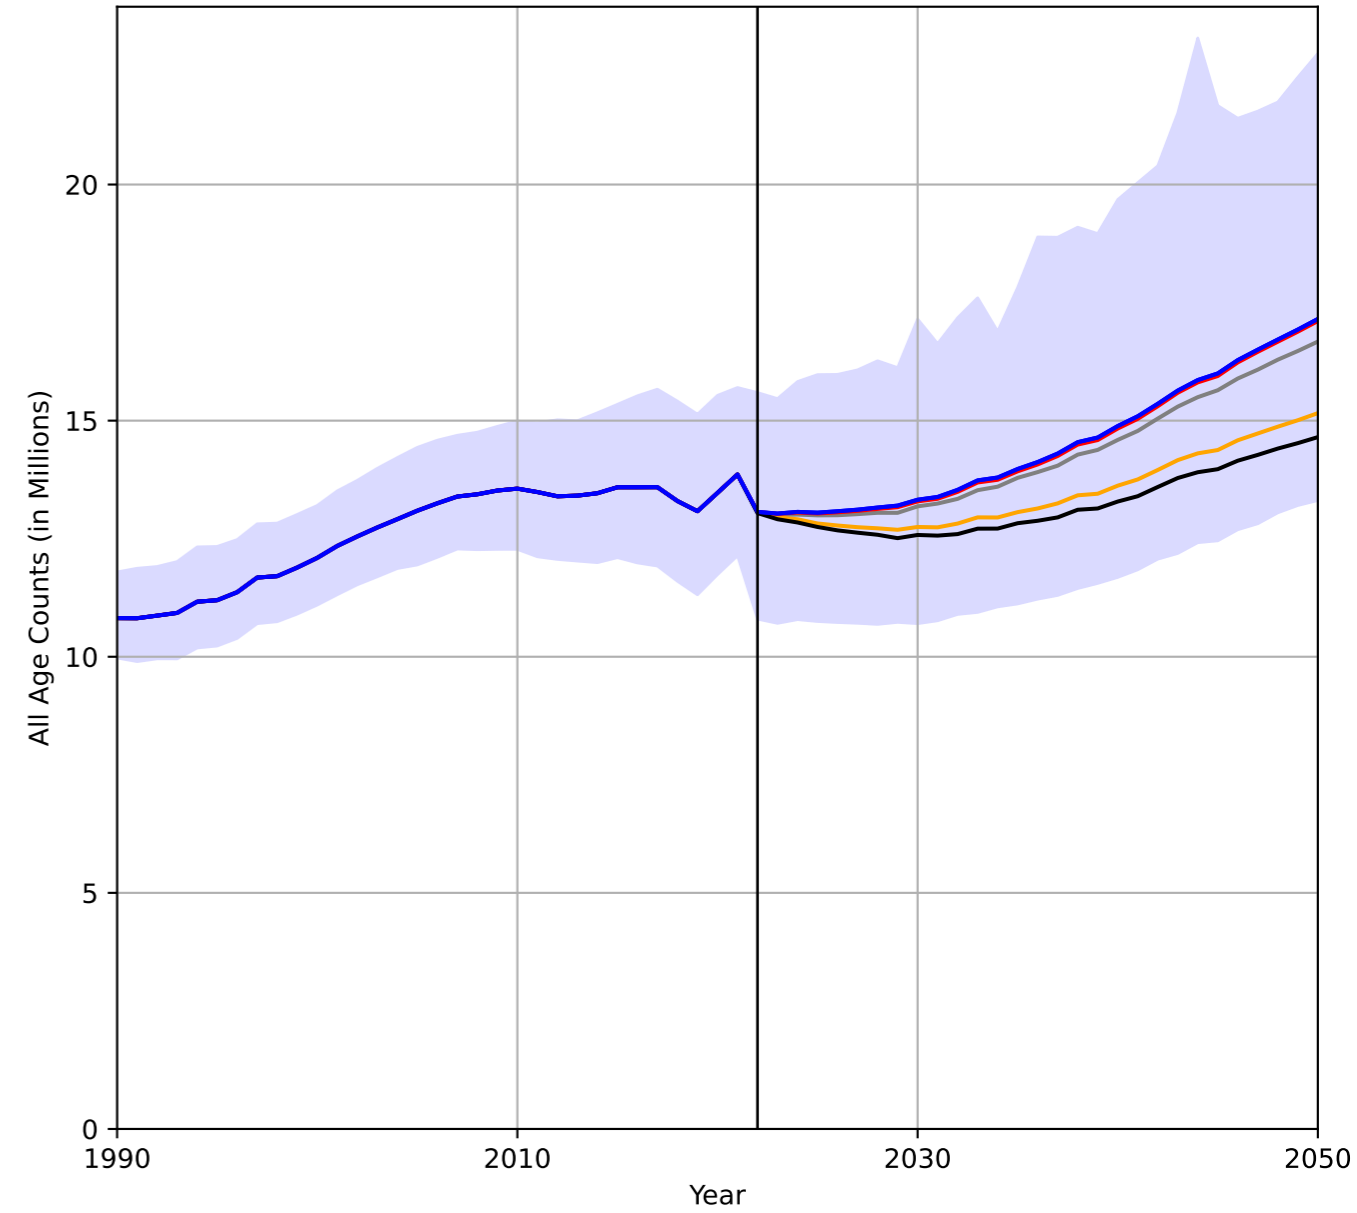

# Guinea

Supplemental Results Figure S10. All-cause age standardised DALY rates (A) and all age DALY counts (B), for the past and for five future scenarios, 1990–2050

1604

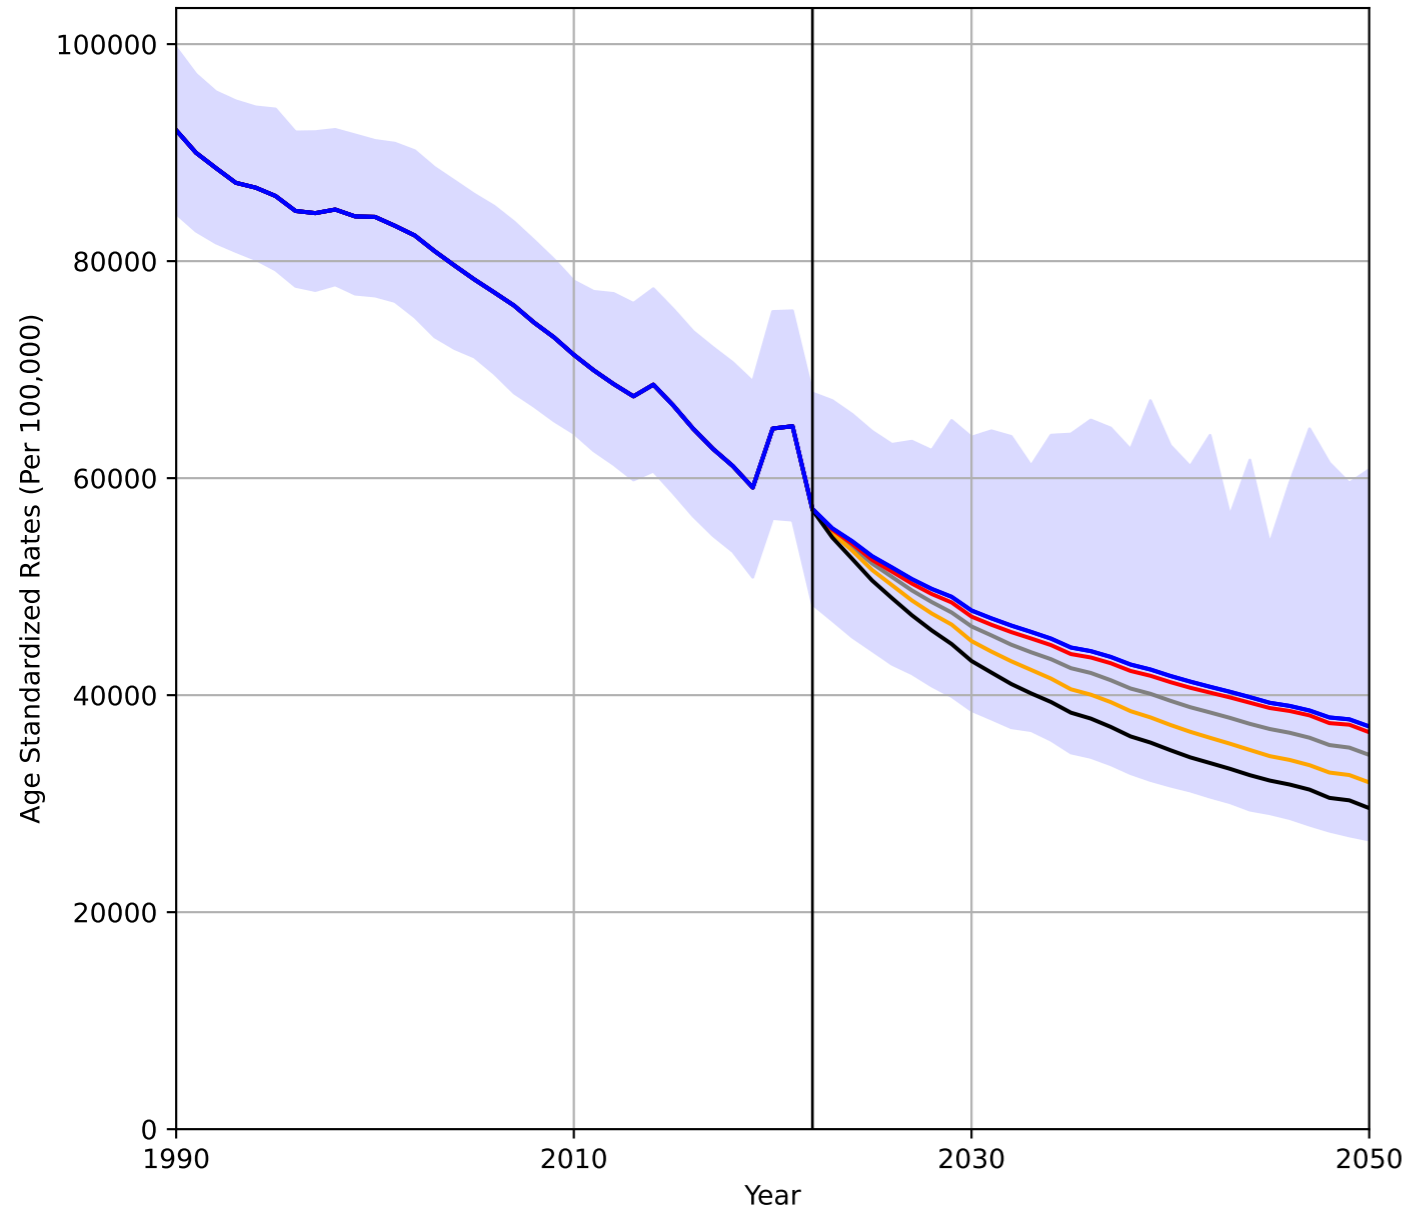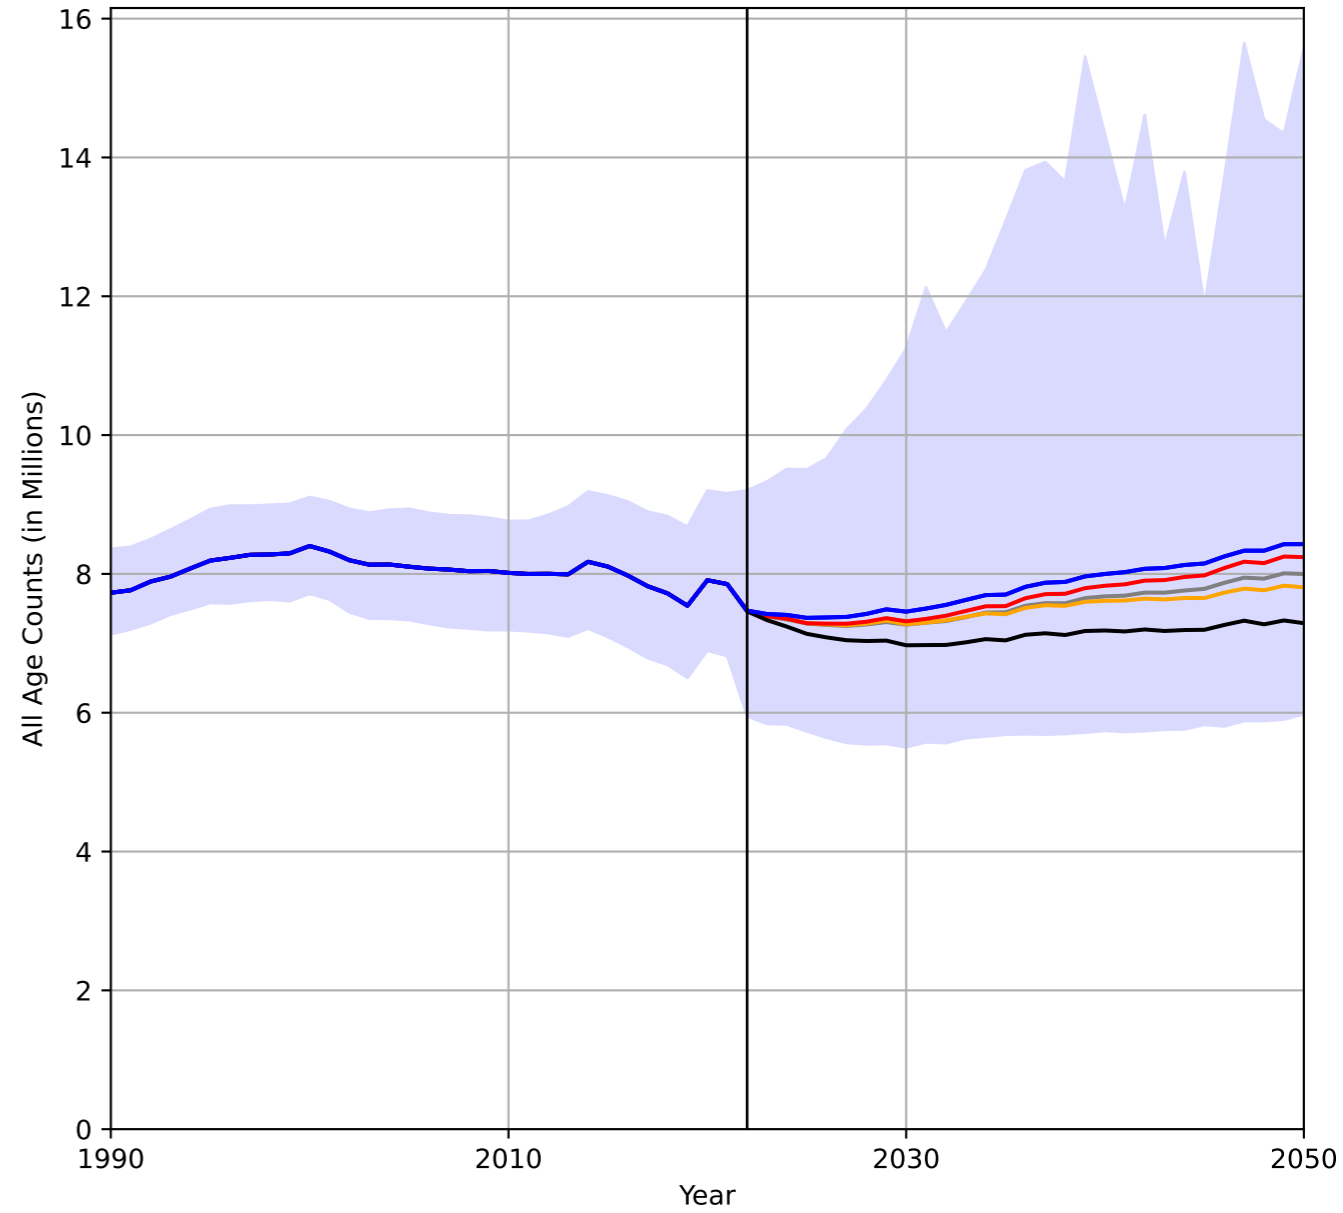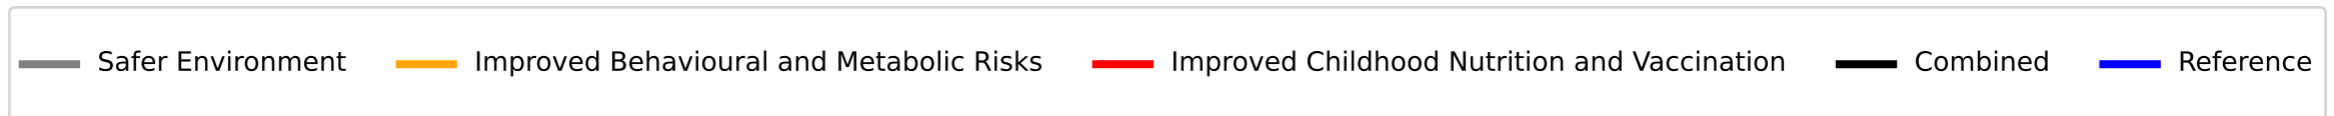

# Guinea-Bissau

Supplemental Results Figure S10. All-cause age standardised DALY rates (A) and all age DALY counts (B), for the past and for five future scenarios, 1990–2050

1605

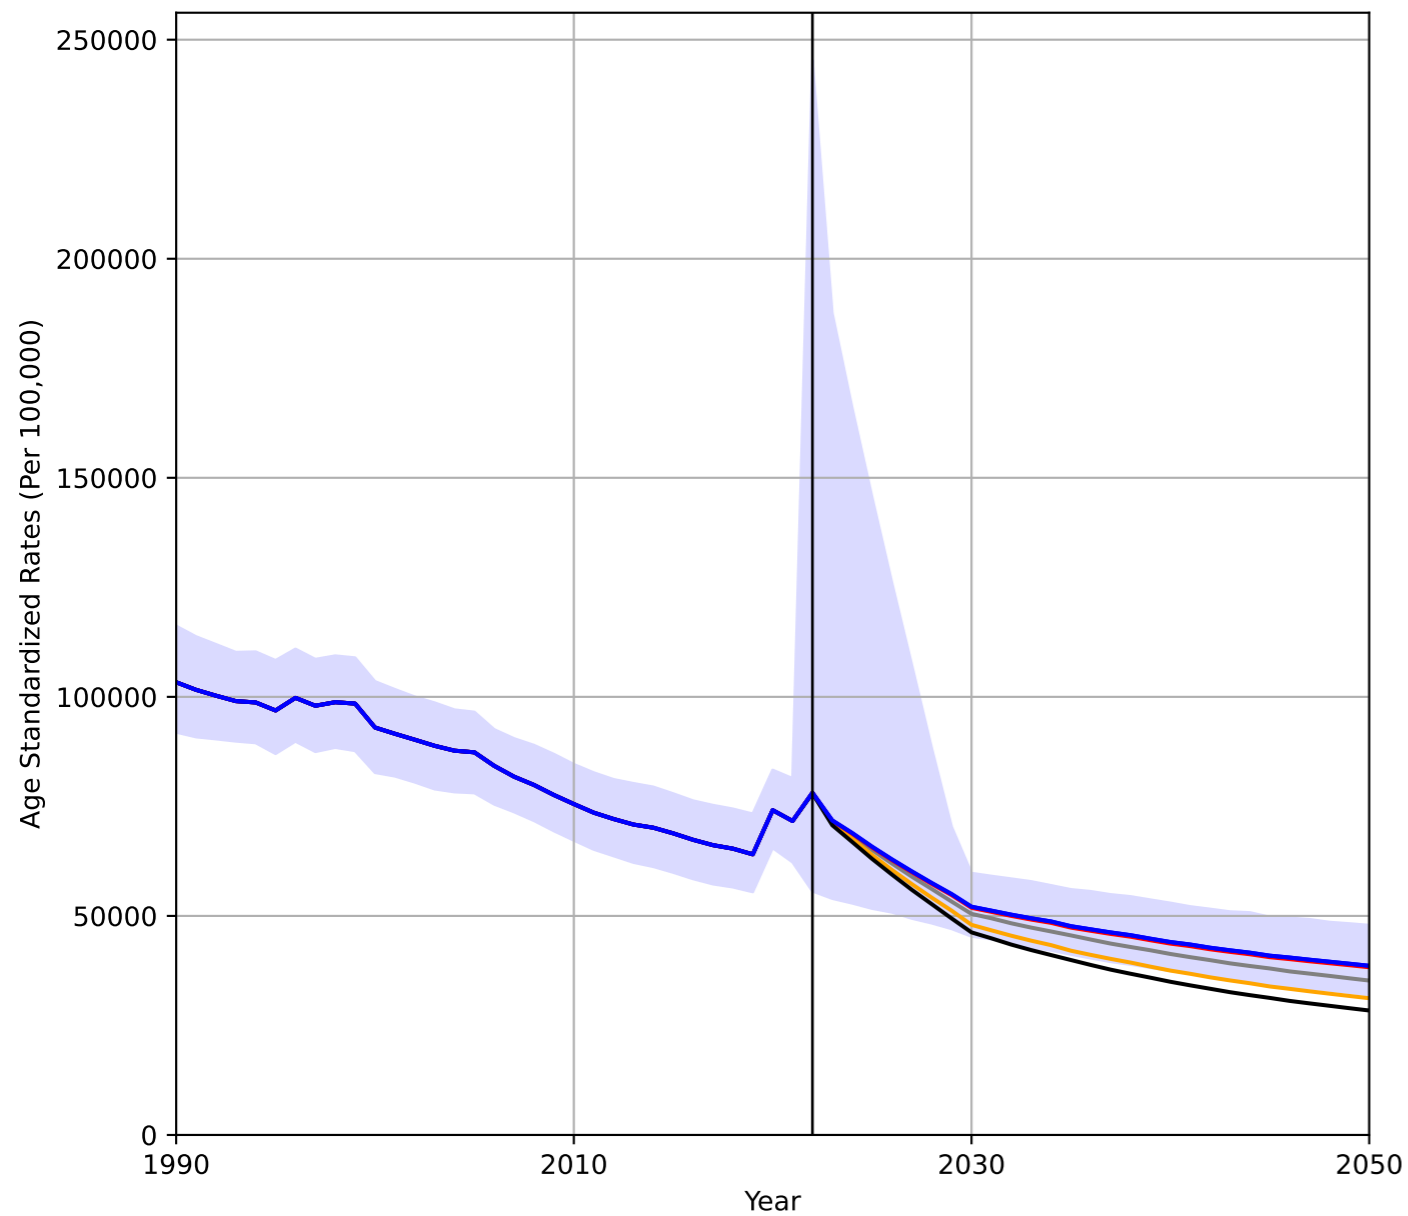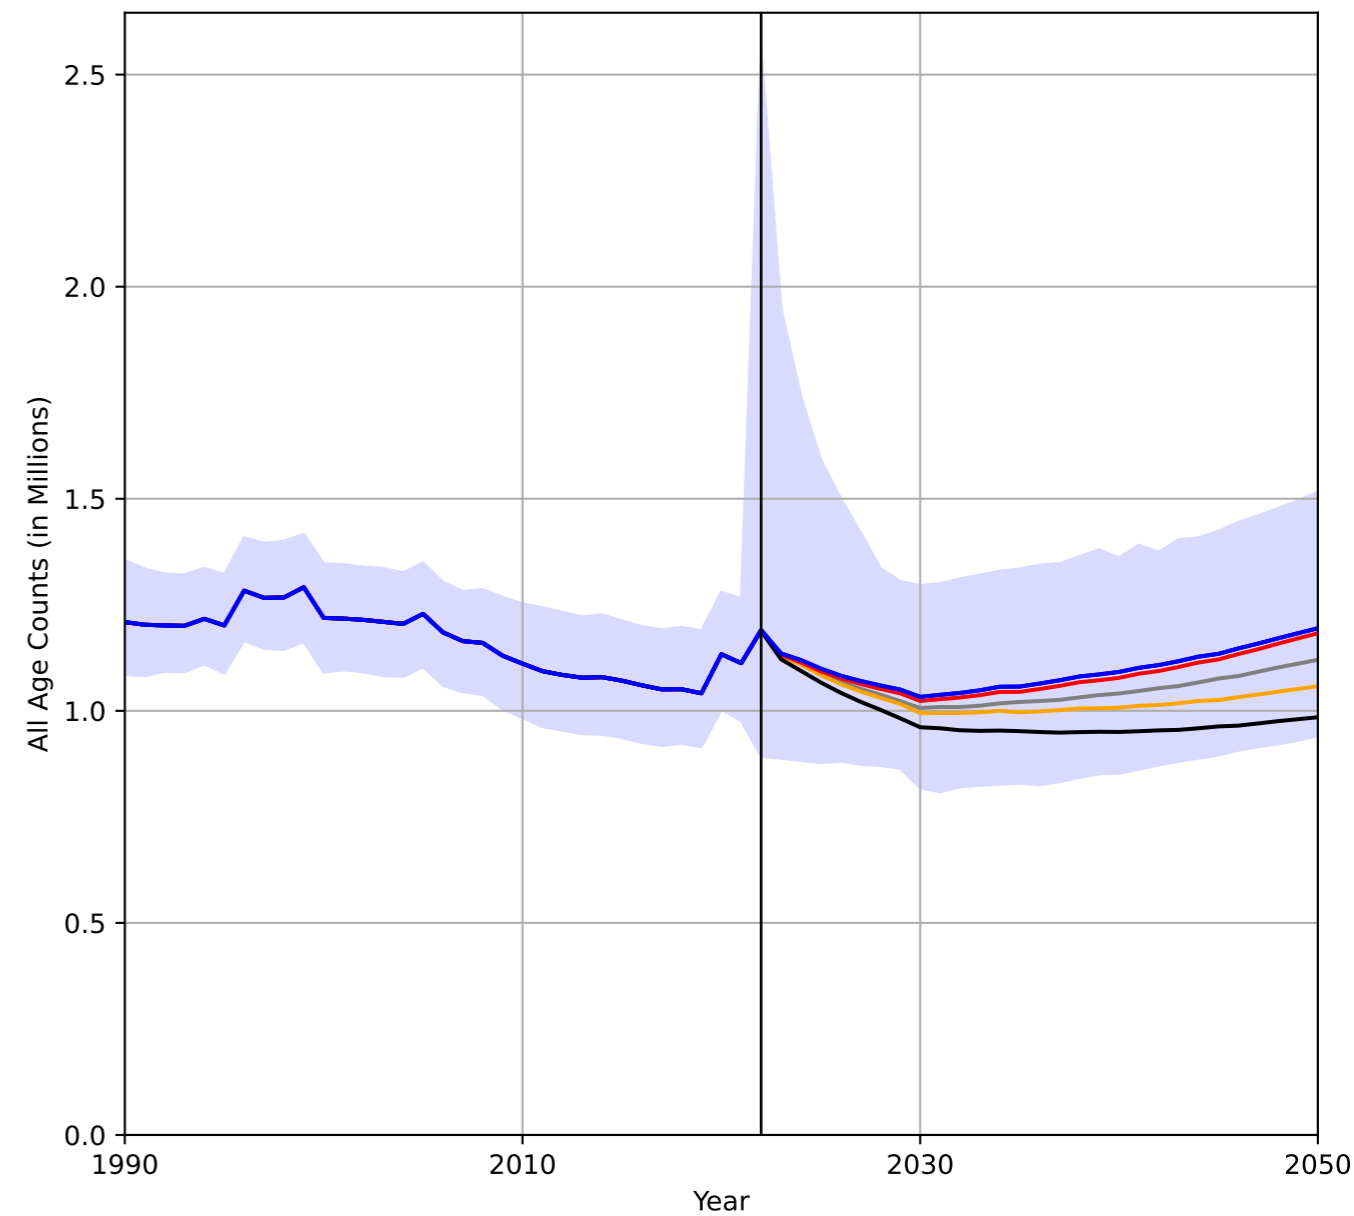

# Liberia

Supplemental Results Figure S10. All-cause age standardised DALY rates (A) and all age DALY counts (B), for the past and for five future scenarios, 1990–2050

1606

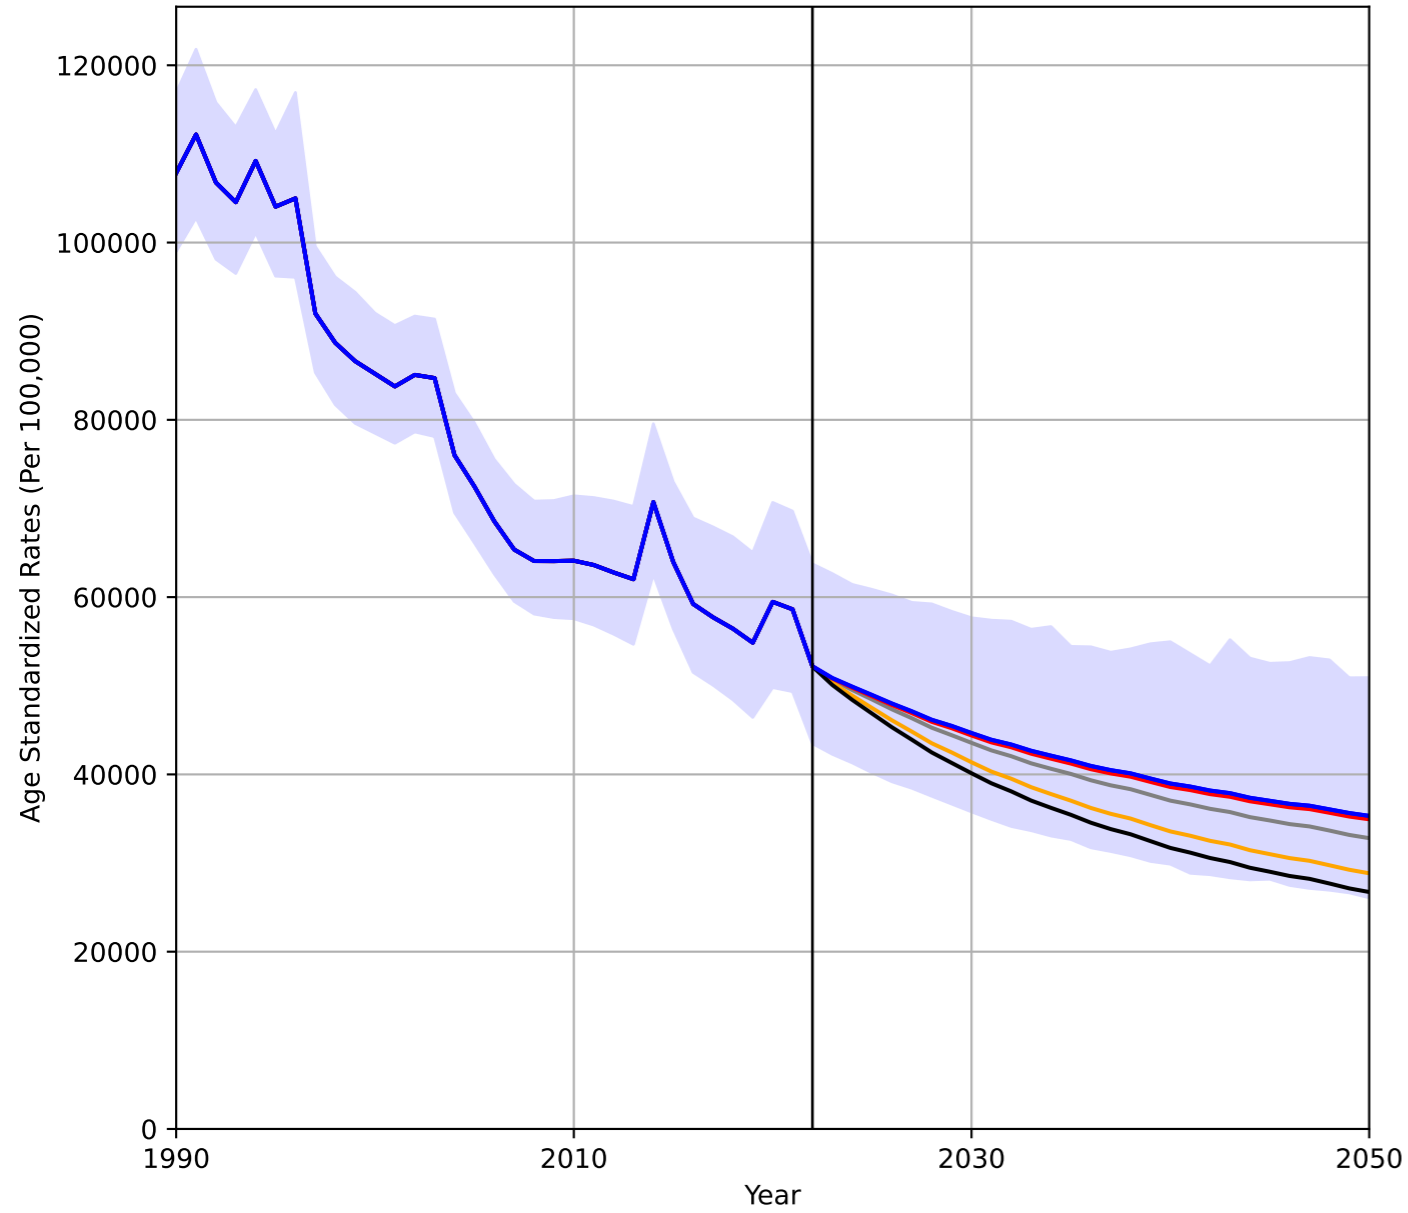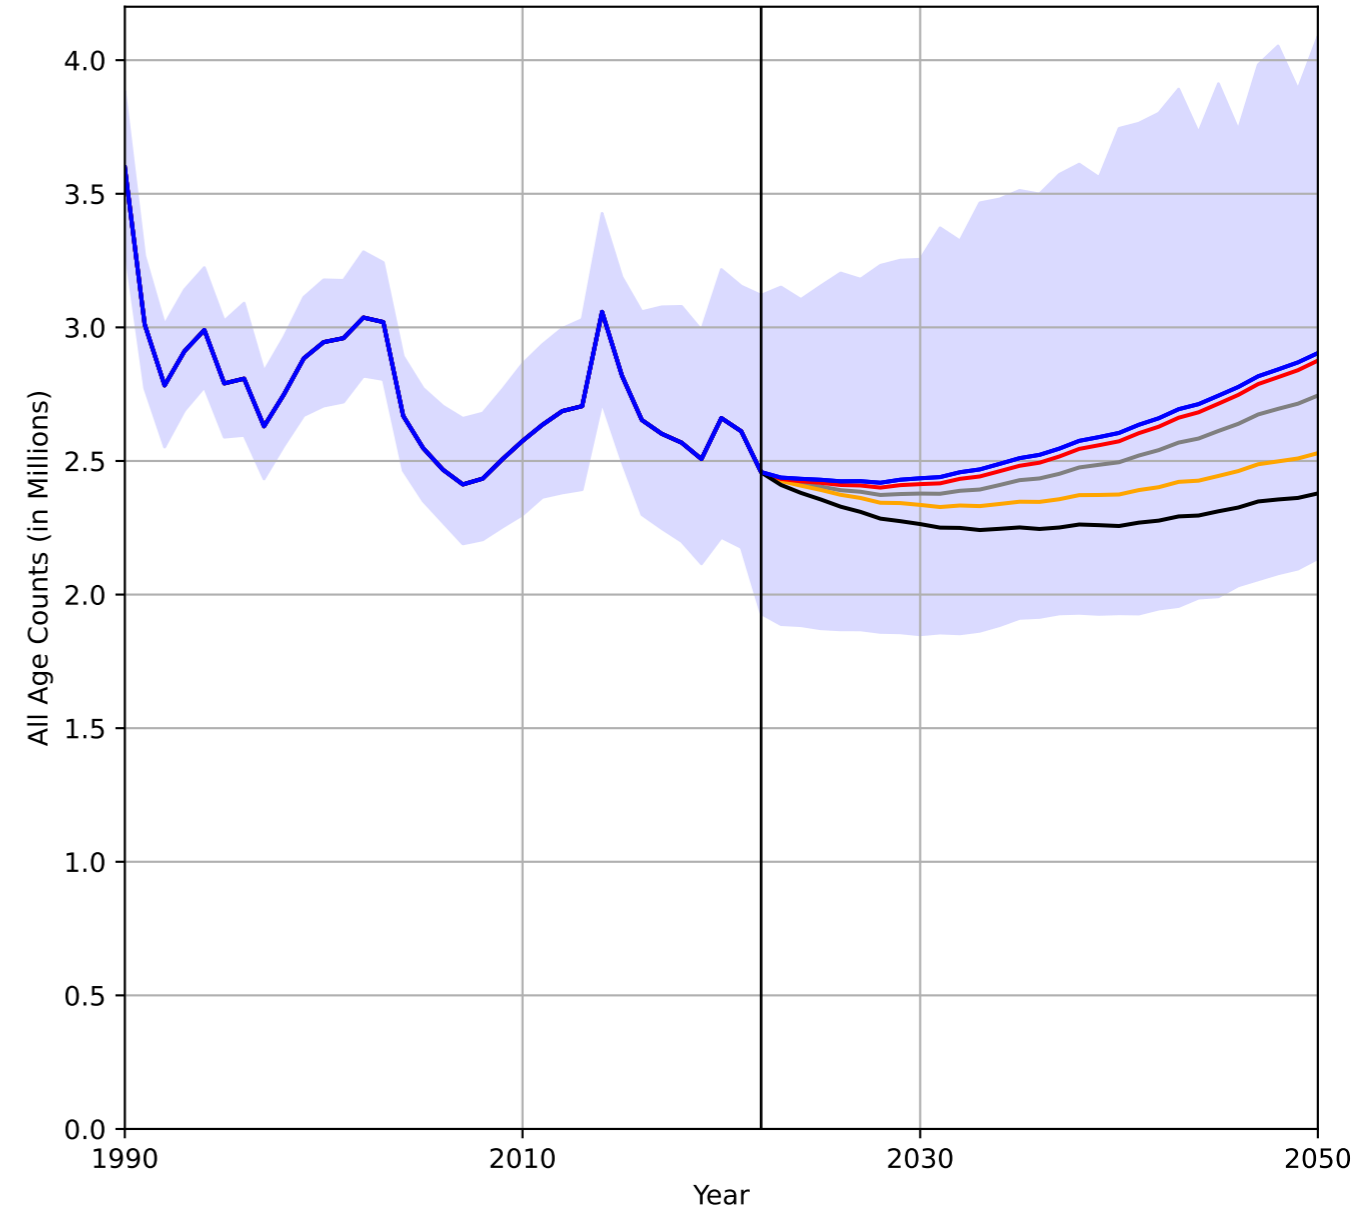

# Mali

Supplemental Results Figure S10. All-cause age standardised DALY rates (A) and all age DALY counts (B), for the past and for five future scenarios, 1990–2050

1607

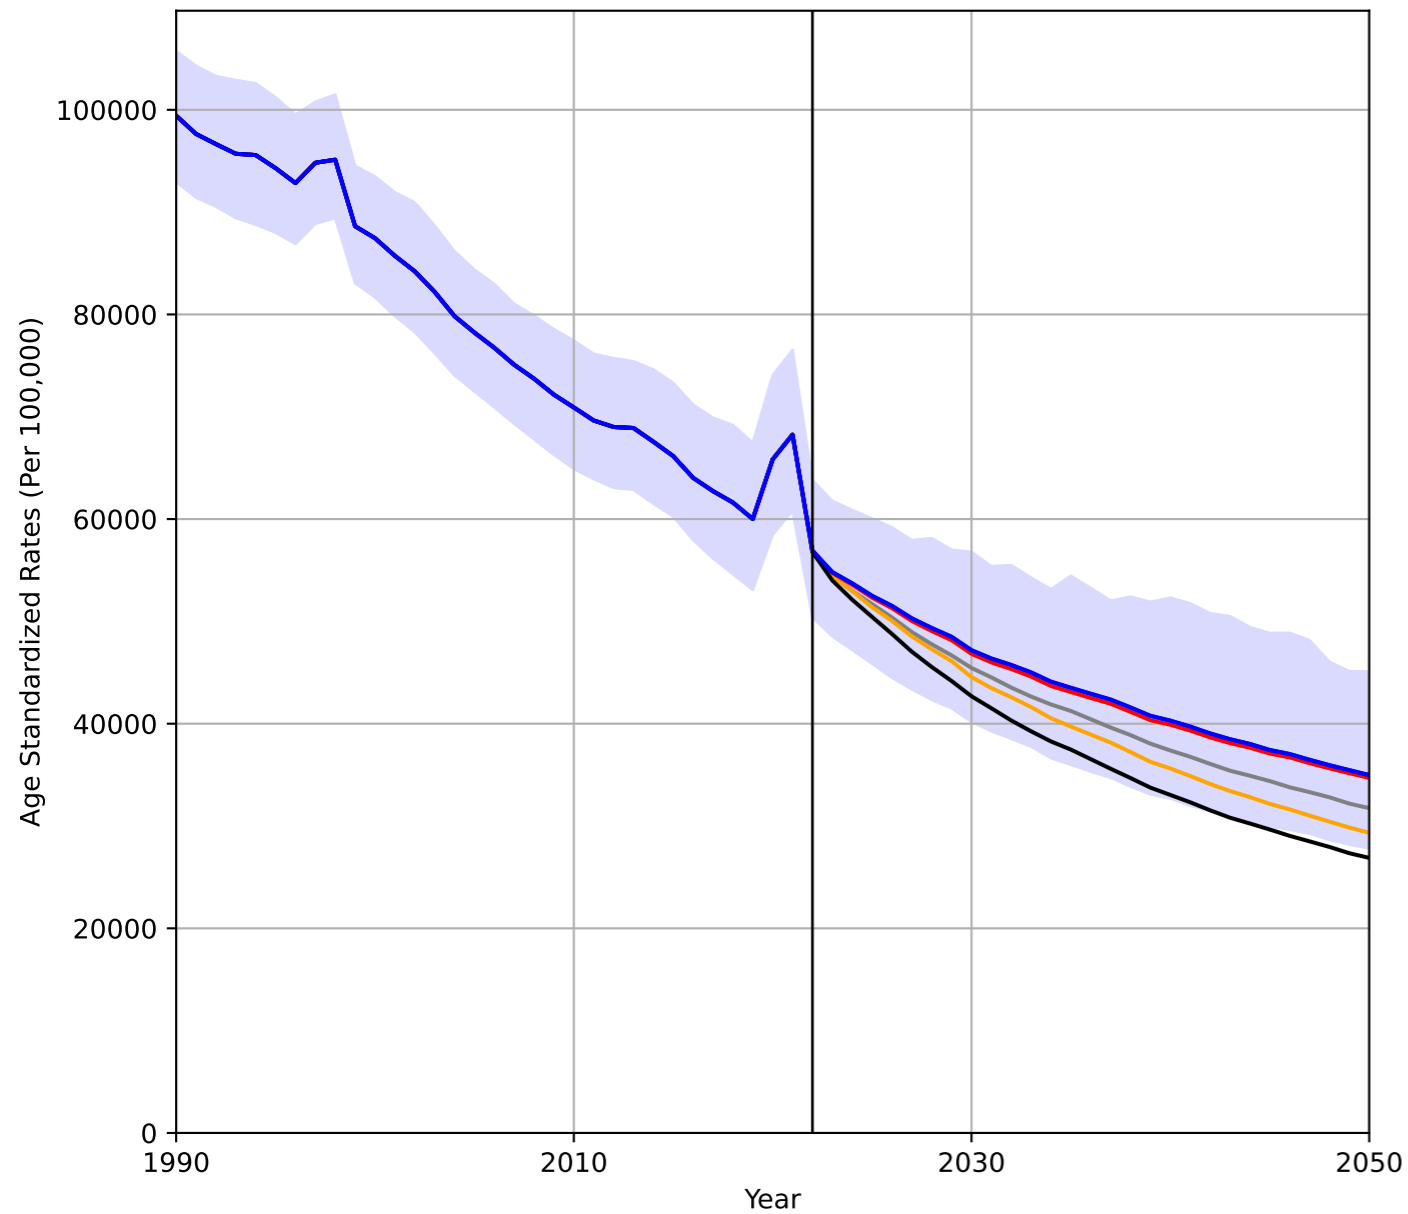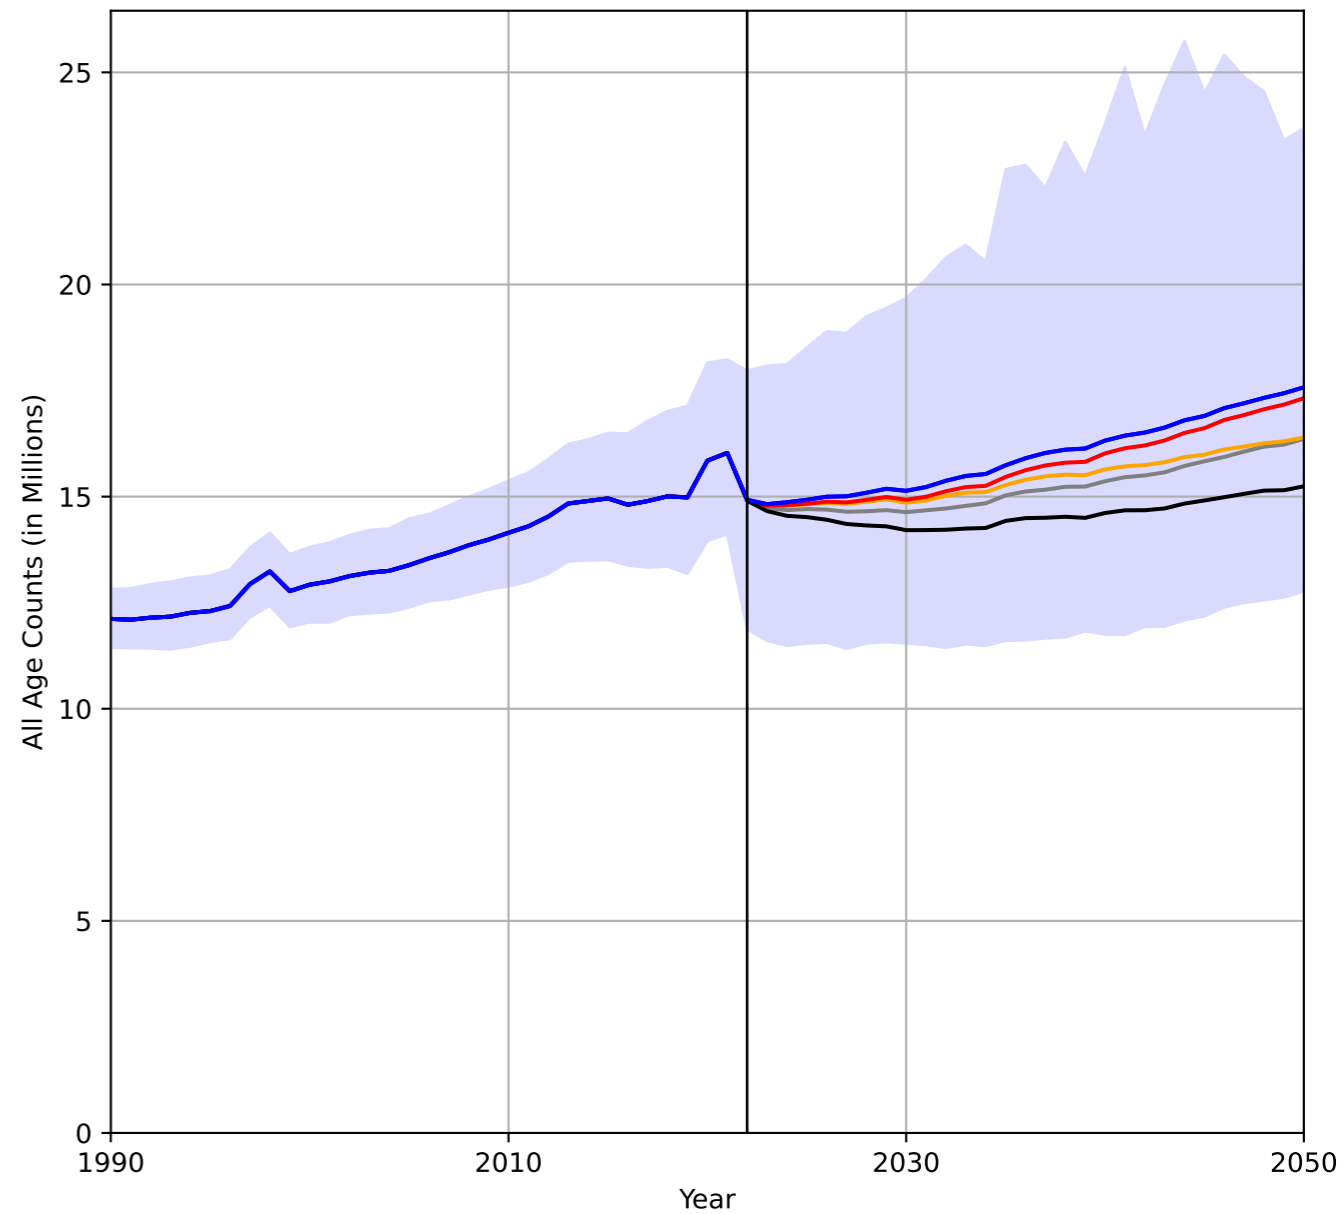



# Mauritania

Supplemental Results Figure S10. All-cause age standardised DALY rates (A) and all age DALY counts (B), for the past and for five future scenarios, 1990–2050

1608

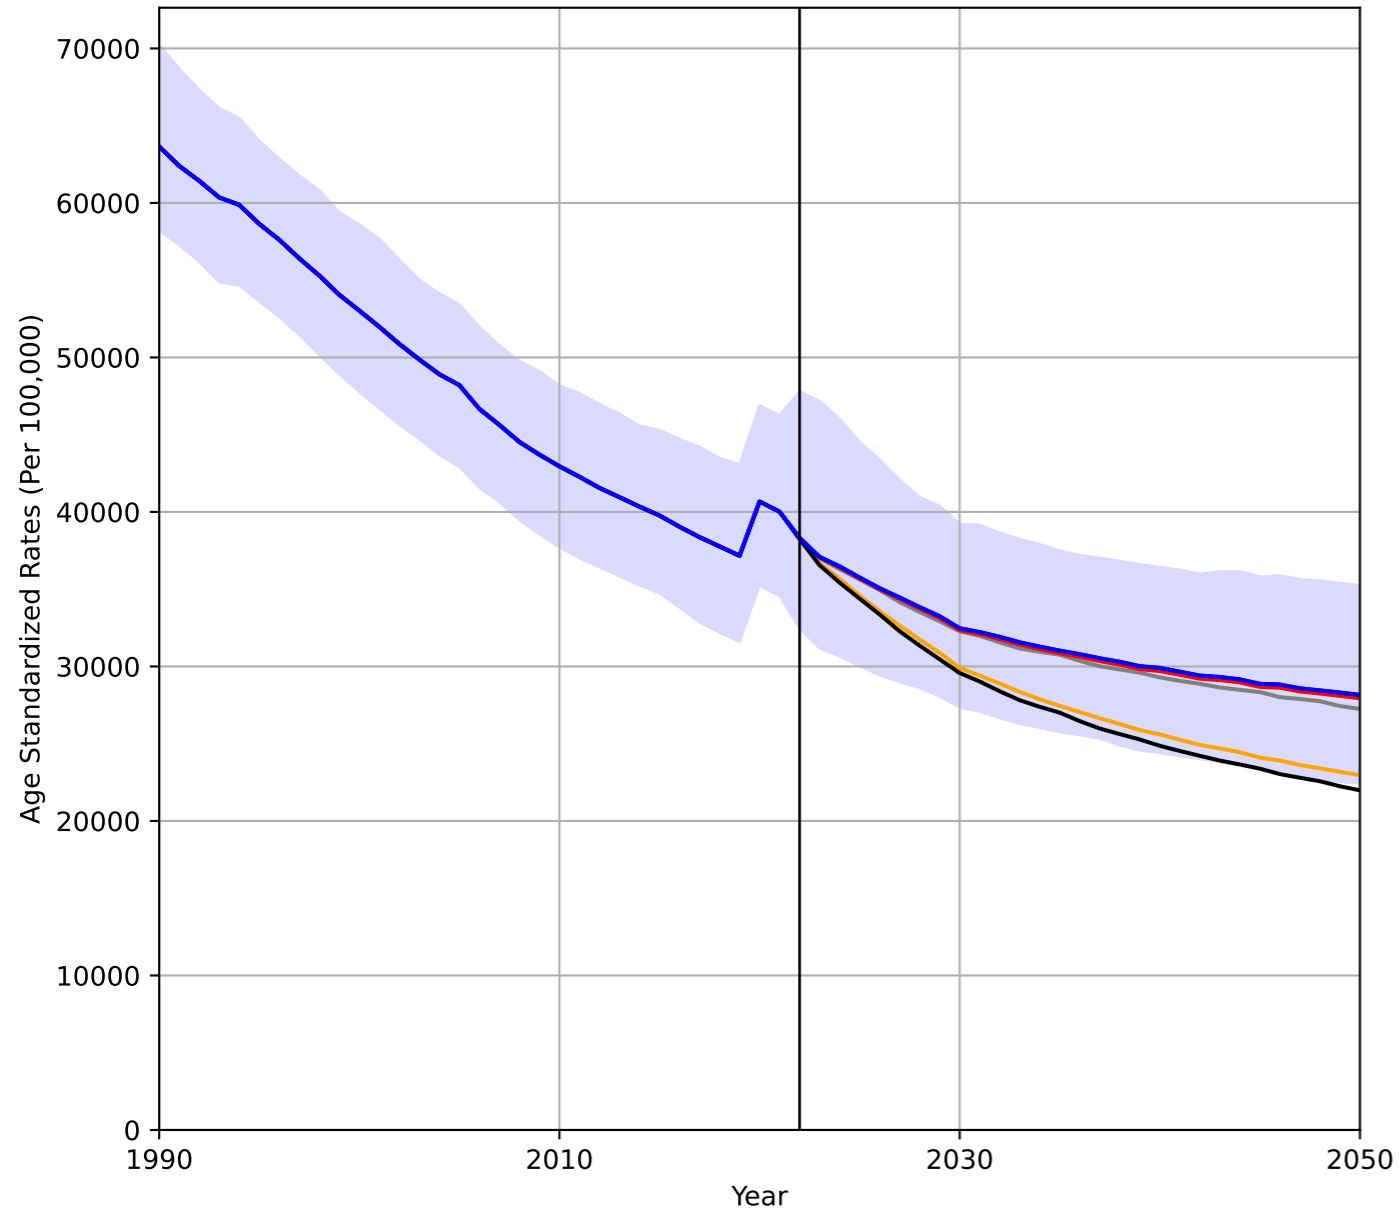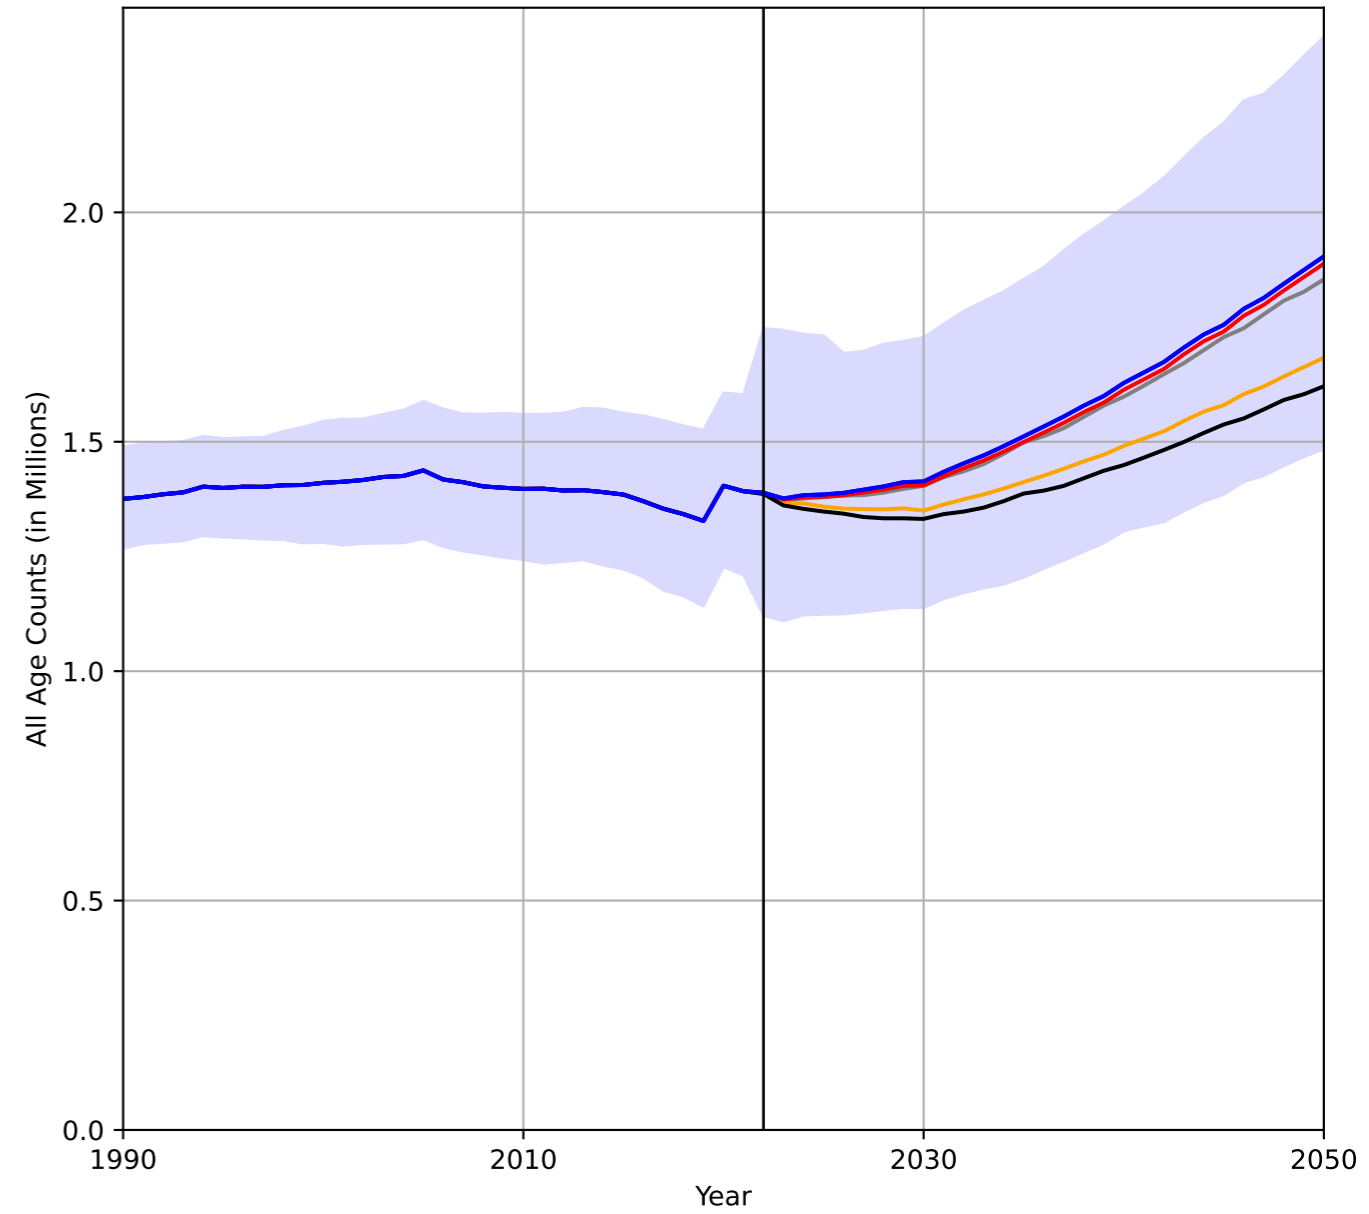

# Niger

Supplemental Results Figure S10. All-cause age standardised DALY rates (A) and all age DALY counts (B), for the past and for five future scenarios, 1990–2050

1609

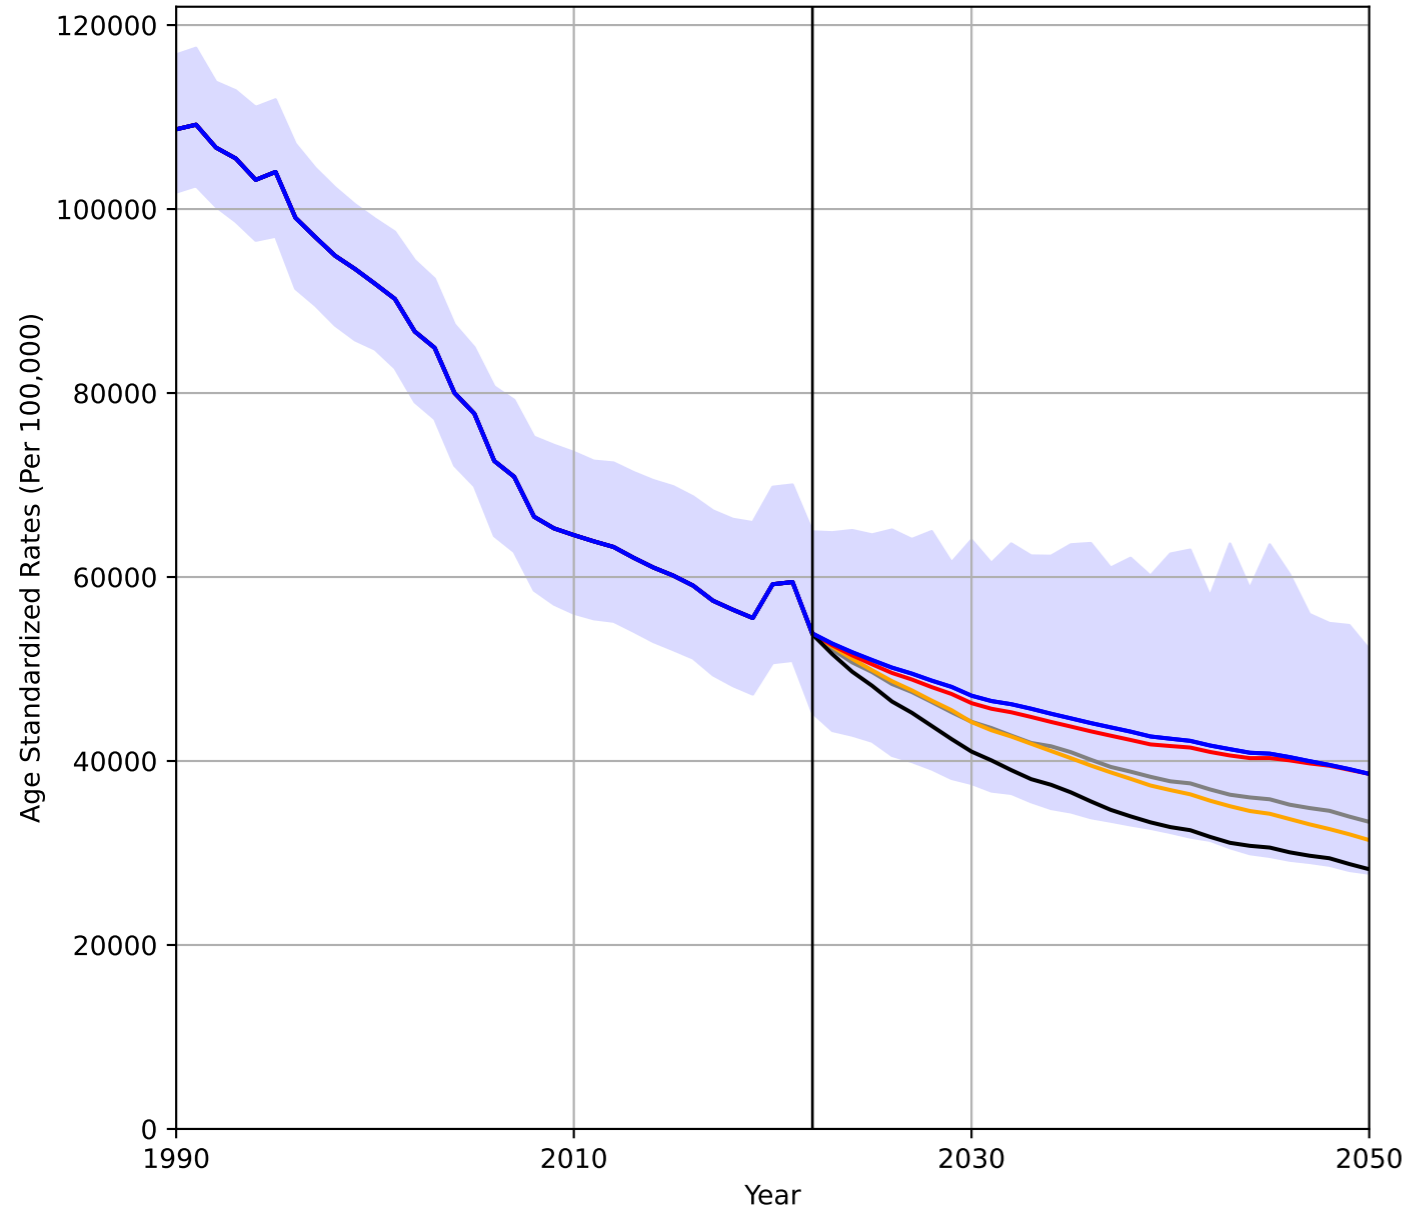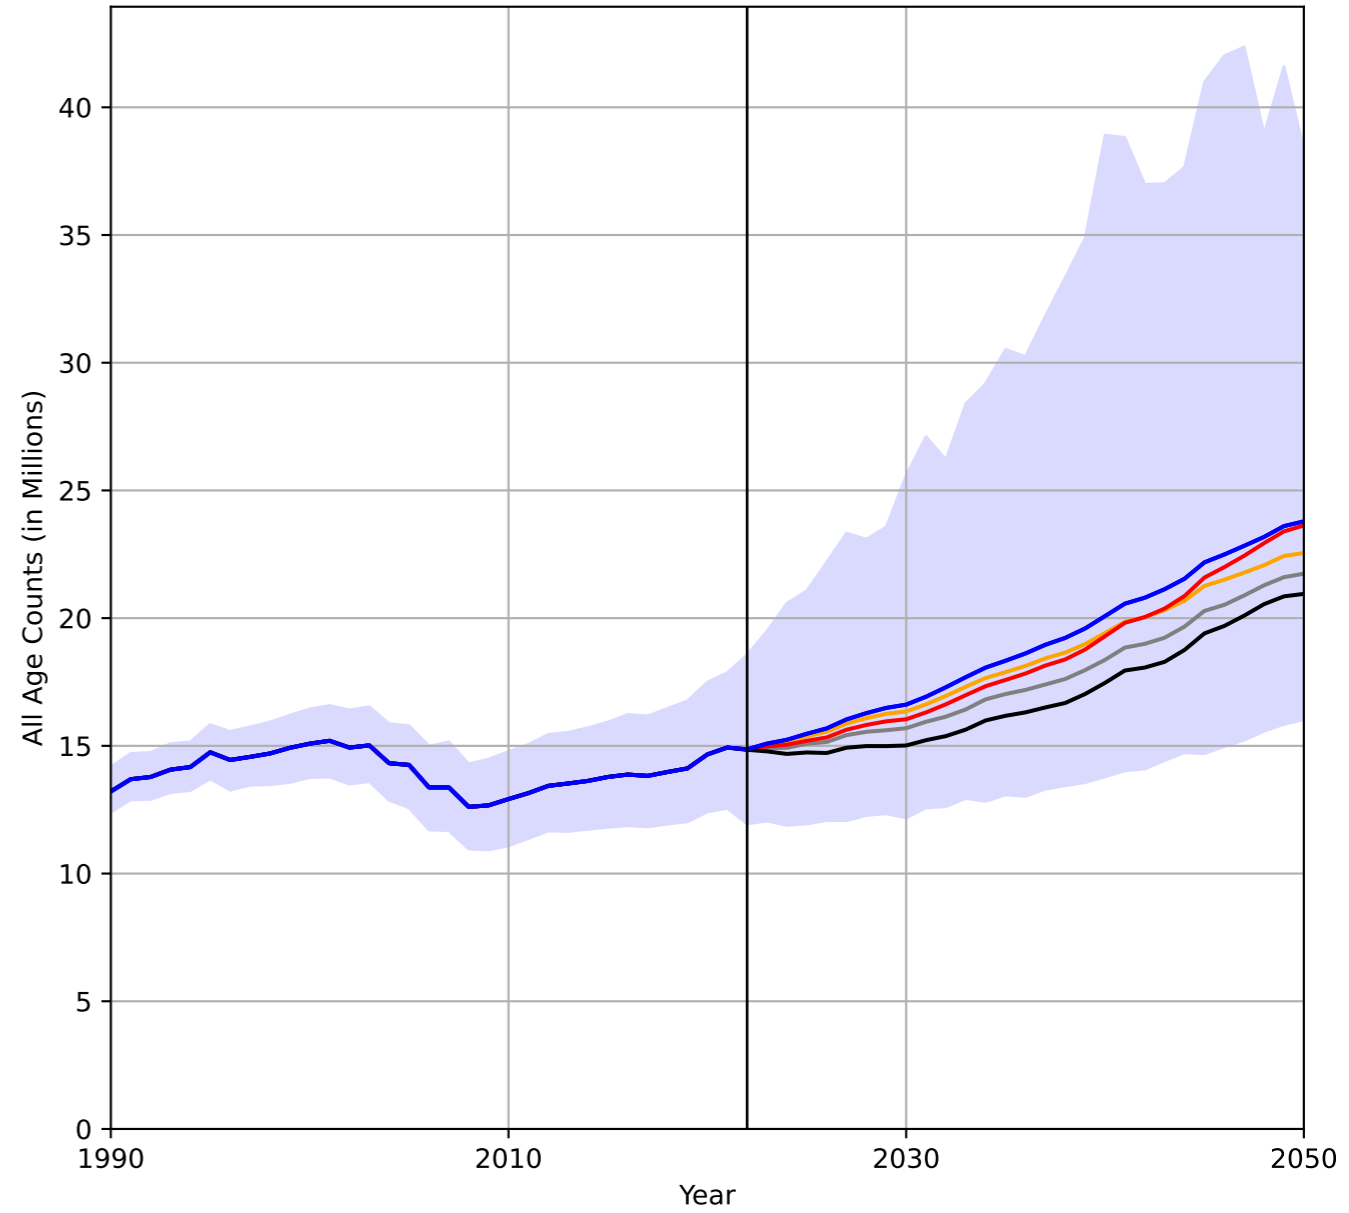

# Nigeria

Supplemental Results Figure S10. All-cause age standardised DALY rates (A) and all age DALY counts (B), for the past and for five future scenarios, 1990–2050

1610

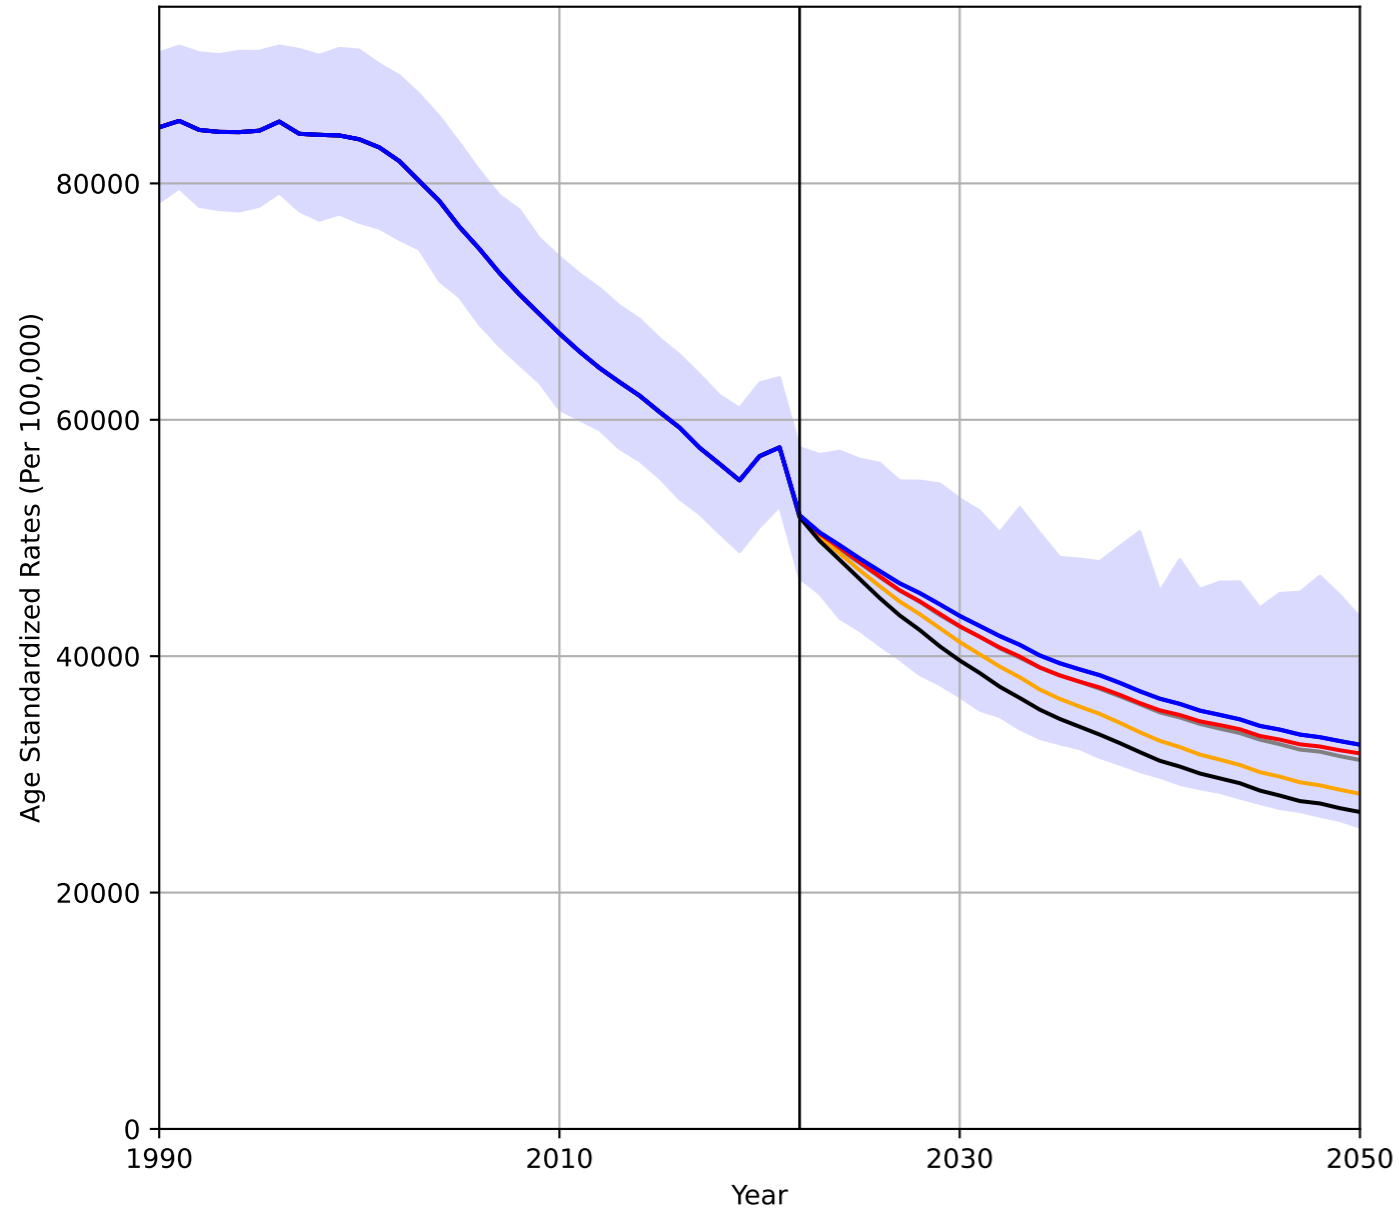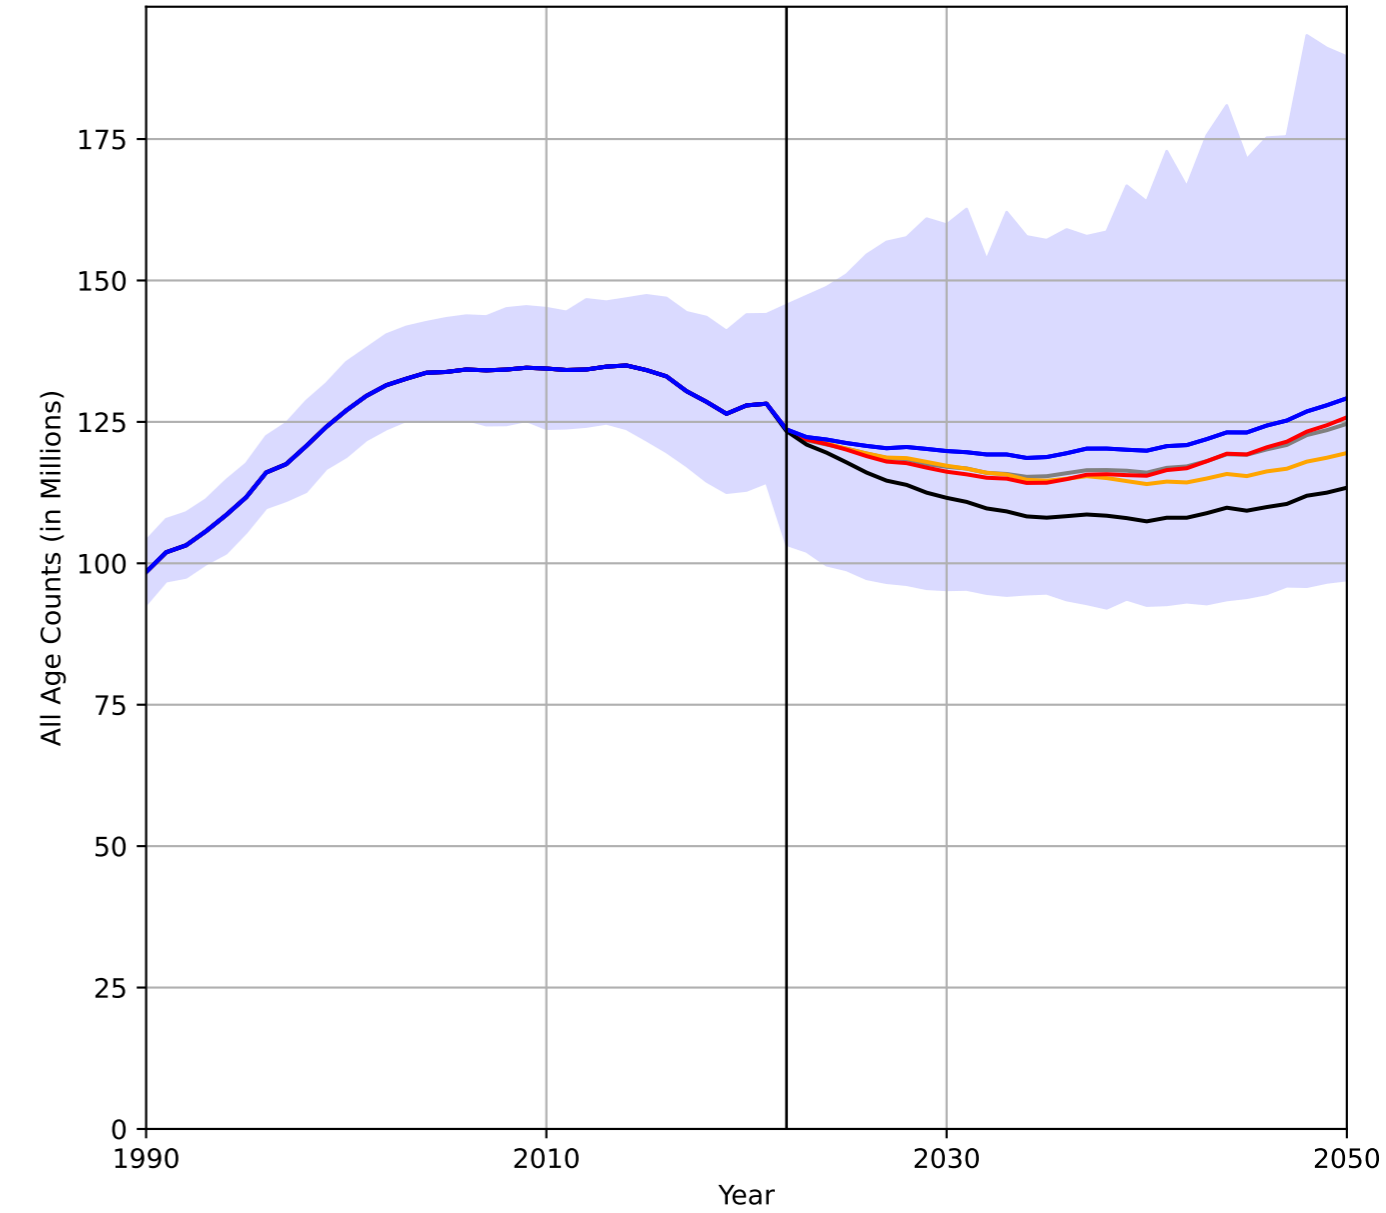

# São Tomé And Príncipe

1611

Supplemental Results Figure S10. All-cause age standardised DALY rates (A) and all age DALY counts (B), for the past and for five future scenarios, 1990–2050

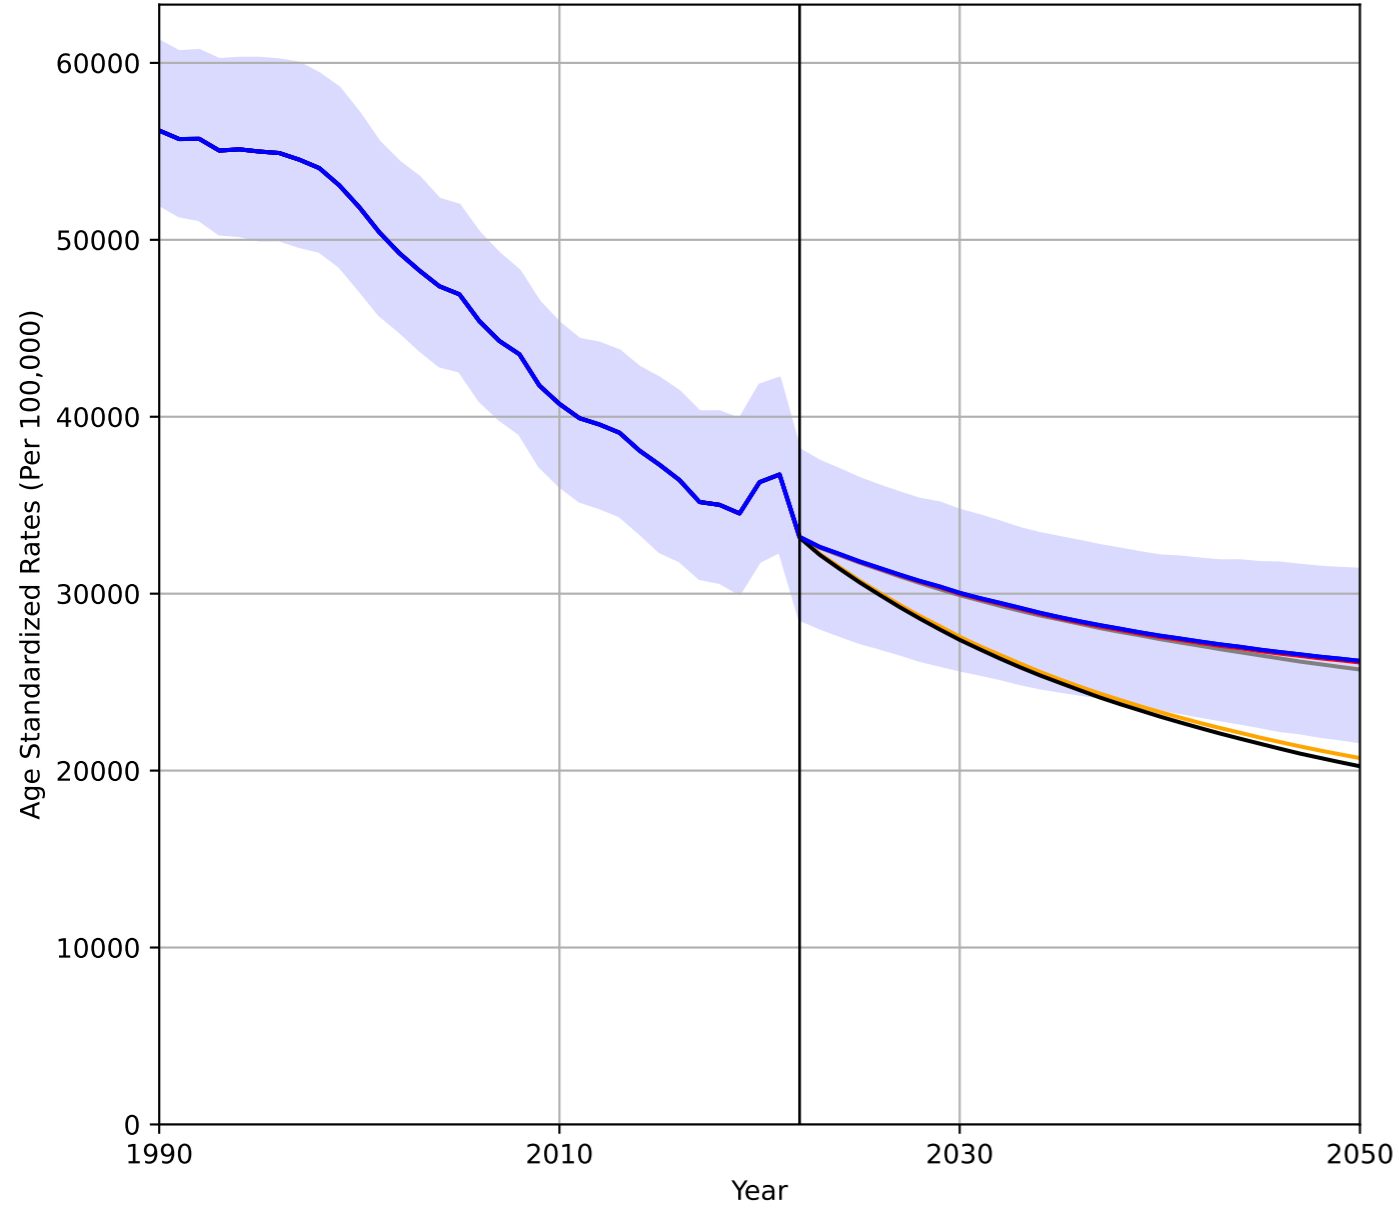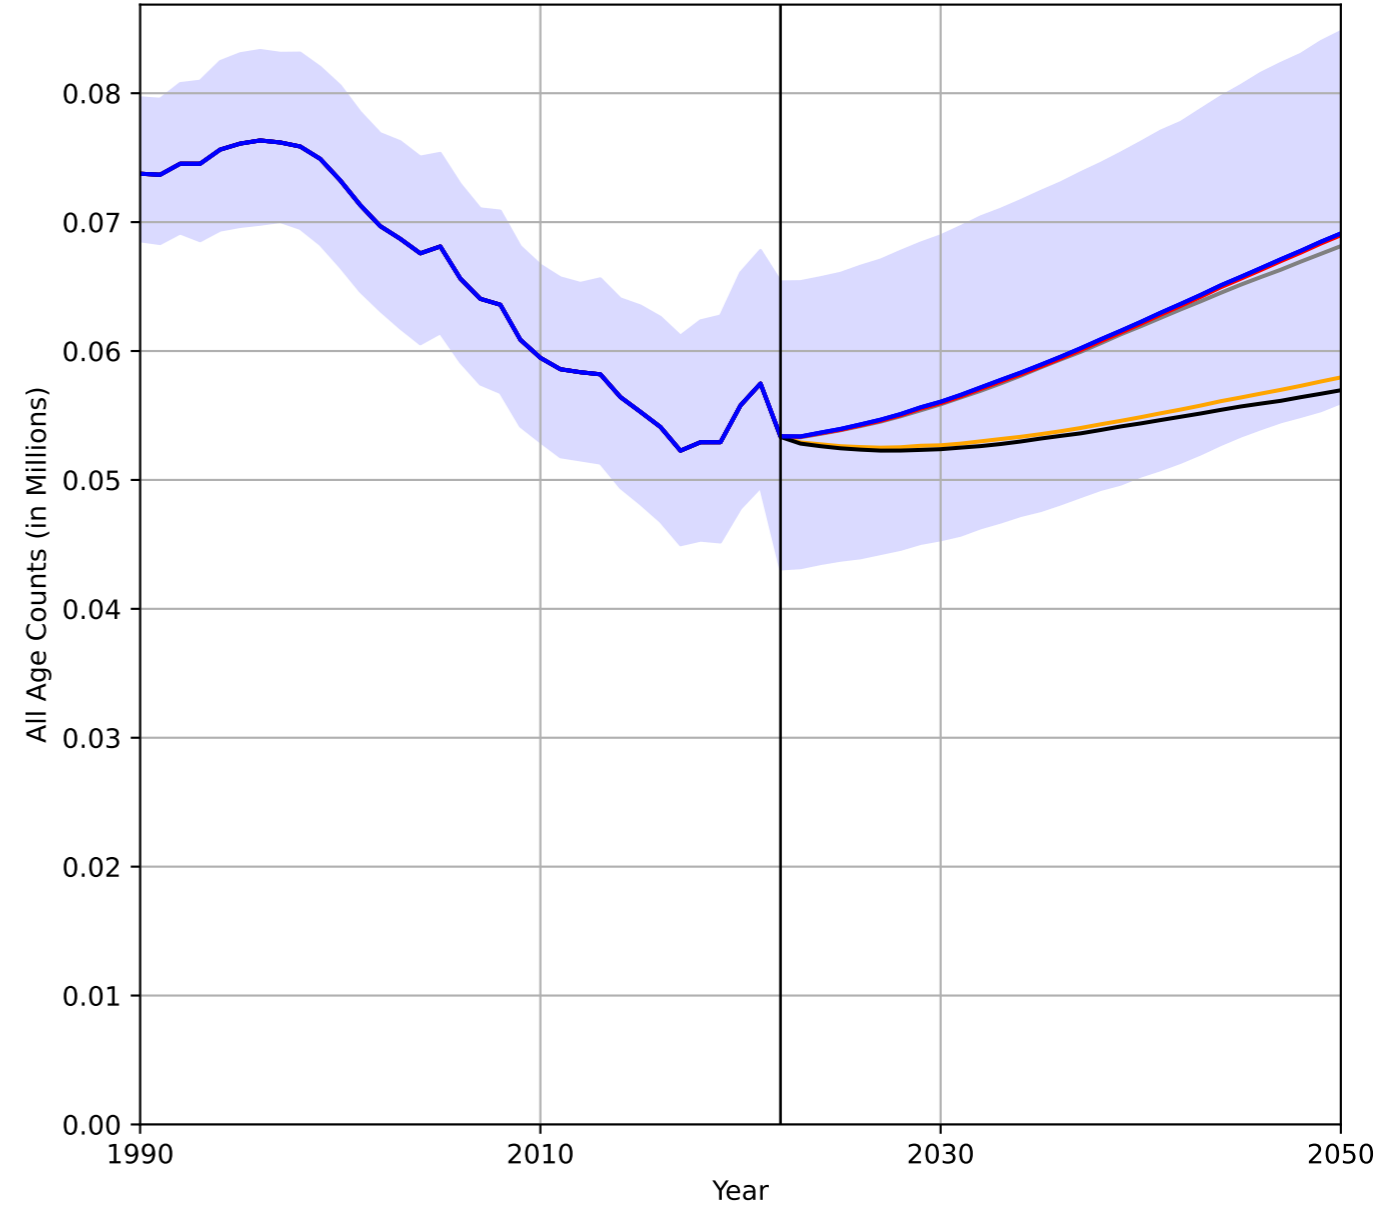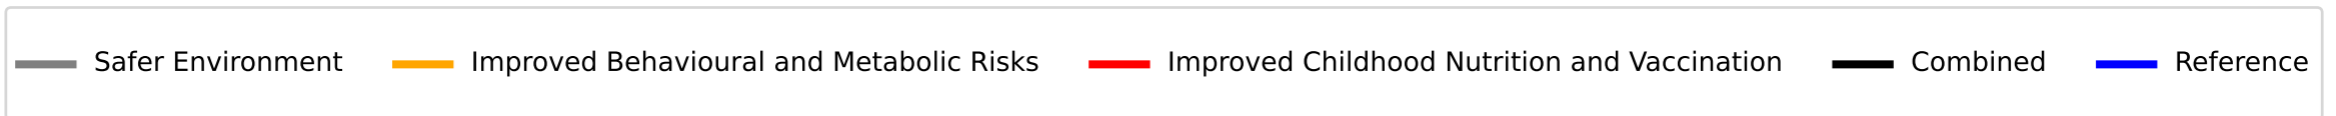

# Senegal

Supplemental Results Figure S10. All-cause age standardised DALY rates (A) and all age DALY counts (B), for the past and for five future scenarios, 1990–2050

1612

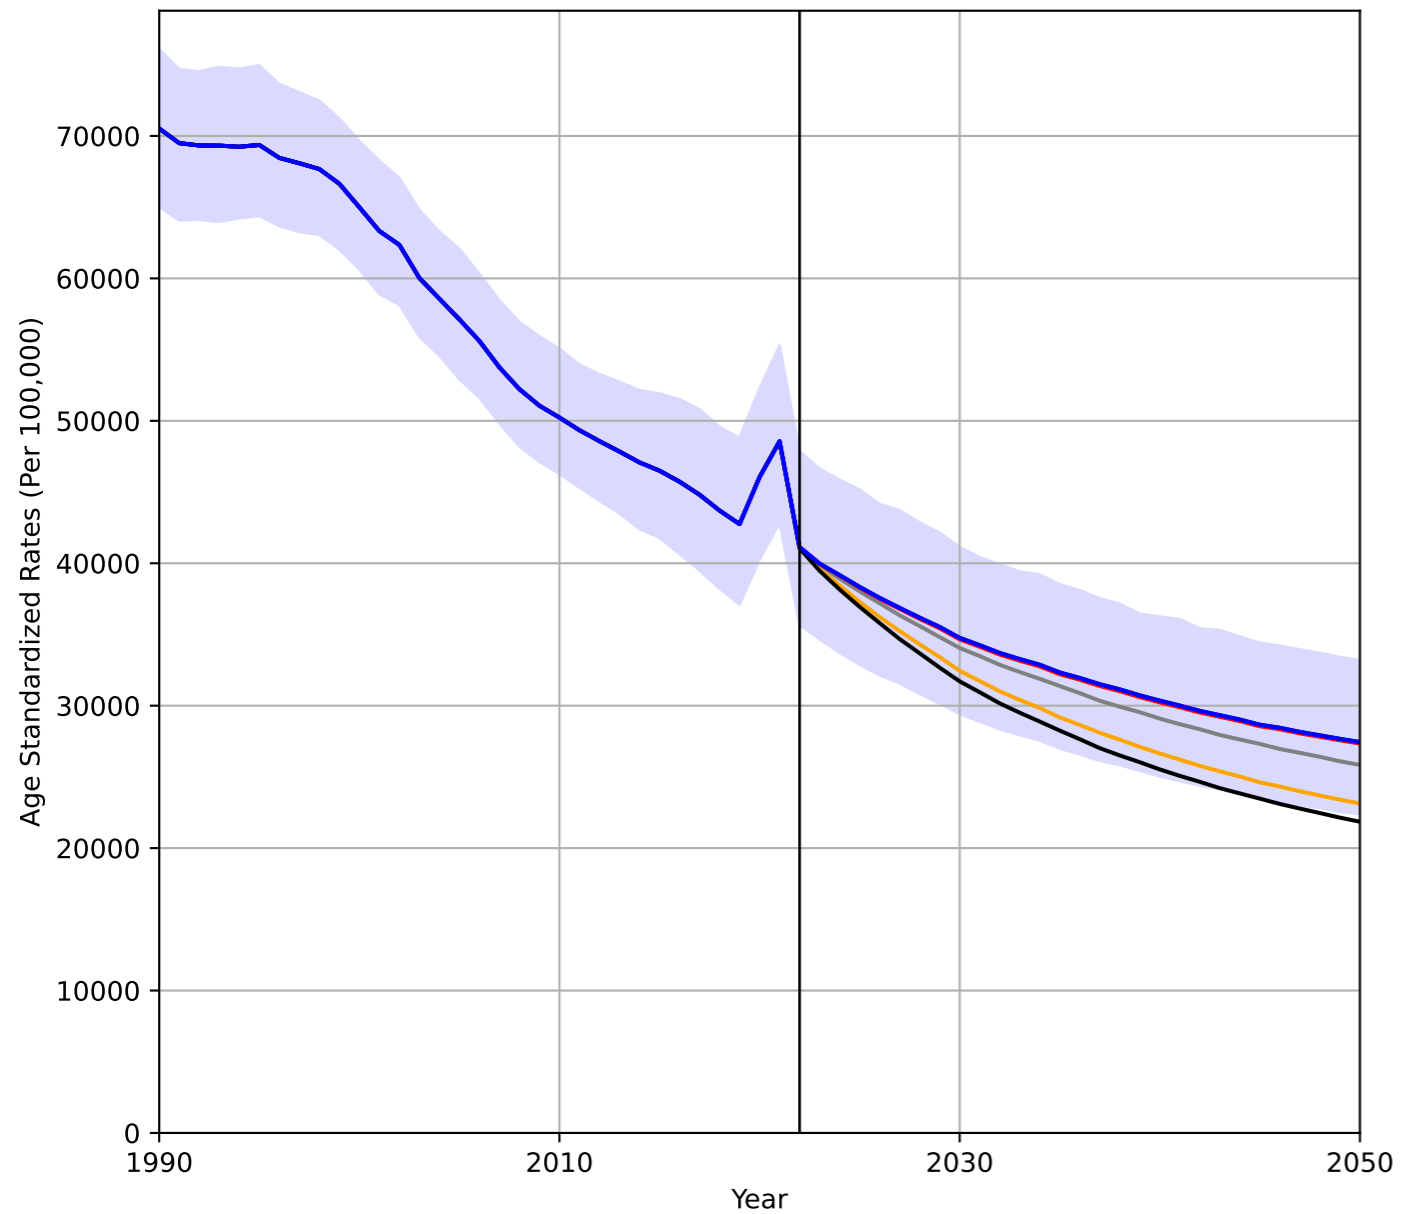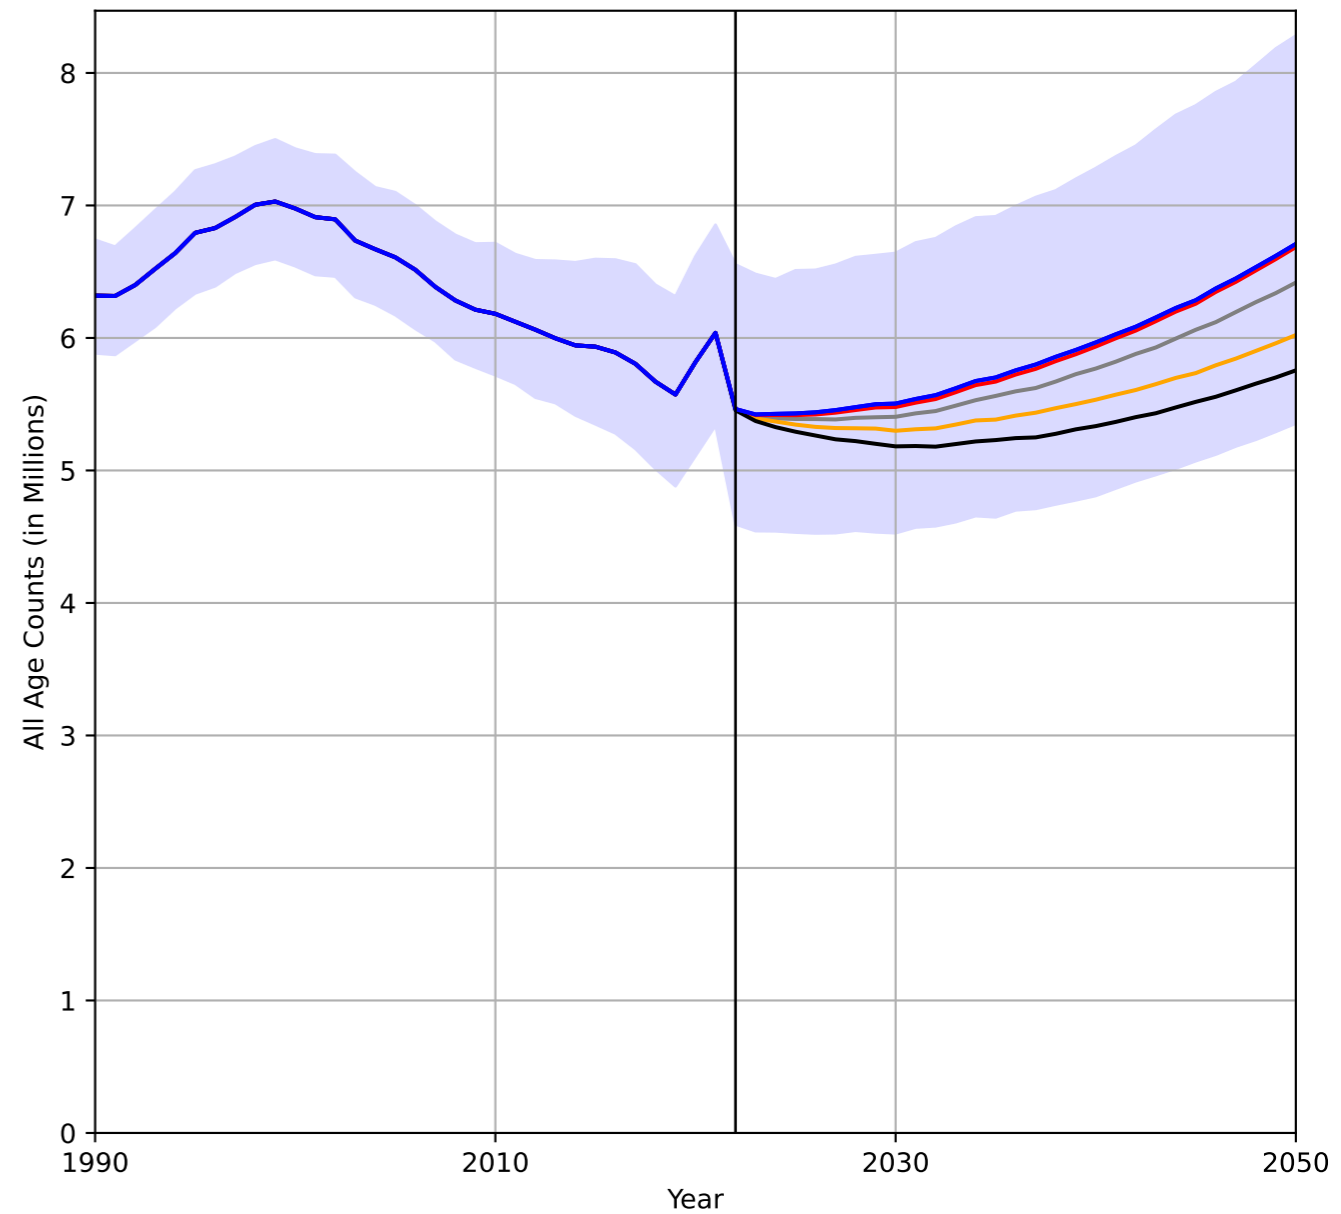

# Sierra Leone

Supplemental Results Figure S10. All-cause age standardised DALY rates (A) and all age DALY counts (B), for the past and for five future scenarios, 1990–2050

1613

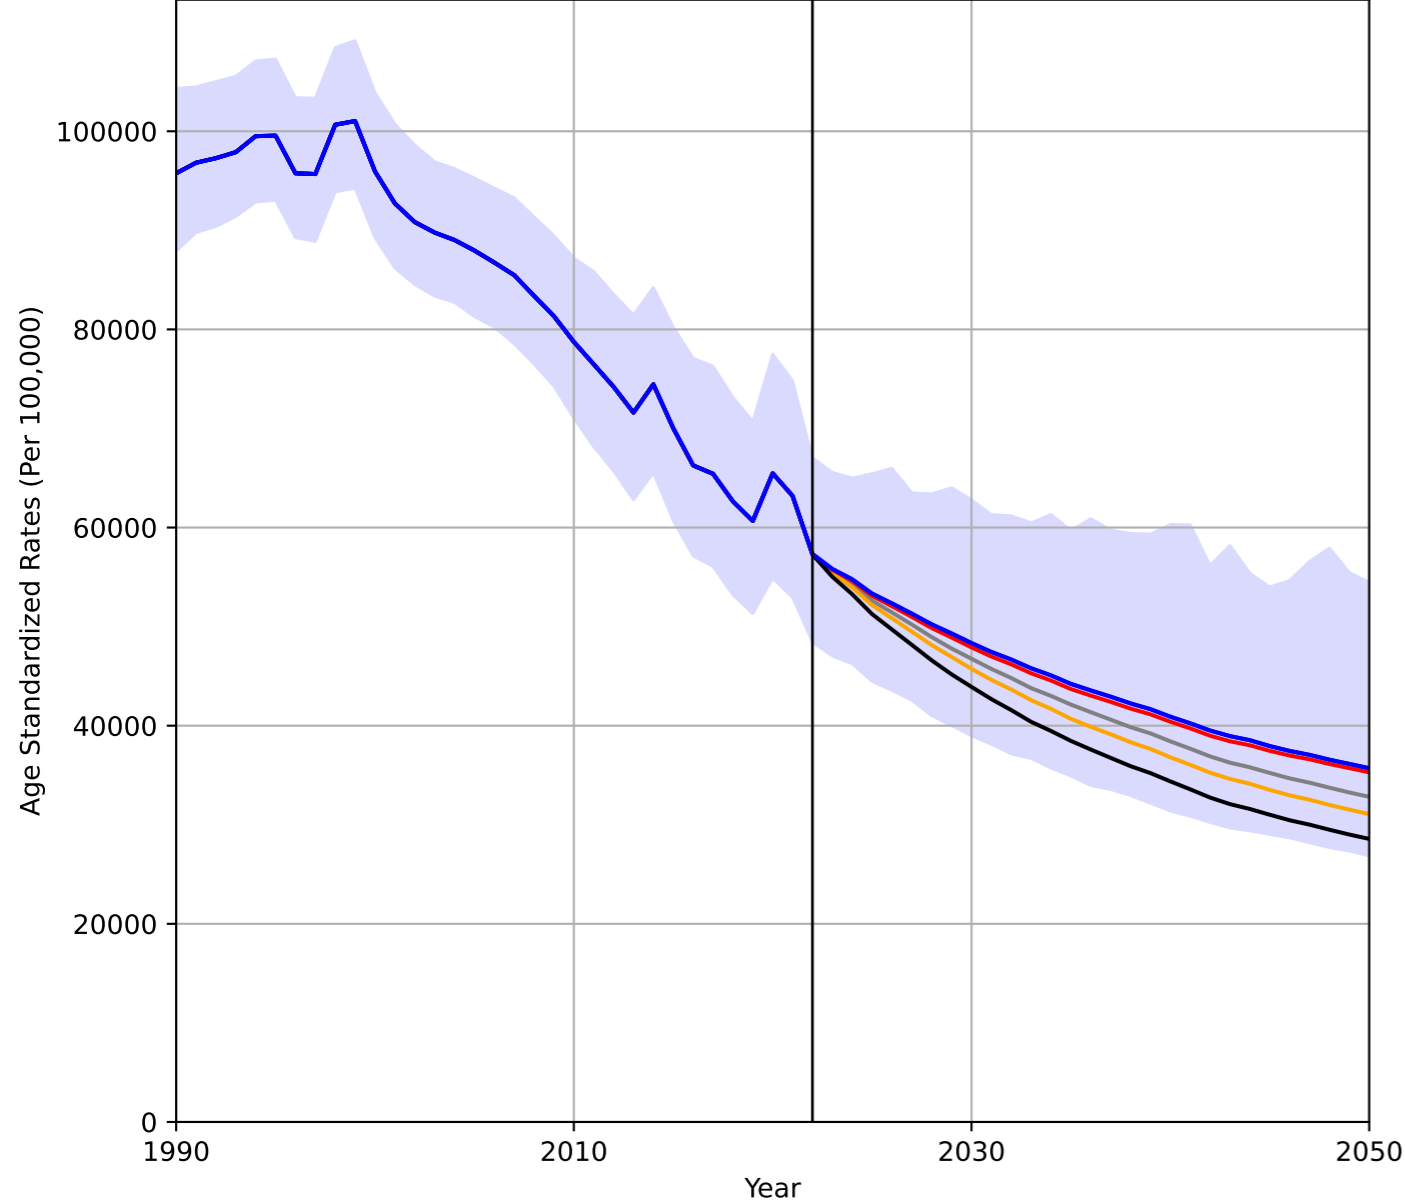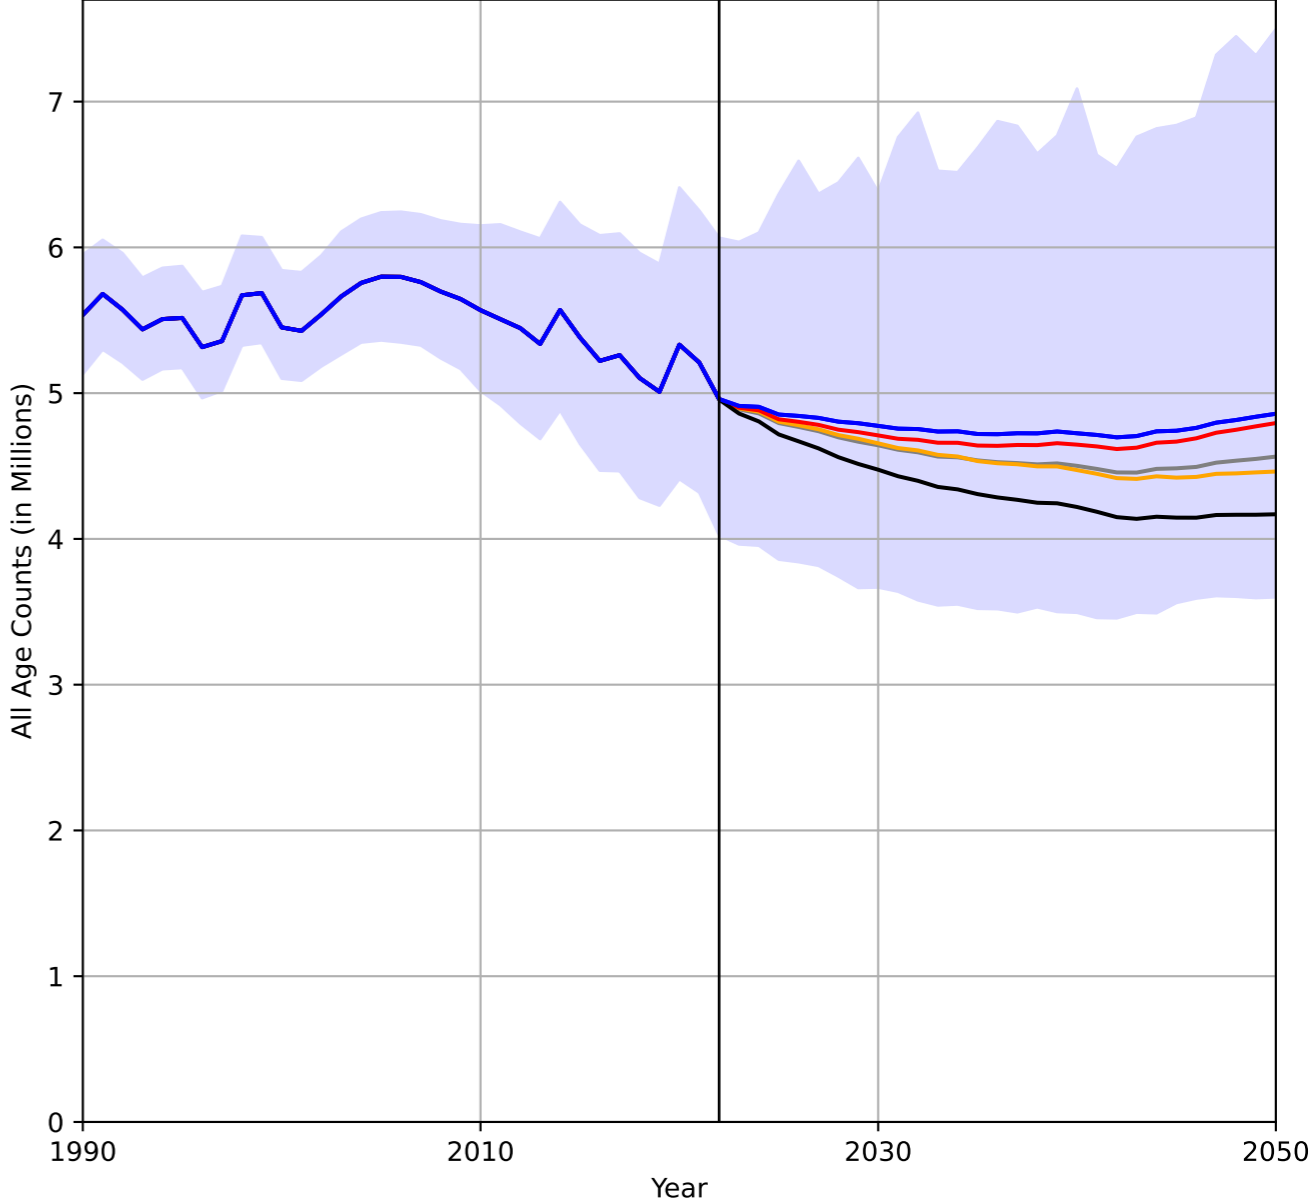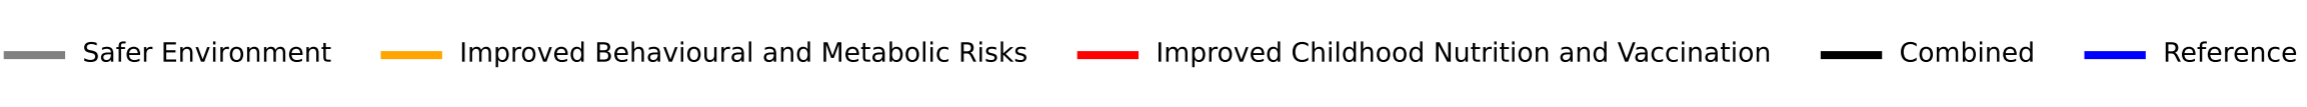

# Togo

Supplemental Results Figure S10. All-cause age standardised DALY rates (A) and all age DALY counts (B), for the past and for five future scenarios, 1990–2050

1614

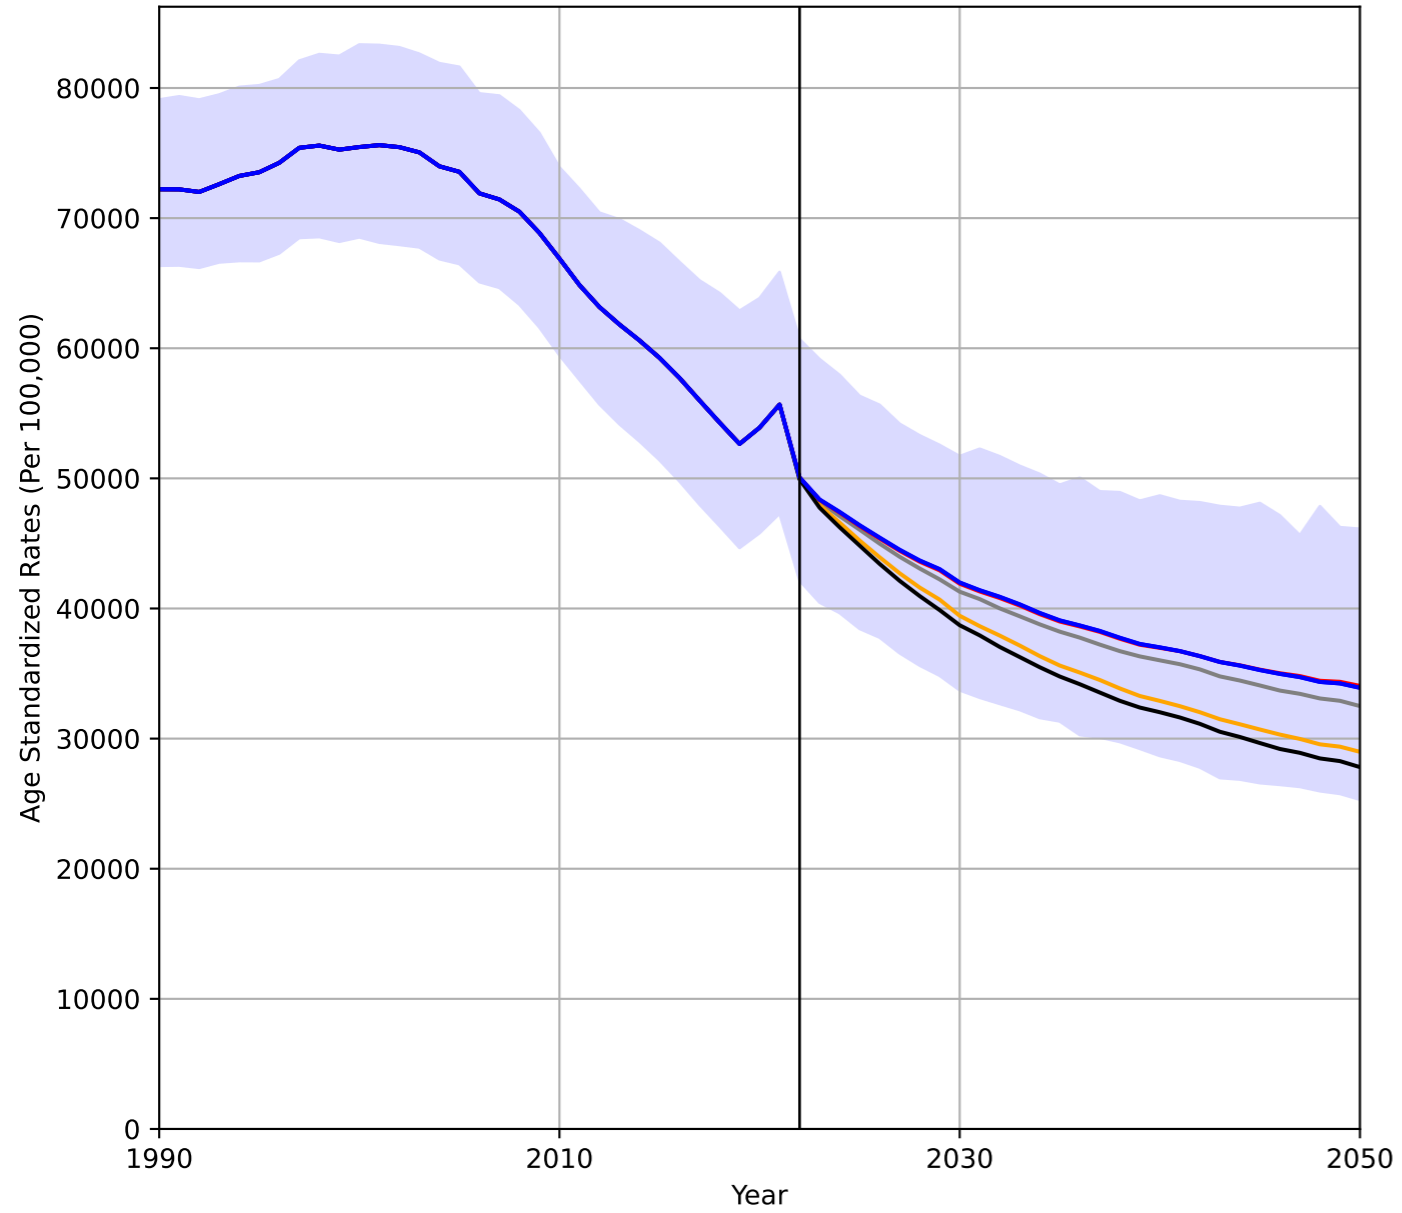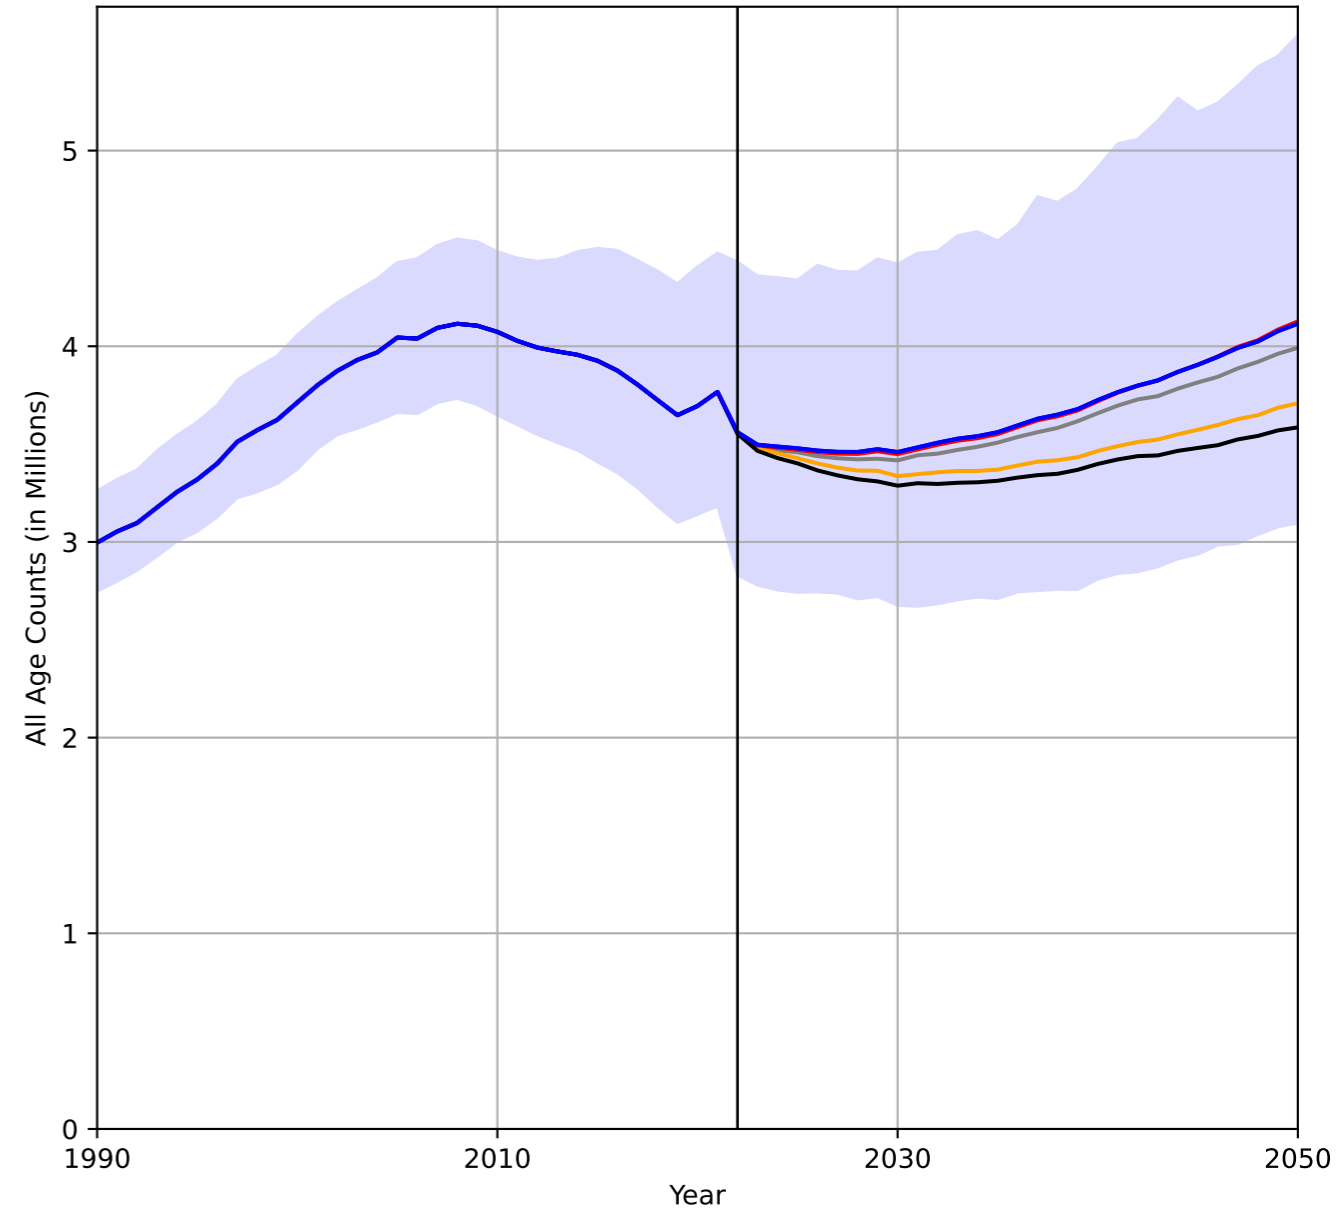

# Global

Supplemental Results Figure S10. All-cause age standardised DALY rates (A) and all age DALY counts (B), for the past and for five future scenarios, 1990–2050

1615

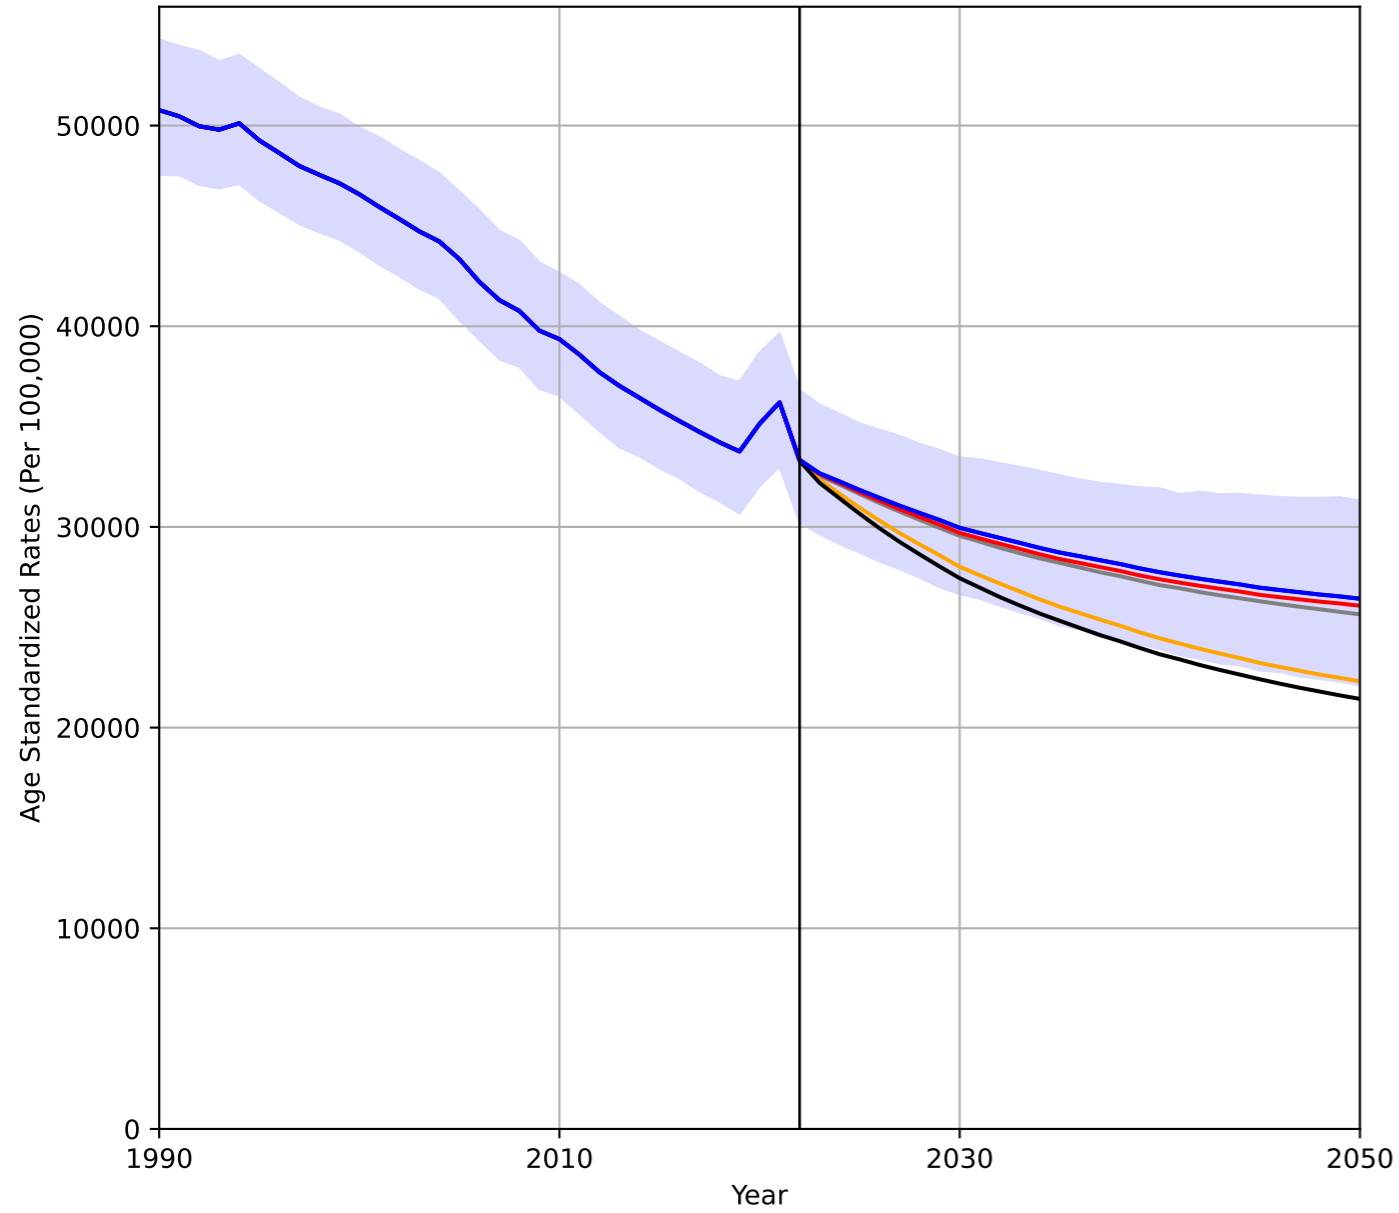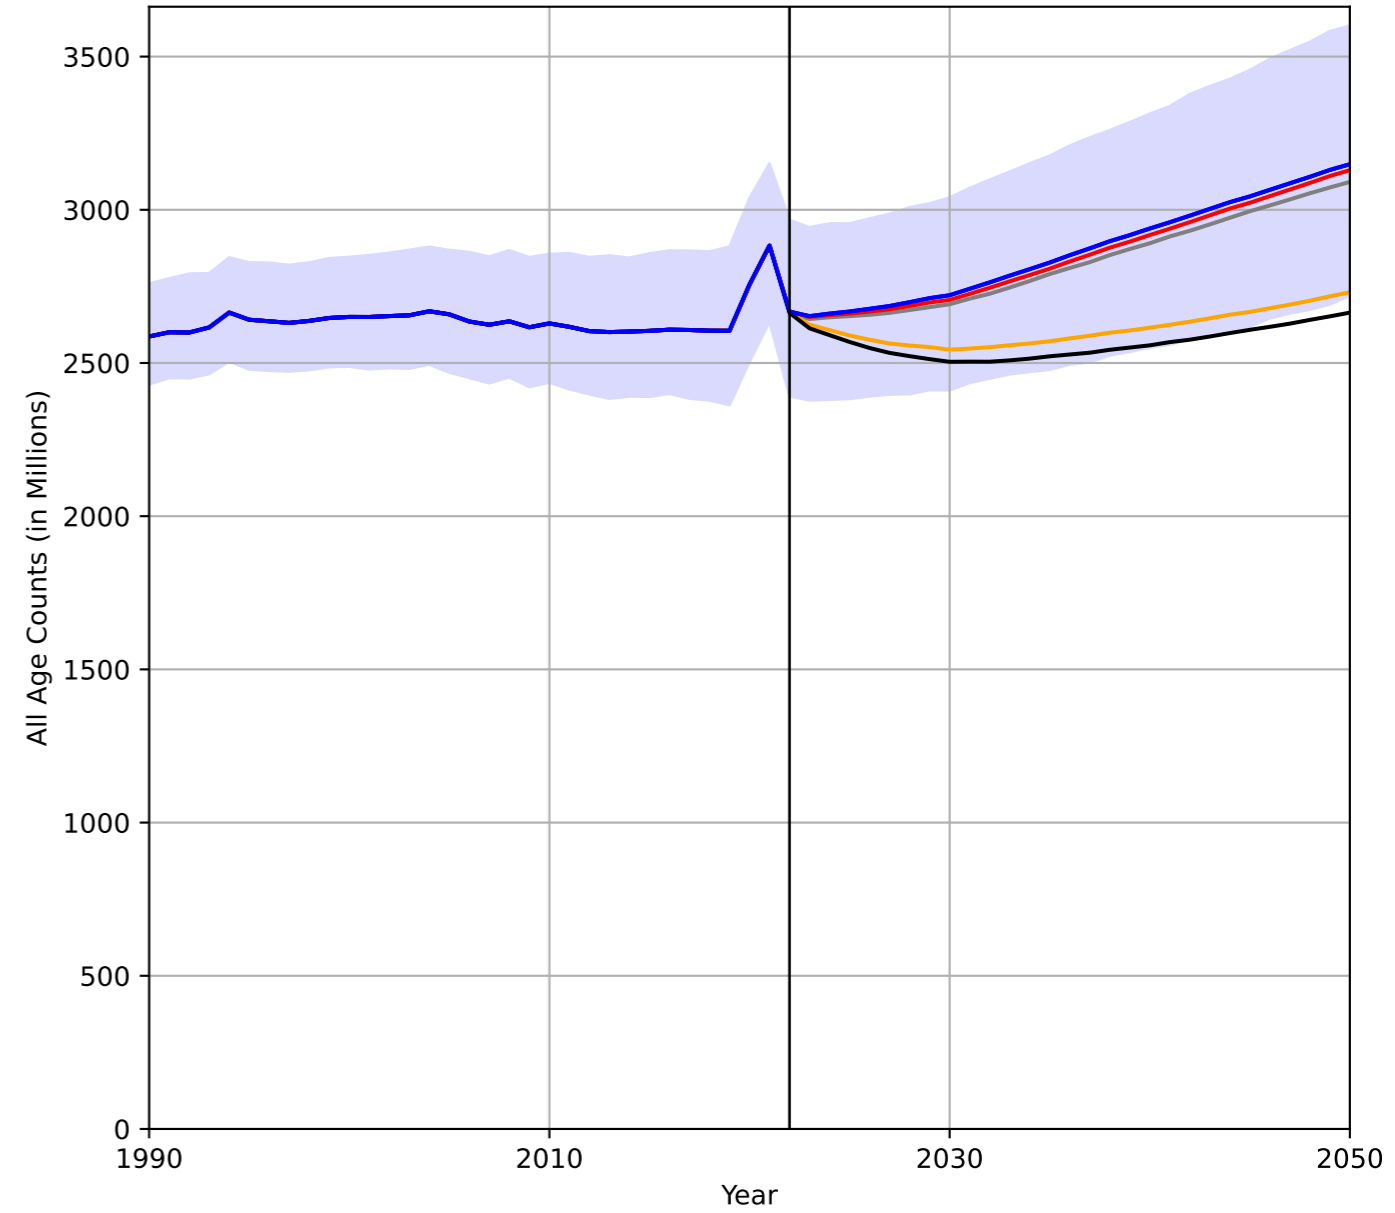



# Central Europe, Eastern Europe, And Central Asia

Supplemental Results Figure S10. All-cause age standardised DALY rates (A) and all age DALY counts (B), for the past and for five future scenarios, 1990–2050

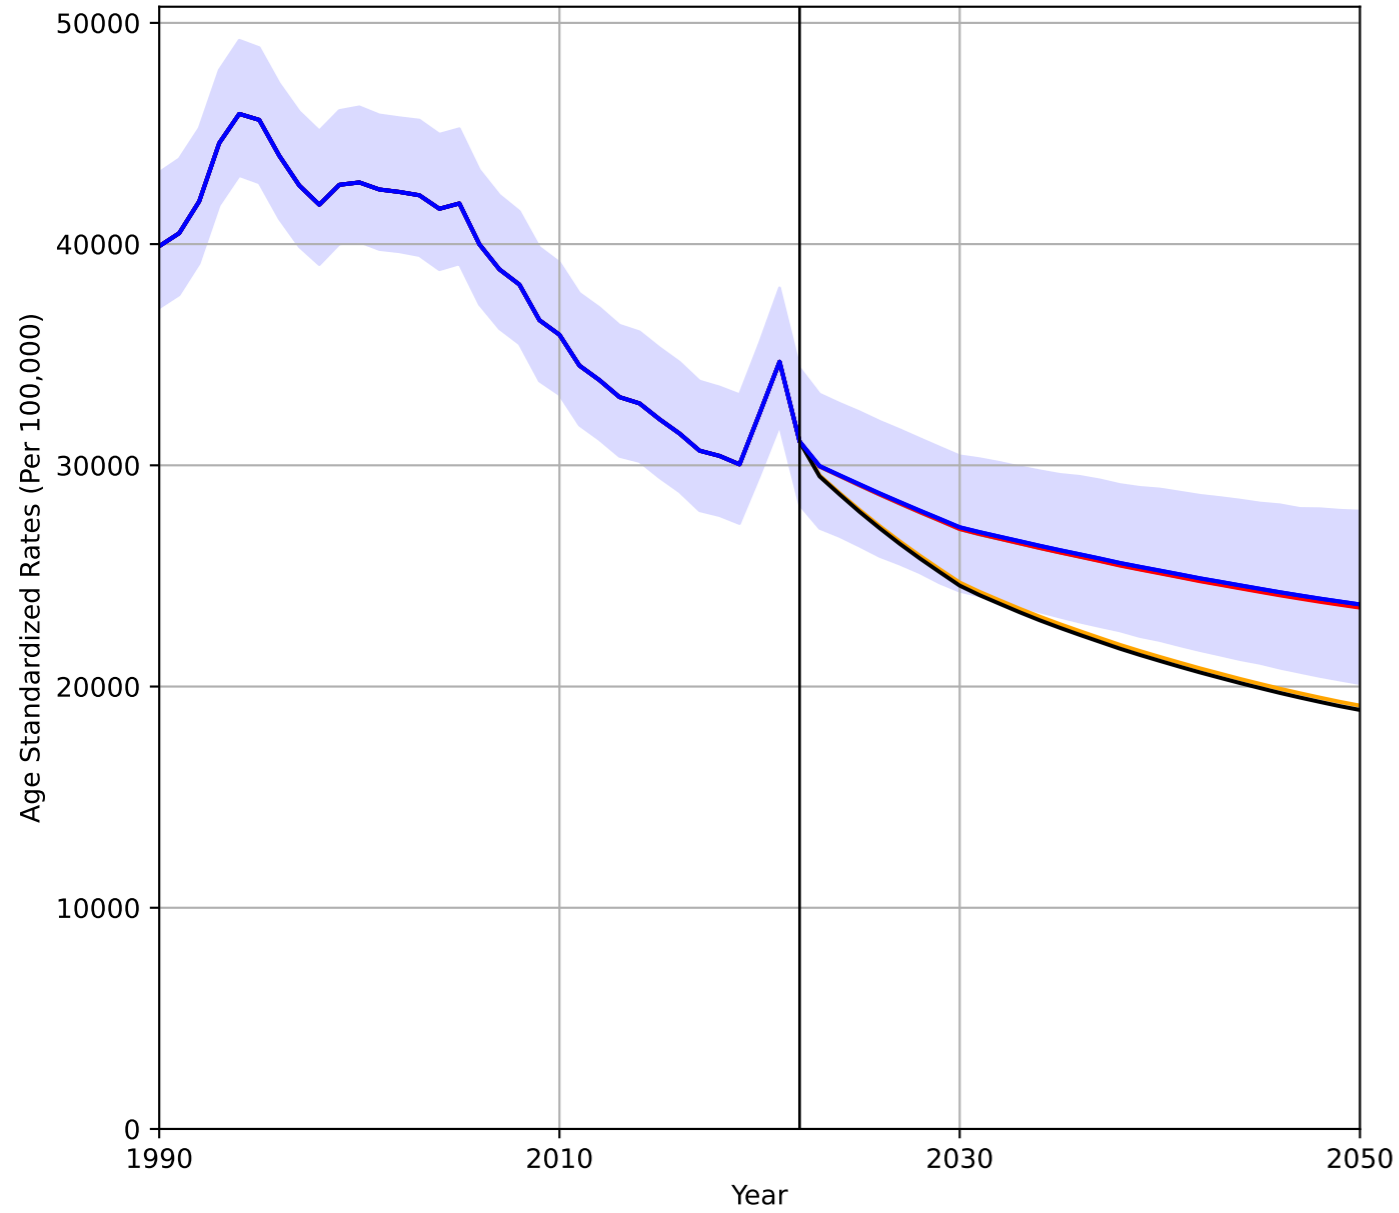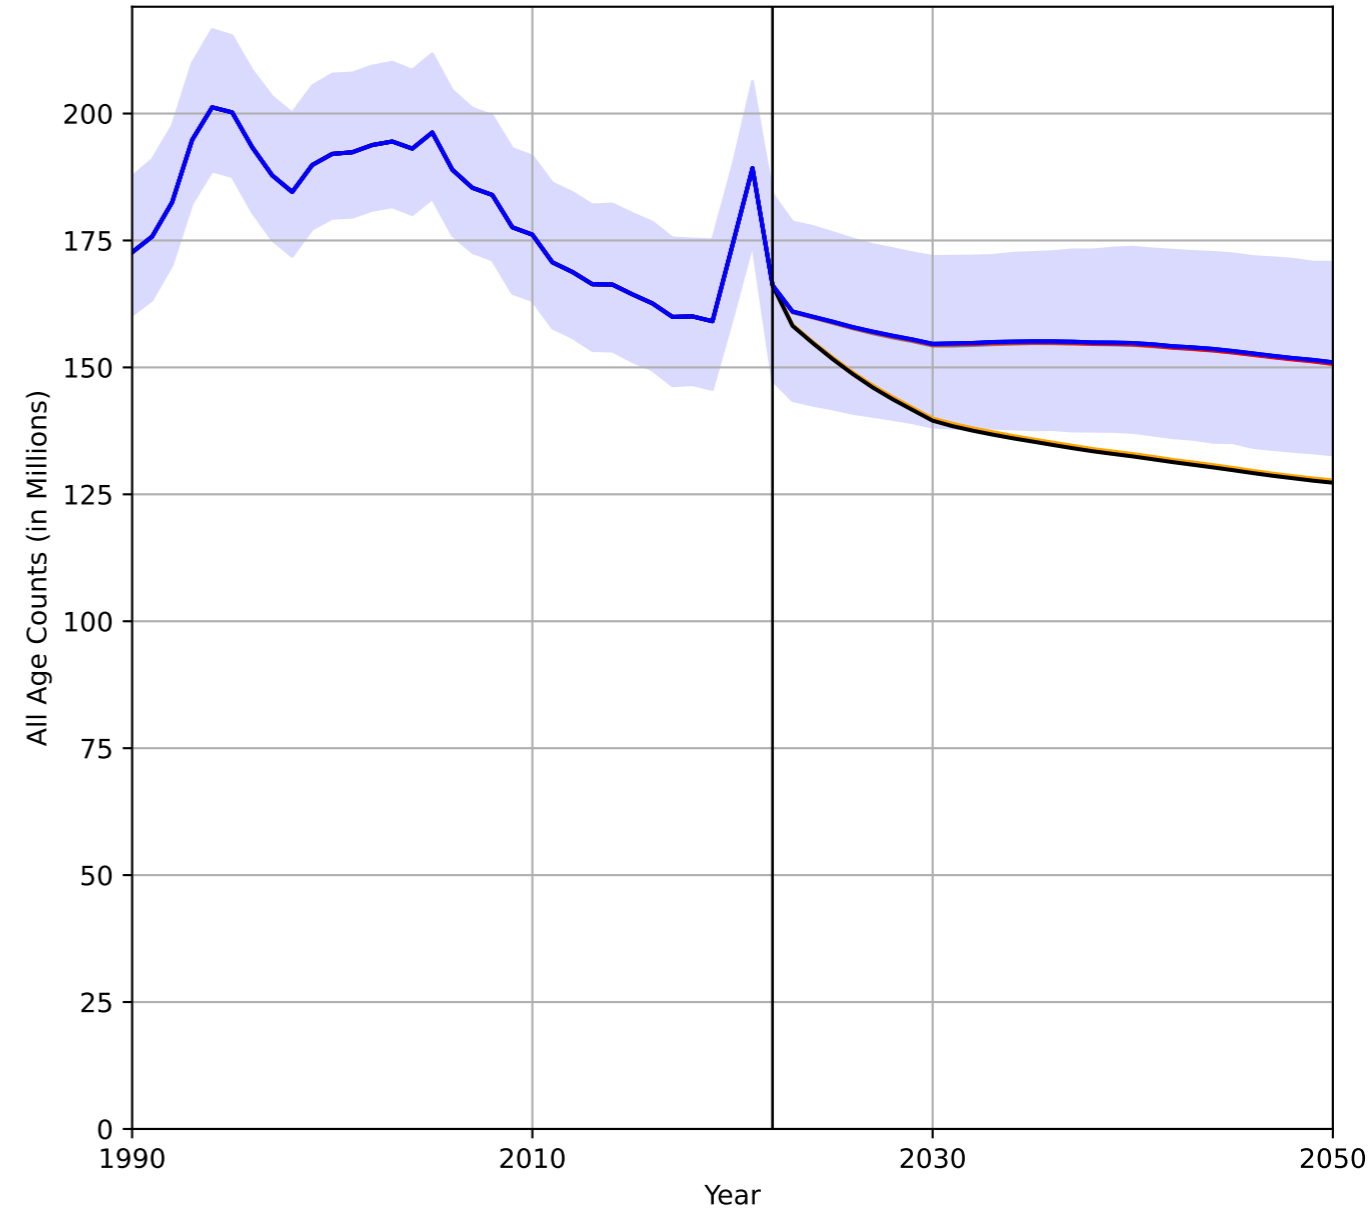

# High Income

Supplemental Results Figure S10. All-cause age standardised DALY rates (A) and all age DALY counts (B), for the past and for five future scenarios, 1990–2050

1617

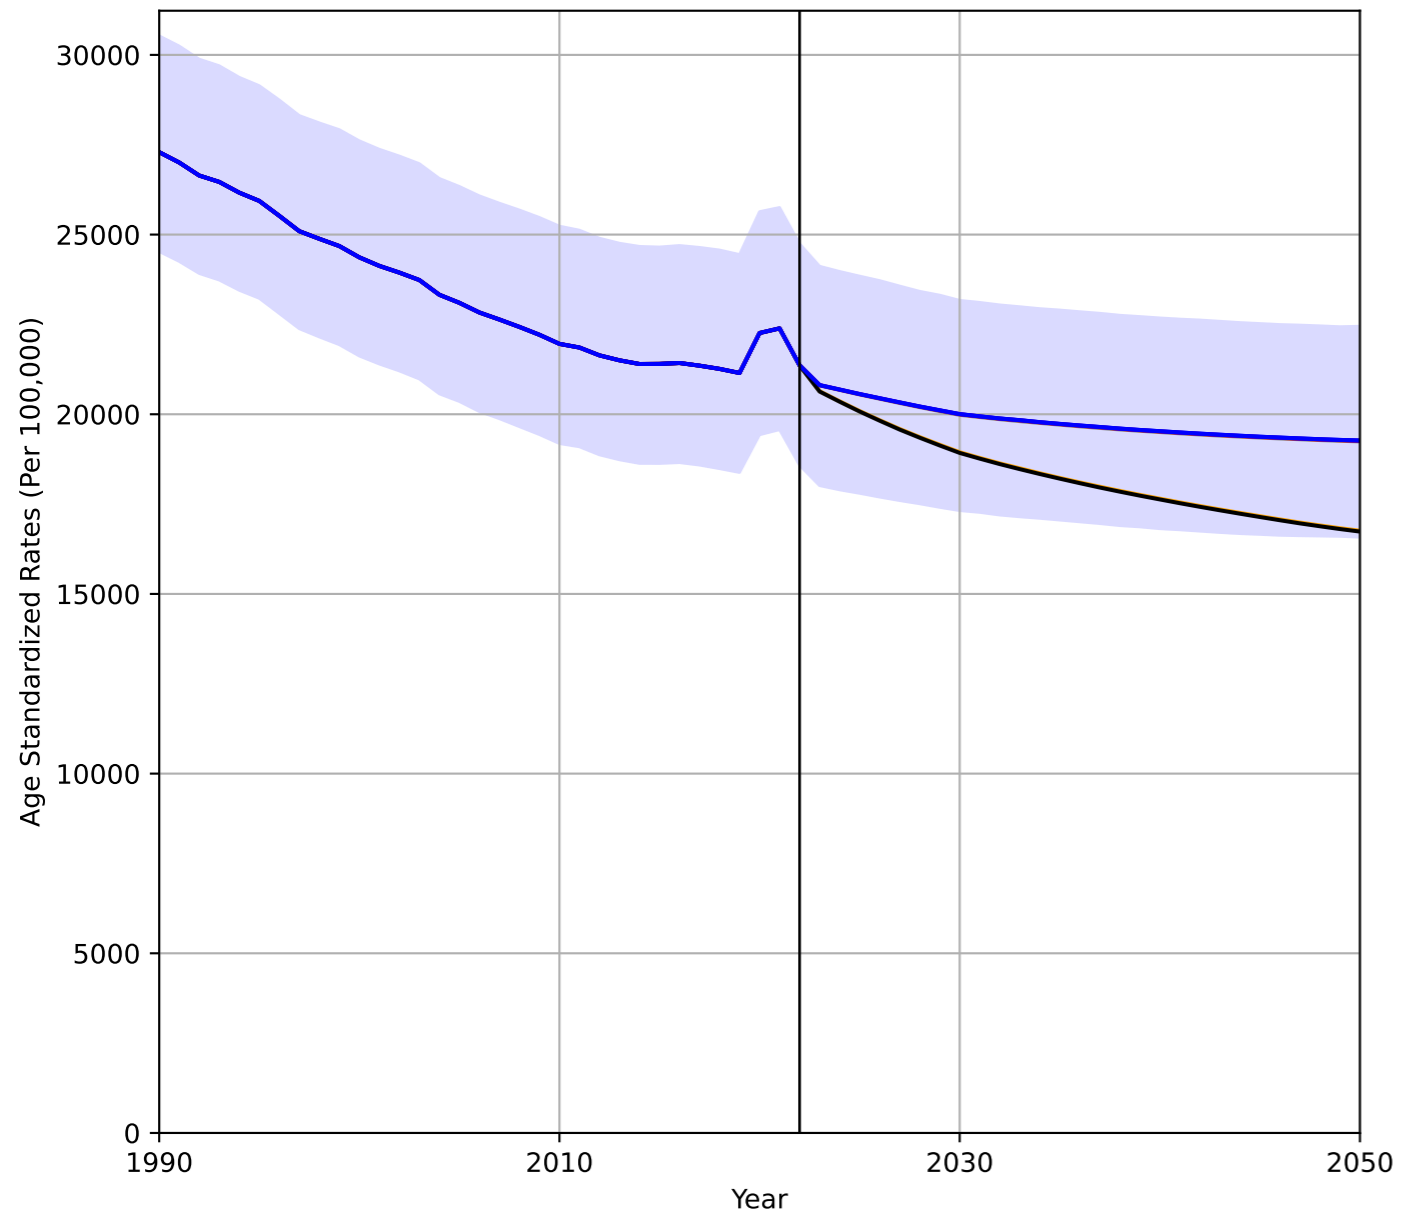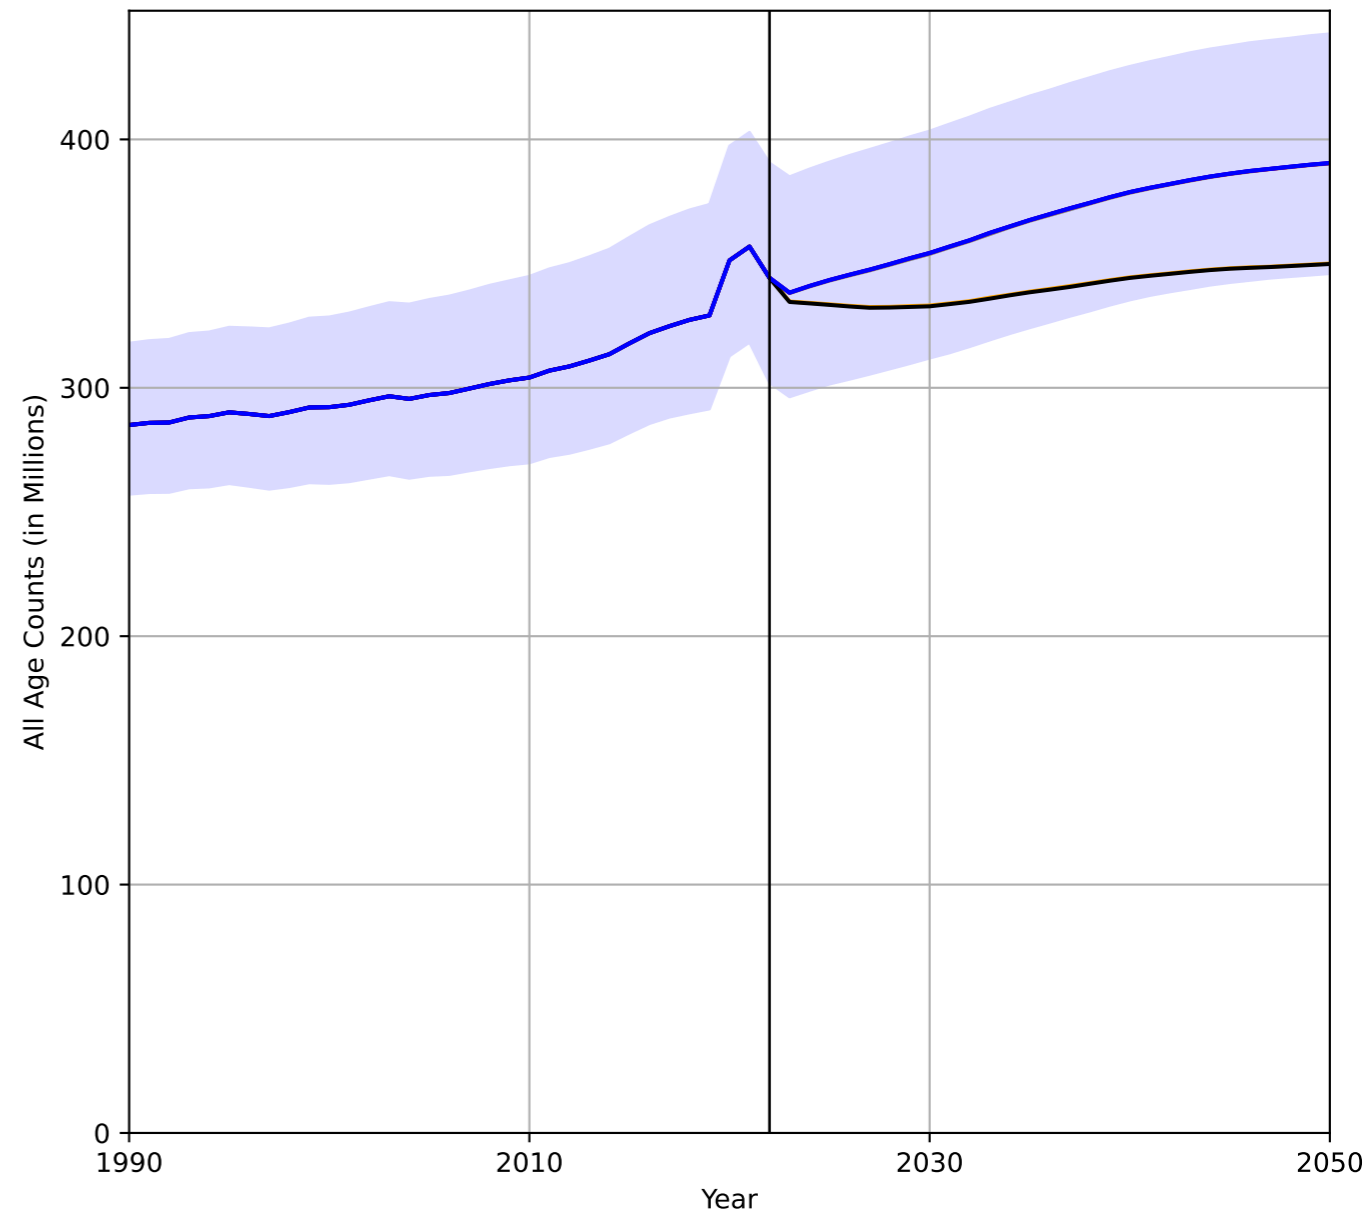

# Latin America And Caribbean

1618

Supplemental Results Figure S10. All-cause age standardised DALY rates (A) and all age DALY counts (B), for the past and for five future scenarios, 1990–2050

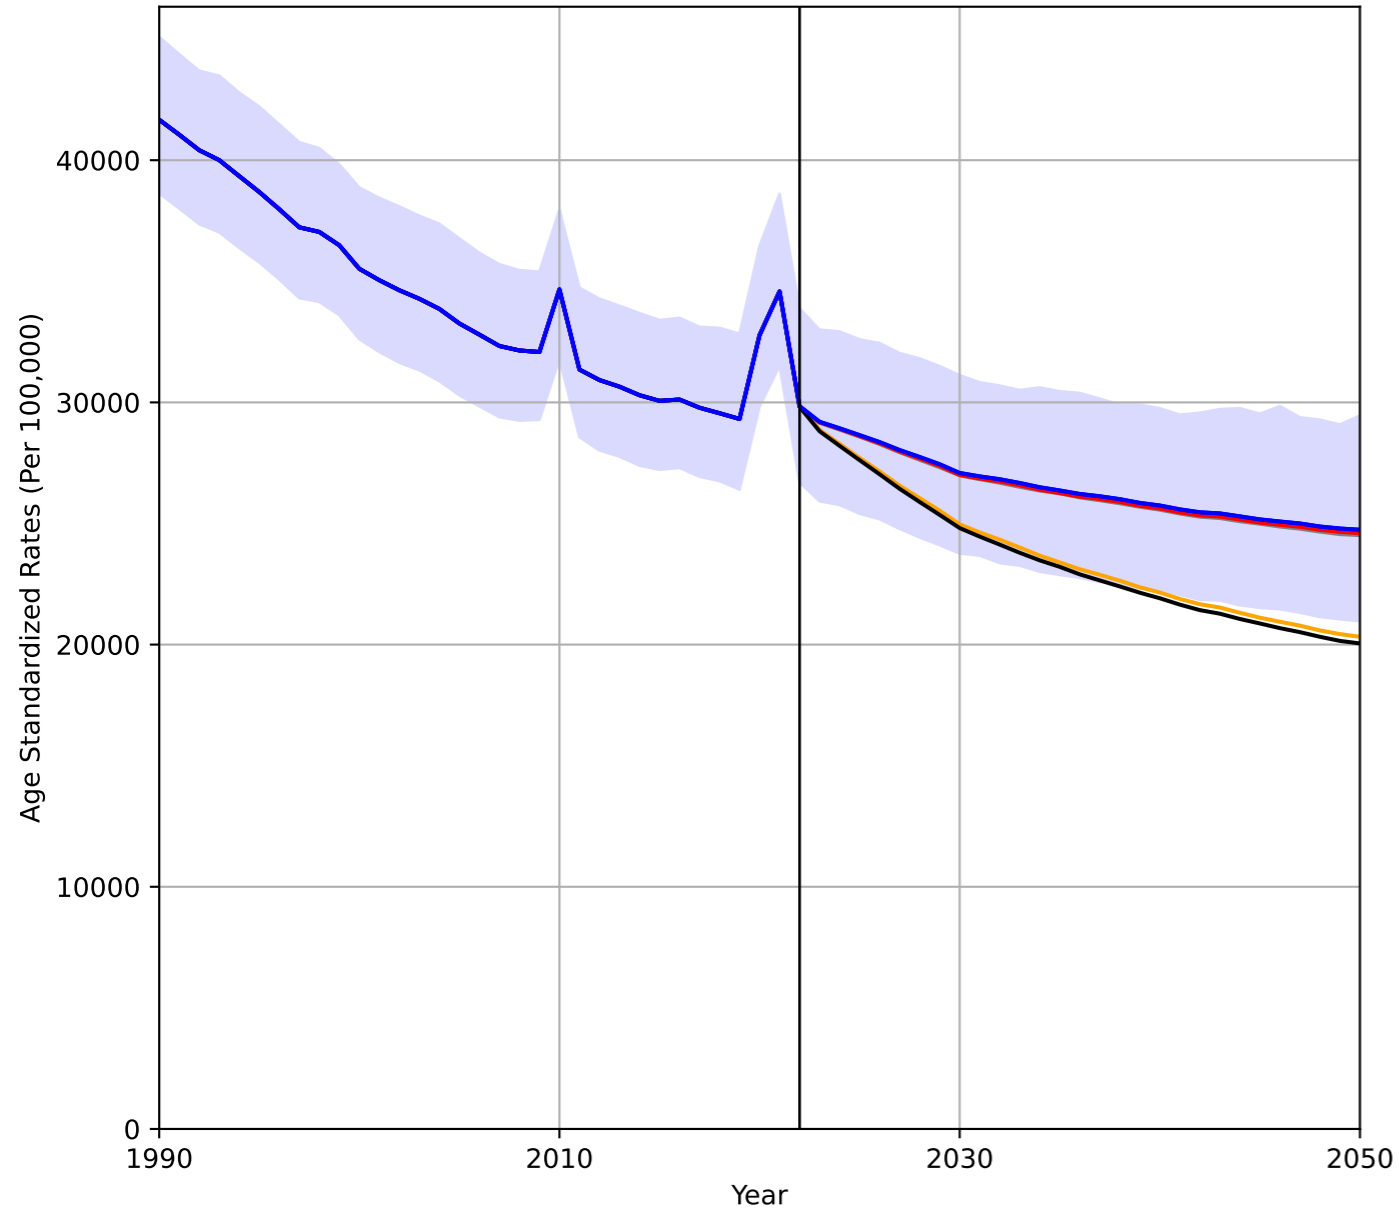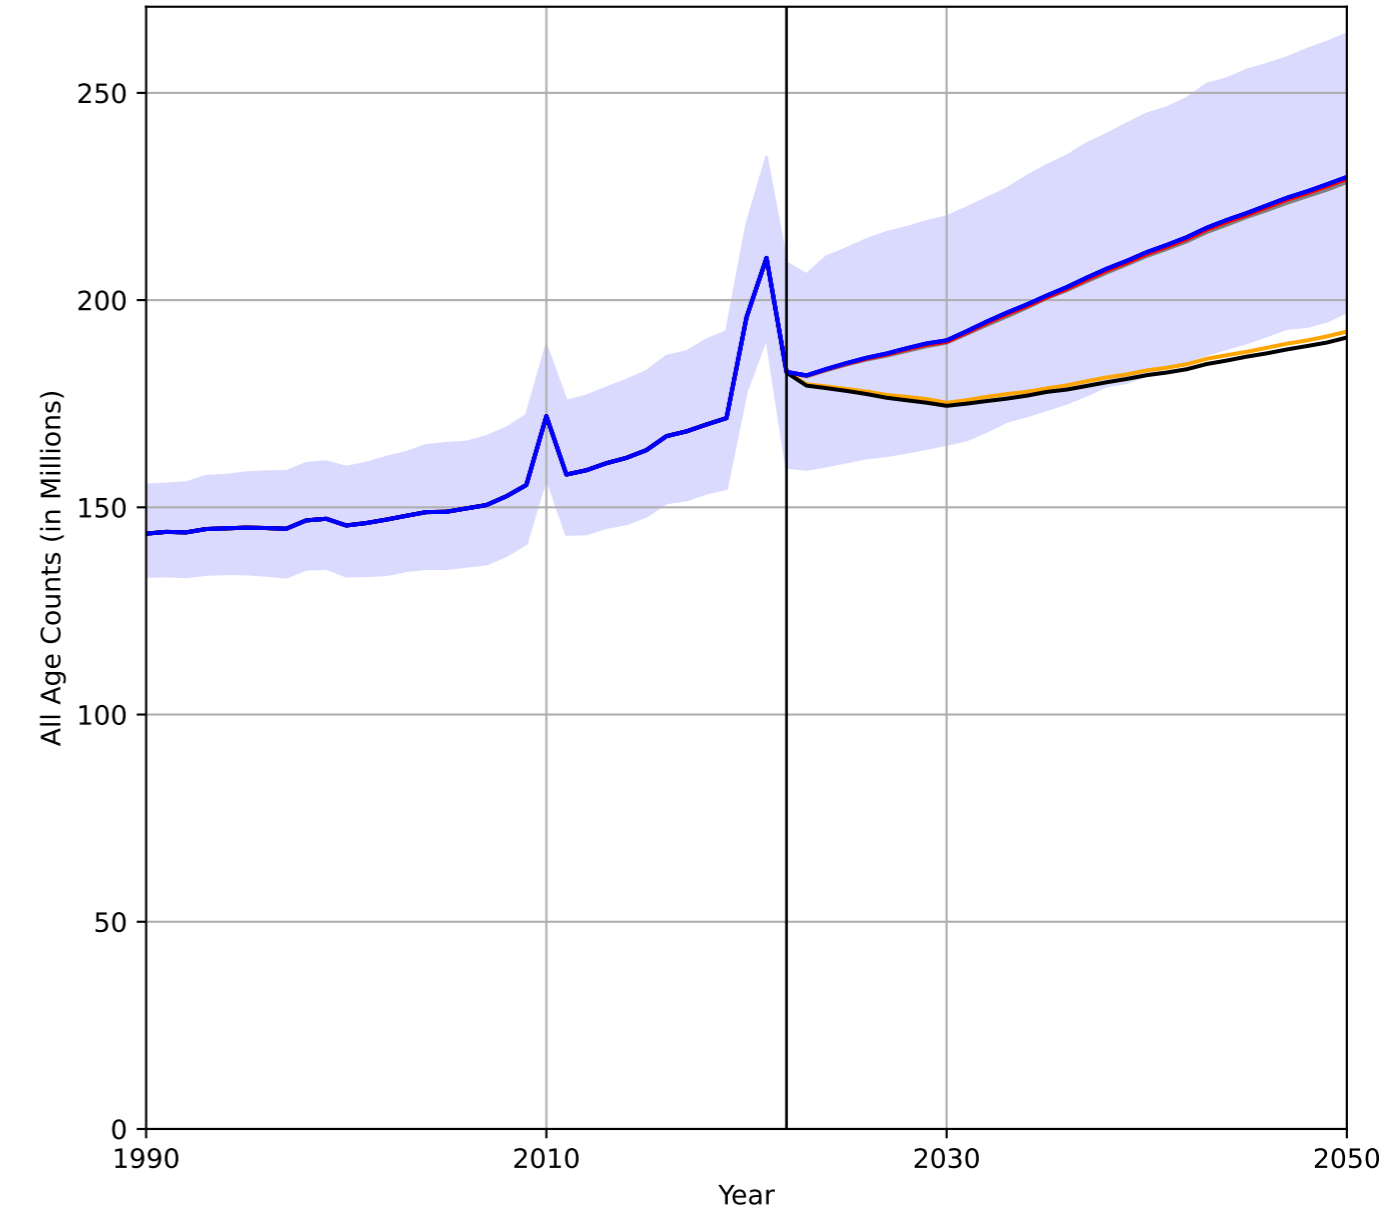

# North Africa And Middle East

Supplemental Results Figure S10. All-cause age standardised DALY rates (A) and all age DALY counts (B), for the past and for five future scenarios, 1990–2050

1619

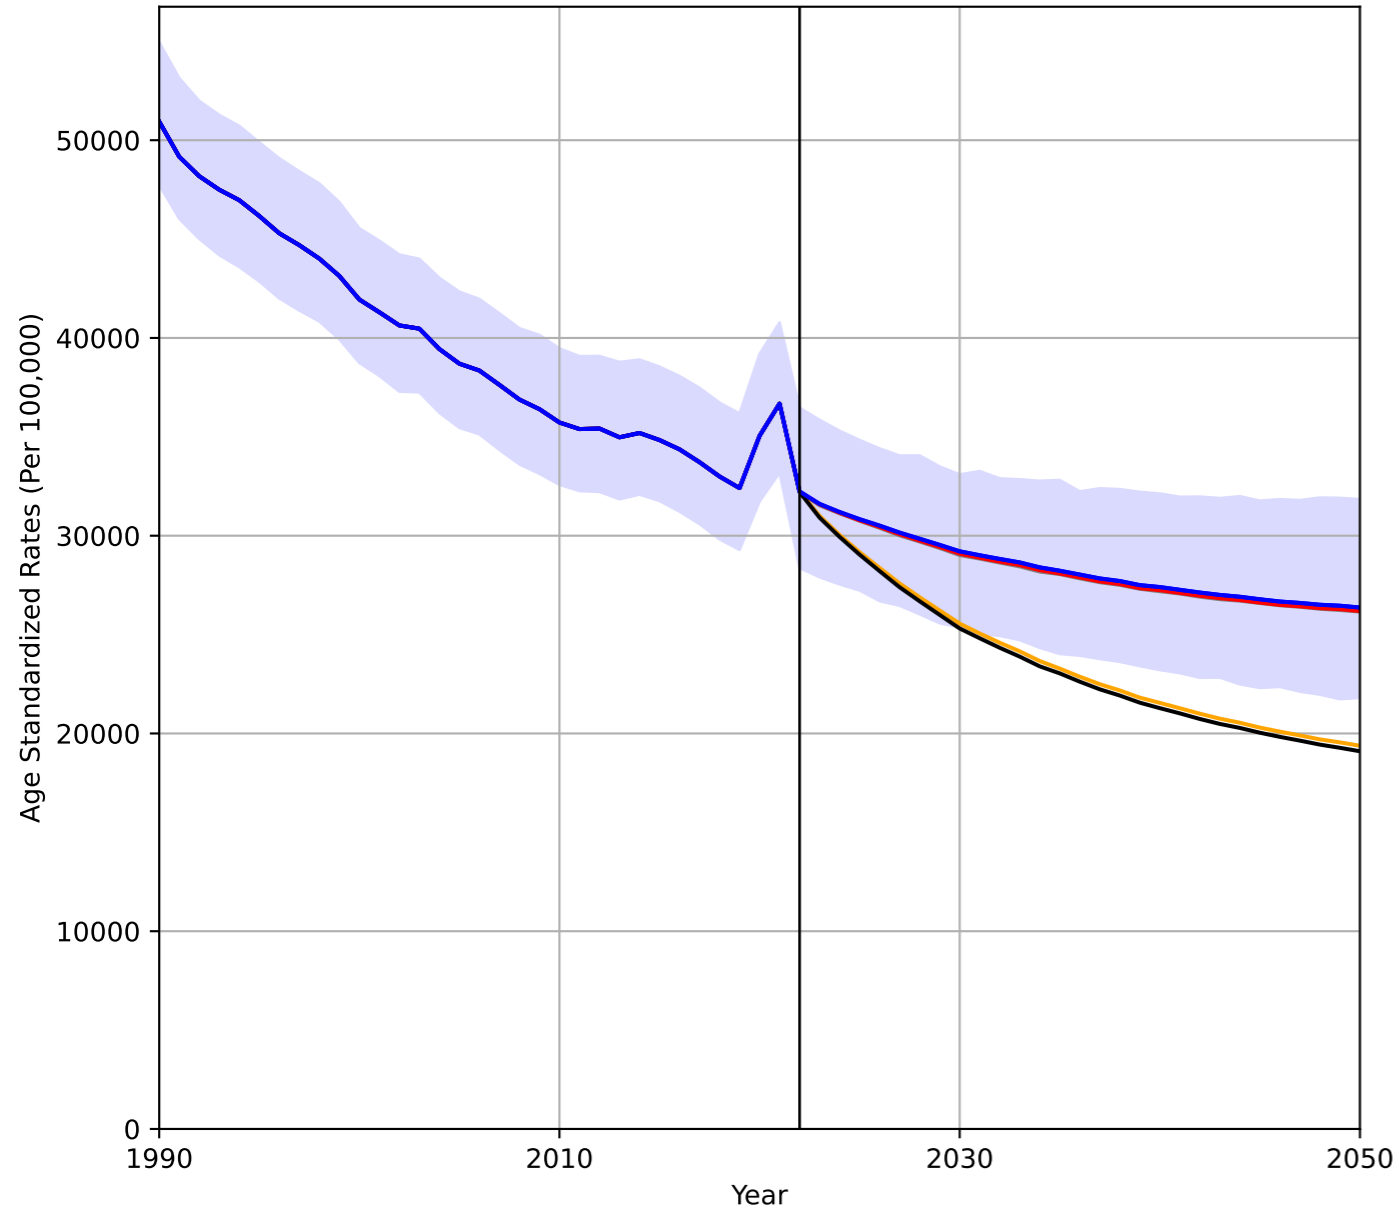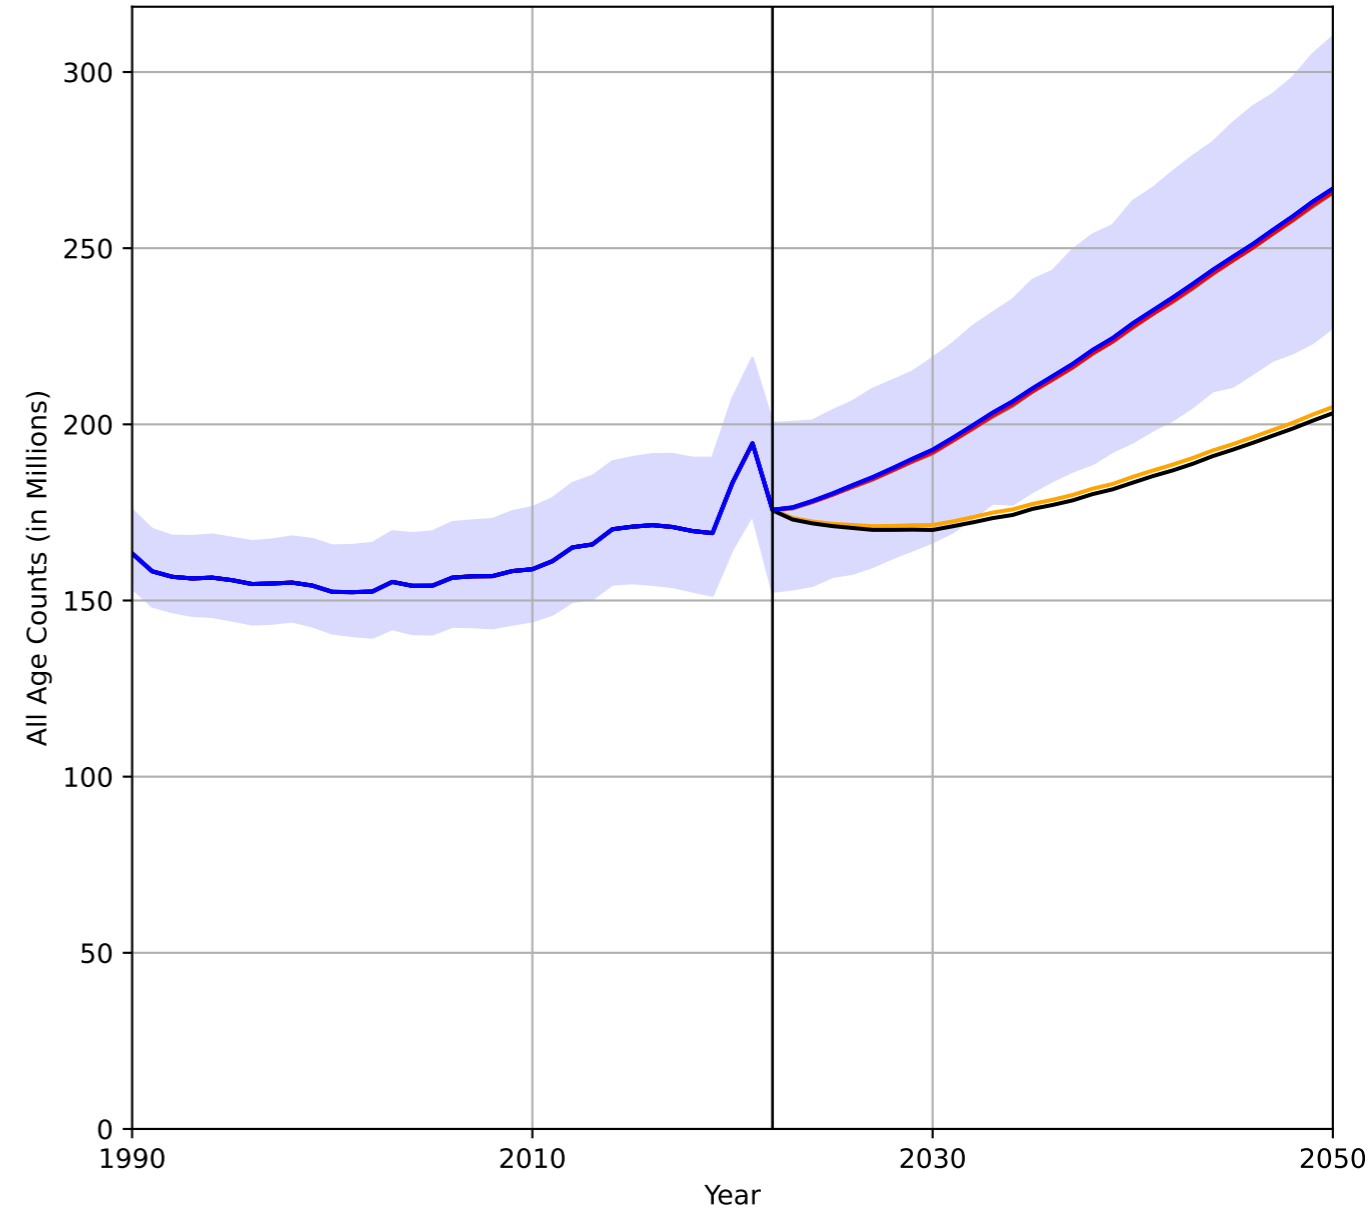

# South Asia

Supplemental Results Figure S10. All-cause age standardised DALY rates (A) and all age DALY counts (B), for the past and for five future scenarios, 1990–2050

1620

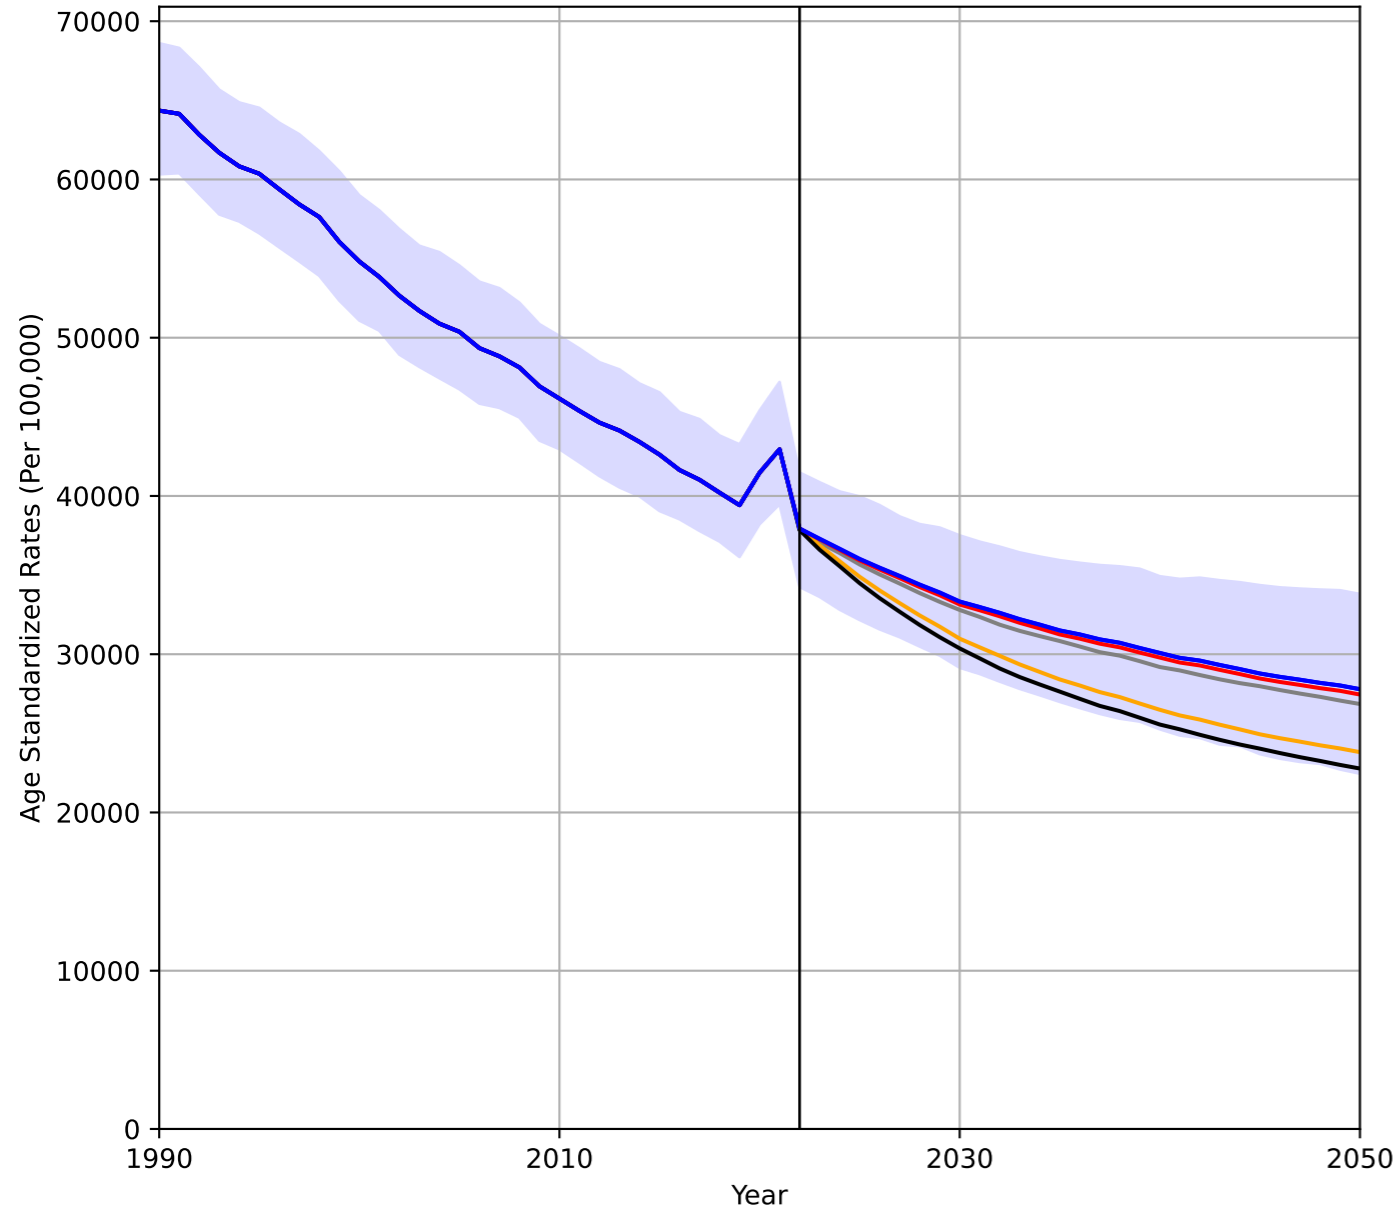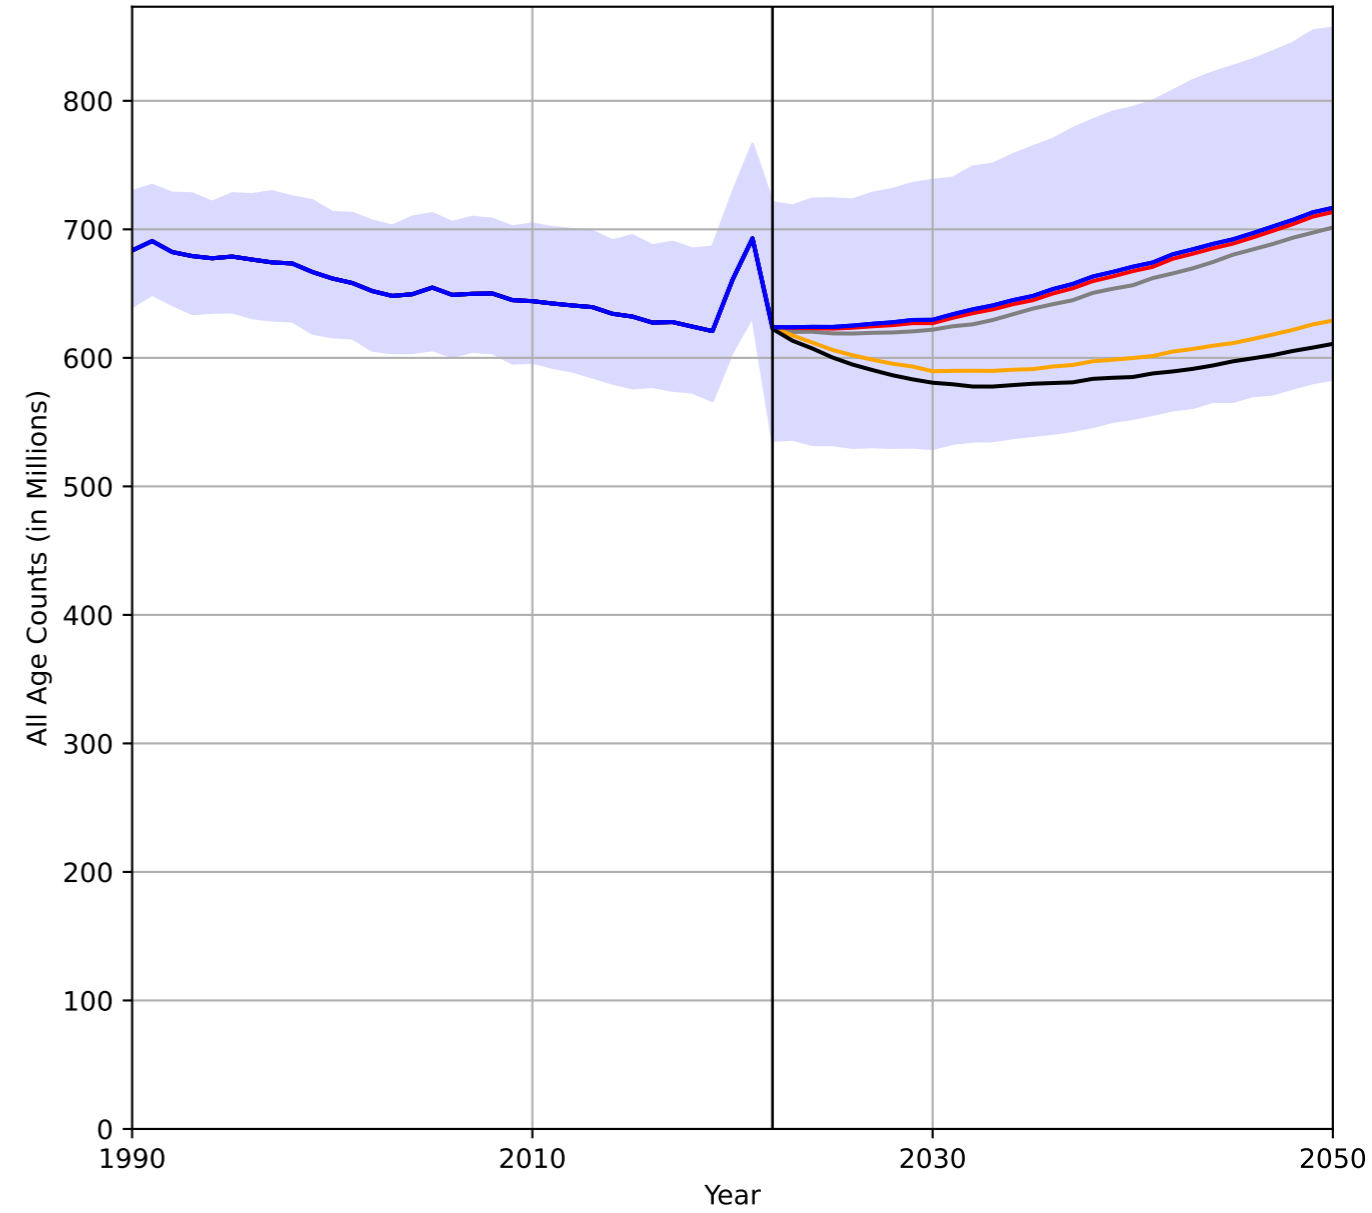

# Southeast Asia, East Asia, And Oceania

Supplemental Results Figure S10. All-cause age standardised DALY rates (A) and all age DALY counts (B), for the past and for five future scenarios, 1990–2050

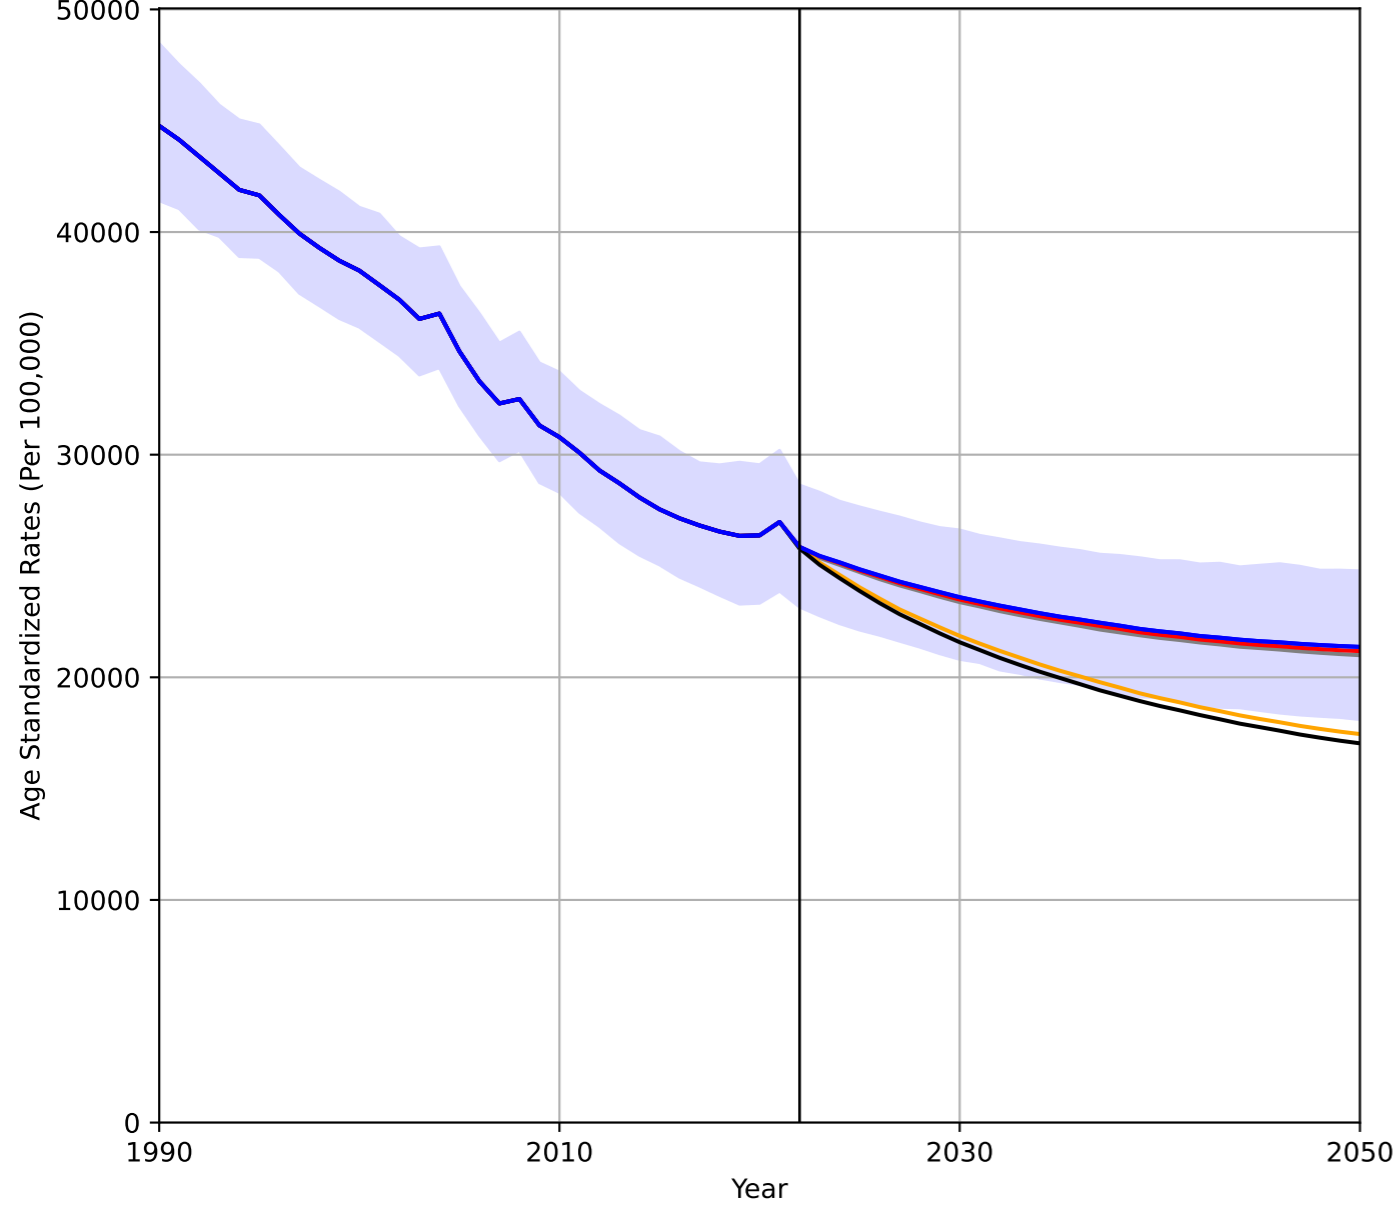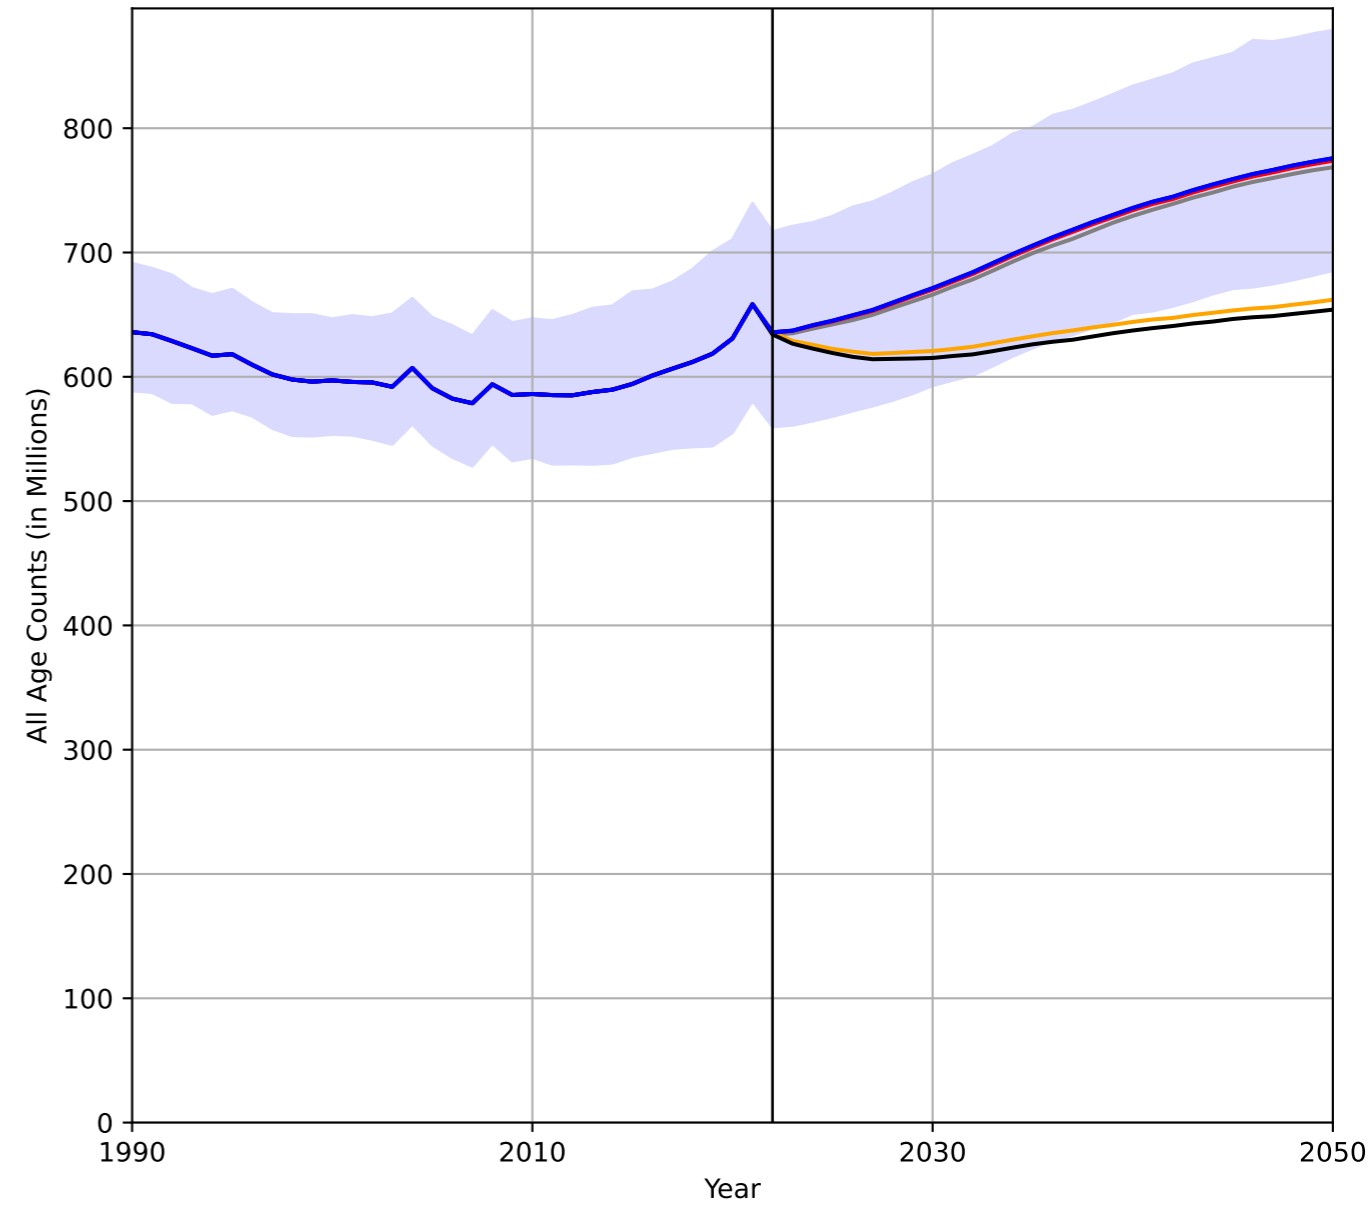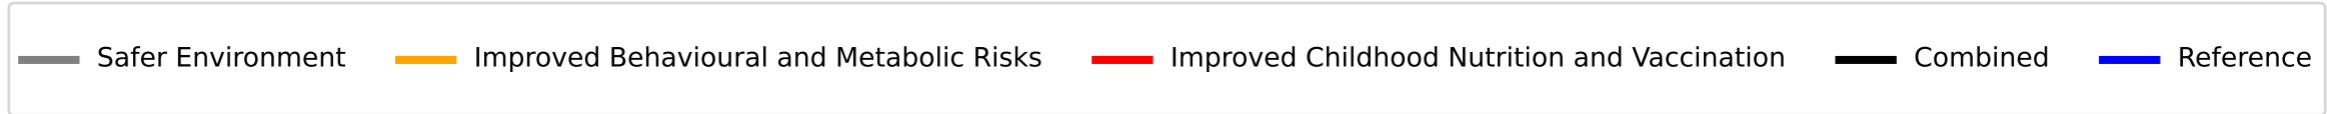

# Sub-Saharan Africa

Supplemental Results Figure S10. All-cause age standardised DALY rates (A) and all age DALY counts (B), for the past and for five future scenarios, 1990–2050

1622

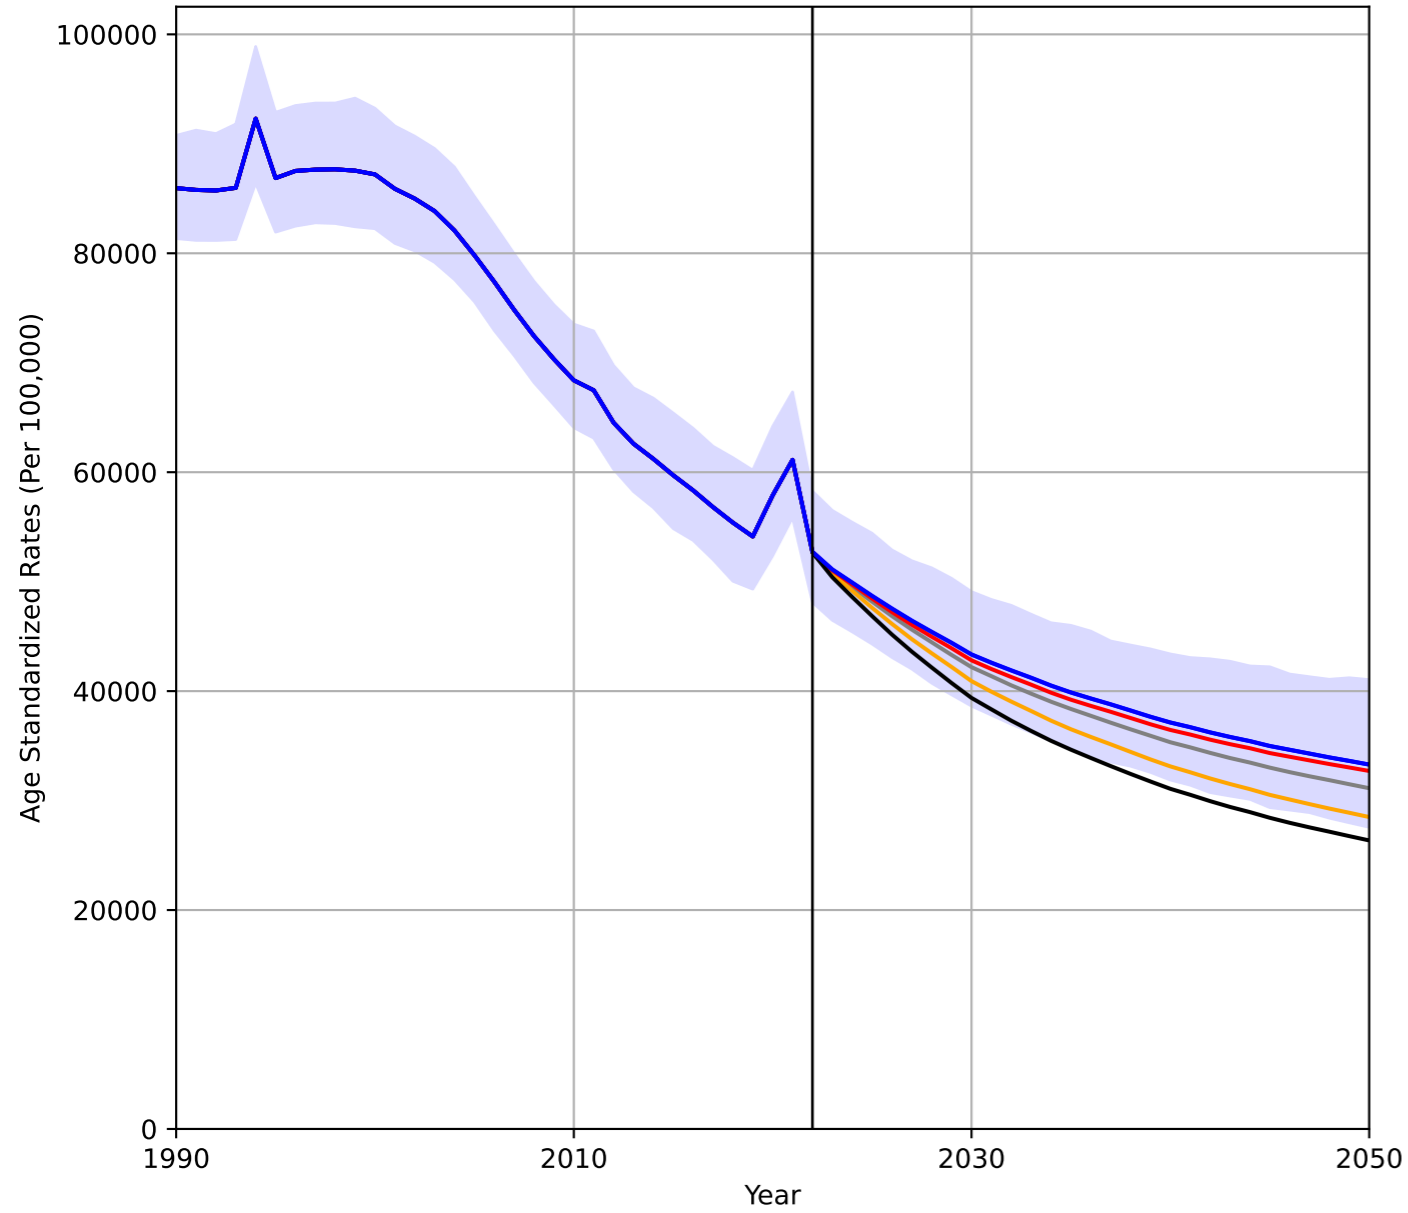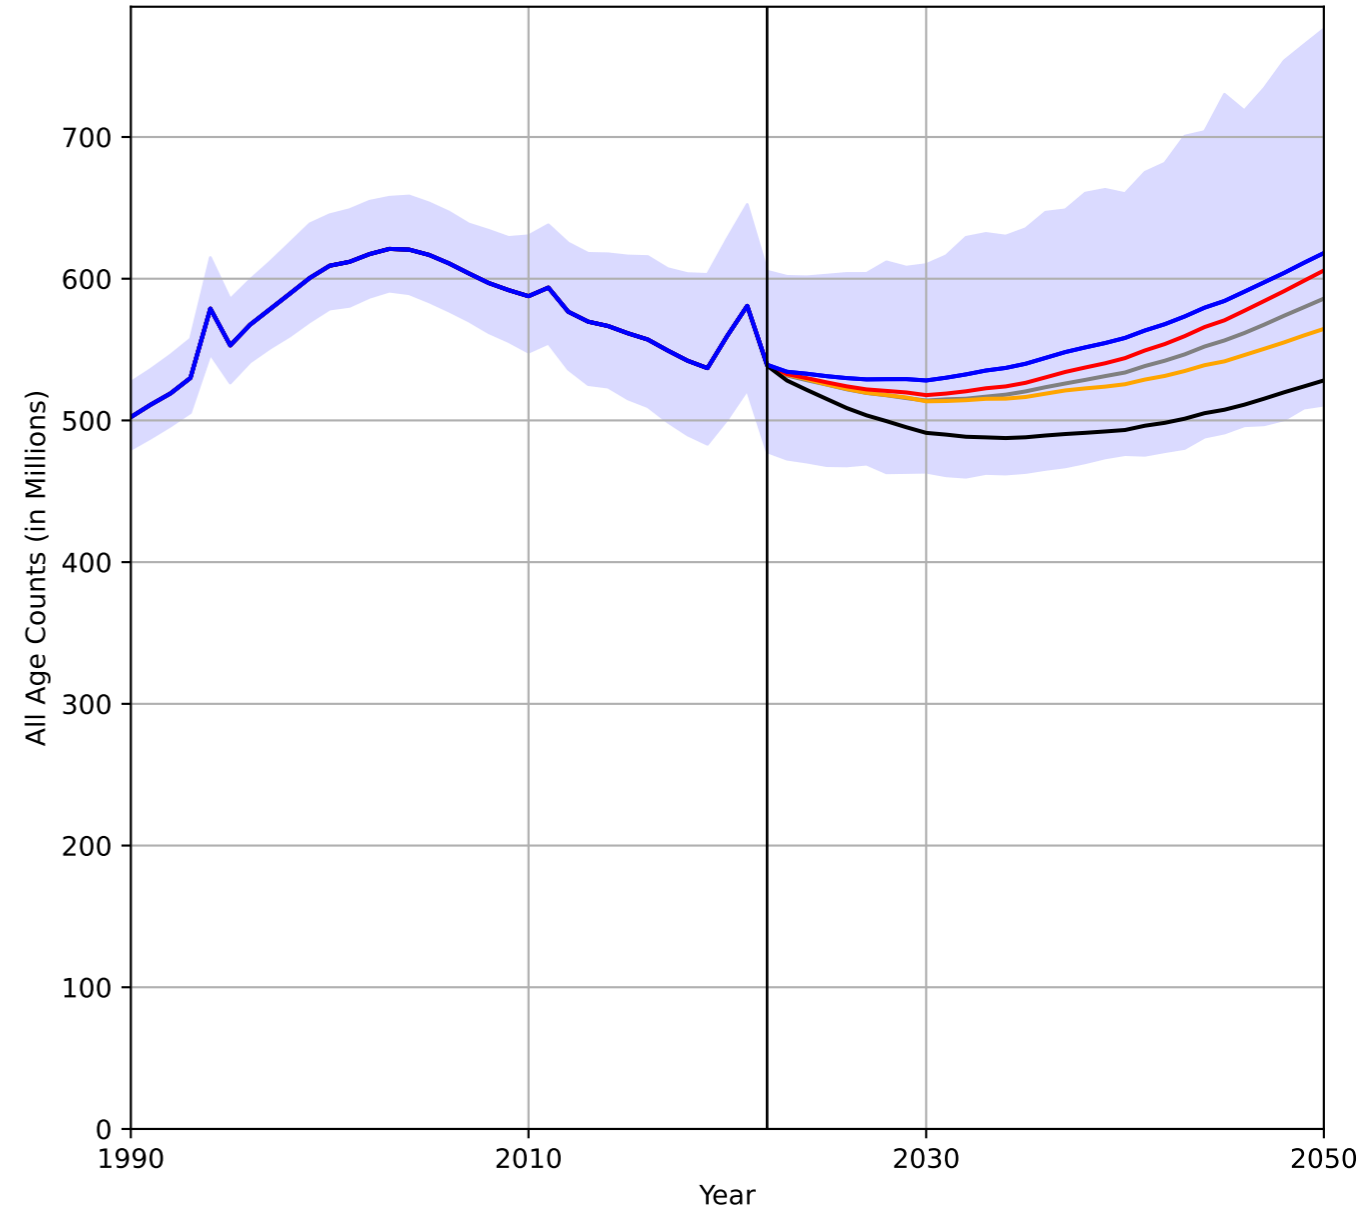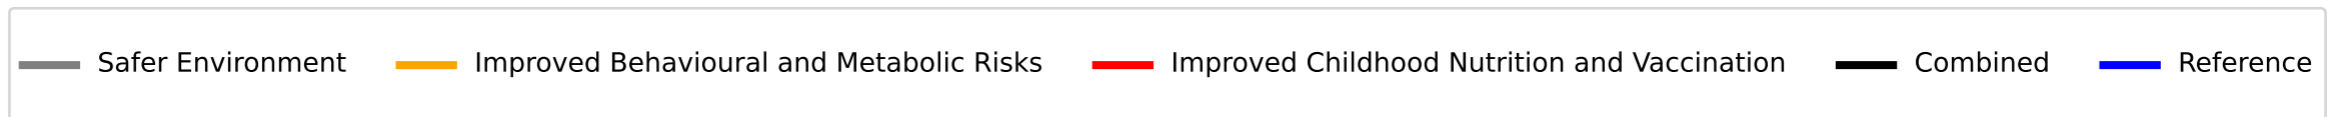

# Central Asia

Supplemental Results Figure S10. All-cause age standardised DALY rates (A) and all age DALY counts (B), for the past and for five future scenarios, 1990–2050

1623

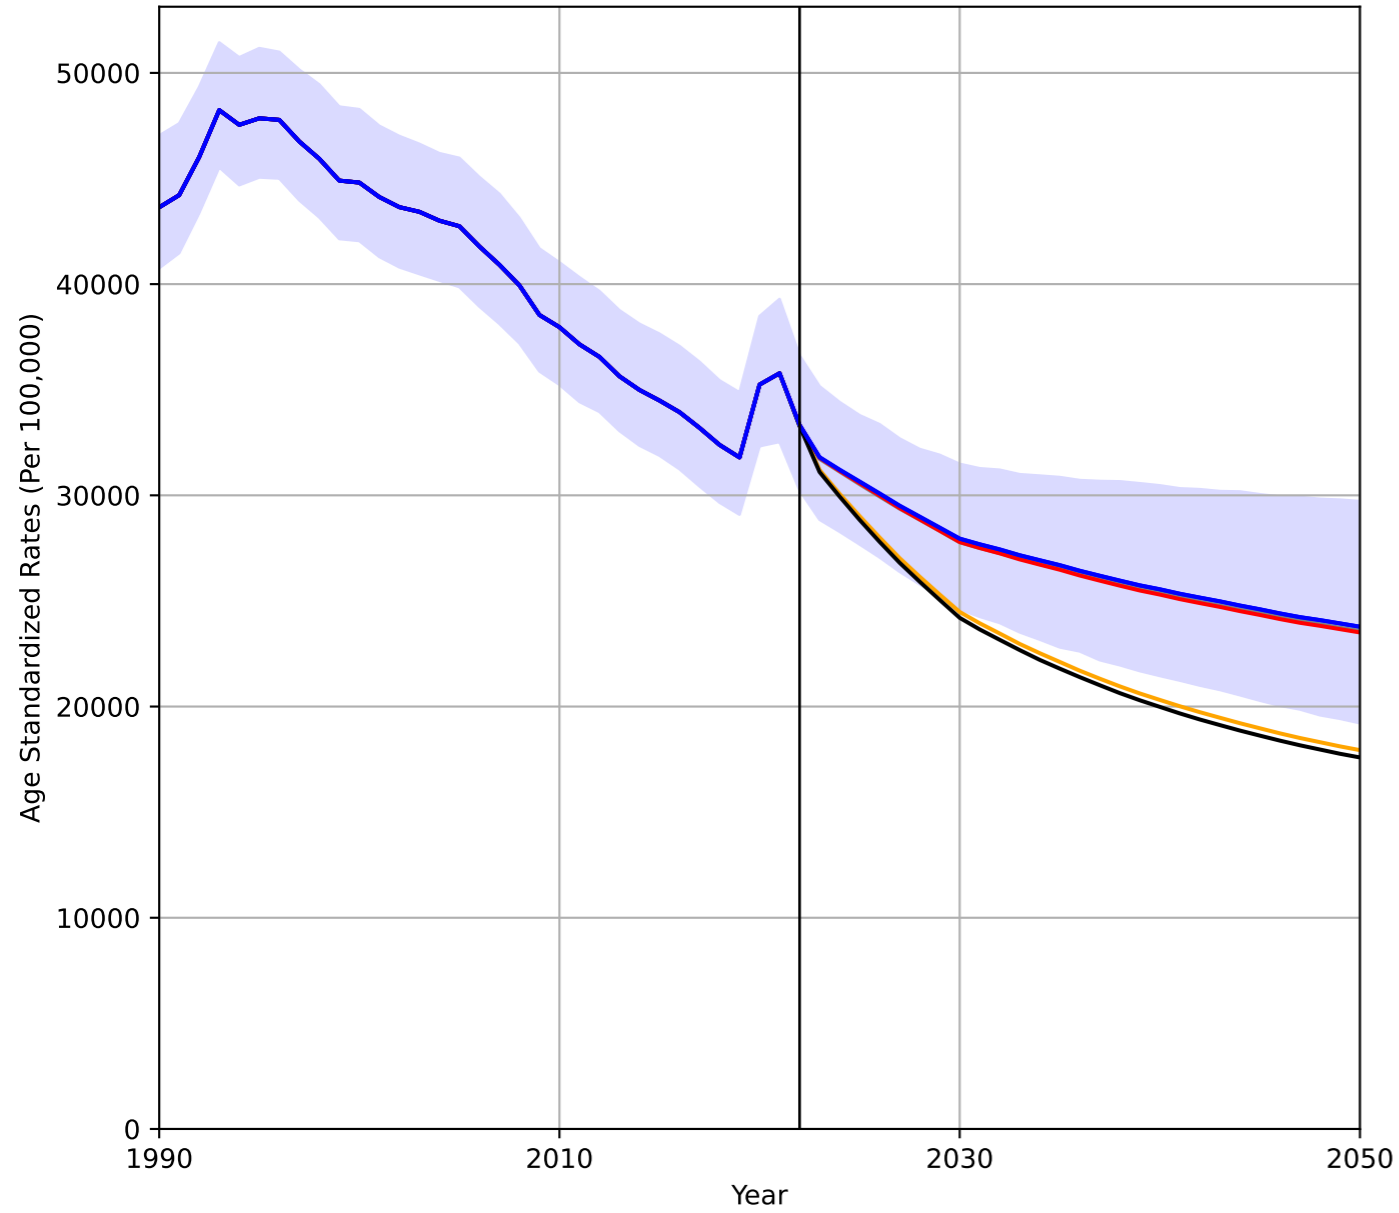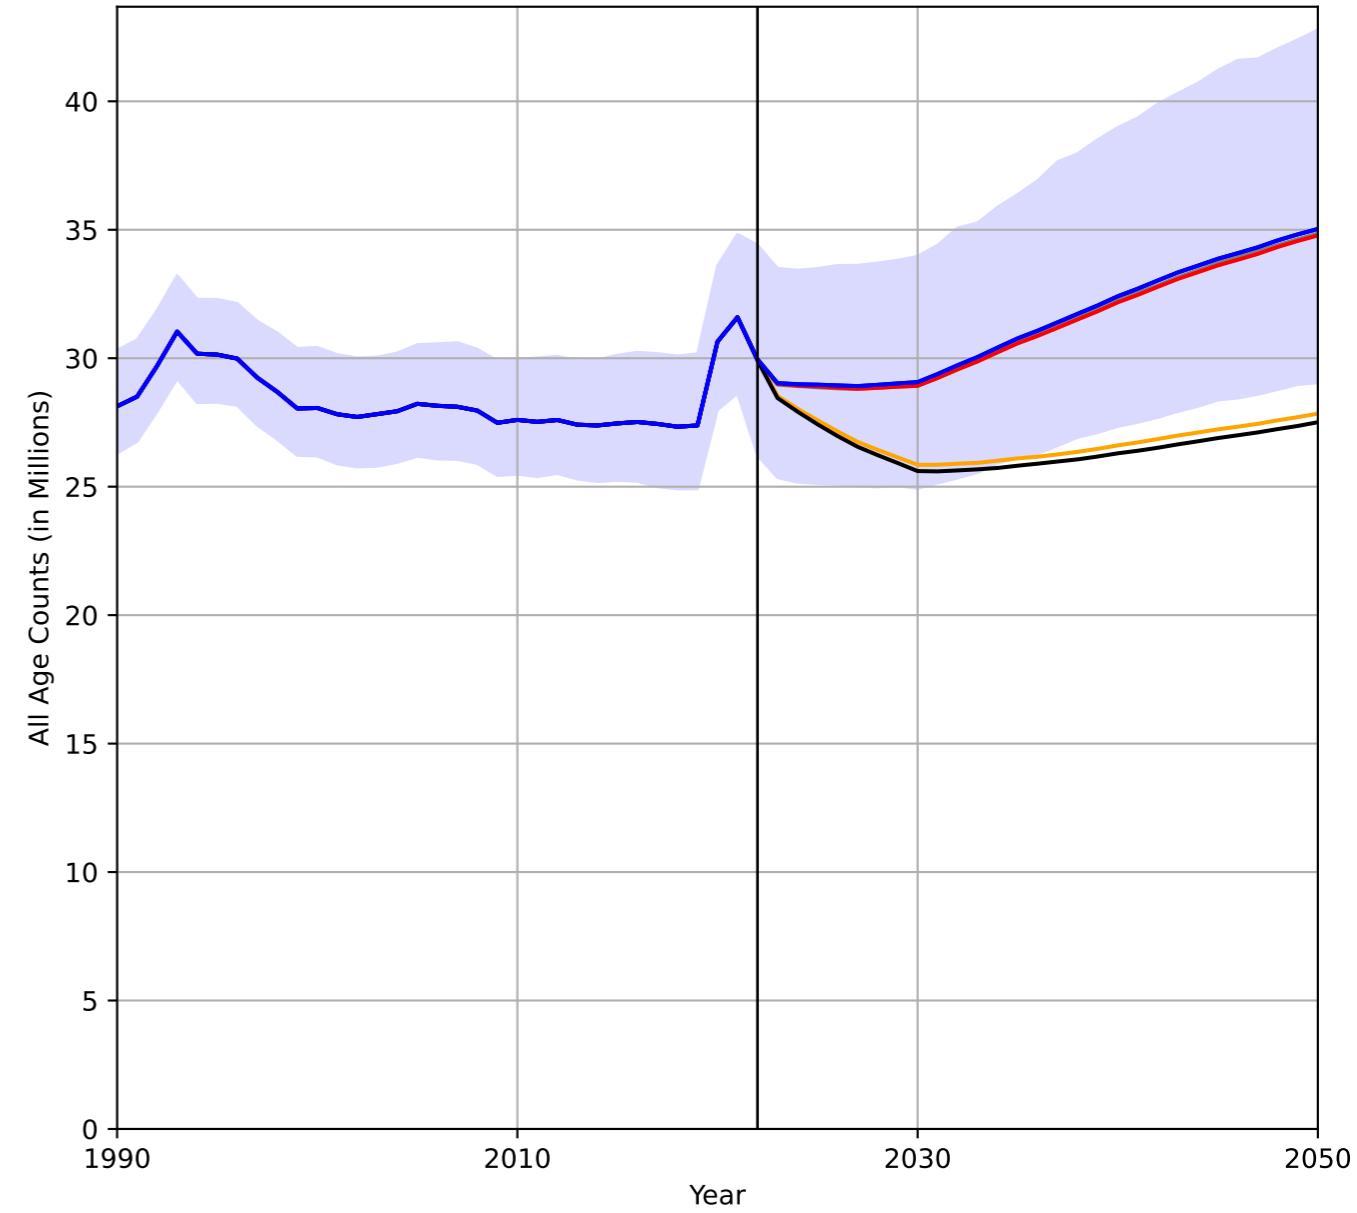



# Central Europe

Supplemental Results Figure S10. All-cause age standardised DALY rates (A) and all age DALY counts (B), for the past and for five future scenarios, 1990–2050

1624

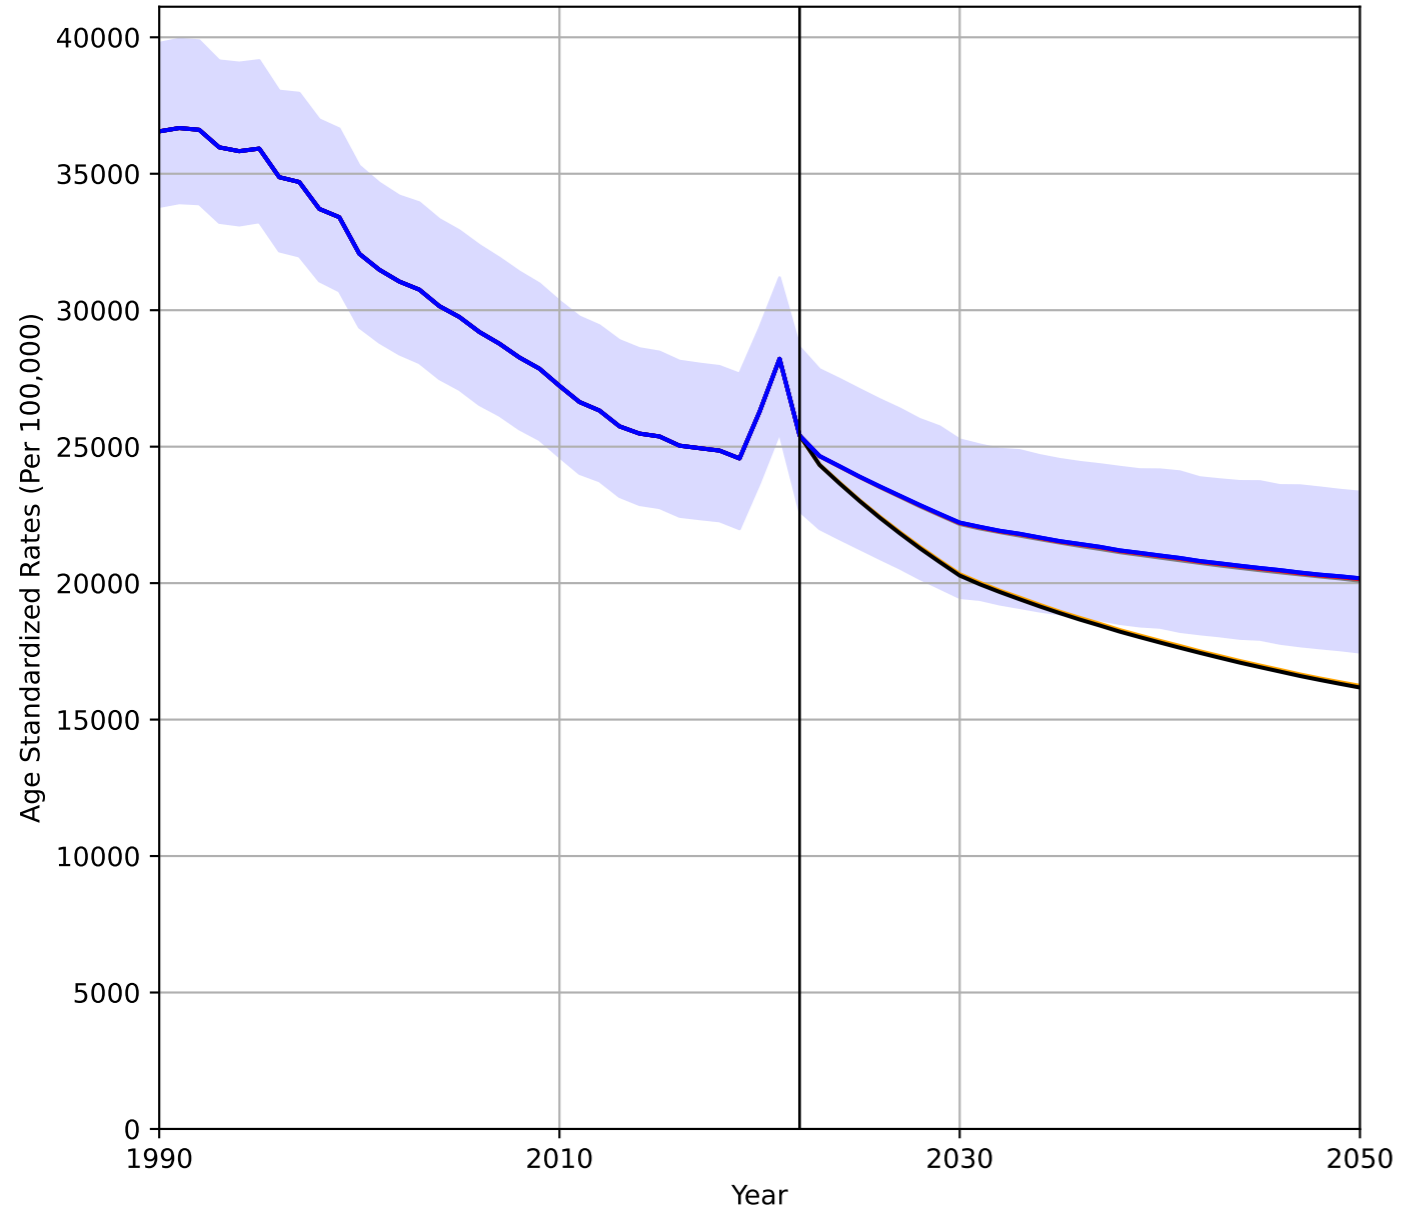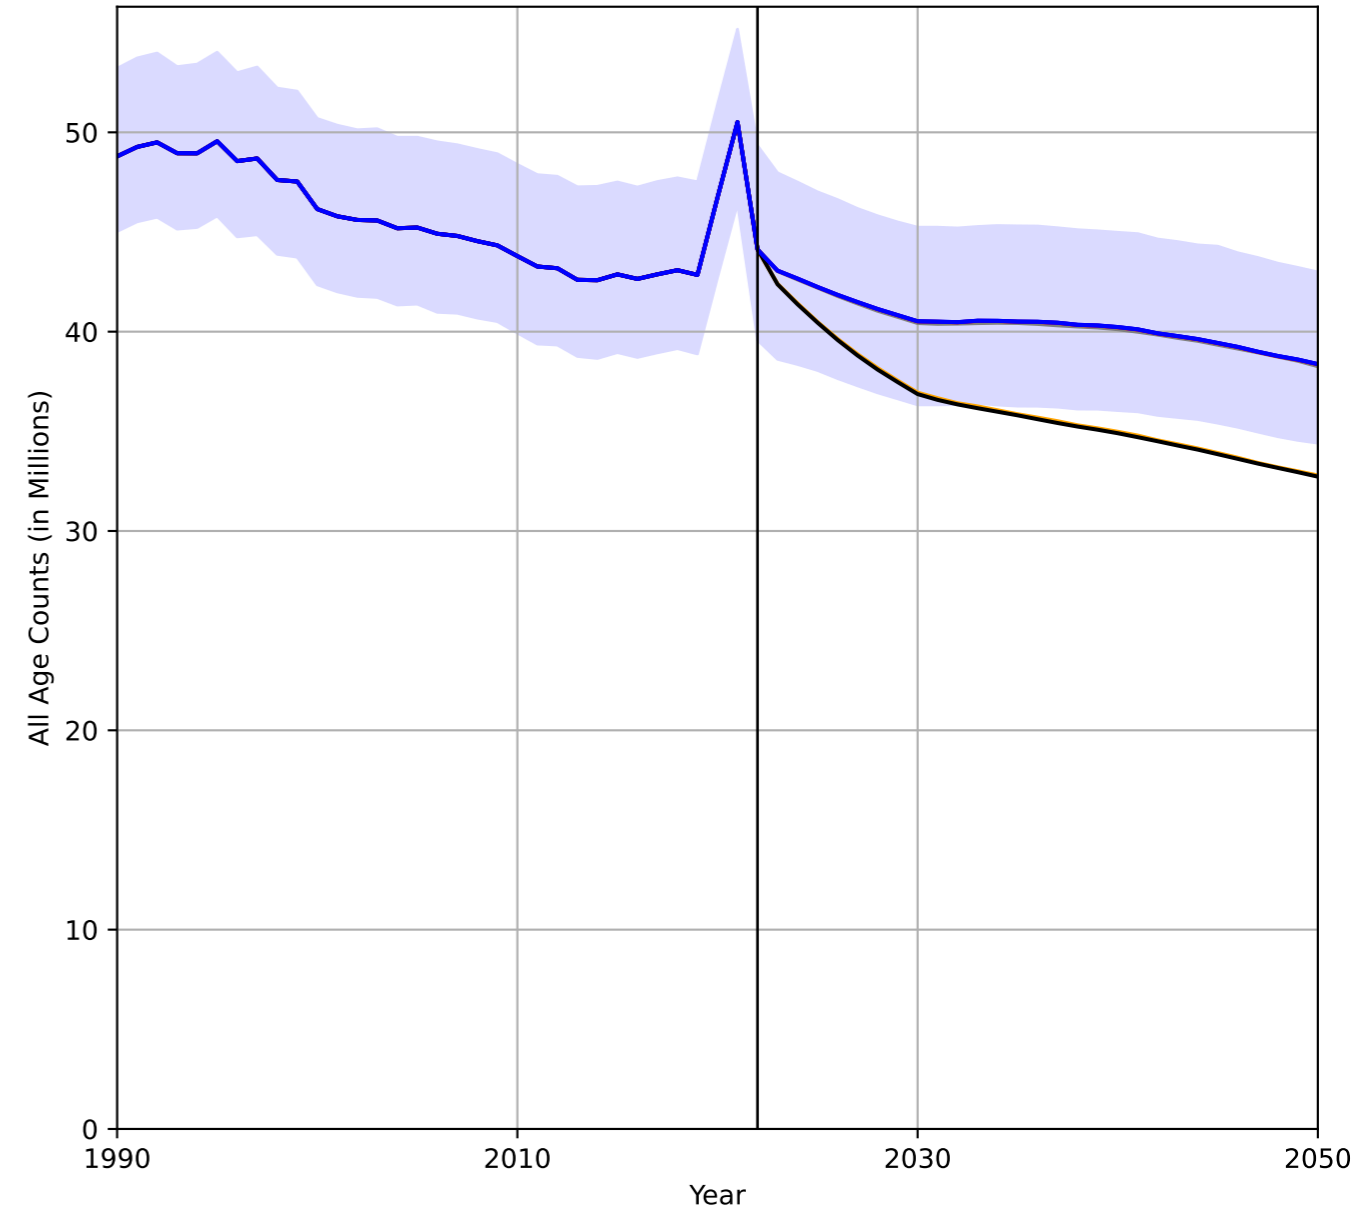

# Eastern Europe

Supplemental Results Figure S10. All-cause age standardised DALY rates (A) and all age DALY counts (B), for the past and for five future scenarios, 1990–2050

1625

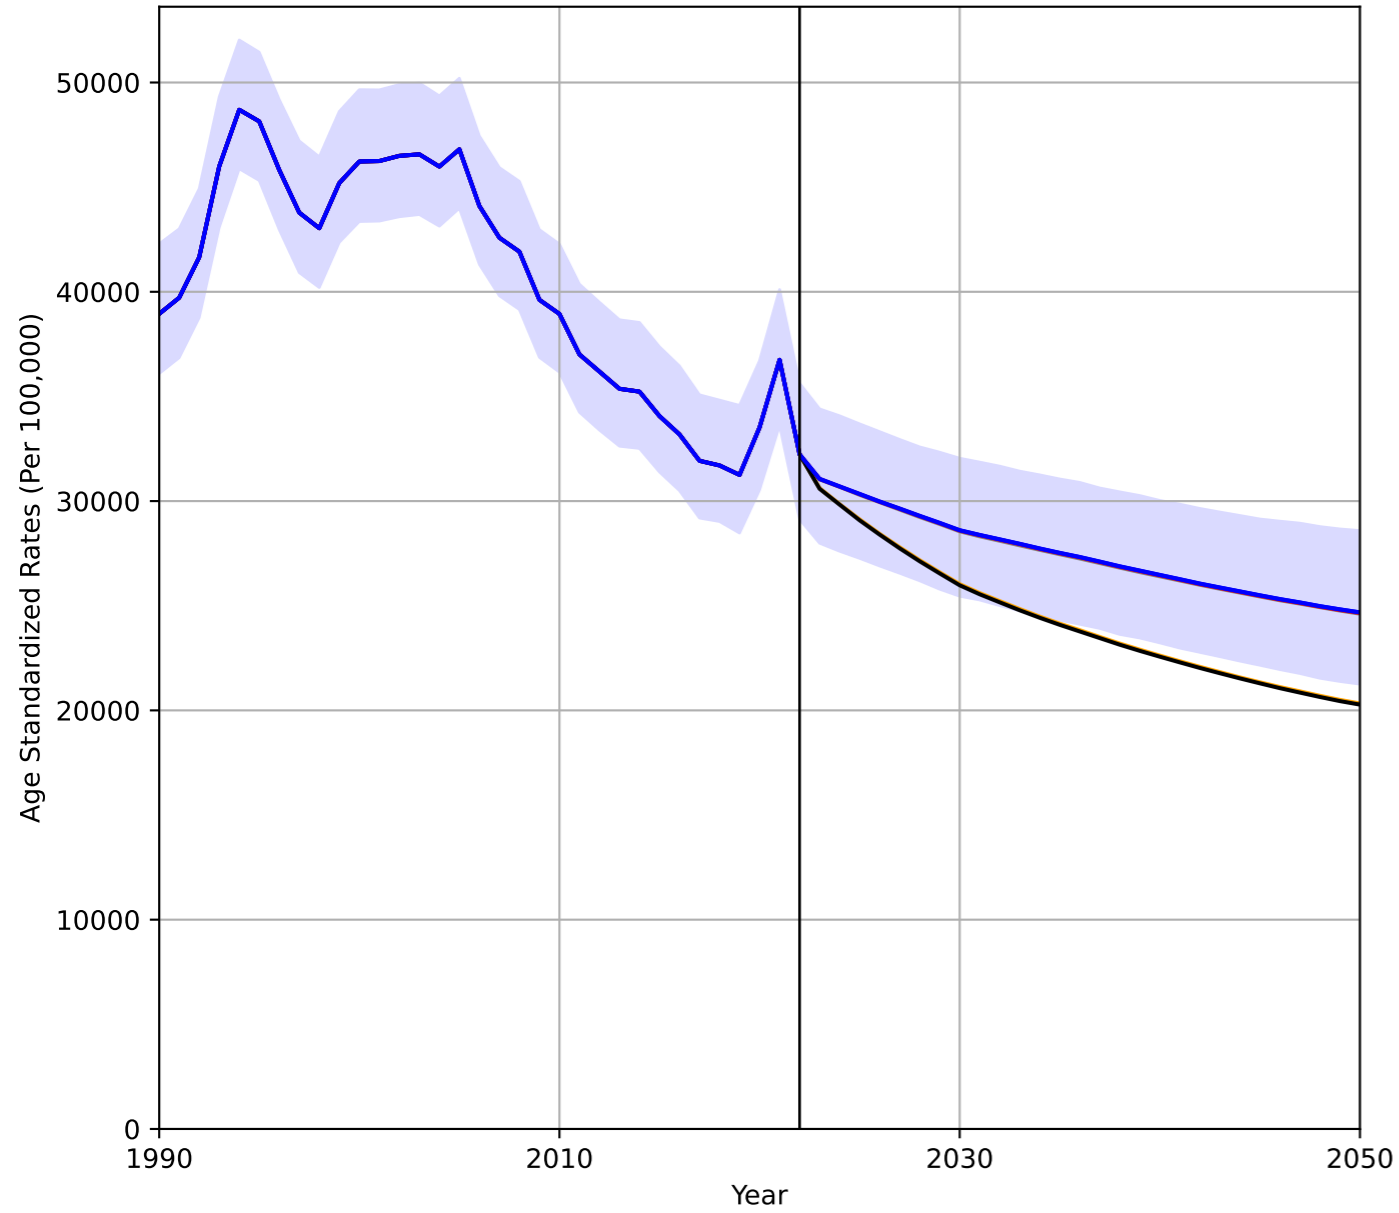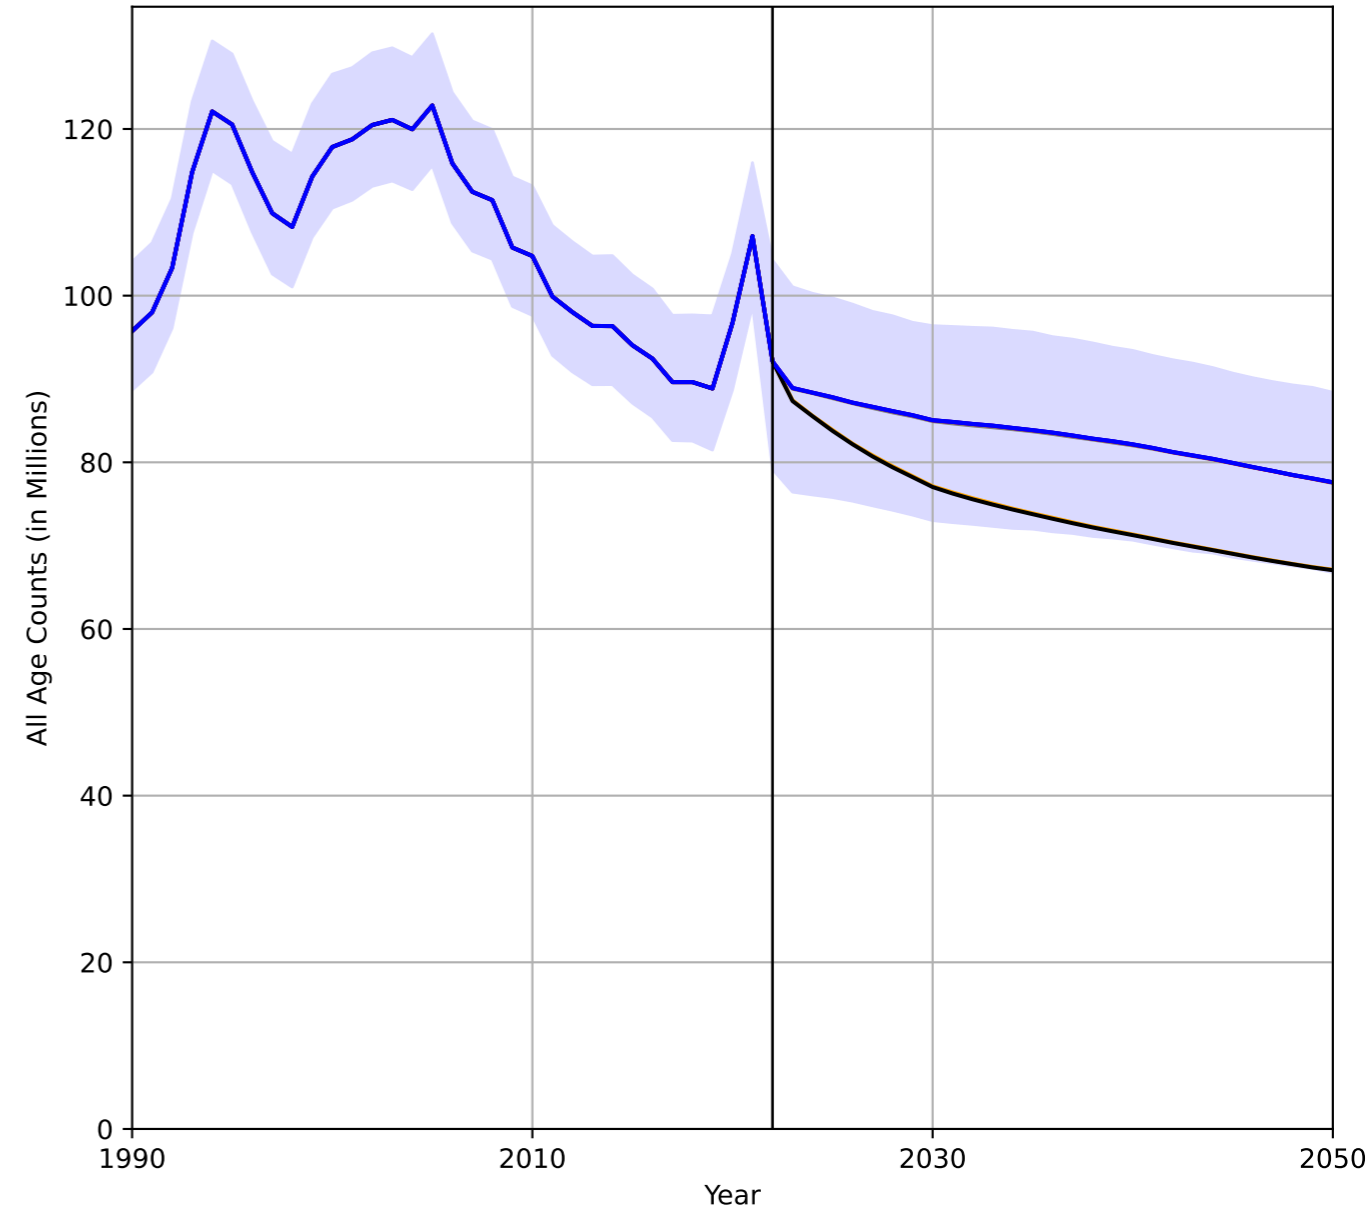

# Australasia

Supplemental Results Figure S10. All-cause age standardised DALY rates (A) and all age DALY counts (B), for the past and for five future scenarios, 1990–2050

1626

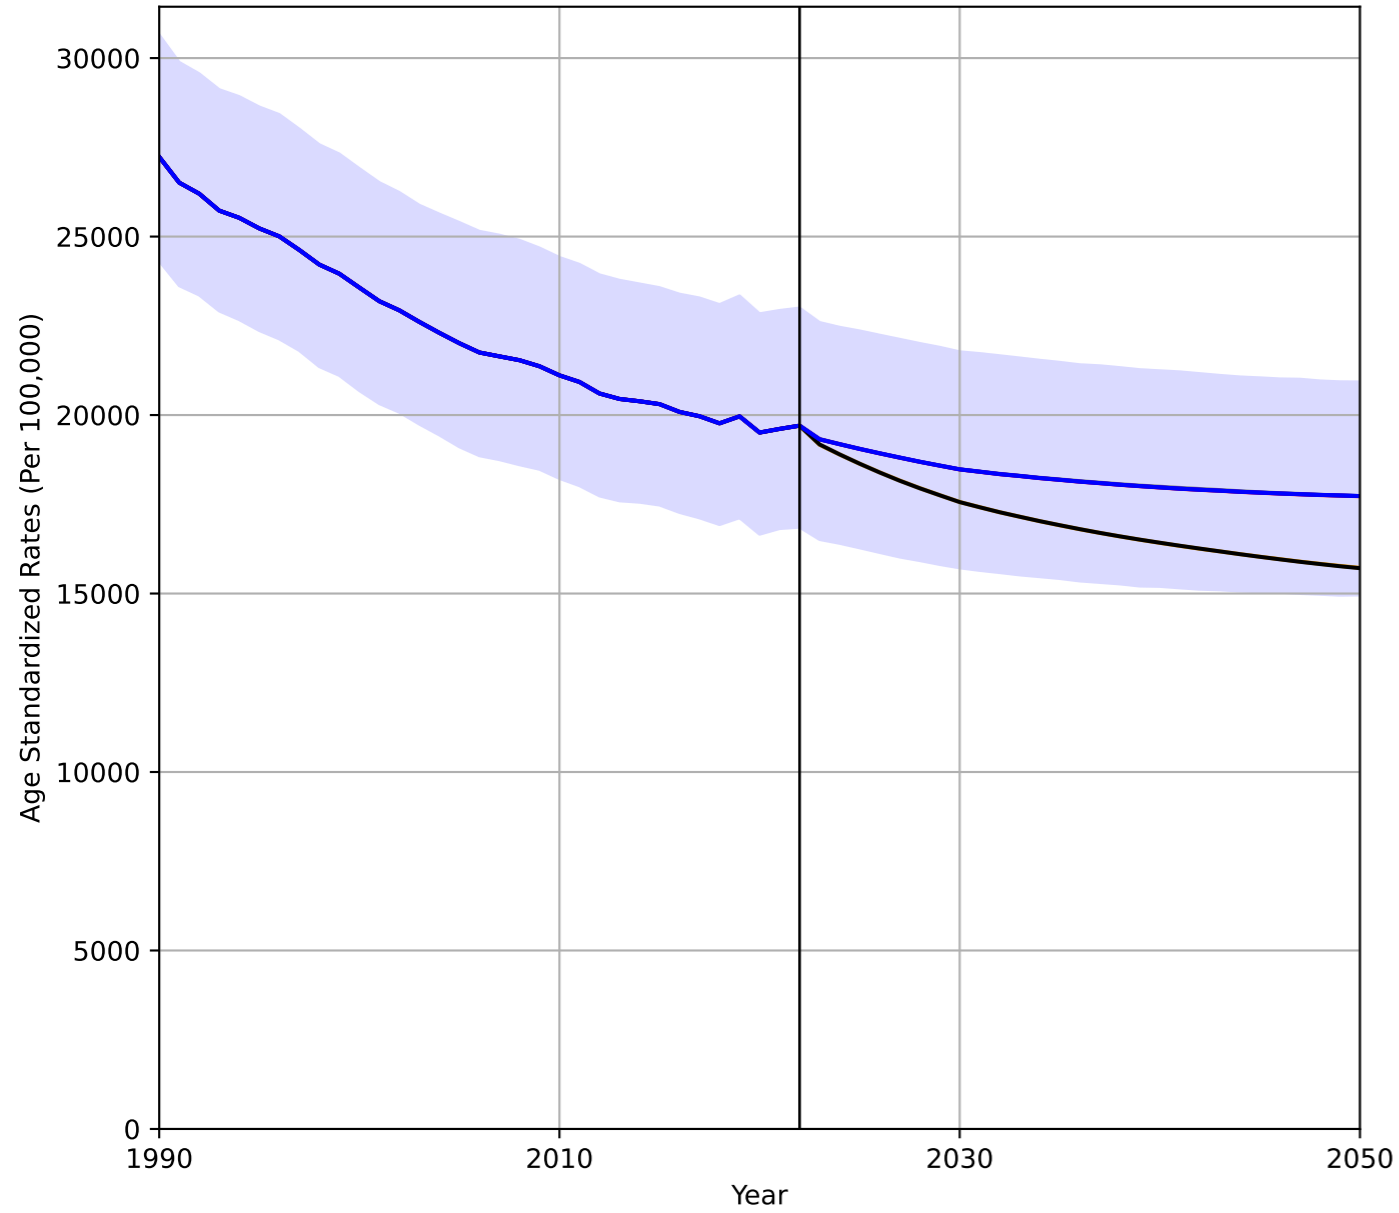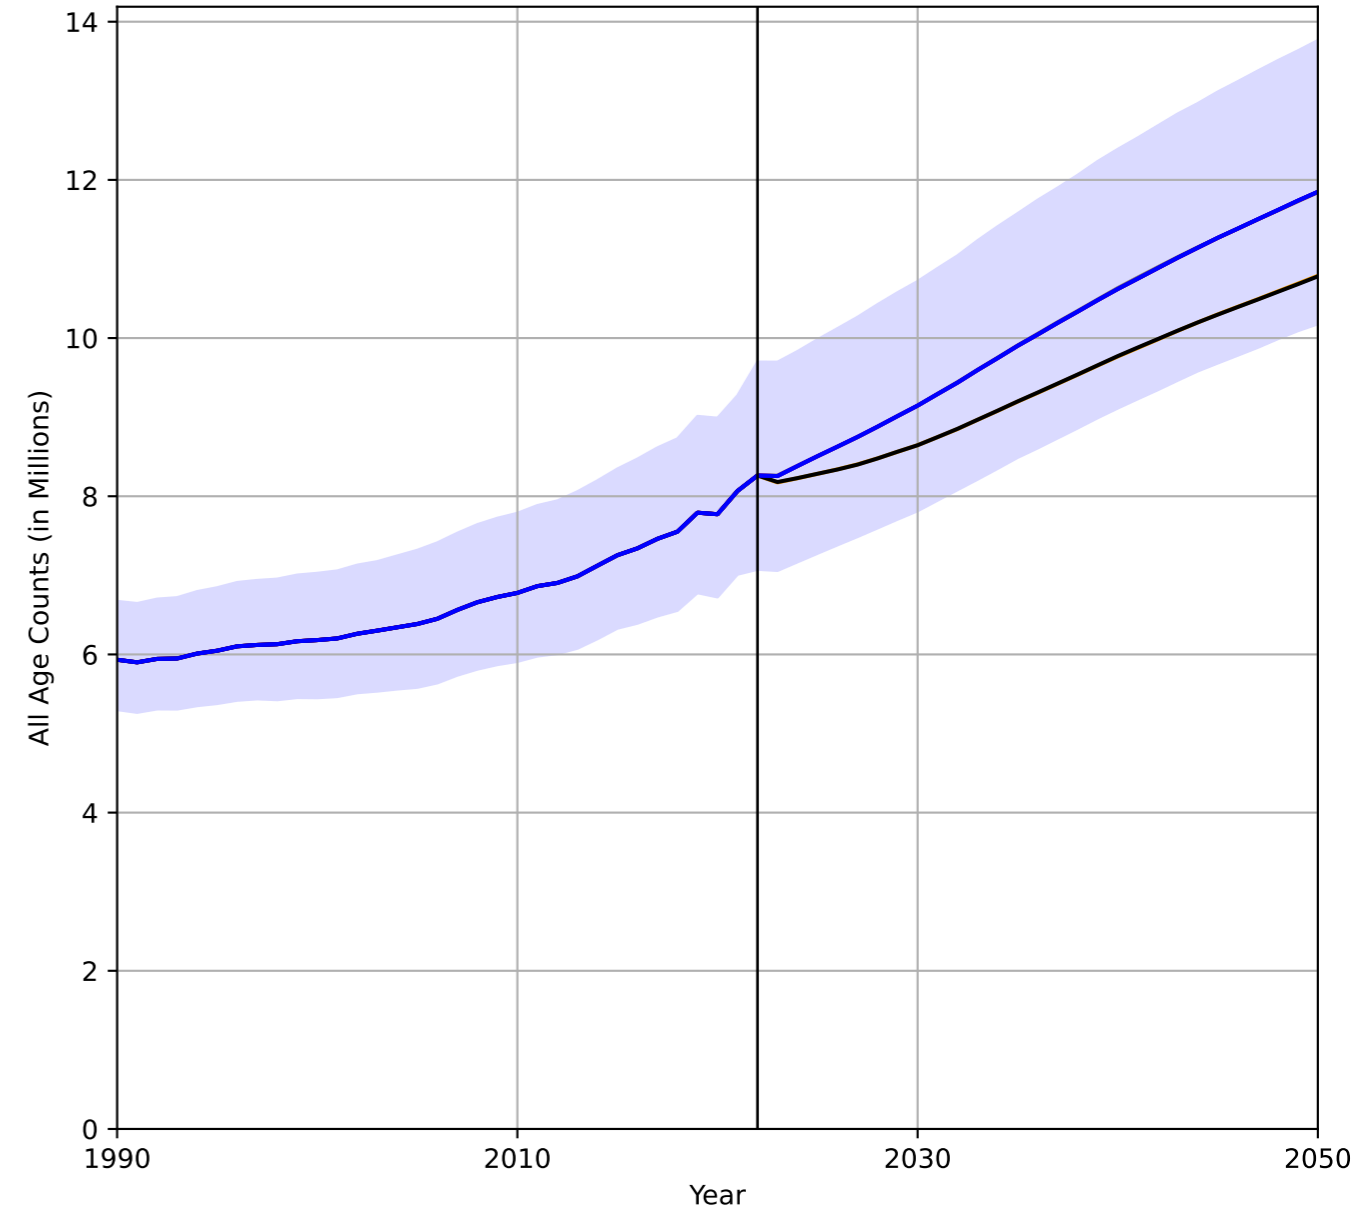

# High-Income Asia Pacific

Supplemental Results Figure S10. All-cause age standardised DALY rates (A) and all age DALY counts (B), for the past and for five future scenarios, 1990–2050

1627

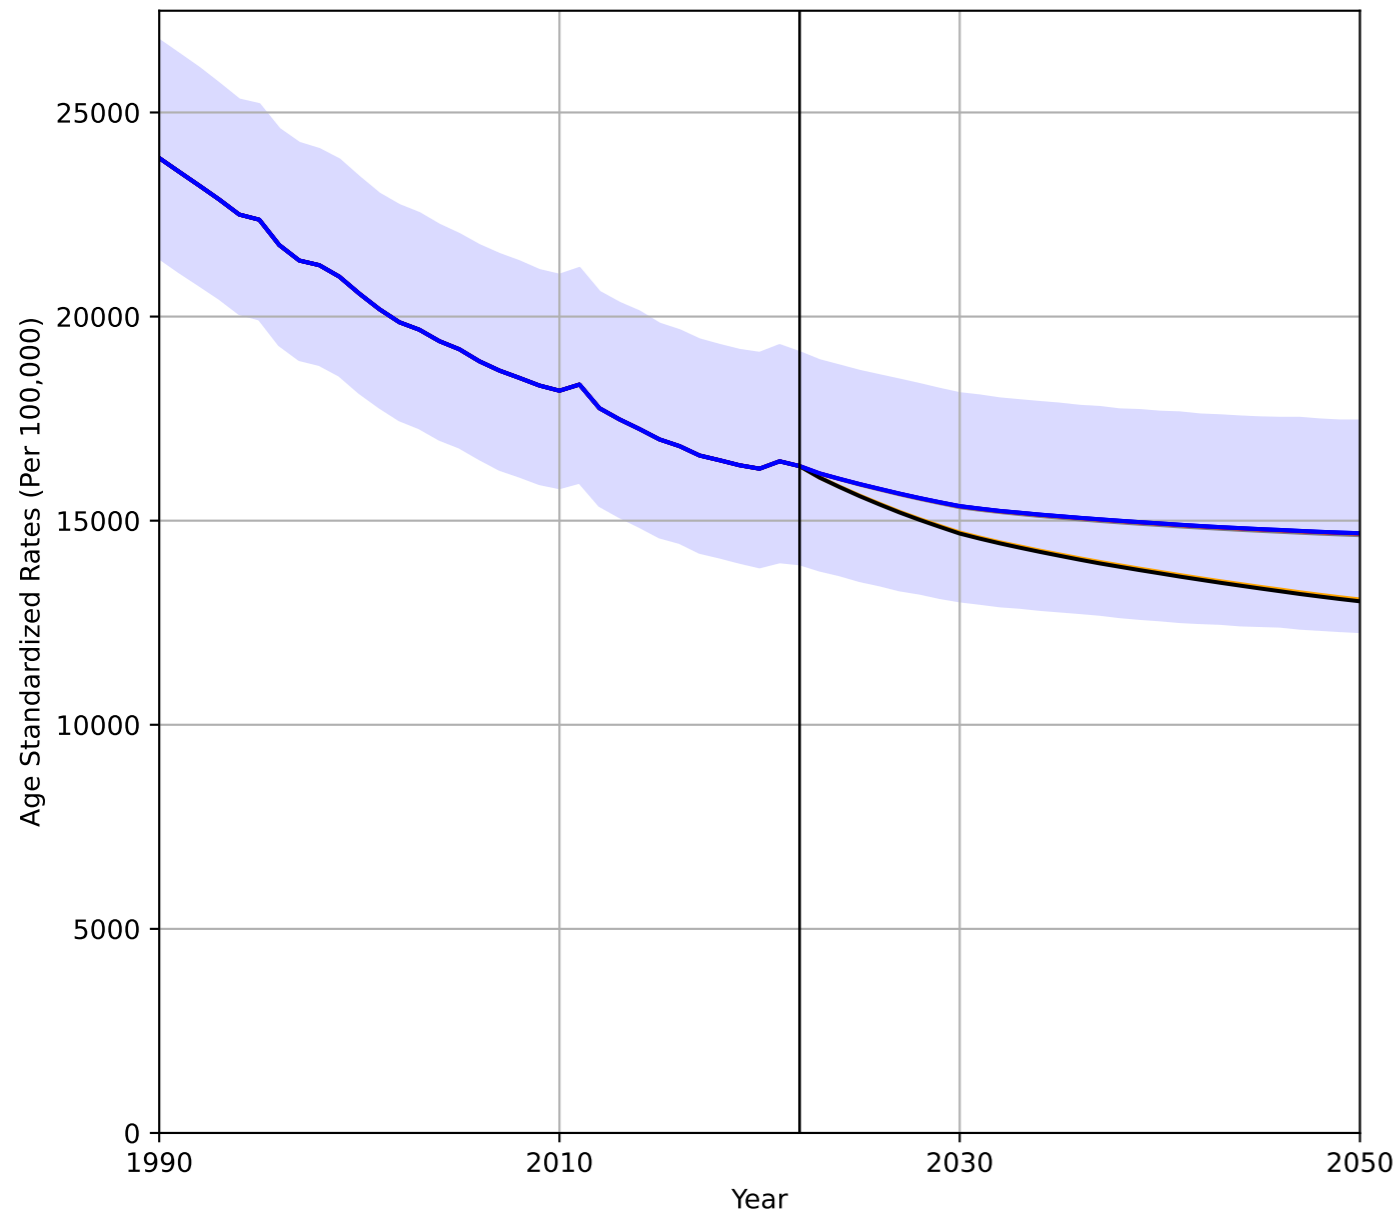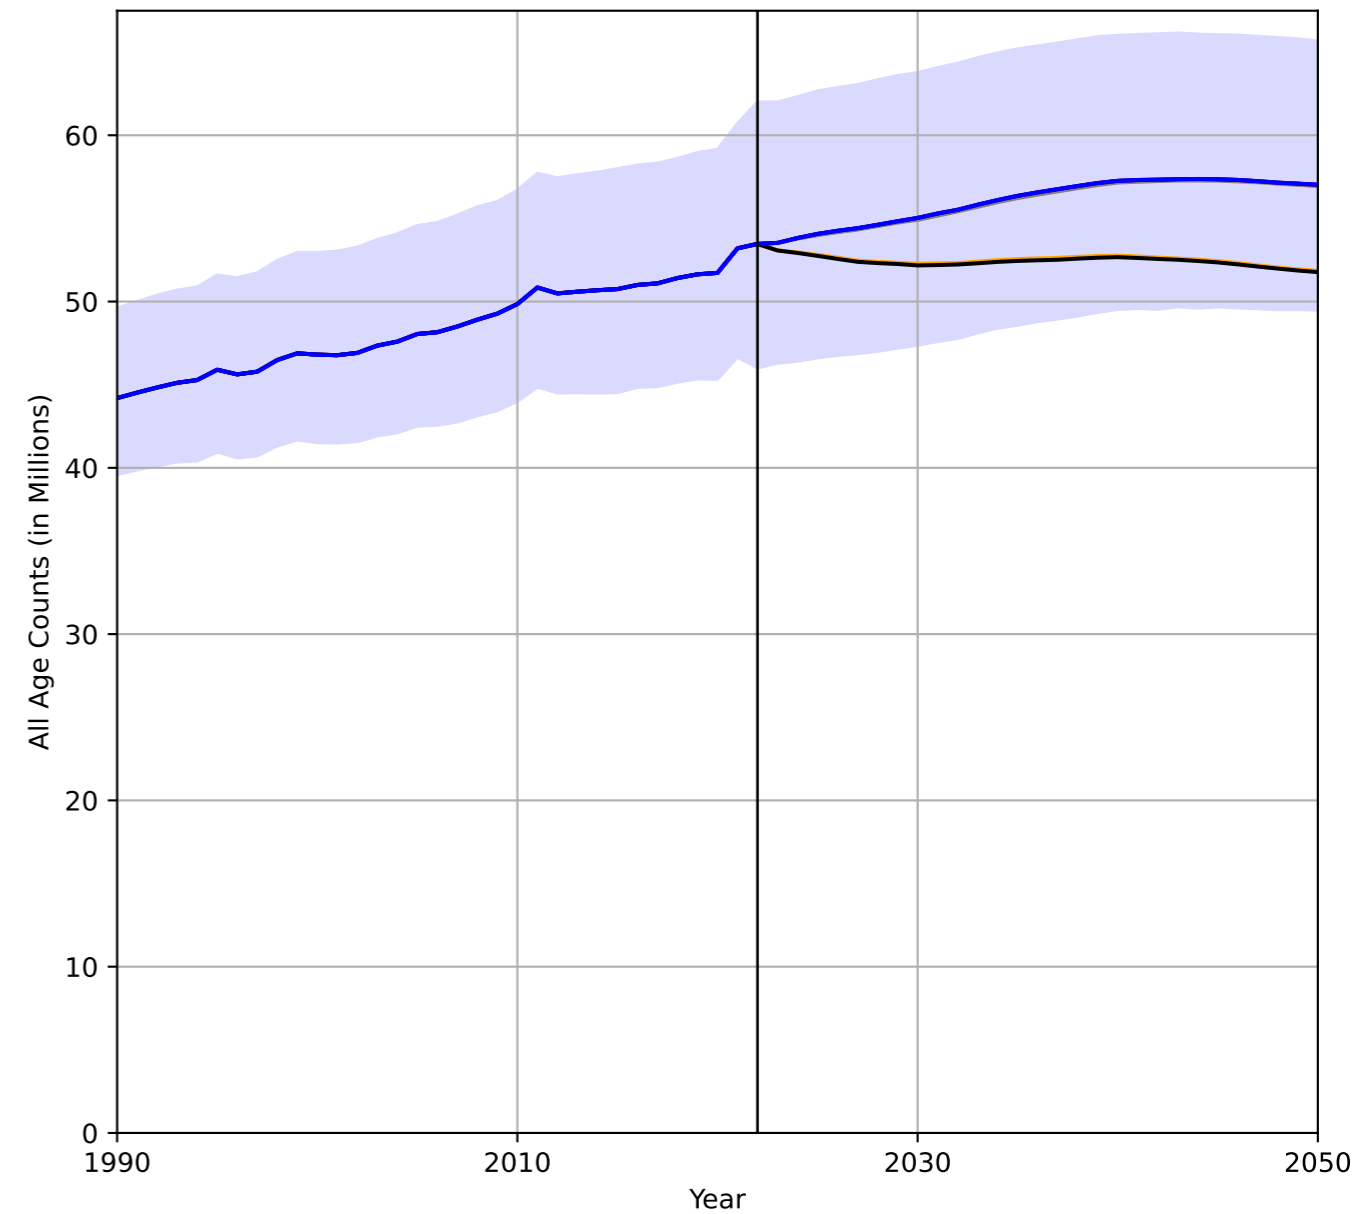

# High-Income North America

Supplemental Results Figure S10. All-cause age standardised DALY rates (A) and all age DALY counts (B), for the past and for five future scenarios, 1990–2050

1628

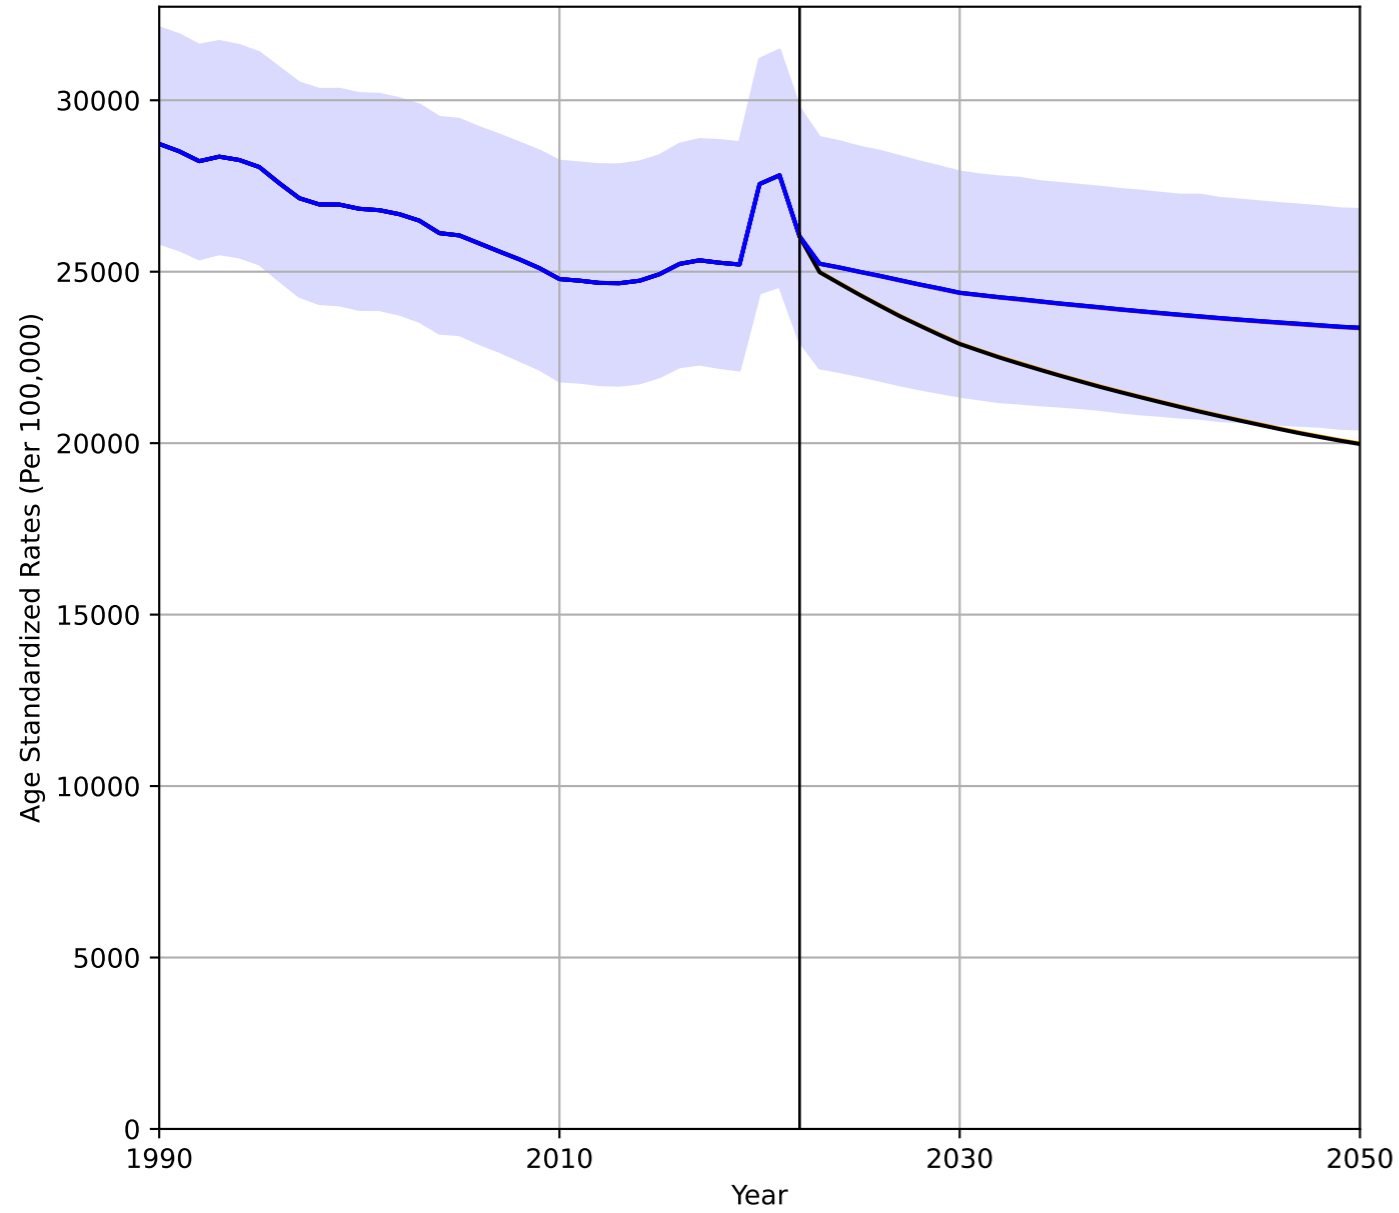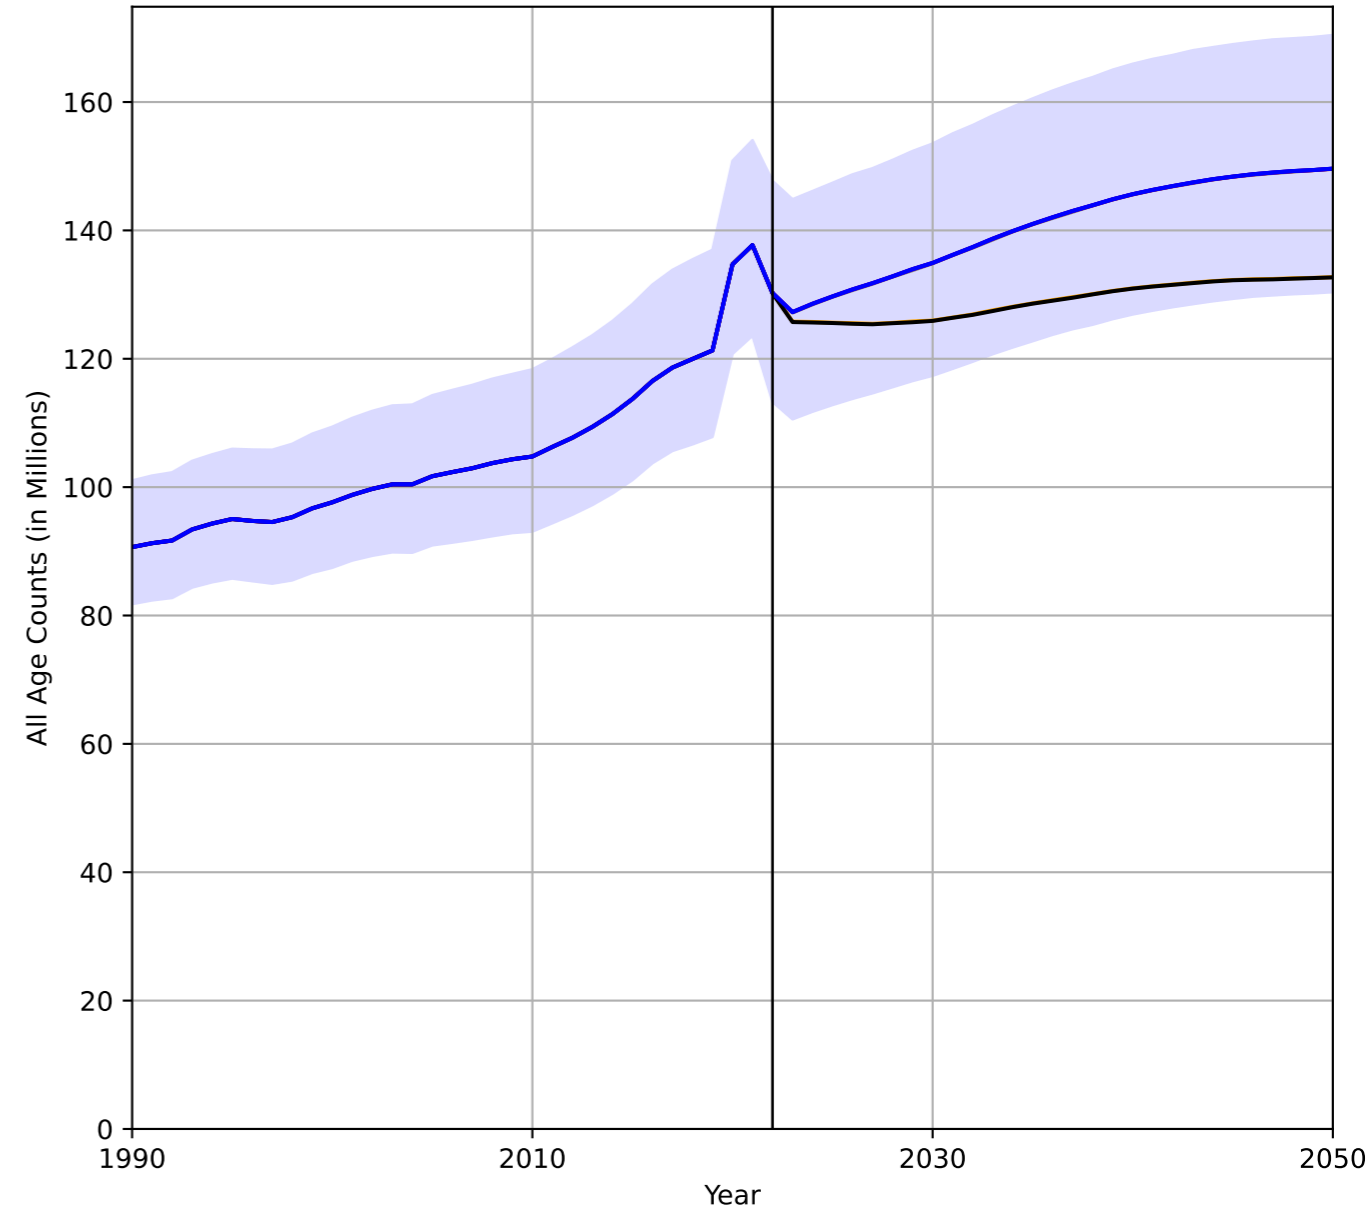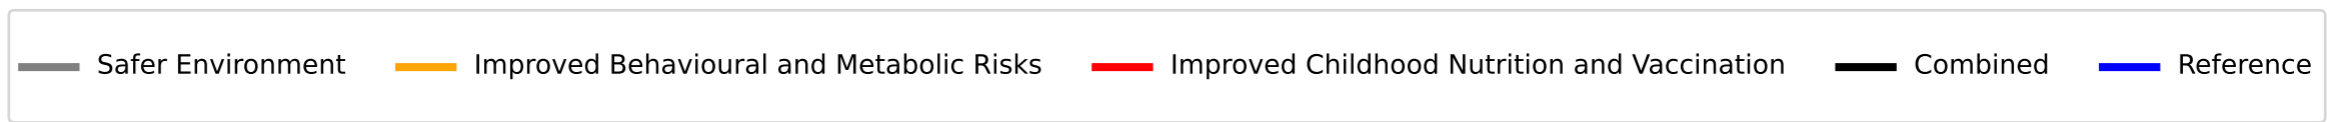

# Southern Latin America

Supplemental Results Figure S10. All-cause age standardised DALY rates (A) and all age DALY counts (B), for the past and for five future scenarios, 1990–2050

1629

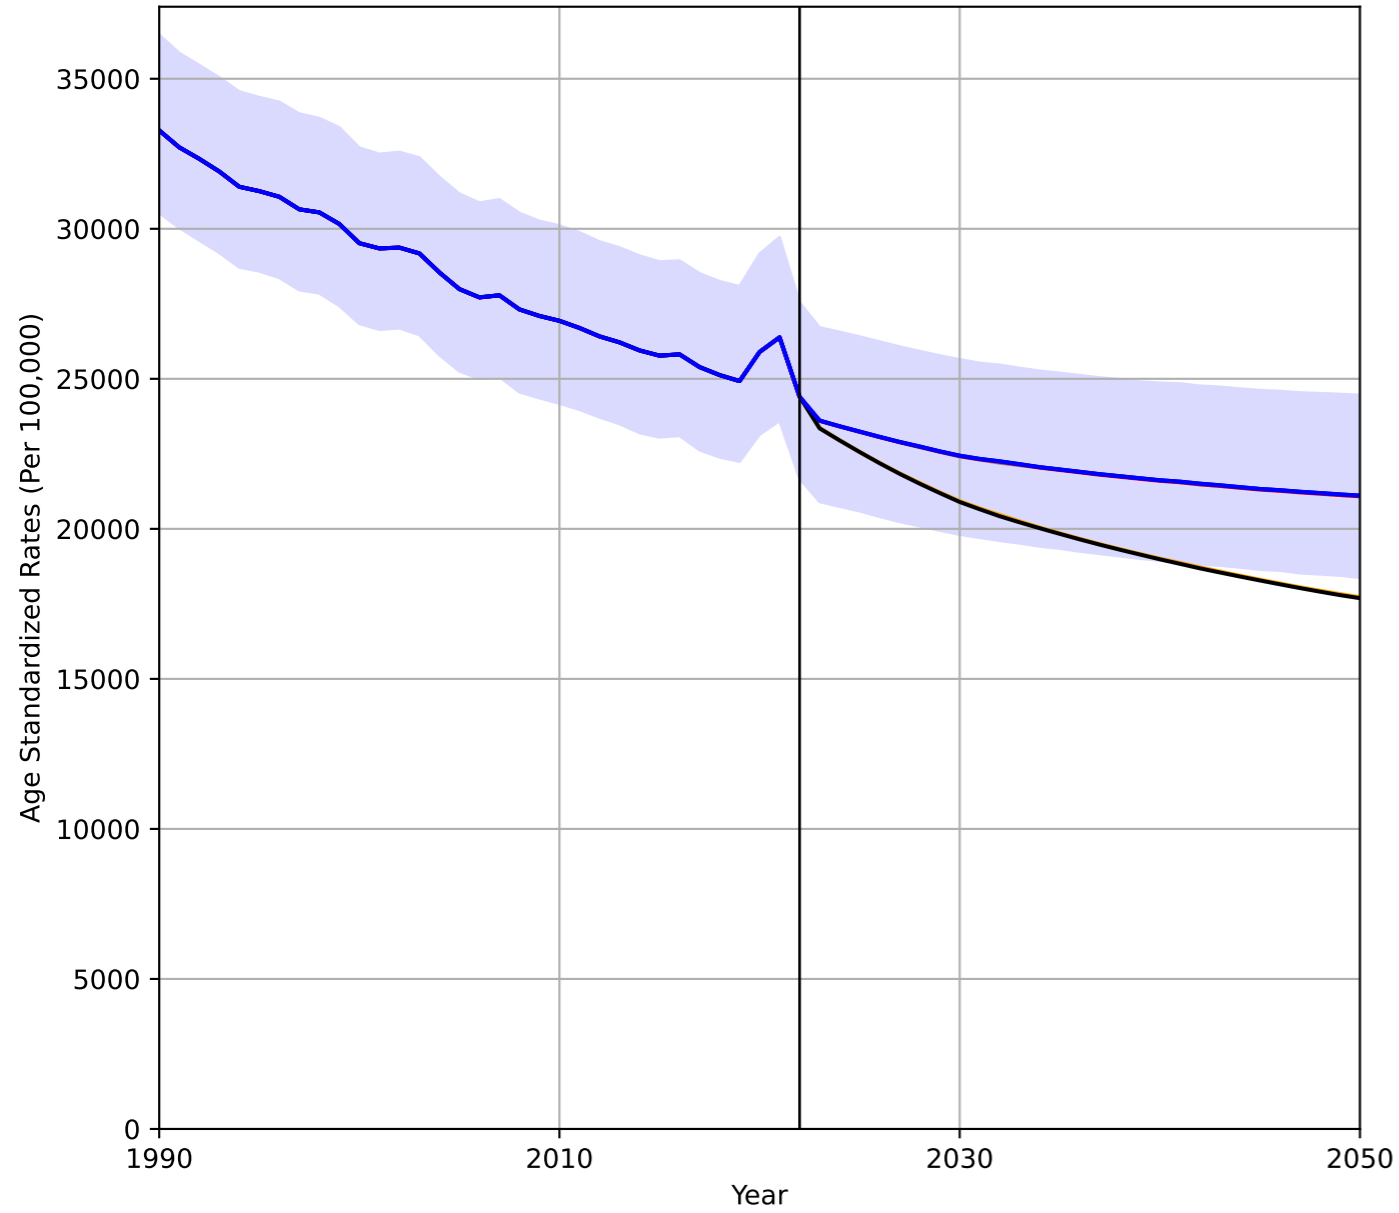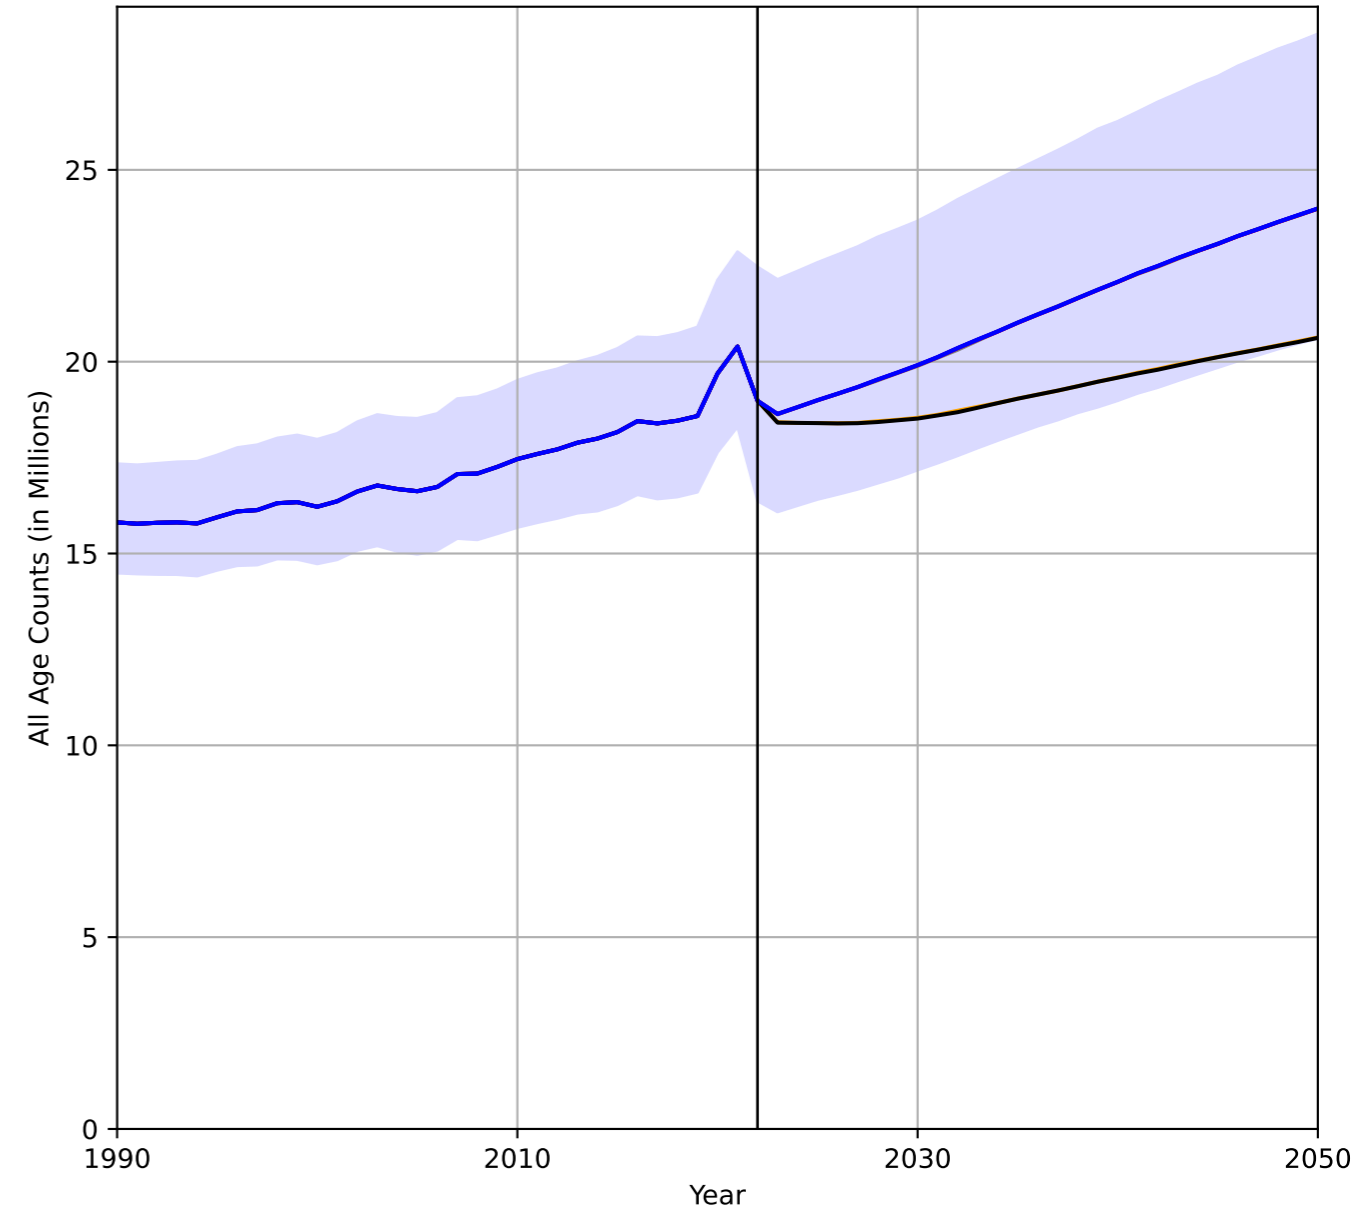

# Western Europe

Supplemental Results Figure S10. All-cause age standardised DALY rates (A) and all age DALY counts (B), for the past and for five future scenarios, 1990–2050

1630

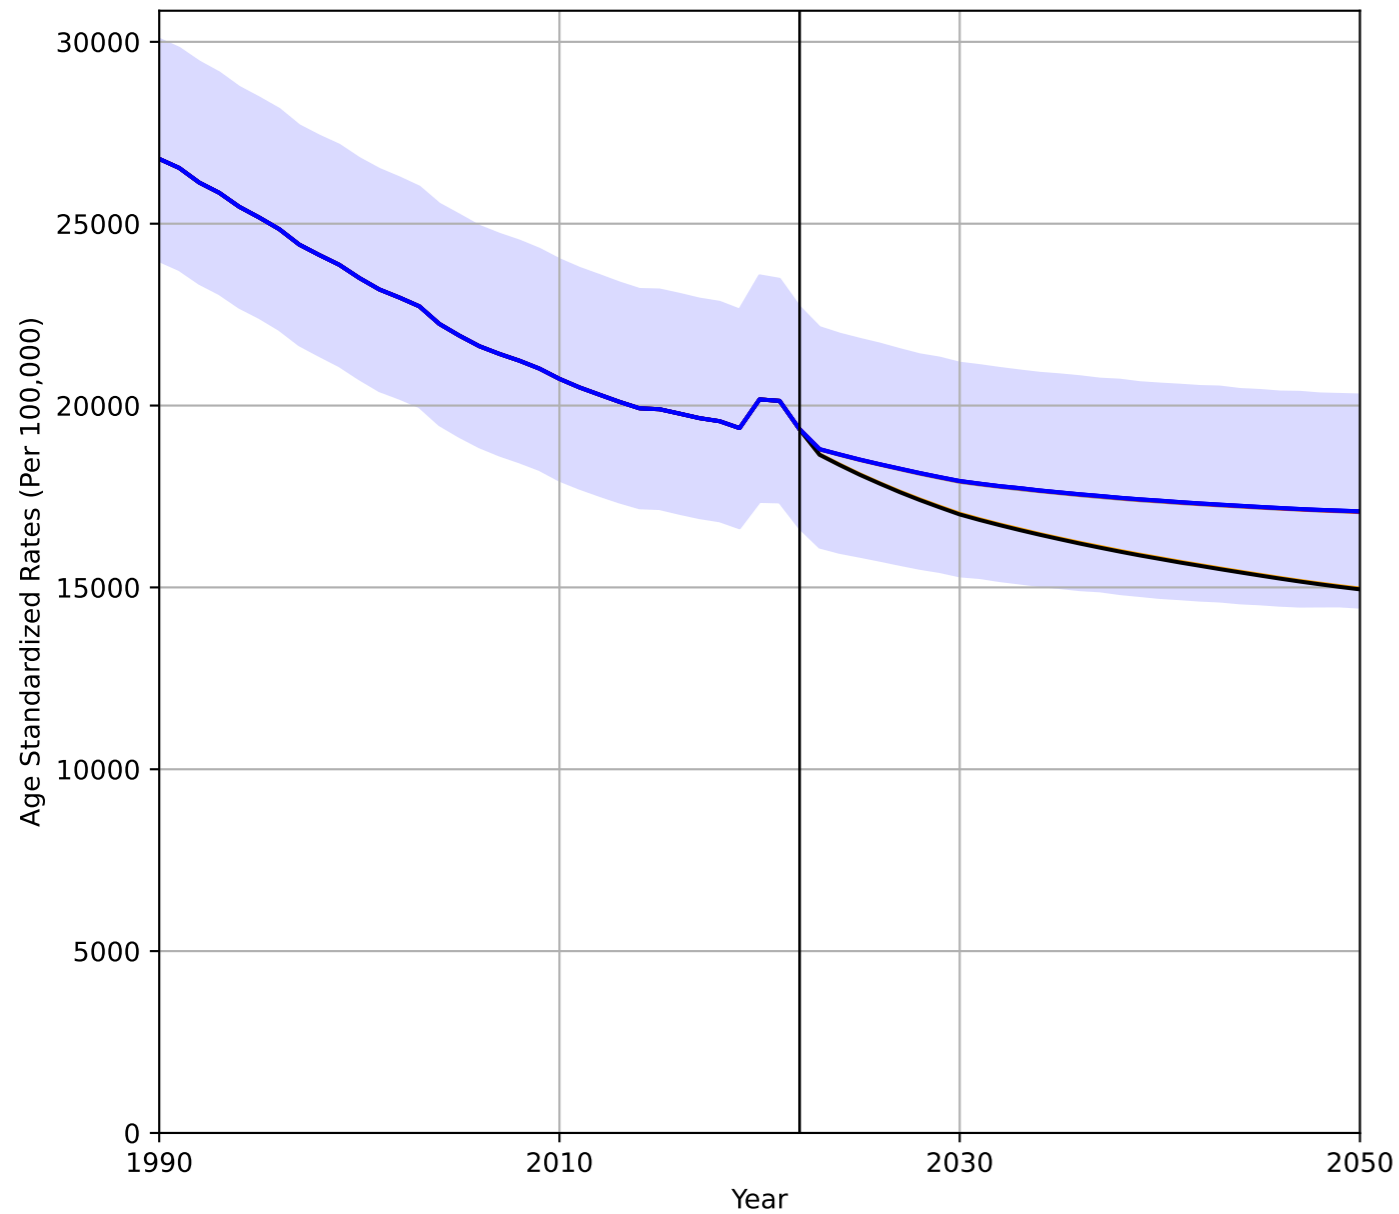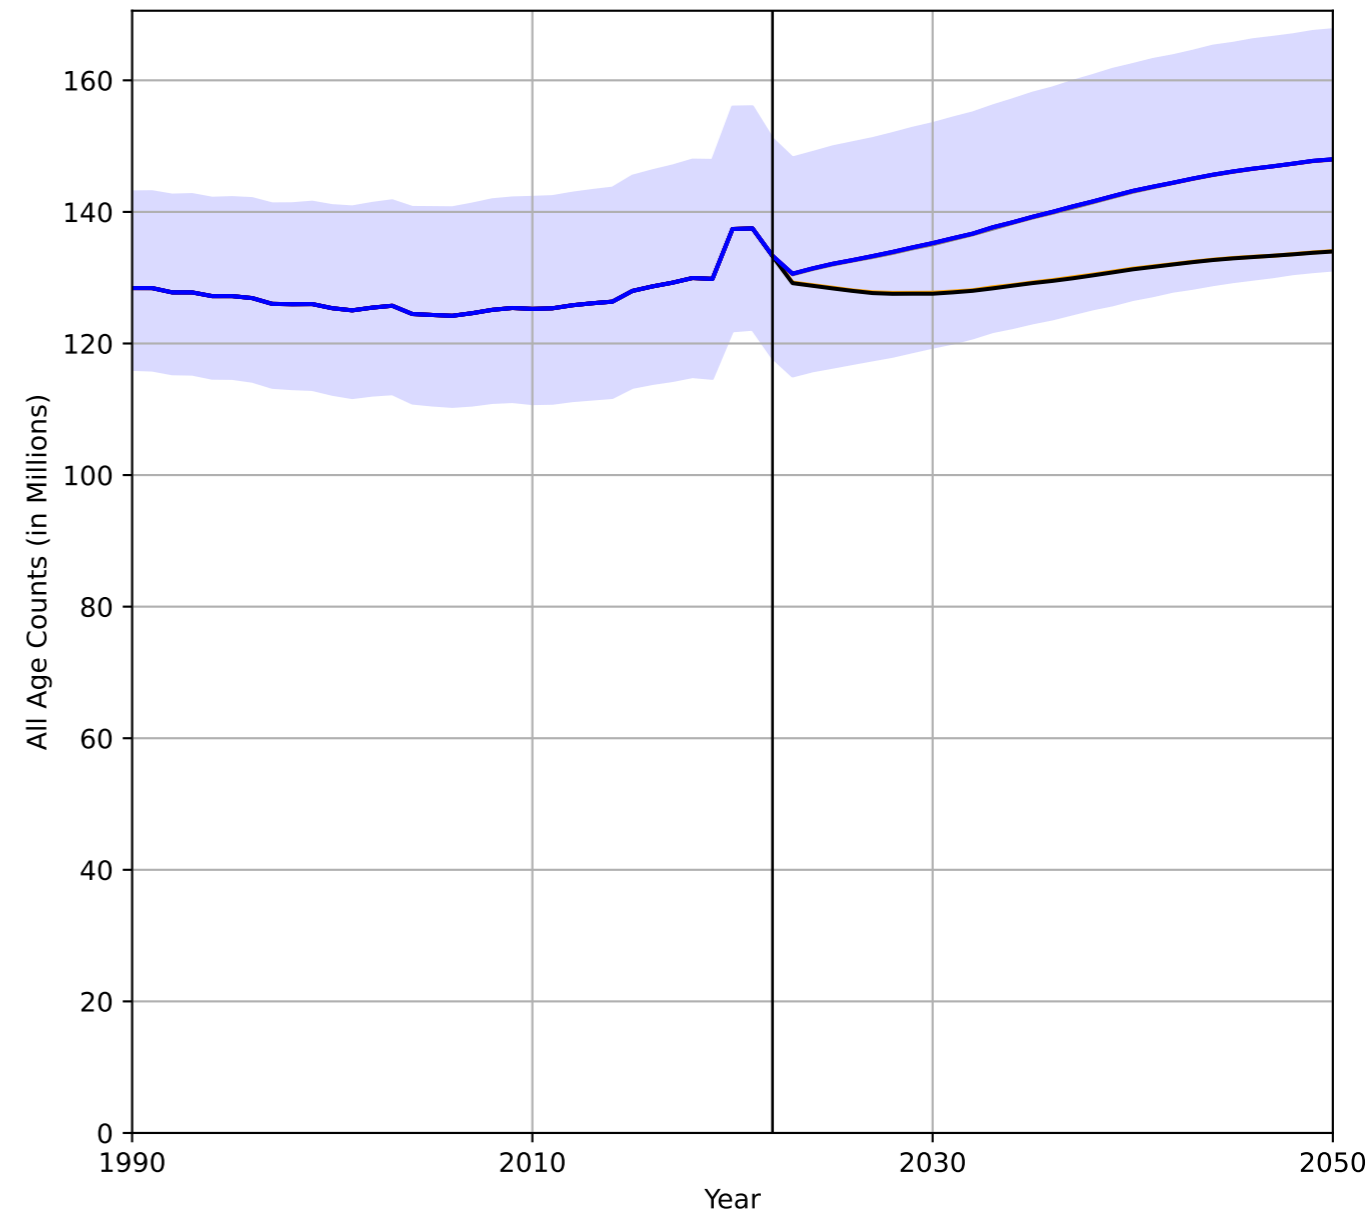

# Andean Latin America

Supplemental Results Figure S10. All-cause age standardised DALY rates (A) and all age DALY counts (B), for the past and for five future scenarios, 1990–2050

1631

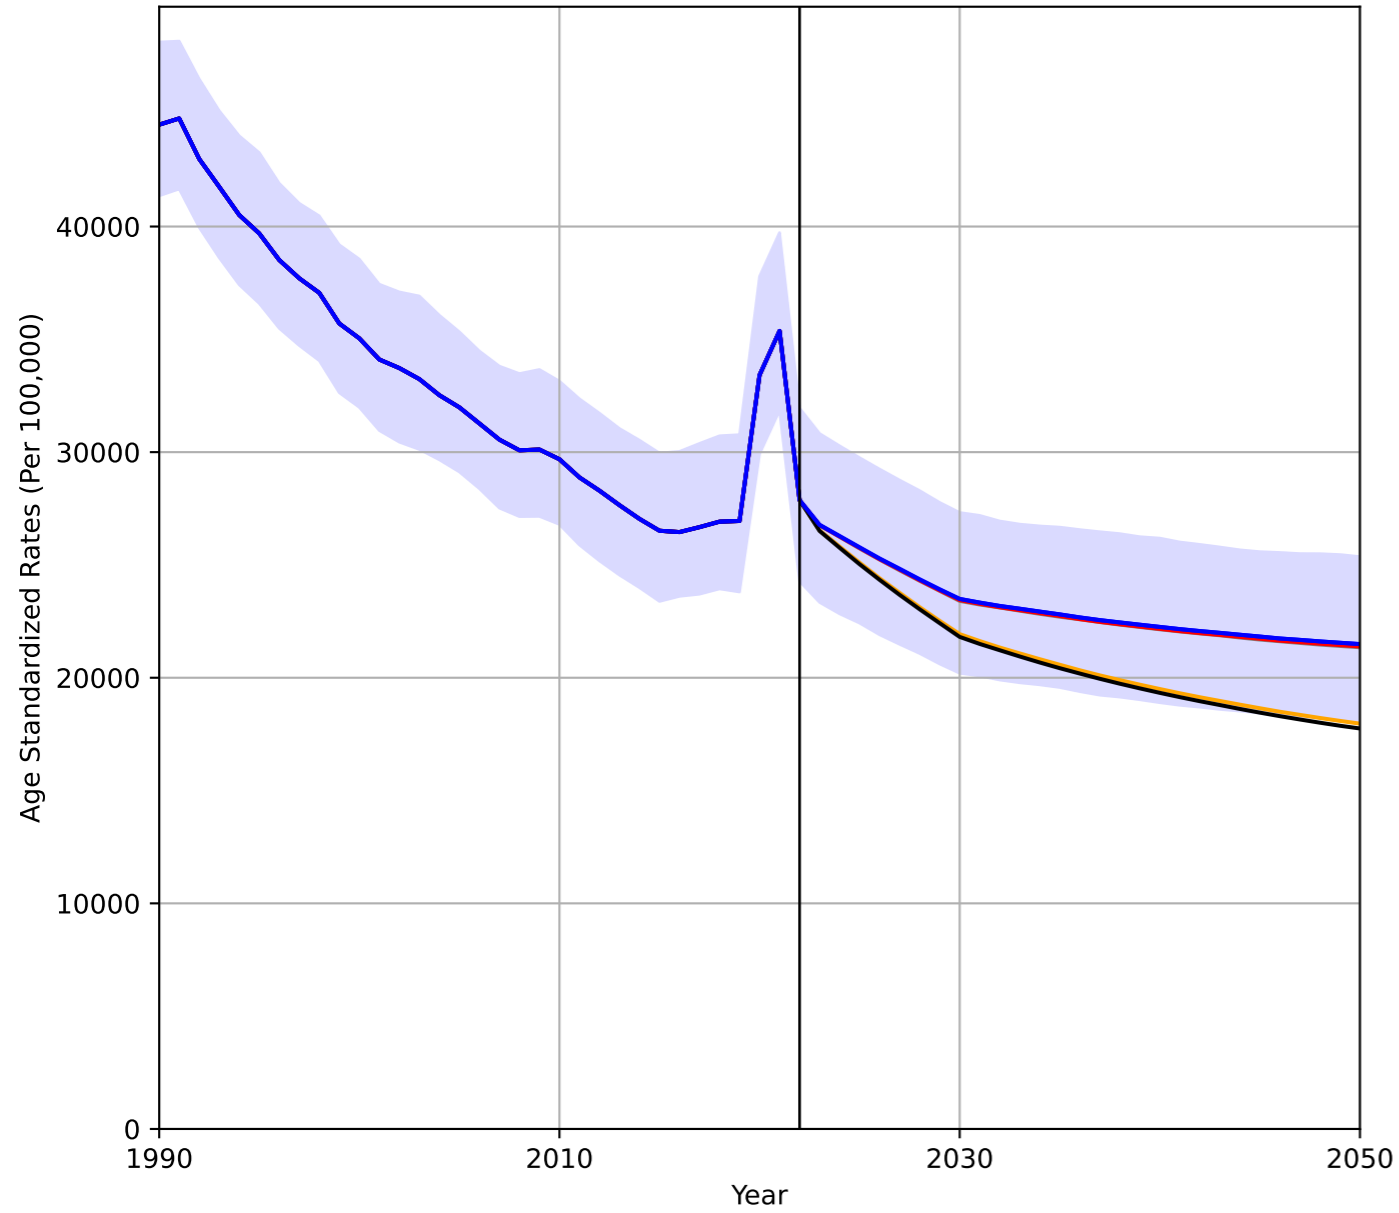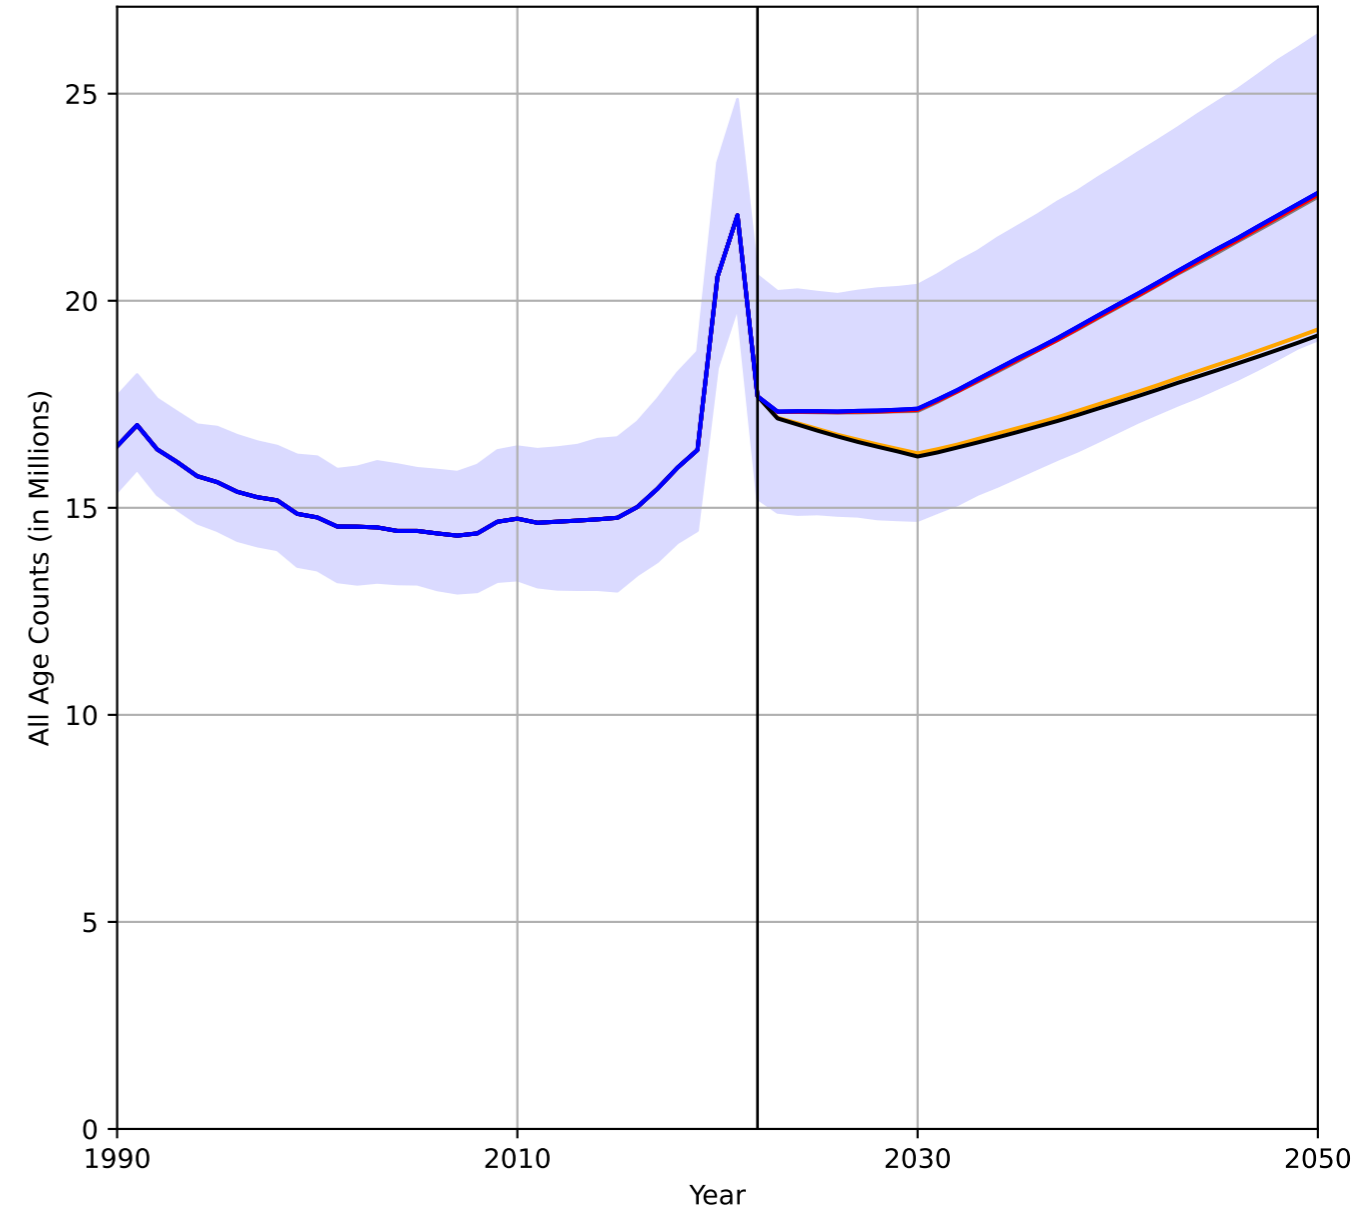



# Caribbean

Supplemental Results Figure S10. All-cause age standardised DALY rates (A) and all age DALY counts (B), for the past and for five future scenarios, 1990–2050

1632

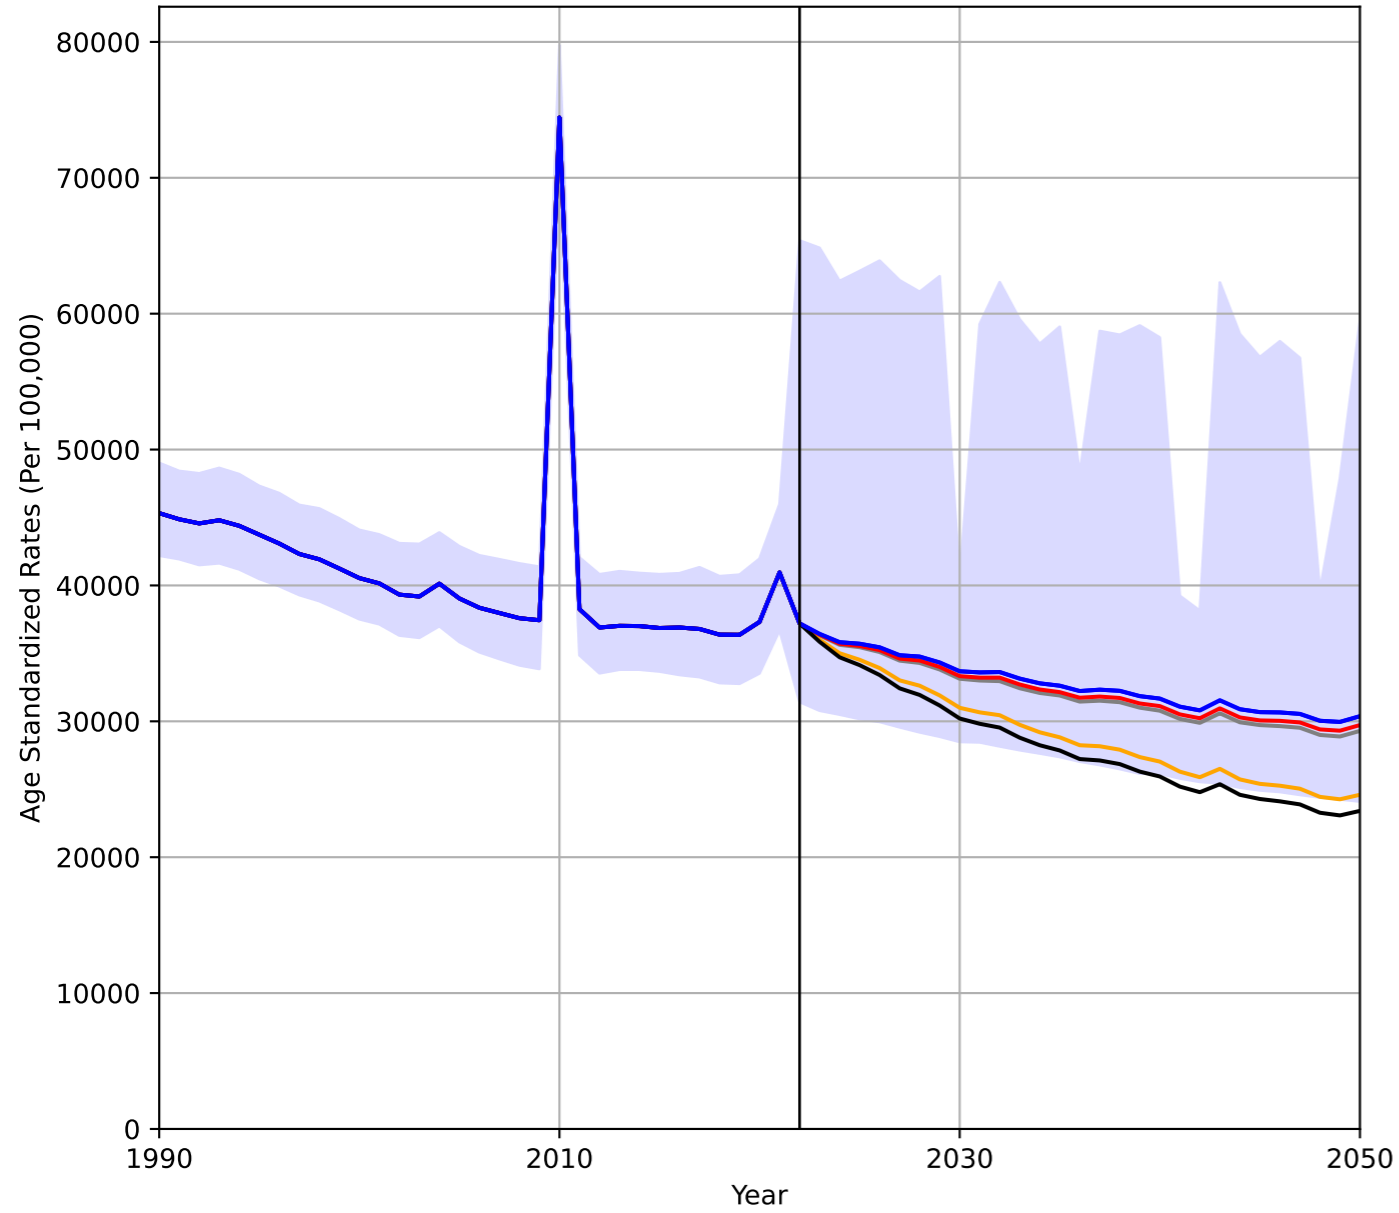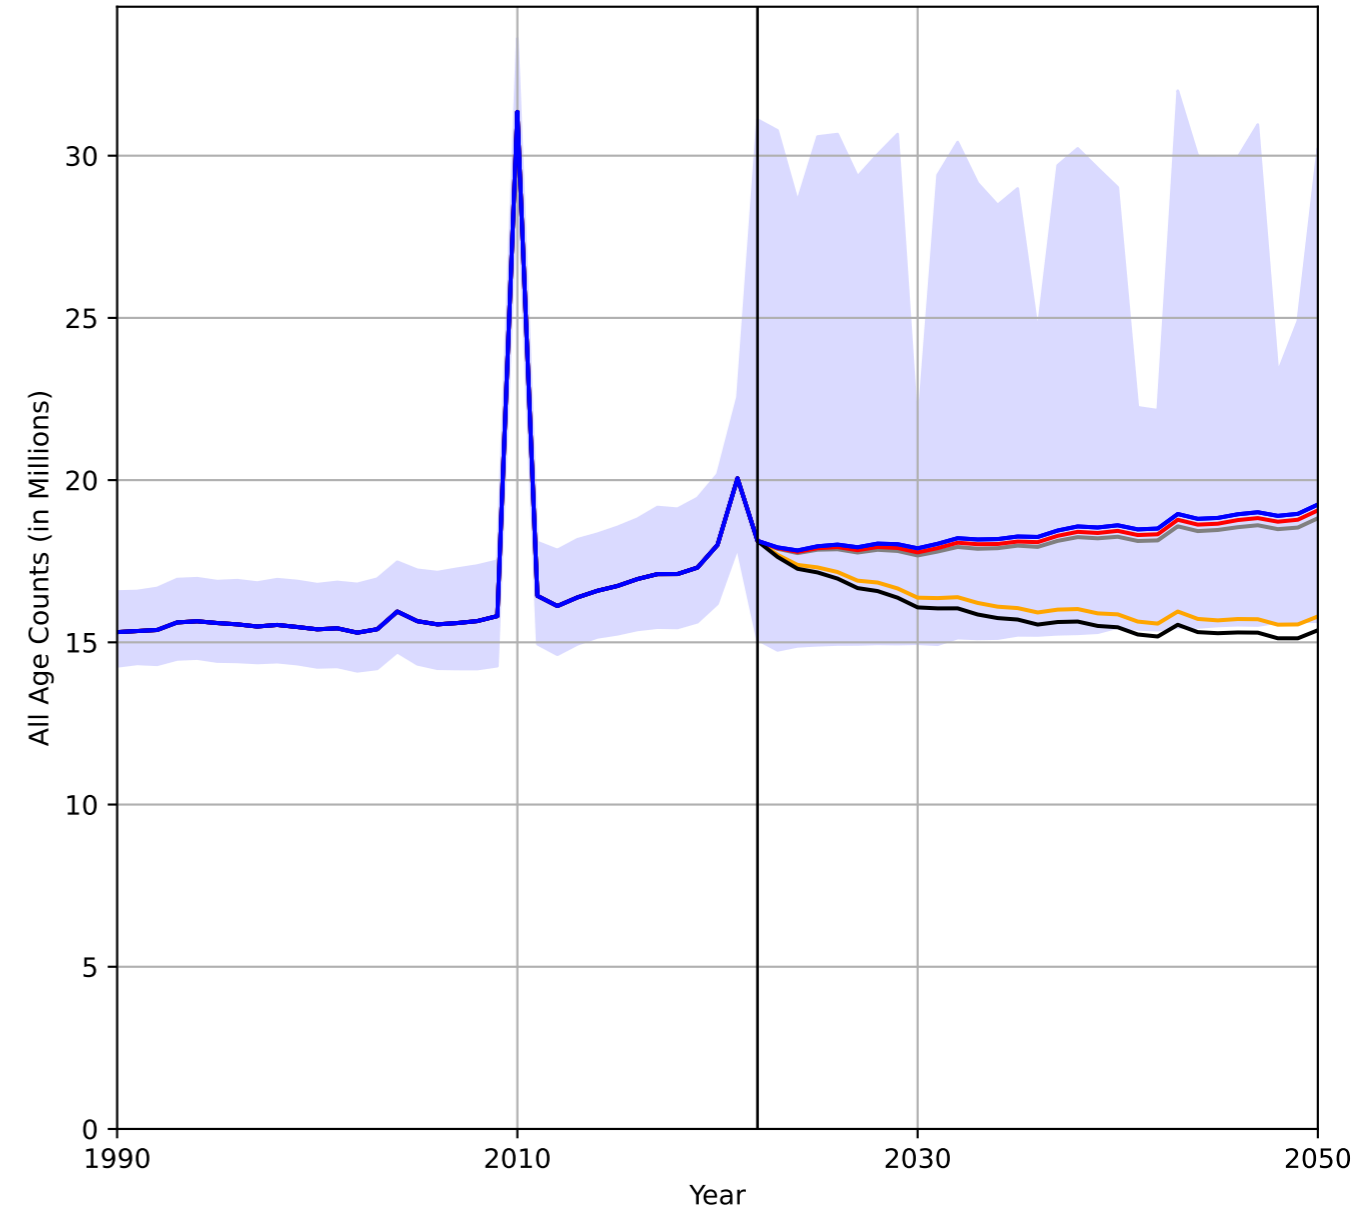

# Central Latin America

Supplemental Results Figure S10. All-cause age standardised DALY rates (A) and all age DALY counts (B), for the past and for five future scenarios, 1990–2050

1633

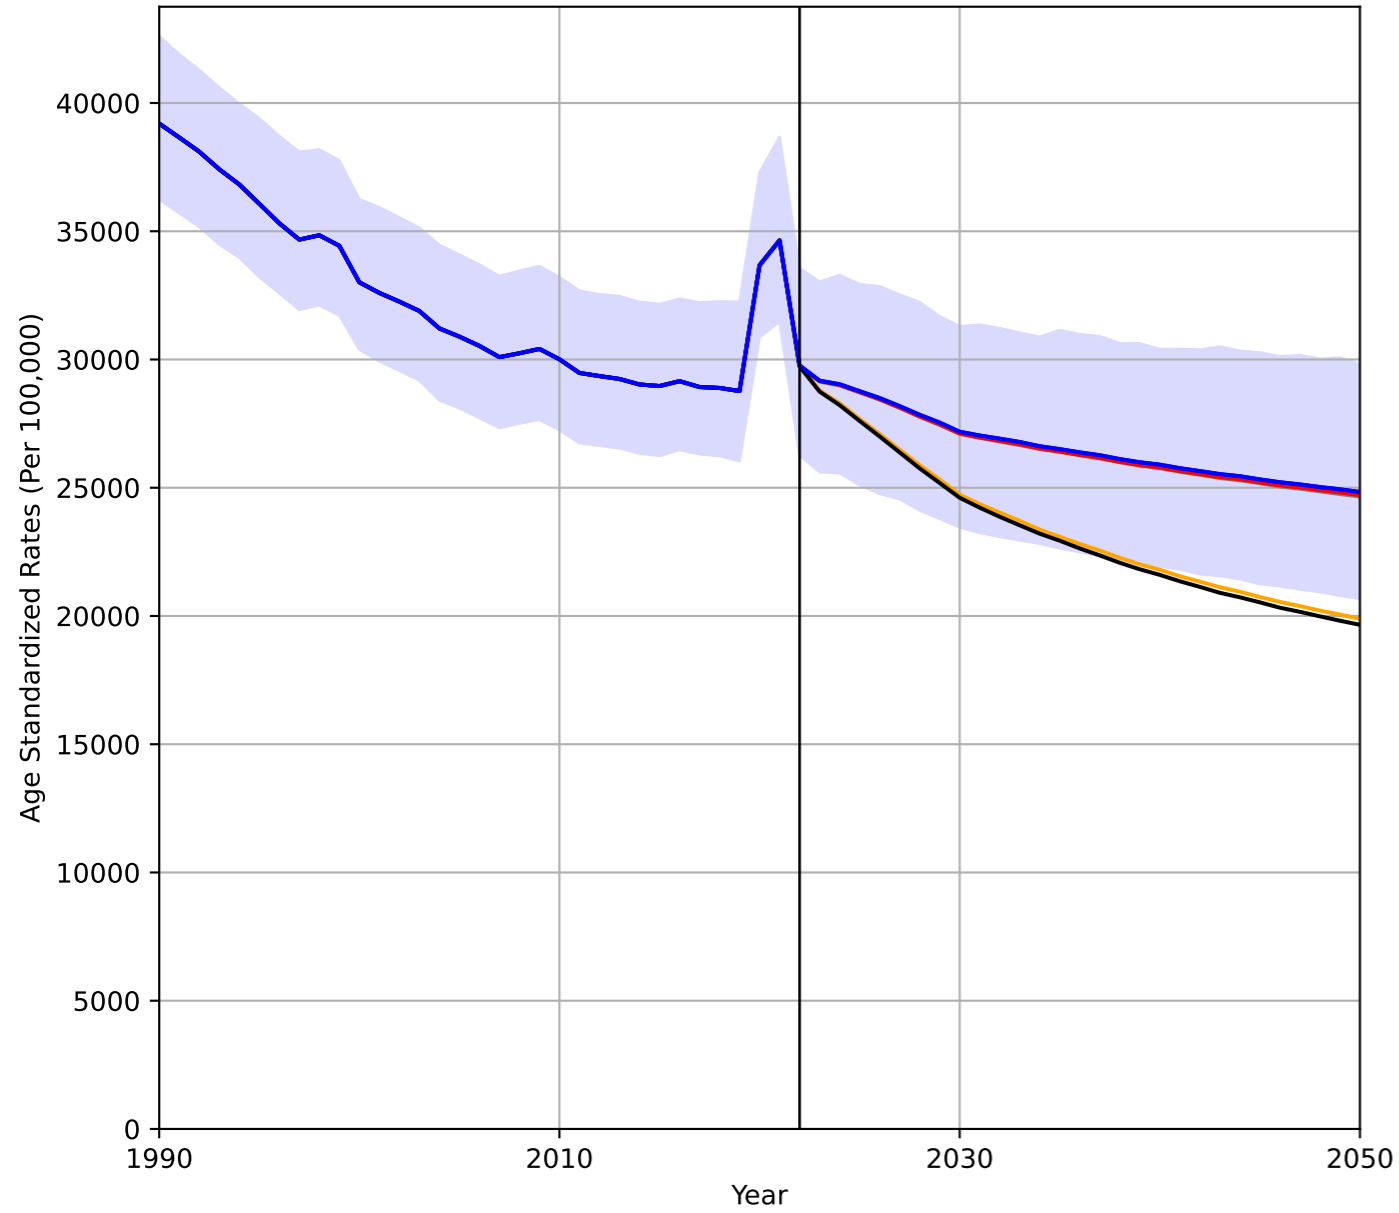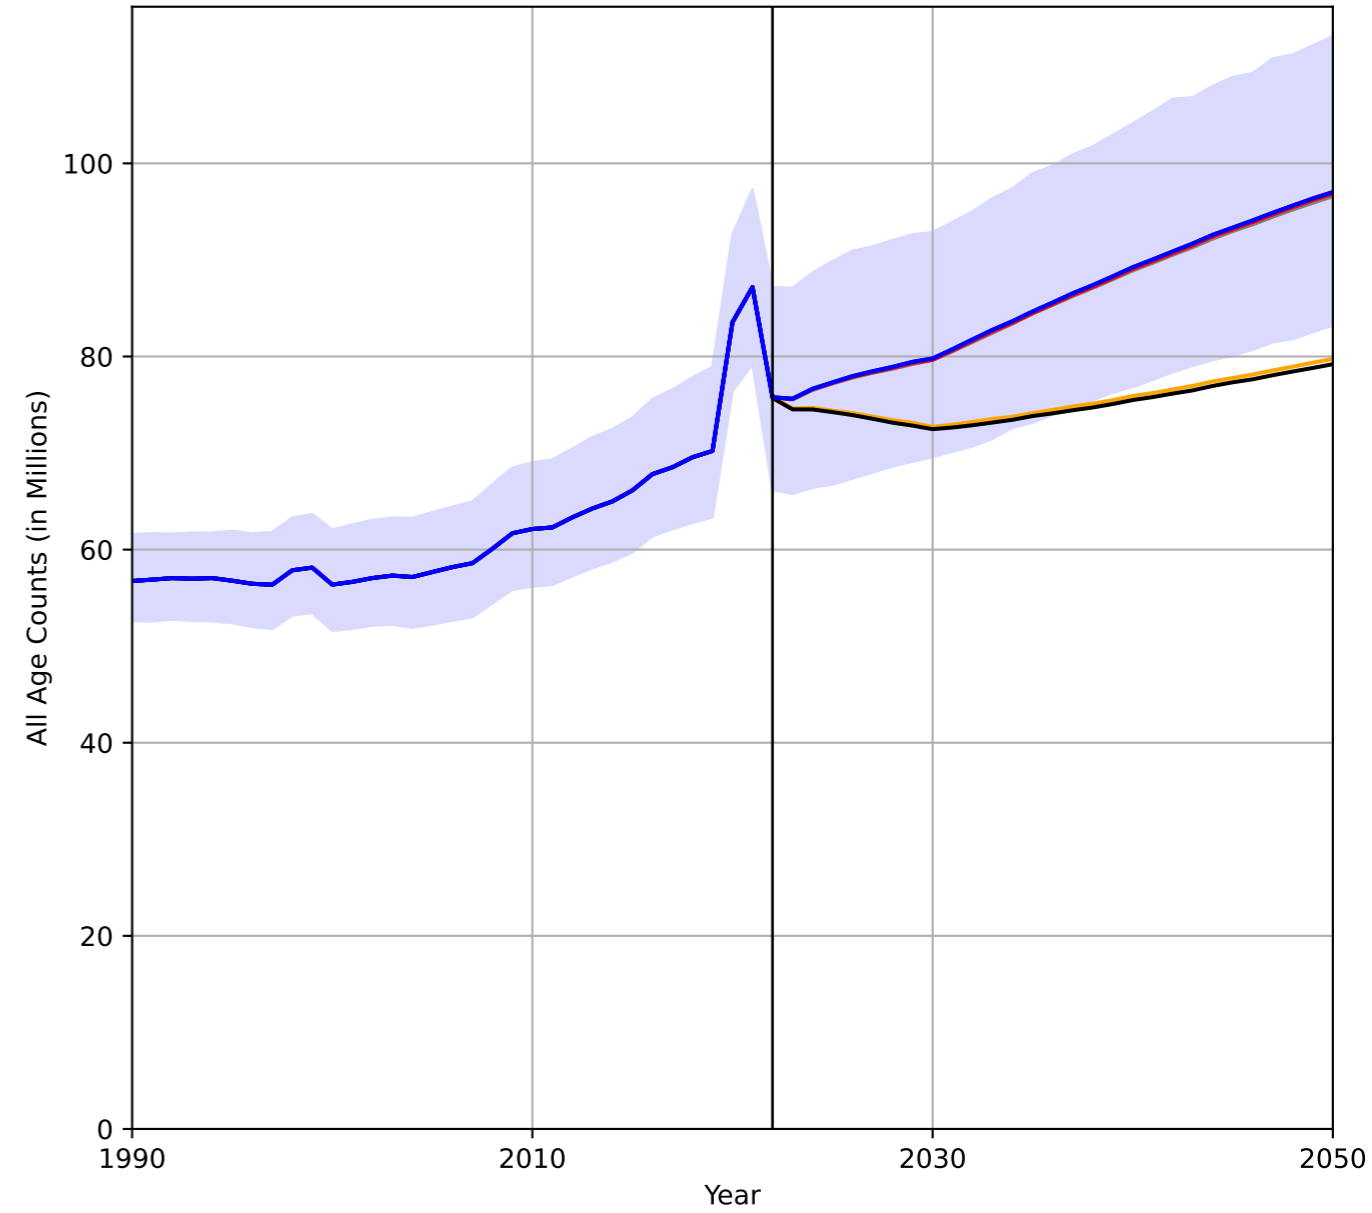

# Tropical Latin America

Supplemental Results Figure S10. All-cause age standardised DALY rates (A) and all age DALY counts (B), for the past and for five future scenarios, 1990–2050

1634

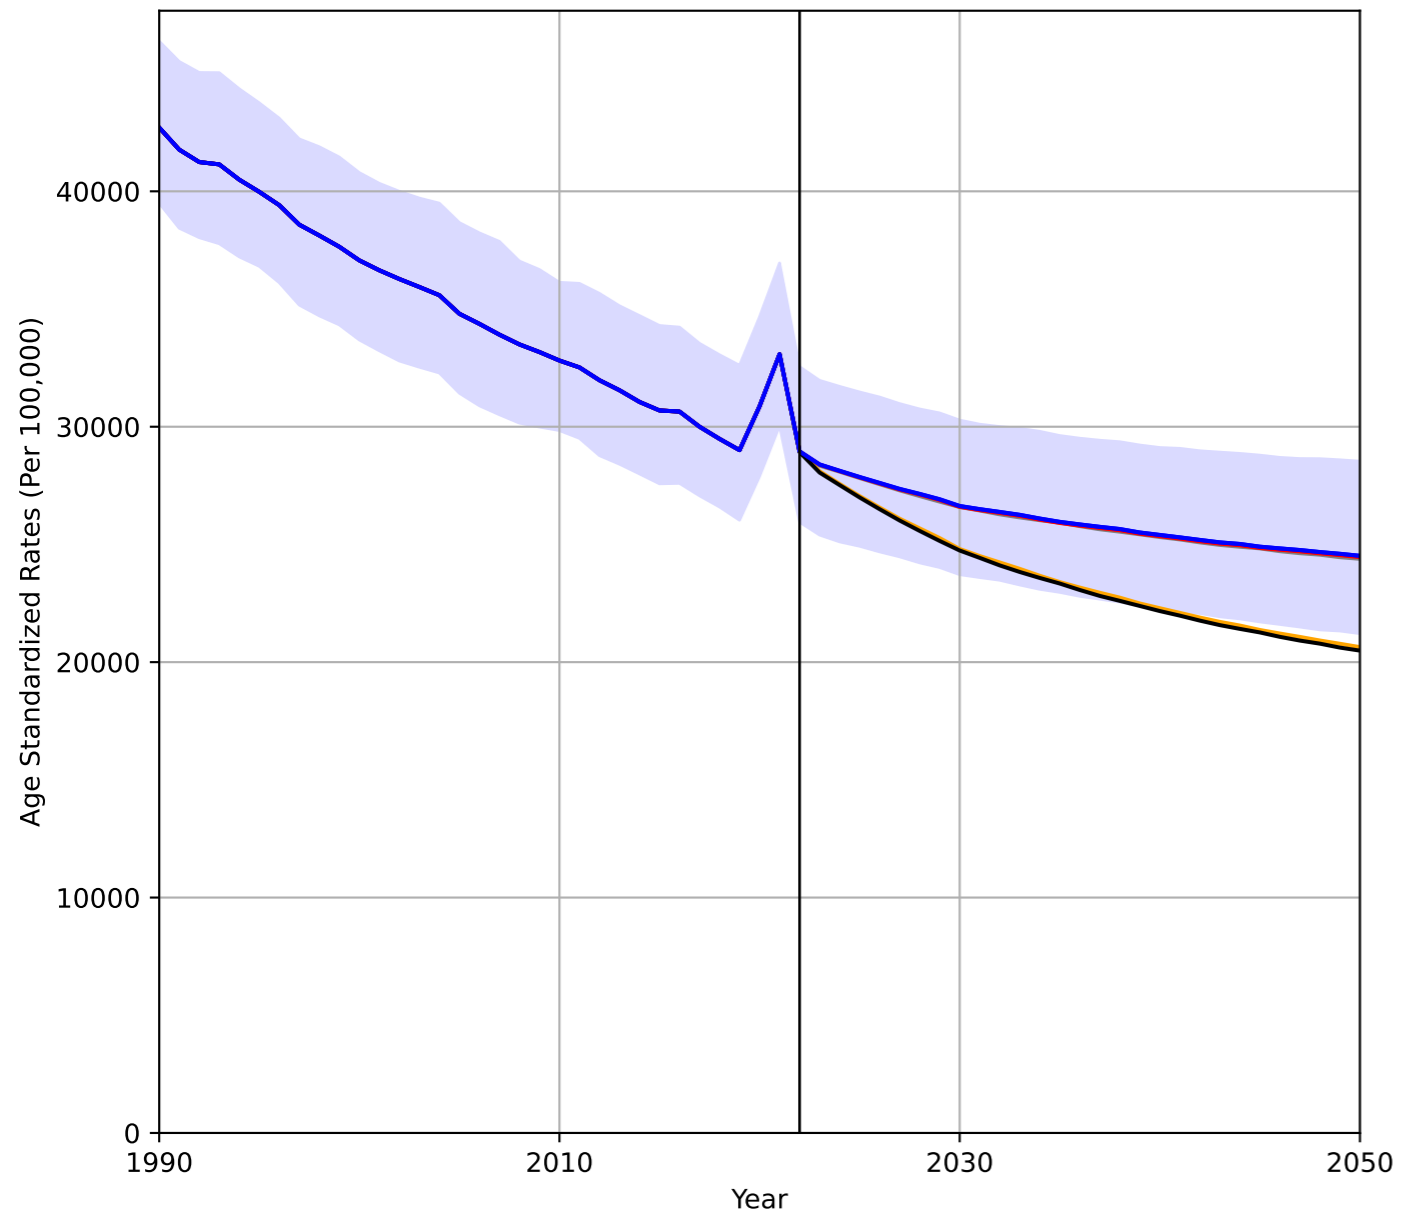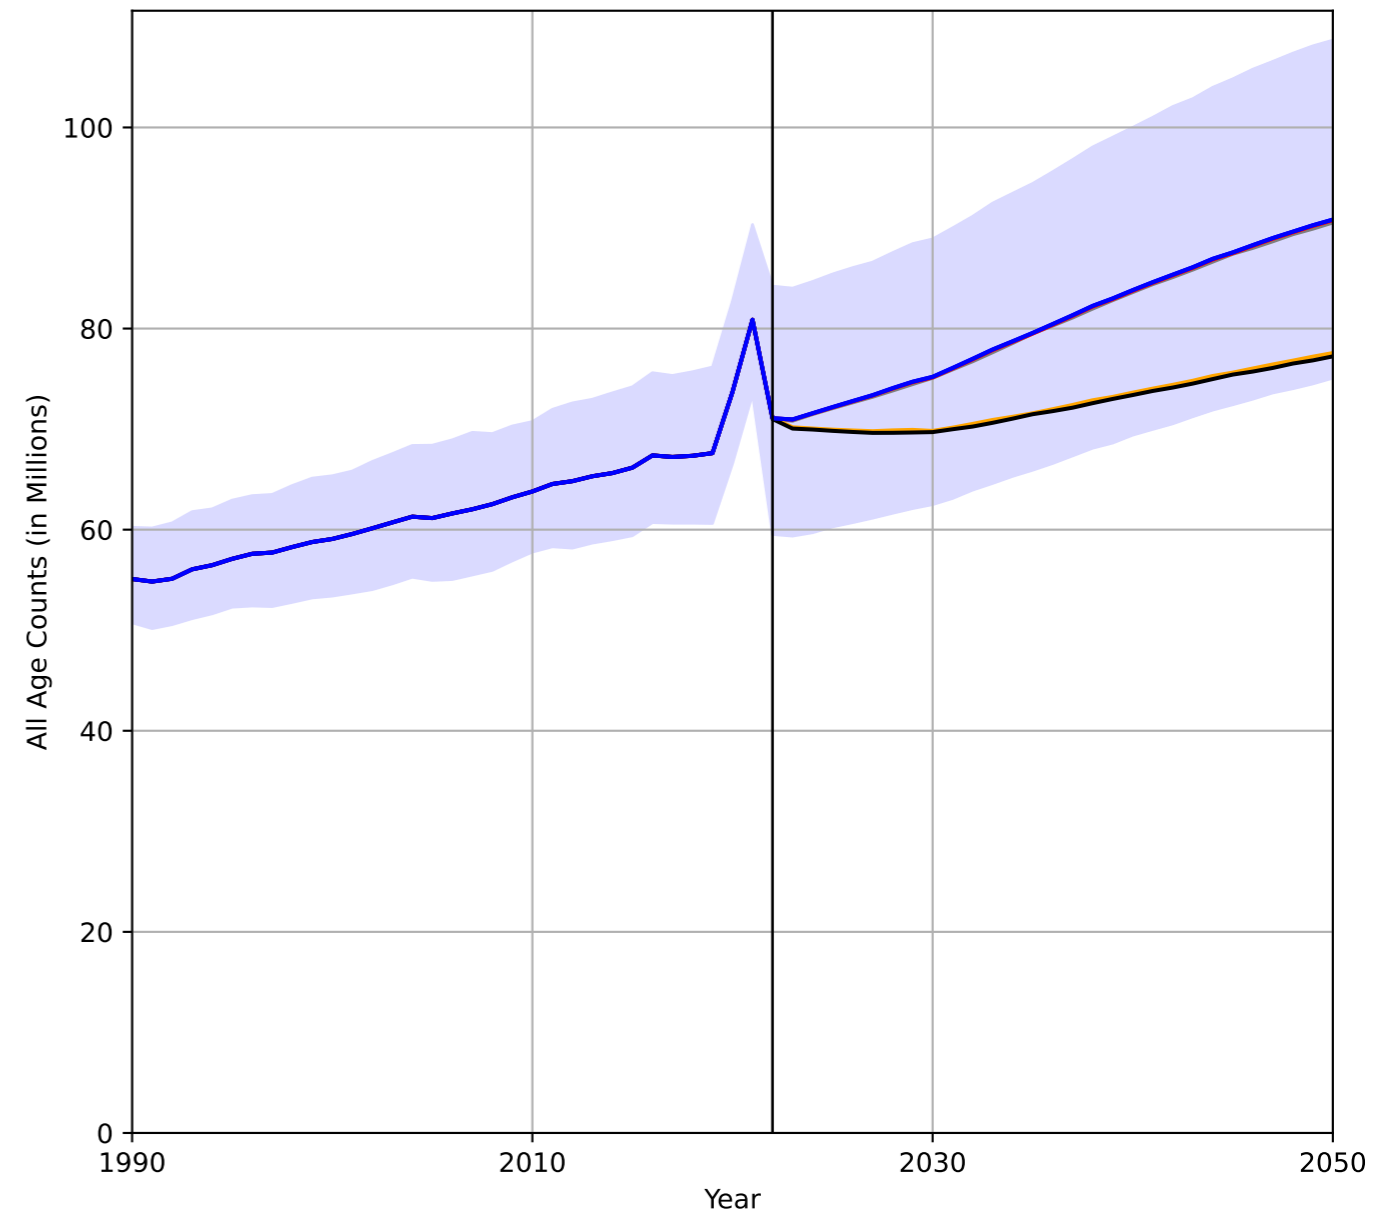

# North Africa And Middle East

Supplemental Results Figure S10. All-cause age standardised DALY rates (A) and all age DALY counts (B), for the past and for five future scenarios, 1990–2050

1635



# South Asia

Supplemental Results Figure S10. All-cause age standardised DALY rates (A) and all age DALY counts (B), for the past and for five future scenarios, 1990–2050

1636



# East Asia

Supplemental Results Figure S10. All-cause age standardised DALY rates (A) and all age DALY counts (B), for the past and for five future scenarios, 1990–2050

1637

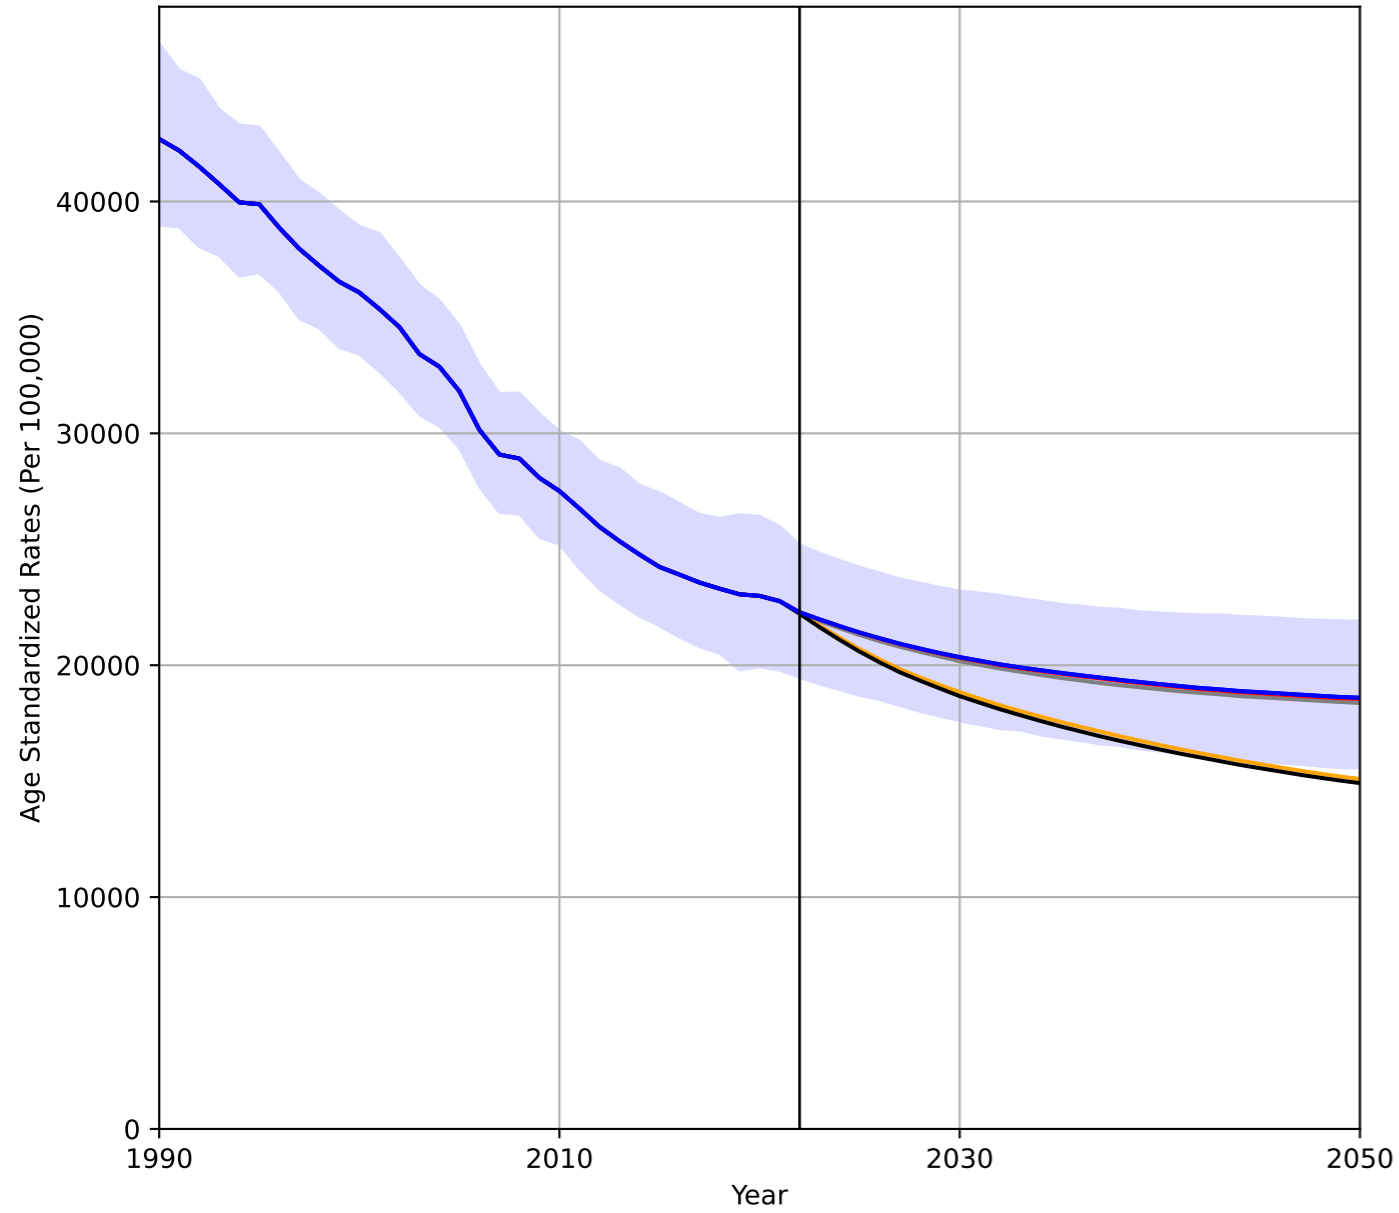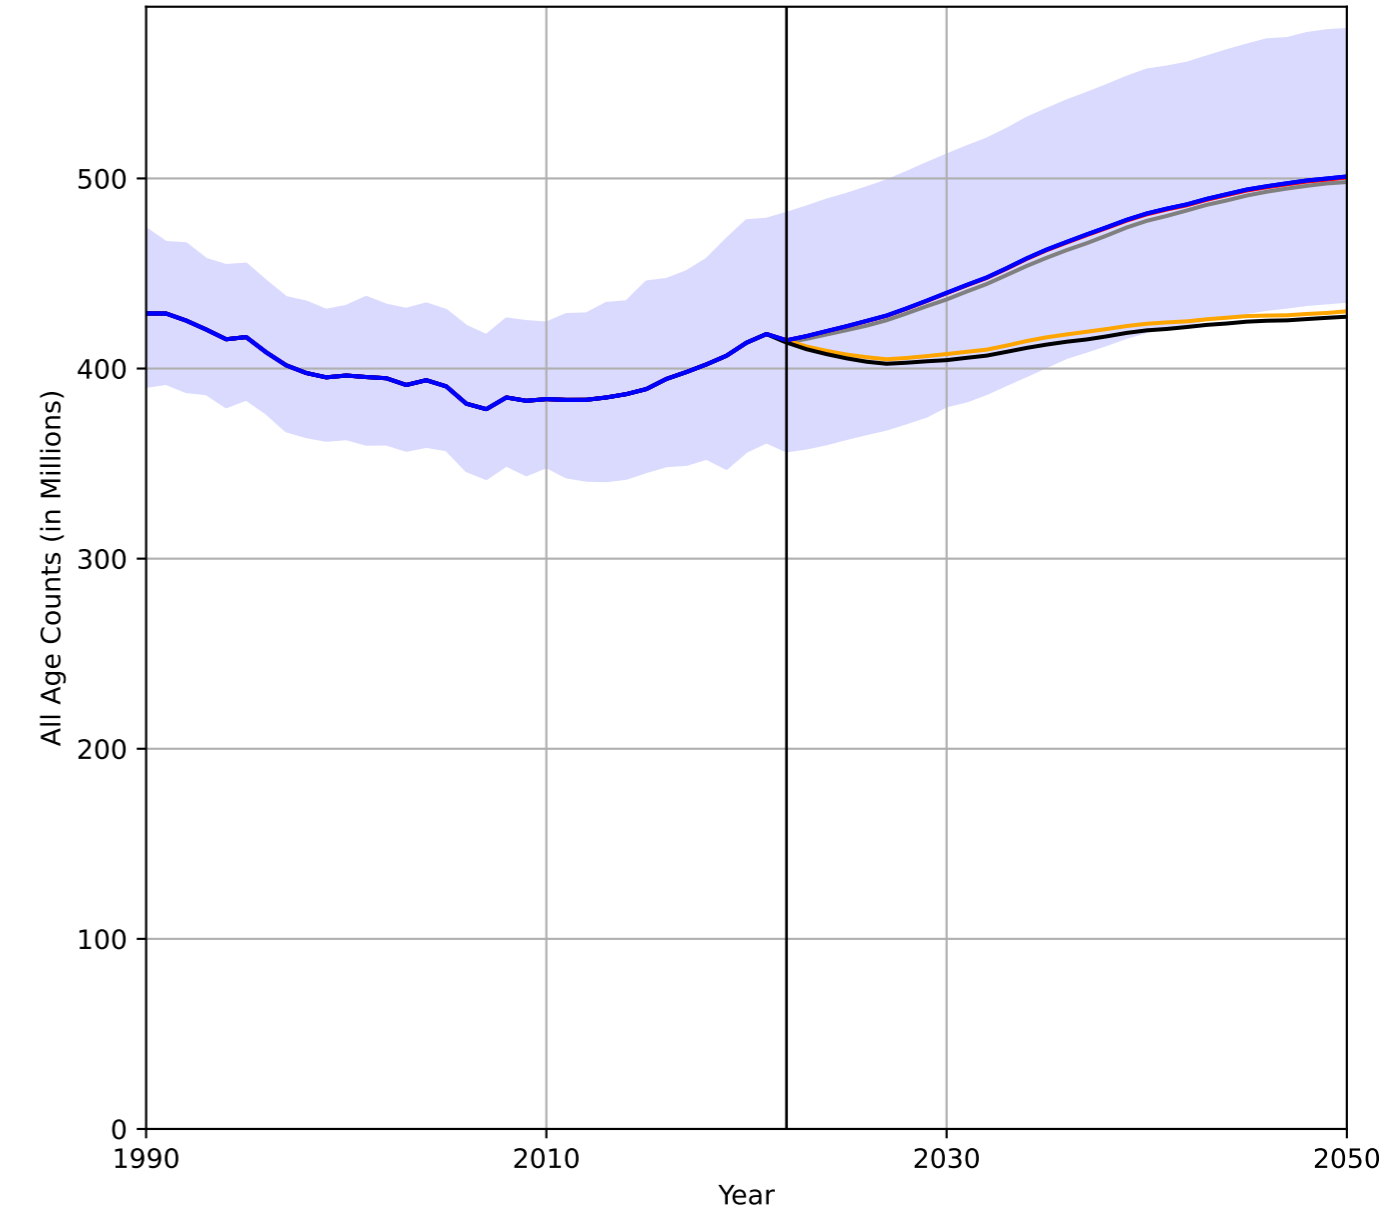

# Oceania

Supplemental Results Figure S10. All-cause age standardised DALY rates (A) and all age DALY counts (B), for the past and for five future scenarios, 1990–2050

1638

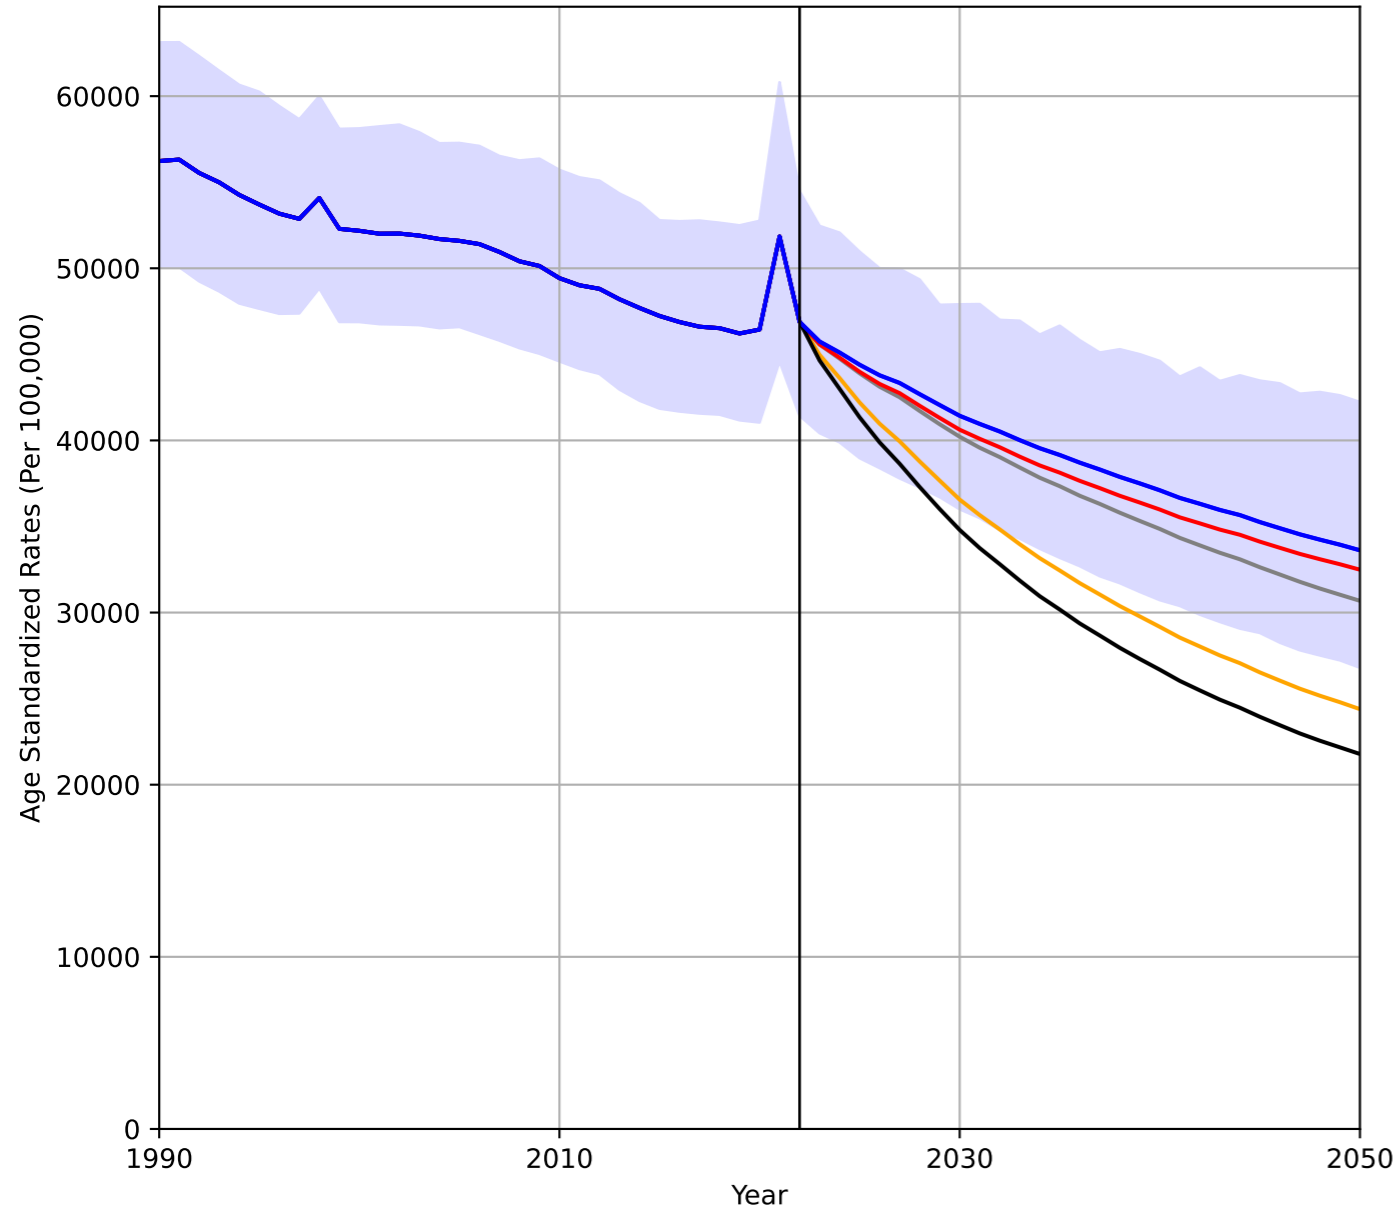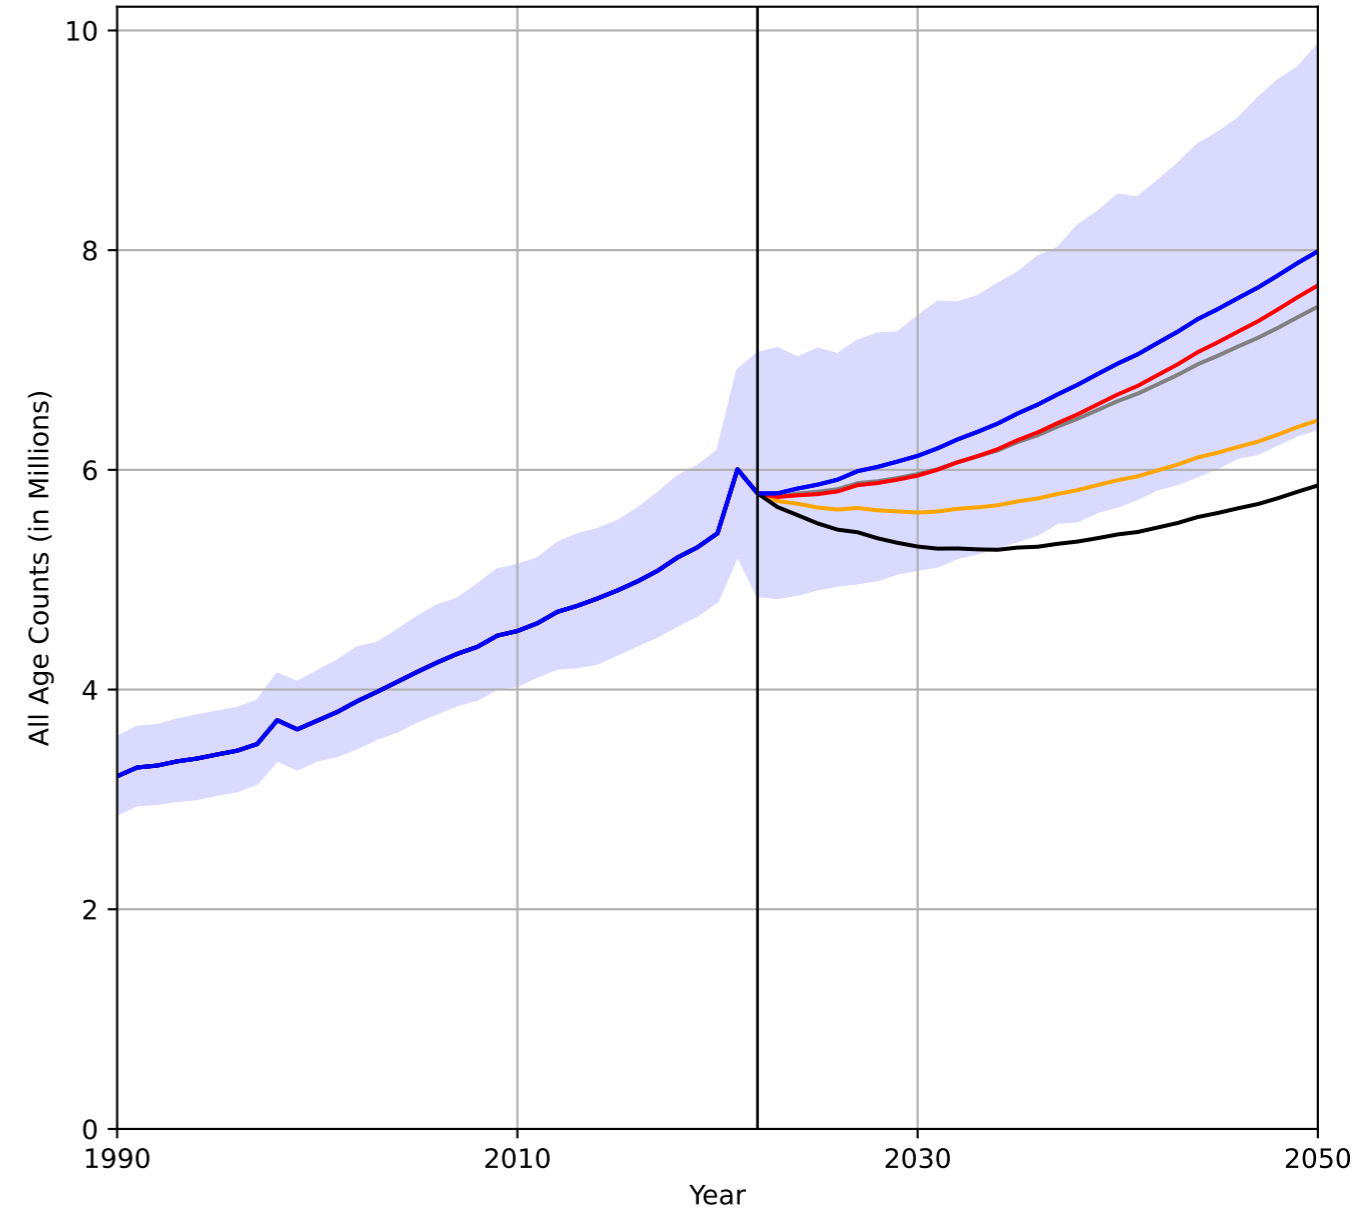

# Southeast Asia

Supplemental Results Figure S10. All-cause age standardised DALY rates (A) and all age DALY counts (B), for the past and for five future scenarios, 1990–2050

1639

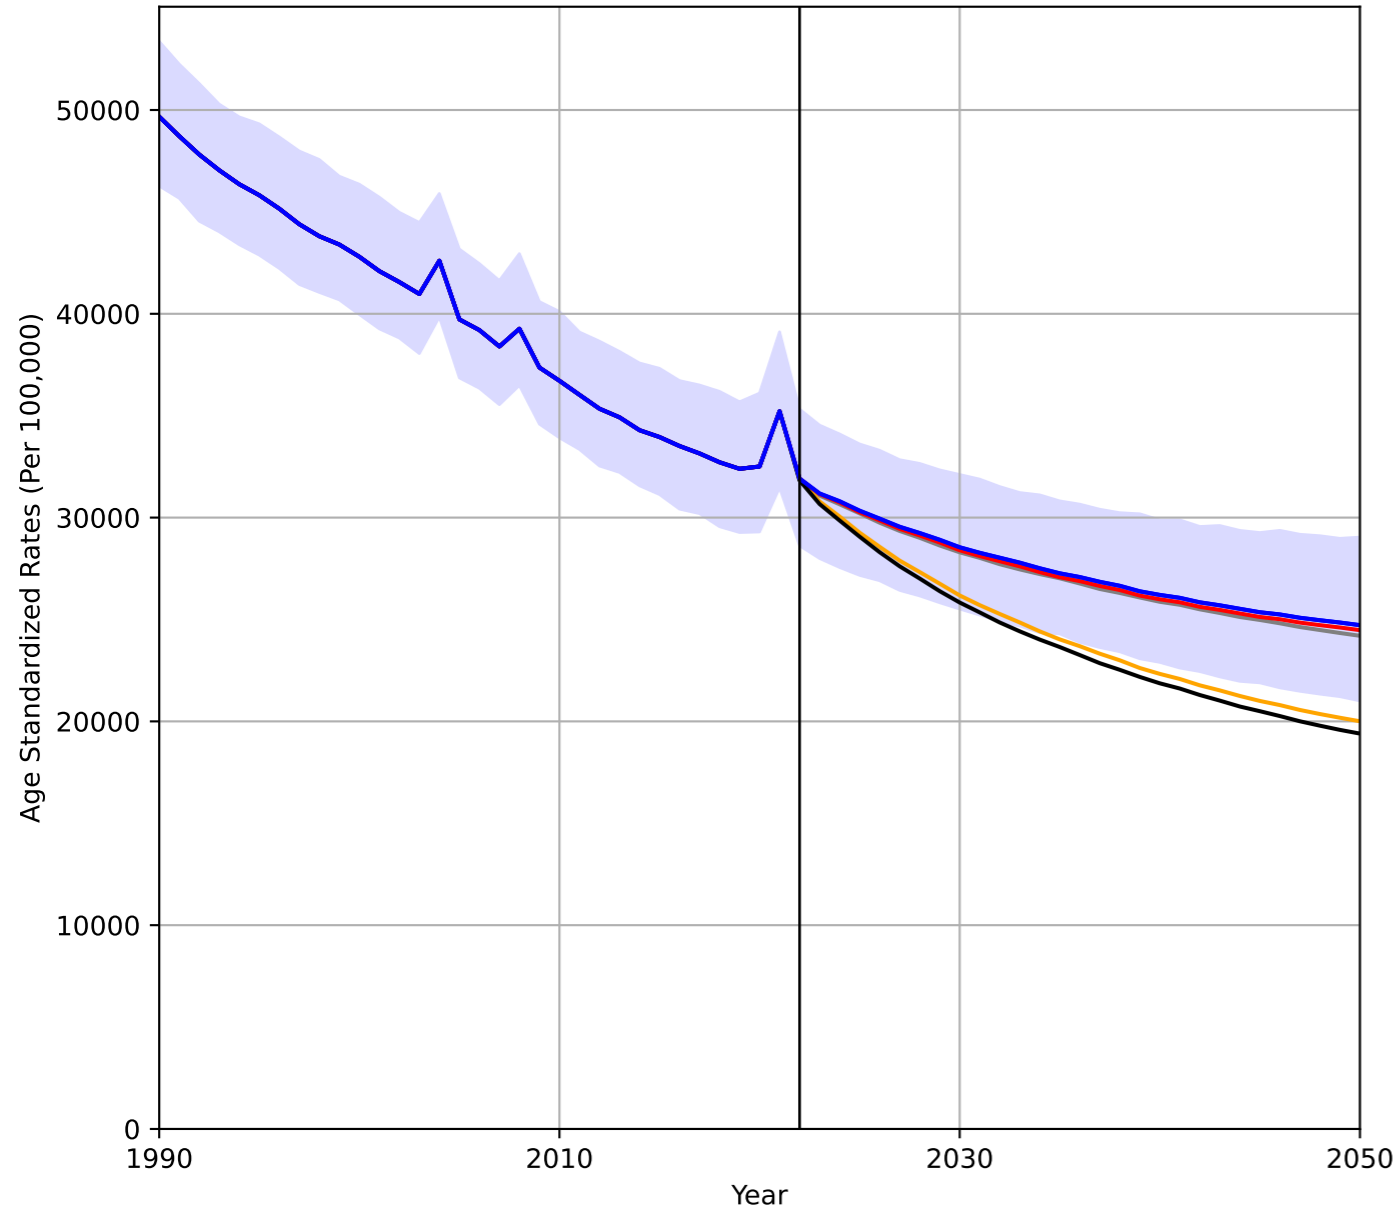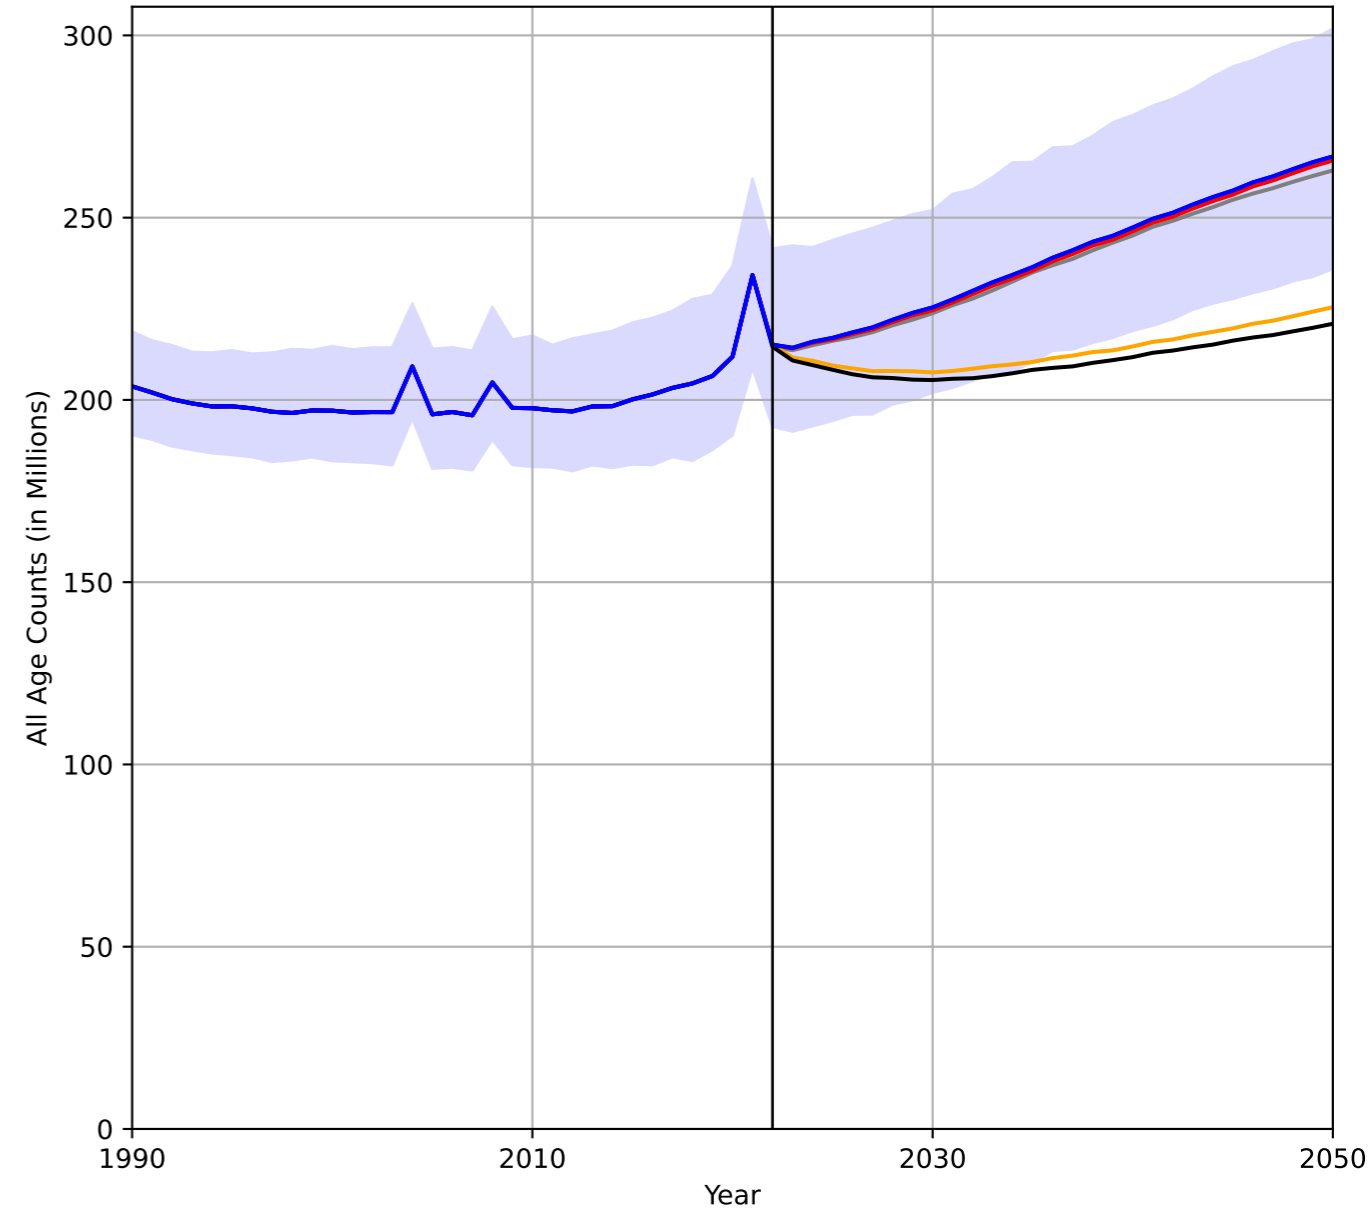



# Central Sub-Saharan Africa

Supplemental Results Figure S10. All-cause age standardised DALY rates (A) and all age DALY counts (B), for the past and for five future scenarios, 1990–2050

1640

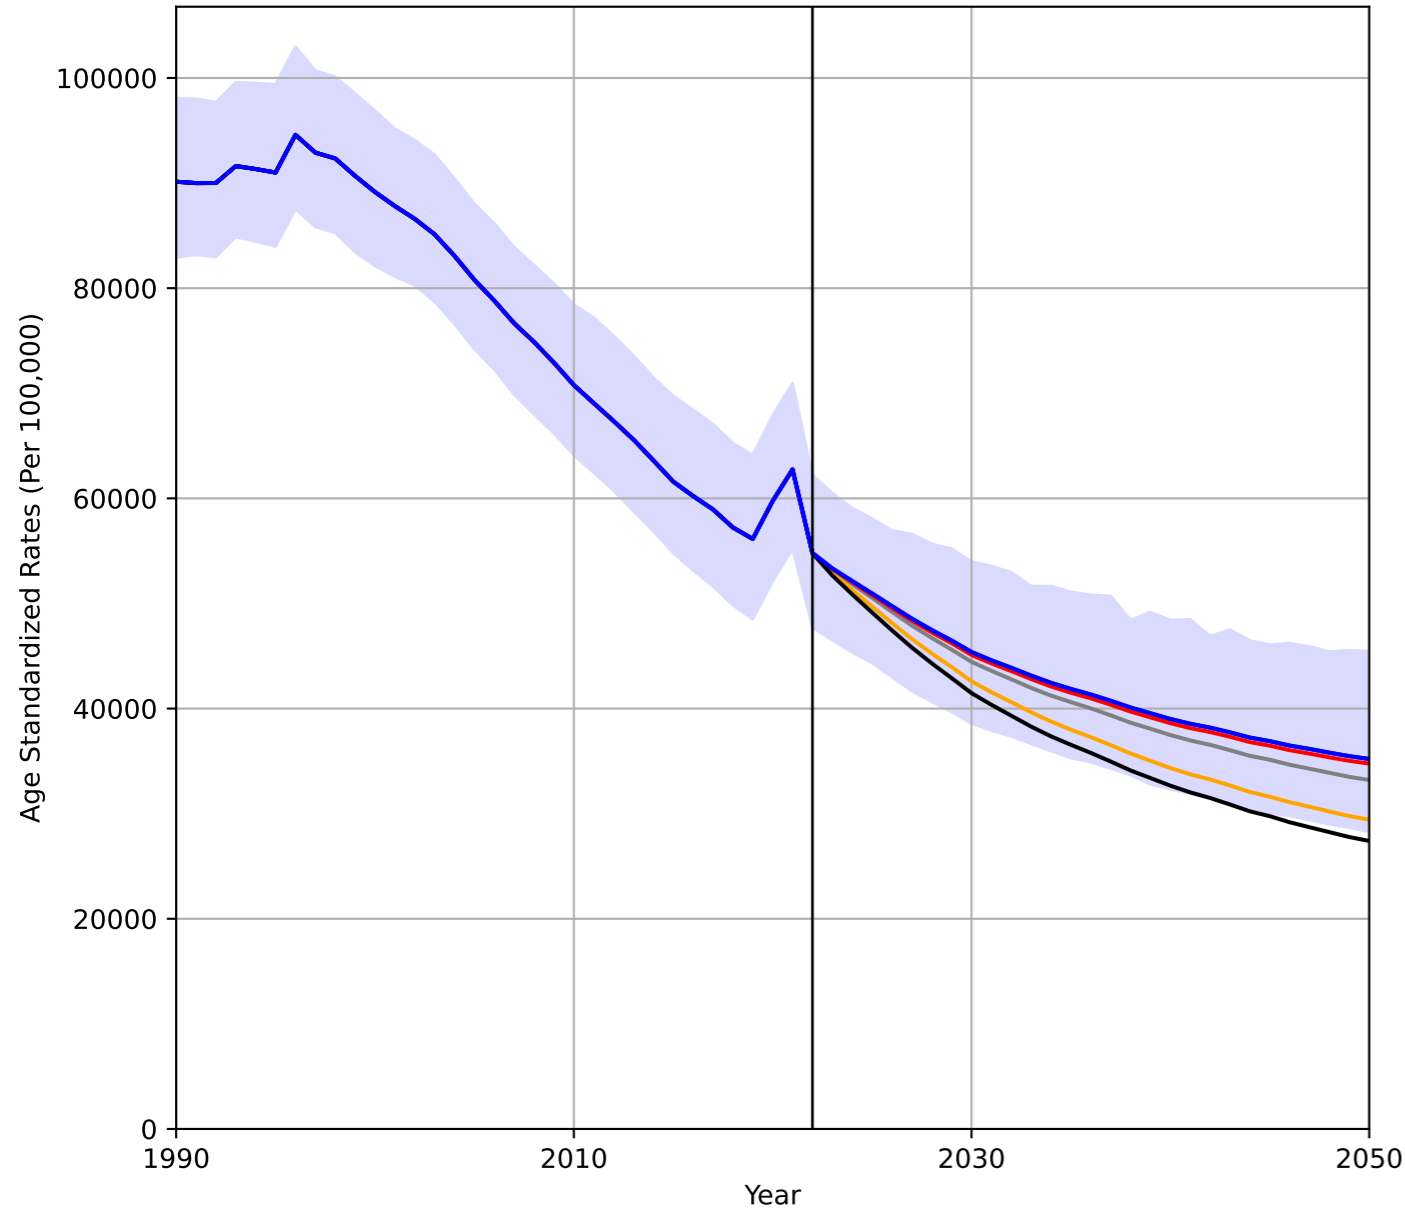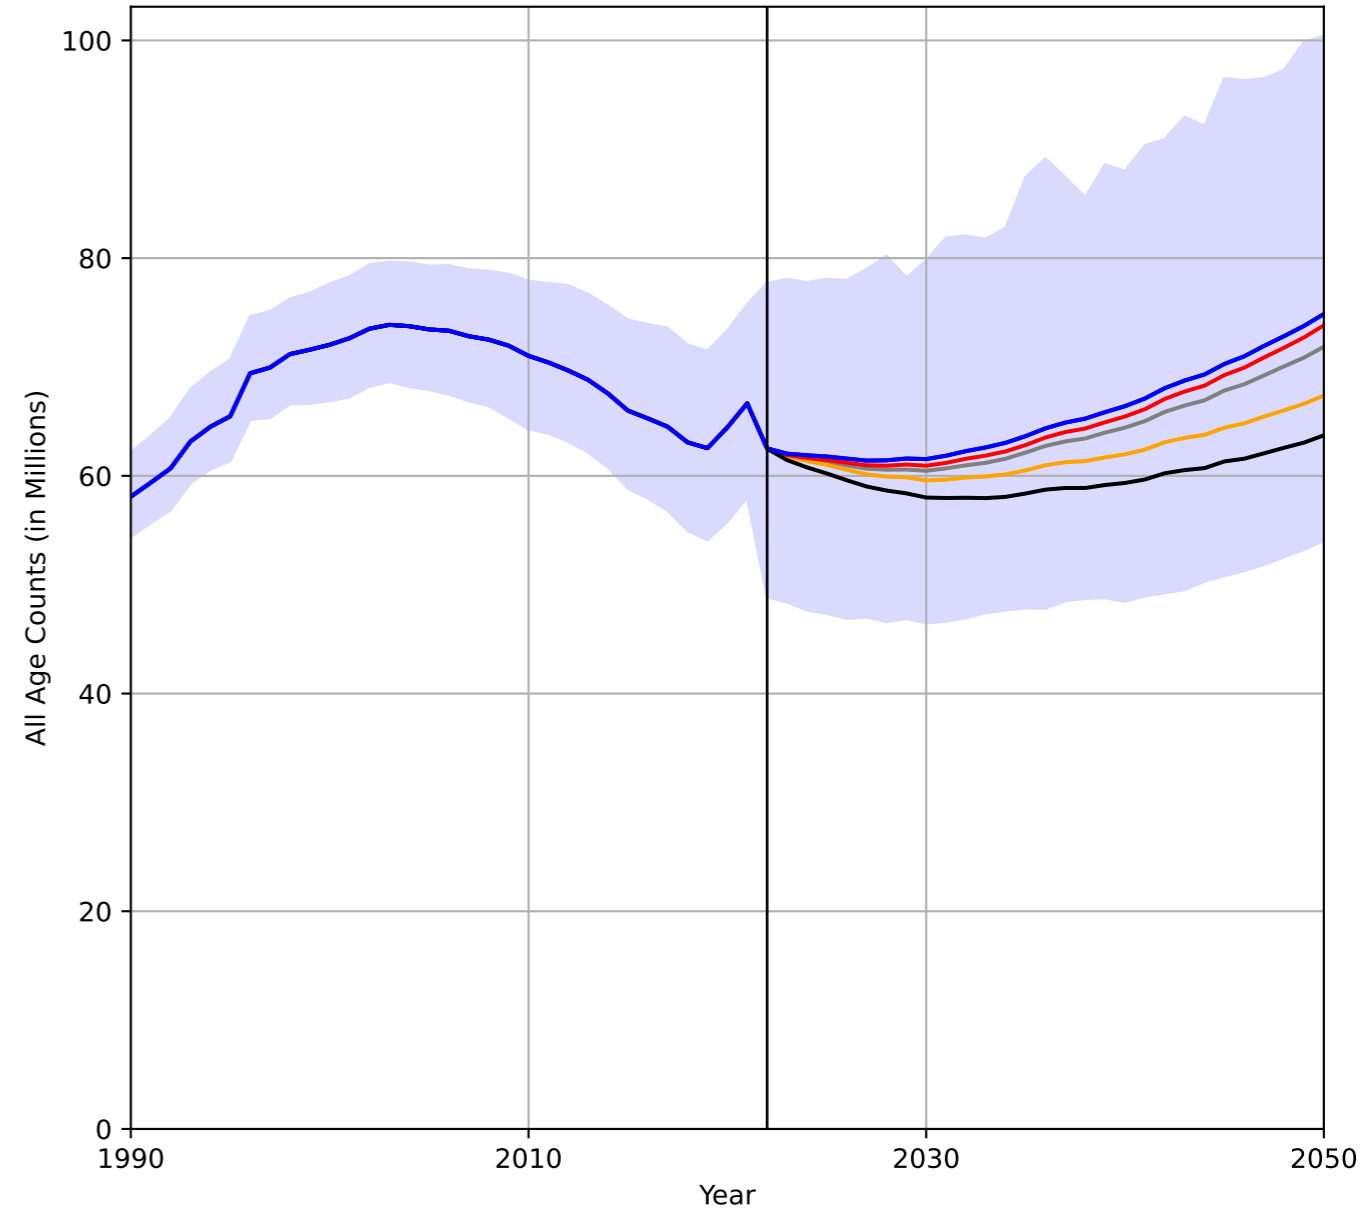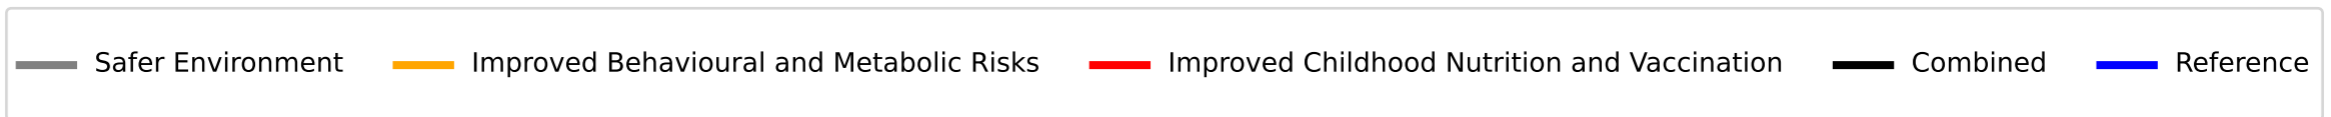

# Eastern Sub-Saharan Africa

Supplemental Results Figure S10. All-cause age standardised DALY rates (A) and all age DALY counts (B), for the past and for five future scenarios, 1990–2050

1641

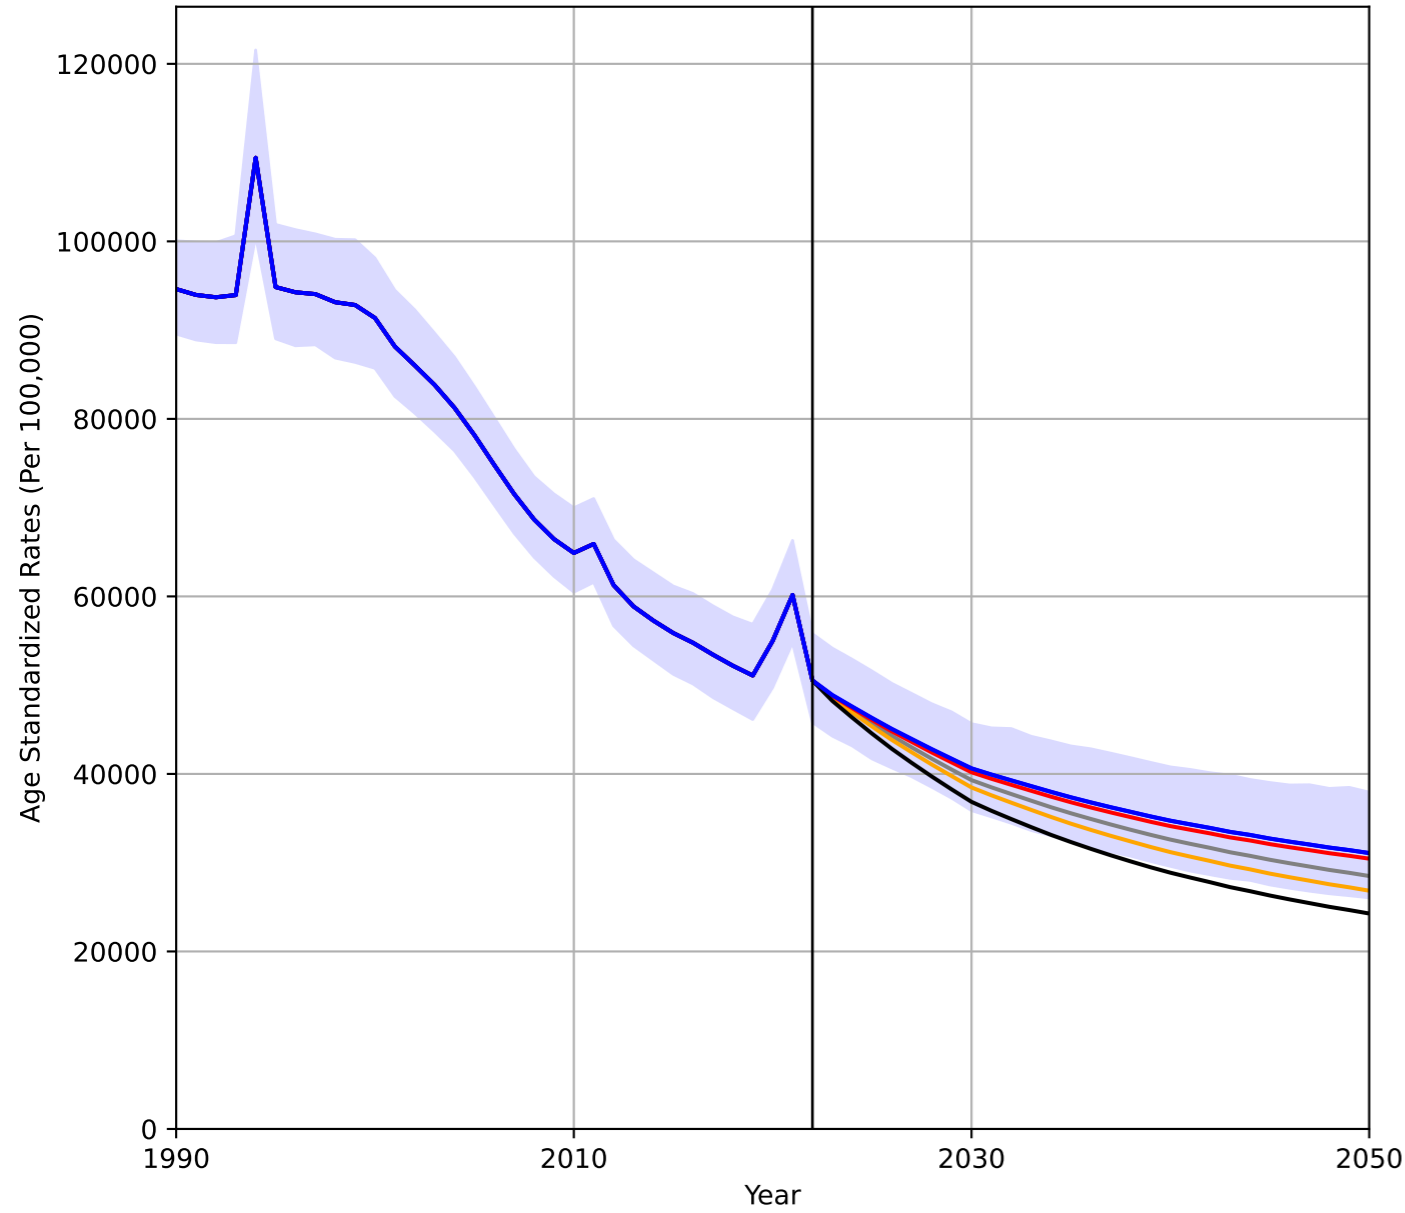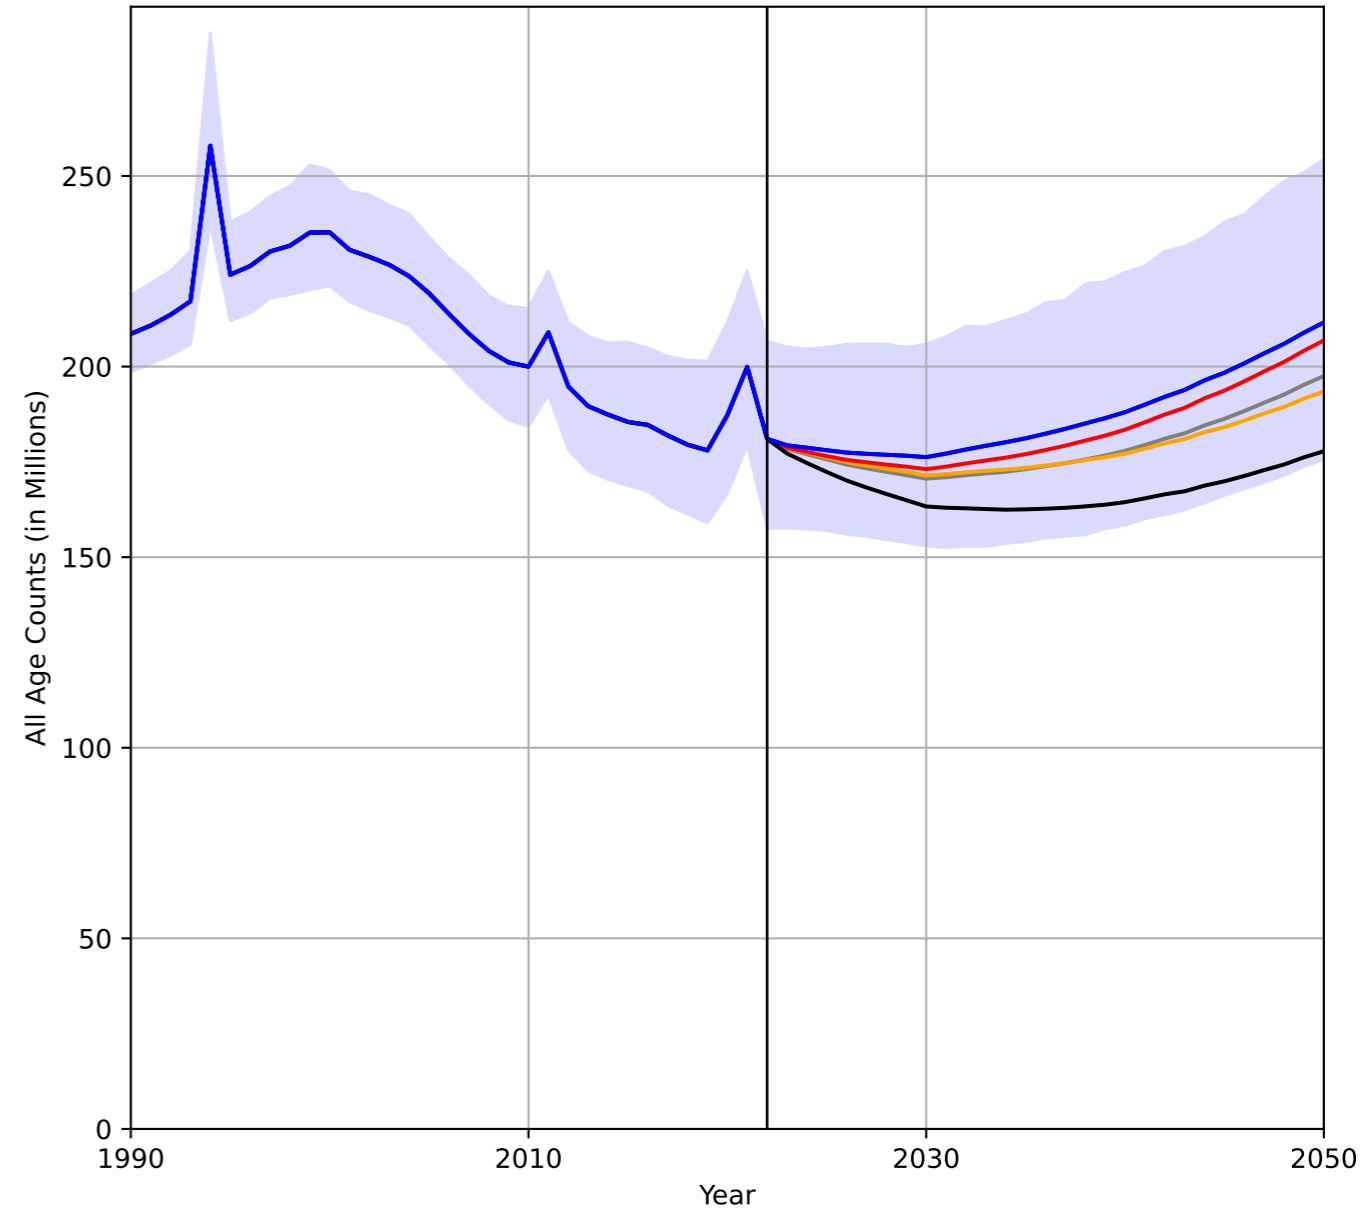

# Southern Sub-Saharan Africa

1642

Supplemental Results Figure S10. All-cause age standardised DALY rates (A) and all age DALY counts (B), for the past and for five future scenarios, 1990–2050

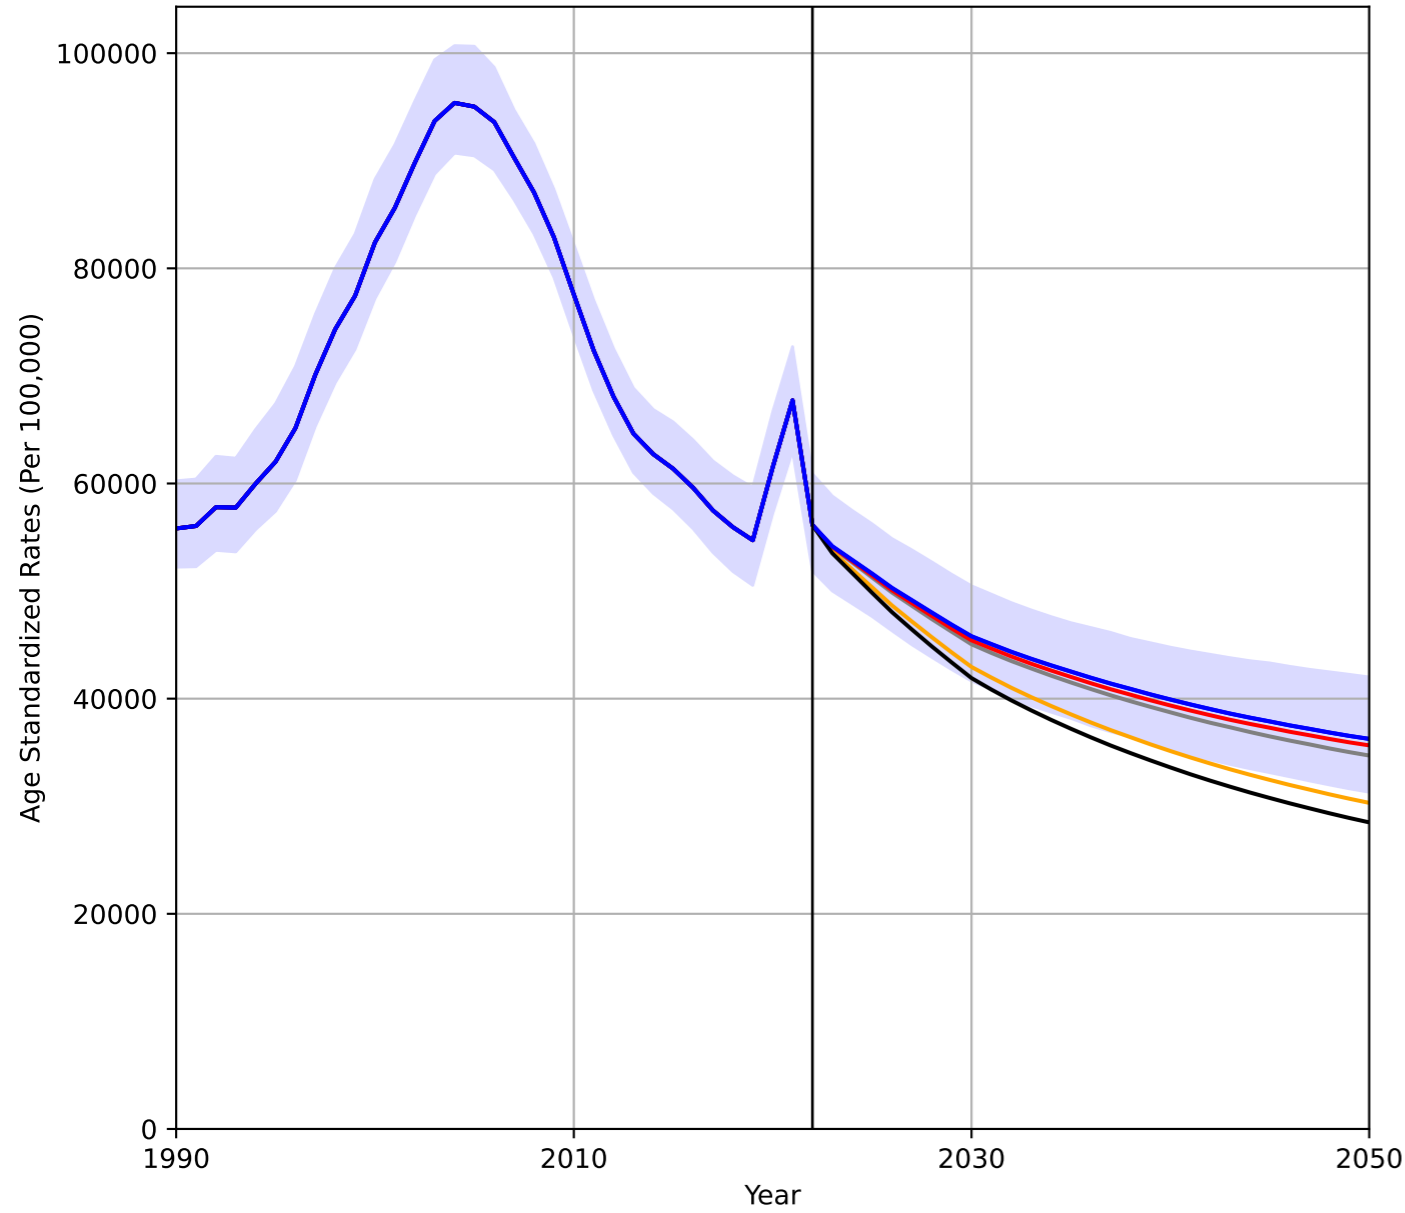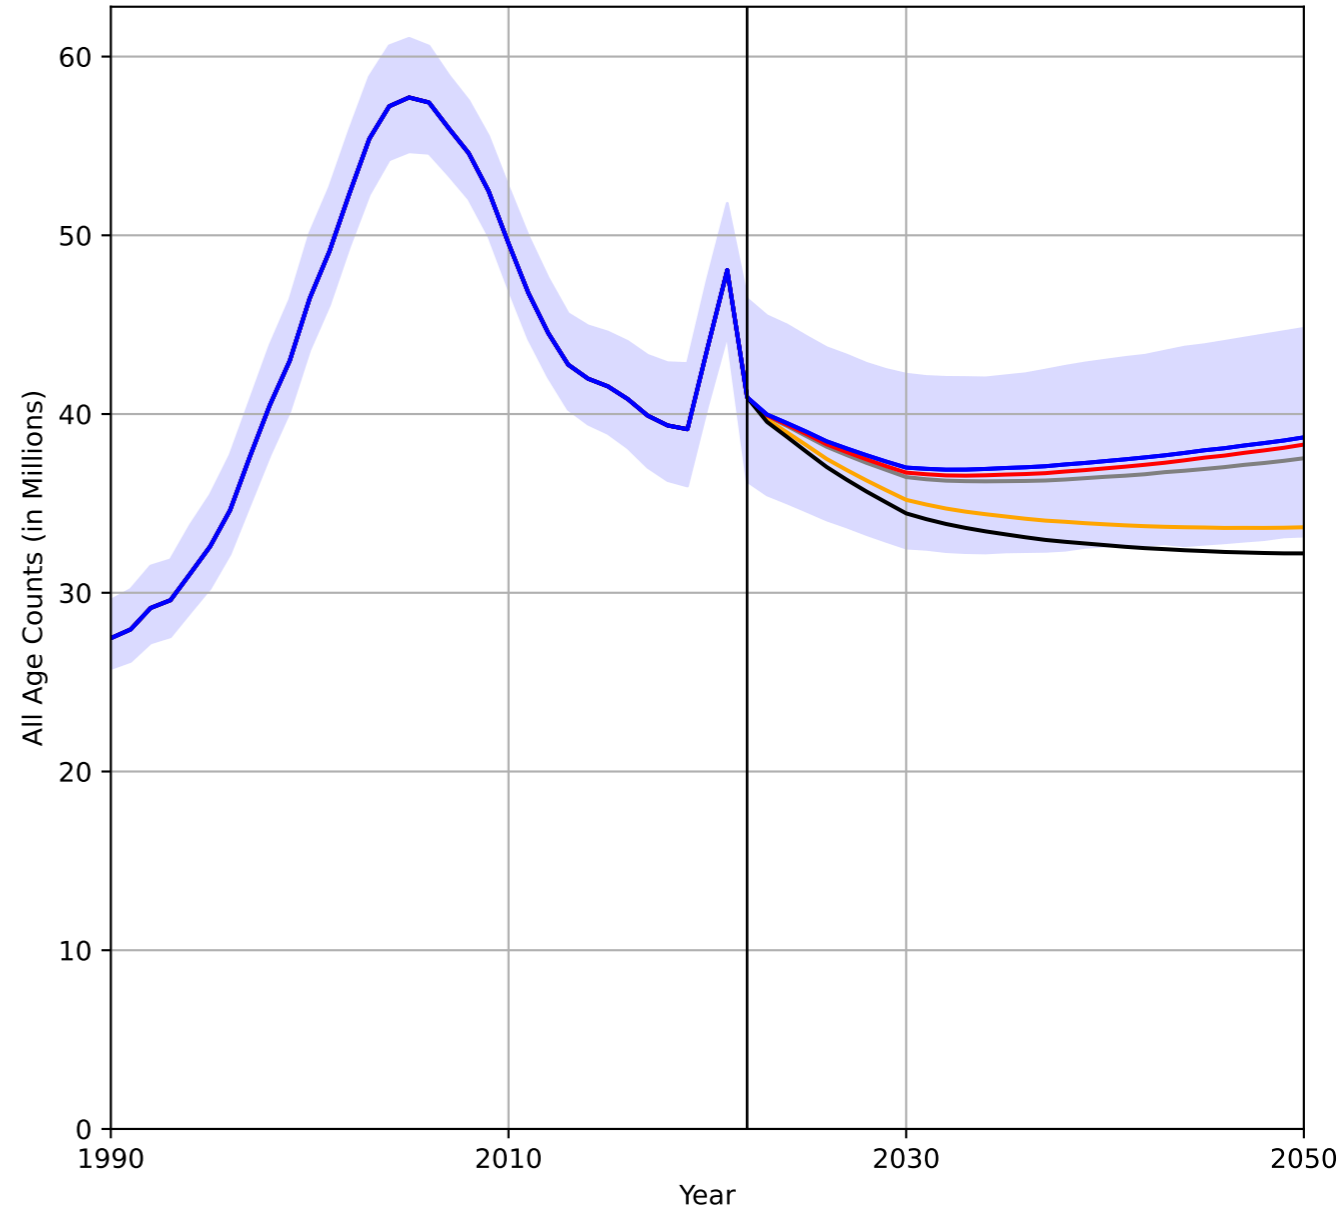

# Western Sub-Saharan Africa

Supplemental Results Figure S10. All-cause age standardised DALY rates (A) and all age DALY counts (B), for the past and for five future scenarios, 1990–2050

1643

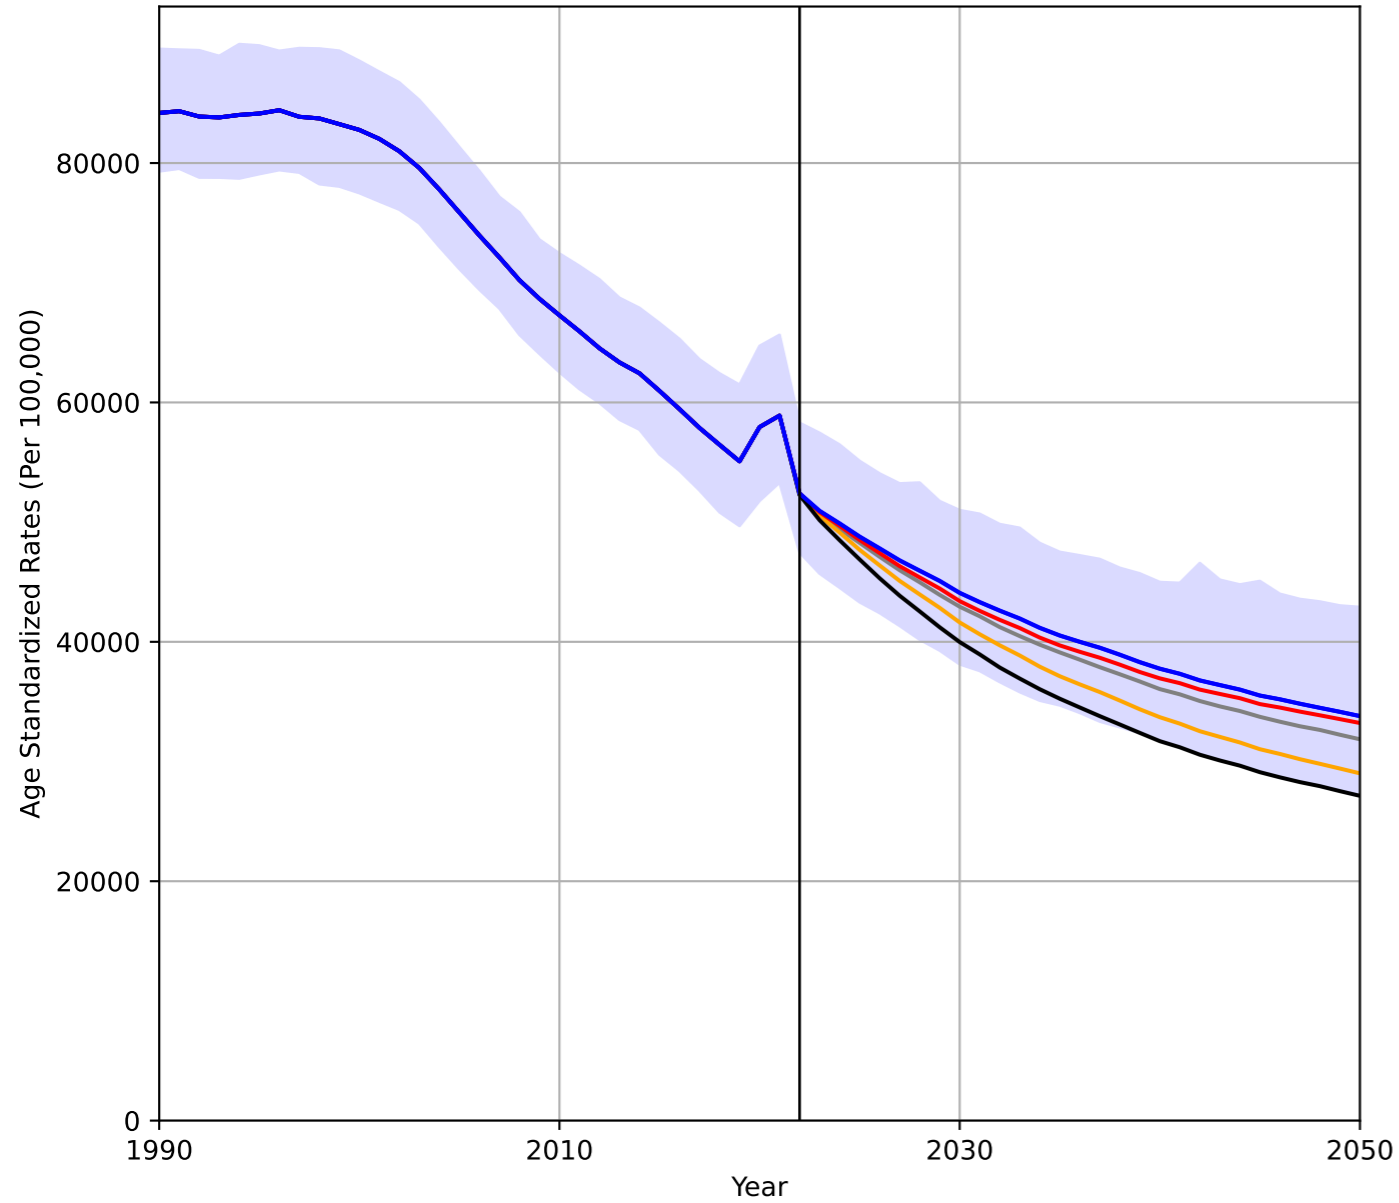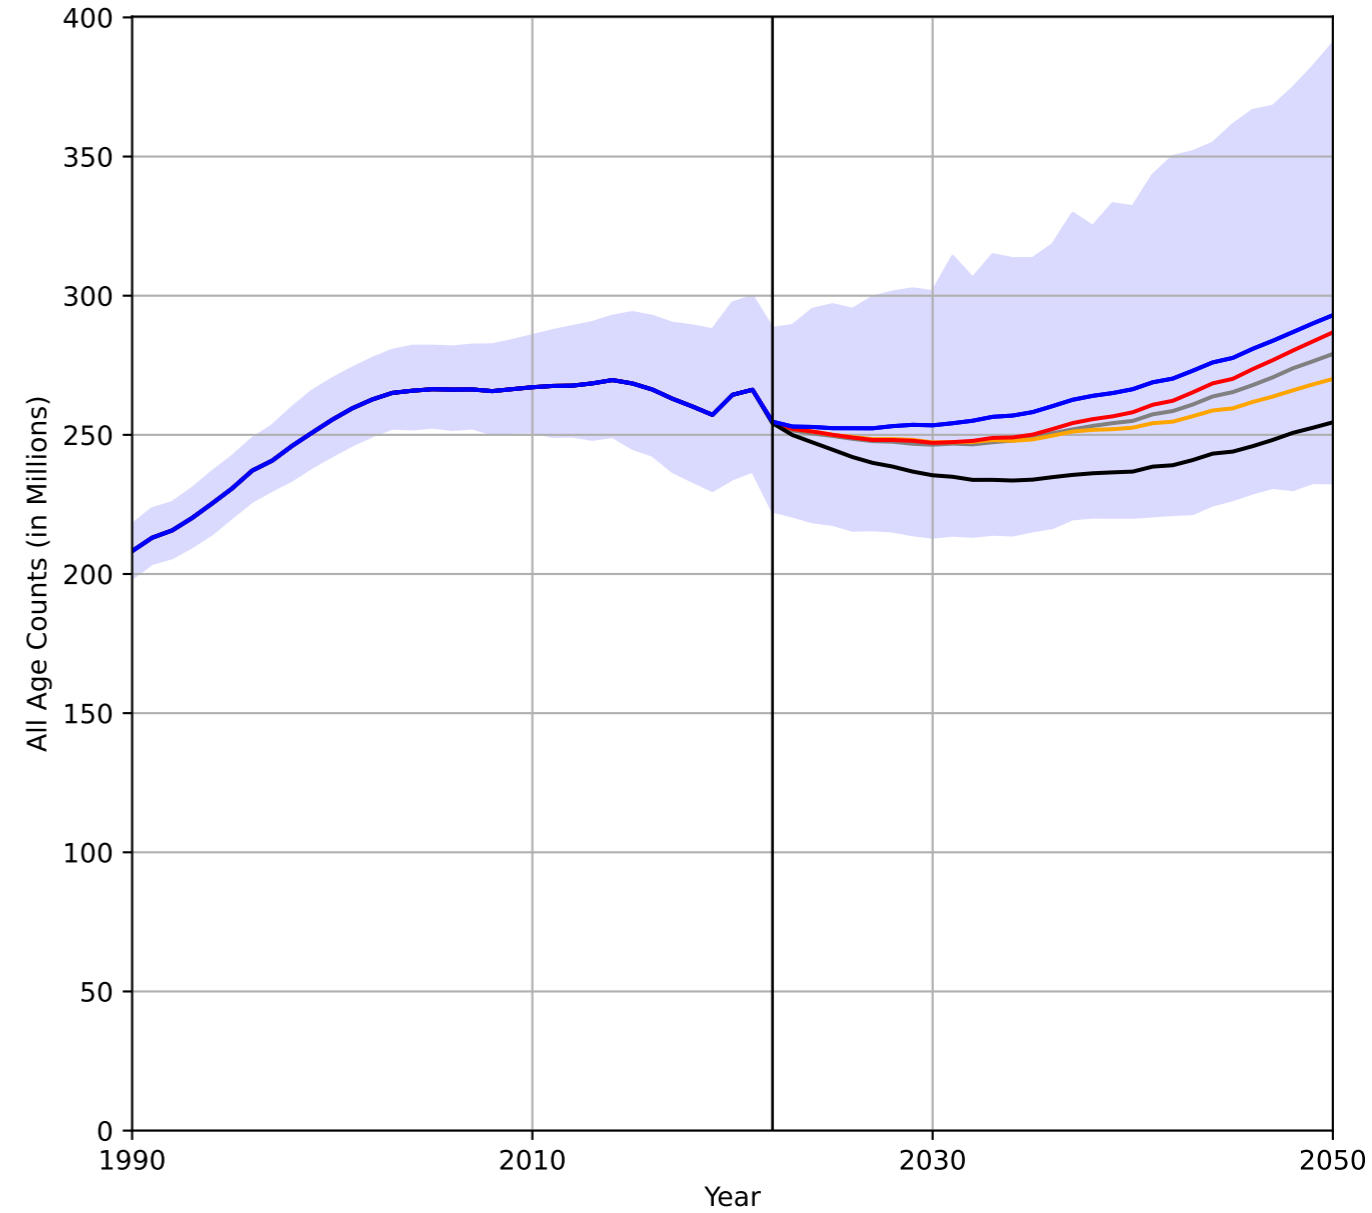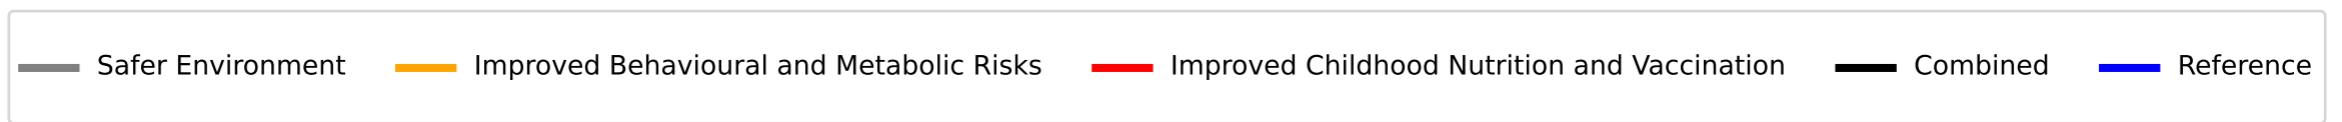

# Armenia

Supplemental Results Figure S11. All-cause age standardised death rates (A) and all age death counts (B), for the past and for five future scenarios, 1990–2050

1644

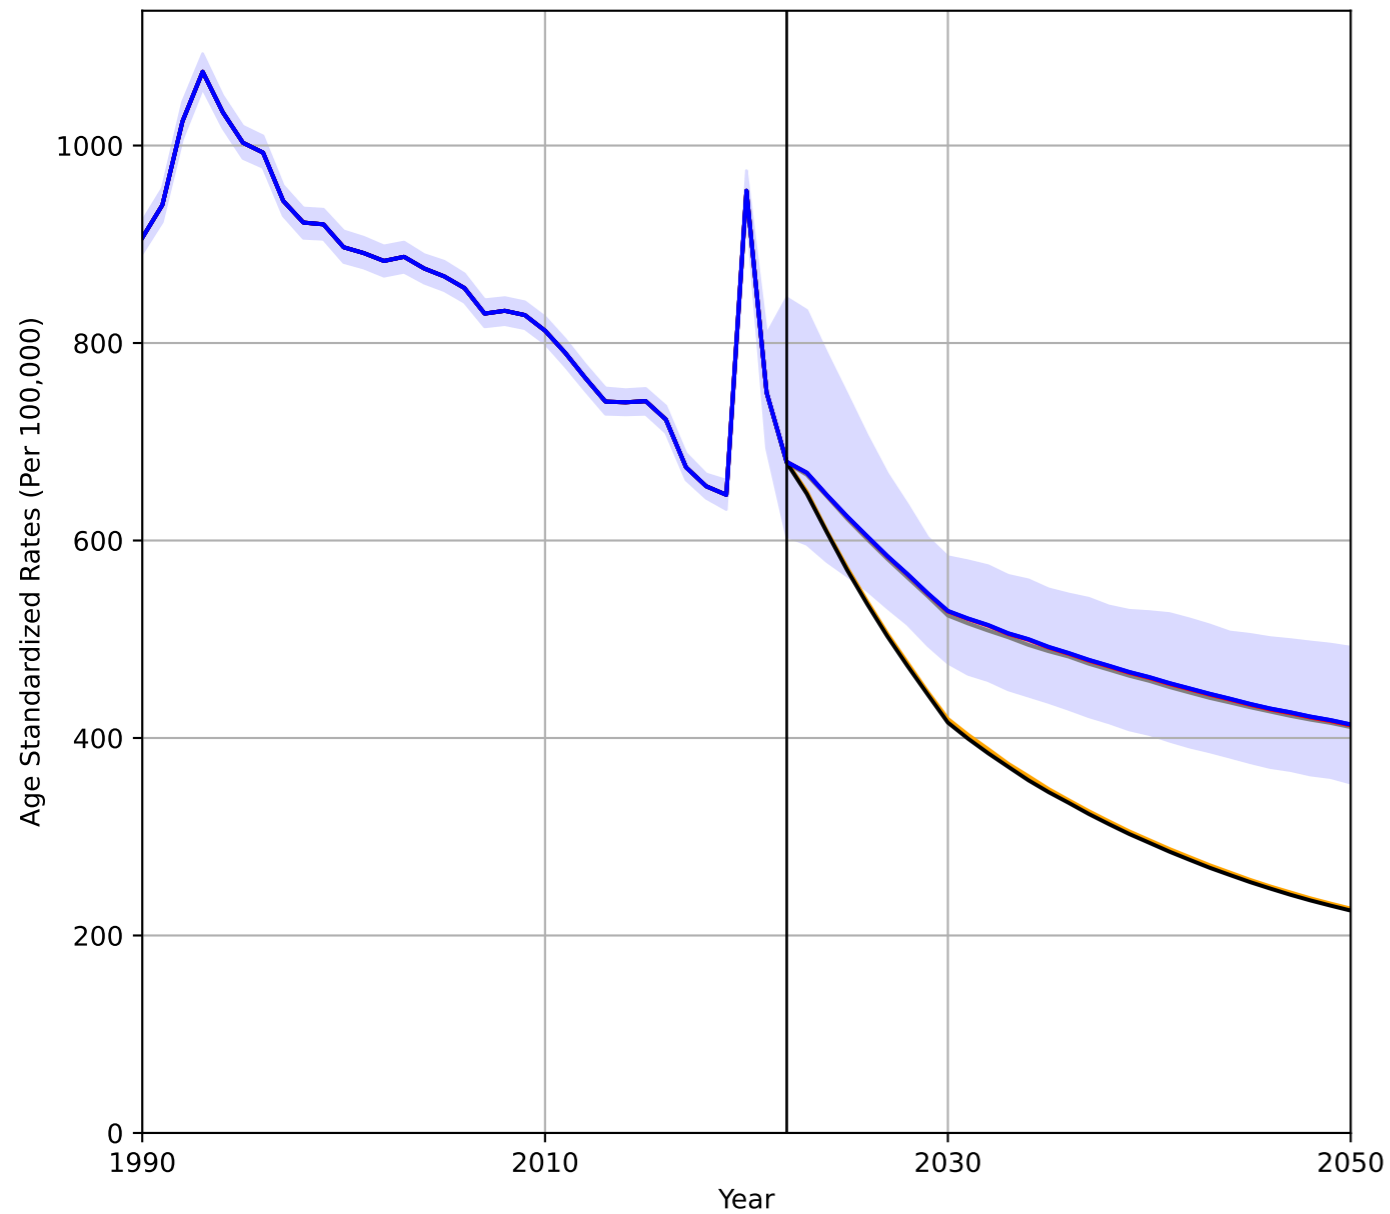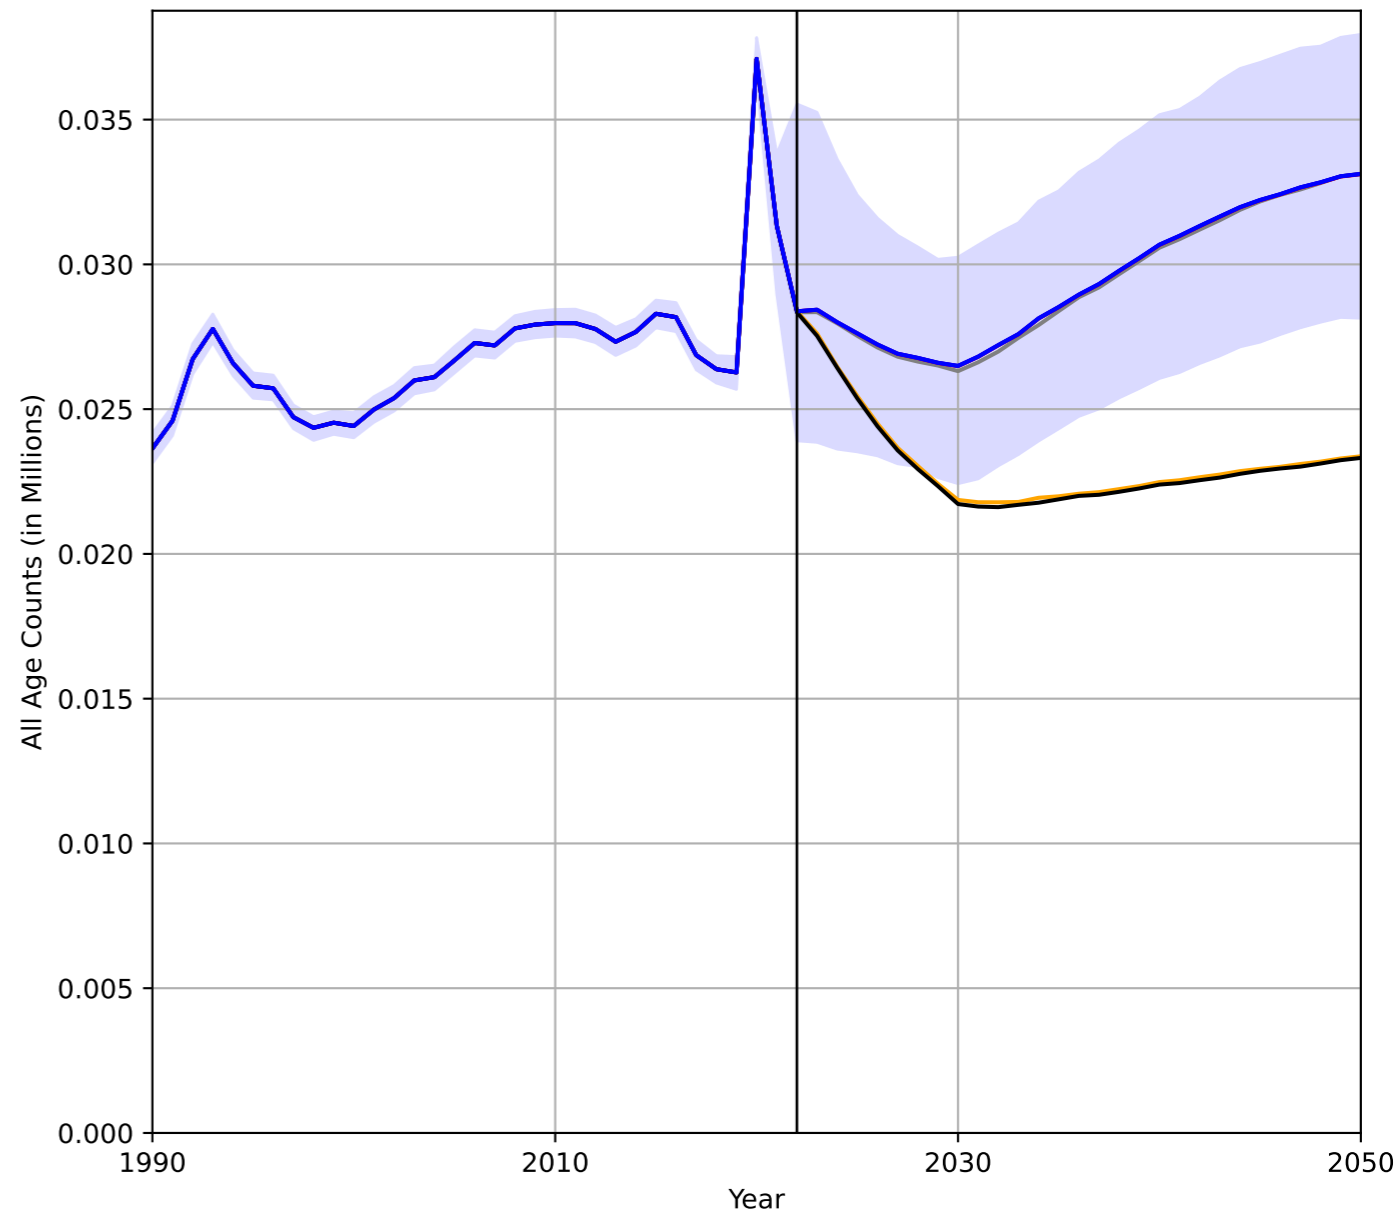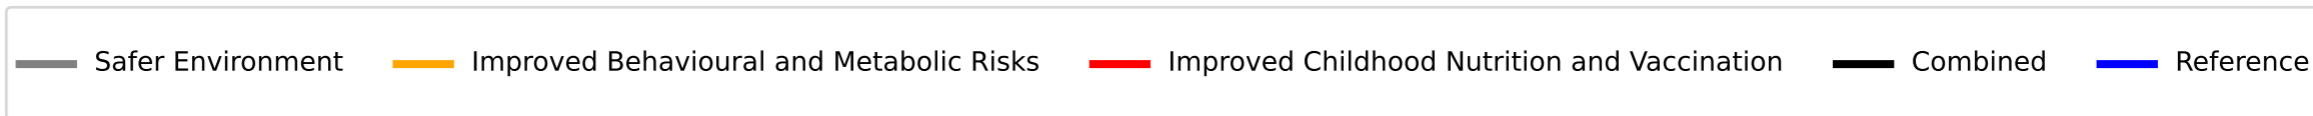

# Azerbaijan

Supplemental Results Figure S11. All-cause age standardised death rates (A) and all age death counts (B), for the past and for five future scenarios, 1990–2050

1645

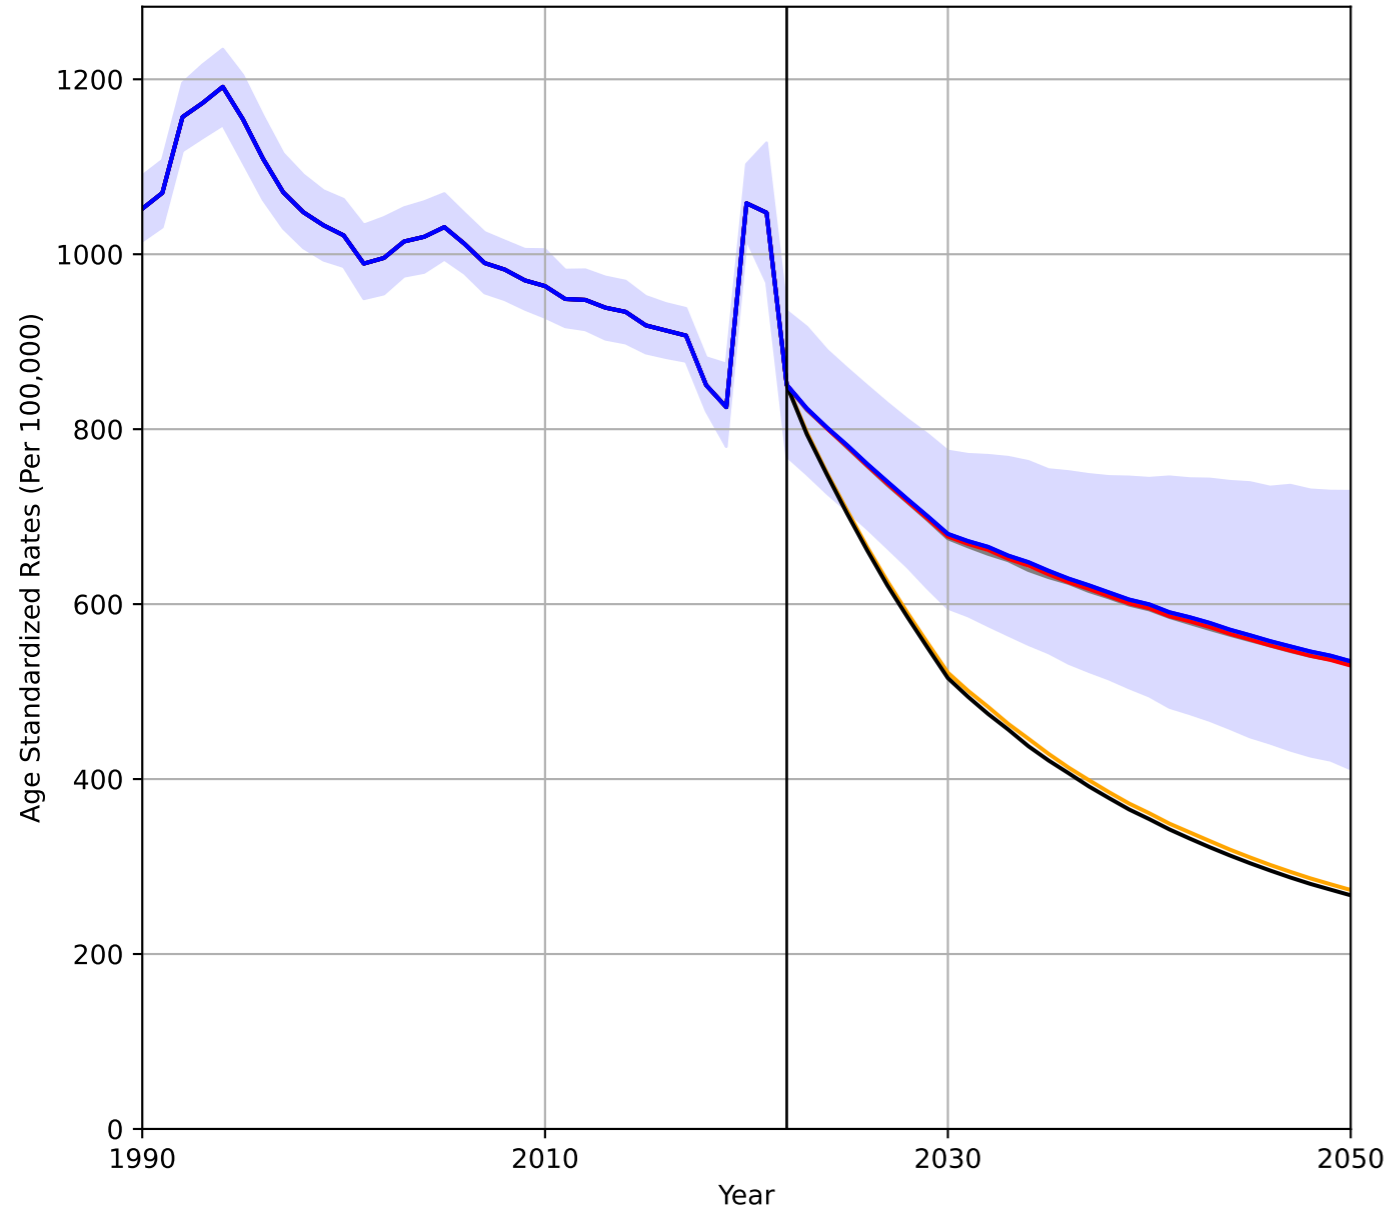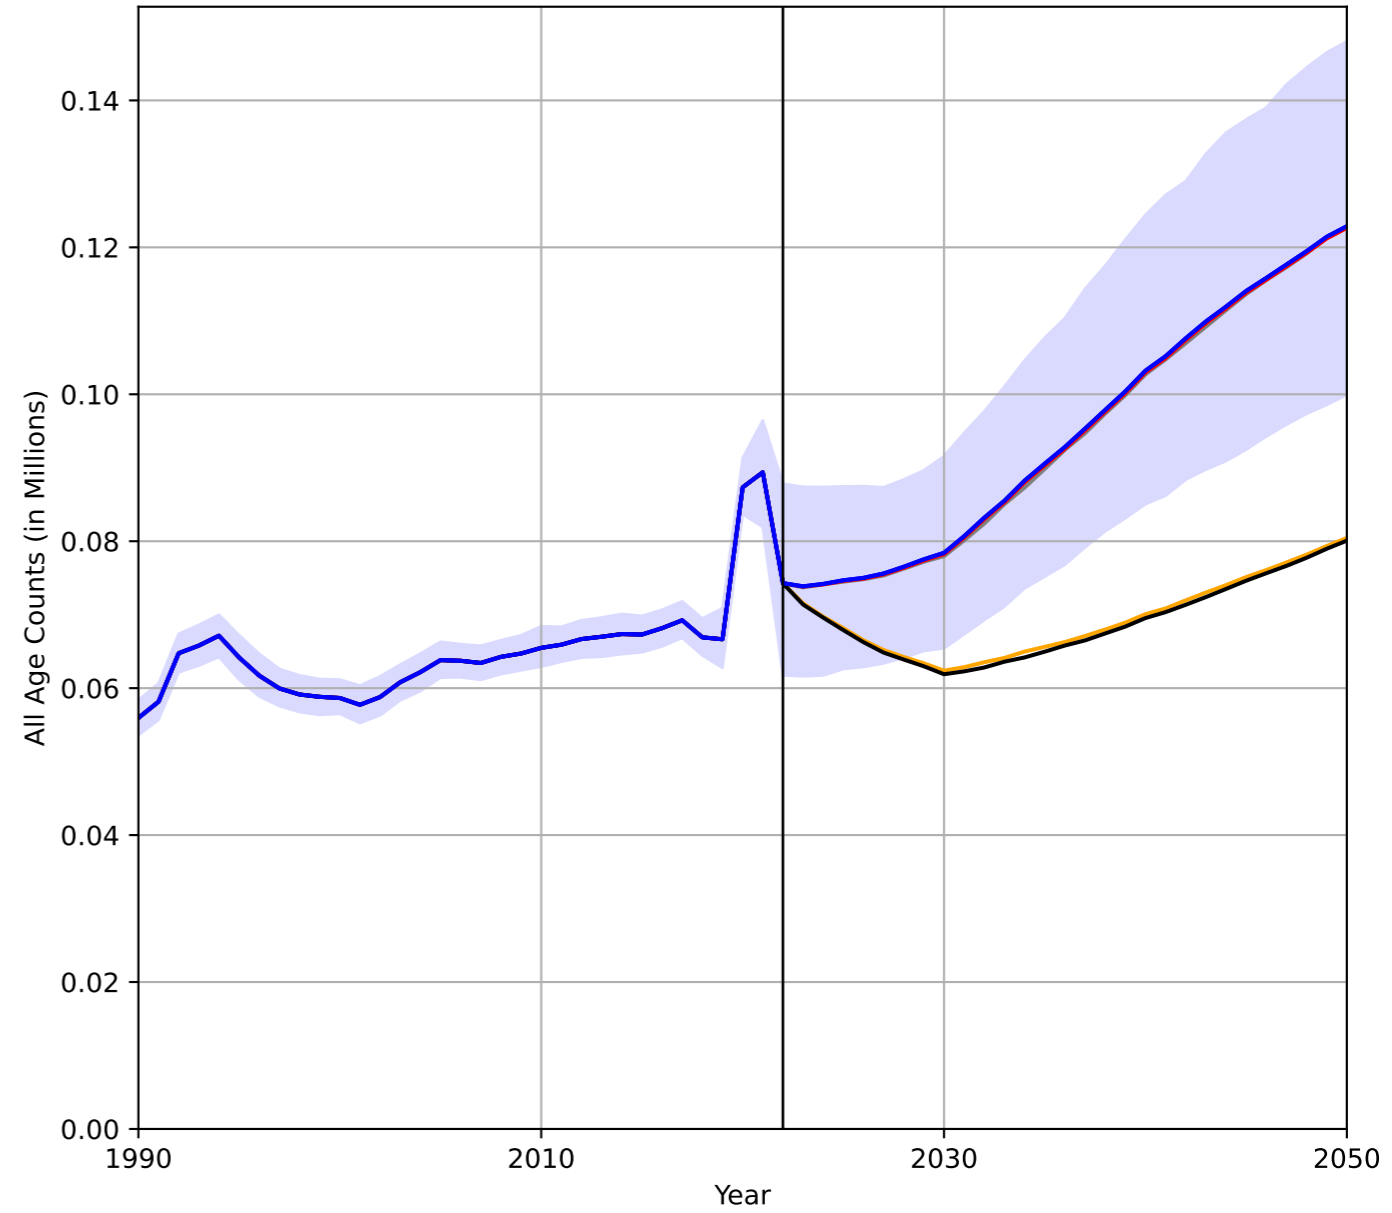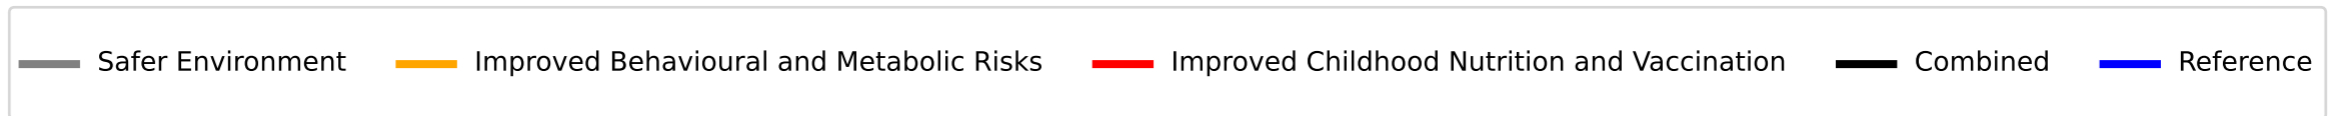

# Georgia

Supplemental Results Figure S11. All-cause age standardised death rates (A) and all age death counts (B), for the past and for five future scenarios, 1990–2050

1646

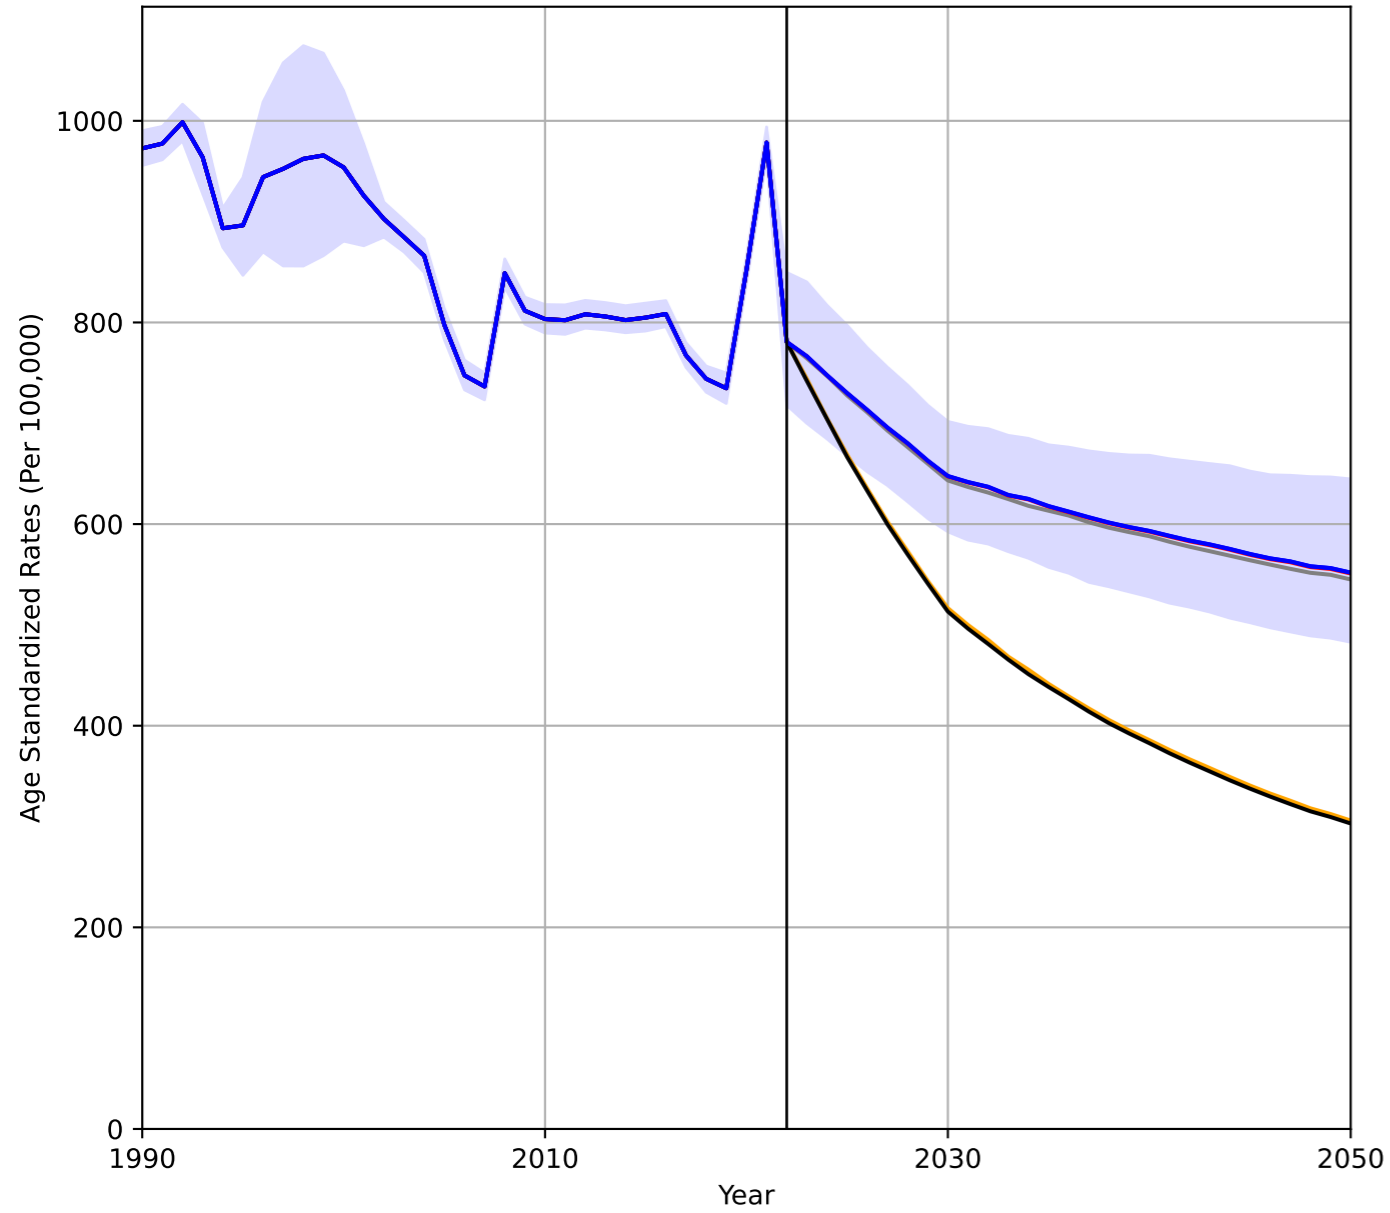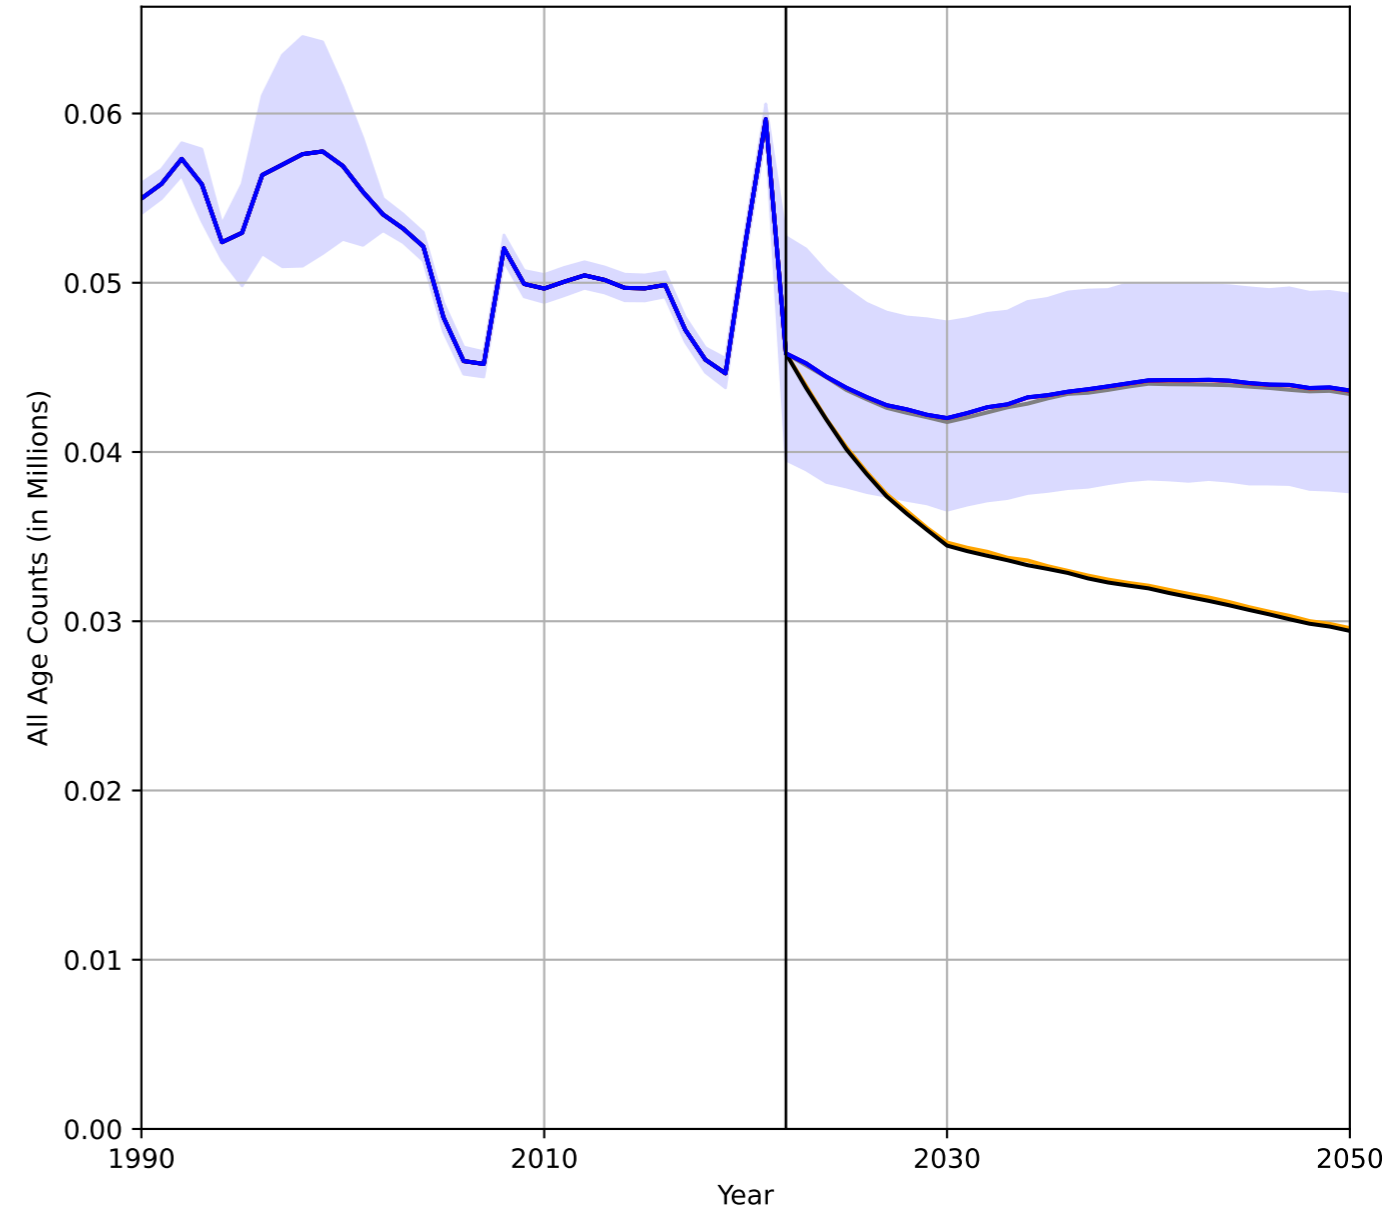

# Kazakhstan

Supplemental Results Figure S11. All-cause age standardised death rates (A) and all age death counts (B), for the past and for five future scenarios, 1990–2050

1647

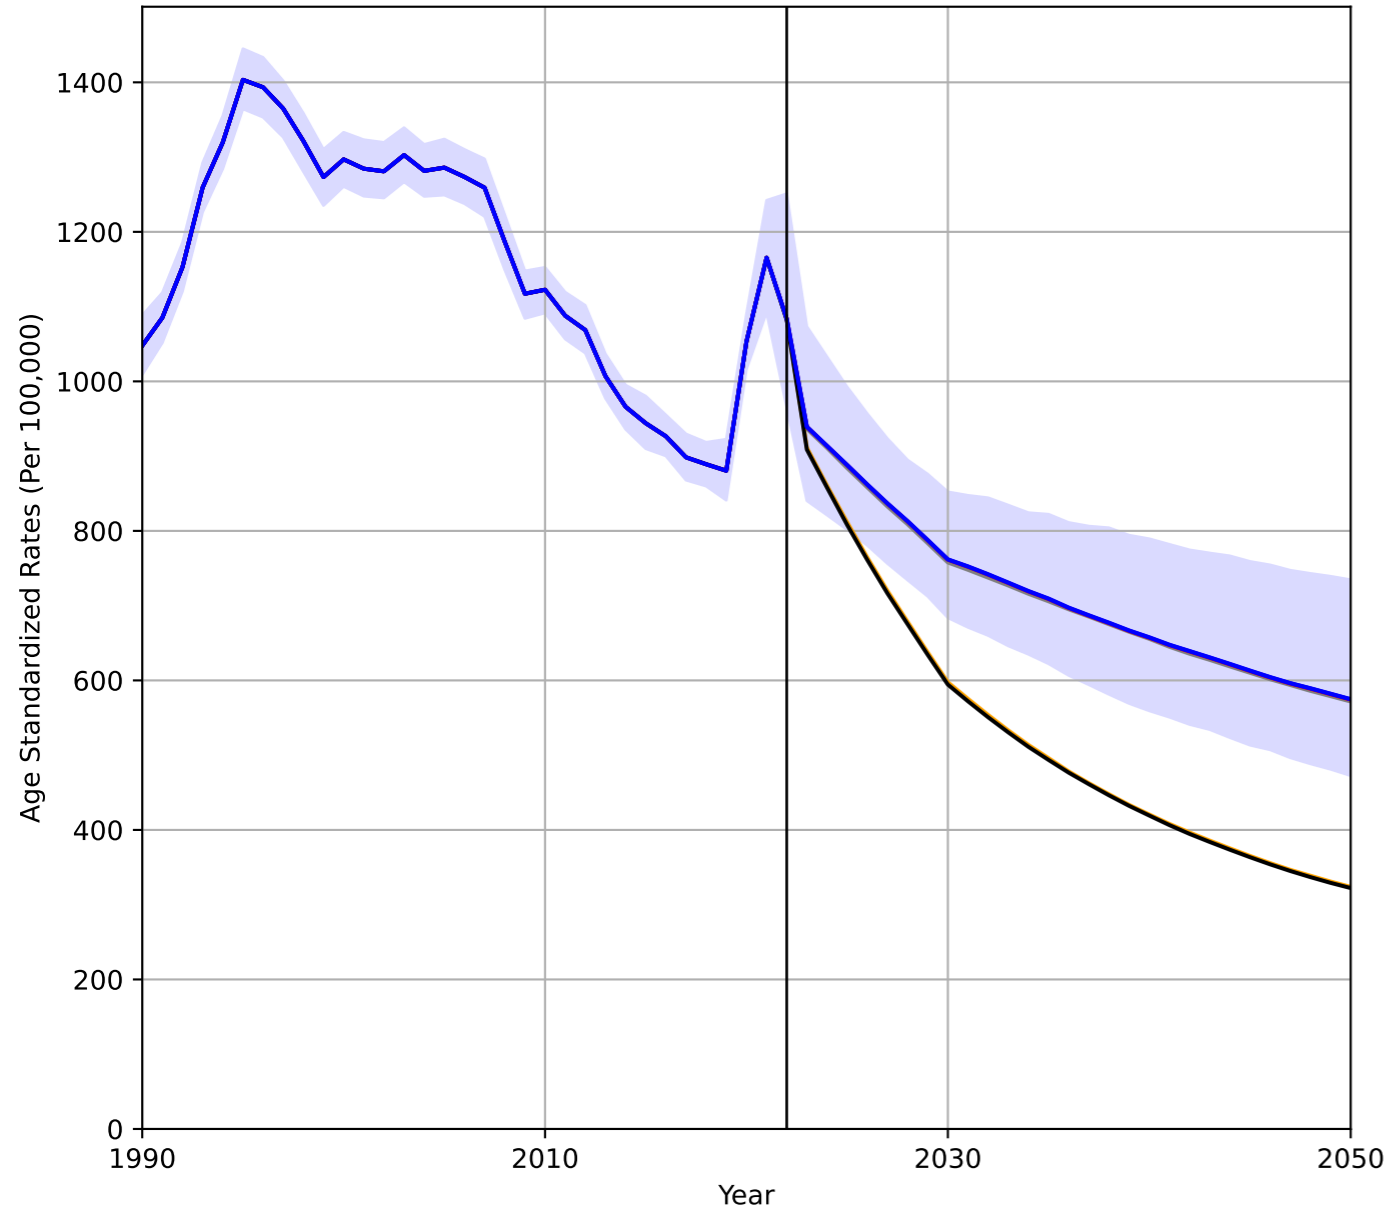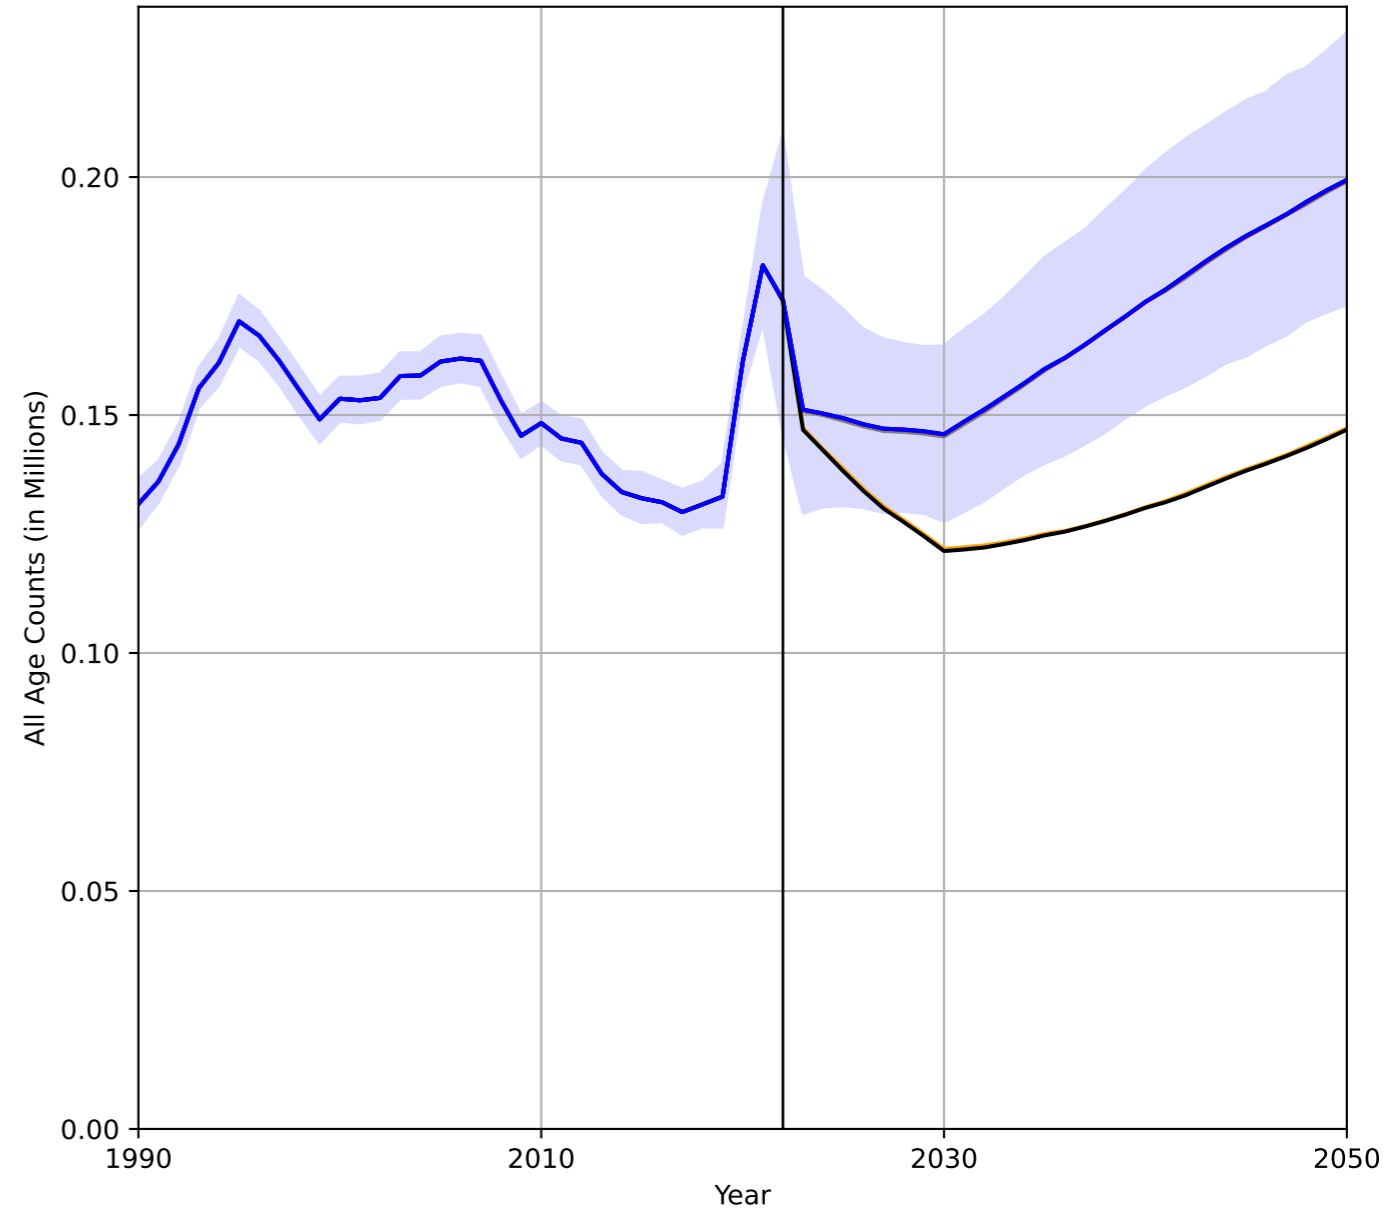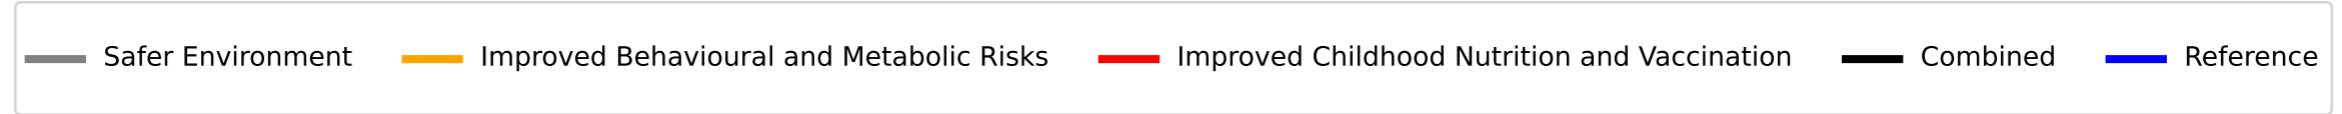



# Kyrgyzstan

Supplemental Results Figure S11. All-cause age standardised death rates (A) and all age death counts (B), for the past and for five future scenarios, 1990–2050

1648

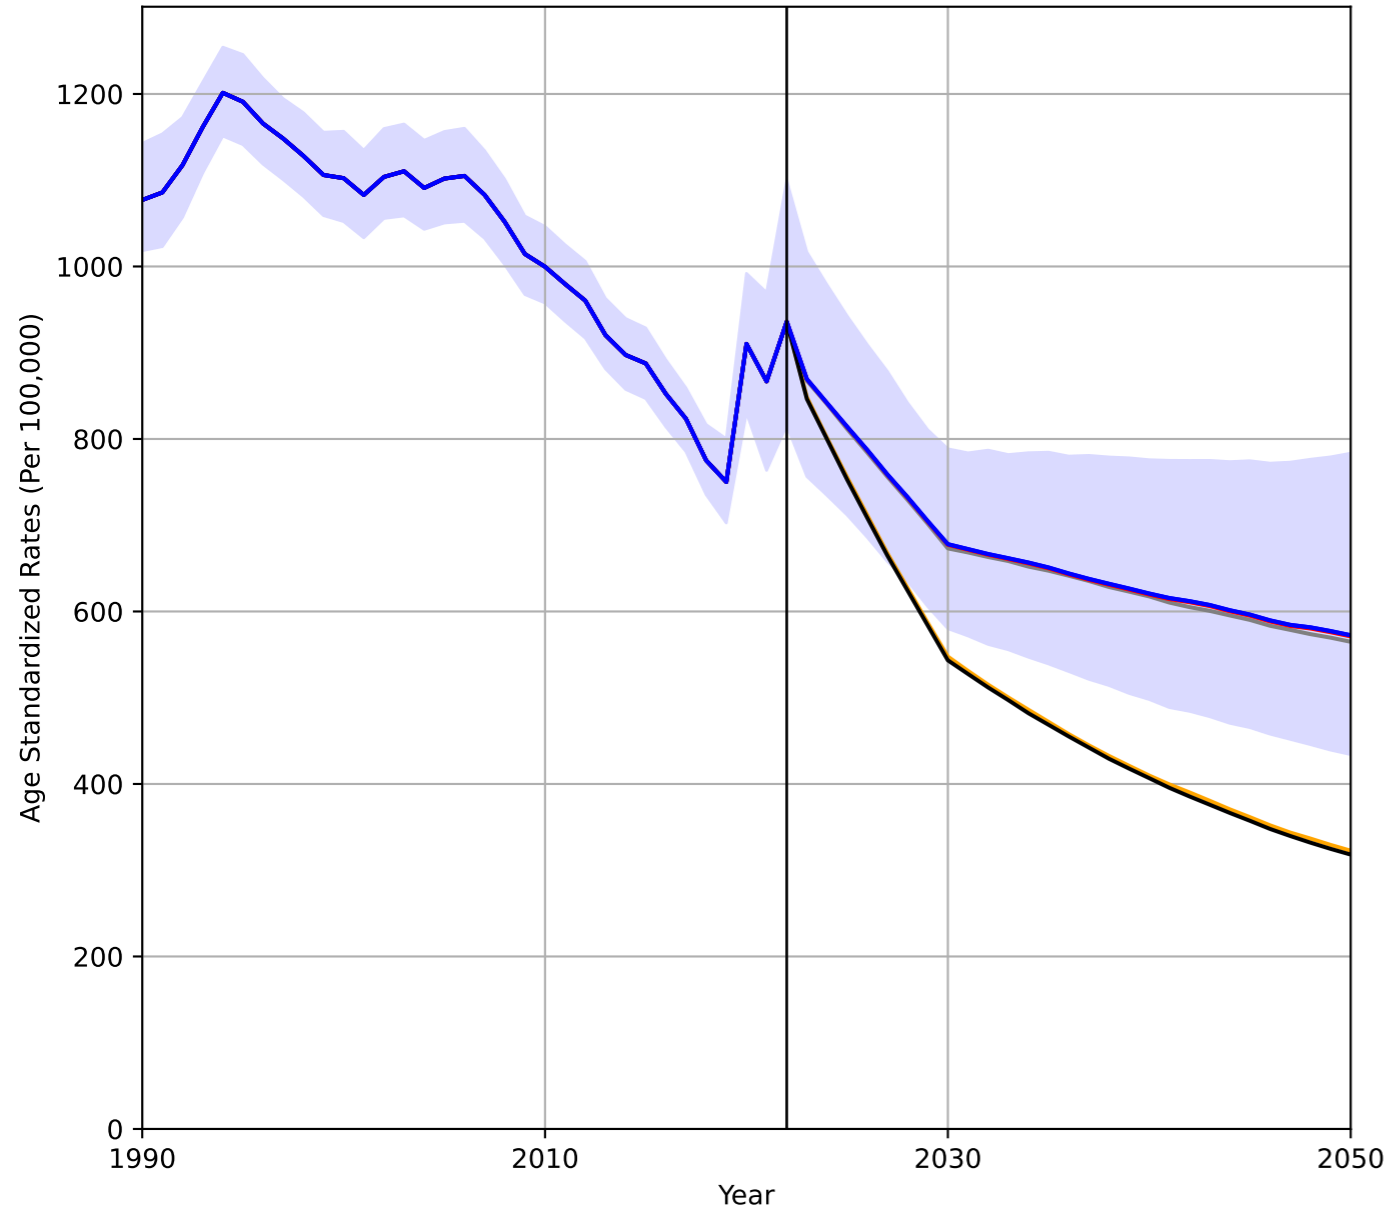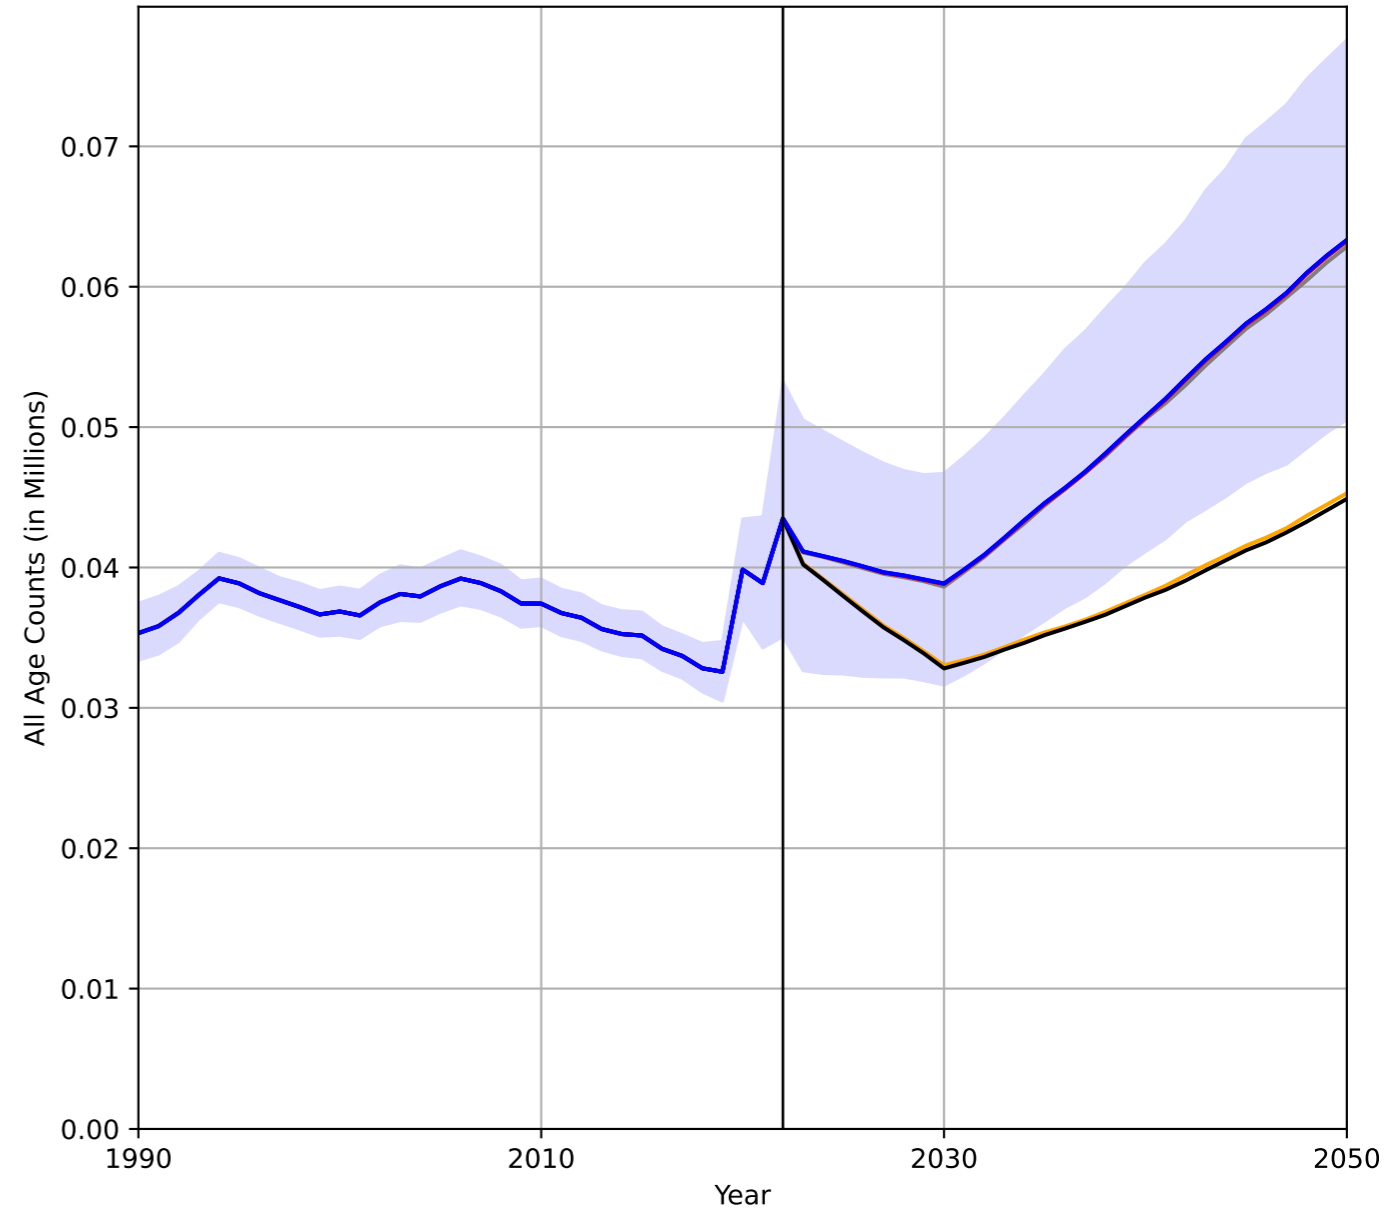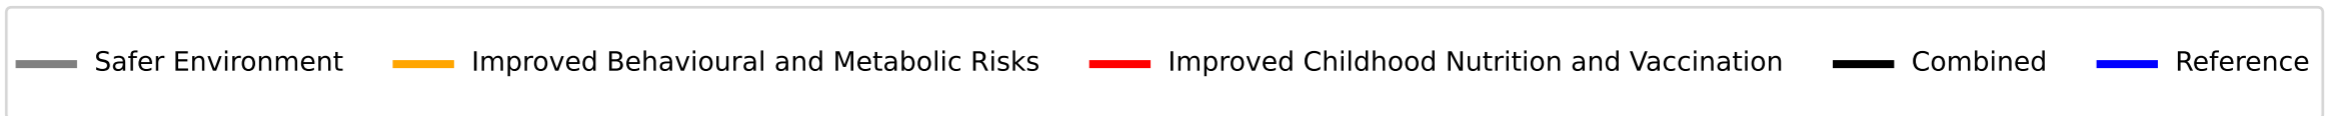

# Mongolia

Supplemental Results Figure S11. All-cause age standardised death rates (A) and all age death counts (B), for the past and for five future scenarios, 1990–2050

1649

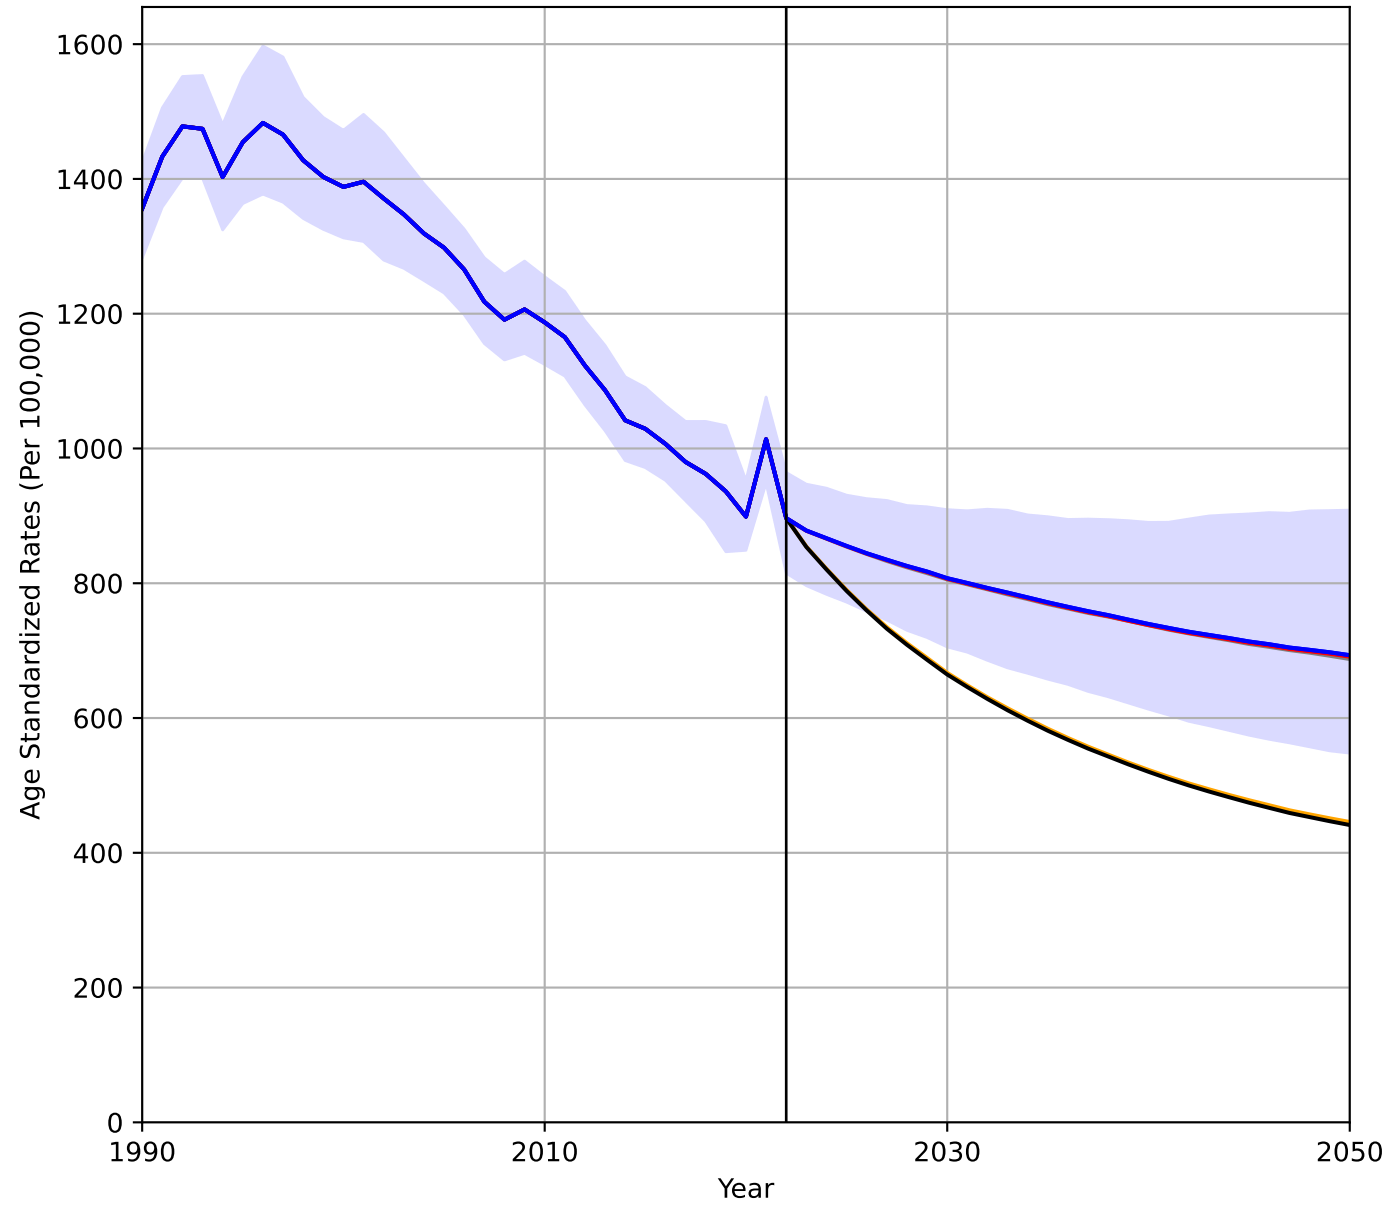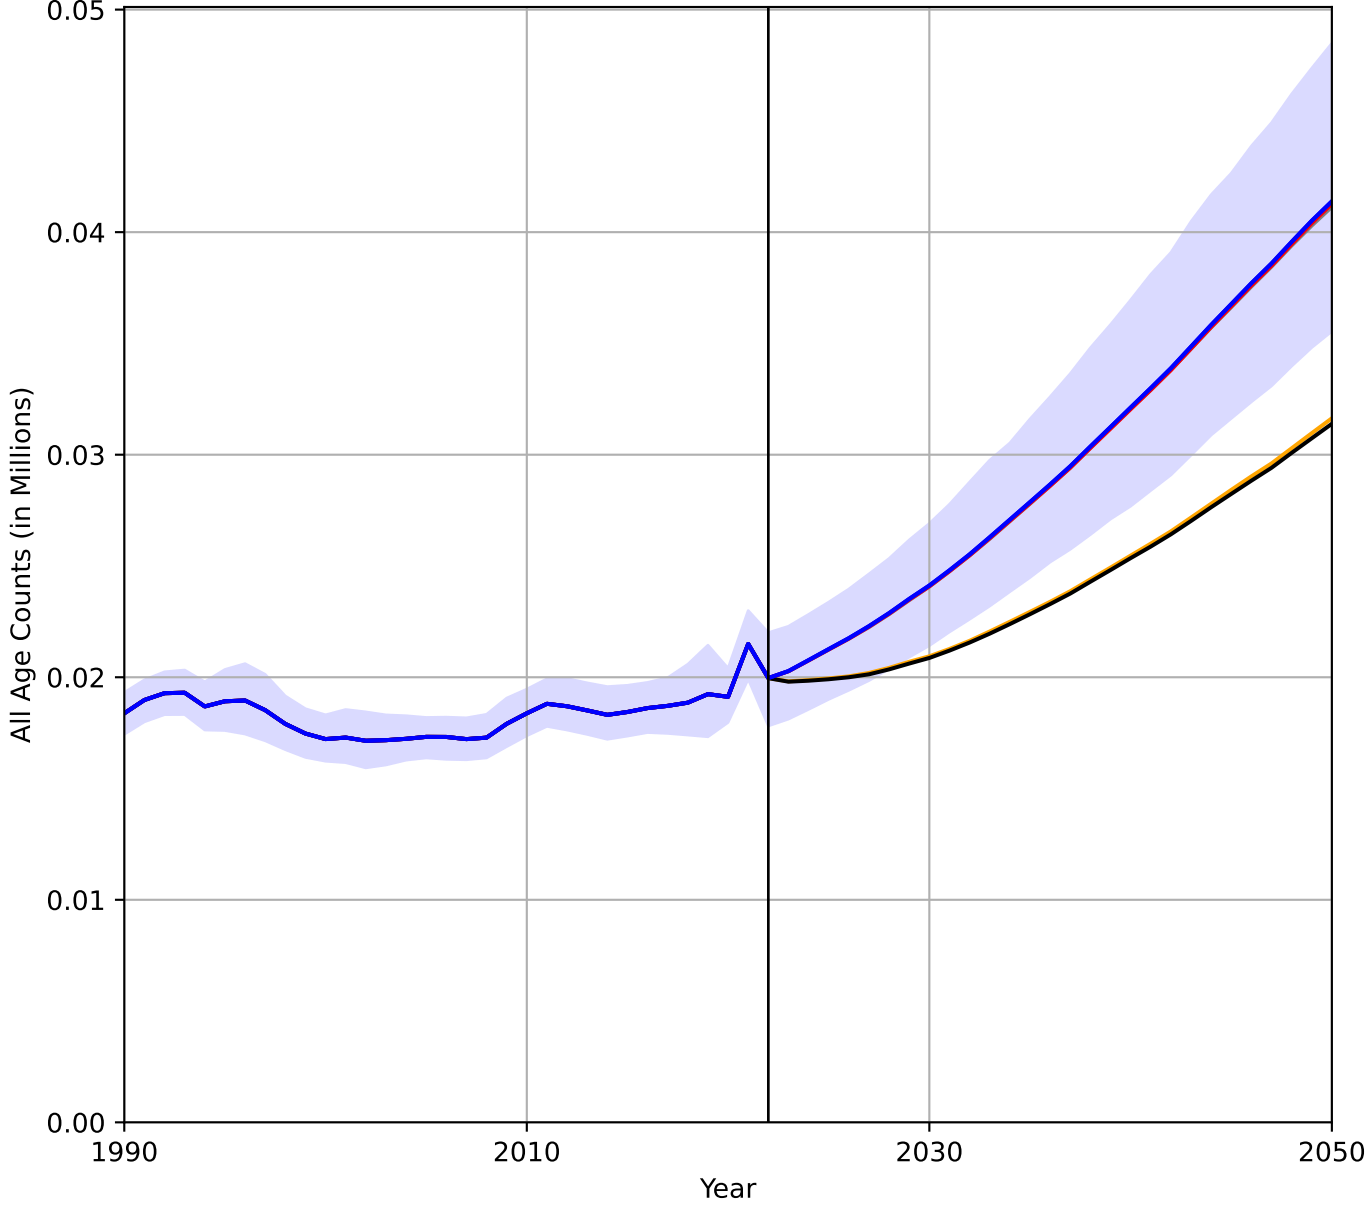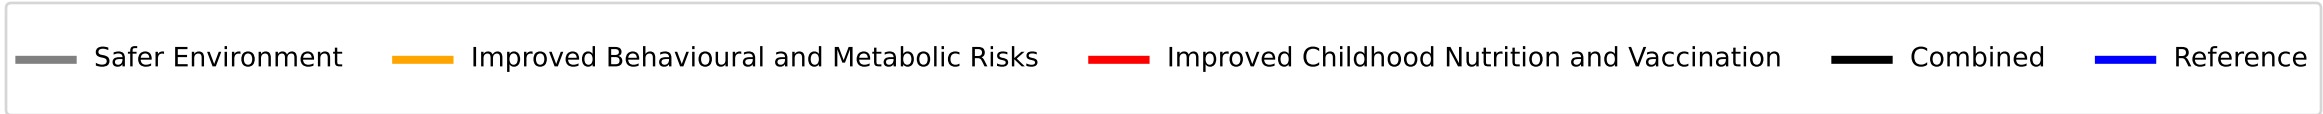

# Tajikistan

Supplemental Results Figure S11. All-cause age standardised death rates (A) and all age death counts (B), for the past and for five future scenarios, 1990–2050

1650

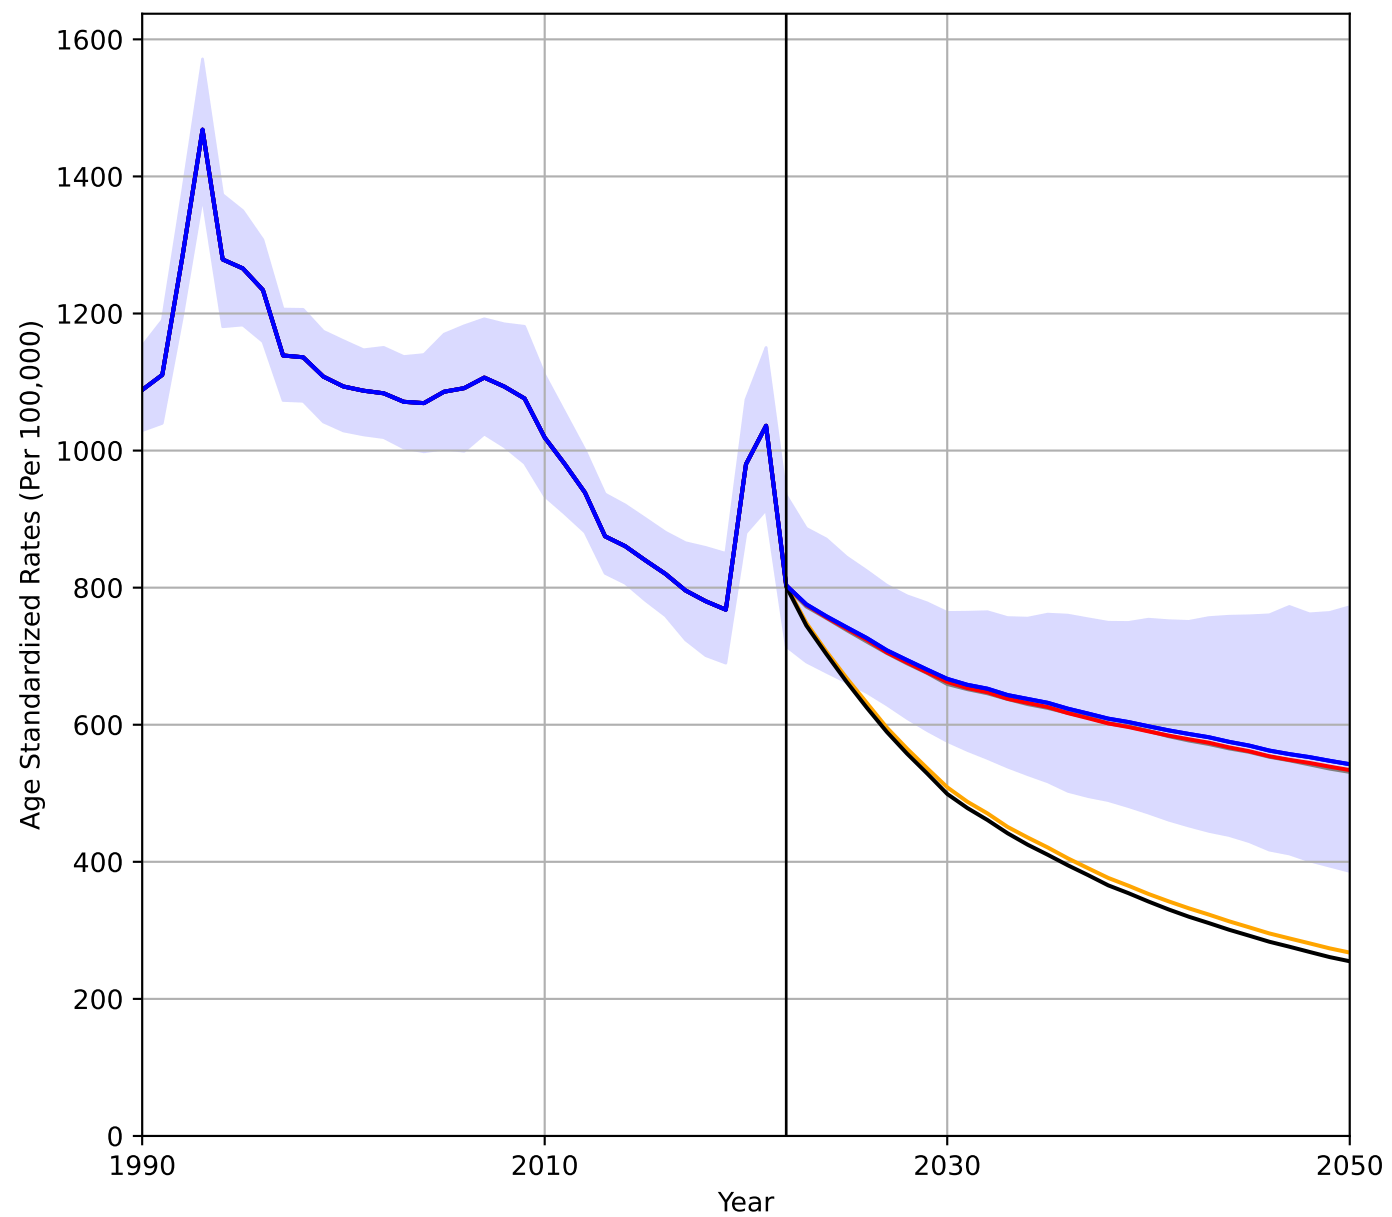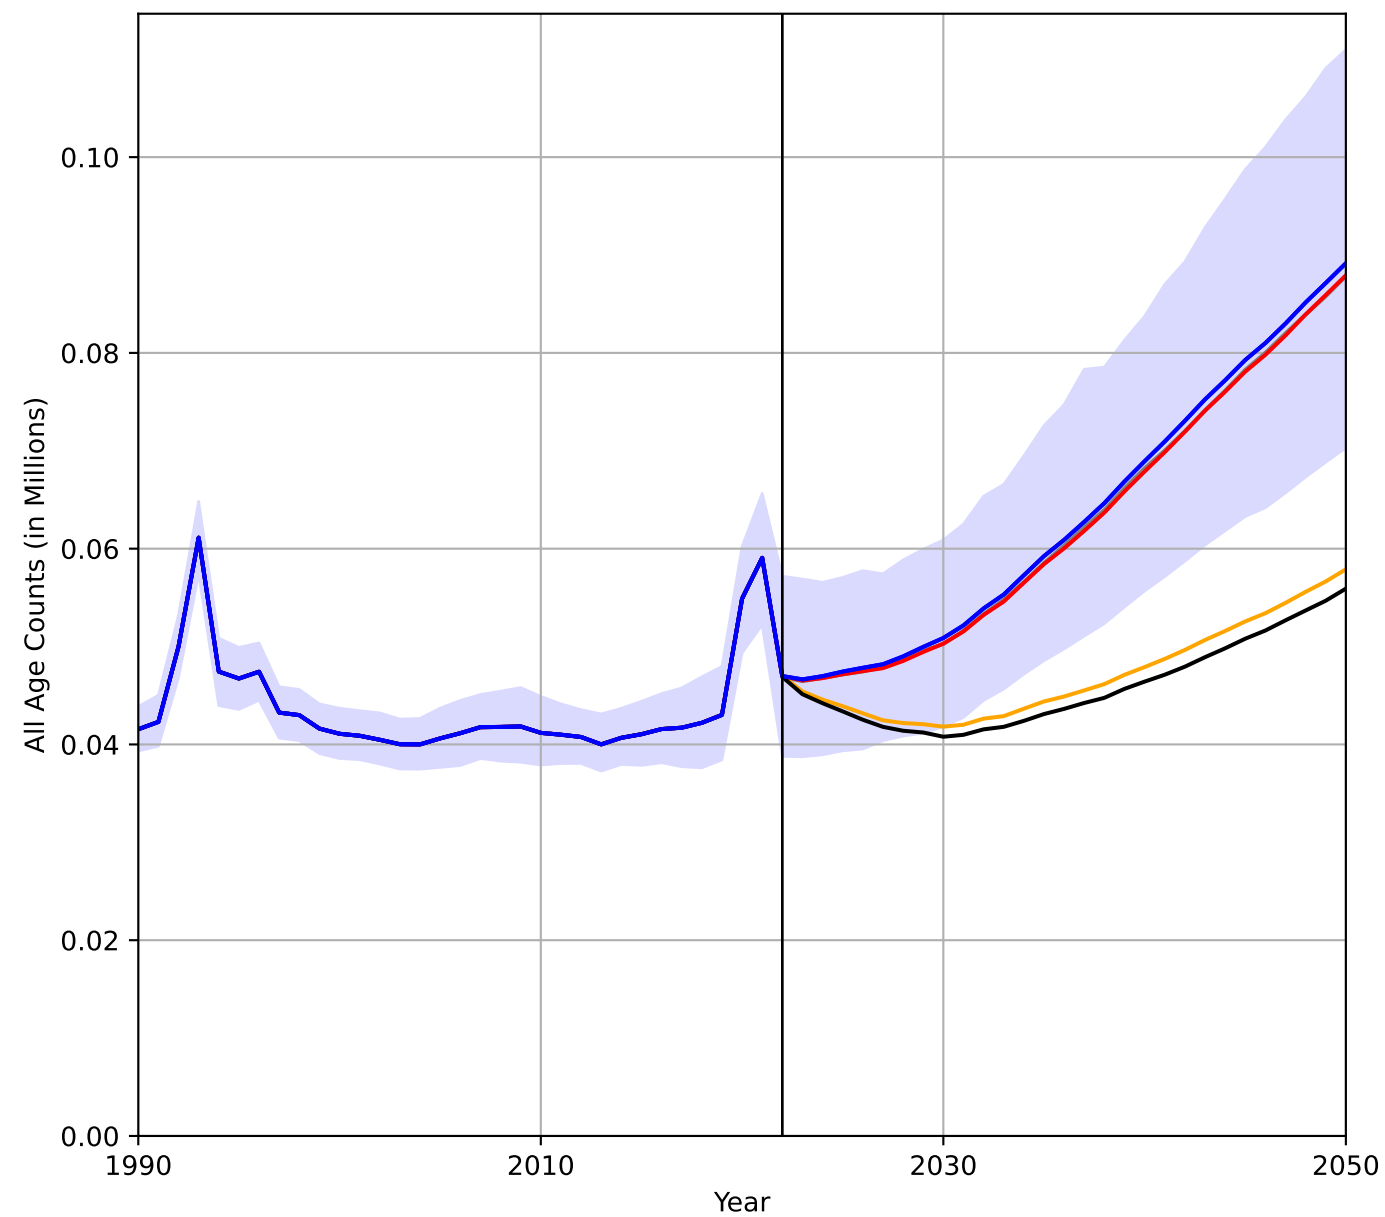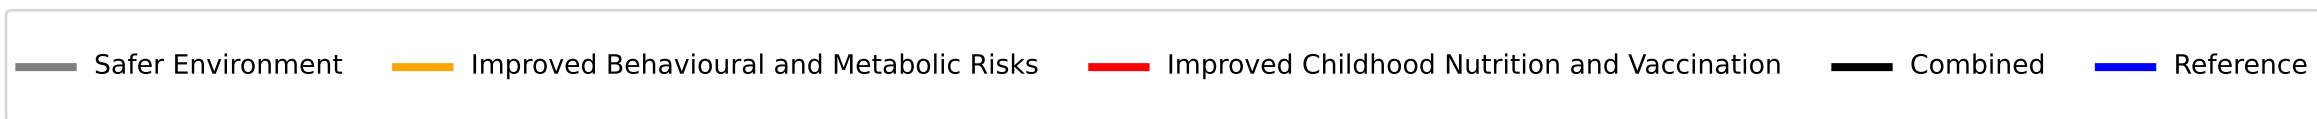

# Turkmenistan

Supplemental Results Figure S11. All-cause age standardised death rates (A) and all age death counts (B), for the past and for five future scenarios, 1990–2050

1651

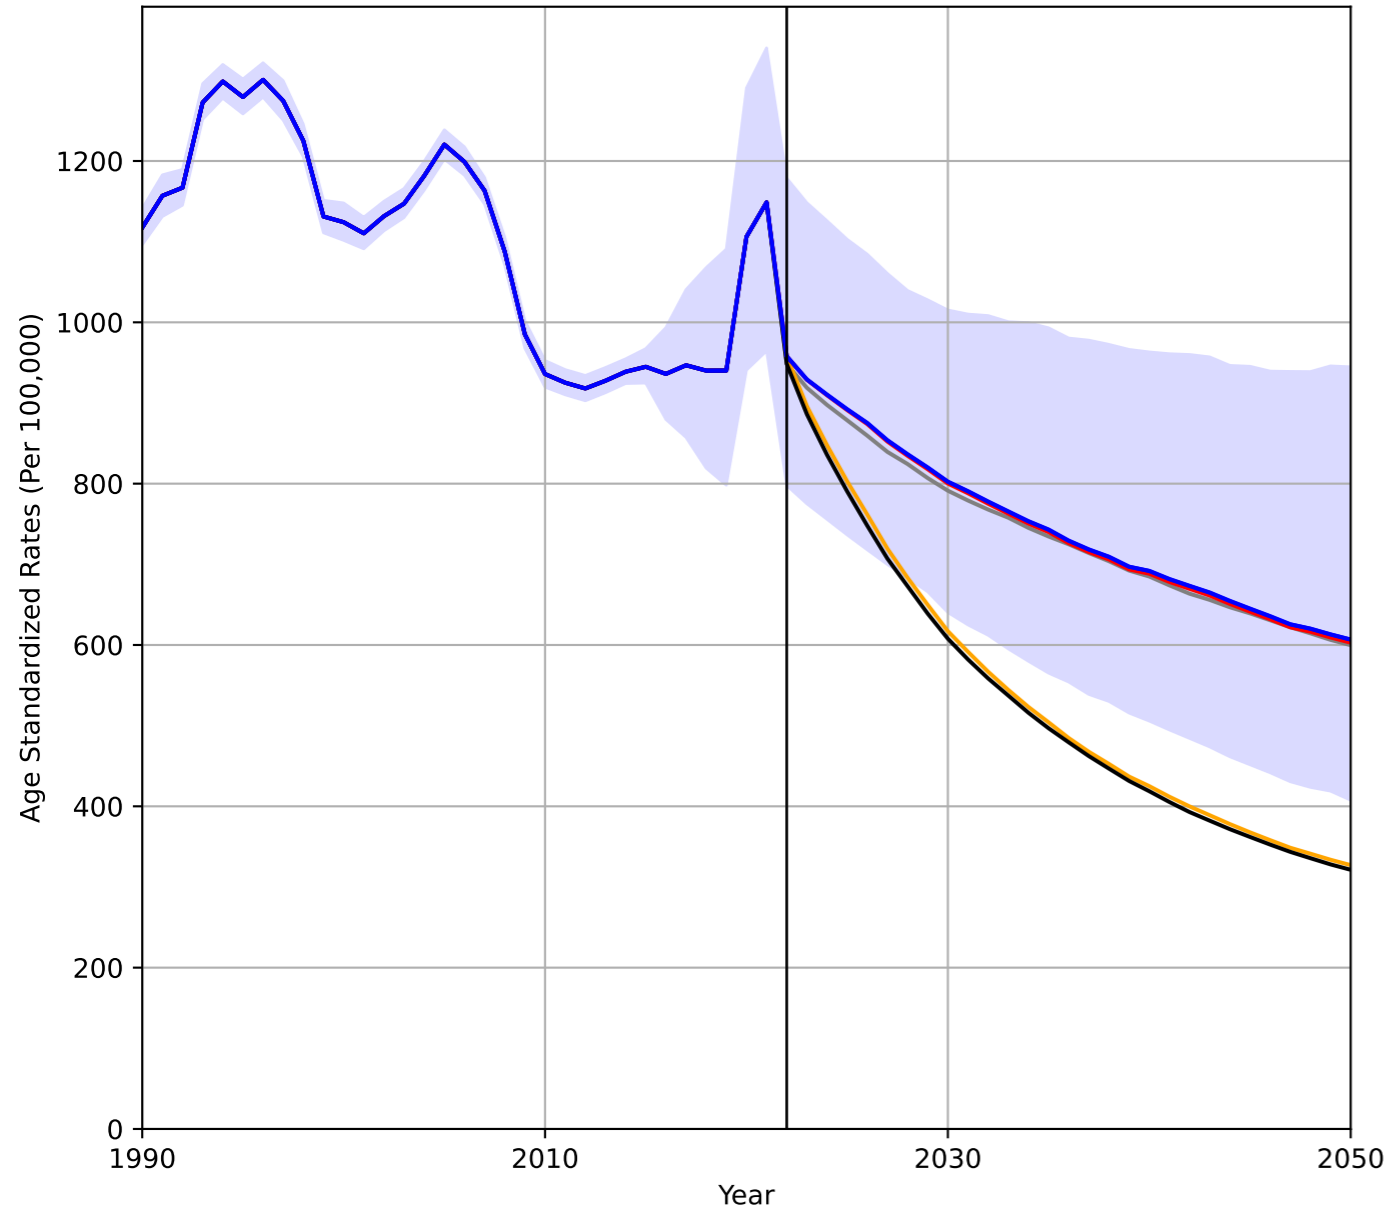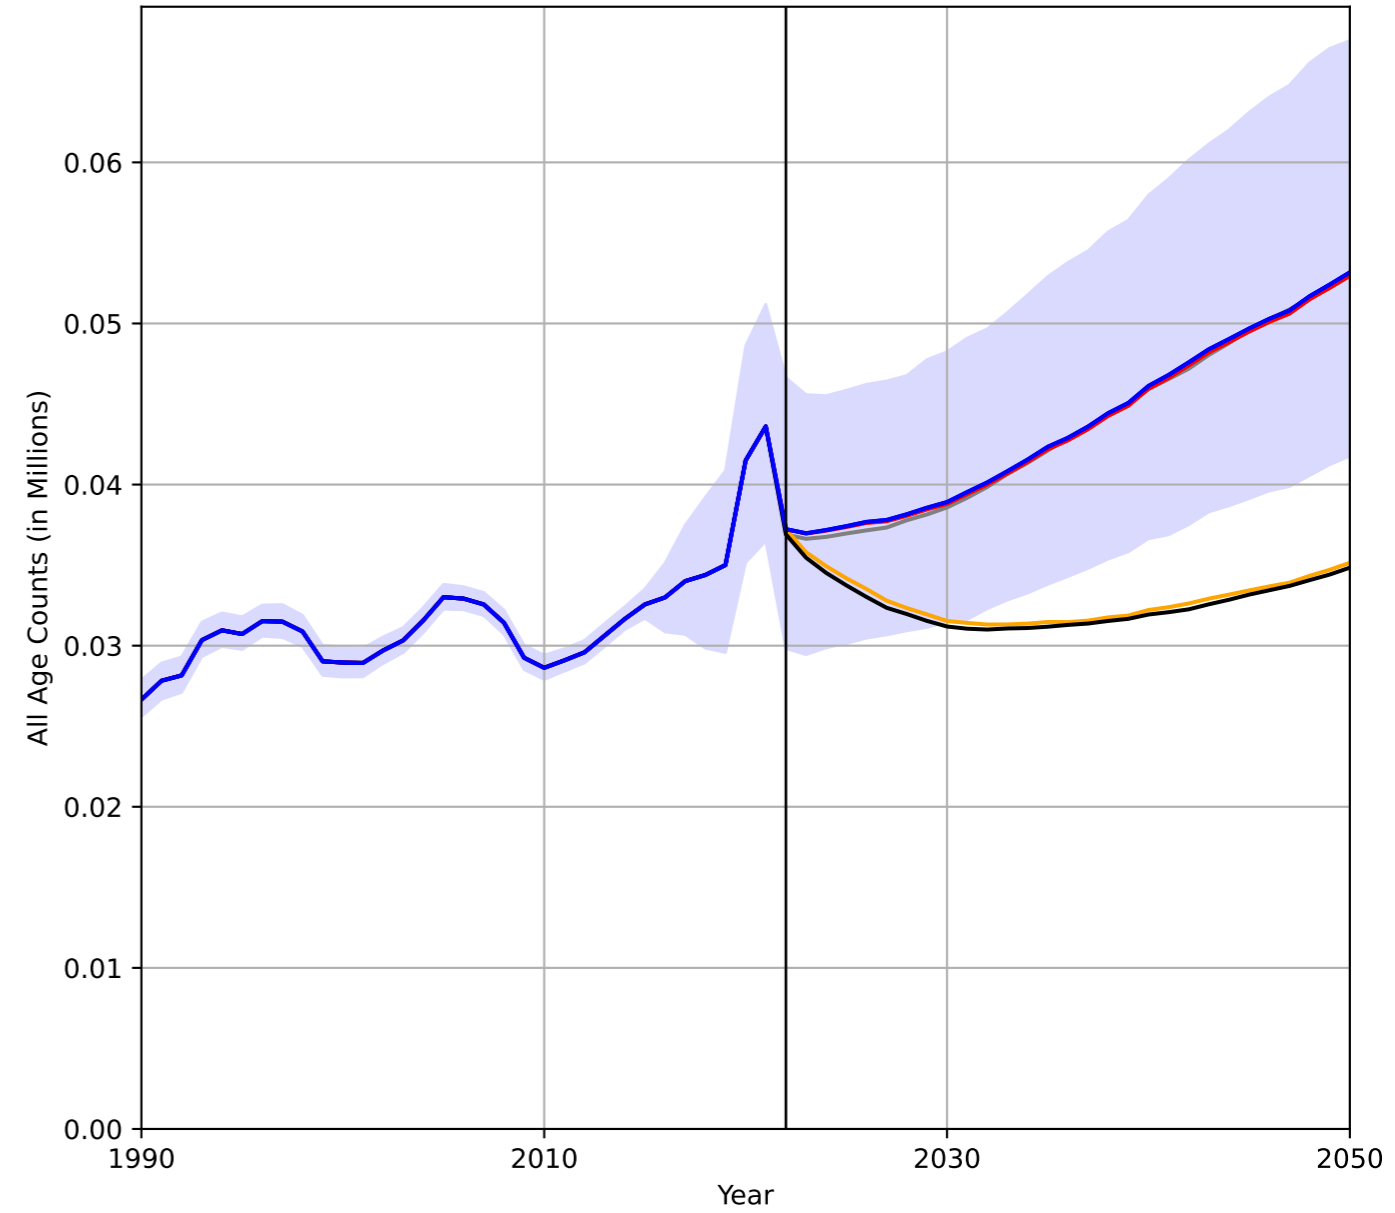

# Uzbekistan

Supplemental Results Figure S11. All-cause age standardised death rates (A) and all age death counts (B), for the past and for five future scenarios, 1990–2050

1652

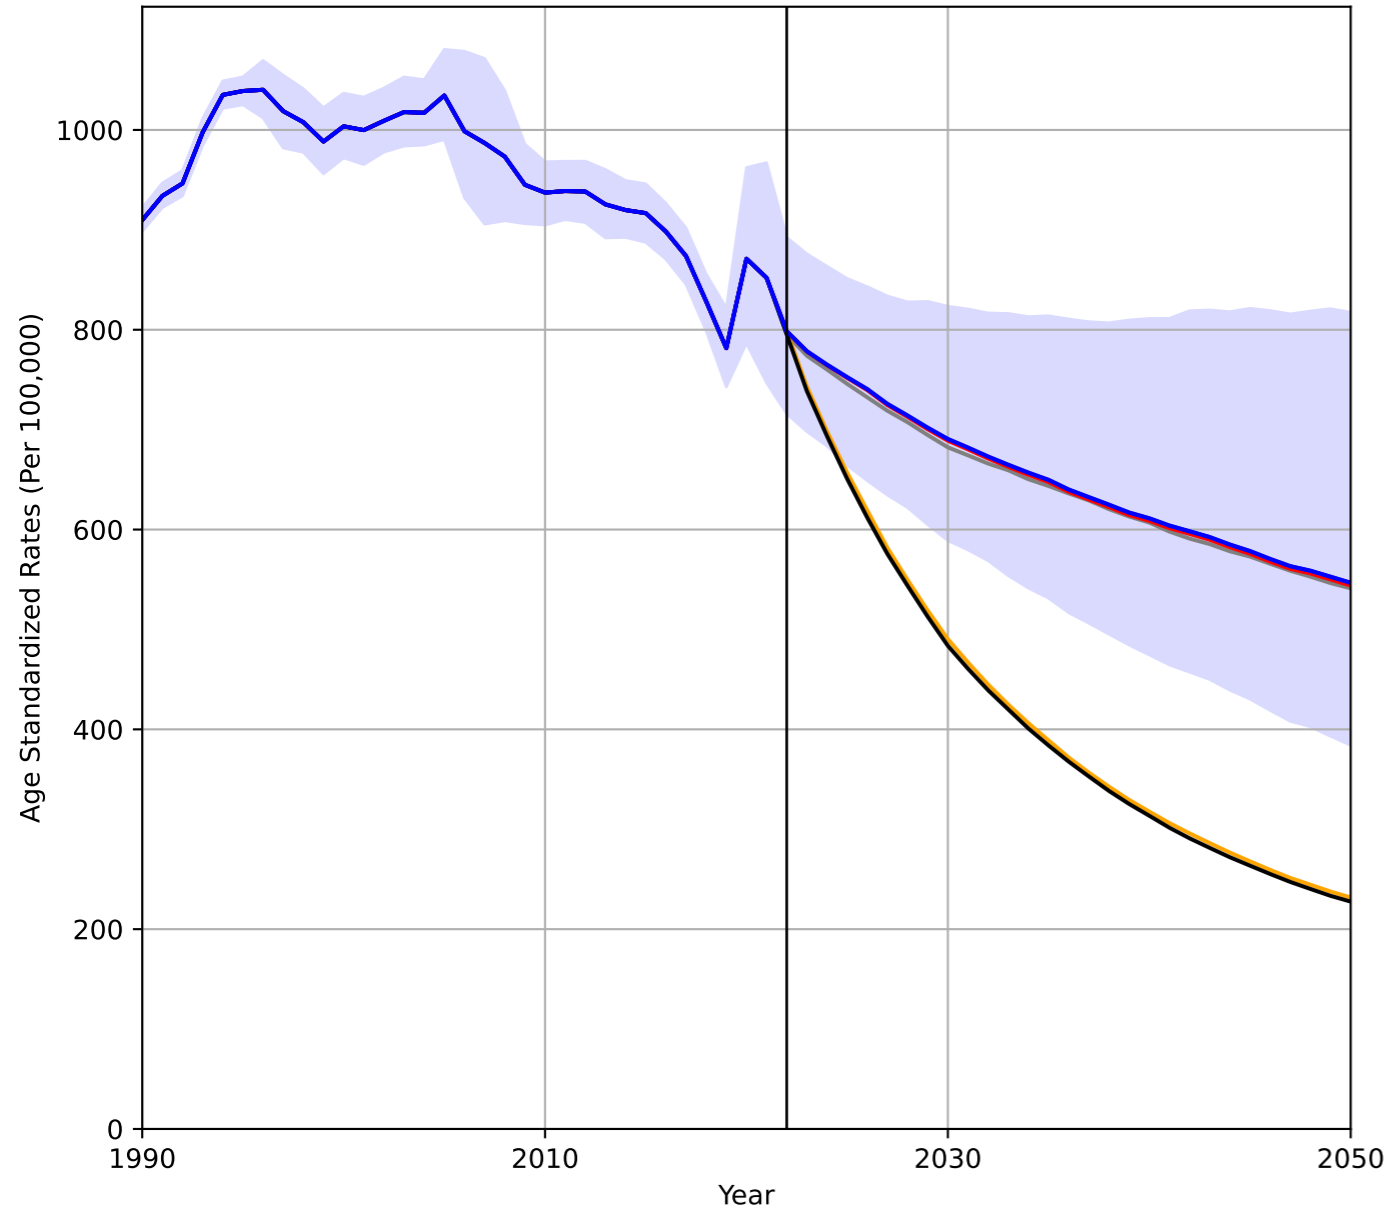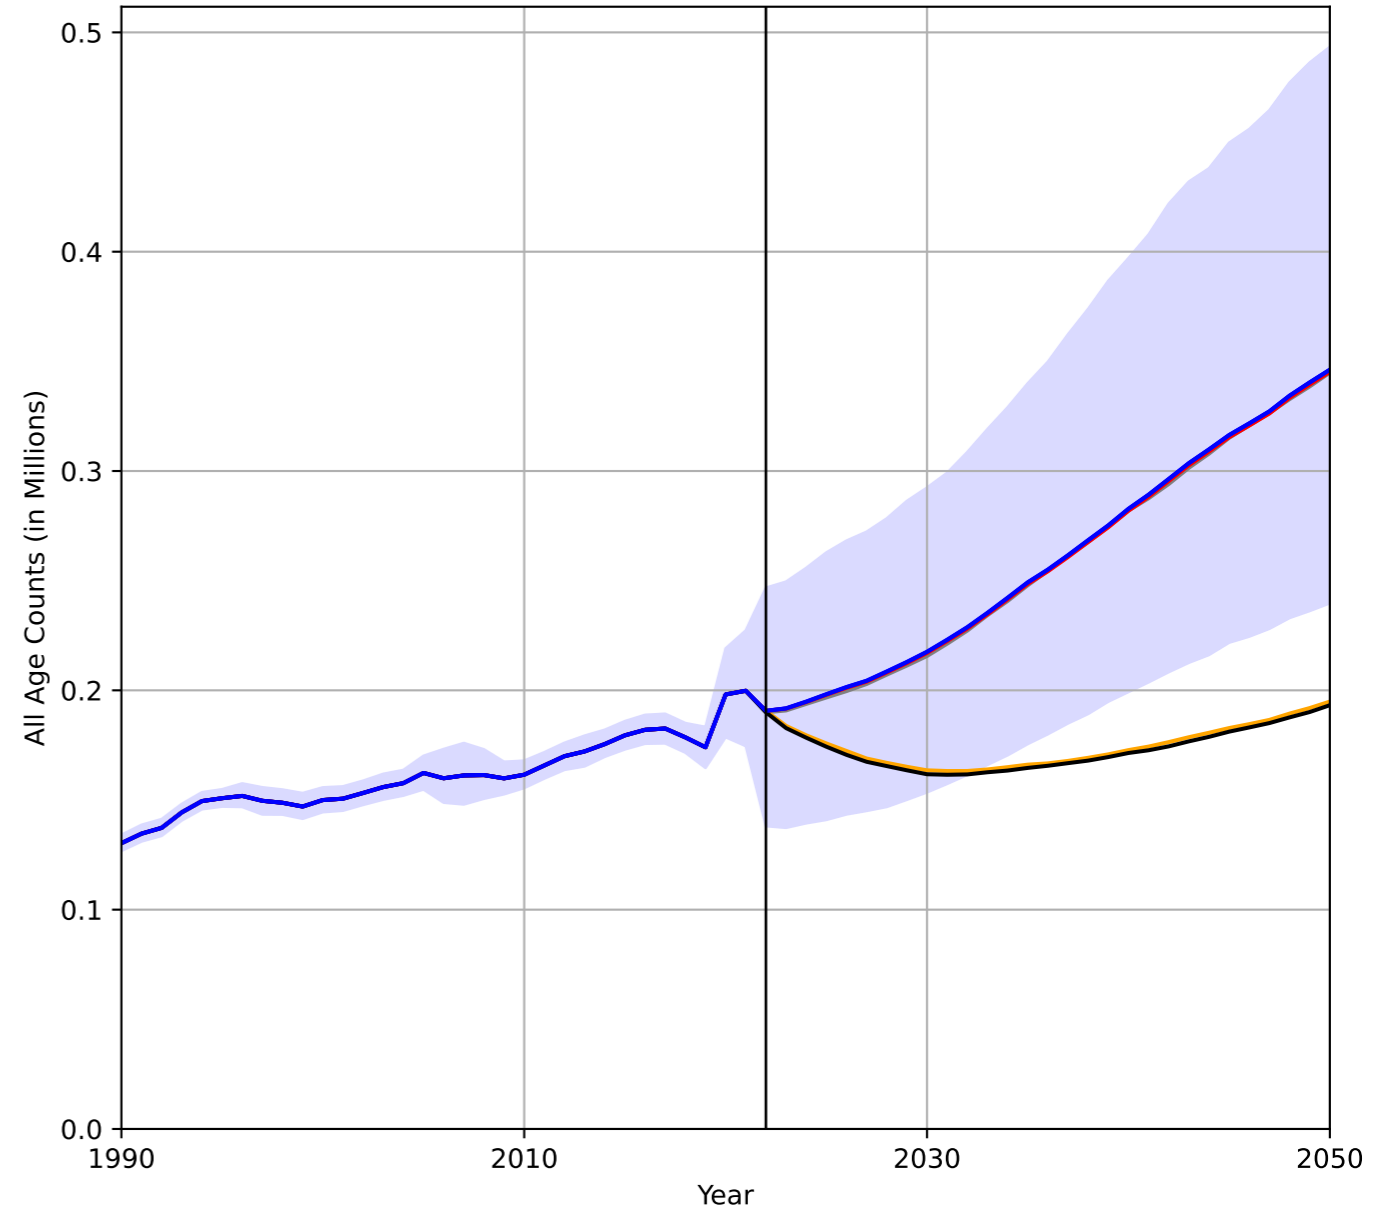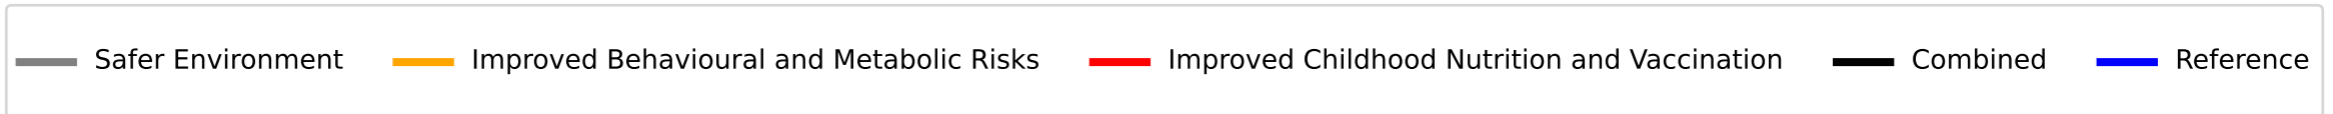

# Albania

Supplemental Results Figure S11. All-cause age standardised death rates (A) and all age death counts (B), for the past and for five future scenarios, 1990–2050

1653

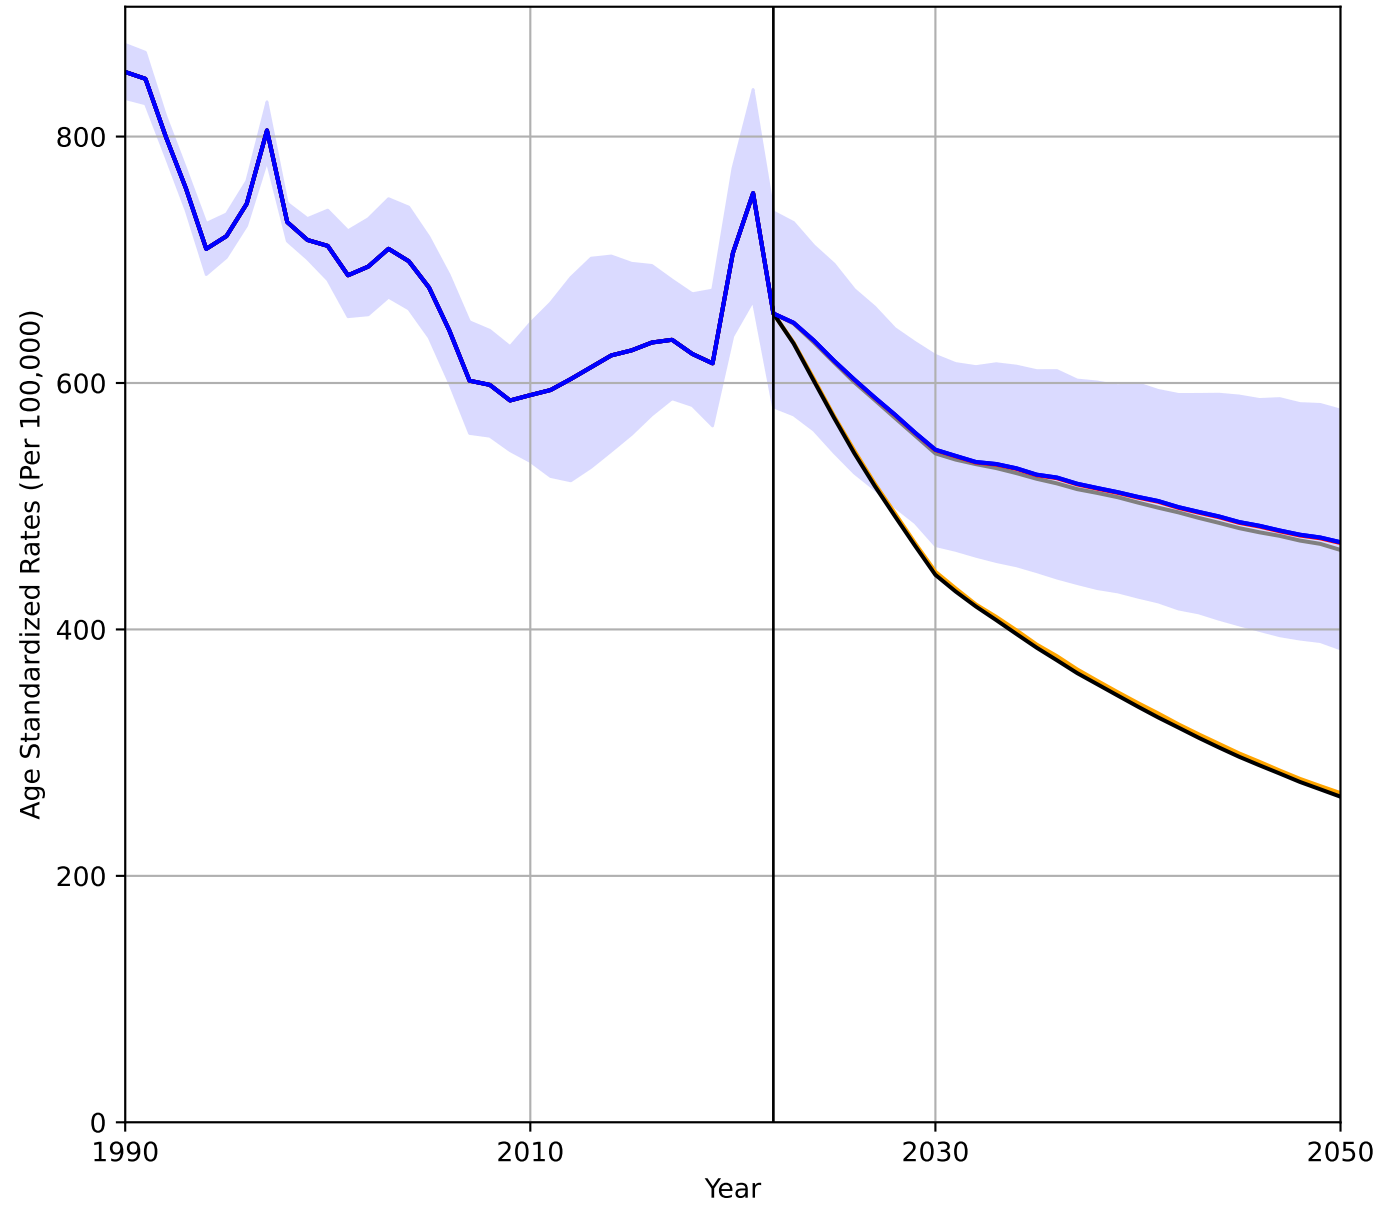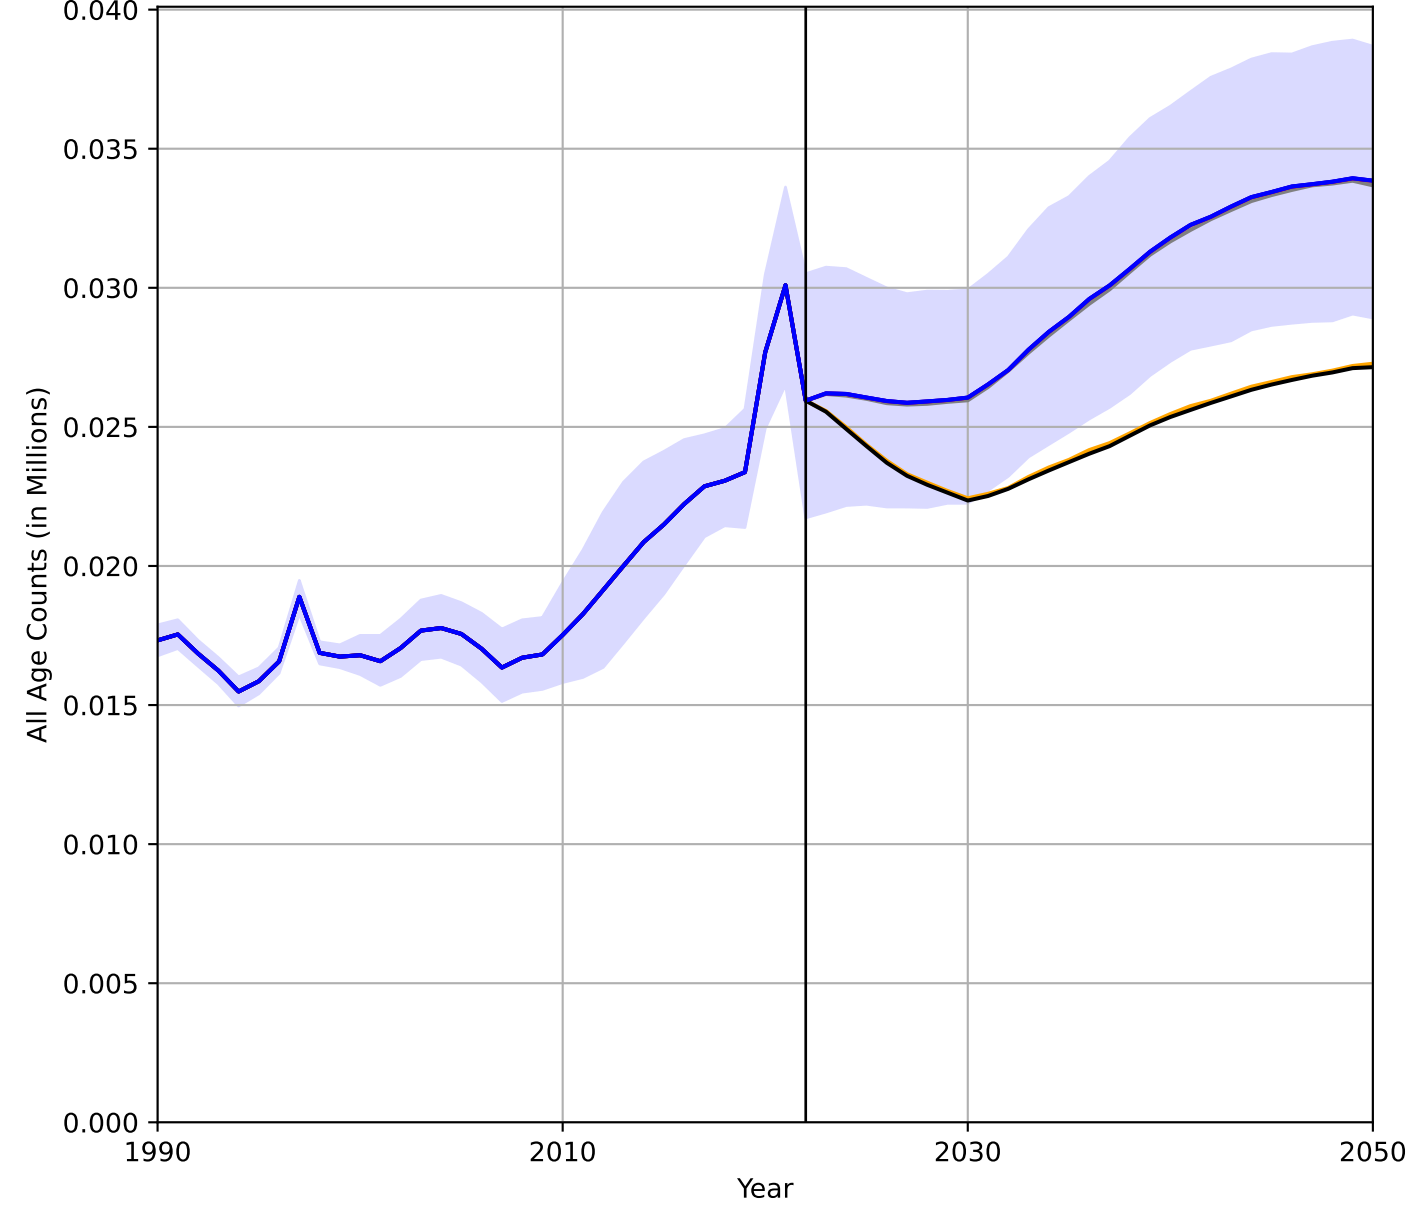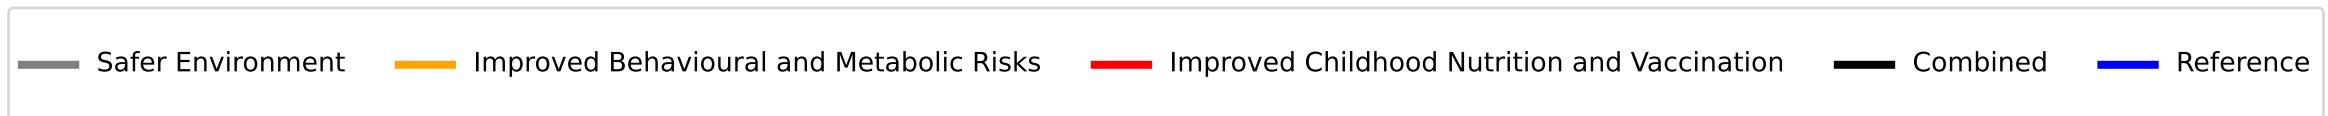

# Bosnia And Herzegovina

Supplemental Results Figure S11. All-cause age standardised death rates (A) and all age death counts (B), for the past and for five future scenarios, 1990–2050

1654

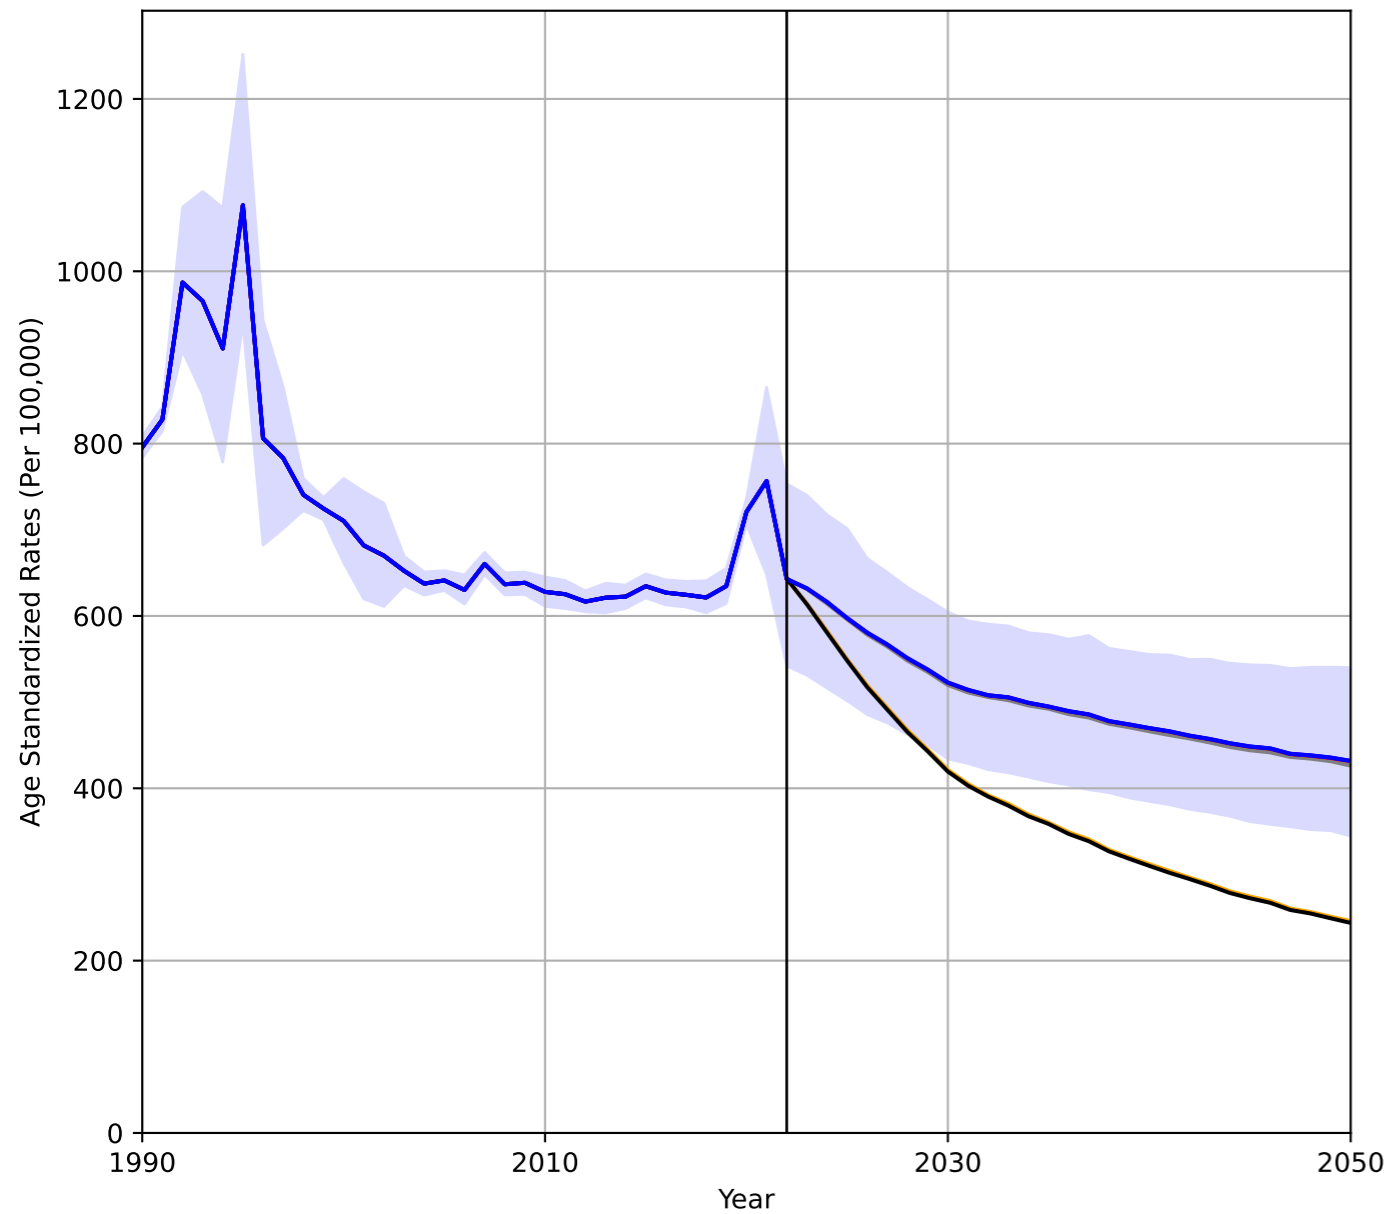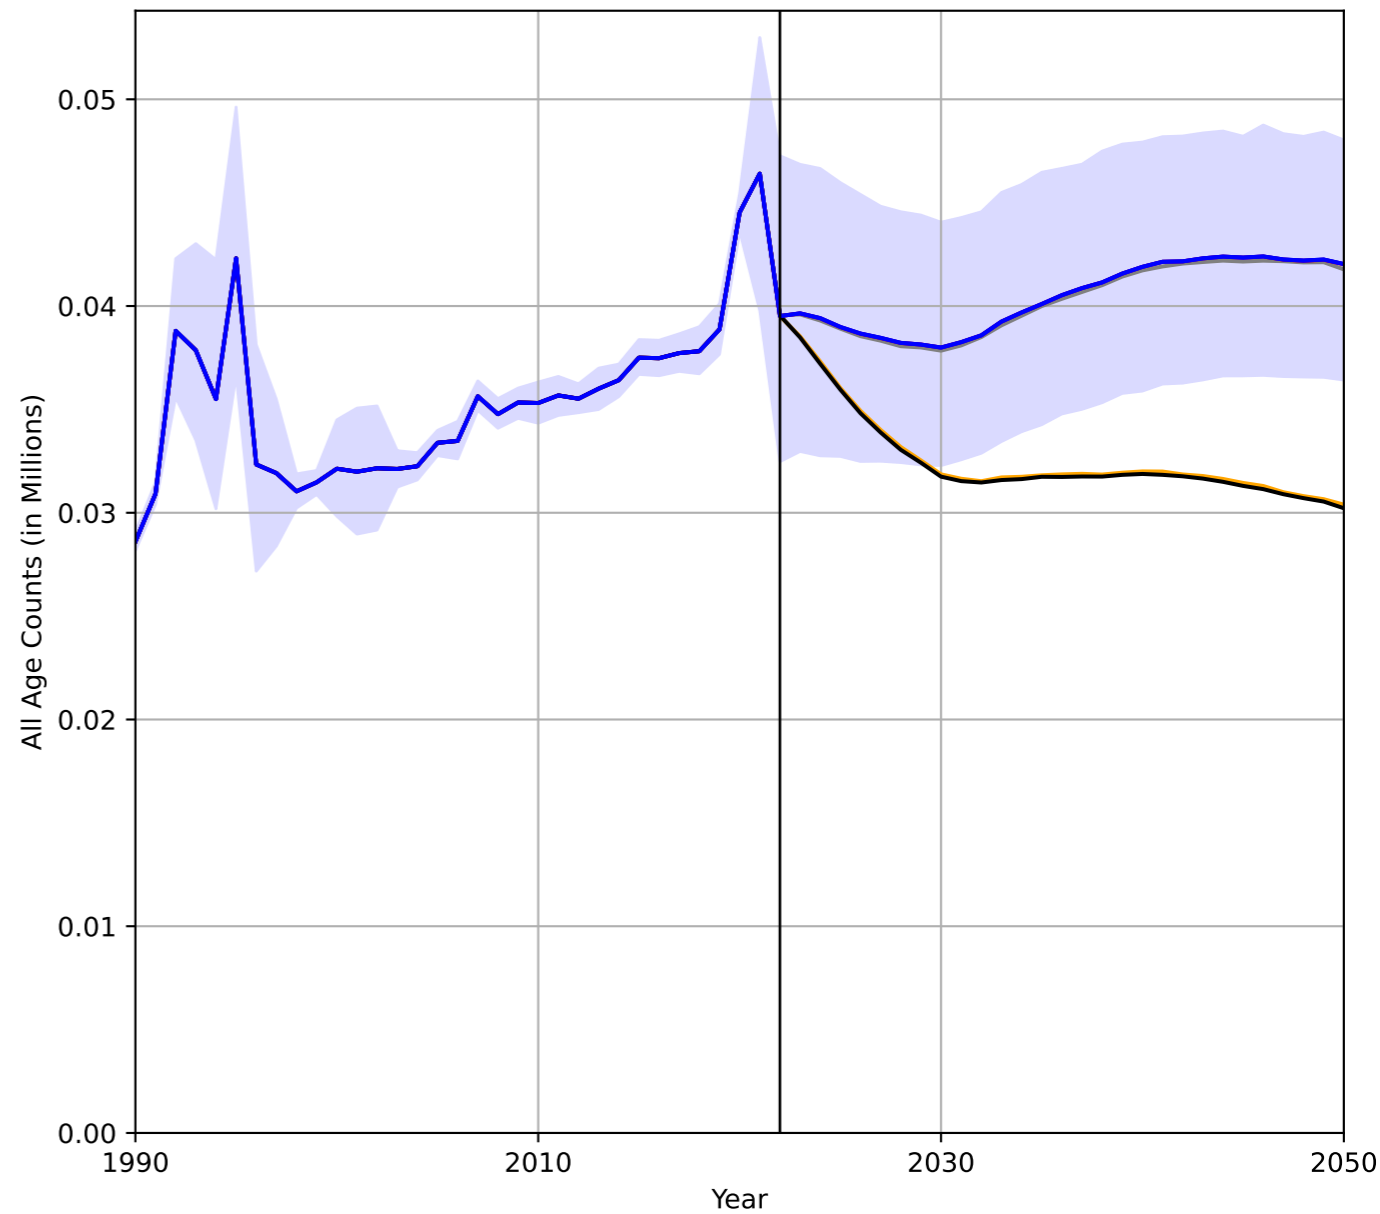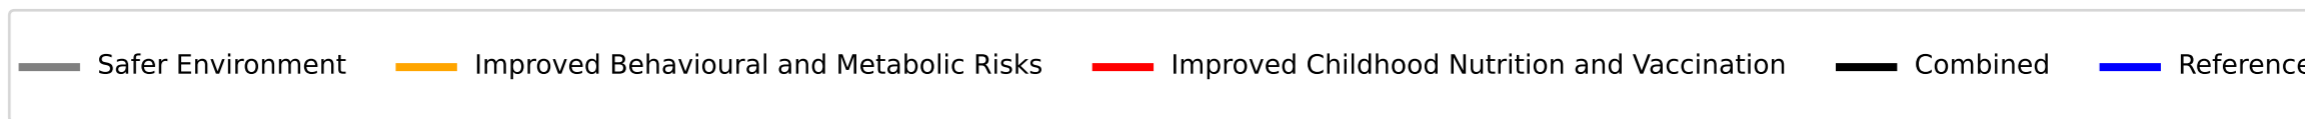

# Bulgaria

Supplemental Results Figure S11. All-cause age standardised death rates (A) and all age death counts (B), for the past and for five future scenarios, 1990–2050

1655

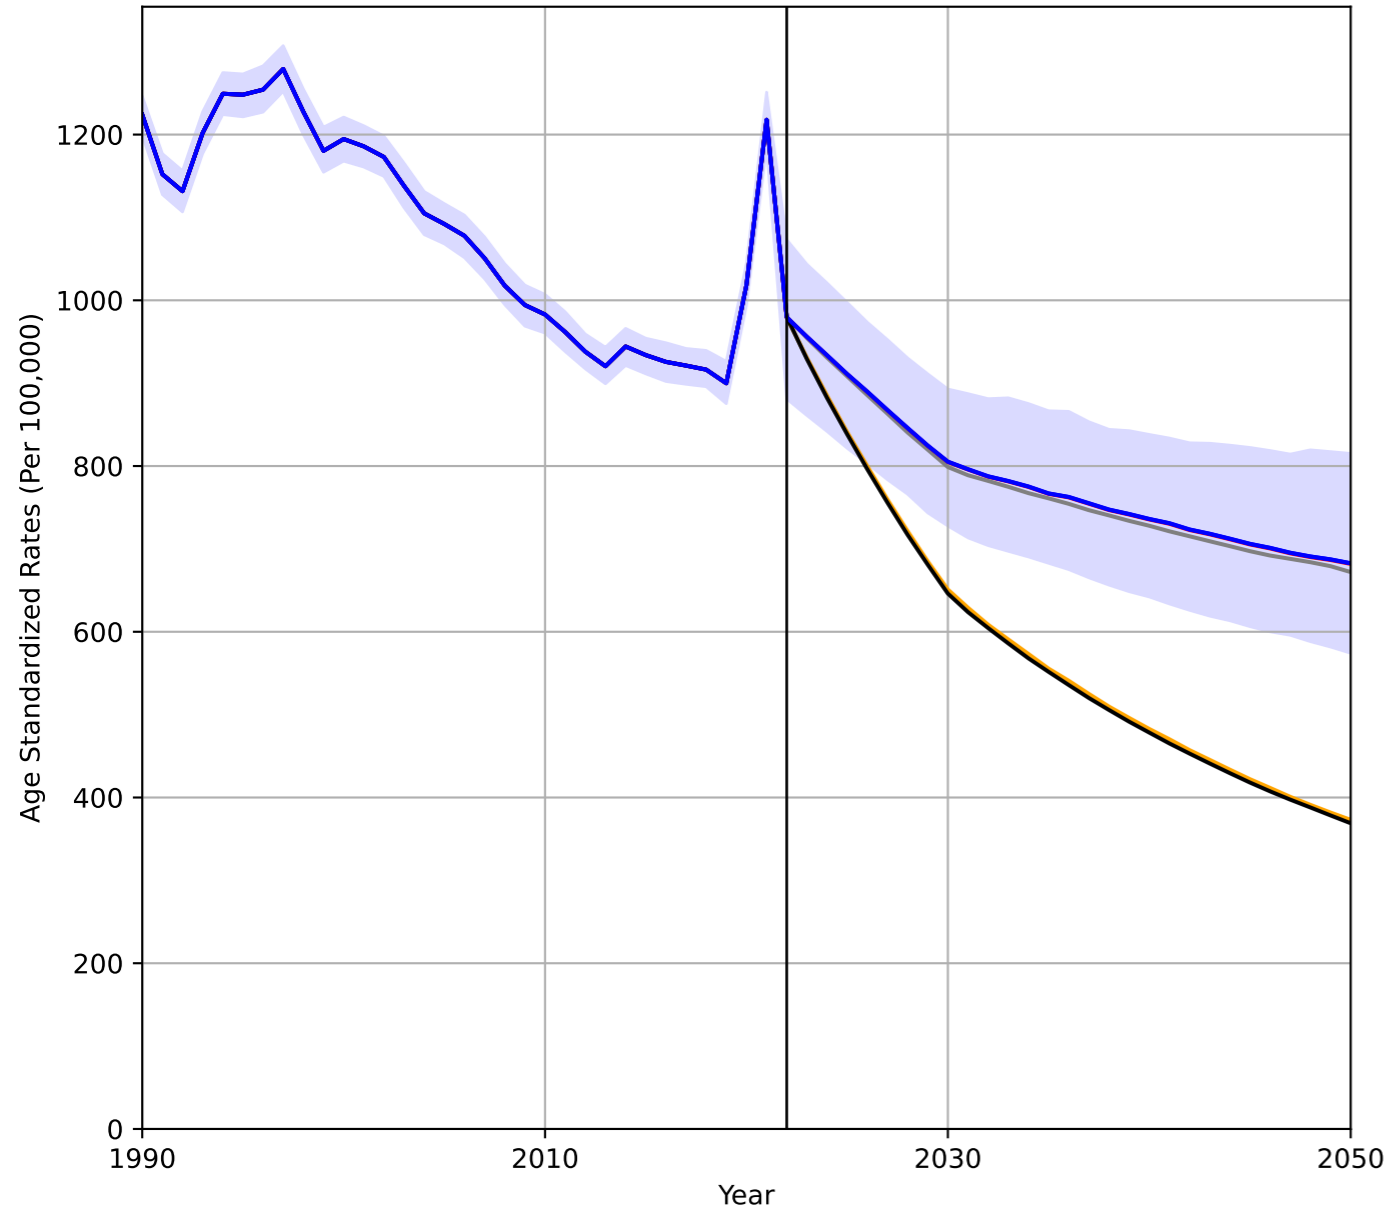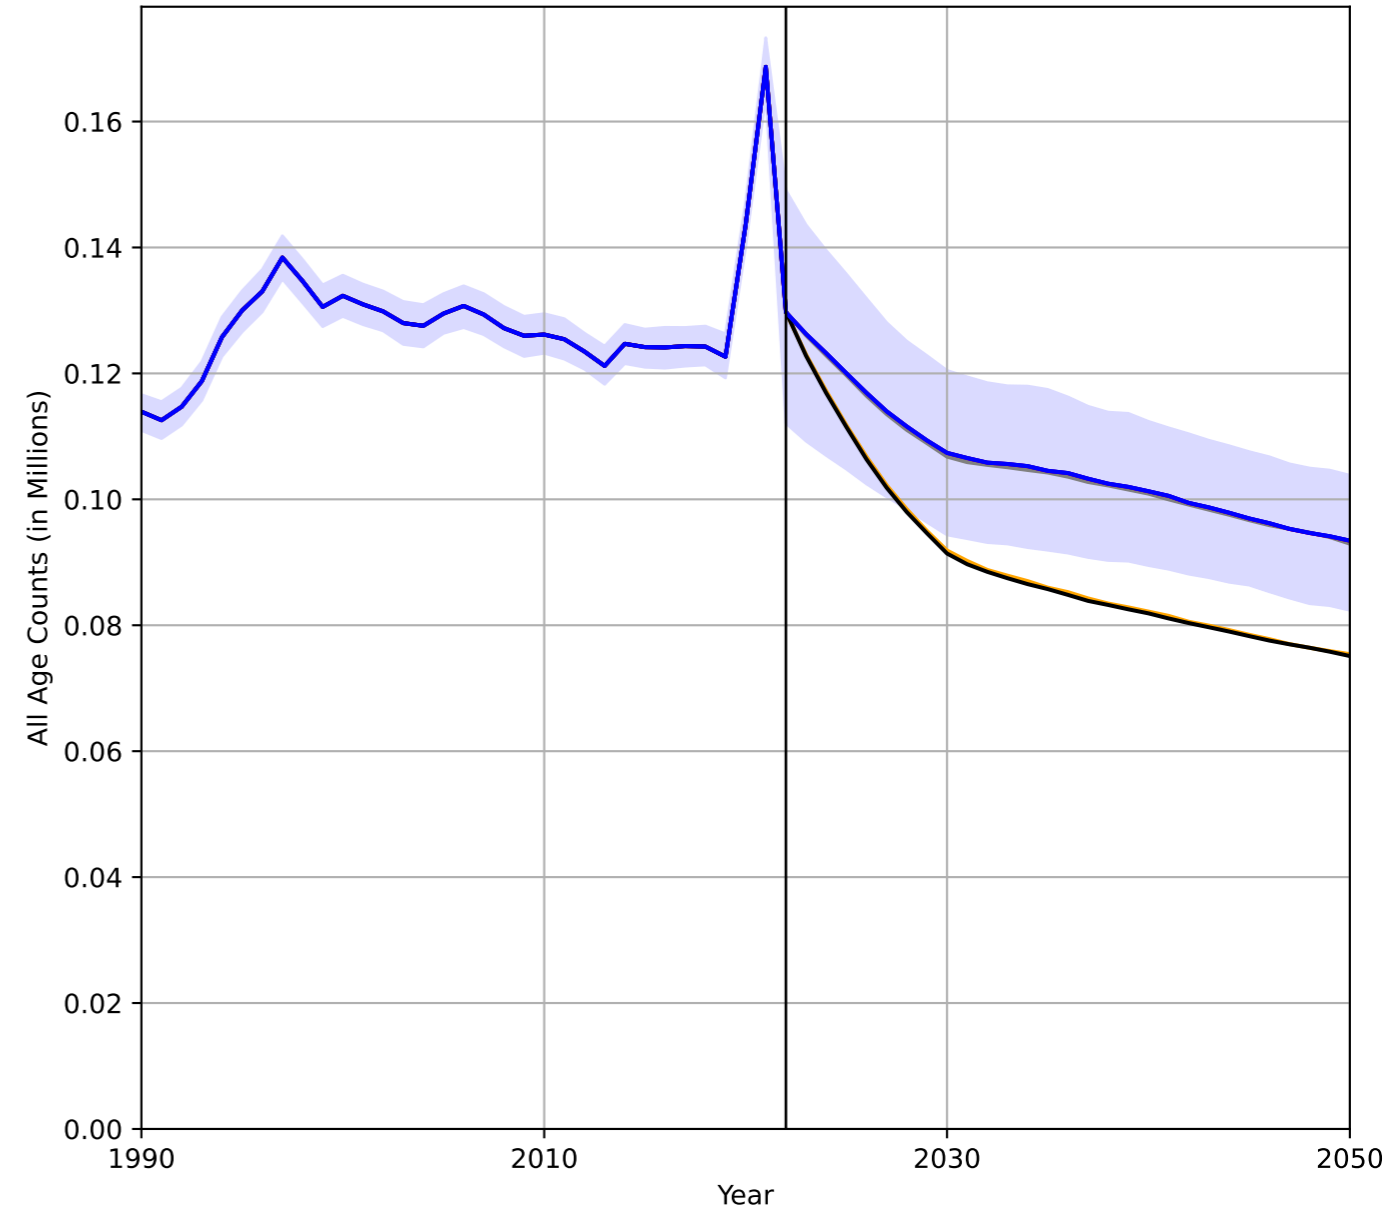



# Croatia

Supplemental Results Figure S11. All-cause age standardised death rates (A) and all age death counts (B), for the past and for five future scenarios, 1990–2050

1656

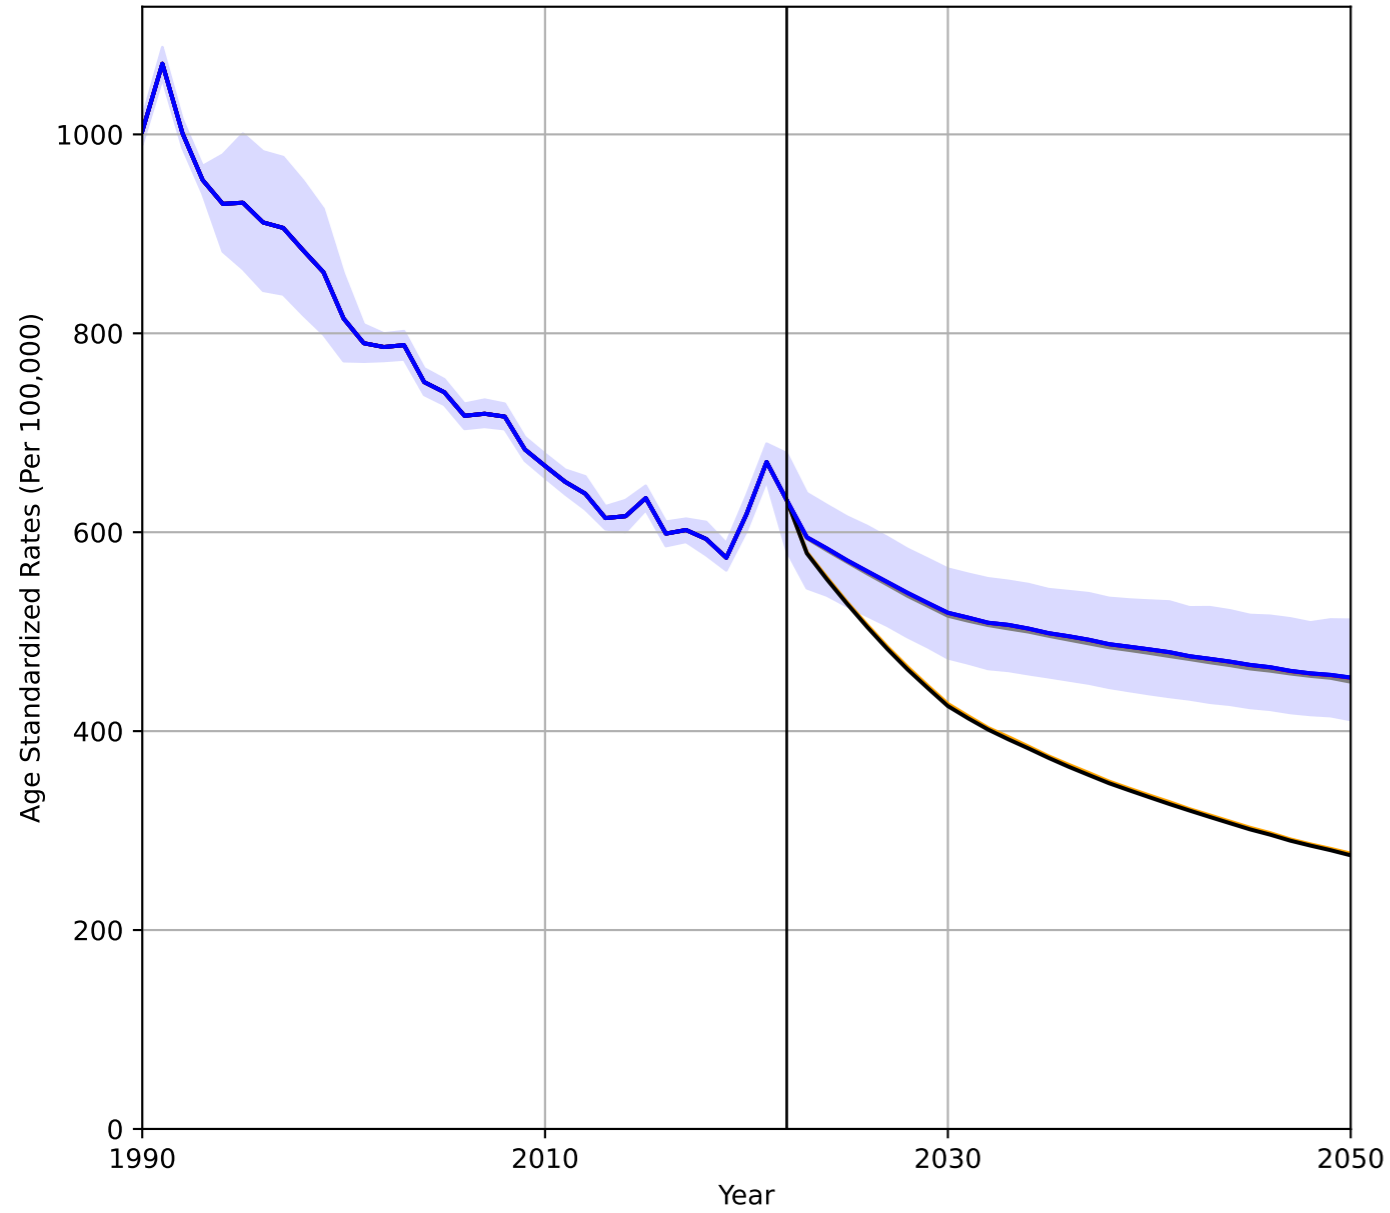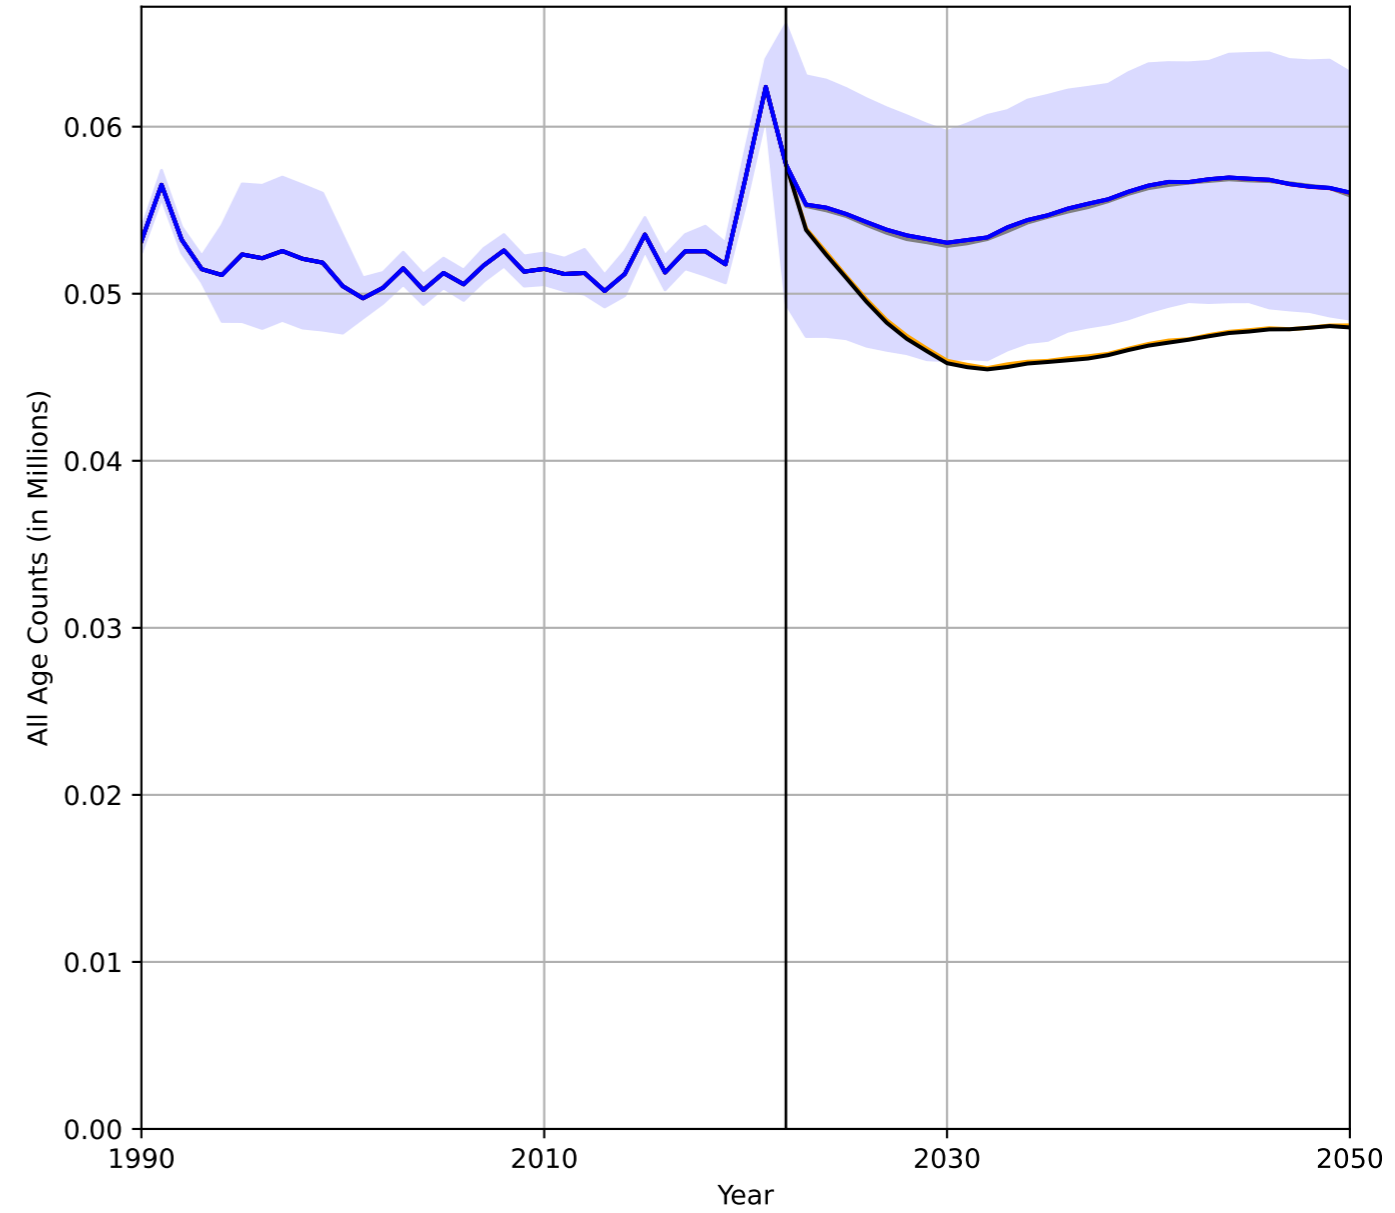

# Czechia

Supplemental Results Figure S11. All-cause age standardised death rates (A) and all age death counts (B), for the past and for five future scenarios, 1990–2050

1657

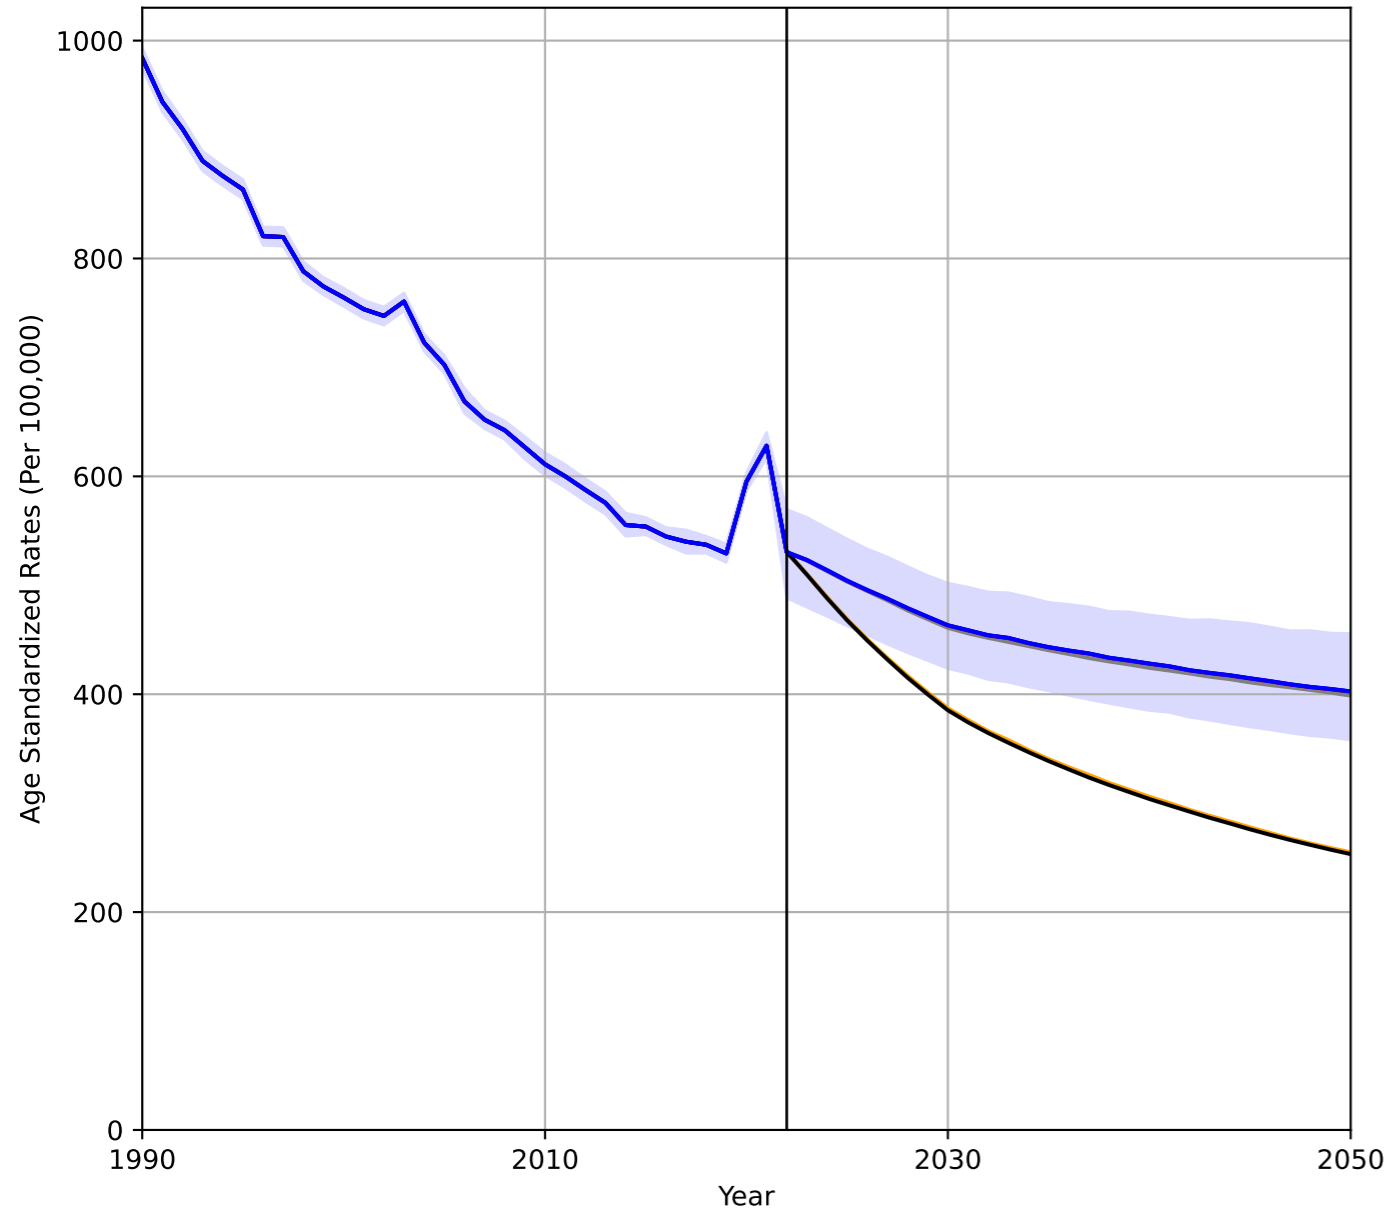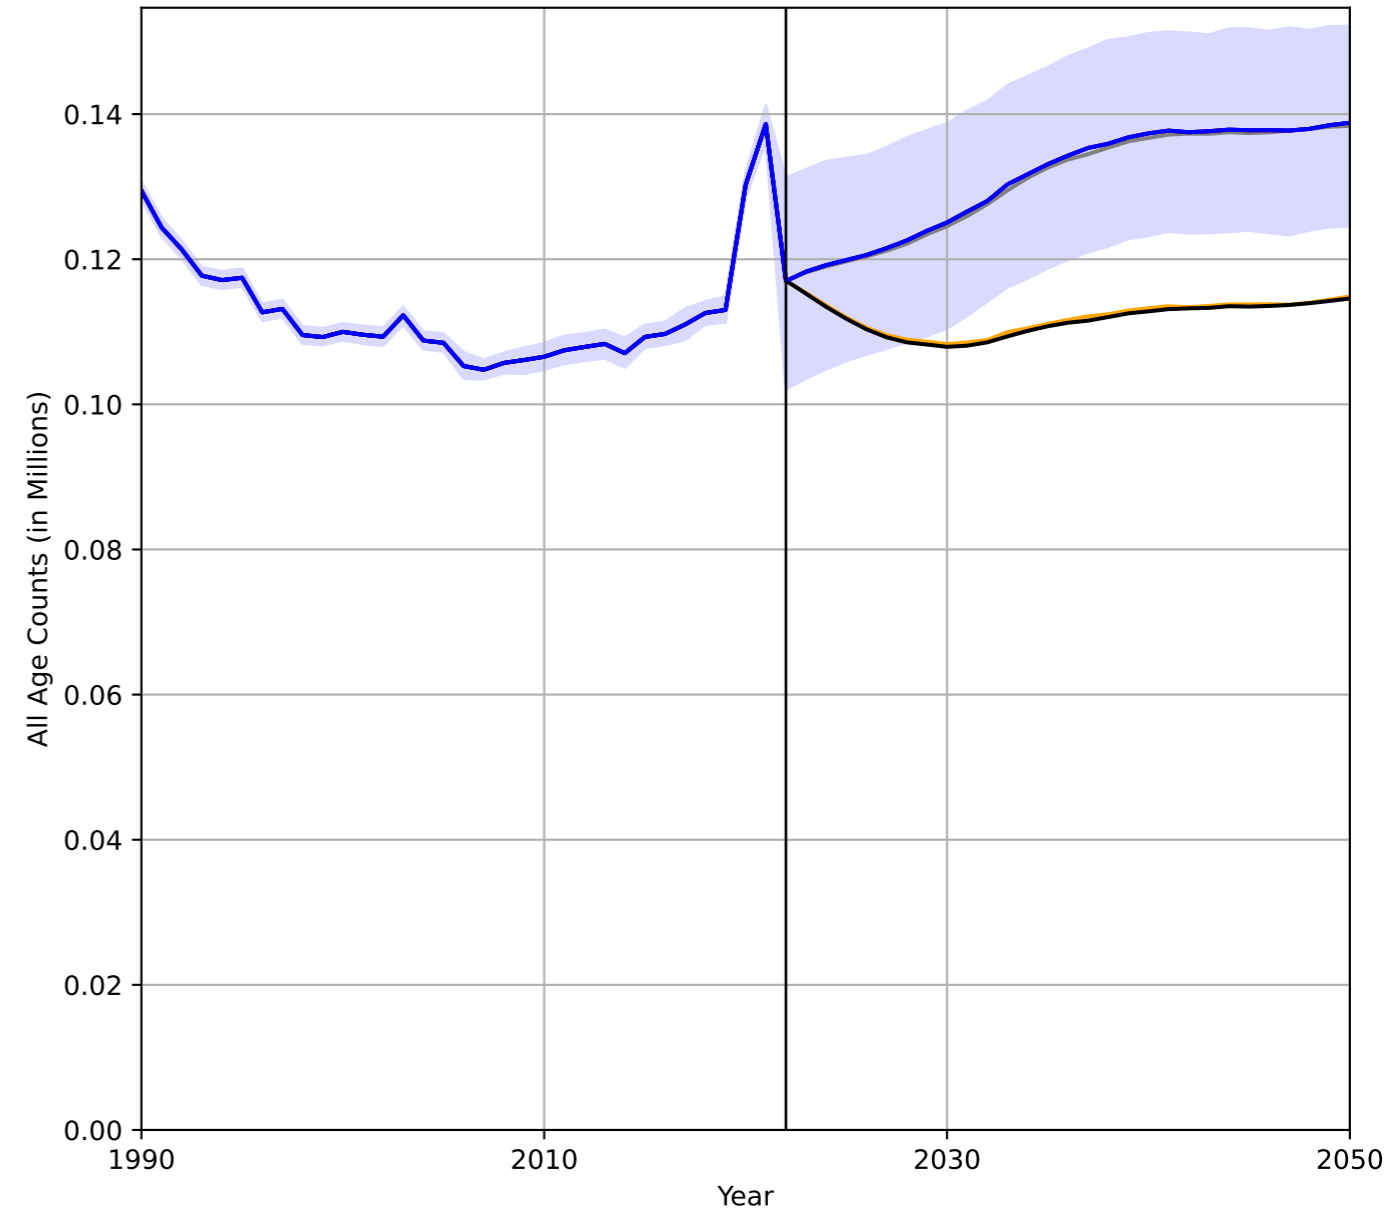

# Hungary

Supplemental Results Figure S11. All-cause age standardised death rates (A) and all age death counts (B), for the past and for five future scenarios, 1990–2050

1658

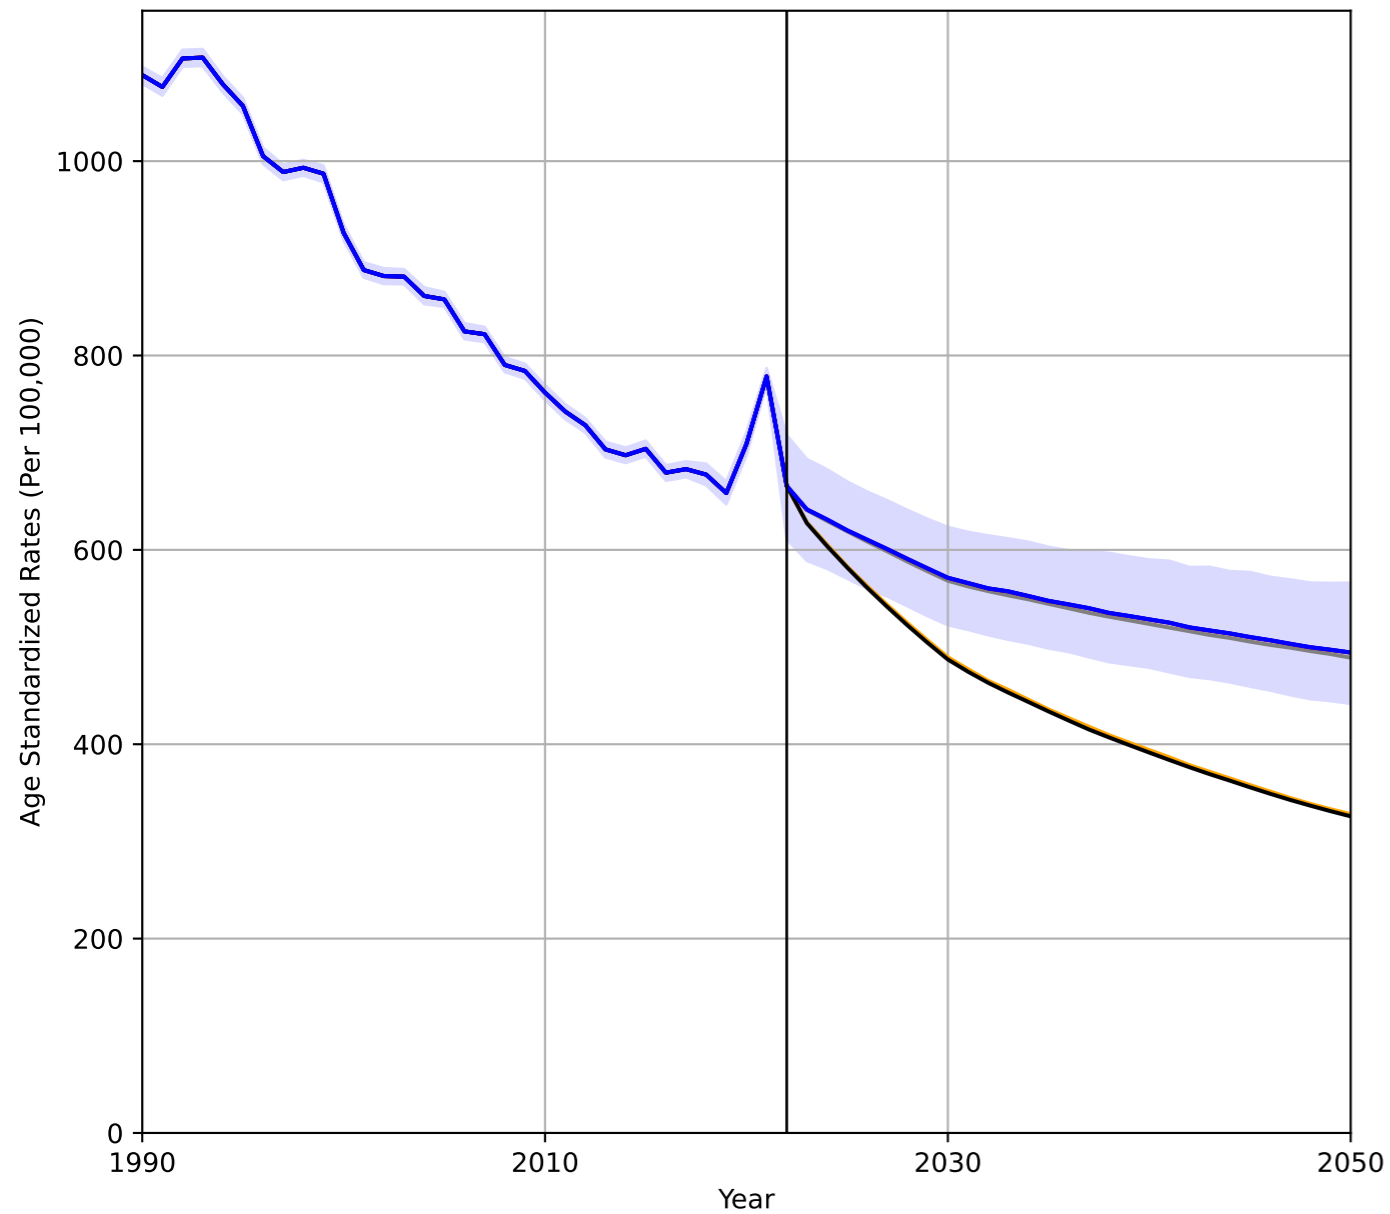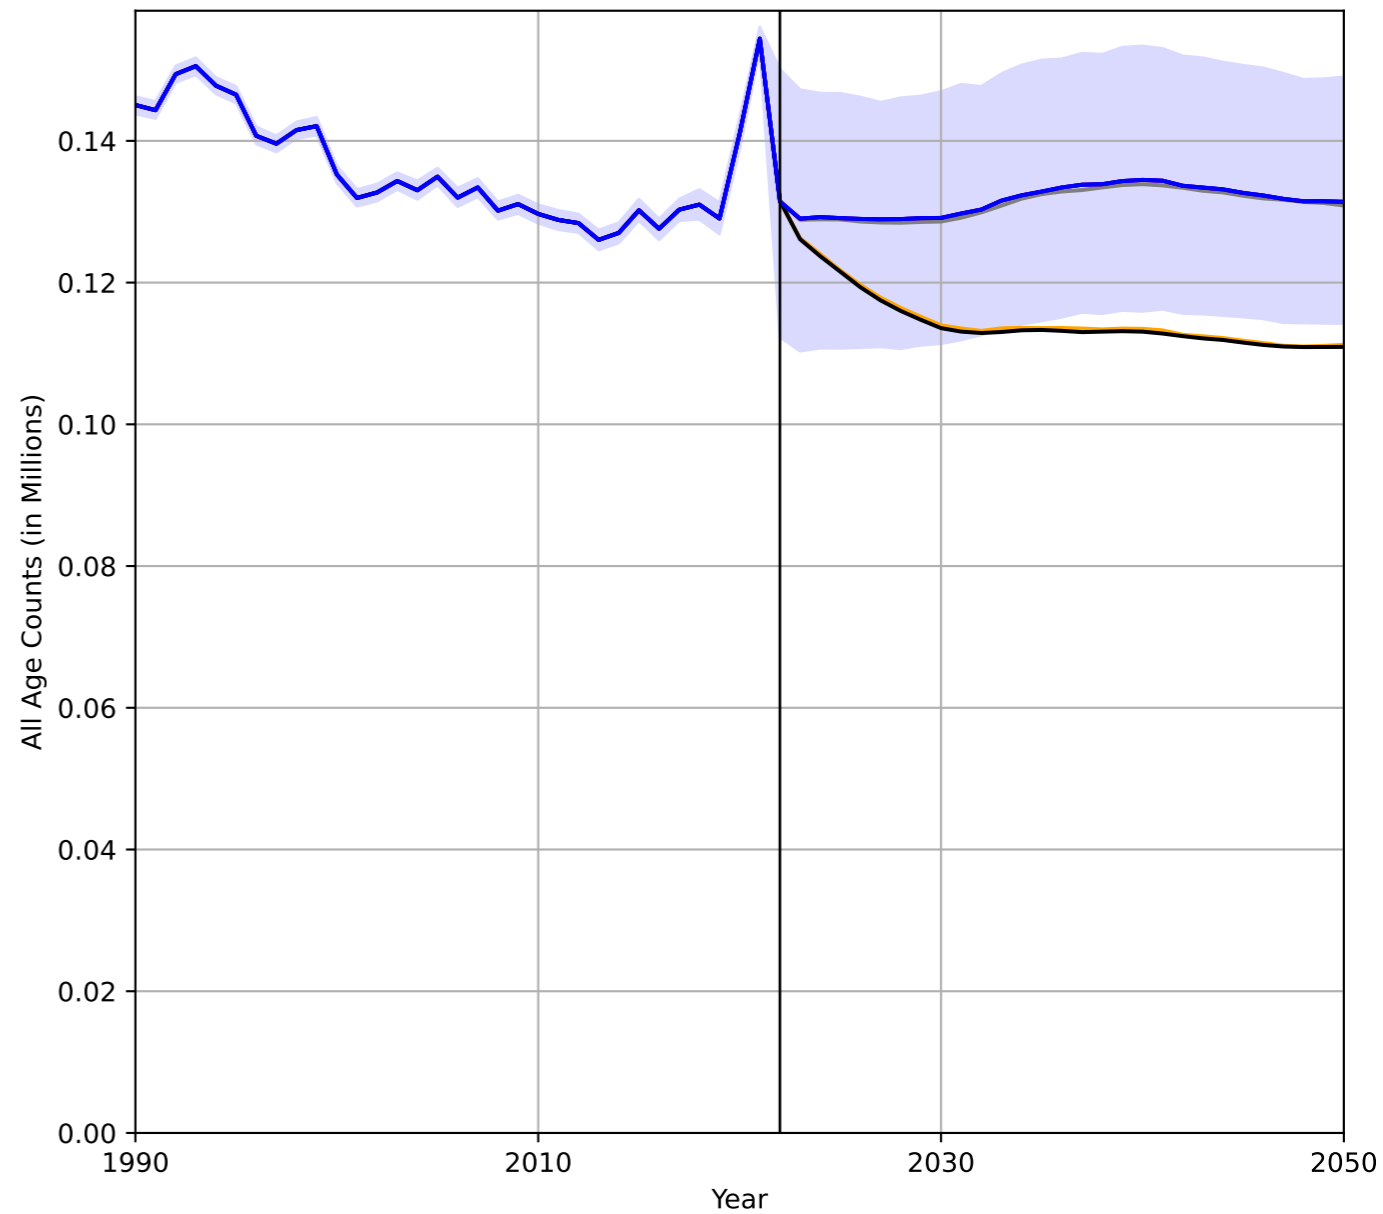

# Montenegro

Supplemental Results Figure S11. All-cause age standardised death rates (A) and all age death counts (B), for the past and for five future scenarios, 1990–2050

1659

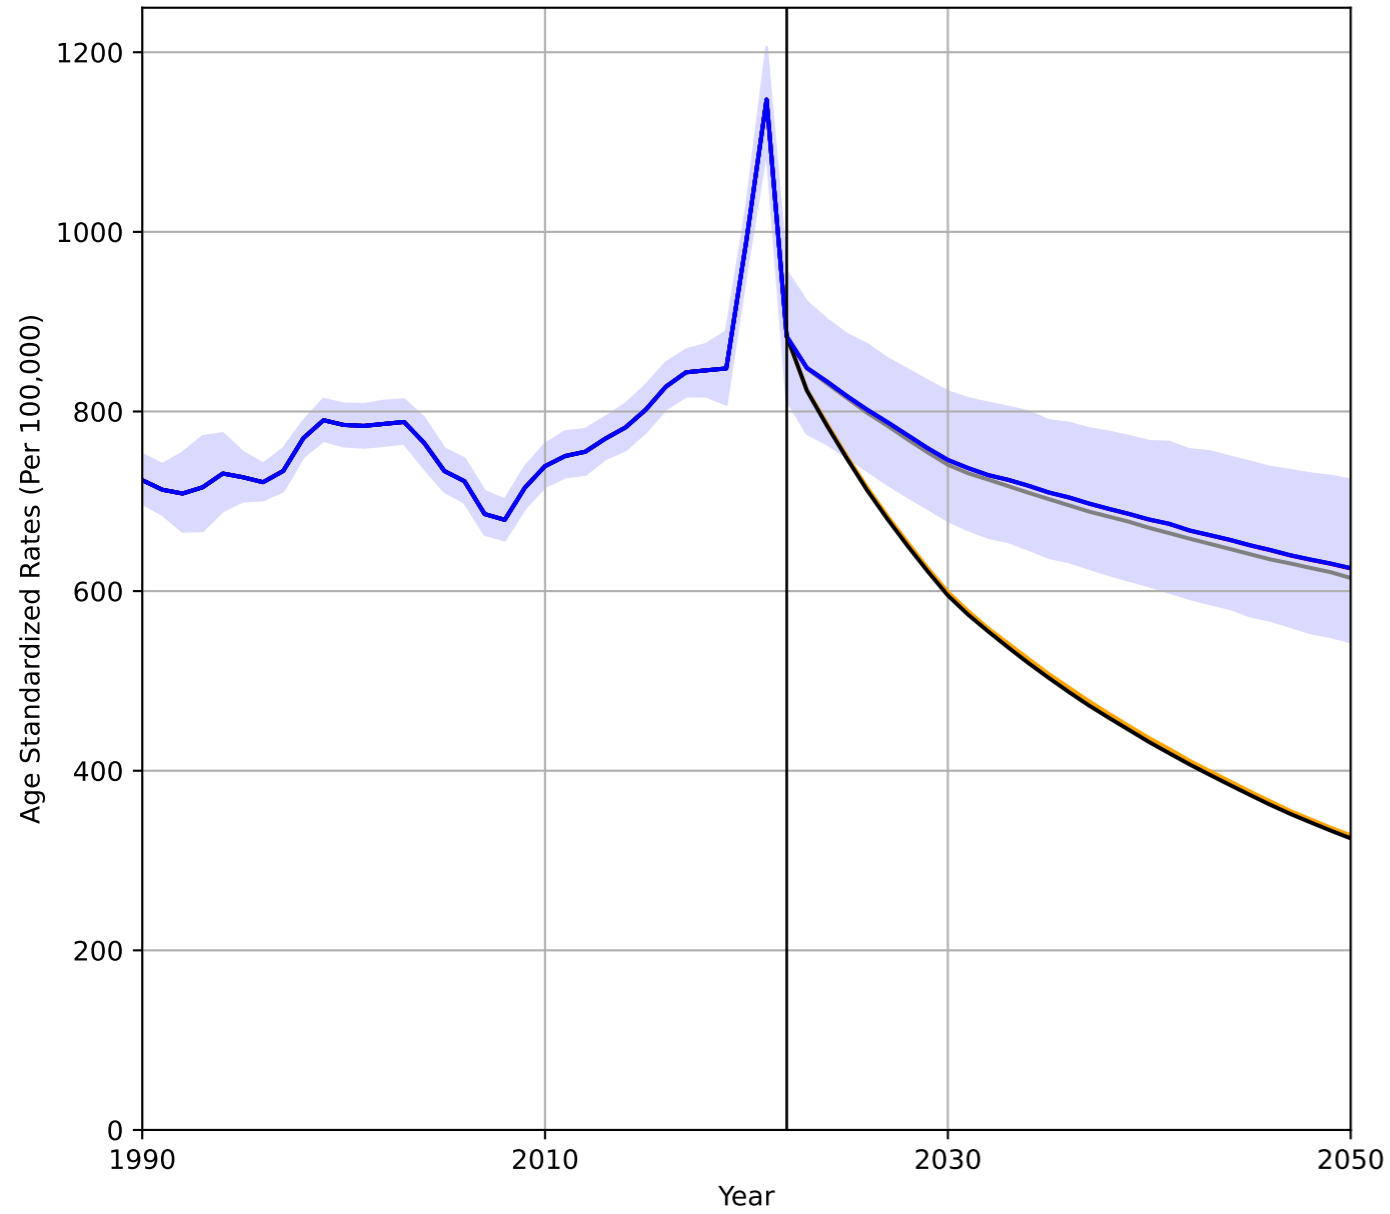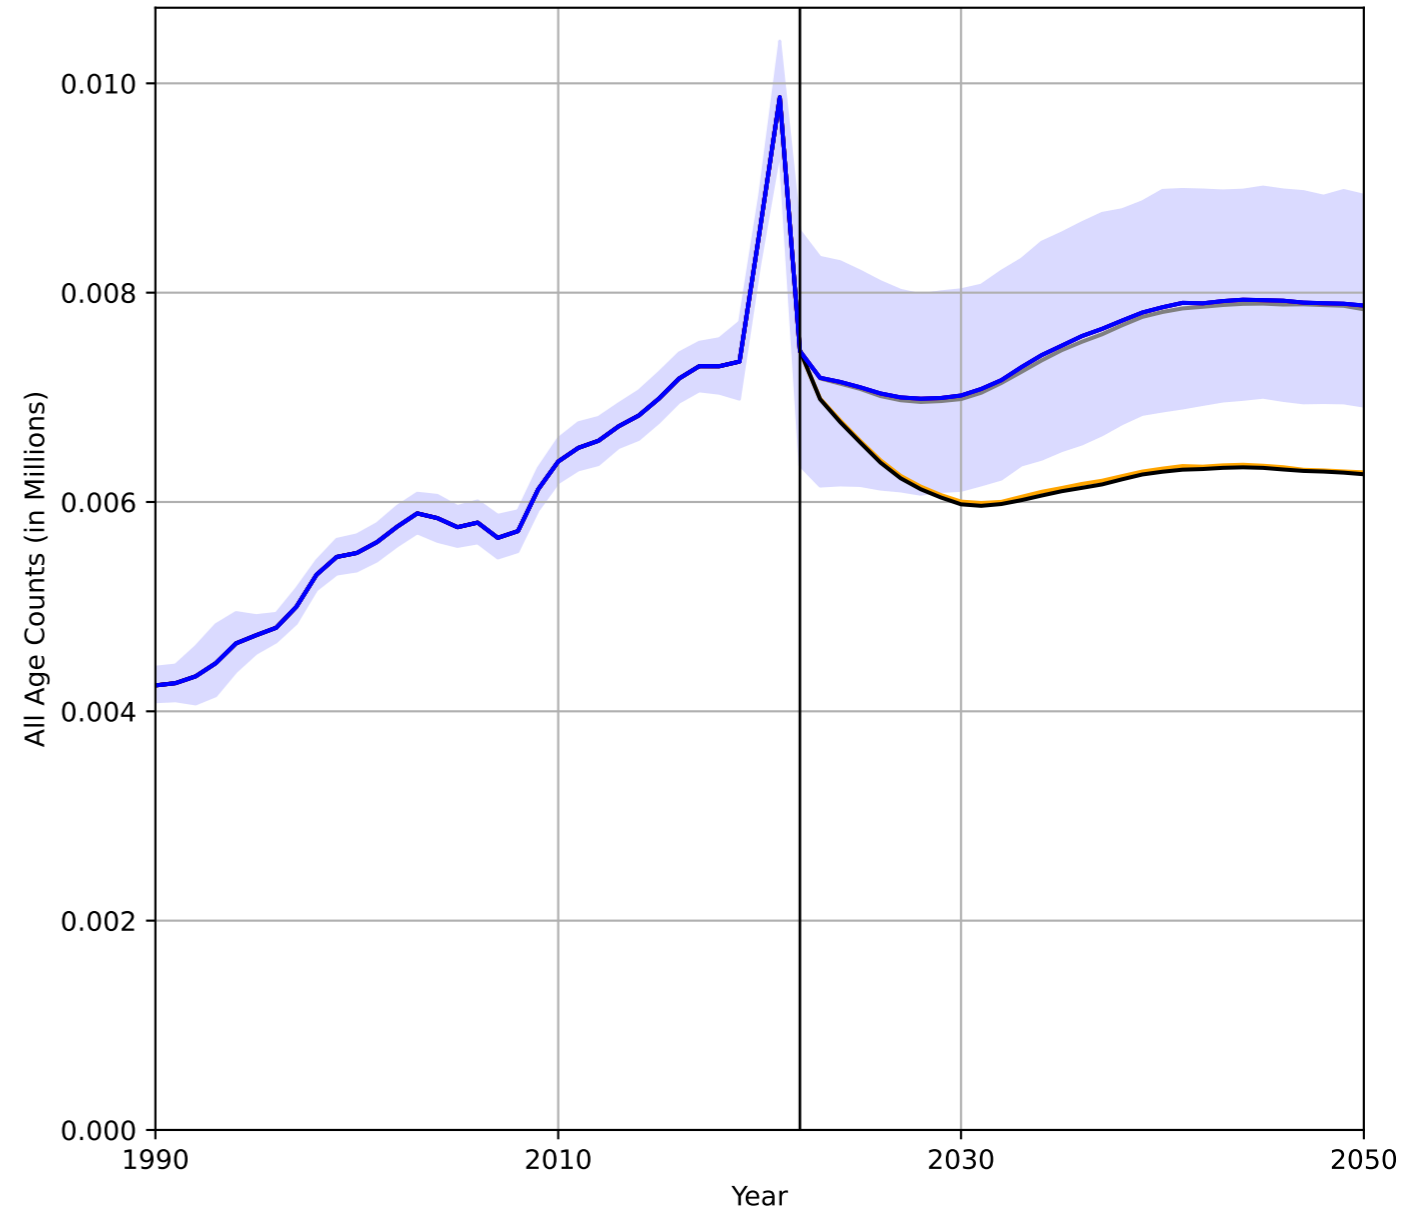

# North Macedonia

Supplemental Results Figure S11. All-cause age standardised death rates (A) and all age death counts (B), for the past and for five future scenarios, 1990–2050

1660

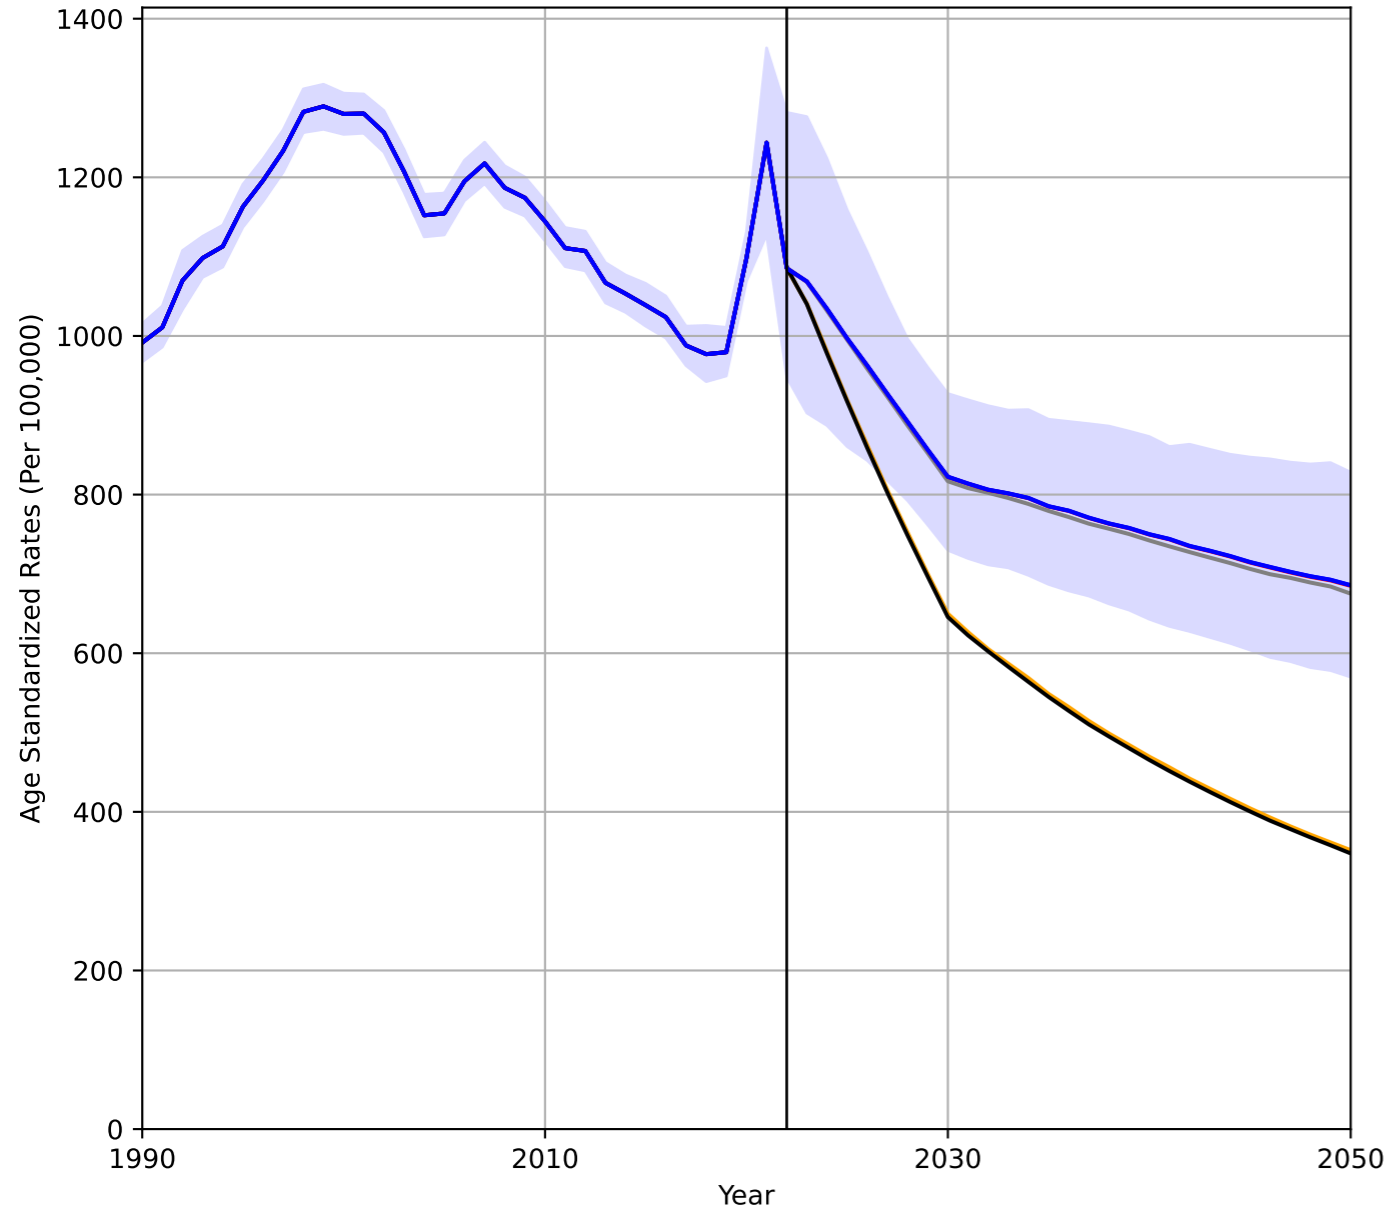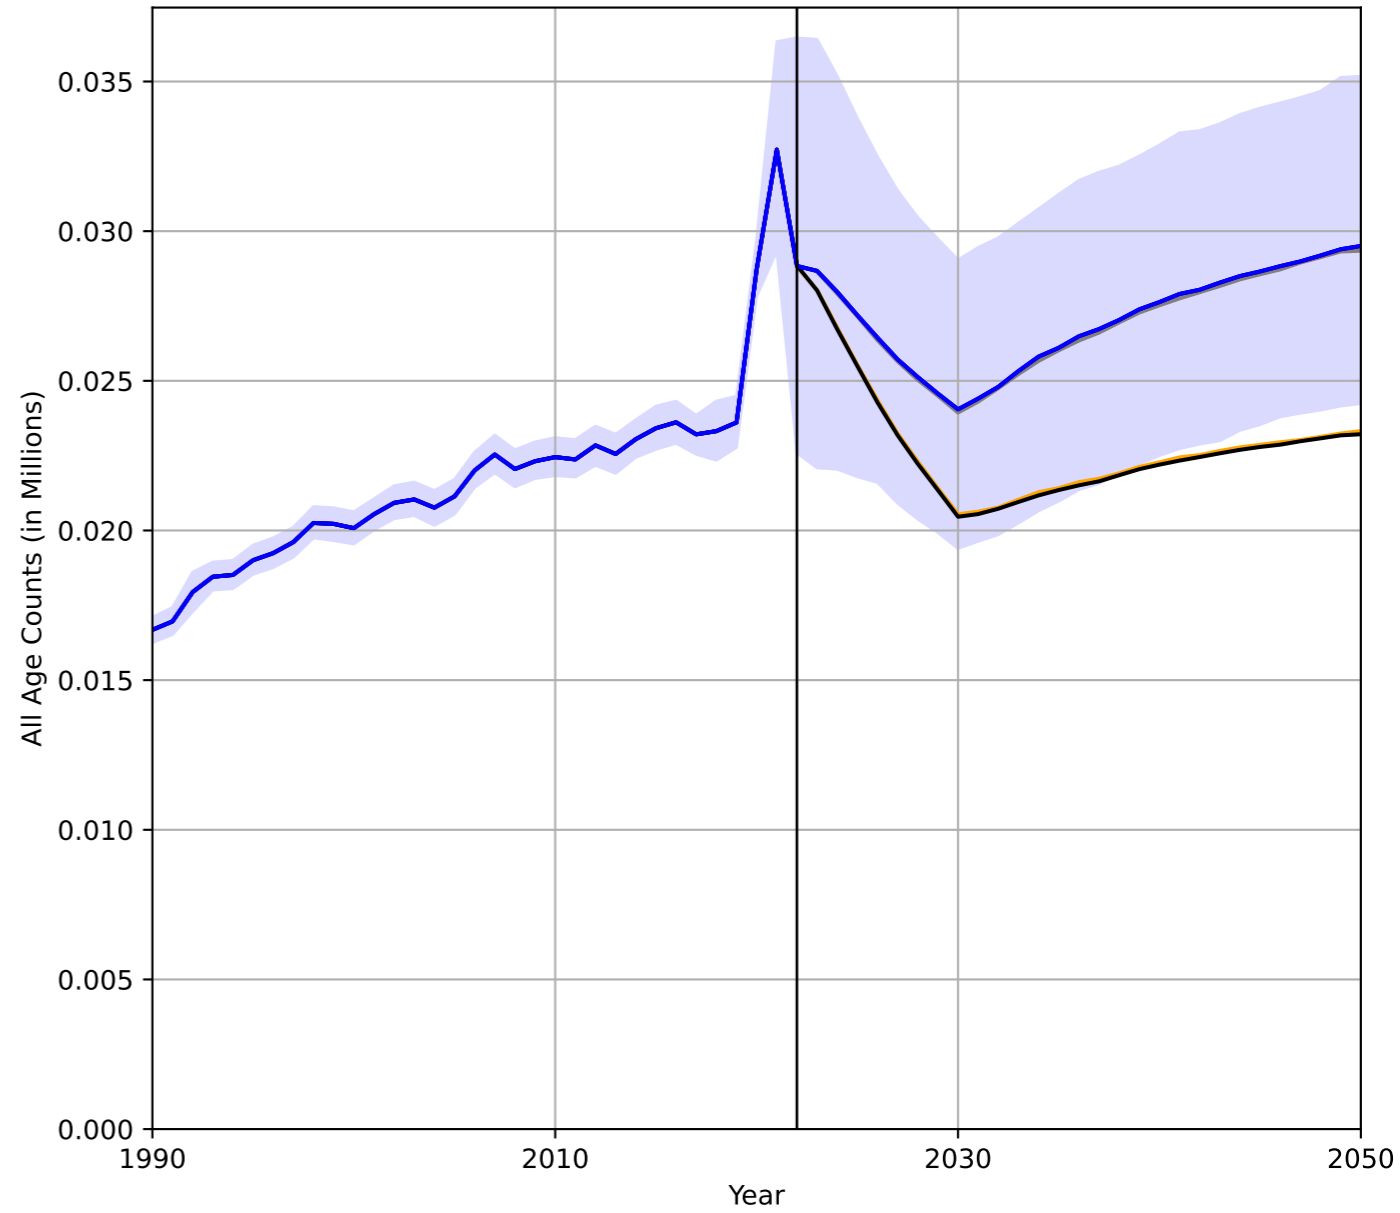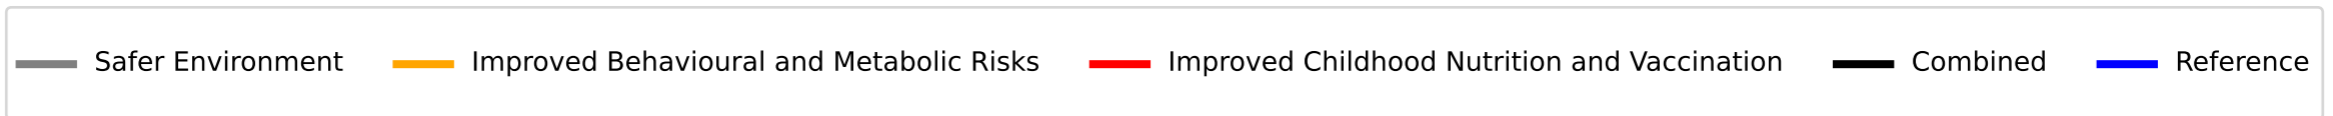

# Poland

Supplemental Results Figure S11. All-cause age standardised death rates (A) and all age death counts (B), for the past and for five future scenarios, 1990–2050

1661

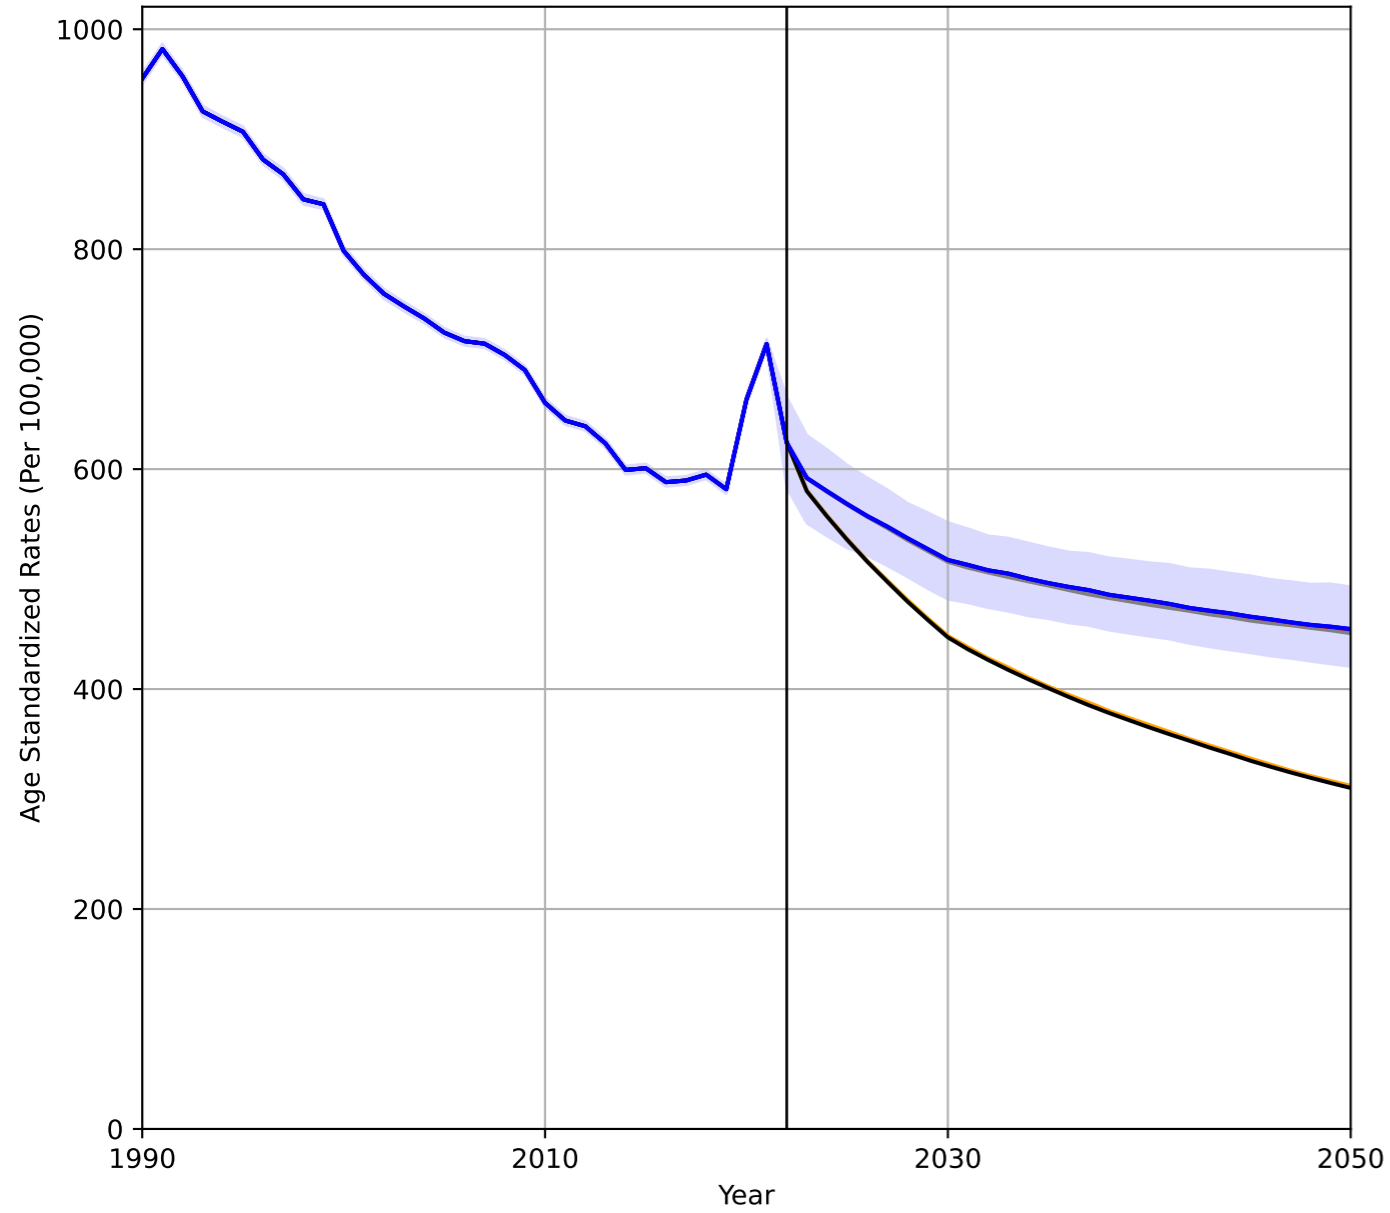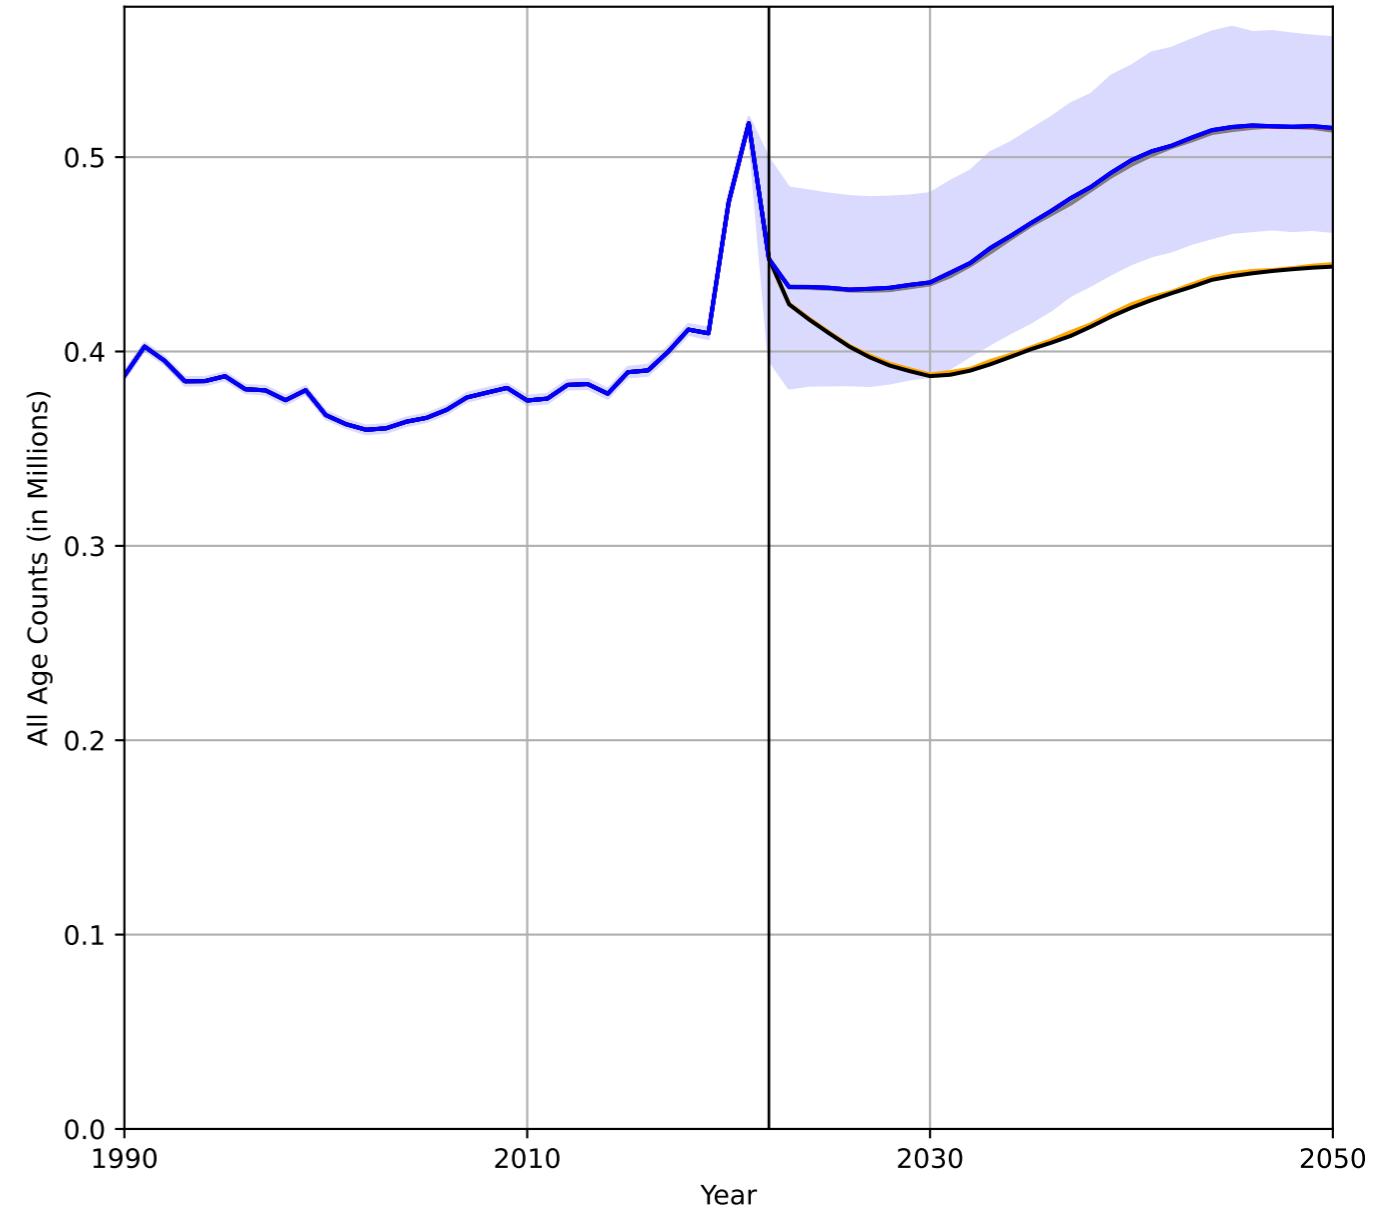

# Romania

Supplemental Results Figure S11. All-cause age standardised death rates (A) and all age death counts (B), for the past and for five future scenarios, 1990–2050

1662

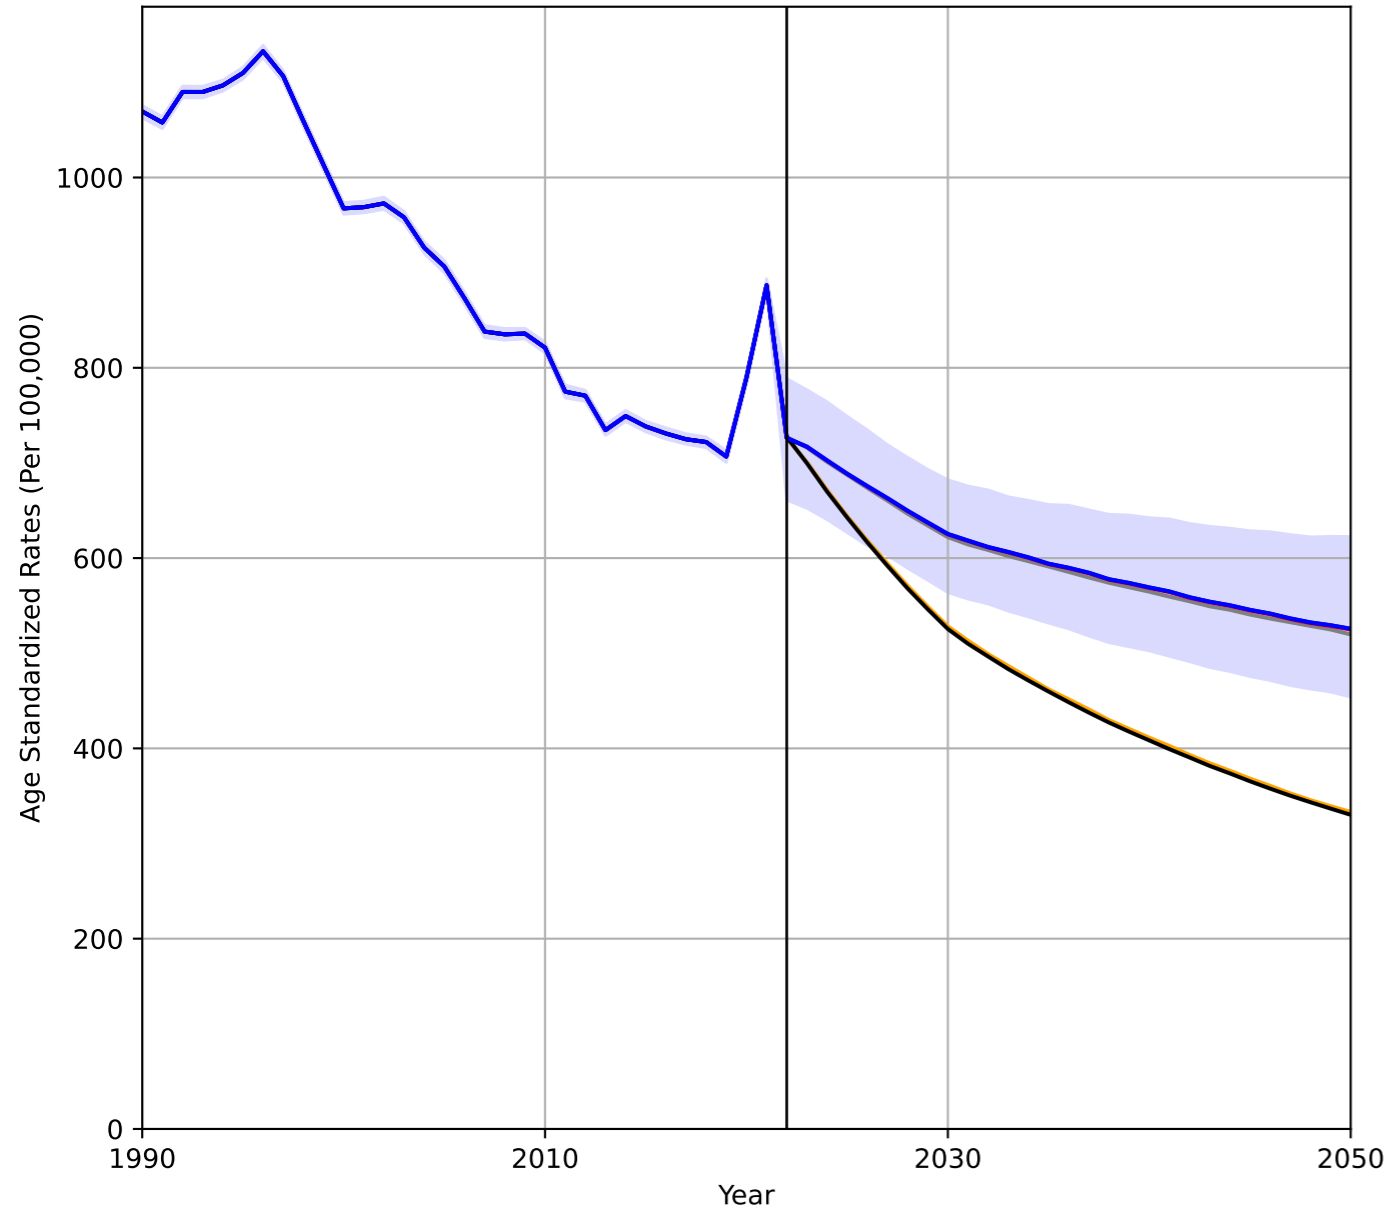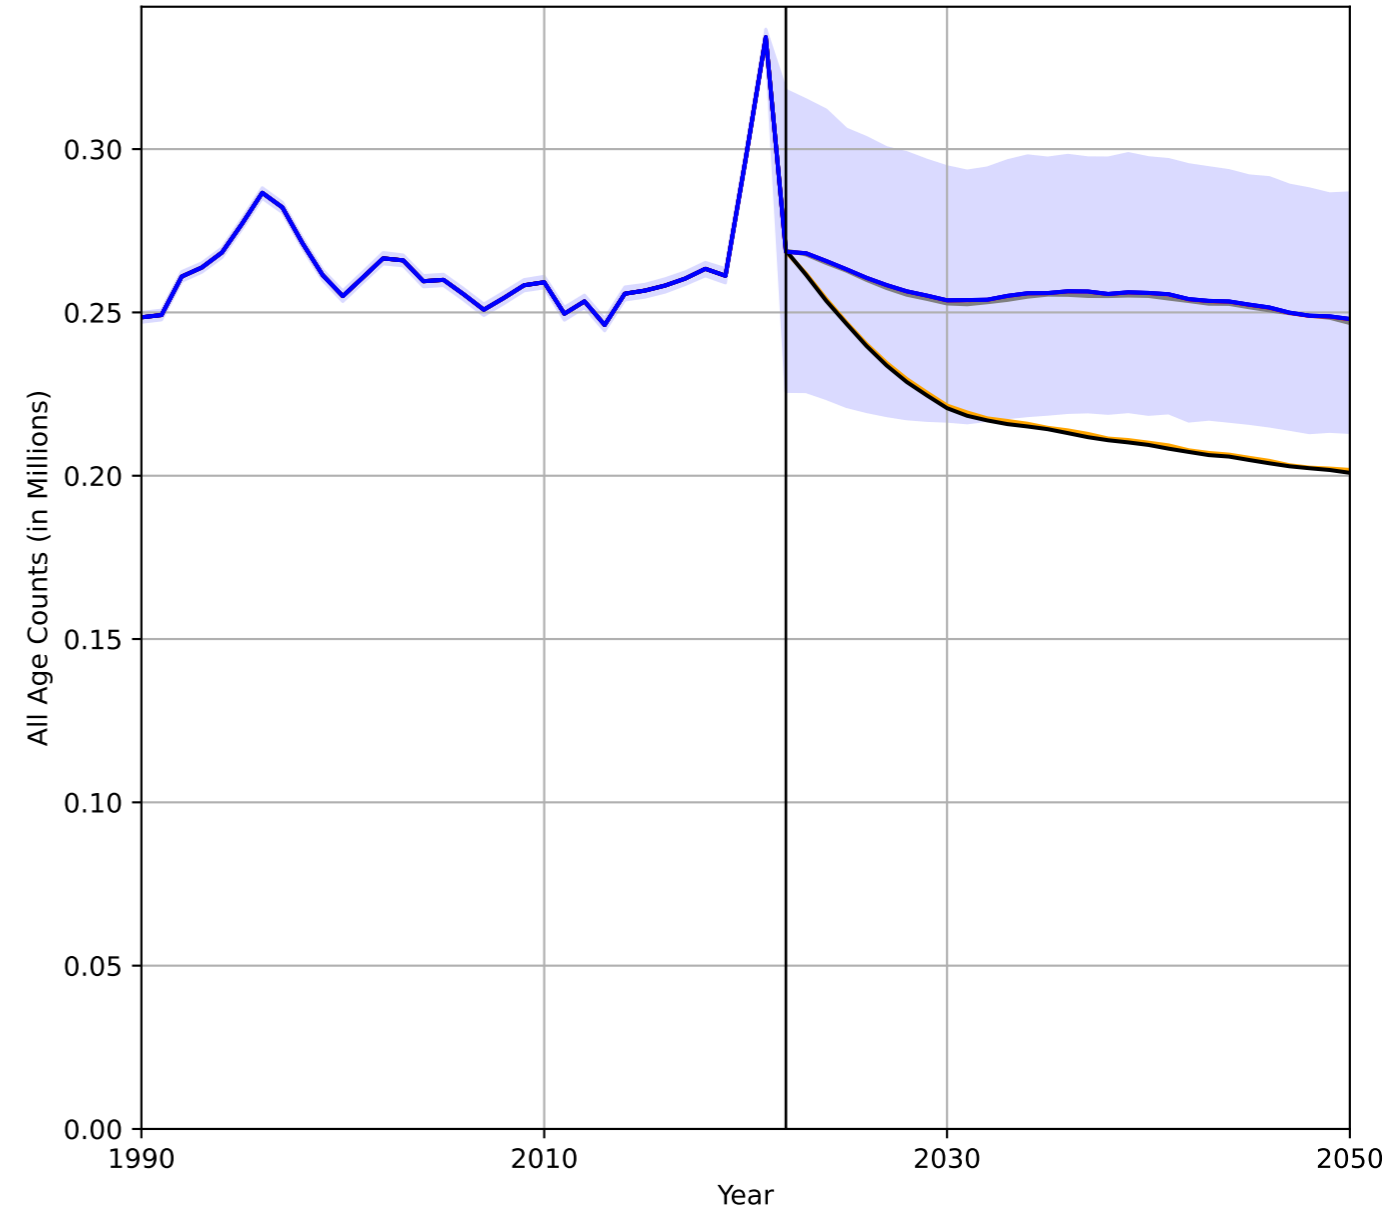

# Serbia

Supplemental Results Figure S11. All-cause age standardised death rates (A) and all age death counts (B), for the past and for five future scenarios, 1990–2050

1663

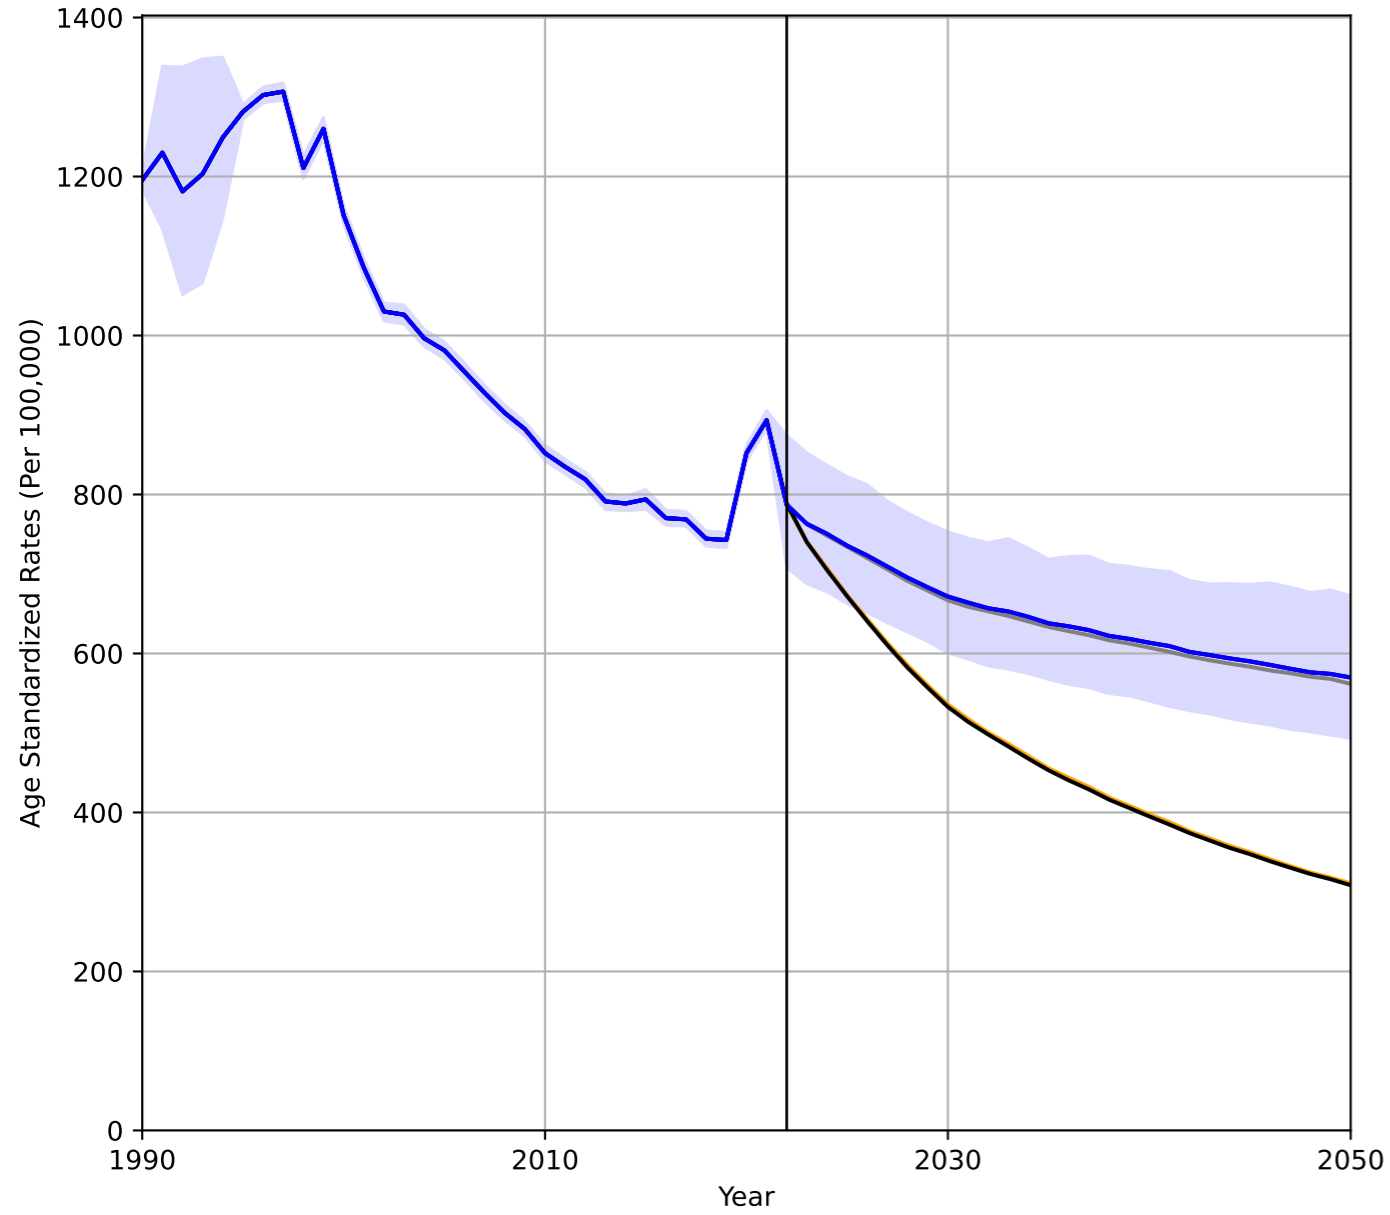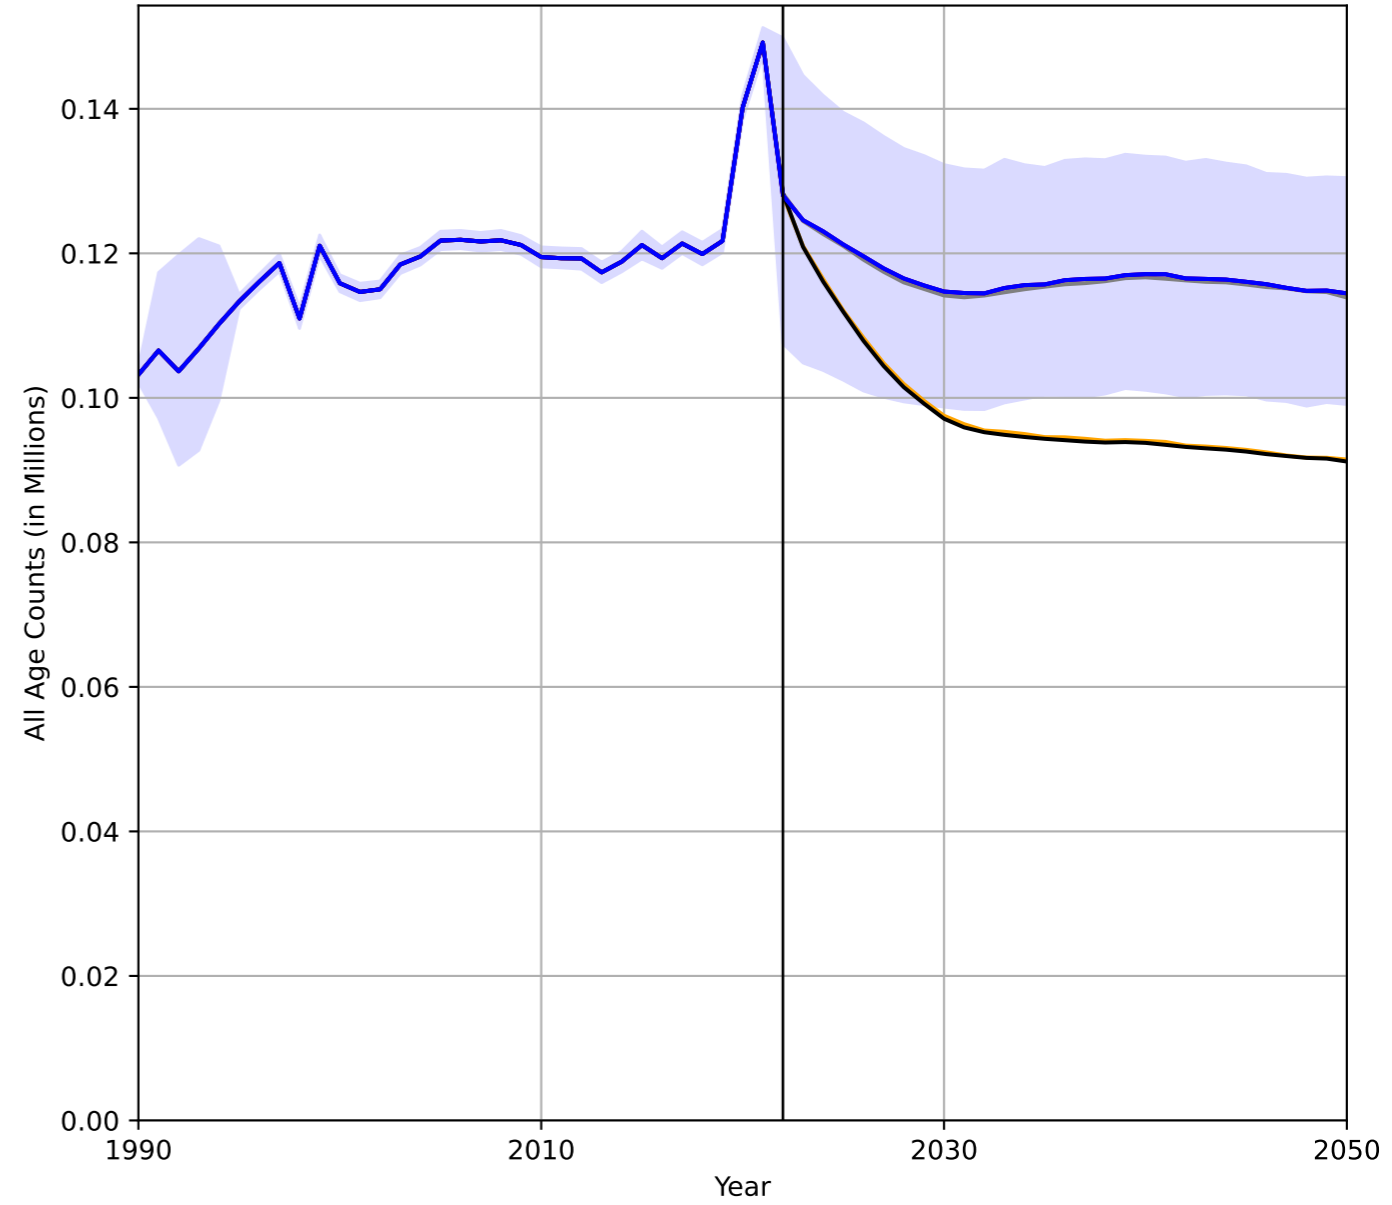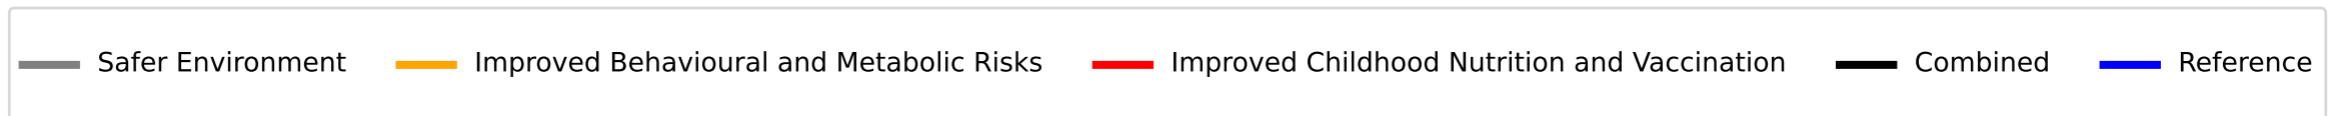



# Slovakia

Supplemental Results Figure S11. All-cause age standardised death rates (A) and all age death counts (B), for the past and for five future scenarios, 1990–2050

1664

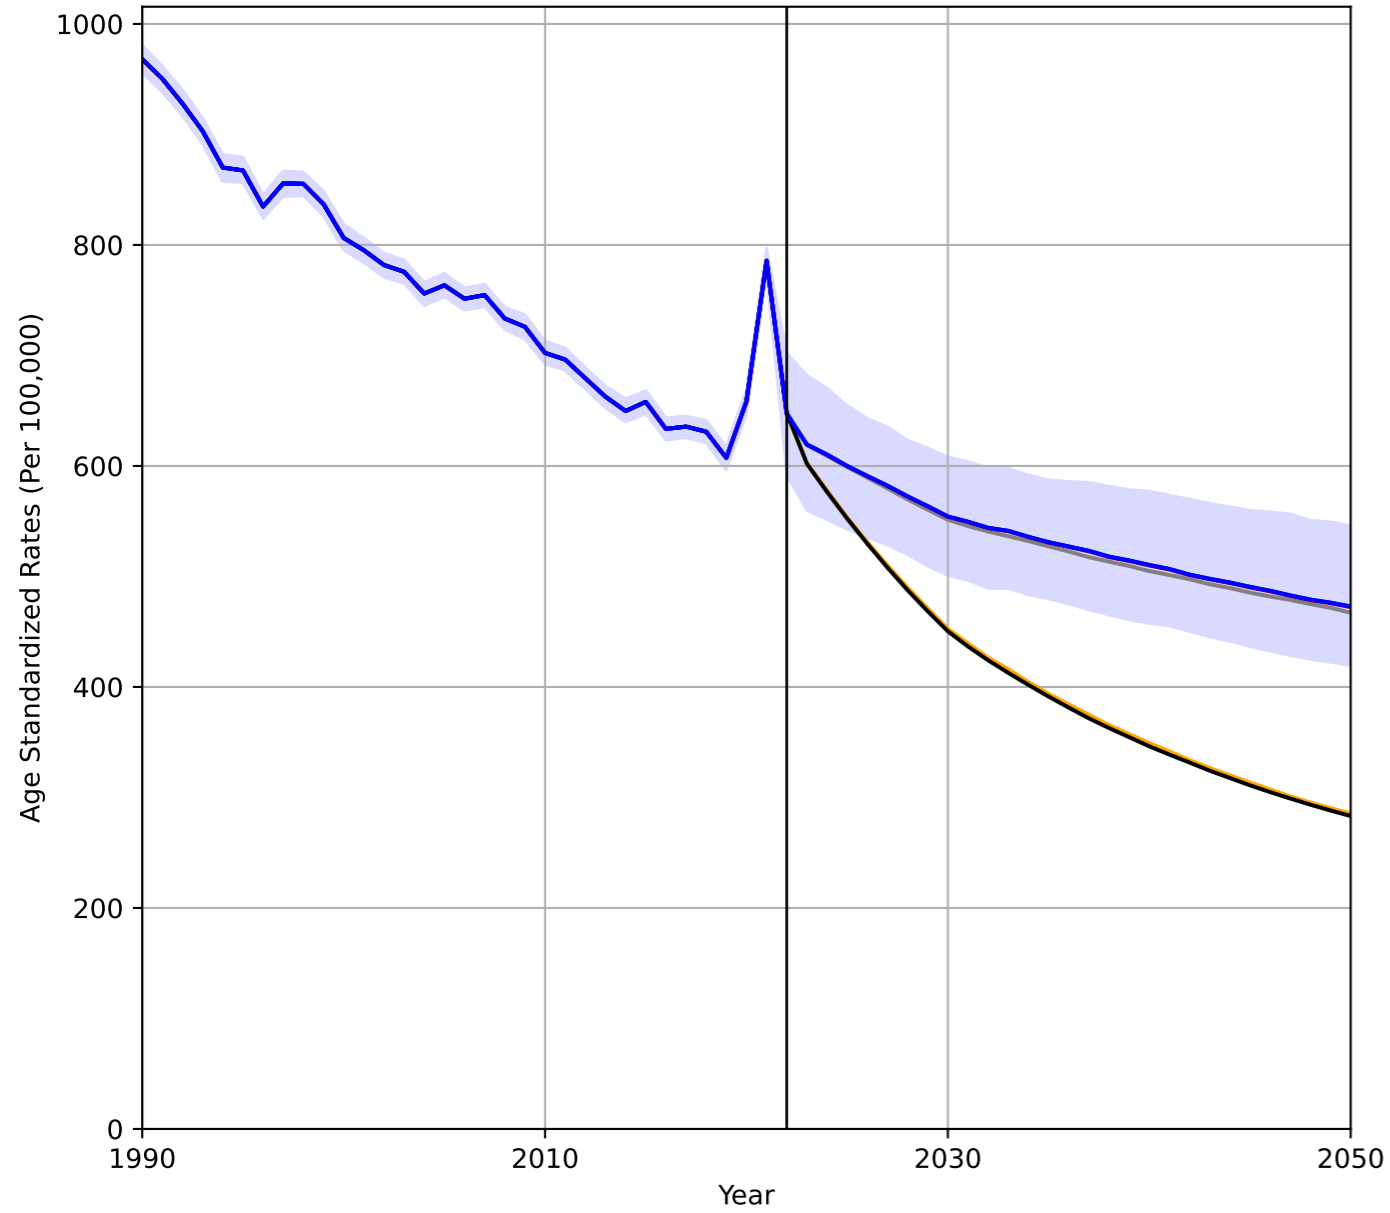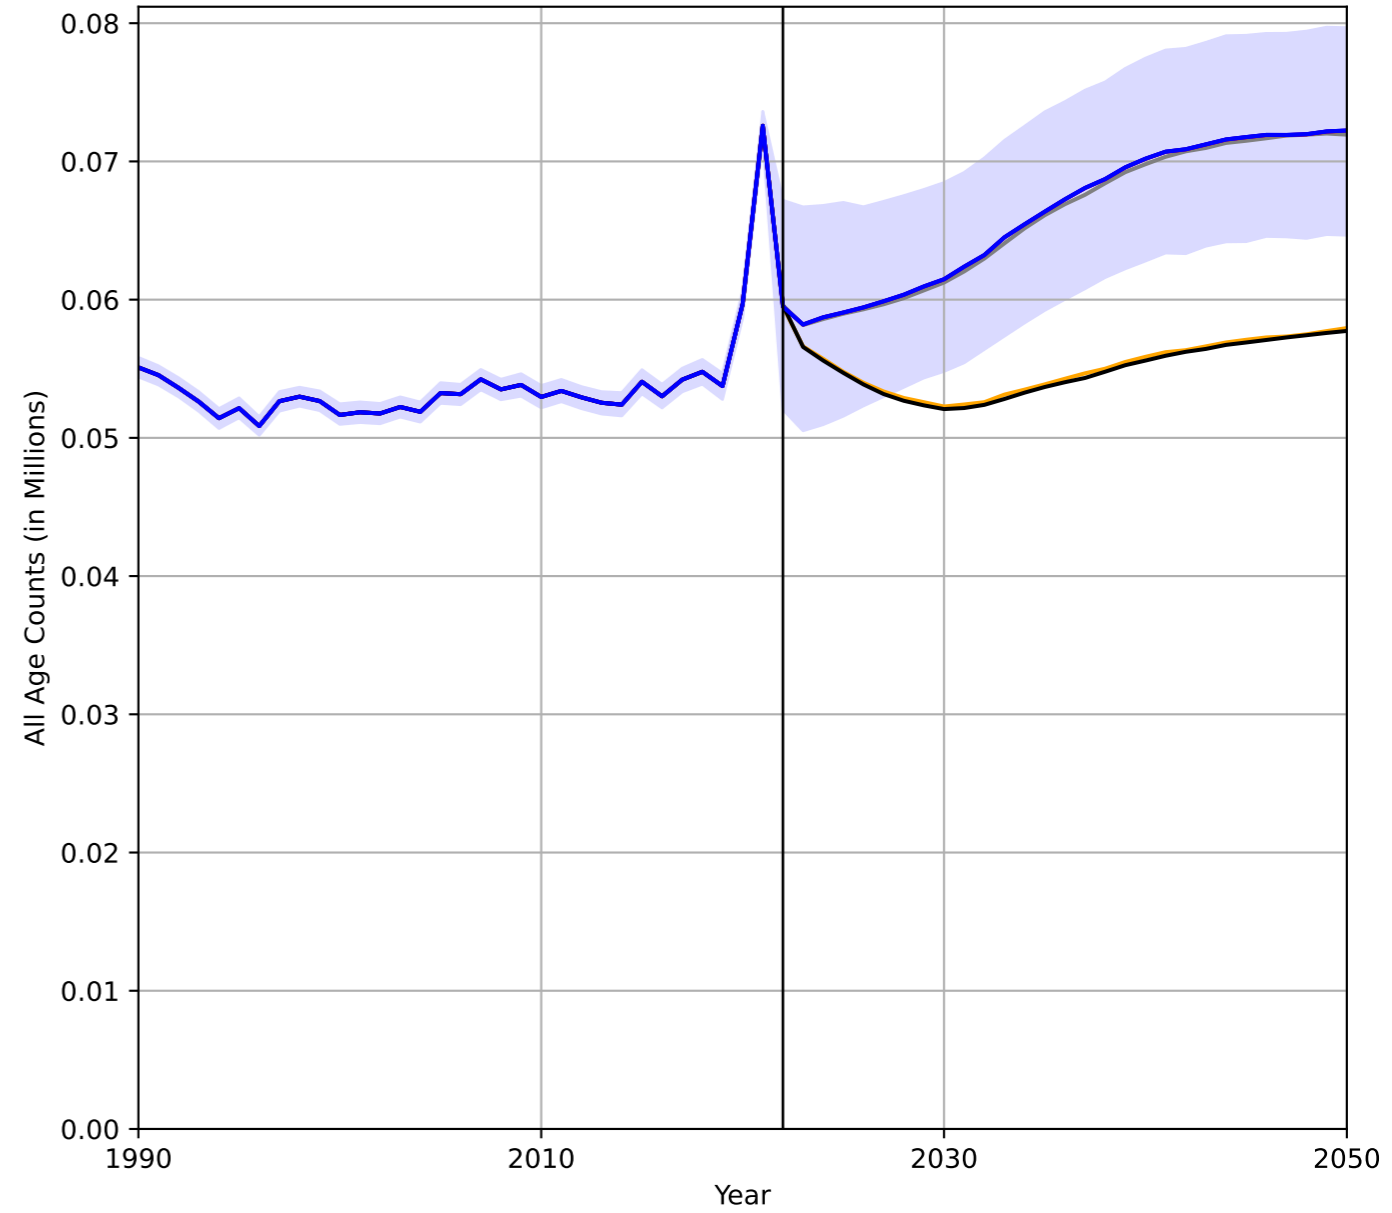

# Slovenia

Supplemental Results Figure S11. All-cause age standardised death rates (A) and all age death counts (B), for the past and for five future scenarios, 1990–2050

1665

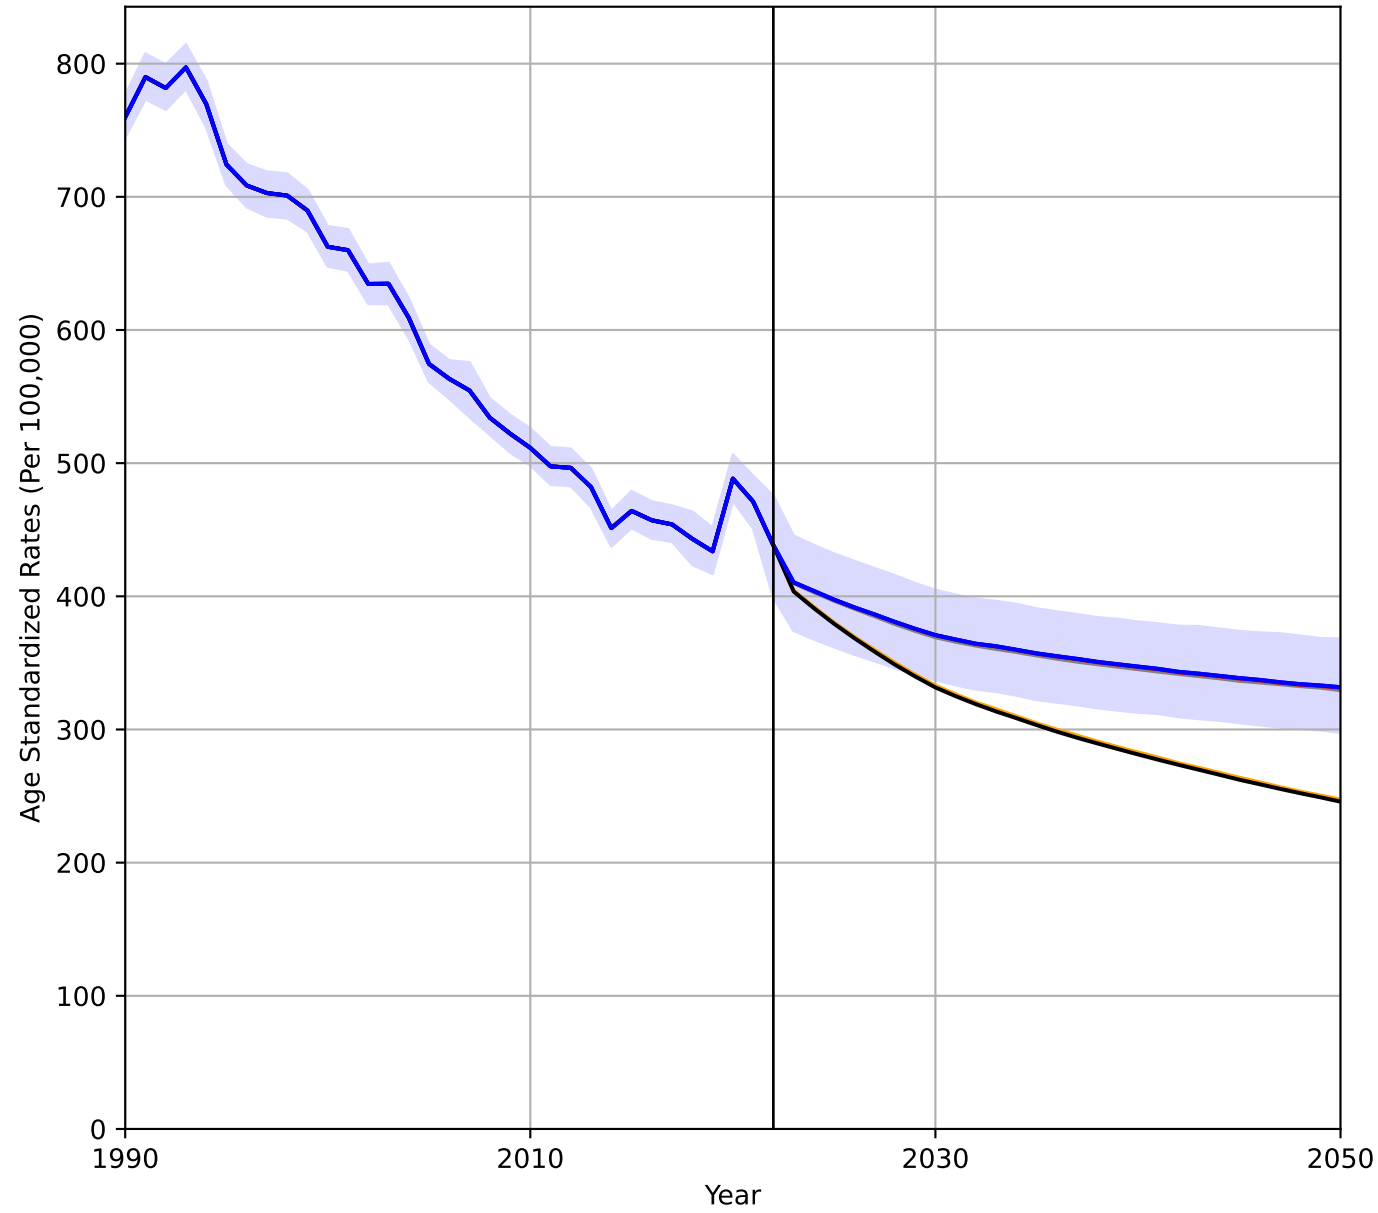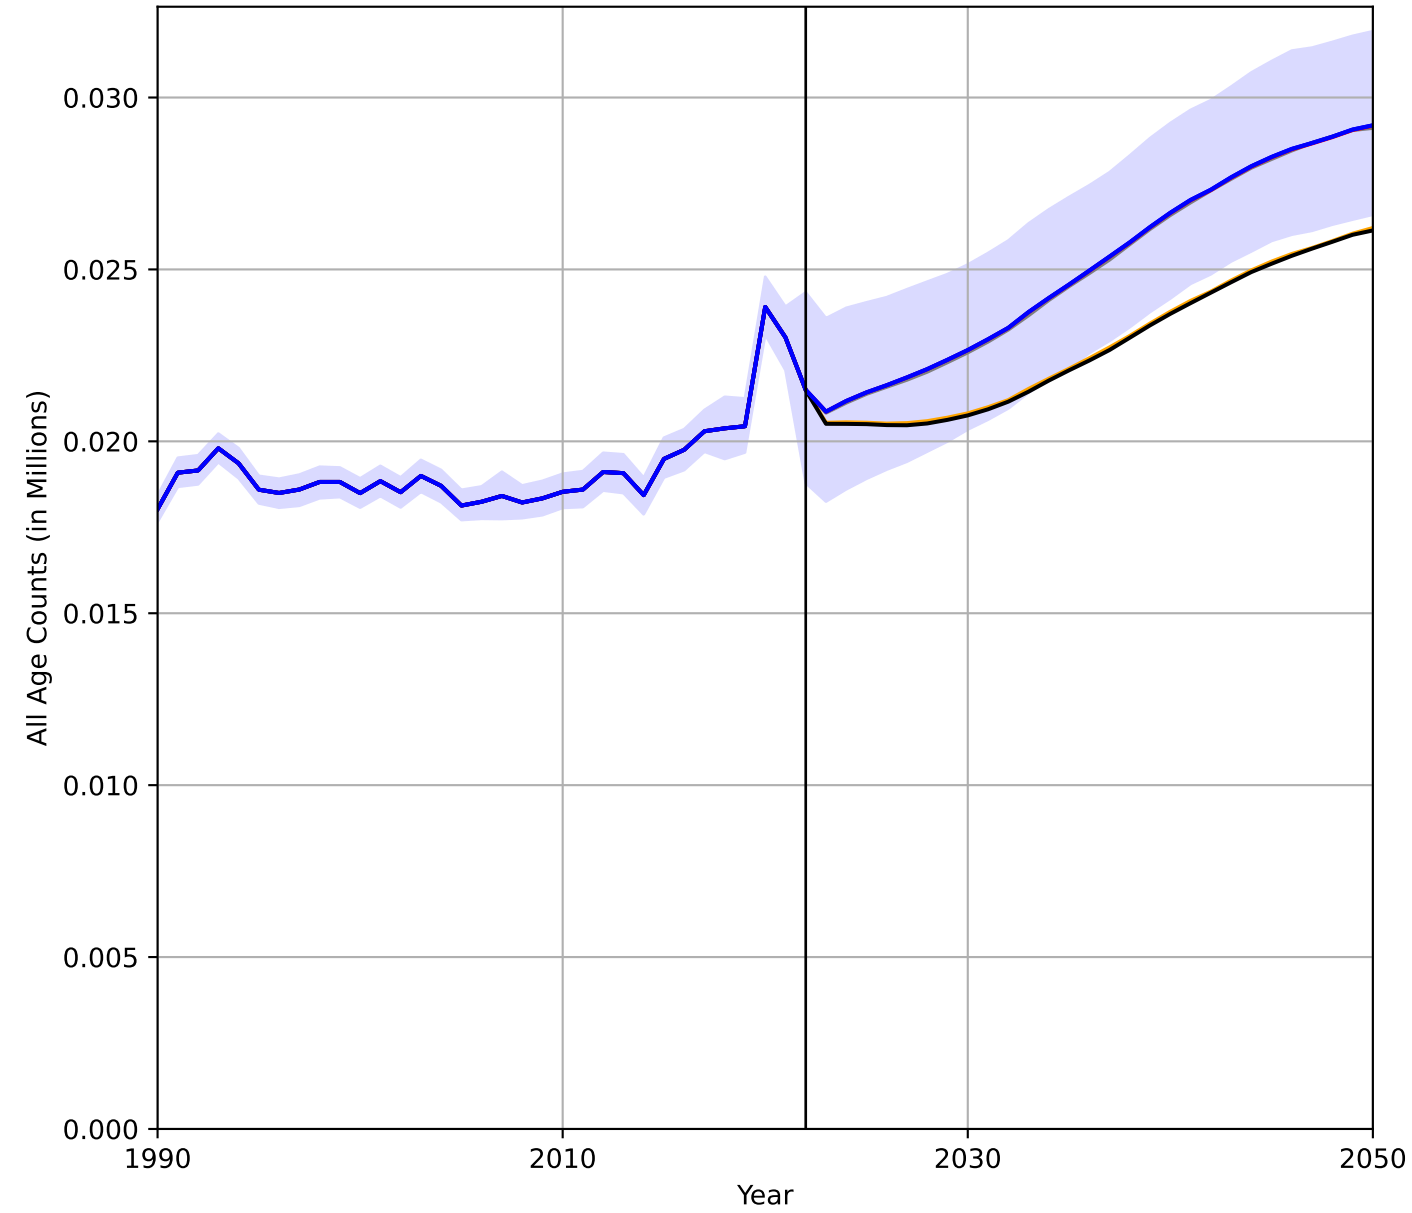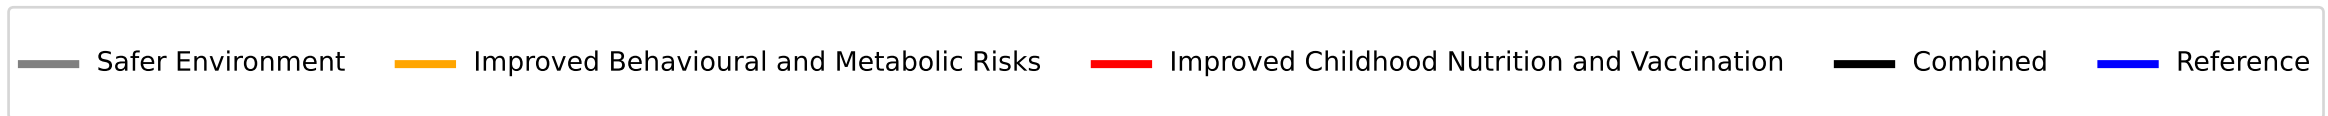

# Belarus

Supplemental Results Figure S11. All-cause age standardised death rates (A) and all age death counts (B), for the past and for five future scenarios, 1990–2050

1666

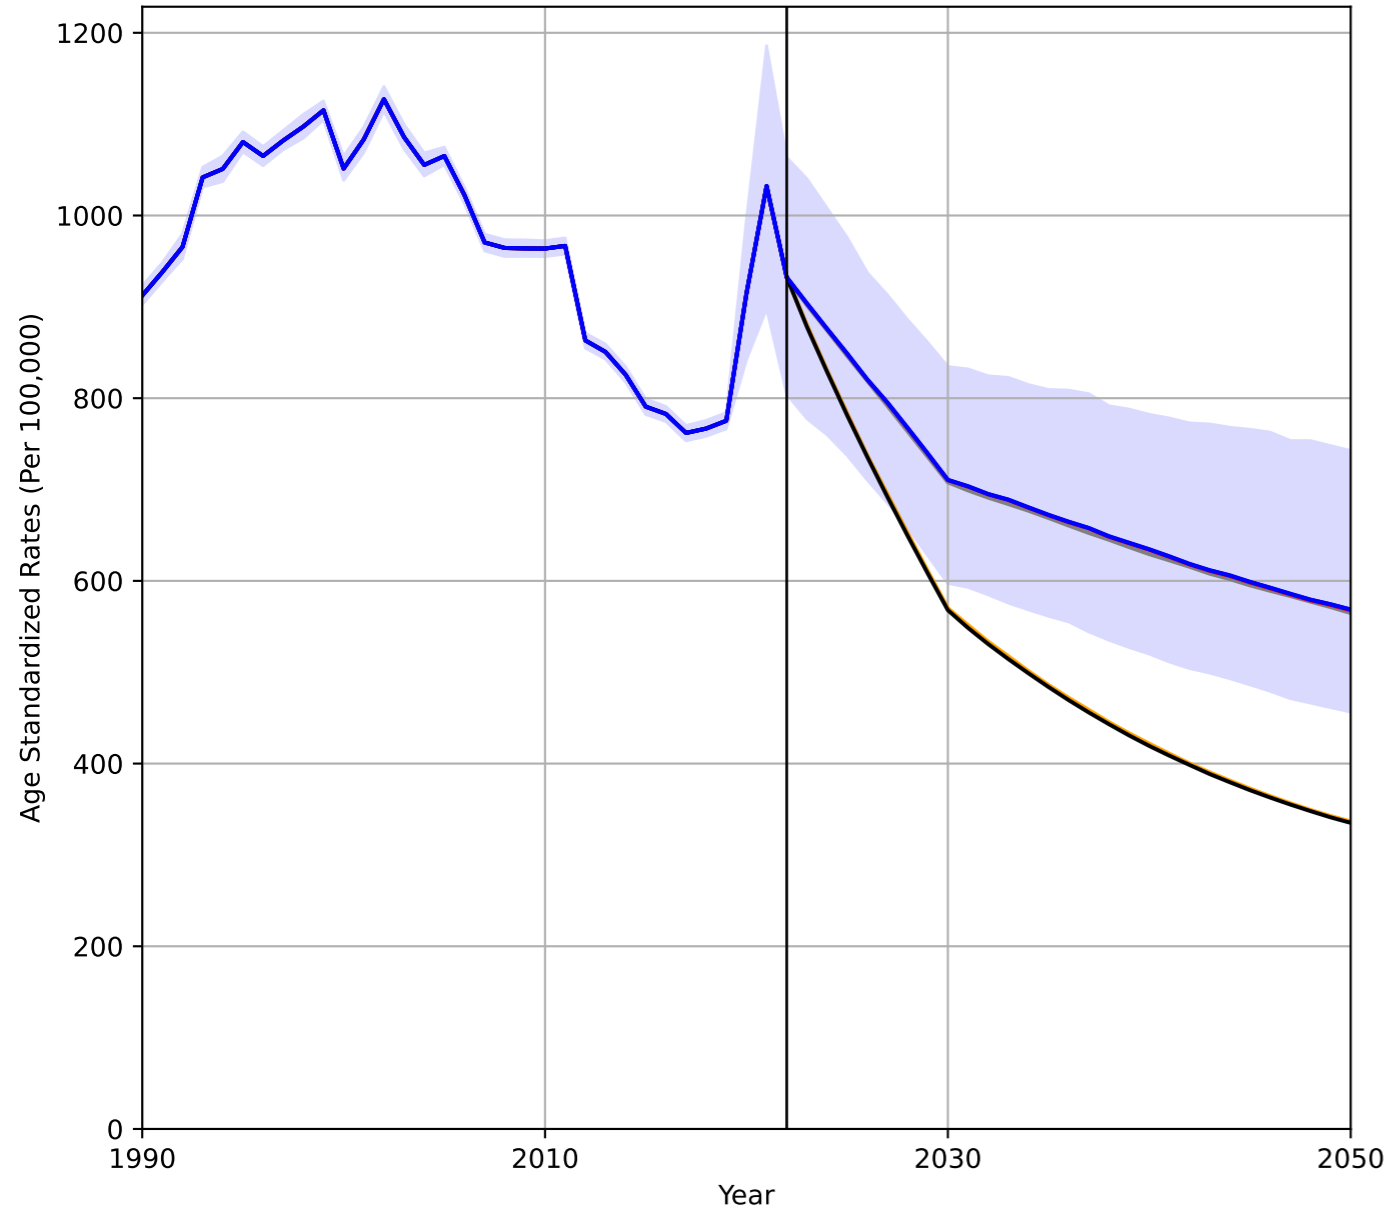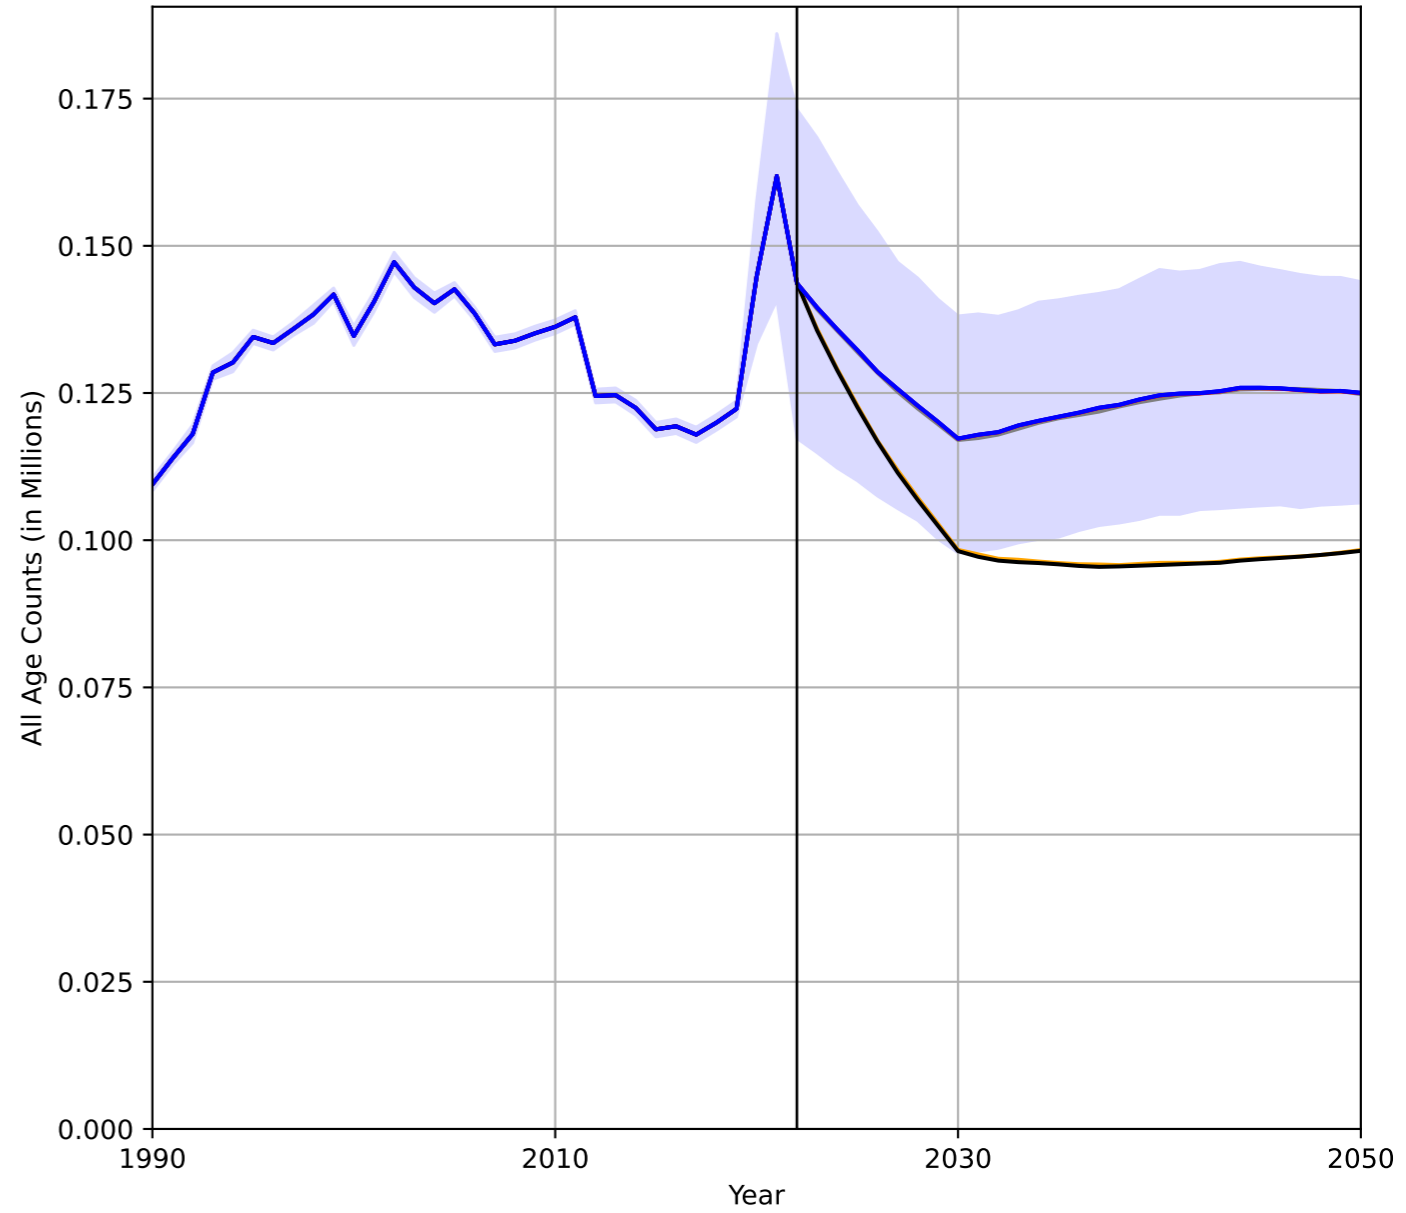

# Estonia

Supplemental Results Figure S11. All-cause age standardised death rates (A) and all age death counts (B), for the past and for five future scenarios, 1990–2050

1667

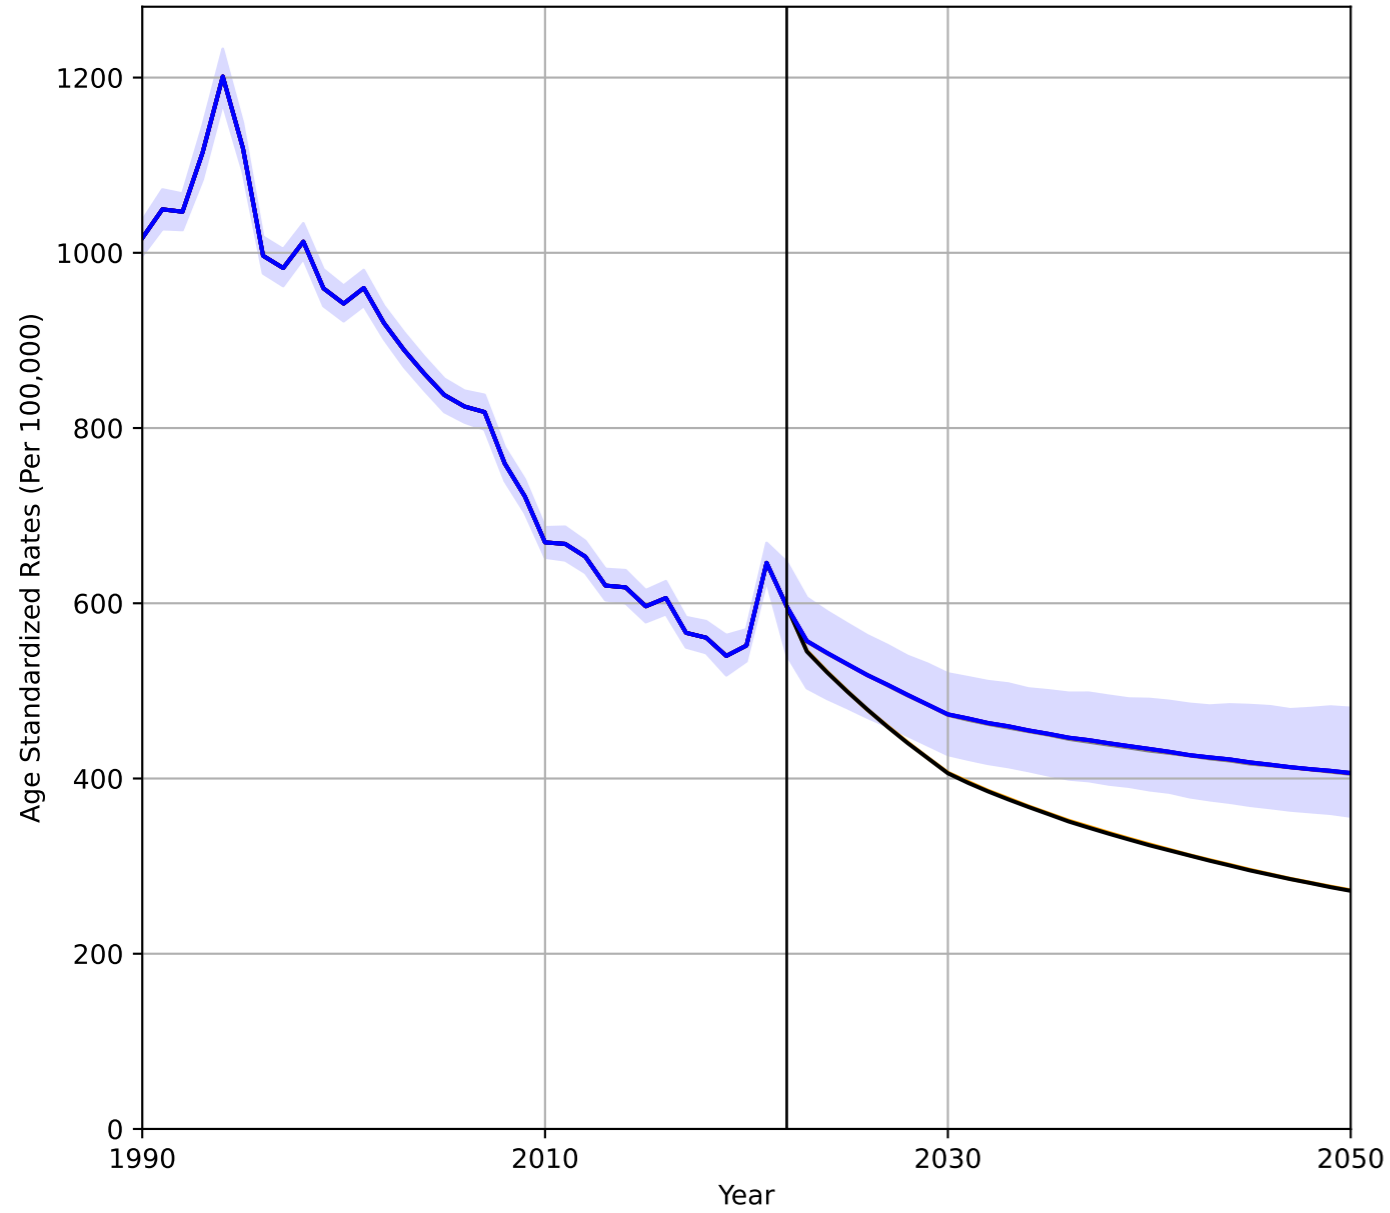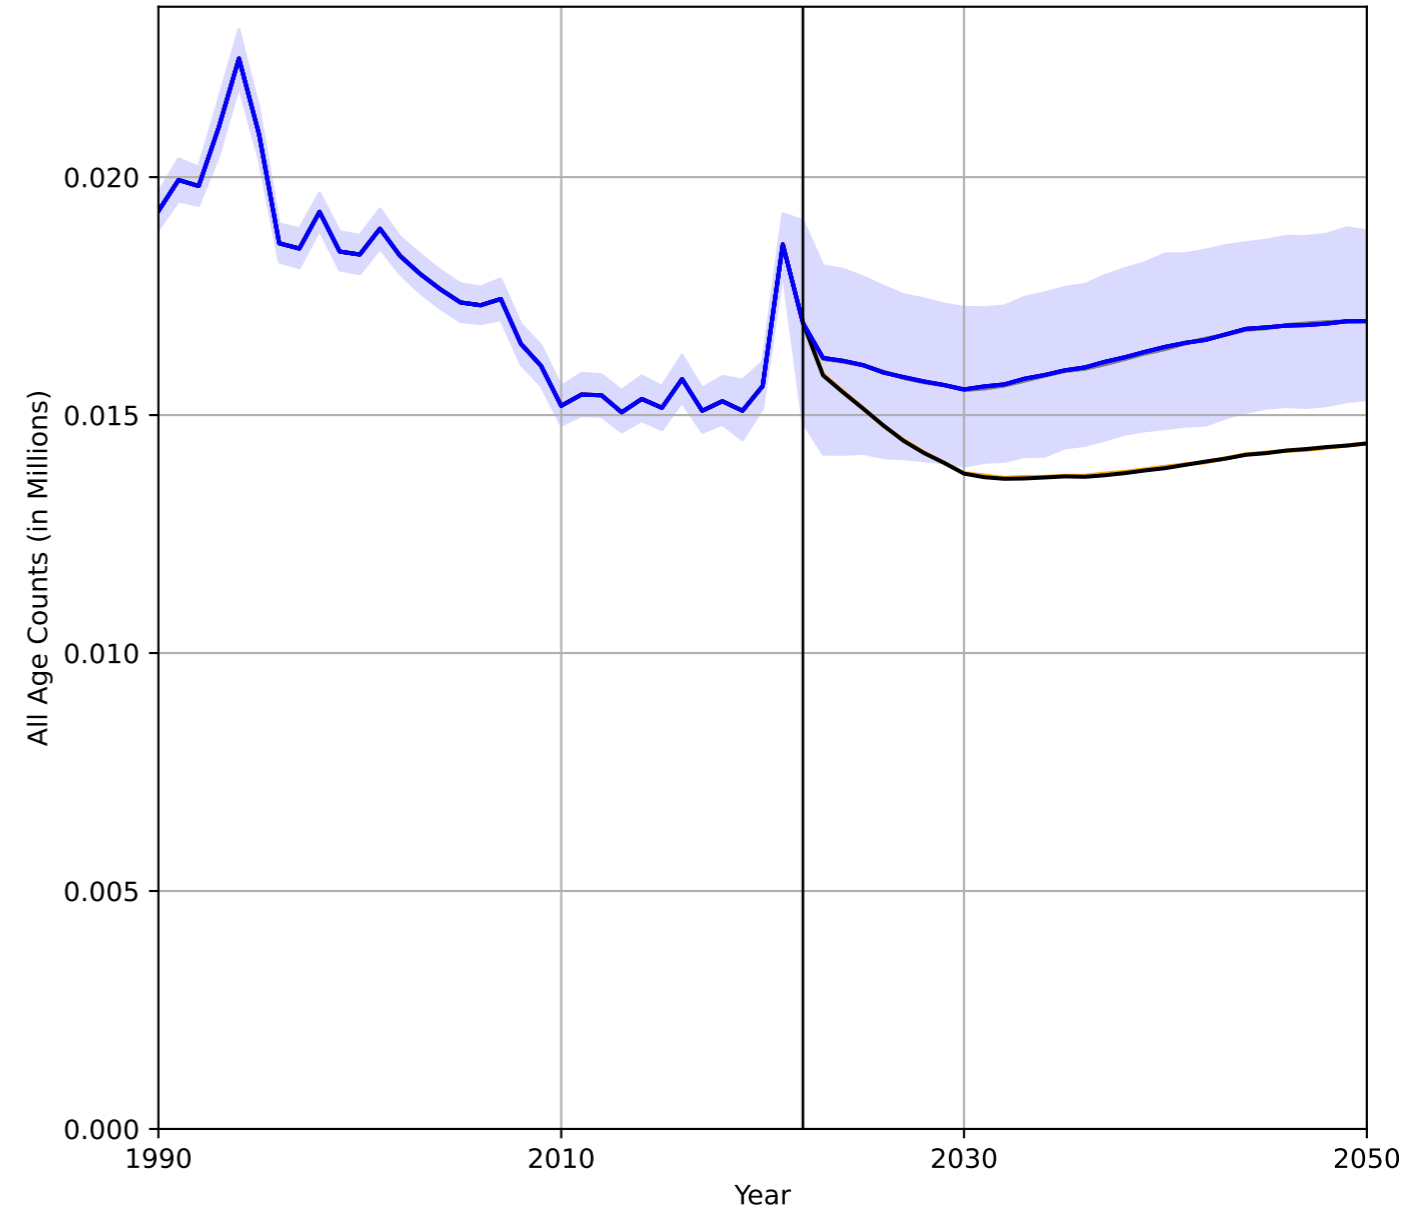

# Latvia

Supplemental Results Figure S11. All-cause age standardised death rates (A) and all age death counts (B), for the past and for five future scenarios, 1990–2050

1668

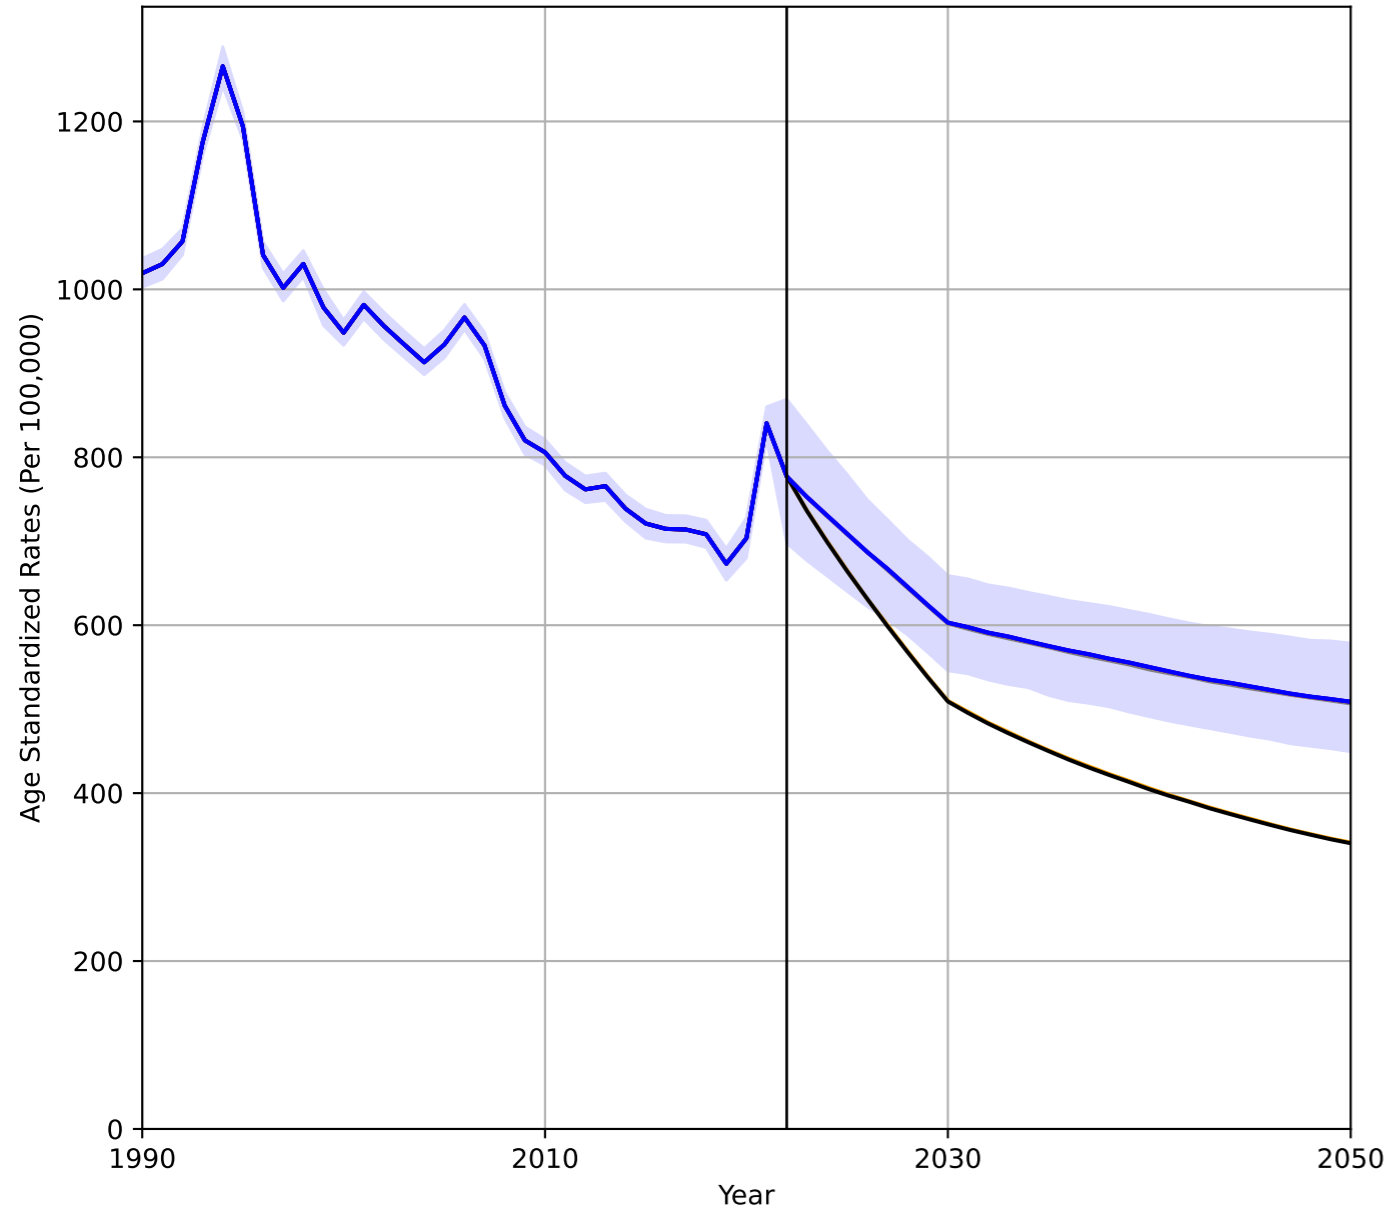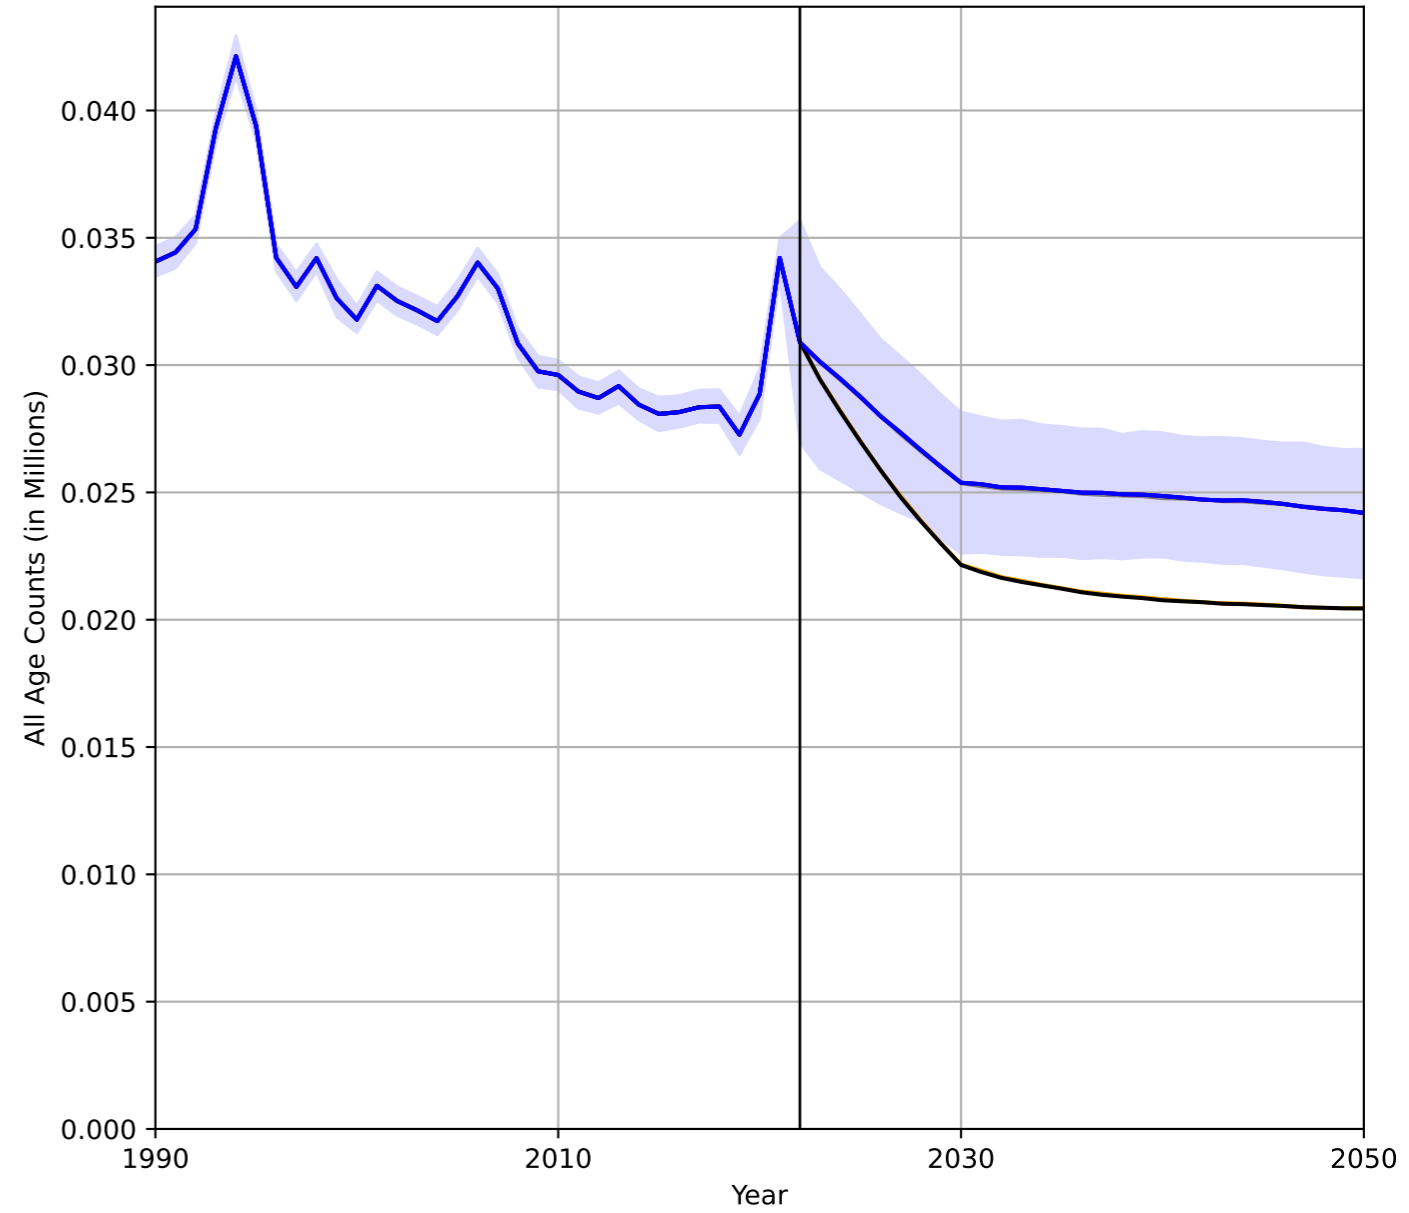

# Lithuania

Supplemental Results Figure S11. All-cause age standardised death rates (A) and all age death counts (B), for the past and for five future scenarios, 1990–2050

1669

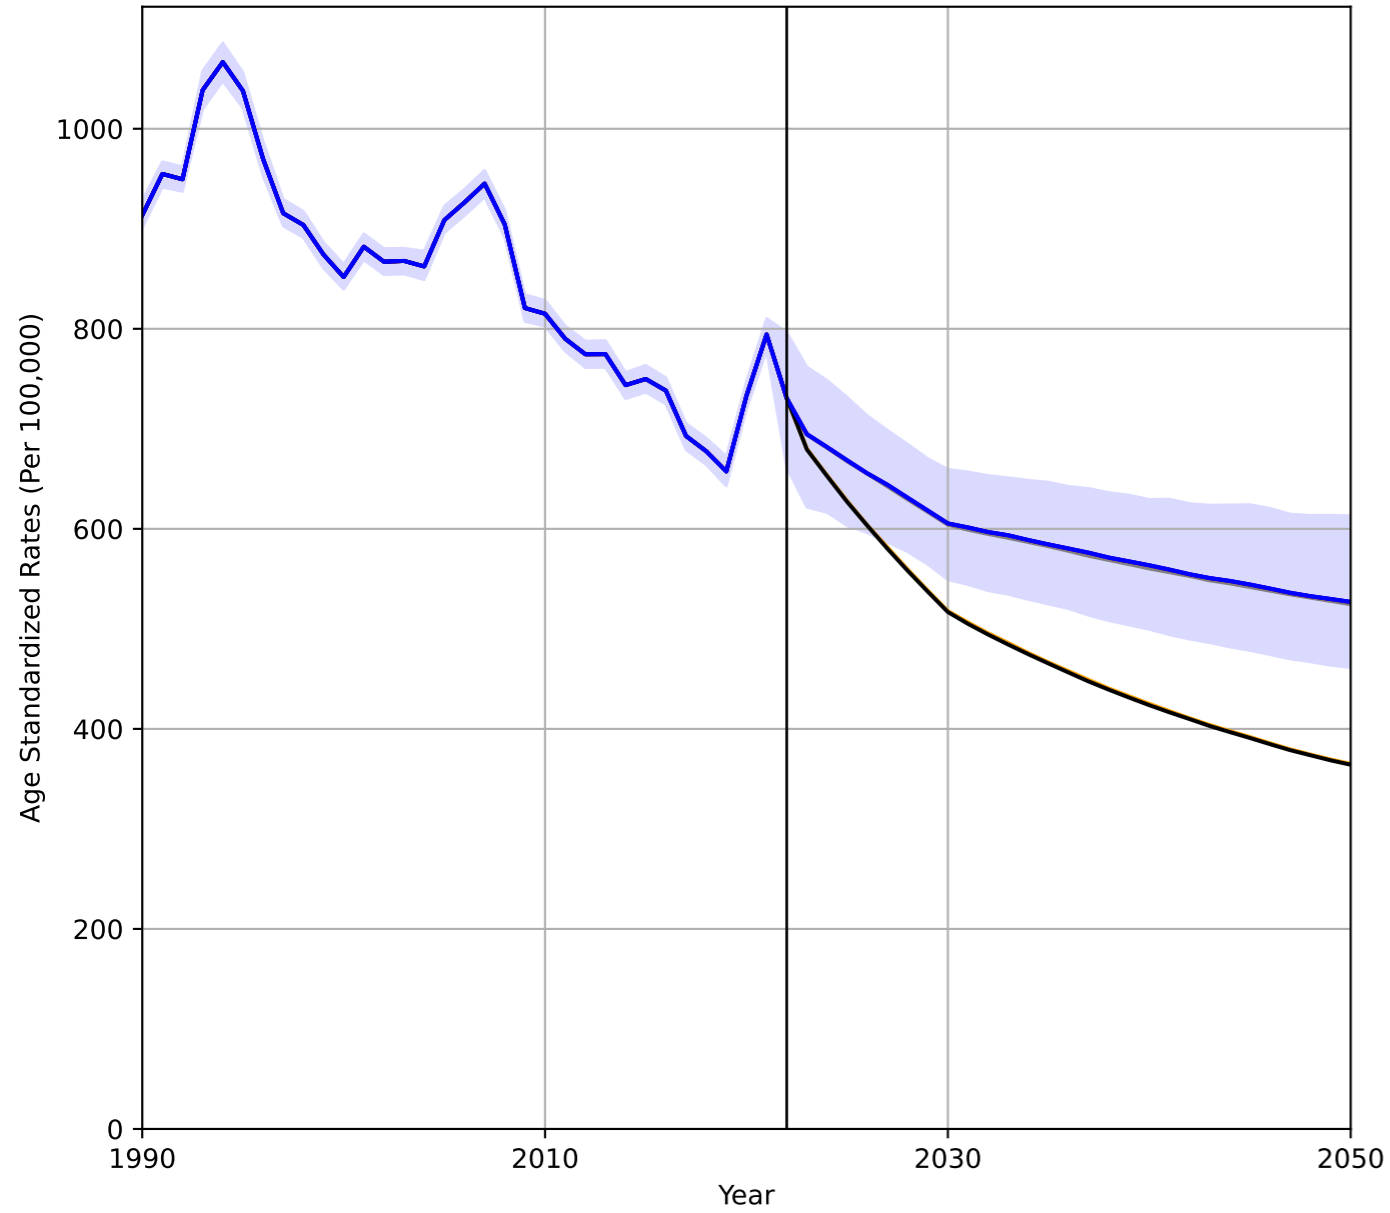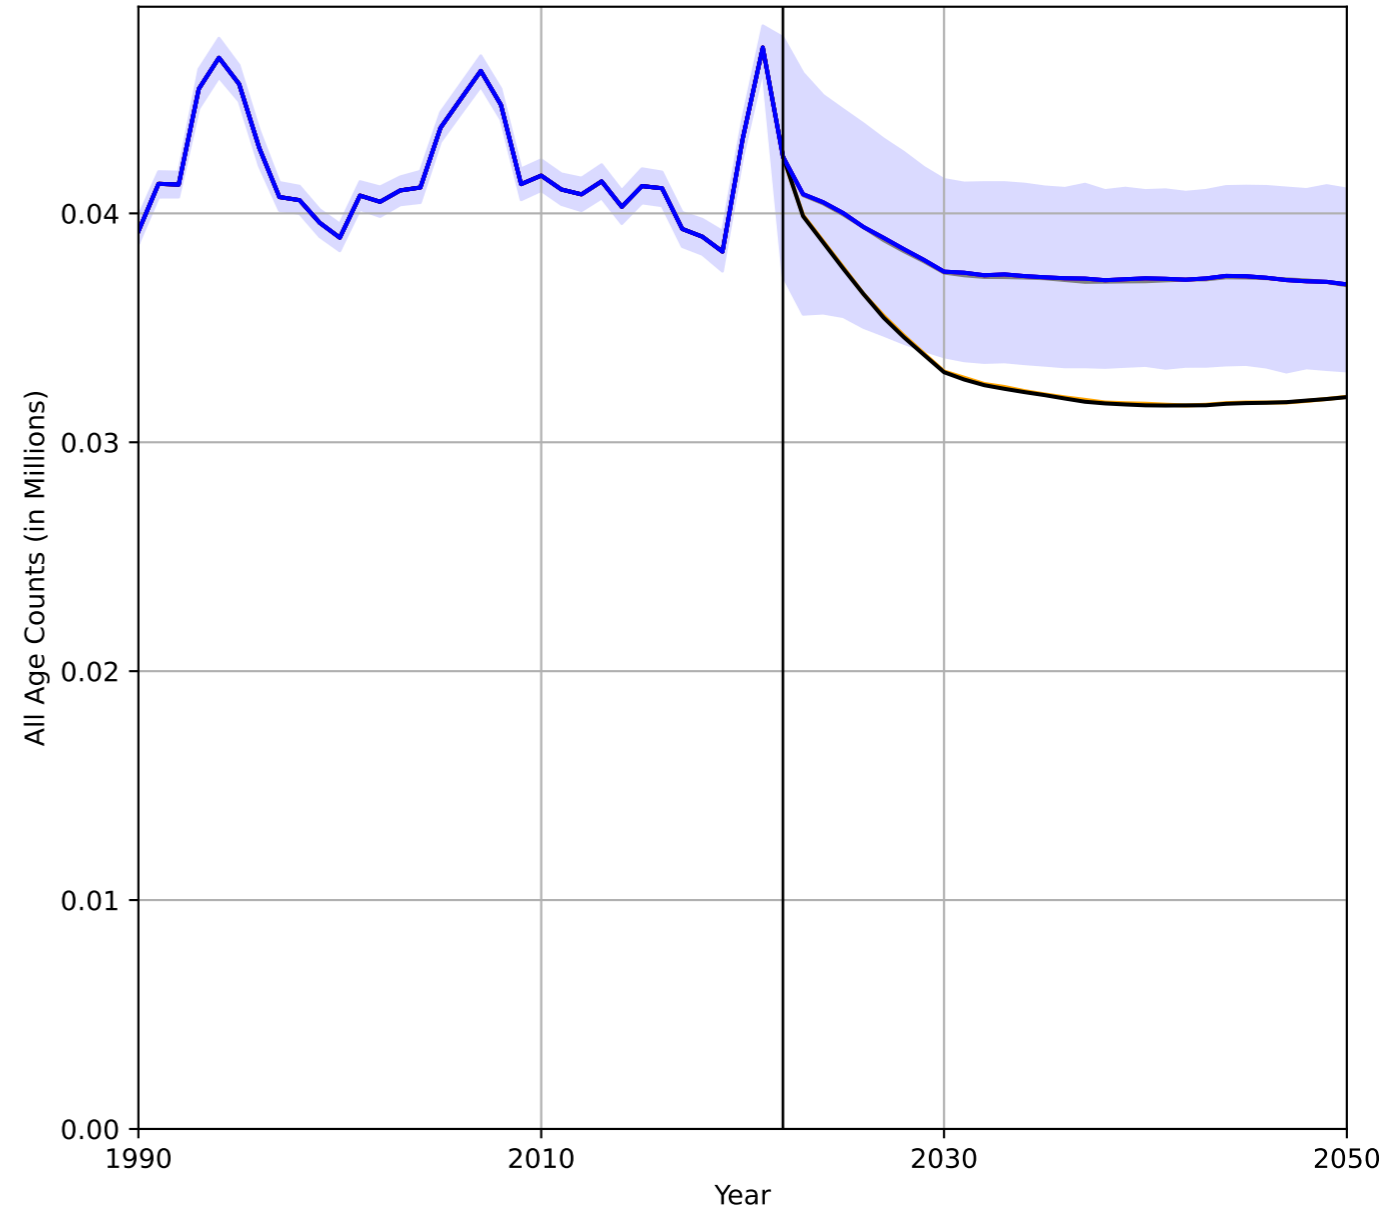

# Moldova

Supplemental Results Figure S11. All-cause age standardised death rates (A) and all age death counts (B), for the past and for five future scenarios, 1990–2050

1670

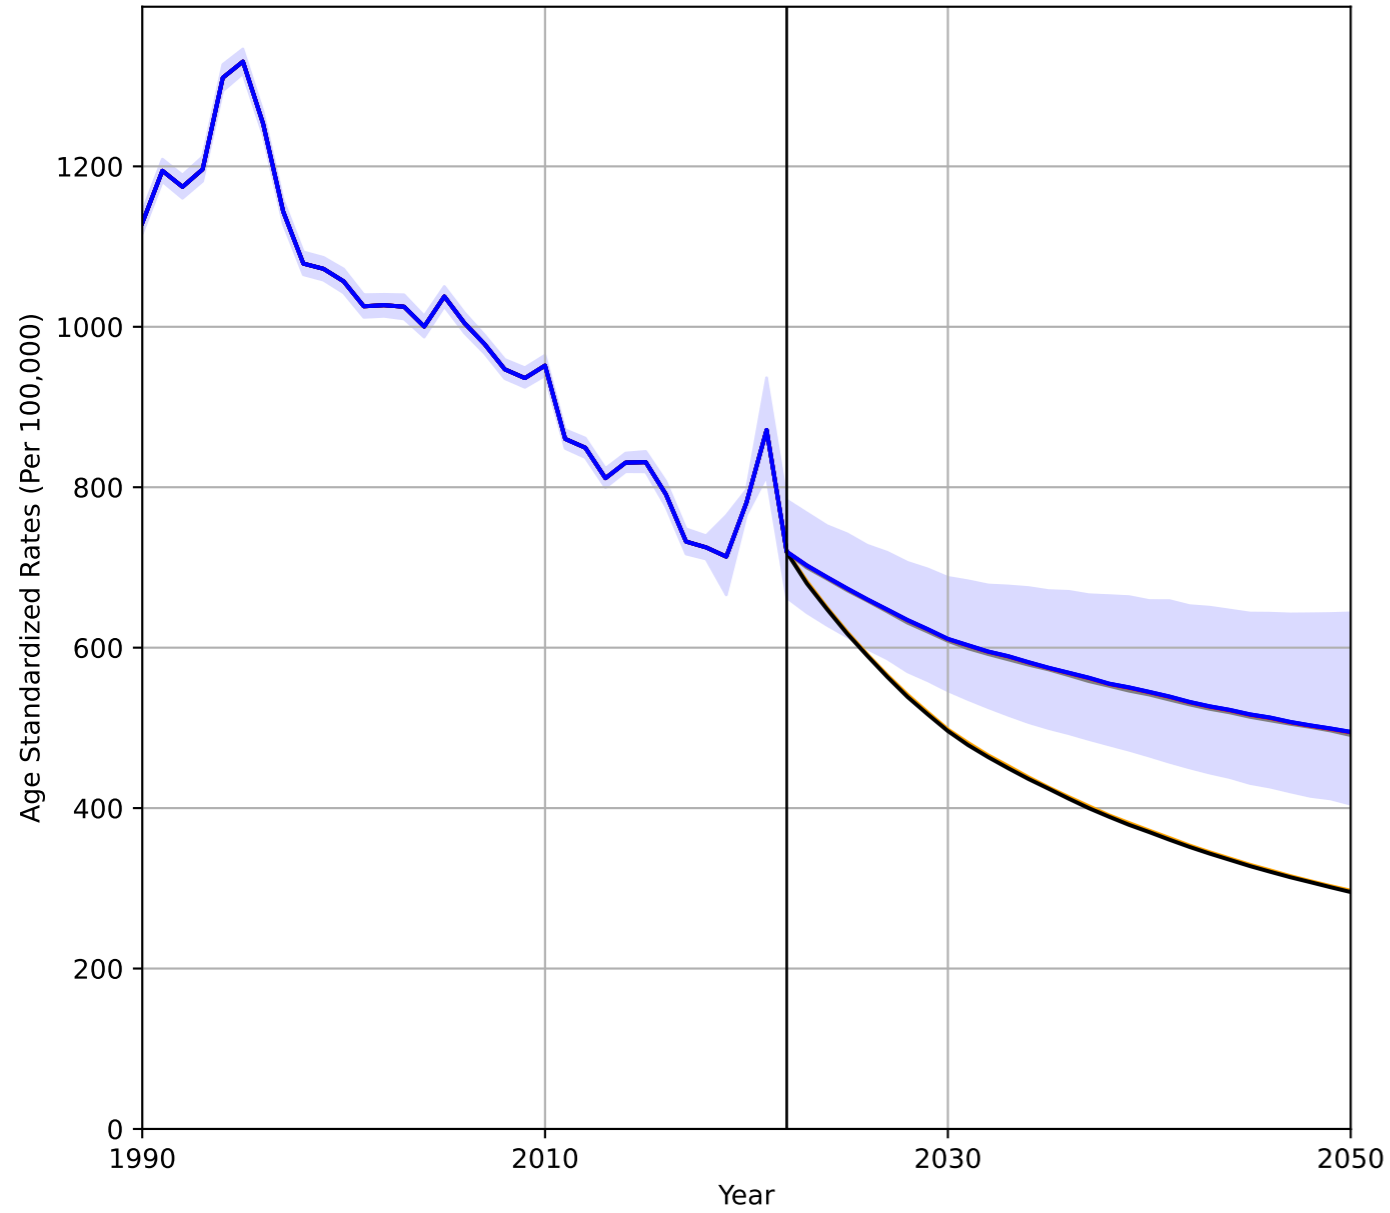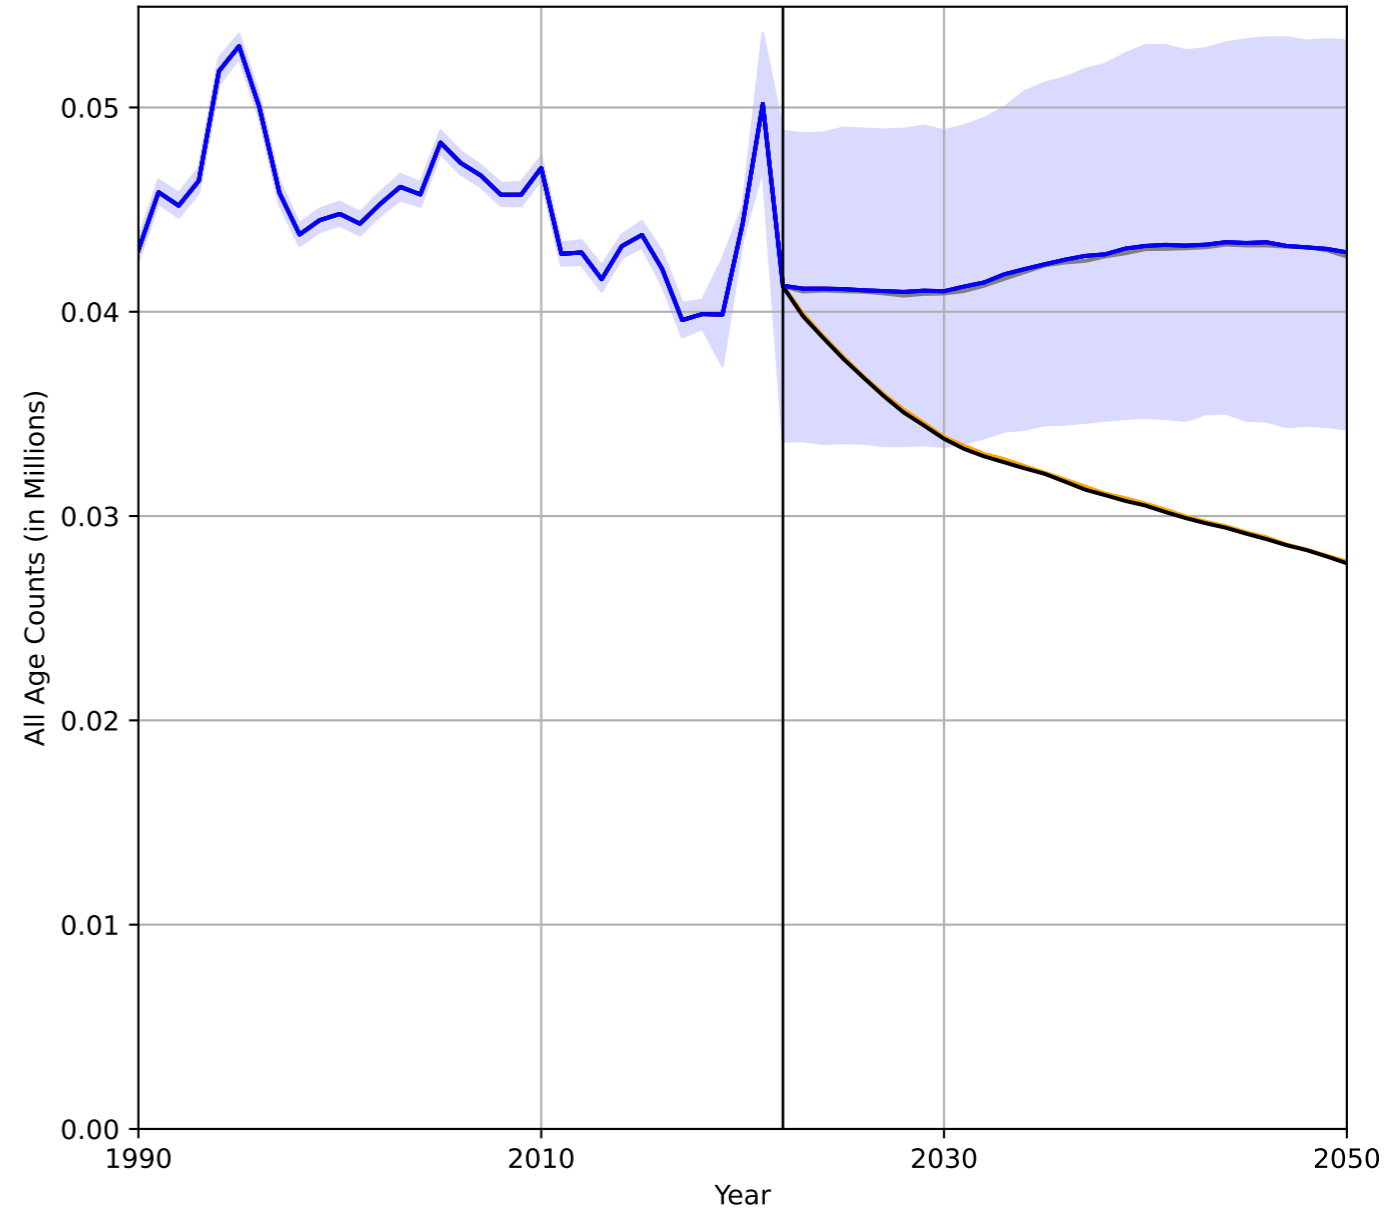

# Russia

Supplemental Results Figure S11. All-cause age standardised death rates (A) and all age death counts (B), for the past and for five future scenarios, 1990–2050

1671

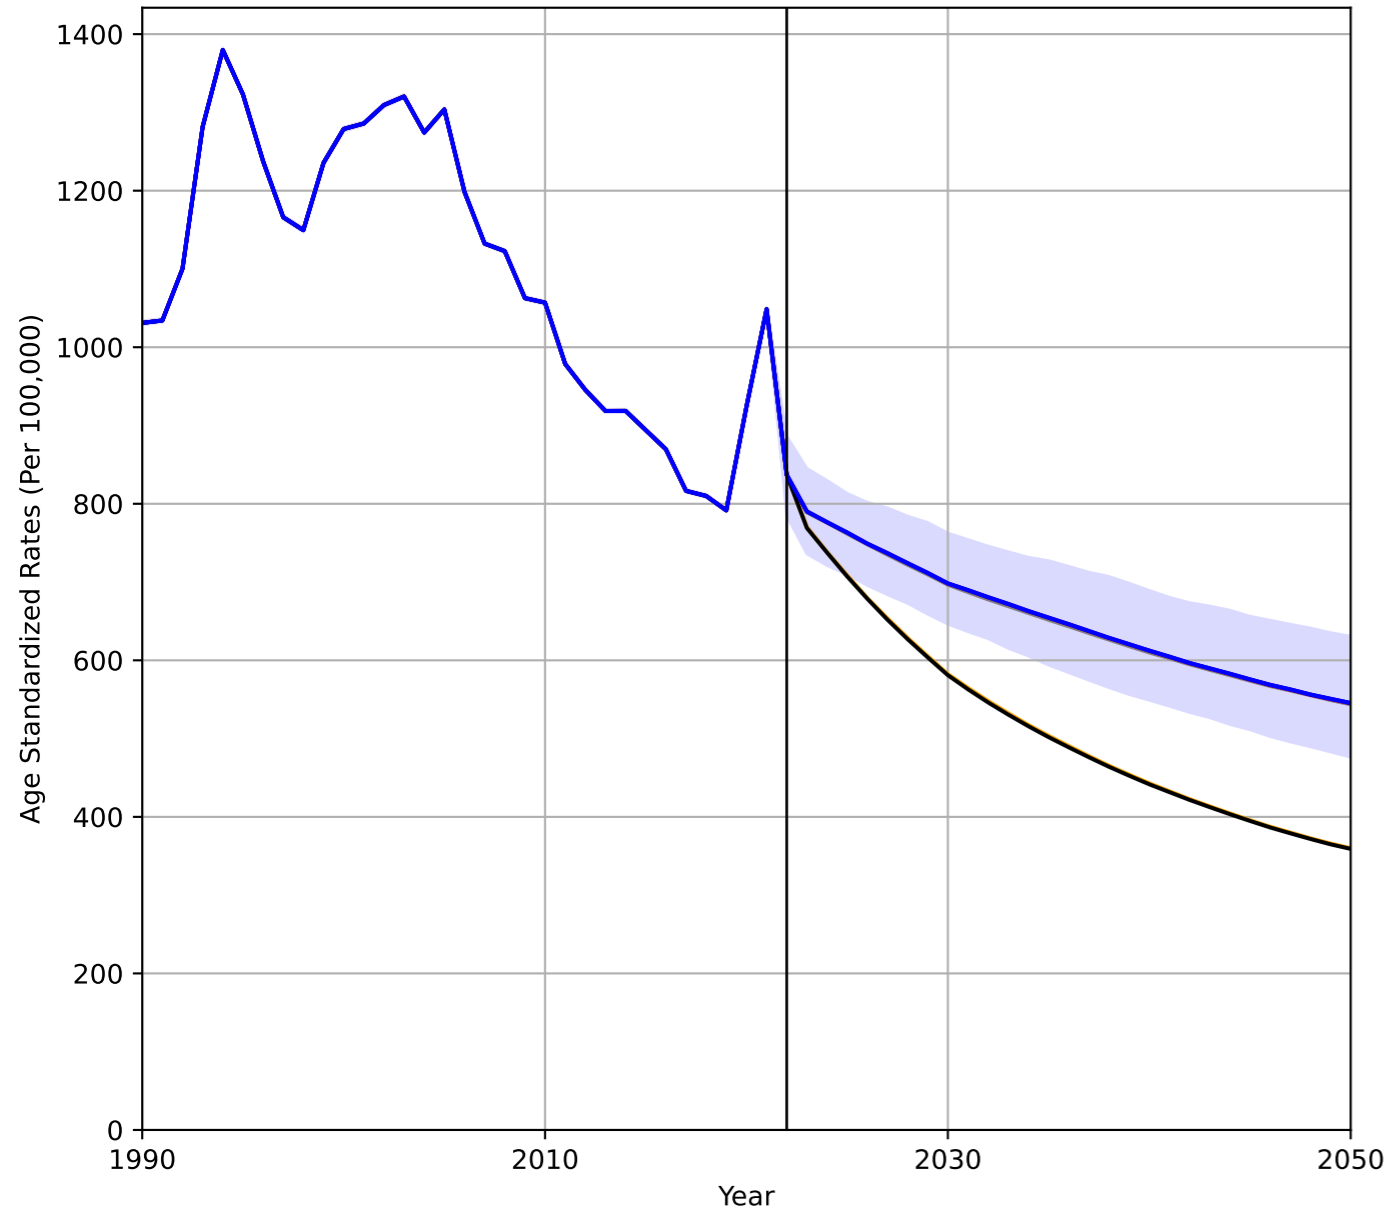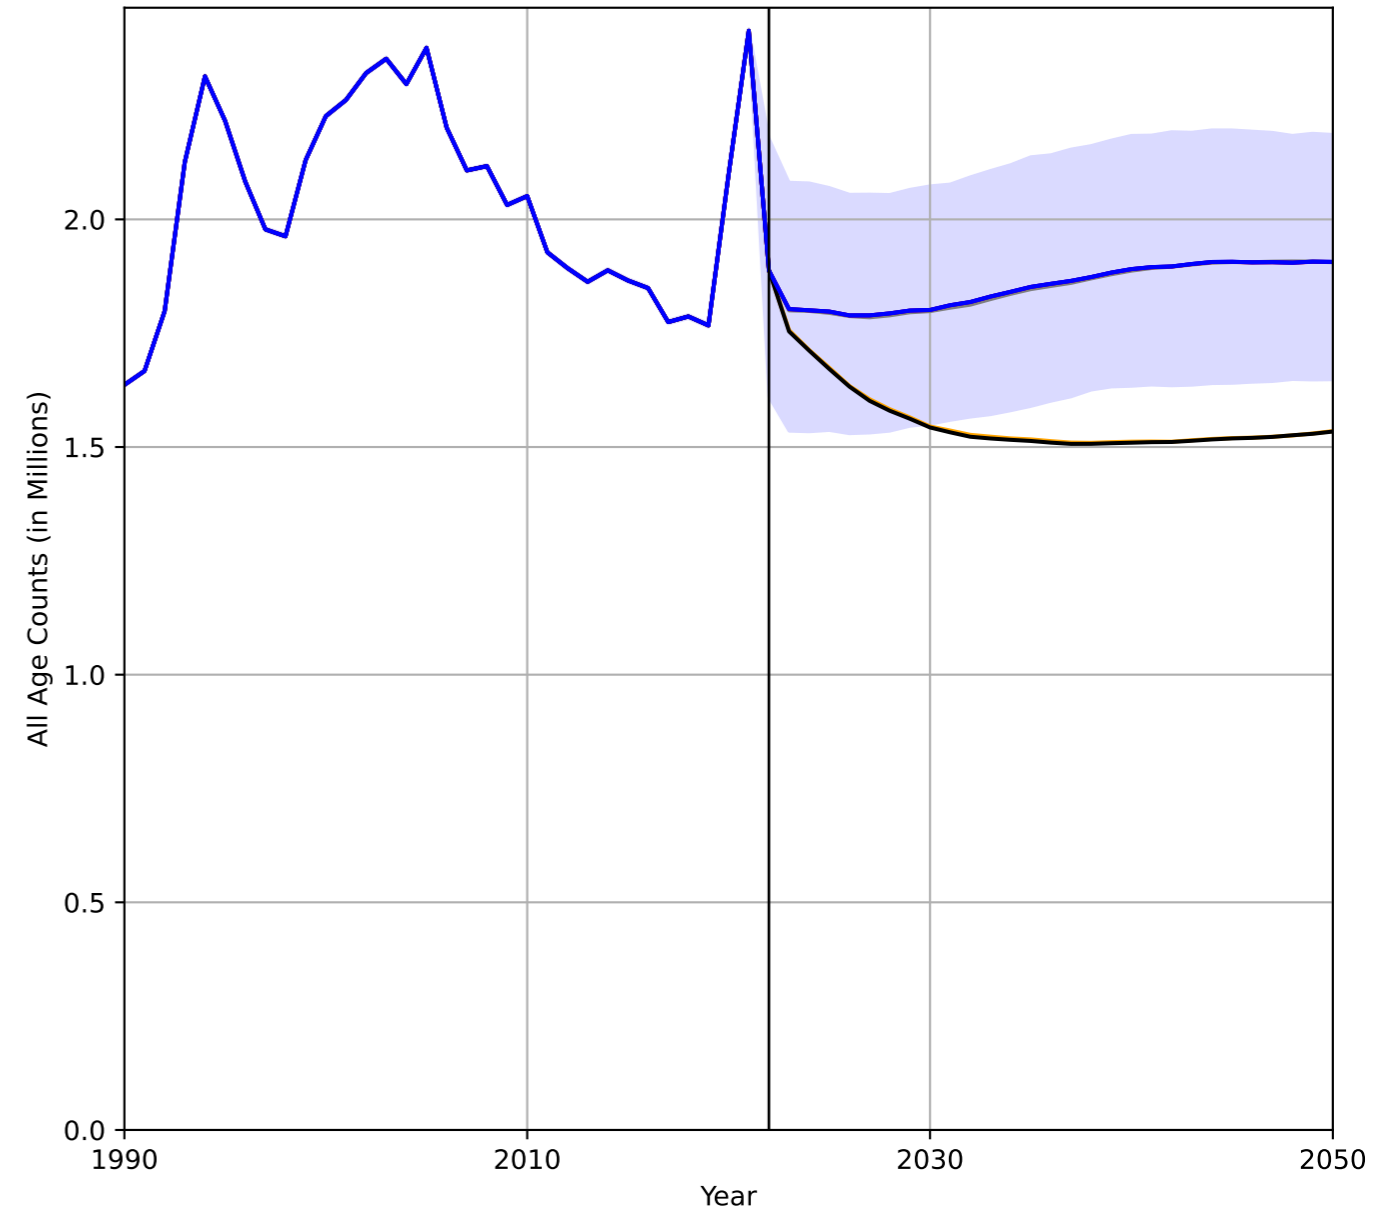



# Ukraine

Supplemental Results Figure S11. All-cause age standardised death rates (A) and all age death counts (B), for the past and for five future scenarios, 1990–2050

1672

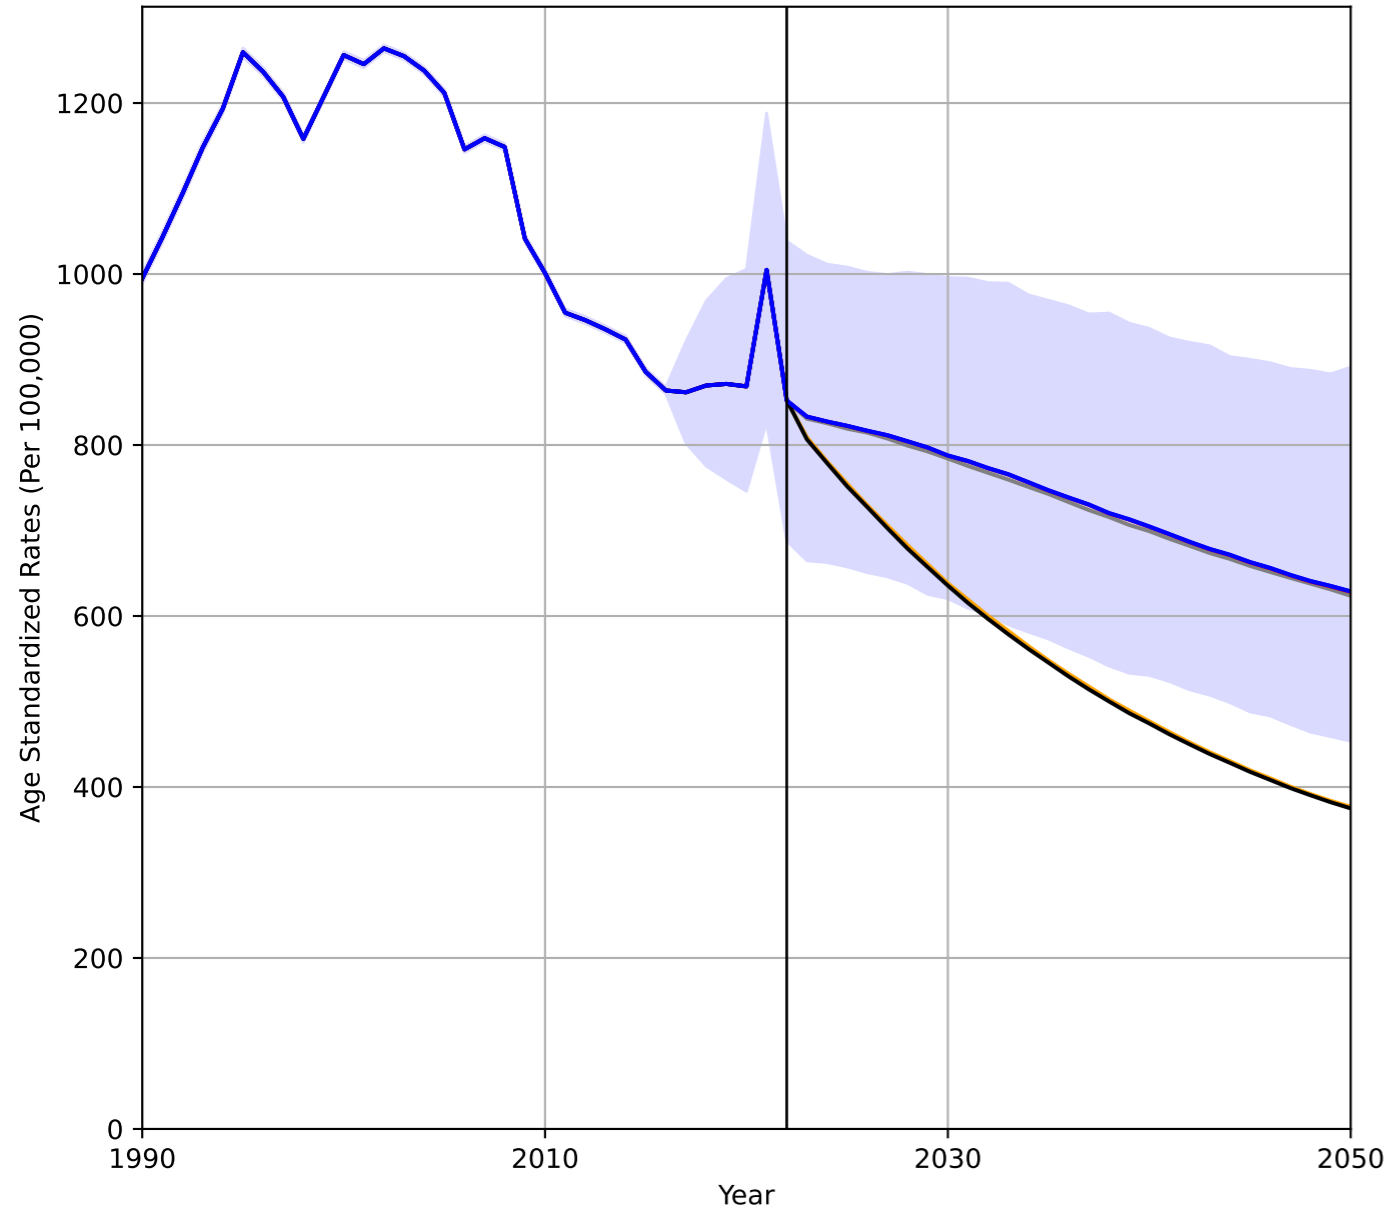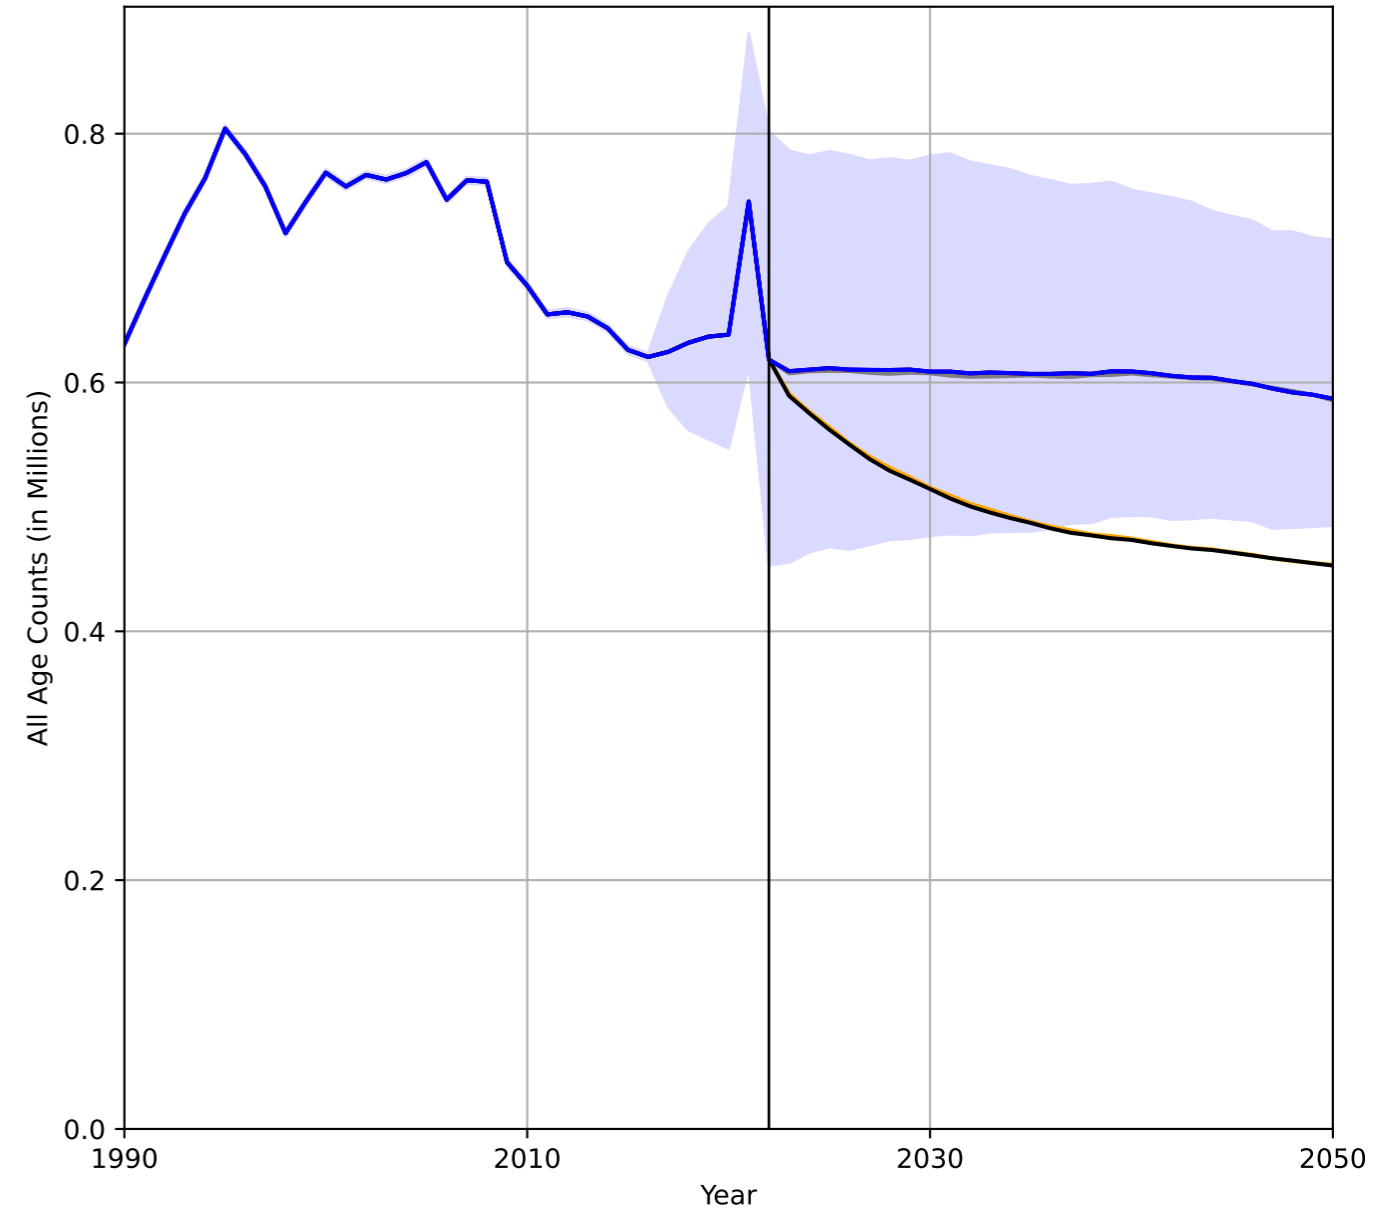

# Australia

Supplemental Results Figure S11. All-cause age standardised death rates (A) and all age death counts (B), for the past and for five future scenarios, 1990–2050

1673

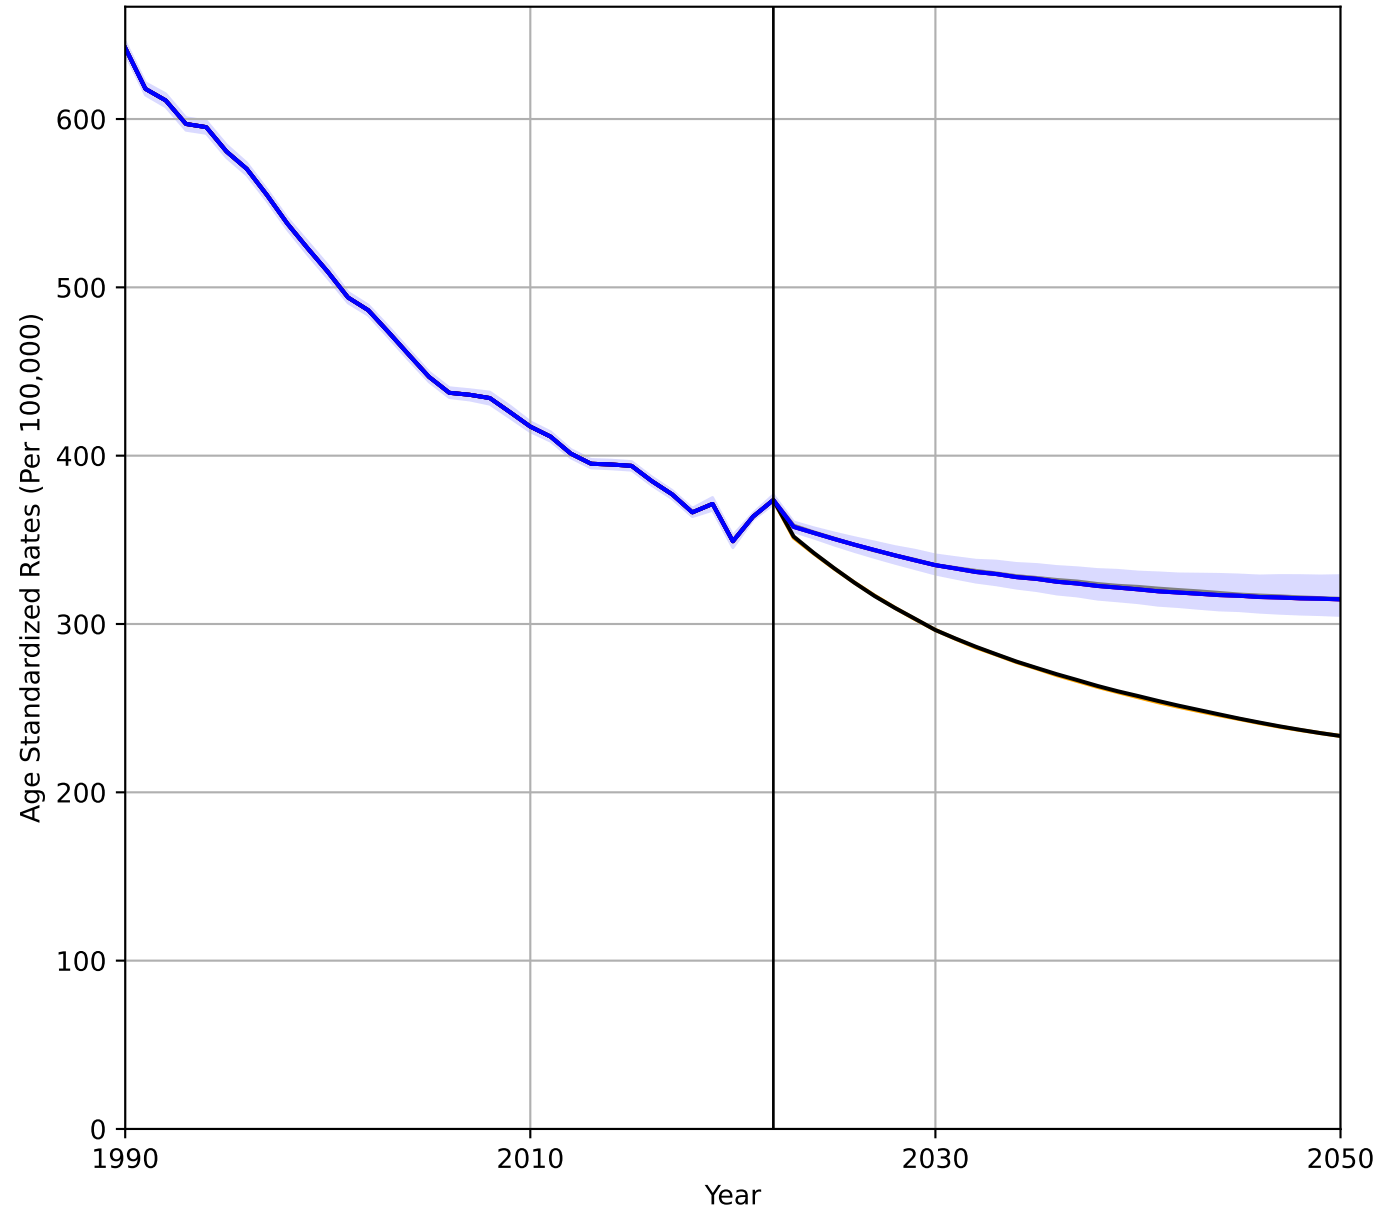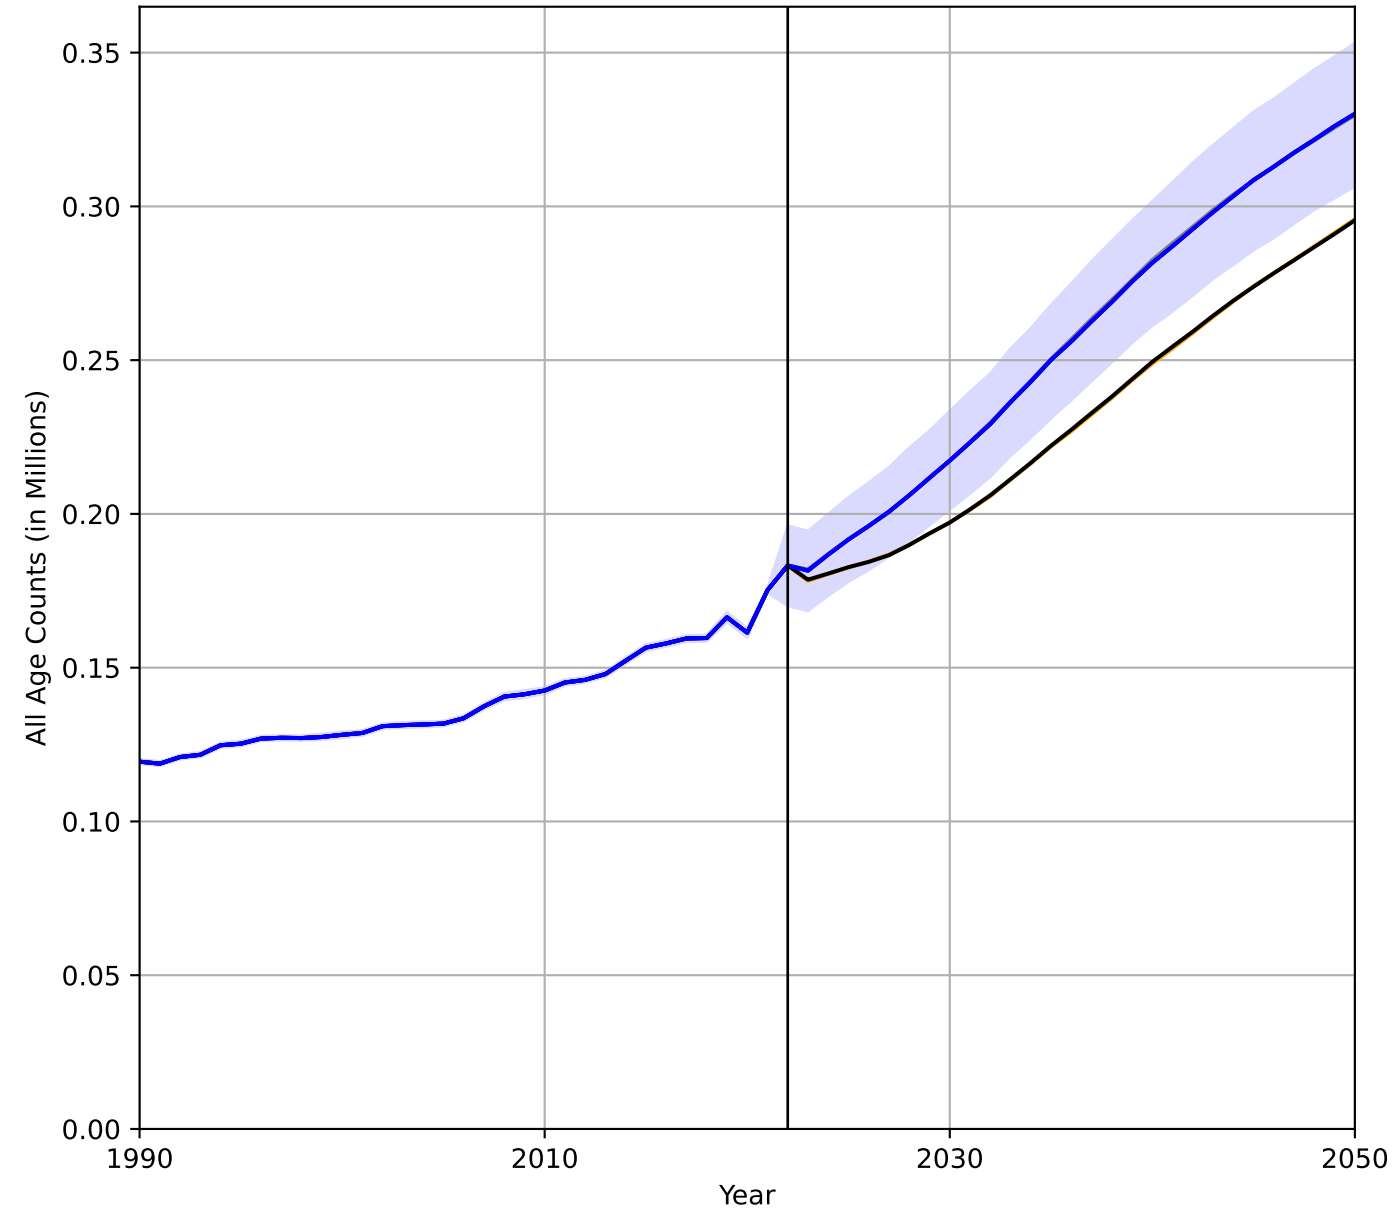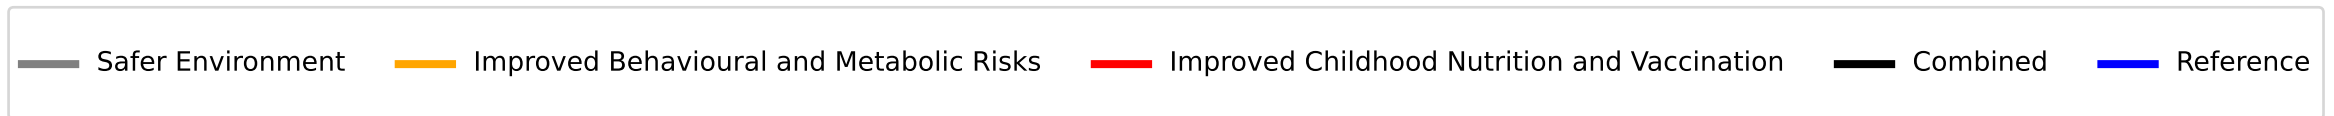

# New Zealand

Supplemental Results Figure S11. All-cause age standardised death rates (A) and all age death counts (B), for the past and for five future scenarios, 1990–2050

1674

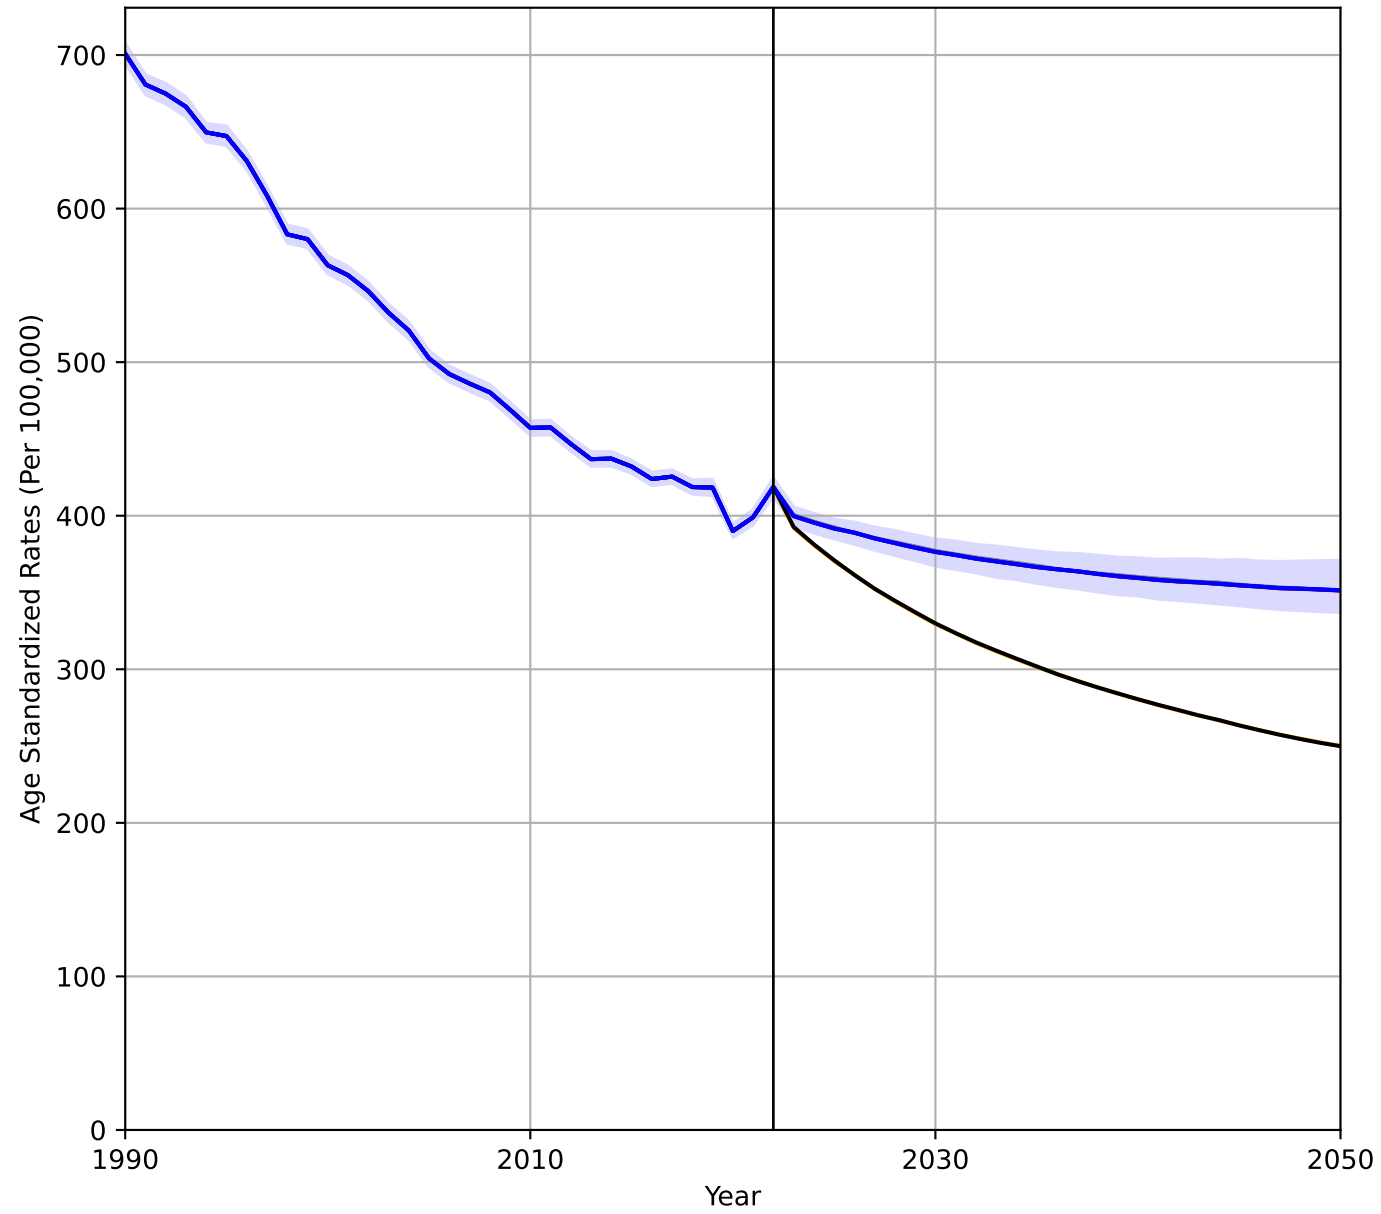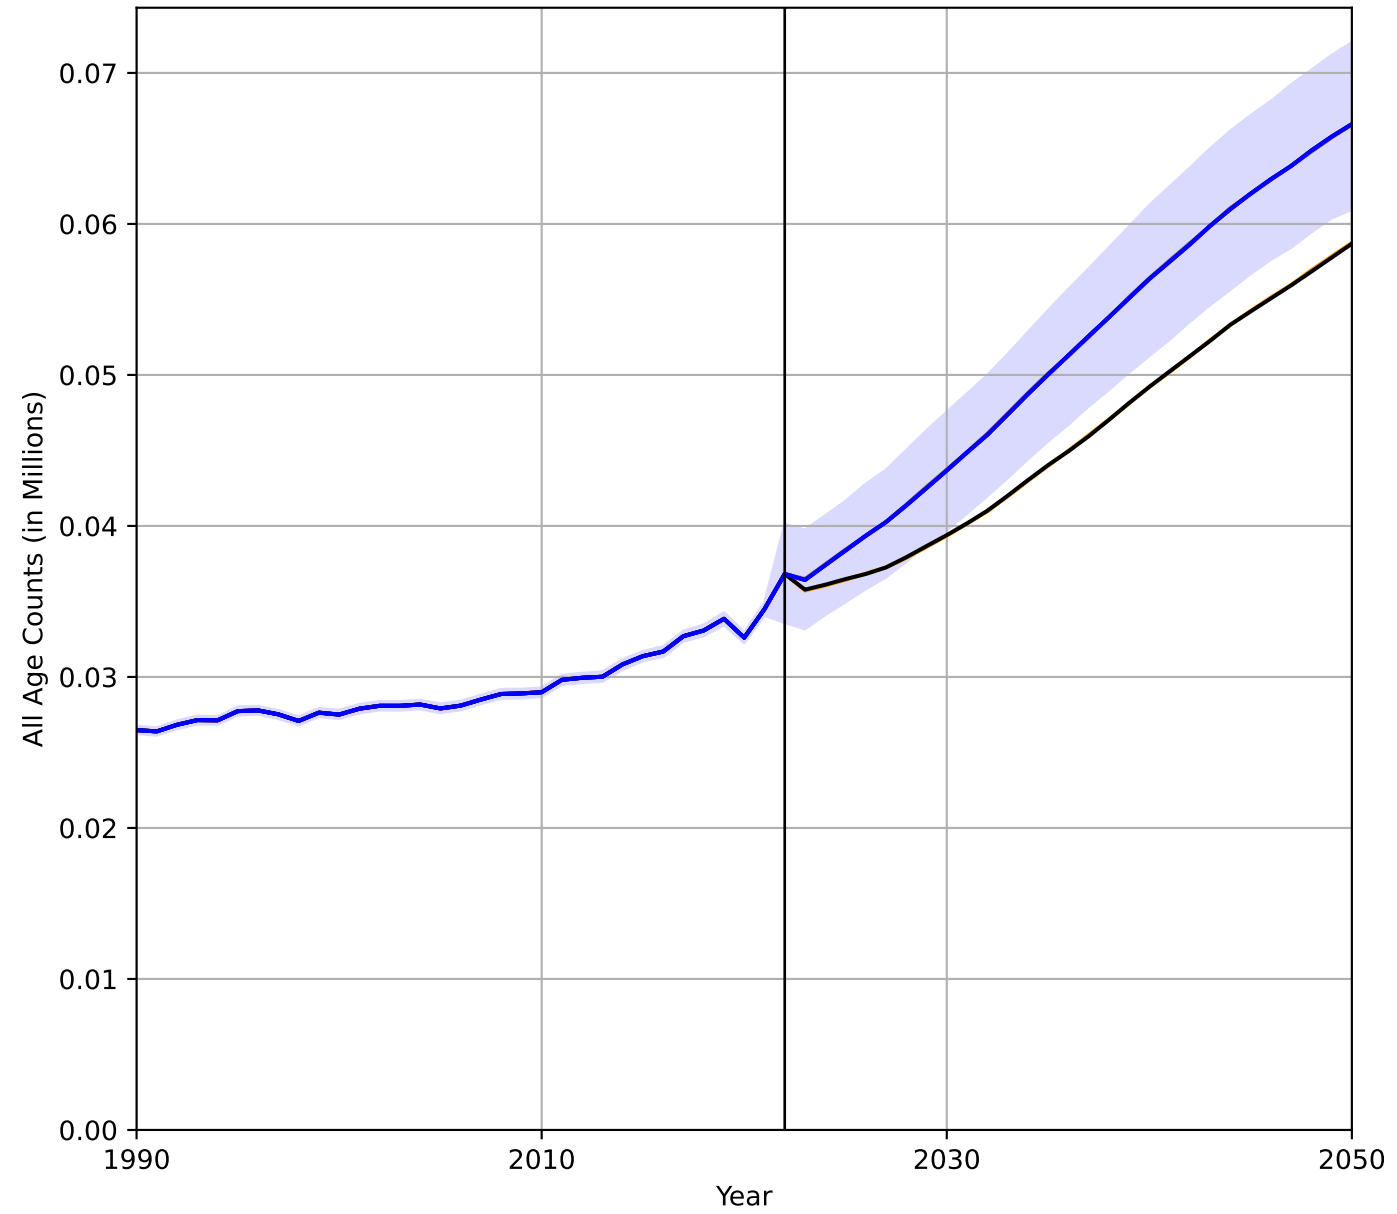

# Brunei

Supplemental Results Figure S11. All-cause age standardised death rates (A) and all age death counts (B), for the past and for five future scenarios, 1990–2050

1675

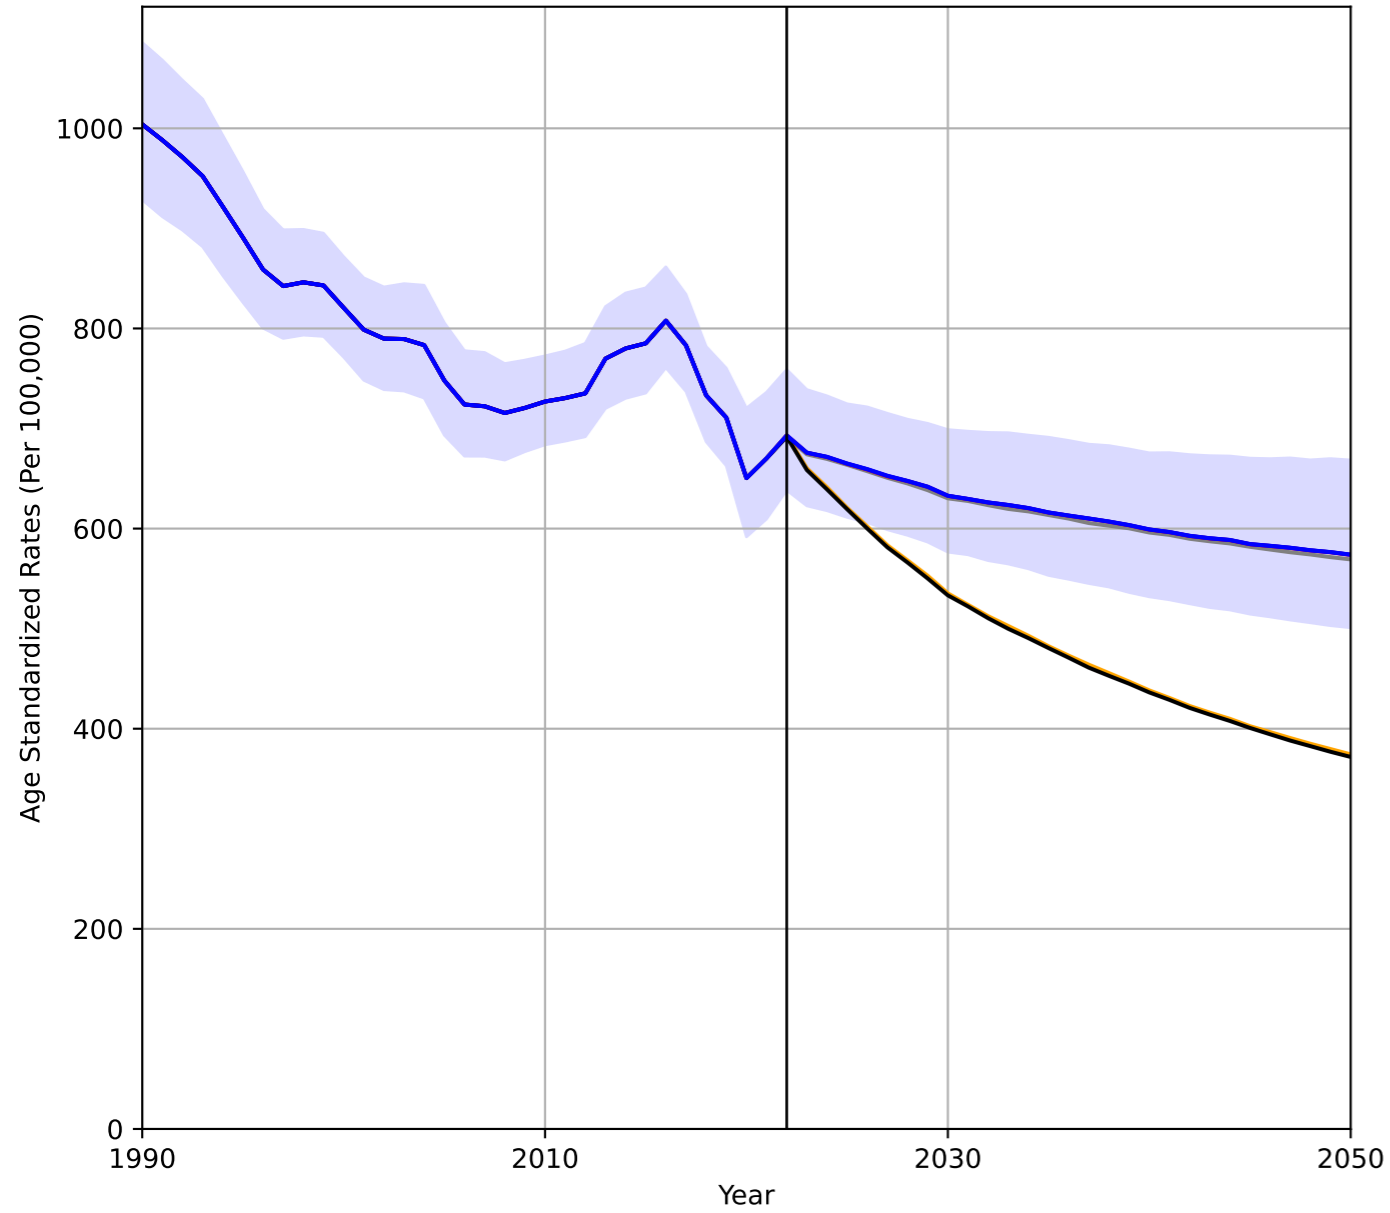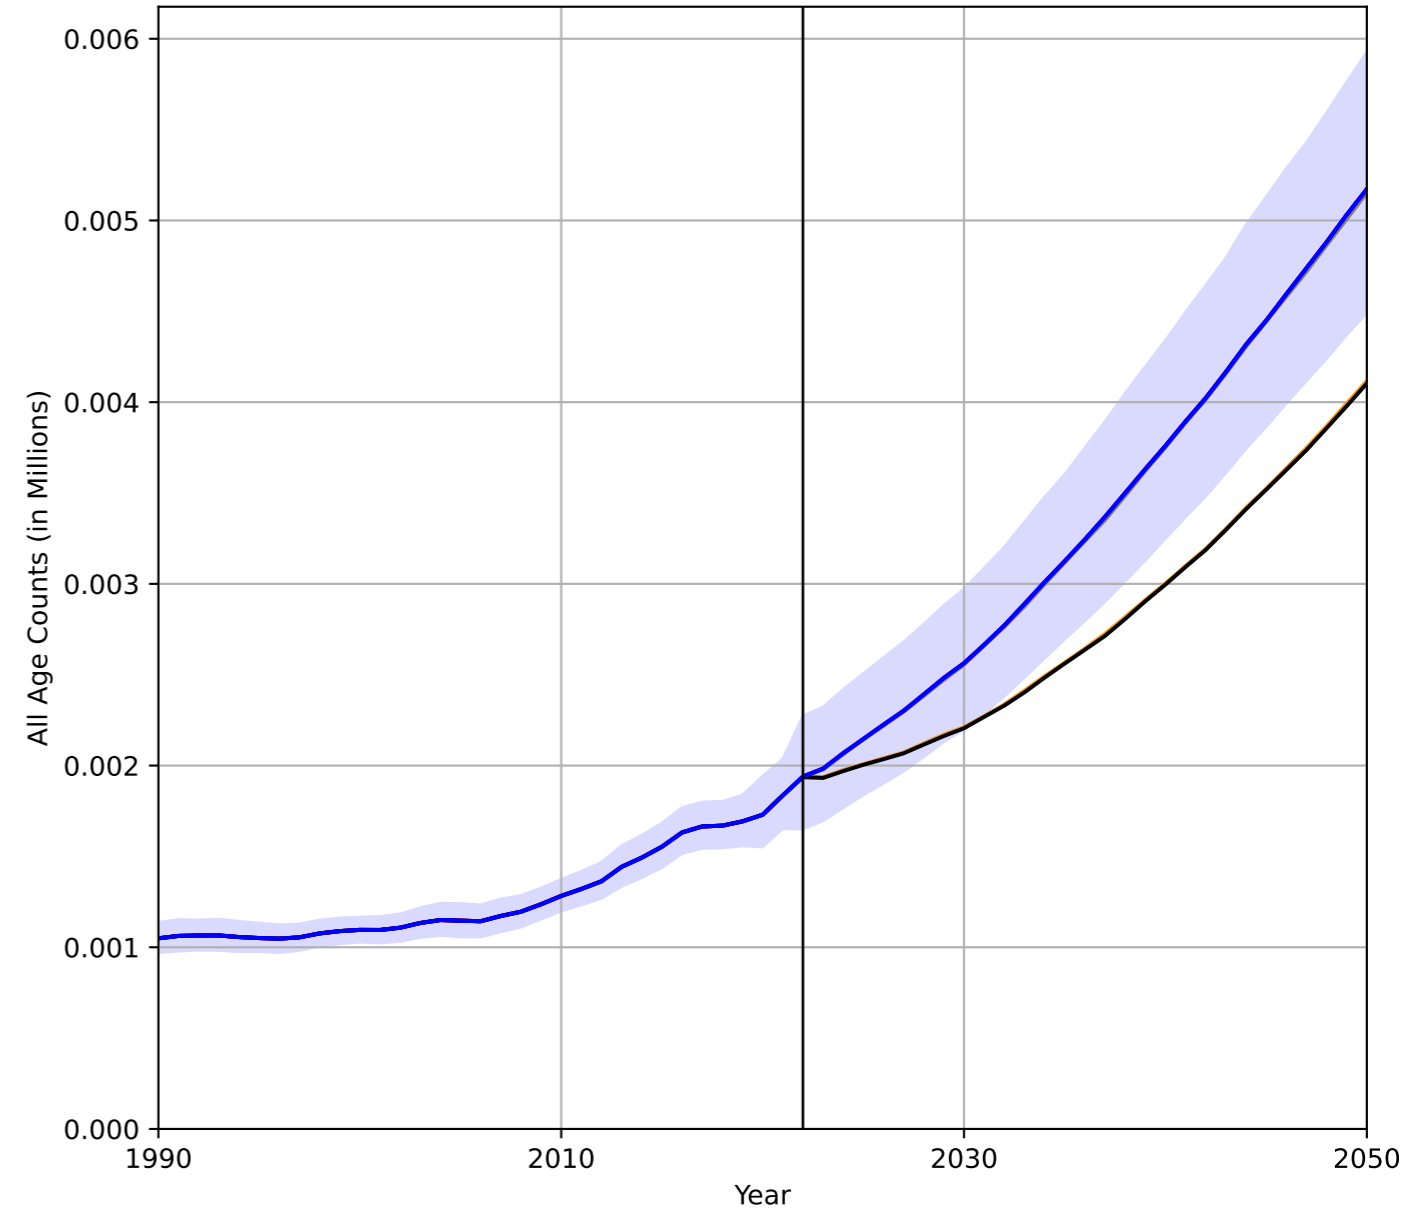

# Japan

Supplemental Results Figure S11. All-cause age standardised death rates (A) and all age death counts (B), for the past and for five future scenarios, 1990–2050

1676

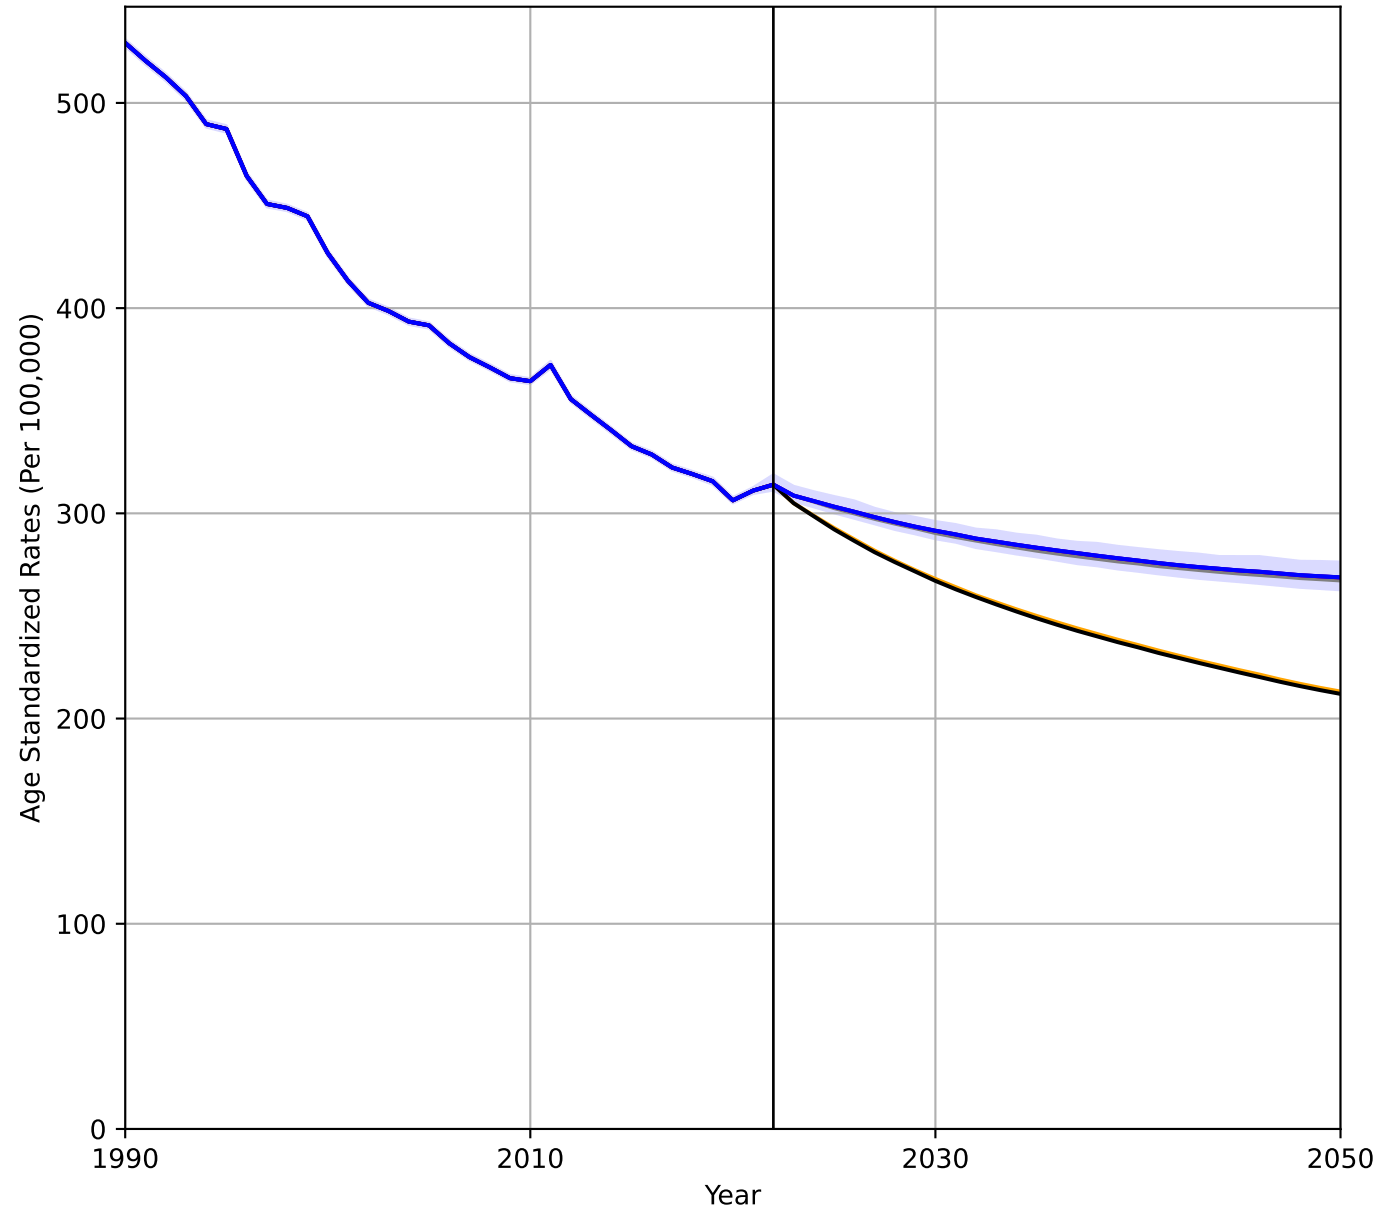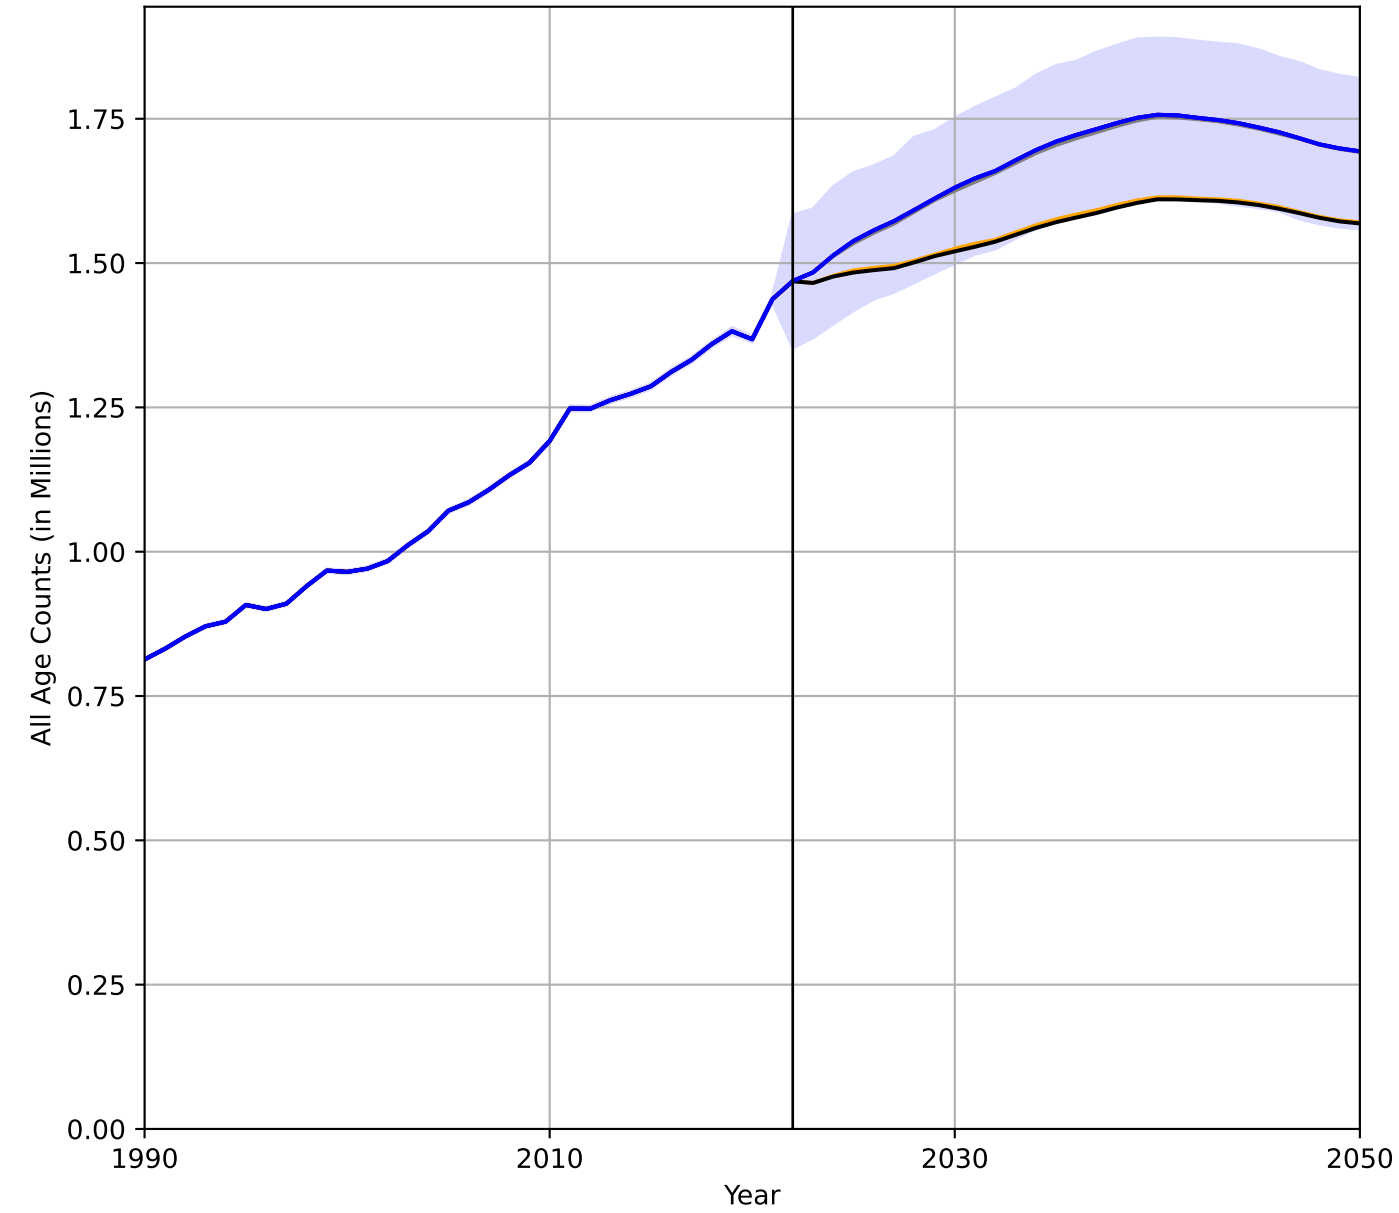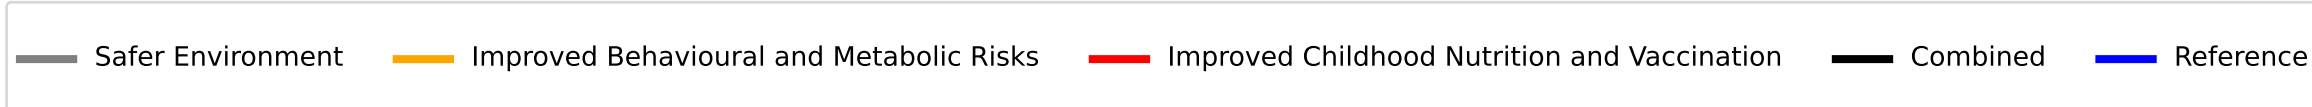

# South Korea

Supplemental Results Figure S11. All-cause age standardised death rates (A) and all age death counts (B), for the past and for five future scenarios, 1990–2050

1677

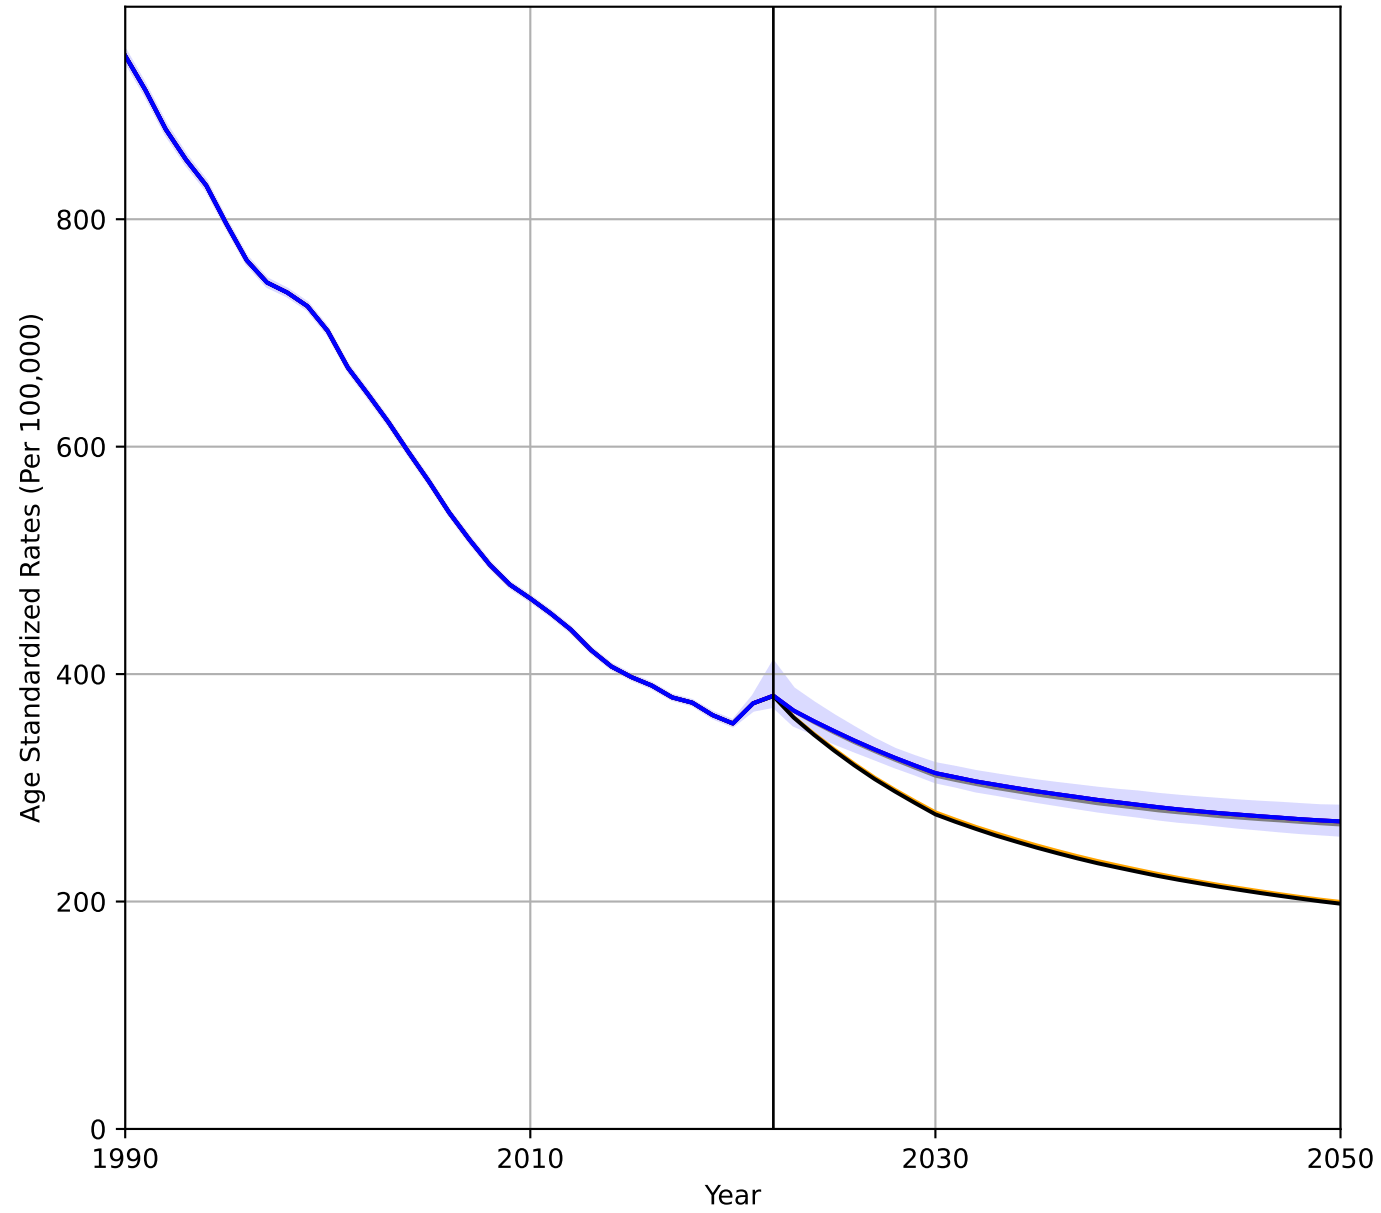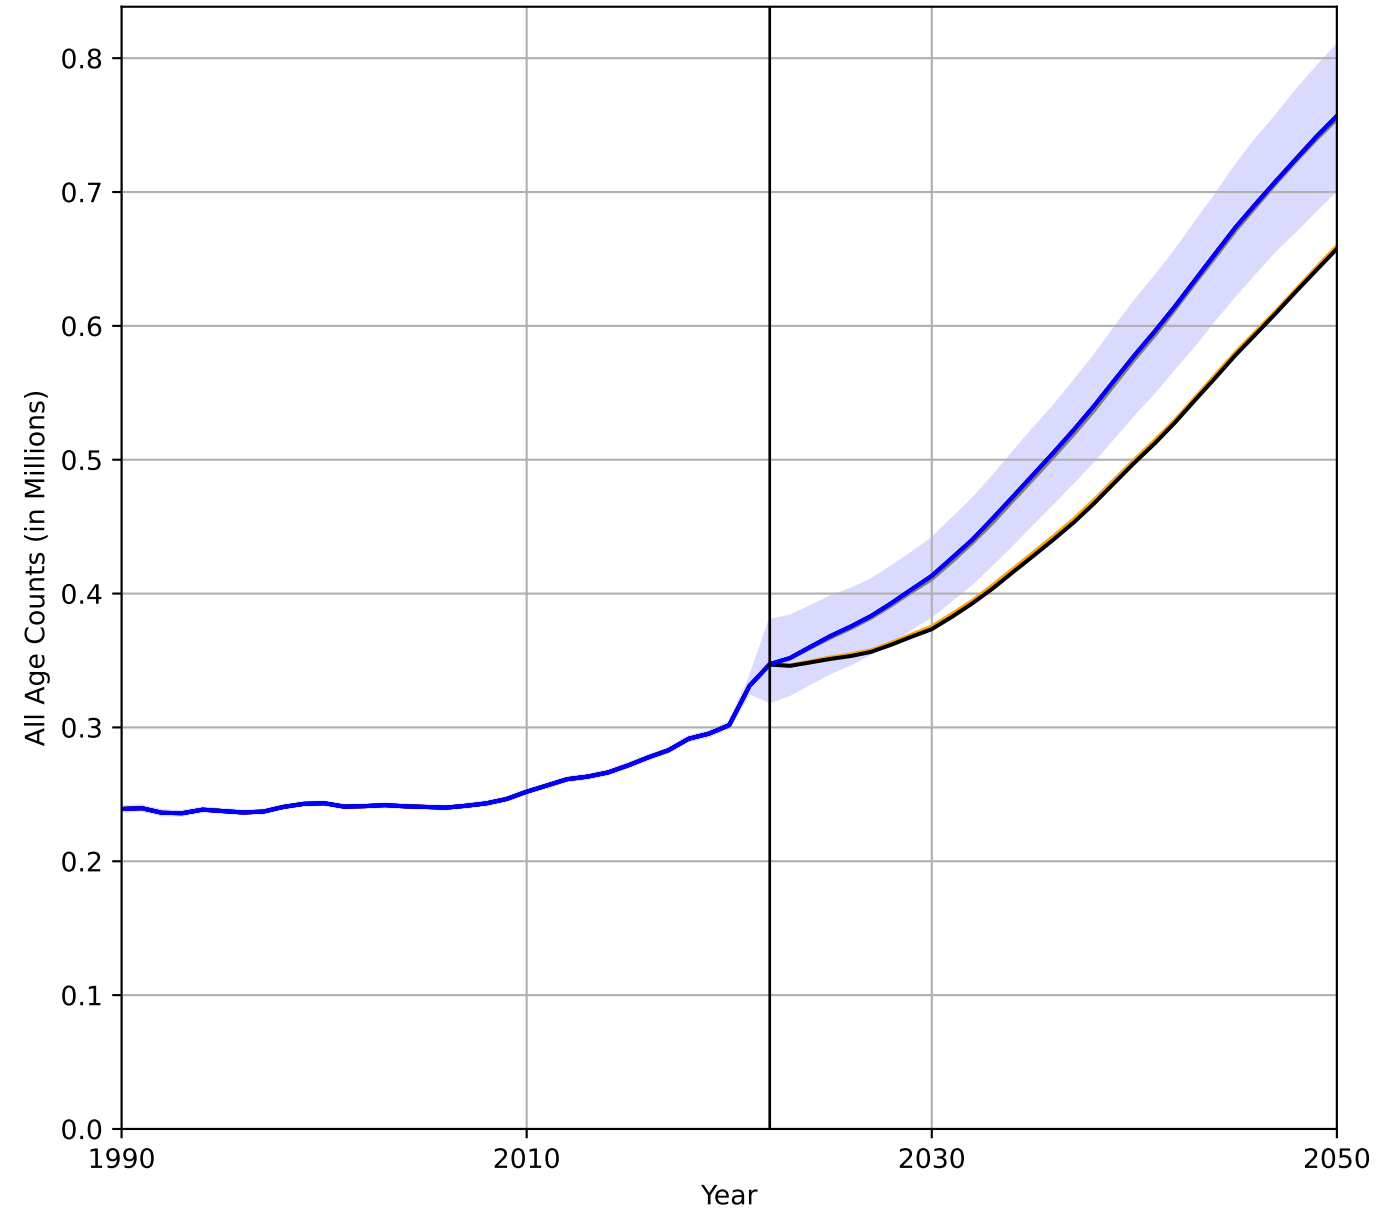

# Singapore

Supplemental Results Figure S11. All-cause age standardised death rates (A) and all age death counts (B), for the past and for five future scenarios, 1990–2050

1678

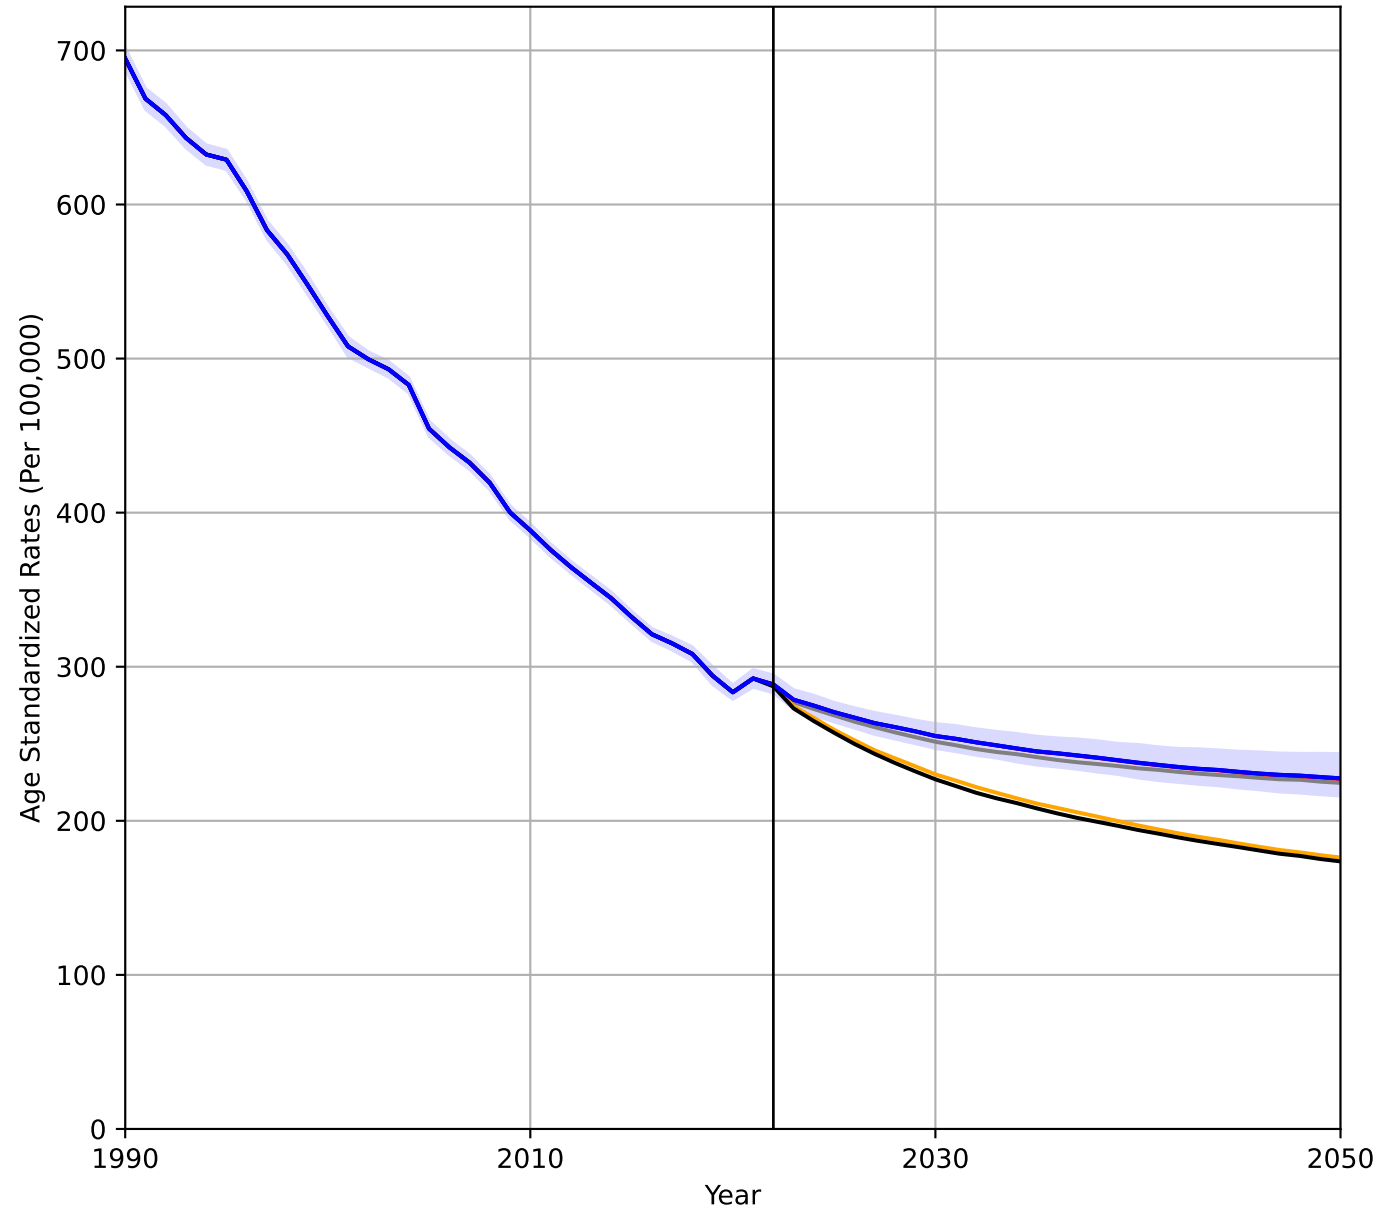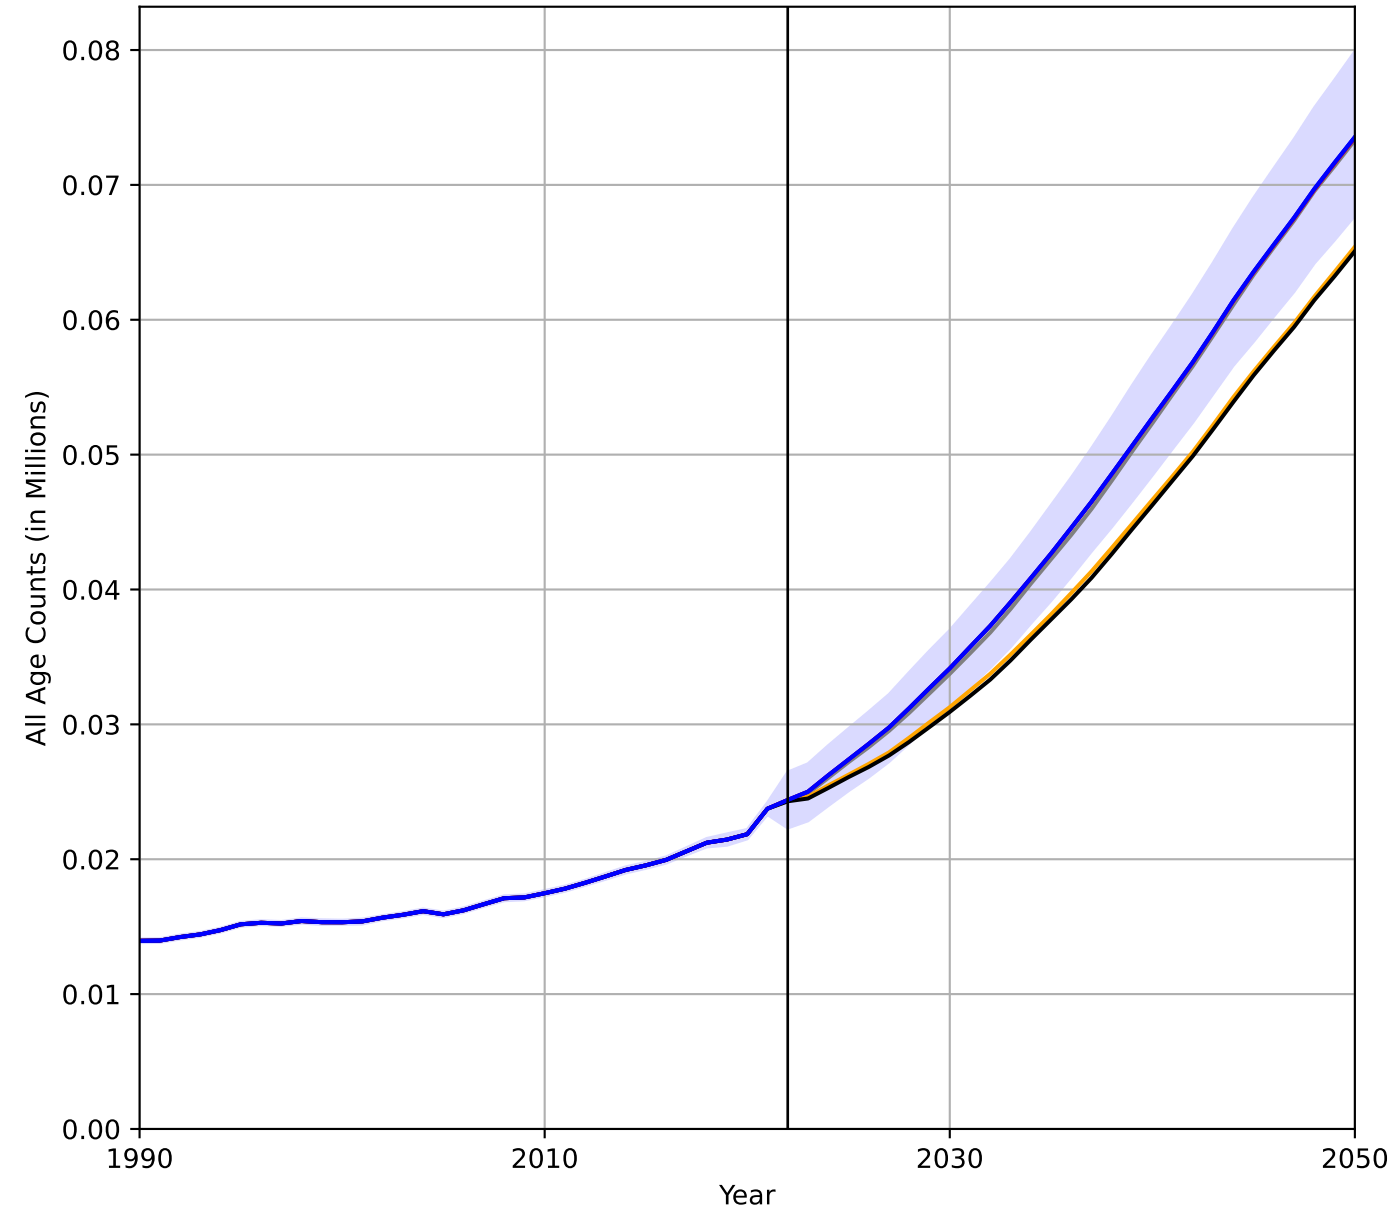

# Canada

Supplemental Results Figure S11. All-cause age standardised death rates (A) and all age death counts (B), for the past and for five future scenarios, 1990–2050

1679

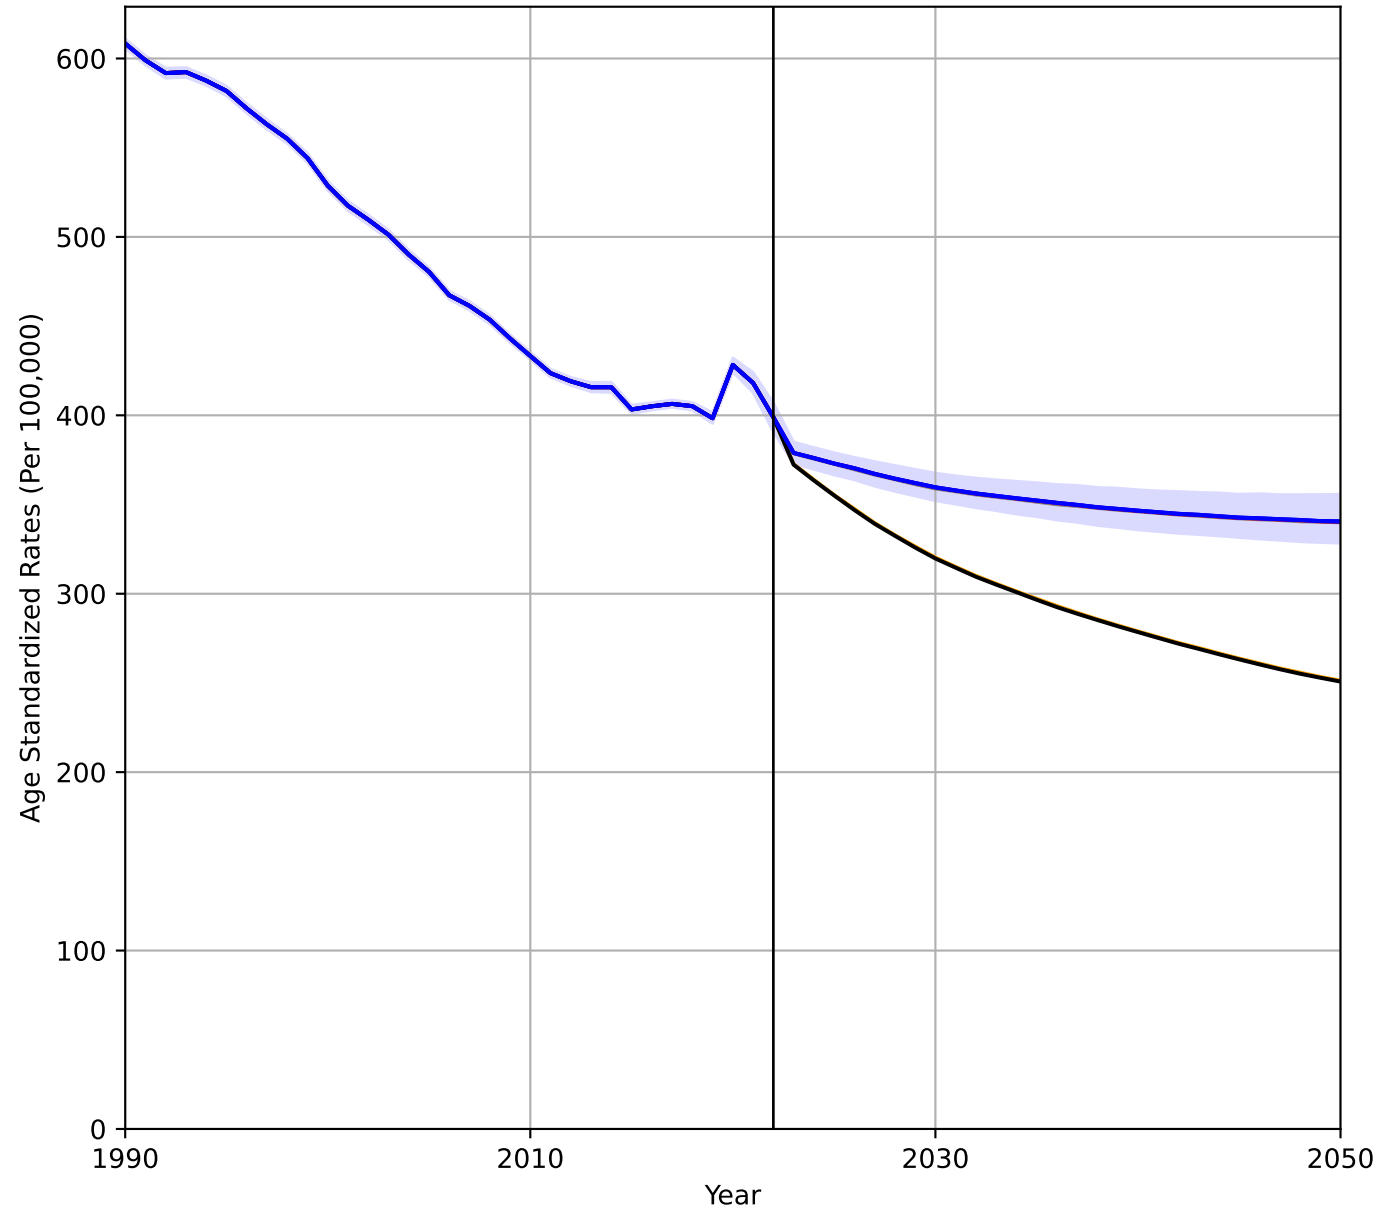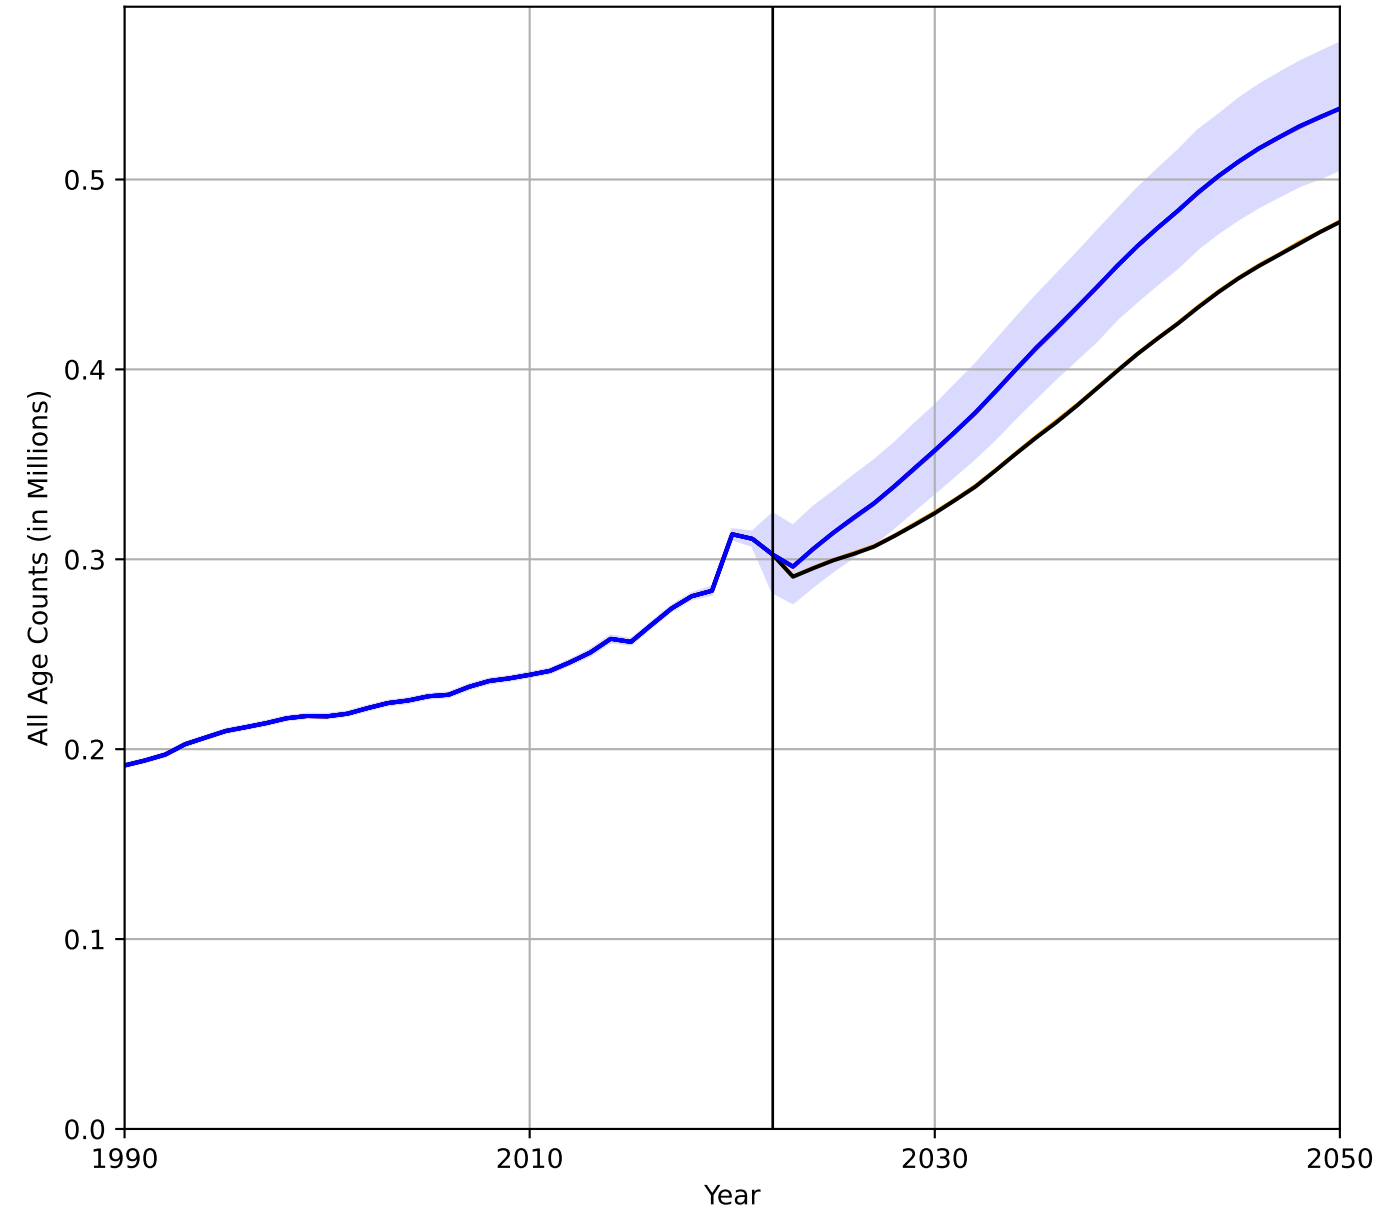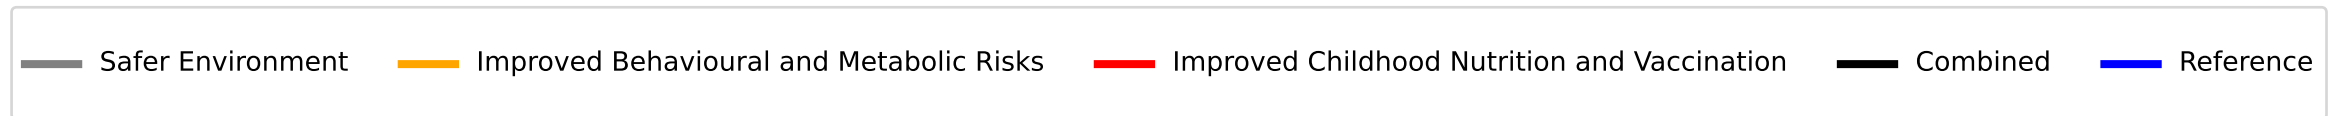



# Greenland

Supplemental Results Figure S11. All-cause age standardised death rates (A) and all age death counts (B), for the past and for five future scenarios, 1990–2050

1680

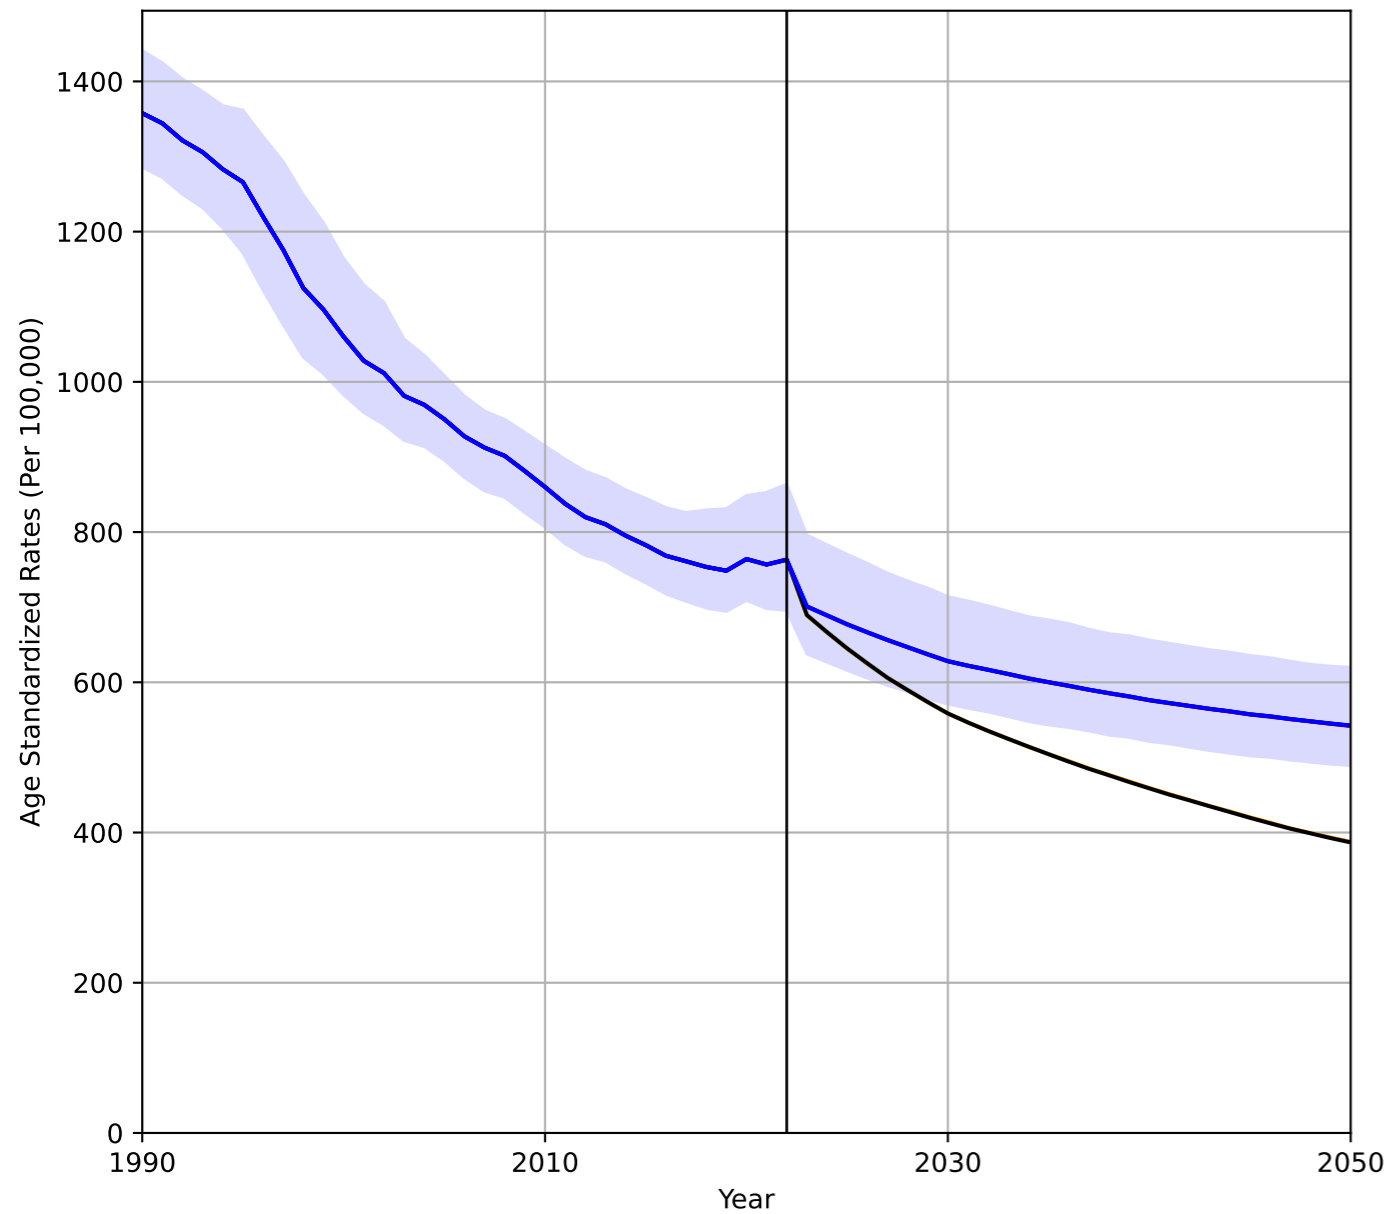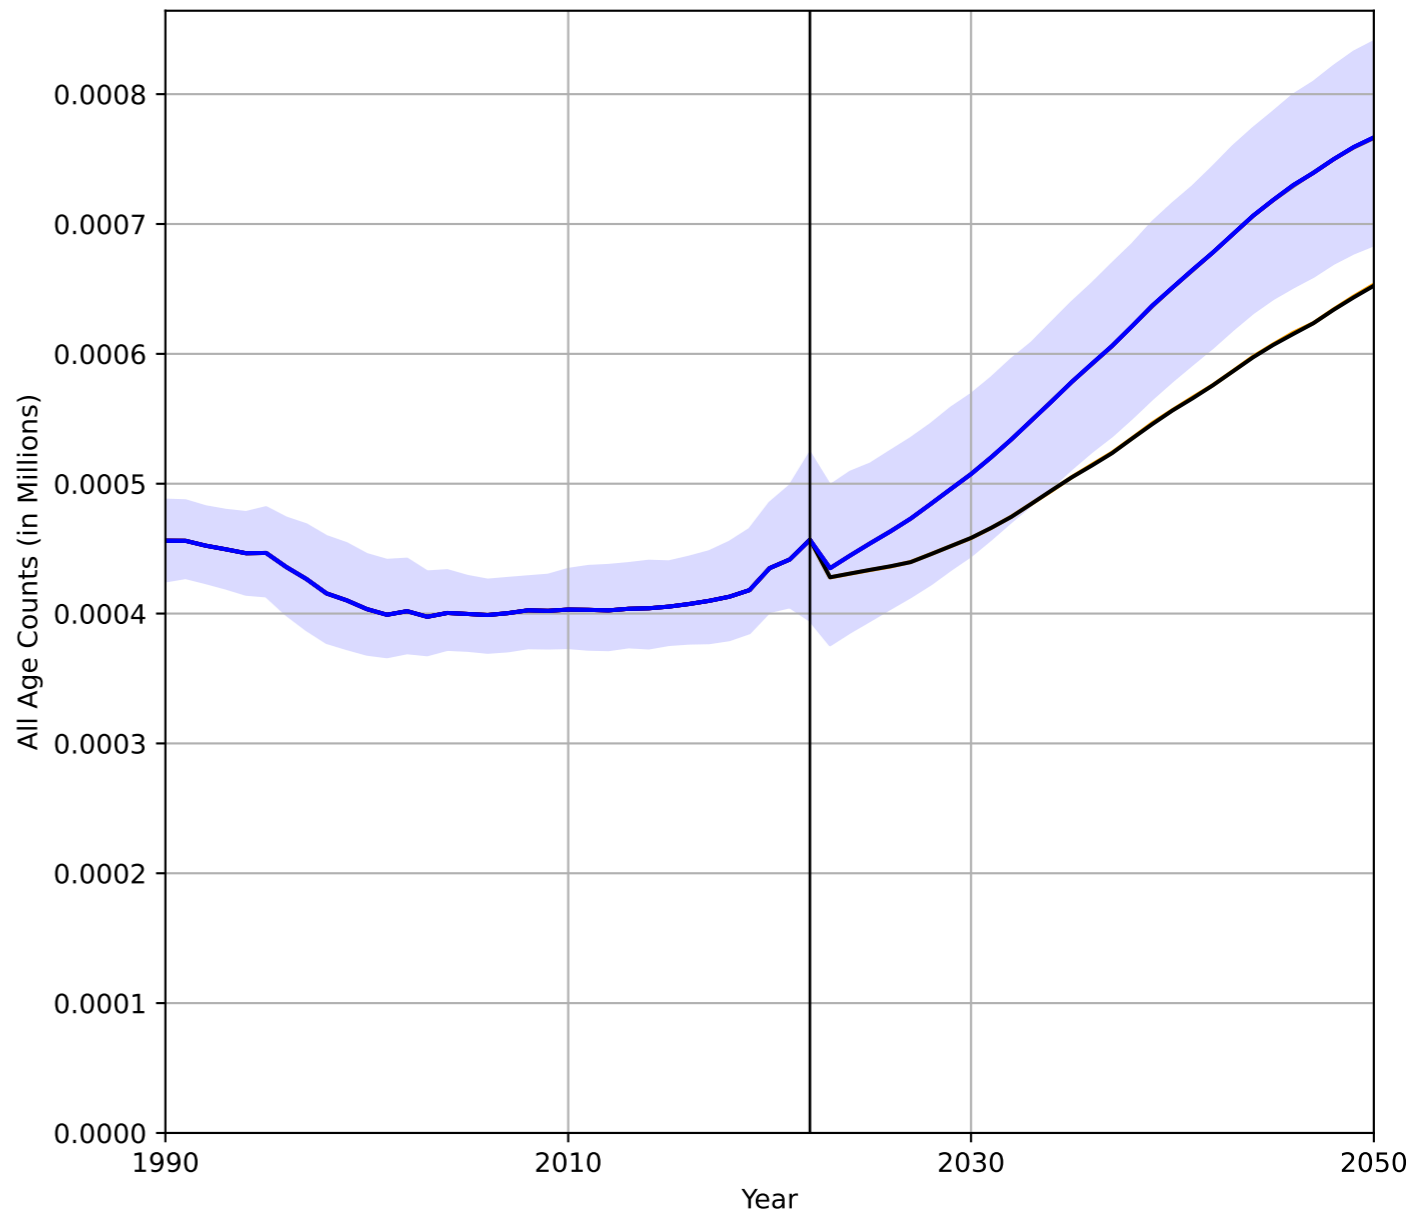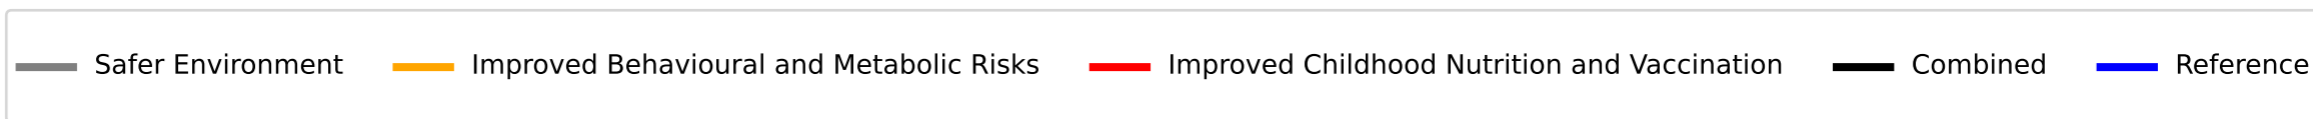

# USA

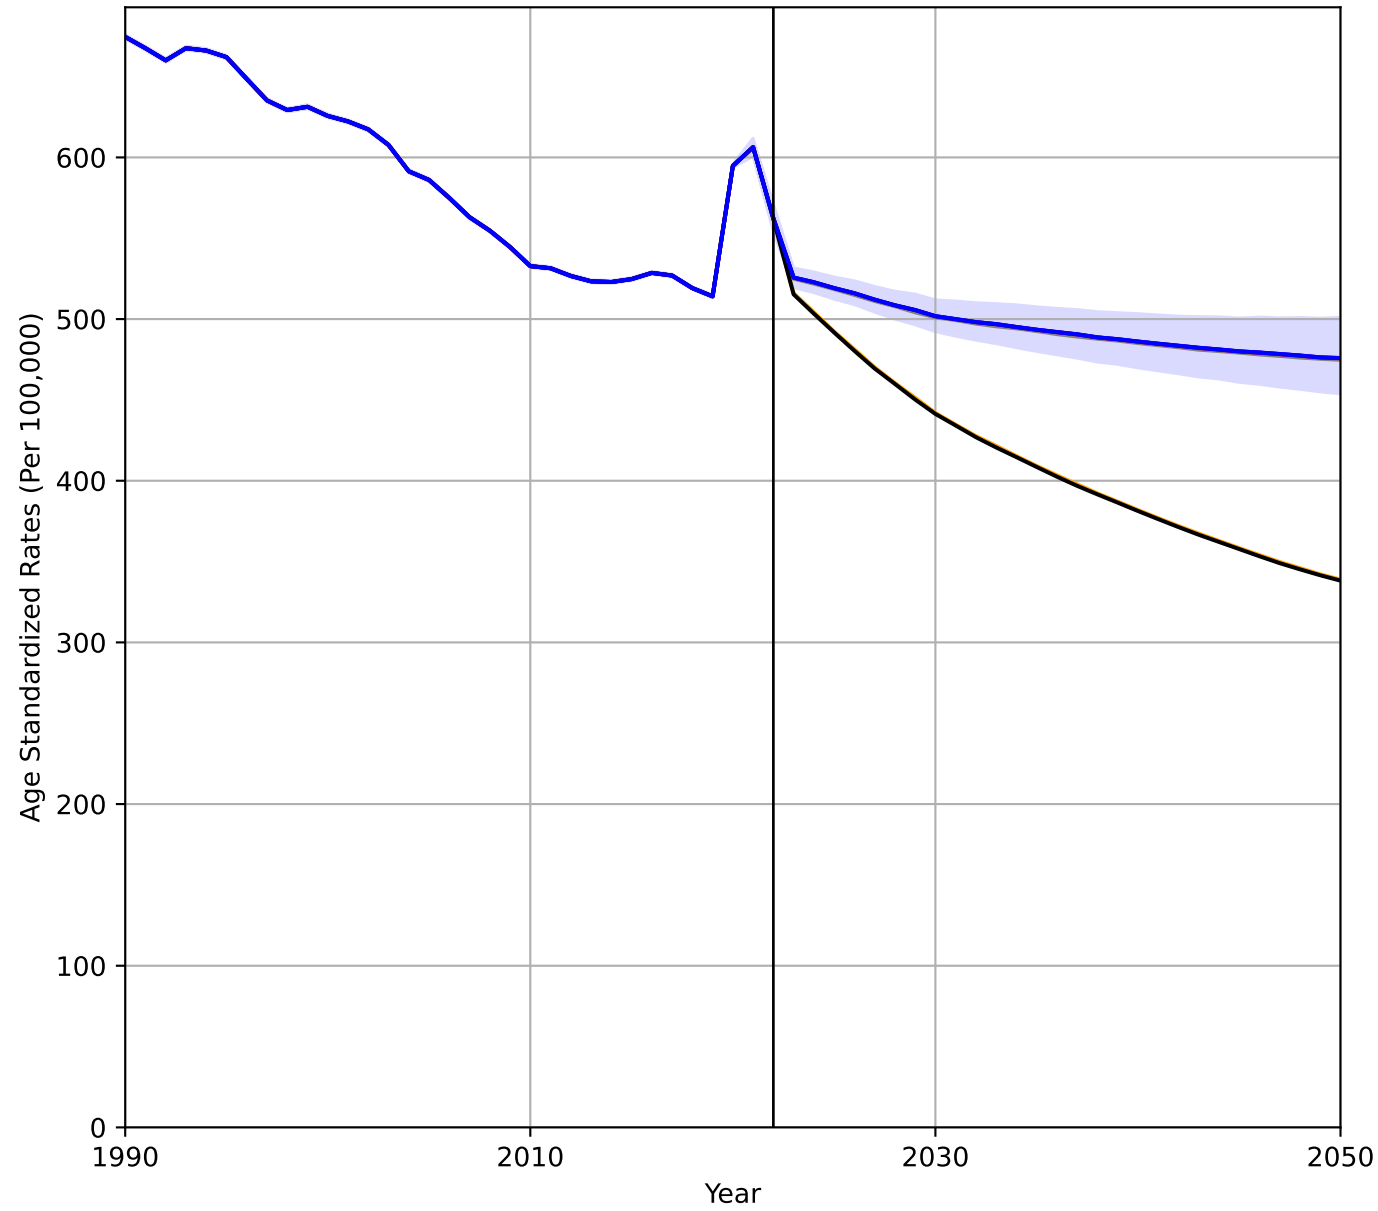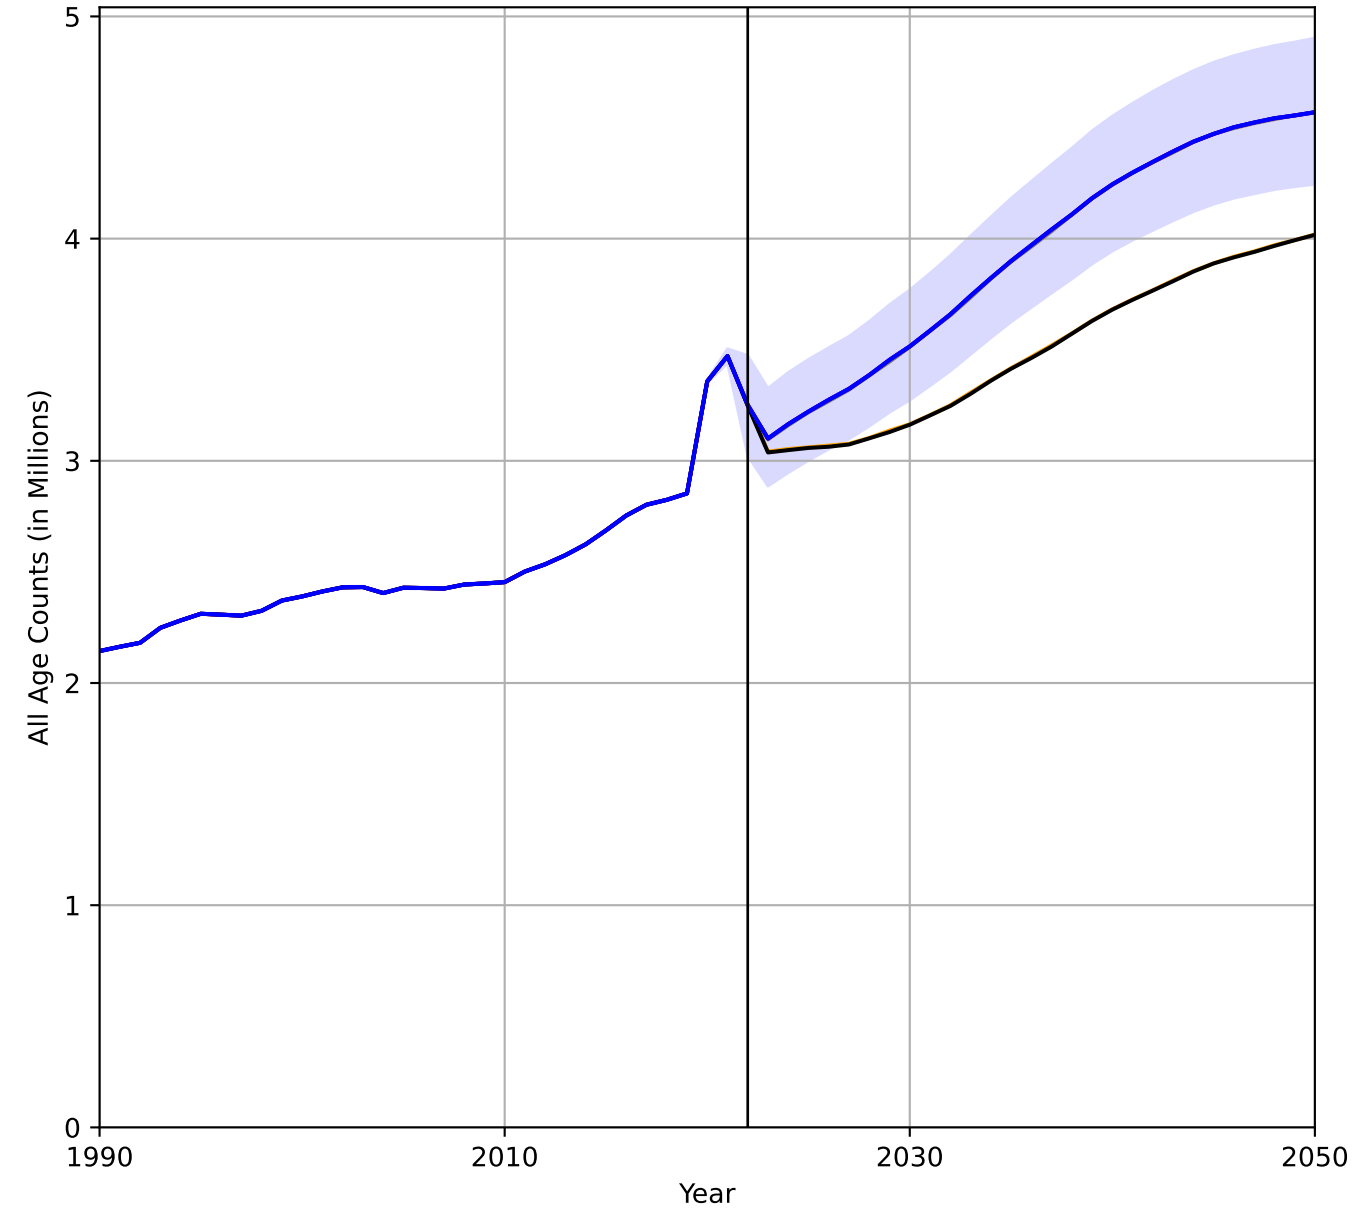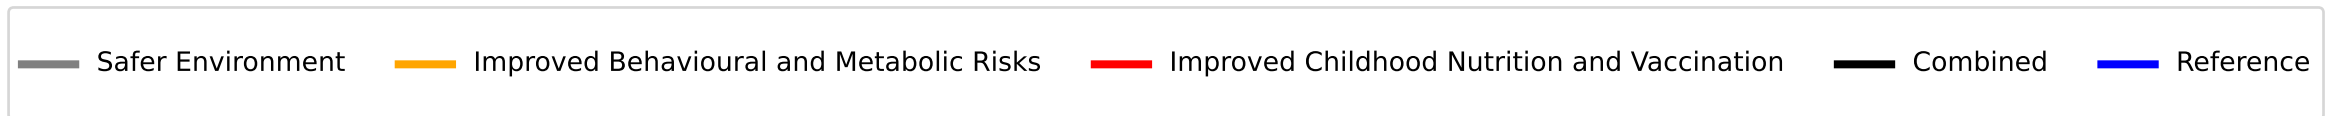

# Argentina

Supplemental Results Figure S11. All-cause age standardised death rates (A) and all age death counts (B), for the past and for five future scenarios, 1990–2050

1682

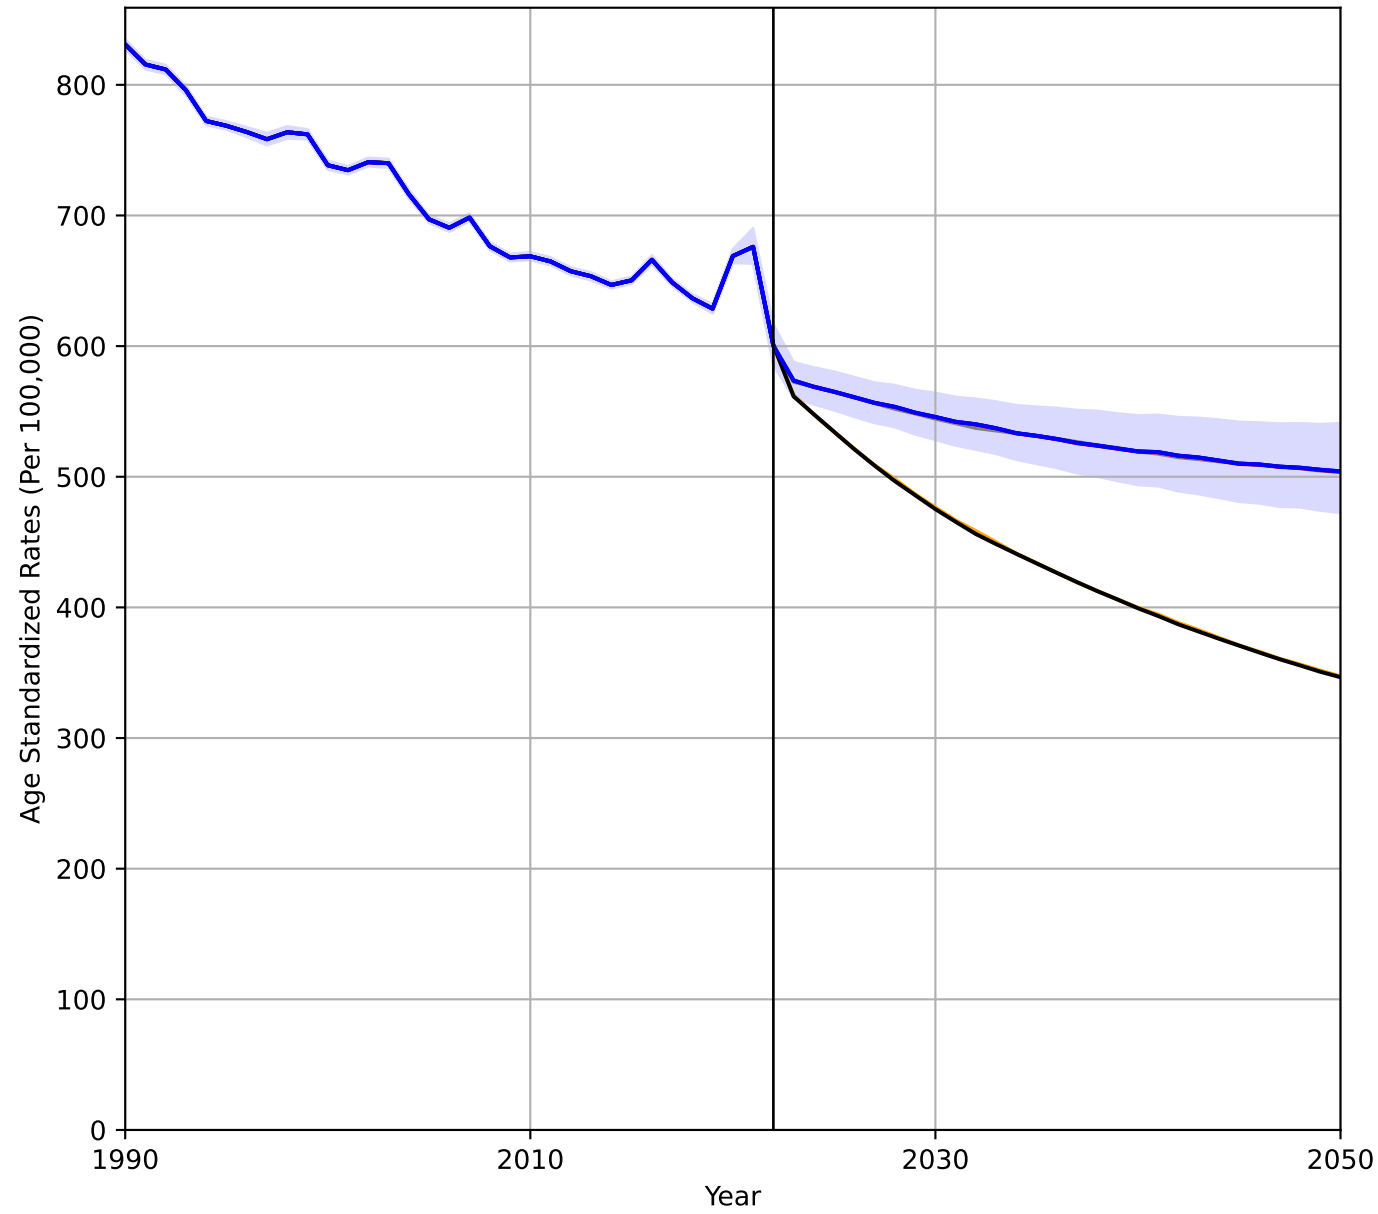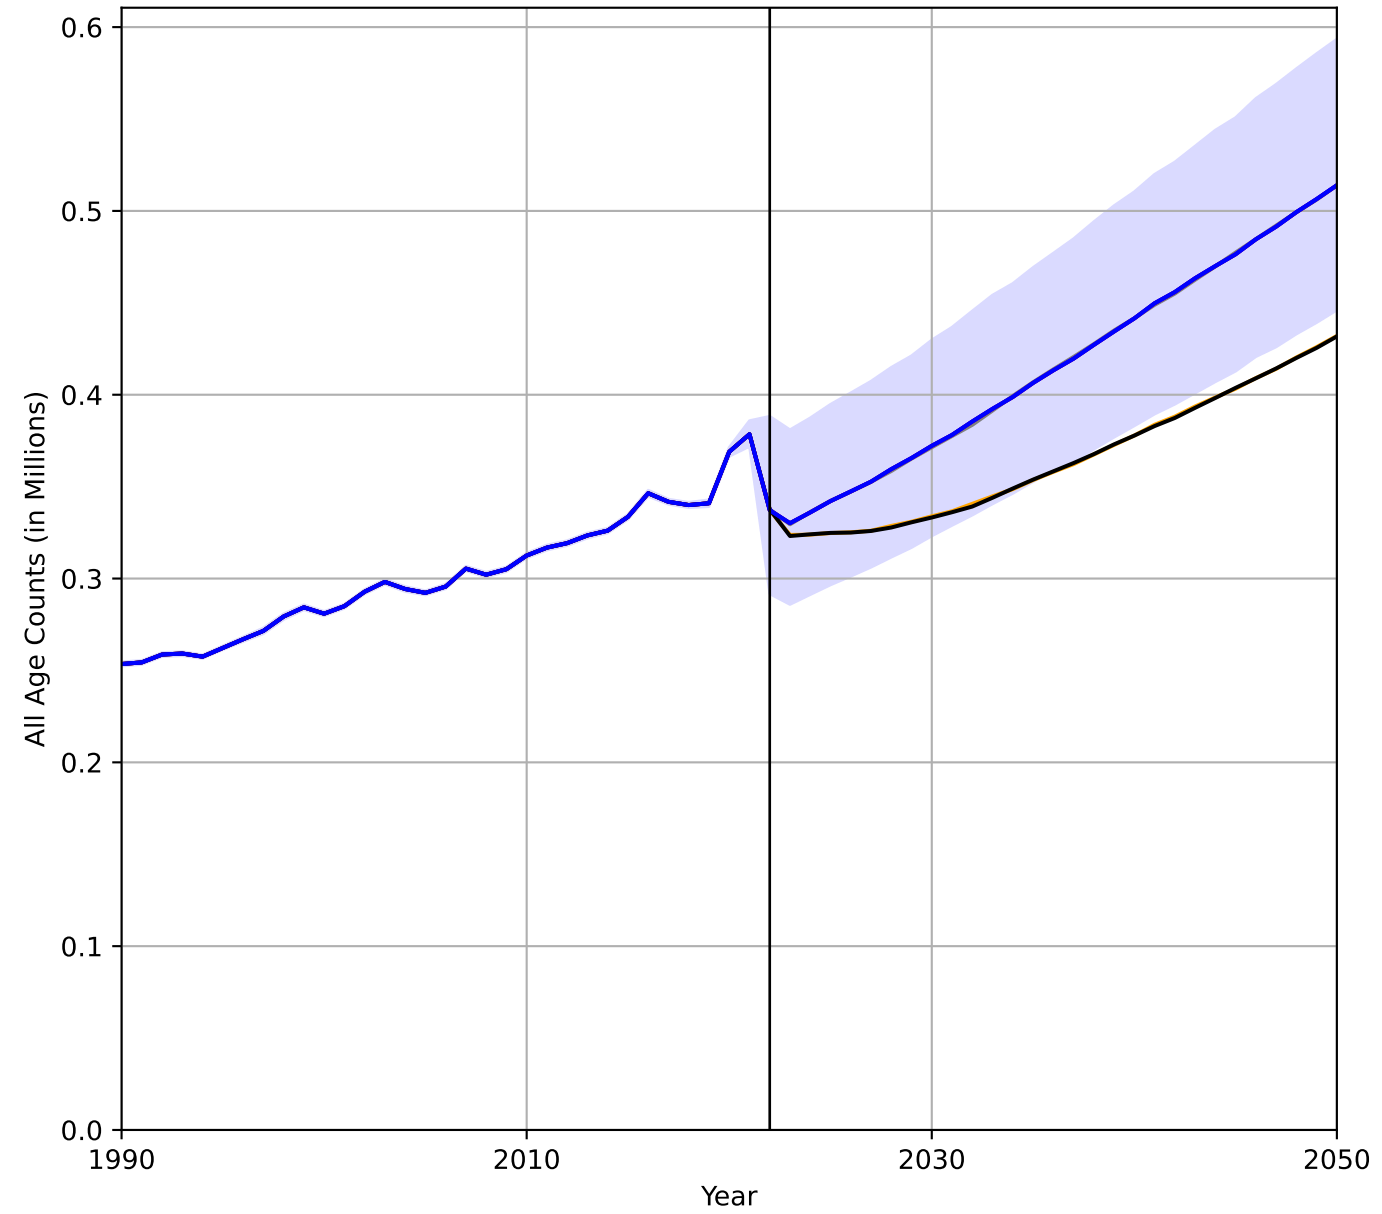

# Chile

Supplemental Results Figure S11. All-cause age standardised death rates (A) and all age death counts (B), for the past and for five future scenarios, 1990–2050

1683

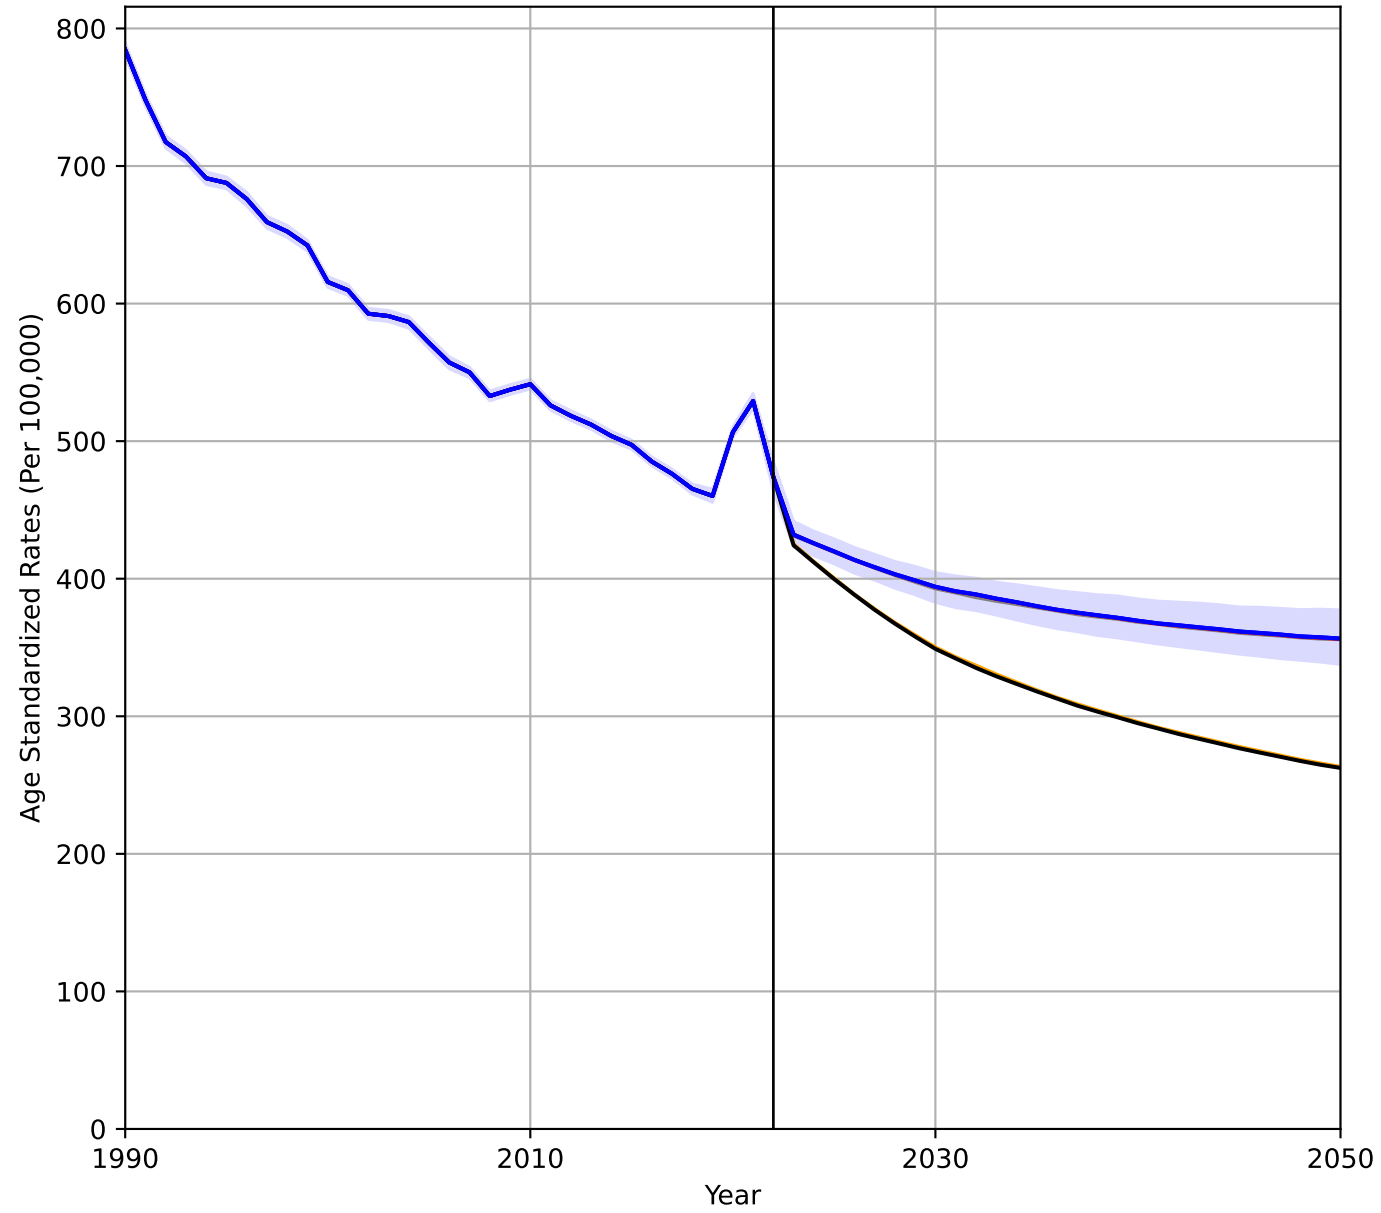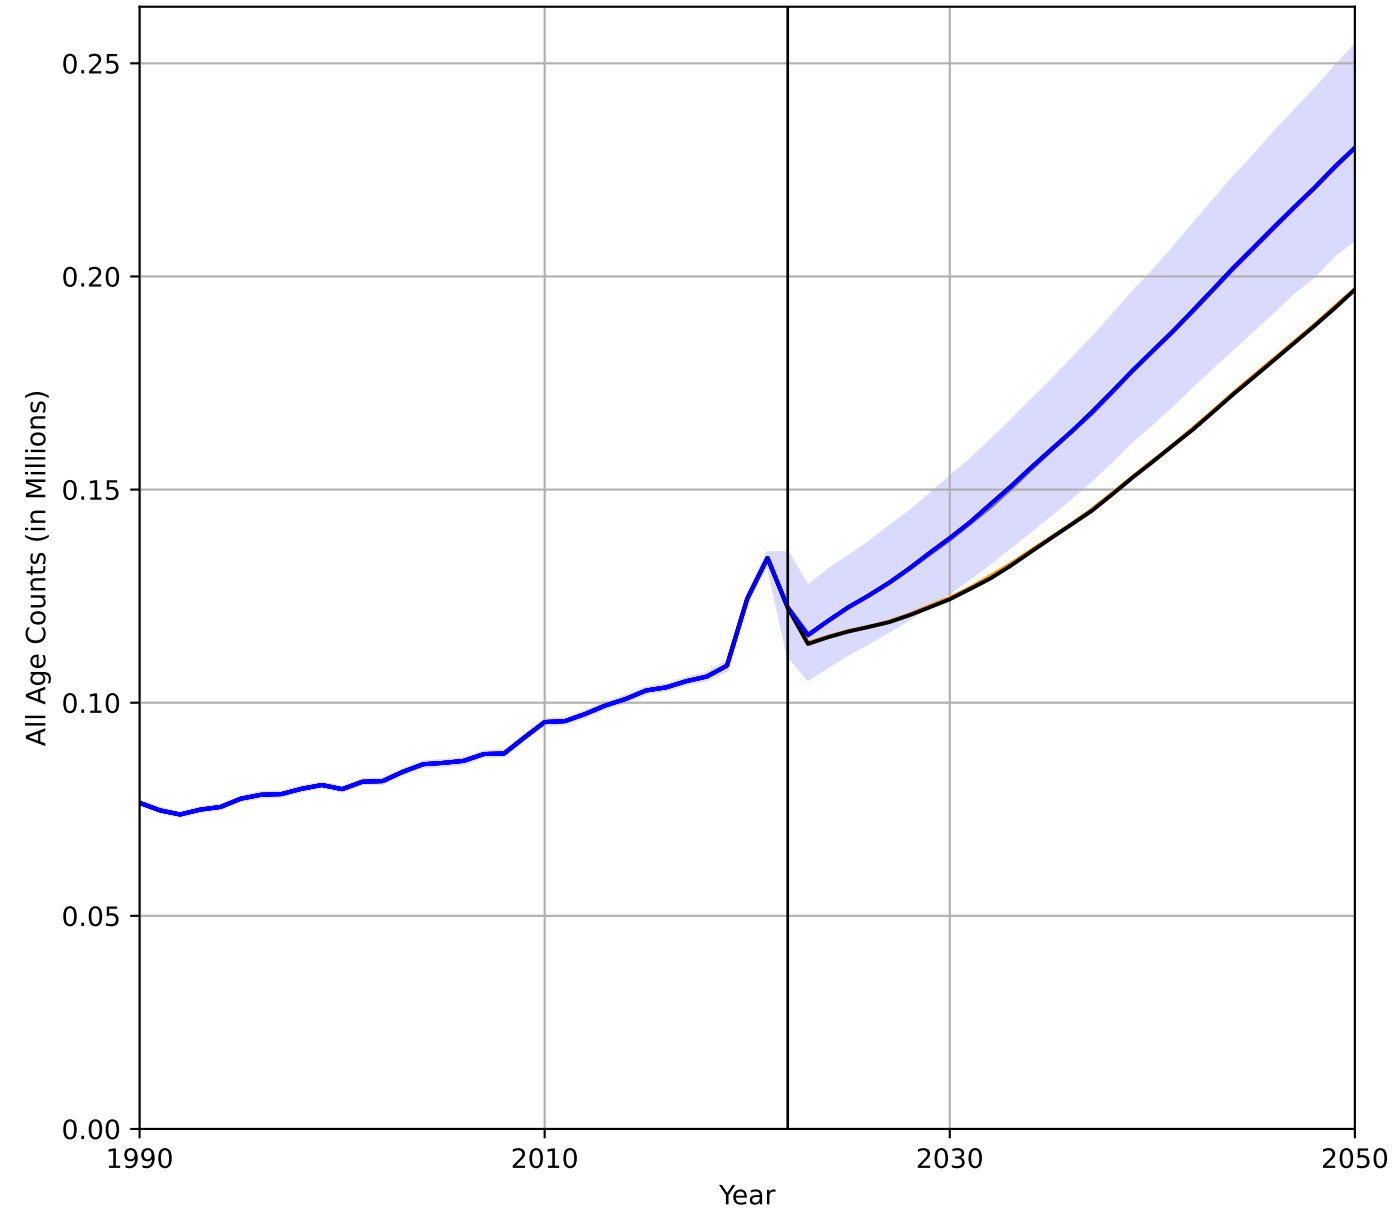

# Uruguay

Supplemental Results Figure S11. All-cause age standardised death rates (A) and all age death counts (B), for the past and for five future scenarios, 1990–2050

1684

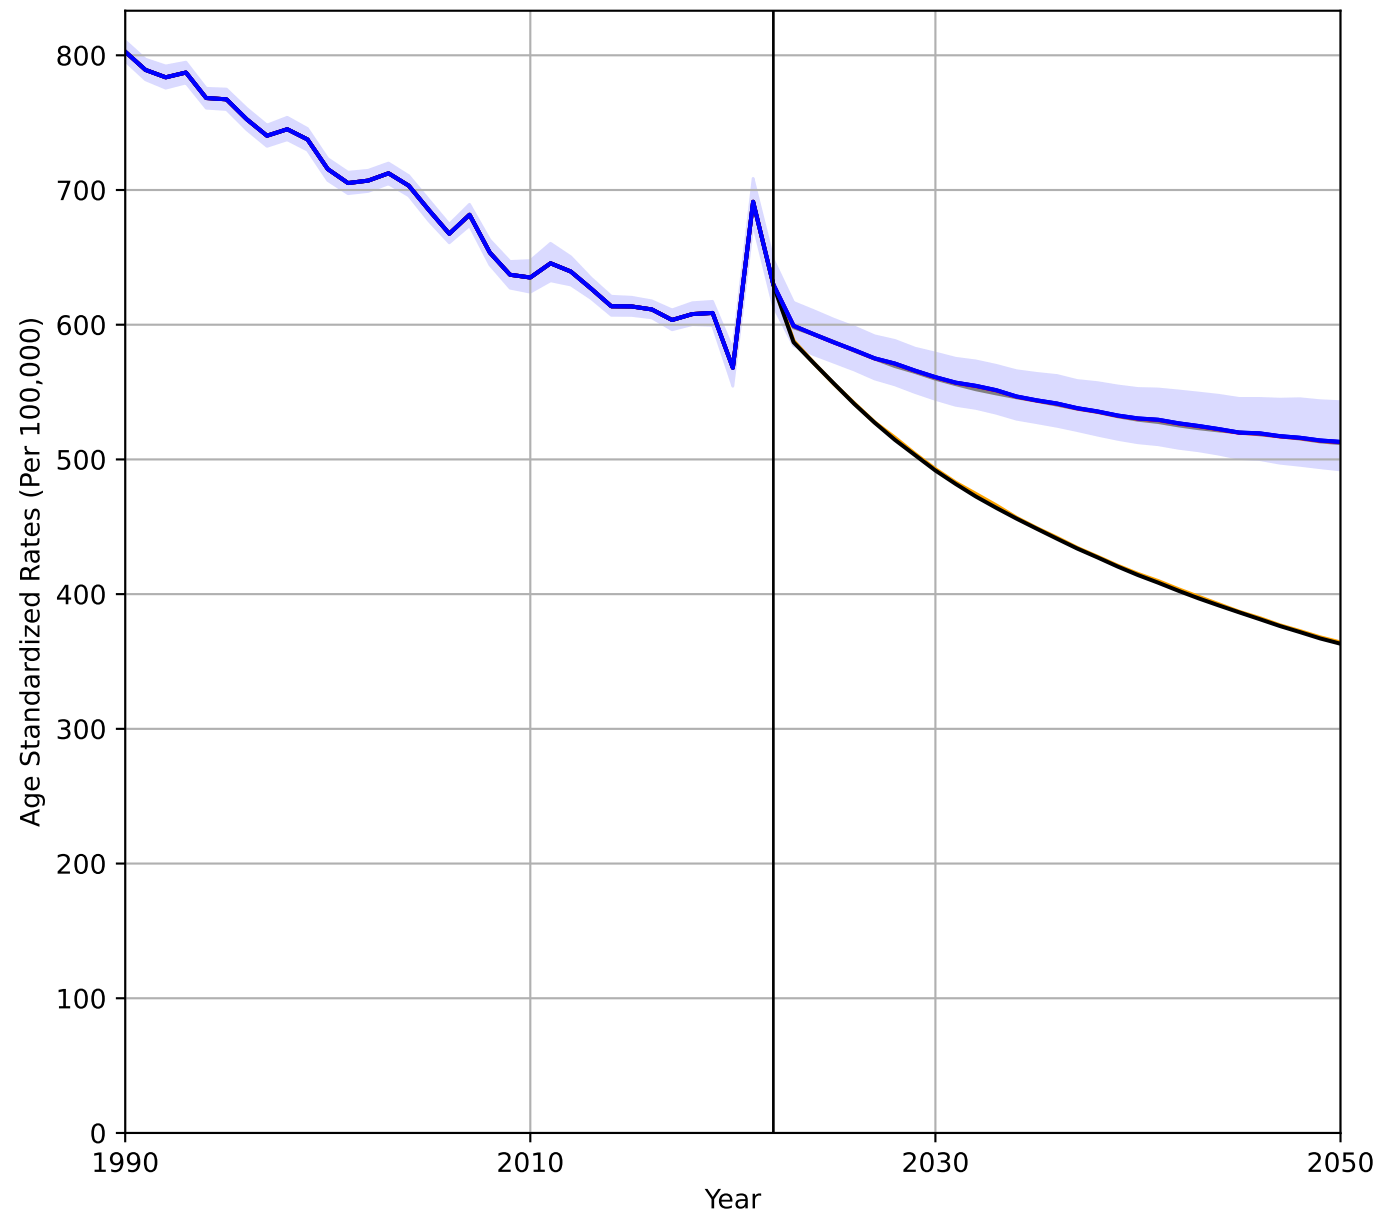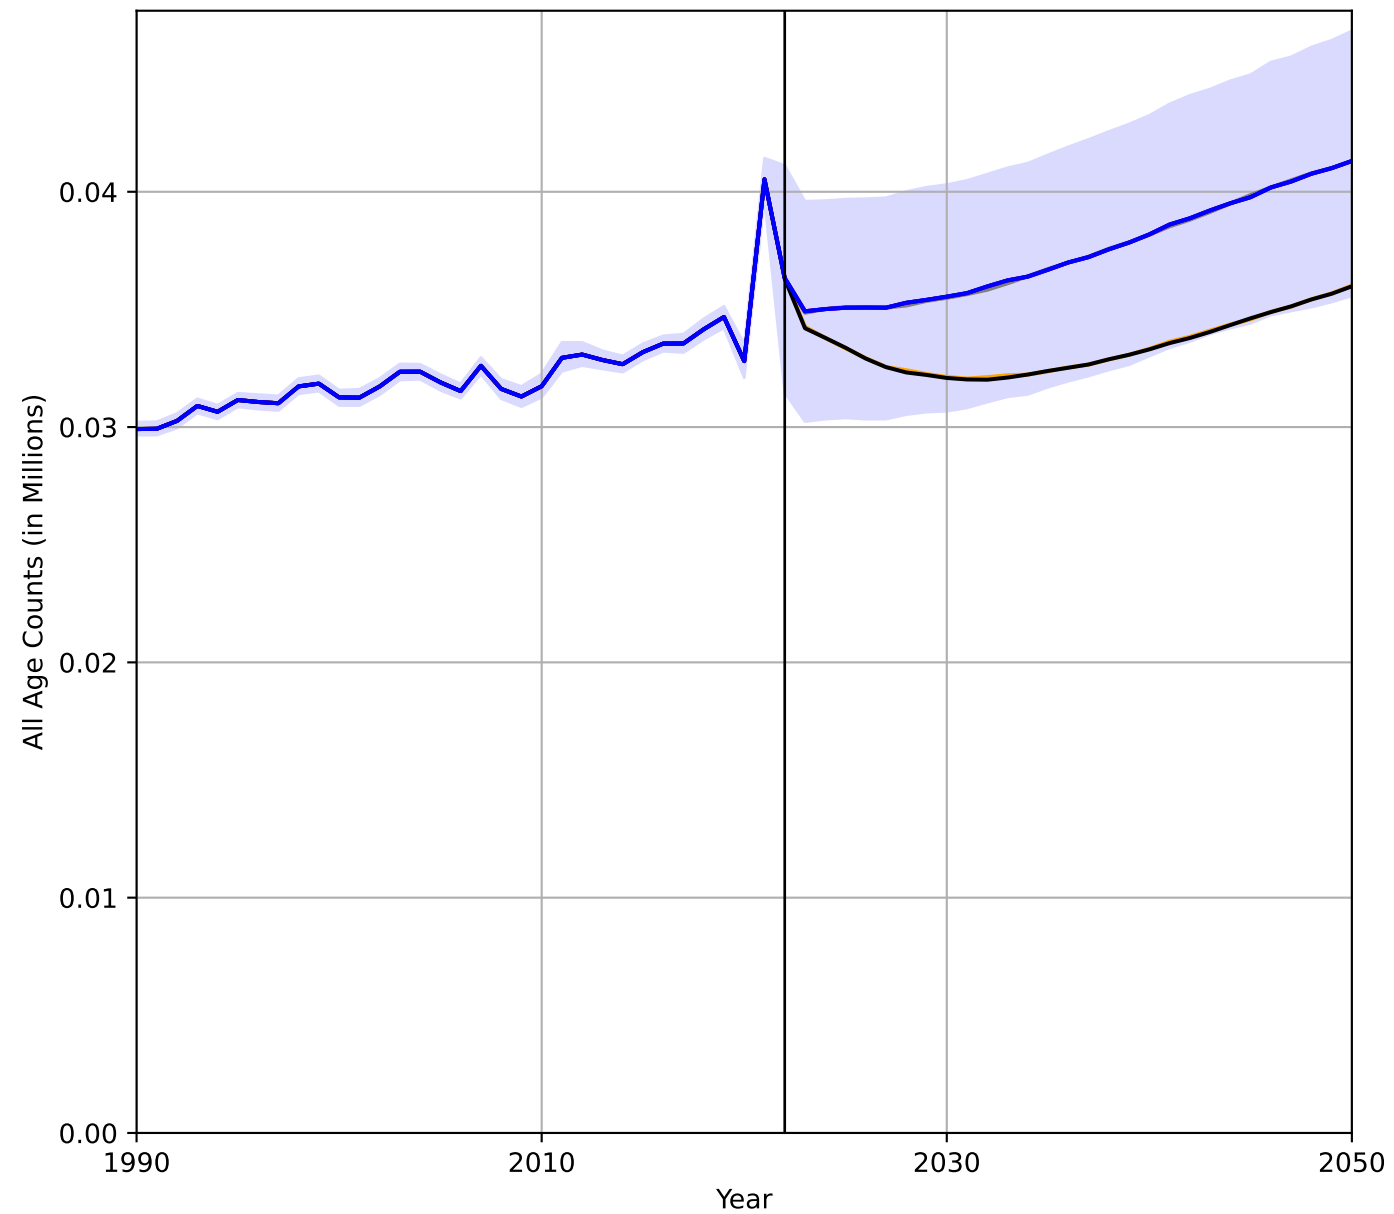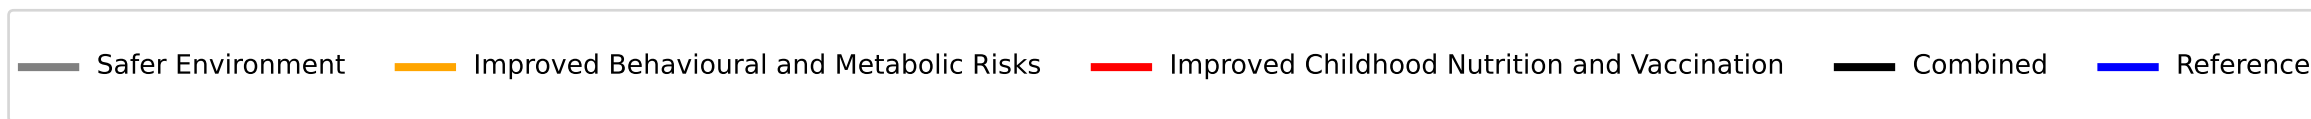

# Andorra

Supplemental Results Figure S11. All-cause age standardised death rates (A) and all age death counts (B), for the past and for five future scenarios, 1990–2050

1685

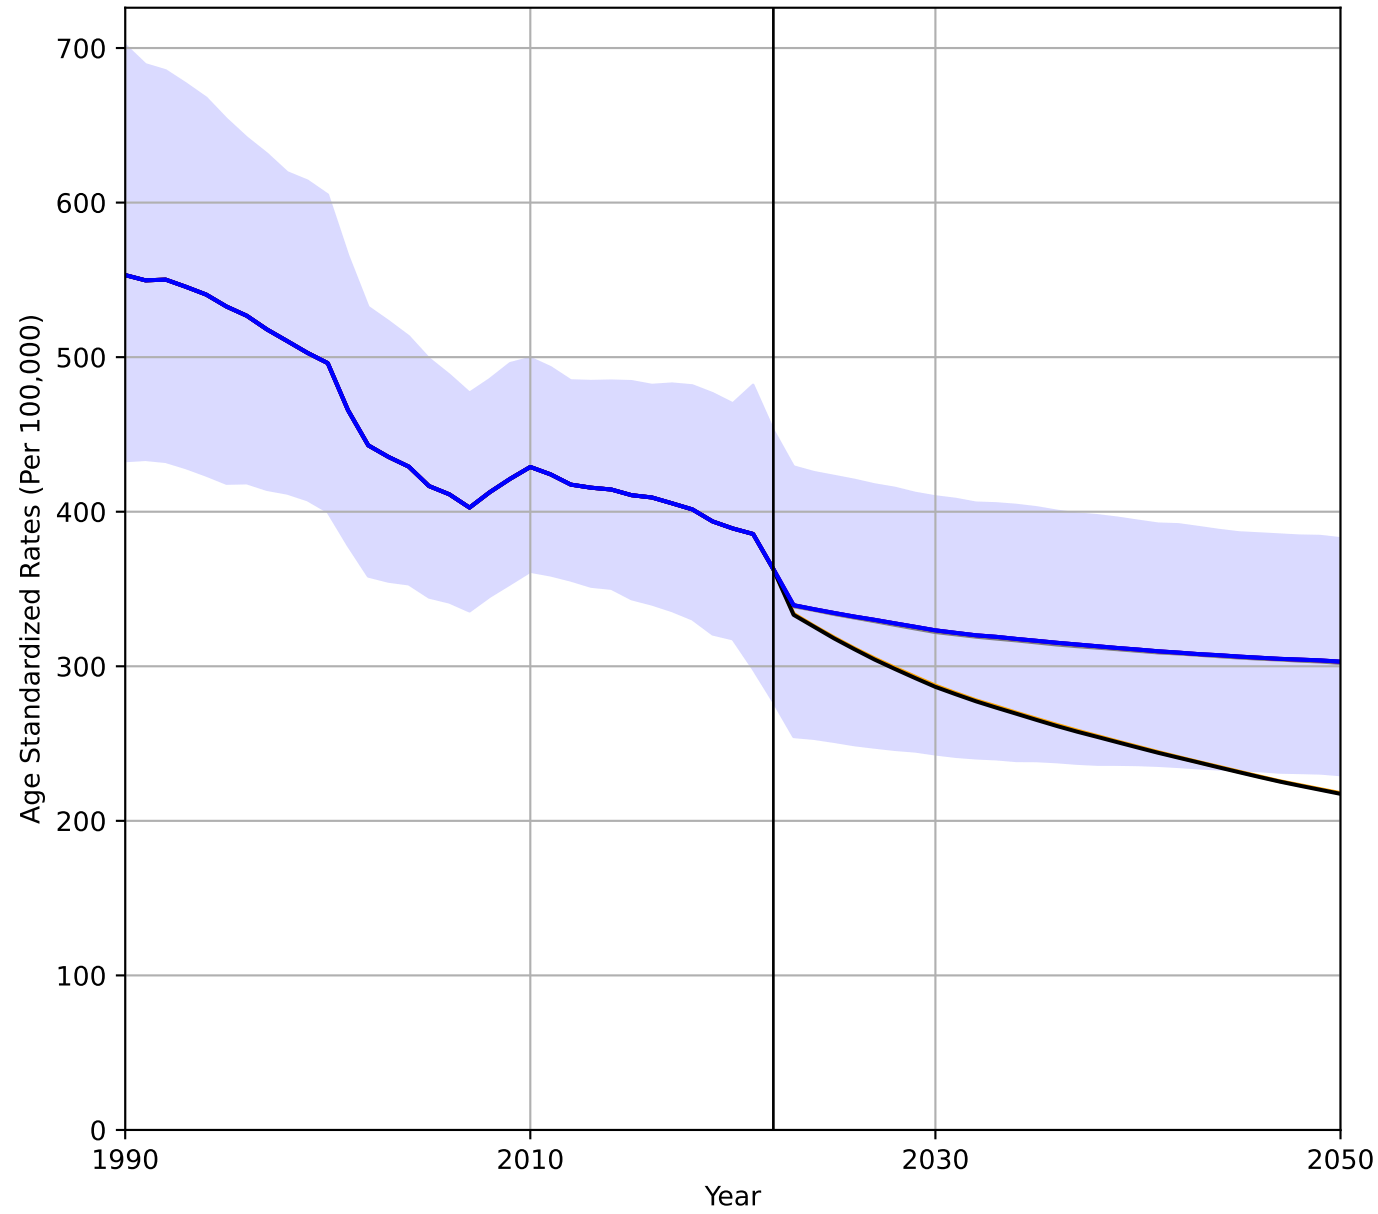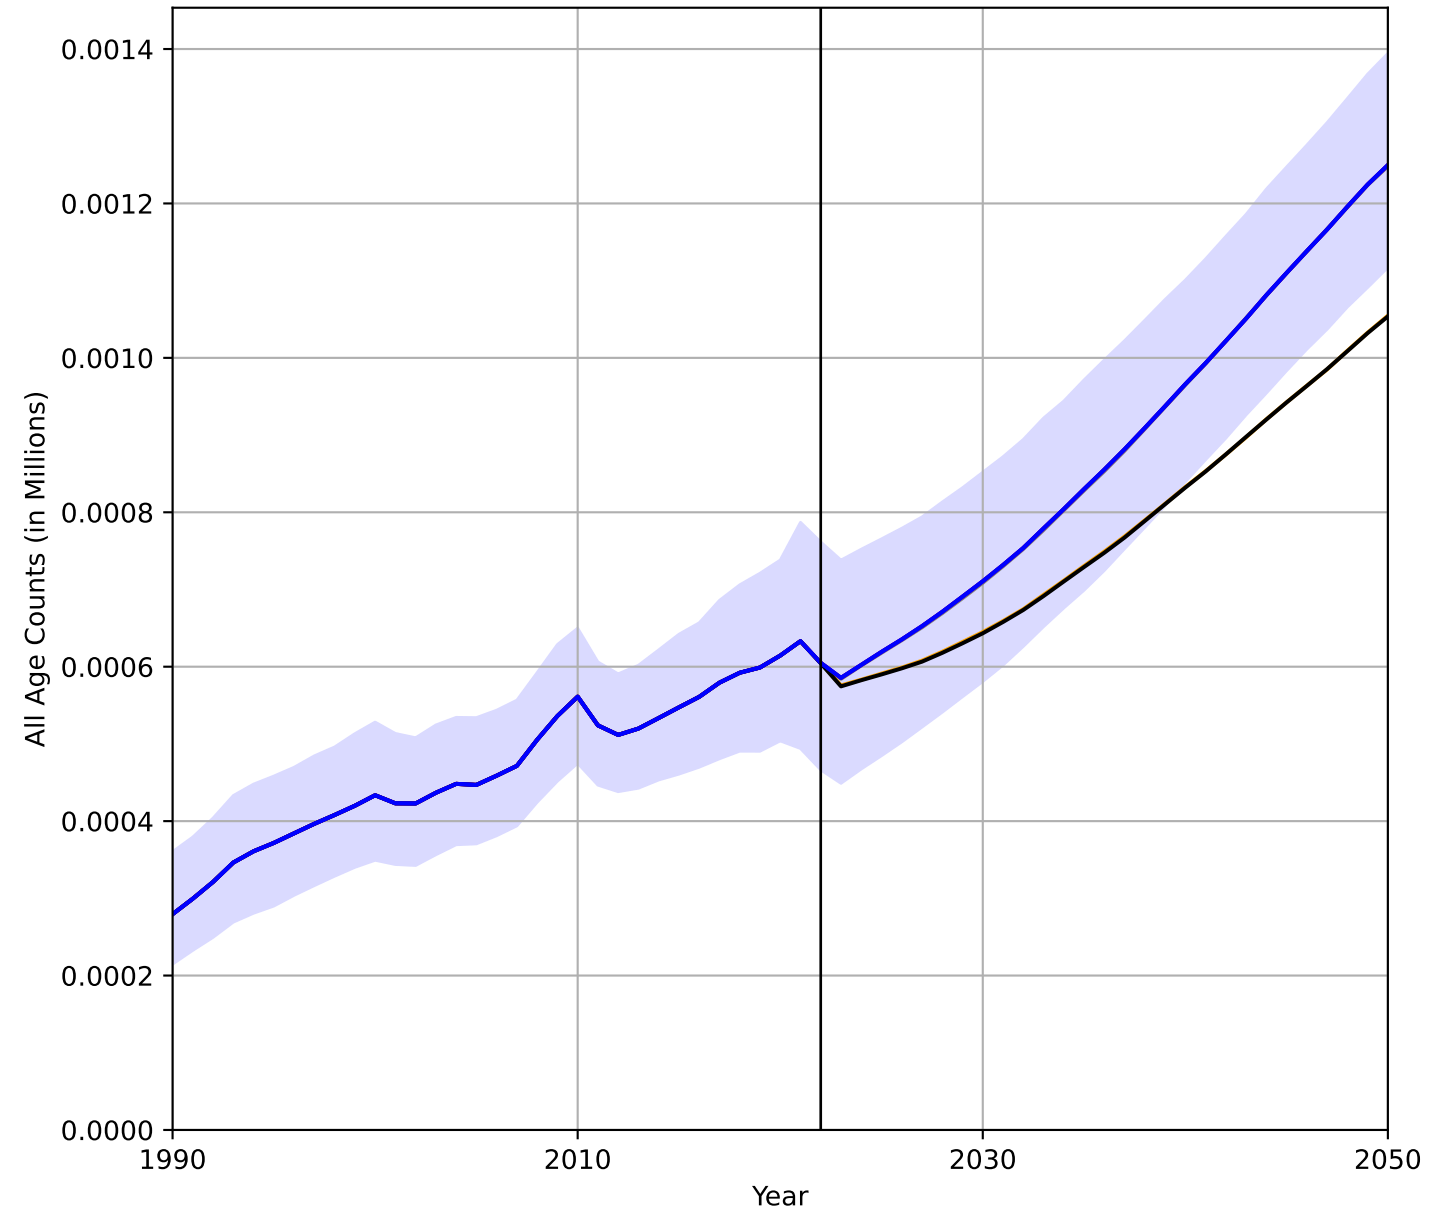

# Austria

Supplemental Results Figure S11. All-cause age standardised death rates (A) and all age death counts (B), for the past and for five future scenarios, 1990–2050

1686

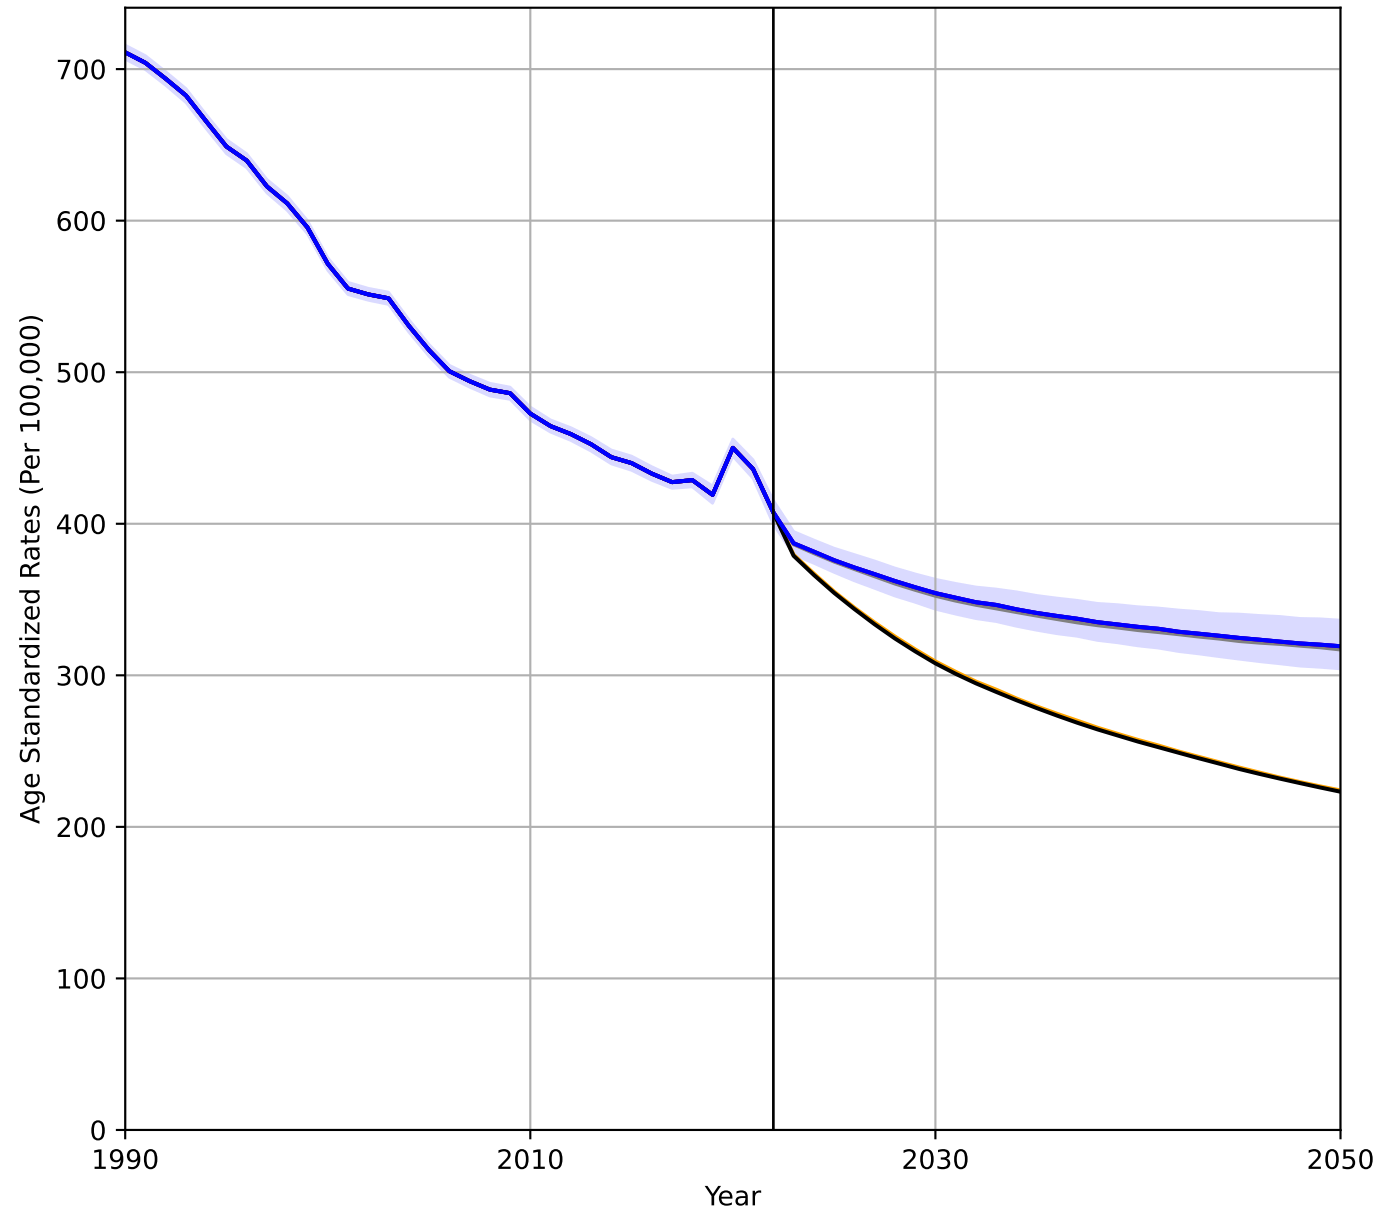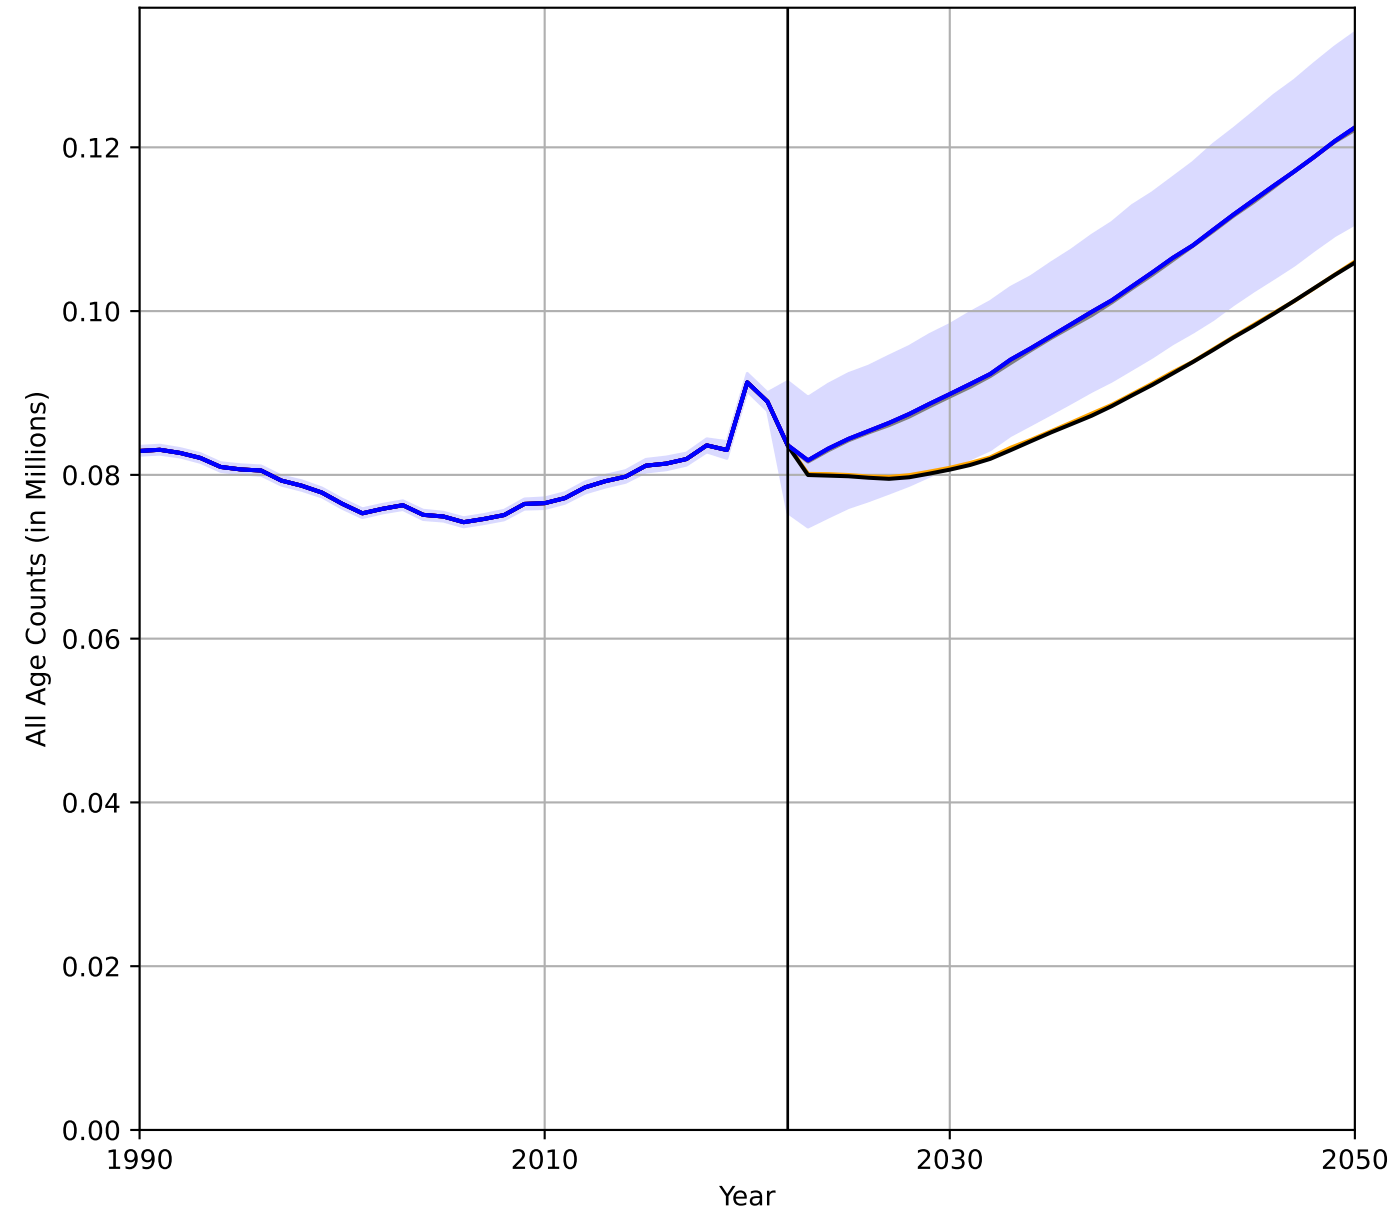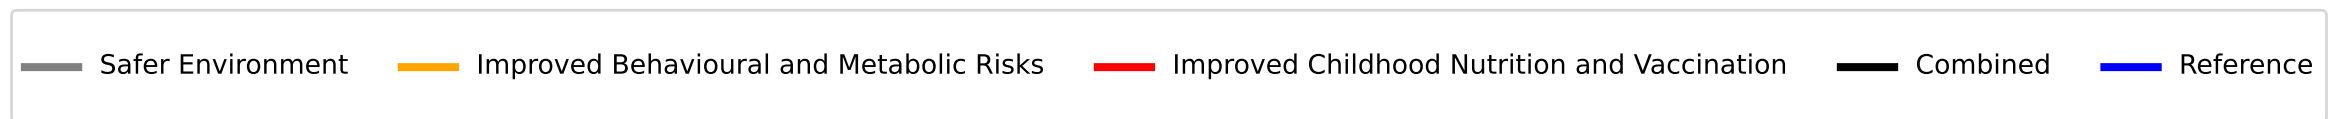

# Belgium

Supplemental Results Figure S11. All-cause age standardised death rates (A) and all age death counts (B), for the past and for five future scenarios, 1990–2050

1687

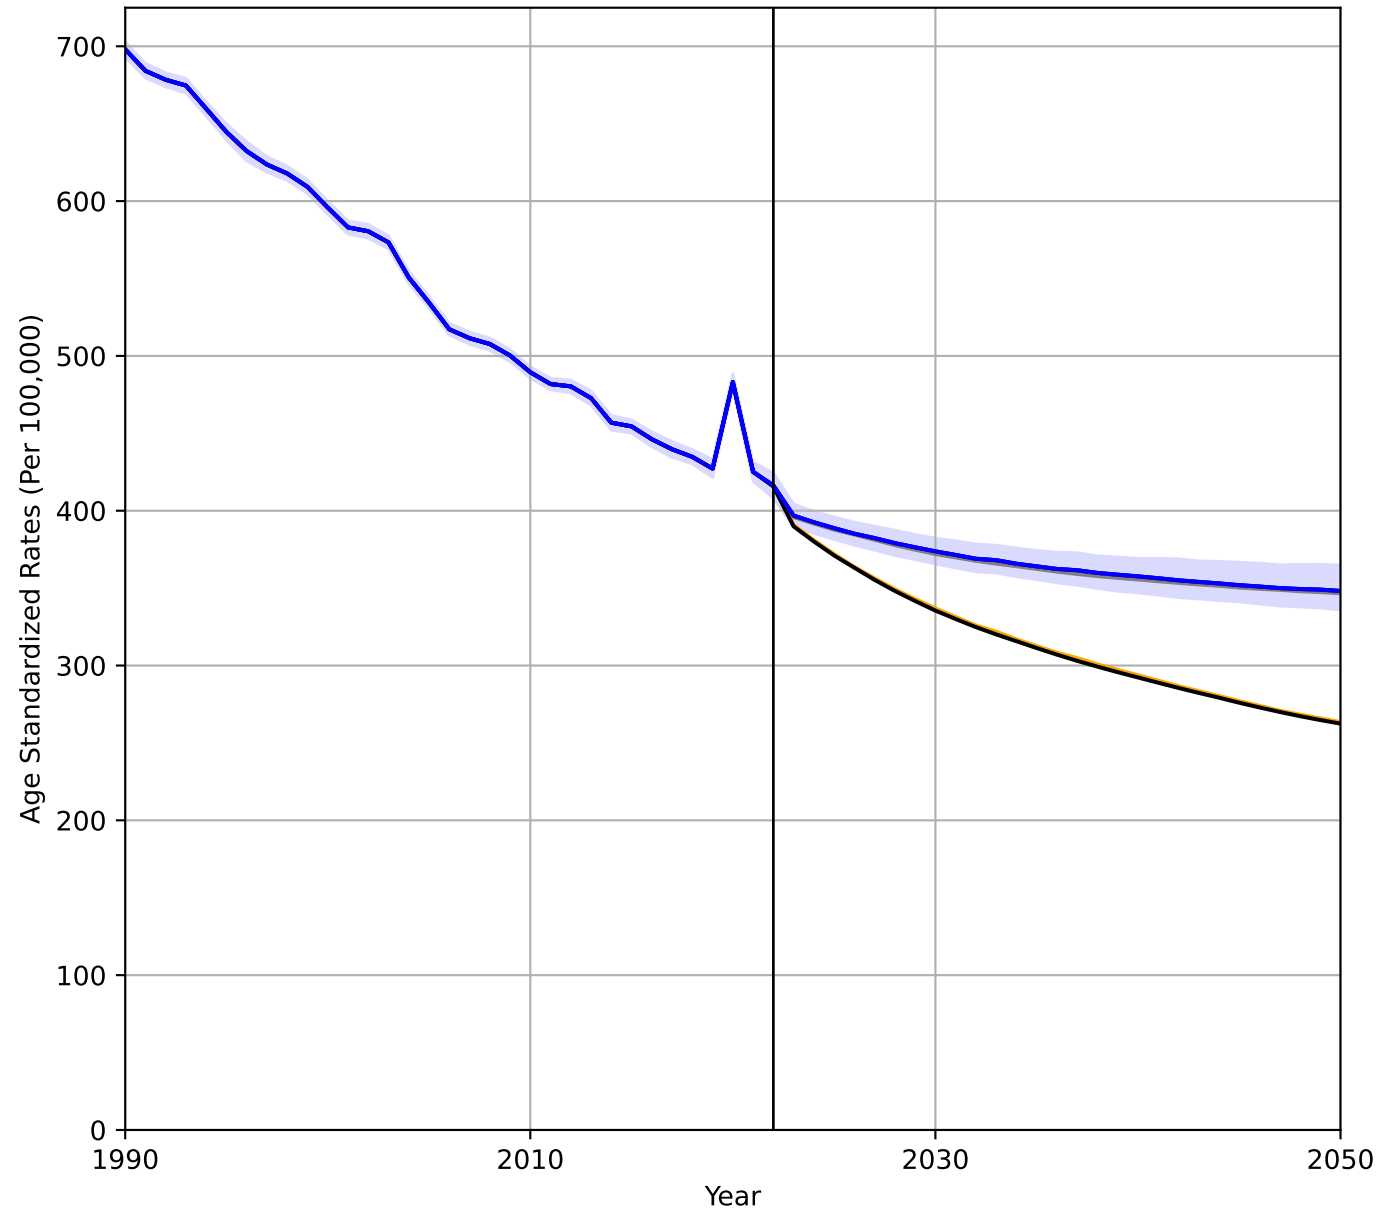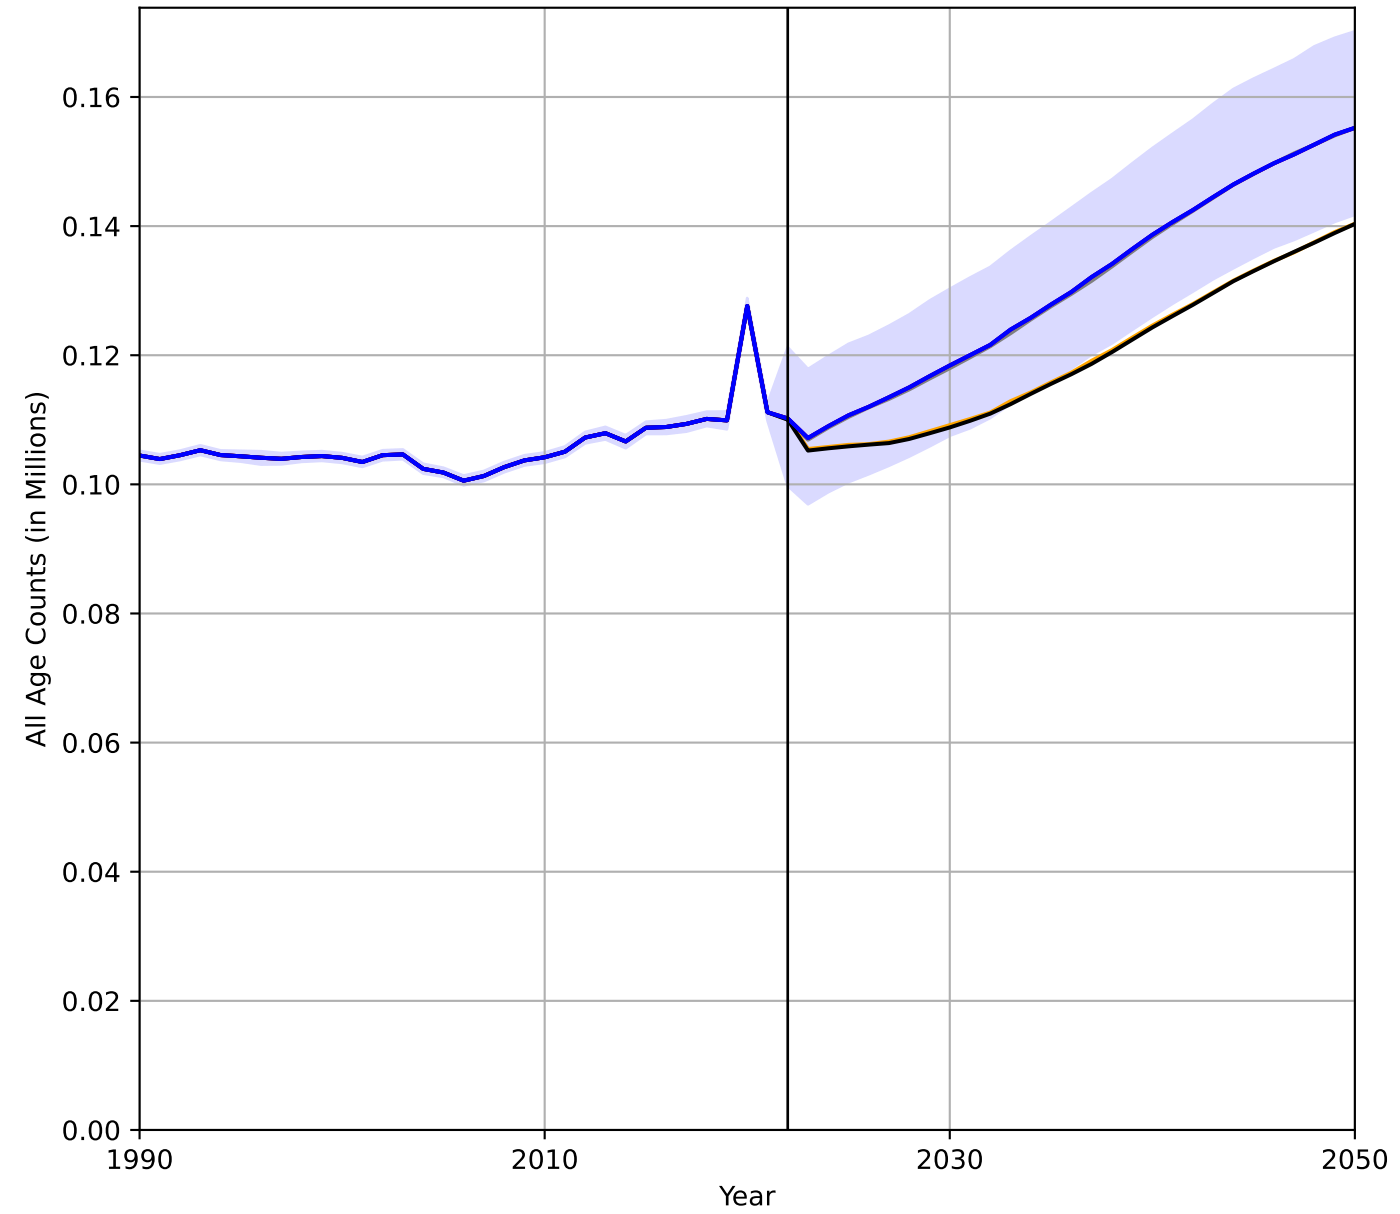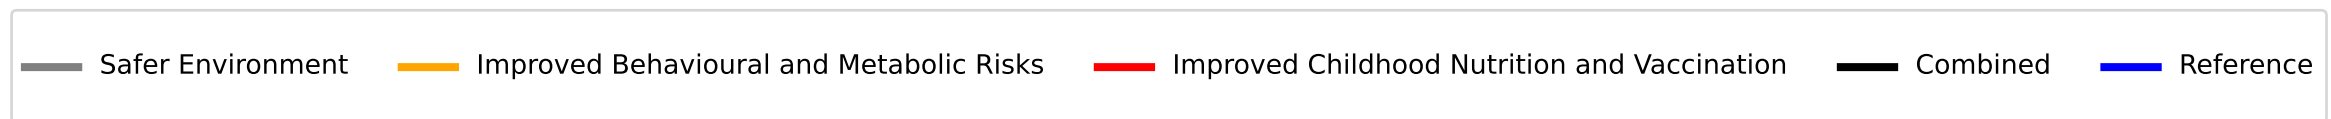



# Cyprus

Supplemental Results Figure S11. All-cause age standardised death rates (A) and all age death counts (B), for the past and for five future scenarios, 1990–2050

1688

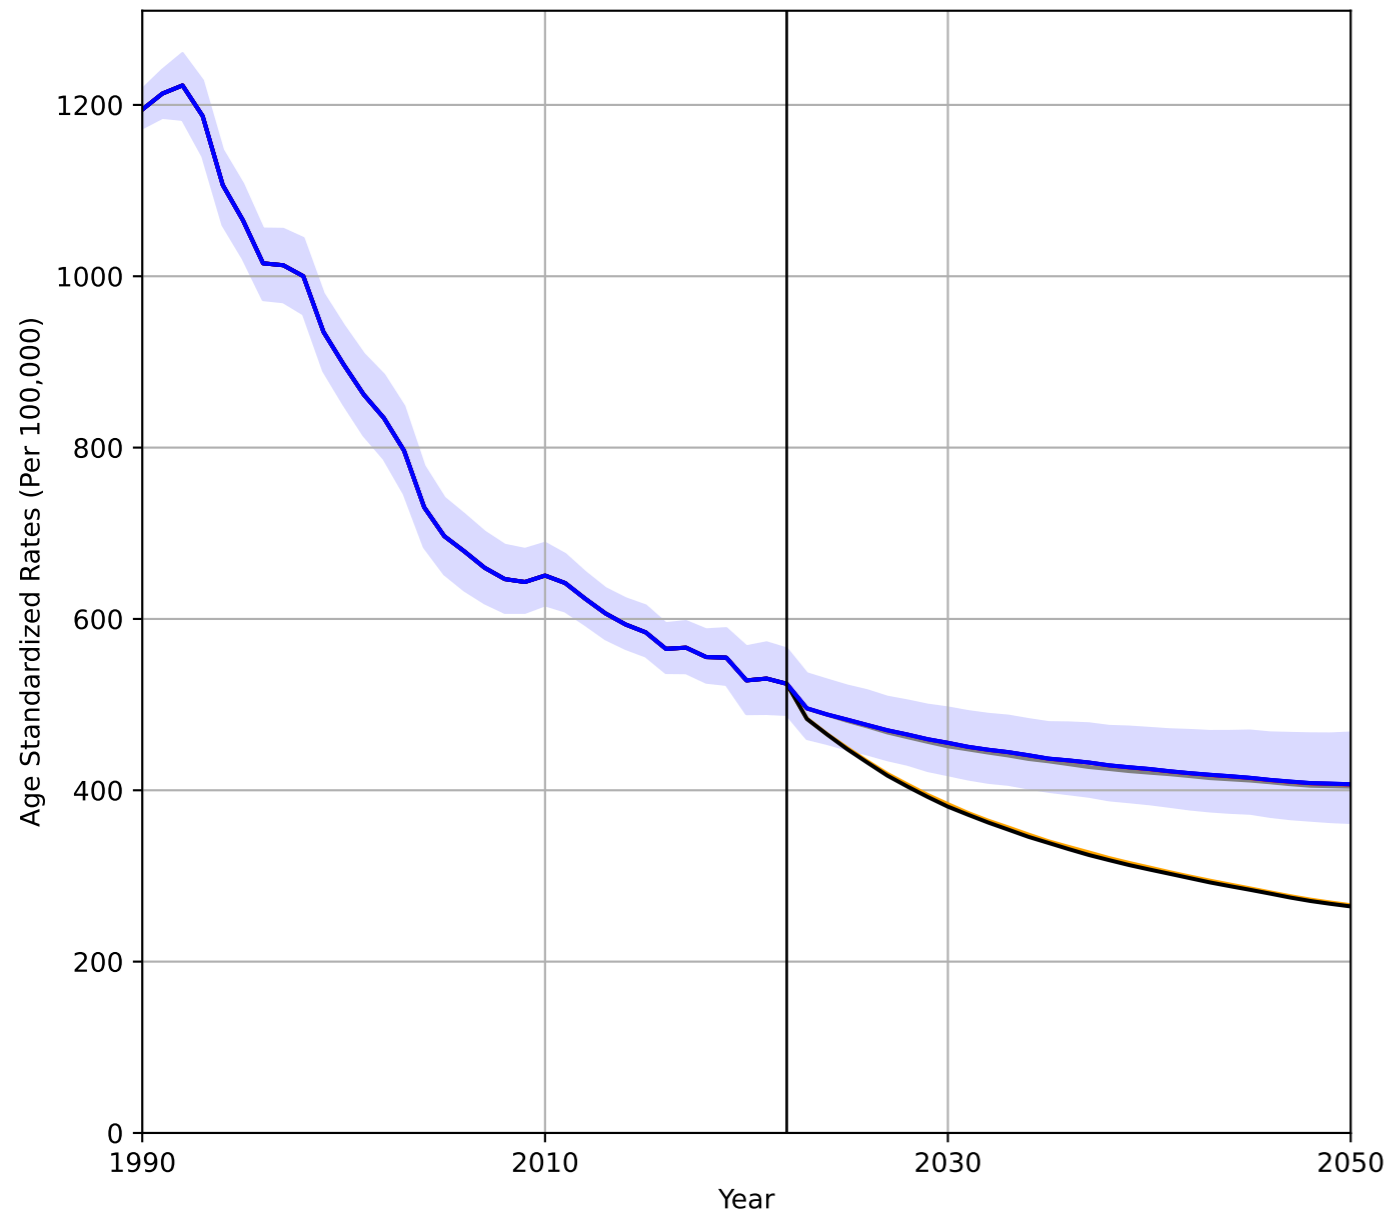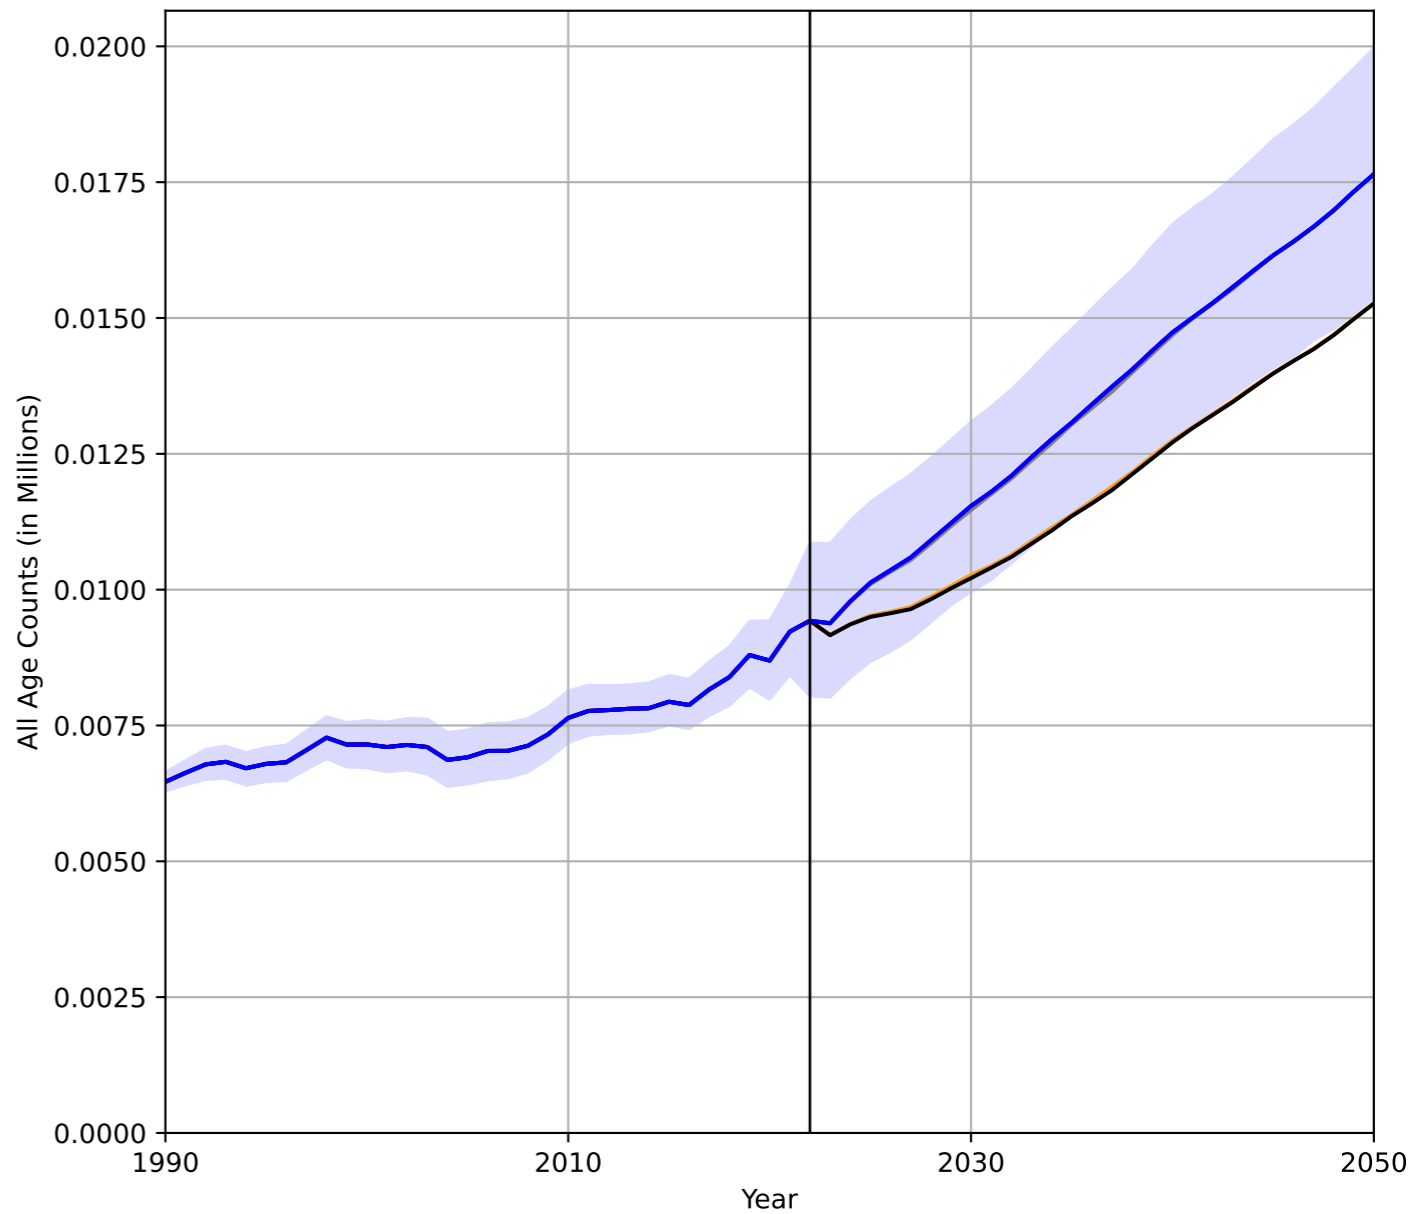

# Denmark

Supplemental Results Figure S11. All-cause age standardised death rates (A) and all age death counts (B), for the past and for five future scenarios, 1990–2050

1689

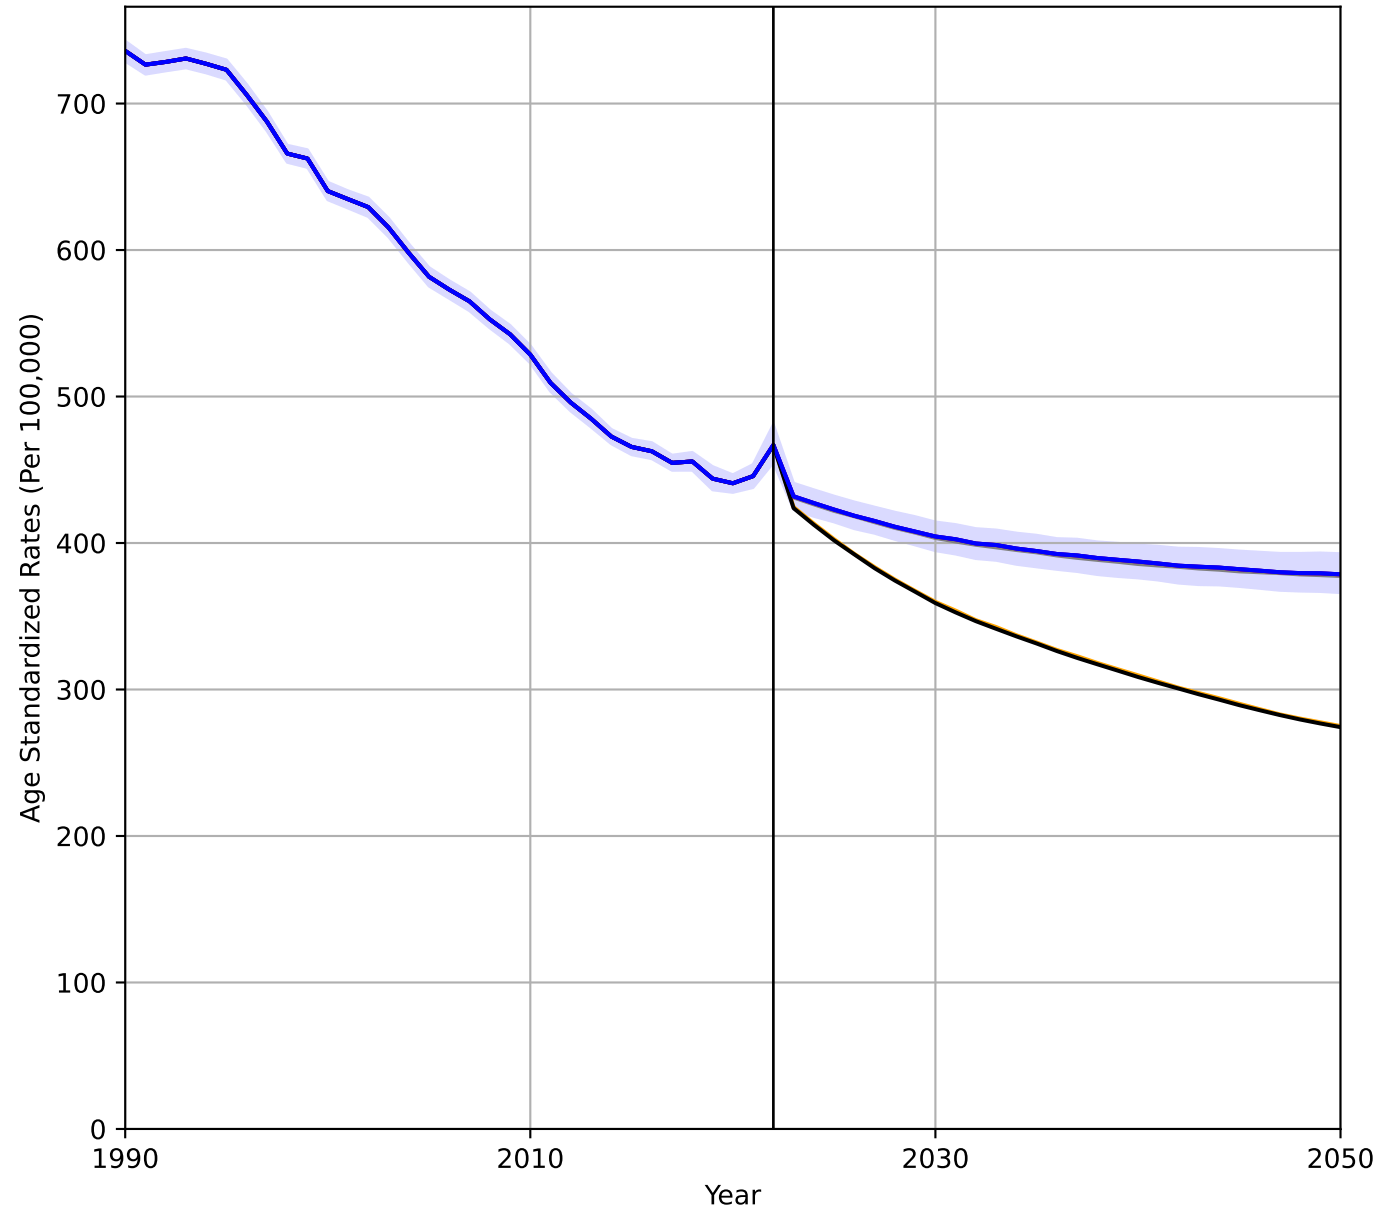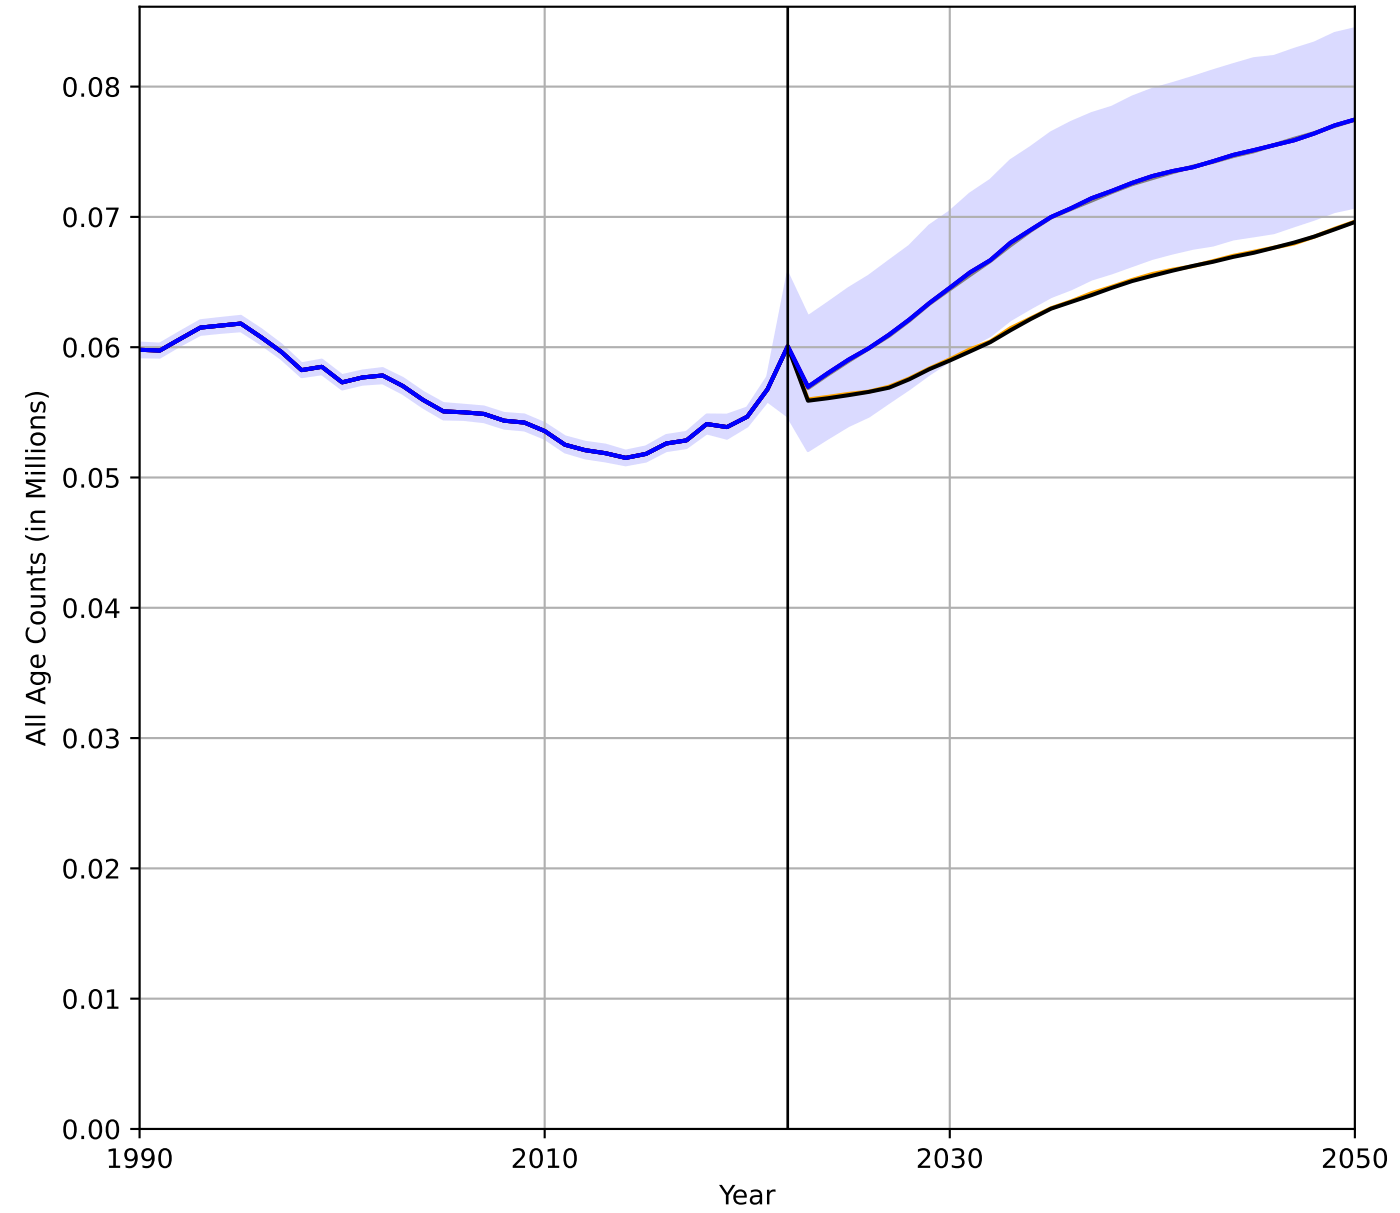

# Finland

Supplemental Results Figure S11. All-cause age standardised death rates (A) and all age death counts (B), for the past and for five future scenarios, 1990–2050

1690

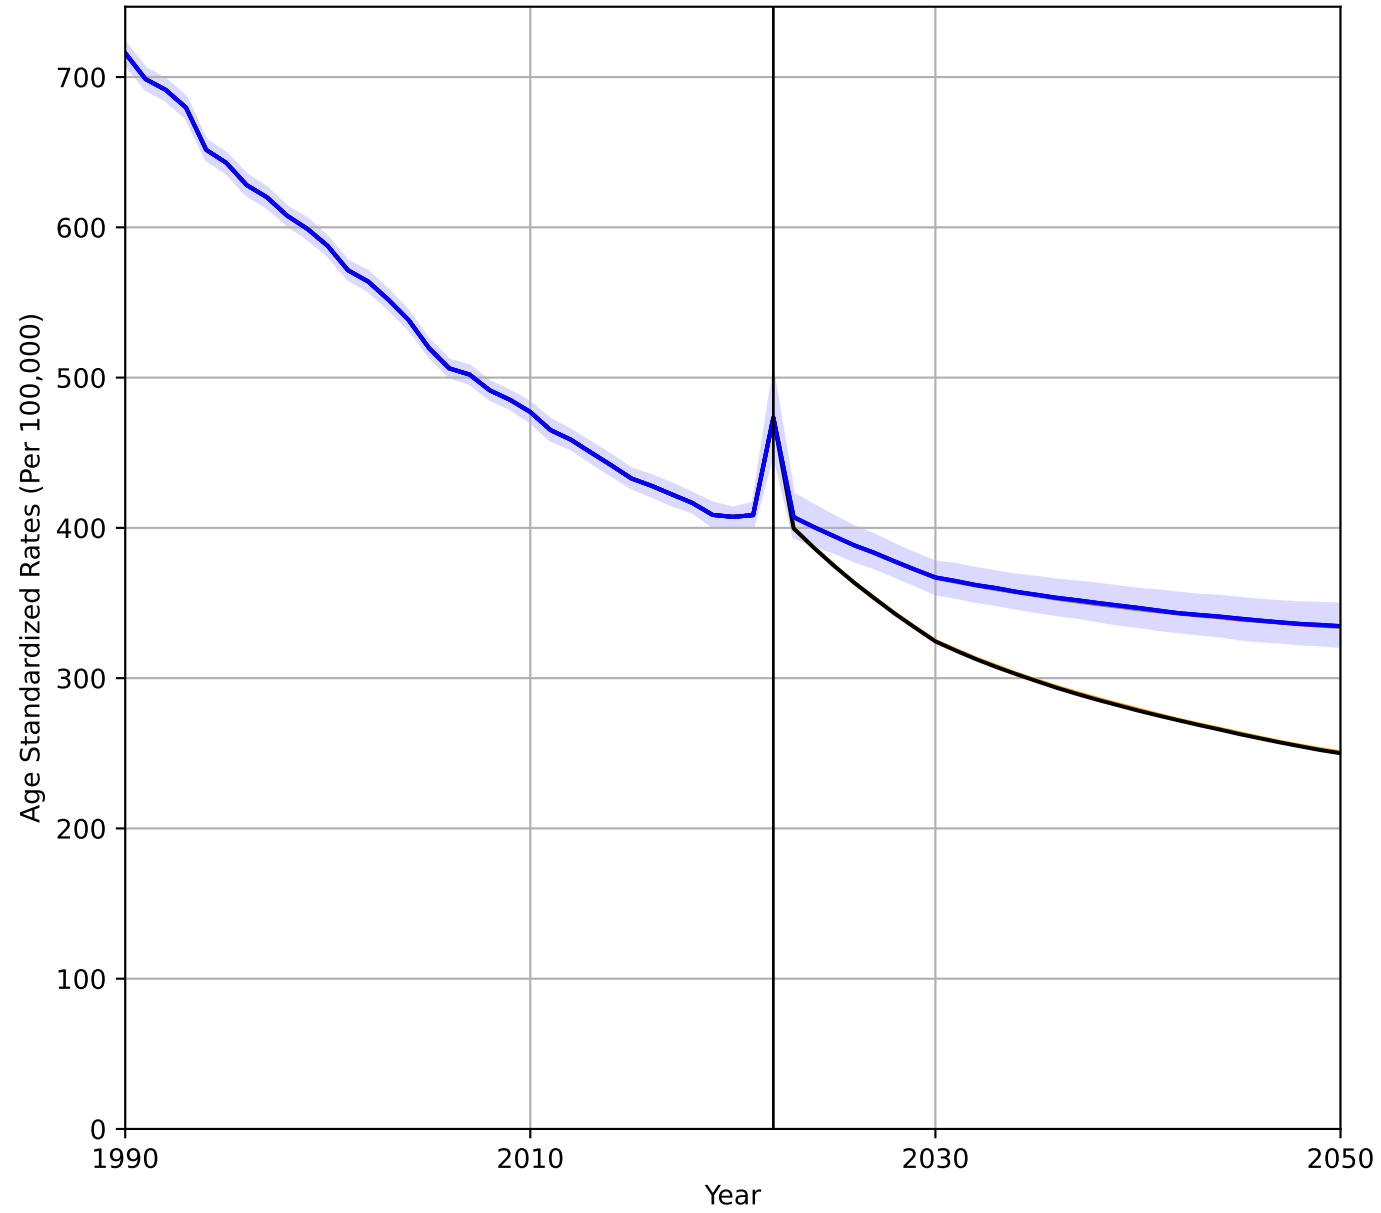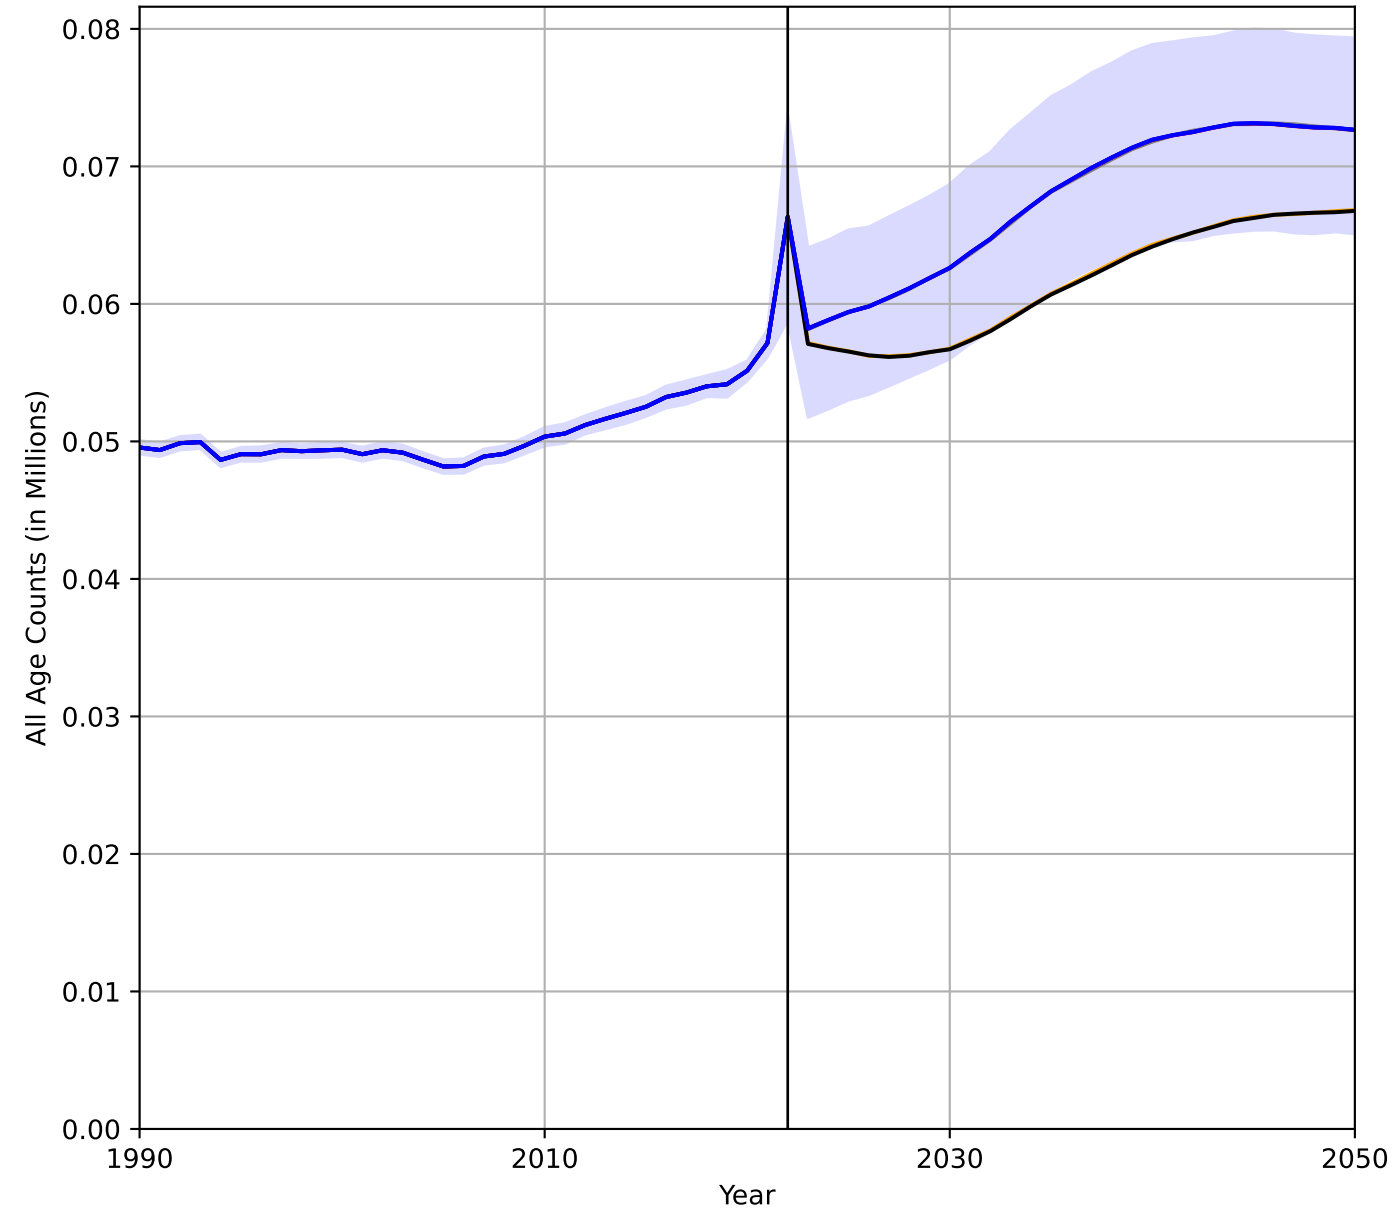

# France

Supplemental Results Figure S11. All-cause age standardised death rates (A) and all age death counts (B), for the past and for five future scenarios, 1990–2050

1691

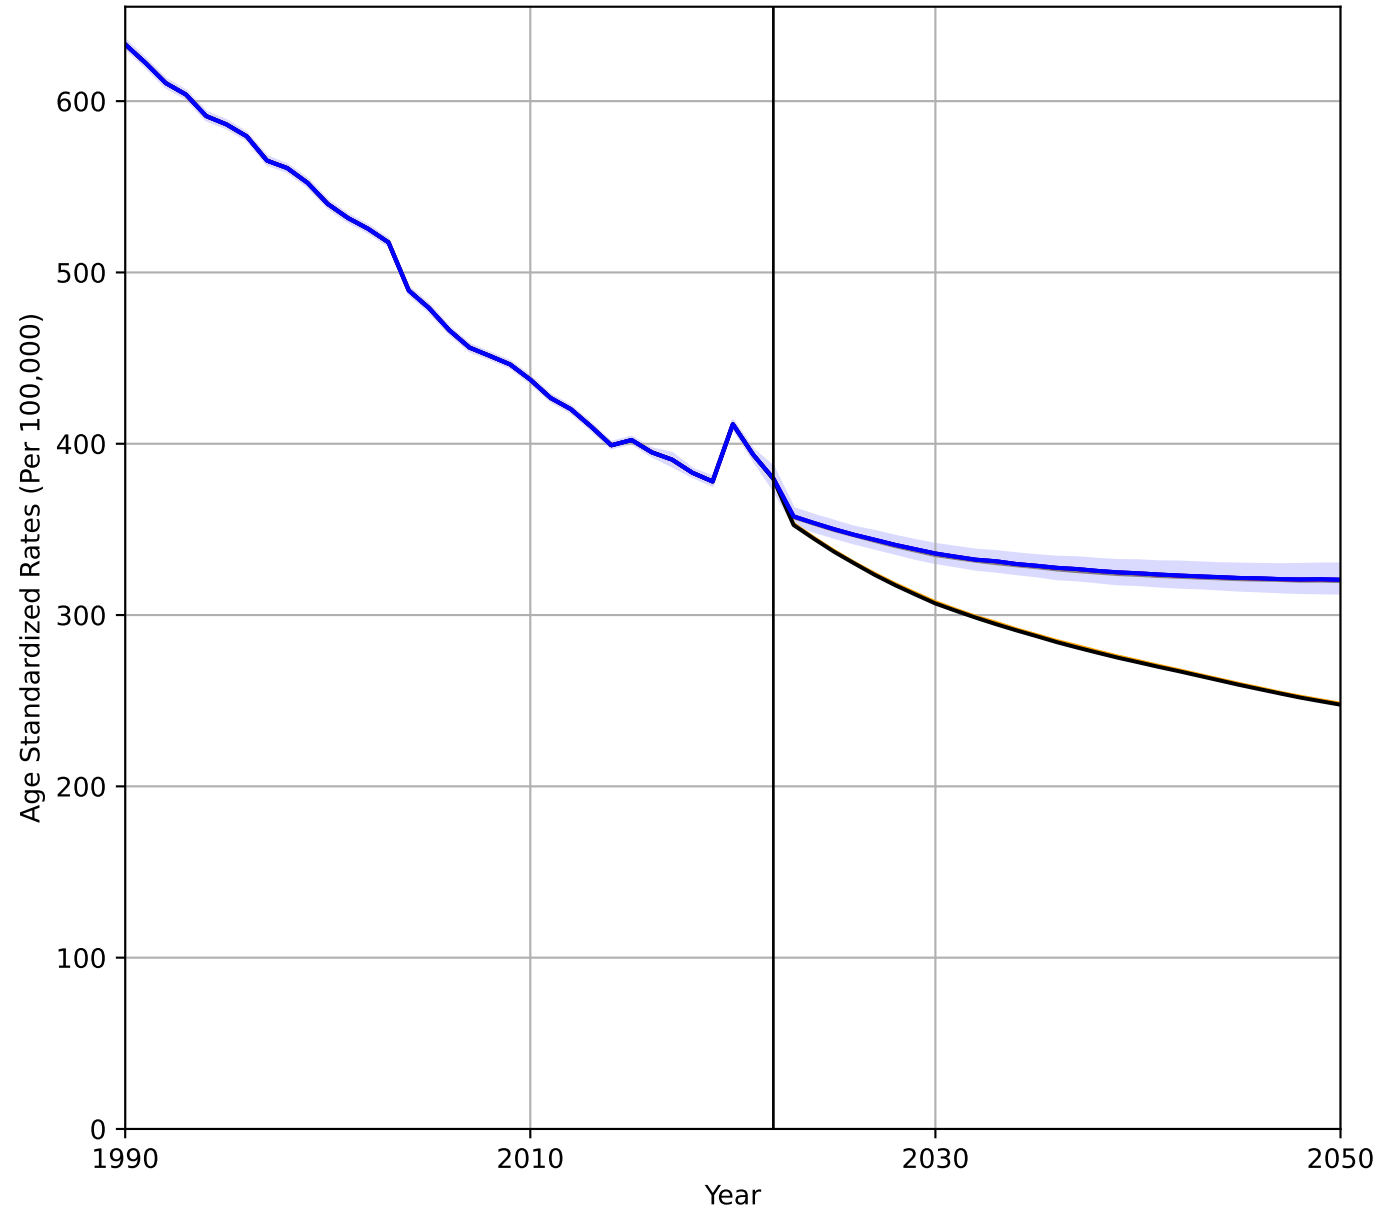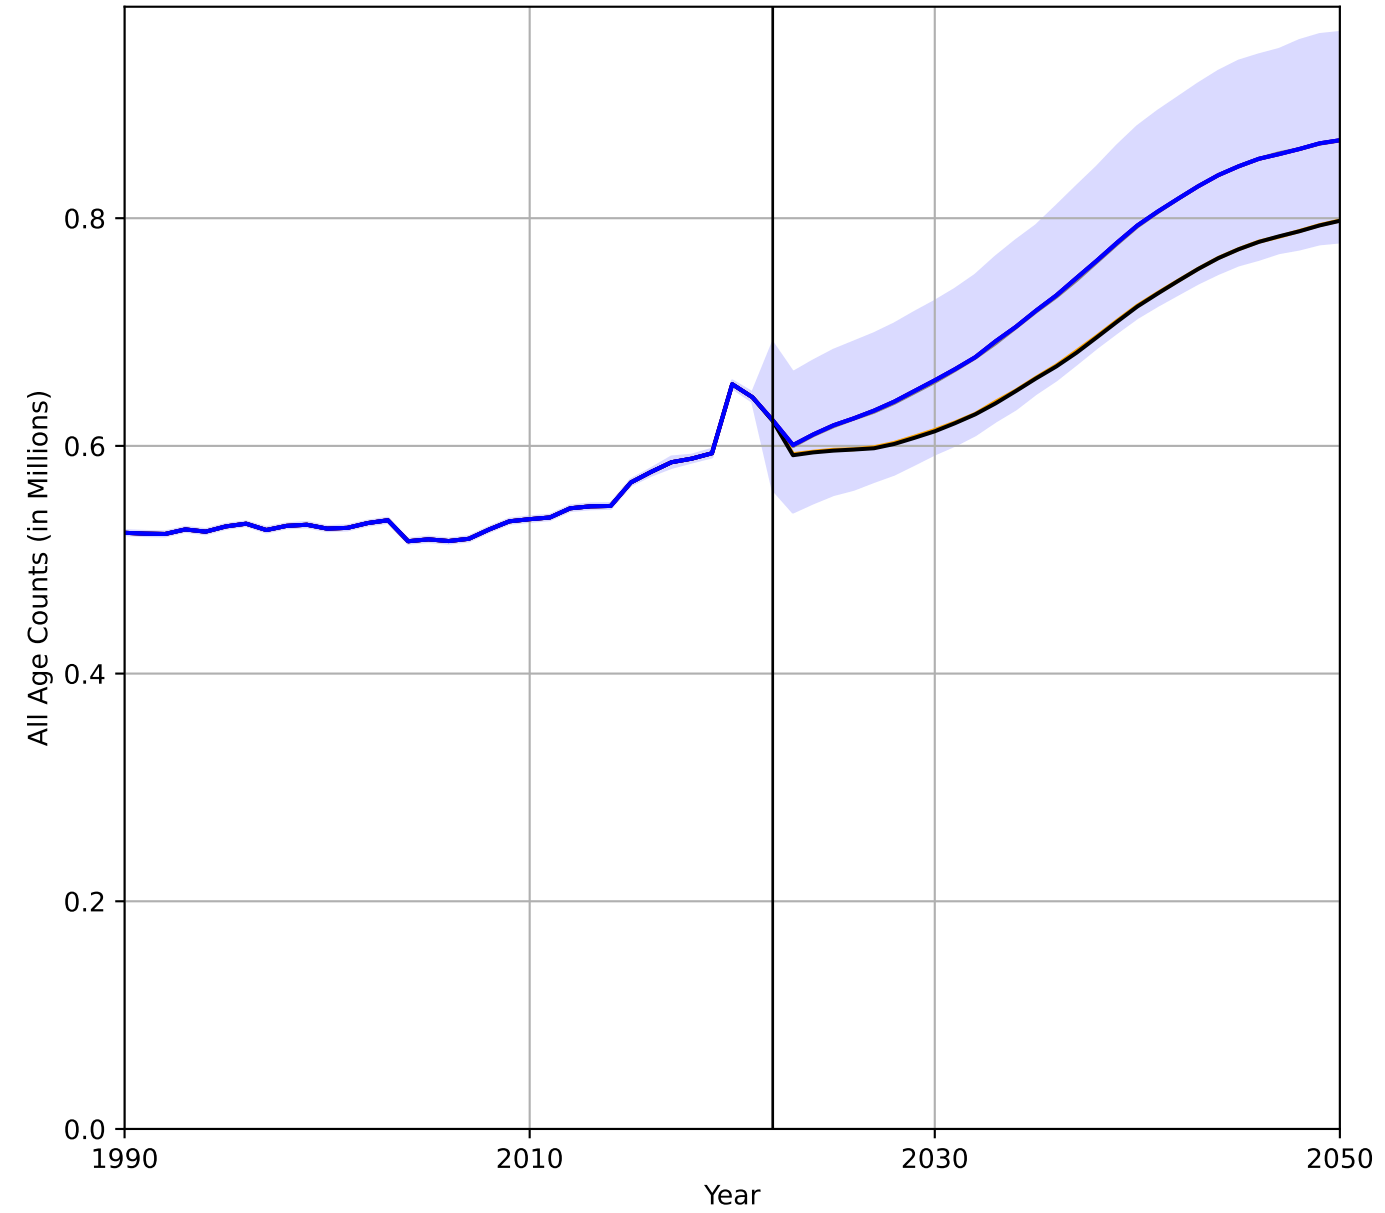

# Germany

Supplemental Results Figure S11. All-cause age standardised death rates (A) and all age death counts (B), for the past and for five future scenarios, 1990–2050

1692

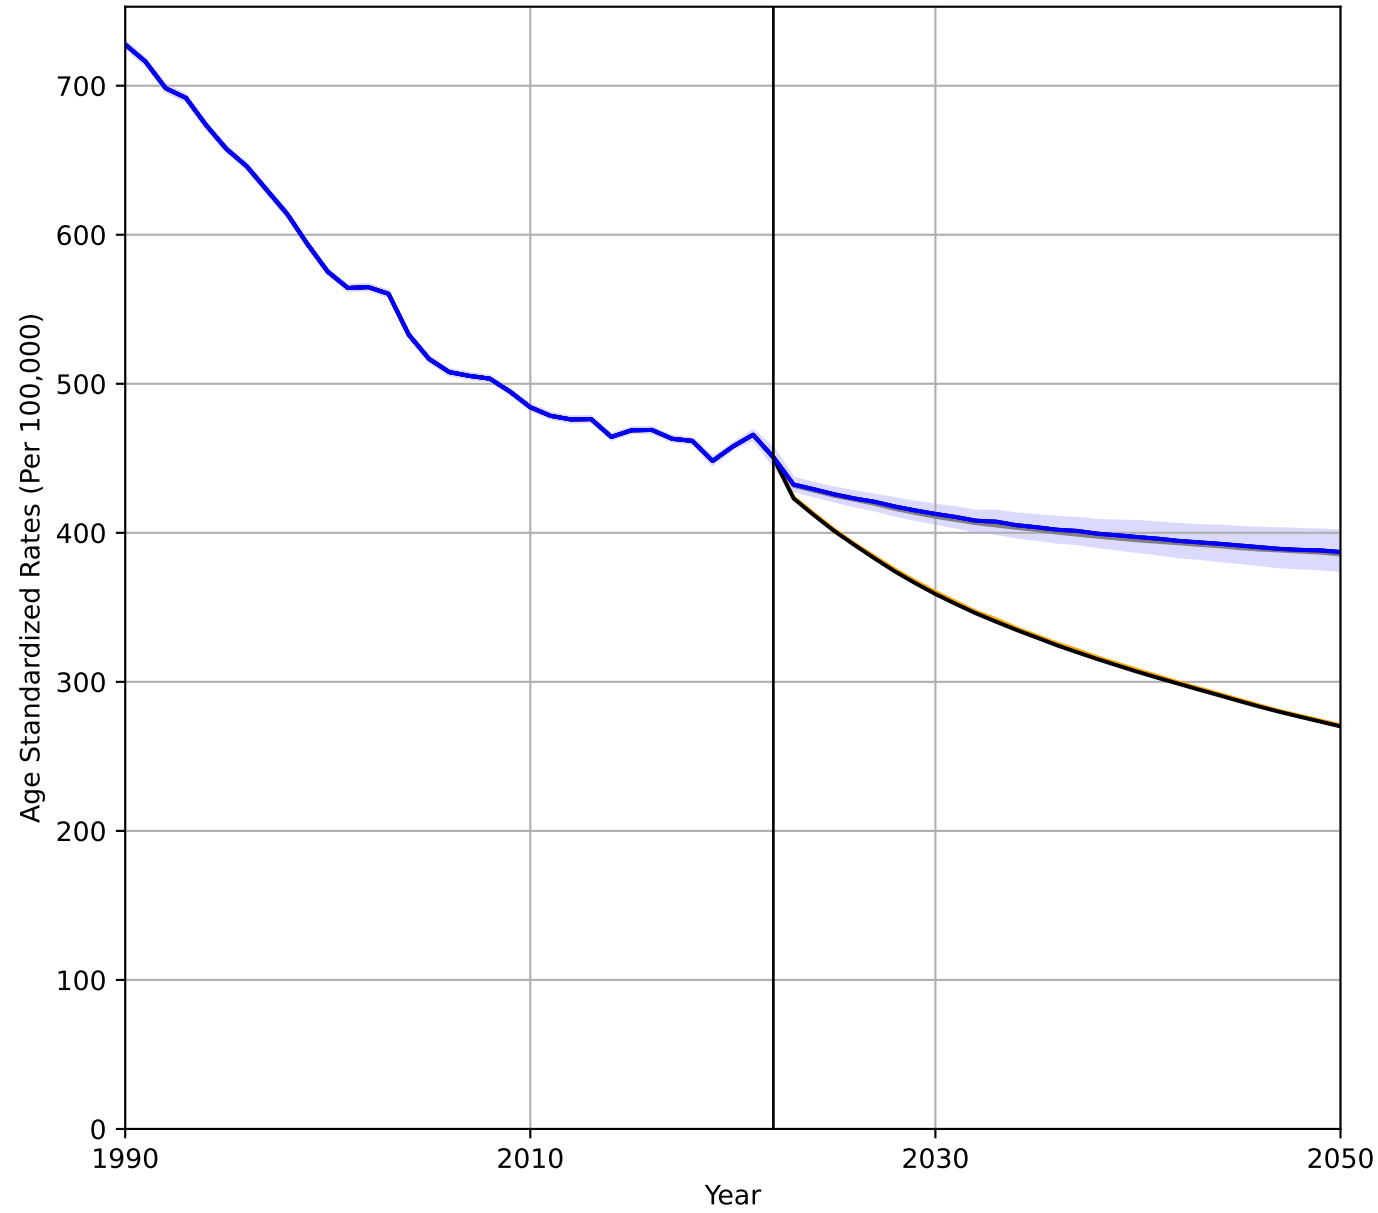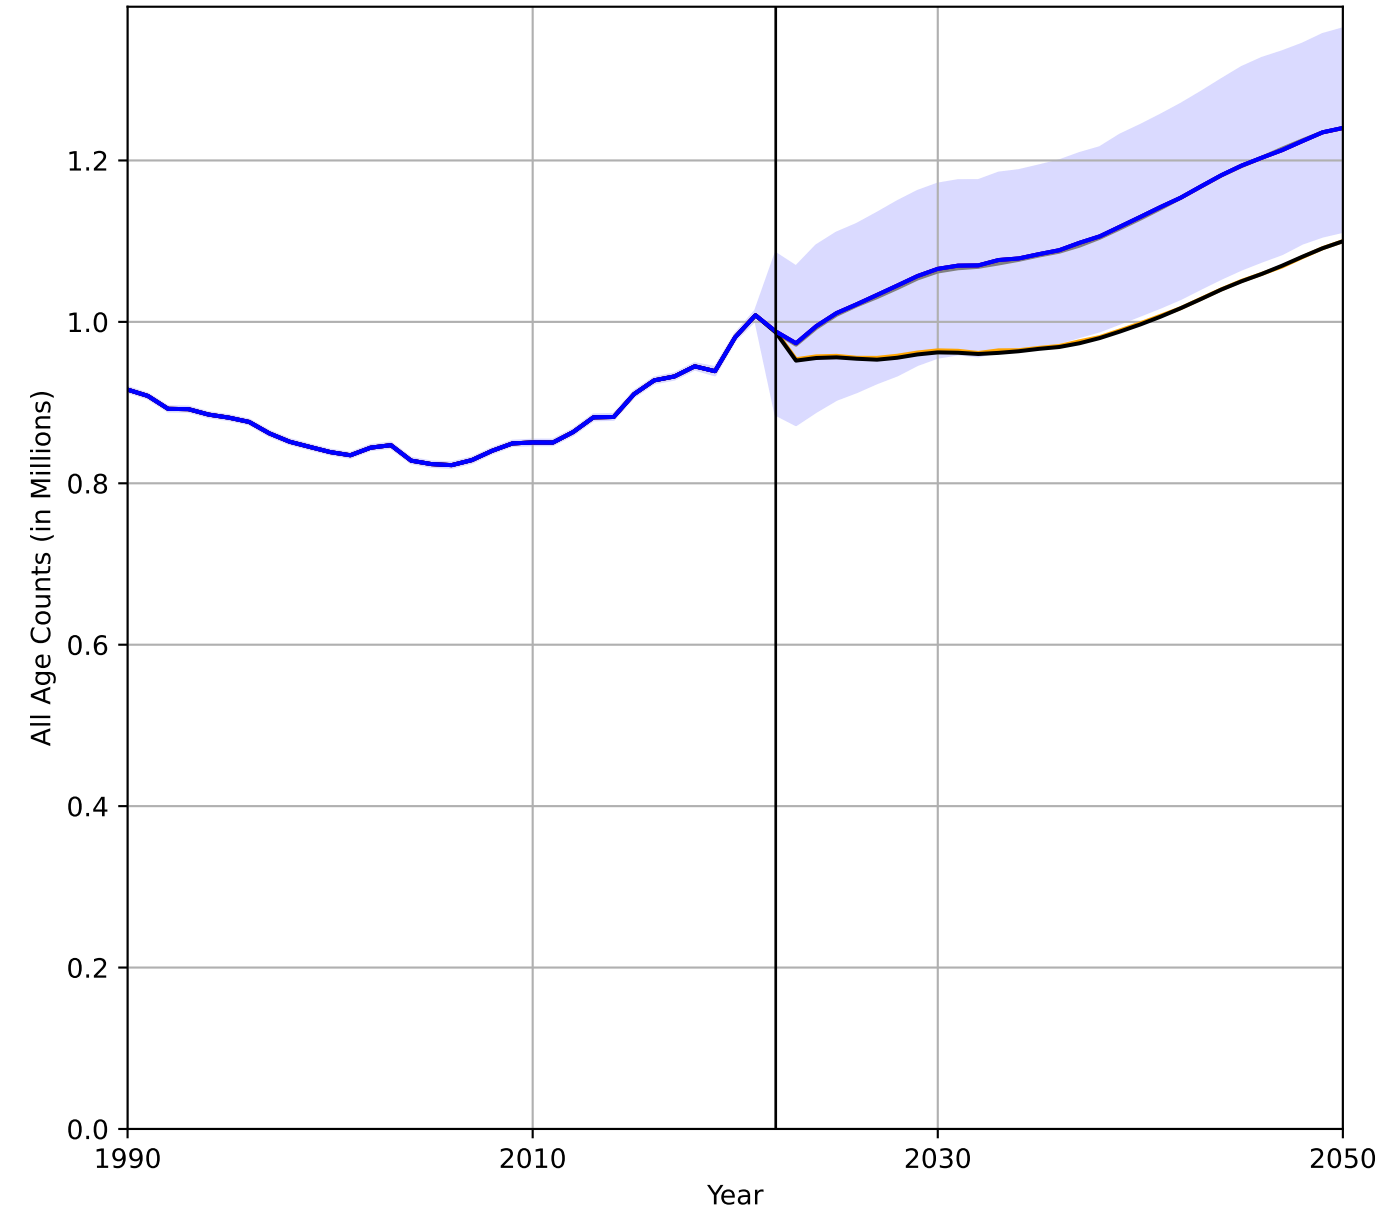

# Greece

Supplemental Results Figure S11. All-cause age standardised death rates (A) and all age death counts (B), for the past and for five future scenarios, 1990–2050

1693

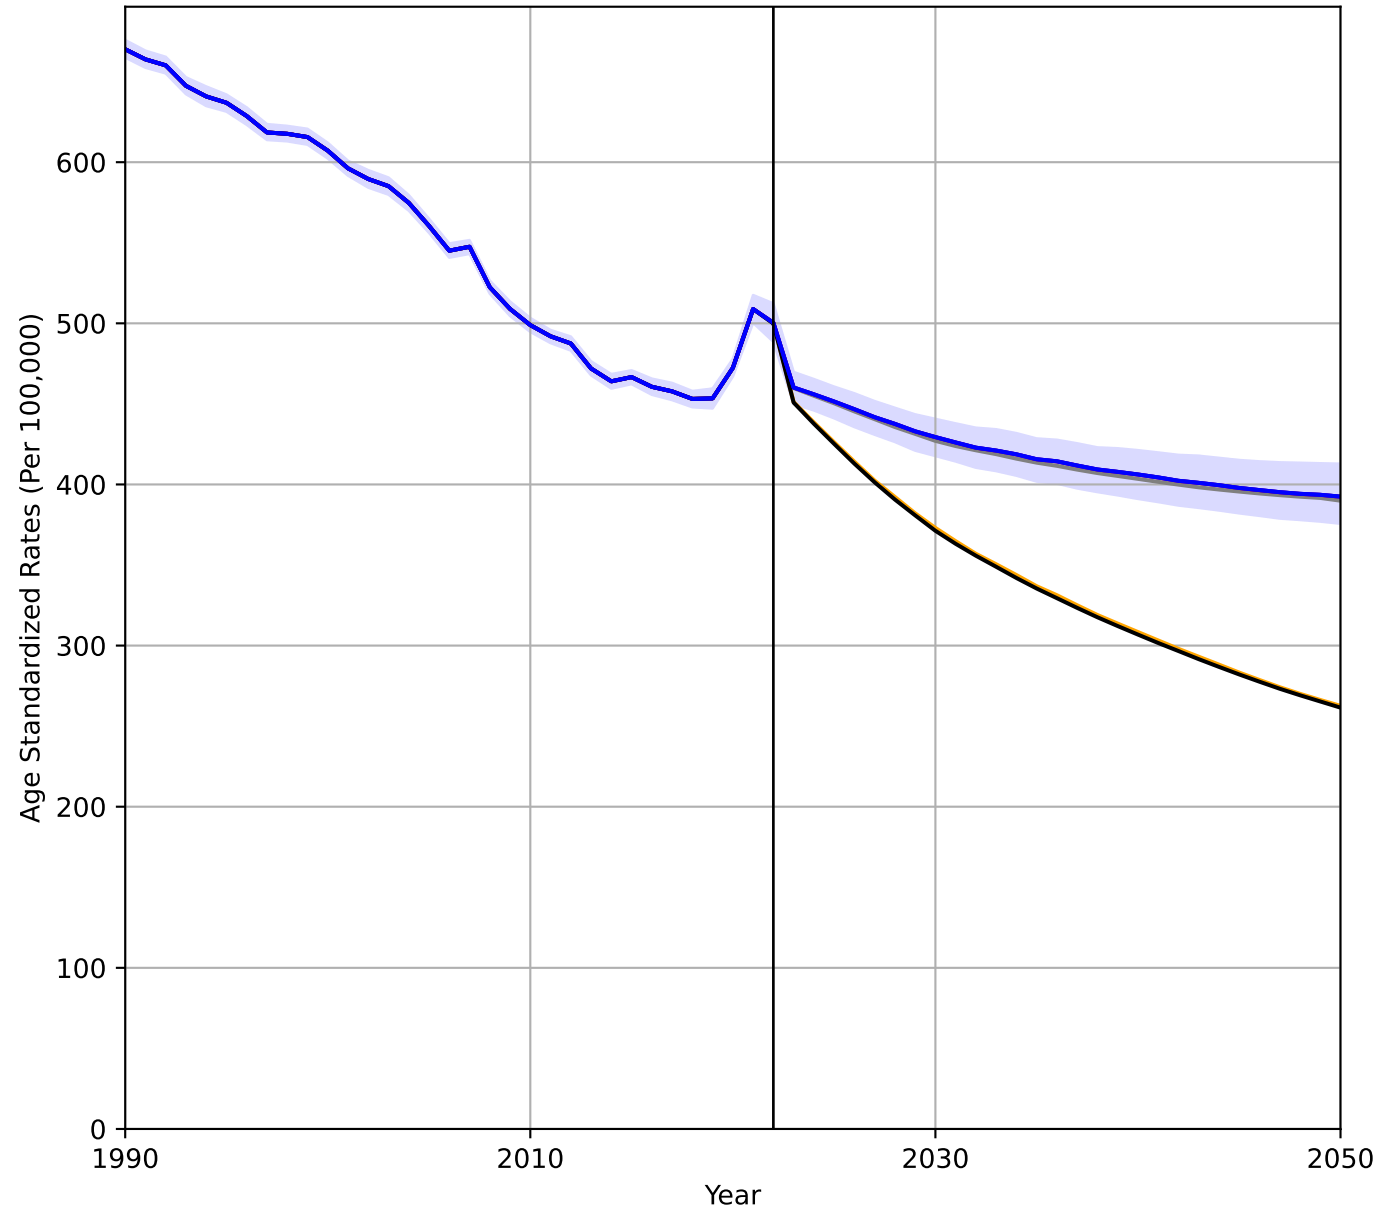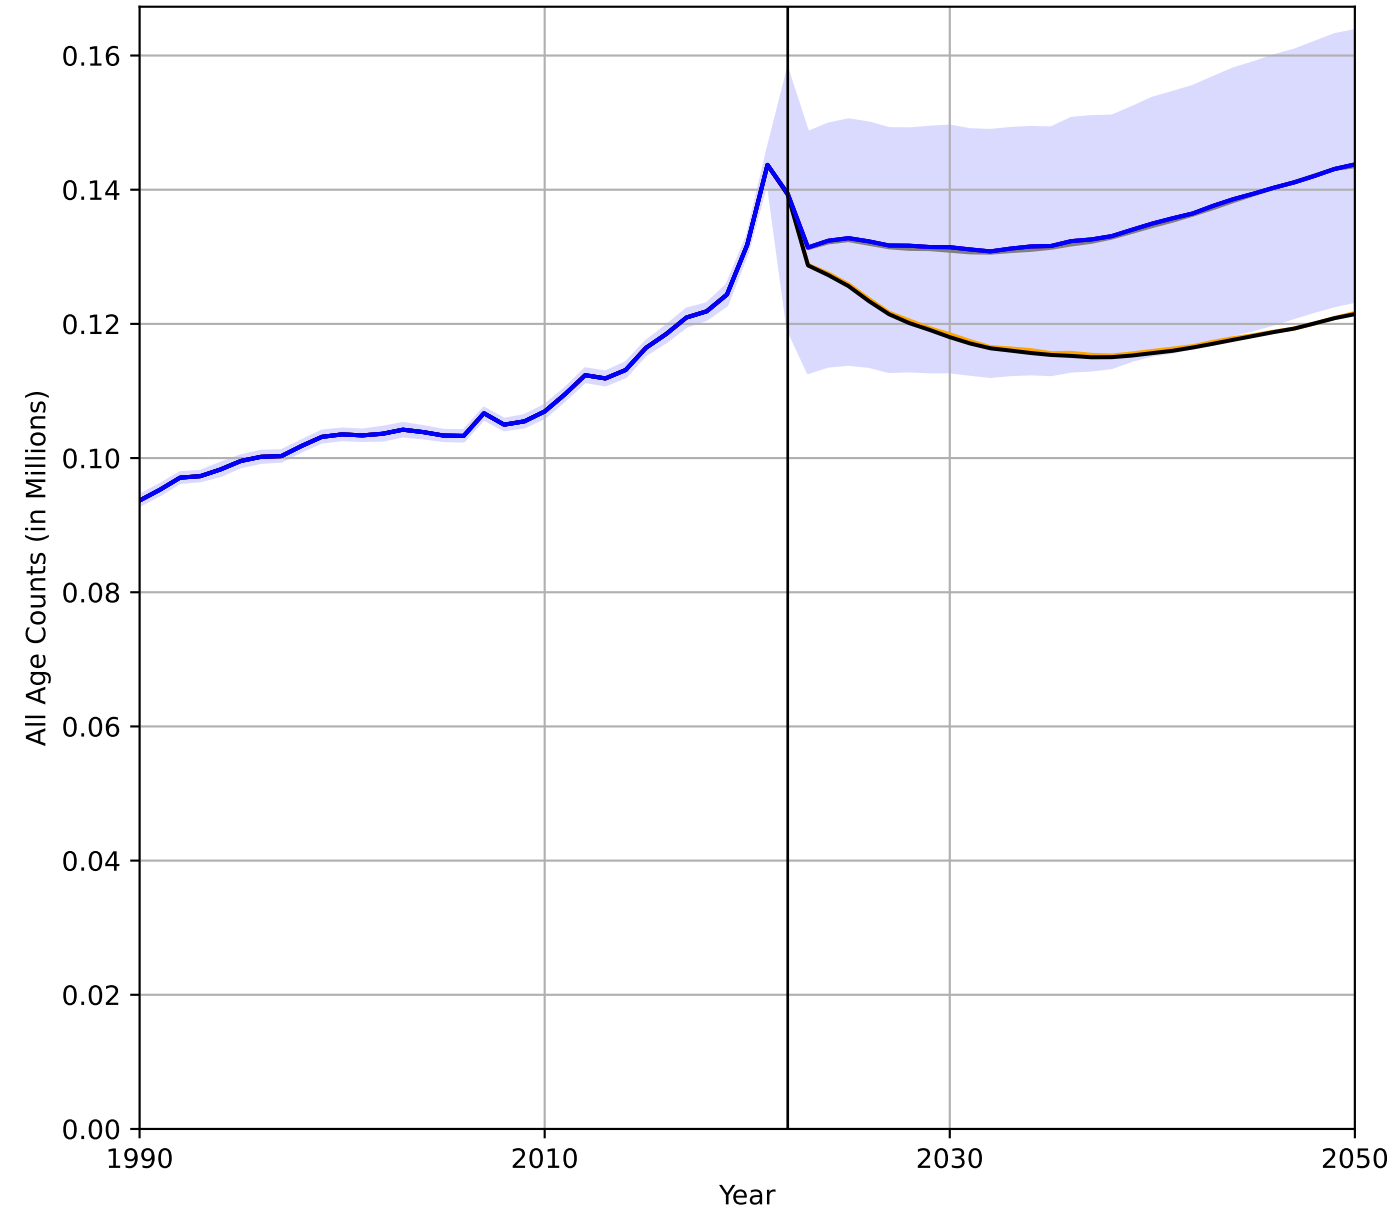

# Iceland

Supplemental Results Figure S11. All-cause age standardised death rates (A) and all age death counts (B), for the past and for five future scenarios, 1990–2050

1694

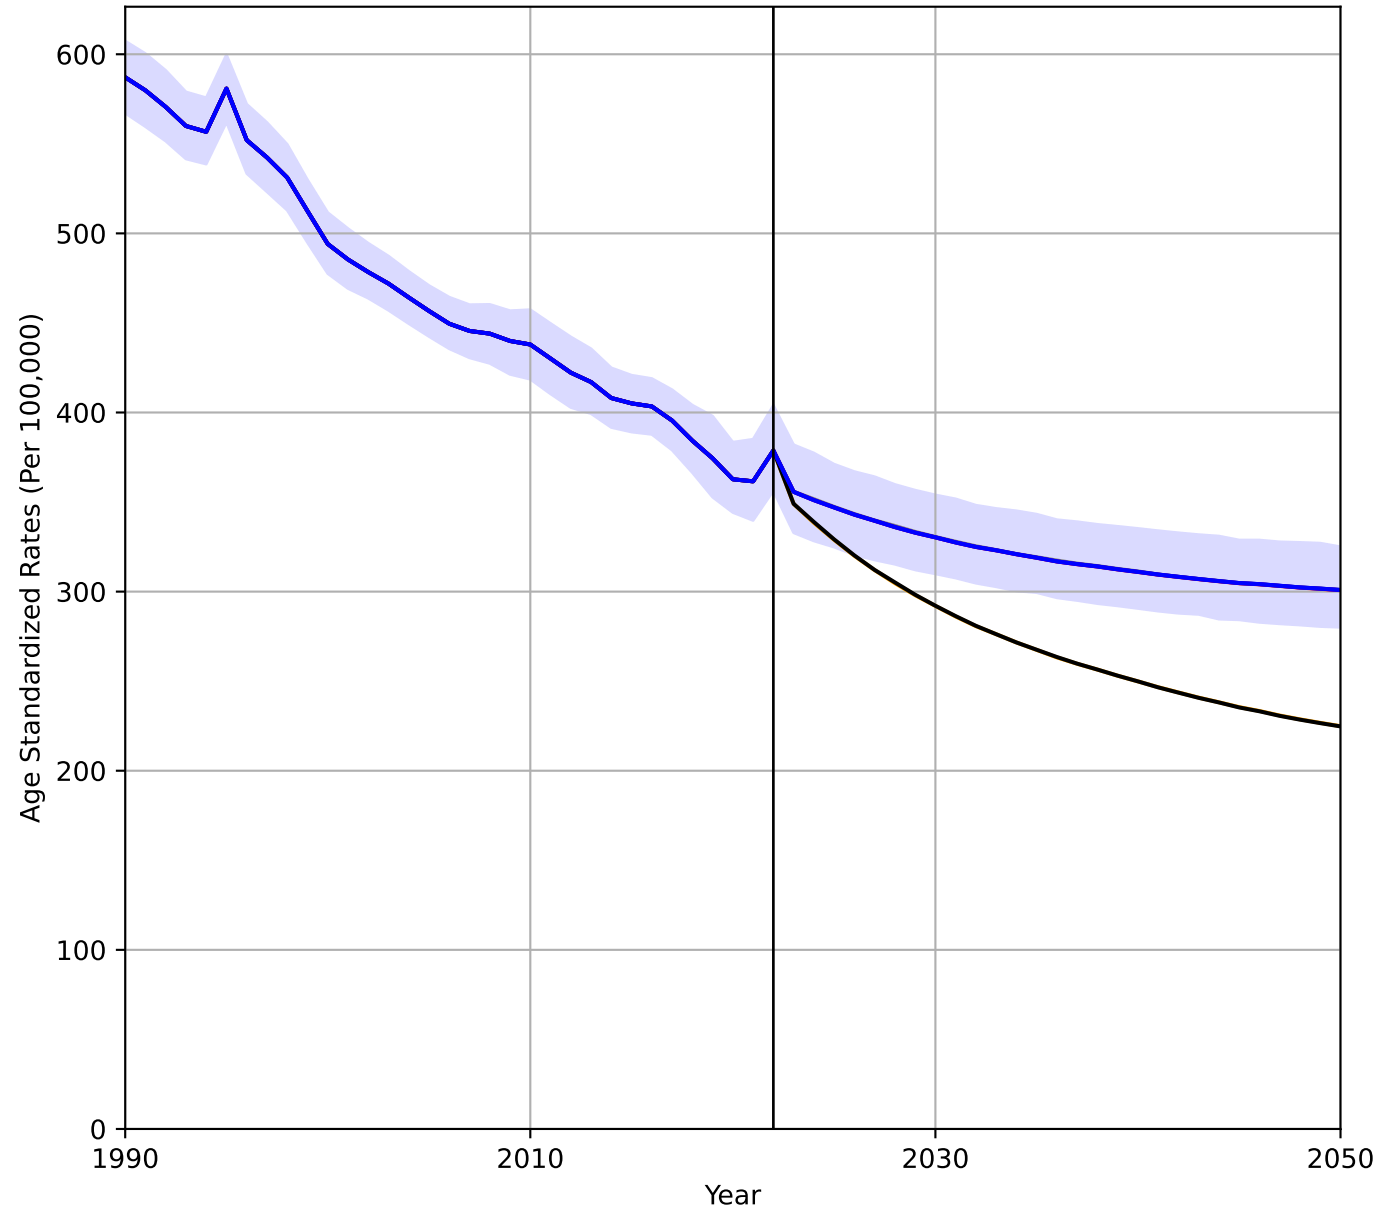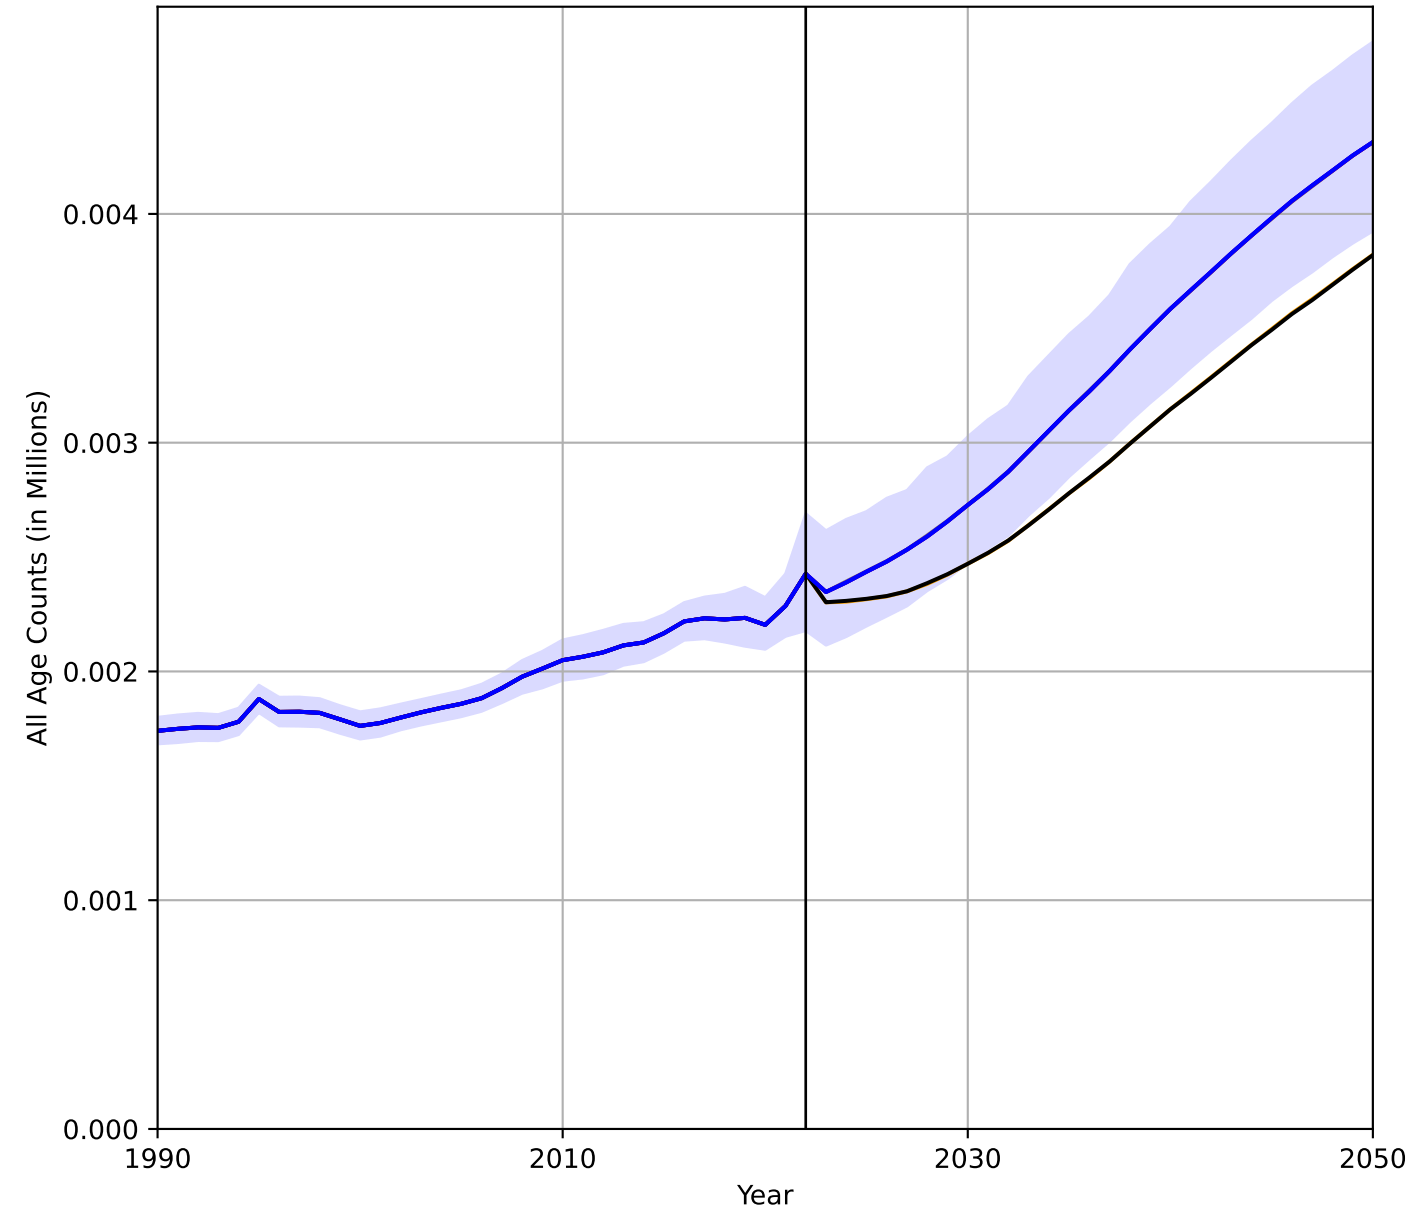

# Ireland

Supplemental Results Figure S11. All-cause age standardised death rates (A) and all age death counts (B), for the past and for five future scenarios, 1990–2050

1695

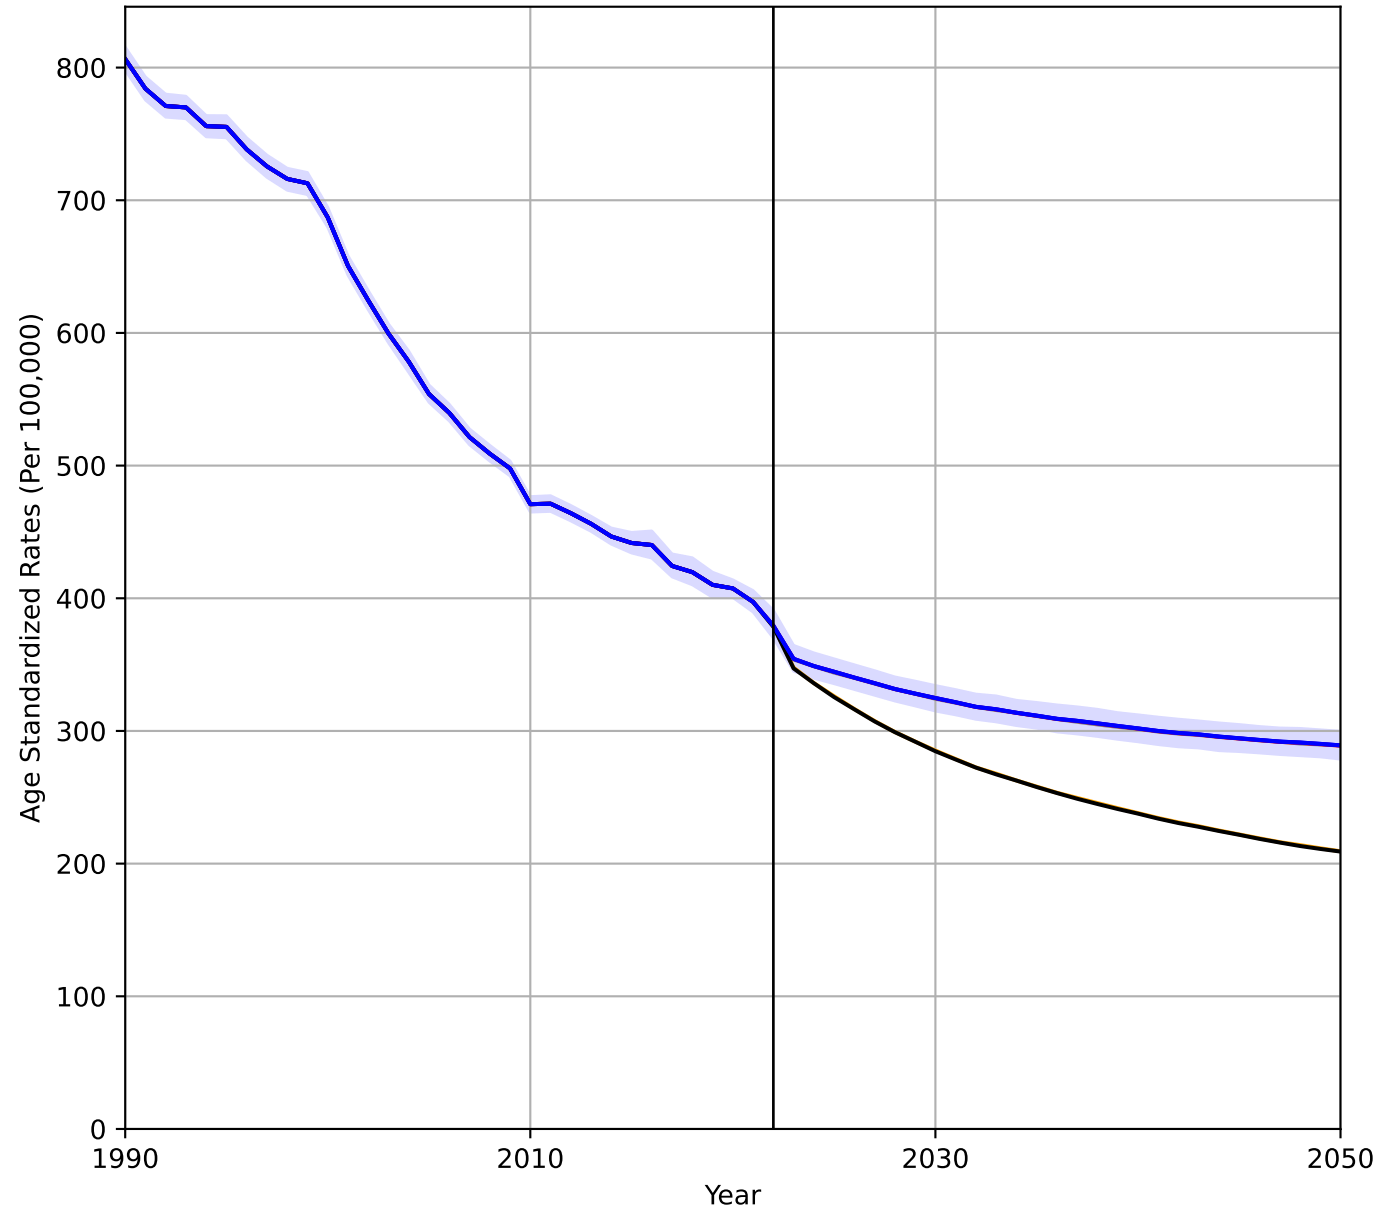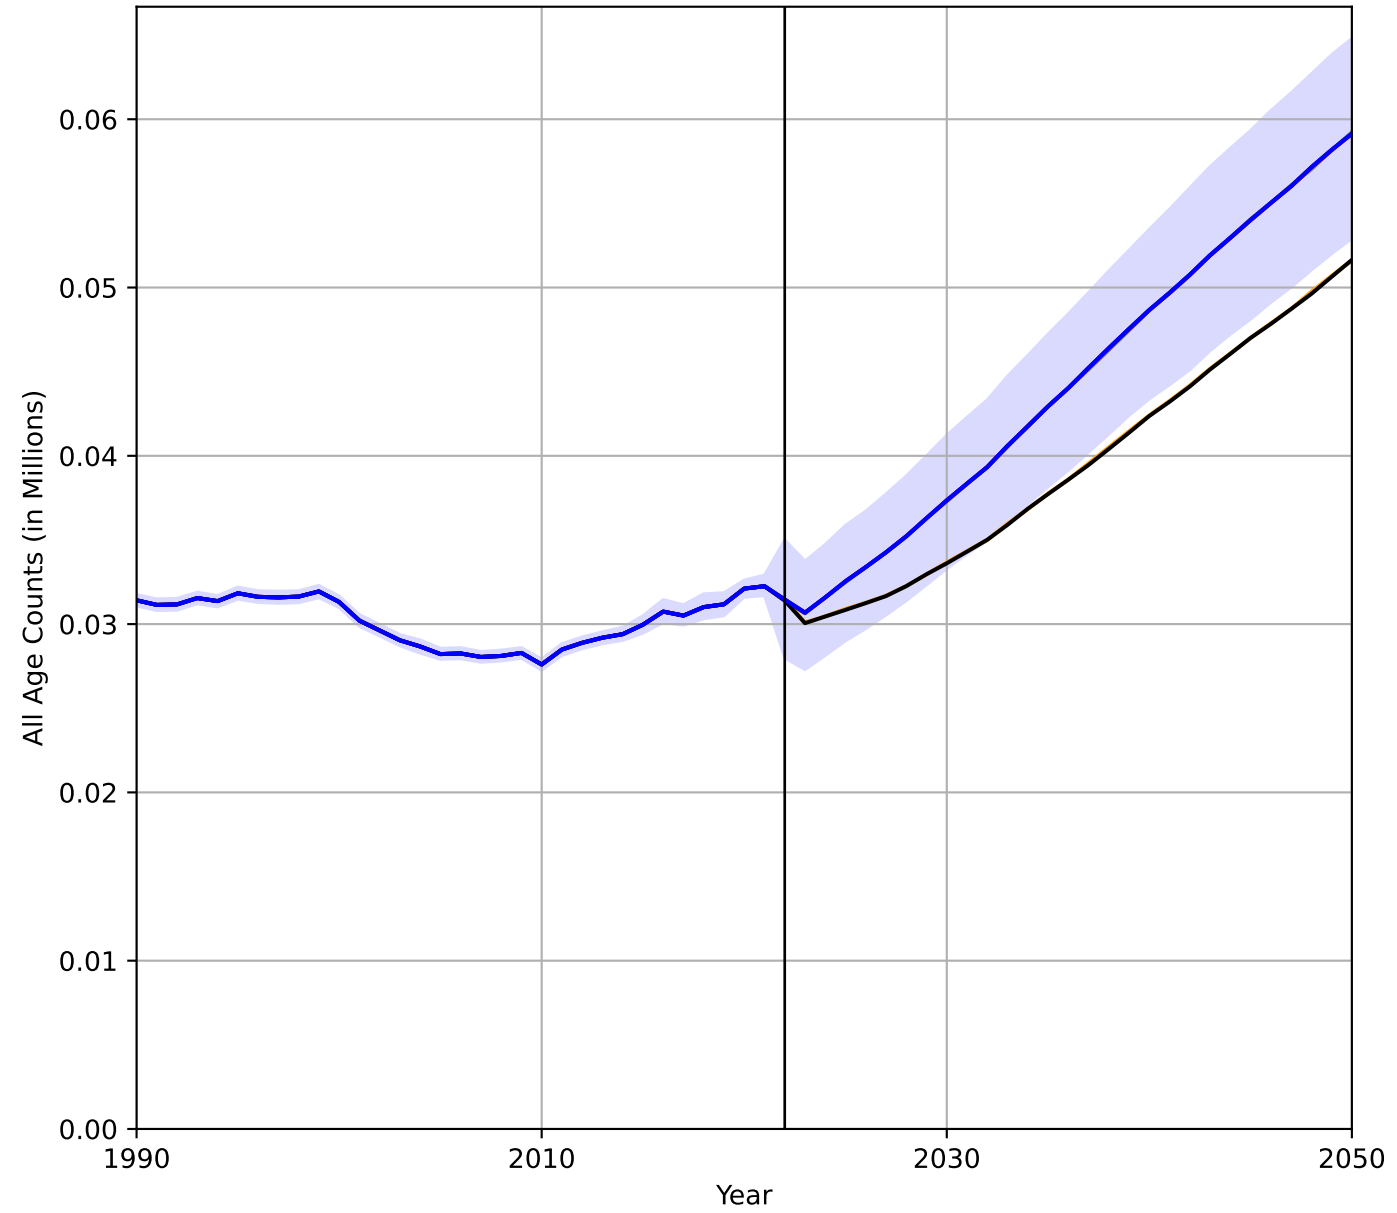



# Israel

Supplemental Results Figure S11. All-cause age standardised death rates (A) and all age death counts (B), for the past and for five future scenarios, 1990–2050

1696

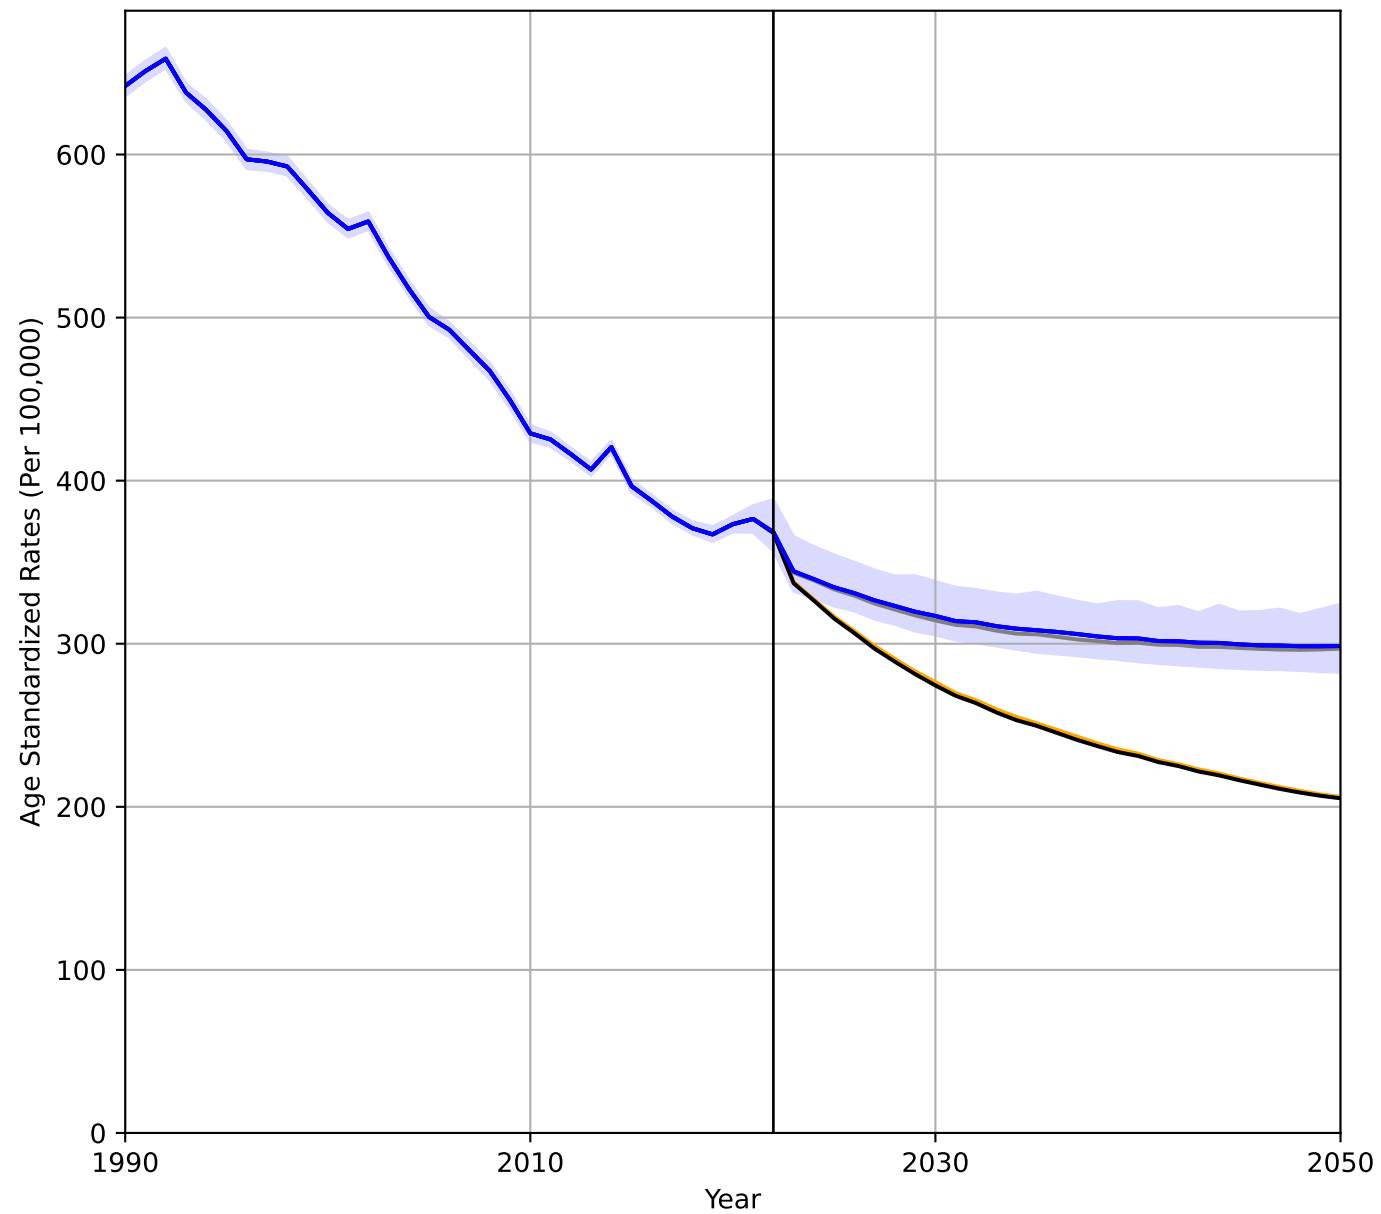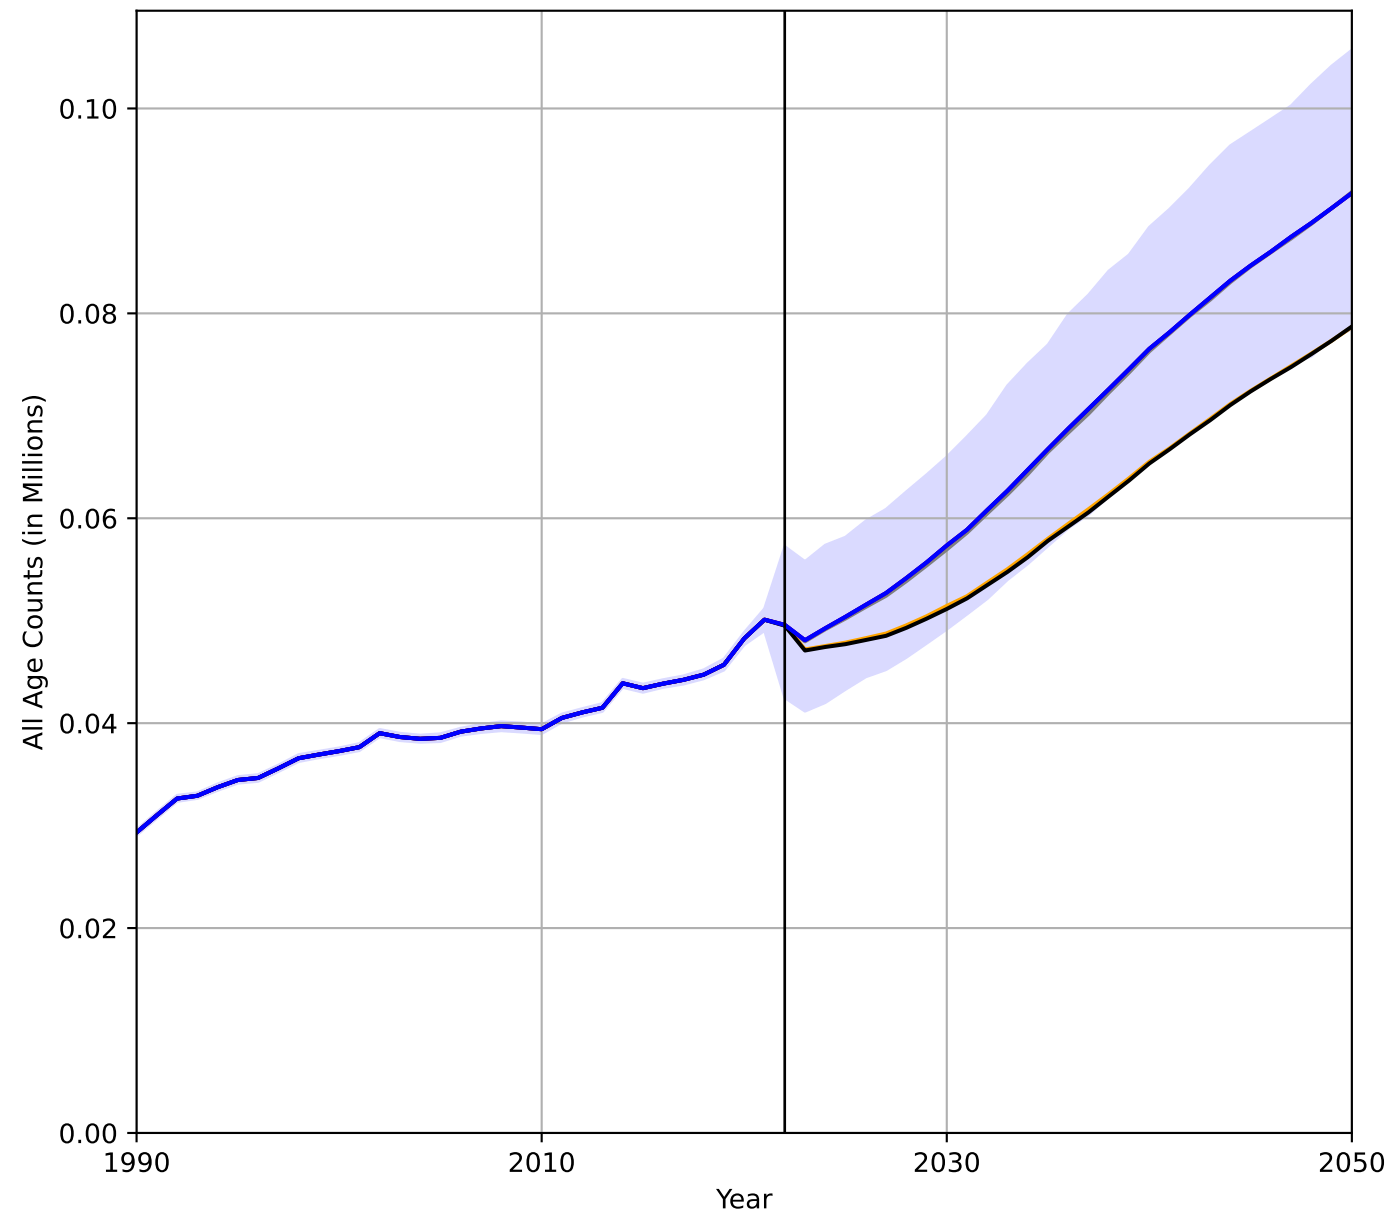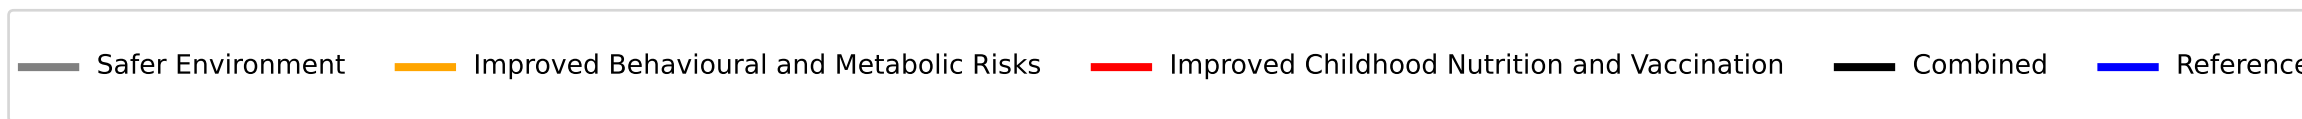

# Italy

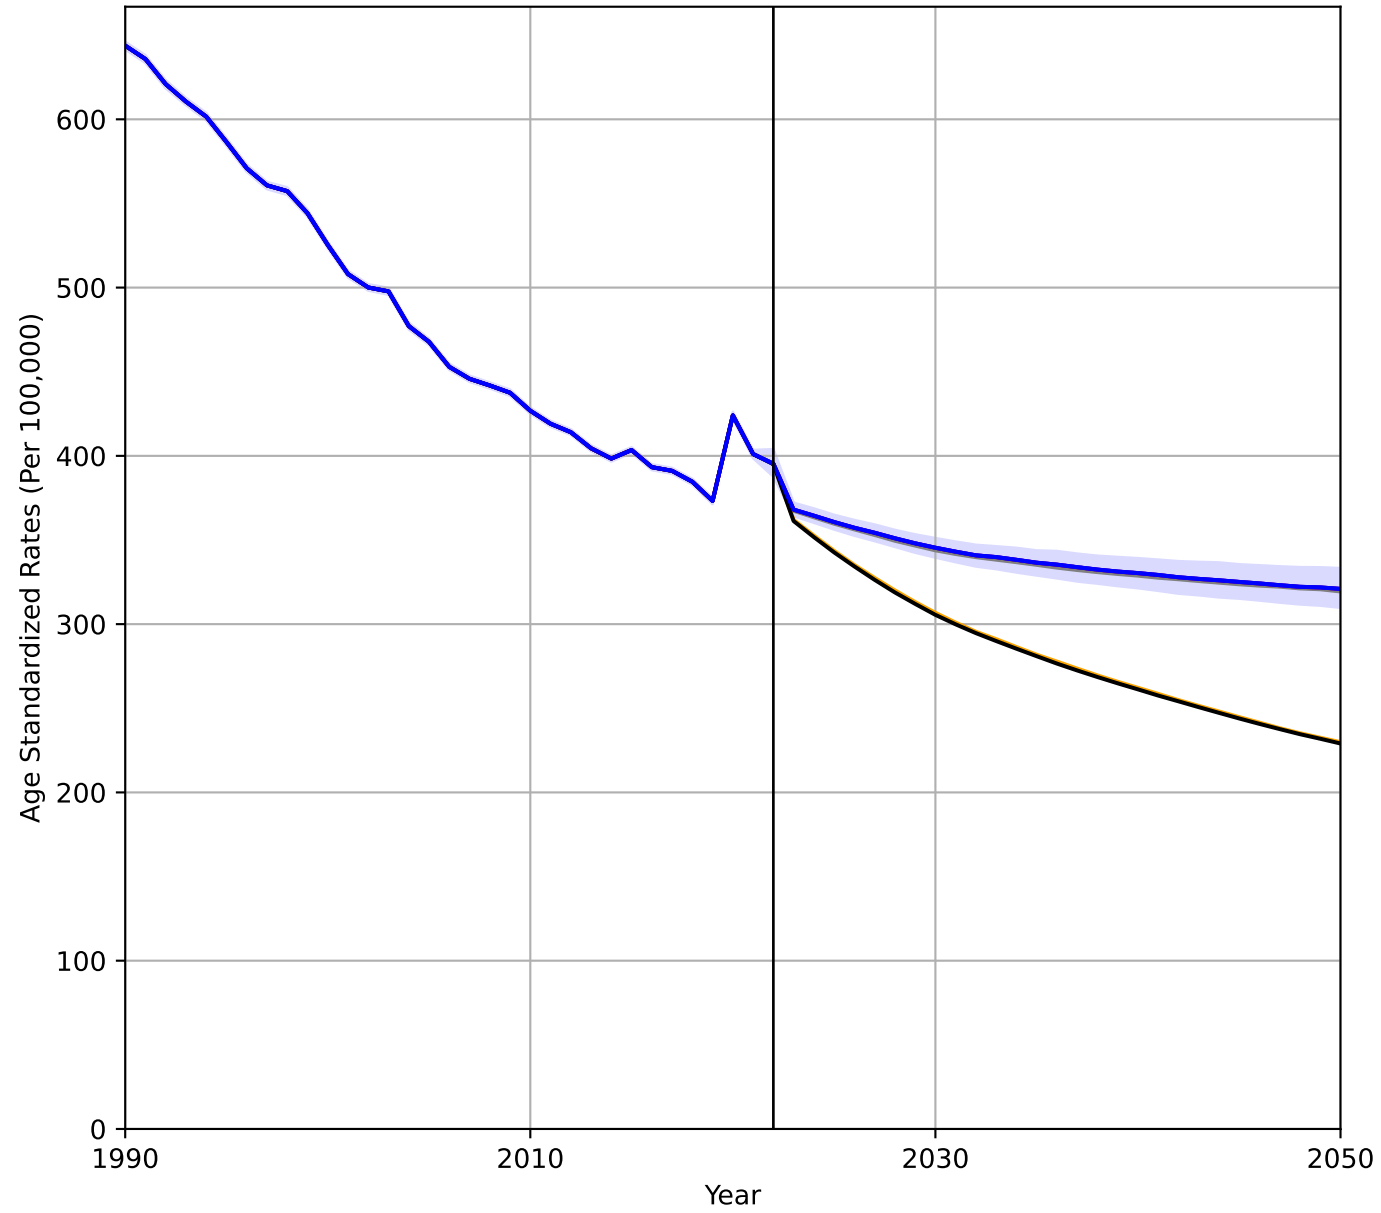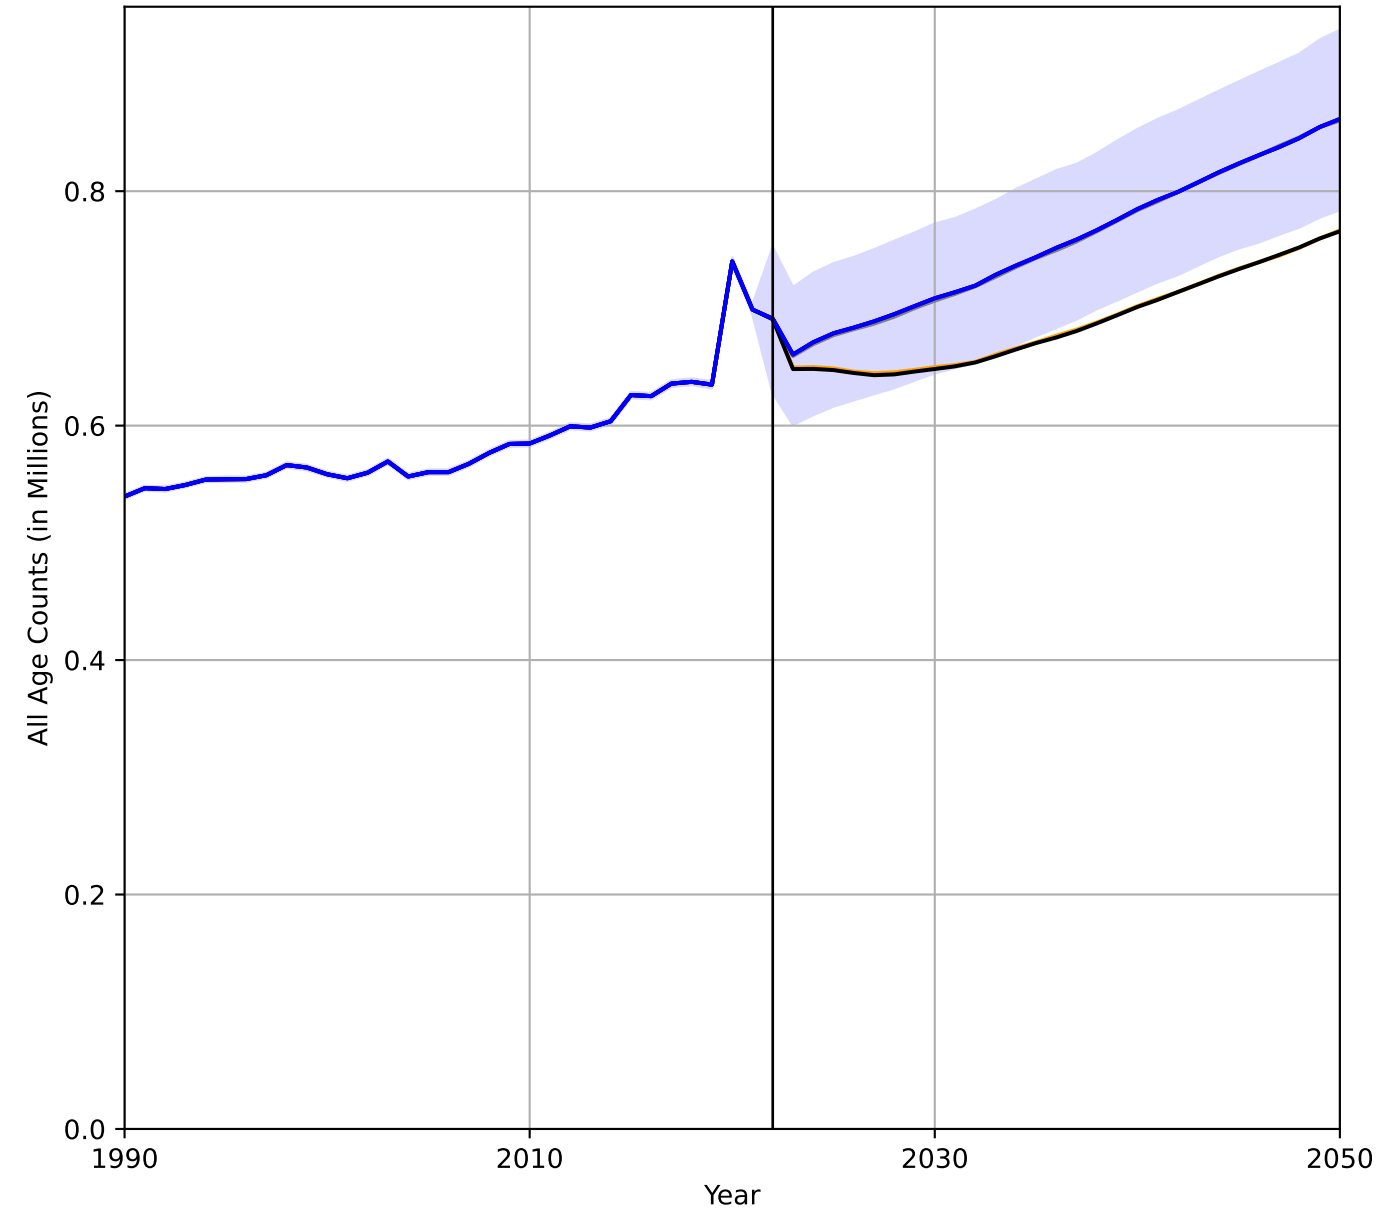

# Luxembourg

Supplemental Results Figure S11. All-cause age standardised death rates (A) and all age death counts (B), for the past and for five future scenarios, 1990–2050

1698

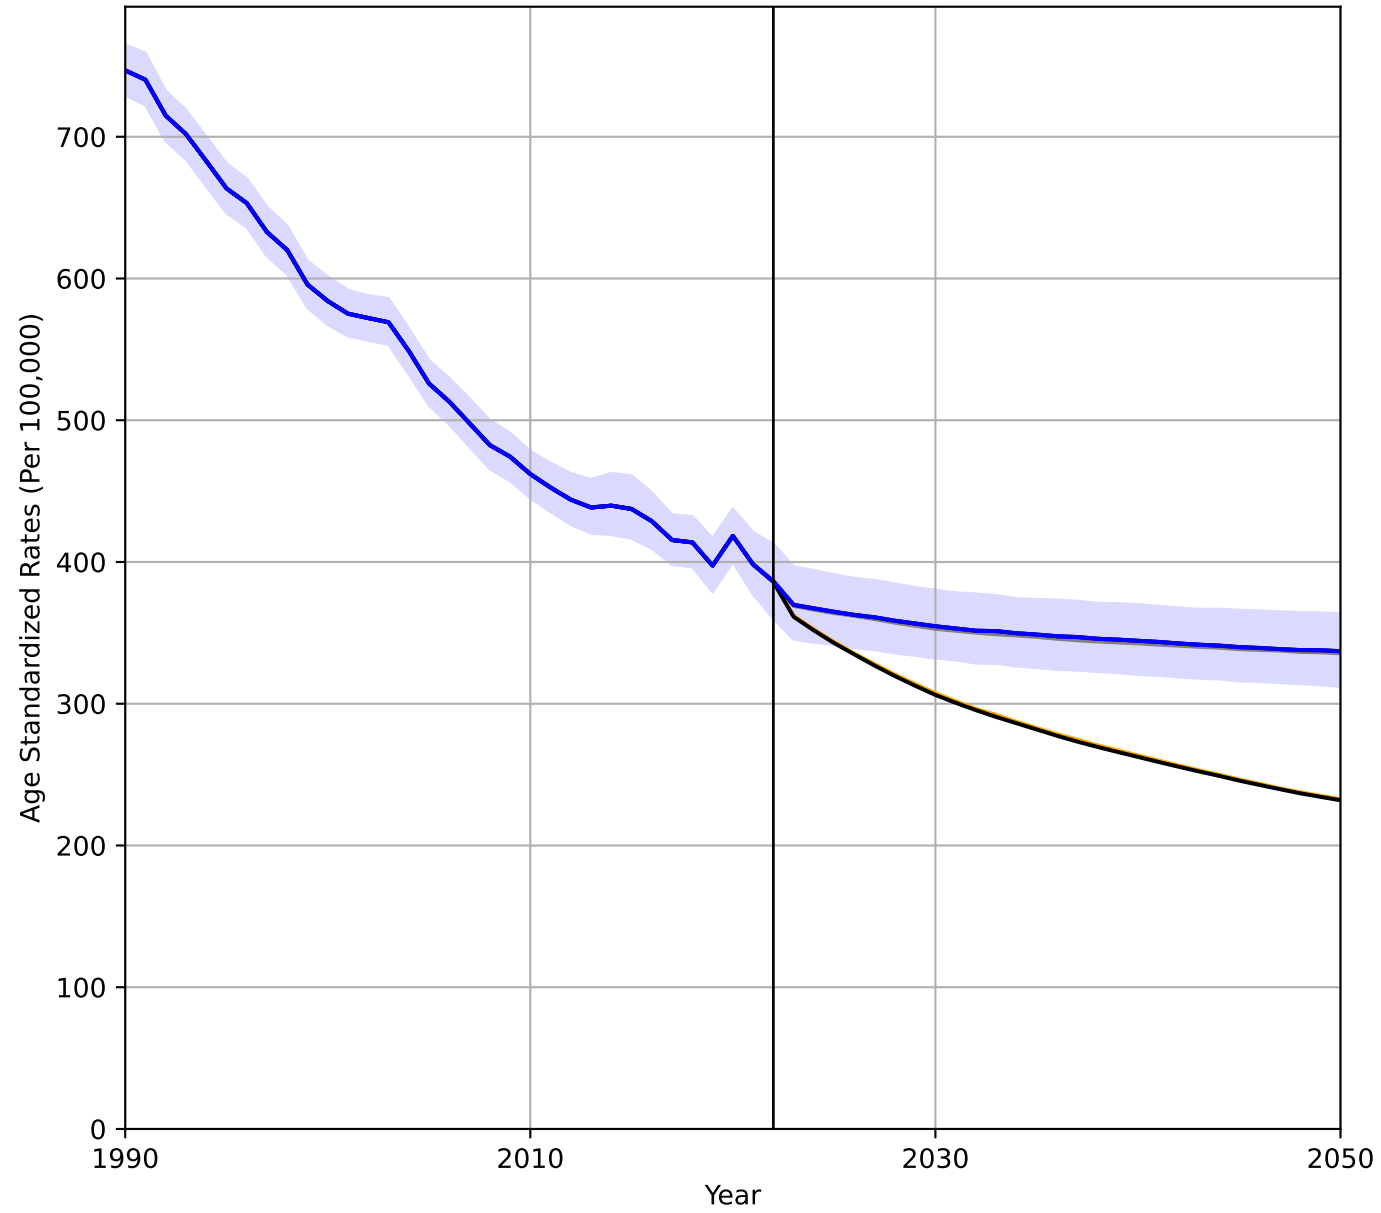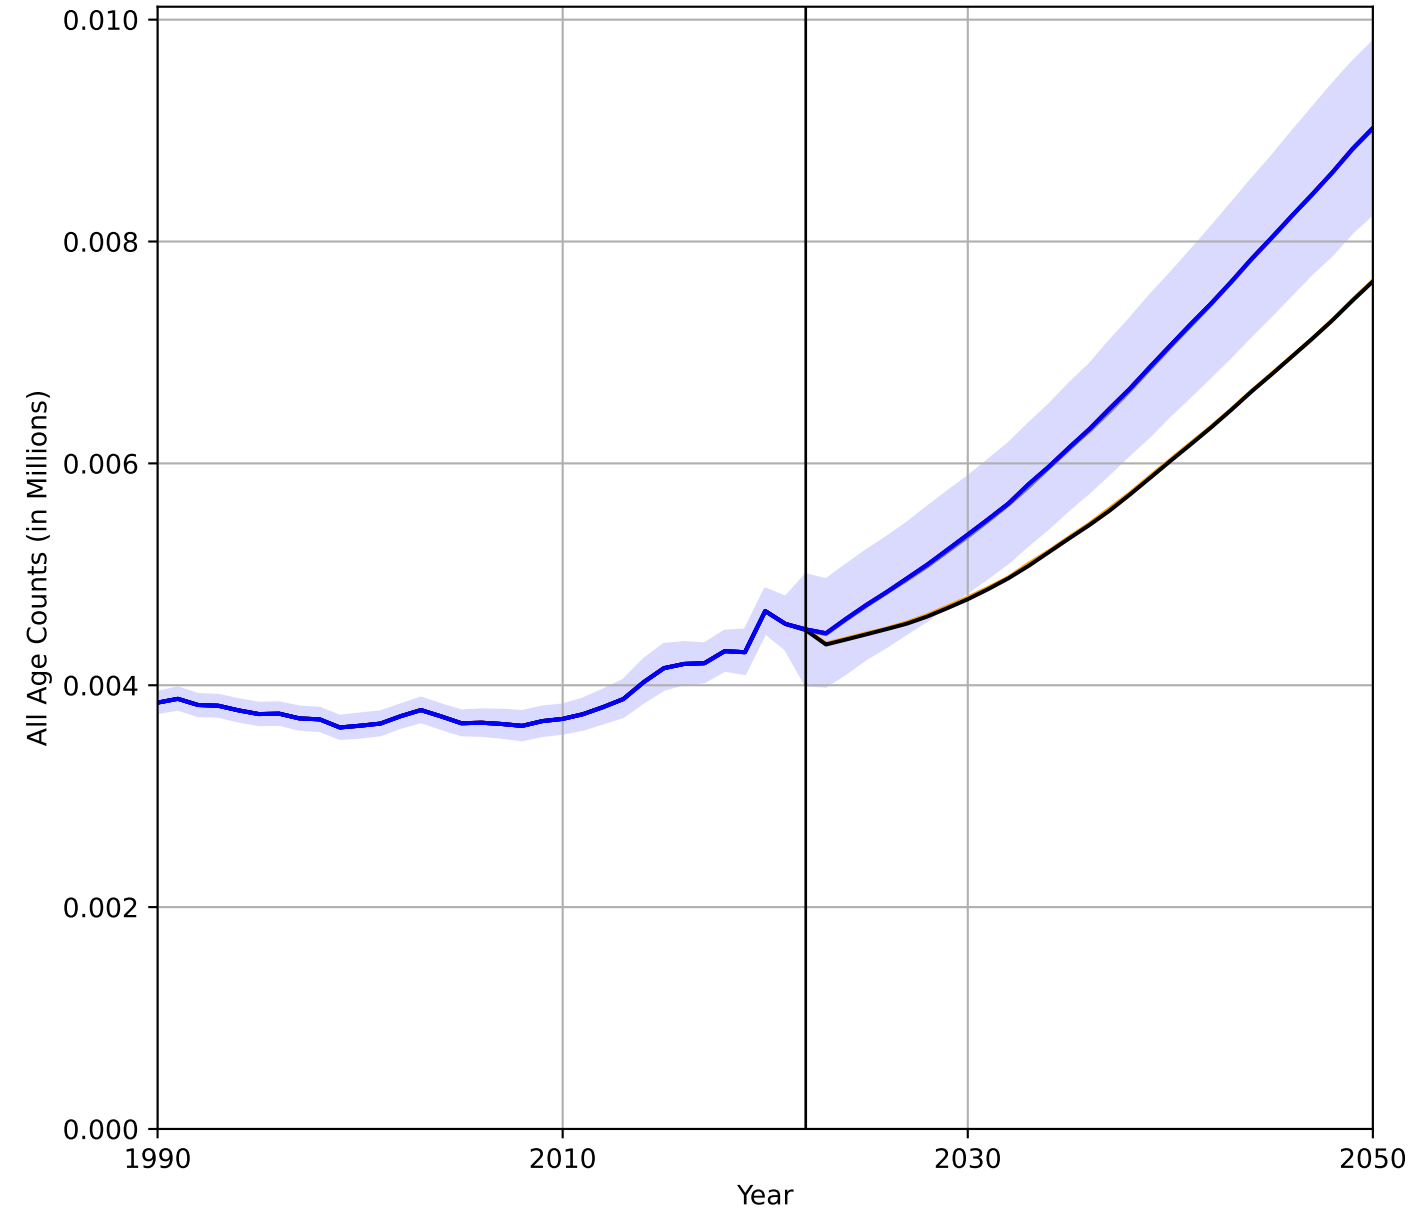

# Malta

Supplemental Results Figure S11. All-cause age standardised death rates (A) and all age death counts (B), for the past and for five future scenarios, 1990–2050

1699

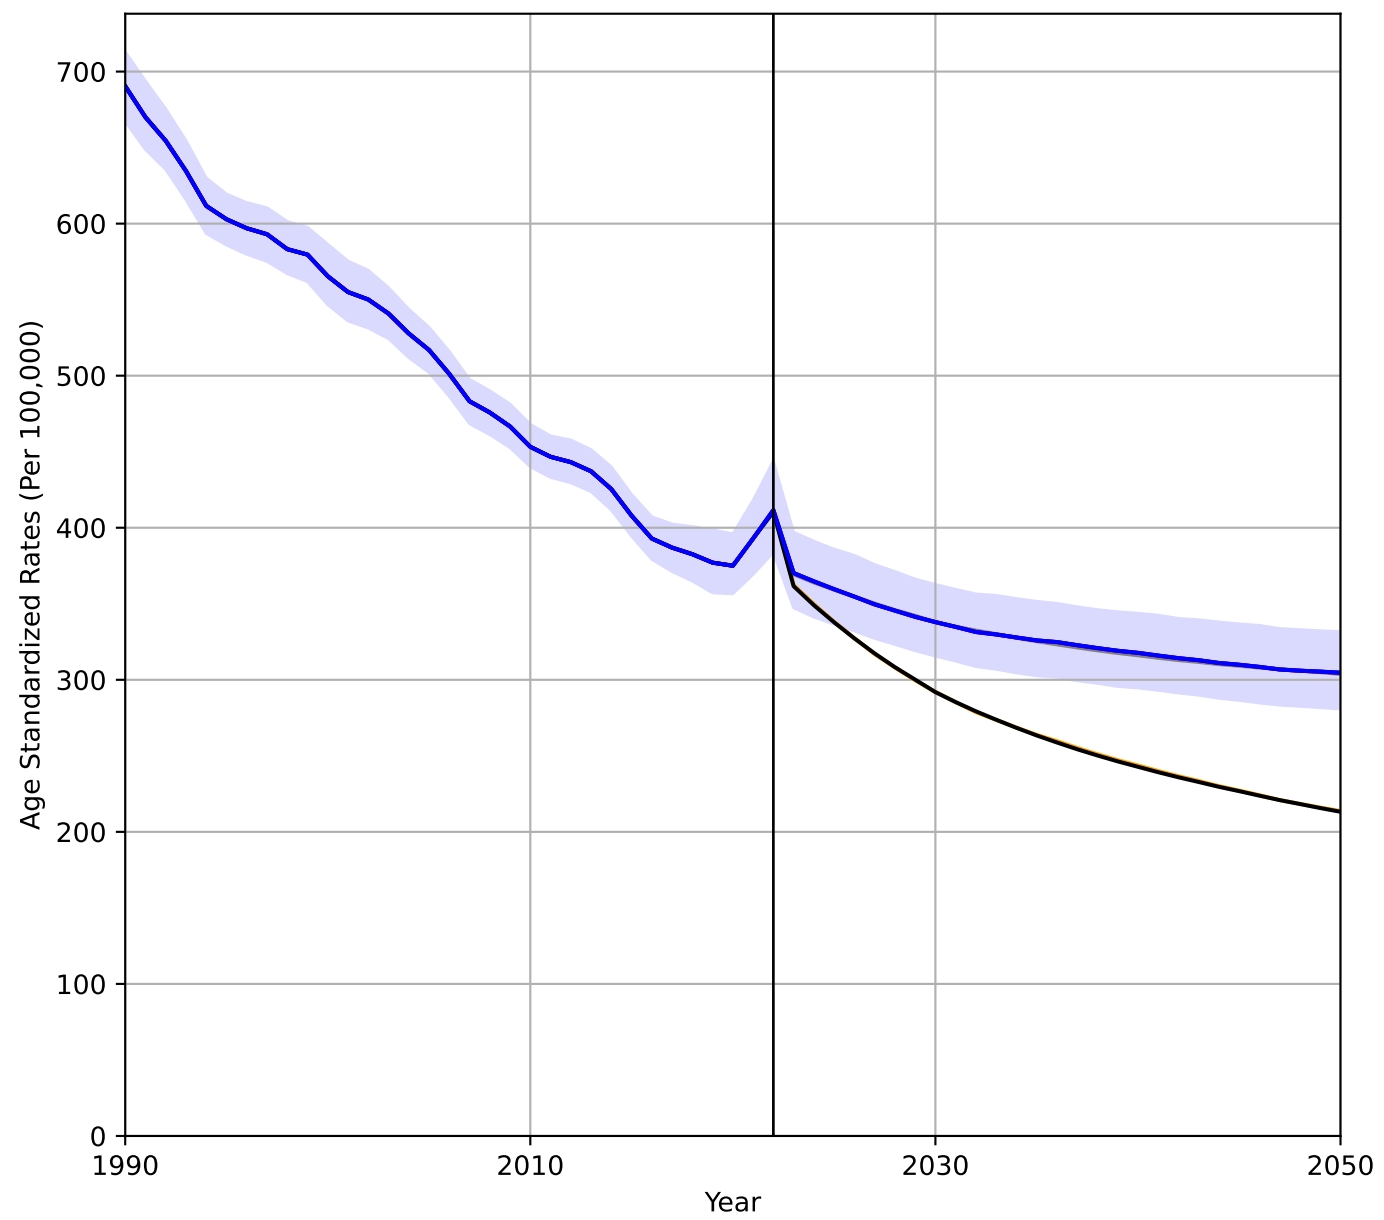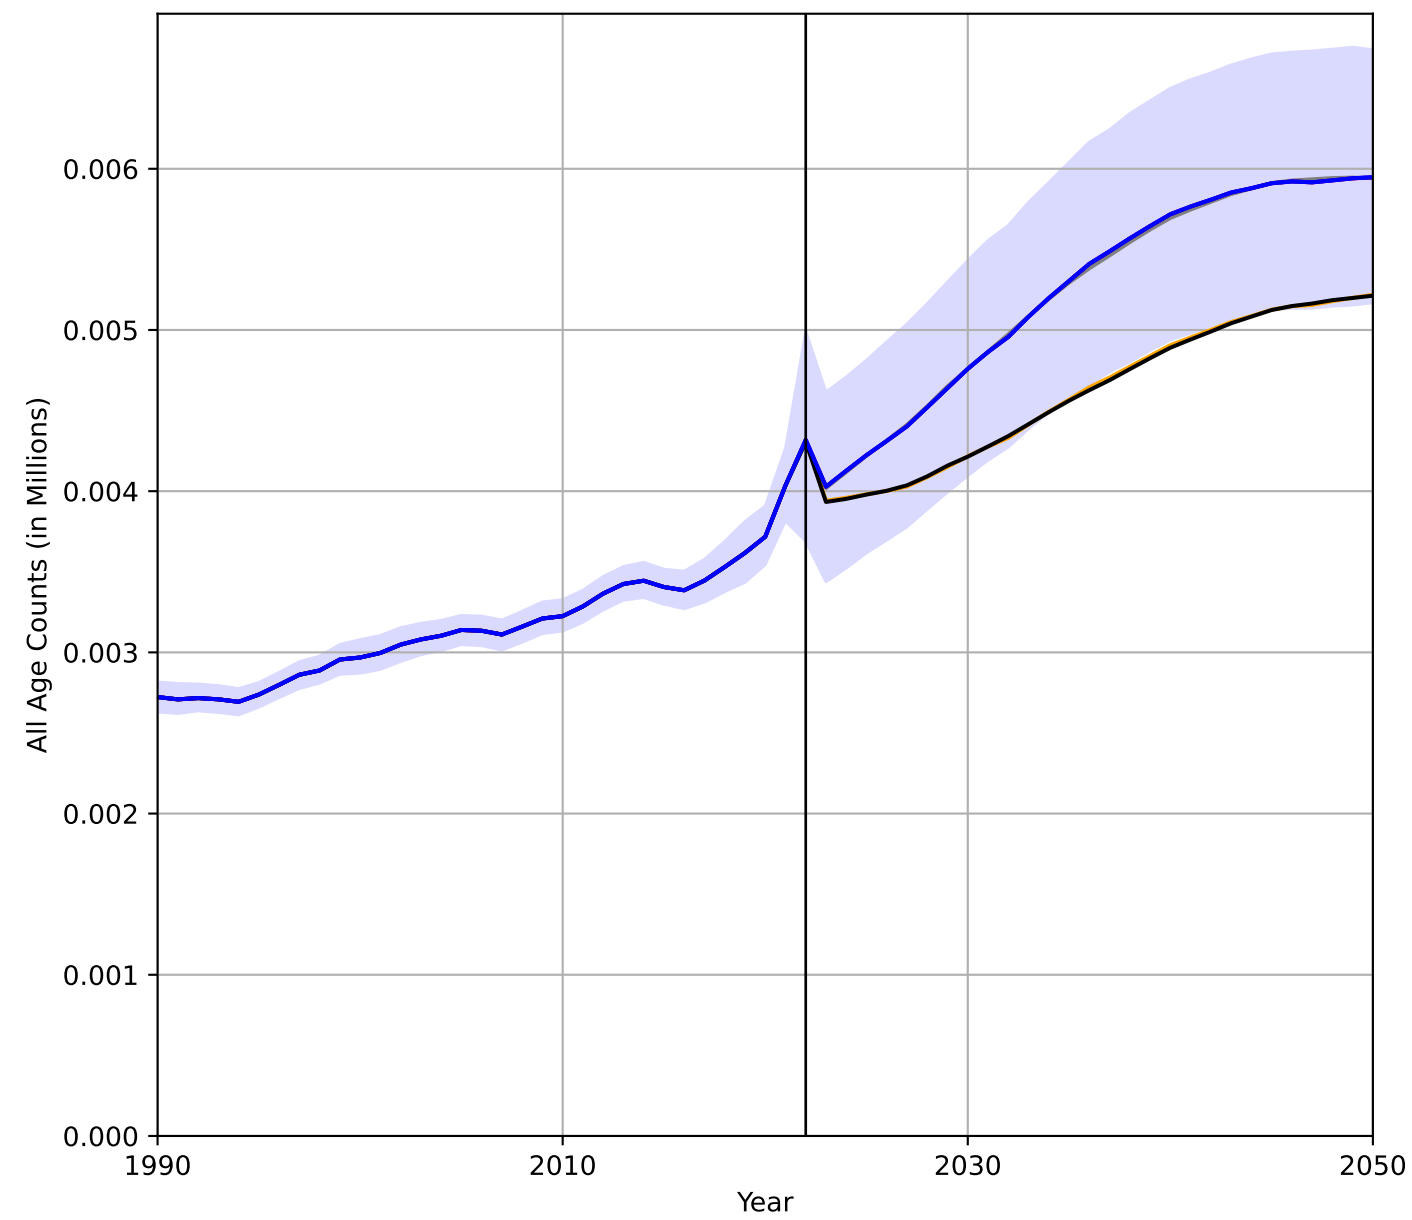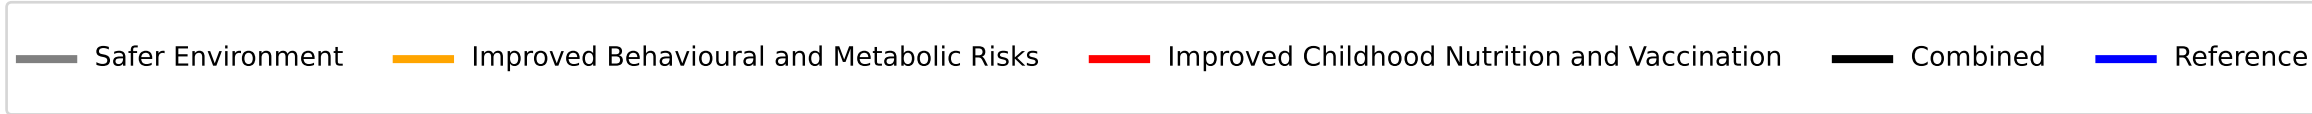

# Monaco

Supplemental Results Figure S11. All-cause age standardised death rates (A) and all age death counts (B), for the past and for five future scenarios, 1990–2050

1700

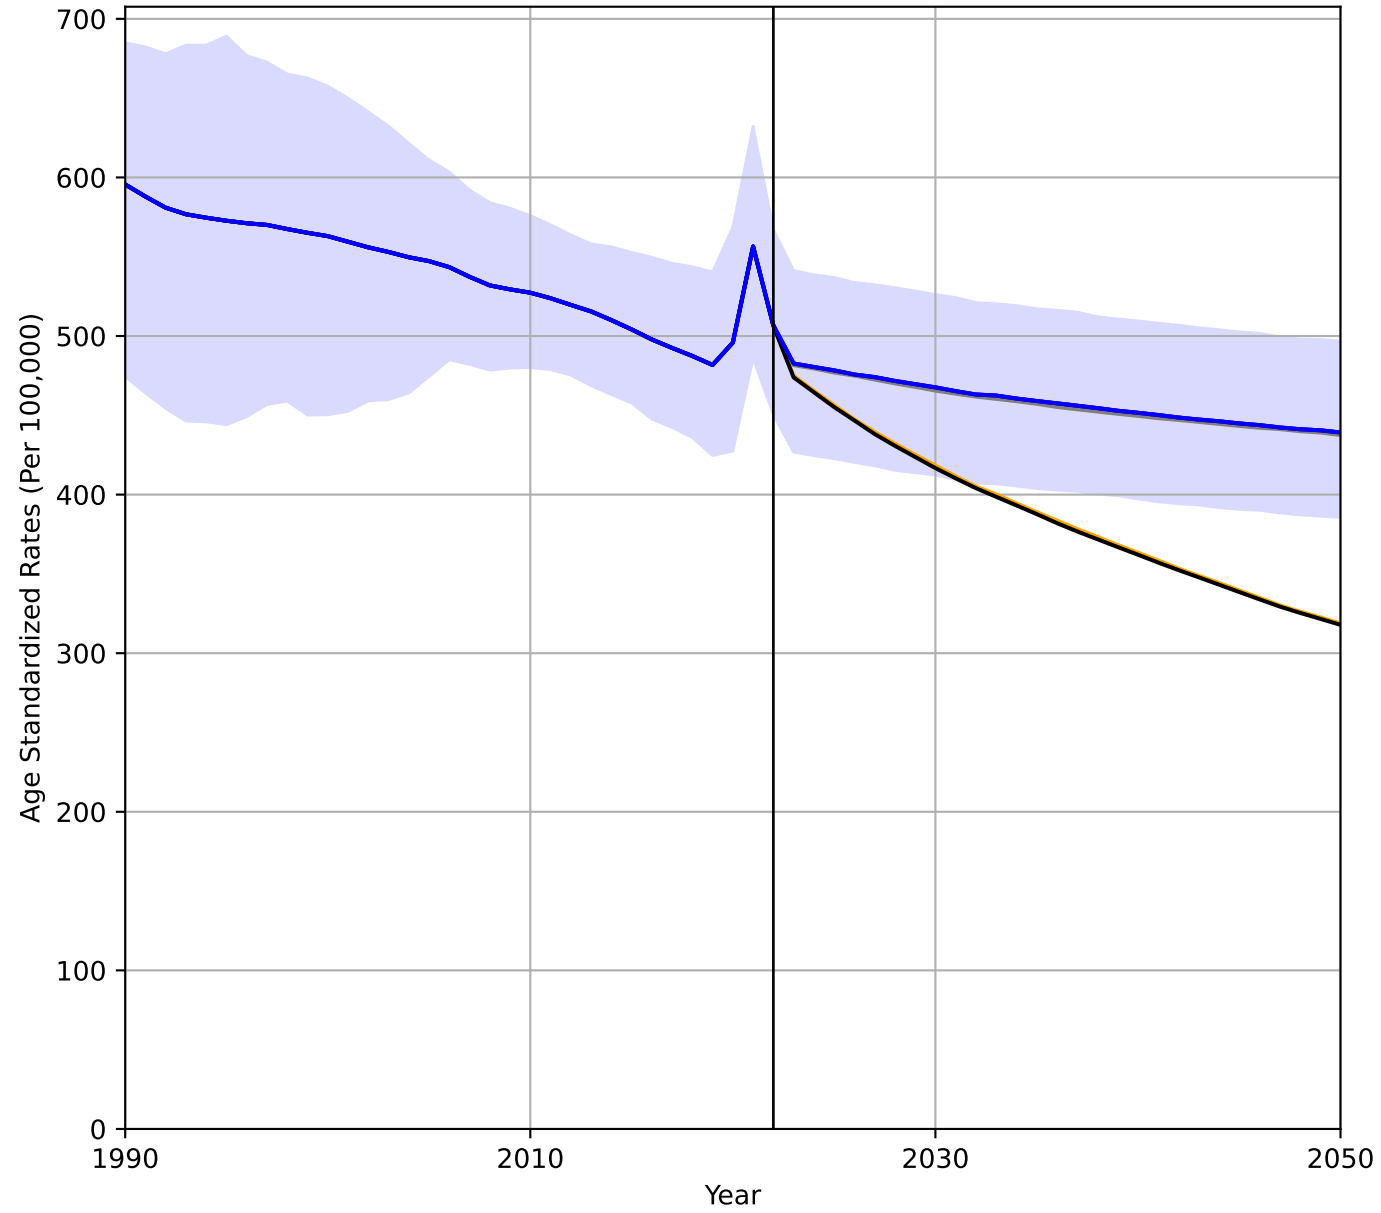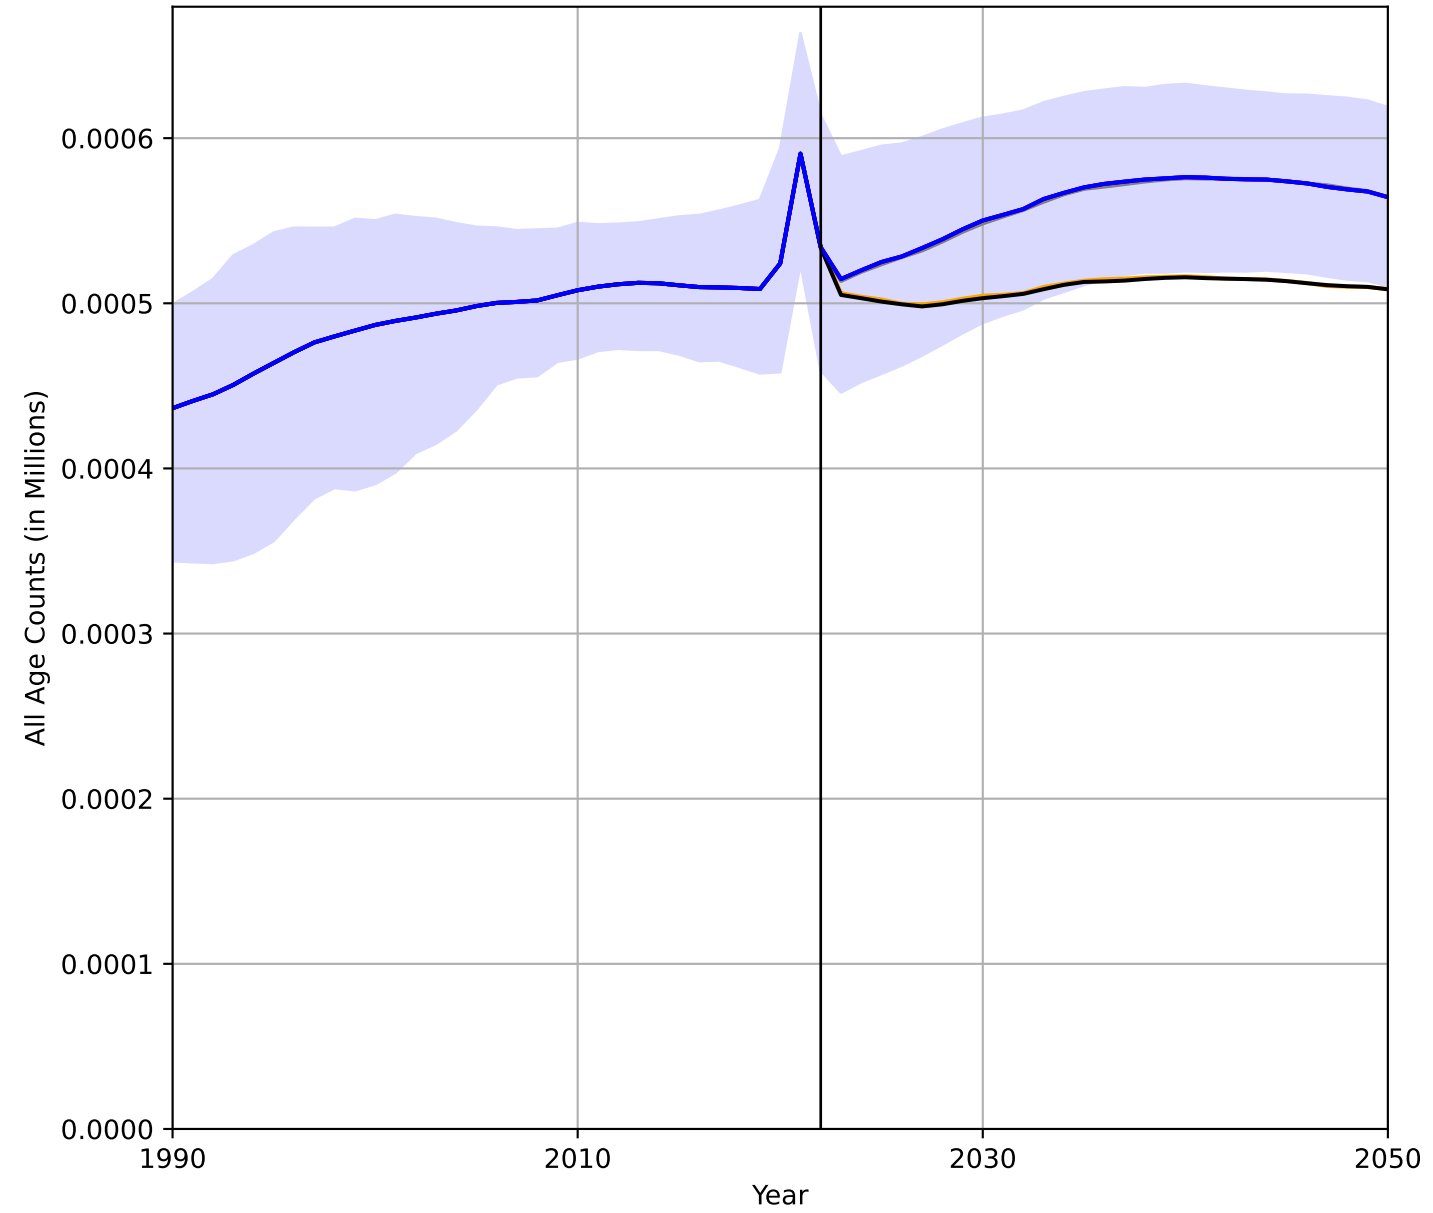

# Netherlands

Supplemental Results Figure S11. All-cause age standardised death rates (A) and all age death counts (B), for the past and for five future scenarios, 1990–2050

1701

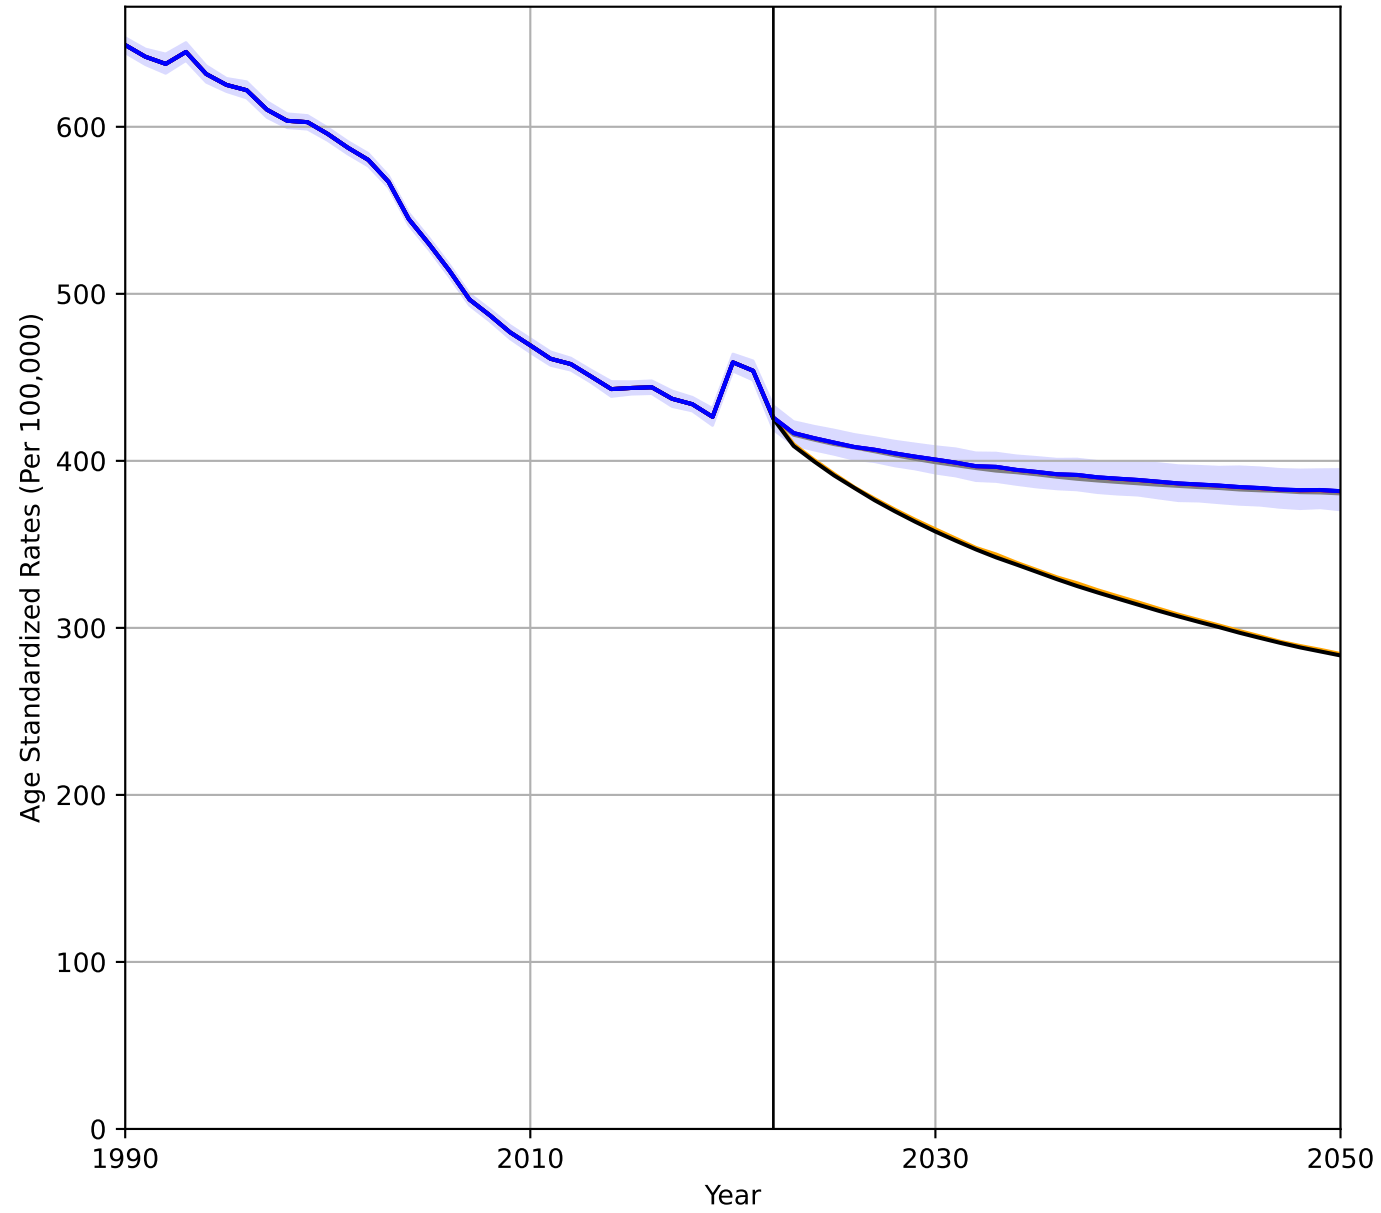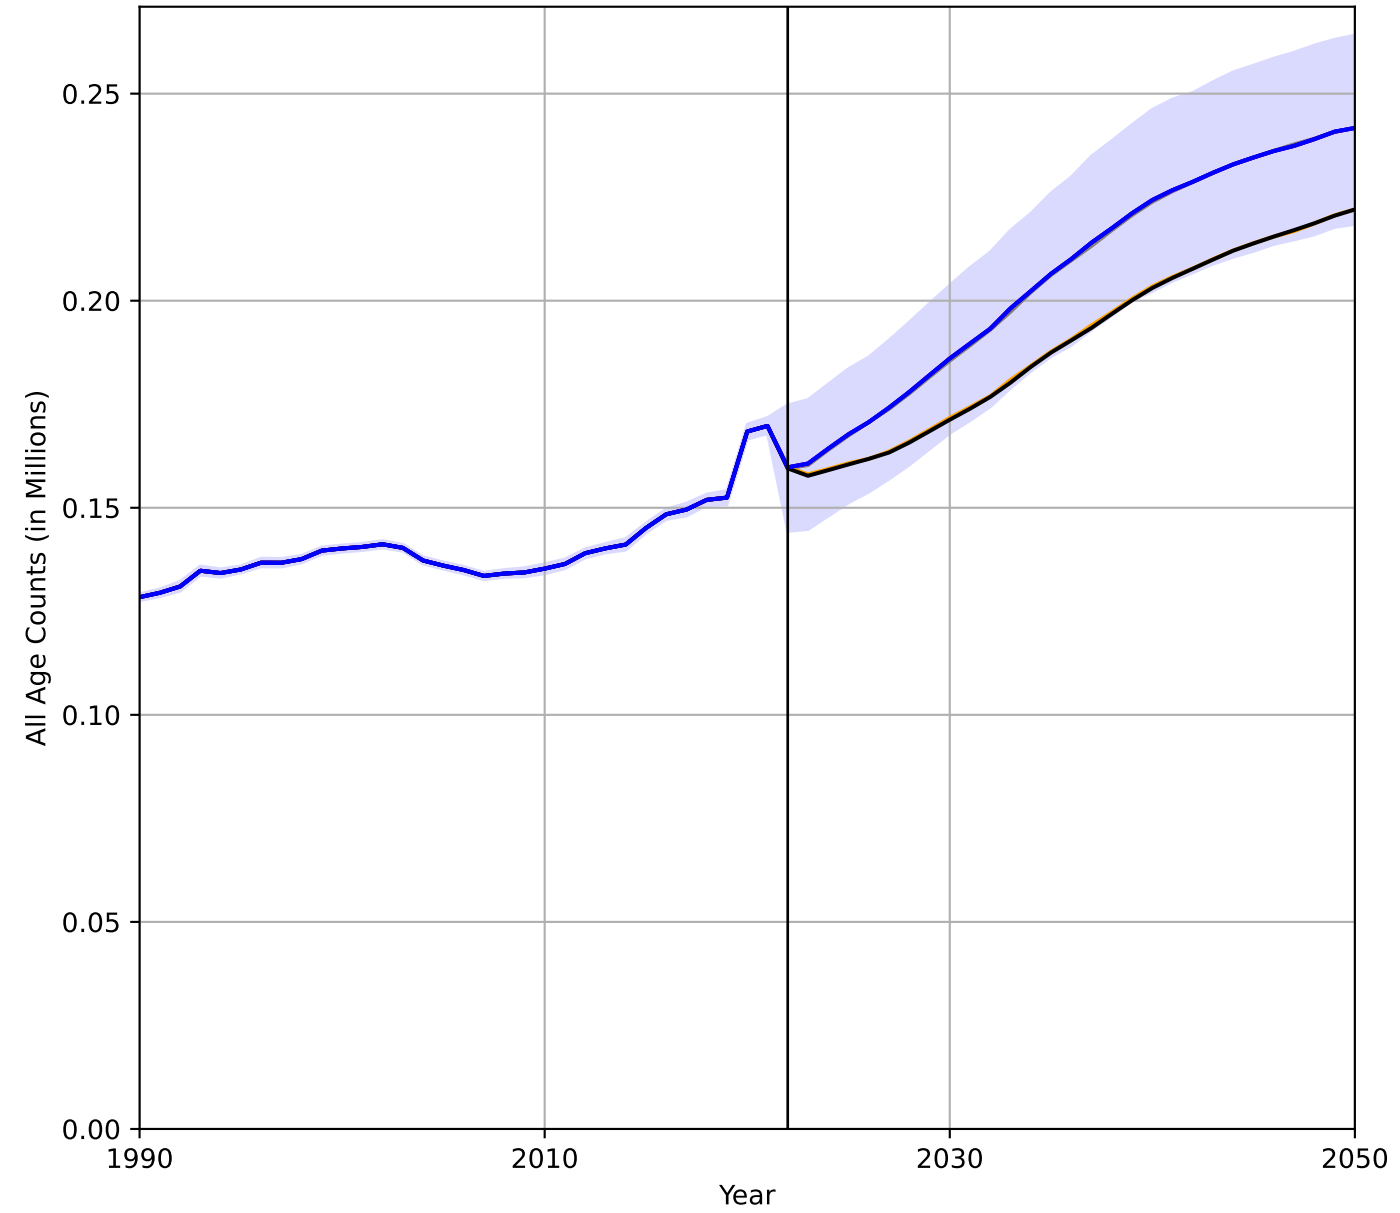

# Norway

Supplemental Results Figure S11. All-cause age standardised death rates (A) and all age death counts (B), for the past and for five future scenarios, 1990–2050

1702

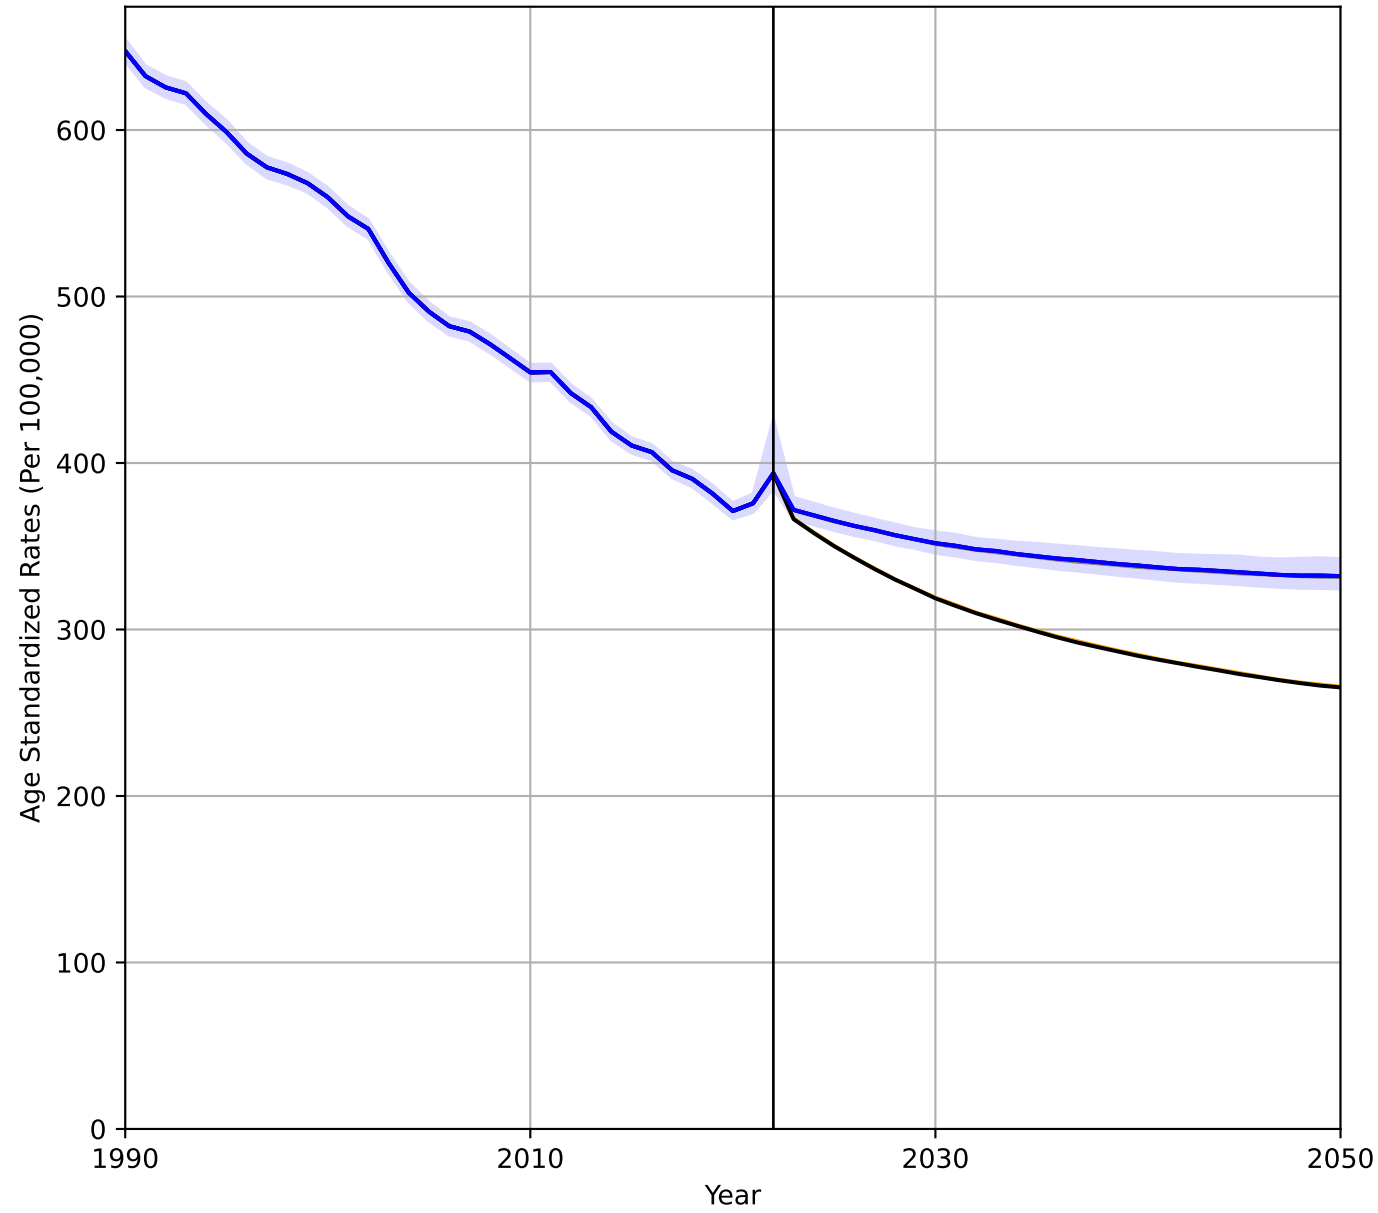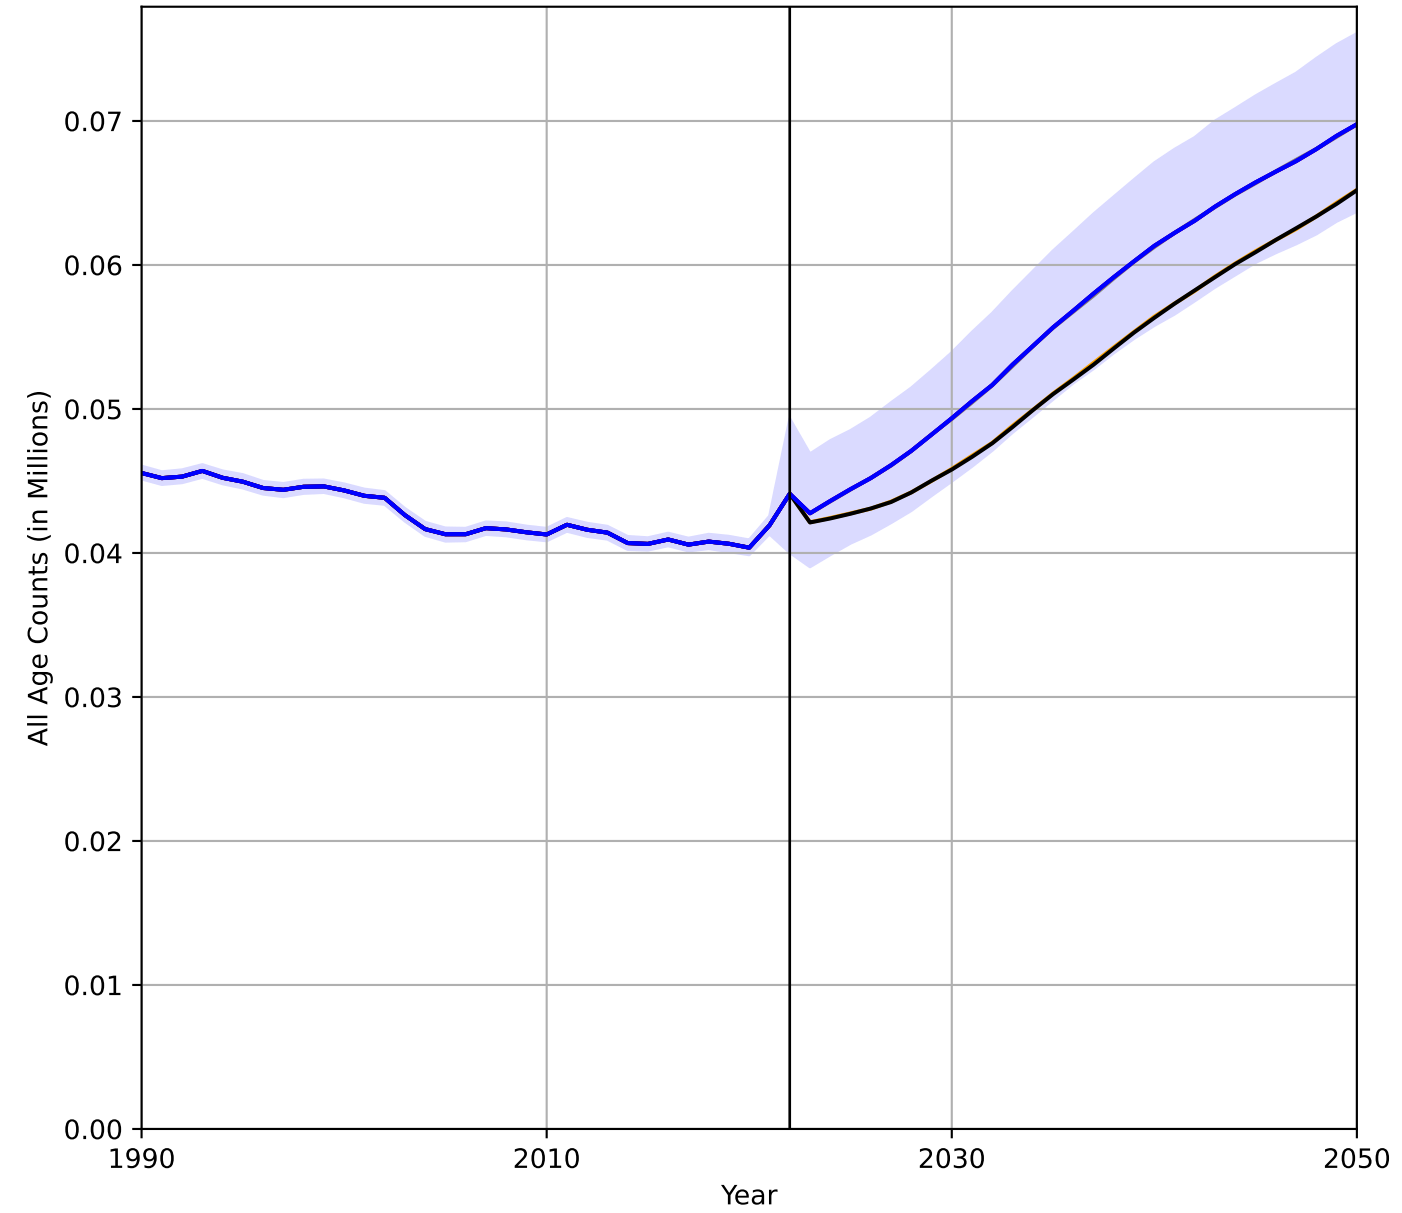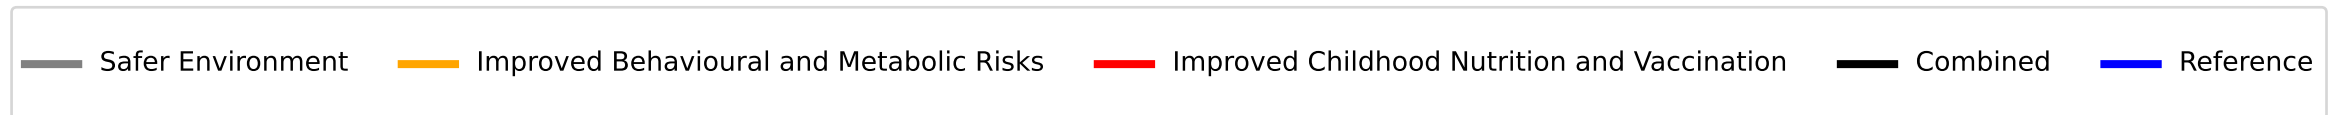

# Portugal

Supplemental Results Figure S11. All-cause age standardised death rates (A) and all age death counts (B), for the past and for five future scenarios, 1990–2050

1703

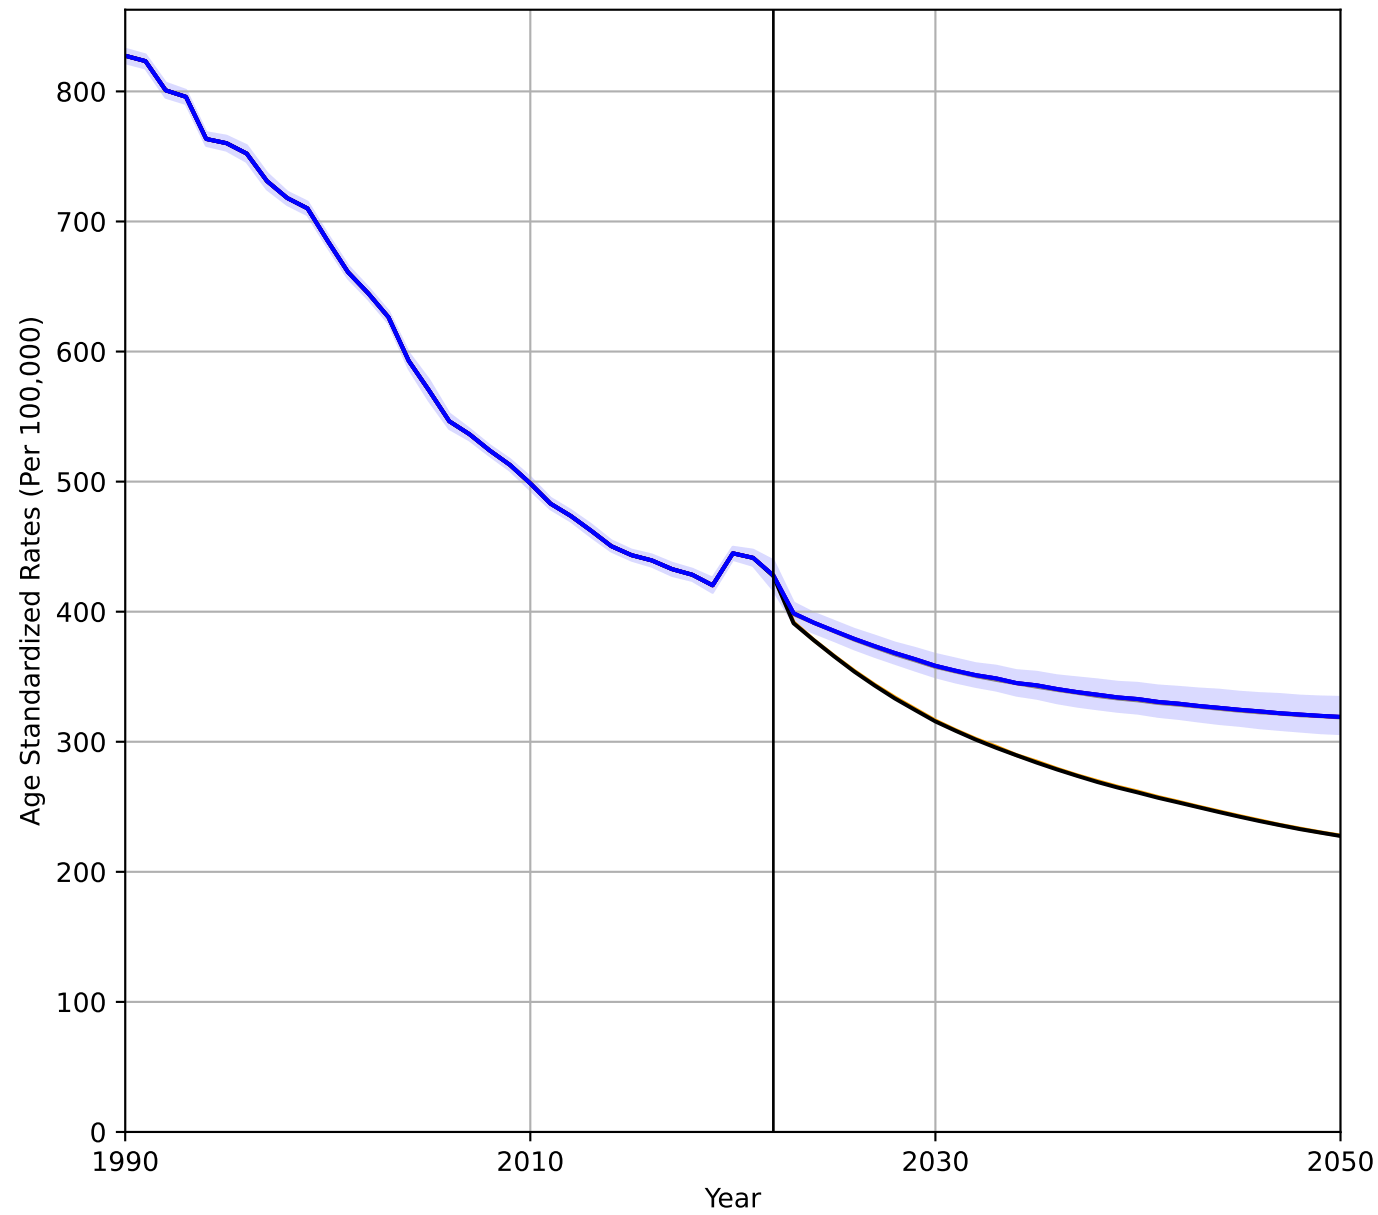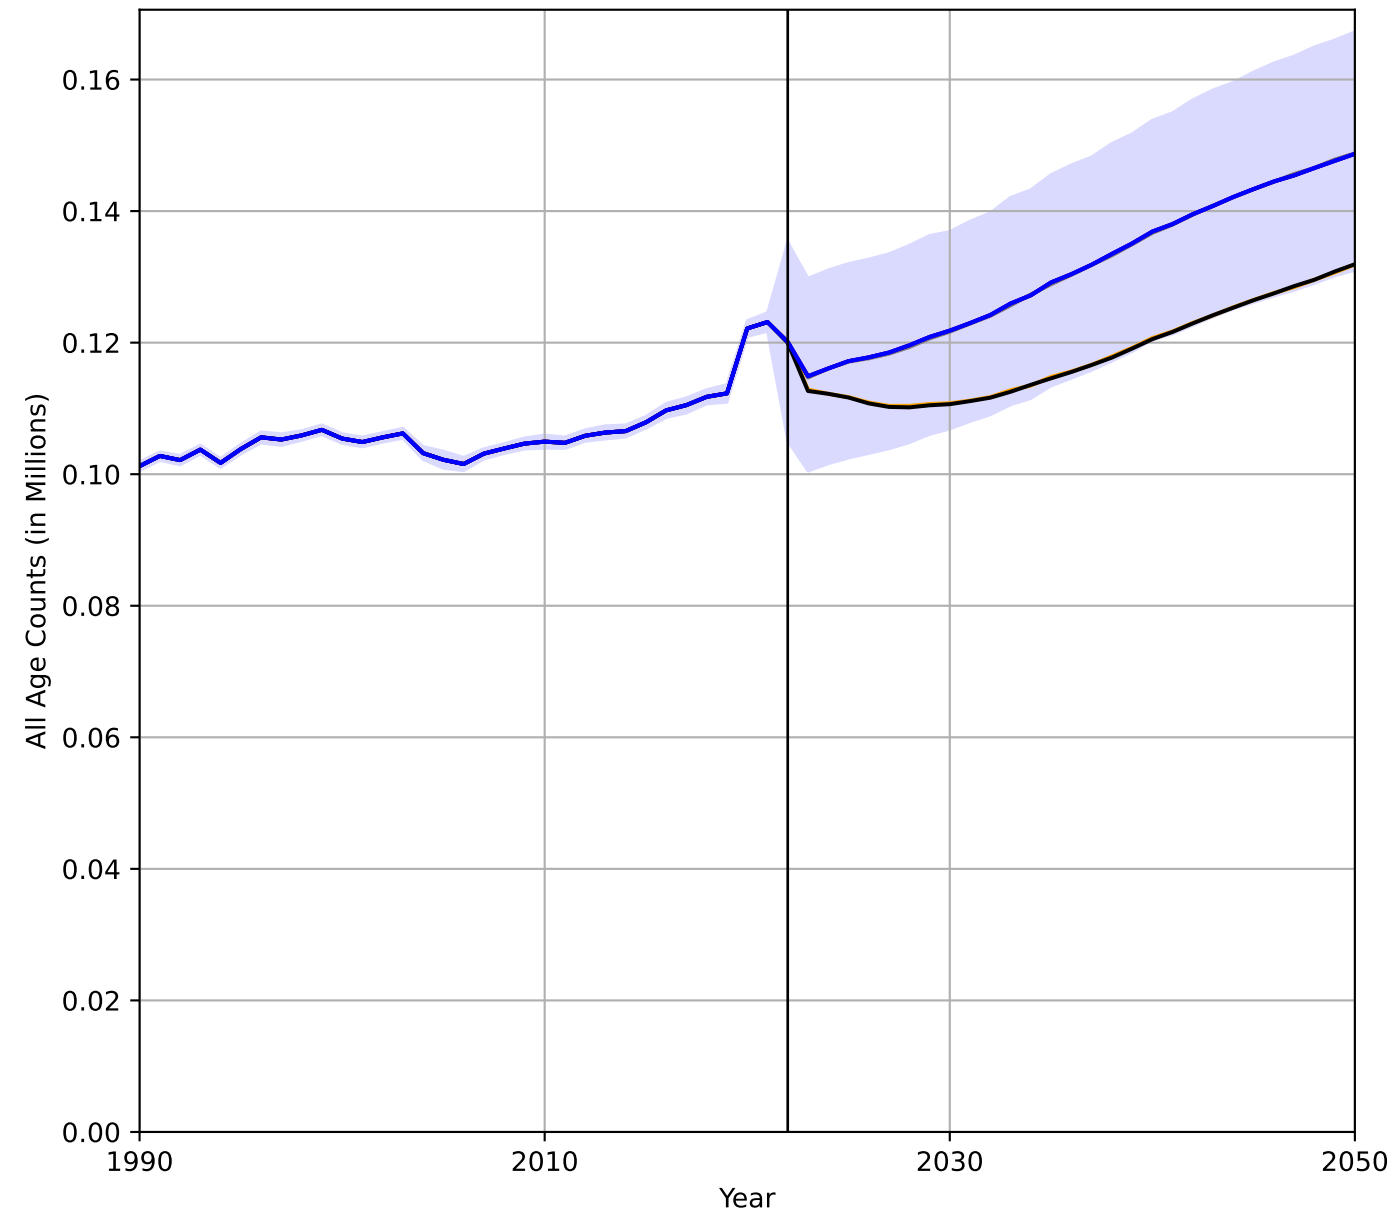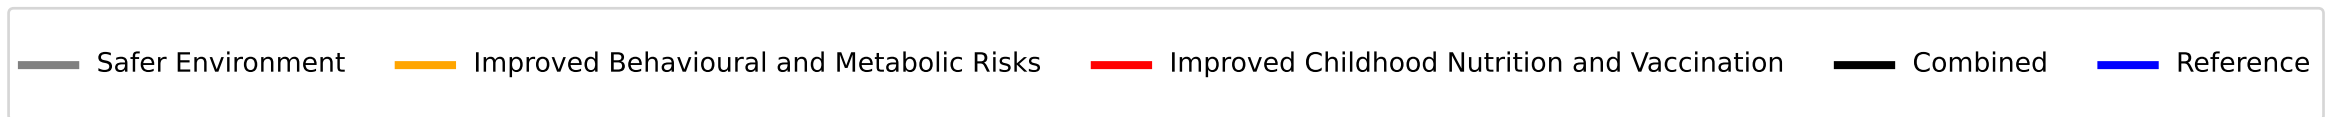



# San Marino

Supplemental Results Figure S11. All-cause age standardised death rates (A) and all age death counts (B), for the past and for five future scenarios, 1990–2050

1704

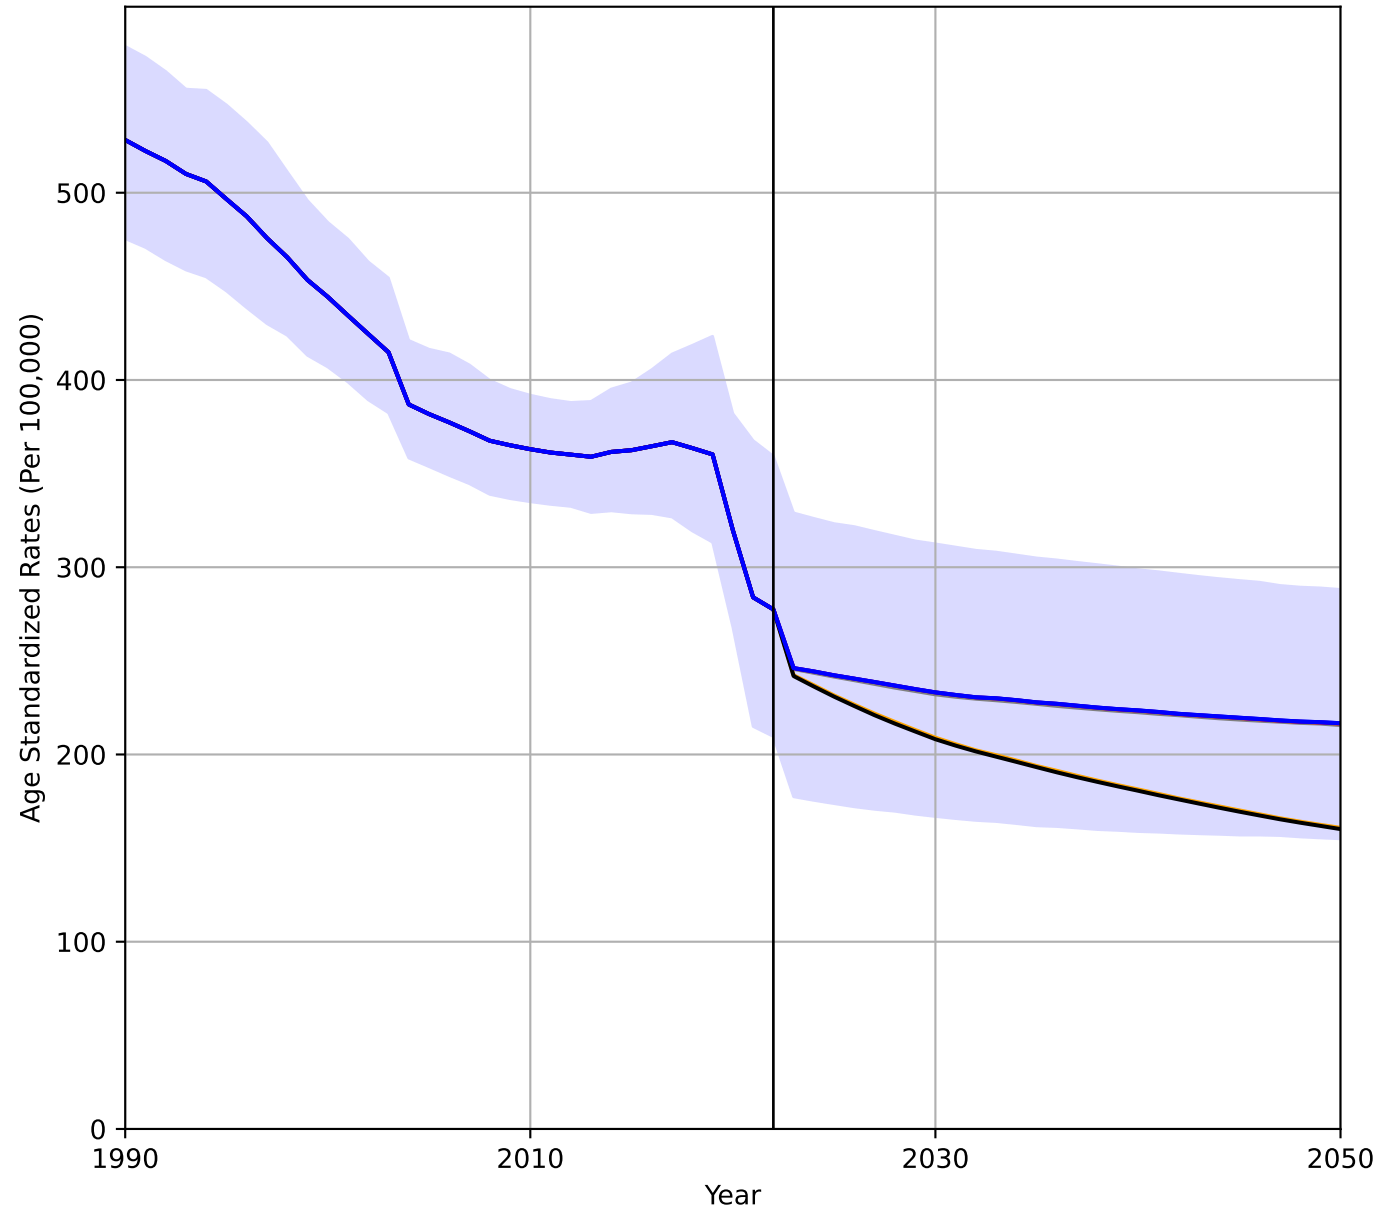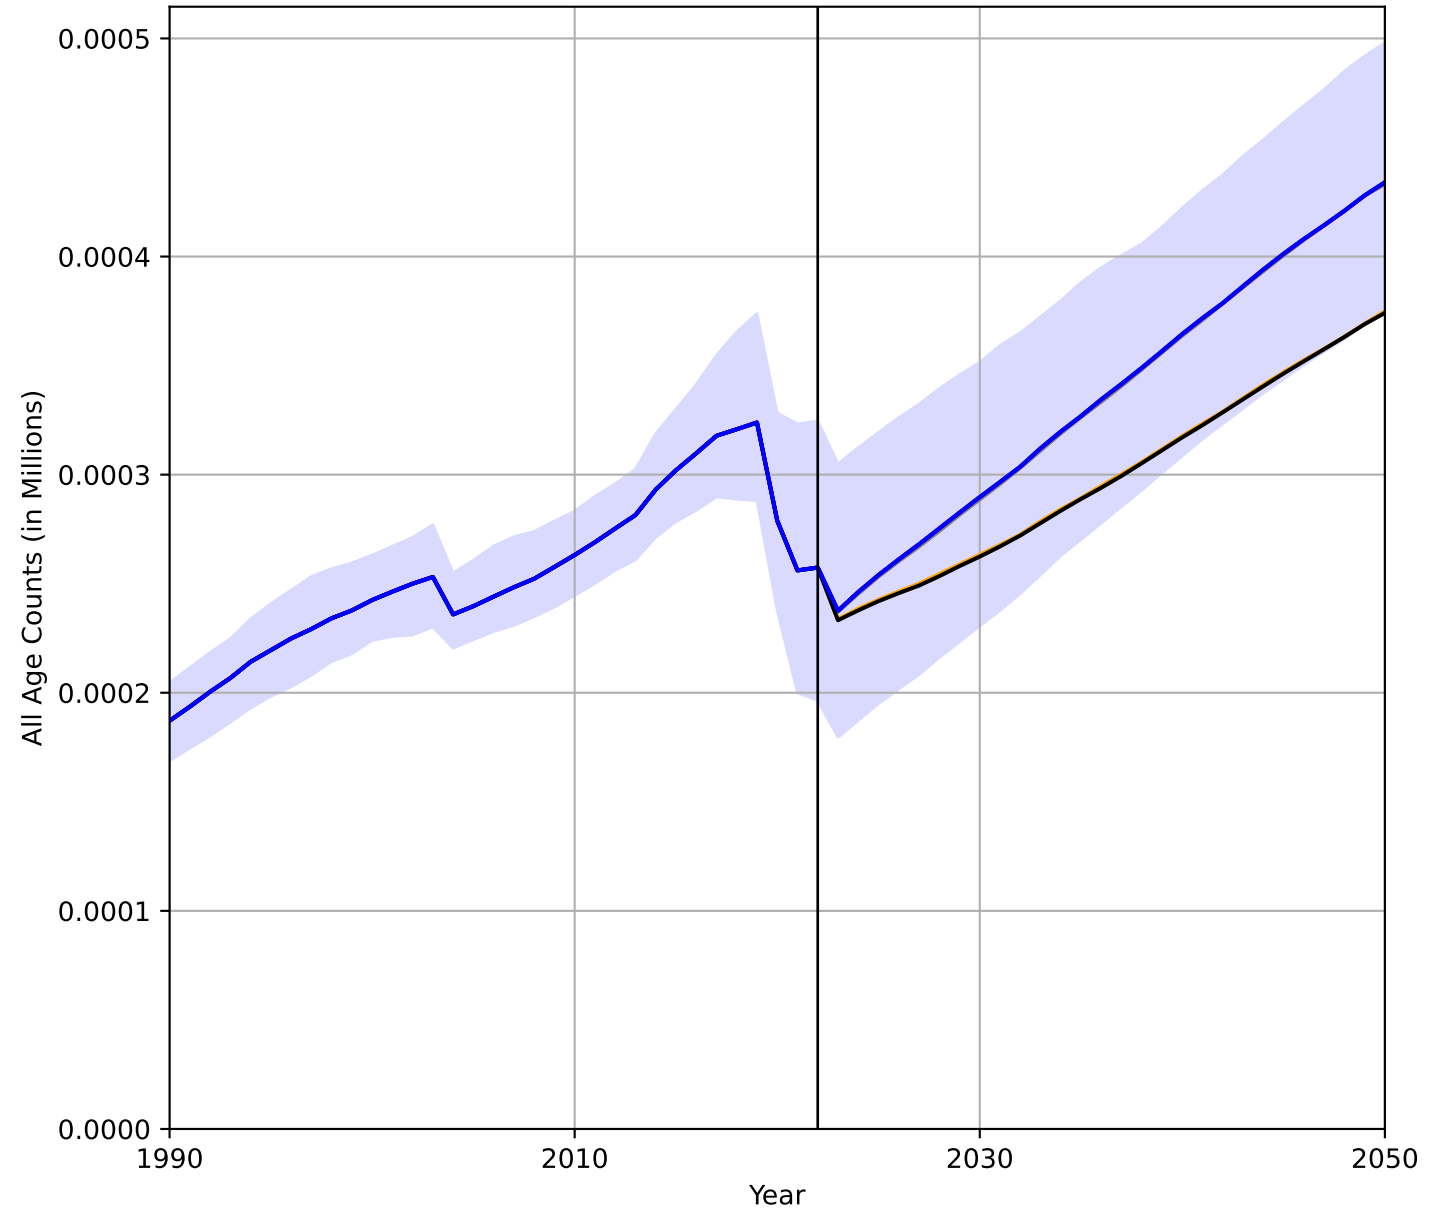

# Spain

Supplemental Results Figure S11. All-cause age standardised death rates (A) and all age death counts (B), for the past and for five future scenarios, 1990–2050

1705

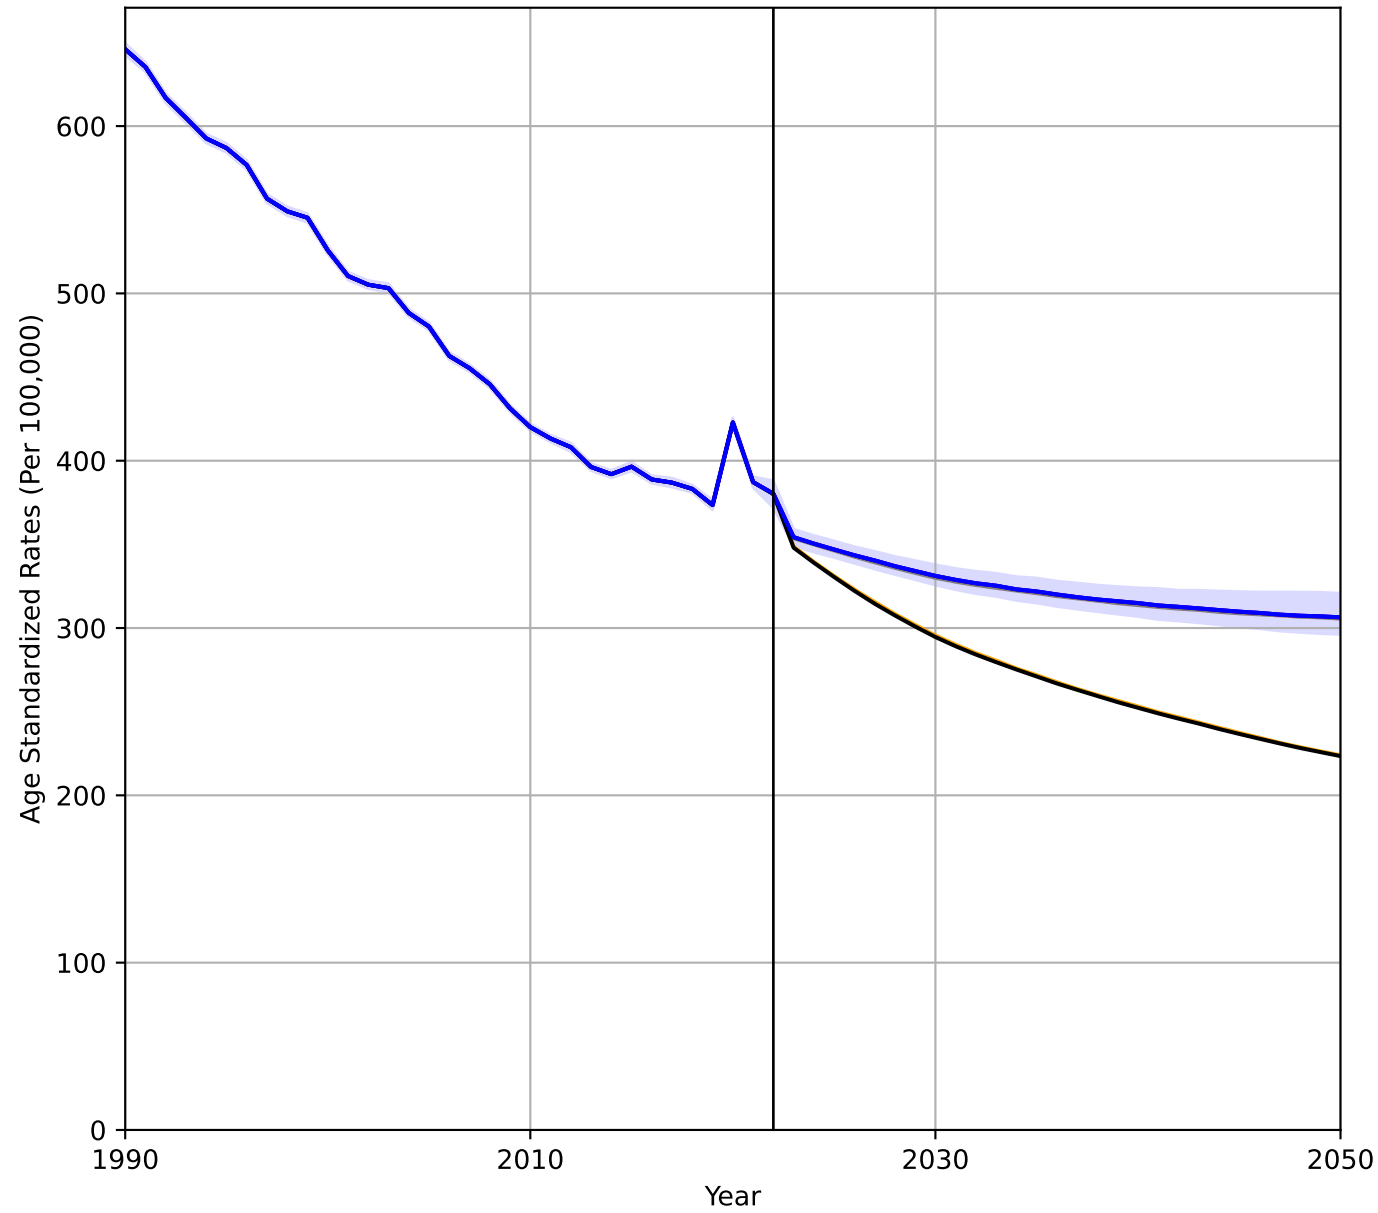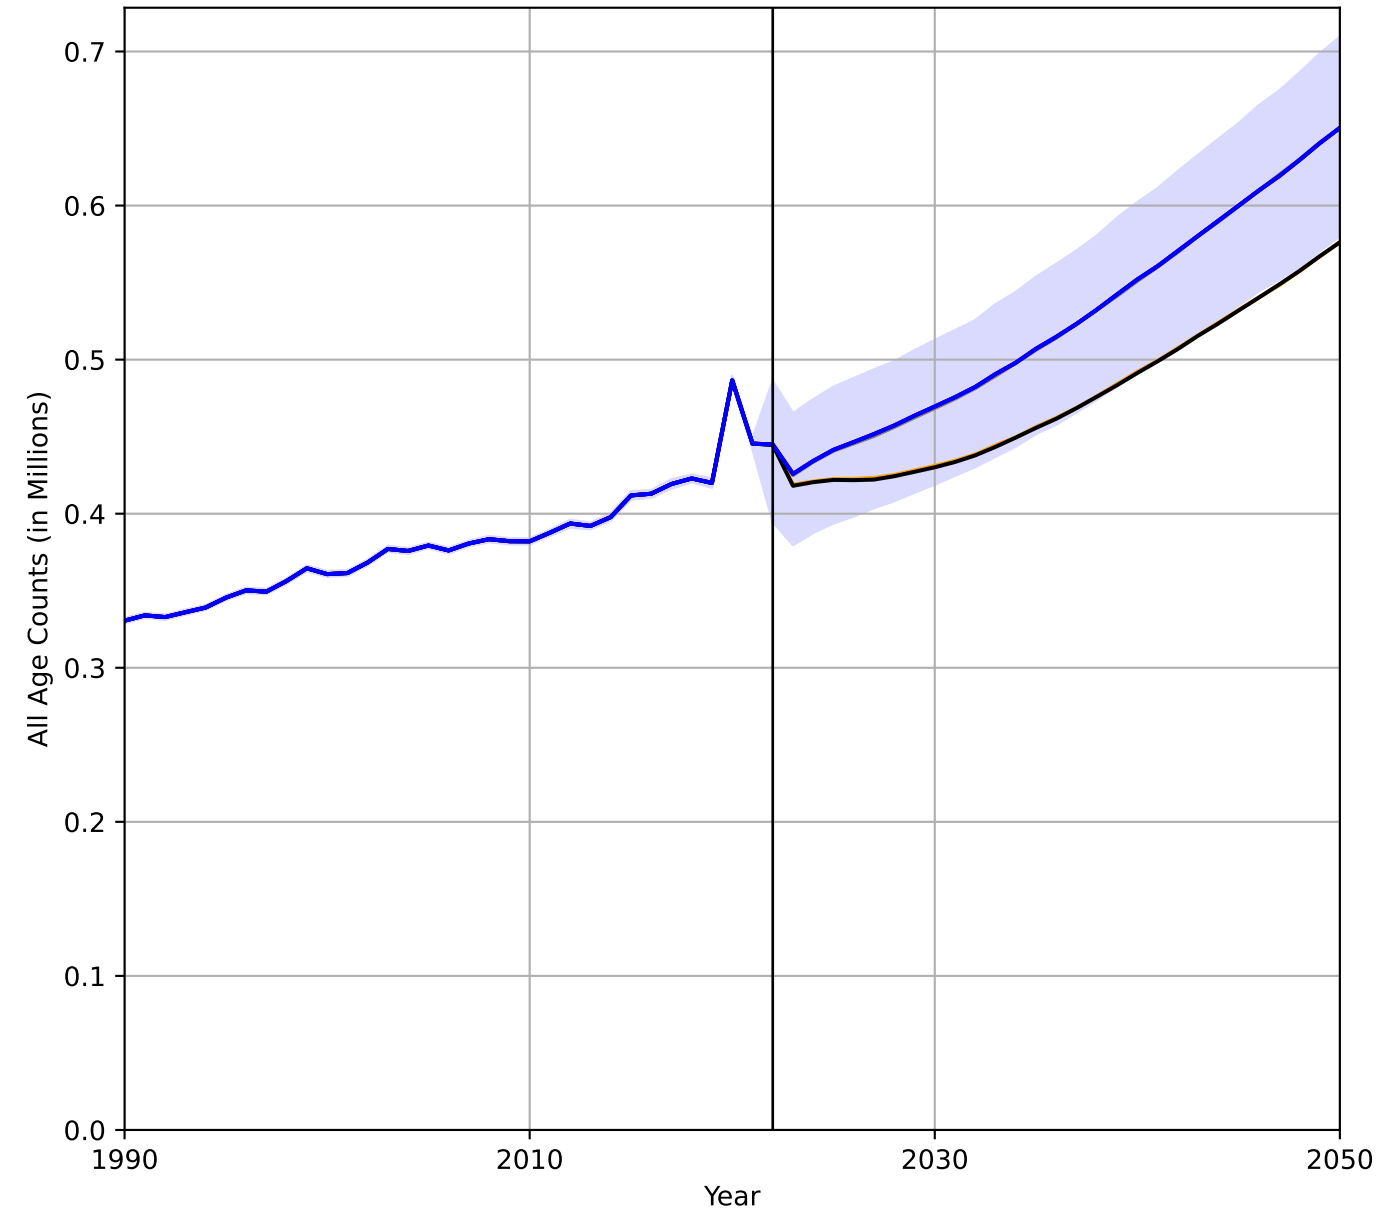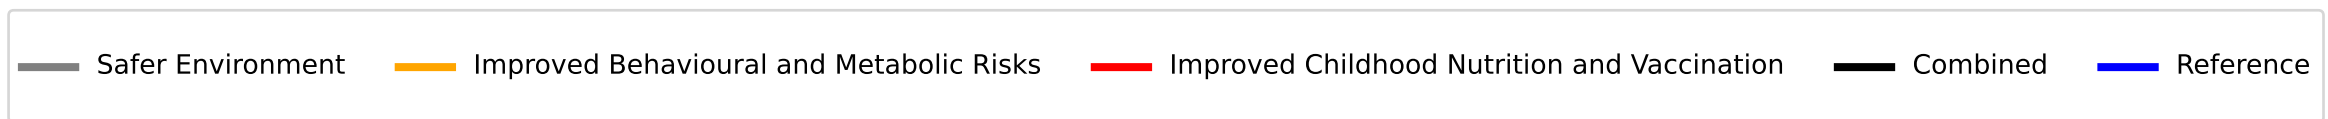

# Sweden

Supplemental Results Figure S11. All-cause age standardised death rates (A) and all age death counts (B), for the past and for five future scenarios, 1990–2050

1706

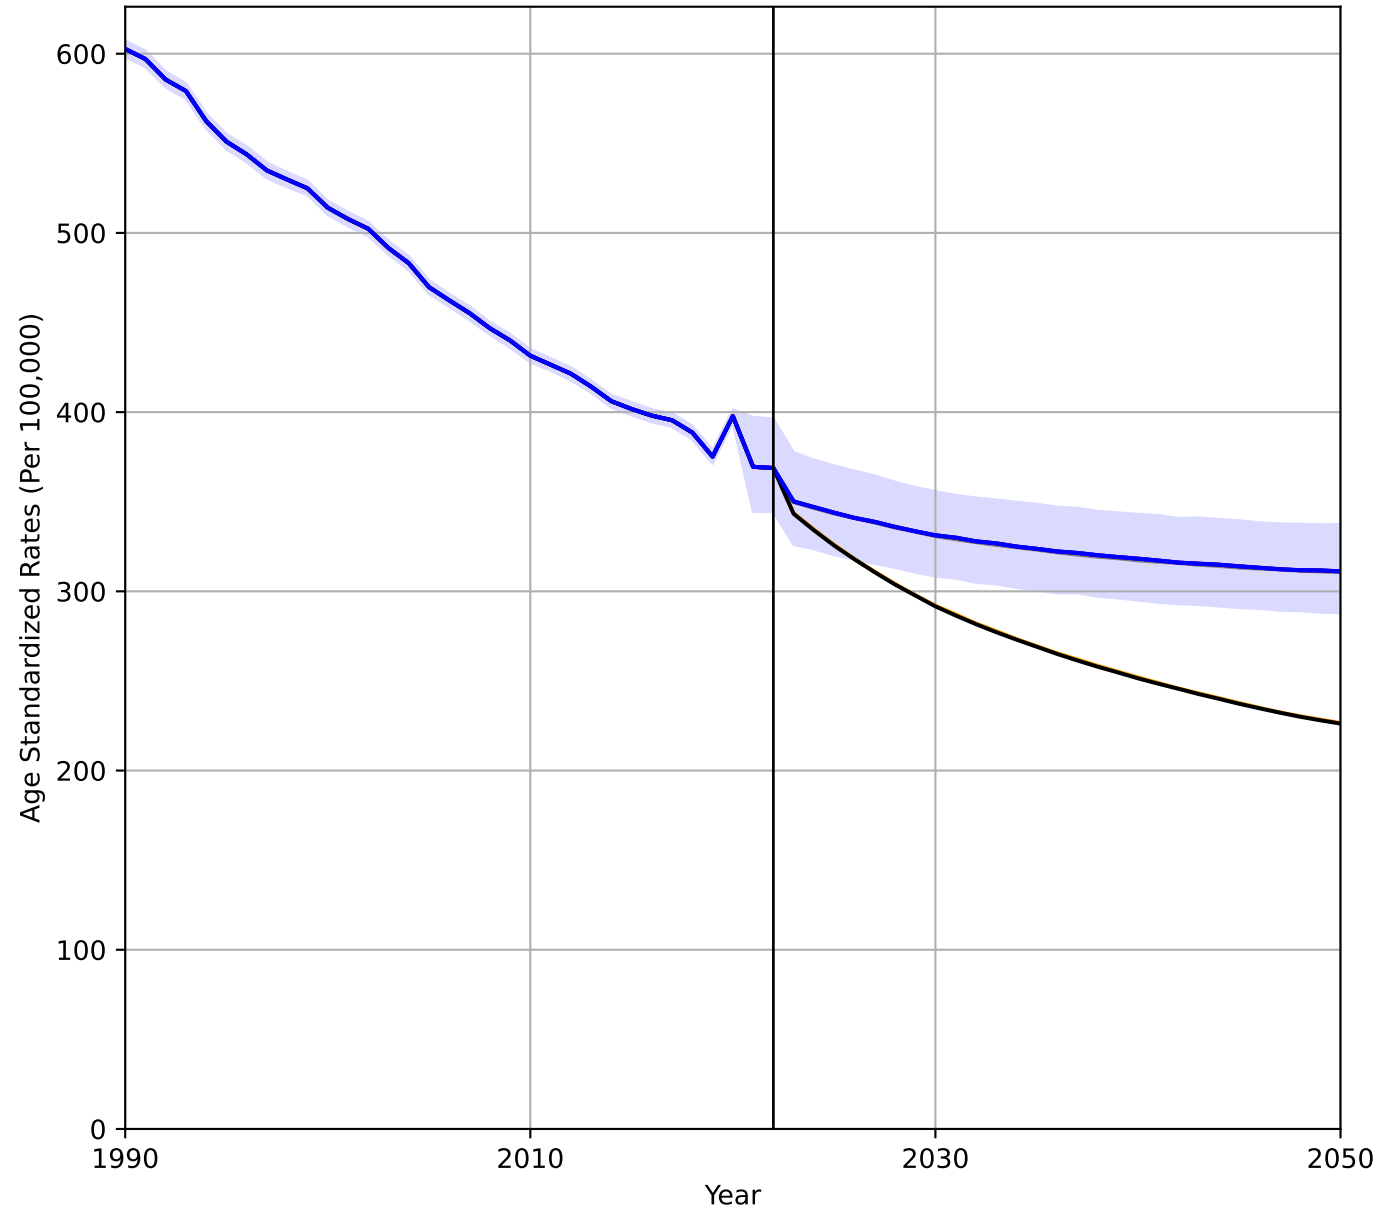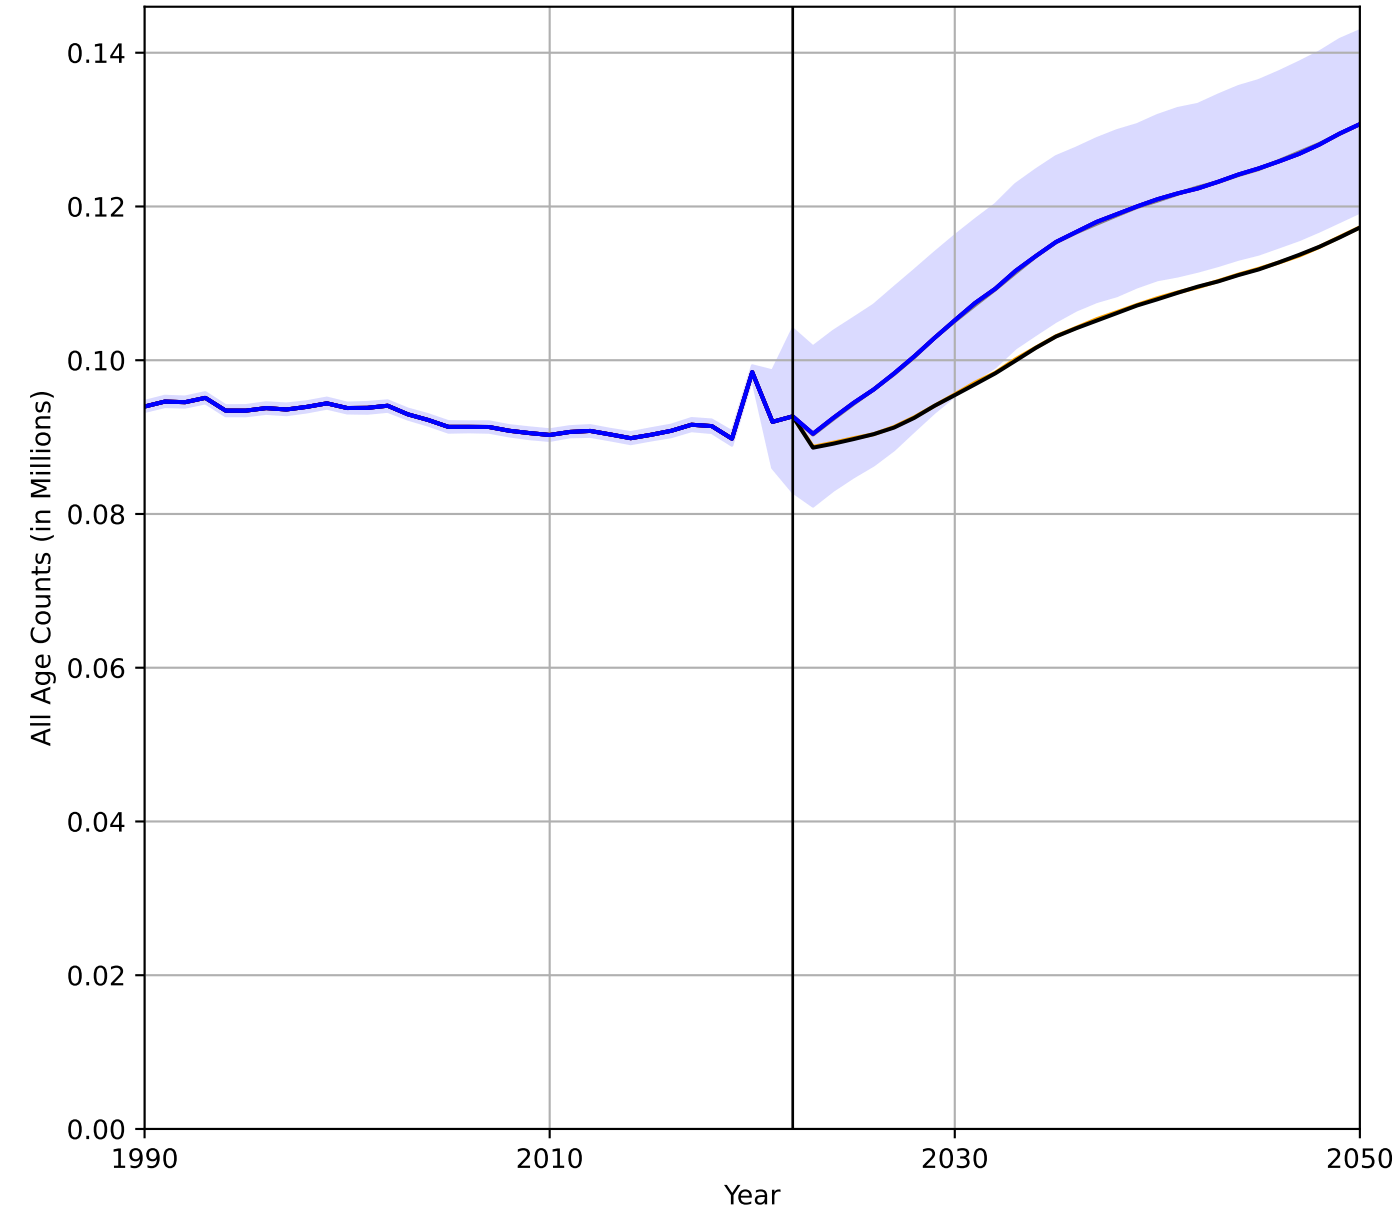

# Switzerland

Supplemental Results Figure S11. All-cause age standardised death rates (A) and all age death counts (B), for the past and for five future scenarios, 1990–2050

1707

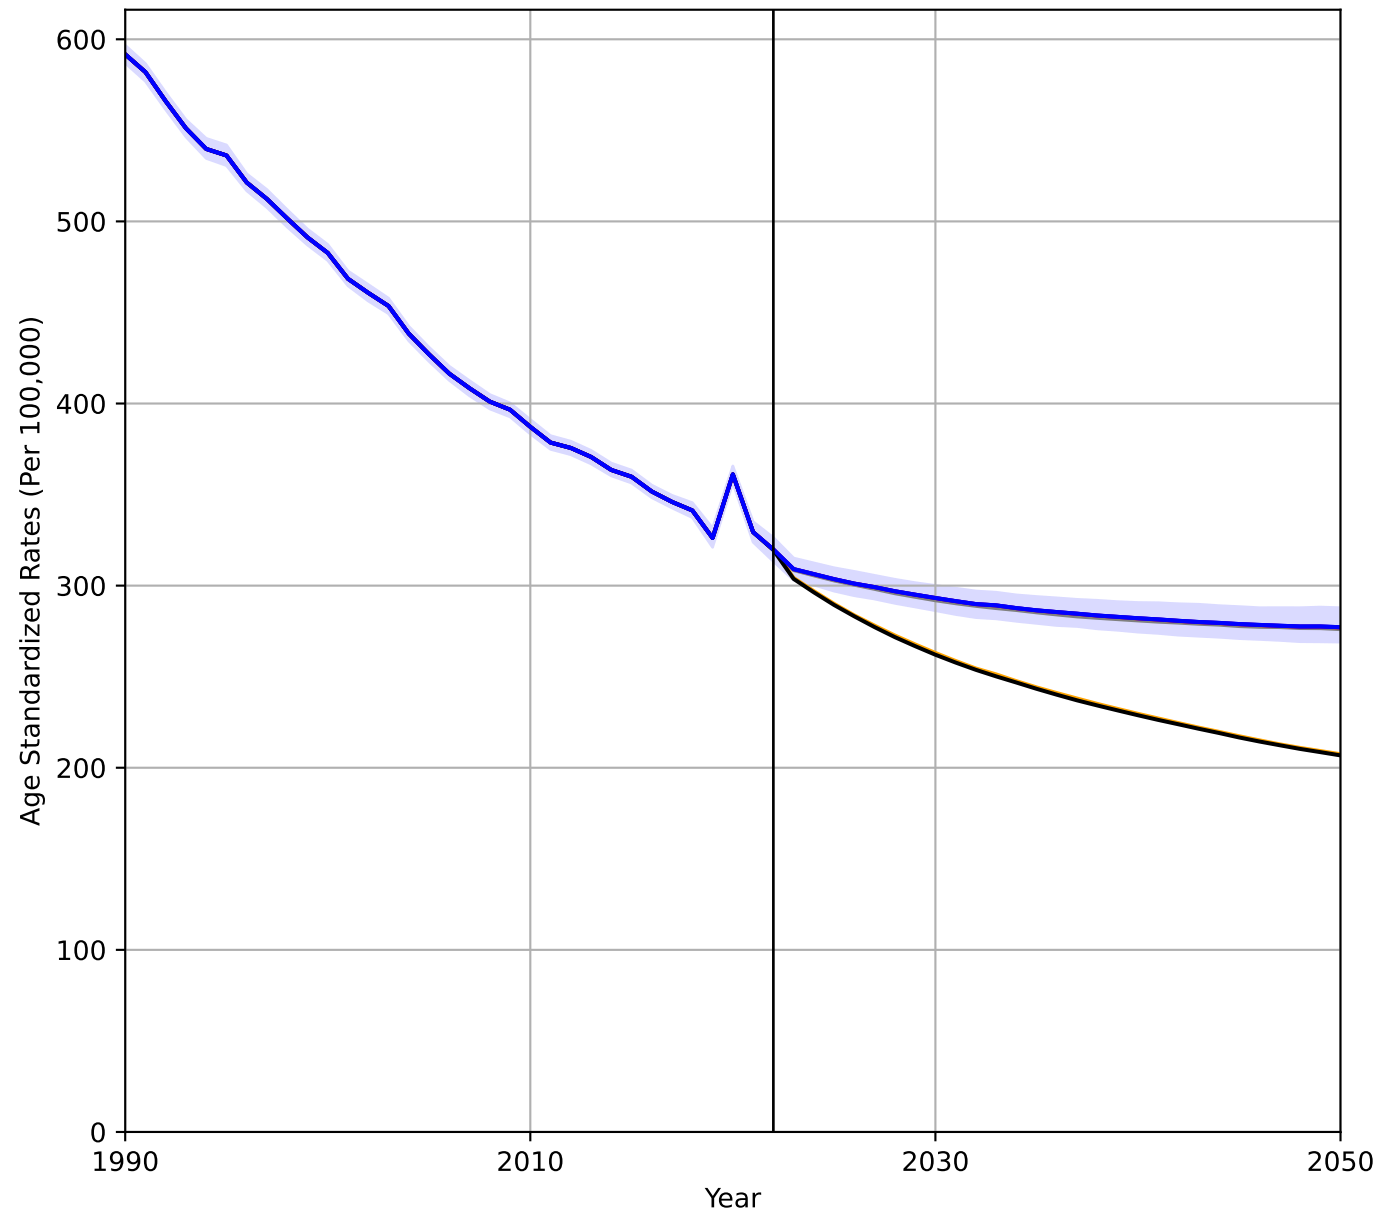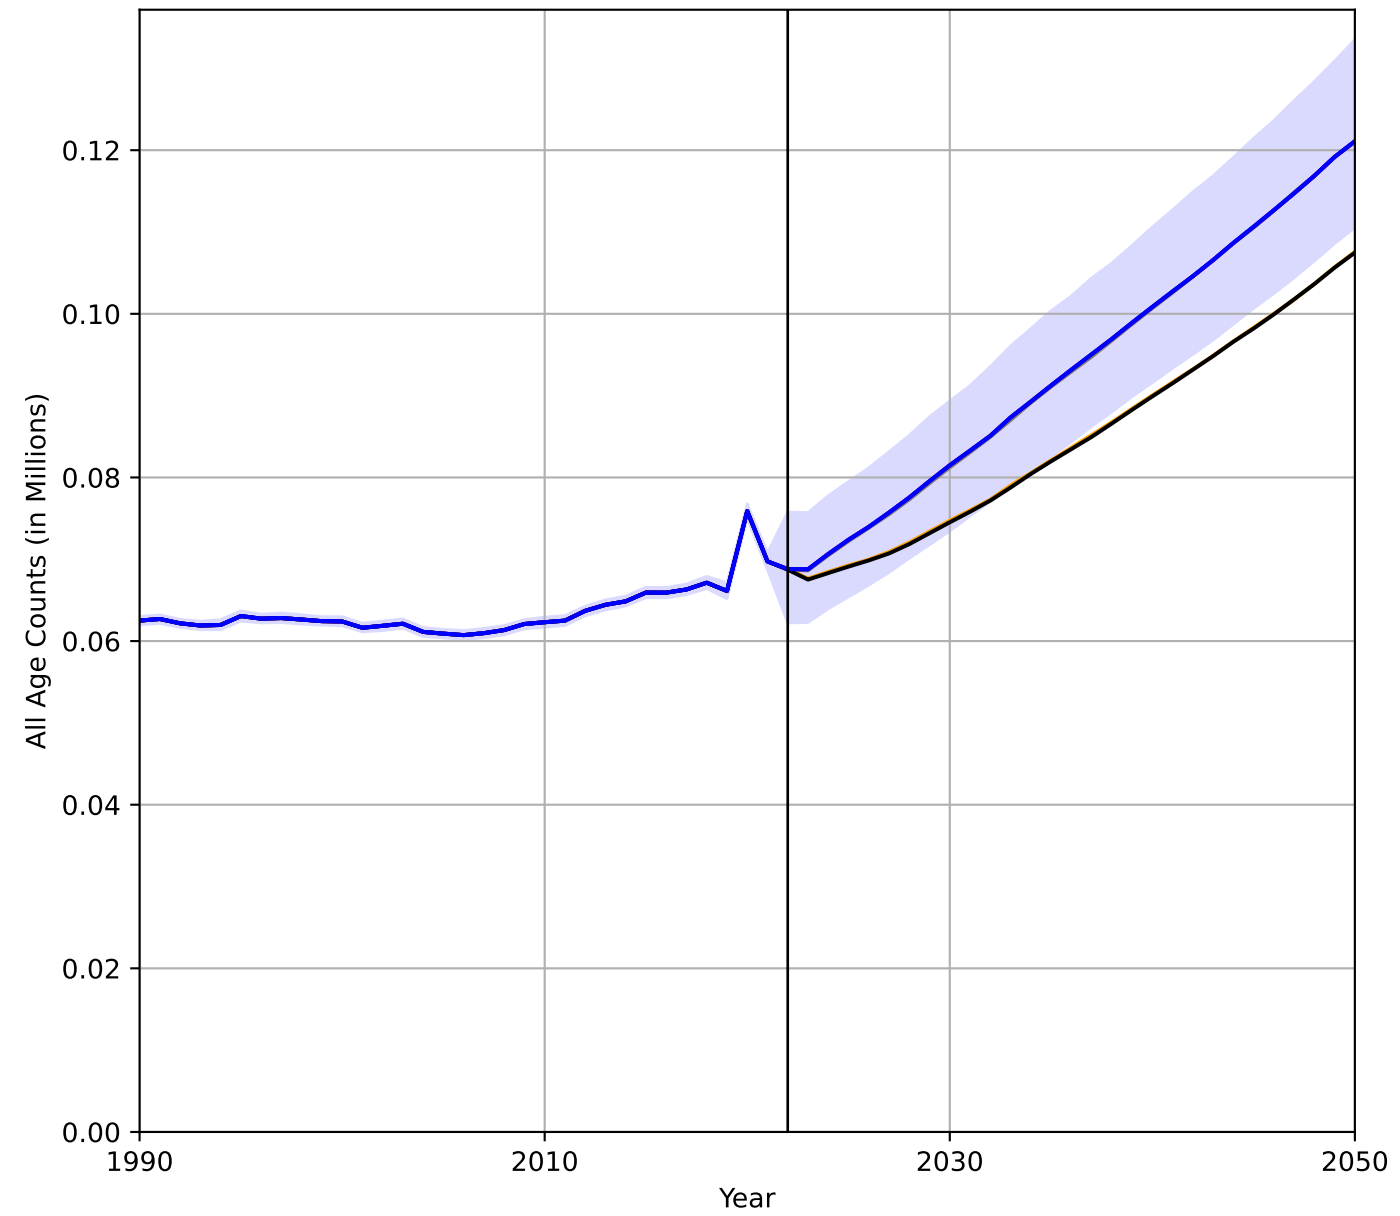

# UK

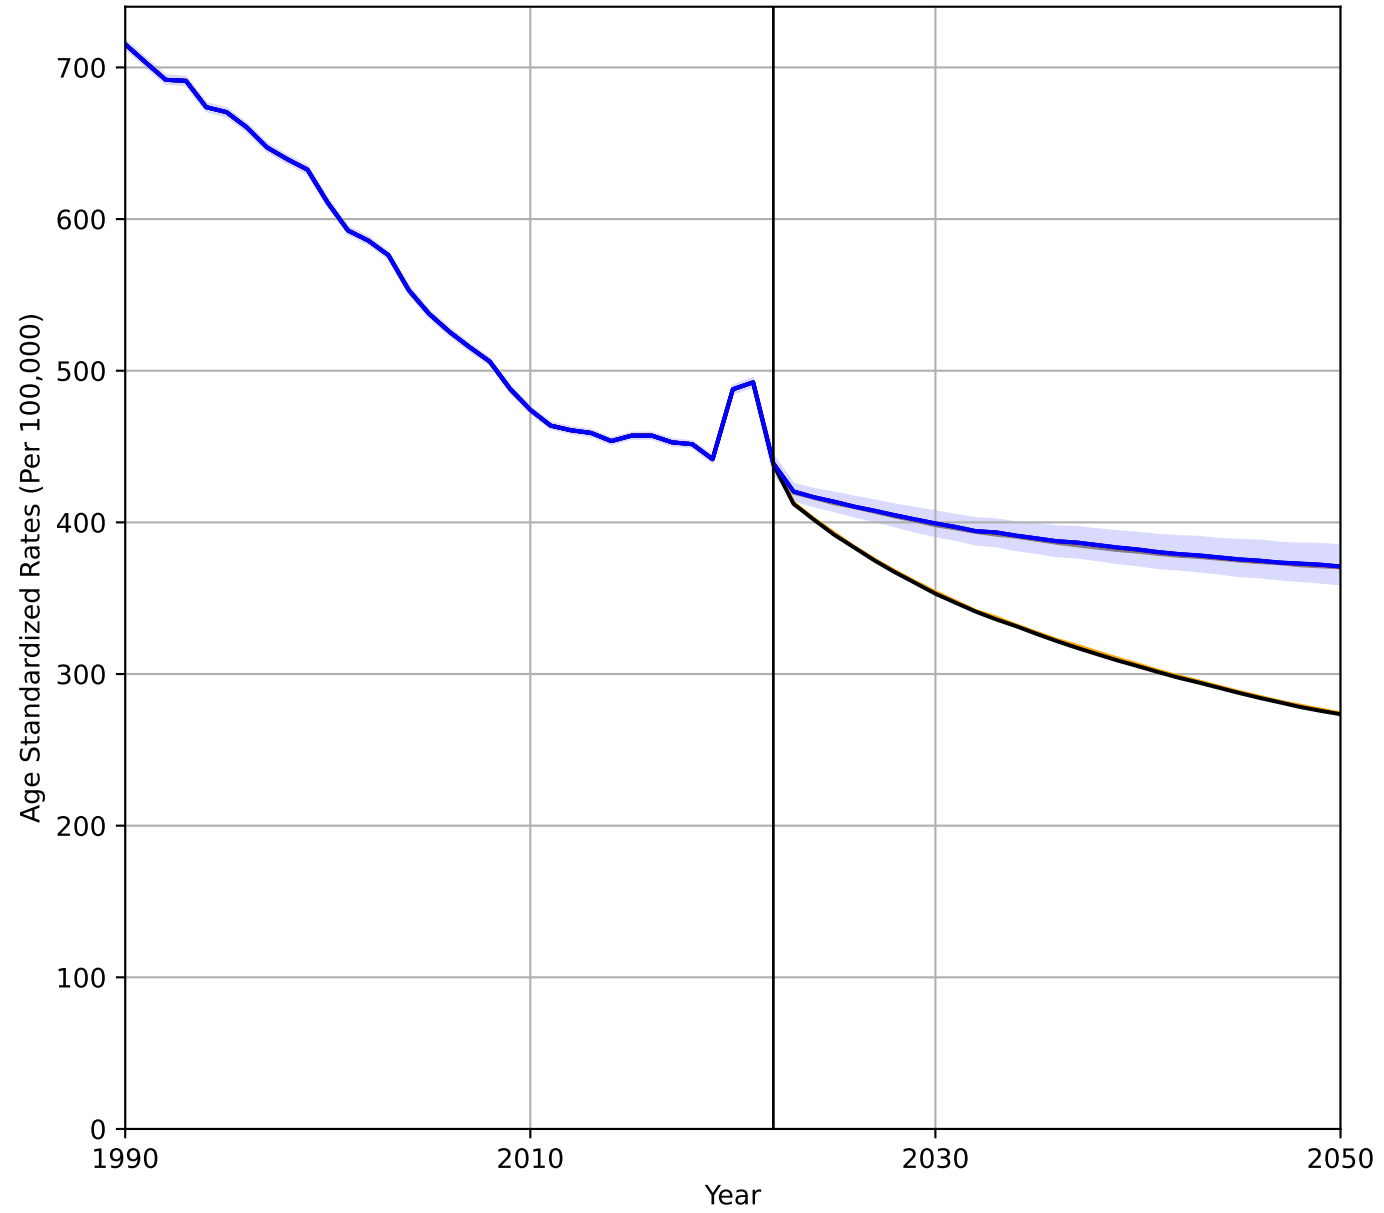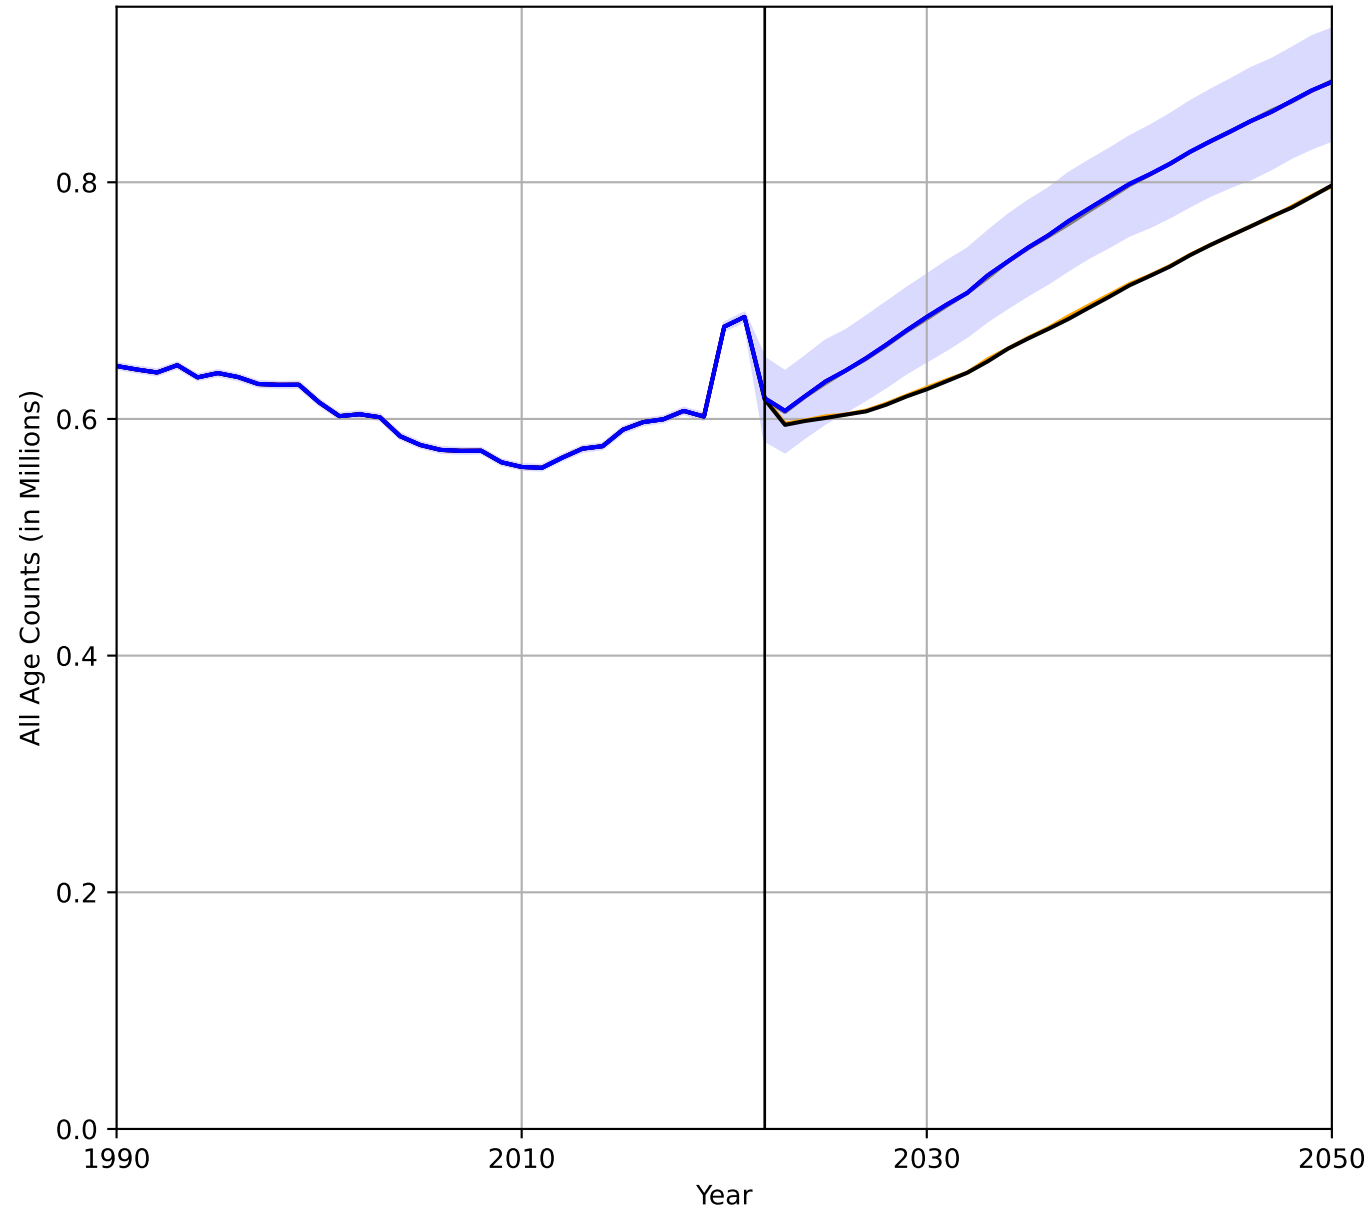

# Bolivia

Supplemental Results Figure S11. All-cause age standardised death rates (A) and all age death counts (B), for the past and for five future scenarios, 1990–2050

1709

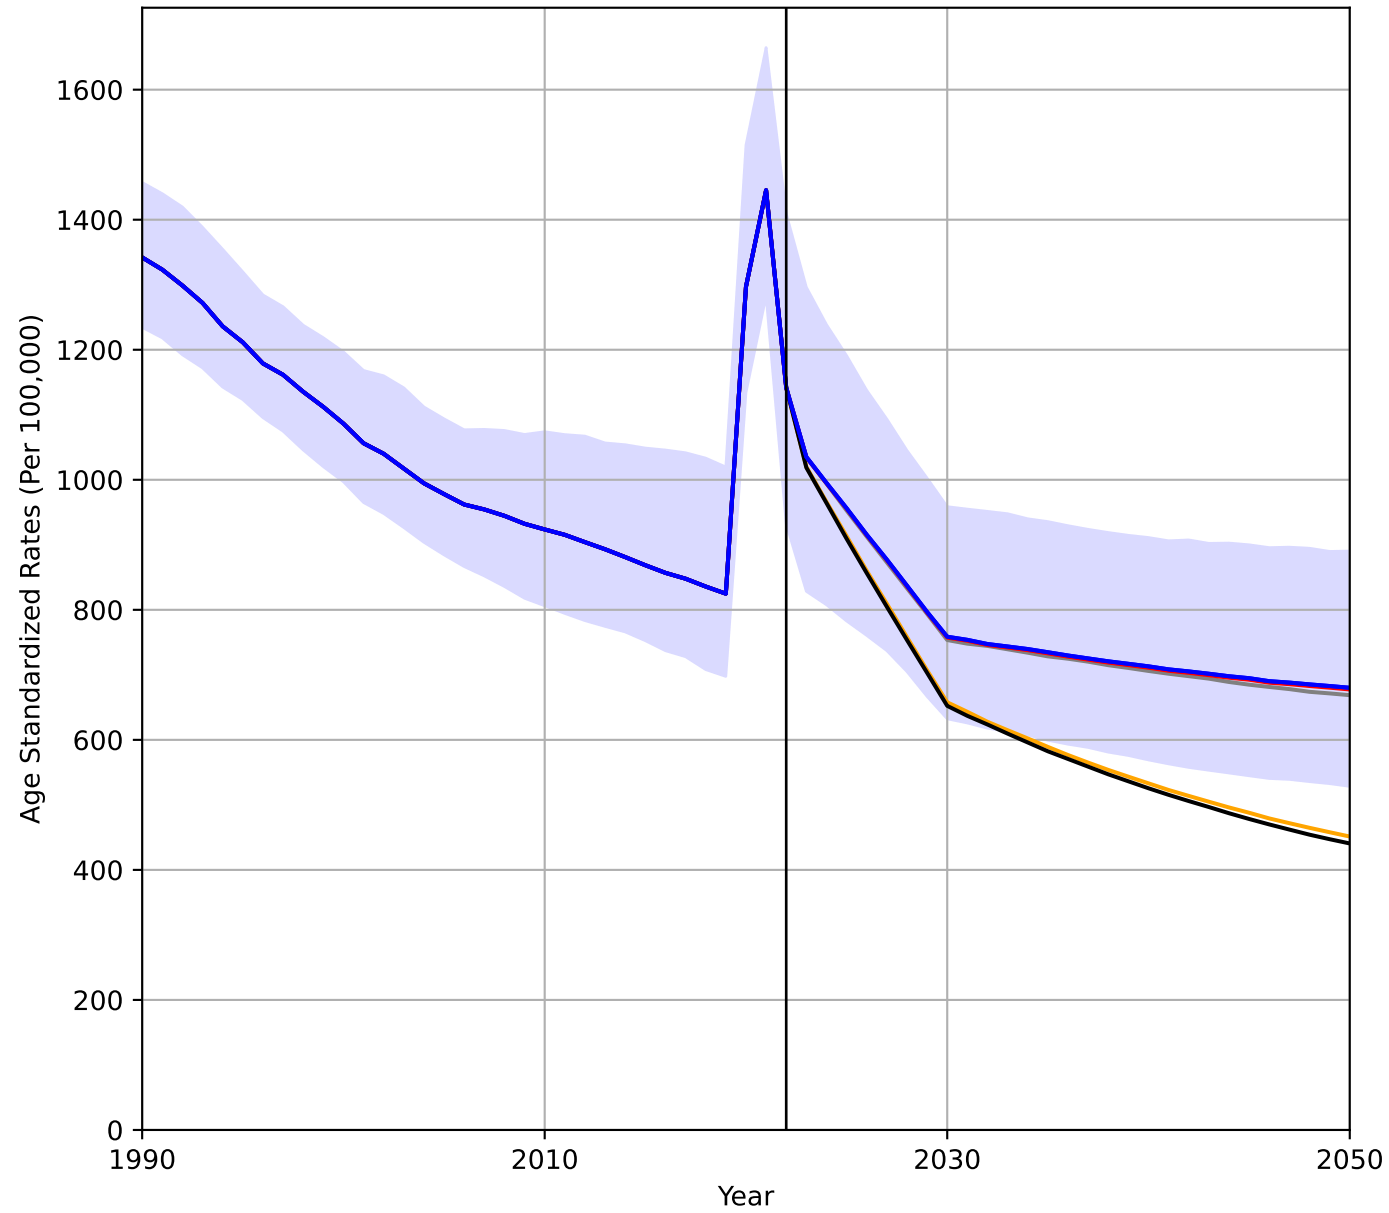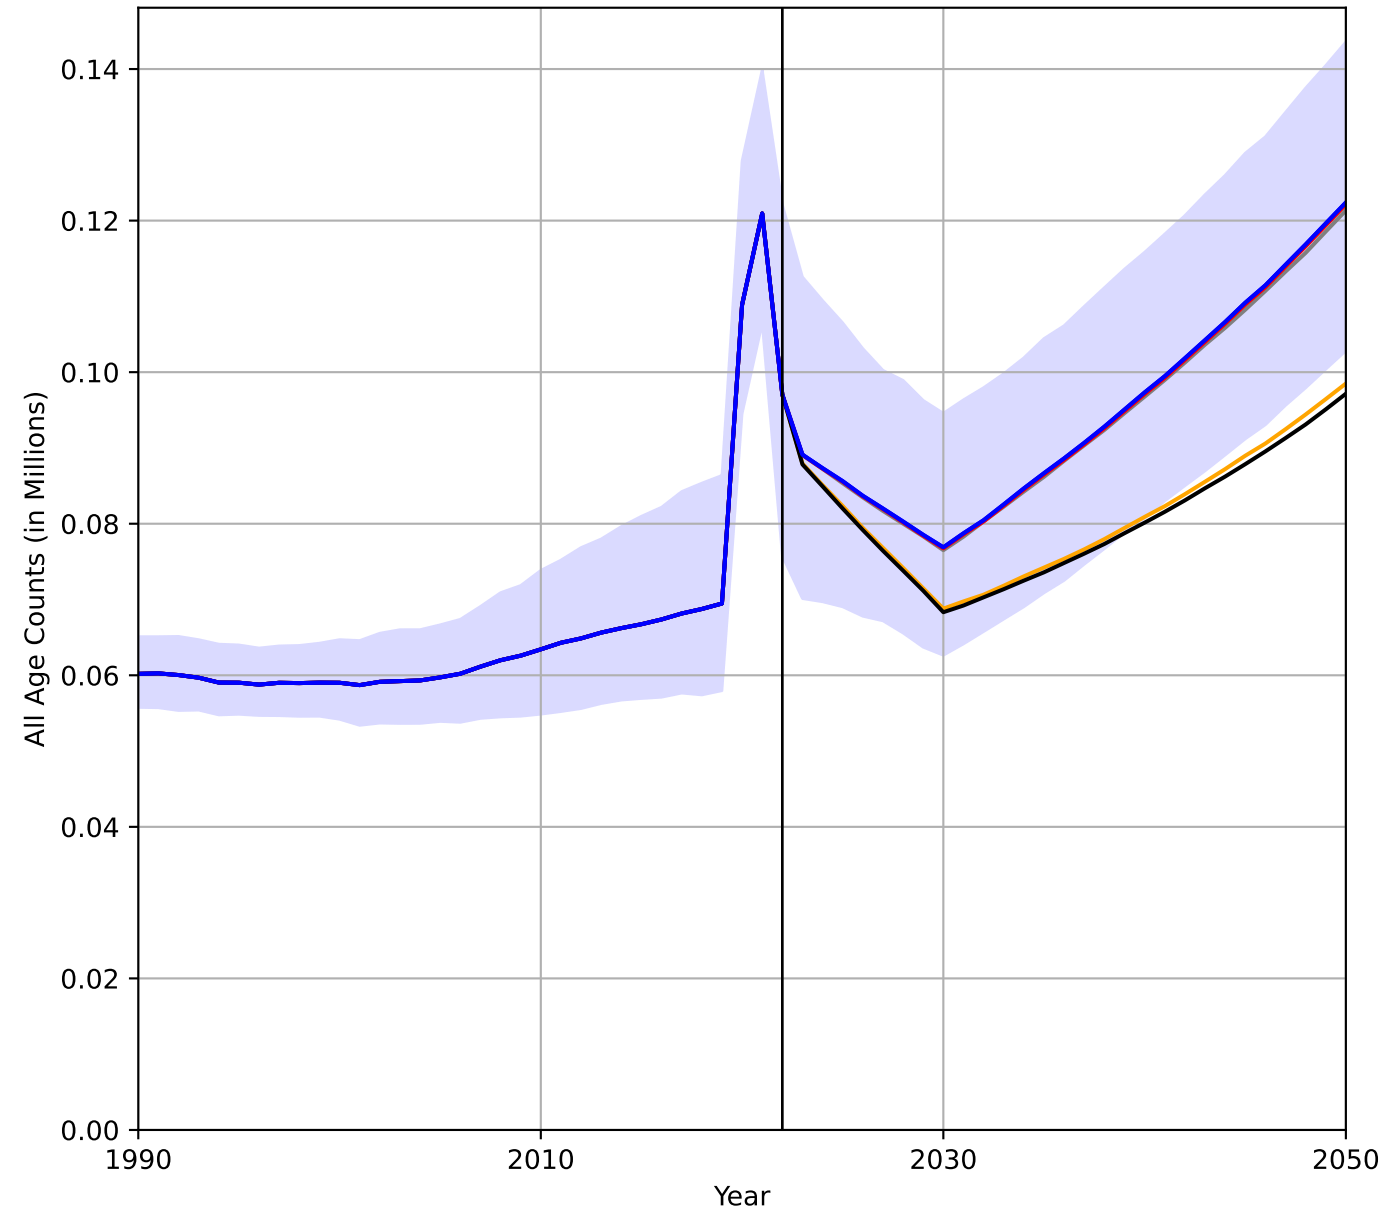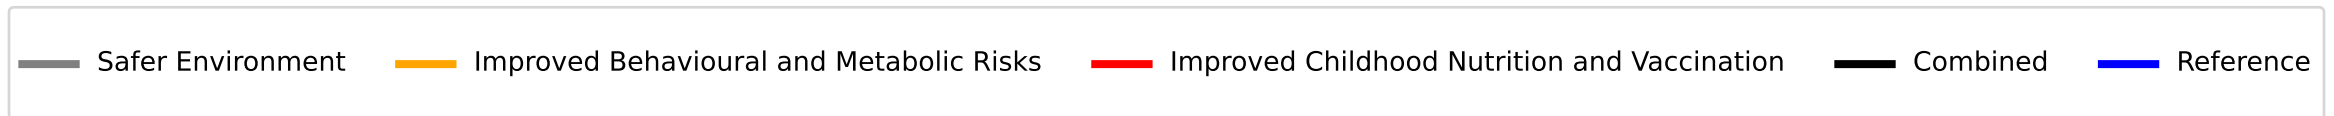

# Ecuador

Supplemental Results Figure S11. All-cause age standardised death rates (A) and all age death counts (B), for the past and for five future scenarios, 1990–2050

1710

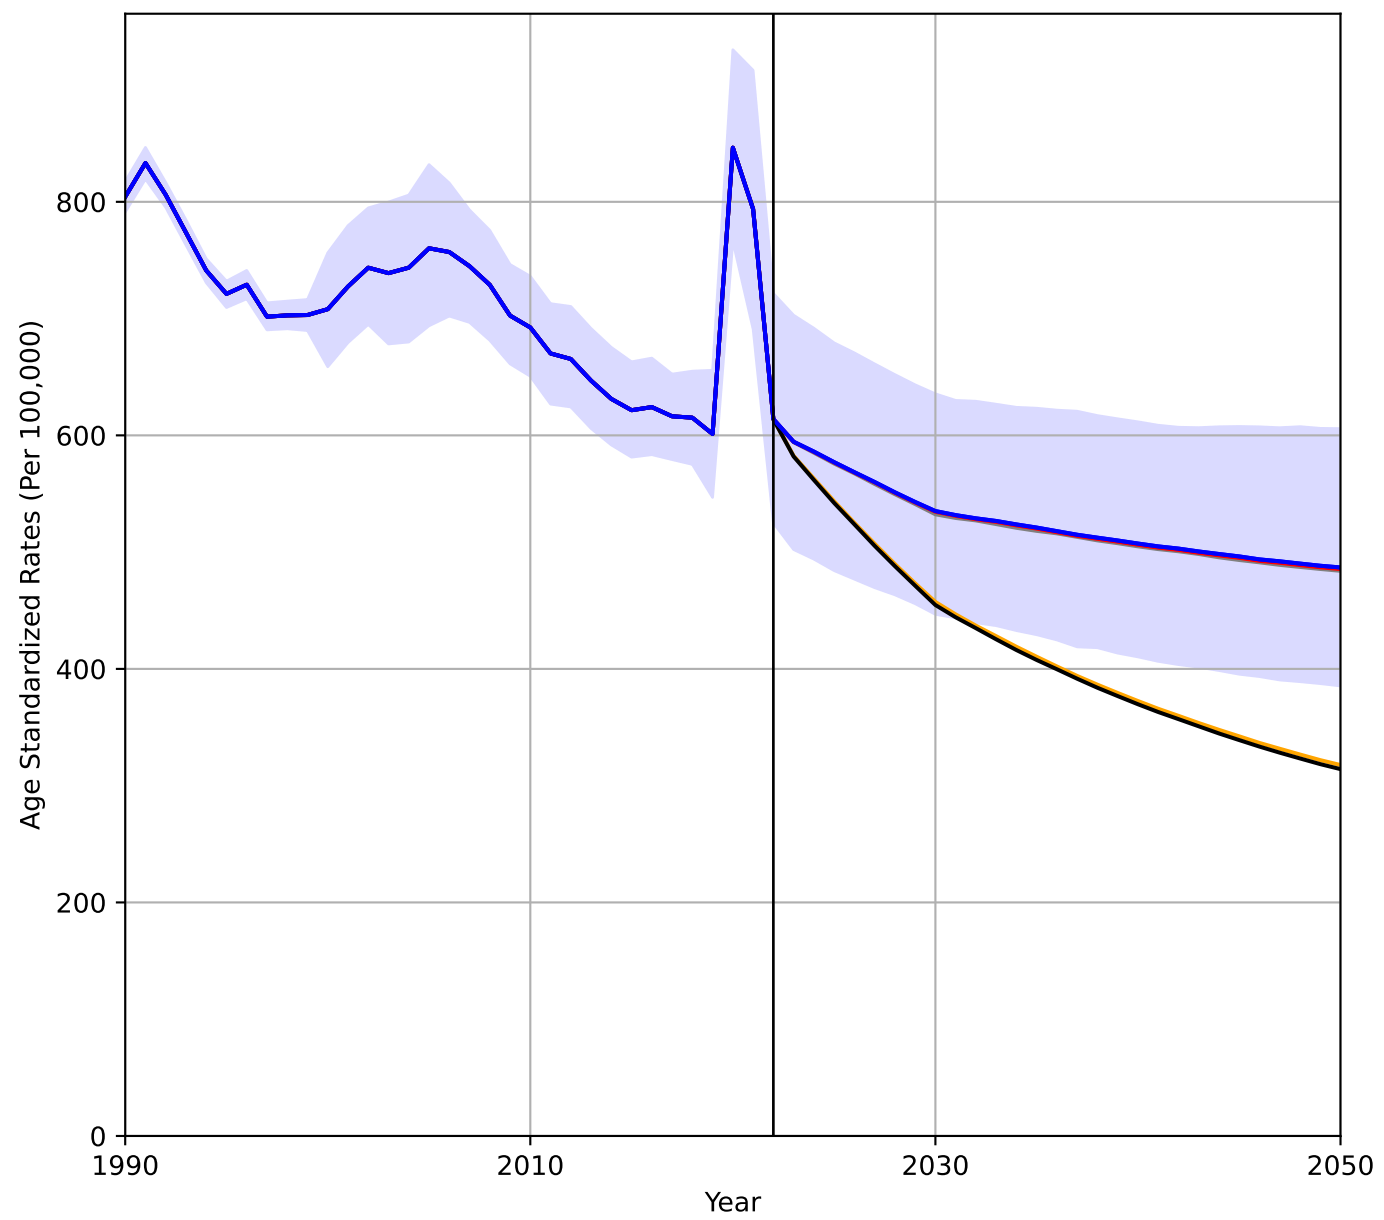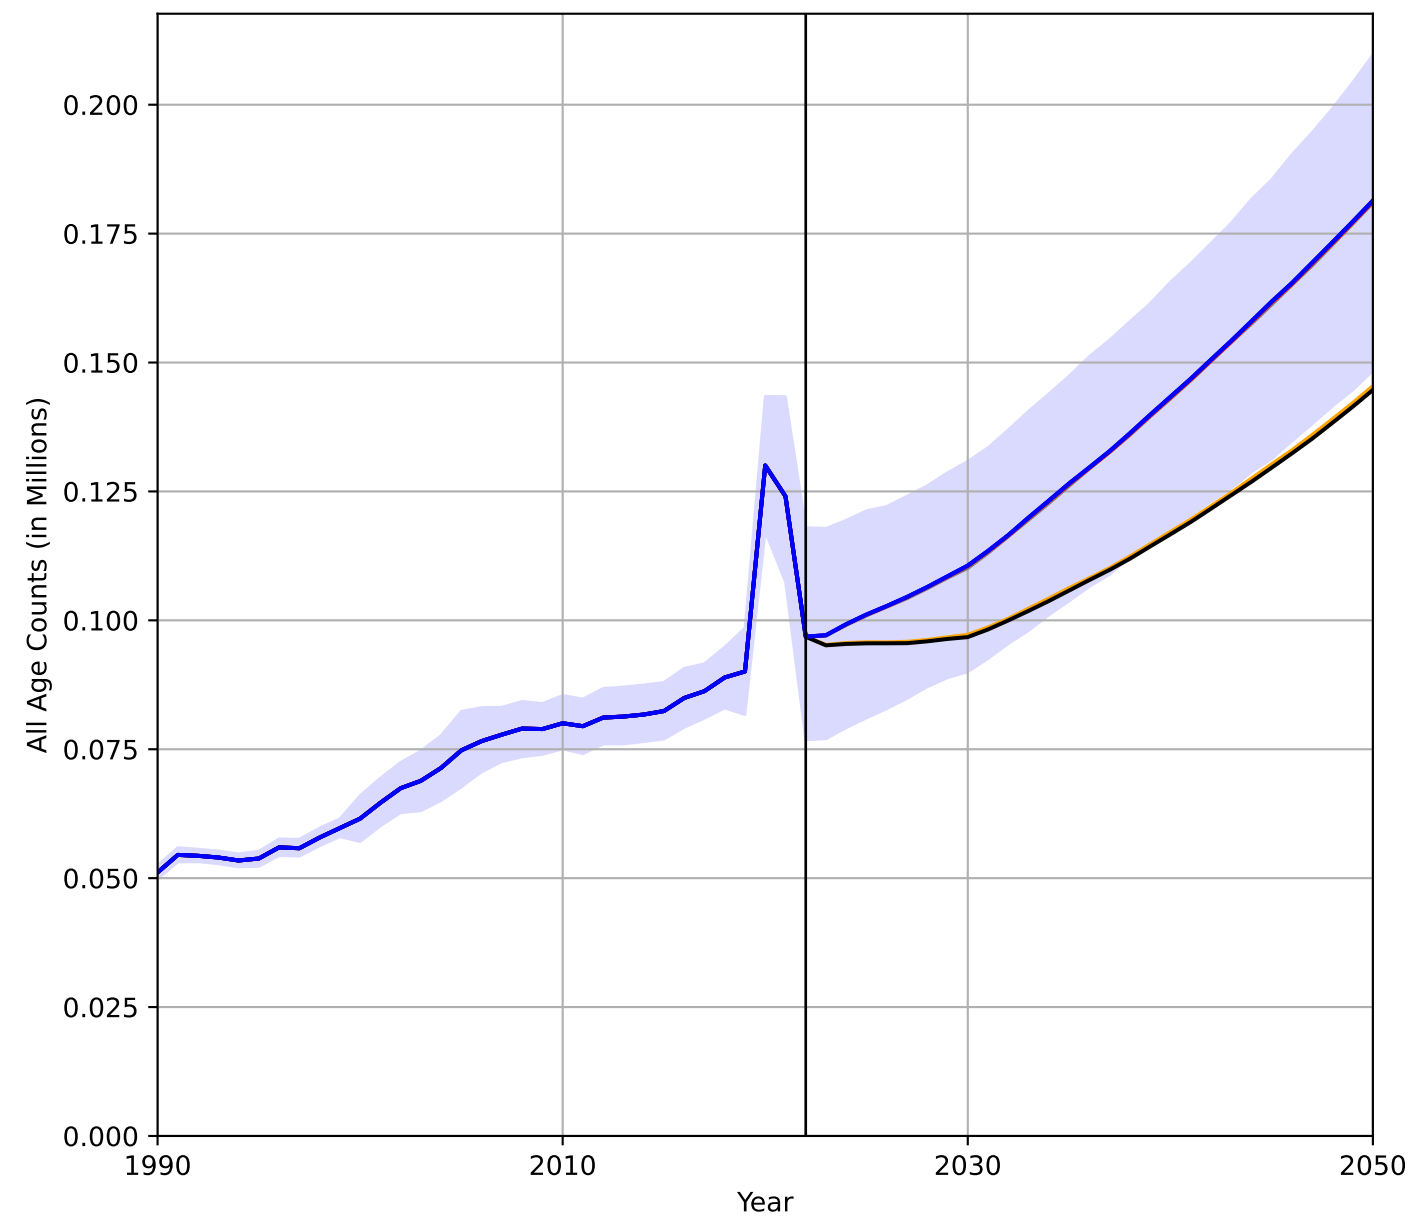

# Peru

Supplemental Results Figure S11. All-cause age standardised death rates (A) and all age death counts (B), for the past and for five future scenarios, 1990–2050

1711

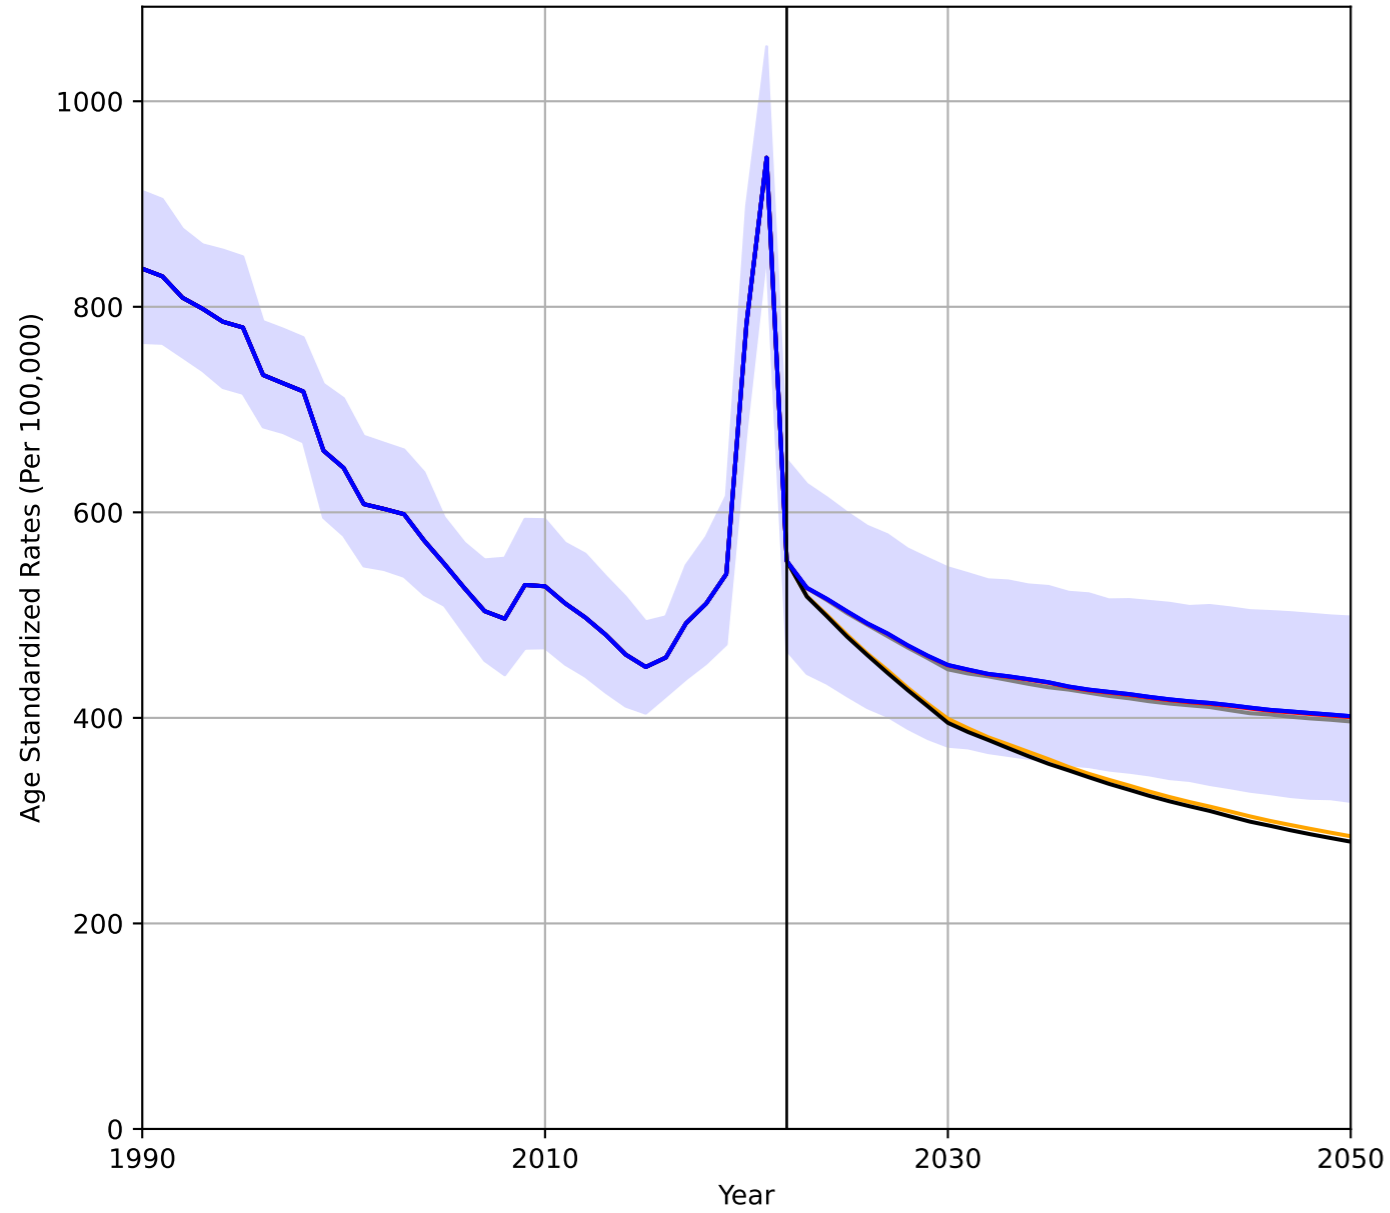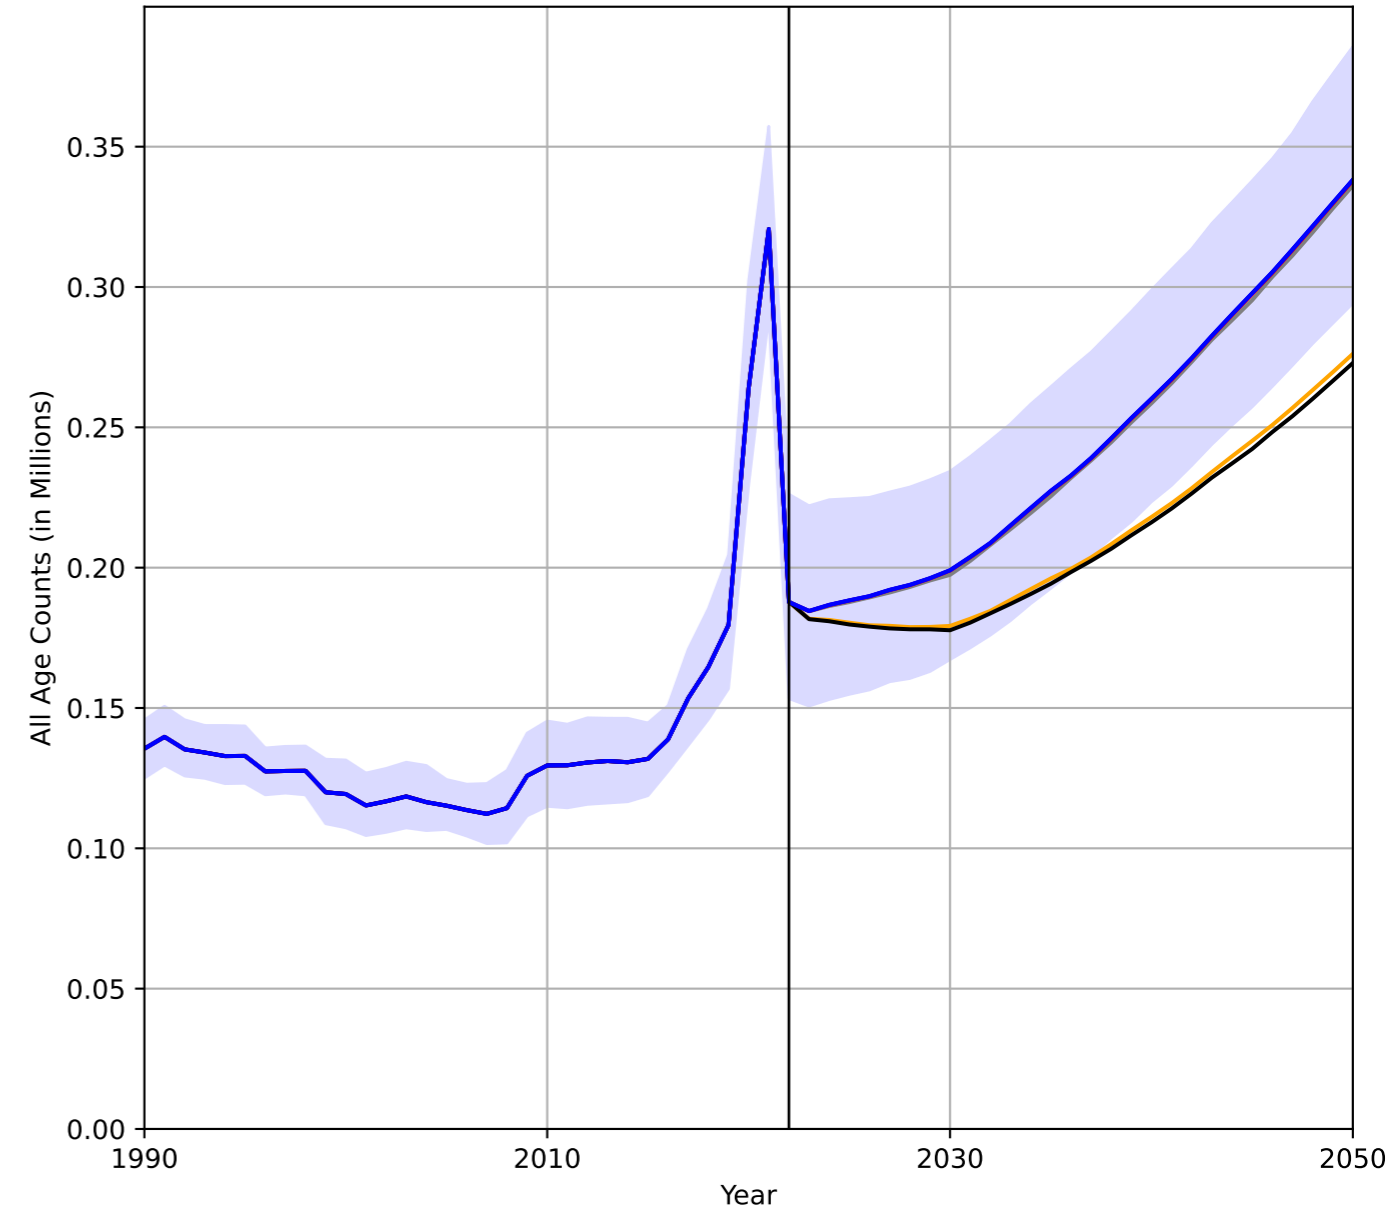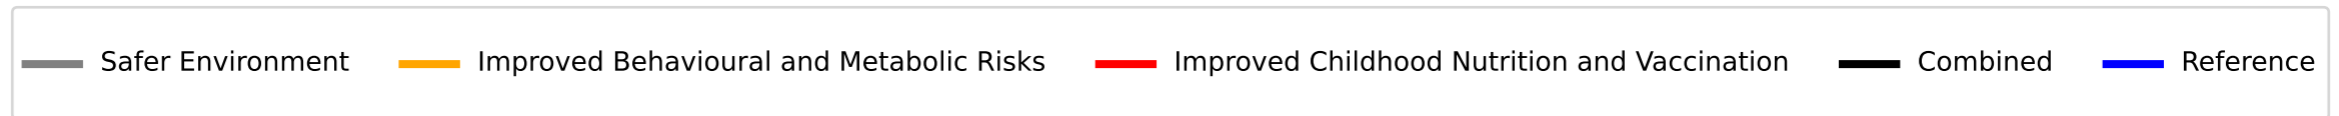



# Antigua And Barbuda

Supplemental Results Figure S11. All-cause age standardised death rates (A) and all age death counts (B), for the past and for five future scenarios, 1990–2050

1712

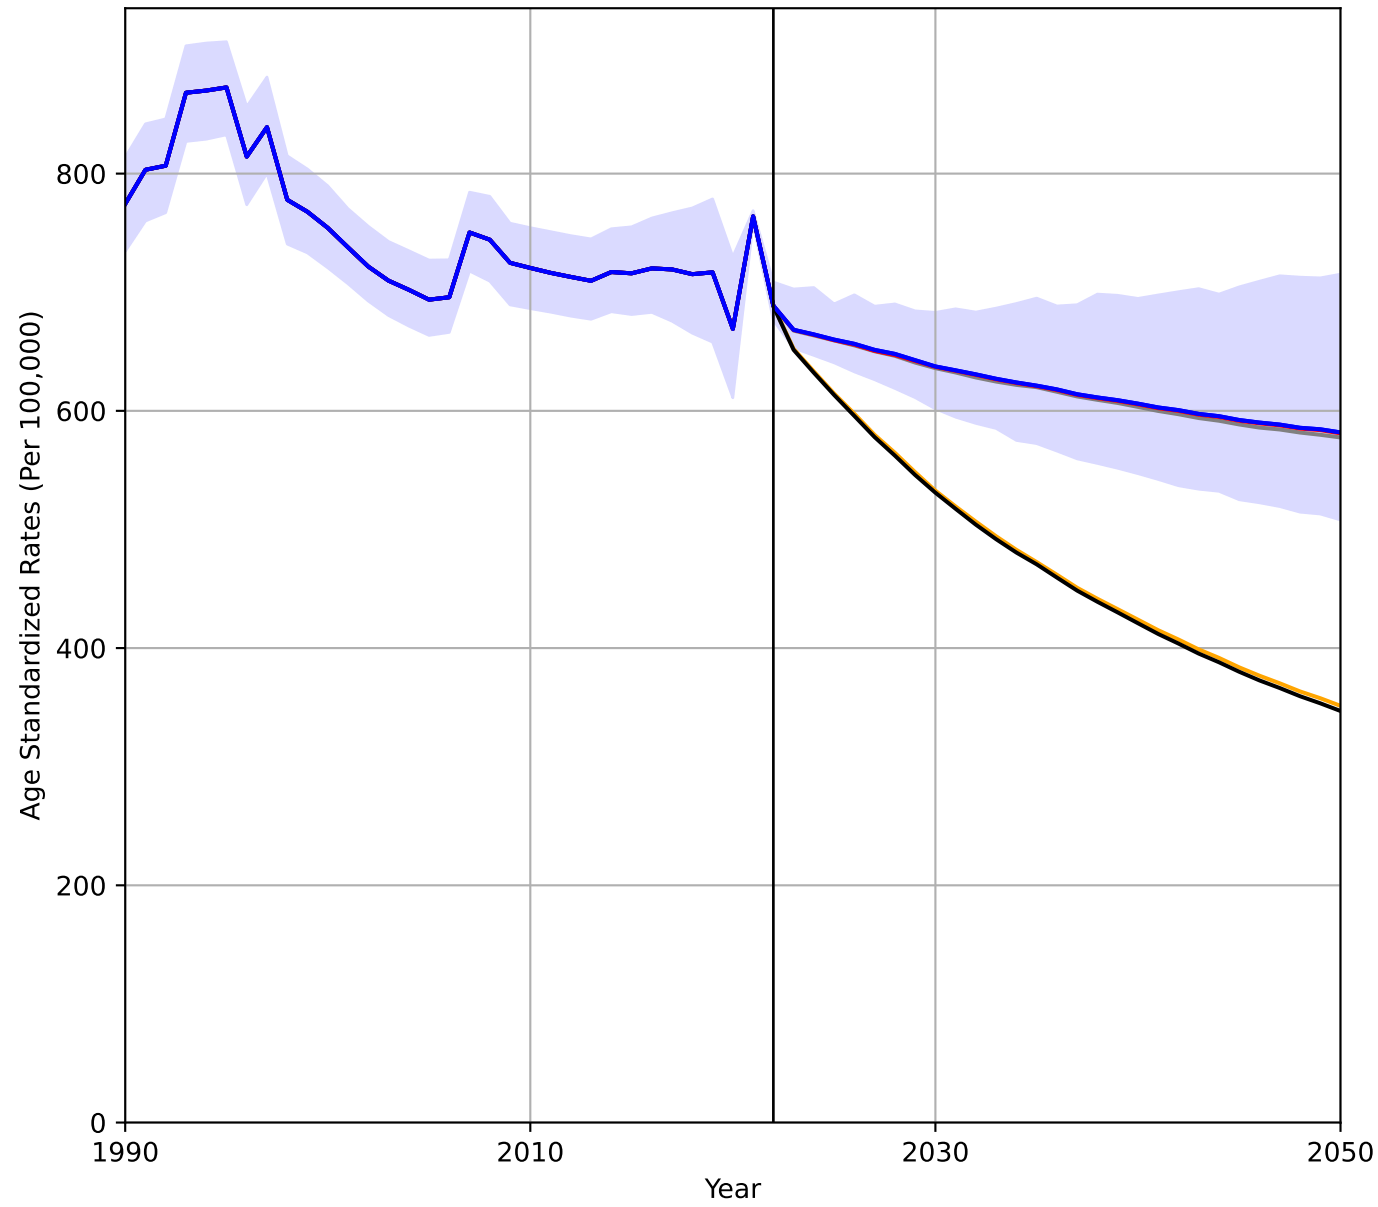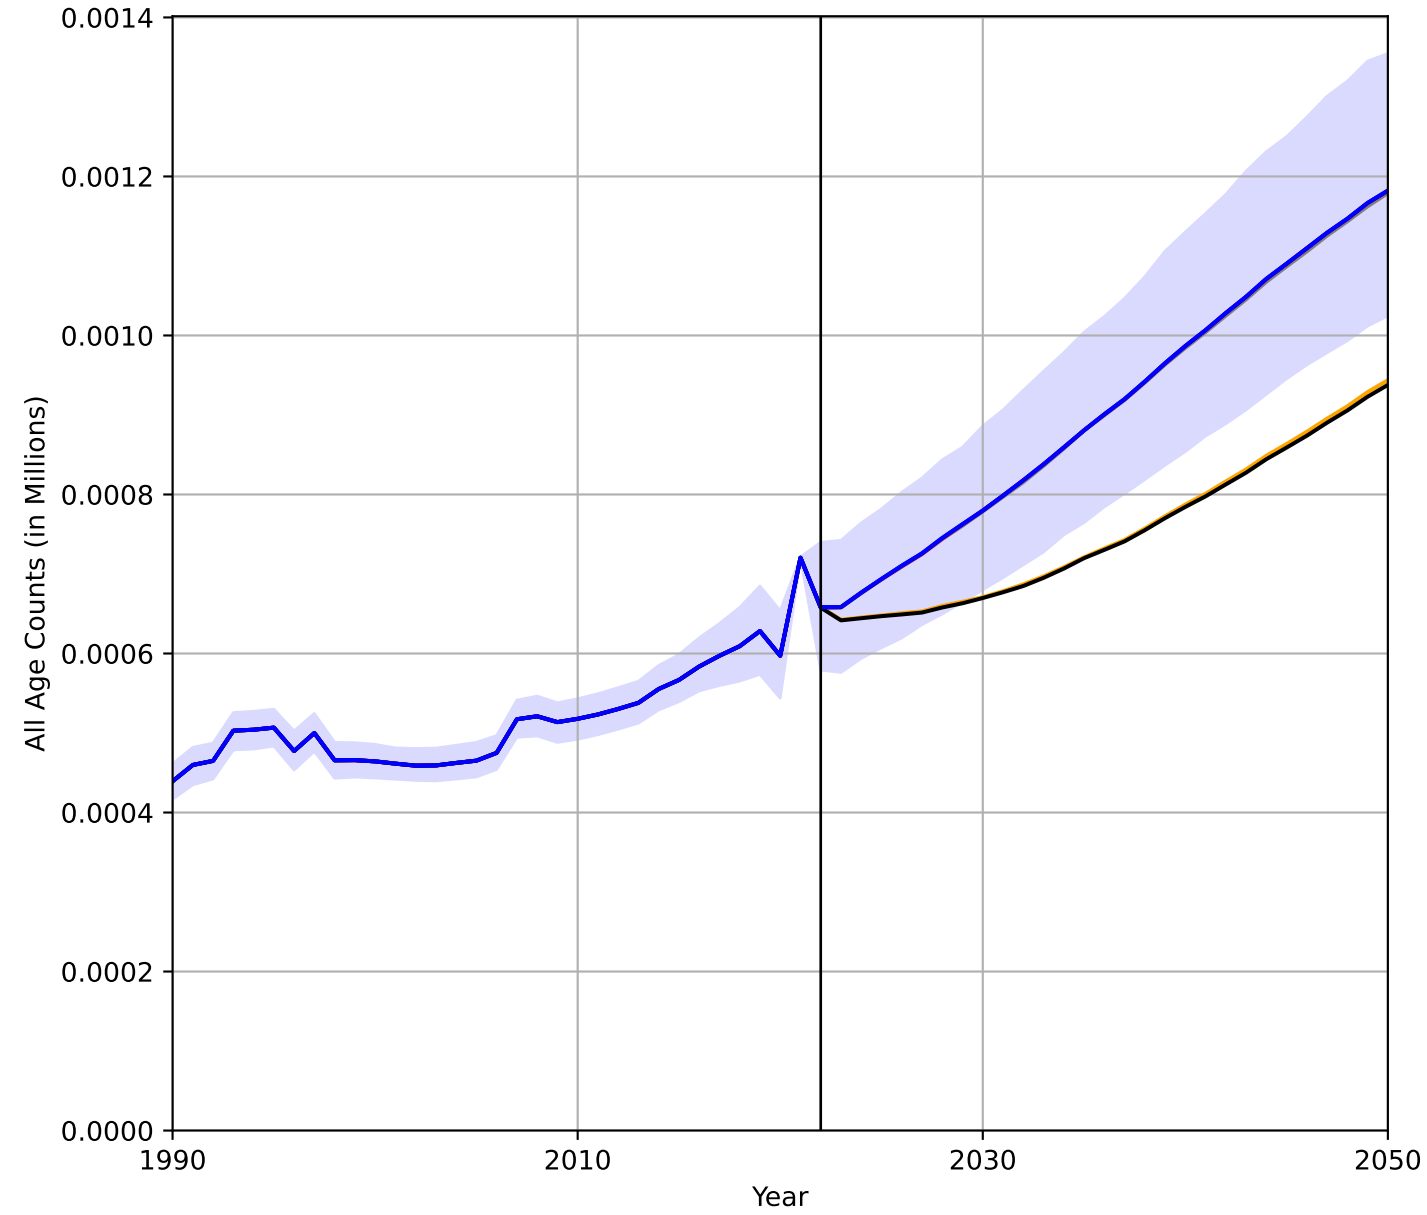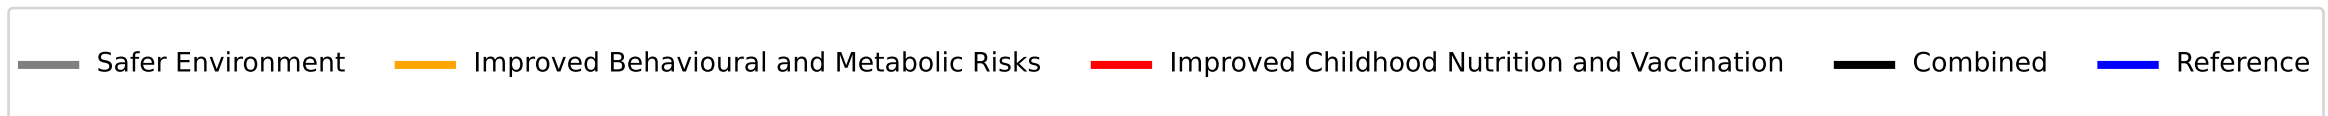

# The Bahamas

Supplemental Results Figure S11. All-cause age standardised death rates (A) and all age death counts (B), for the past and for five future scenarios, 1990–2050

1713

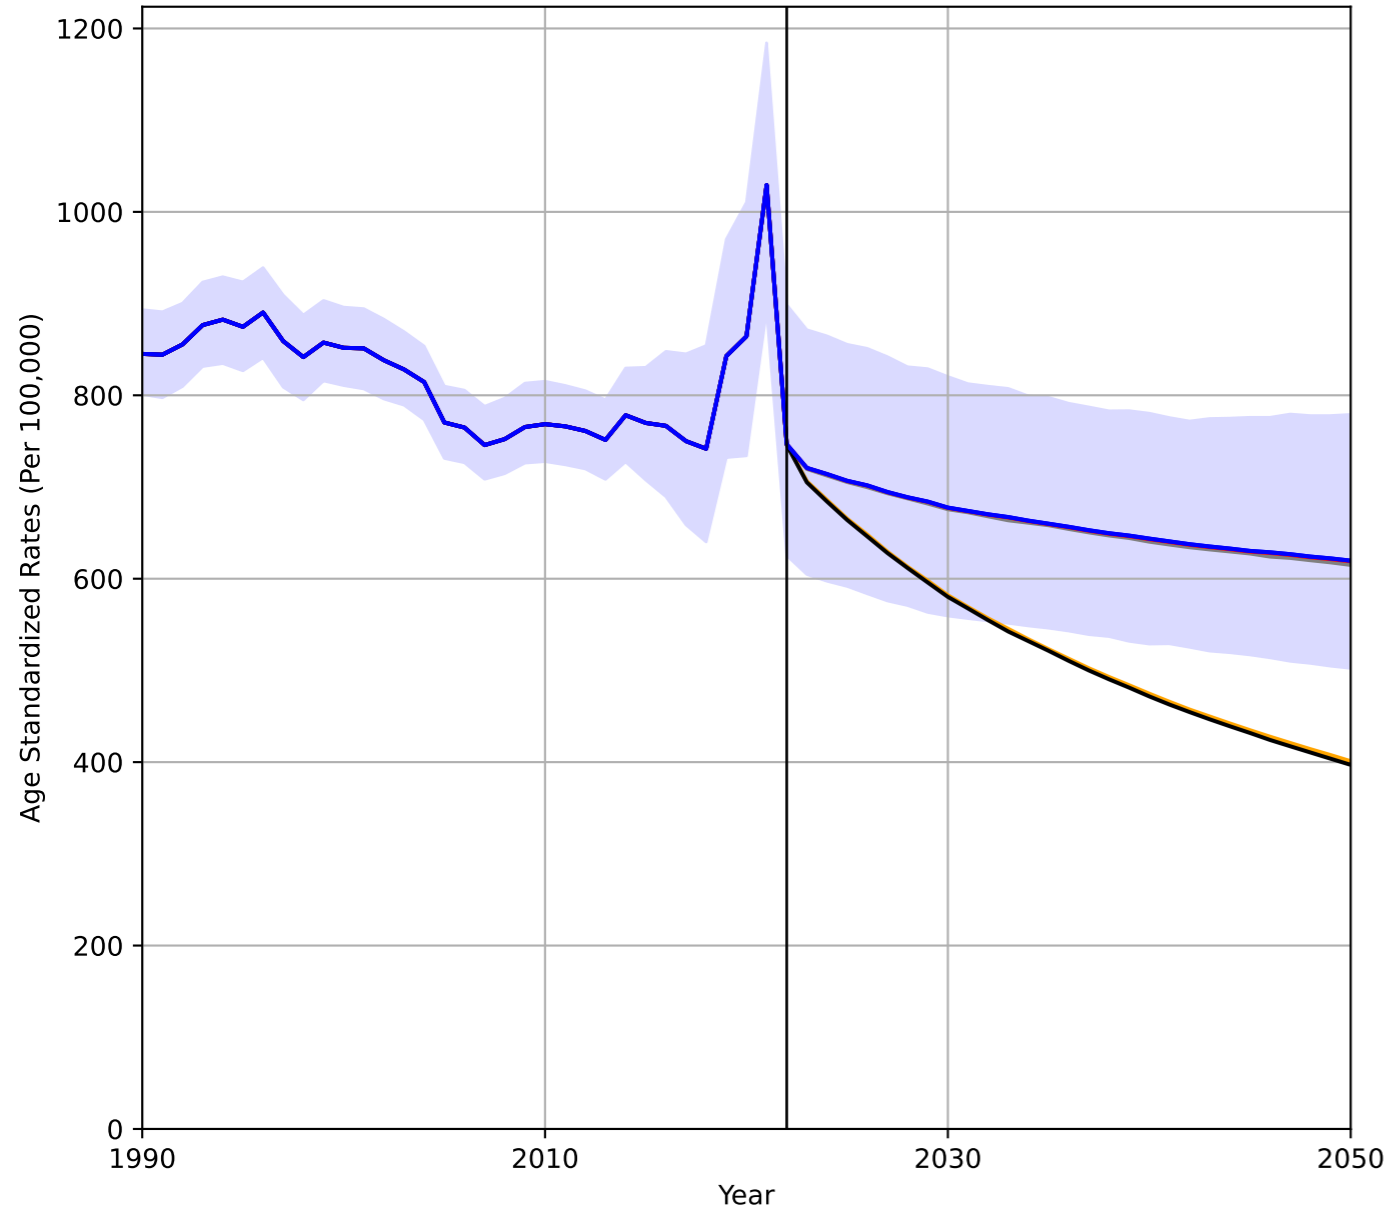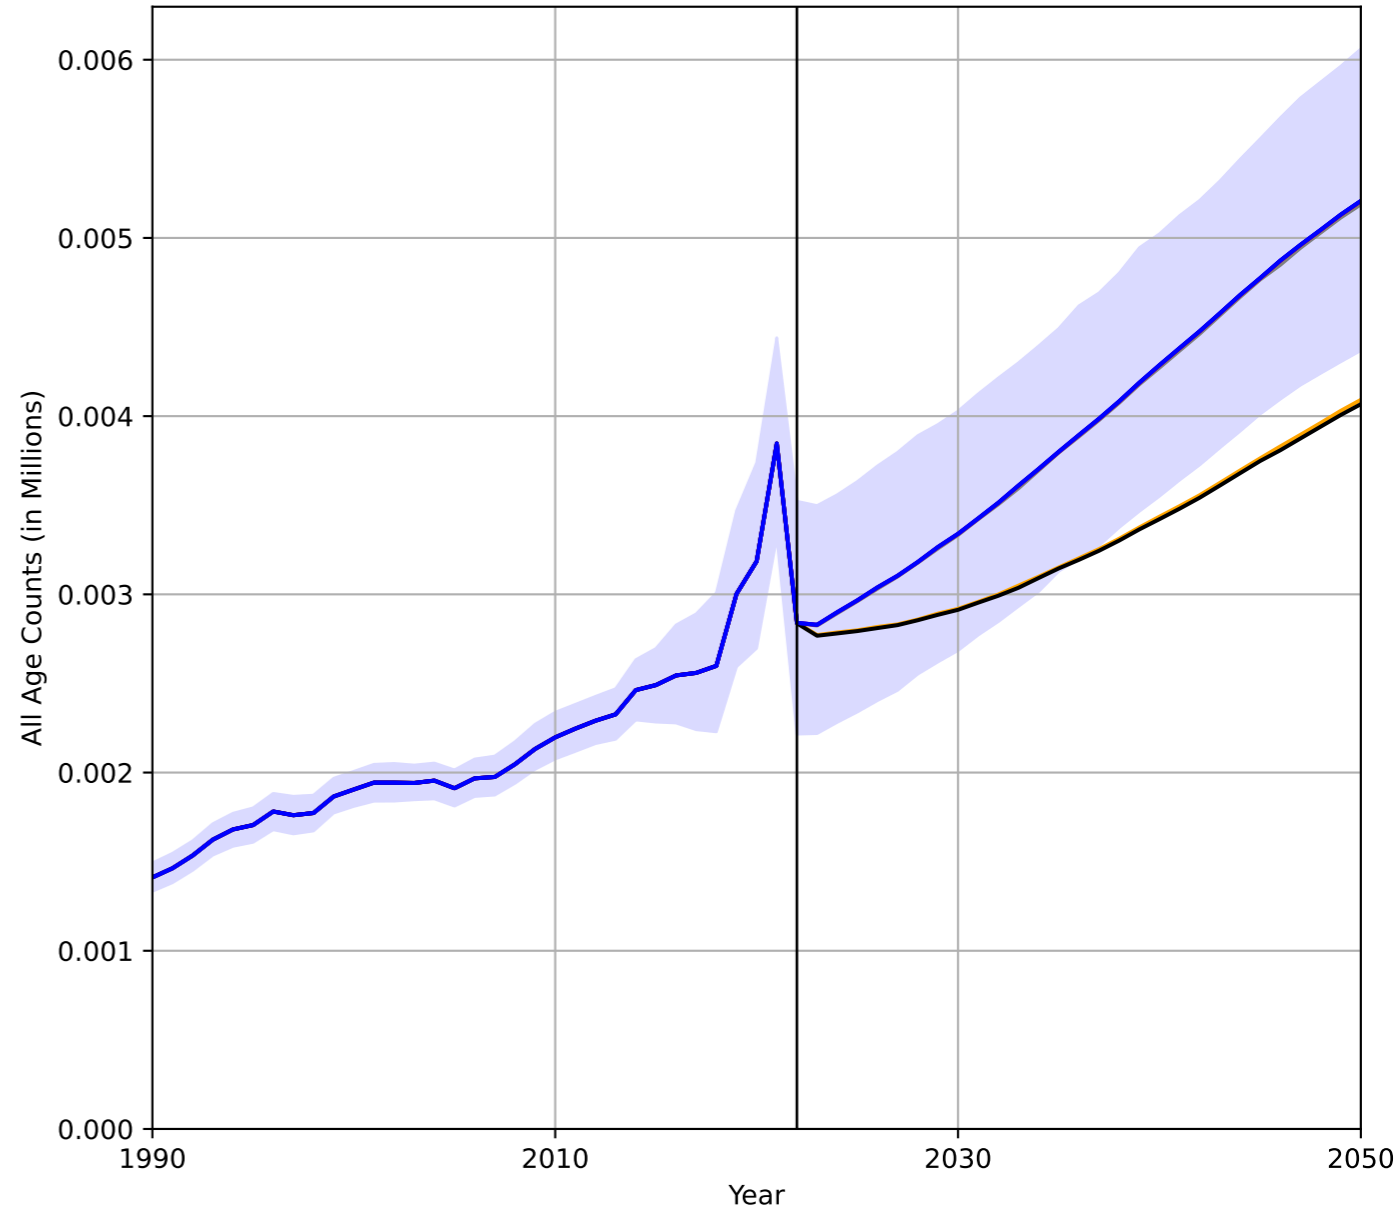

# Barbados

Supplemental Results Figure S11. All-cause age standardised death rates (A) and all age death counts (B), for the past and for five future scenarios, 1990–2050

1714

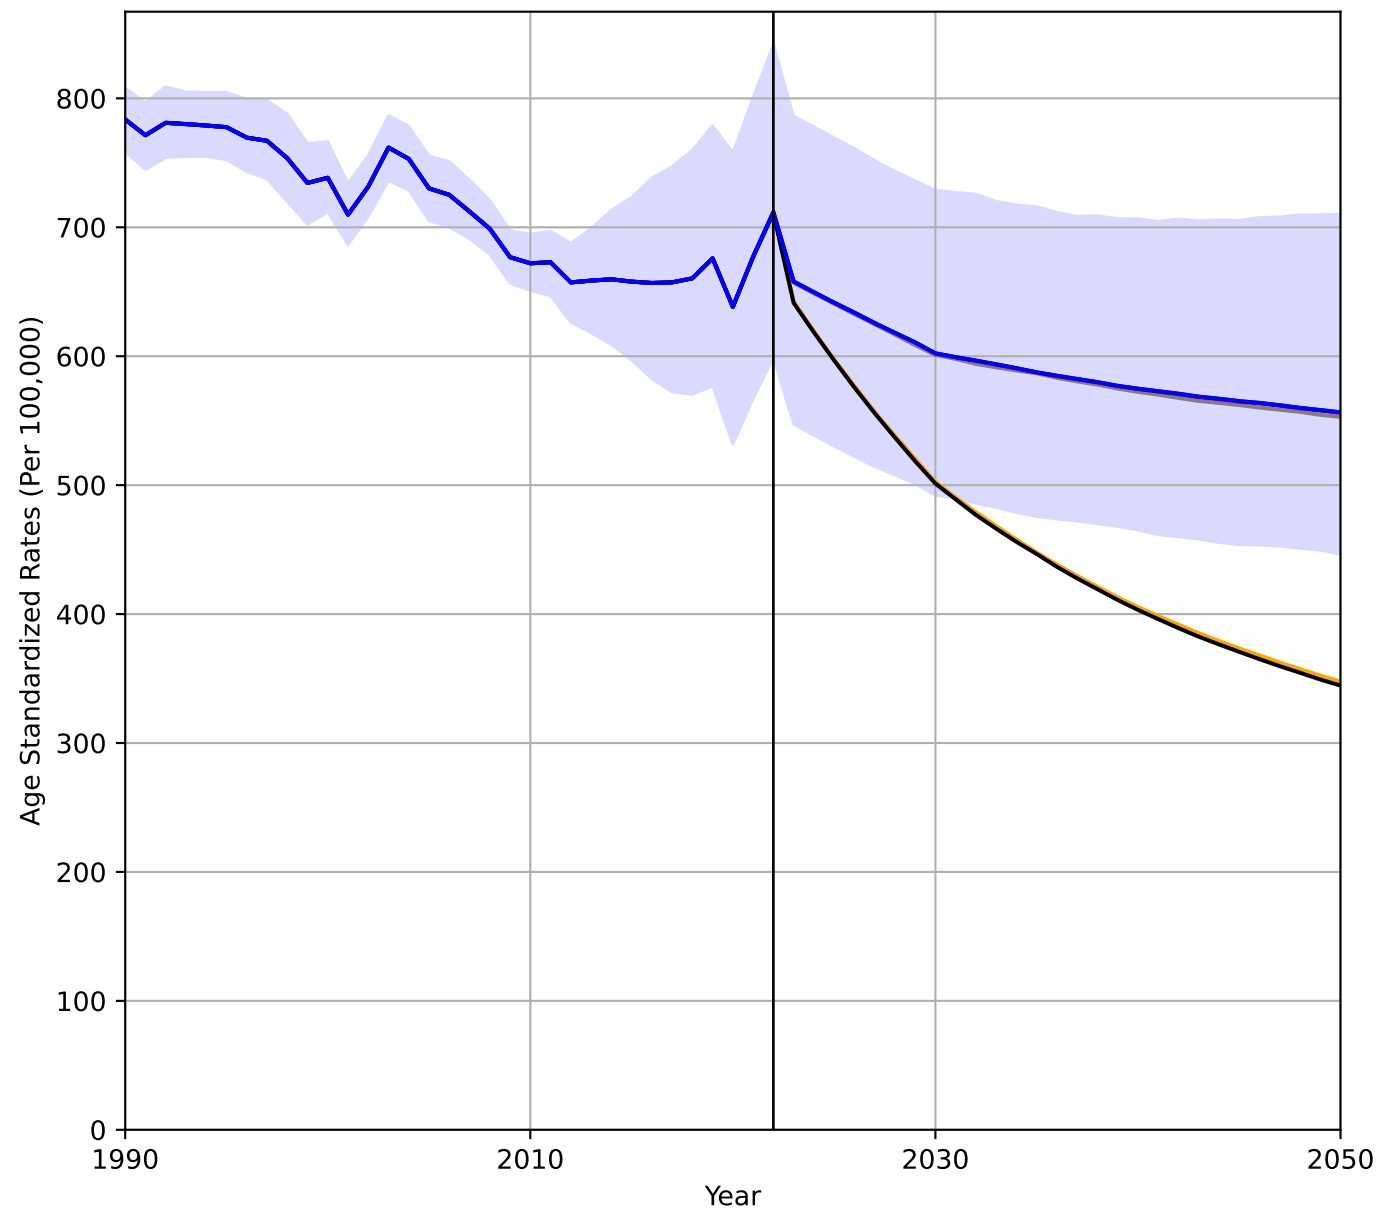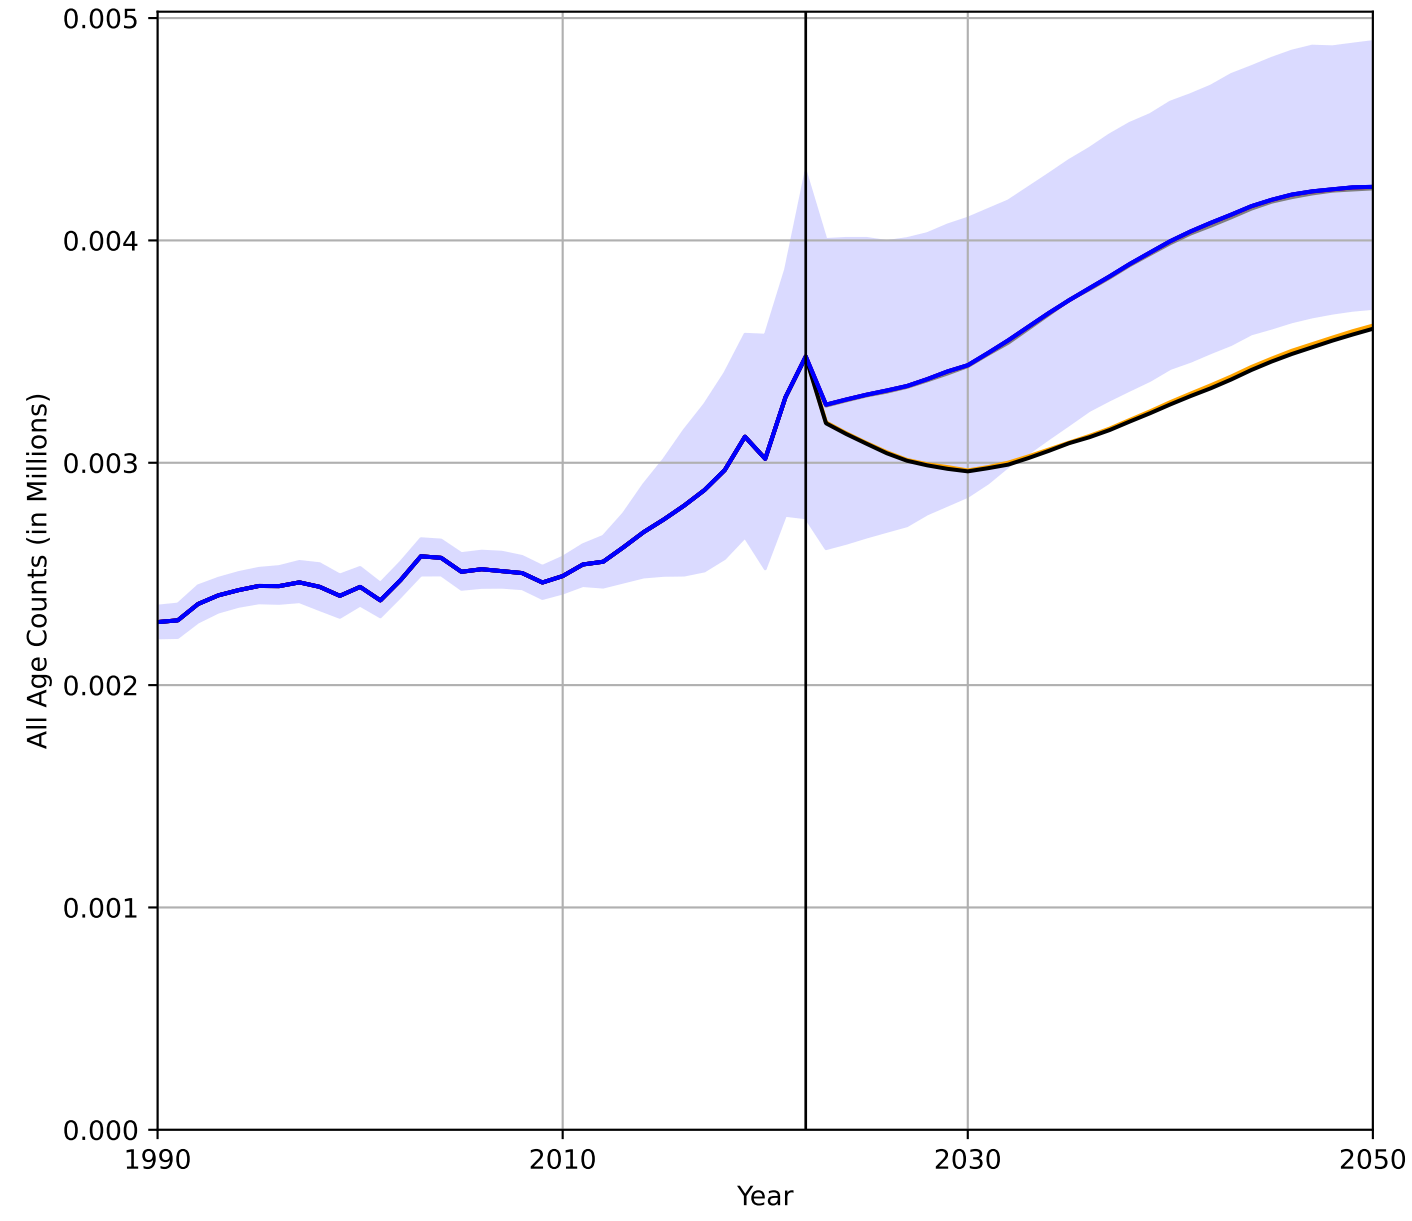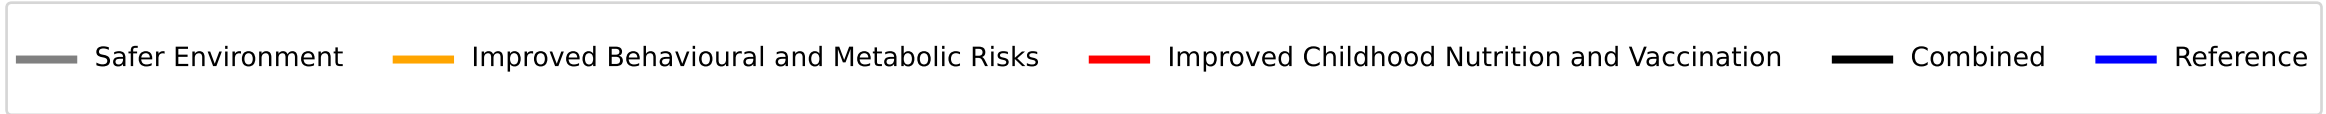

# Belize

Supplemental Results Figure S11. All-cause age standardised death rates (A) and all age death counts (B), for the past and for five future scenarios, 1990–2050

1715

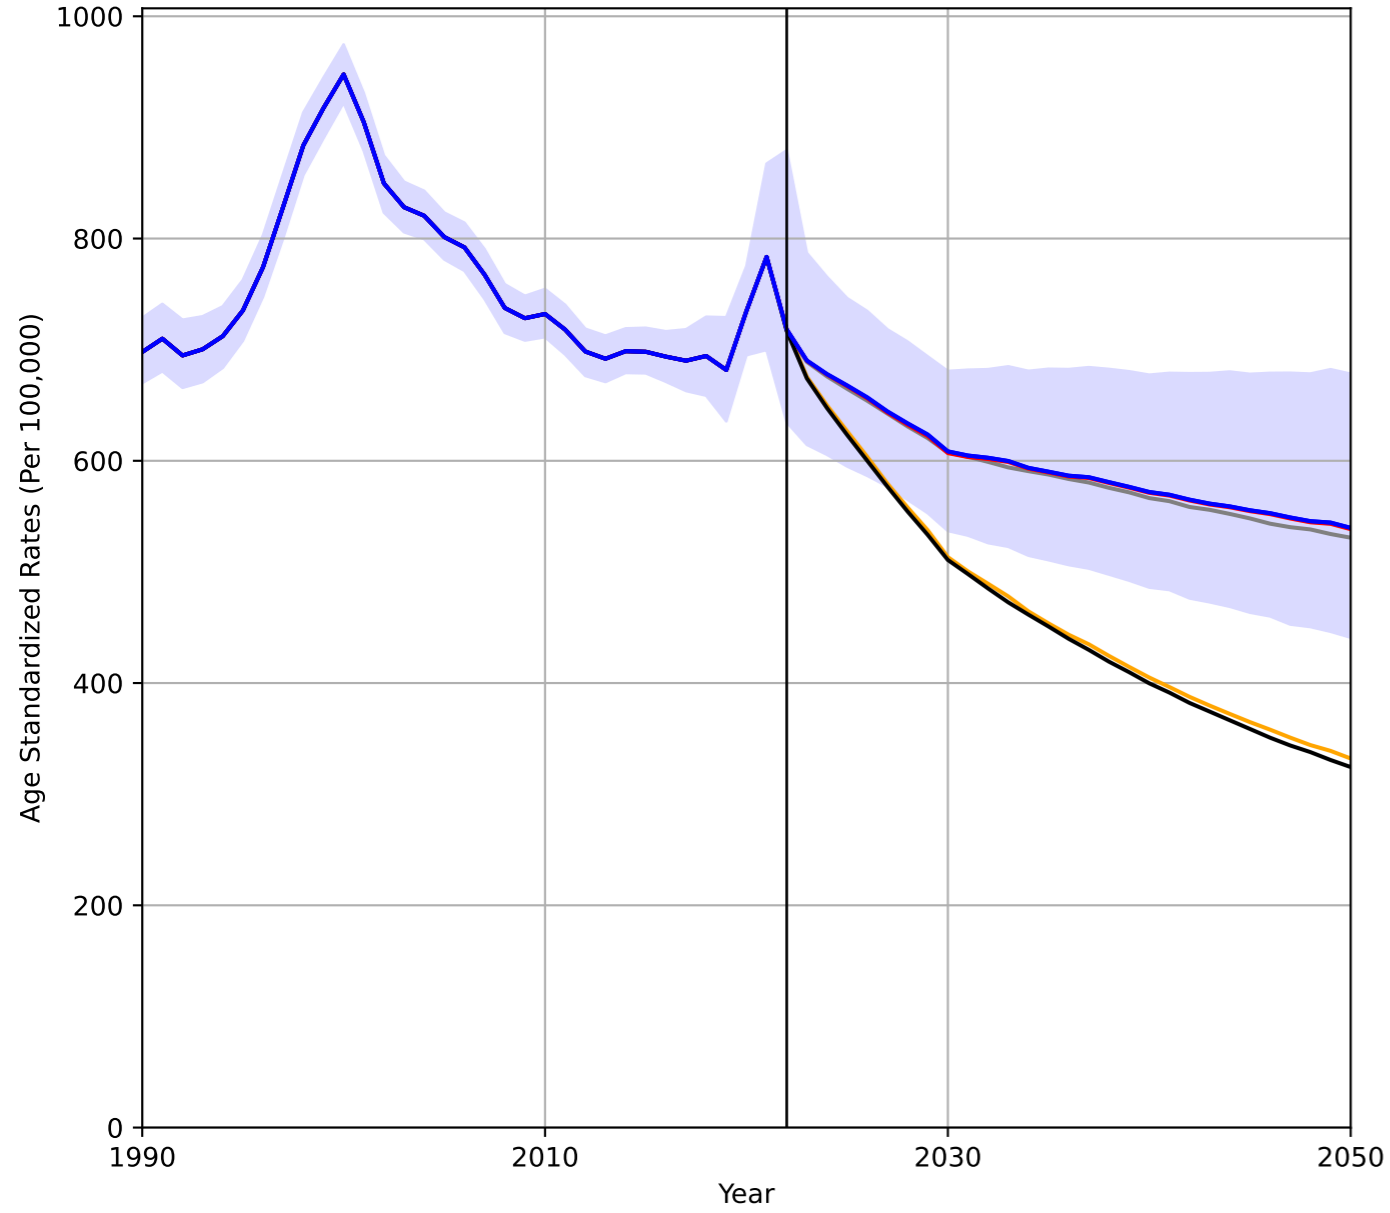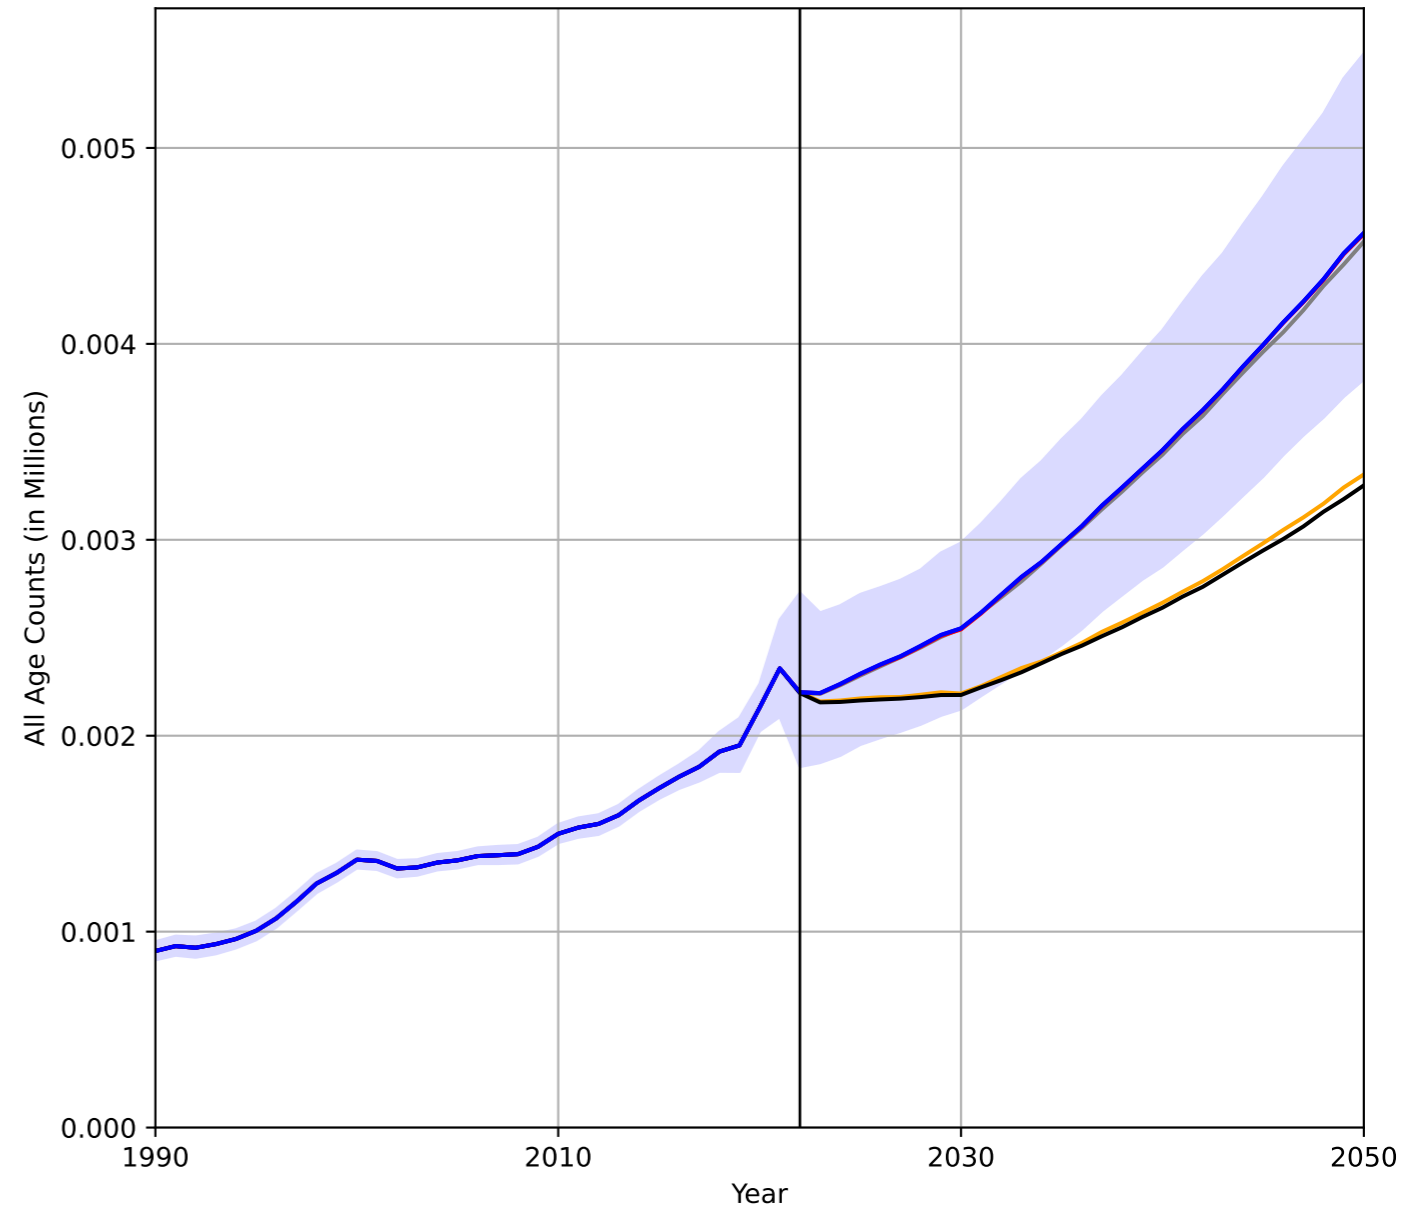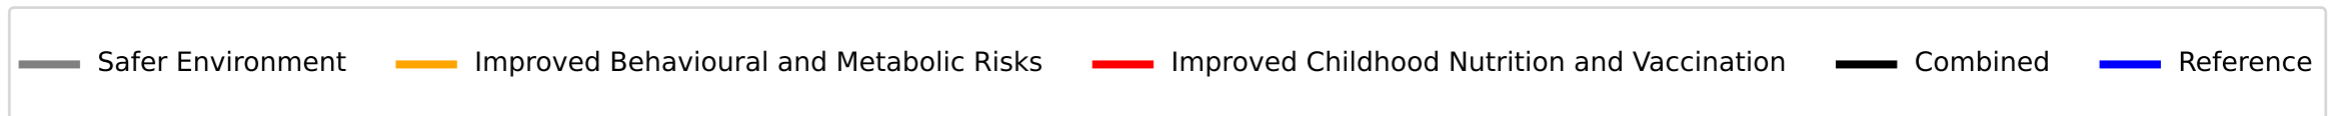

# Bermuda

Supplemental Results Figure S11. All-cause age standardised death rates (A) and all age death counts (B), for the past and for five future scenarios, 1990–2050

1716

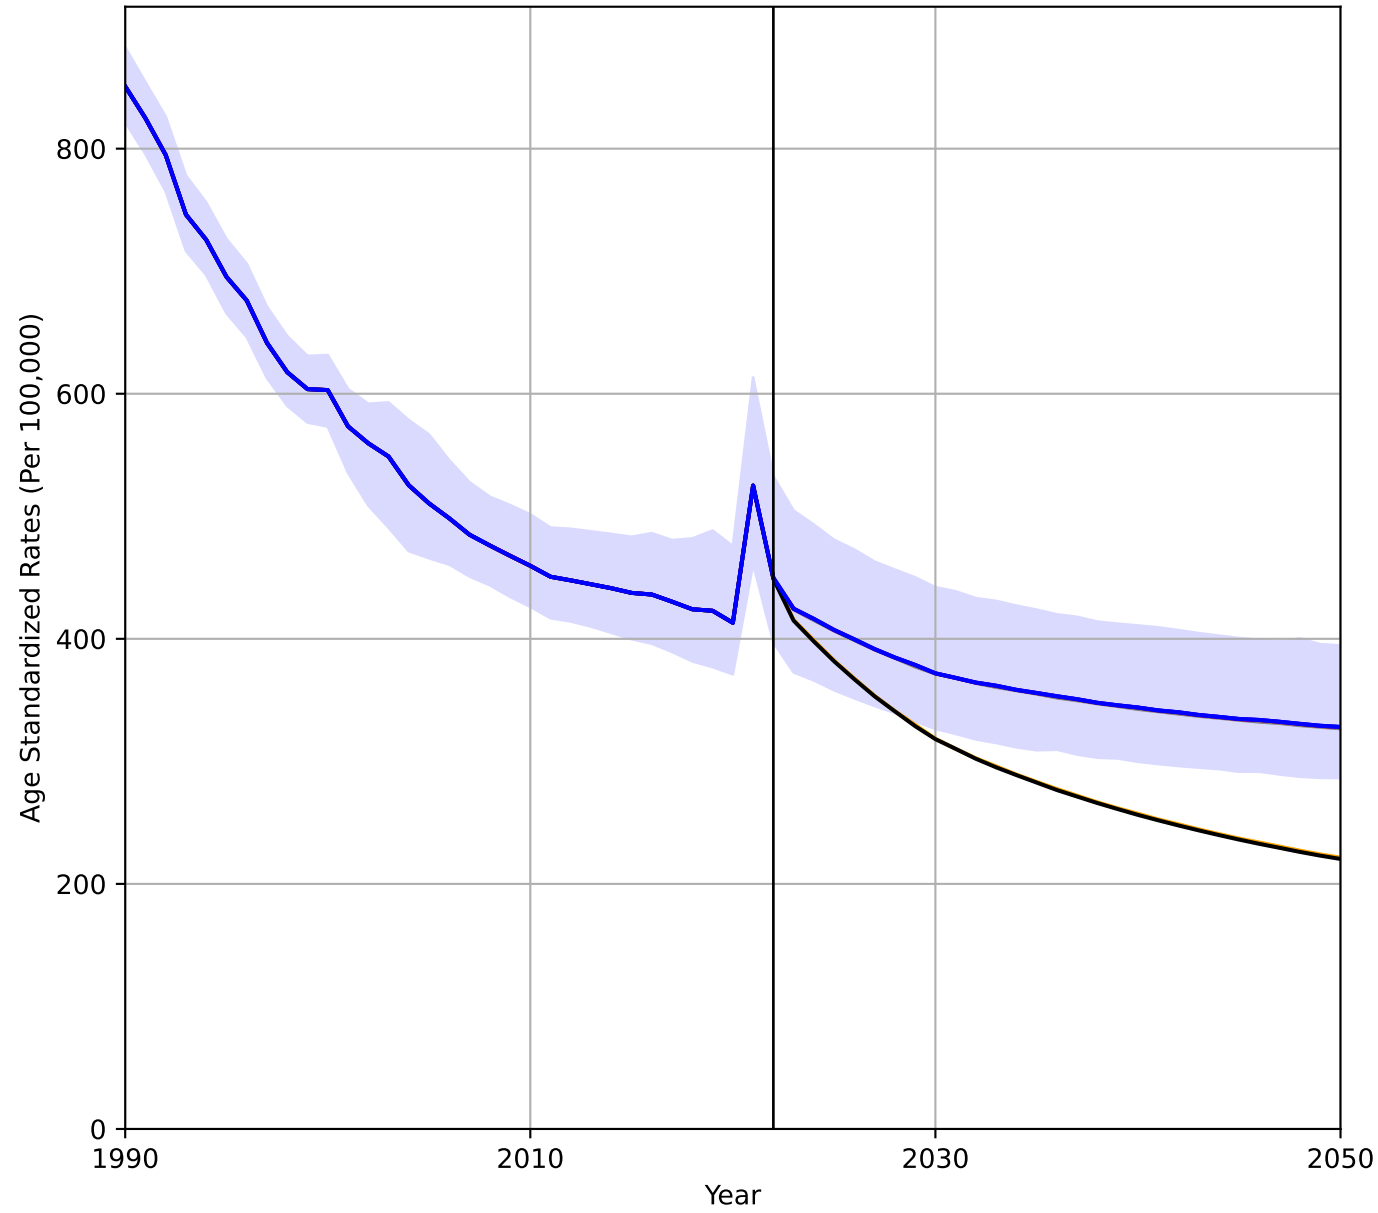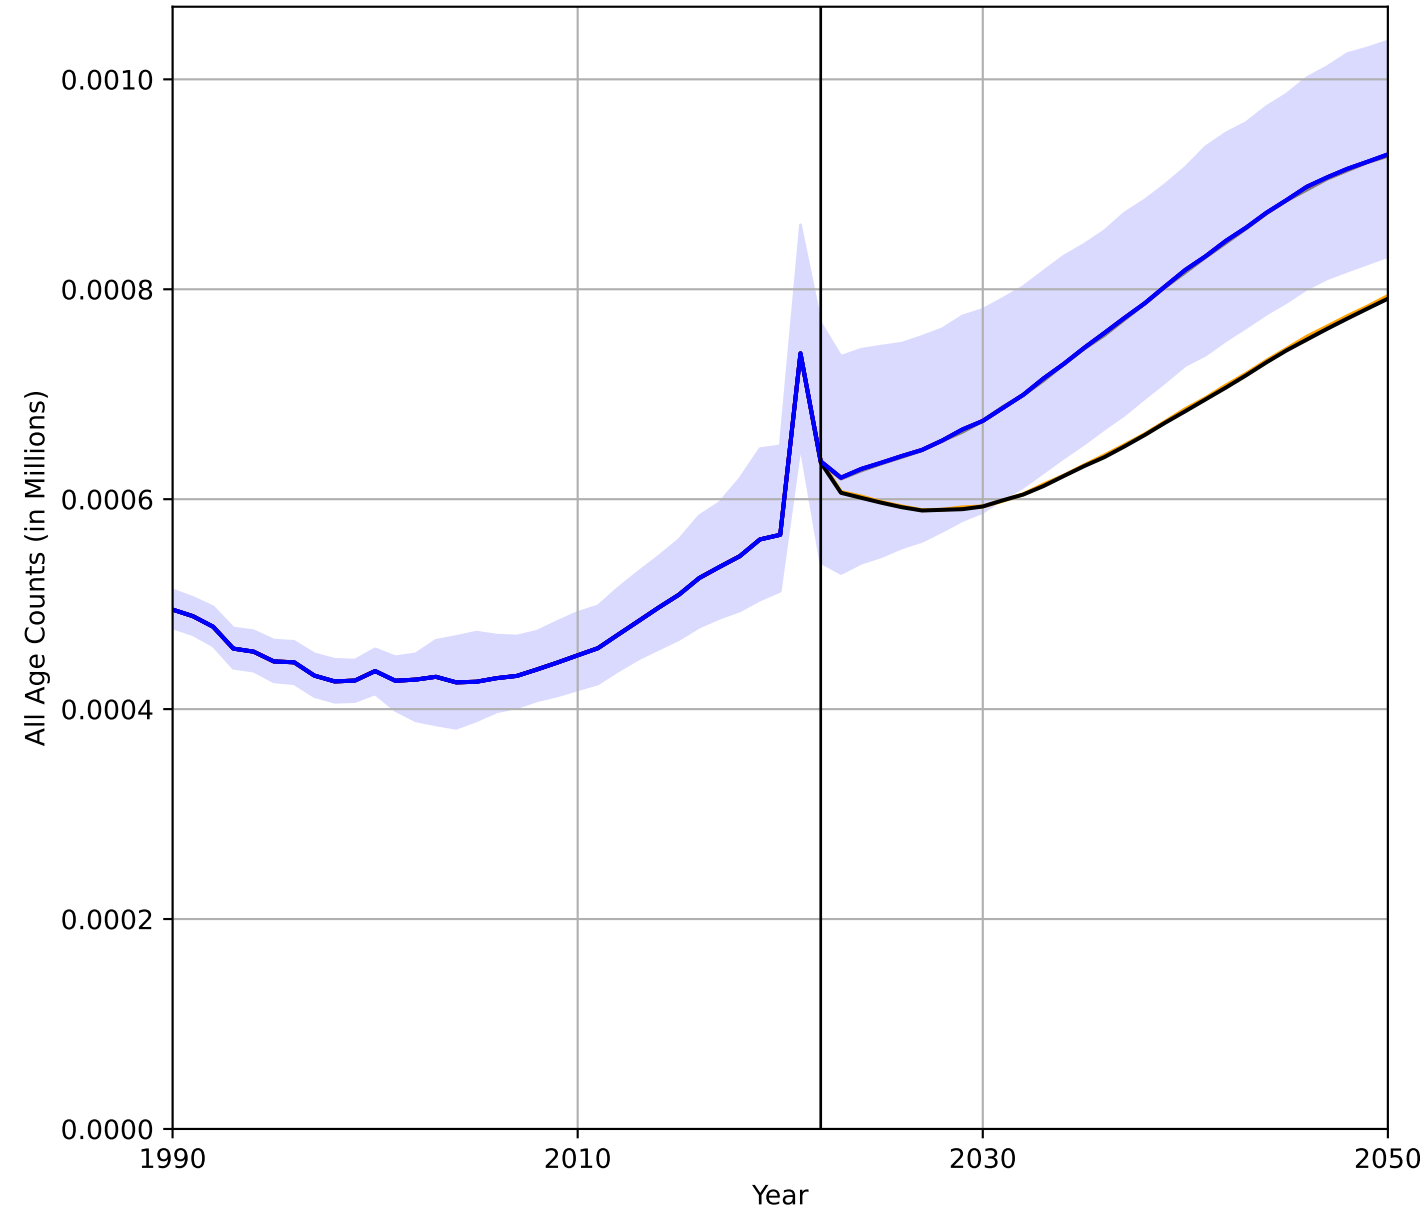

# Cuba

Supplemental Results Figure S11. All-cause age standardised death rates (A) and all age death counts (B), for the past and for five future scenarios, 1990–2050

1717

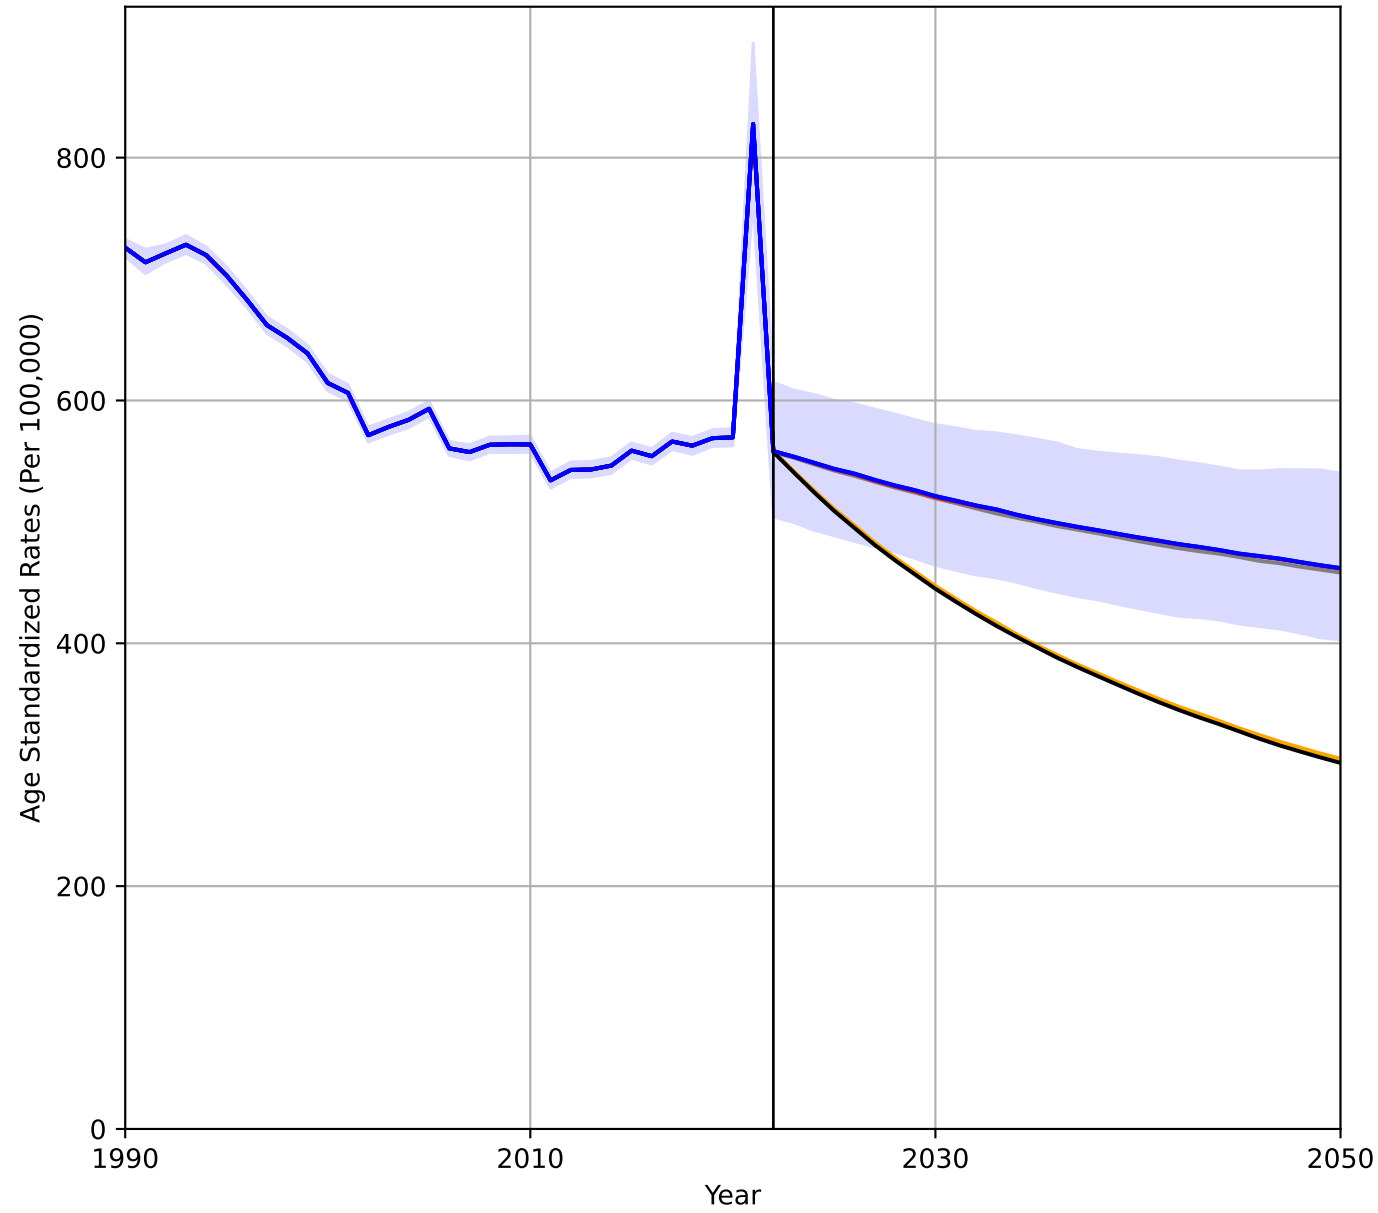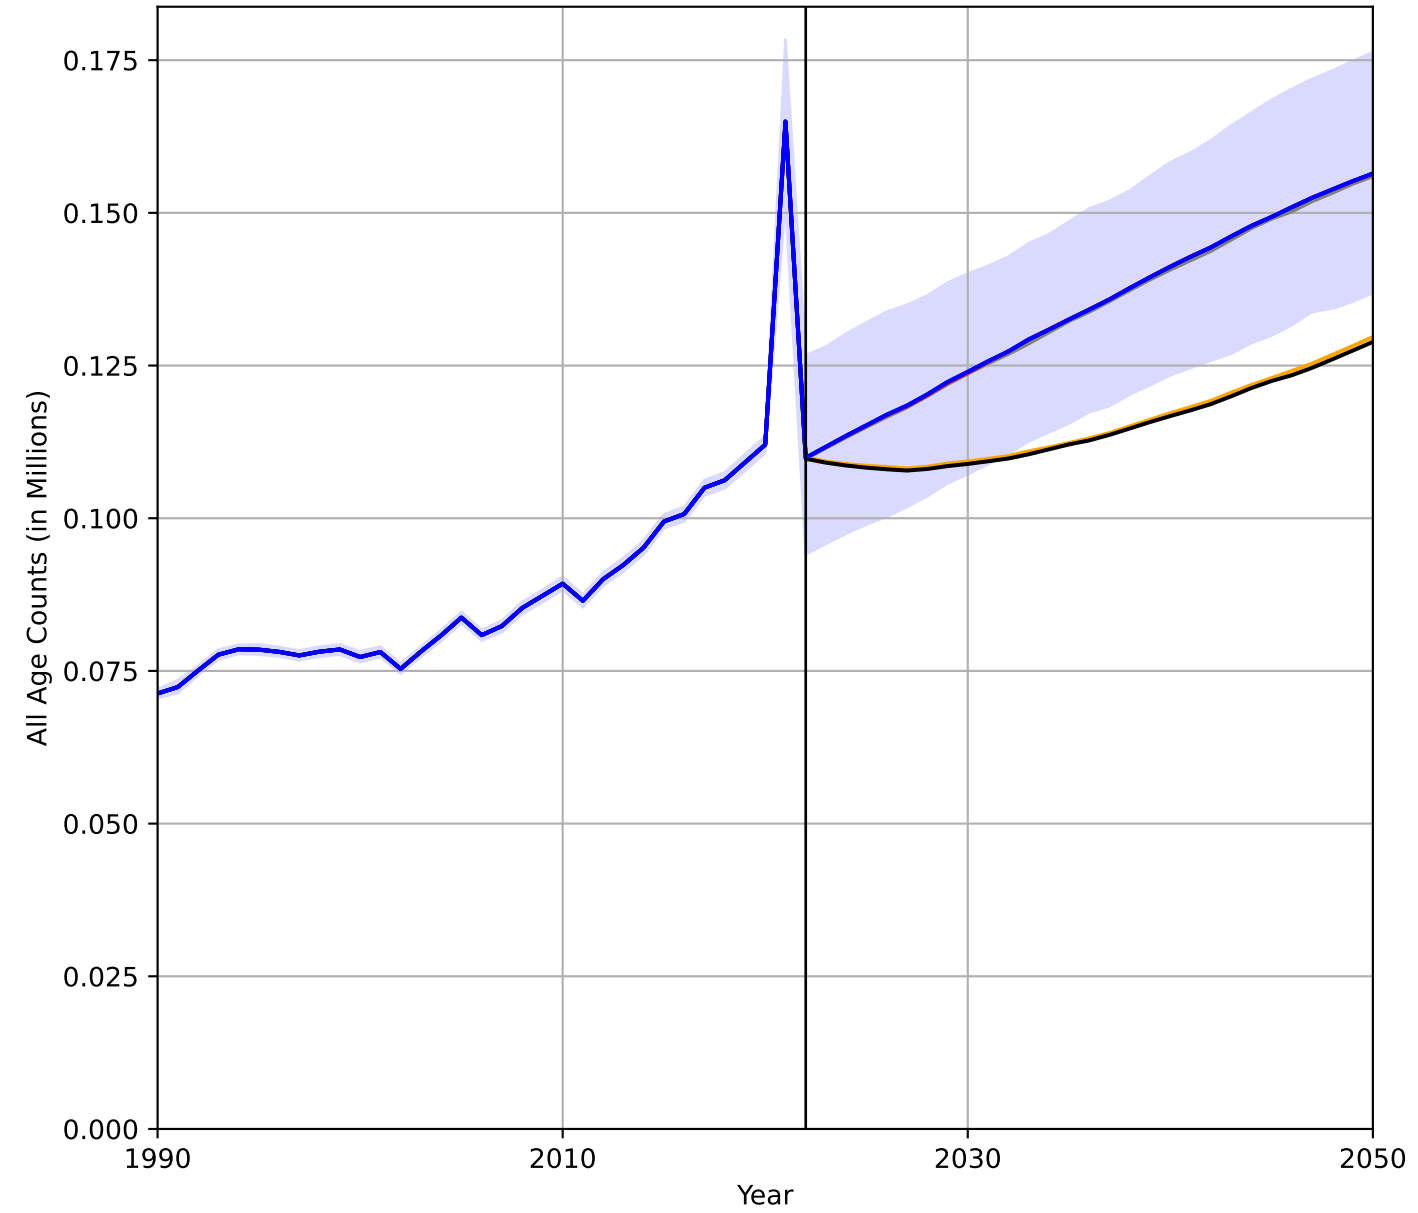

# Dominica

Supplemental Results Figure S11. All-cause age standardised death rates (A) and all age death counts (B), for the past and for five future scenarios, 1990–2050

1718

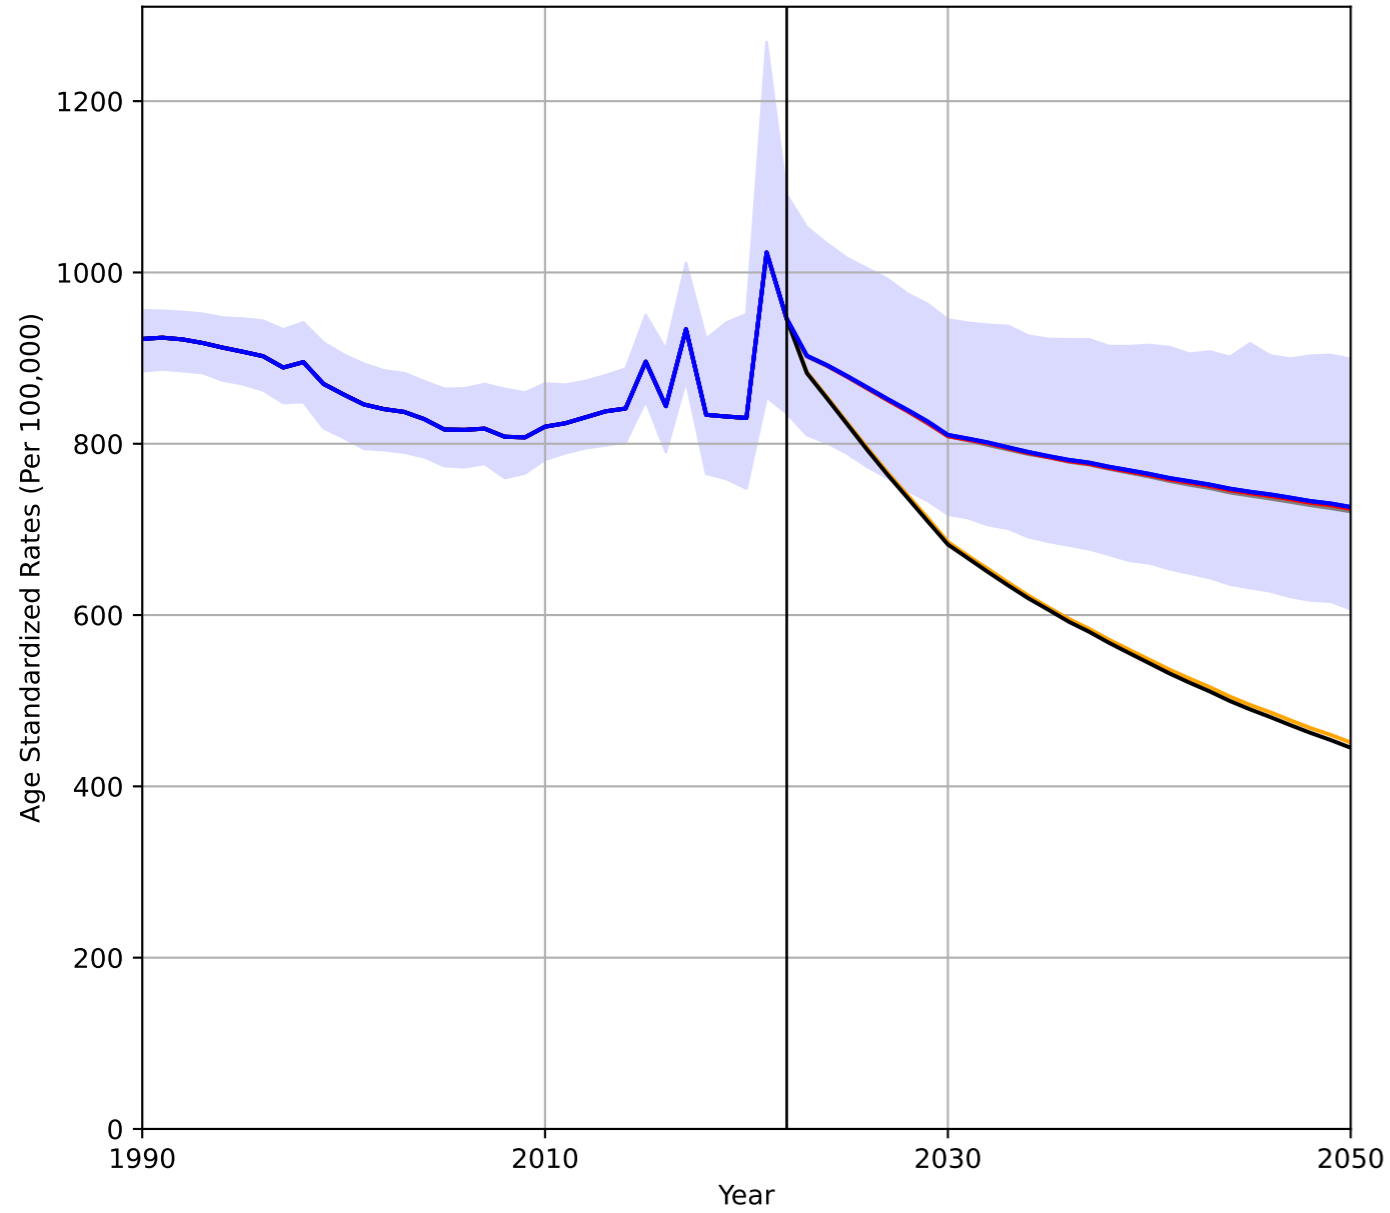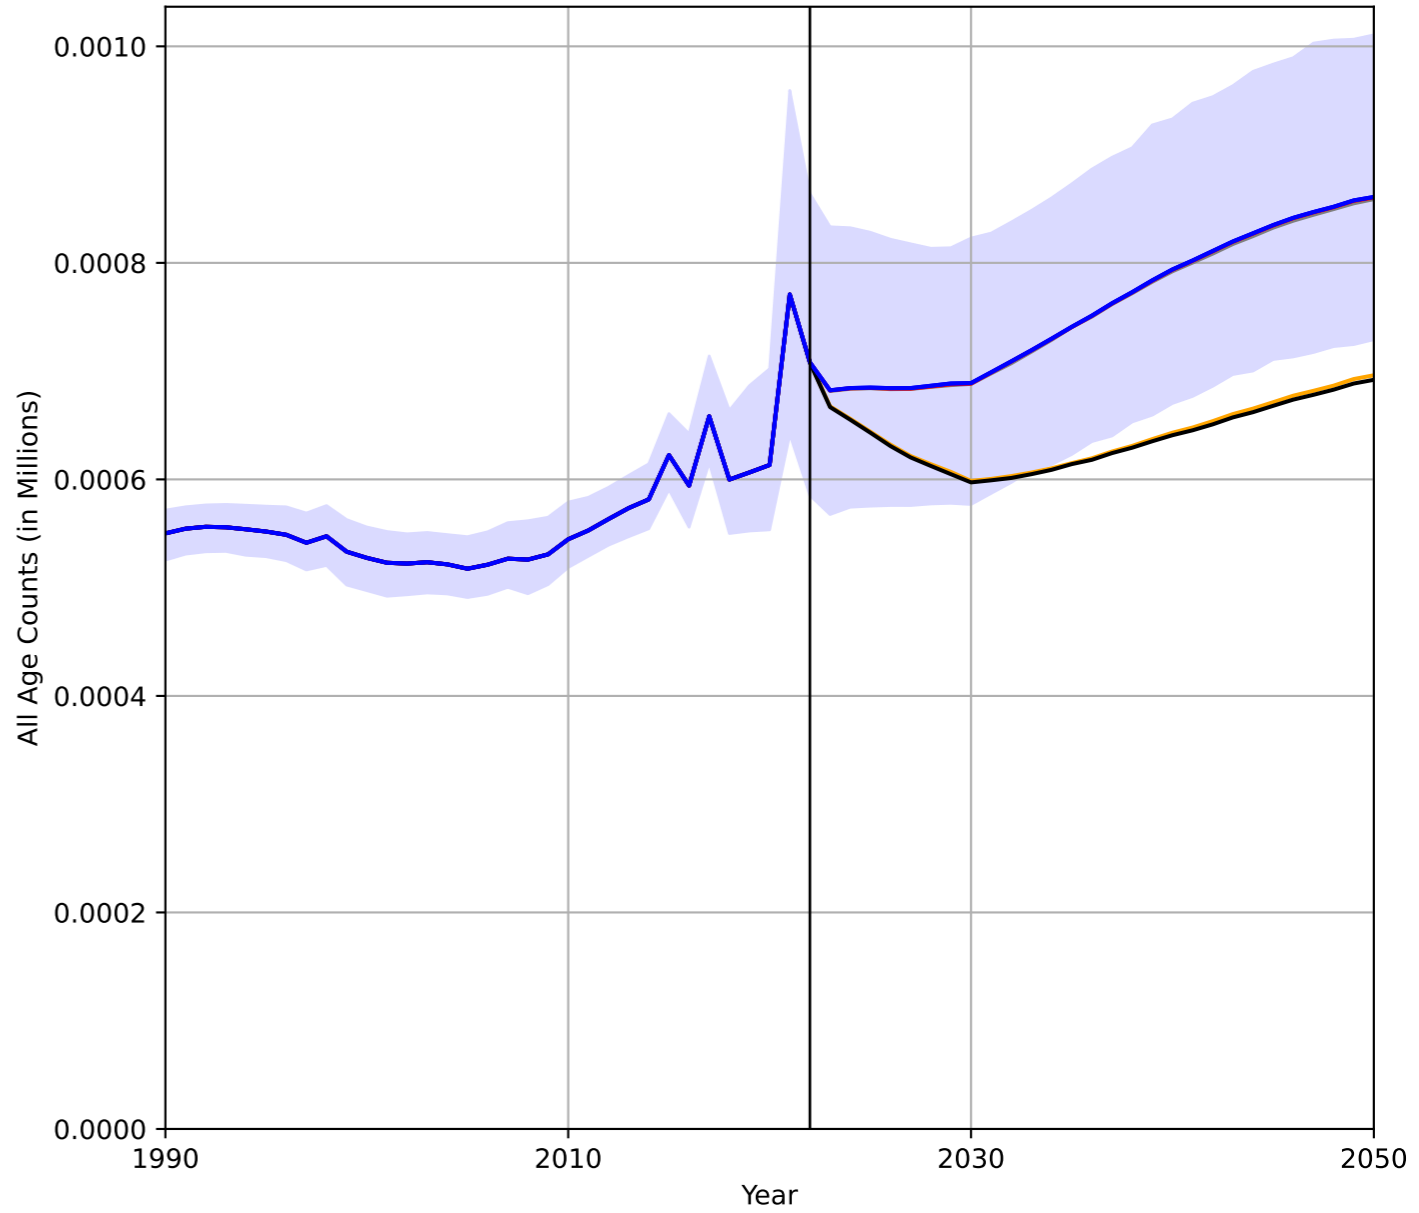

# Dominican Republic

Supplemental Results Figure S11. All-cause age standardised death rates (A) and all age death counts (B), for the past and for five future scenarios, 1990–2050

1719

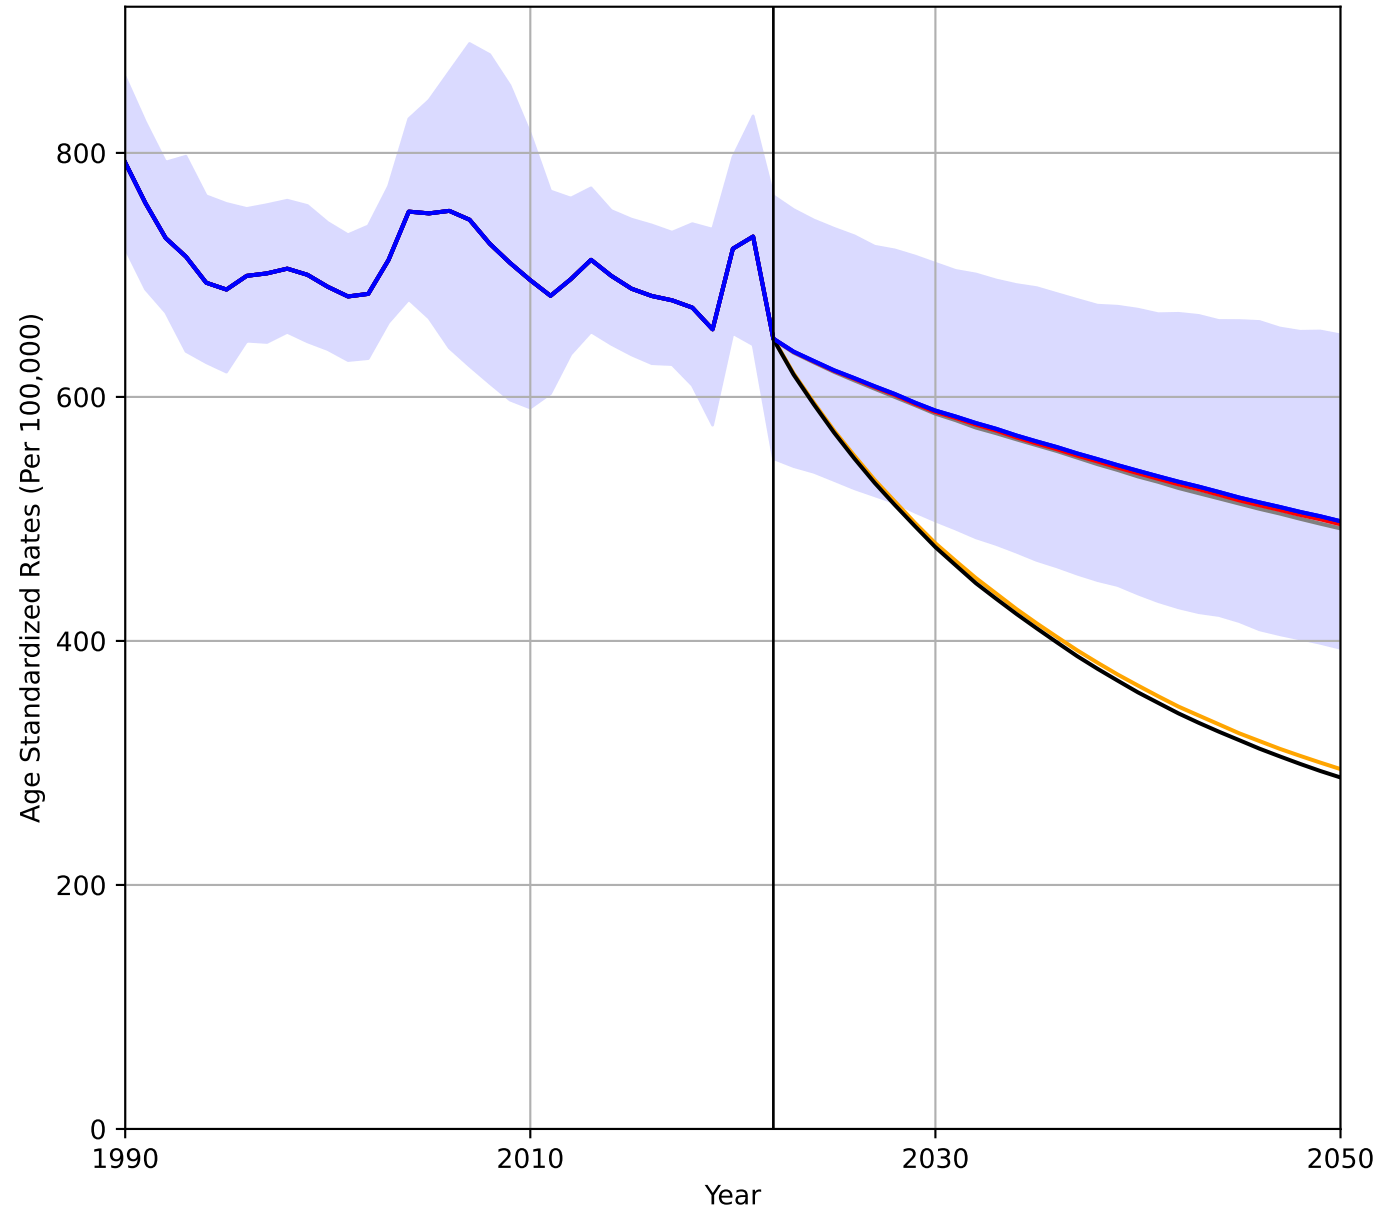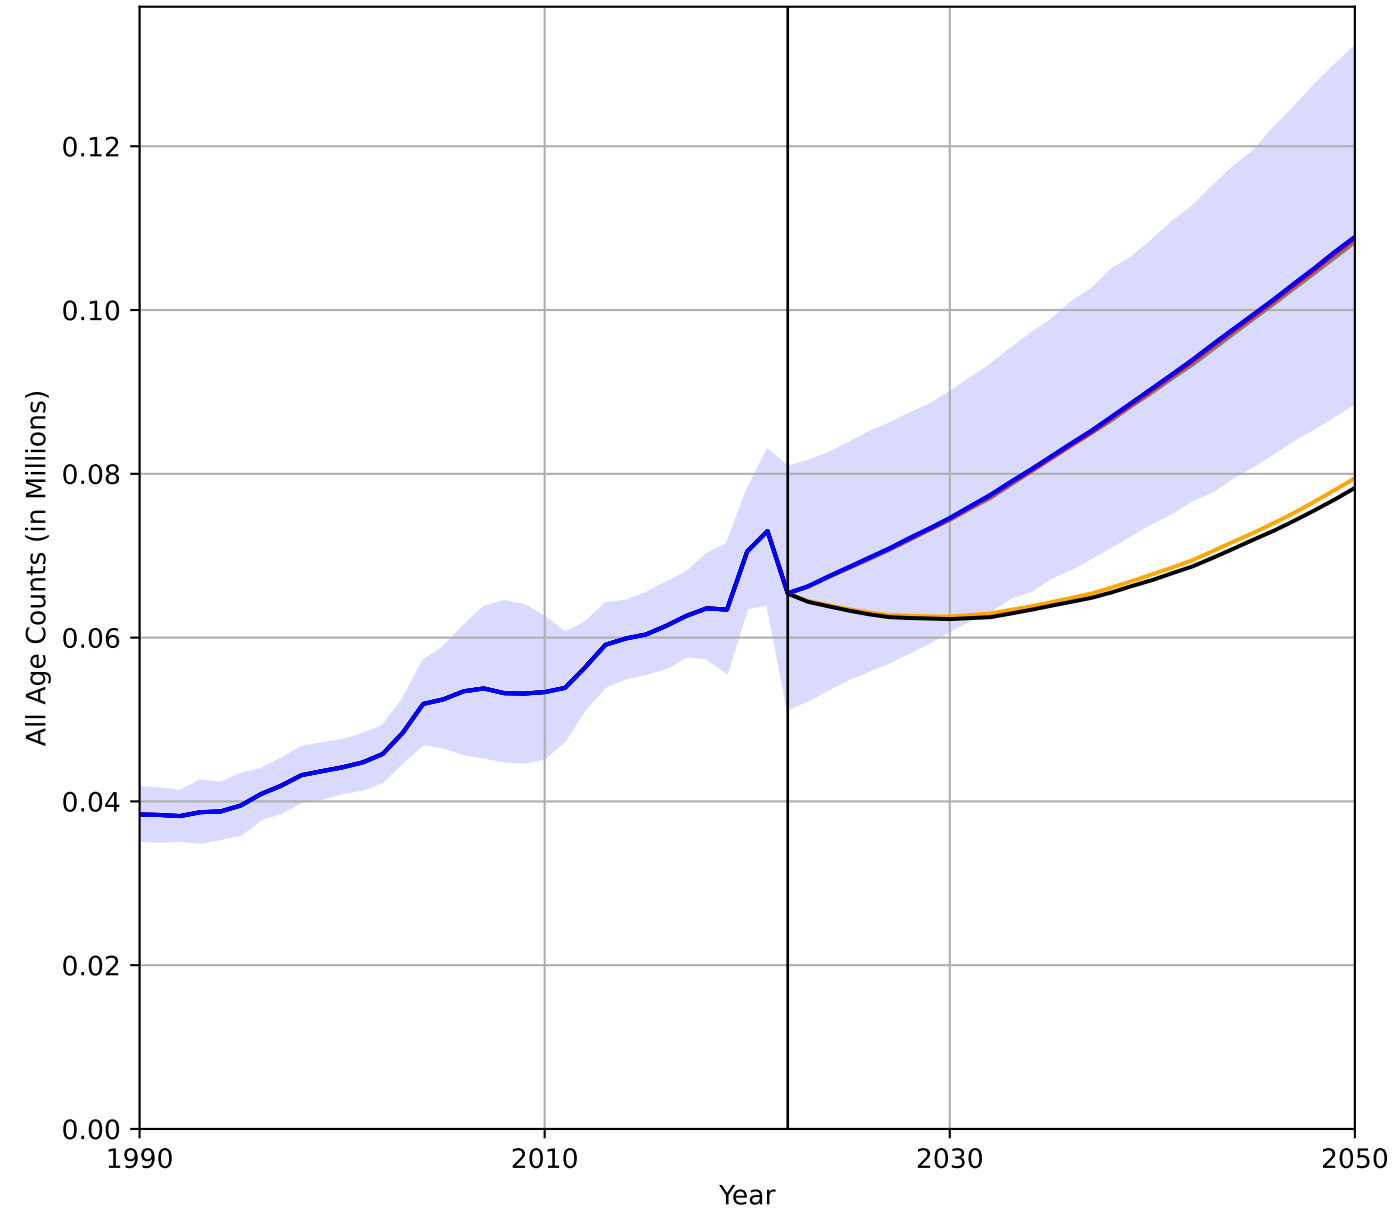



# Grenada

Supplemental Results Figure S11. All-cause age standardised death rates (A) and all age death counts (B), for the past and for five future scenarios, 1990–2050

1720

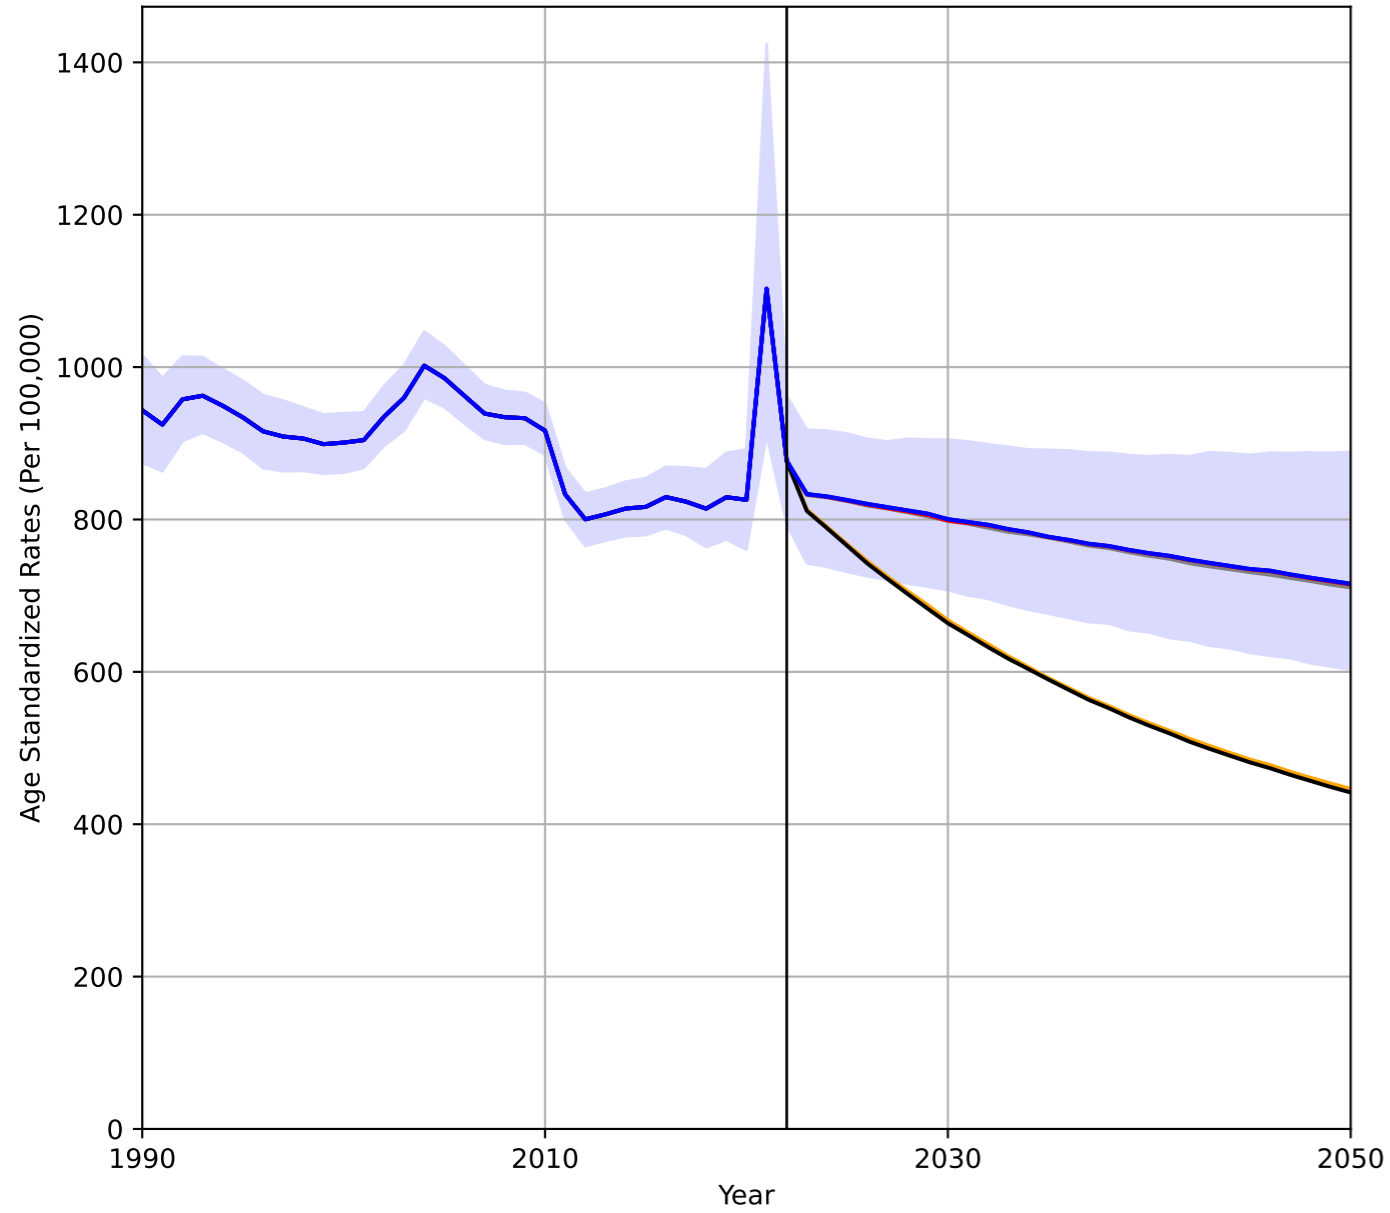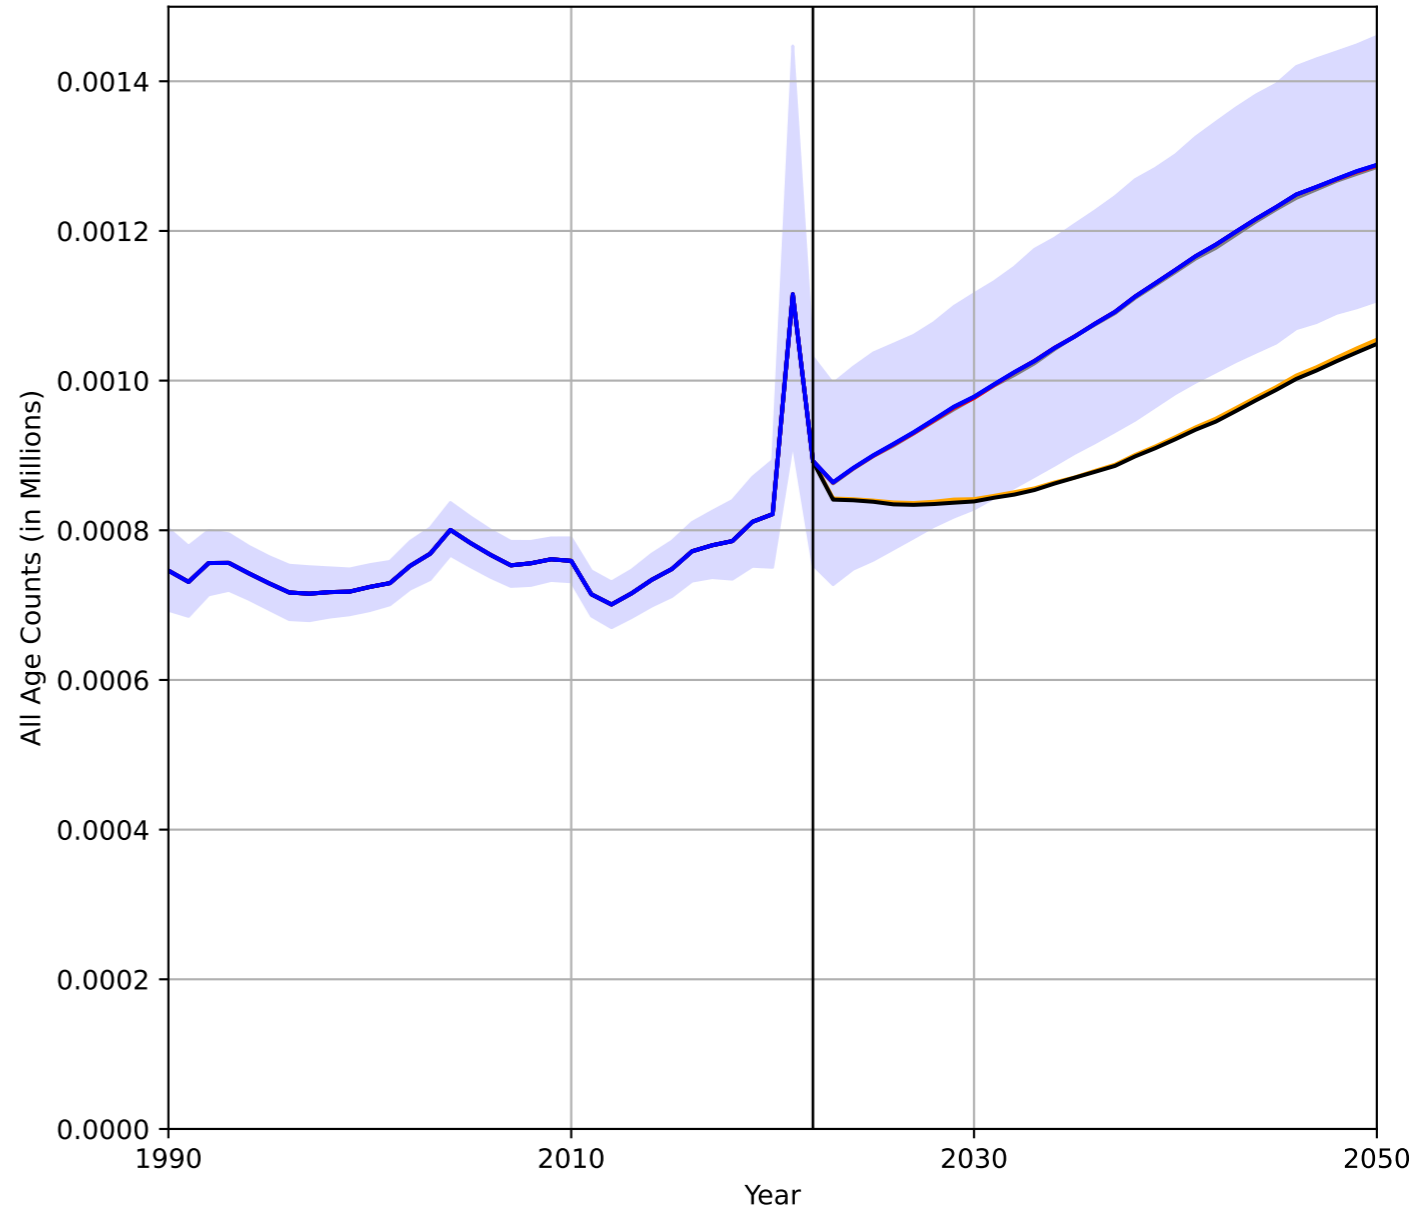

# Guyana

Supplemental Results Figure S11. All-cause age standardised death rates (A) and all age death counts (B), for the past and for five future scenarios, 1990–2050

1721

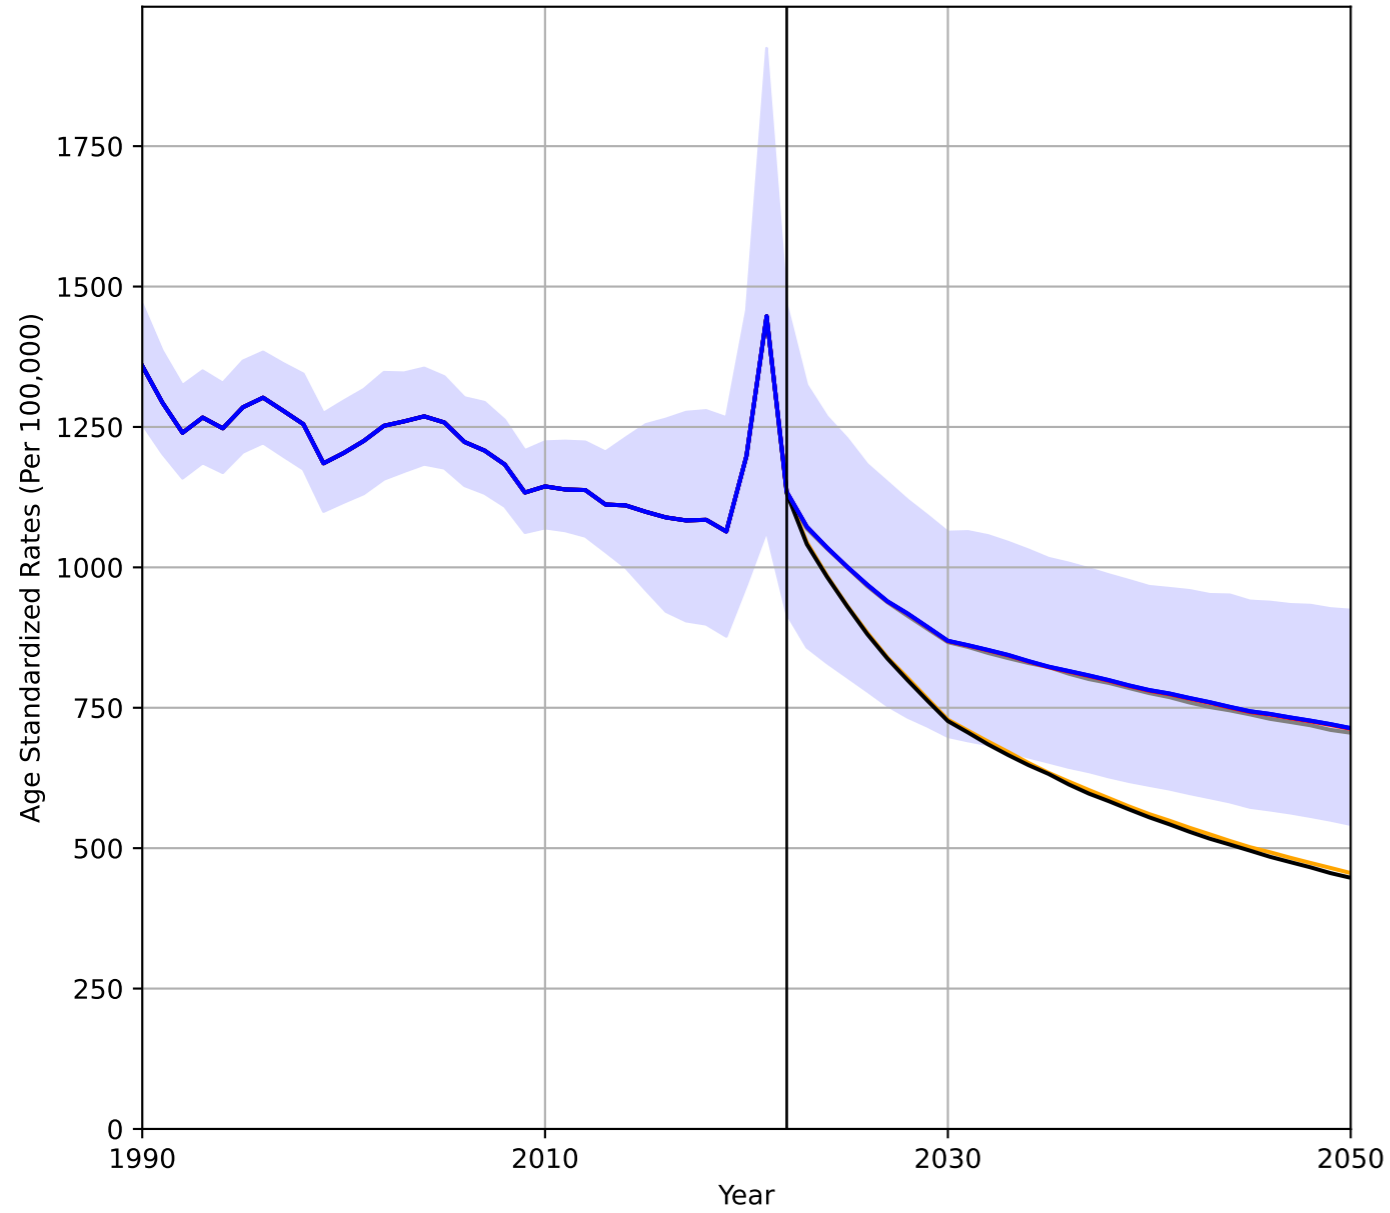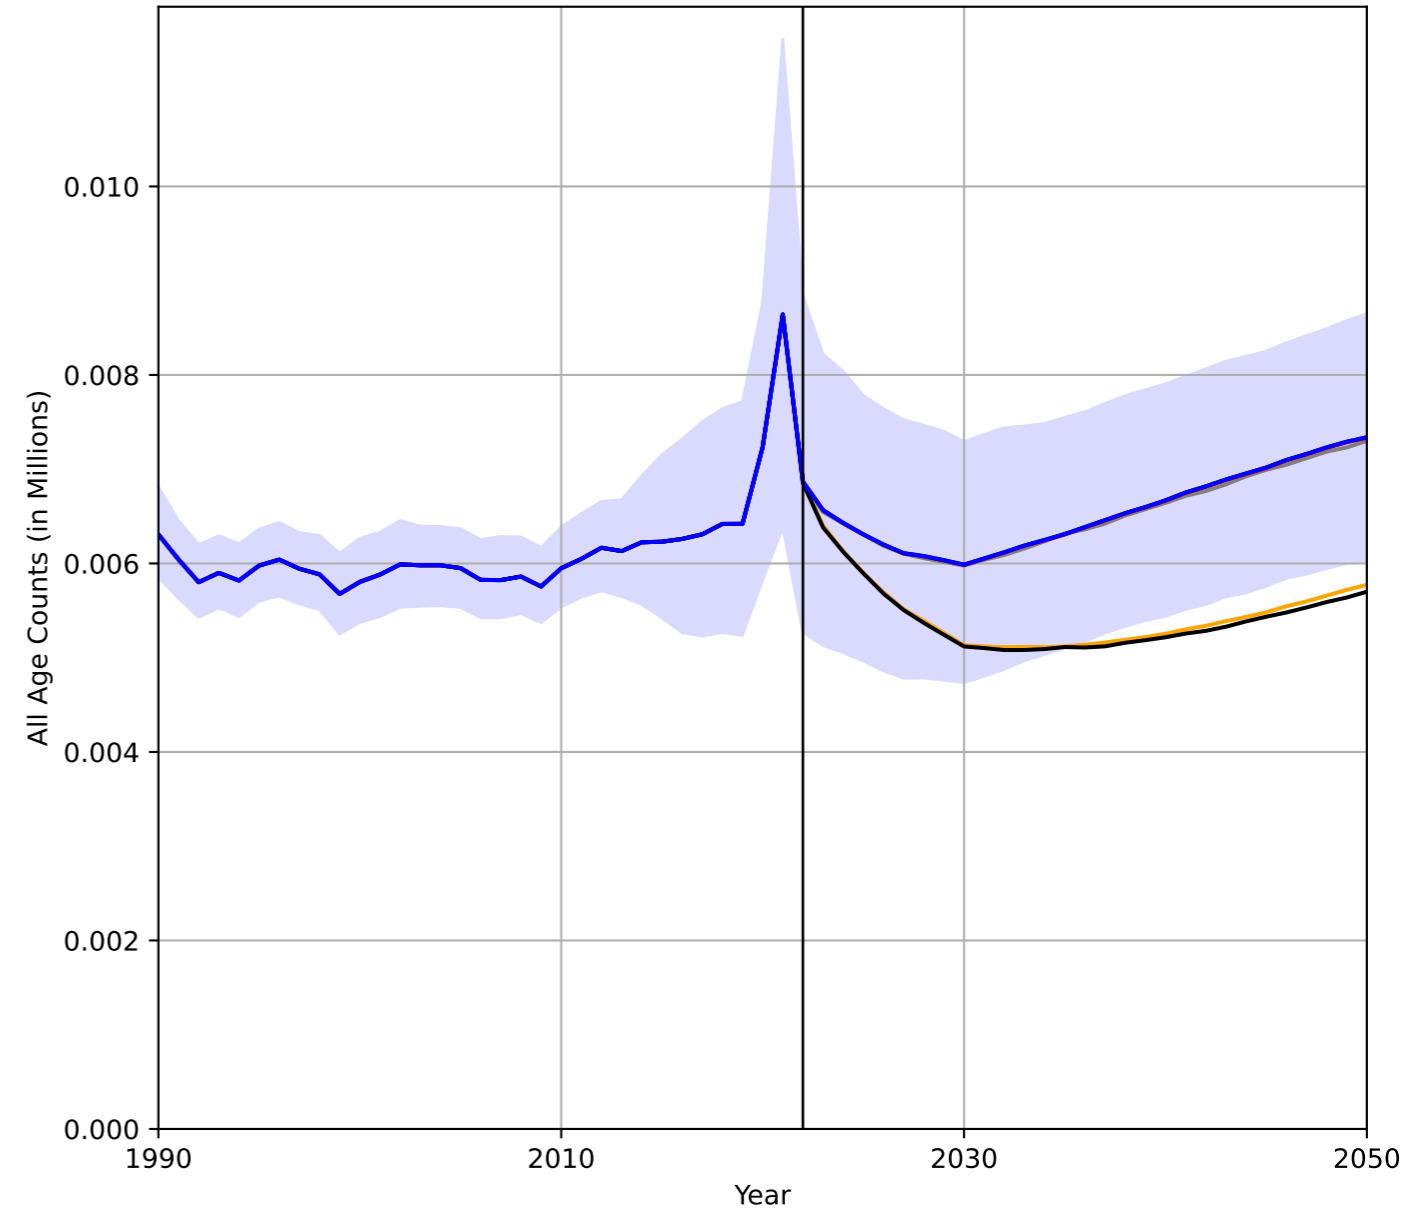

# Haiti

Supplemental Results Figure S11. All-cause age standardised death rates (A) and all age death counts (B), for the past and for five future scenarios, 1990–2050

1722

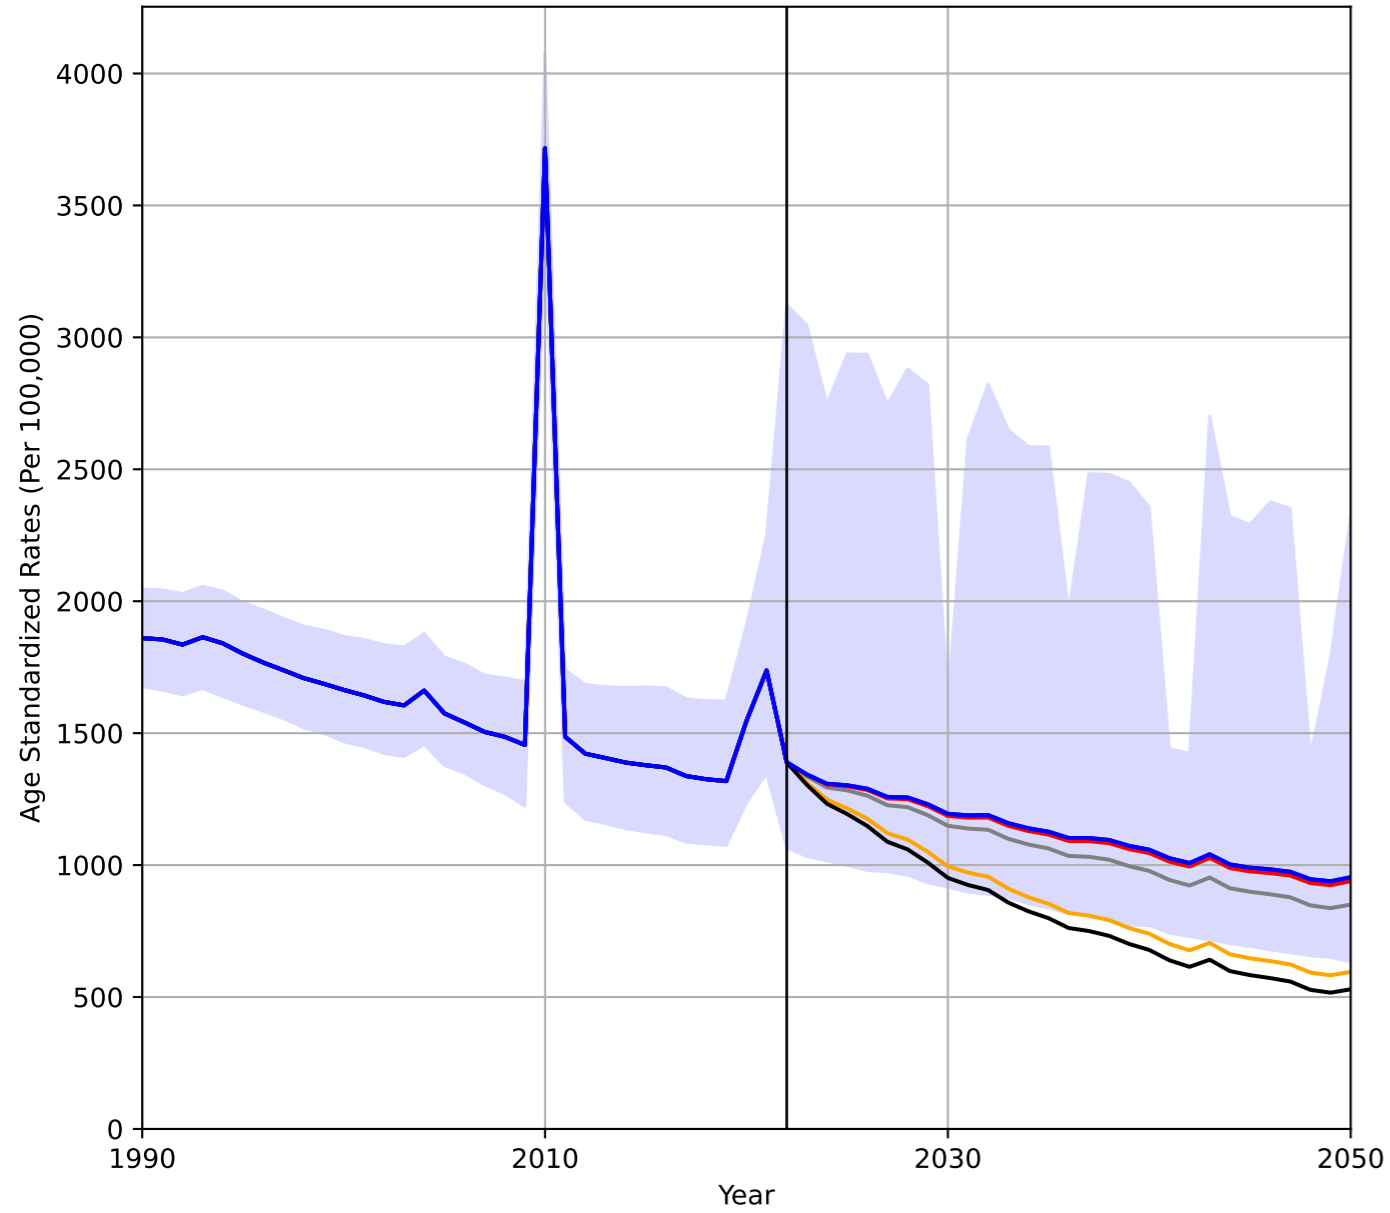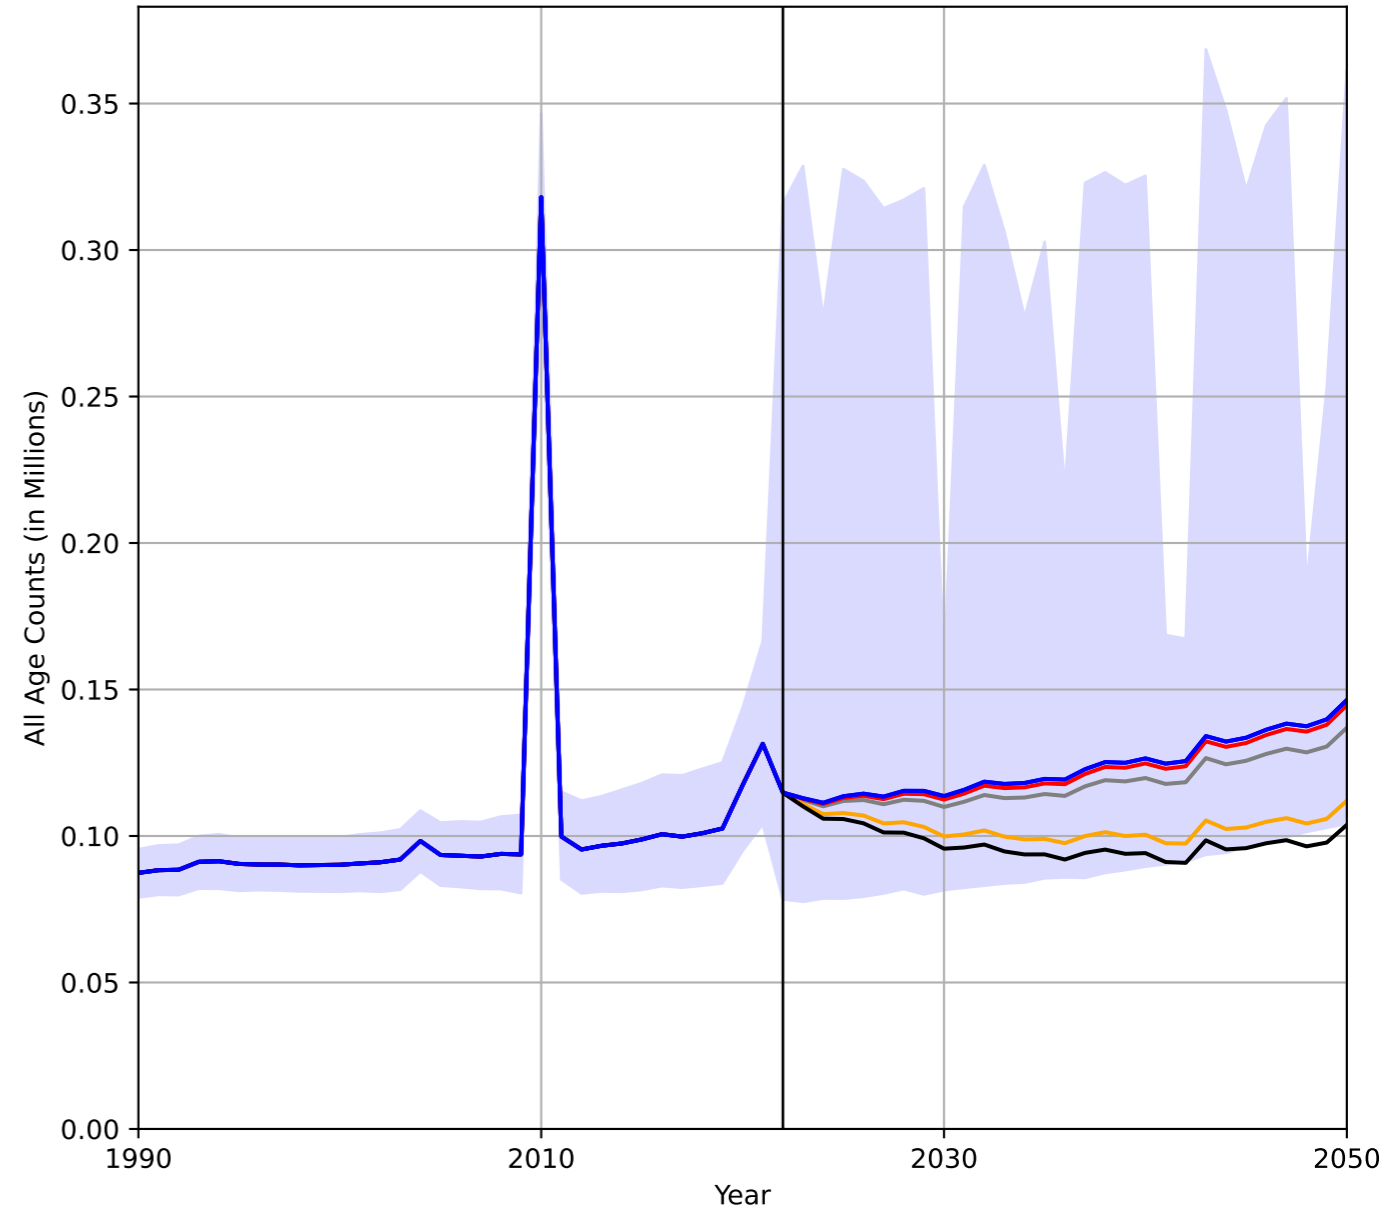

# Jamaica

Supplemental Results Figure S11. All-cause age standardised death rates (A) and all age death counts (B), for the past and for five future scenarios, 1990–2050

1723

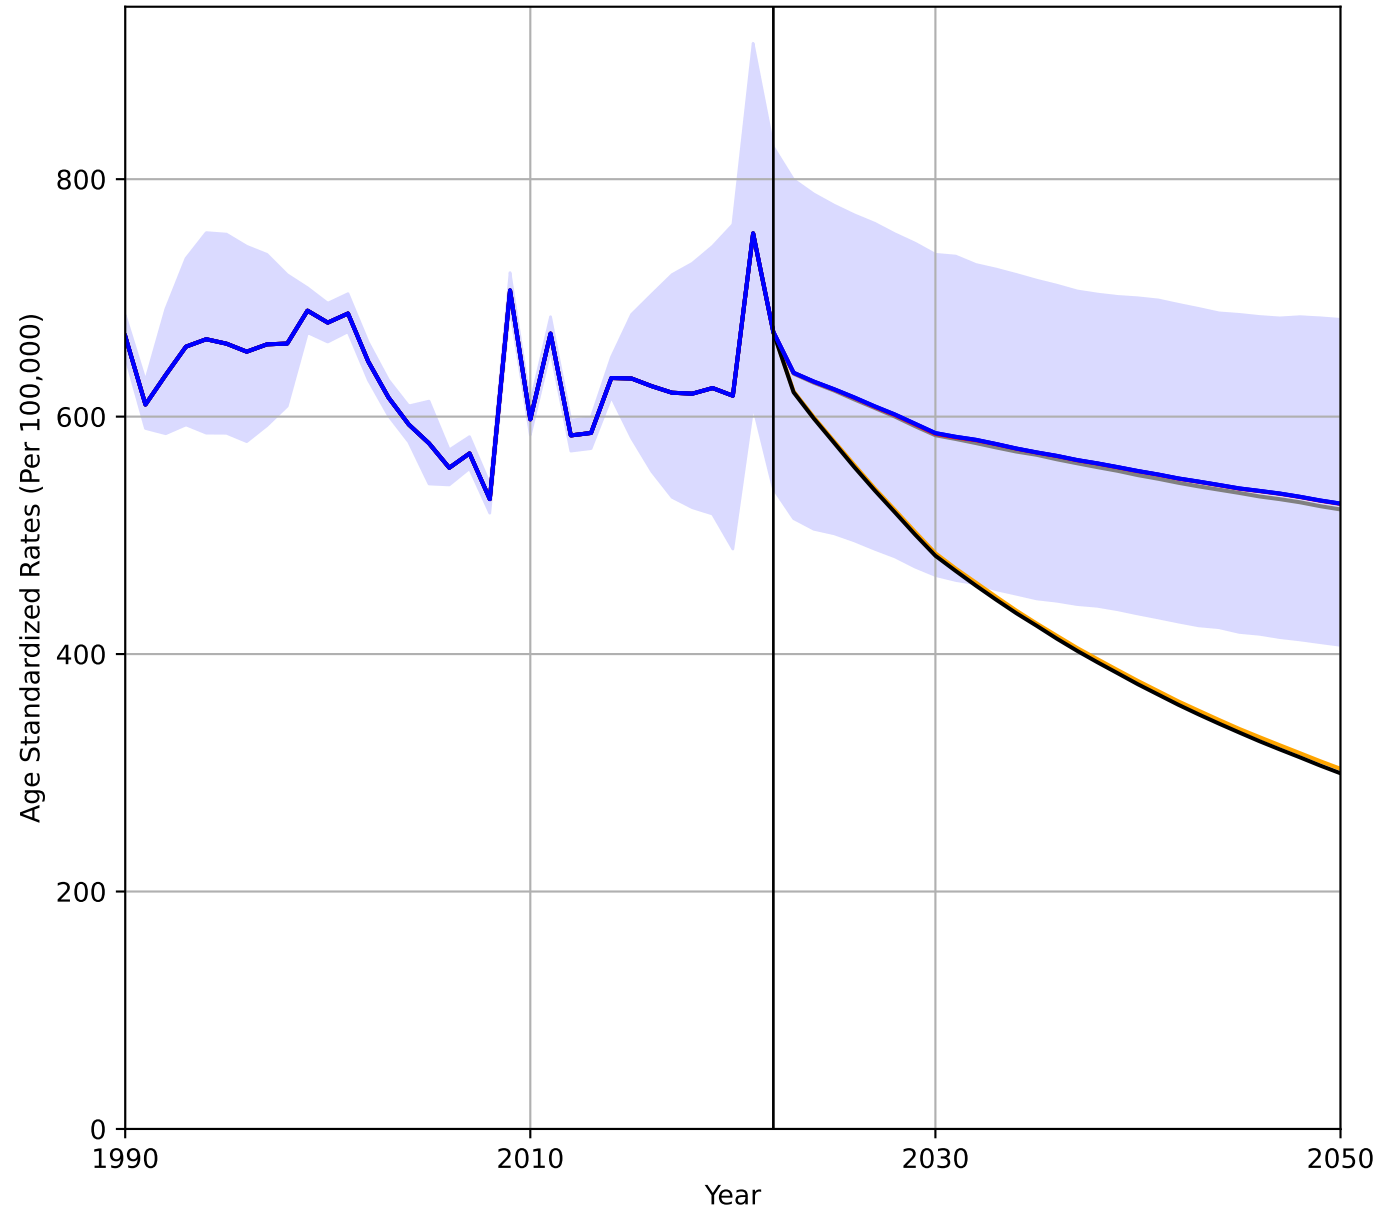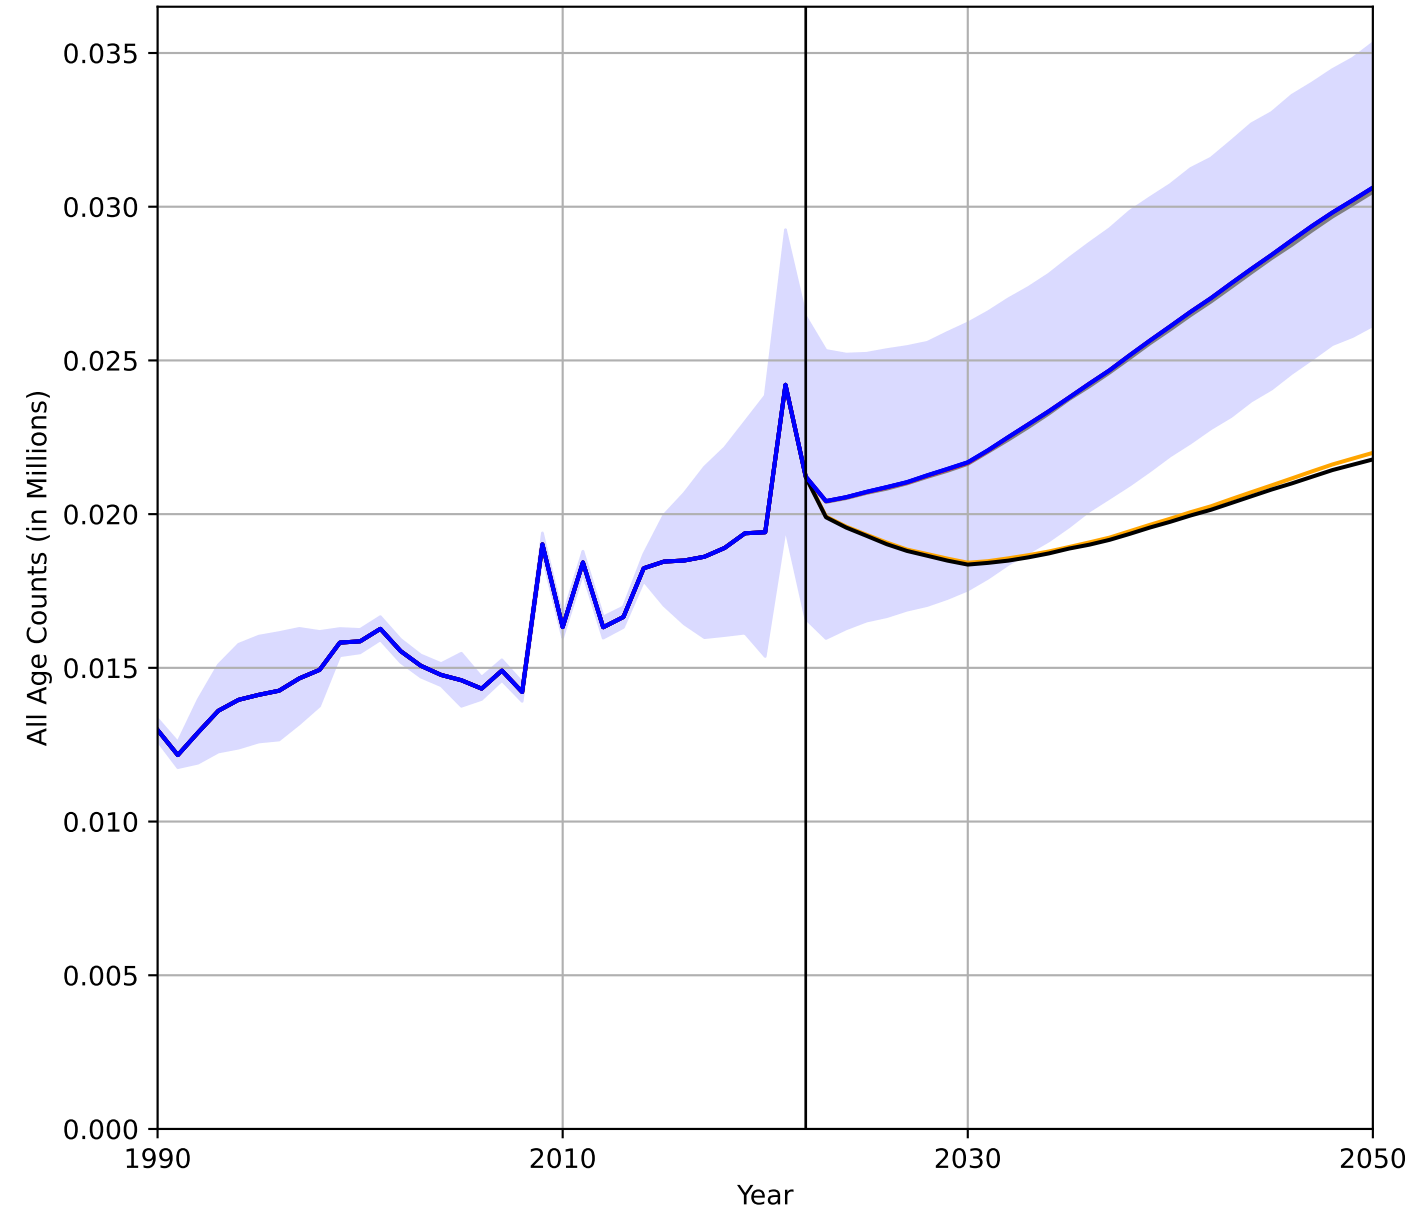

# Puerto Rico

Supplemental Results Figure S11. All-cause age standardised death rates (A) and all age death counts (B), for the past and for five future scenarios, 1990–2050

1724

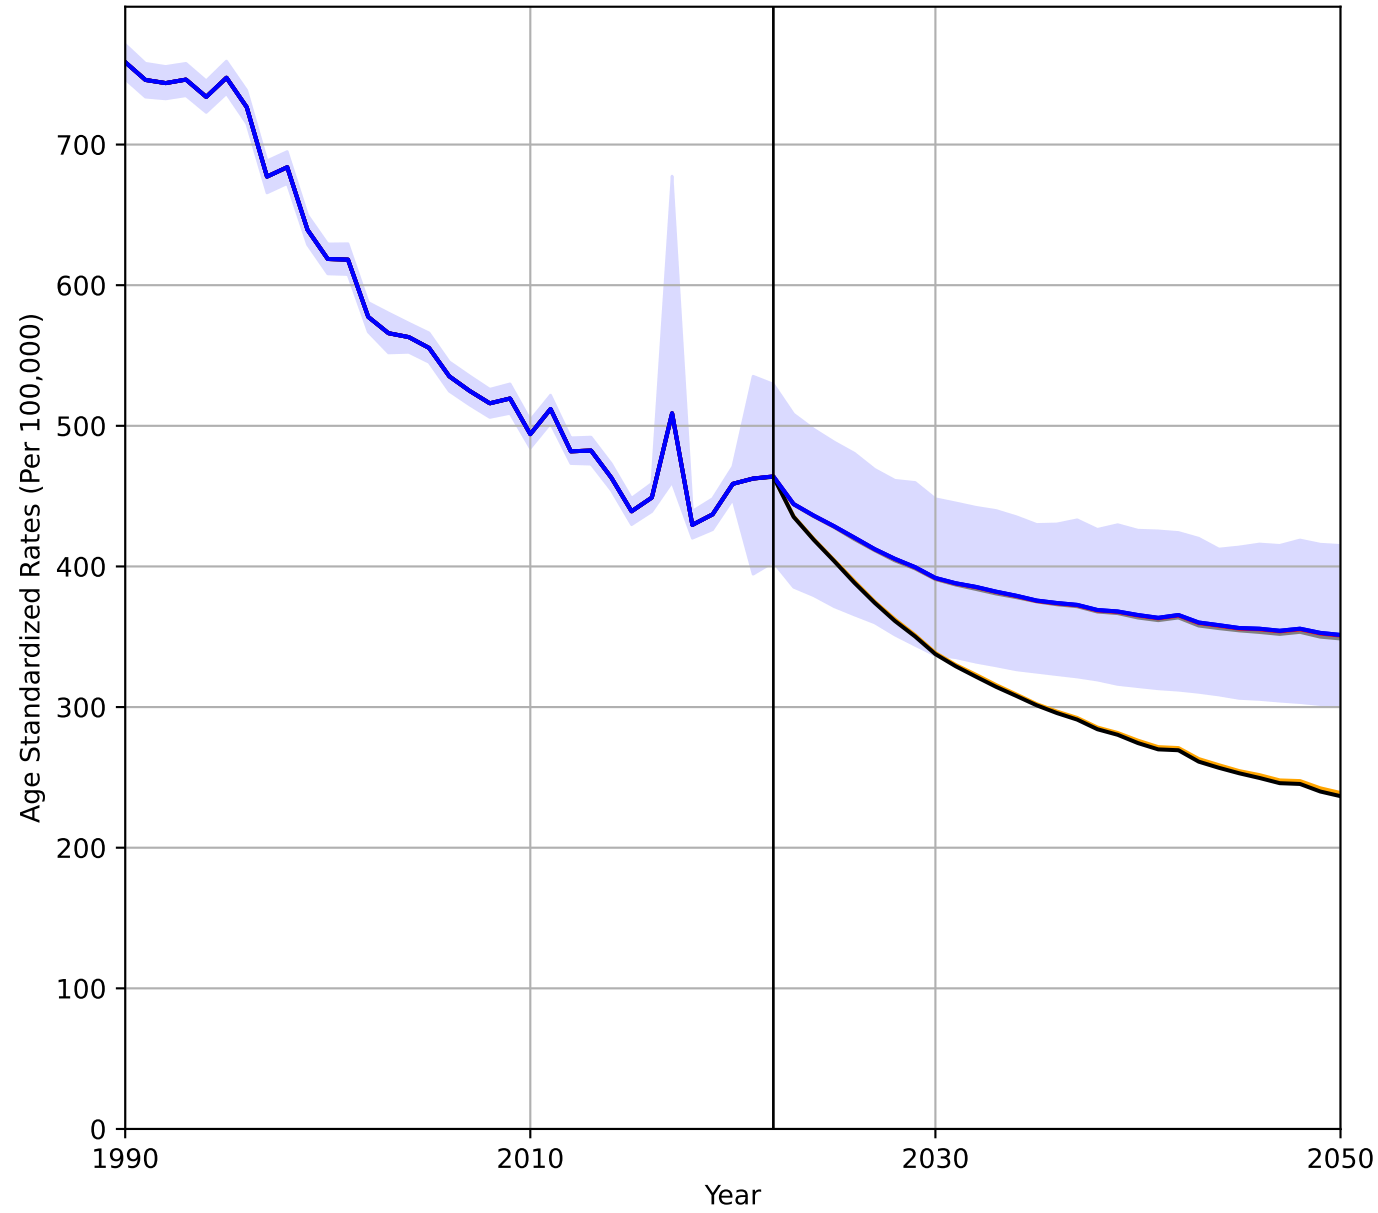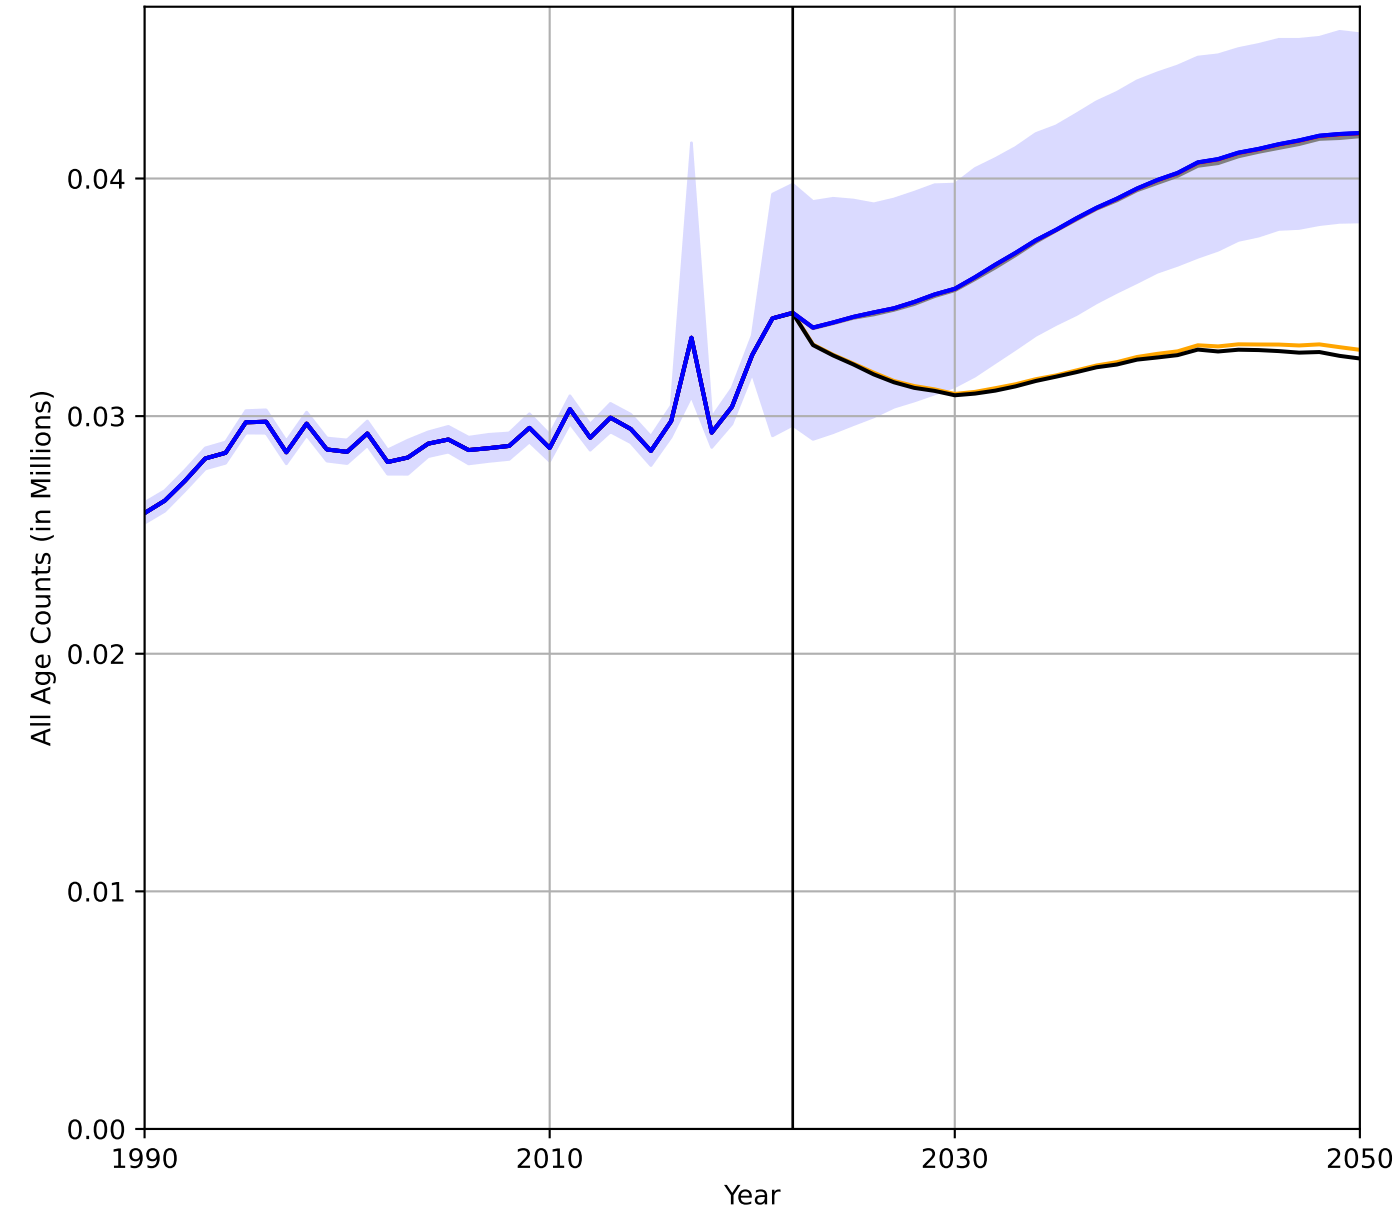

# Saint Kitts And Nevis

Supplemental Results Figure S11. All-cause age standardised death rates (A) and all age death counts (B), for the past and for five future scenarios, 1990–2050

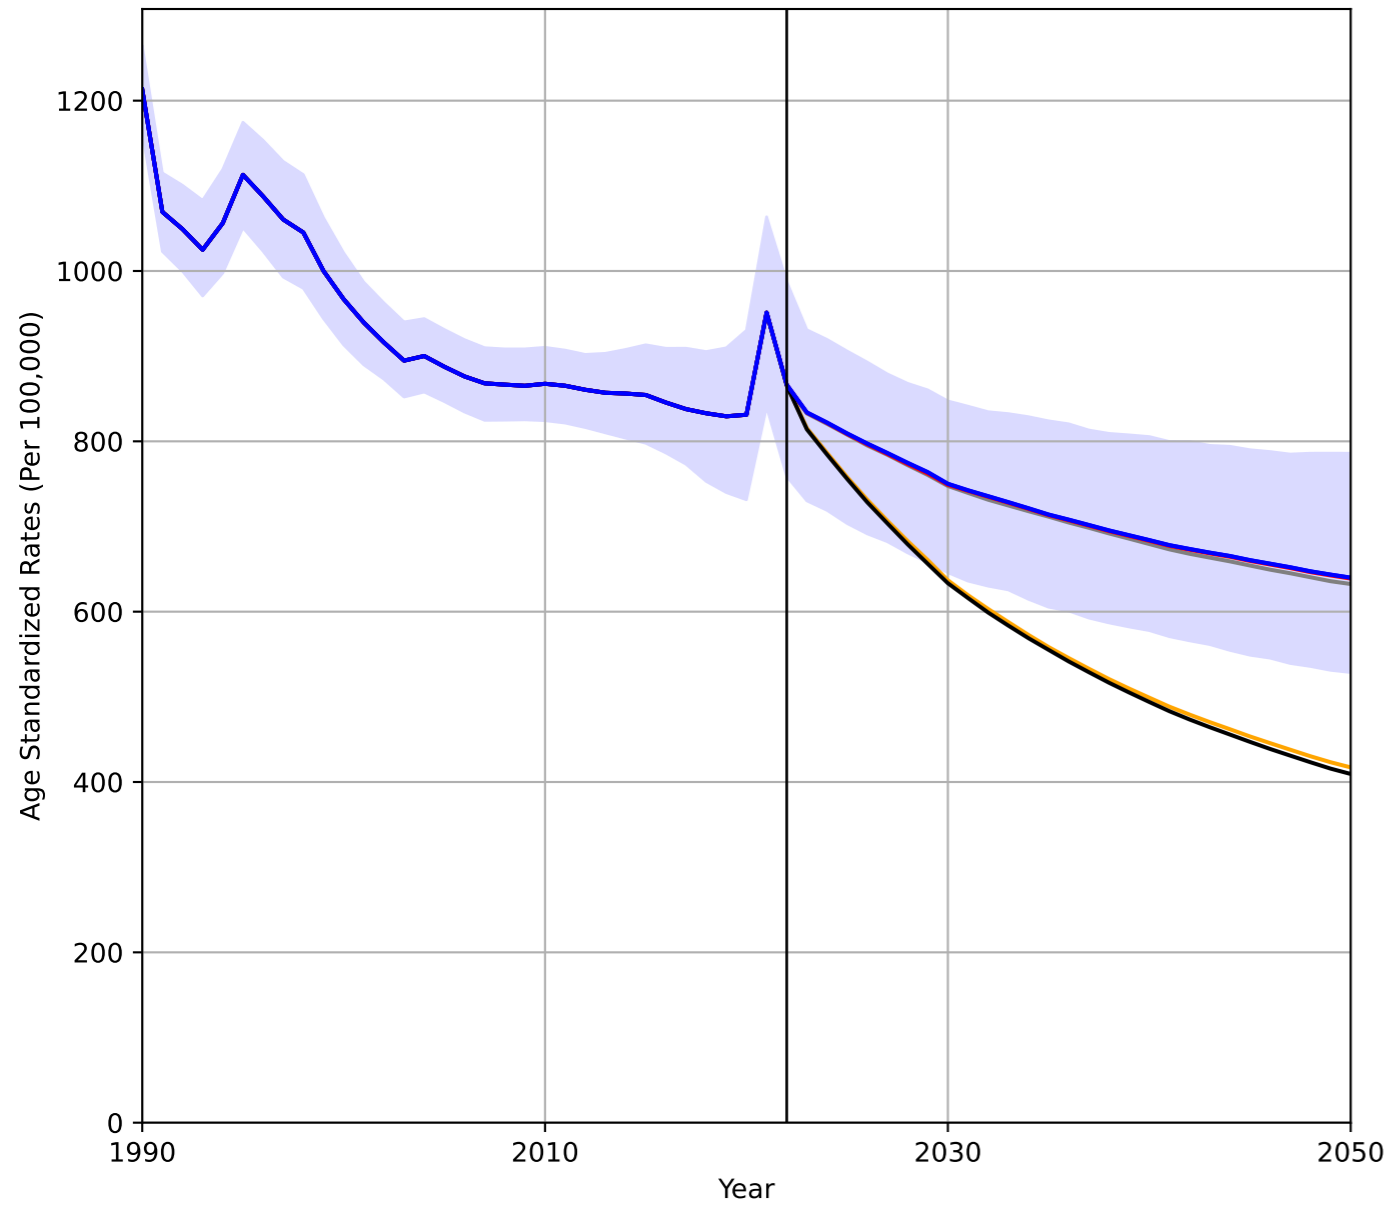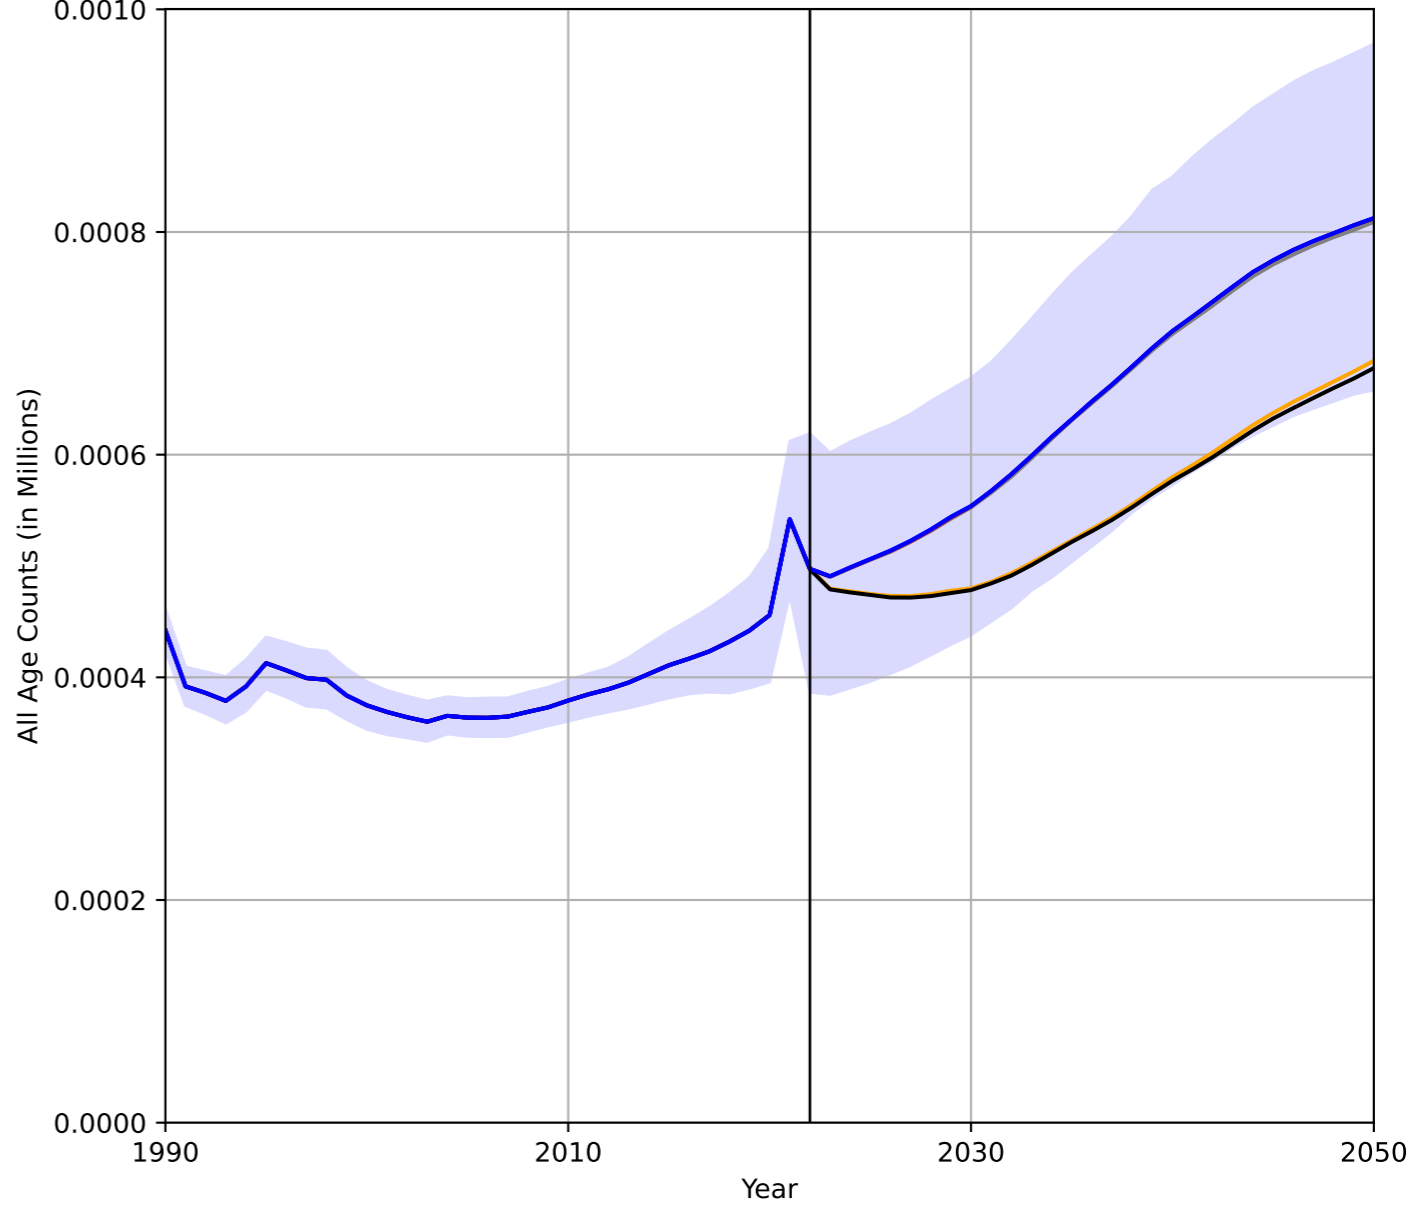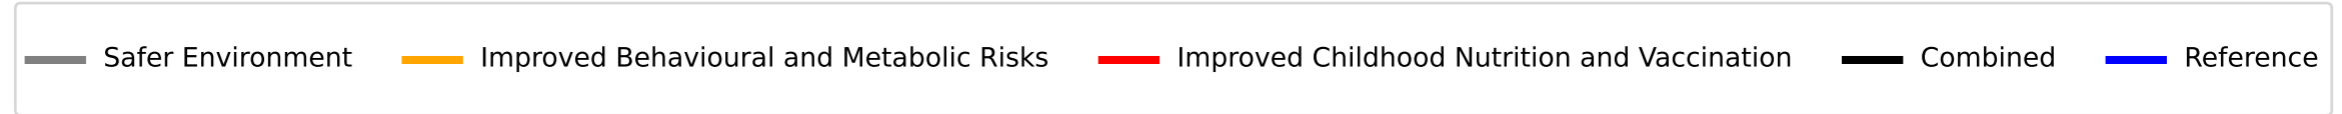

# Saint Lucia

Supplemental Results Figure S11. All-cause age standardised death rates (A) and all age death counts (B), for the past and for five future scenarios, 1990–2050

1726

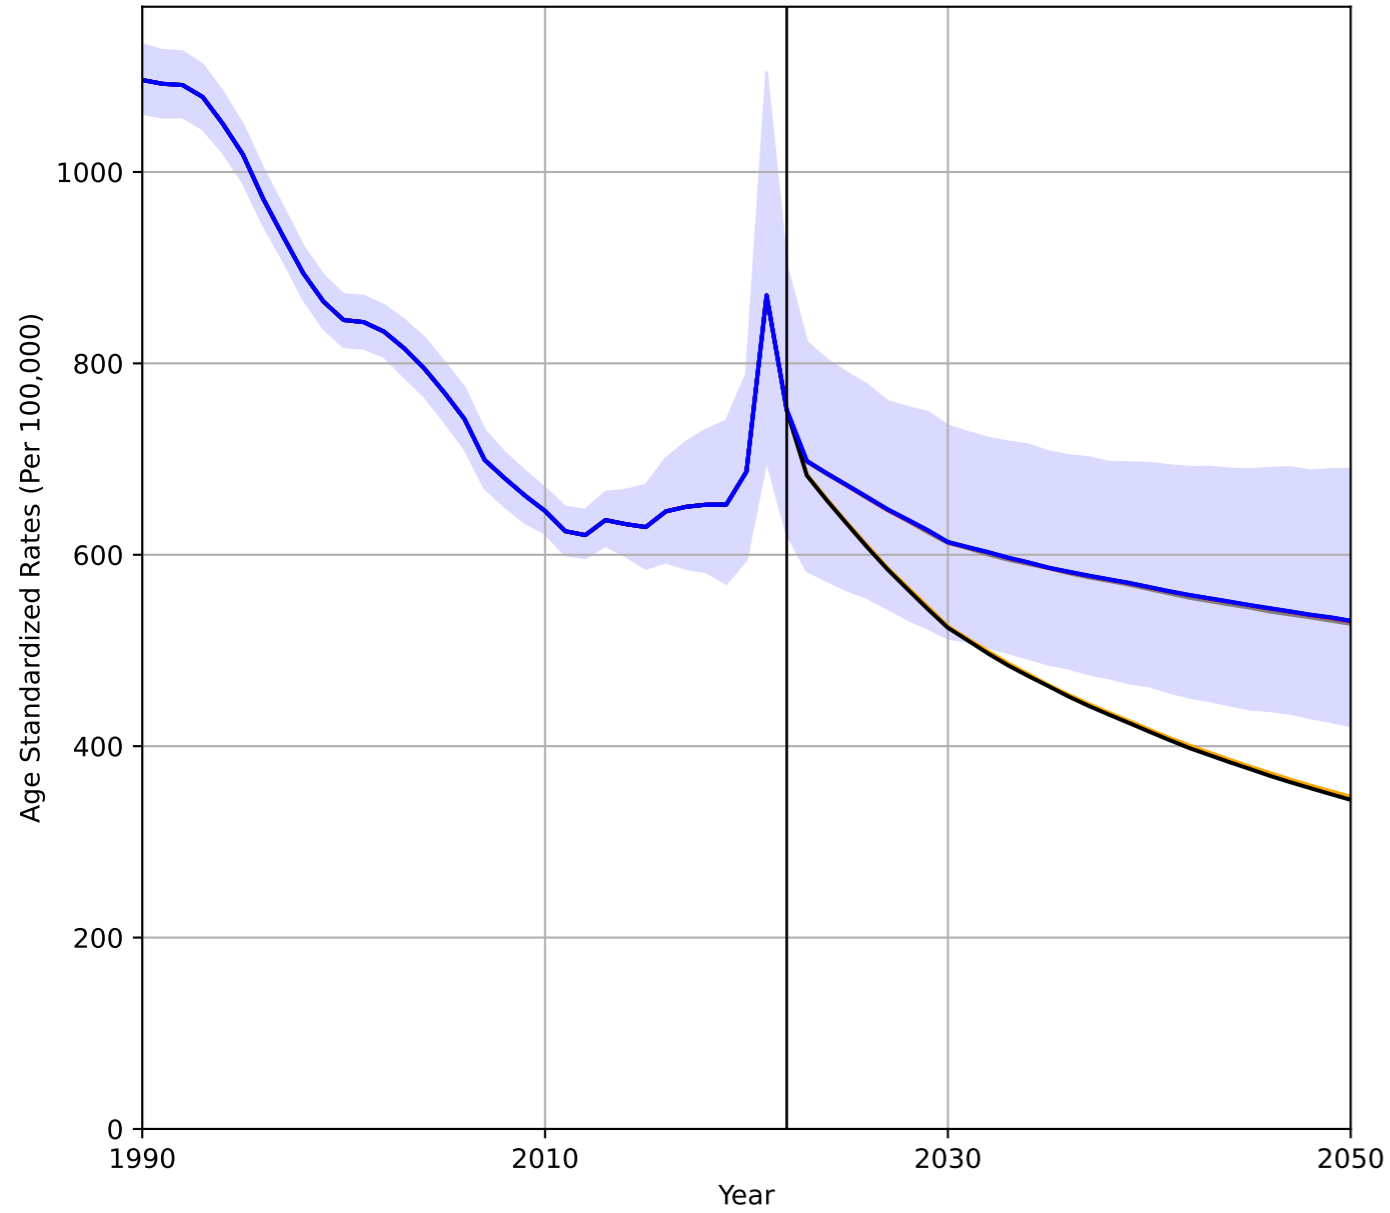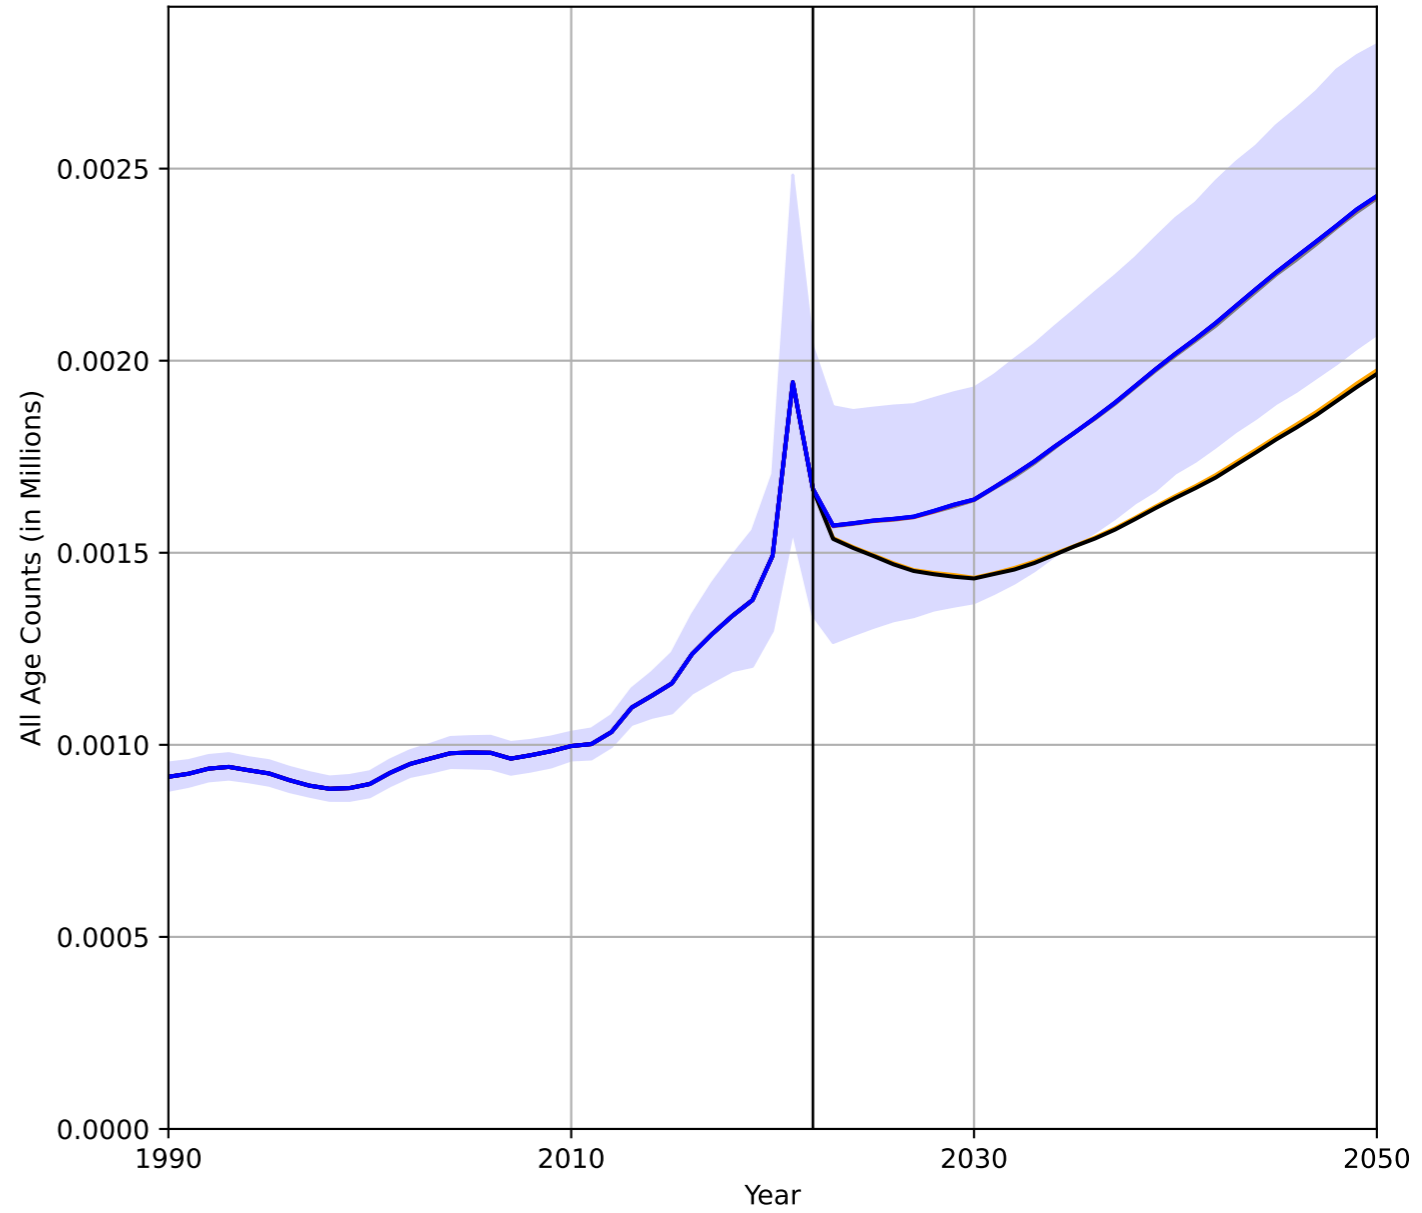

# Saint Vincent And The Grenadines

1727

Supplemental Results Figure S11. All-cause age standardised death rates (A) and all age death counts (B), for the past and for five future scenarios, 1990–2050

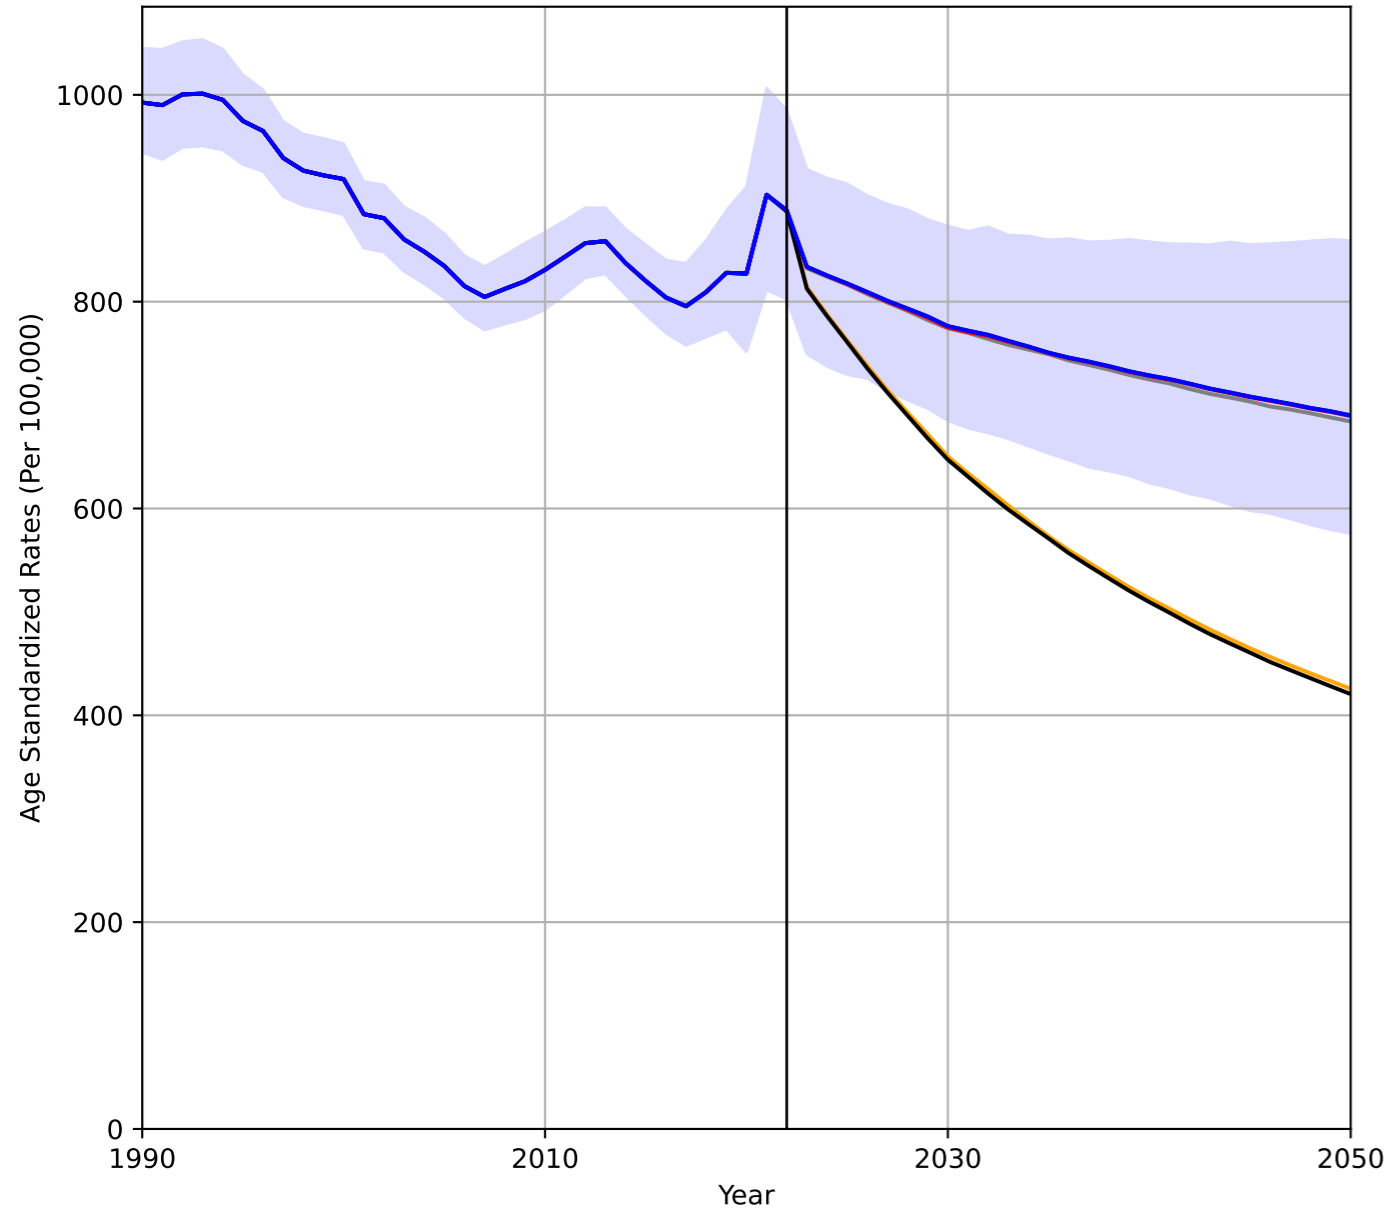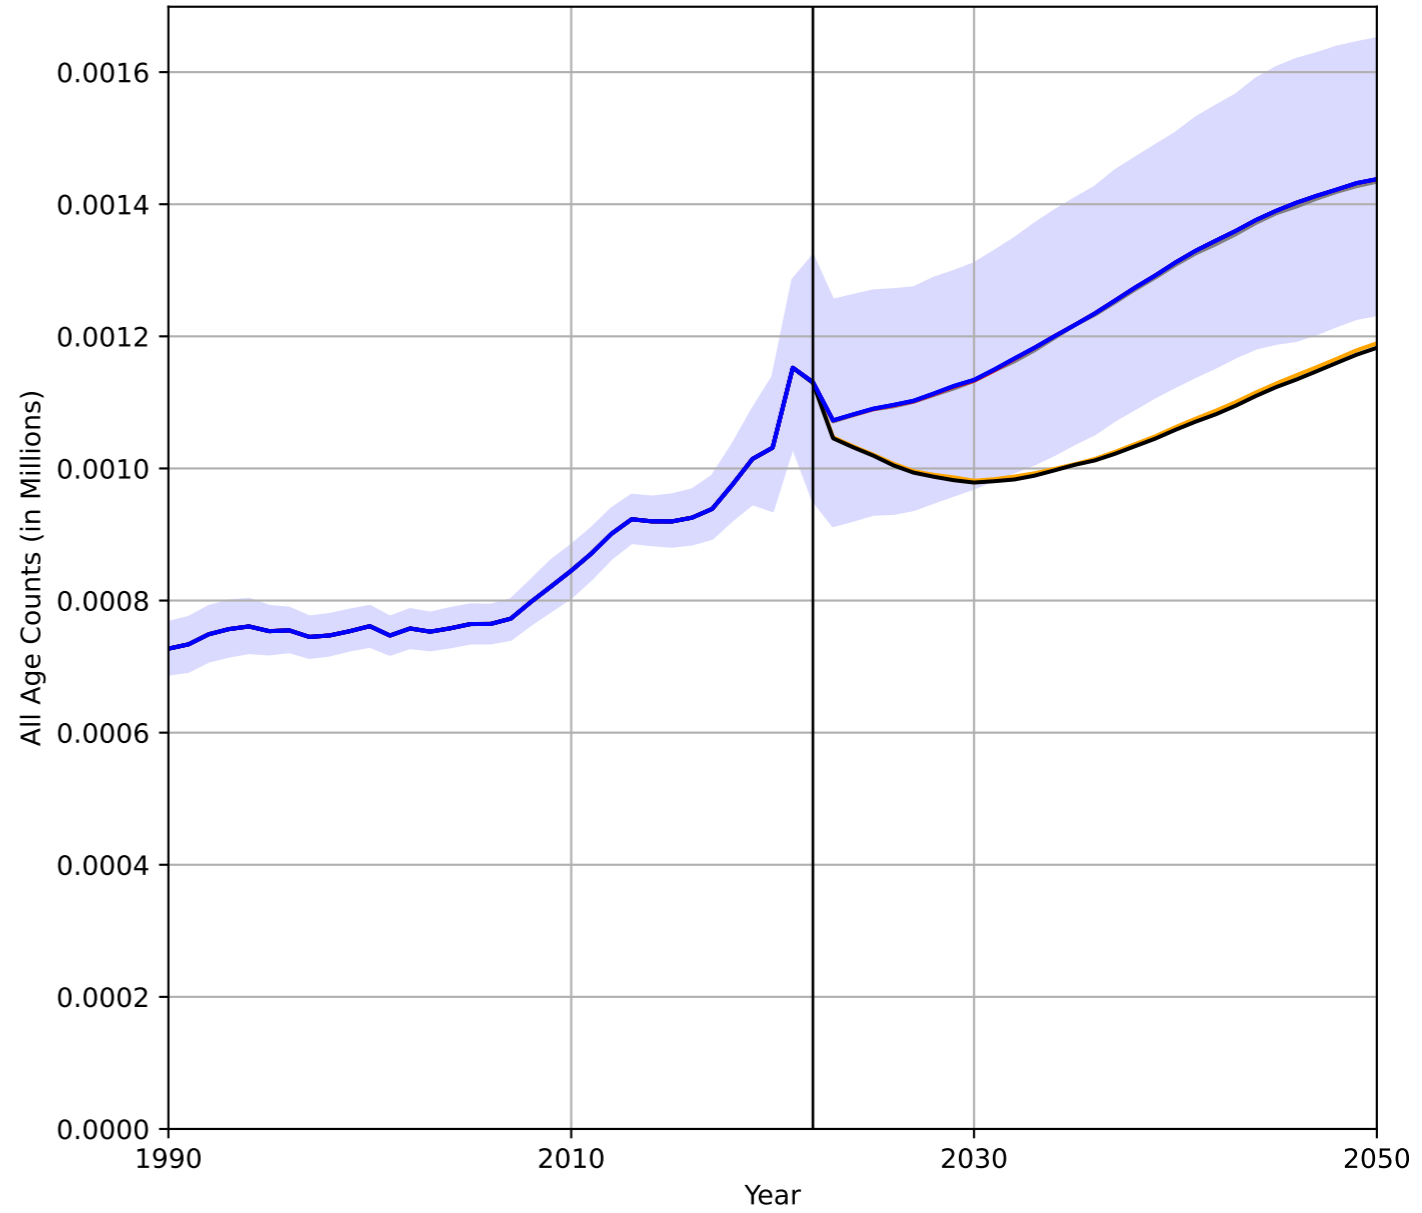



# Suriname

Supplemental Results Figure S11. All-cause age standardised death rates (A) and all age death counts (B), for the past and for five future scenarios, 1990–2050

1728

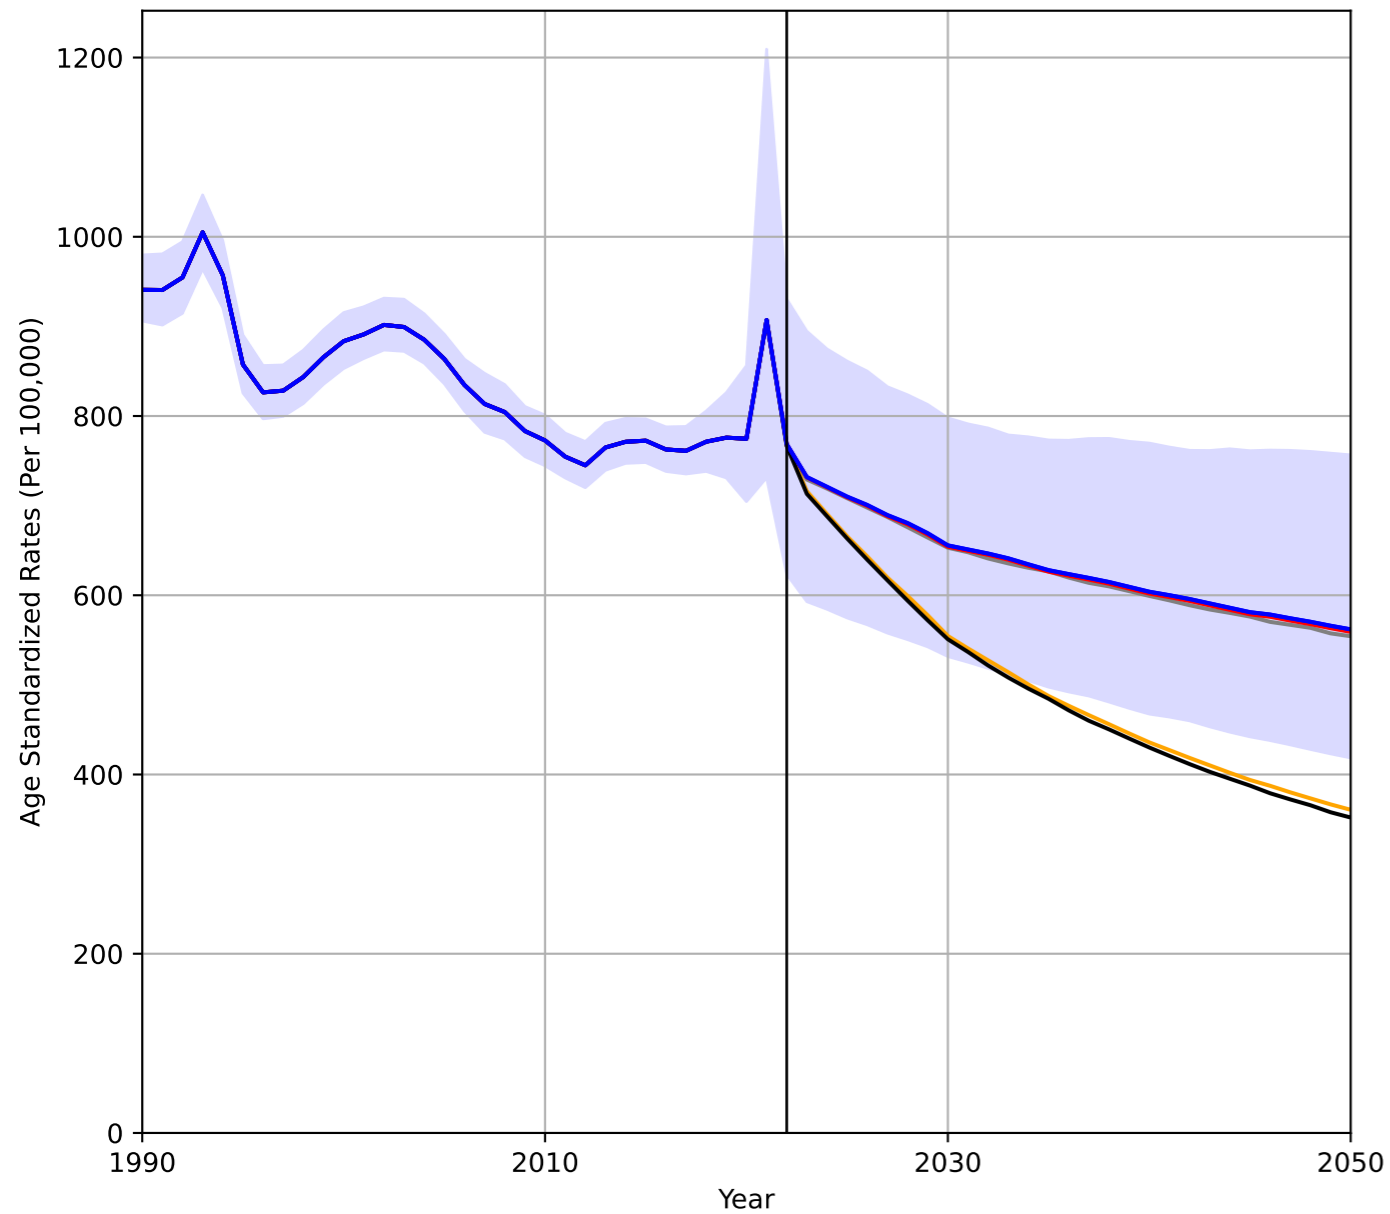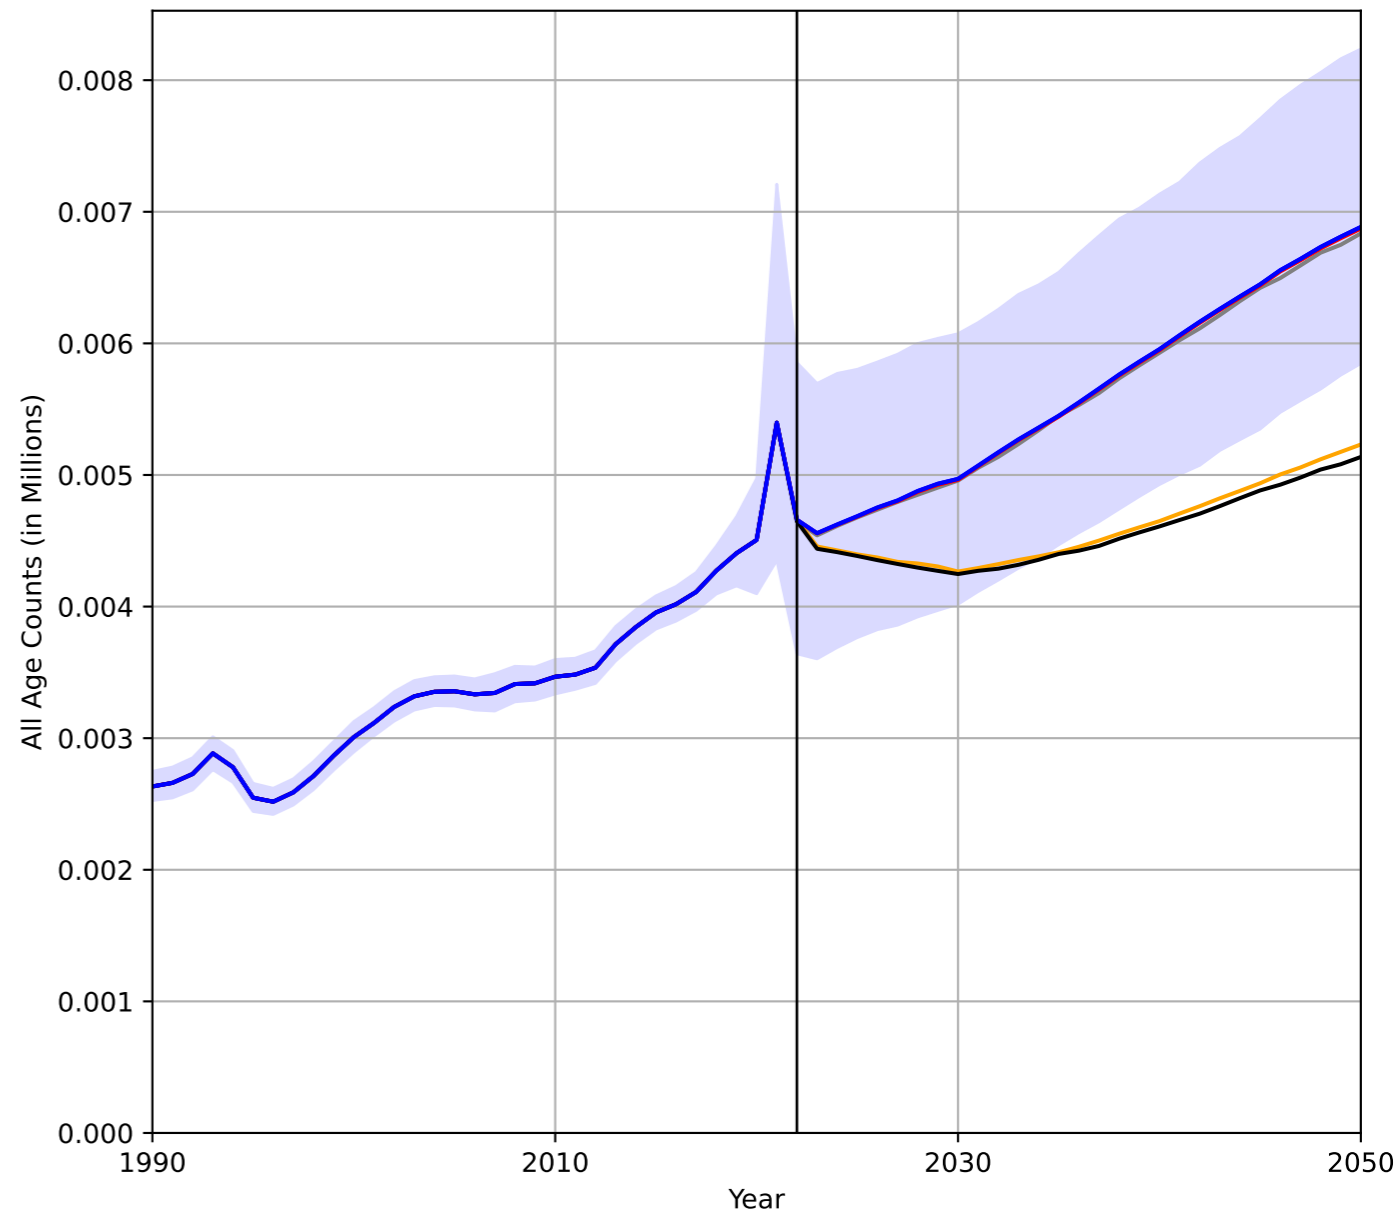

# Trinidad And Tobago

Supplemental Results Figure S11. All-cause age standardised death rates (A) and all age death counts (B), for the past and for five future scenarios, 1990–2050

1729

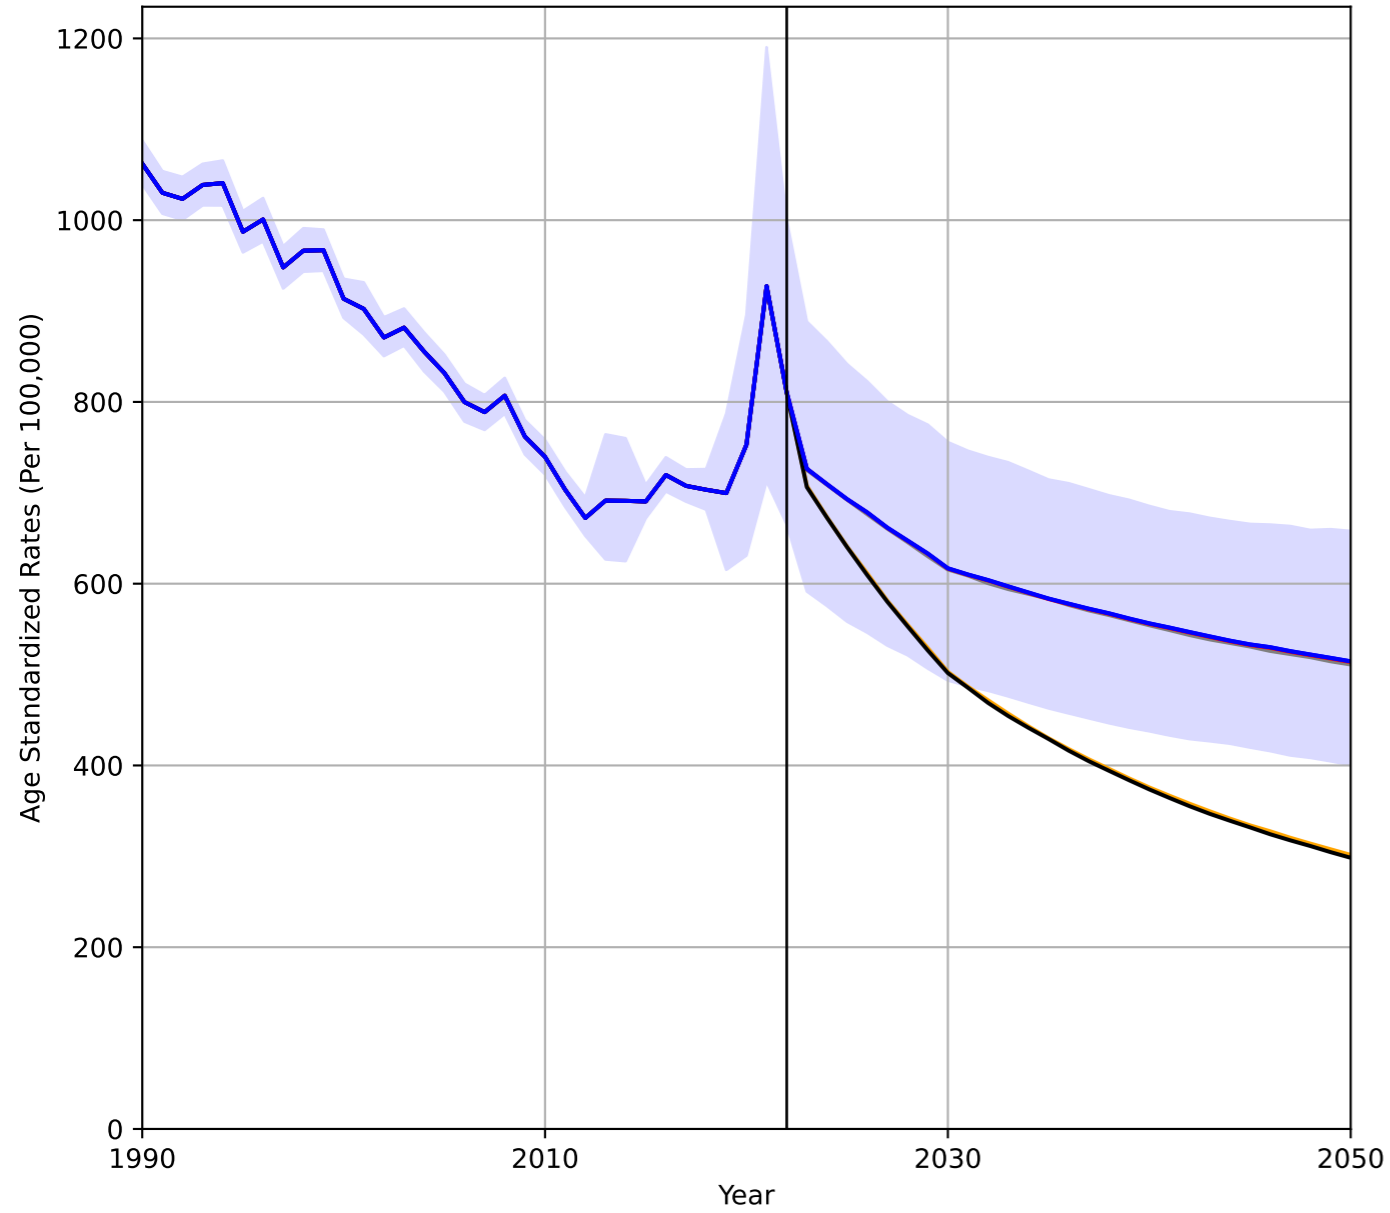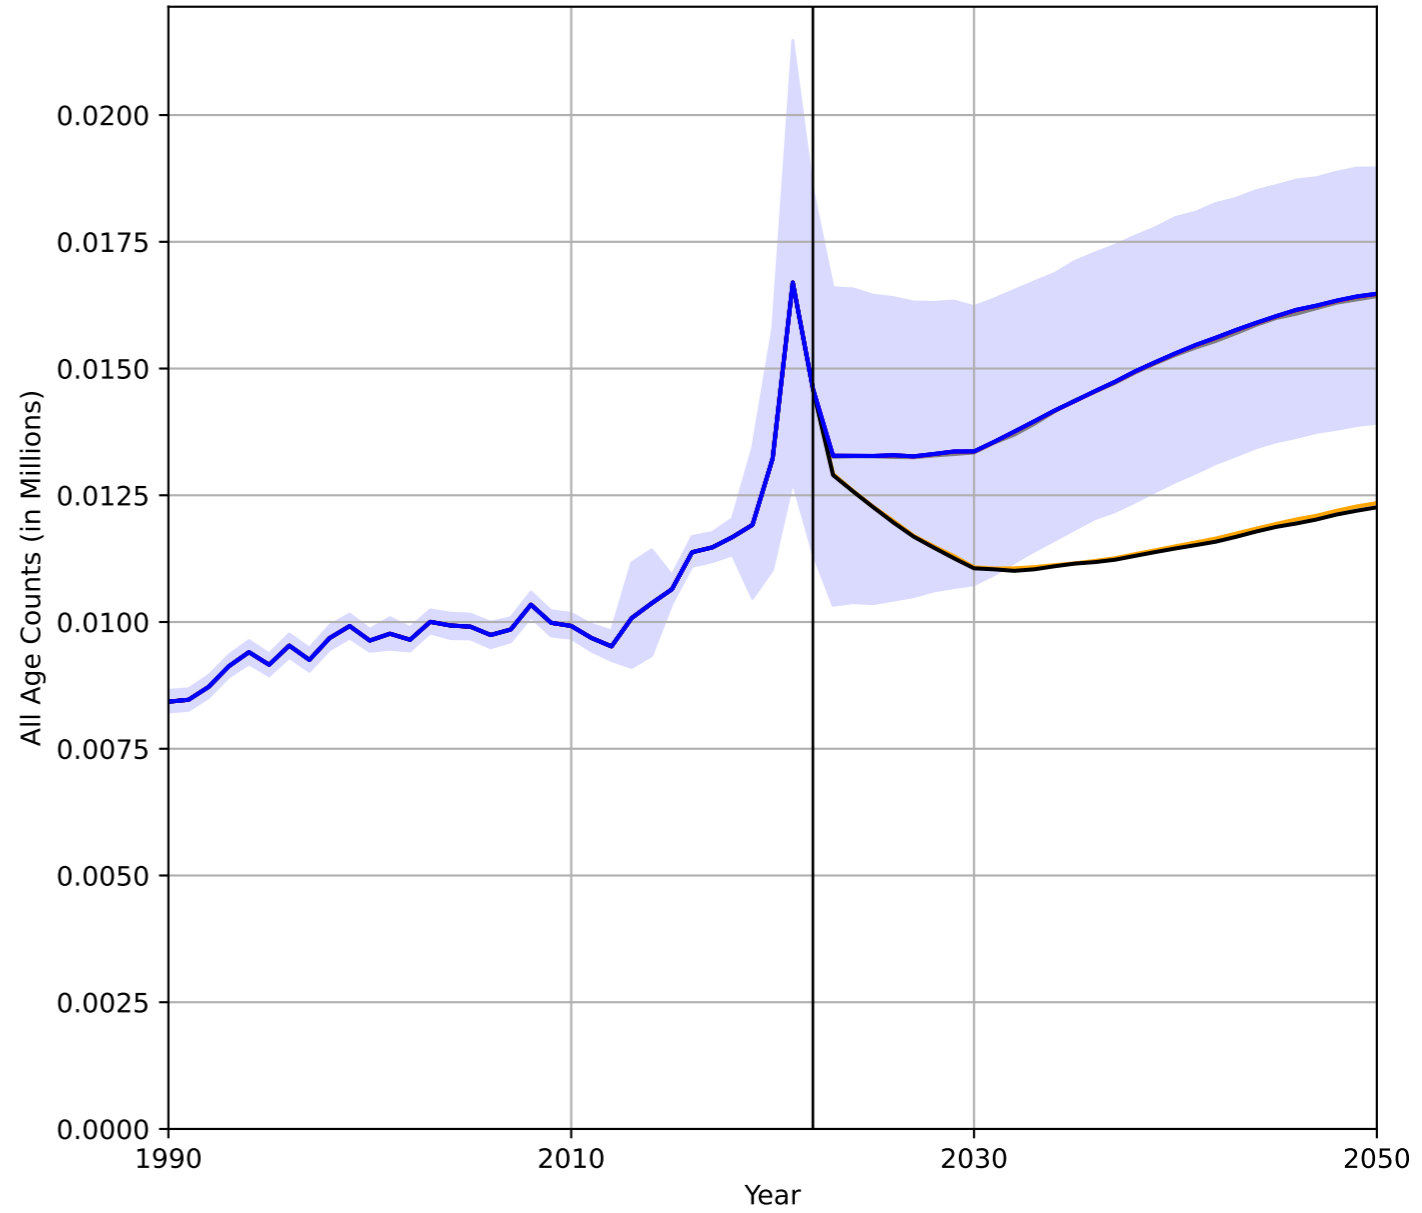

# Virgin Islands

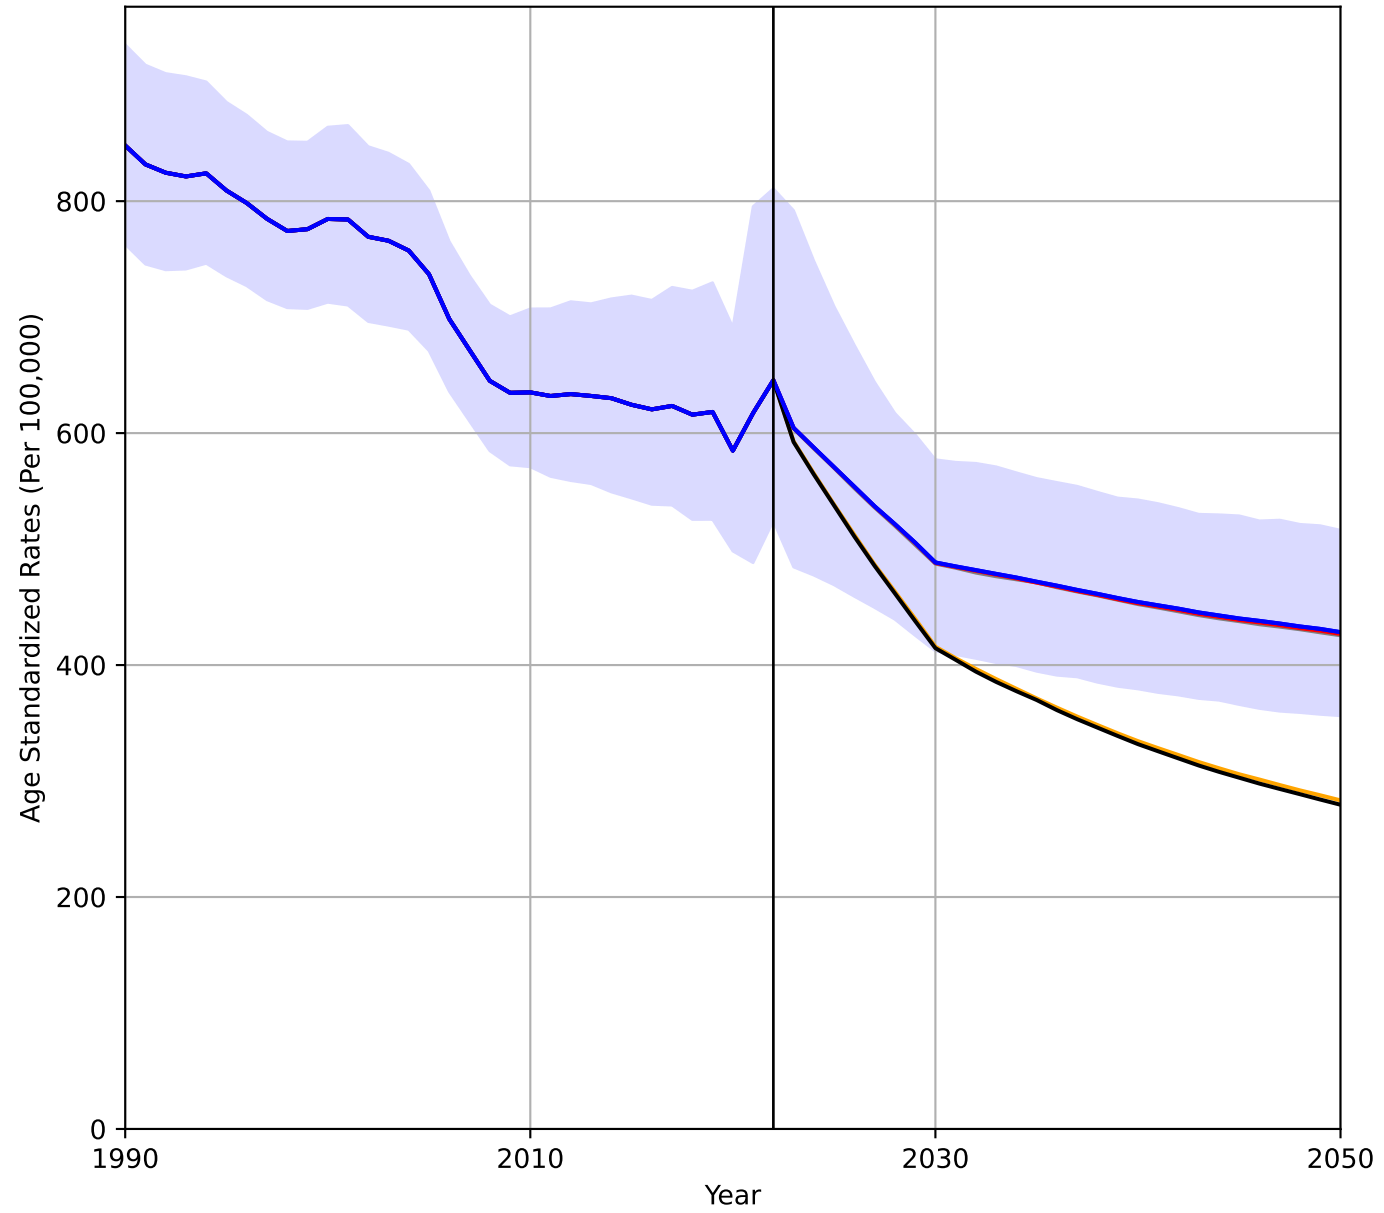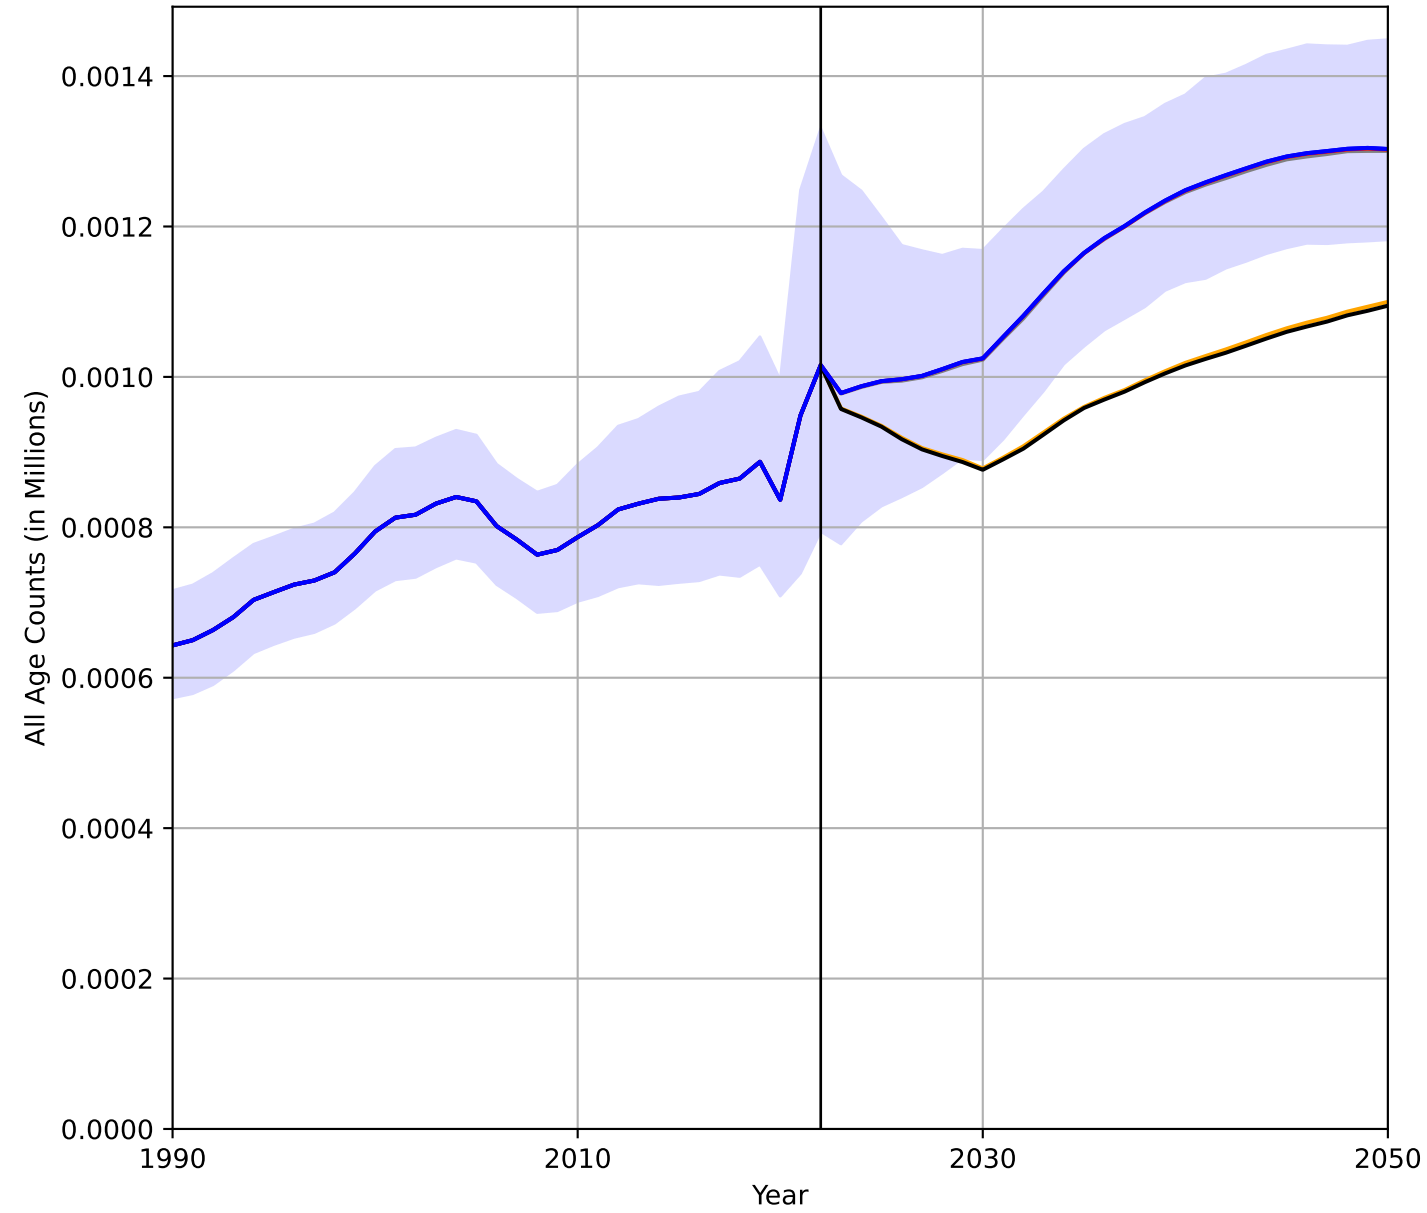

# Colombia

Supplemental Results Figure S11. All-cause age standardised death rates (A) and all age death counts (B), for the past and for five future scenarios, 1990–2050

1731

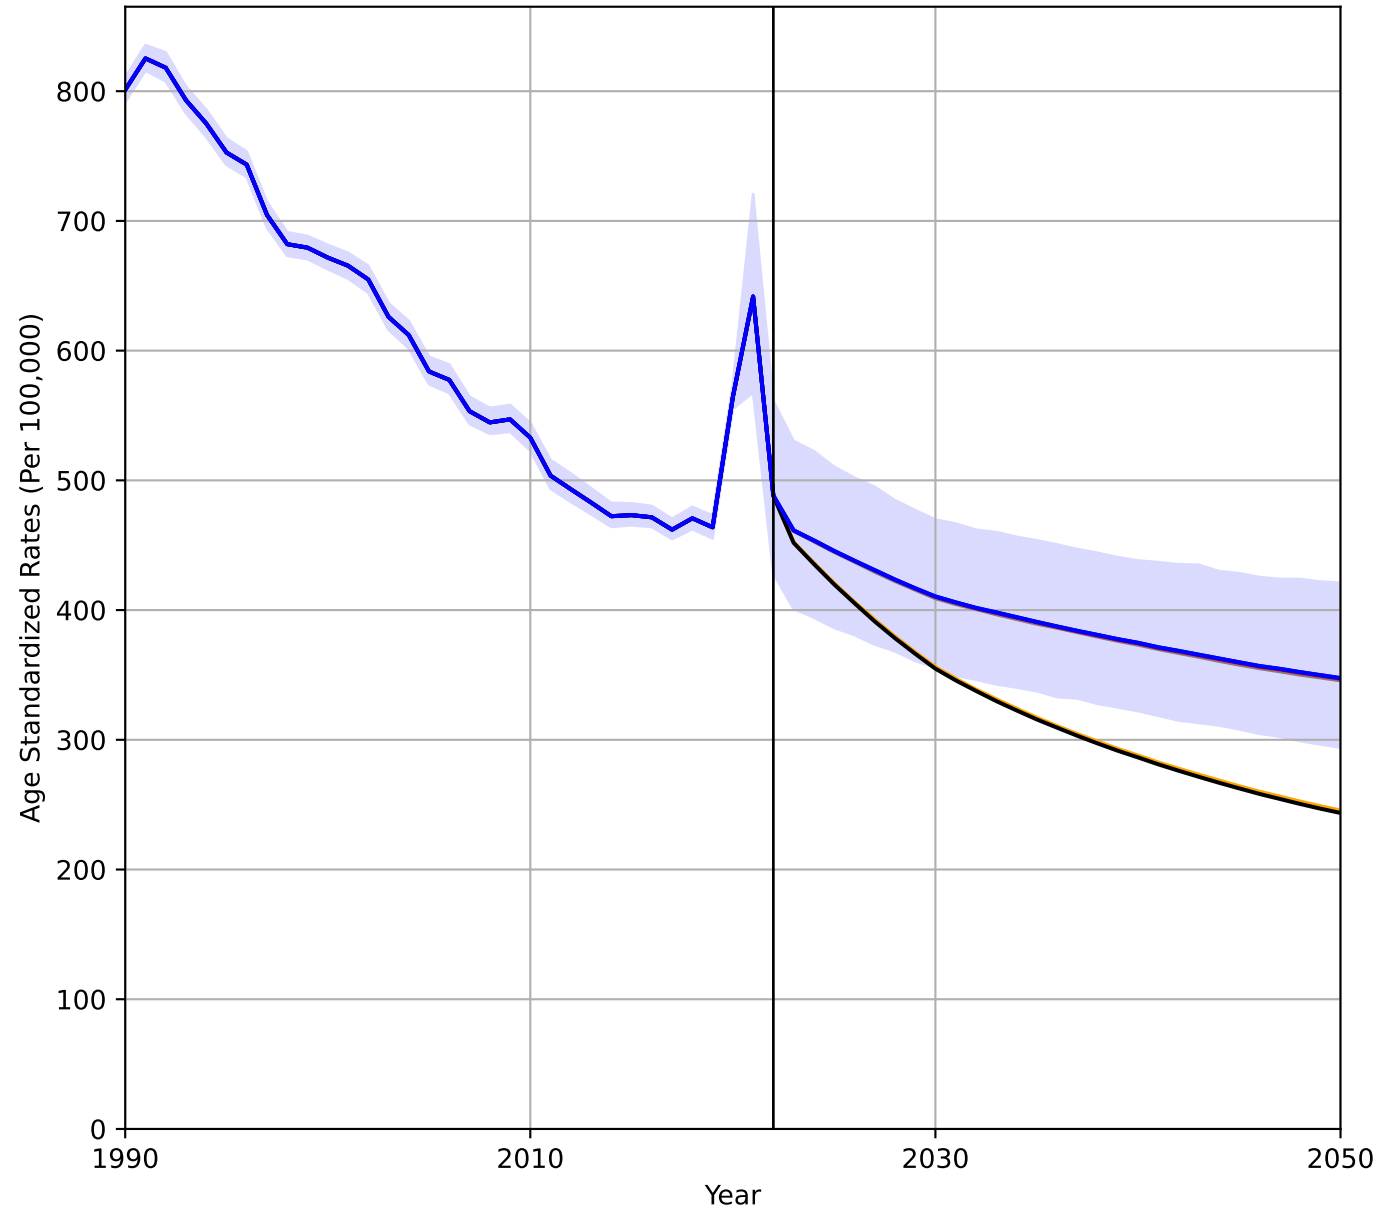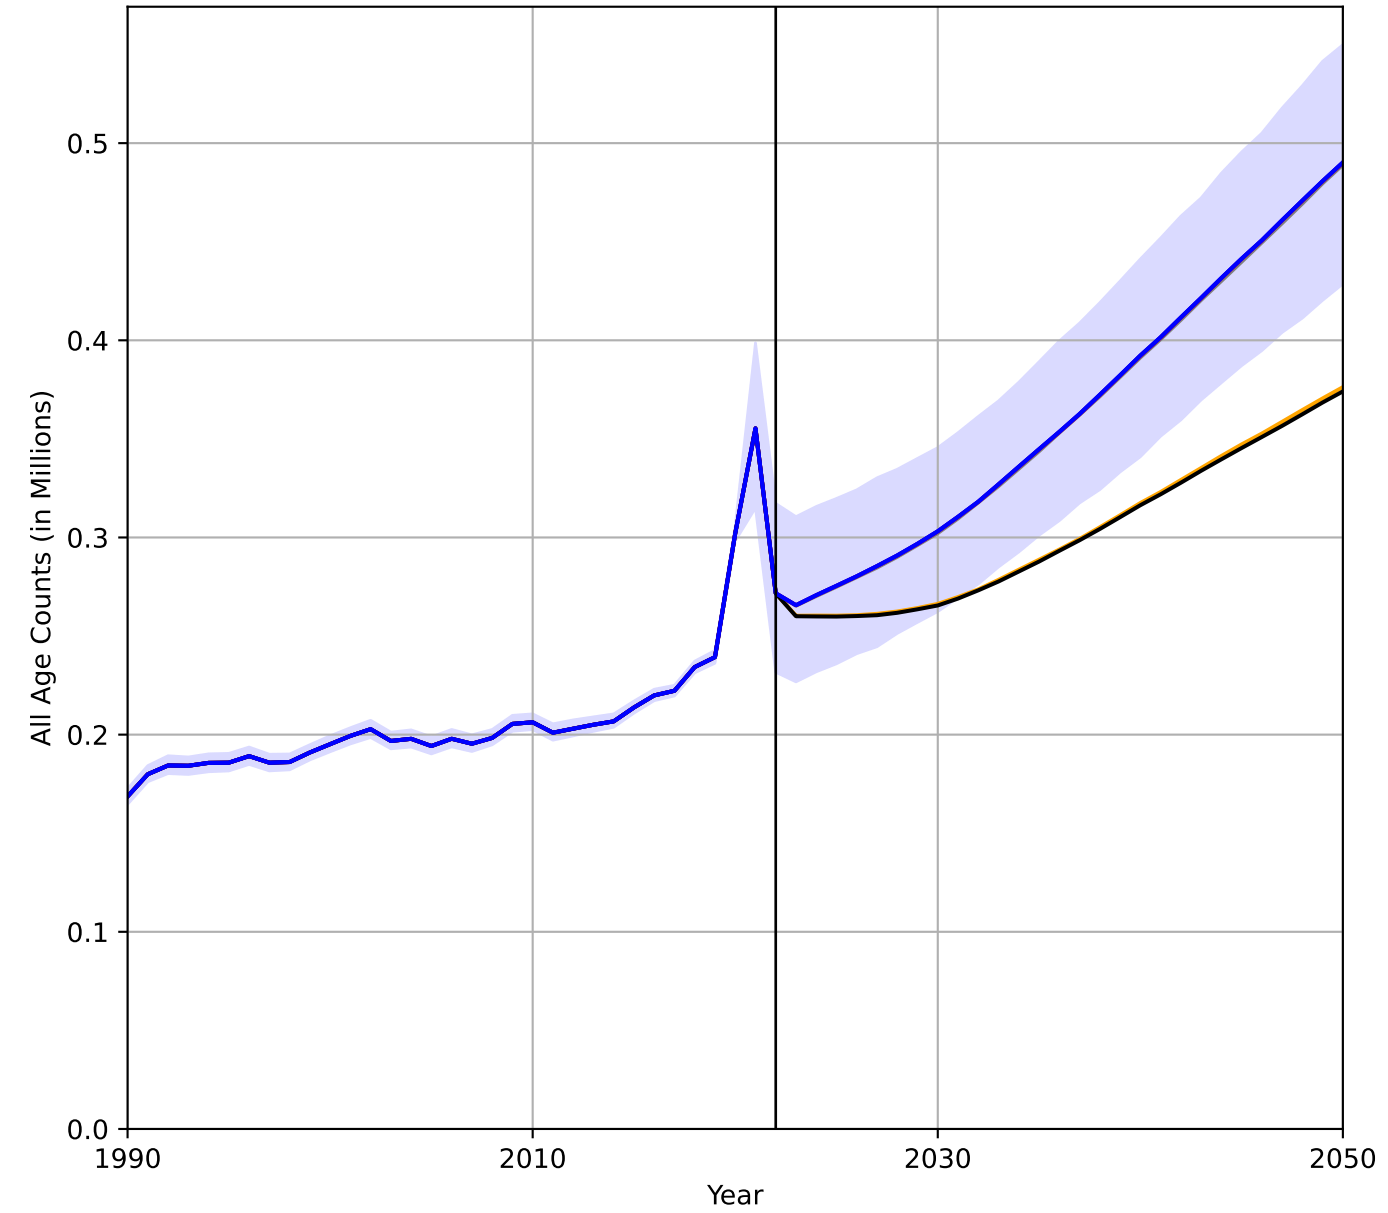

# Costa Rica

Supplemental Results Figure S11. All-cause age standardised death rates (A) and all age death counts (B), for the past and for five future scenarios, 1990–2050

1732

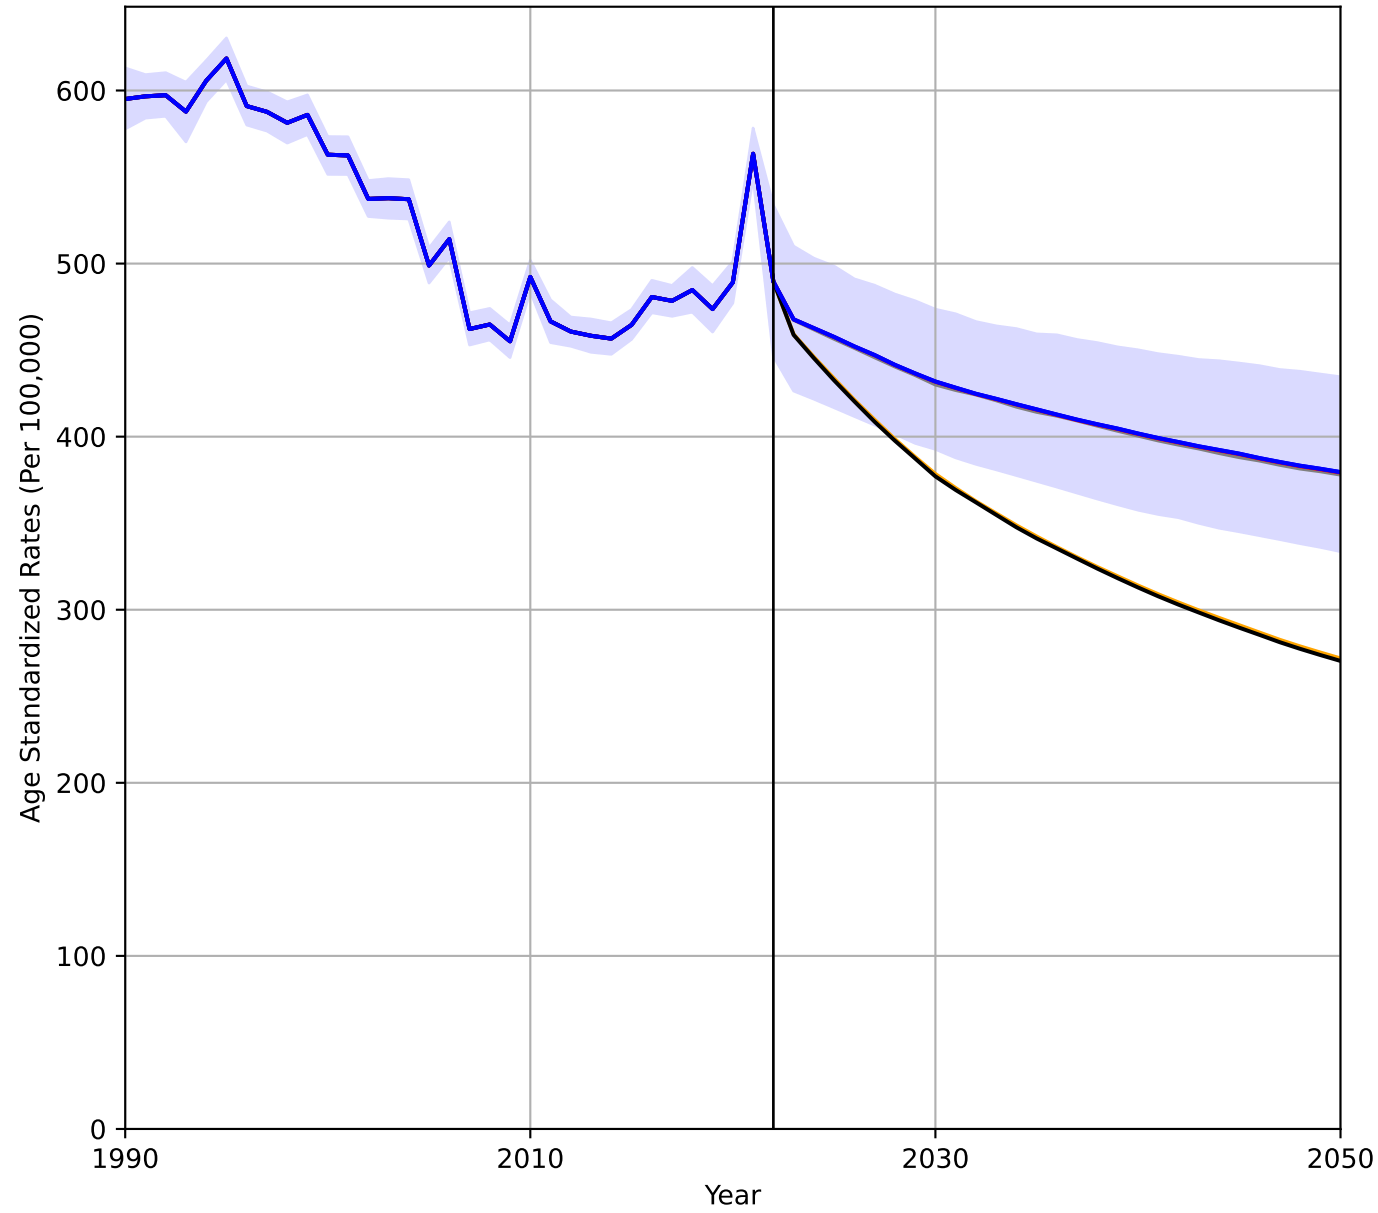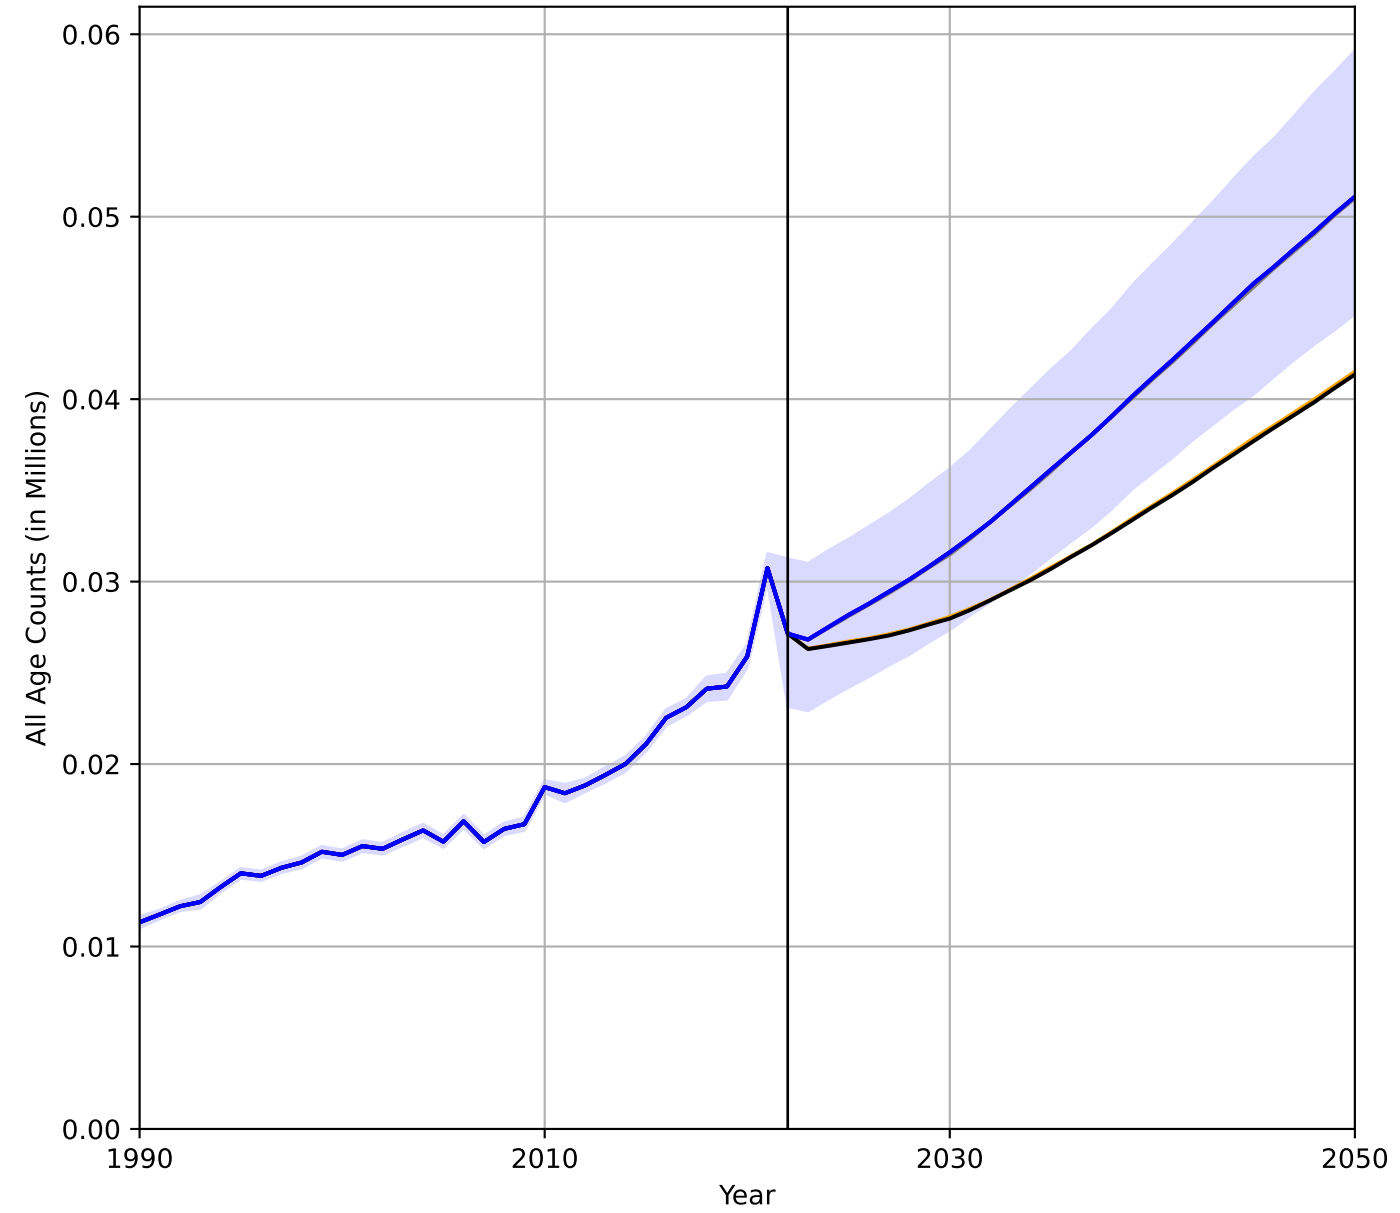

# El Salvador

Supplemental Results Figure S11. All-cause age standardised death rates (A) and all age death counts (B), for the past and for five future scenarios, 1990–2050

1733

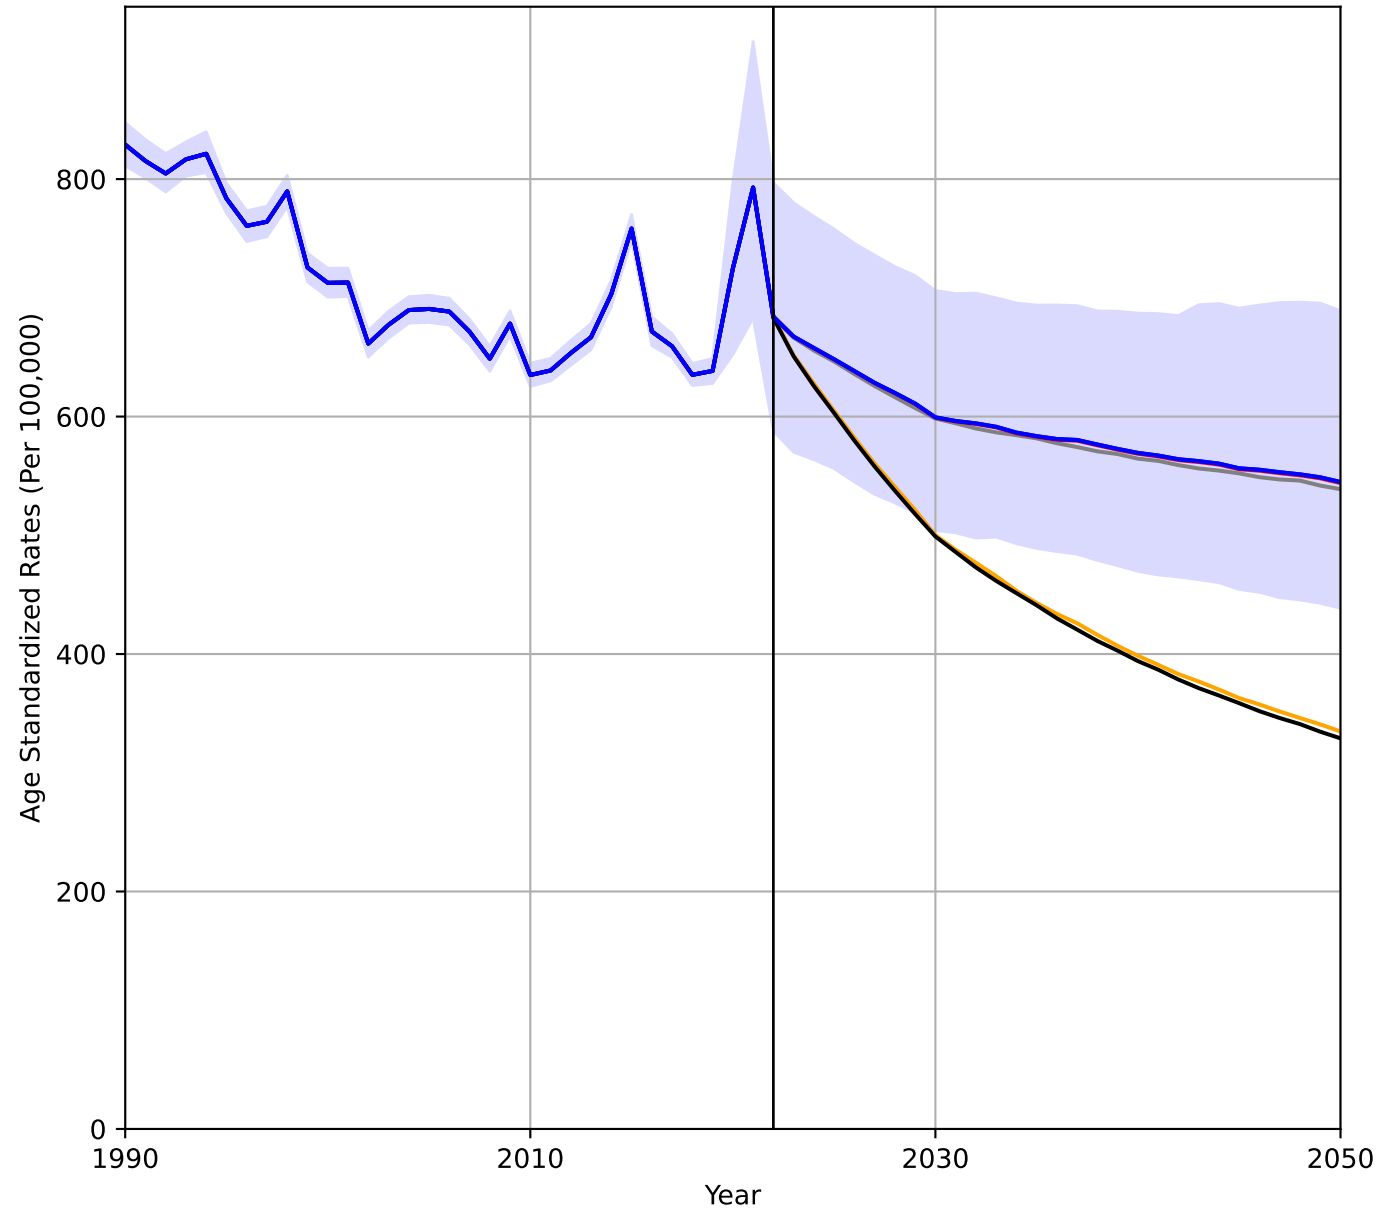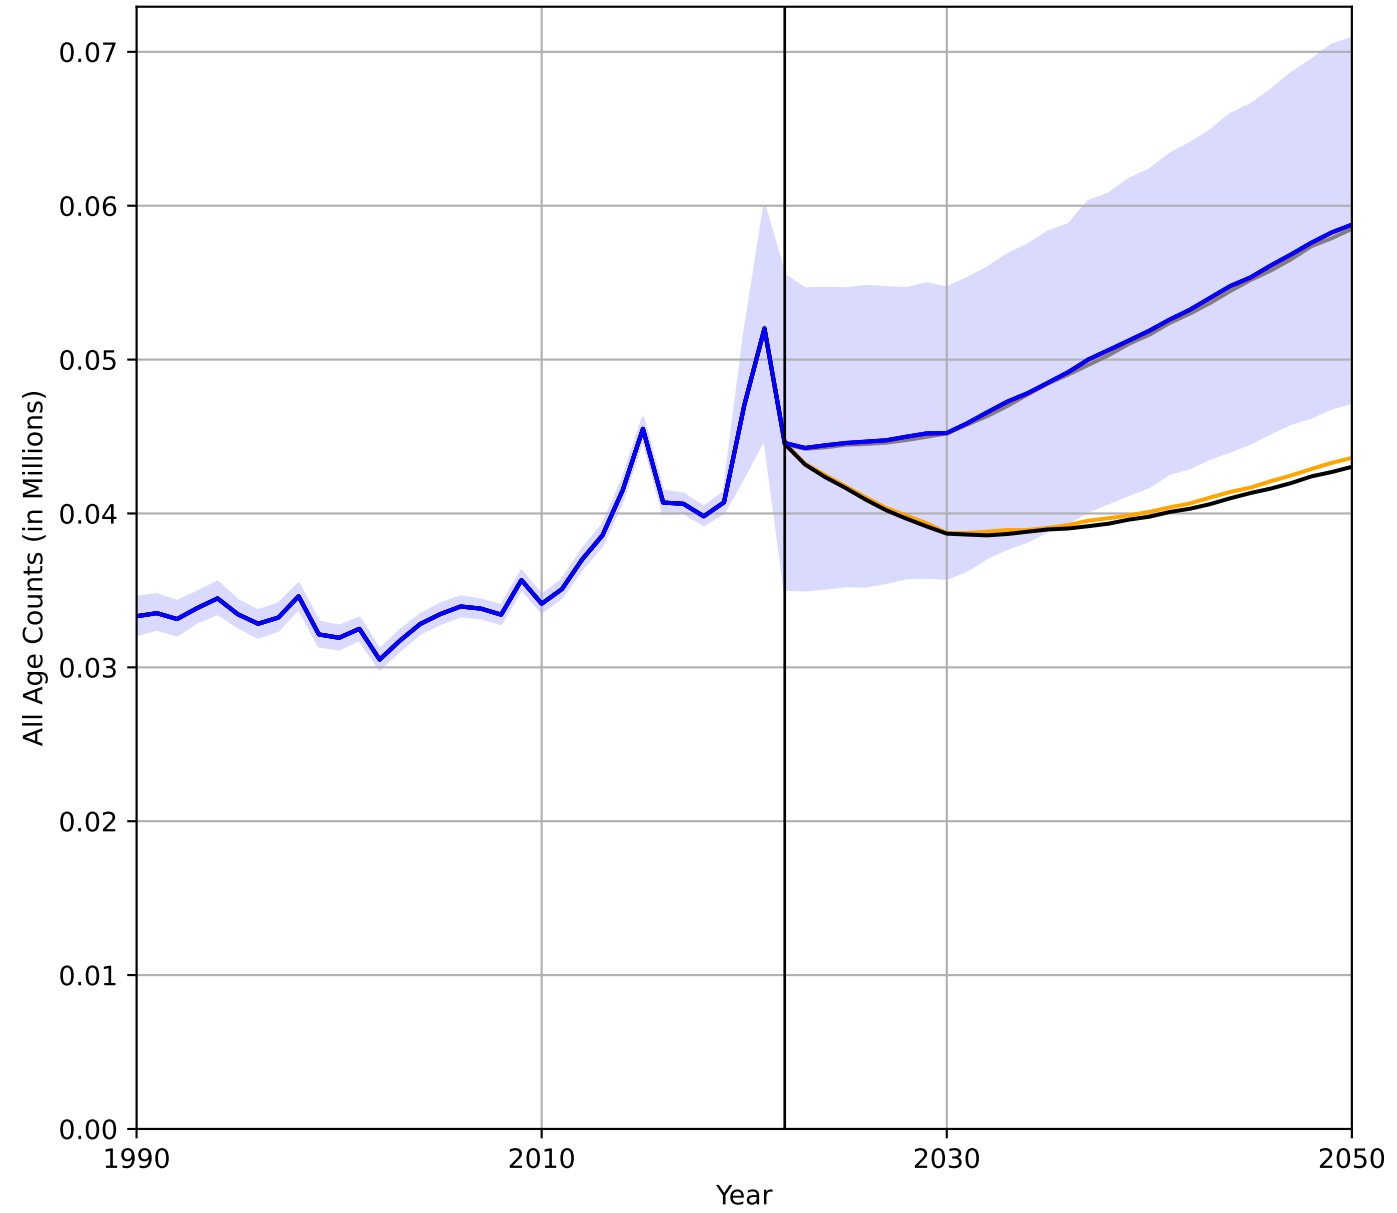

# Guatemala

Supplemental Results Figure S11. All-cause age standardised death rates (A) and all age death counts (B), for the past and for five future scenarios, 1990–2050

1734

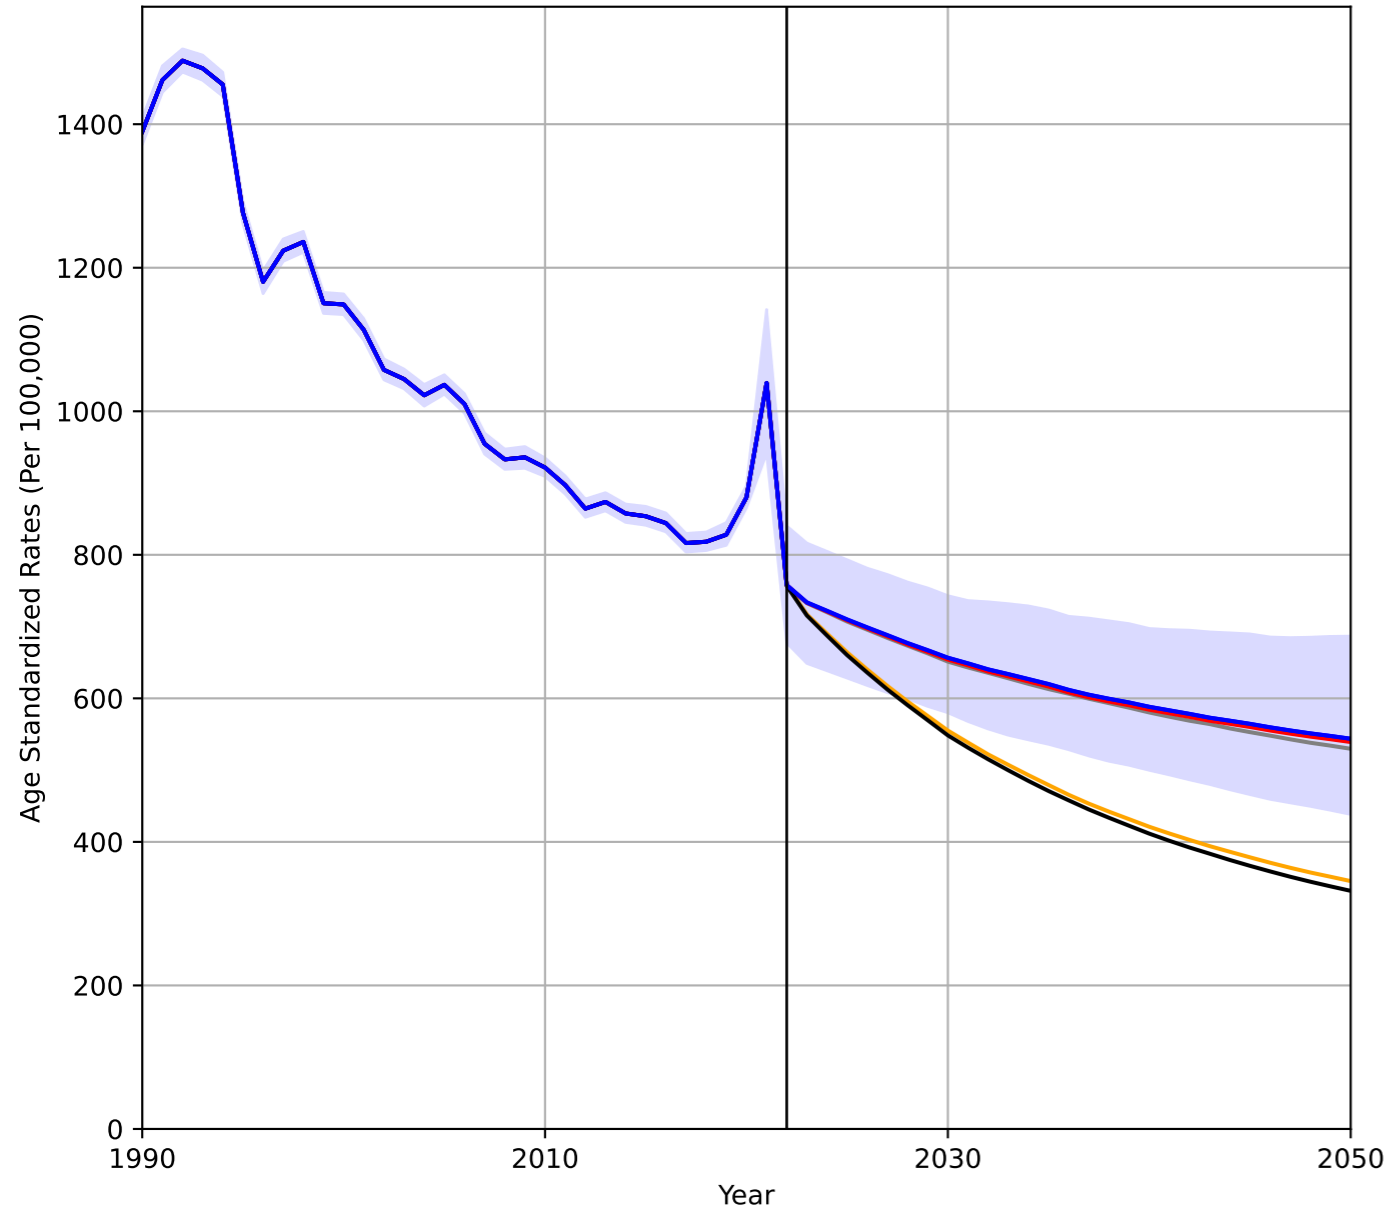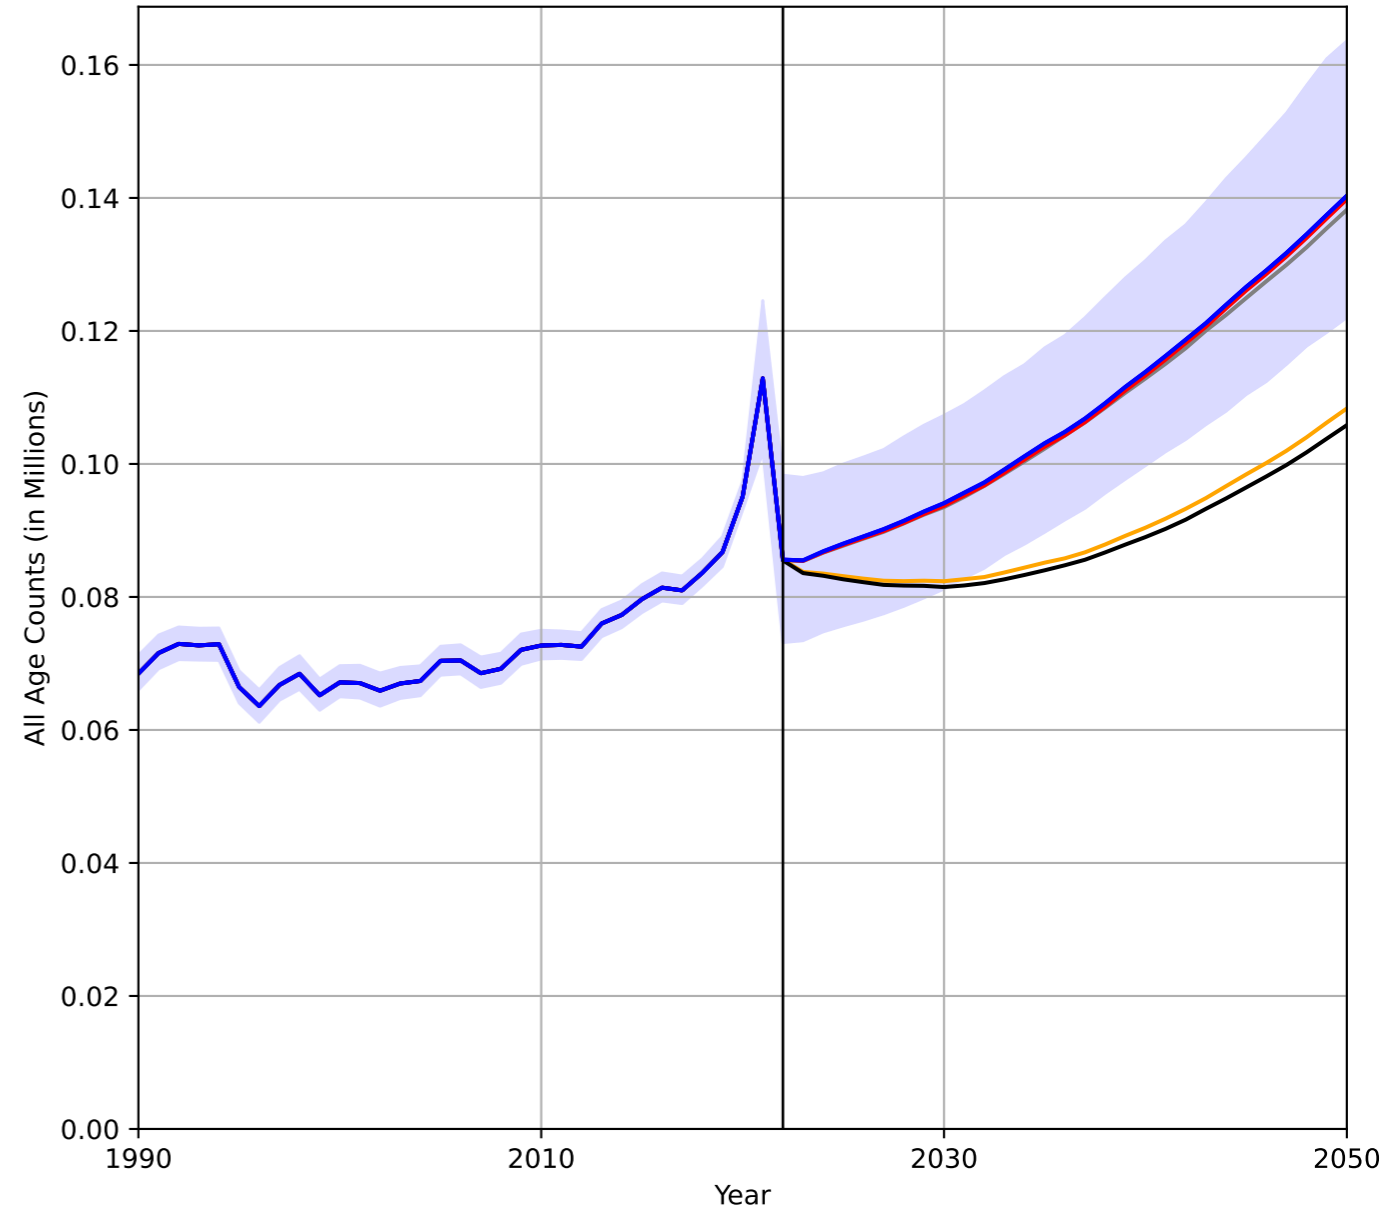

# Honduras

Supplemental Results Figure S11. All-cause age standardised death rates (A) and all age death counts (B), for the past and for five future scenarios, 1990–2050

1735

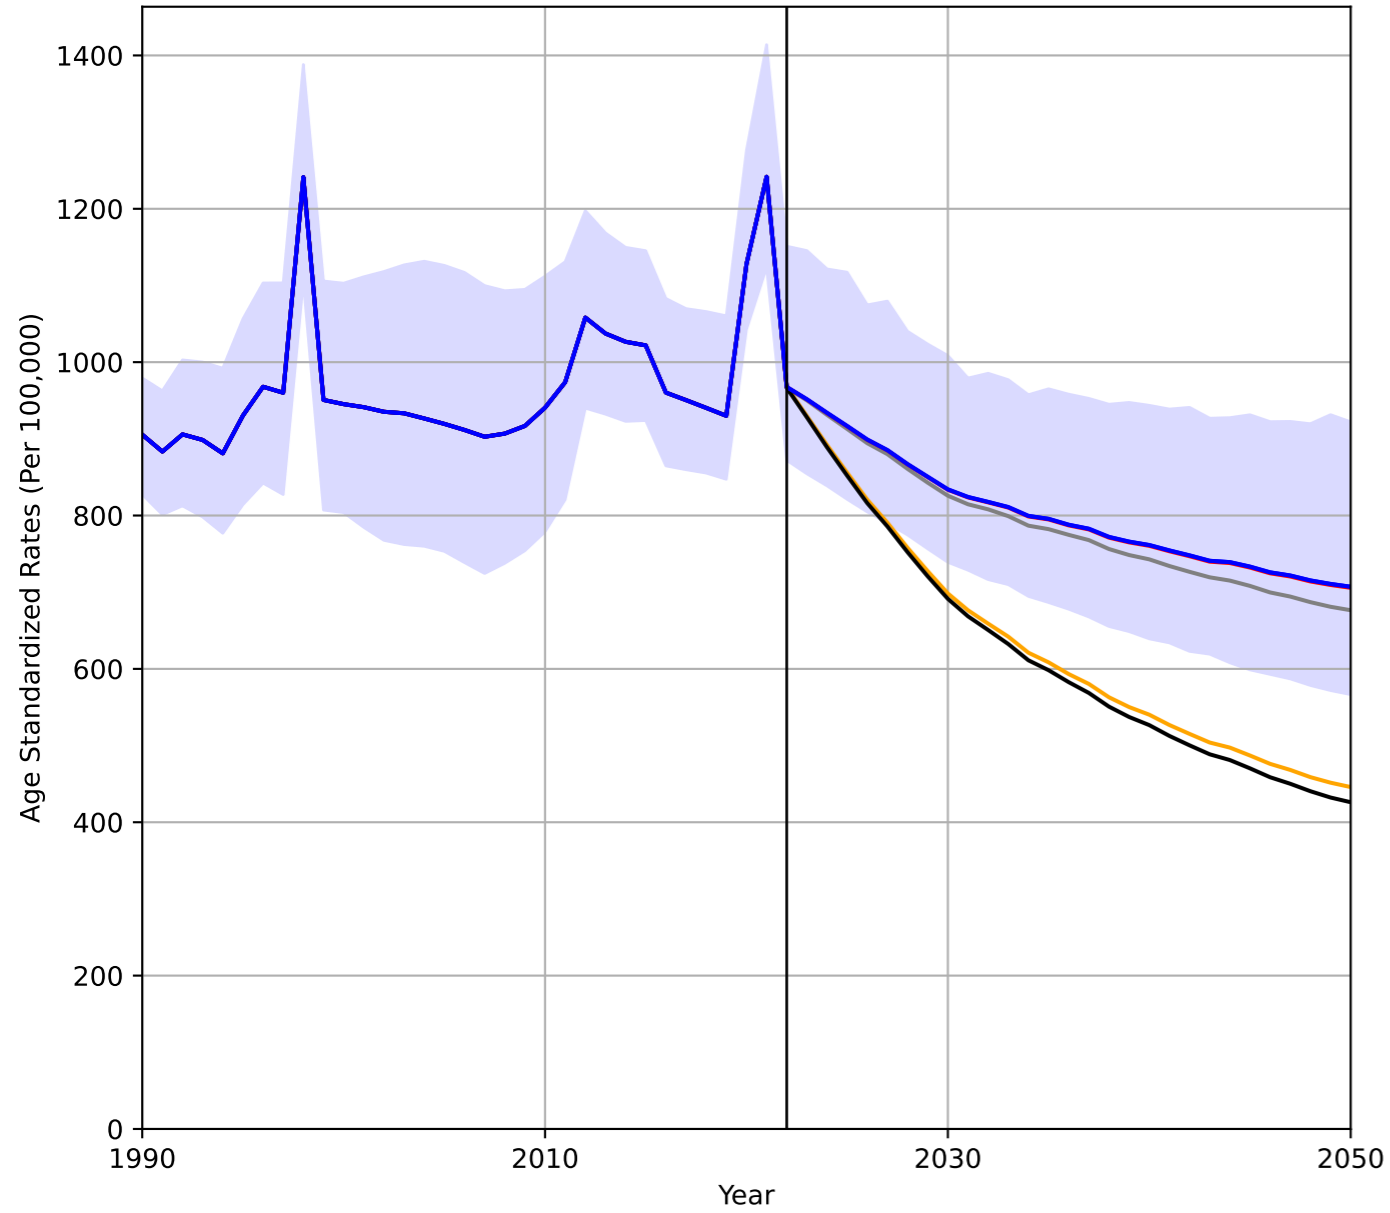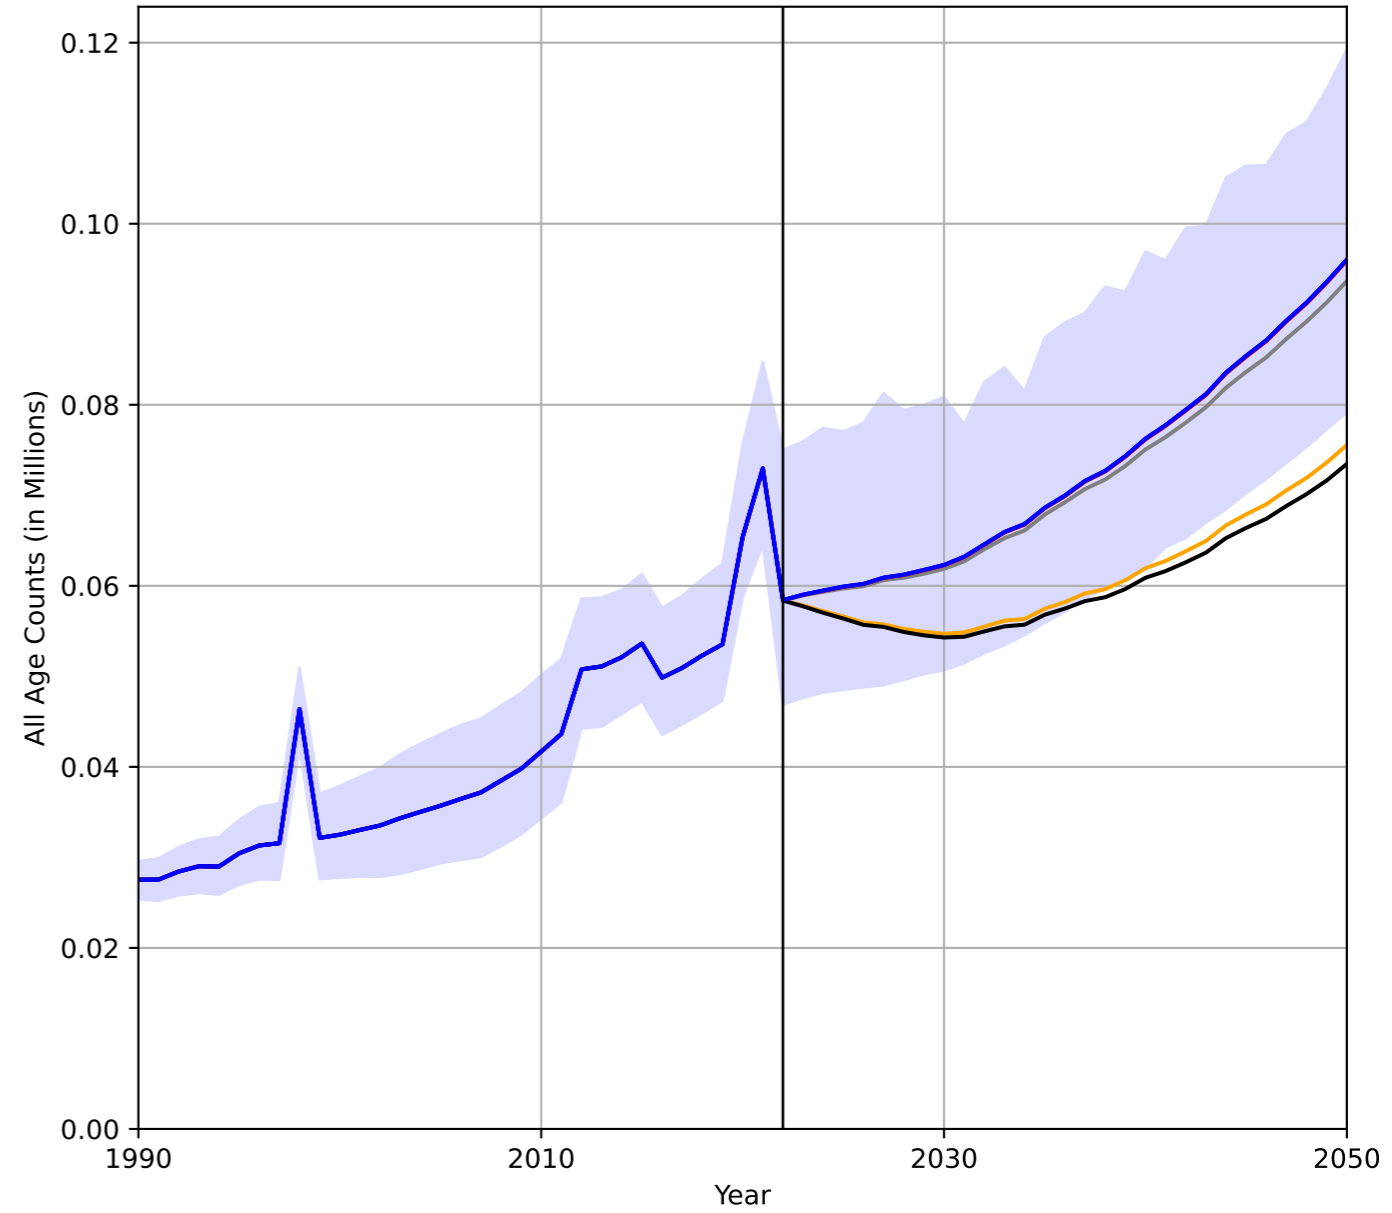



# Mexico

Supplemental Results Figure S11. All-cause age standardised death rates (A) and all age death counts (B), for the past and for five future scenarios, 1990–2050

1736

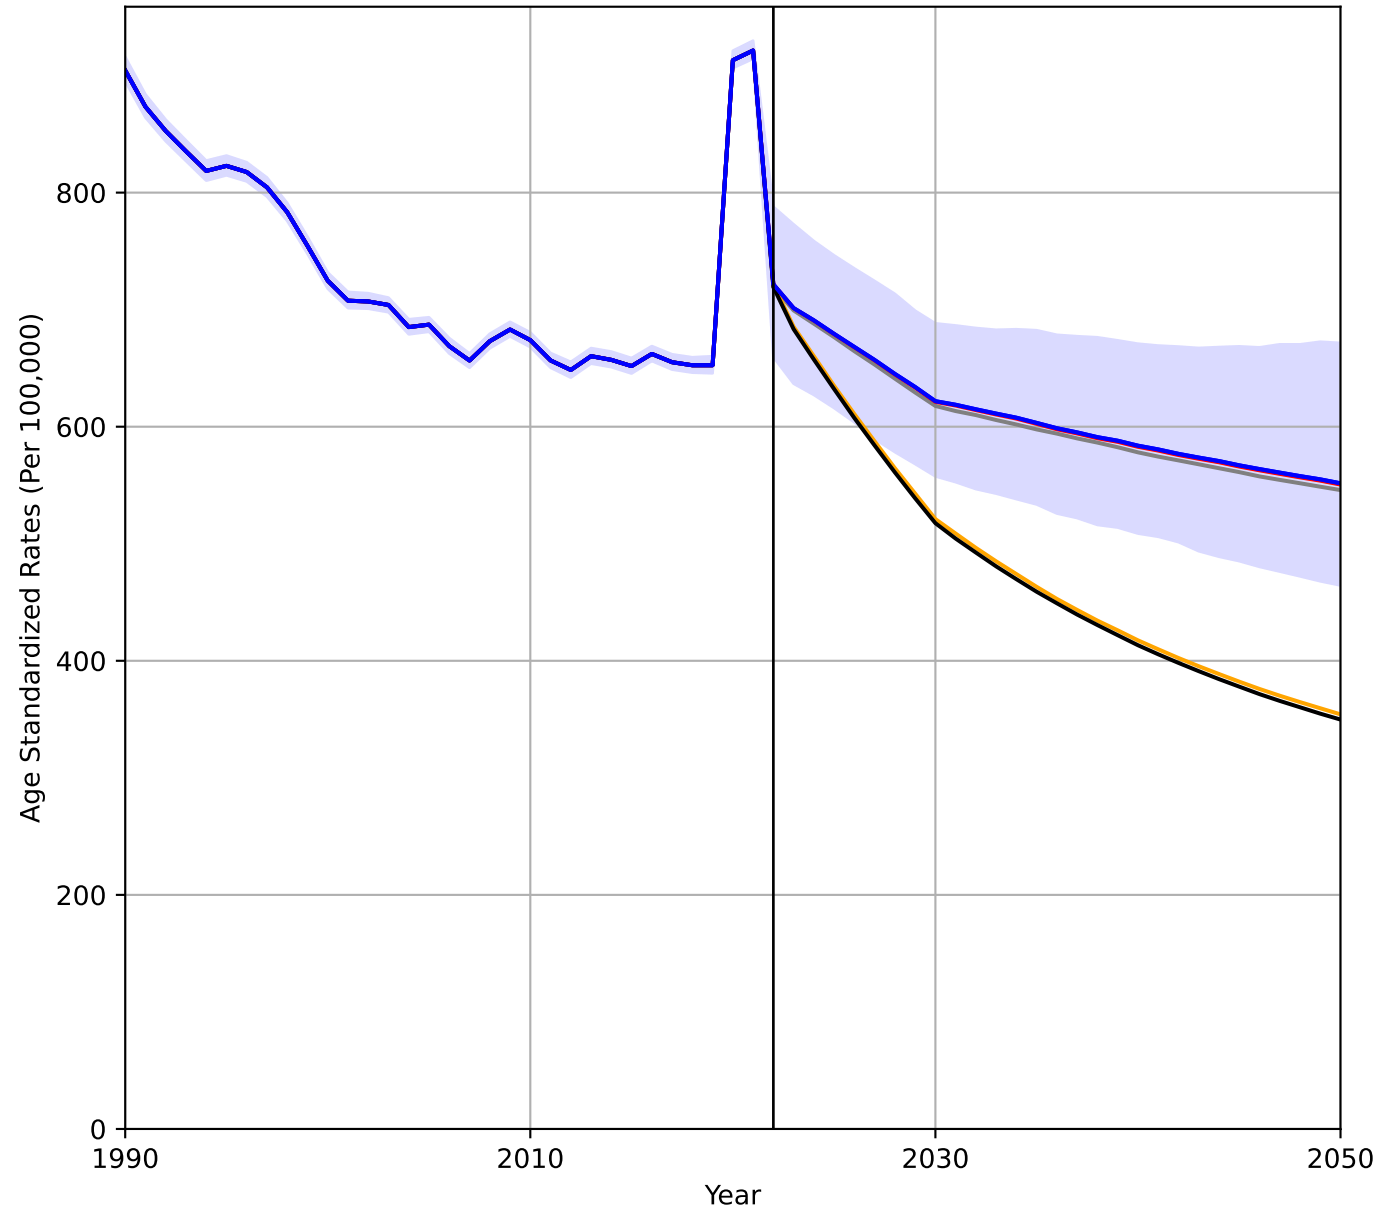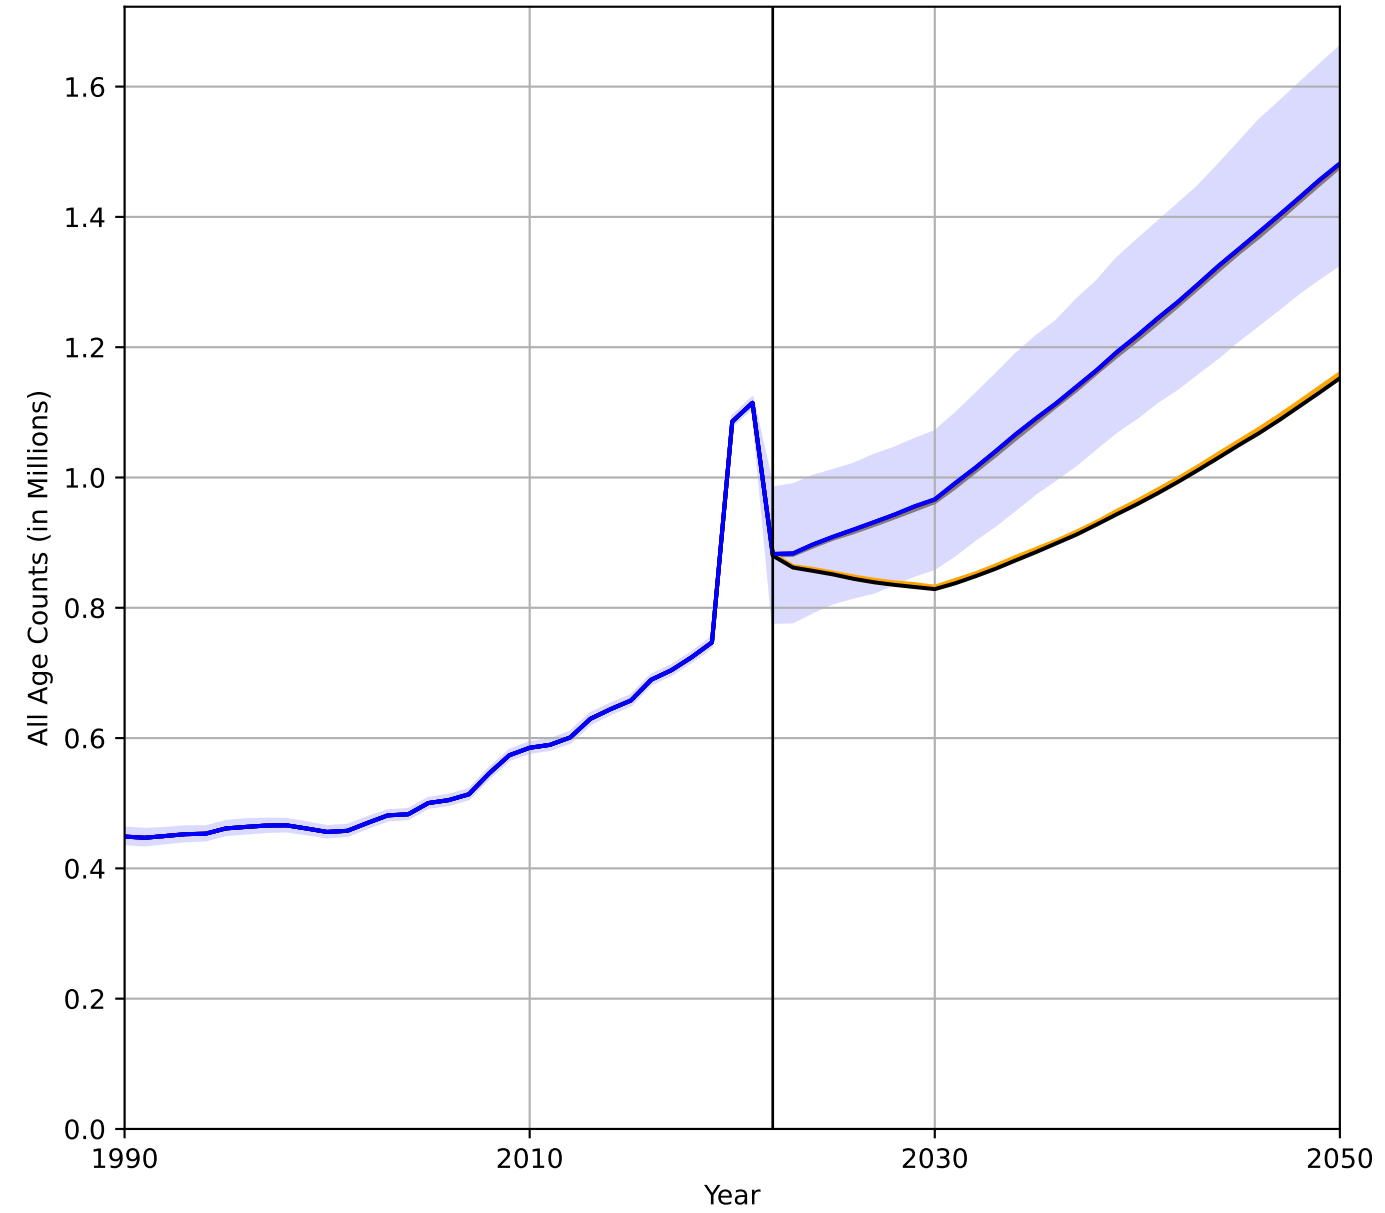

# Nicaragua

Supplemental Results Figure S11. All-cause age standardised death rates (A) and all age death counts (B), for the past and for five future scenarios, 1990–2050

1737

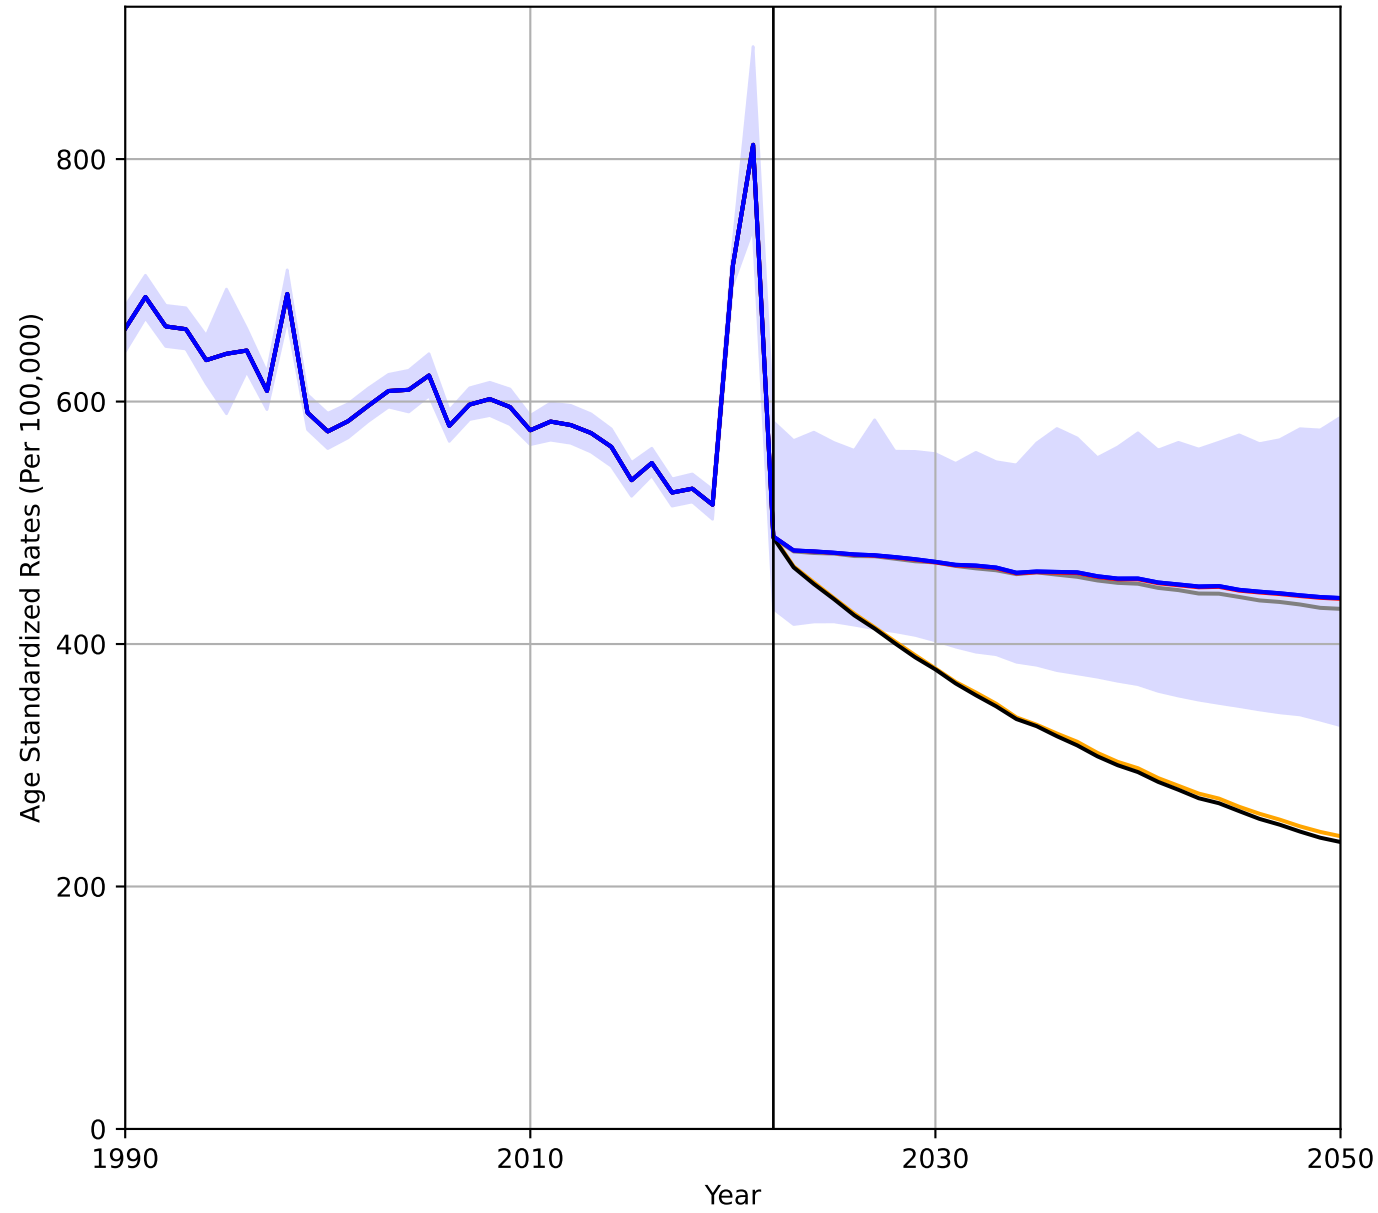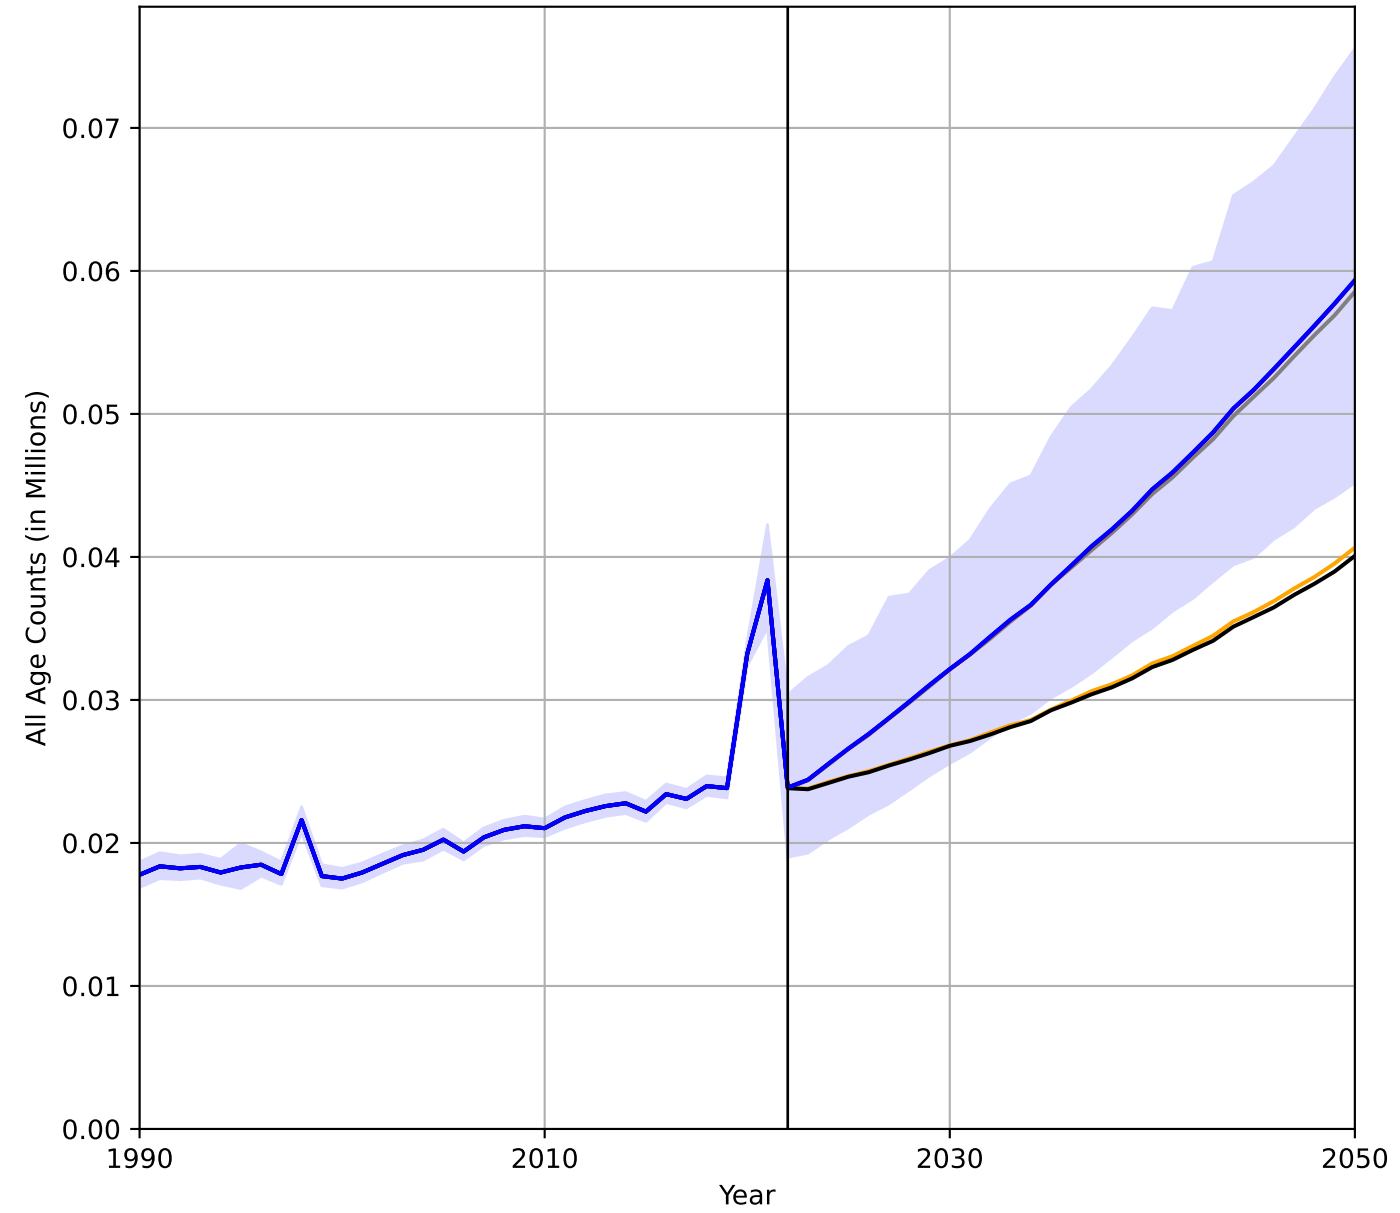

# Panama

Supplemental Results Figure S11. All-cause age standardised death rates (A) and all age death counts (B), for the past and for five future scenarios, 1990–2050

1738

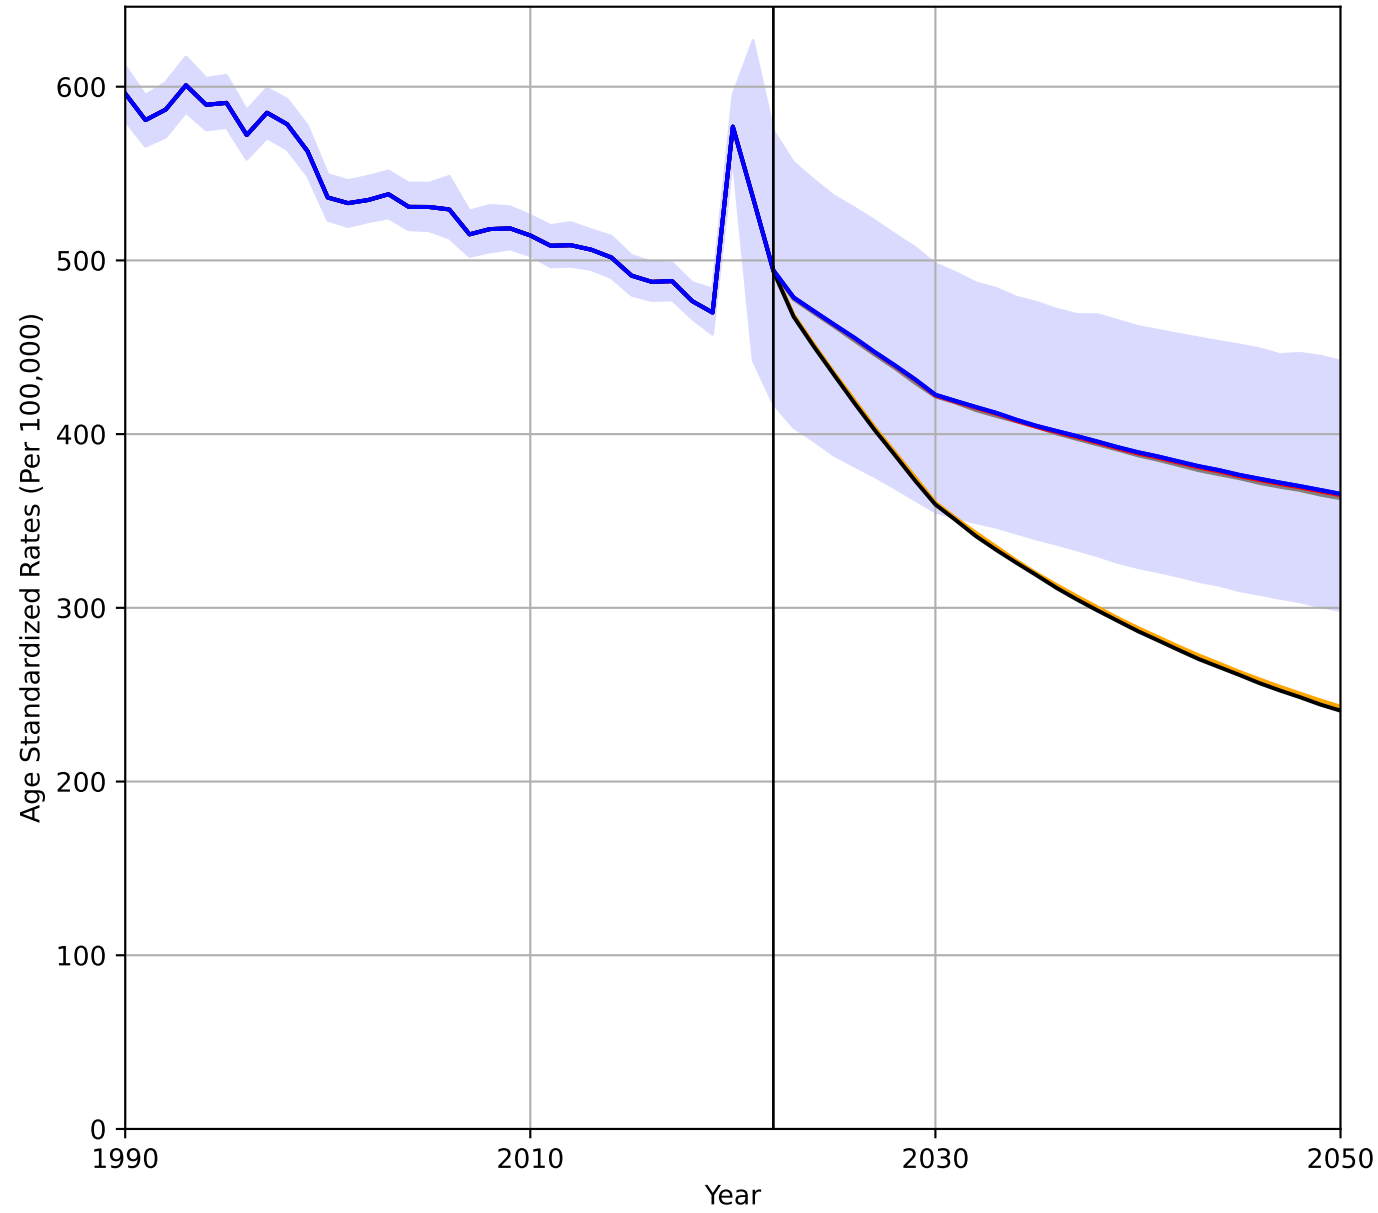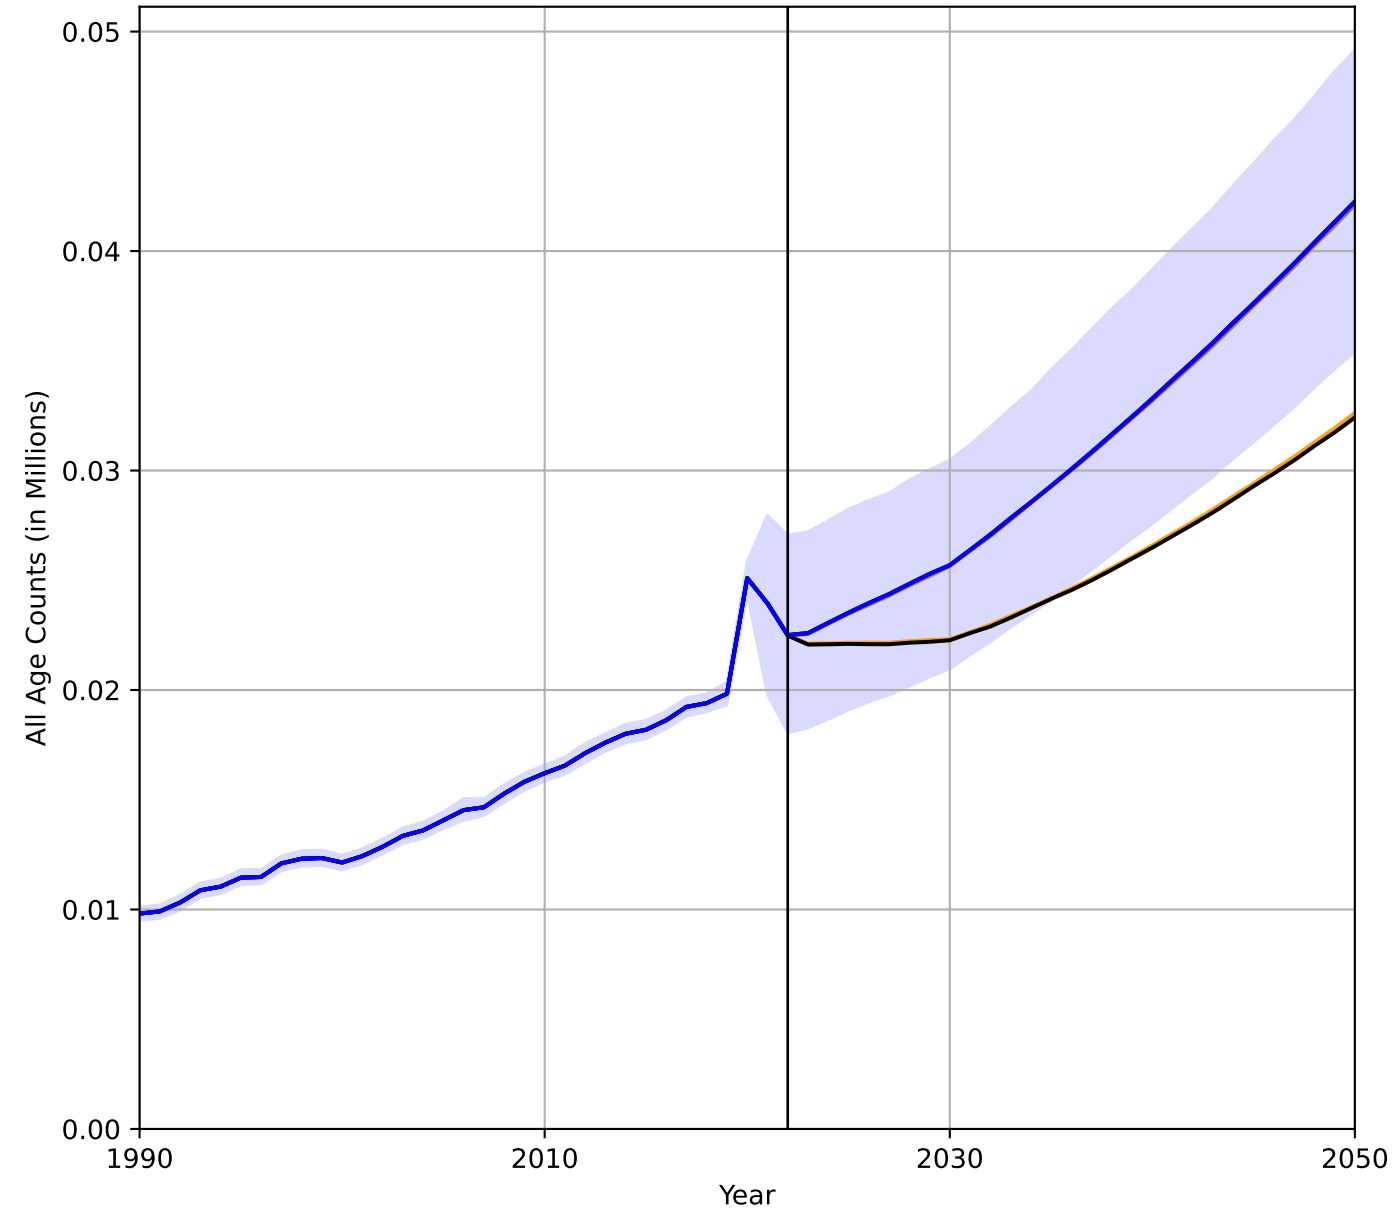

# Venezuela

Supplemental Results Figure S11. All-cause age standardised death rates (A) and all age death counts (B), for the past and for five future scenarios, 1990–2050

1739

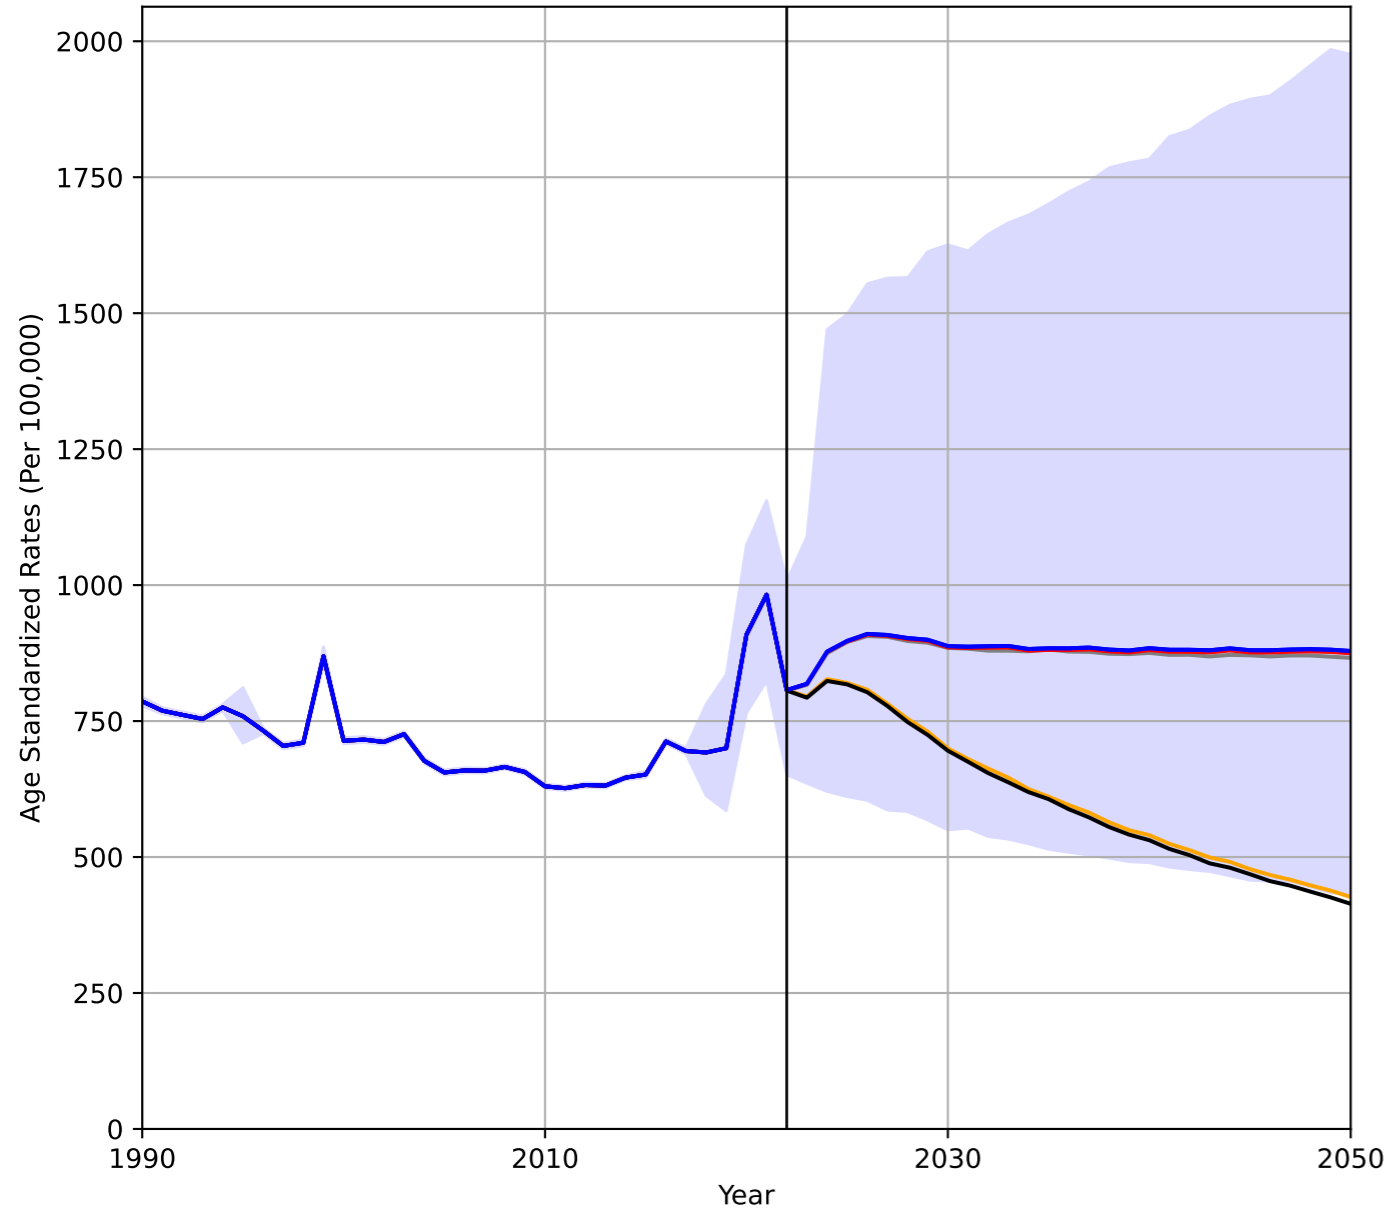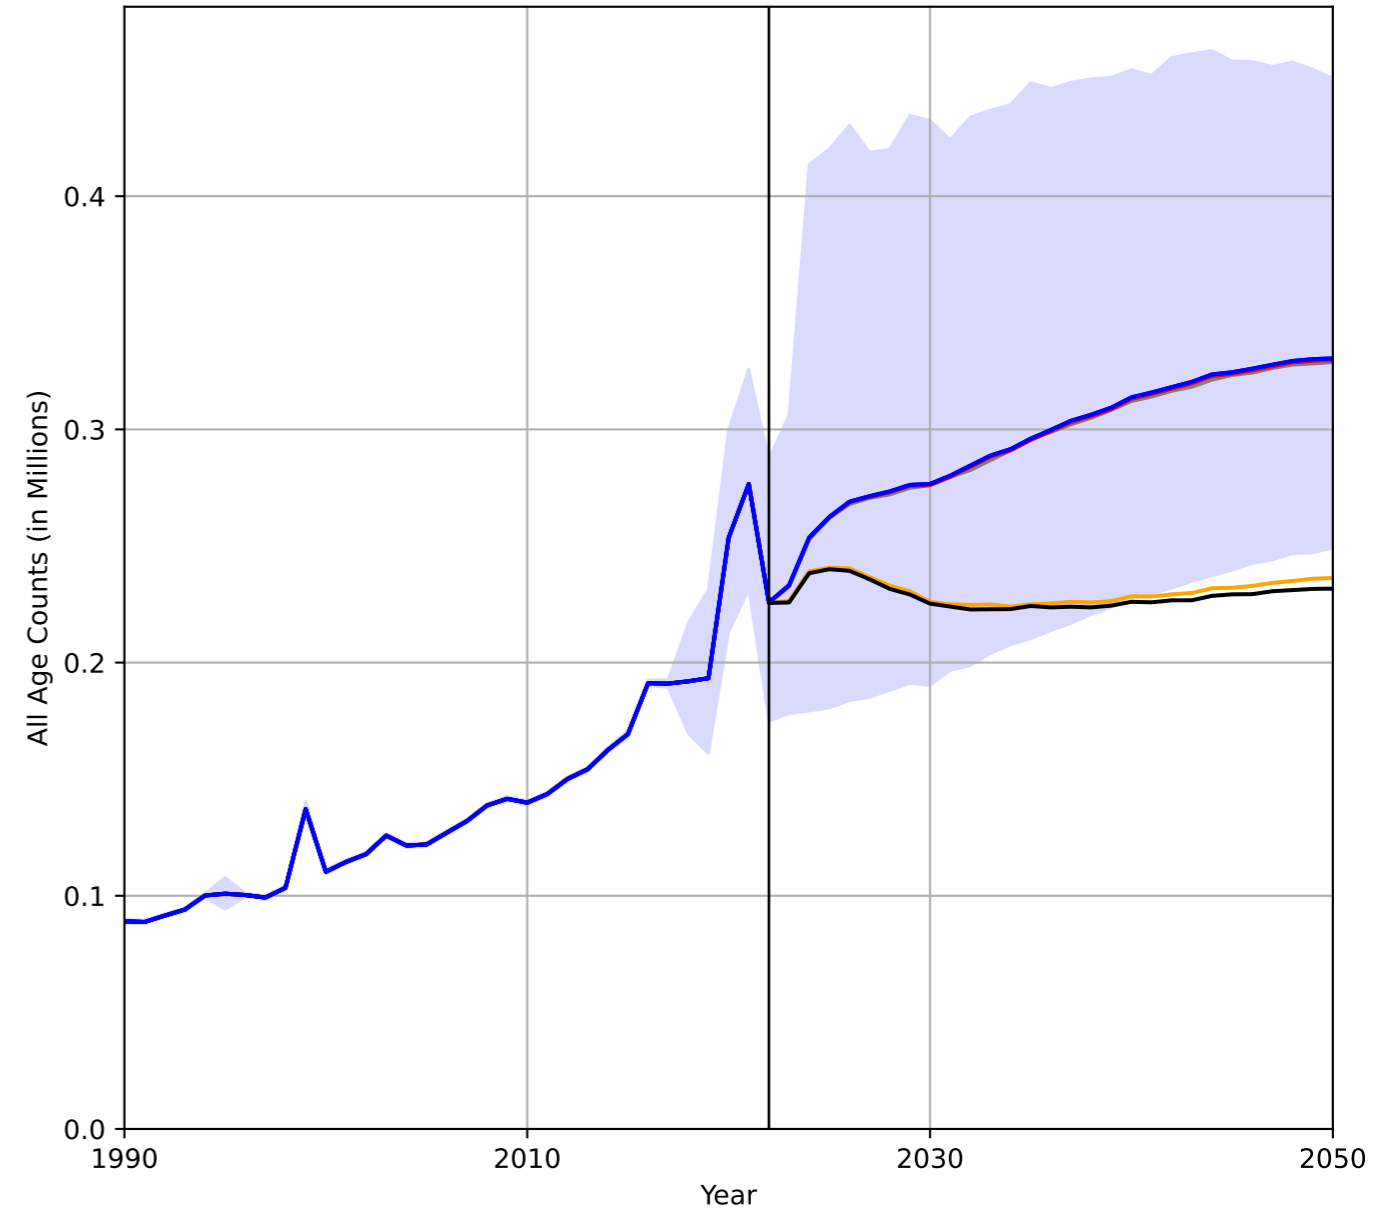

# Brazil

Supplemental Results Figure S11. All-cause age standardised death rates (A) and all age death counts (B), for the past and for five future scenarios, 1990–2050

1740

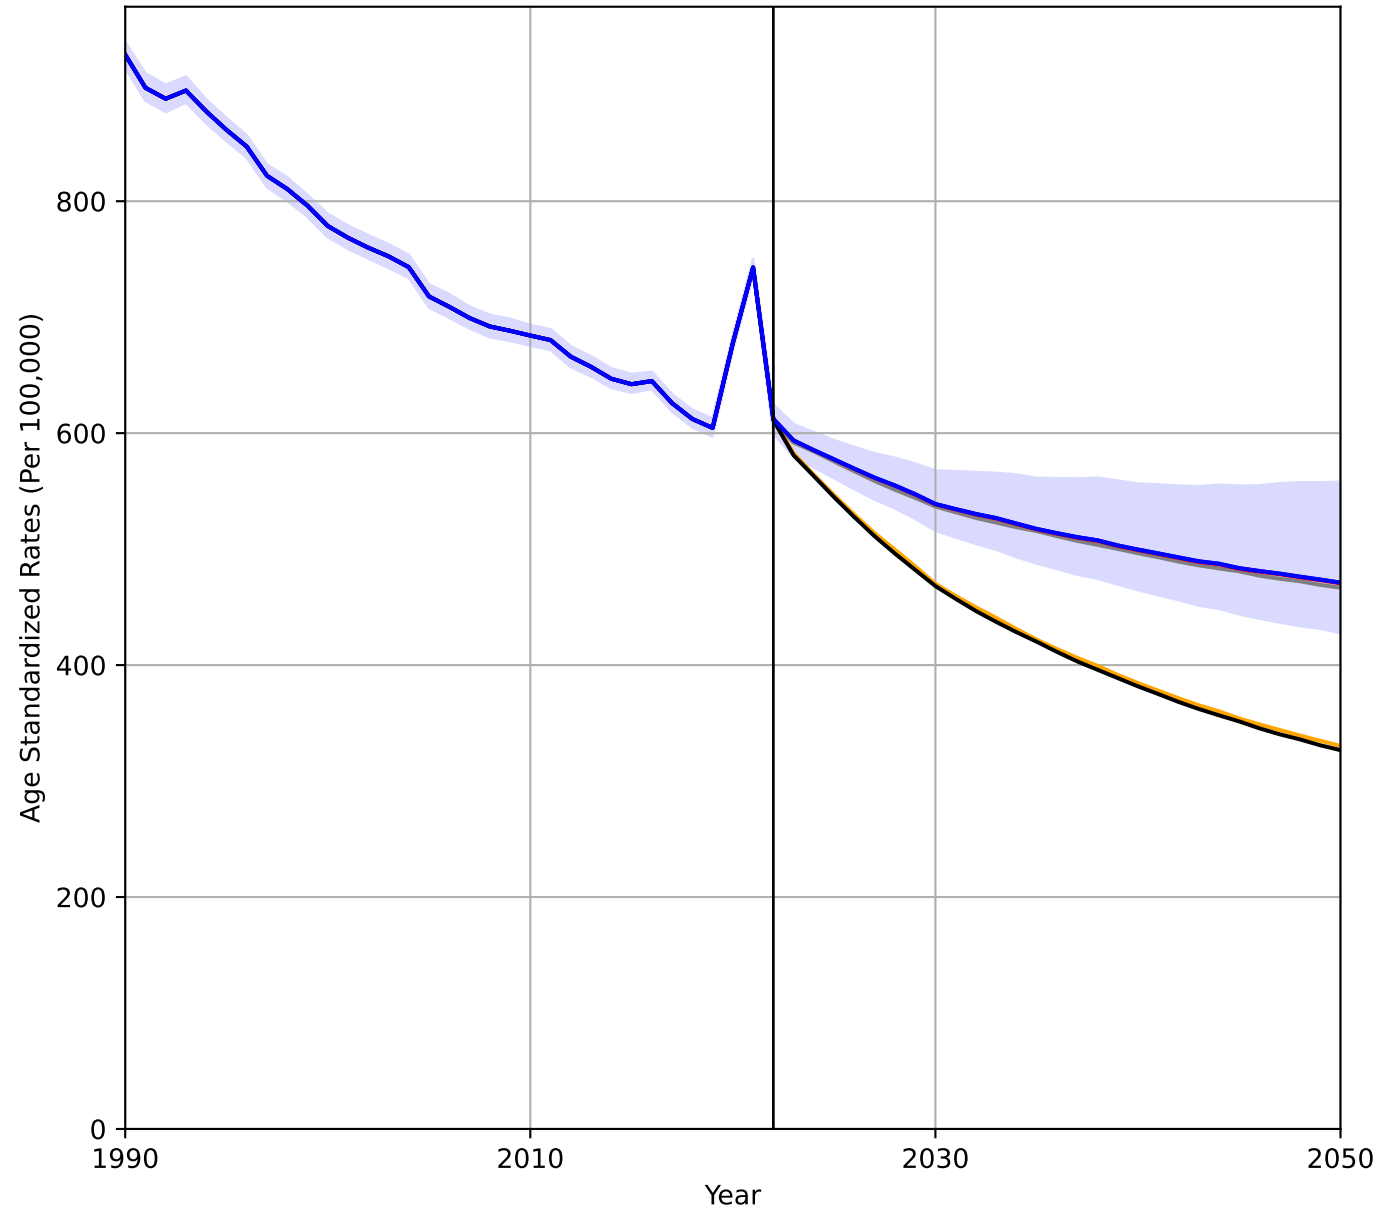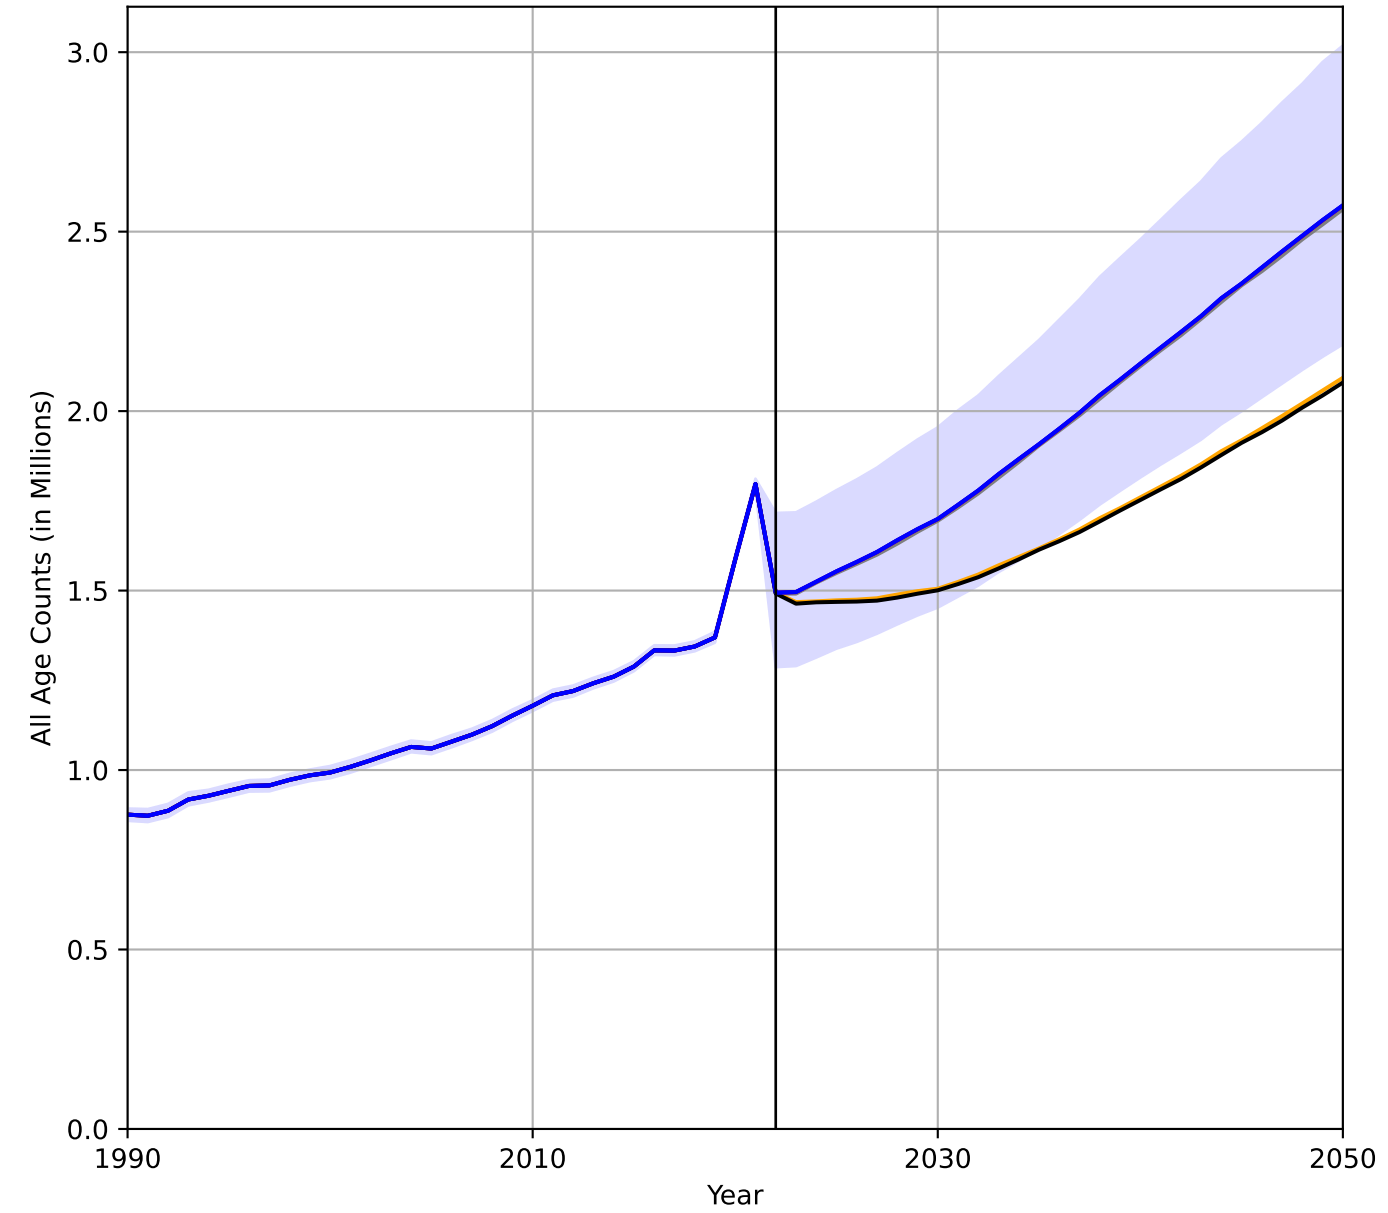

# Paraguay

Supplemental Results Figure S11. All-cause age standardised death rates (A) and all age death counts (B), for the past and for five future scenarios, 1990–2050

1741

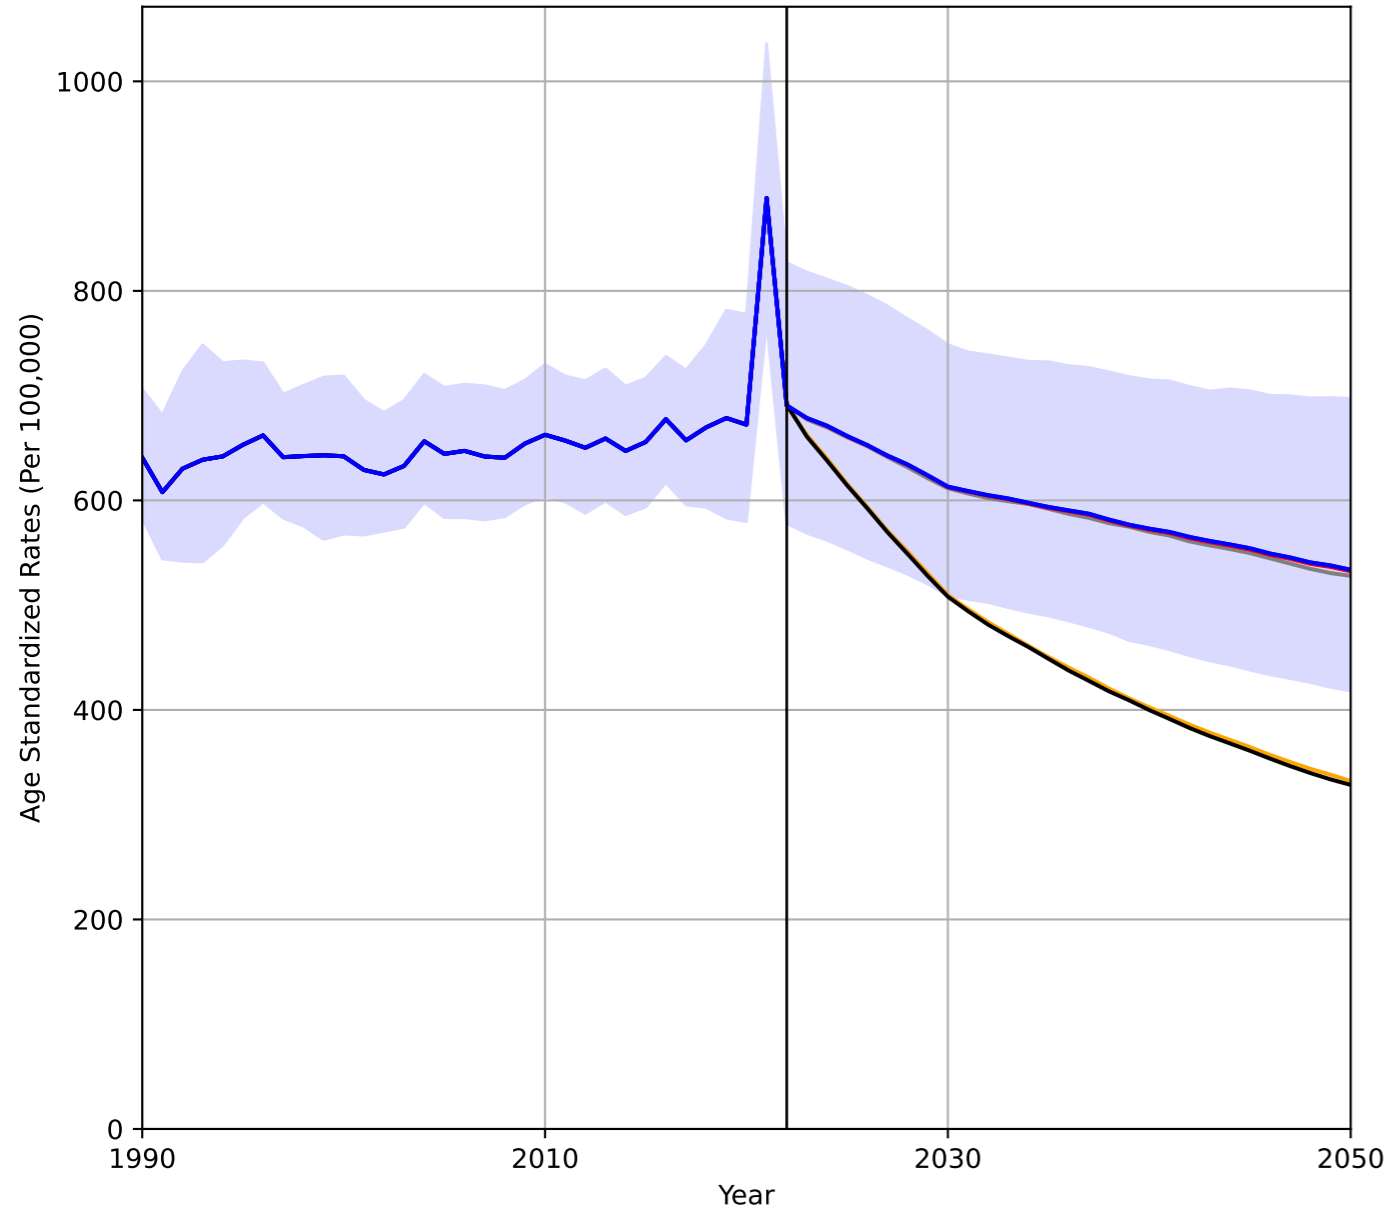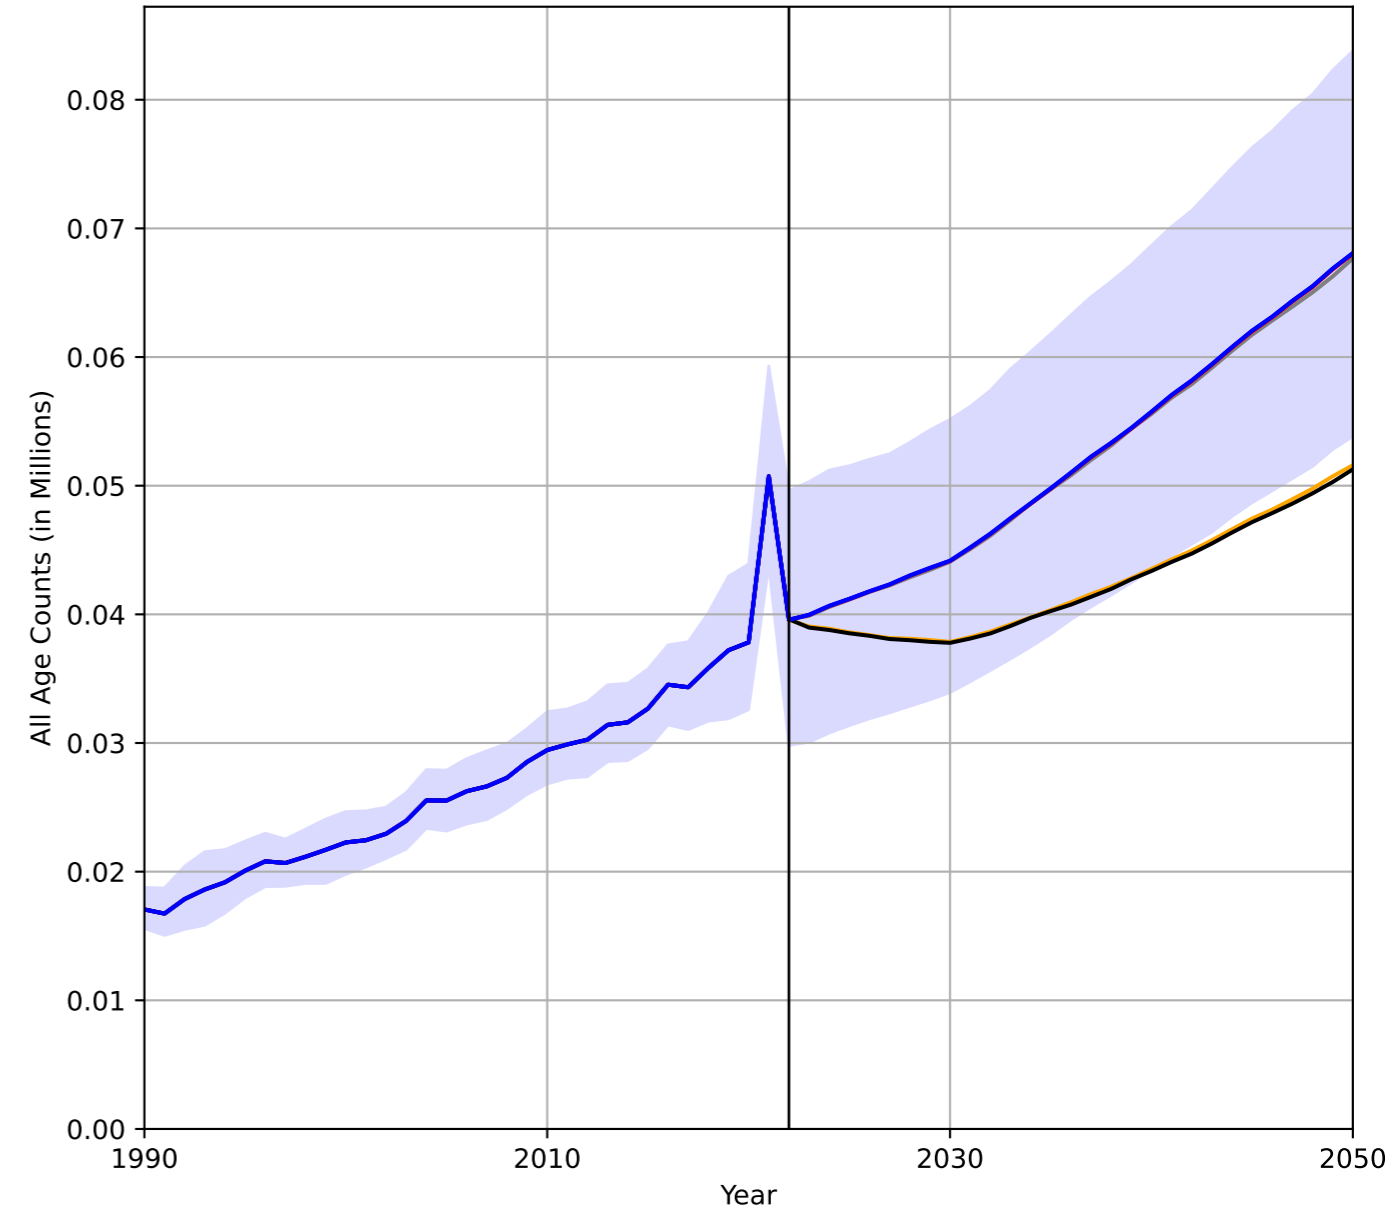

# Afghanistan

Supplemental Results Figure S11. All-cause age standardised death rates (A) and all age death counts (B), for the past and for five future scenarios, 1990–2050

1742

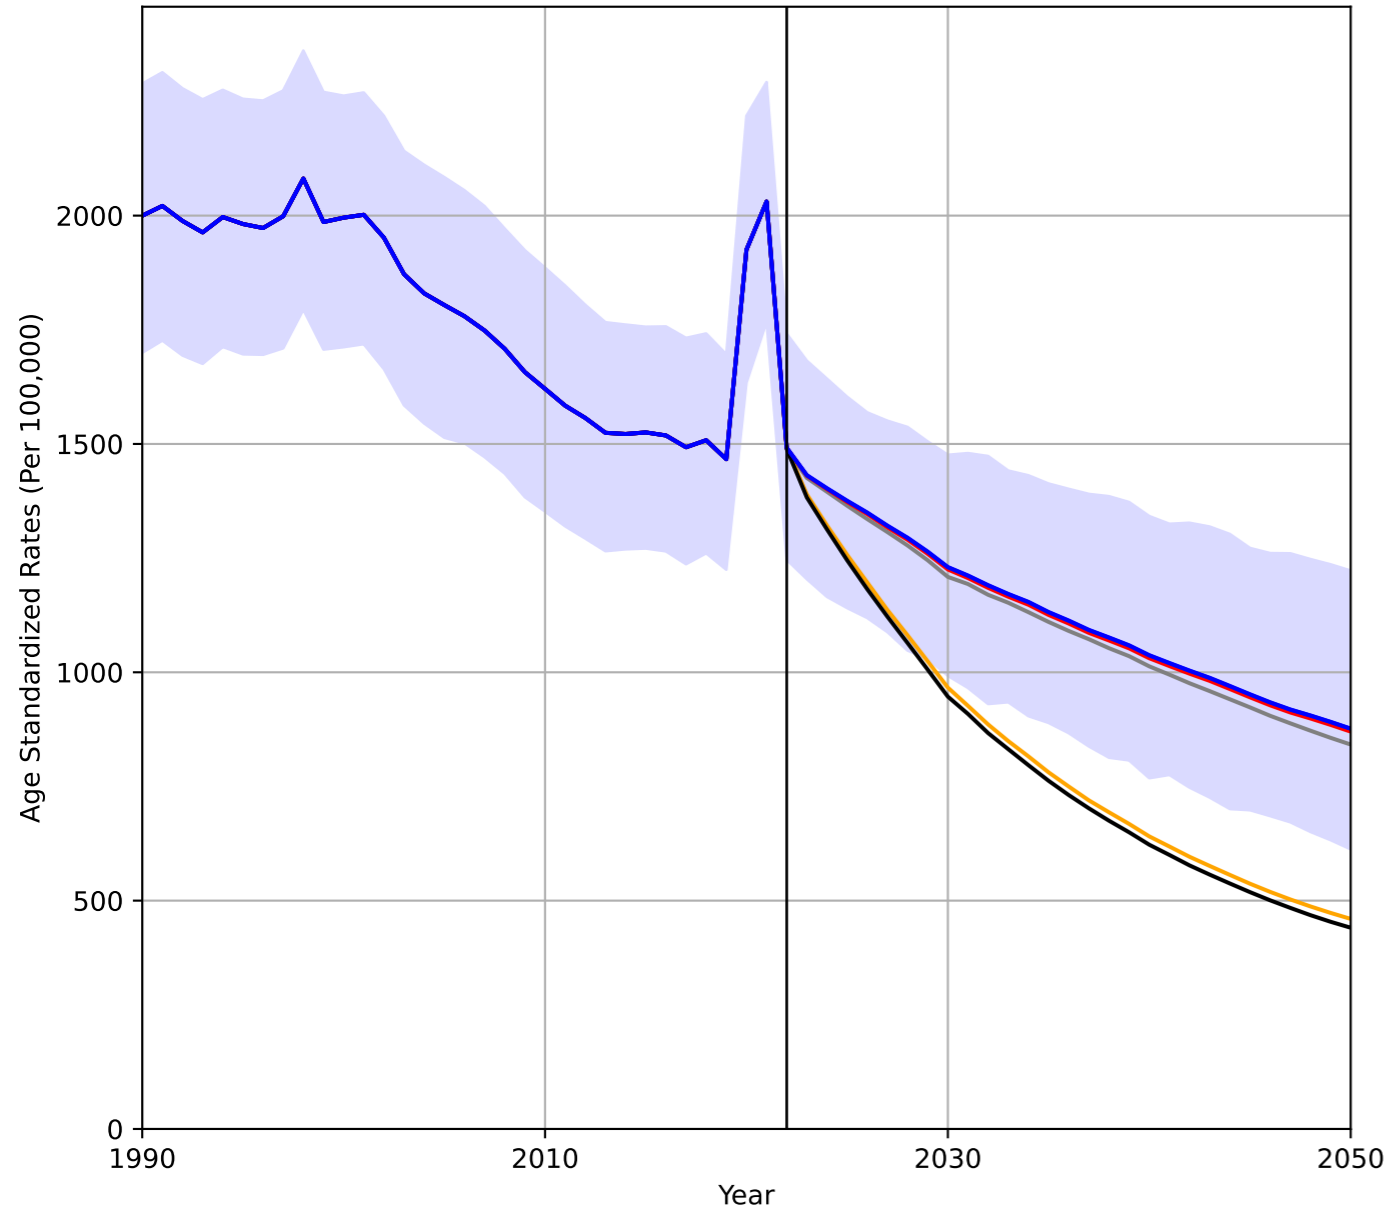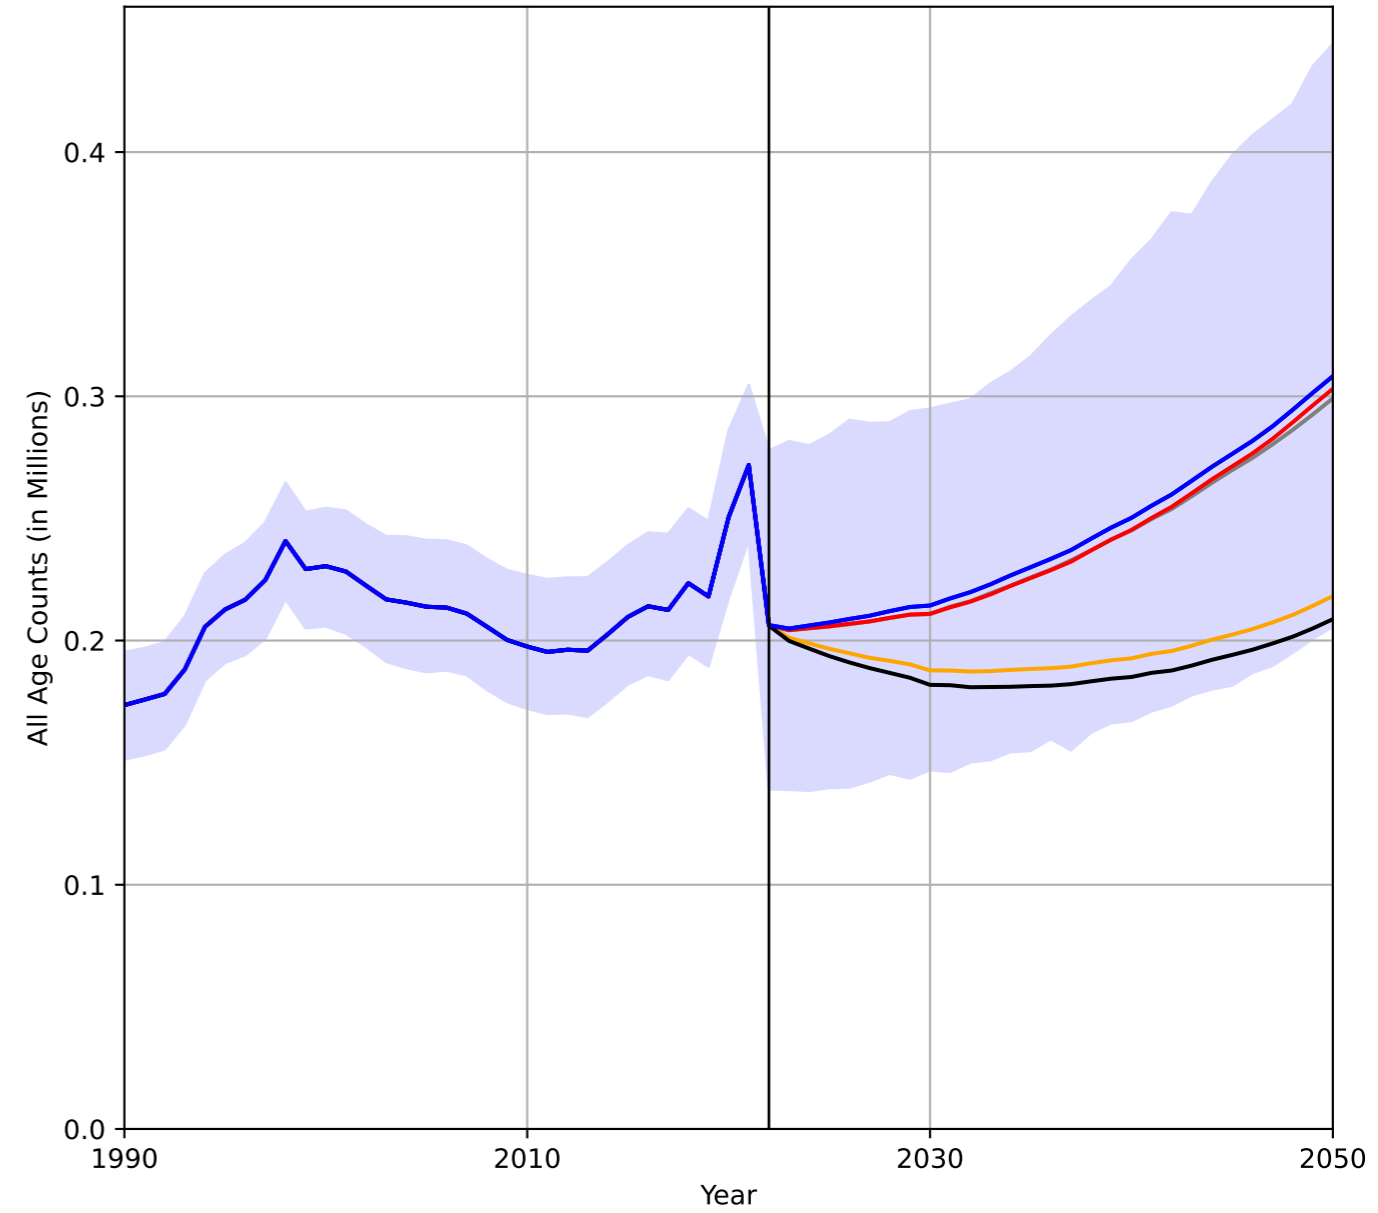

# Algeria

Supplemental Results Figure S11. All-cause age standardised death rates (A) and all age death counts (B), for the past and for five future scenarios, 1990–2050

1743

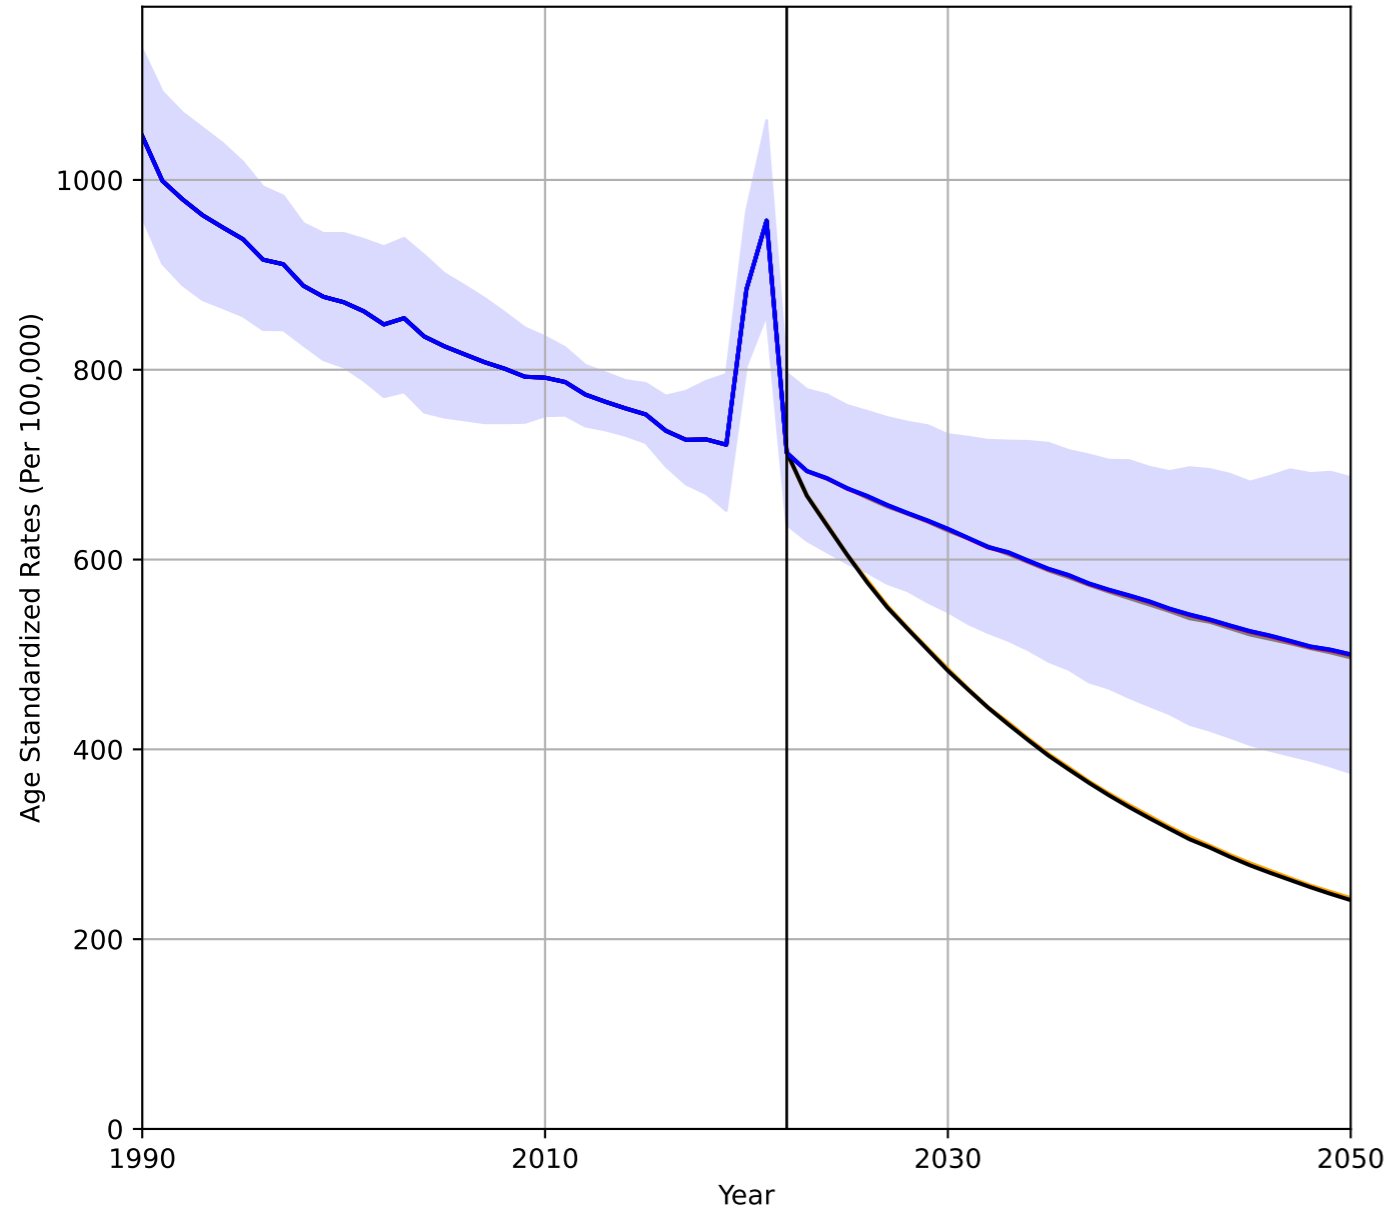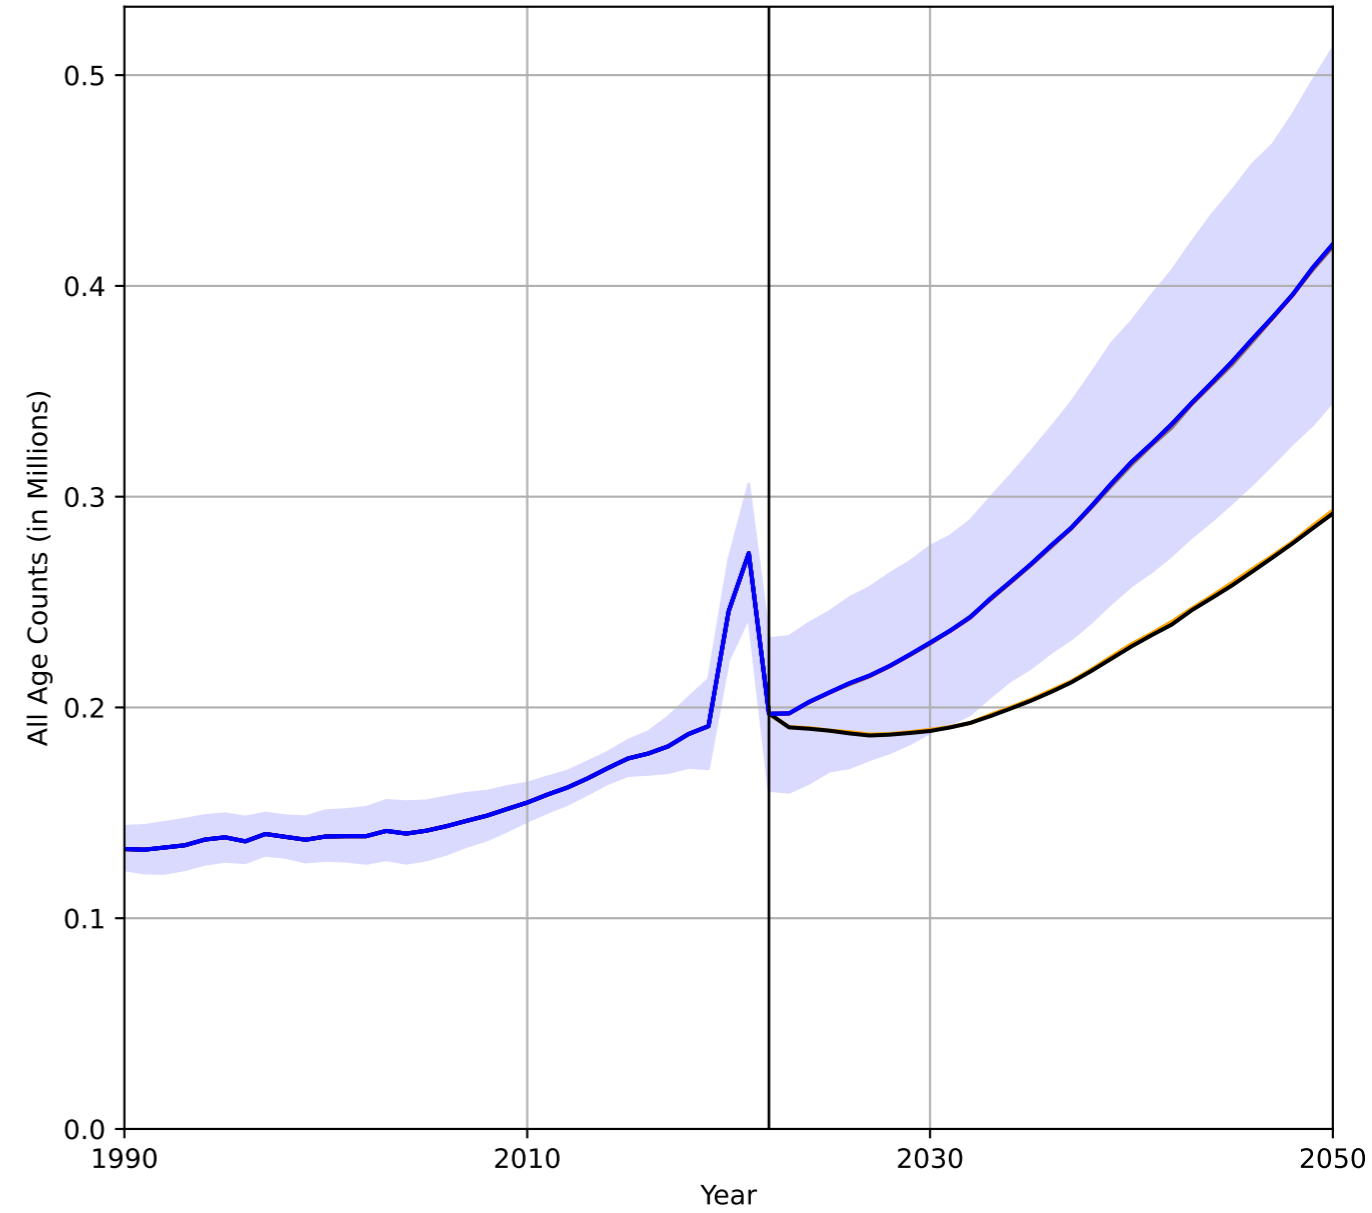



# Bahrain

Supplemental Results Figure S11. All-cause age standardised death rates (A) and all age death counts (B), for the past and for five future scenarios, 1990–2050

1744

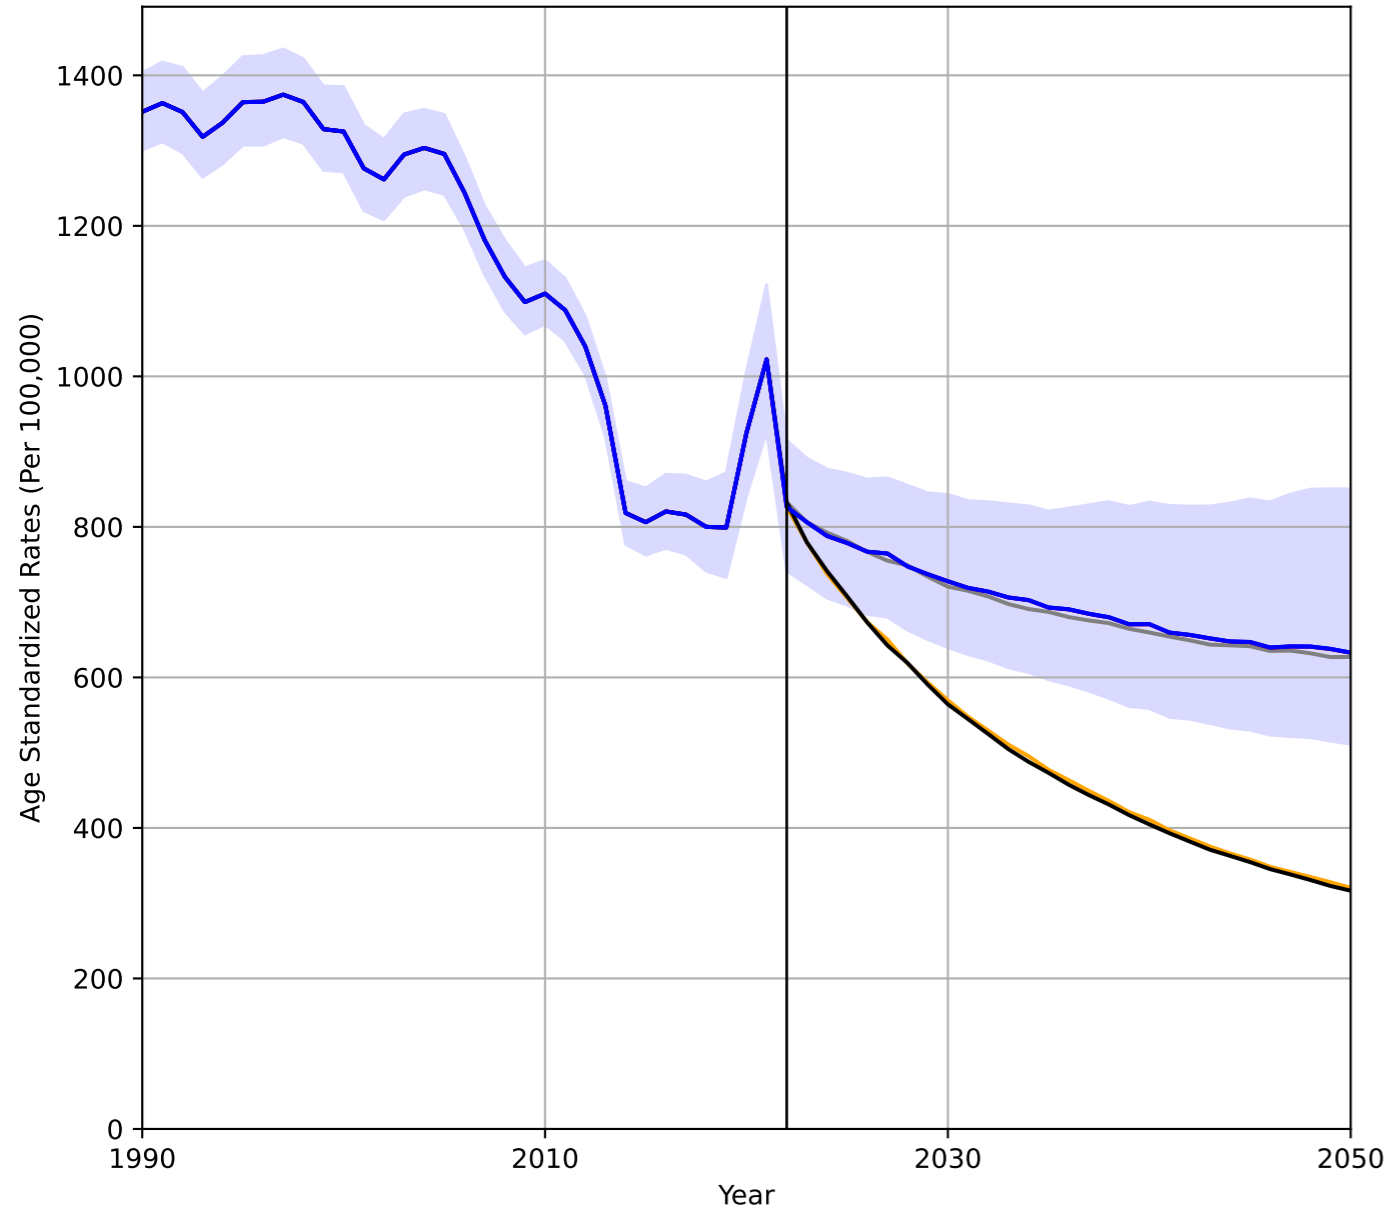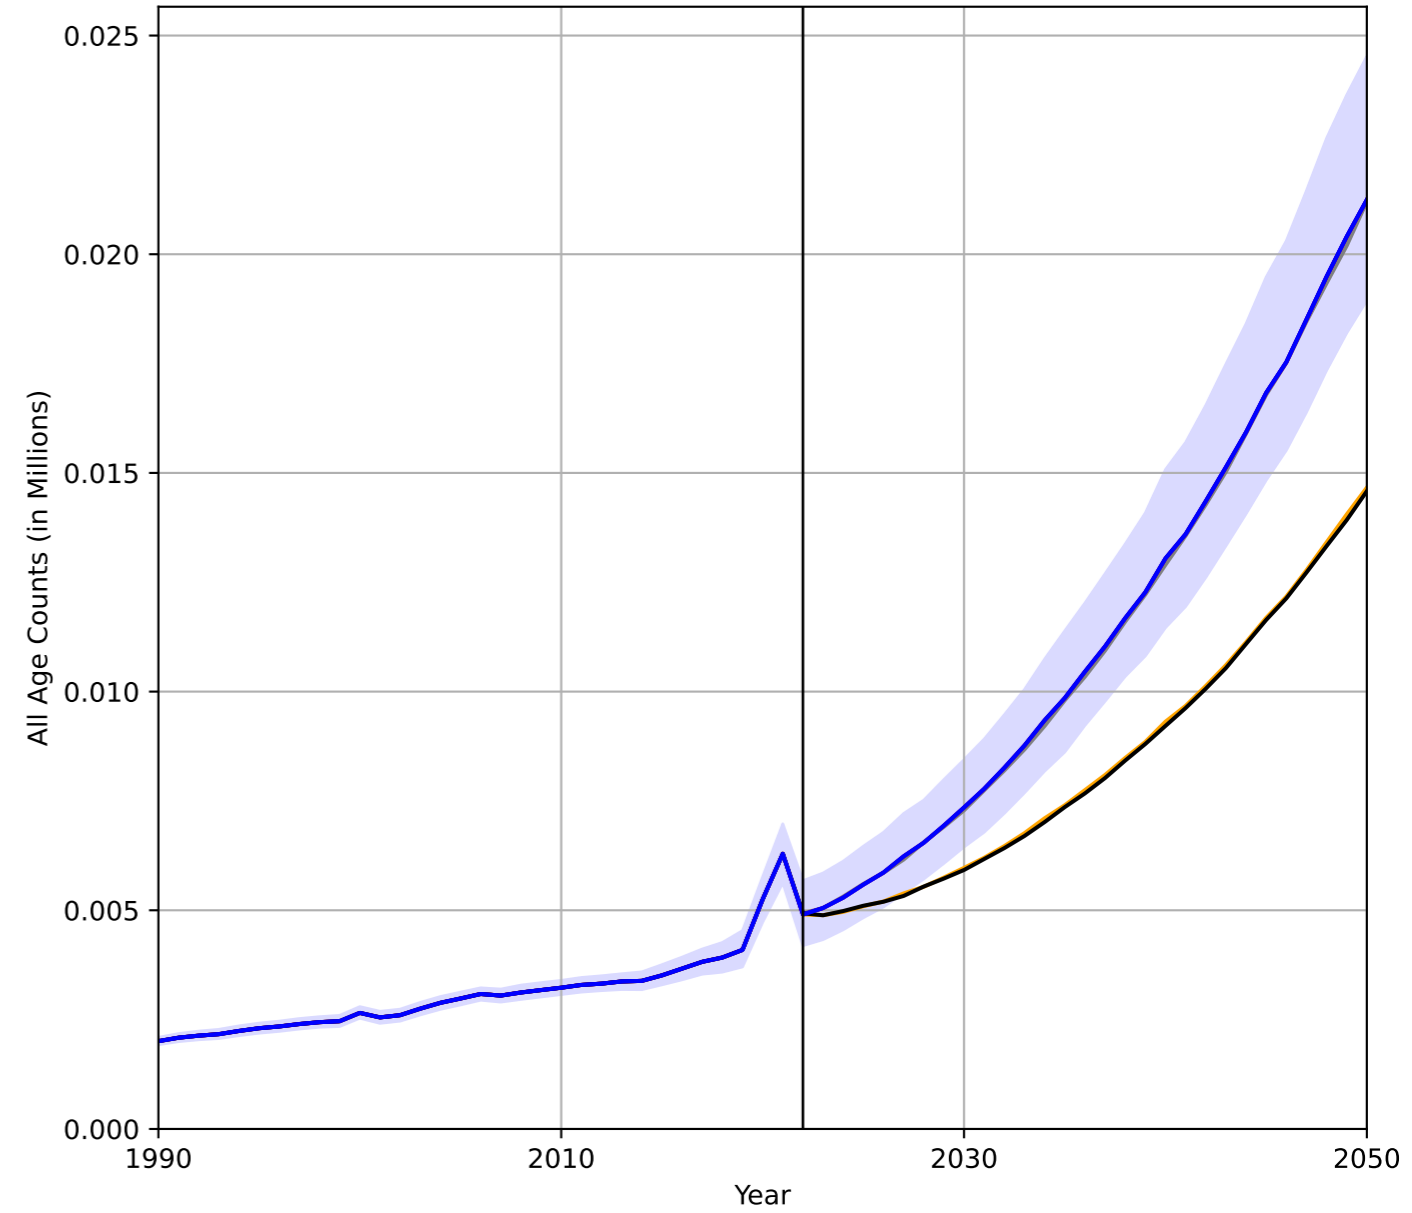

# Egypt

Supplemental Results Figure S11. All-cause age standardised death rates (A) and all age death counts (B), for the past and for five future scenarios, 1990–2050

1745

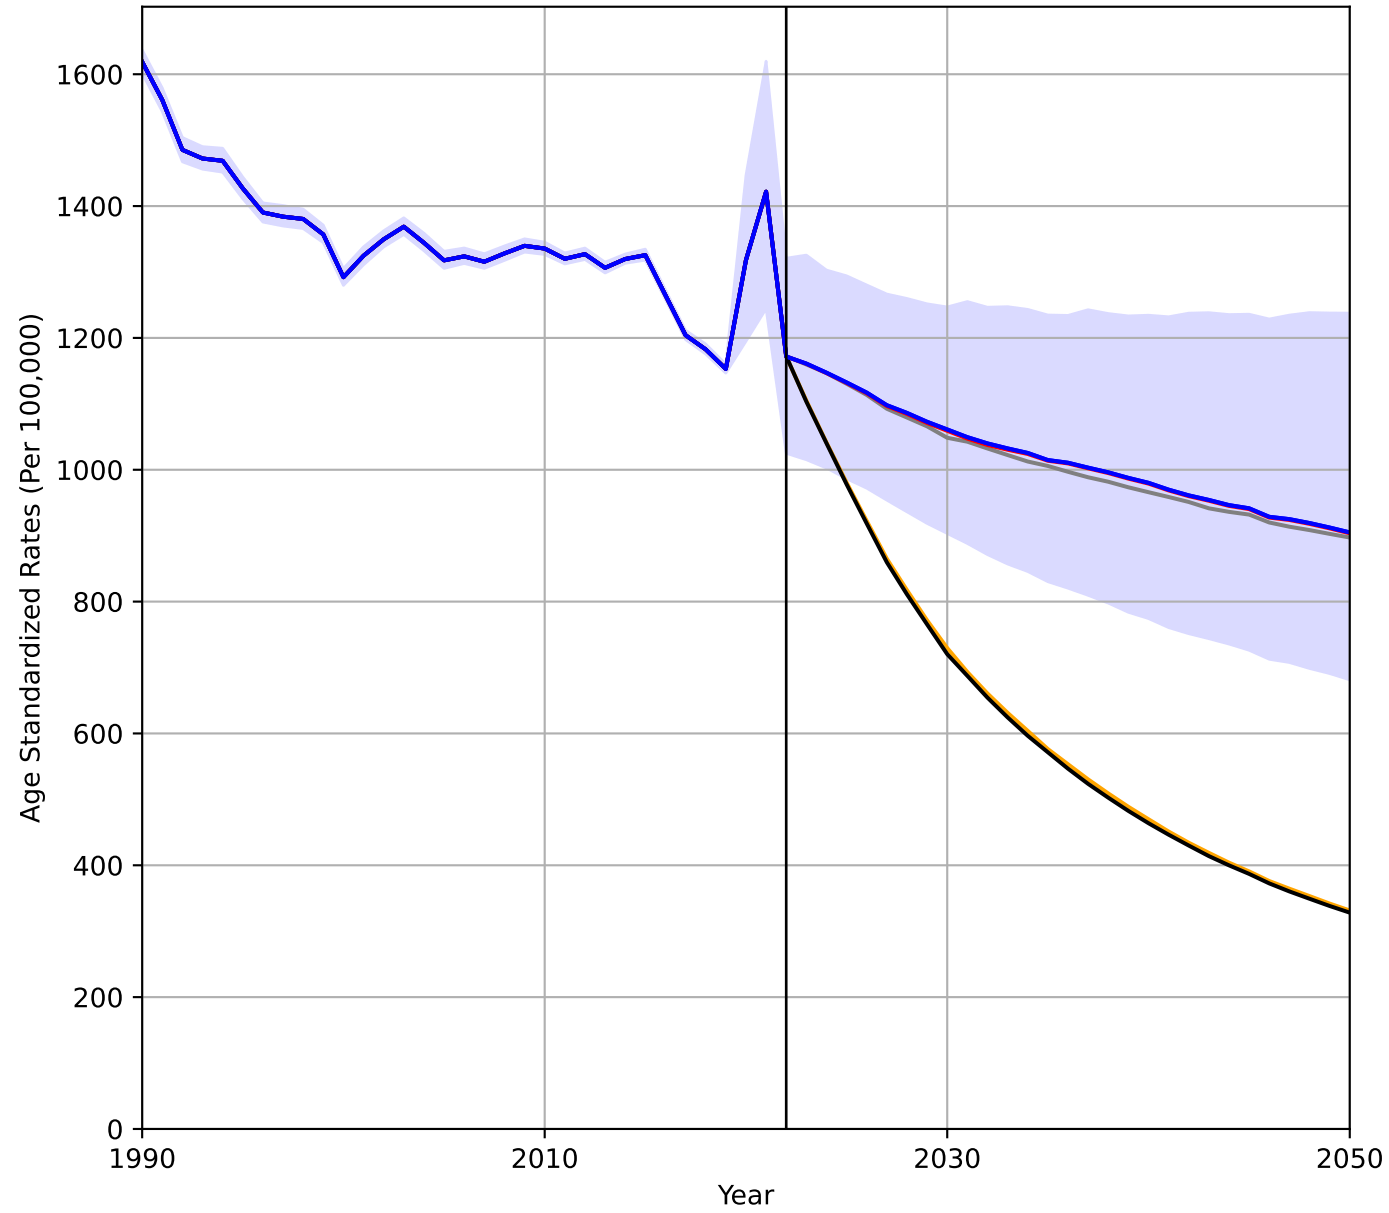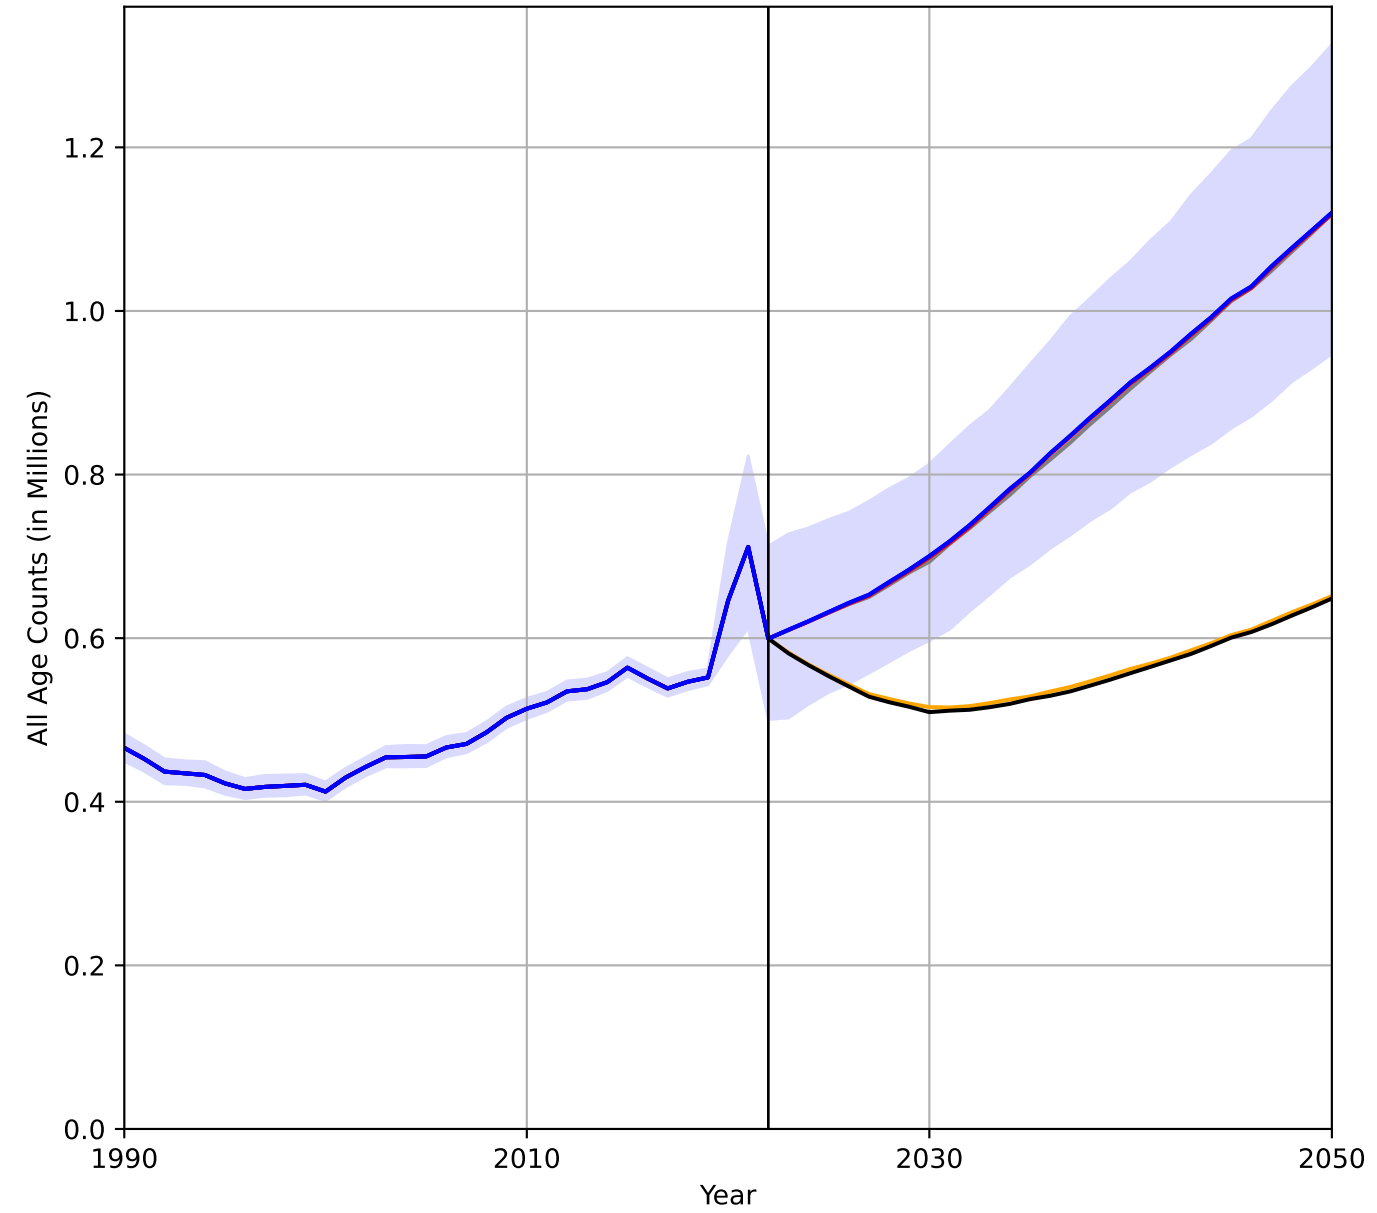

# Iran

Supplemental Results Figure S11. All-cause age standardised death rates (A) and all age death counts (B), for the past and for five future scenarios, 1990–2050

1746

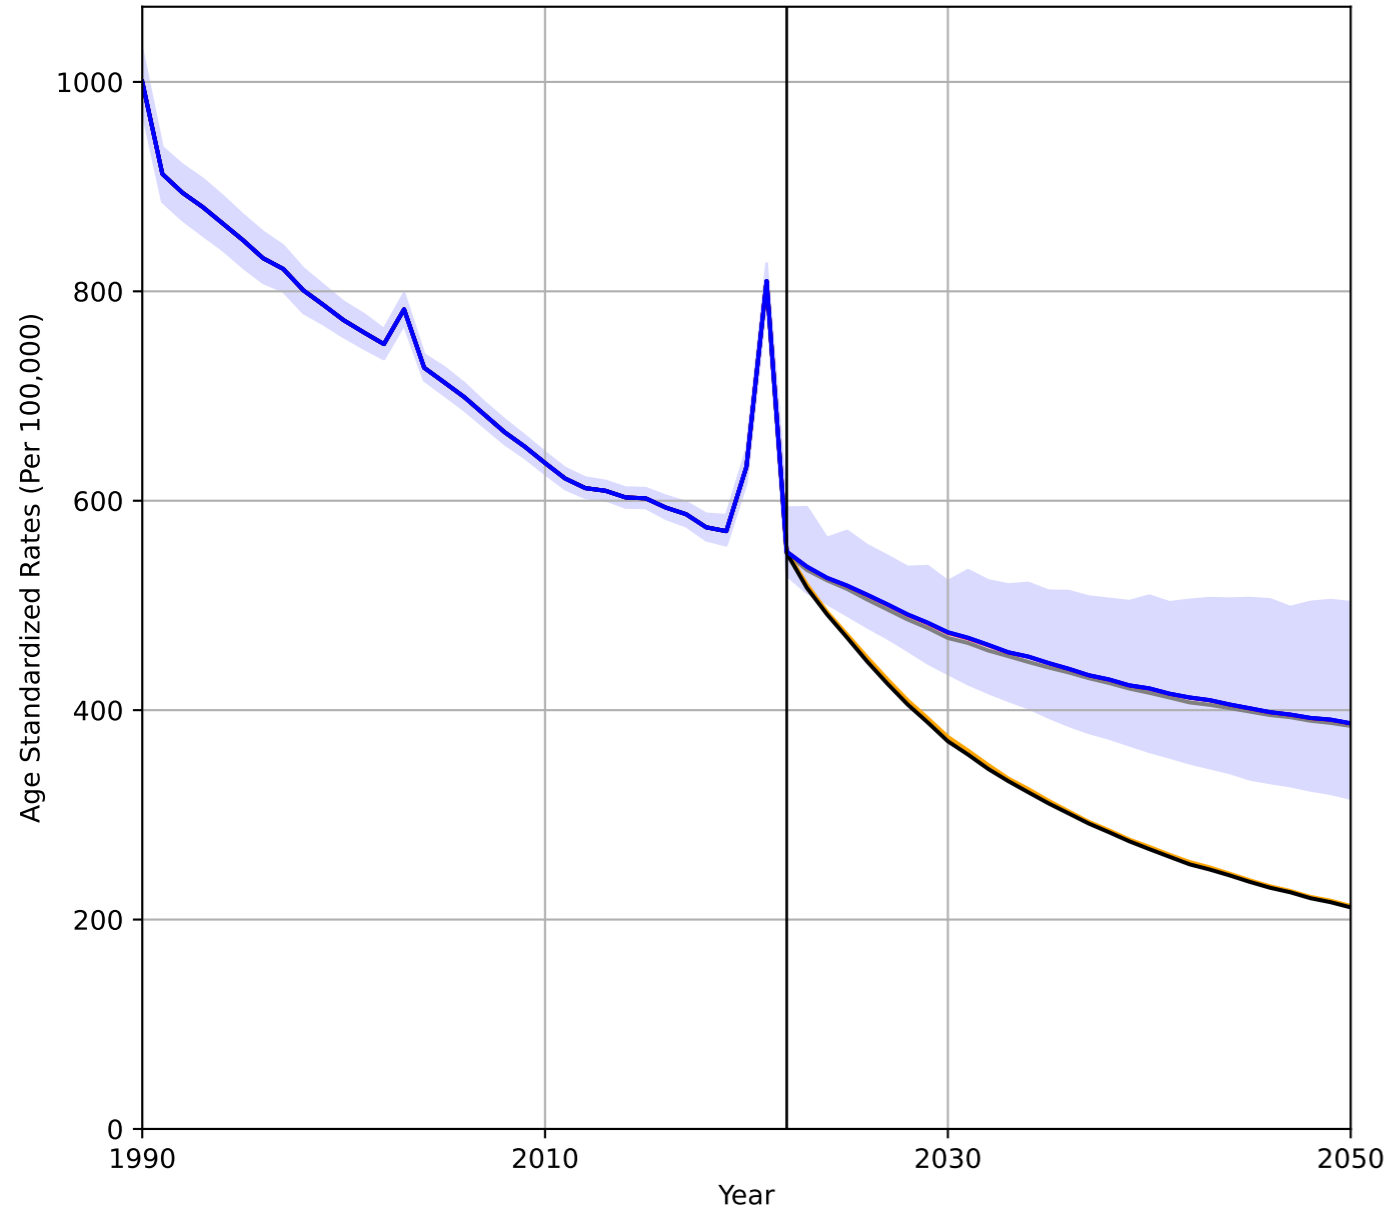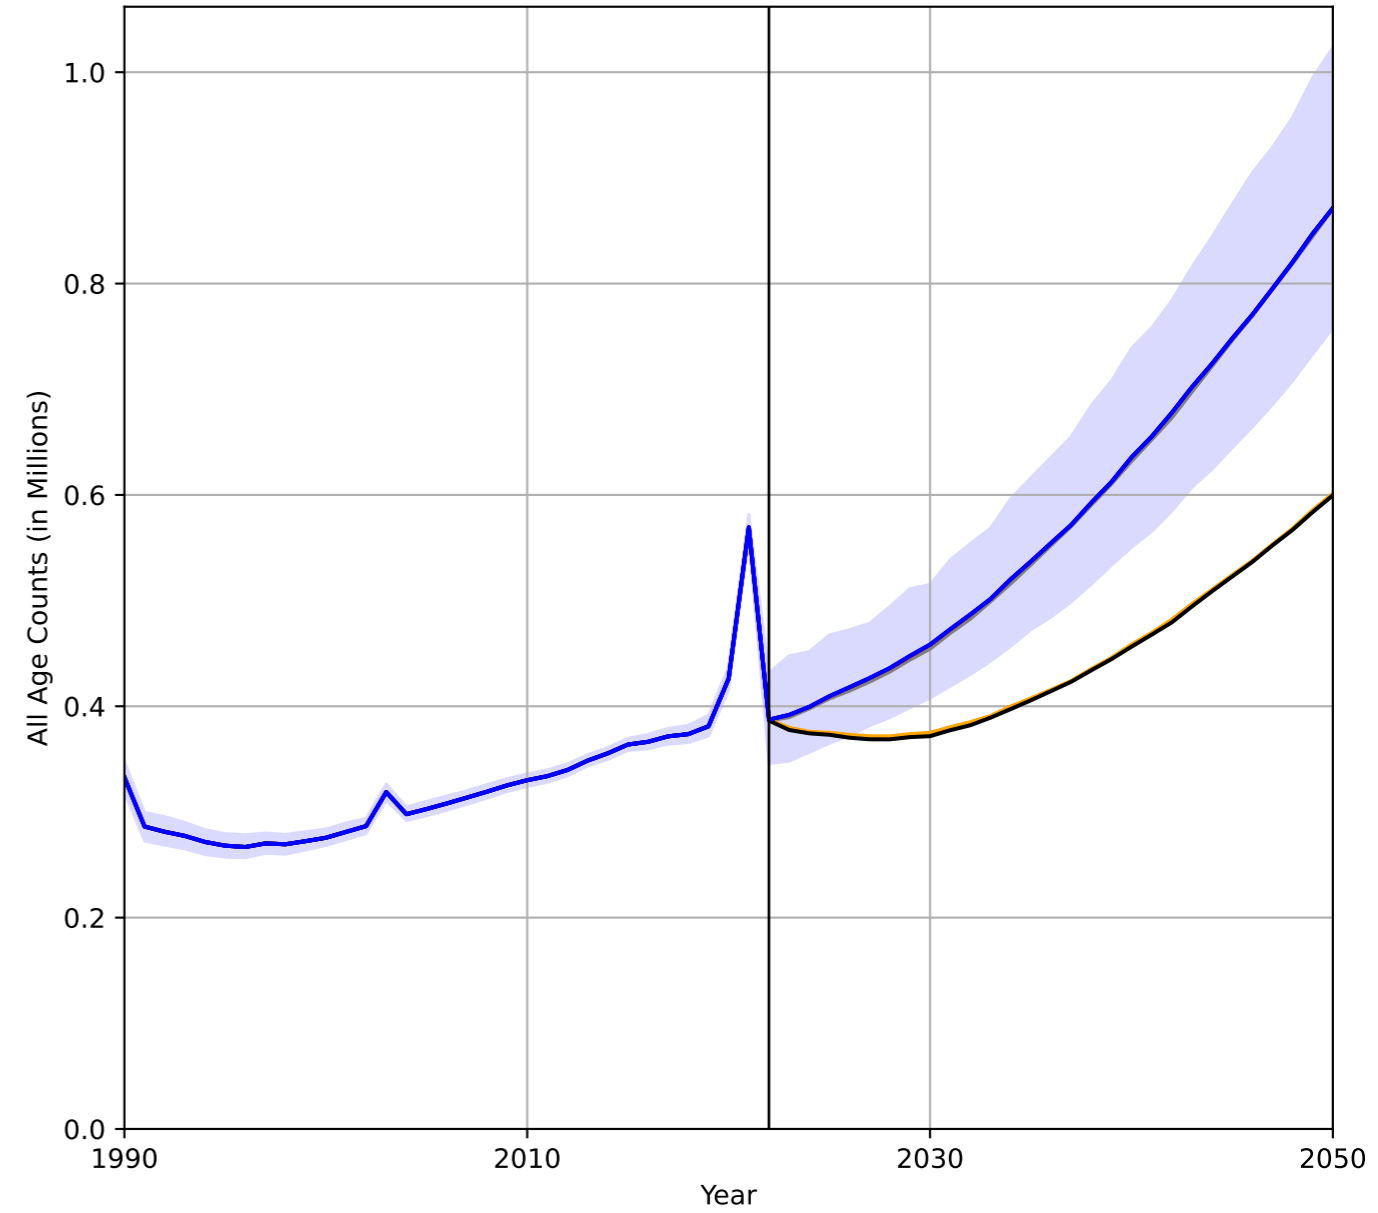

# Iraq

Supplemental Results Figure S11. All-cause age standardised death rates (A) and all age death counts (B), for the past and for five future scenarios, 1990–2050

1747

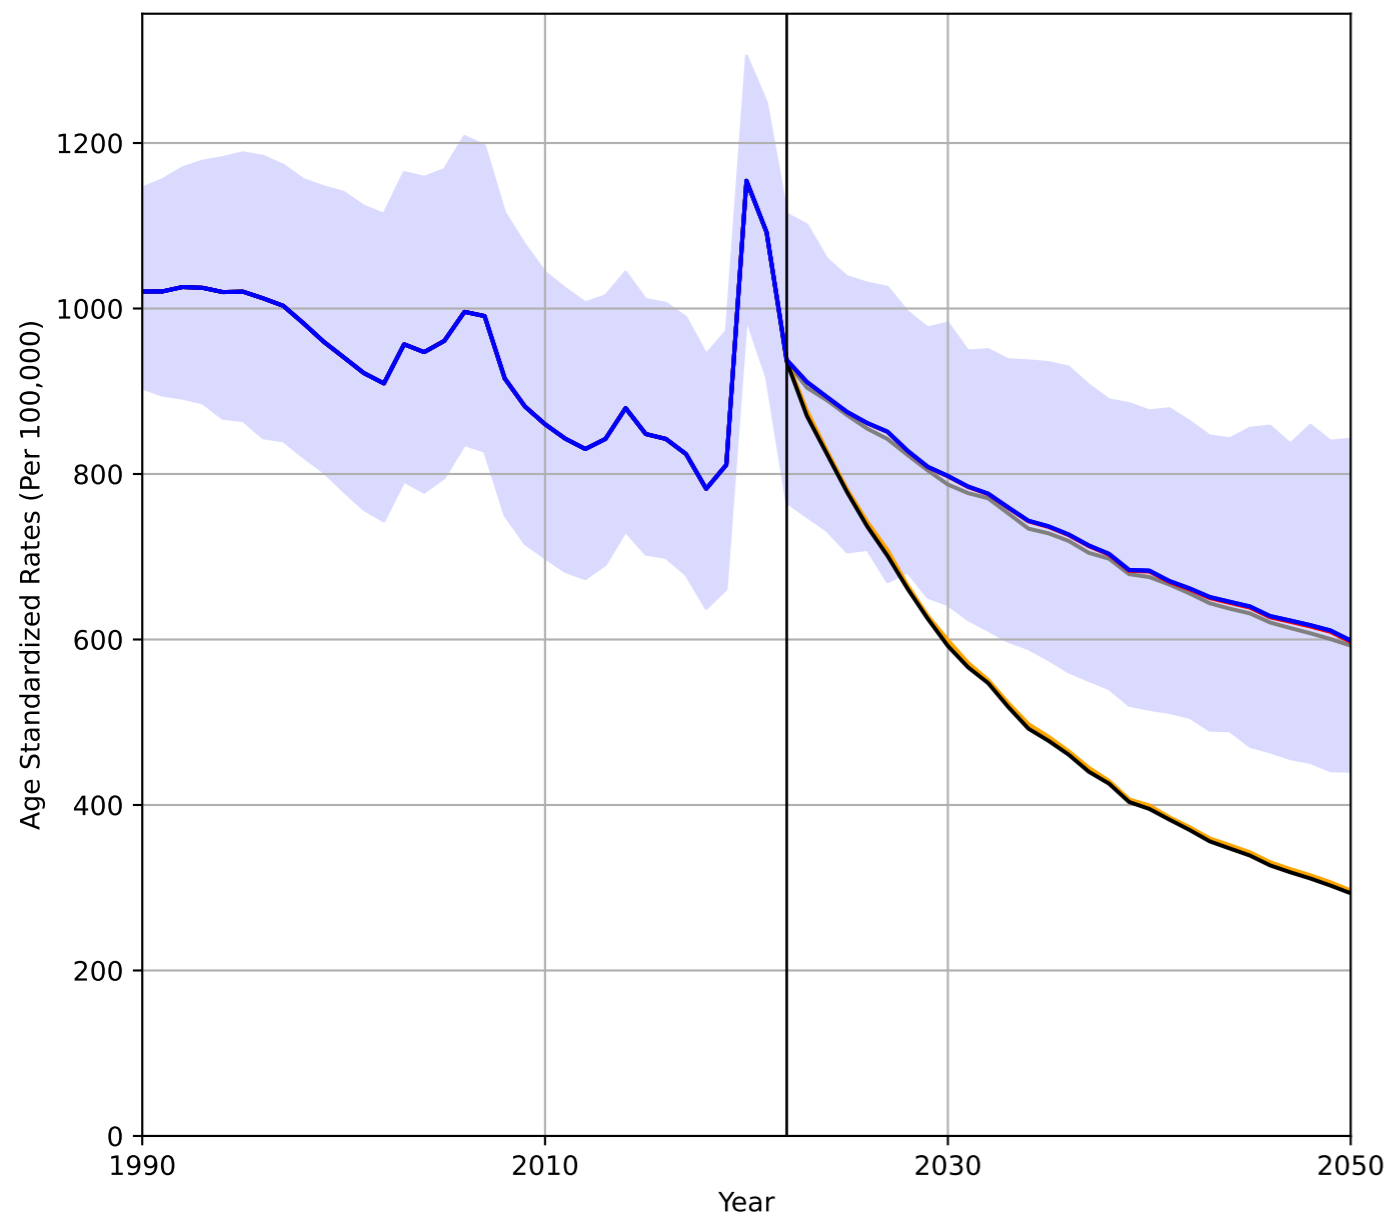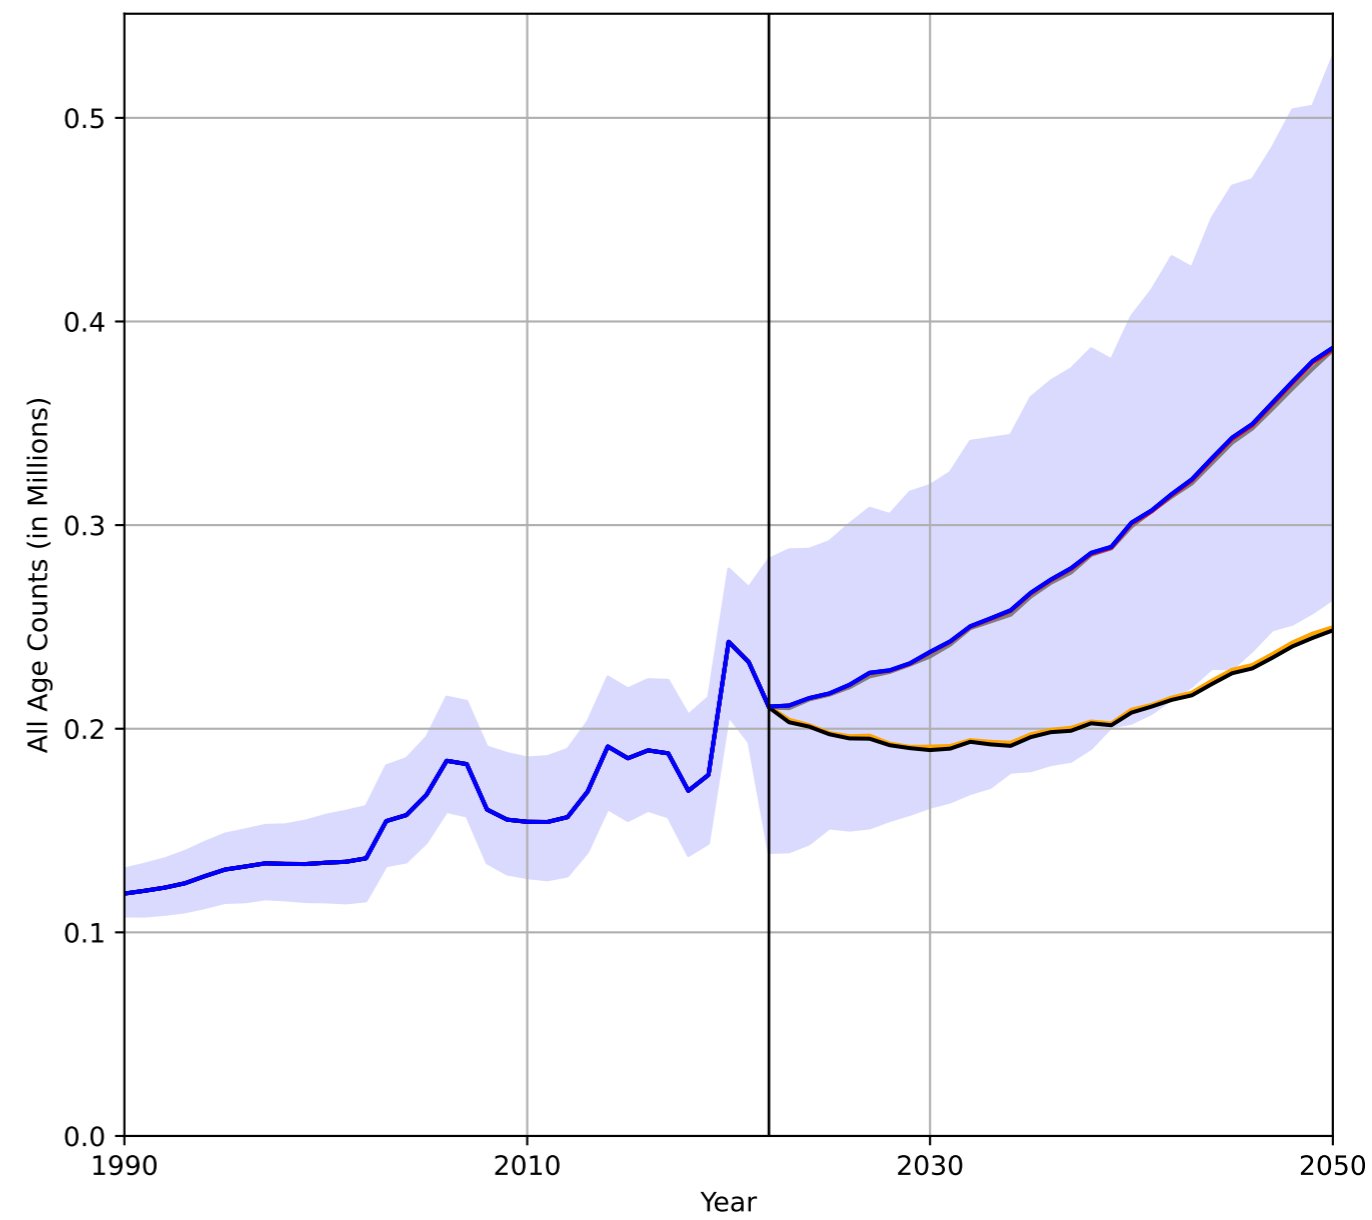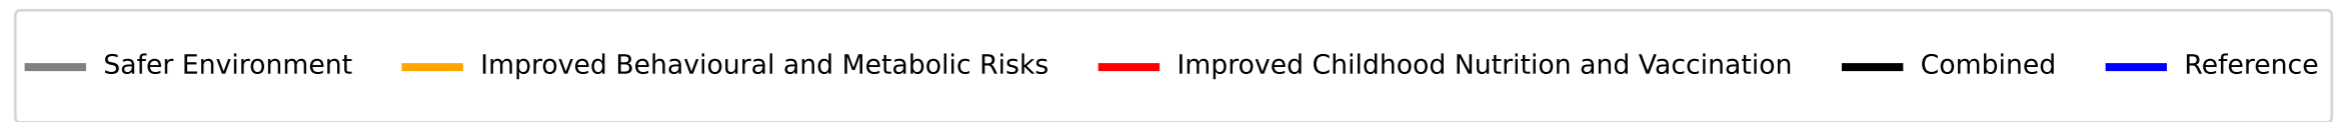

# Jordan

Supplemental Results Figure S11. All-cause age standardised death rates (A) and all age death counts (B), for the past and for five future scenarios, 1990–2050

1748

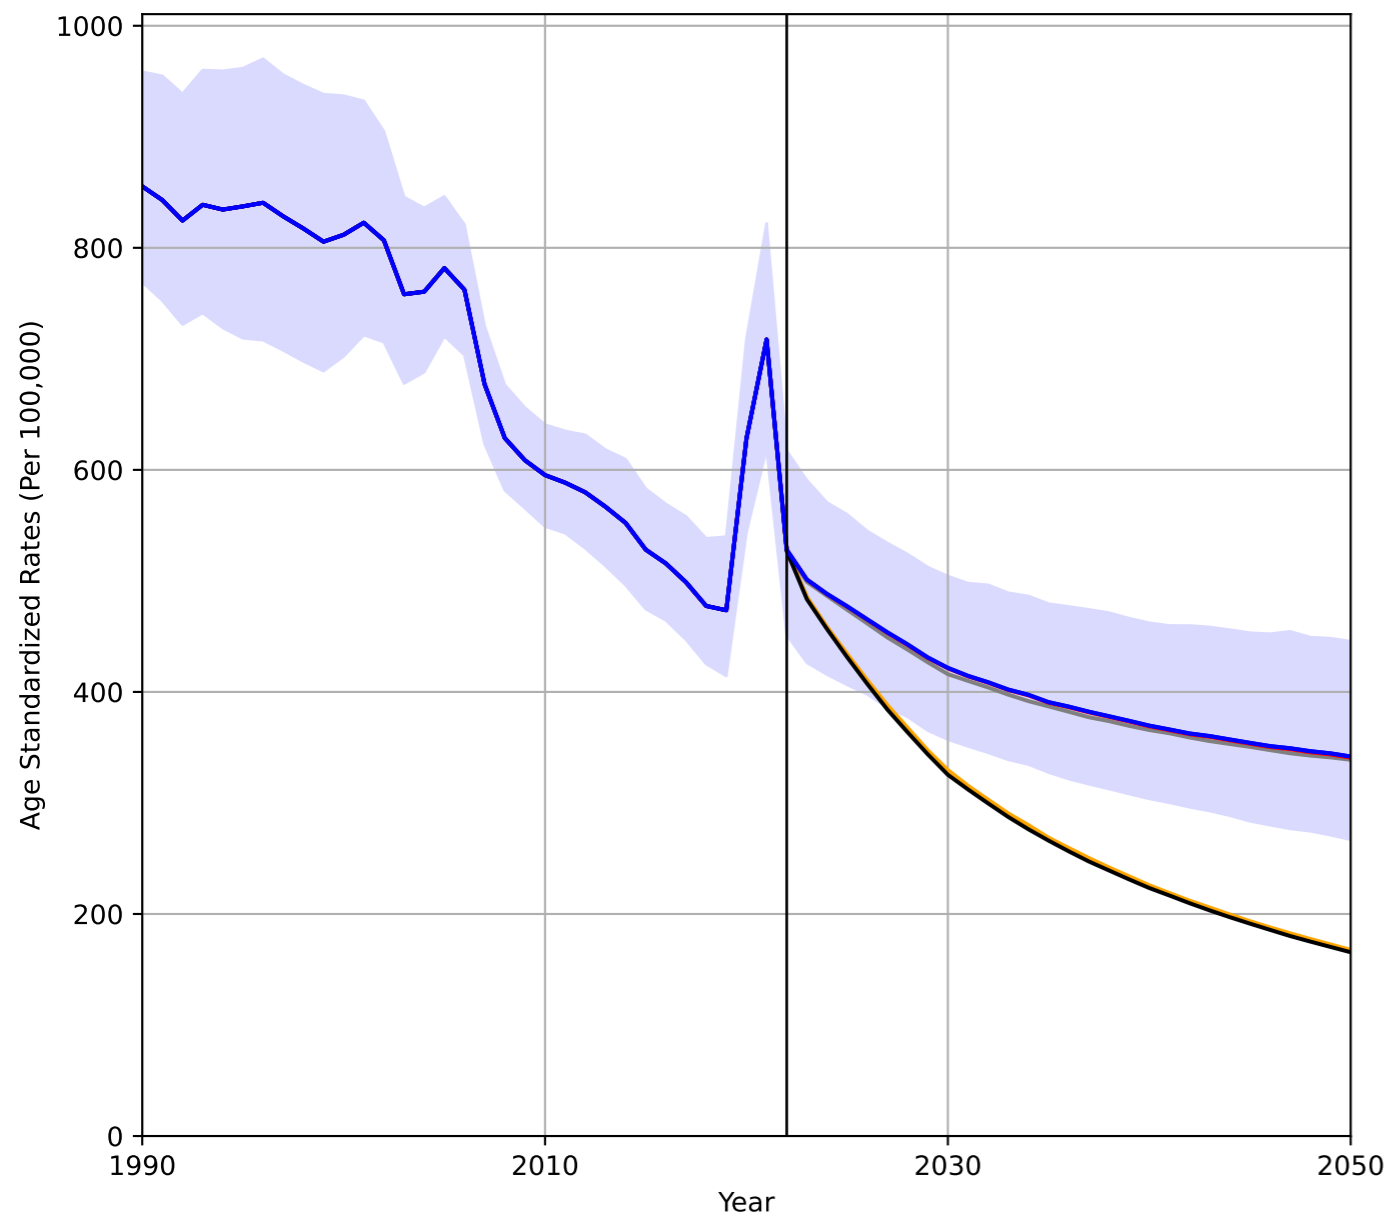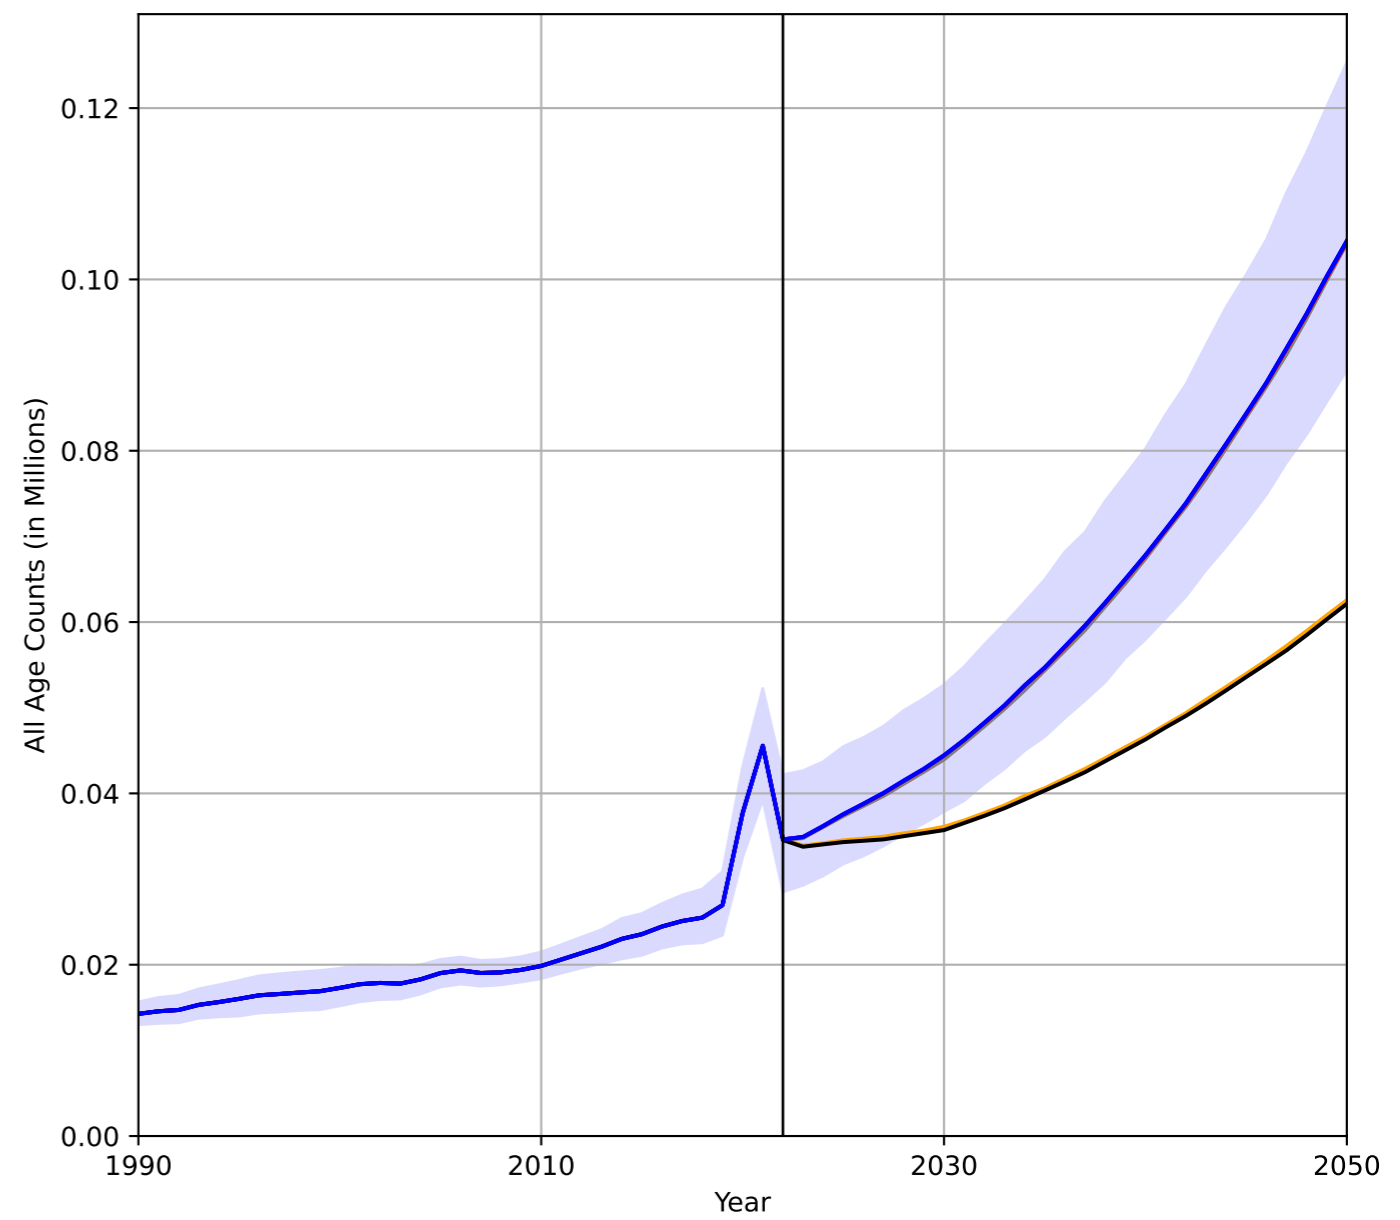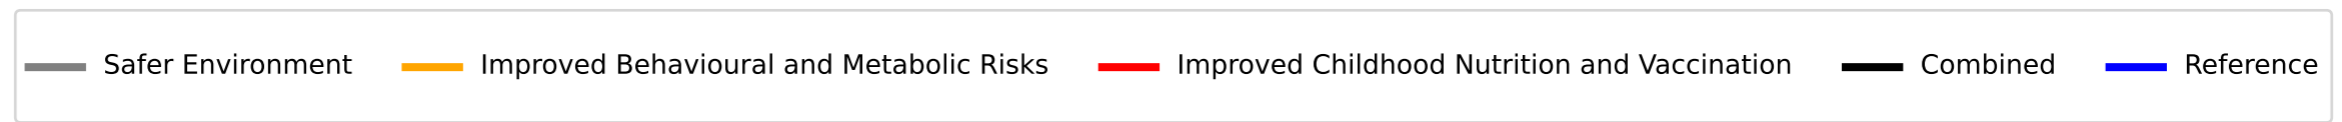

# Kuwait

Supplemental Results Figure S11. All-cause age standardised death rates (A) and all age death counts (B), for the past and for five future scenarios, 1990–2050

1749

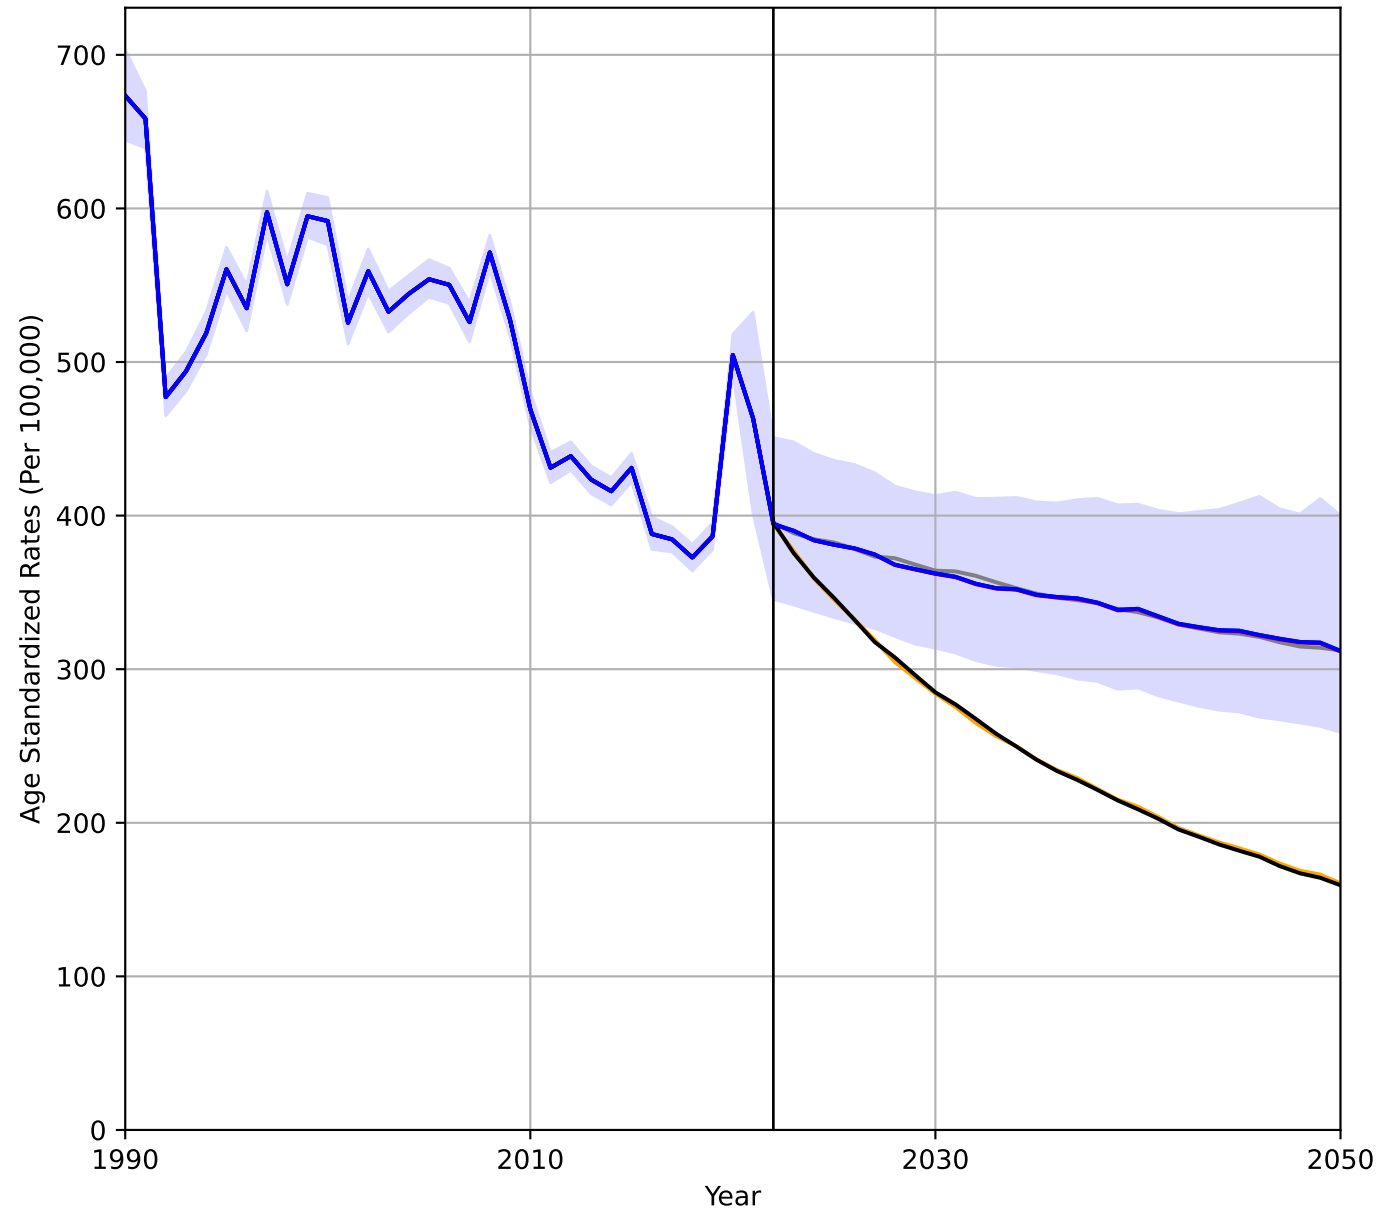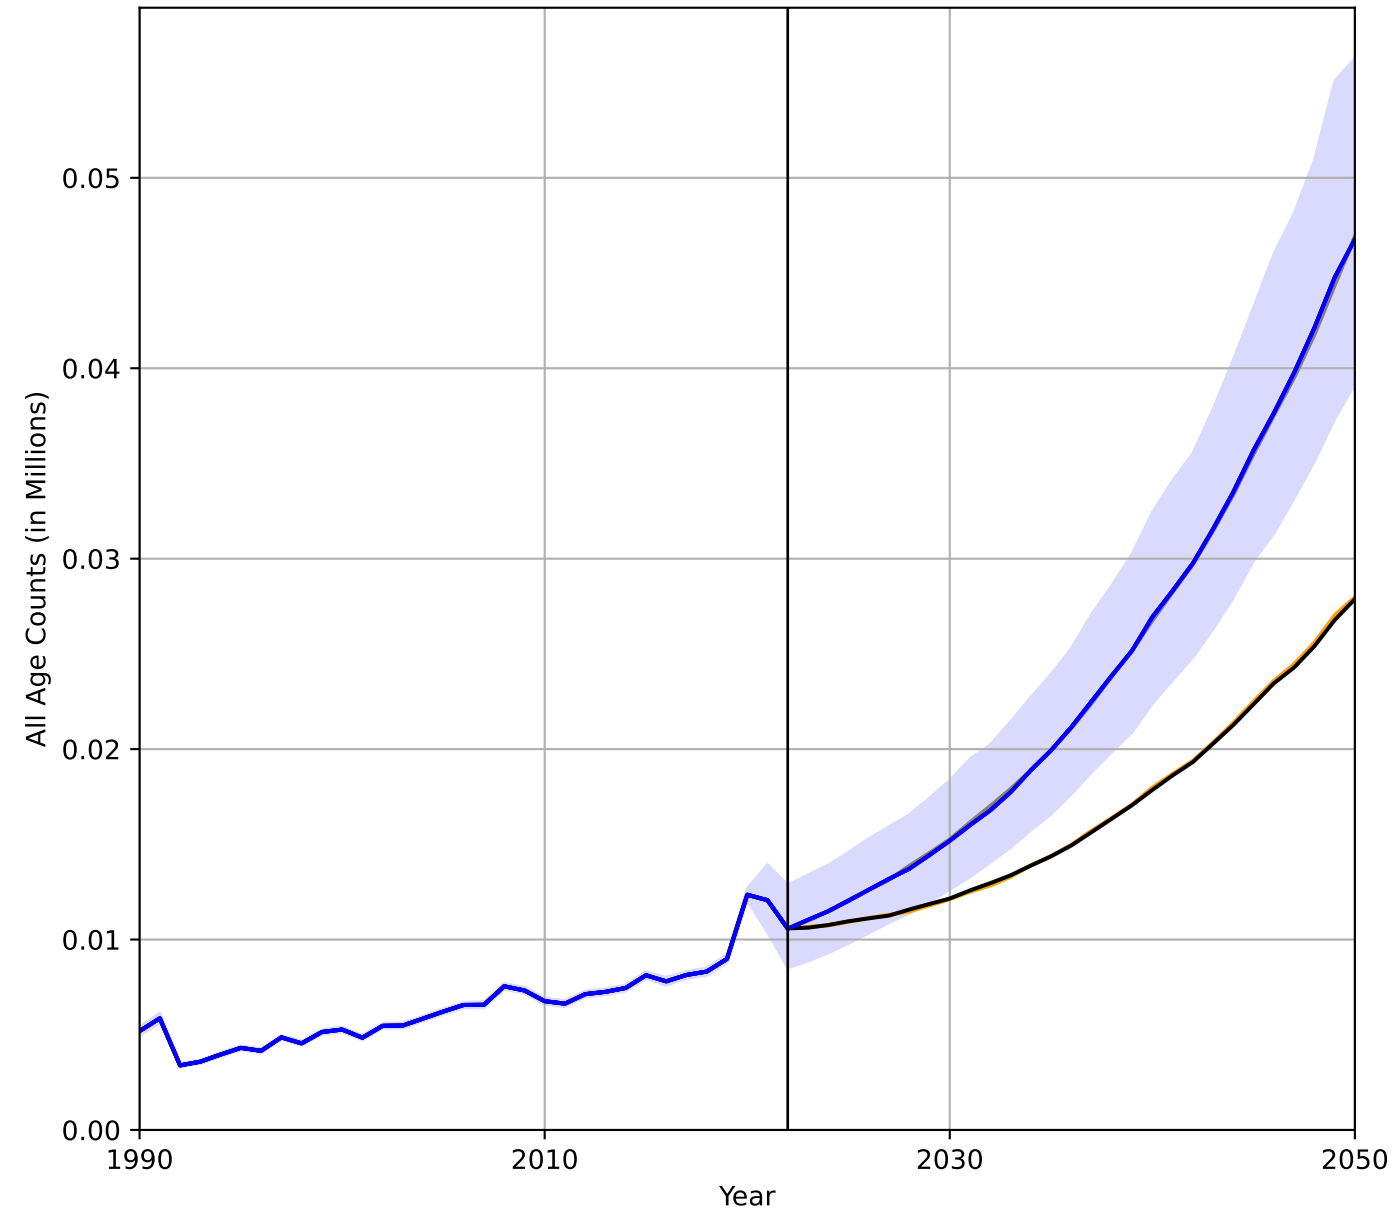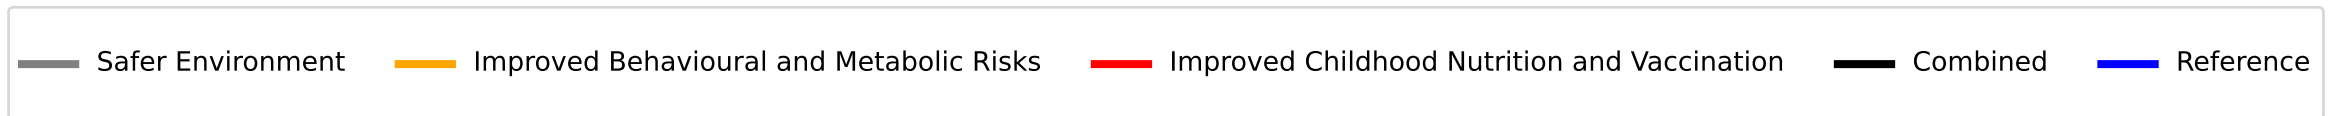

# Lebanon

Supplemental Results Figure S11. All-cause age standardised death rates (A) and all age death counts (B), for the past and for five future scenarios, 1990–2050

1750

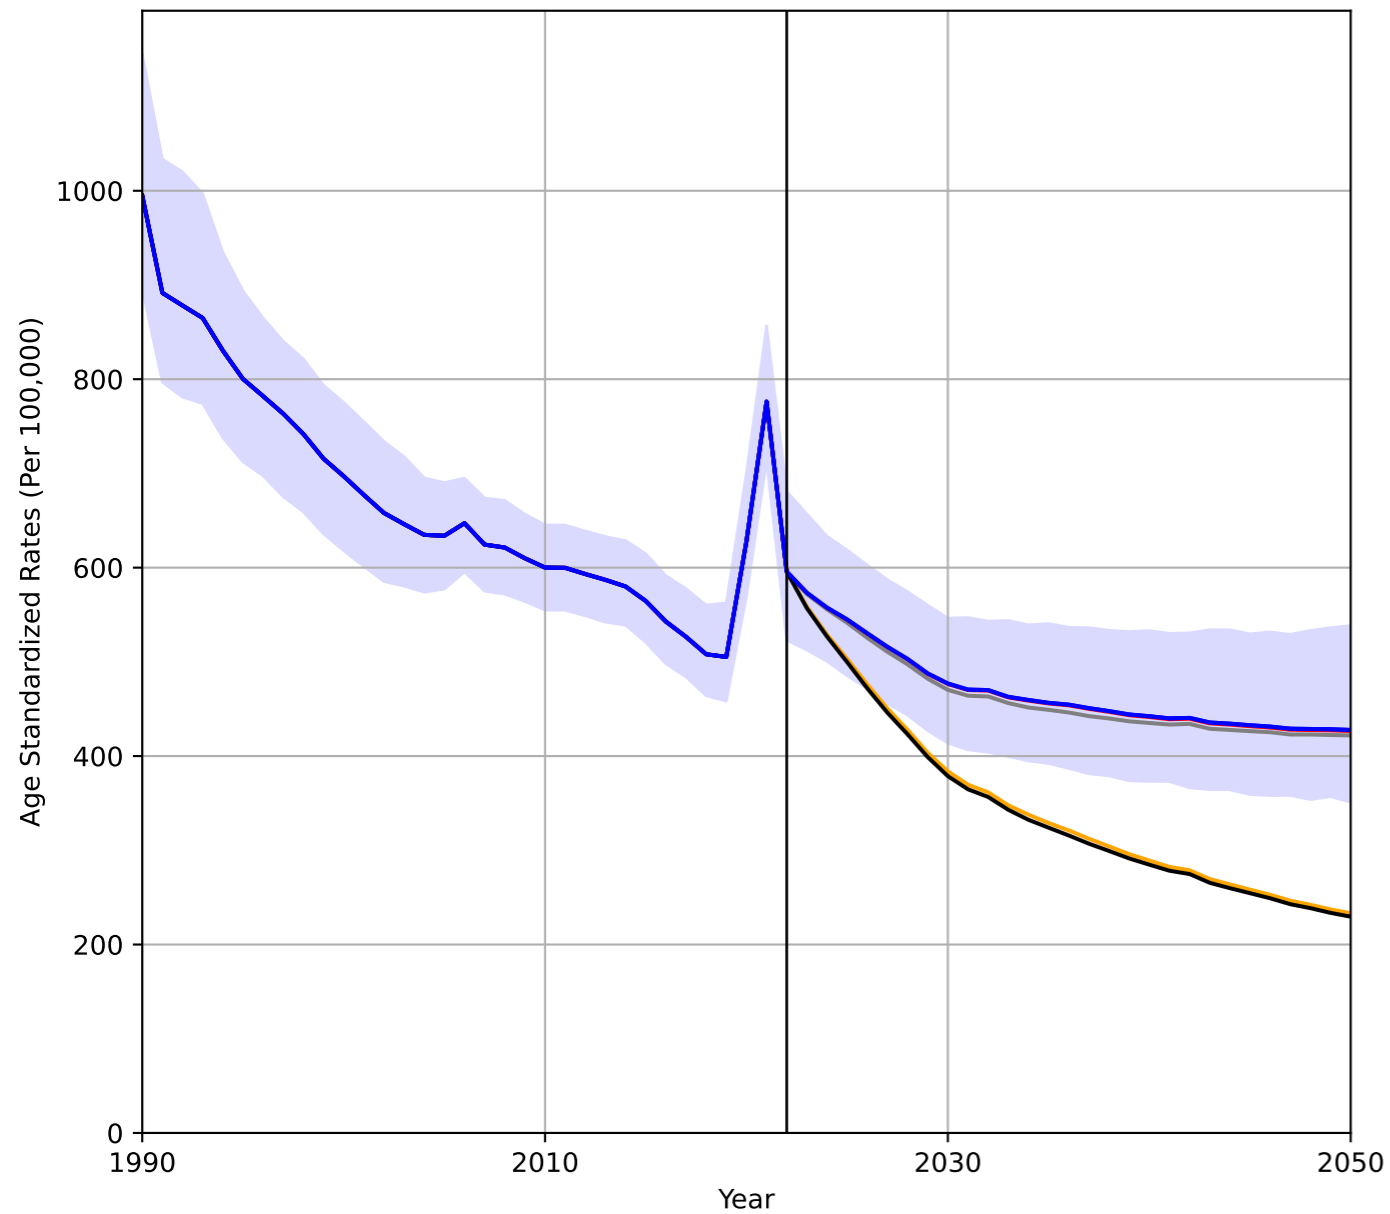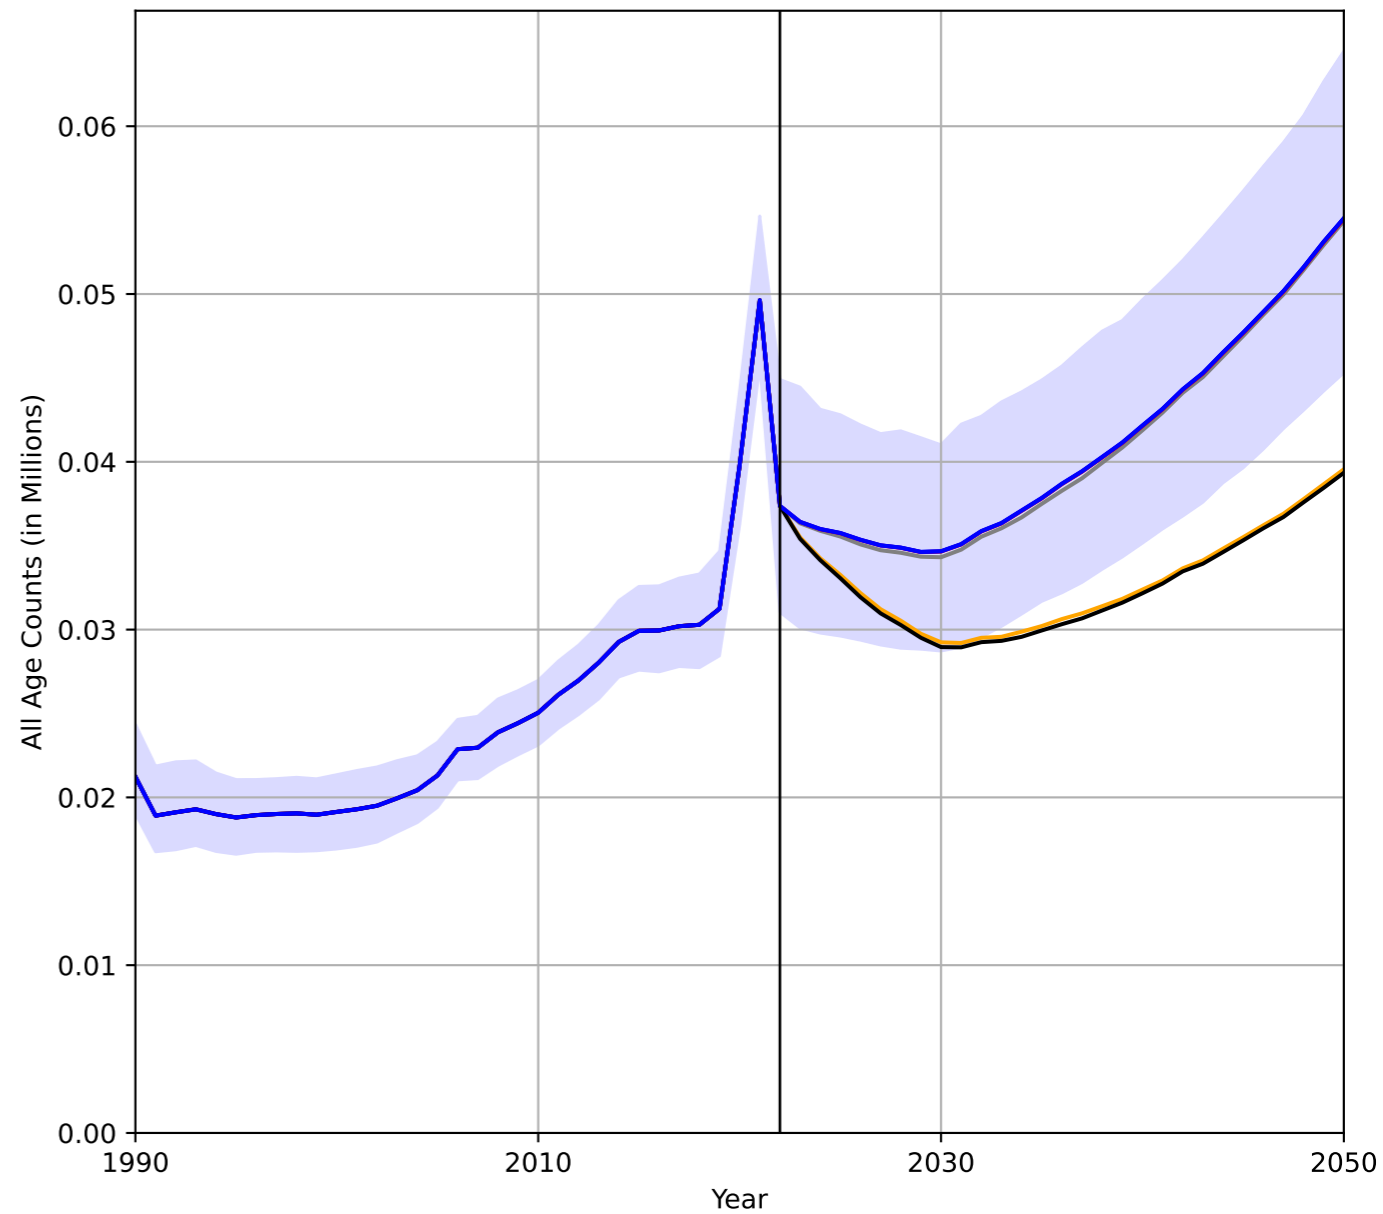

# Libya

Supplemental Results Figure S11. All-cause age standardised death rates (A) and all age death counts (B), for the past and for five future scenarios, 1990–2050

1751

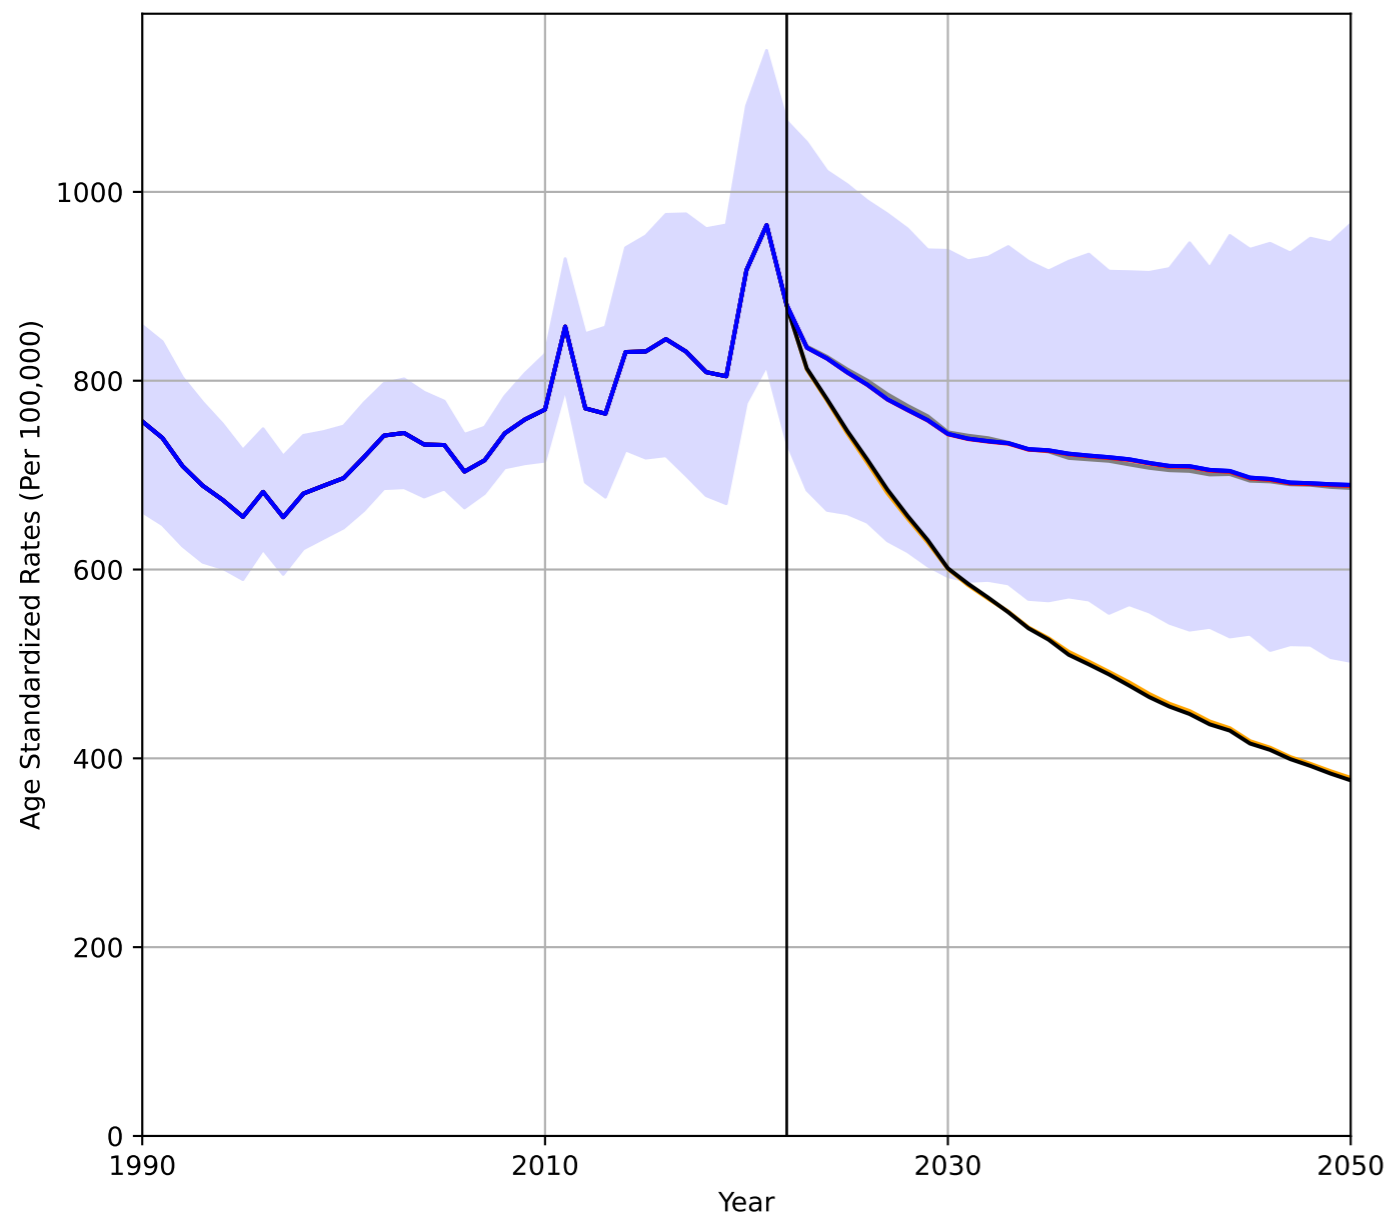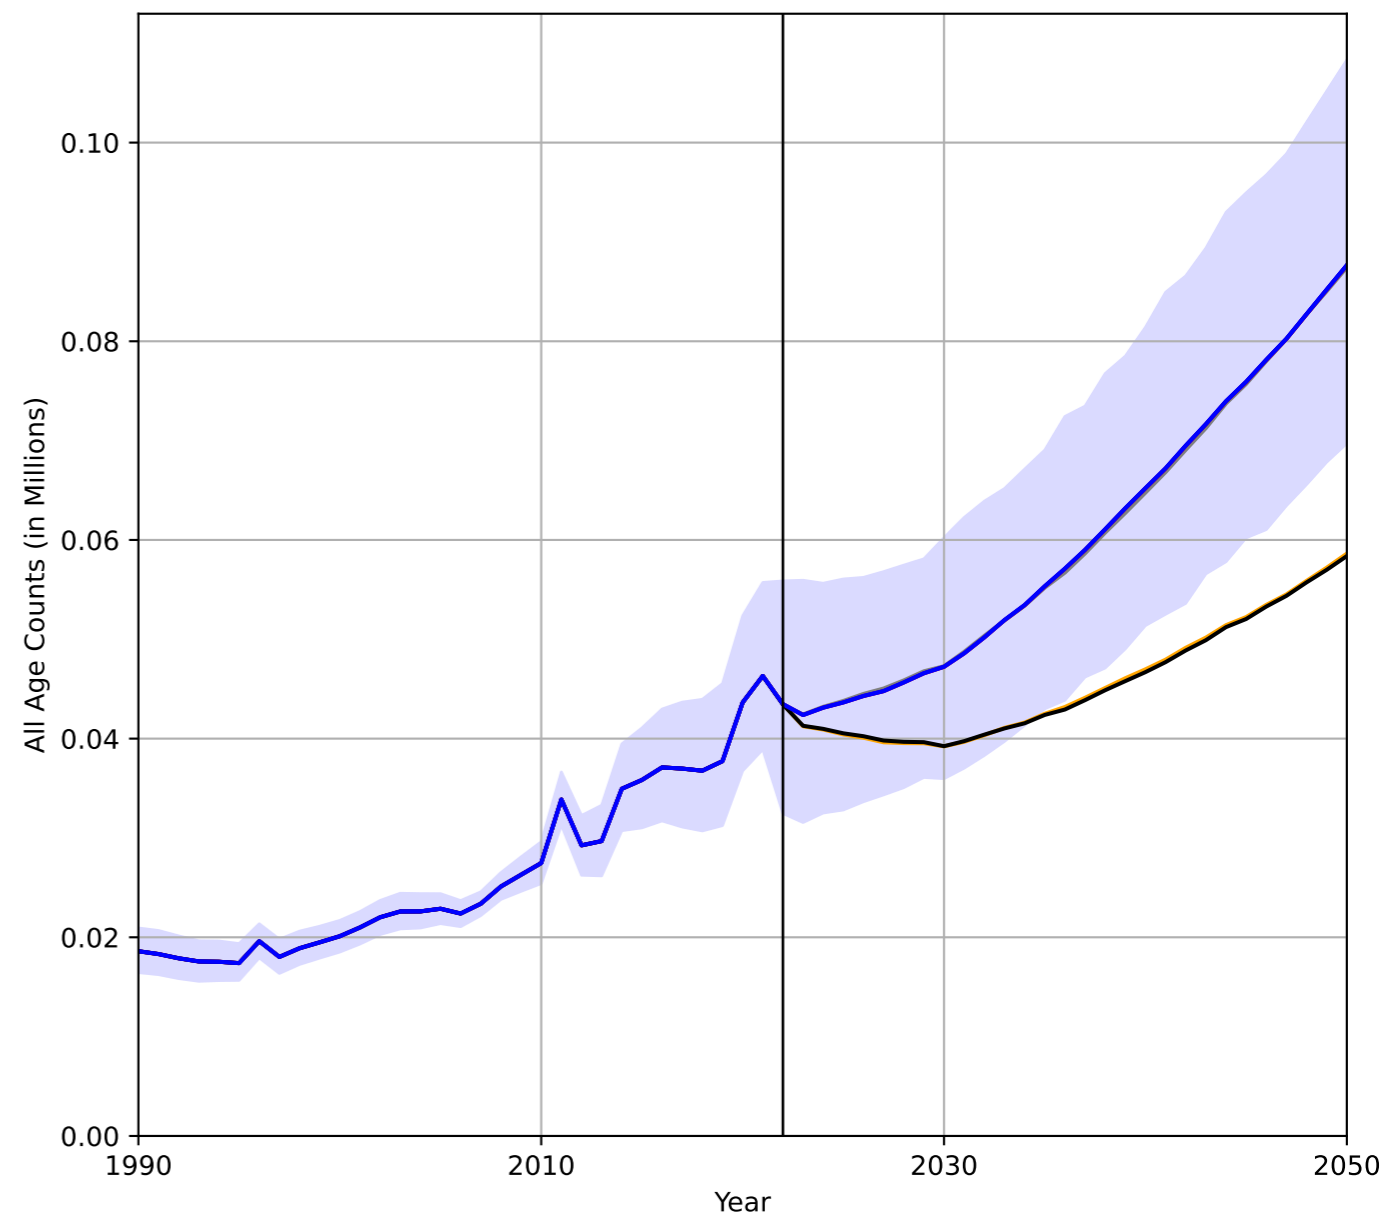



# Morocco

Supplemental Results Figure S11. All-cause age standardised death rates (A) and all age death counts (B), for the past and for five future scenarios, 1990–2050

1752

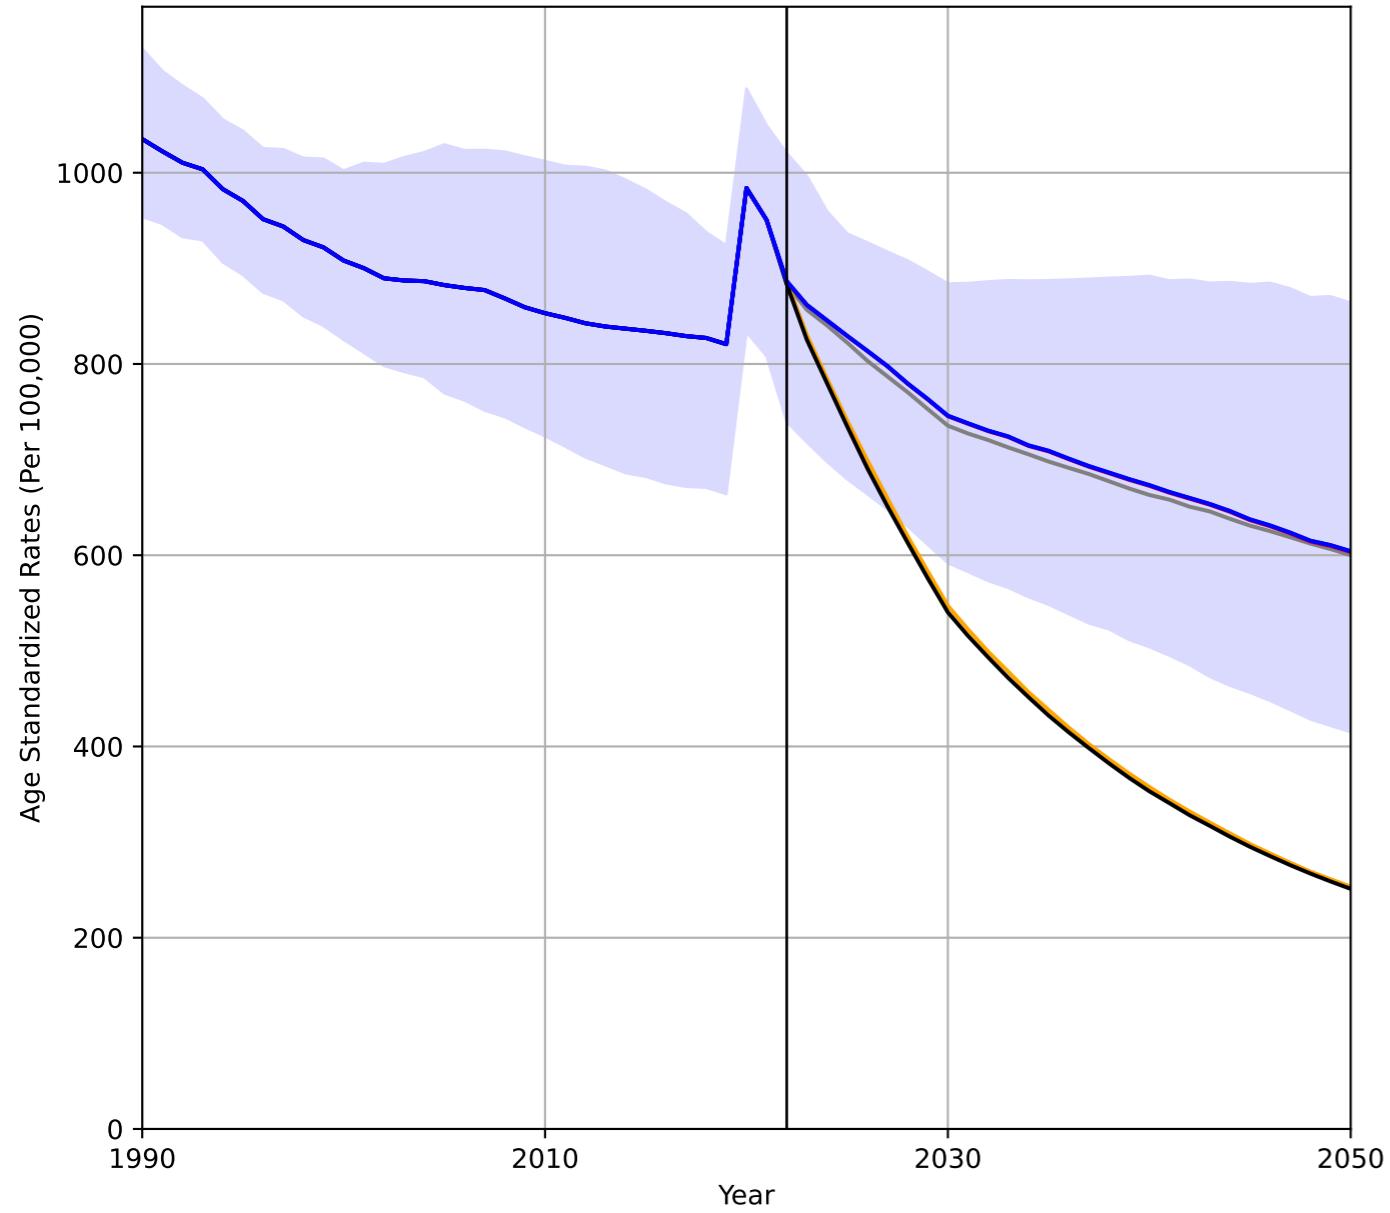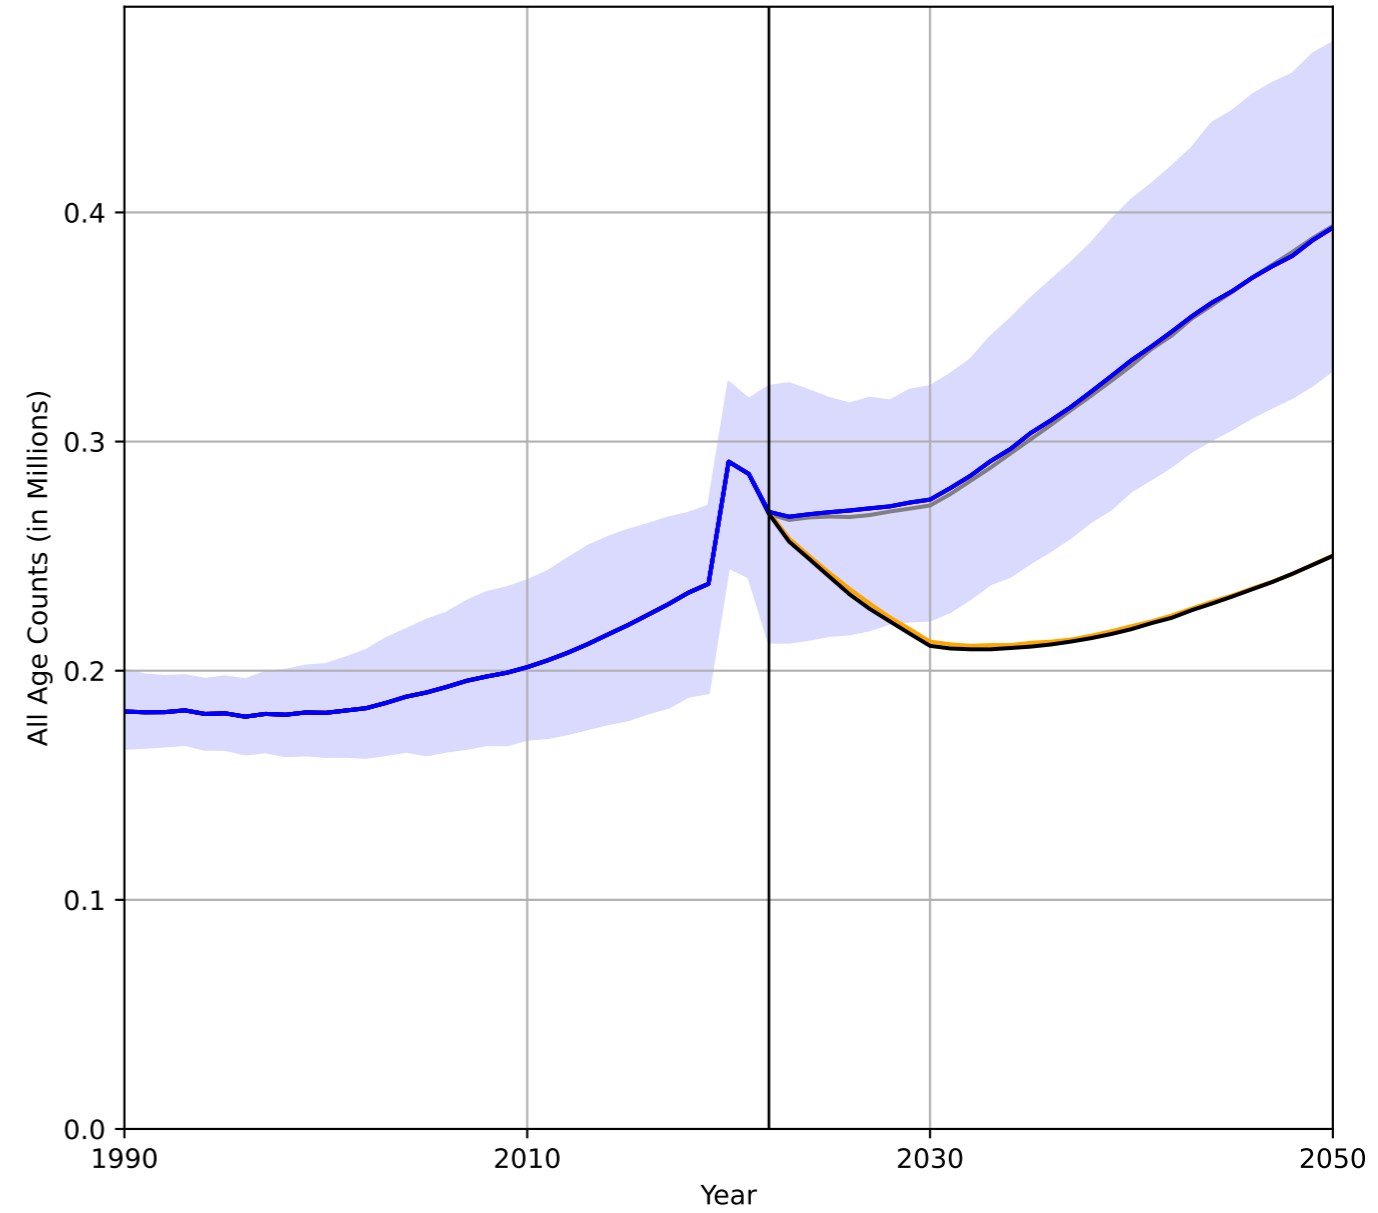

# Oman

Supplemental Results Figure S11. All-cause age standardised death rates (A) and all age death counts (B), for the past and for five future scenarios, 1990–2050

1753

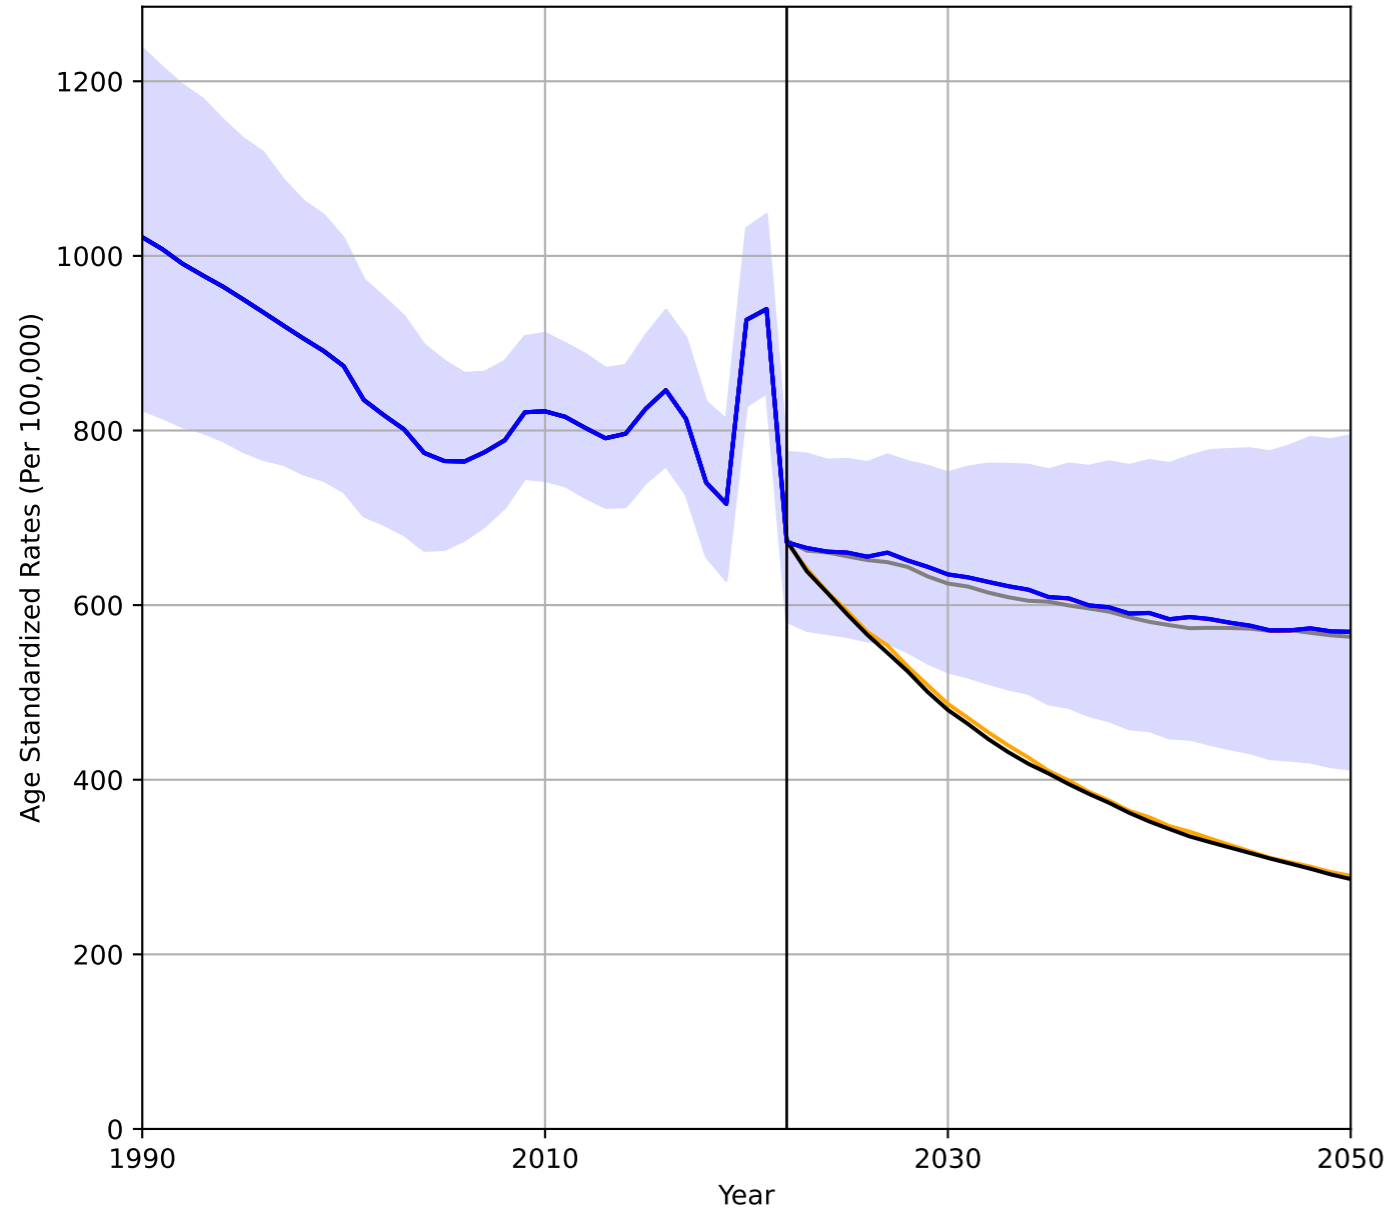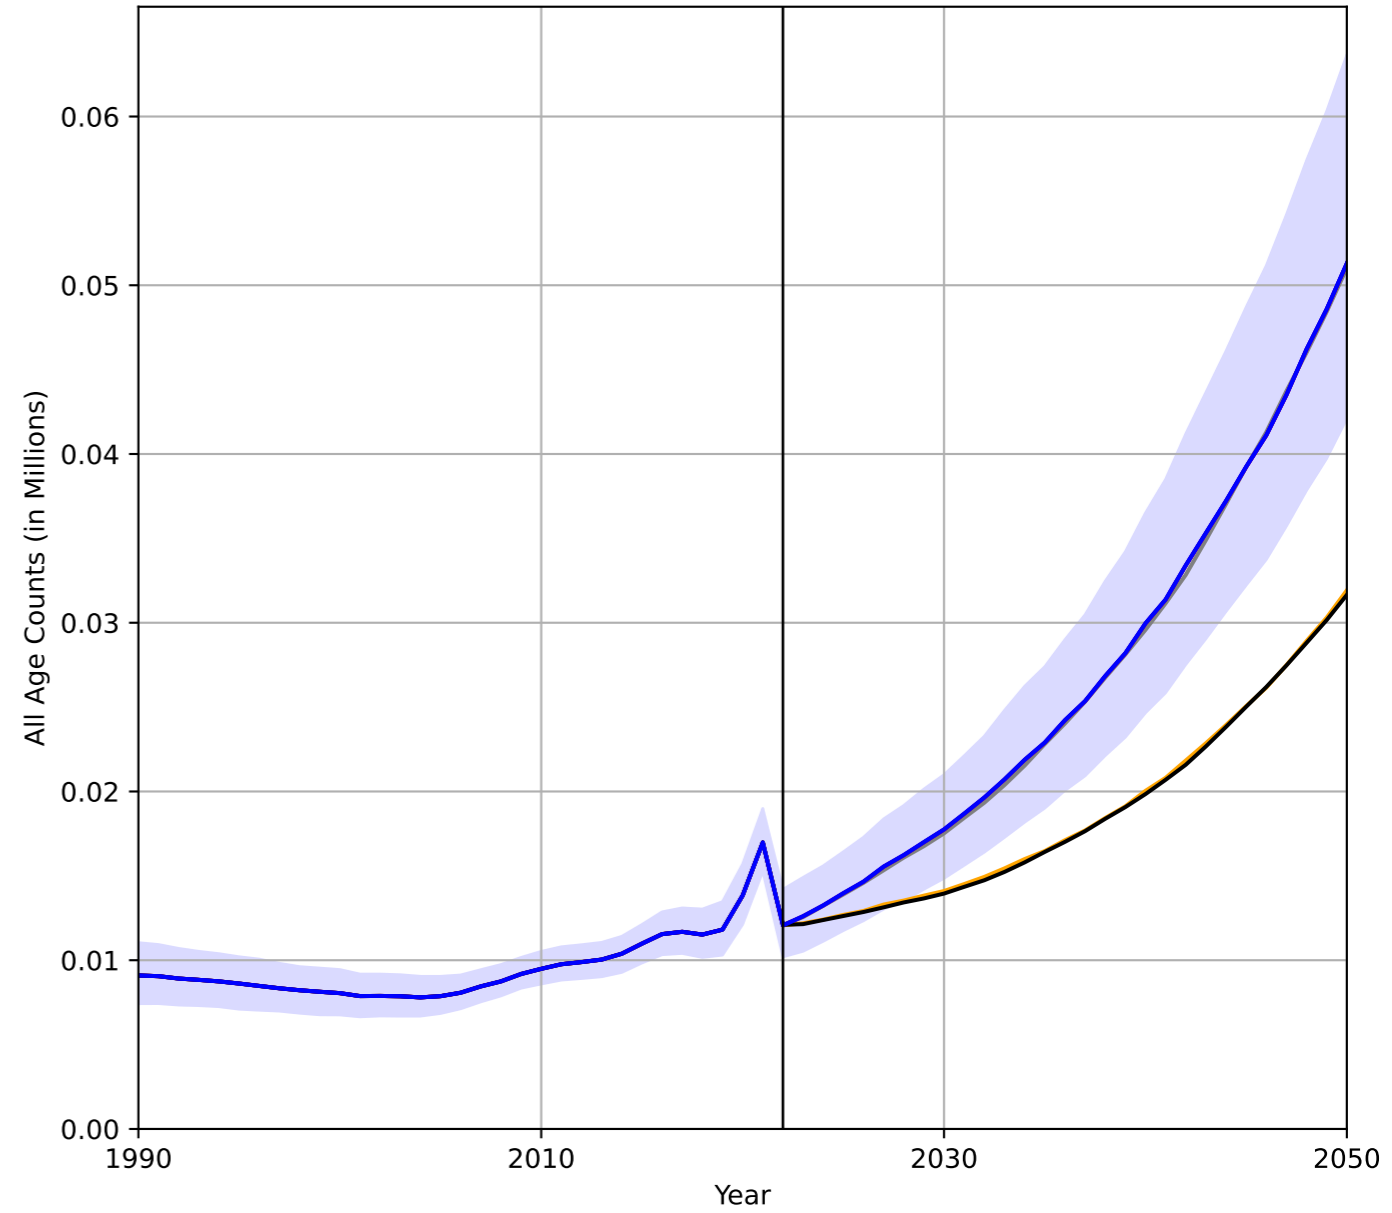

# Palestine

Supplemental Results Figure S11. All-cause age standardised death rates (A) and all age death counts (B), for the past and for five future scenarios, 1990–2050

1754

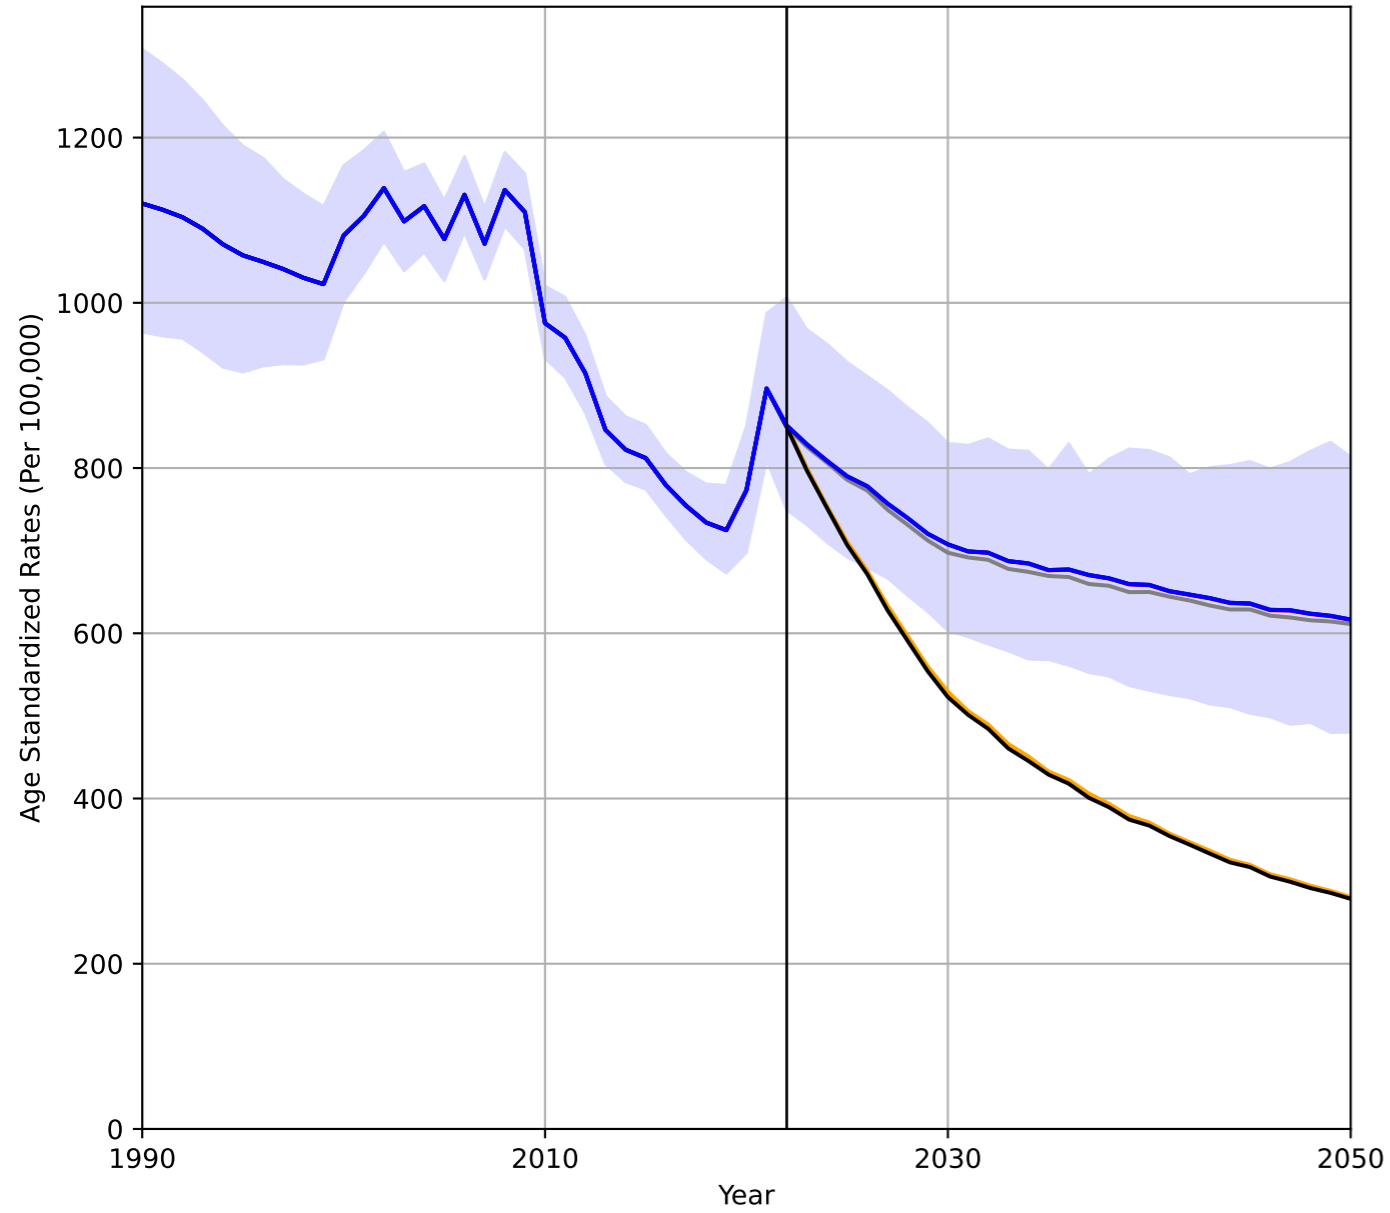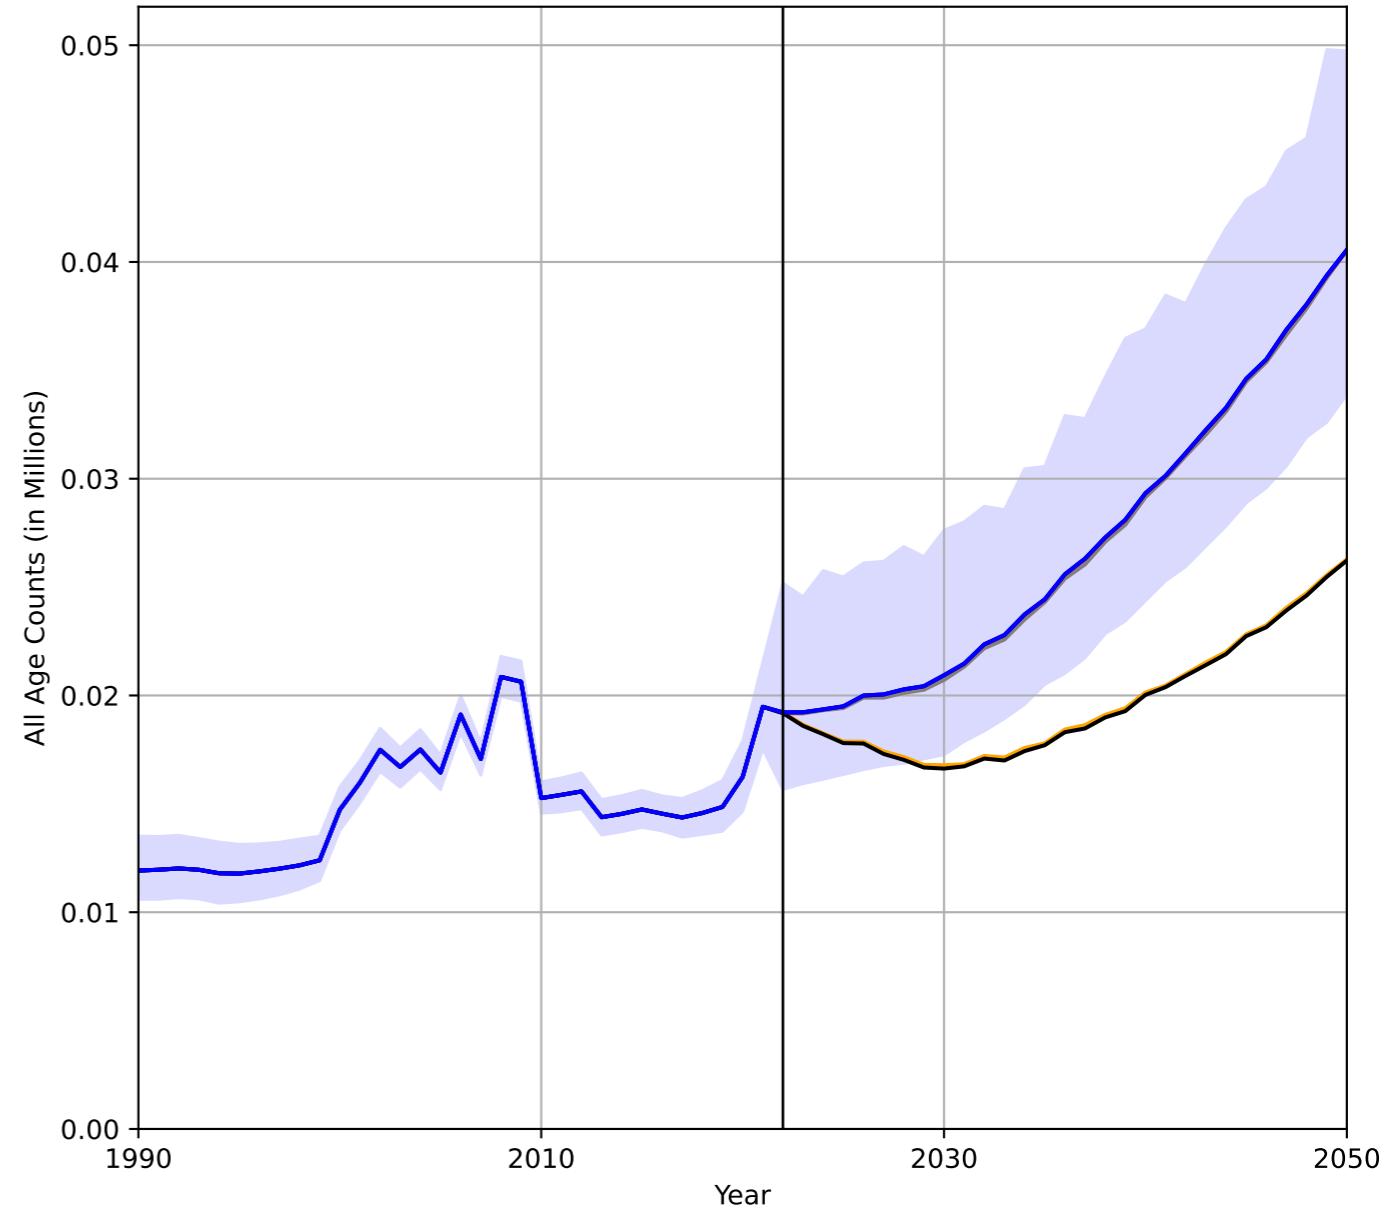

# Qatar

Supplemental Results Figure S11. All-cause age standardised death rates (A) and all age death counts (B), for the past and for five future scenarios, 1990–2050

1755

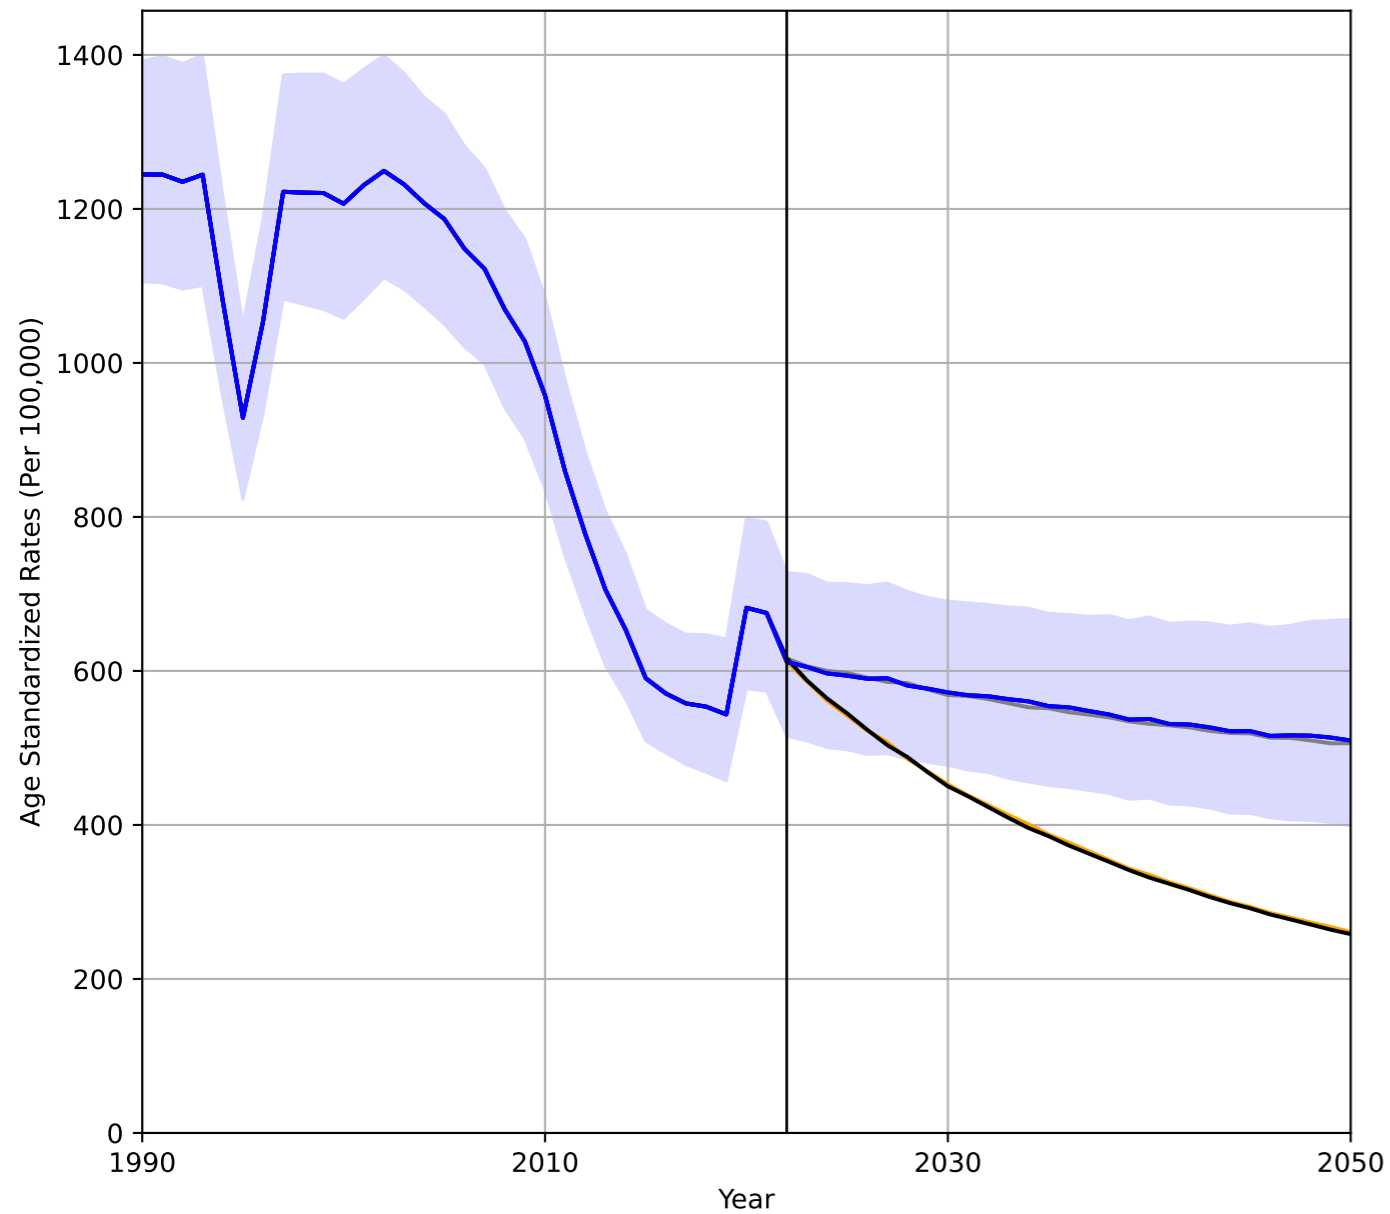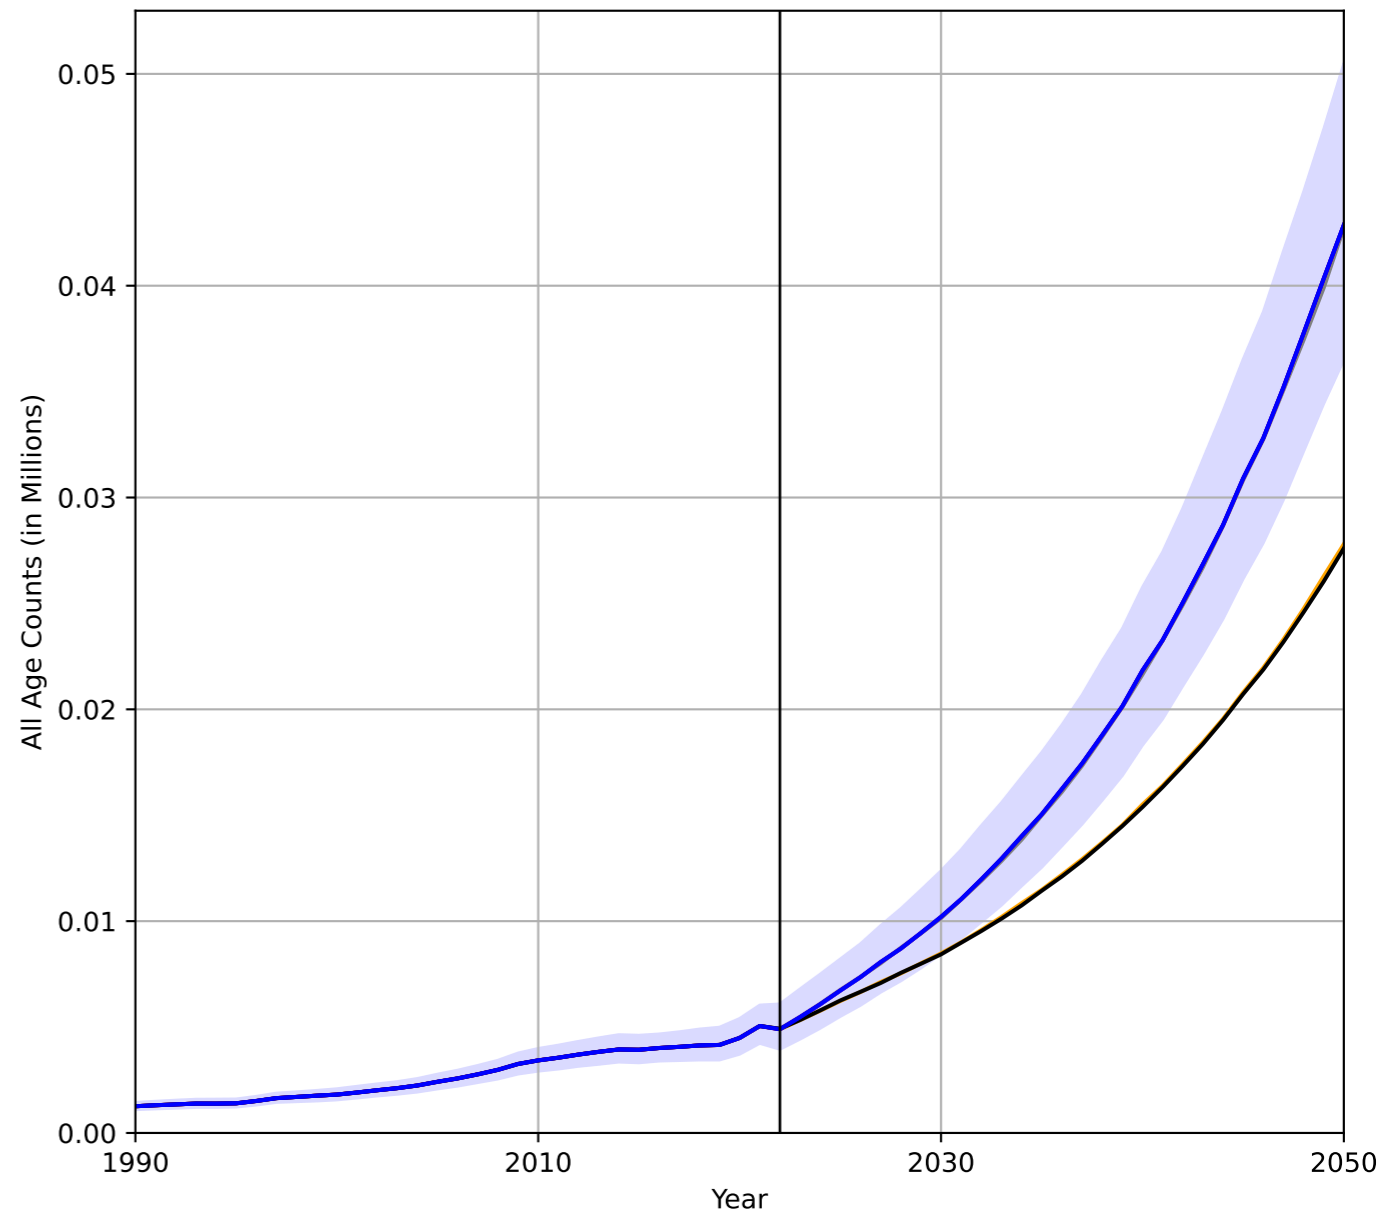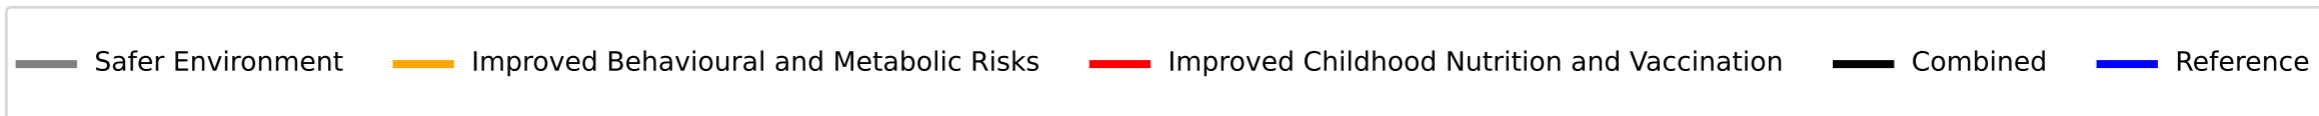

# Saudi Arabia

Supplemental Results Figure S11. All-cause age standardised death rates (A) and all age death counts (B), for the past and for five future scenarios, 1990–2050

1756

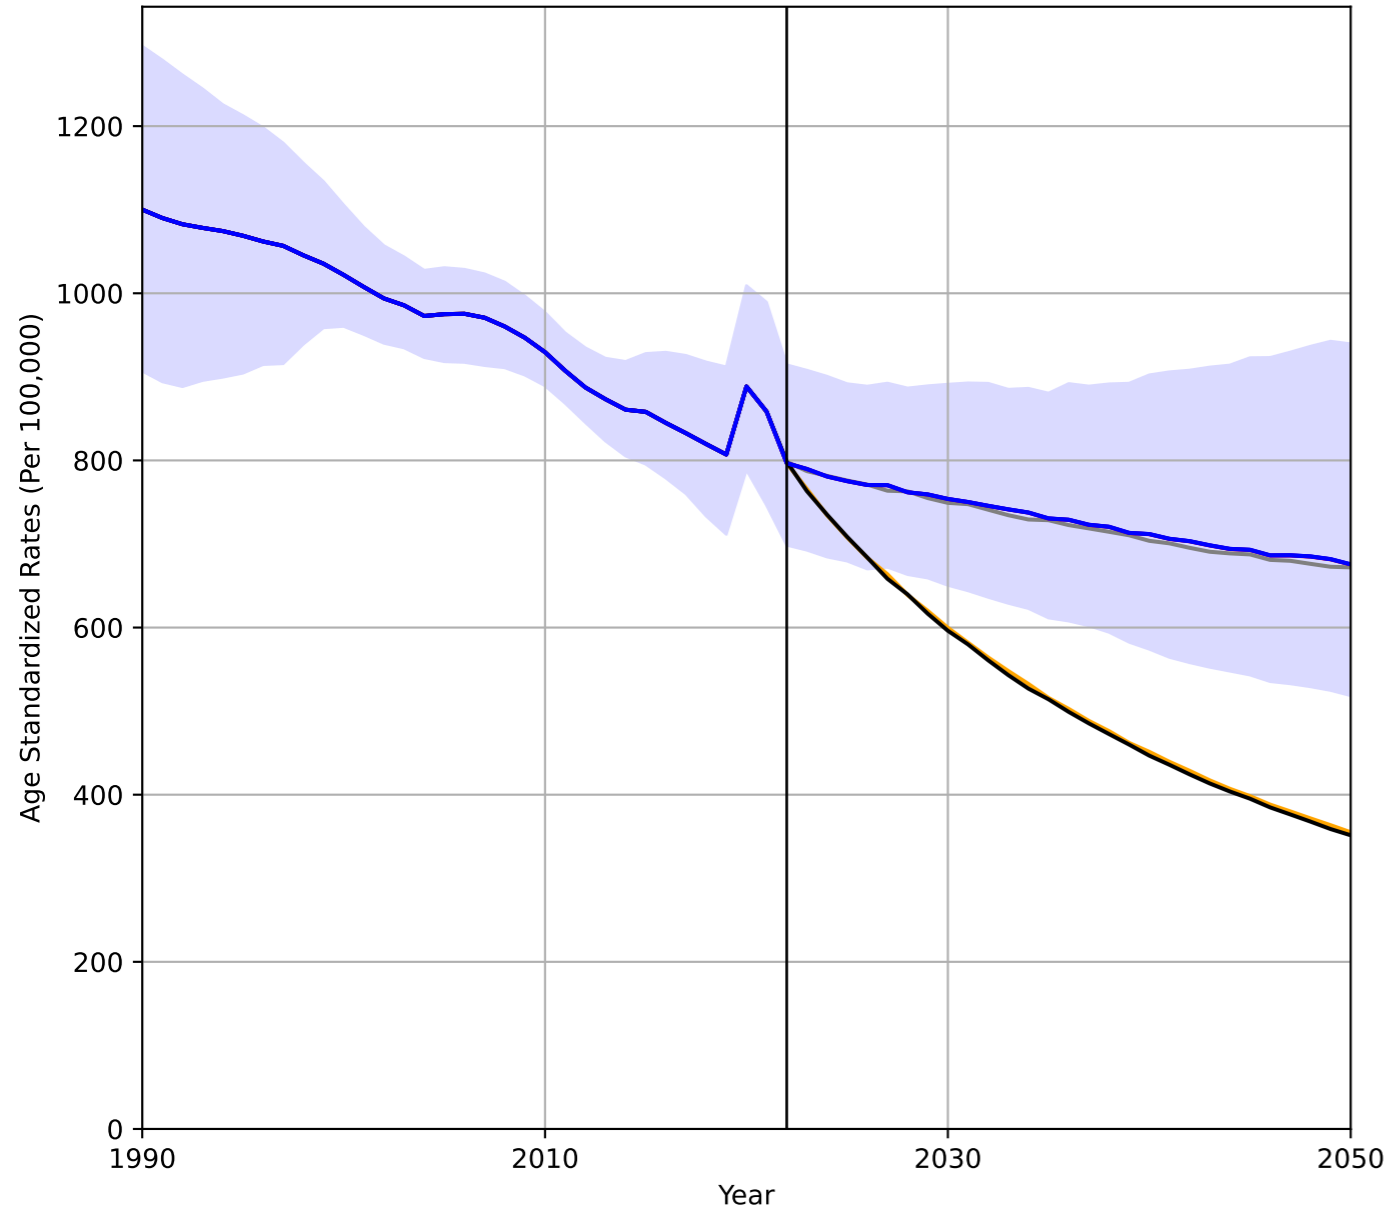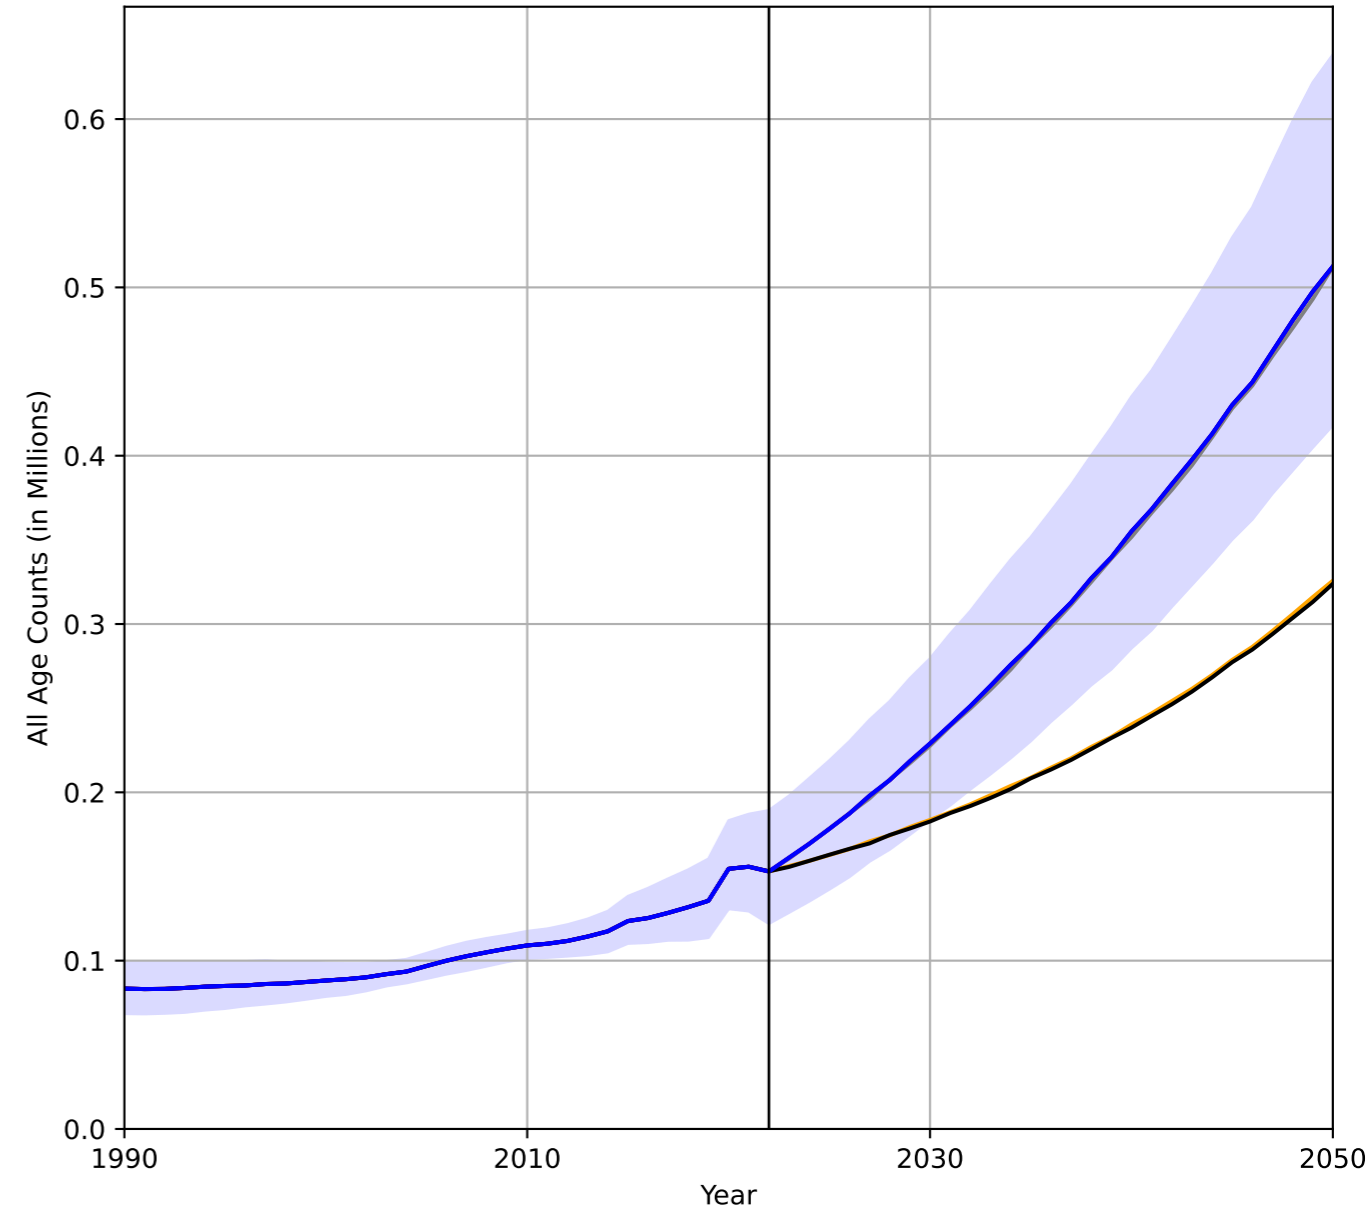

# Sudan

Supplemental Results Figure S11. All-cause age standardised death rates (A) and all age death counts (B), for the past and for five future scenarios, 1990–2050

1757

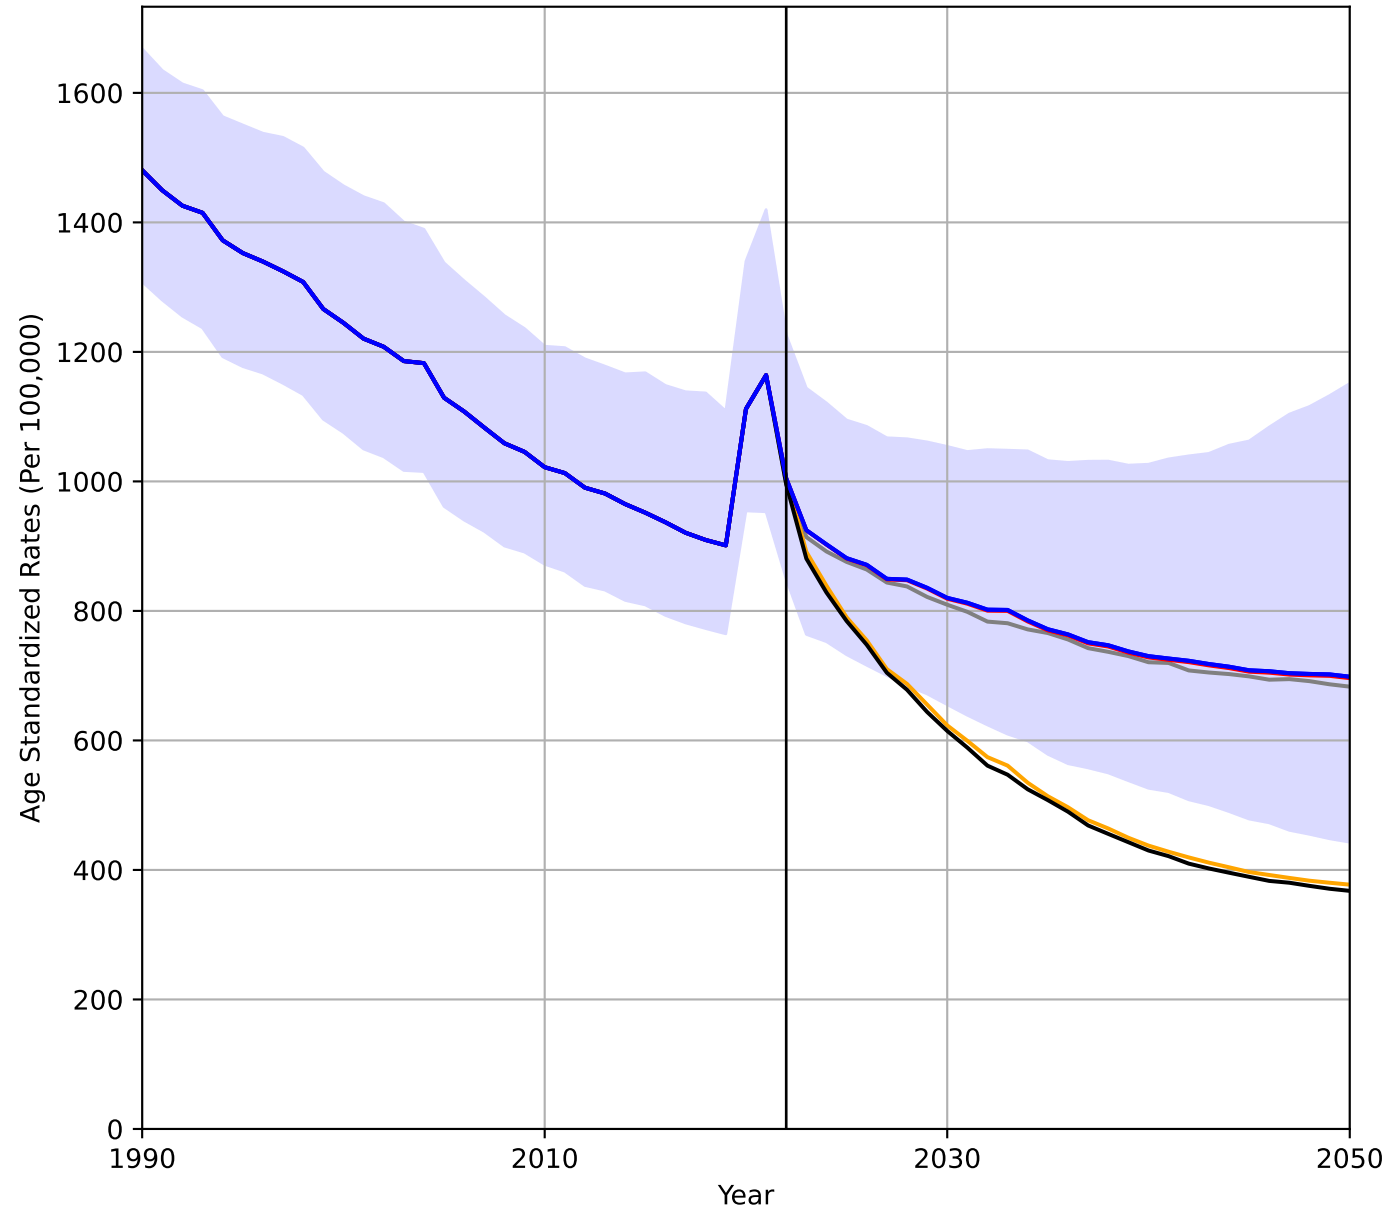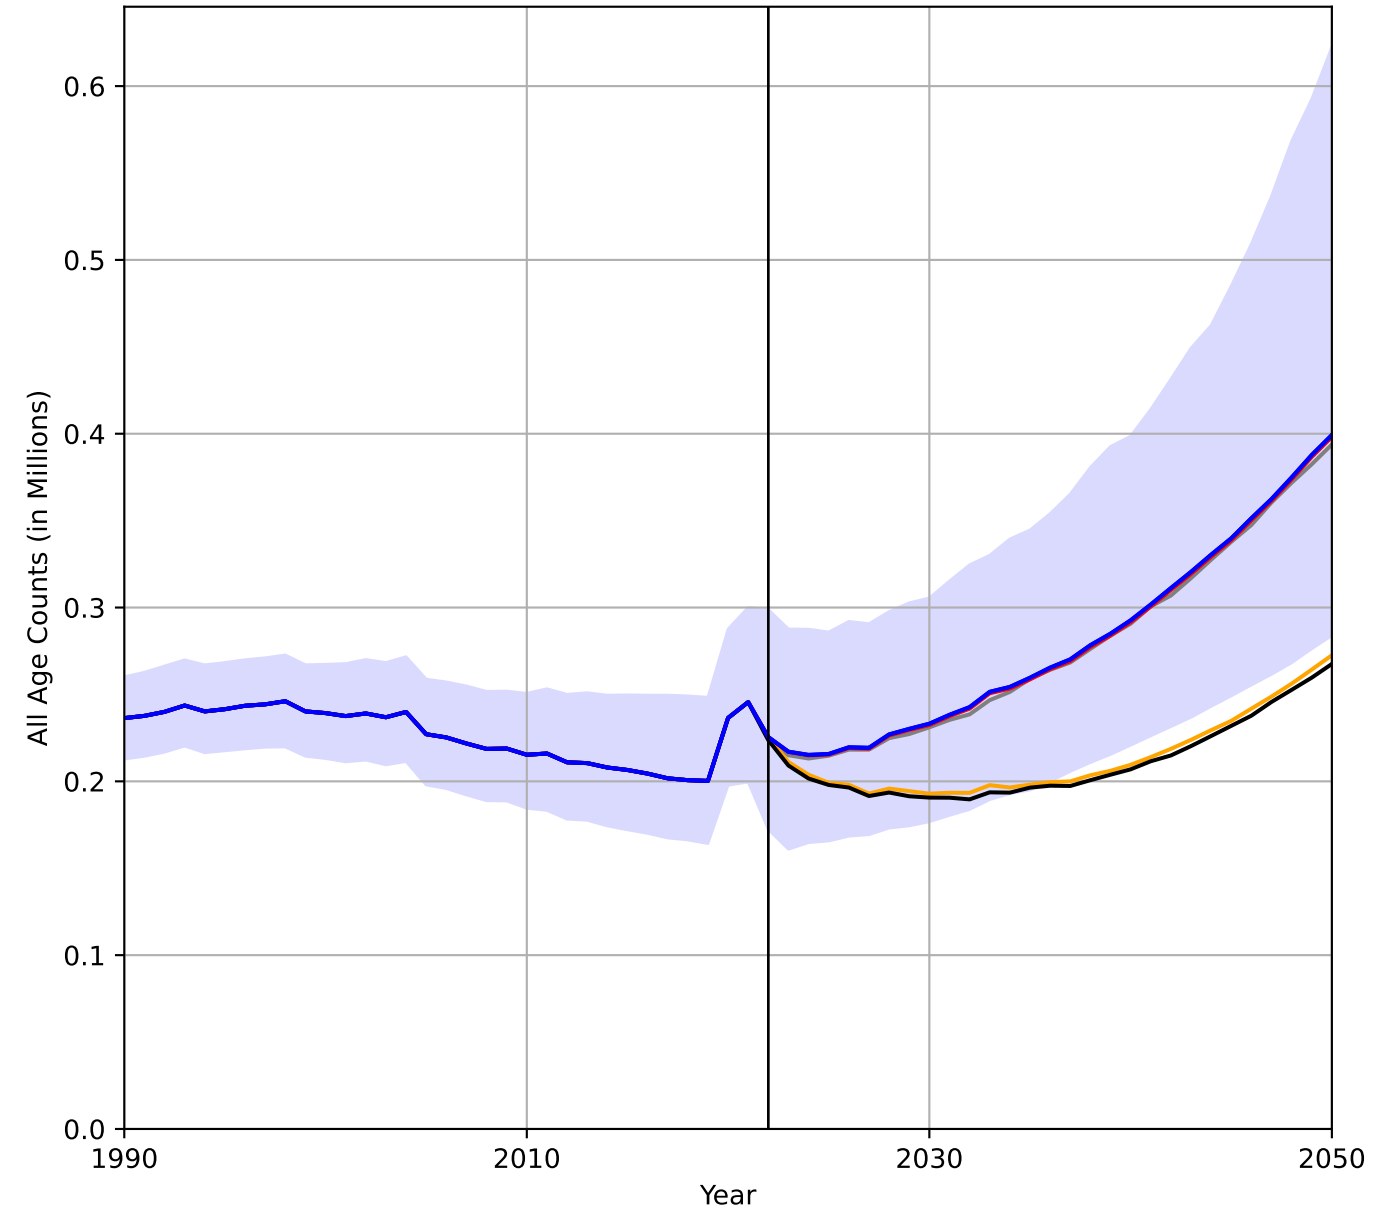

# Syria

Supplemental Results Figure S11. All-cause age standardised death rates (A) and all age death counts (B), for the past and for five future scenarios, 1990–2050

1758

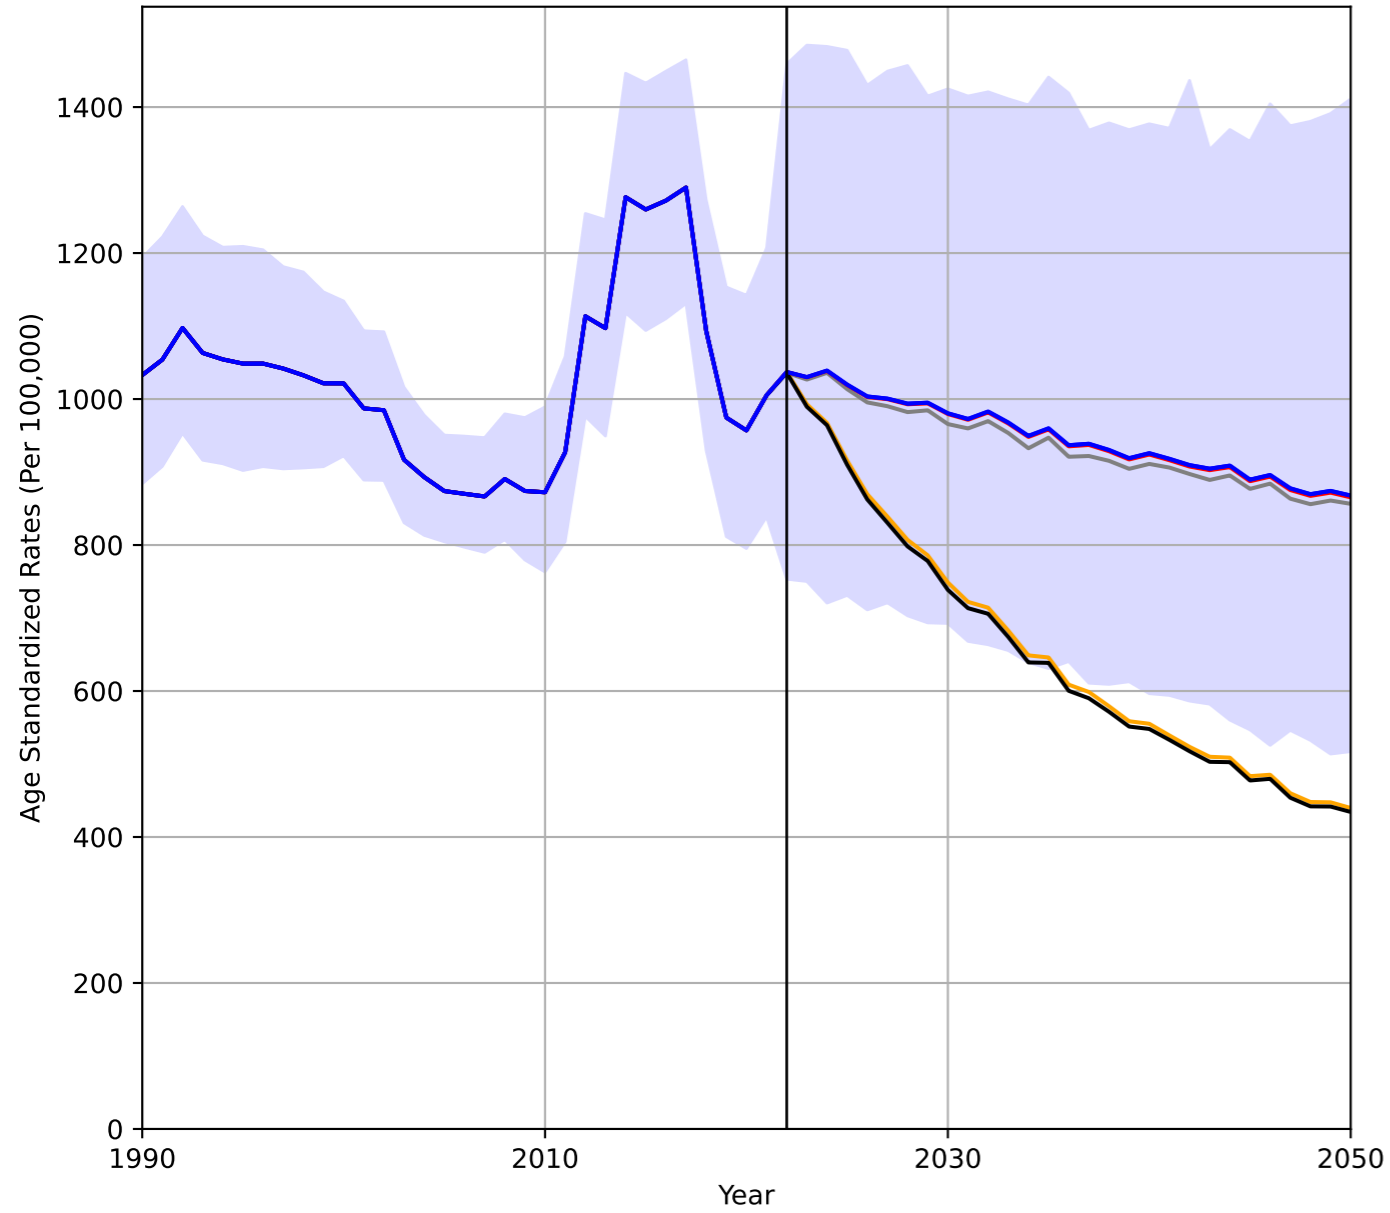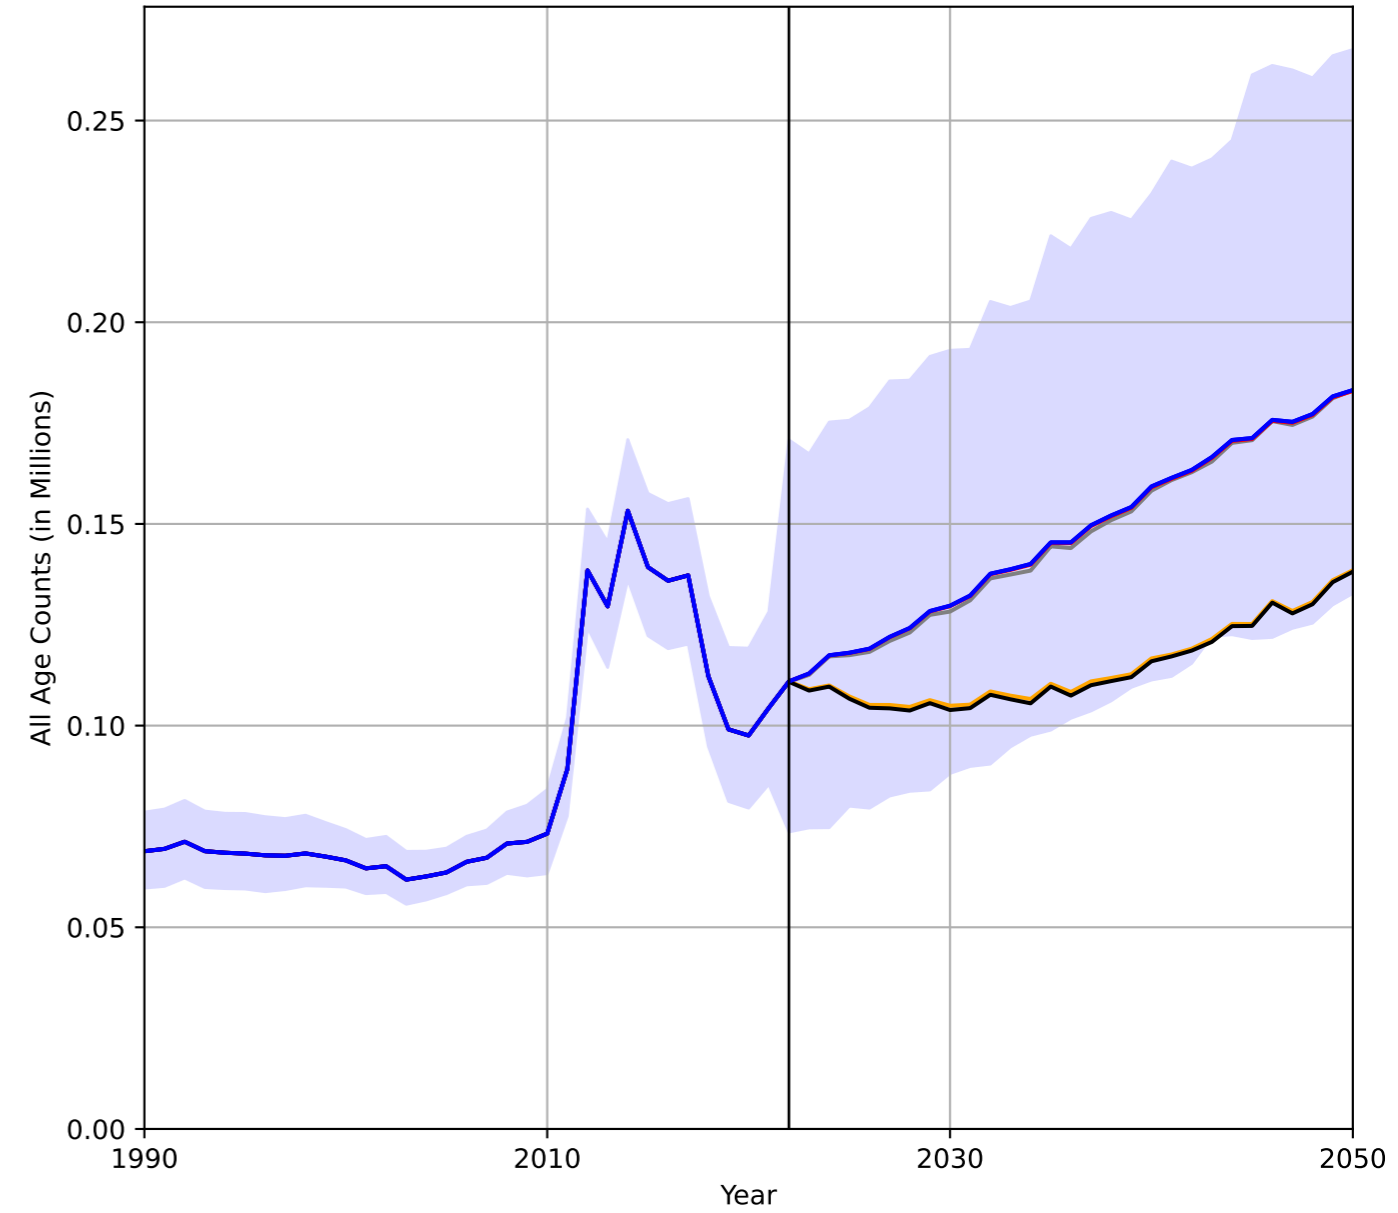

# Tunisia

Supplemental Results Figure S11. All-cause age standardised death rates (A) and all age death counts (B), for the past and for five future scenarios, 1990–2050

1759

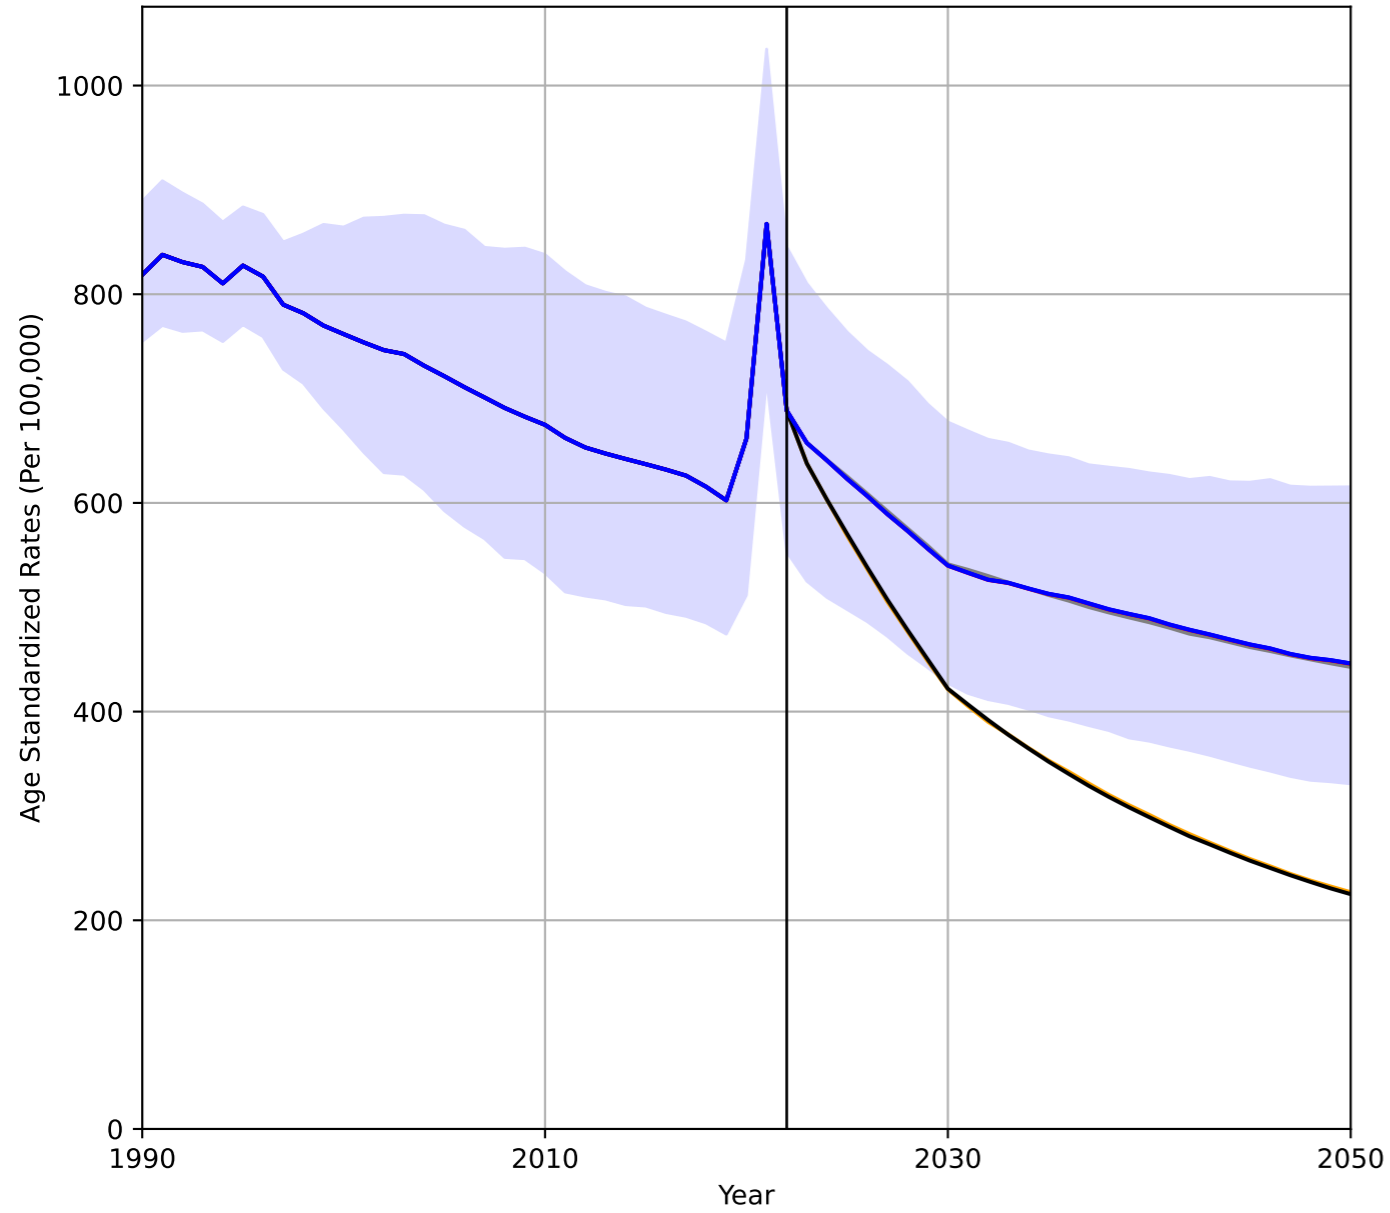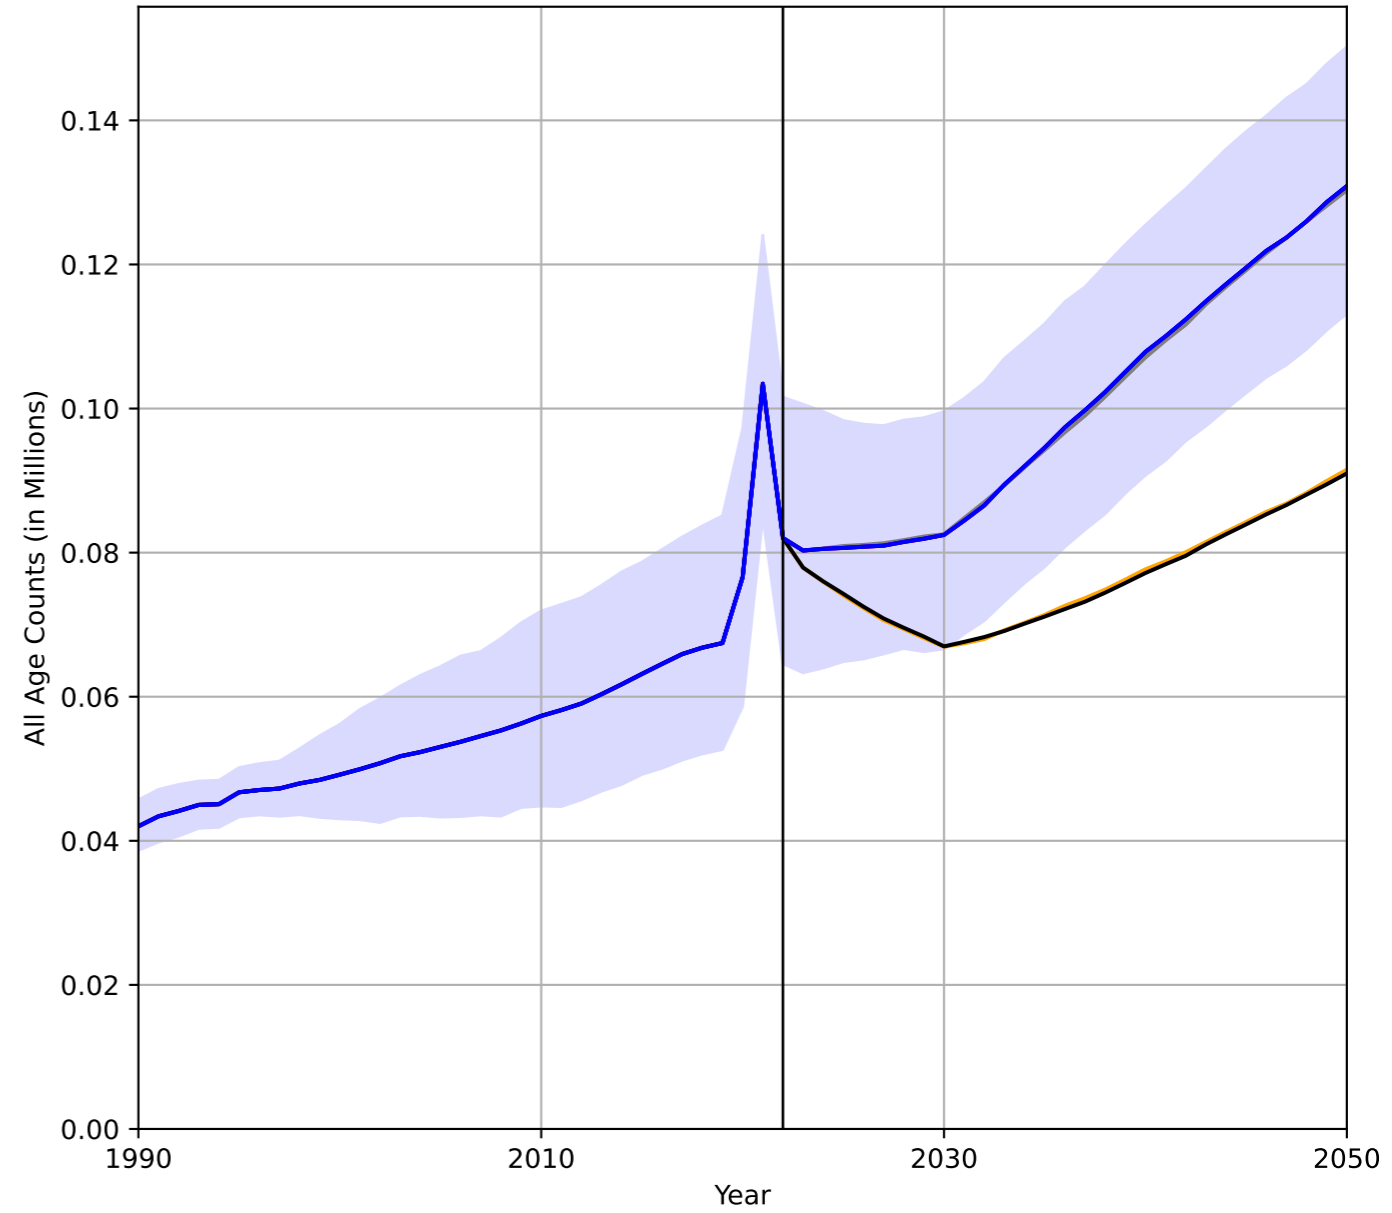



# Türkiye

Supplemental Results Figure S11. All-cause age standardised death rates (A) and all age death counts (B), for the past and for five future scenarios, 1990–2050

1760

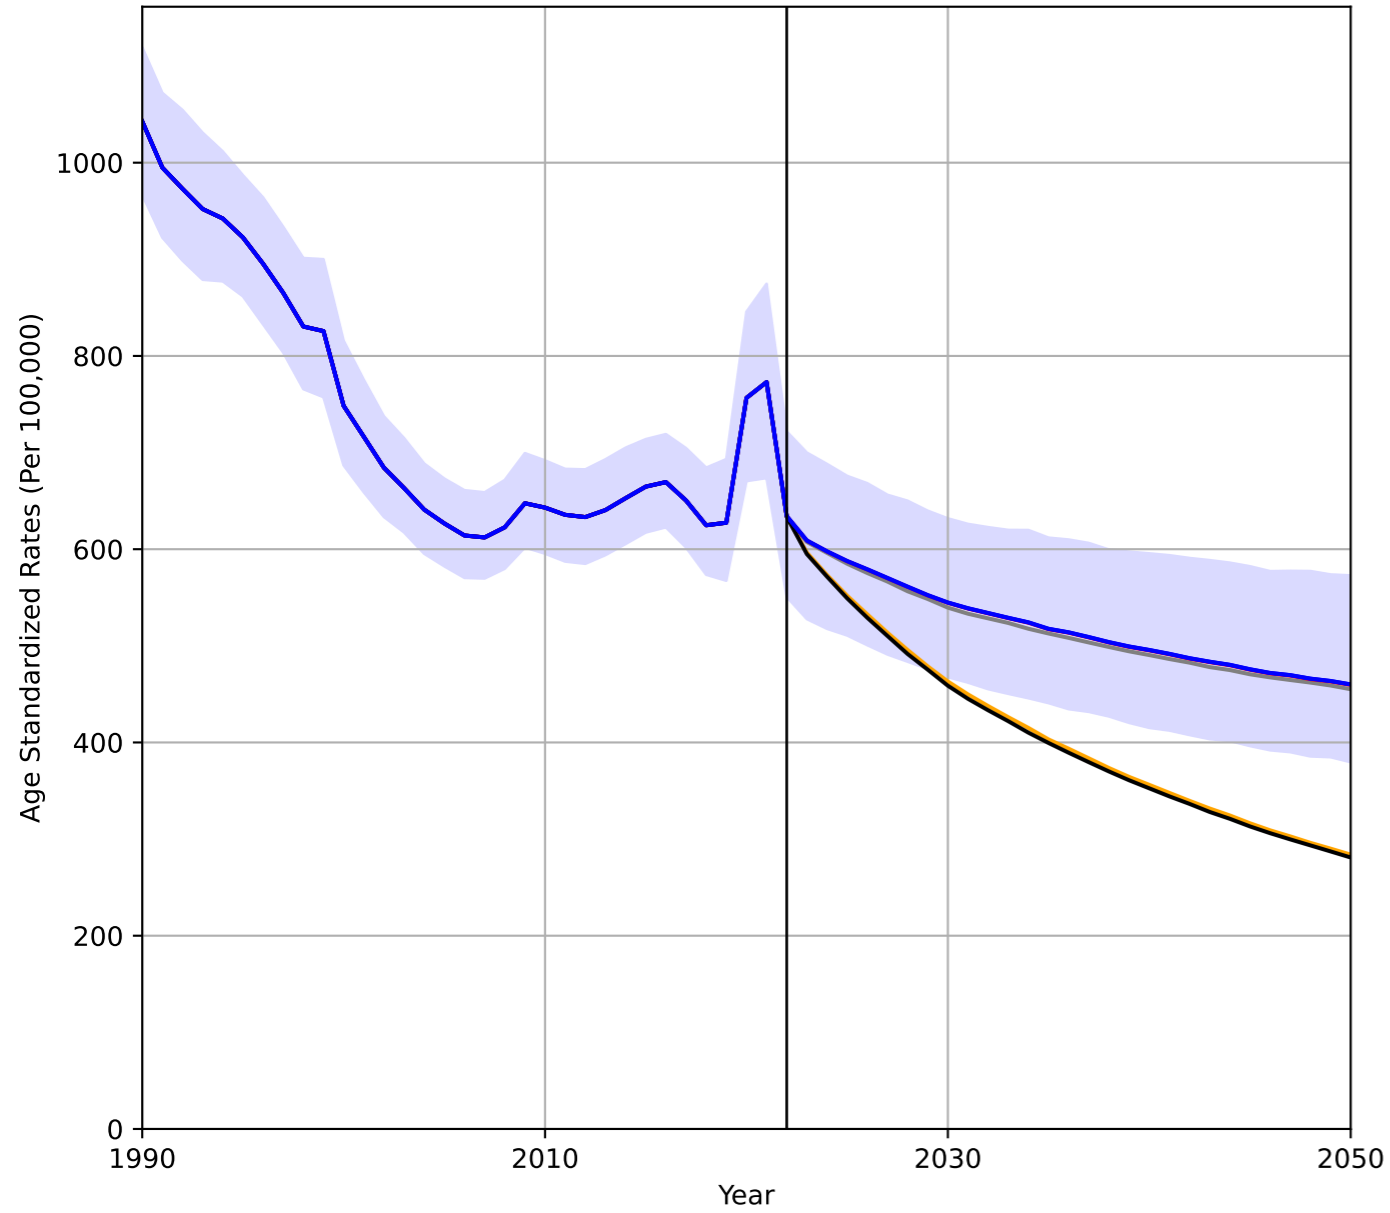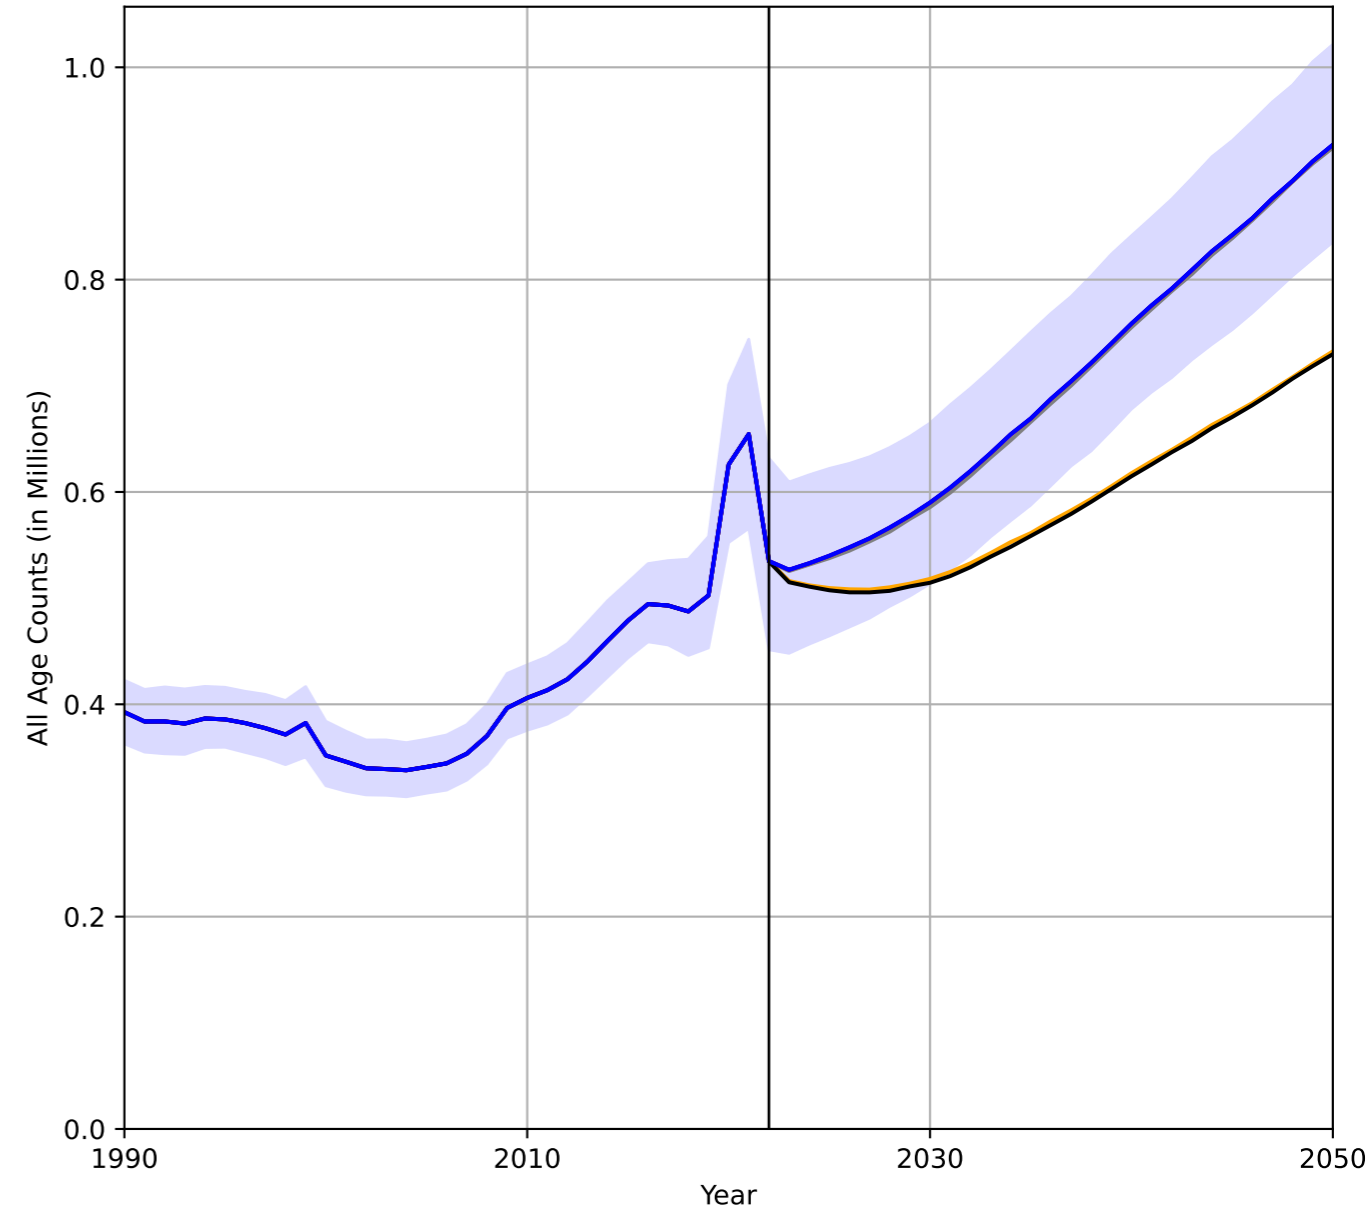

# United Arab Emirates

Supplemental Results Figure S11. All-cause age standardised death rates (A) and all age death counts (B), for the past and for five future scenarios, 1990–2050

1761

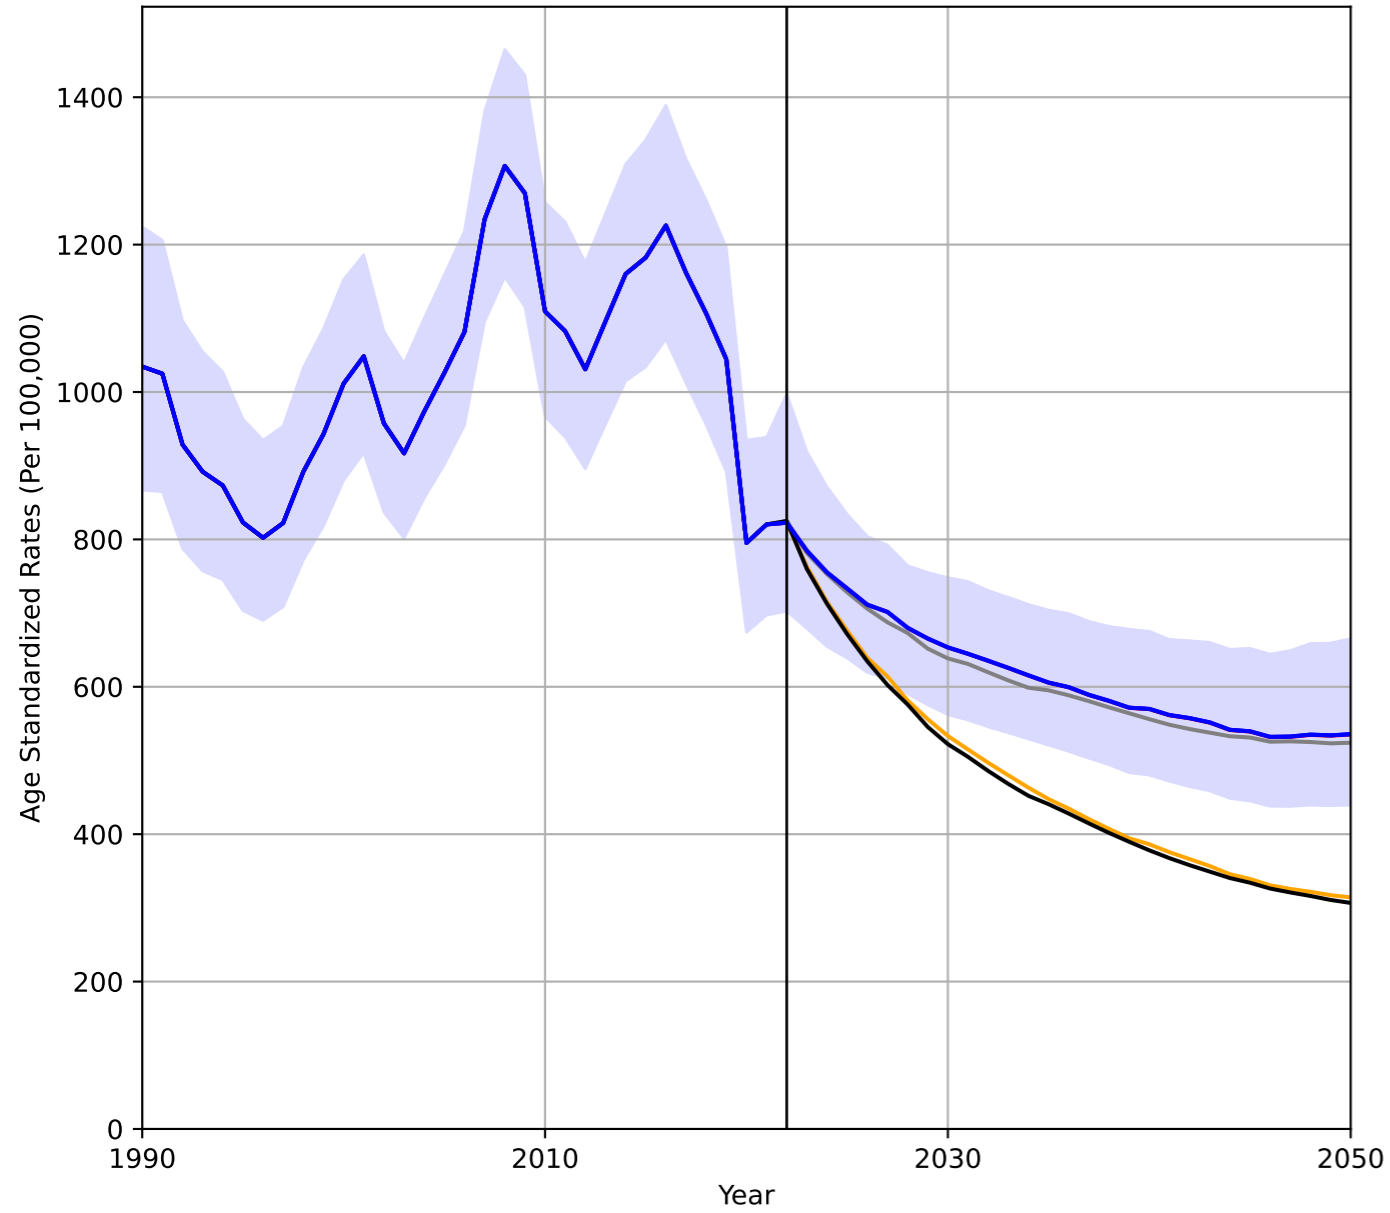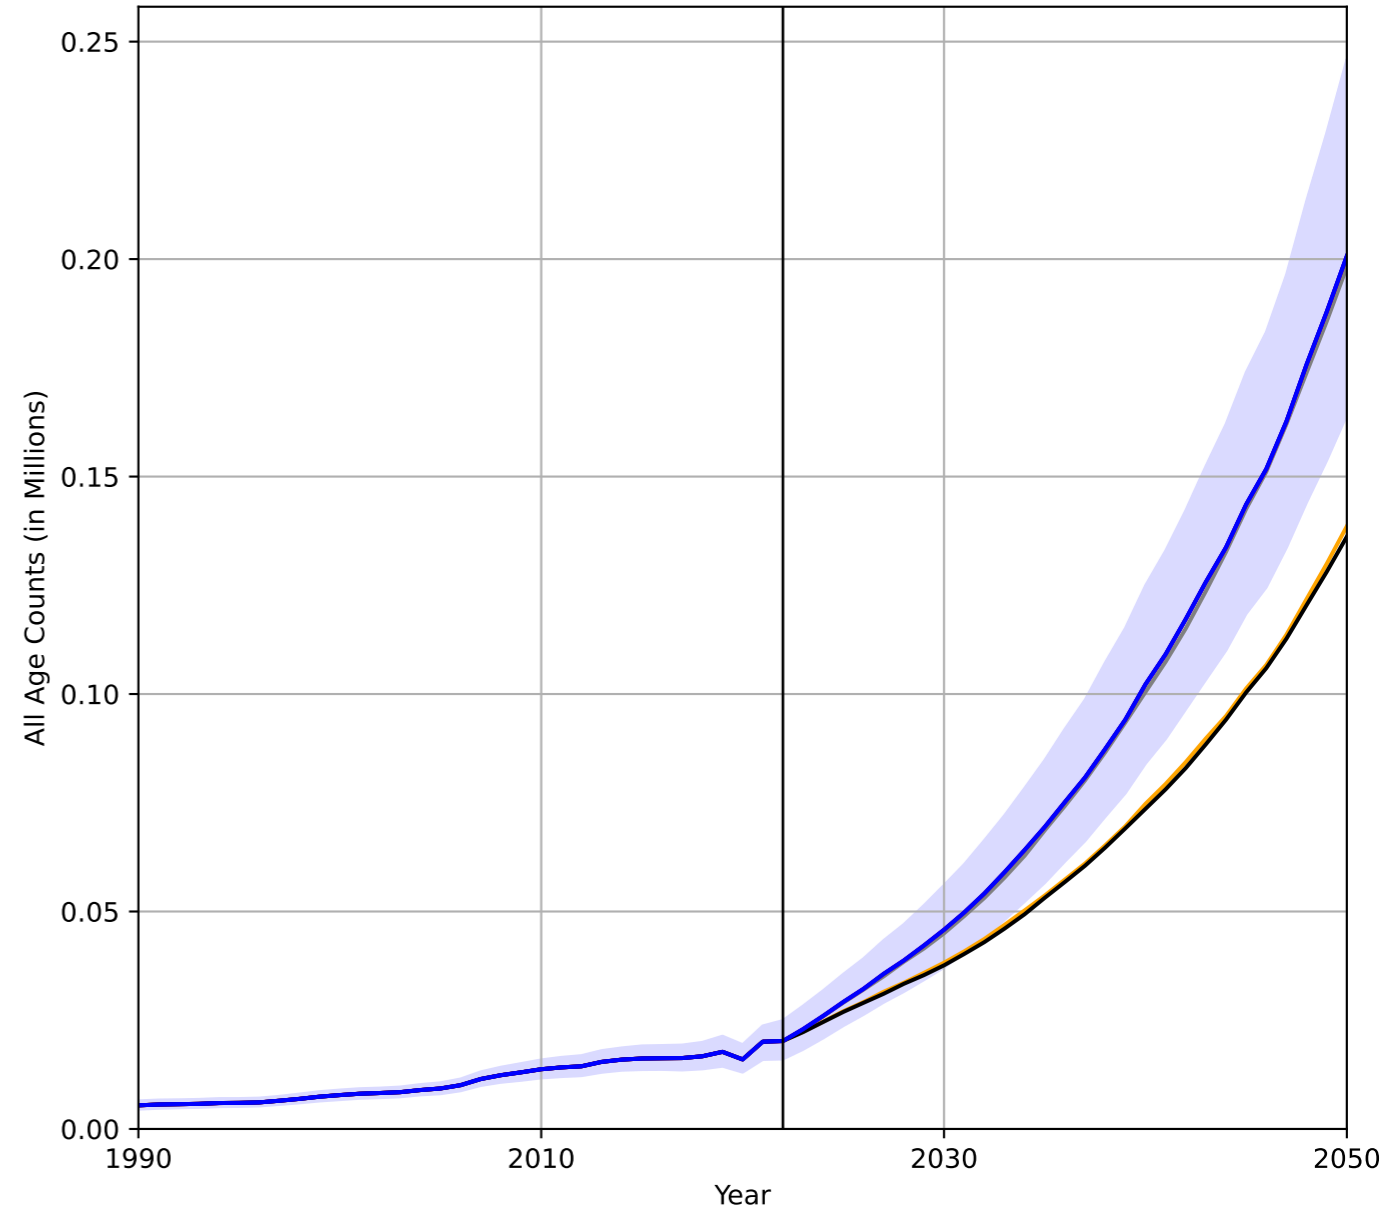

# Yemen

Supplemental Results Figure S11. All-cause age standardised death rates (A) and all age death counts (B), for the past and for five future scenarios, 1990–2050

1762

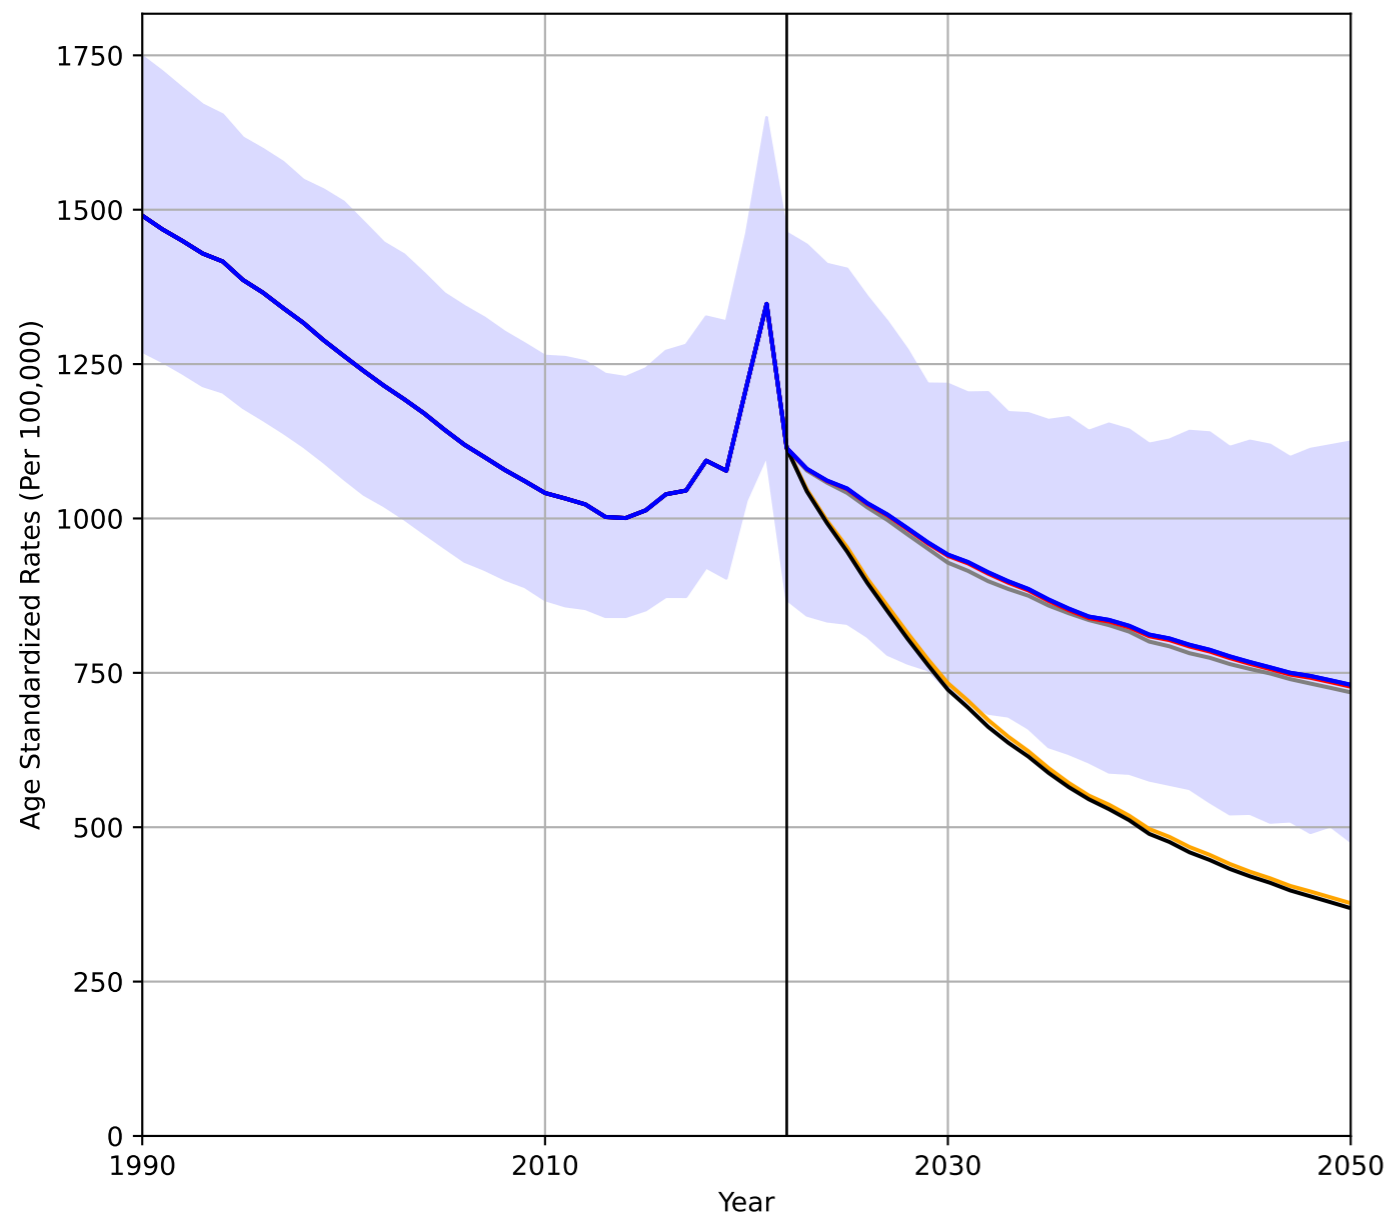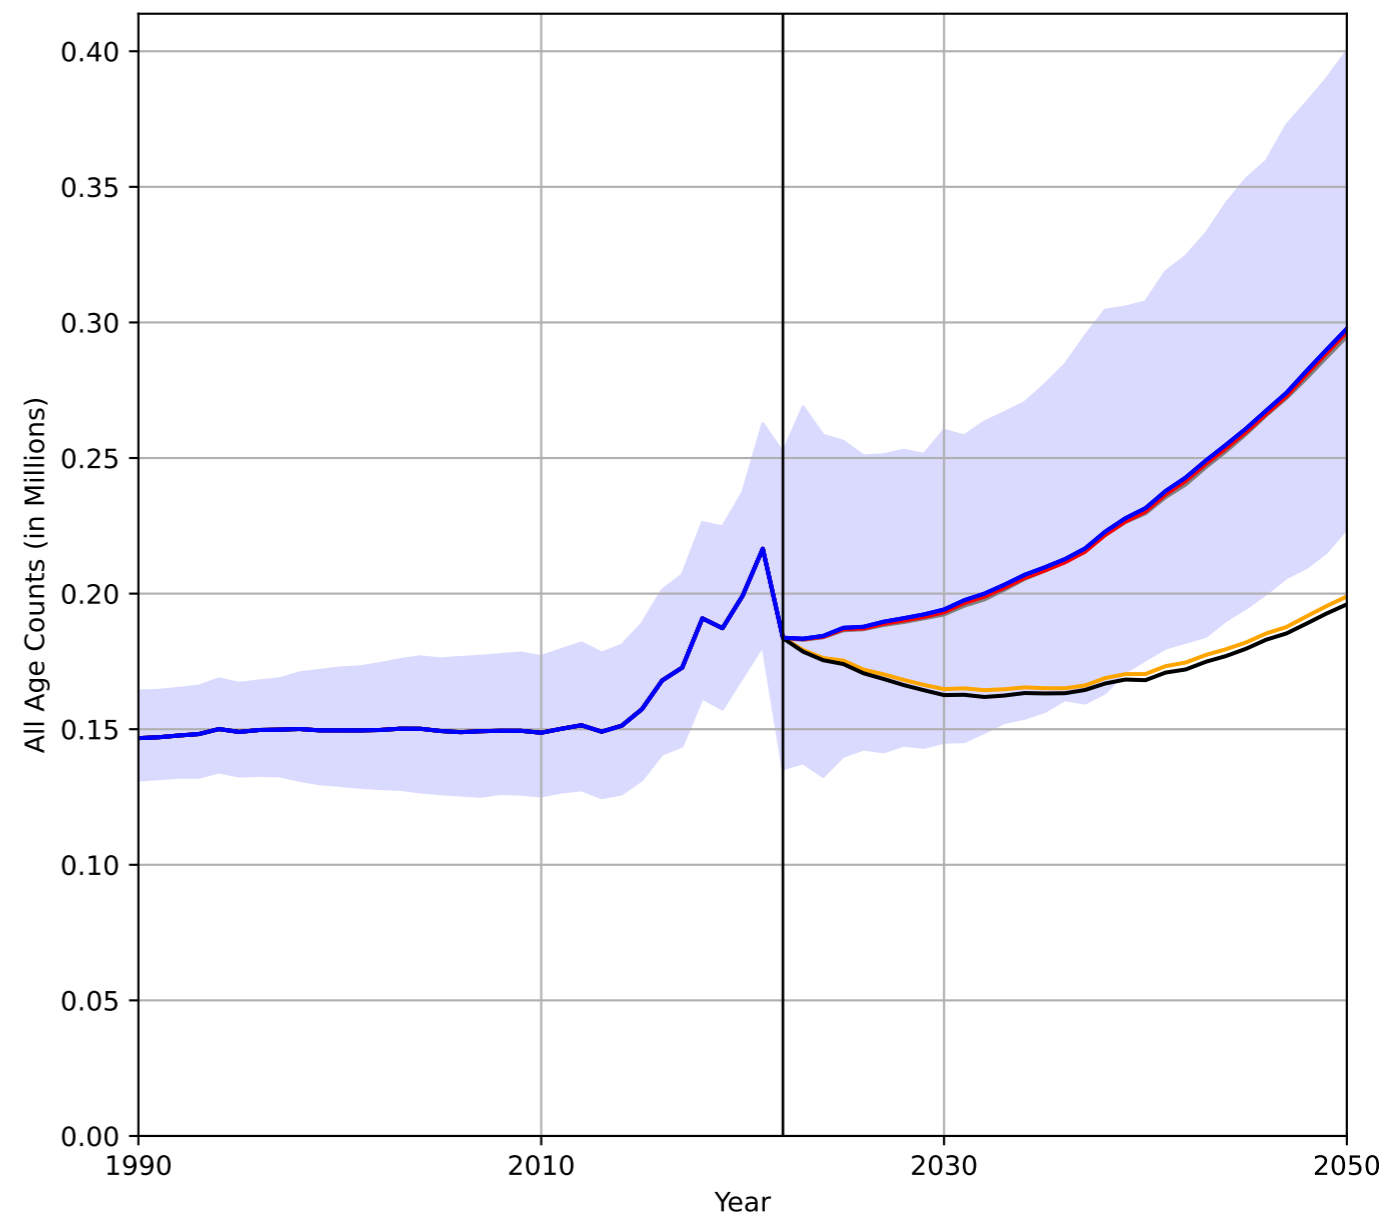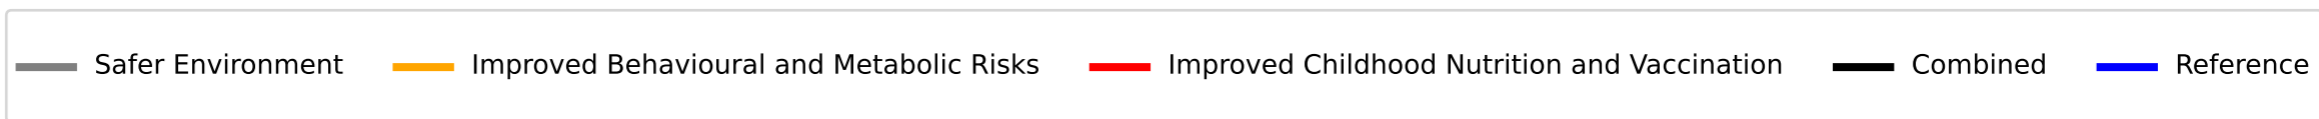

# Bangladesh

Supplemental Results Figure S11. All-cause age standardised death rates (A) and all age death counts (B), for the past and for five future scenarios, 1990–2050

1763

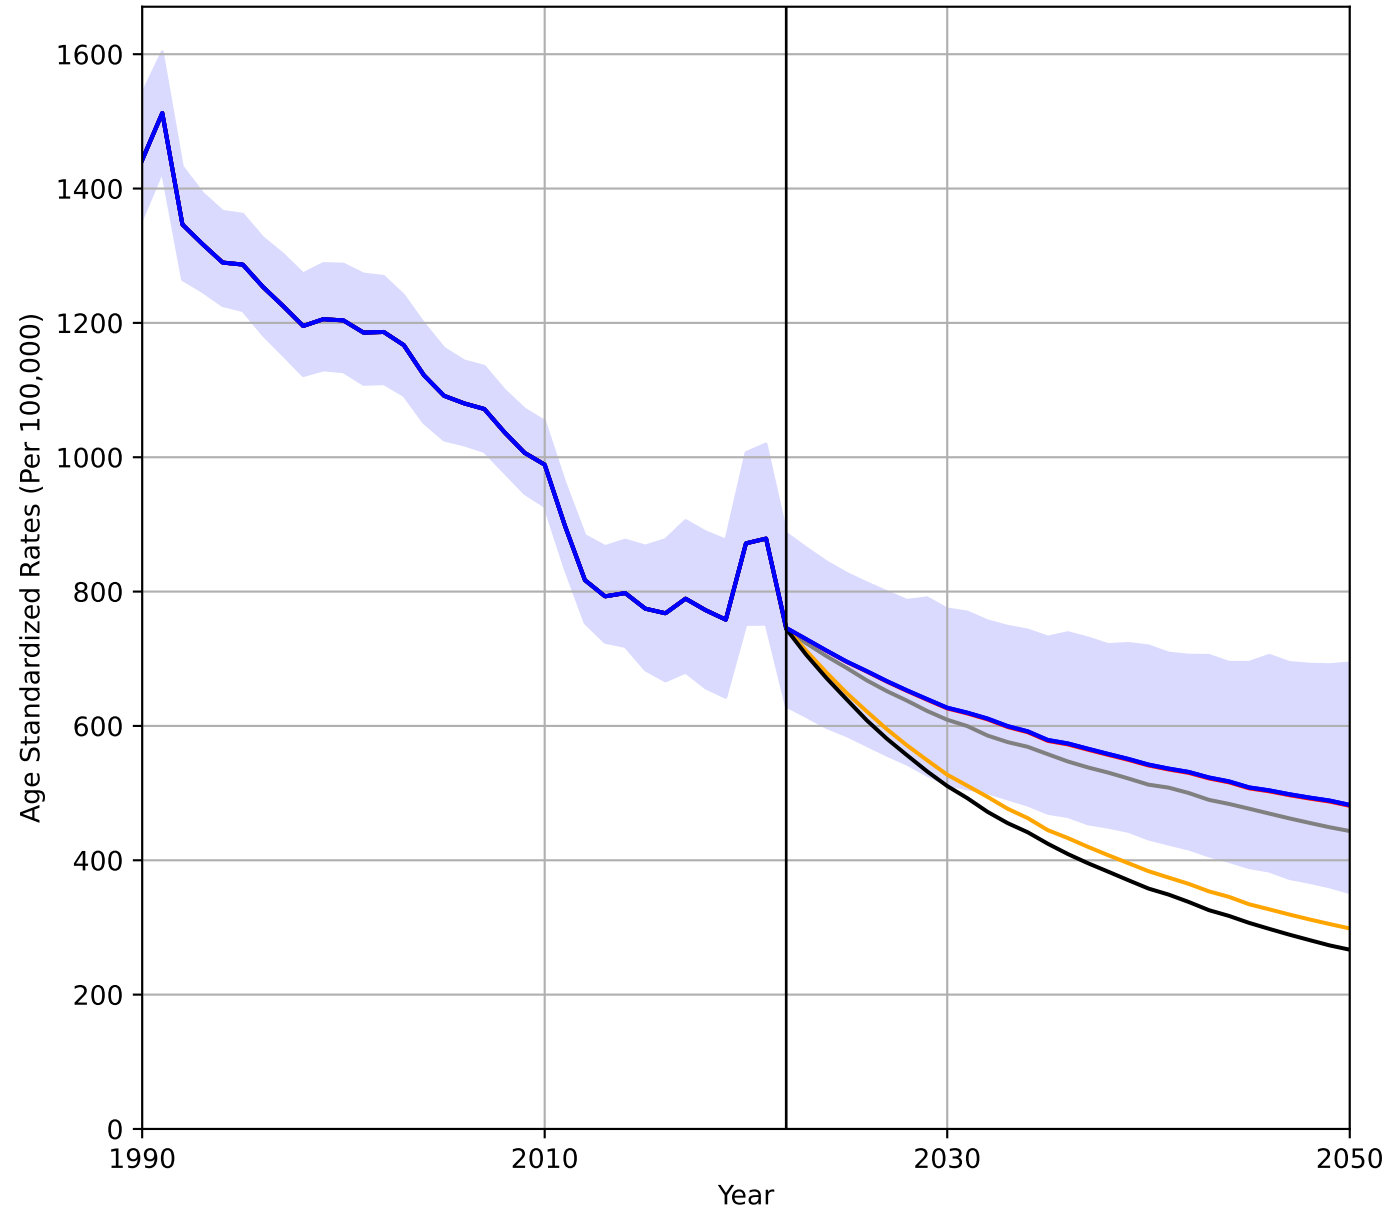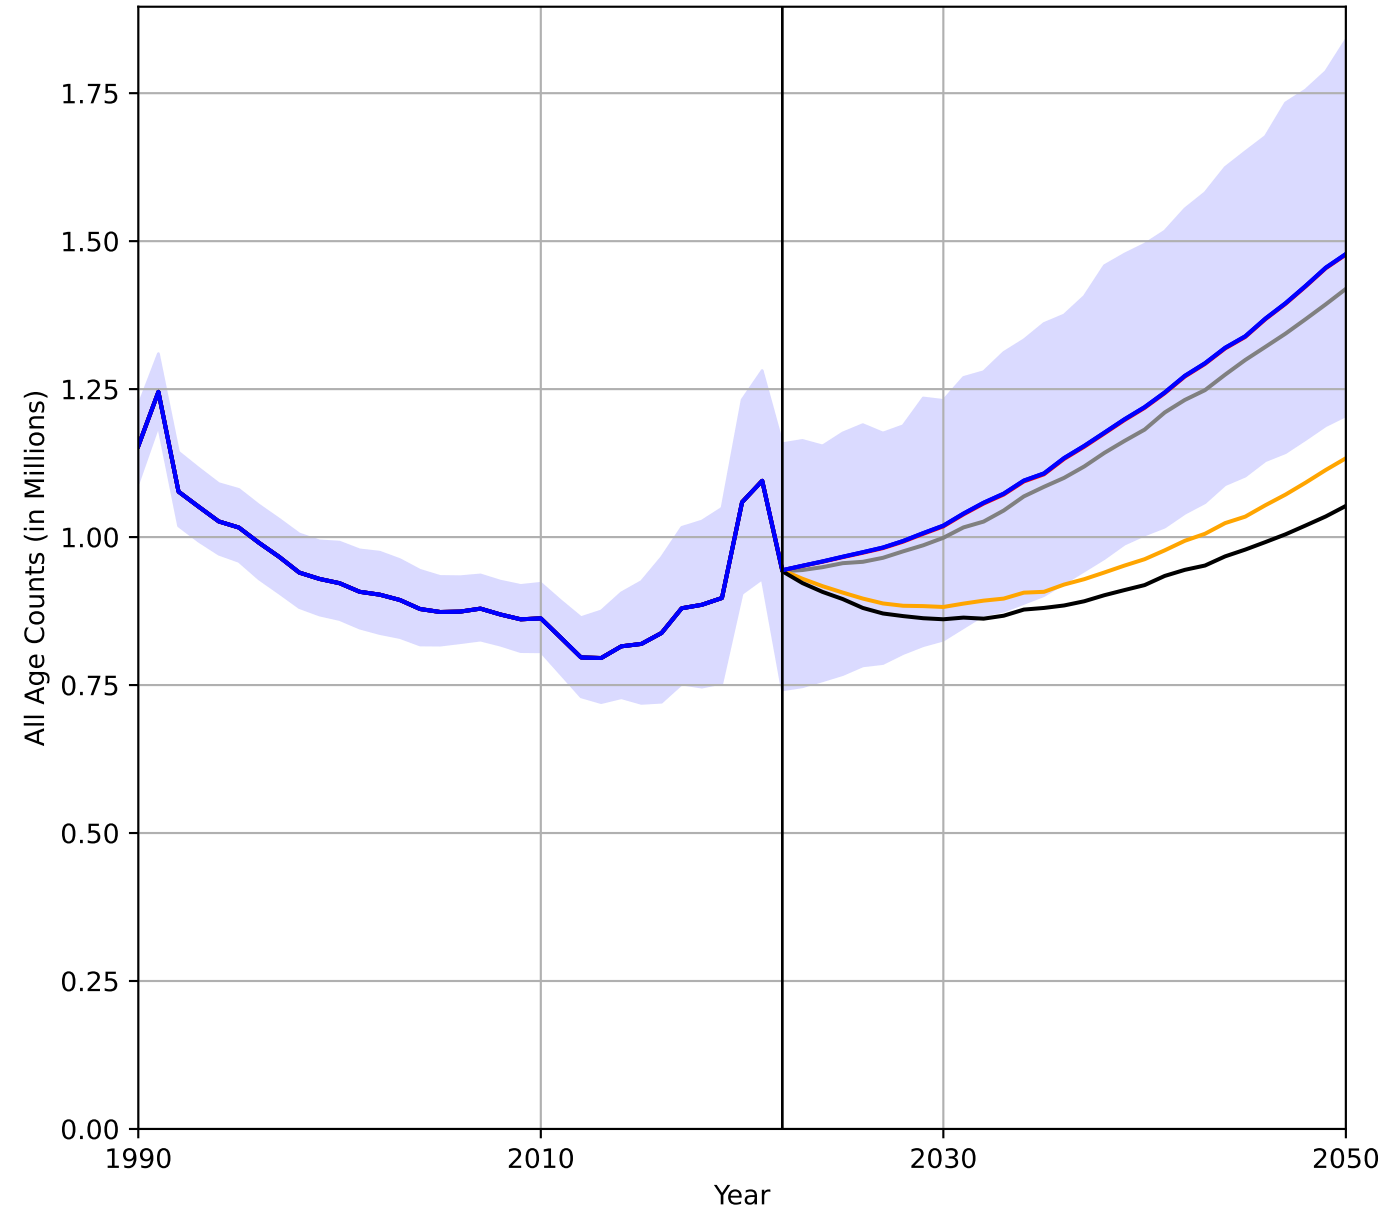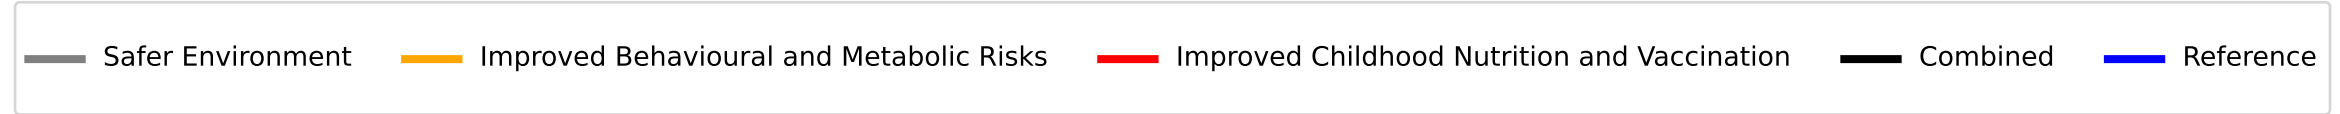

# Bhutan

Supplemental Results Figure S11. All-cause age standardised death rates (A) and all age death counts (B), for the past and for five future scenarios, 1990–2050

1764

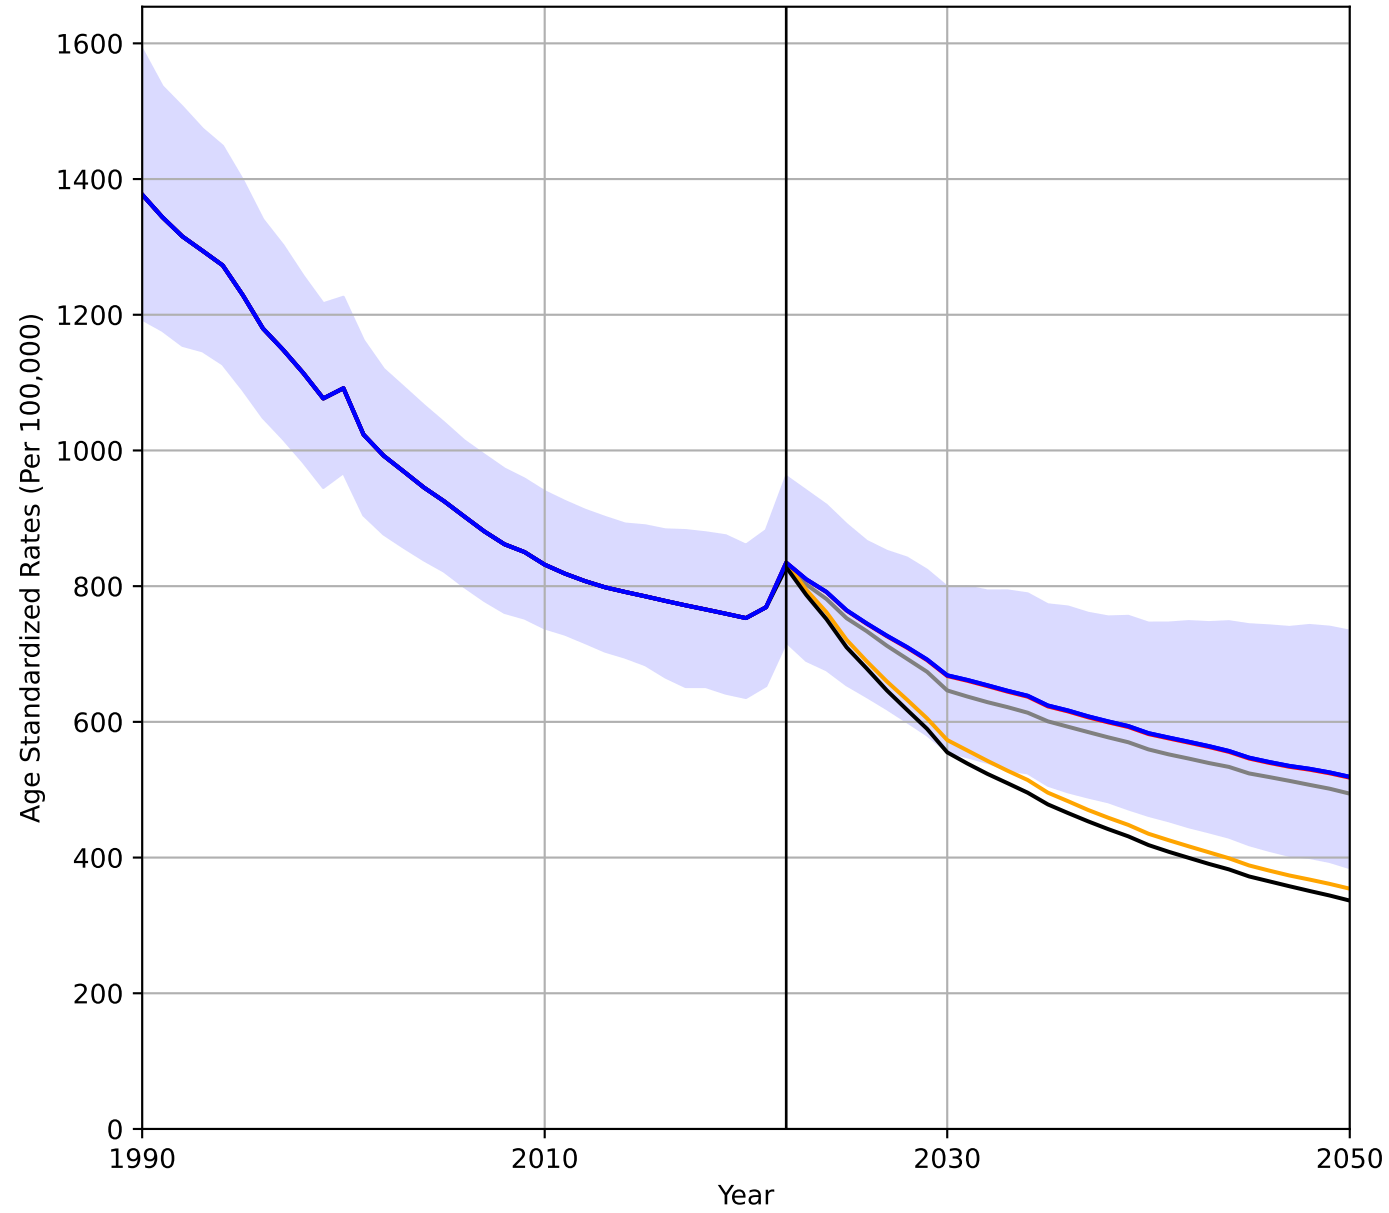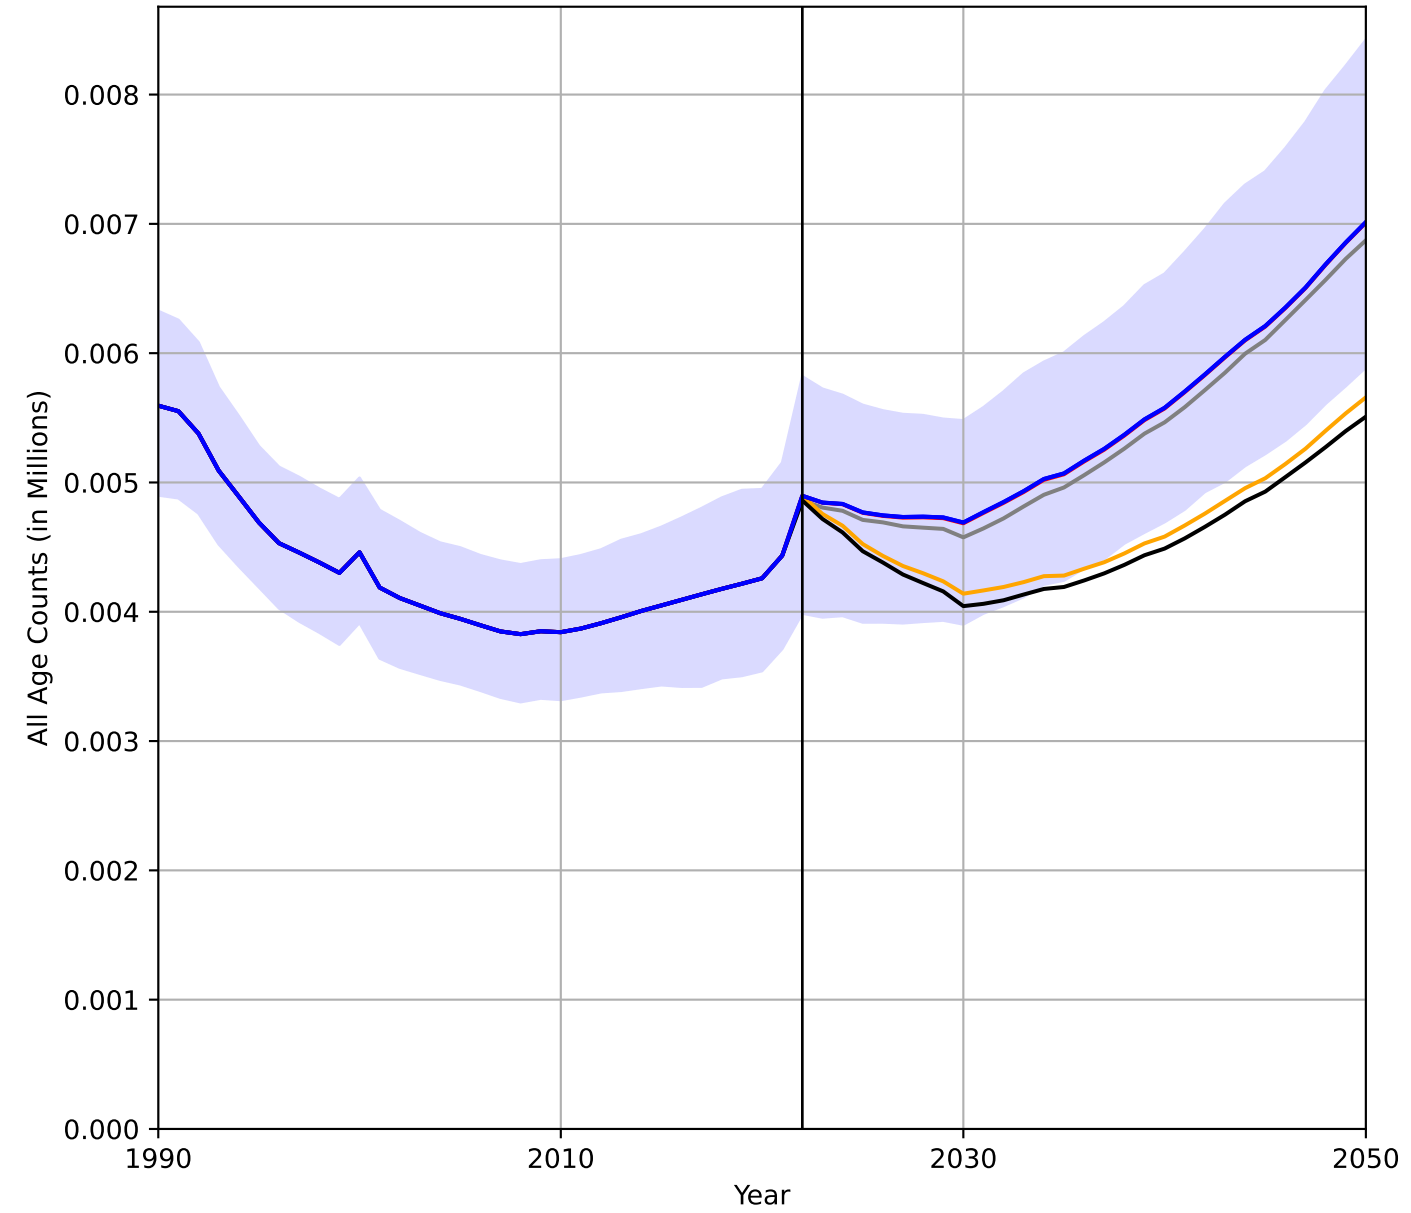

# India

Supplemental Results Figure S11. All-cause age standardised death rates (A) and all age death counts (B), for the past and for five future scenarios, 1990–2050

1765

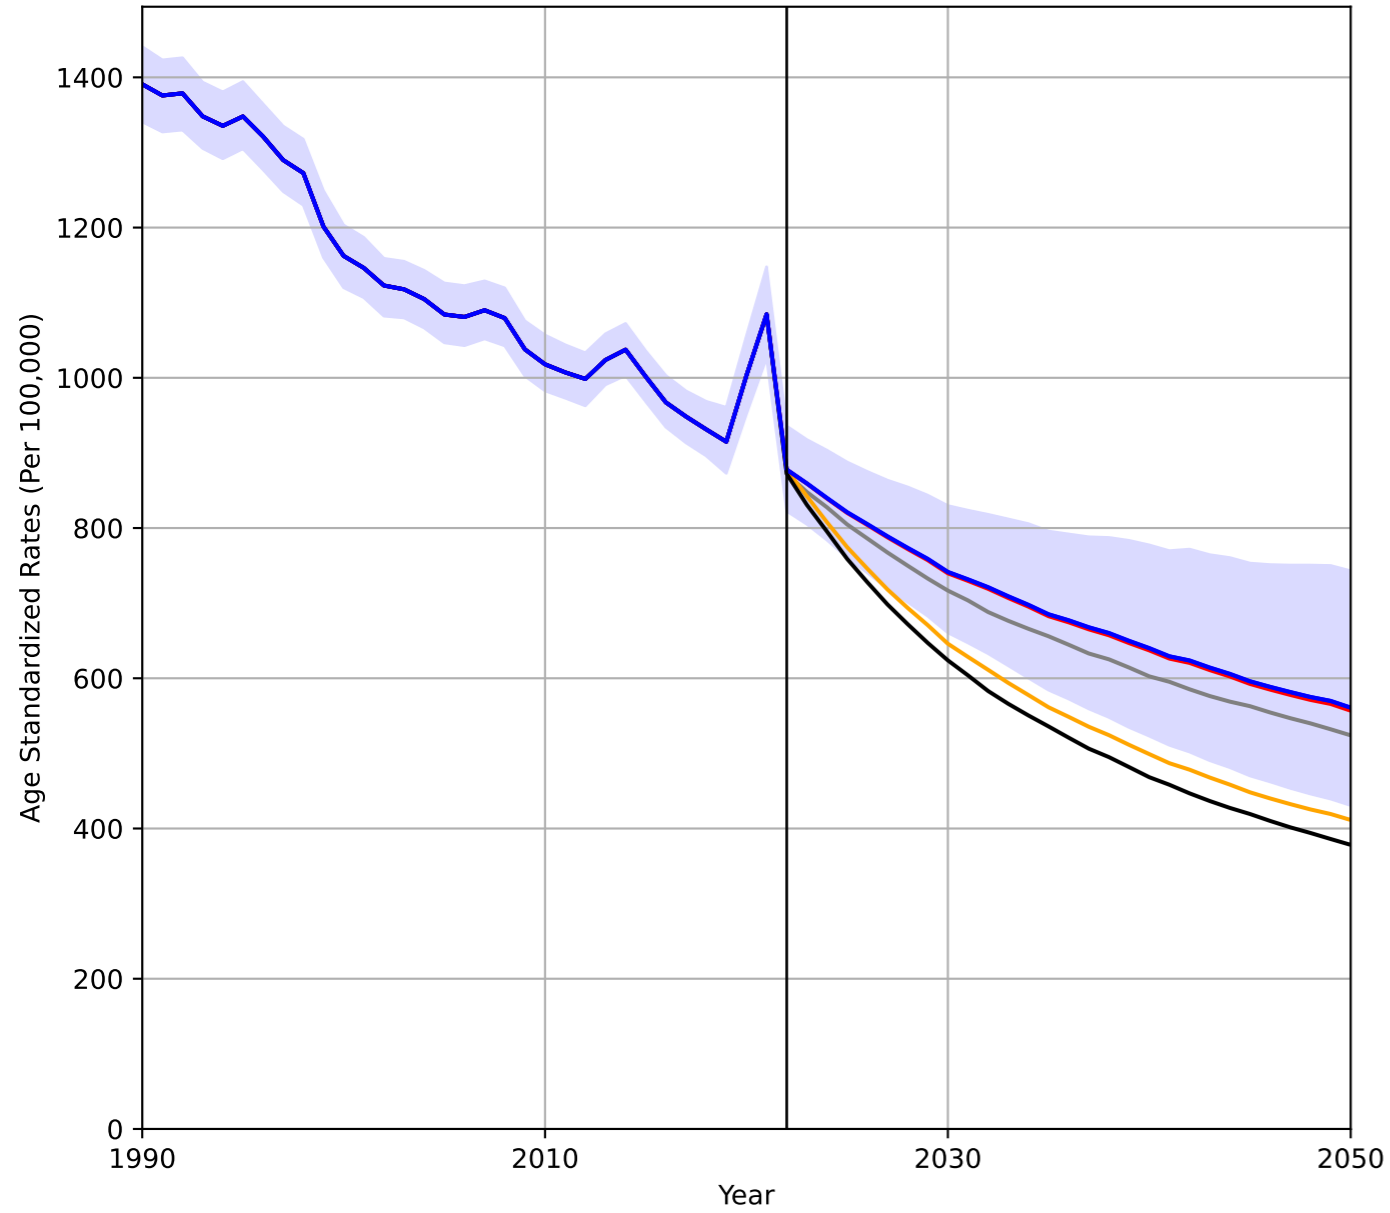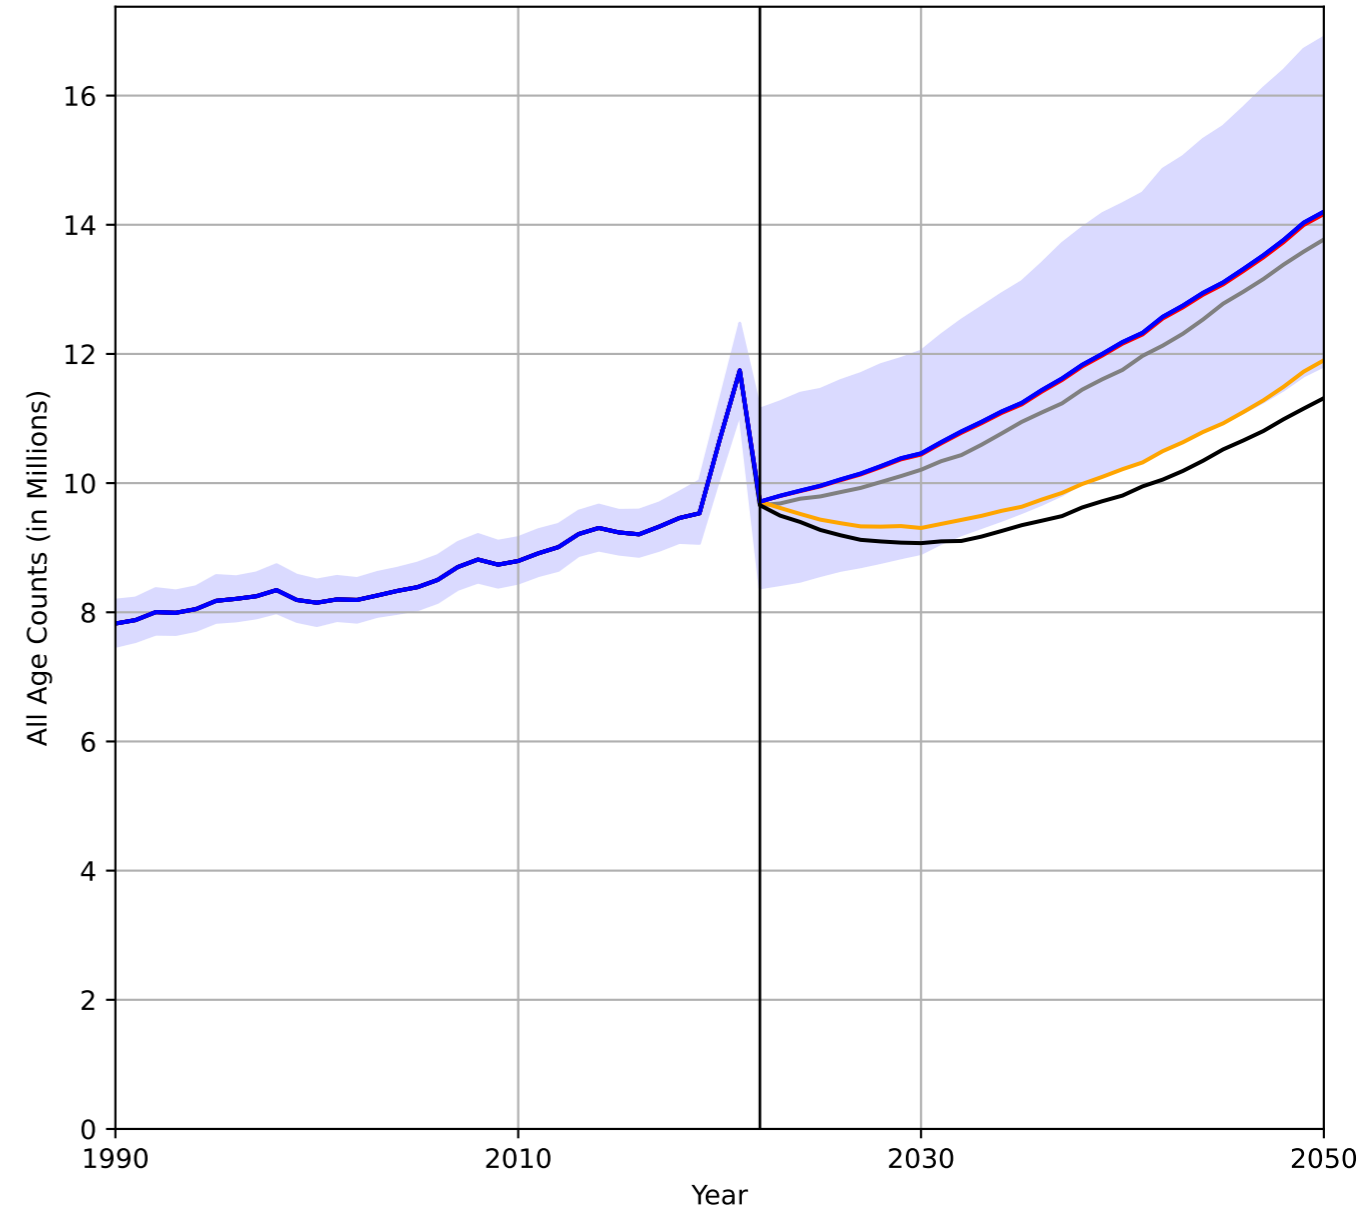

# Nepal

Supplemental Results Figure S11. All-cause age standardised death rates (A) and all age death counts (B), for the past and for five future scenarios, 1990–2050

1766

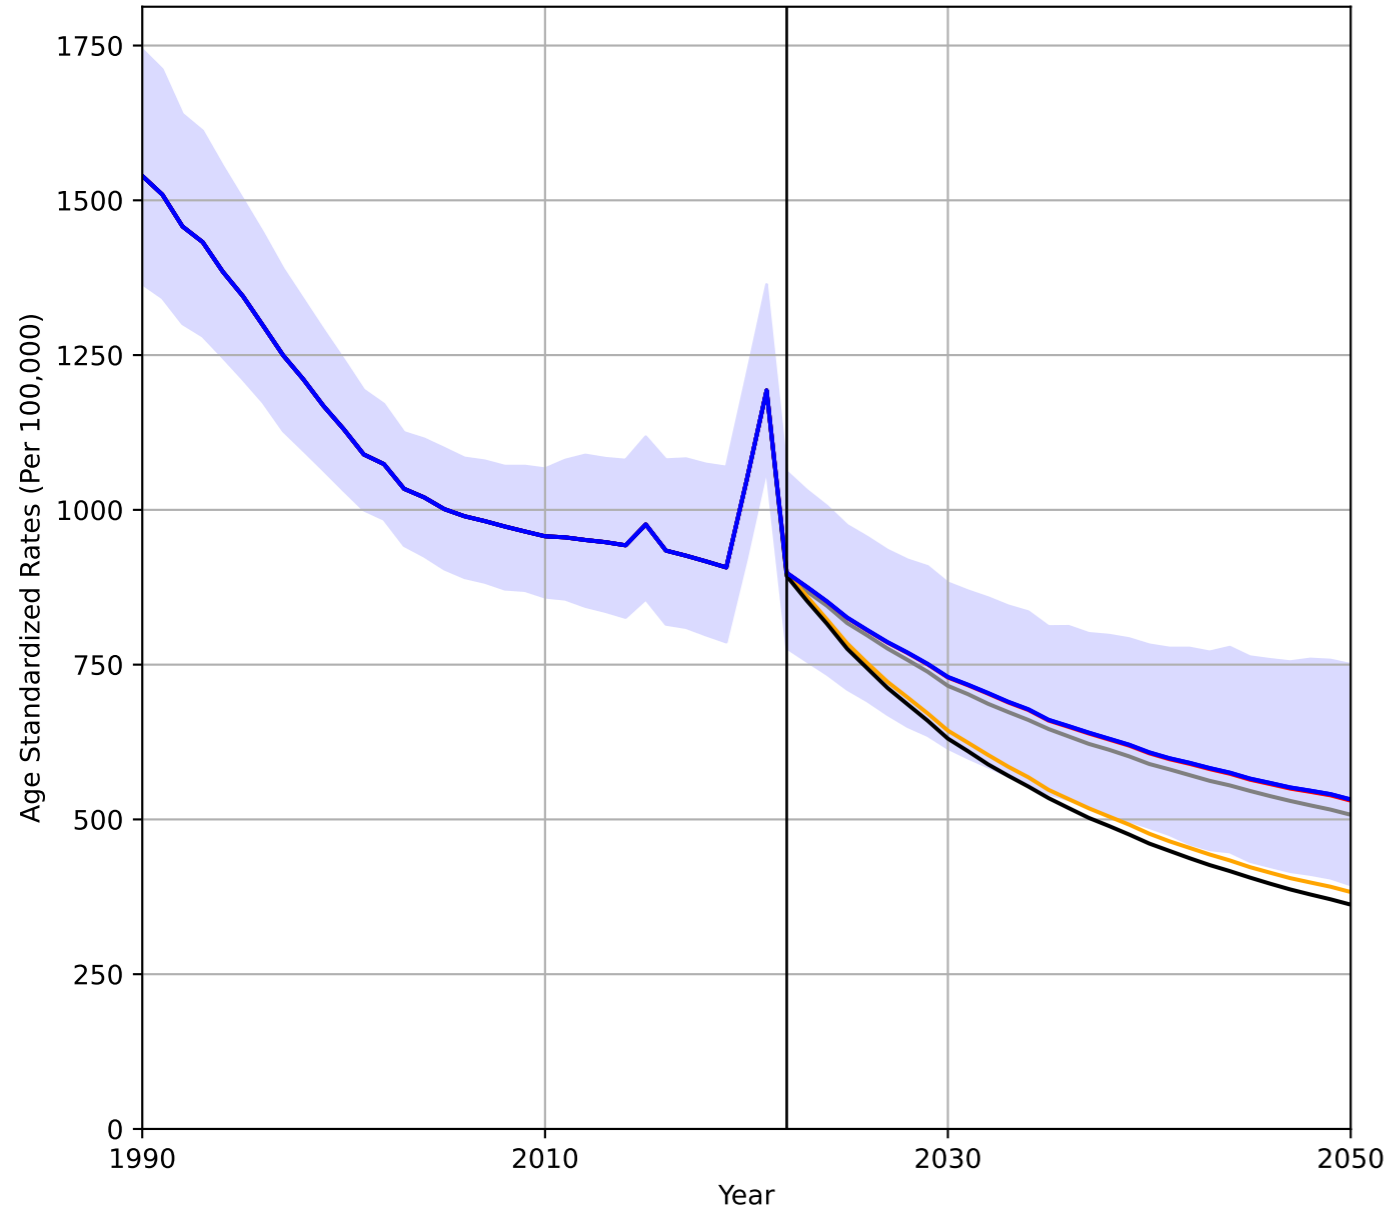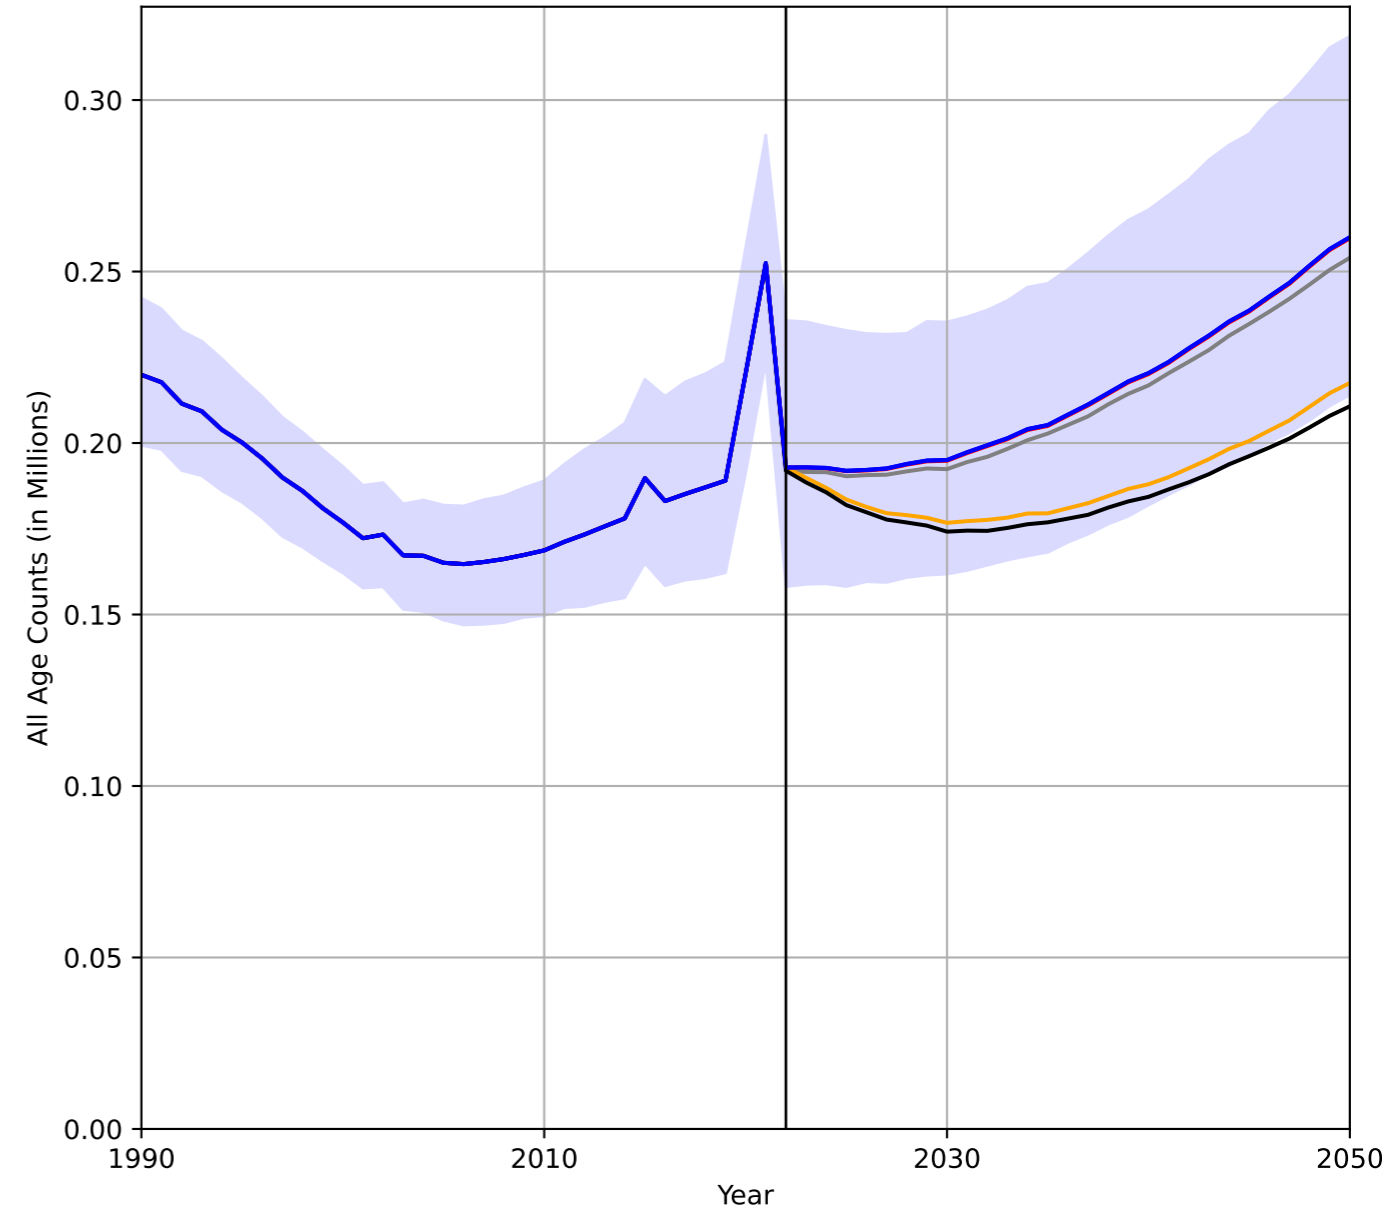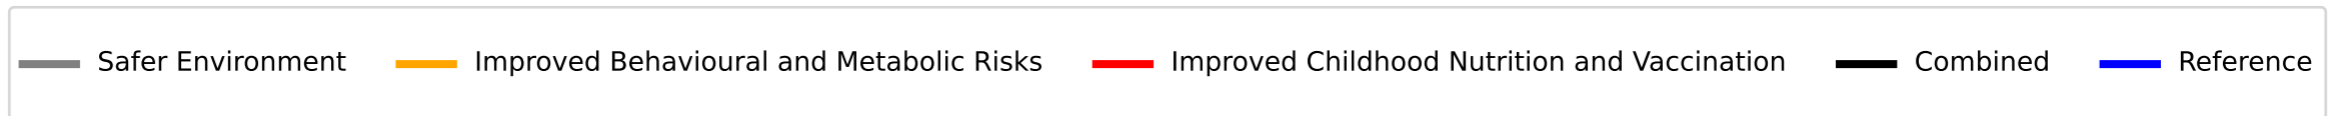

# Pakistan

Supplemental Results Figure S11. All-cause age standardised death rates (A) and all age death counts (B), for the past and for five future scenarios, 1990–2050

1767

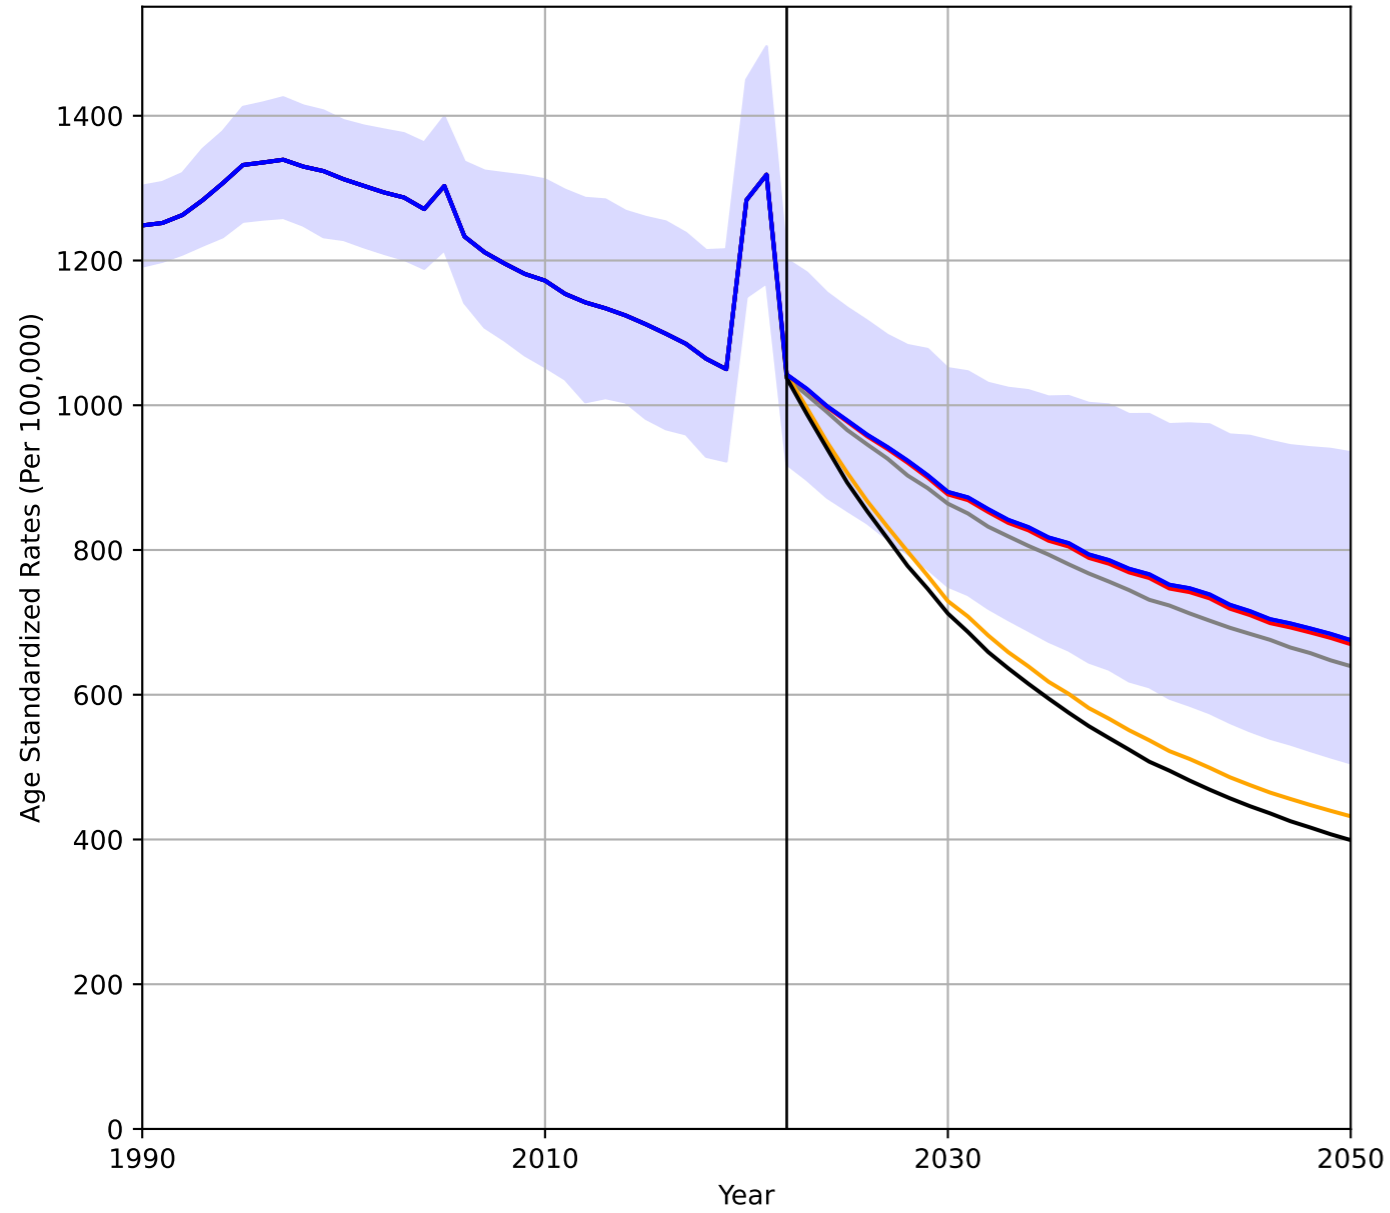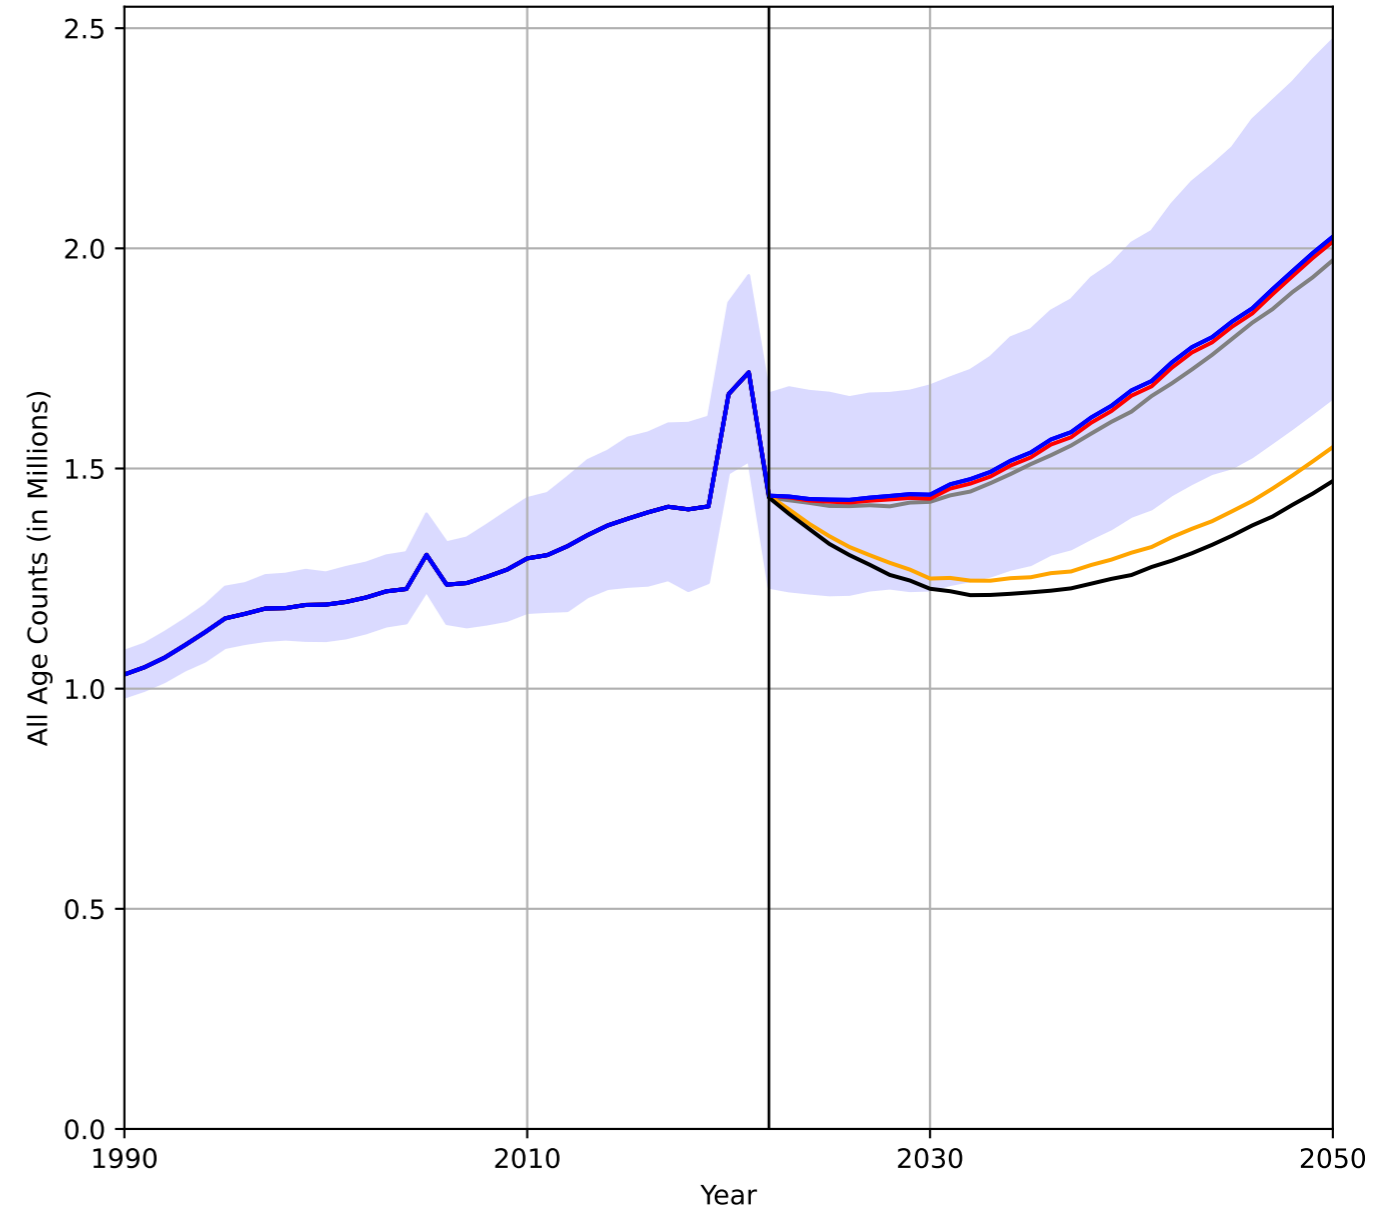



# China

Supplemental Results Figure S11. All-cause age standardised death rates (A) and all age death counts (B), for the past and for five future scenarios, 1990–2050

1768

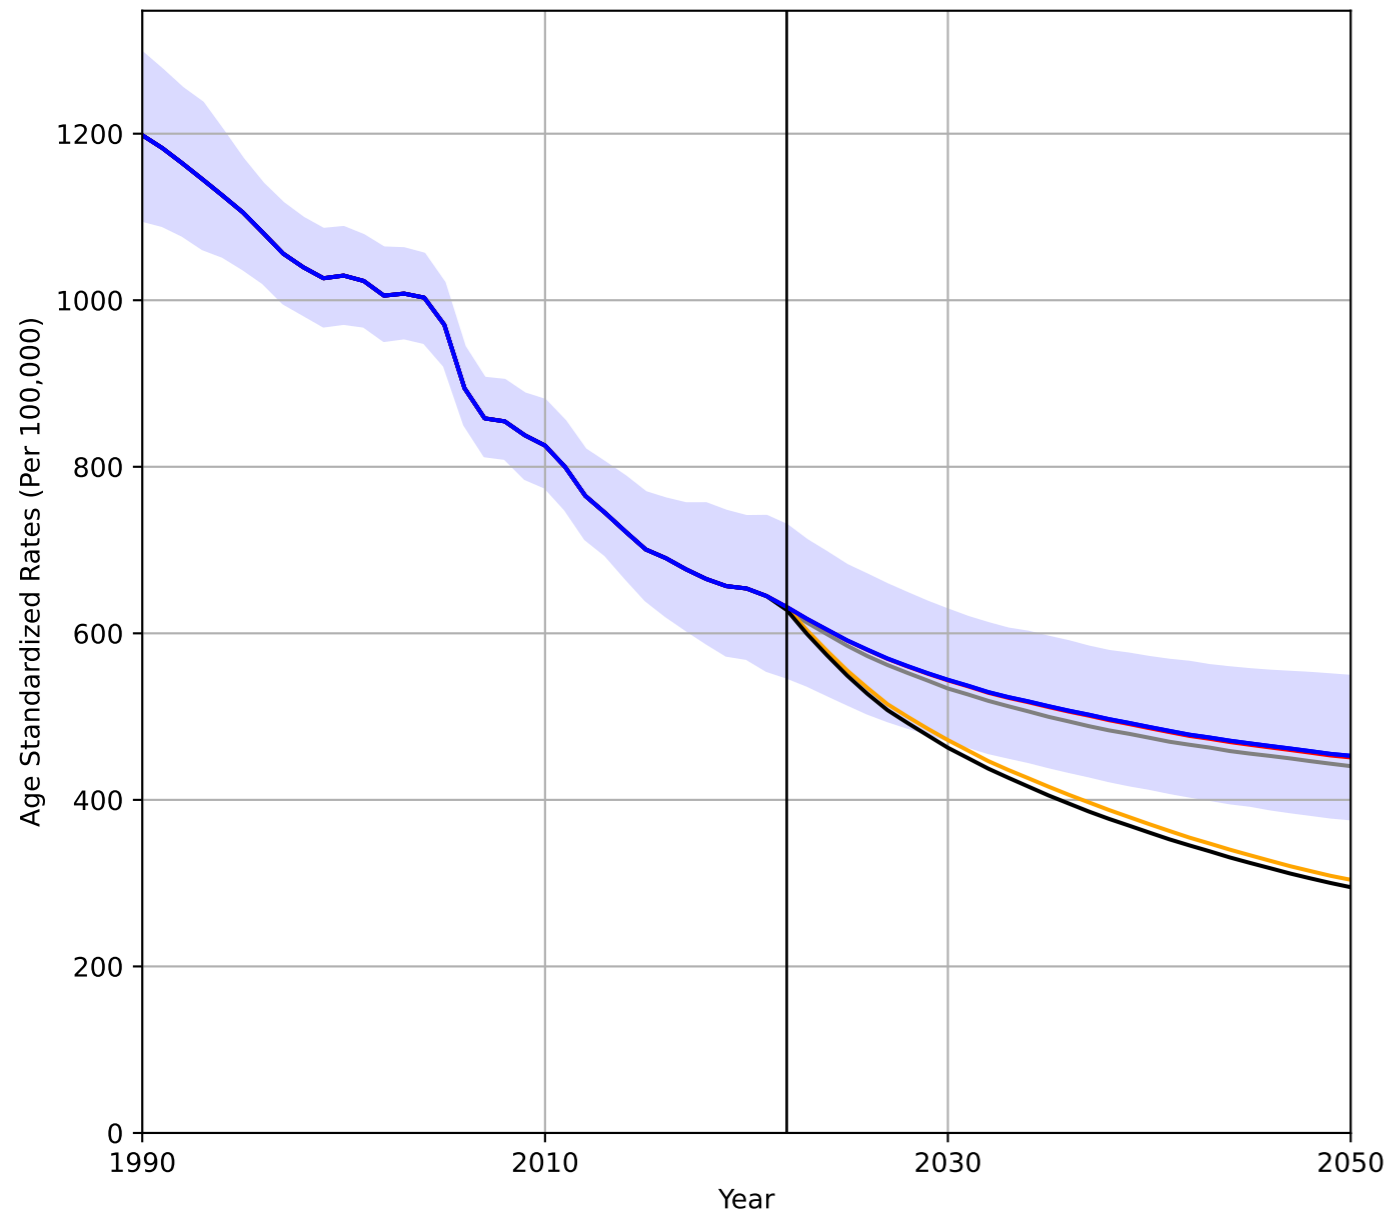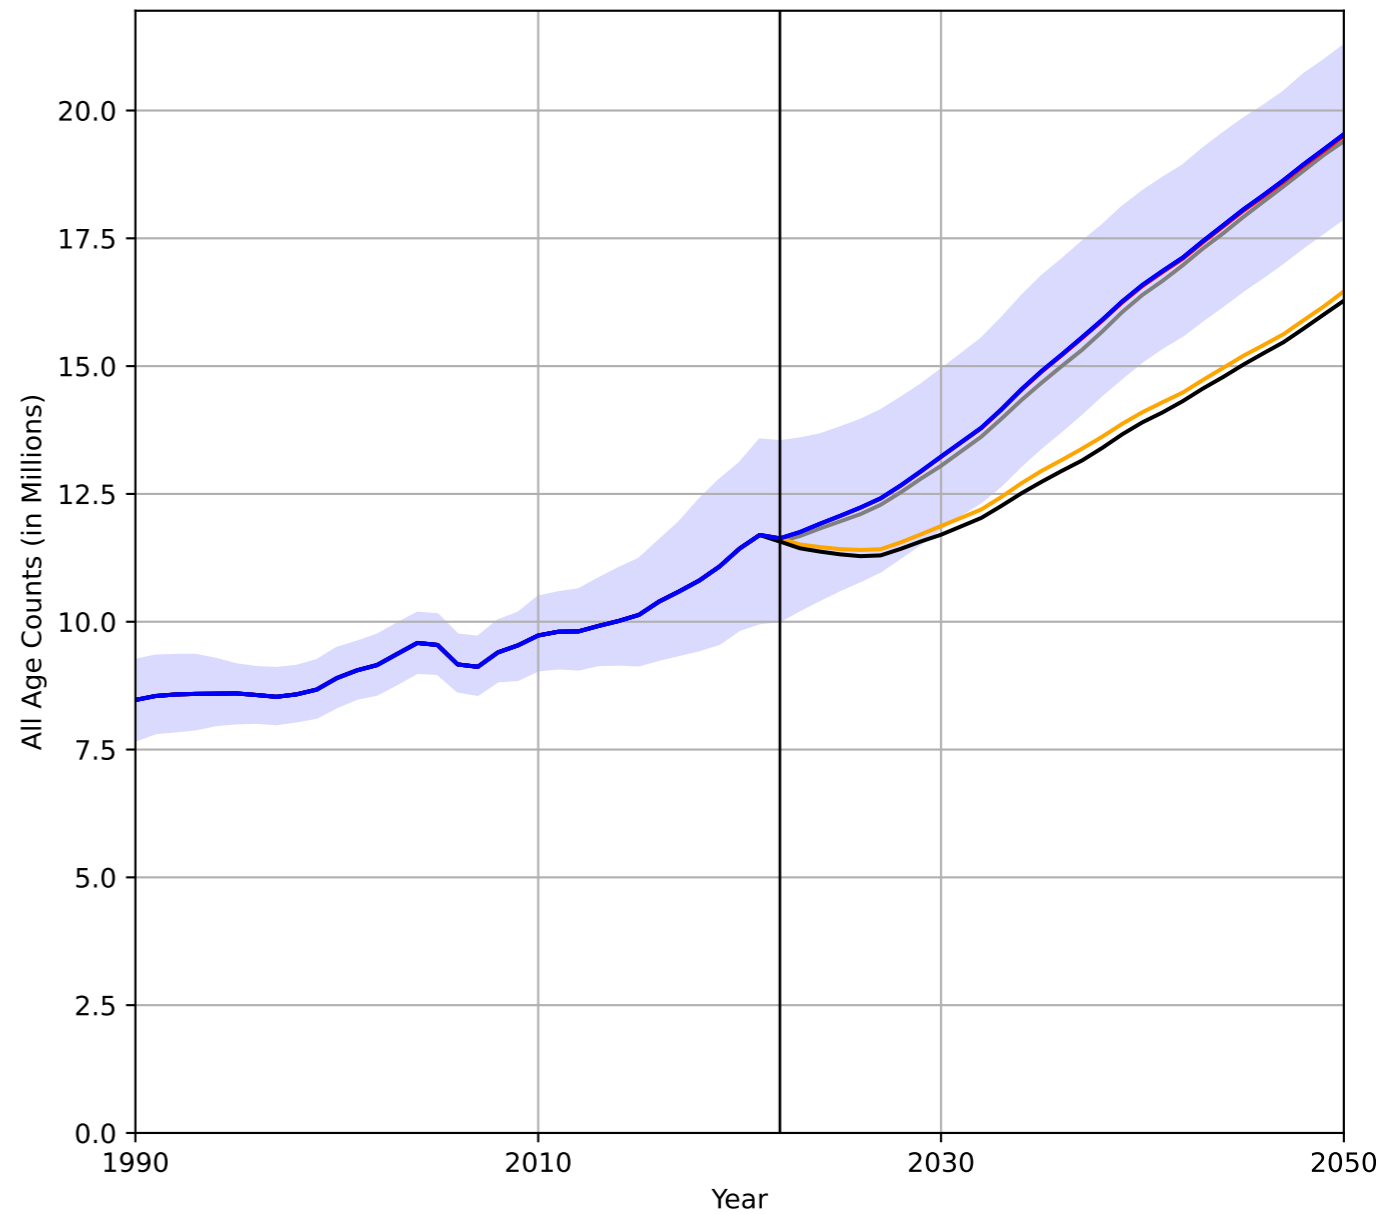

# North Korea

Supplemental Results Figure S11. All-cause age standardised death rates (A) and all age death counts (B), for the past and for five future scenarios, 1990–2050

1769

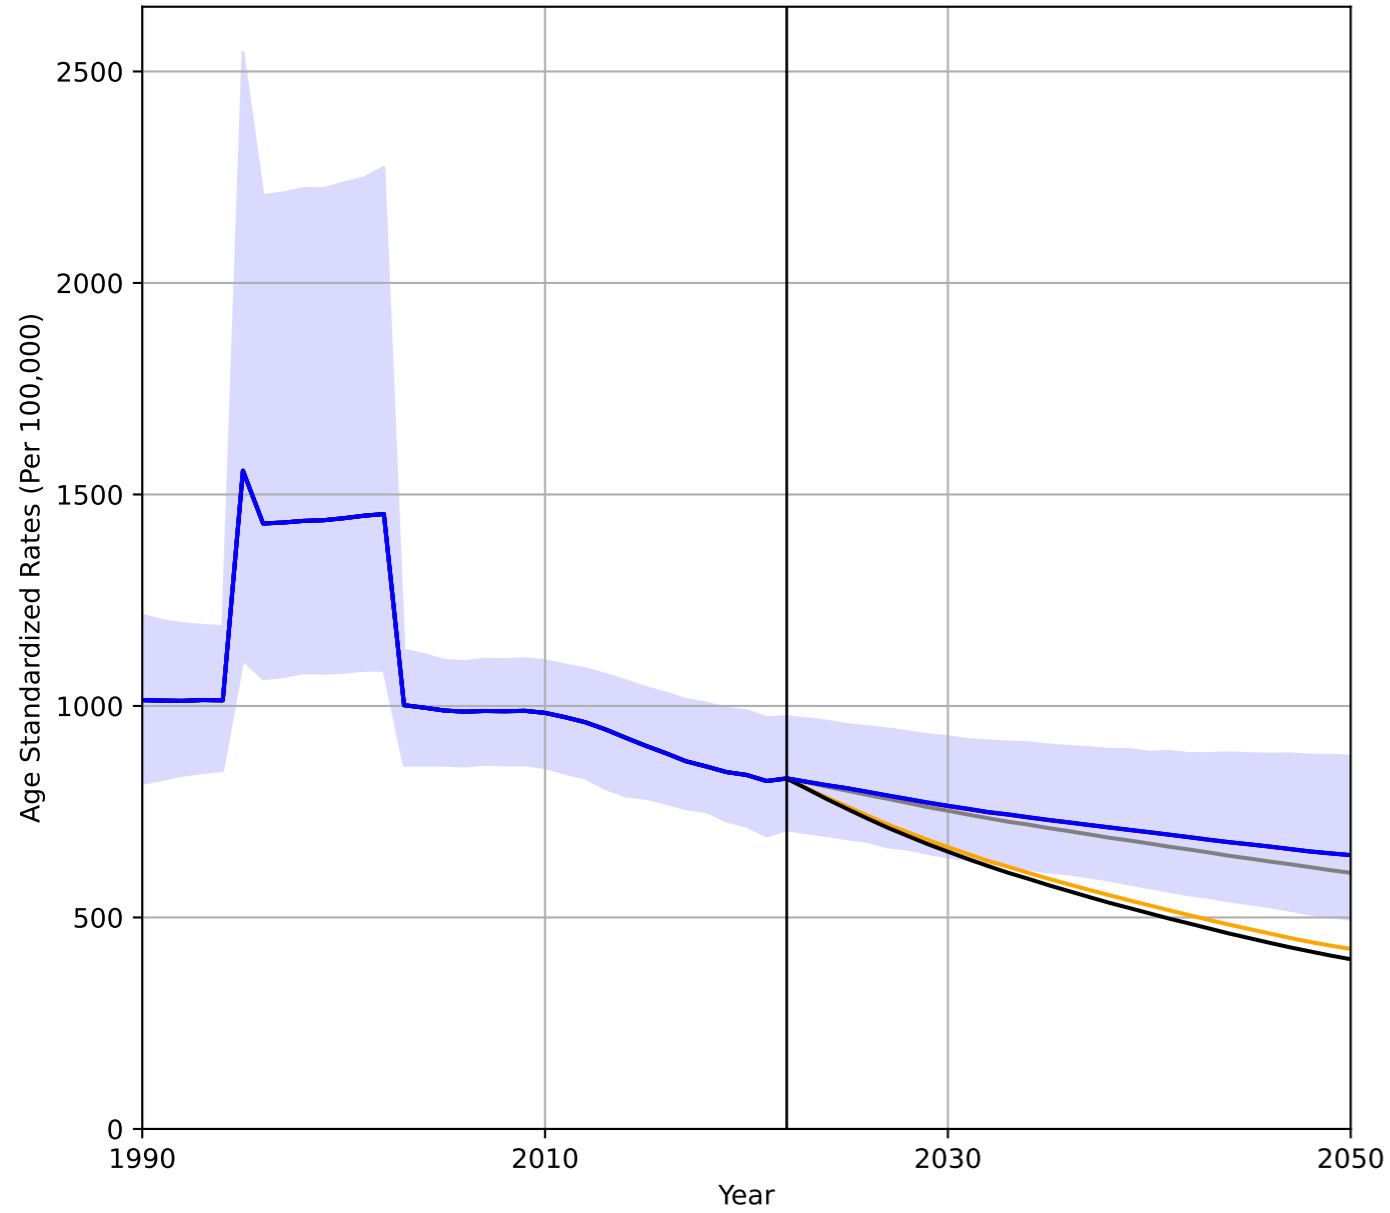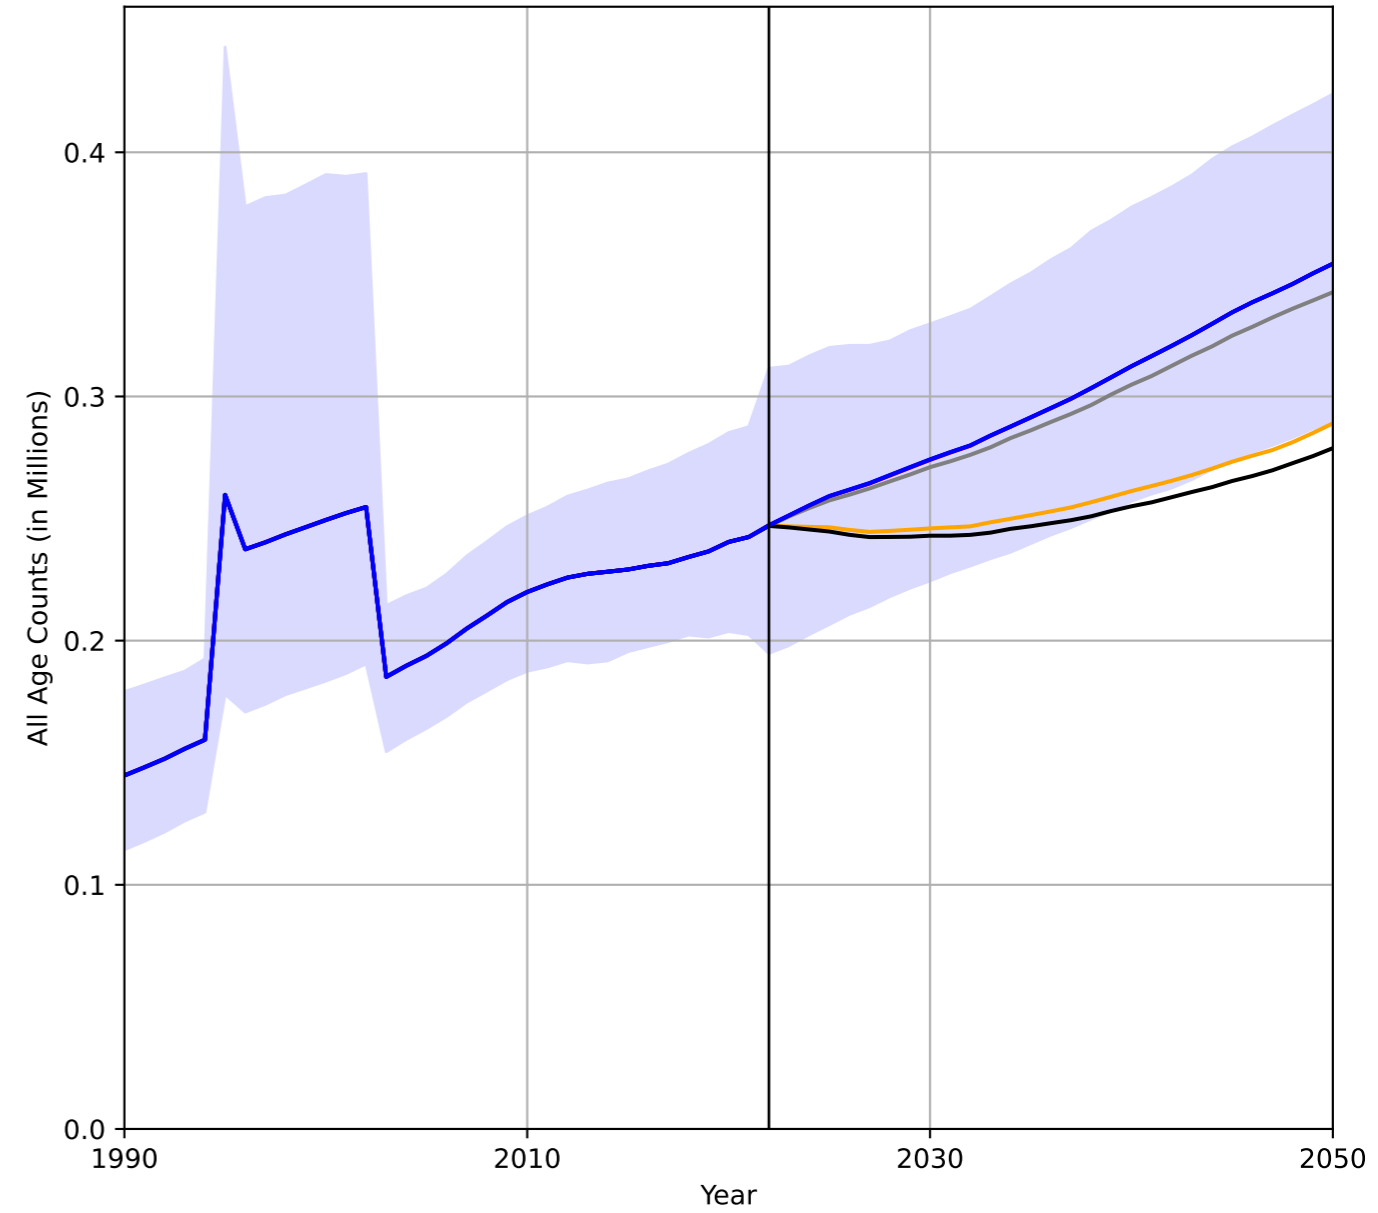

# Taiwan (Province Of China)

Supplemental Results Figure S11. All-cause age standardised death rates (A) and all age death counts (B), for the past and for five future scenarios, 1990–2050

1770

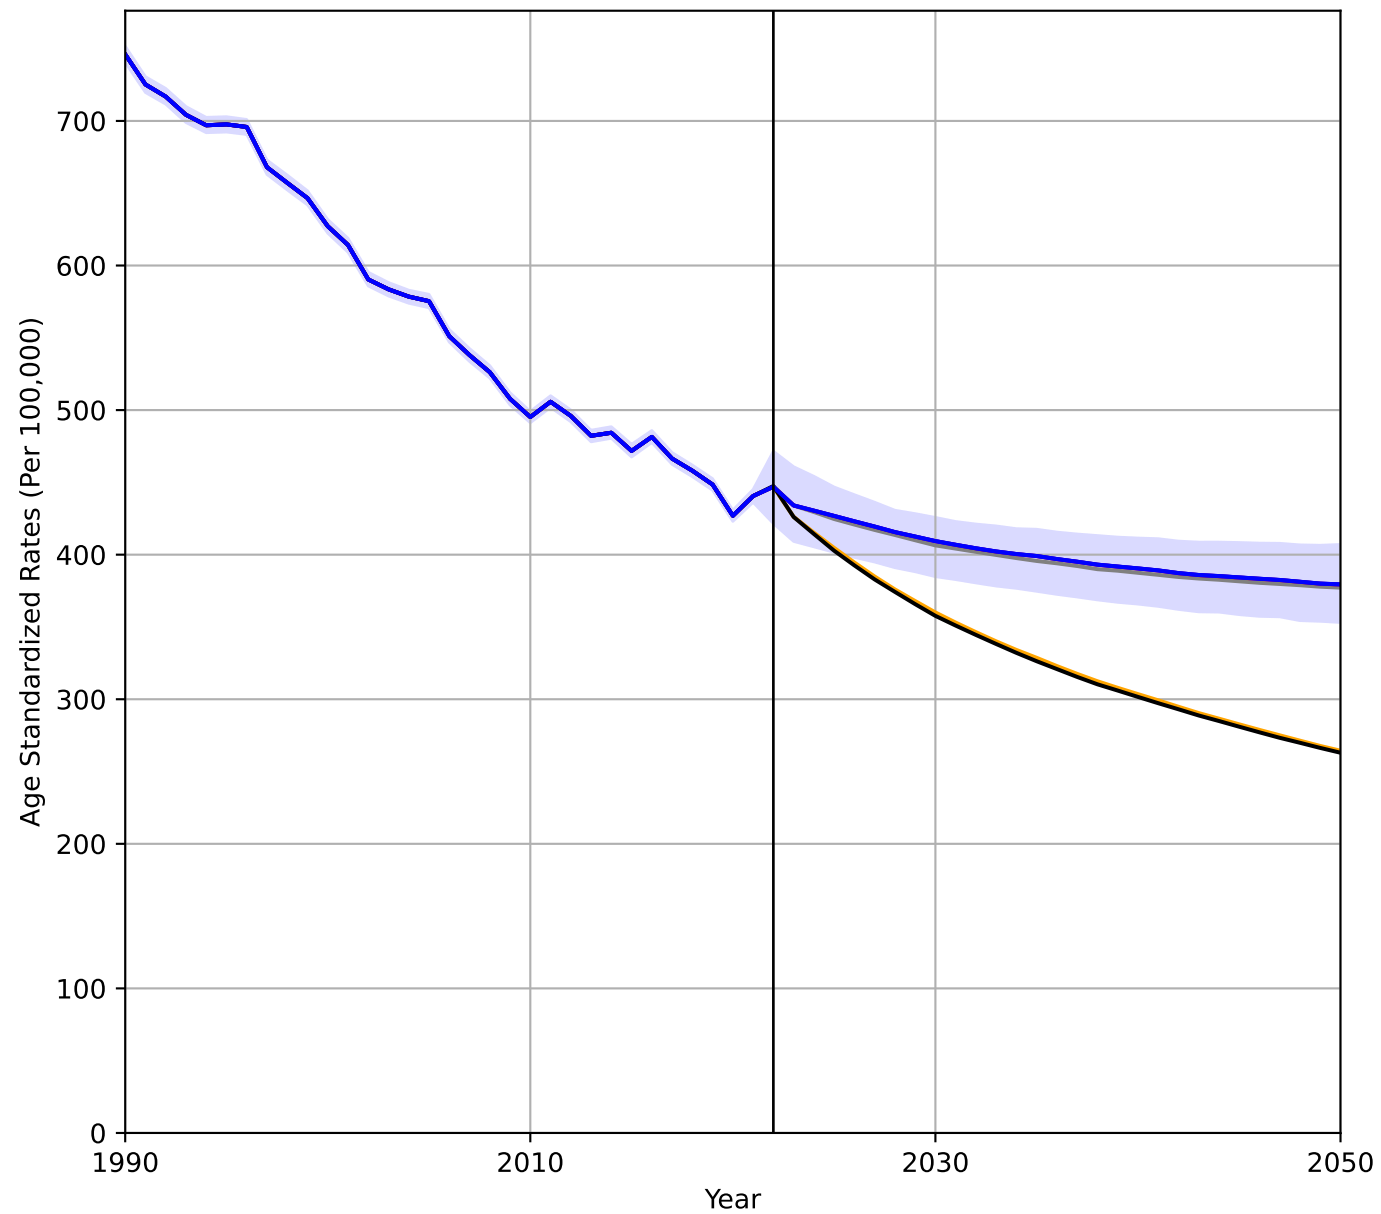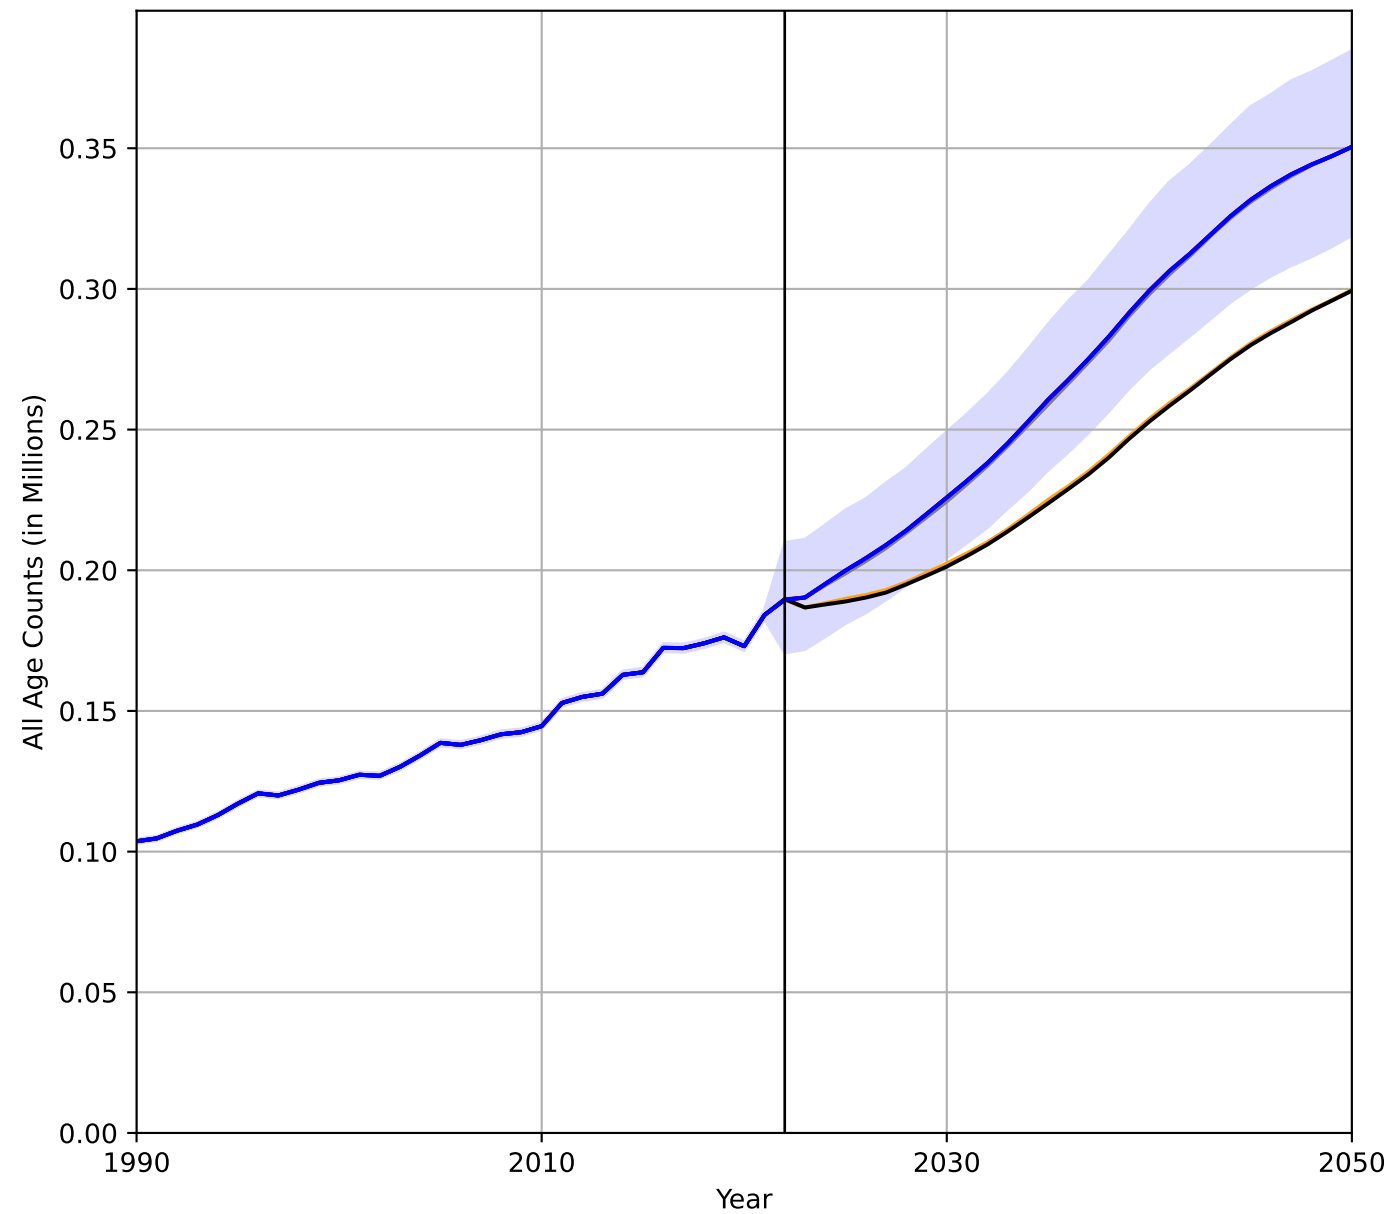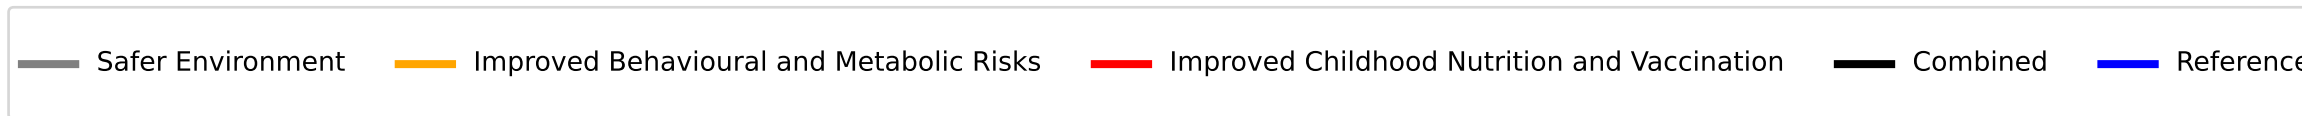

# American Samoa

Supplemental Results Figure S11. All-cause age standardised death rates (A) and all age death counts (B), for the past and for five future scenarios, 1990–2050

1771

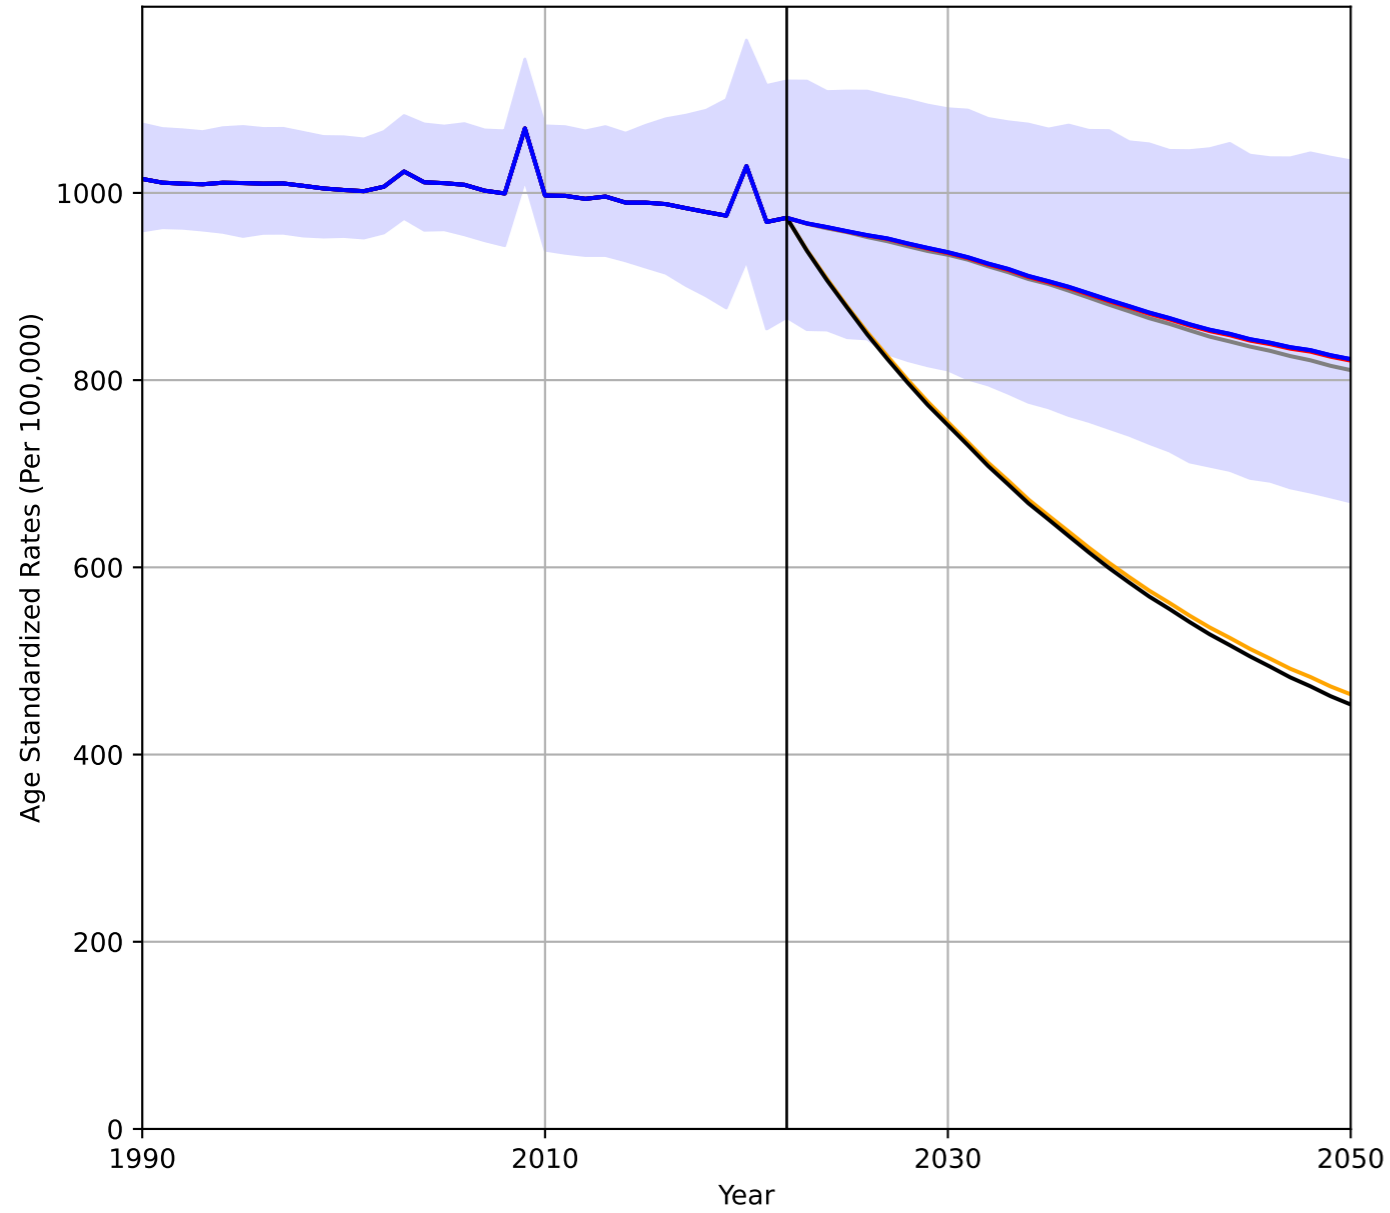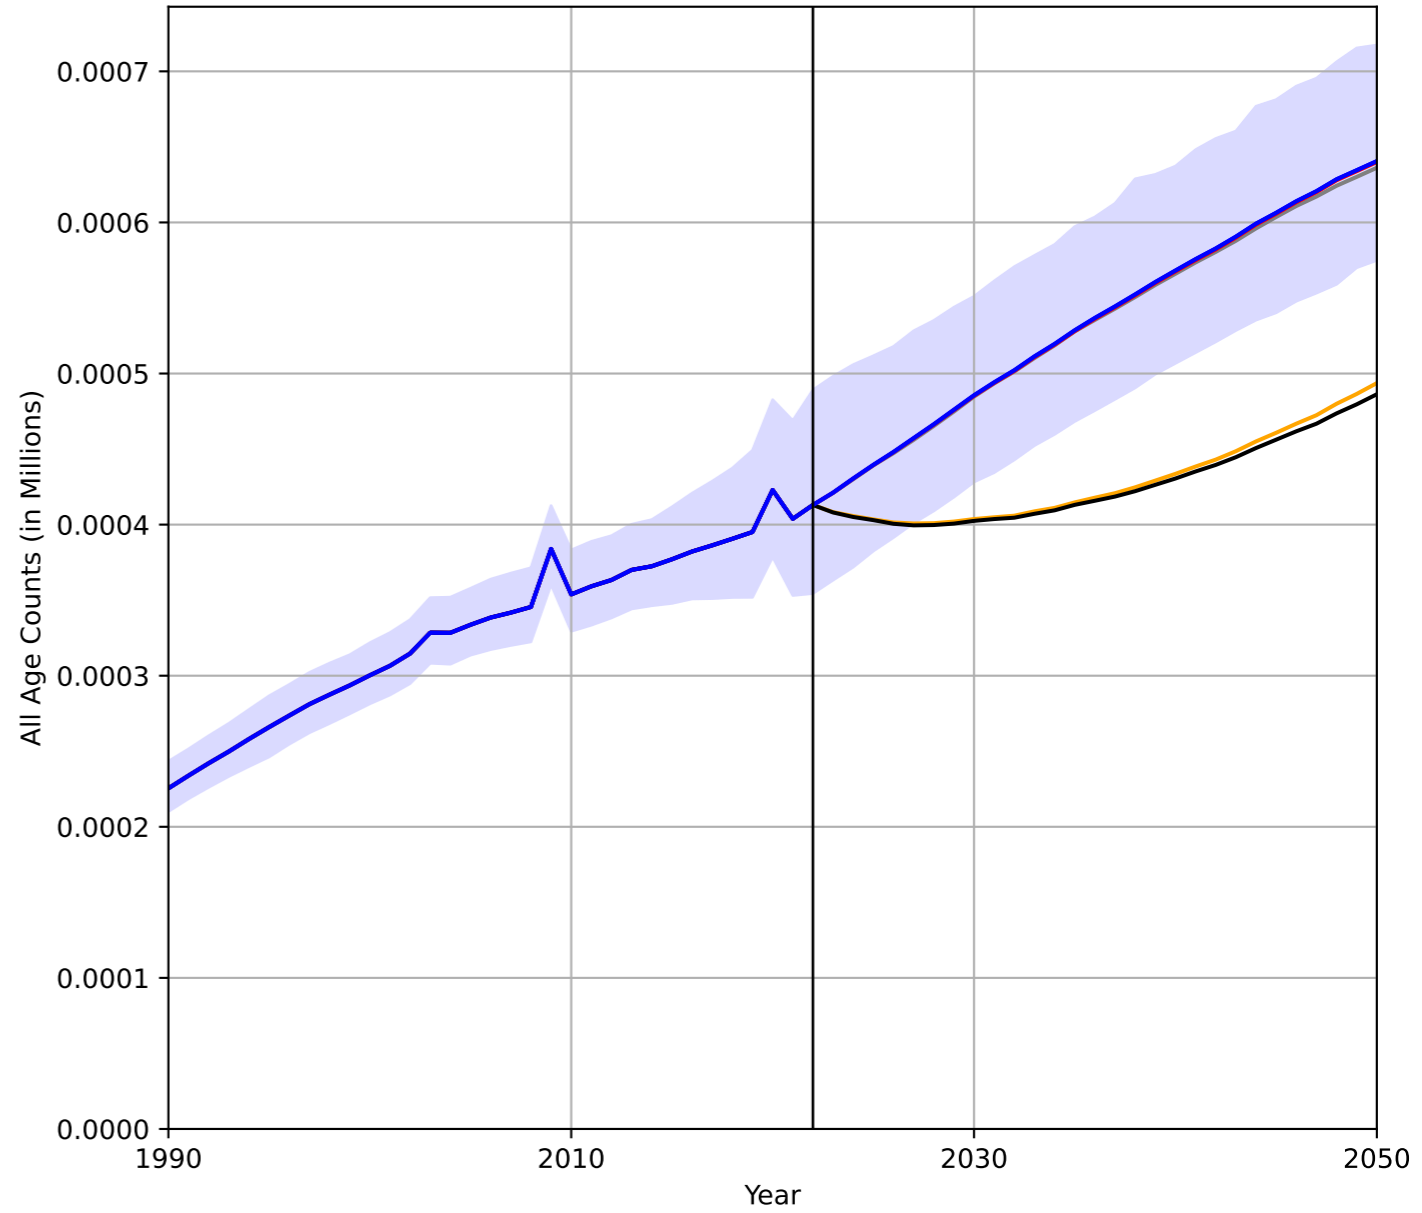

# Cook Islands

Supplemental Results Figure S11. All-cause age standardised death rates (A) and all age death counts (B), for the past and for five future scenarios, 1990–2050

1772

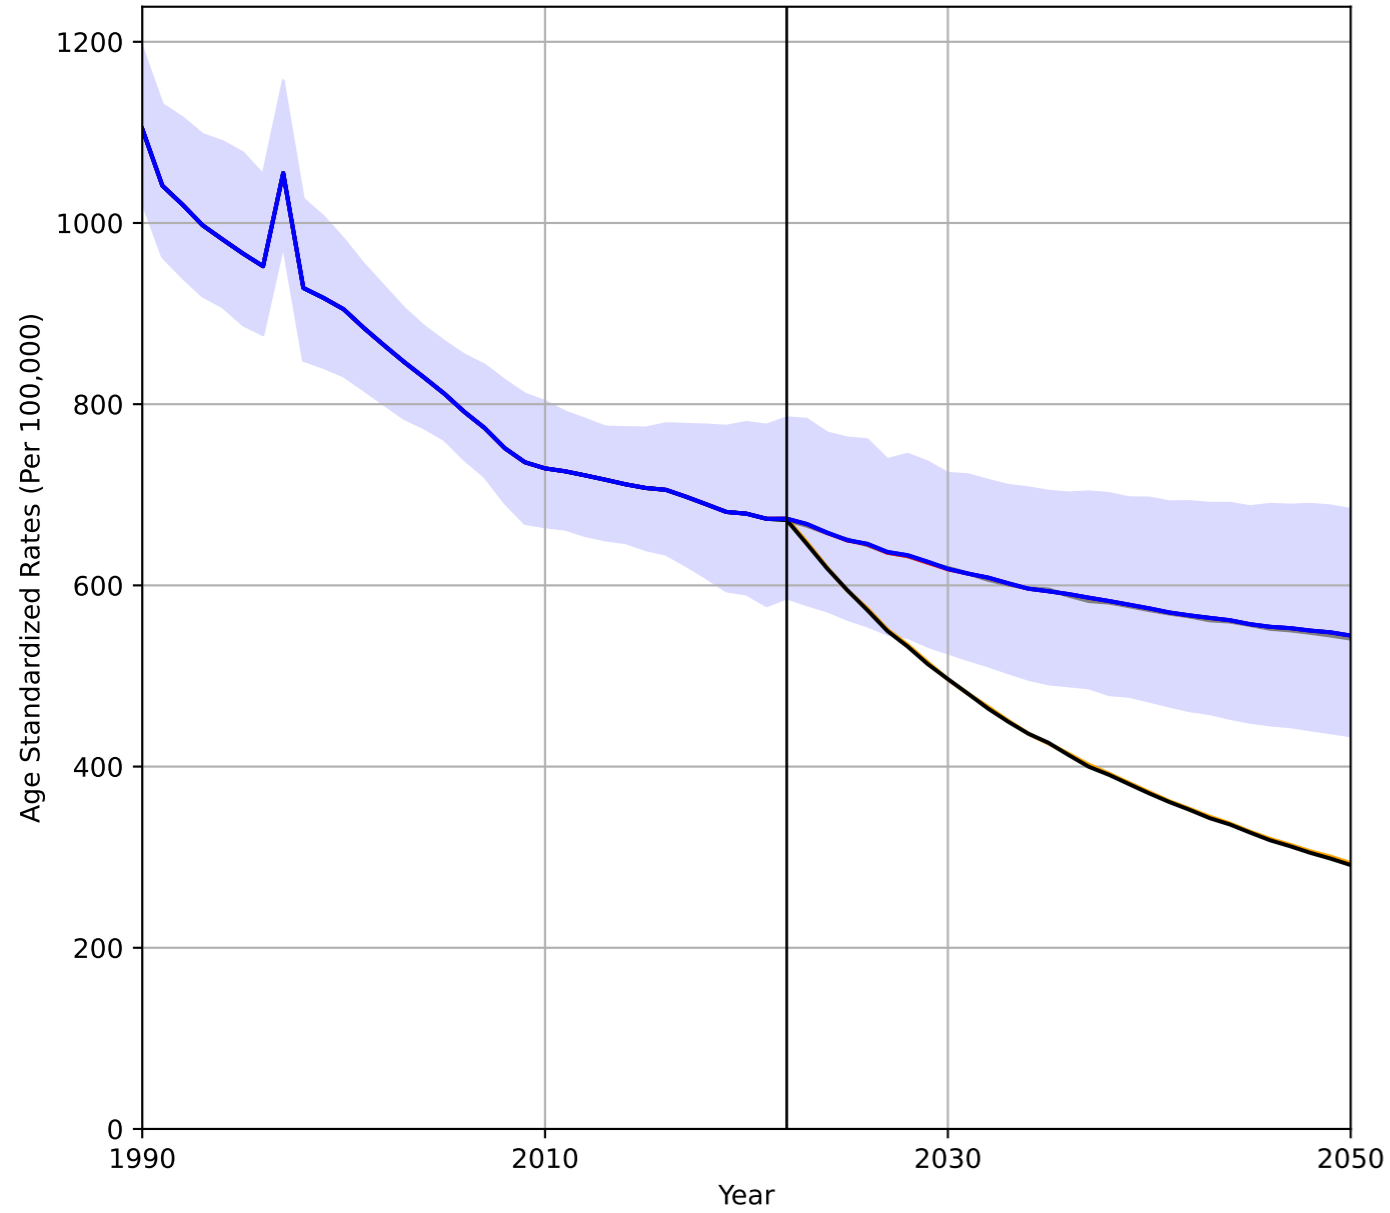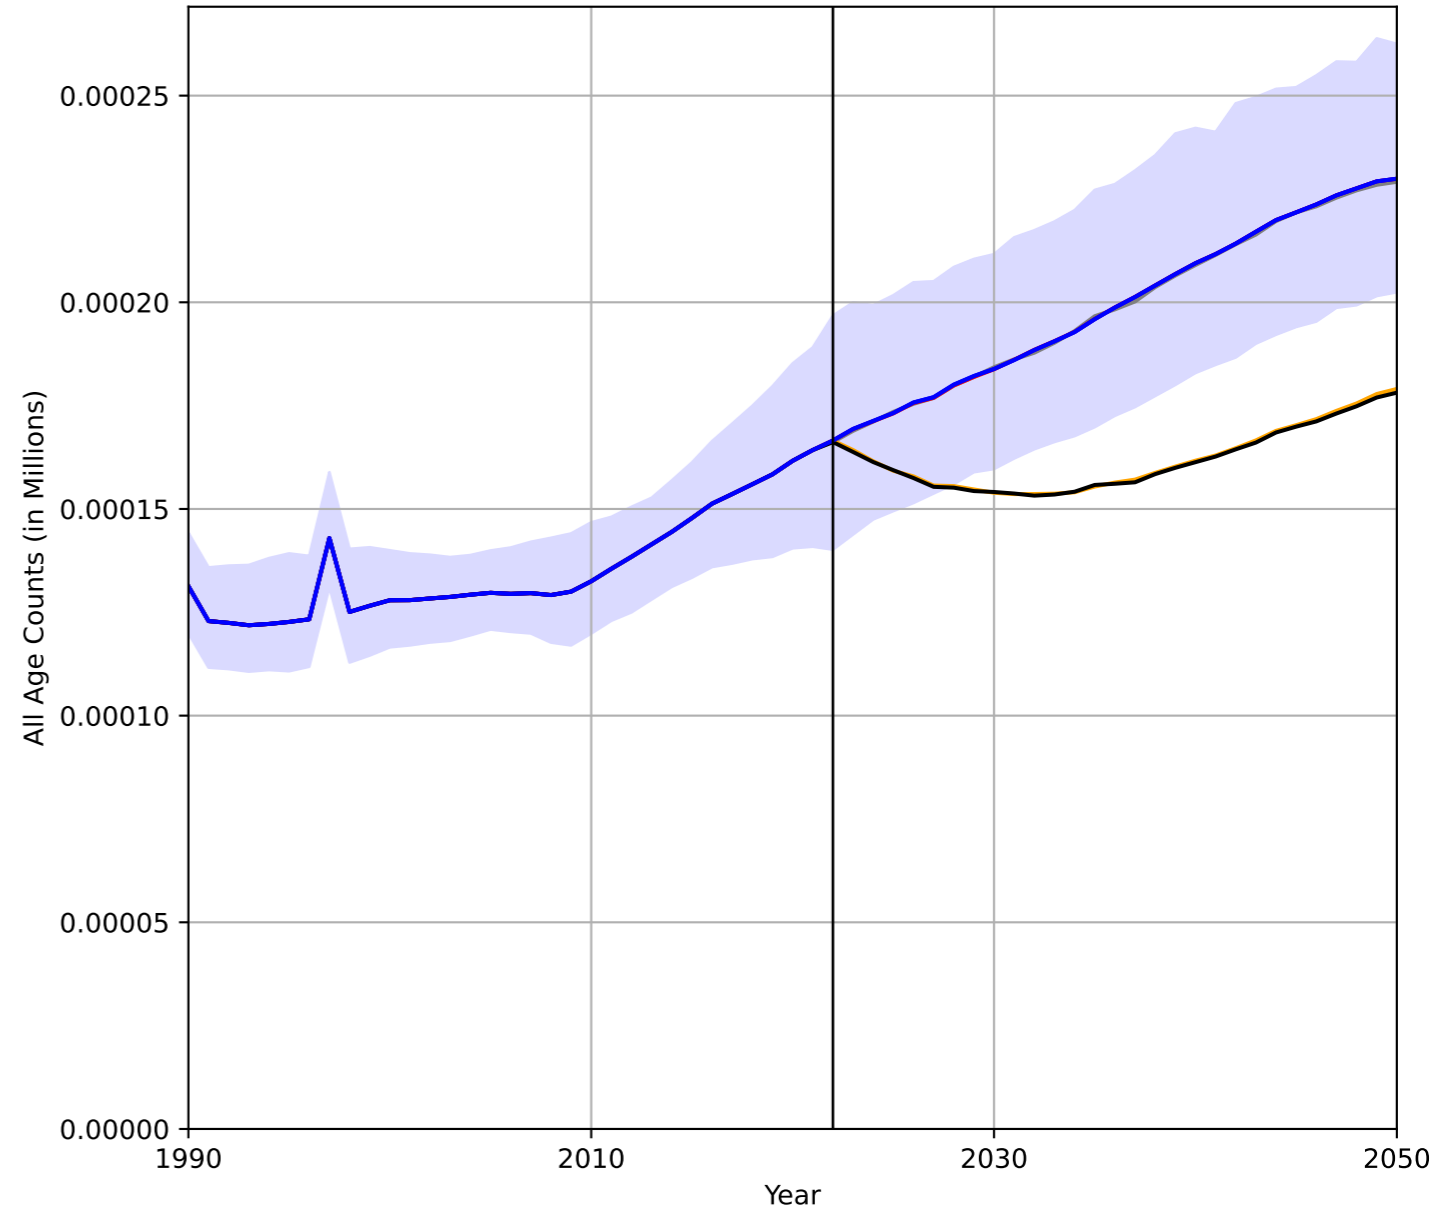

# Fiji

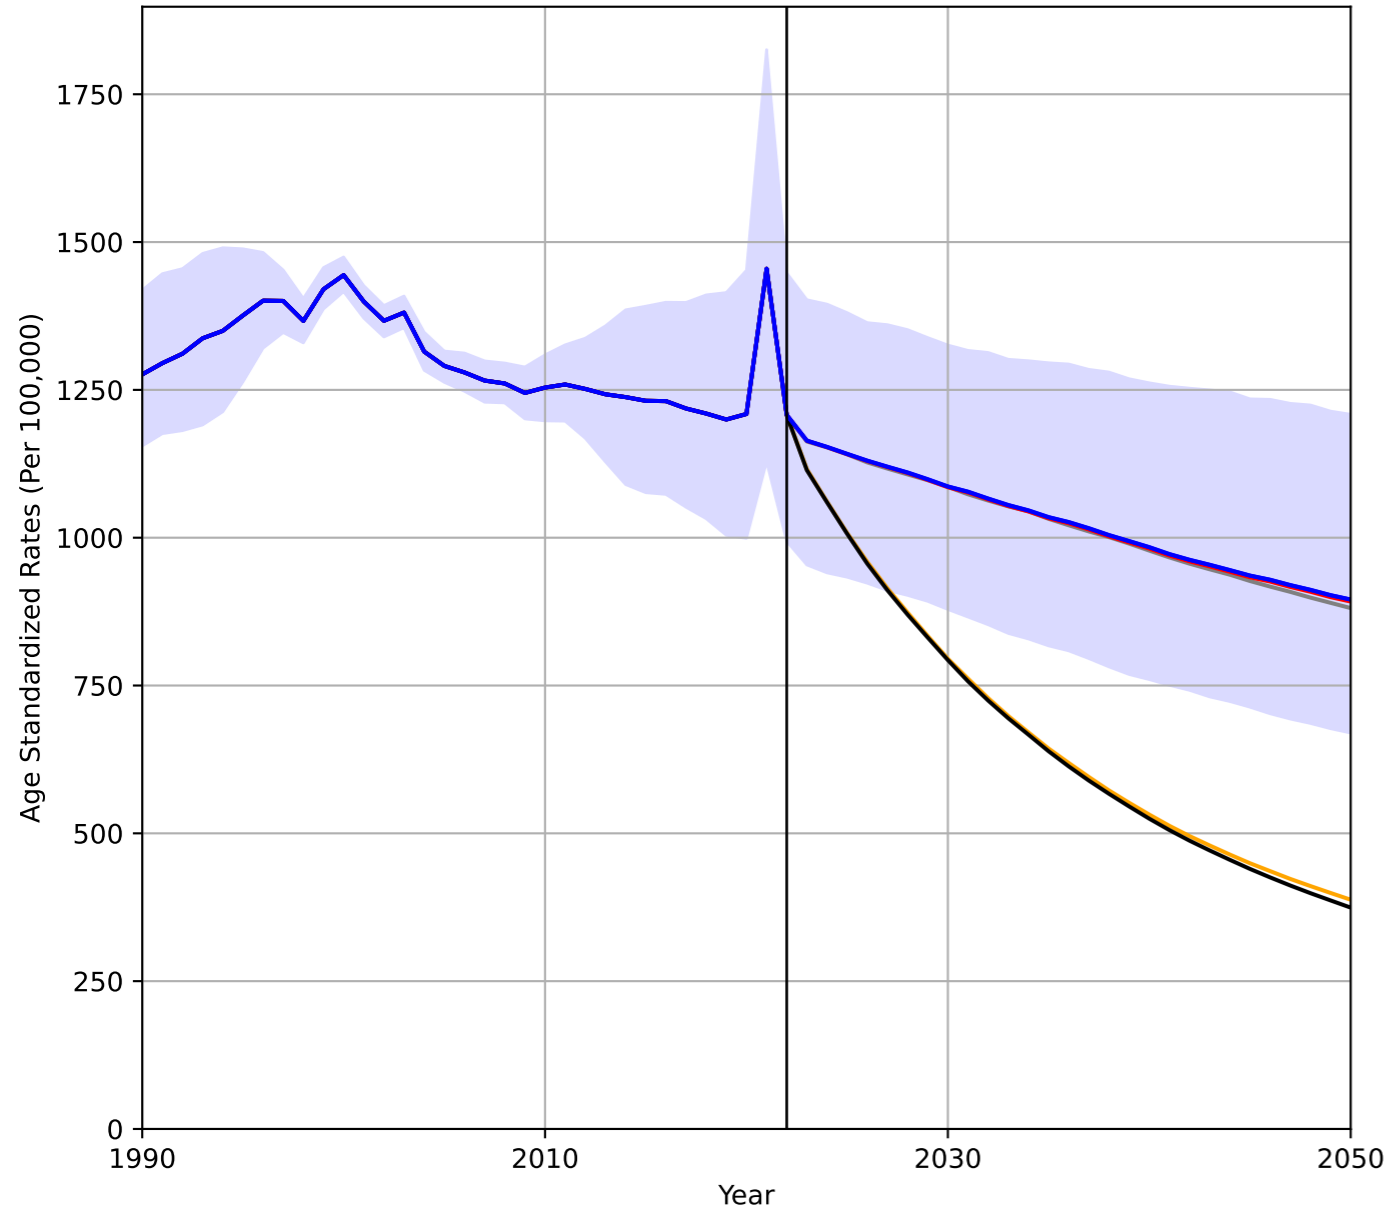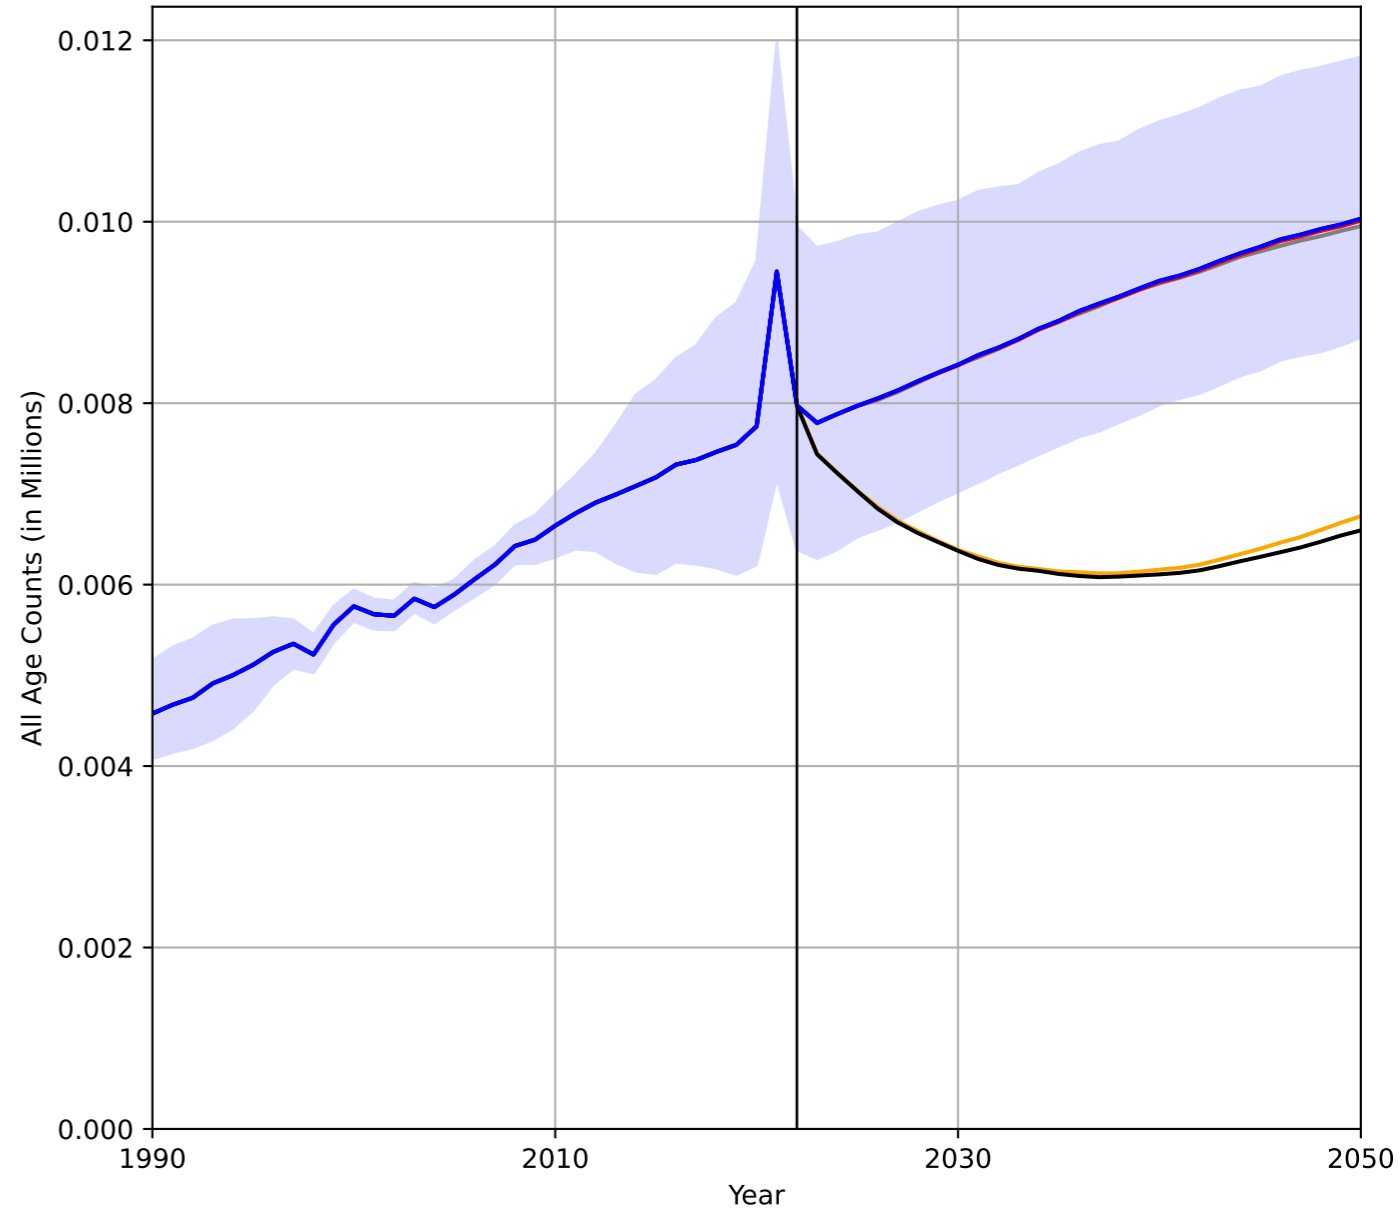

# Guam

Supplemental Results Figure S11. All-cause age standardised death rates (A) and all age death counts (B), for the past and for five future scenarios, 1990–2050

1774

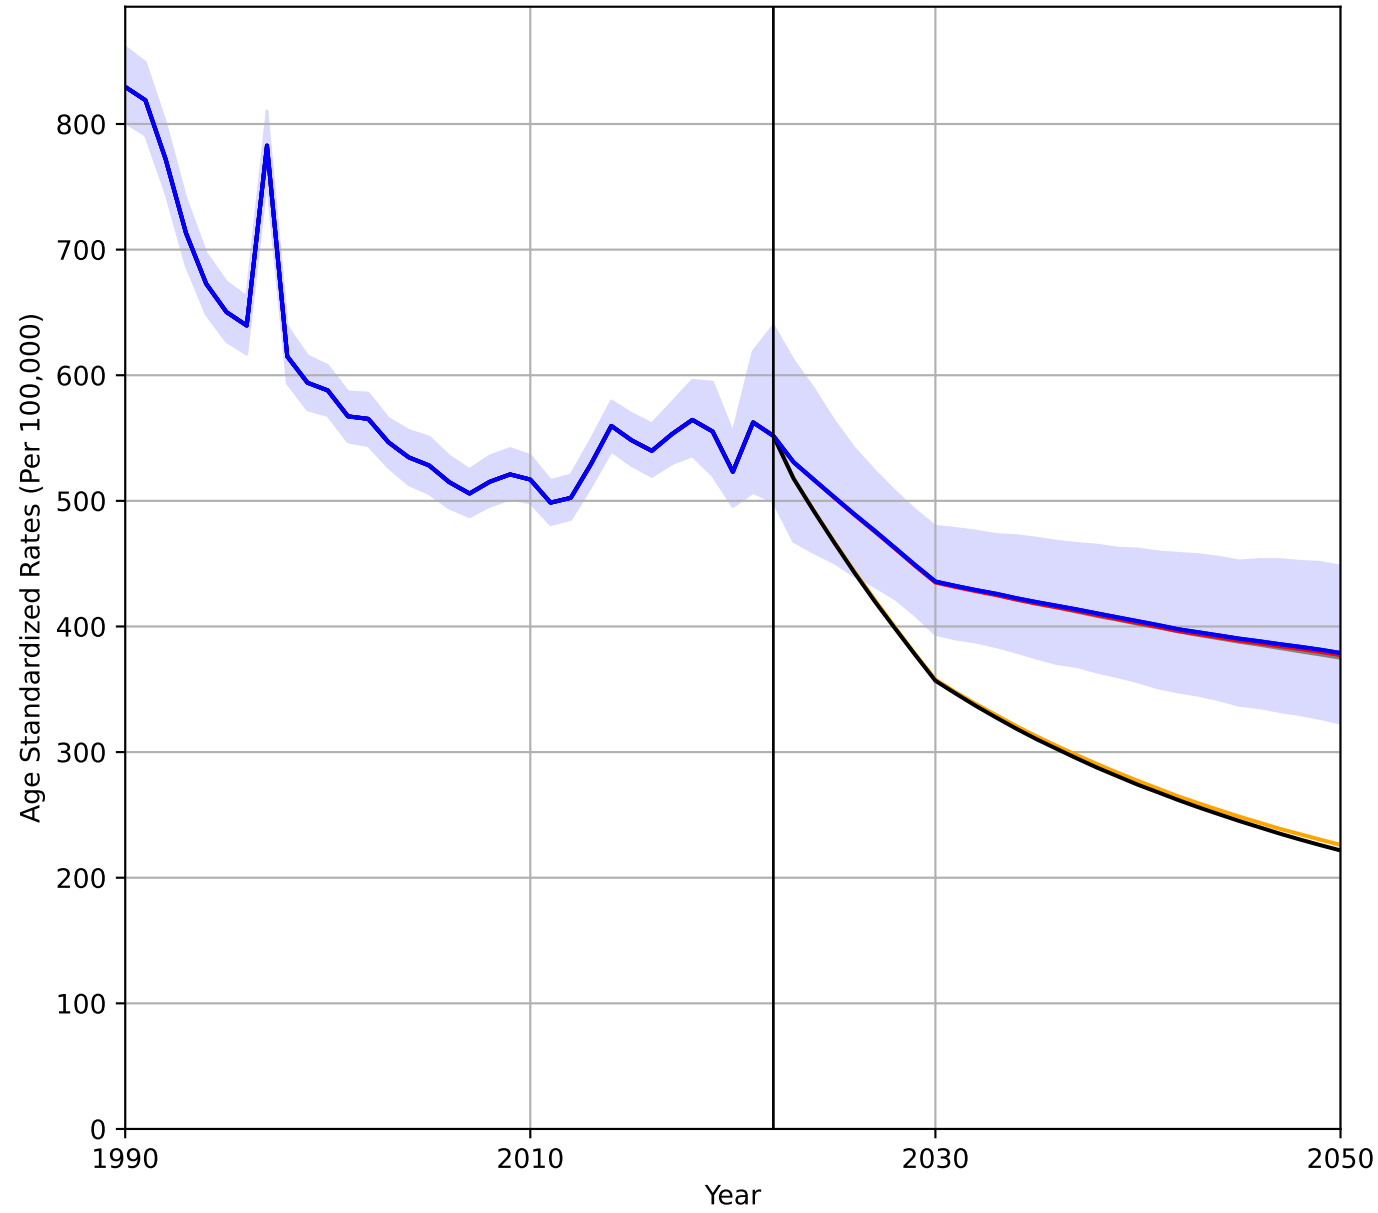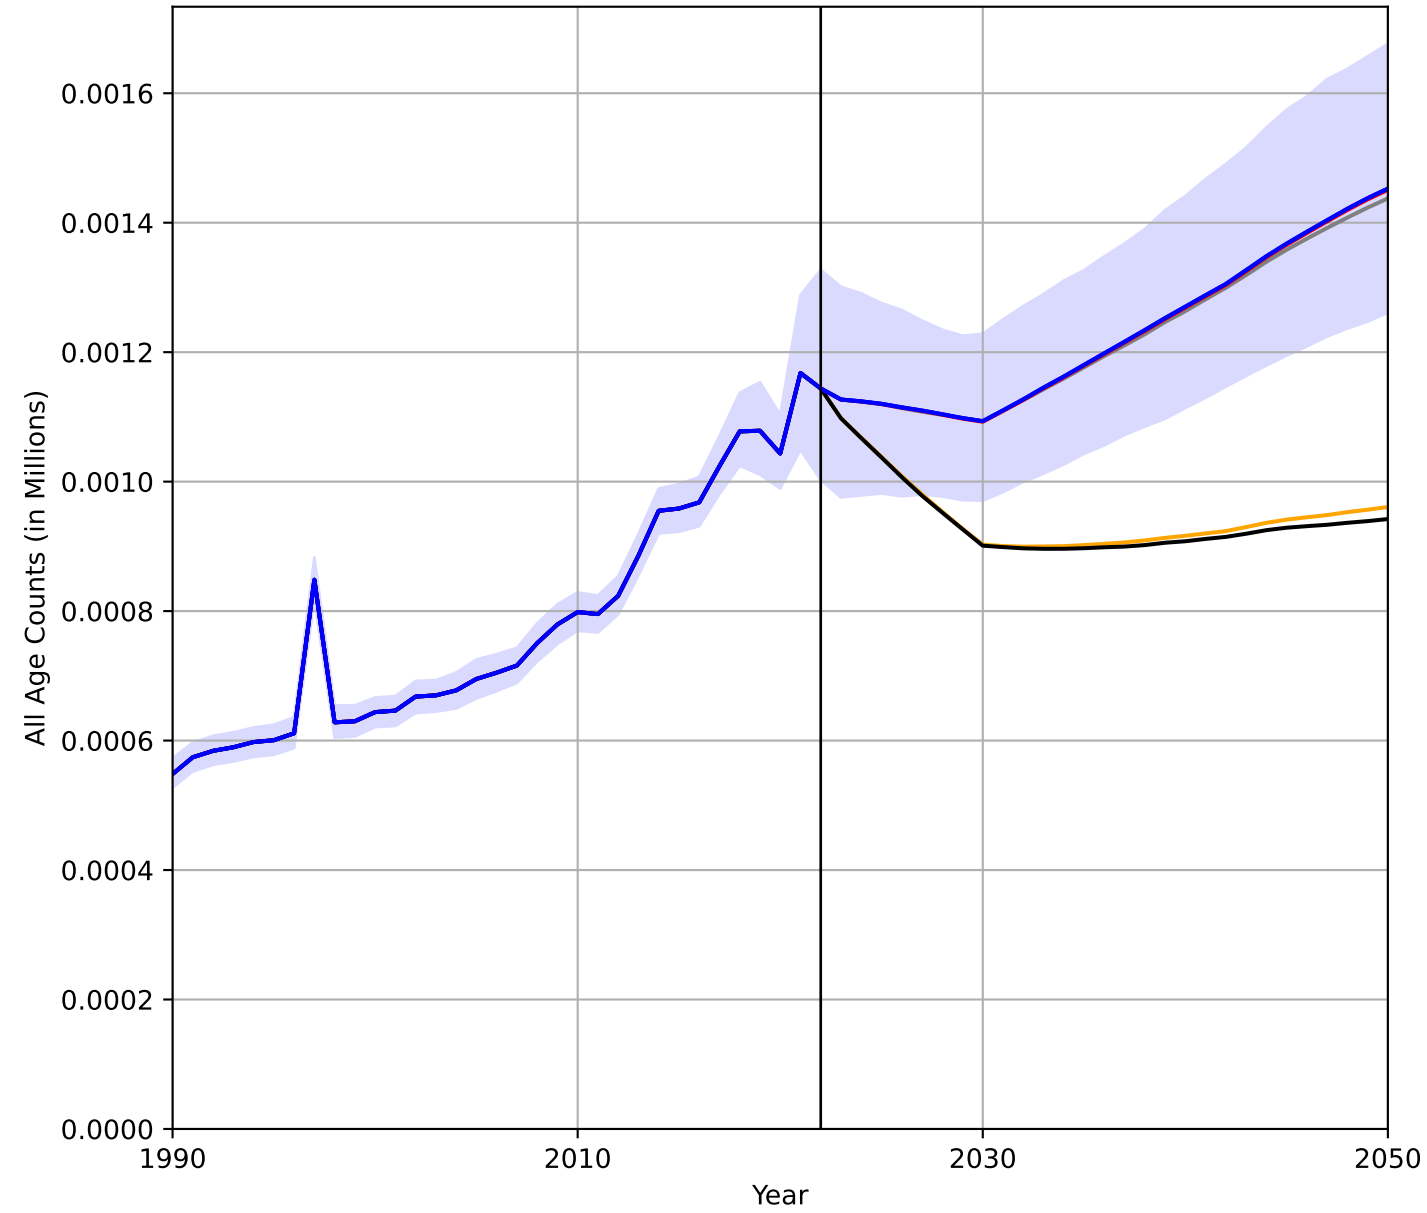

# Kiribati

Supplemental Results Figure S11. All-cause age standardised death rates (A) and all age death counts (B), for the past and for five future scenarios, 1990–2050

1775

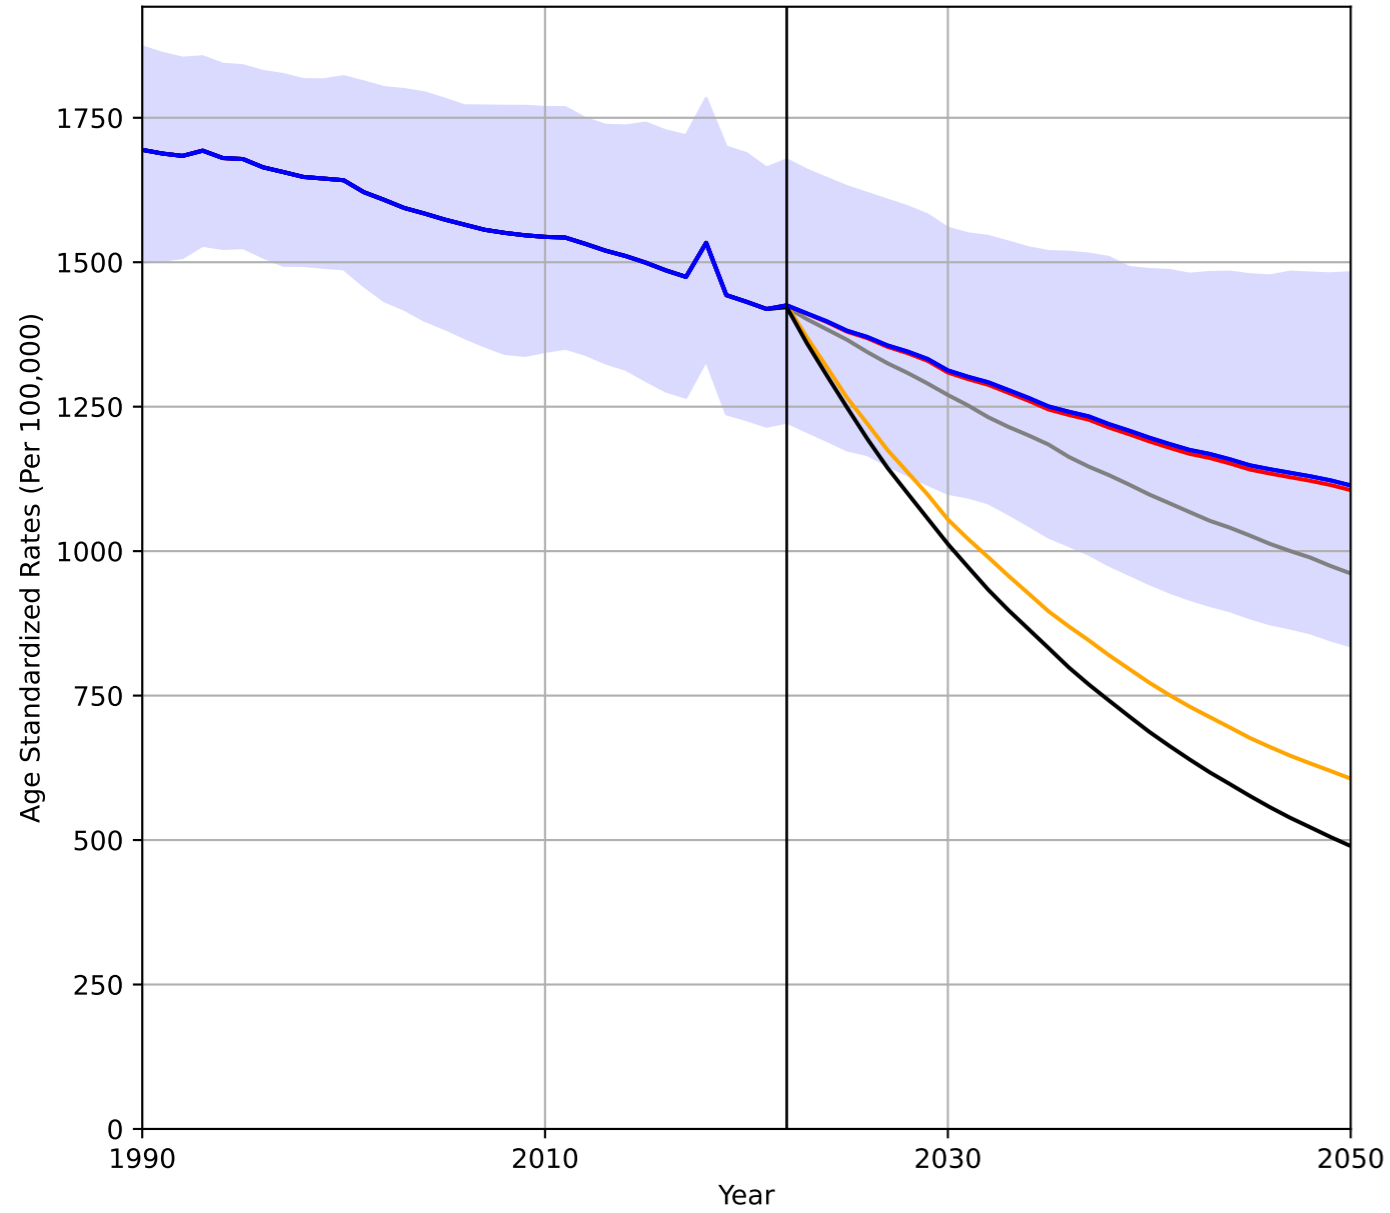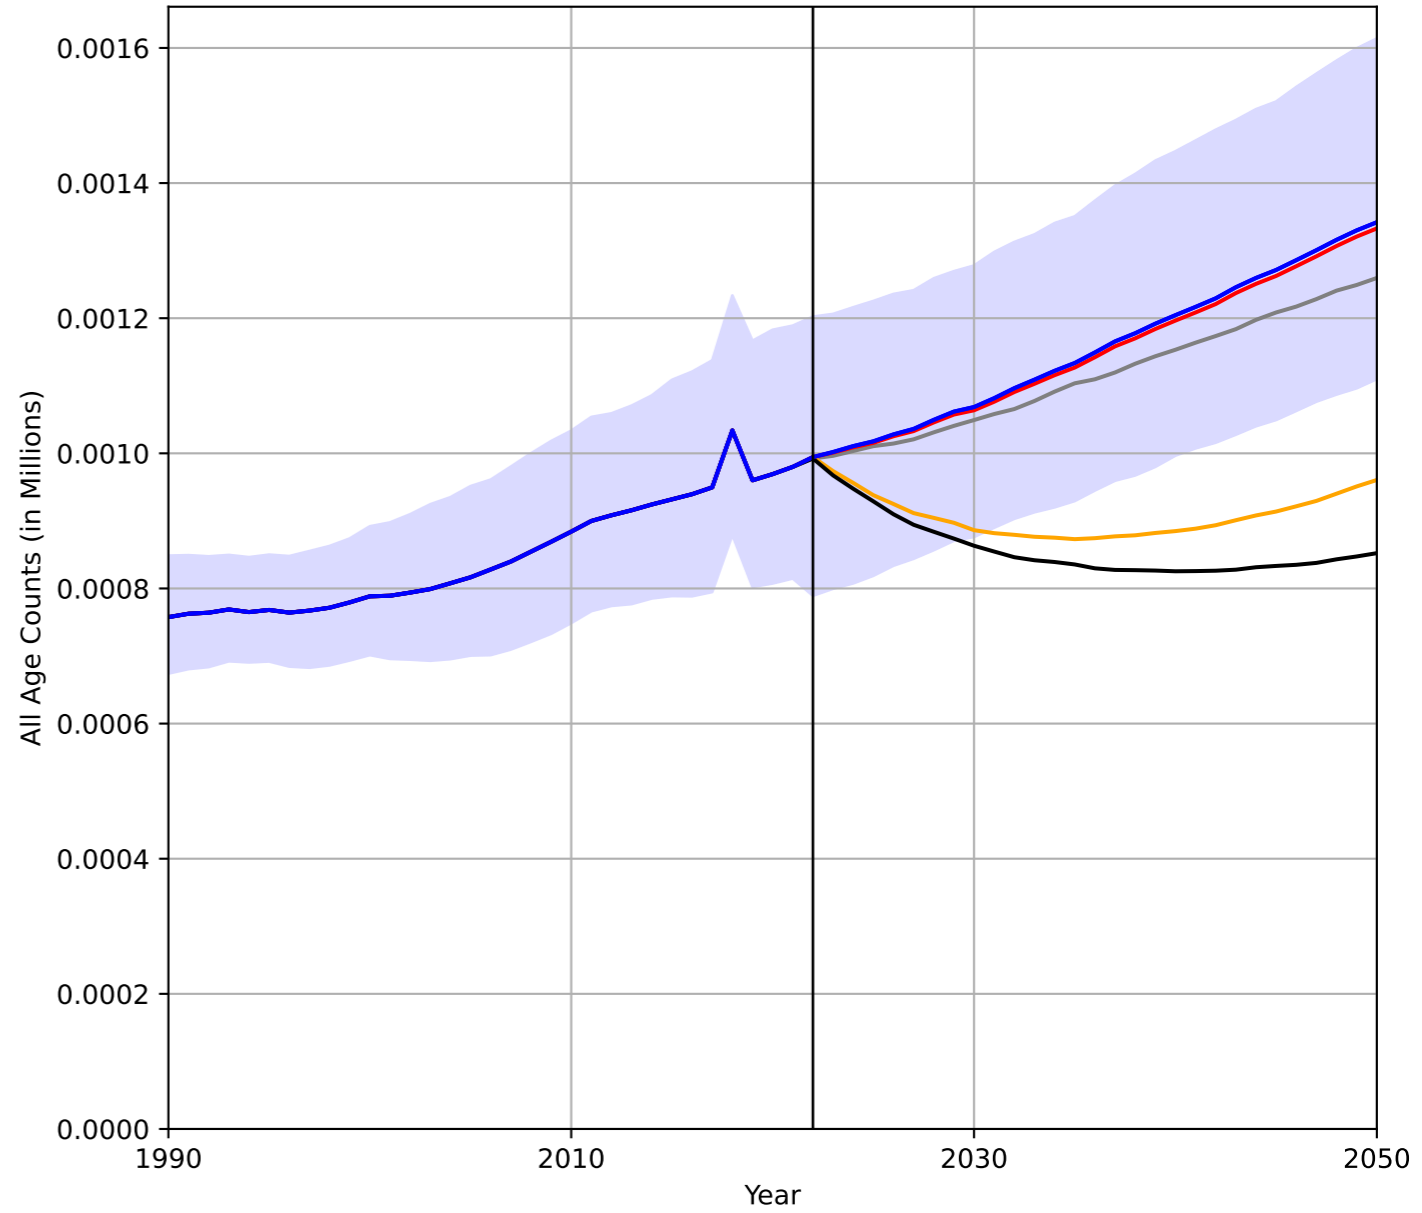



# Marshall Islands

Supplemental Results Figure S11. All-cause age standardised death rates (A) and all age death counts (B), for the past and for five future scenarios, 1990–2050

1776

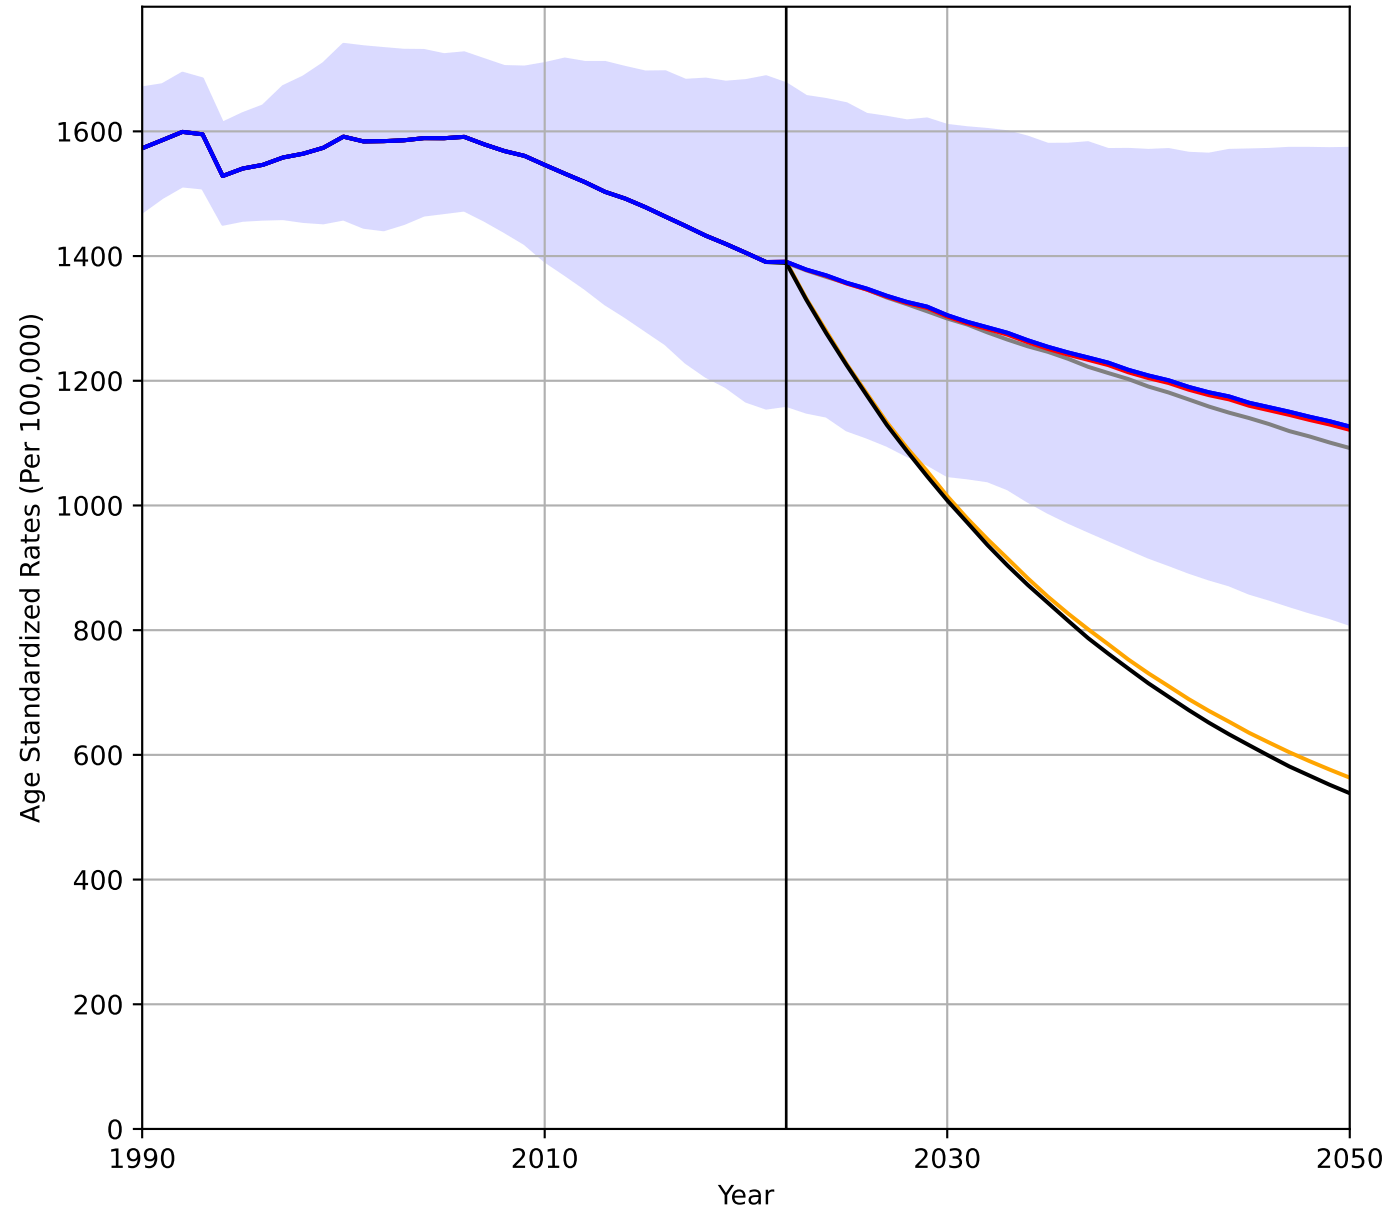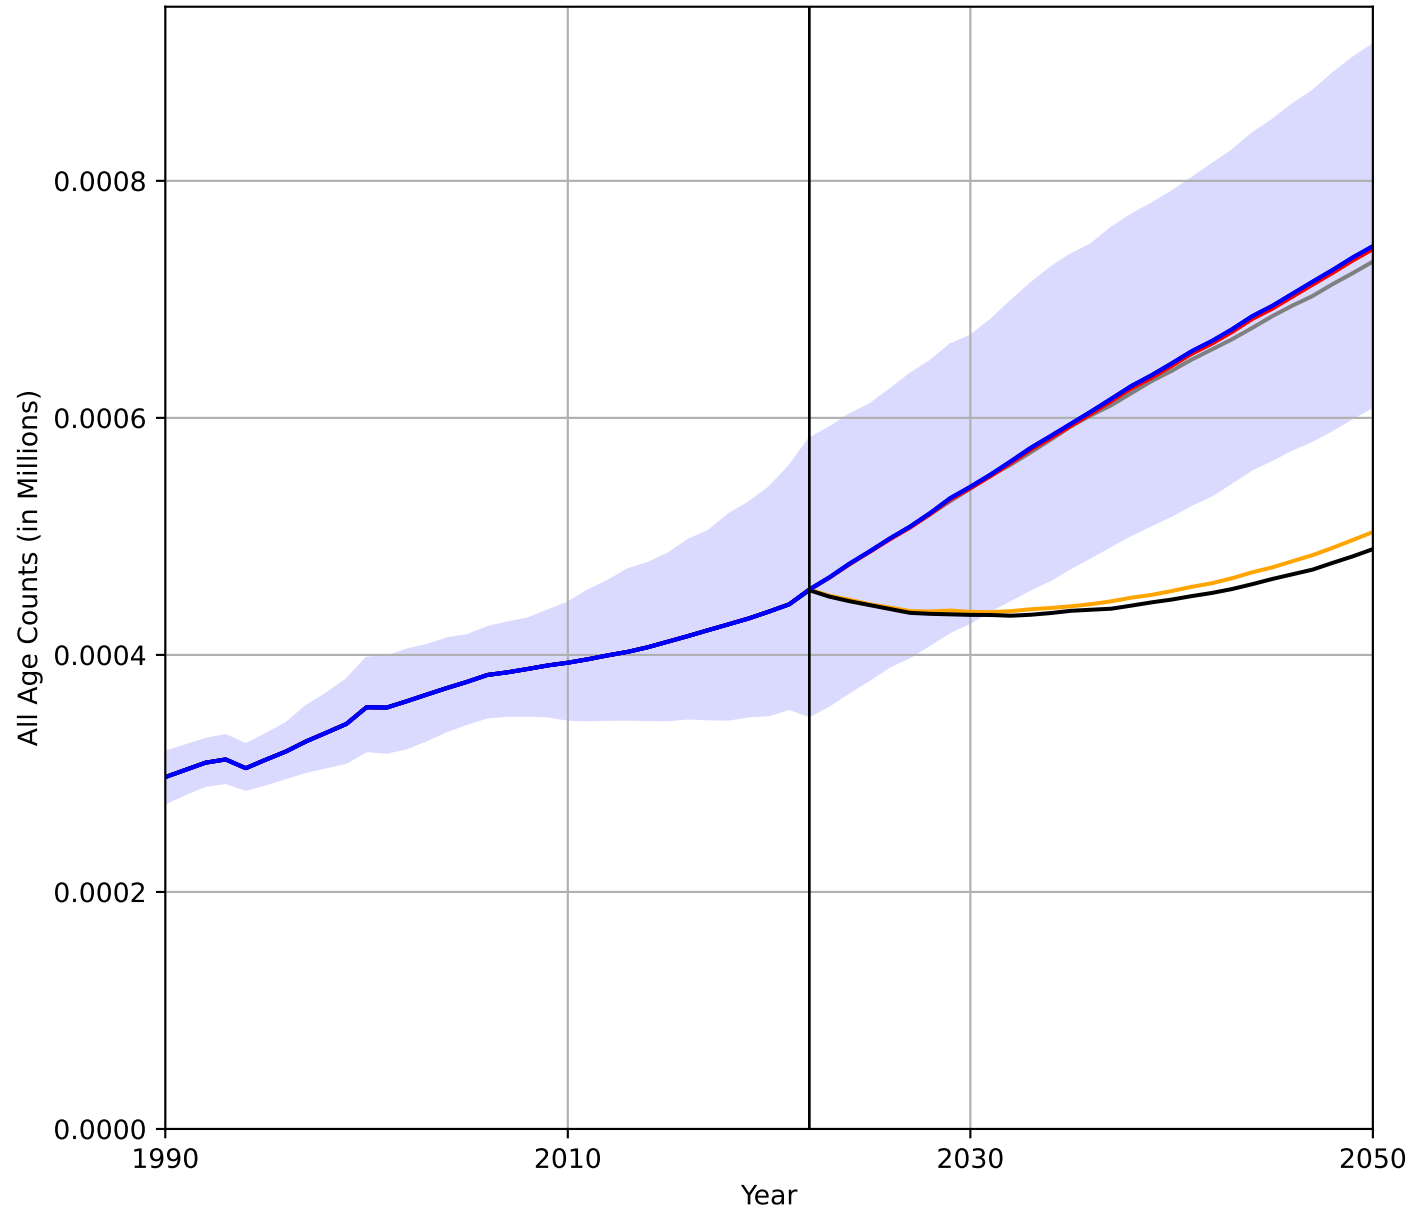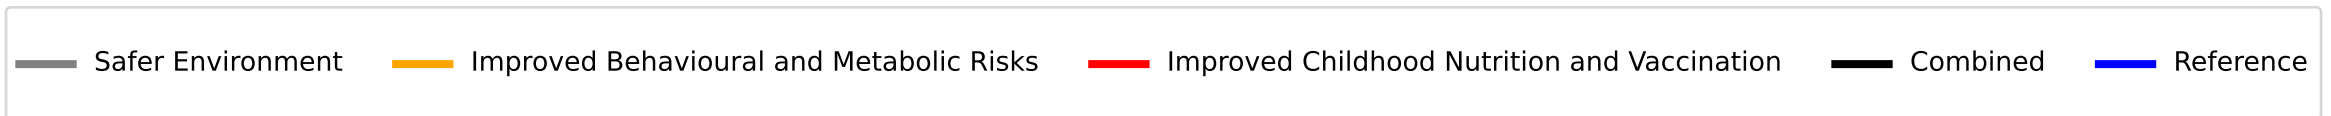

# Federated States Of Micronesia

Supplemental Results Figure S11. All-cause age standardised death rates (A) and all age death counts (B), for the past and for five future scenarios, 1990–2050

1777

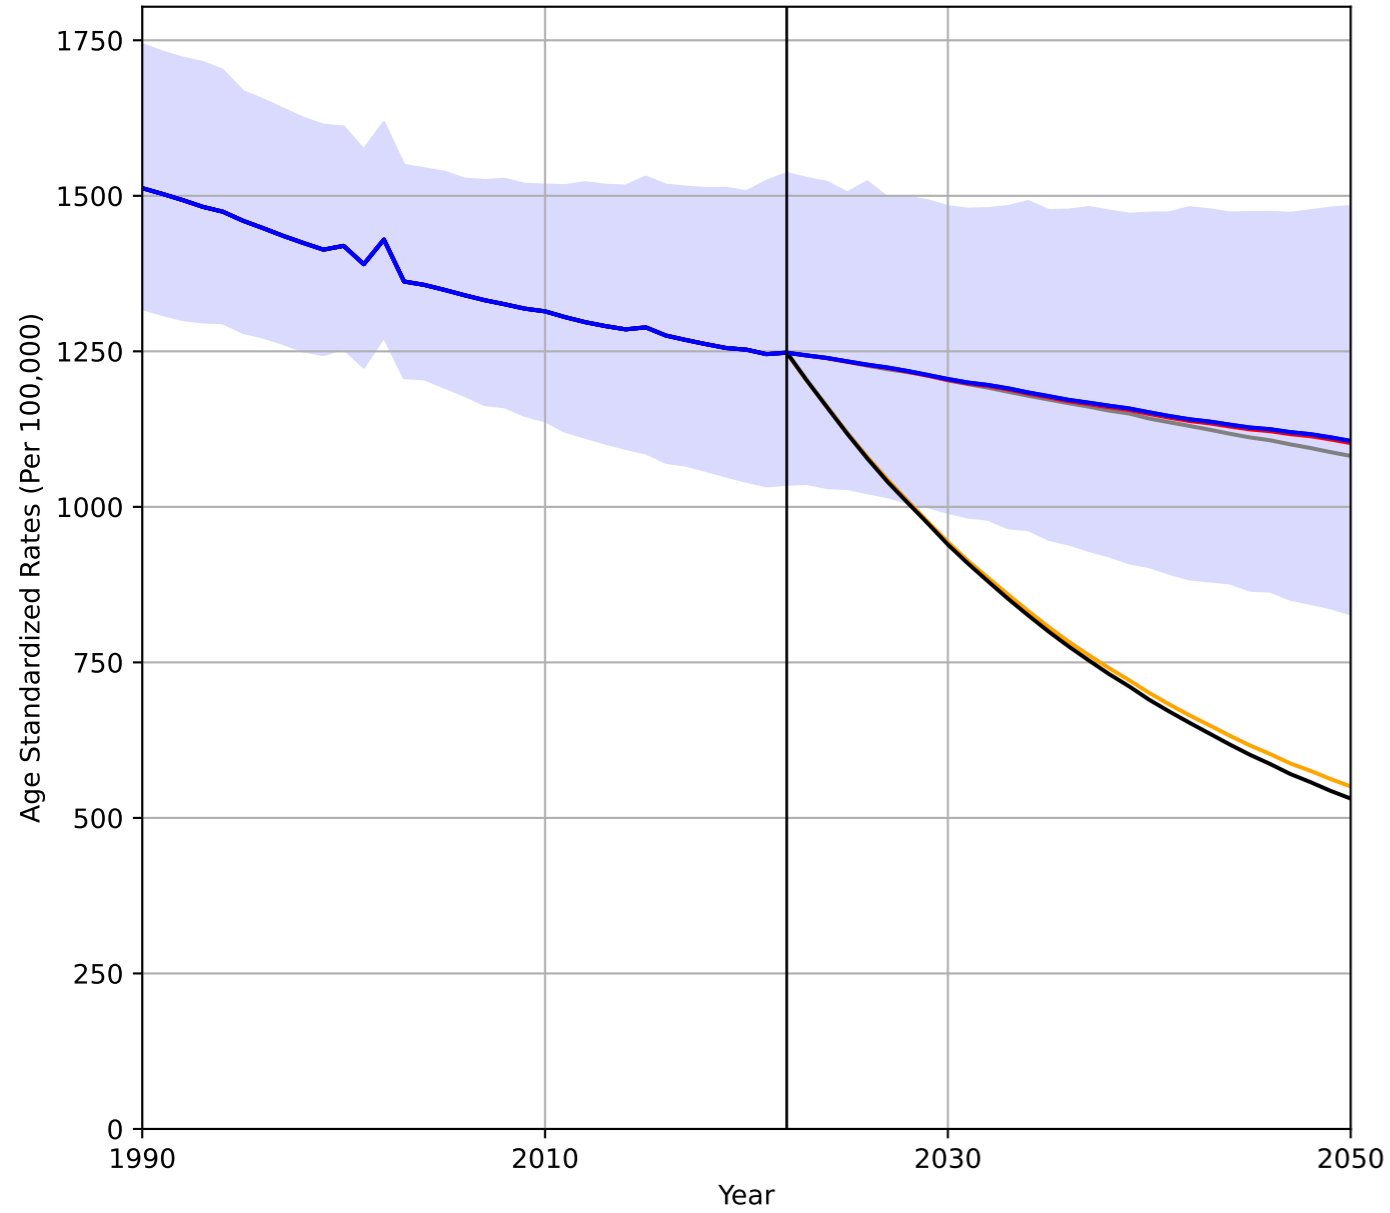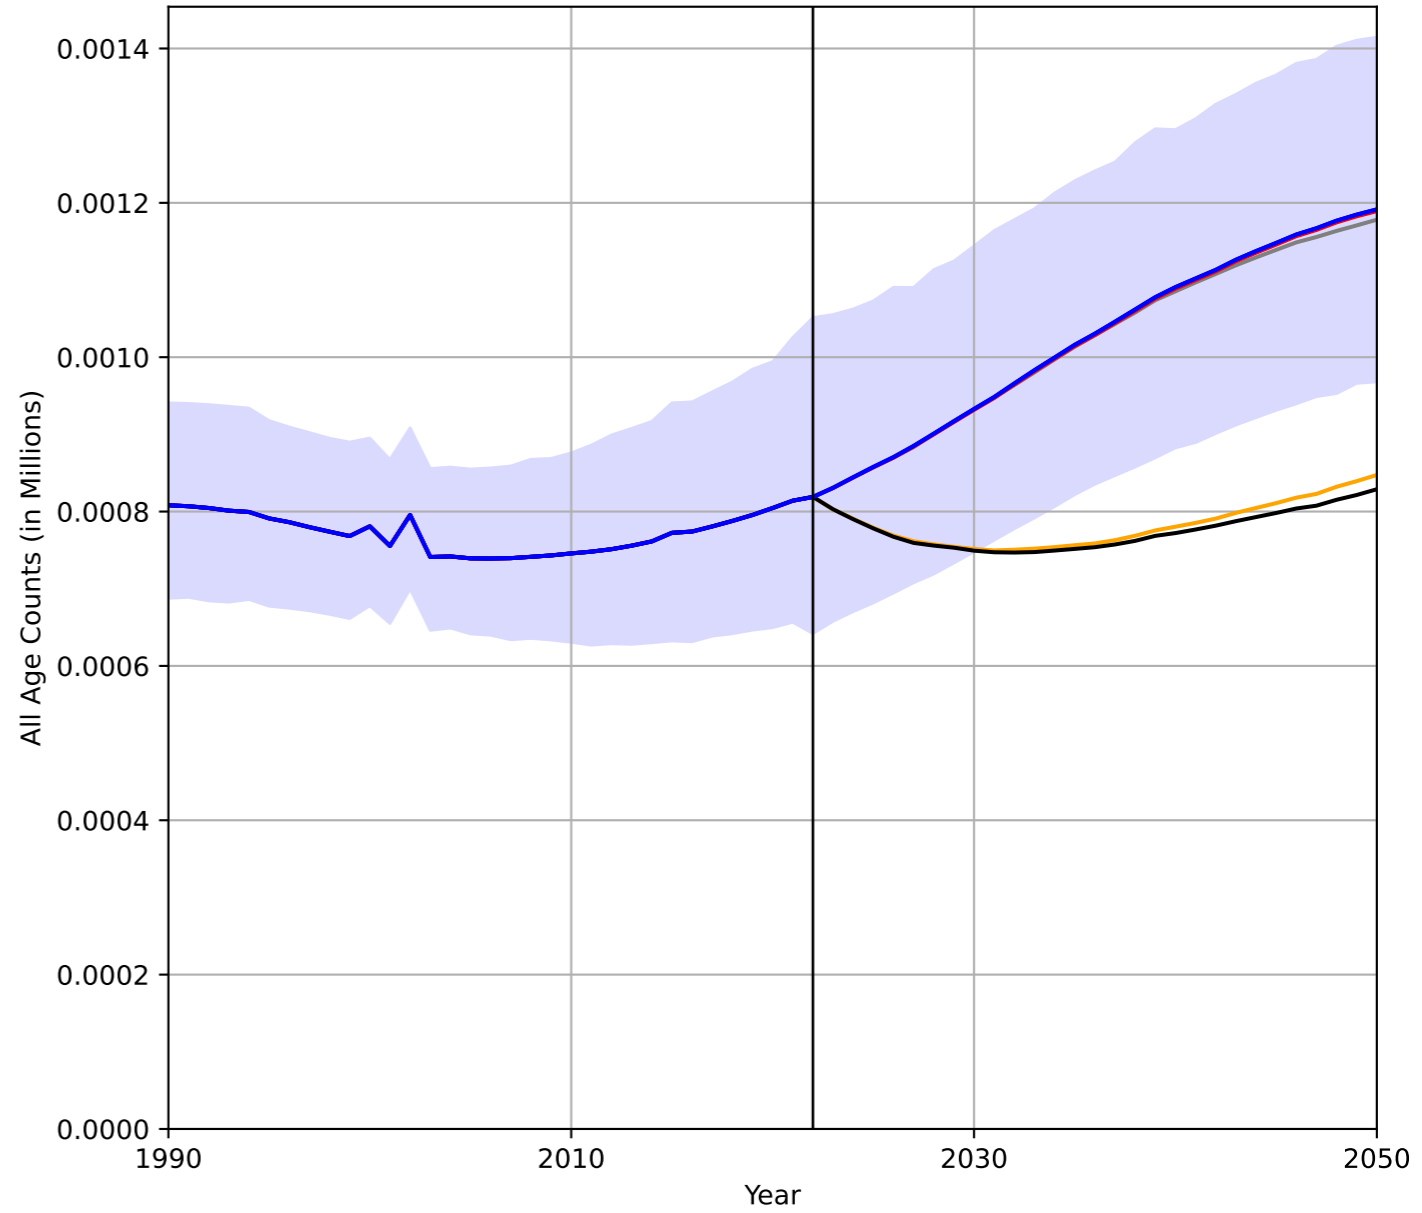

# Nauru

Supplemental Results Figure S11. All-cause age standardised death rates (A) and all age death counts (B), for the past and for five future scenarios, 1990–2050

1778

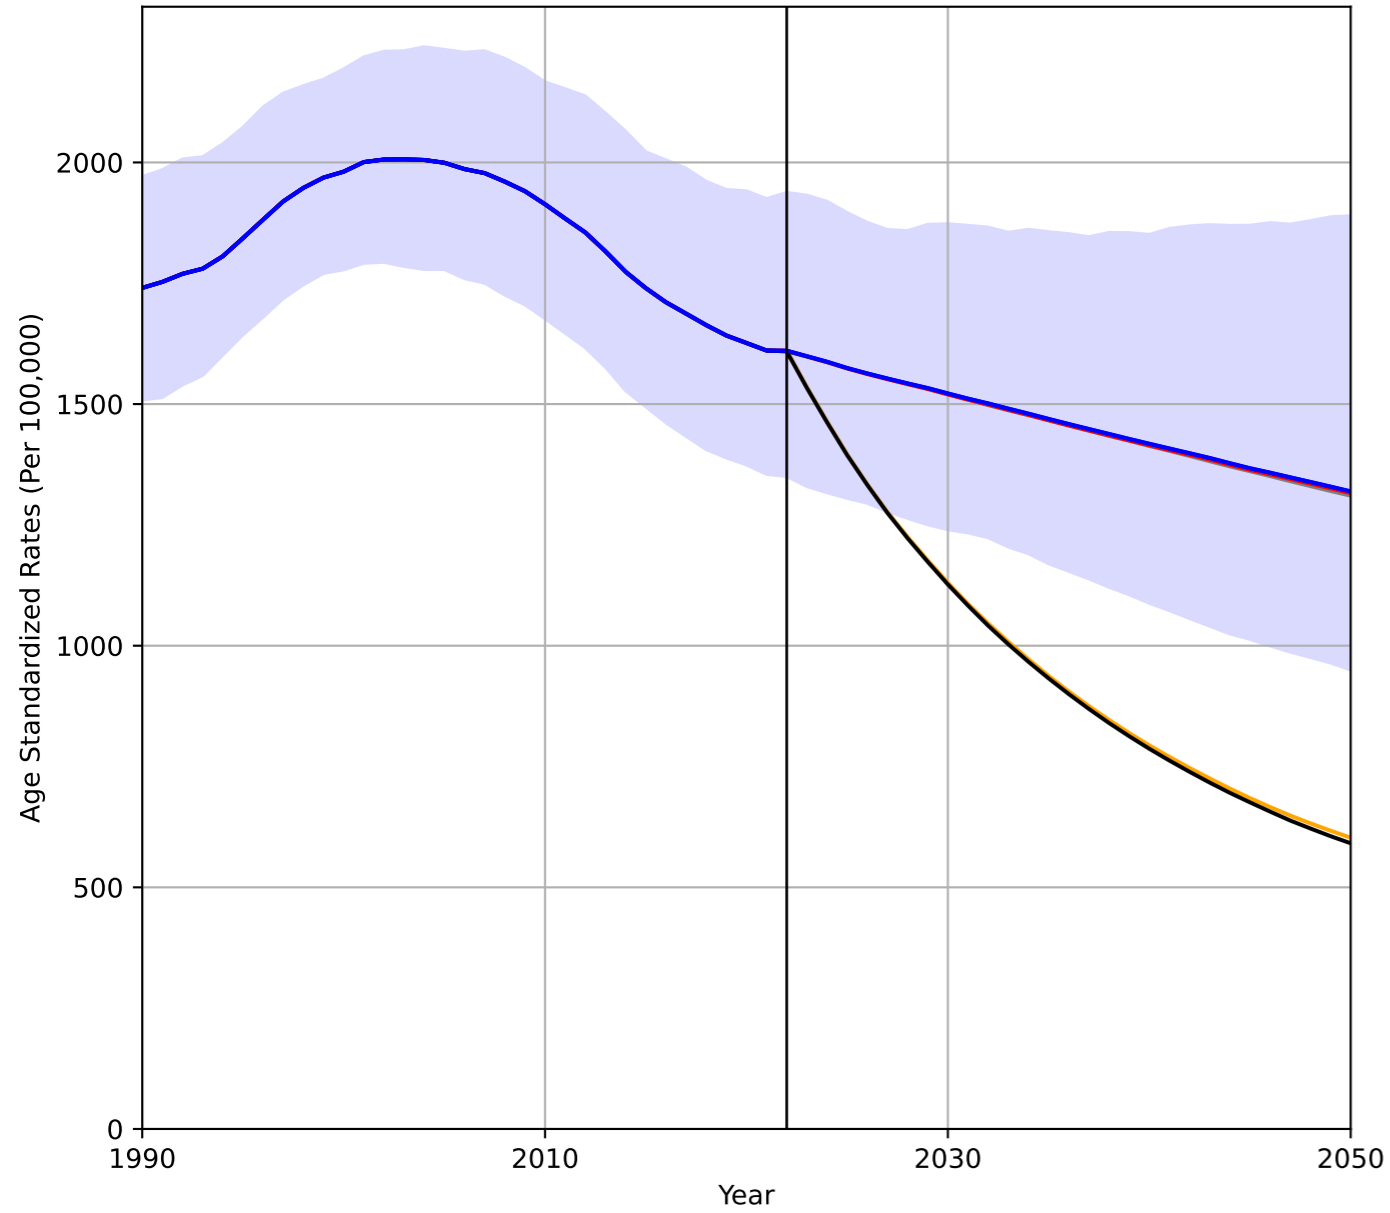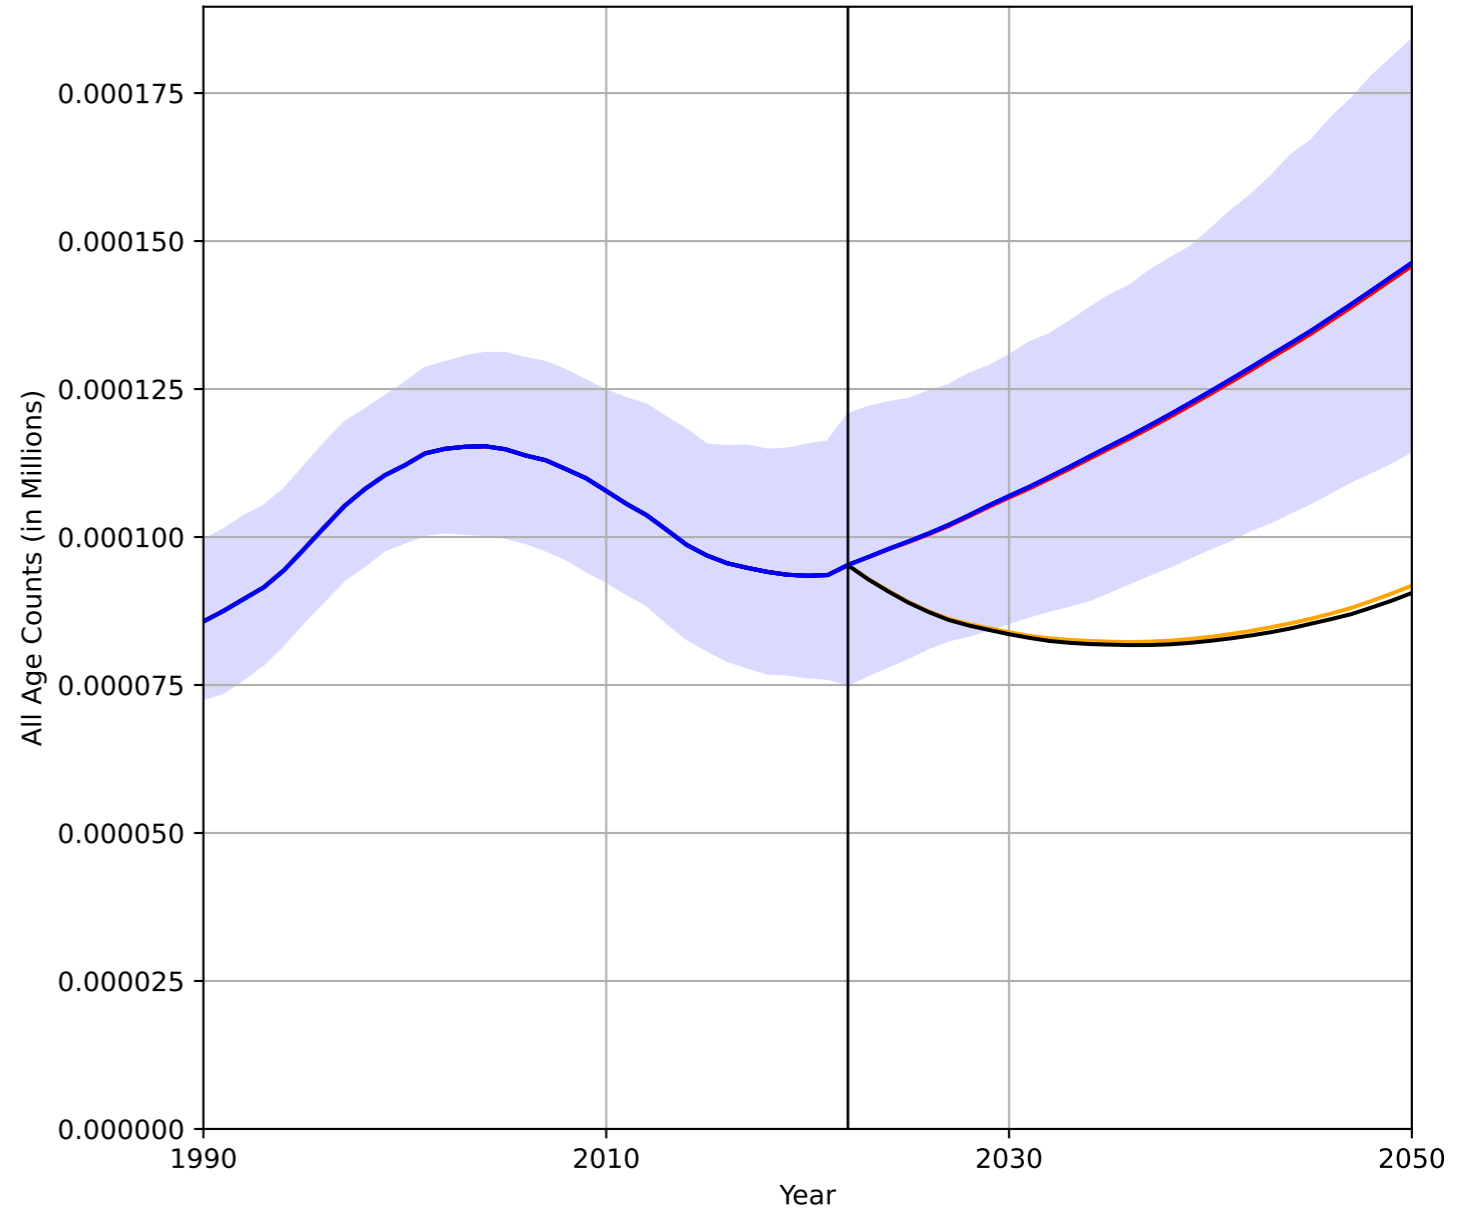

# Niue

Supplemental Results Figure S11. All-cause age standardised death rates (A) and all age death counts (B), for the past and for five future scenarios, 1990–2050

1779

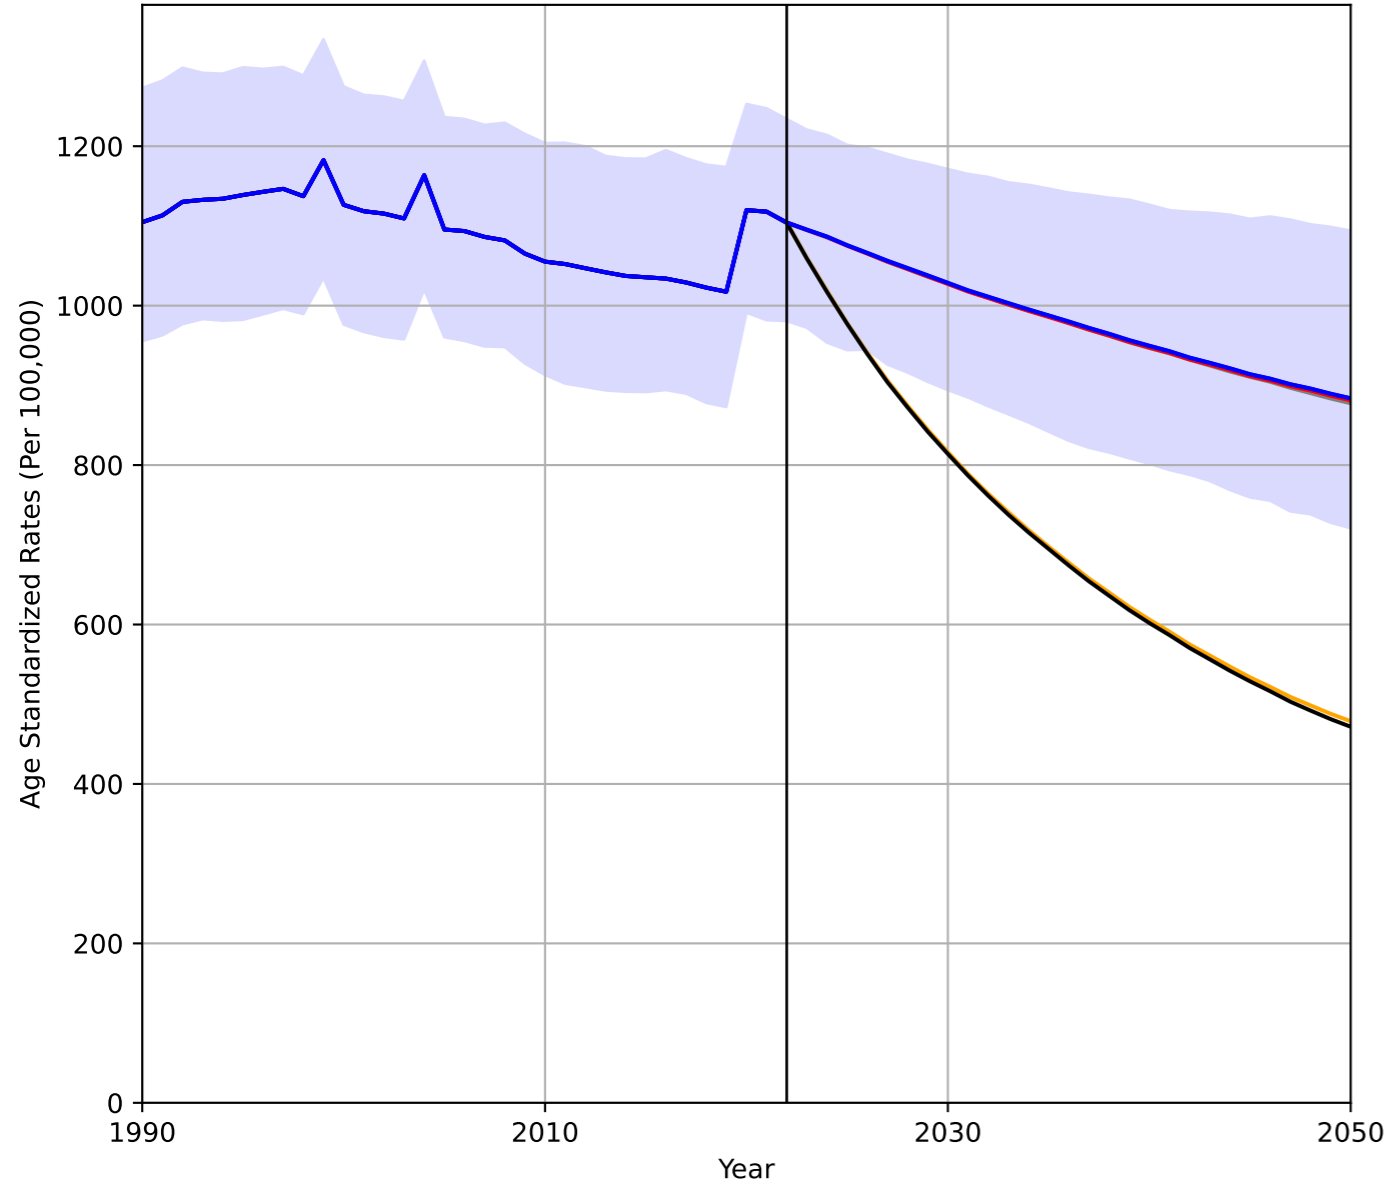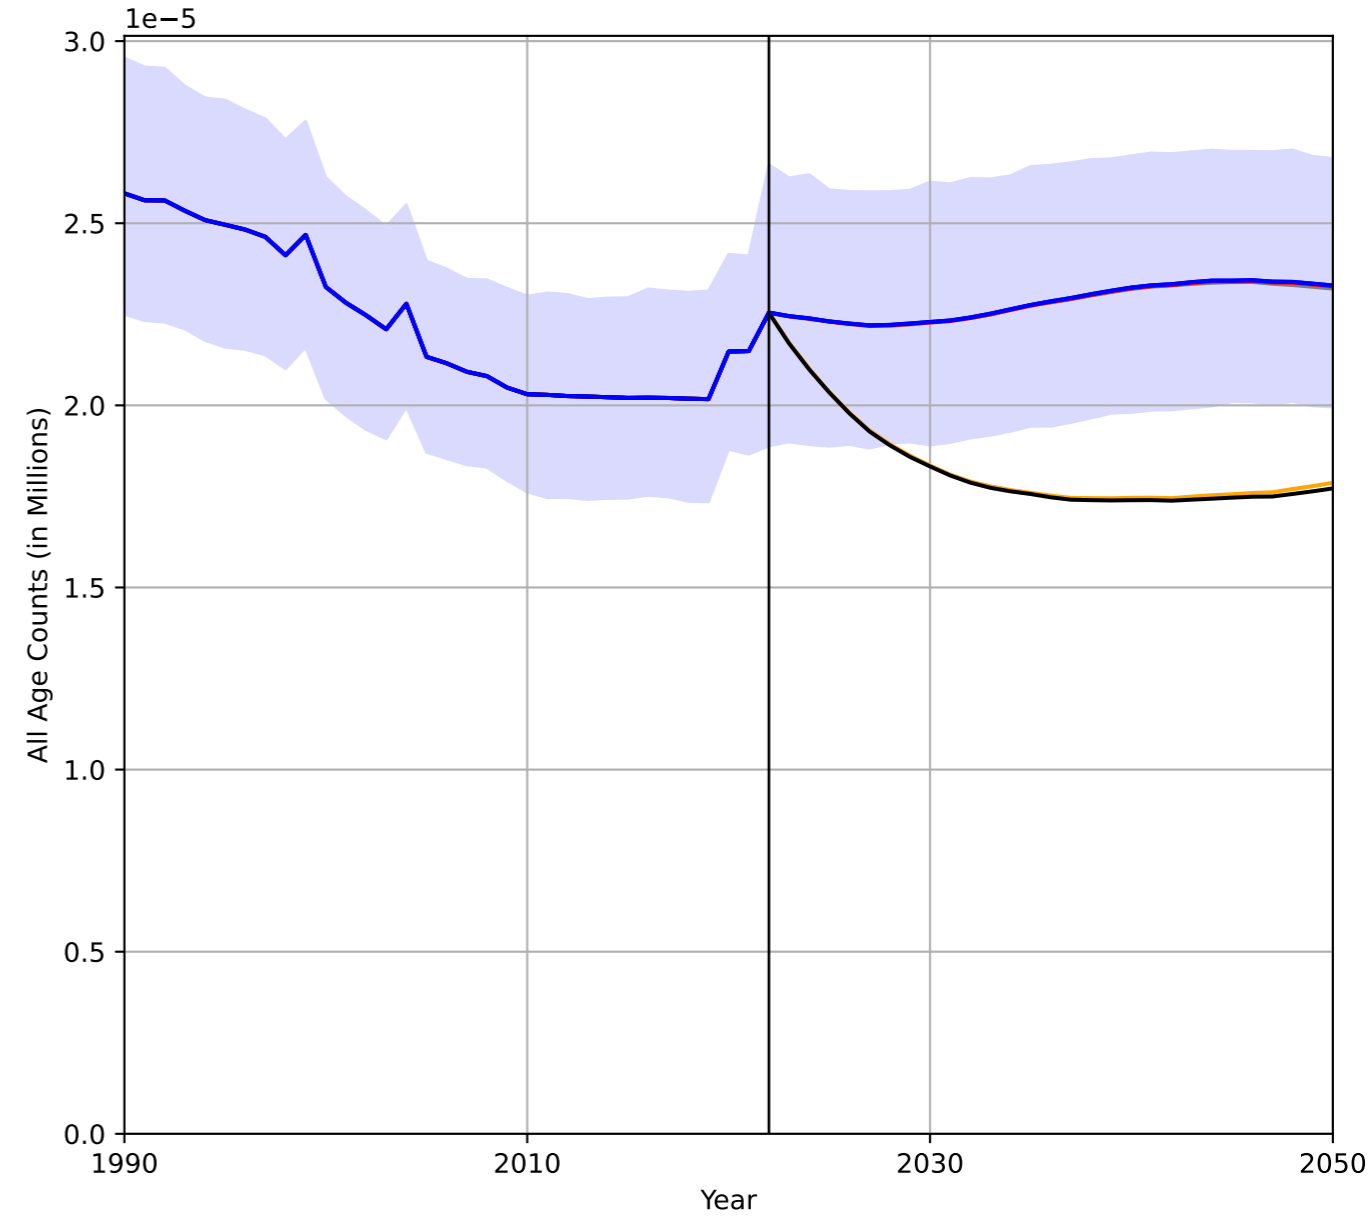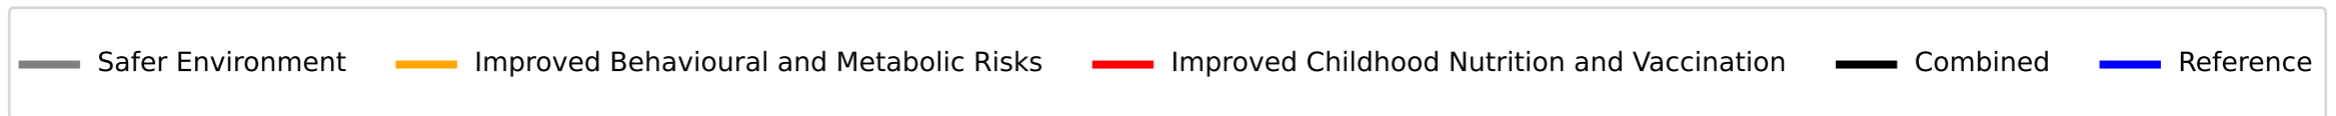

# Northern Mariana Islands

Supplemental Results Figure S11. All-cause age standardised death rates (A) and all age death counts (B), for the past and for five future scenarios, 1990–2050

1780

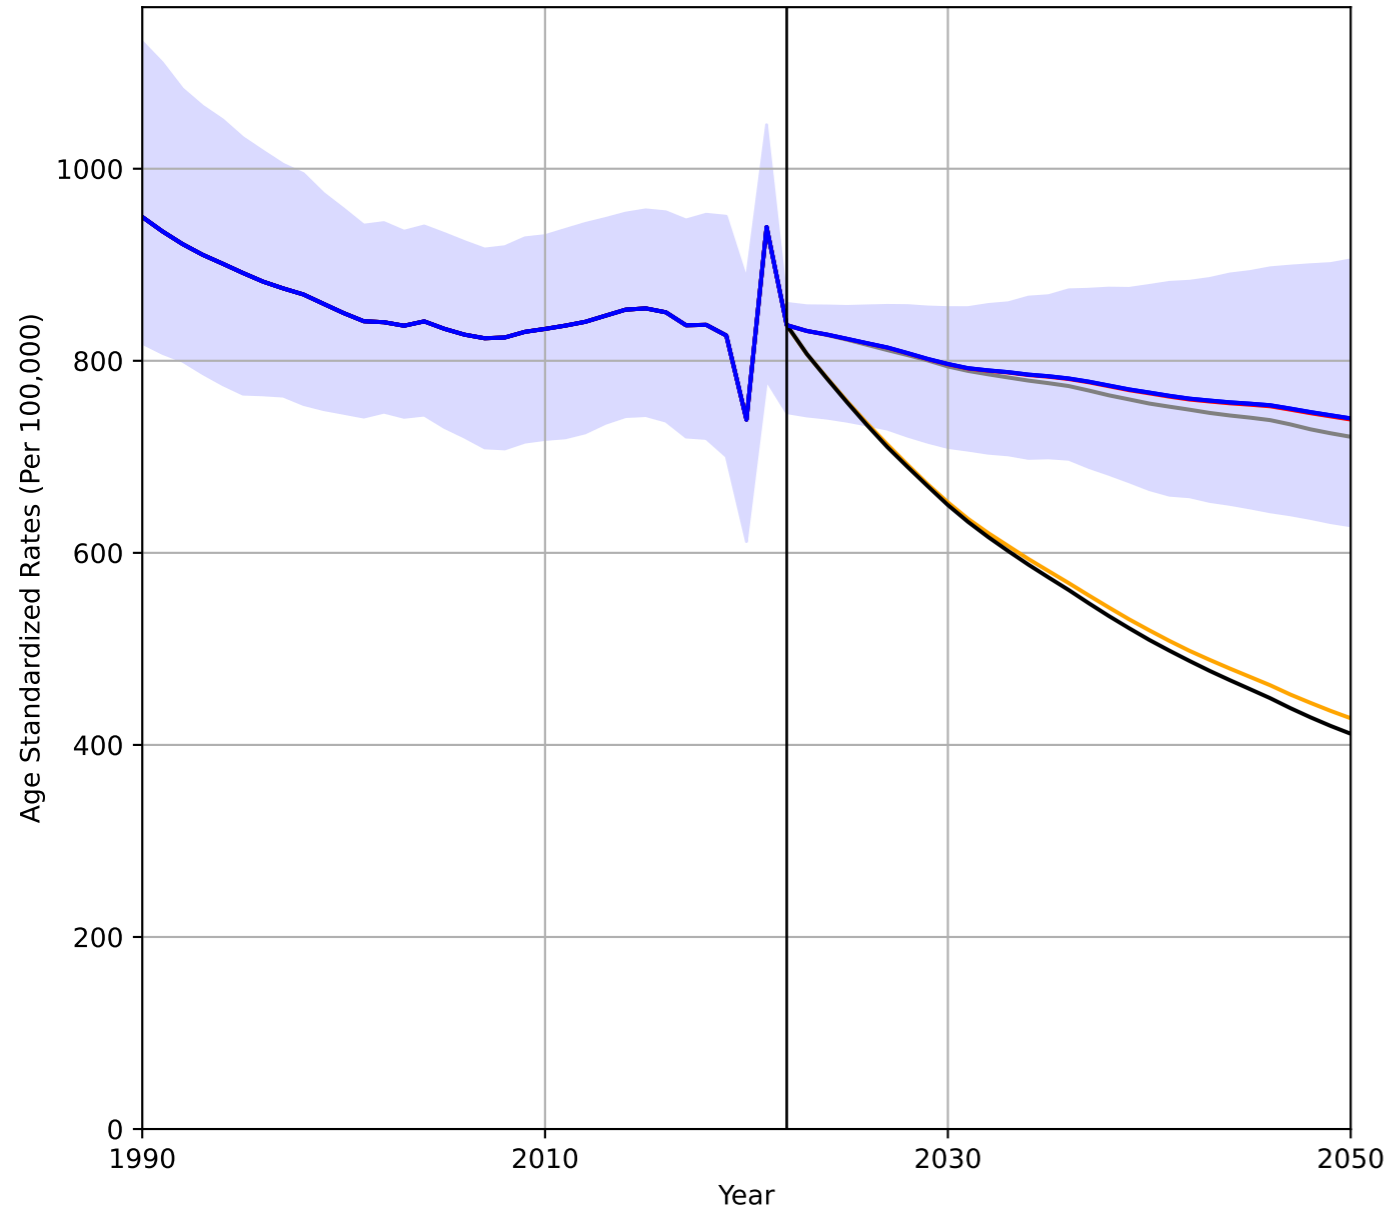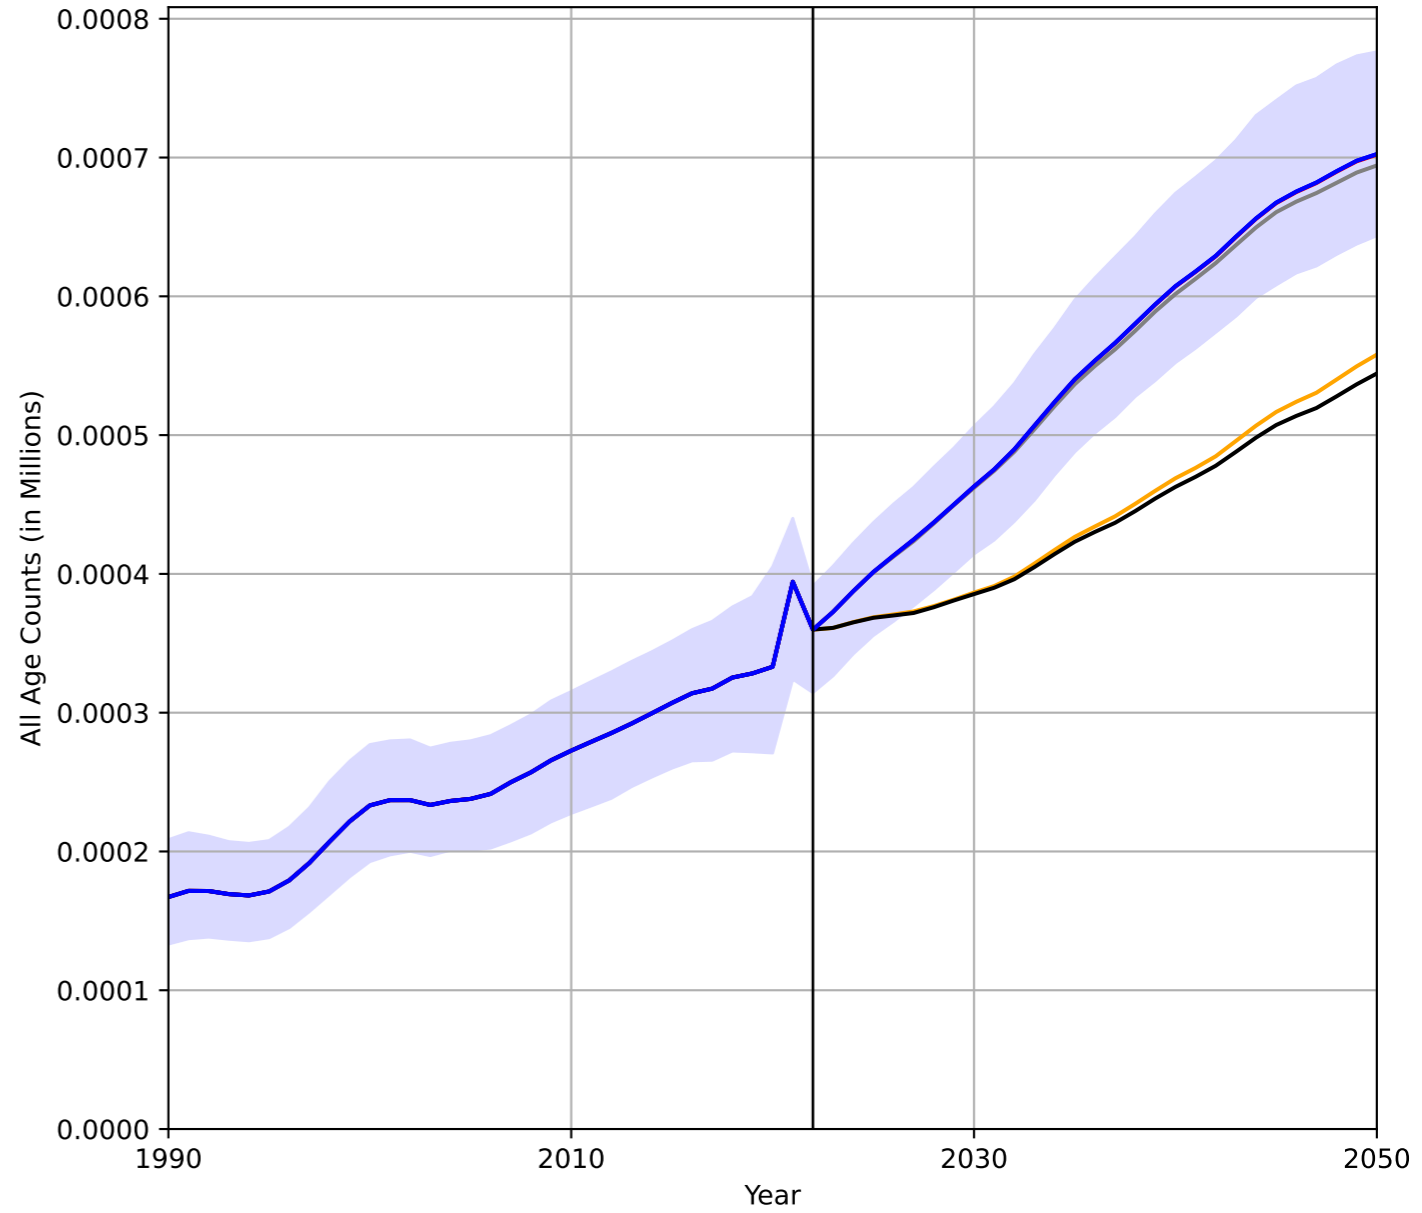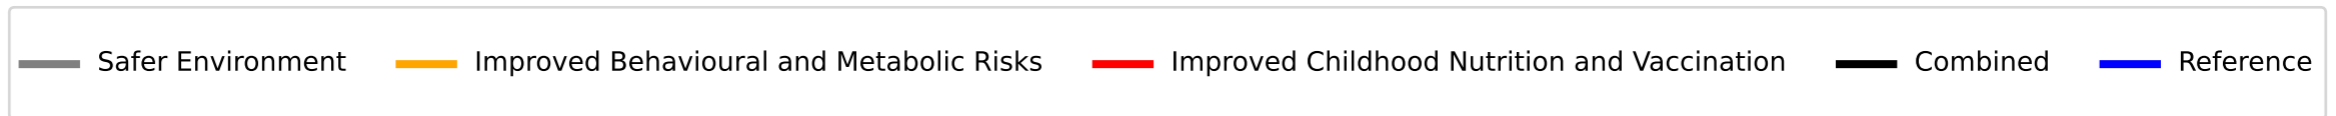

# Palau

Supplemental Results Figure S11. All-cause age standardised death rates (A) and all age death counts (B), for the past and for five future scenarios, 1990–2050

1781

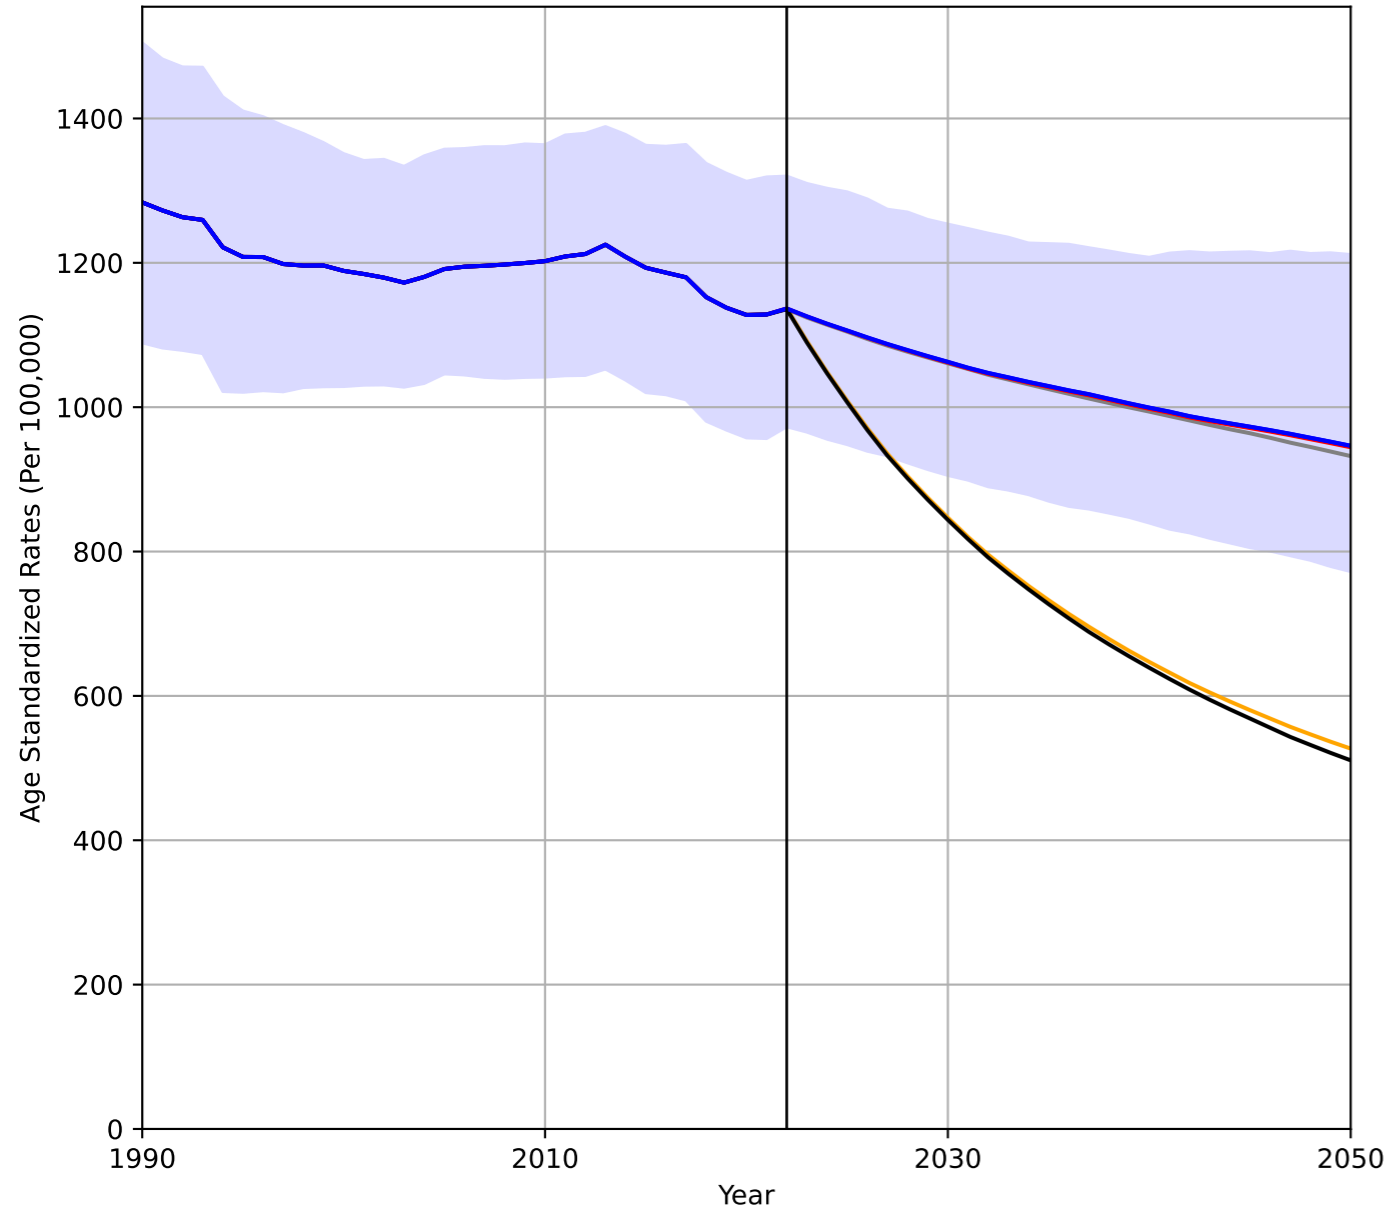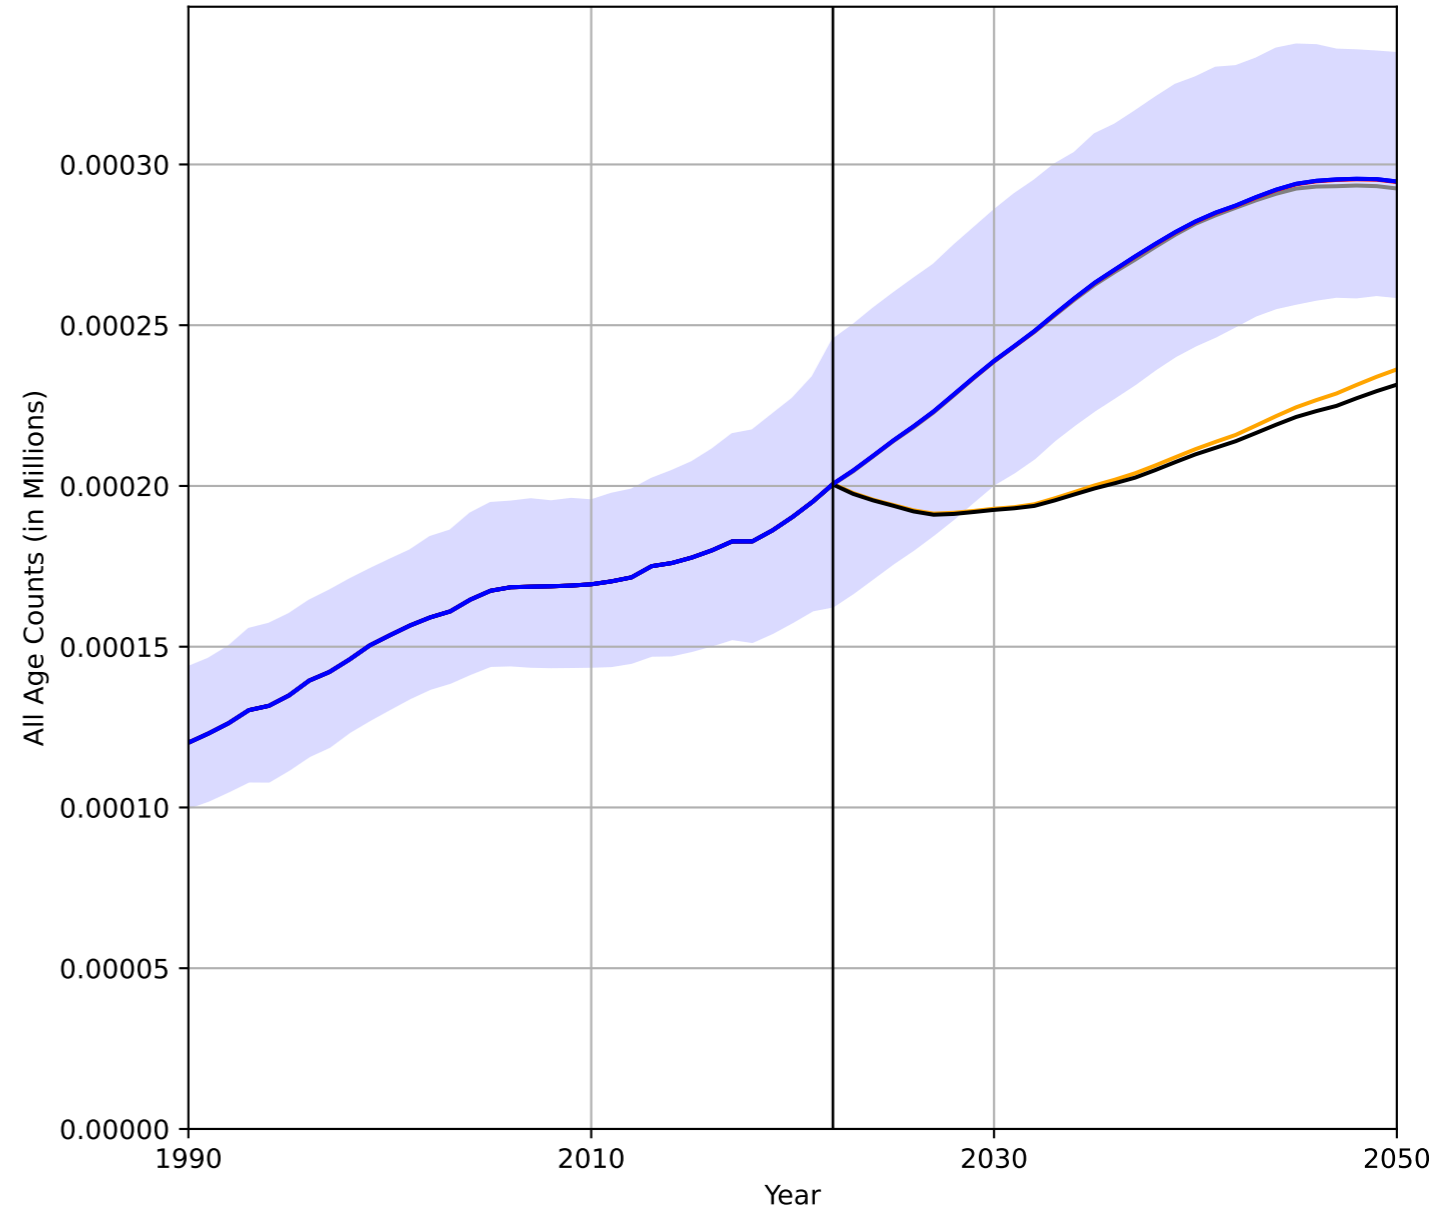

# Papua New Guinea

Supplemental Results Figure S11. All-cause age standardised death rates (A) and all age death counts (B), for the past and for five future scenarios, 1990–2050

1782

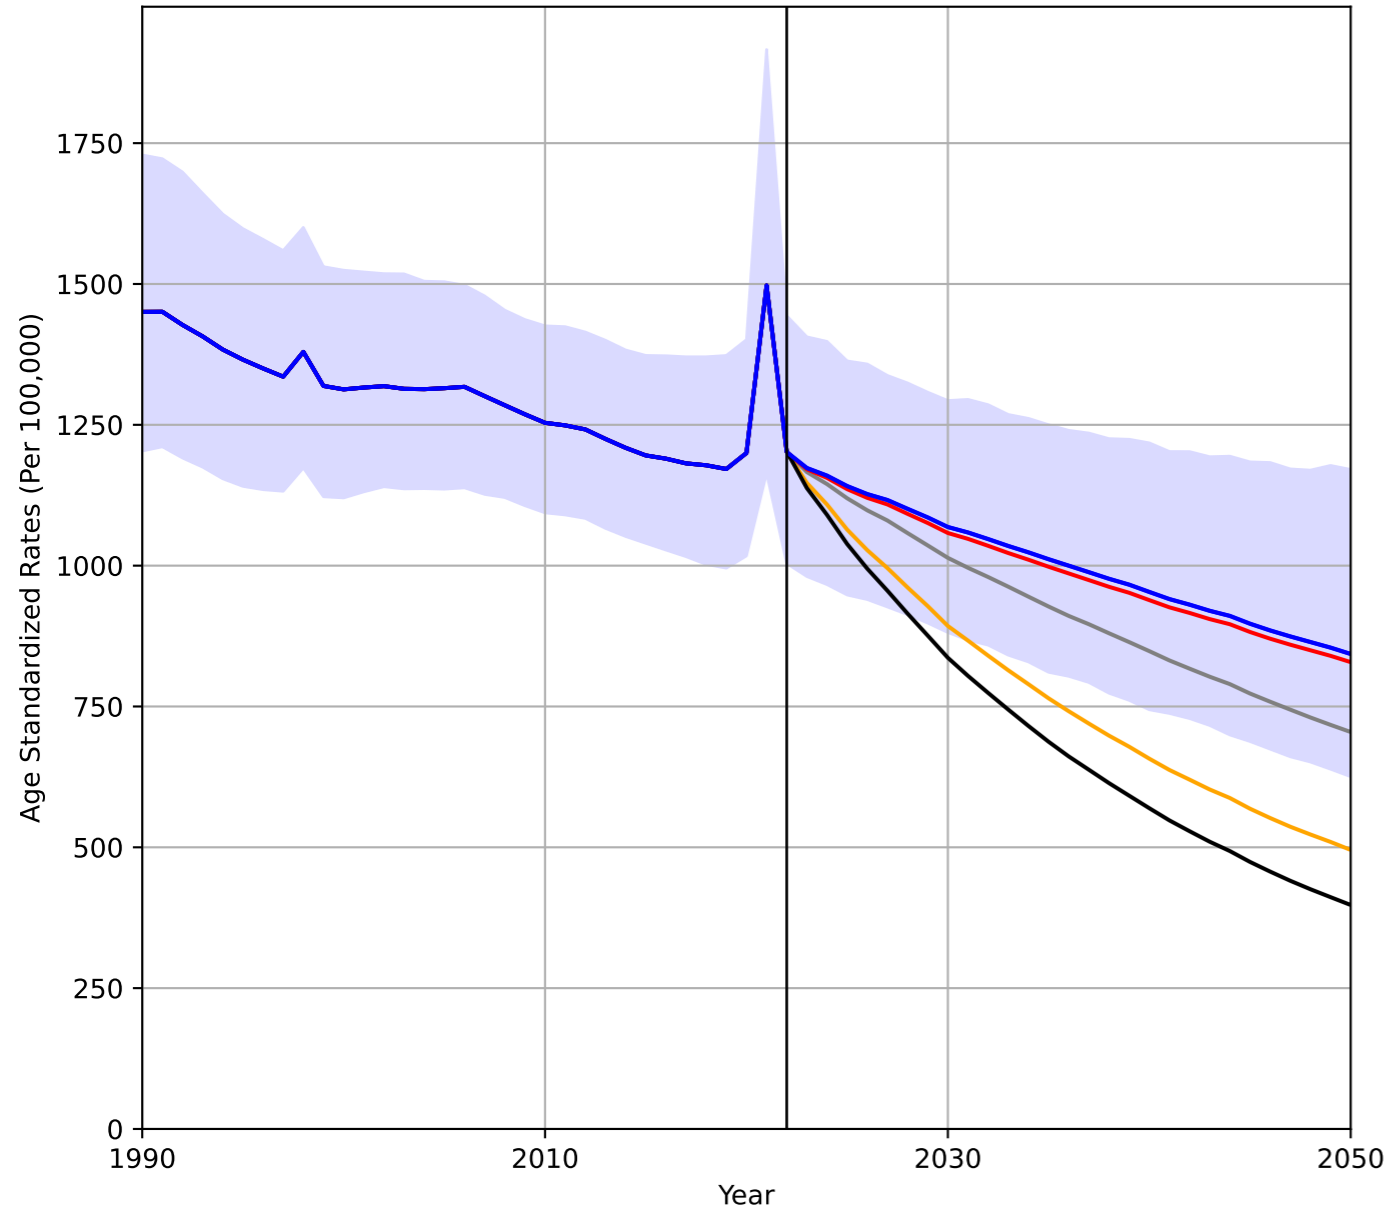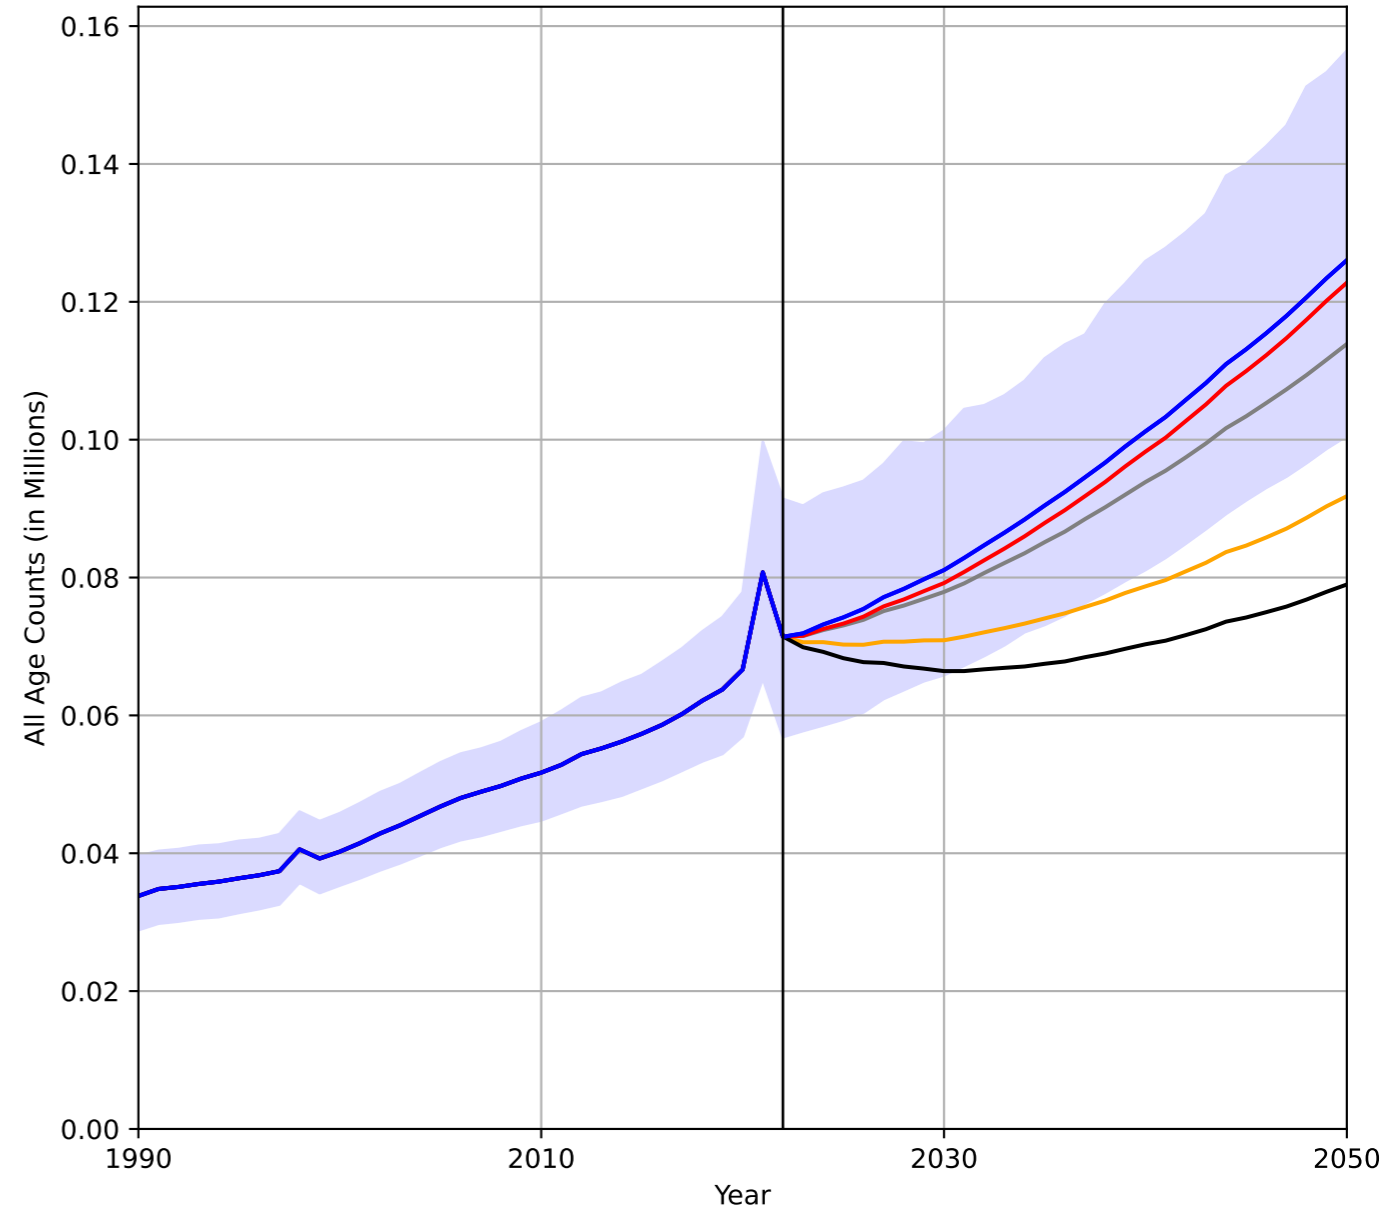

# Samoa

Supplemental Results Figure S11. All-cause age standardised death rates (A) and all age death counts (B), for the past and for five future scenarios, 1990–2050

1783

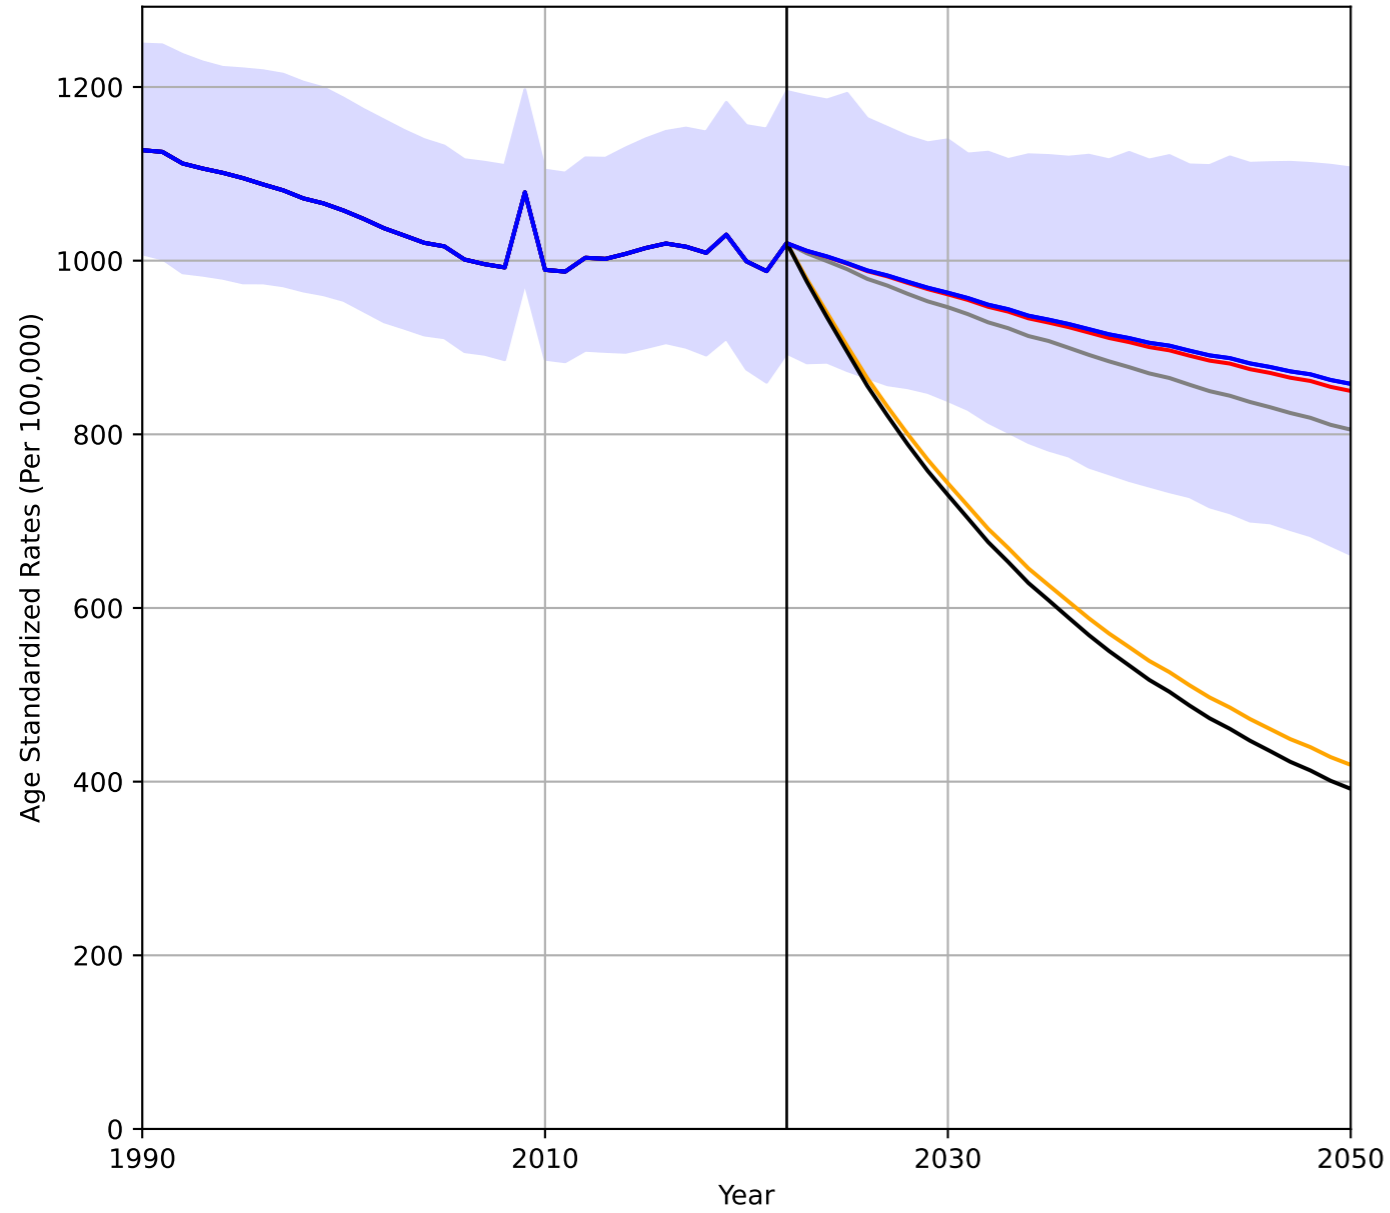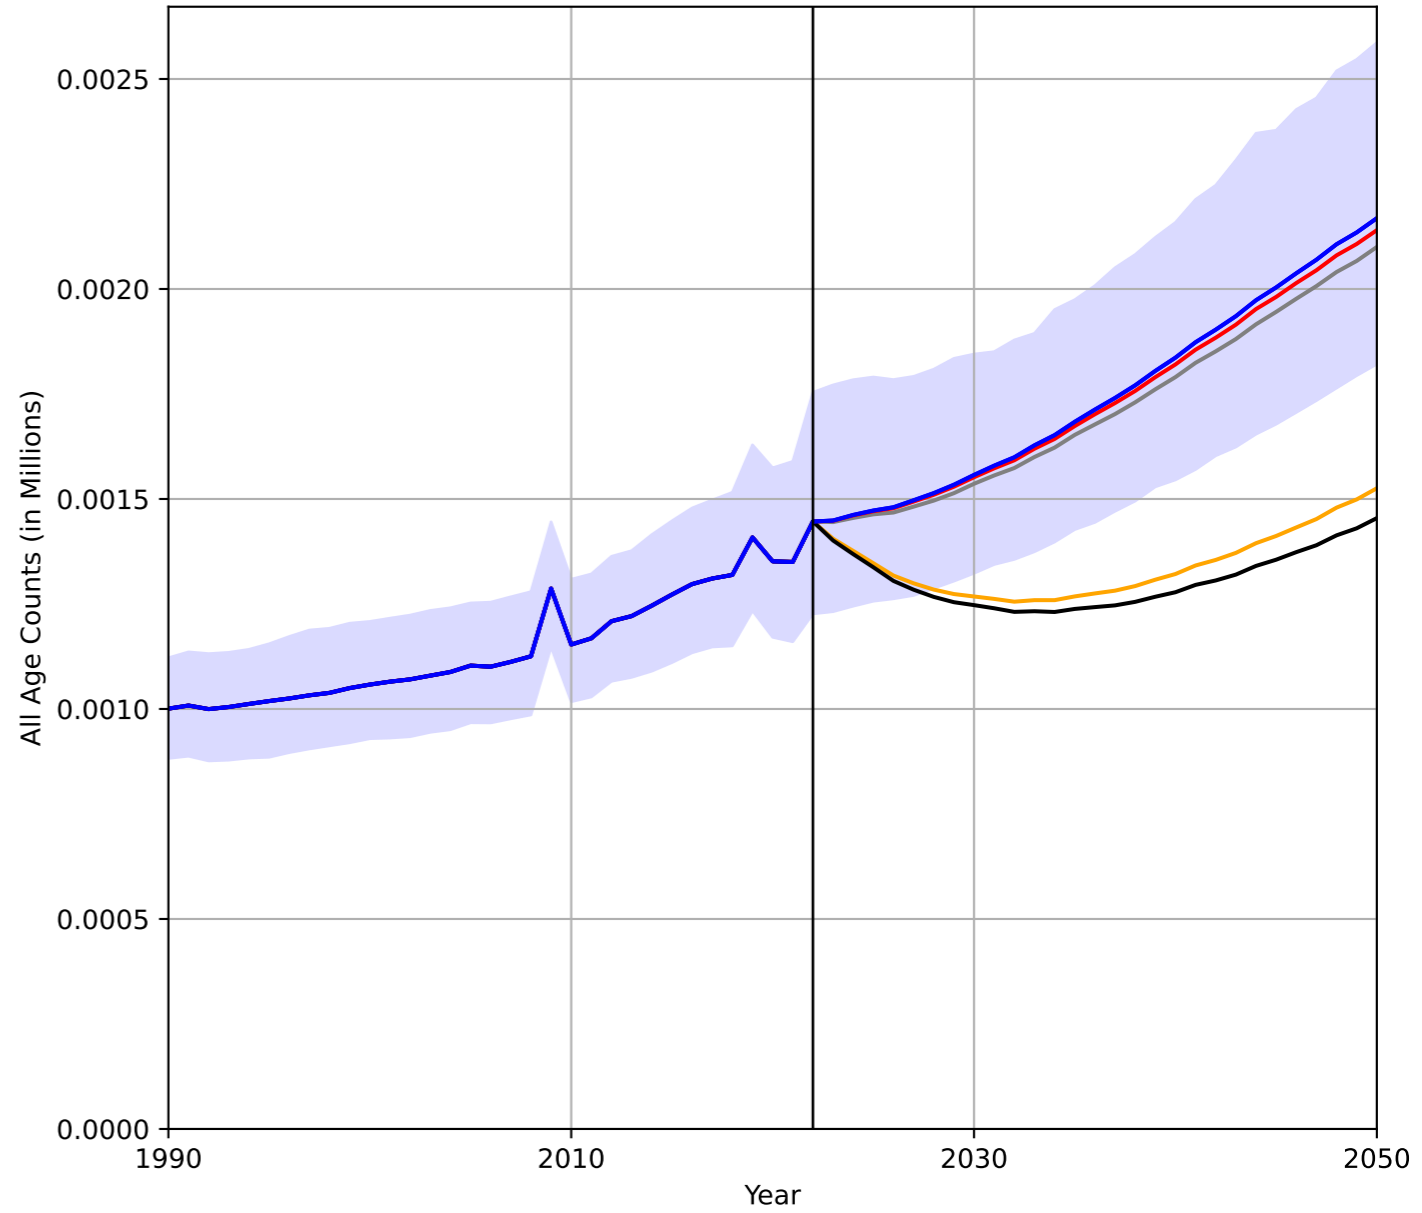



# Solomon Islands

1784

Supplemental Results Figure S11. All-cause age standardised death rates (A) and all age death counts (B), for the past and for five future scenarios, 1990–2050

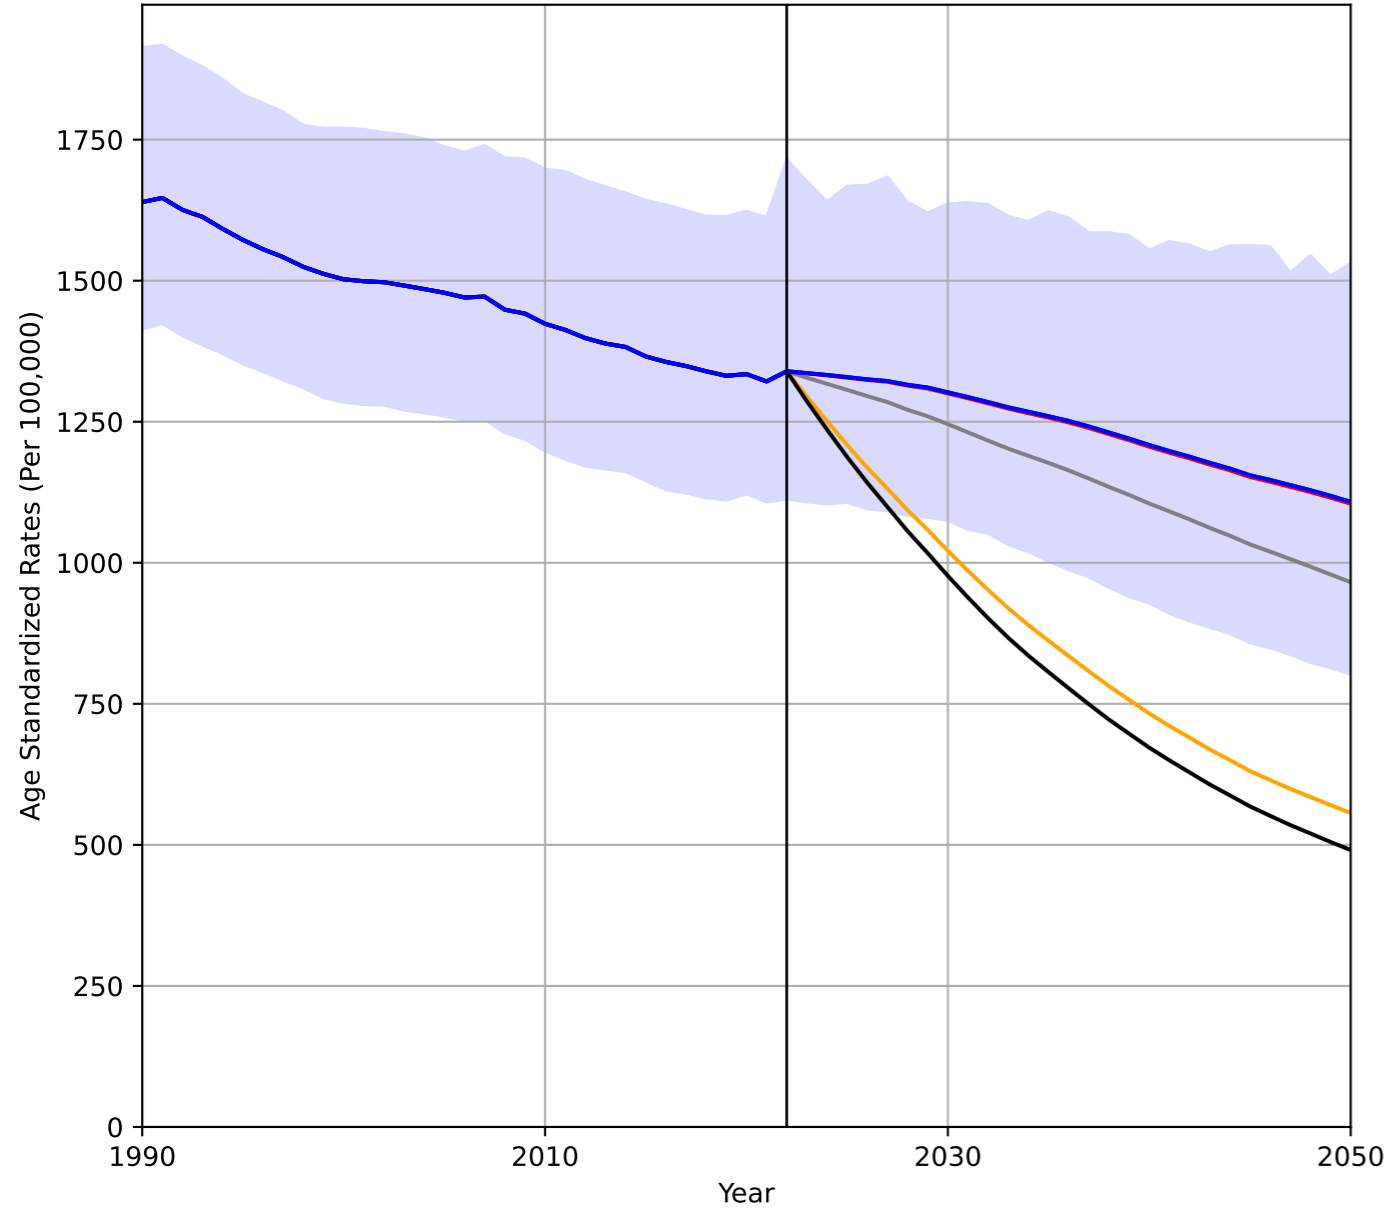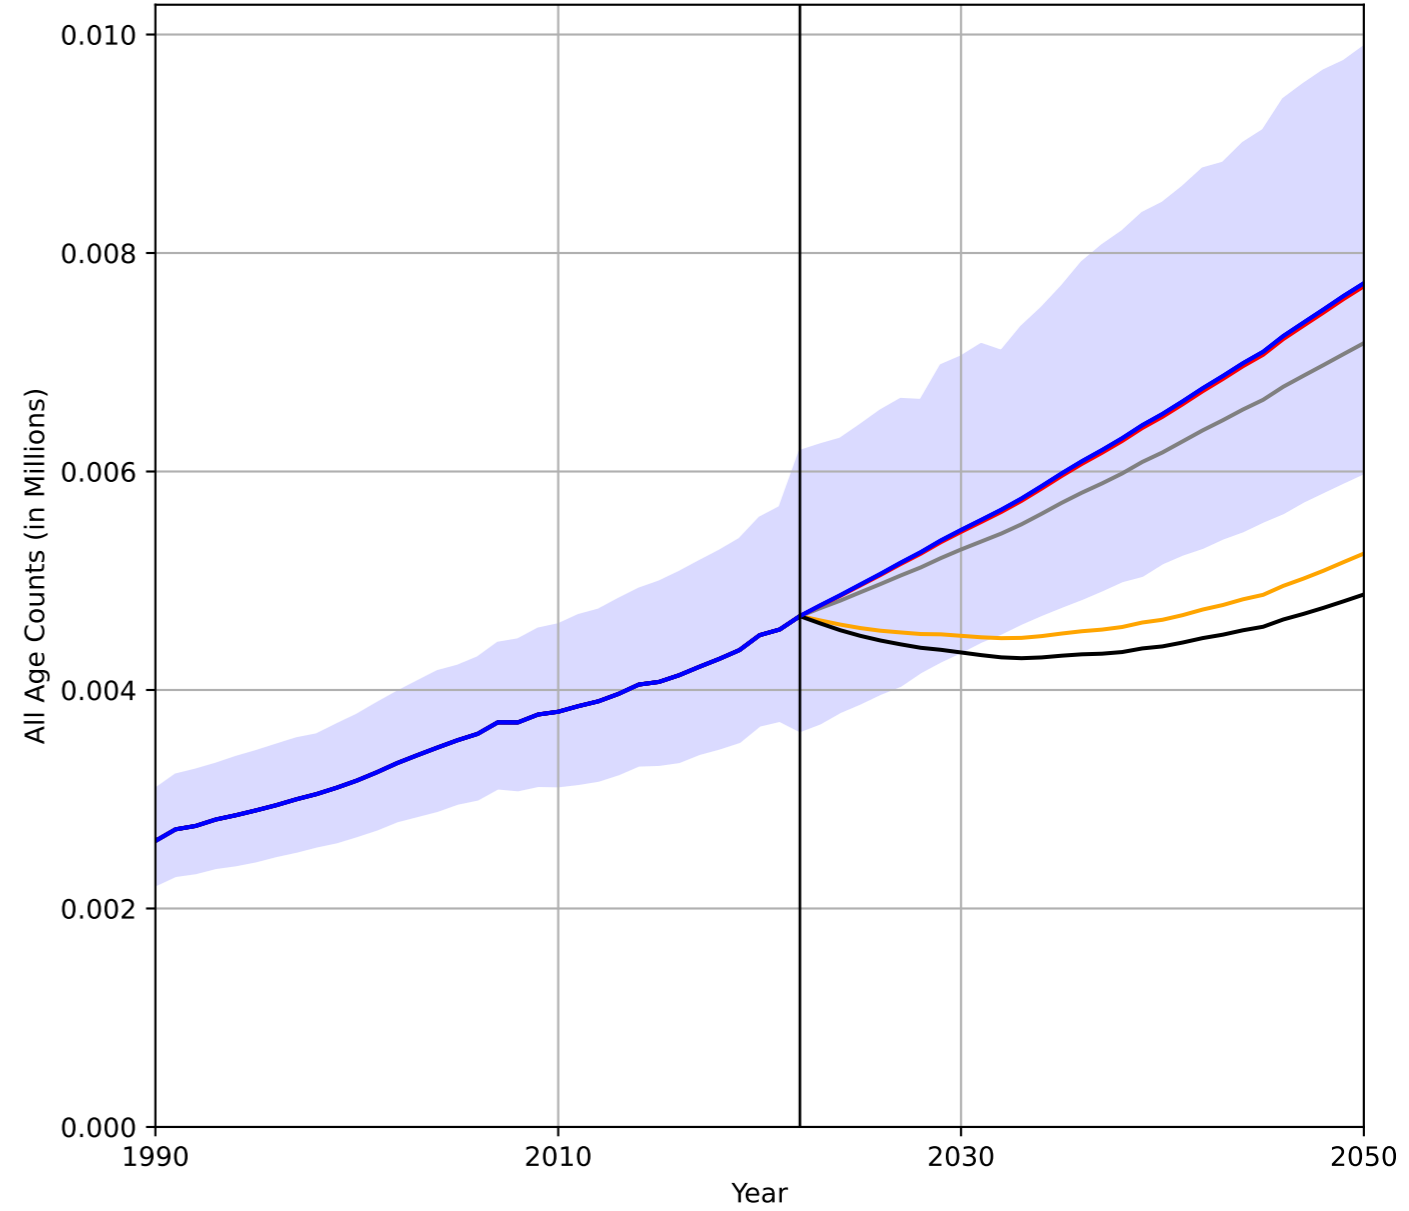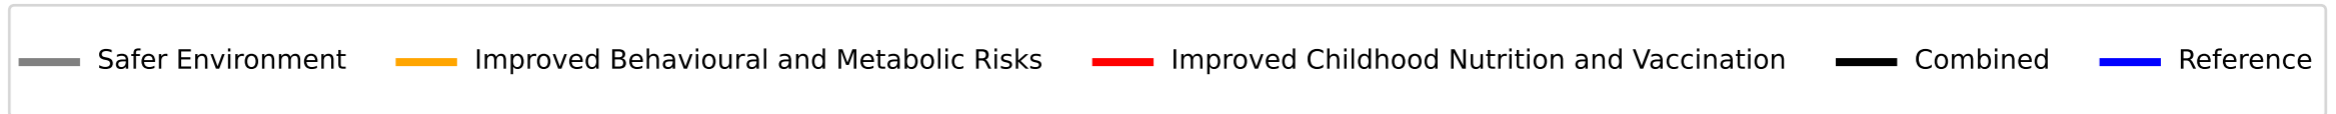

# Tokelau

Supplemental Results Figure S11. All-cause age standardised death rates (A) and all age death counts (B), for the past and for five future scenarios, 1990–2050

1785

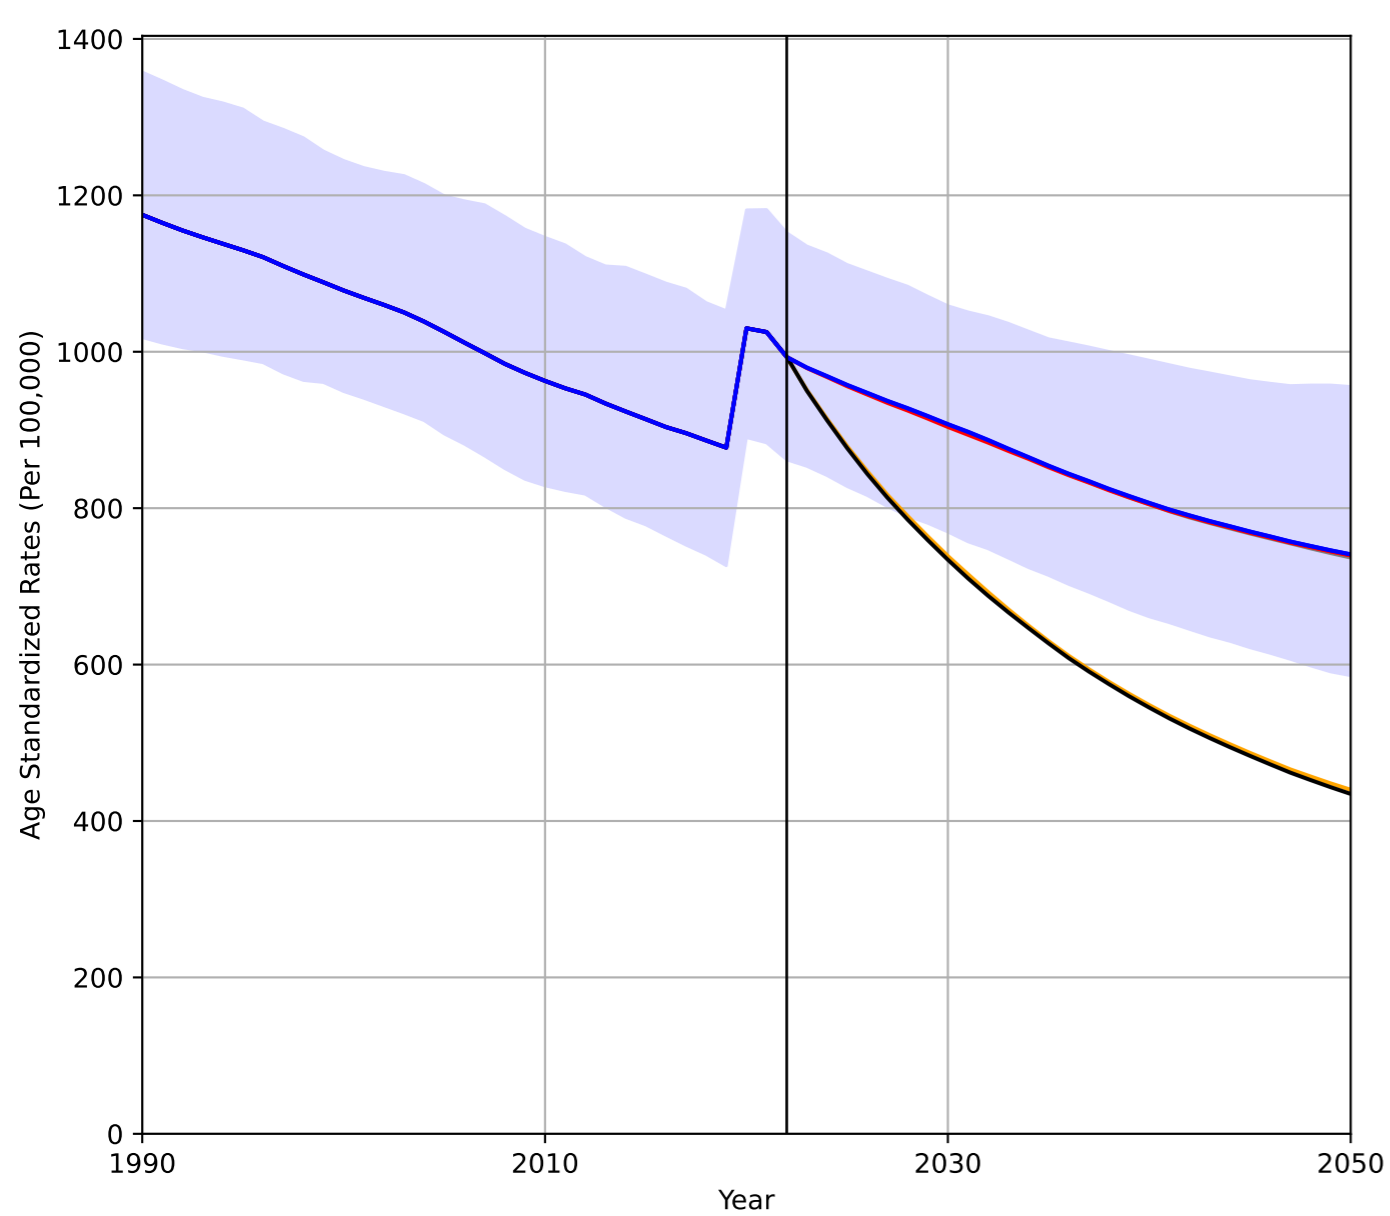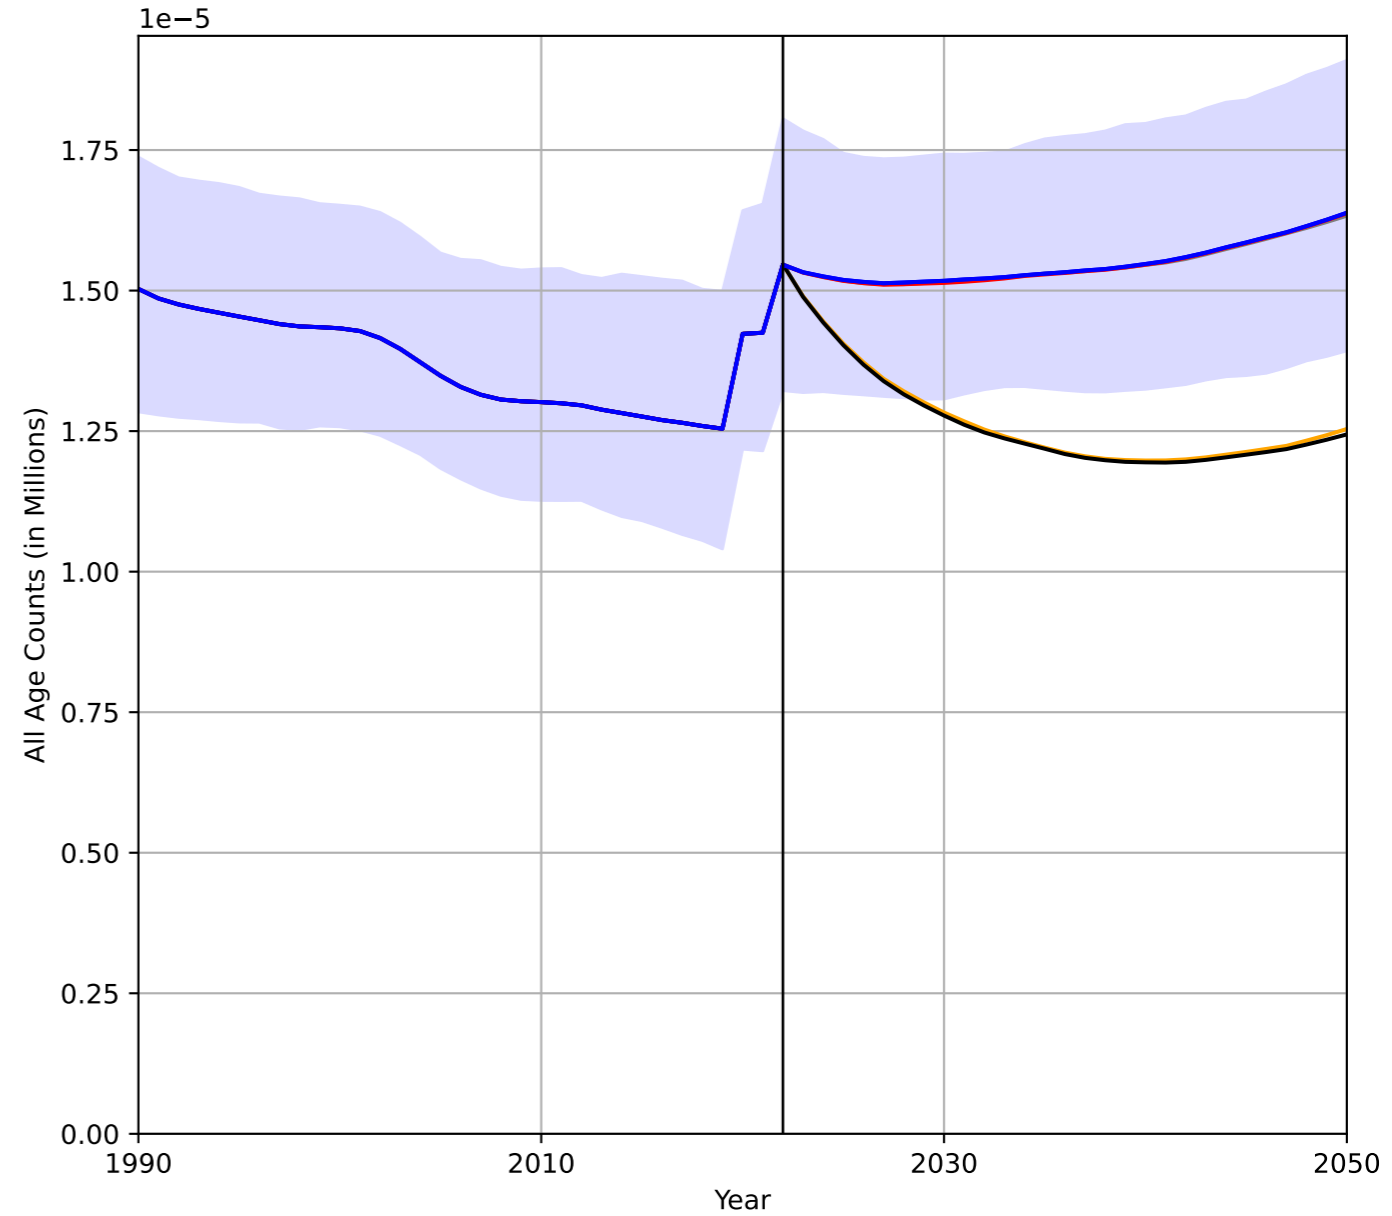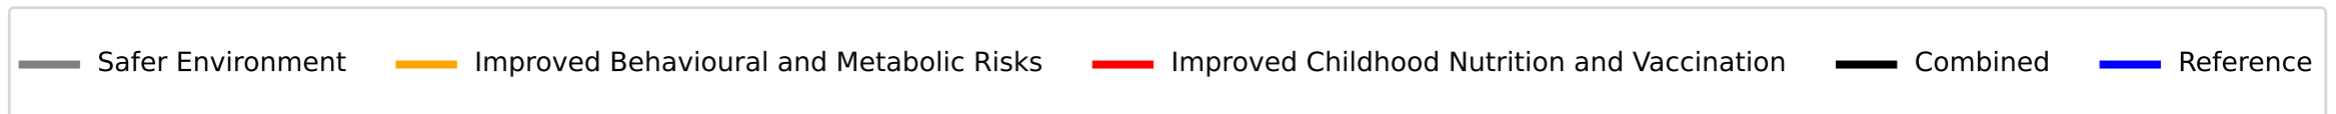

# Tonga

Supplemental Results Figure S11. All-cause age standardised death rates (A) and all age death counts (B), for the past and for five future scenarios, 1990–2050

1786

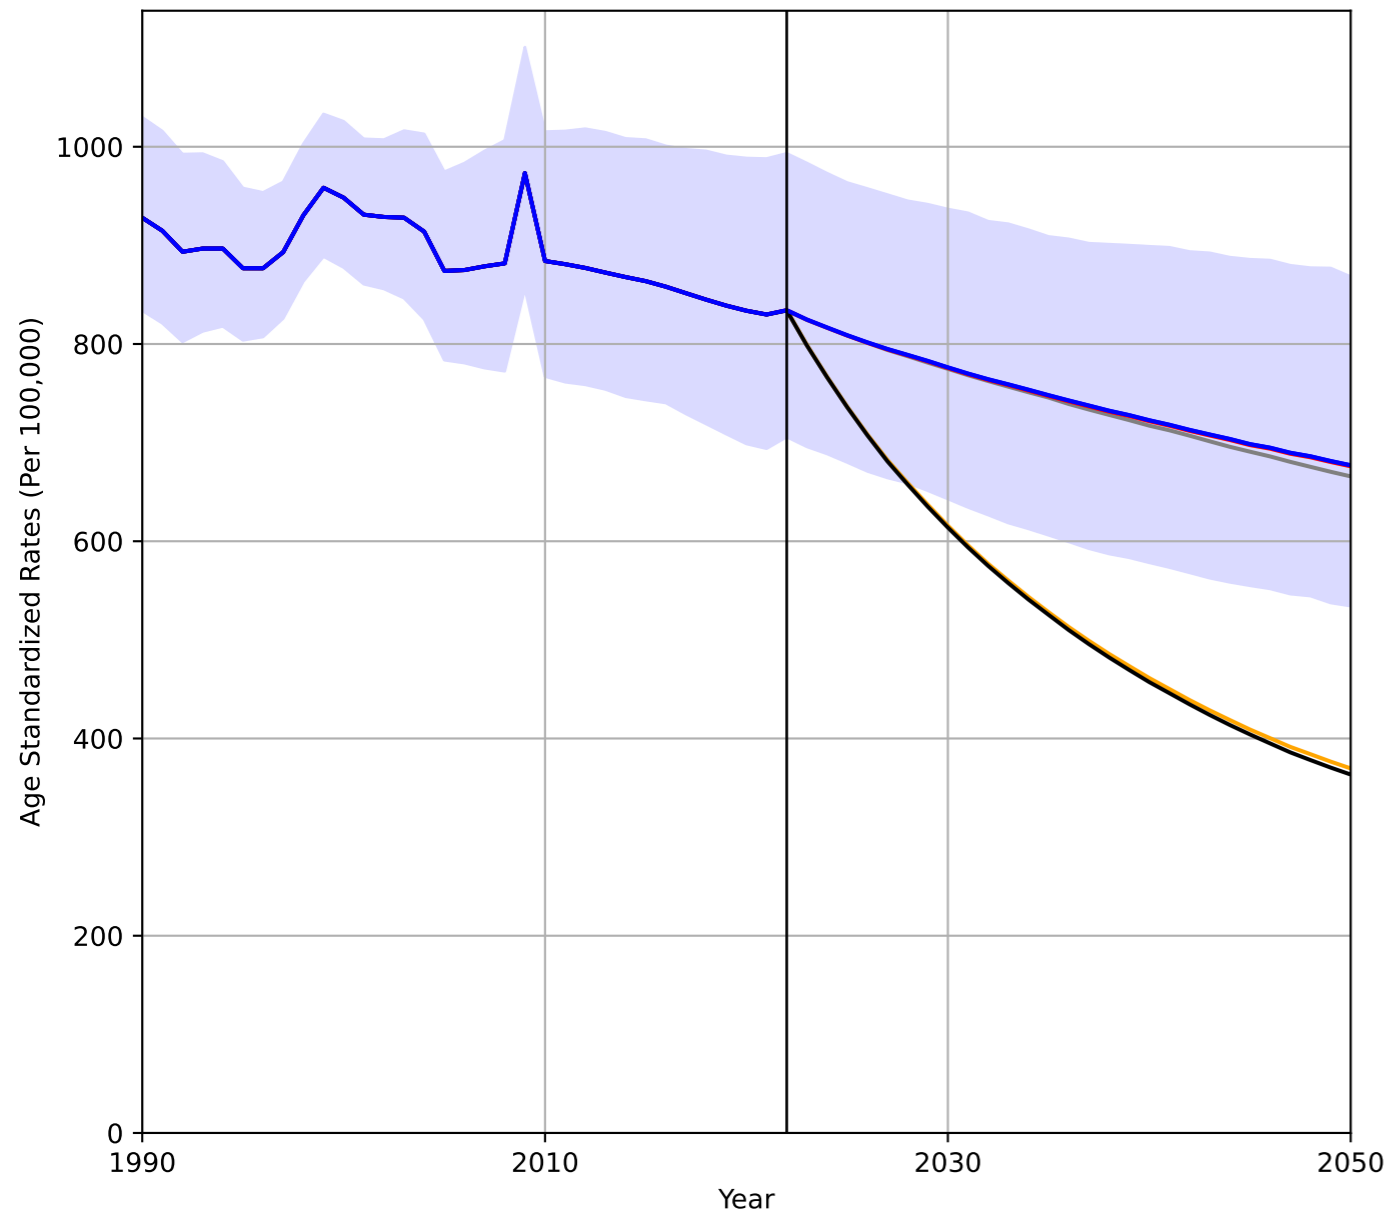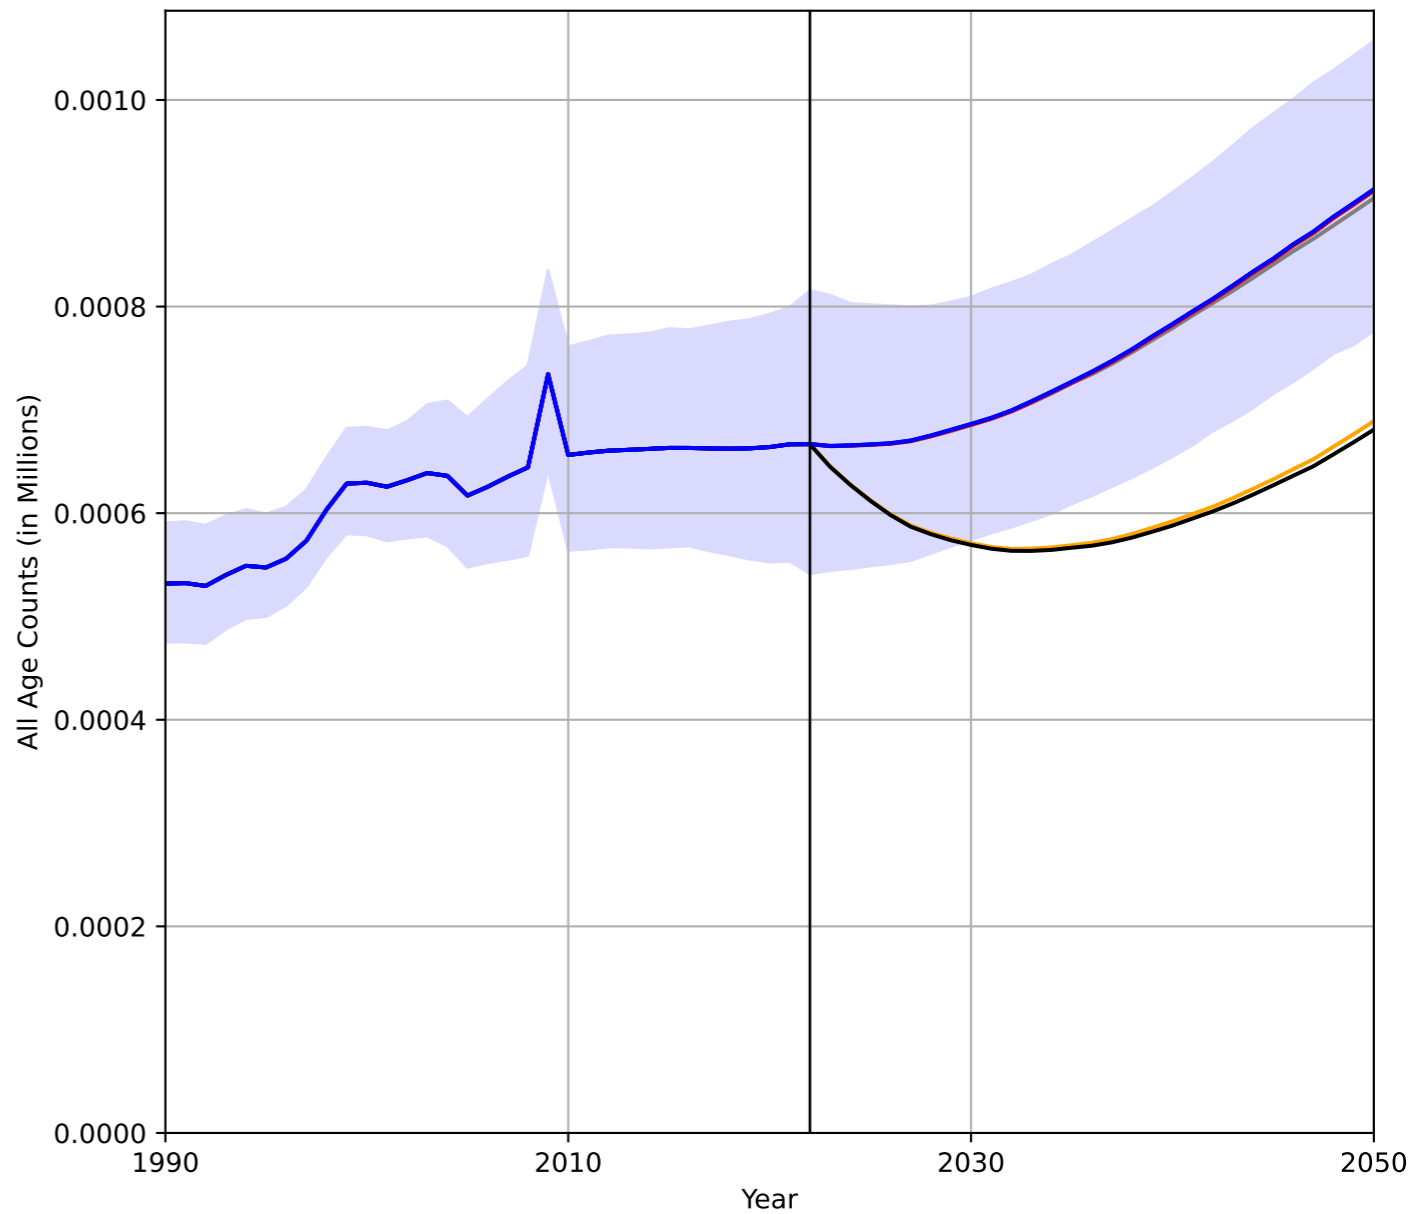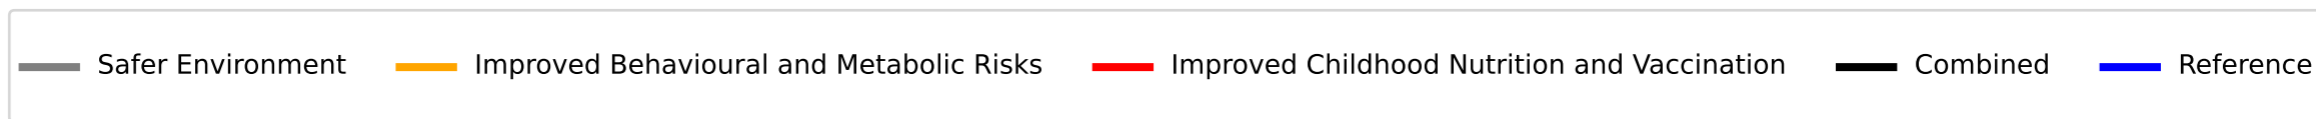

# Tuvalu

Supplemental Results Figure S11. All-cause age standardised death rates (A) and all age death counts (B), for the past and for five future scenarios, 1990–2050

1787

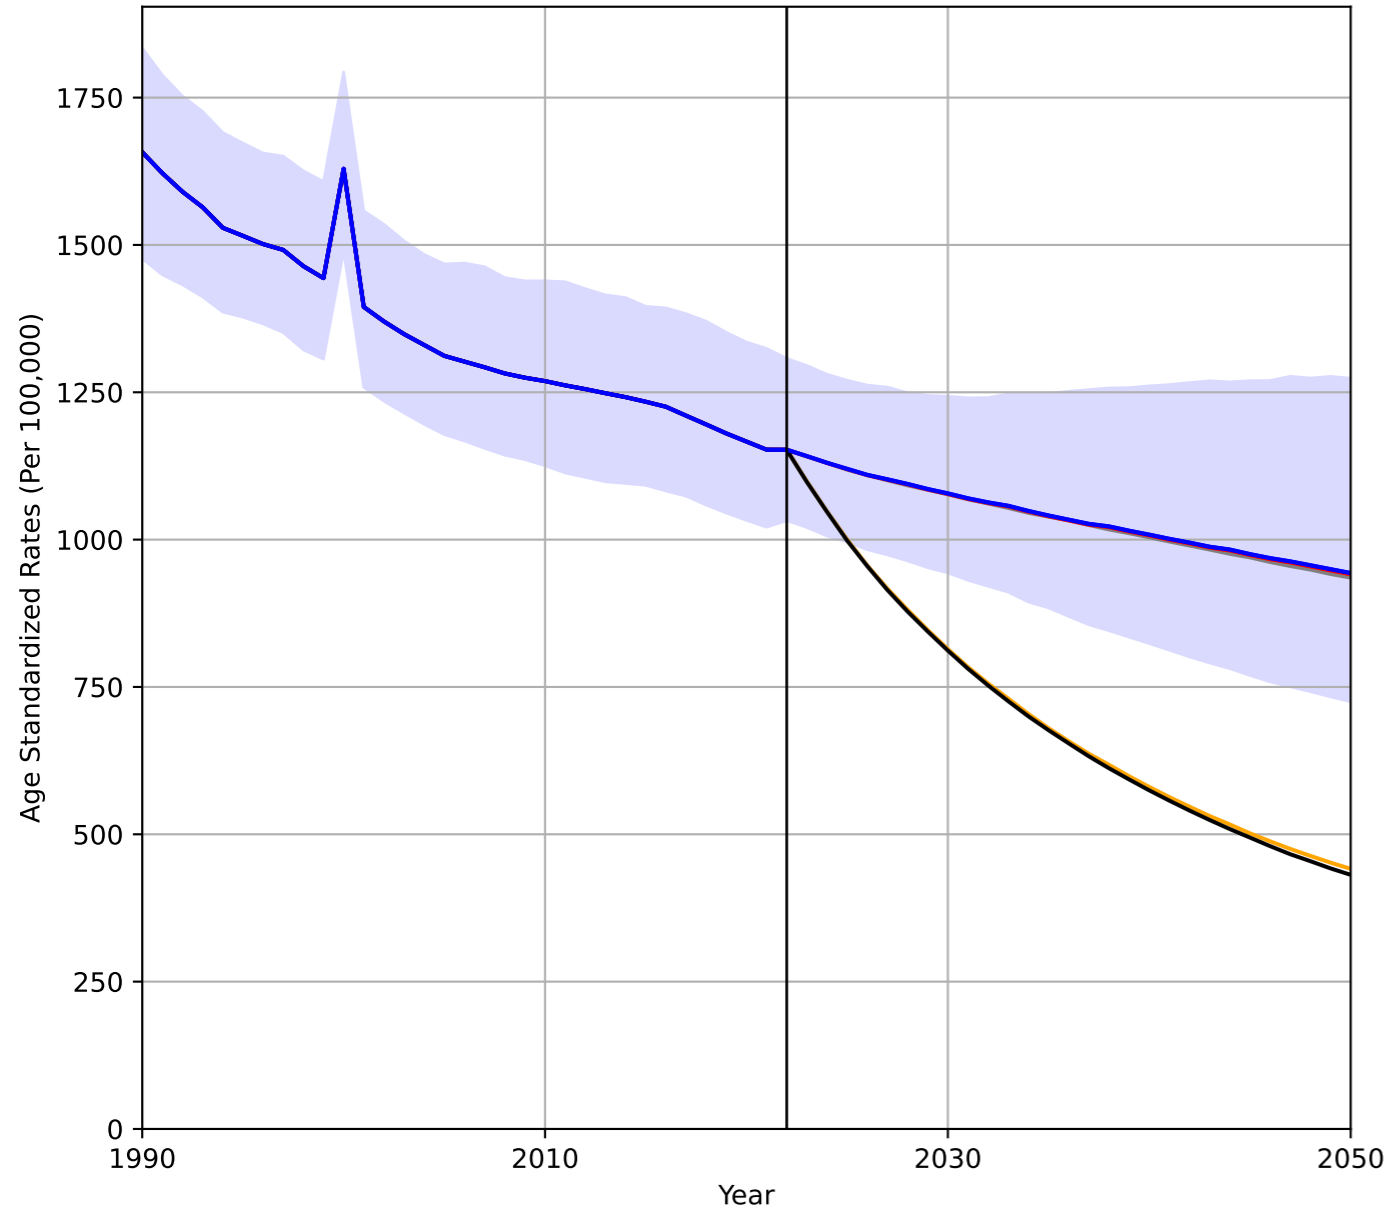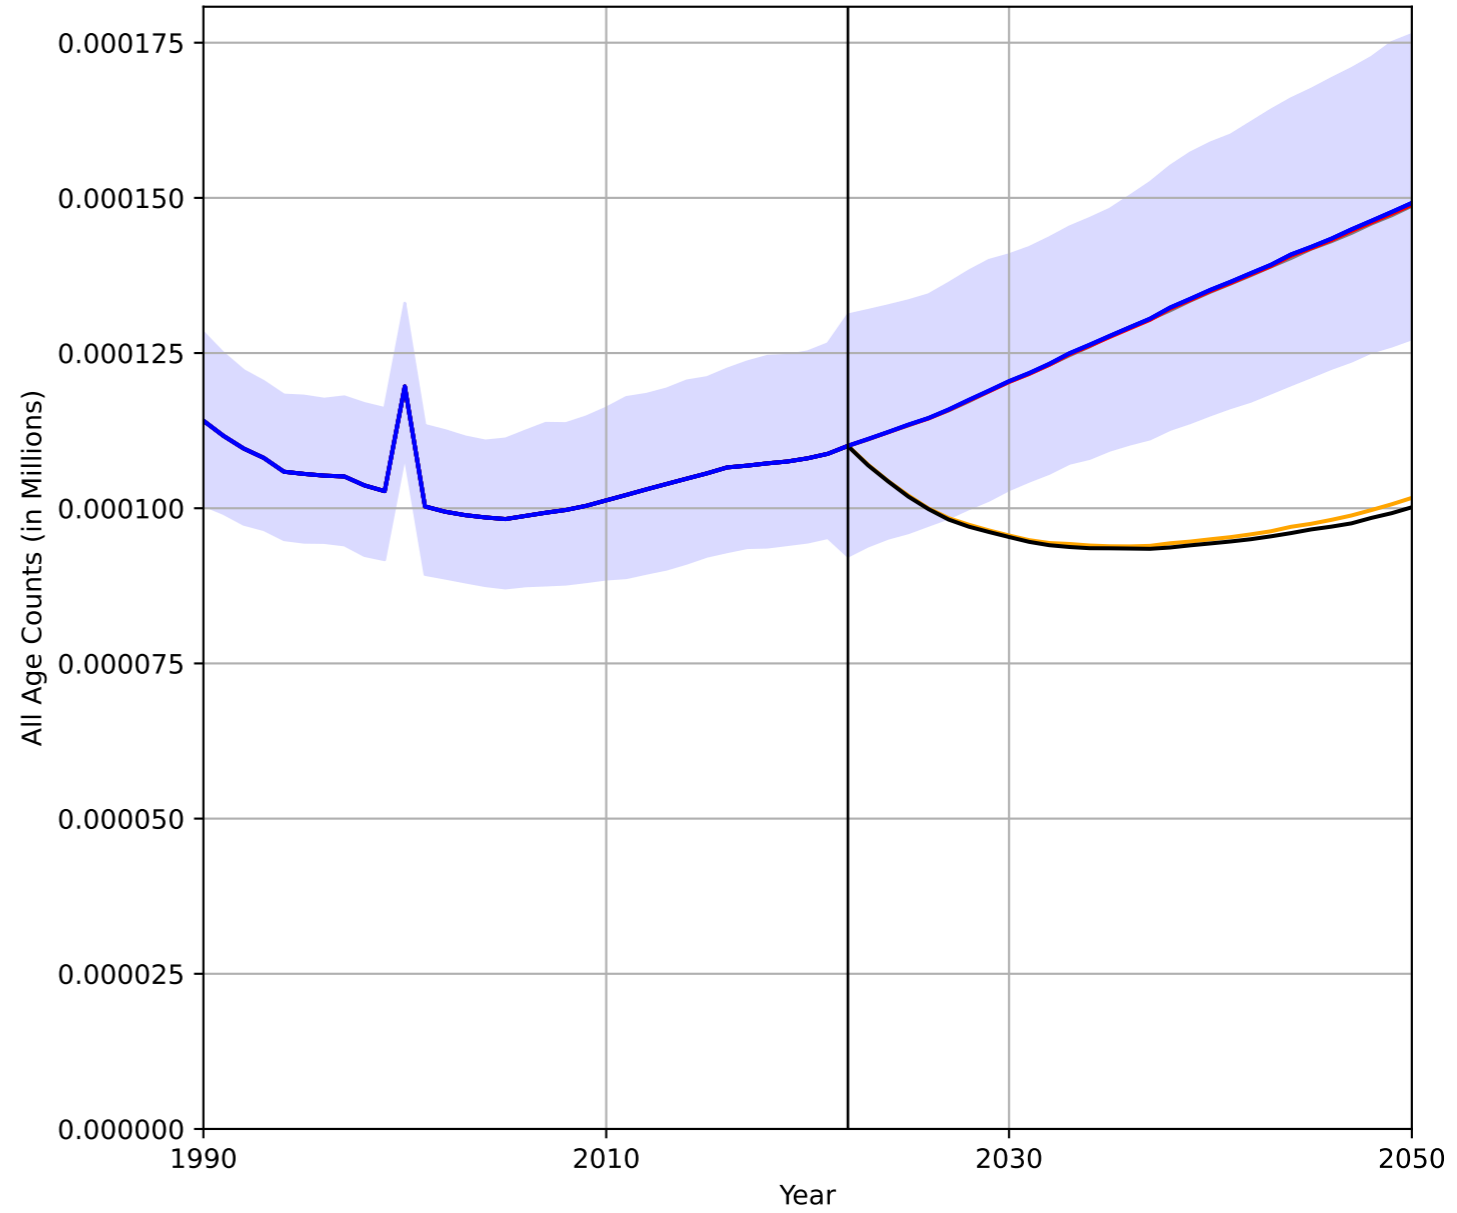

# Vanuatu

Supplemental Results Figure S11. All-cause age standardised death rates (A) and all age death counts (B), for the past and for five future scenarios, 1990–2050

1788

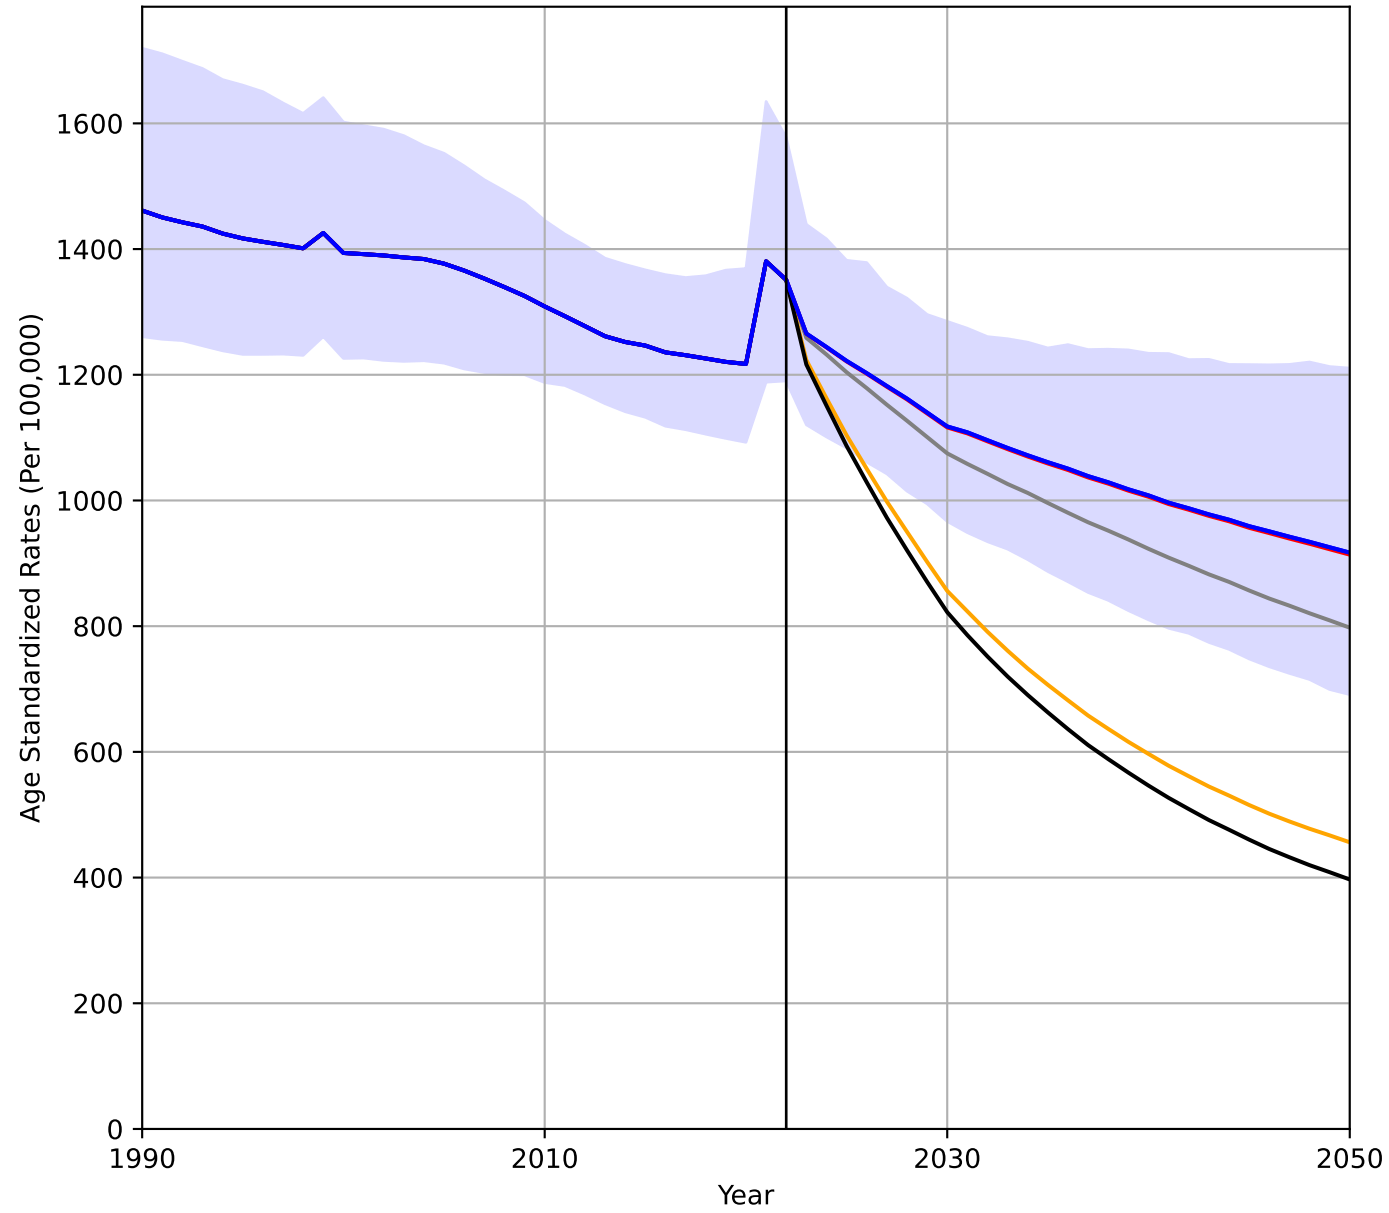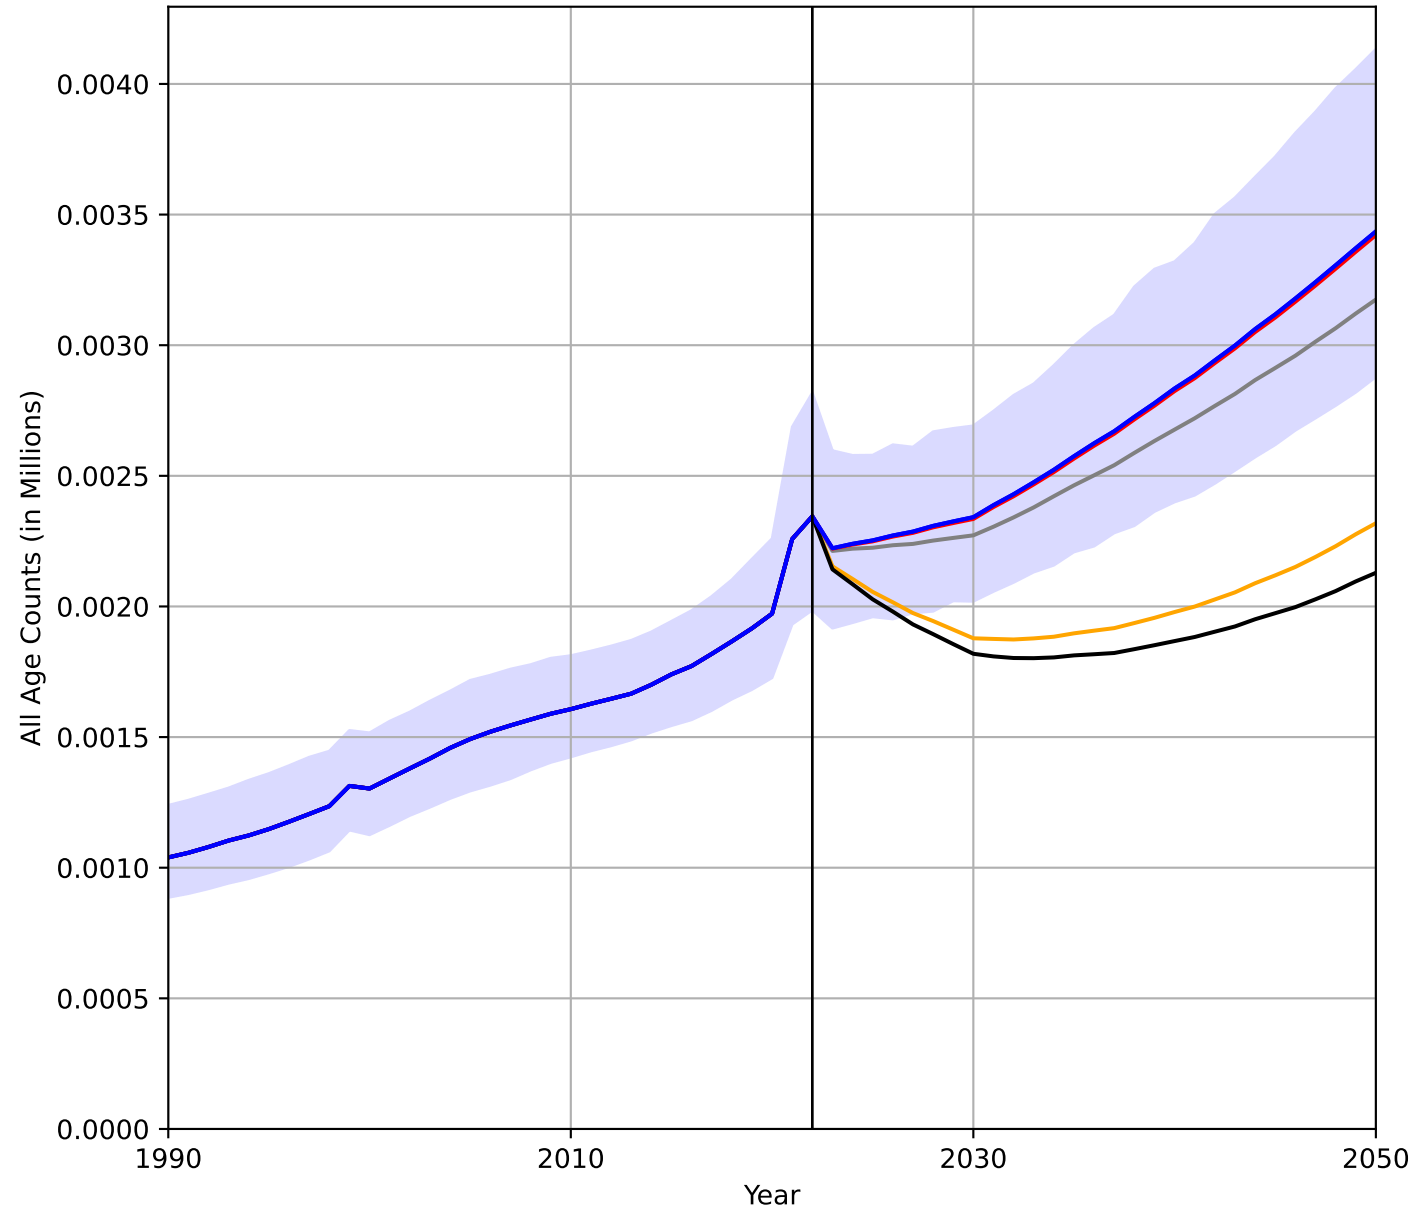

# Cambodia

Supplemental Results Figure S11. All-cause age standardised death rates (A) and all age death counts (B), for the past and for five future scenarios, 1990–2050

1789

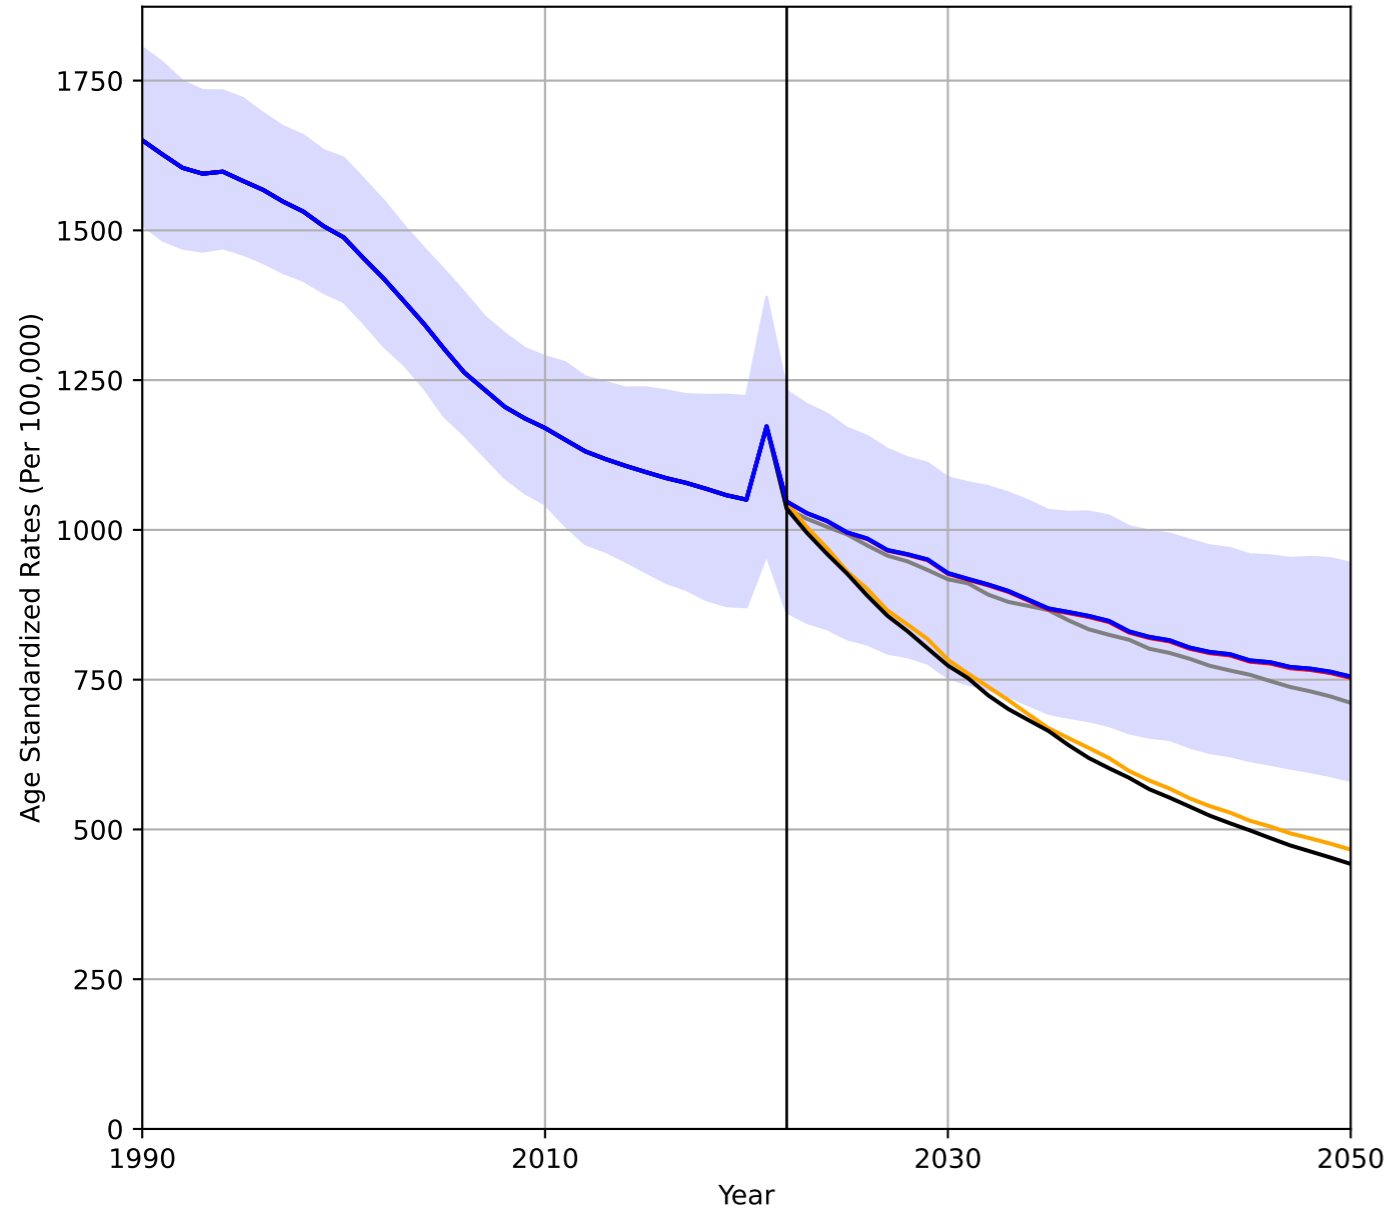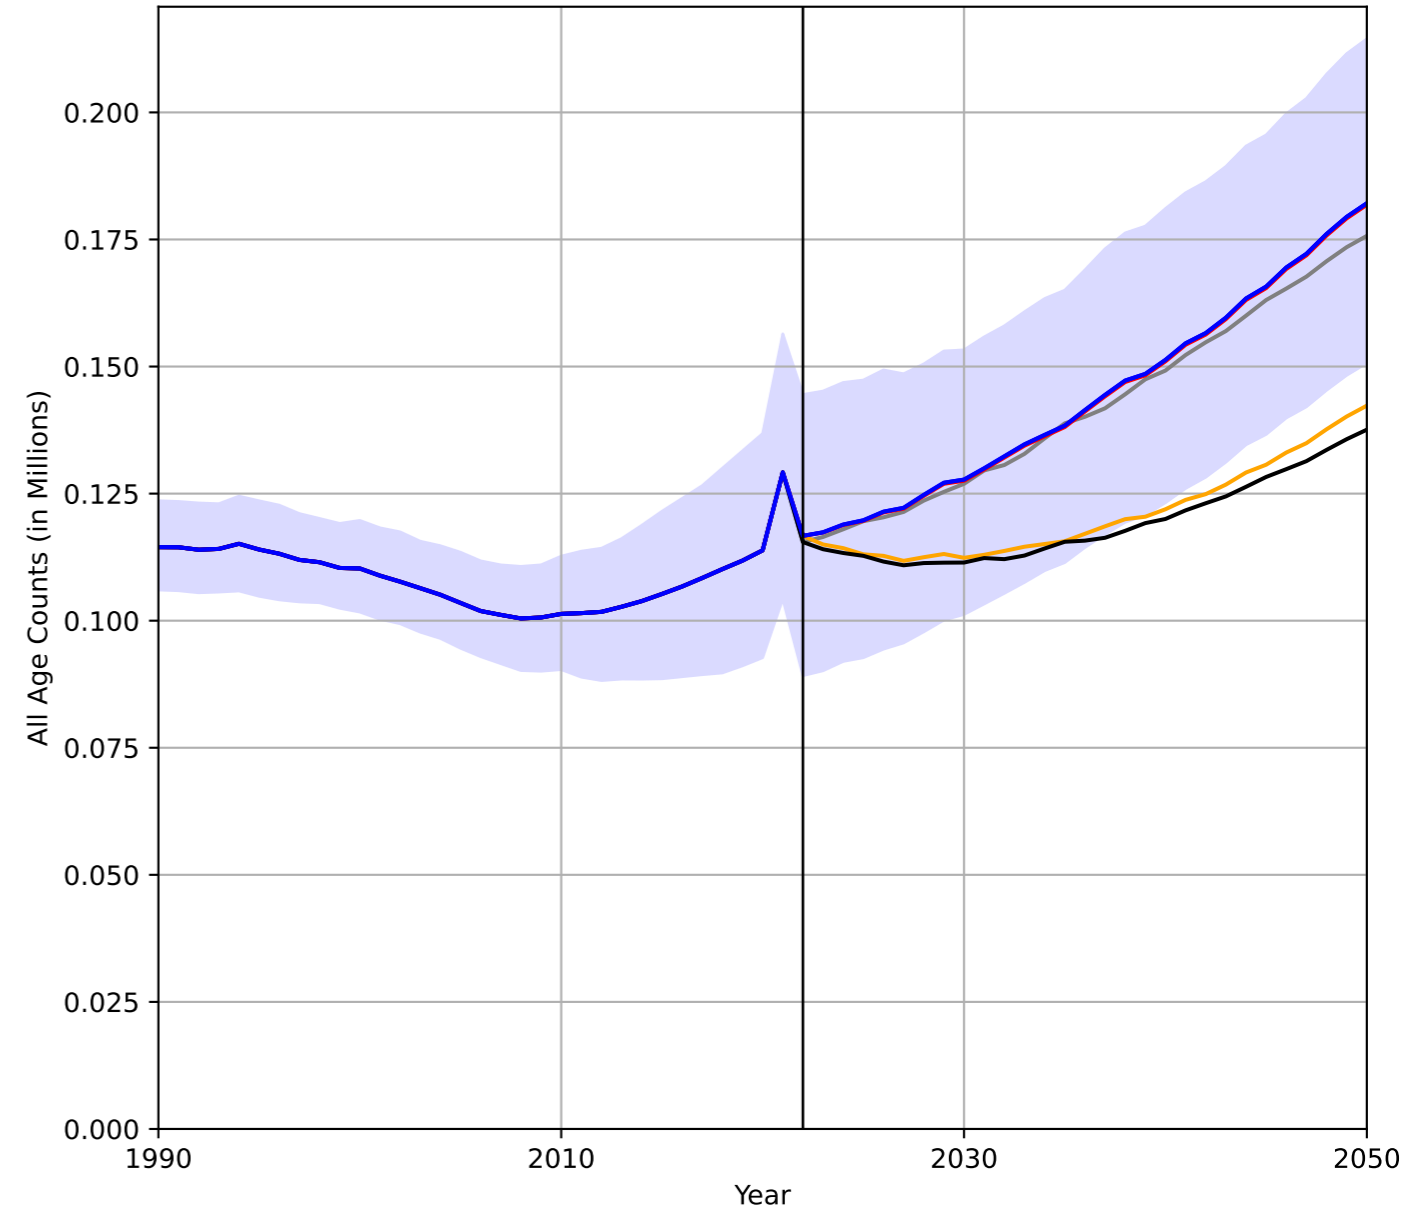

# Indonesia

Supplemental Results Figure S11. All-cause age standardised death rates (A) and all age death counts (B), for the past and for five future scenarios, 1990–2050

1790

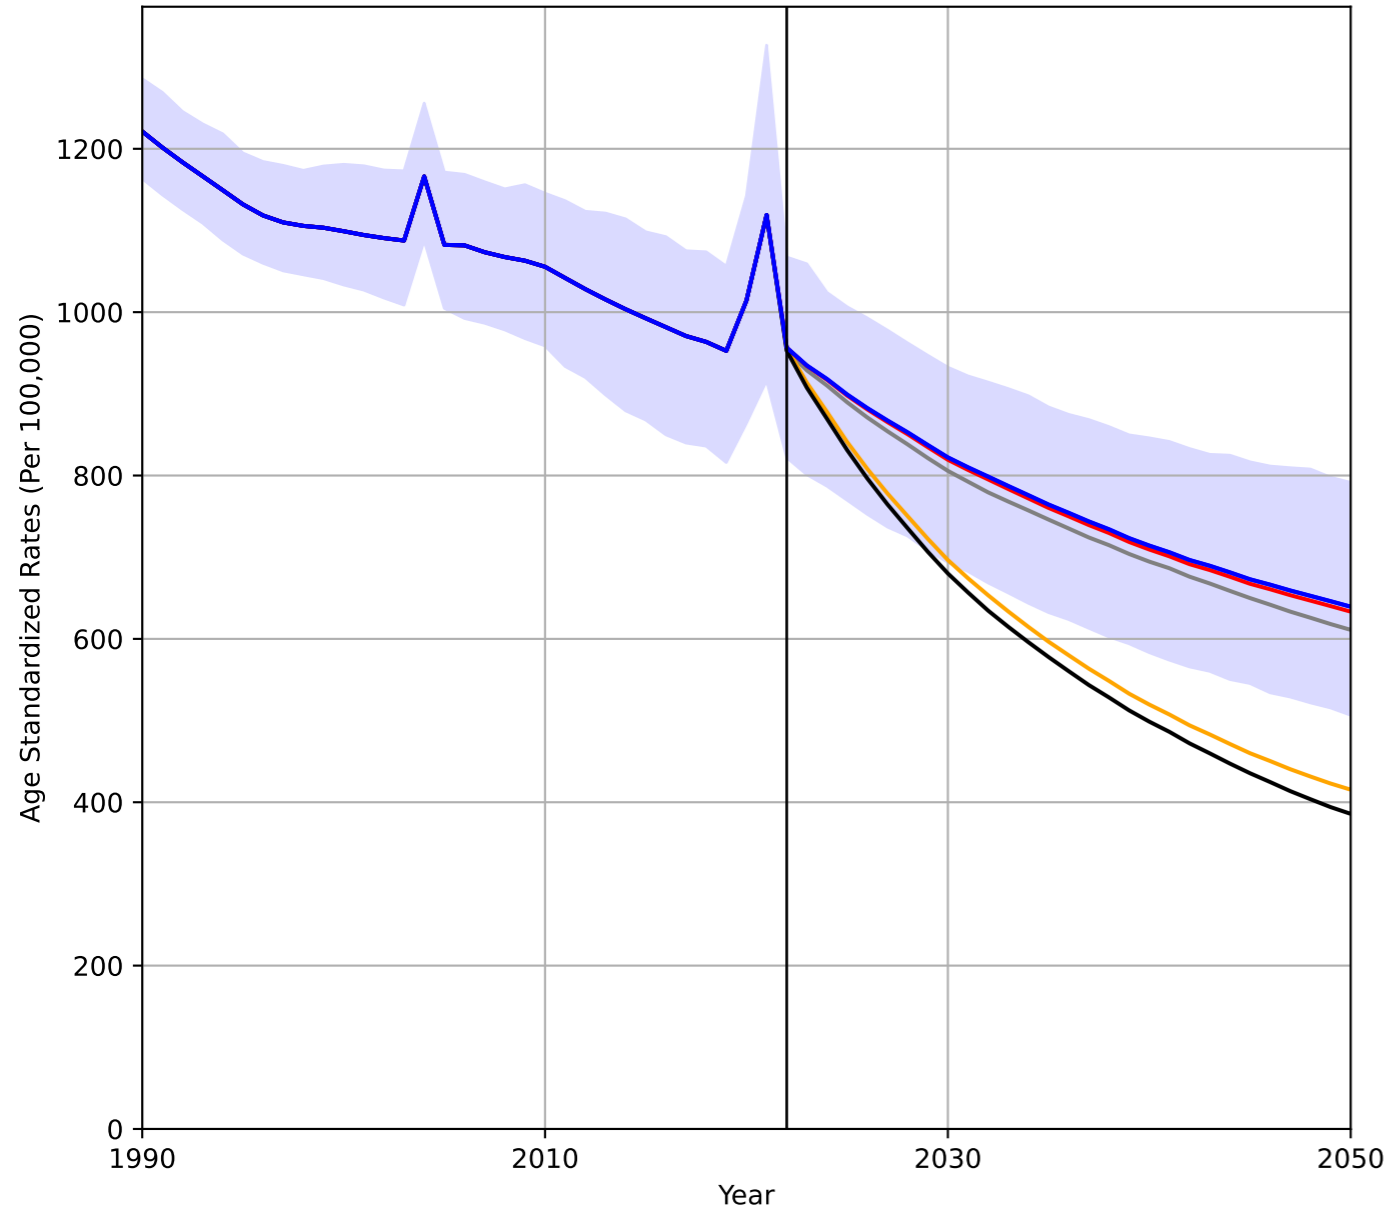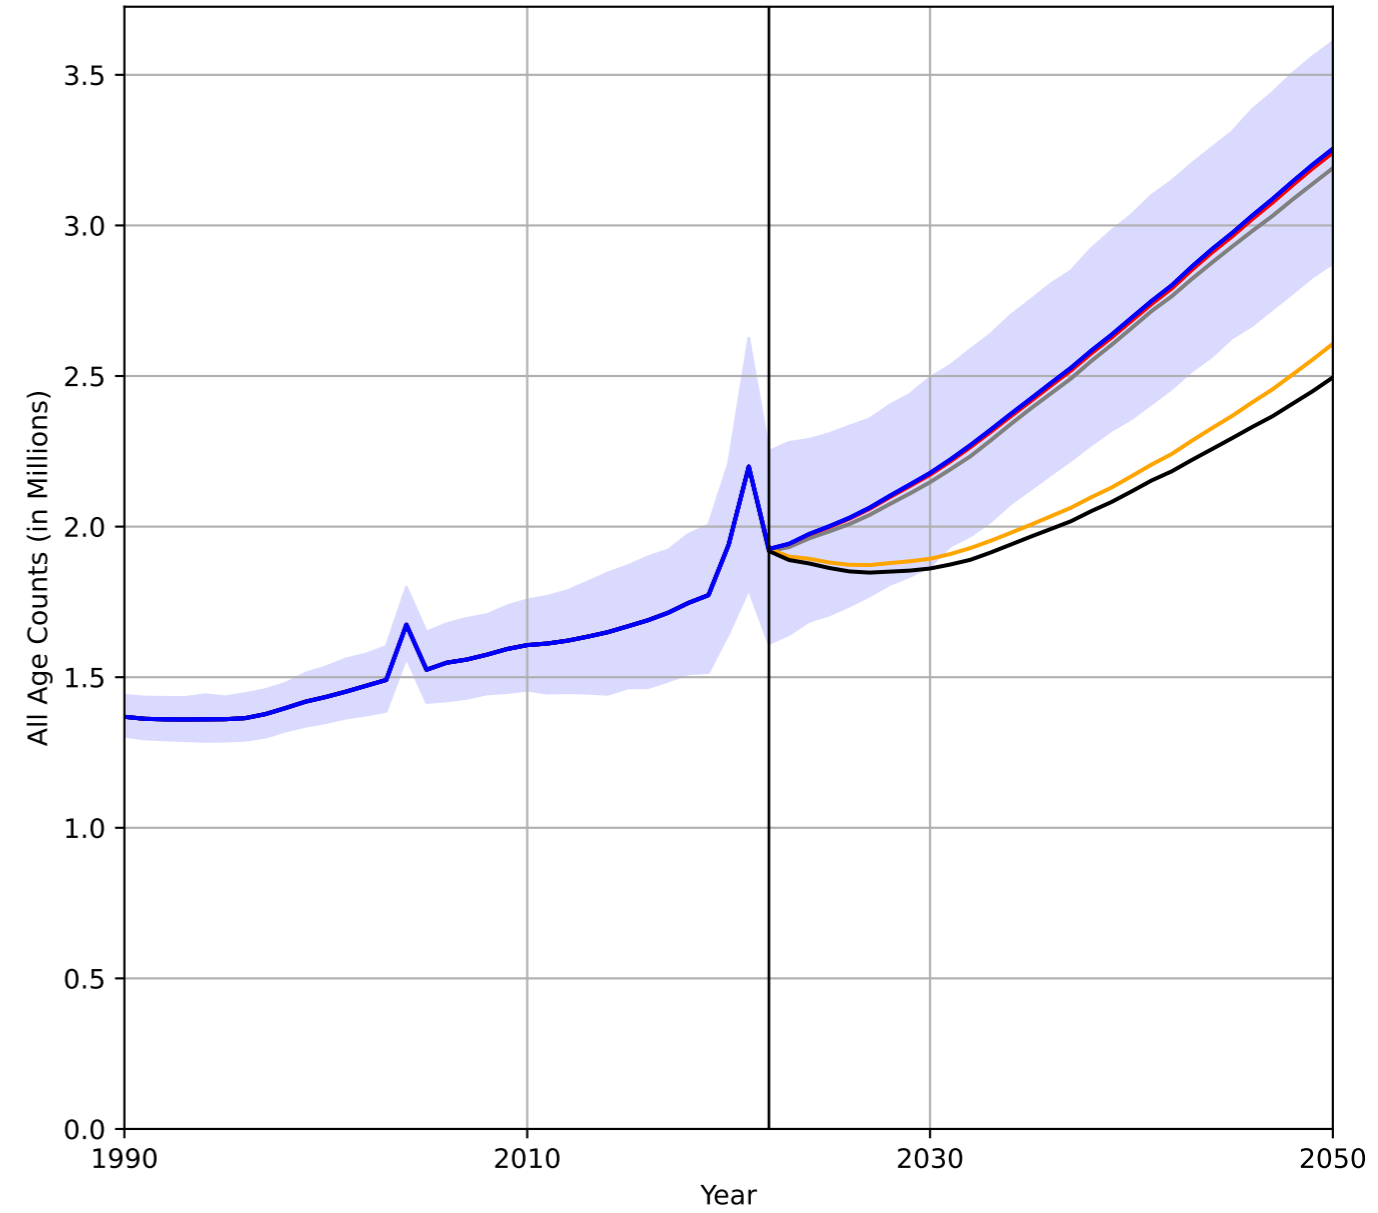

# Laos

Supplemental Results Figure S11. All-cause age standardised death rates (A) and all age death counts (B), for the past and for five future scenarios, 1990–2050

1791

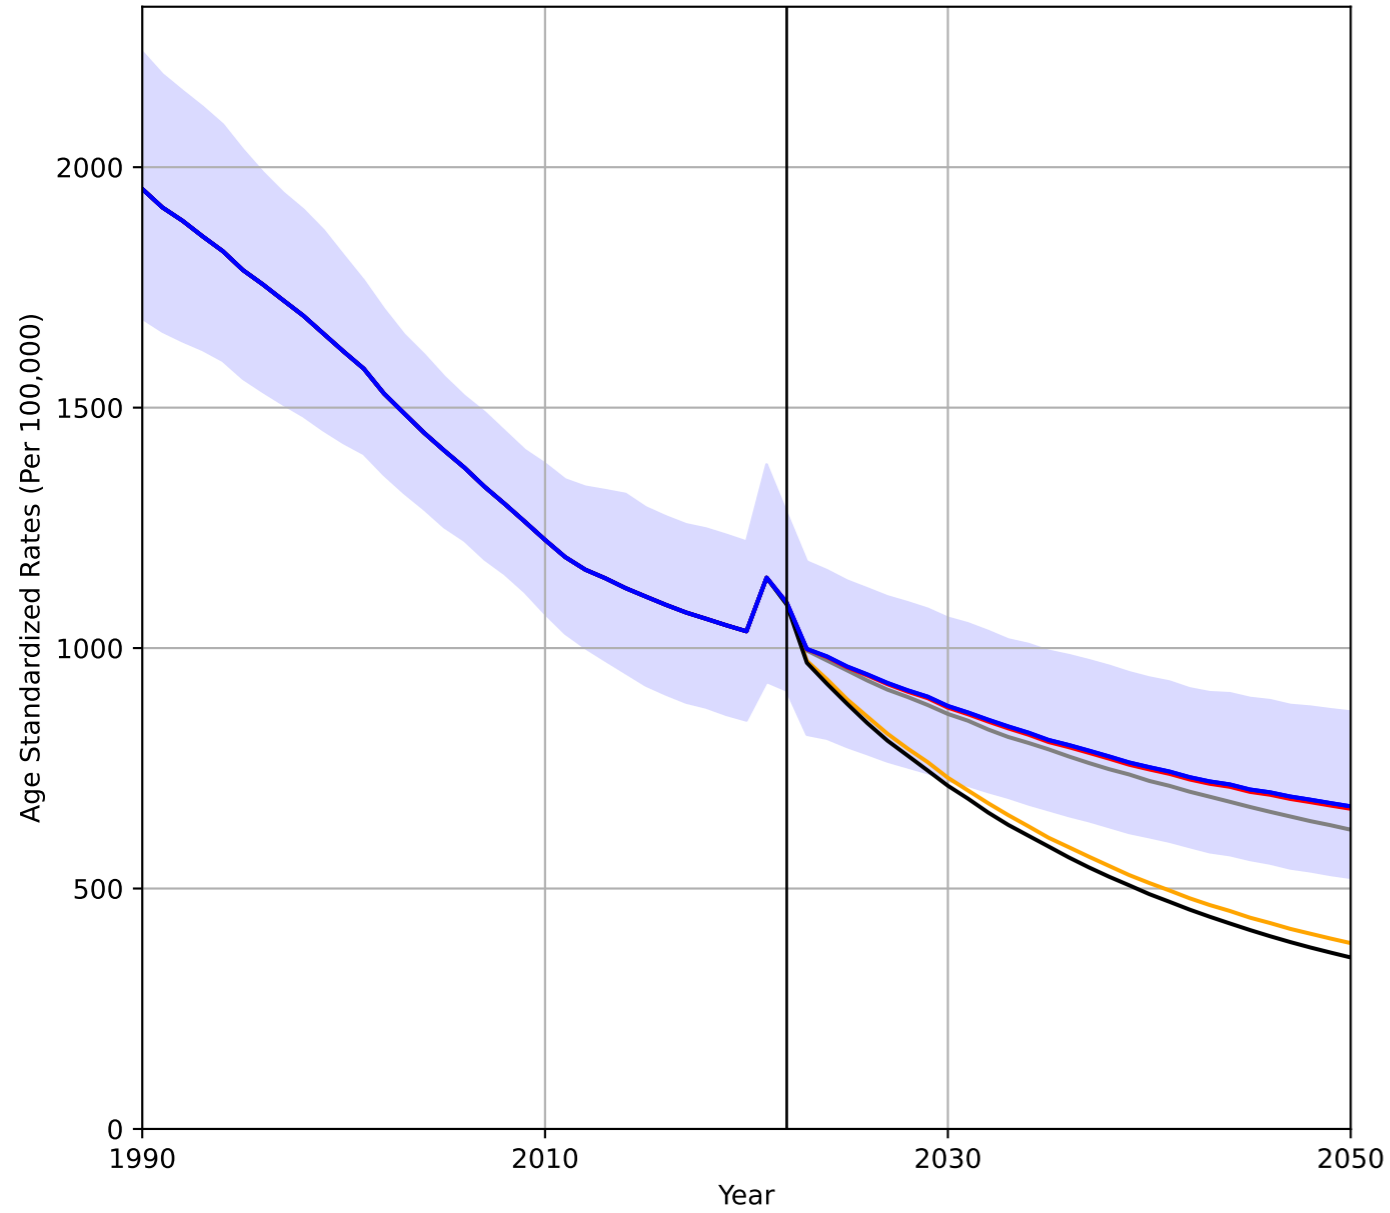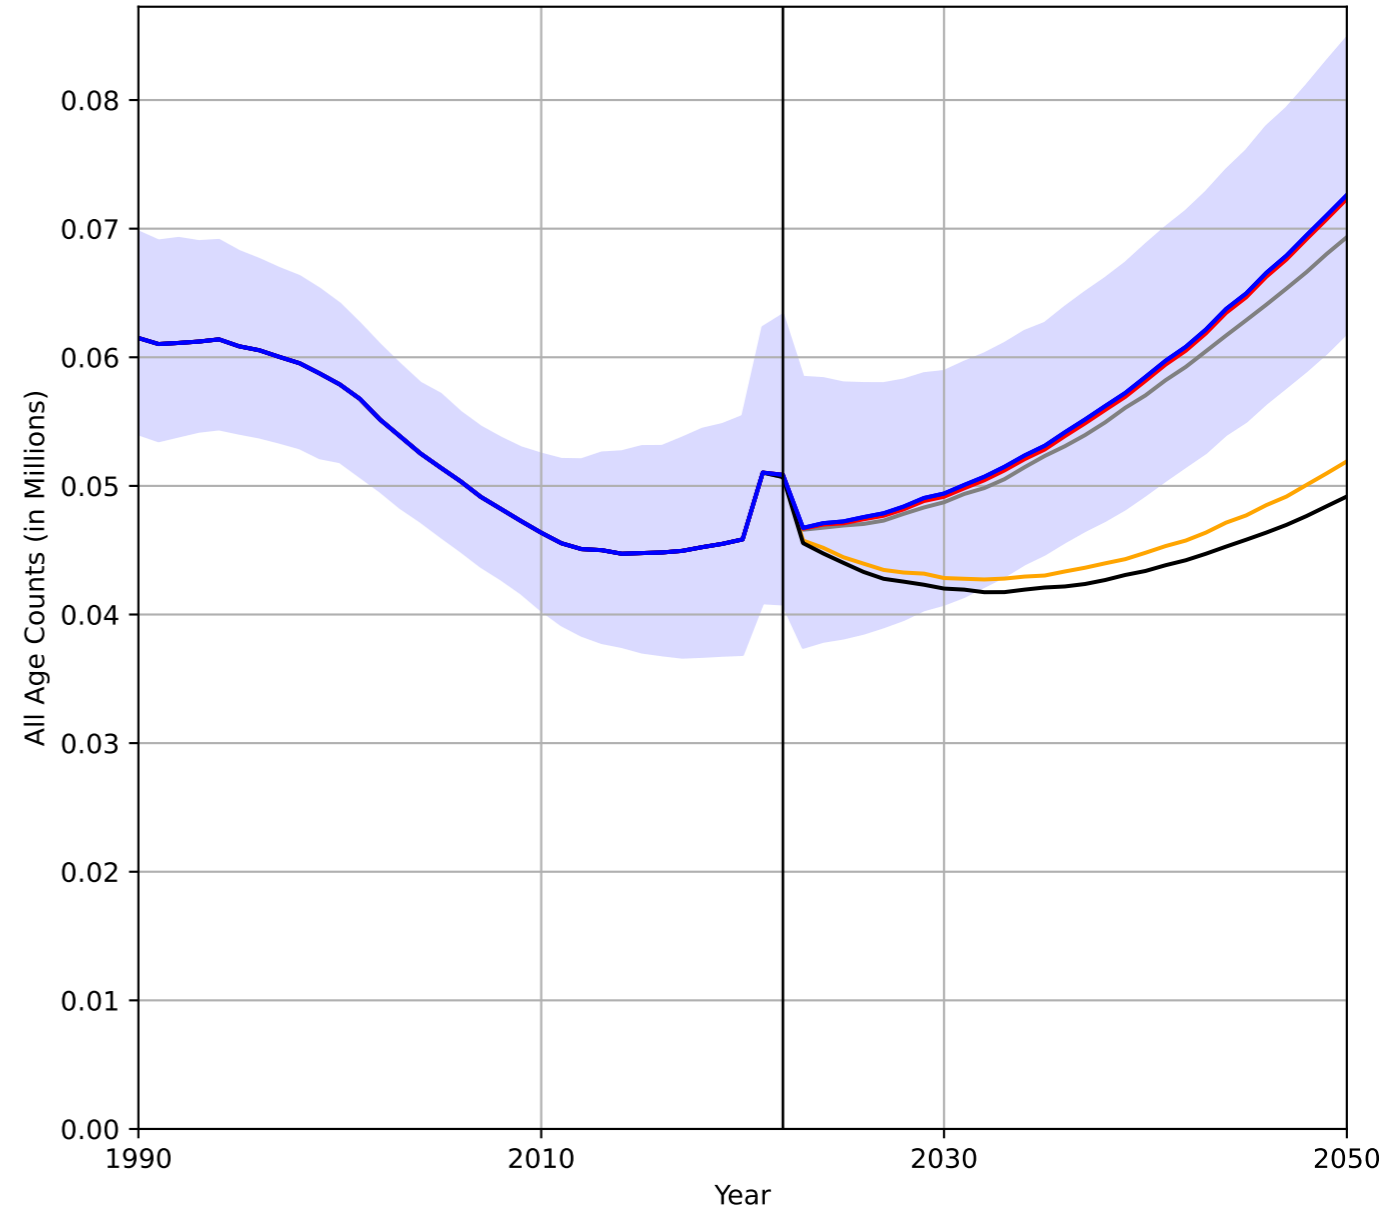



# Malaysia

Supplemental Results Figure S11. All-cause age standardised death rates (A) and all age death counts (B), for the past and for five future scenarios, 1990–2050

1792

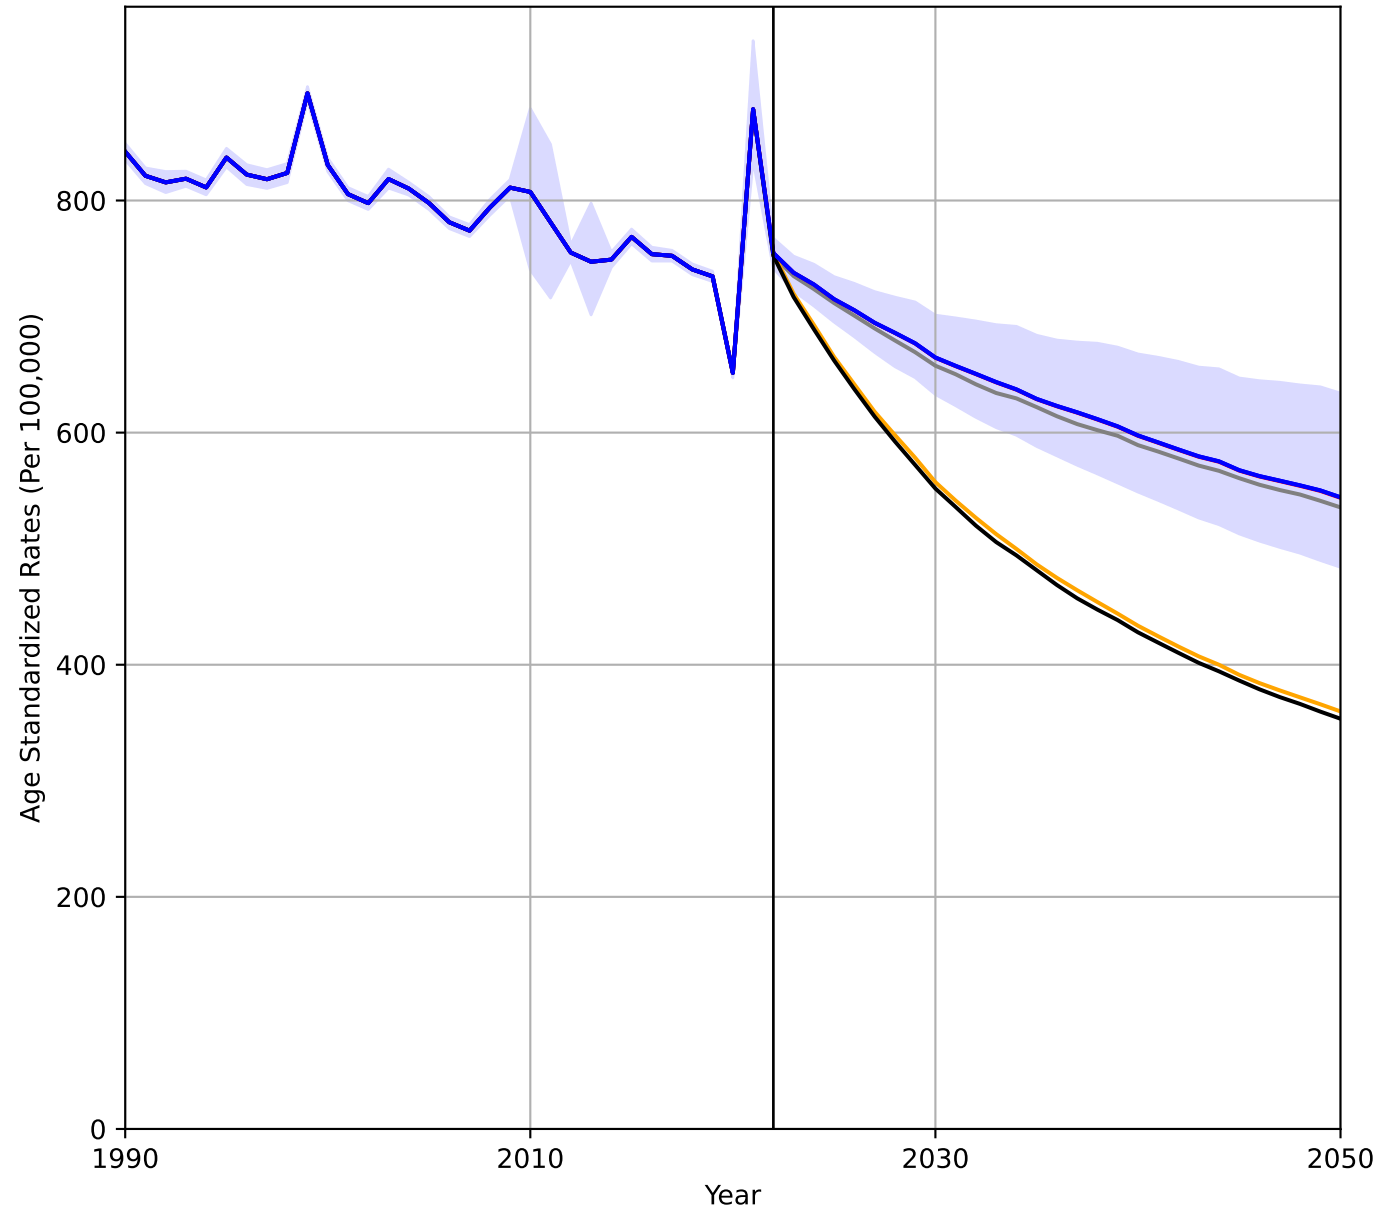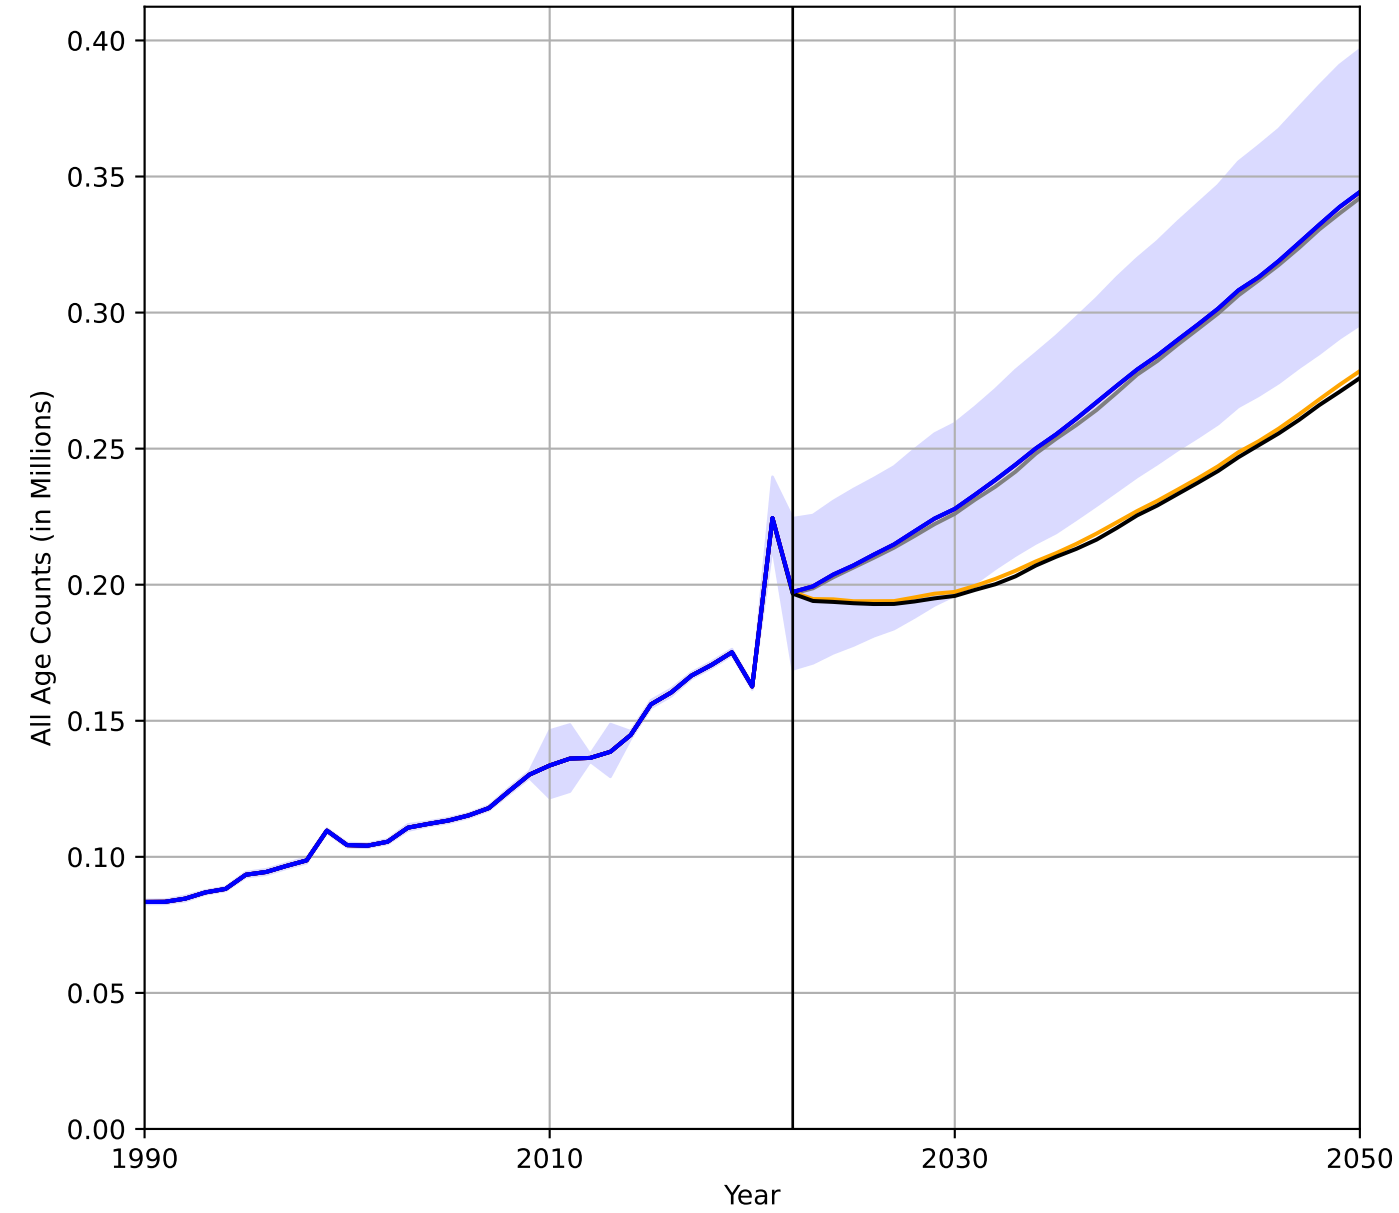

# Maldives

Supplemental Results Figure S11. All-cause age standardised death rates (A) and all age death counts (B), for the past and for five future scenarios, 1990–2050

1793

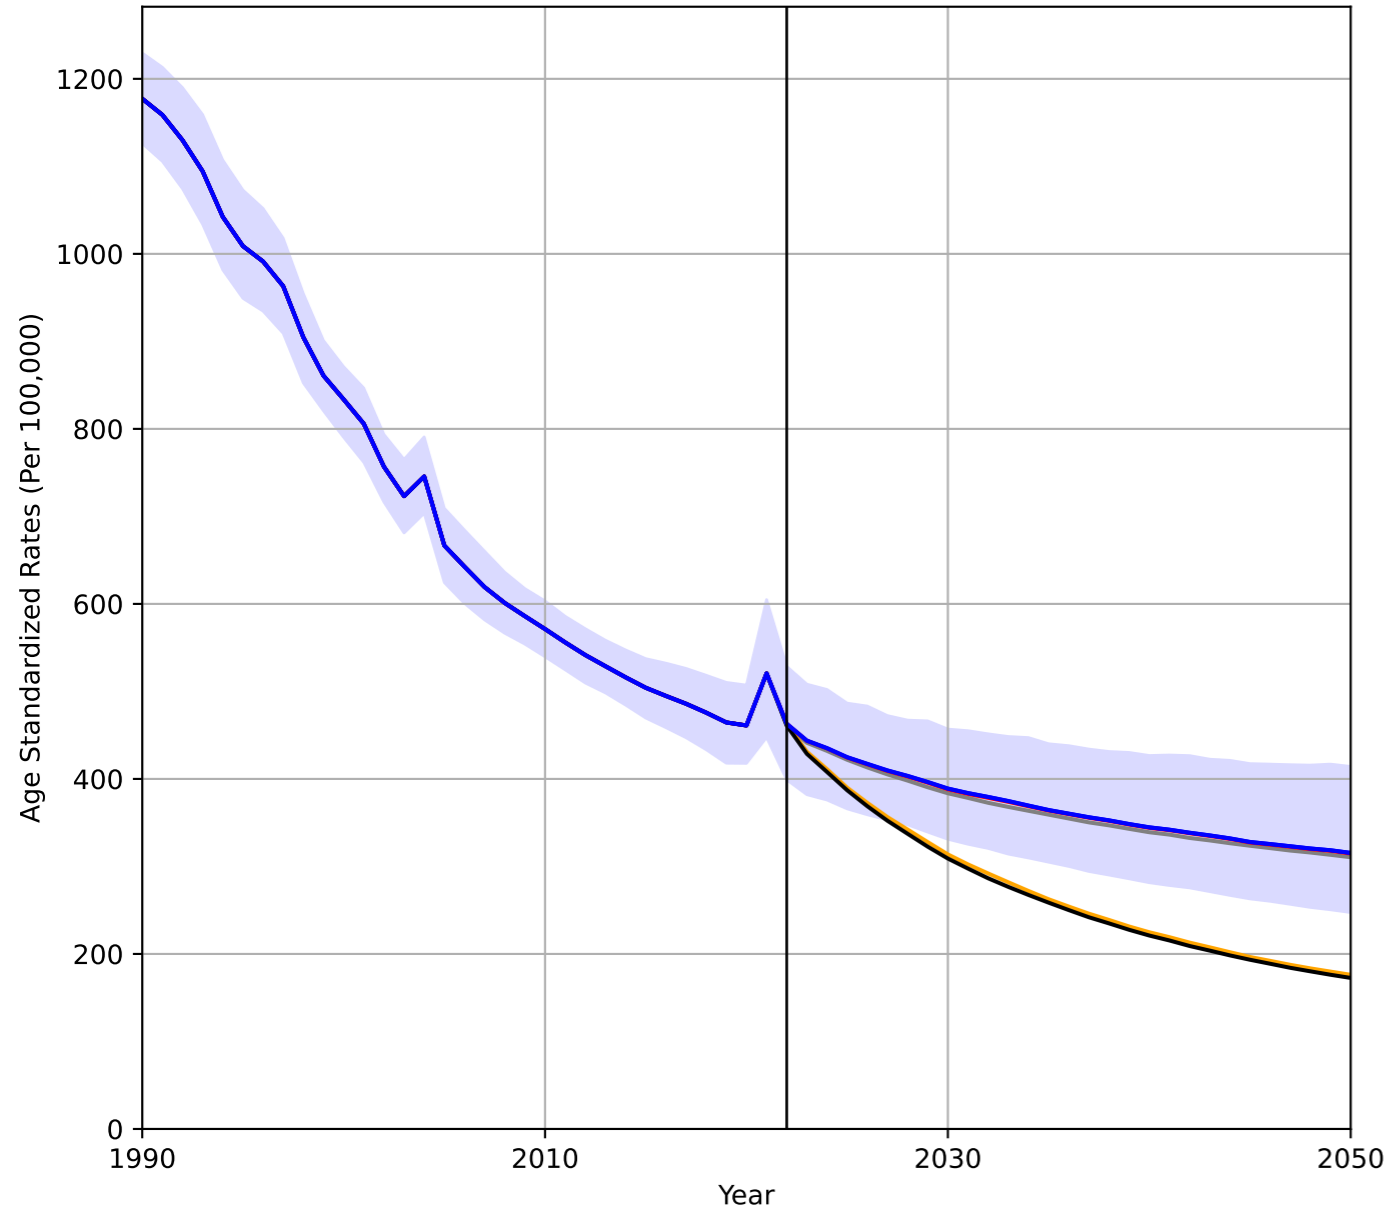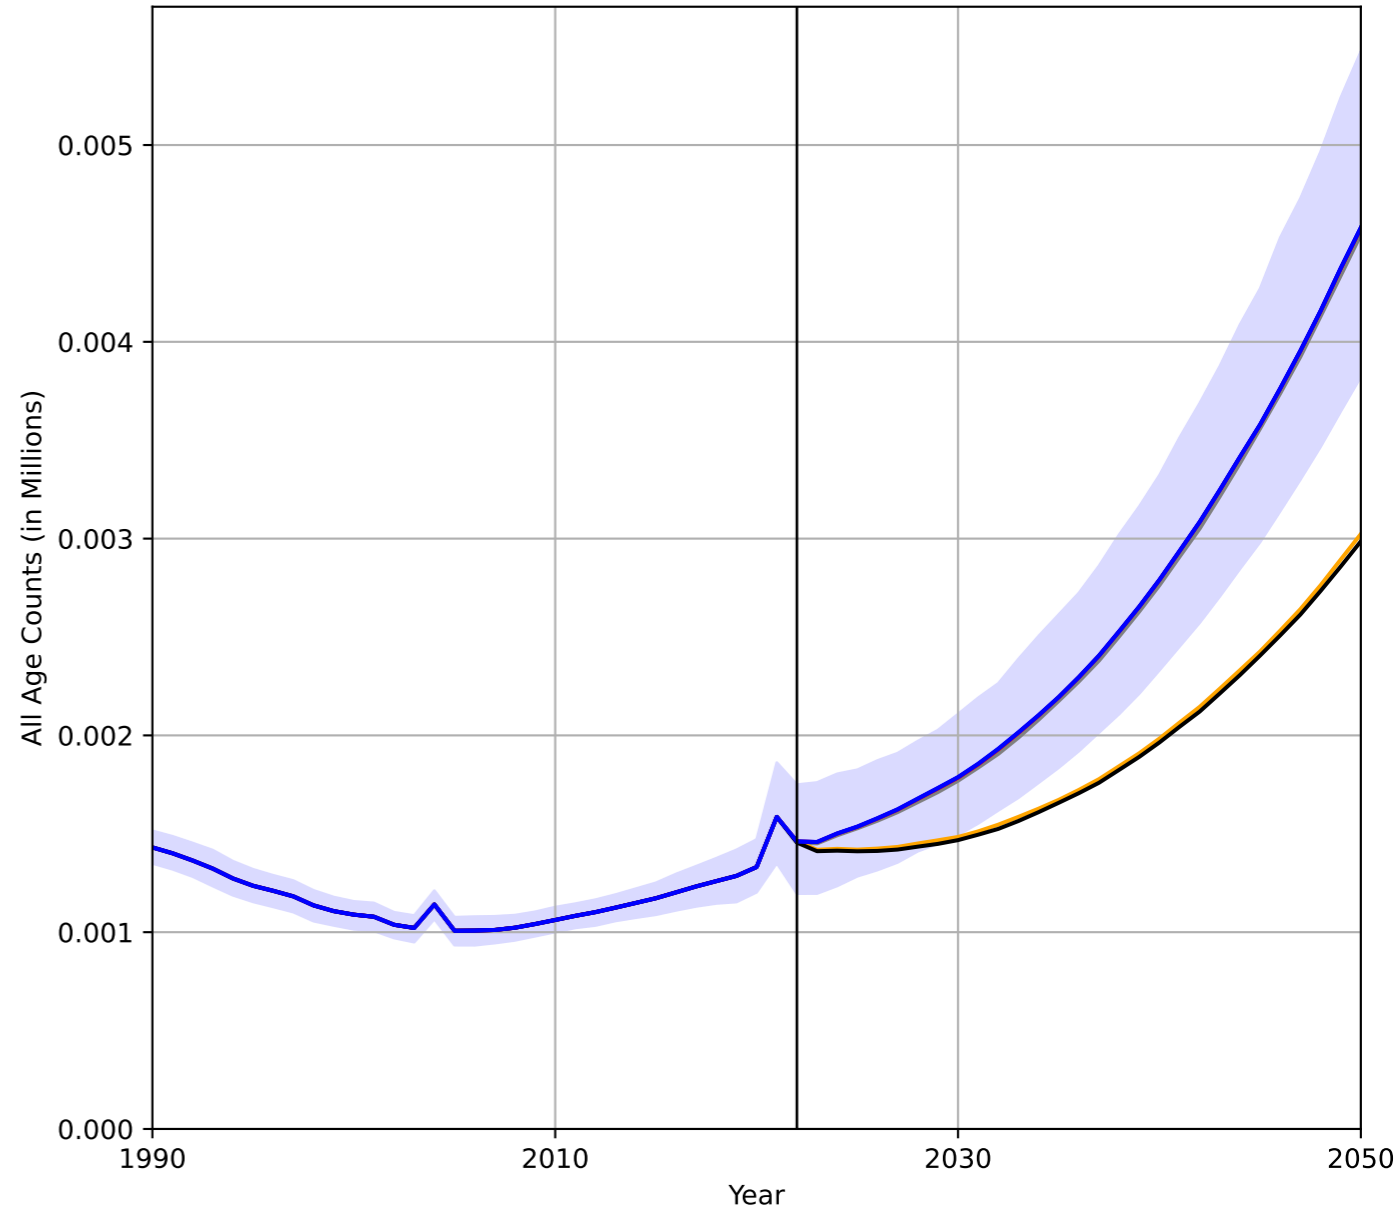

# Mauritius

Supplemental Results Figure S11. All-cause age standardised death rates (A) and all age death counts (B), for the past and for five future scenarios, 1990–2050

1794

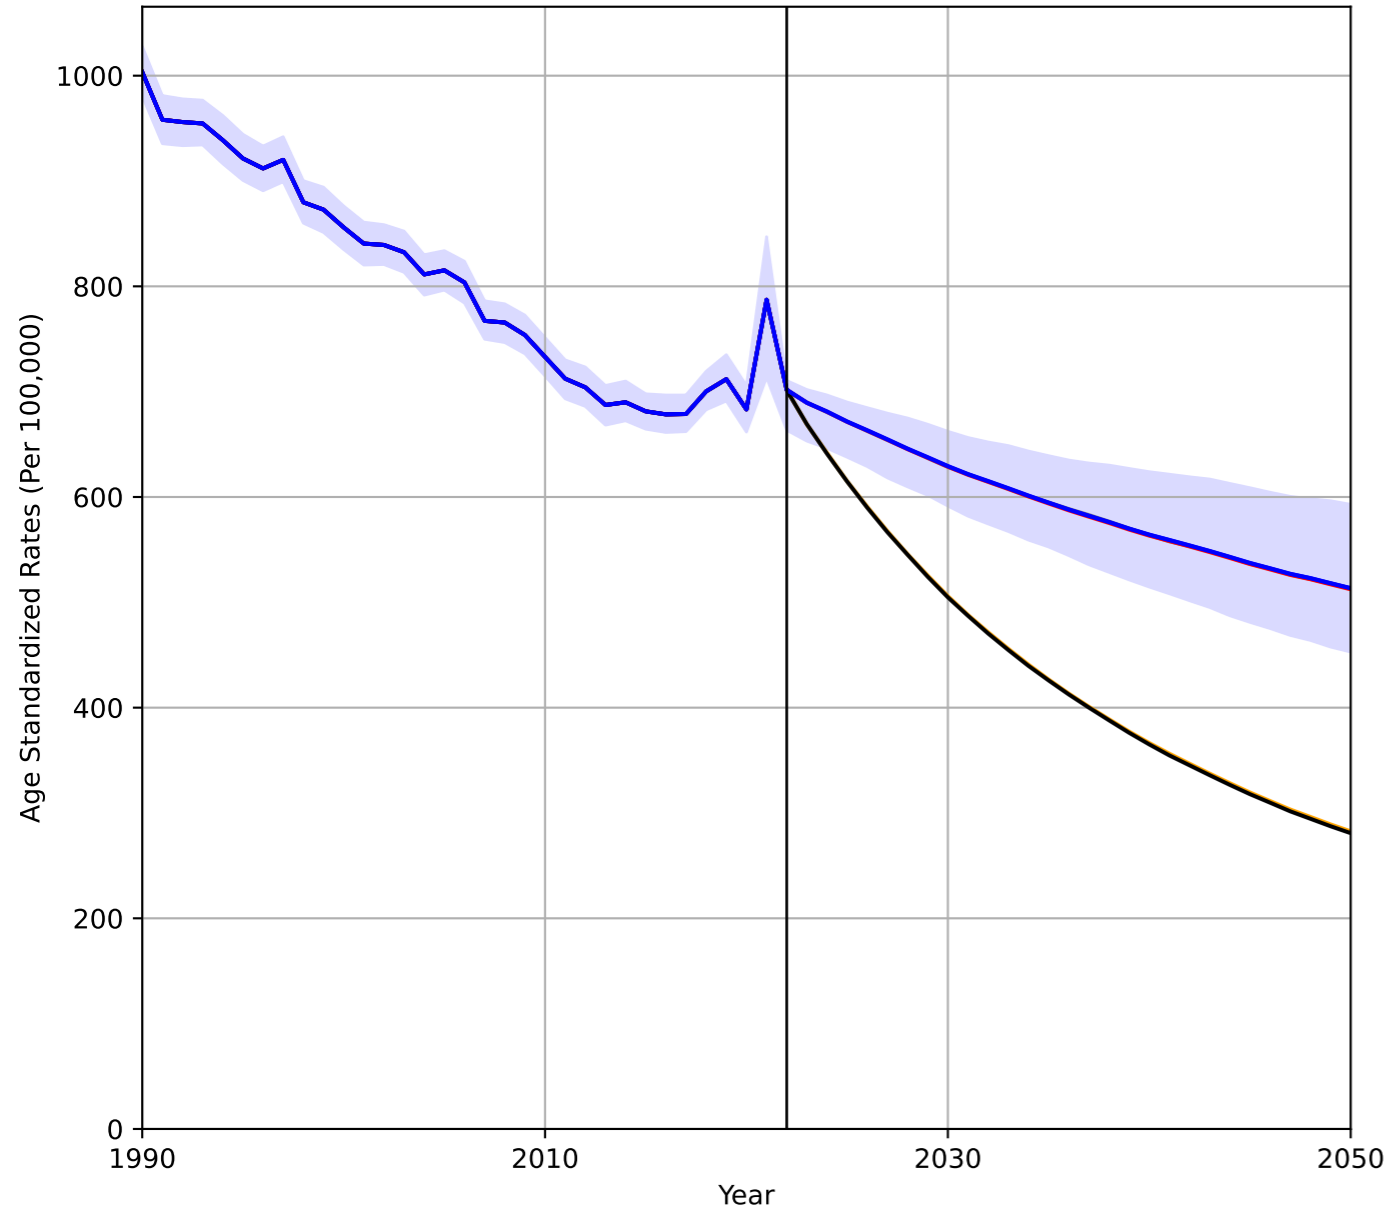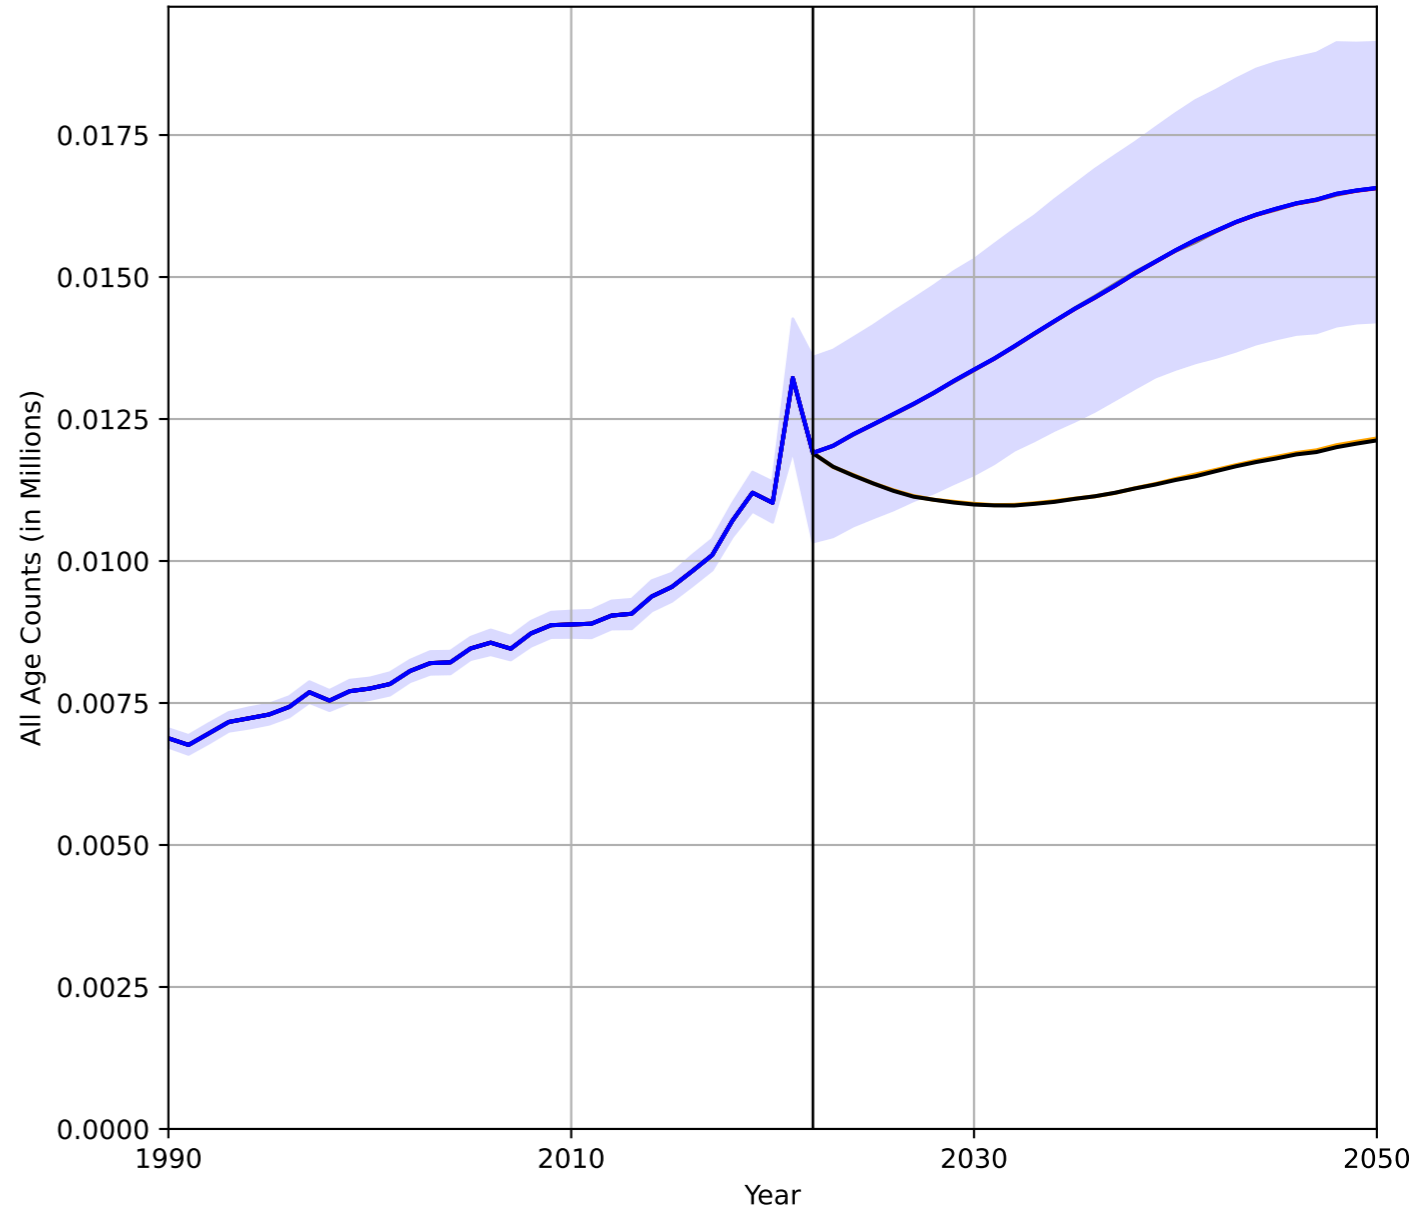

# Myanmar

Supplemental Results Figure S11. All-cause age standardised death rates (A) and all age death counts (B), for the past and for five future scenarios, 1990–2050

1795

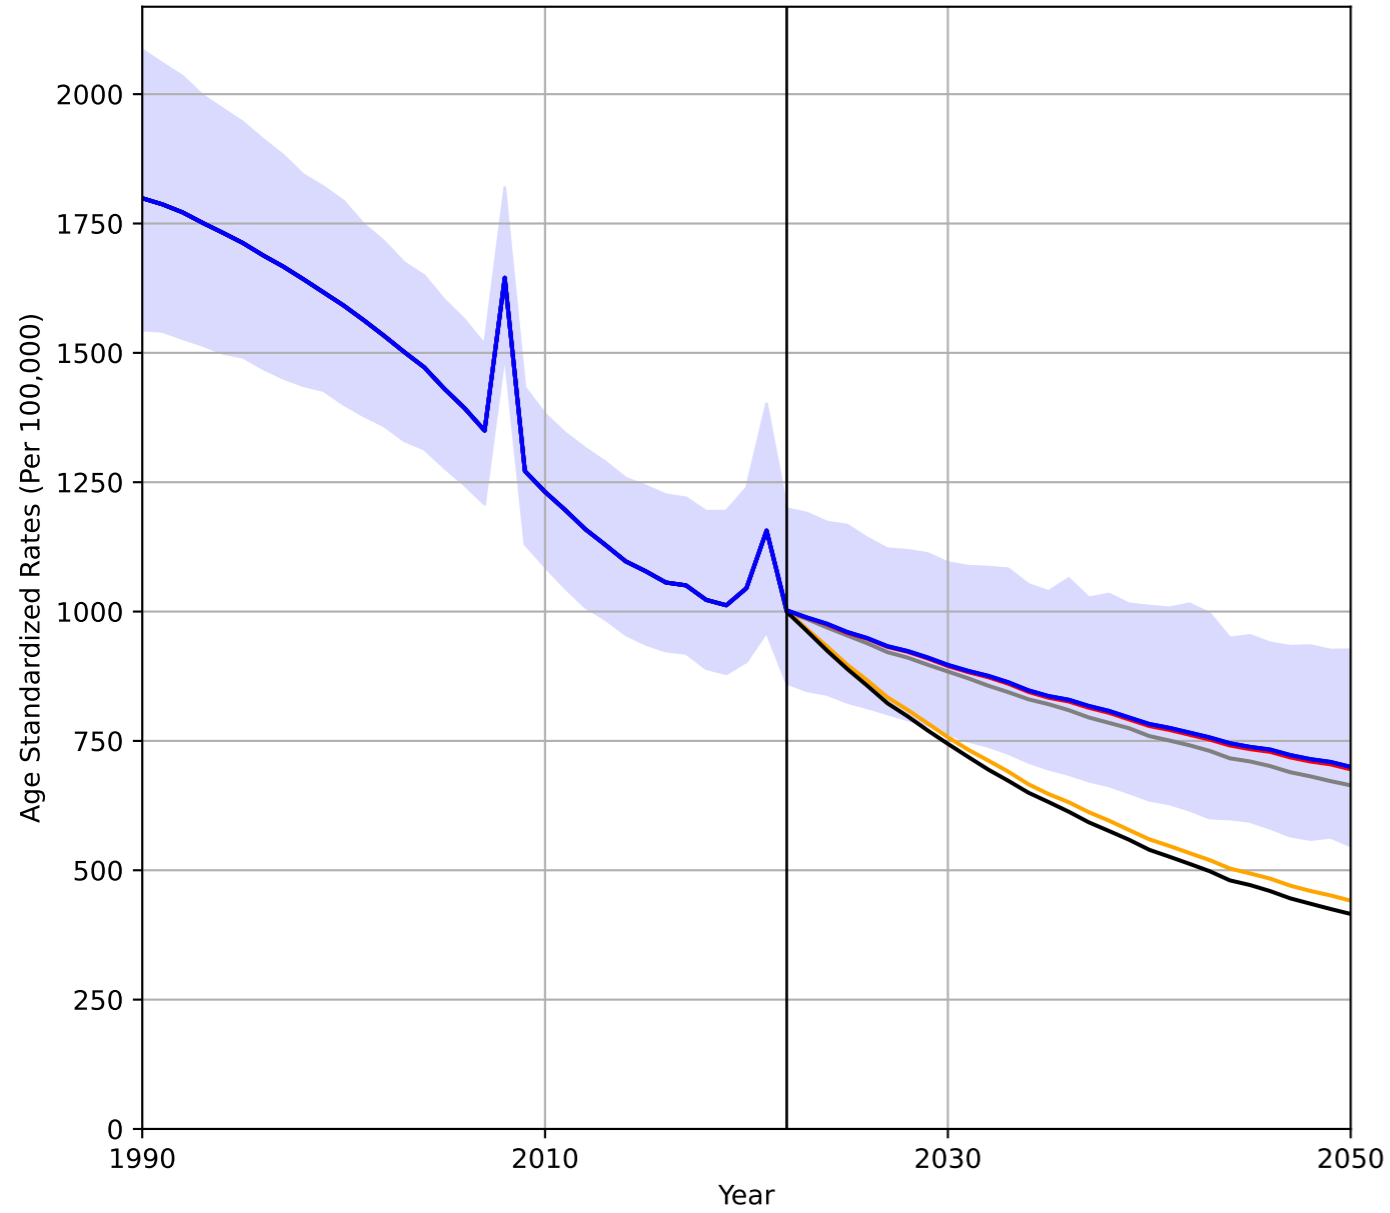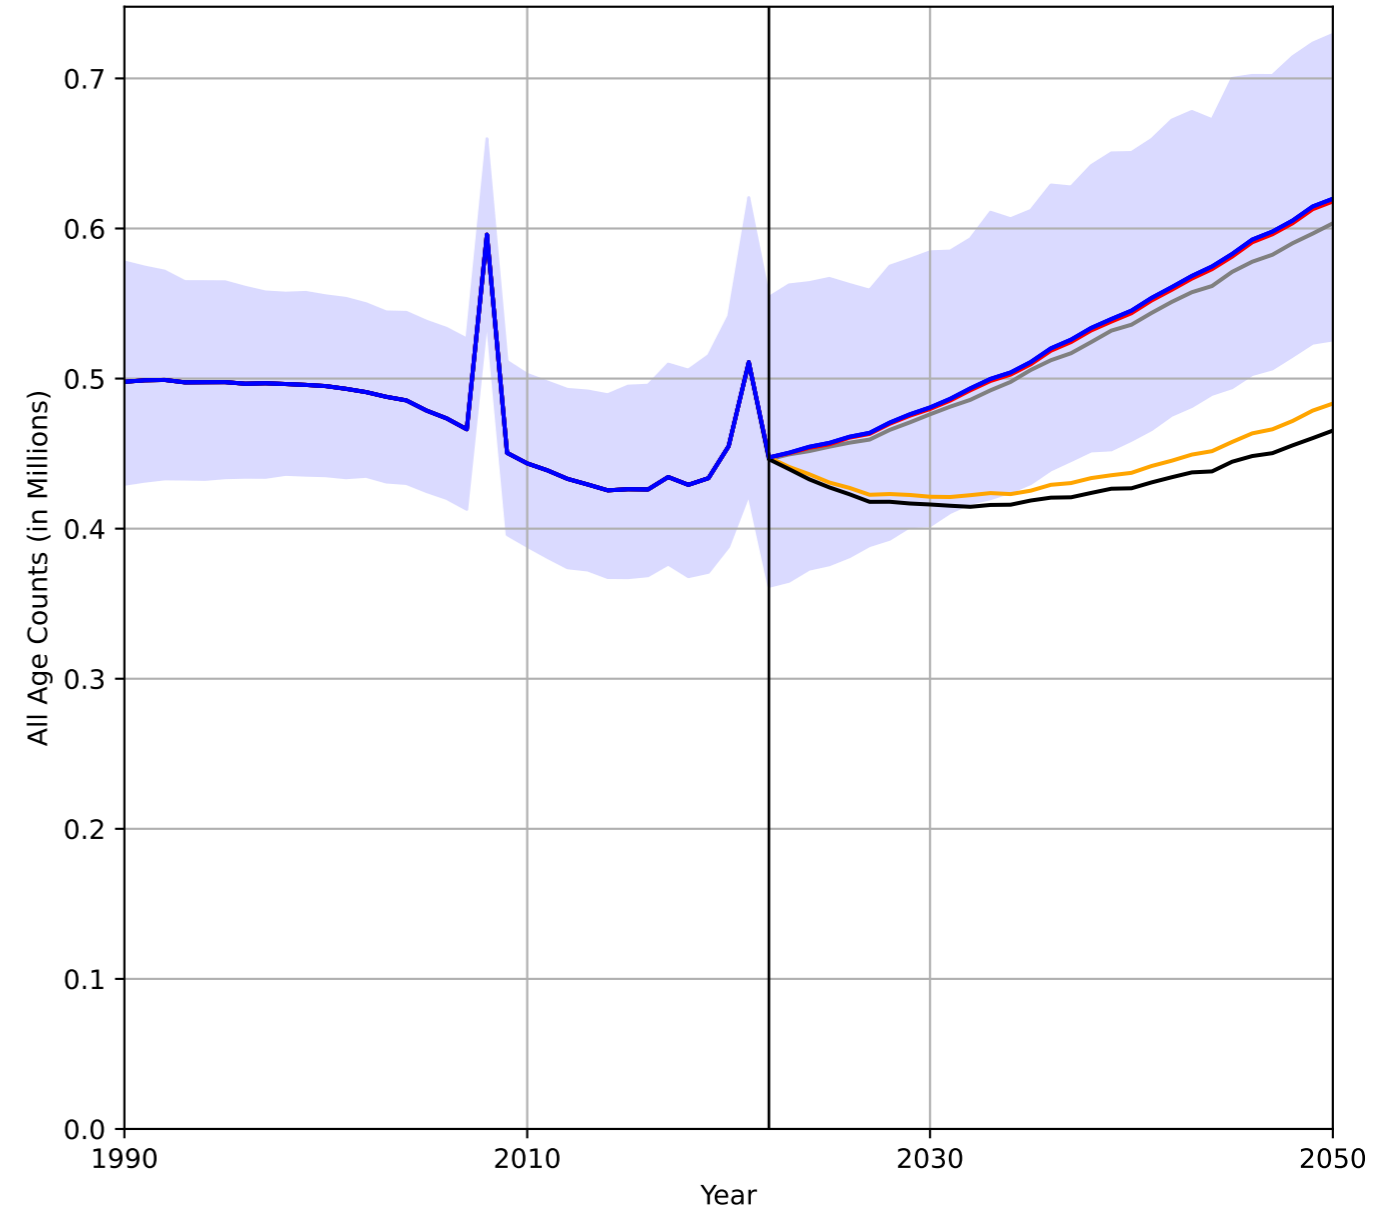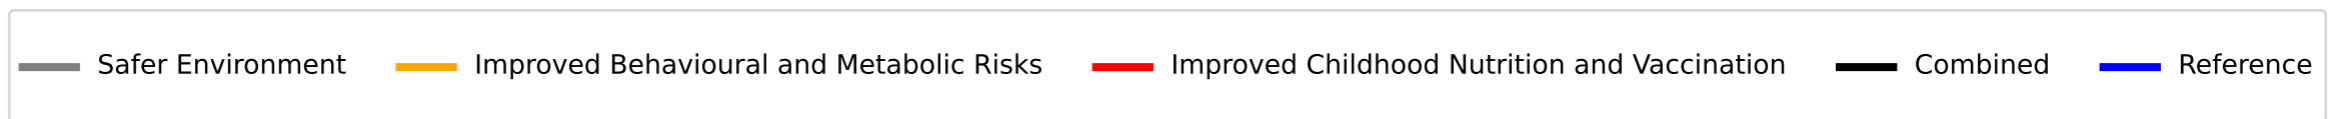

# Philippines

Supplemental Results Figure S11. All-cause age standardised death rates (A) and all age death counts (B), for the past and for five future scenarios, 1990–2050

1796

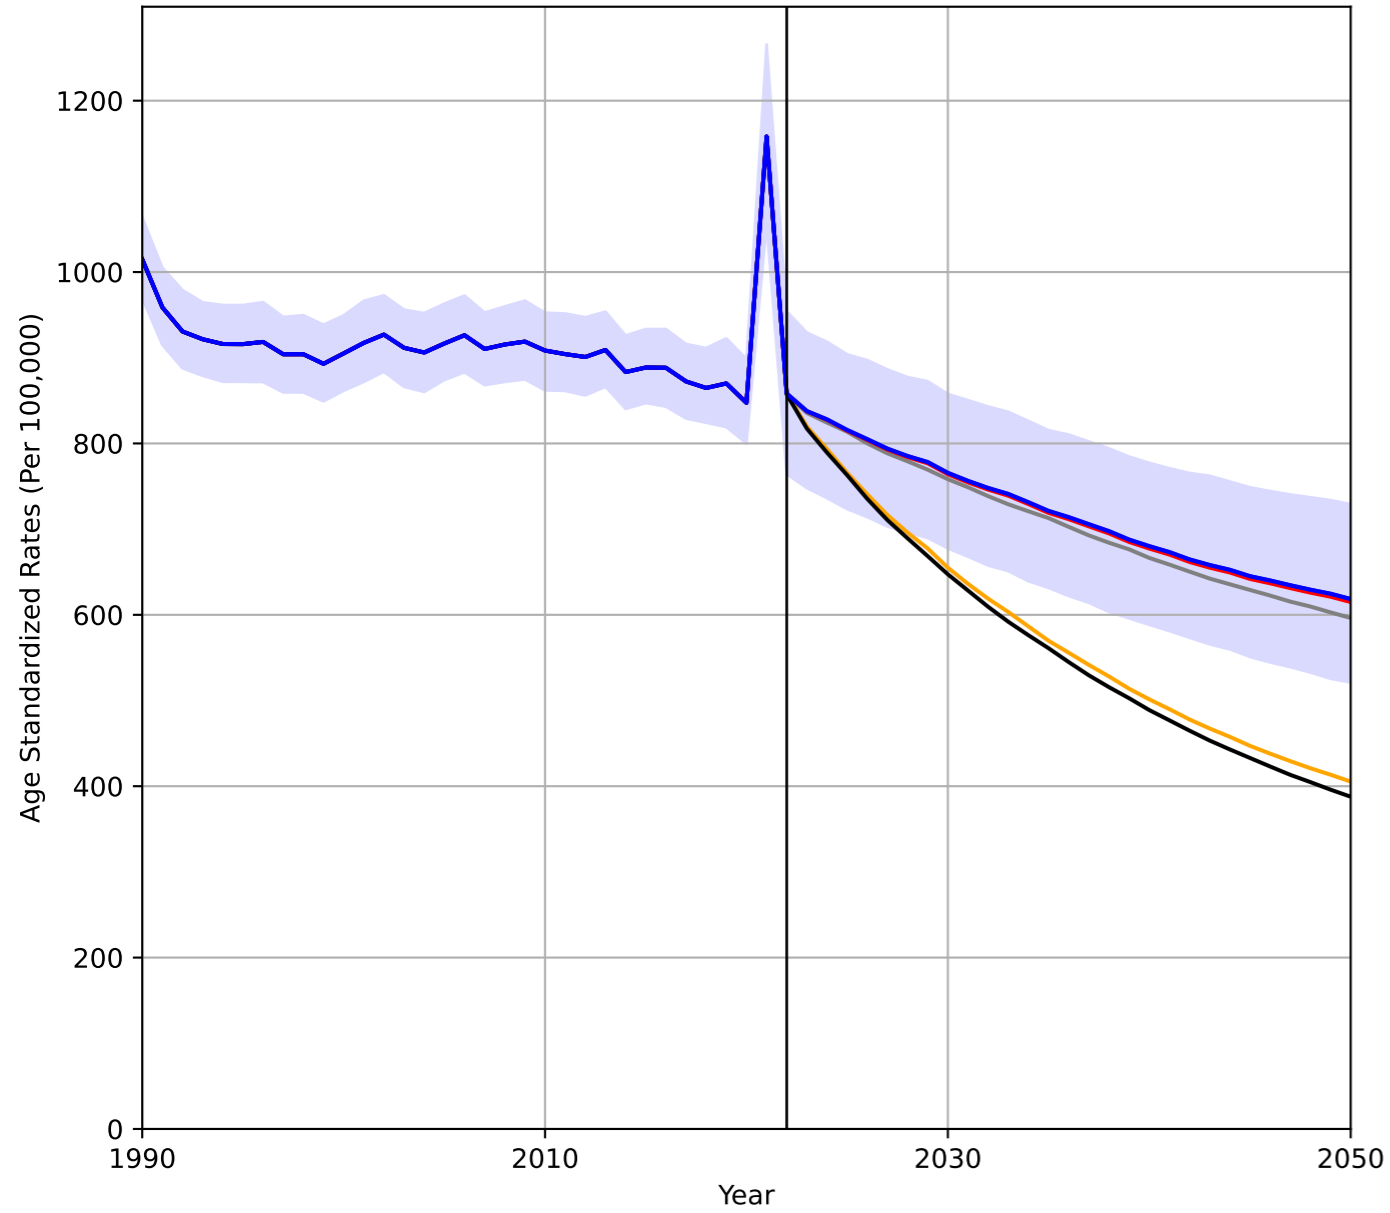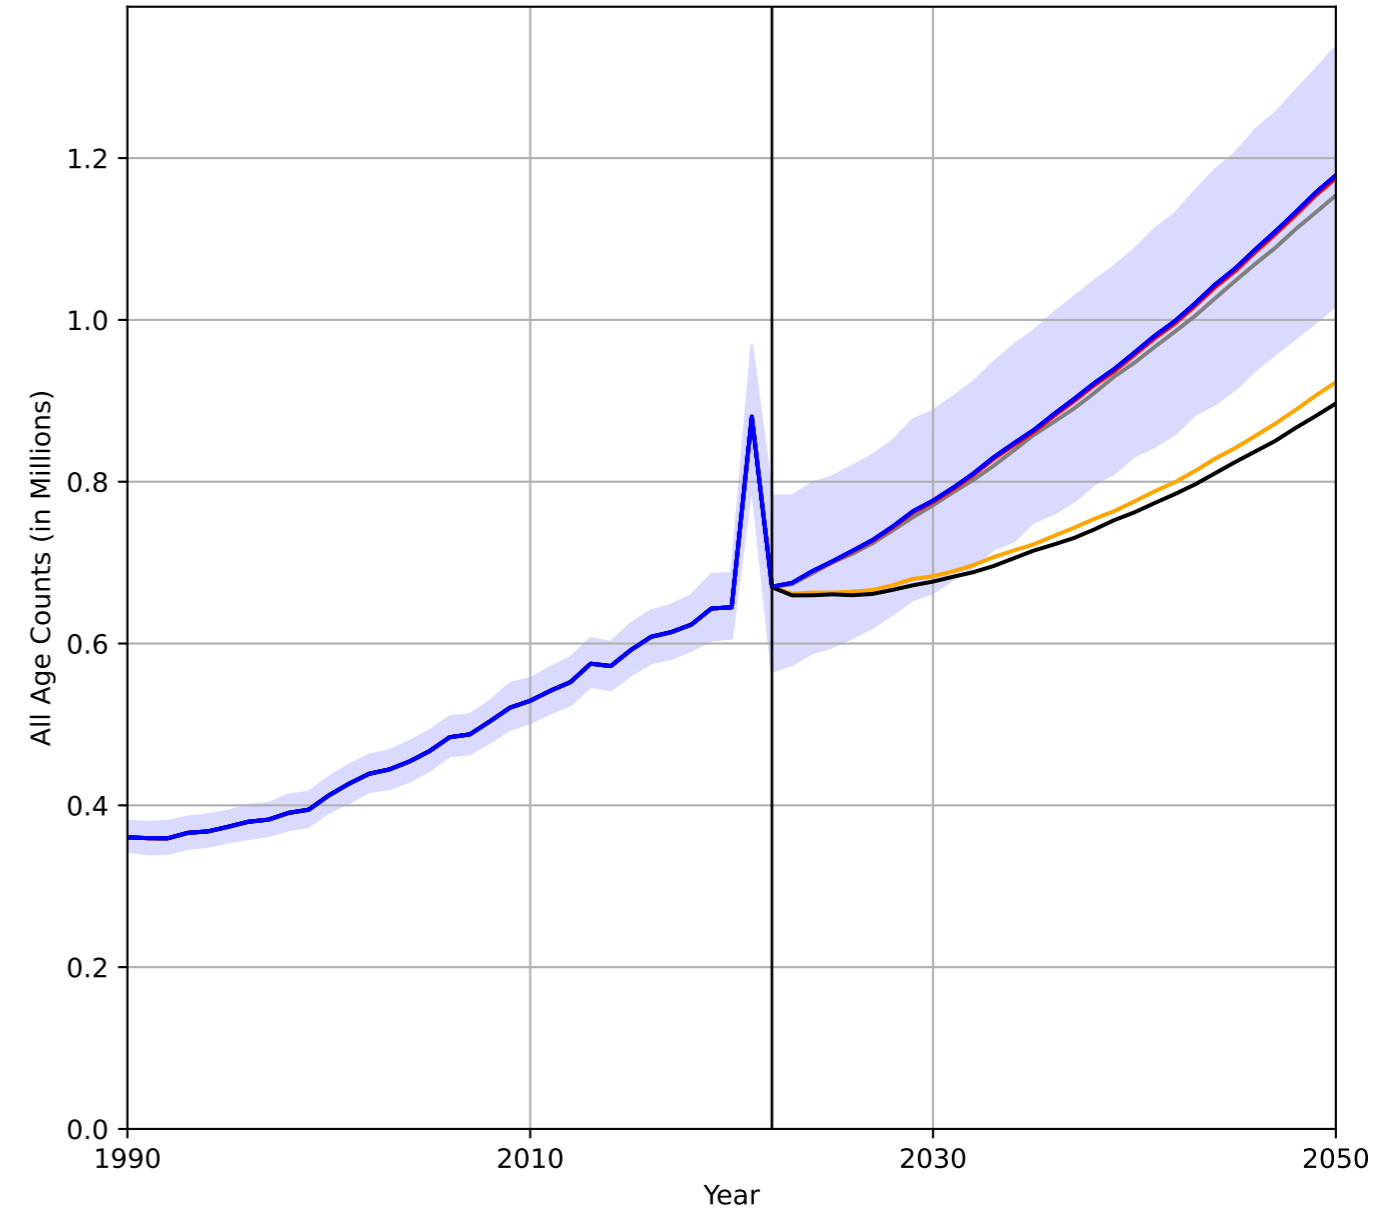

# Seychelles

Supplemental Results Figure S11. All-cause age standardised death rates (A) and all age death counts (B), for the past and for five future scenarios, 1990–2050

1797

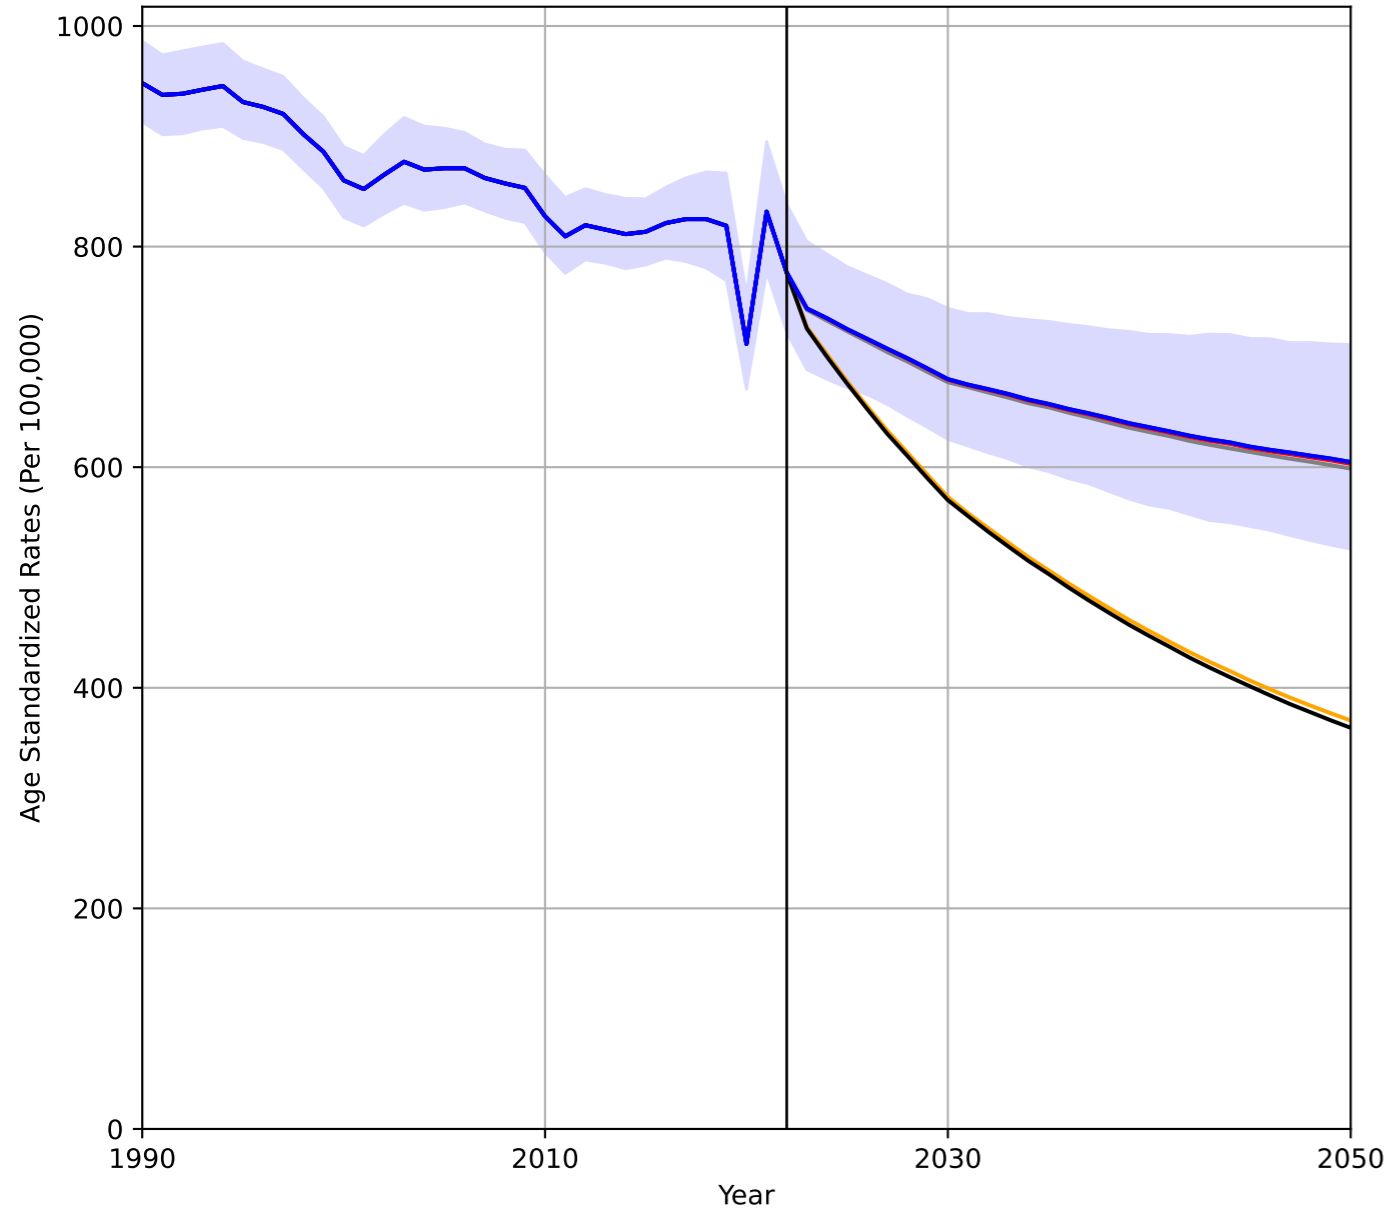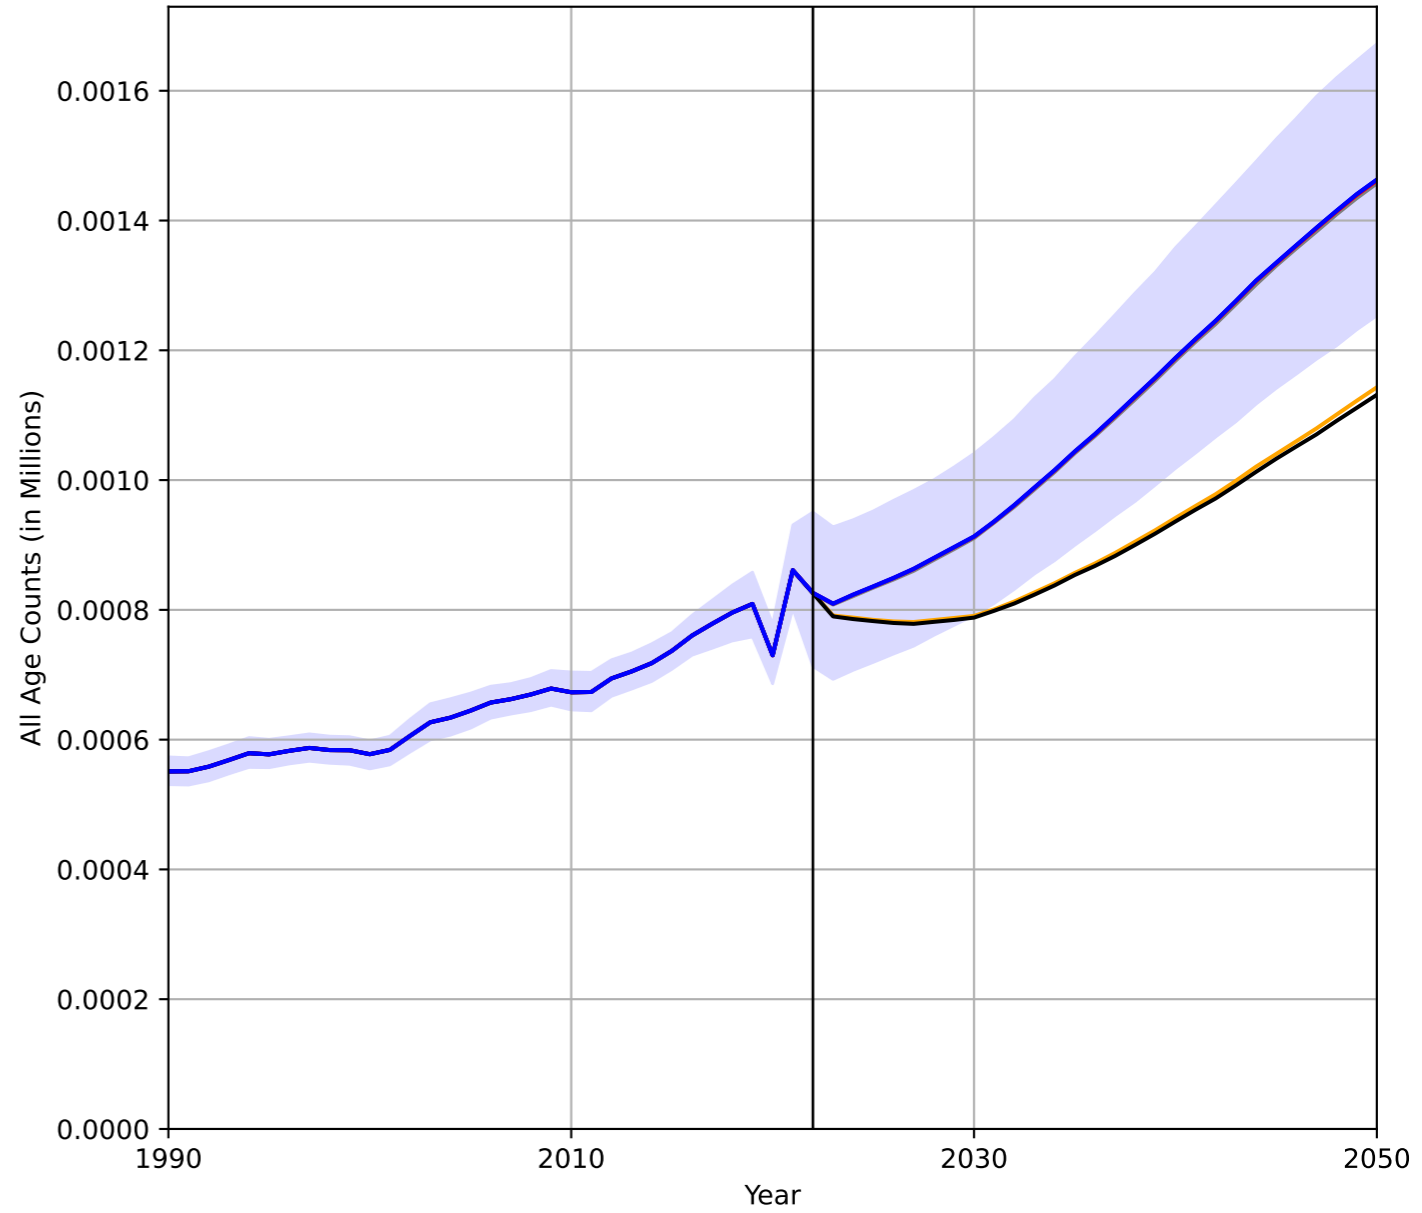

# Sri Lanka

Supplemental Results Figure S11. All-cause age standardised death rates (A) and all age death counts (B), for the past and for five future scenarios, 1990–2050

1798

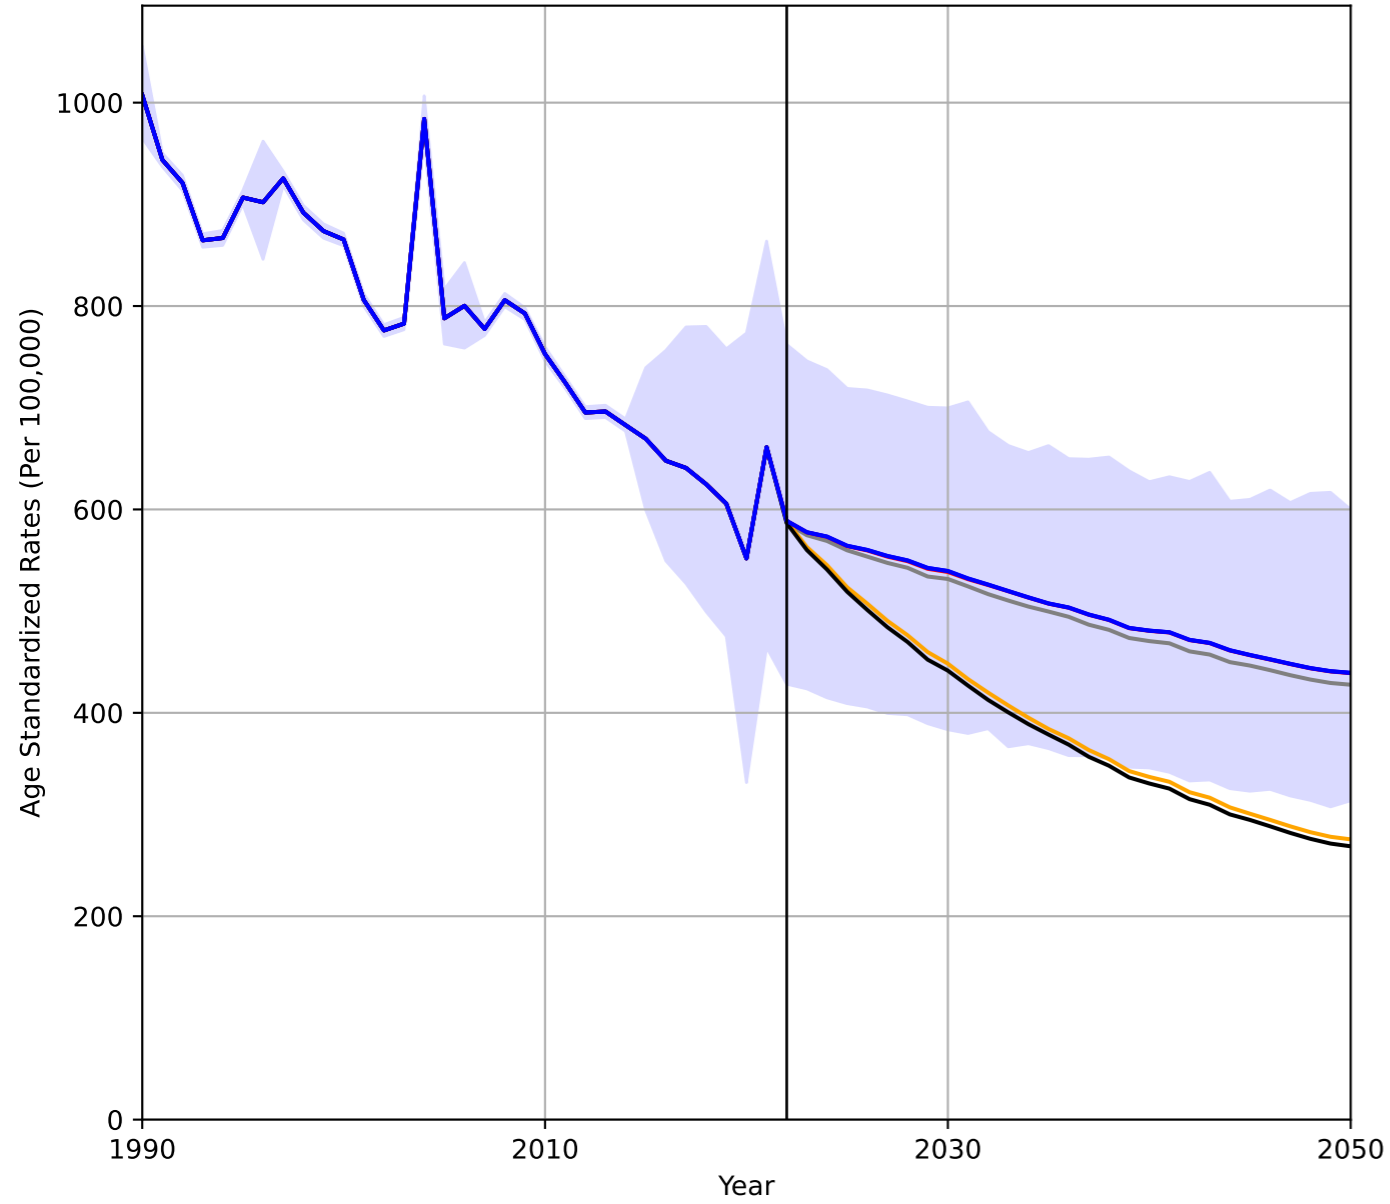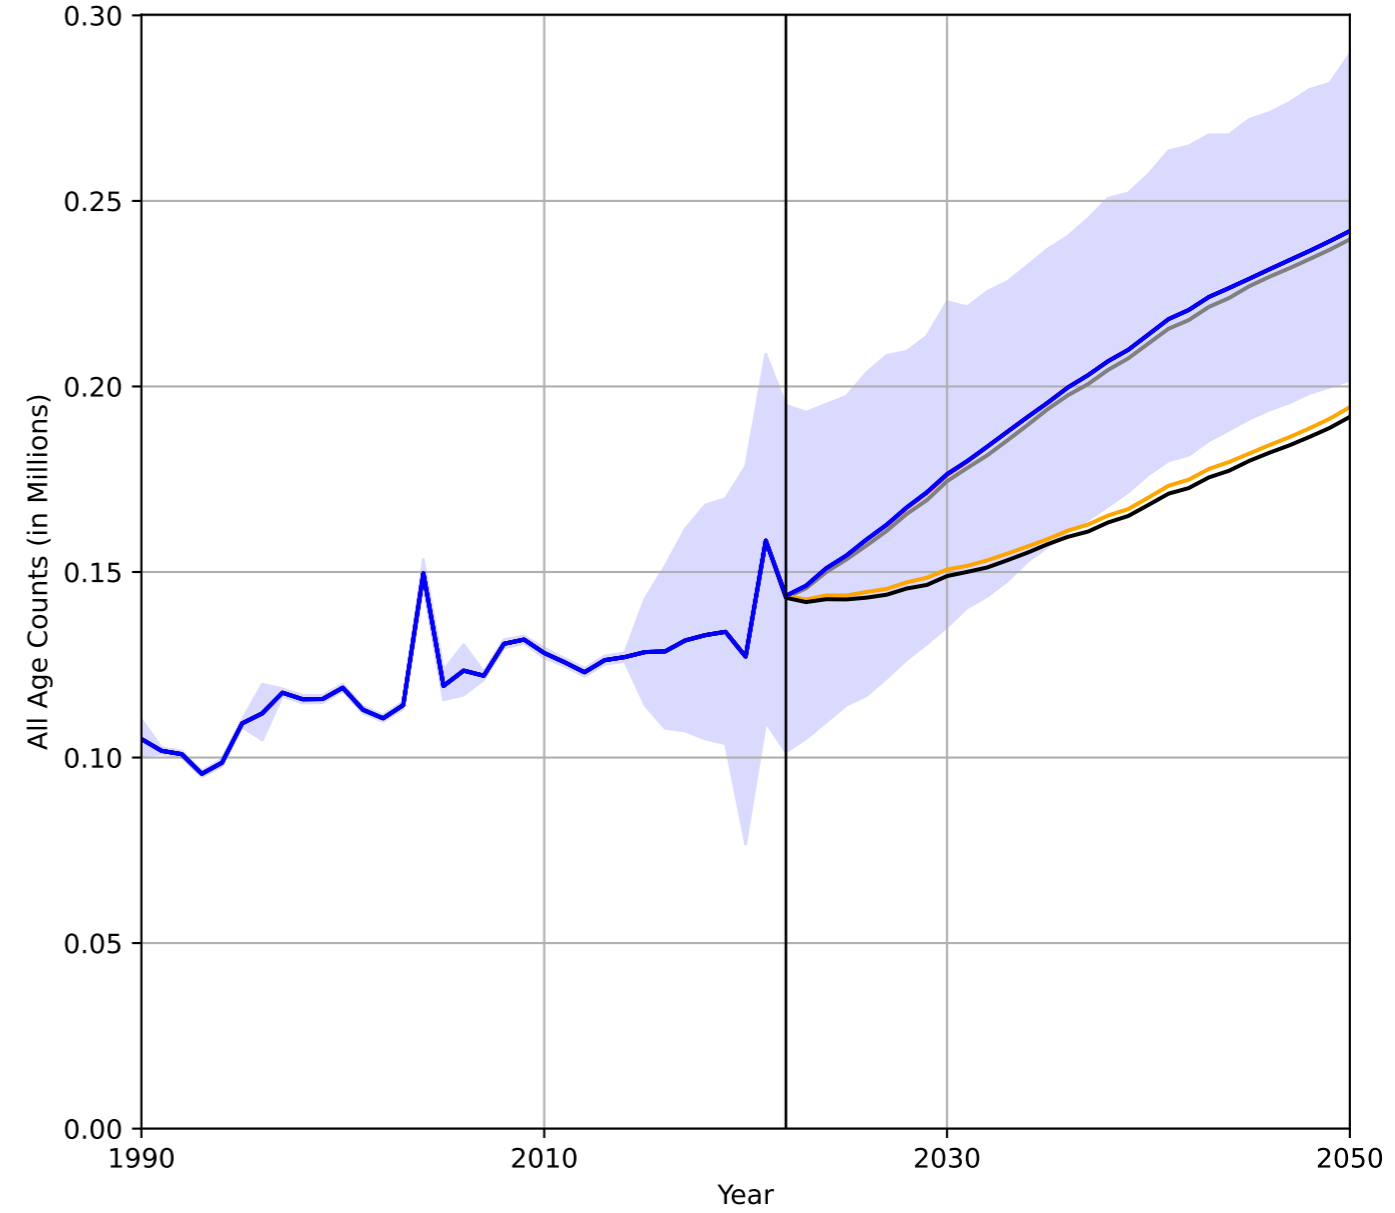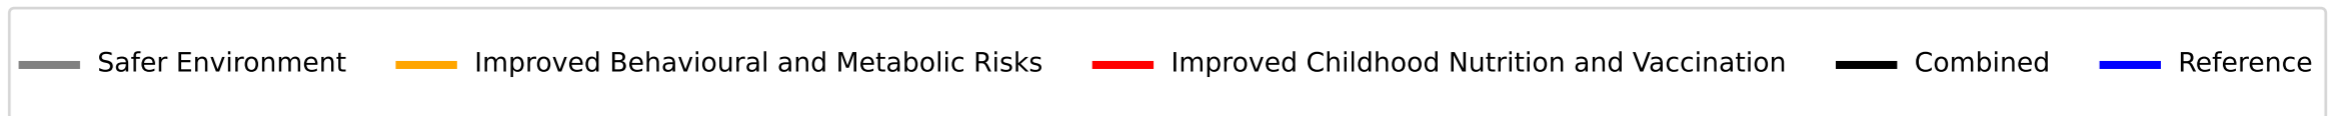

# Thailand

Supplemental Results Figure S11. All-cause age standardised death rates (A) and all age death counts (B), for the past and for five future scenarios, 1990–2050

1799

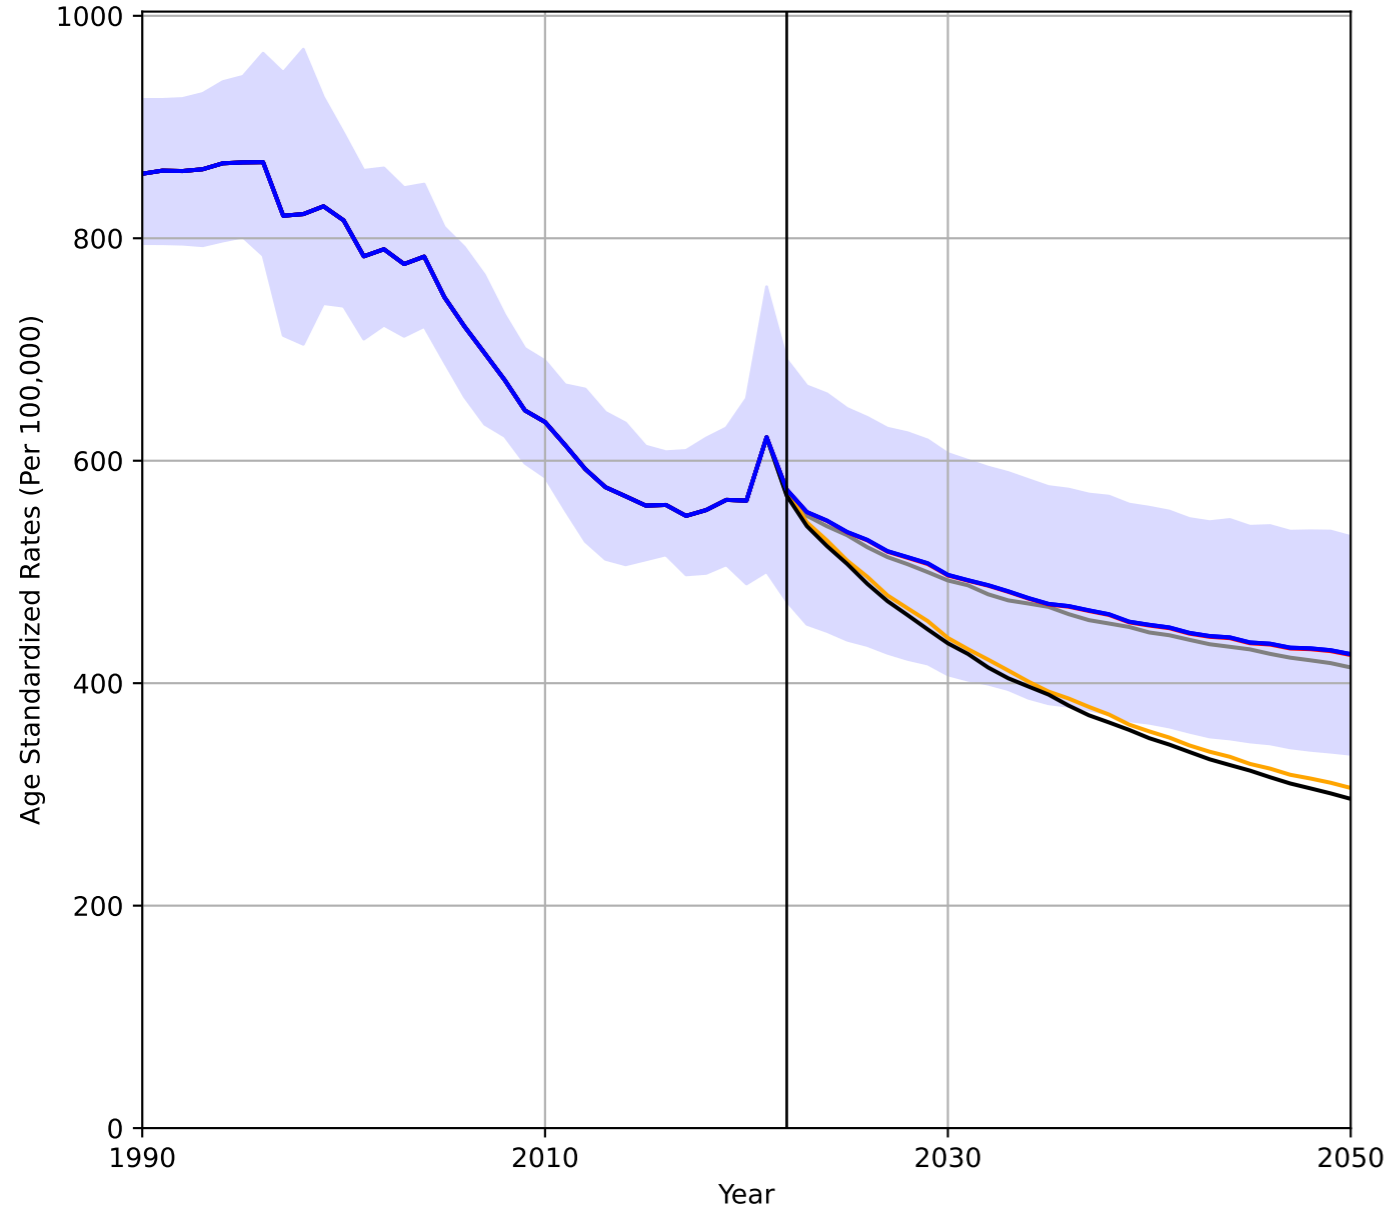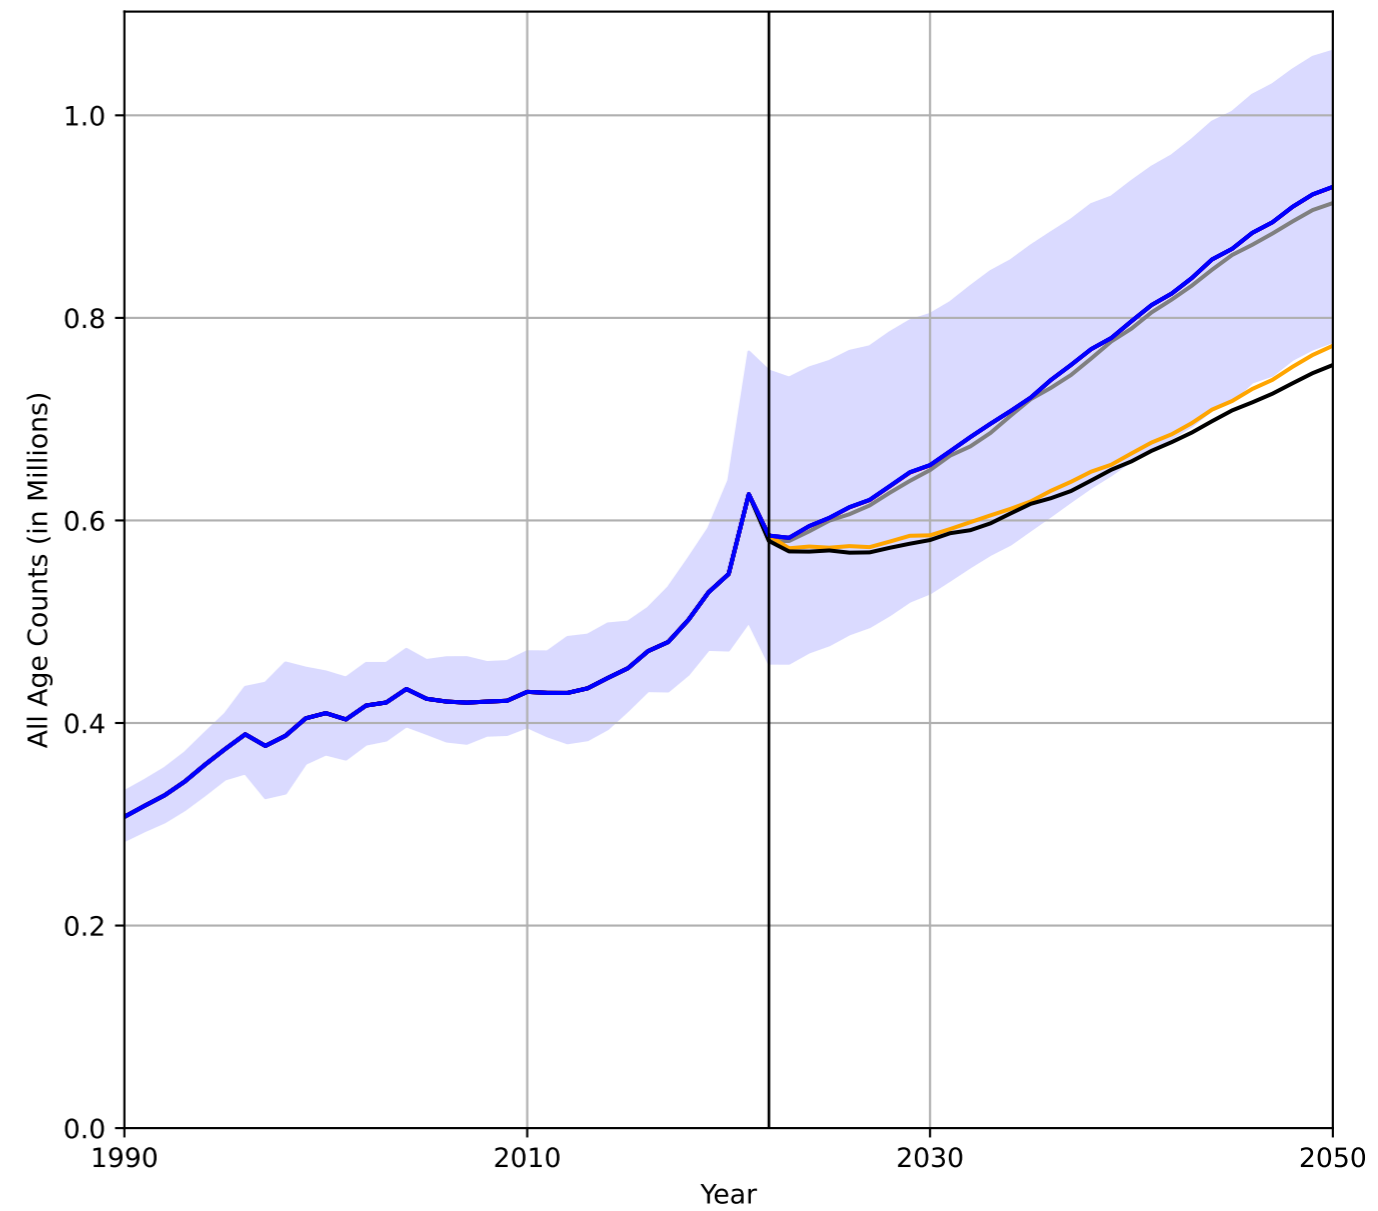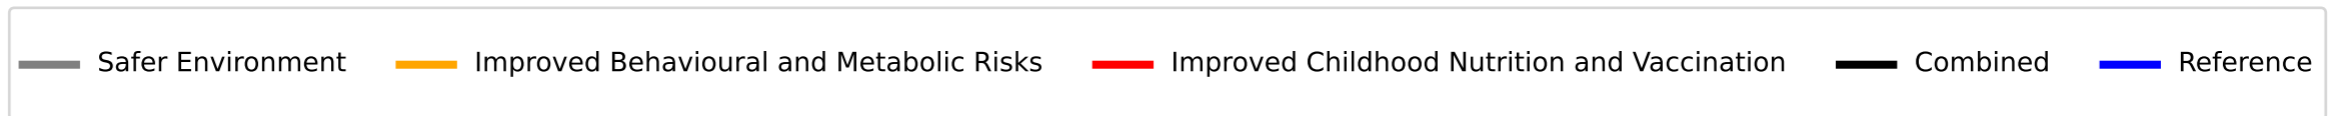



# Timor-Leste

Supplemental Results Figure S11. All-cause age standardised death rates (A) and all age death counts (B), for the past and for five future scenarios, 1990–2050

1800

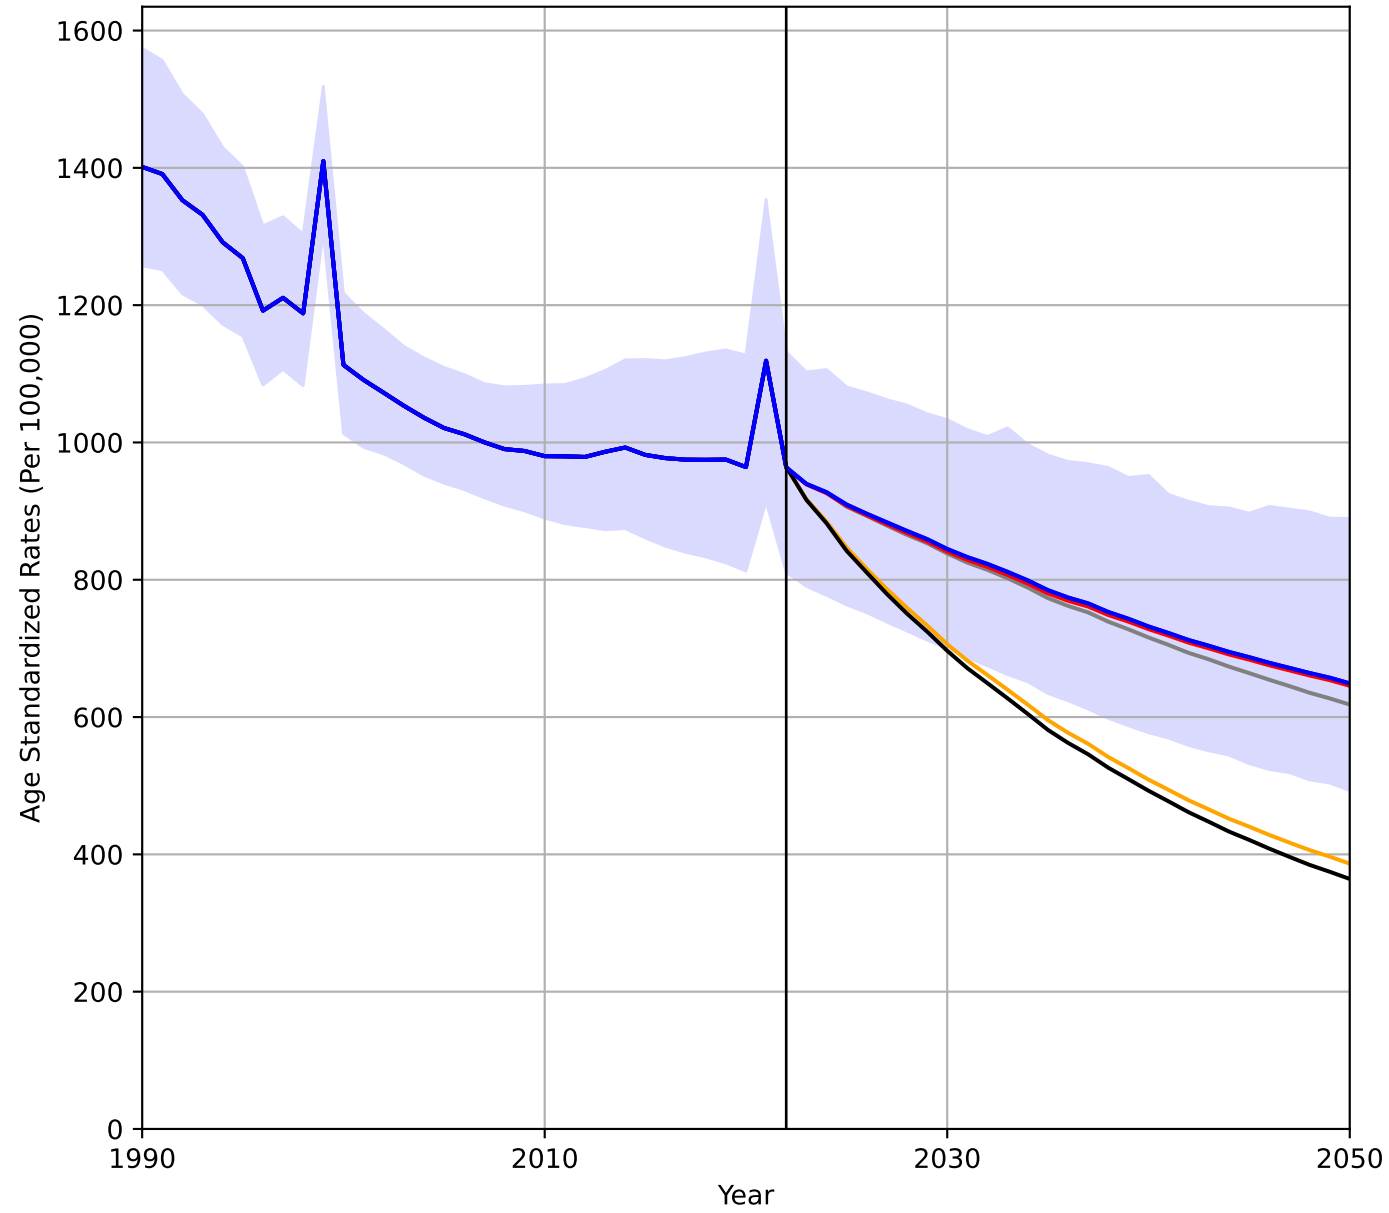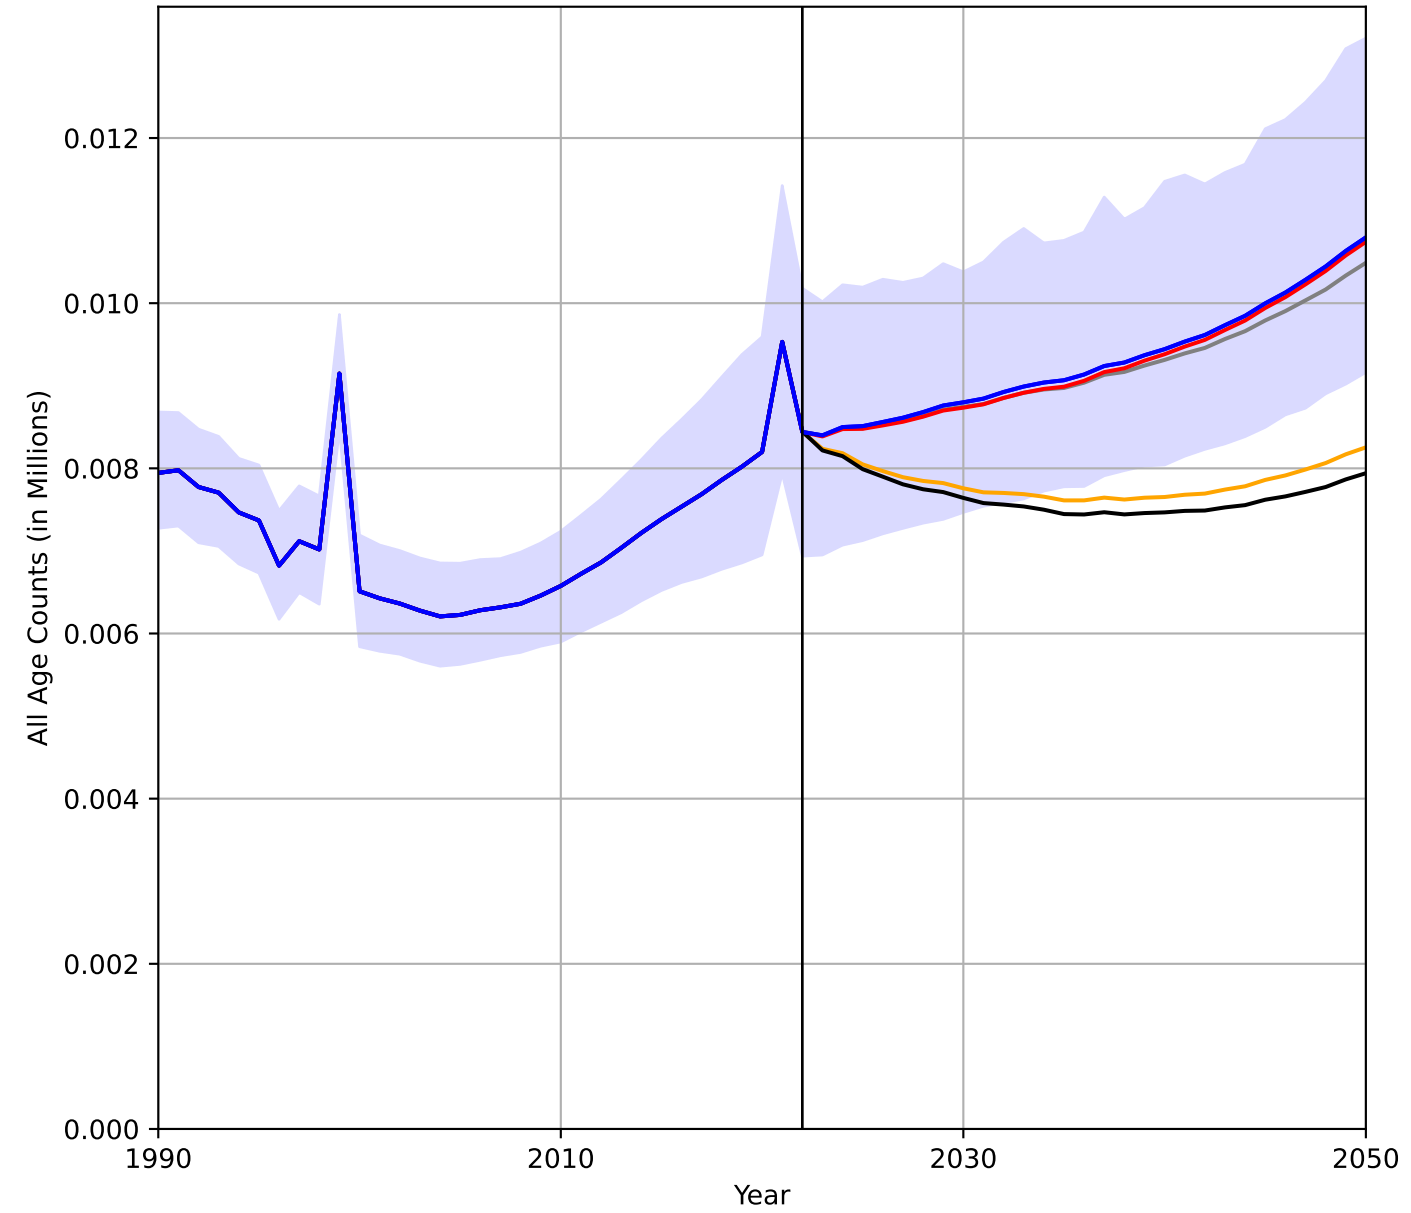

# Viet Nam

Supplemental Results Figure S11. All-cause age standardised death rates (A) and all age death counts (B), for the past and for five future scenarios, 1990–2050

1801

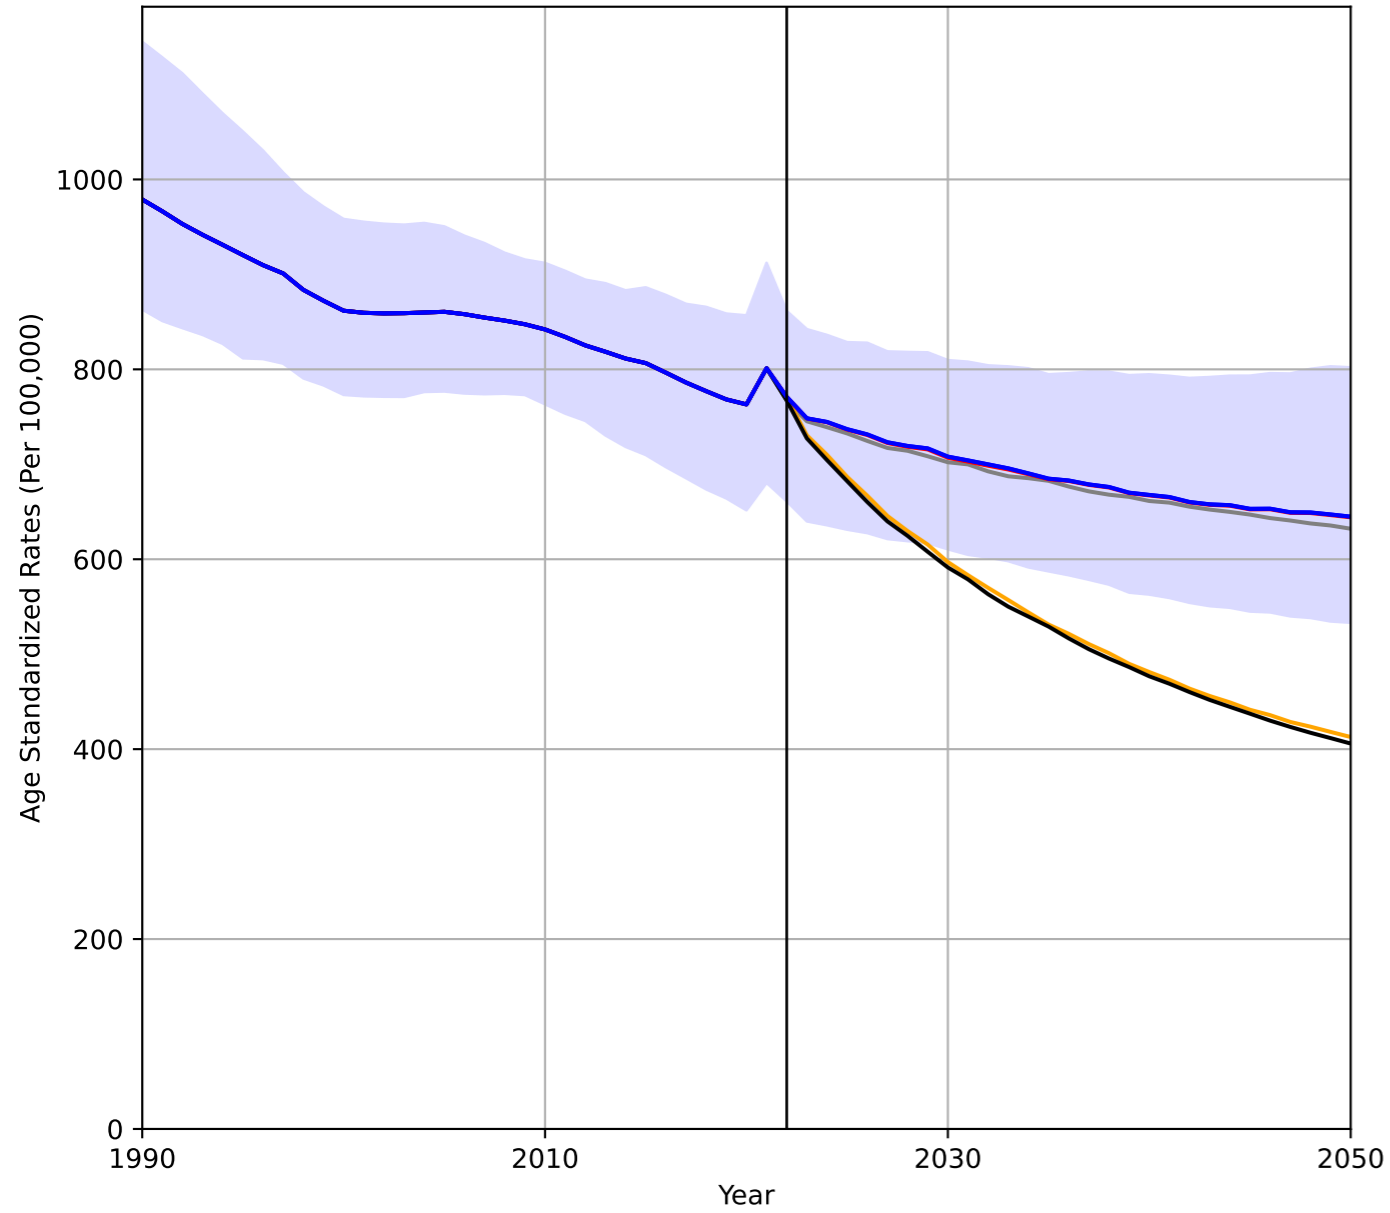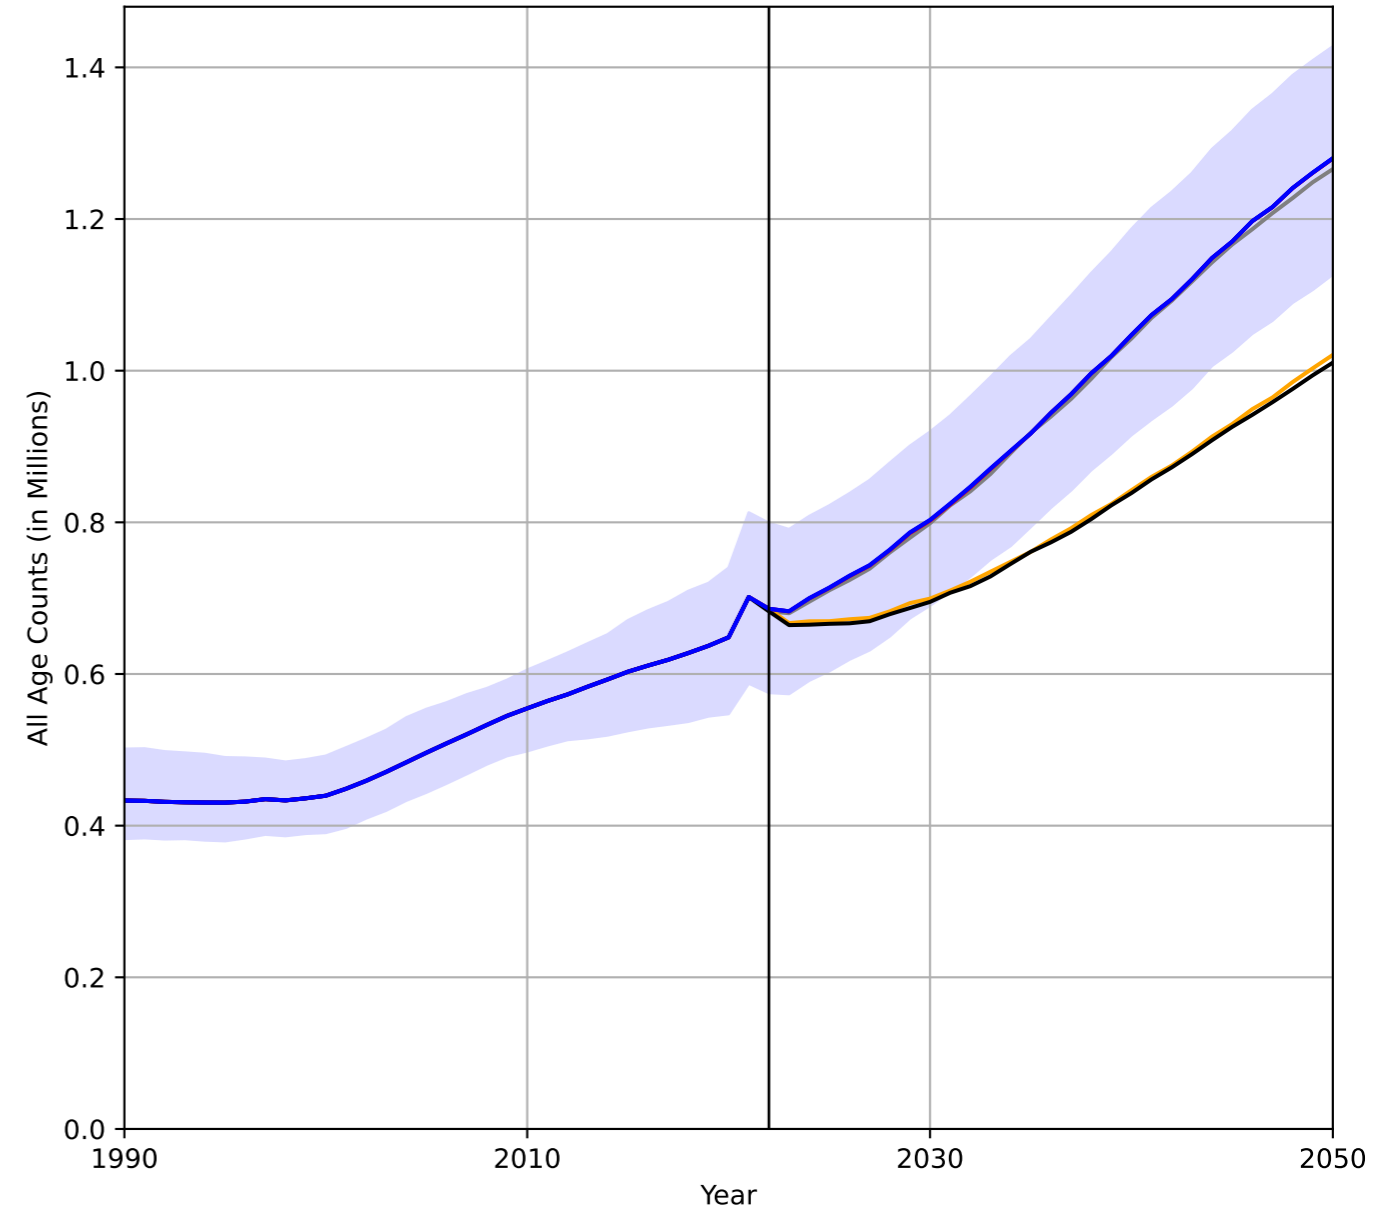

# Angola

Supplemental Results Figure S11. All-cause age standardised death rates (A) and all age death counts (B), for the past and for five future scenarios, 1990–2050

1802

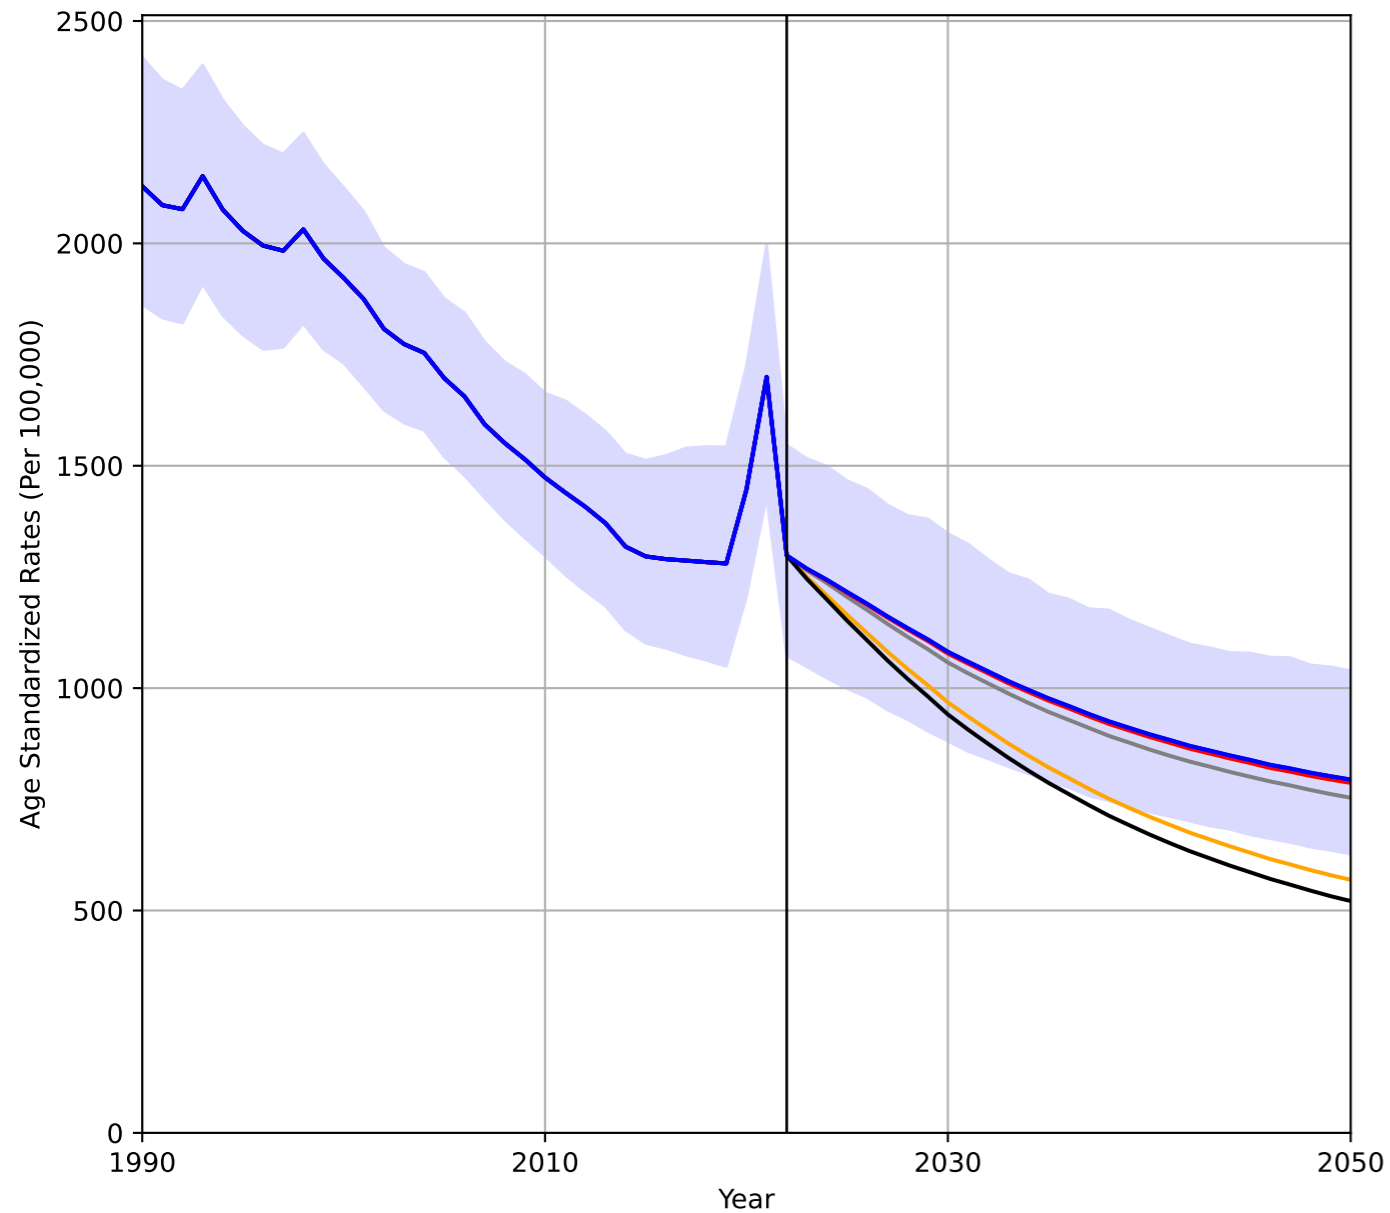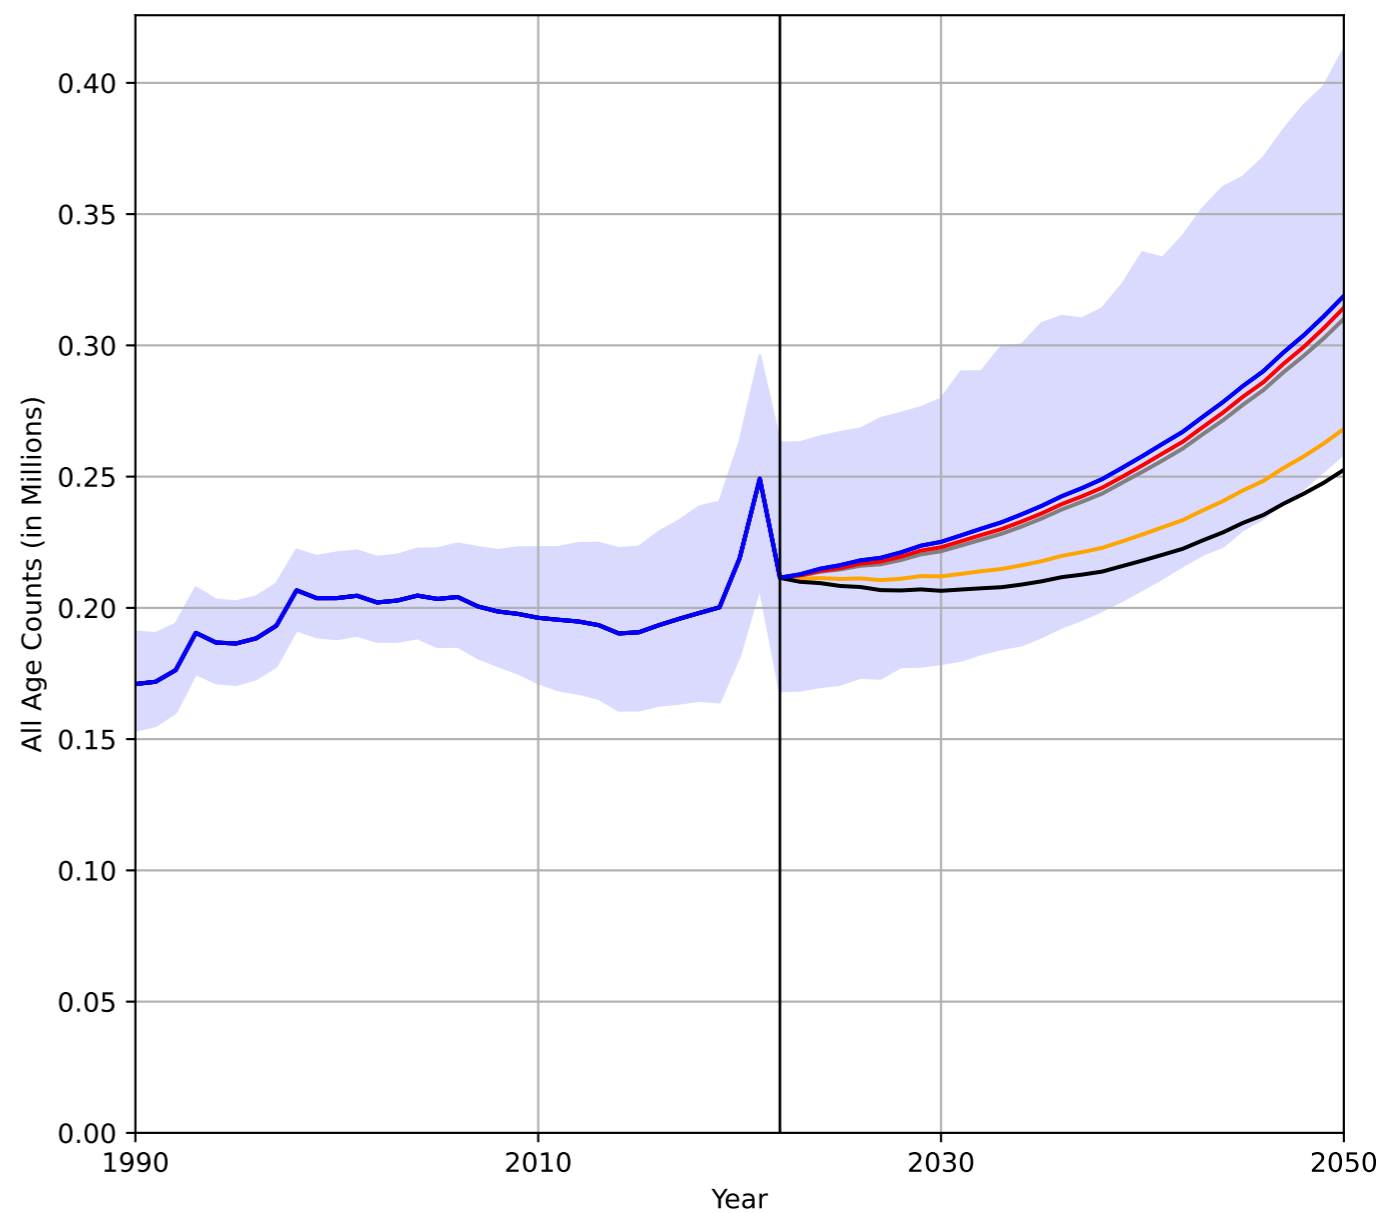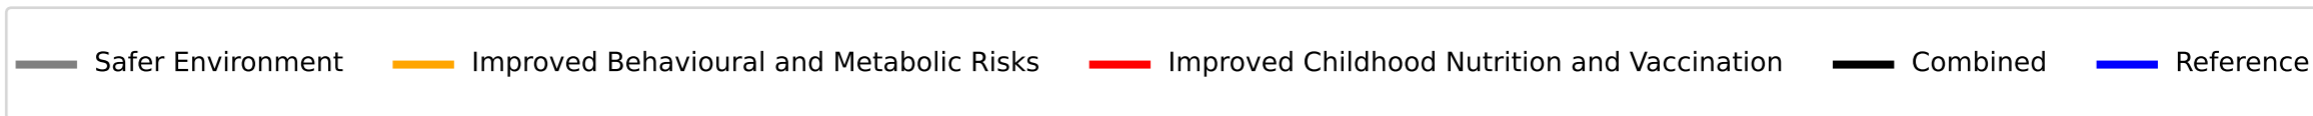

# Central African Republic

1803

Supplemental Results Figure S11. All-cause age standardised death rates (A) and all age death counts (B), for the past and for five future scenarios, 1990–2050

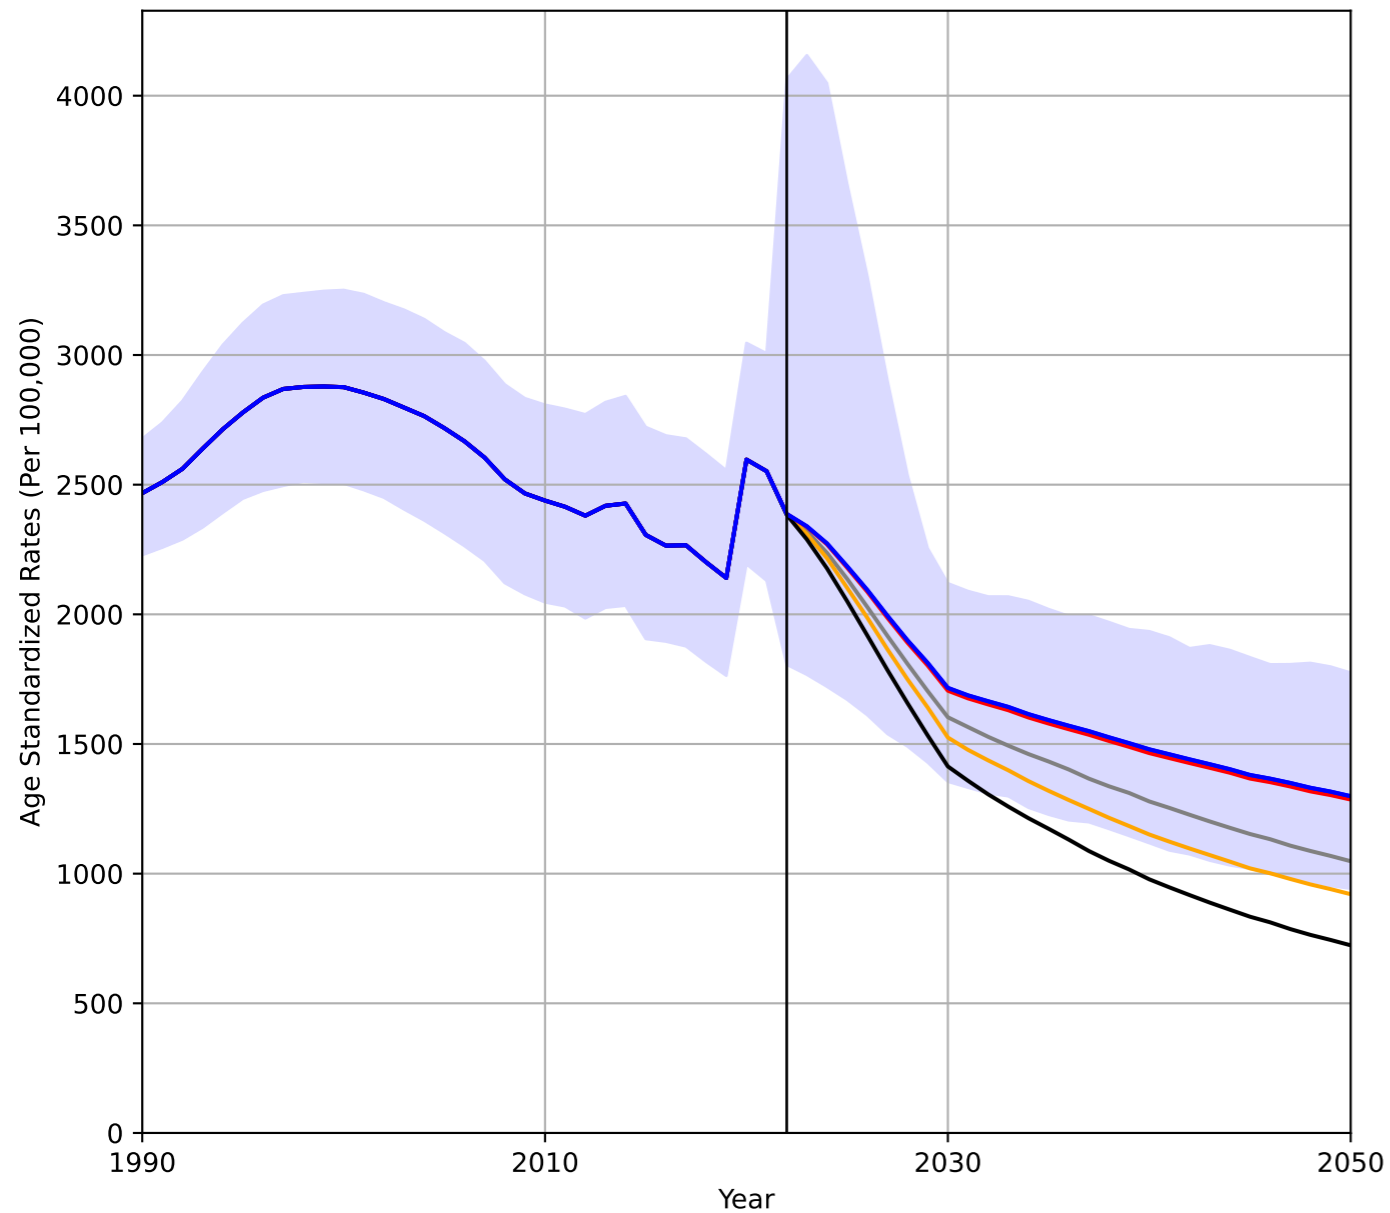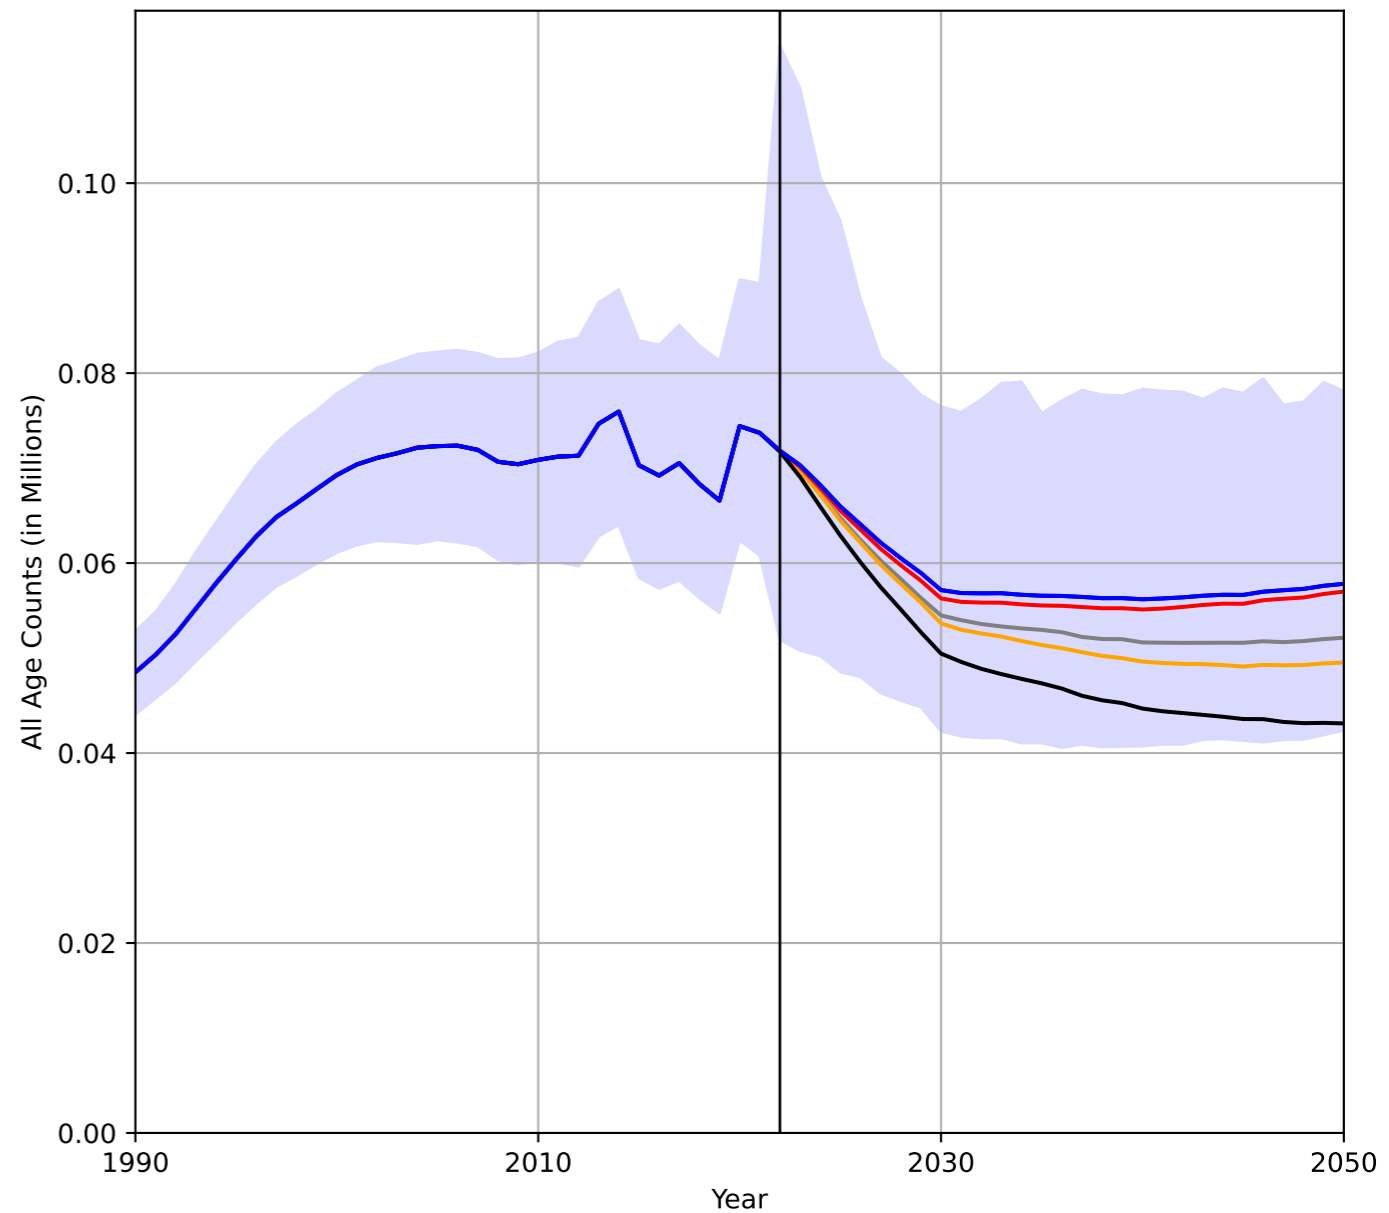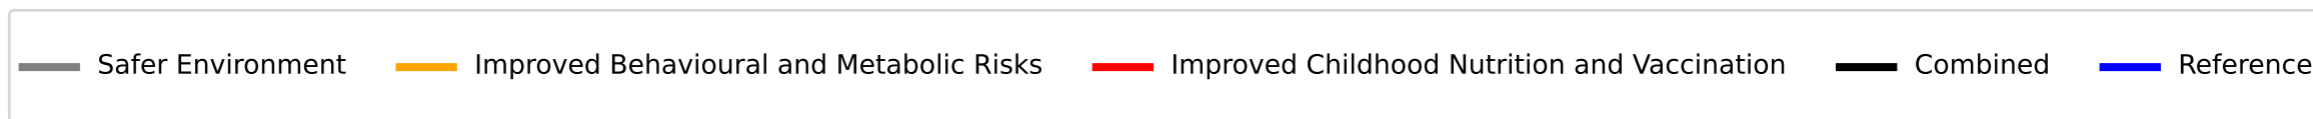

# Congo (Brazzaville)

Supplemental Results Figure S11. All-cause age standardised death rates (A) and all age death counts (B), for the past and for five future scenarios, 1990–2050

1804

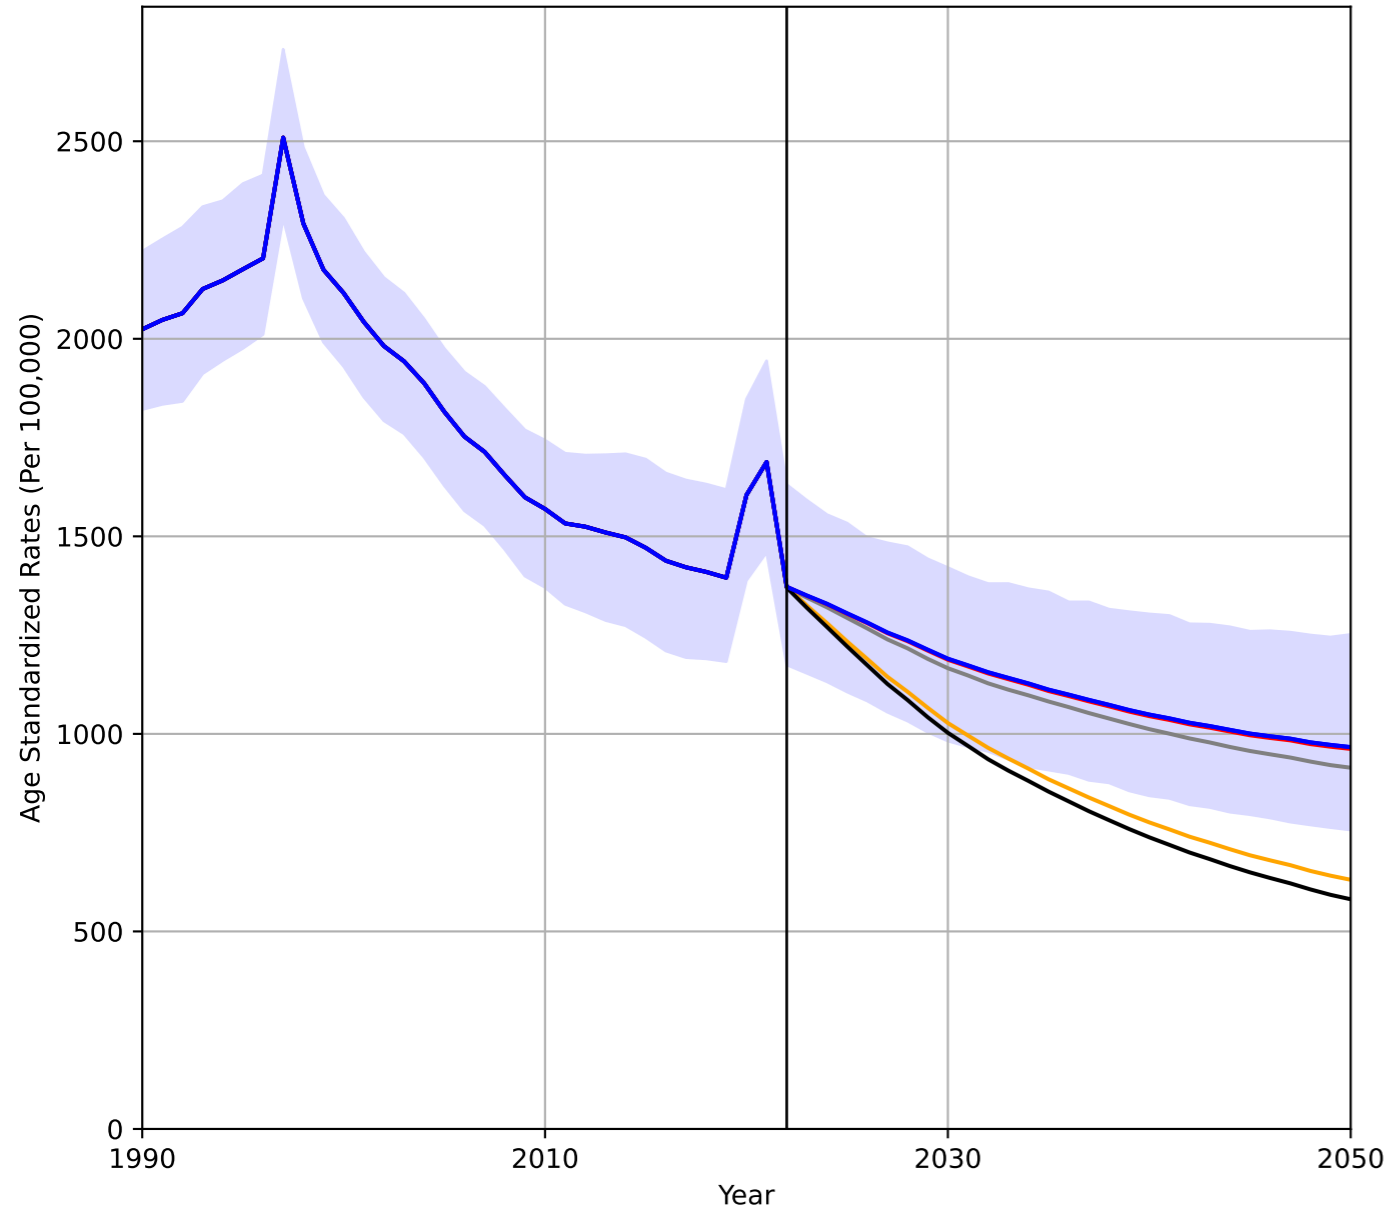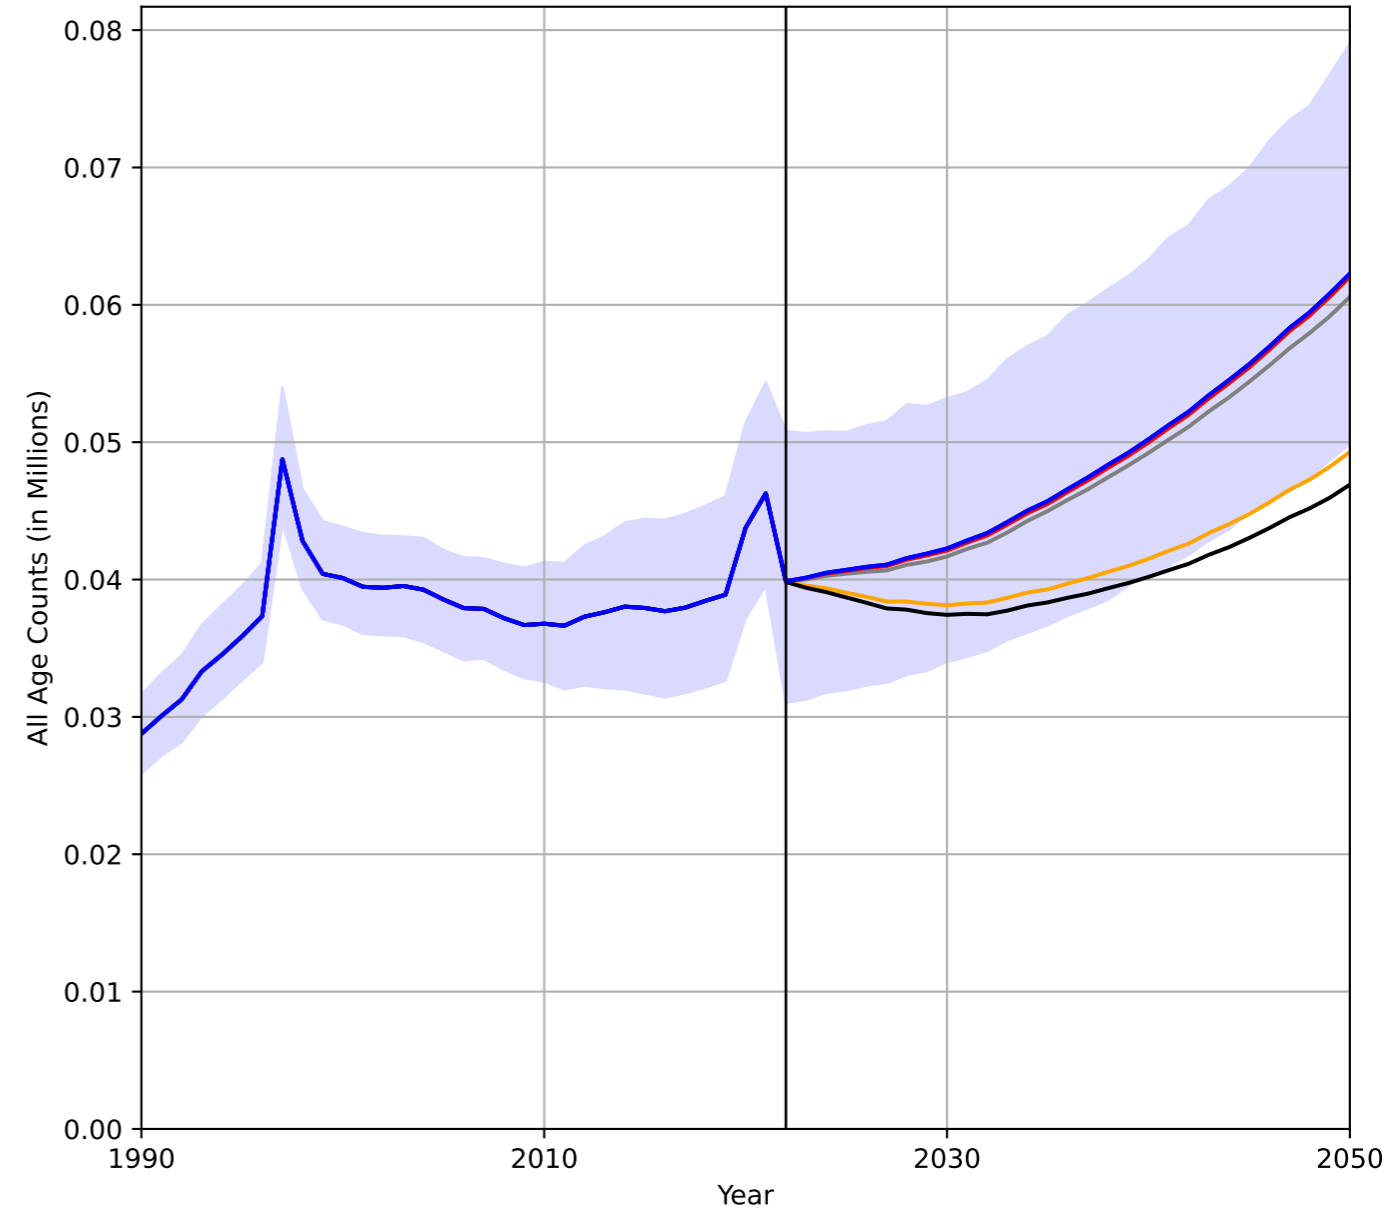

# DR Congo

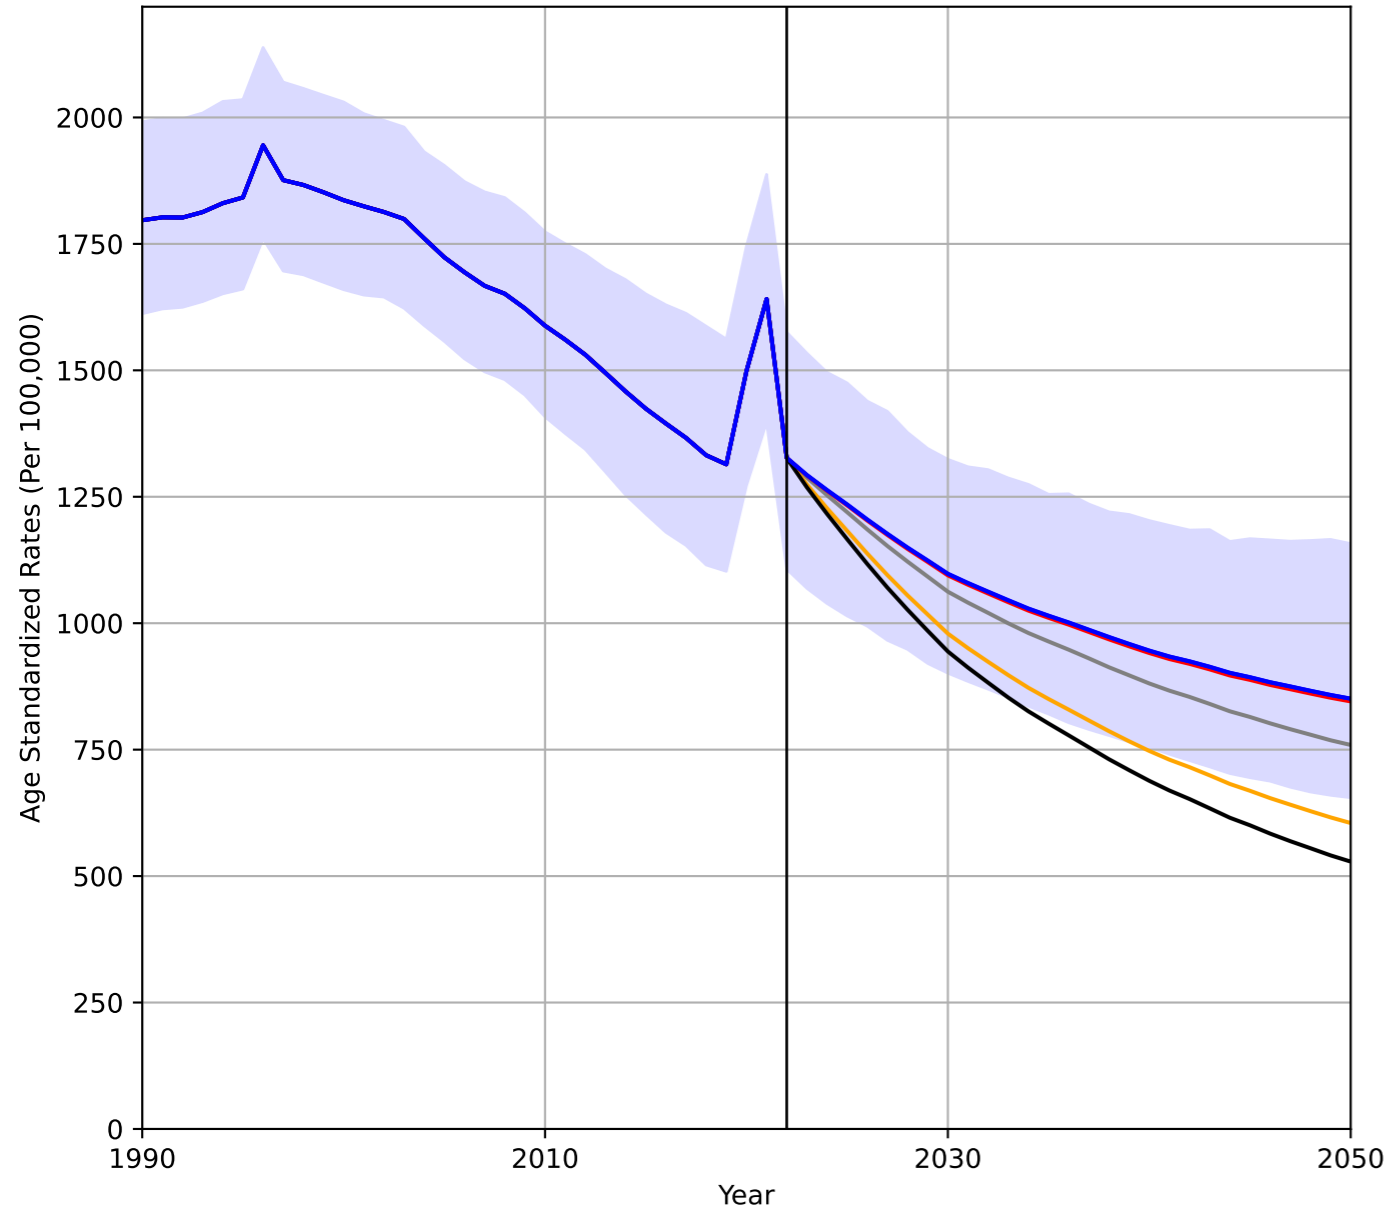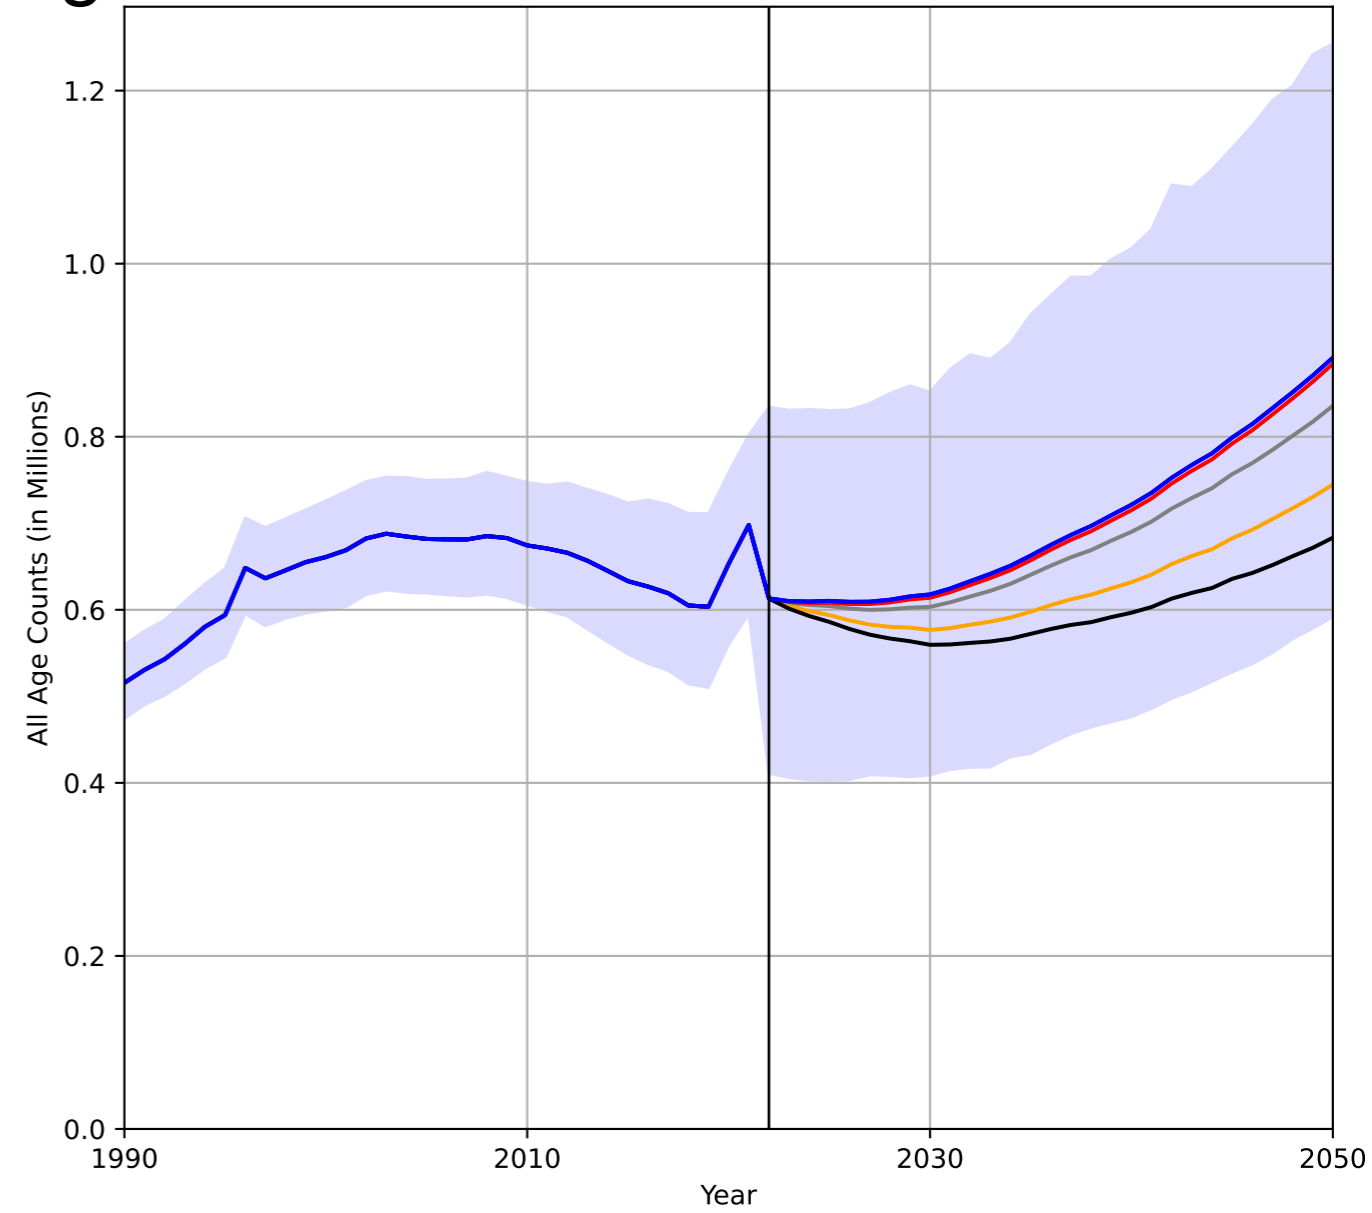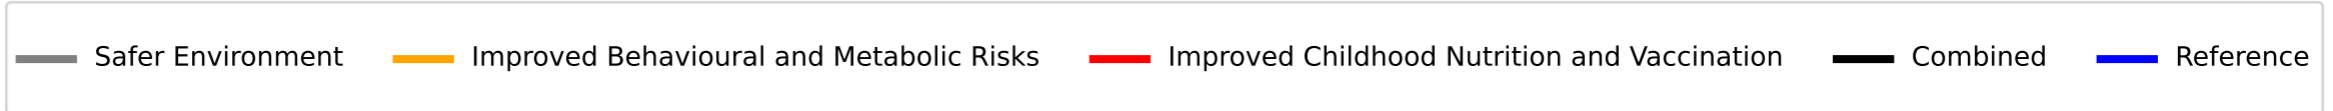

# Equatorial Guinea

Supplemental Results Figure S11. All-cause age standardised death rates (A) and all age death counts (B), for the past and for five future scenarios, 1990–2050

1806

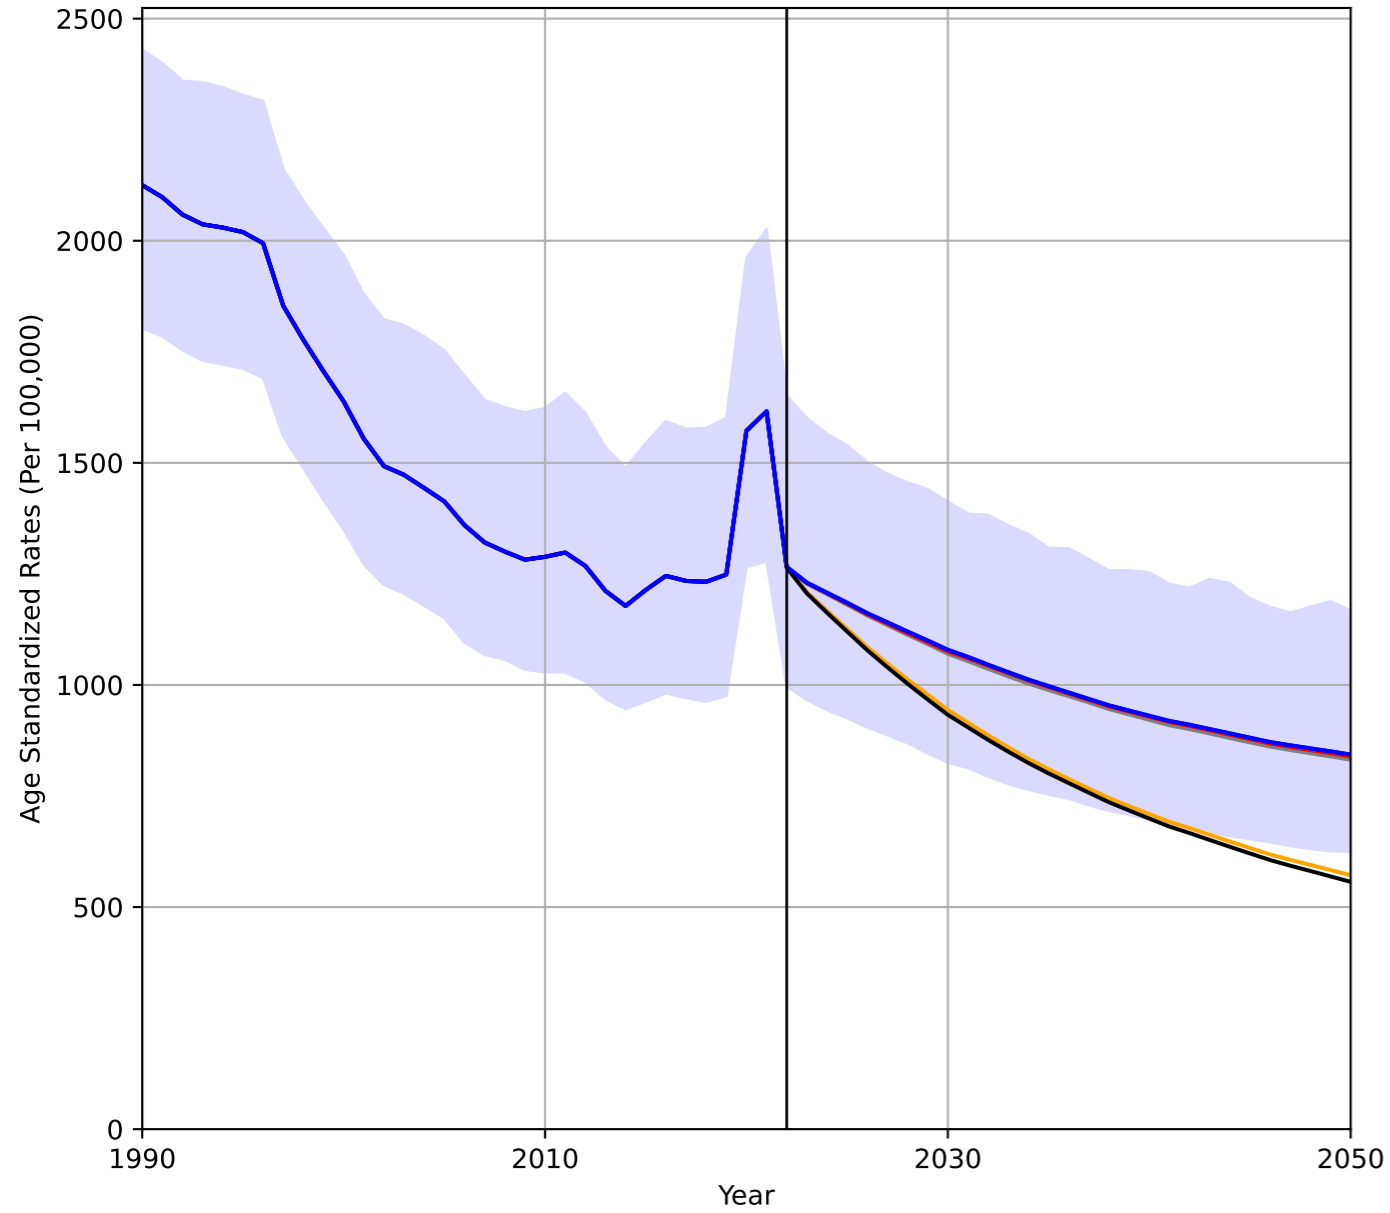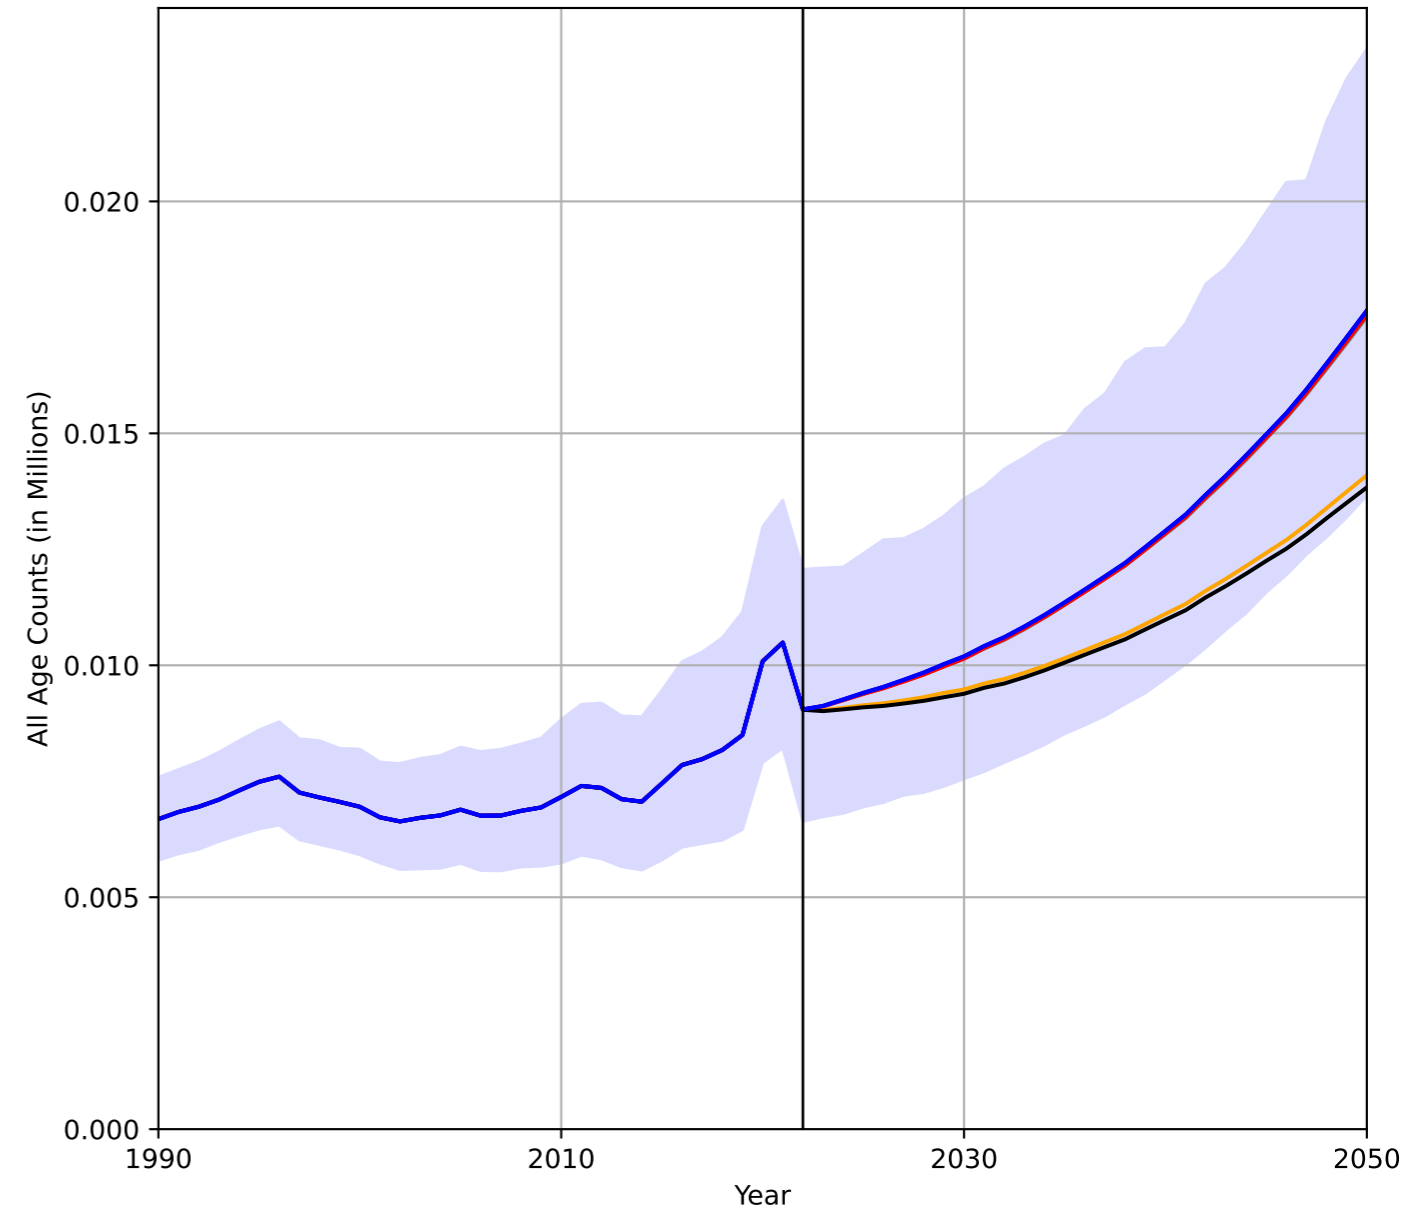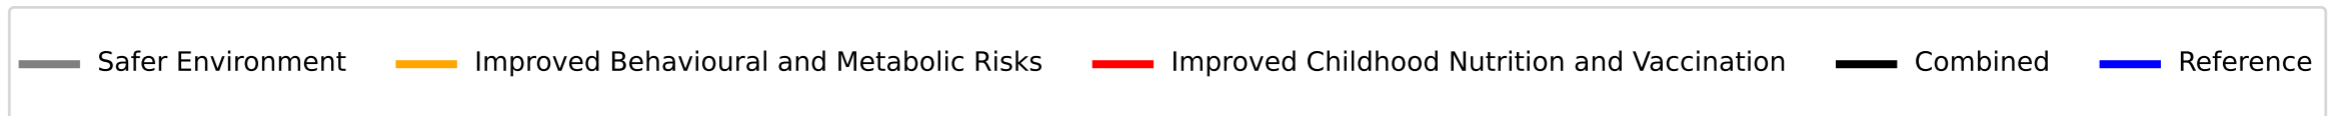

# Gabon

Supplemental Results Figure S11. All-cause age standardised death rates (A) and all age death counts (B), for the past and for five future scenarios, 1990–2050

1807

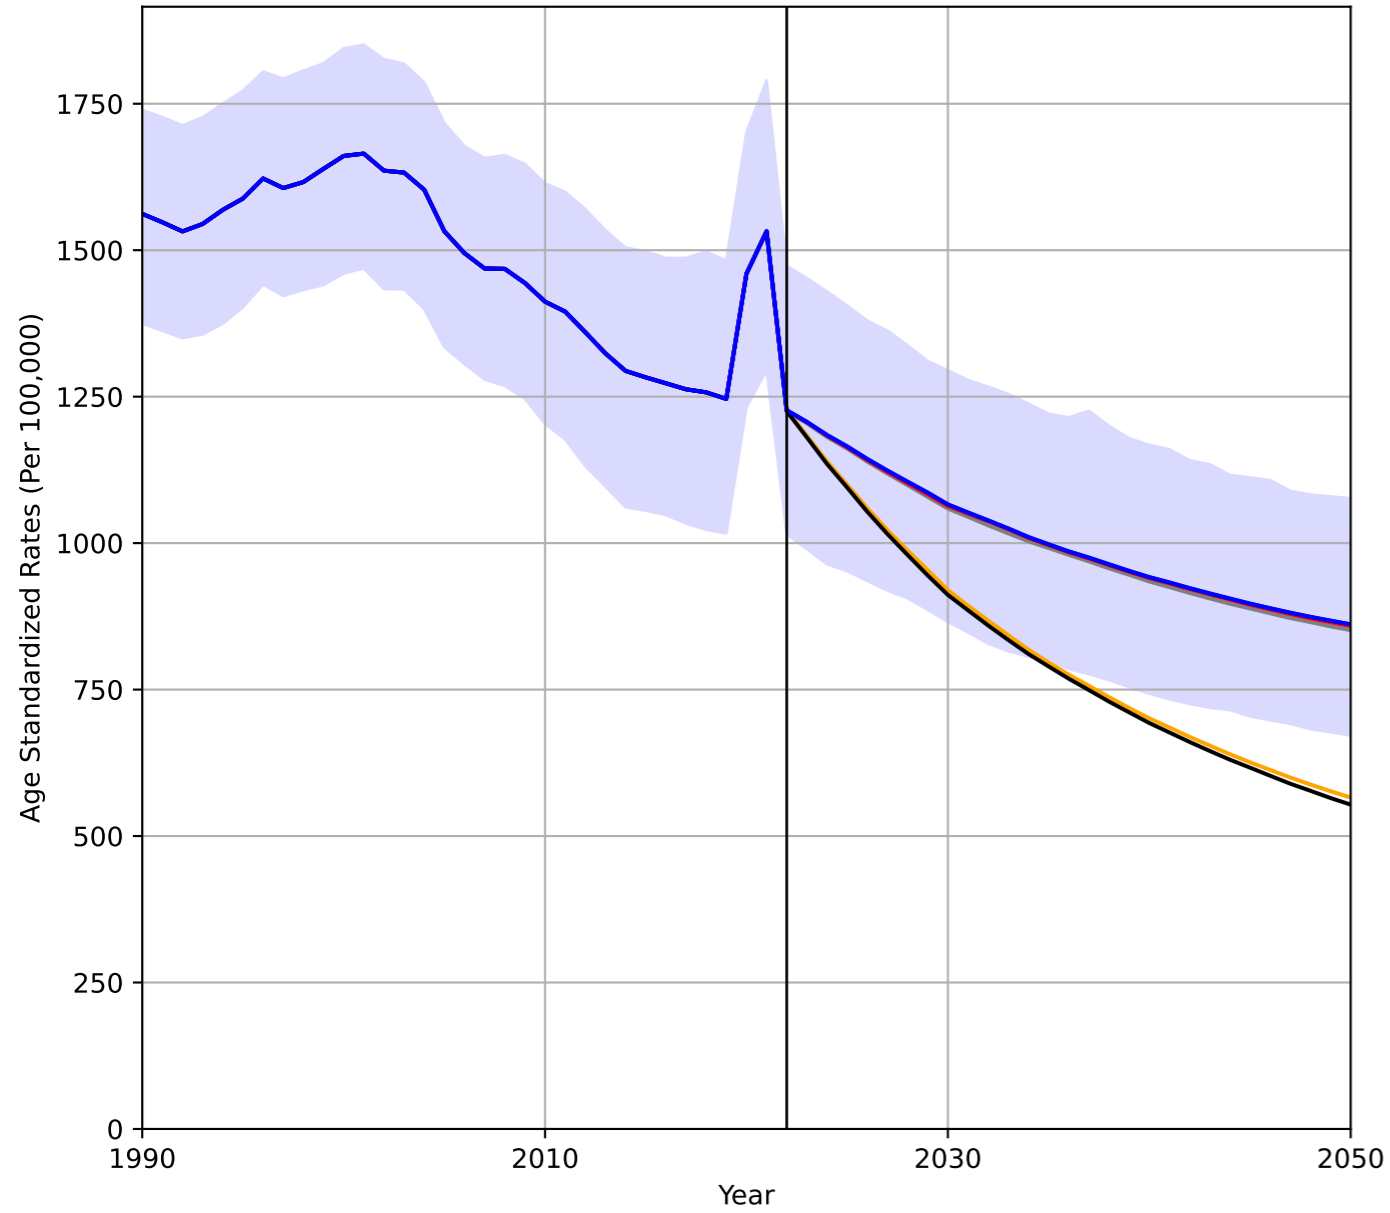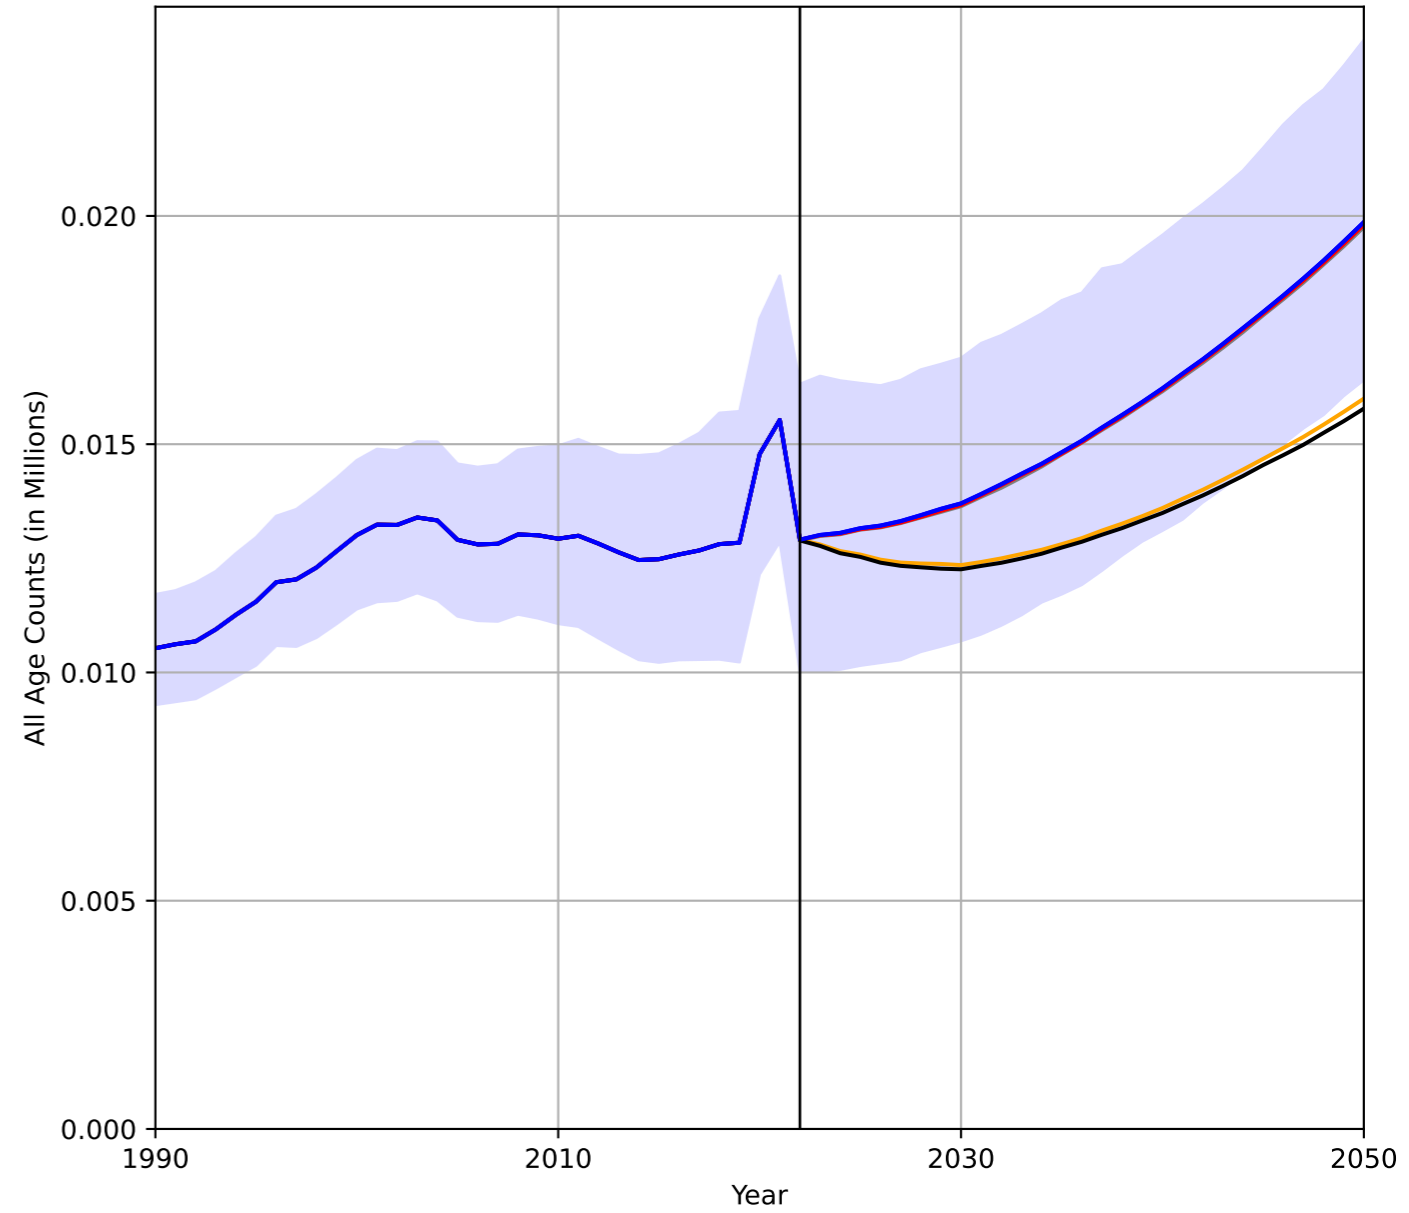



# Burundi

Supplemental Results Figure S11. All-cause age standardised death rates (A) and all age death counts (B), for the past and for five future scenarios, 1990–2050

1808

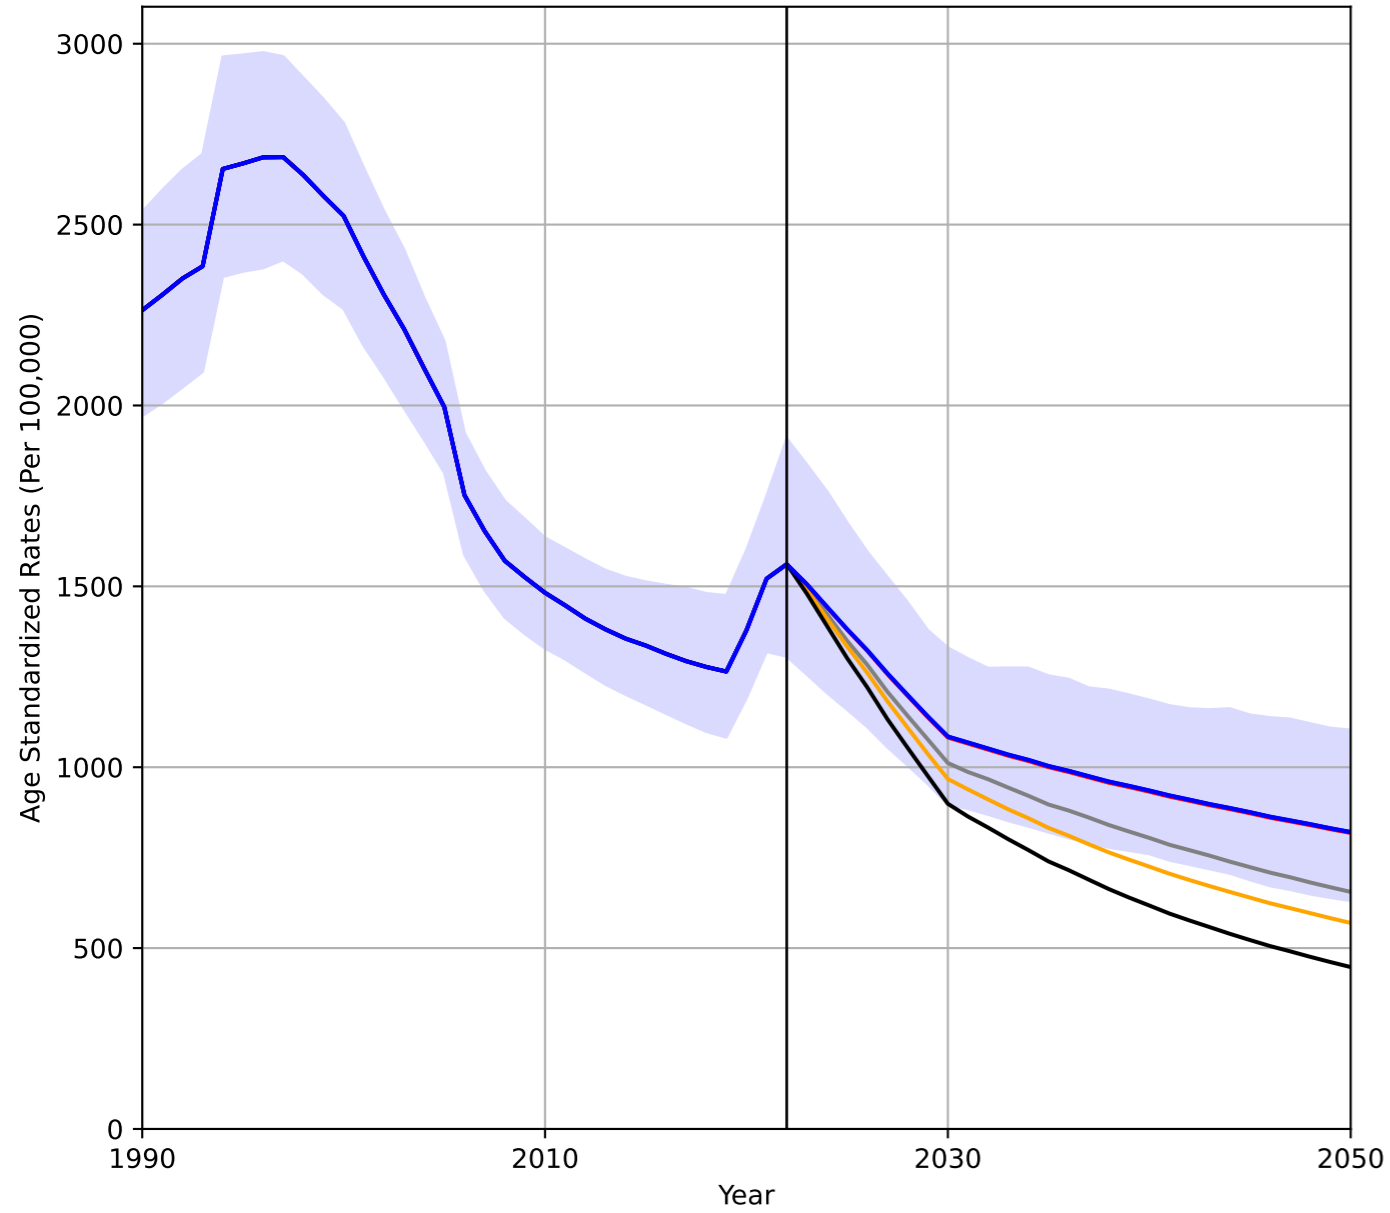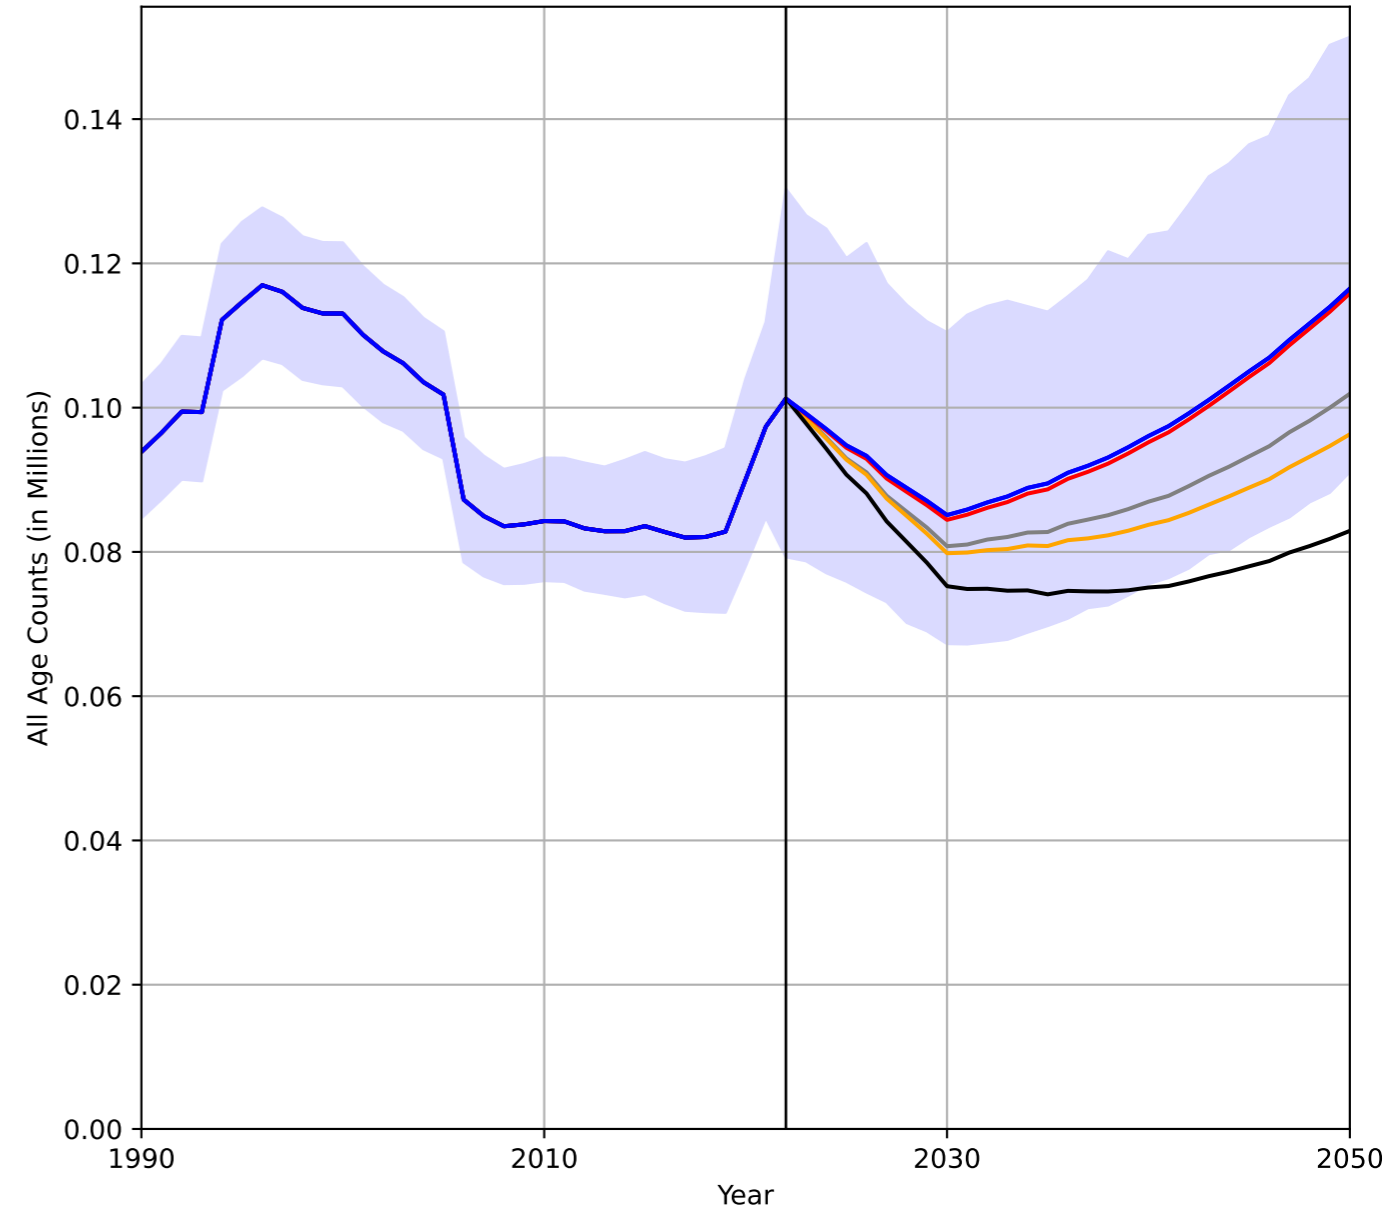

# Comoros

Supplemental Results Figure S11. All-cause age standardised death rates (A) and all age death counts (B), for the past and for five future scenarios, 1990–2050

1809

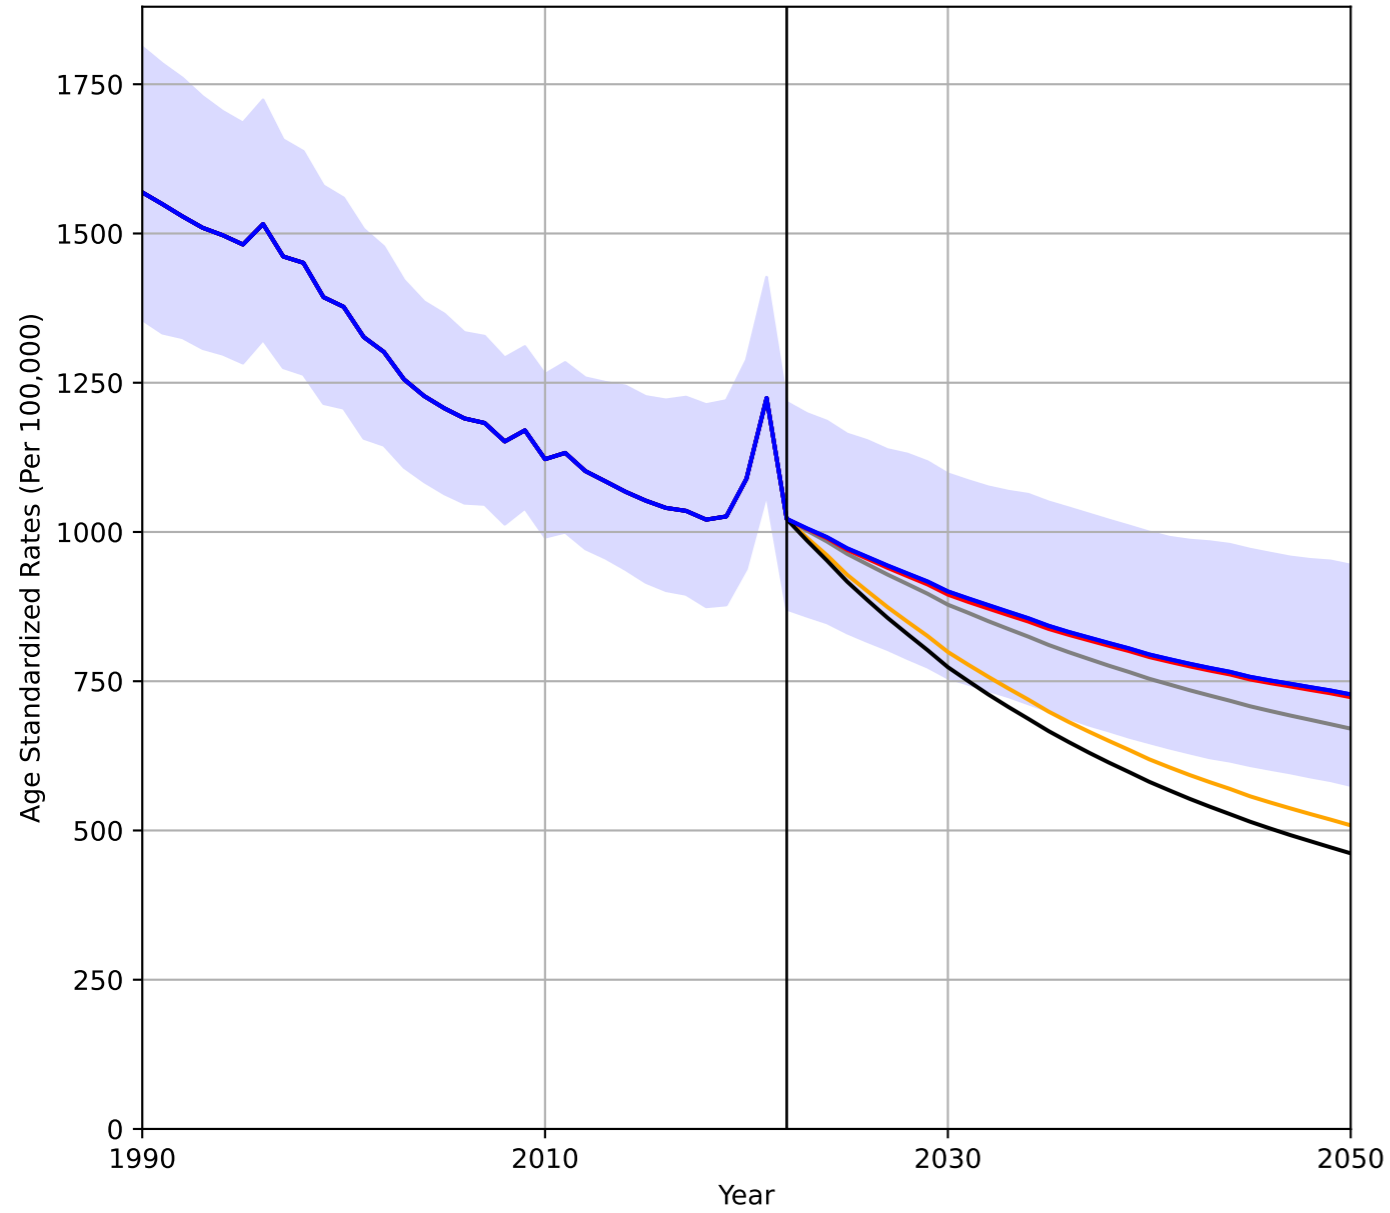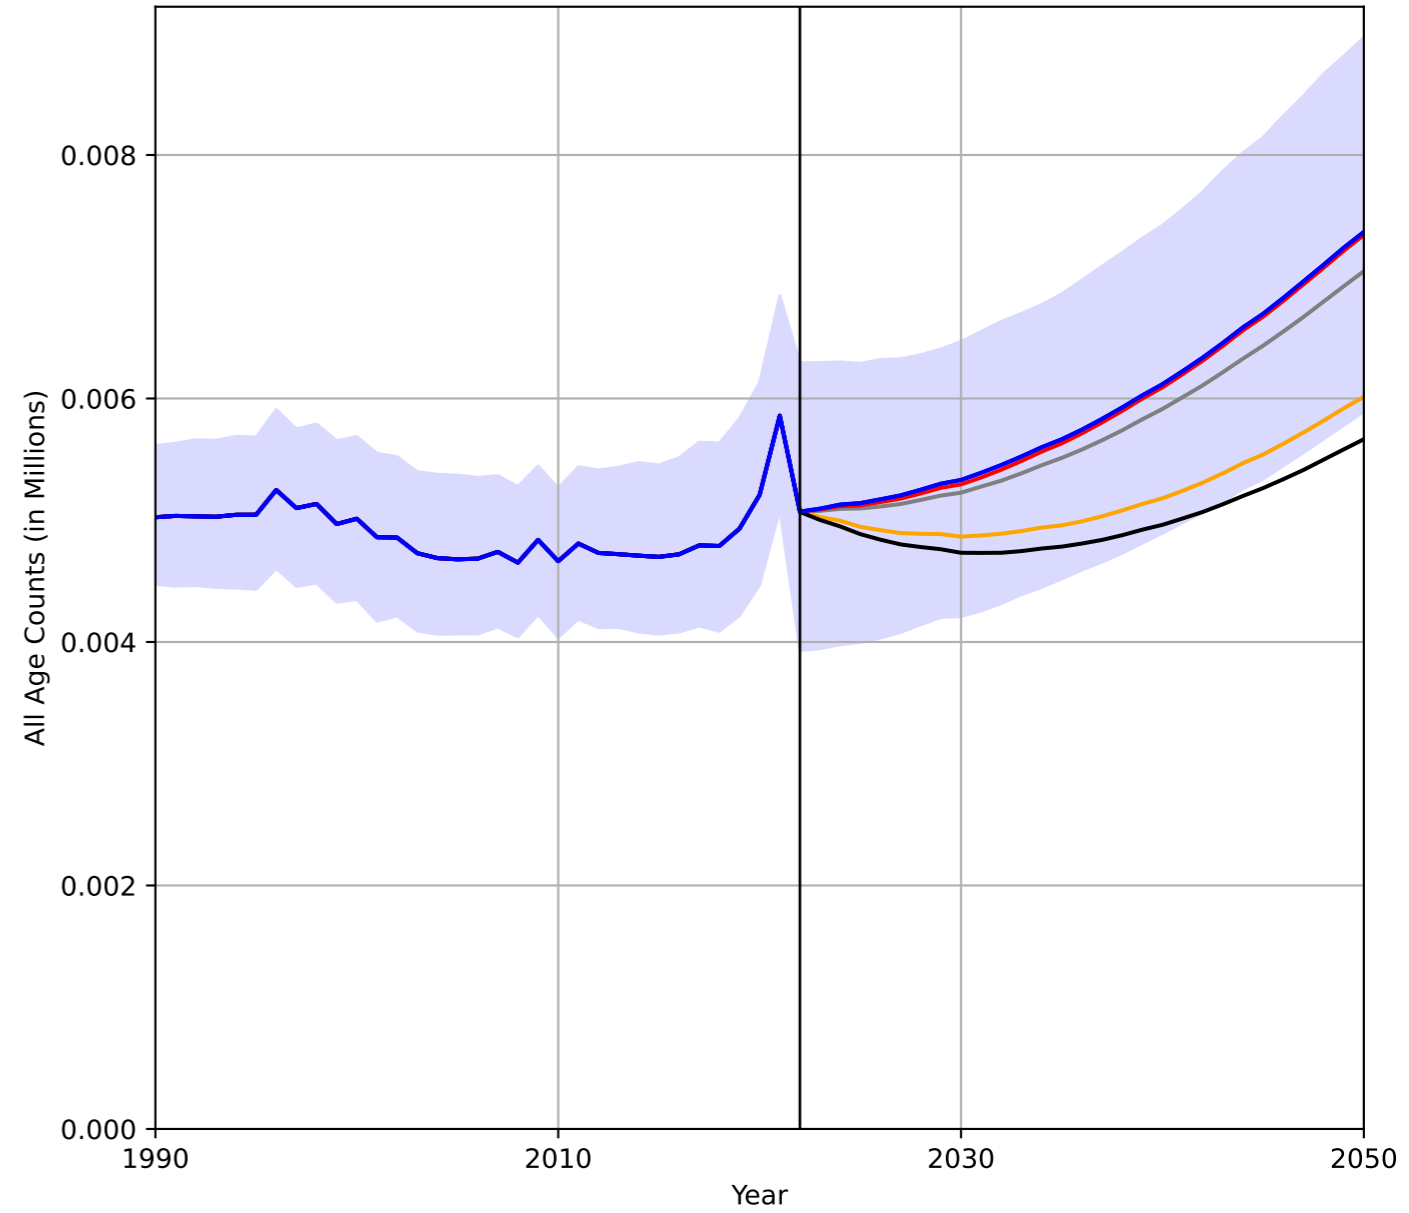

# Djibouti

Supplemental Results Figure S11. All-cause age standardised death rates (A) and all age death counts (B), for the past and for five future scenarios, 1990–2050

1810

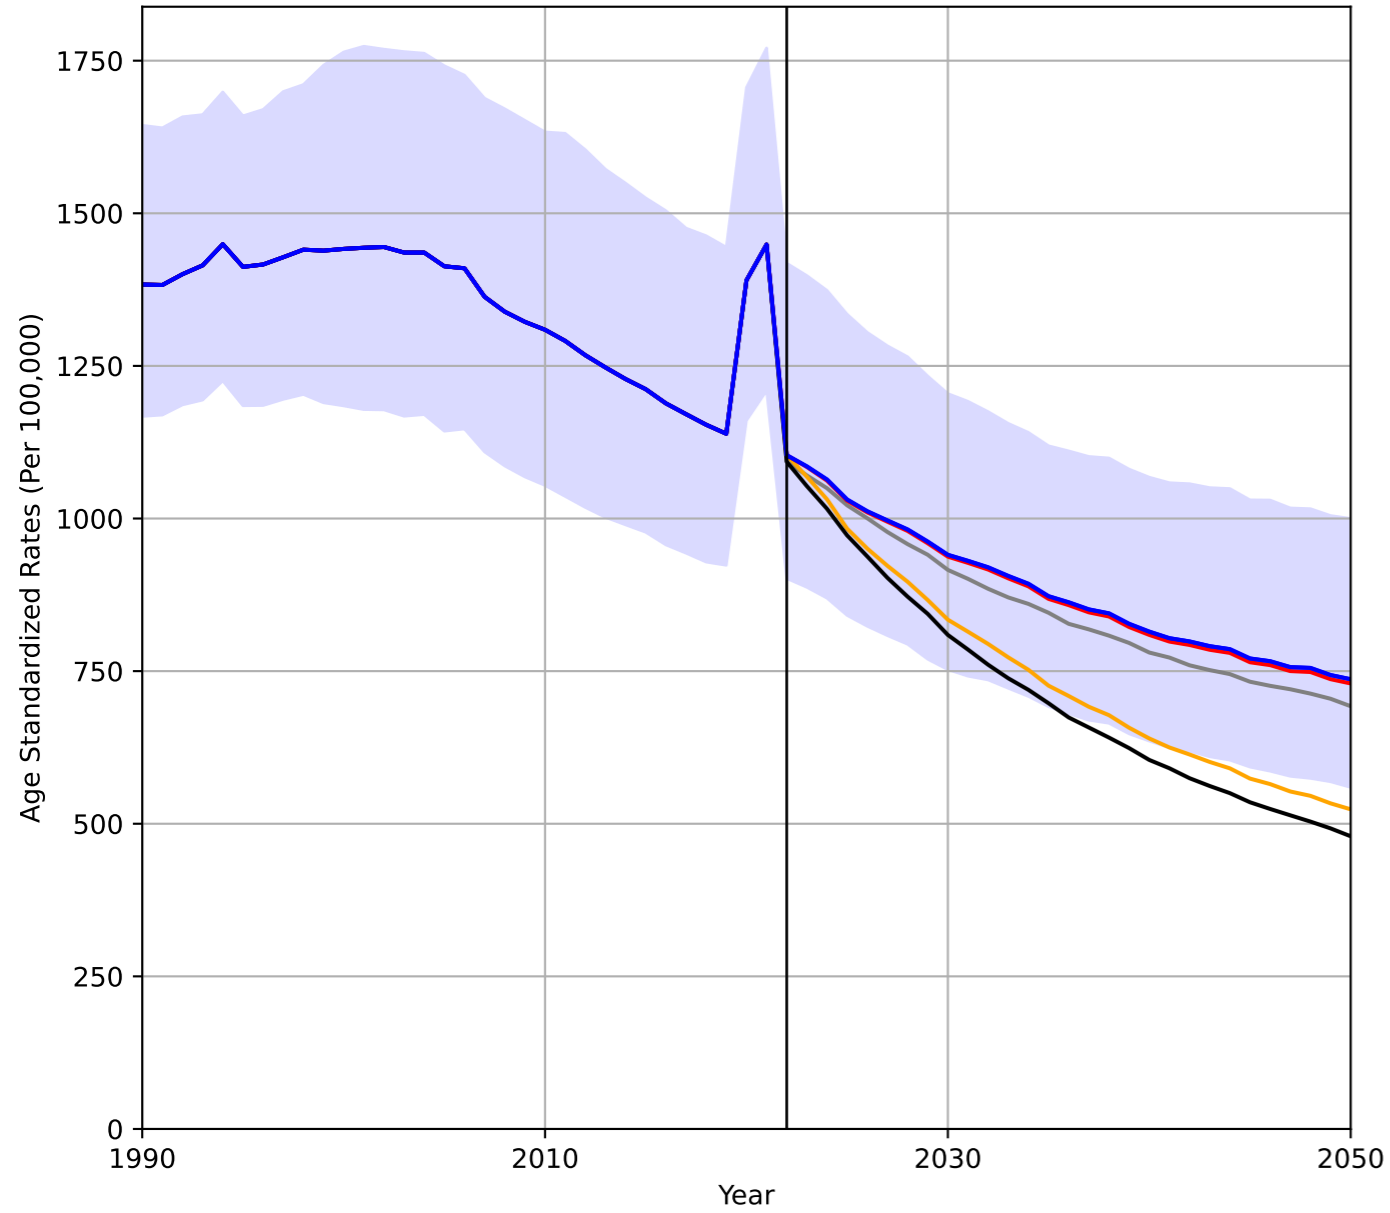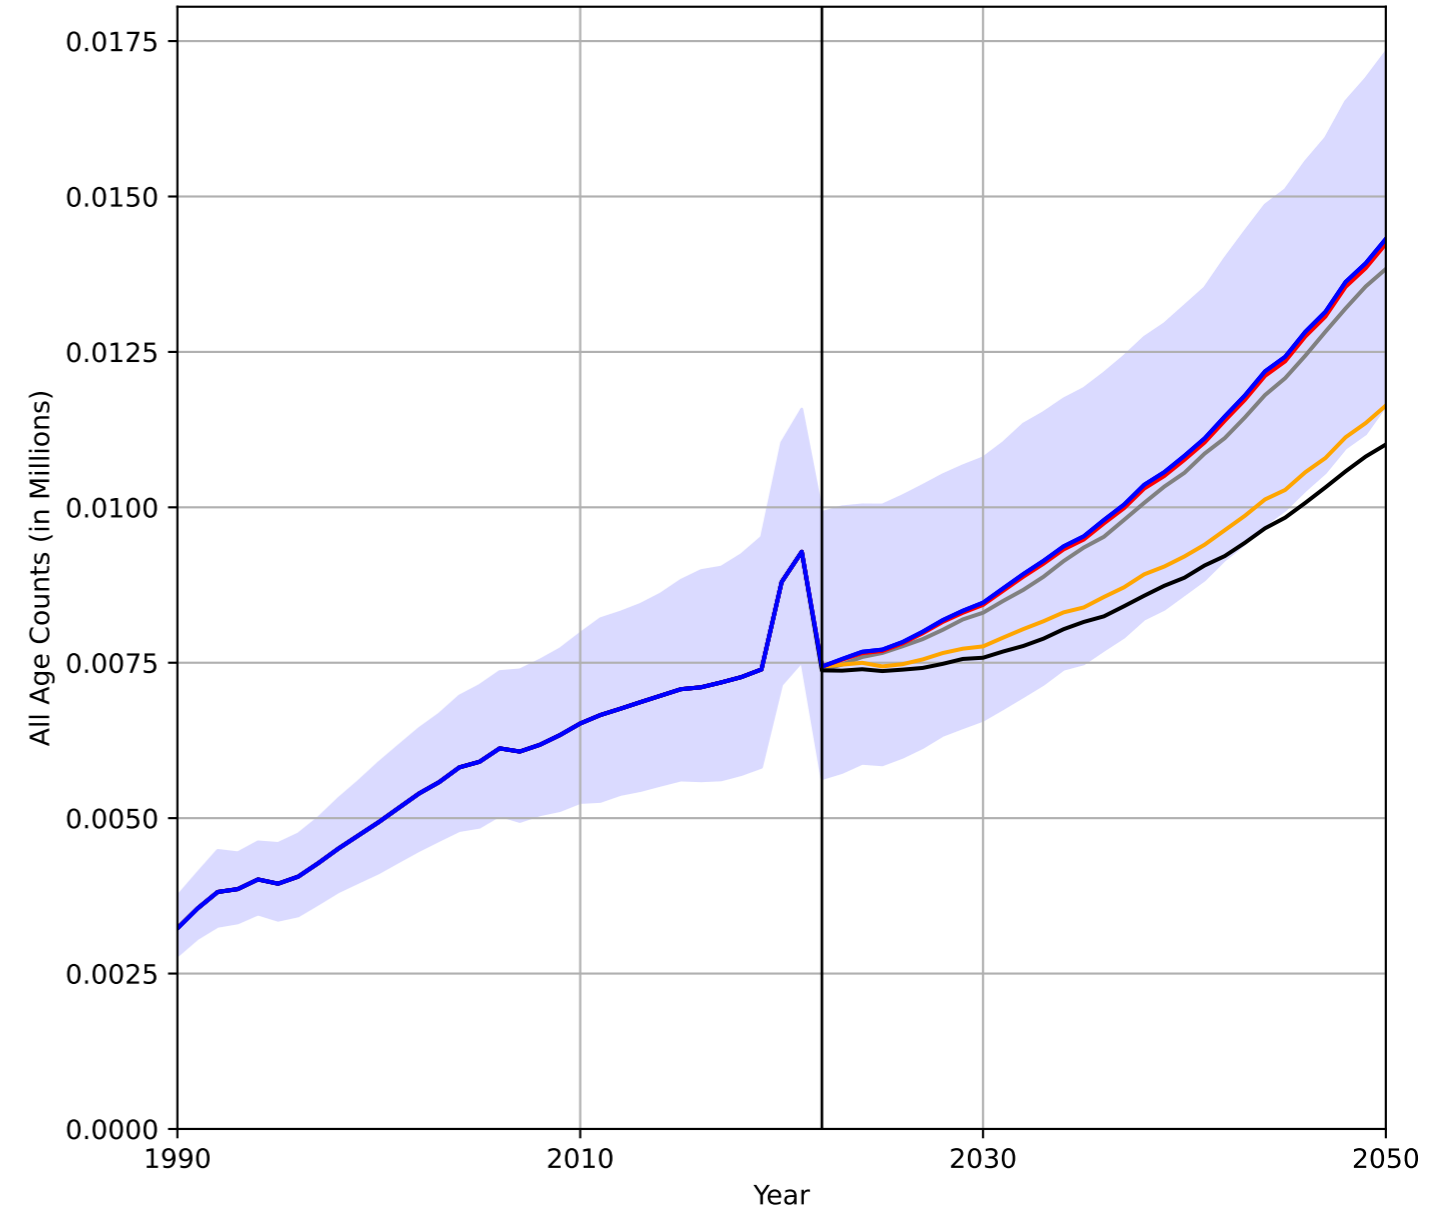

# Eritrea

Supplemental Results Figure S11. All-cause age standardised death rates (A) and all age death counts (B), for the past and for five future scenarios, 1990–2050

1811

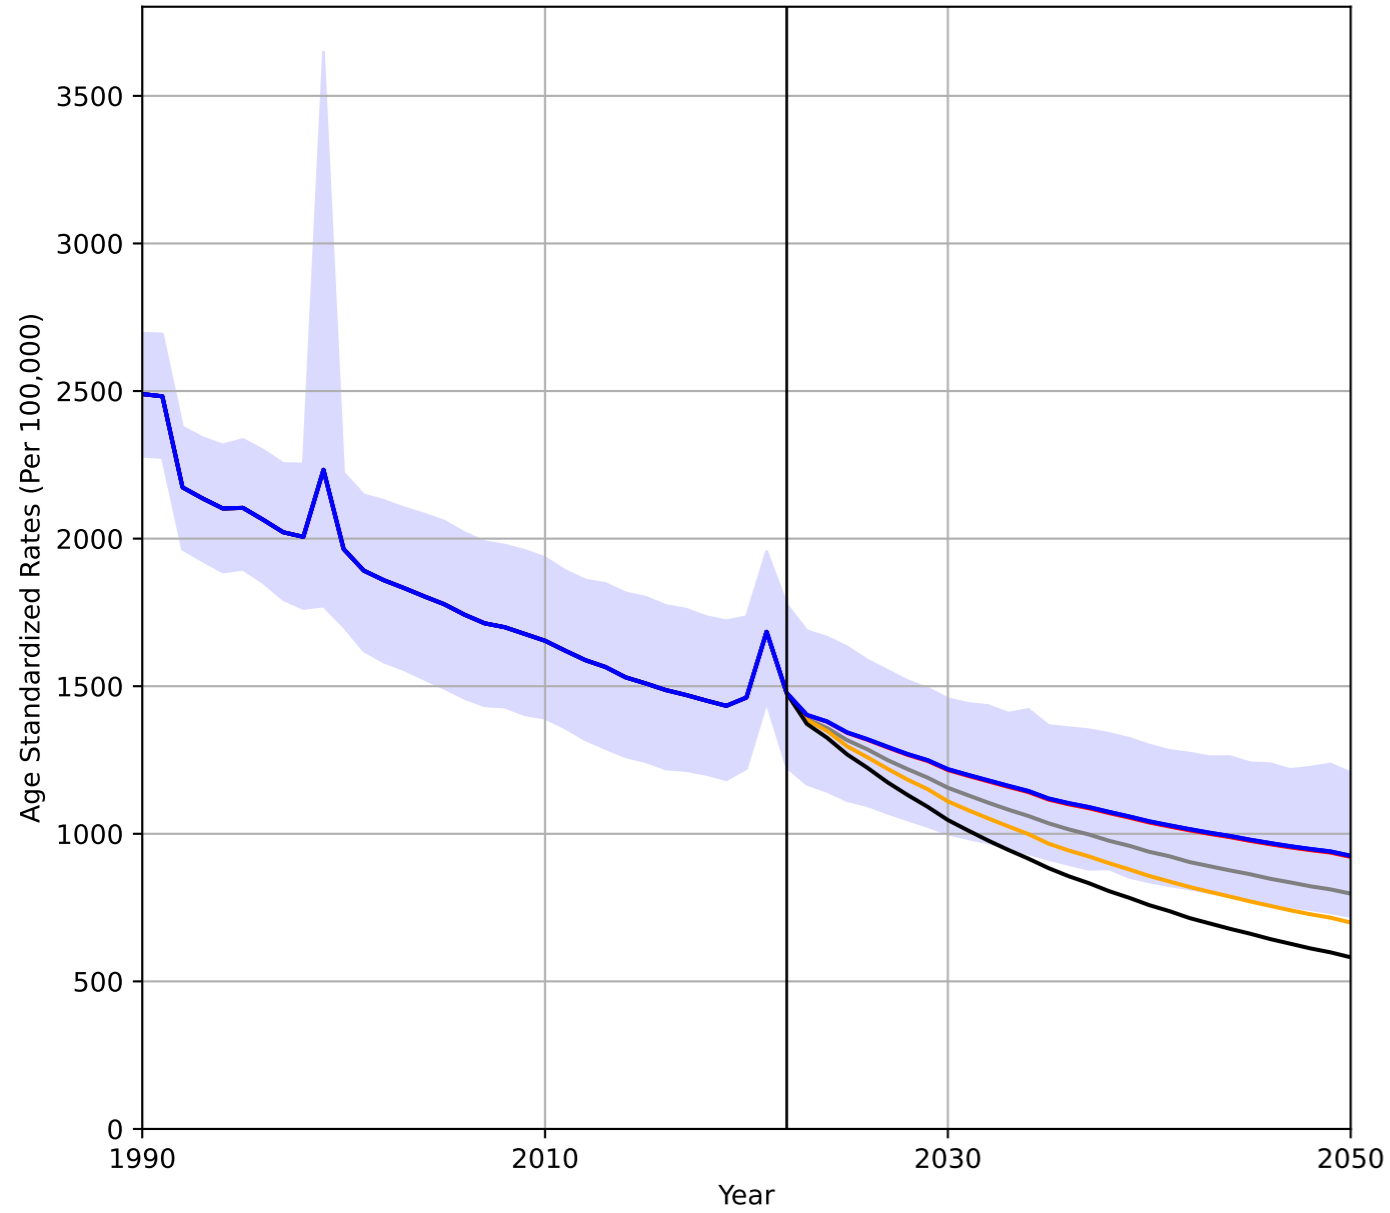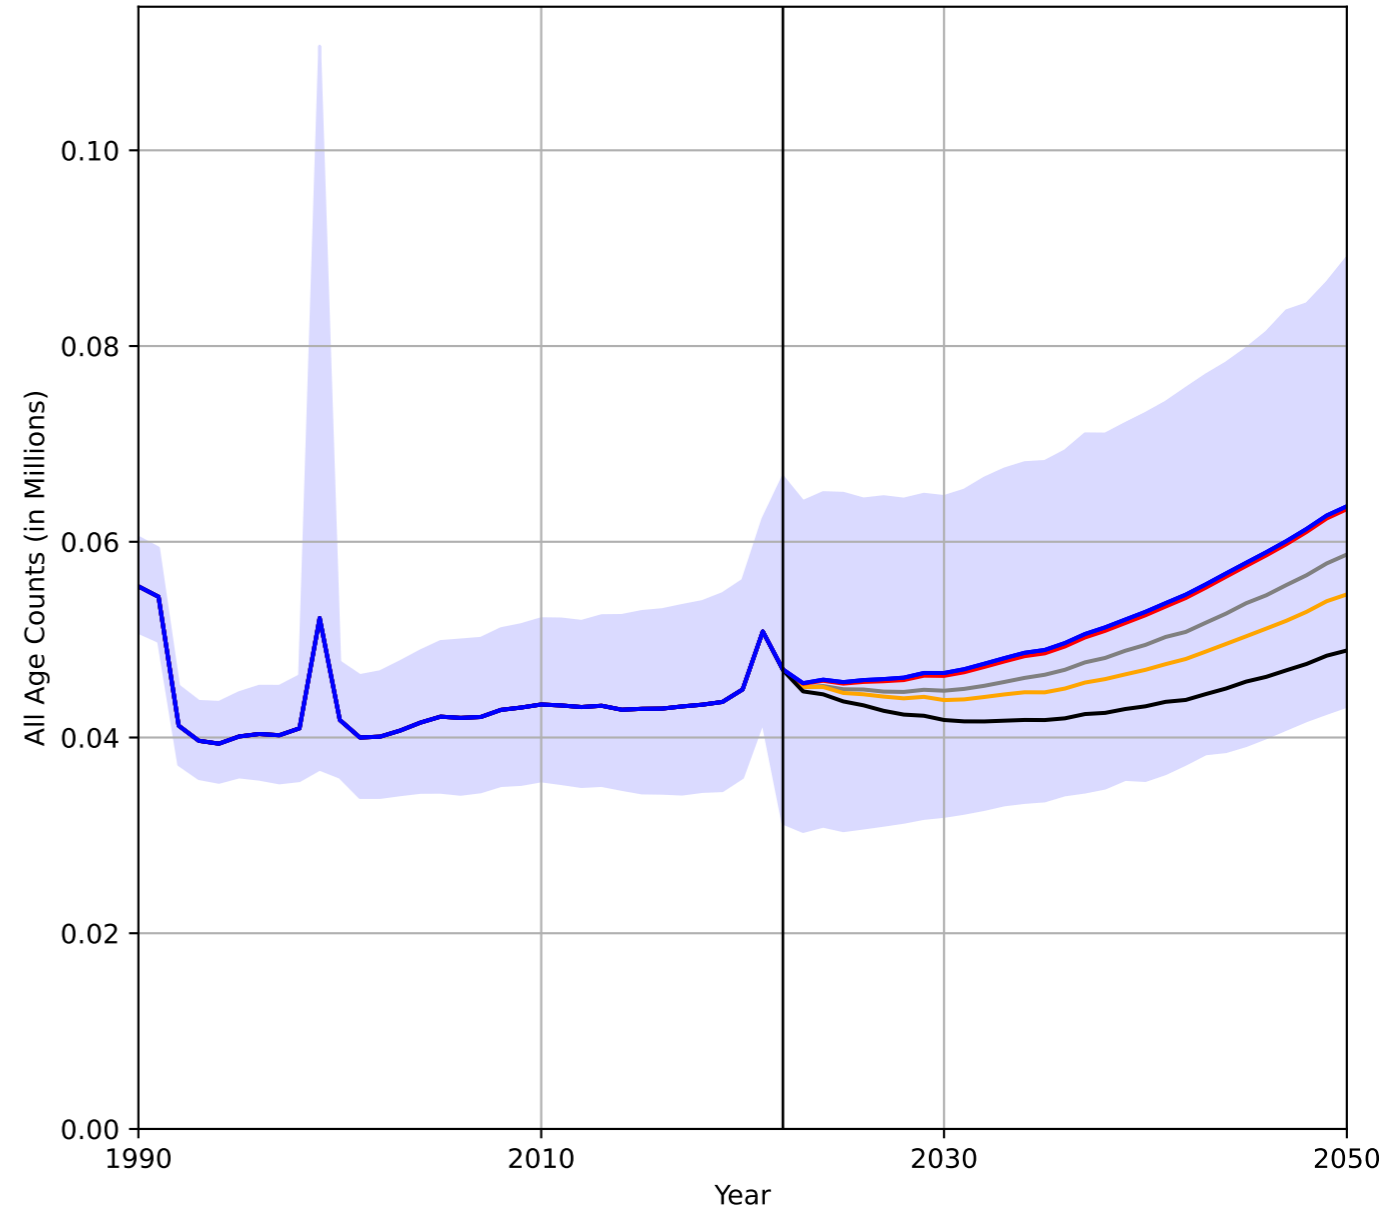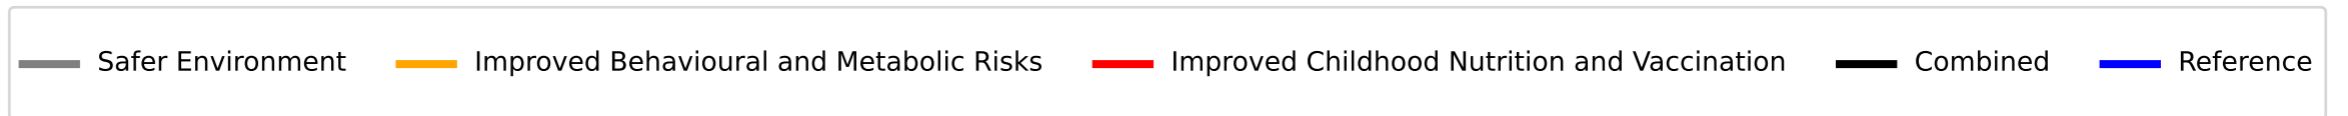

# Ethiopia

Supplemental Results Figure S11. All-cause age standardised death rates (A) and all age death counts (B), for the past and for five future scenarios, 1990–2050

1812

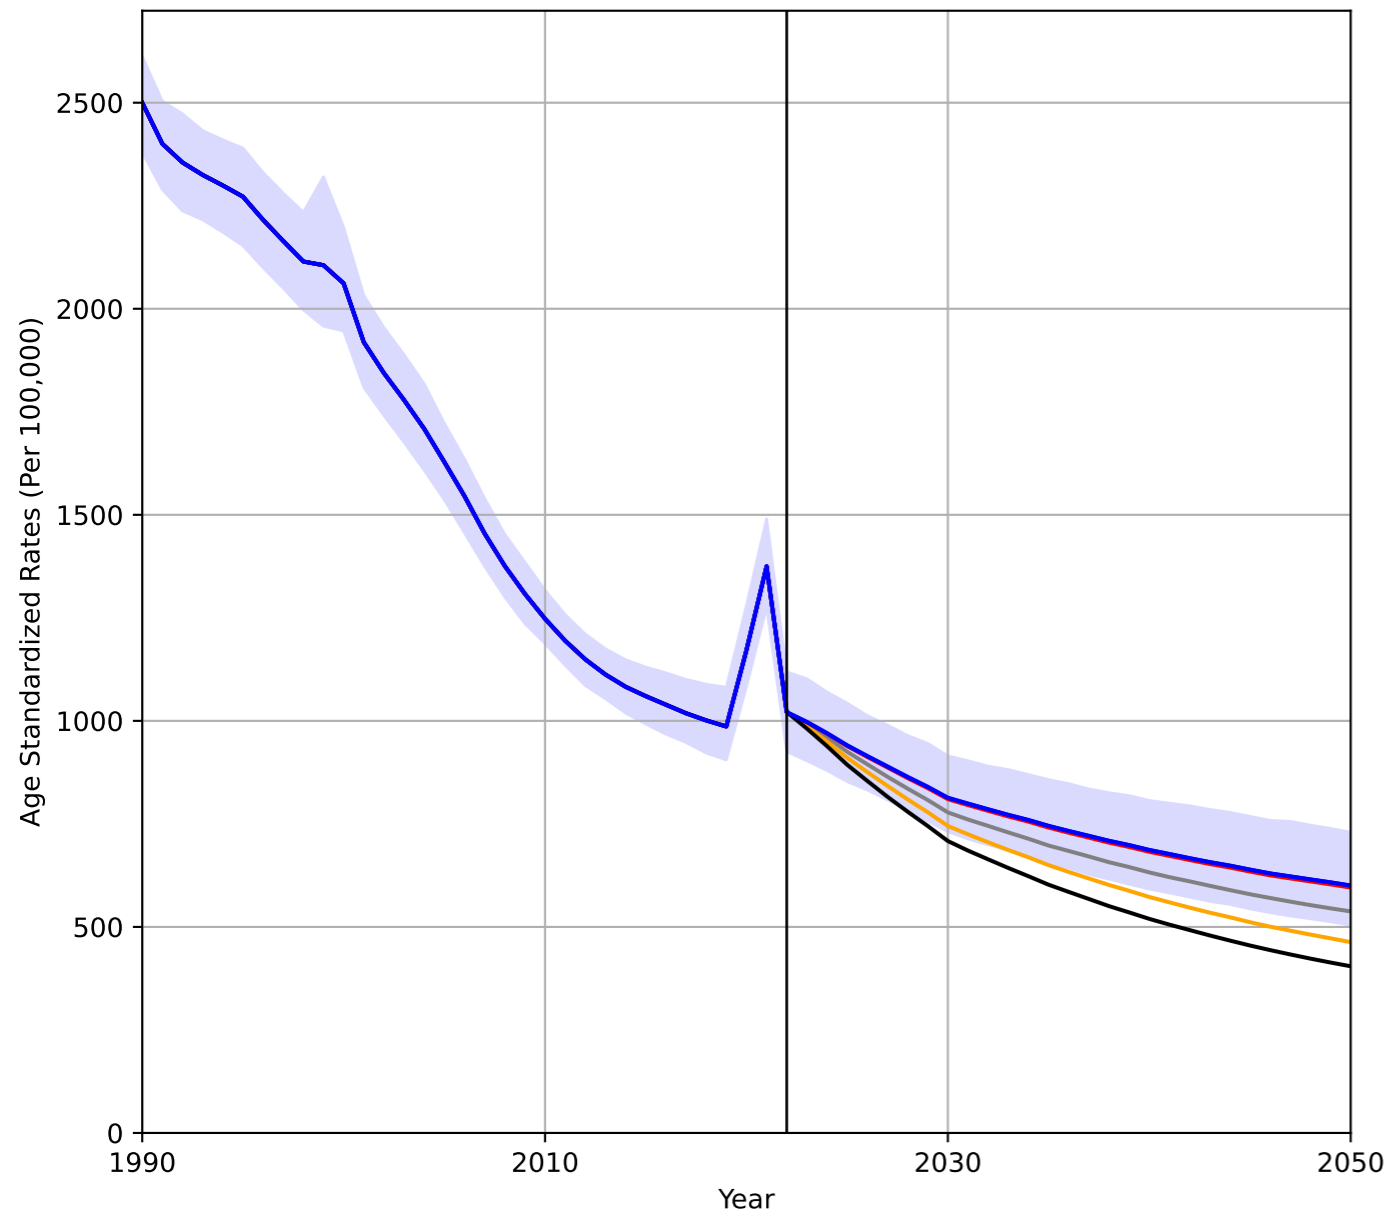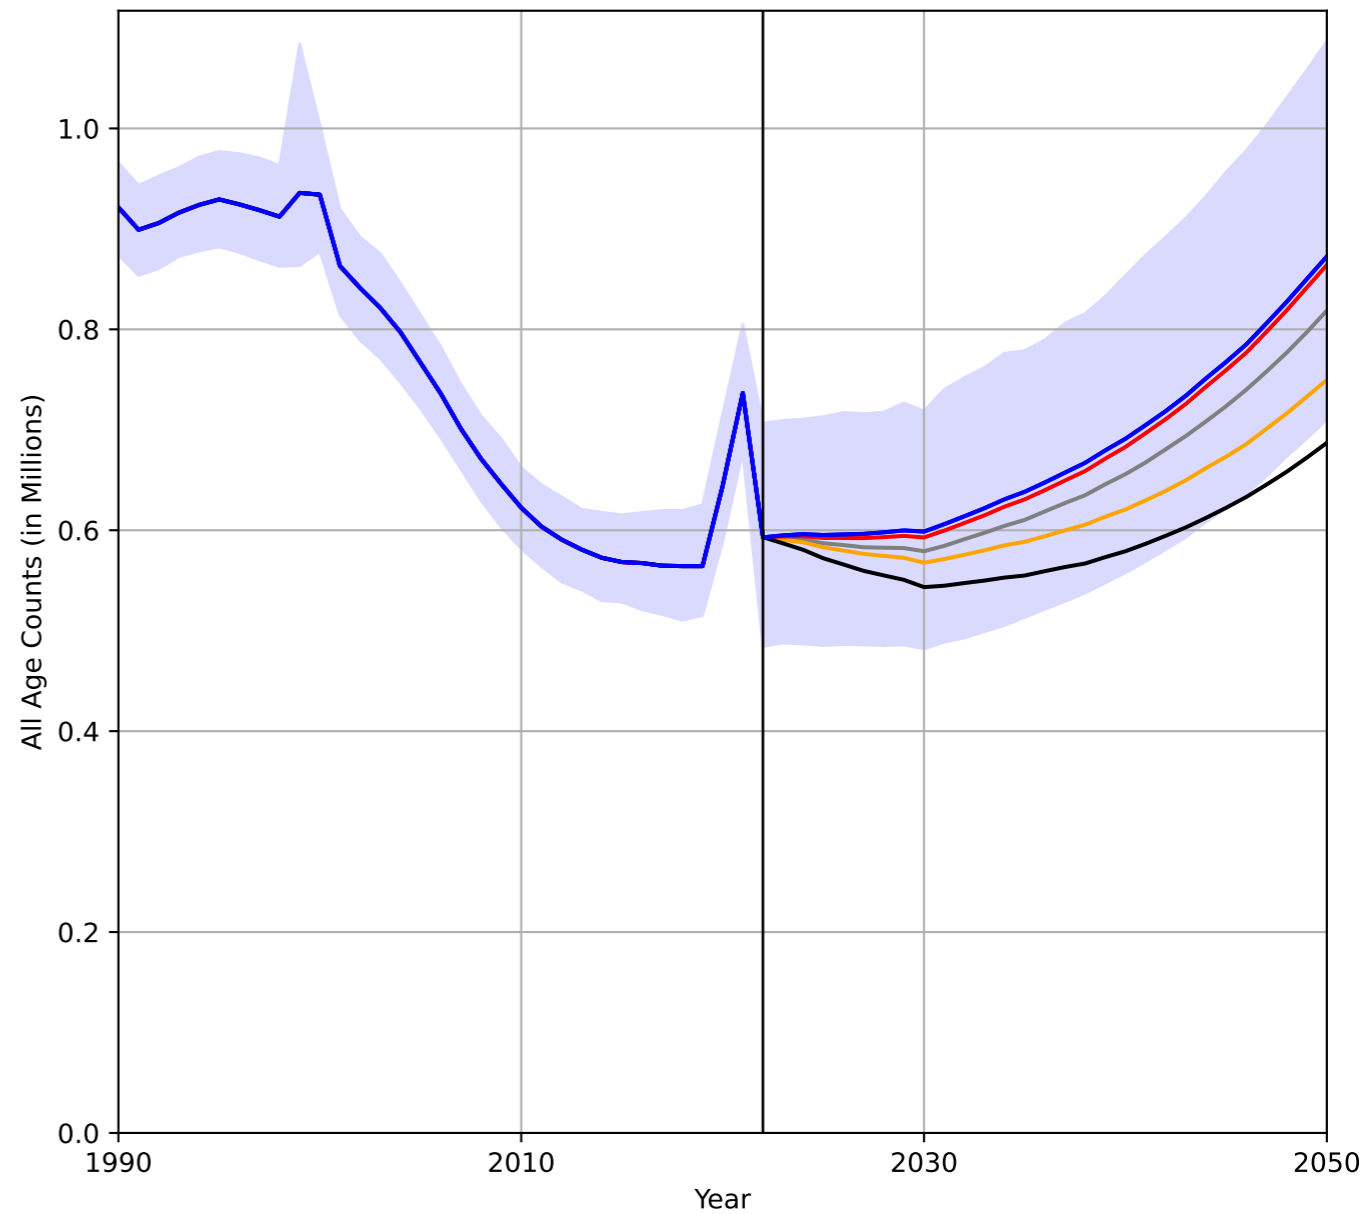

# Kenya

Supplemental Results Figure S11. All-cause age standardised death rates (A) and all age death counts (B), for the past and for five future scenarios, 1990–2050

1813

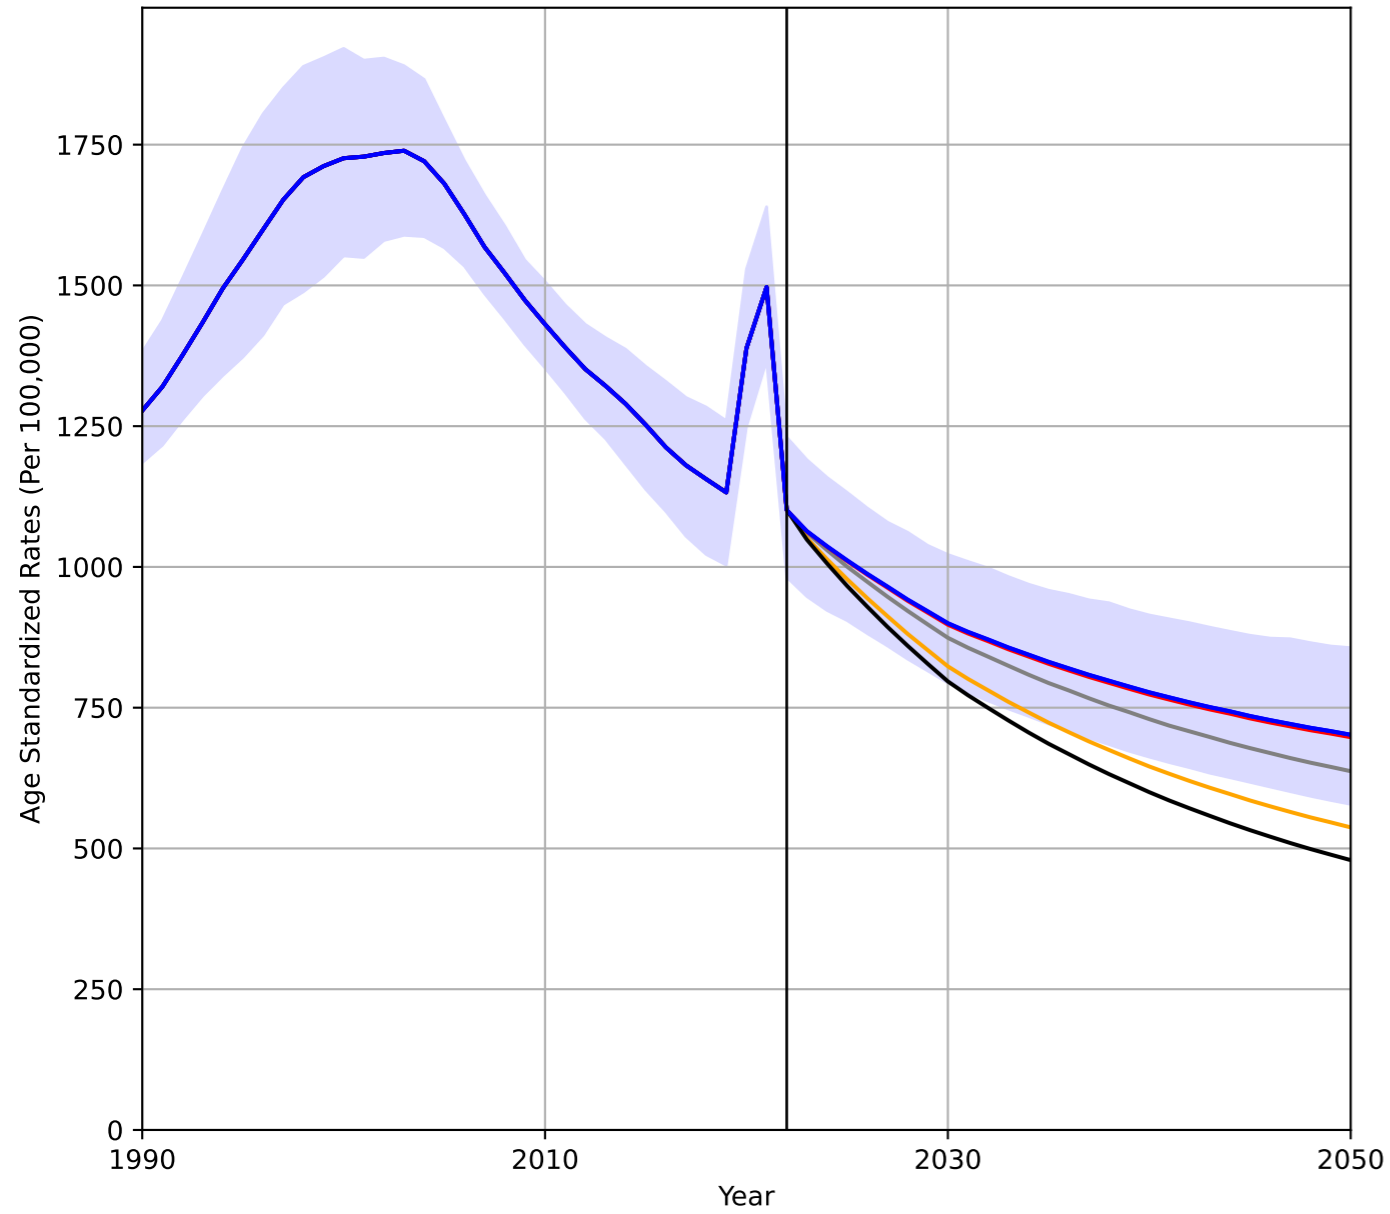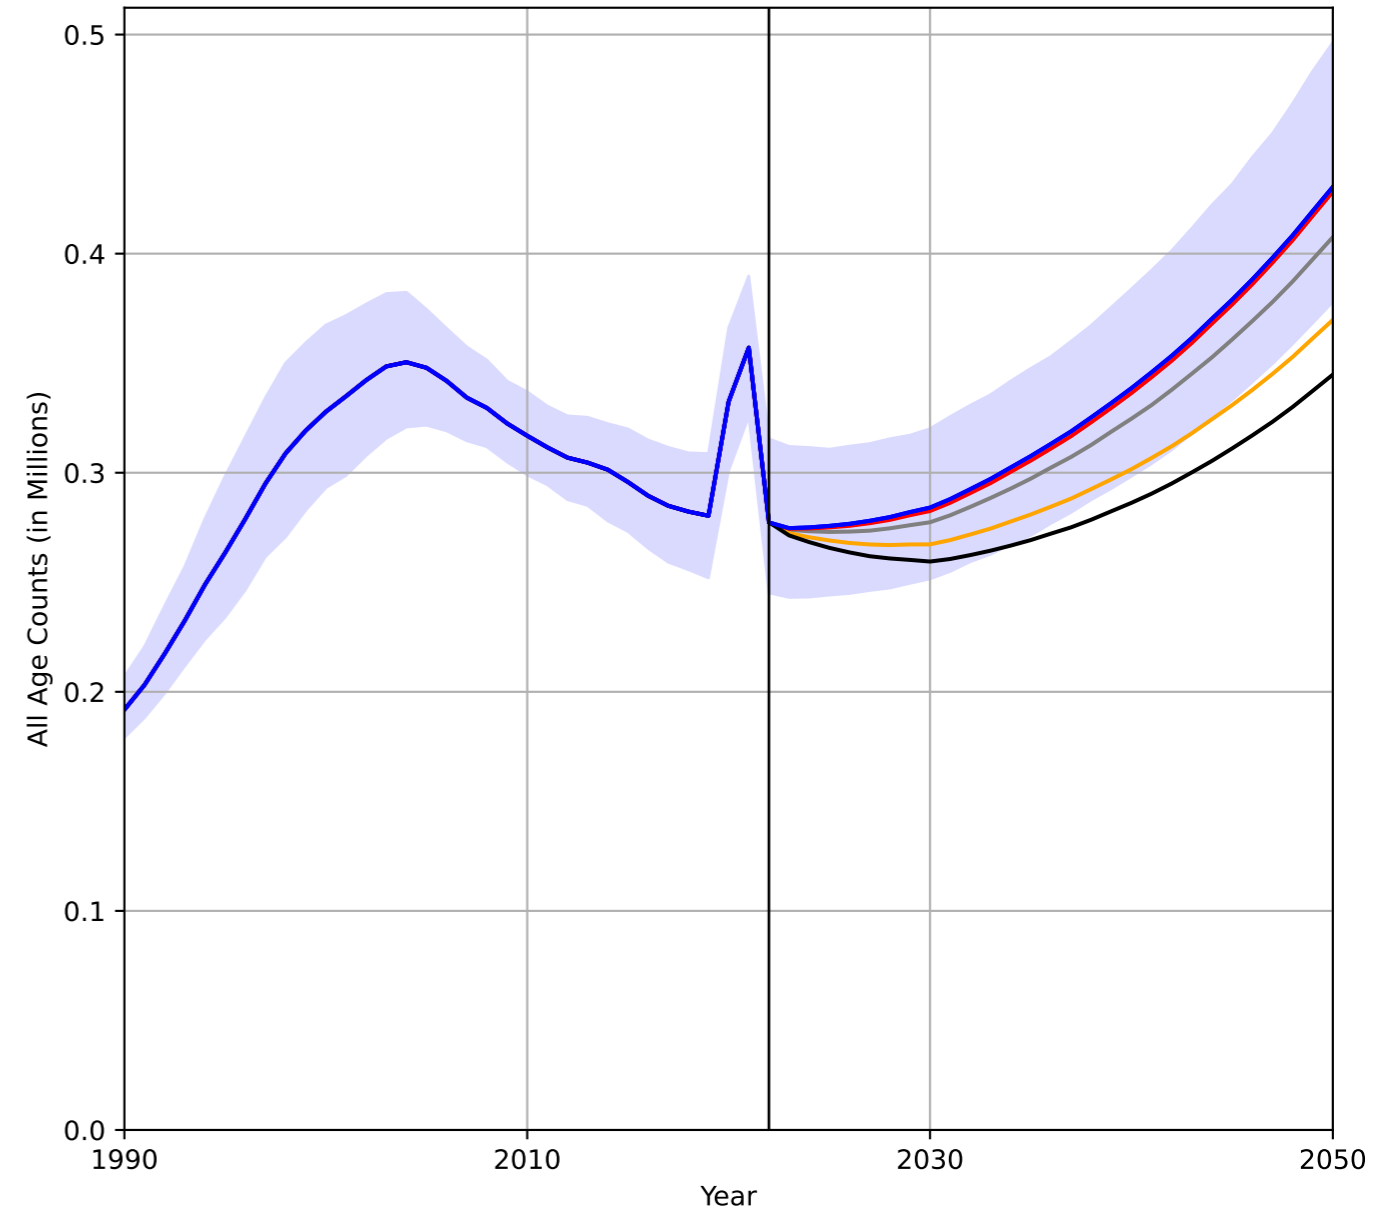

# Madagascar

Supplemental Results Figure S11. All-cause age standardised death rates (A) and all age death counts (B), for the past and for five future scenarios, 1990–2050

1814

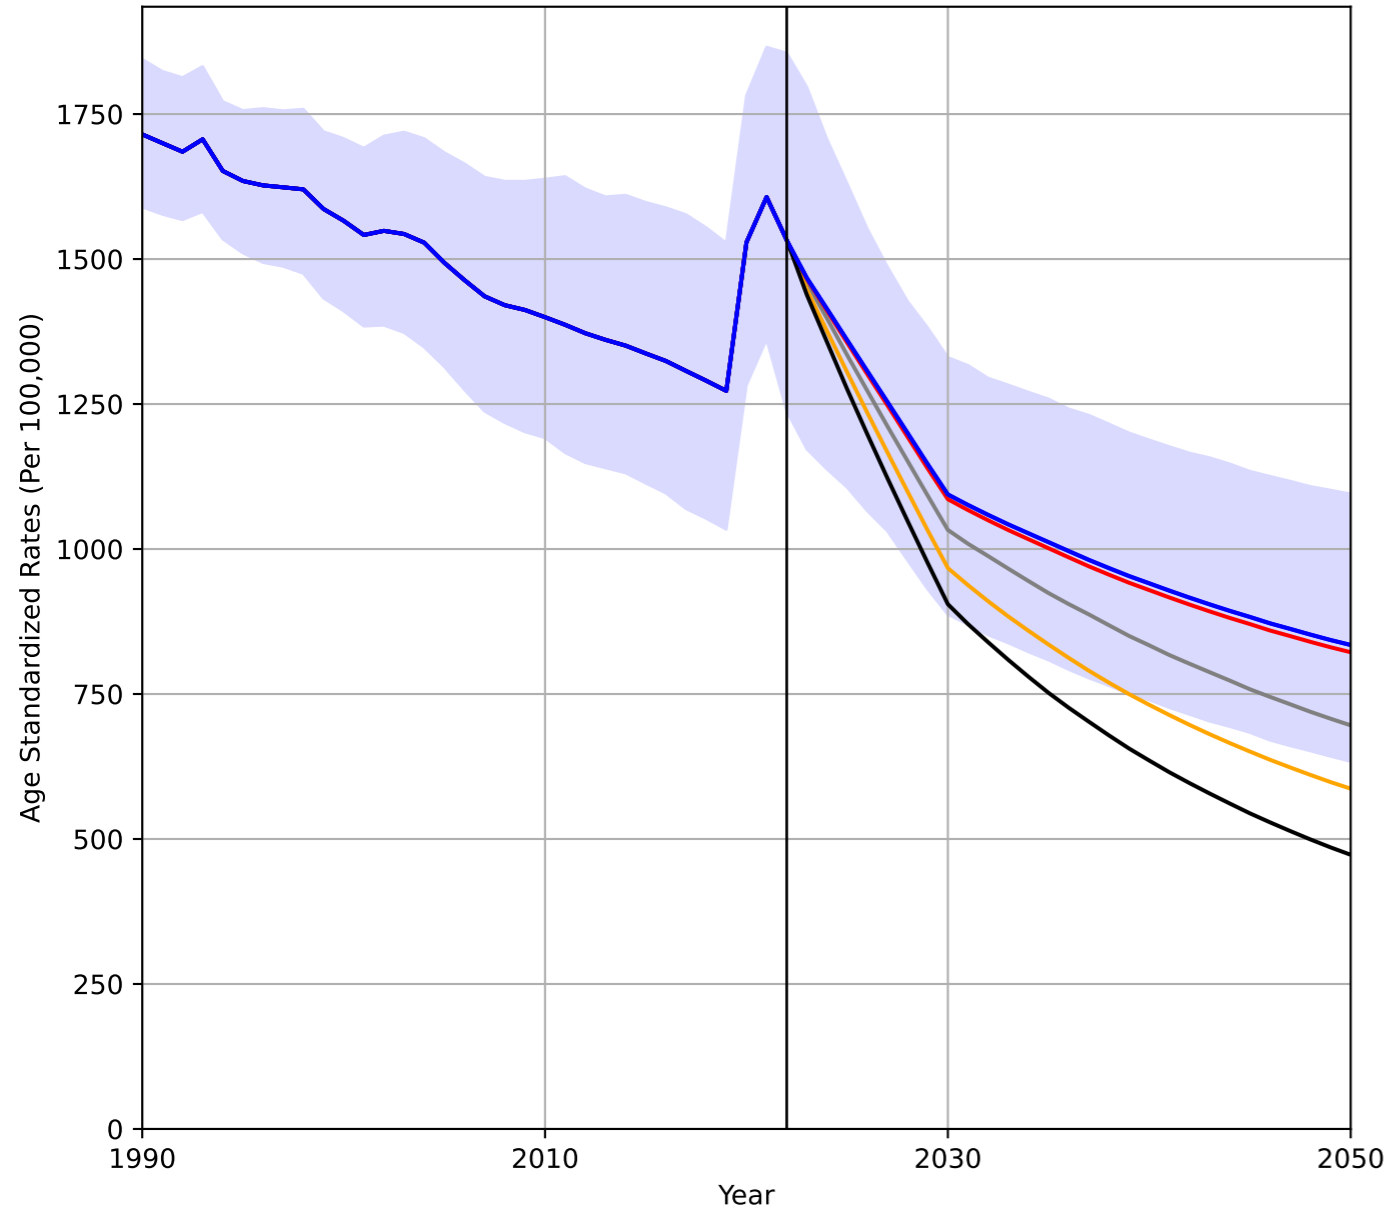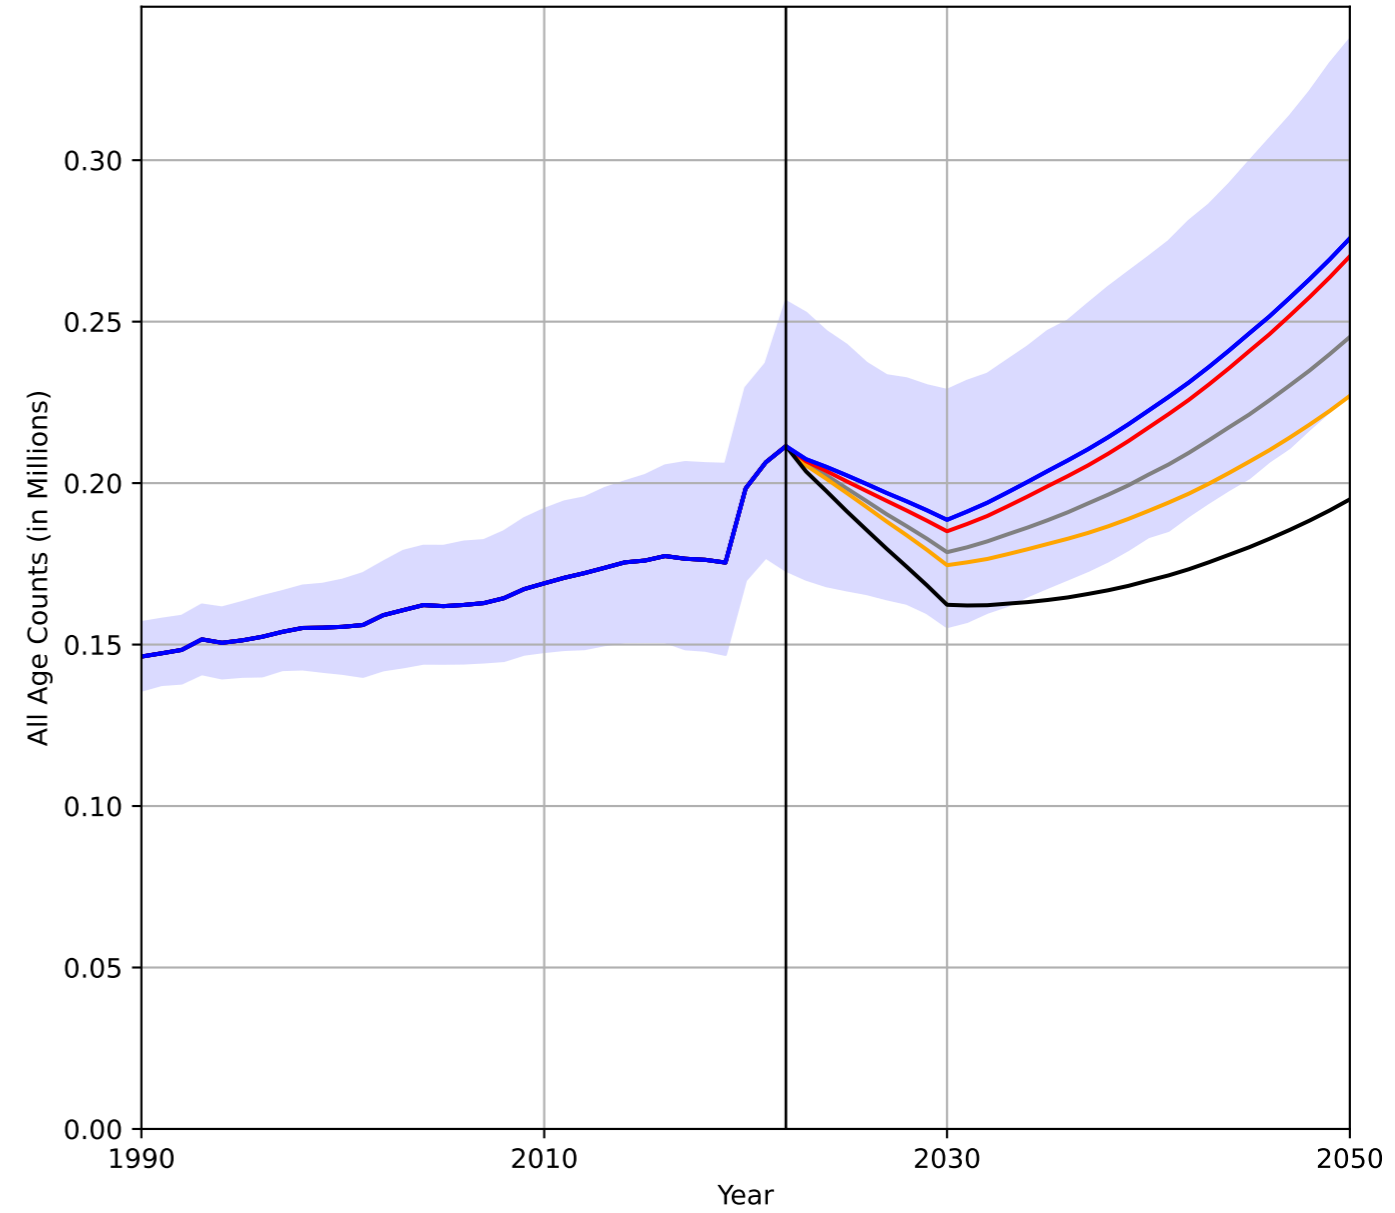

# Malawi

Supplemental Results Figure S11. All-cause age standardised death rates (A) and all age death counts (B), for the past and for five future scenarios, 1990–2050

1815

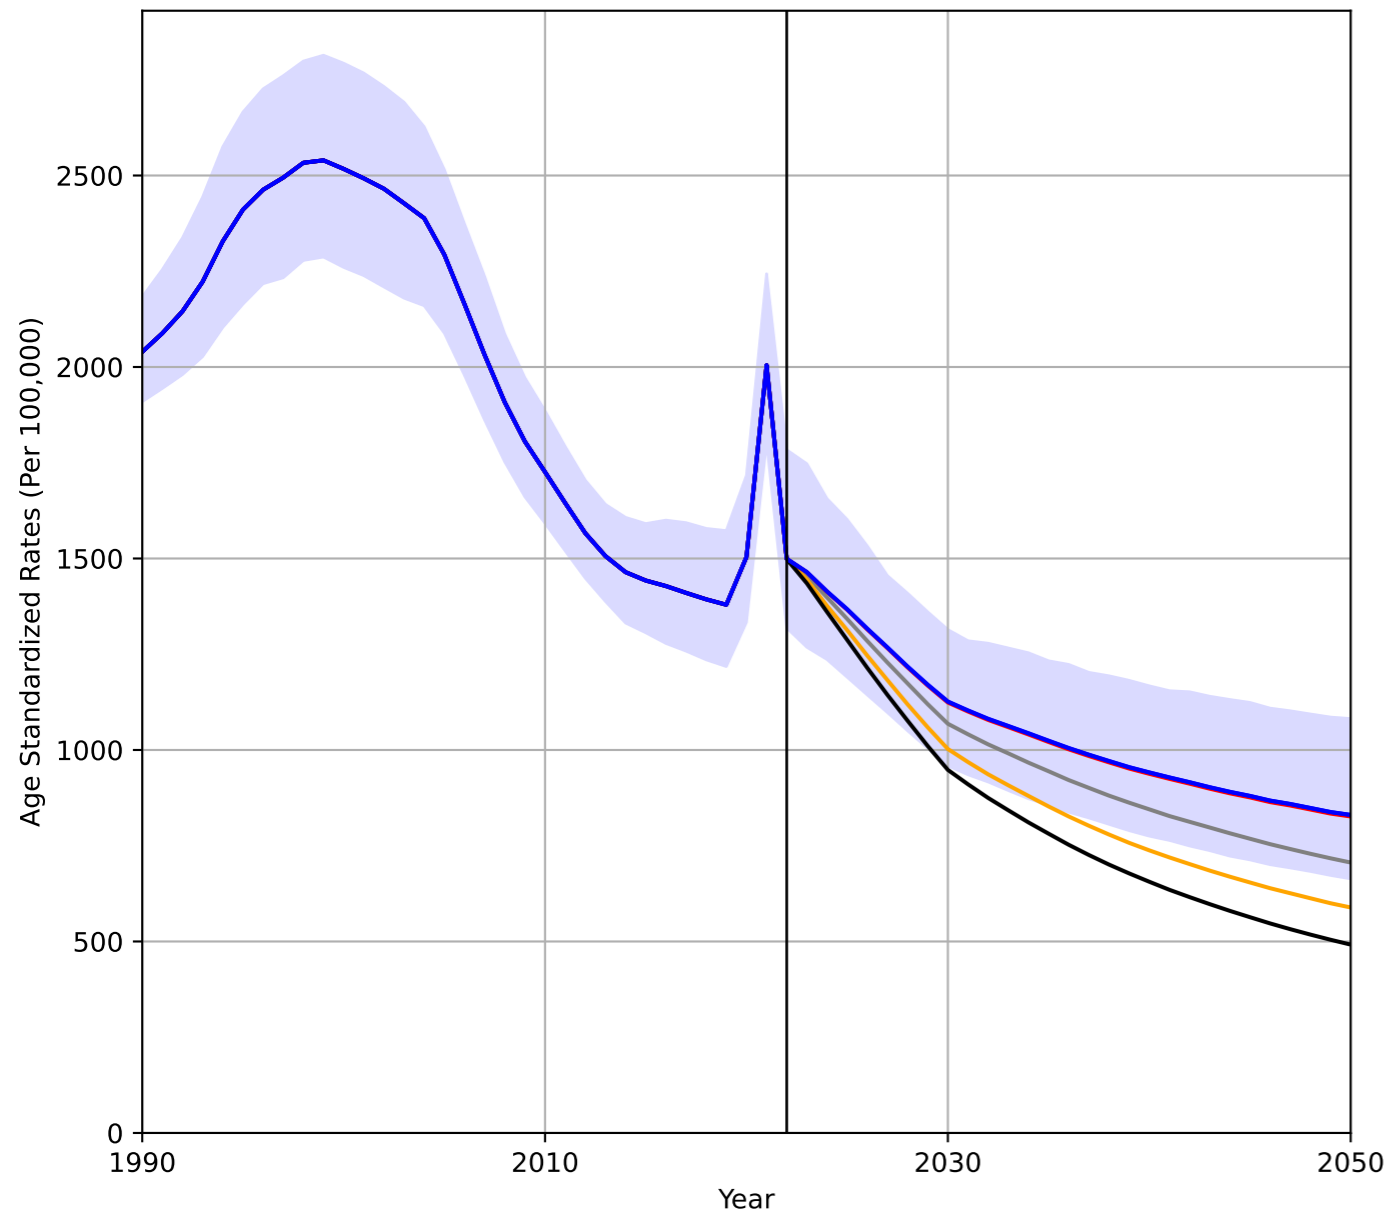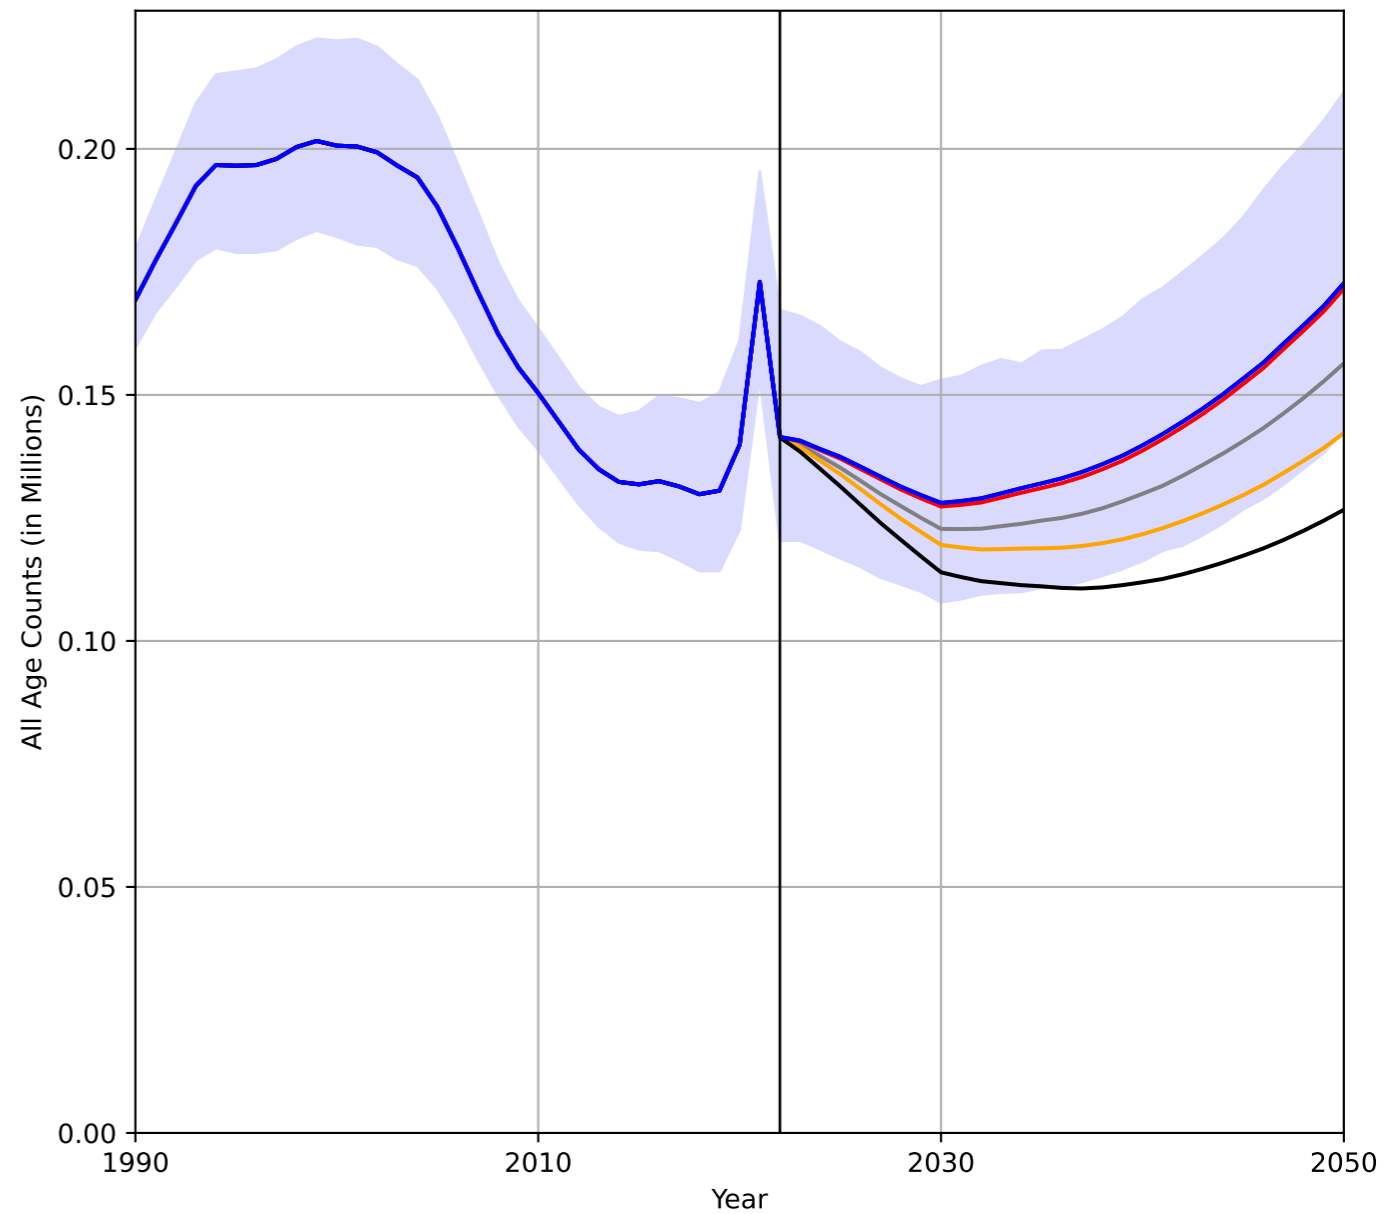



# Mozambique

Supplemental Results Figure S11. All-cause age standardised death rates (A) and all age death counts (B), for the past and for five future scenarios, 1990–2050

1816

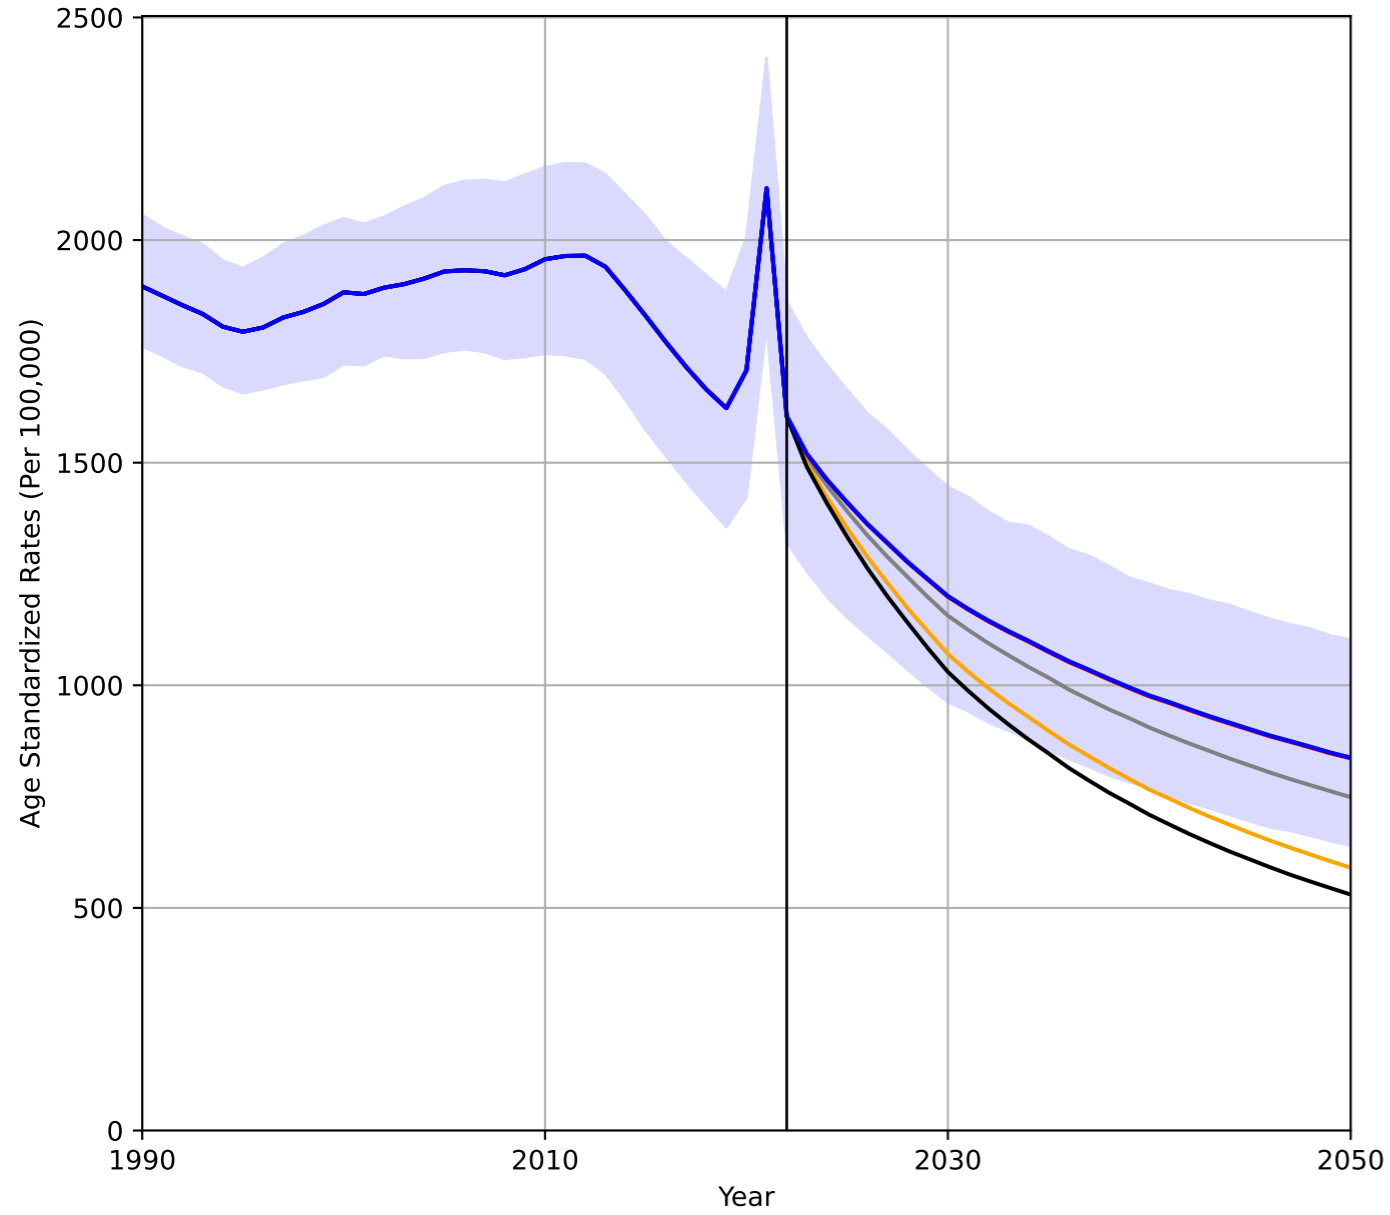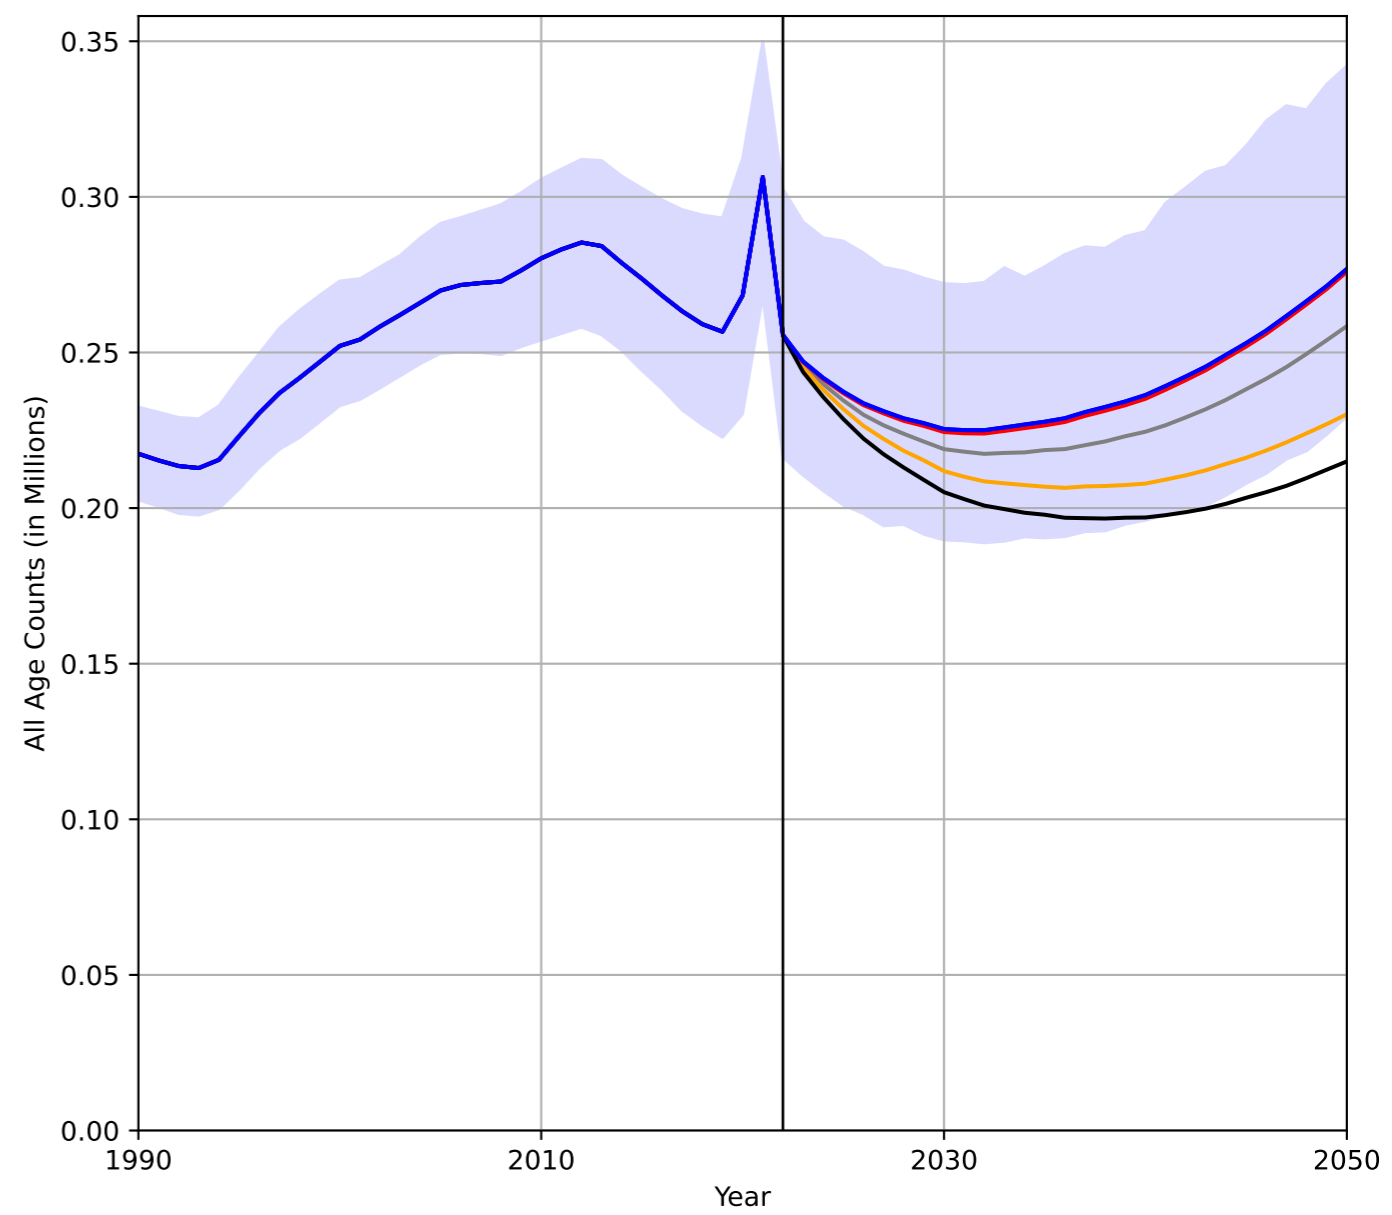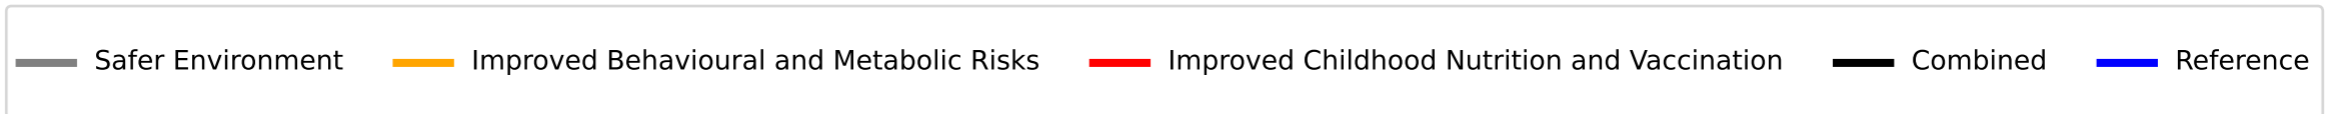

# Rwanda

Supplemental Results Figure S11. All-cause age standardised death rates (A) and all age death counts (B), for the past and for five future scenarios, 1990–2050

1817

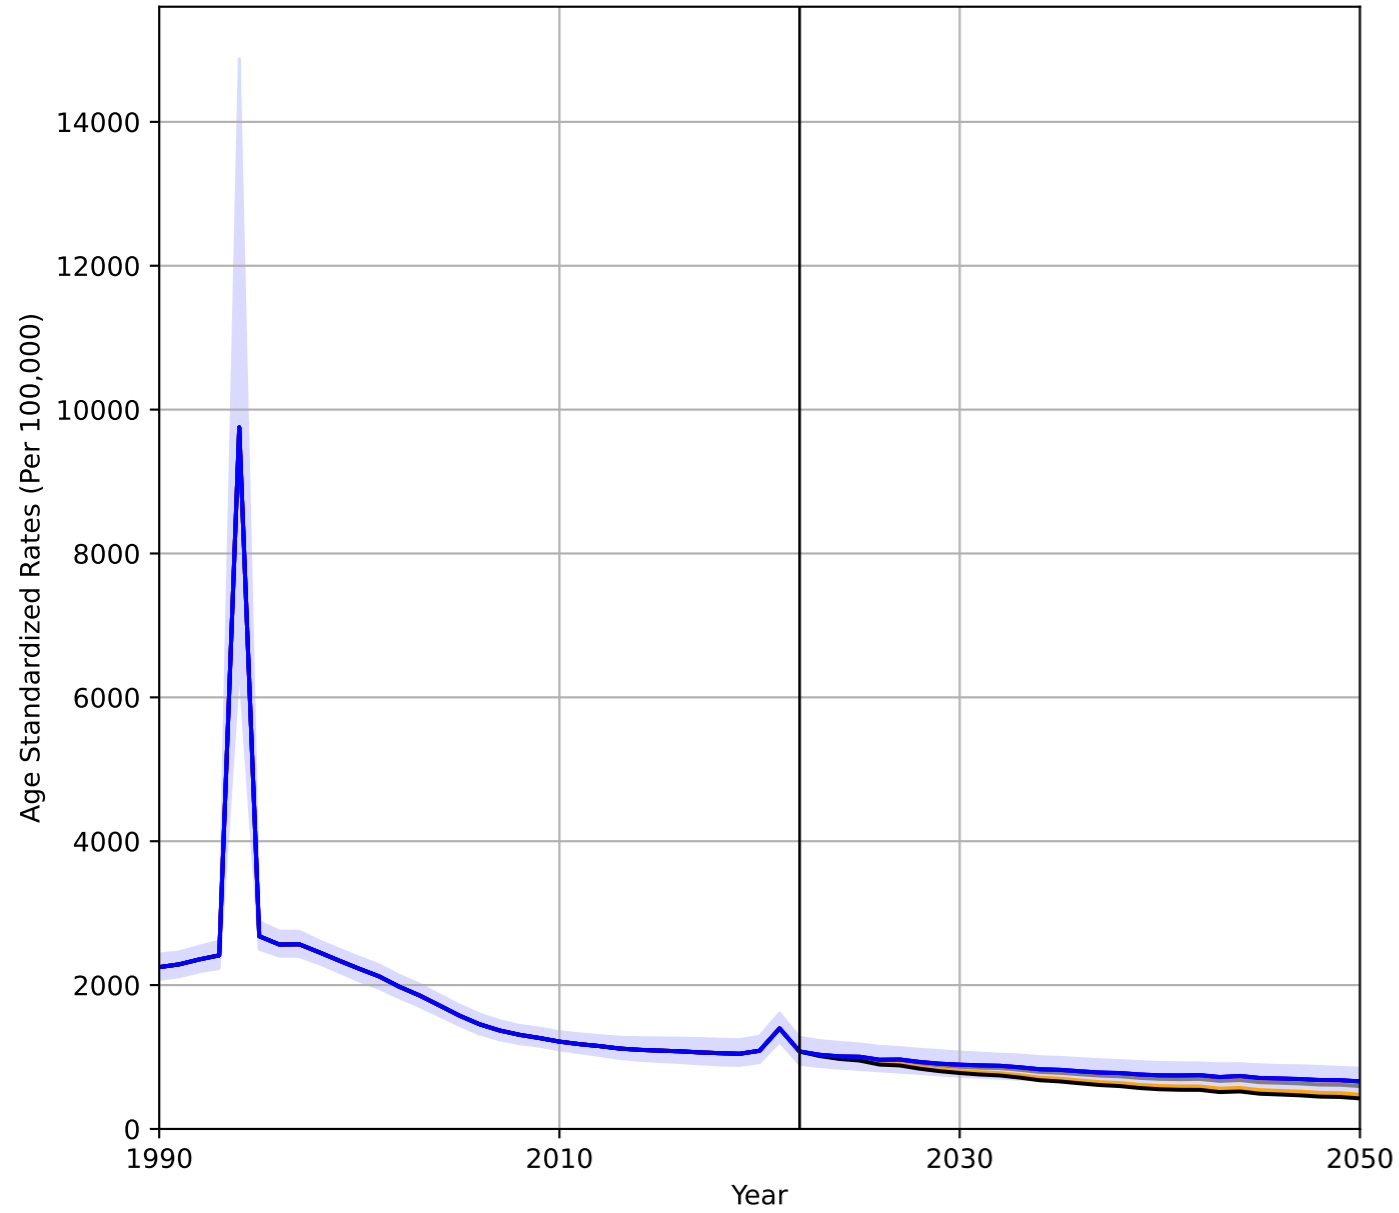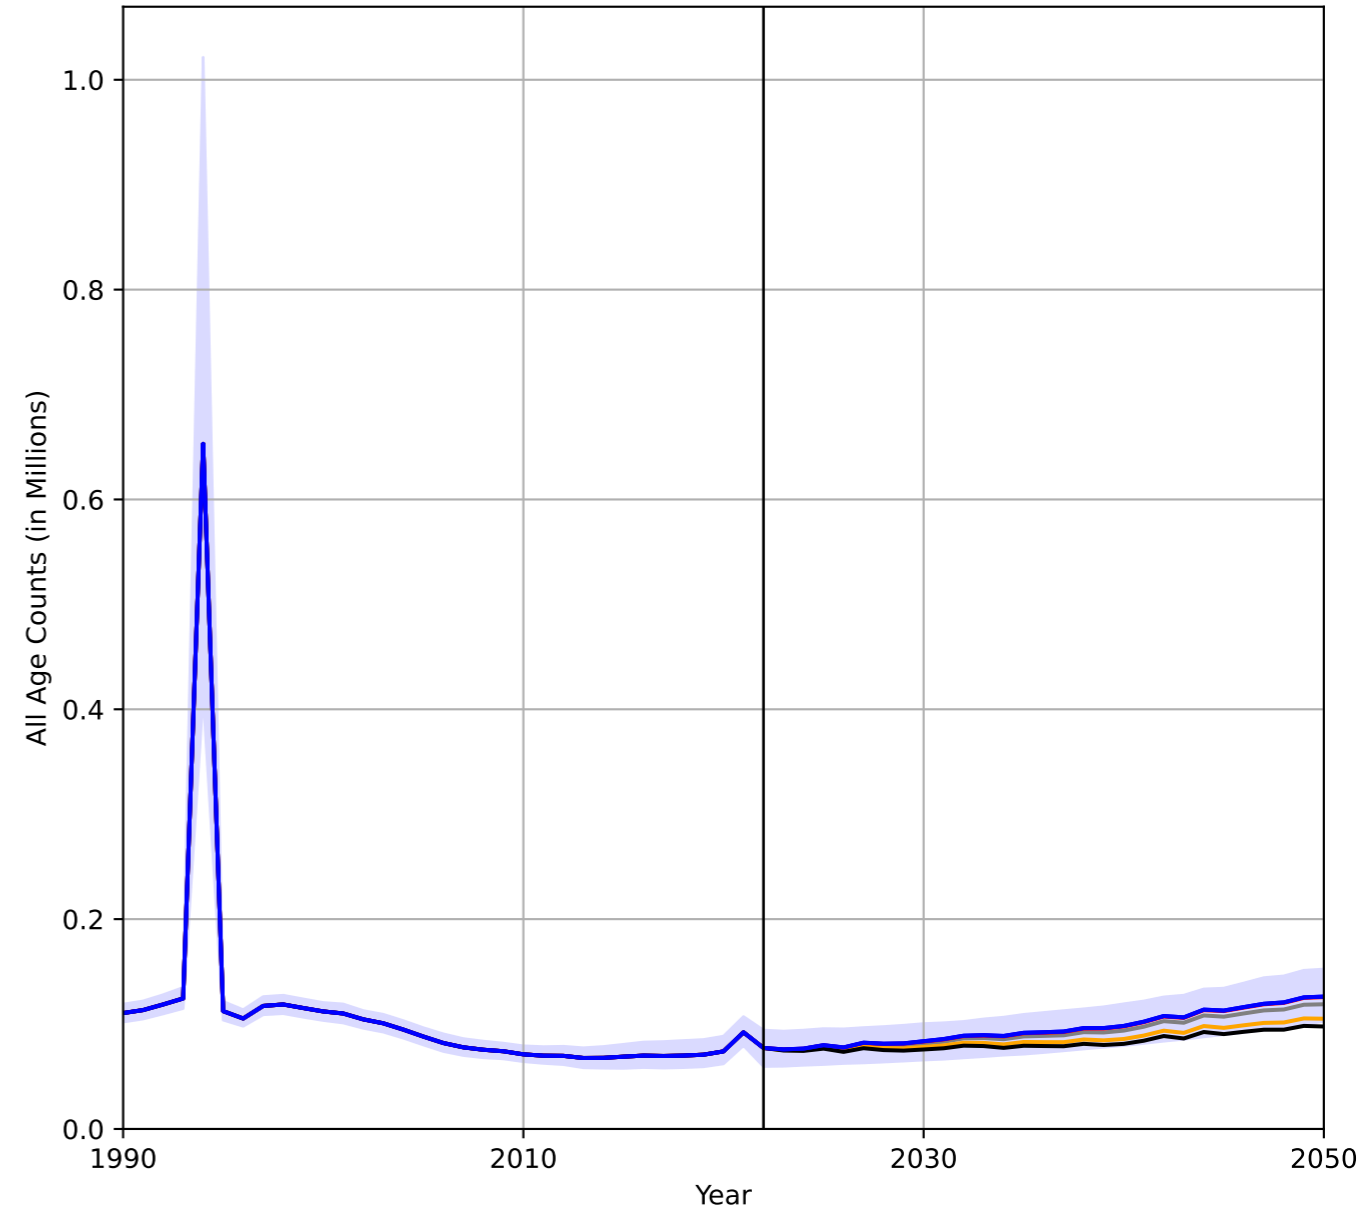

# Somalia

Supplemental Results Figure S11. All-cause age standardised death rates (A) and all age death counts (B), for the past and for five future scenarios, 1990–2050

1818

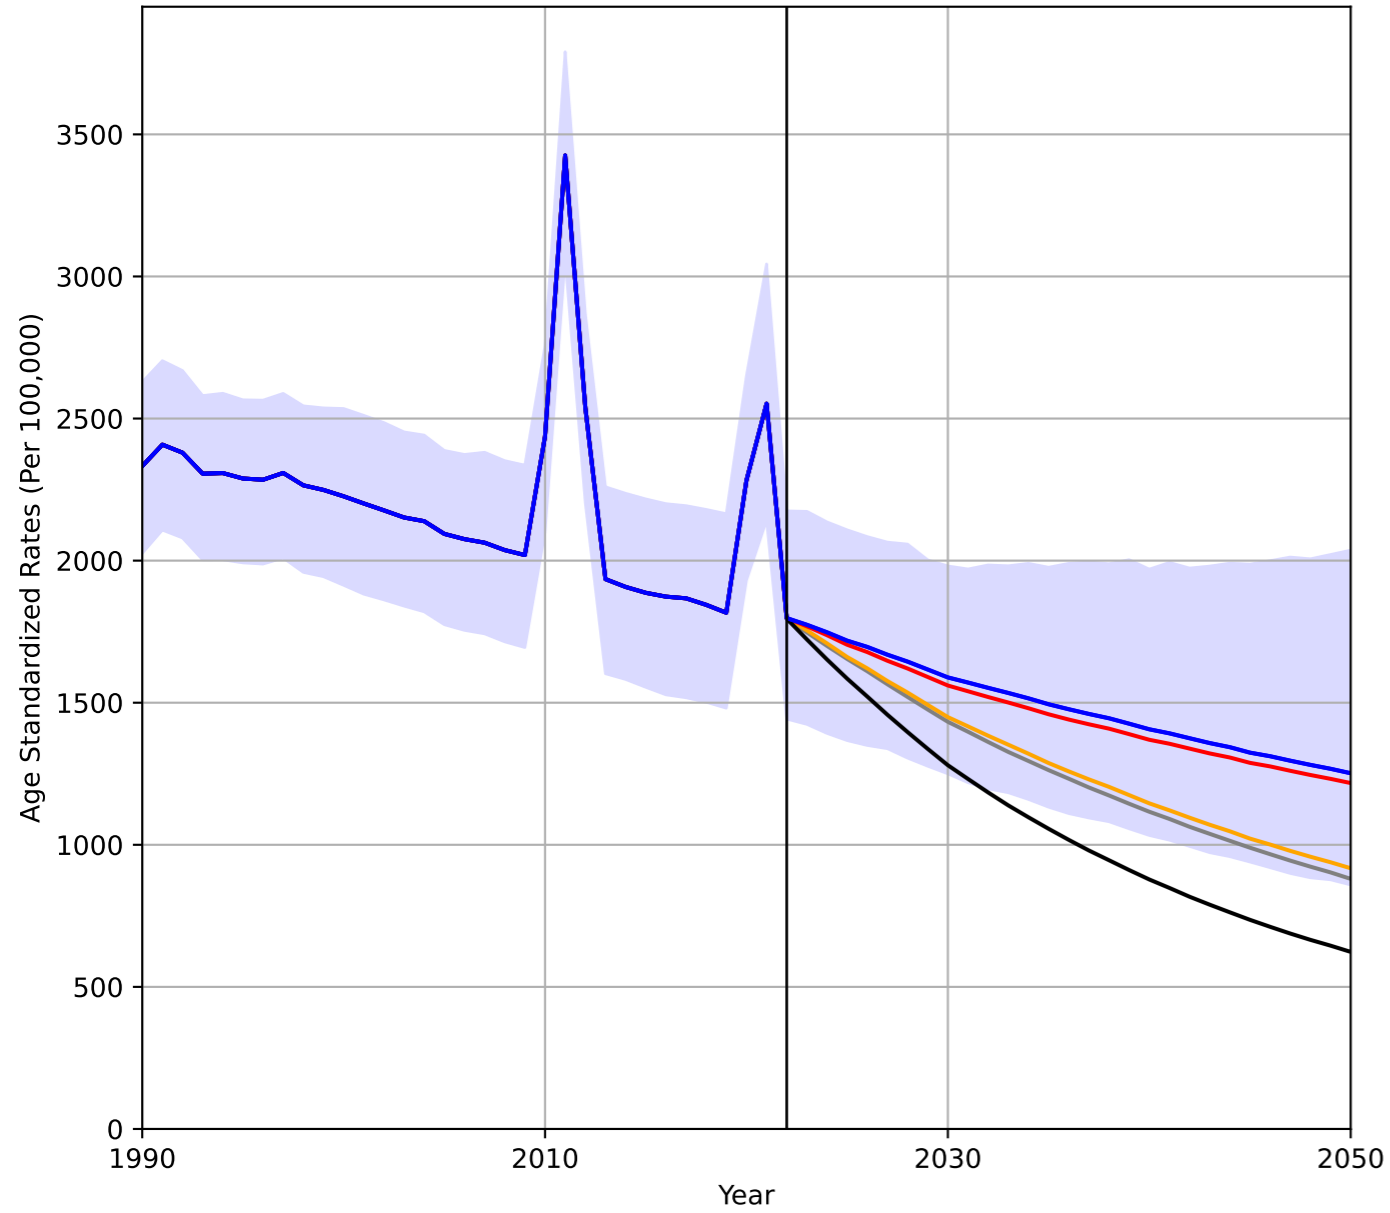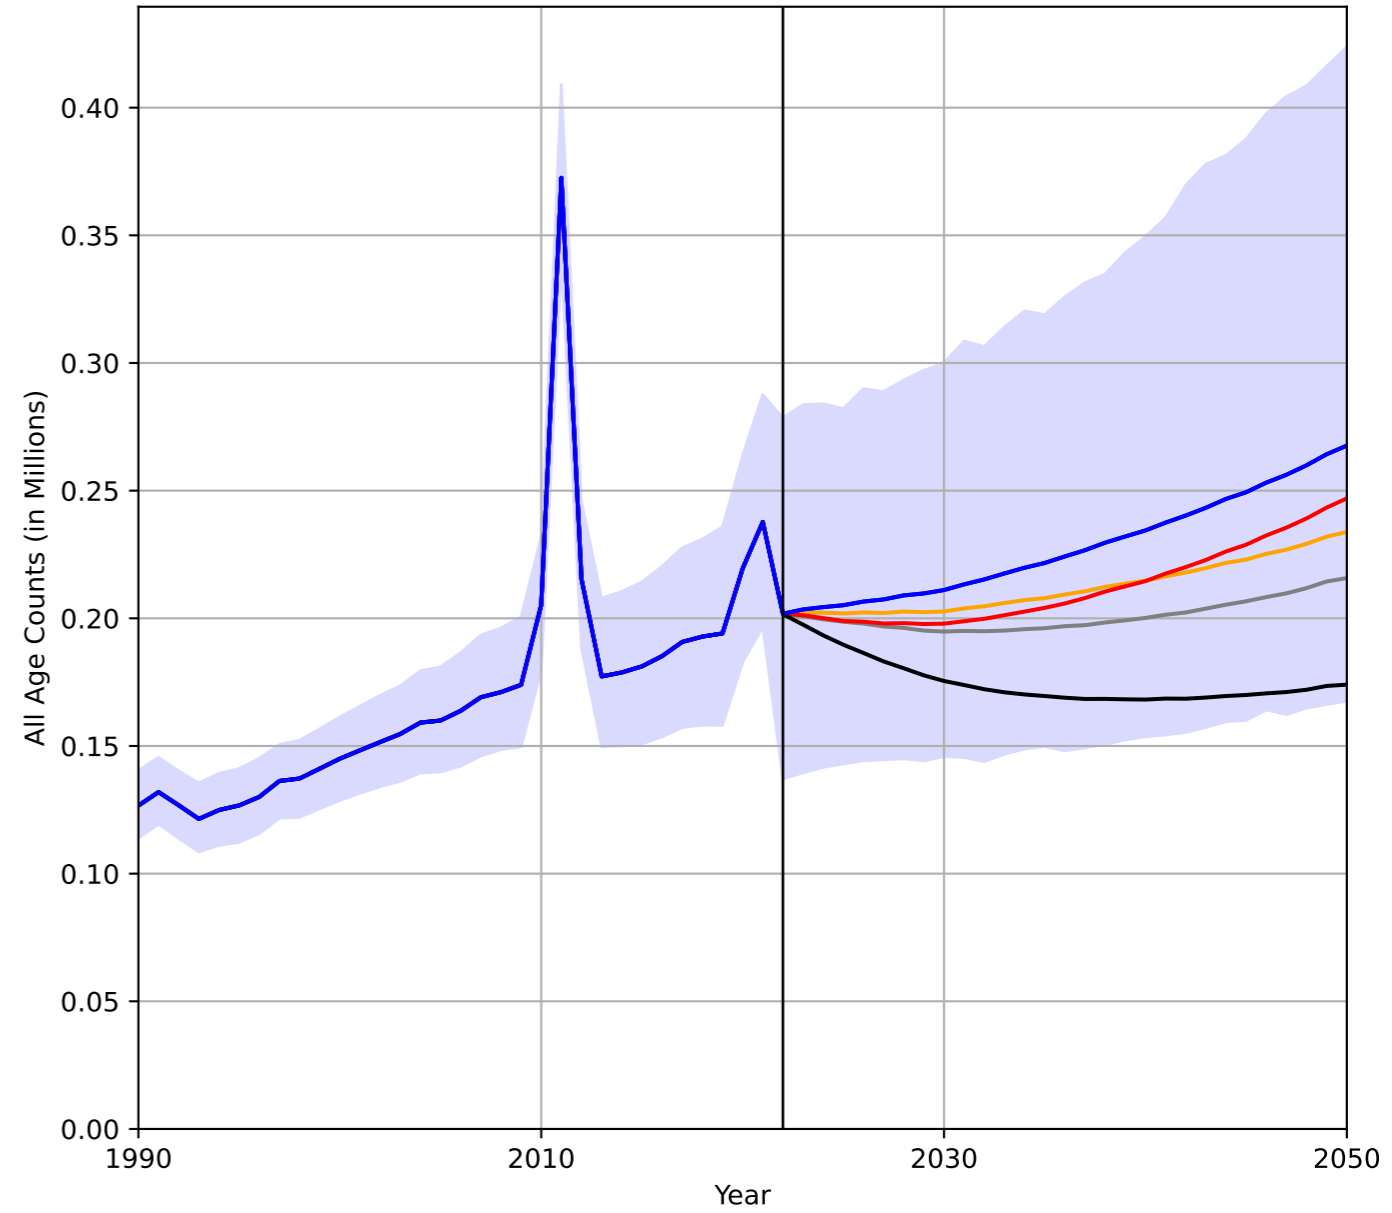

# South Sudan

Supplemental Results Figure S11. All-cause age standardised death rates (A) and all age death counts (B), for the past and for five future scenarios, 1990–2050

1819

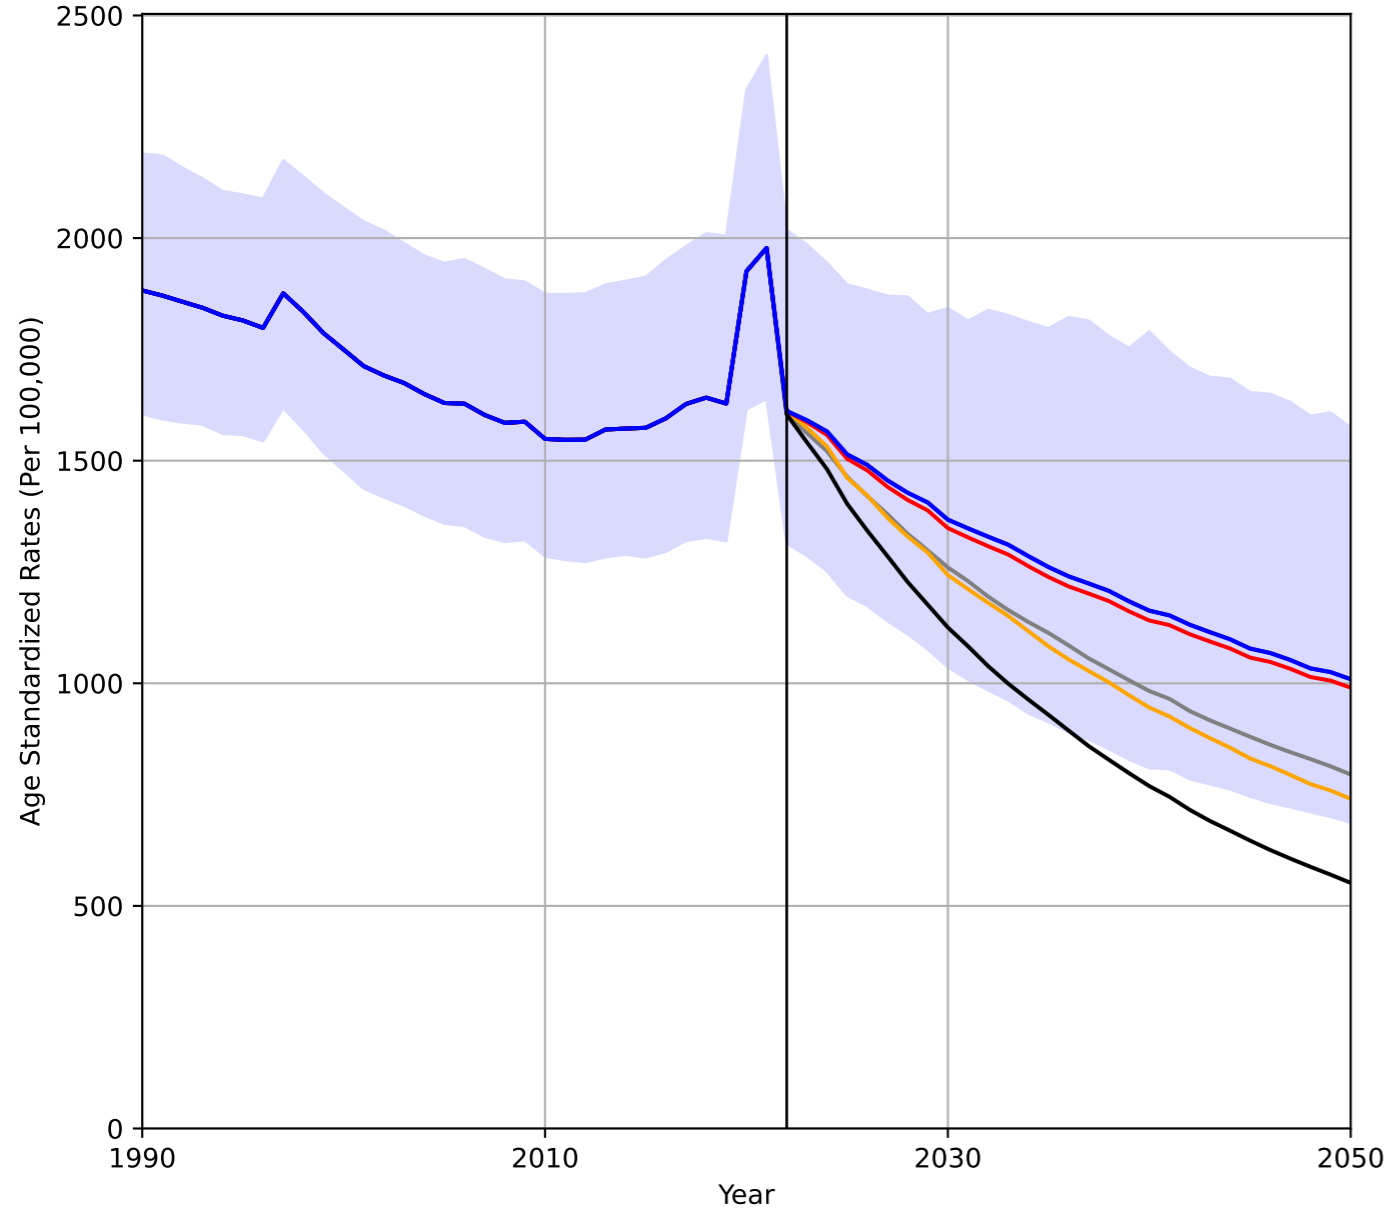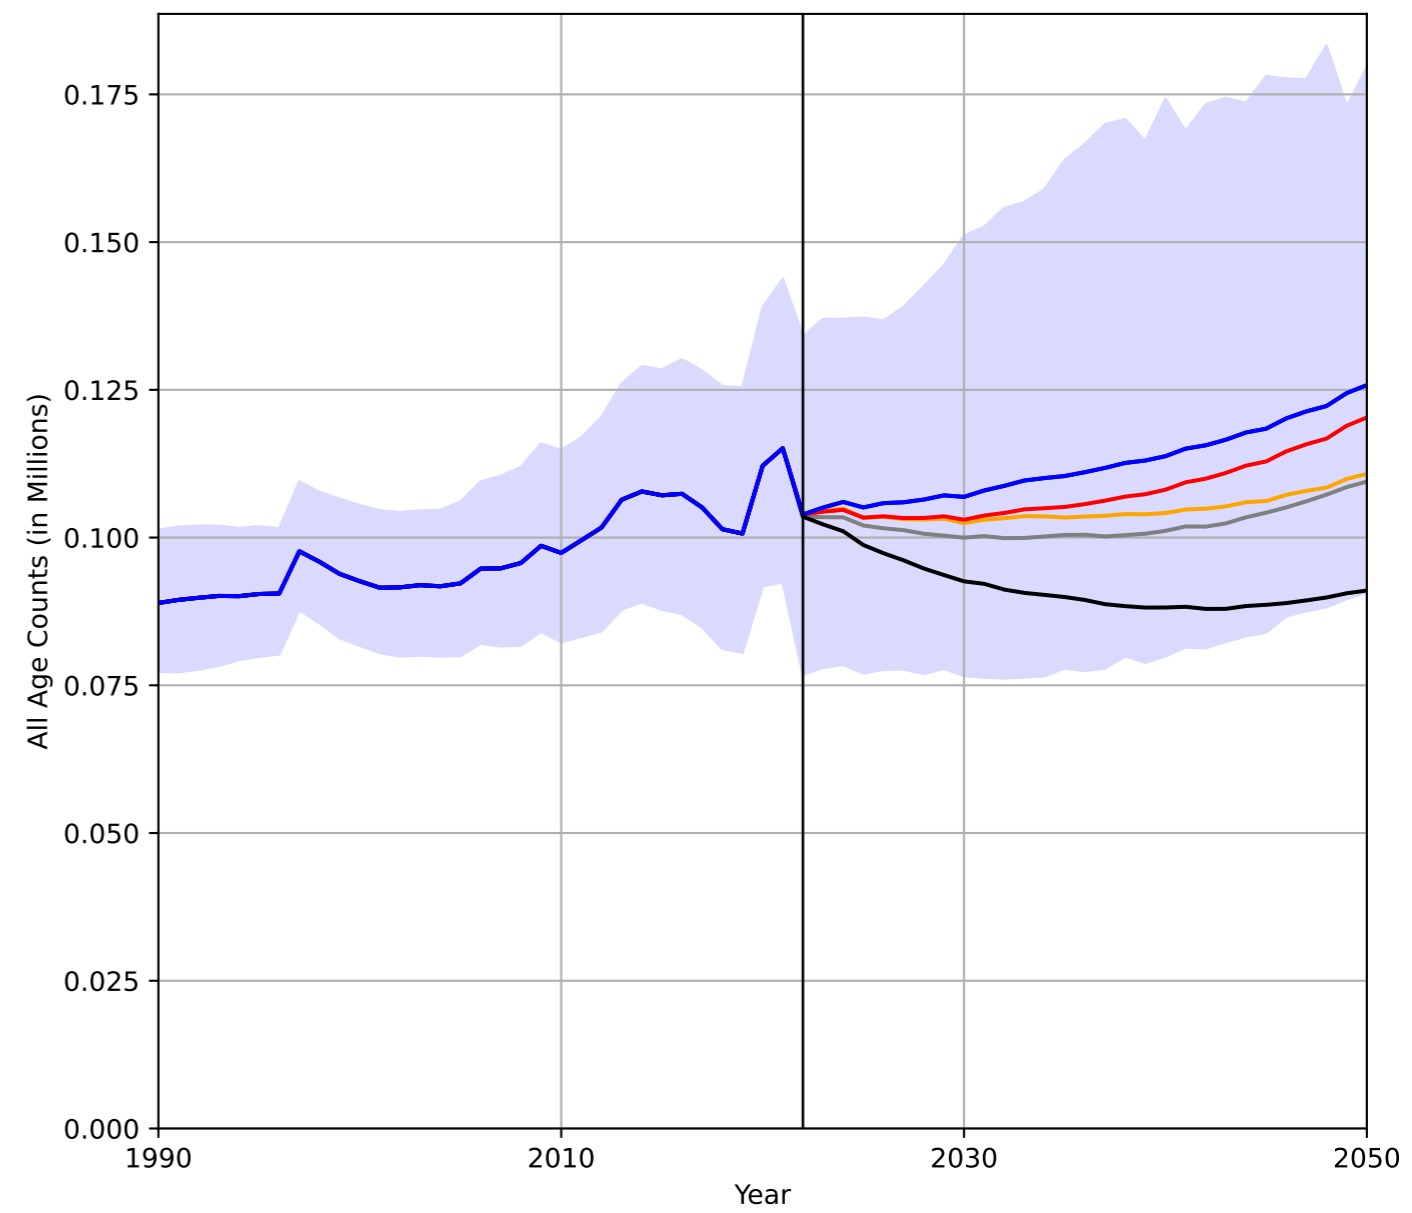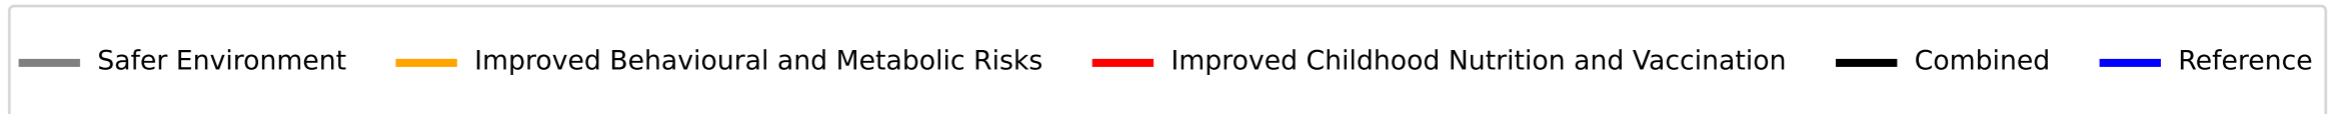

# Uganda

Supplemental Results Figure S11. All-cause age standardised death rates (A) and all age death counts (B), for the past and for five future scenarios, 1990–2050

1820

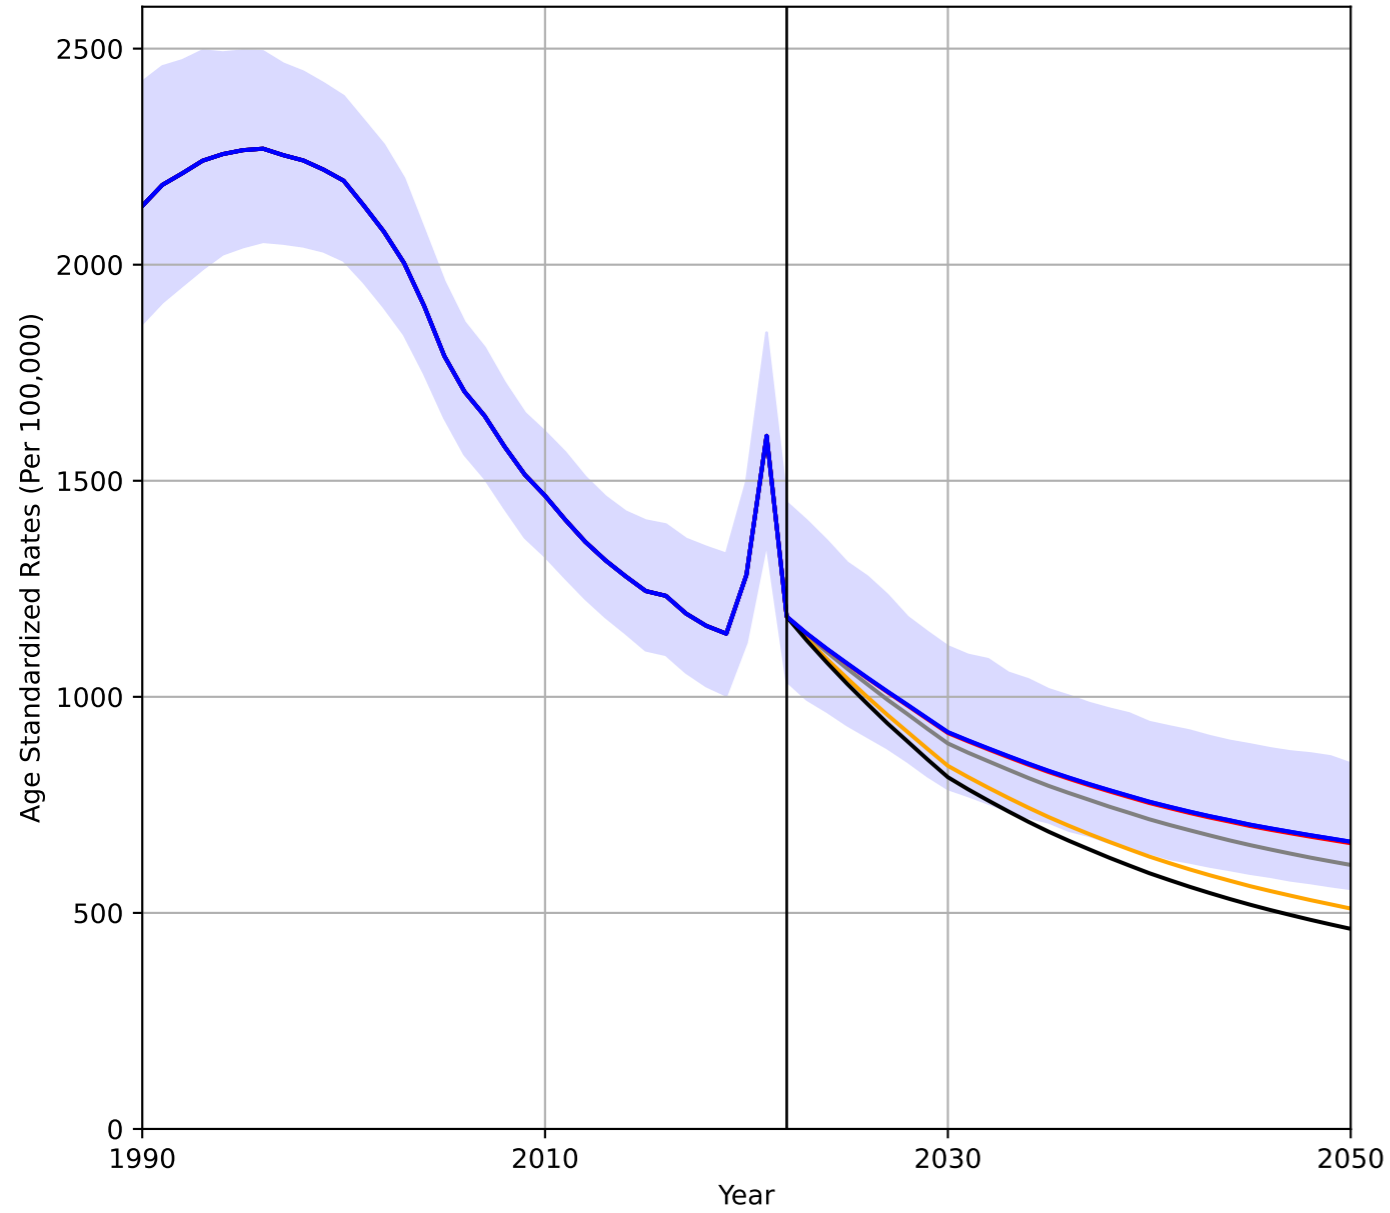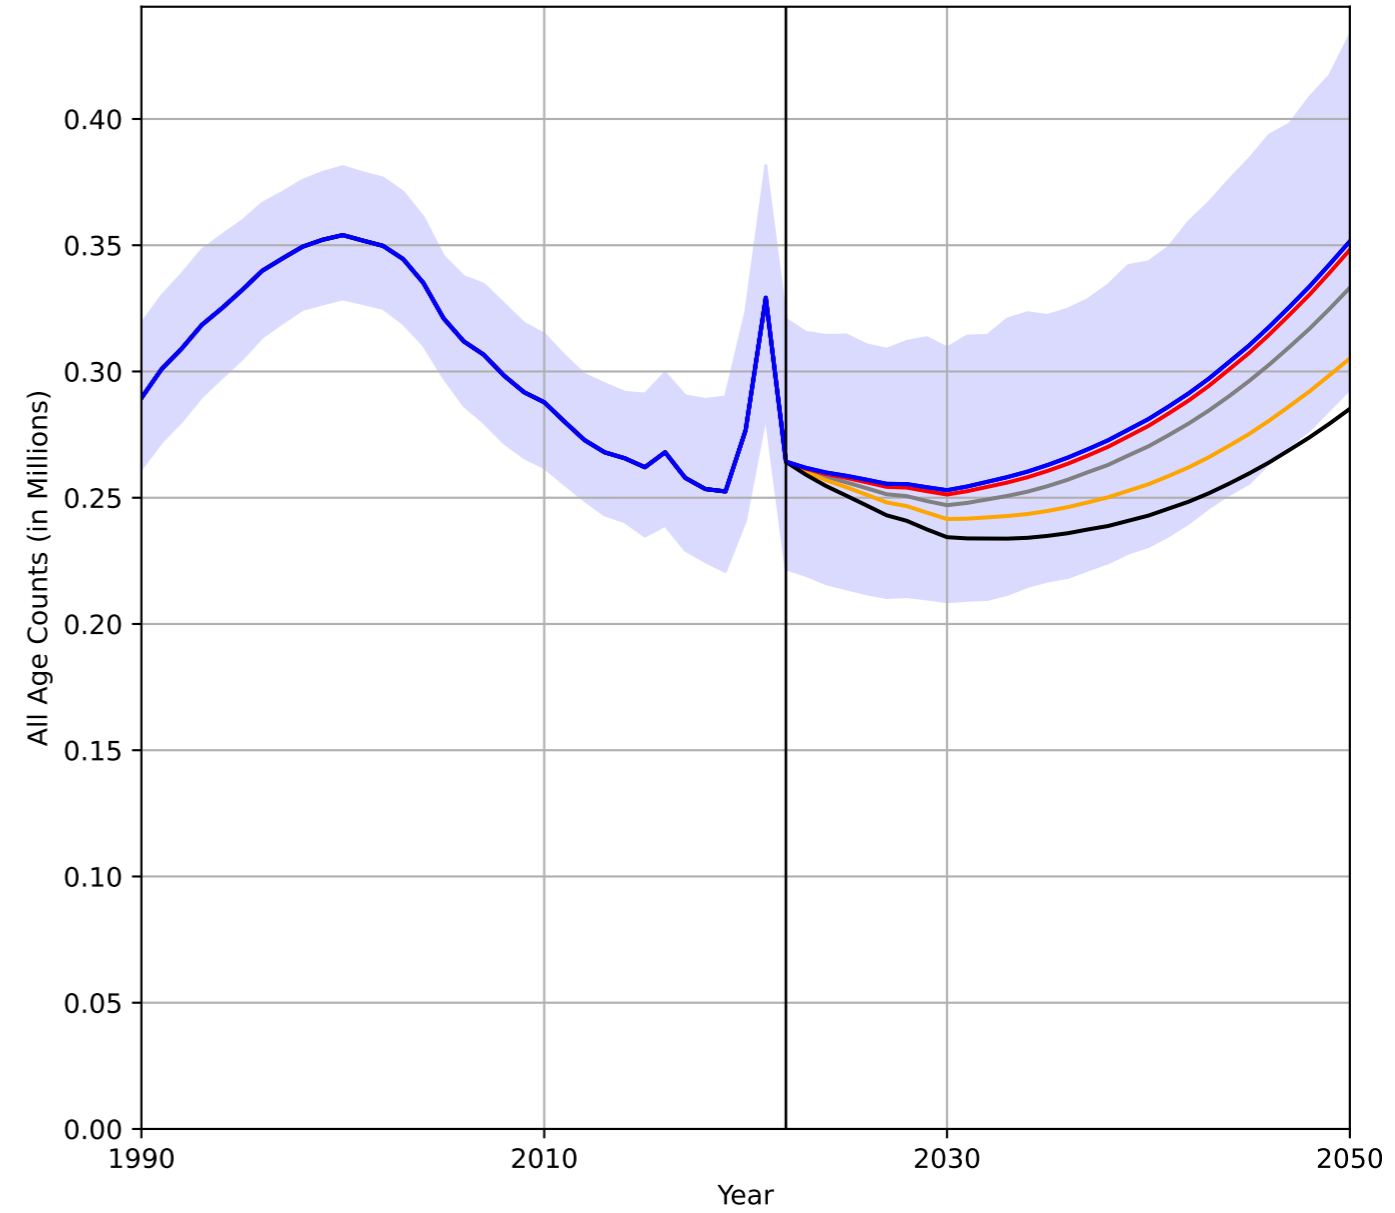

# Tanzania

Supplemental Results Figure S11. All-cause age standardised death rates (A) and all age death counts (B), for the past and for five future scenarios, 1990–2050

1821

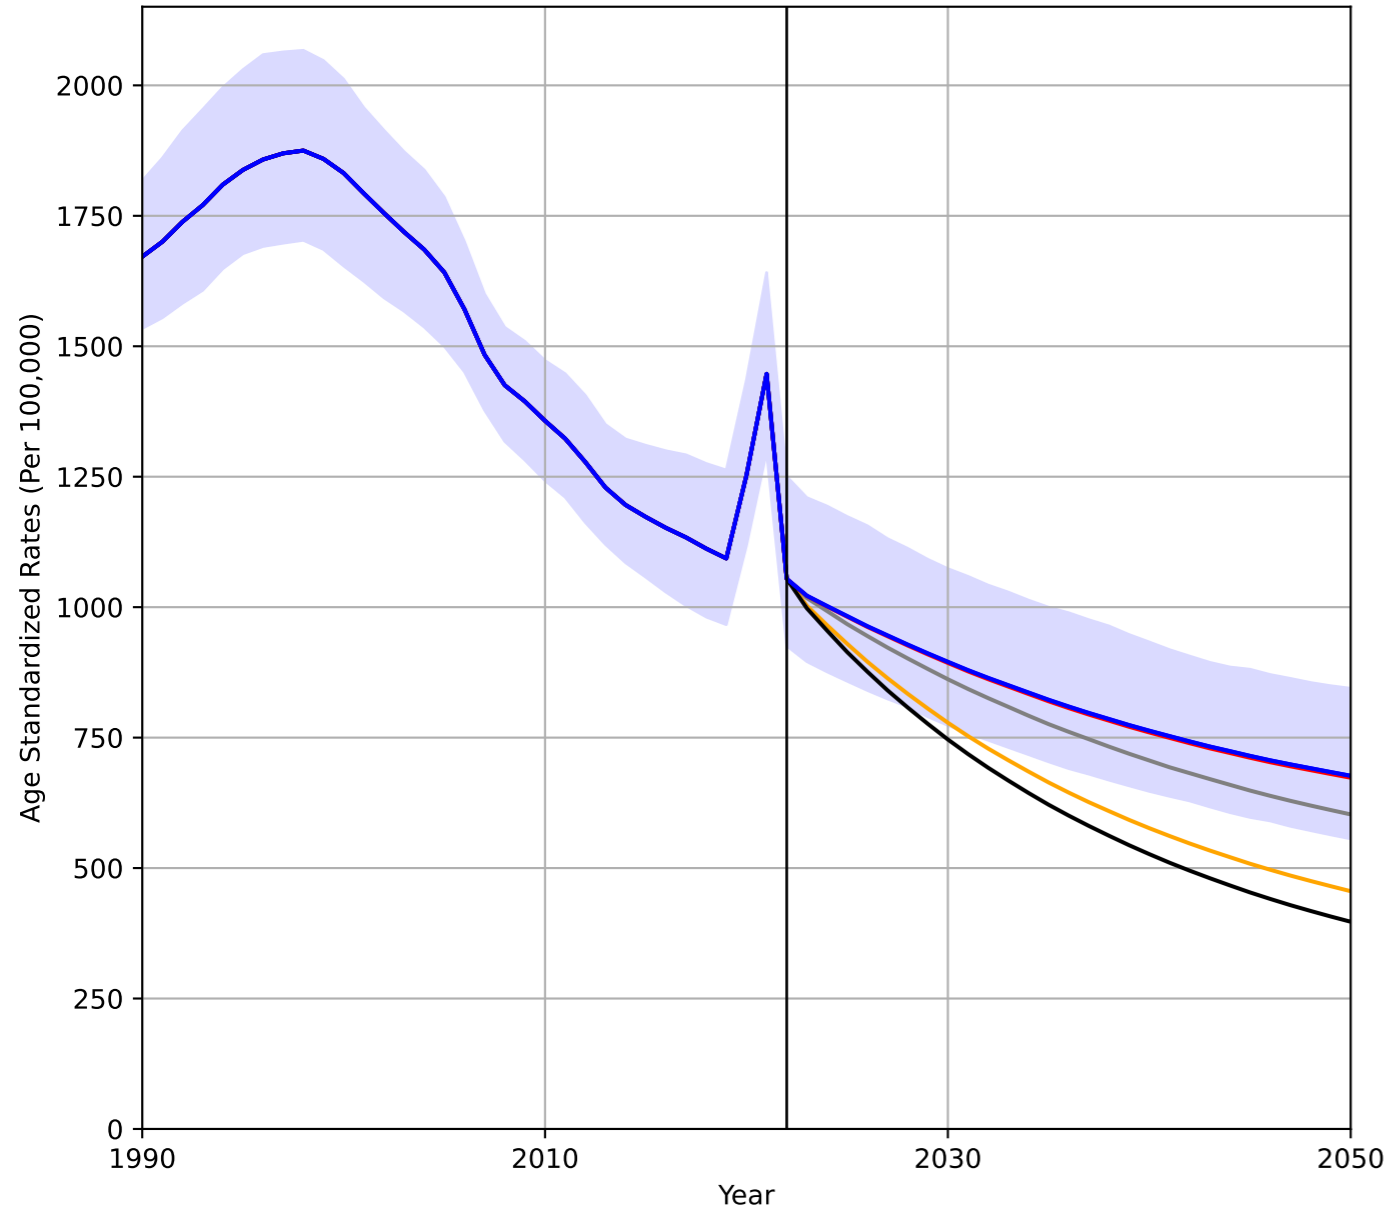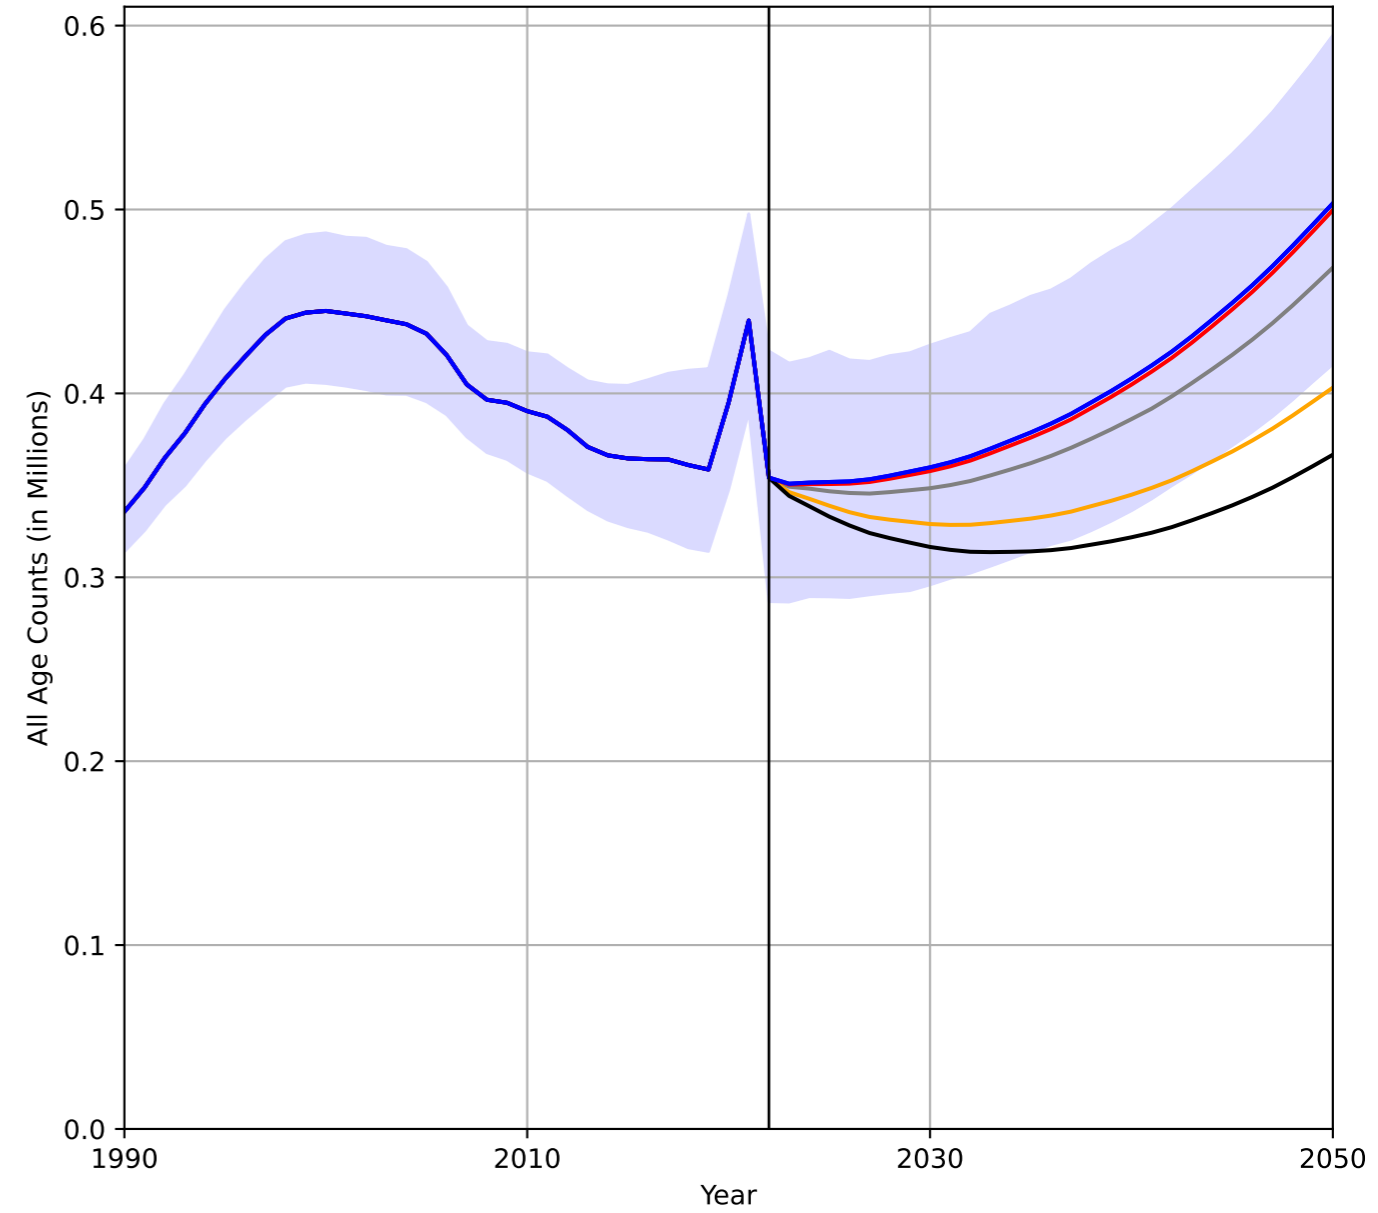

# Zambia

Supplemental Results Figure S11. All-cause age standardised death rates (A) and all age death counts (B), for the past and for five future scenarios, 1990–2050

1822

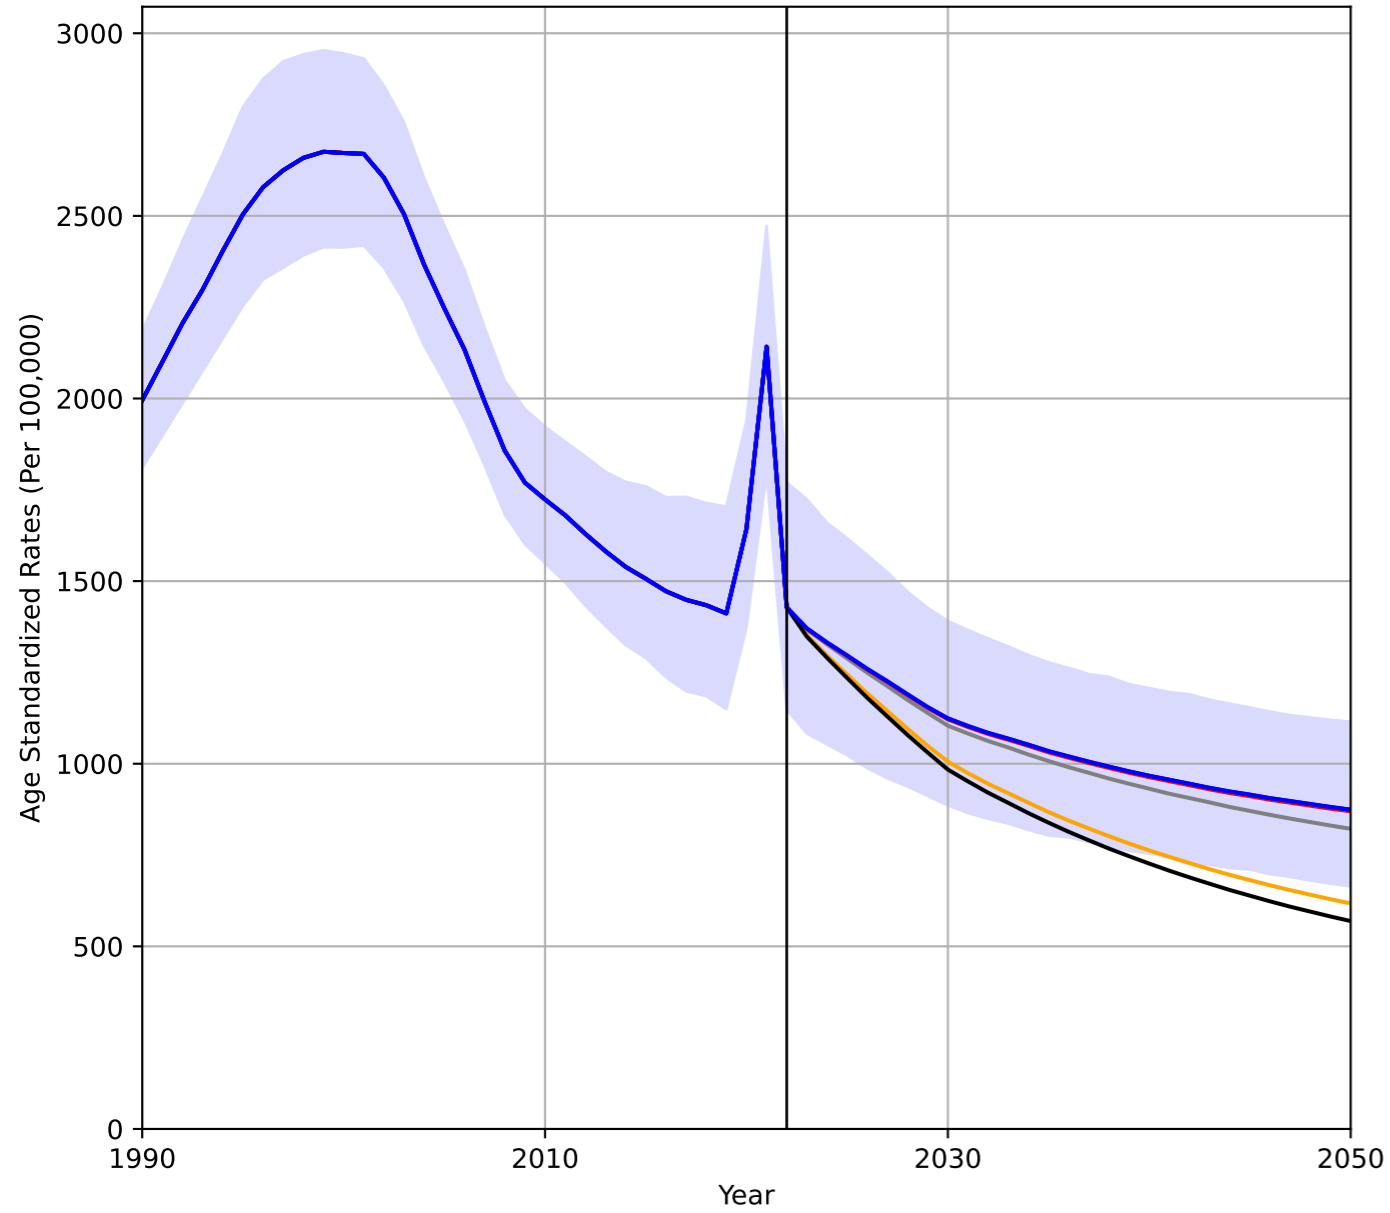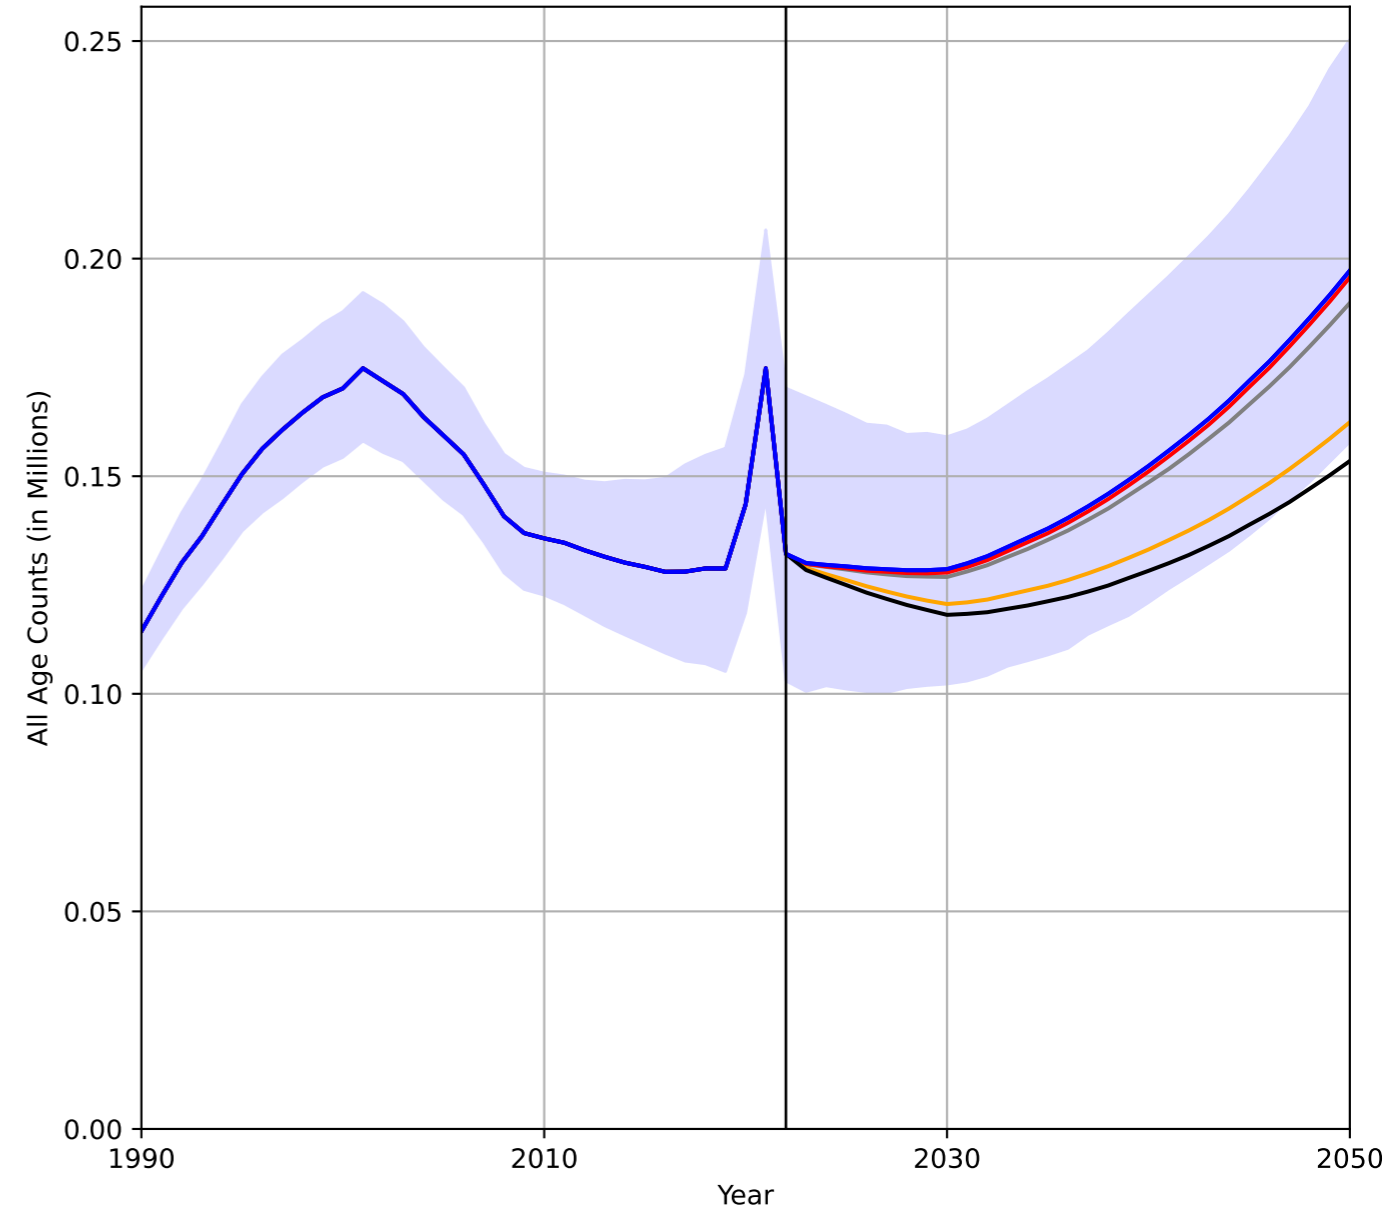

# Botswana

Supplemental Results Figure S11. All-cause age standardised death rates (A) and all age death counts (B), for the past and for five future scenarios, 1990–2050

1823

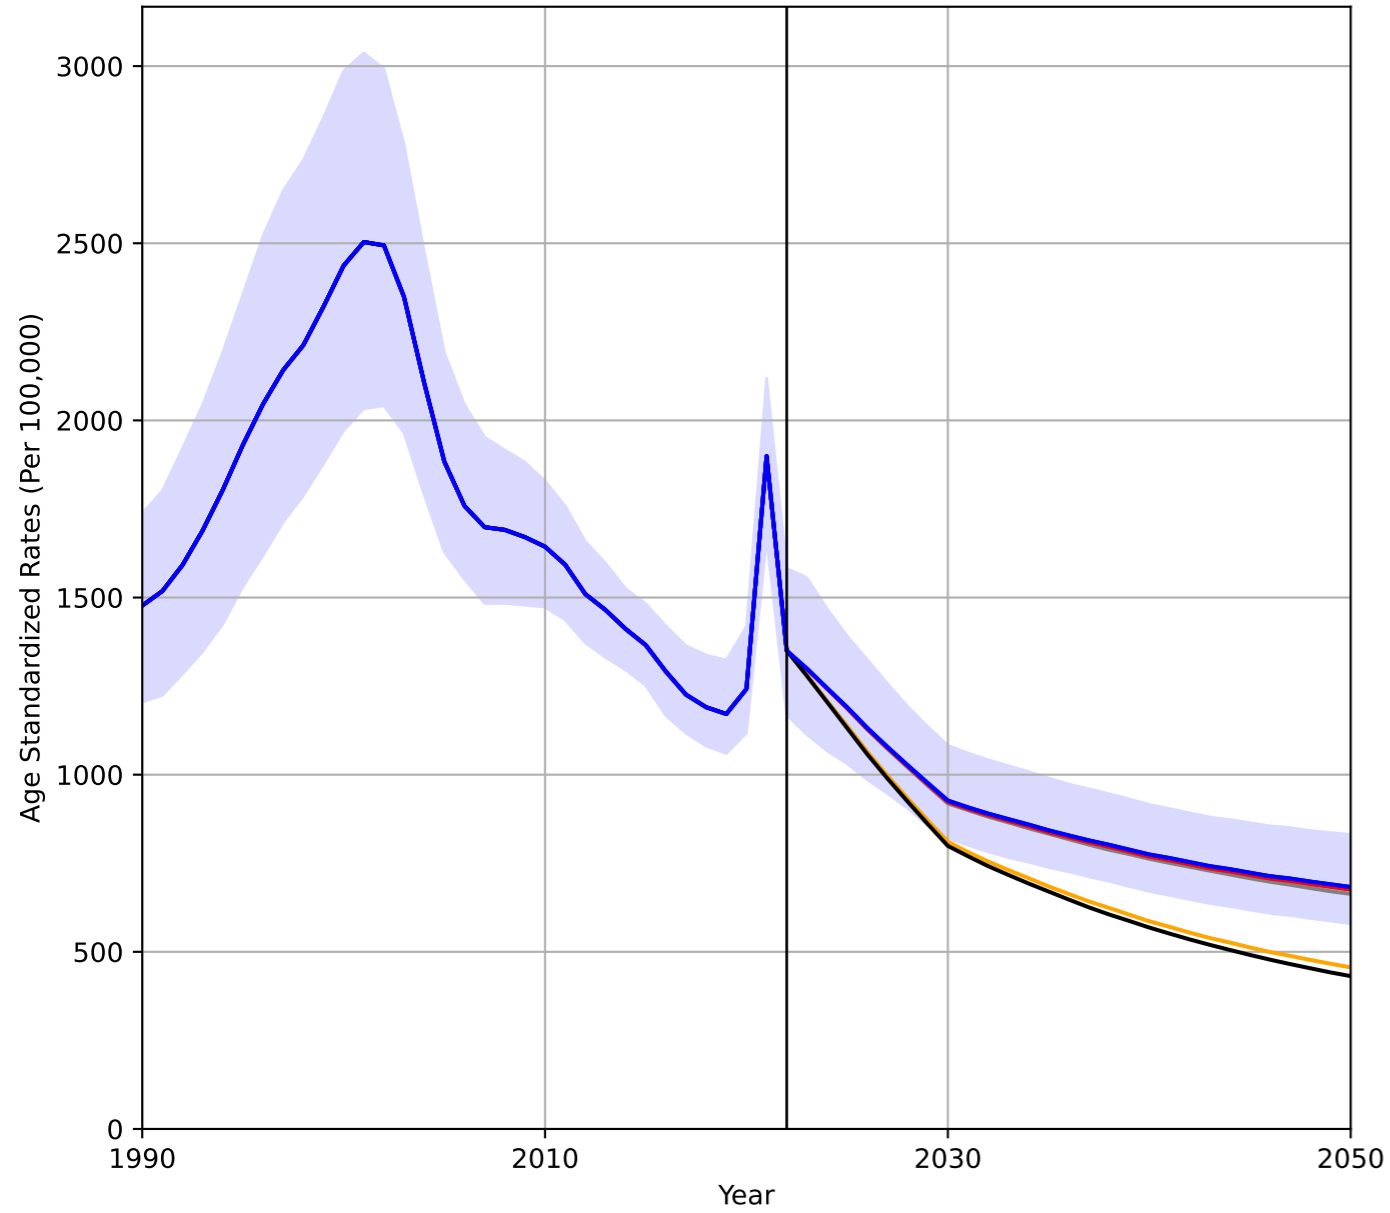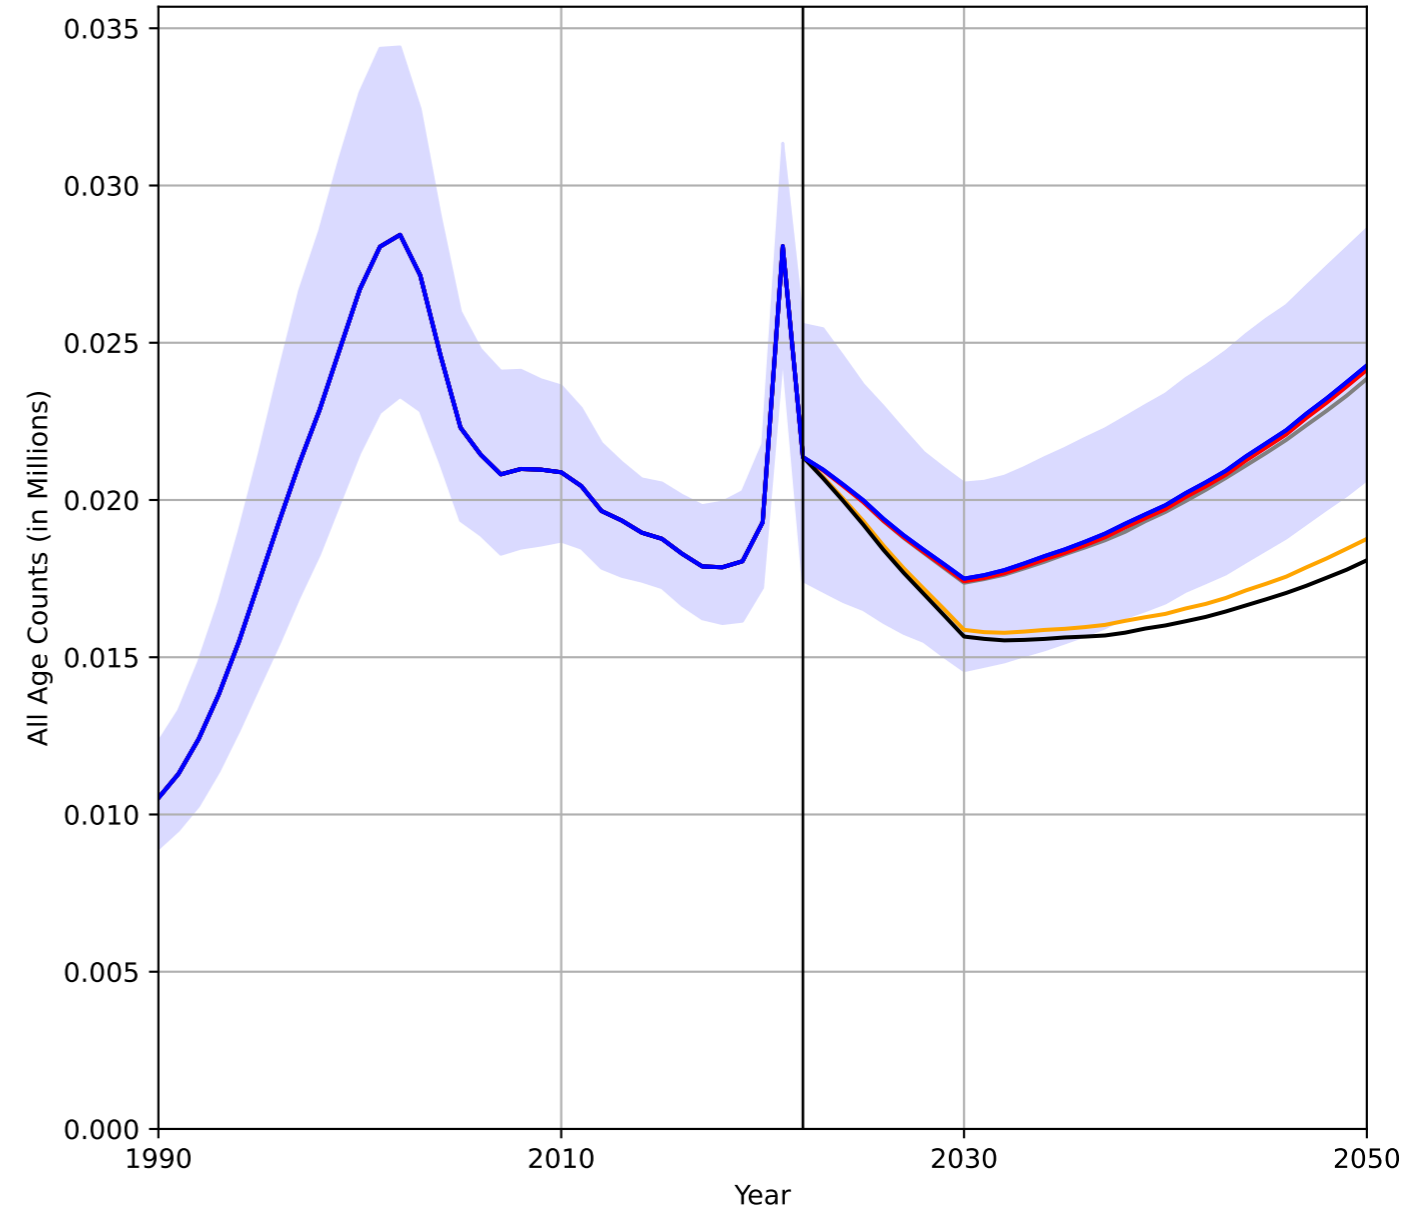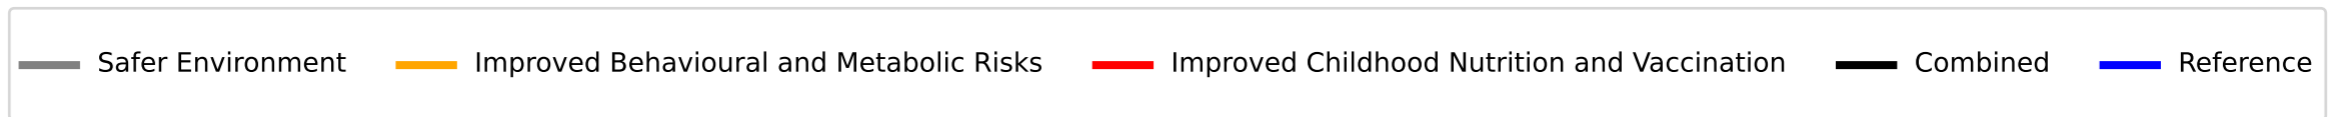



# Eswatini

Supplemental Results Figure S11. All-cause age standardised death rates (A) and all age death counts (B), for the past and for five future scenarios, 1990–2050

1824

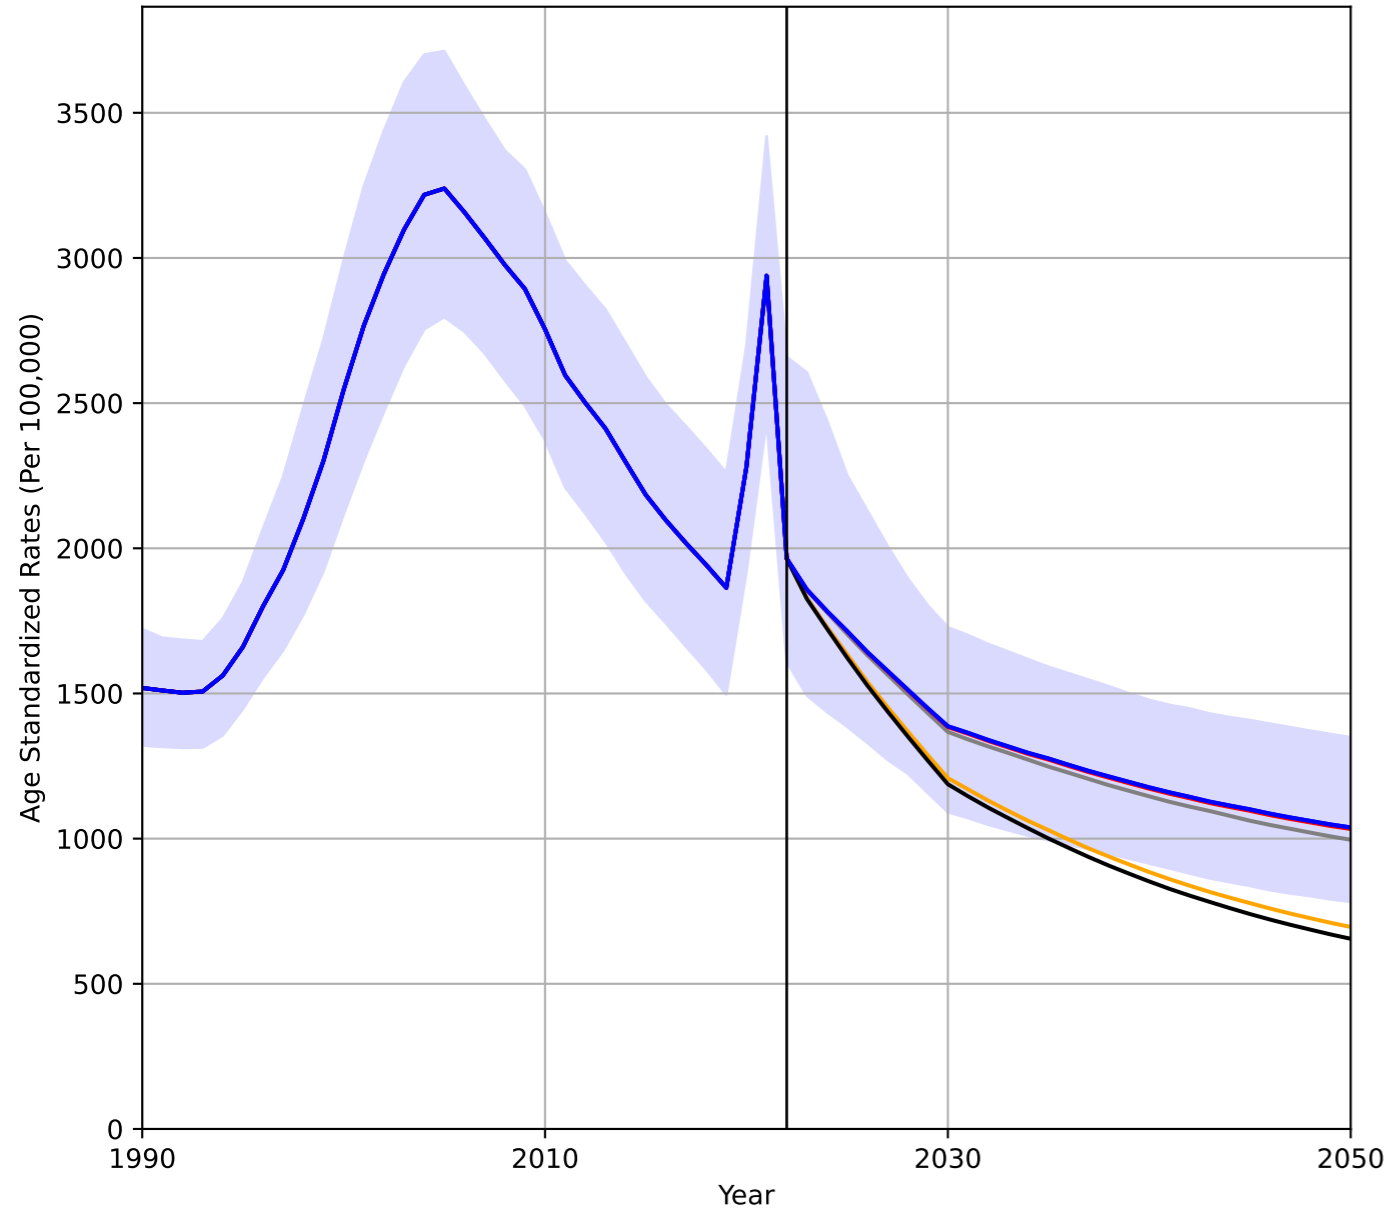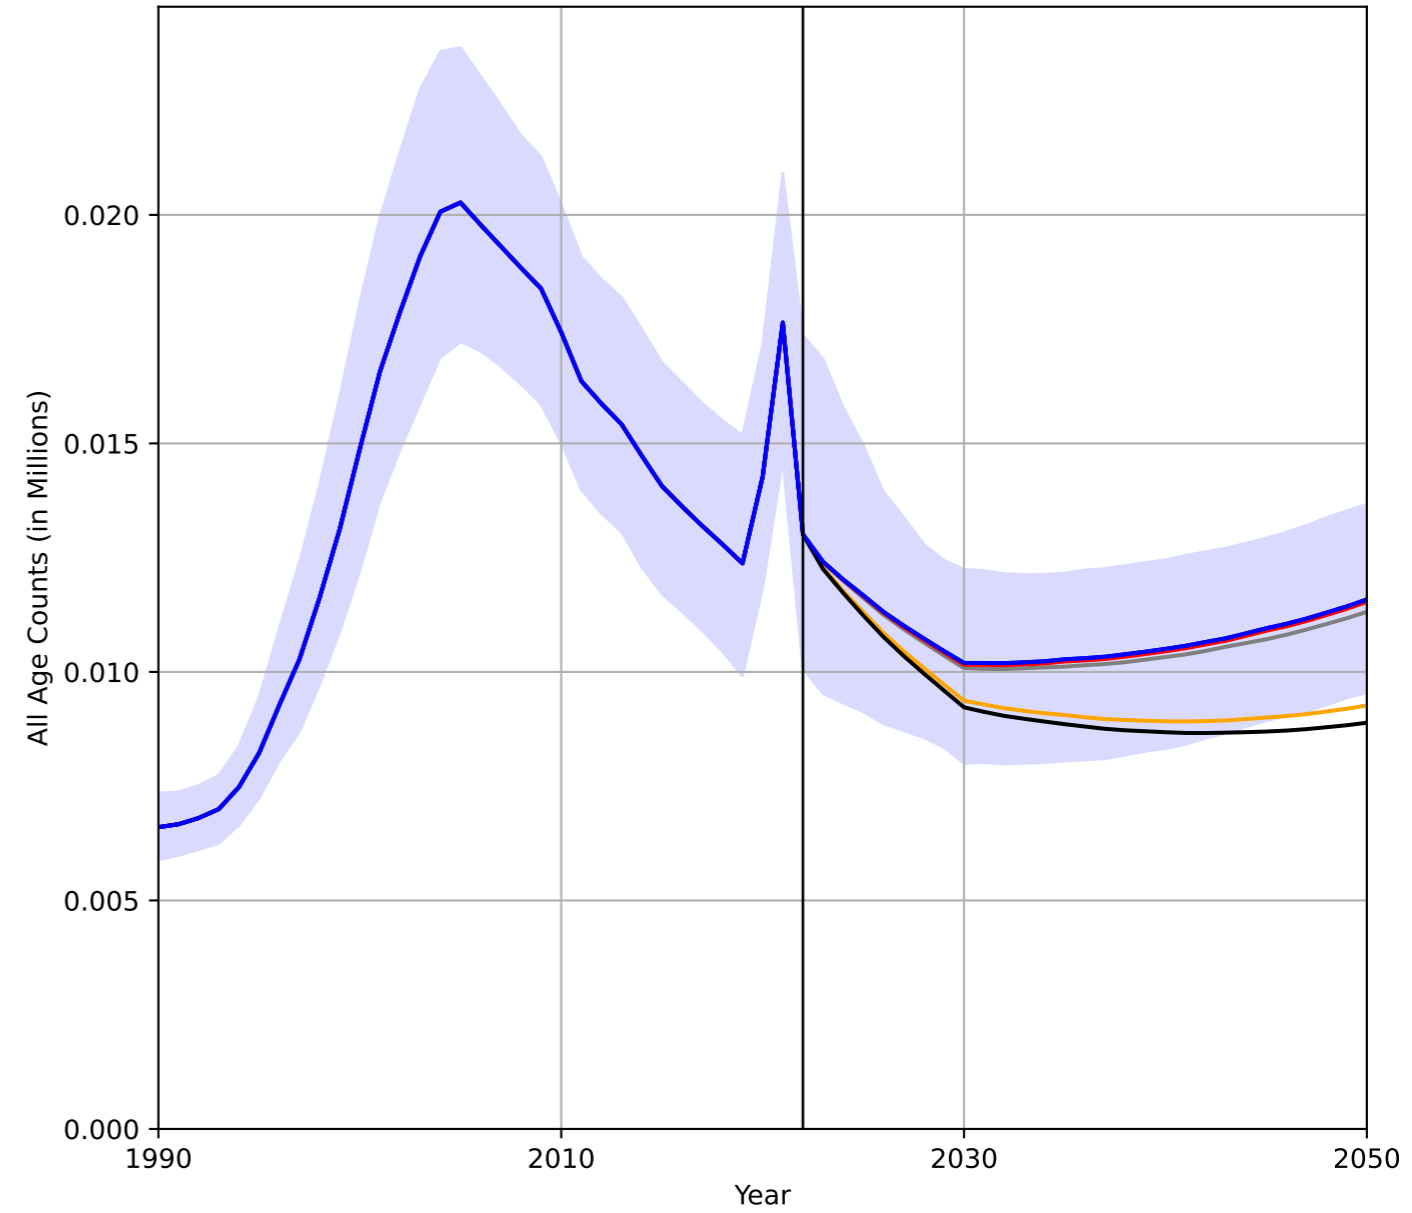

# Lesotho

Supplemental Results Figure S11. All-cause age standardised death rates (A) and all age death counts (B), for the past and for five future scenarios, 1990–2050

1825

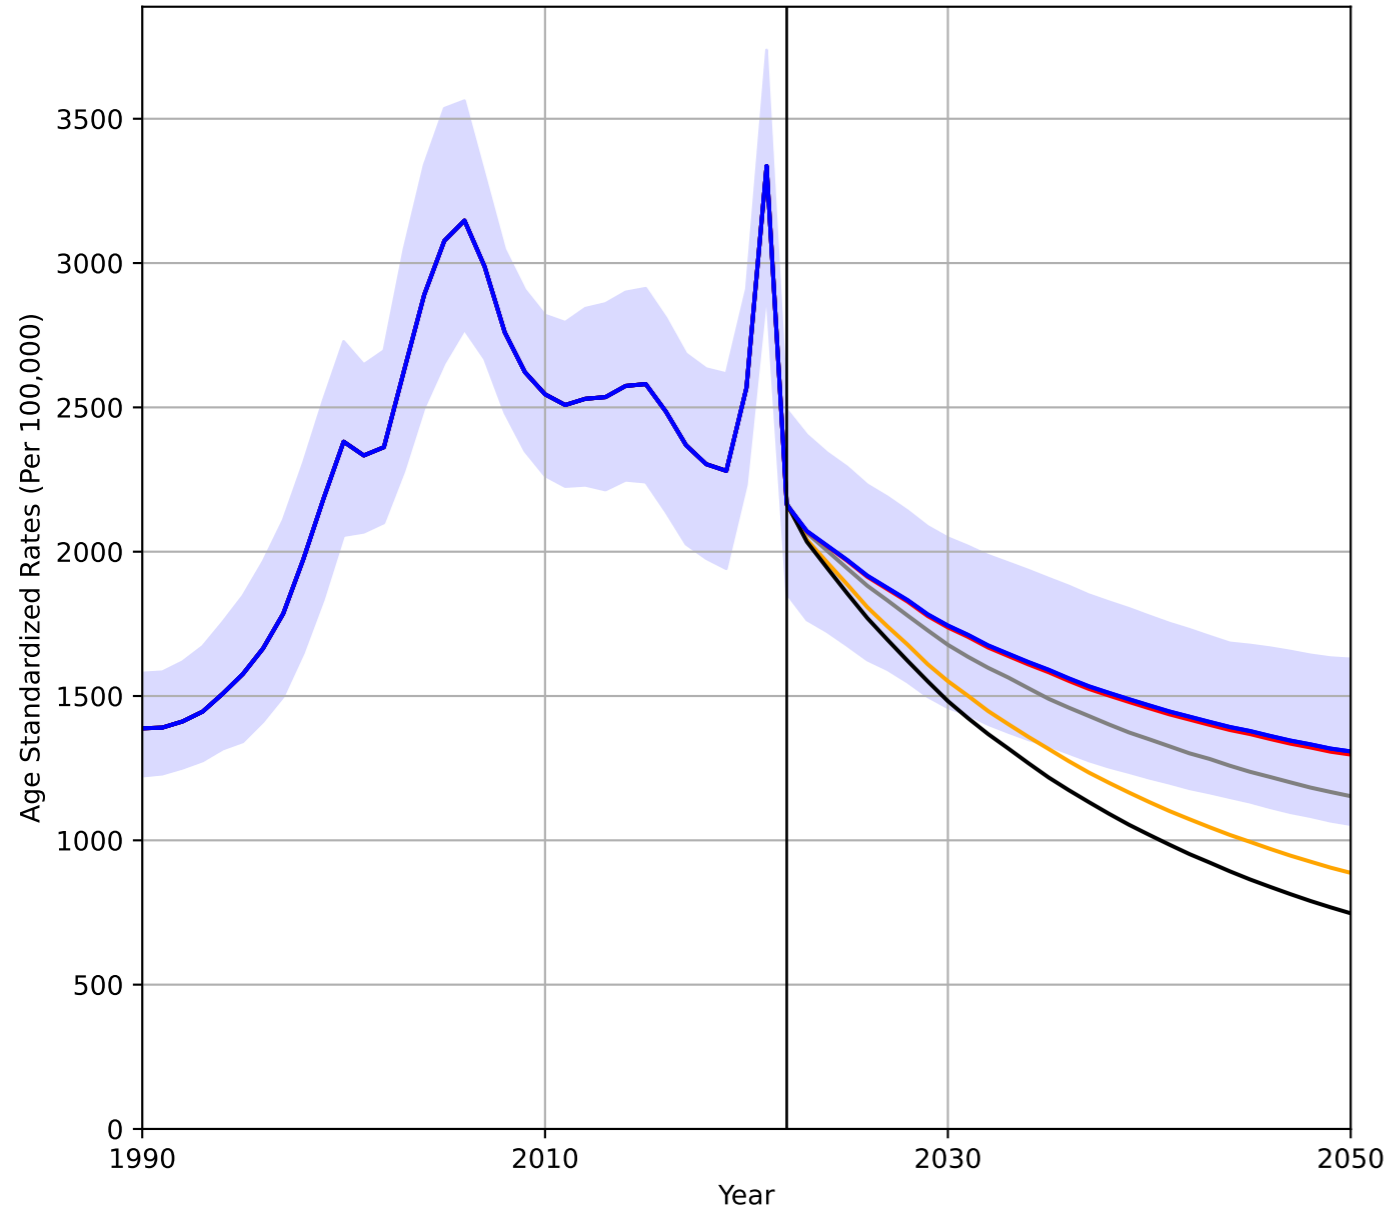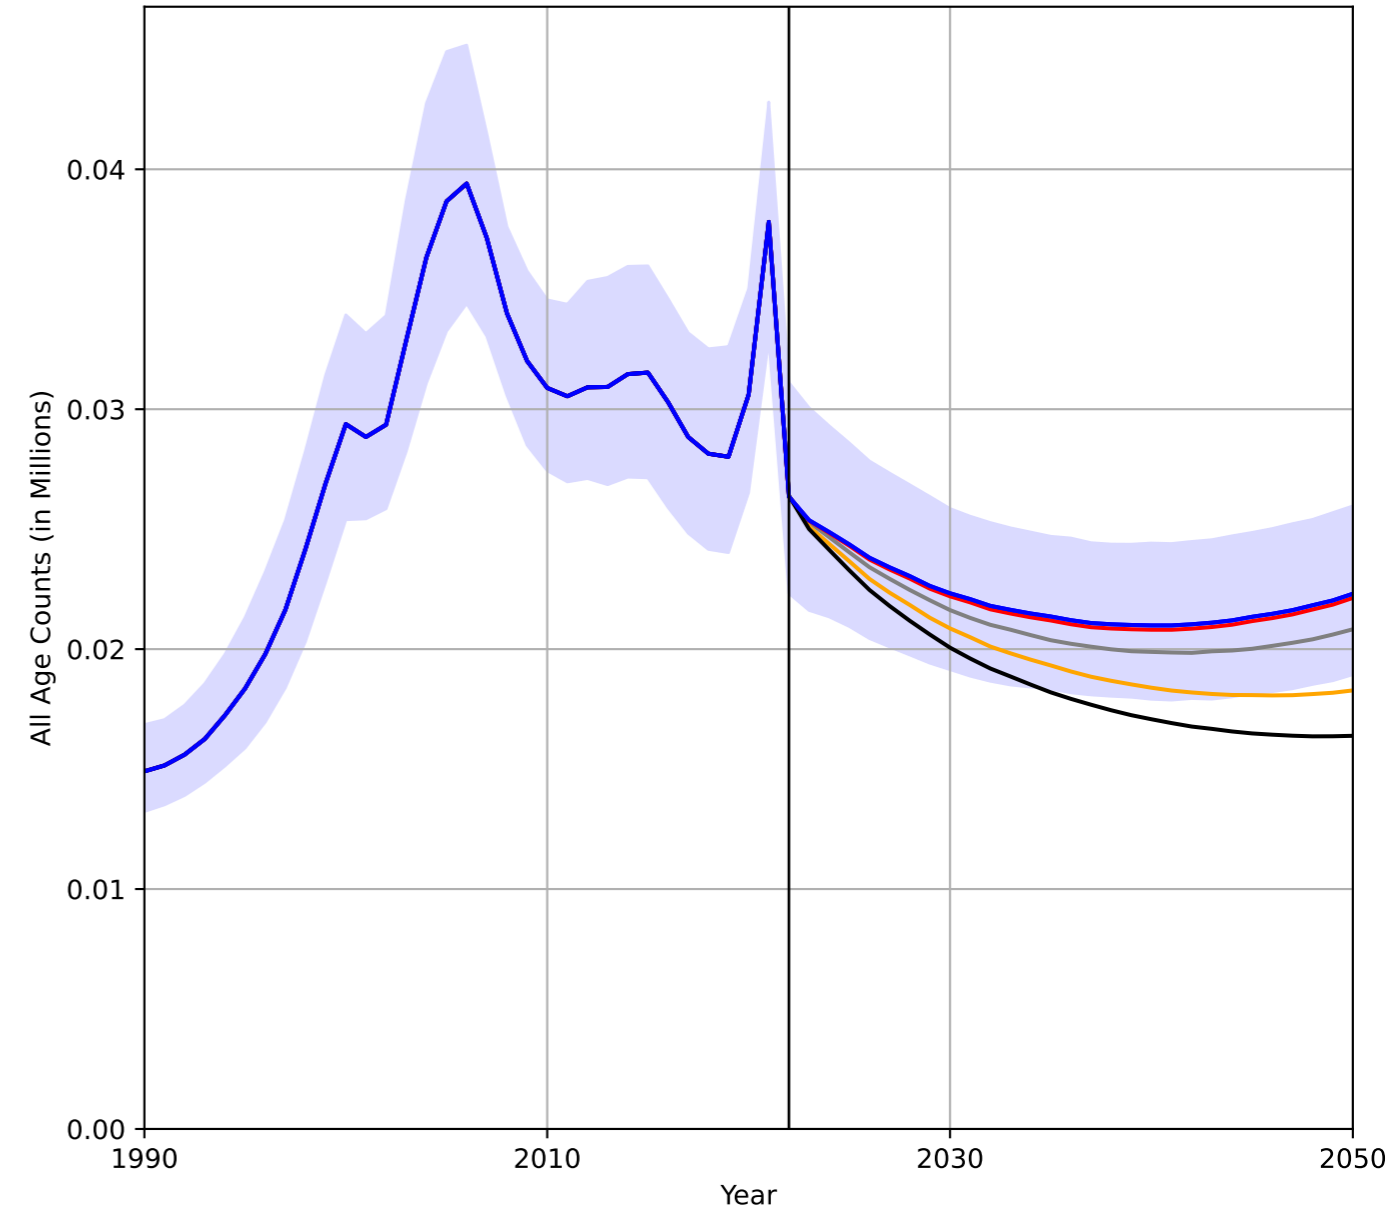

# Namibia

Supplemental Results Figure S11. All-cause age standardised death rates (A) and all age death counts (B), for the past and for five future scenarios, 1990–2050

1826

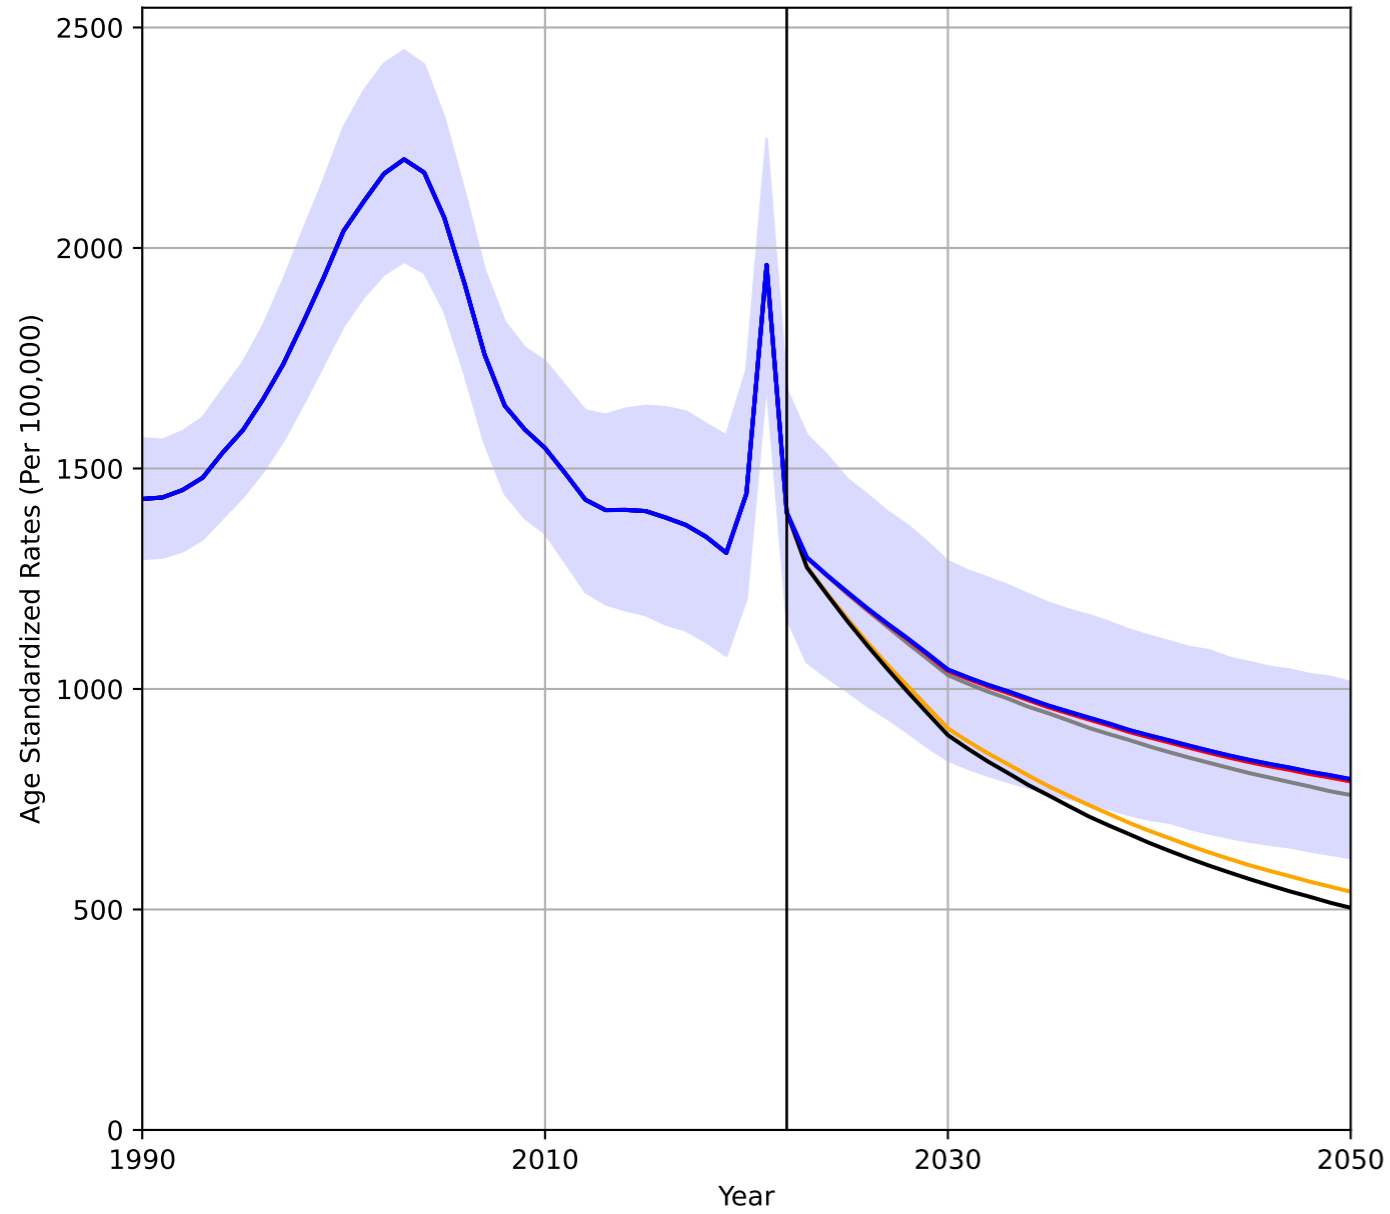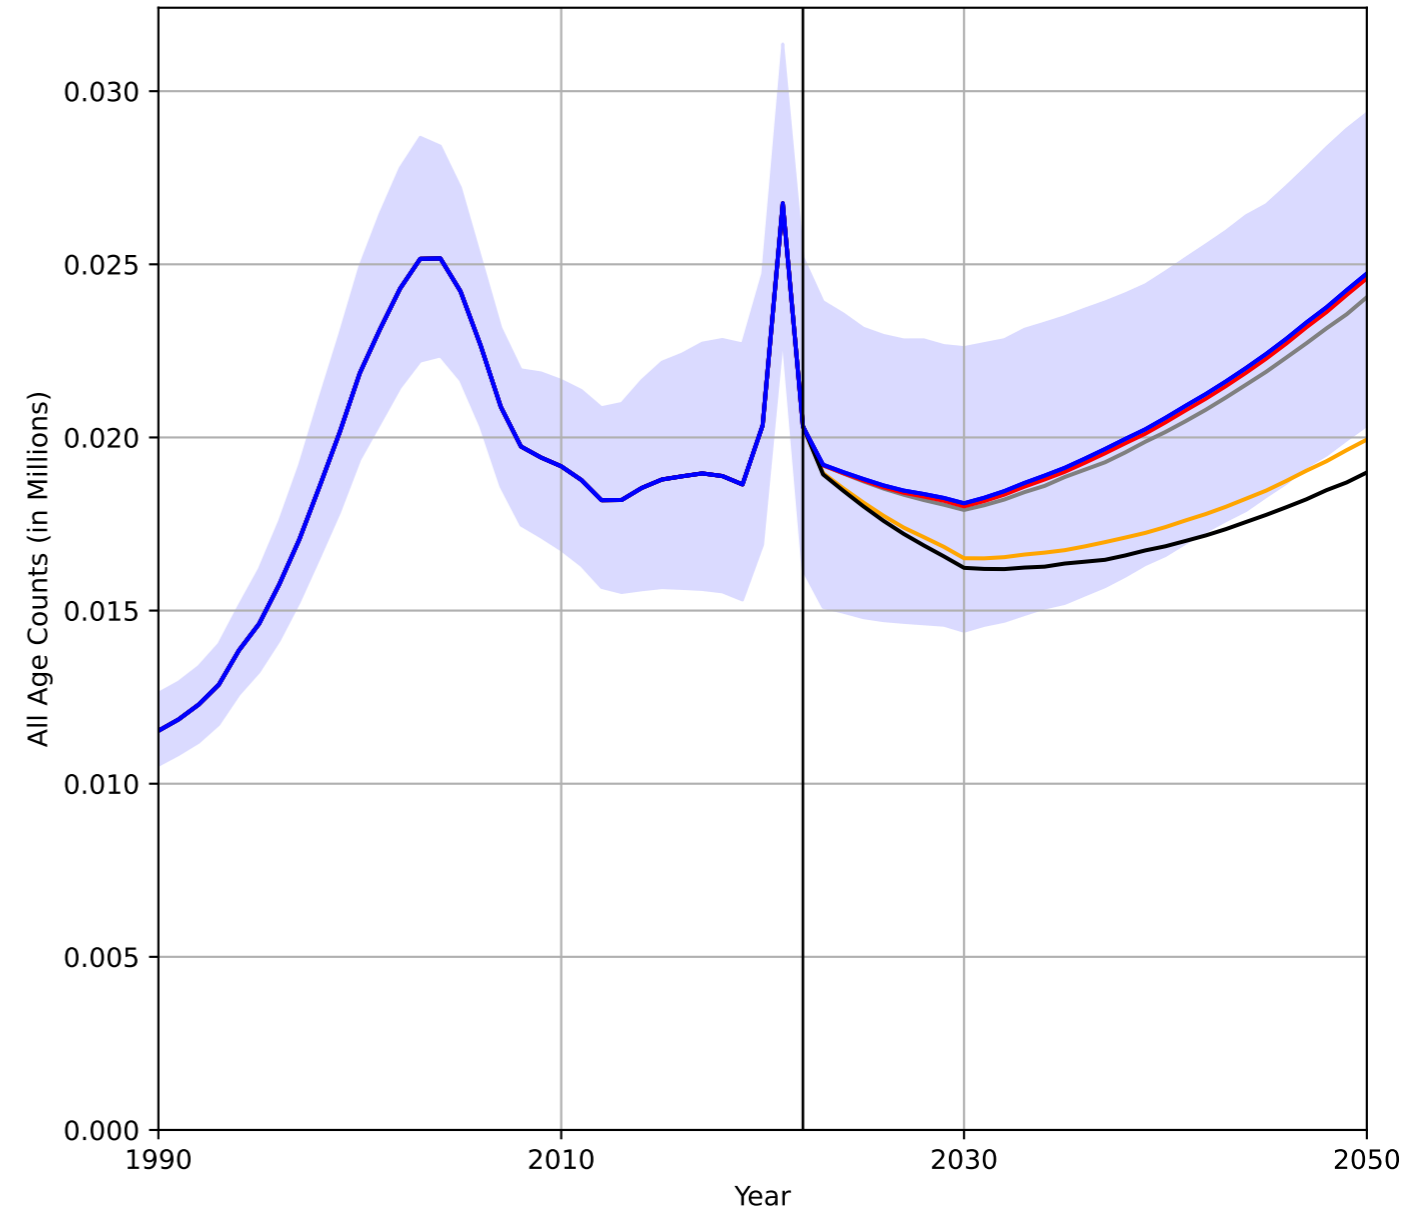

# South Africa

Supplemental Results Figure S11. All-cause age standardised death rates (A) and all age death counts (B), for the past and for five future scenarios, 1990–2050

1827

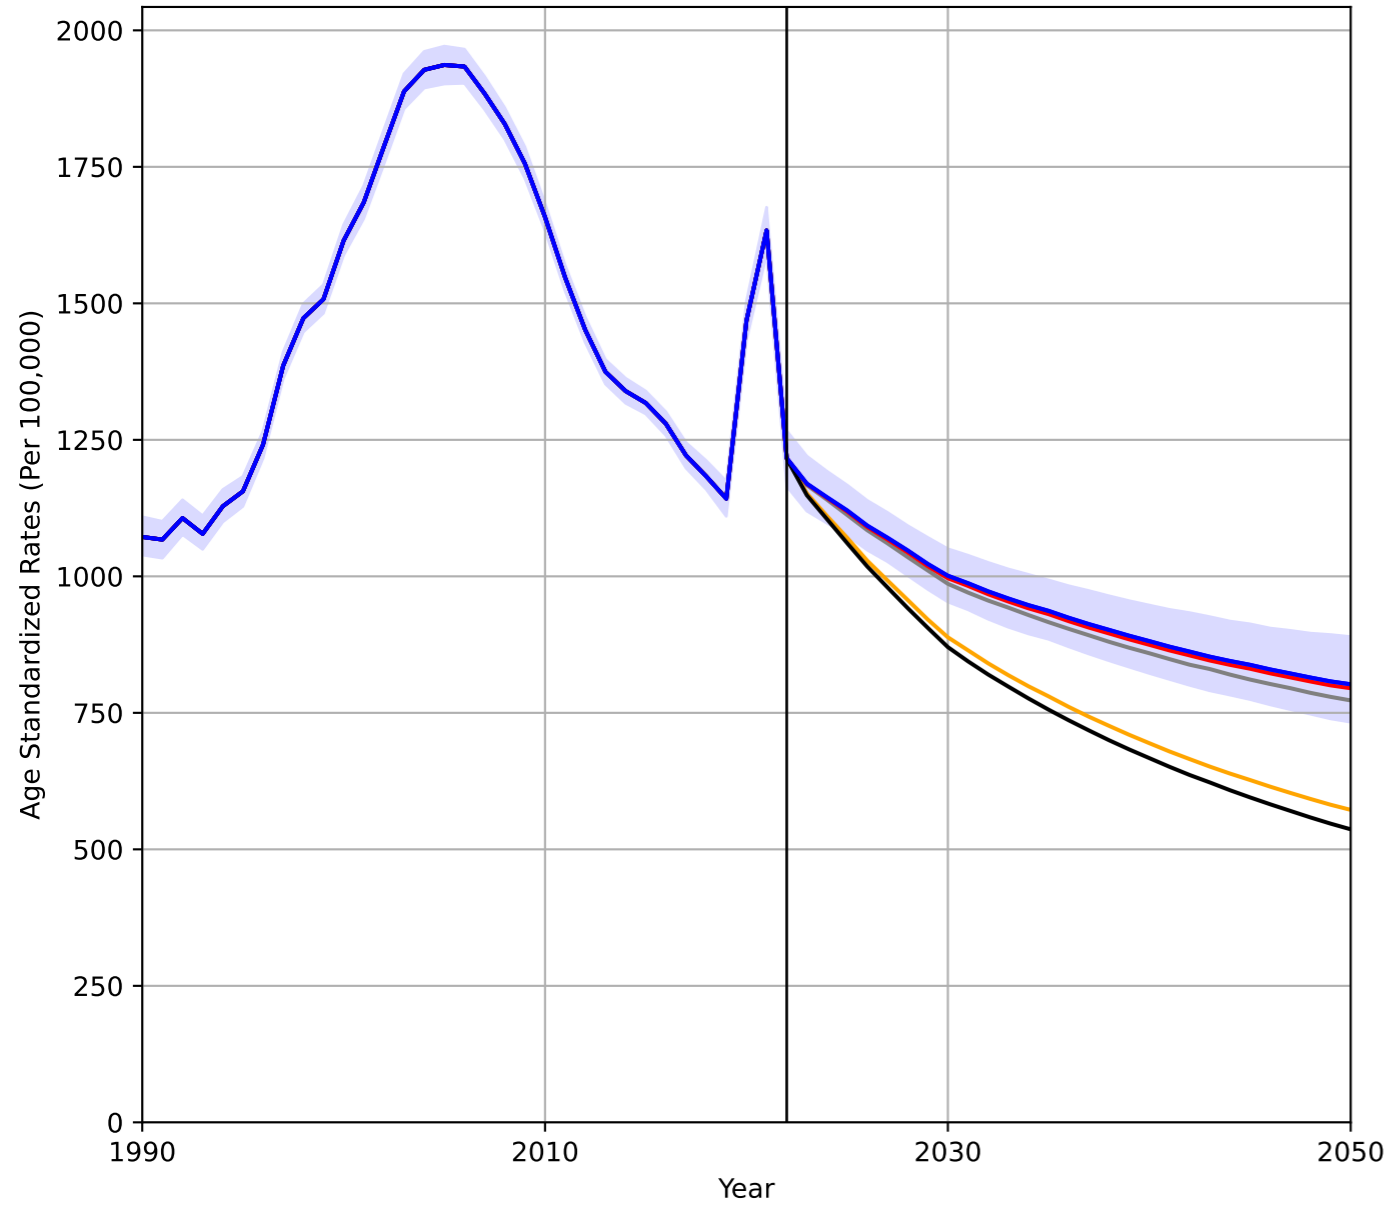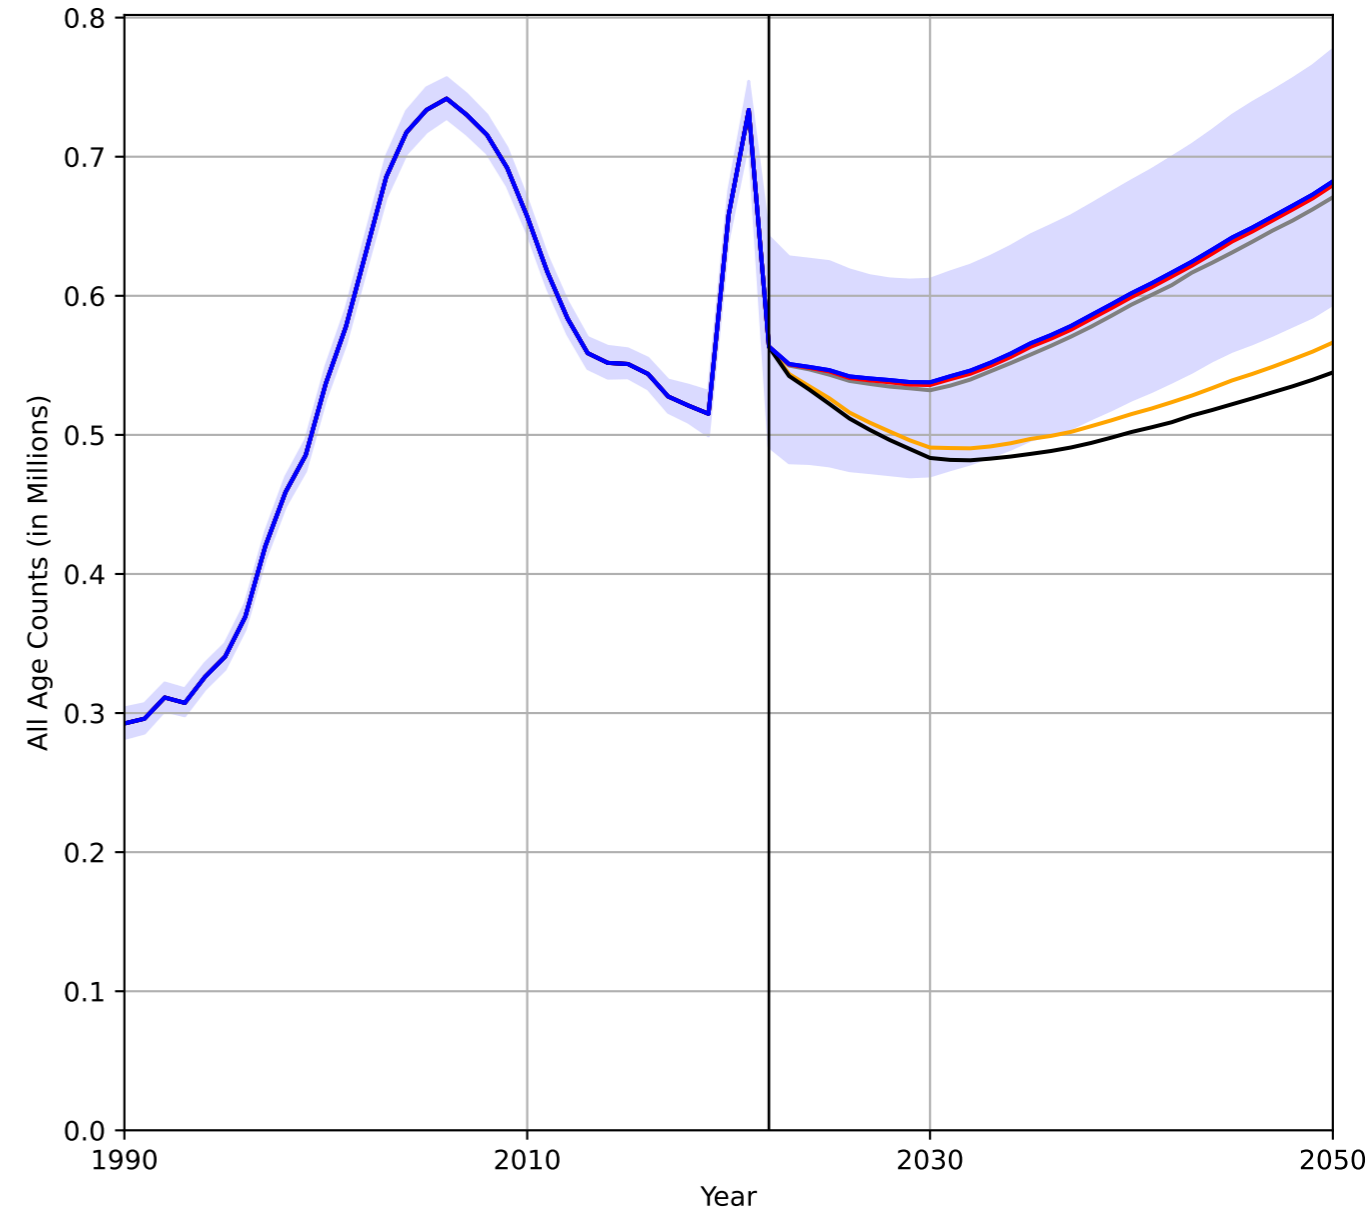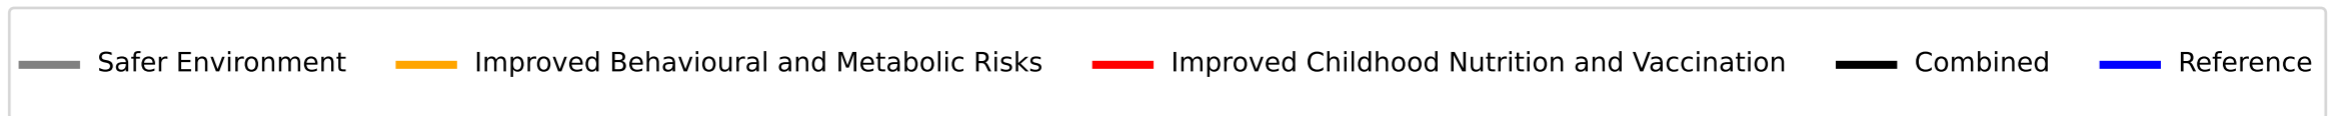

# Zimbabwe

Supplemental Results Figure S11. All-cause age standardised death rates (A) and all age death counts (B), for the past and for five future scenarios, 1990–2050

1828

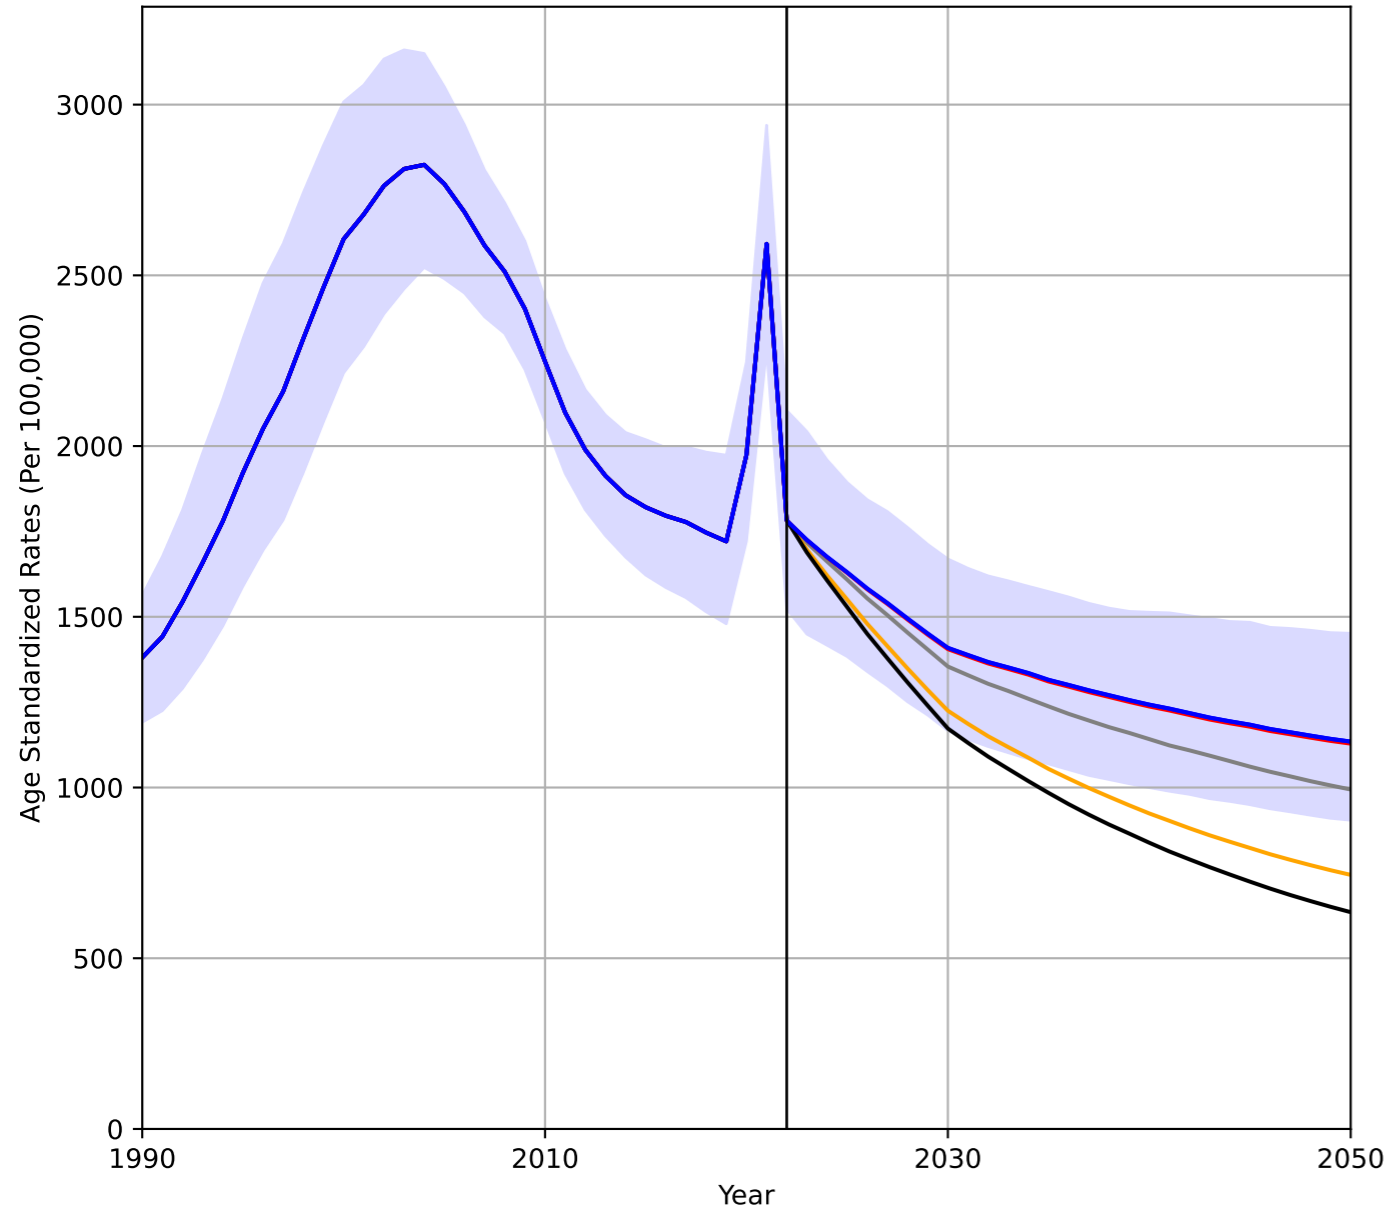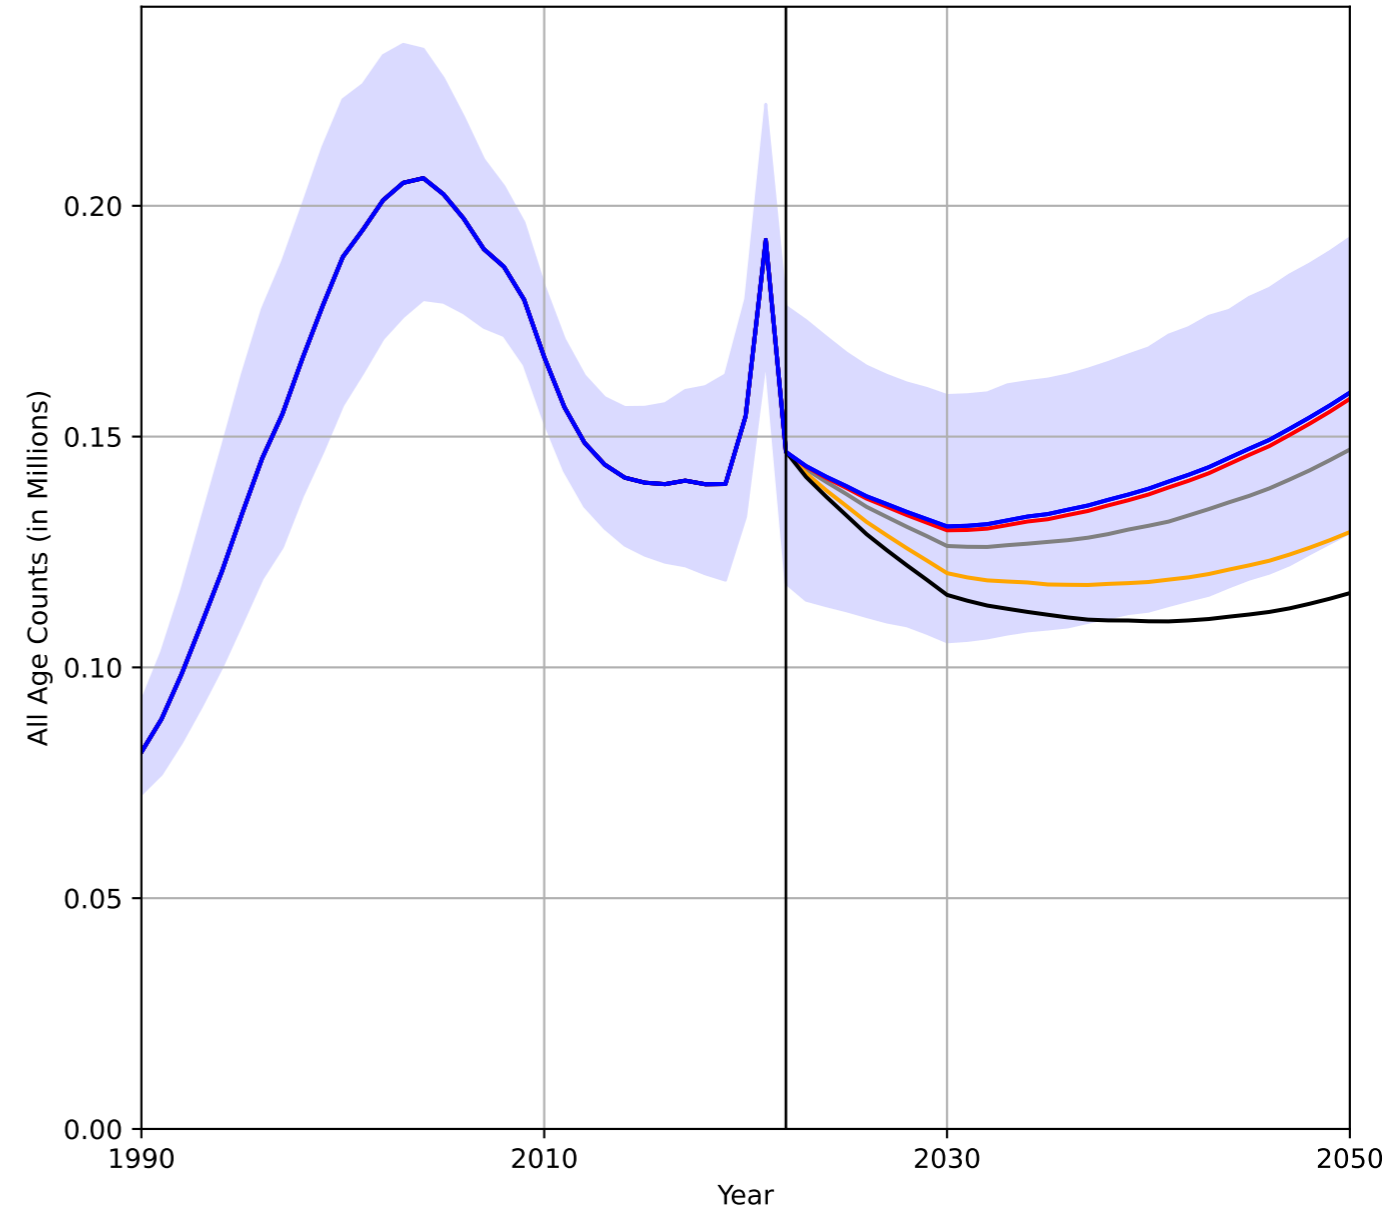

# Benin

Supplemental Results Figure S11. All-cause age standardised death rates (A) and all age death counts (B), for the past and for five future scenarios, 1990–2050

1829

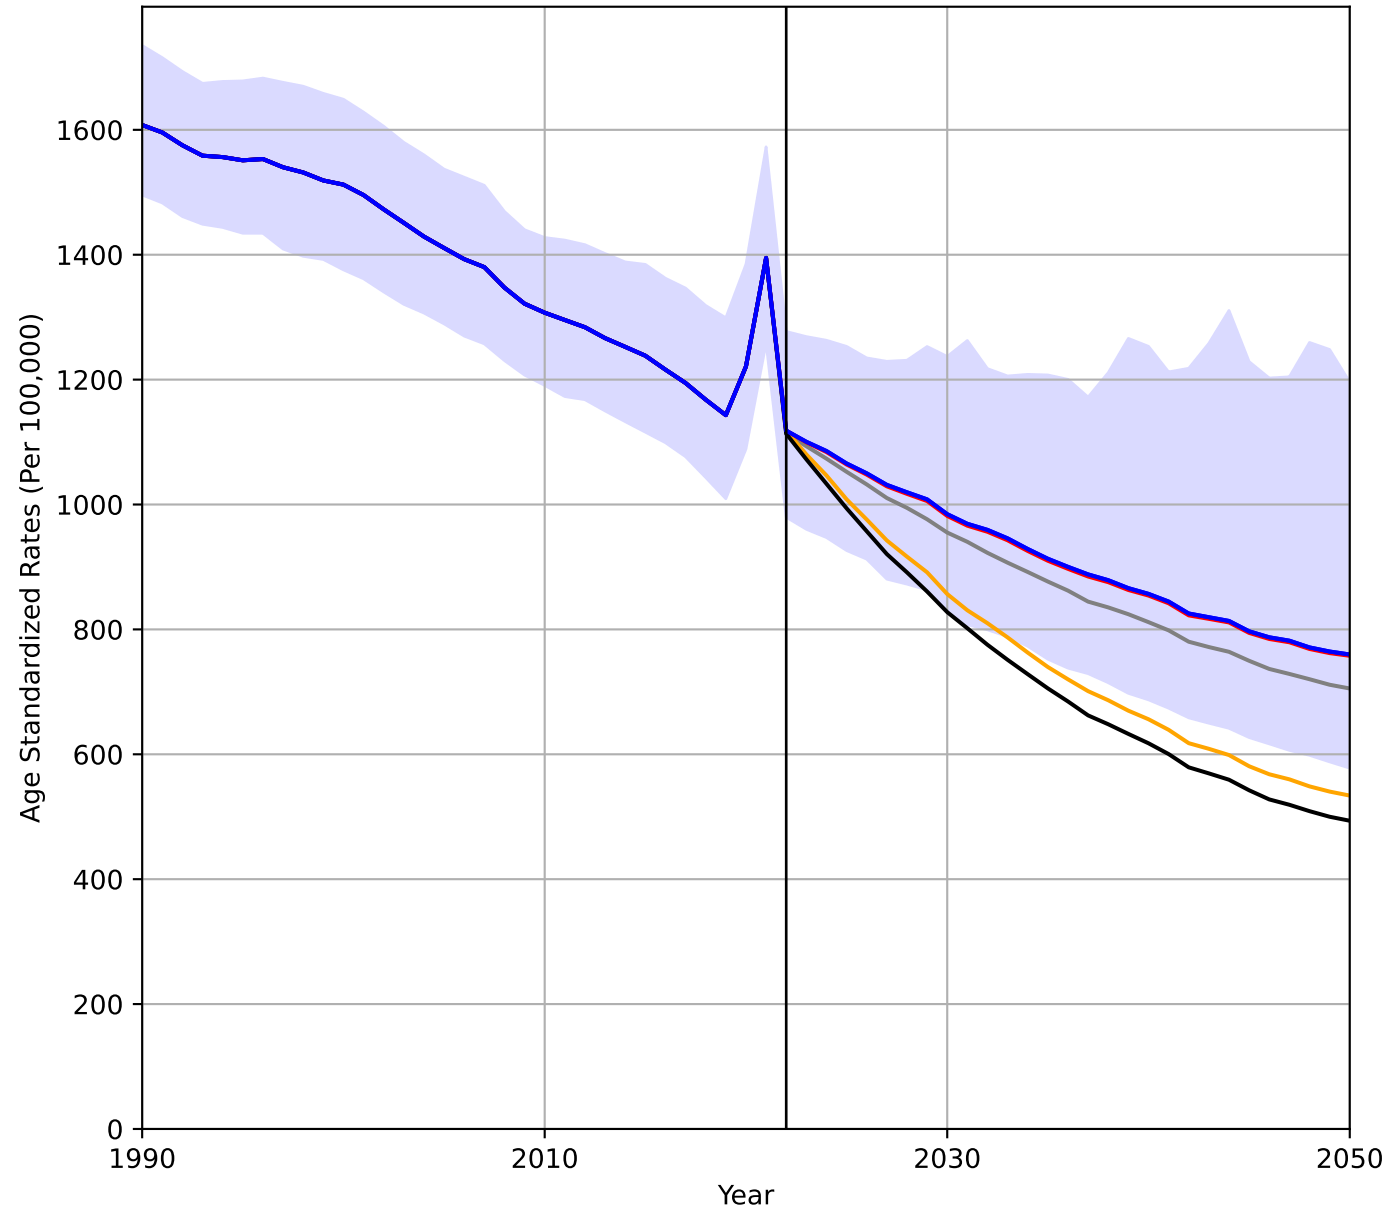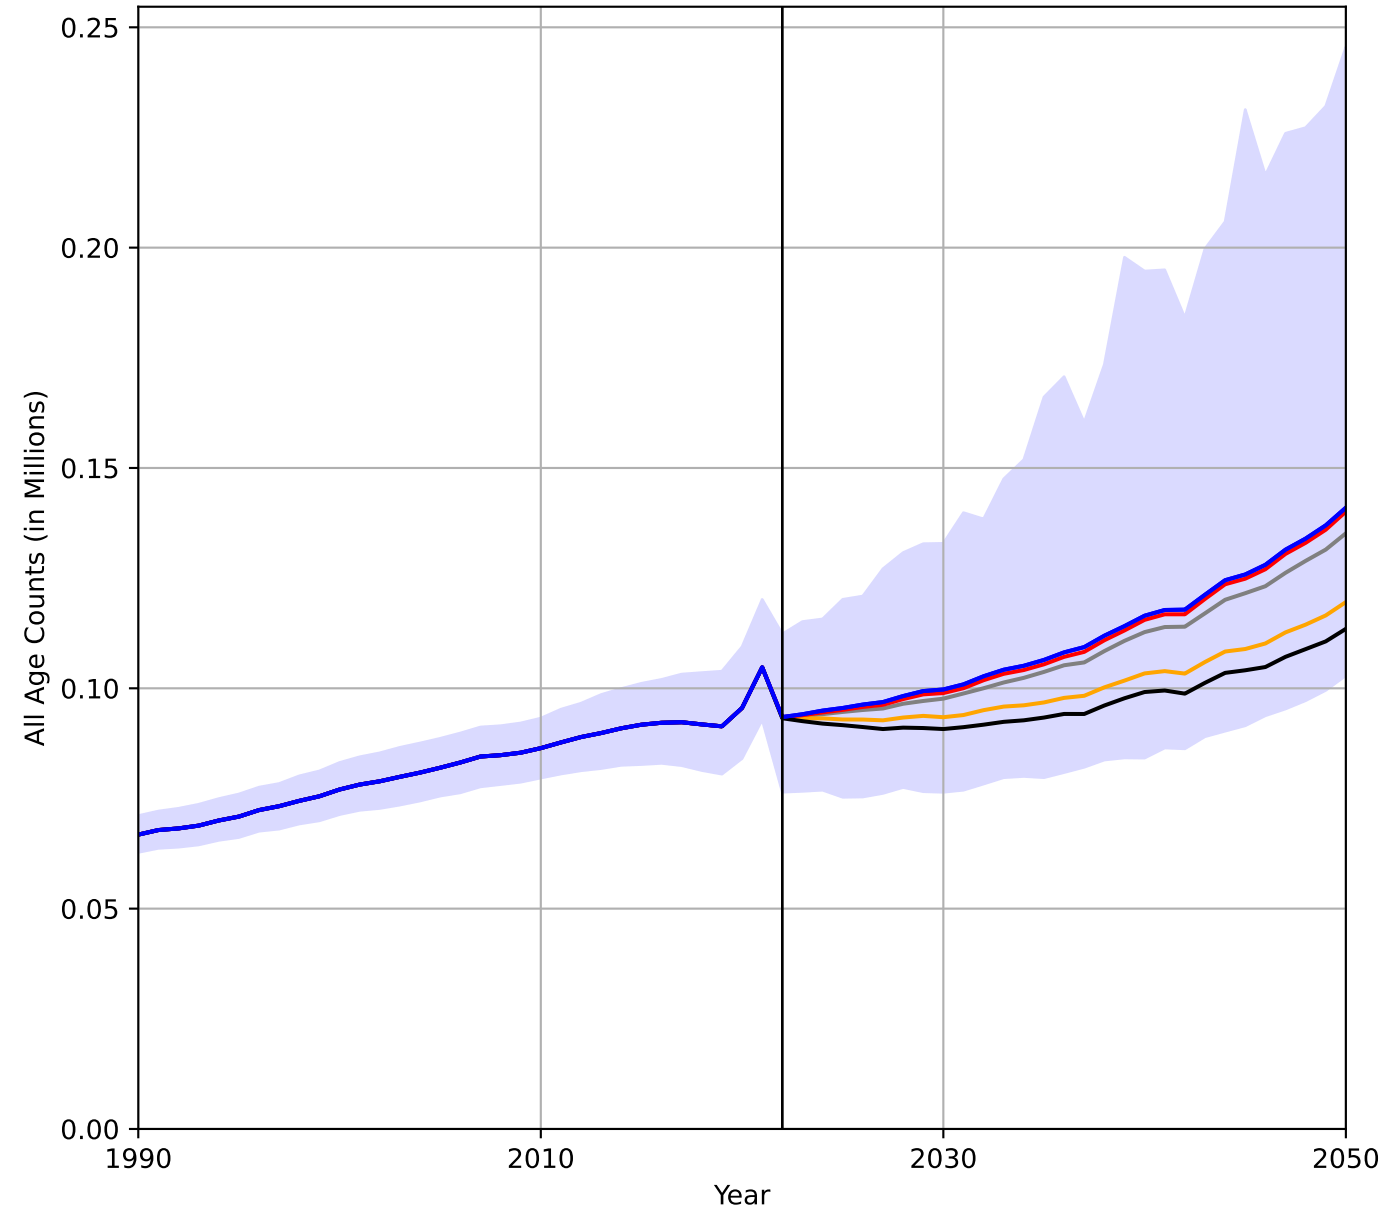

# Burkina Faso

Supplemental Results Figure S11. All-cause age standardised death rates (A) and all age death counts (B), for the past and for five future scenarios, 1990–2050

1830

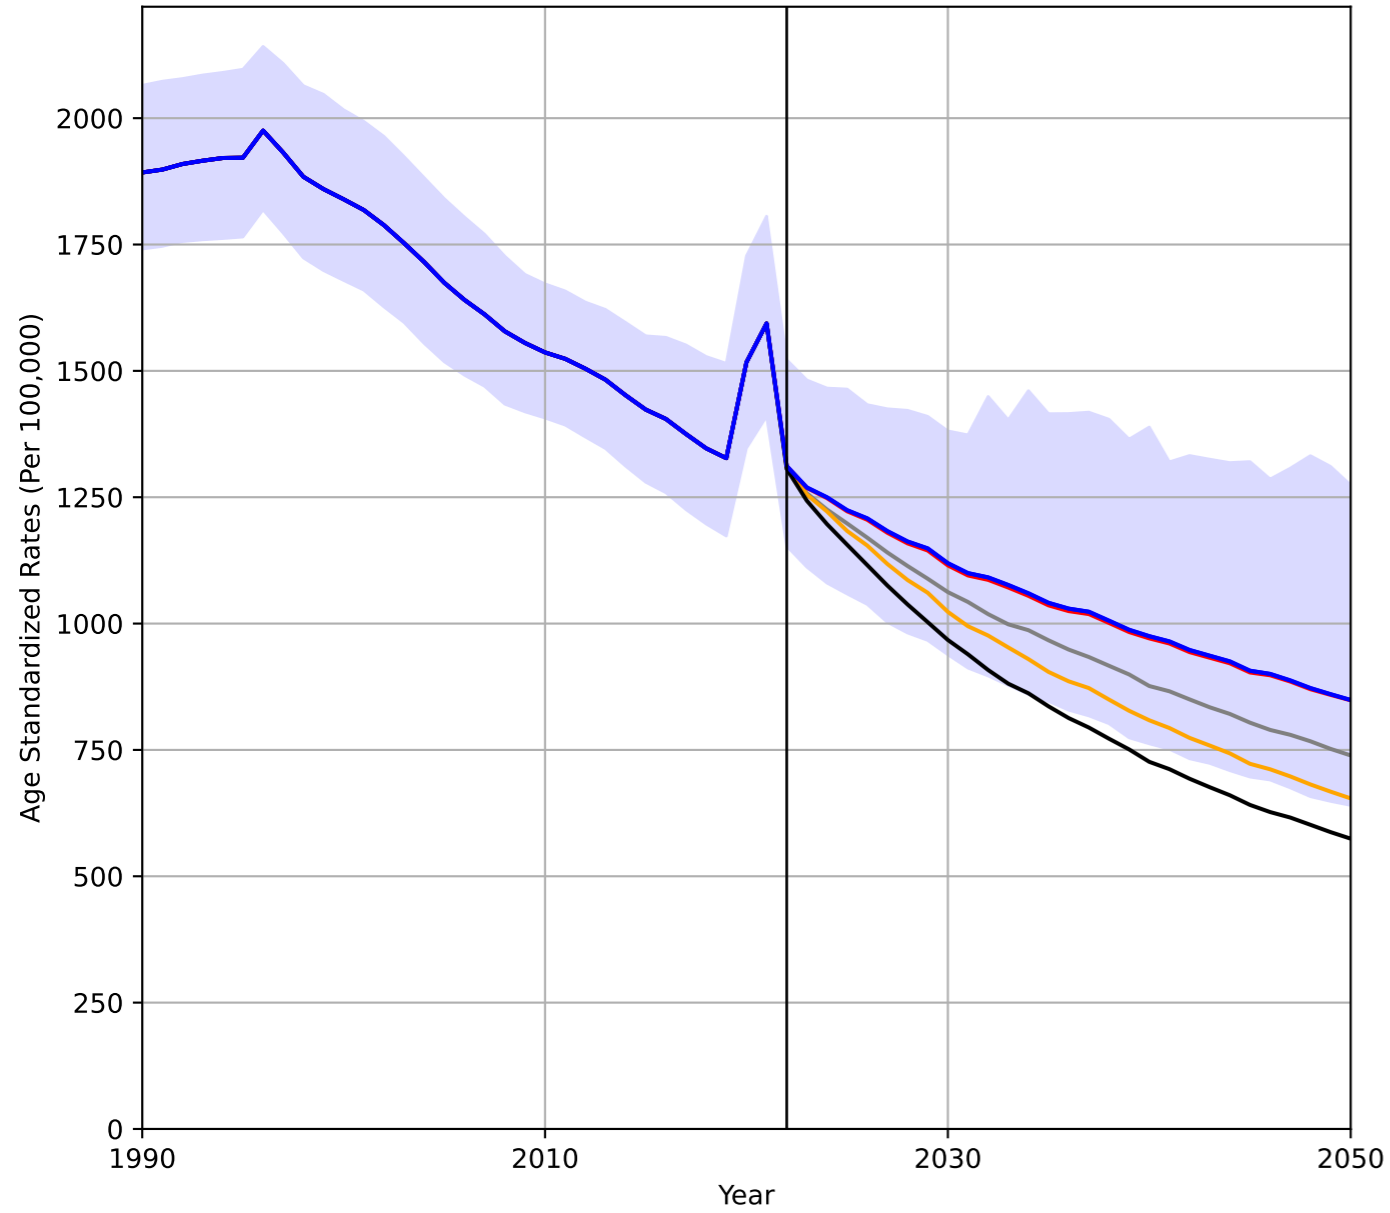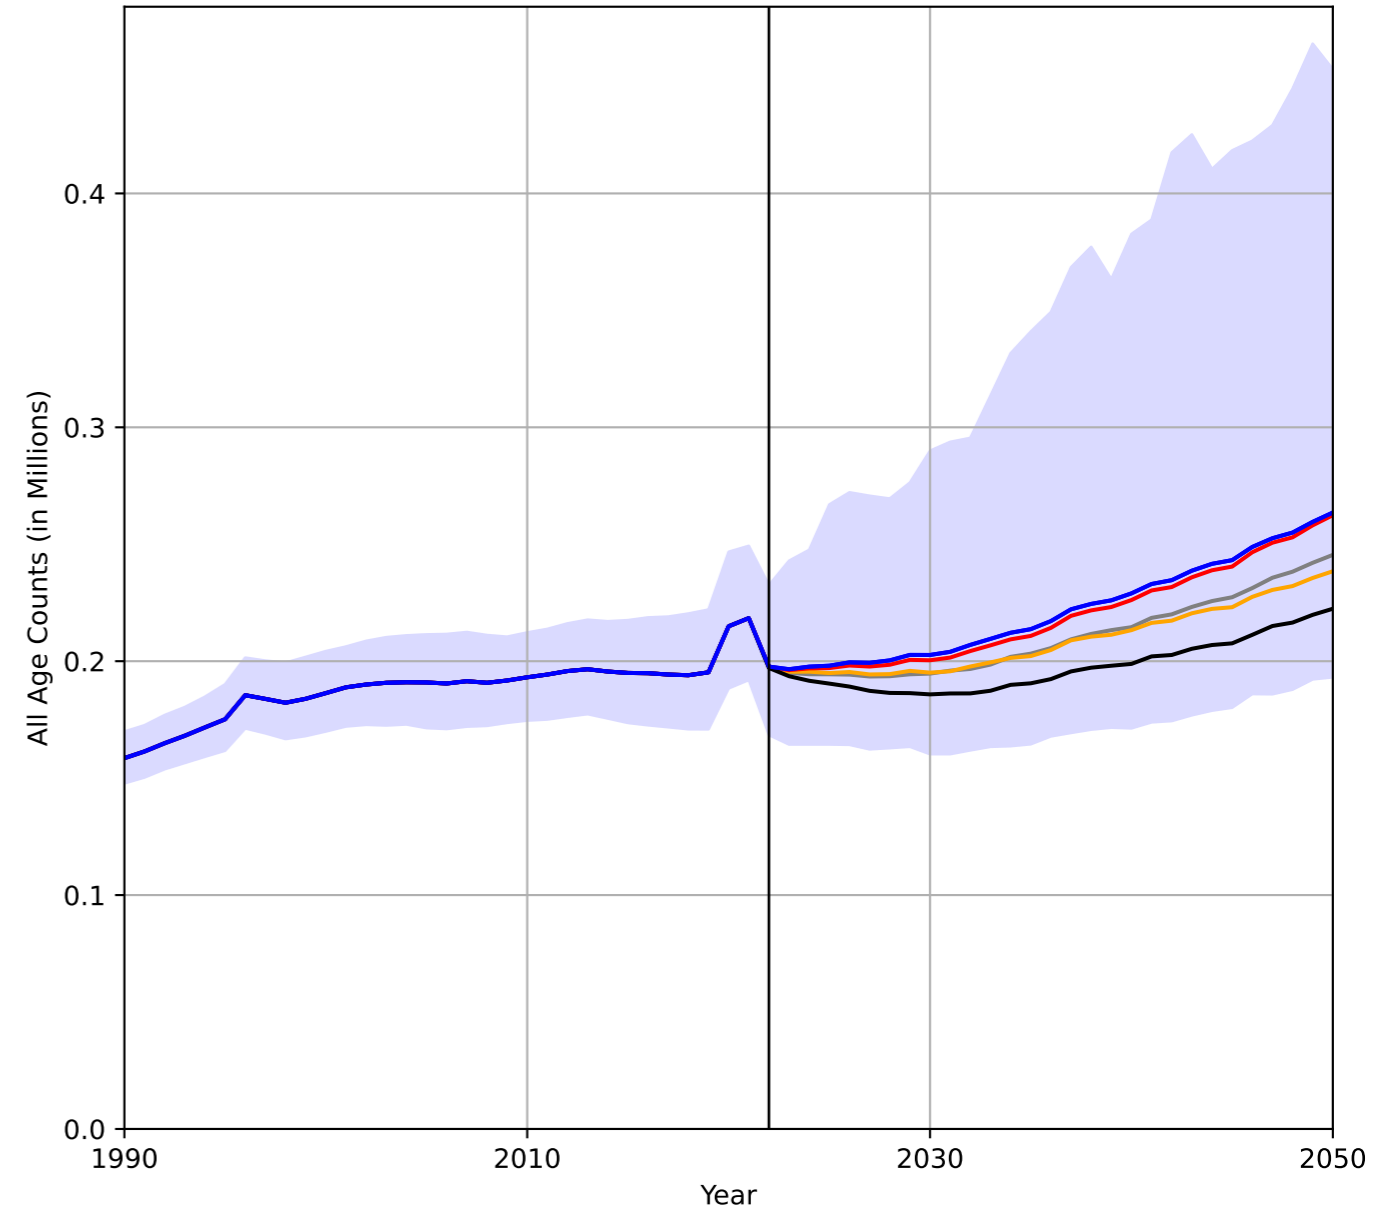

# Cabo Verde

Supplemental Results Figure S11. All-cause age standardised death rates (A) and all age death counts (B), for the past and for five future scenarios, 1990–2050

1831

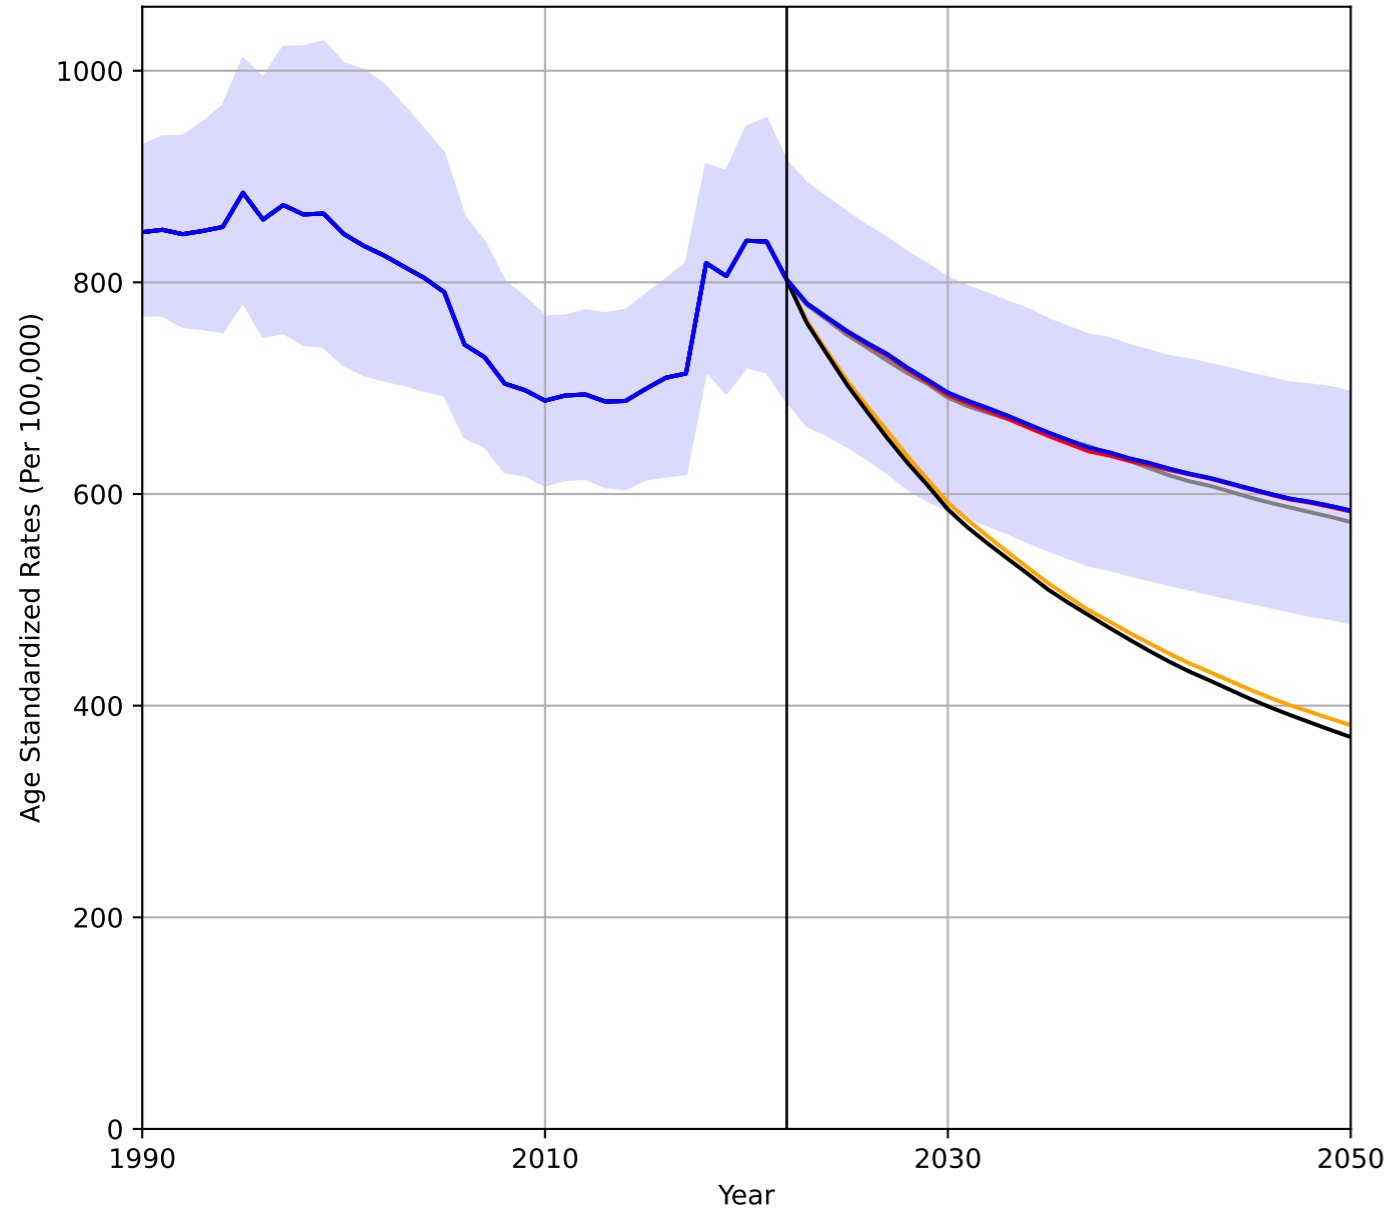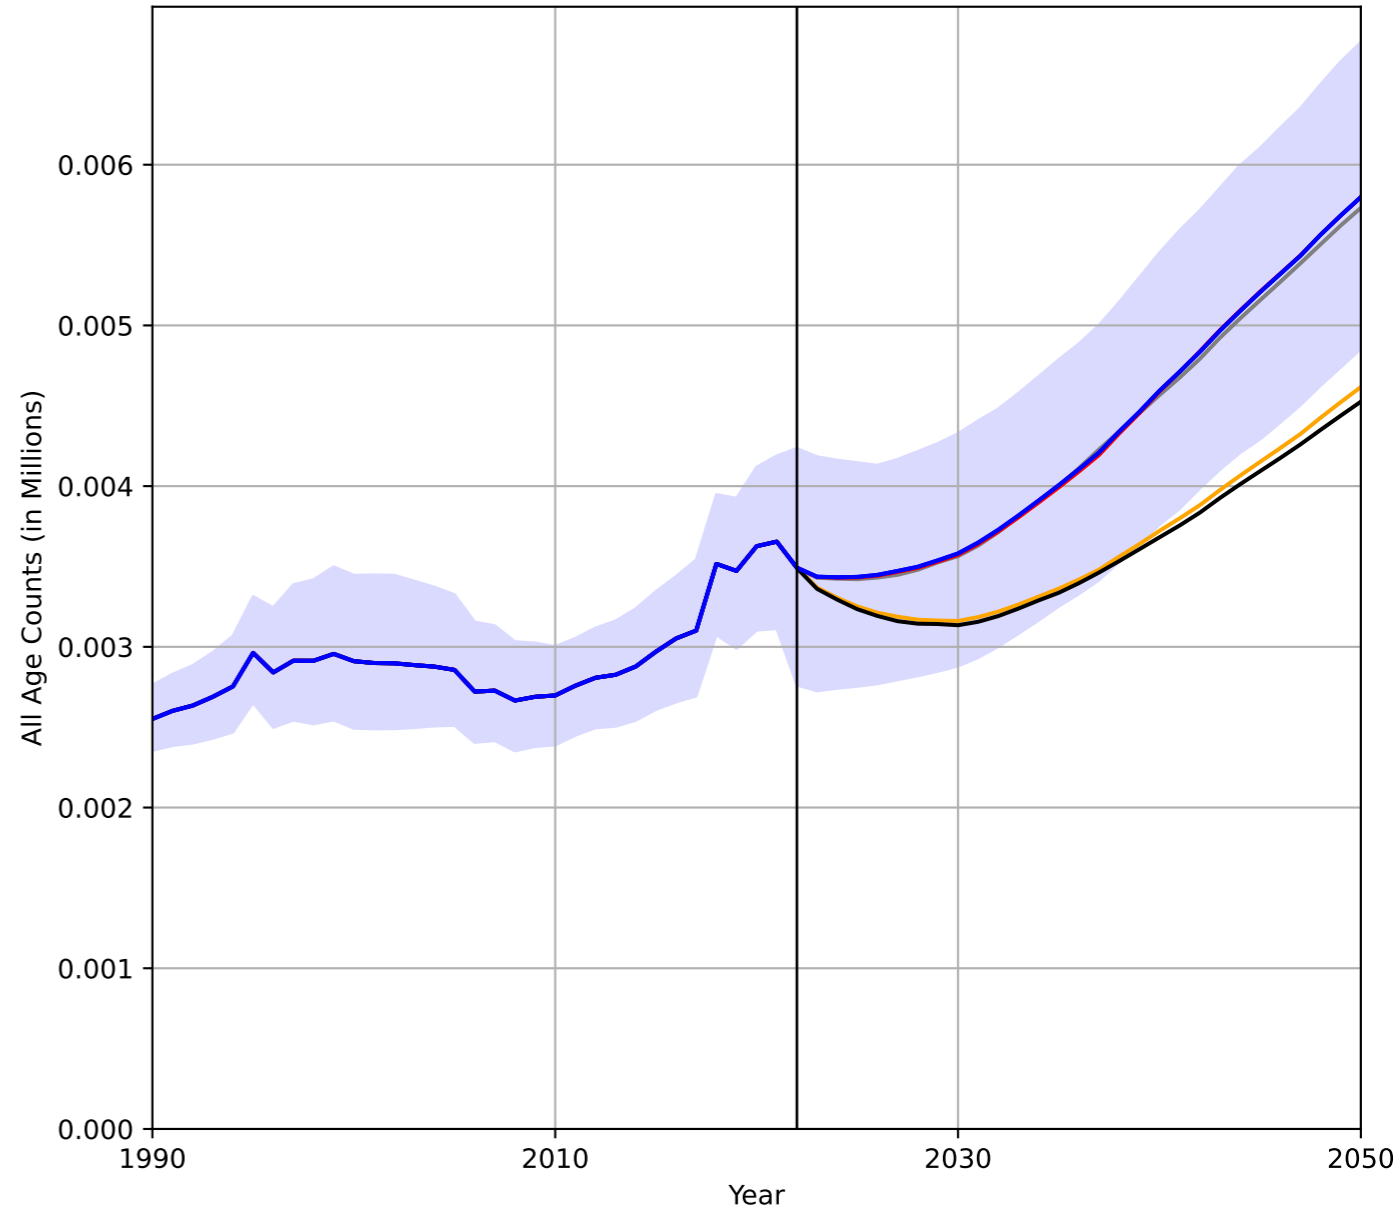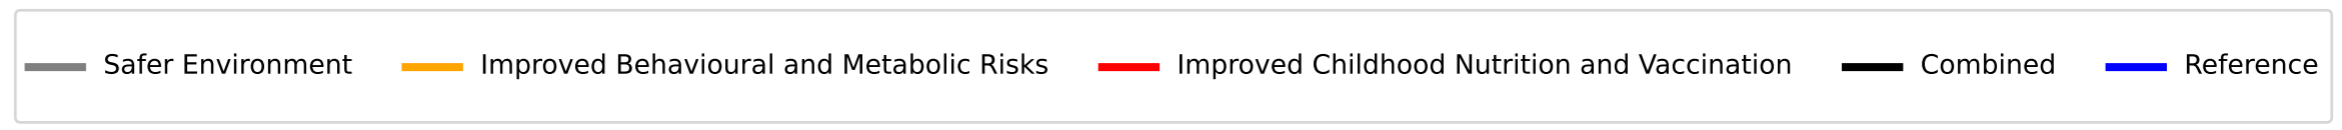



# Cameroon

Supplemental Results Figure S11. All-cause age standardised death rates (A) and all age death counts (B), for the past and for five future scenarios, 1990–2050

1832

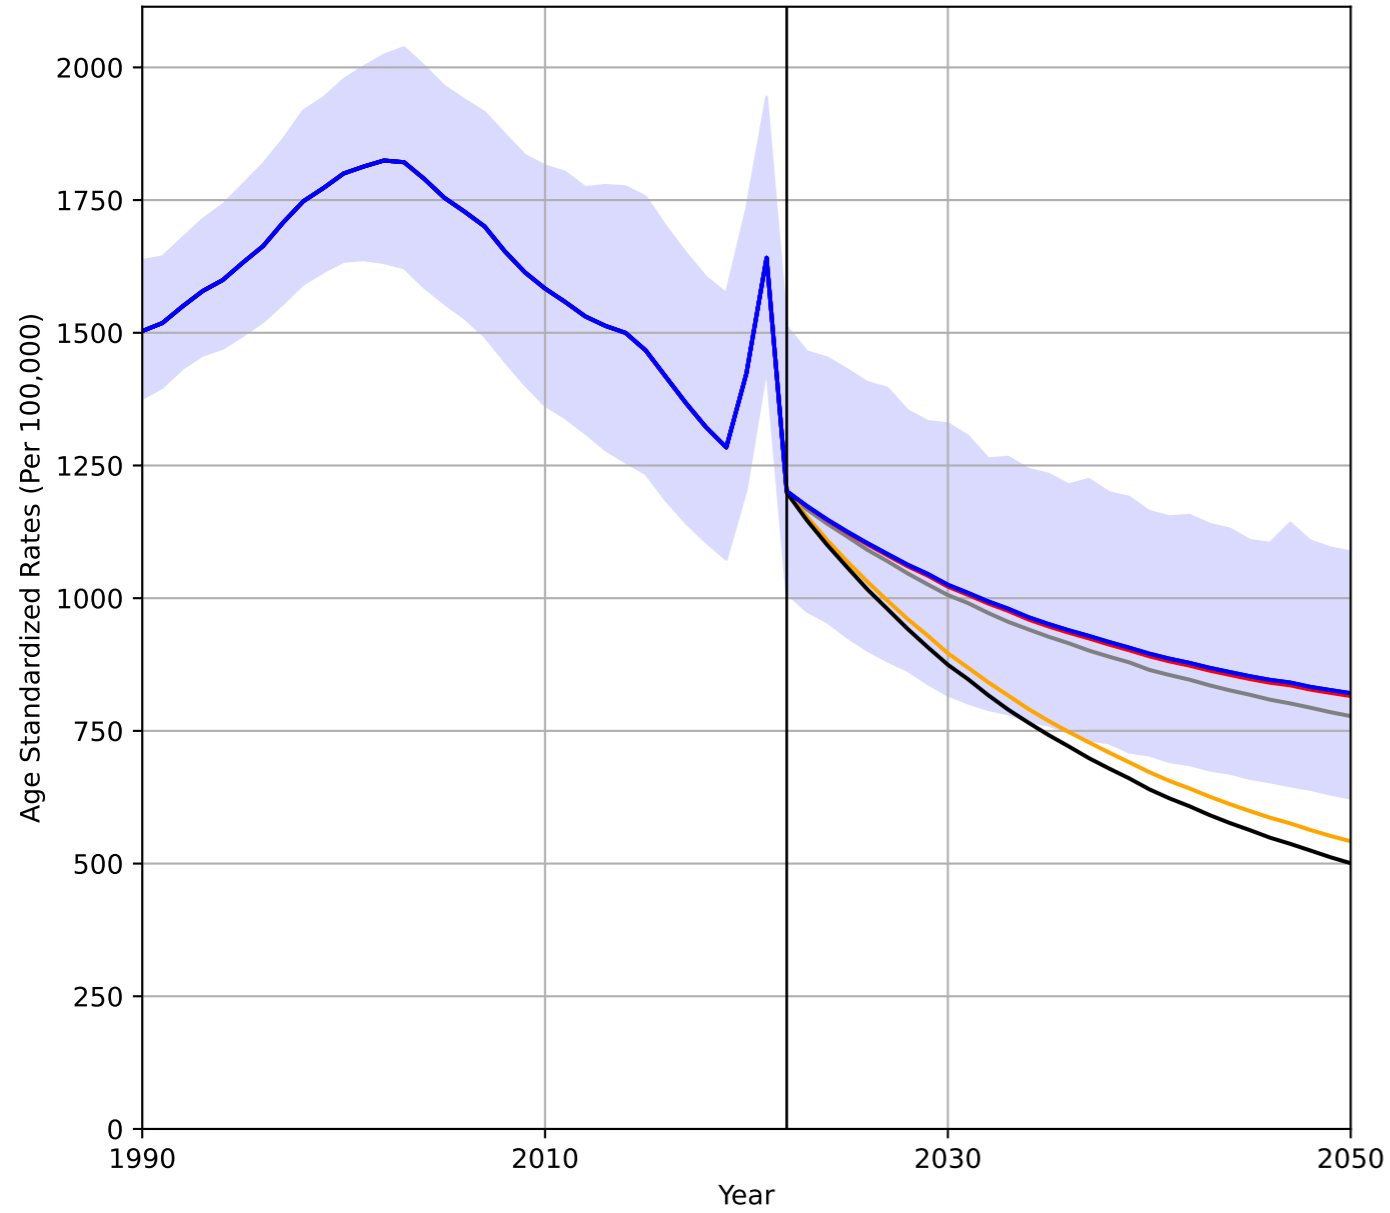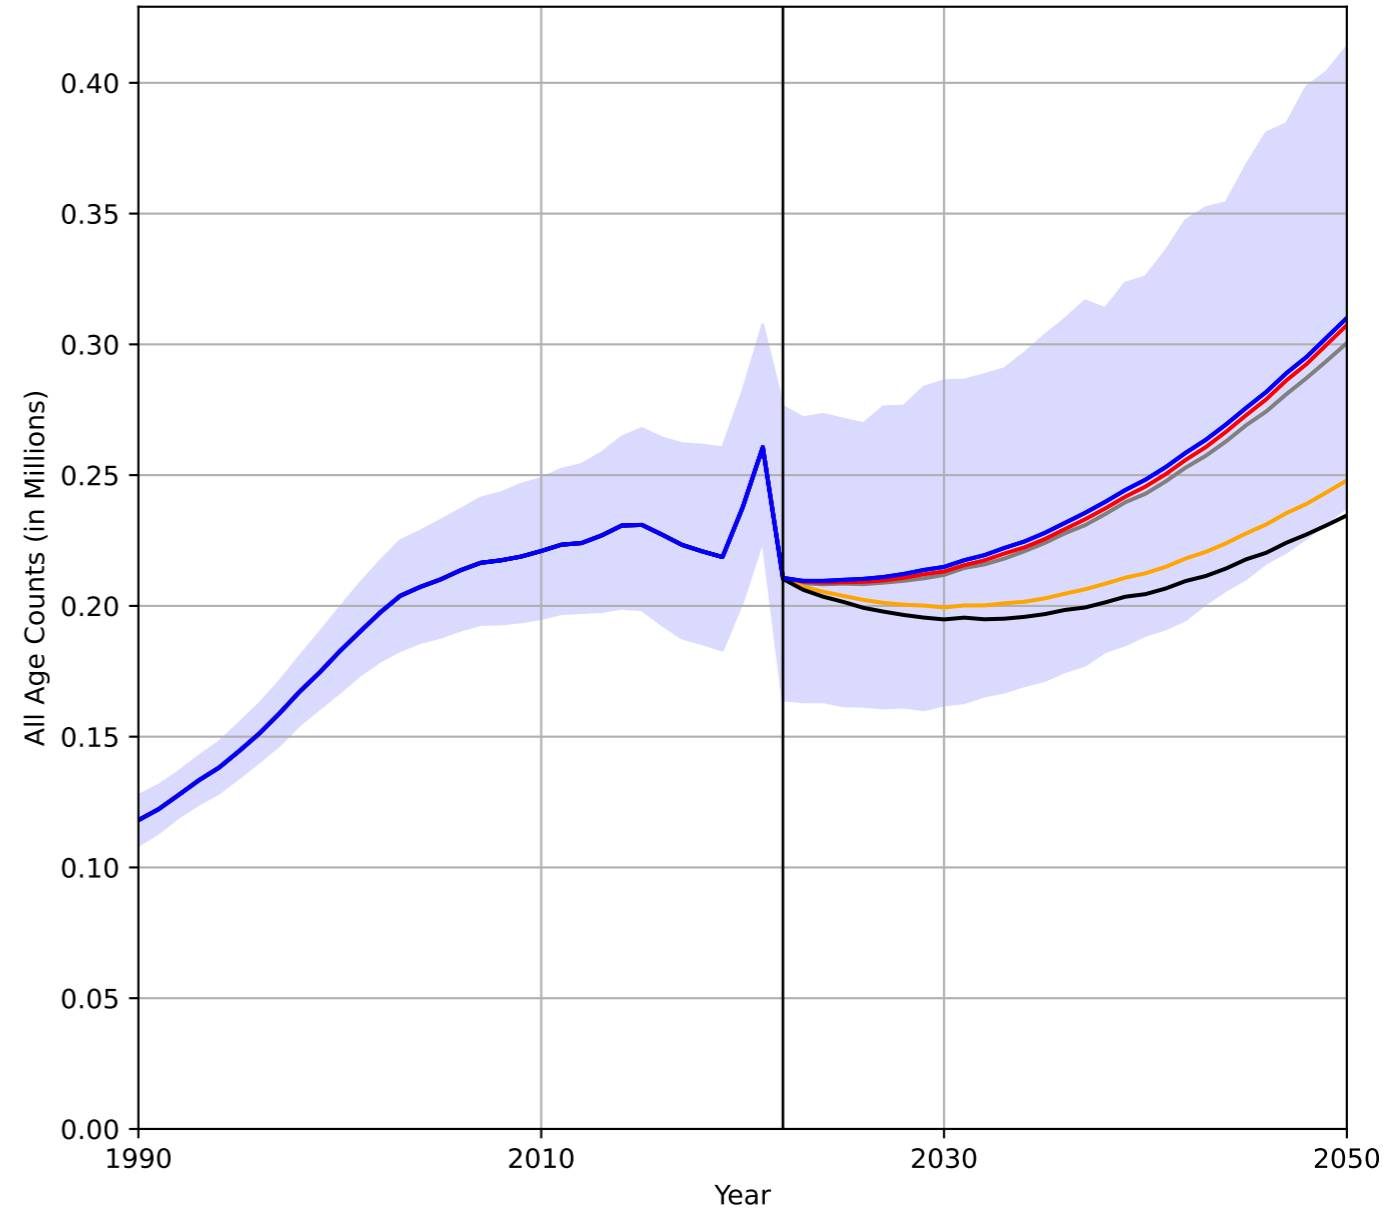

# Chad

Supplemental Results Figure S11. All-cause age standardised death rates (A) and all age death counts (B), for the past and for five future scenarios, 1990–2050

1833

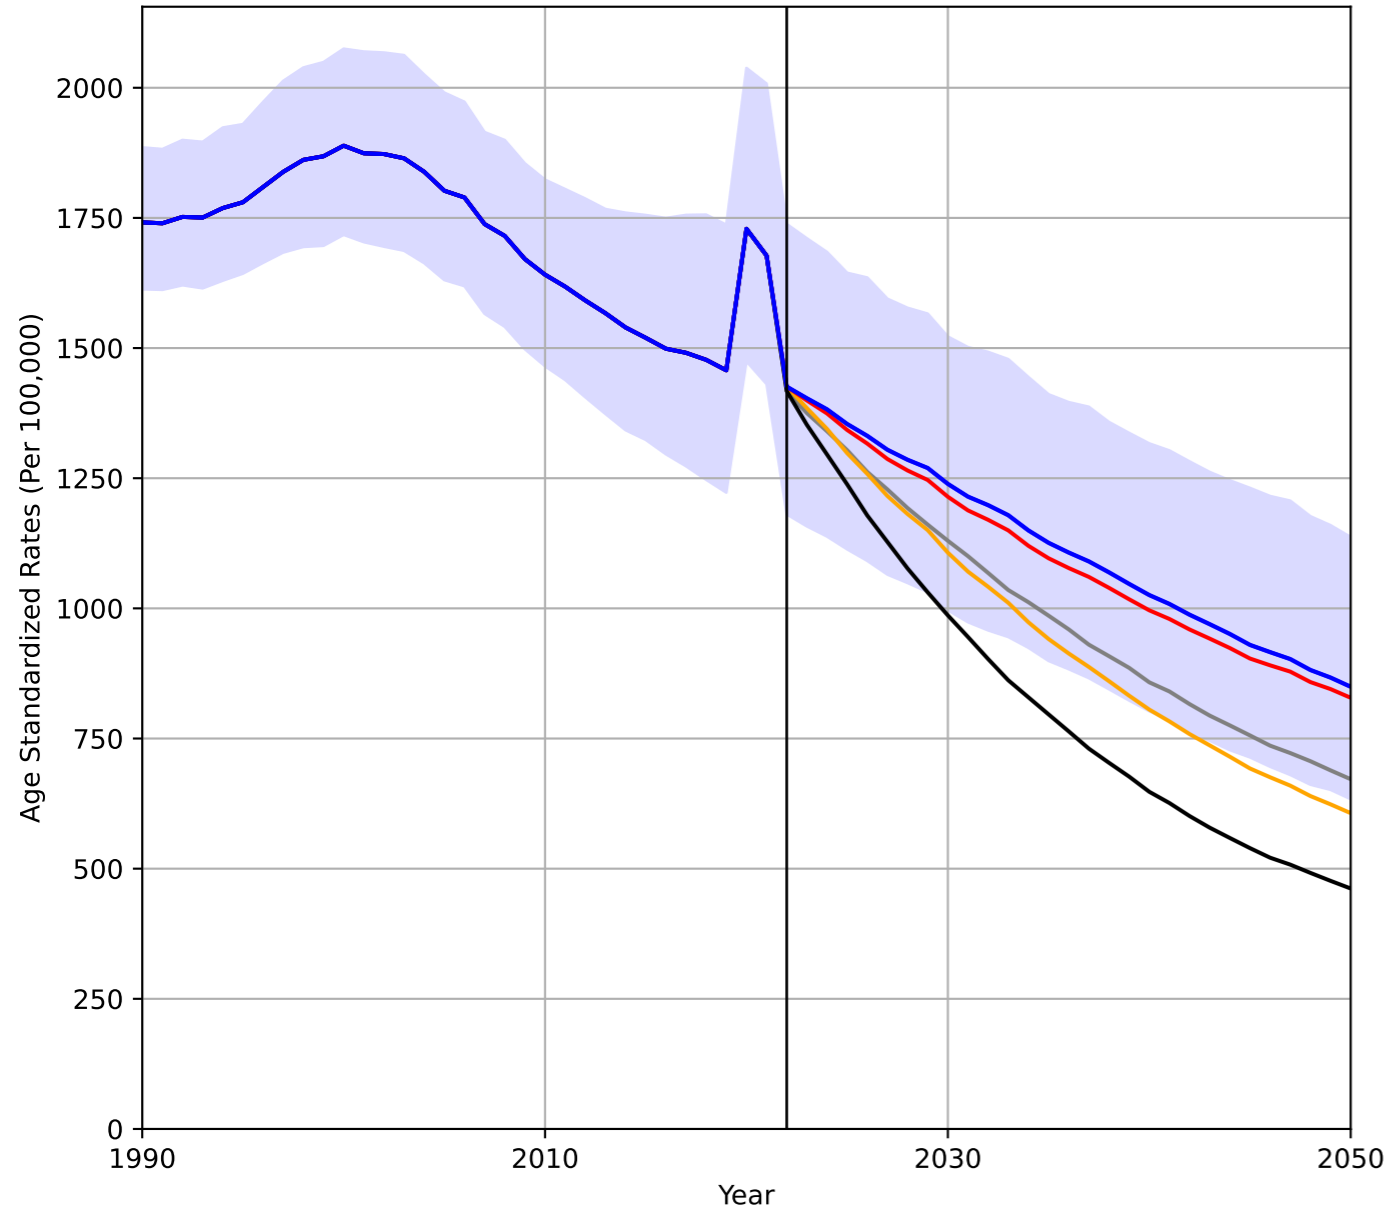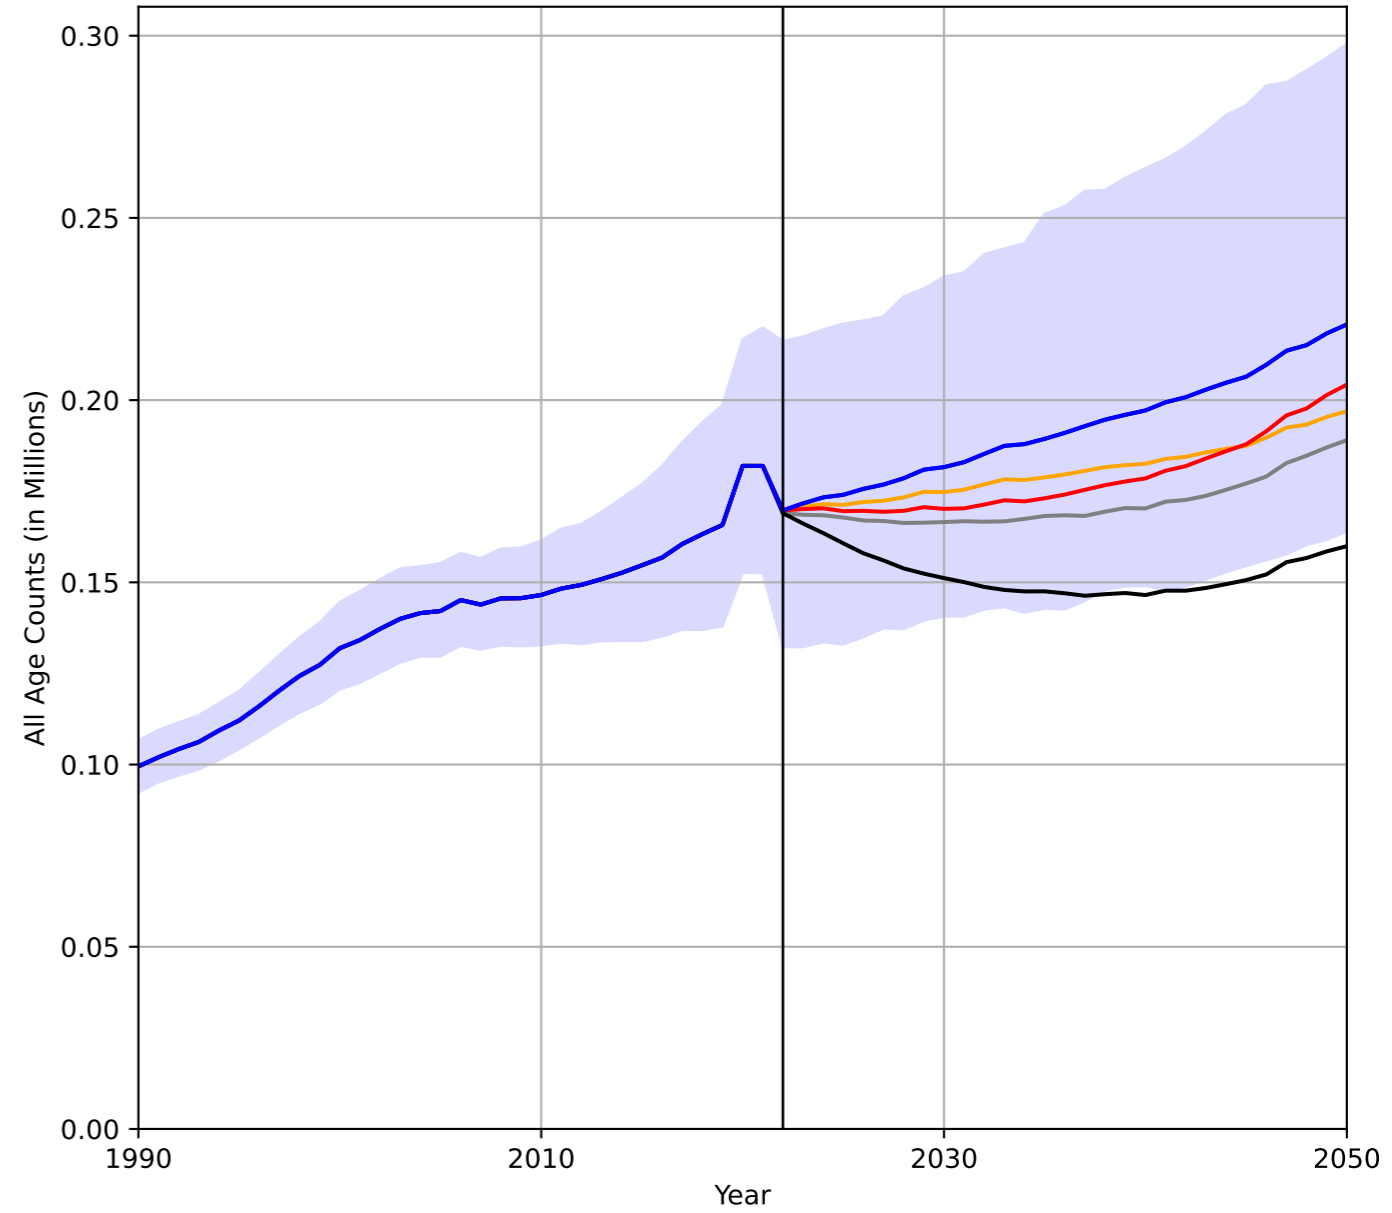

# Côte D'Ivoire

Supplemental Results Figure S11. All-cause age standardised death rates (A) and all age death counts (B), for the past and for five future scenarios, 1990–2050

1834

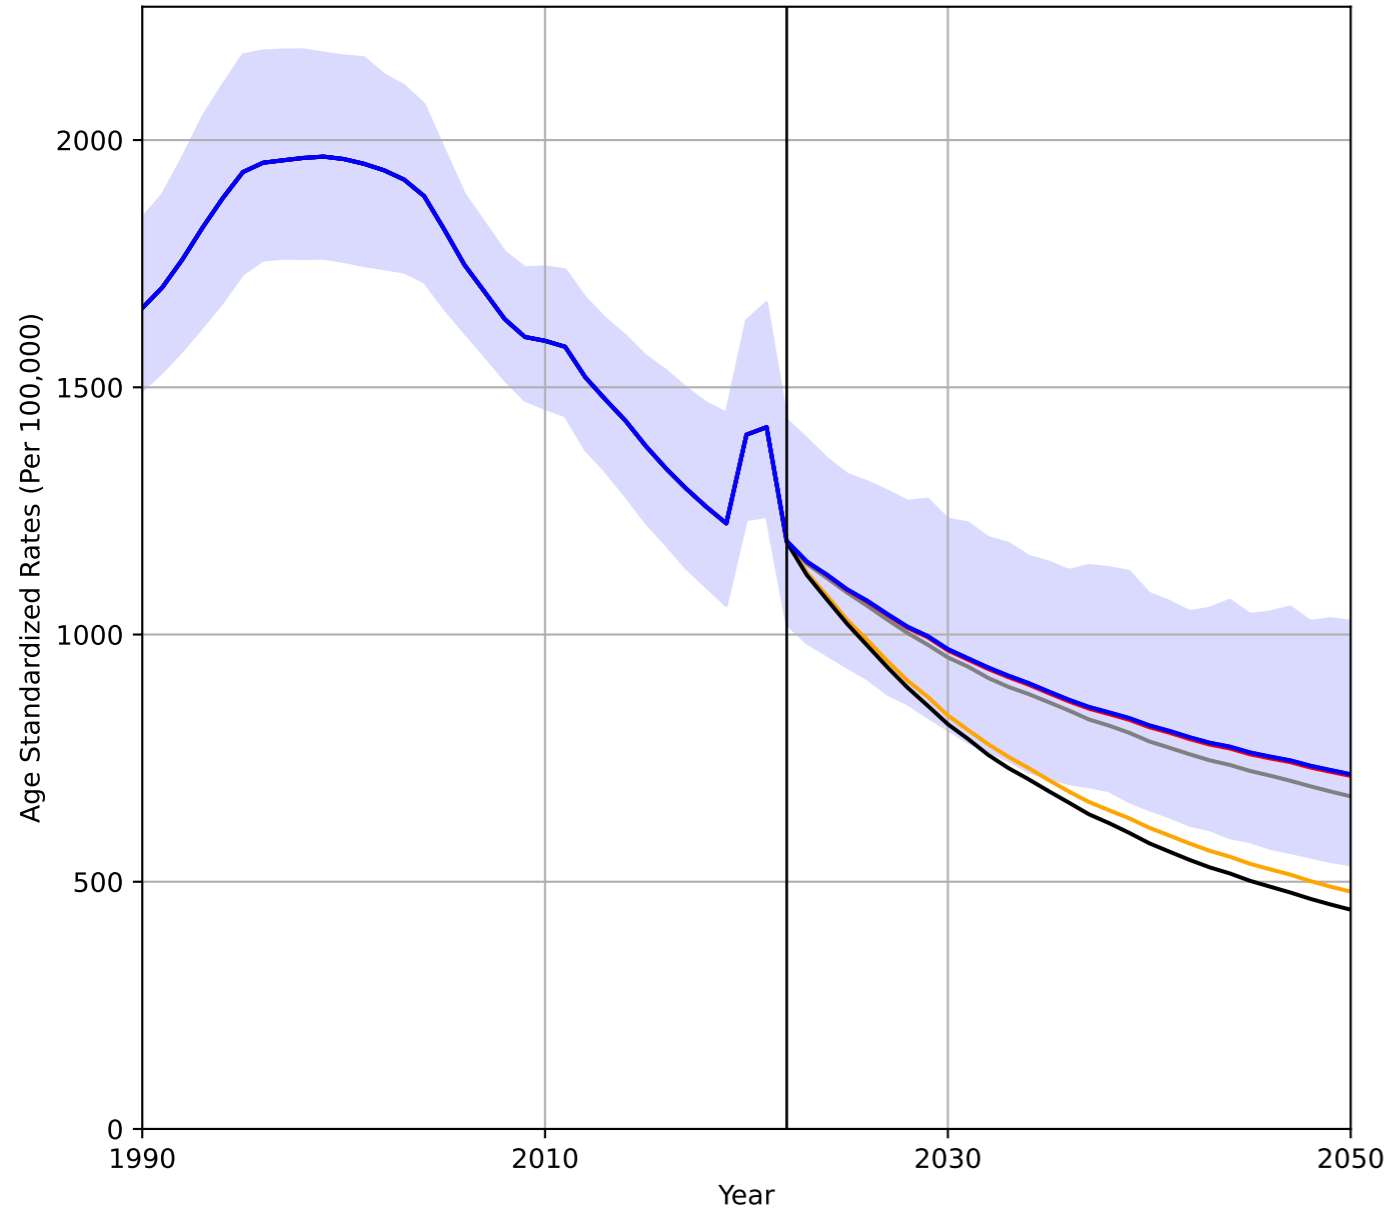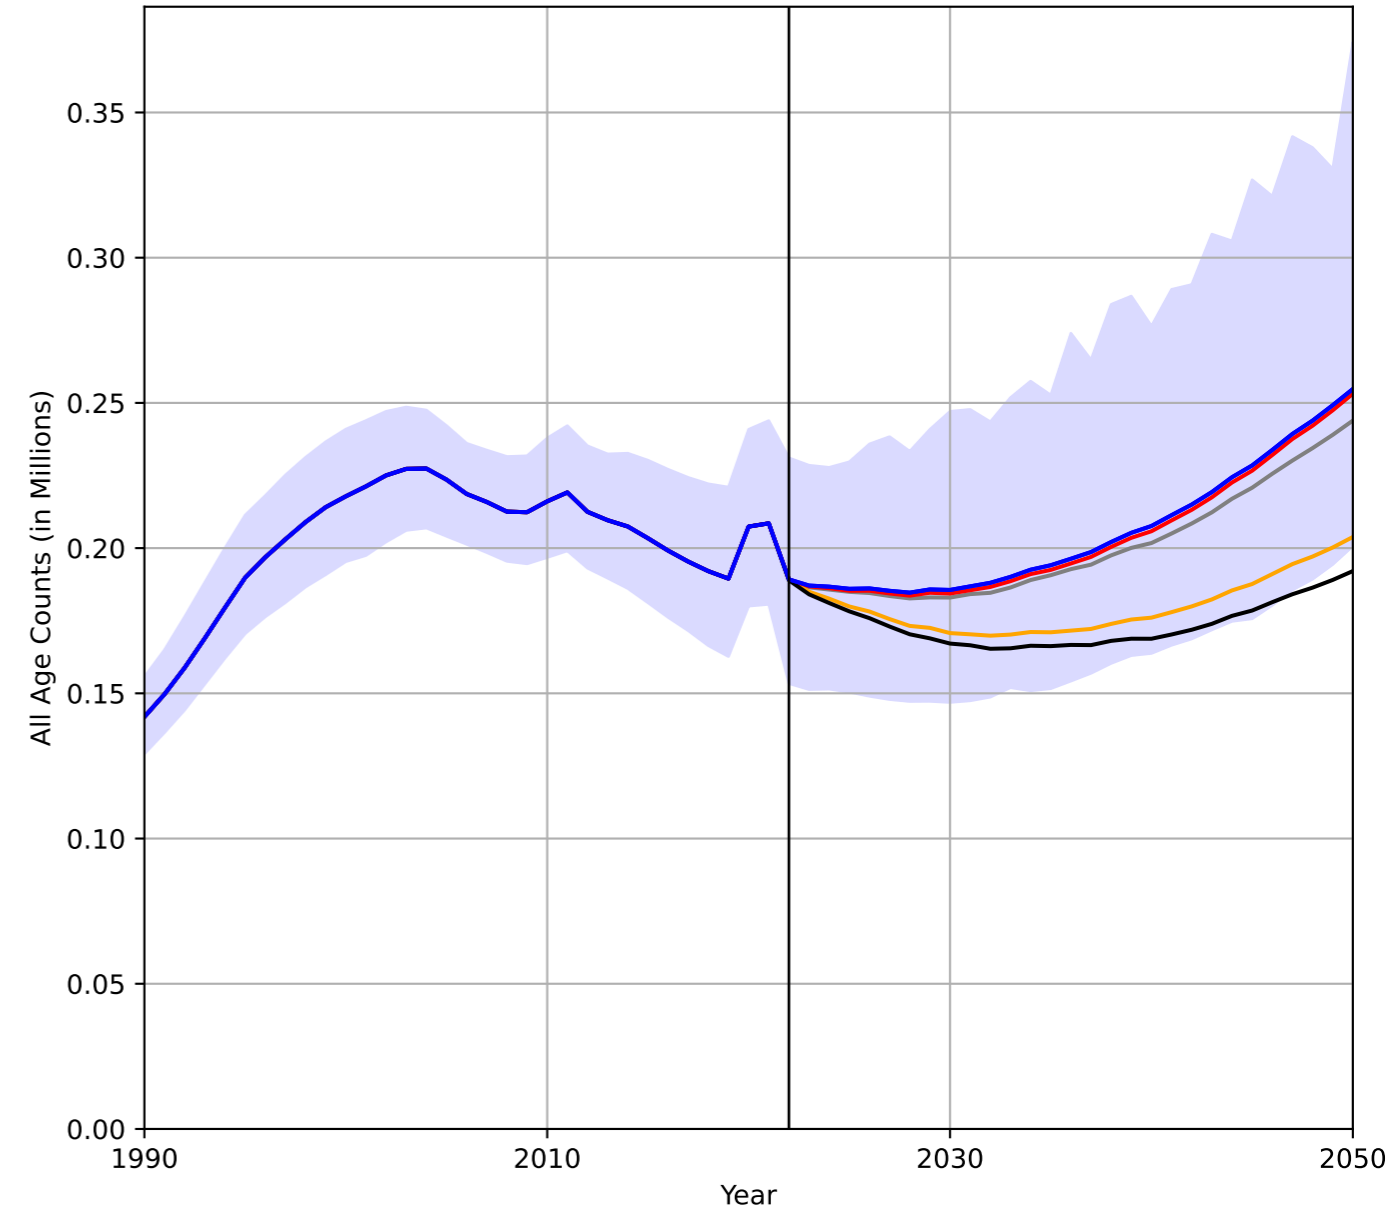

# The Gambia

Supplemental Results Figure S11. All-cause age standardised death rates (A) and all age death counts (B), for the past and for five future scenarios, 1990–2050

1835

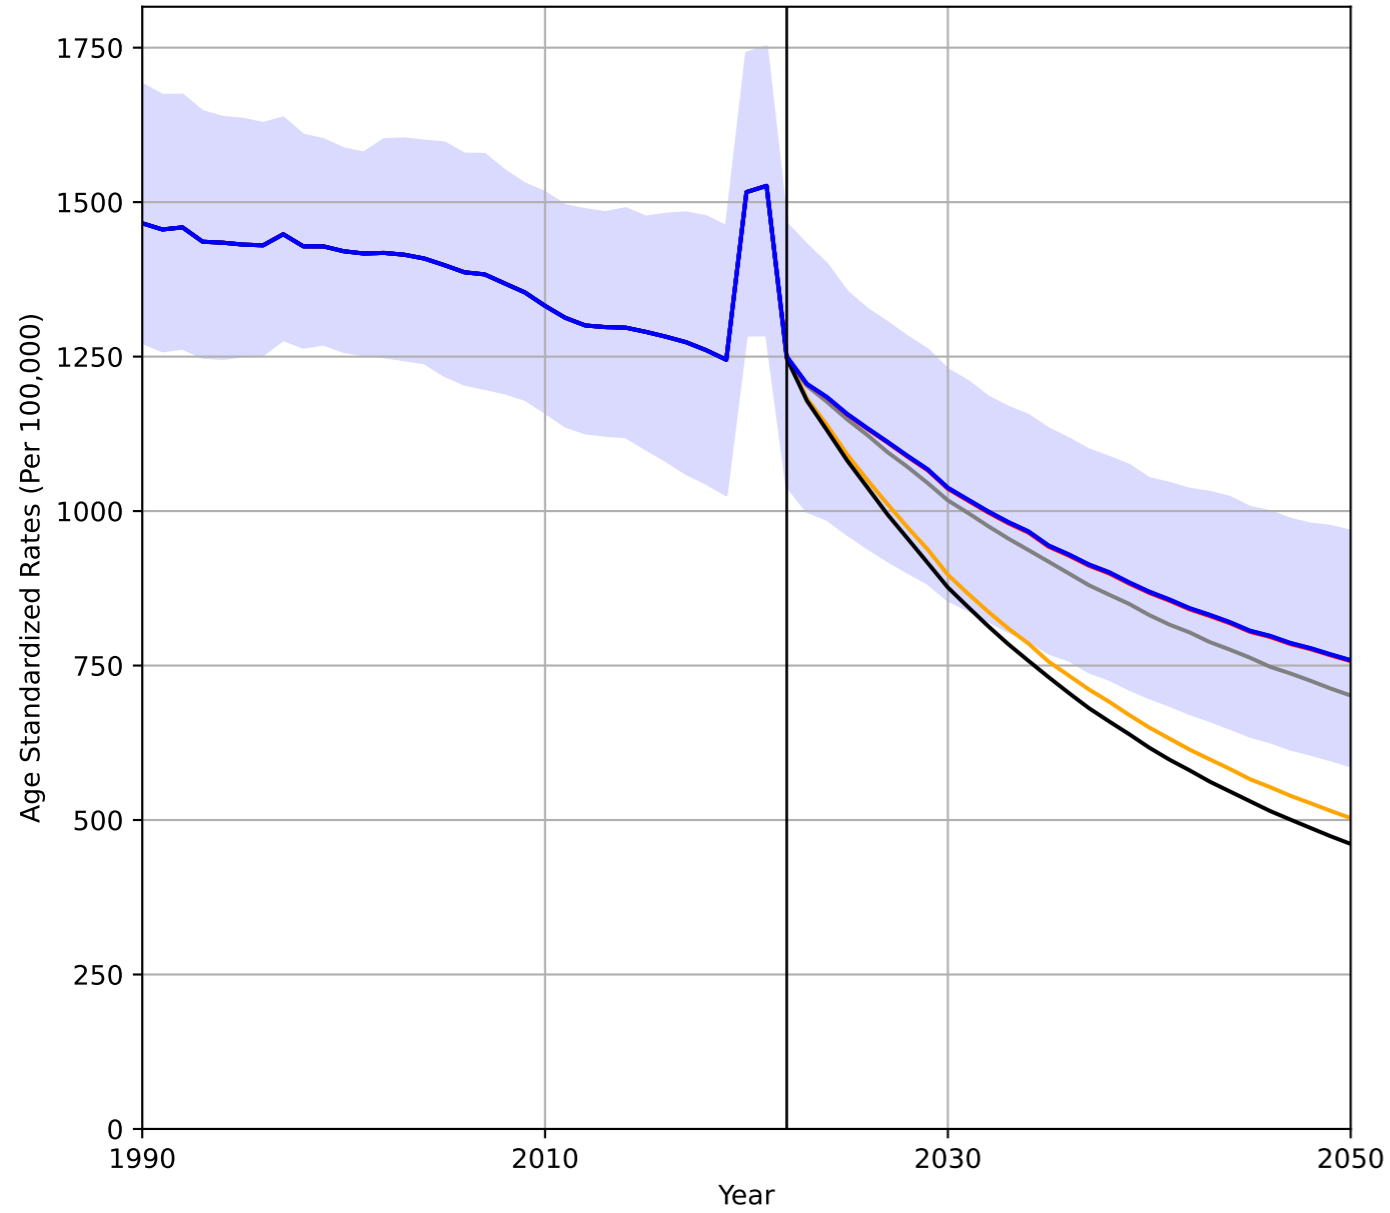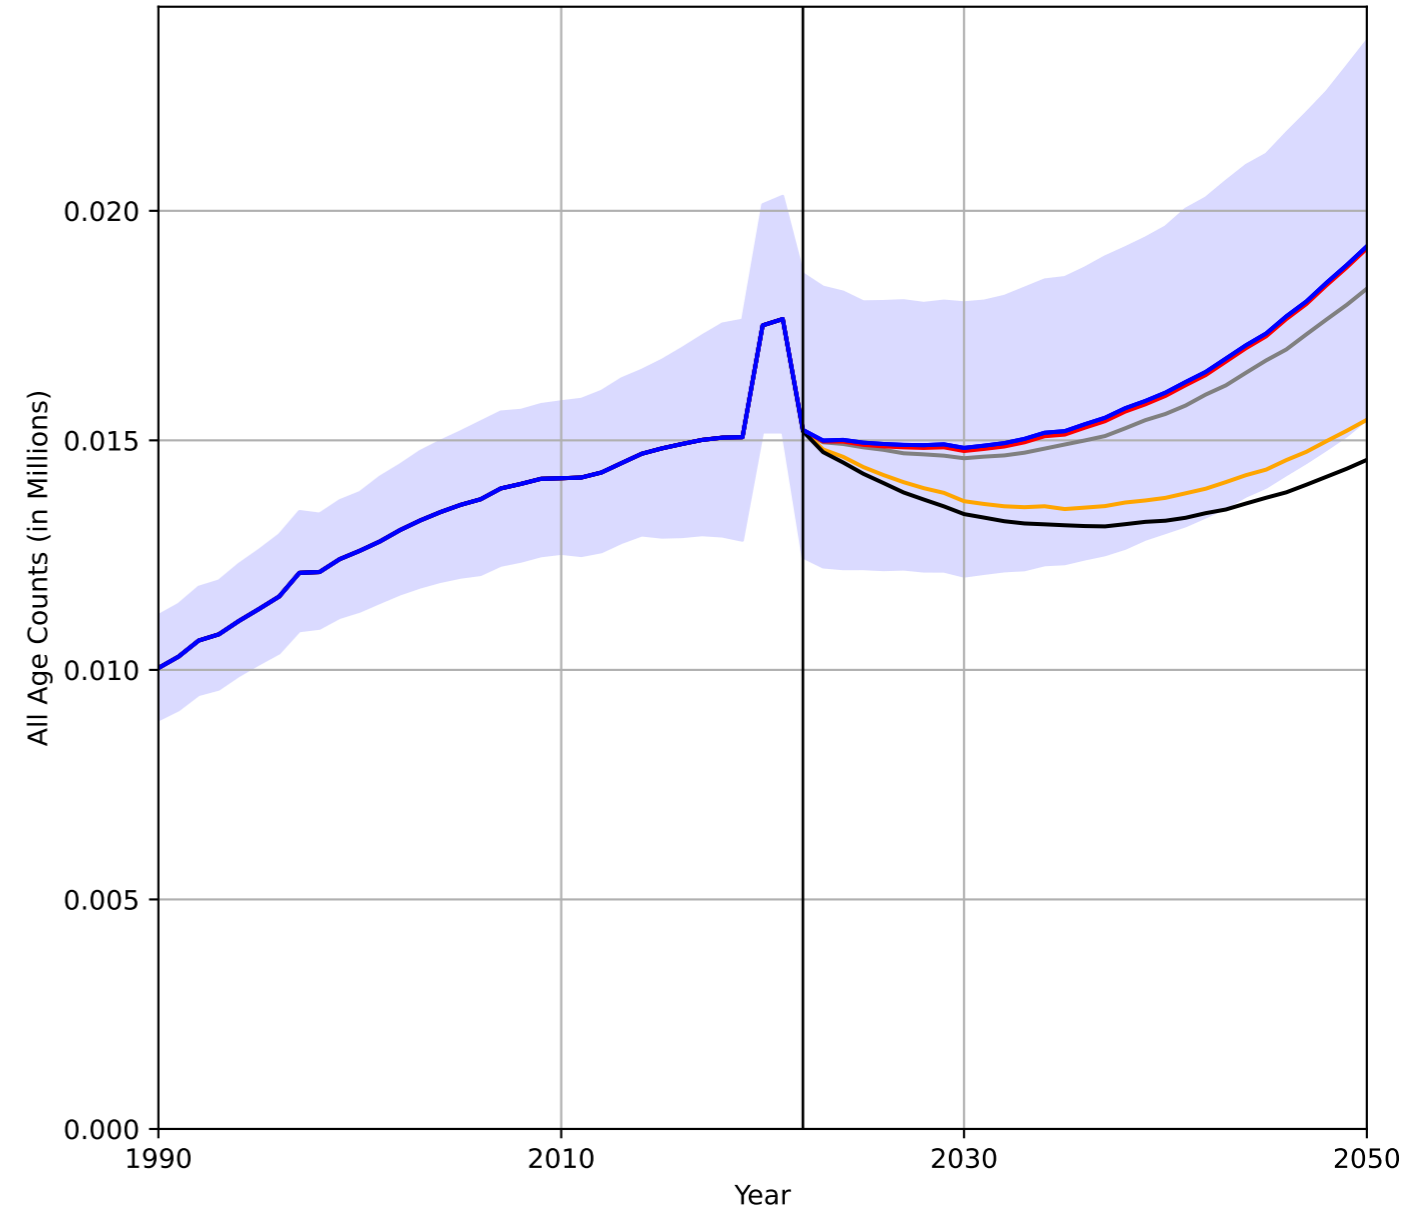

# Ghana

Supplemental Results Figure S11. All-cause age standardised death rates (A) and all age death counts (B), for the past and for five future scenarios, 1990–2050

1836

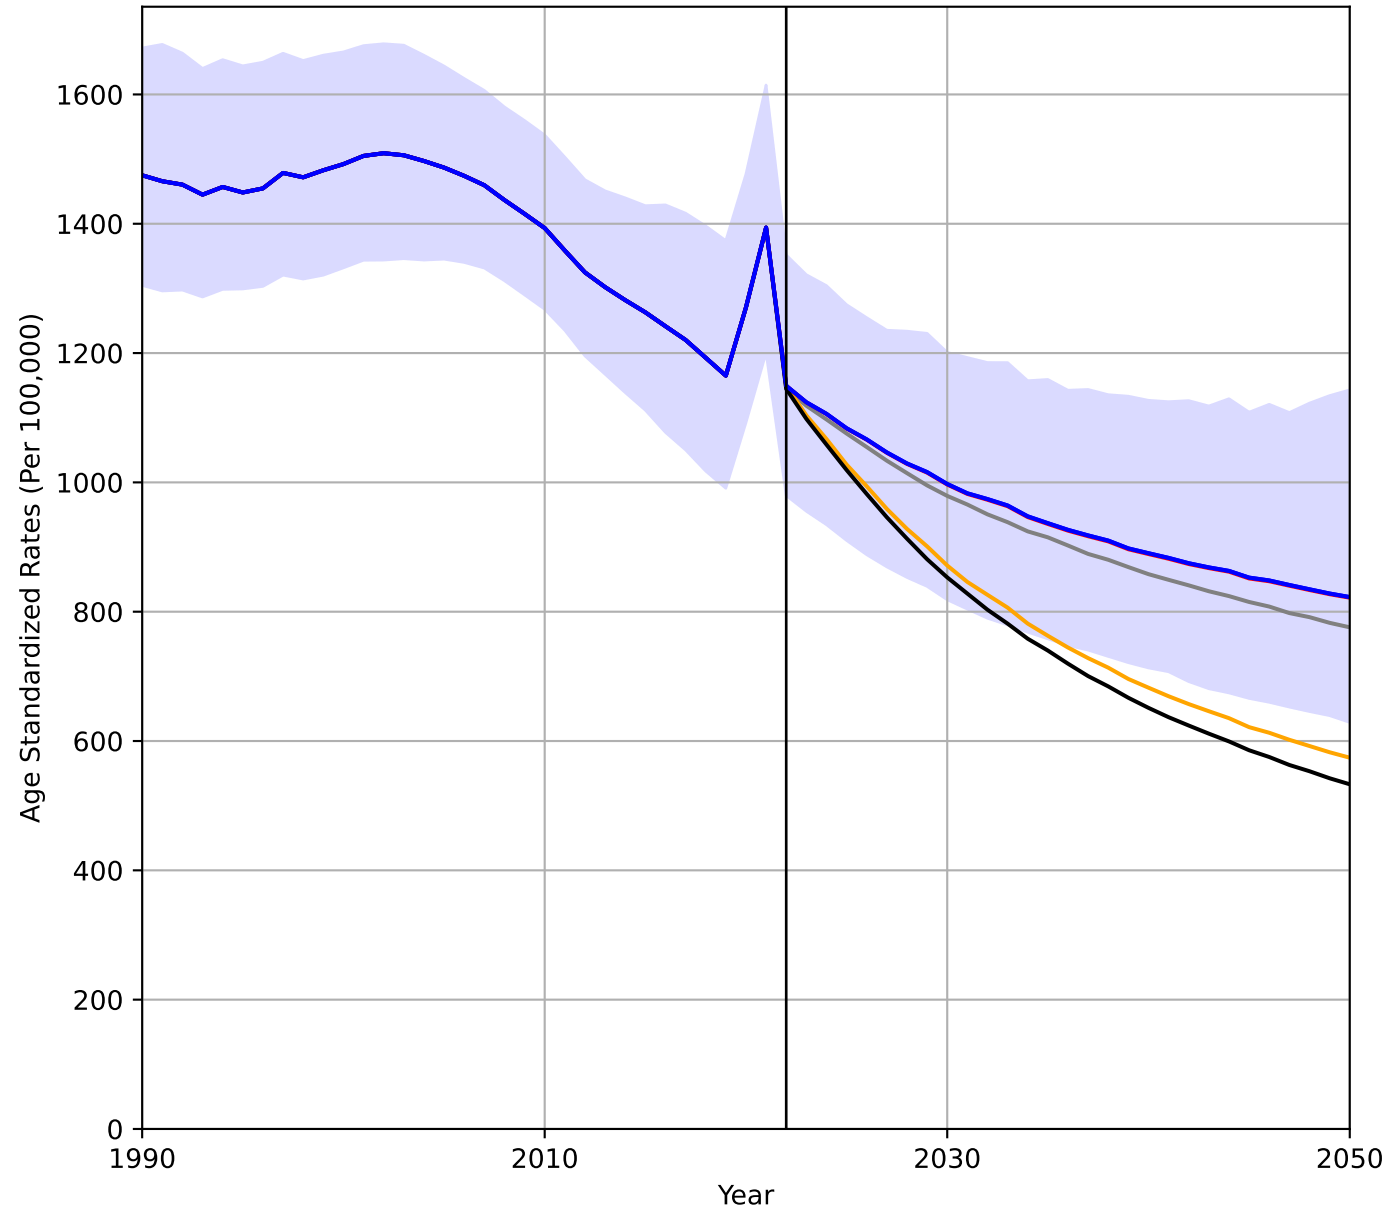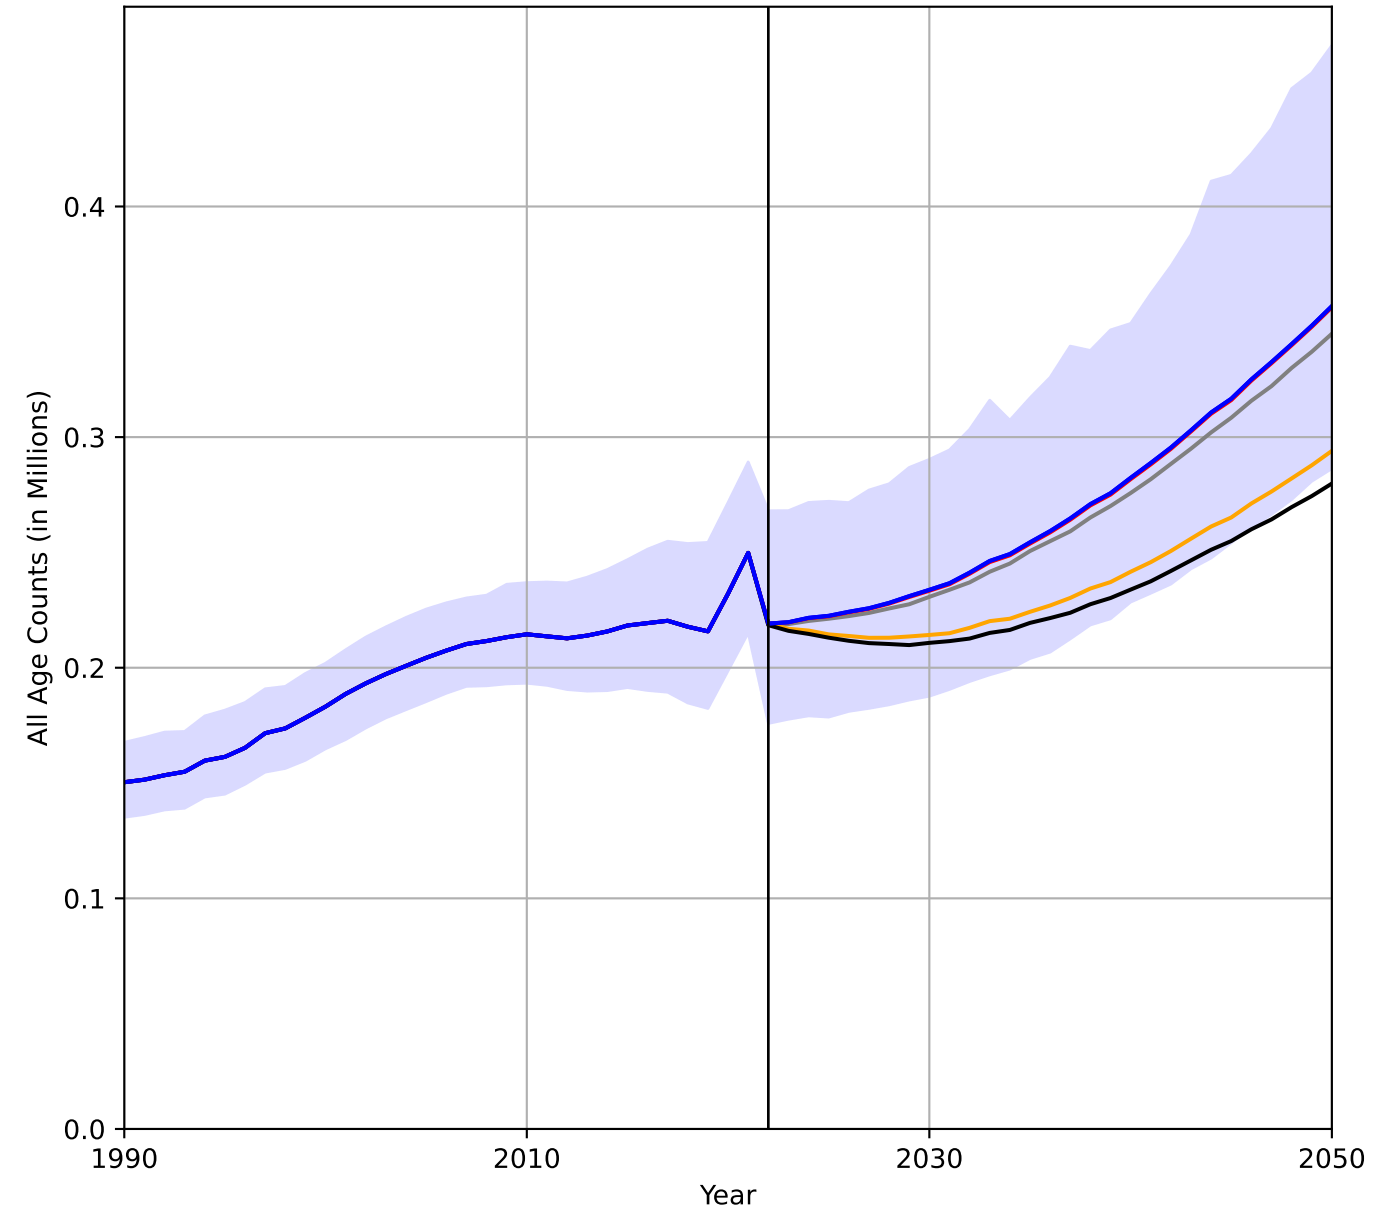

# Guinea

Supplemental Results Figure S11. All-cause age standardised death rates (A) and all age death counts (B), for the past and for five future scenarios, 1990–2050

1837

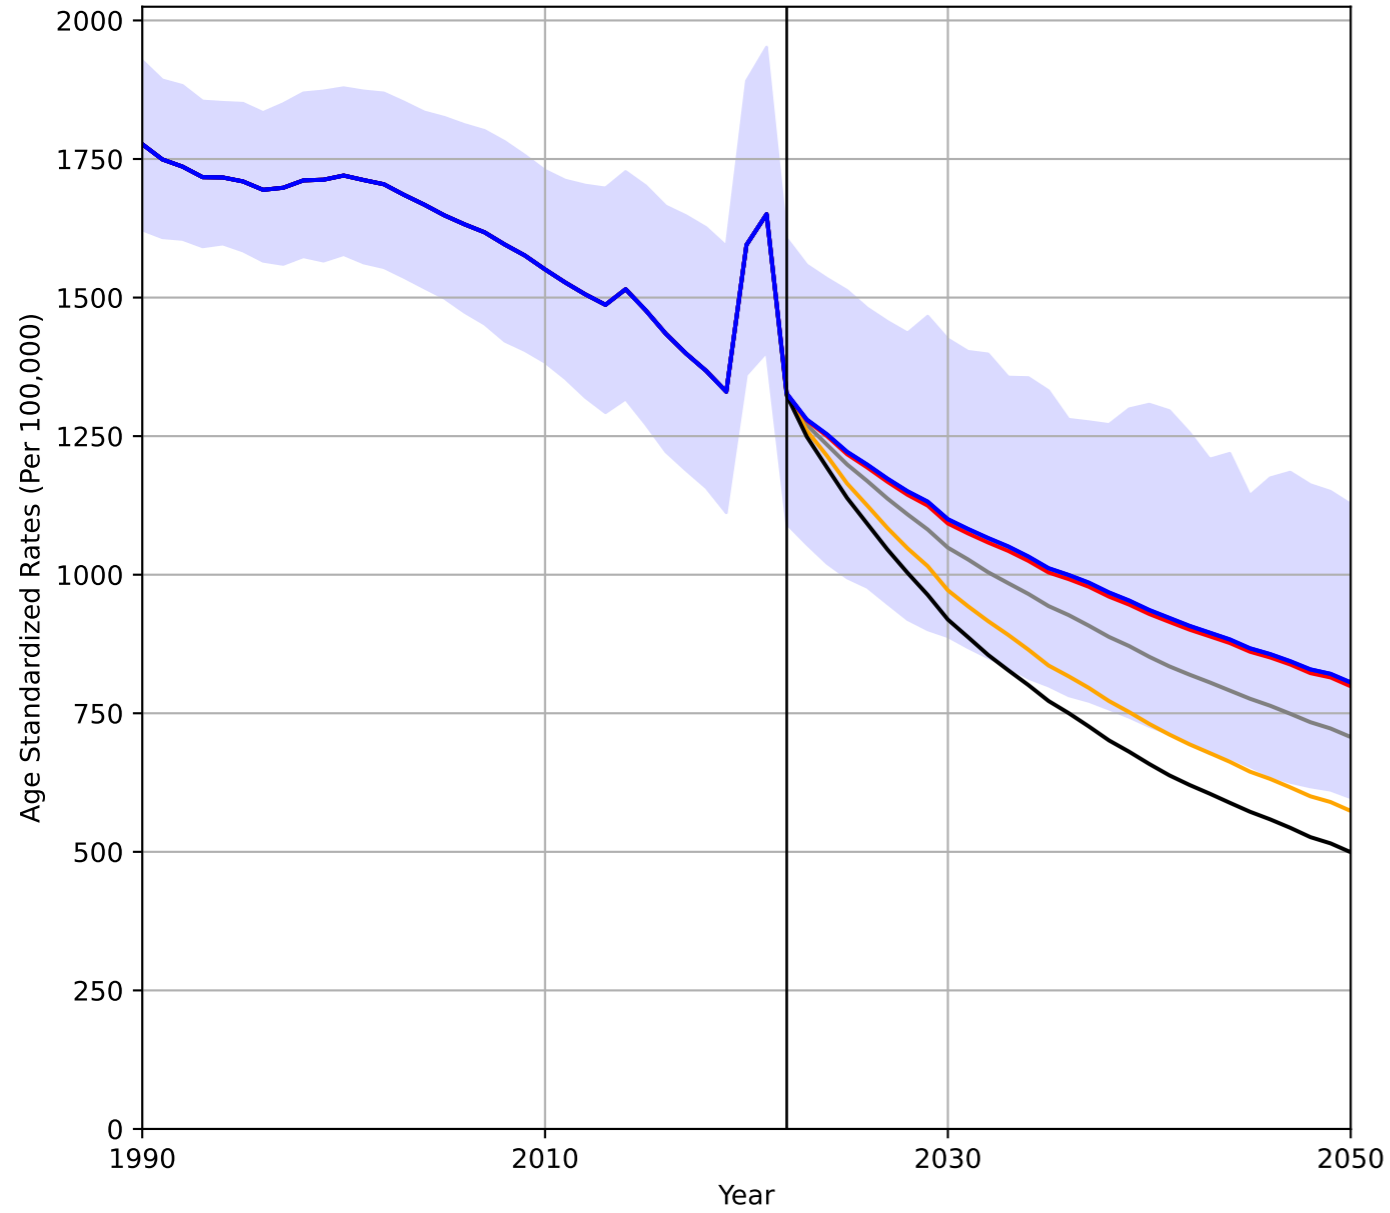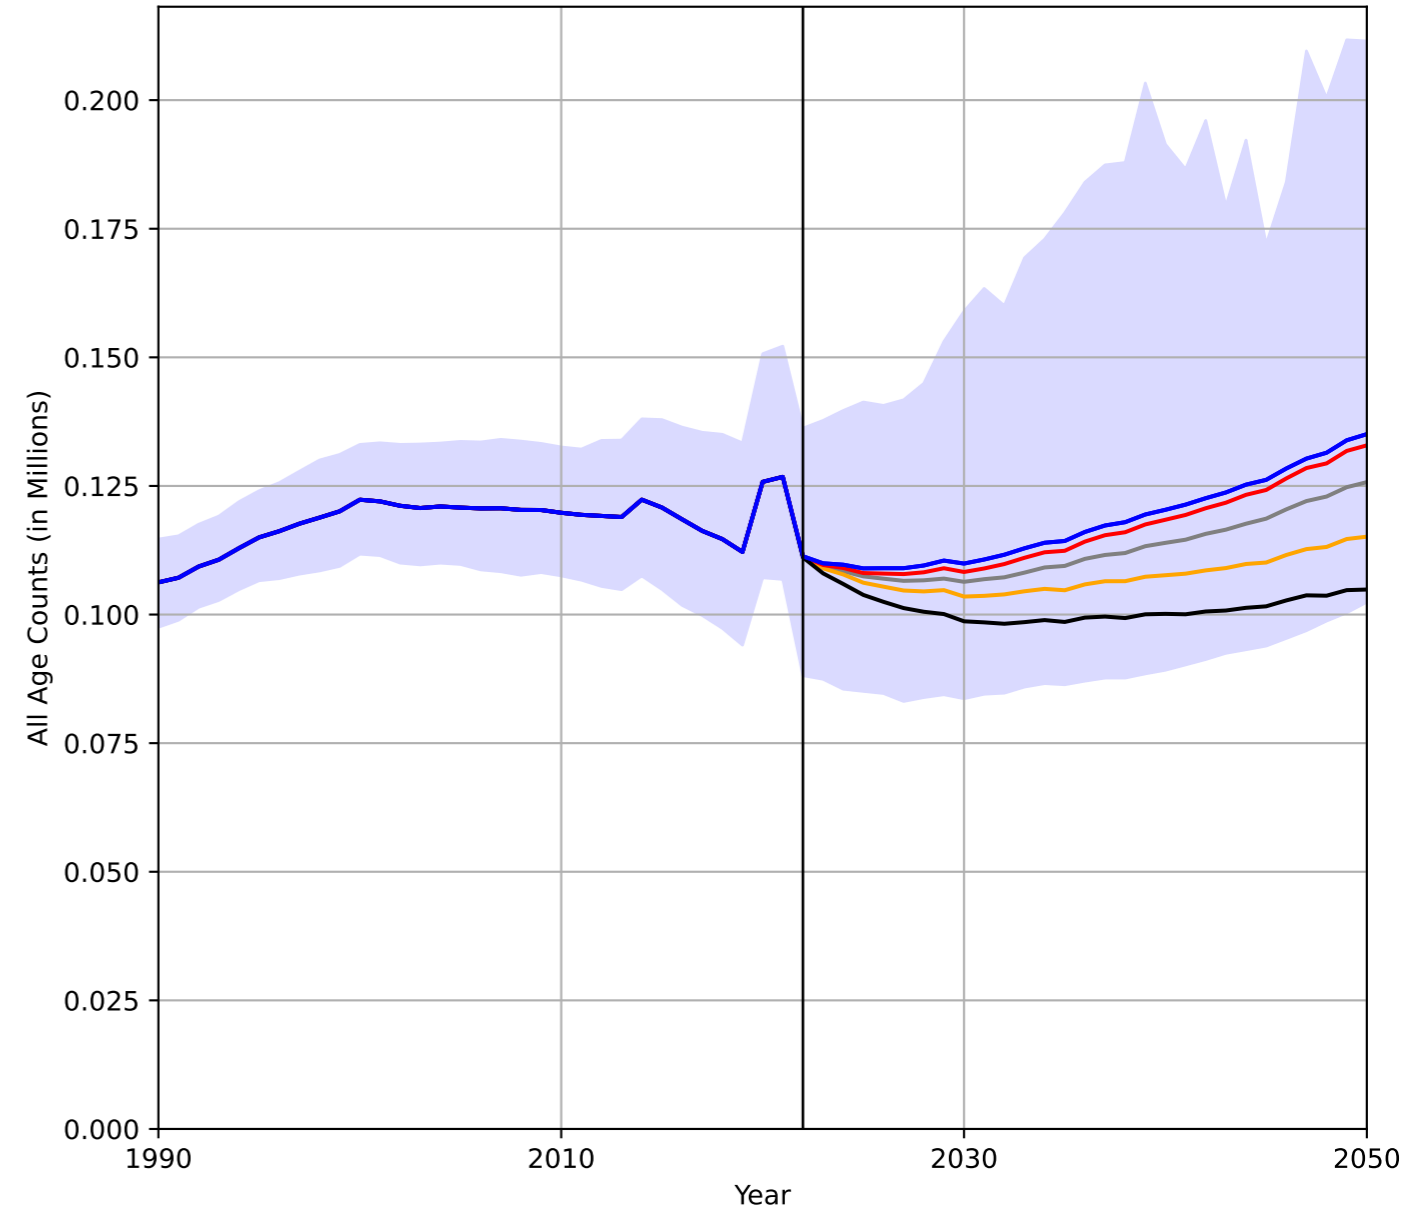

# Guinea-Bissau

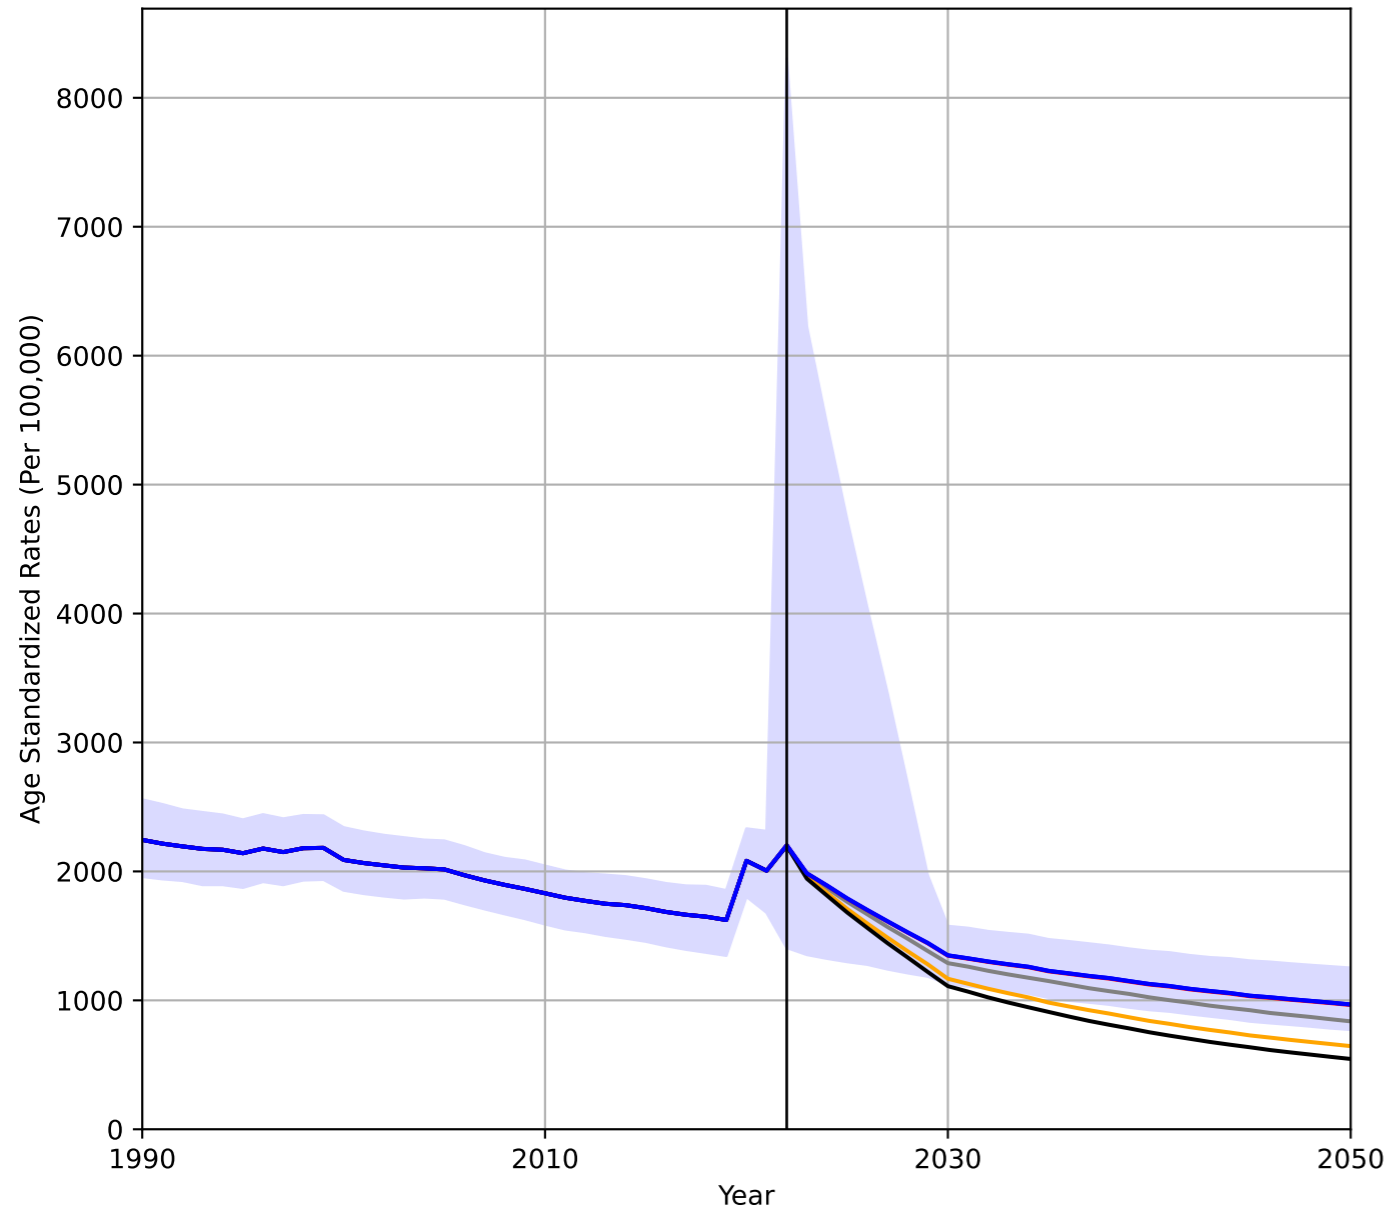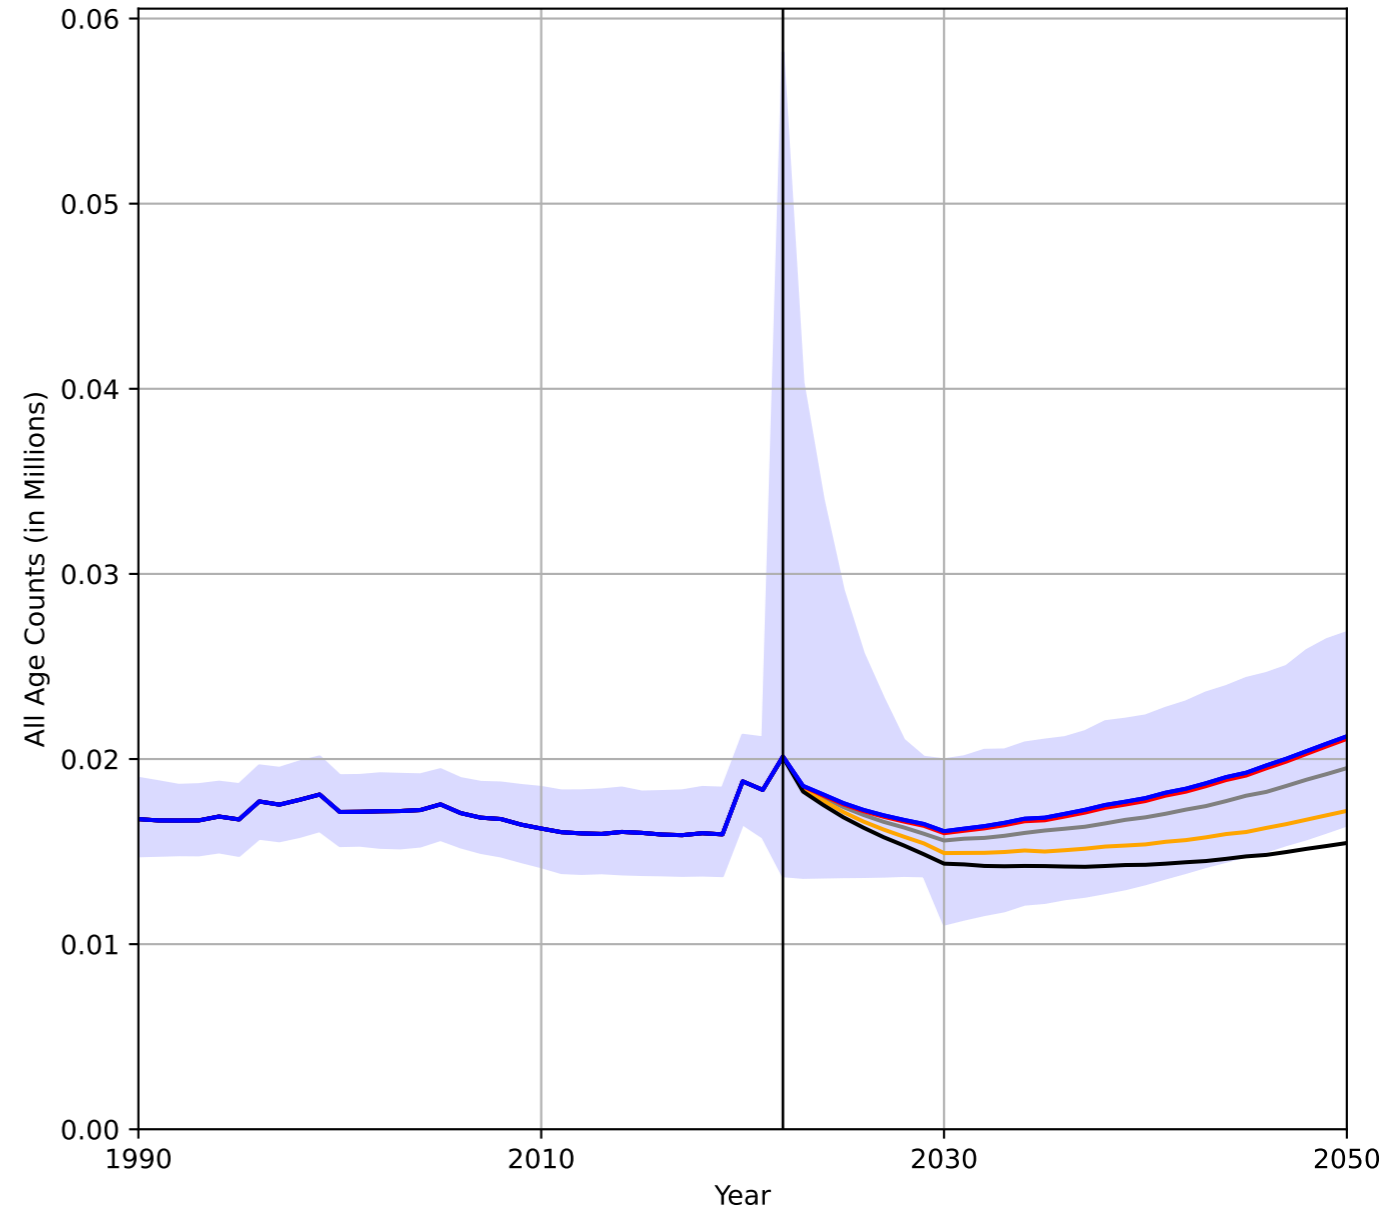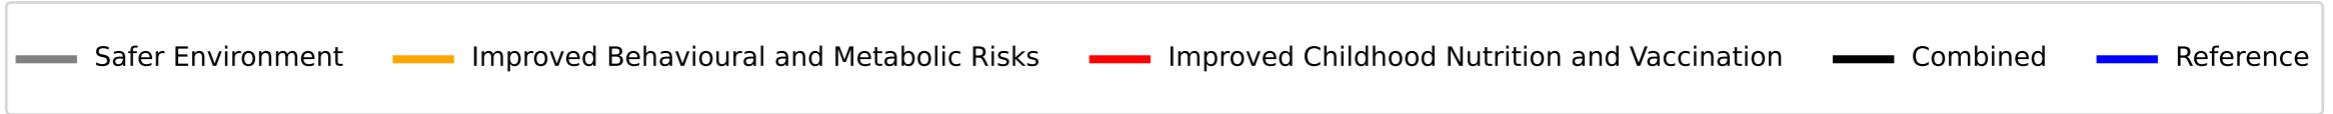

# Liberia

Supplemental Results Figure S11. All-cause age standardised death rates (A) and all age death counts (B), for the past and for five future scenarios, 1990–2050

1839

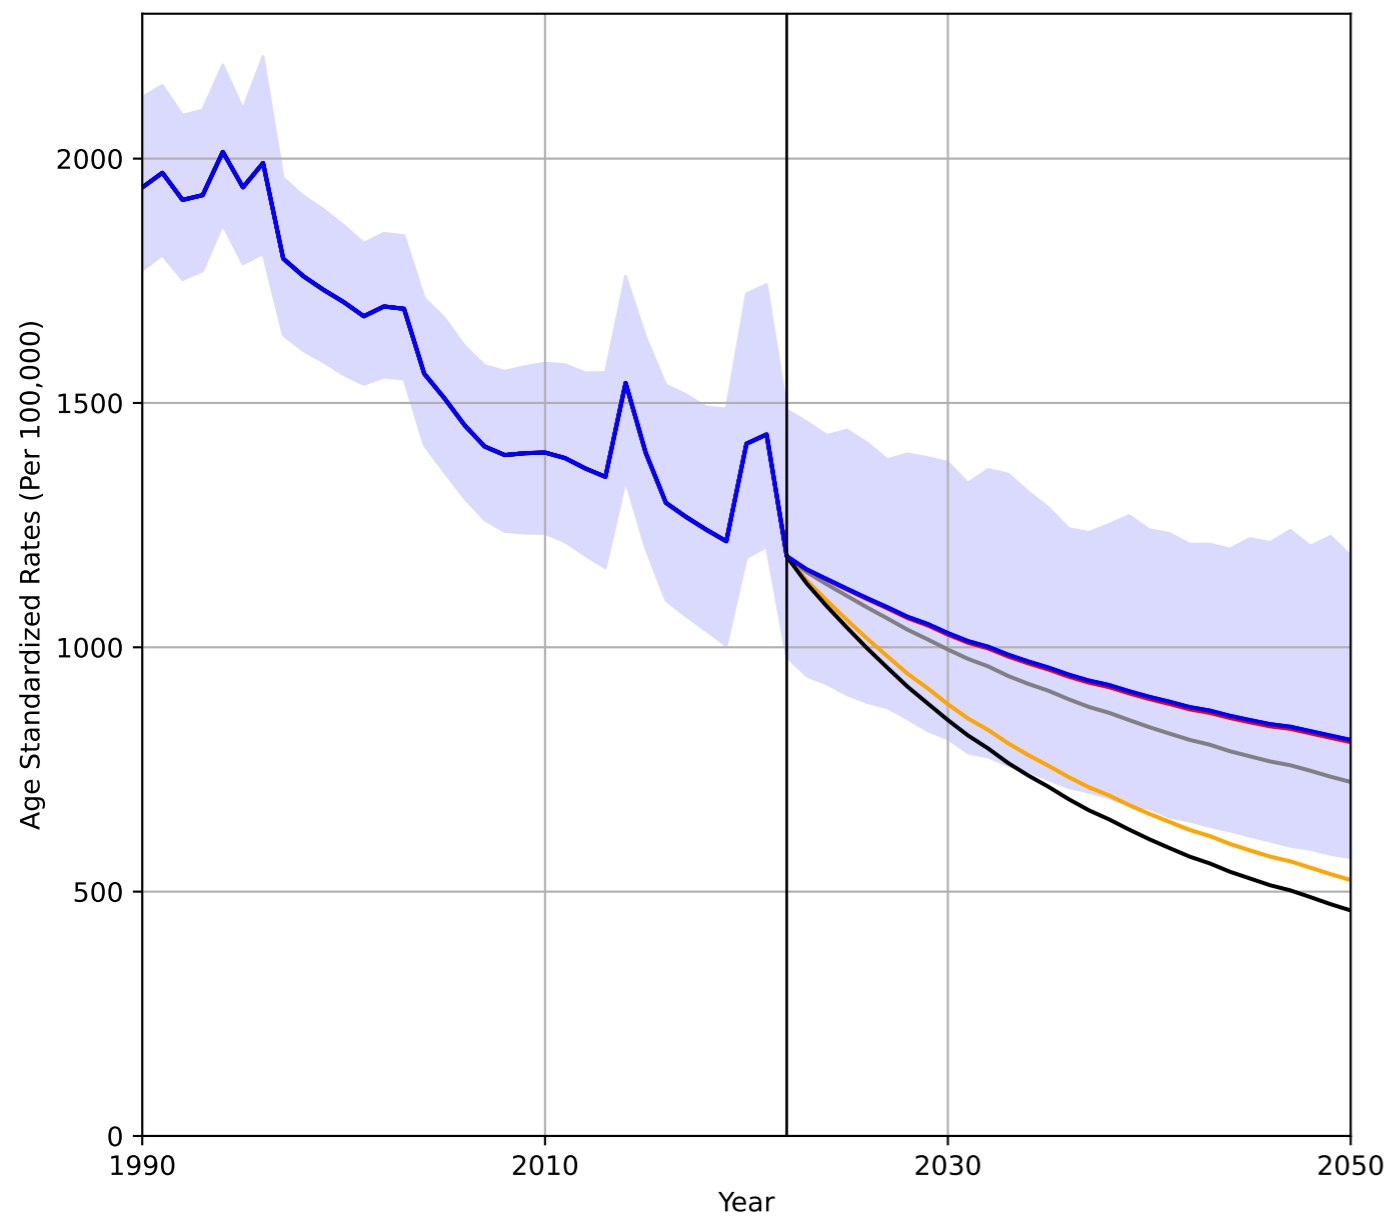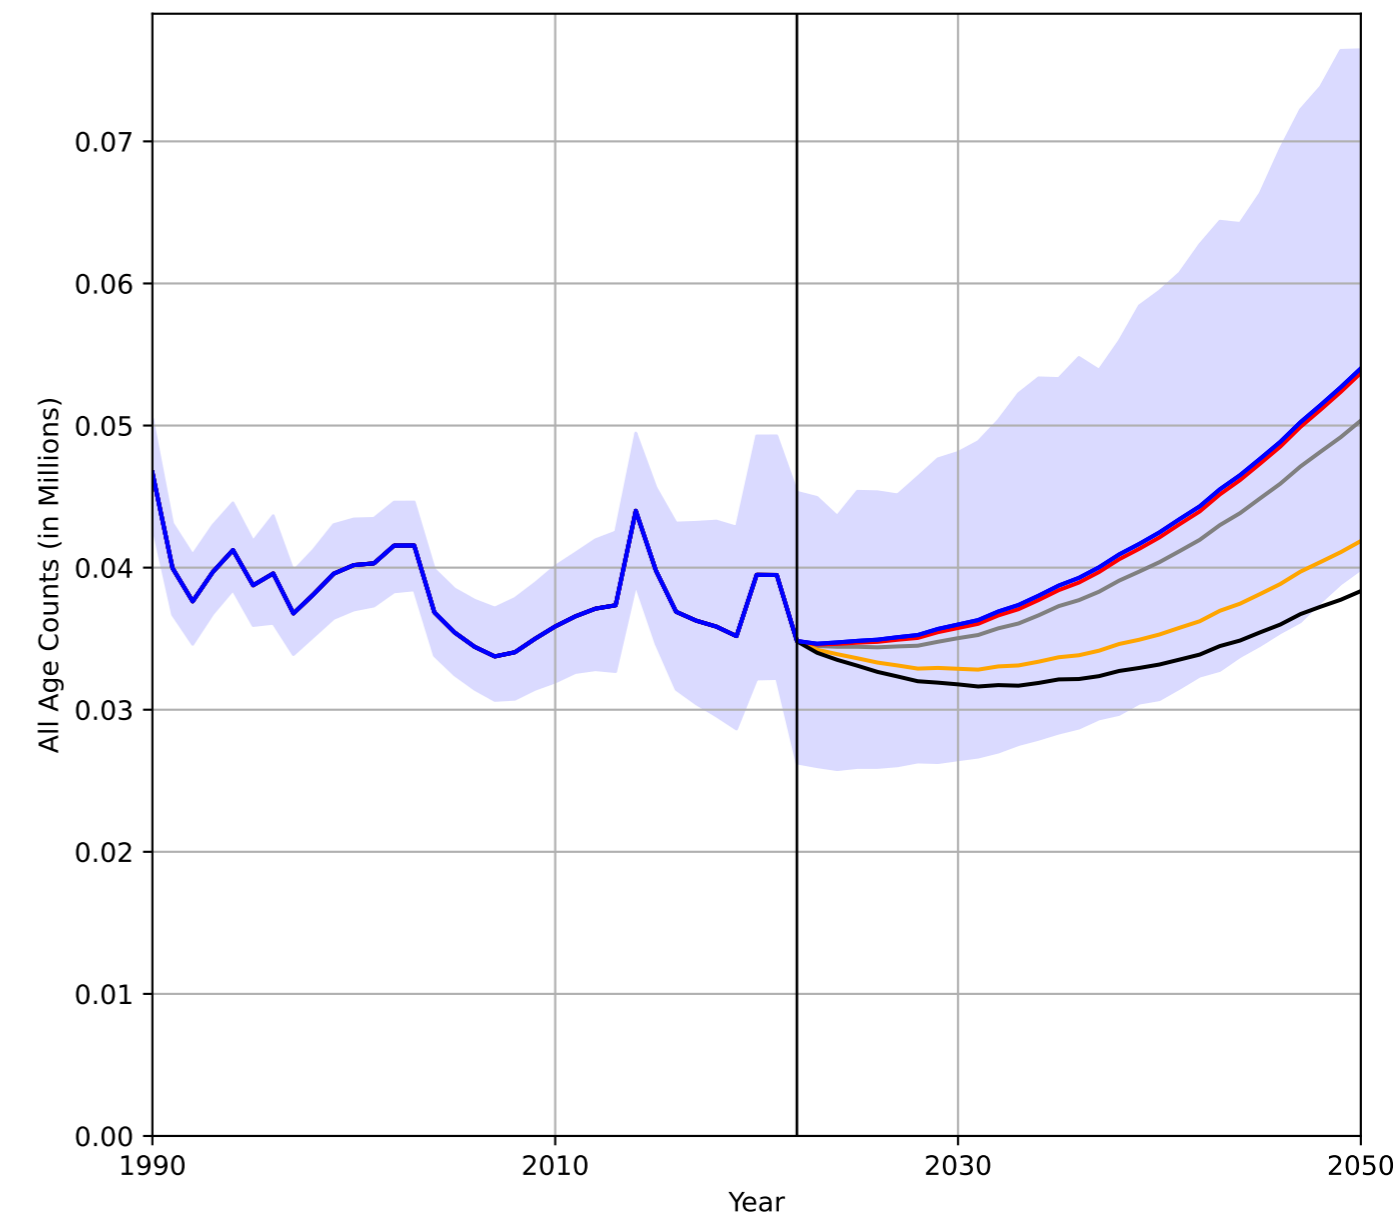



# Mali

Supplemental Results Figure S11. All-cause age standardised death rates (A) and all age death counts (B), for the past and for five future scenarios, 1990–2050

1840

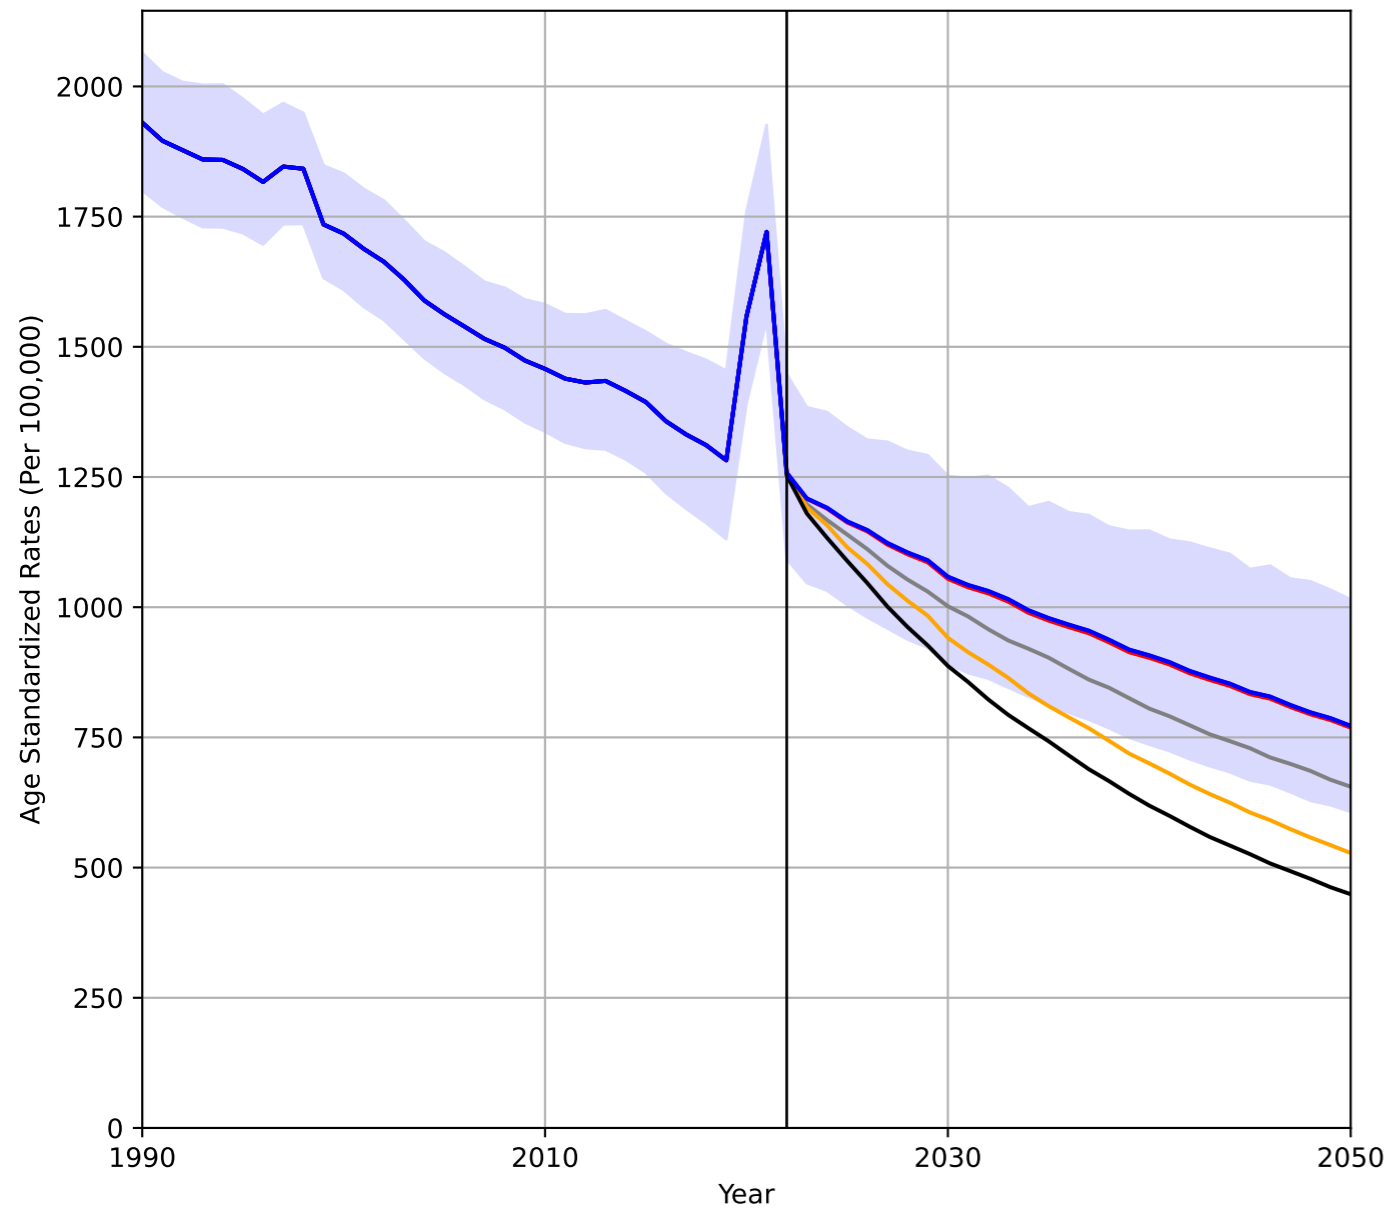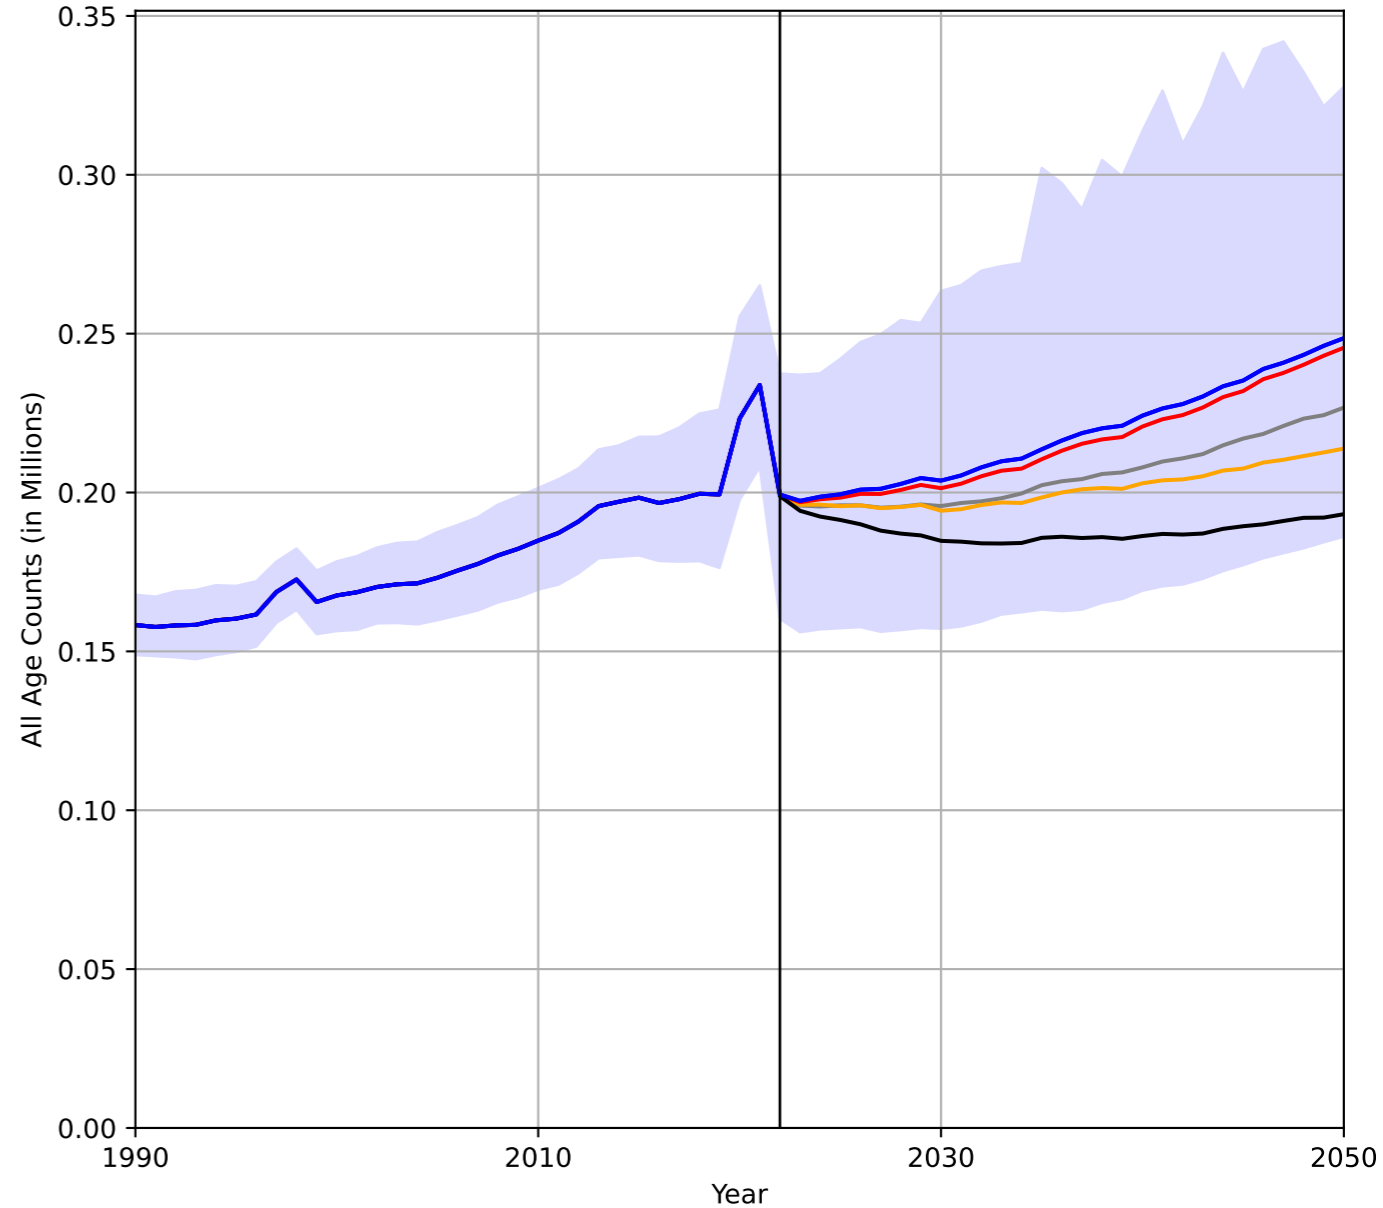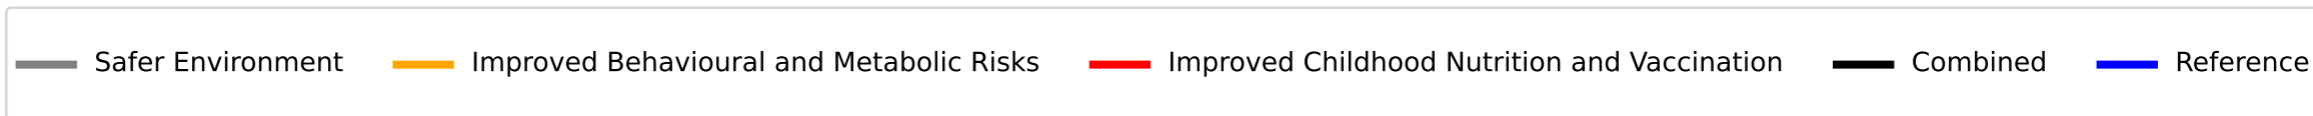

# Mauritania

Supplemental Results Figure S11. All-cause age standardised death rates (A) and all age death counts (B), for the past and for five future scenarios, 1990–2050

1841

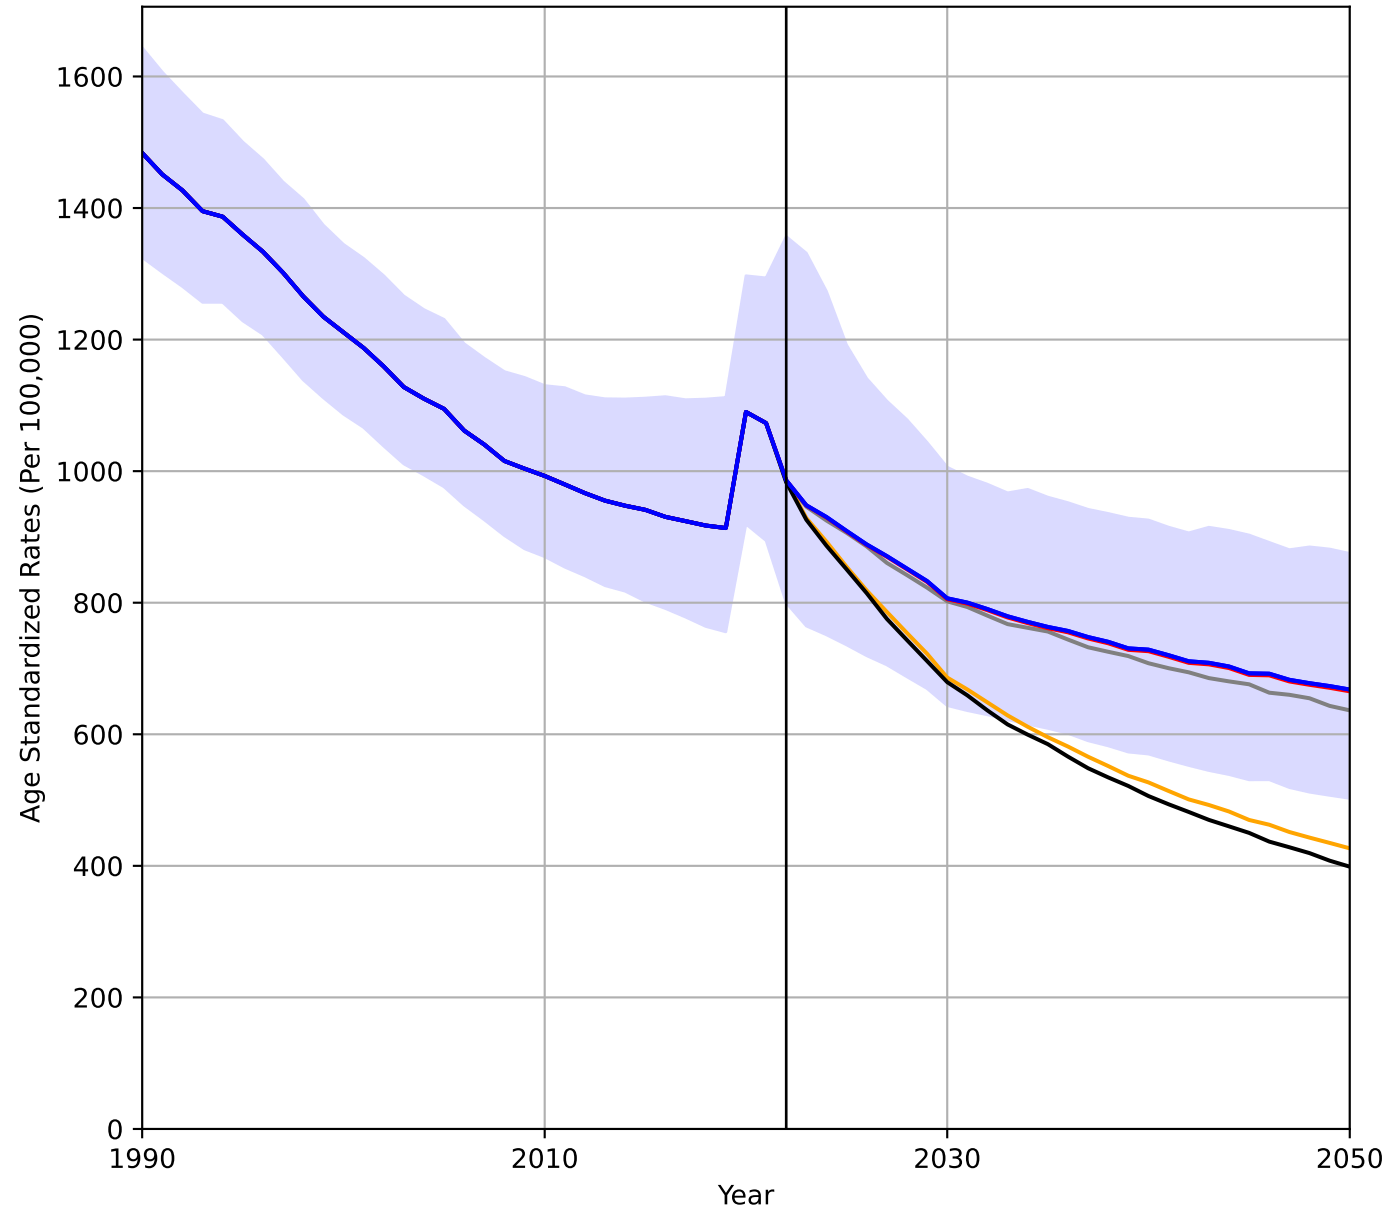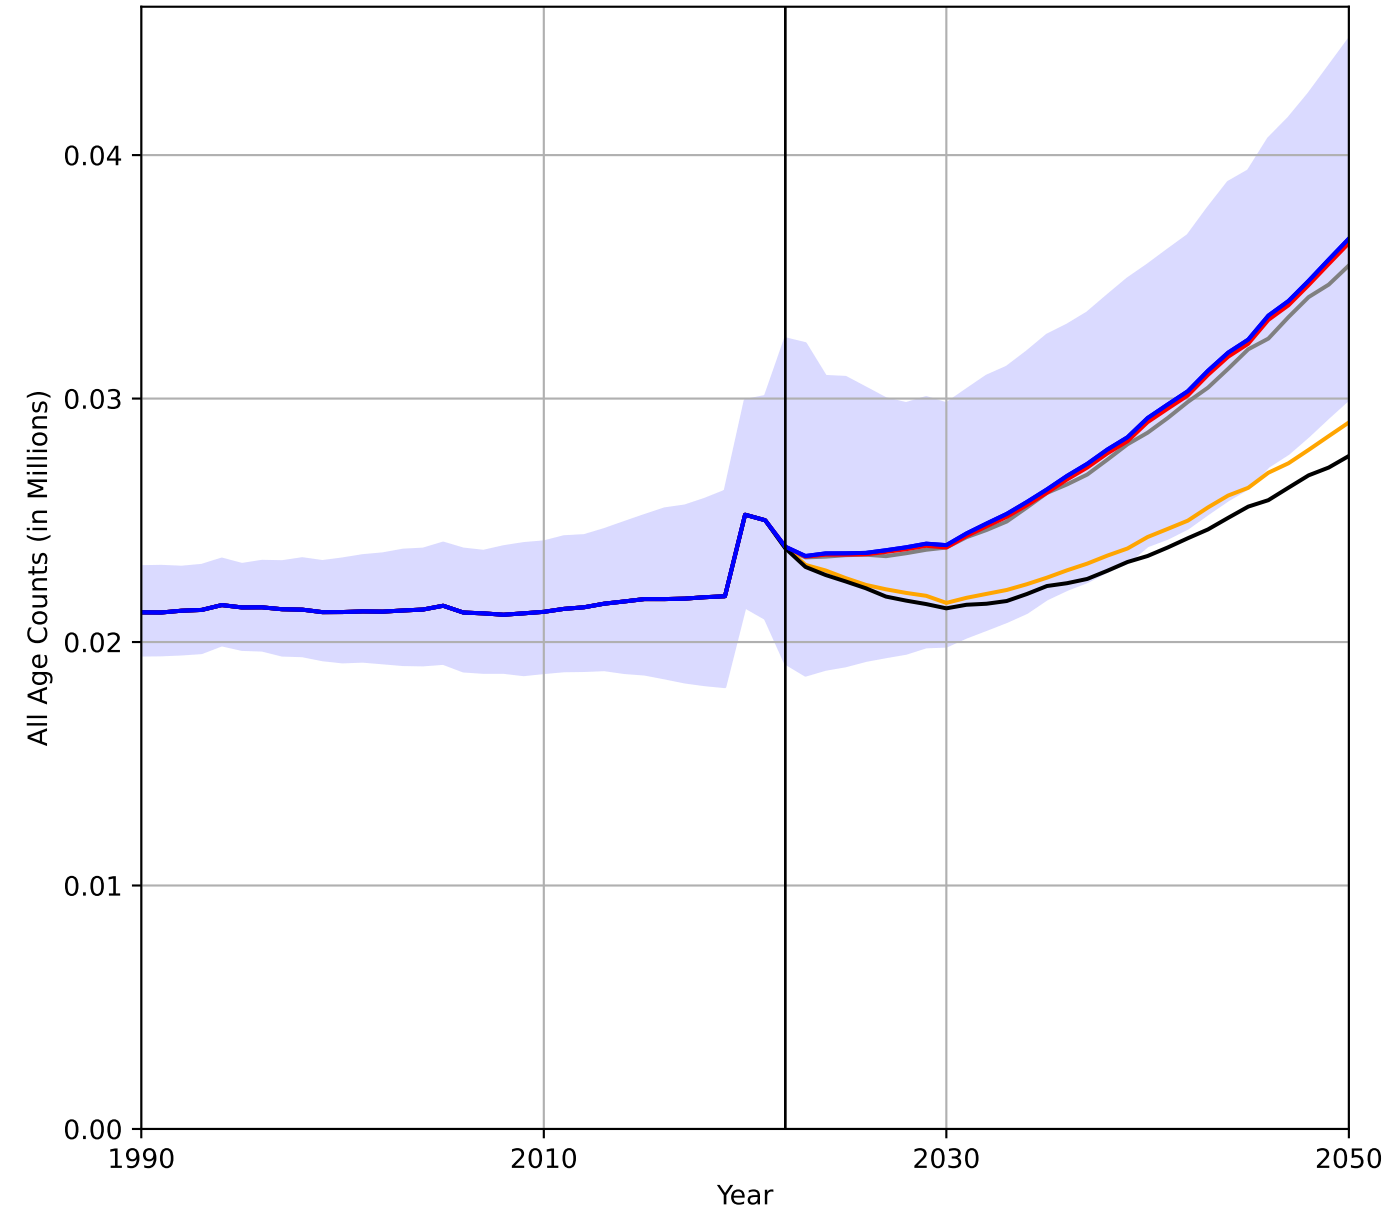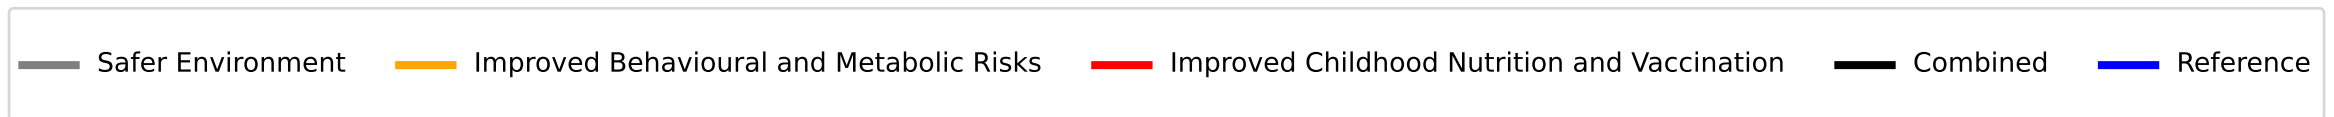

# Niger

Supplemental Results Figure S11. All-cause age standardised death rates (A) and all age death counts (B), for the past and for five future scenarios, 1990–2050

1842

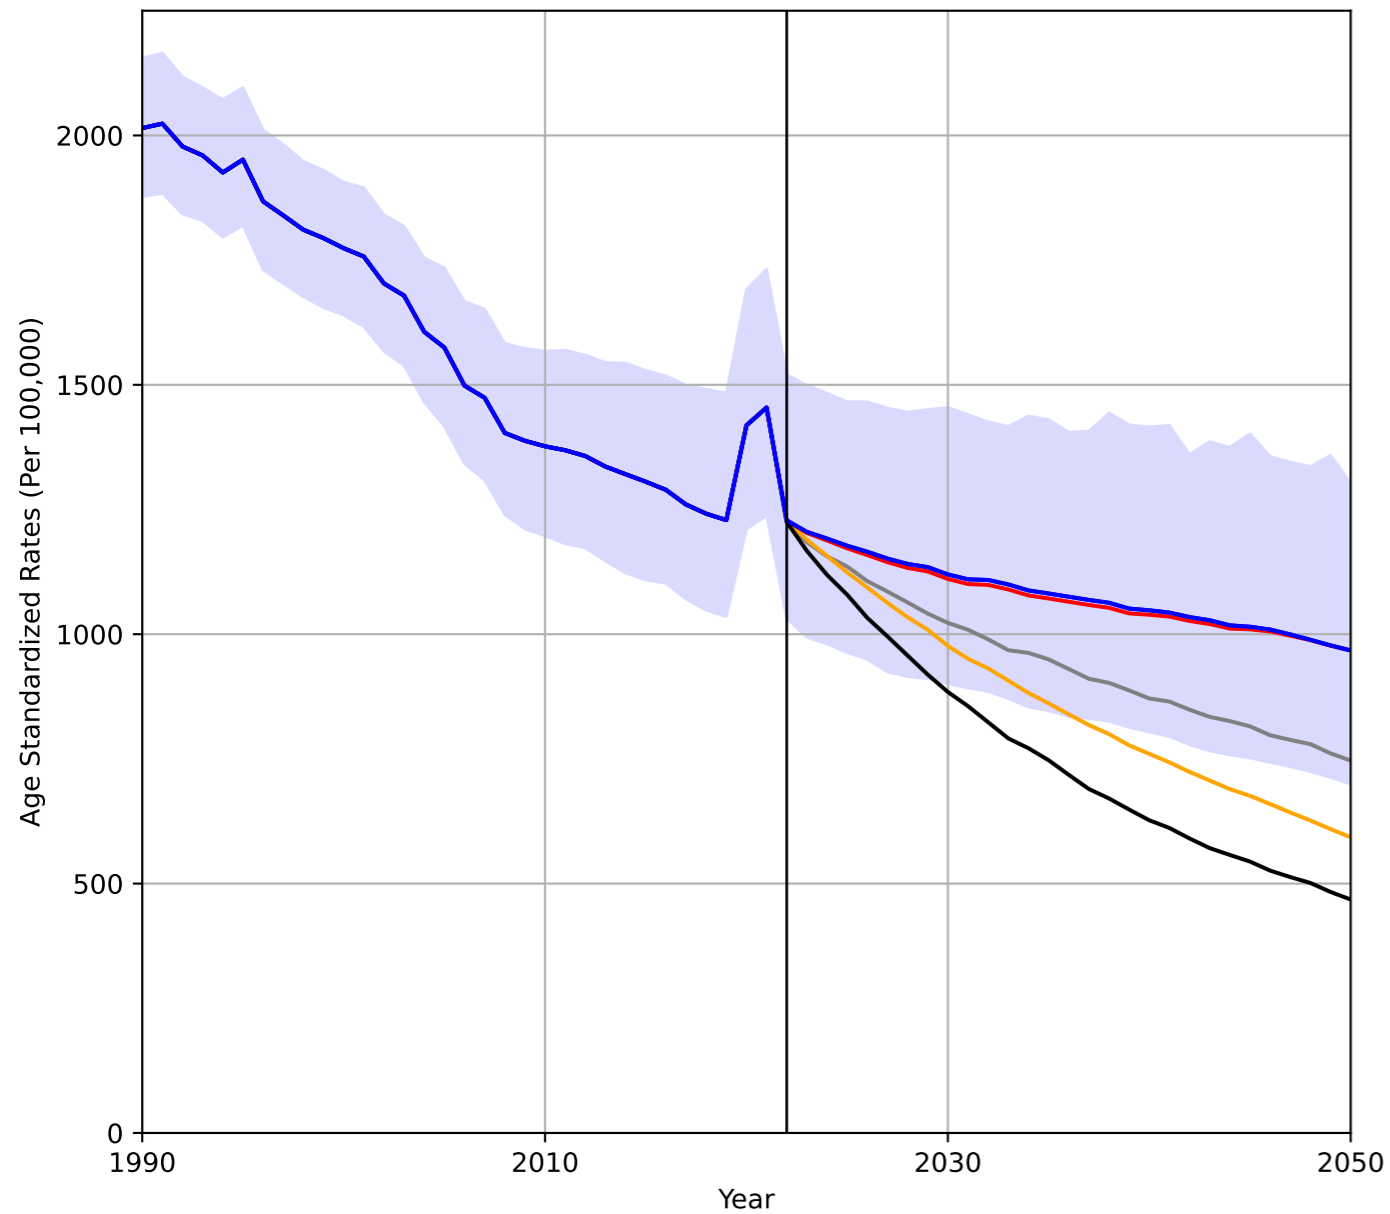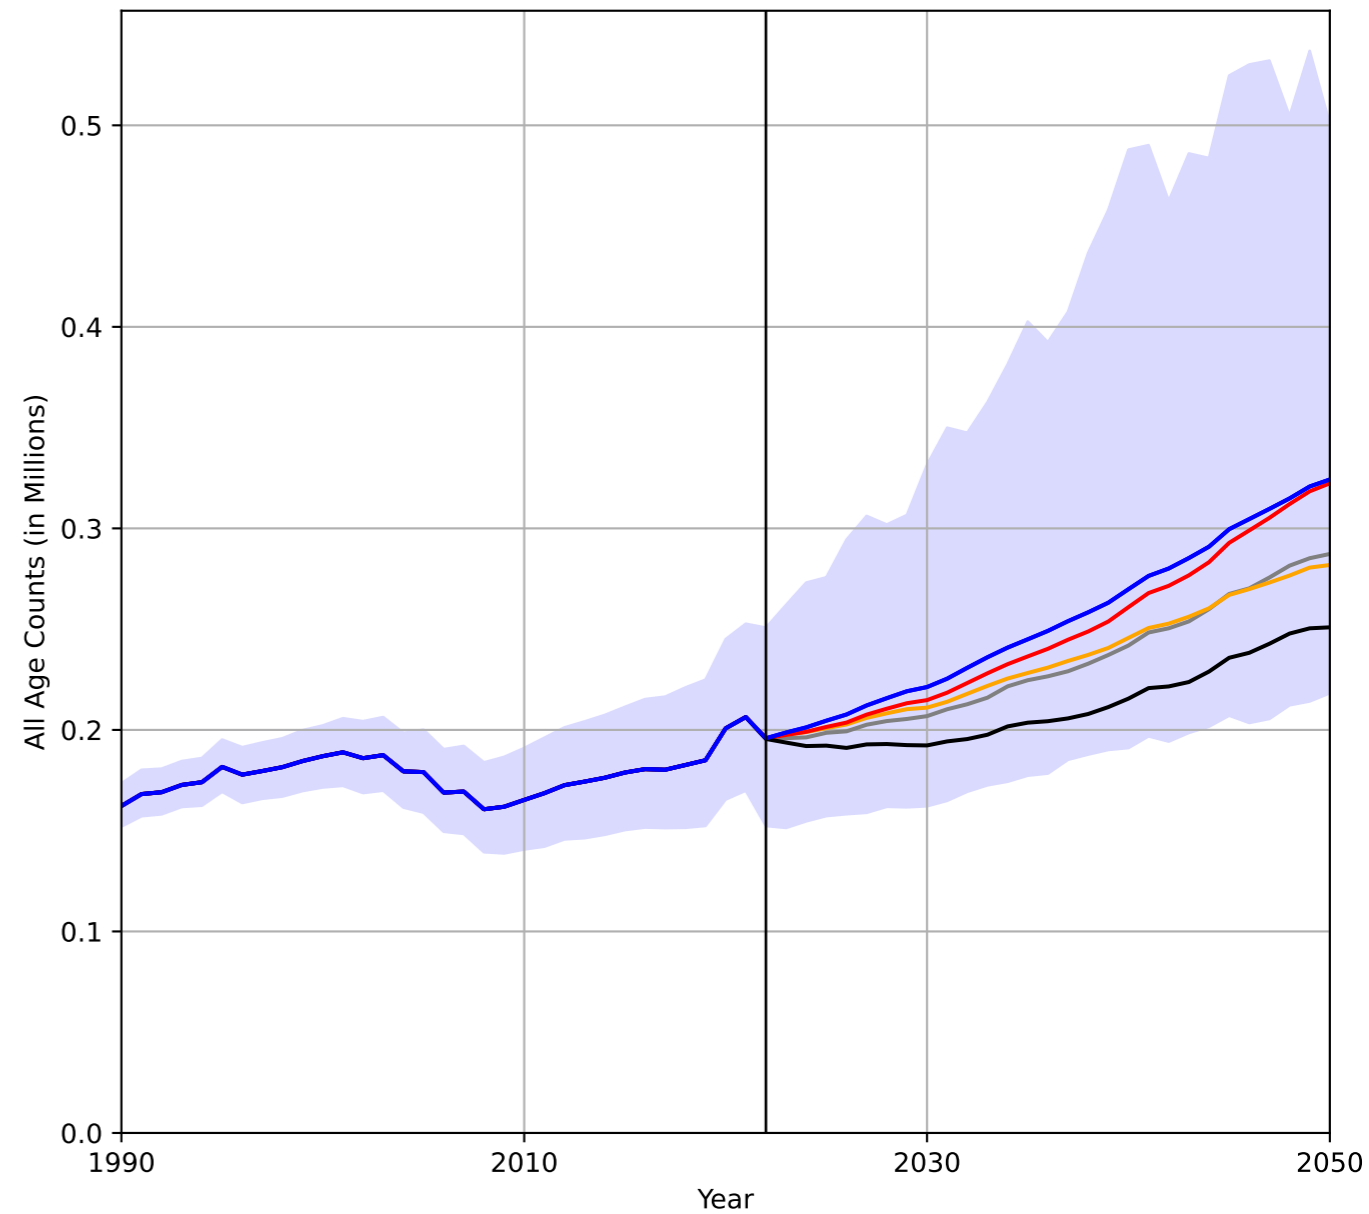

# Nigeria

Supplemental Results Figure S11. All-cause age standardised death rates (A) and all age death counts (B), for the past and for five future scenarios, 1990–2050

1843

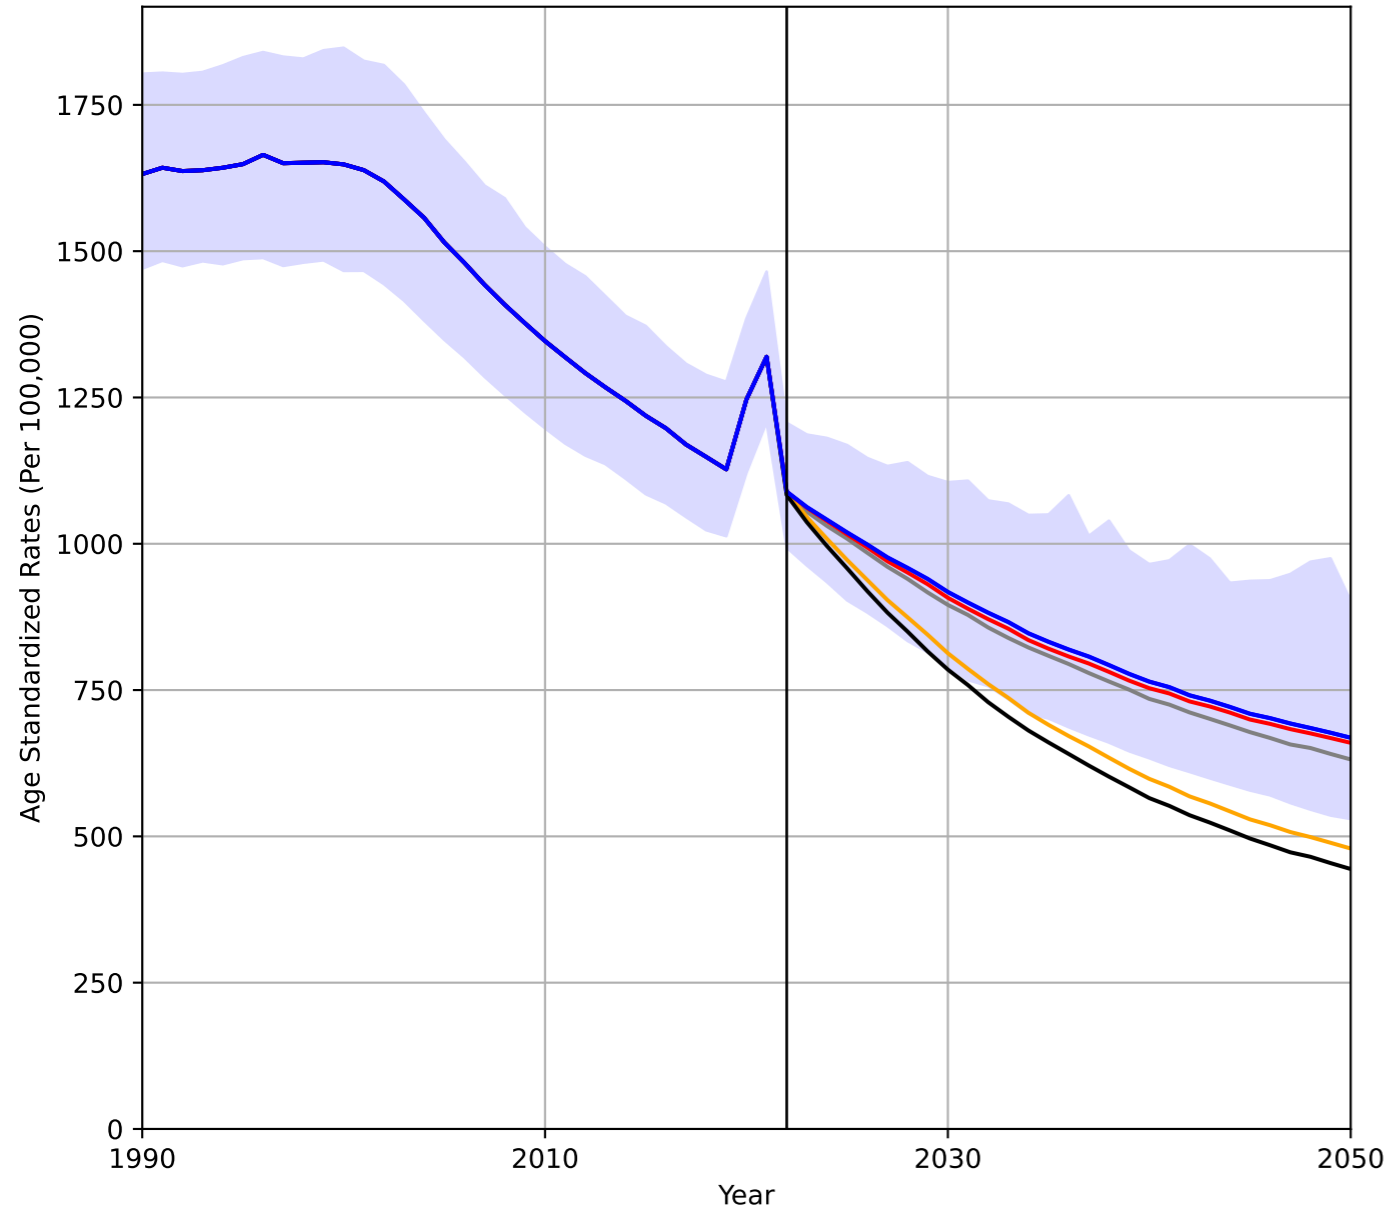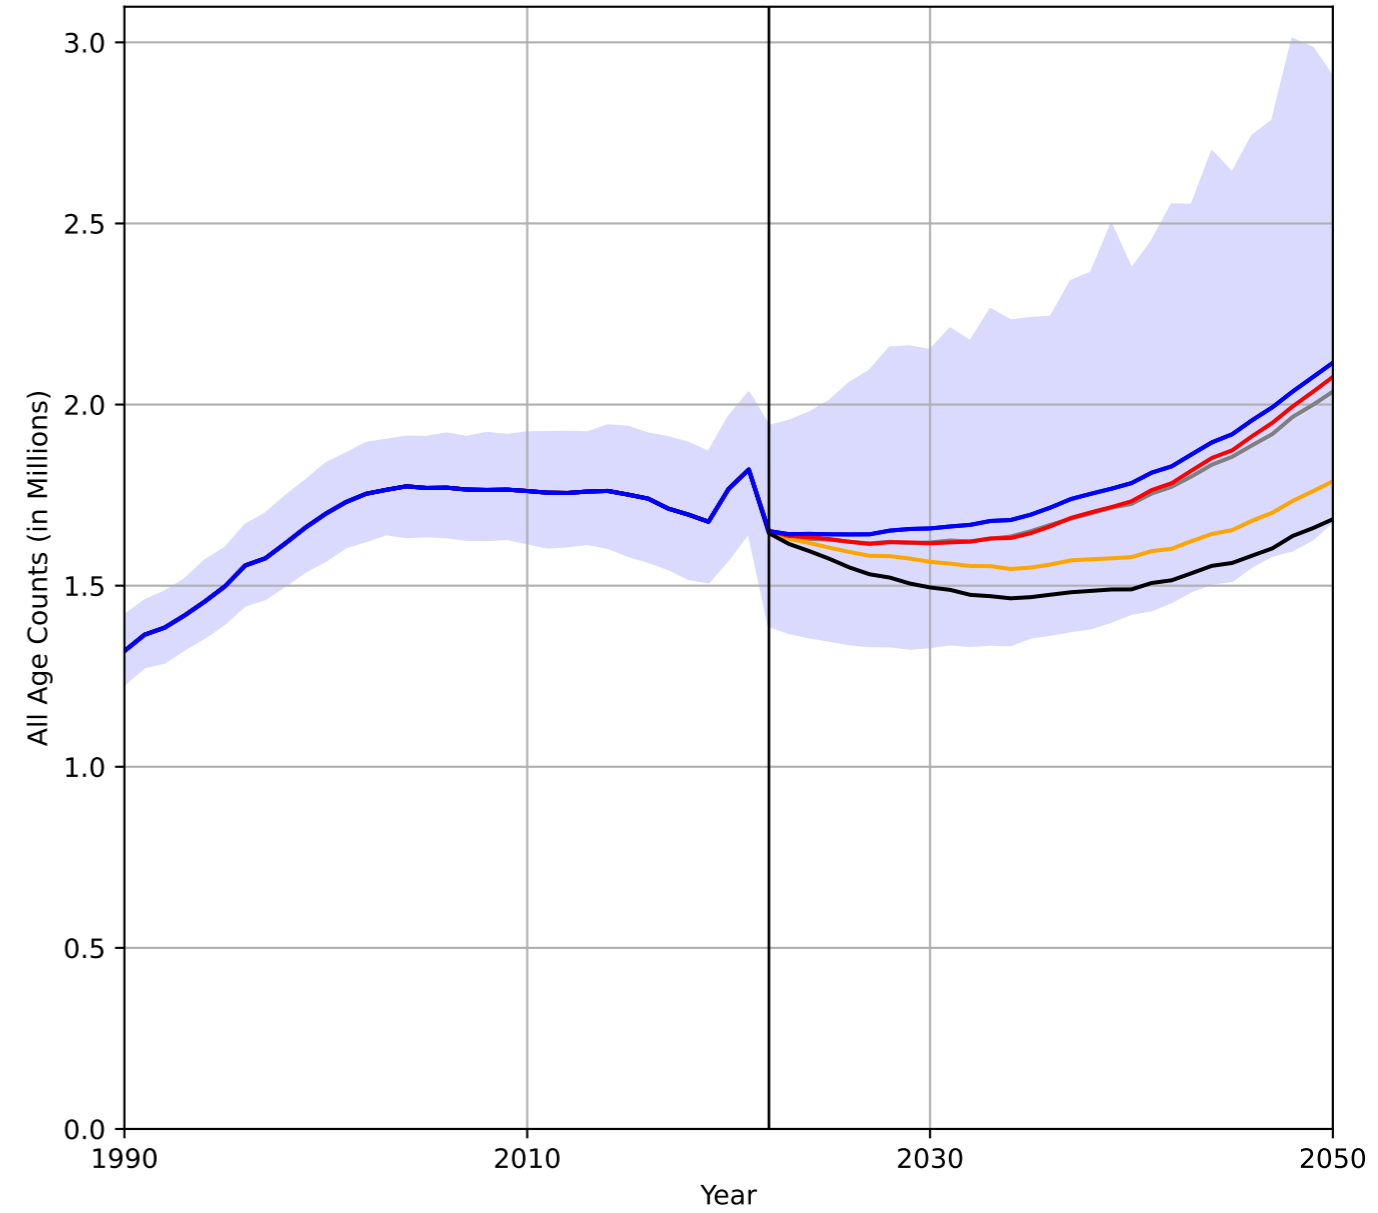

# São Tomé And Príncipe

Supplemental Results Figure S11. All-cause age standardised death rates (A) and all age death counts (B), for the past and for five future scenarios, 1990–2050

1844

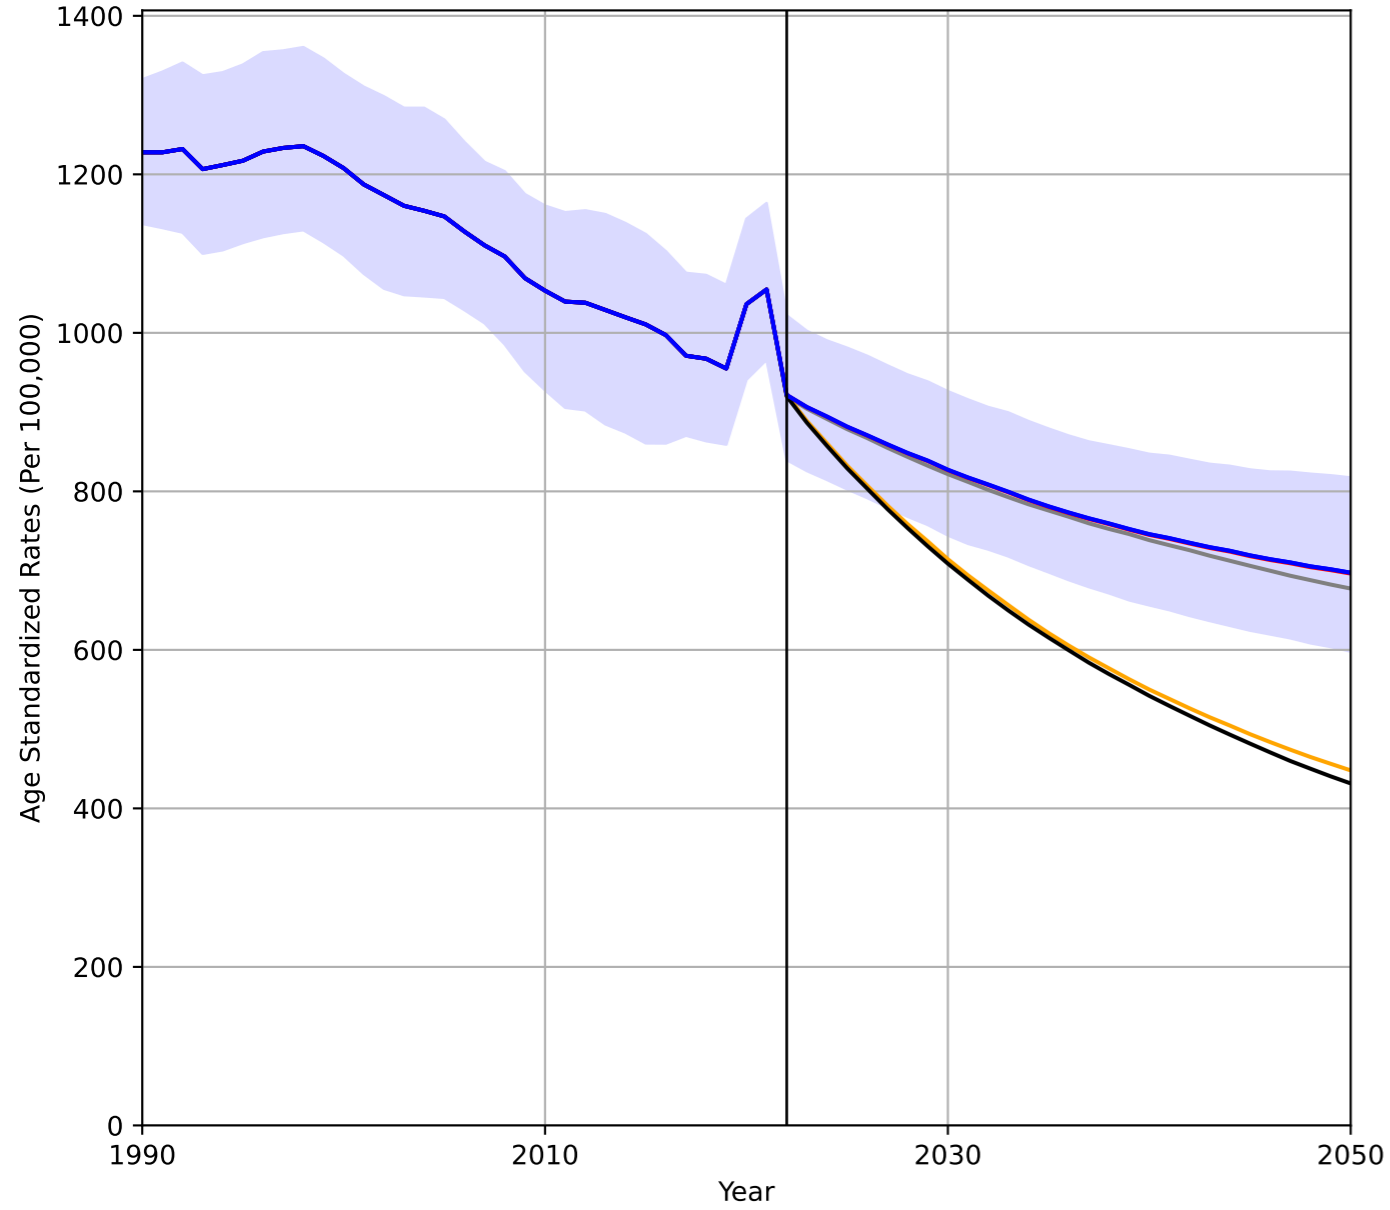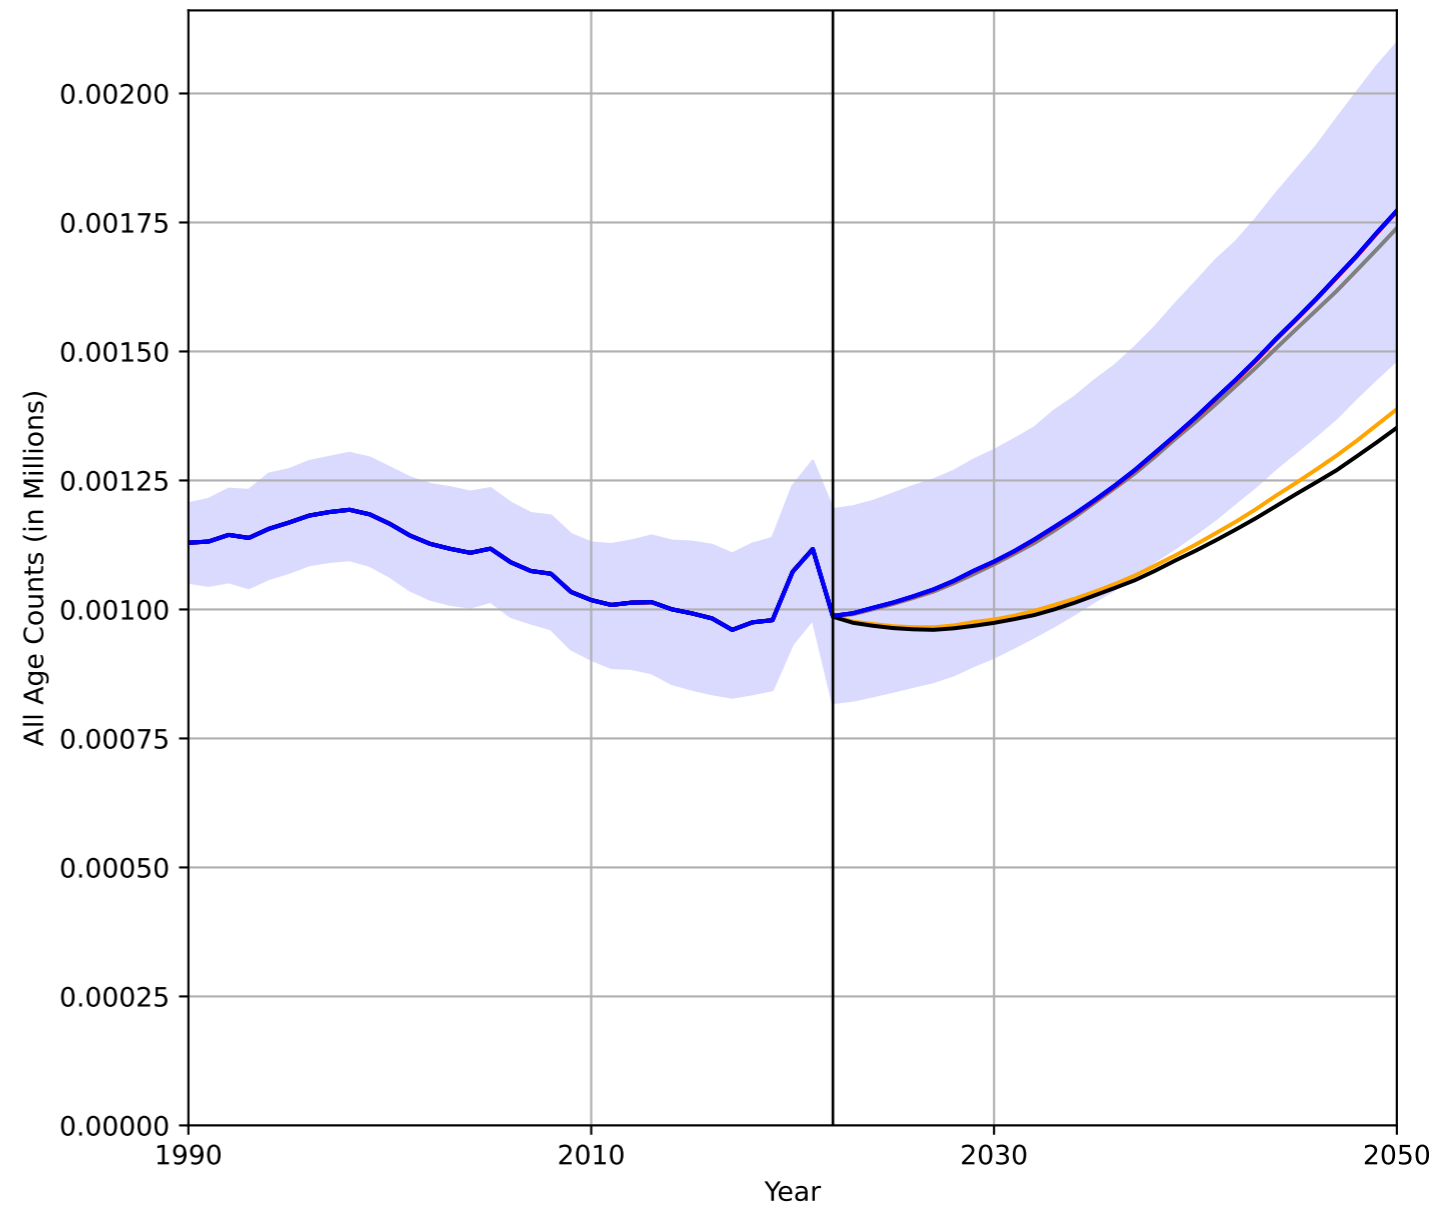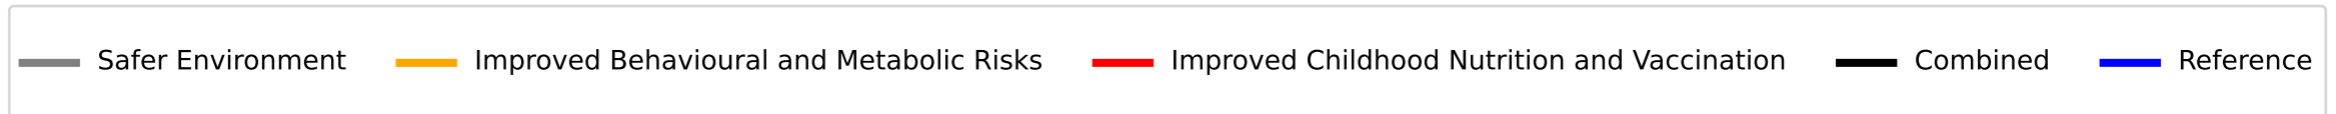

# Senegal

Supplemental Results Figure S11. All-cause age standardised death rates (A) and all age death counts (B), for the past and for five future scenarios, 1990–2050

1845

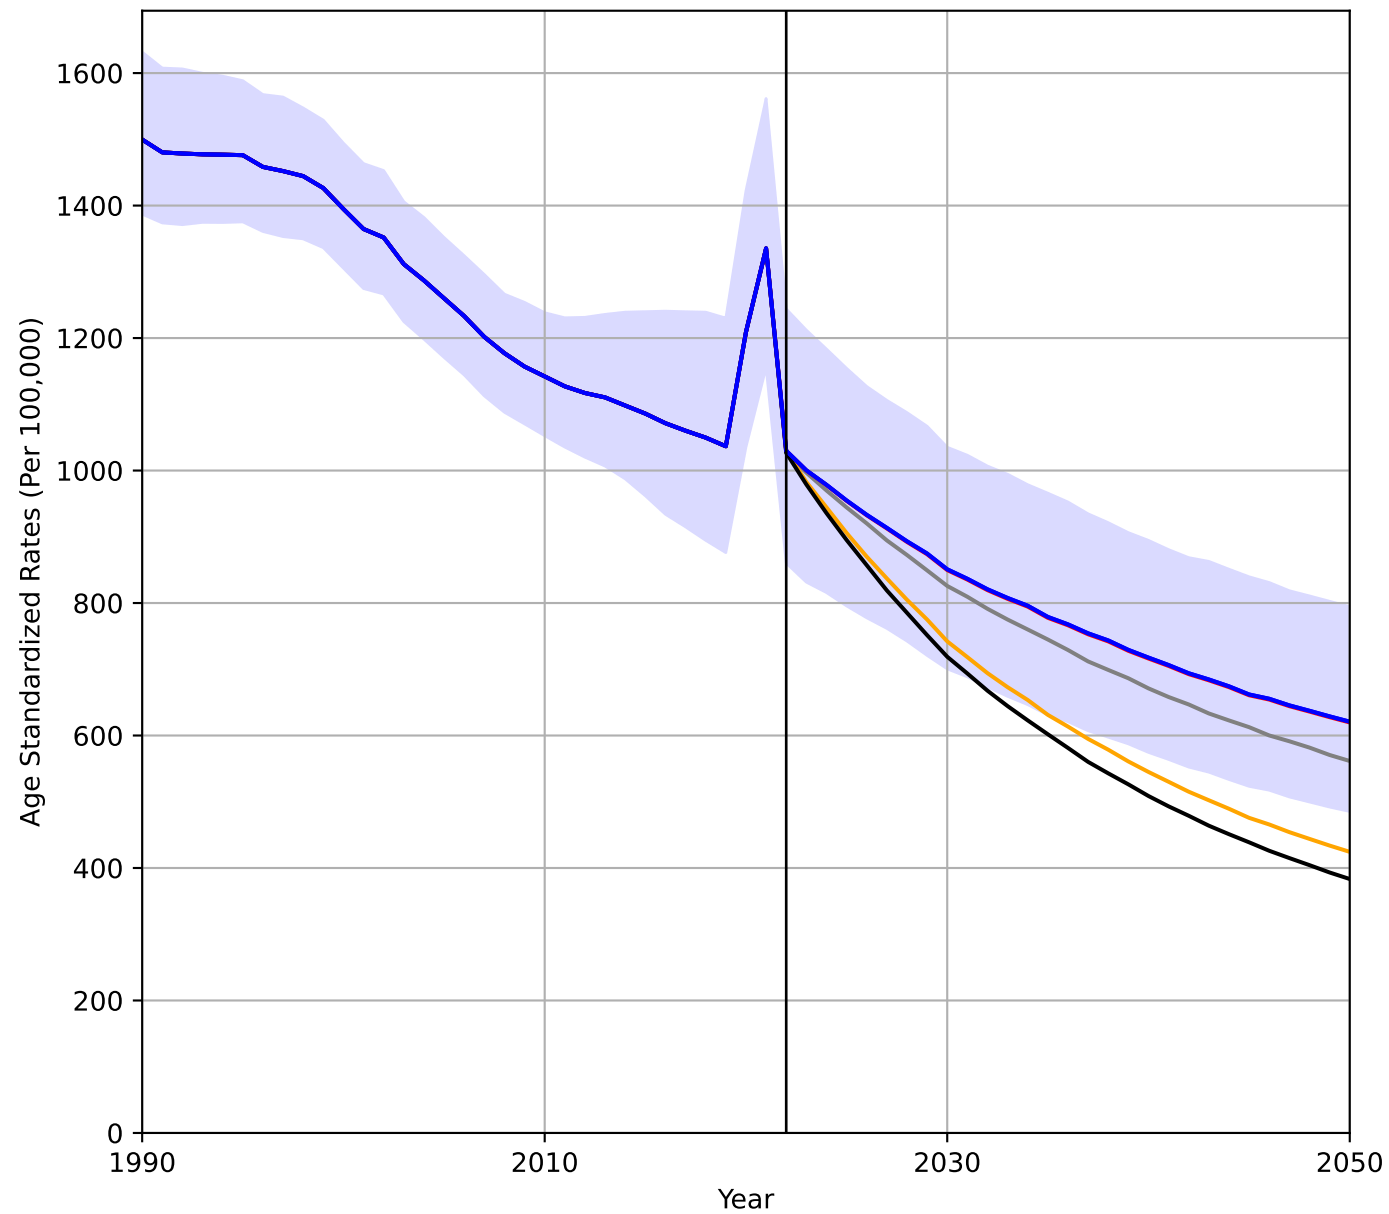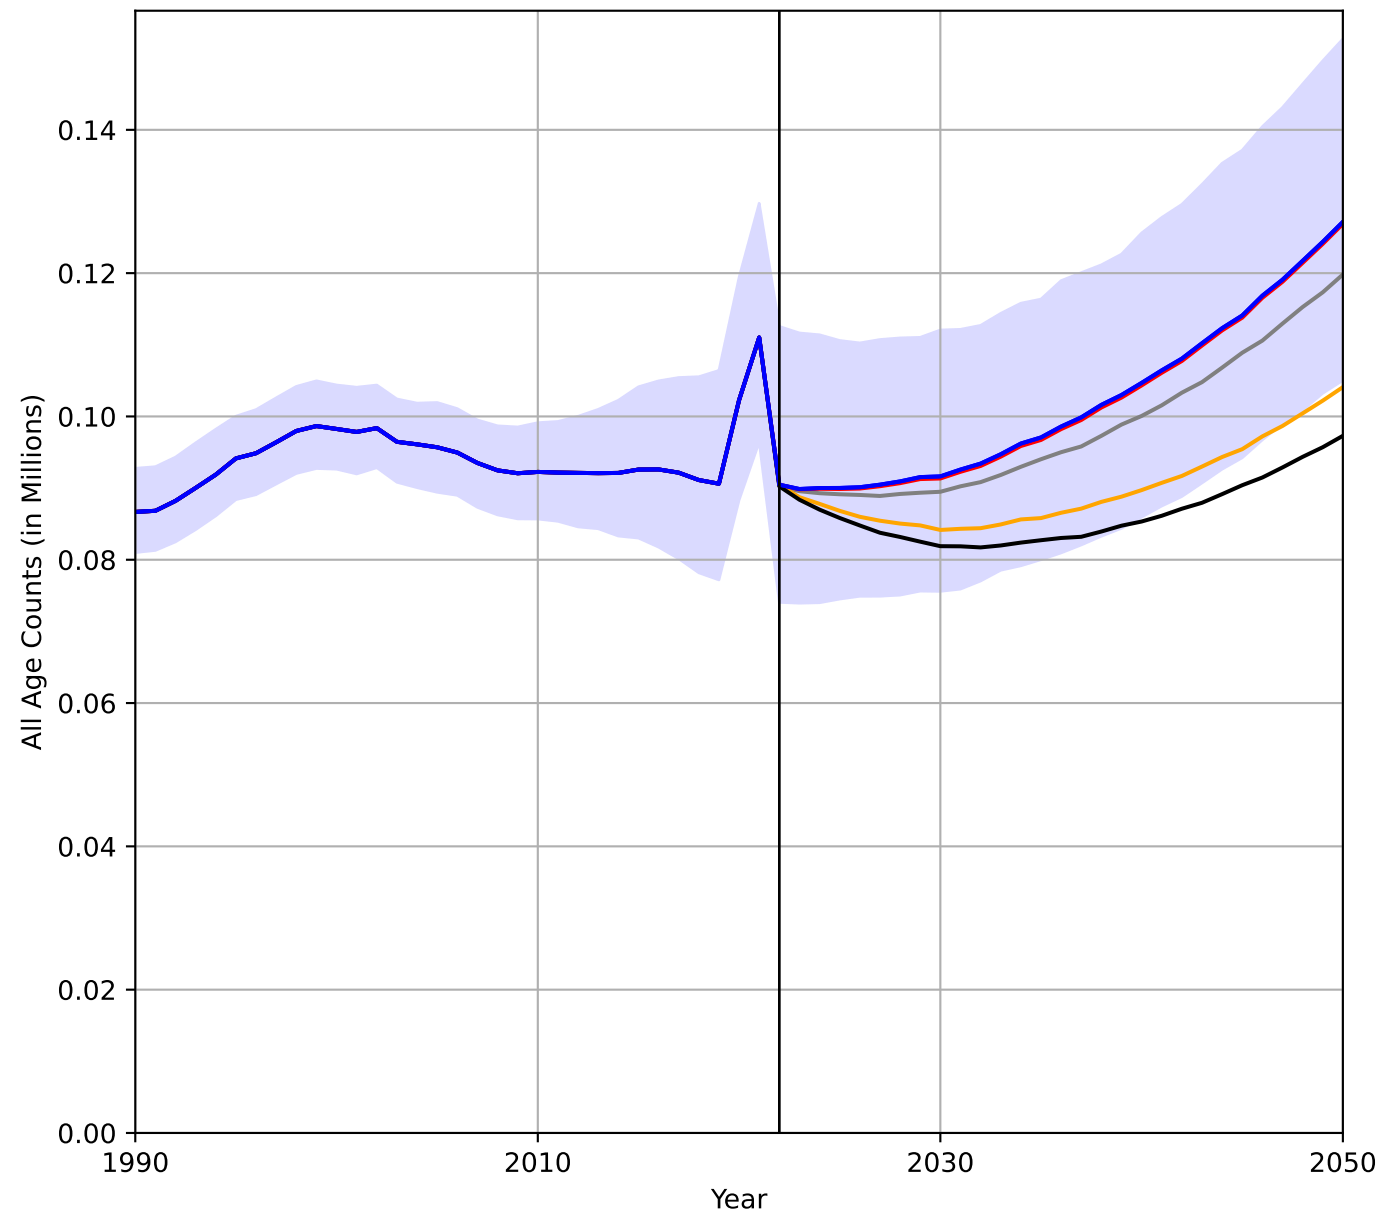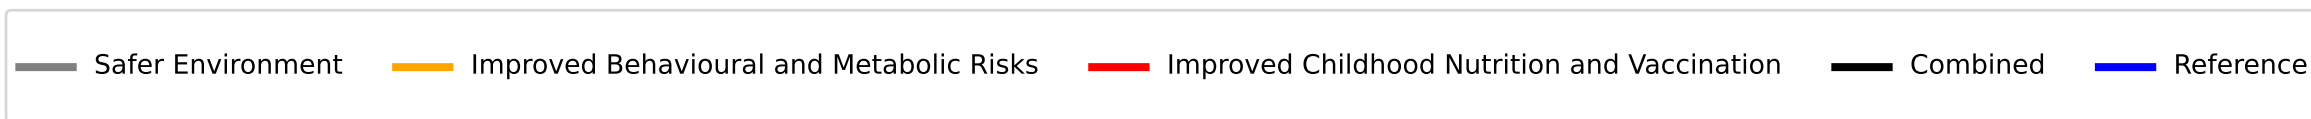

# Sierra Leone

Supplemental Results Figure S11. All-cause age standardised death rates (A) and all age death counts (B), for the past and for five future scenarios, 1990–2050

1846

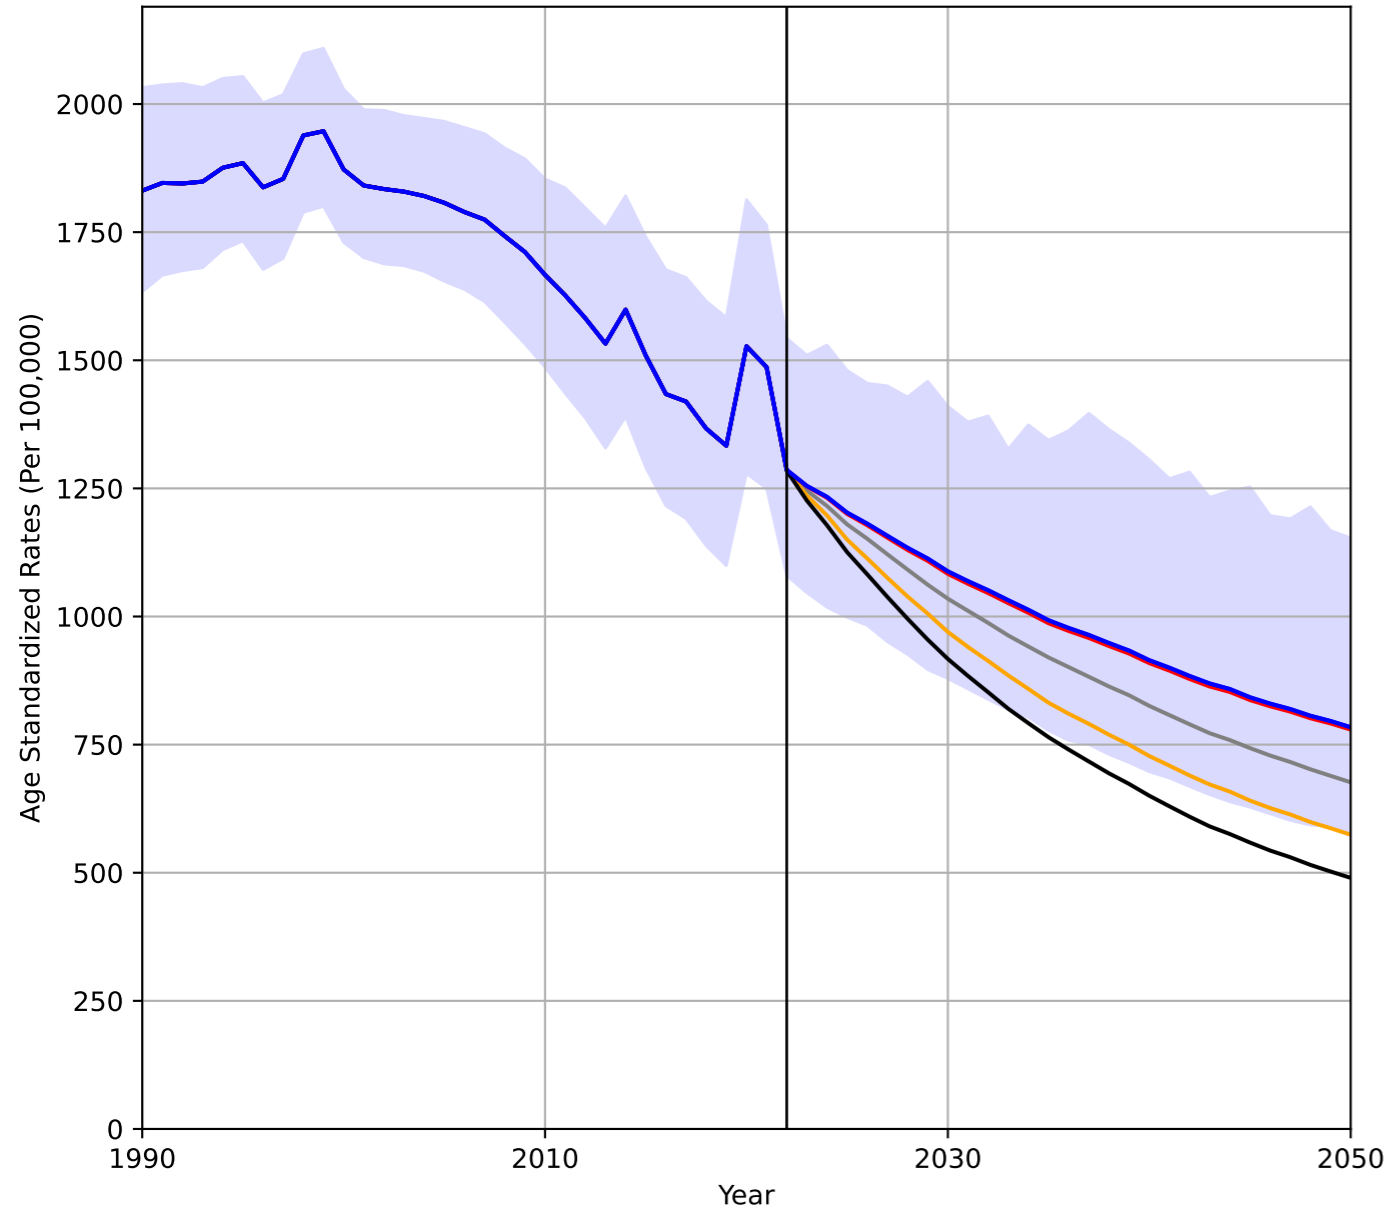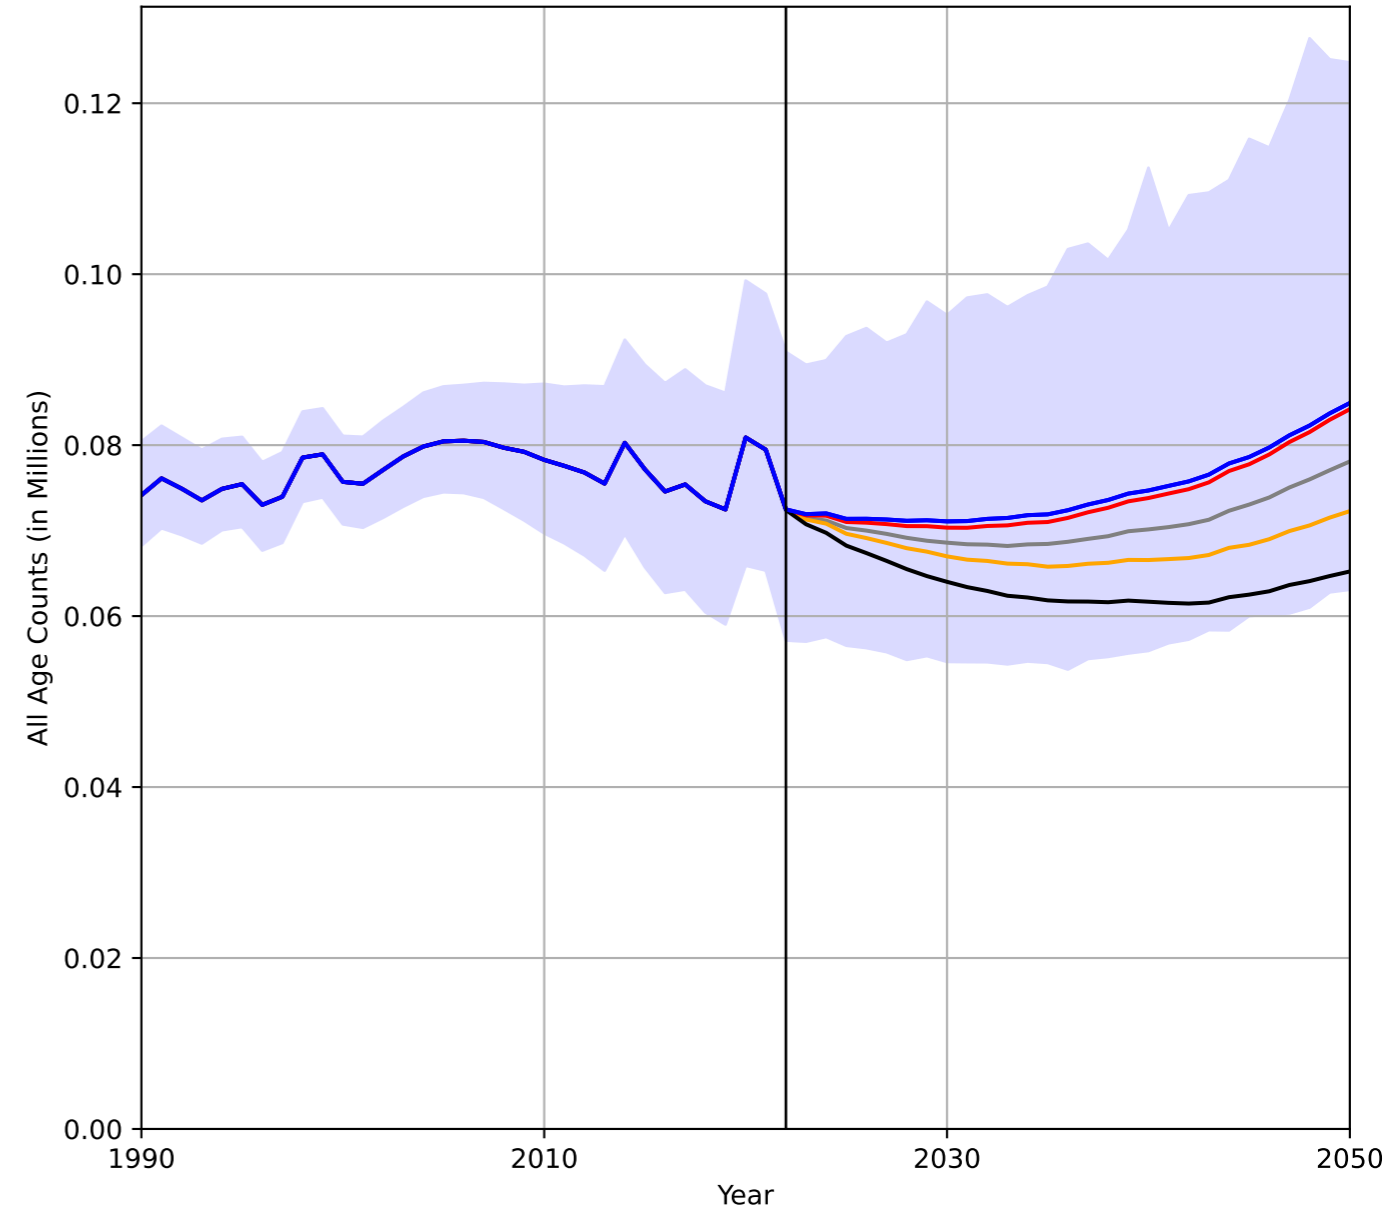

# Togo

Supplemental Results Figure S11. All-cause age standardised death rates (A) and all age death counts (B), for the past and for five future scenarios, 1990–2050

1847

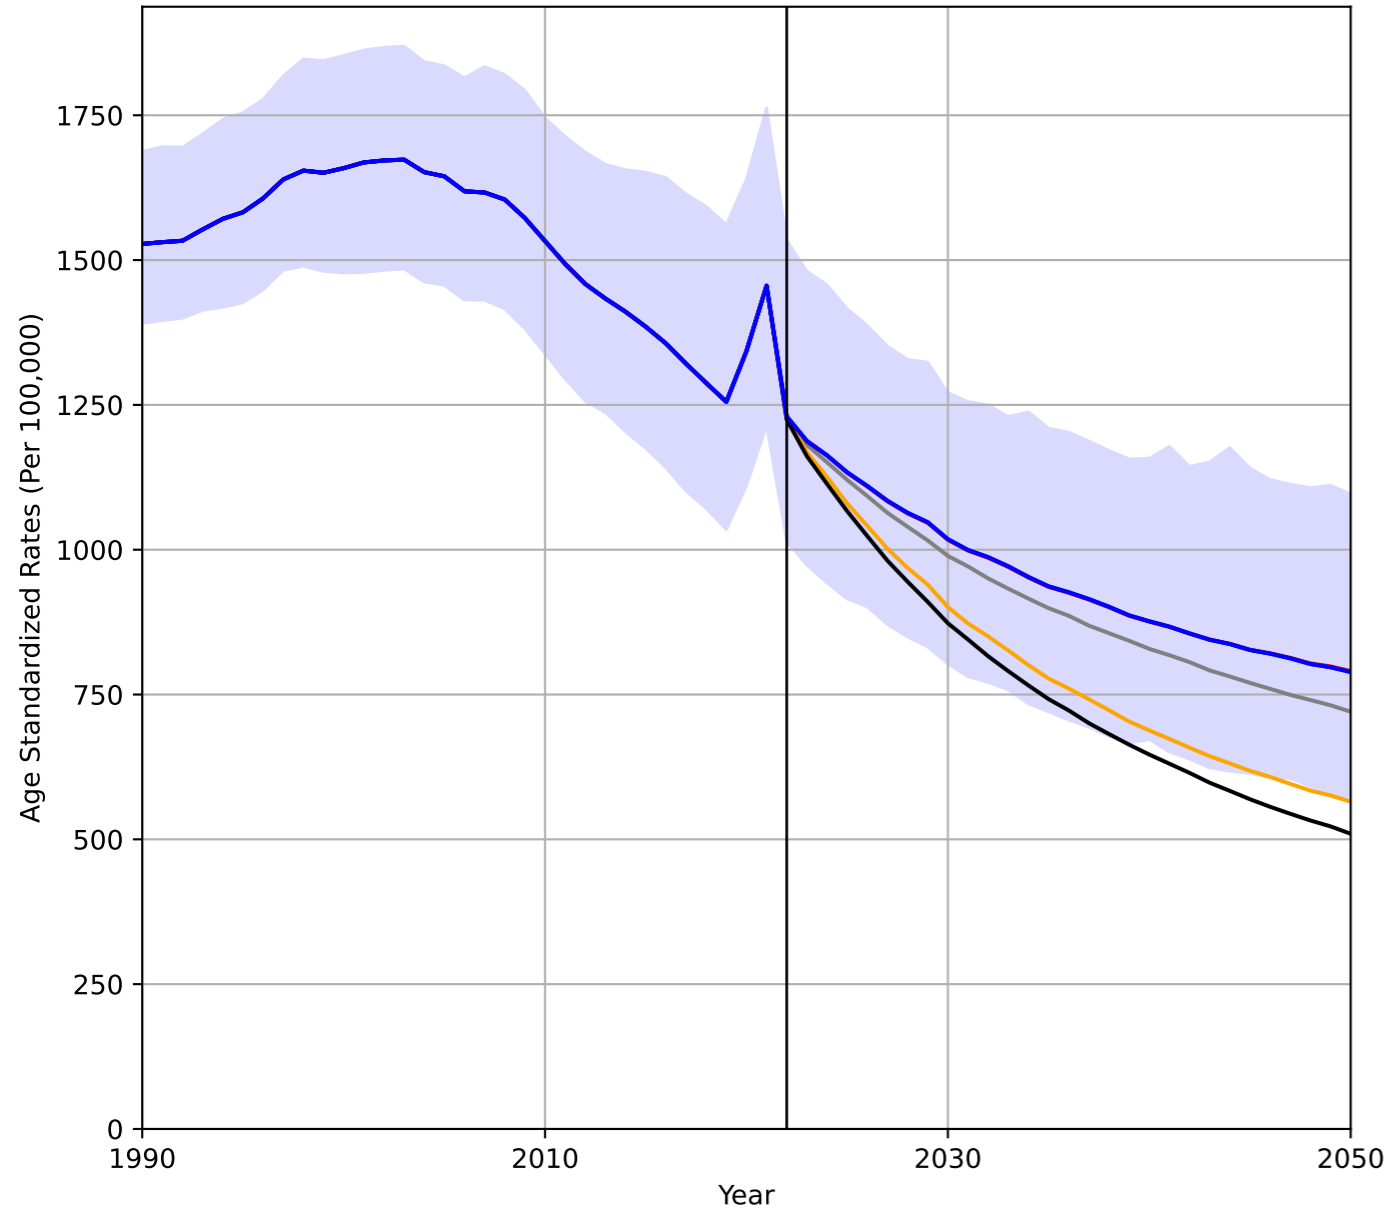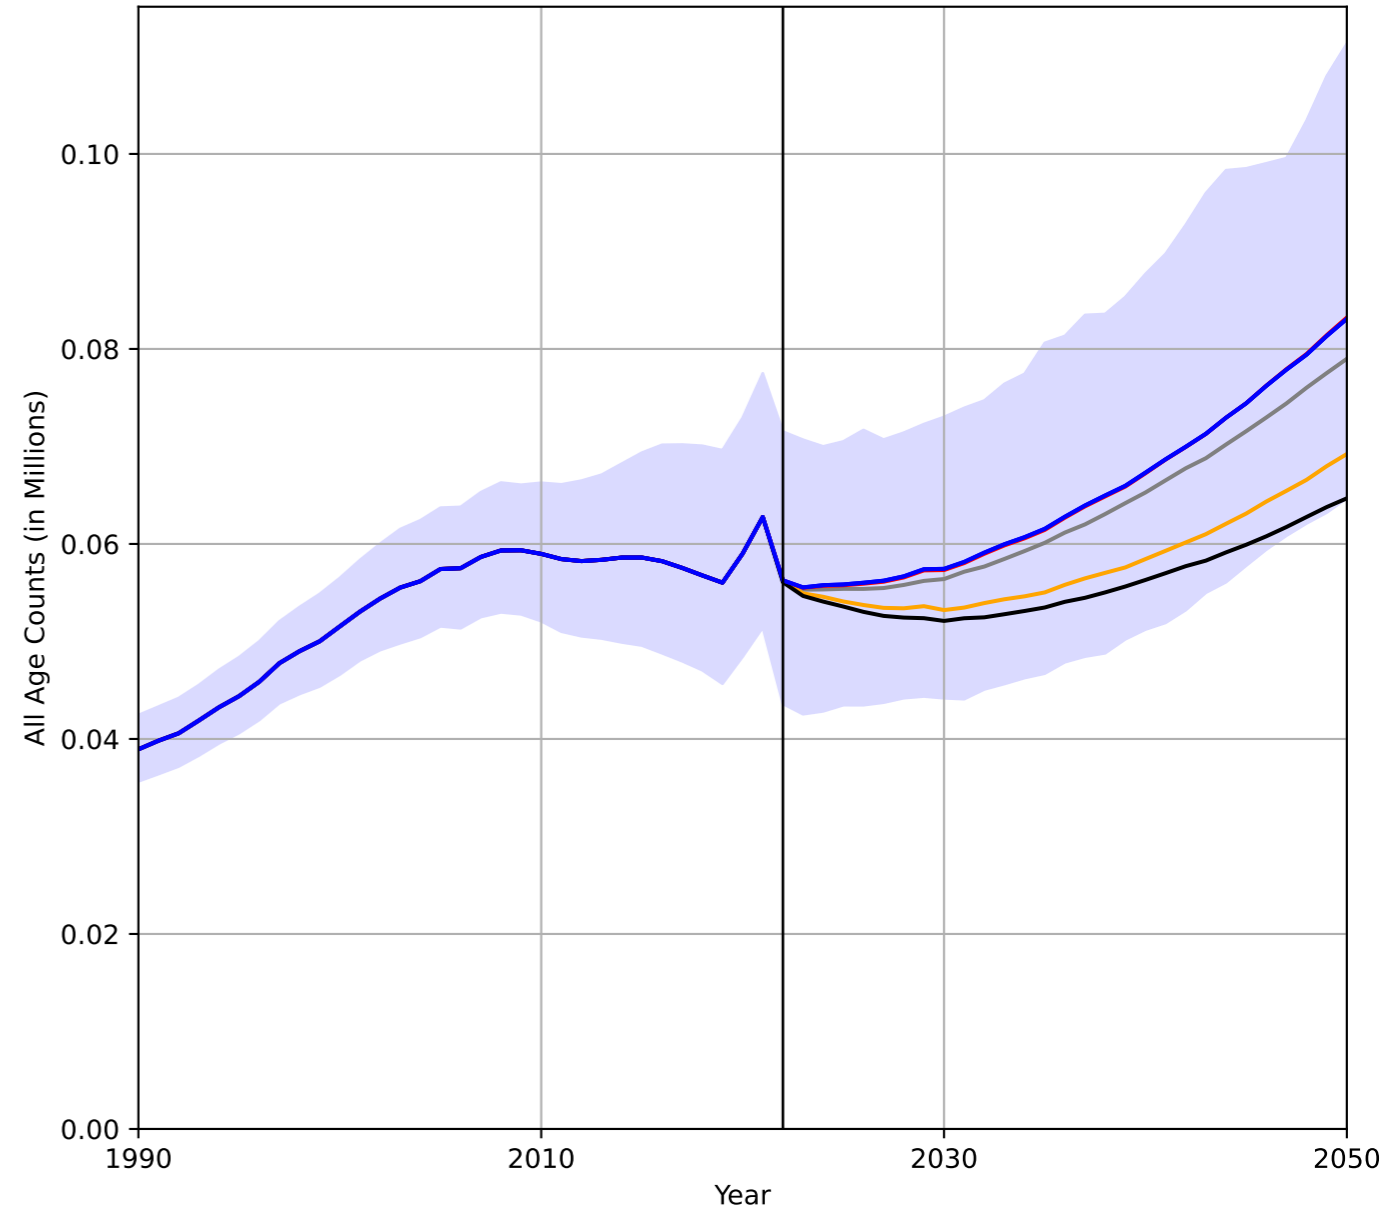



# Global

Supplemental Results Figure S11. All-cause age standardised death rates (A) and all age death counts (B), for the past and for five future scenarios, 1990–2050

1848

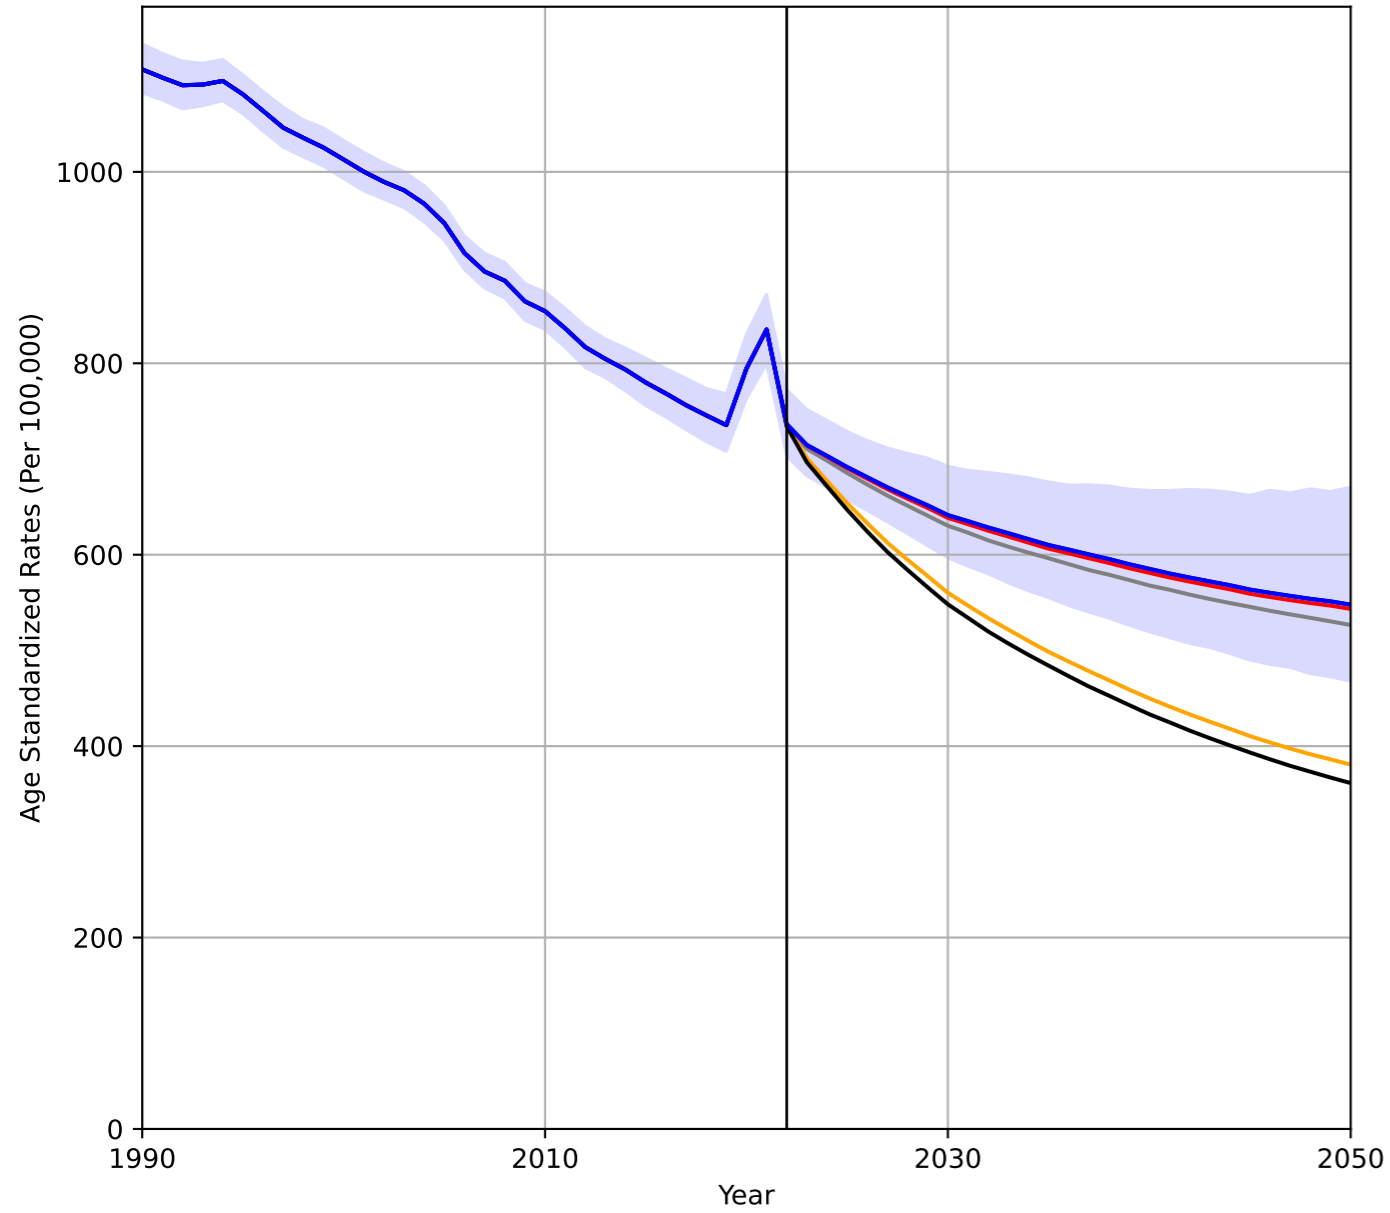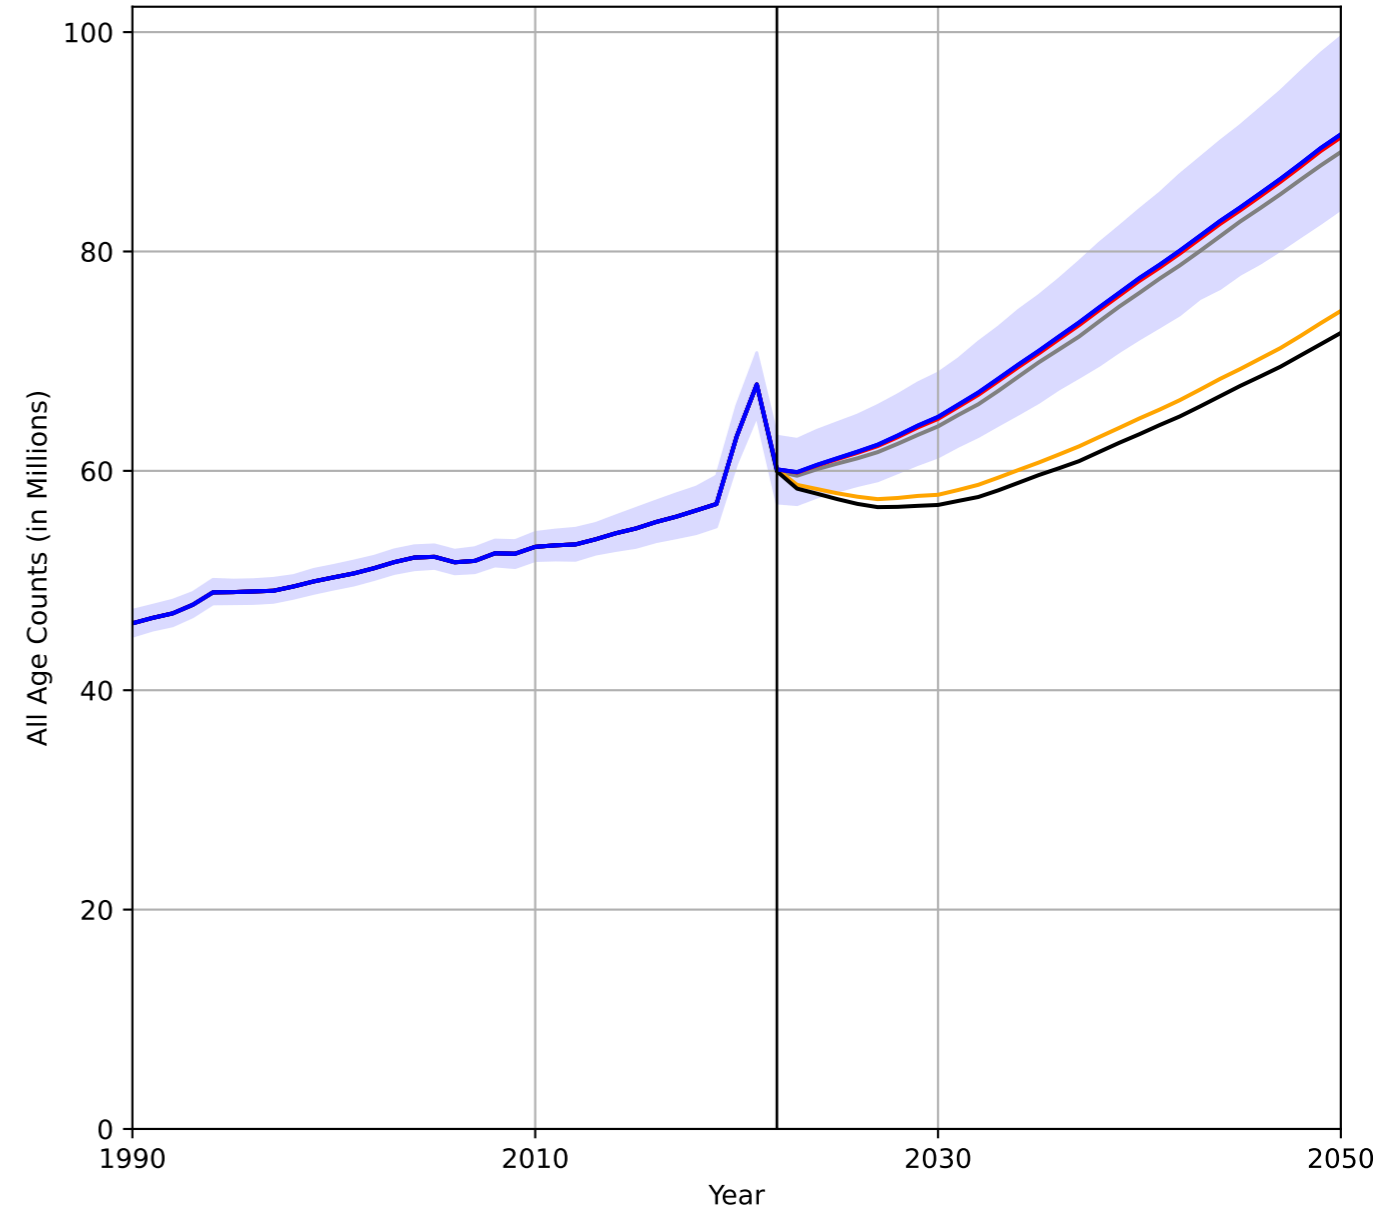

# Central Europe, Eastern Europe, And Central Asia

Supplemental Results Figure S11. All-cause age standardised death rates (A) and all age death counts (B), for the past and for five future scenarios, 1990-2050

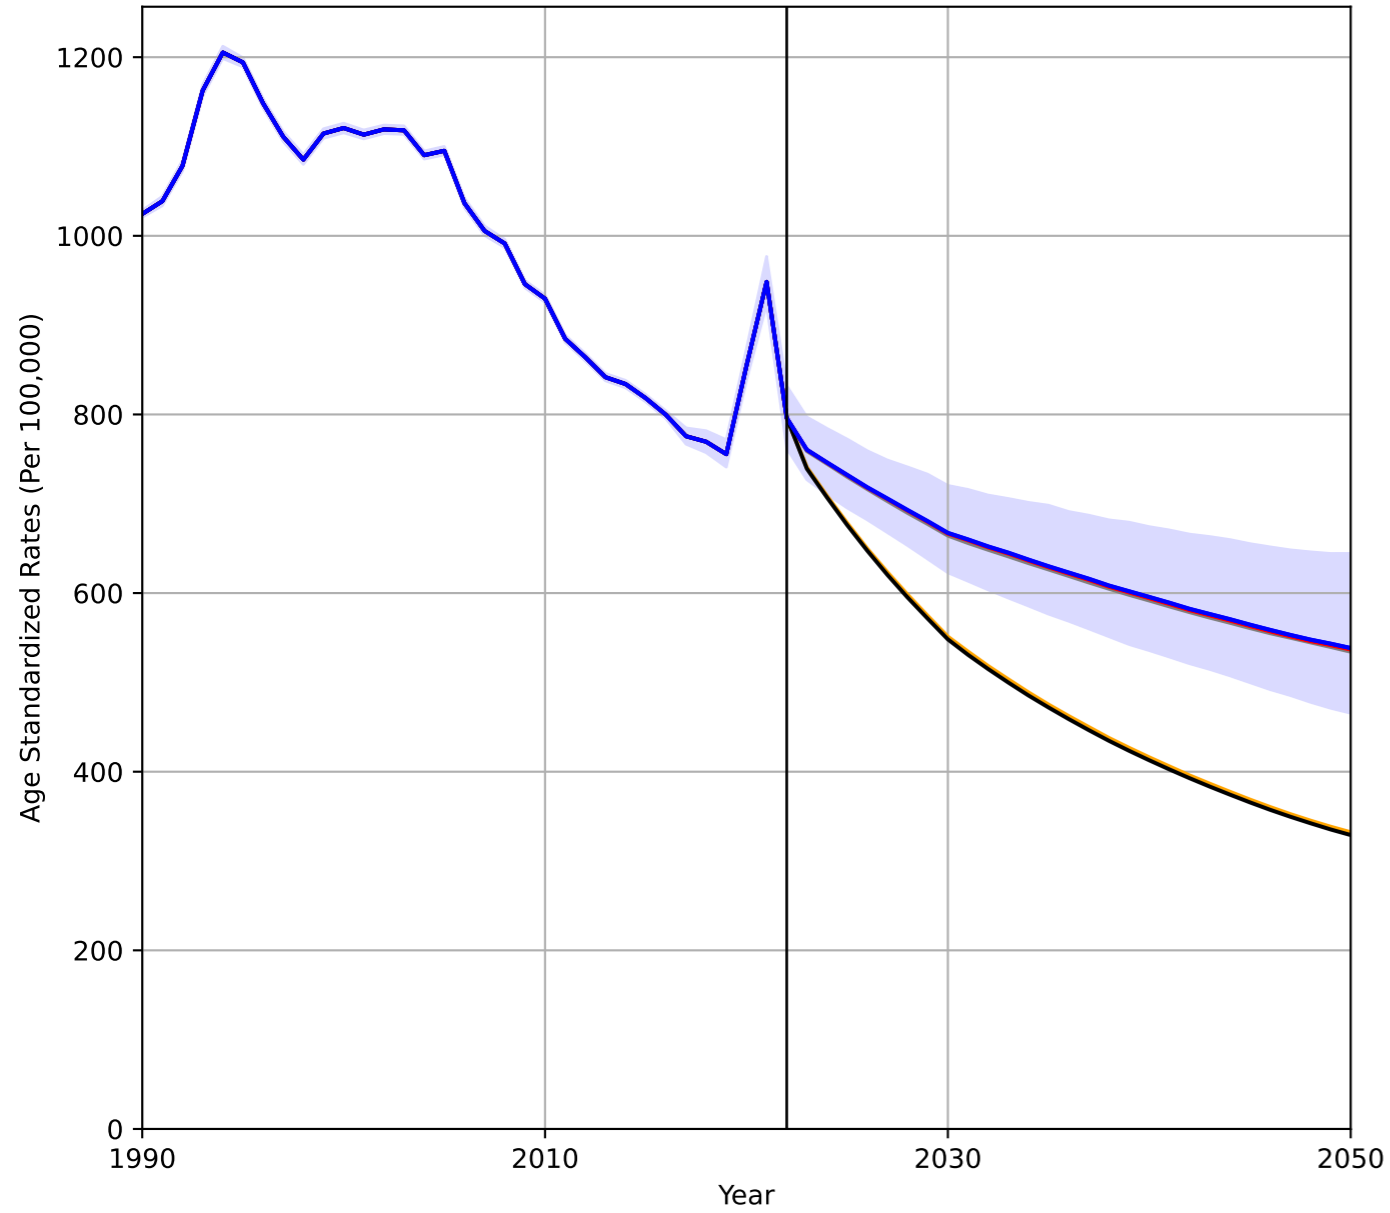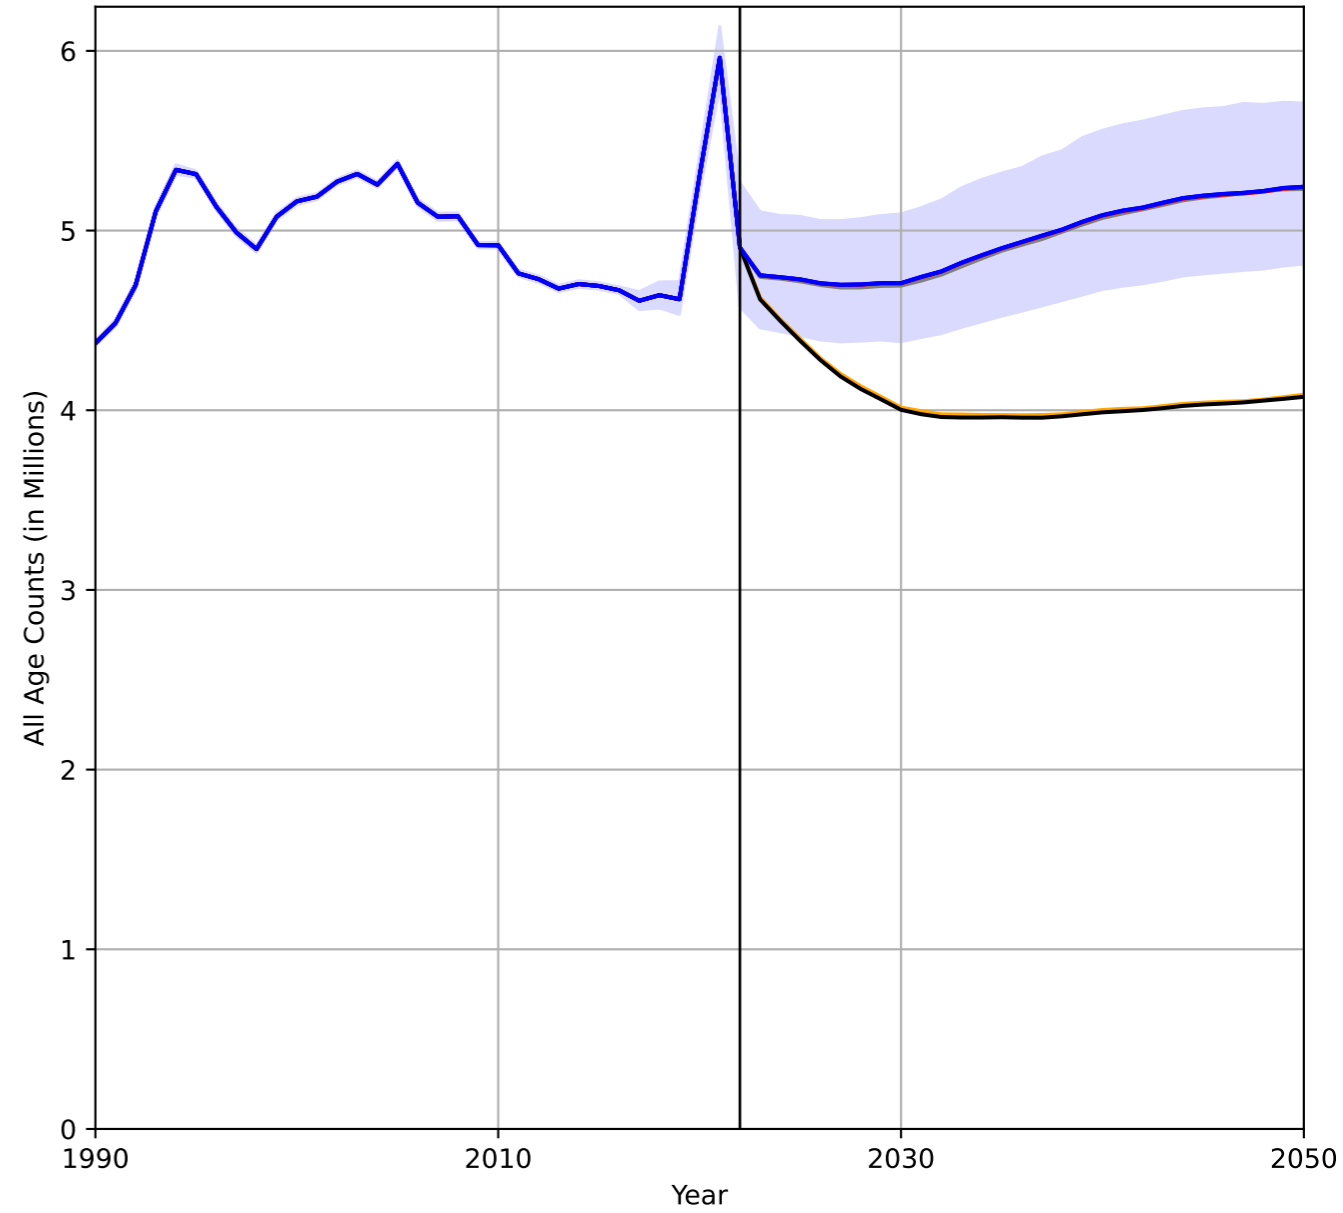

# High Income

Supplemental Results Figure S11. All-cause age standardised death rates (A) and all age death counts (B), for the past and for five future scenarios, 1990–2050

1850

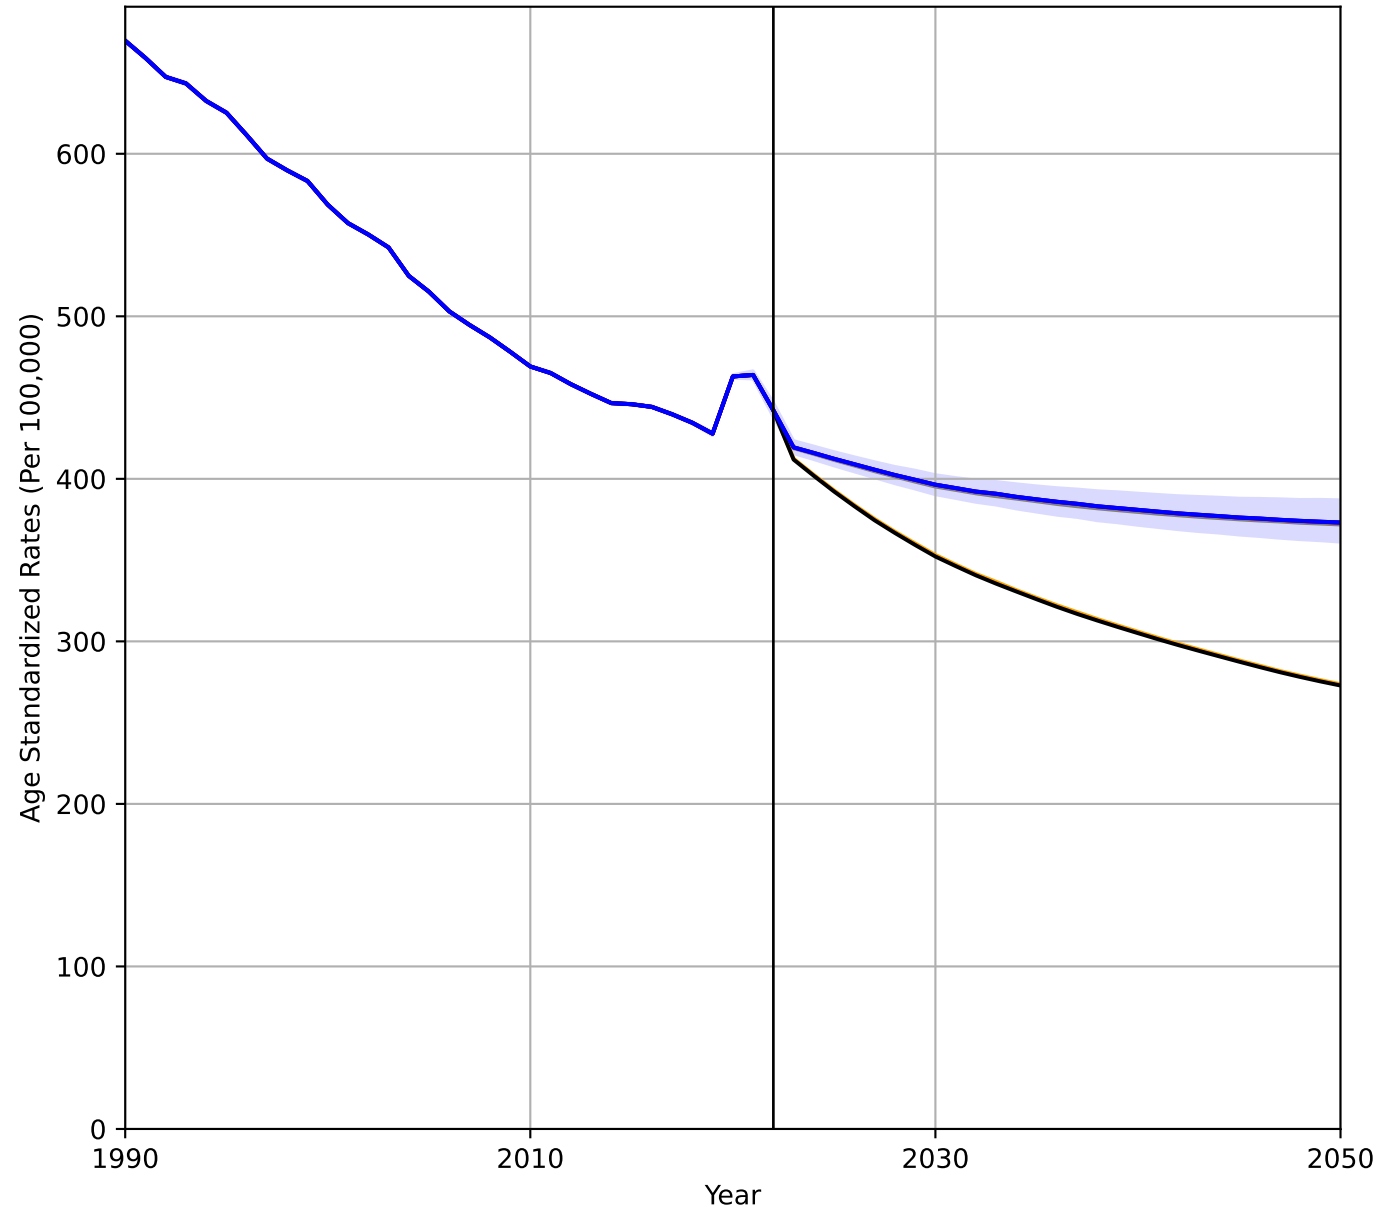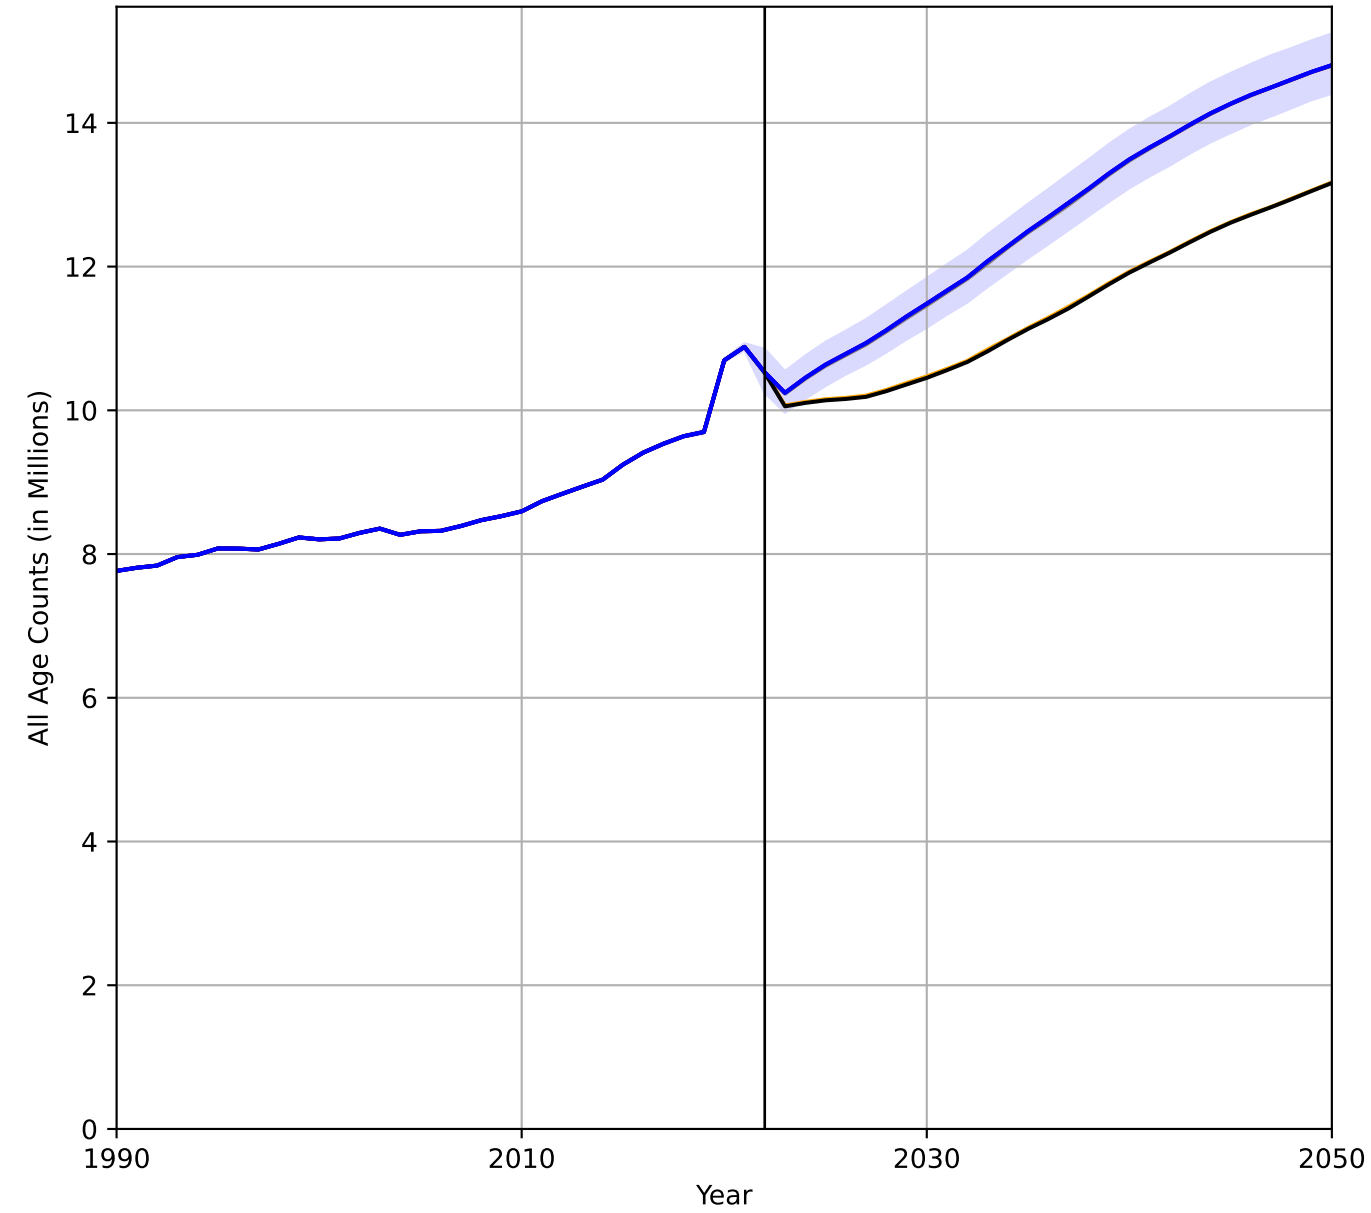

# Latin America And Caribbean

Supplemental Results Figure S11. All-cause age standardised death rates (A) and all age death counts (B), for the past and for five future scenarios, 1990–2050

1851

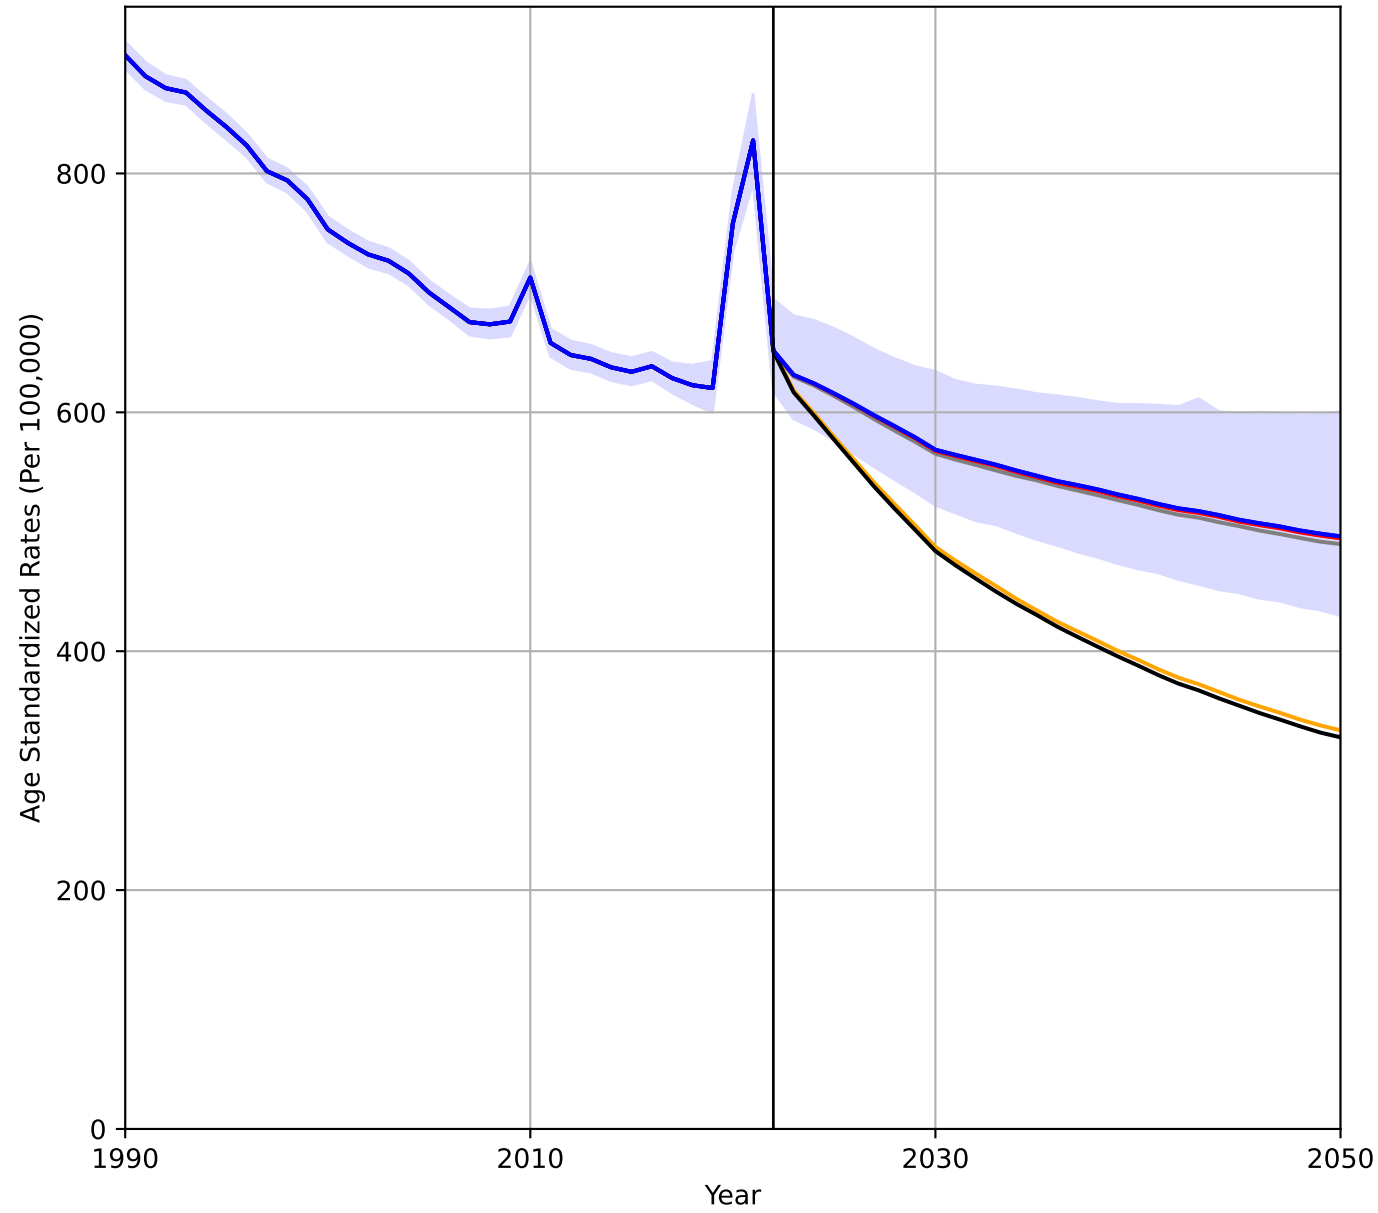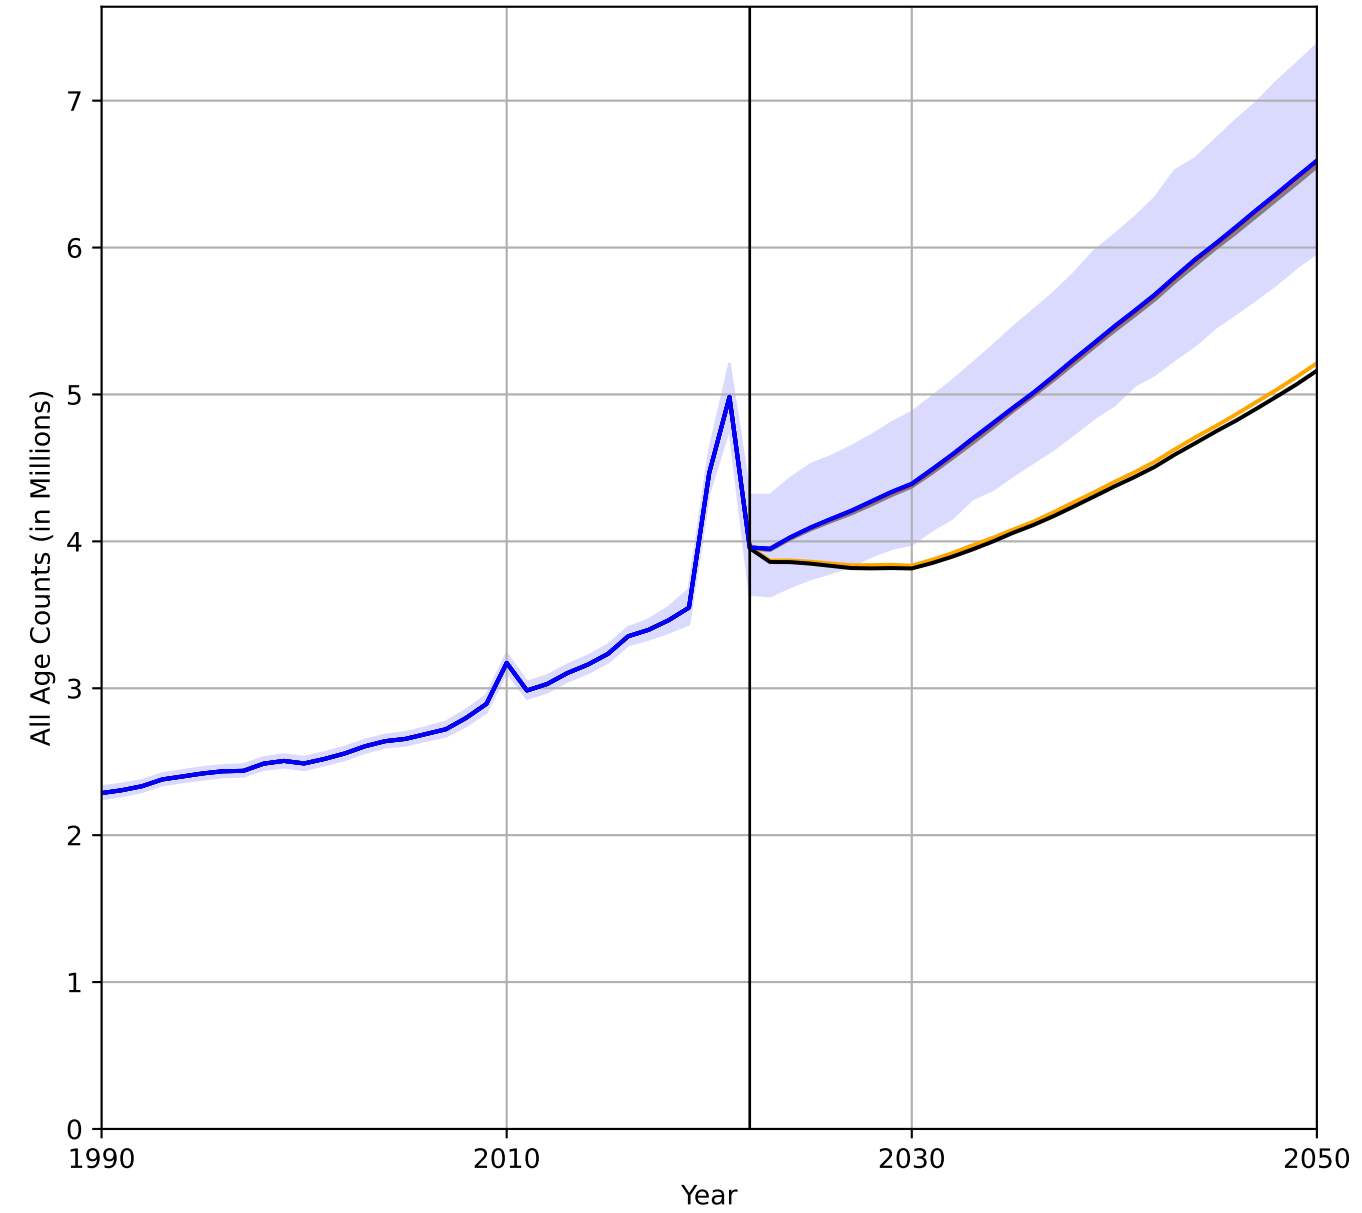

# North Africa And Middle East

Supplemental Results Figure S11. All-cause age standardised death rates (A) and all age death counts (B), for the past and for five future scenarios, 1990–2050

1852

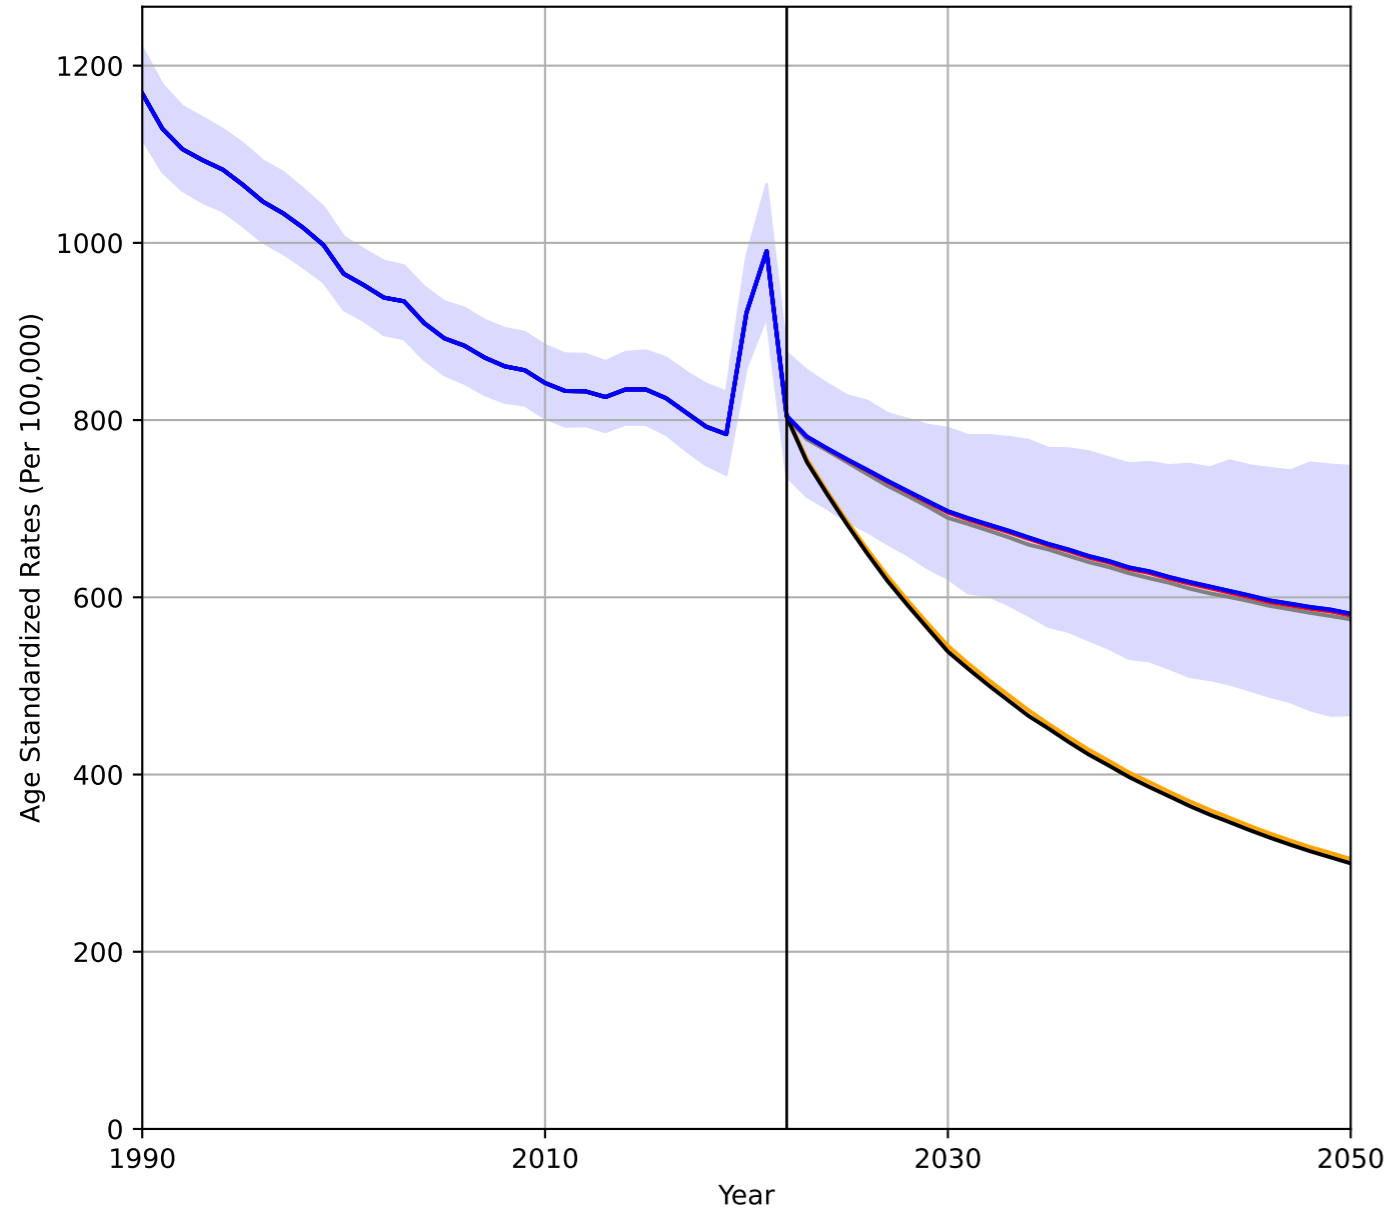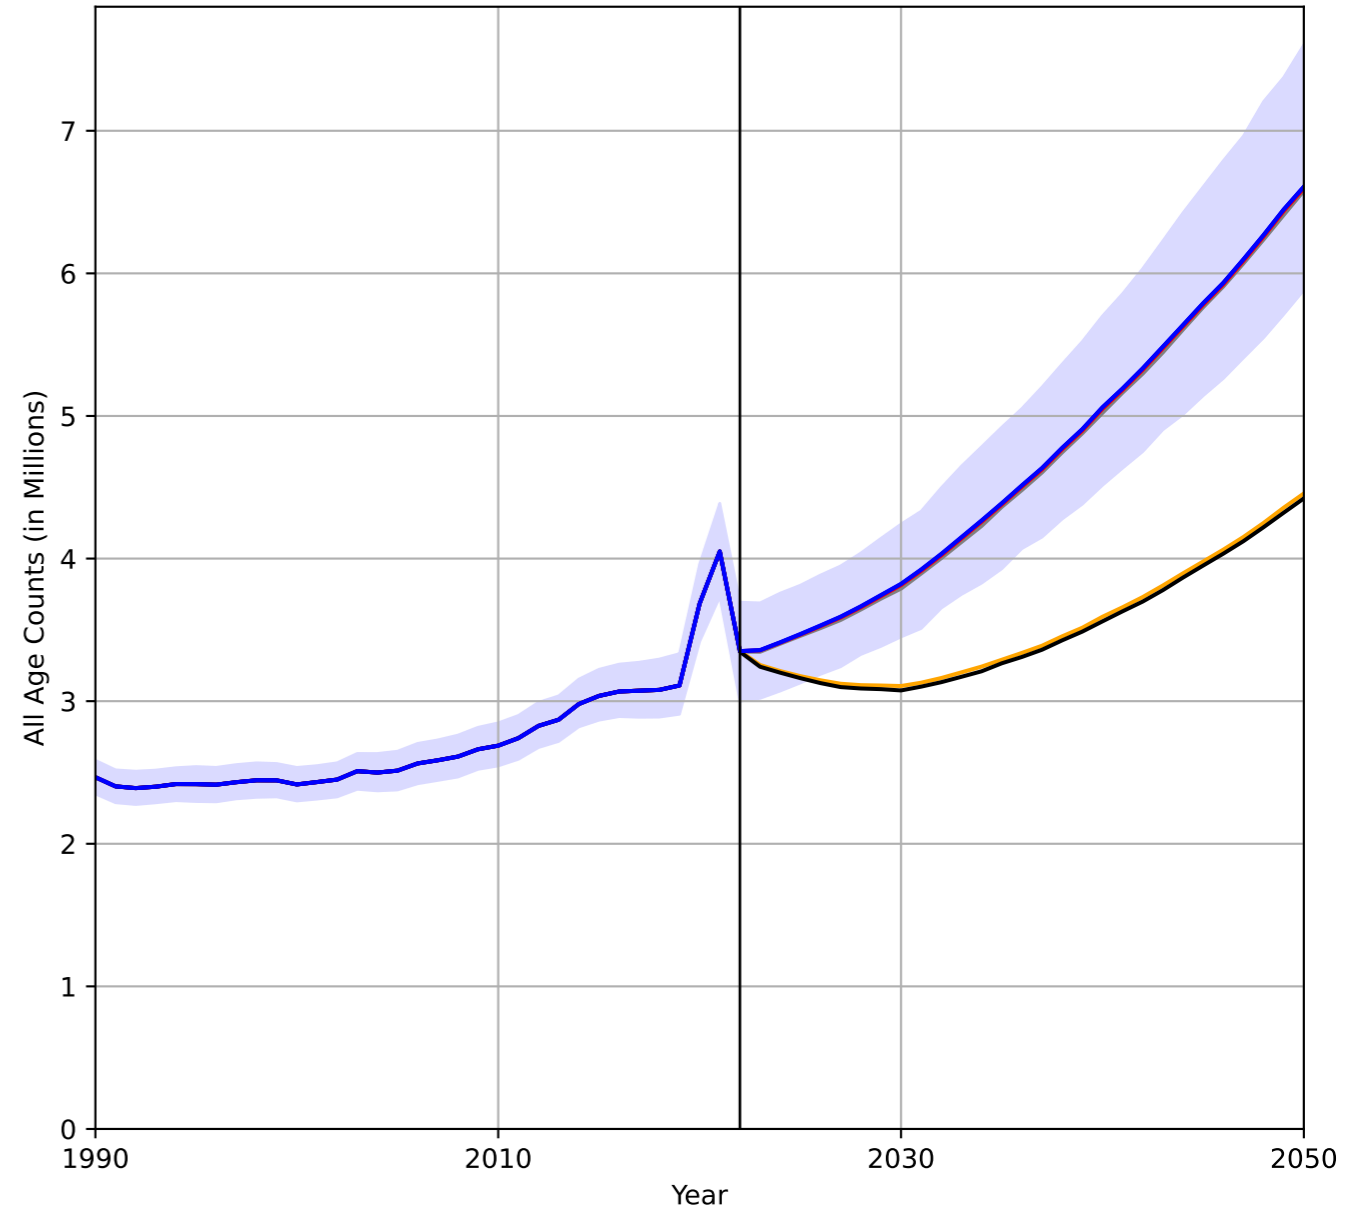

# South Asia

Supplemental Results Figure S11. All-cause age standardised death rates (A) and all age death counts (B), for the past and for five future scenarios, 1990–2050

1853

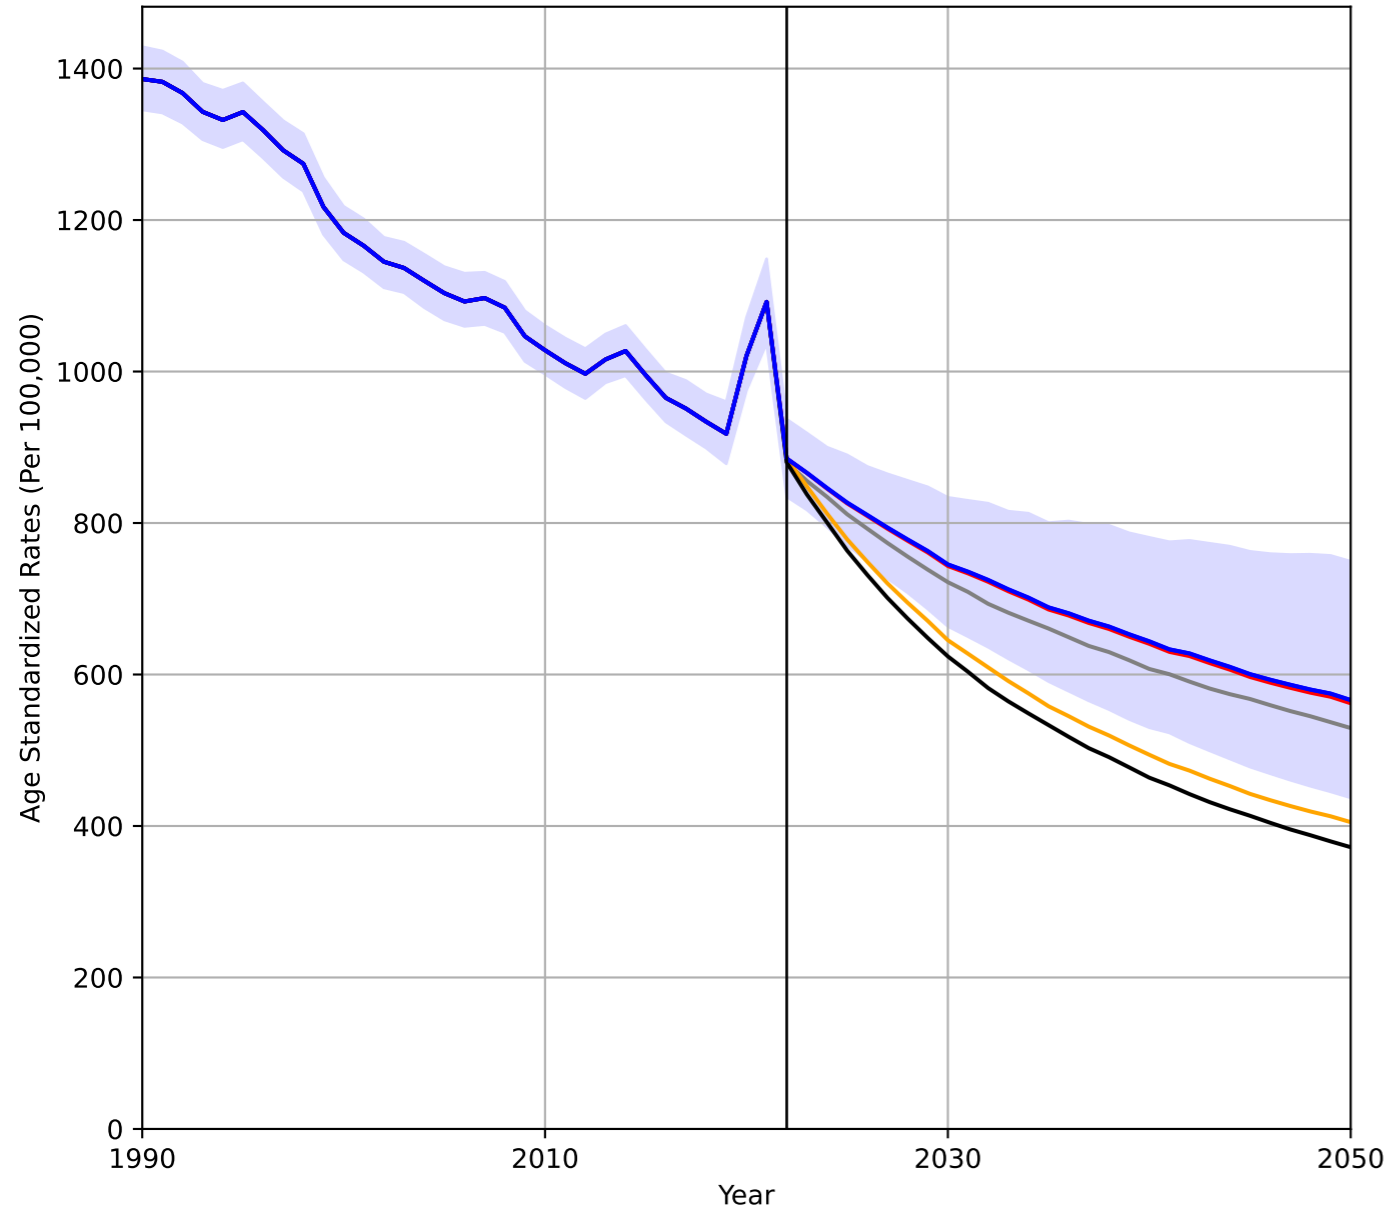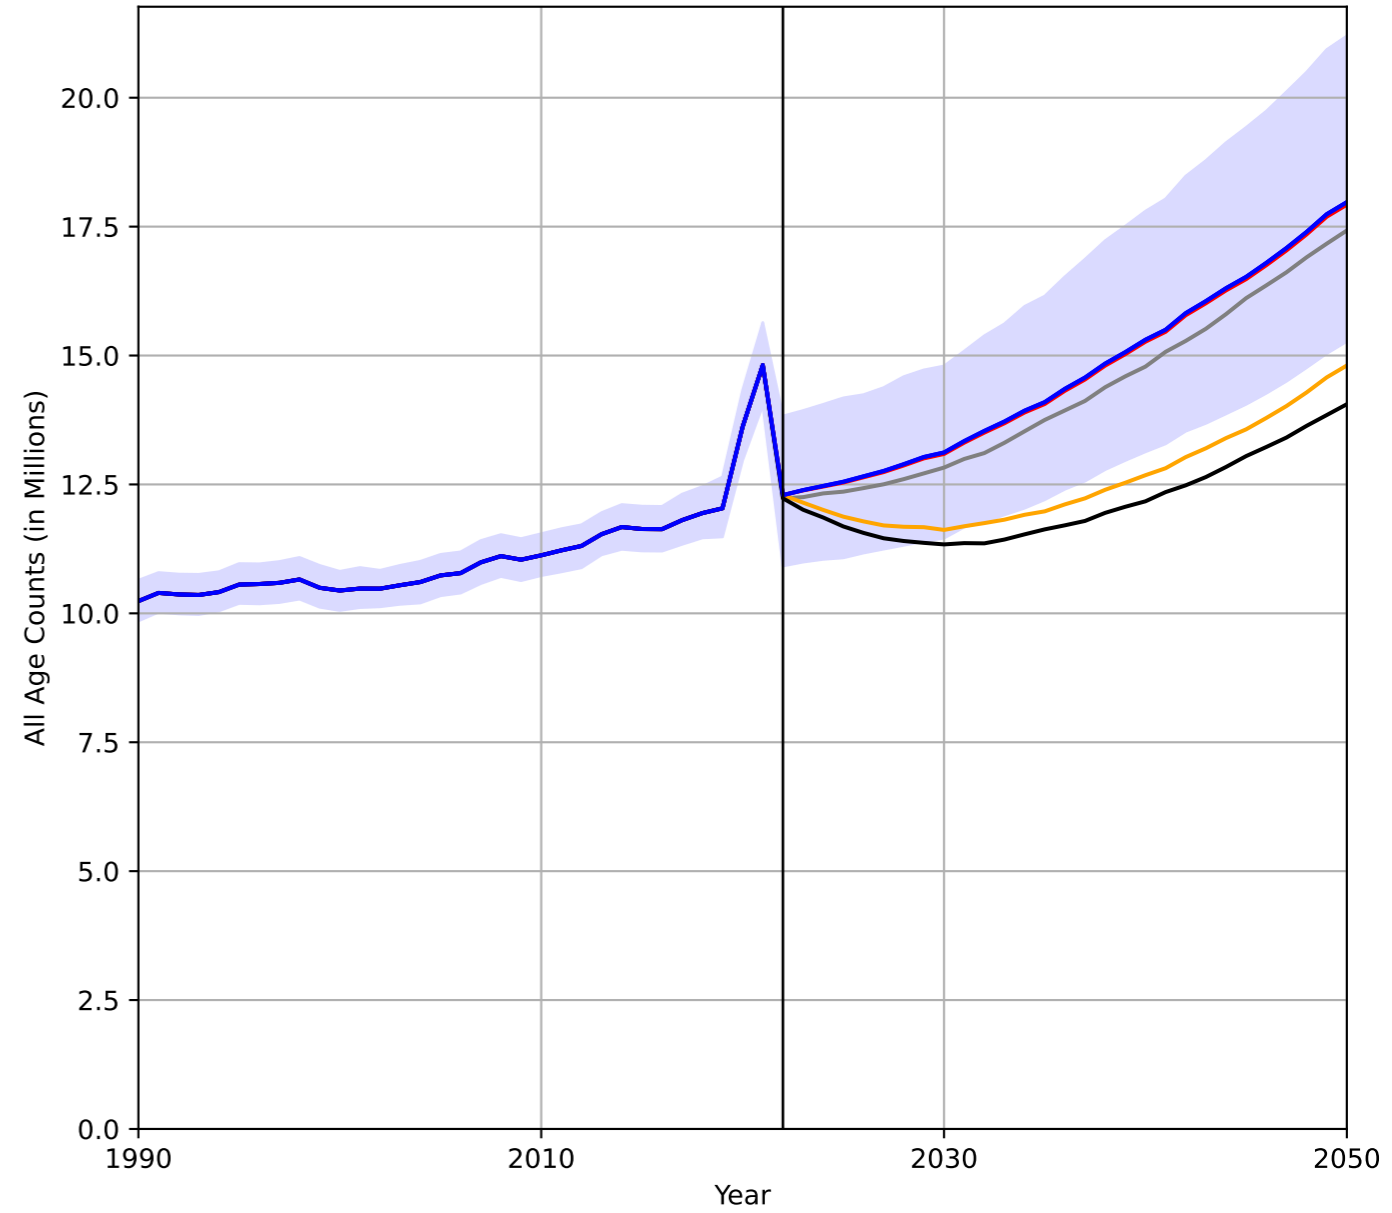

# Southeast Asia, East Asia, And Oceania

Supplemental Results Figure S11. All-cause age standardised death rates (A) and all age death counts (B), for the past and for five future scenarios, 1990–2050

1854

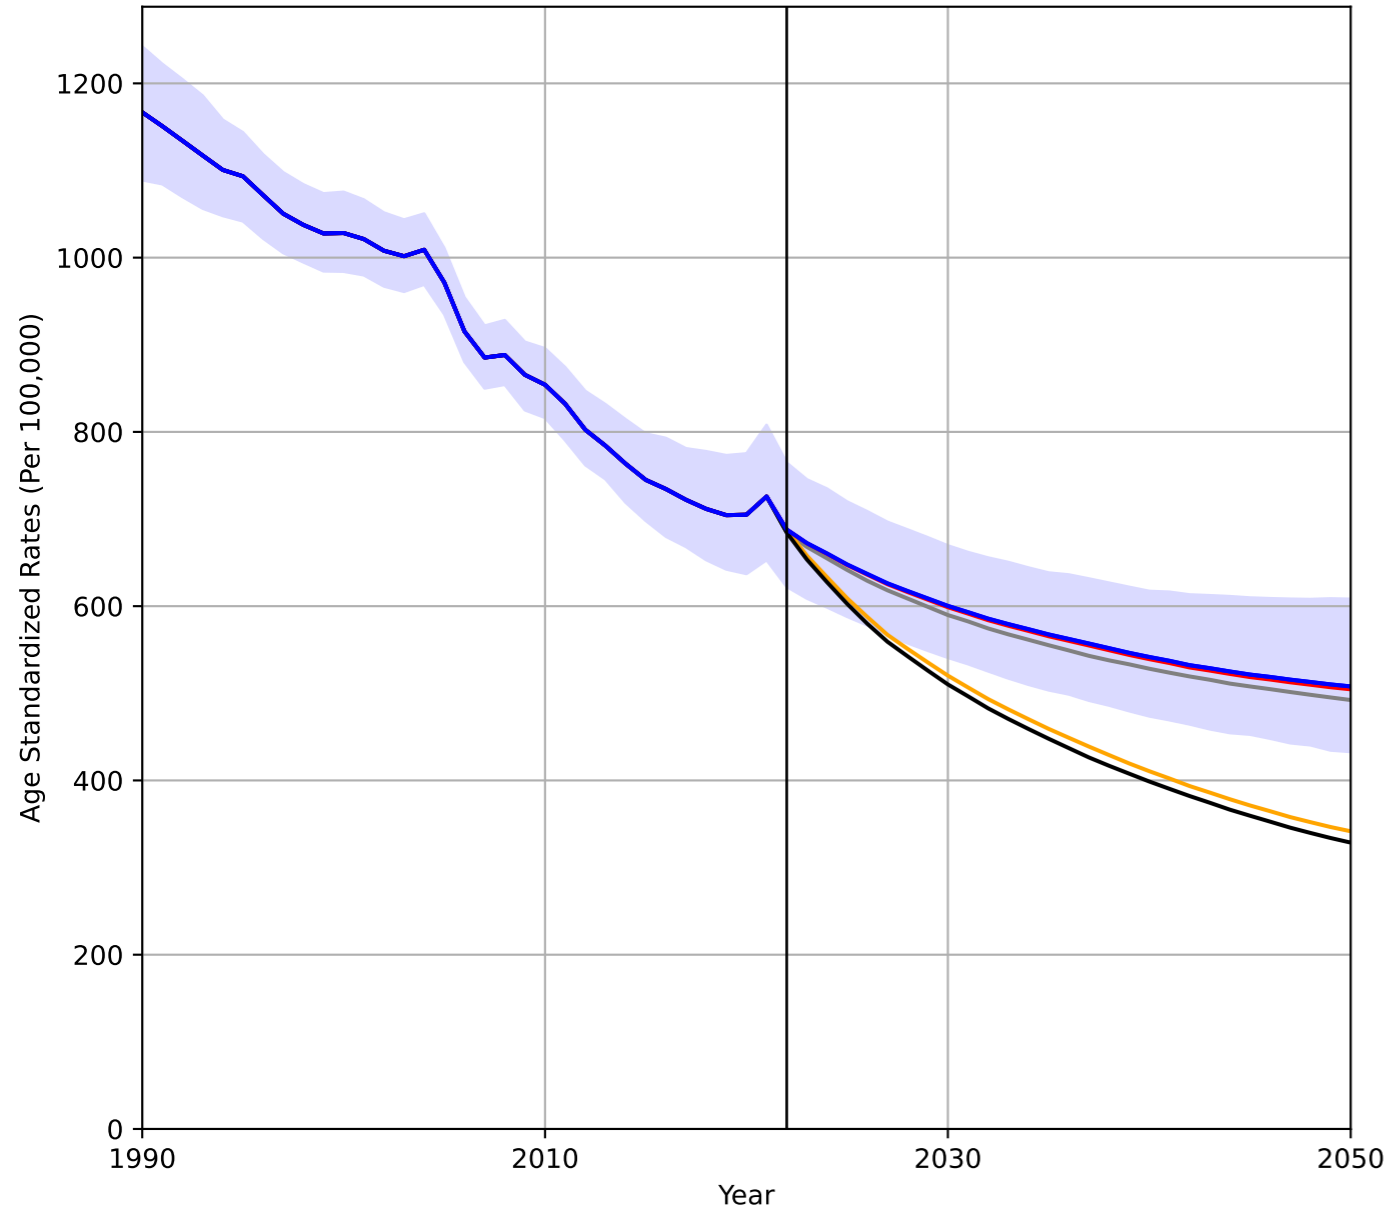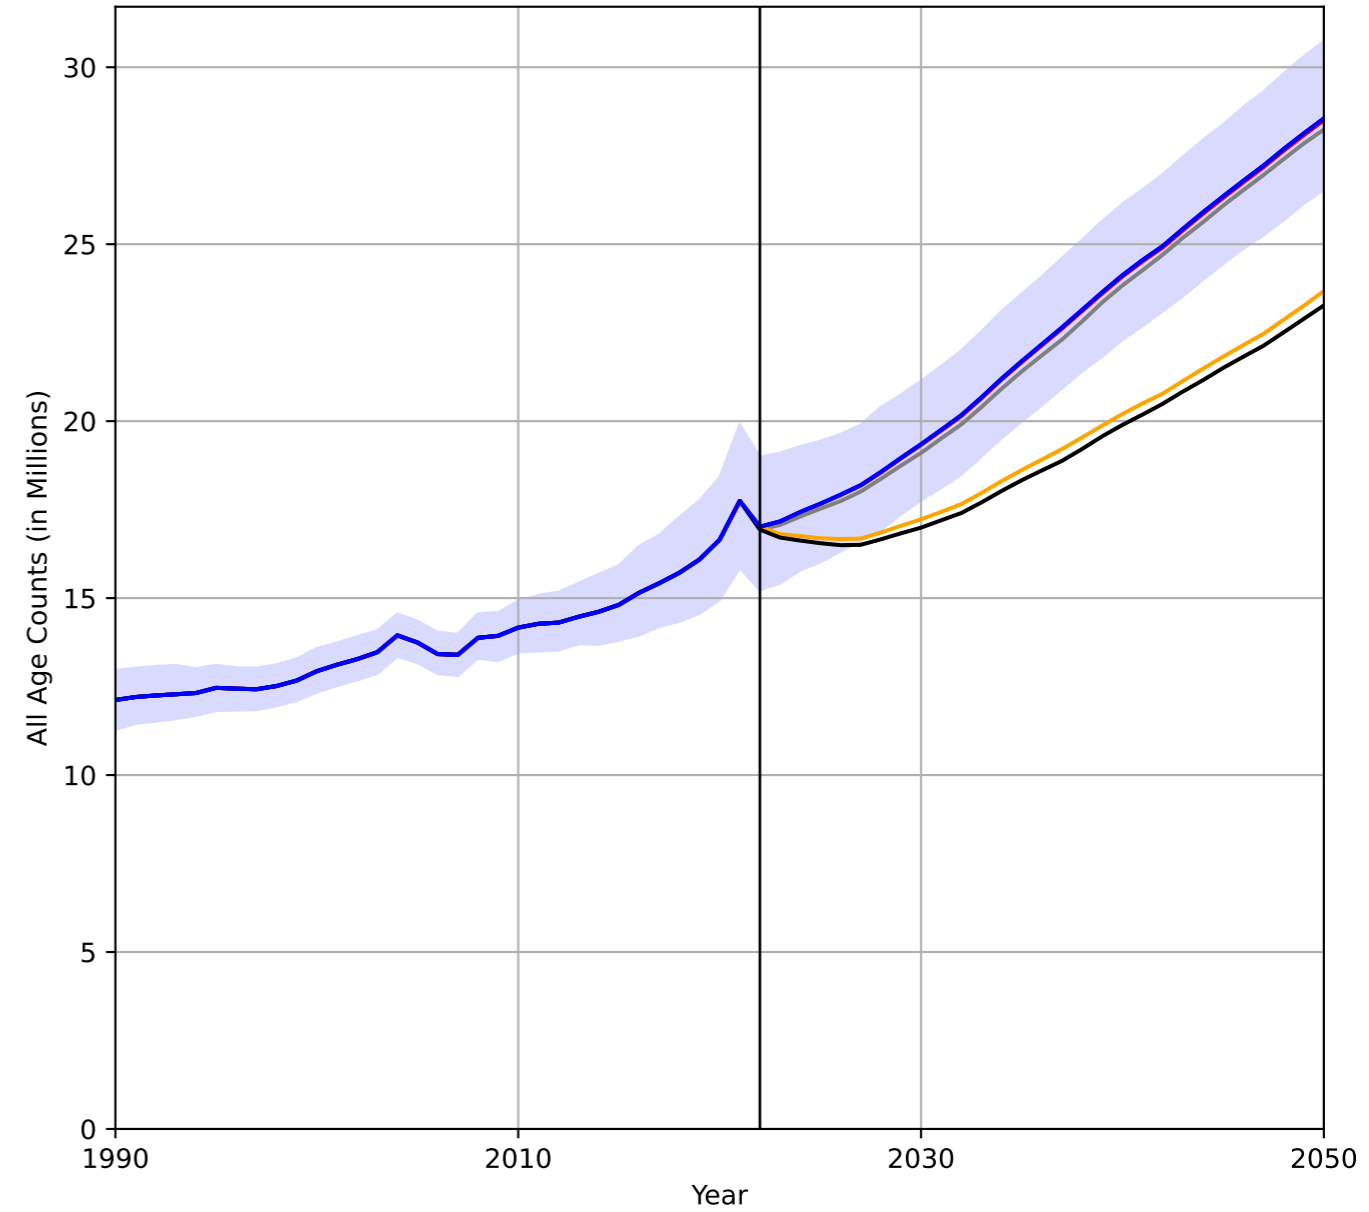

# Sub-Saharan Africa

Supplemental Results Figure S11. All-cause age standardised death rates (A) and all age death counts (B), for the past and for five future scenarios, 1990–2050

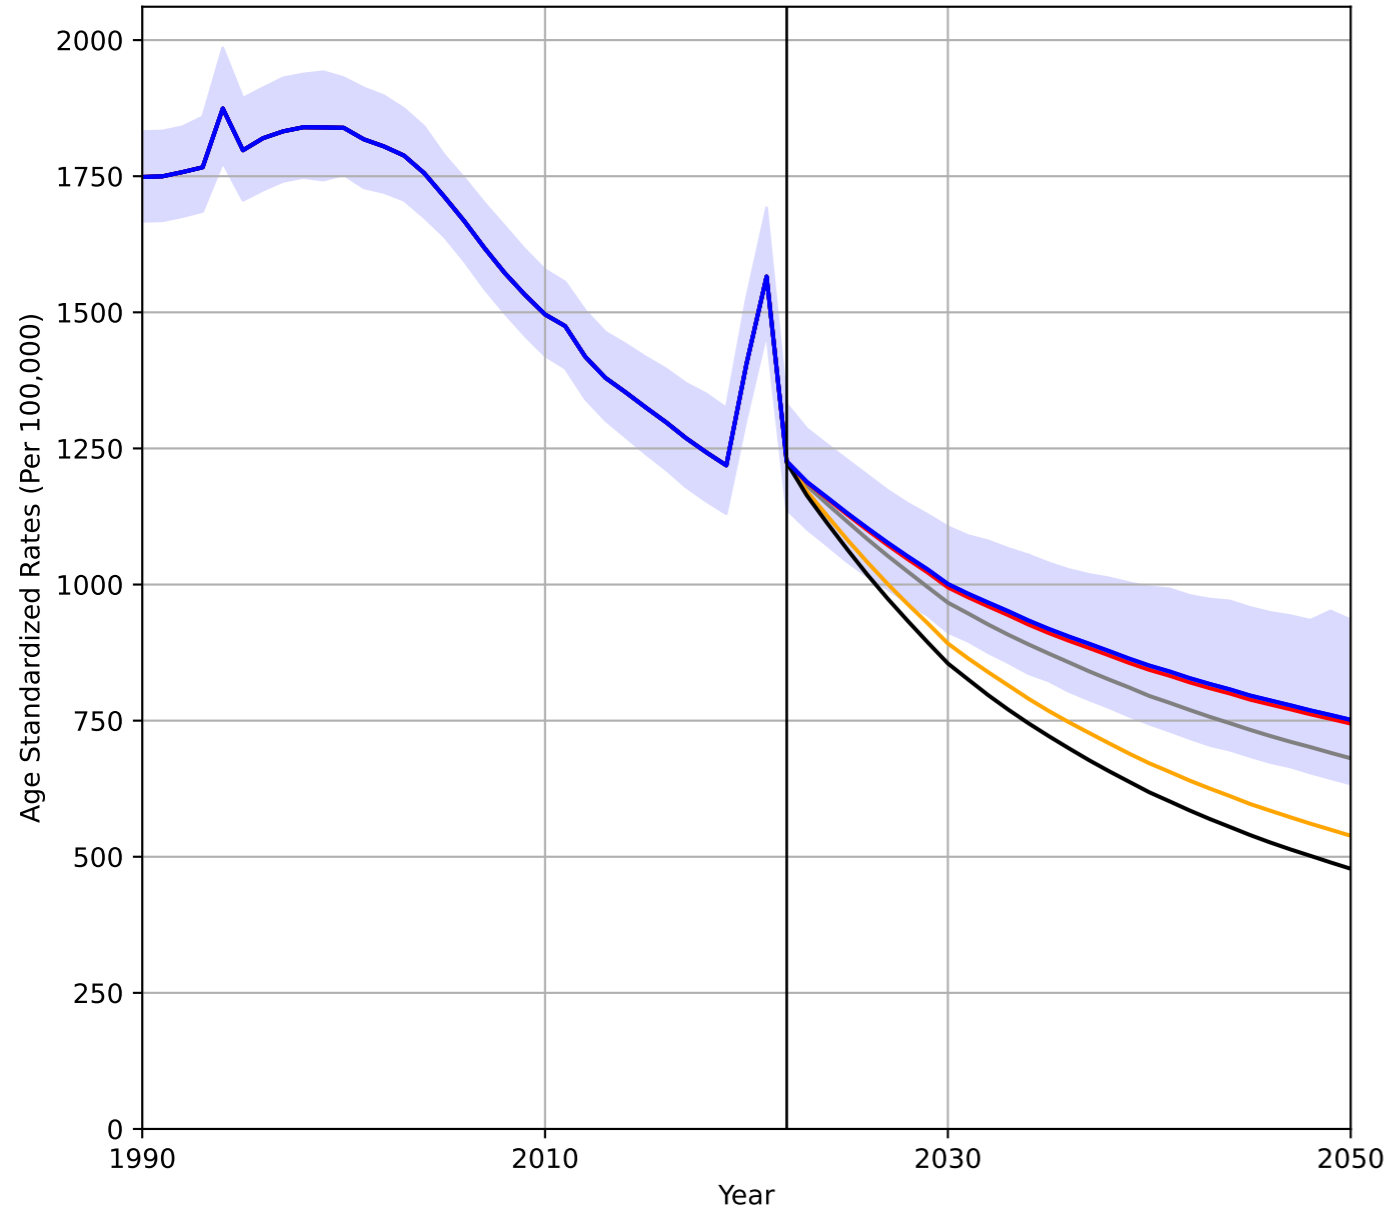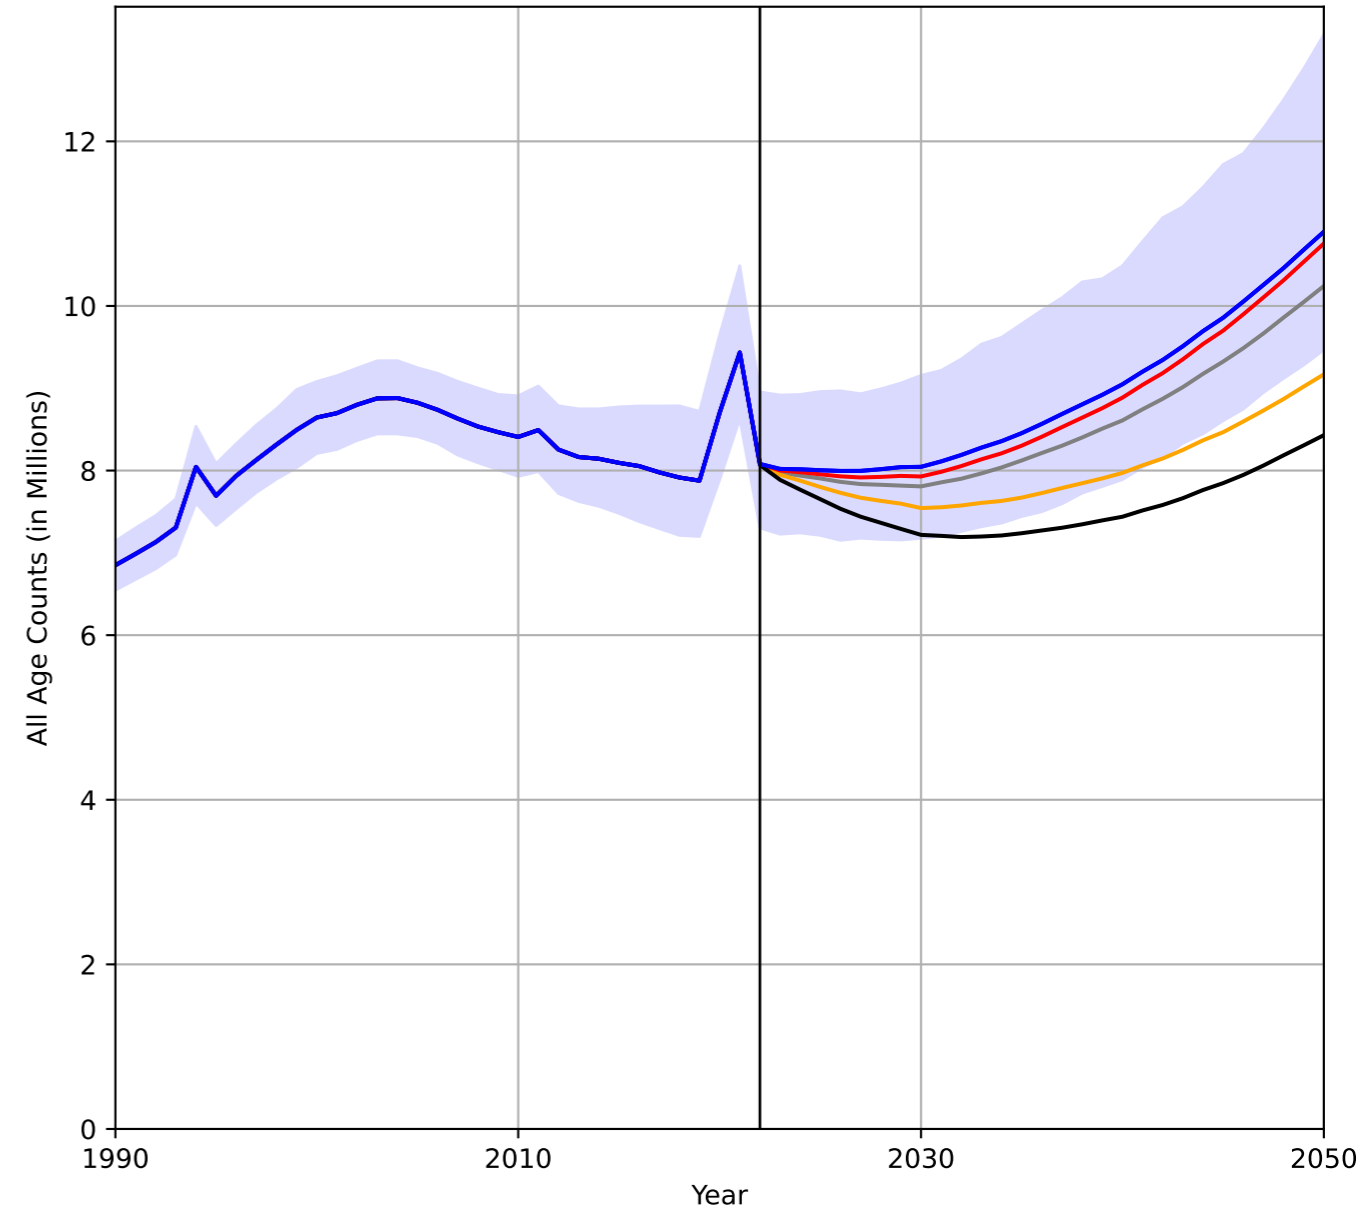



# Central Asia

Supplemental Results Figure S11. All-cause age standardised death rates (A) and all age death counts (B), for the past and for five future scenarios, 1990–2050

1856

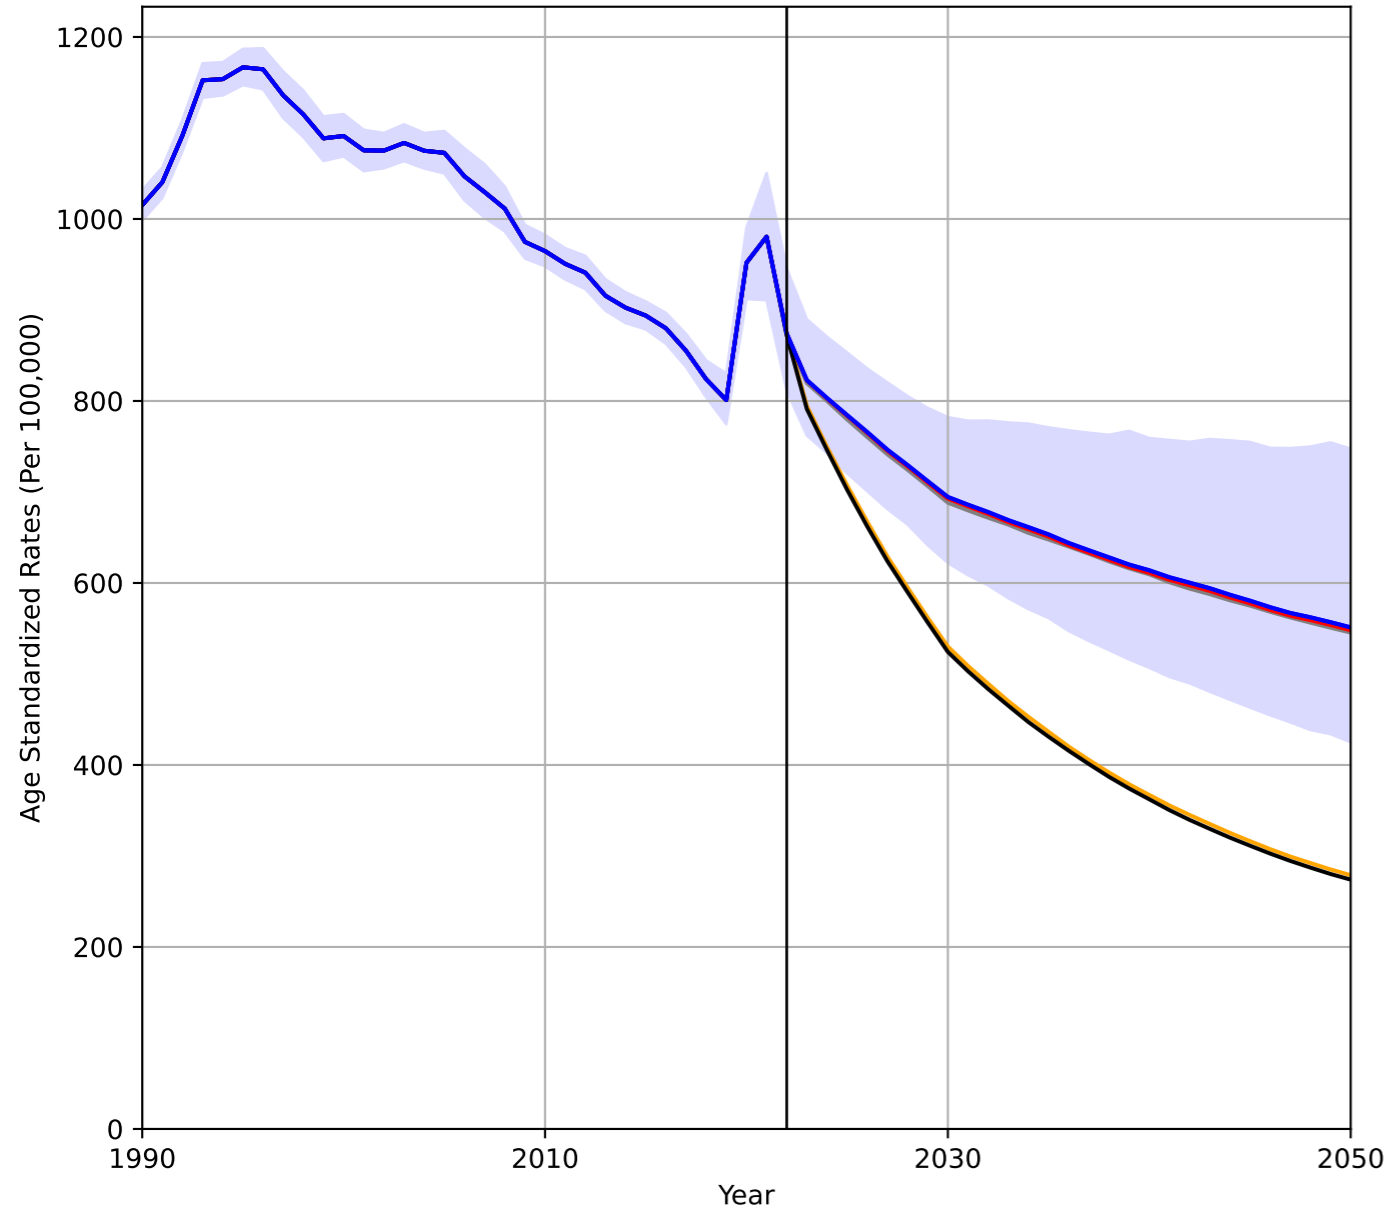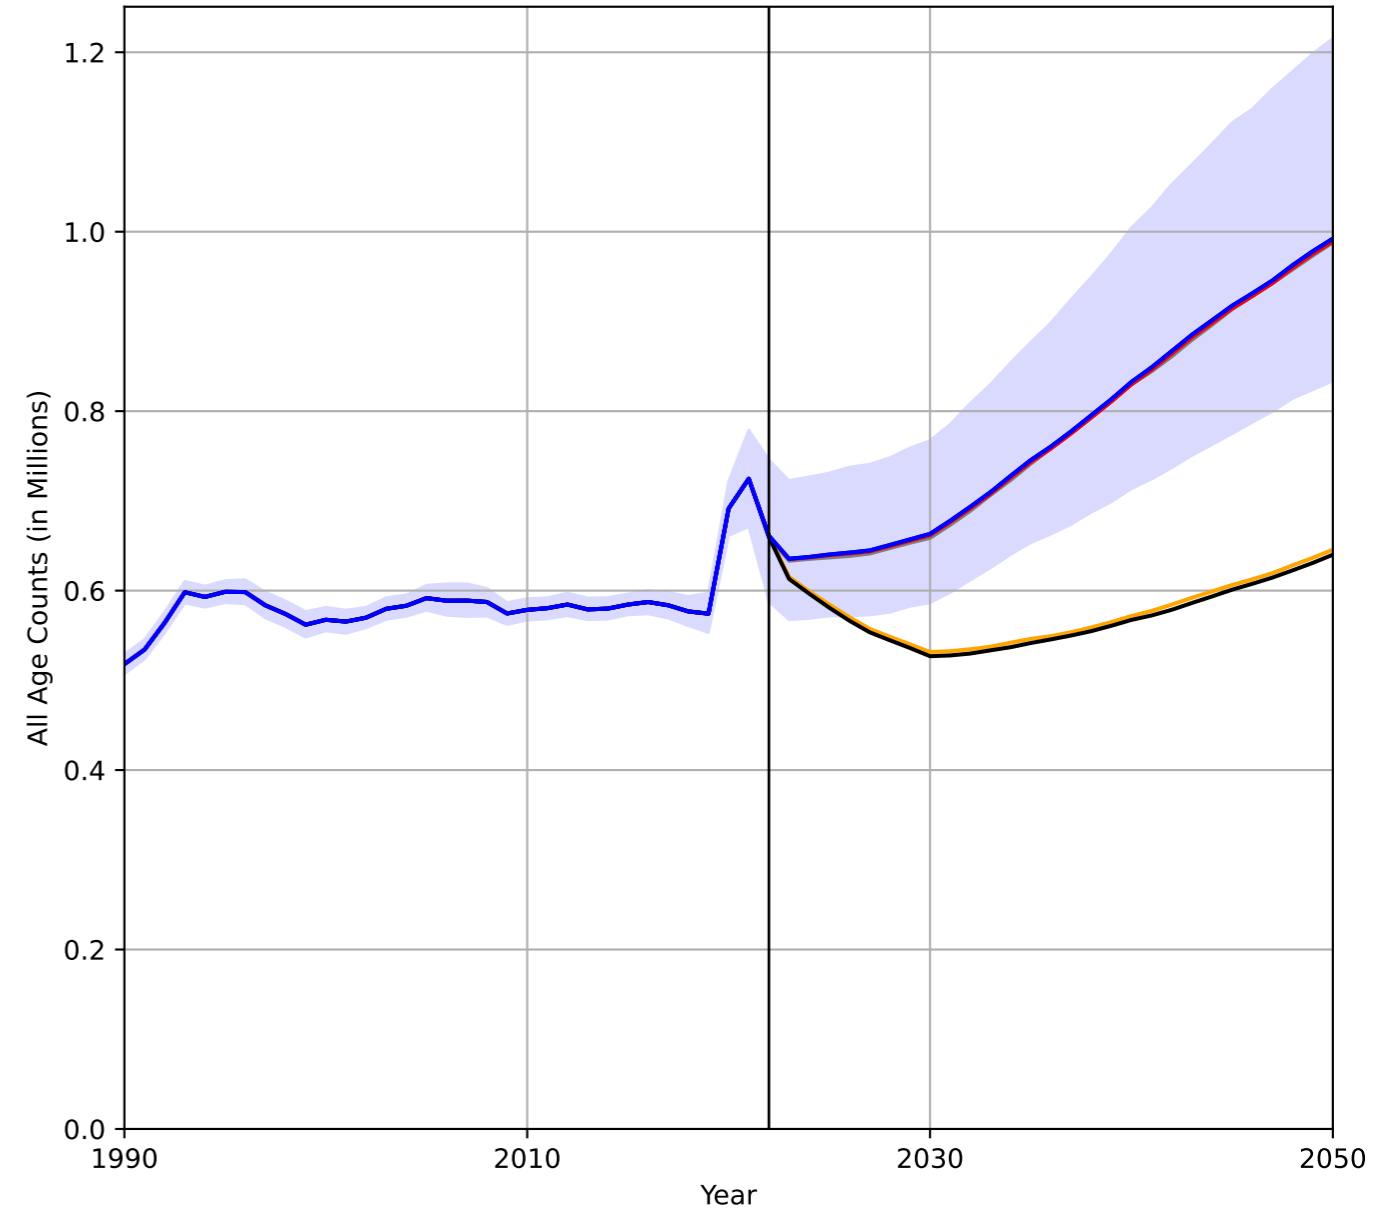

# Central Europe

Supplemental Results Figure S11. All-cause age standardised death rates (A) and all age death counts (B), for the past and for five future scenarios, 1990–2050

1857

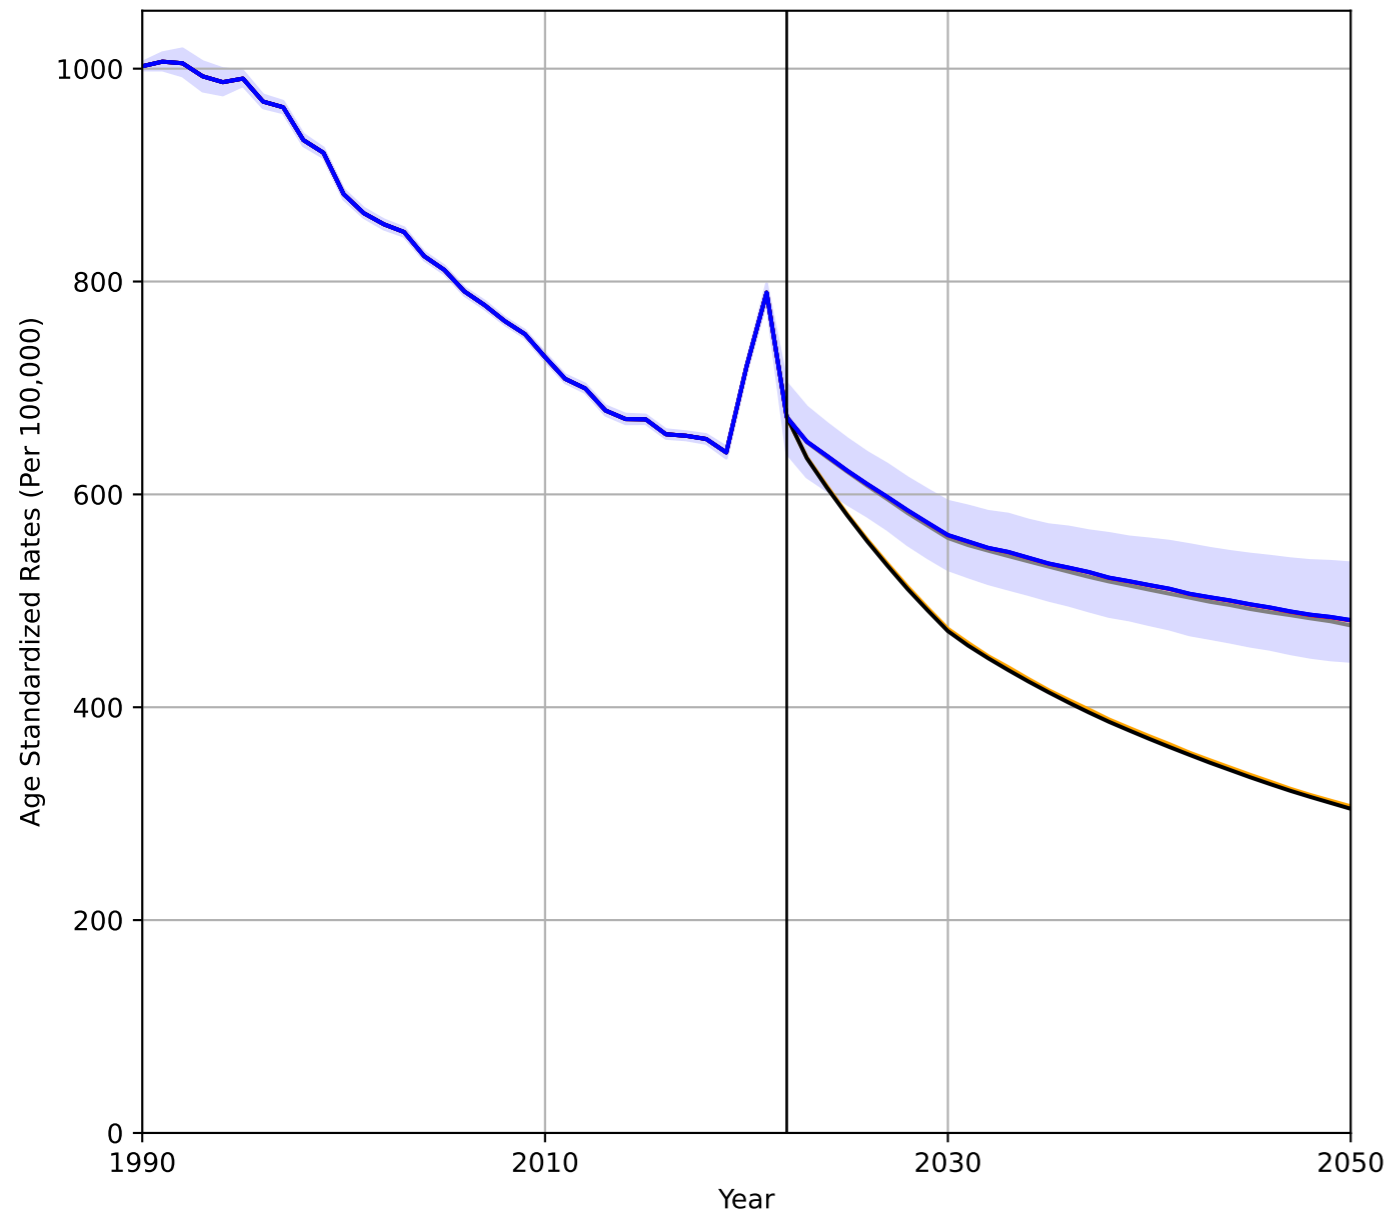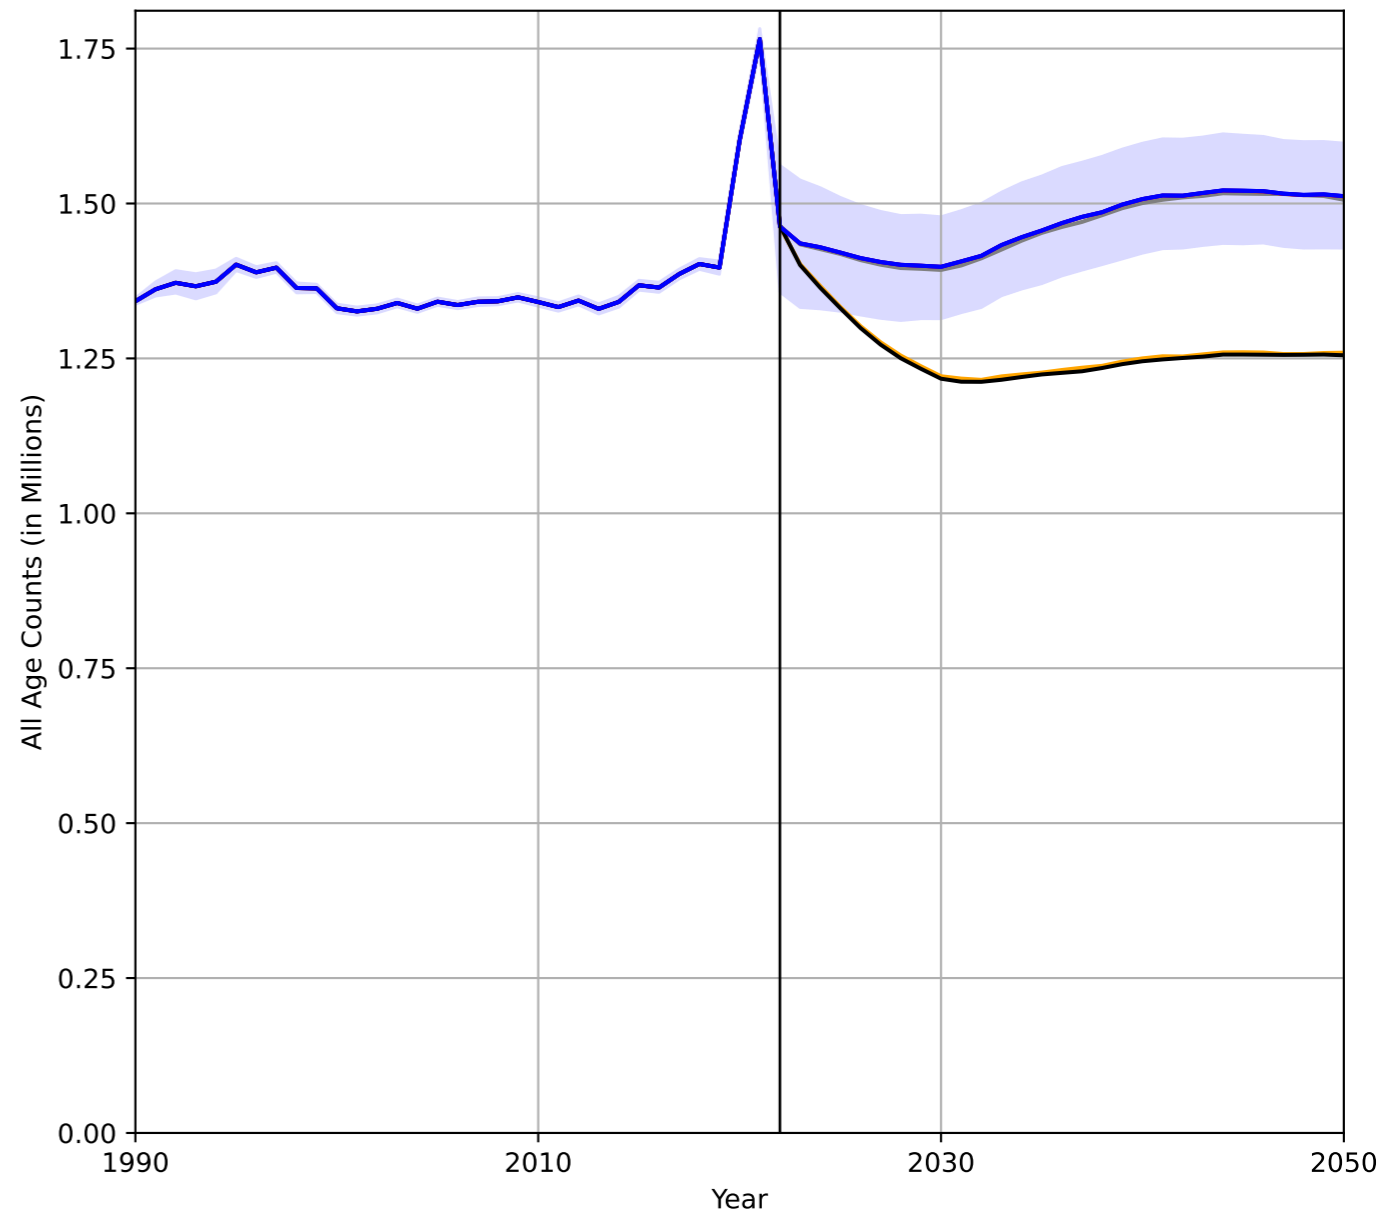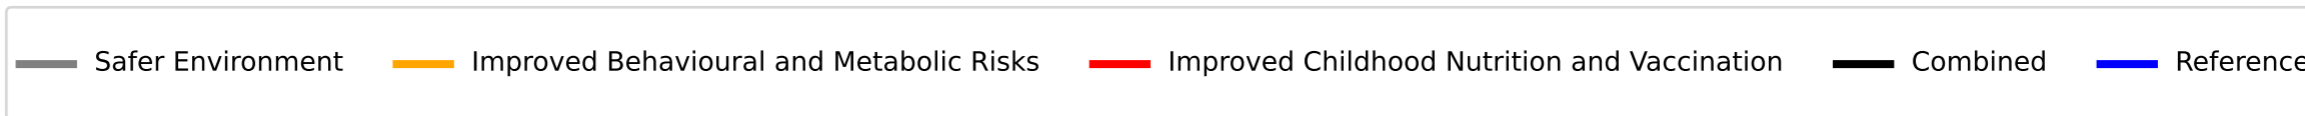

# Eastern Europe

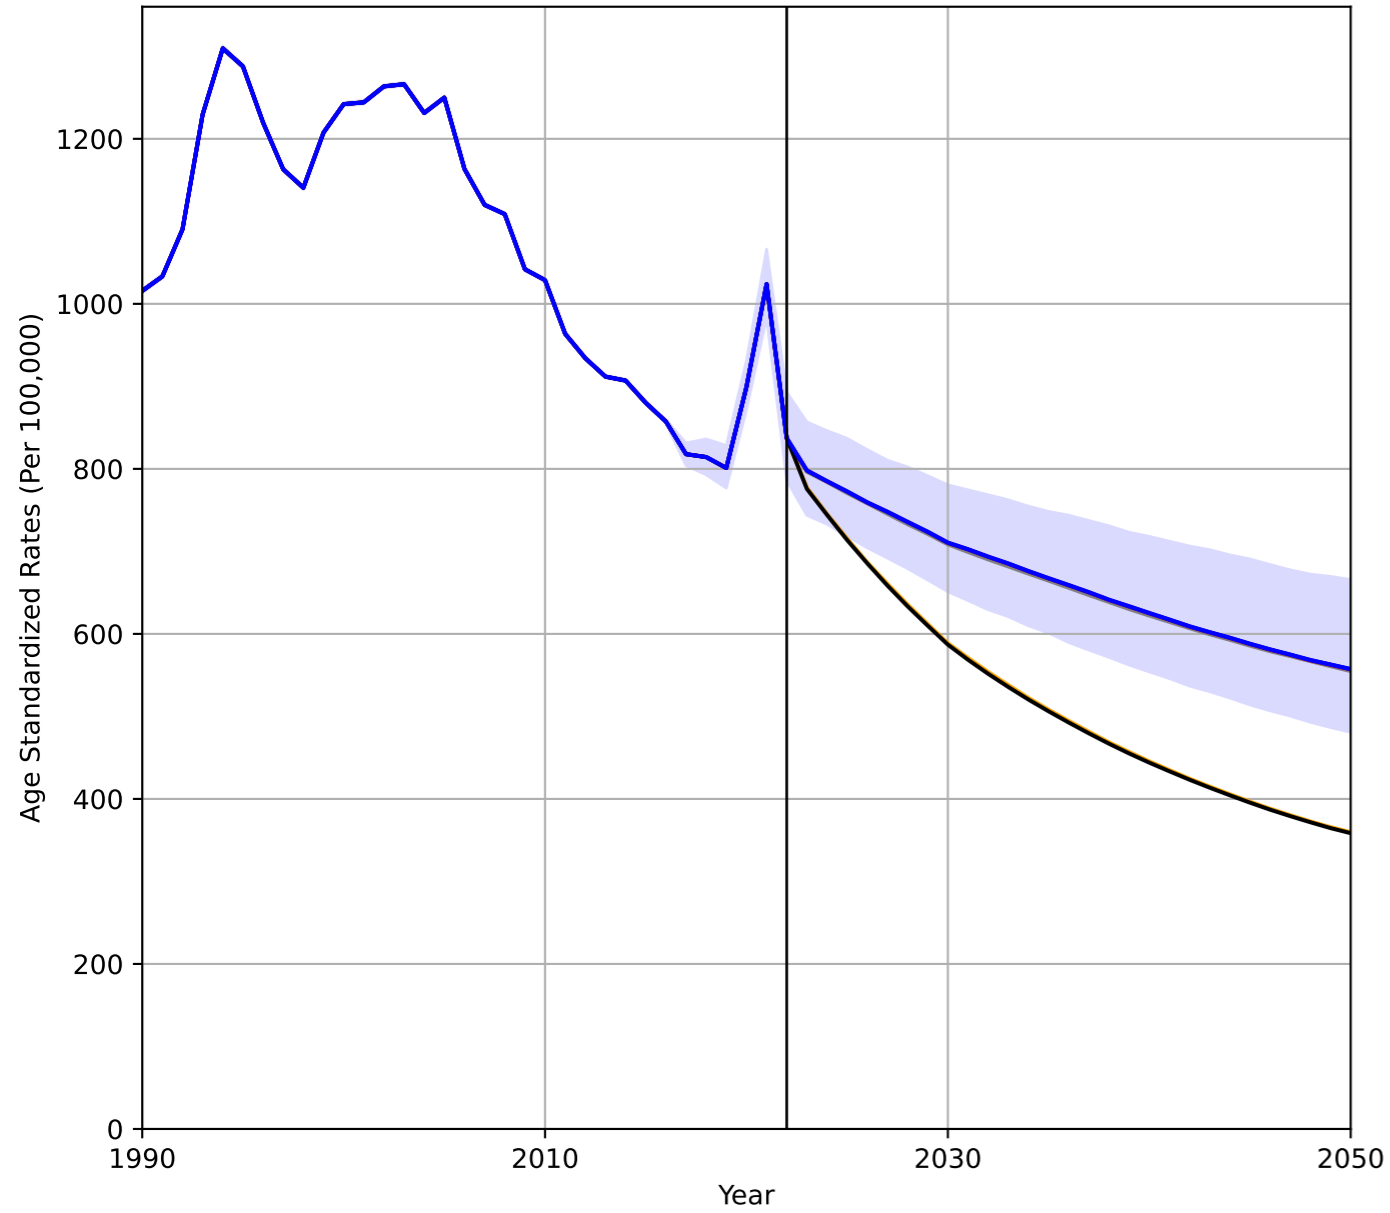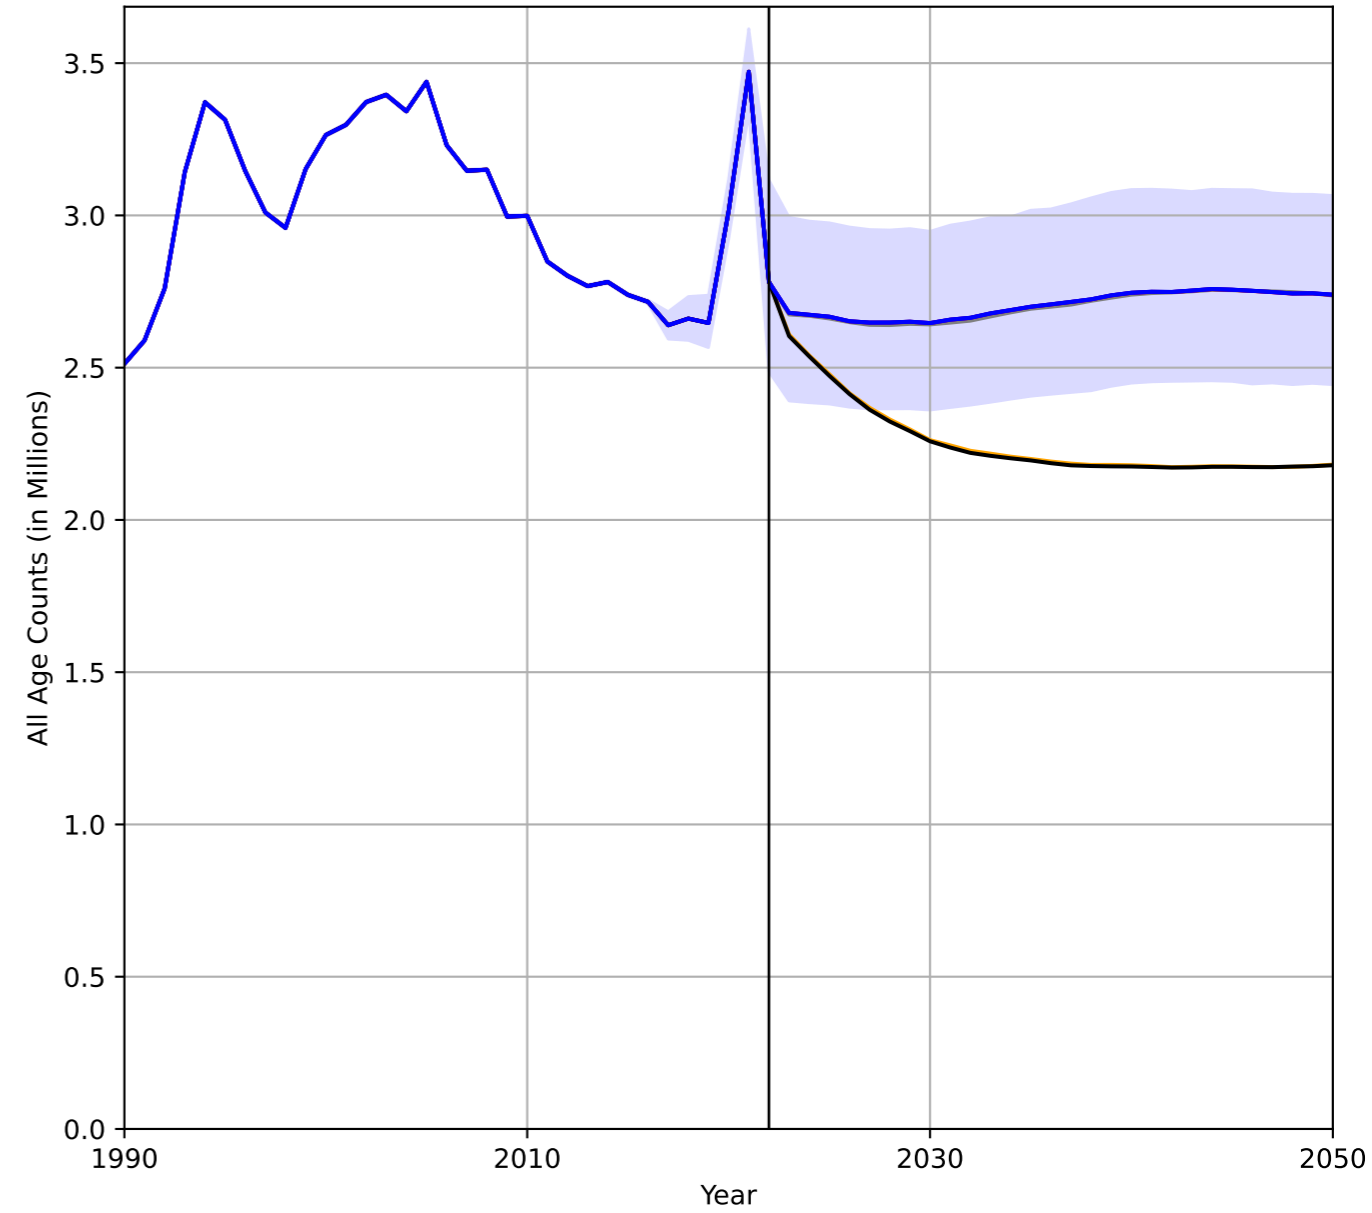

# Australasia

Supplemental Results Figure S11. All-cause age standardised death rates (A) and all age death counts (B), for the past and for five future scenarios, 1990–2050

1859

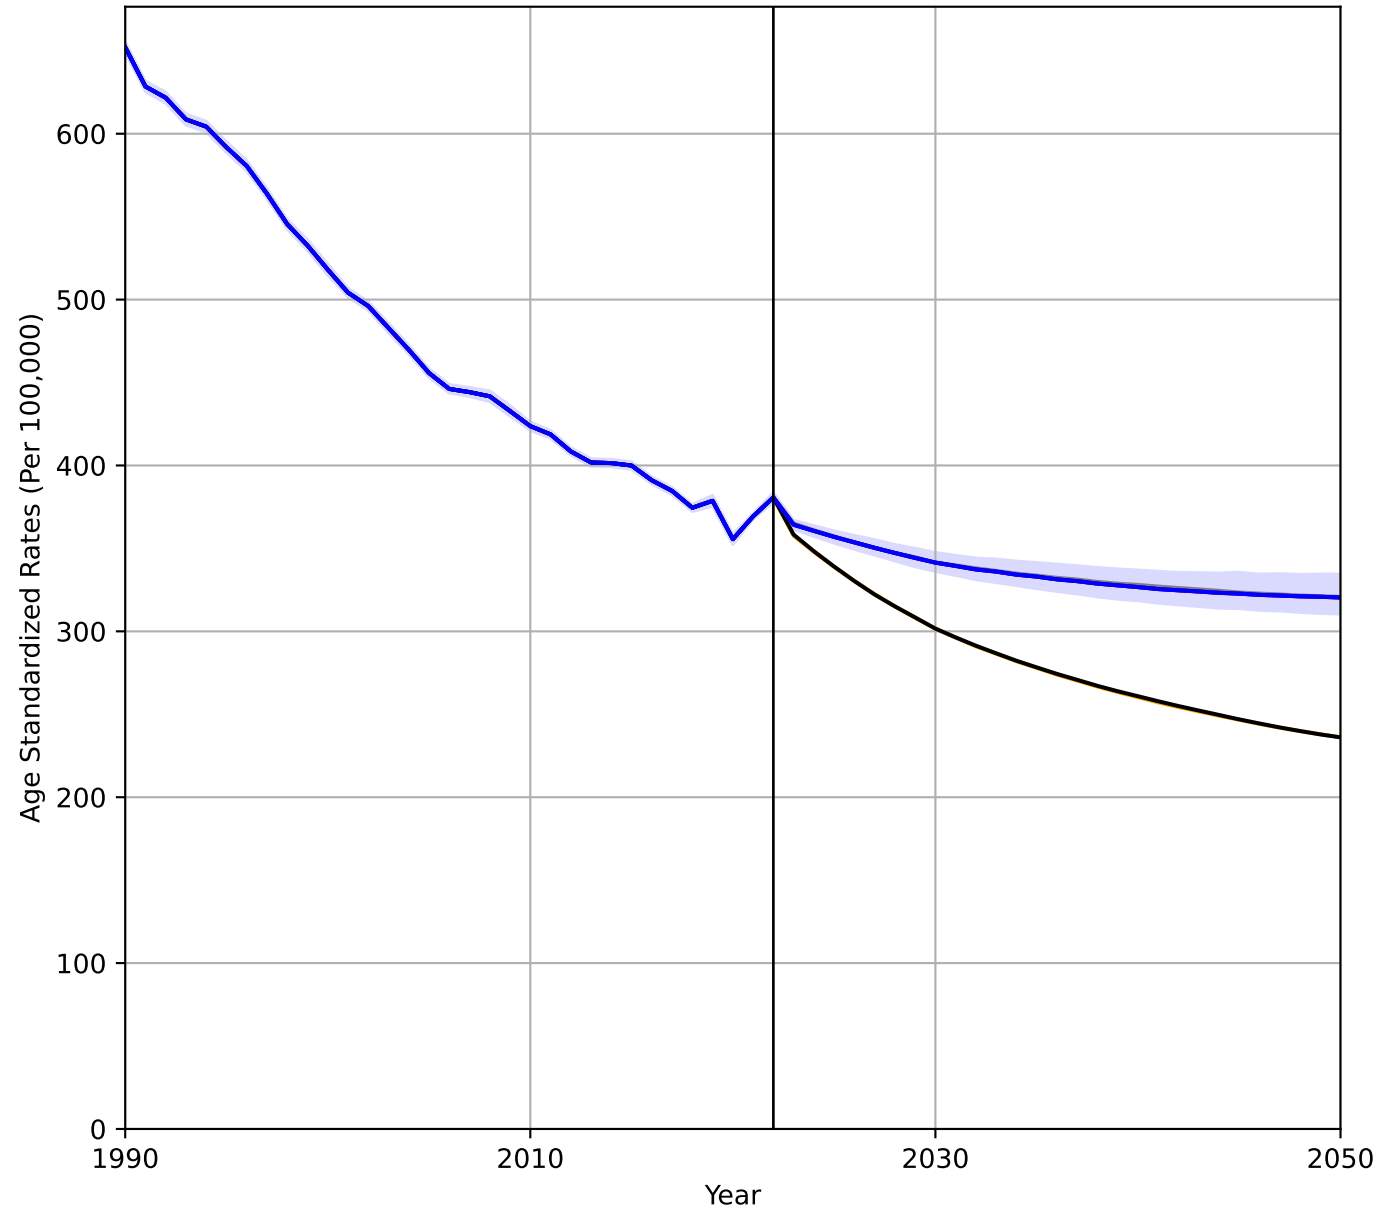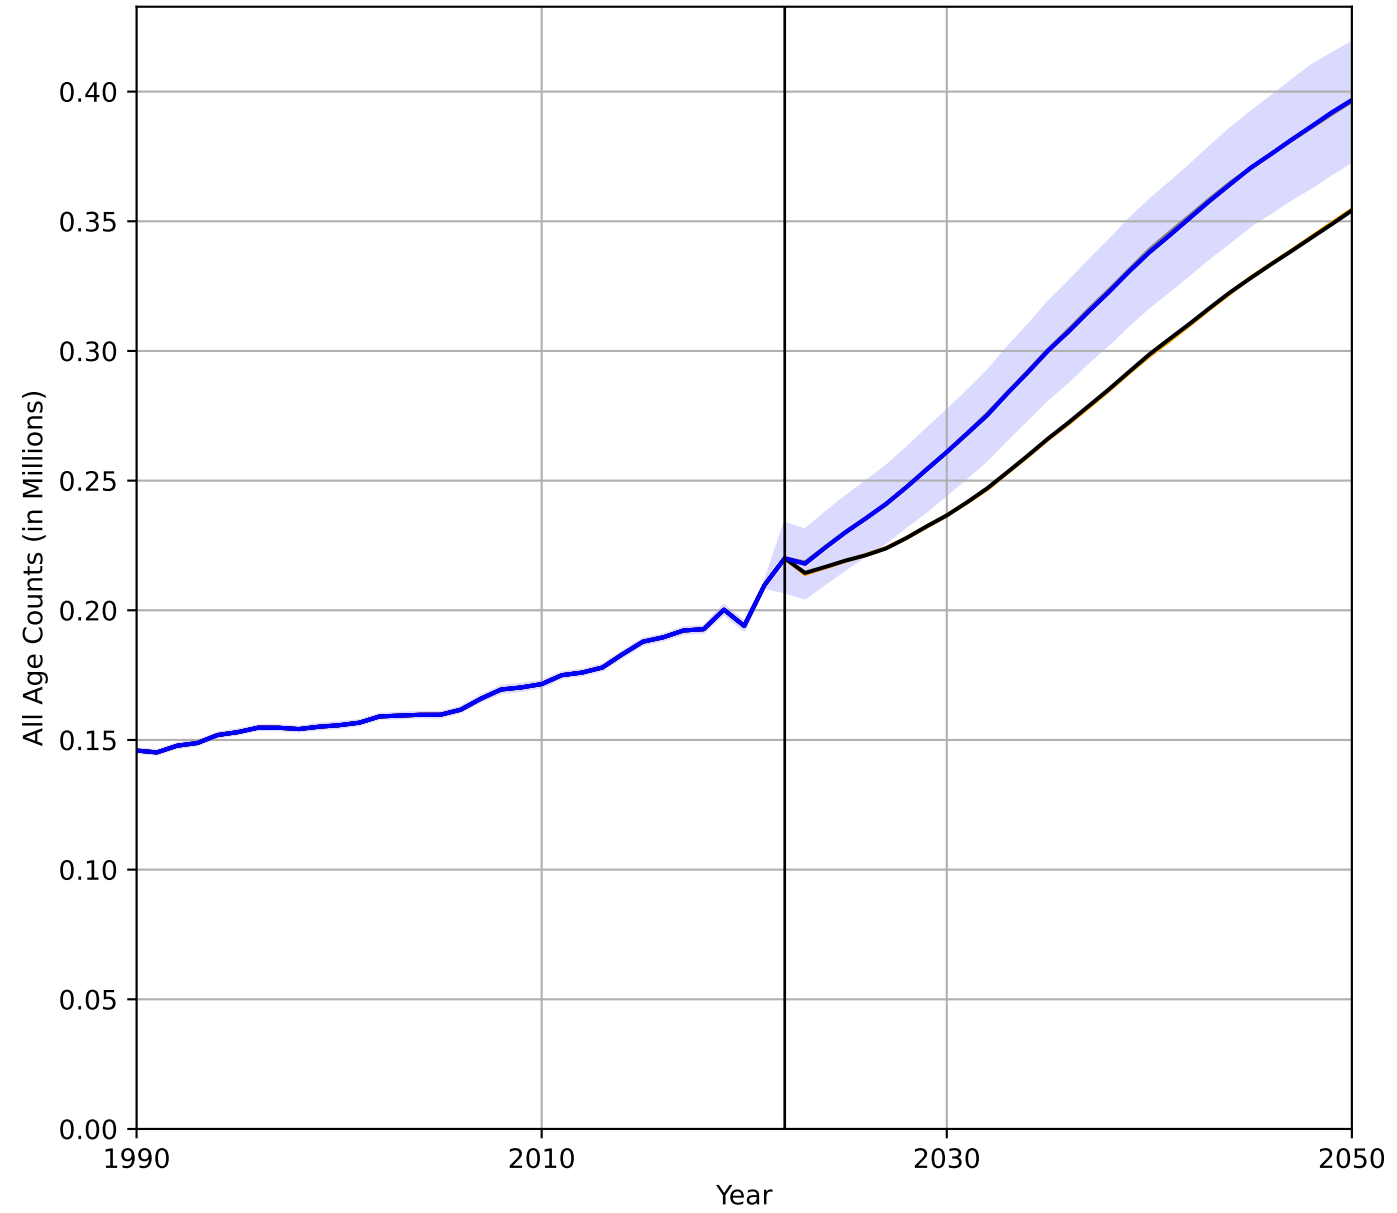

# High-Income Asia Pacific

Supplemental Results Figure S11. All-cause age standardised death rates (A) and all age death counts (B), for the past and for five future scenarios, 1990–2050

1860

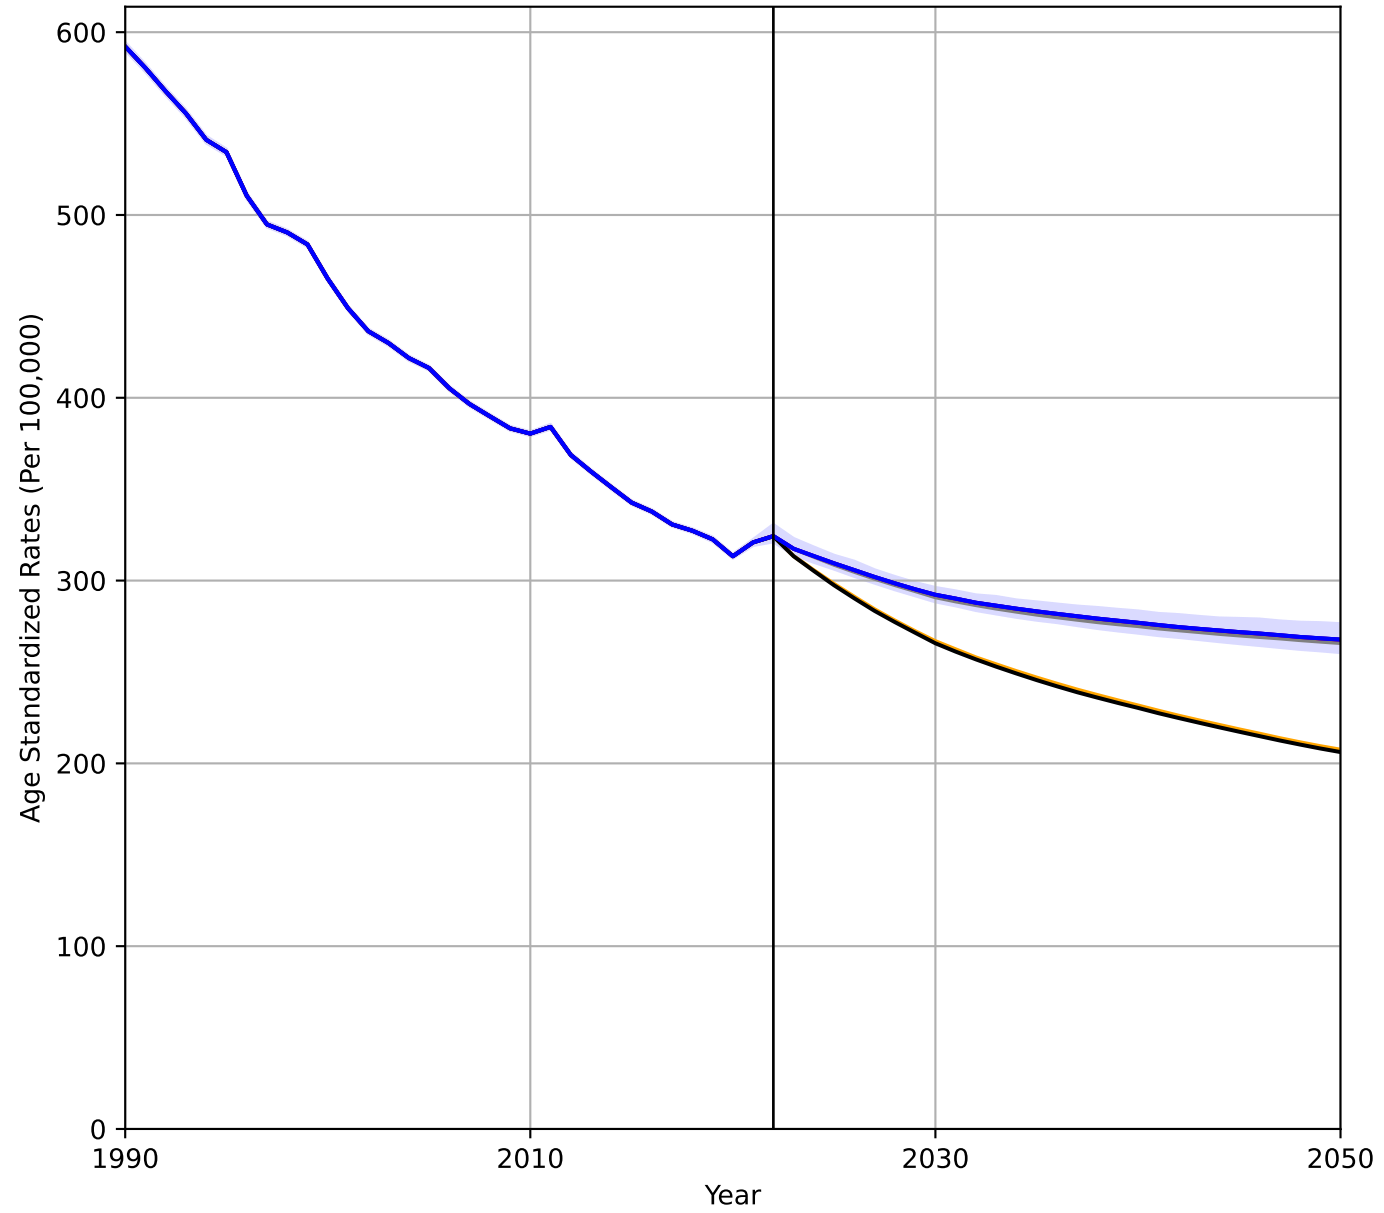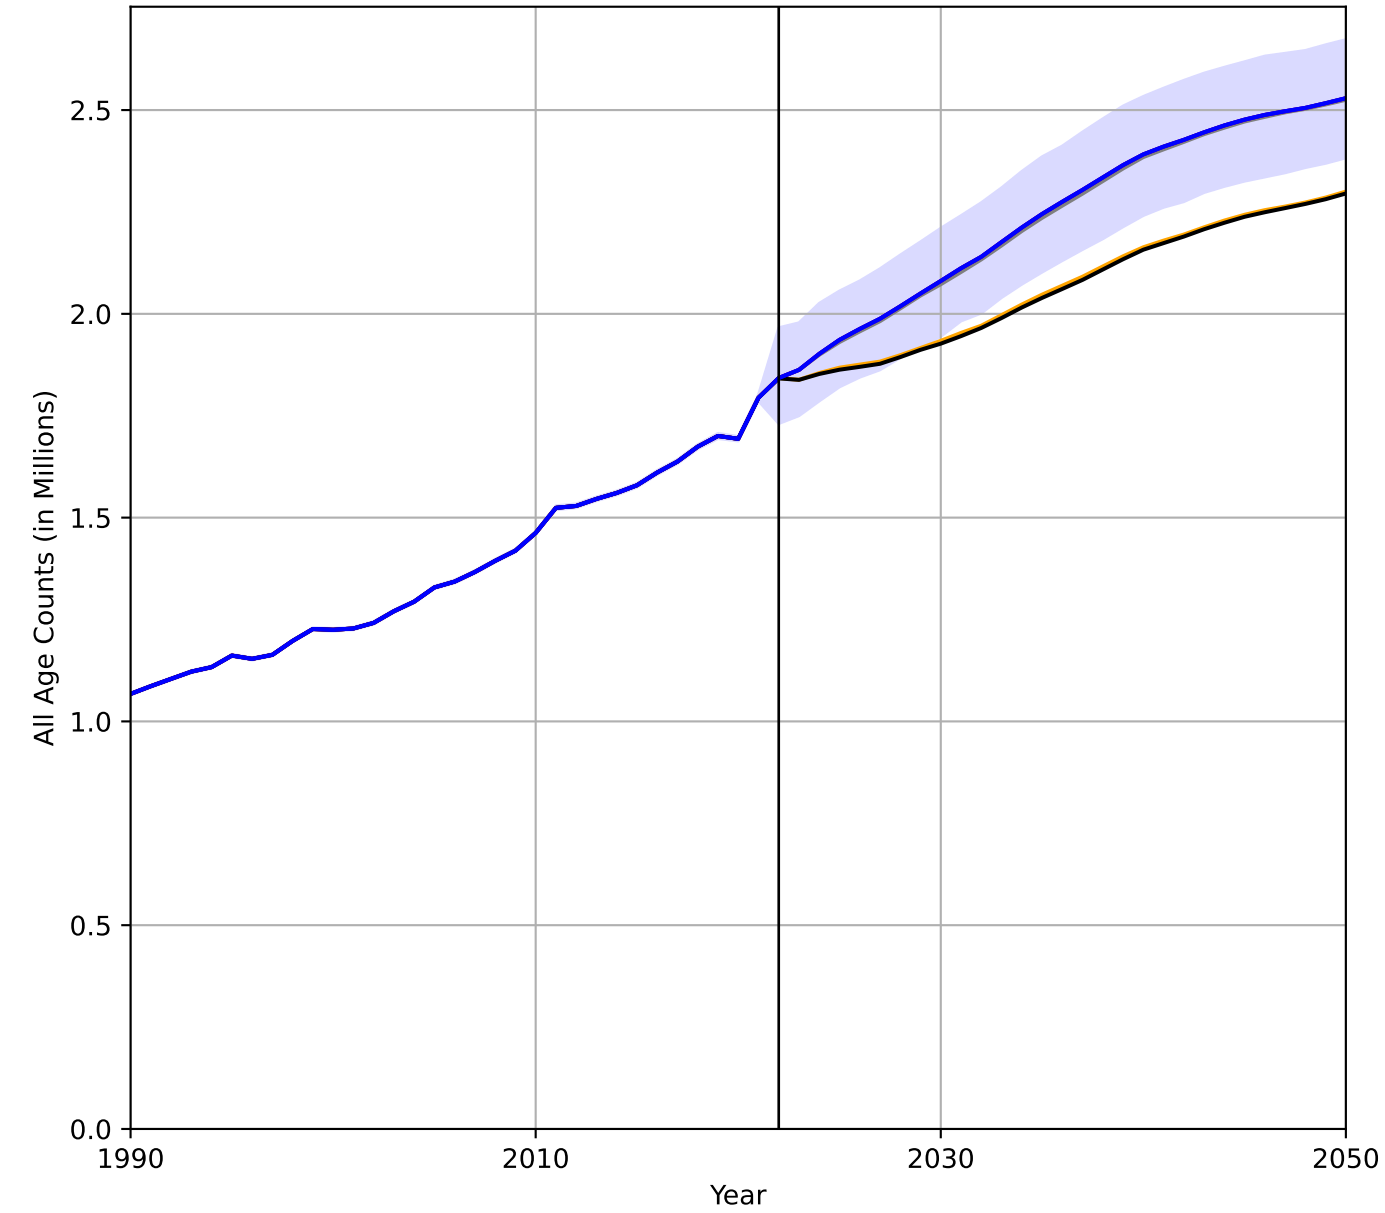

# High-Income North America

Supplemental Results Figure S11. All-cause age standardised death rates (A) and all age death counts (B), for the past and for five future scenarios, 1990–2050

1861

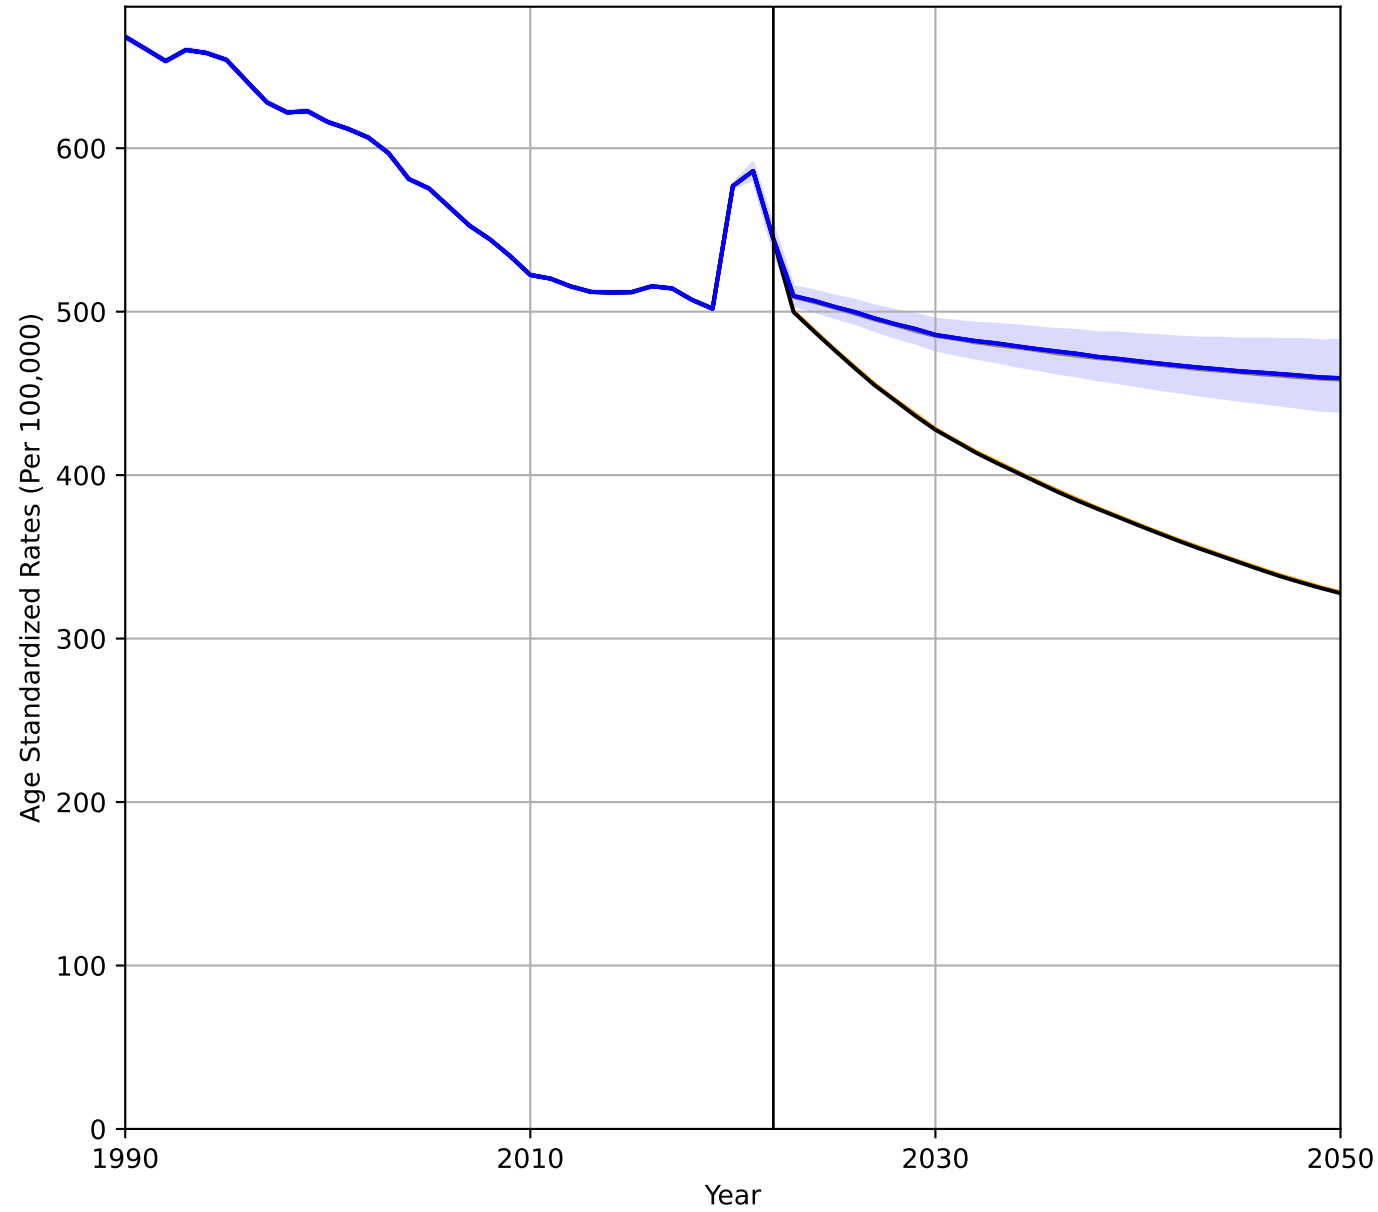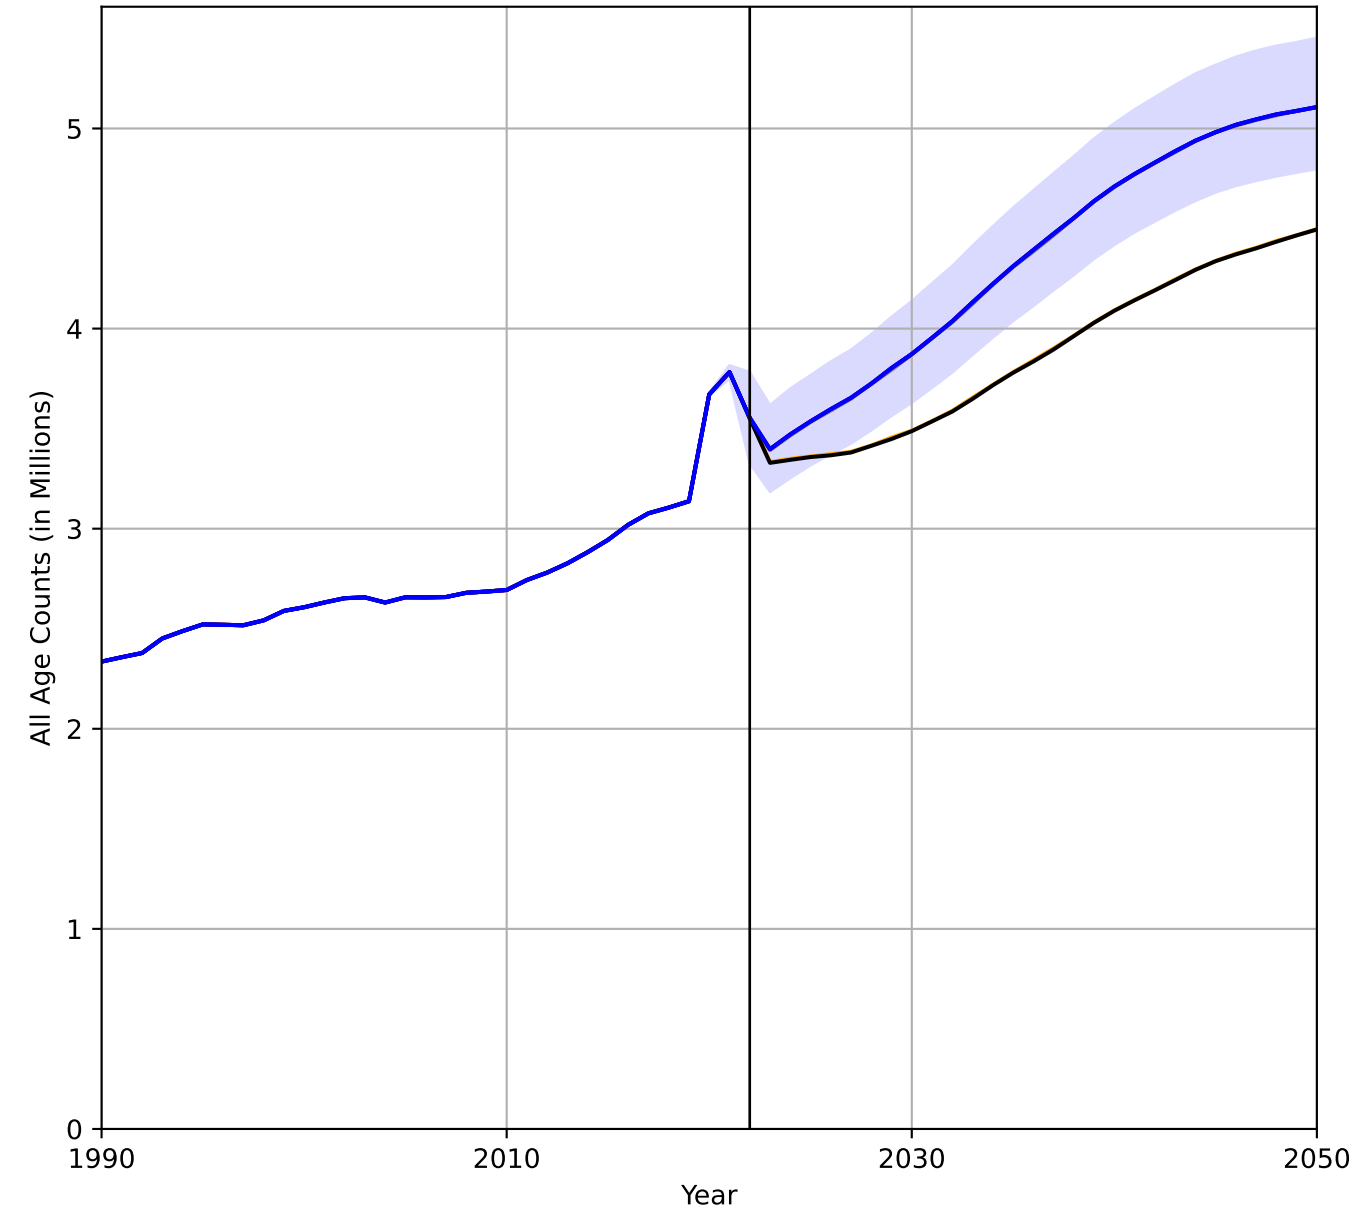

# Southern Latin America

Supplemental Results Figure S11. All-cause age standardised death rates (A) and all age death counts (B), for the past and for five future scenarios, 1990–2050

1862

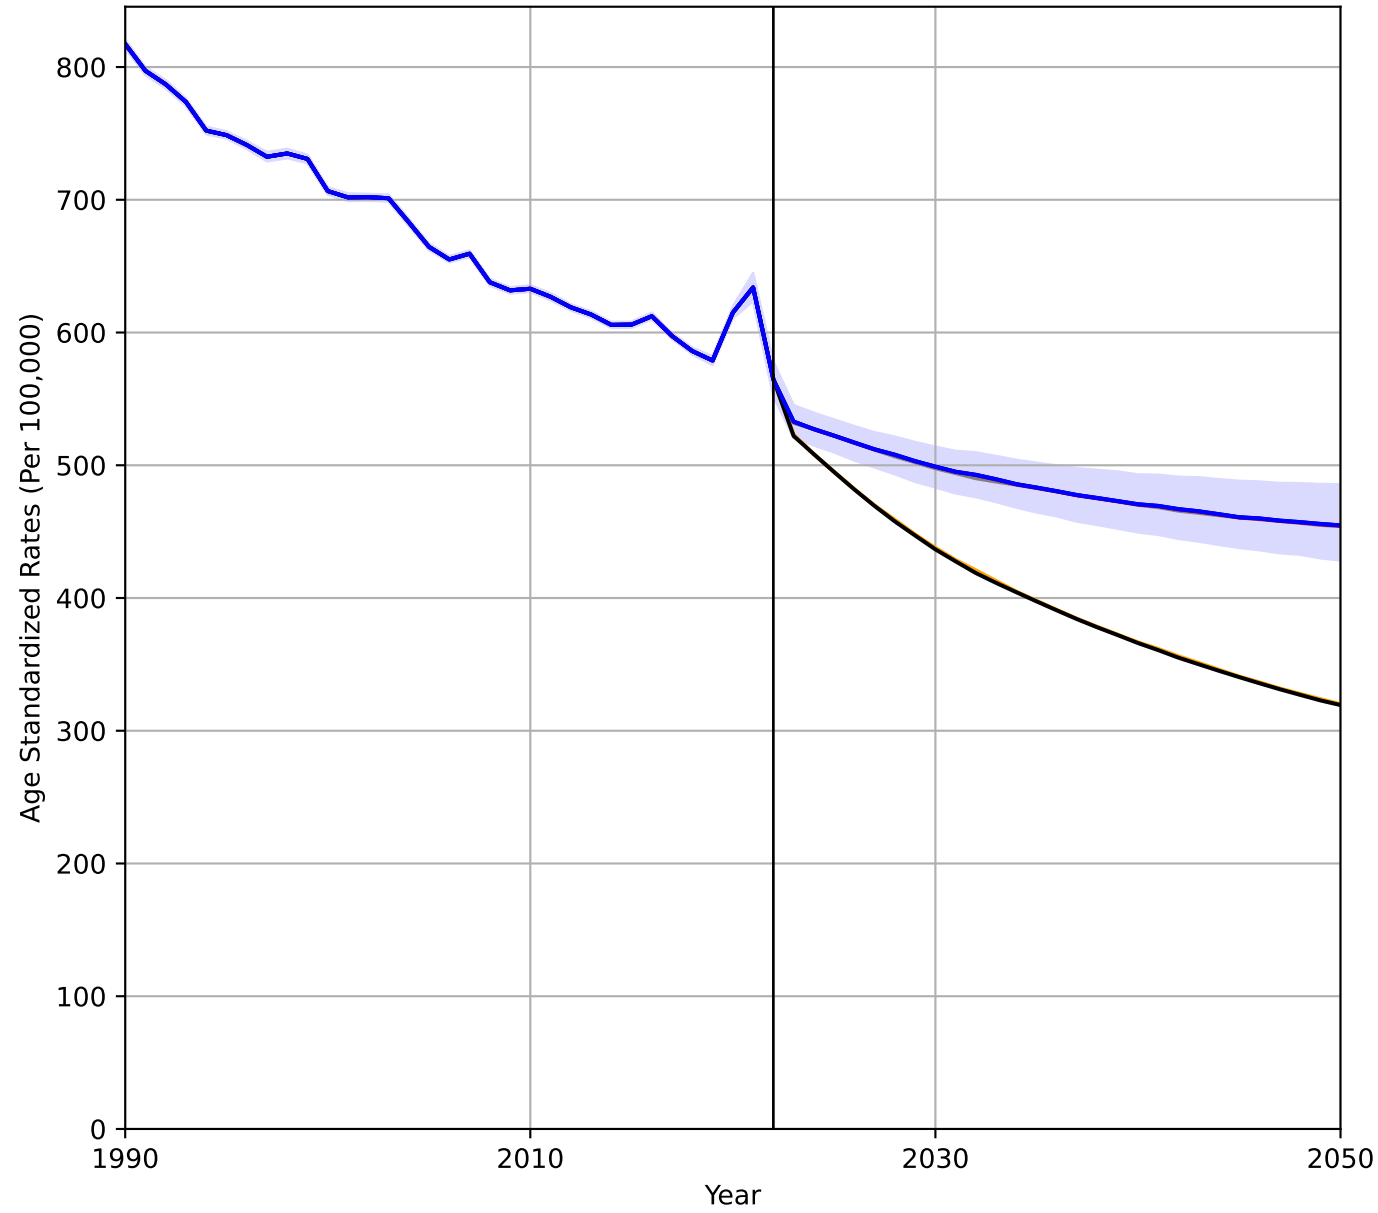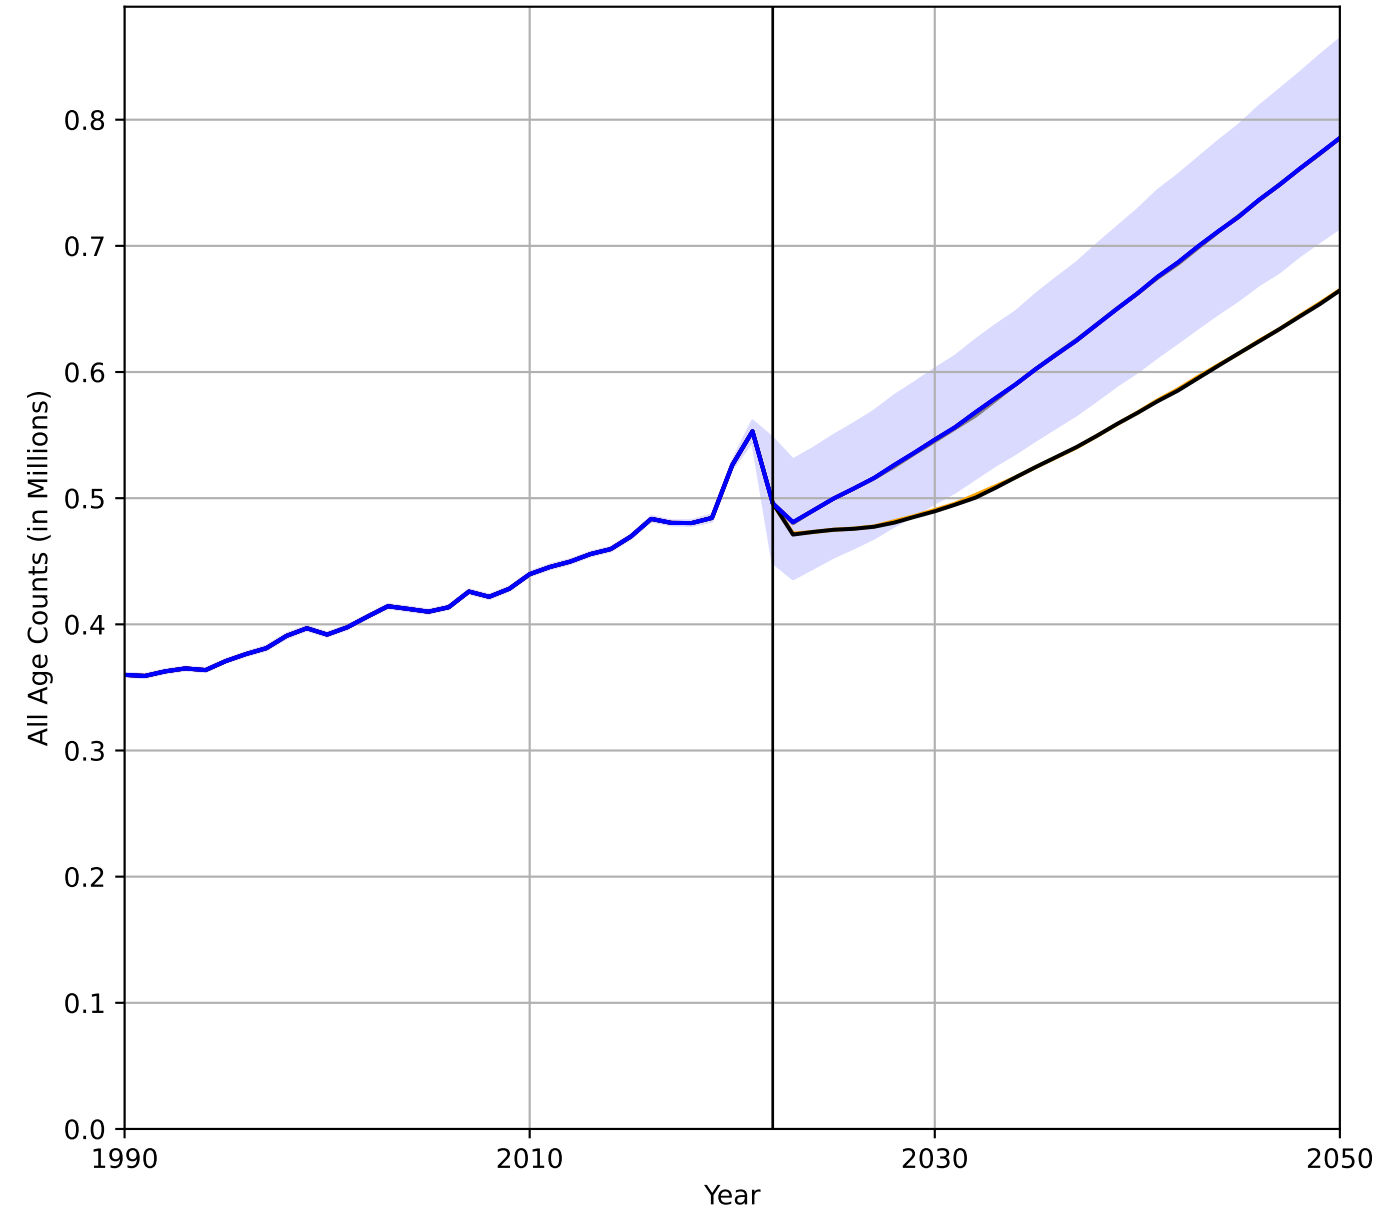

# Western Europe

Supplemental Results Figure S11. All-cause age standardised death rates (A) and all age death counts (B), for the past and for five future scenarios, 1990–2050

1863

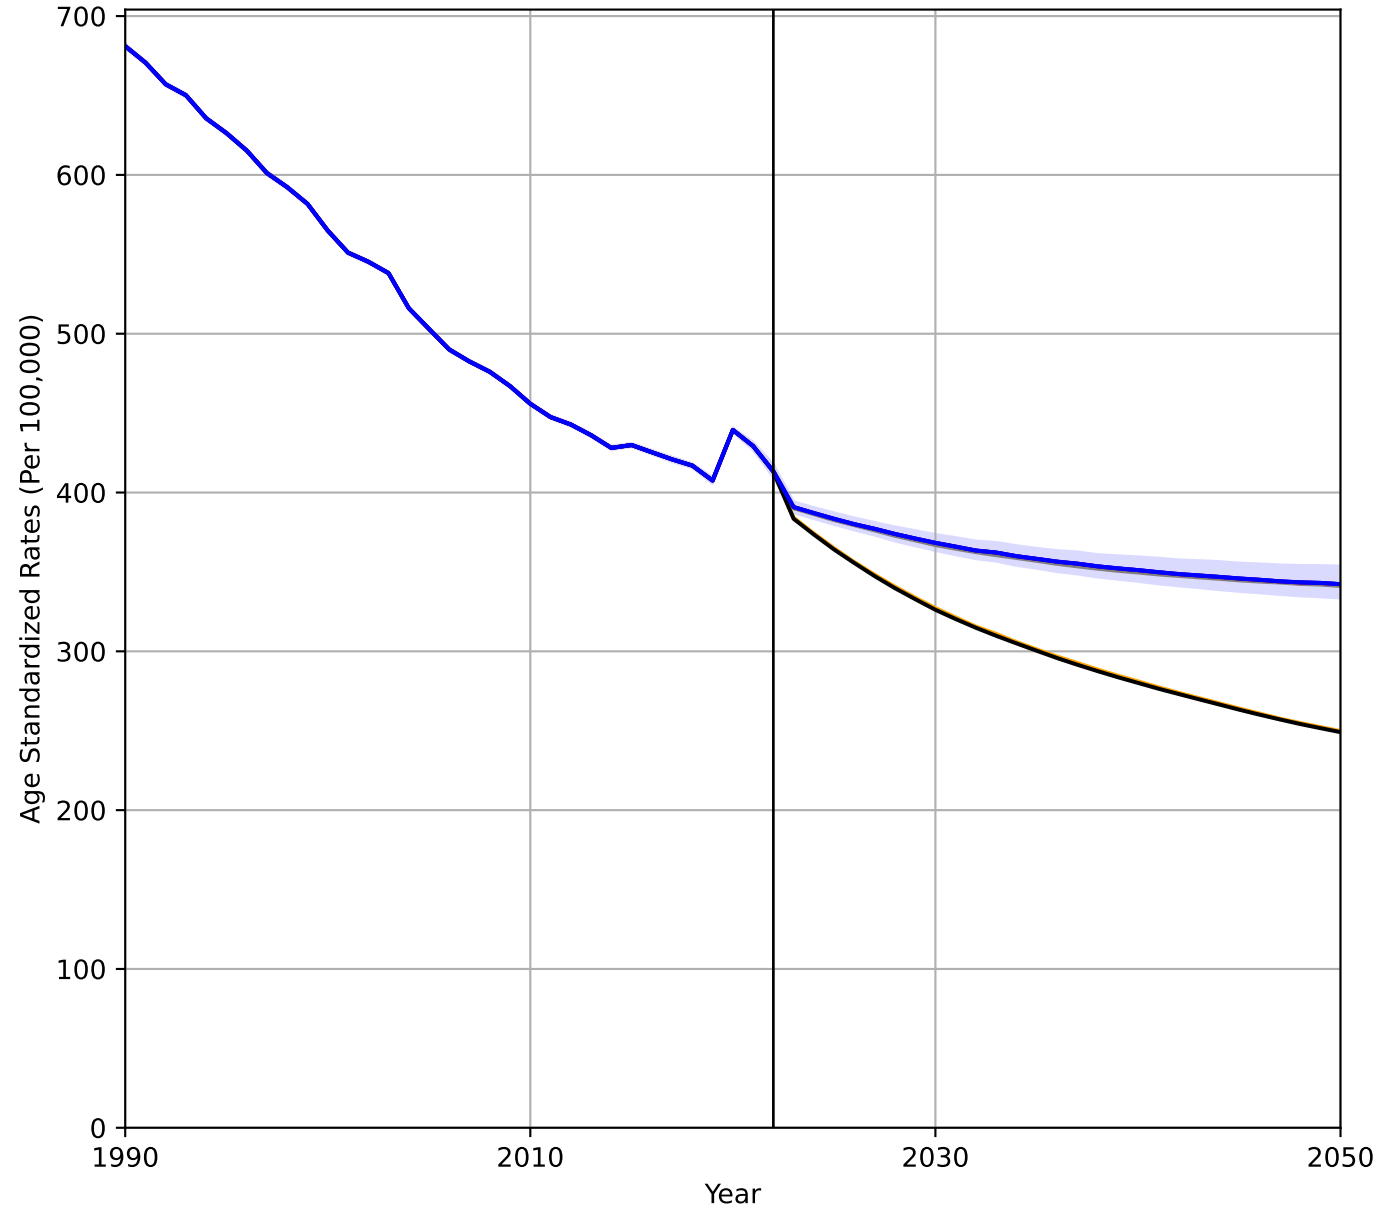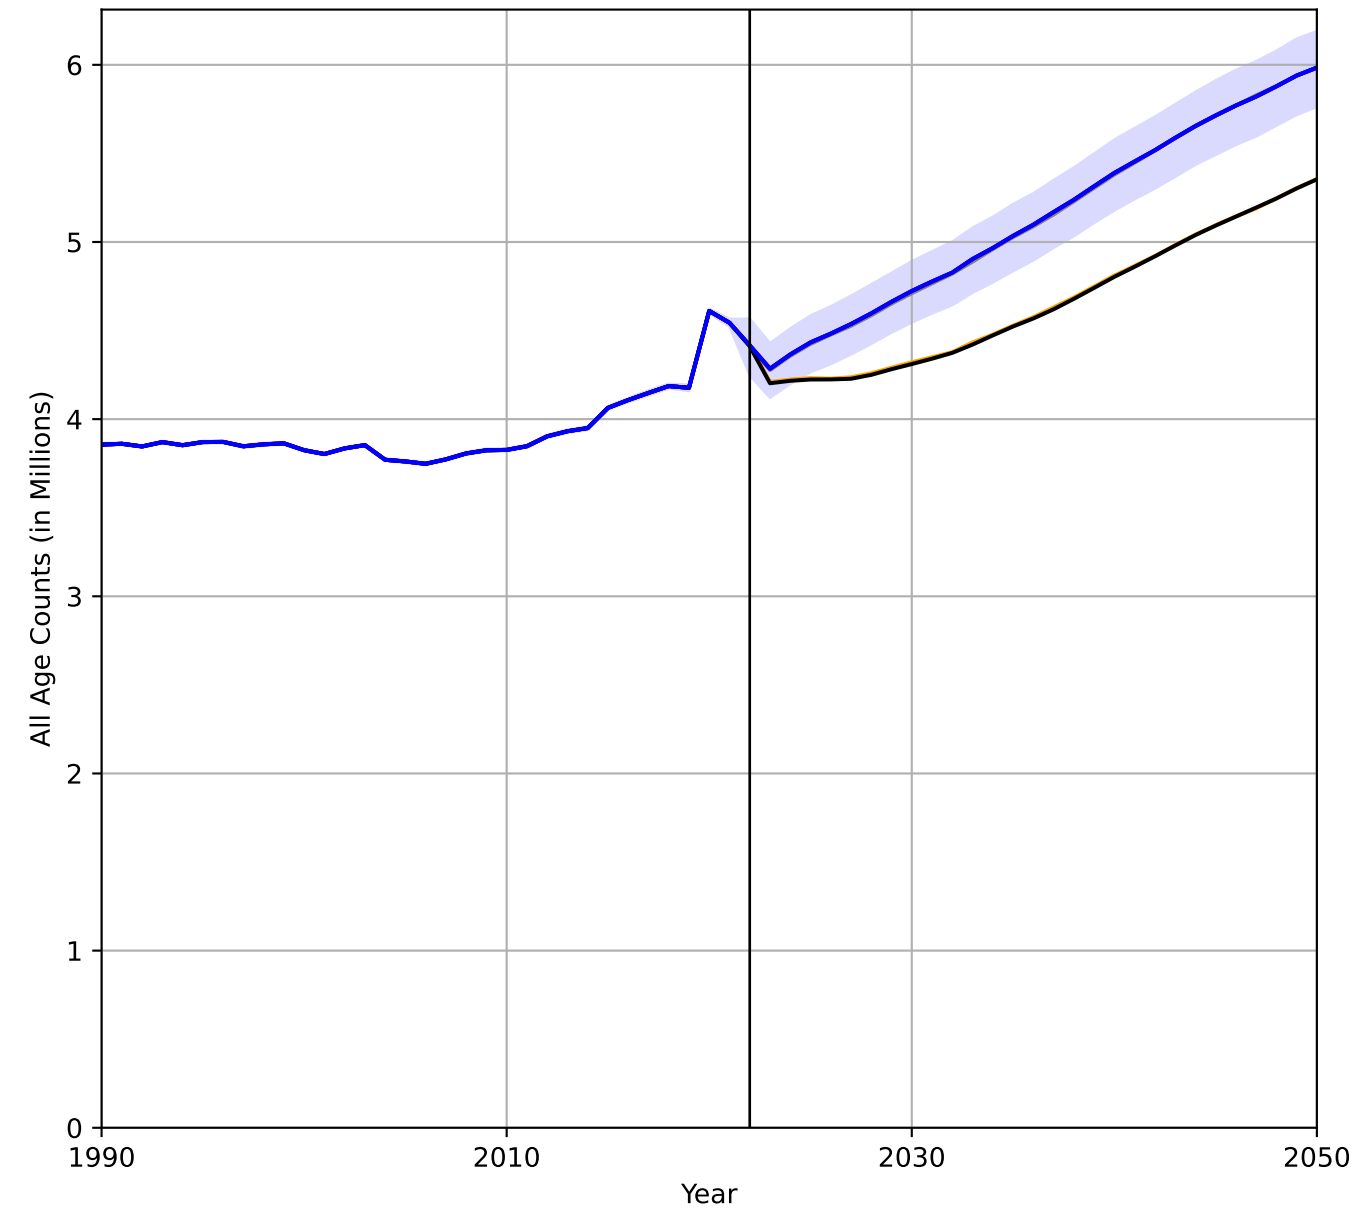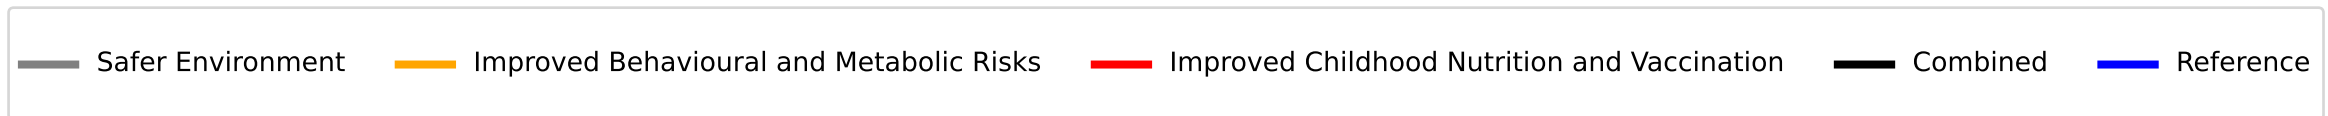



# Andean Latin America

Supplemental Results Figure S11. All-cause age standardised death rates (A) and all age death counts (B), for the past and for five future scenarios, 1990–2050

1864

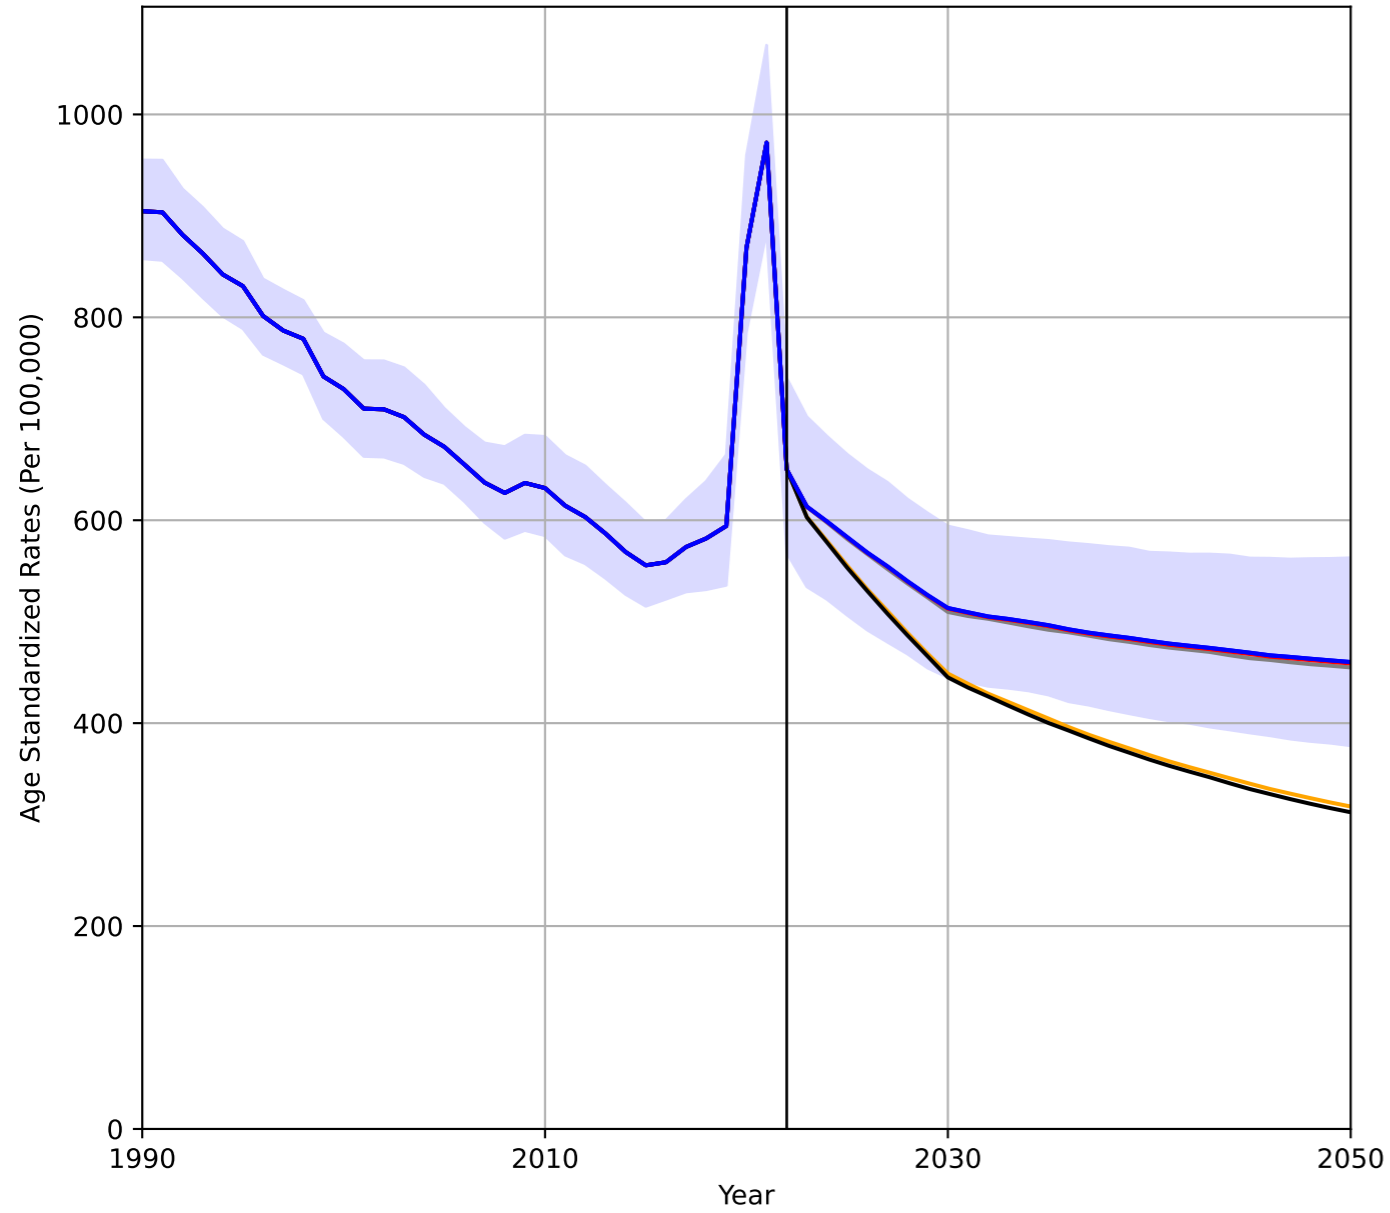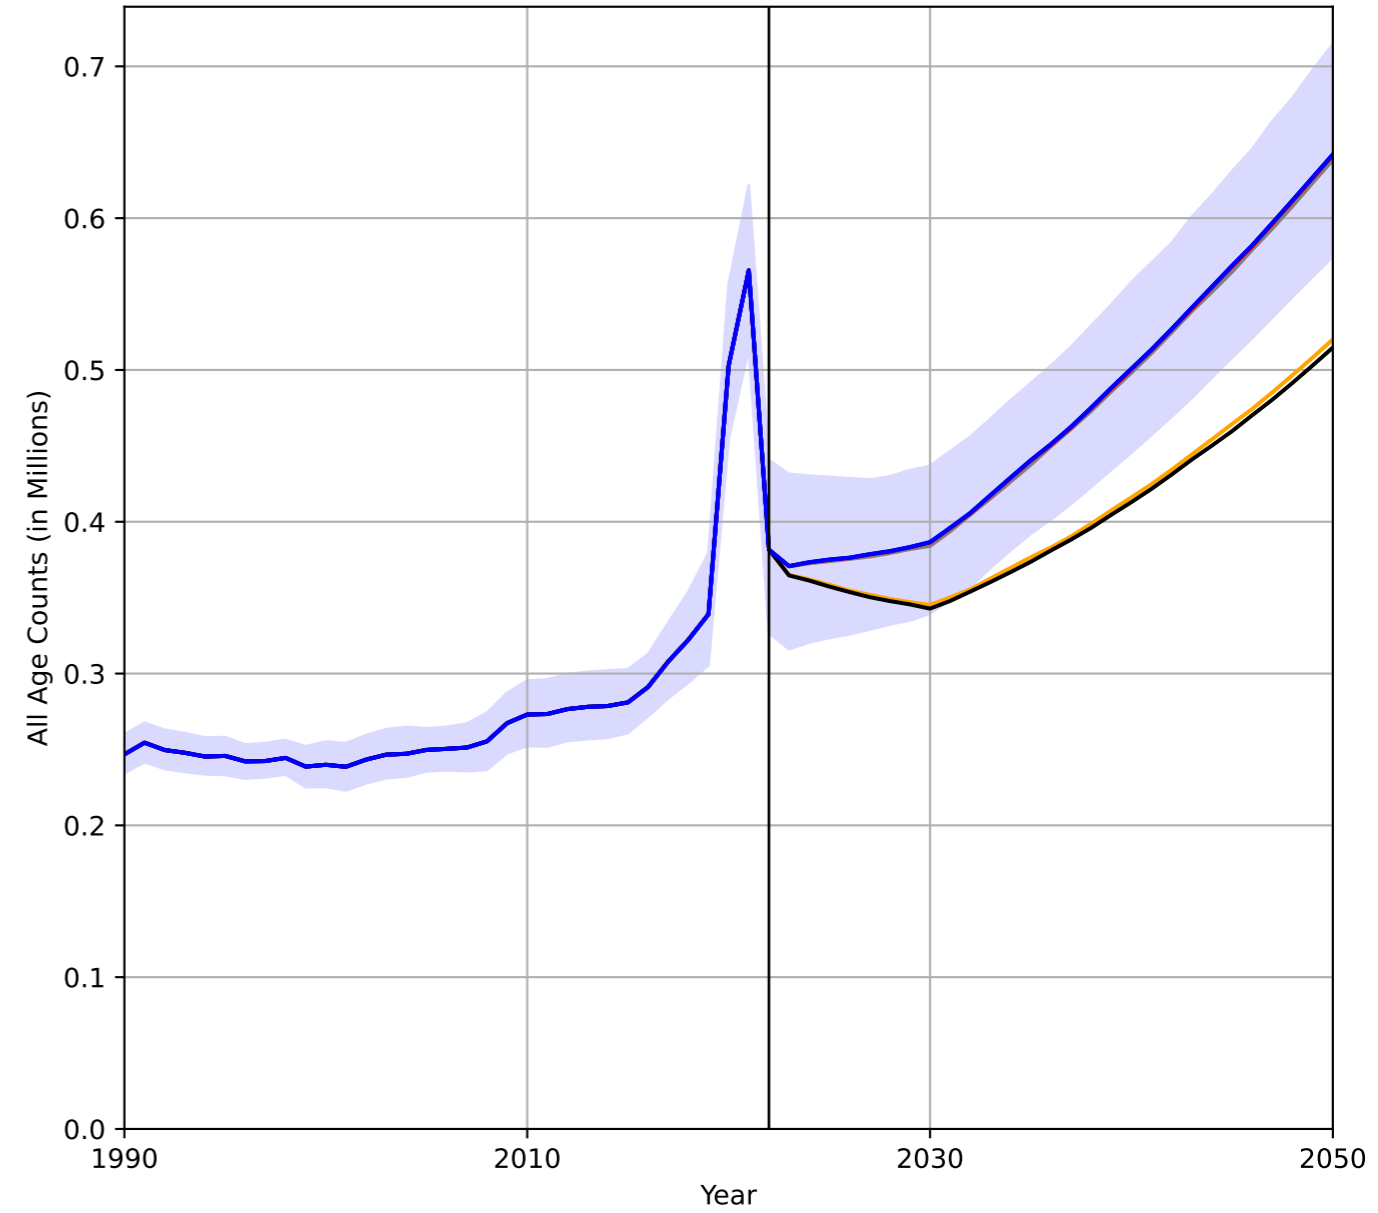

# Caribbean

Supplemental Results Figure S11. All-cause age standardised death rates (A) and all age death counts (B), for the past and for five future scenarios, 1990–2050

1865

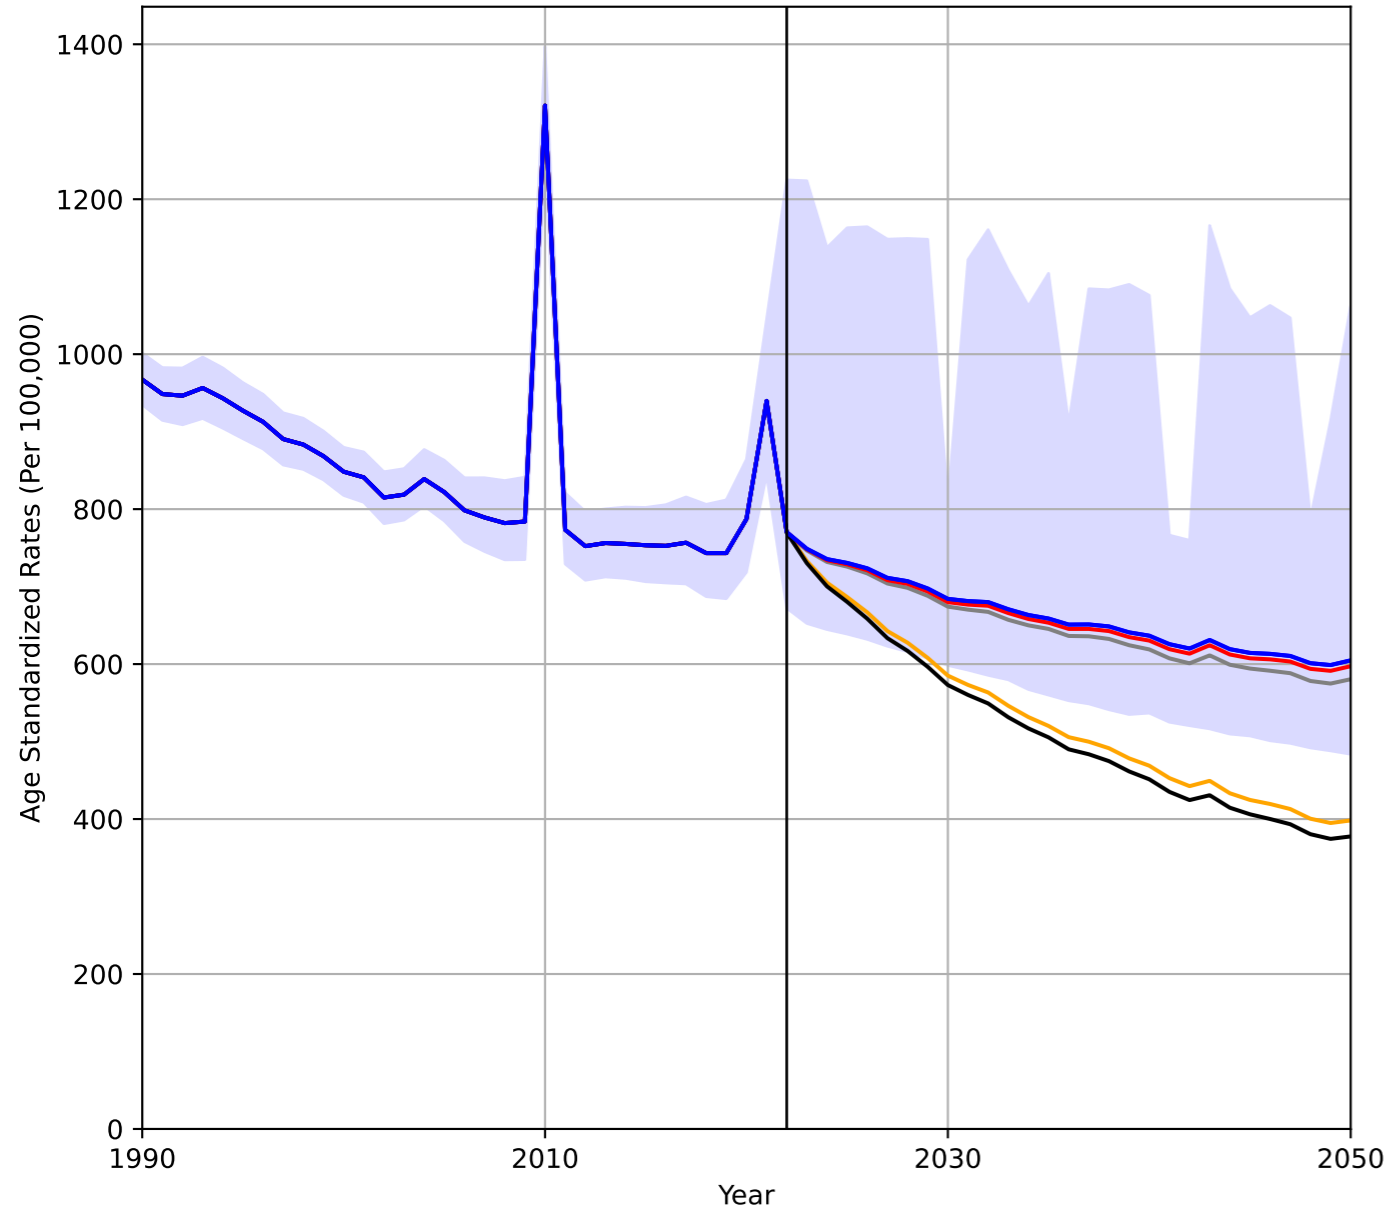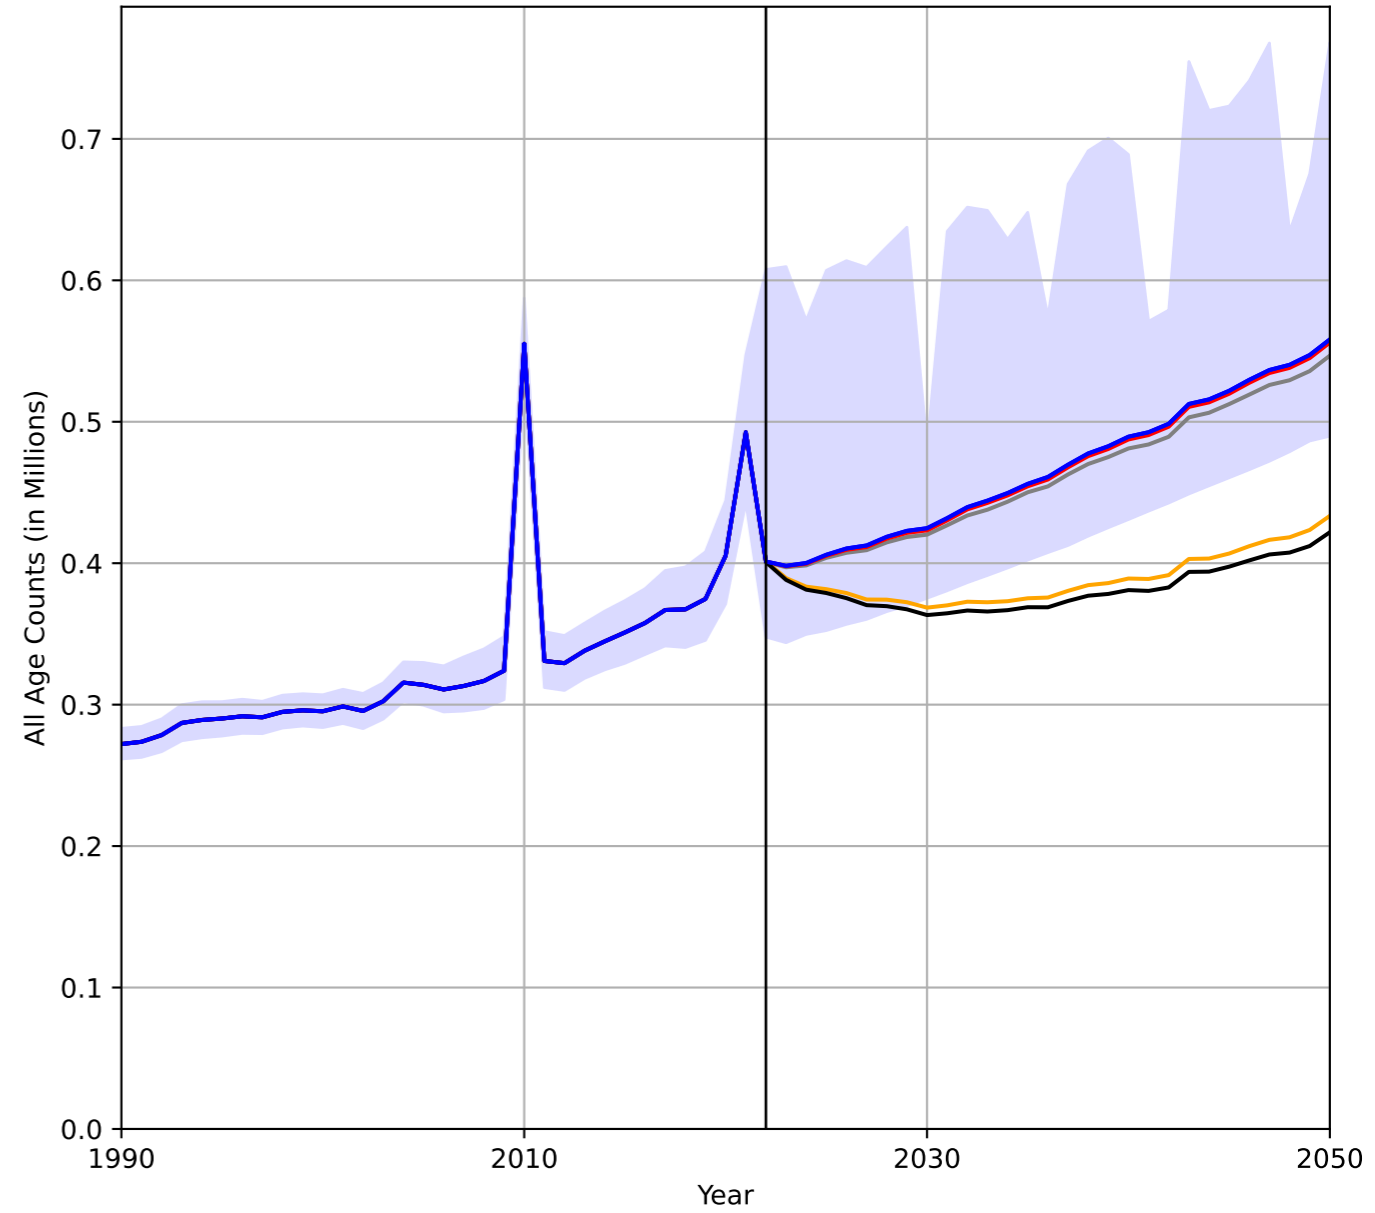

# Central Latin America

Supplemental Results Figure S11. All-cause age standardised death rates (A) and all age death counts (B), for the past and for five future scenarios, 1990–2050

1866

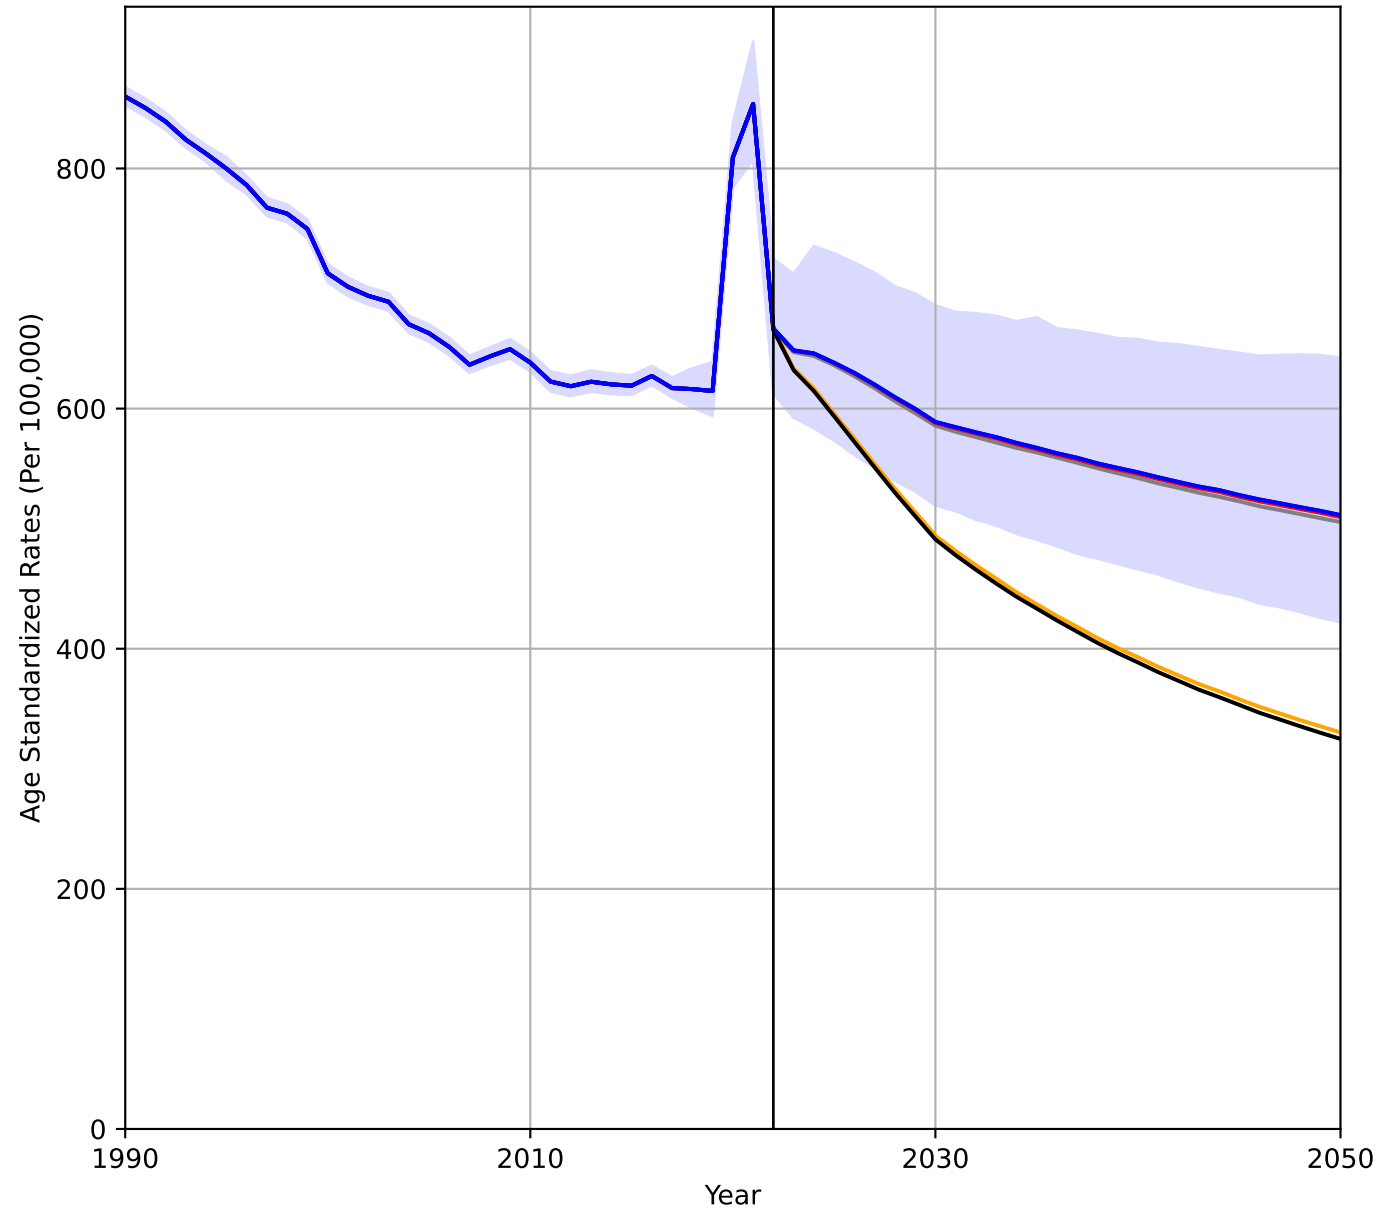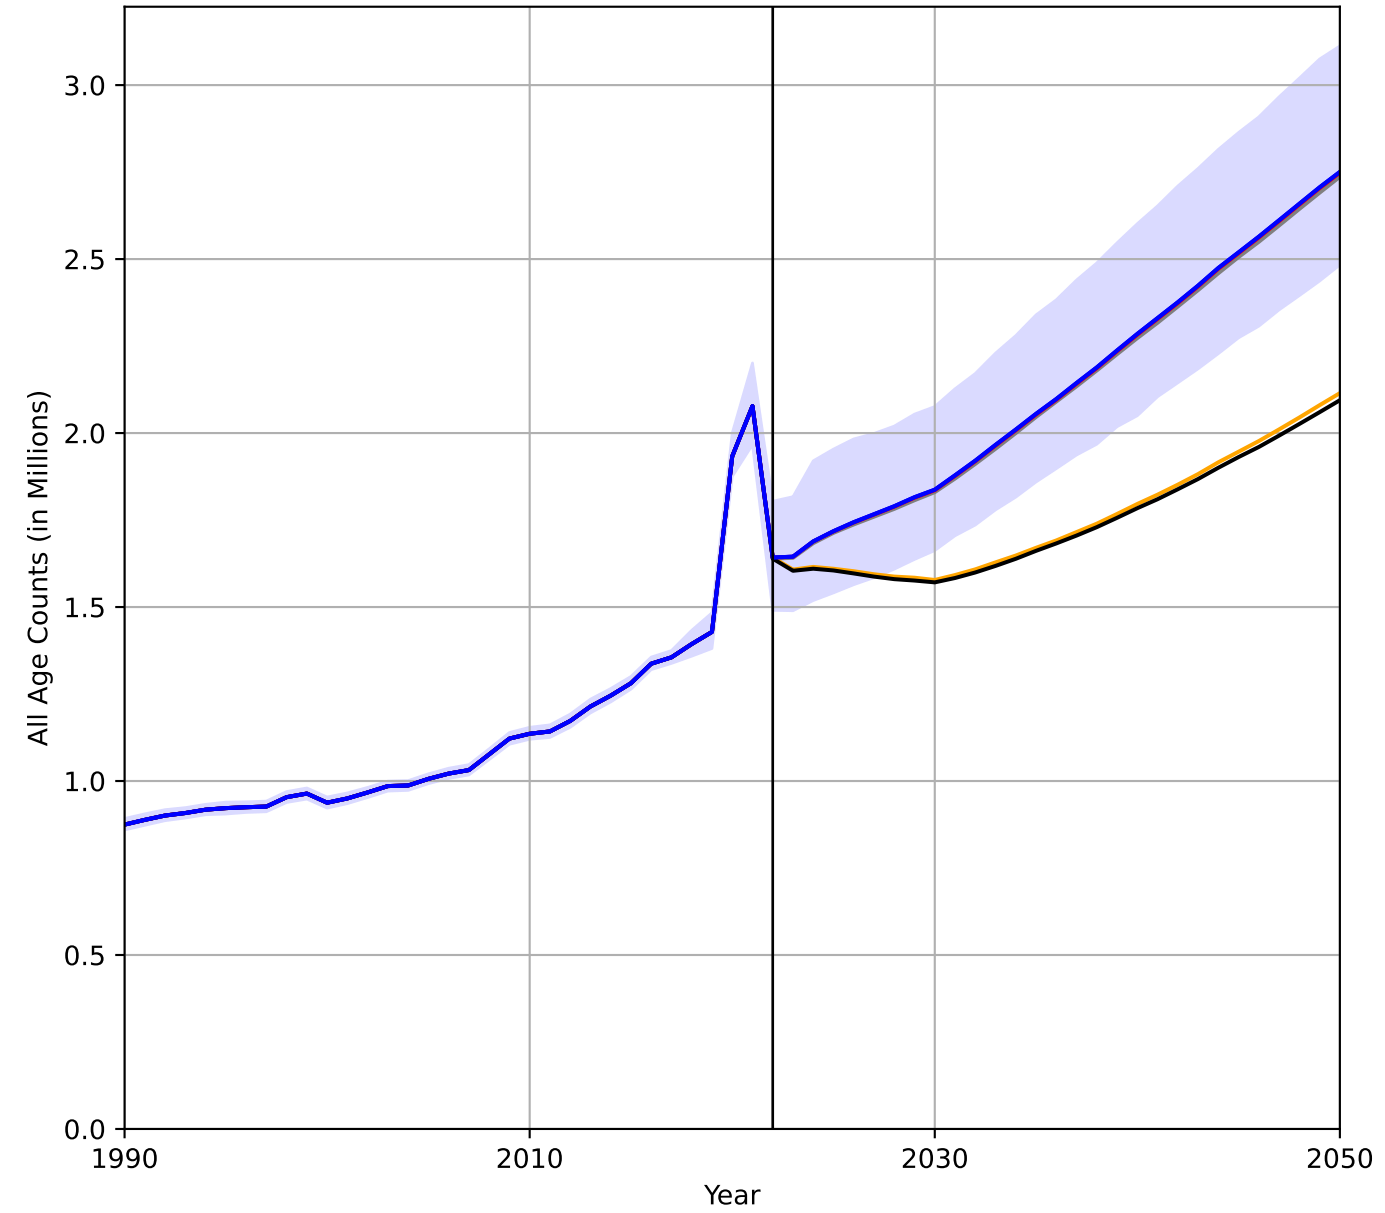

# Tropical Latin America

Supplemental Results Figure S11. All-cause age standardised death rates (A) and all age death counts (B), for the past and for five future scenarios, 1990–2050

1867

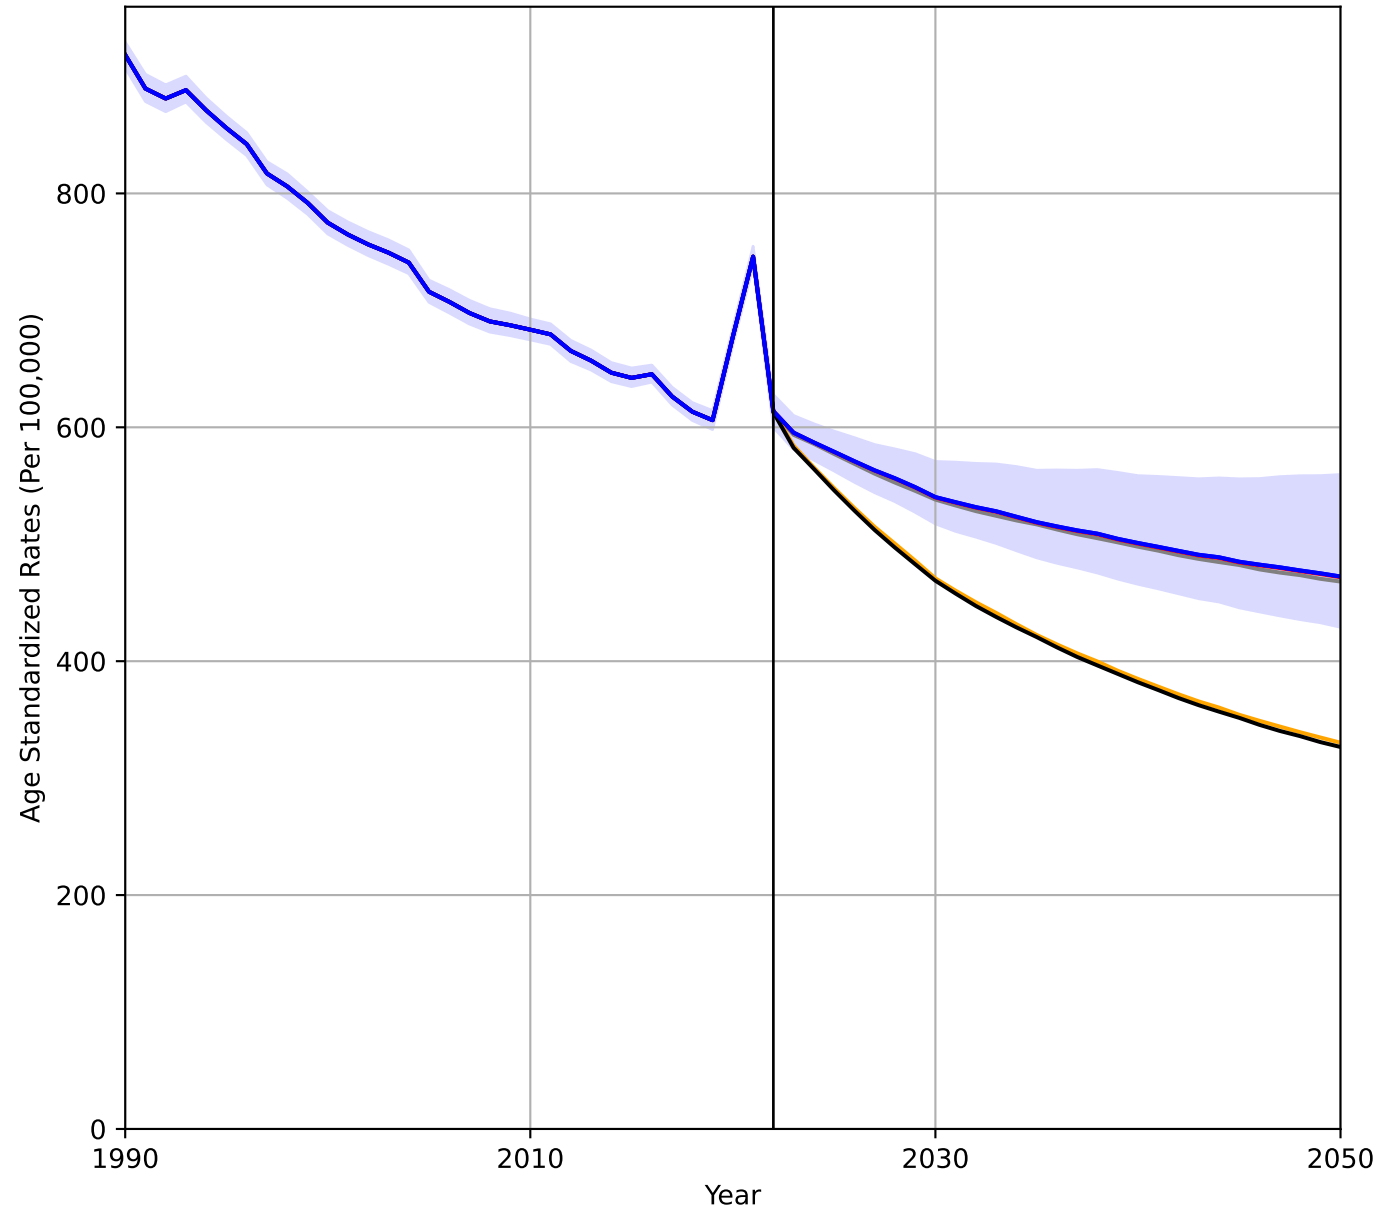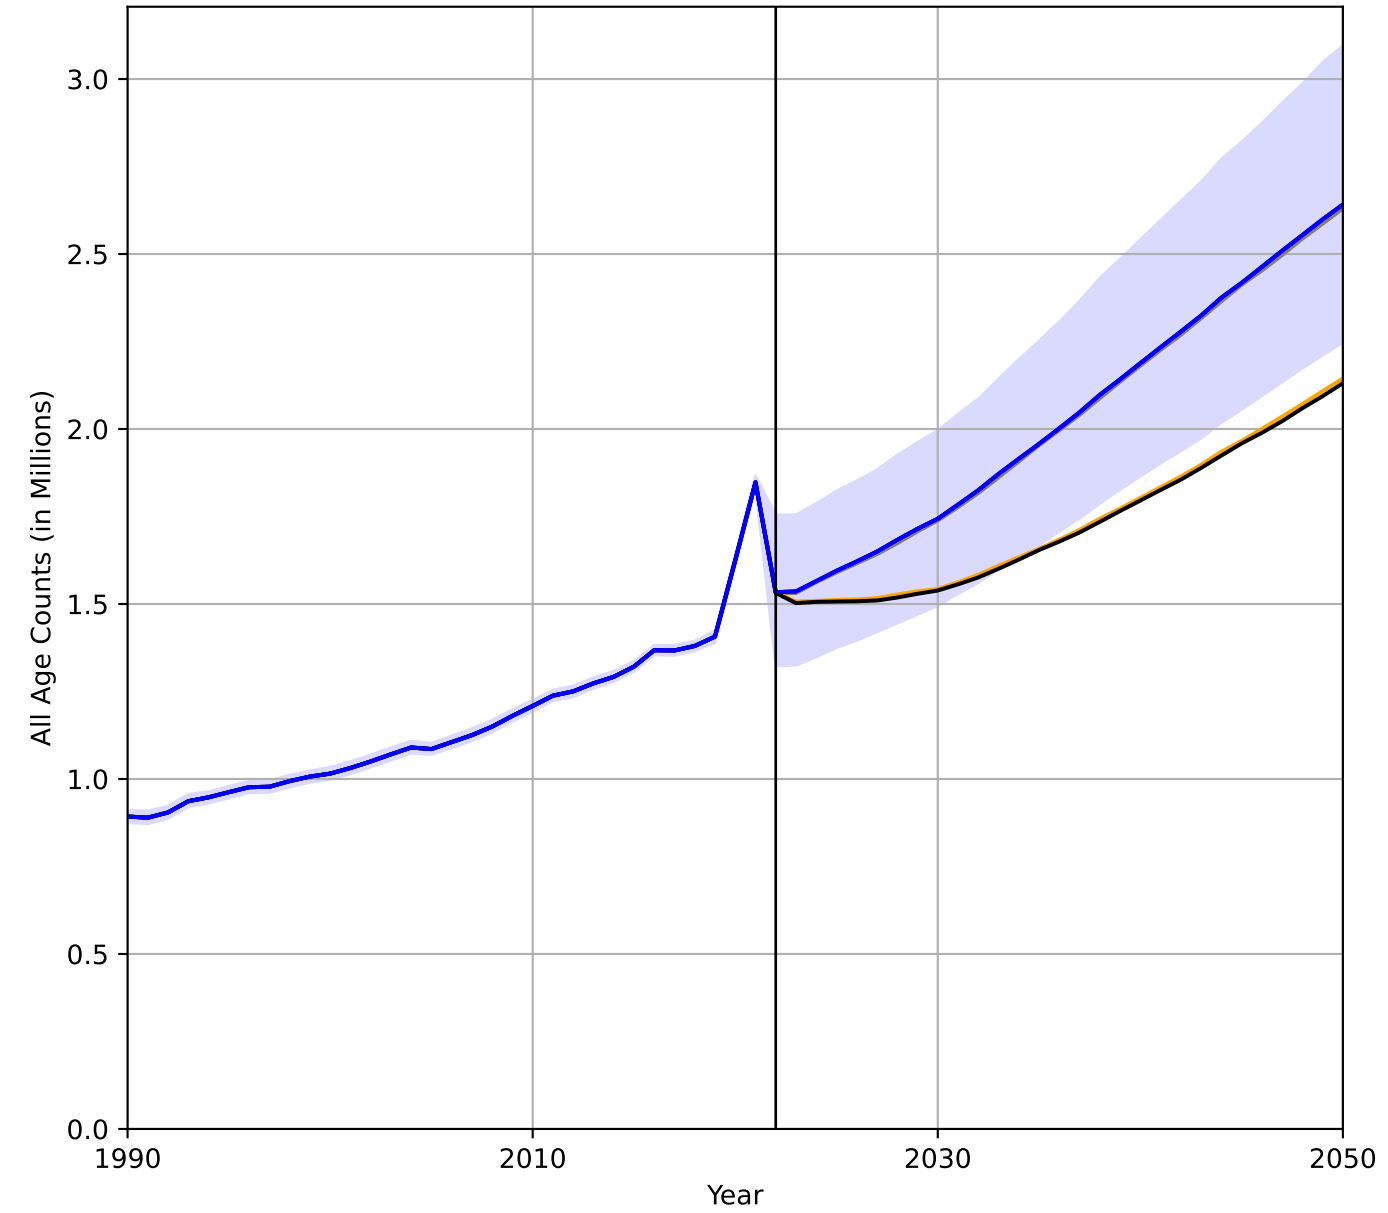

# North Africa And Middle East

1868

Supplemental Results Figure S11. All-cause age standardised death rates (A) and all age death counts (B), for the past and for five future scenarios, 1990–2050

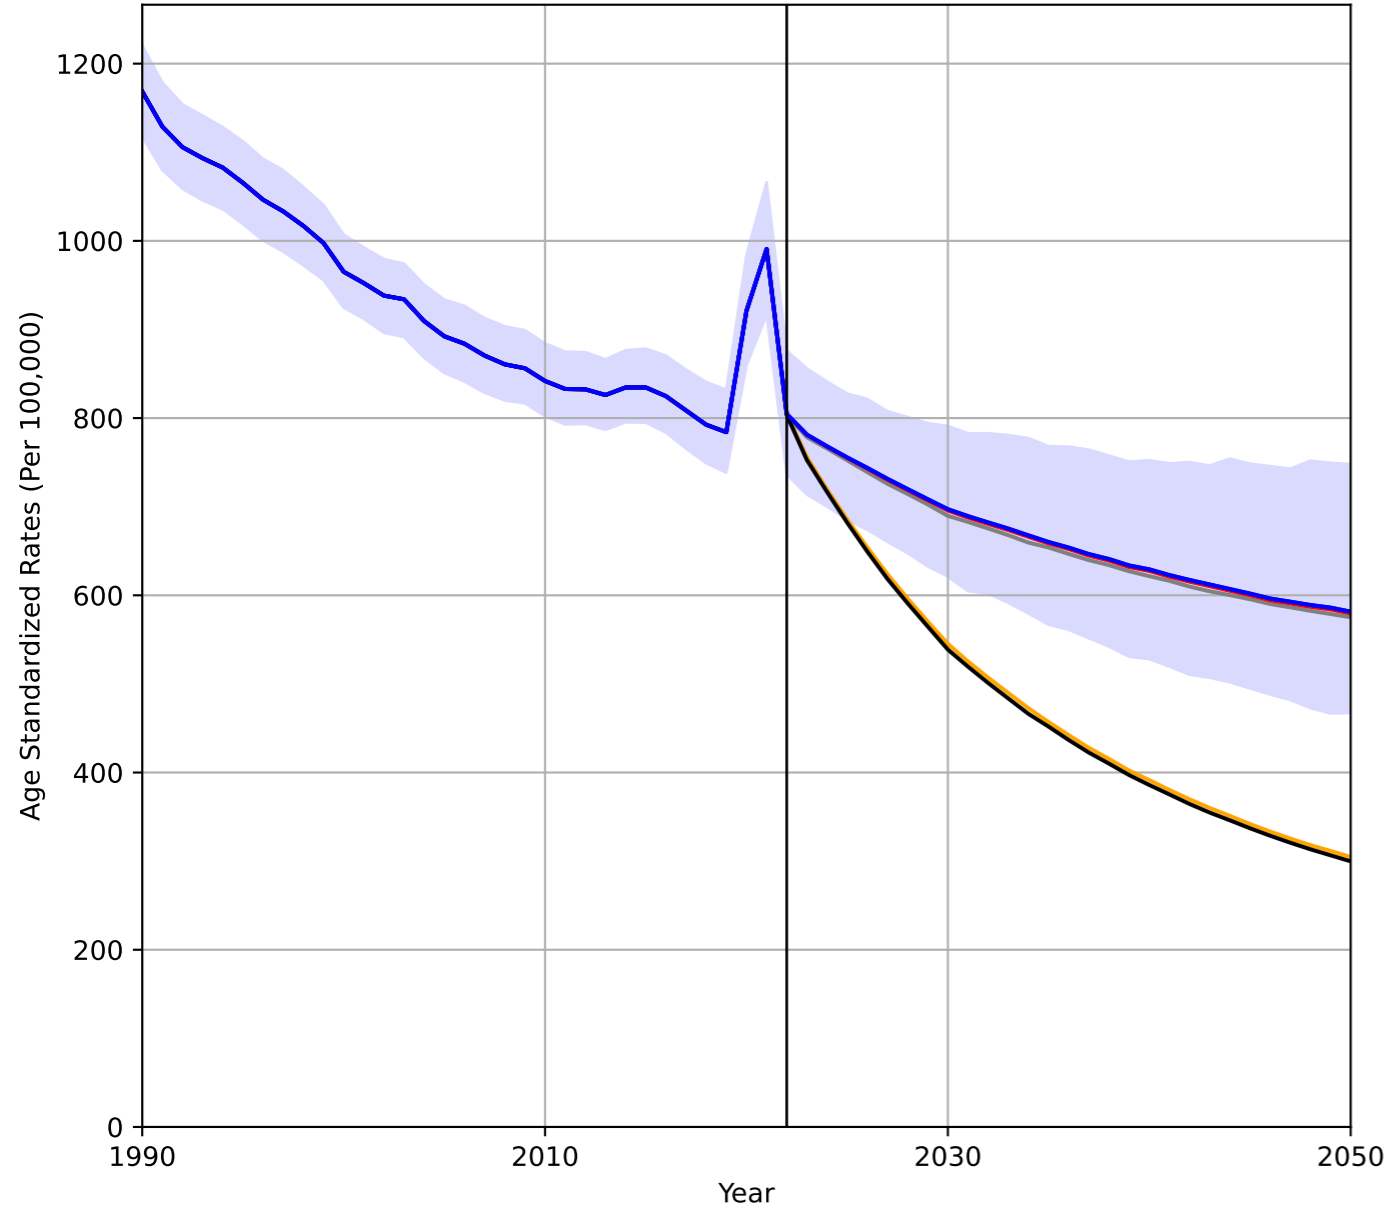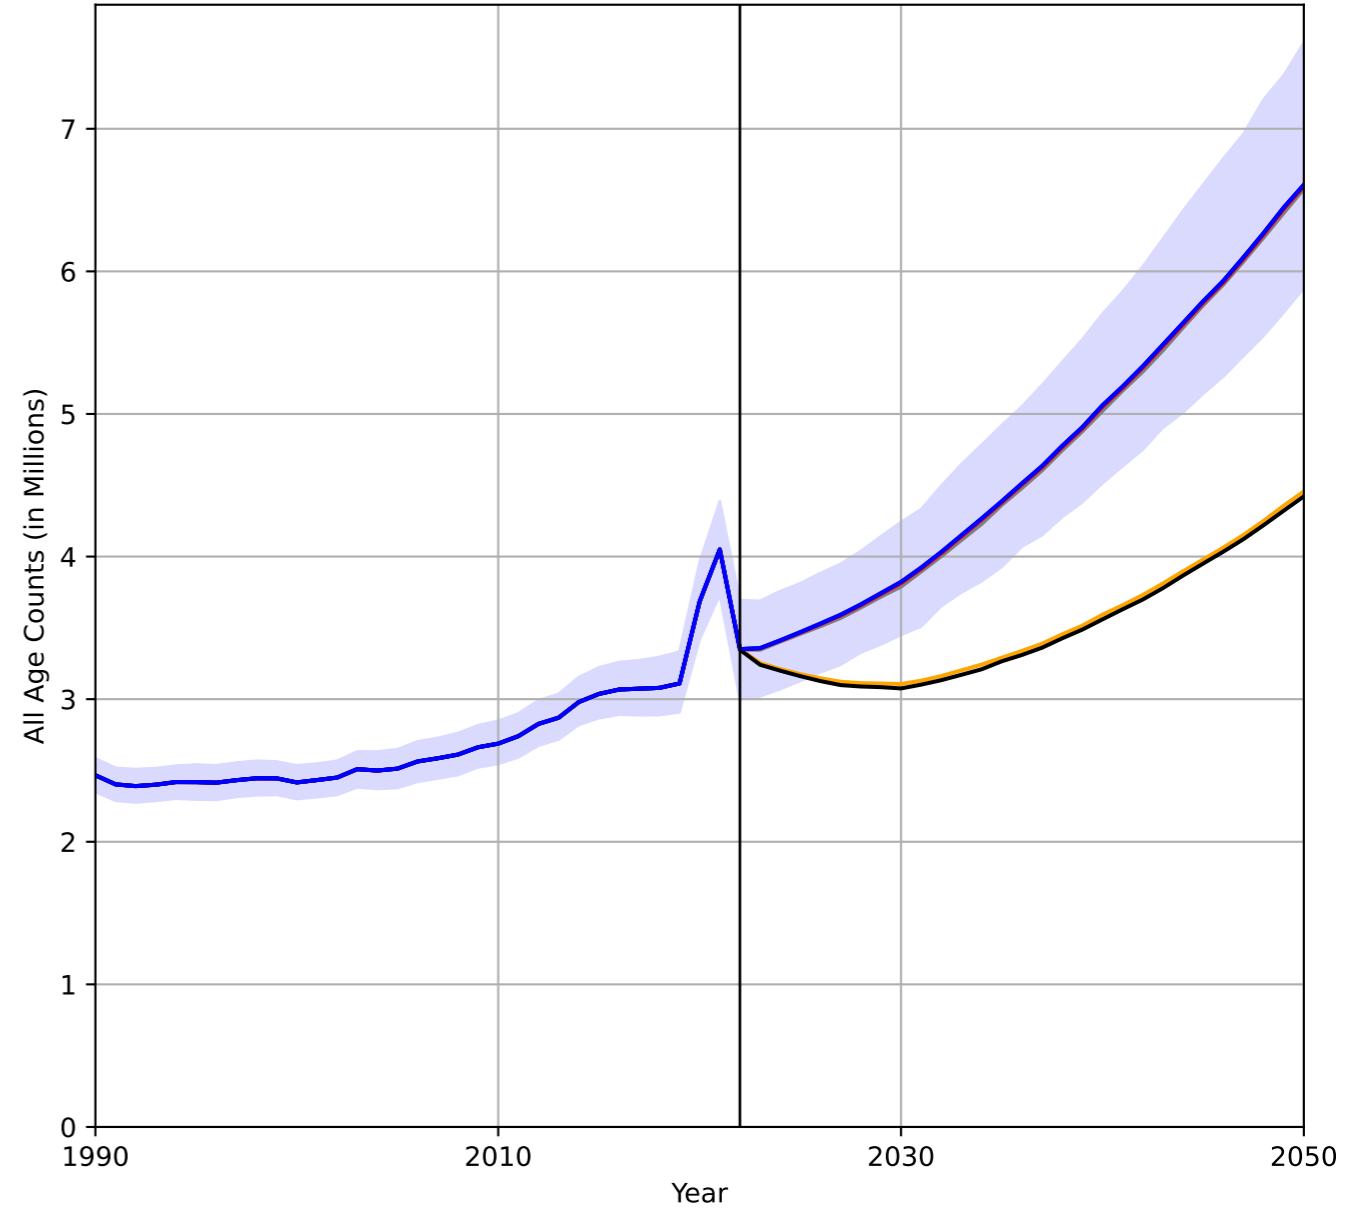

# South Asia

Supplemental Results Figure S11. All-cause age standardised death rates (A) and all age death counts (B), for the past and for five future scenarios, 1990–2050

1869



# East Asia

Supplemental Results Figure S11. All-cause age standardised death rates (A) and all age death counts (B), for the past and for five future scenarios, 1990–2050

1870

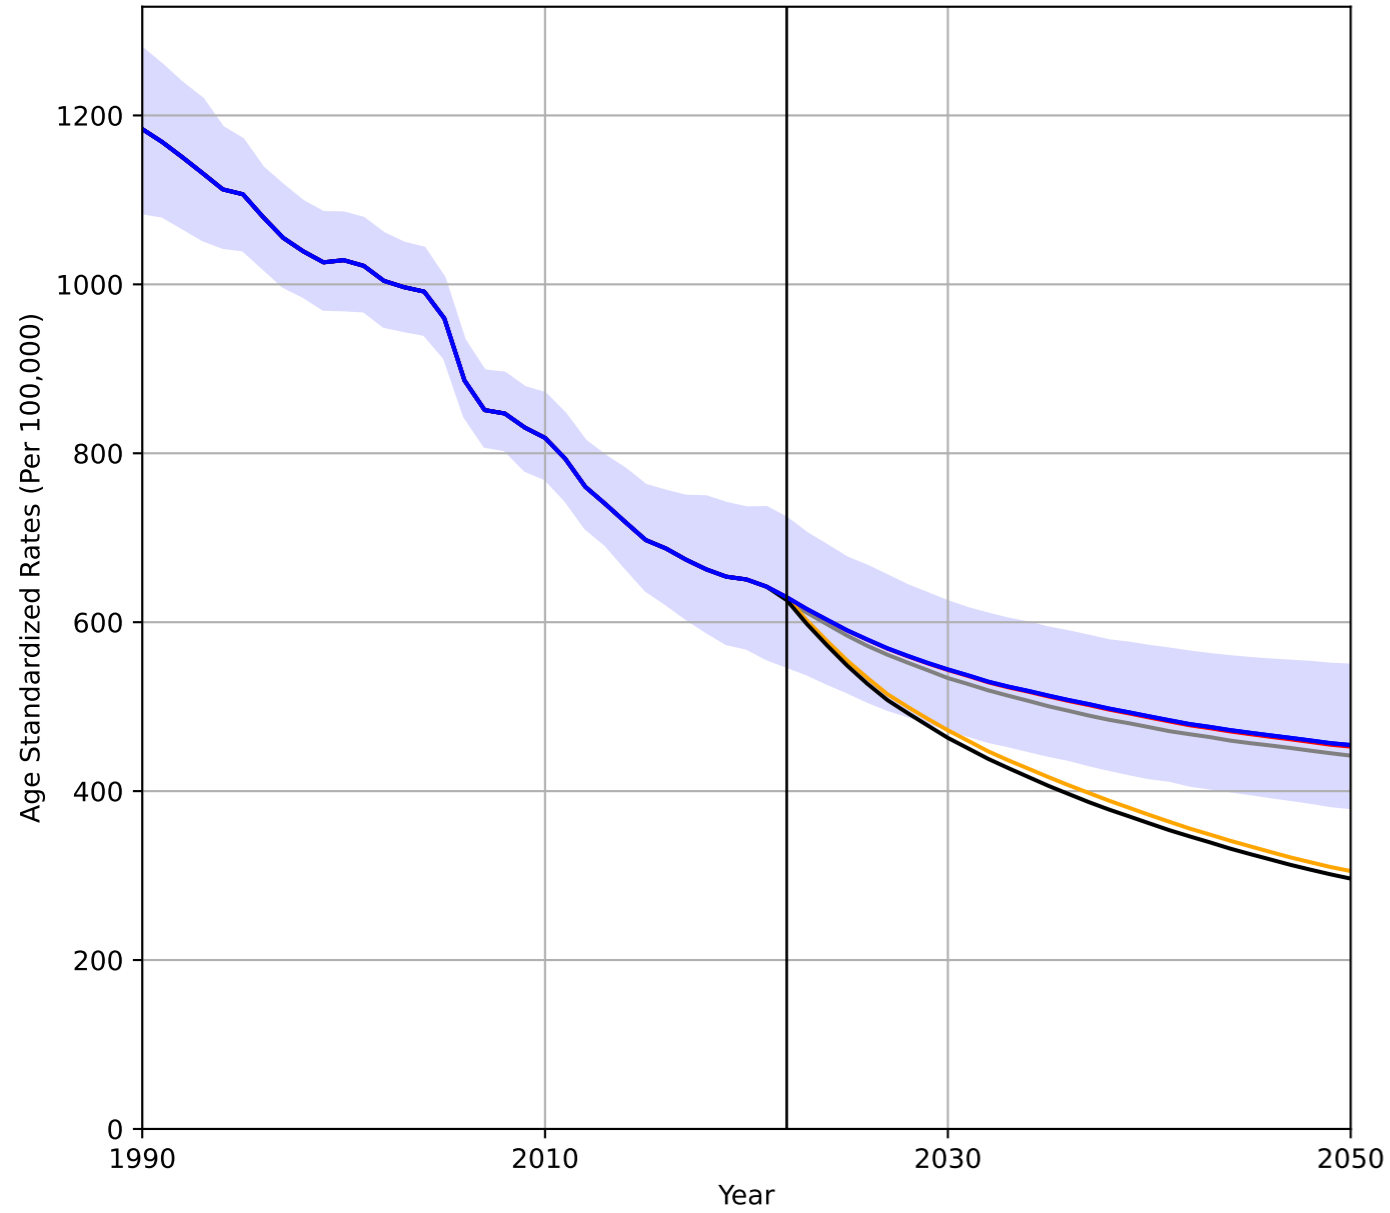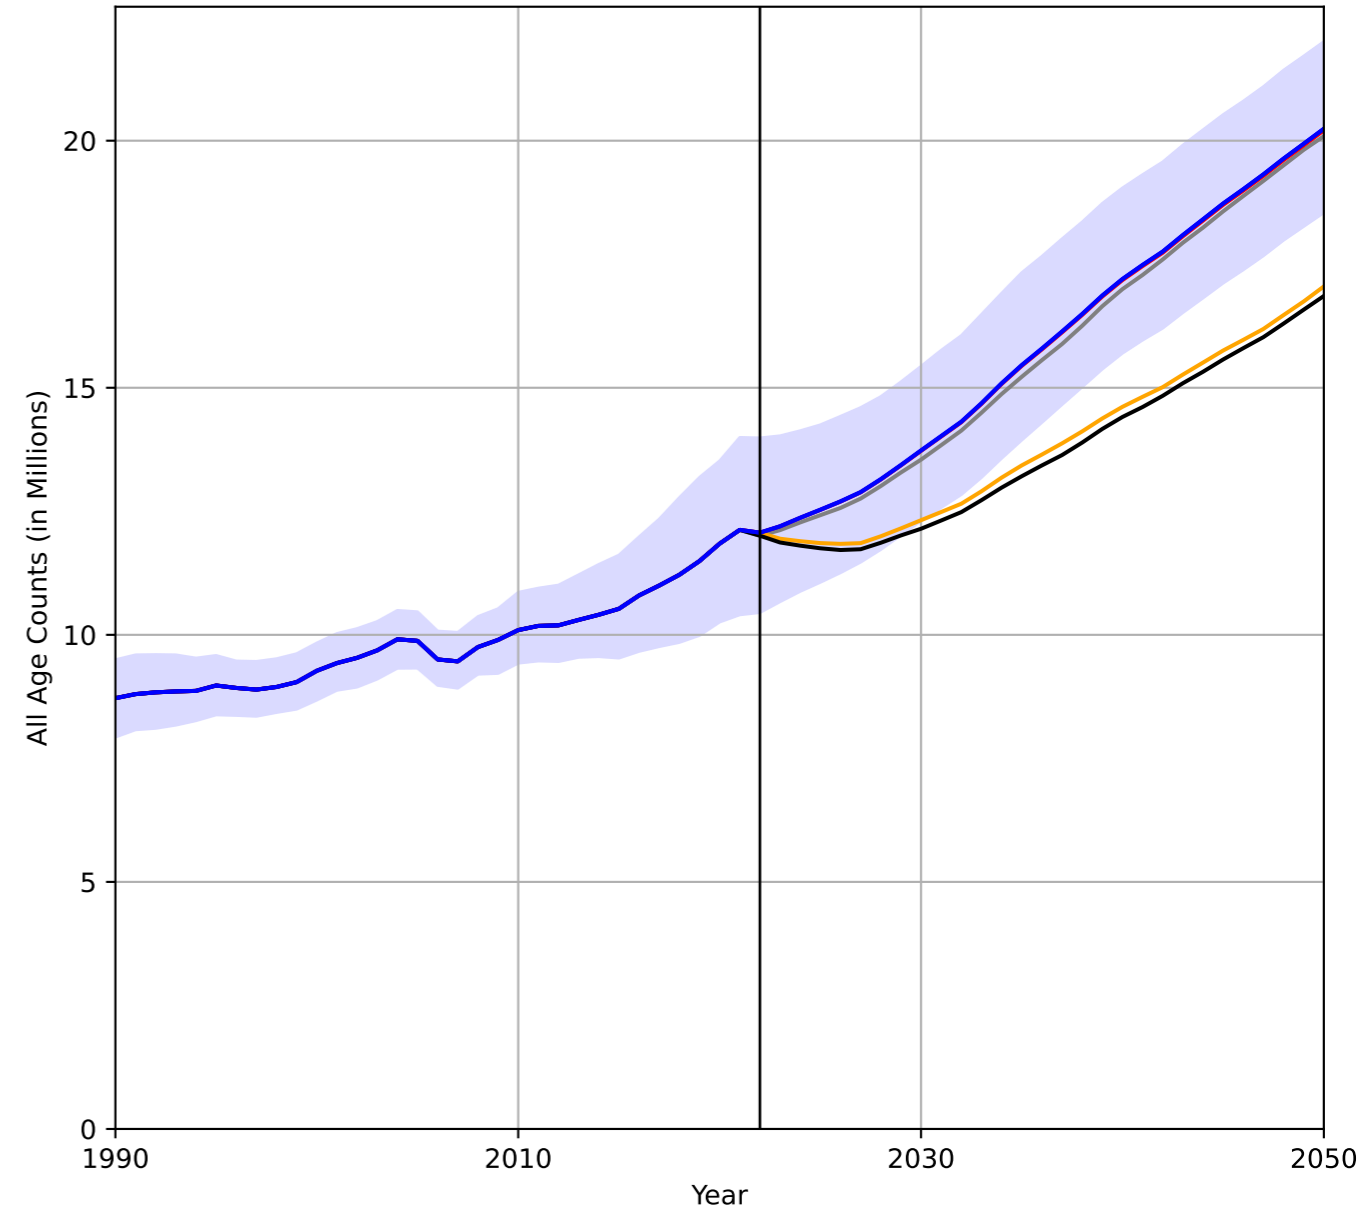

# Oceania

Supplemental Results Figure S11. All-cause age standardised death rates (A) and all age death counts (B), for the past and for five future scenarios, 1990–2050

1871

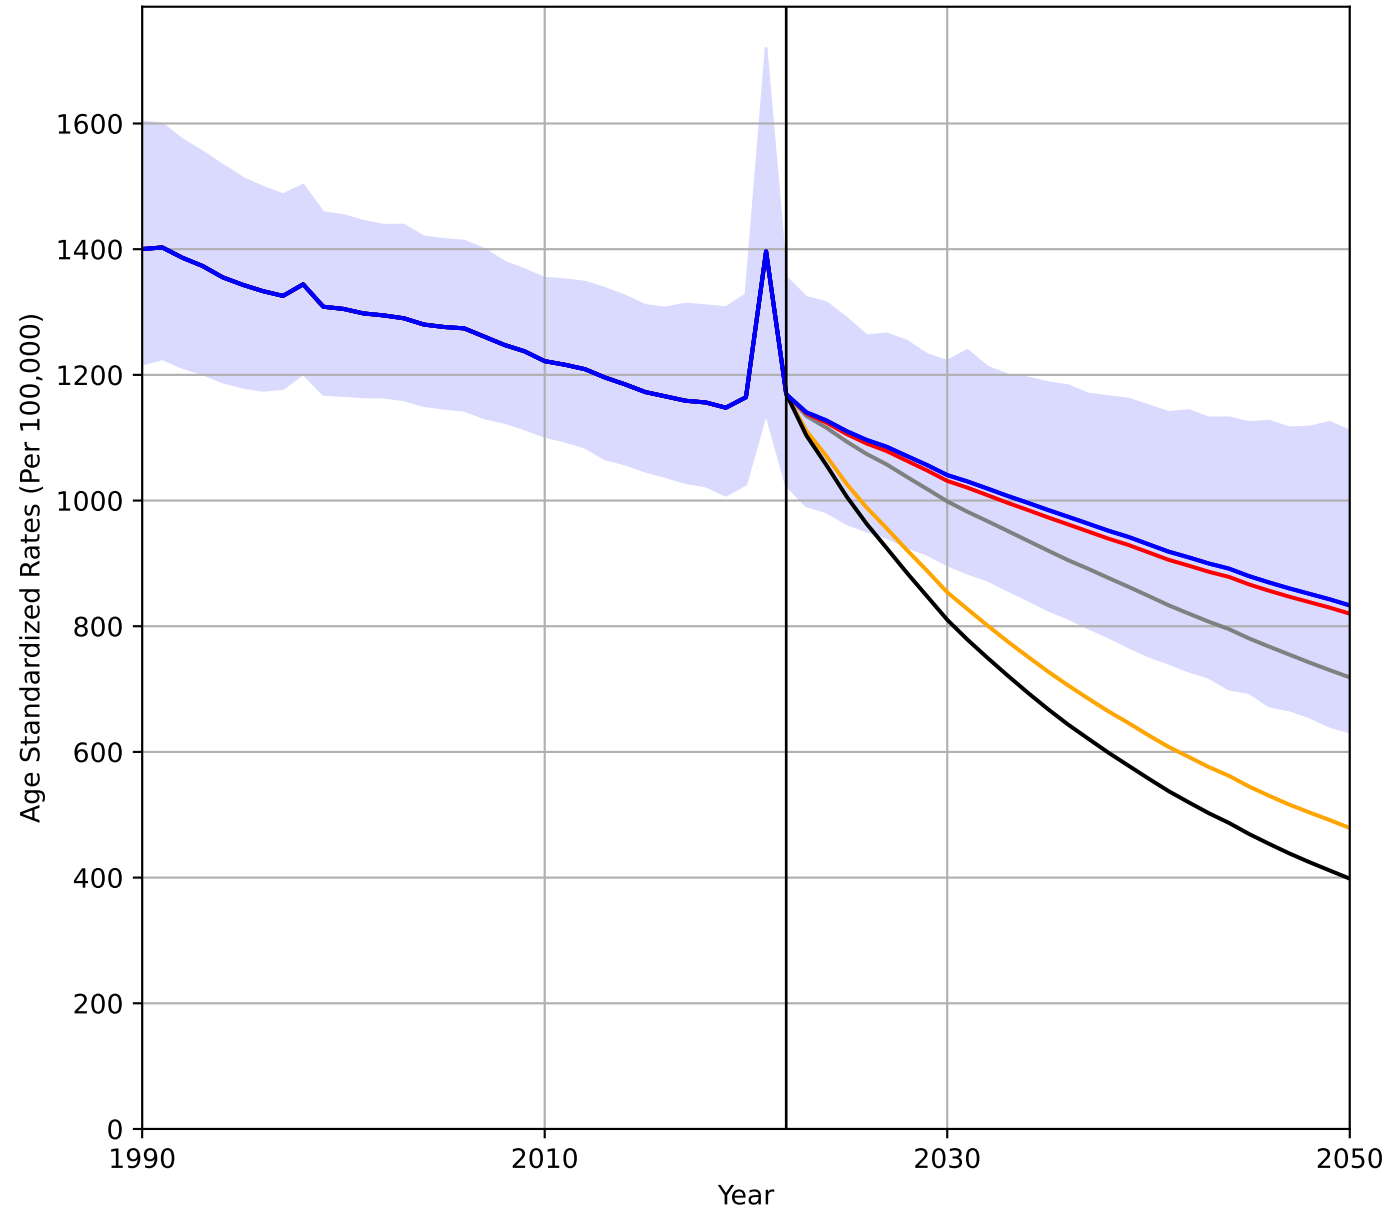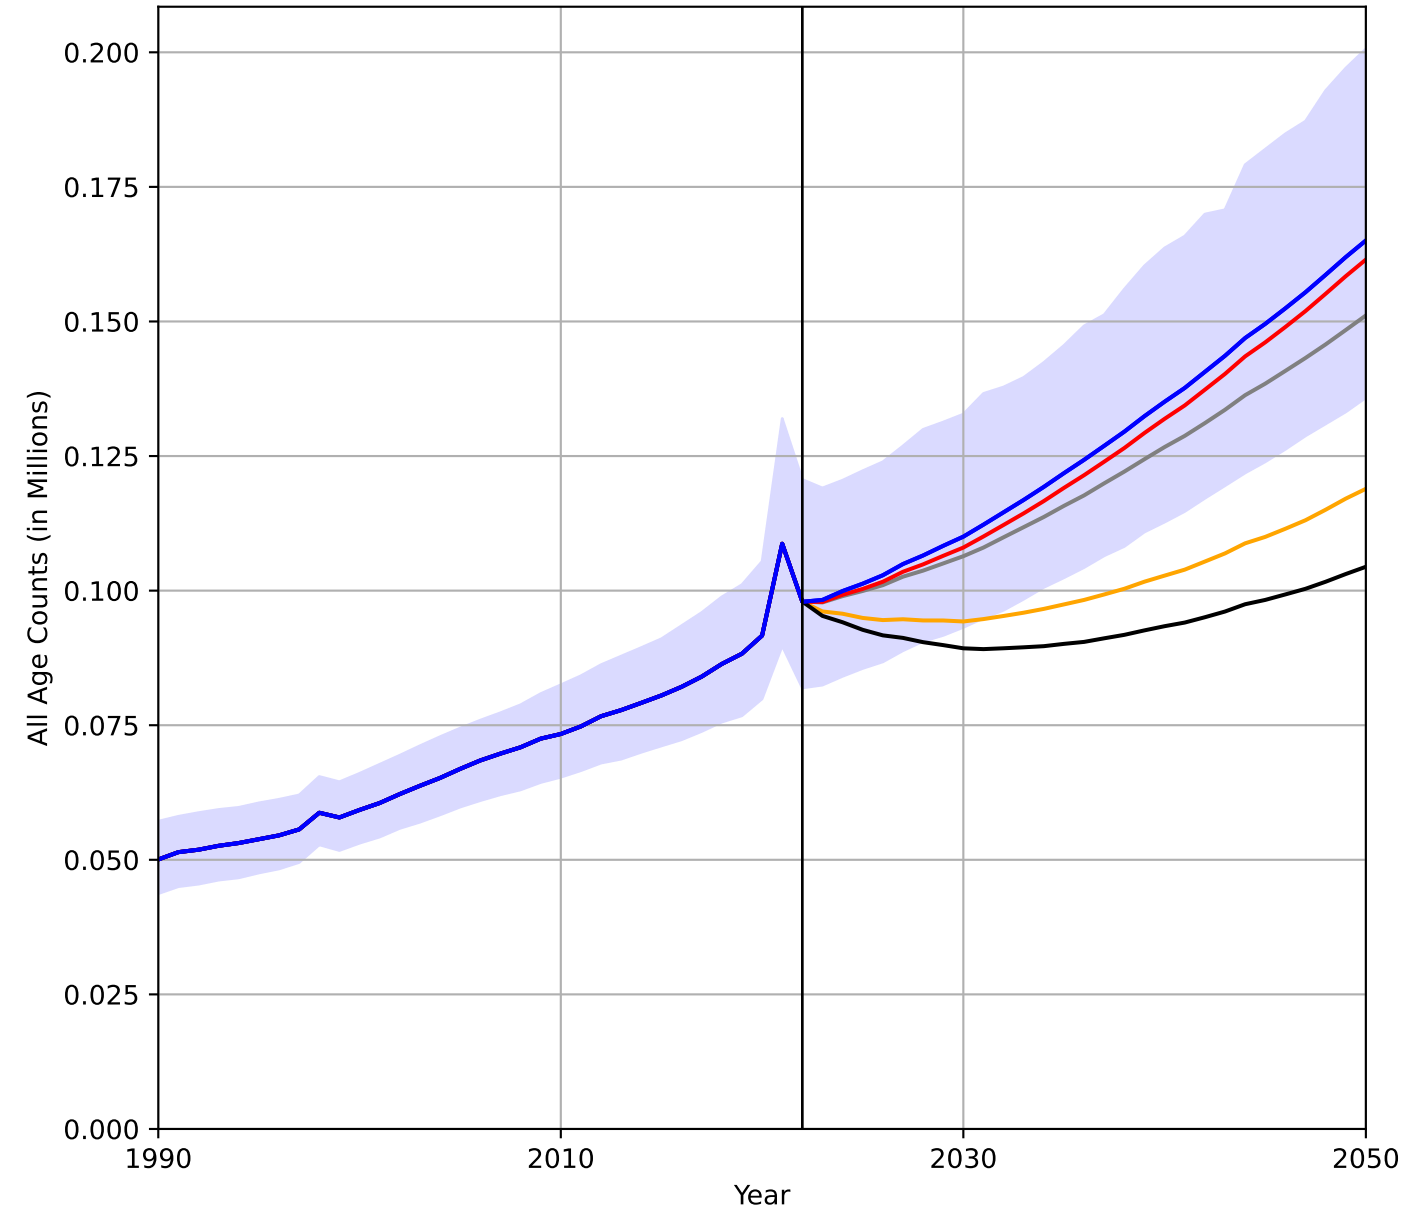



# Southeast Asia

Supplemental Results Figure S11. All-cause age standardised death rates (A) and all age death counts (B), for the past and for five future scenarios, 1990–2050

1872

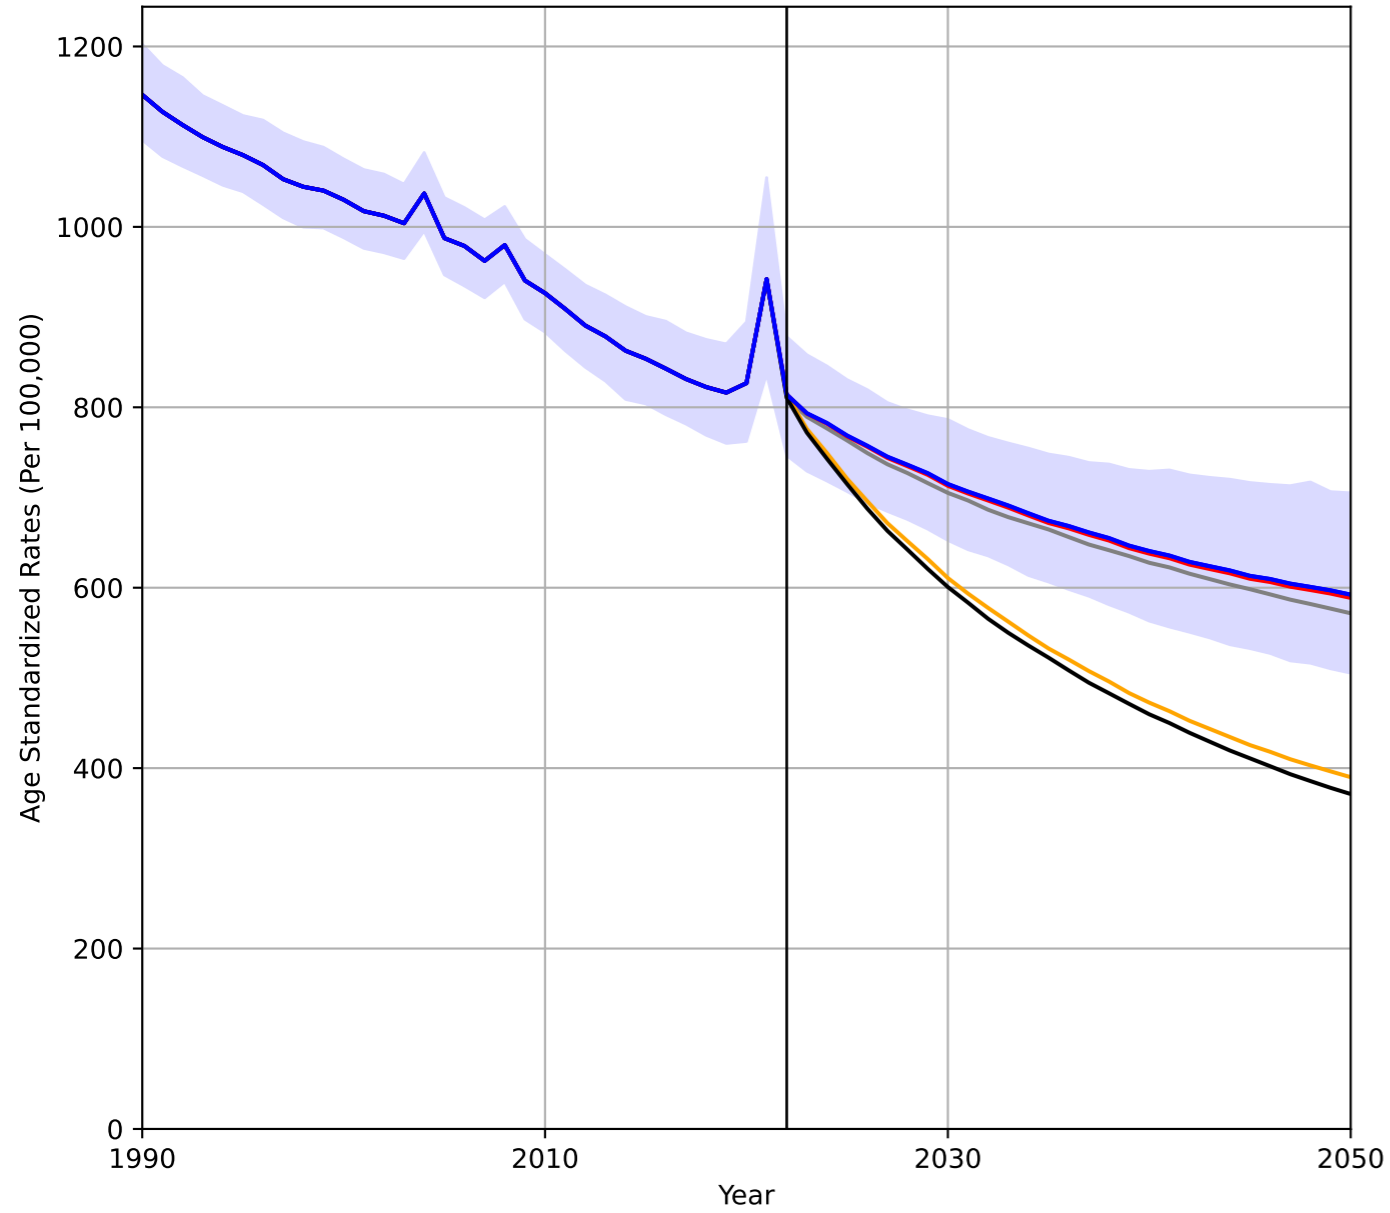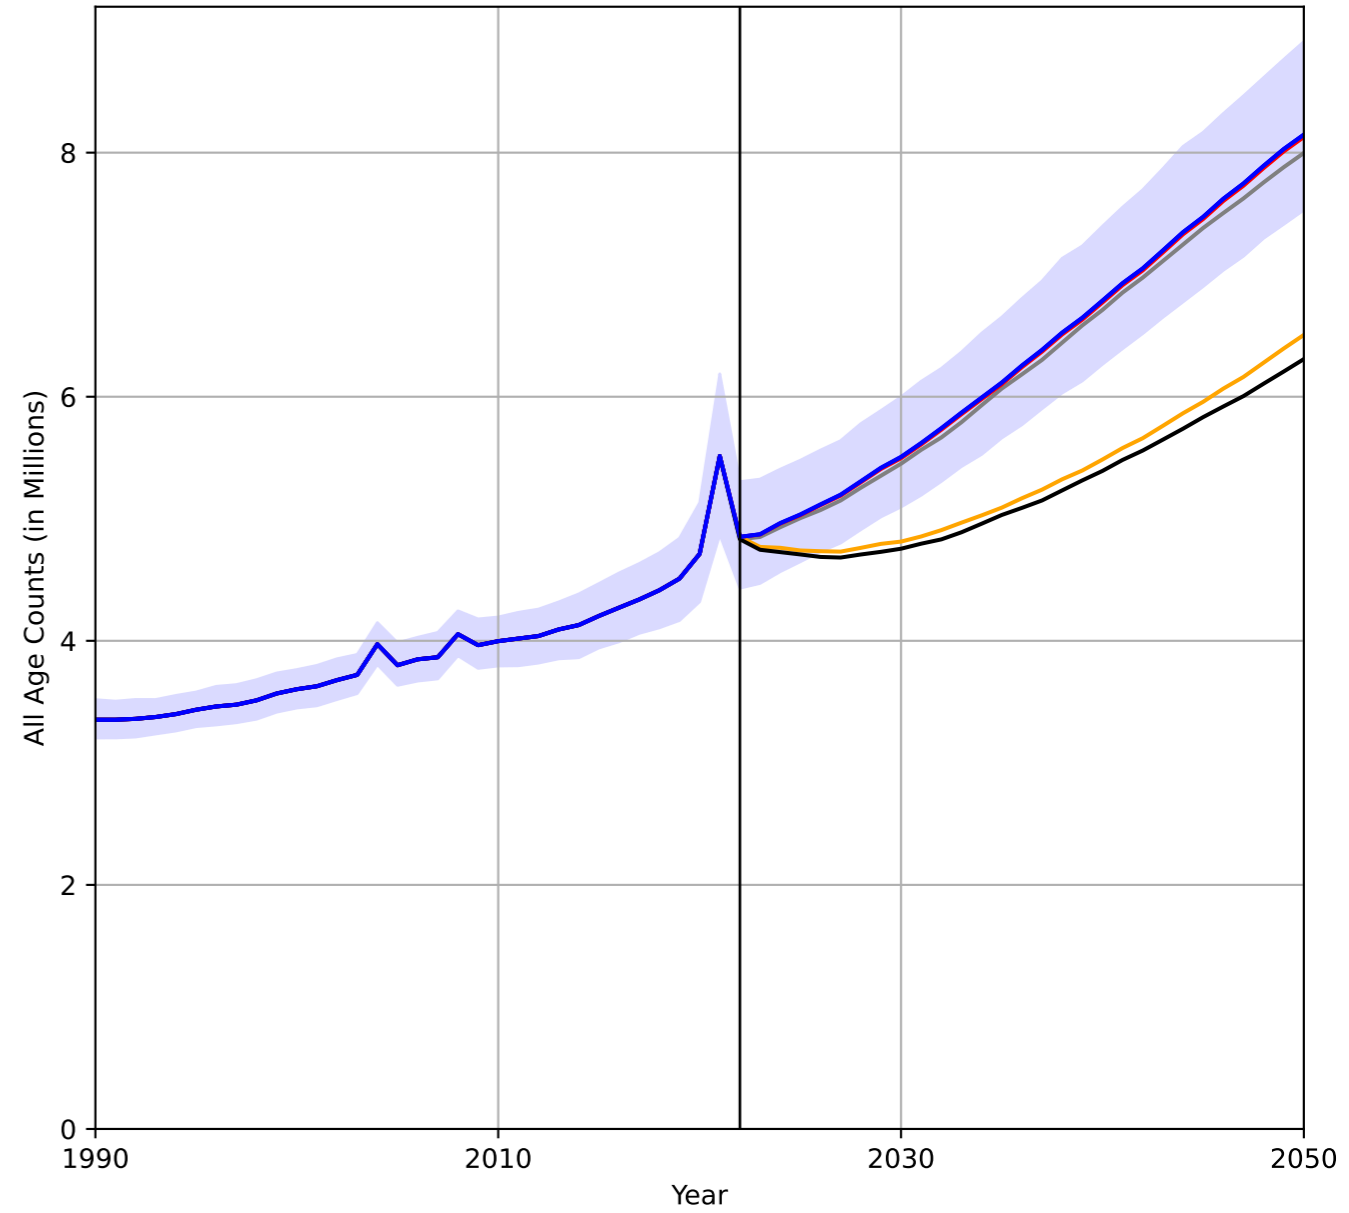

# Central Sub-Saharan Africa

Supplemental Results Figure S11. All-cause age standardised death rates (A) and all age death counts (B), for the past and for five future scenarios, 1990–2050

1873

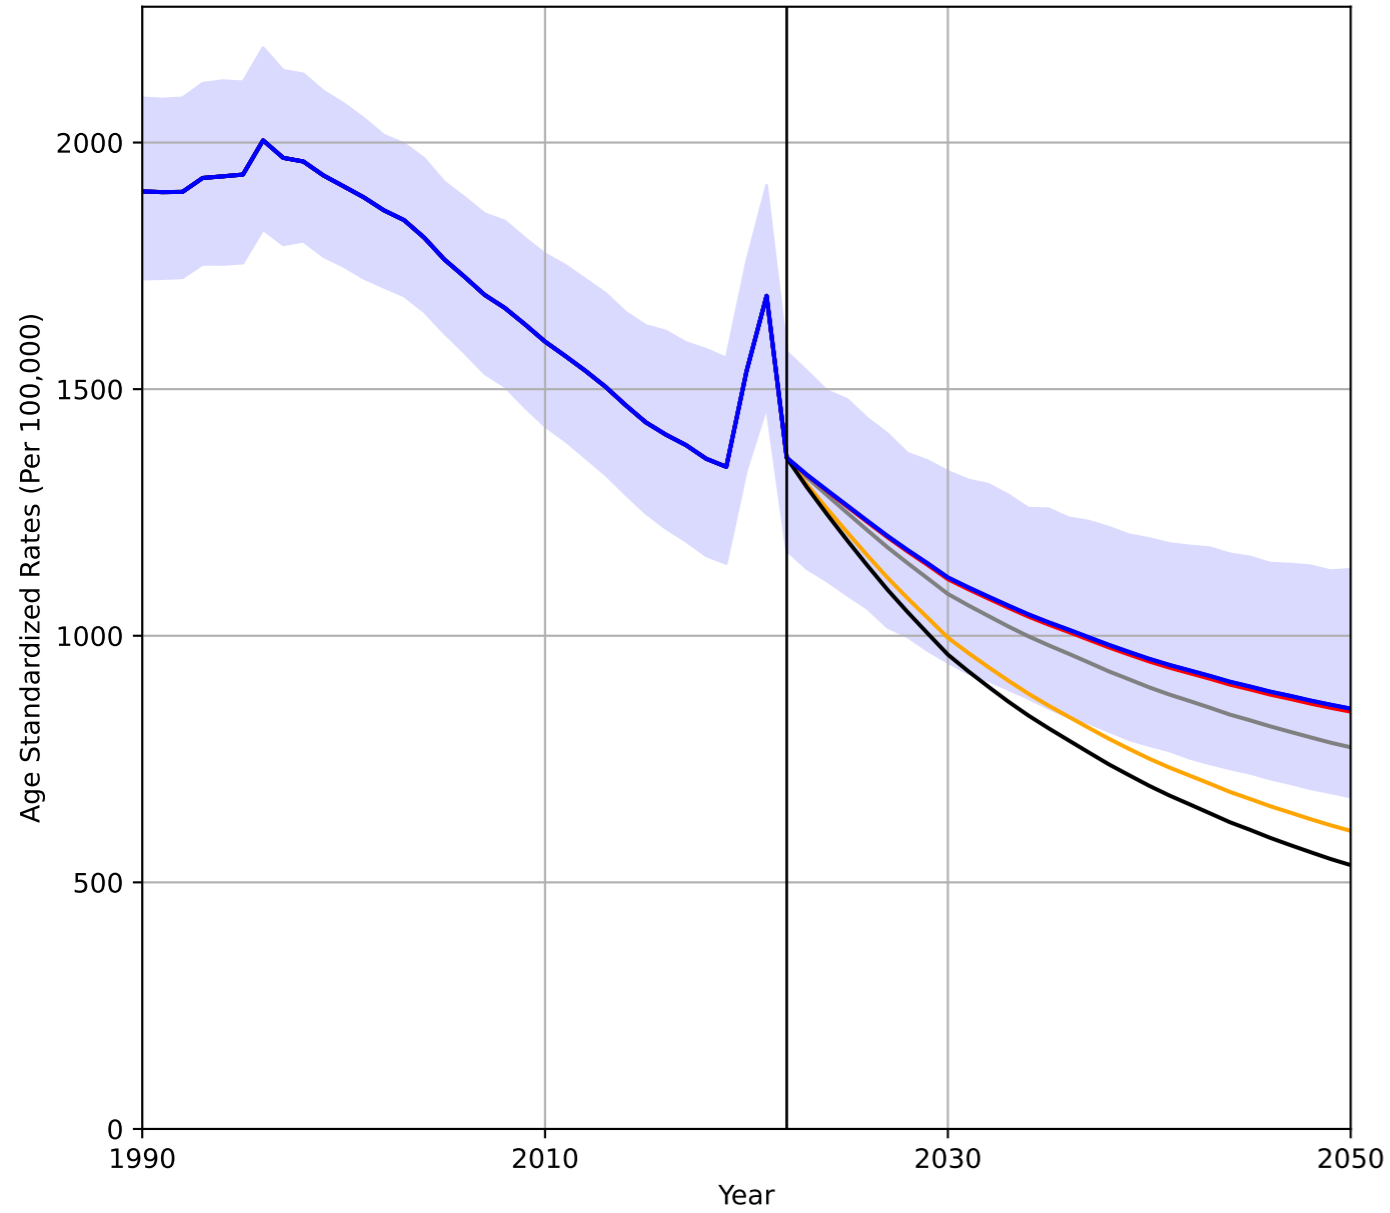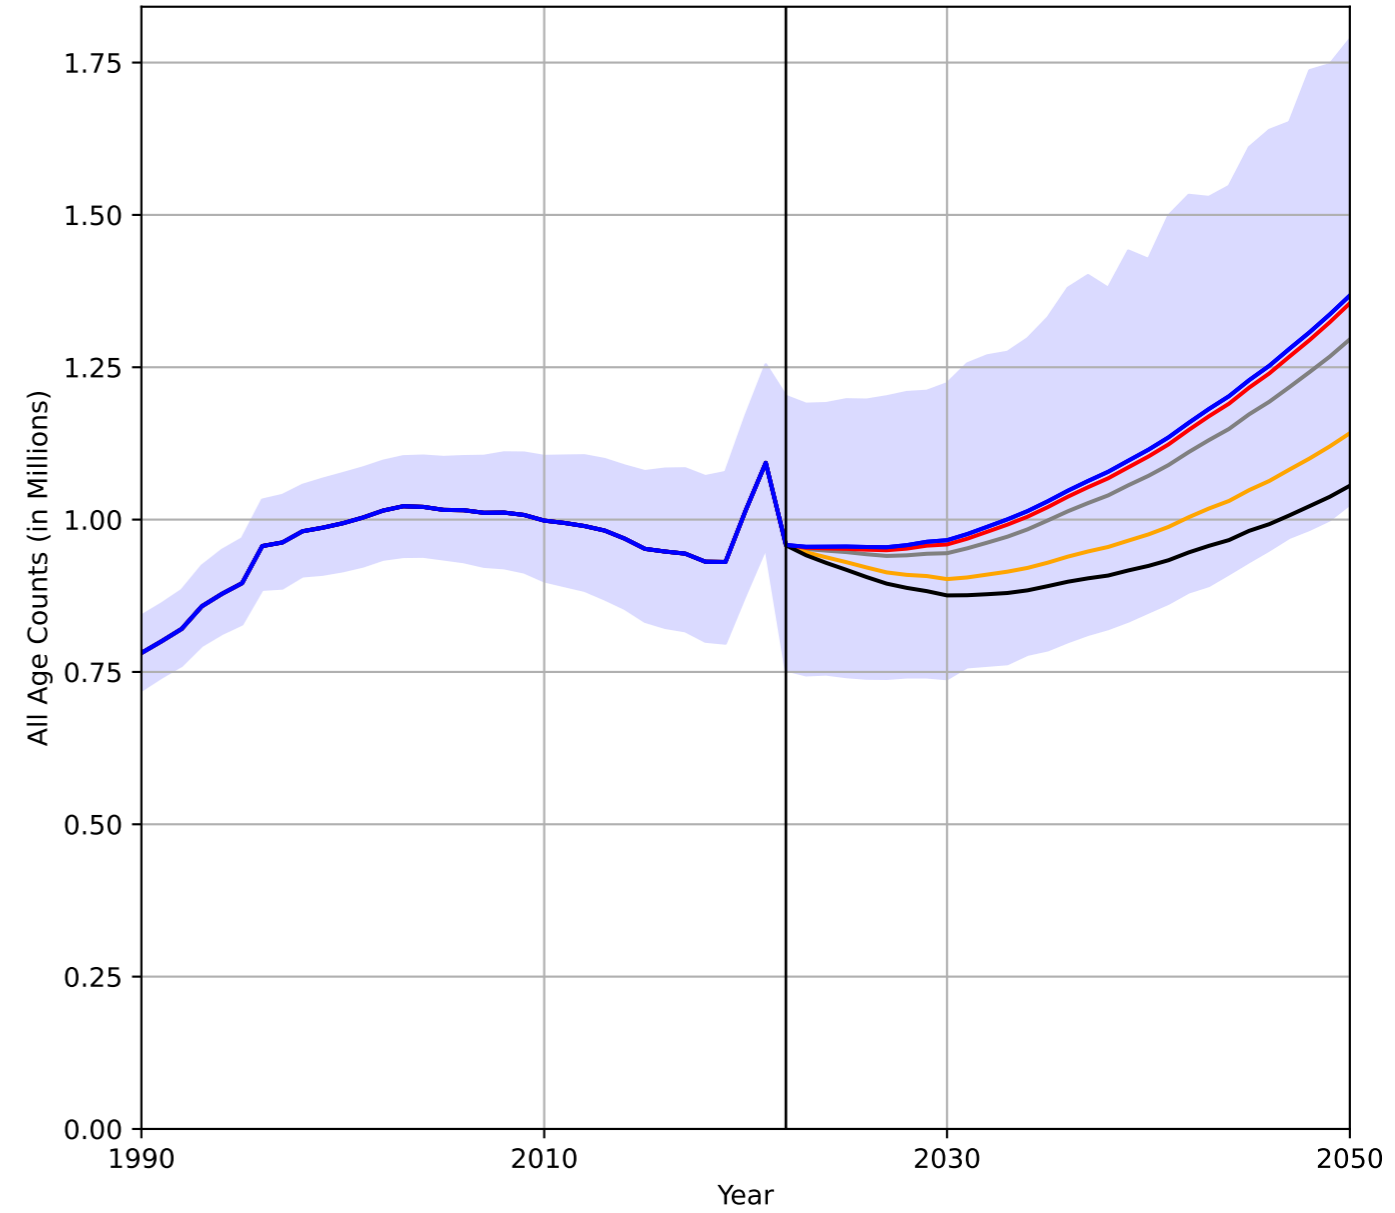

# Eastern Sub-Saharan Africa

Supplemental Results Figure S11. All-cause age standardised death rates (A) and all age death counts (B), for the past and for five future scenarios, 1990–2050

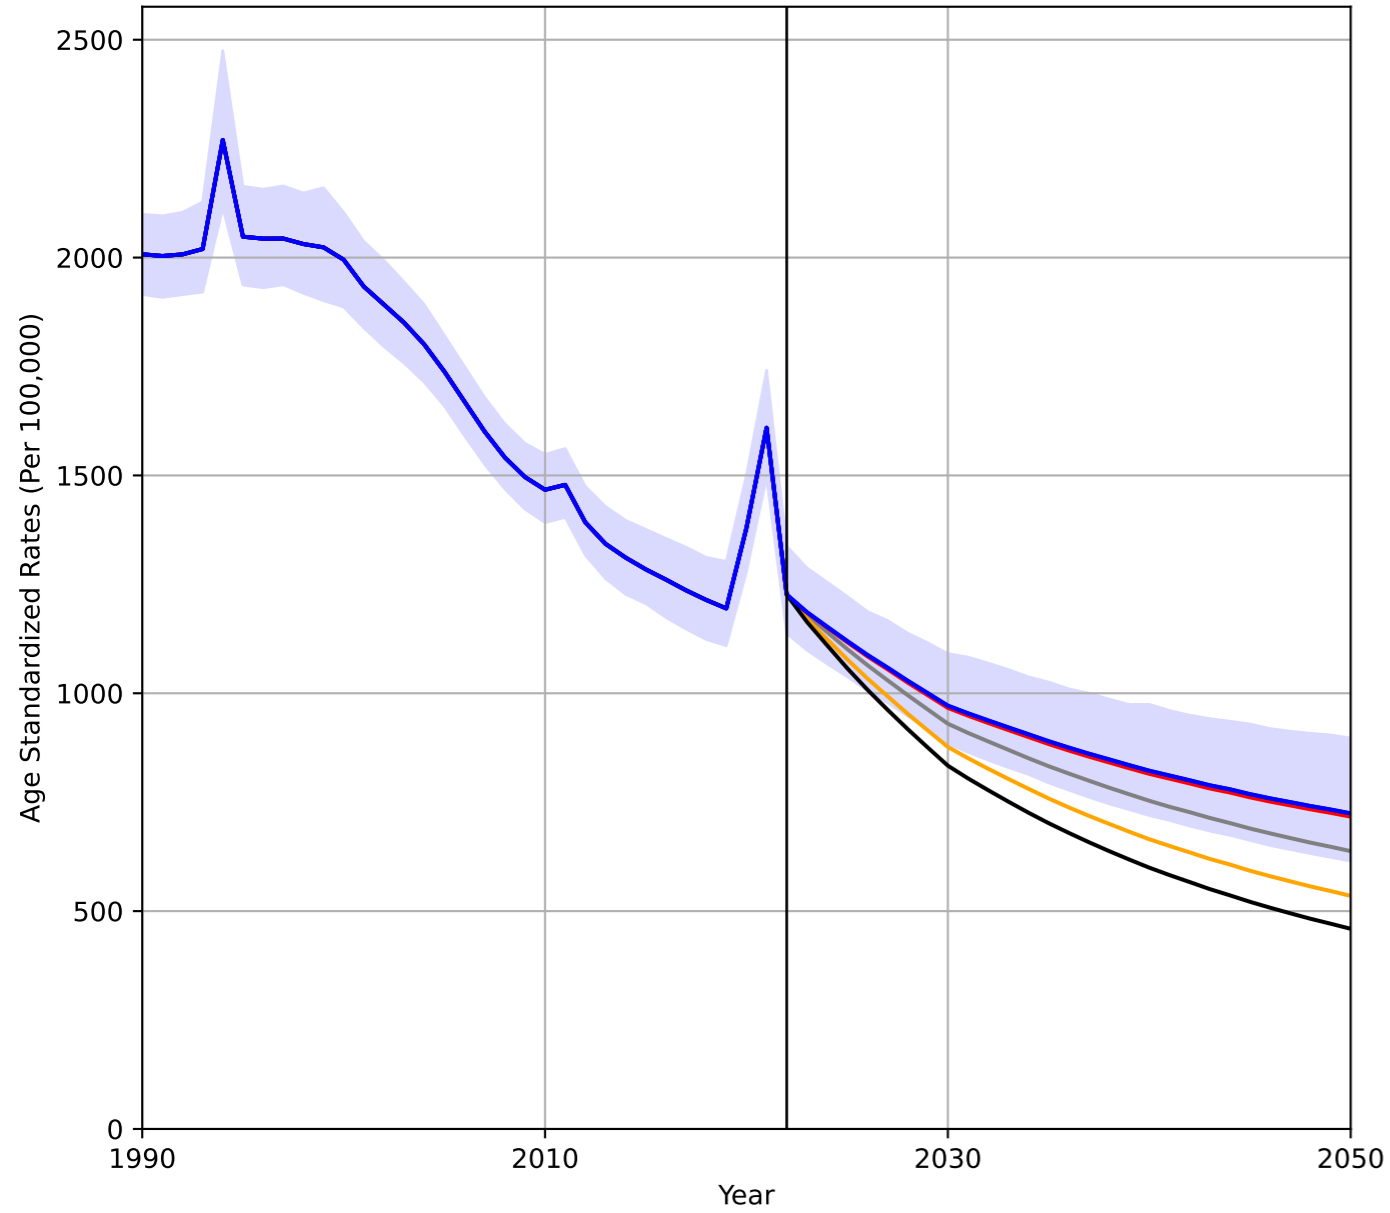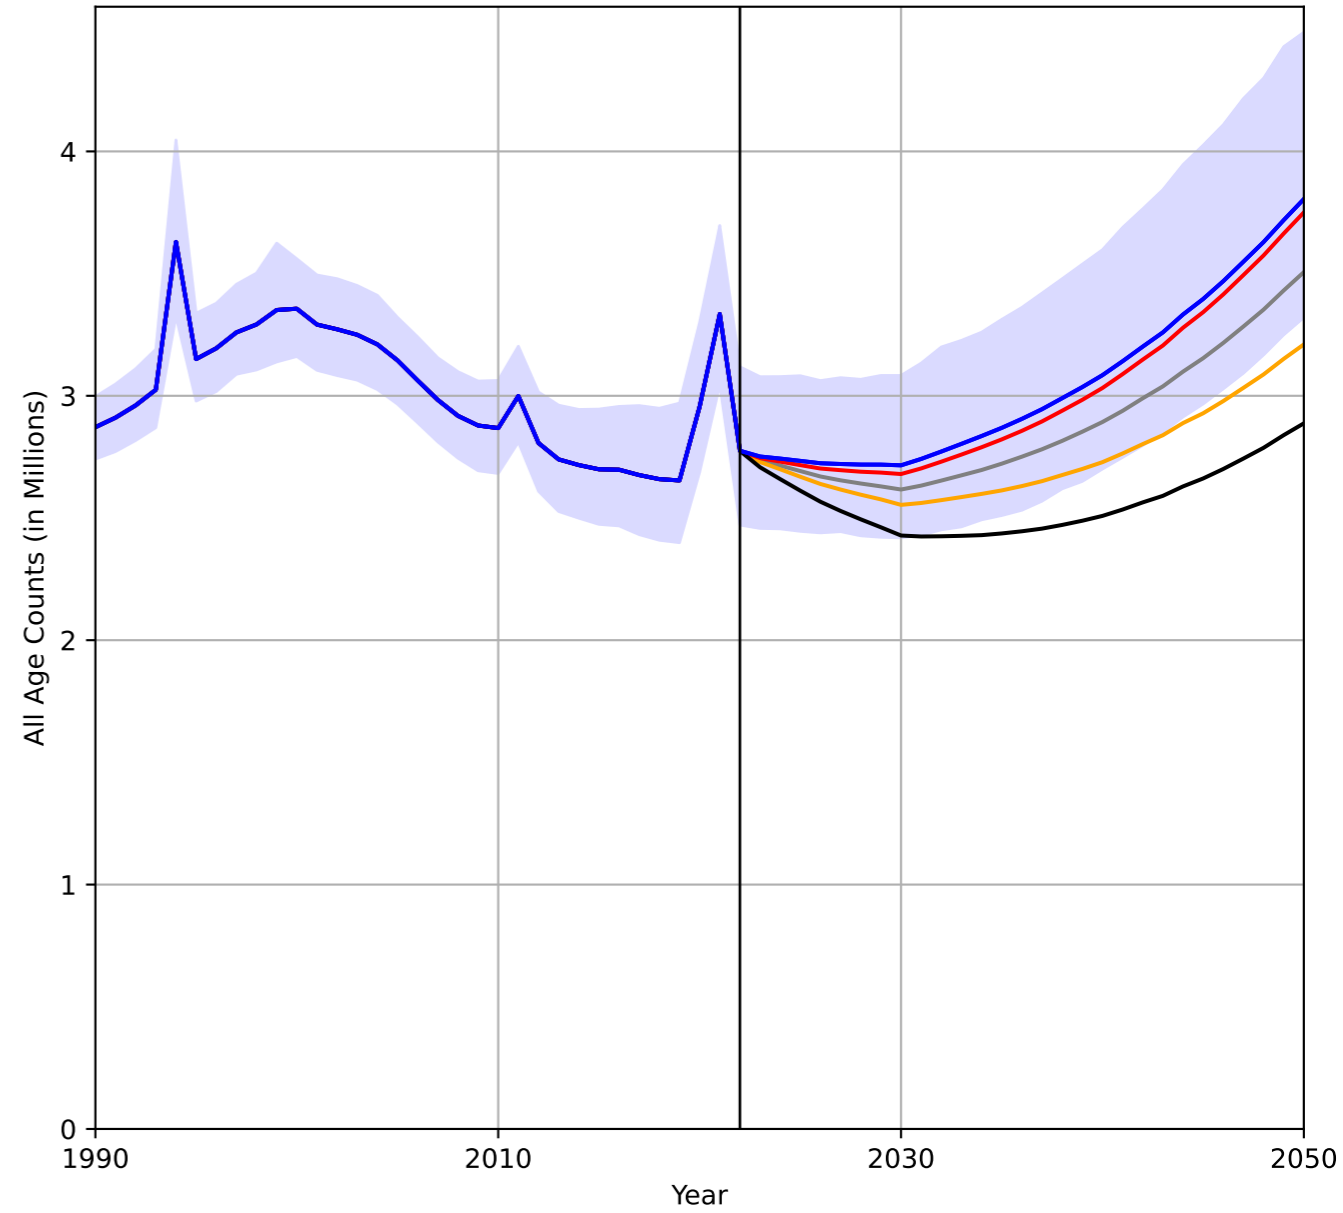

# Southern Sub-Saharan Africa

Supplemental Results Figure S11. All-cause age standardised death rates (A) and all age death counts (B), for the past and for five future scenarios, 1990–2050

1875

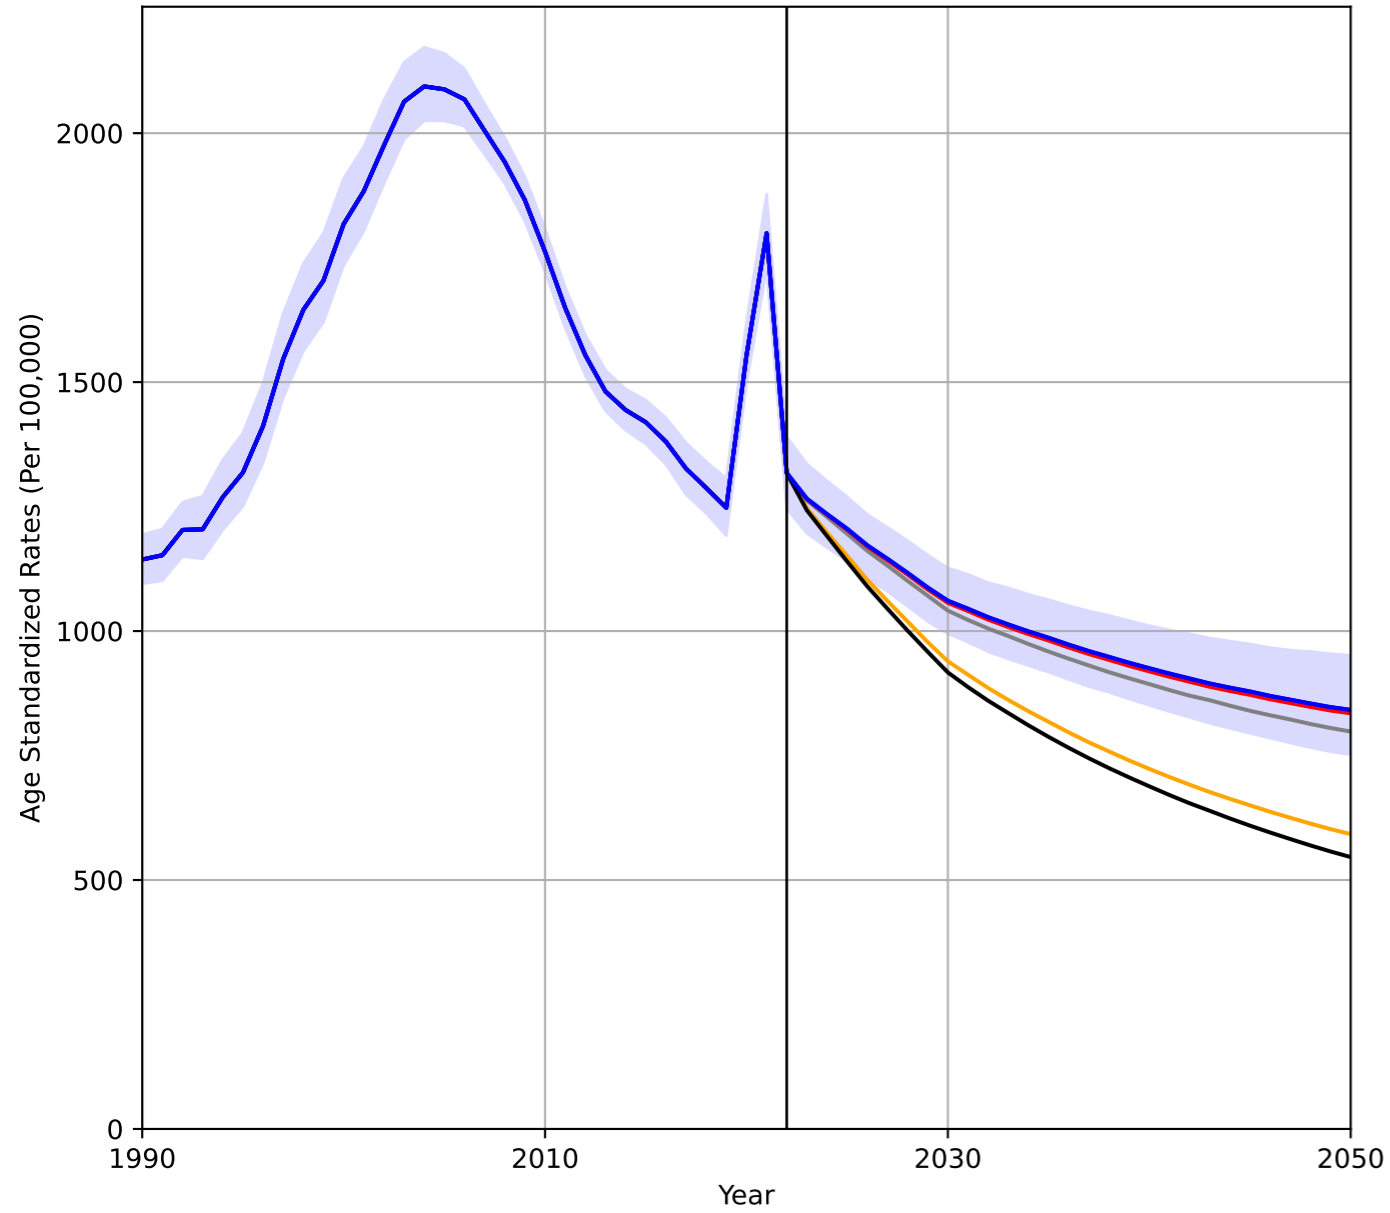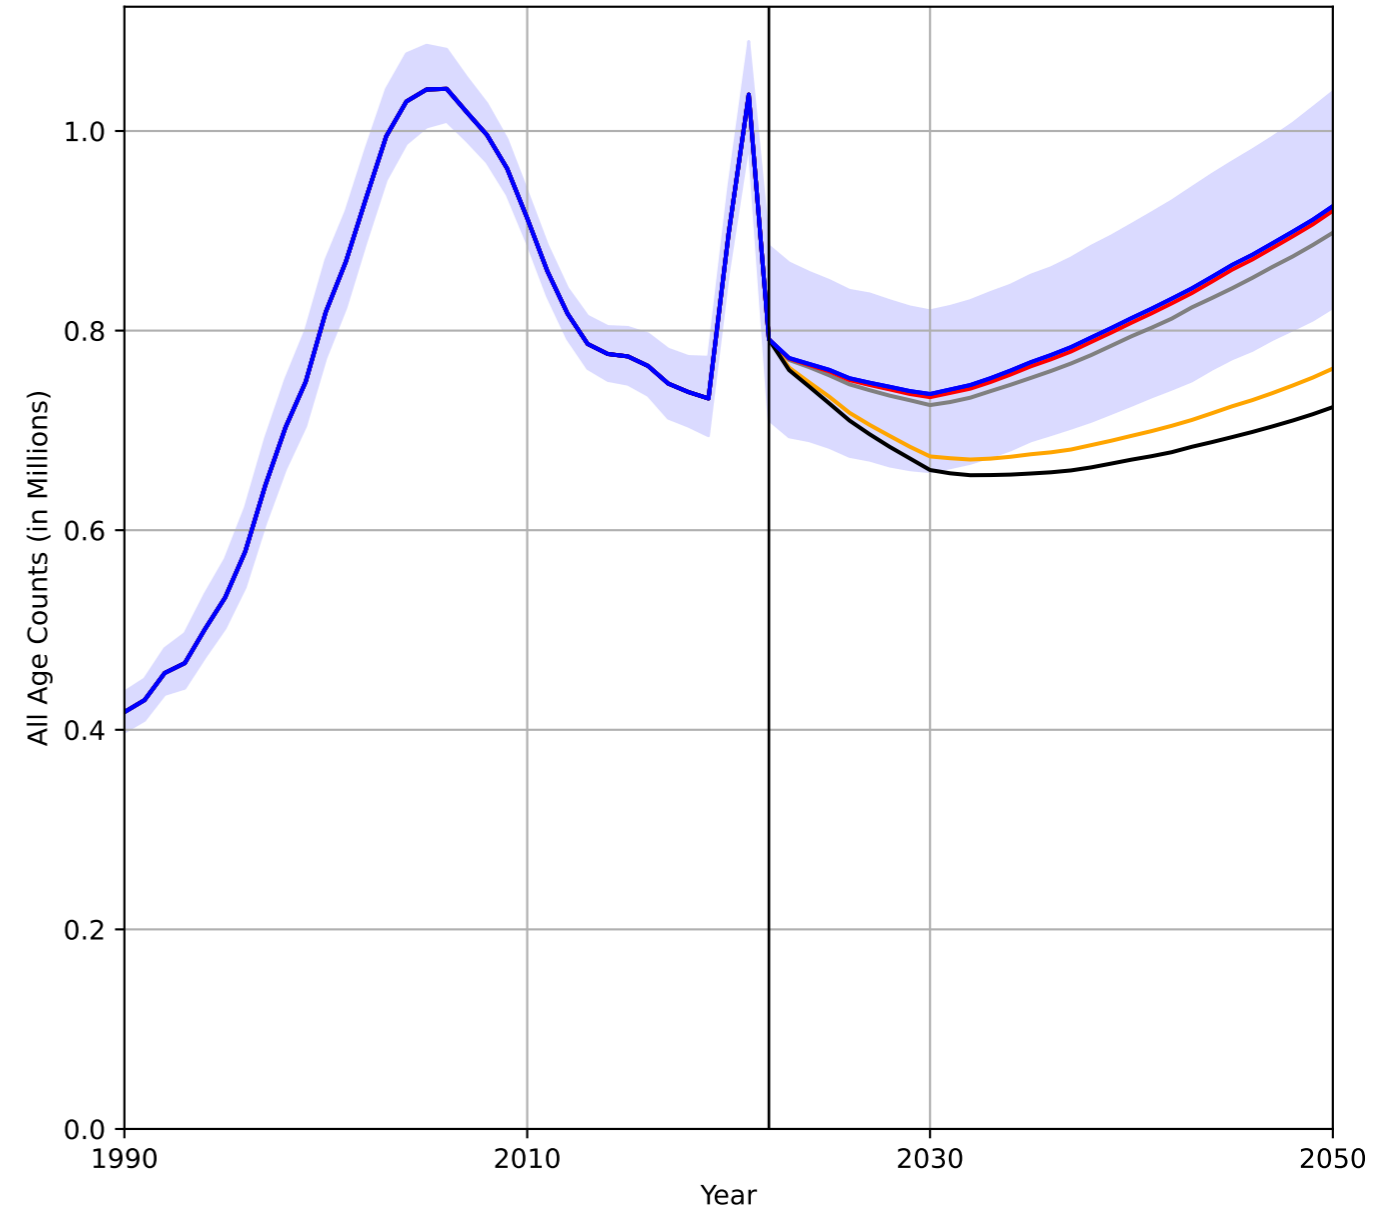

# Western Sub-Saharan Africa

1876

Supplemental Results Figure S11. All-cause age standardised death rates (A) and all age death counts (B), for the past and for five future scenarios, 1990–2050

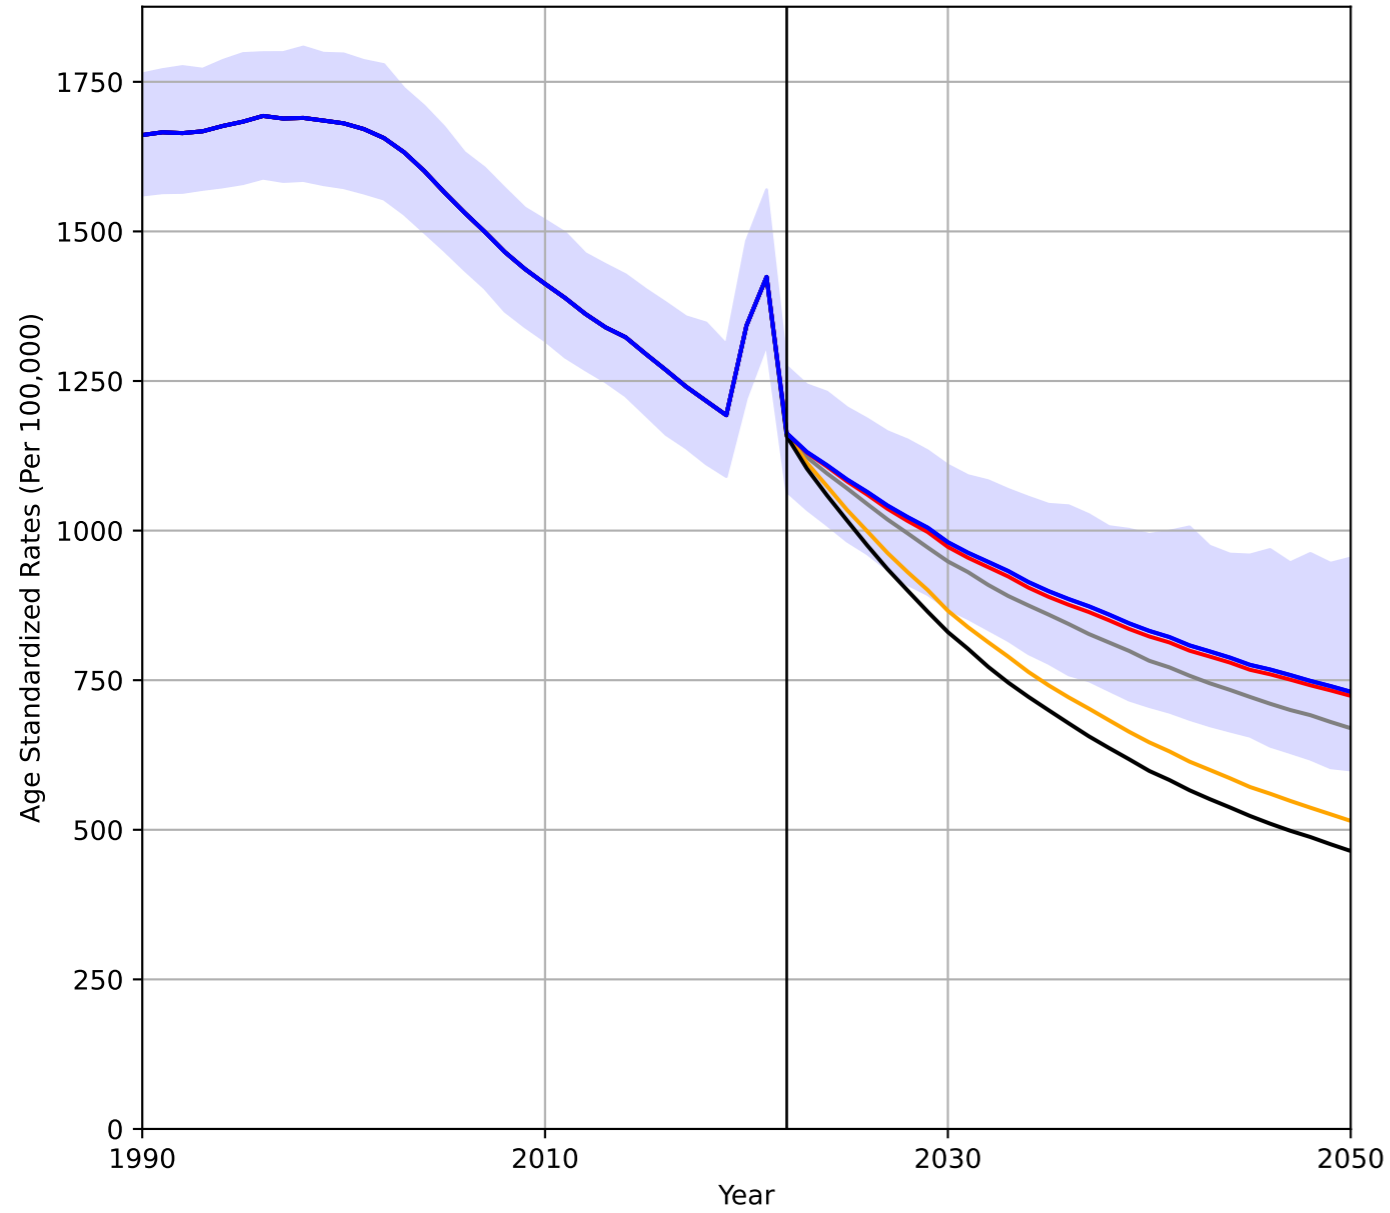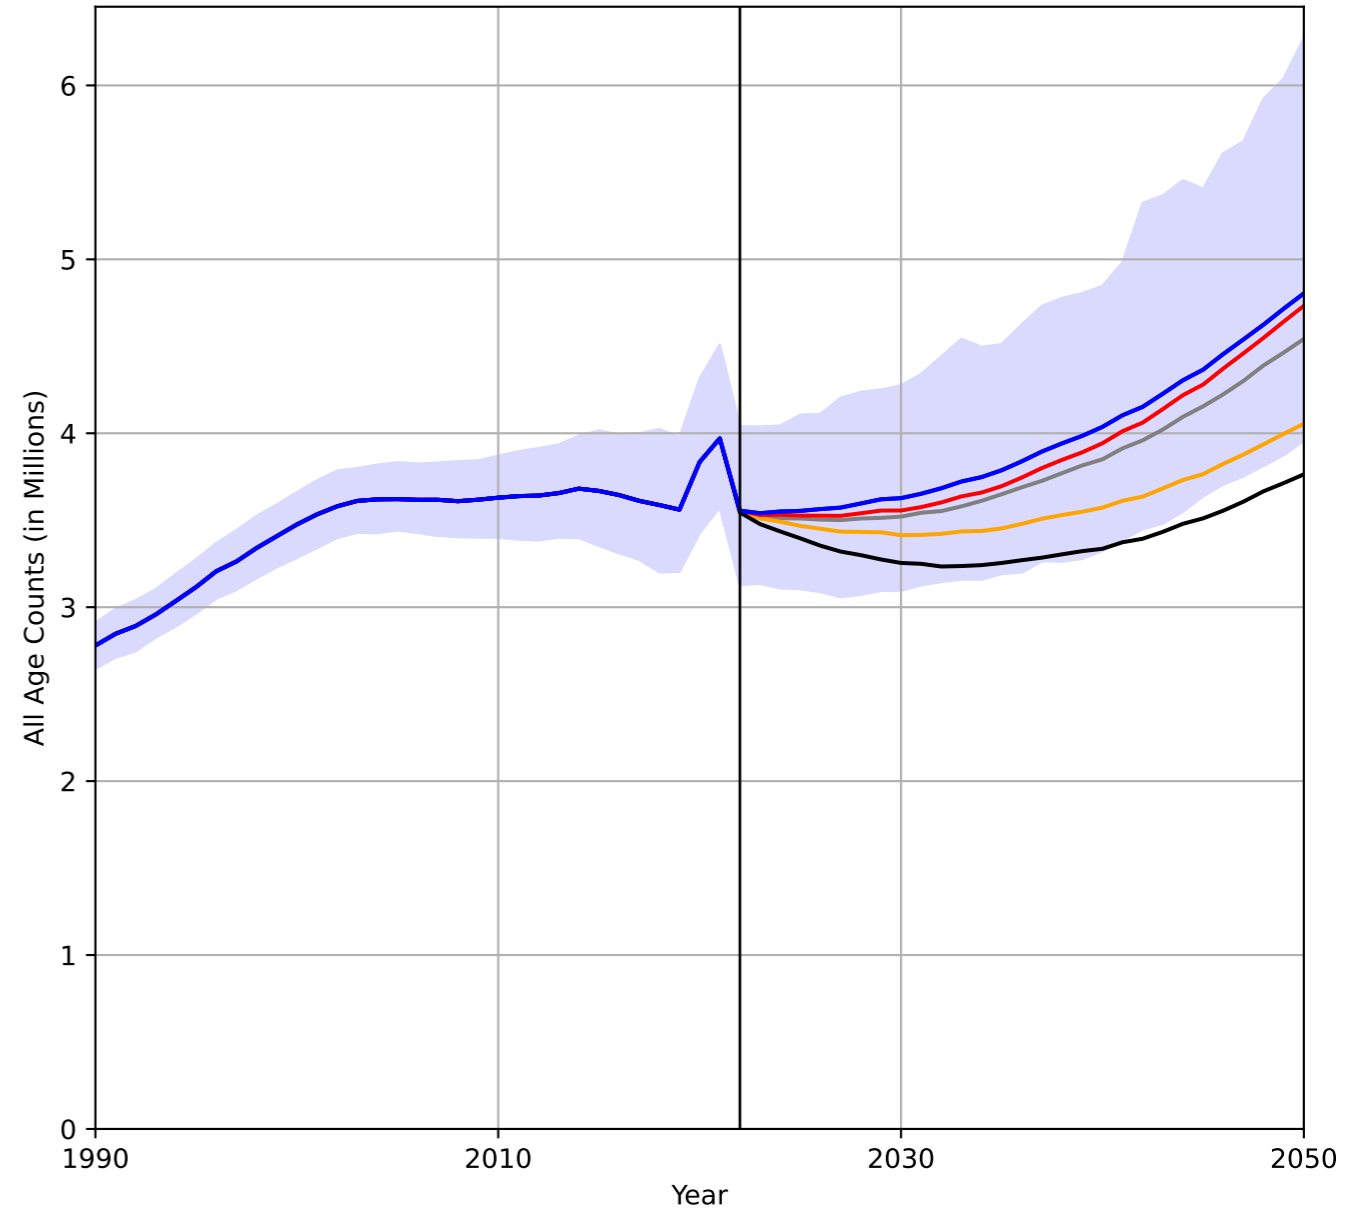

# Armenia

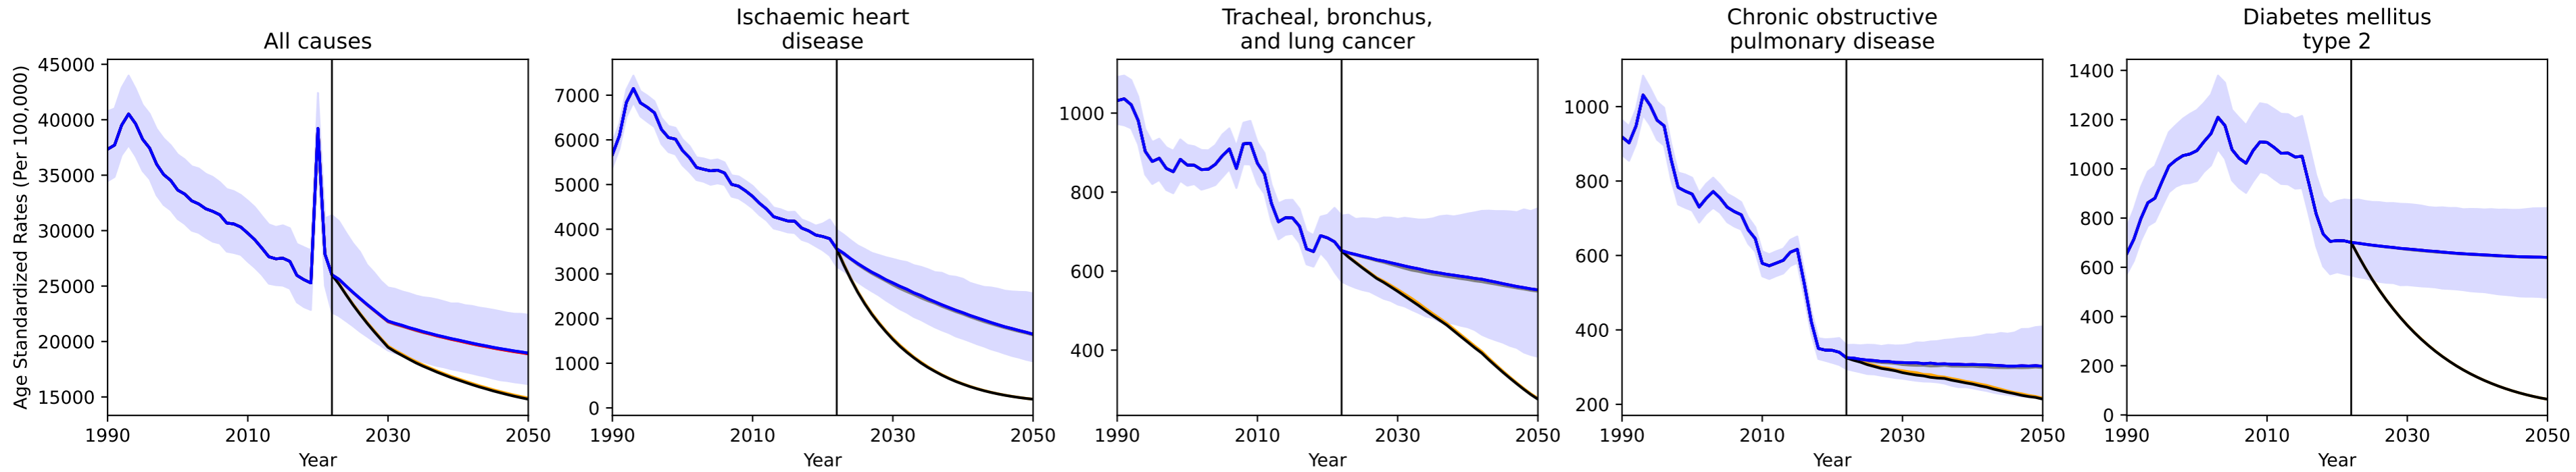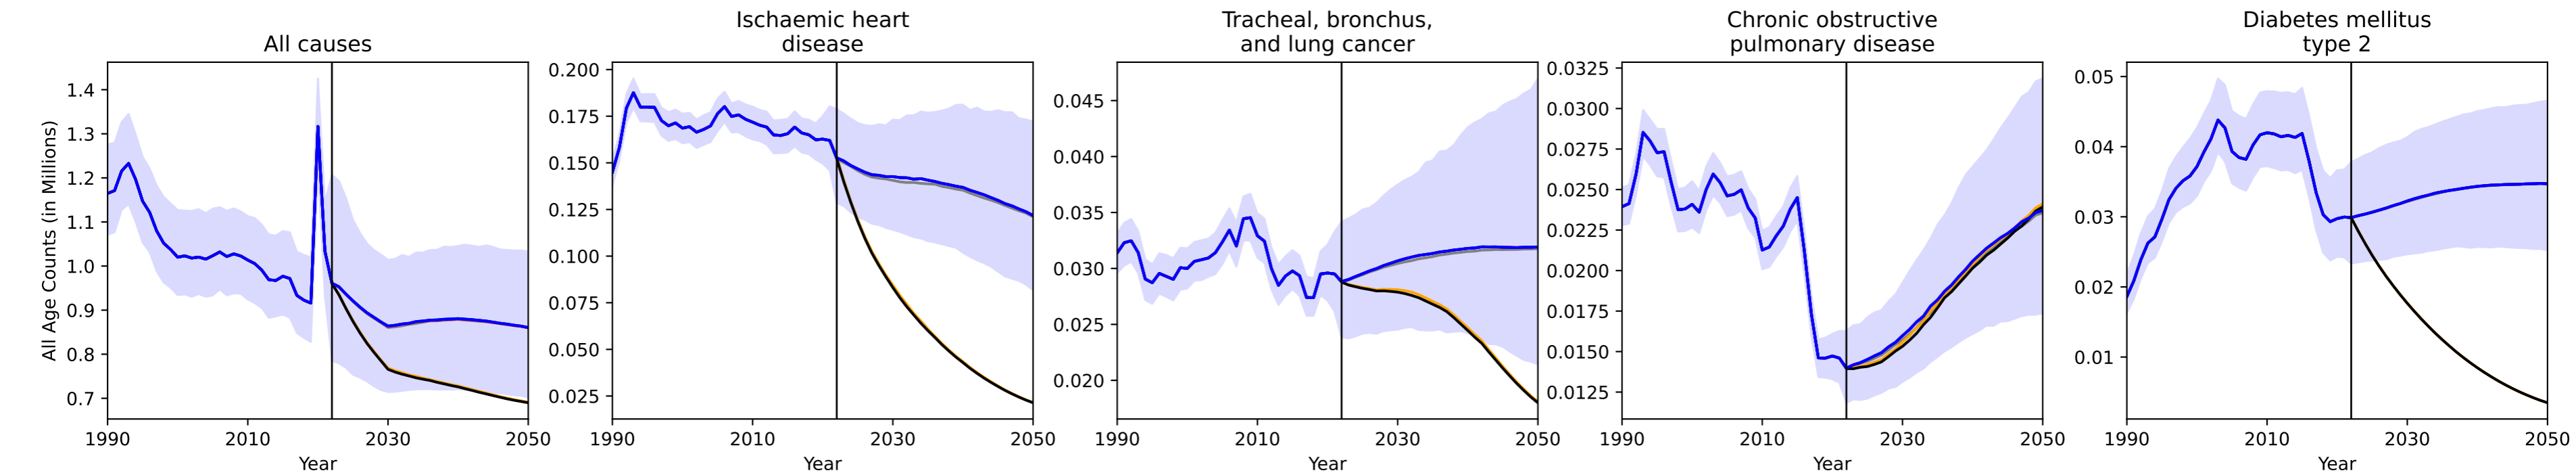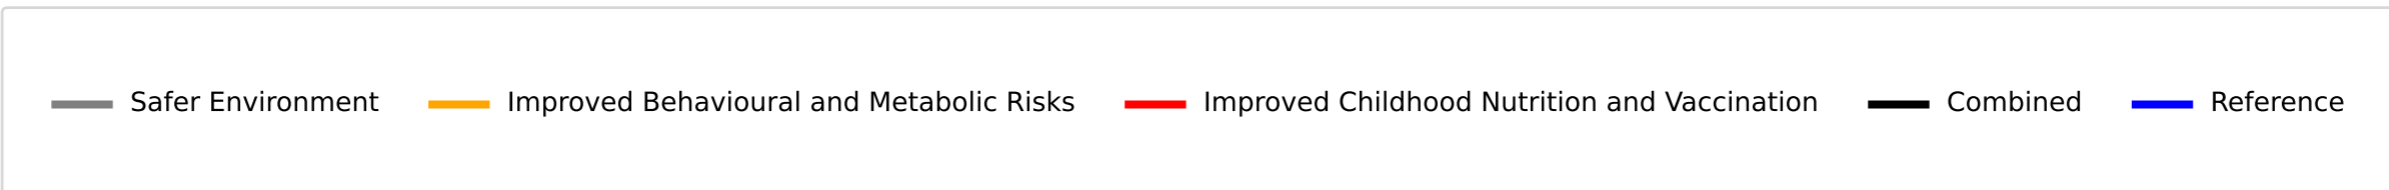

# Azerbaijan

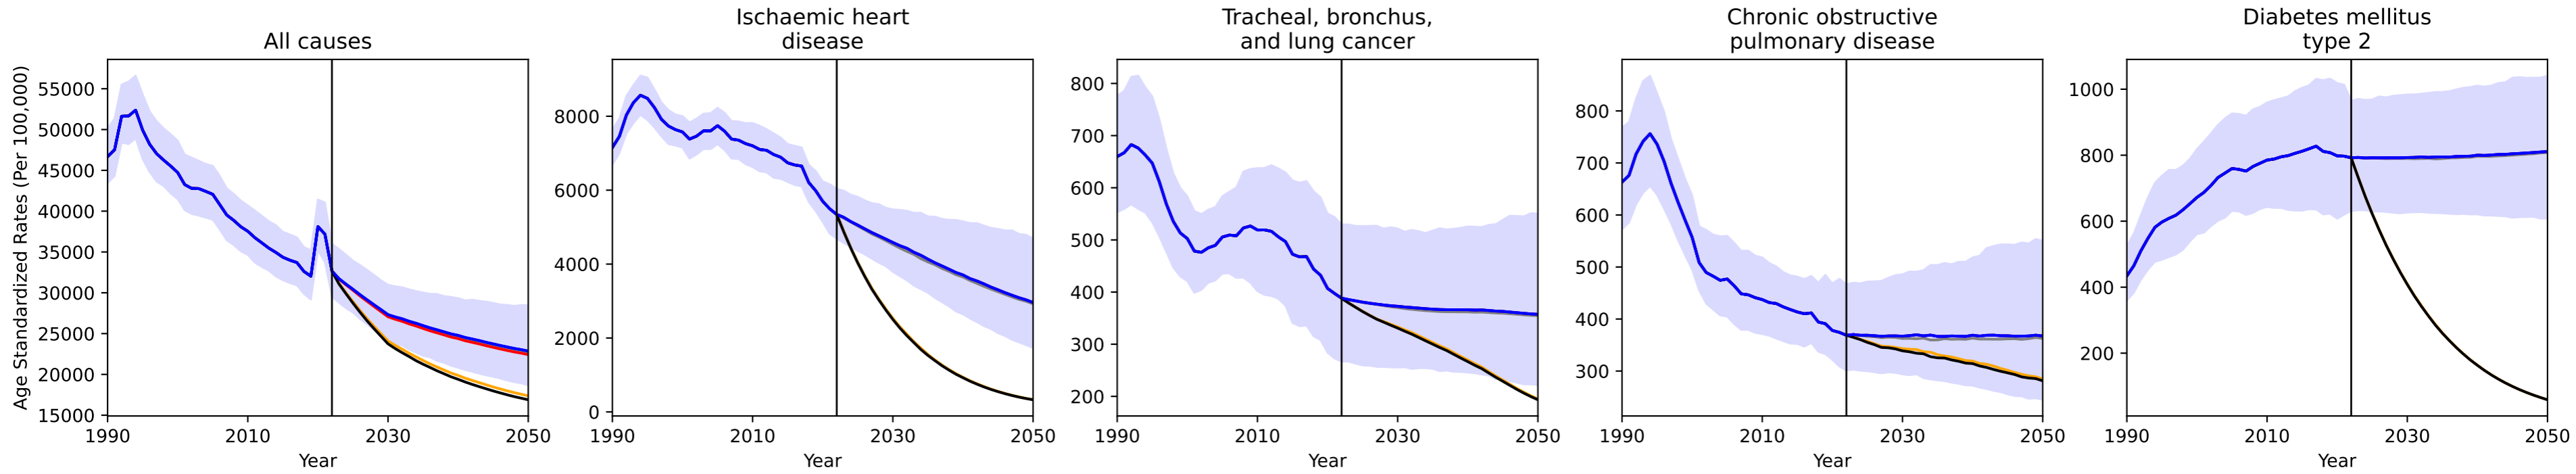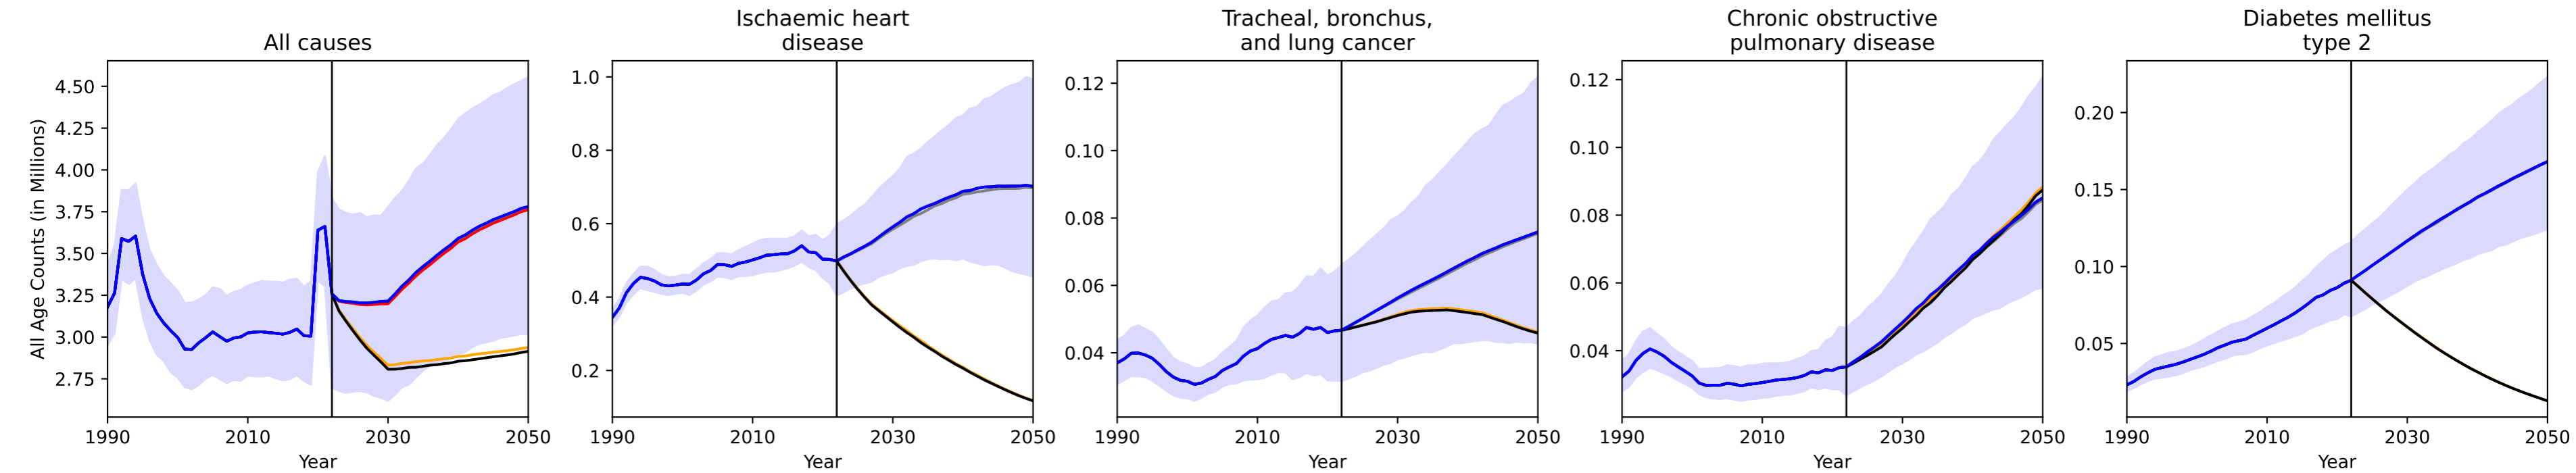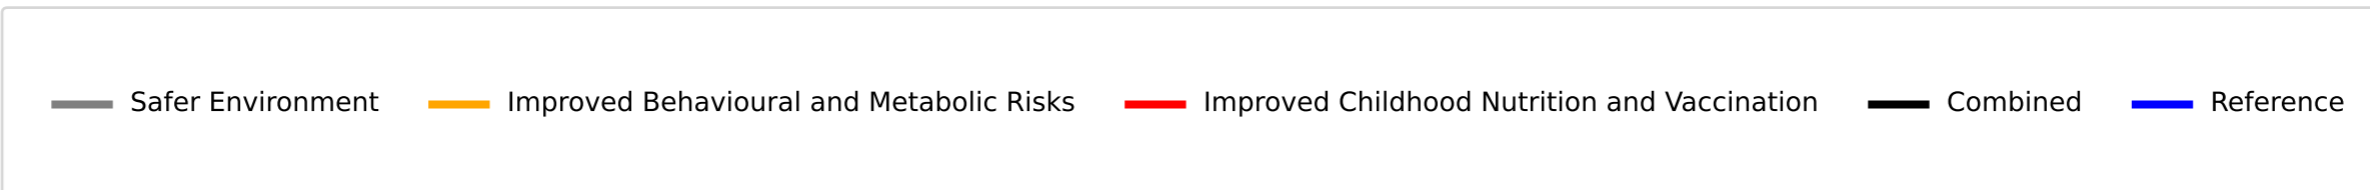

# Georgia

Supplemental Results Figure S12. All cause and top NCD causes age standardized DALY rates and all age counts by scenario and location, 1990-2050

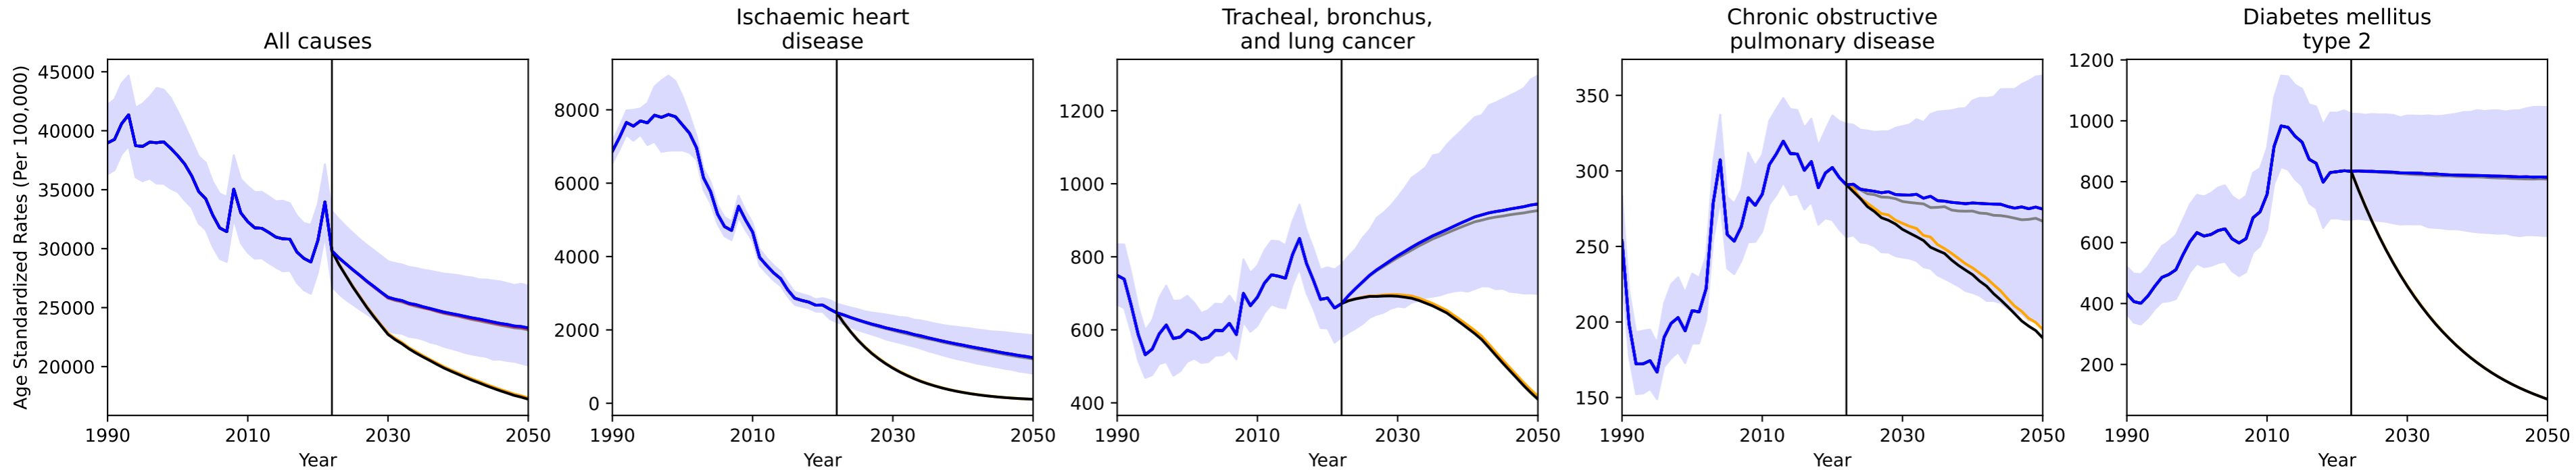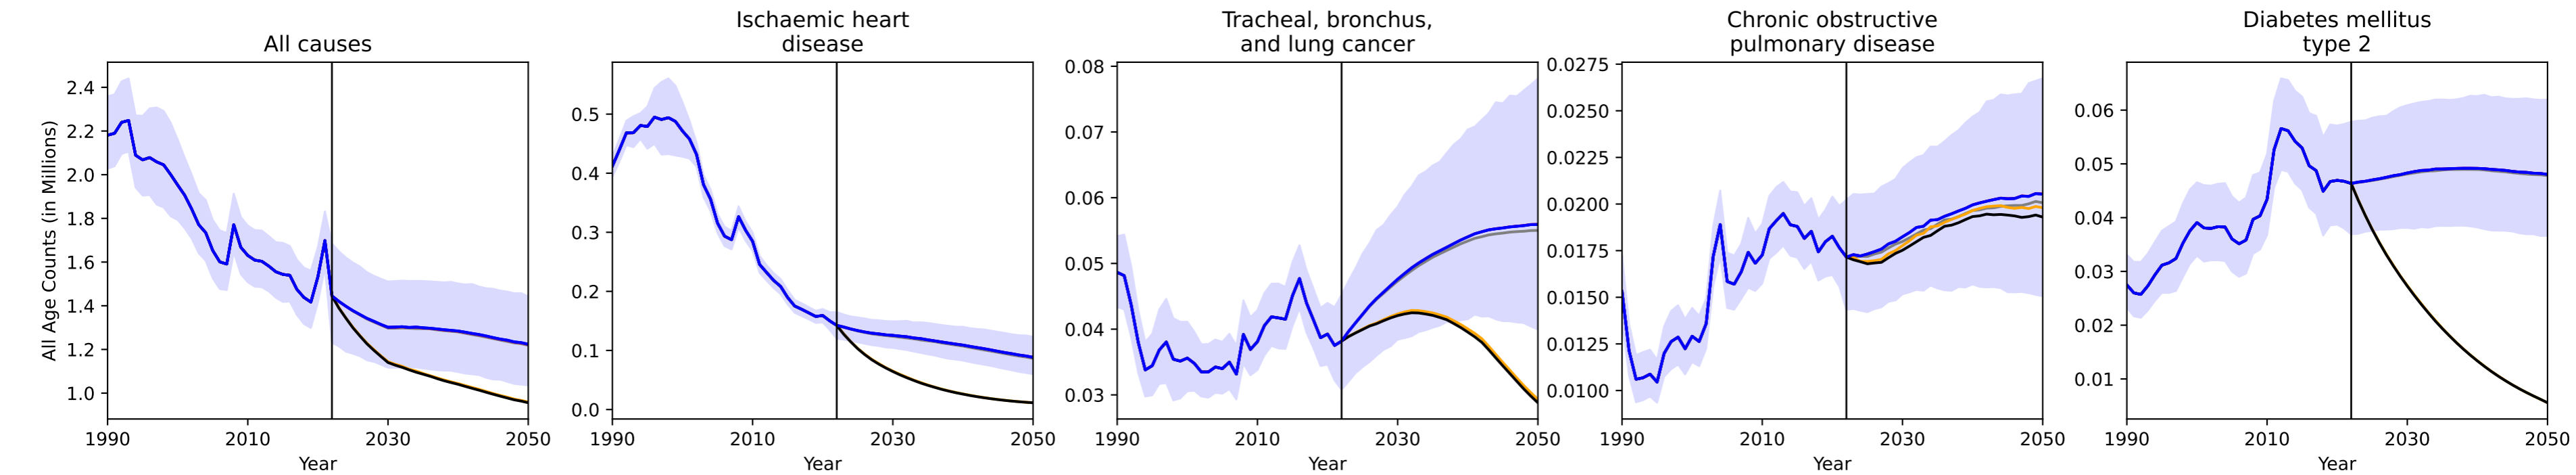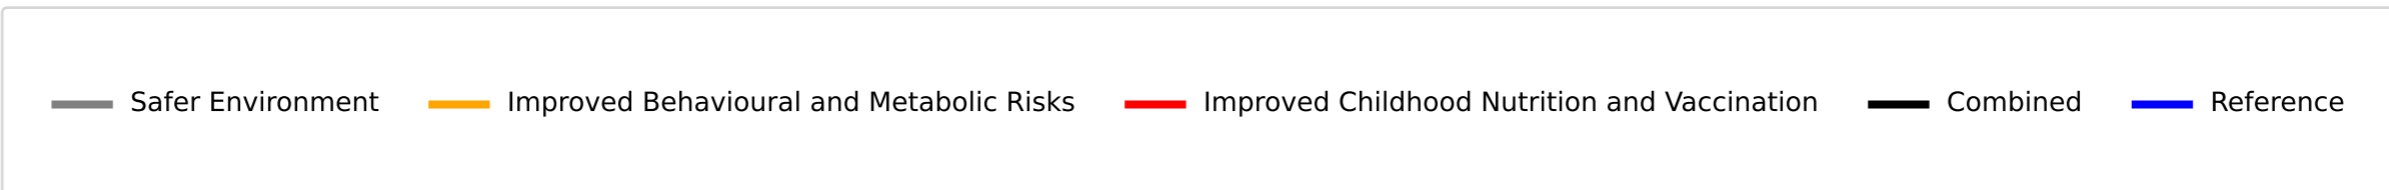



# Kazakhstan

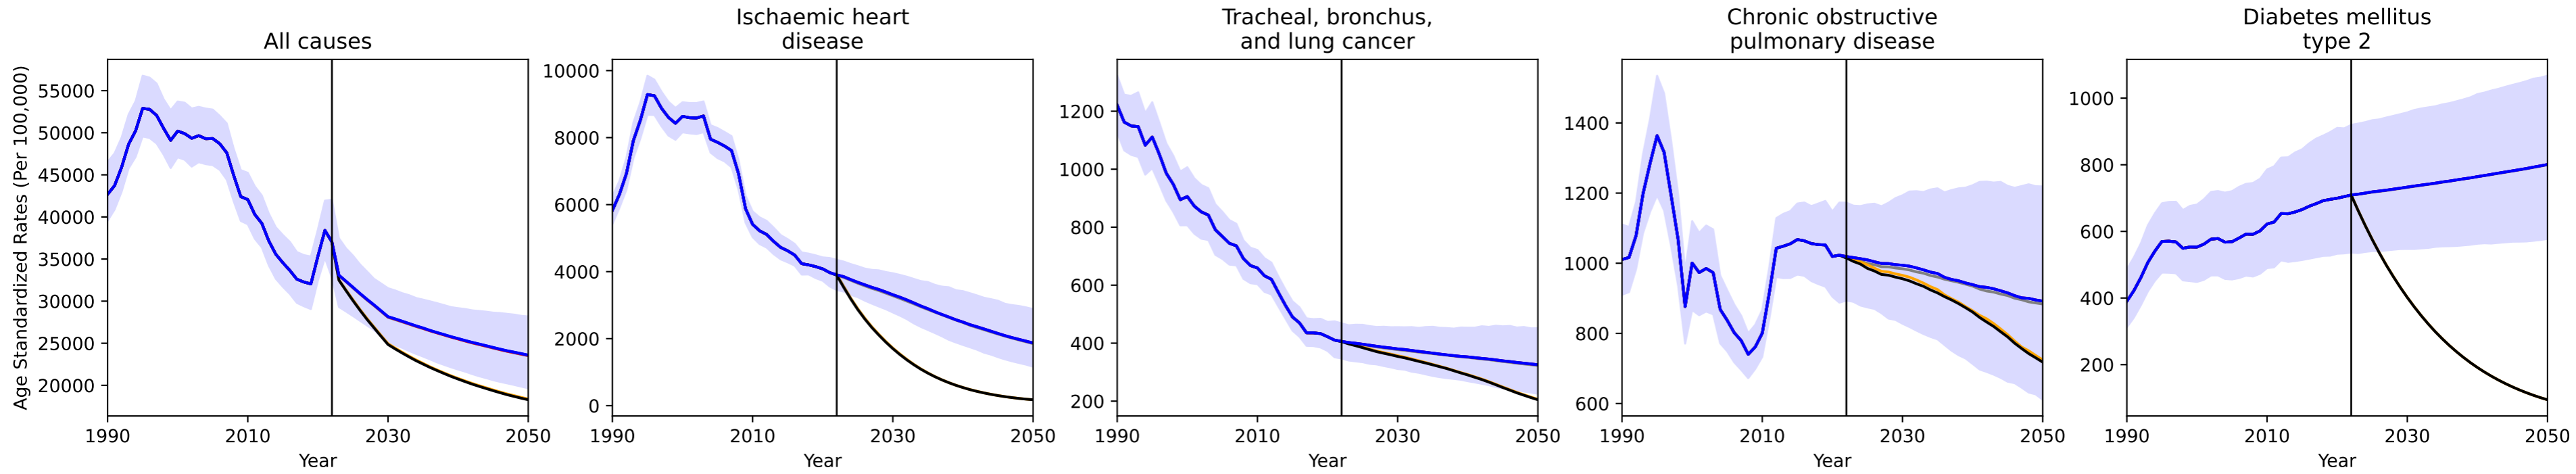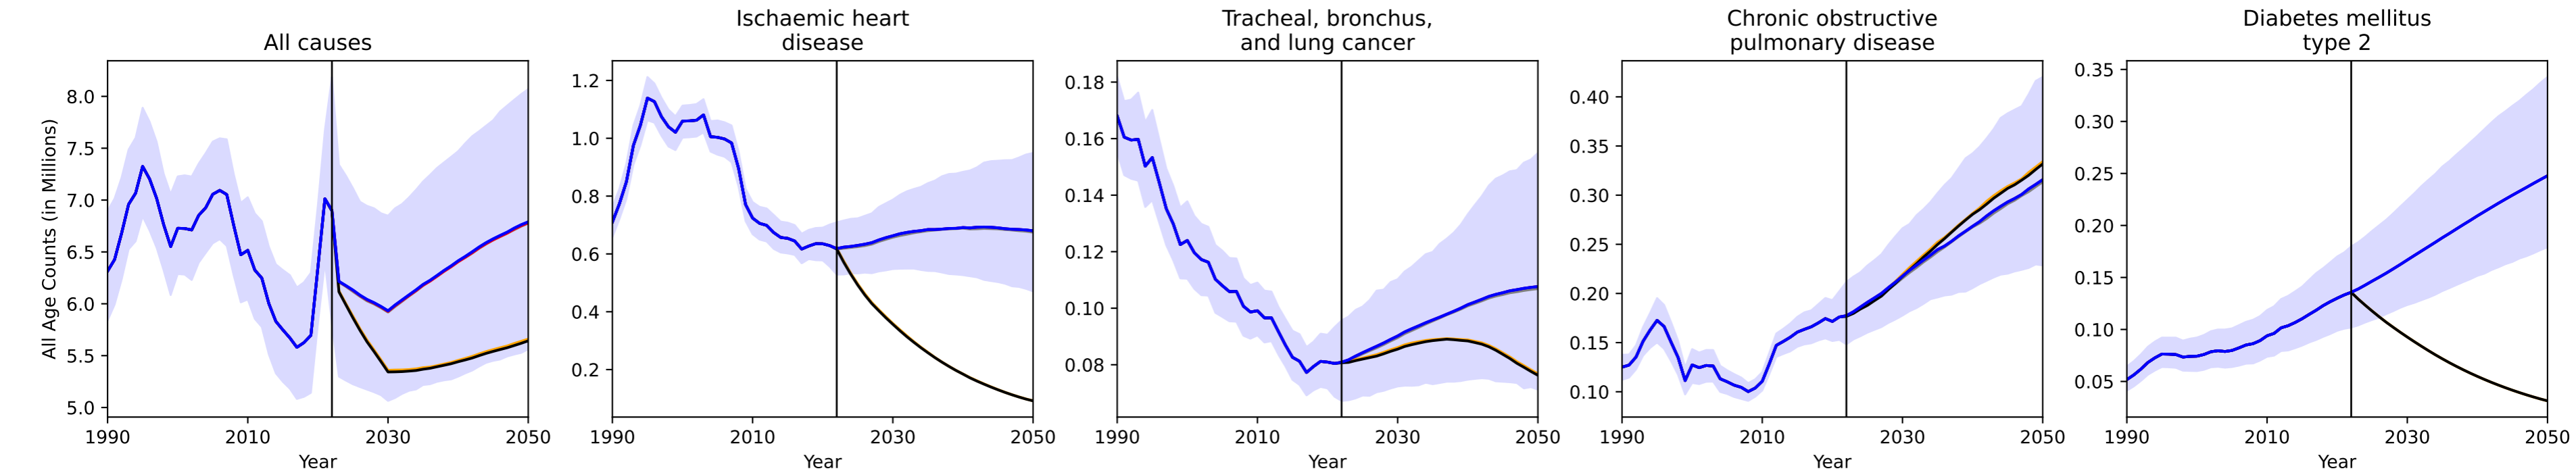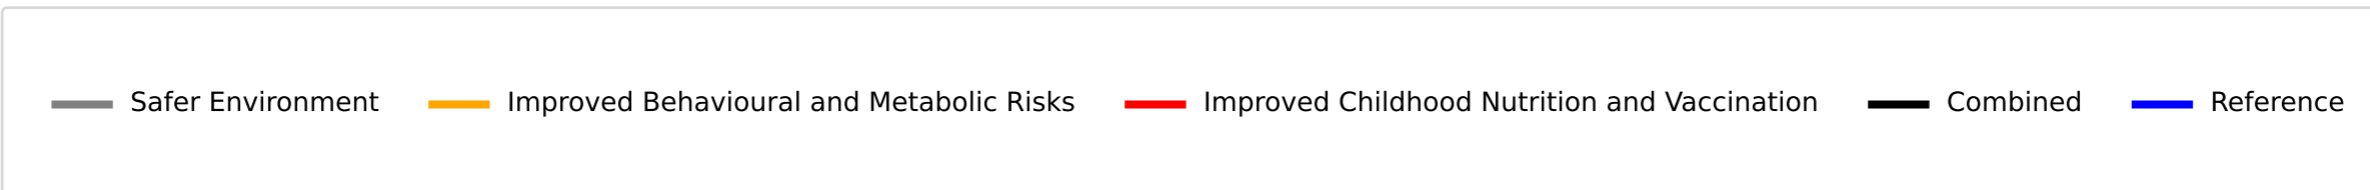

# Kyrgyzstan

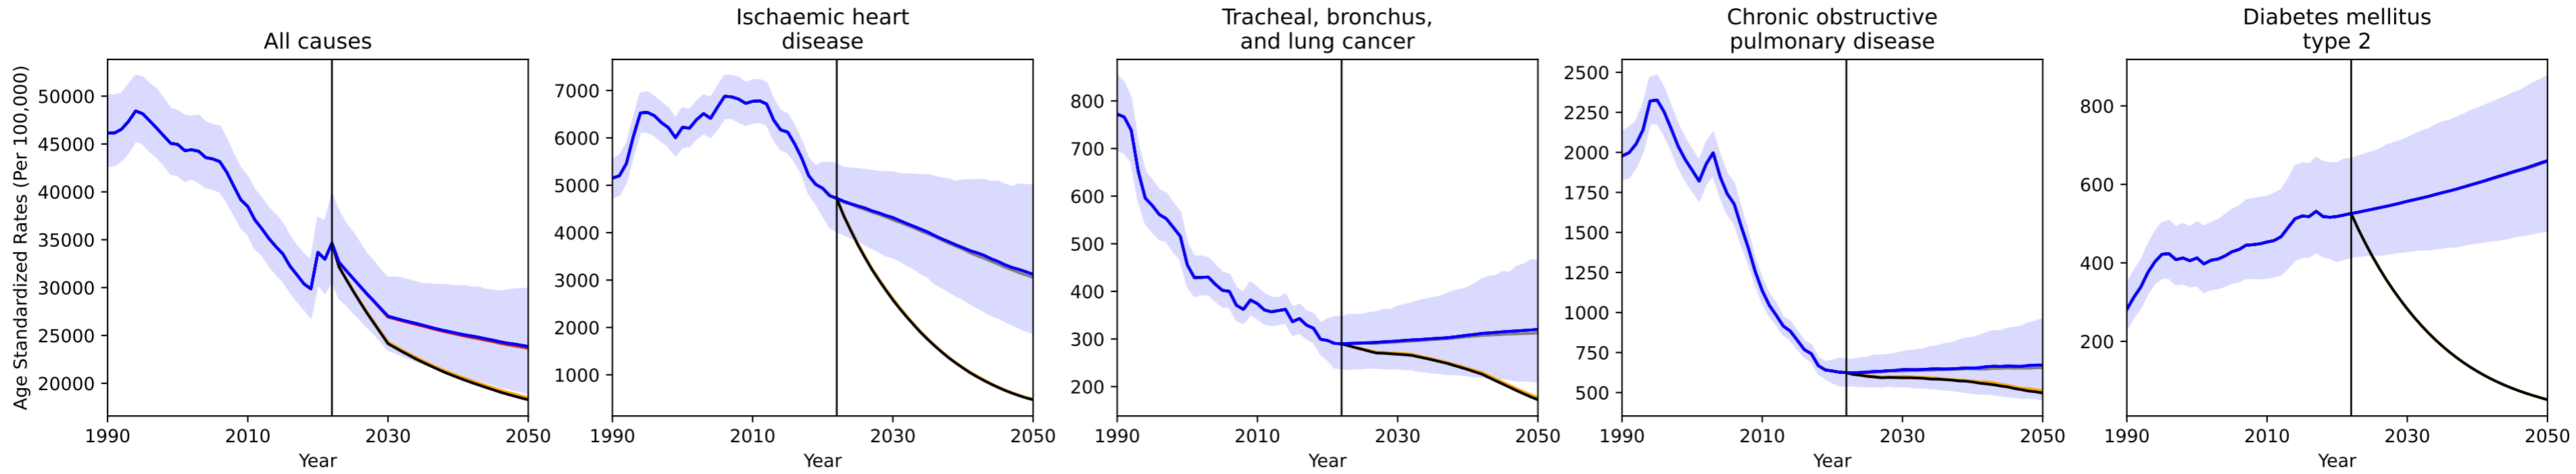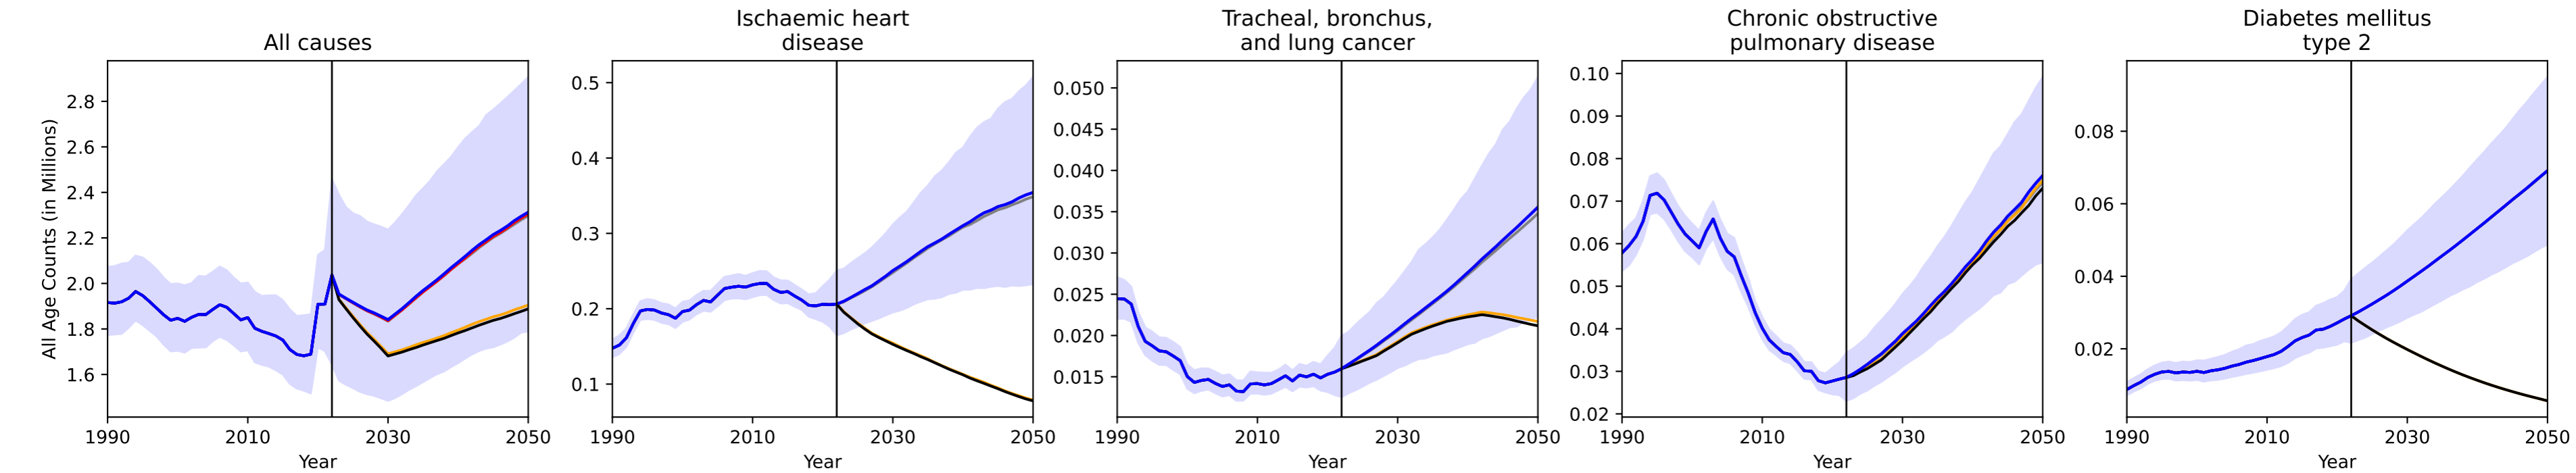

# Mongolia

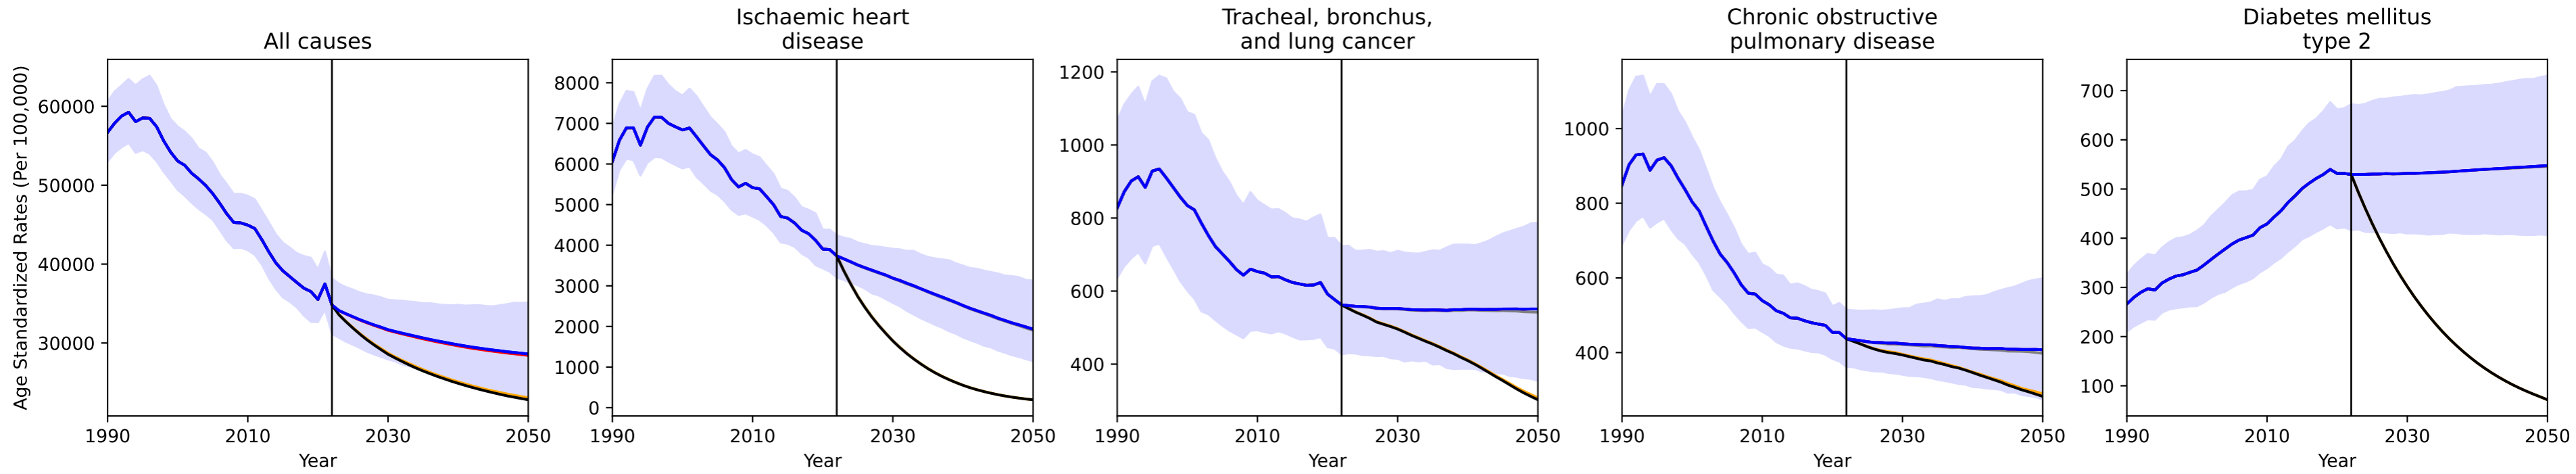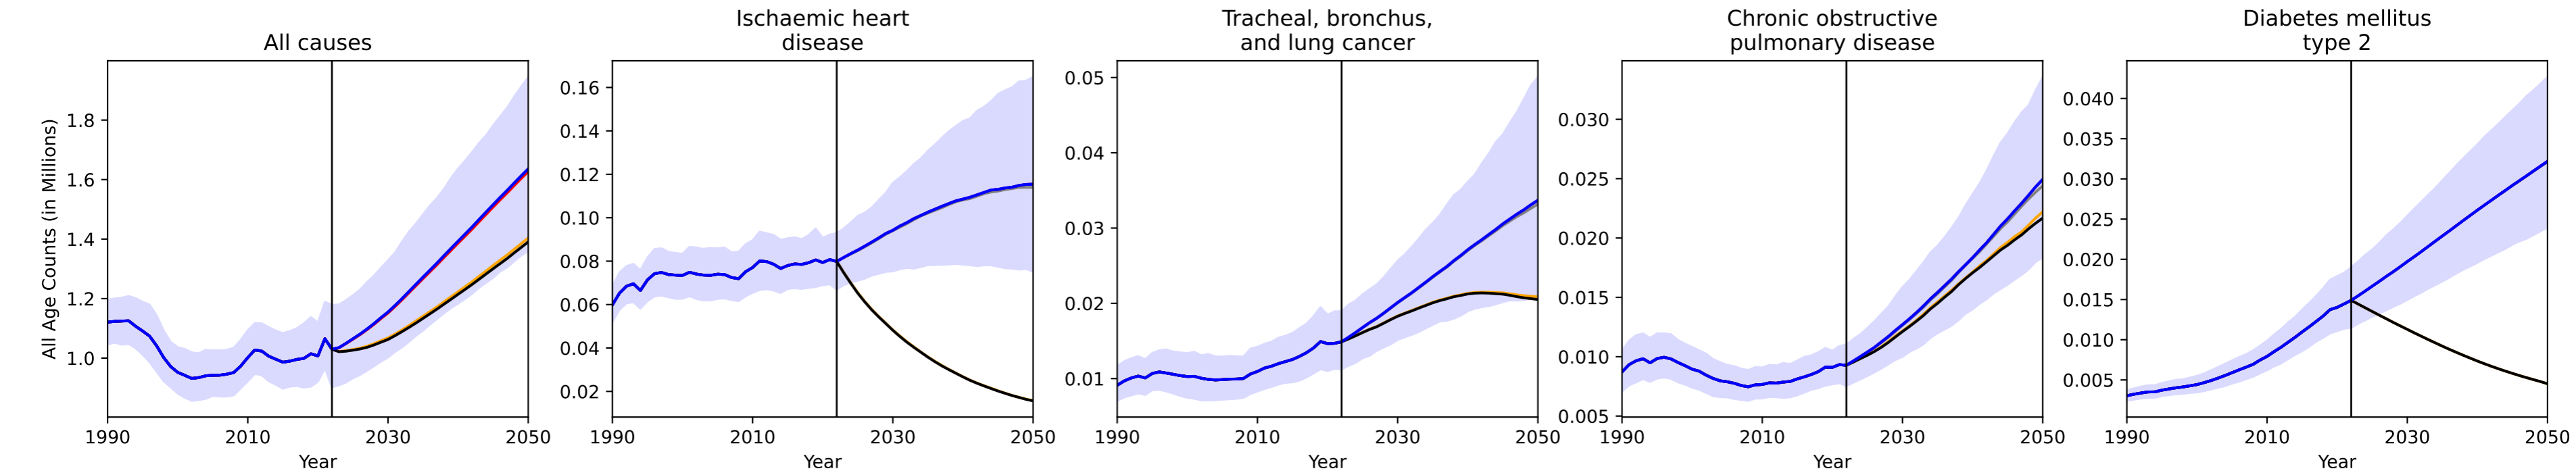

# Tajikistan

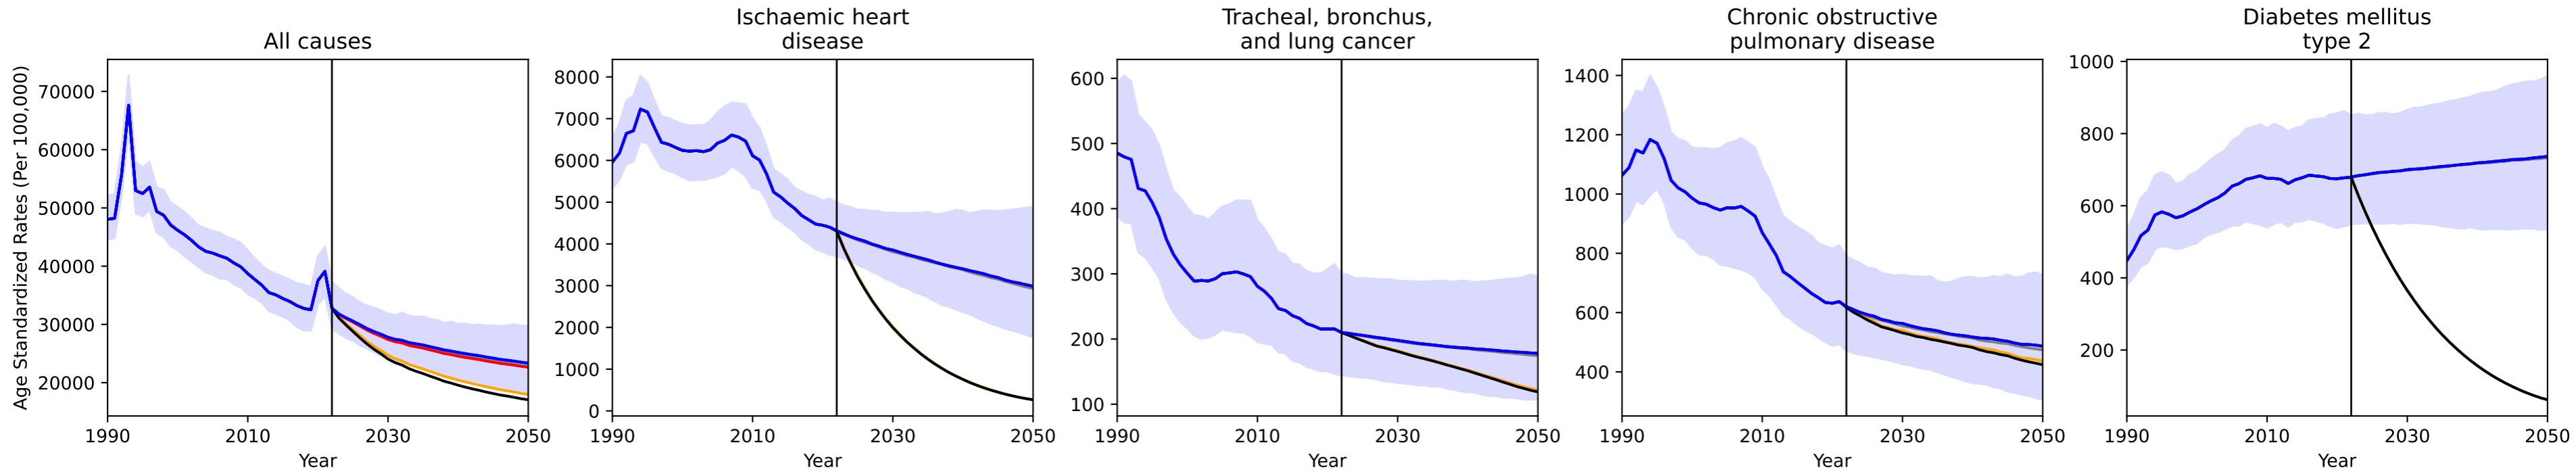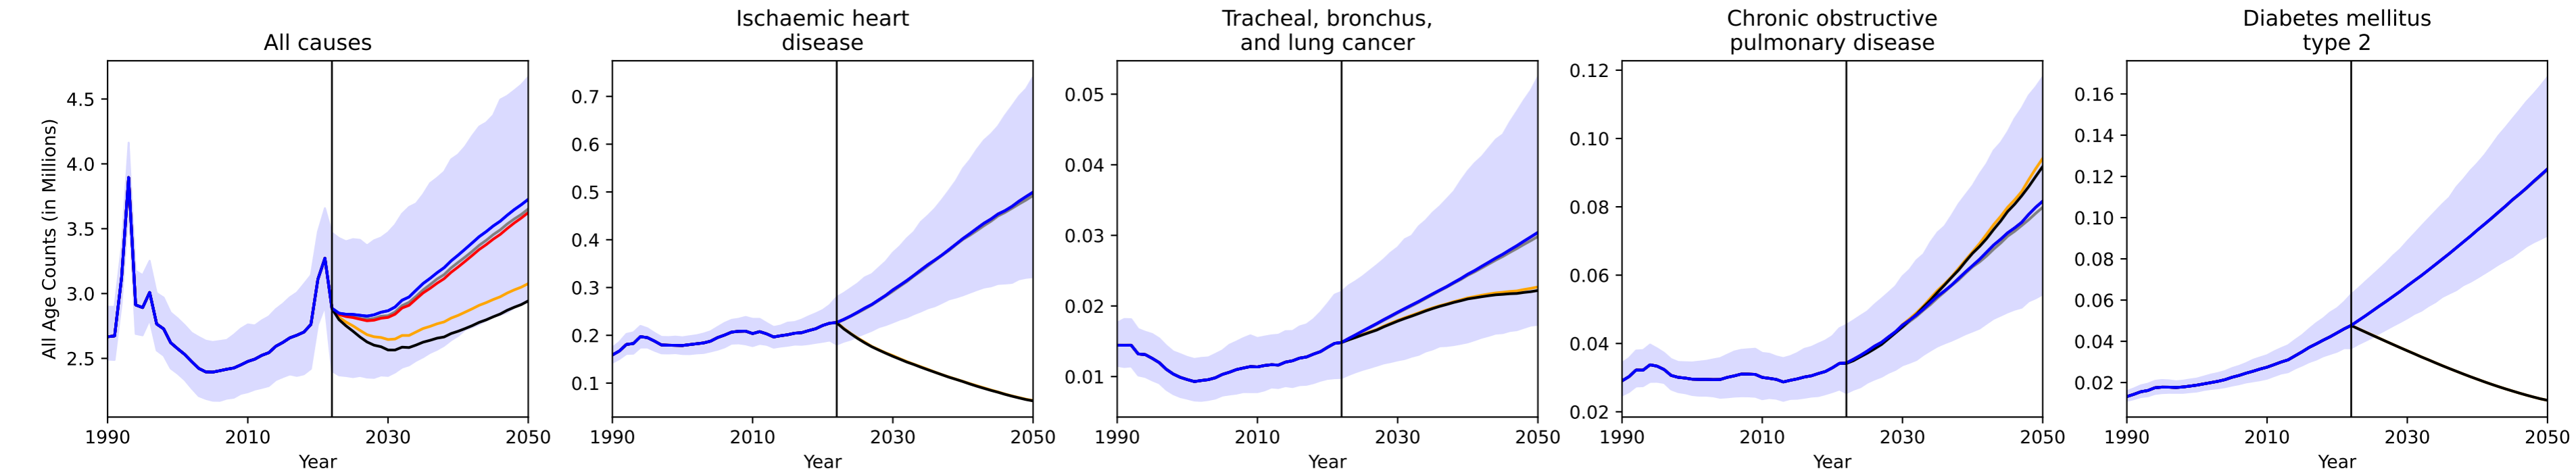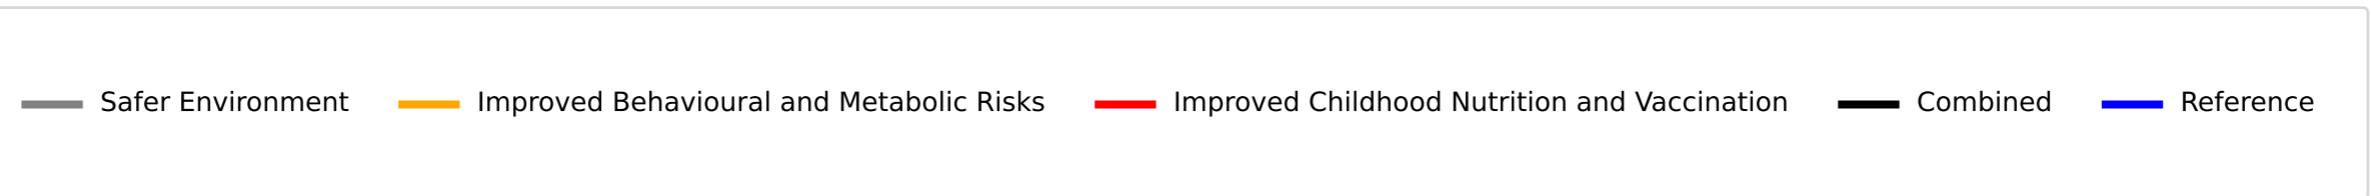

# Turkmenistan

Supplemental Results Figure S12. All cause and top NCD causes age standardized DALY rates and all age counts by scenario and location, 1990-2050

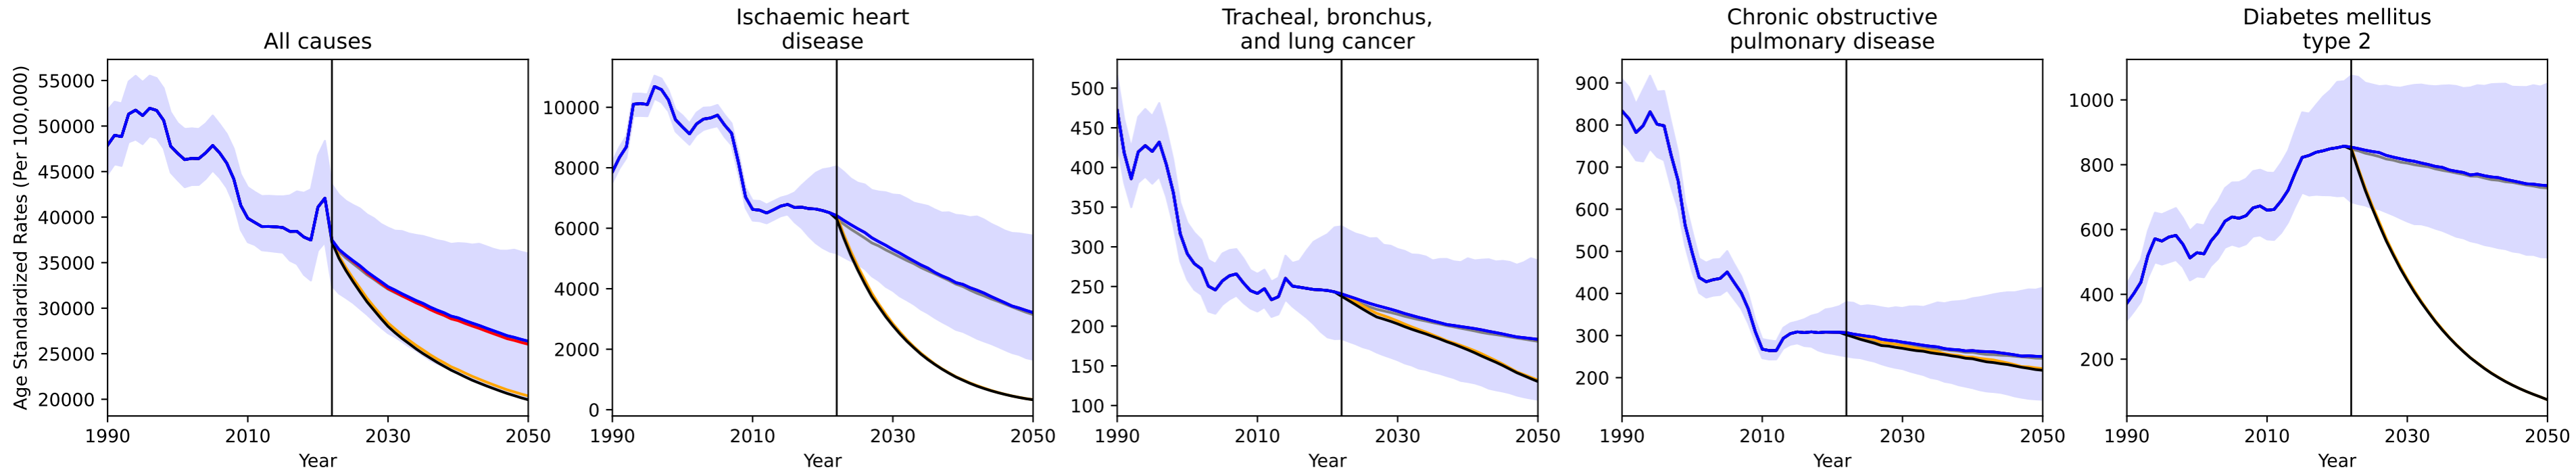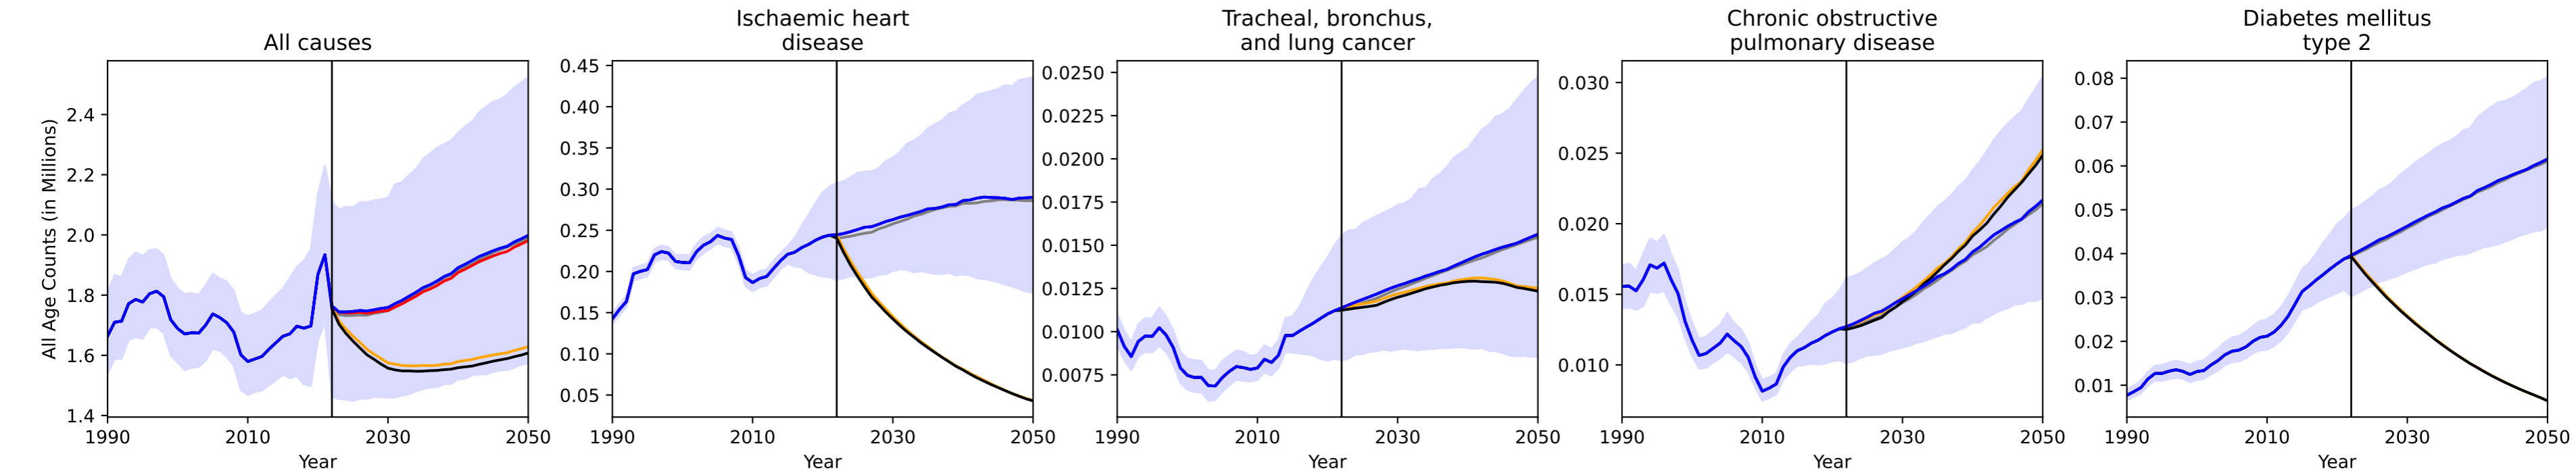

# Uzbekistan

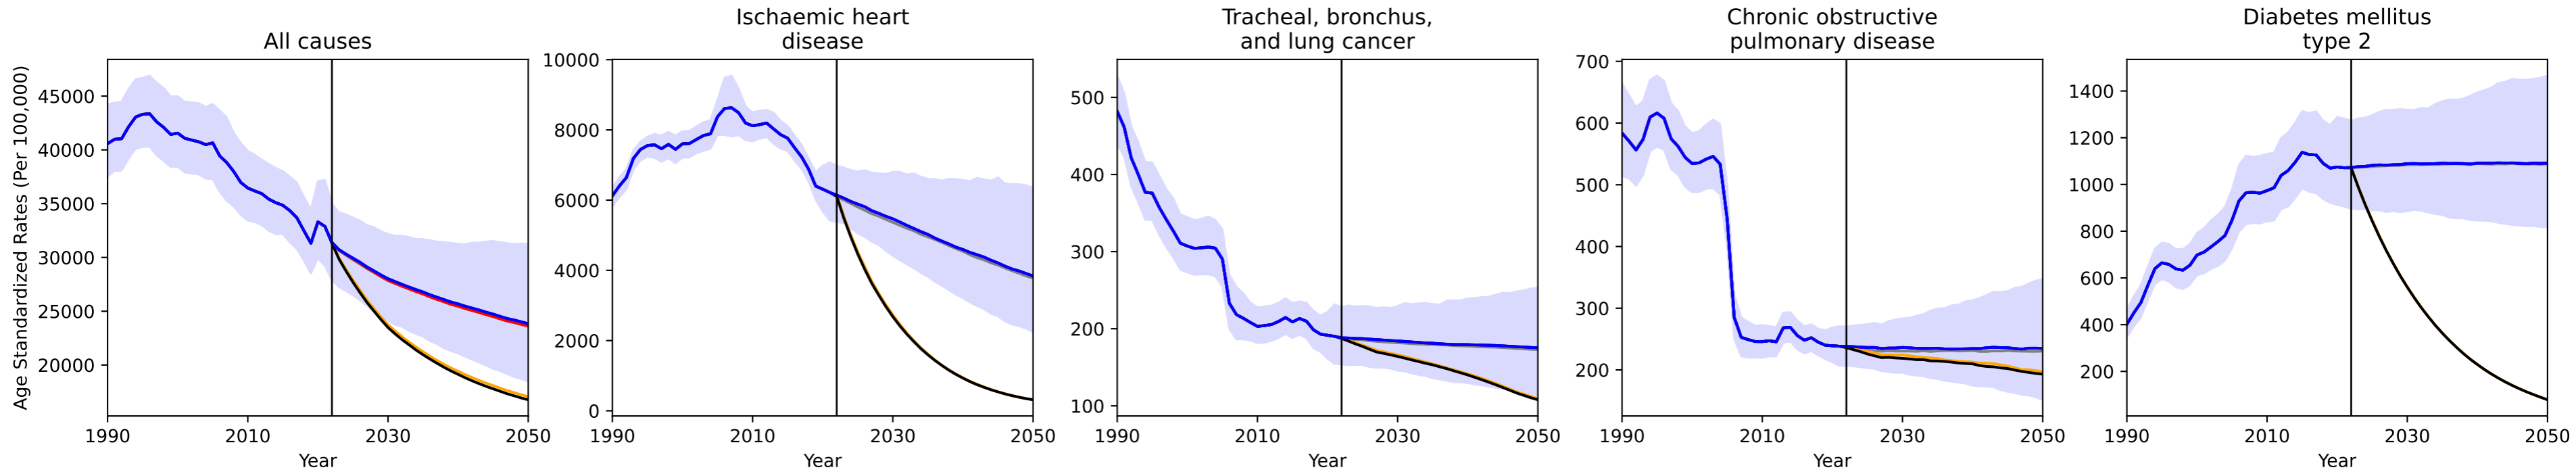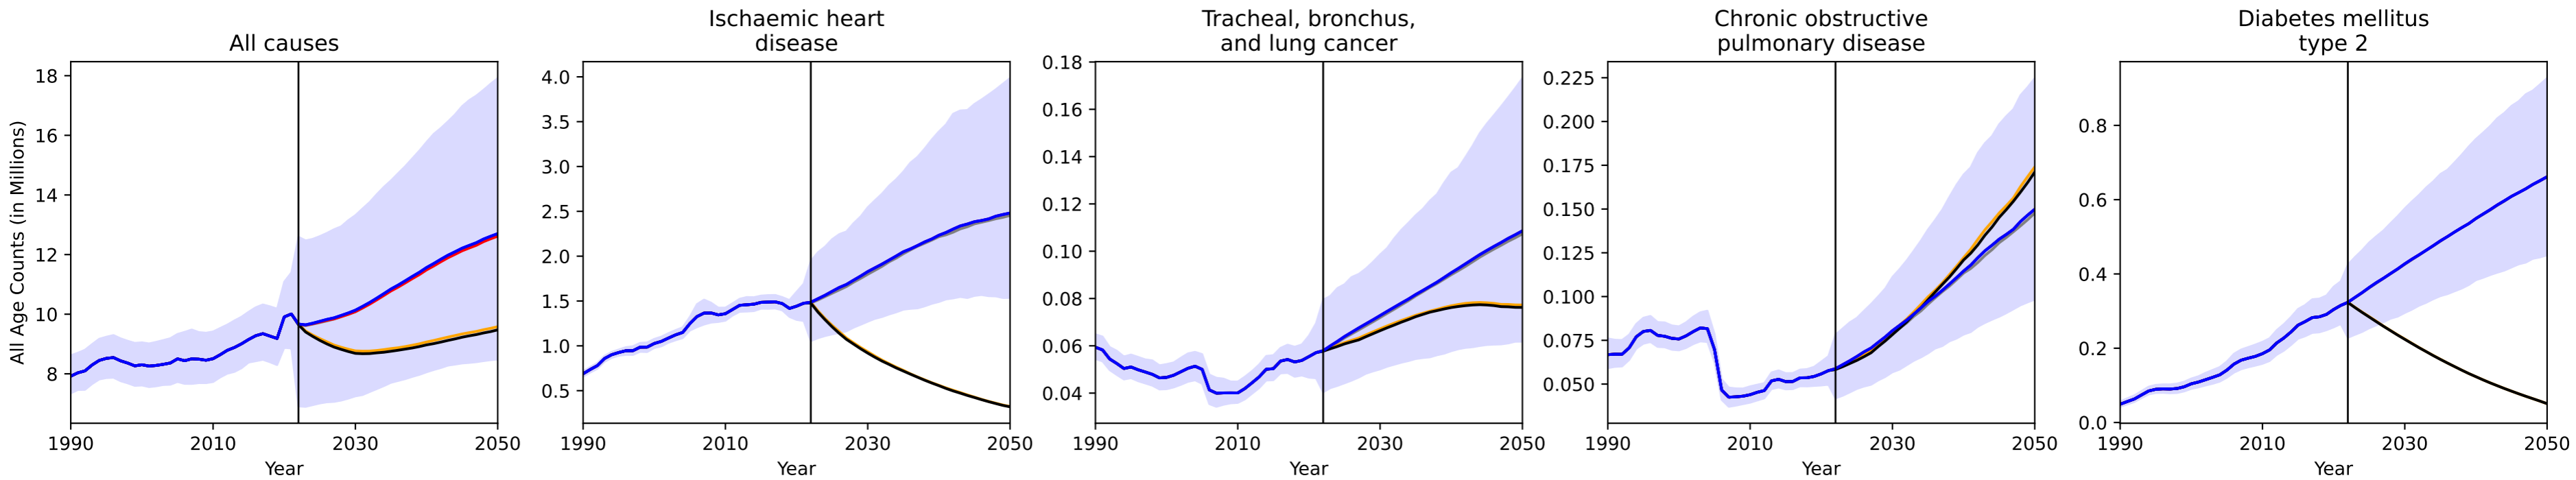

# Albania

Supplemental Results Figure S12. All cause and top NCD causes age standardized DALY rates and all age counts by scenario and location, 1990-2050

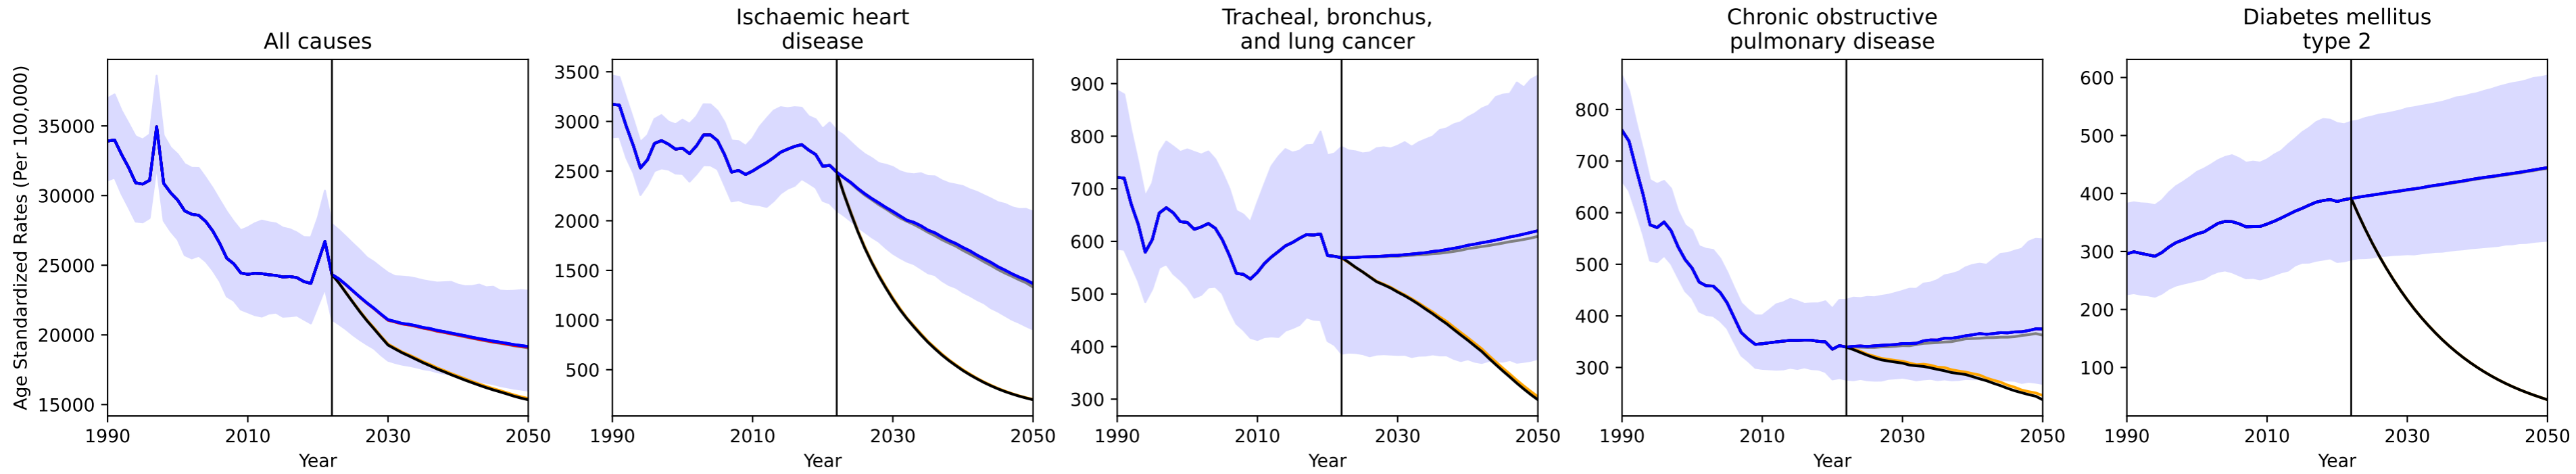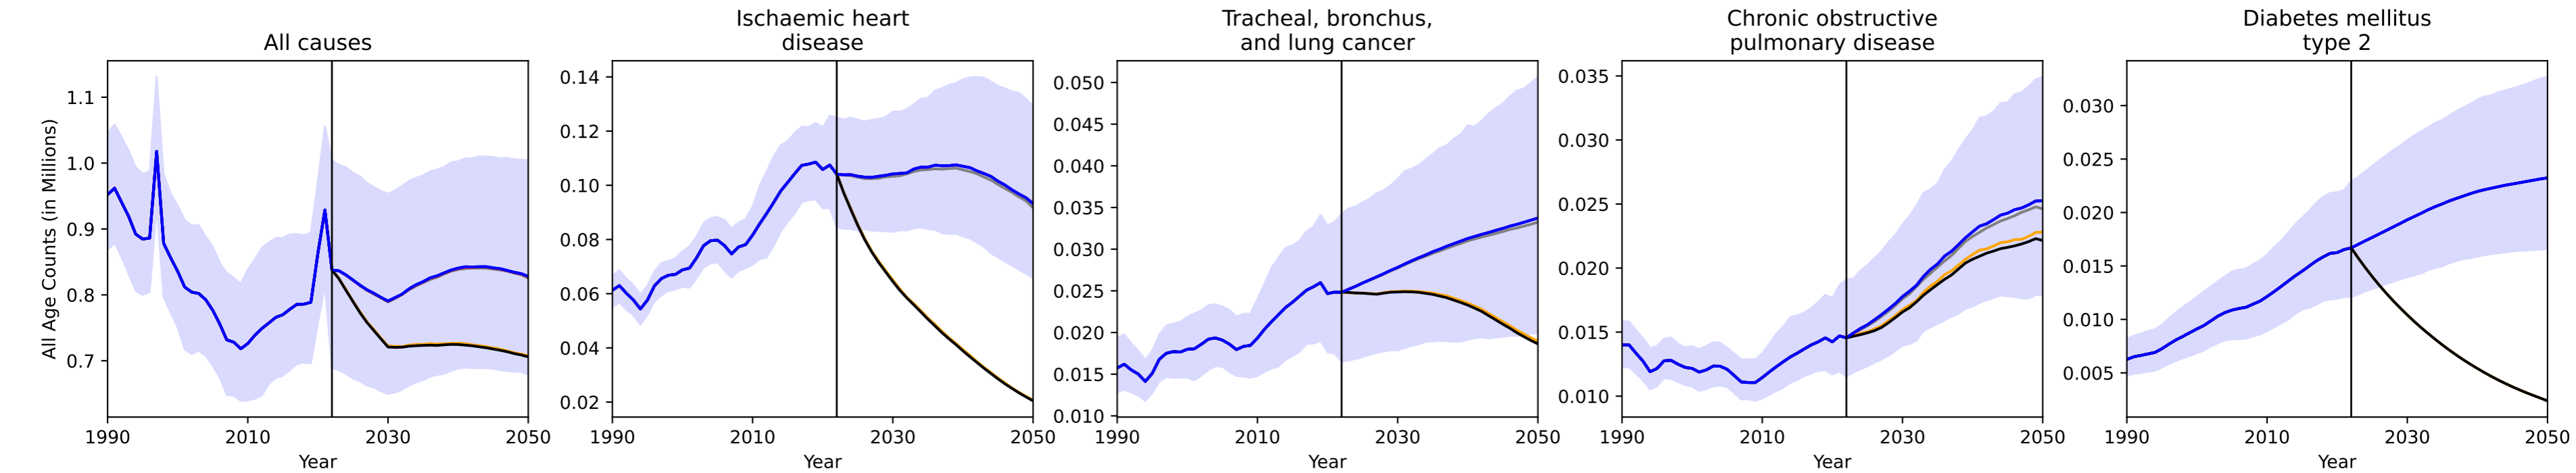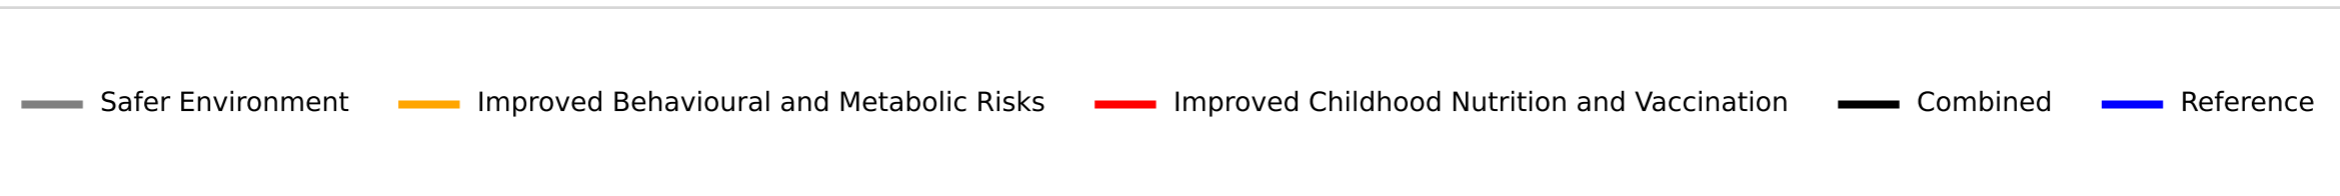

# Bosnia And Herzegovina

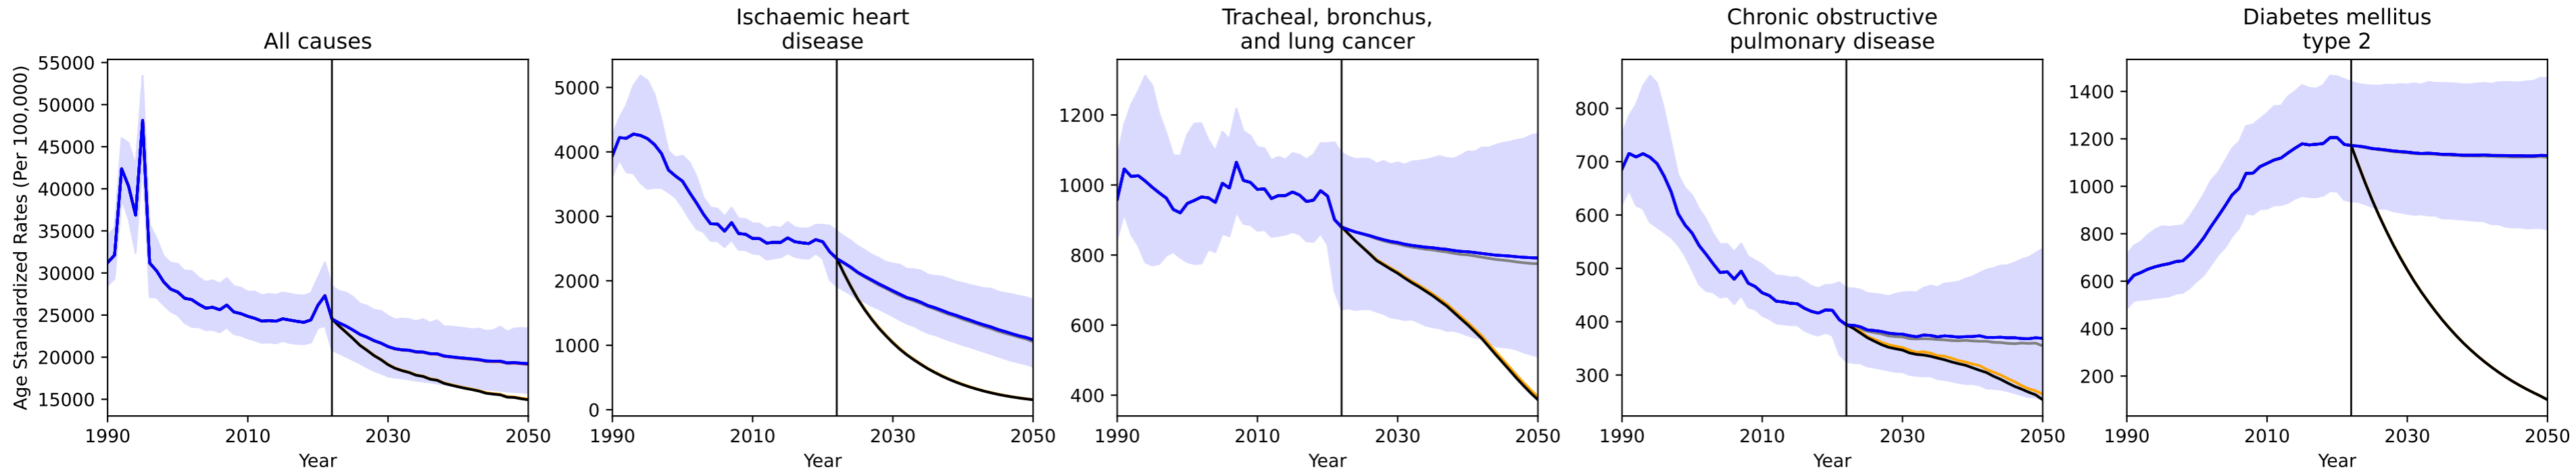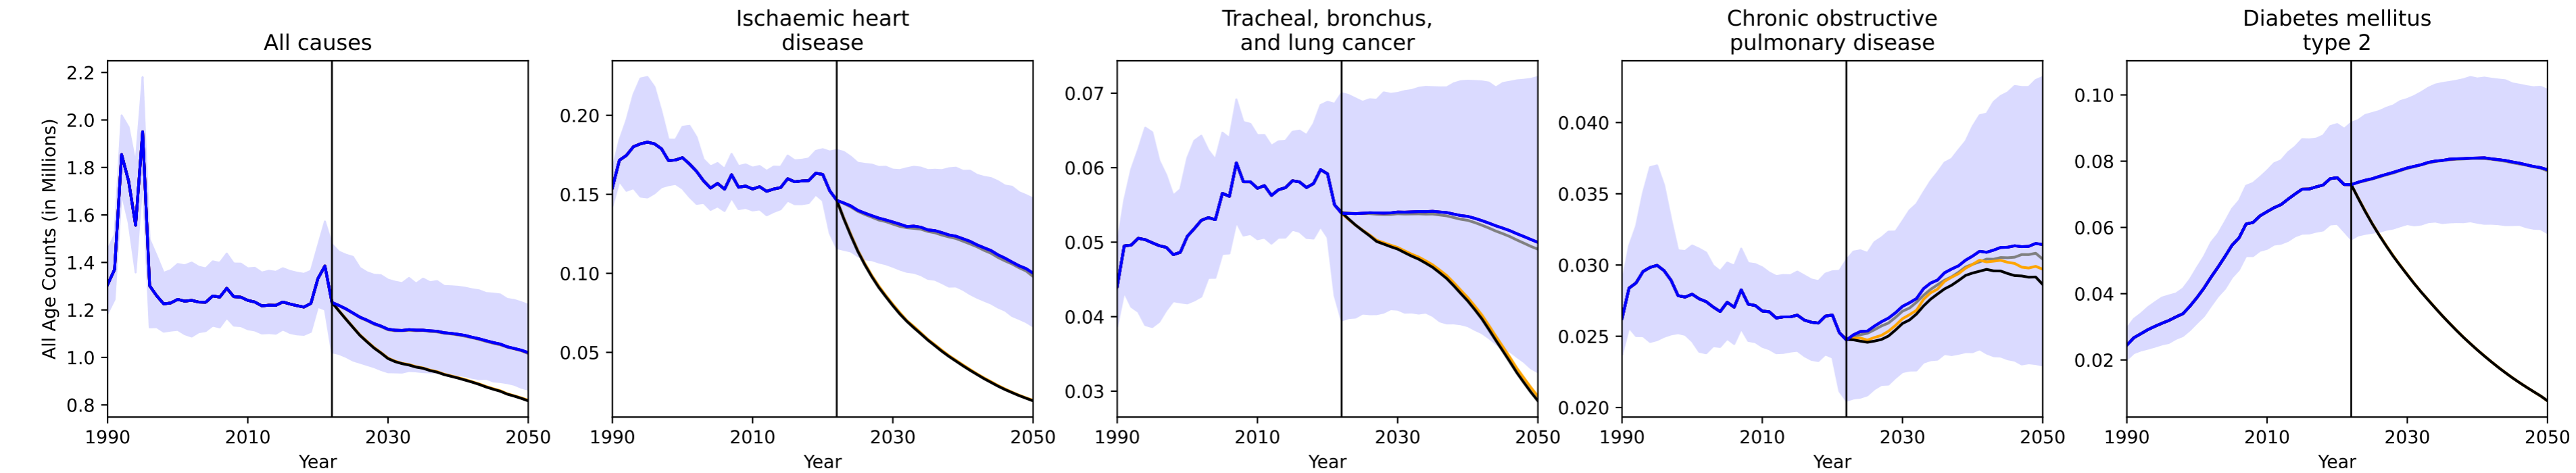



# Bulgaria

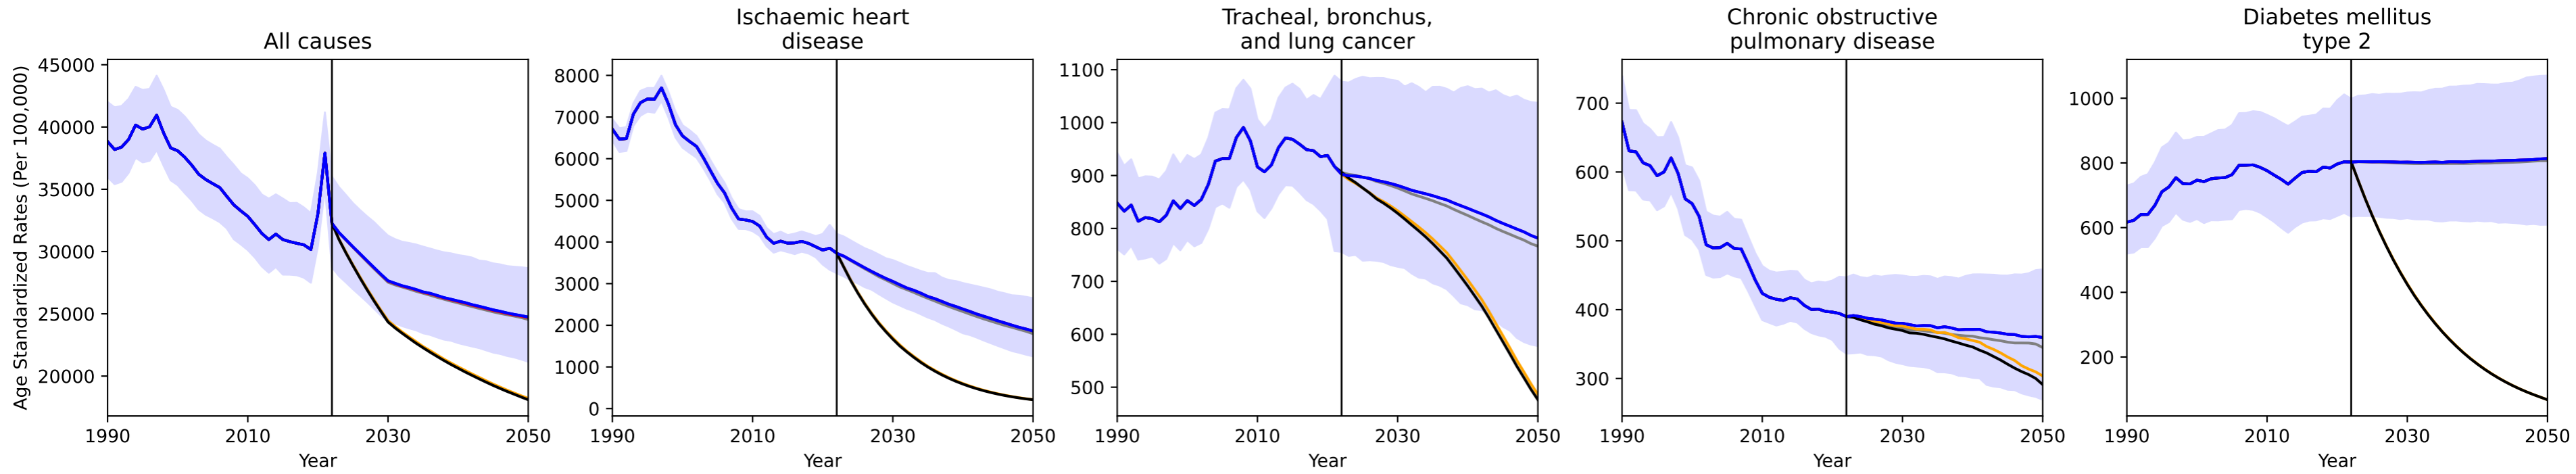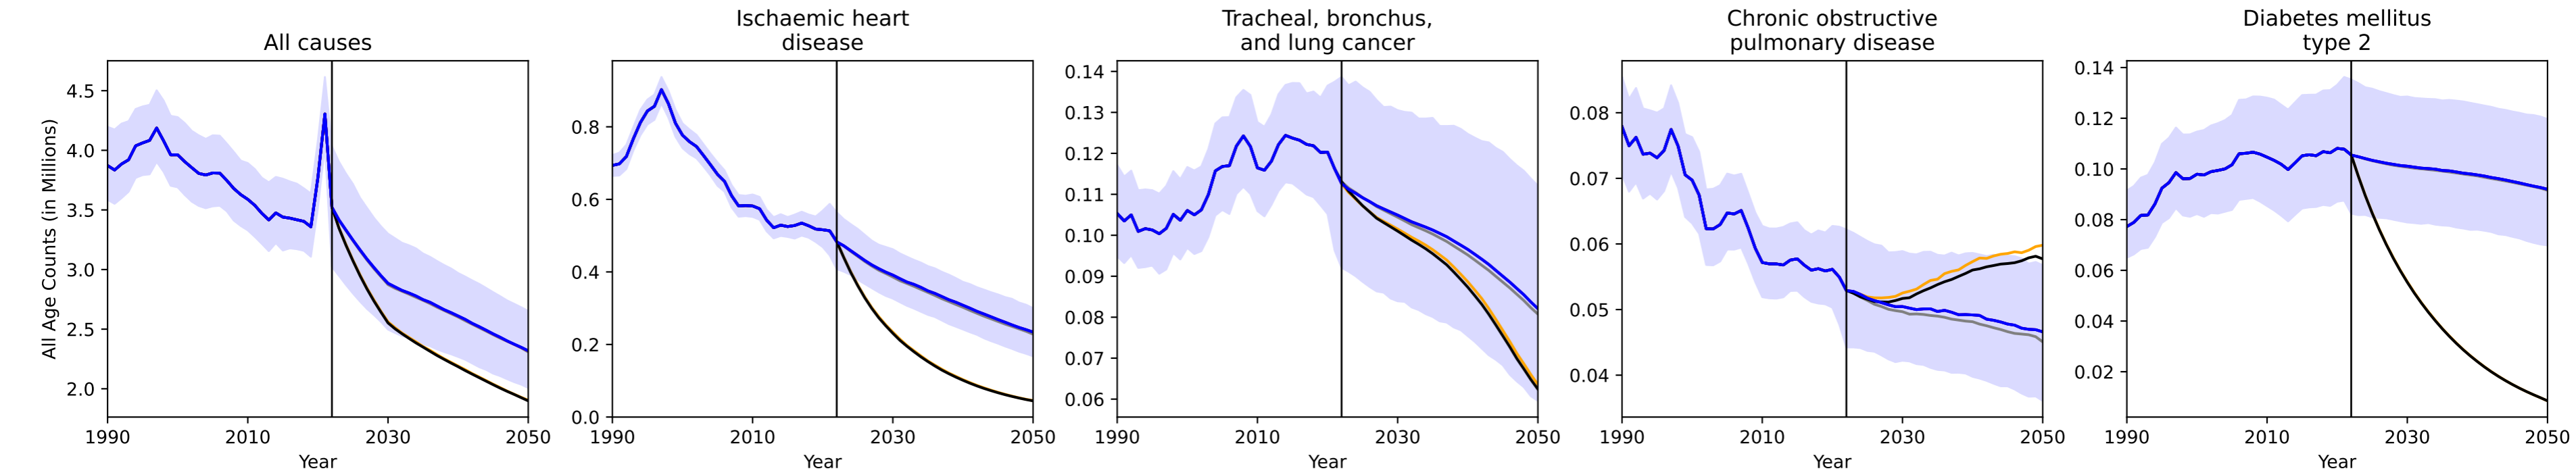

# Croatia

Supplemental Results Figure S12. All cause and top NCD causes age standardized DALY rates and all age counts by scenario and location, 1990-2050

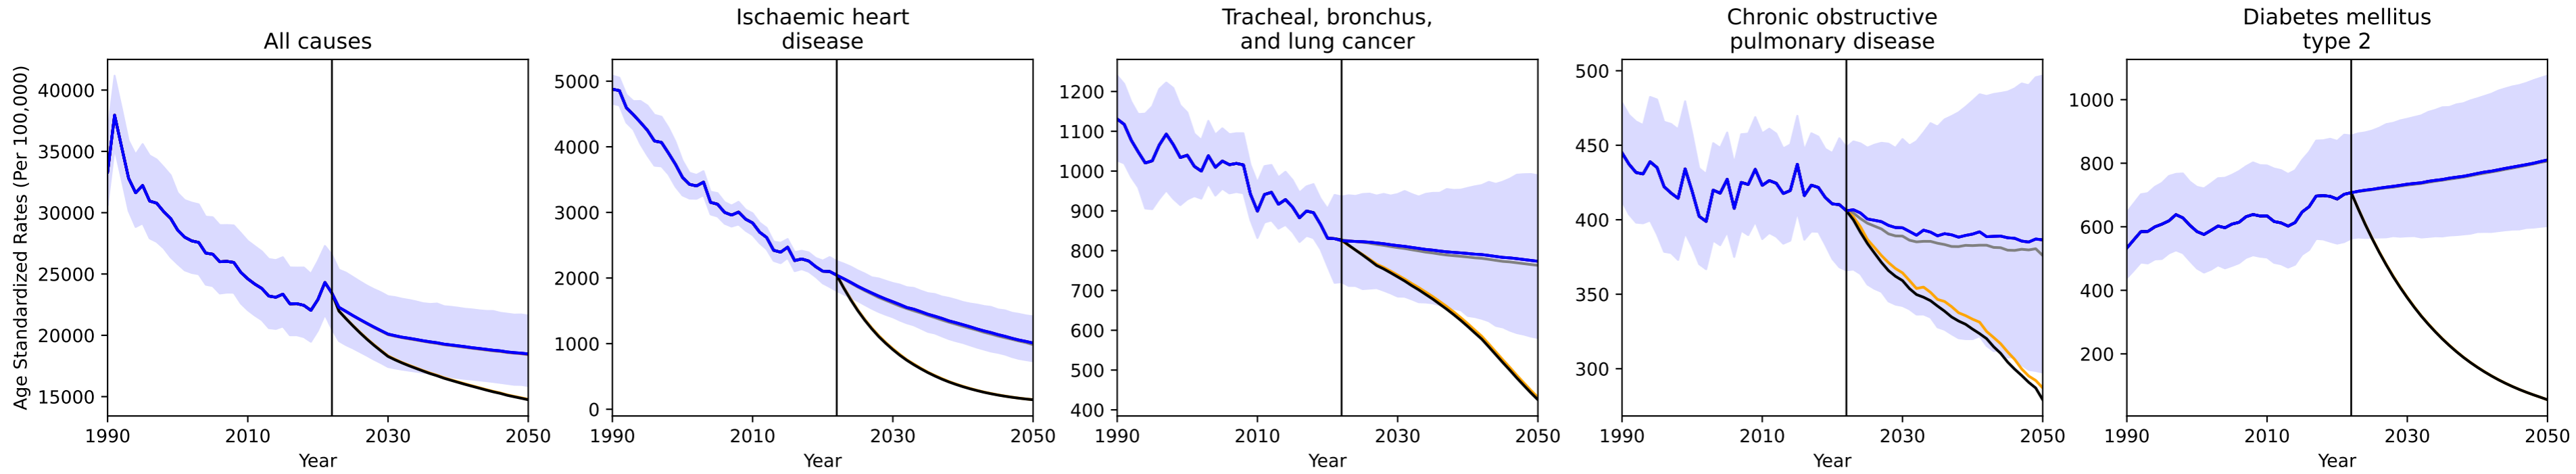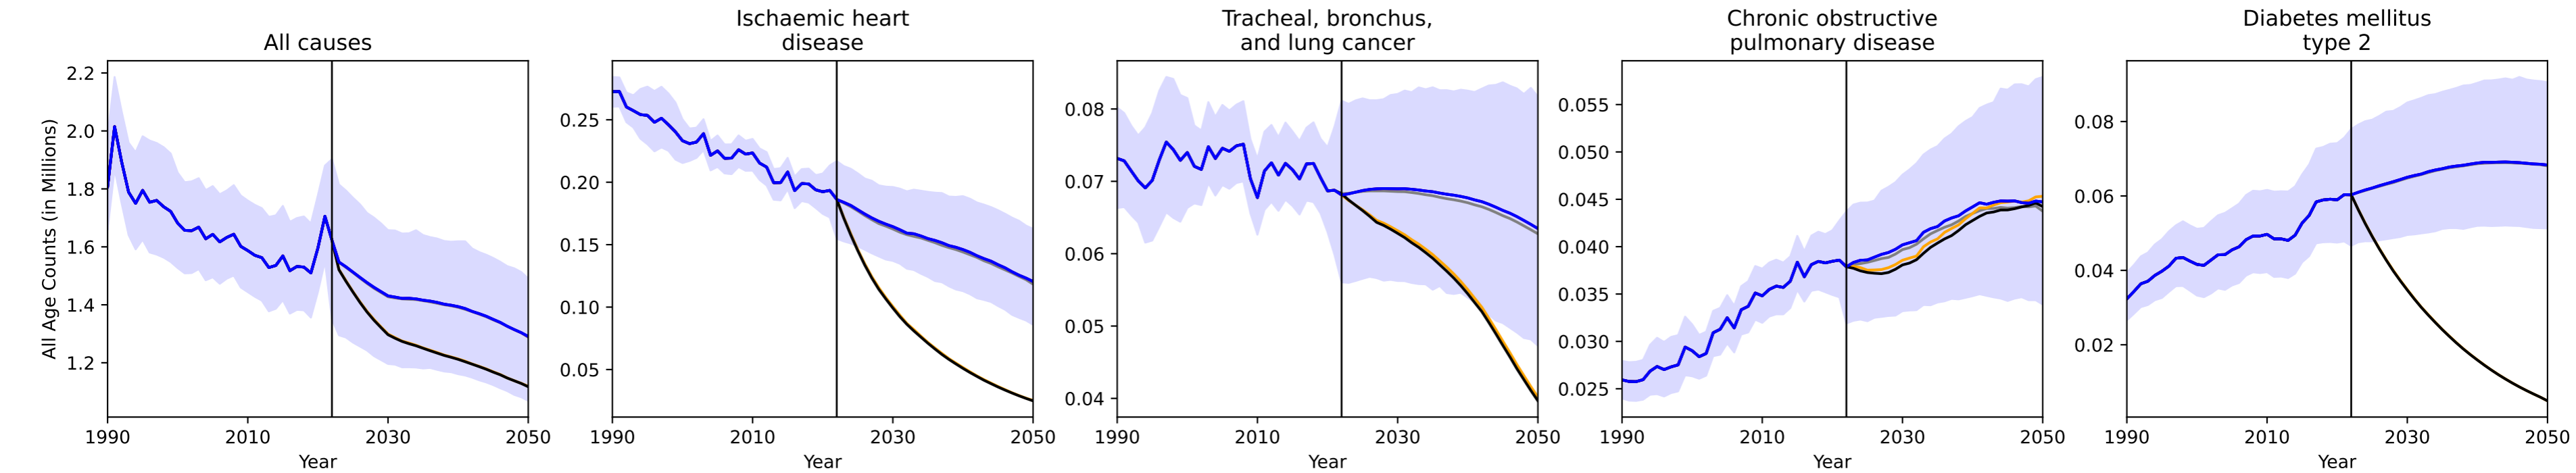

# Czechia

Supplemental Results Figure S12. All cause and top NCD causes age standardized DALY rates and all age counts by scenario and location, 1990-2050

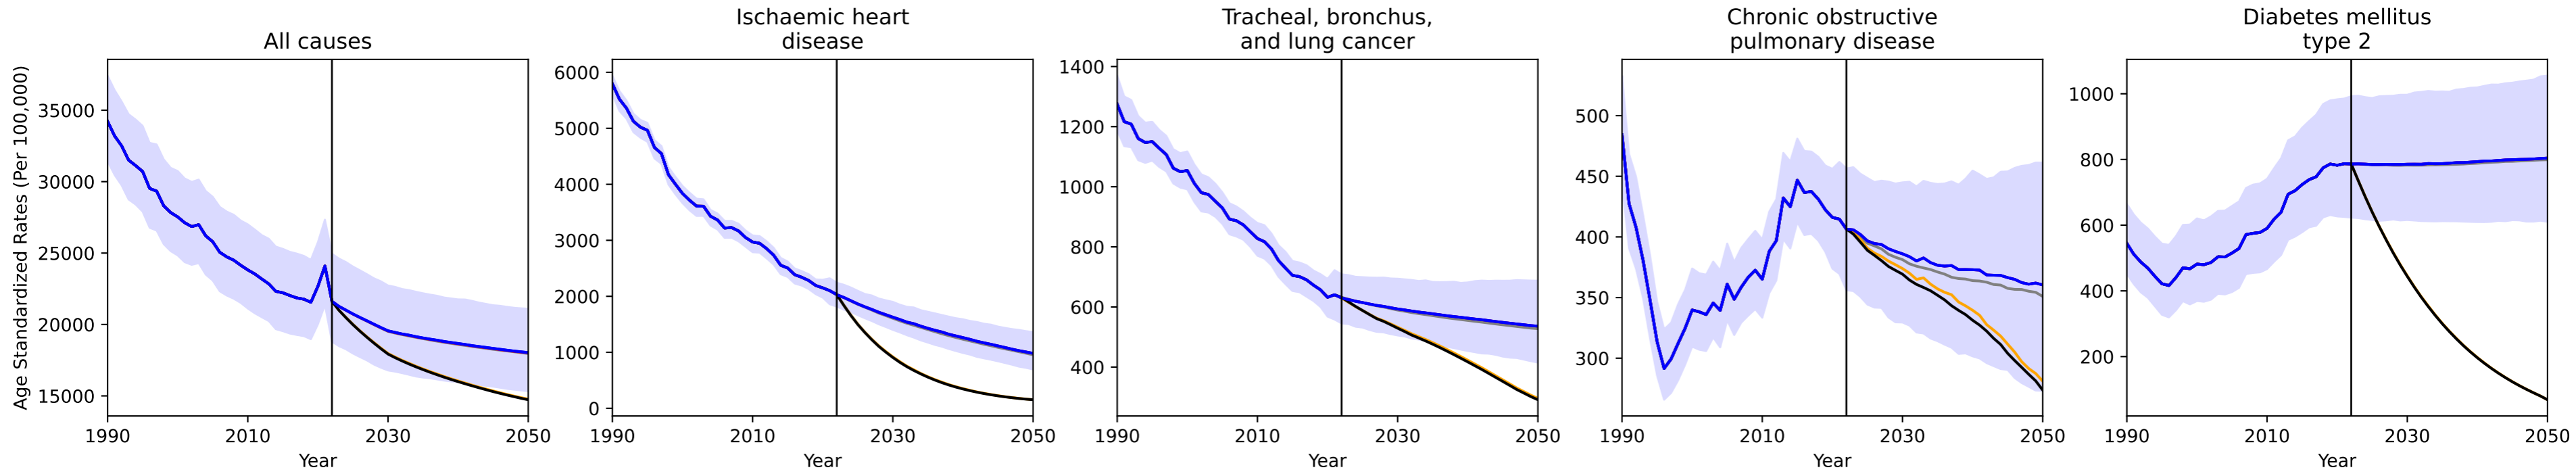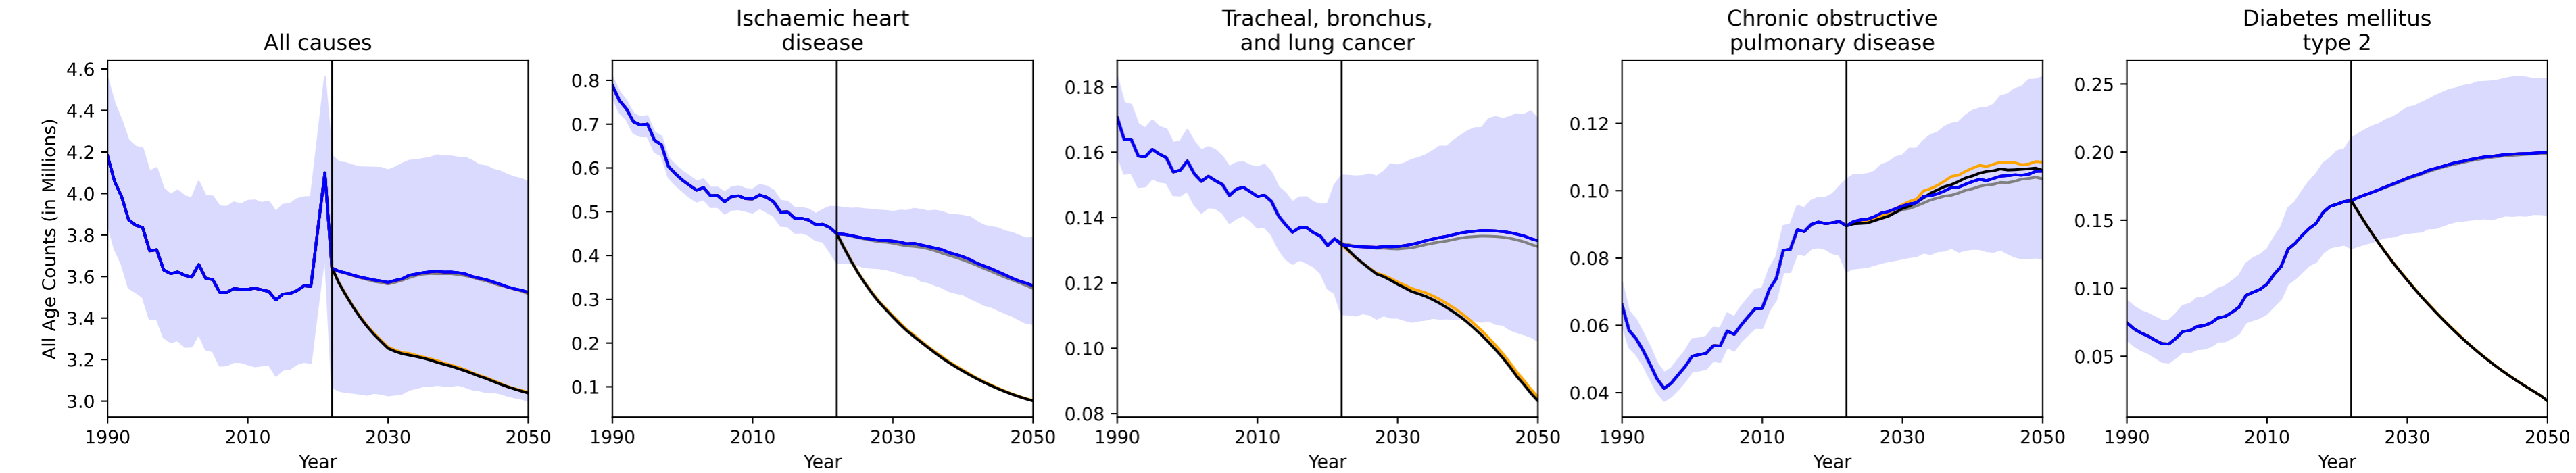

# Hungary

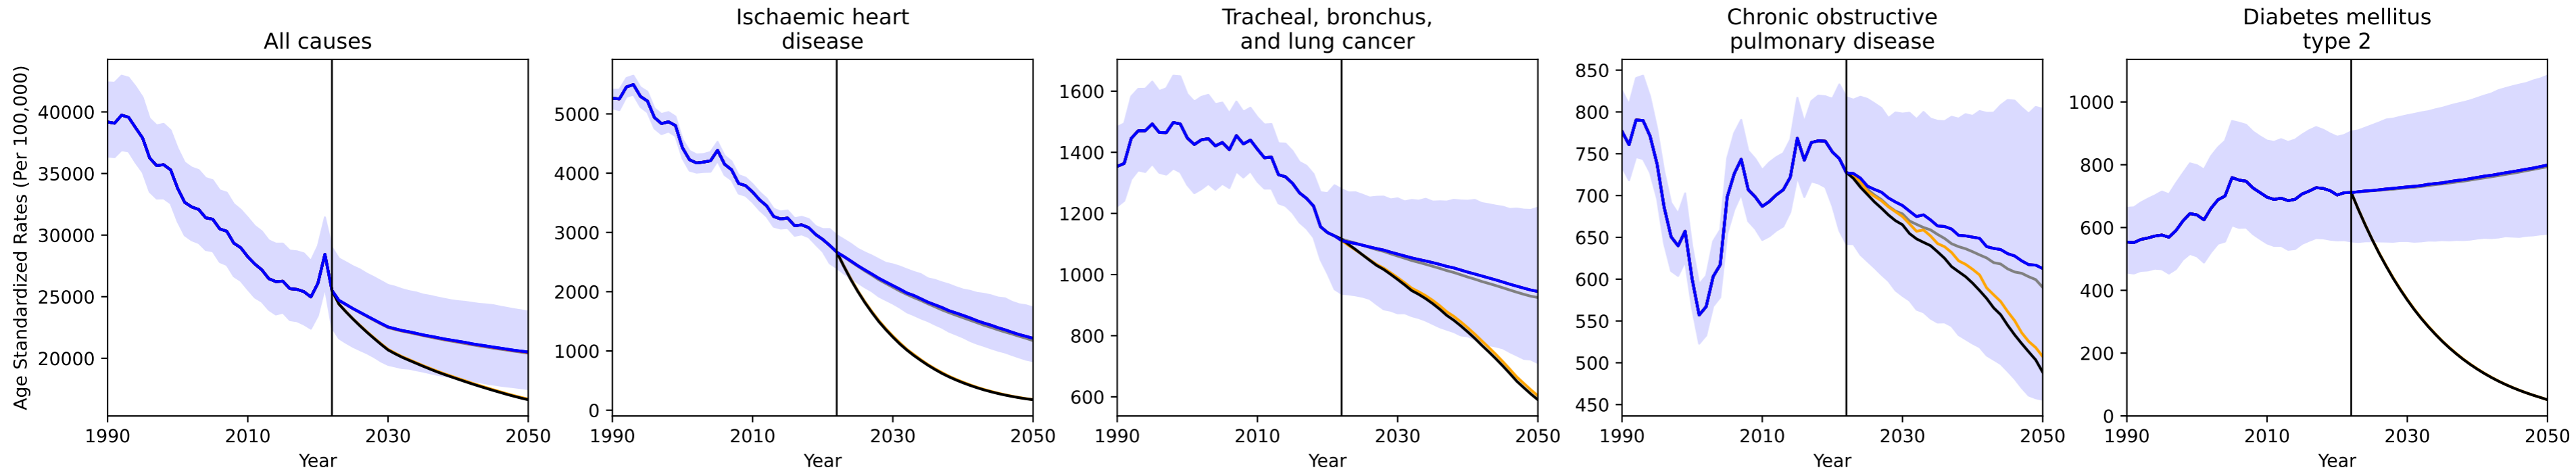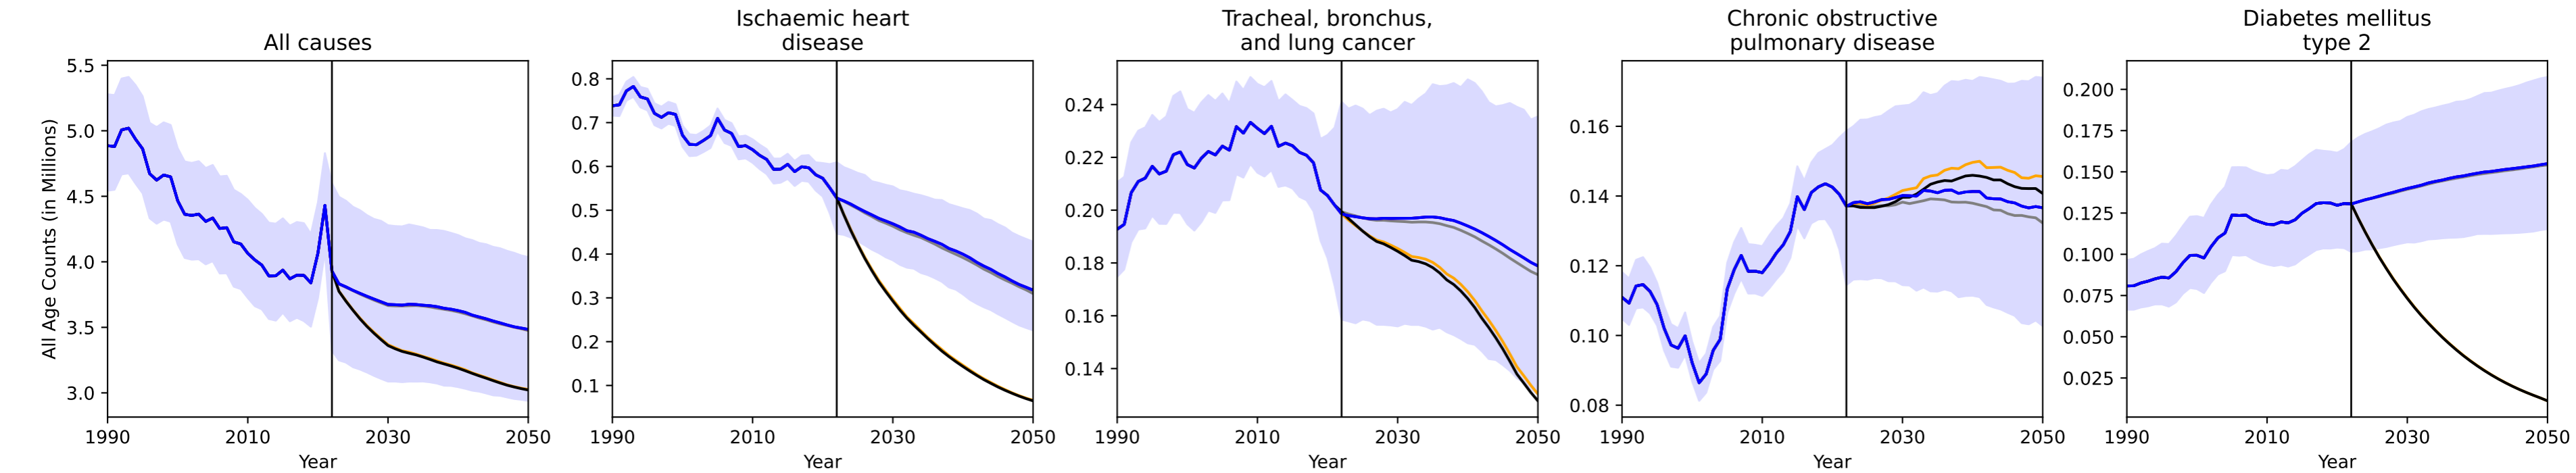

# Montenegro

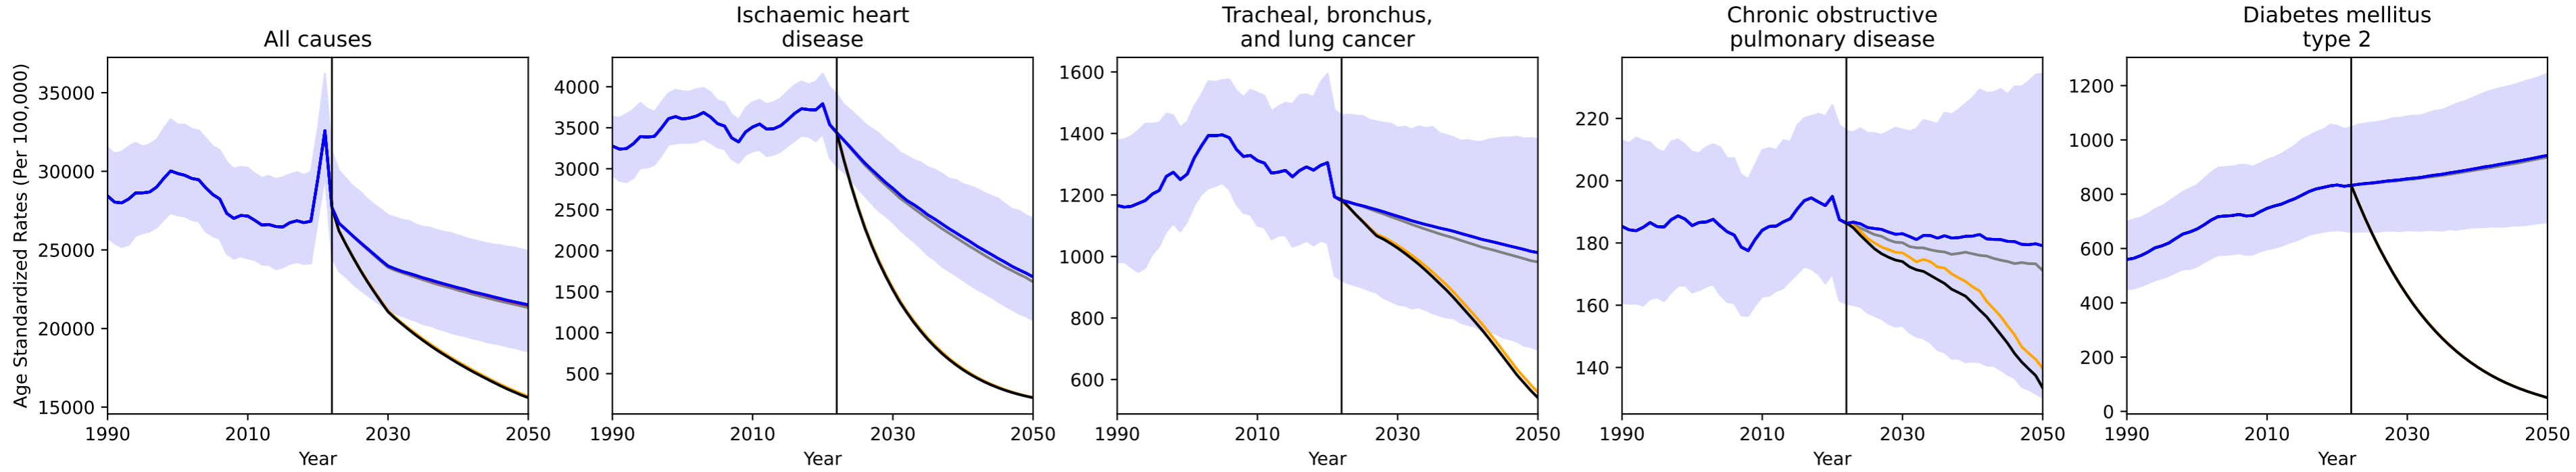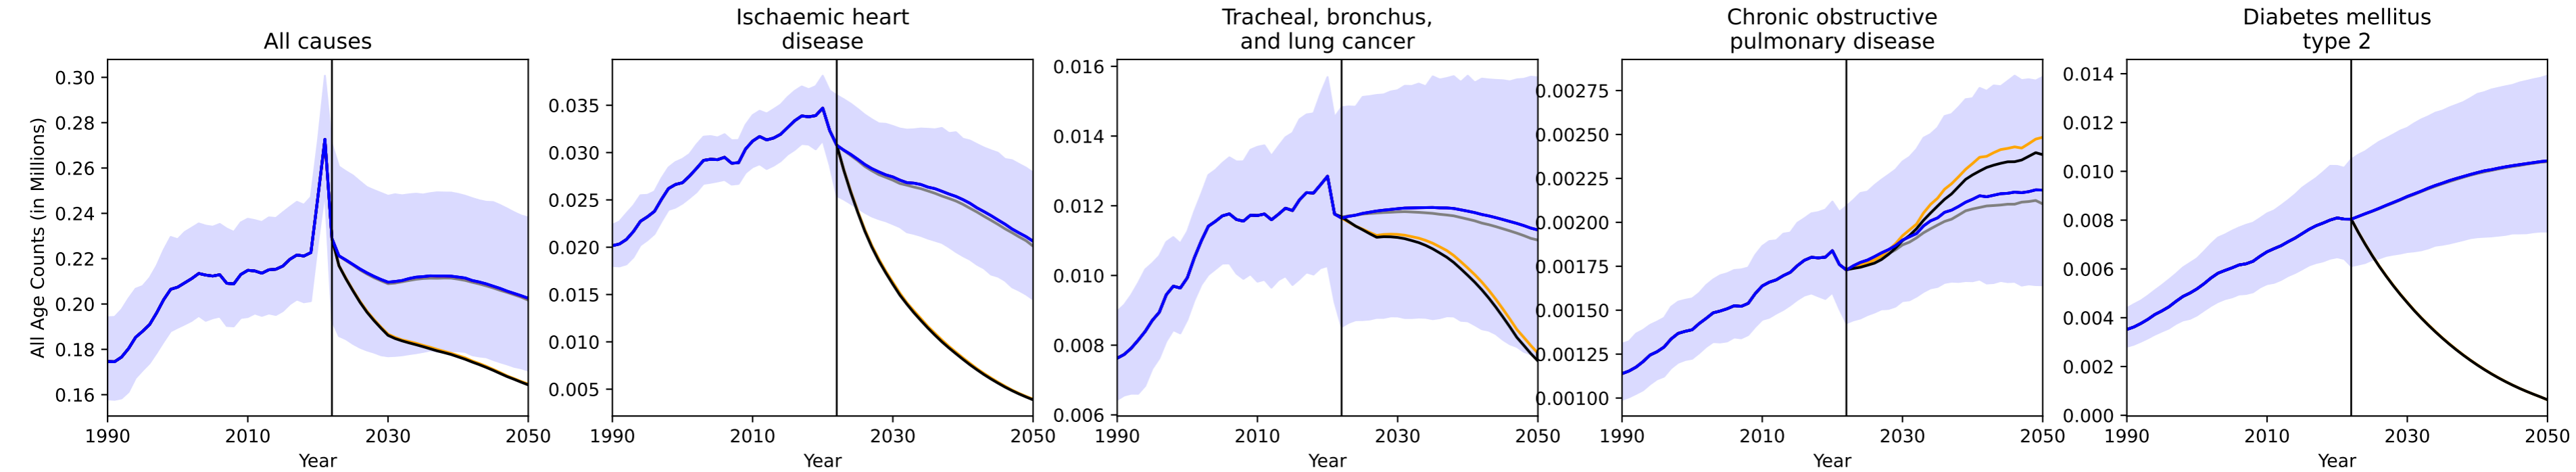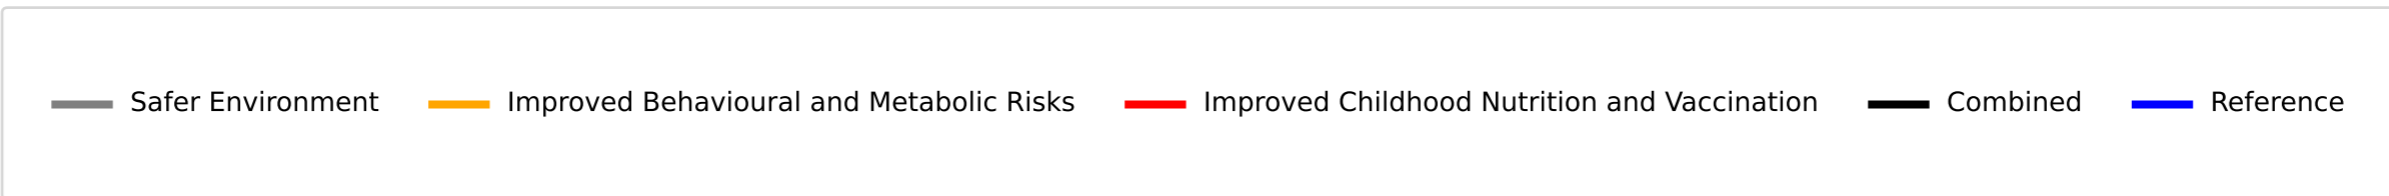

# North Macedonia

Supplemental Results Figure S12. All cause and top NCD causes age standardized DALY rates and all age counts by scenario and location, 1990-2050

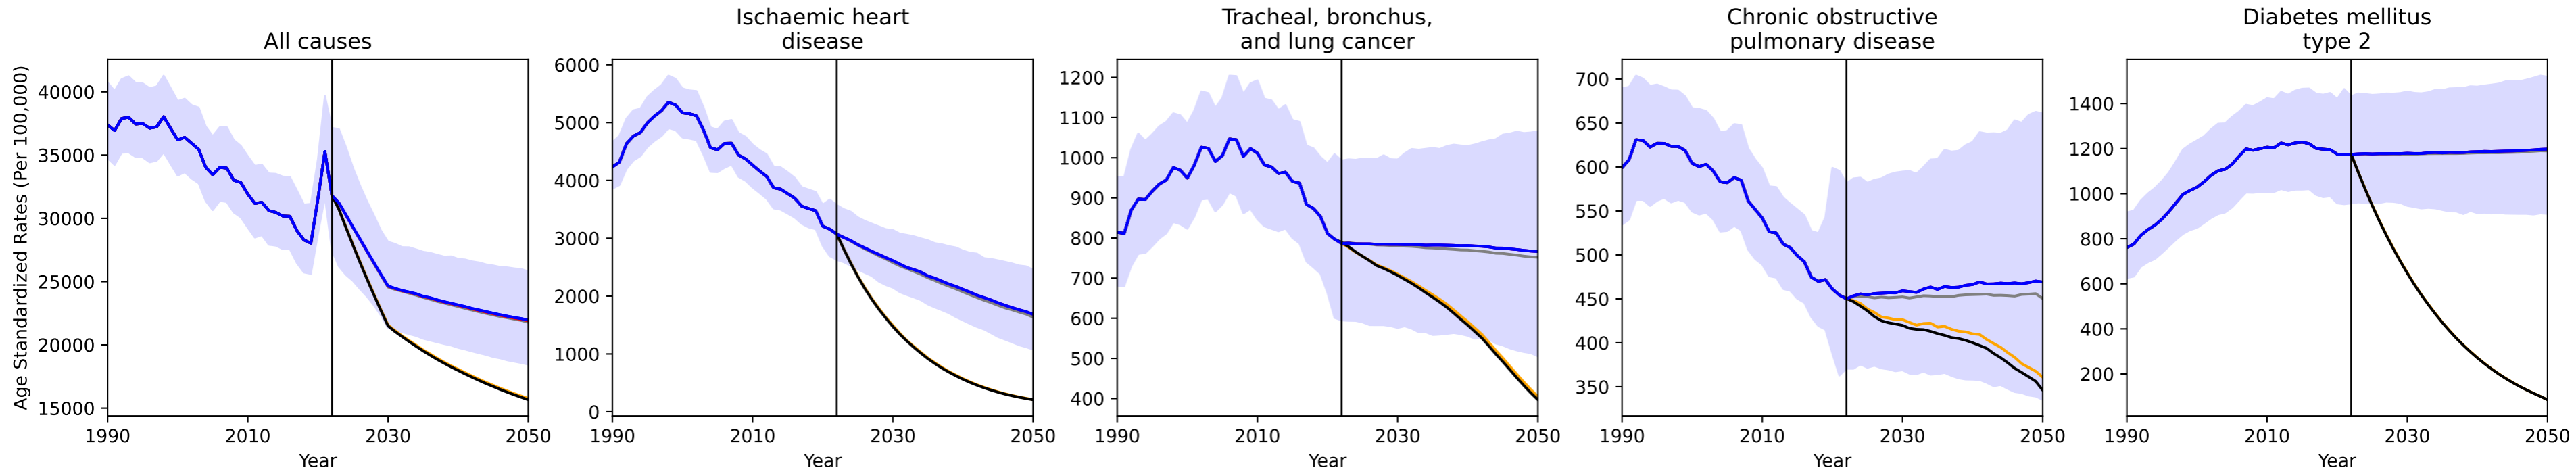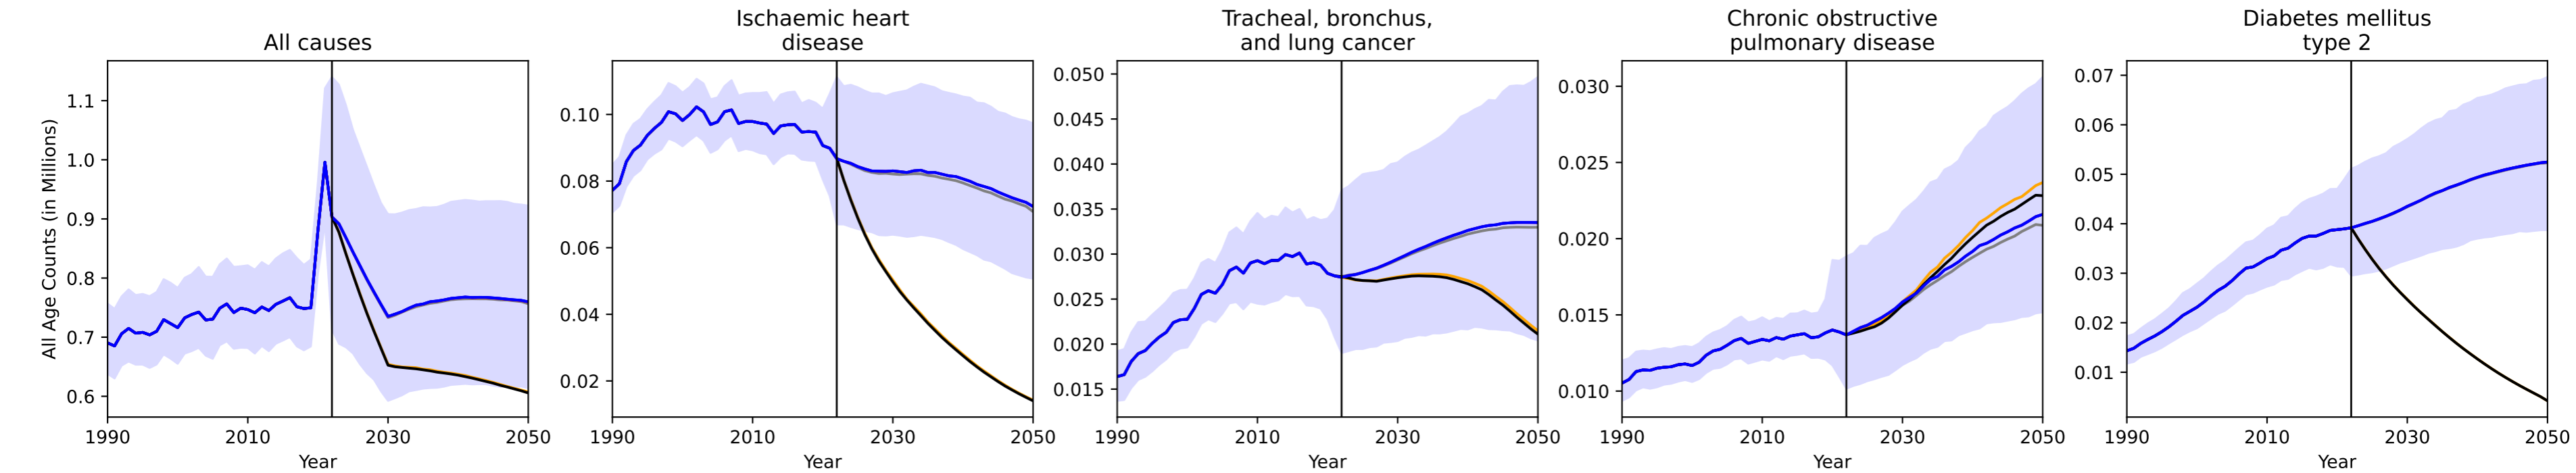

# Poland

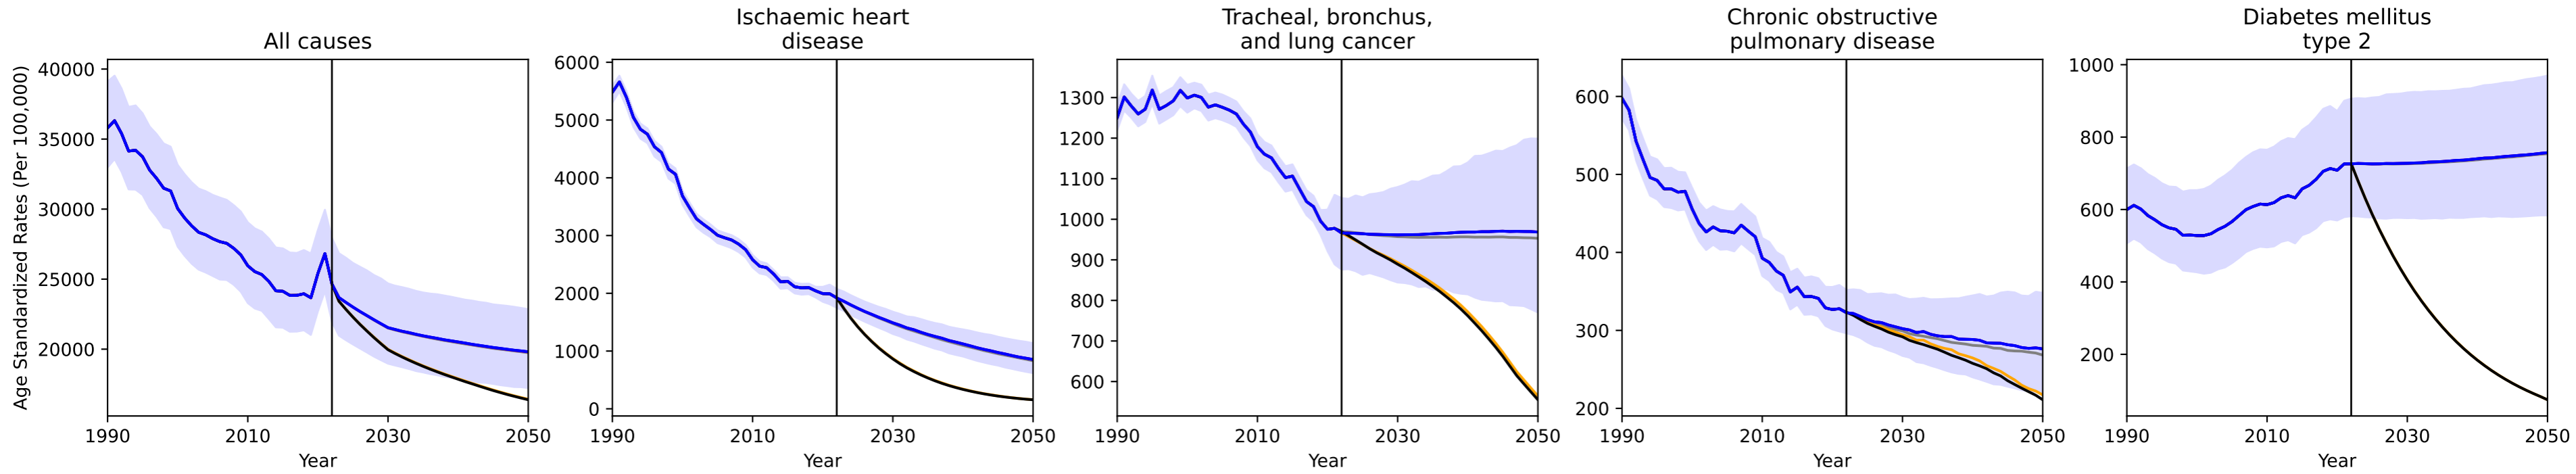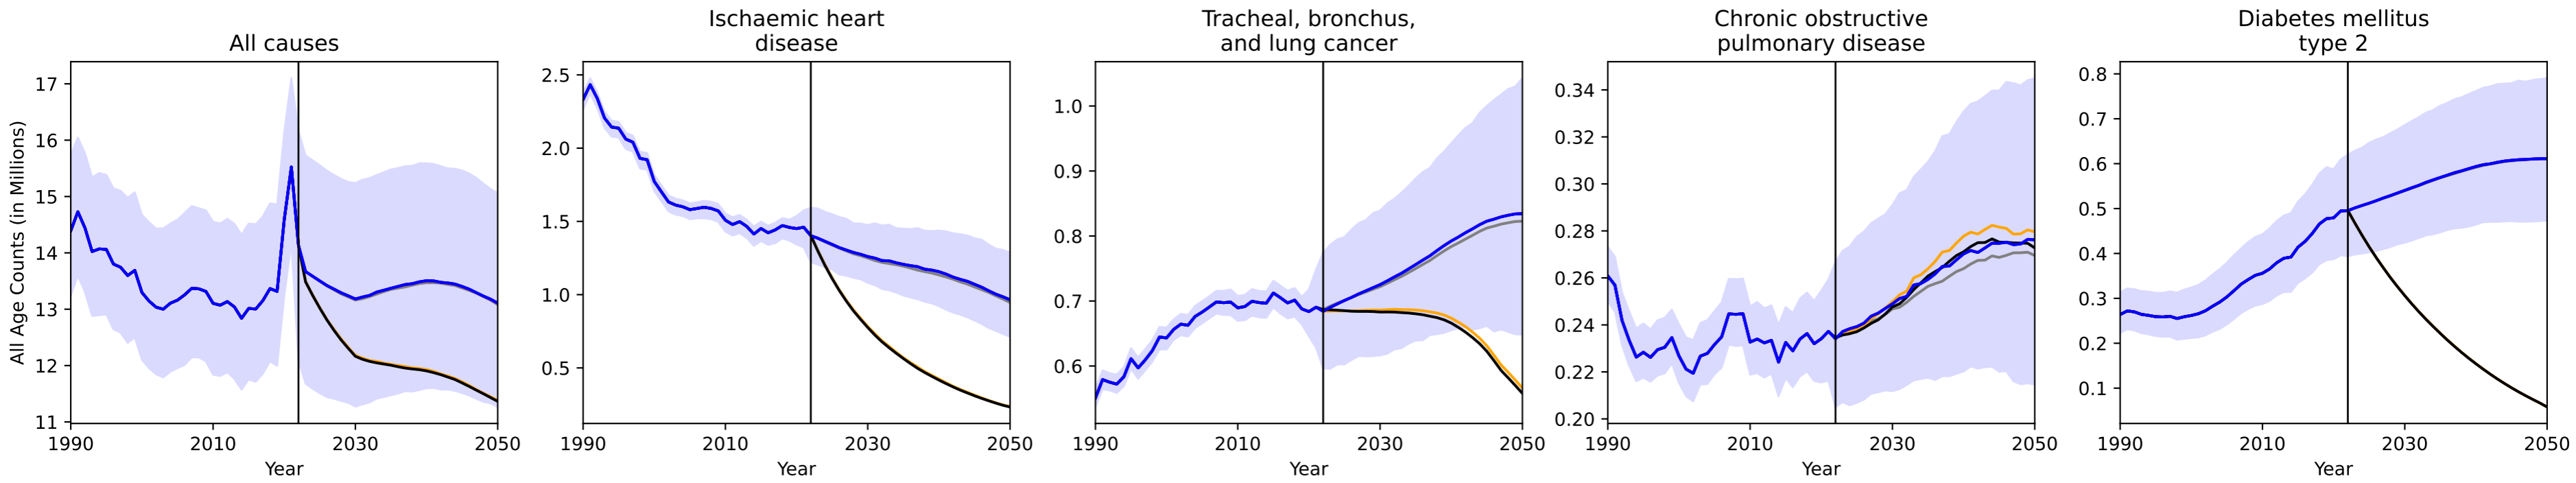

— Safer Environment — Improved Behavioural and Metabolic Risks — Improved Childhood Nutrition and Vaccination — Combined — Reference

# Romania

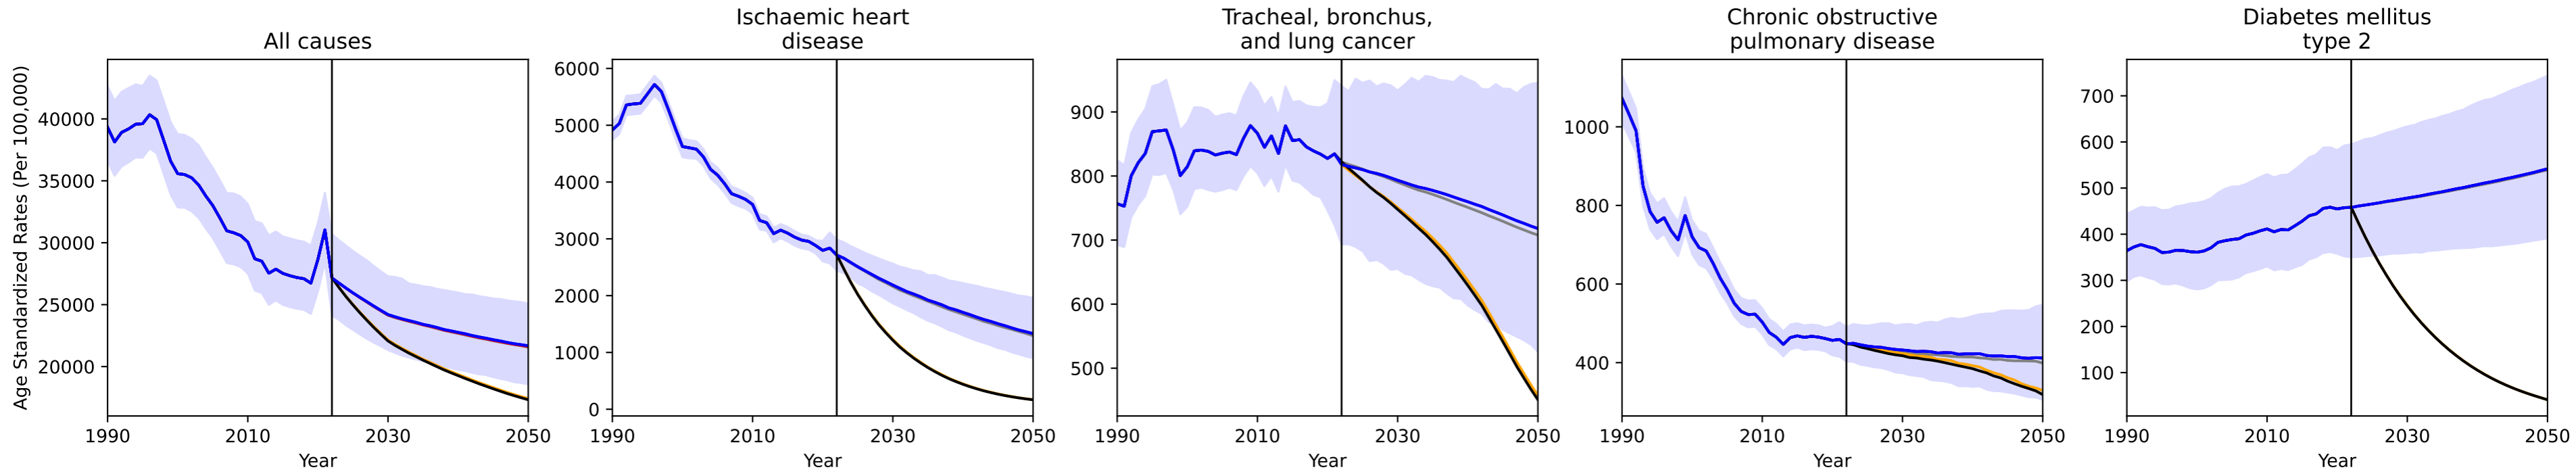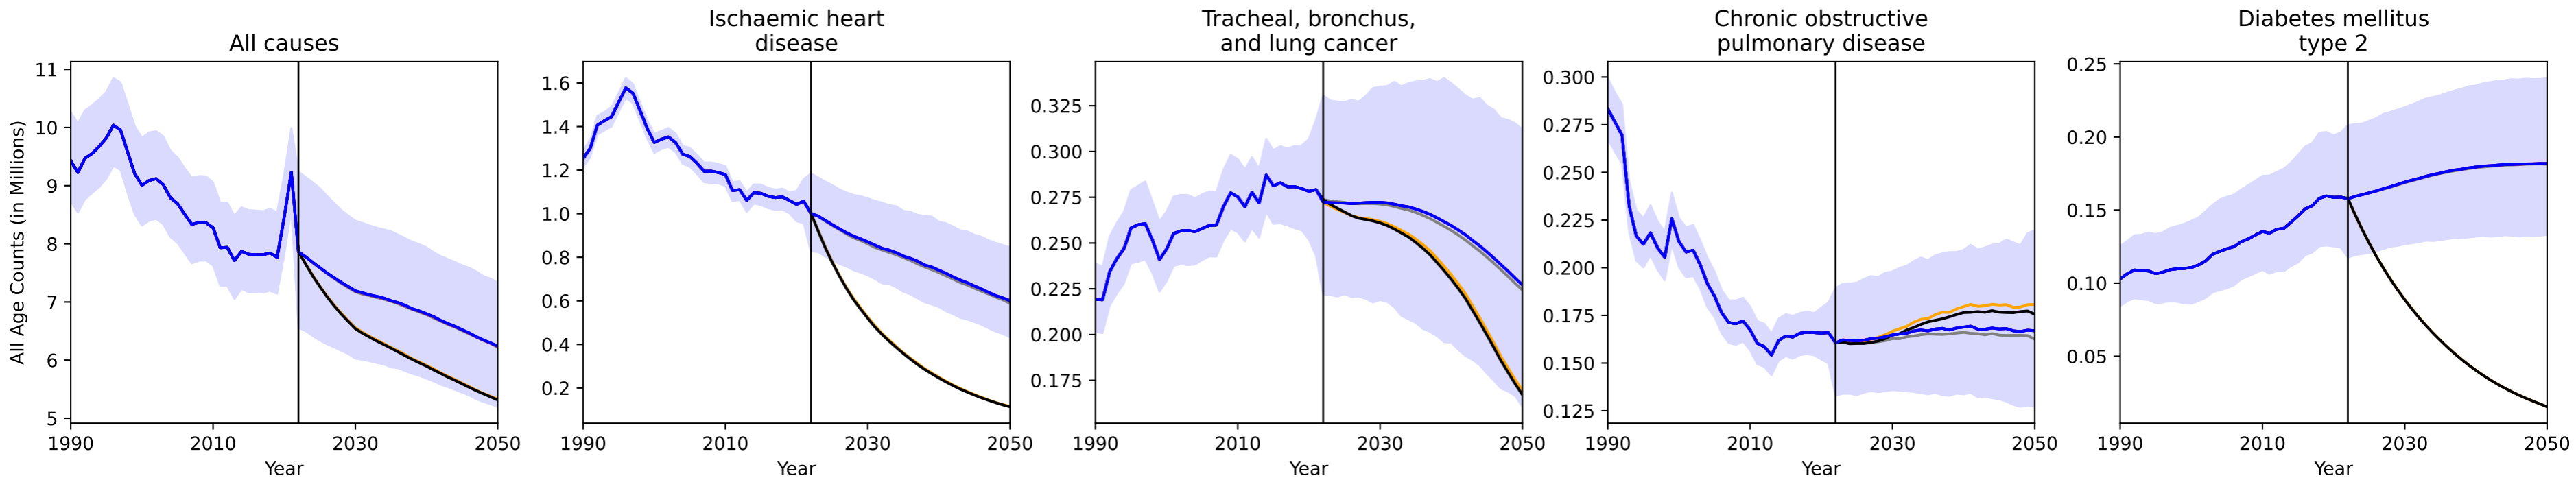



# Serbia

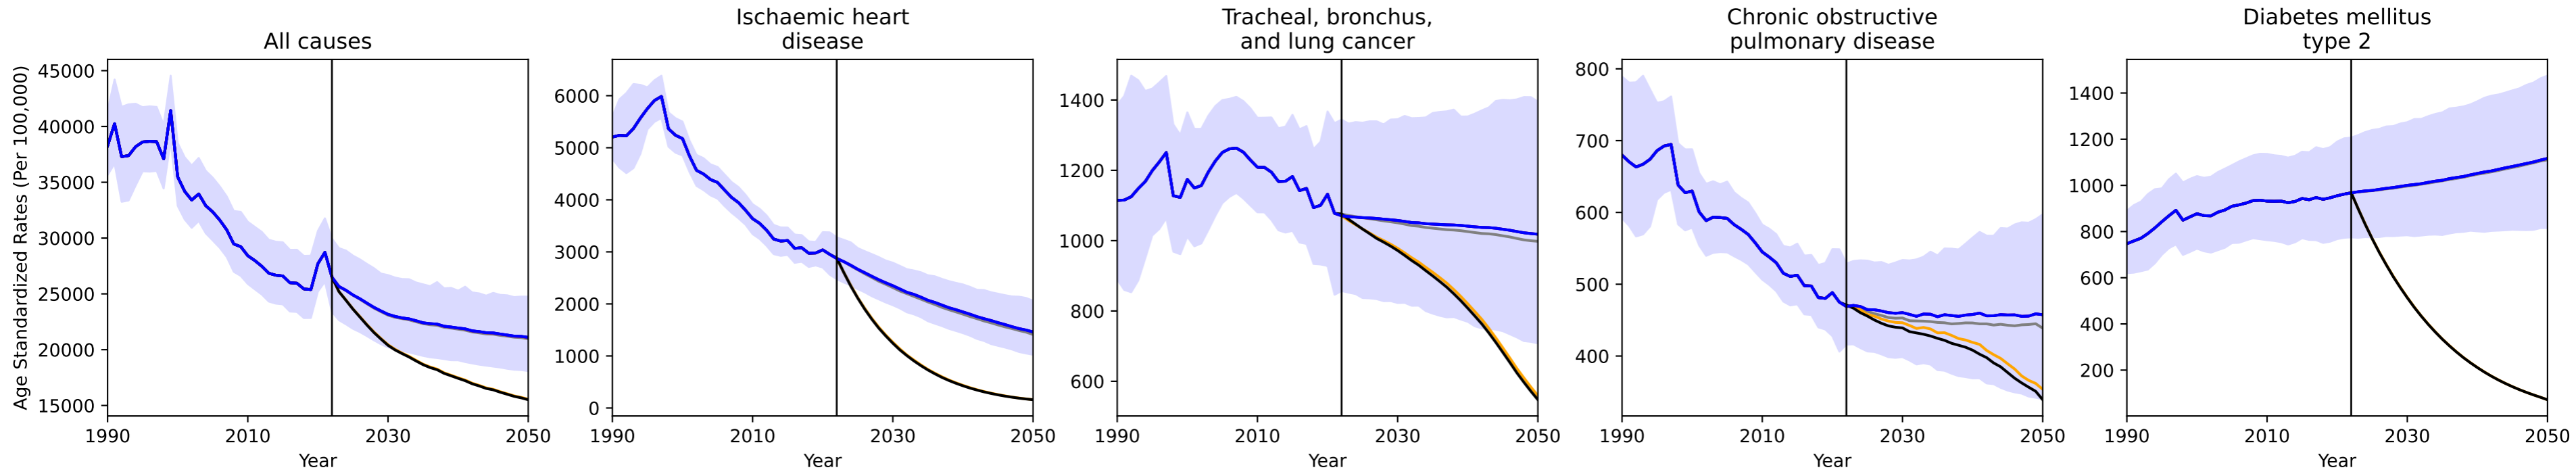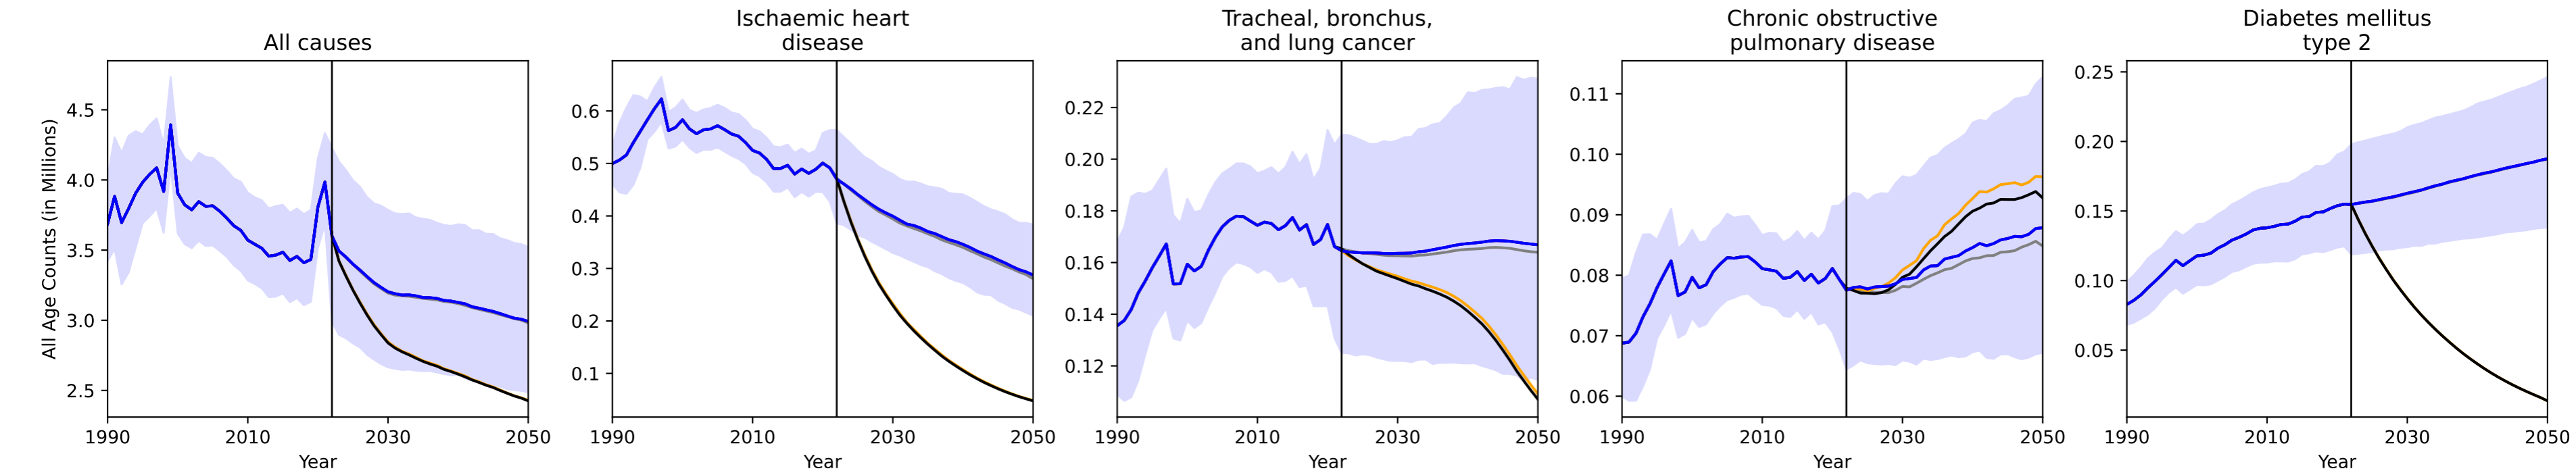

# Slovakia

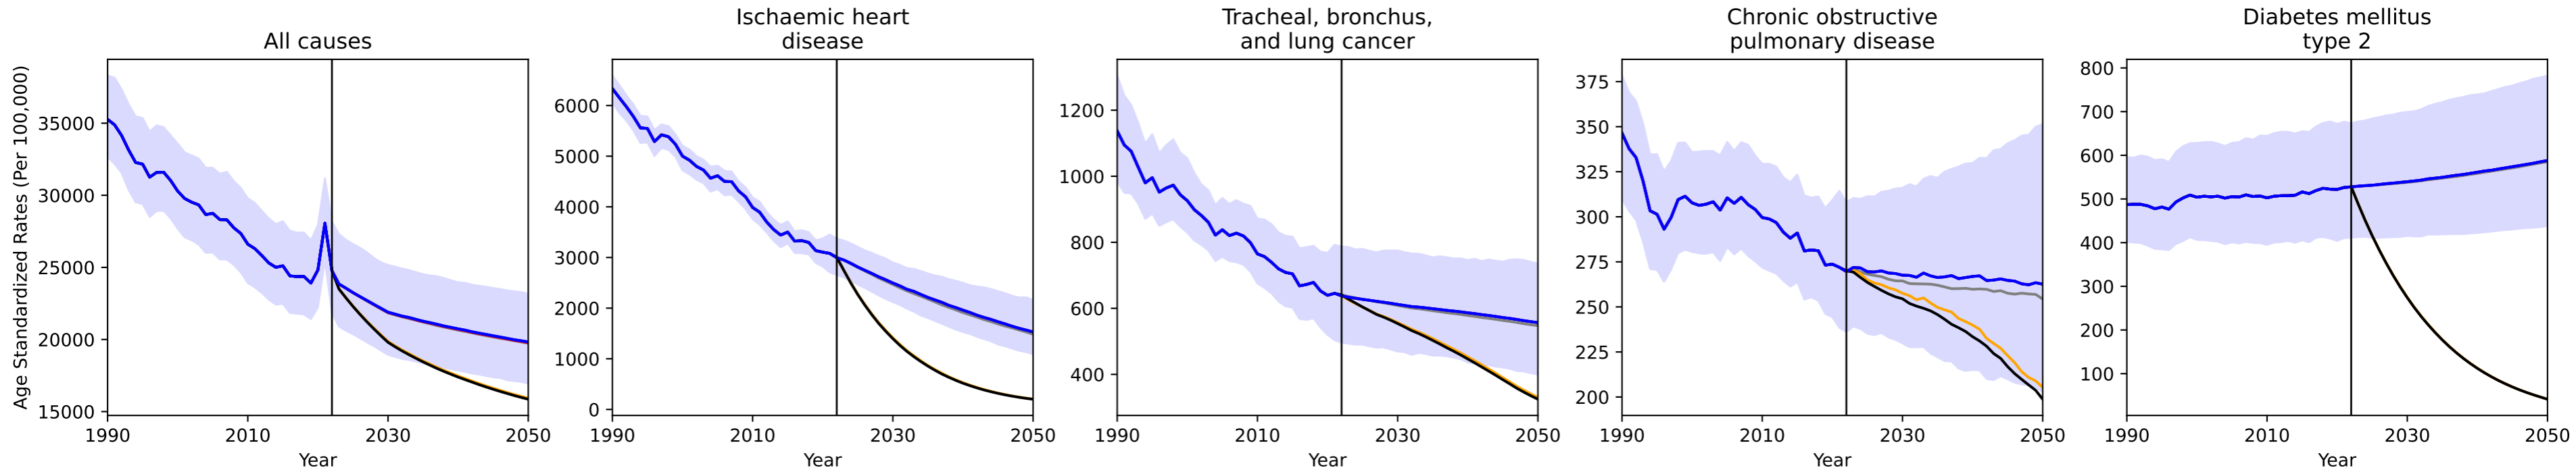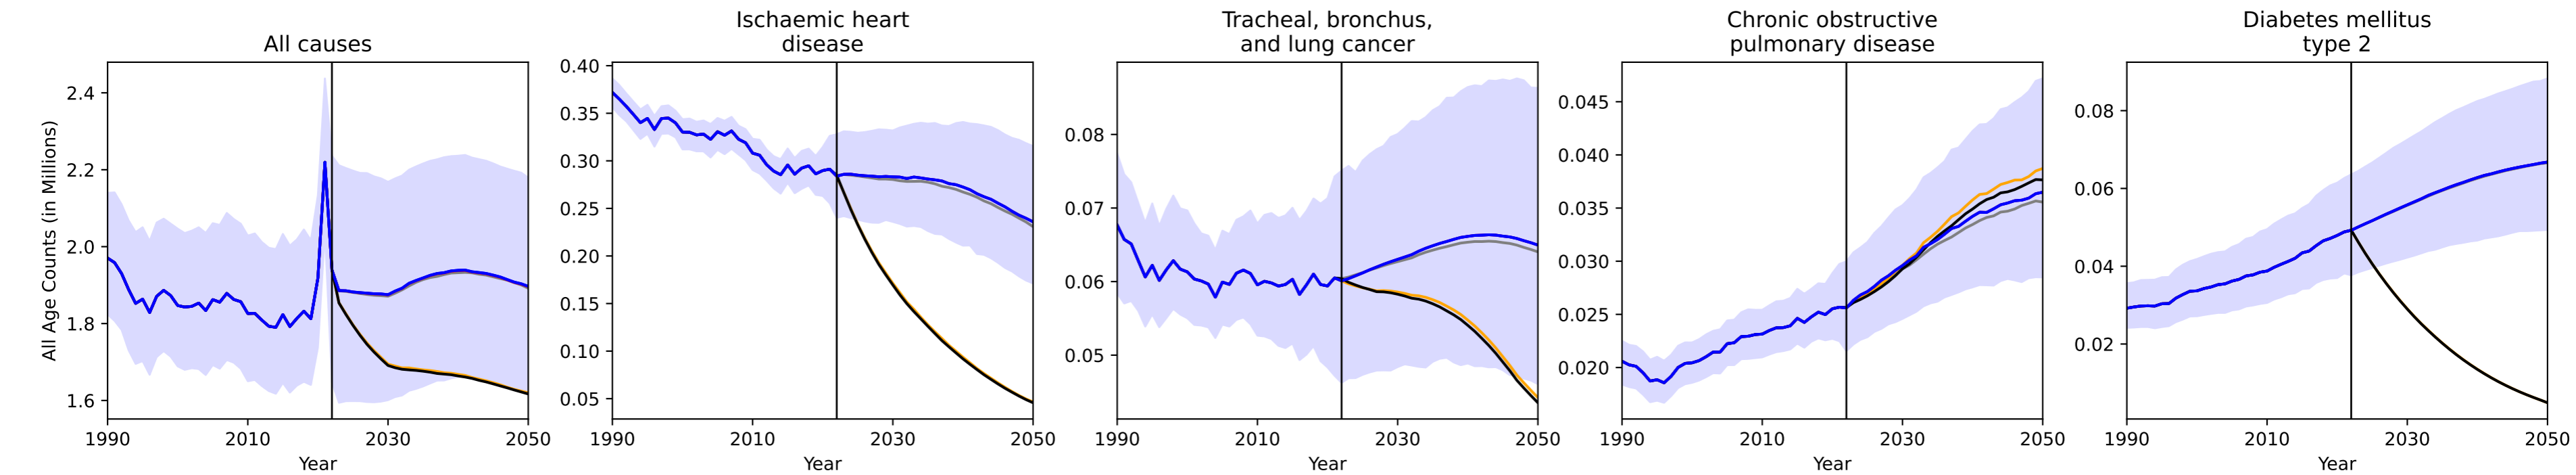

# Slovenia

Supplemental Results Figure S12. All cause and top NCD causes age standardized DALY rates and all age counts by scenario and location, 1990-2050

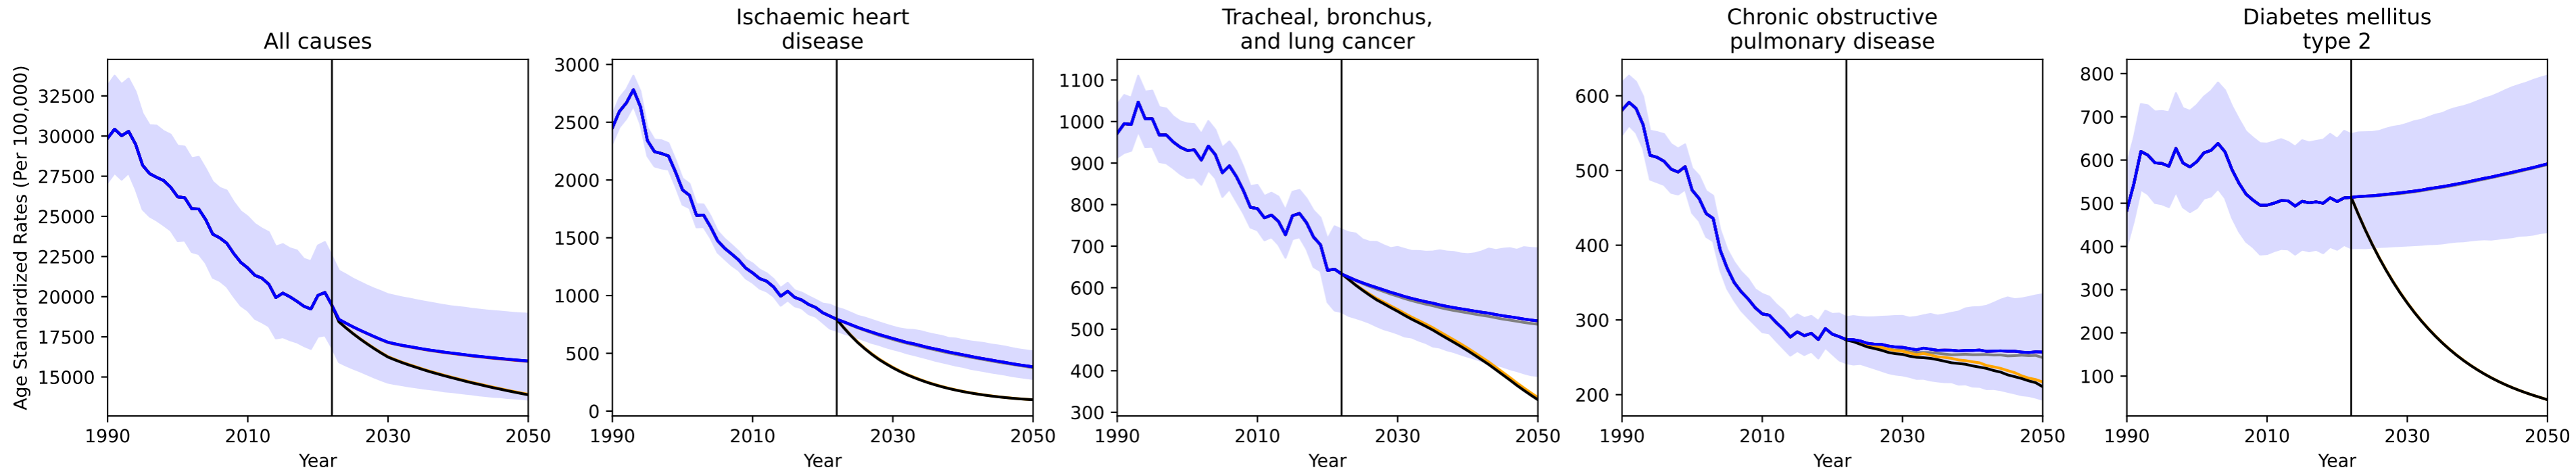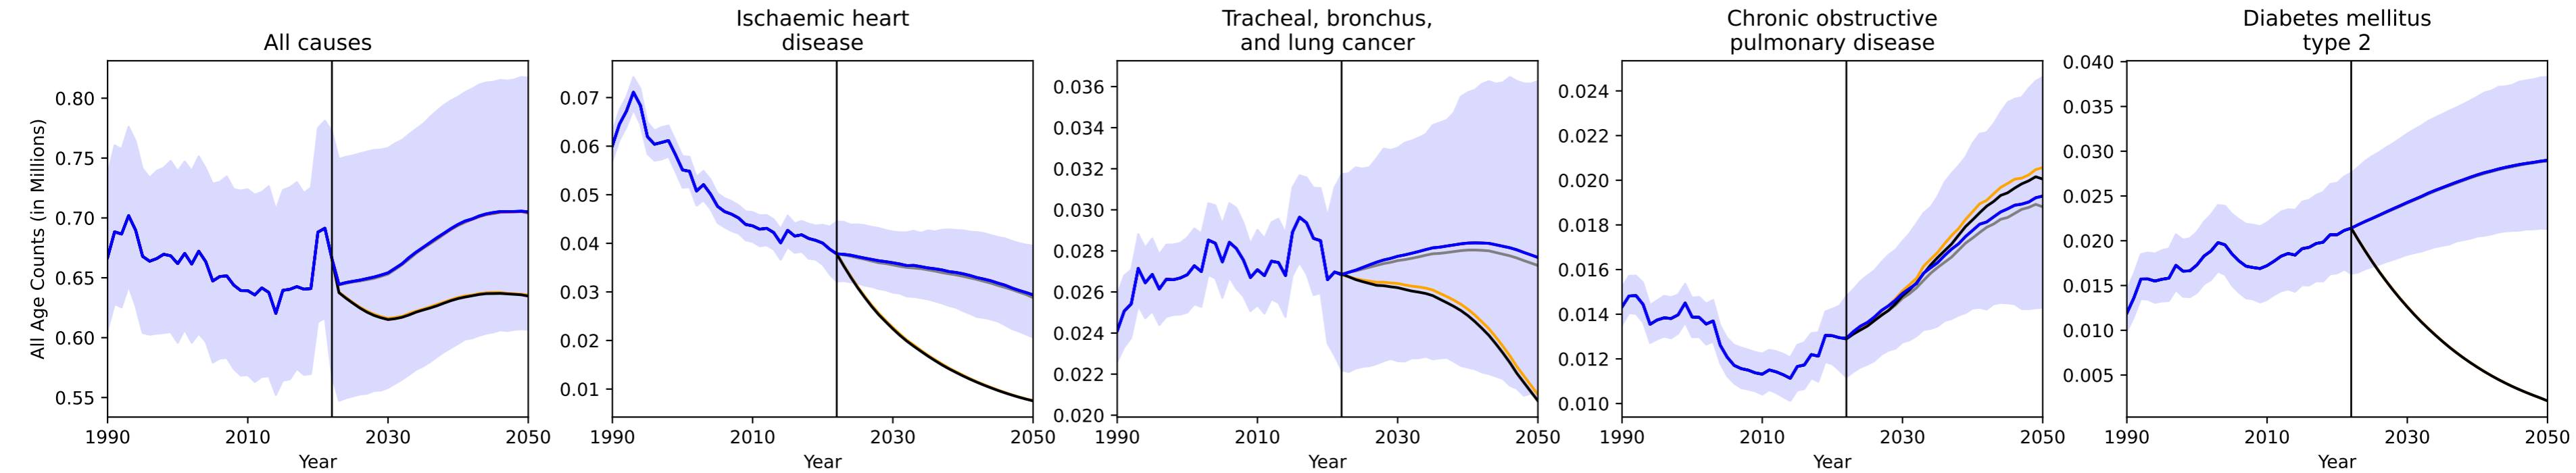

# Belarus

Supplemental Results Figure S12. All cause and top NCD causes age standardized DALY rates and all age counts by scenario and location, 1990-2050

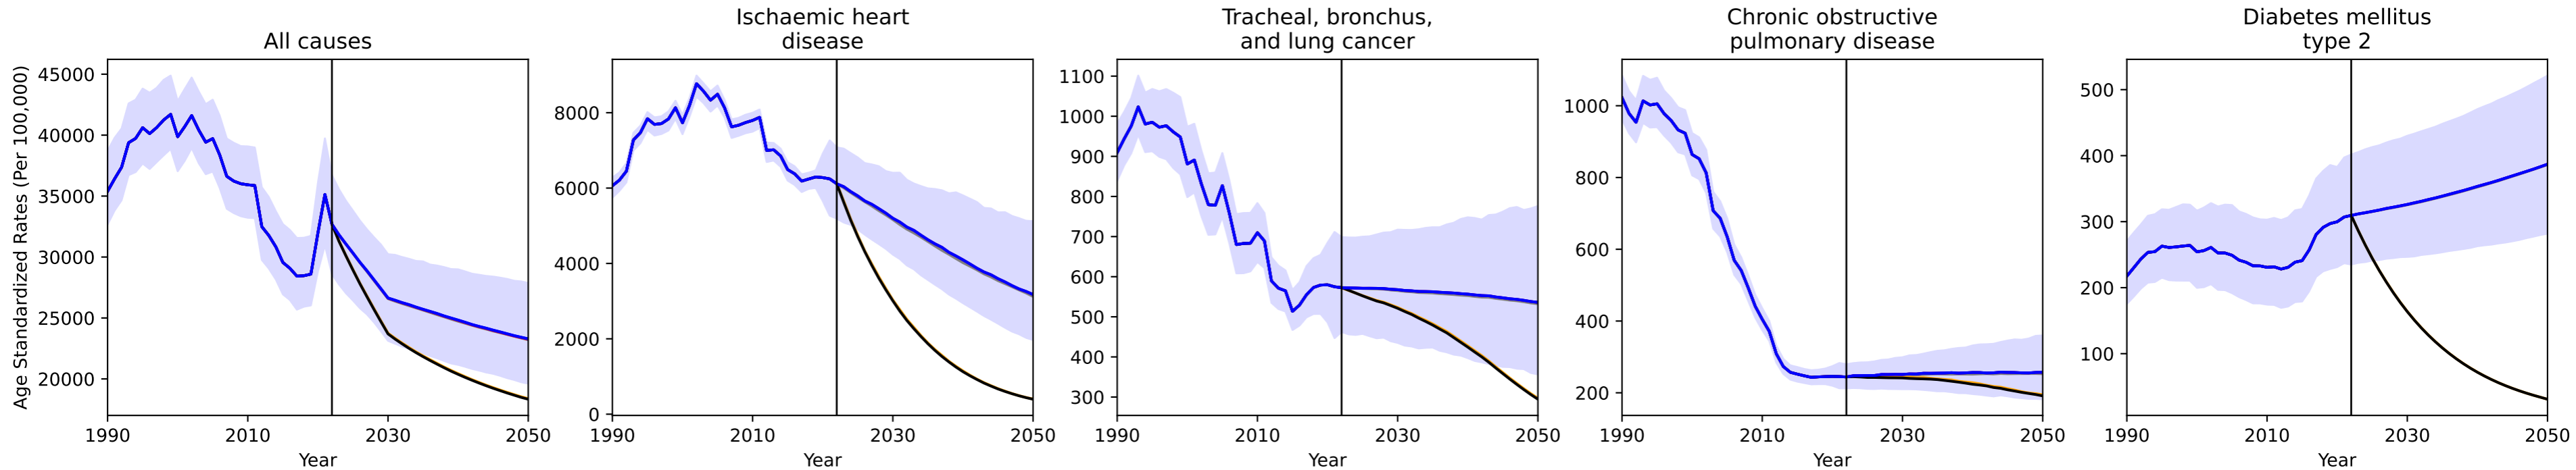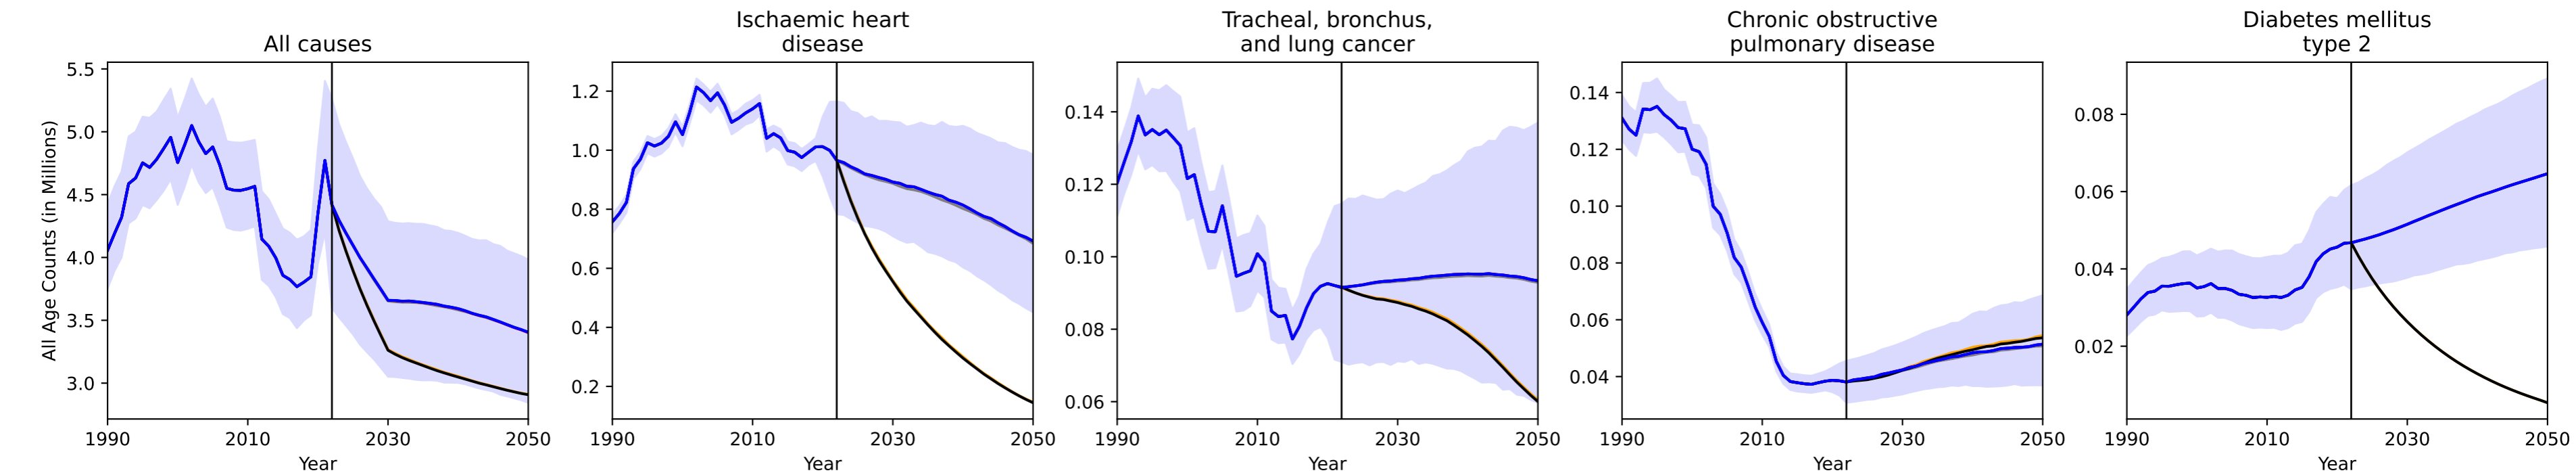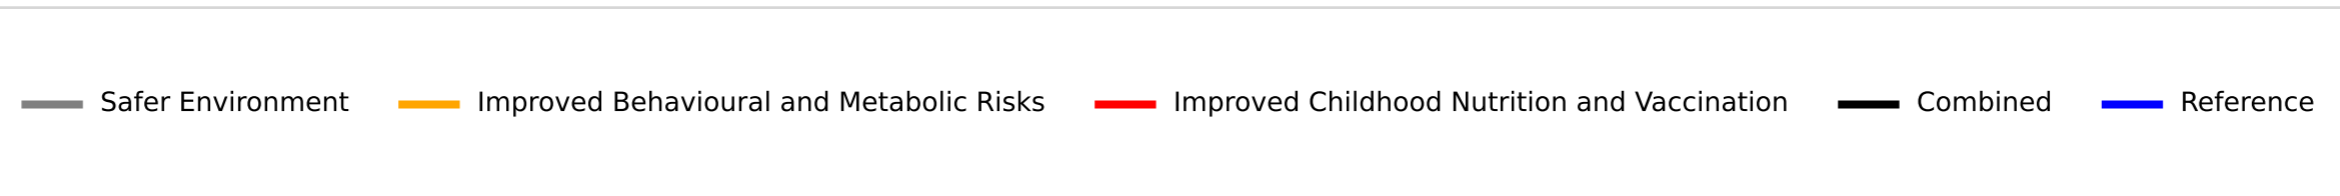

# Estonia

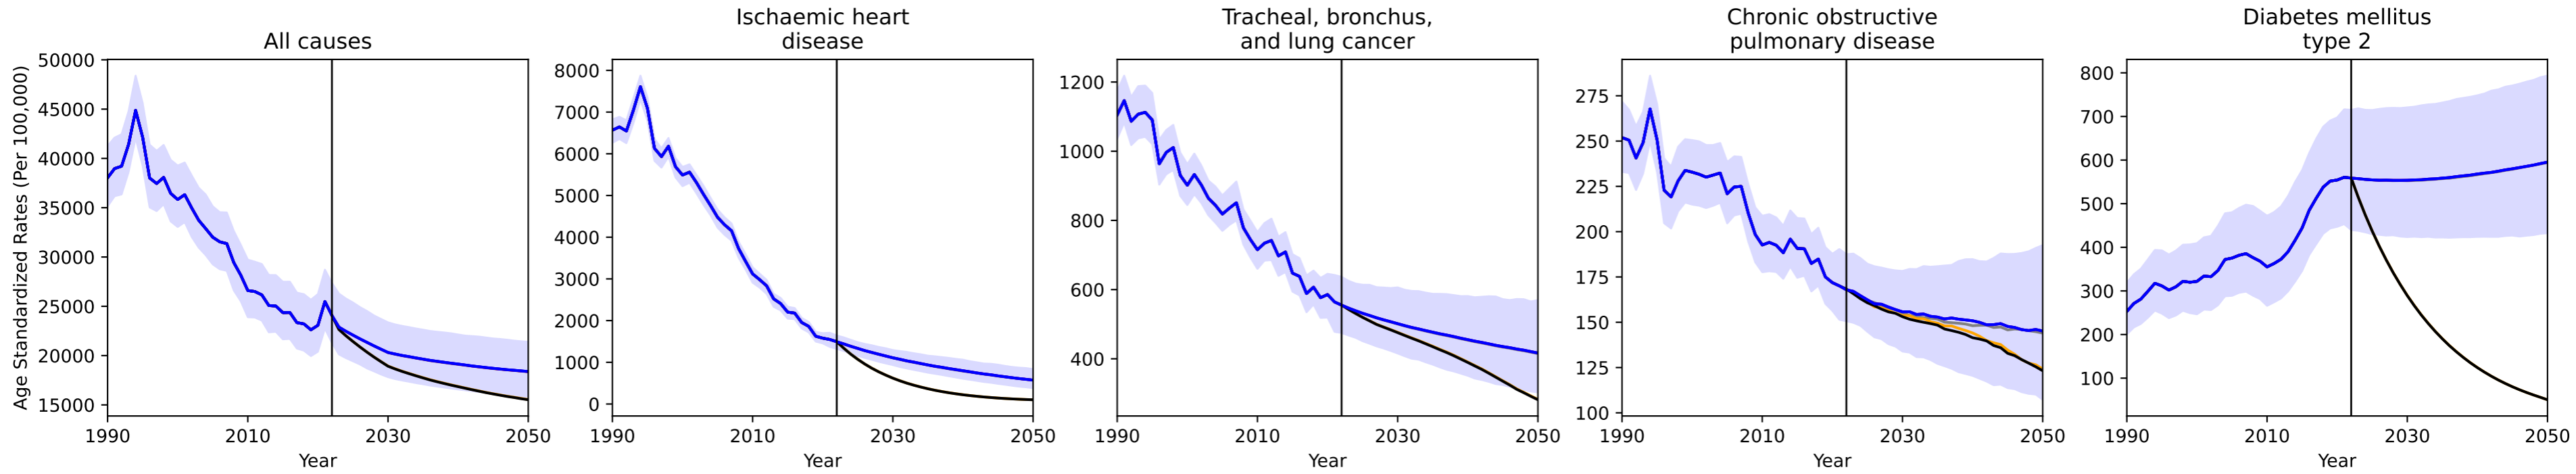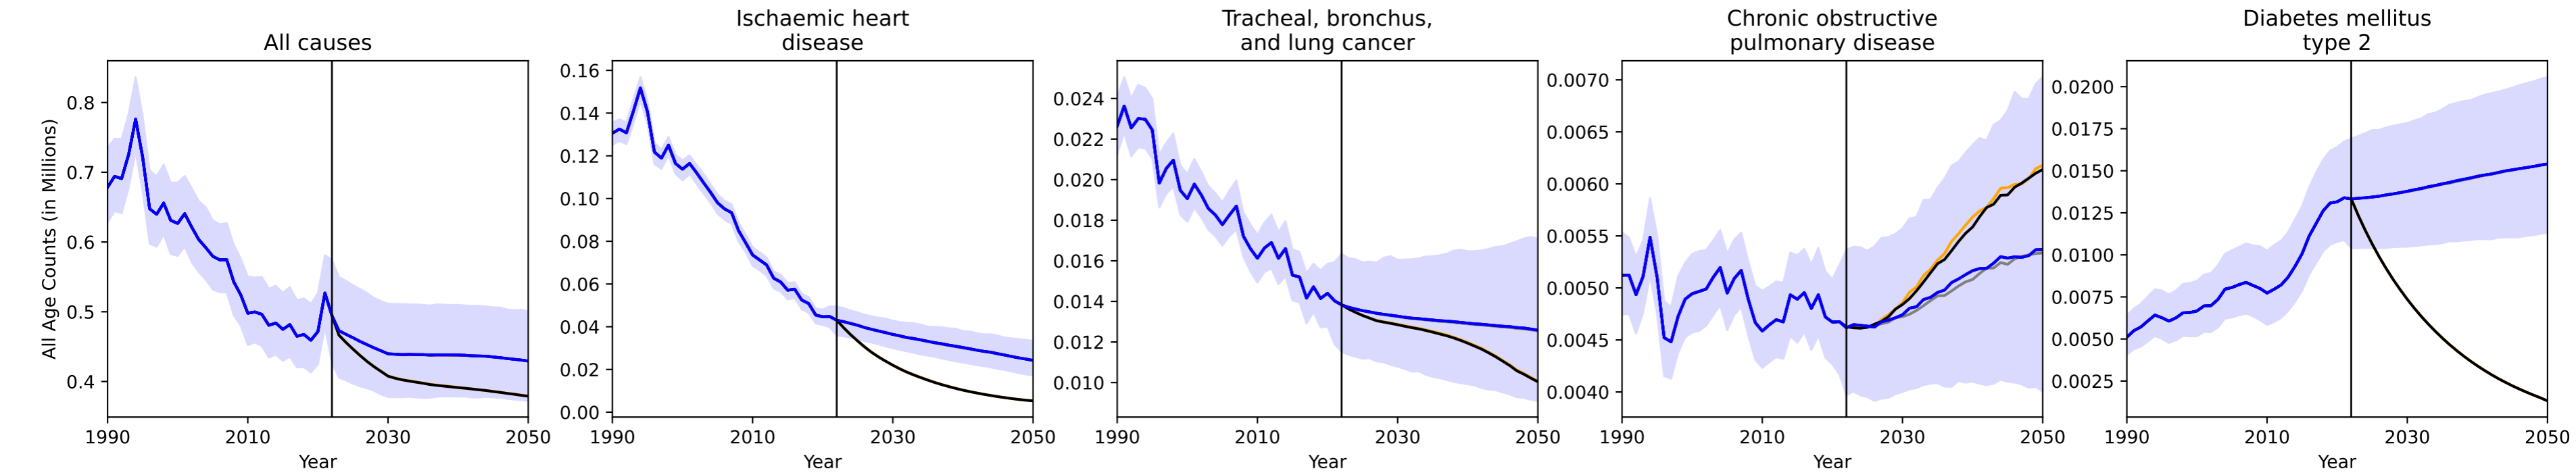

# Latvia

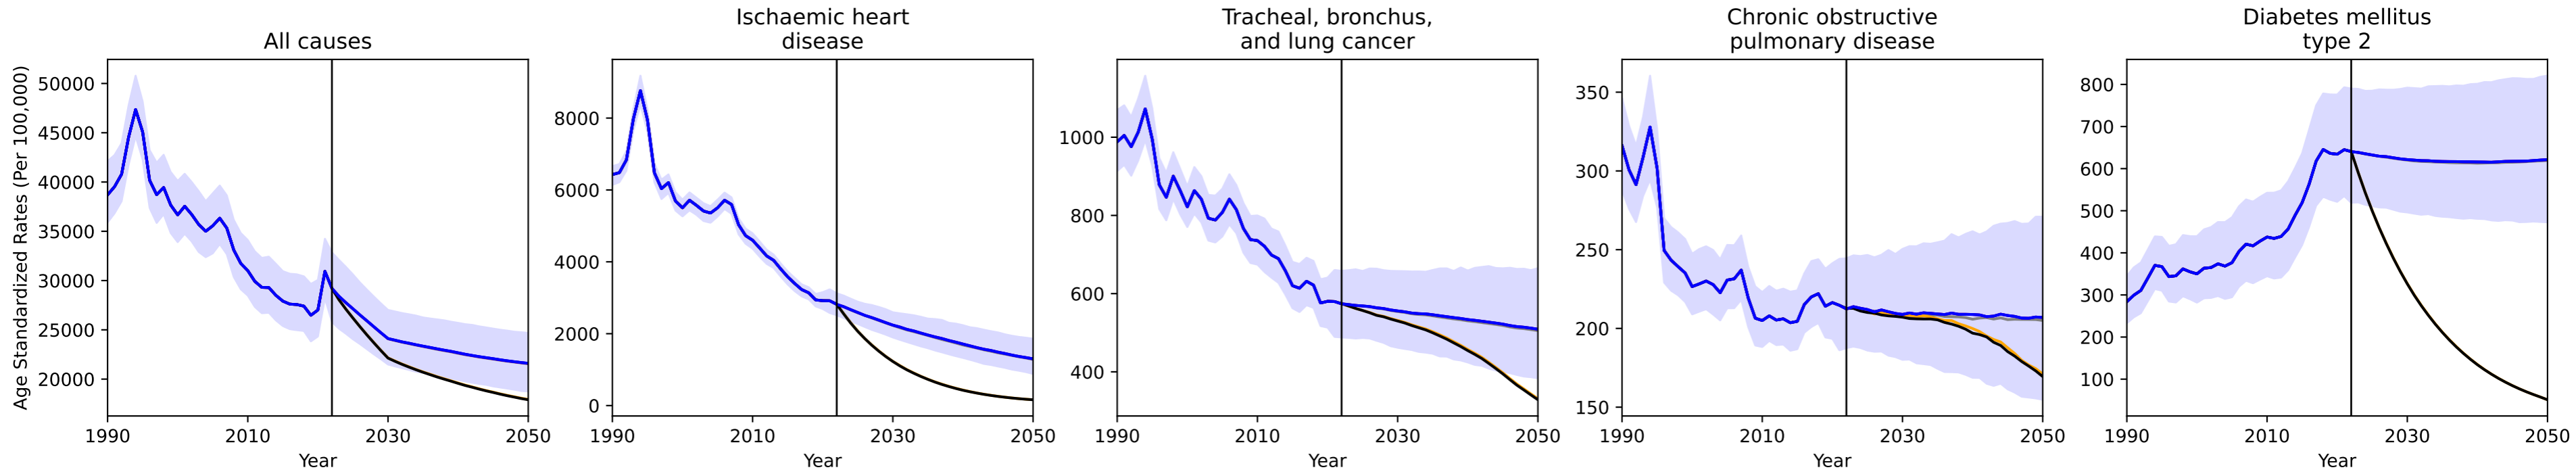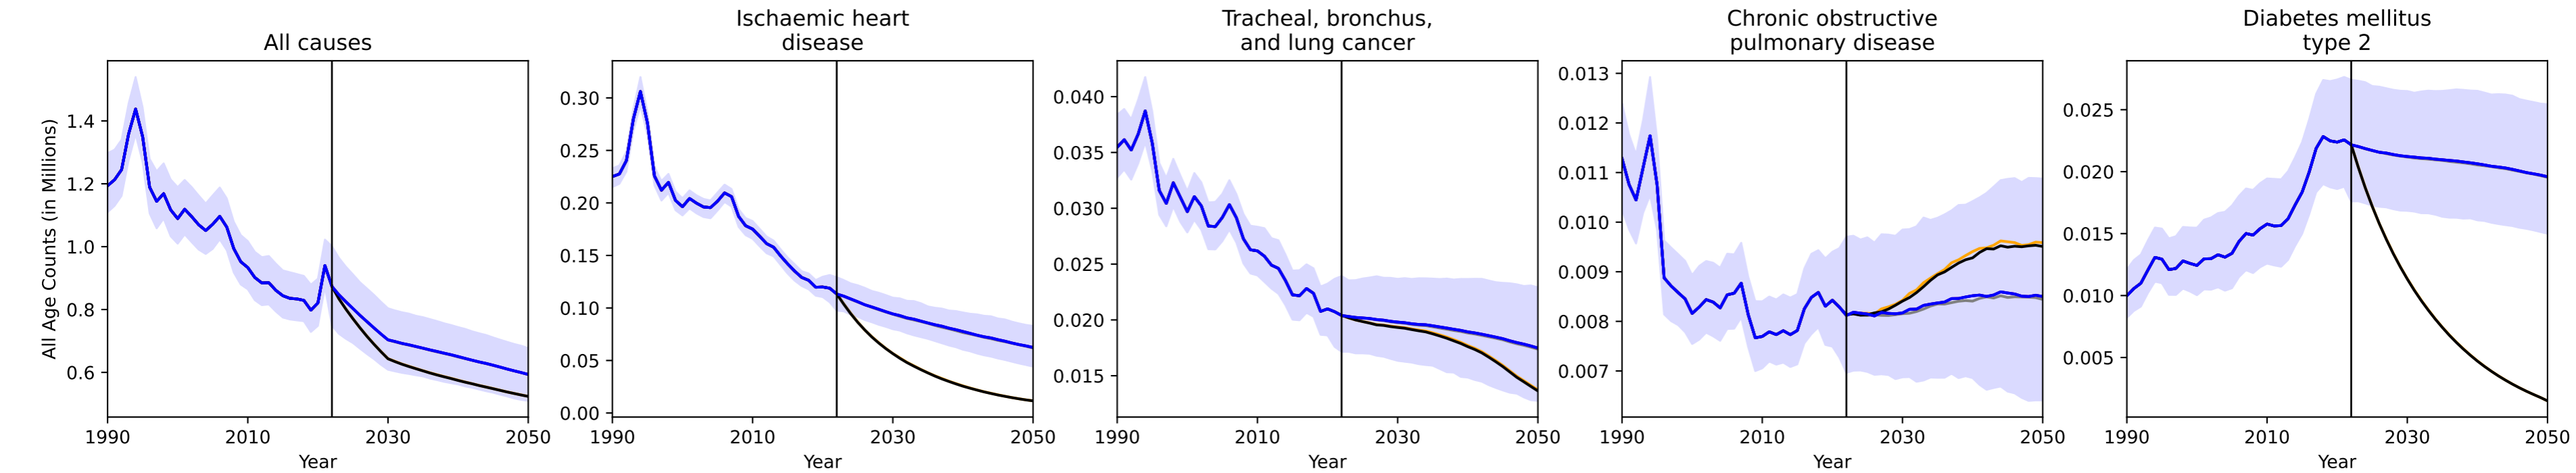

# Lithuania

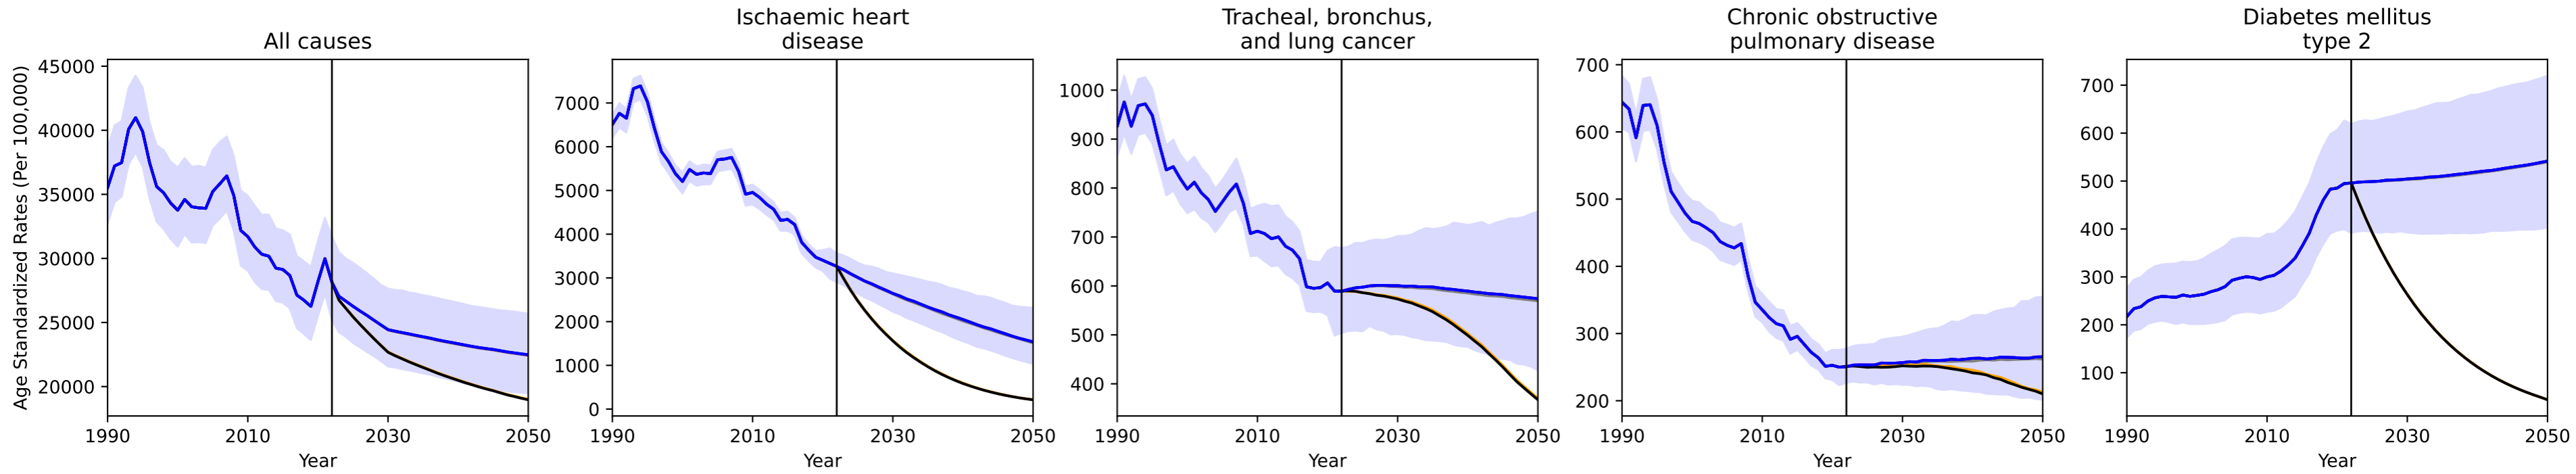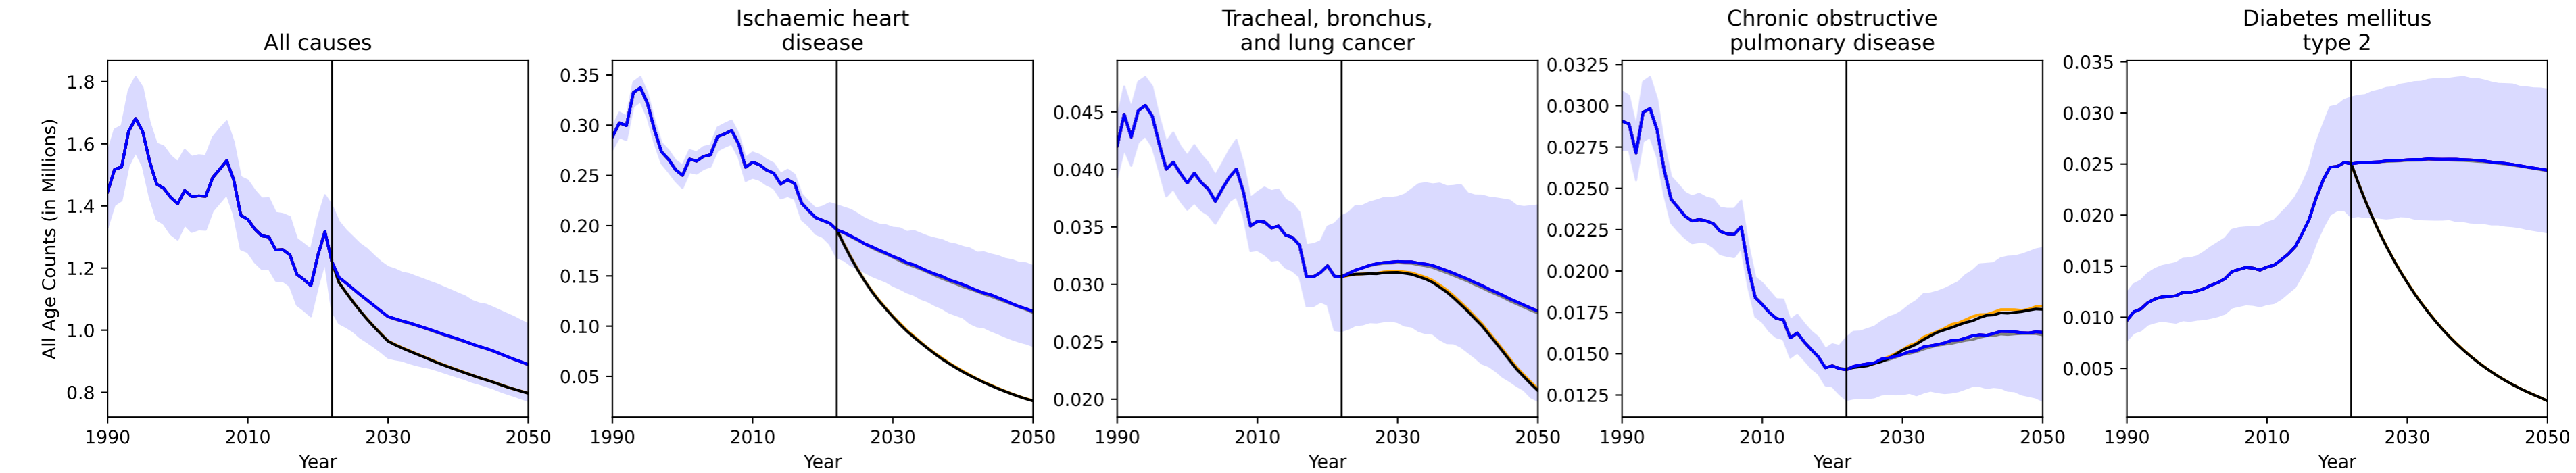

# Moldova

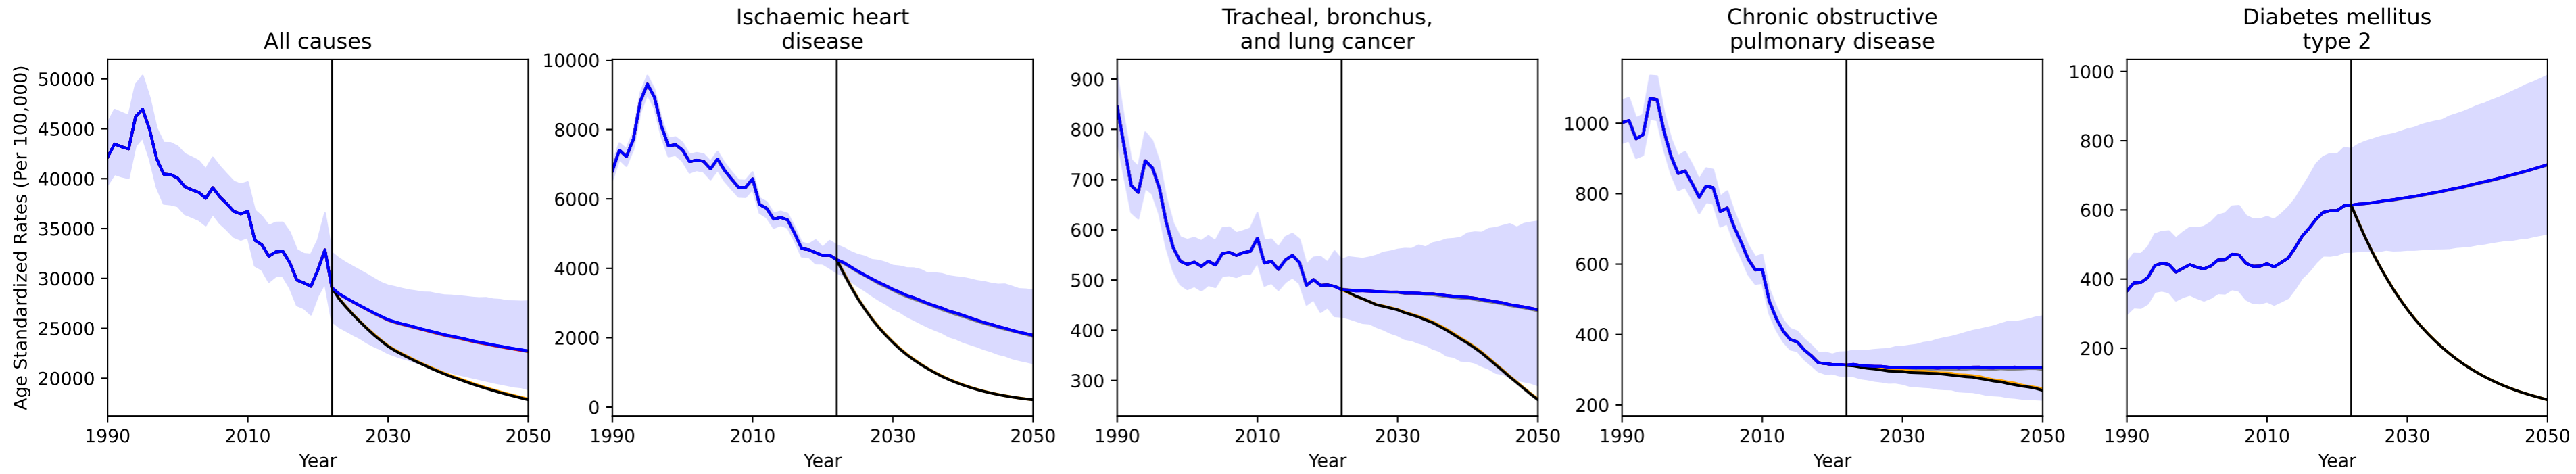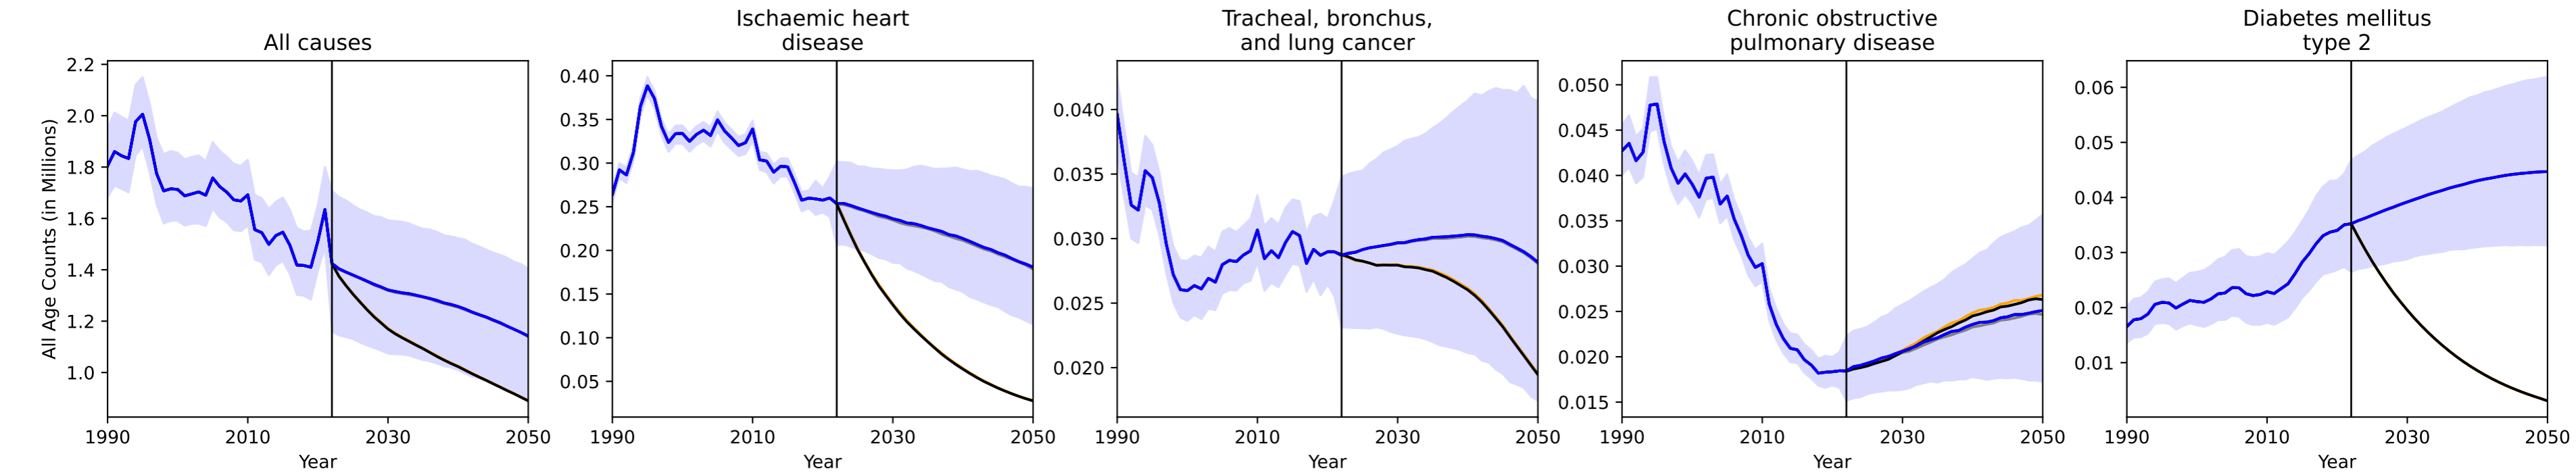



# Russia

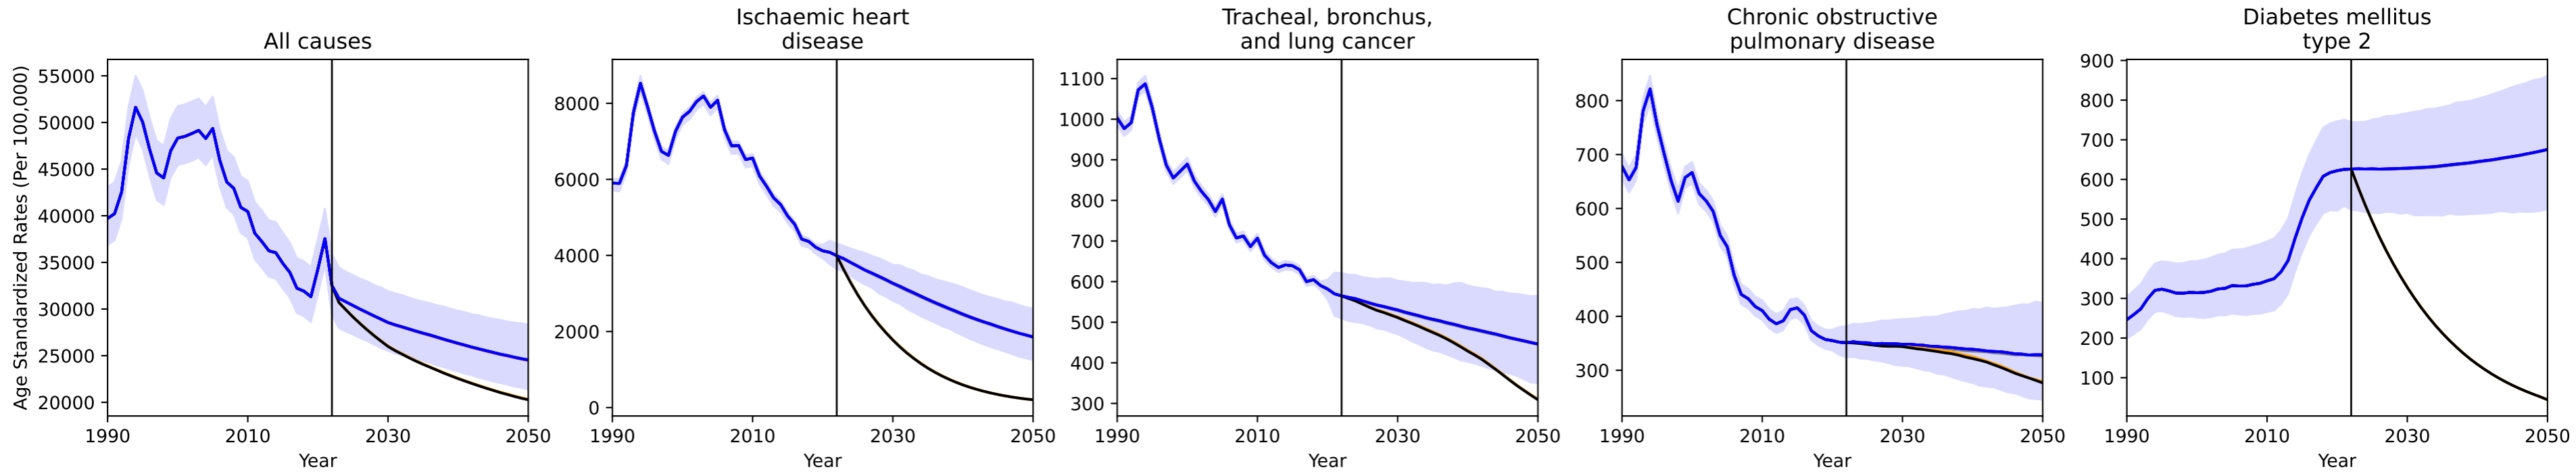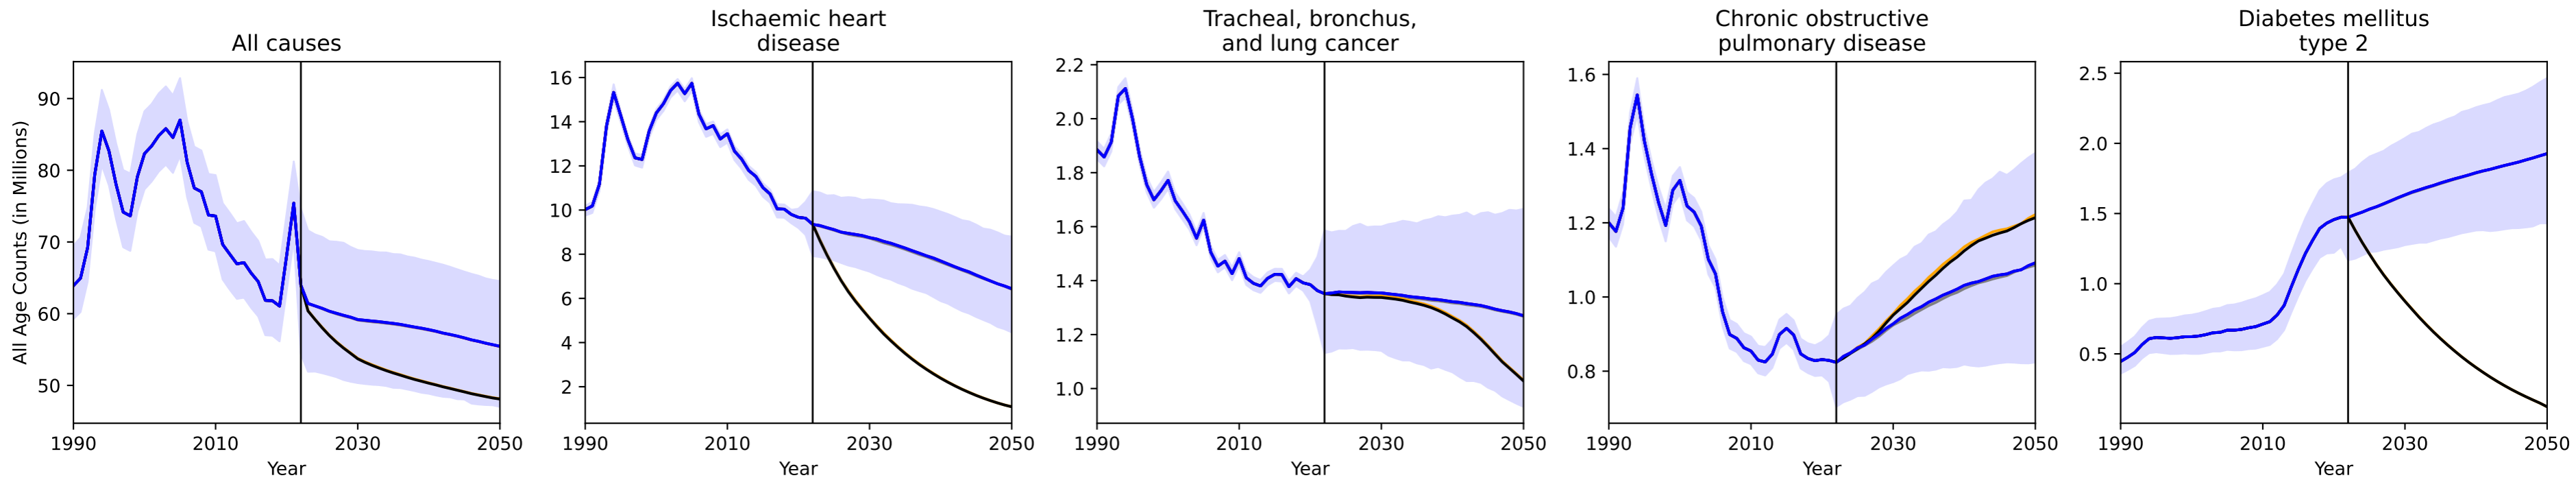

# Ukraine

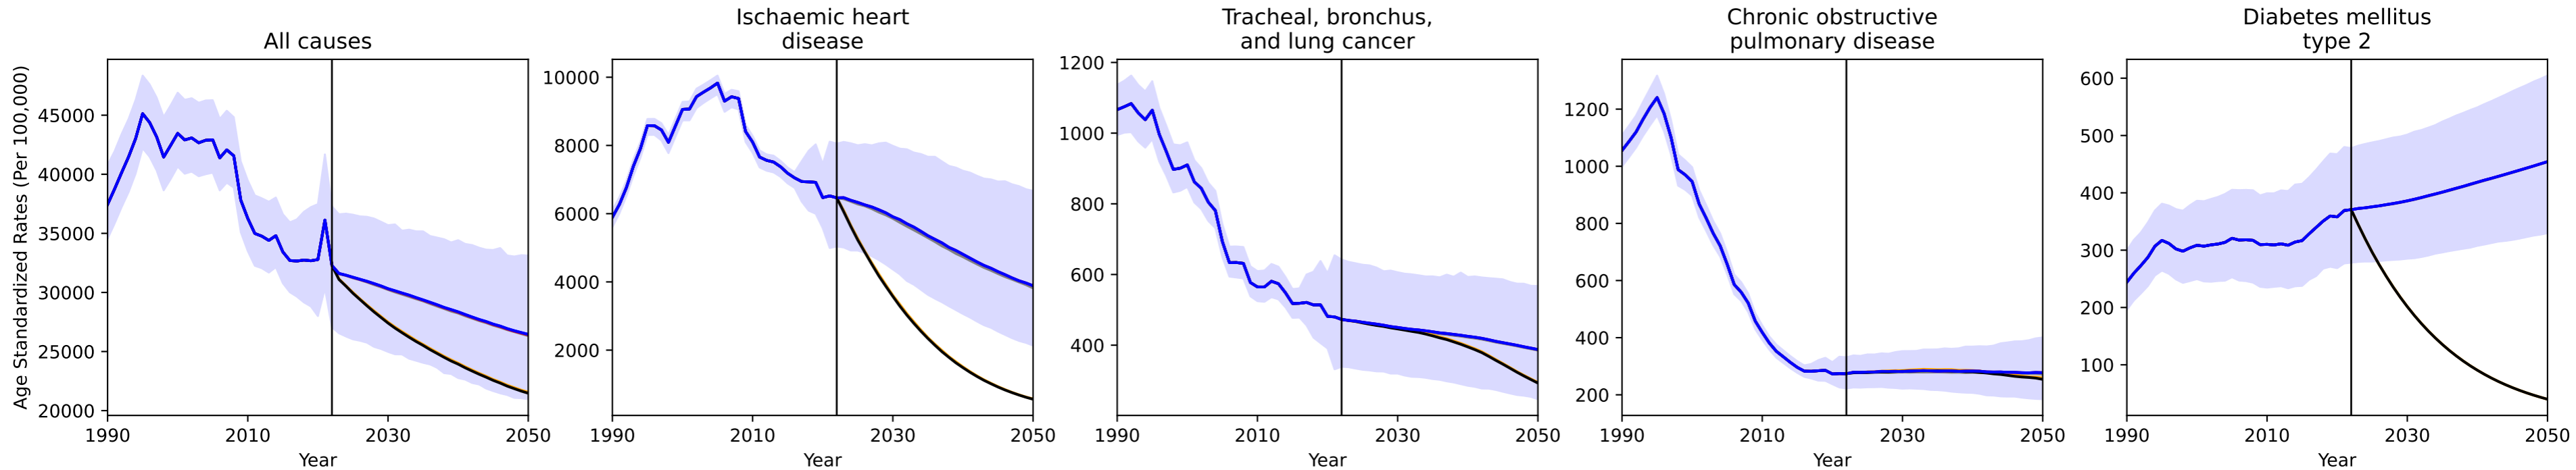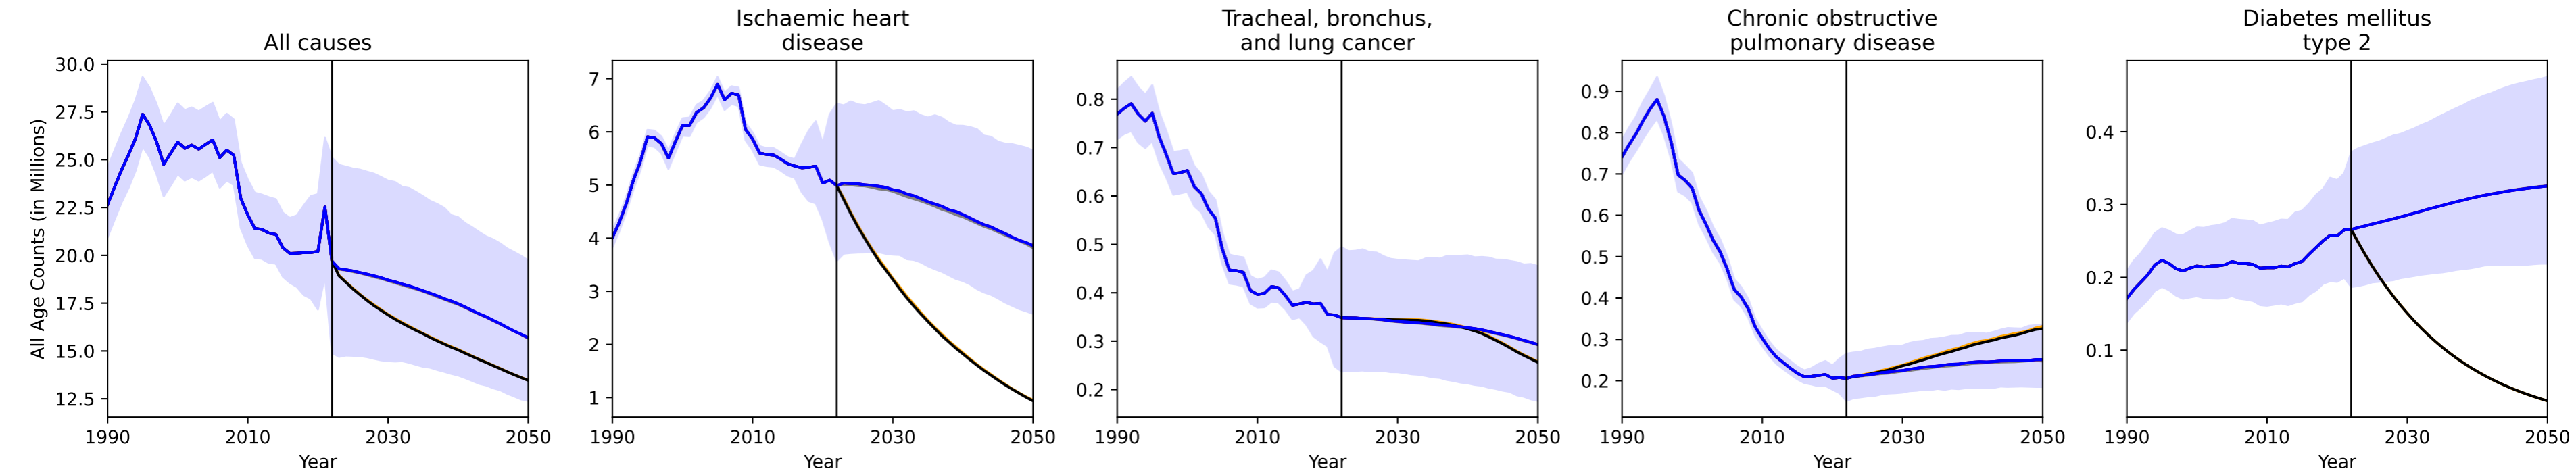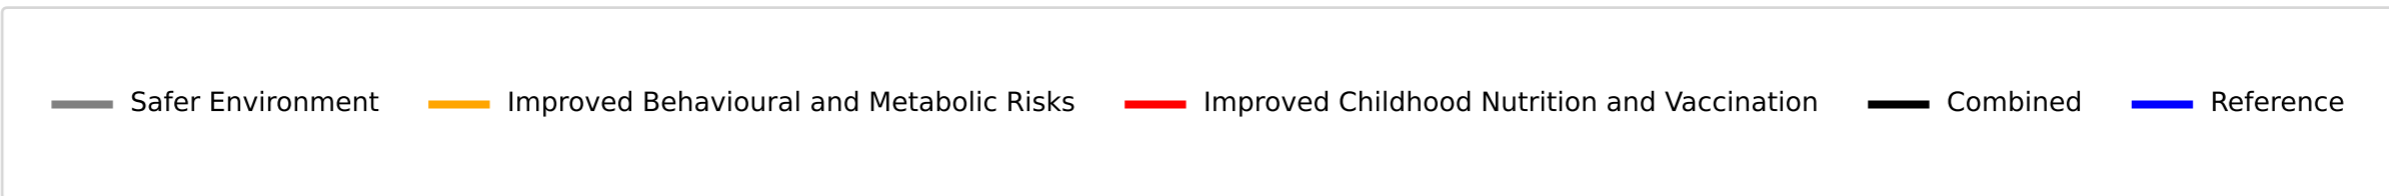

# Australia

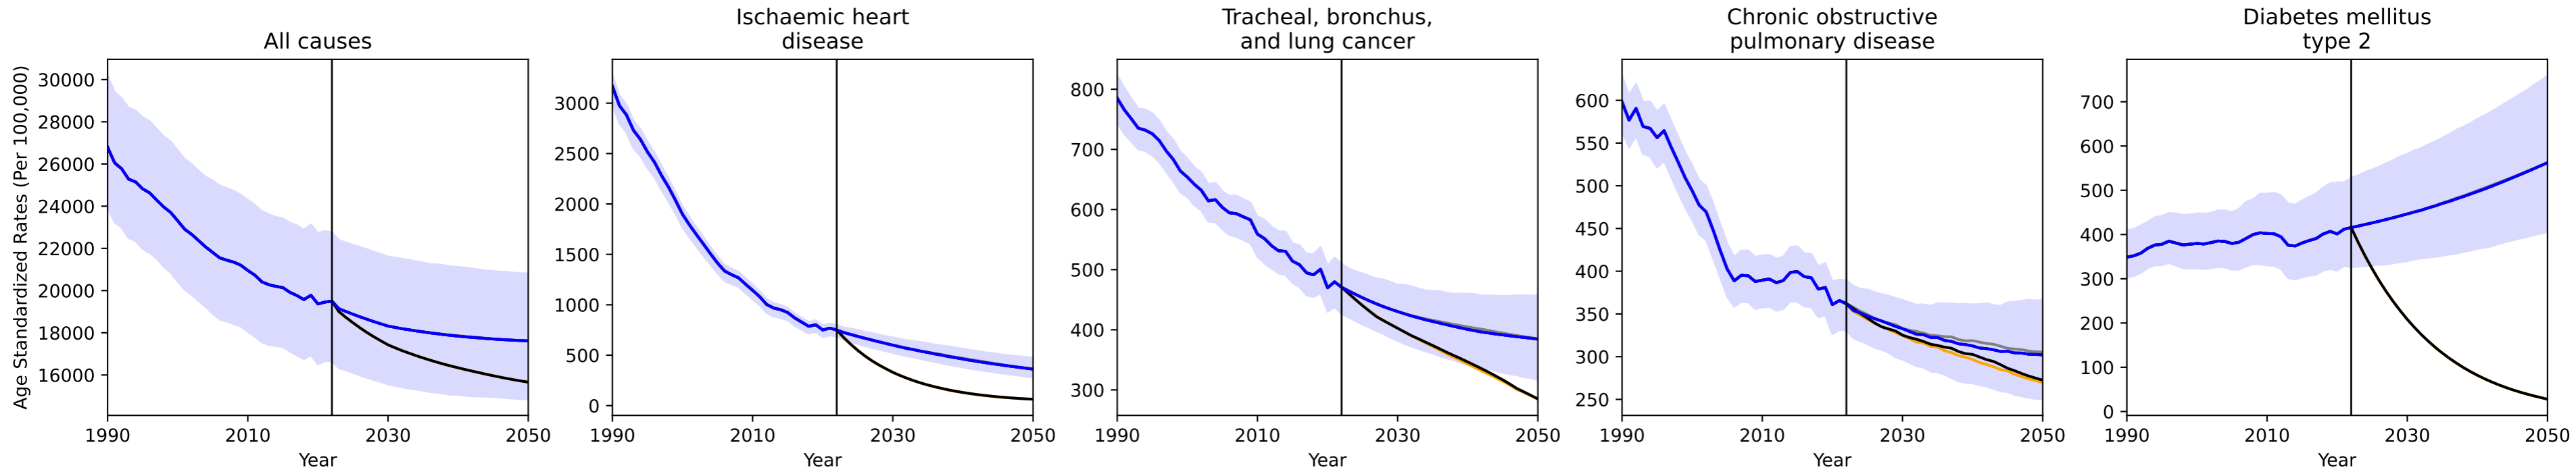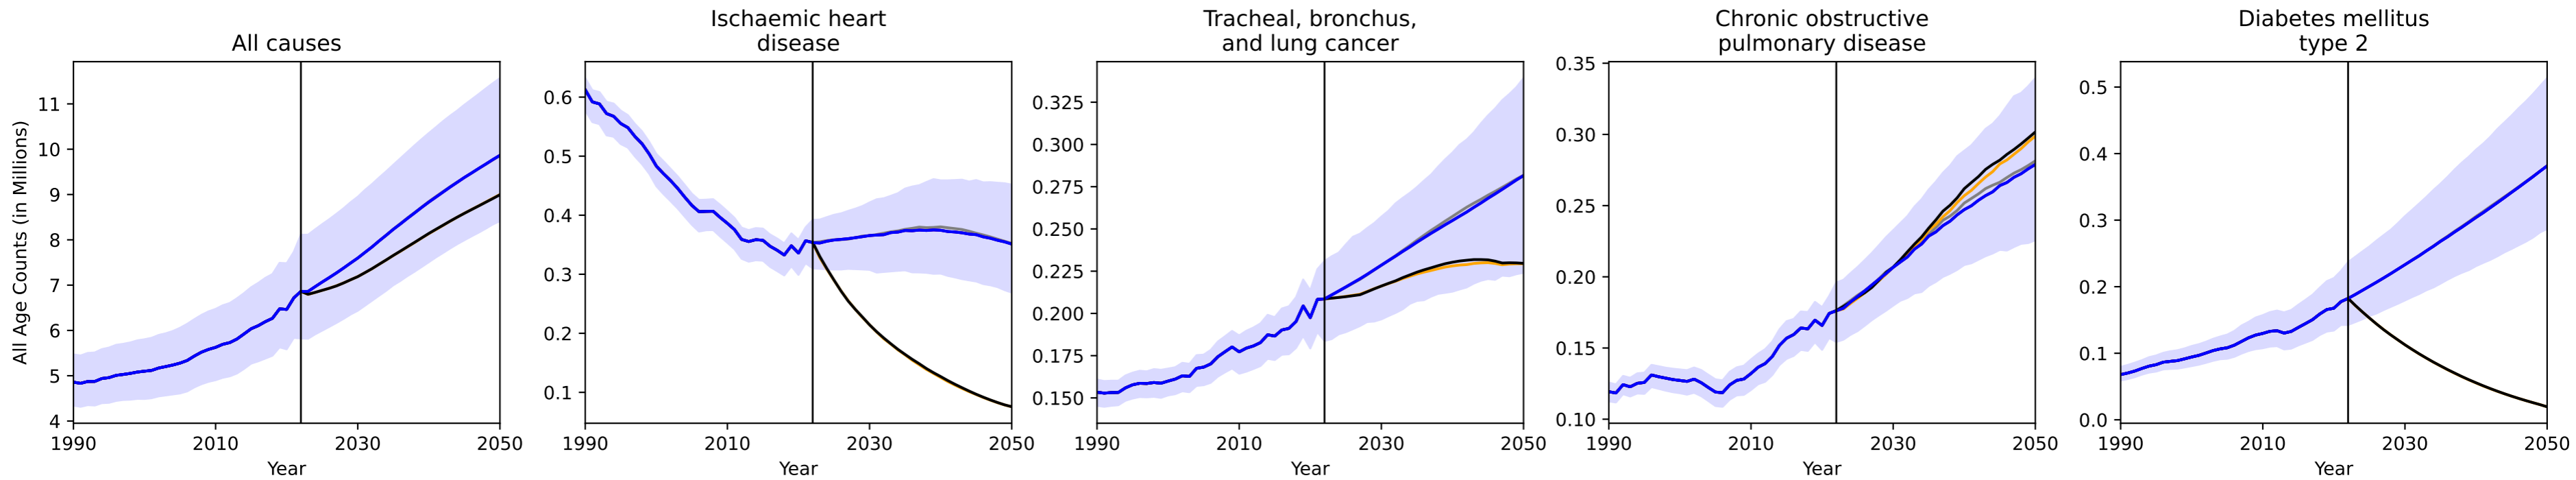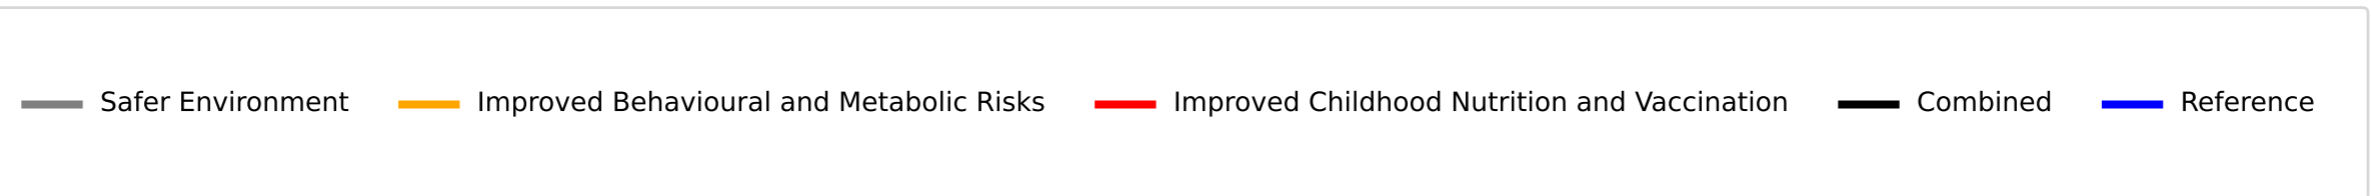

# New Zealand

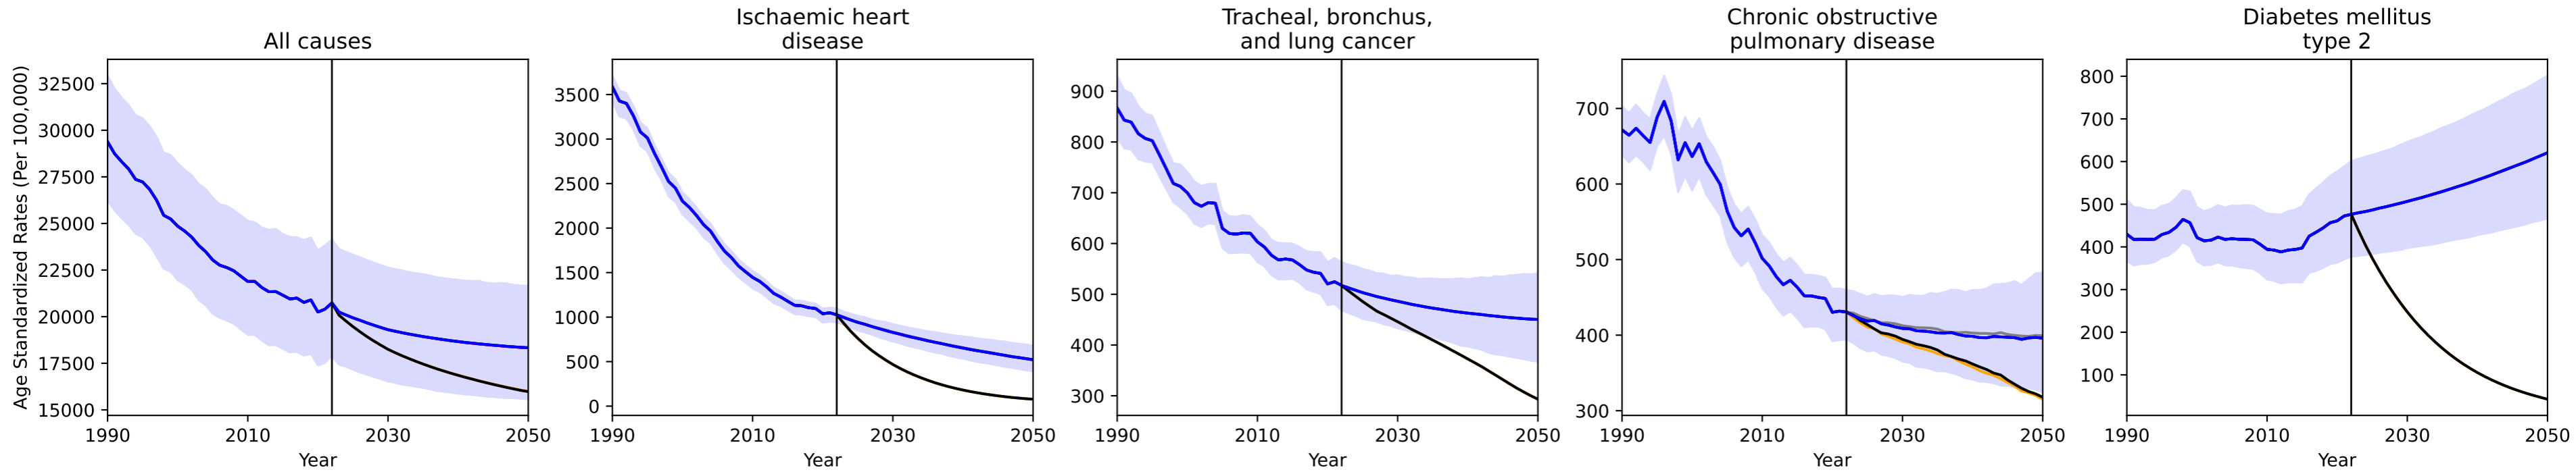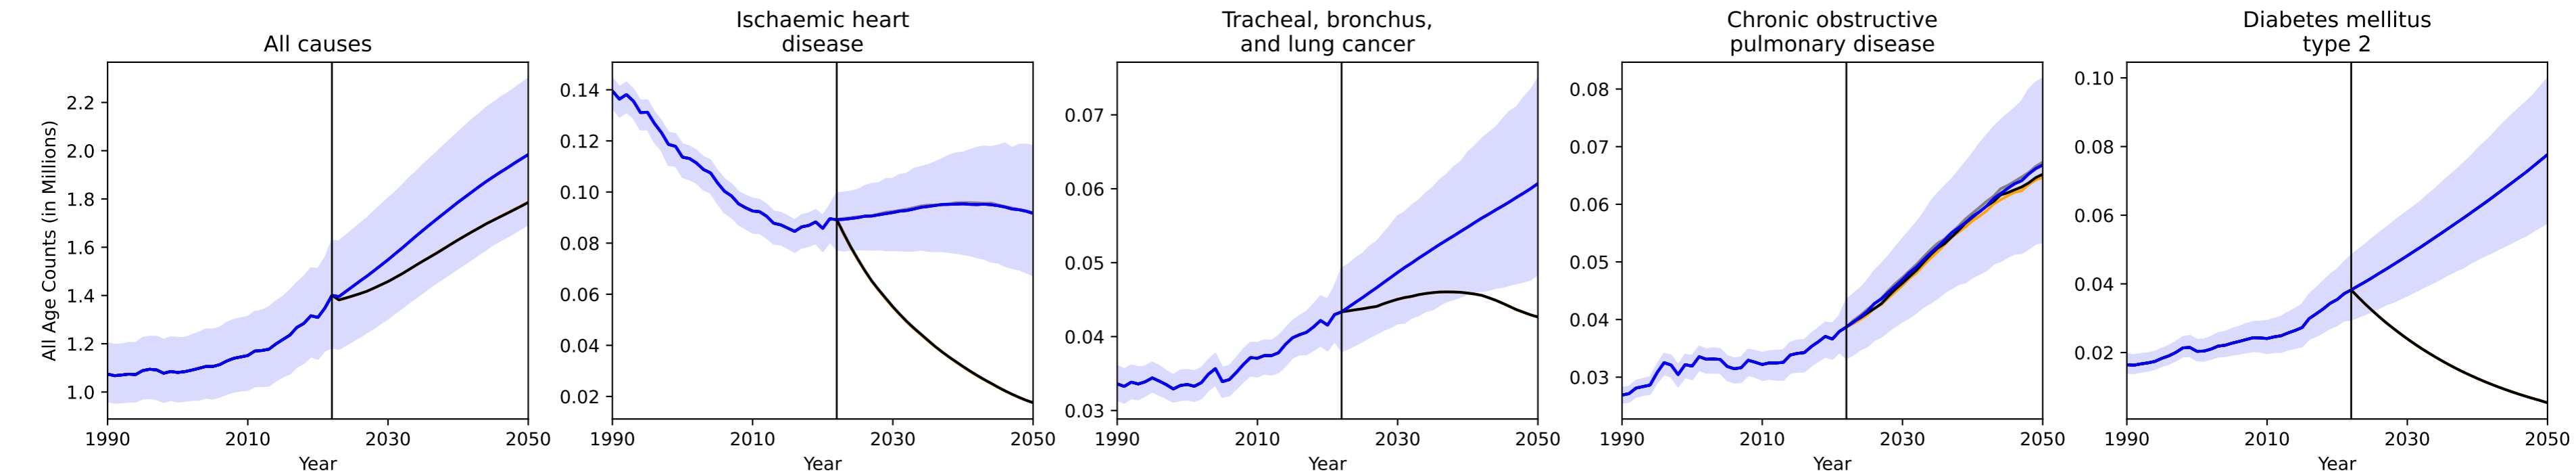

# Brunei

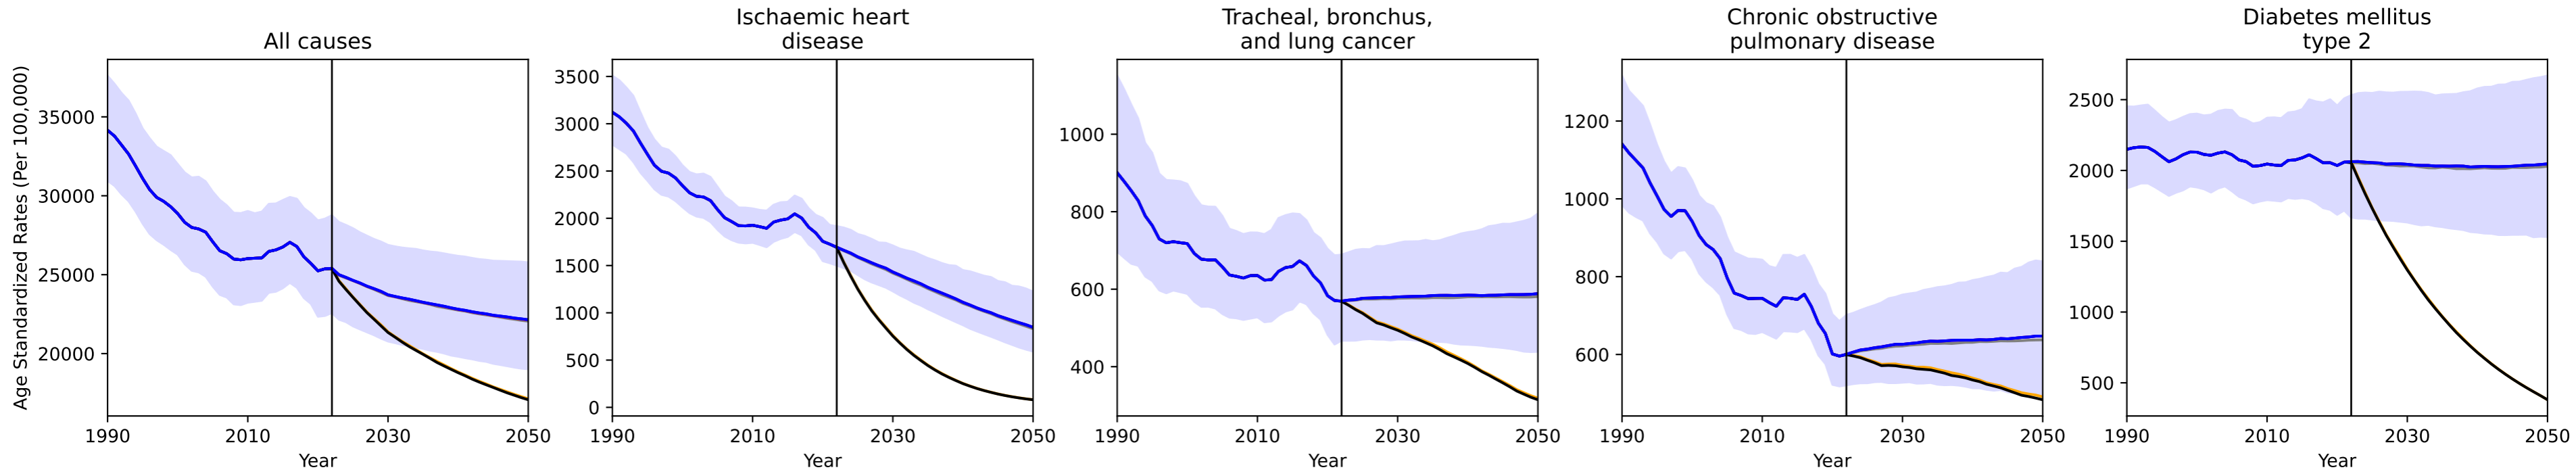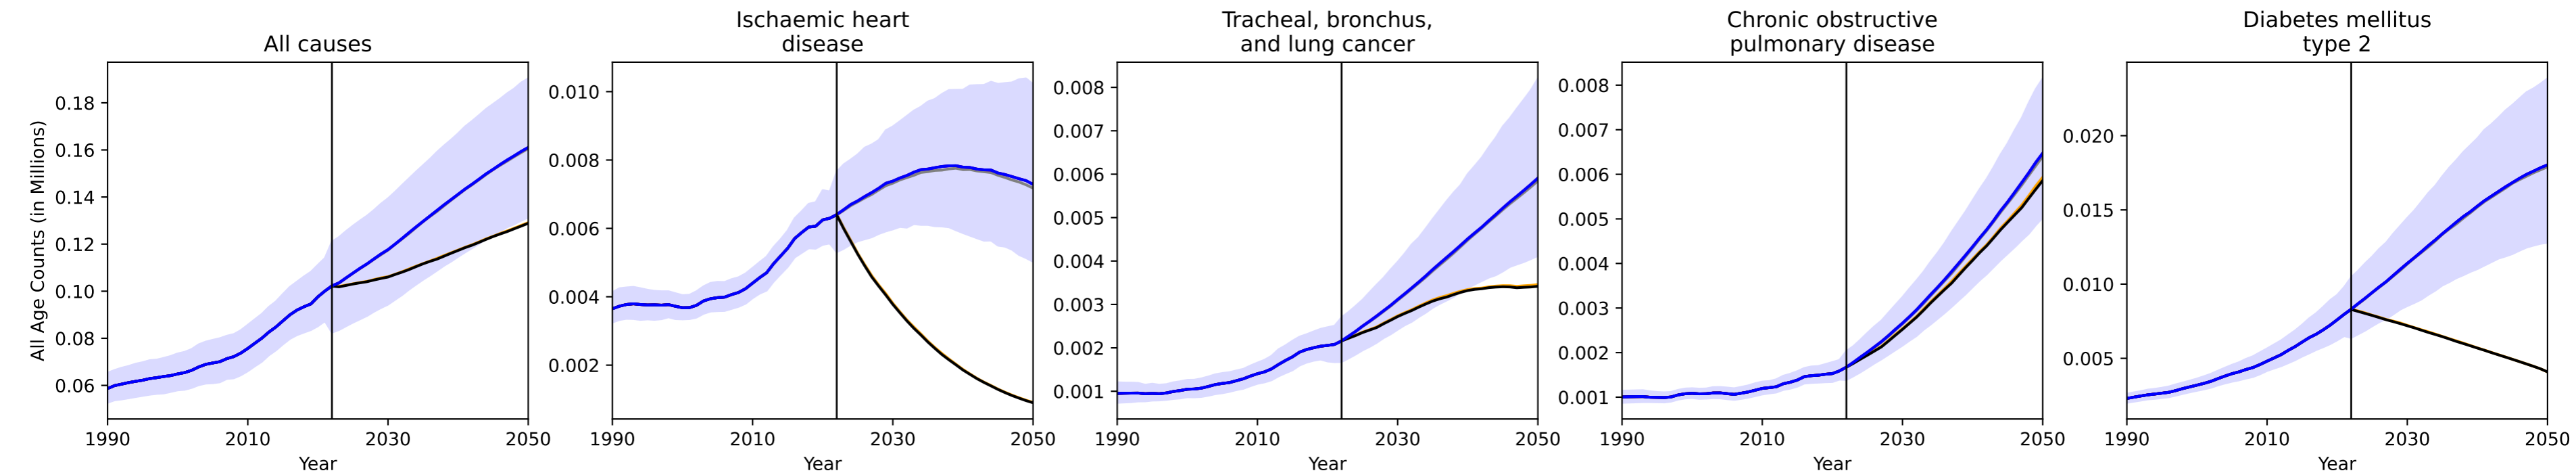

# Japan

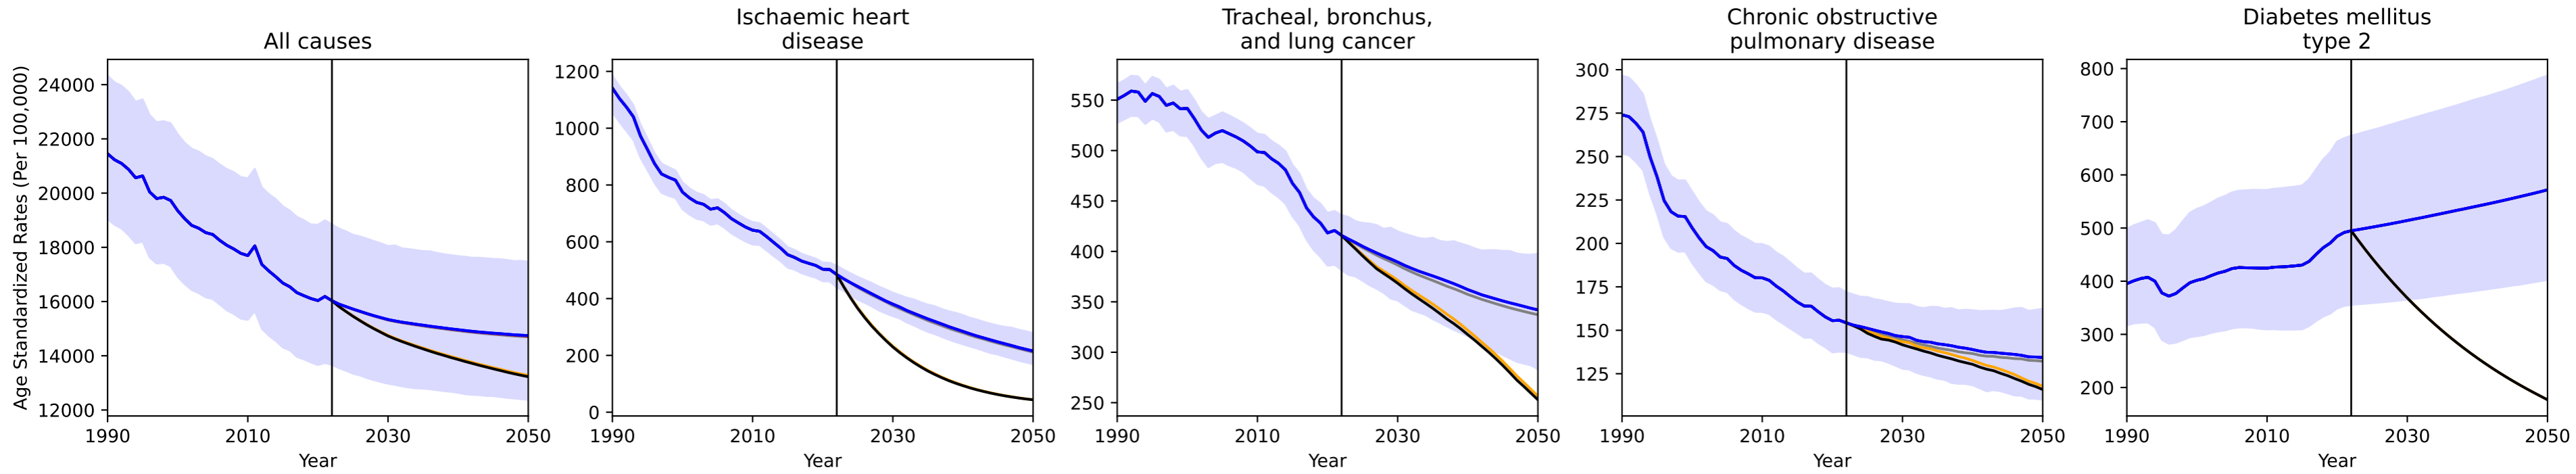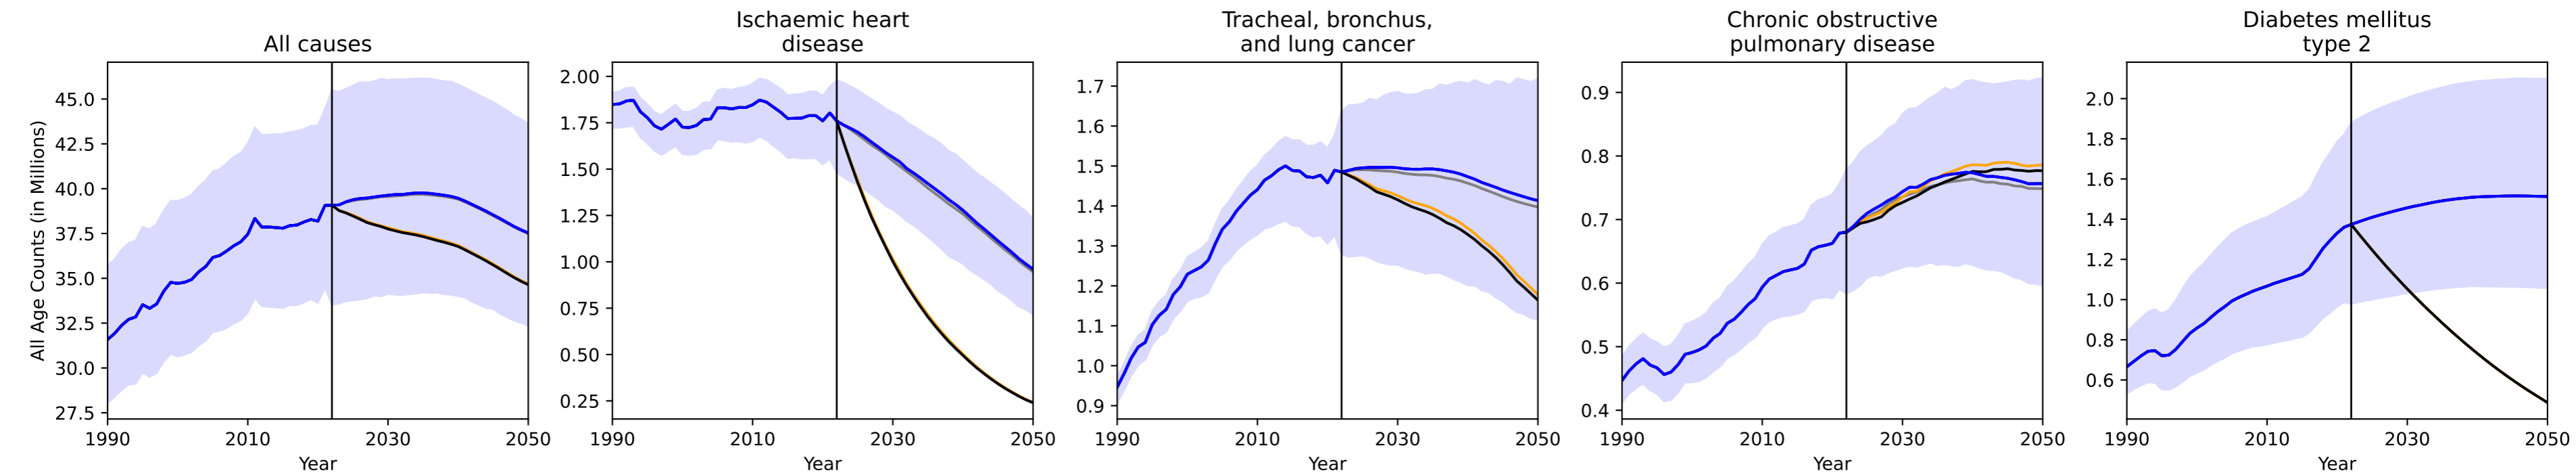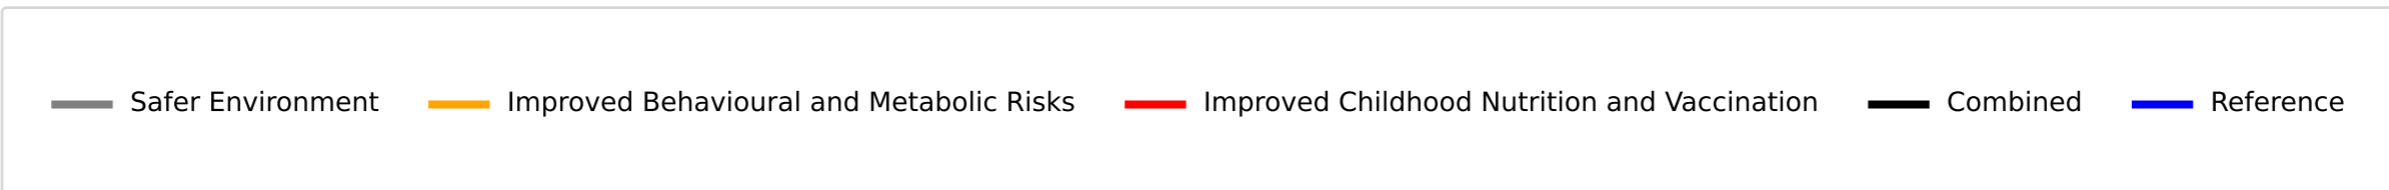

# South Korea

Supplemental Results Figure S12. All cause and top NCD causes age standardized DALY rates and all age counts by scenario and location, 1990-2050

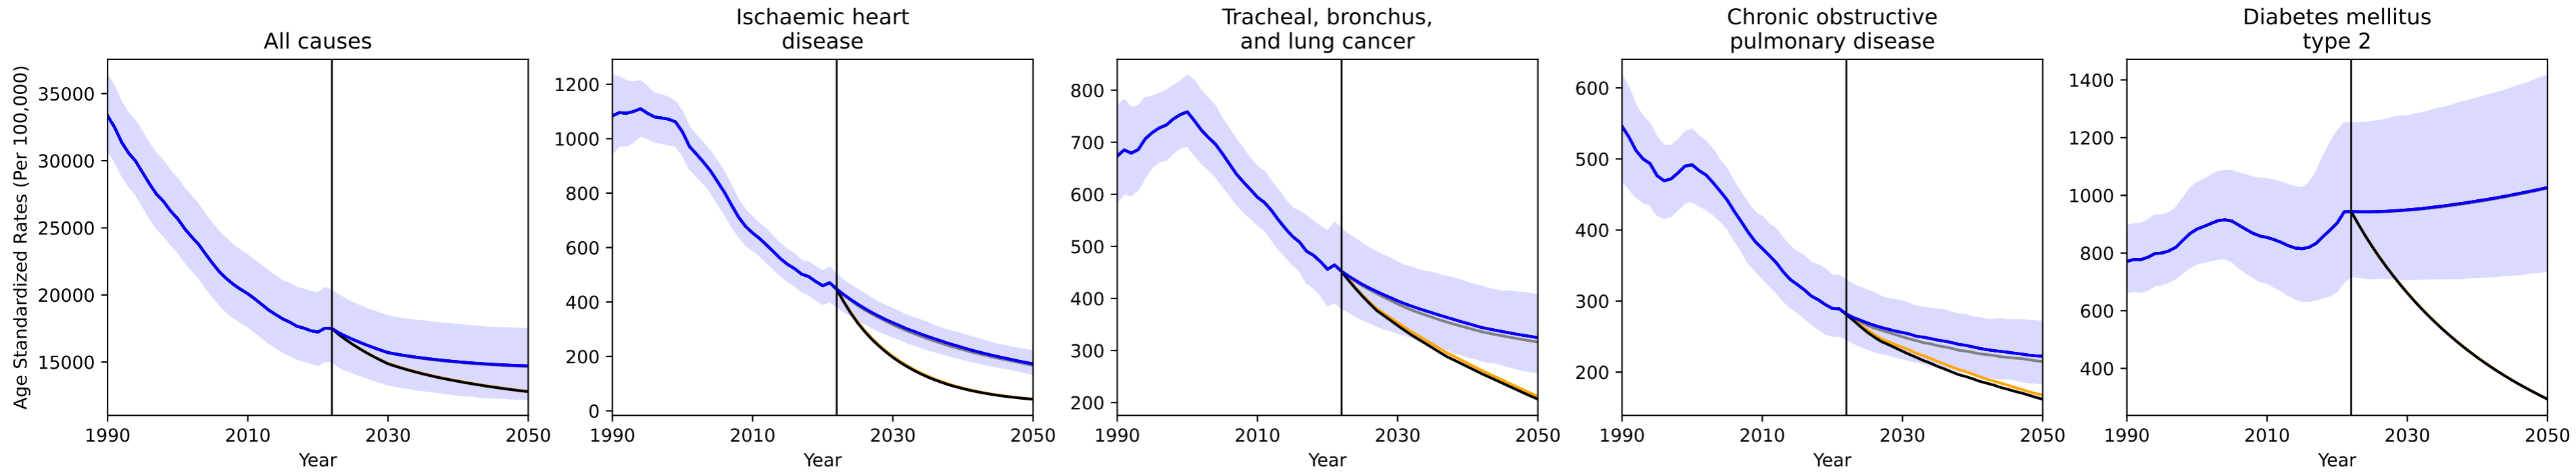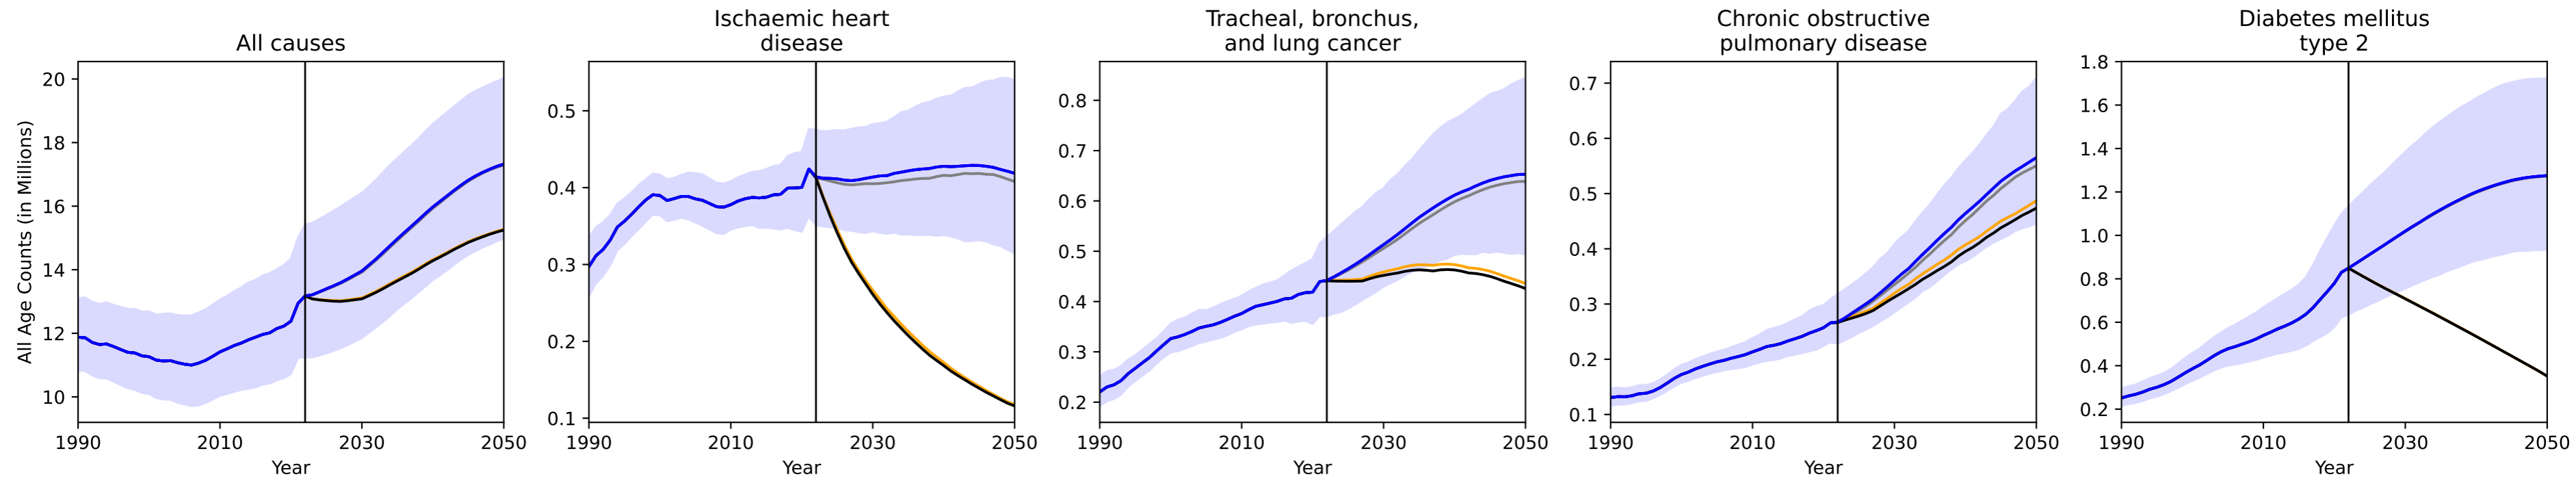

— Safer Environment — Improved Behavioural and Metabolic Risks — Improved Childhood Nutrition and Vaccination — Combined — Reference

# Singapore

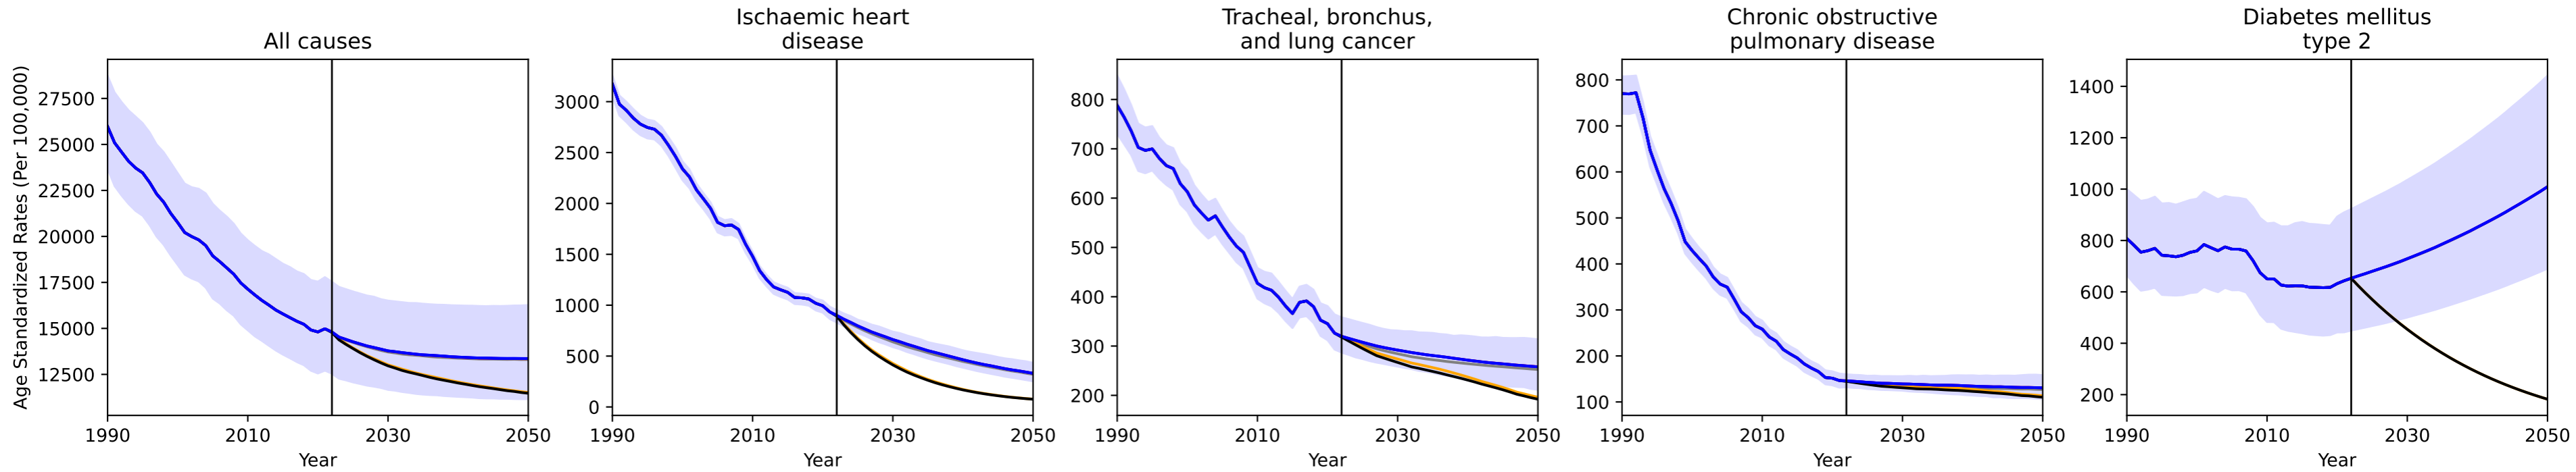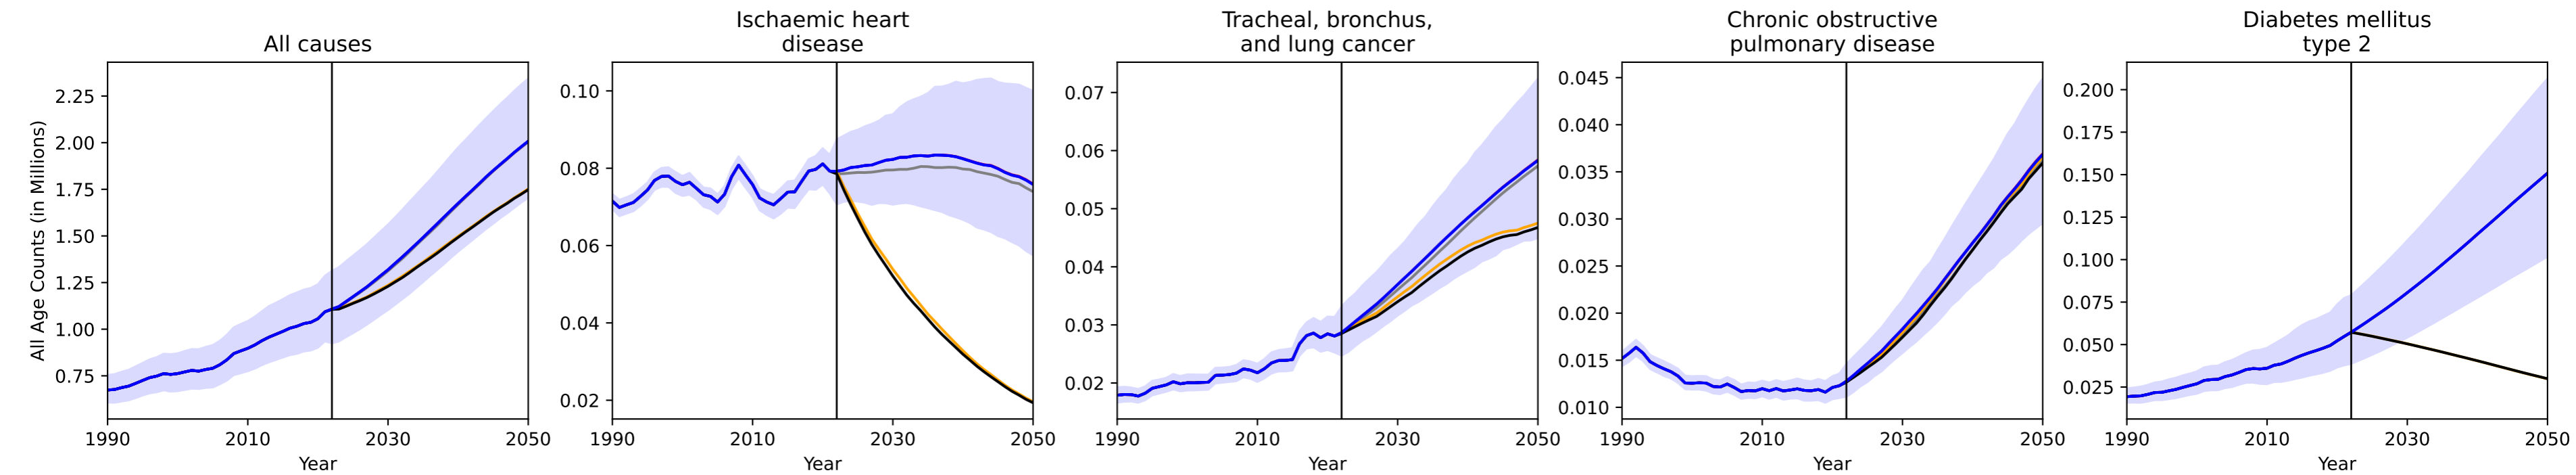



# Canada

Supplemental Results Figure S12. All cause and top NCD causes age standardized DALY rates and all age counts by scenario and location, 1990-2050

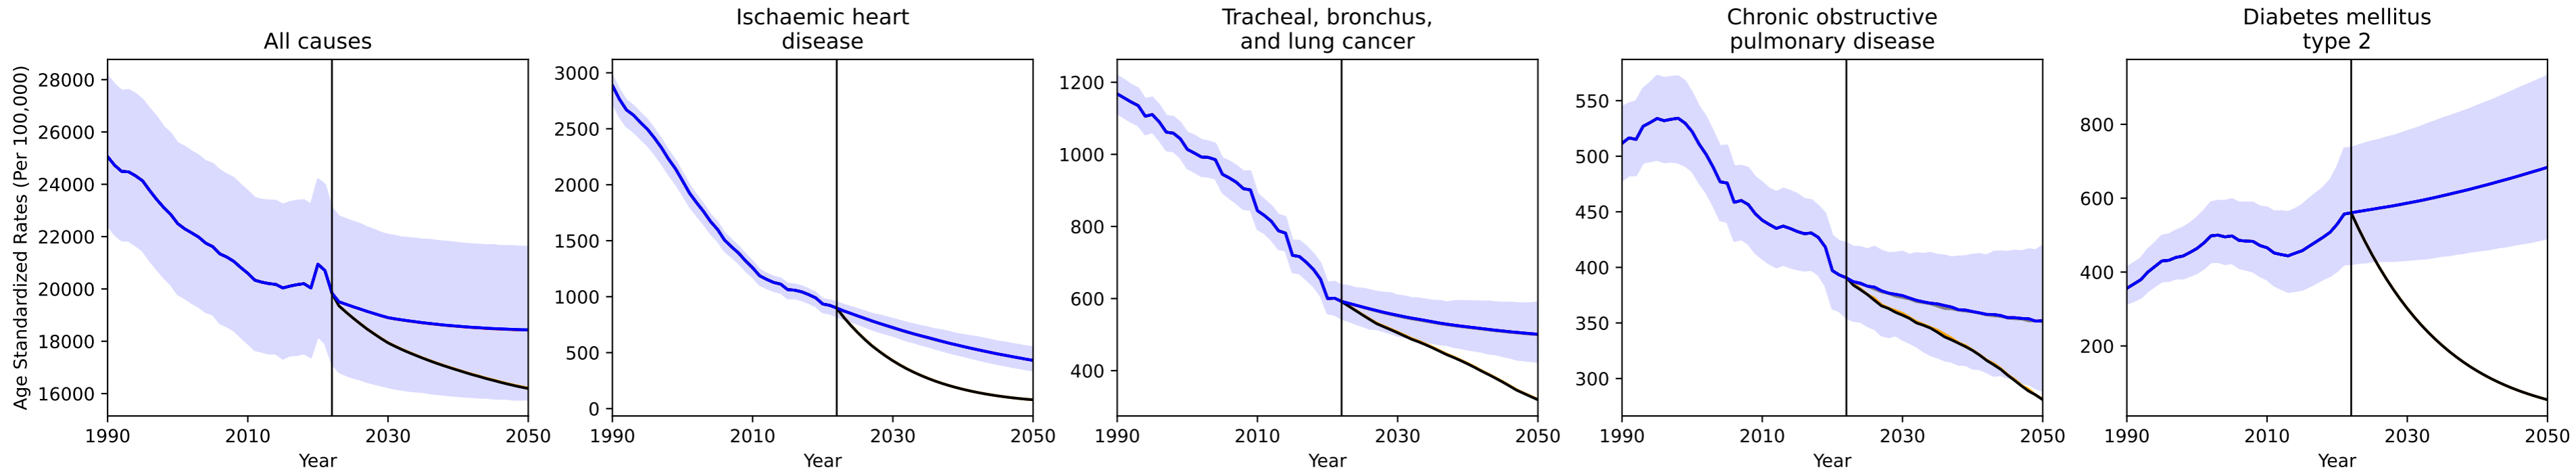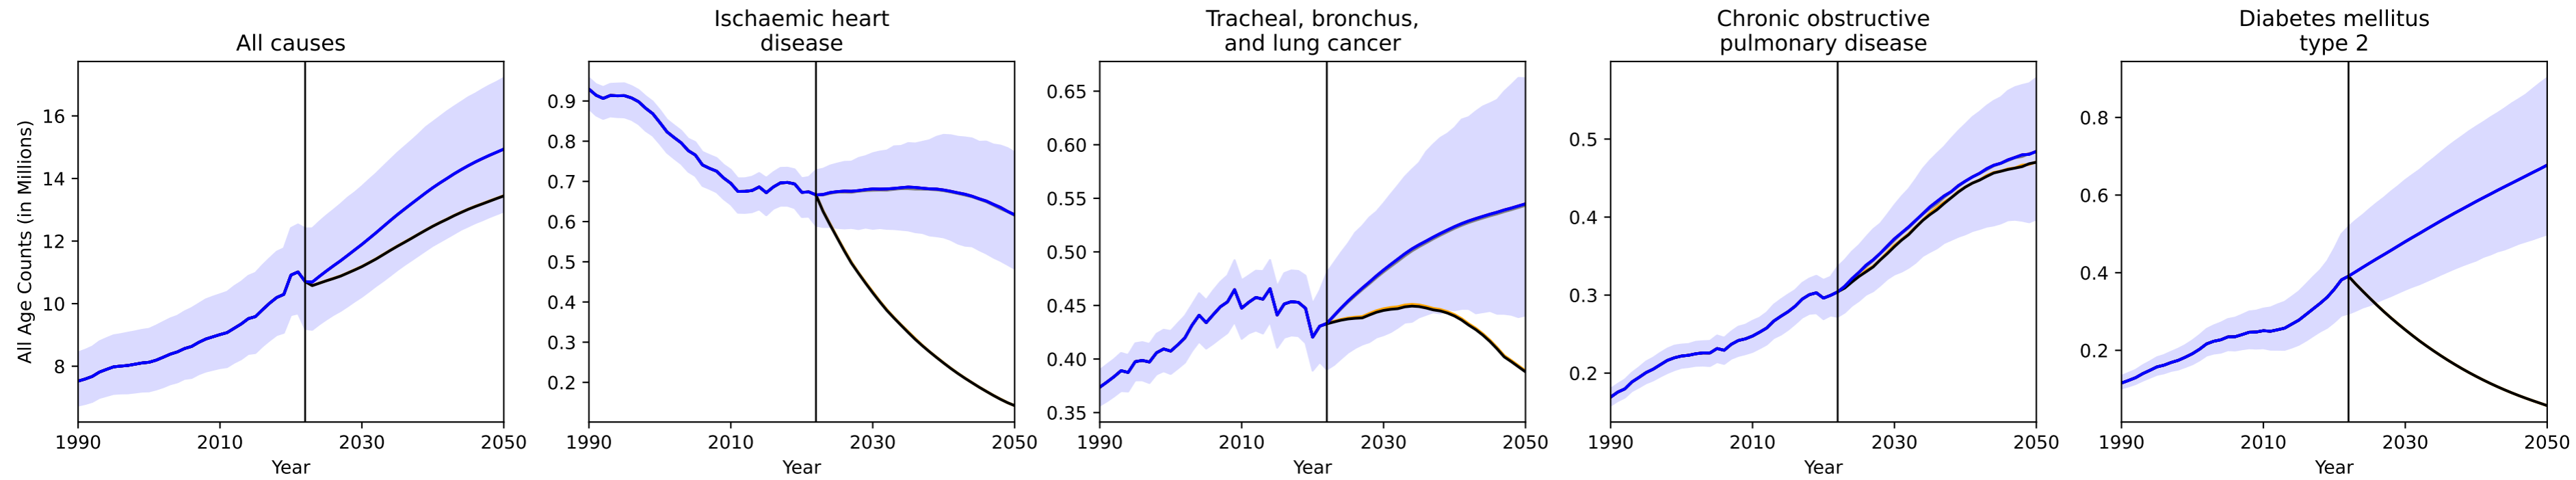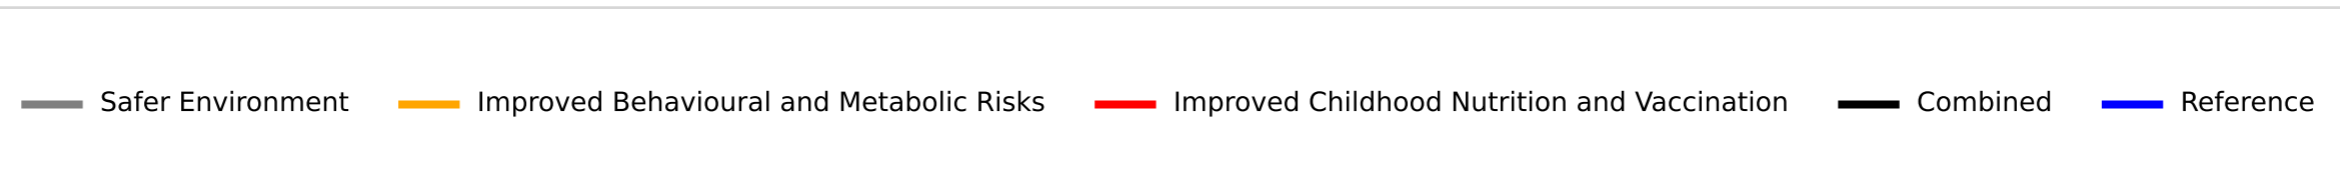

# Greenland

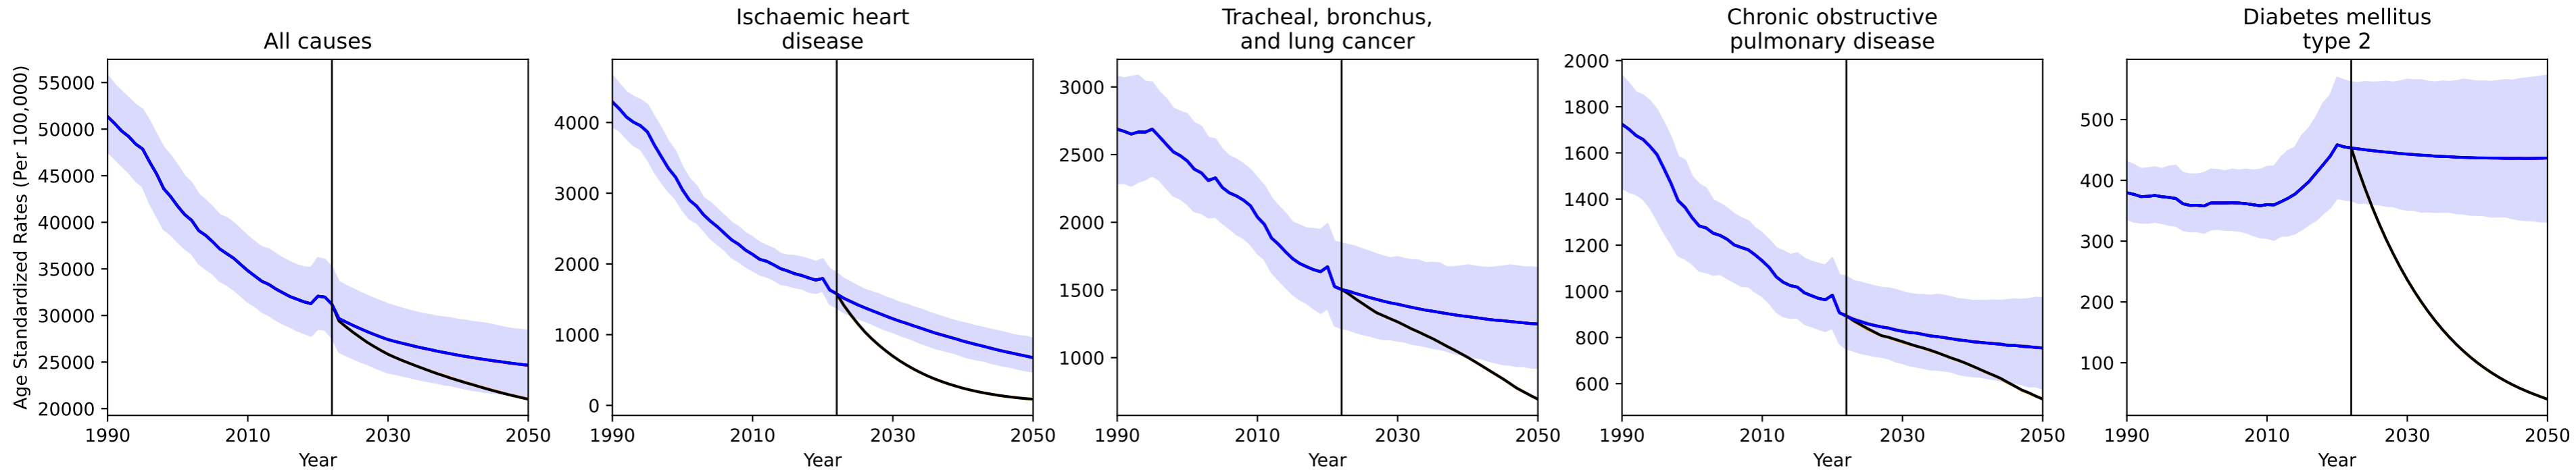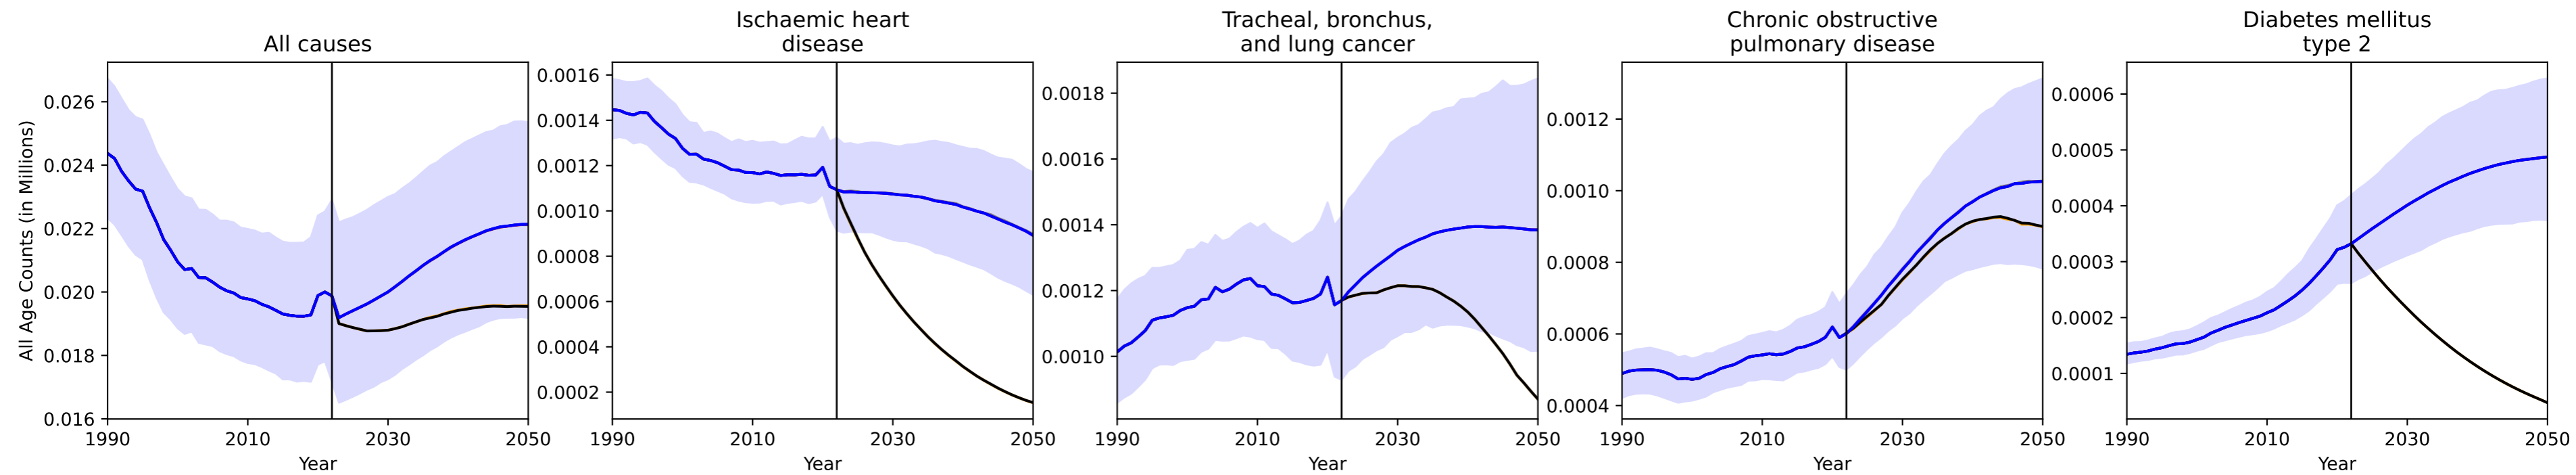

# USA

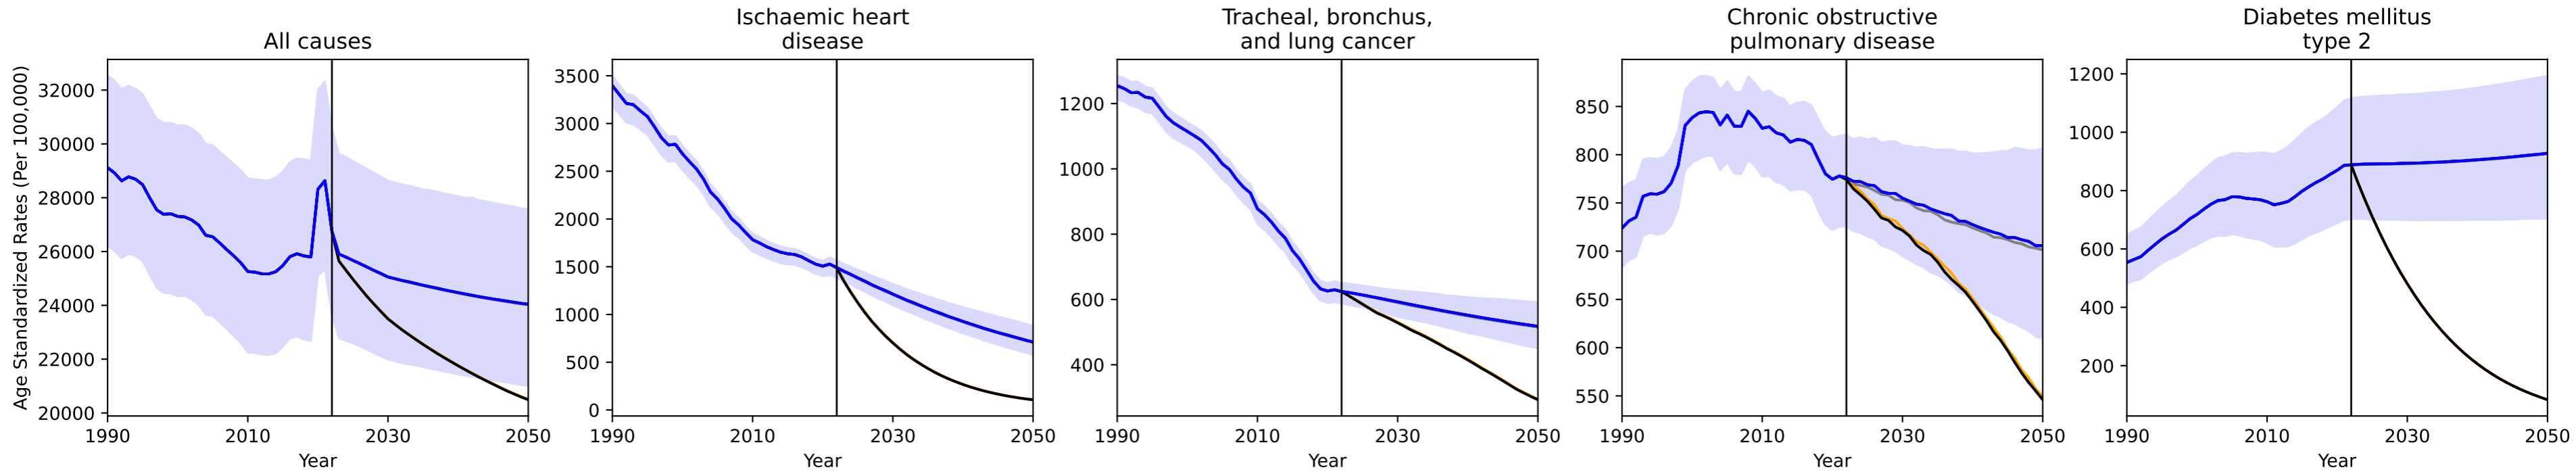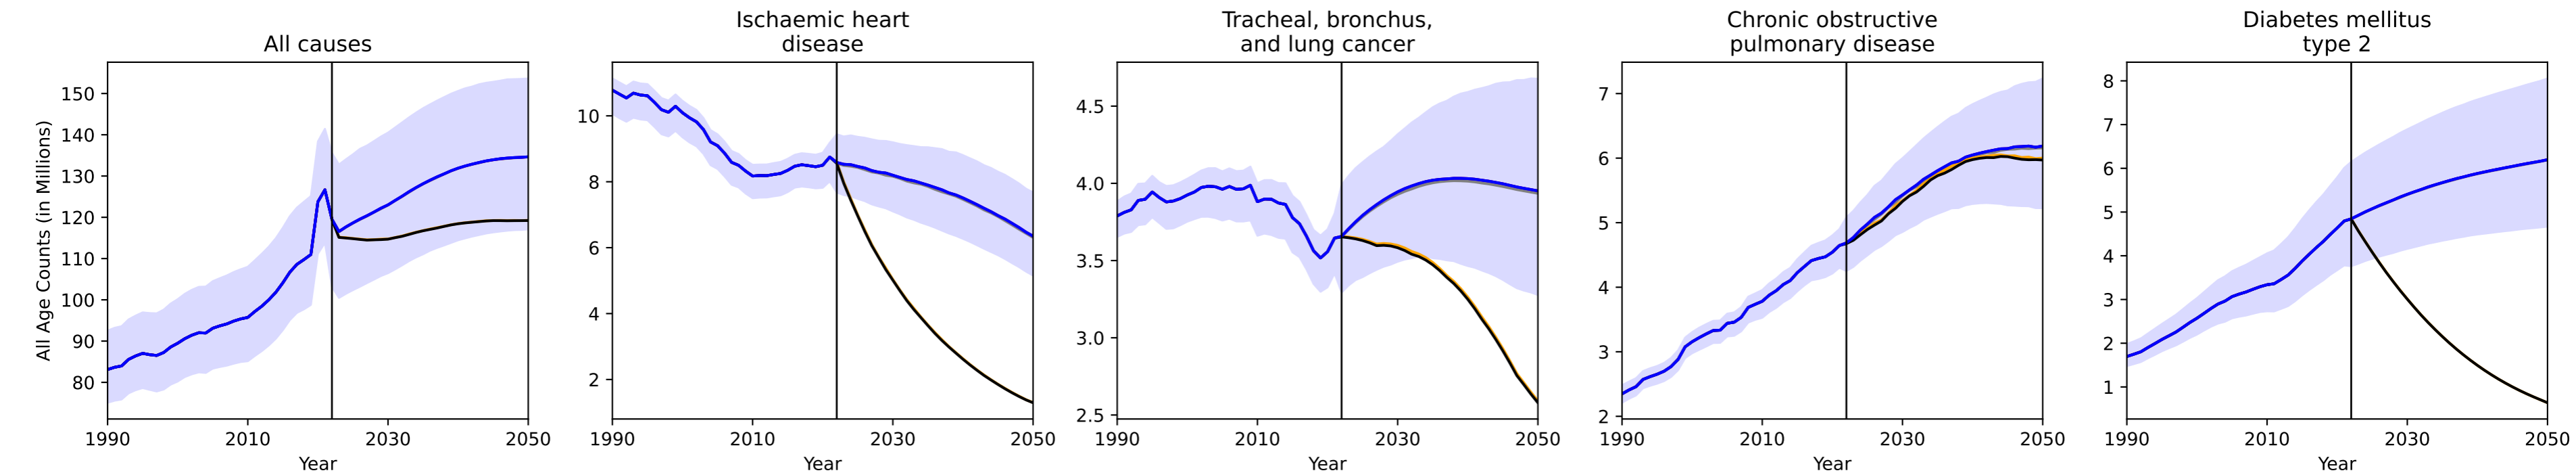

# Argentina

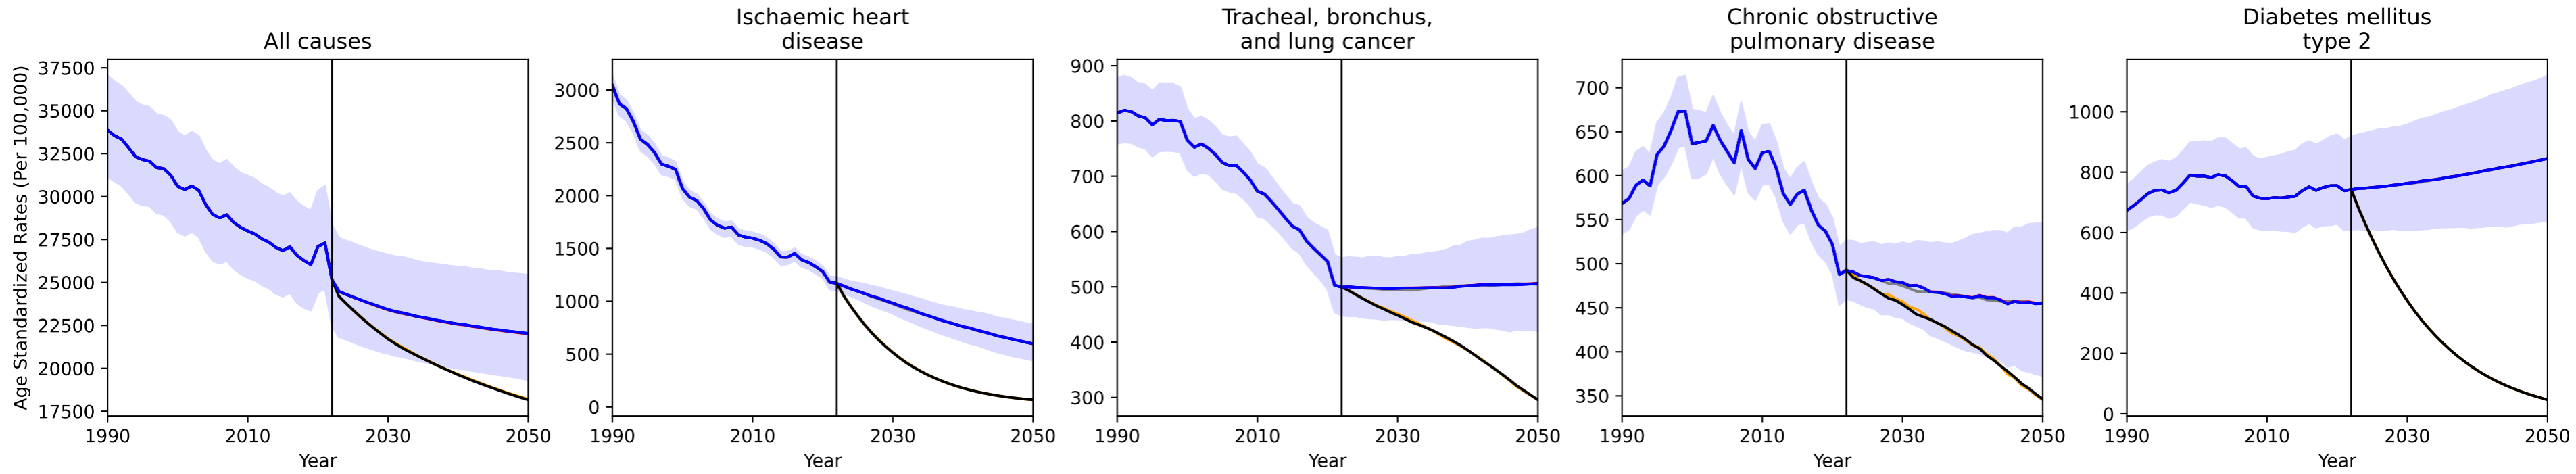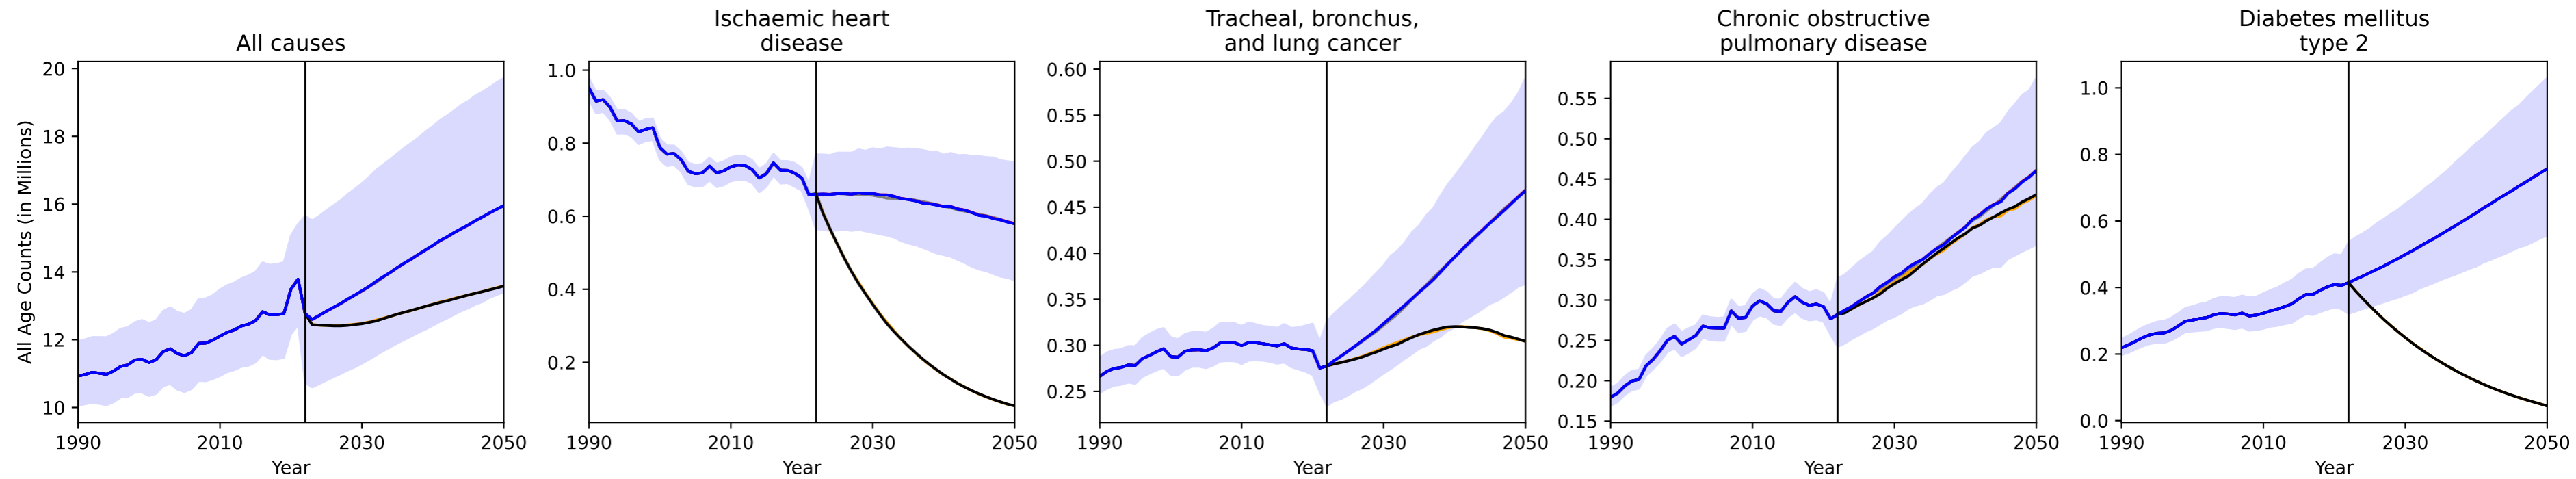

# Chile

Supplemental Results Figure S12. All cause and top NCD causes age standardized DALY rates and all age counts by scenario and location, 1990-2050

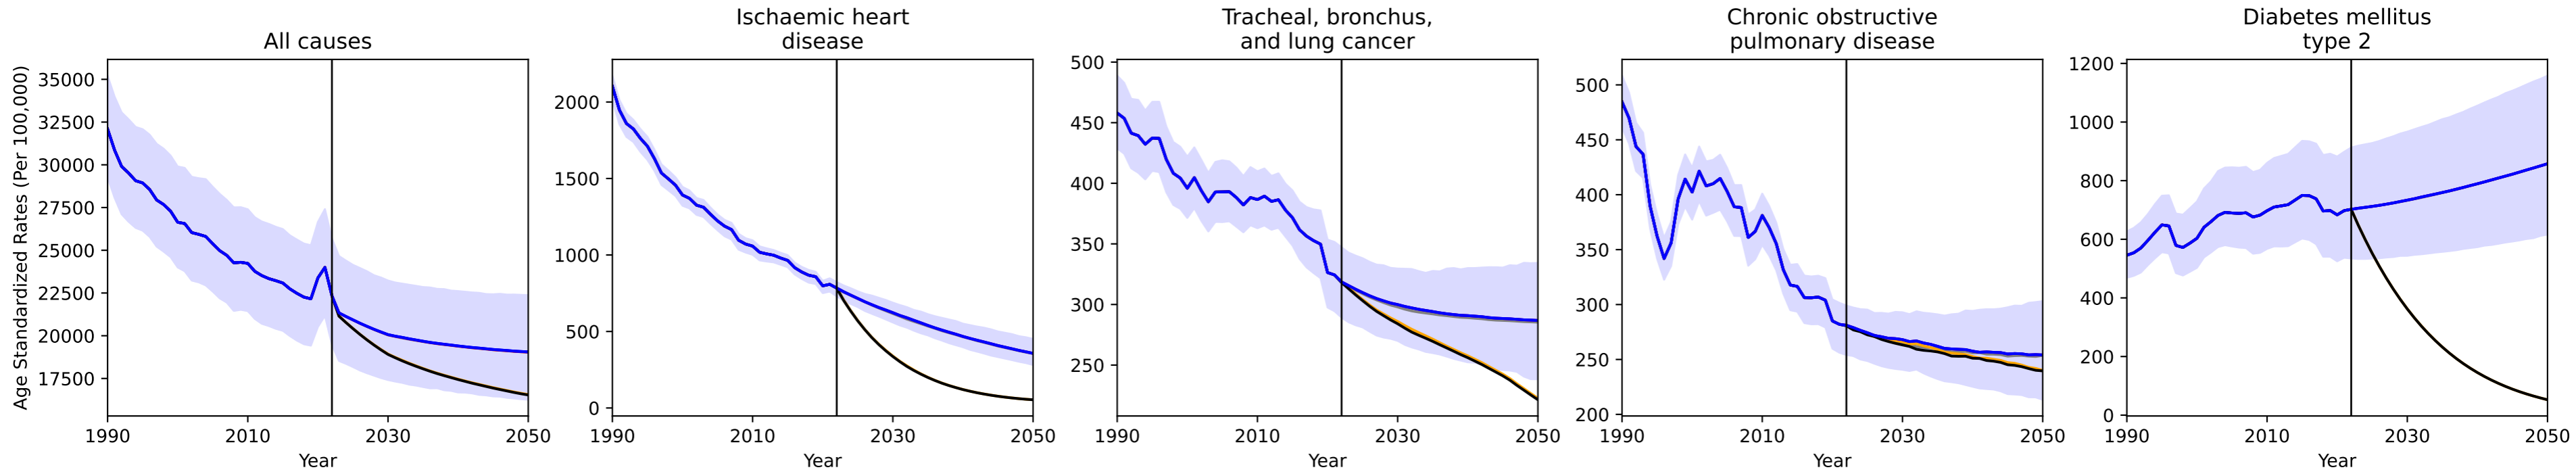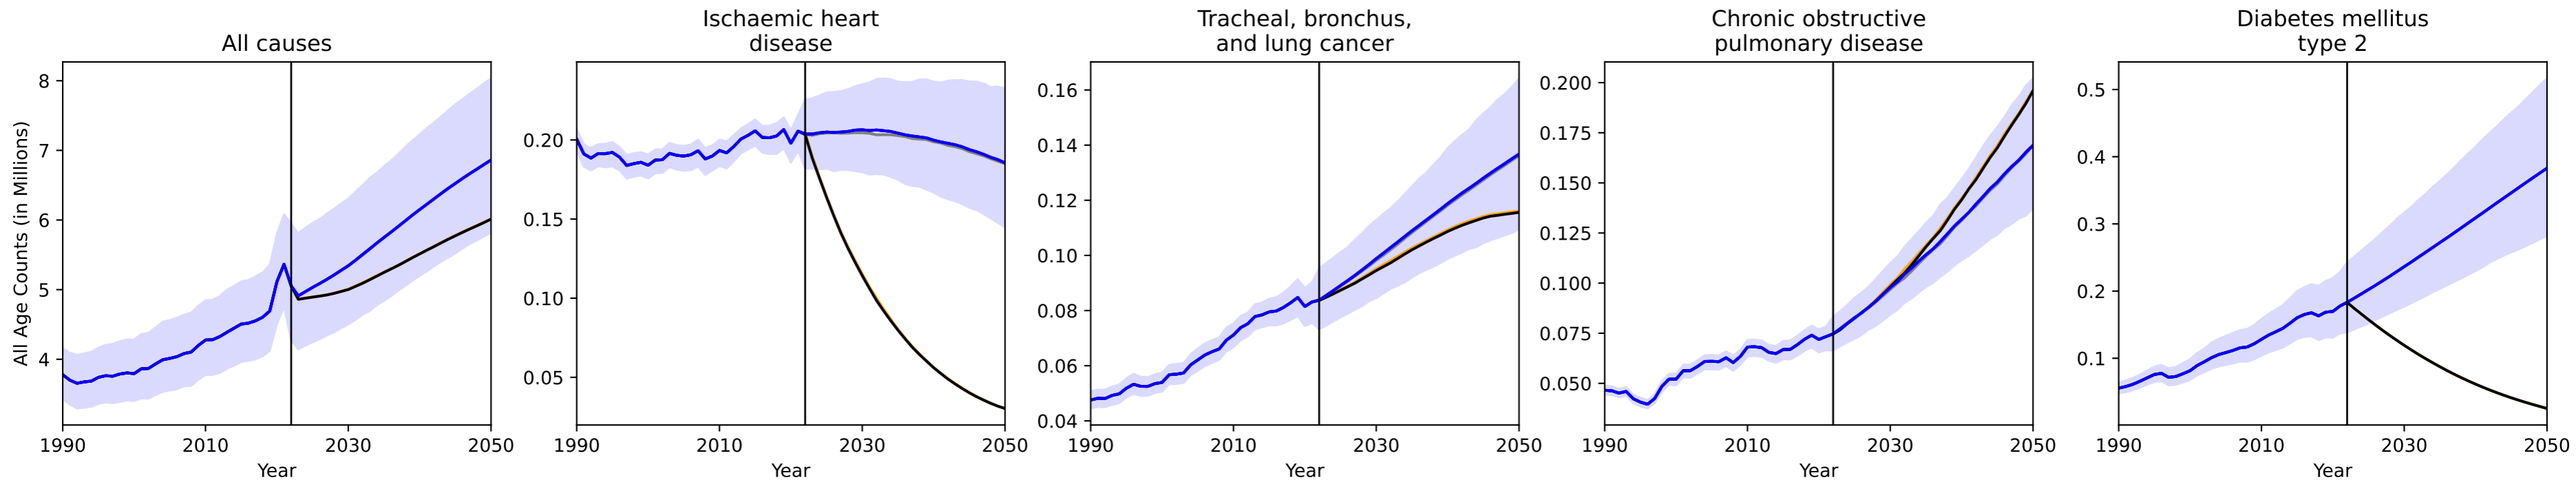

# Uruguay

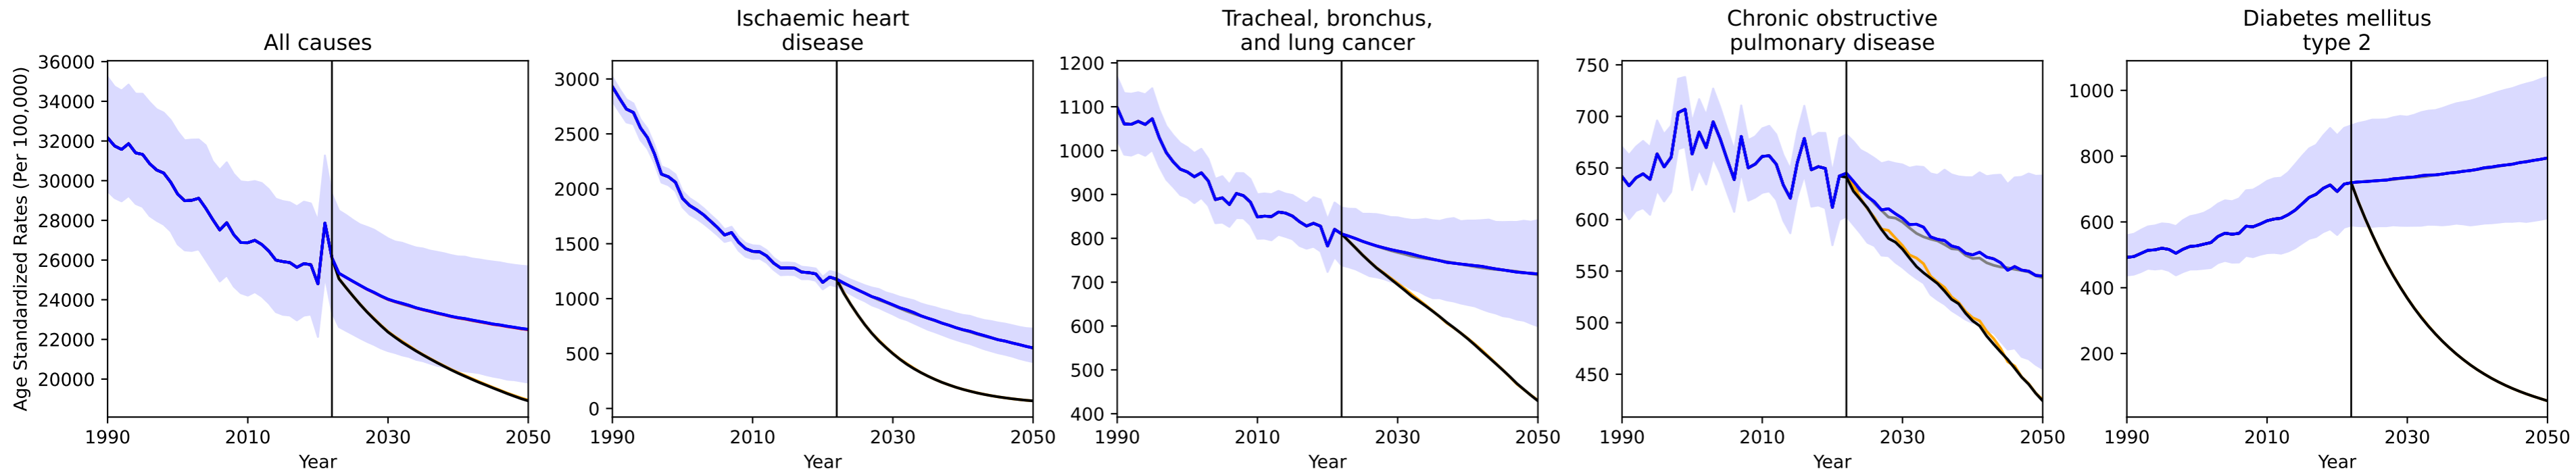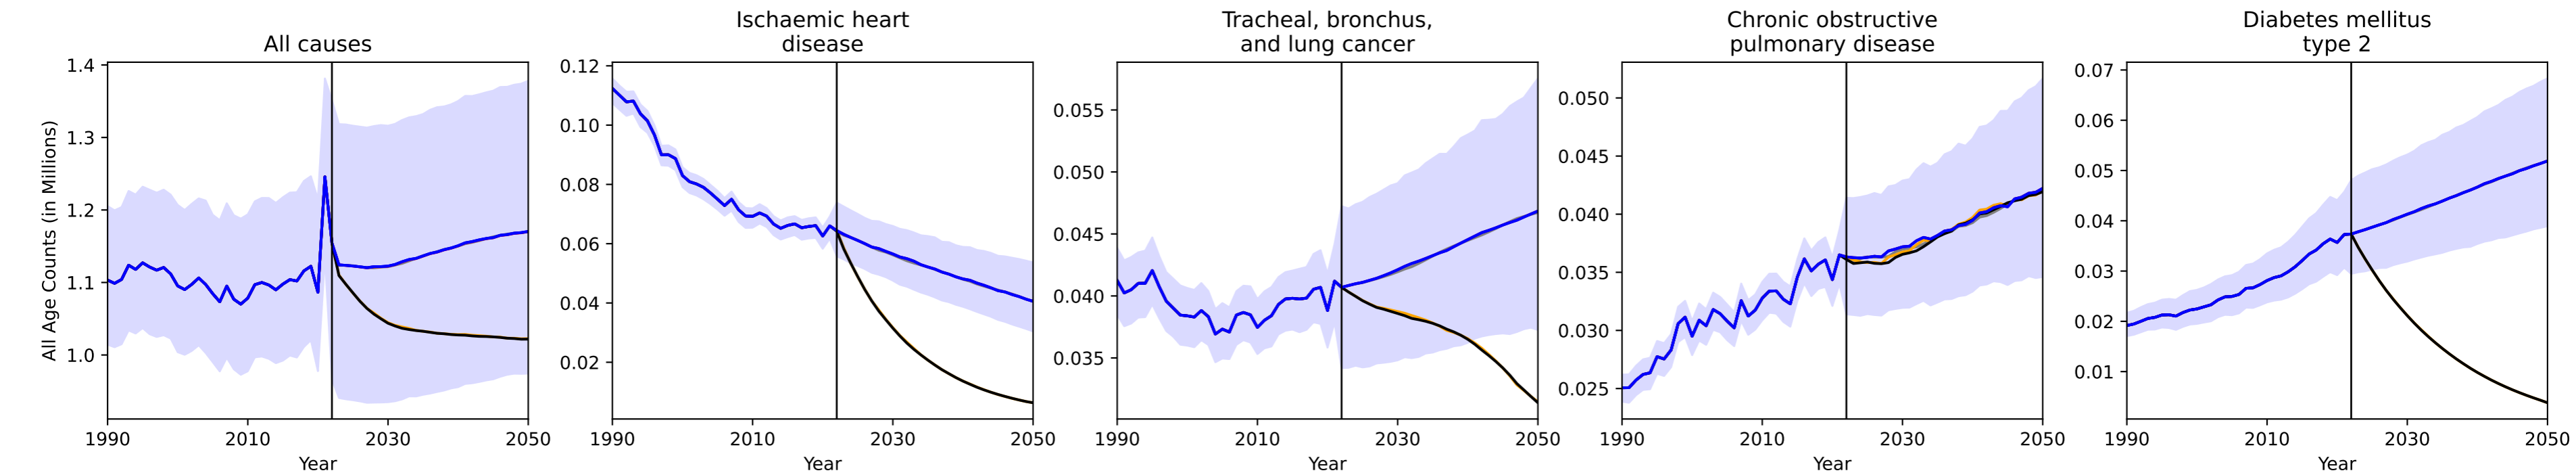

# Andorra

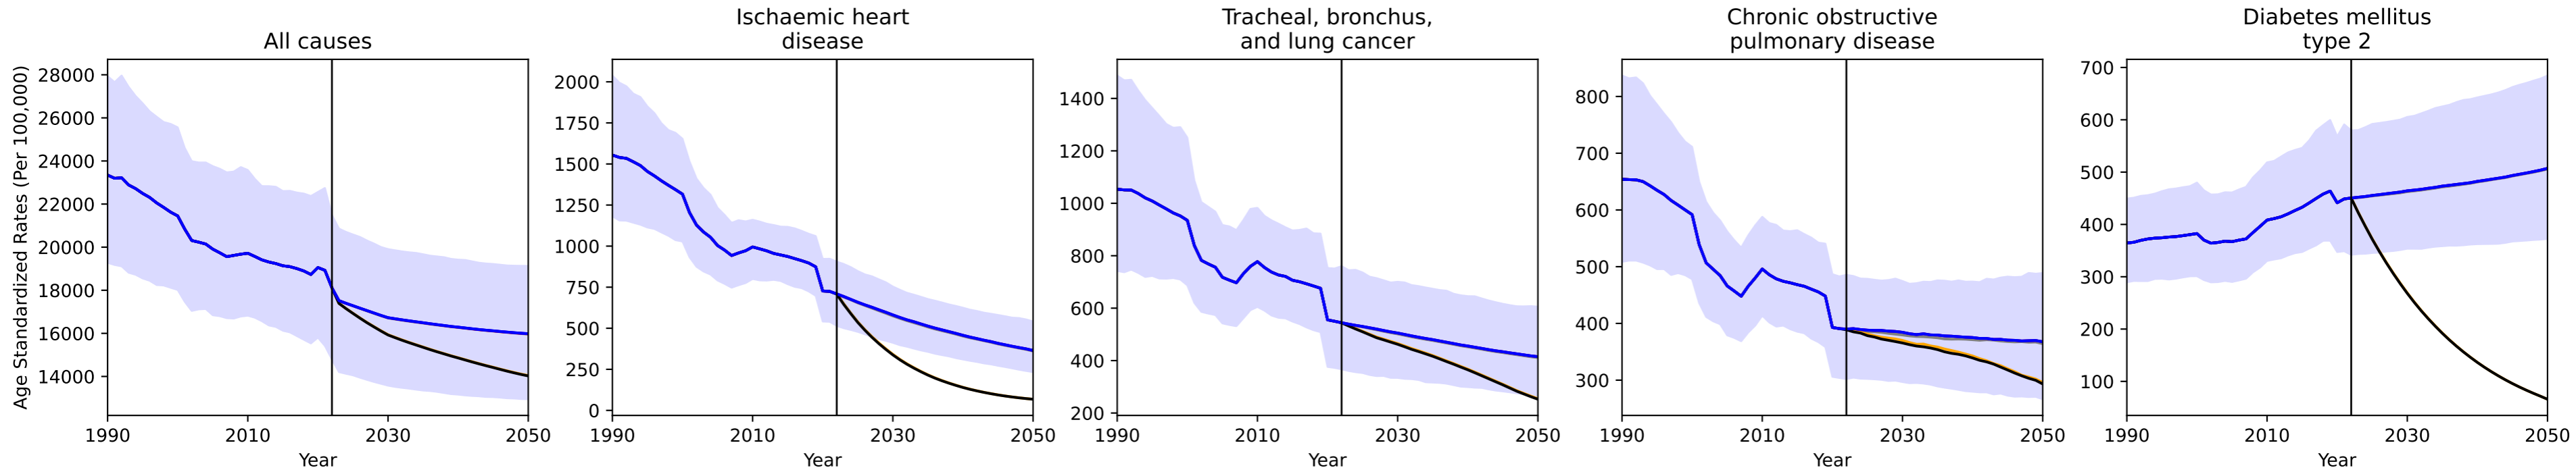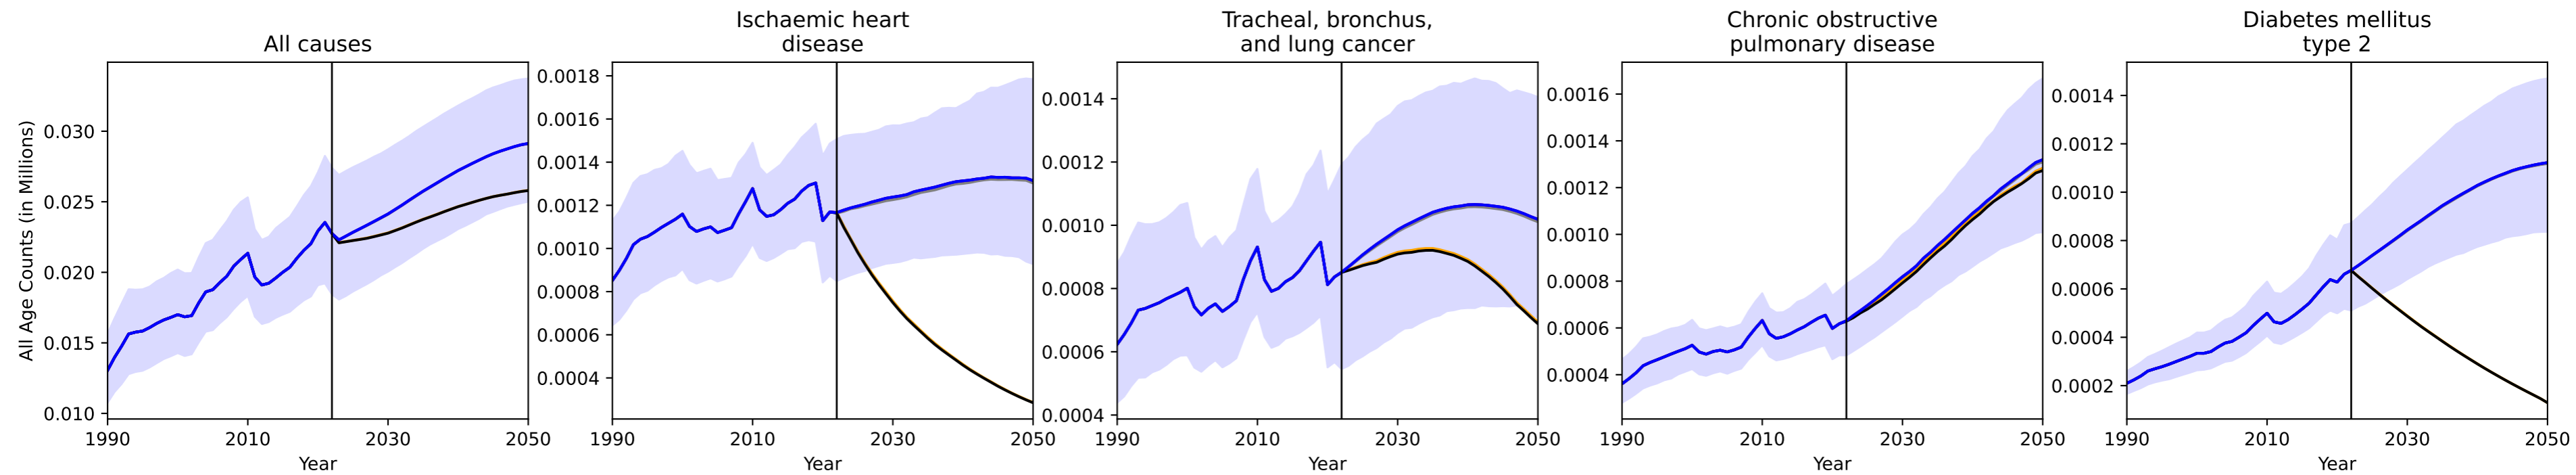

# Austria

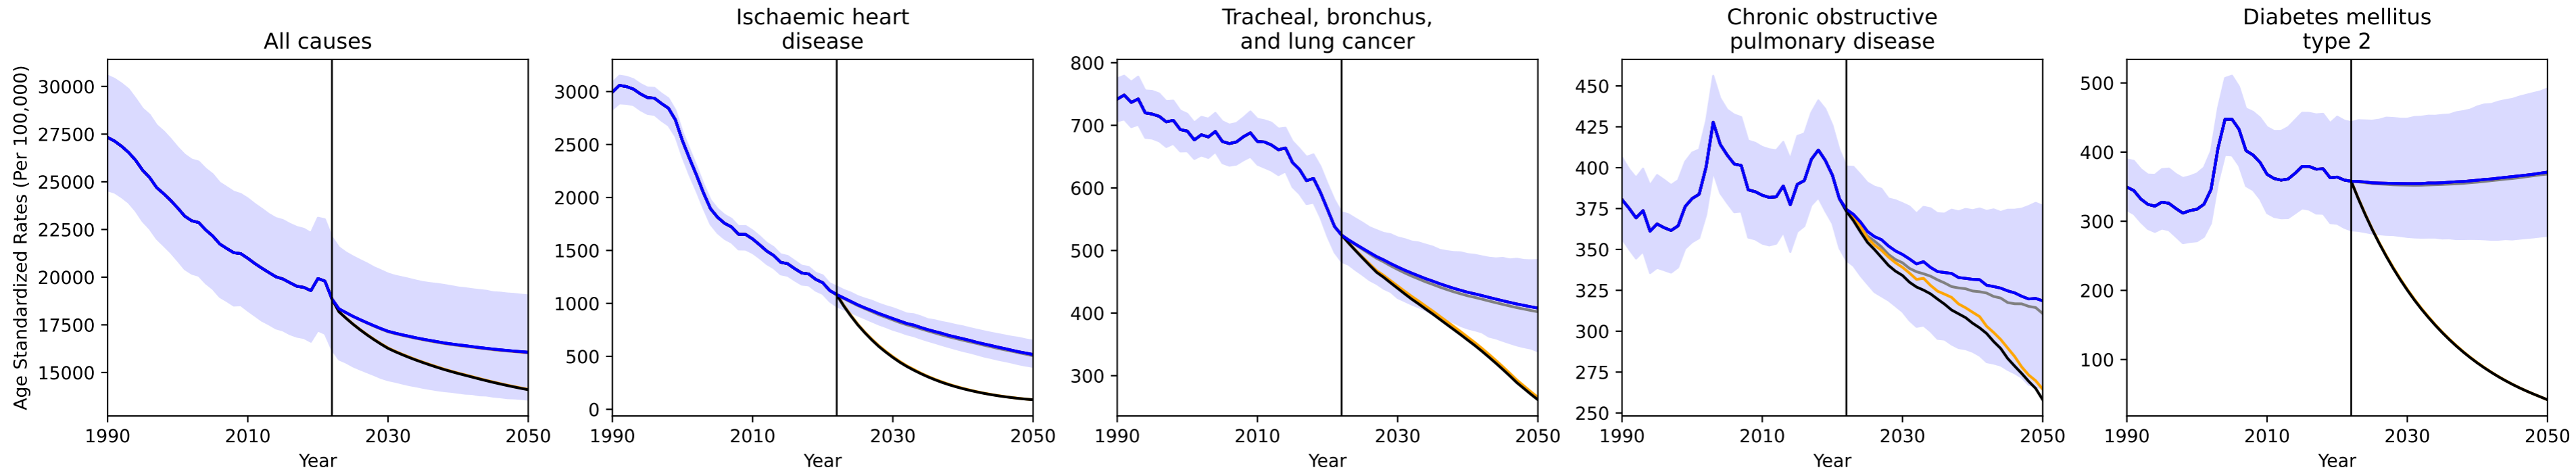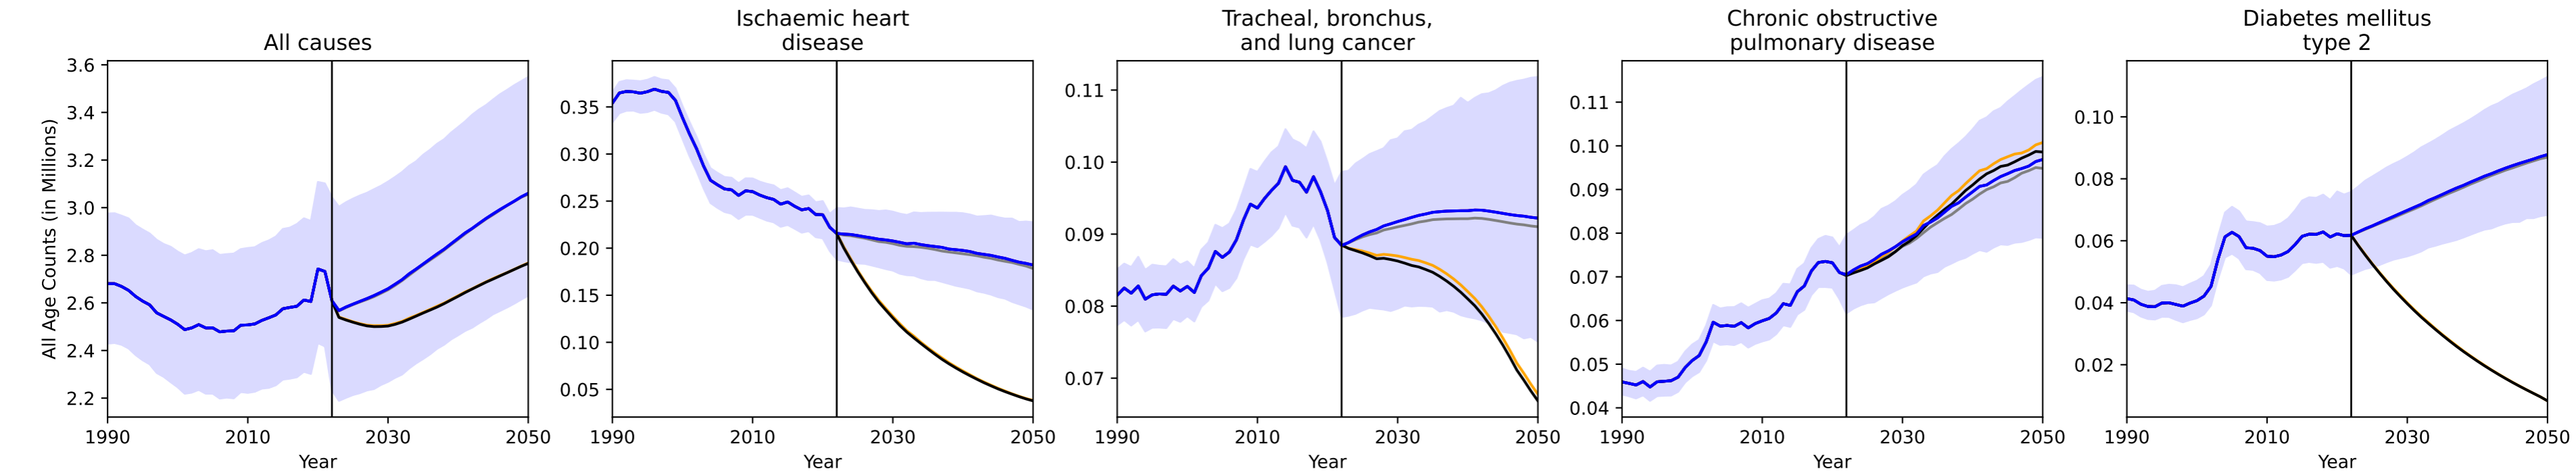



# Belgium

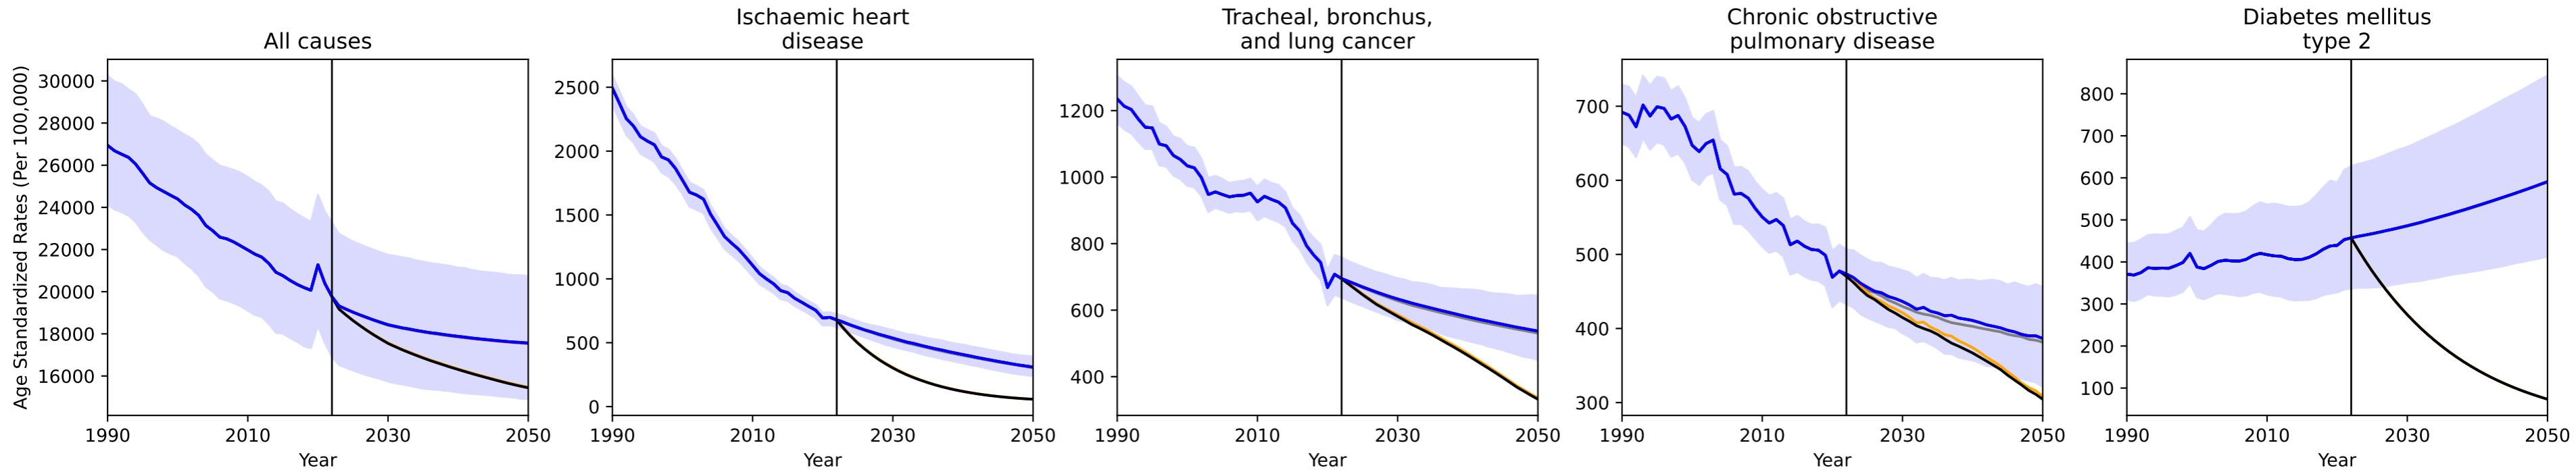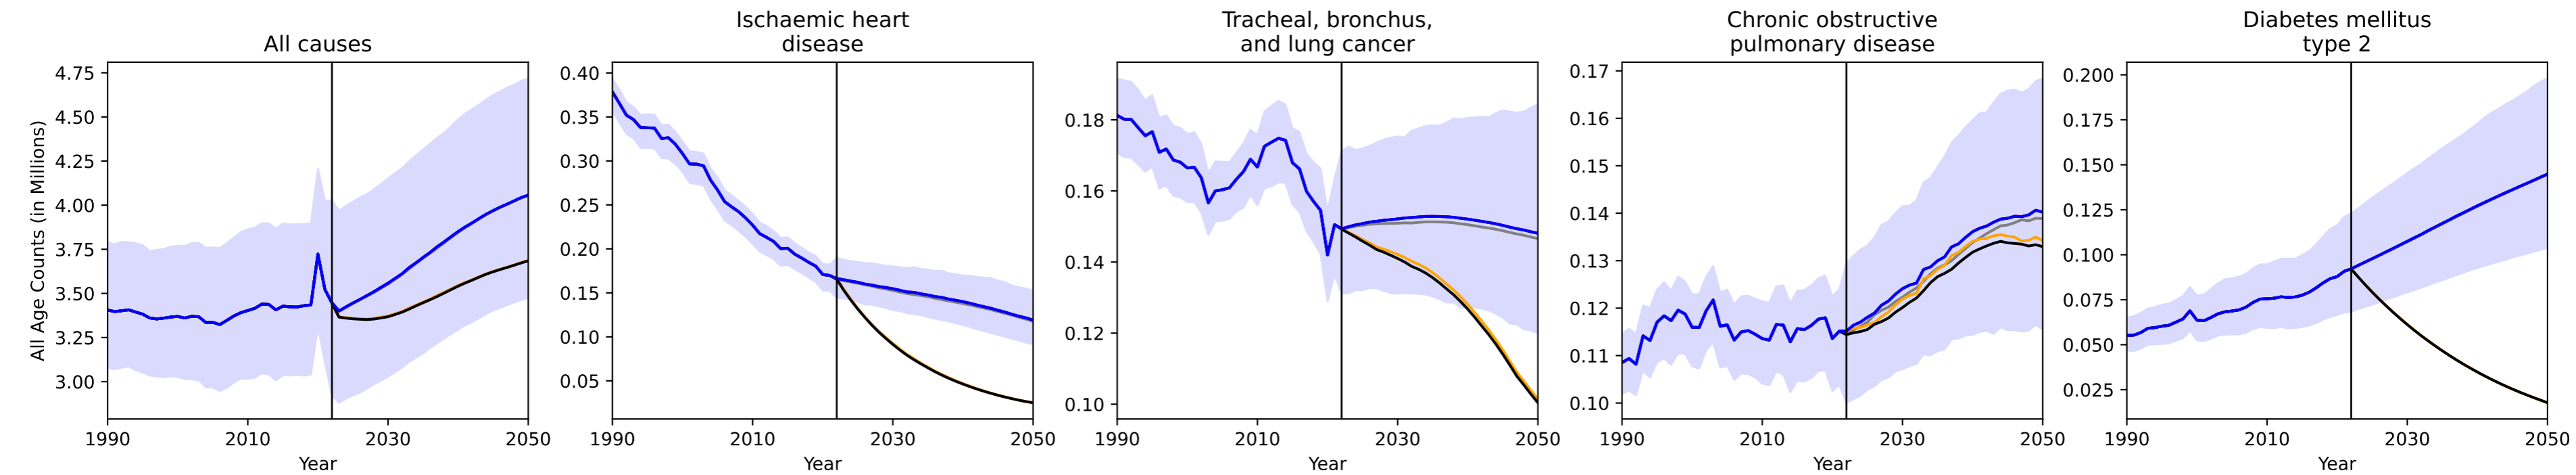

# Cyprus

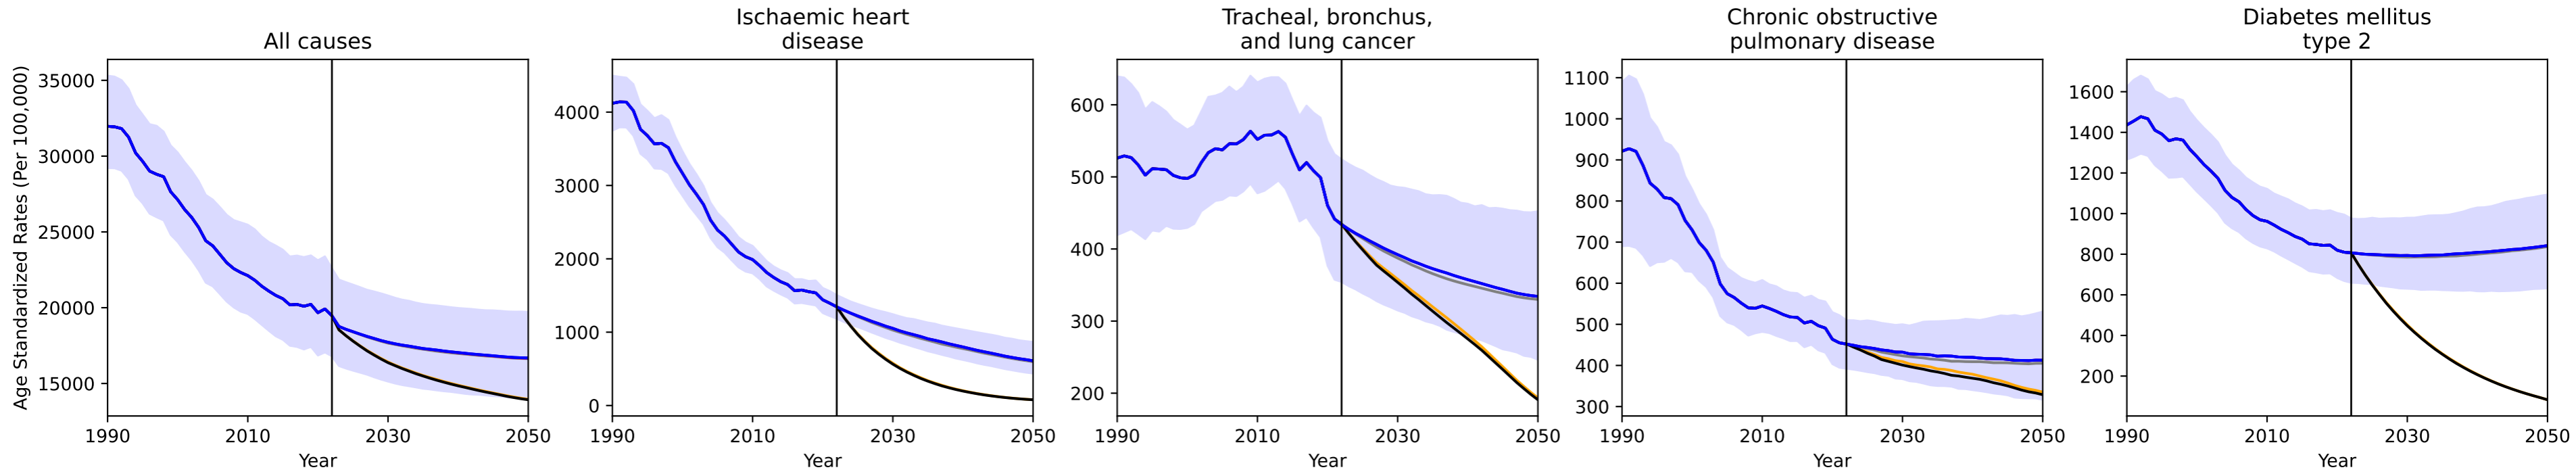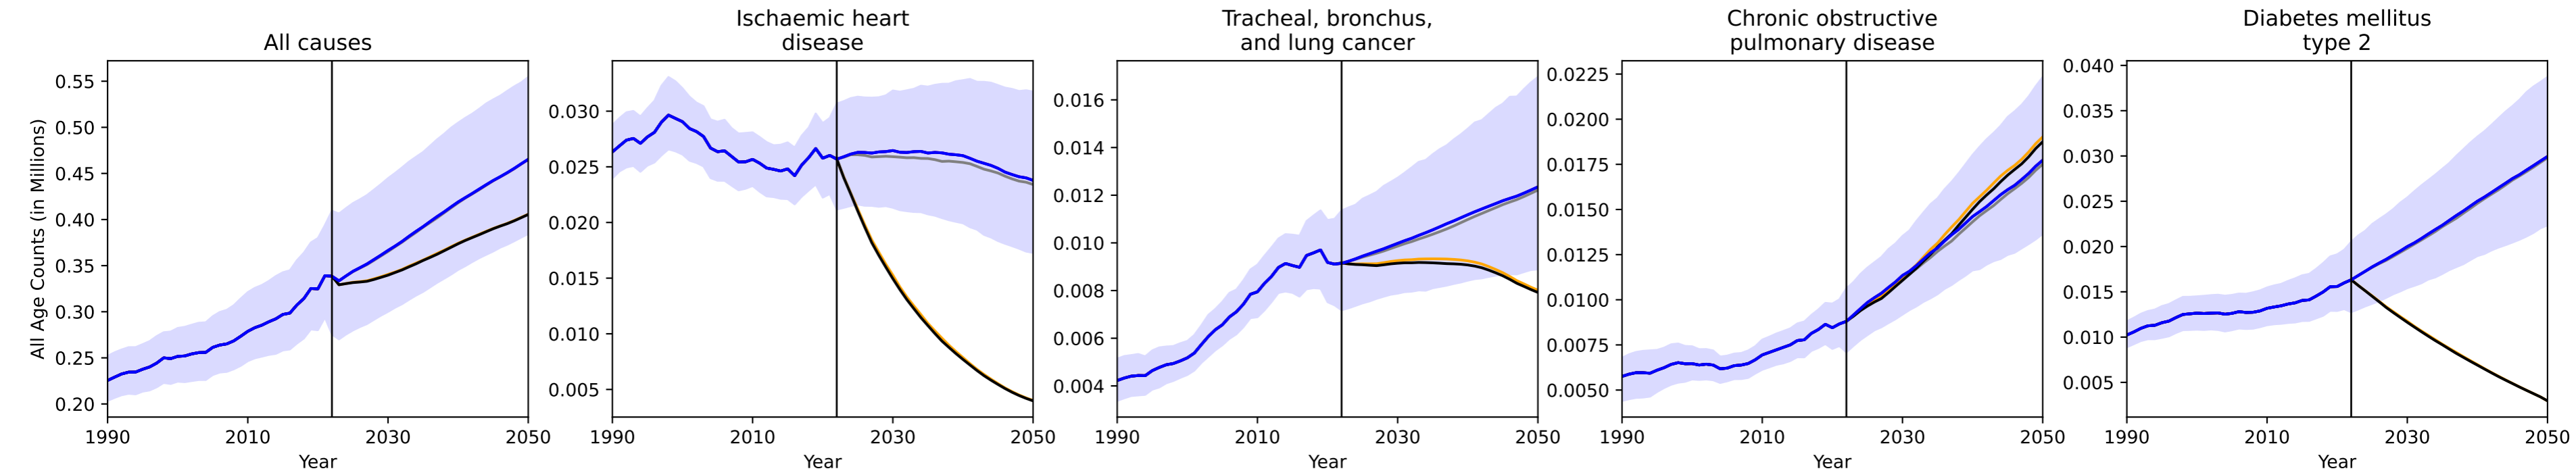

# Denmark

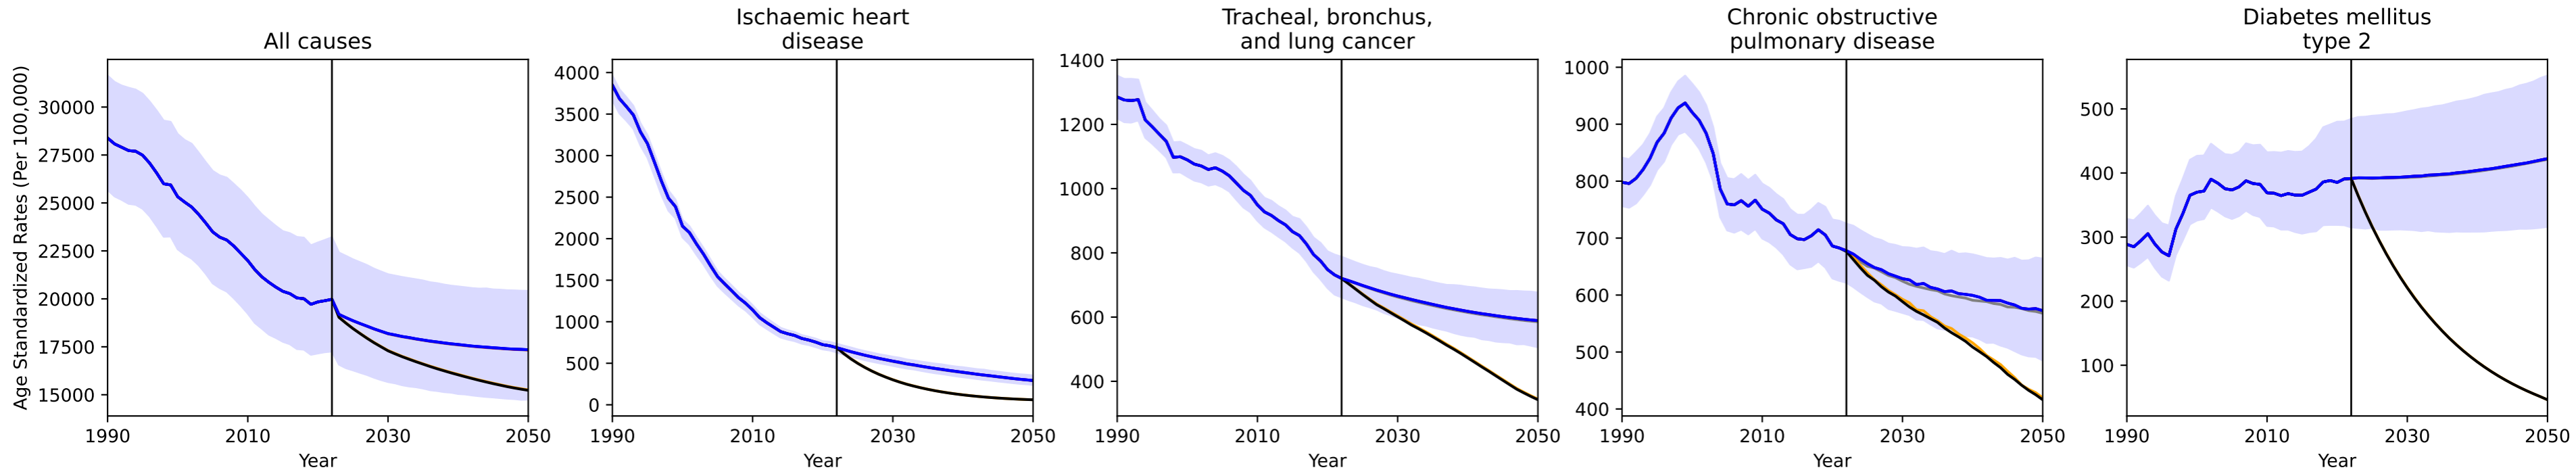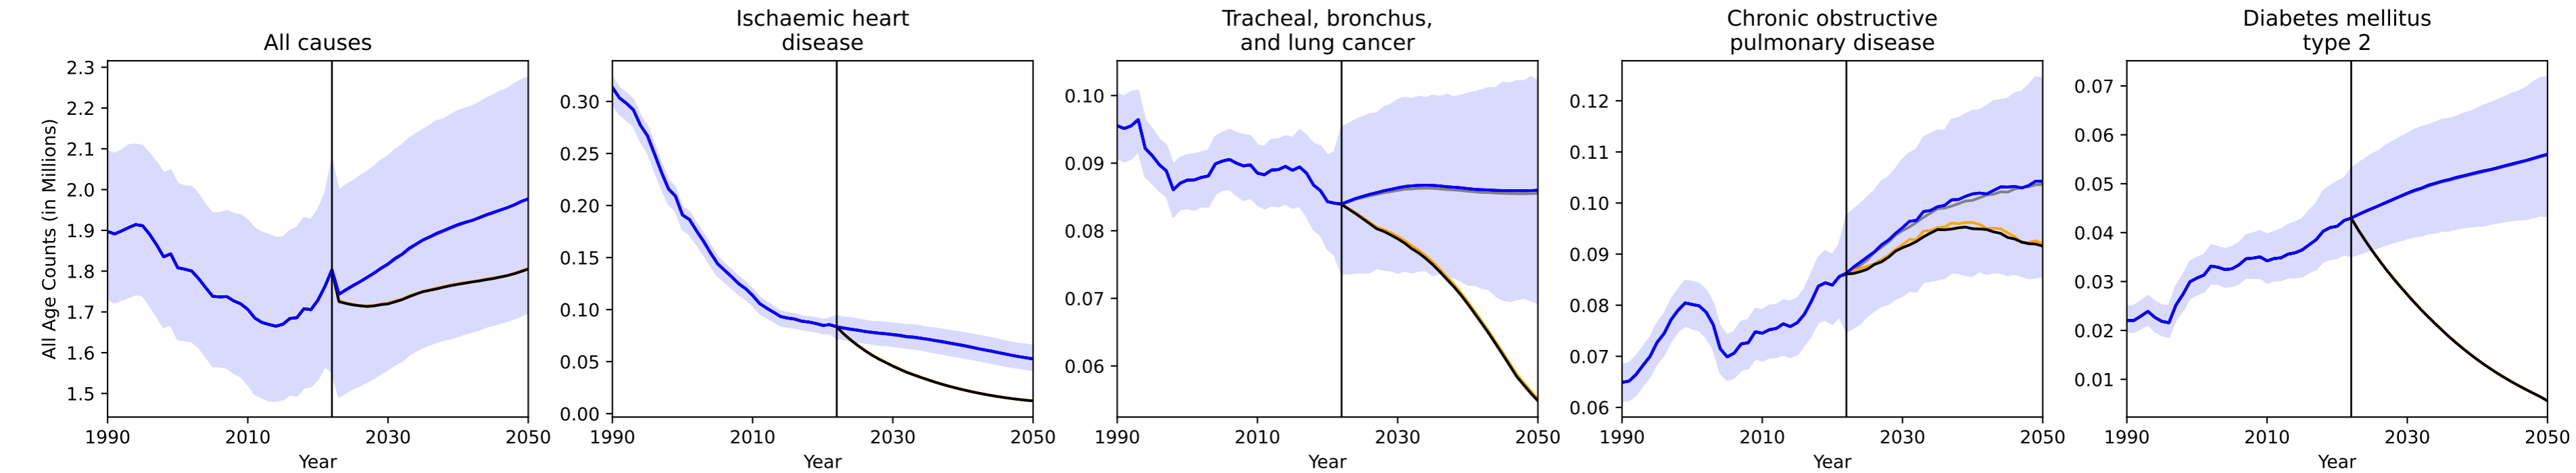

# Finland

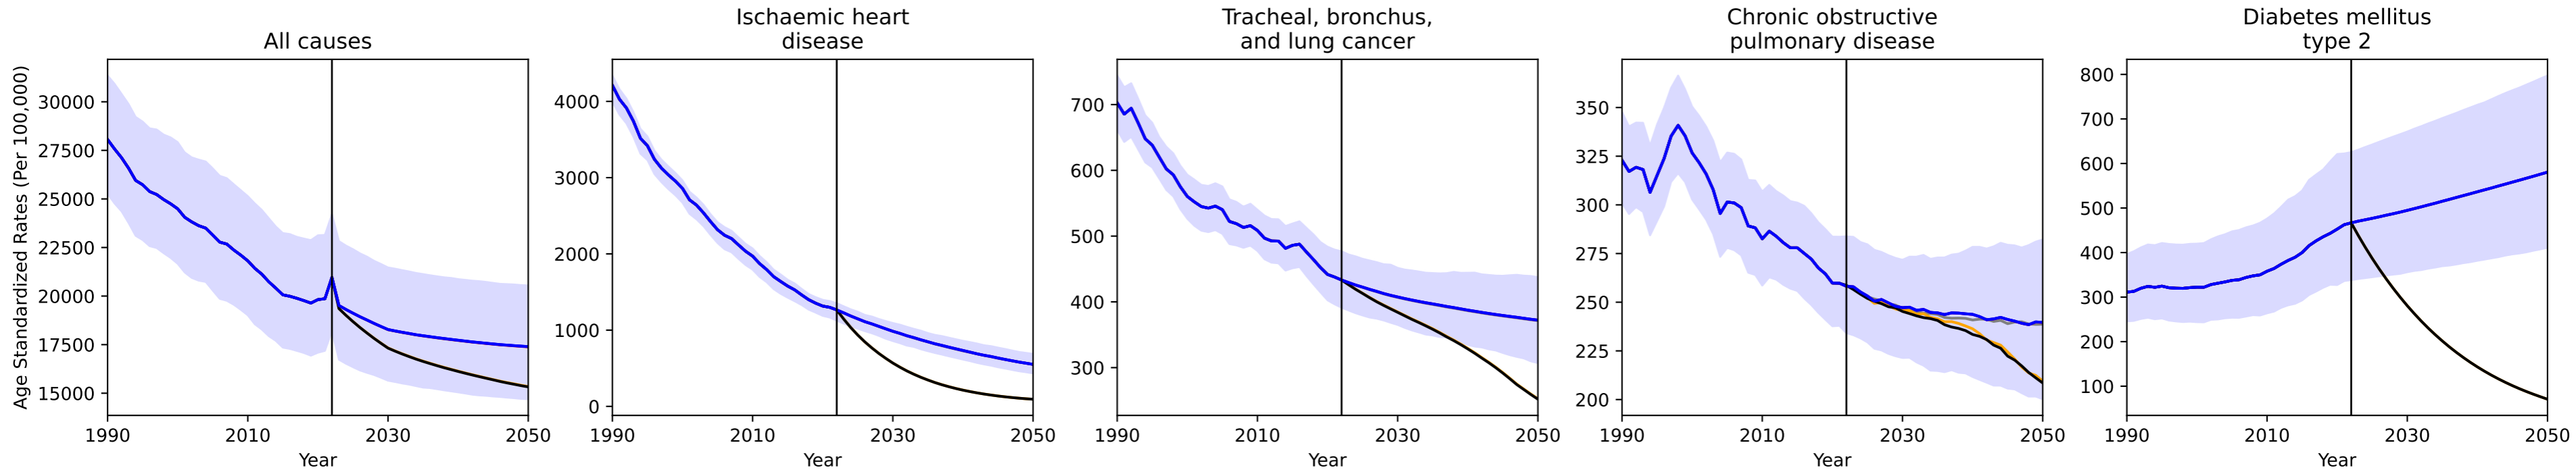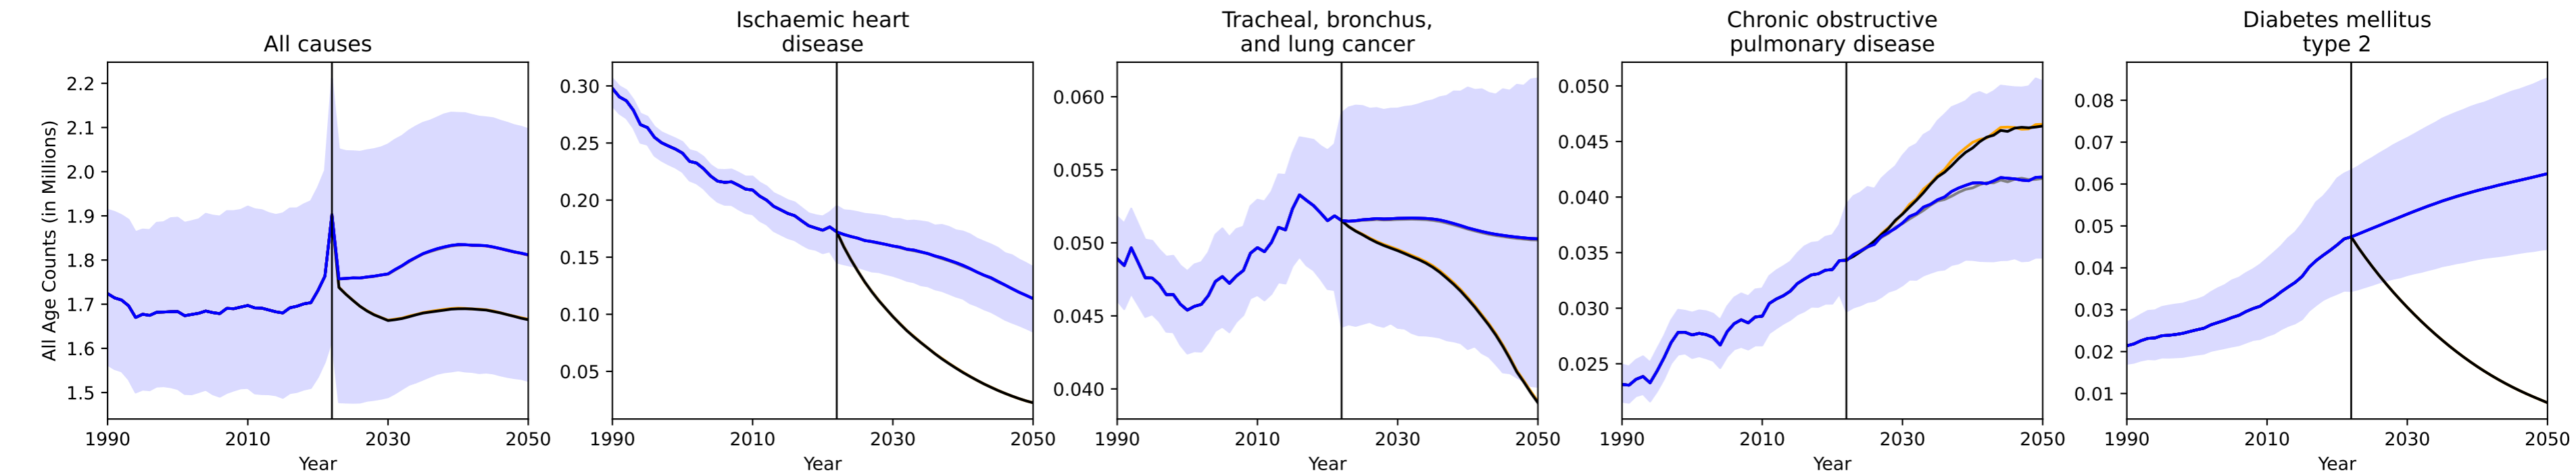

# France

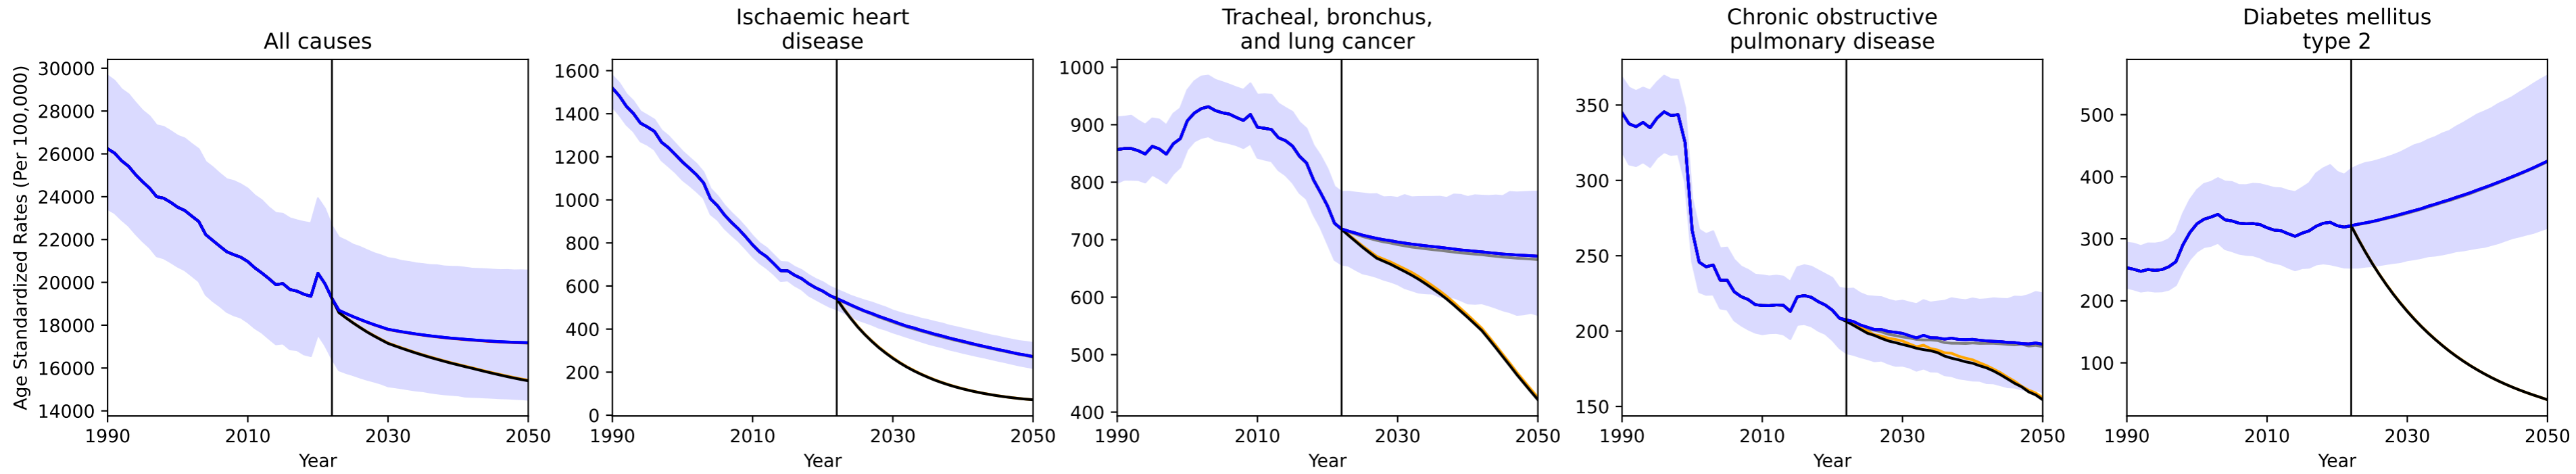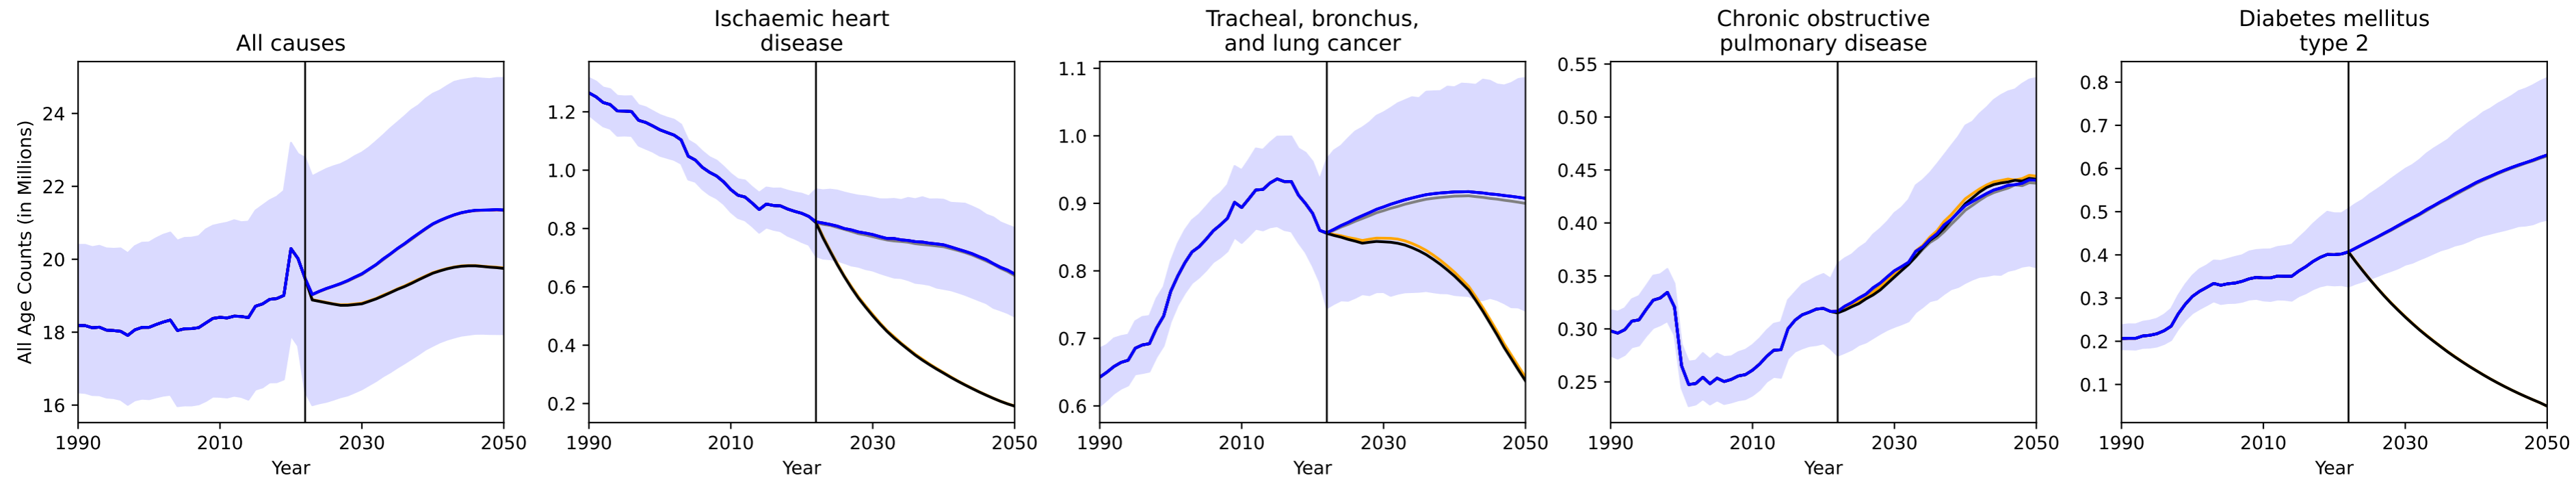

# Germany

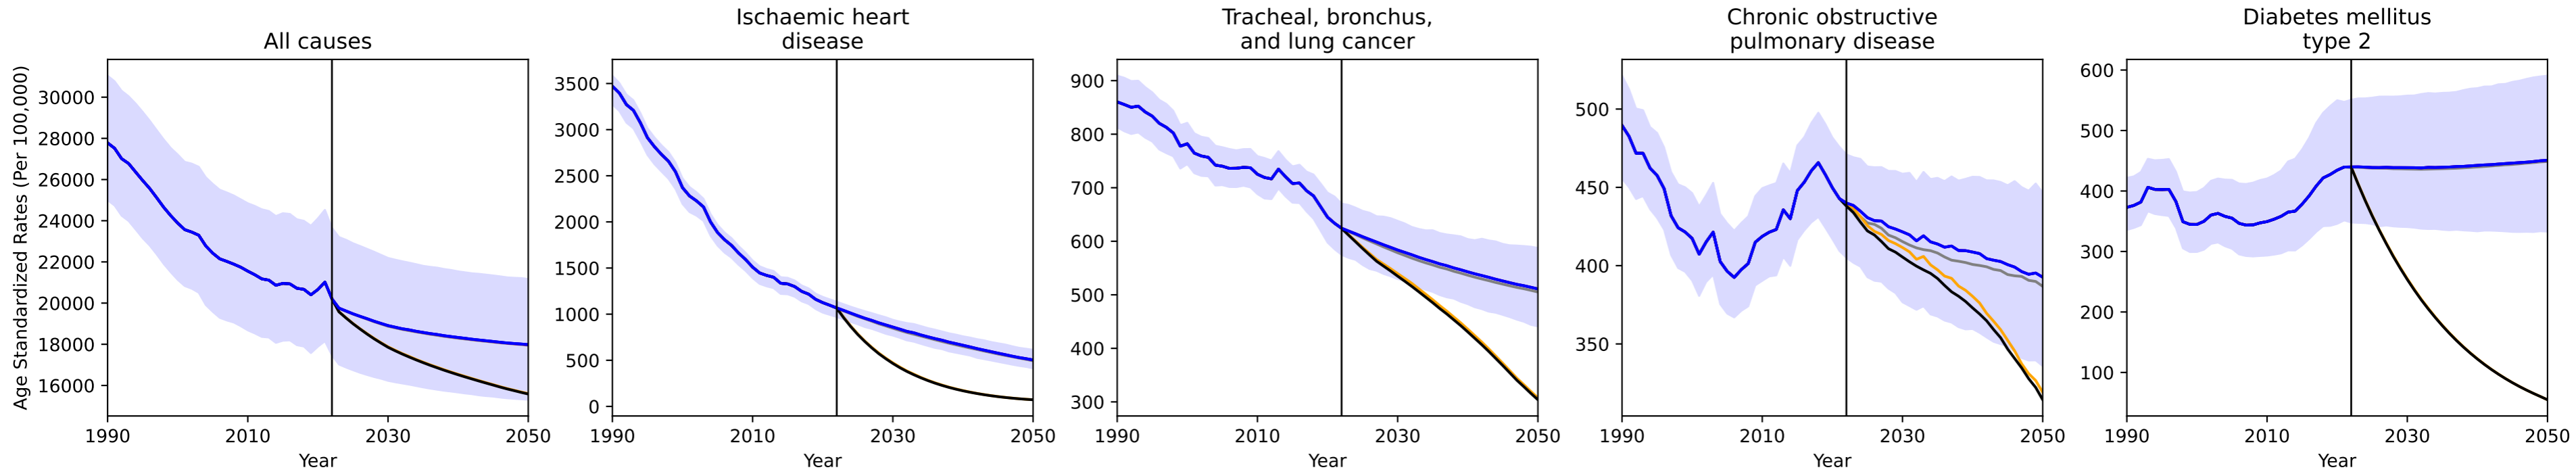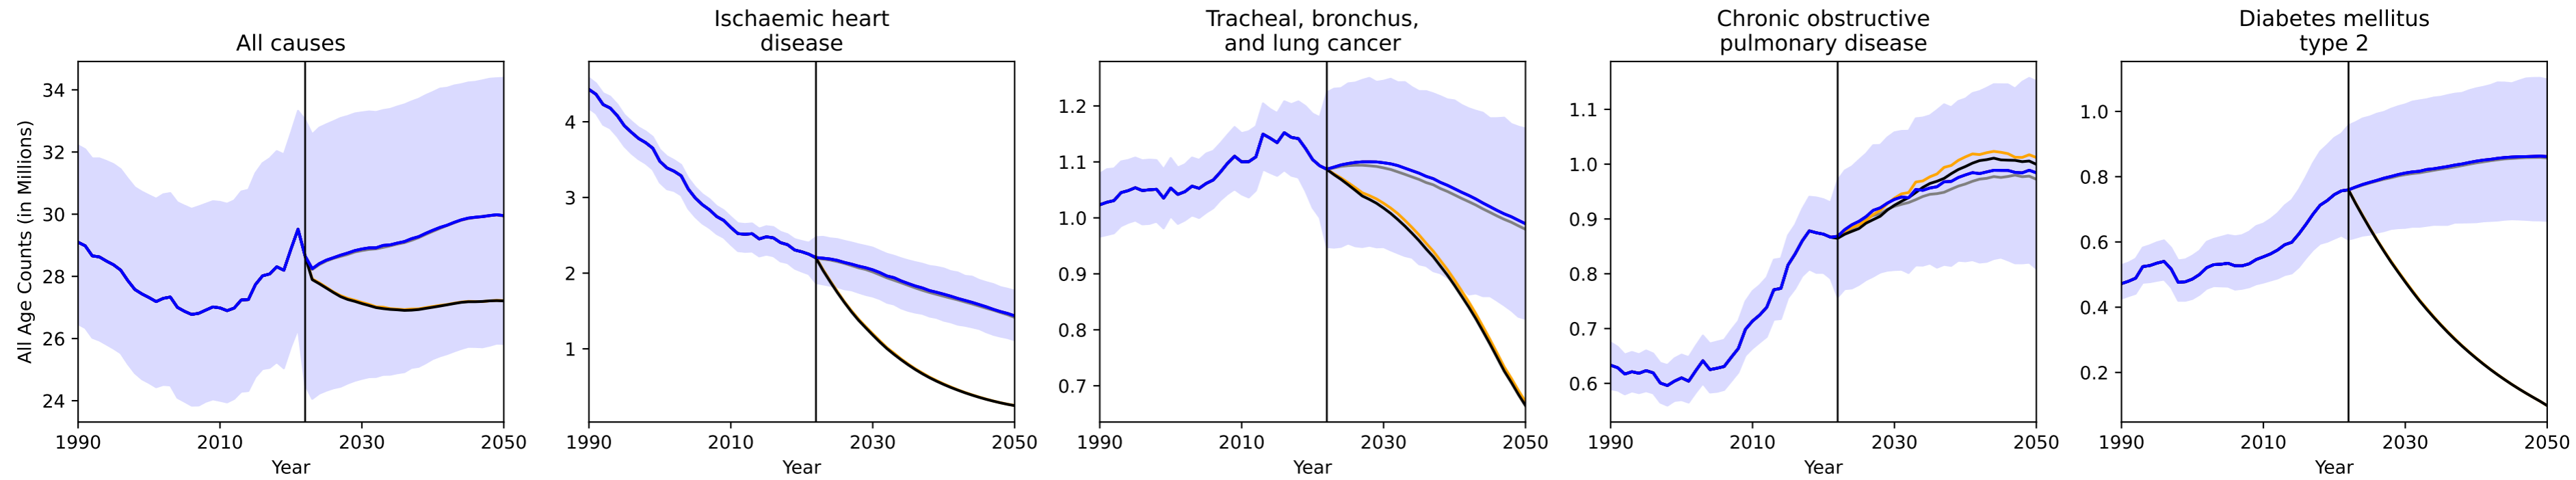

# Greece

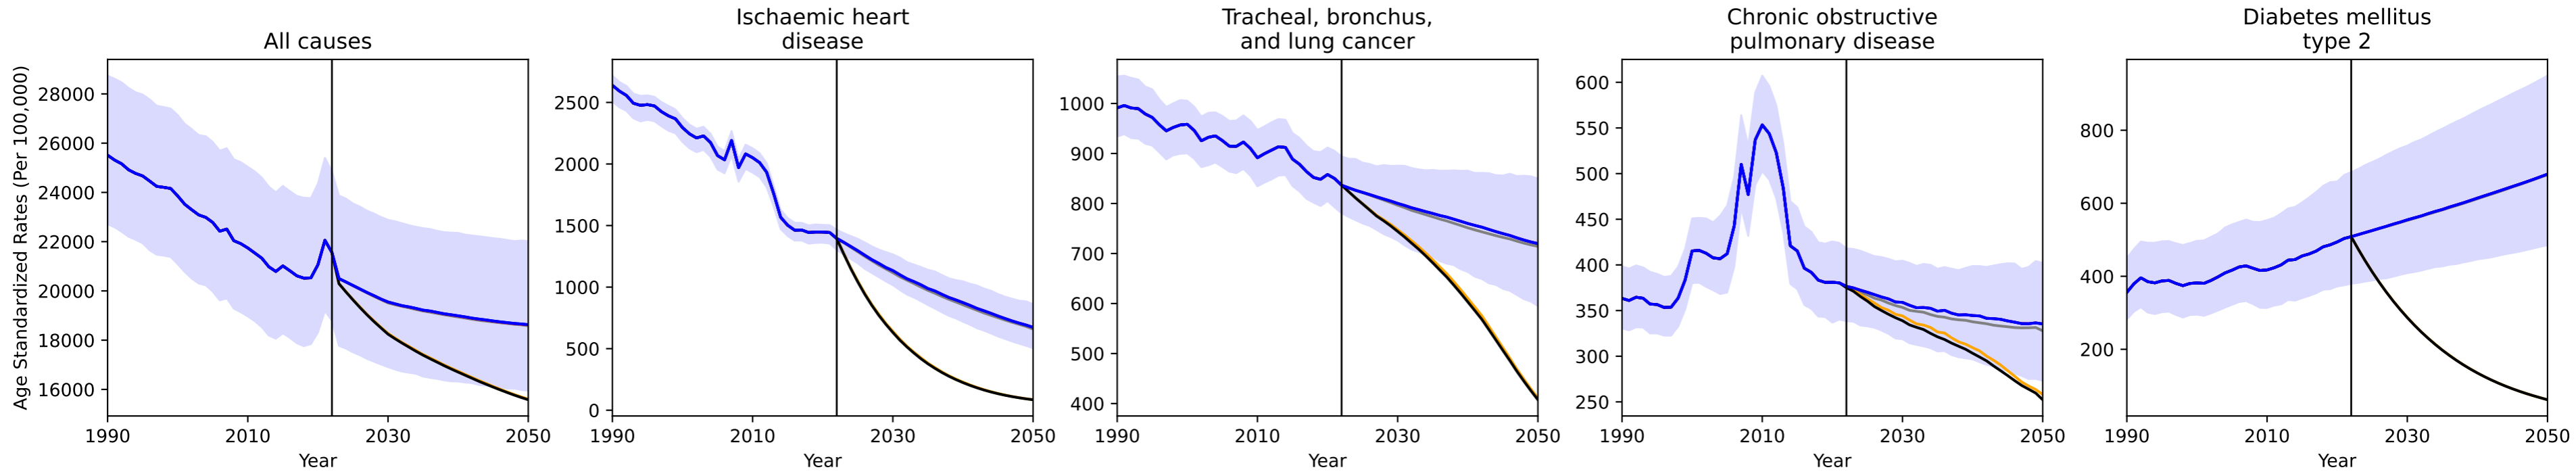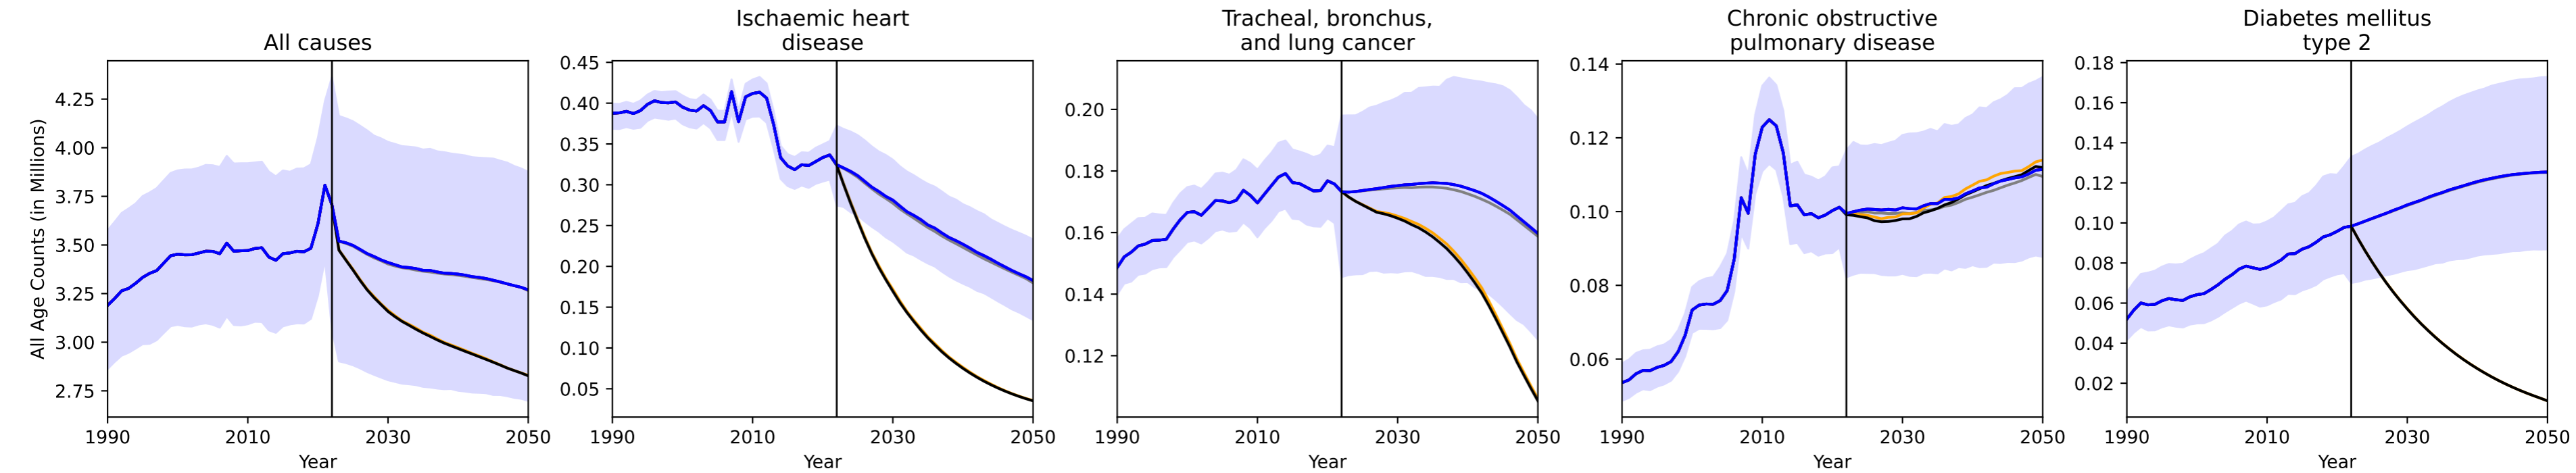

# Iceland

Supplemental Results Figure S12. All cause and top NCD causes age standardized DALY rates and all age counts by scenario and location, 1990-2050

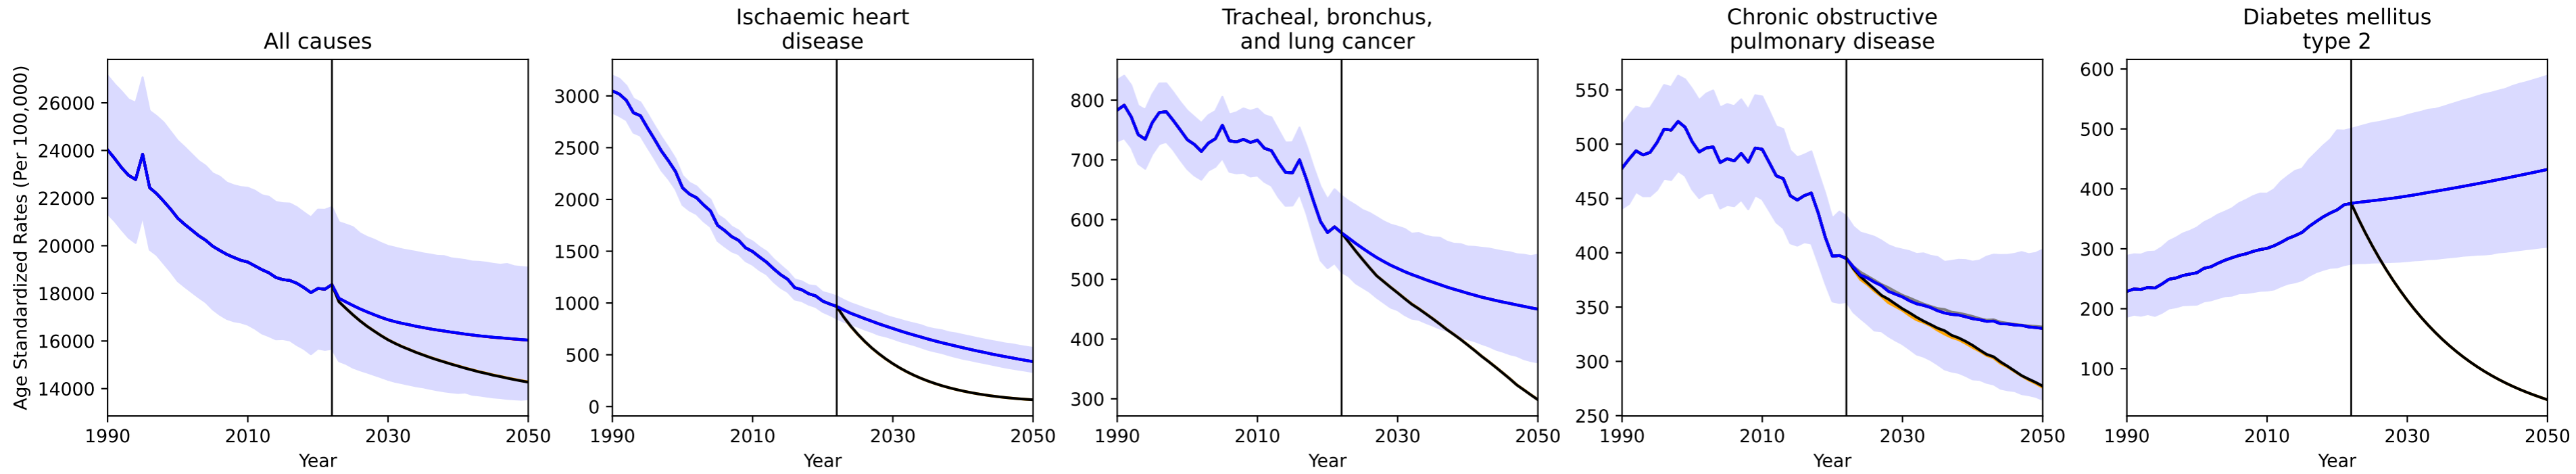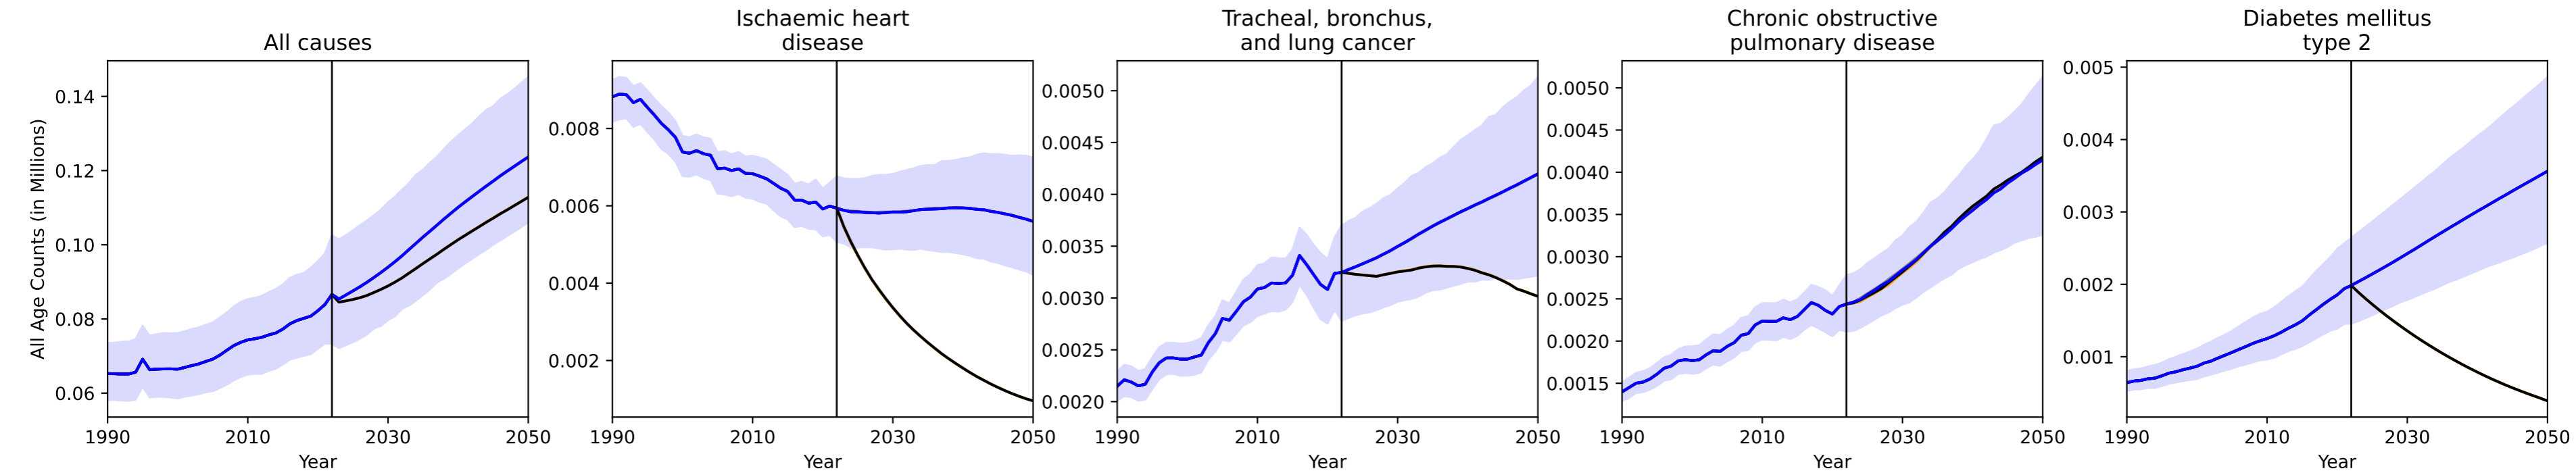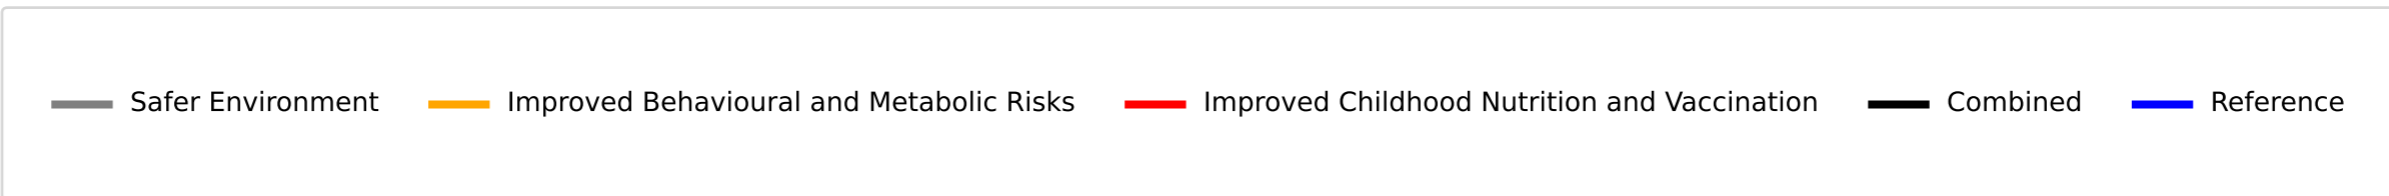



# Ireland

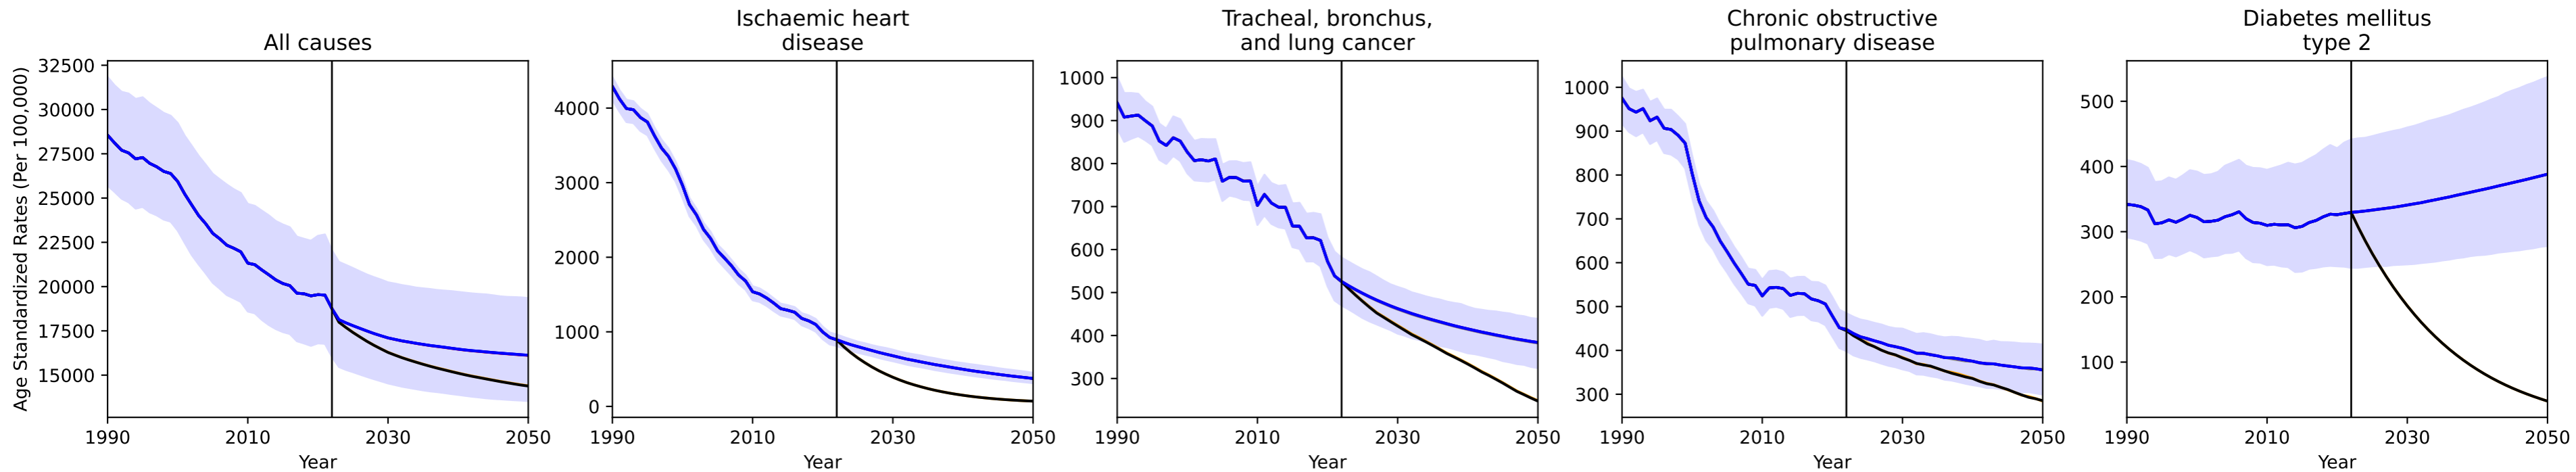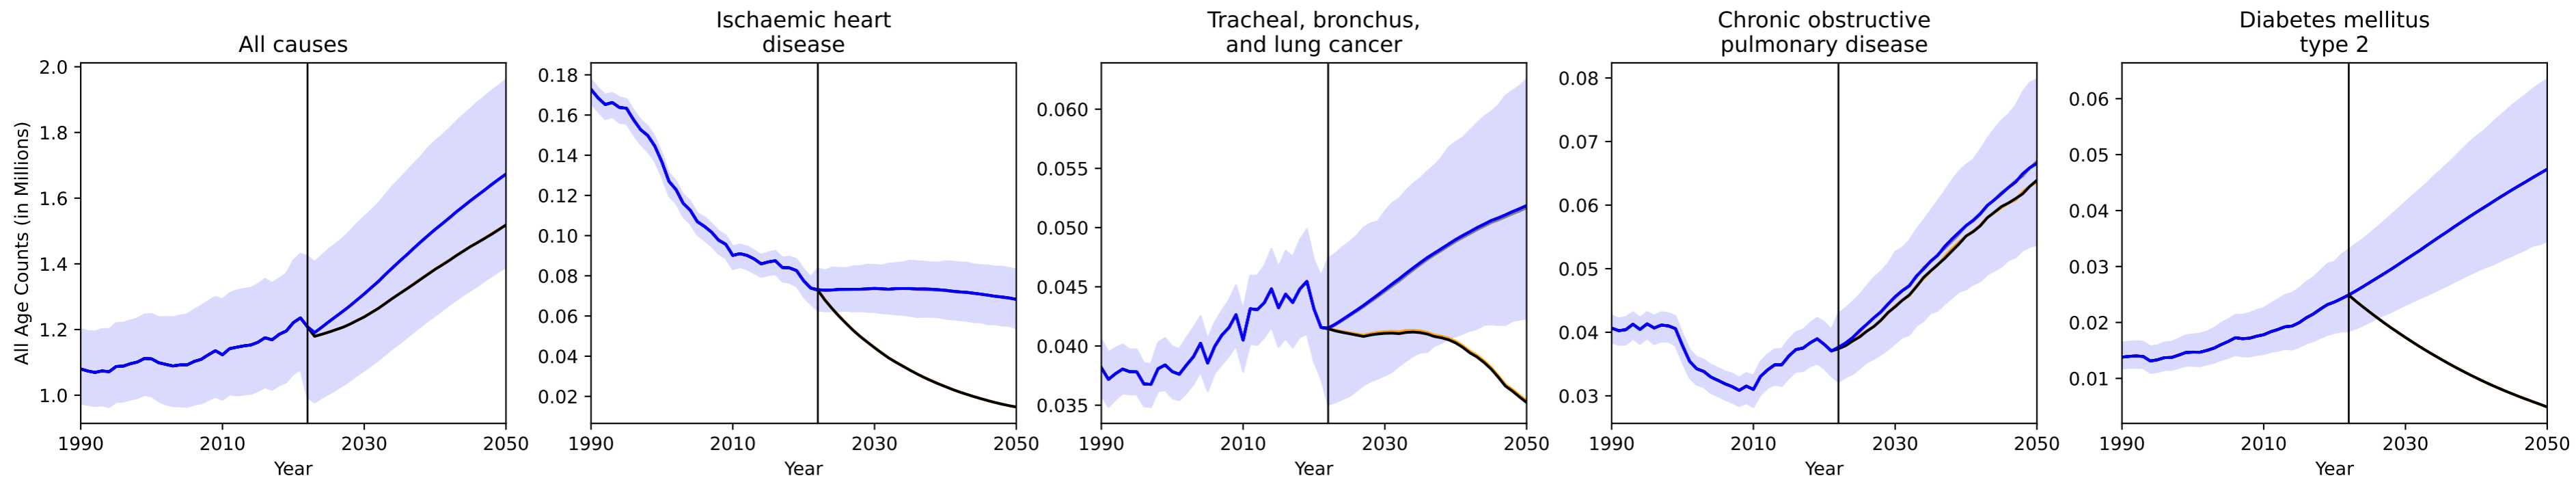

# Israel

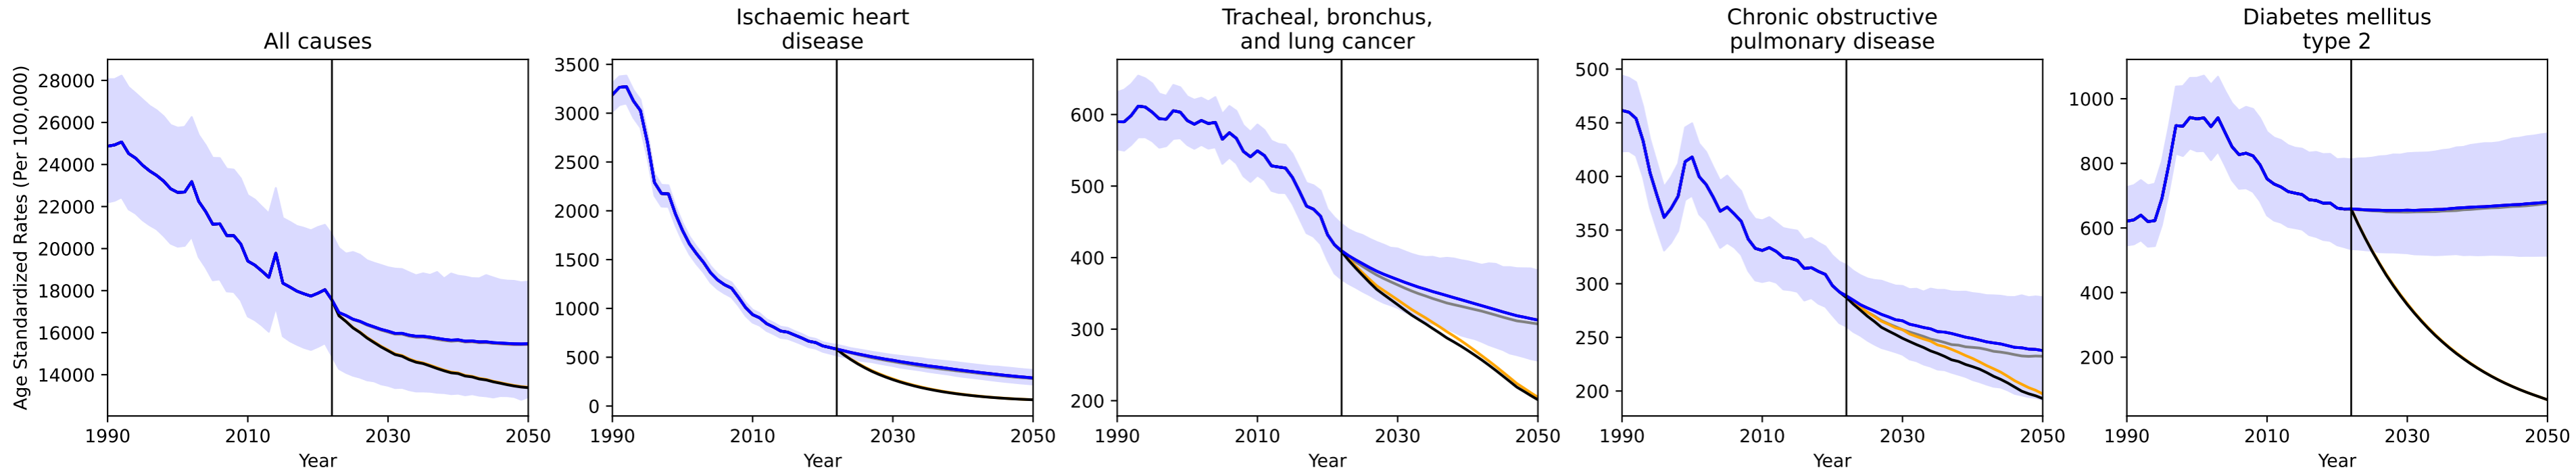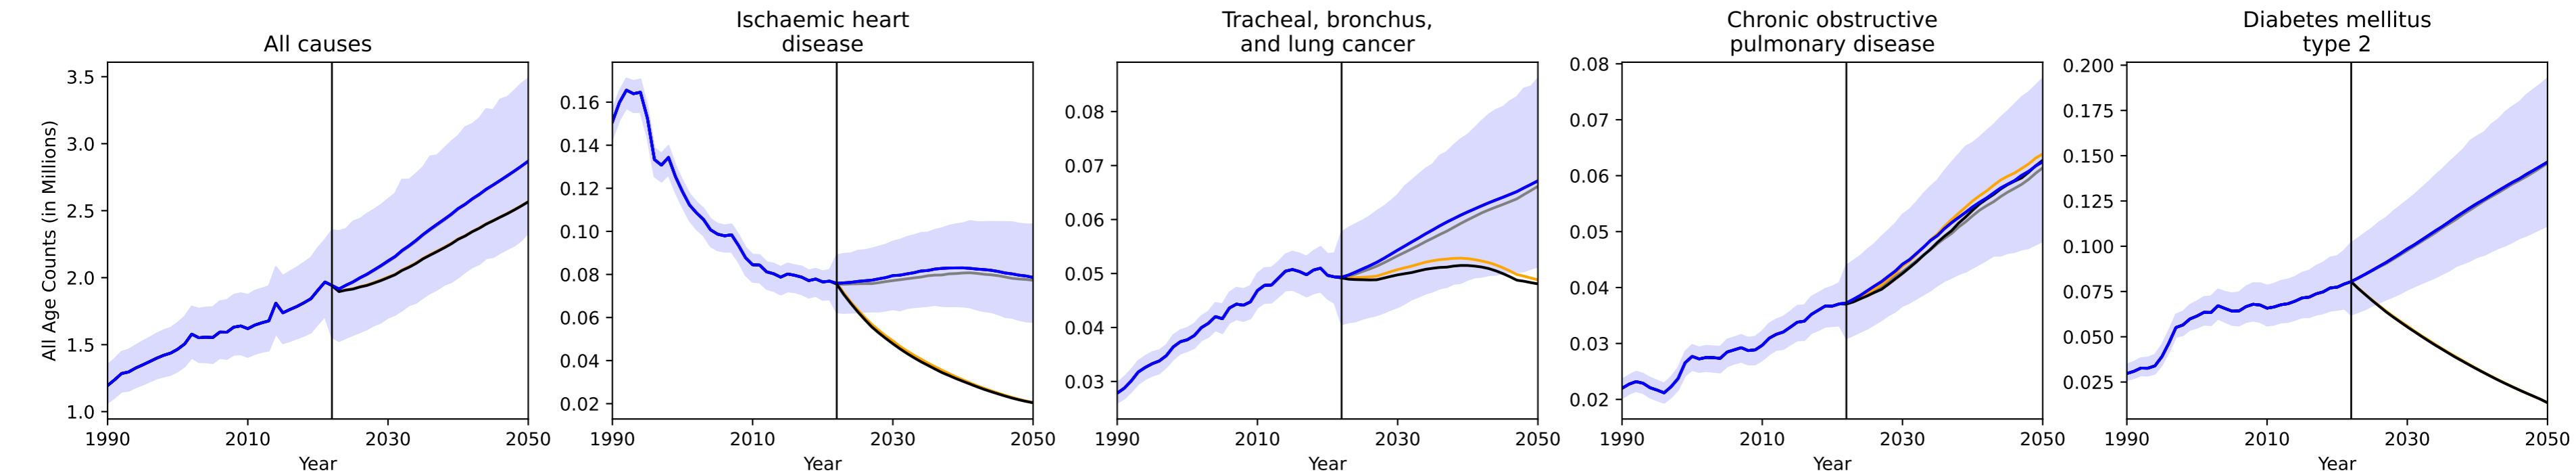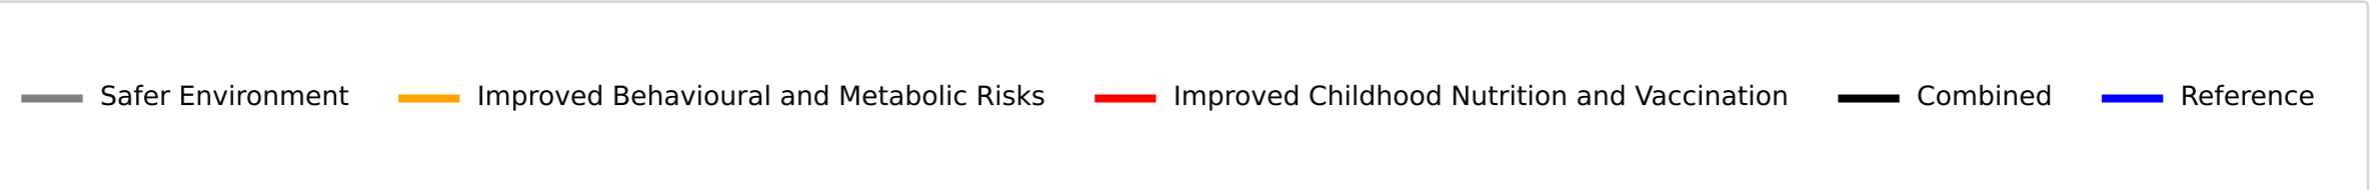

# Italy

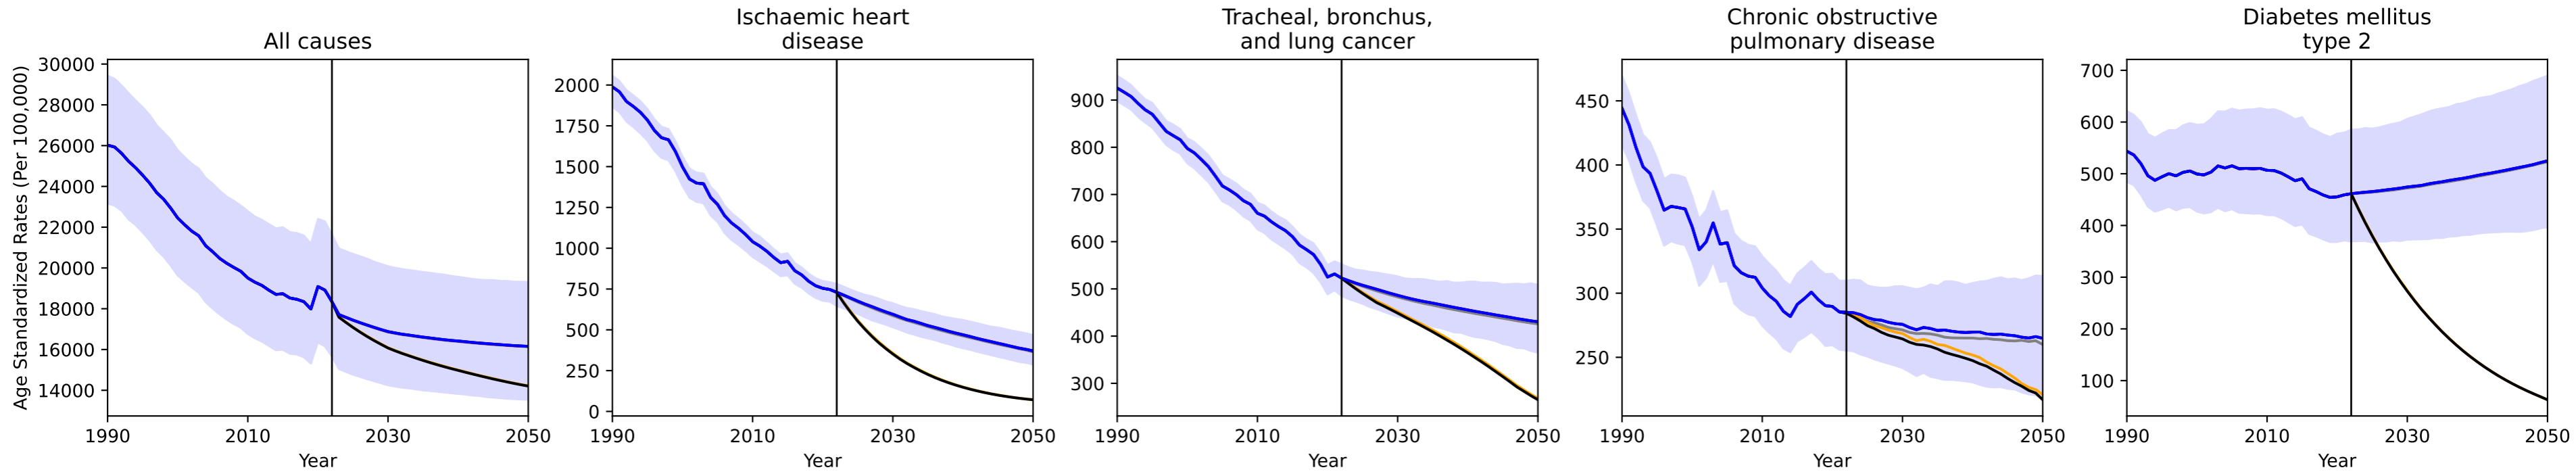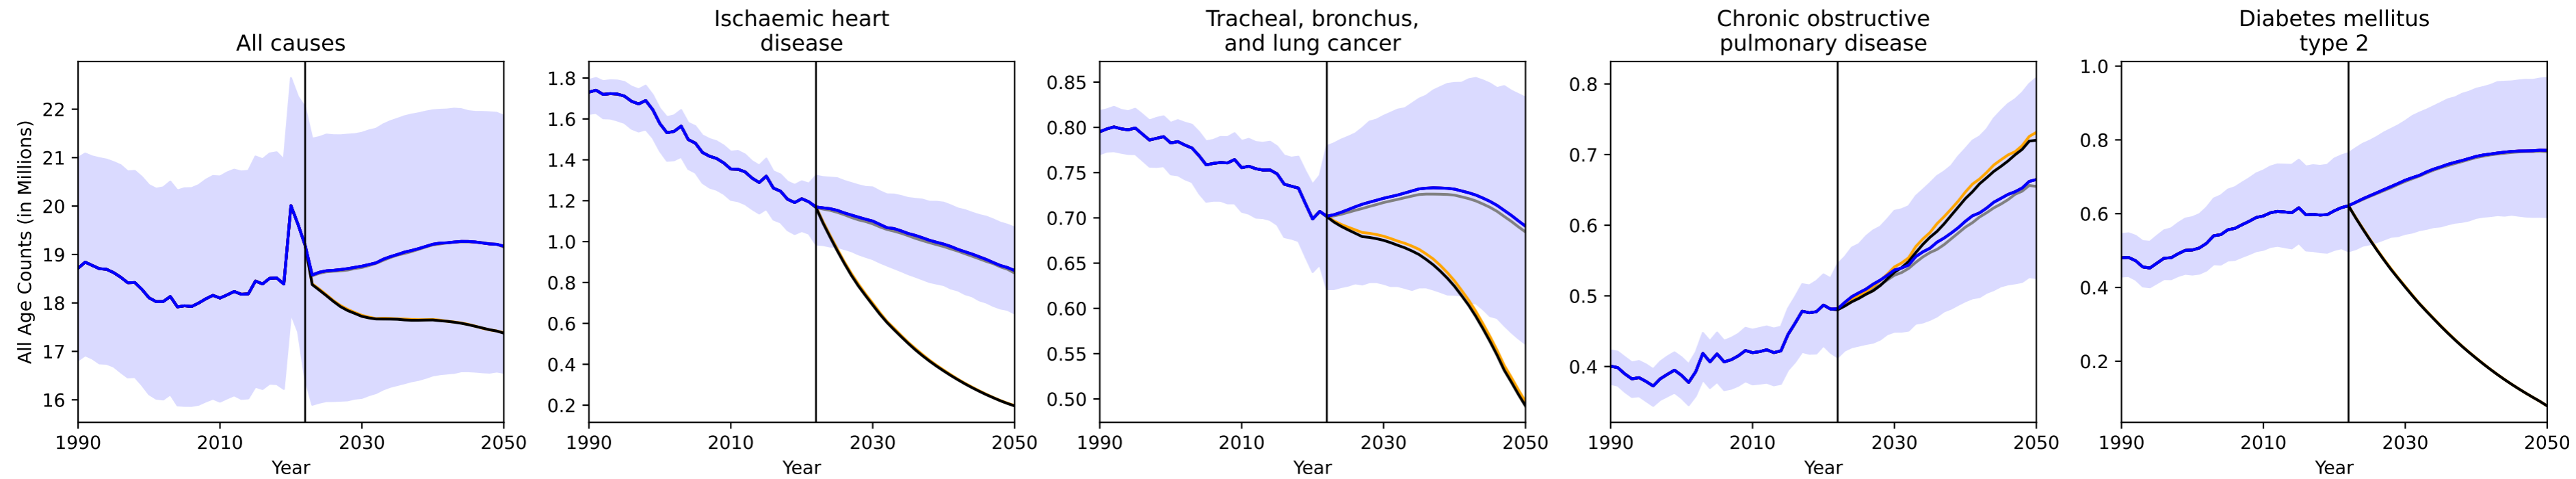

# Luxembourg

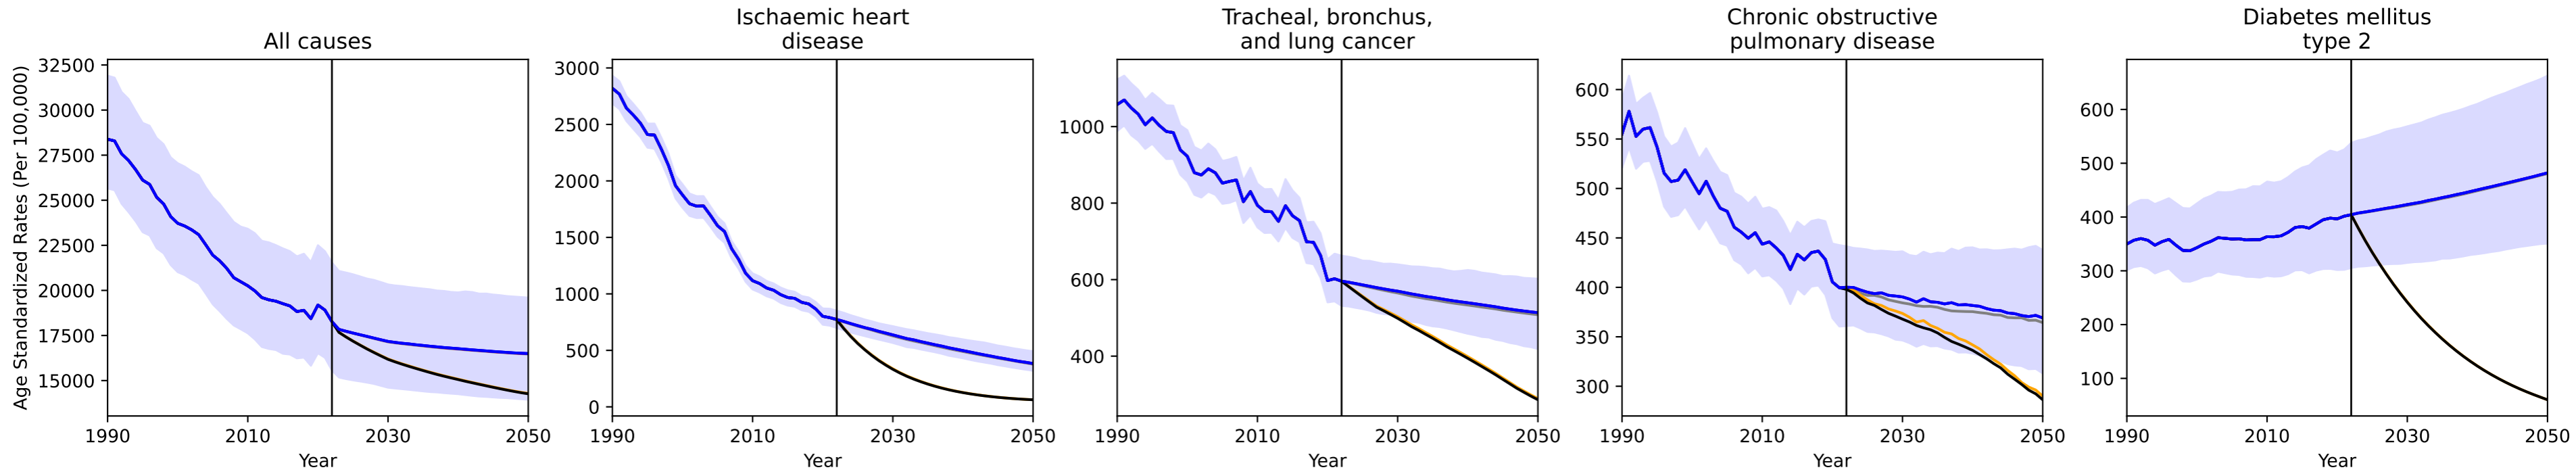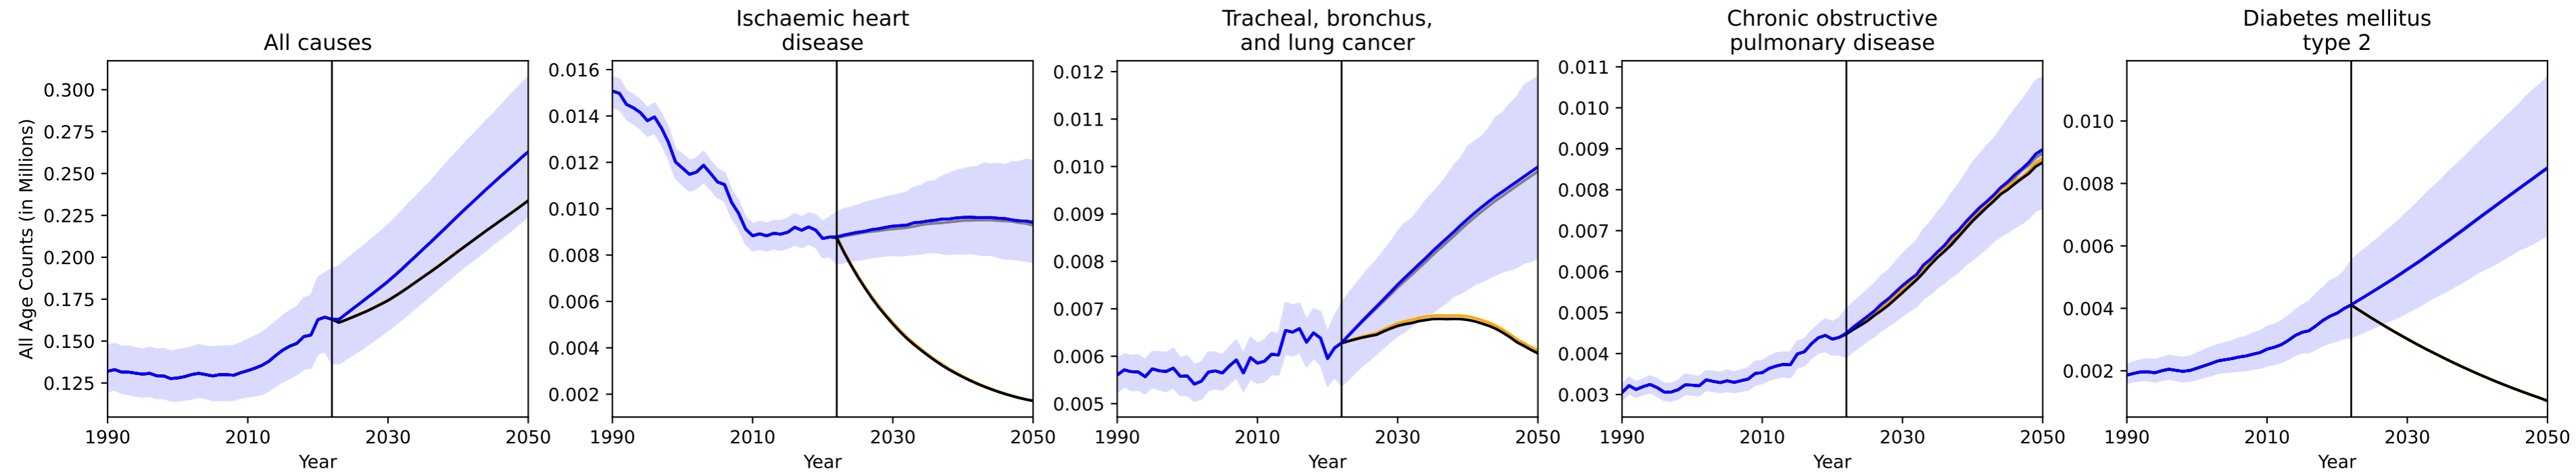

# Malta

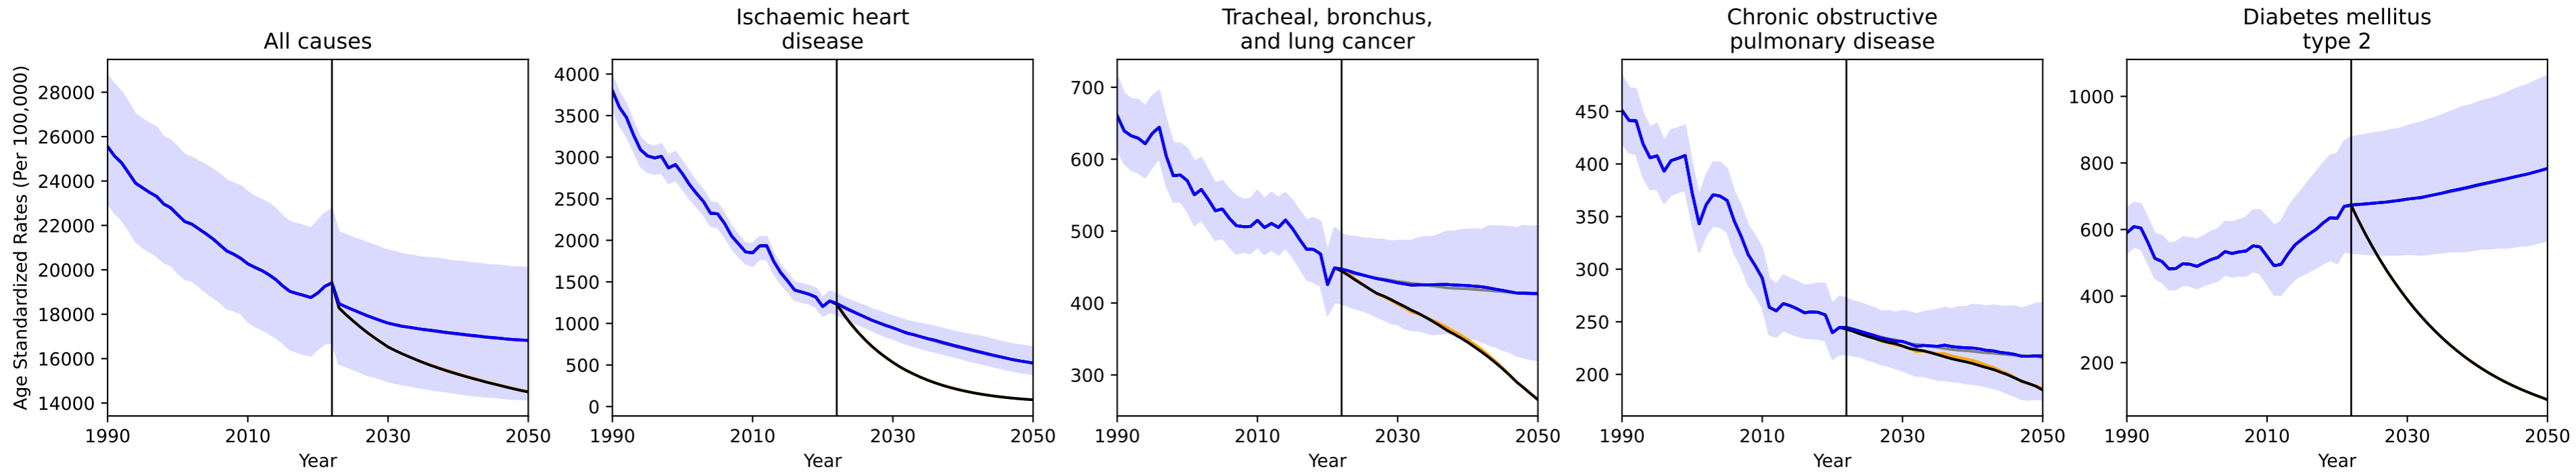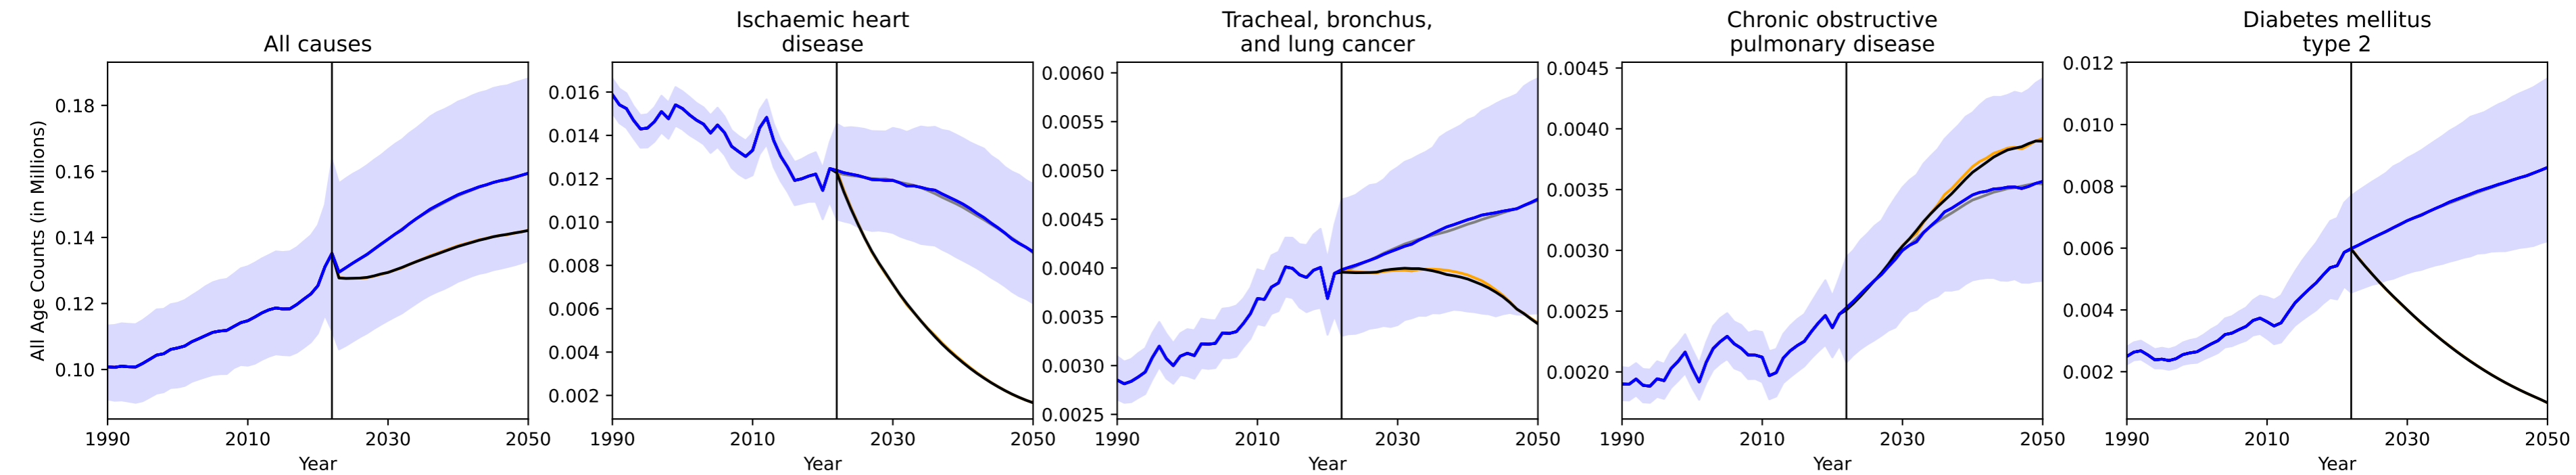

# Monaco

Supplemental Results Figure S12. All cause and top NCD causes age standardized DALY rates and all age counts by scenario and location, 1990-2050

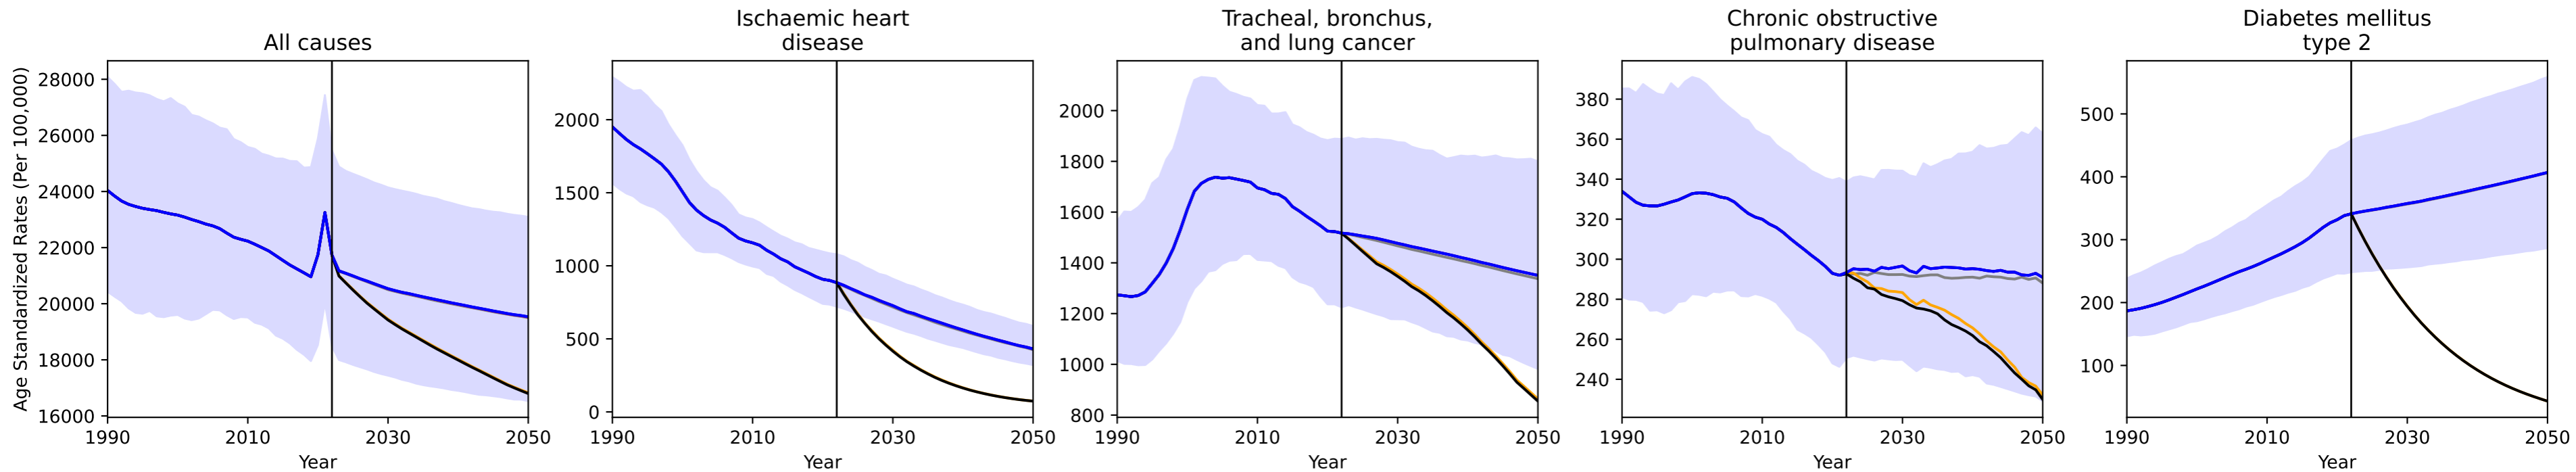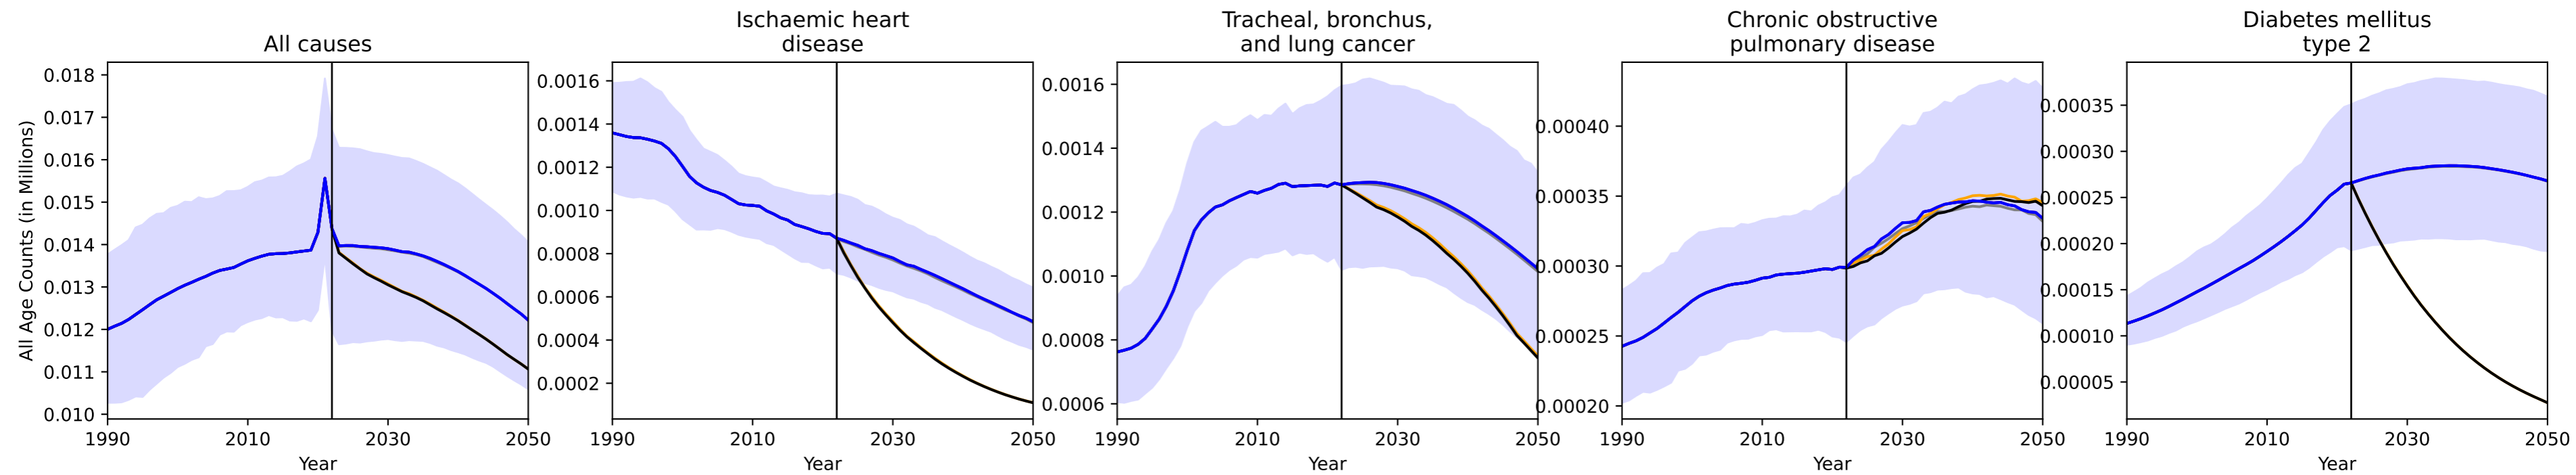

# Netherlands

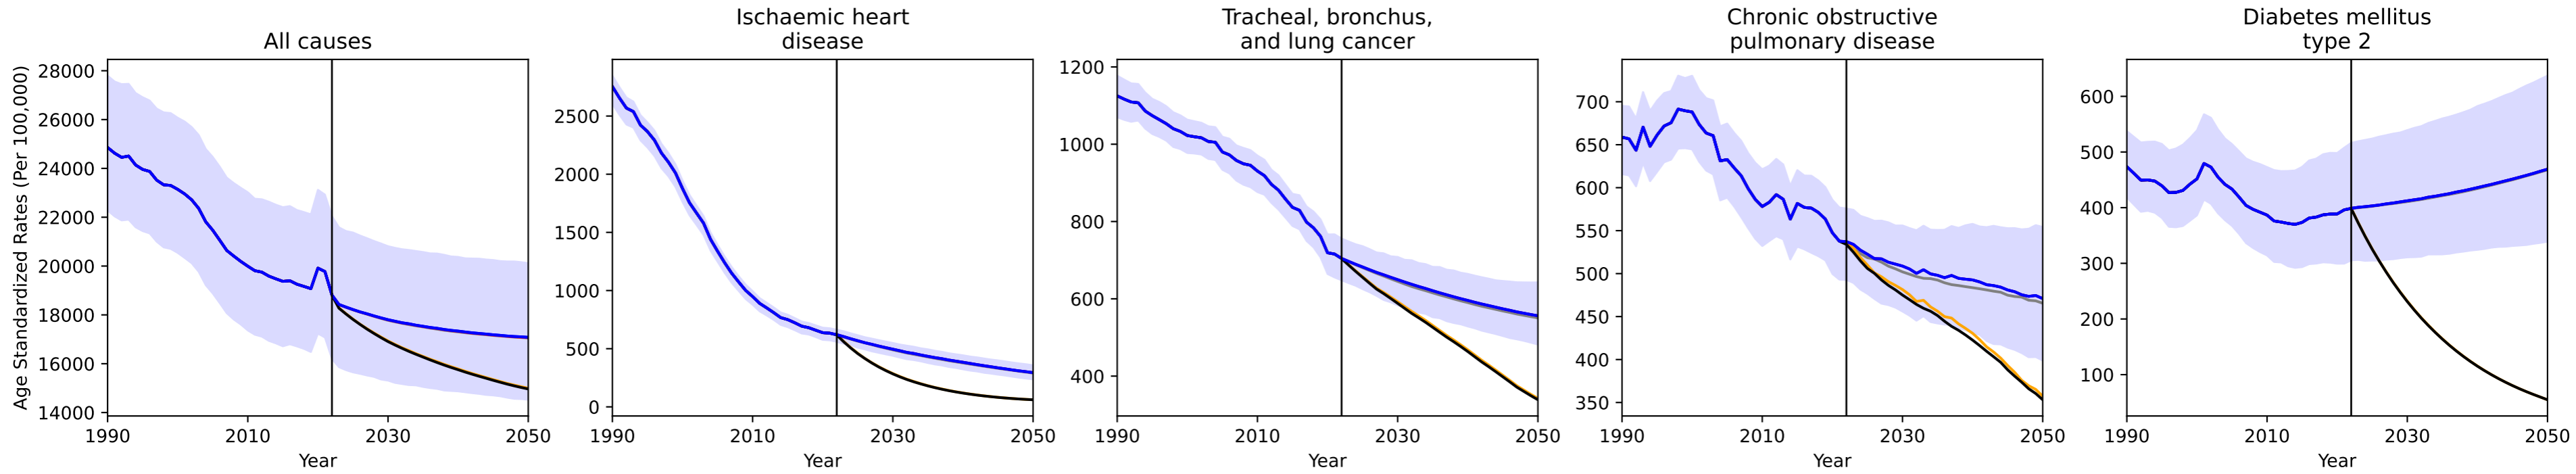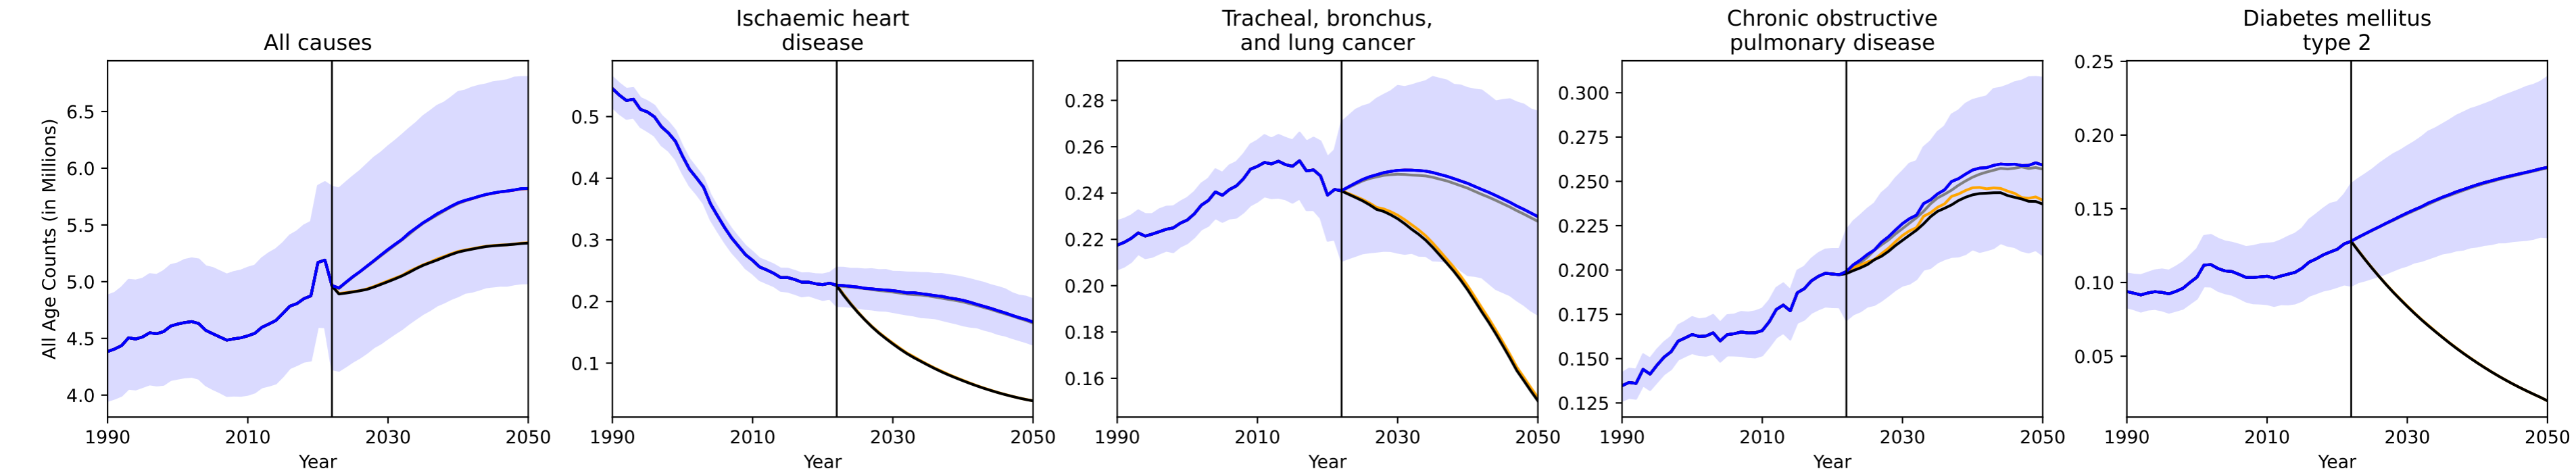

# Norway

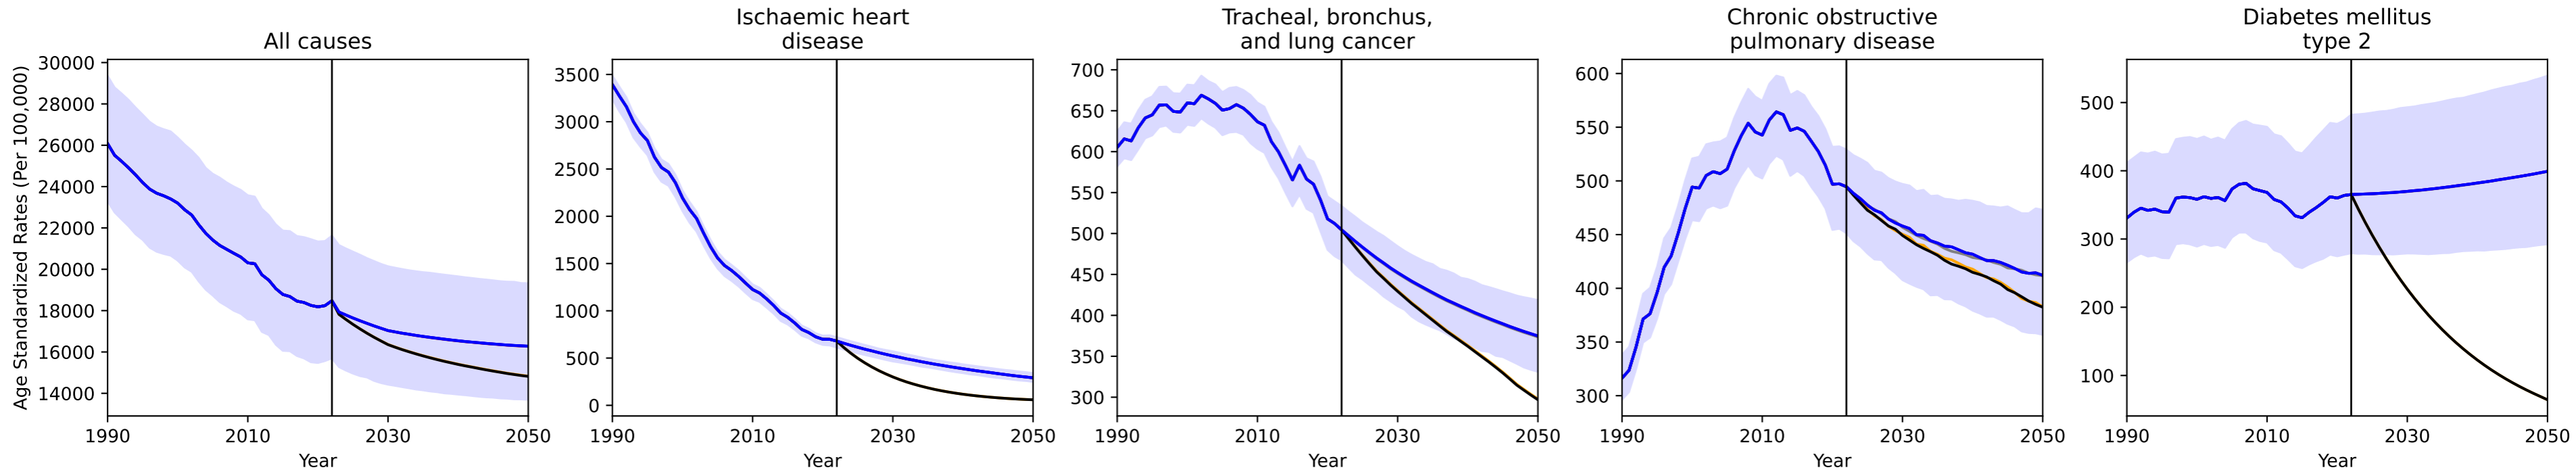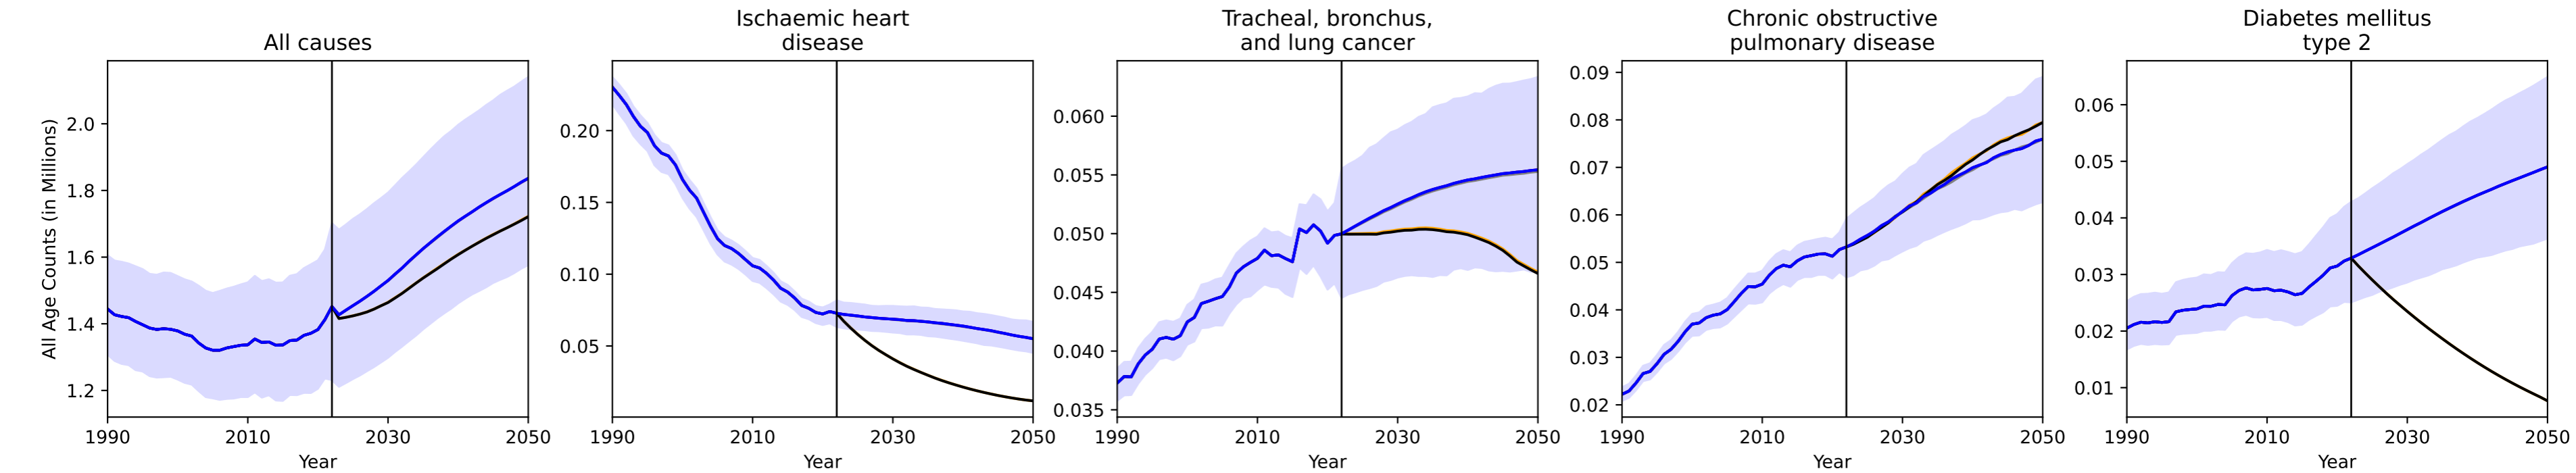



# Portugal

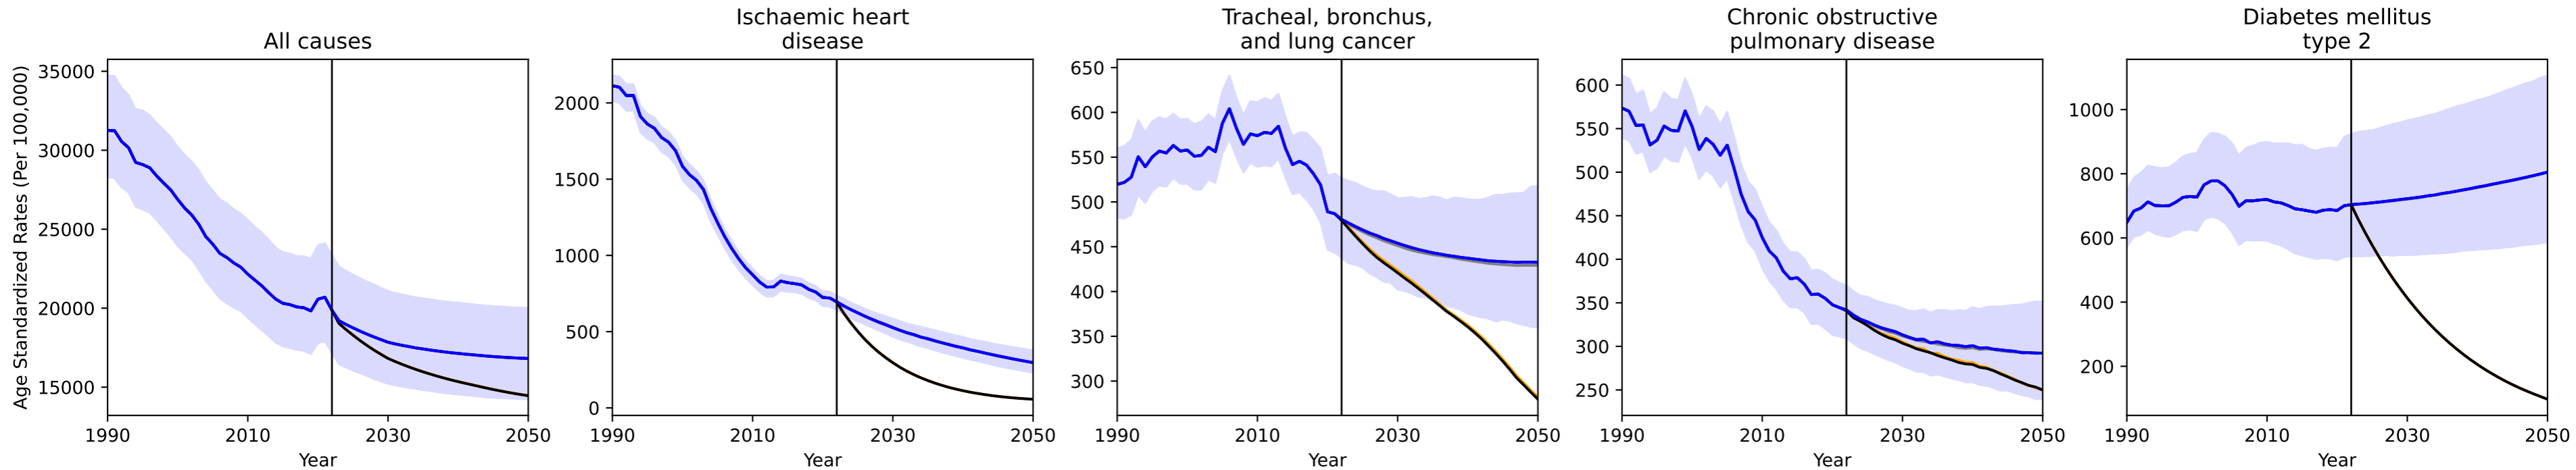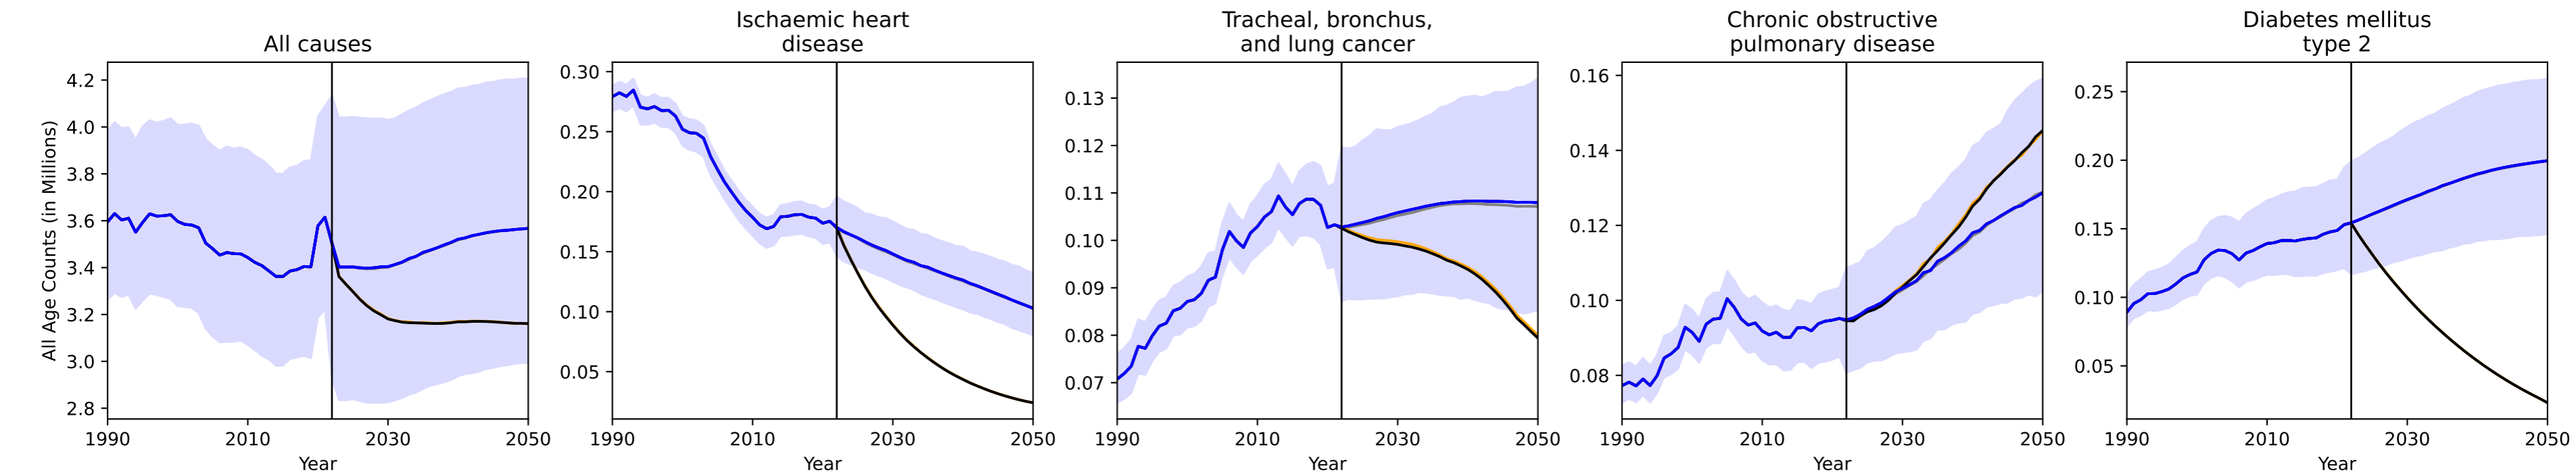

# San Marino

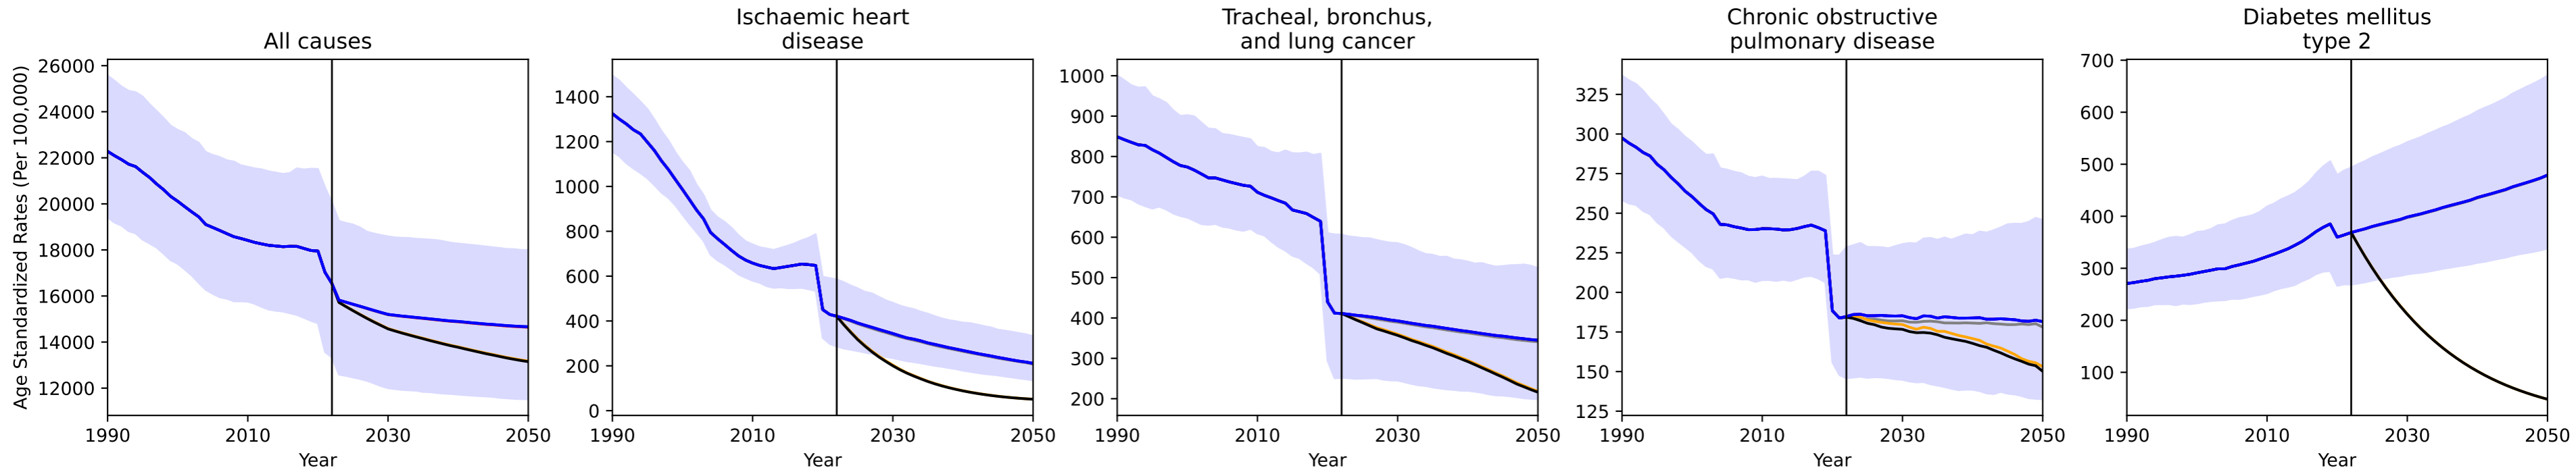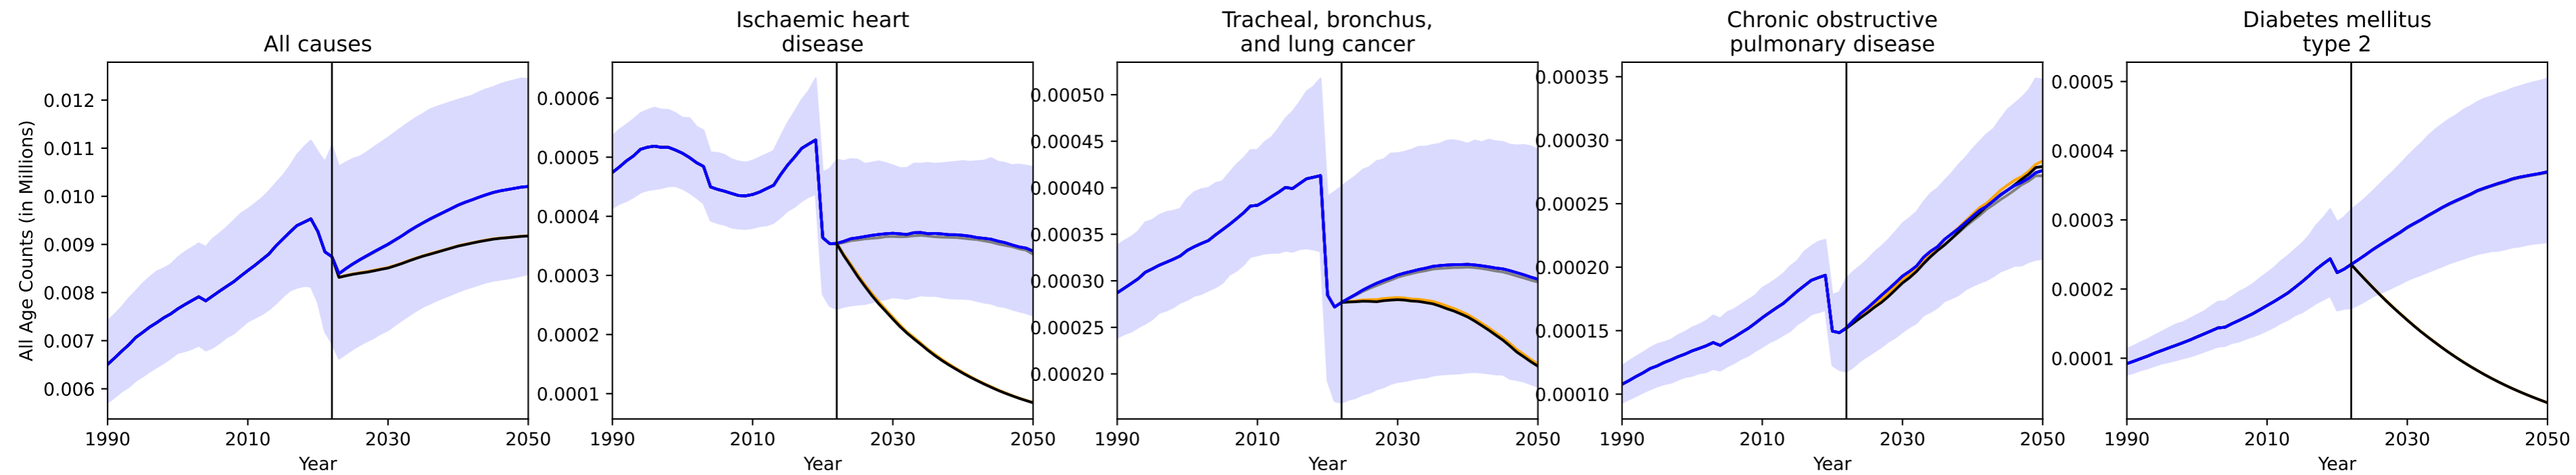

# Spain

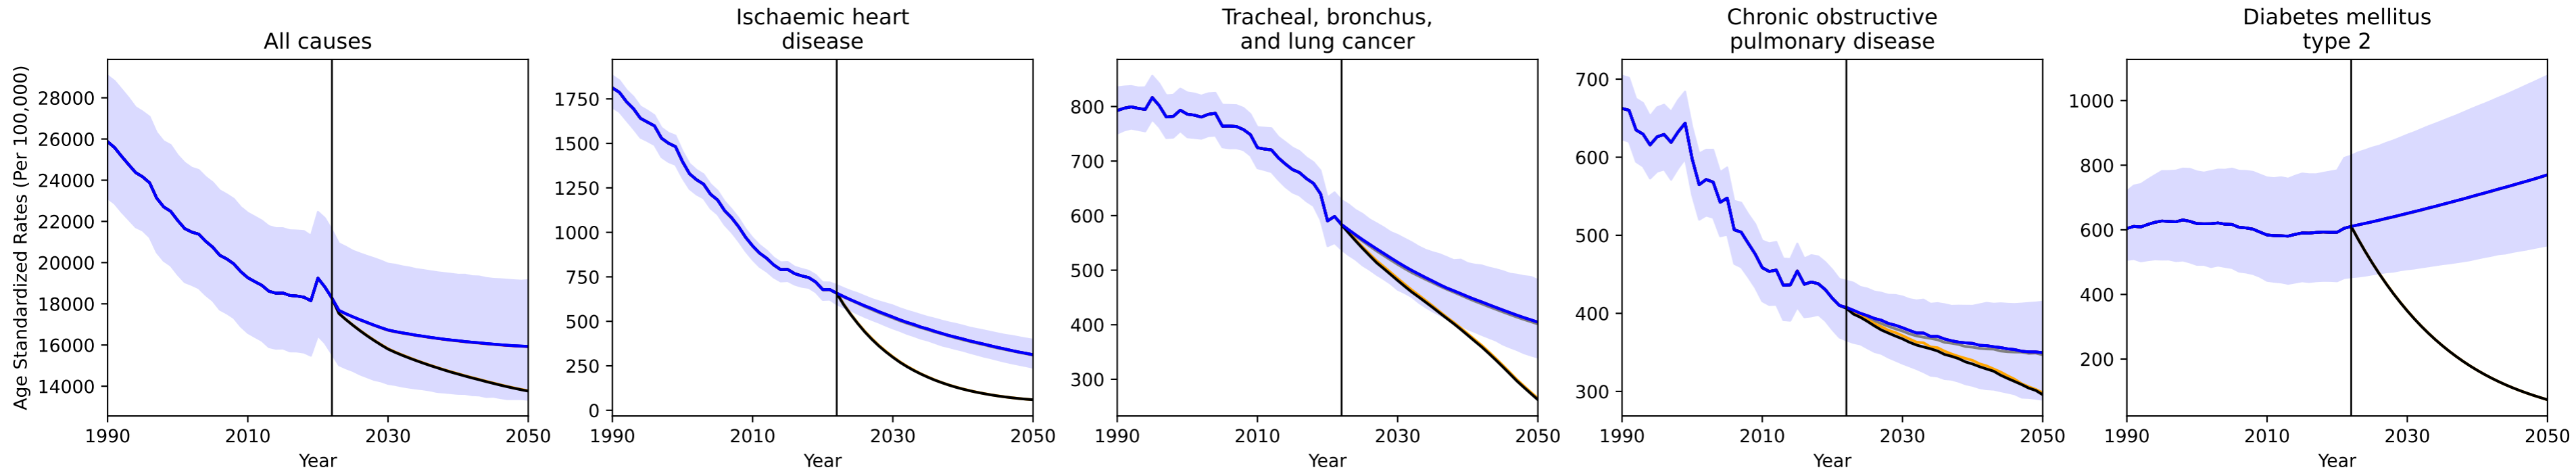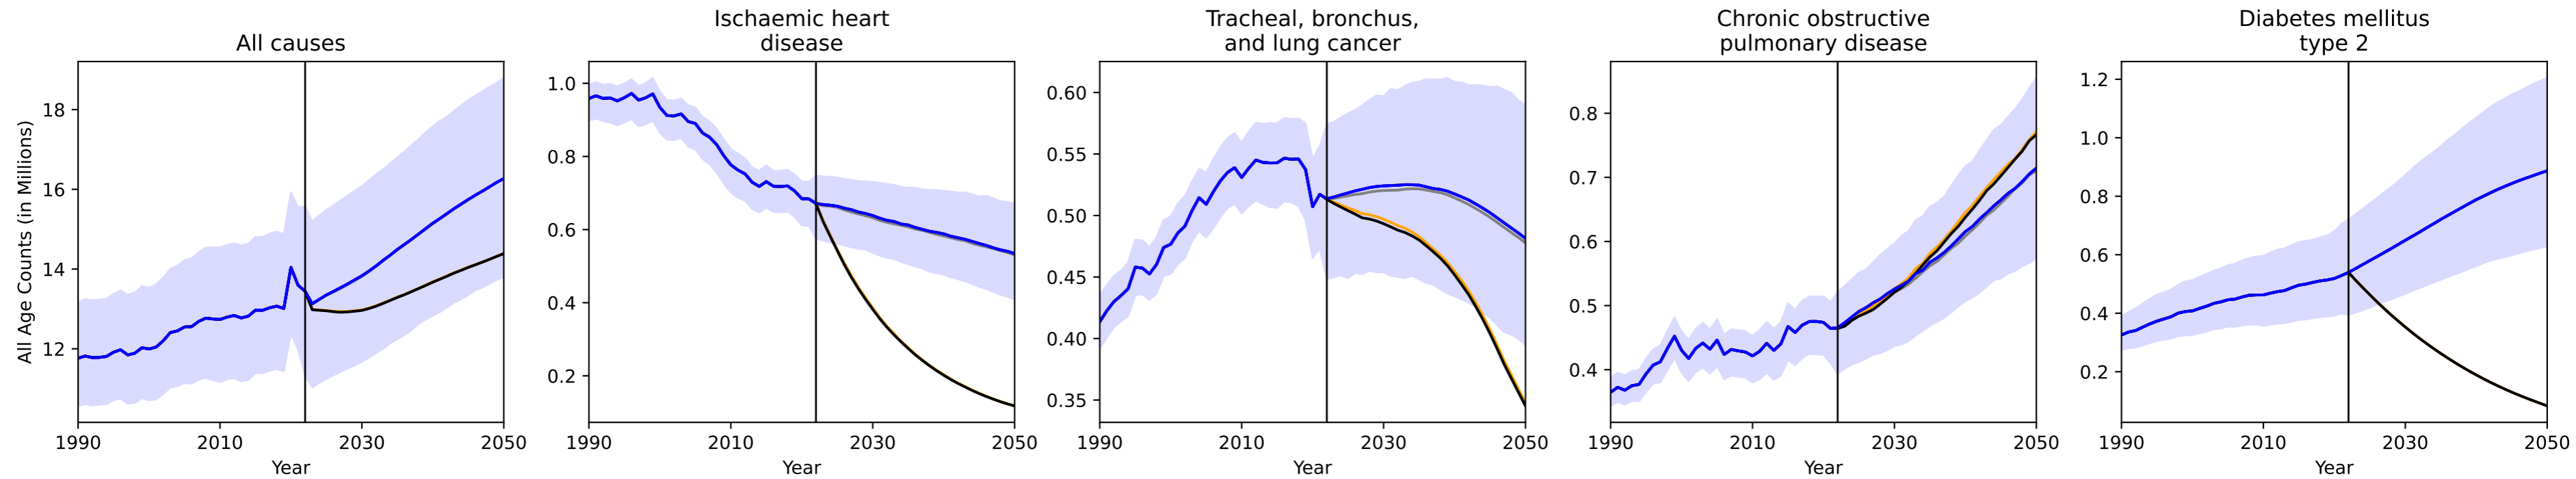

# Sweden

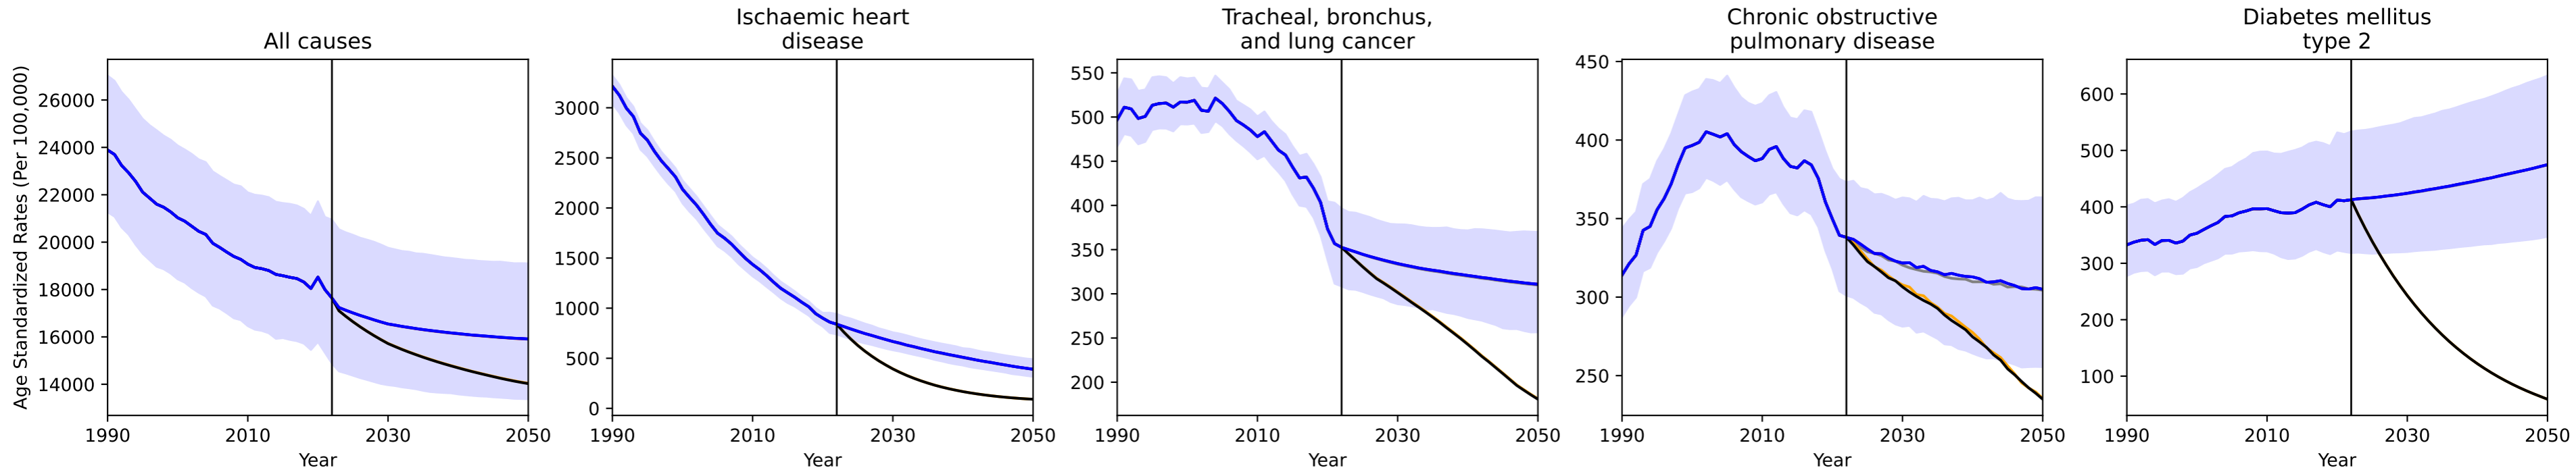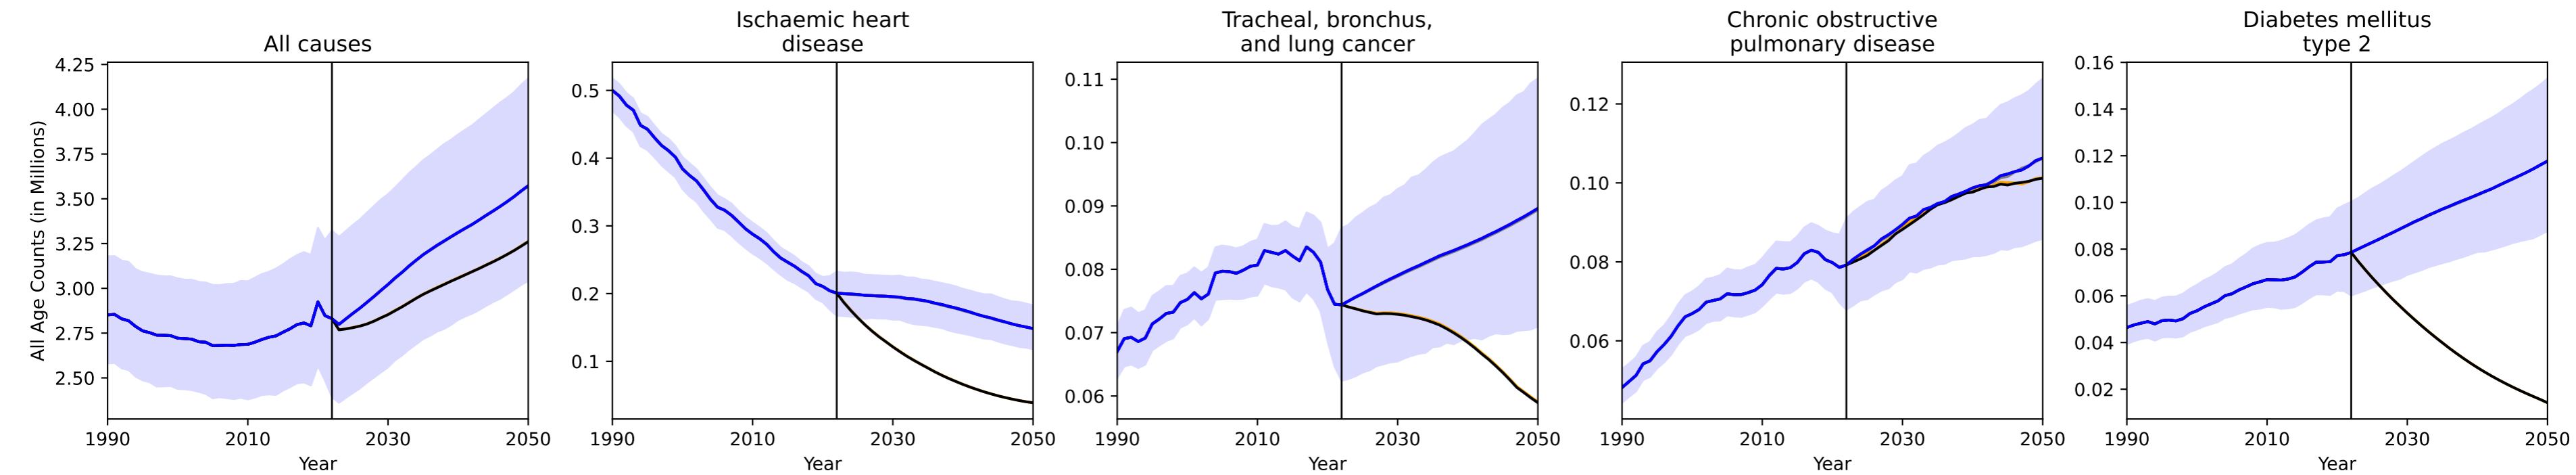

# Switzerland

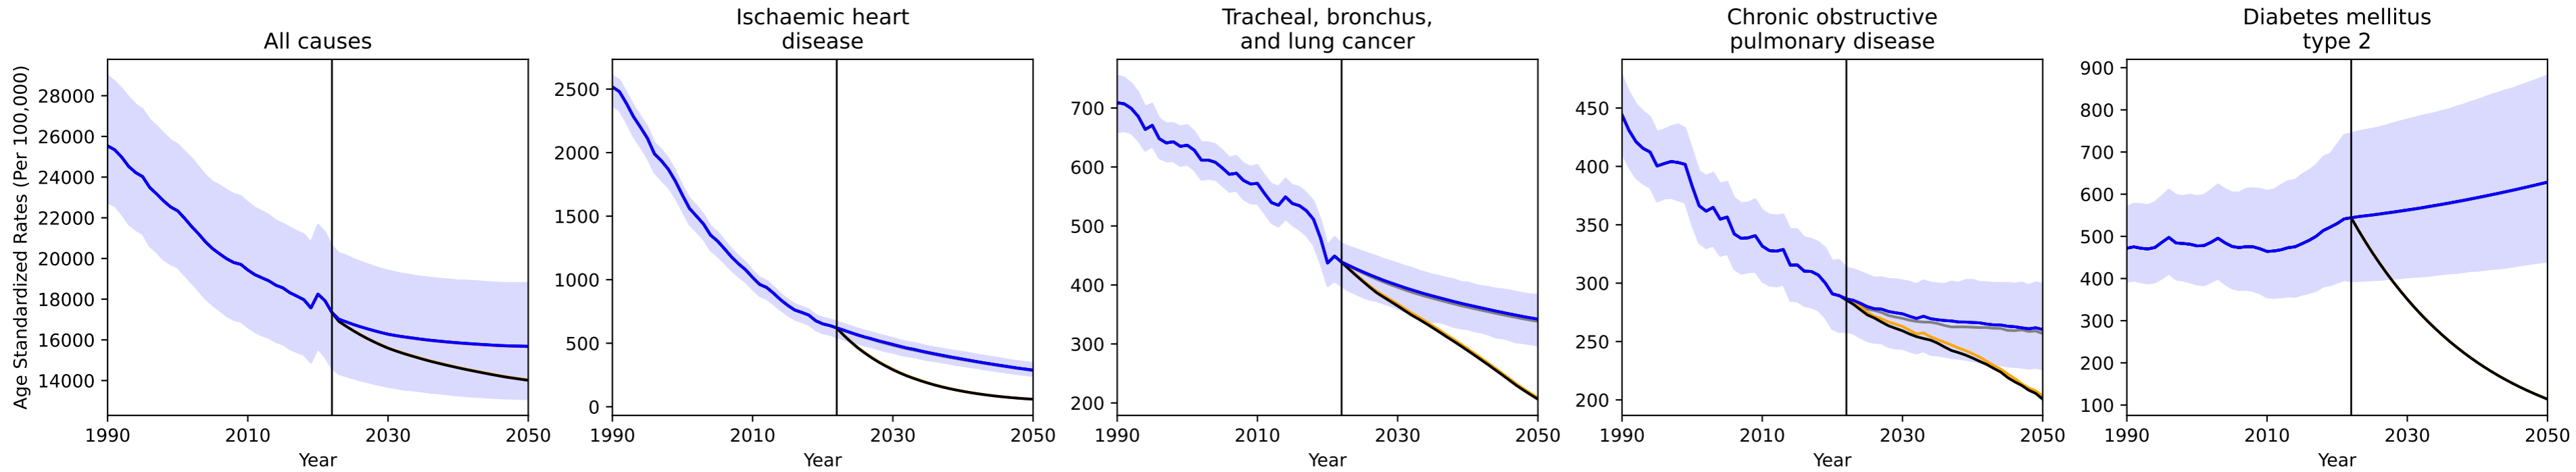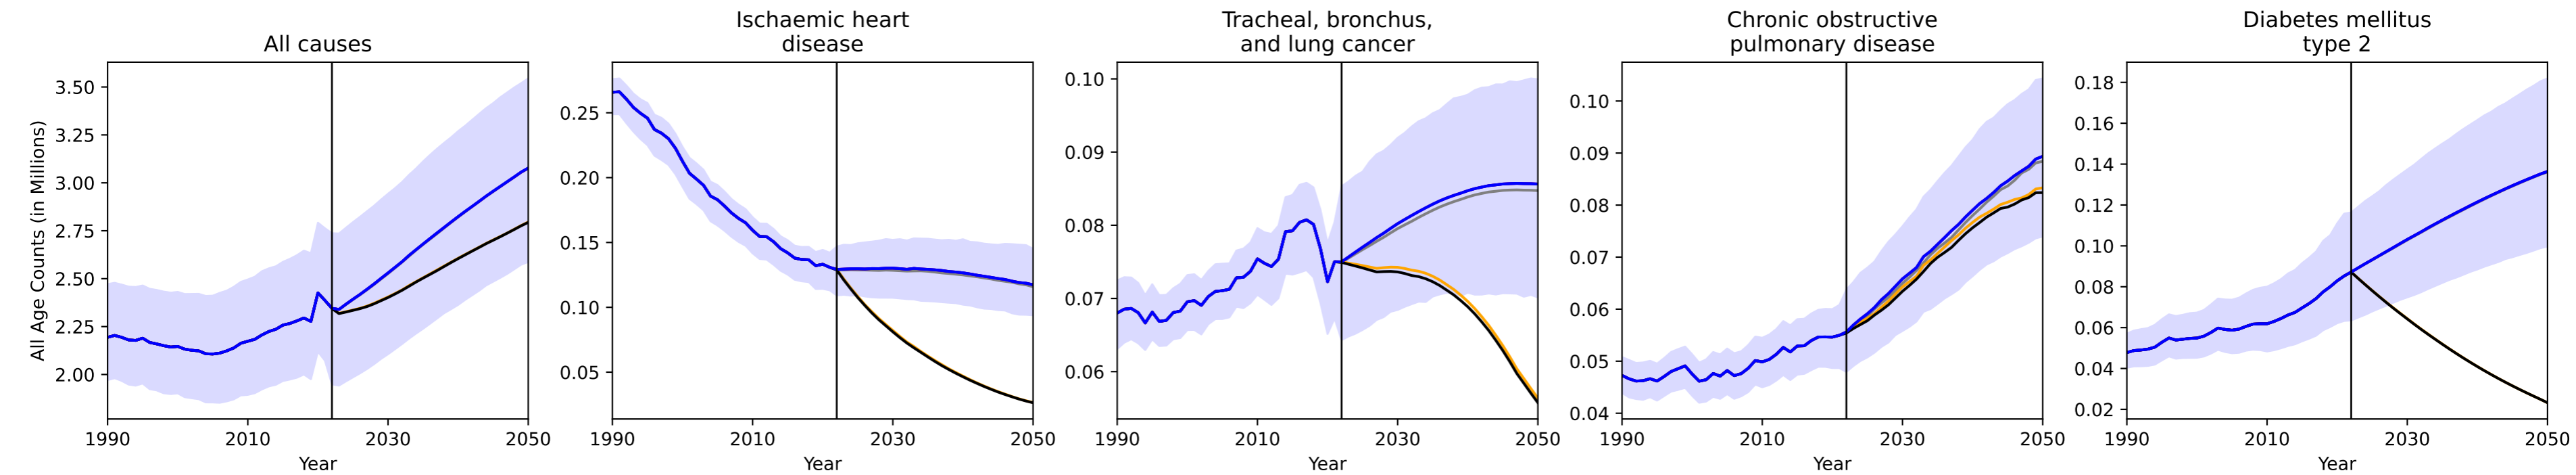

# UK

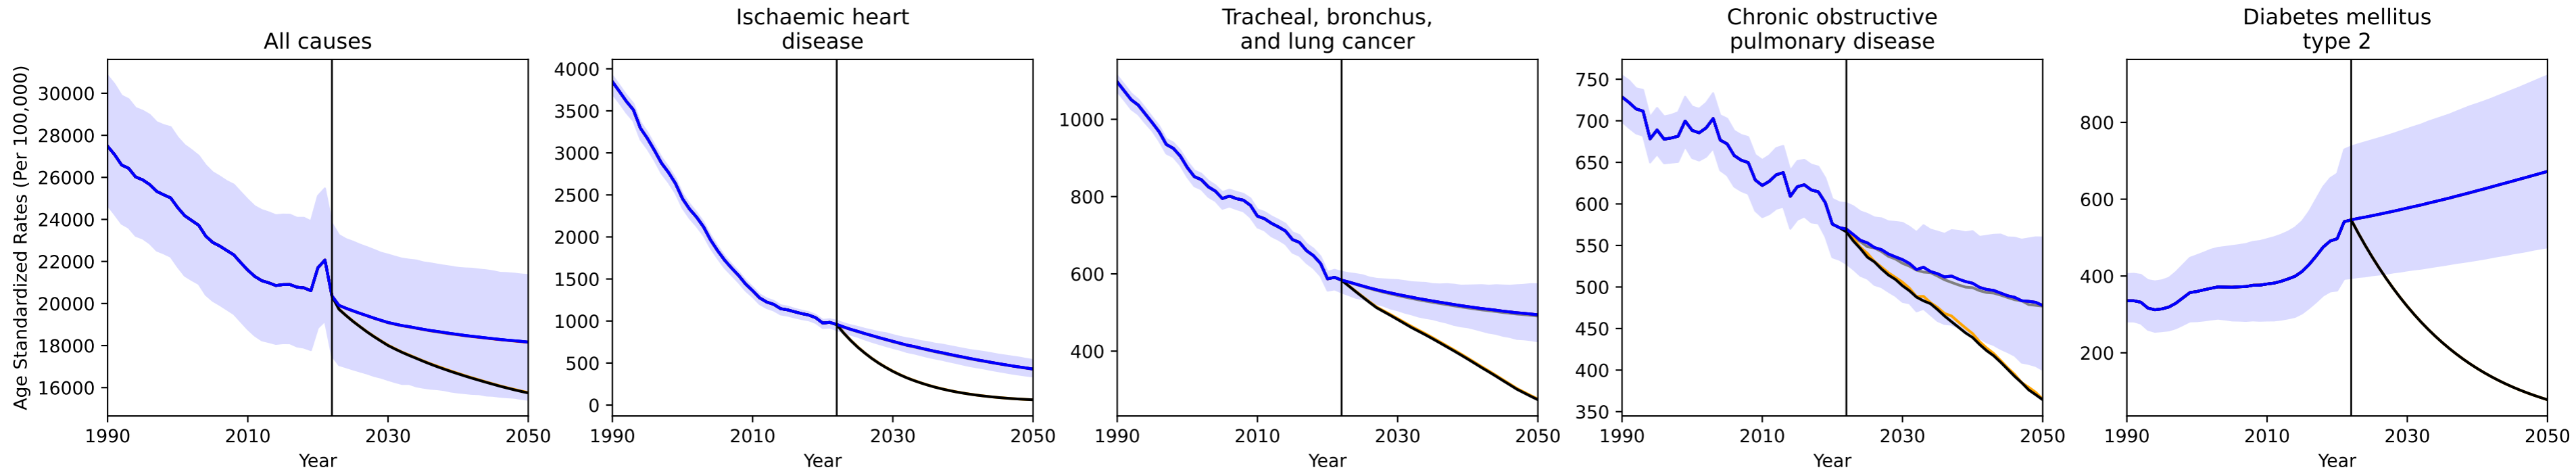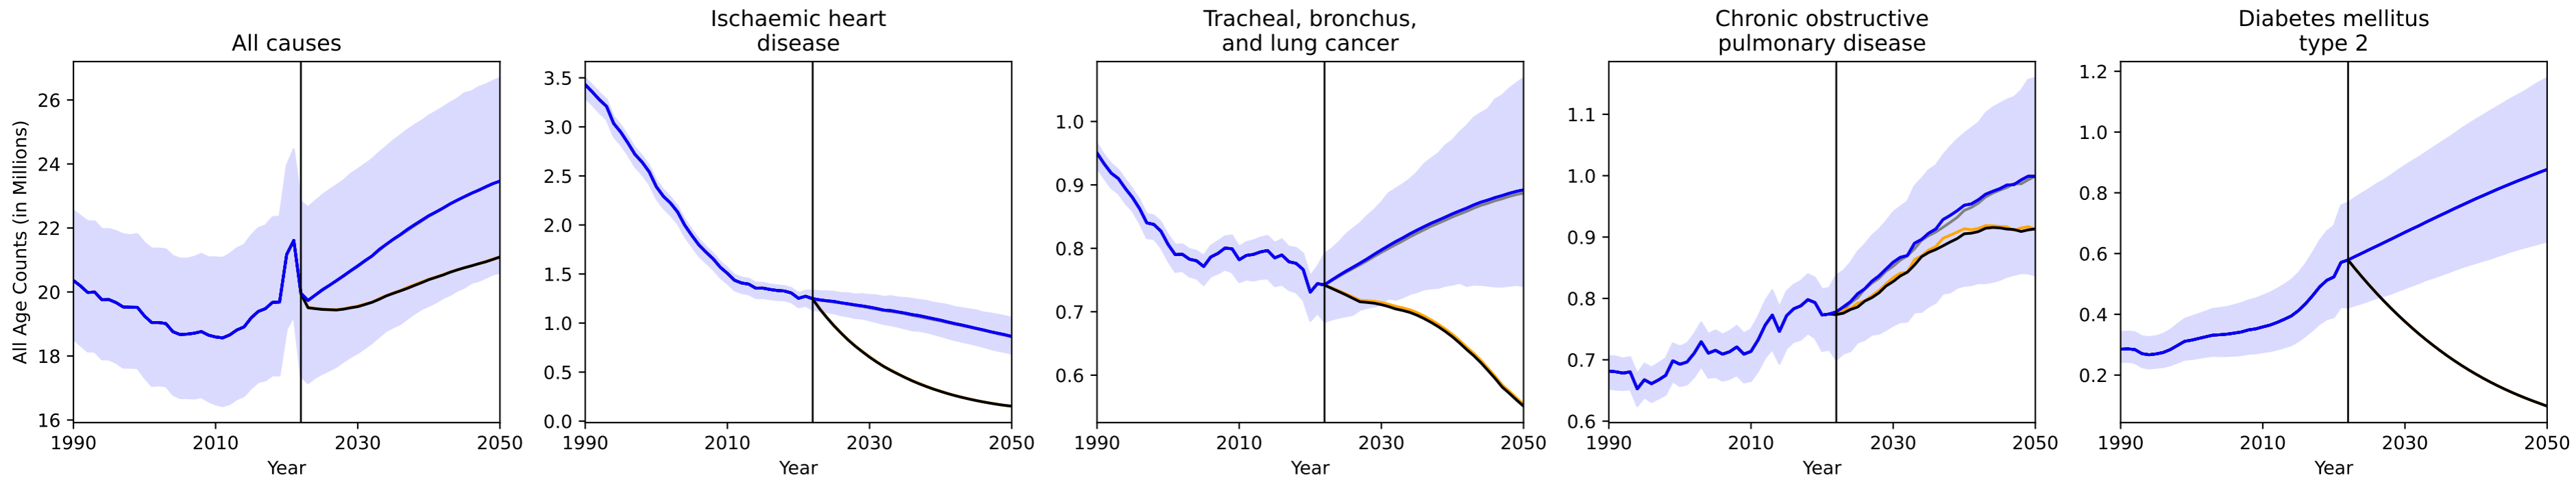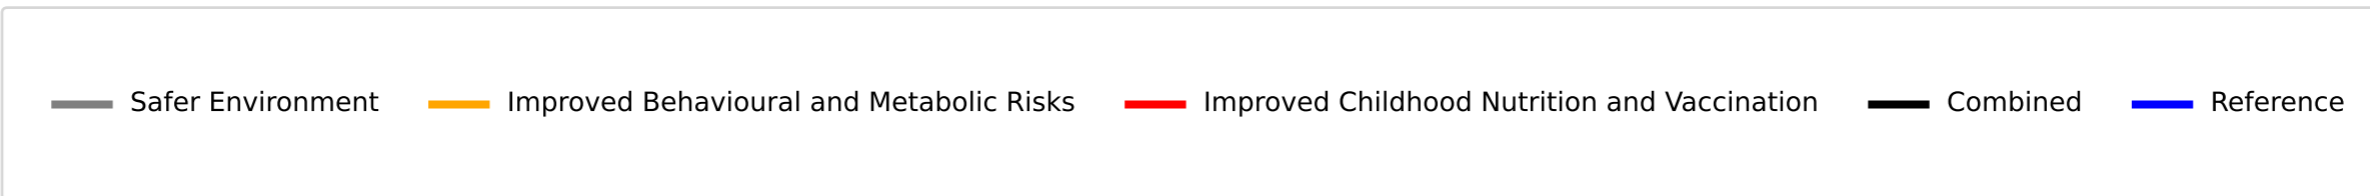

# Bolivia

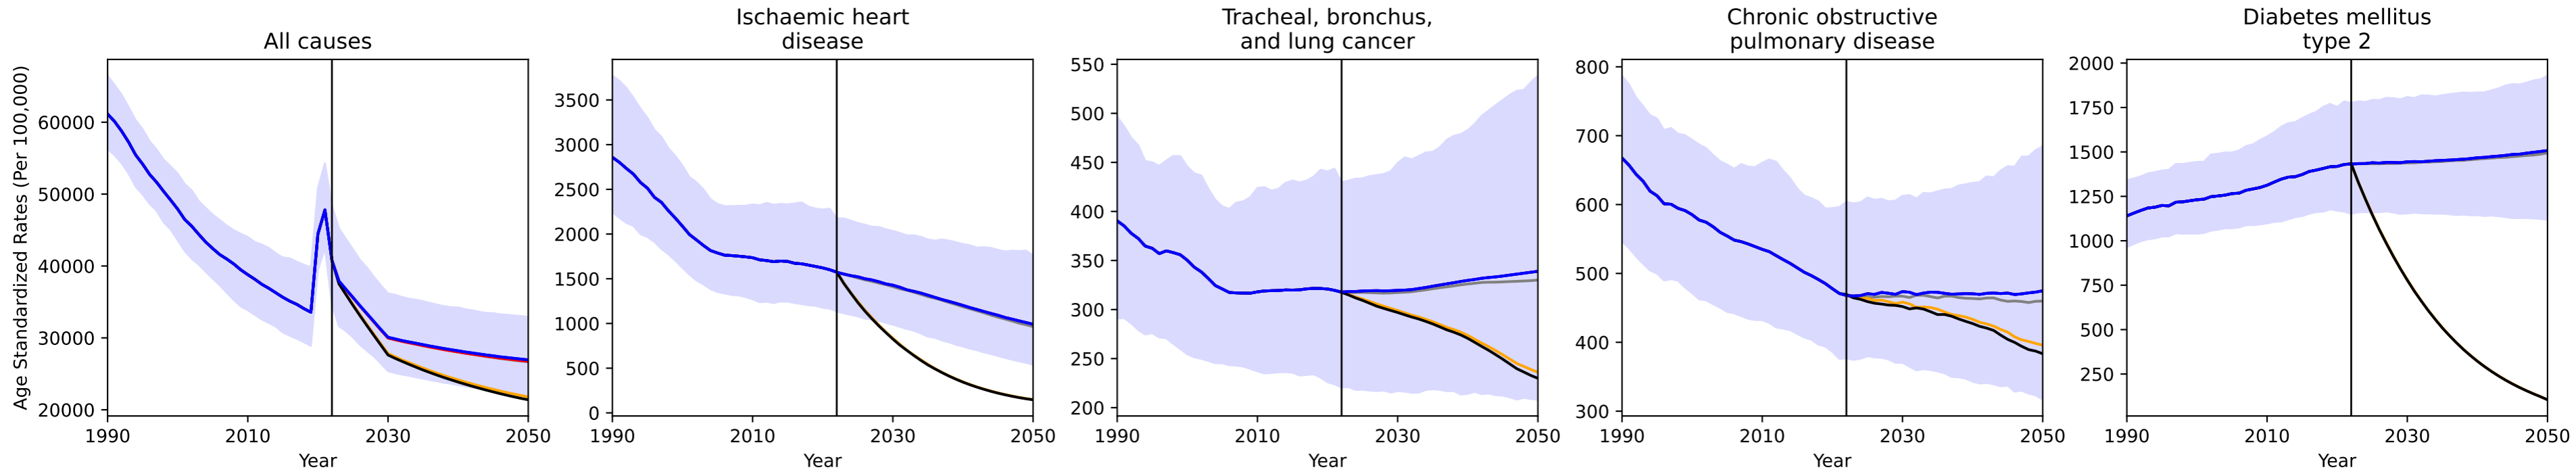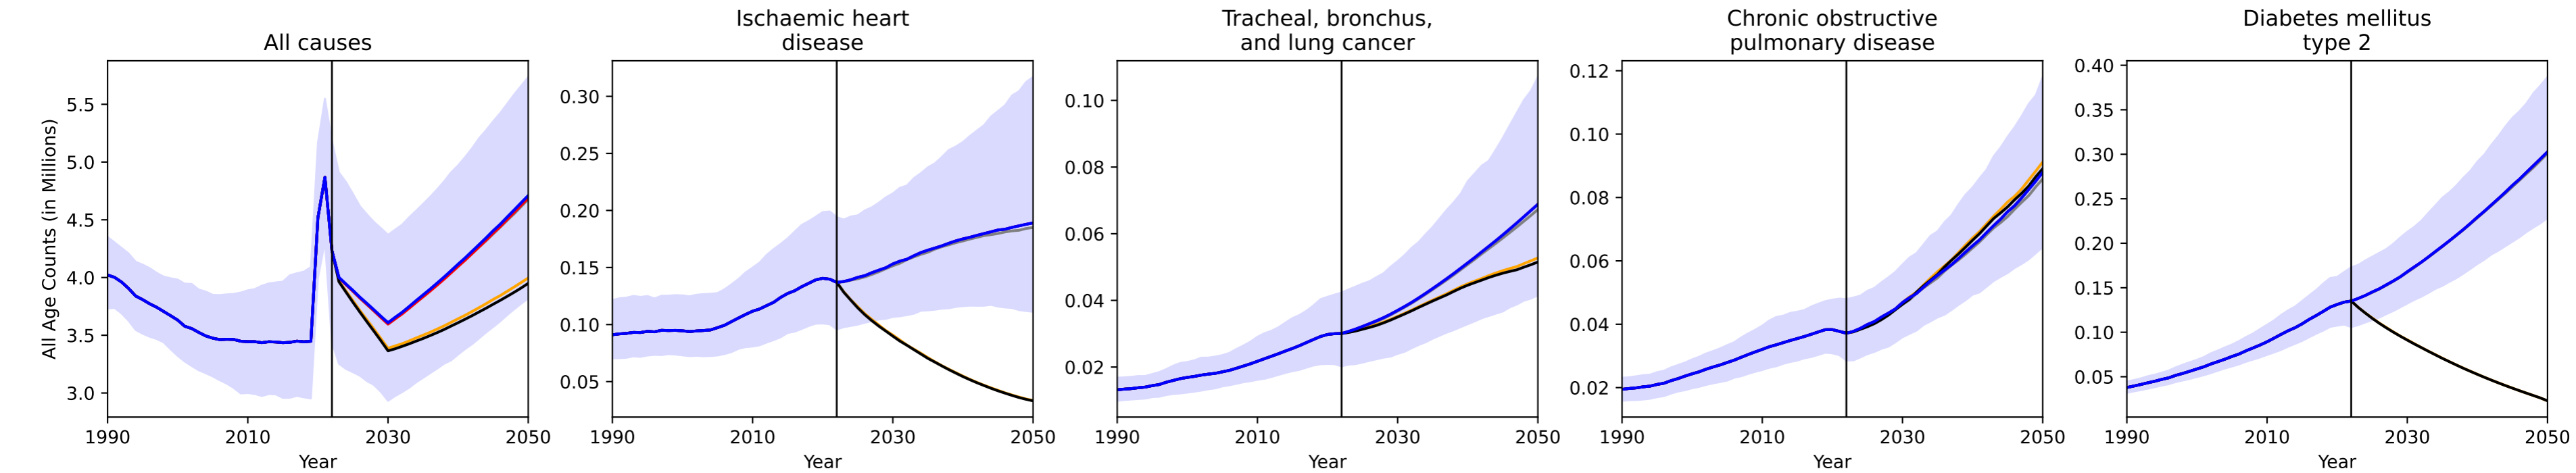

# Ecuador

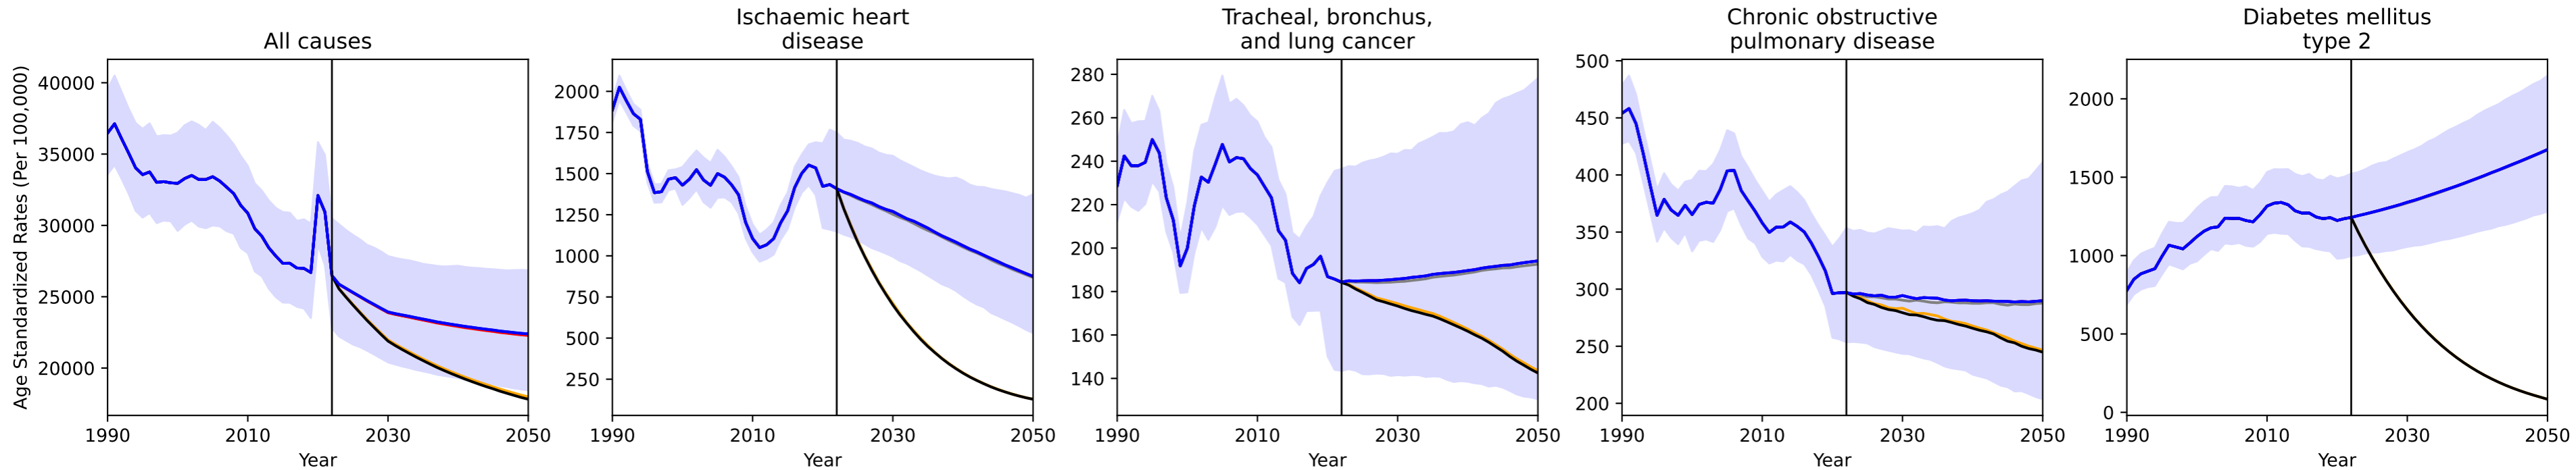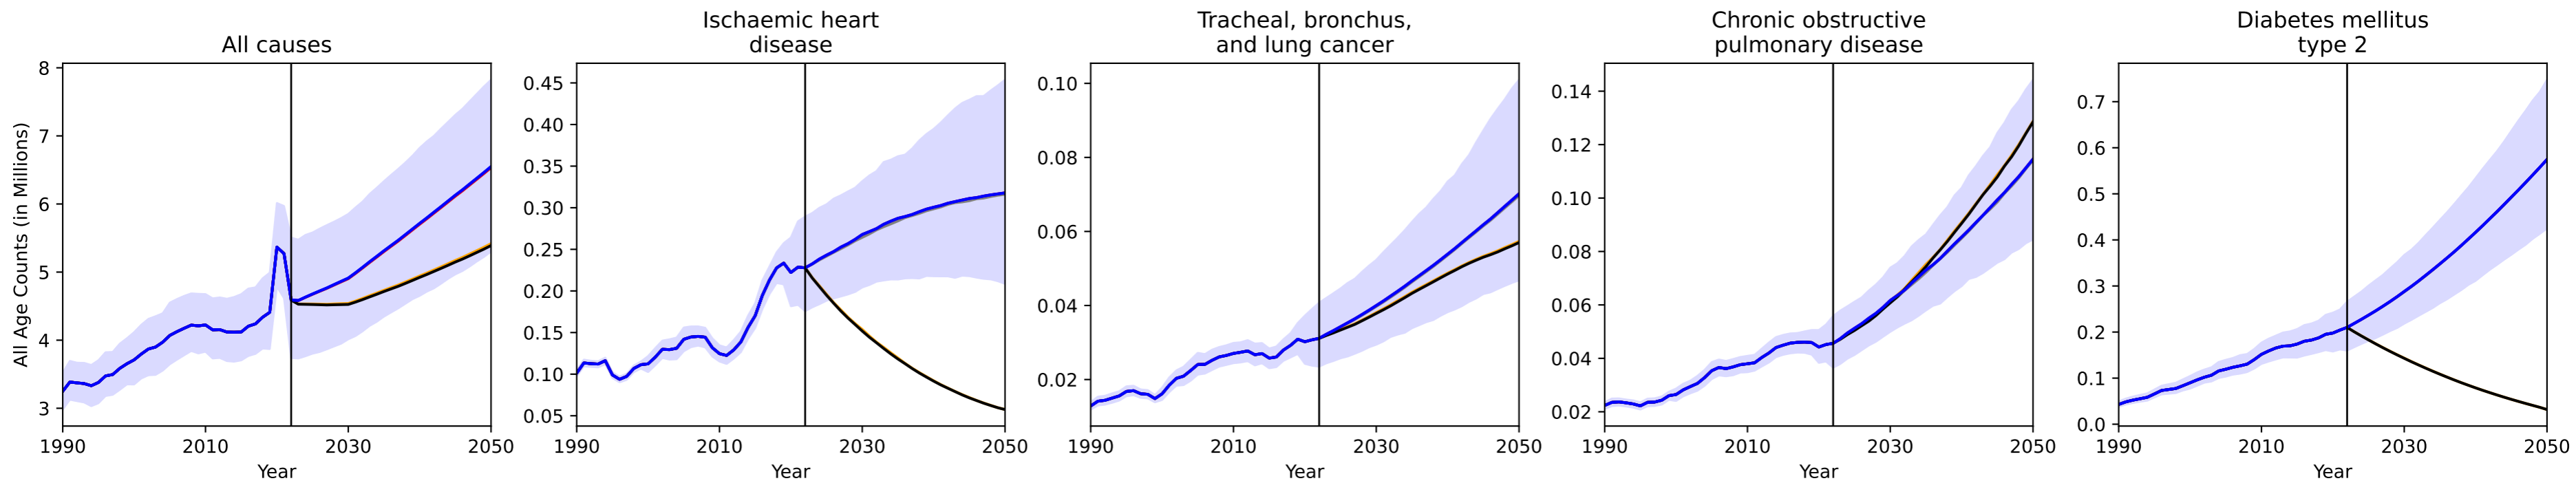



# Peru

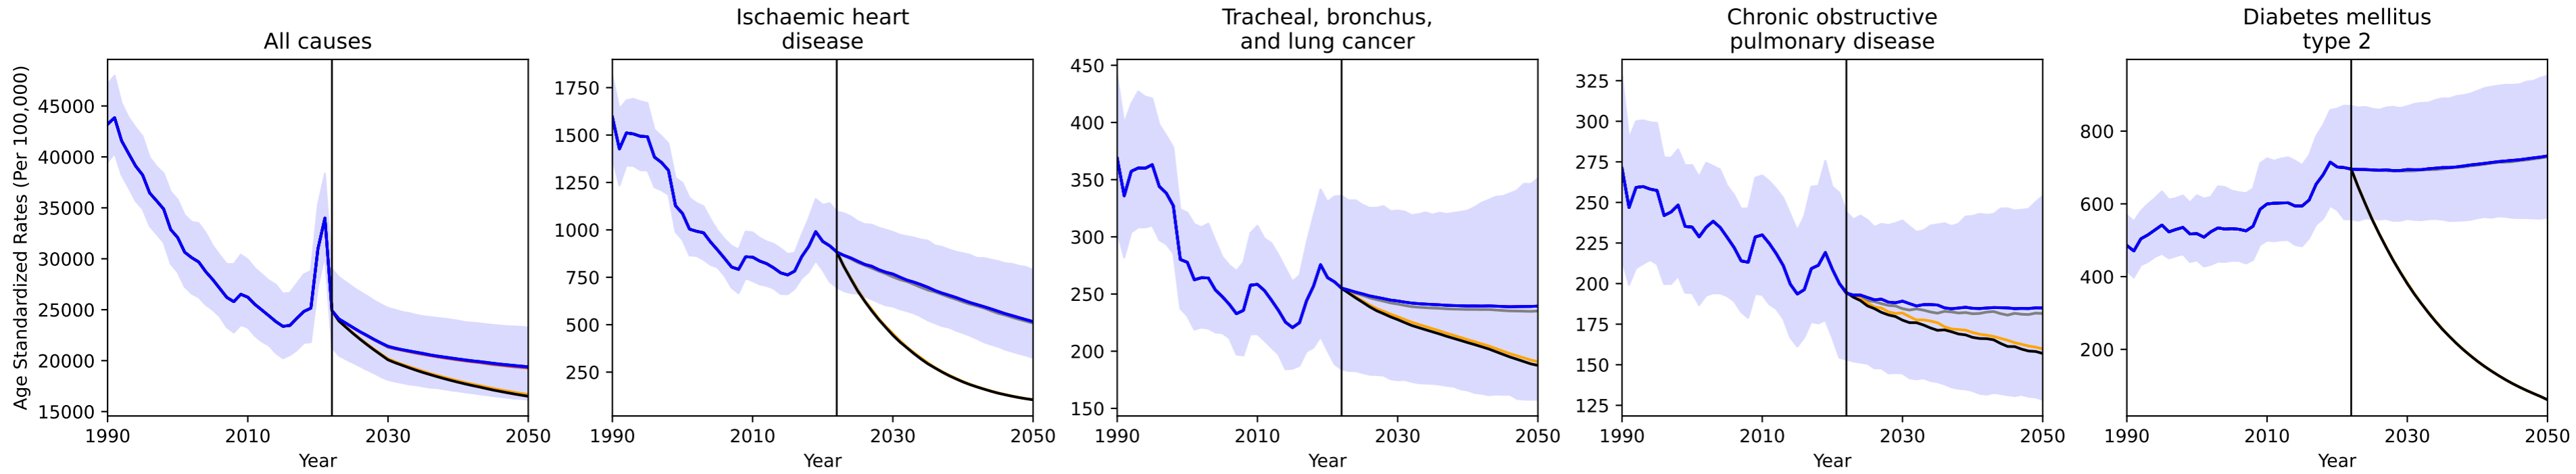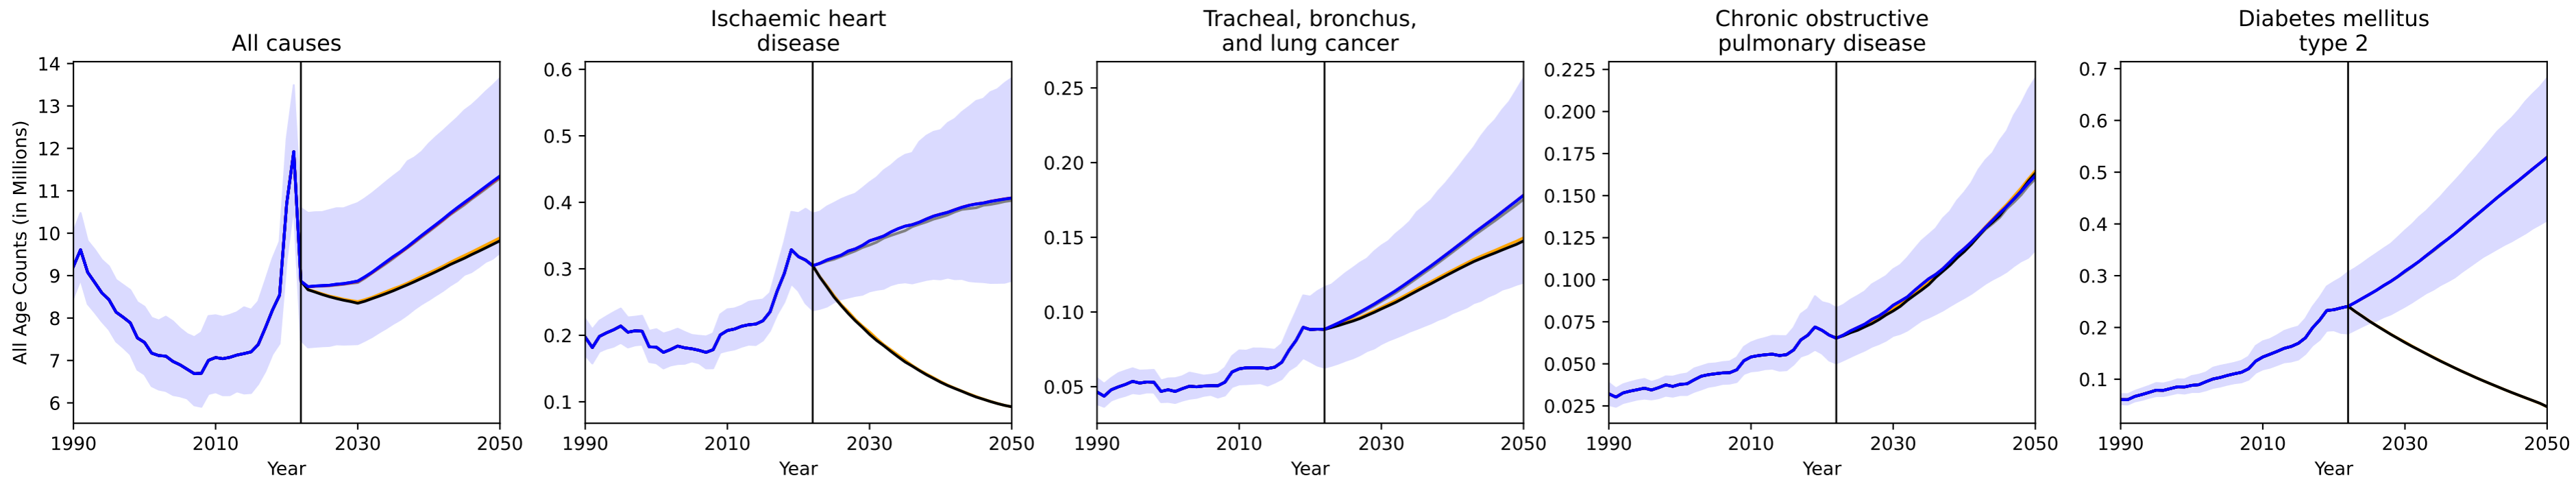

# Antigua And Barbuda

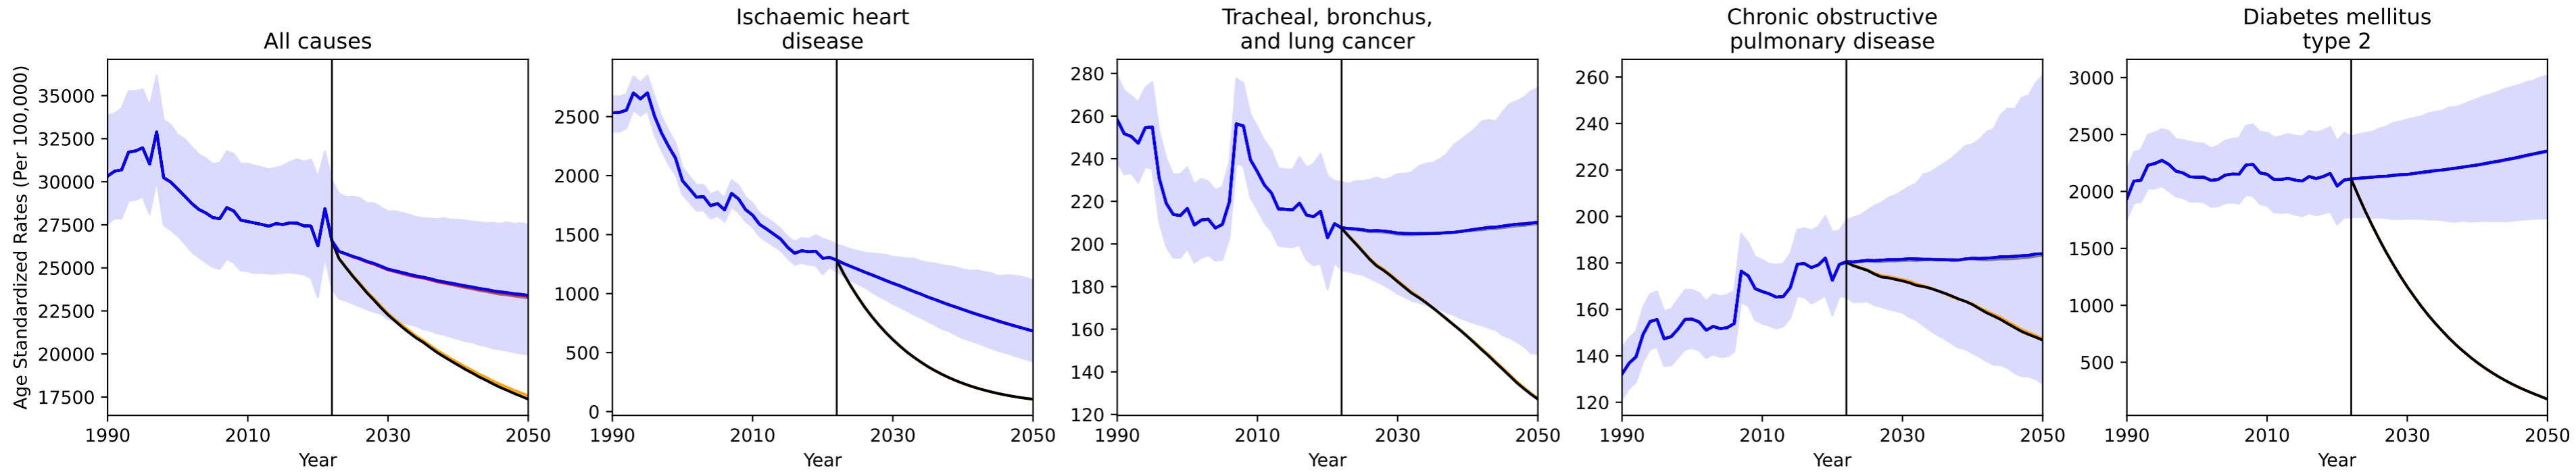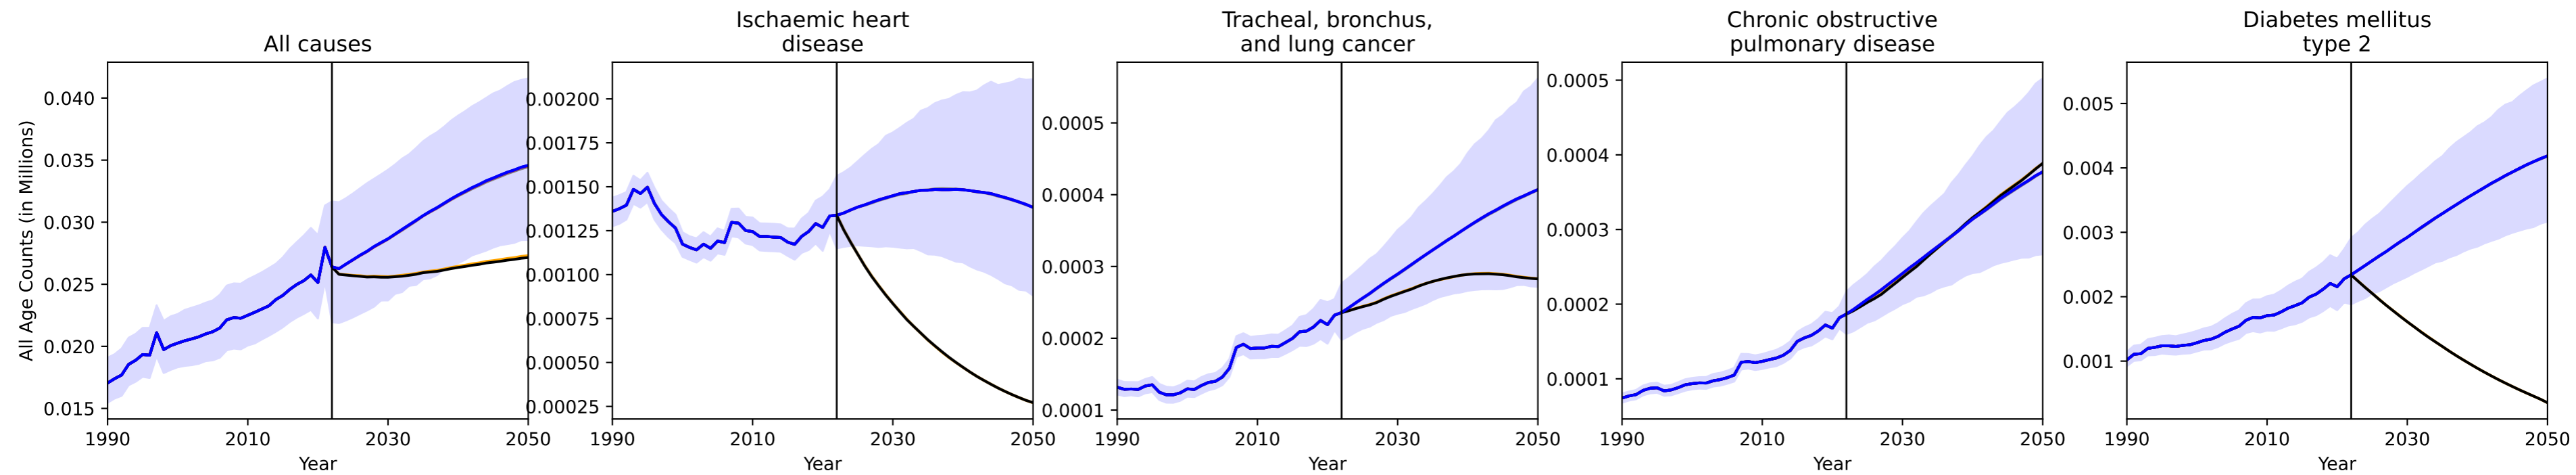

# The Bahamas

Supplemental Results Figure S12. All cause and top NCD causes age standardized DALY rates and all age counts by scenario and location, 1990-2050

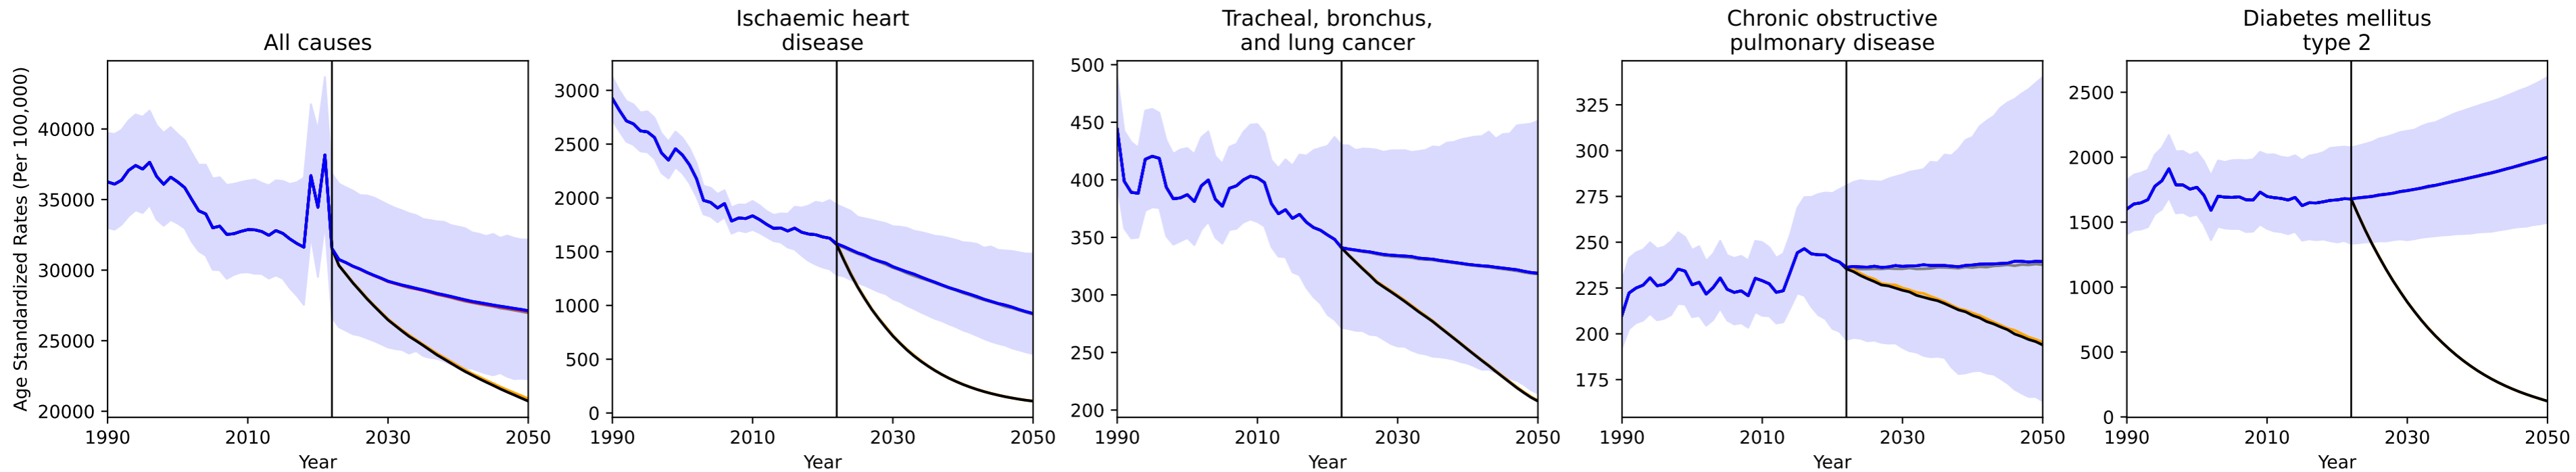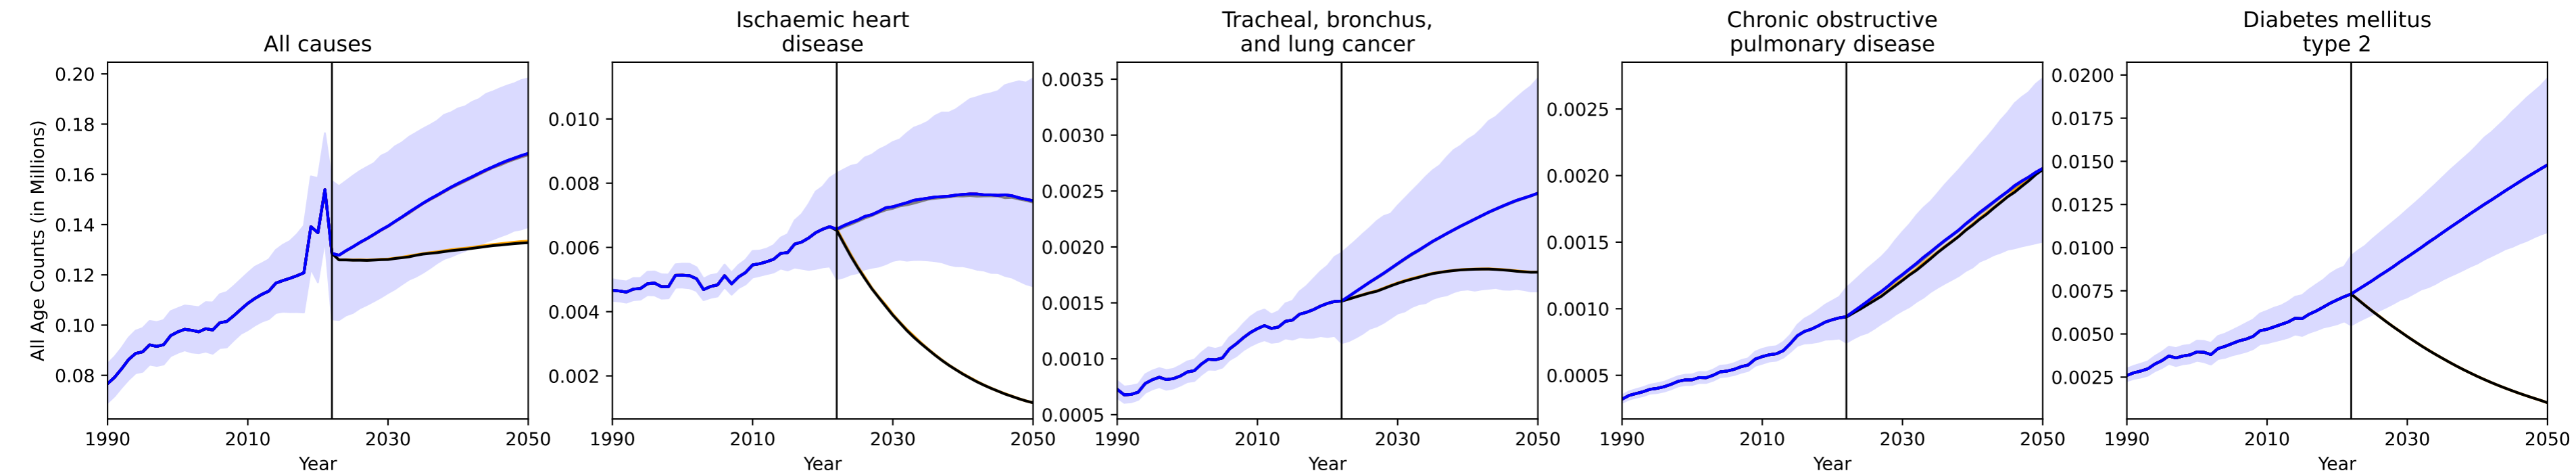

# Barbados

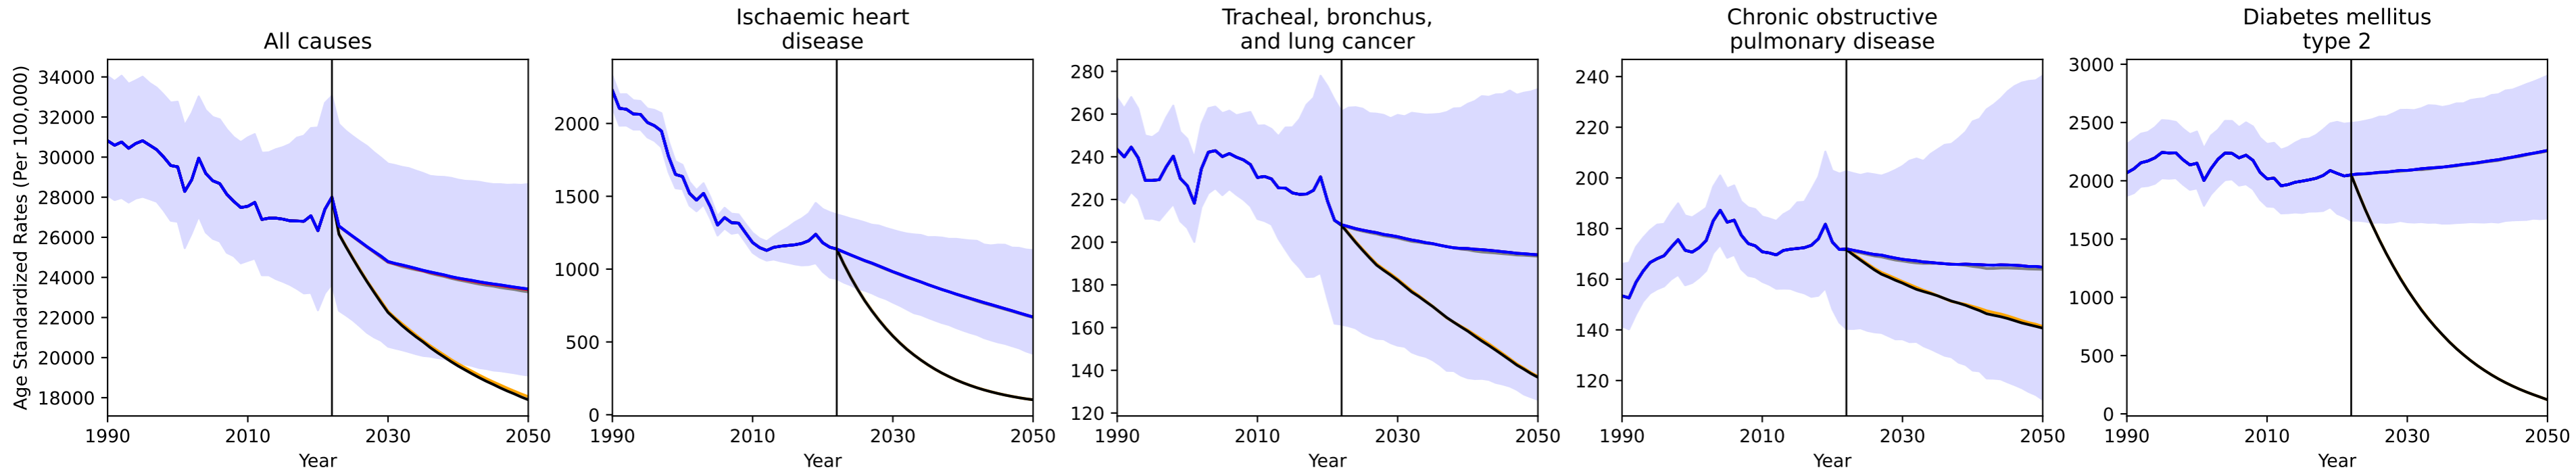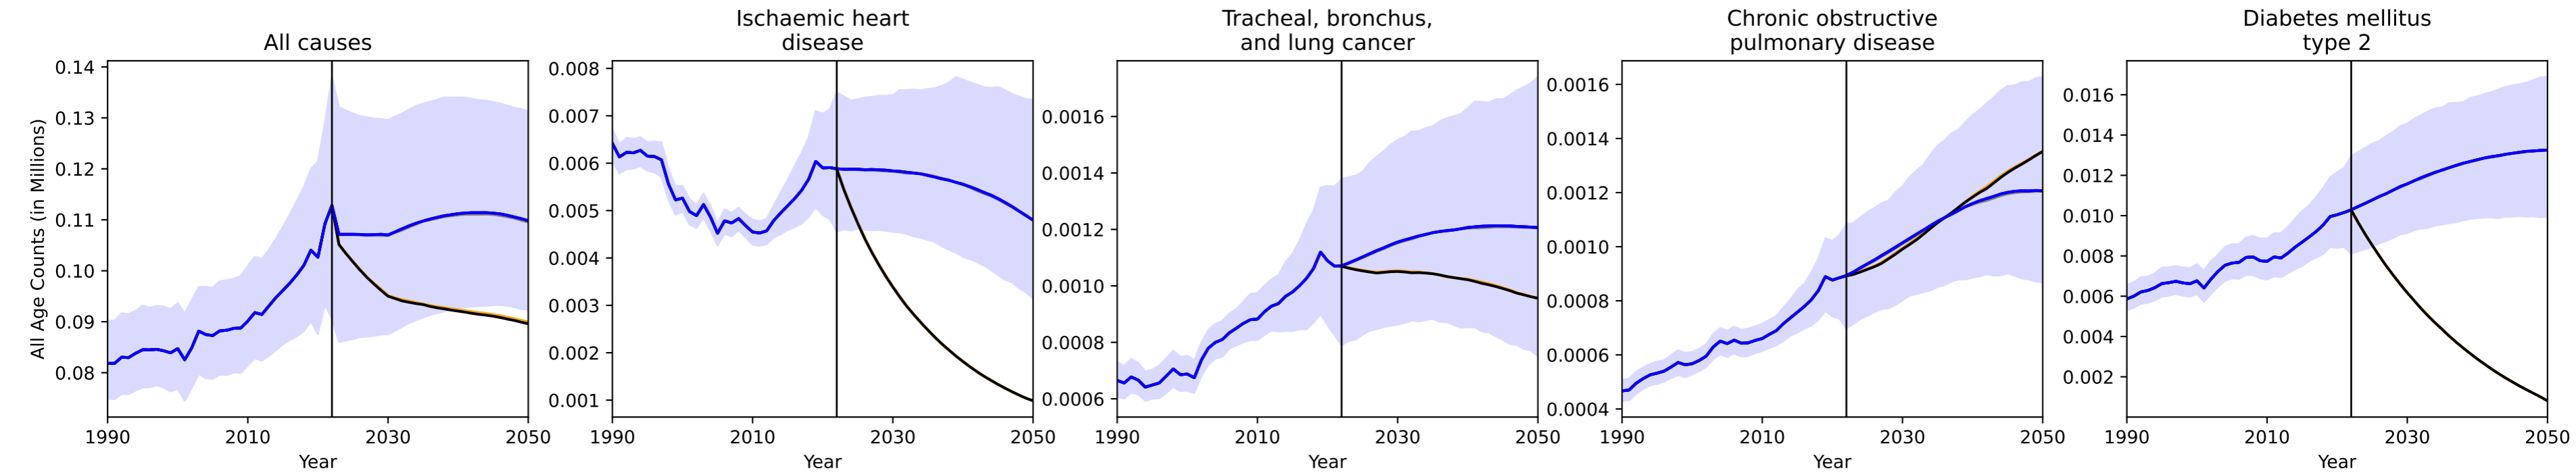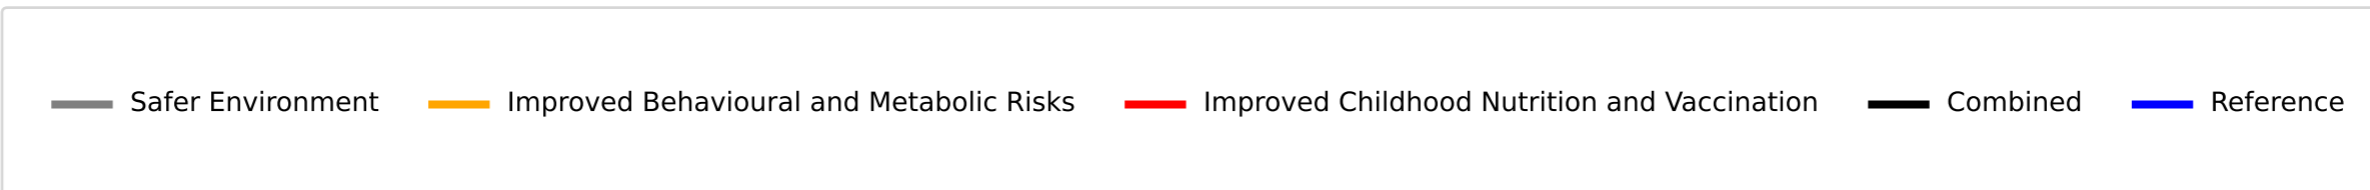

# Belize

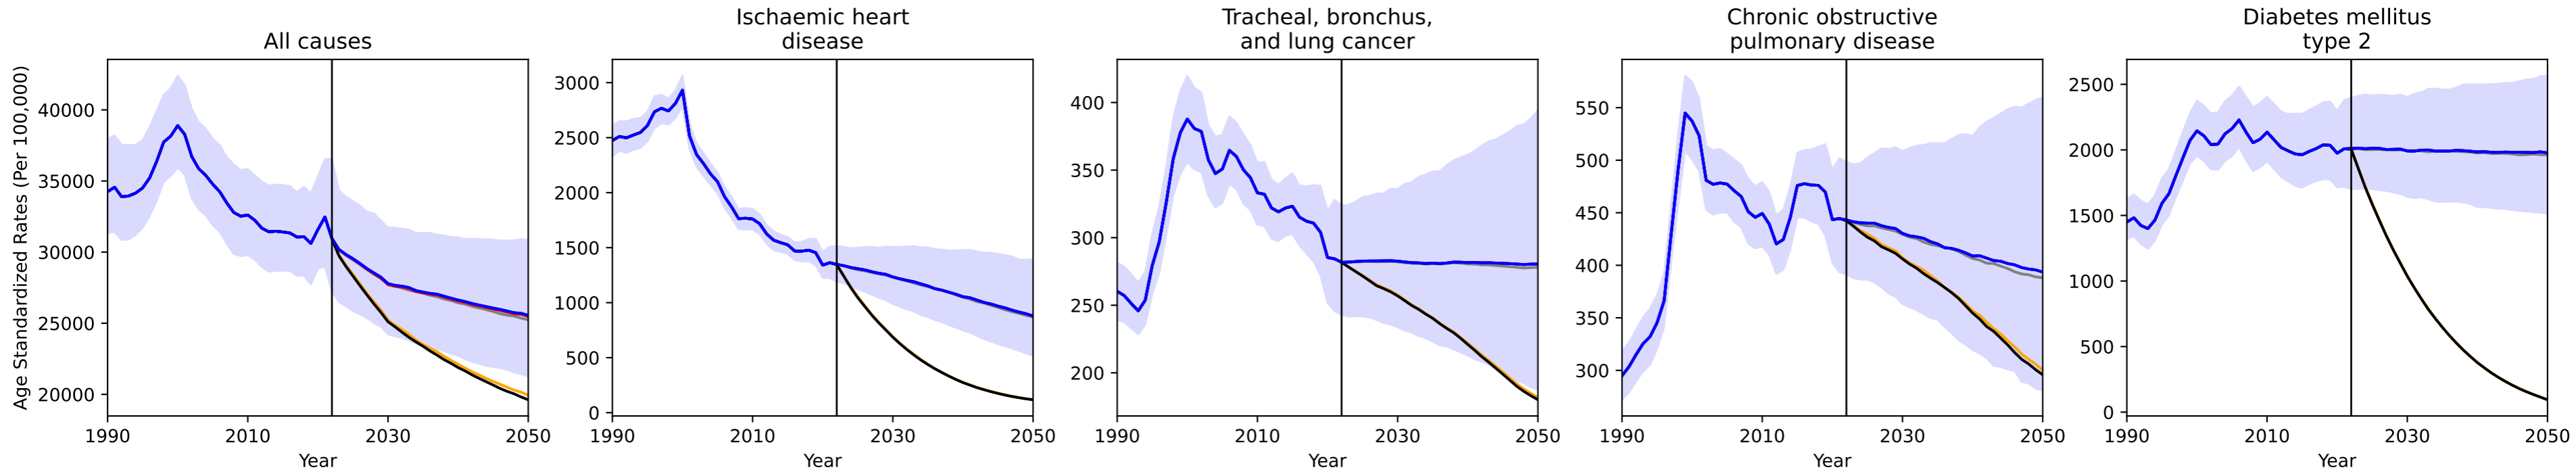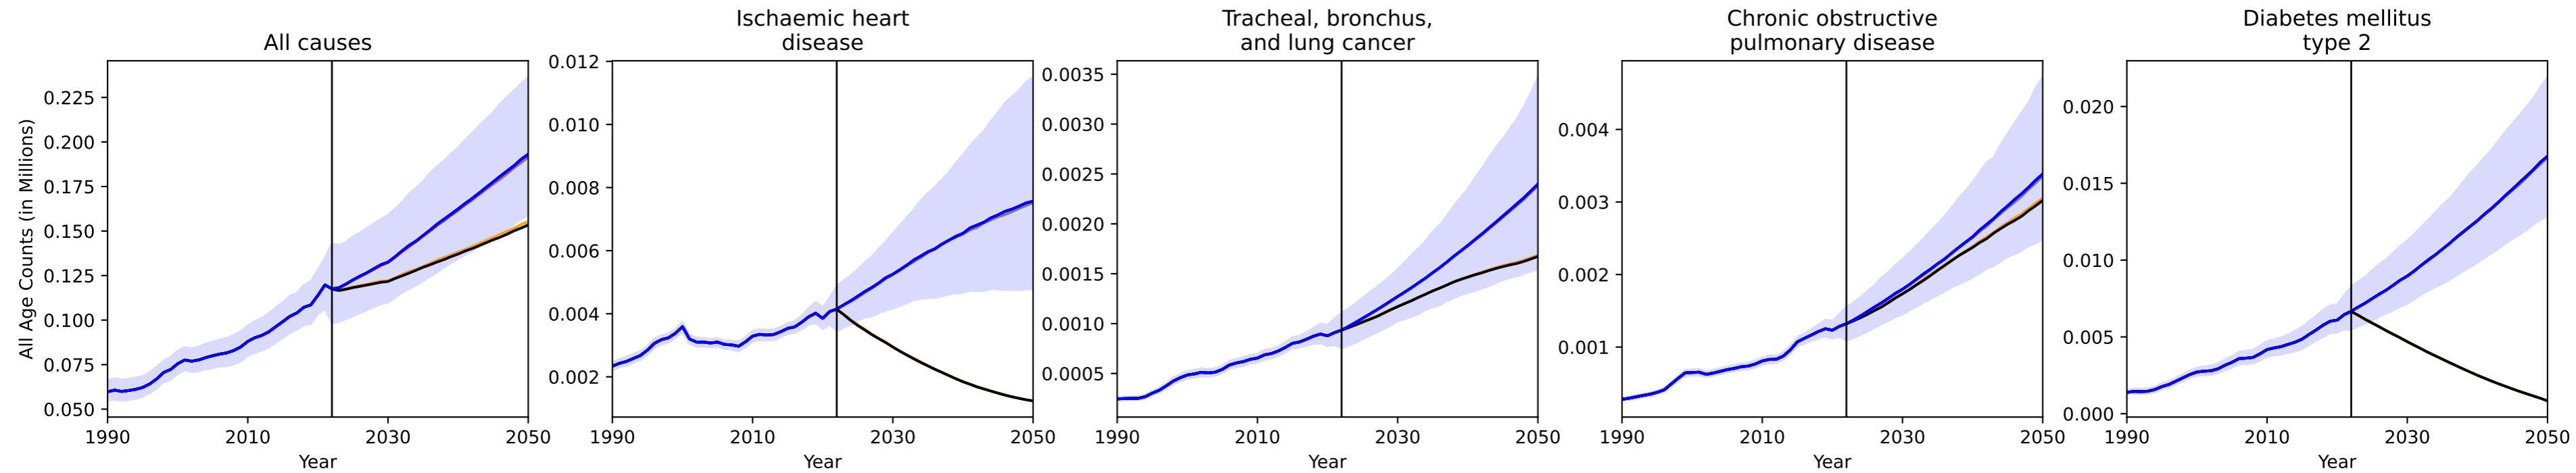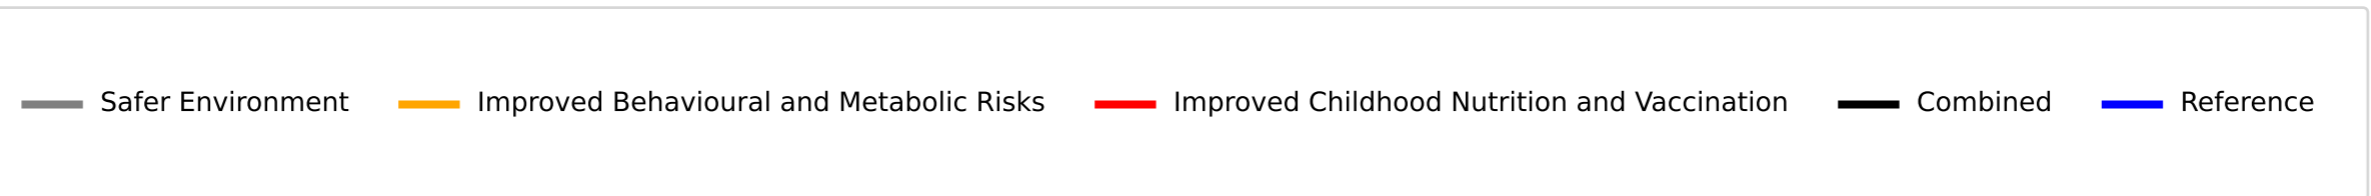

# Bermuda

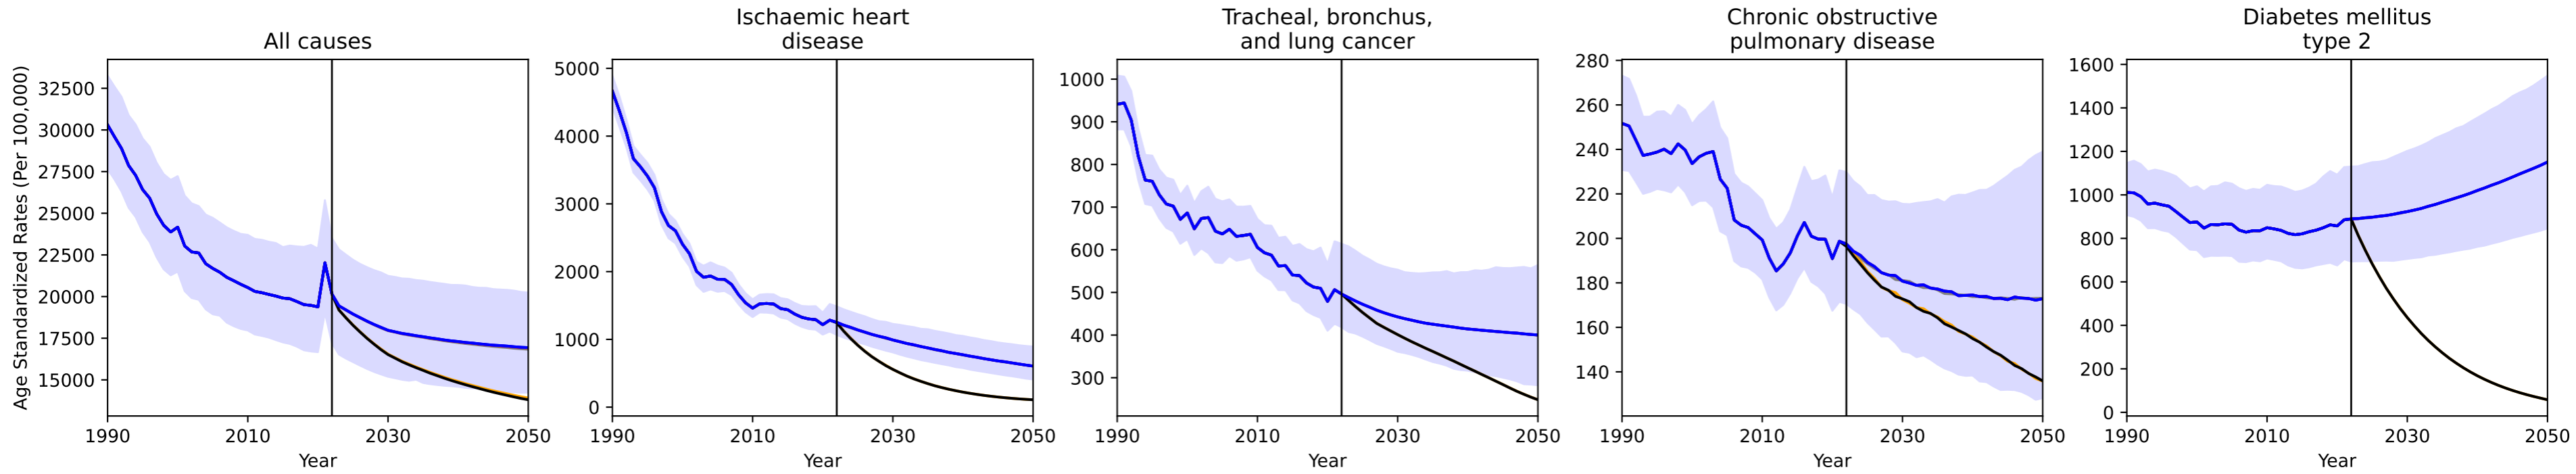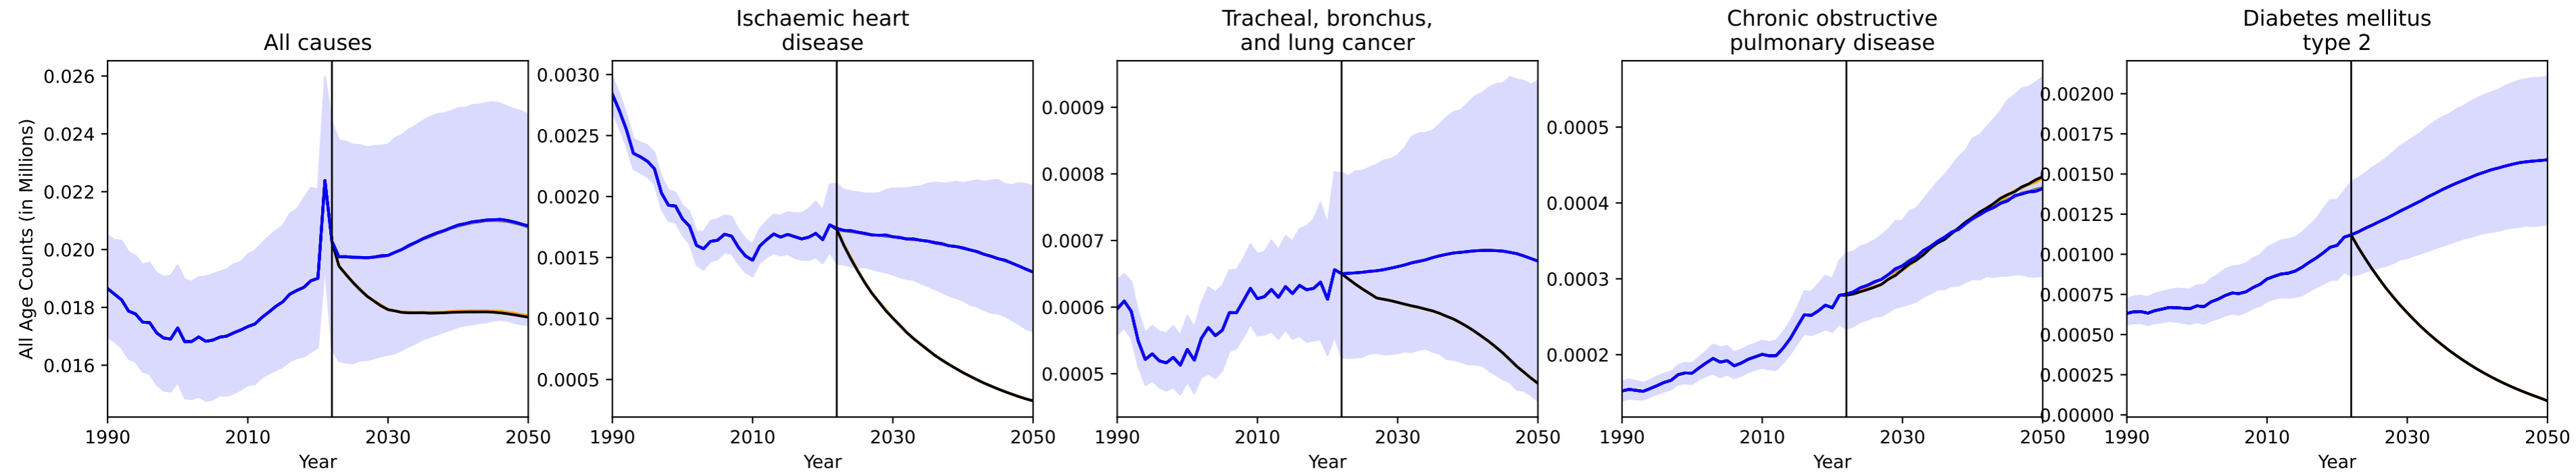

# Cuba

Supplemental Results Figure S12. All cause and top NCD causes age standardized DALY rates and all age counts by scenario and location, 1990-2050

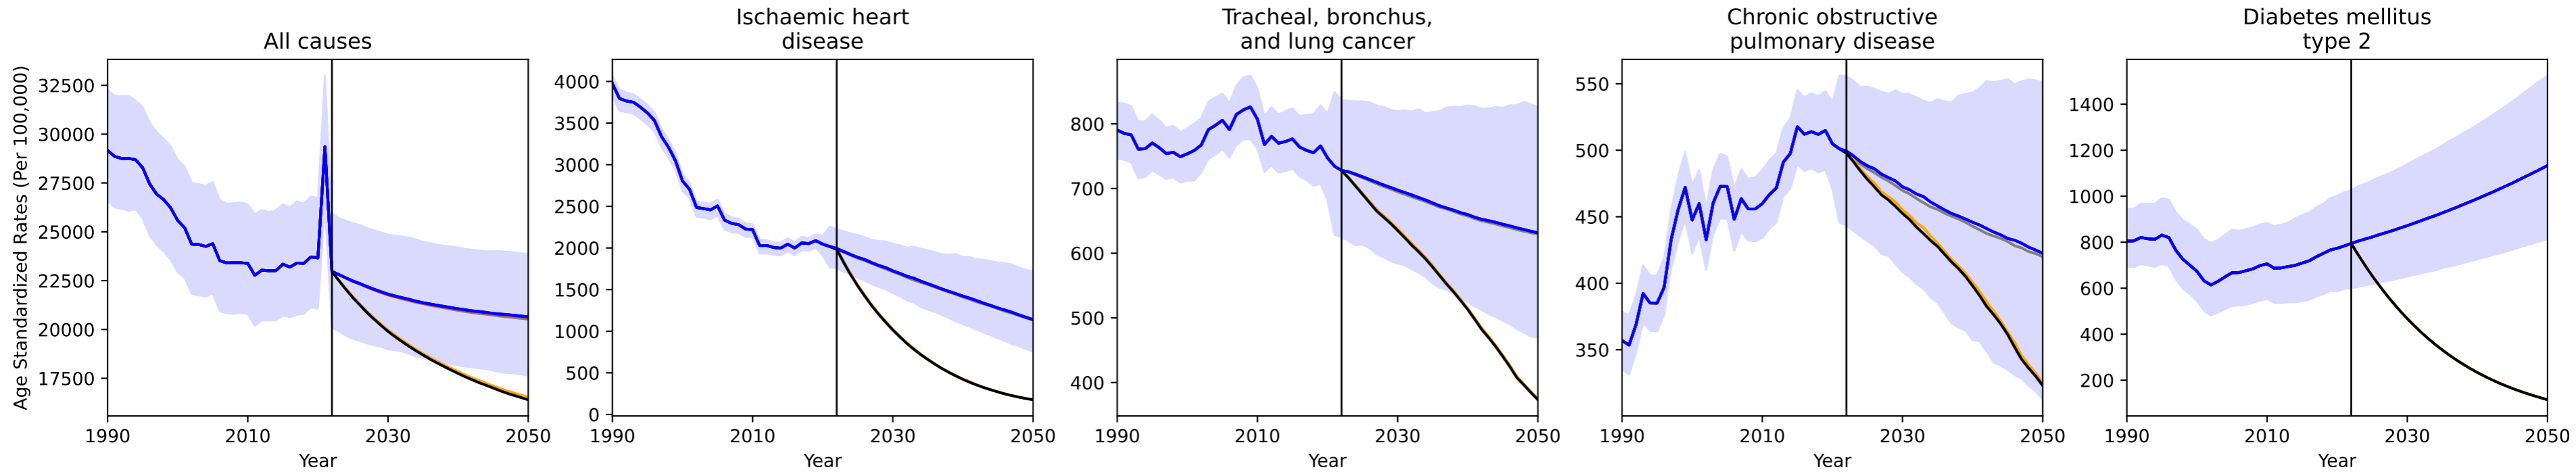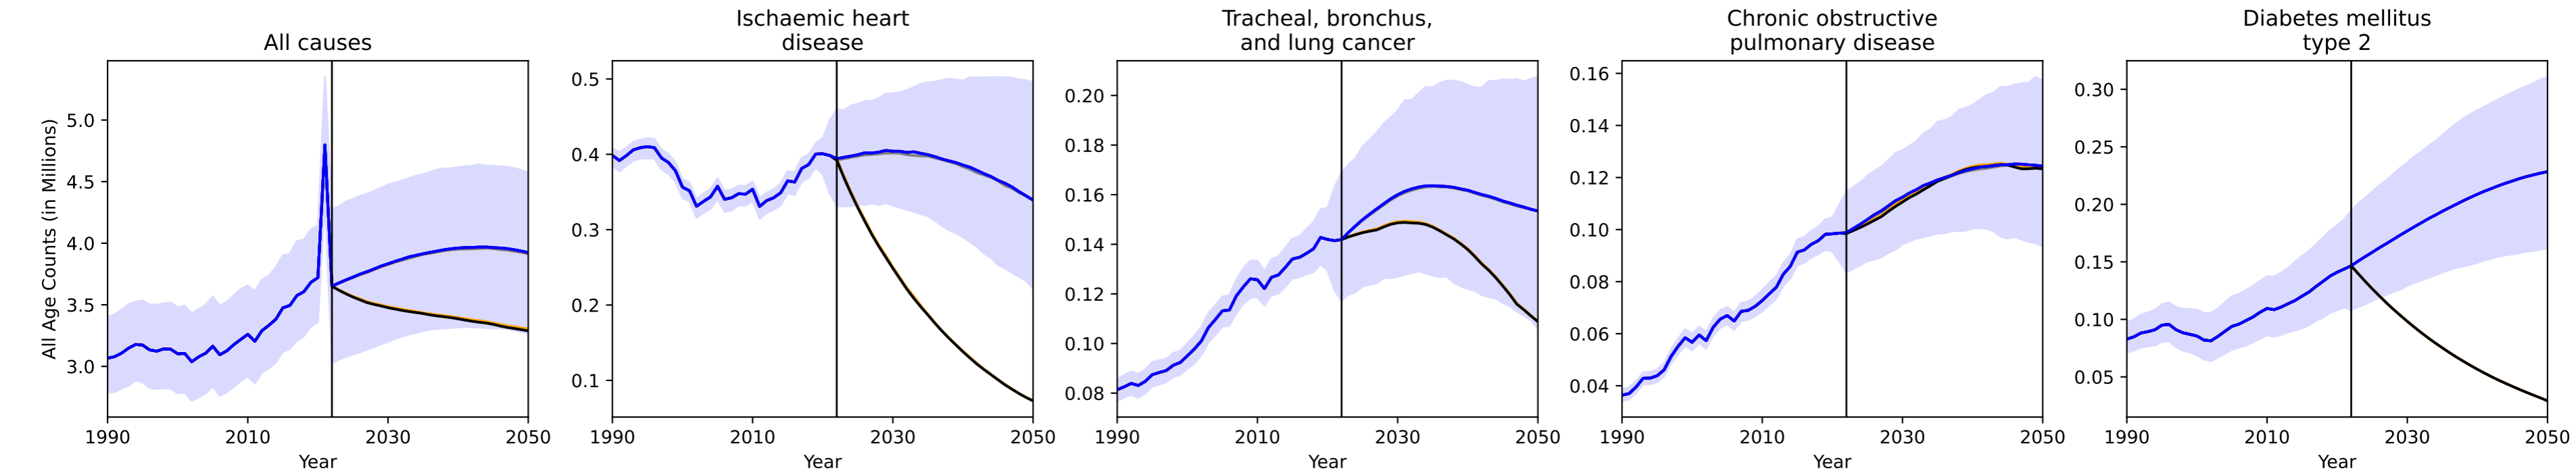

# Dominica

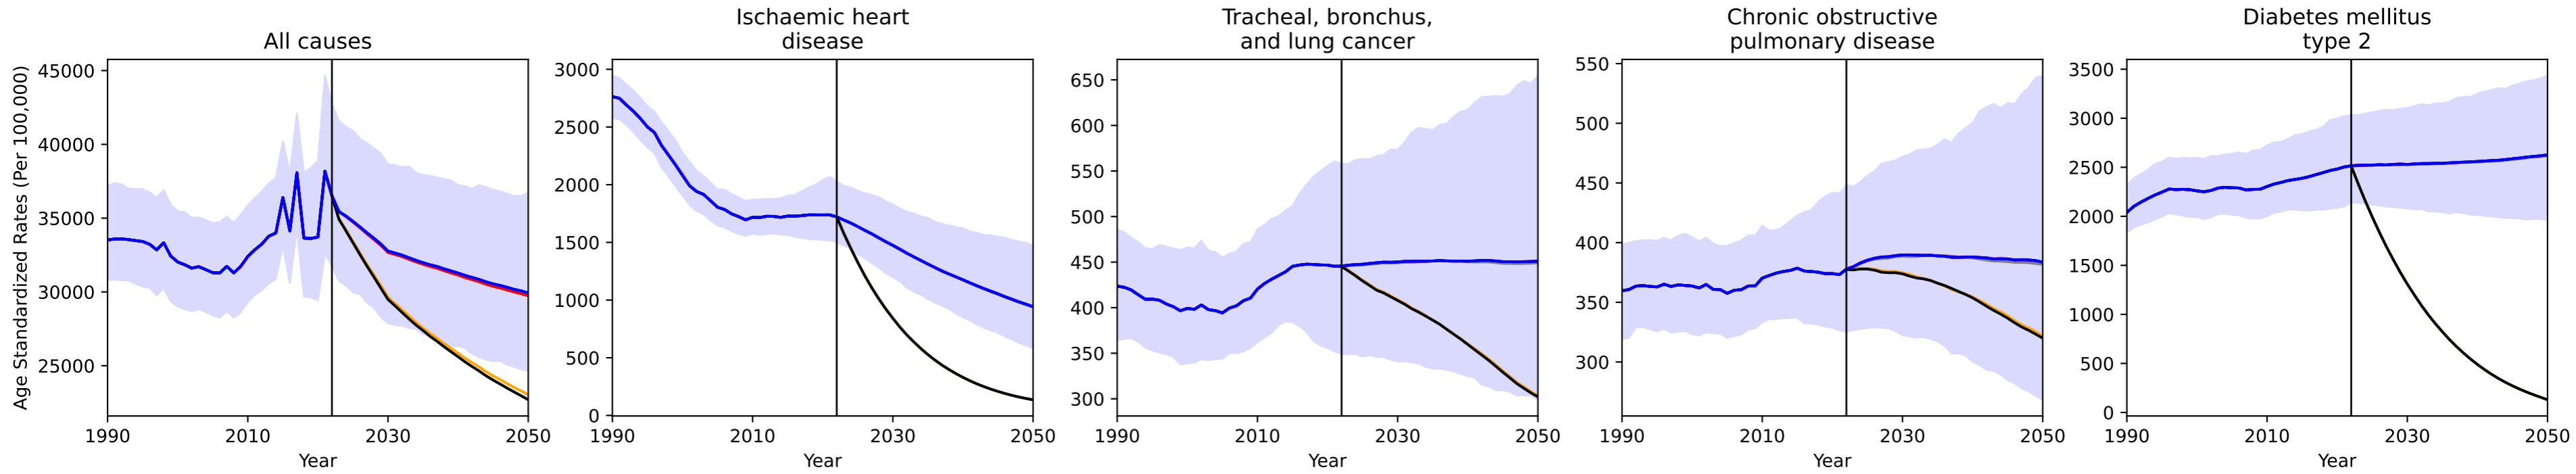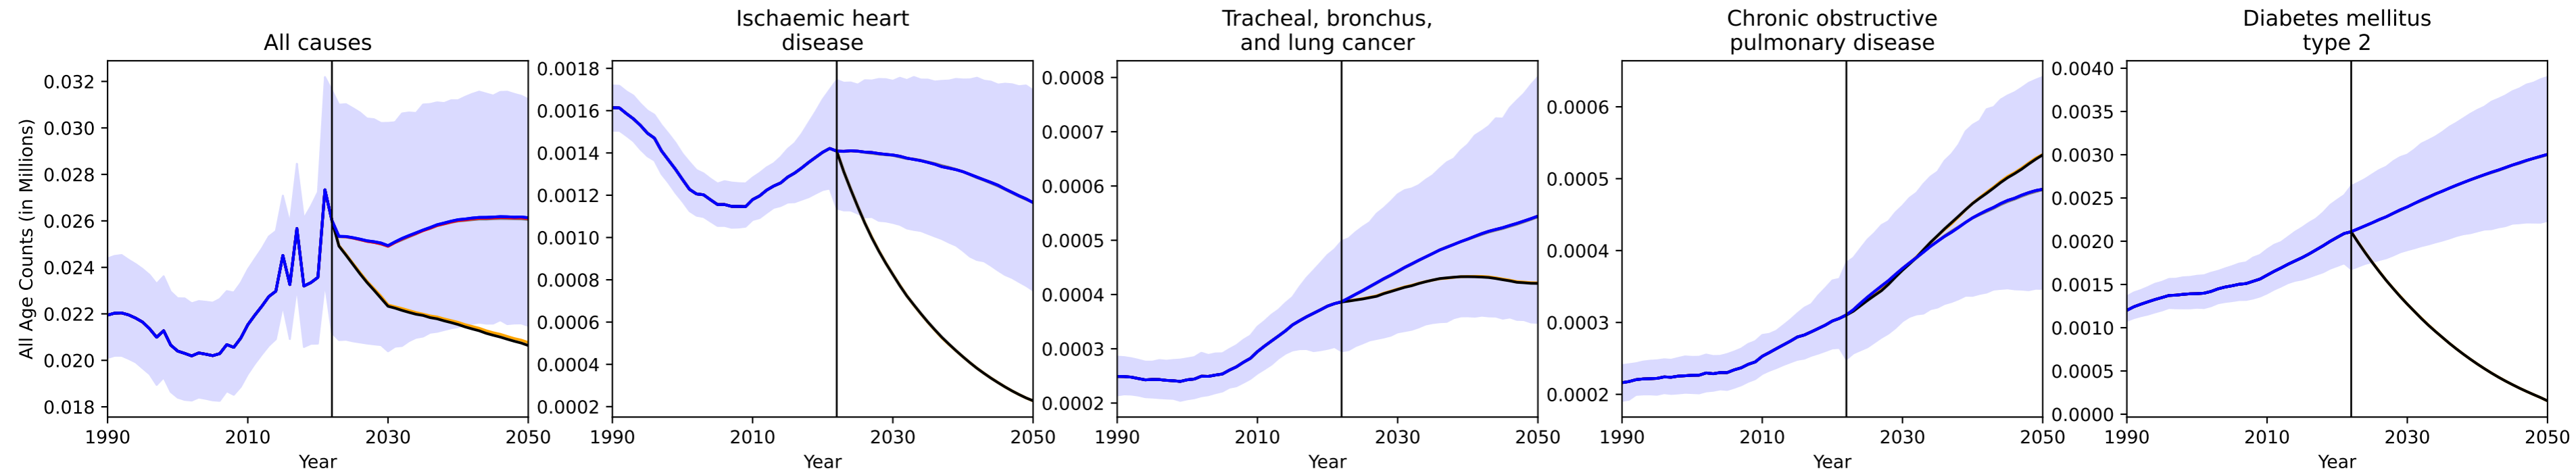



# Dominican Republic

Supplemental Results Figure S12. All cause and top NCD causes age standardized DALY rates and all age counts by scenario and location, 1990-2050

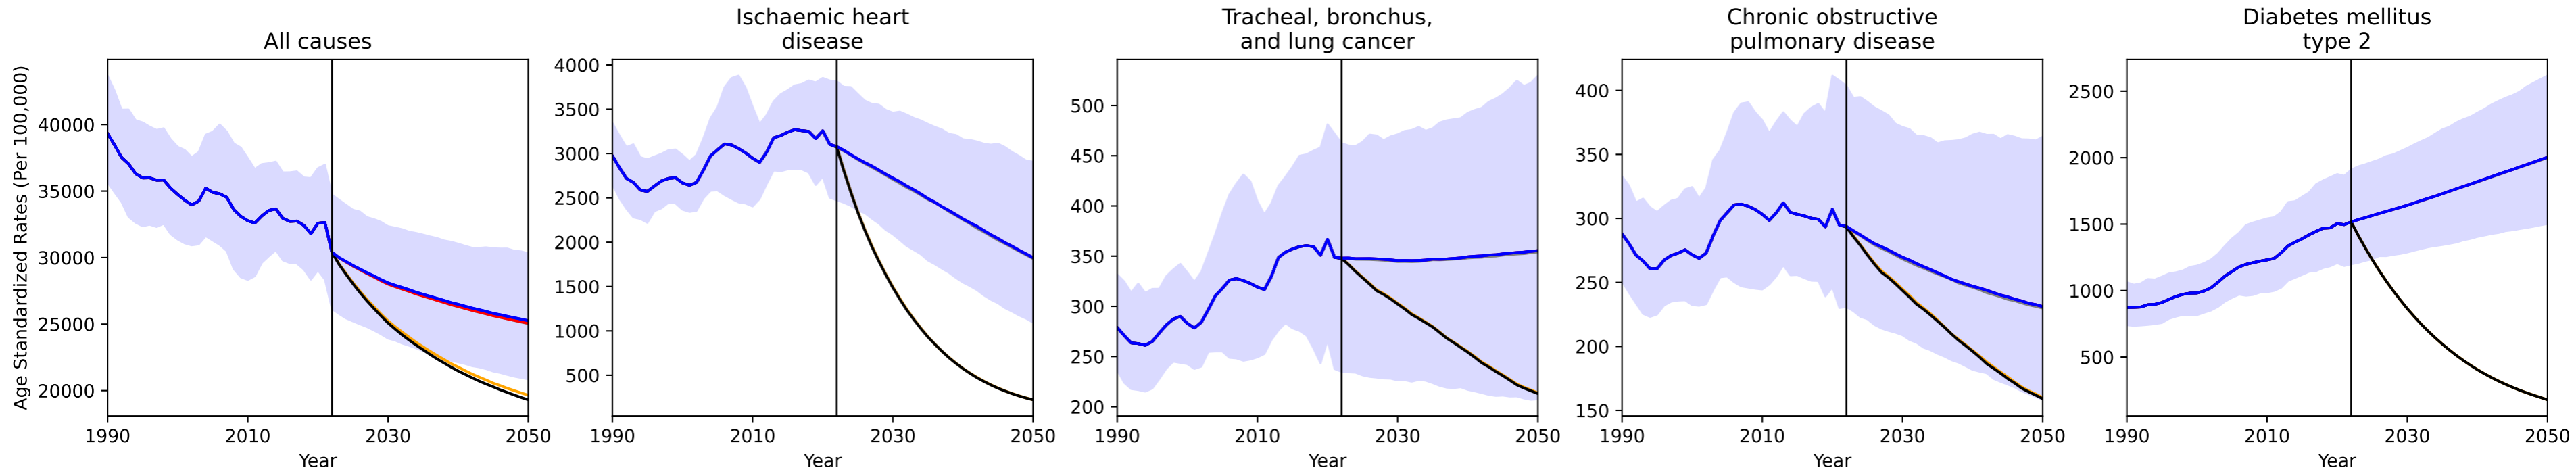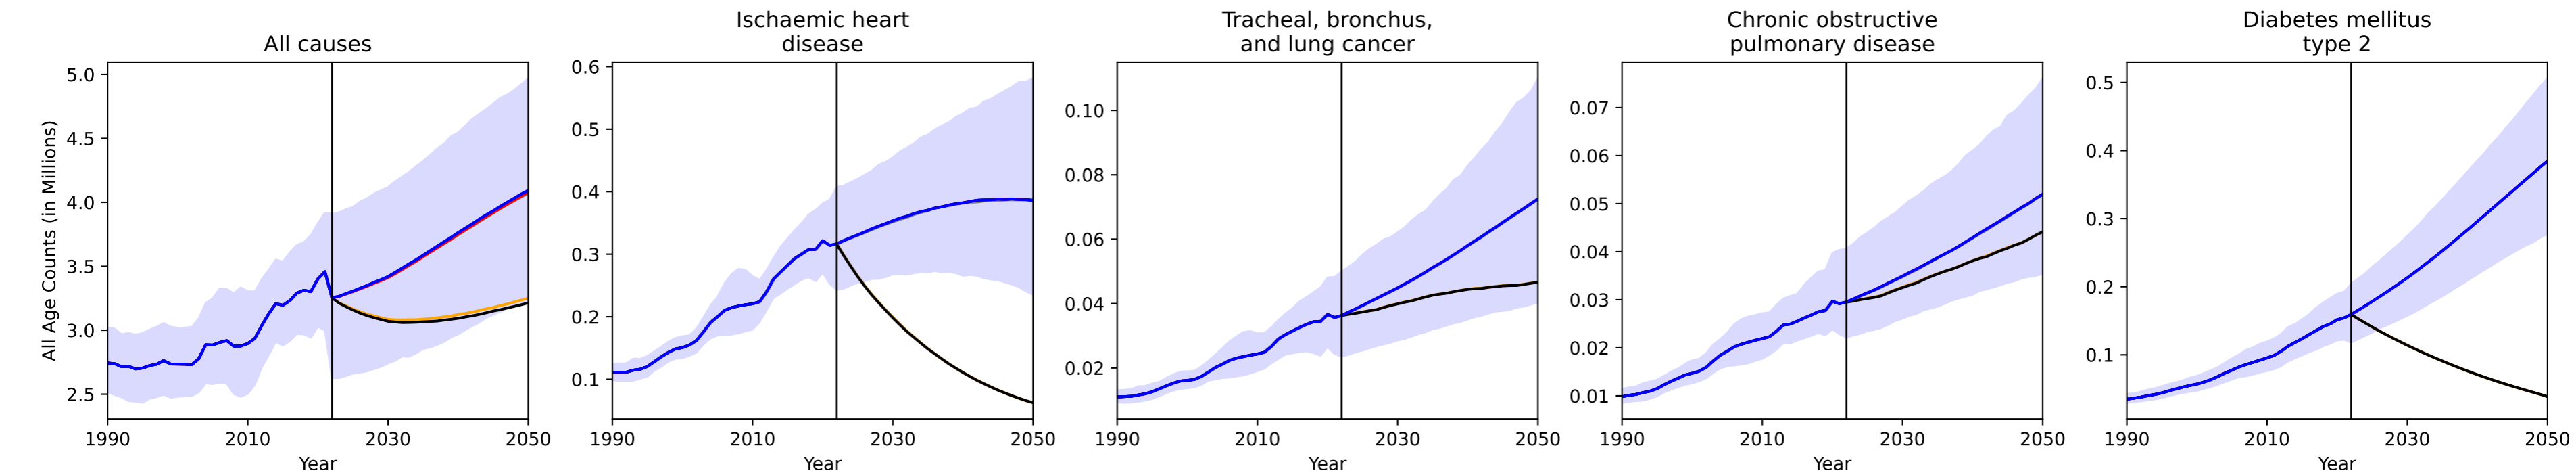

# Grenada

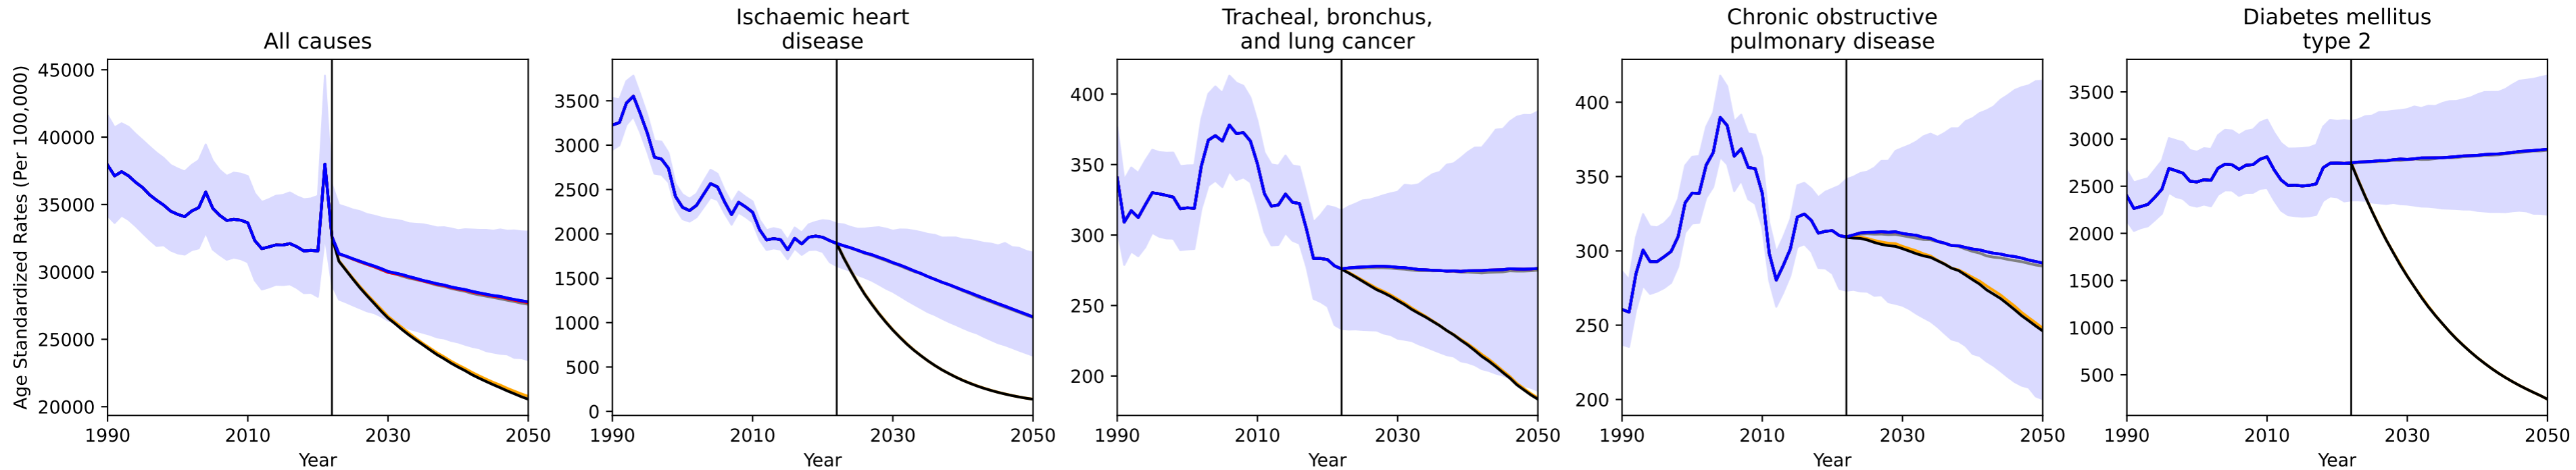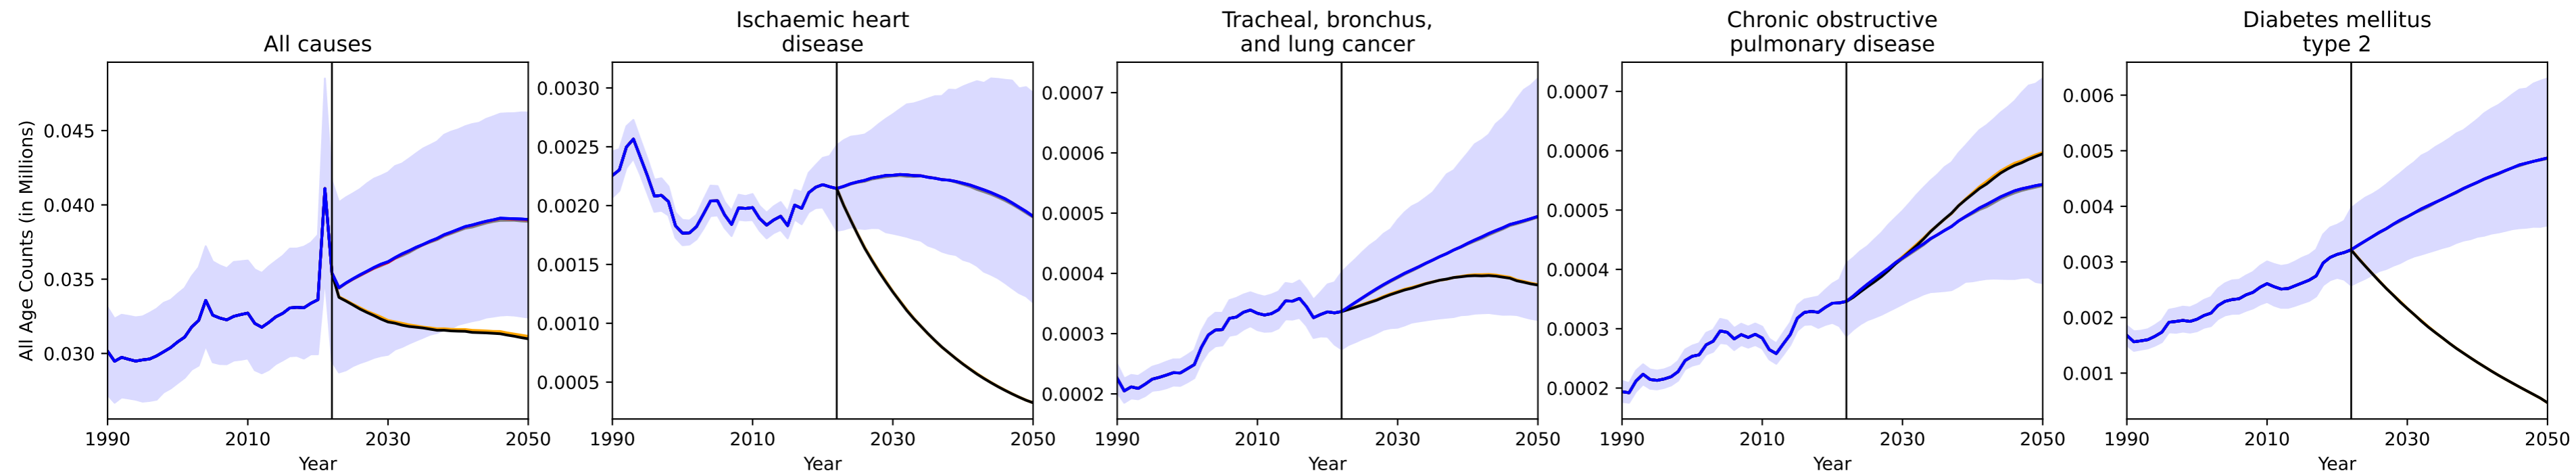

# Guyana

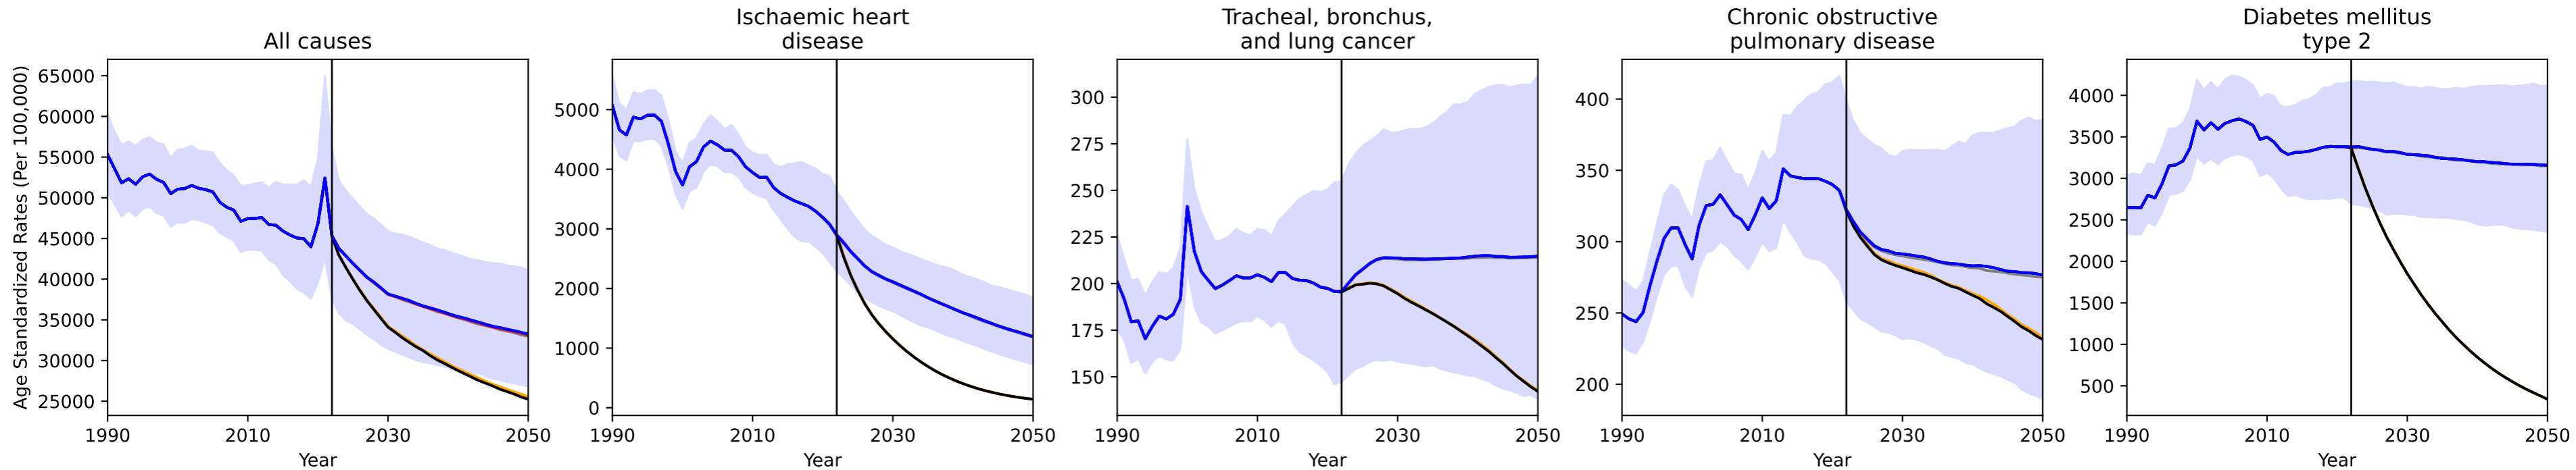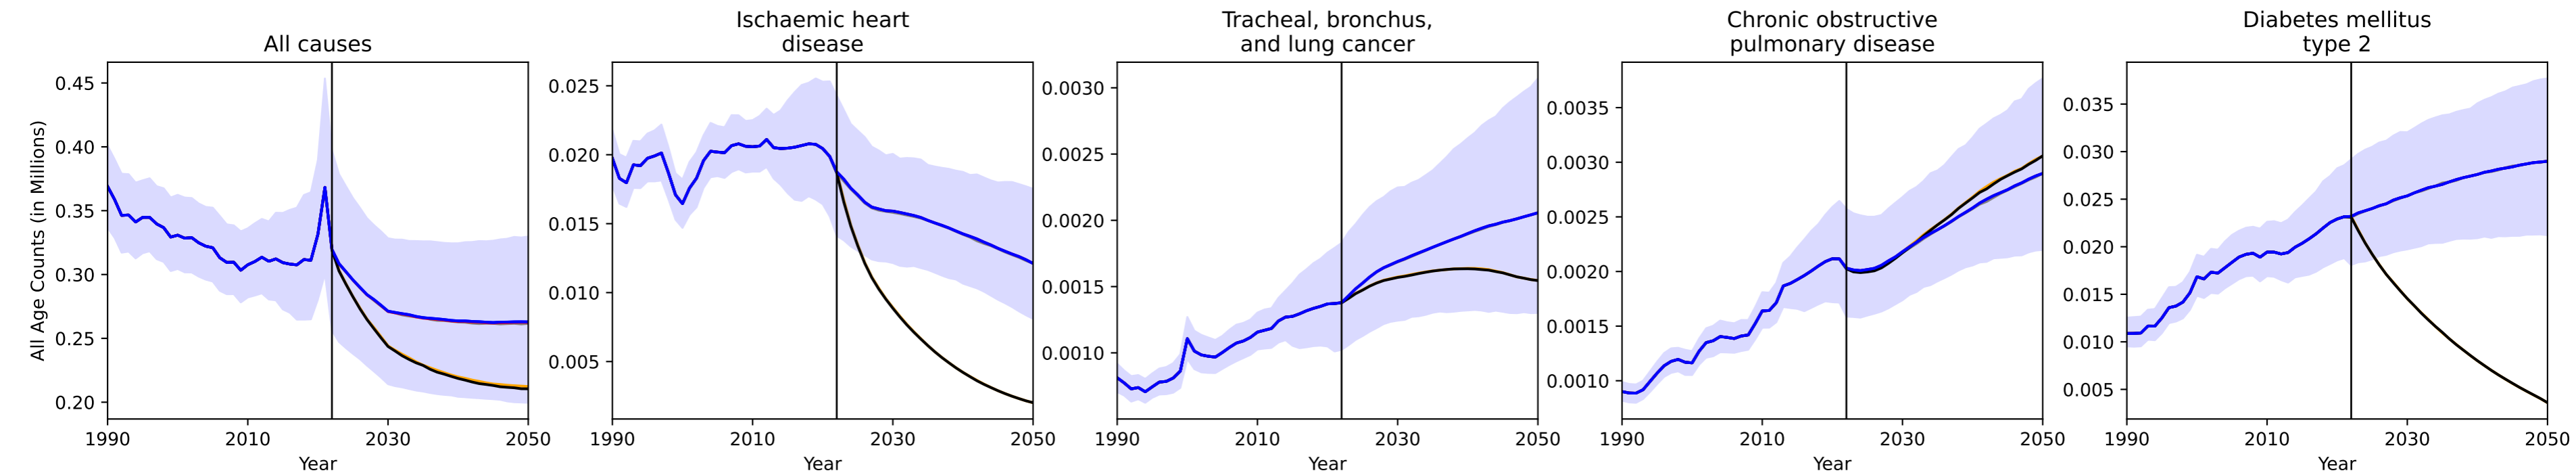

# Haiti

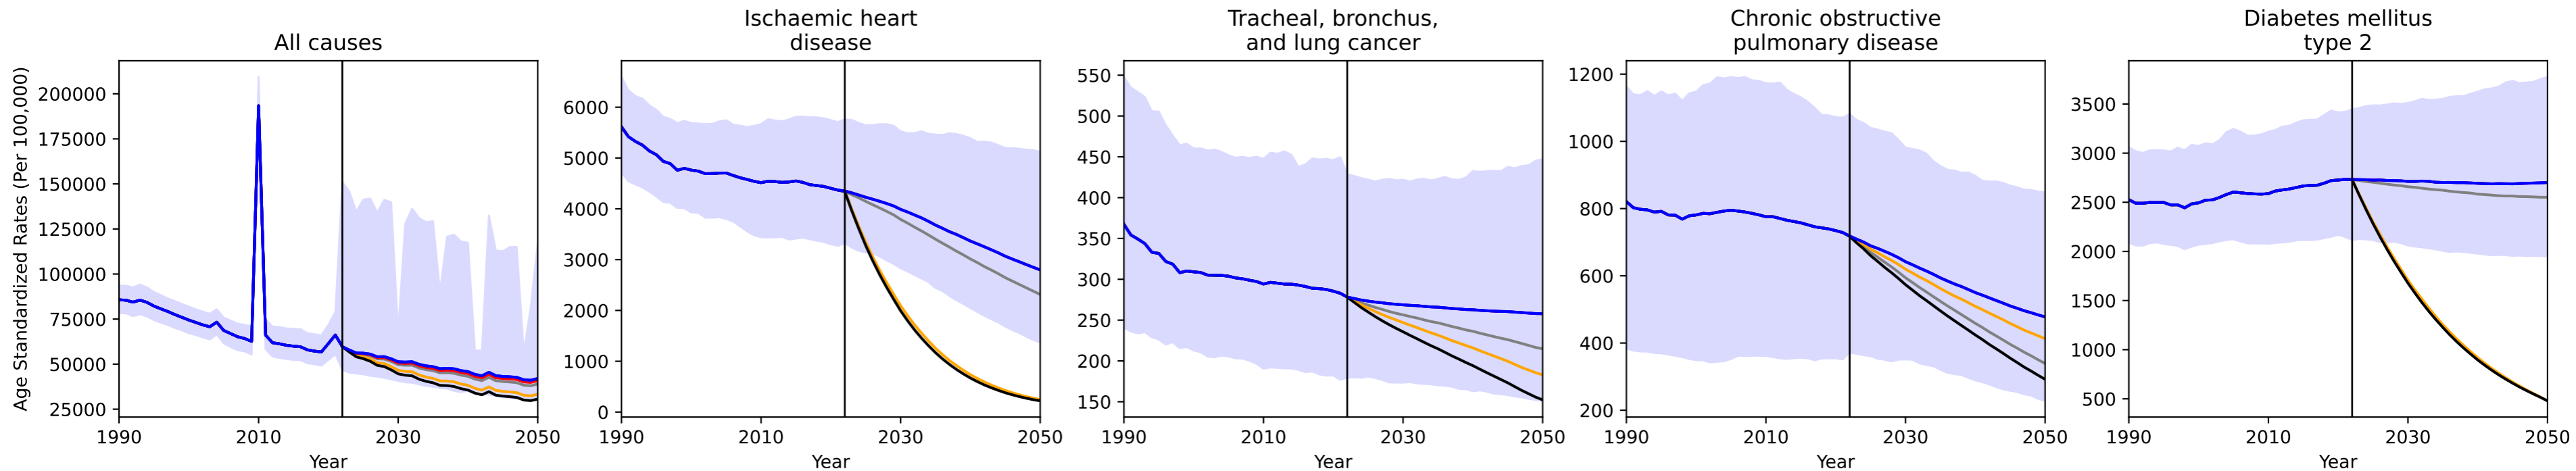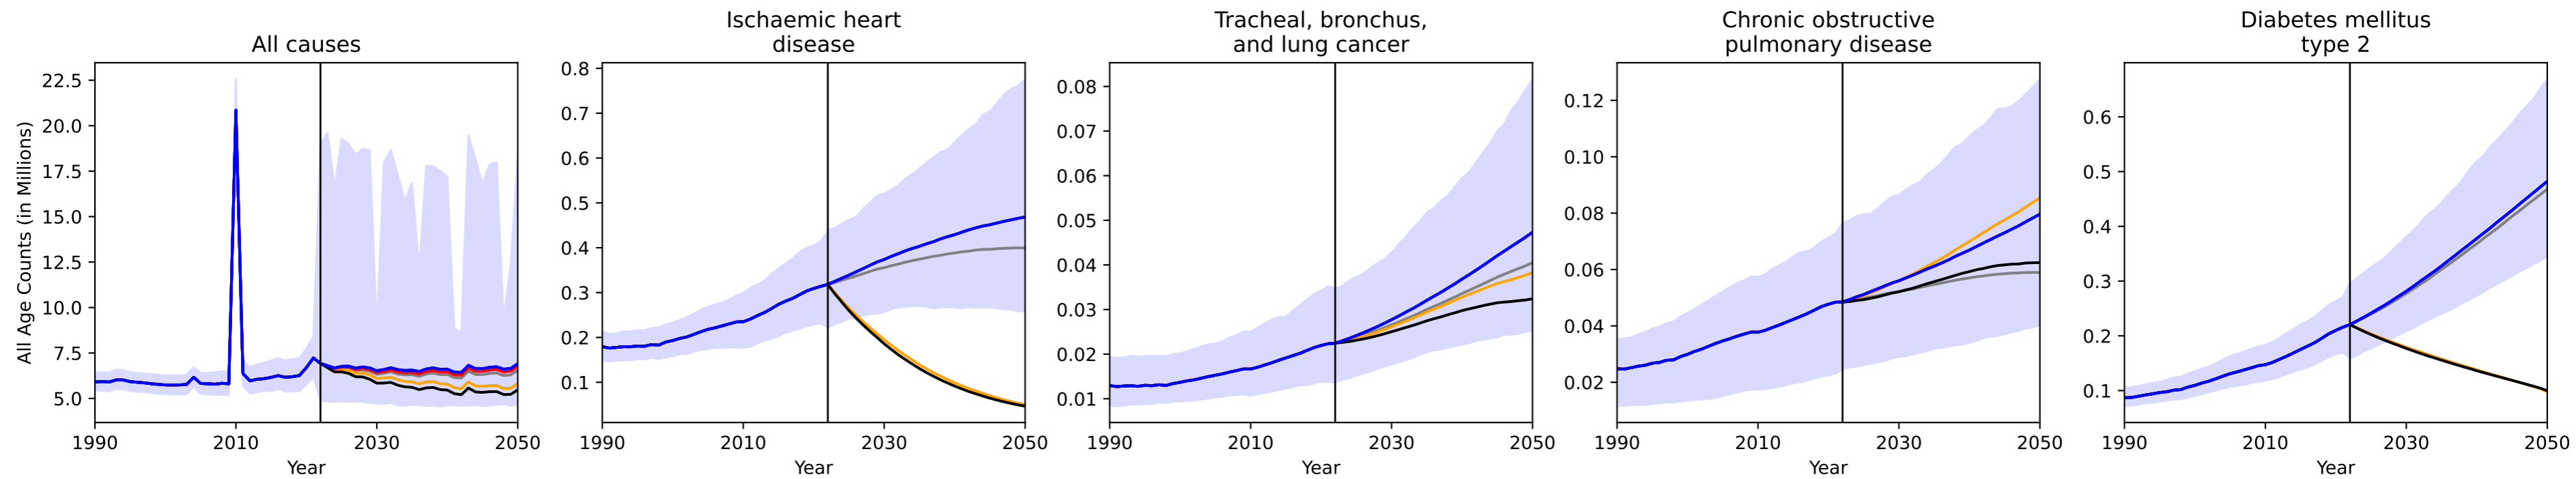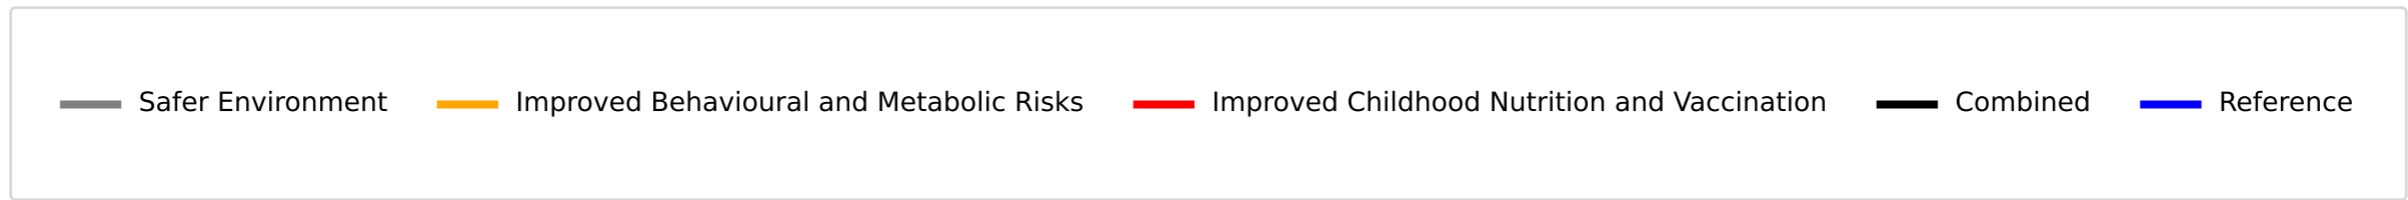

# Jamaica

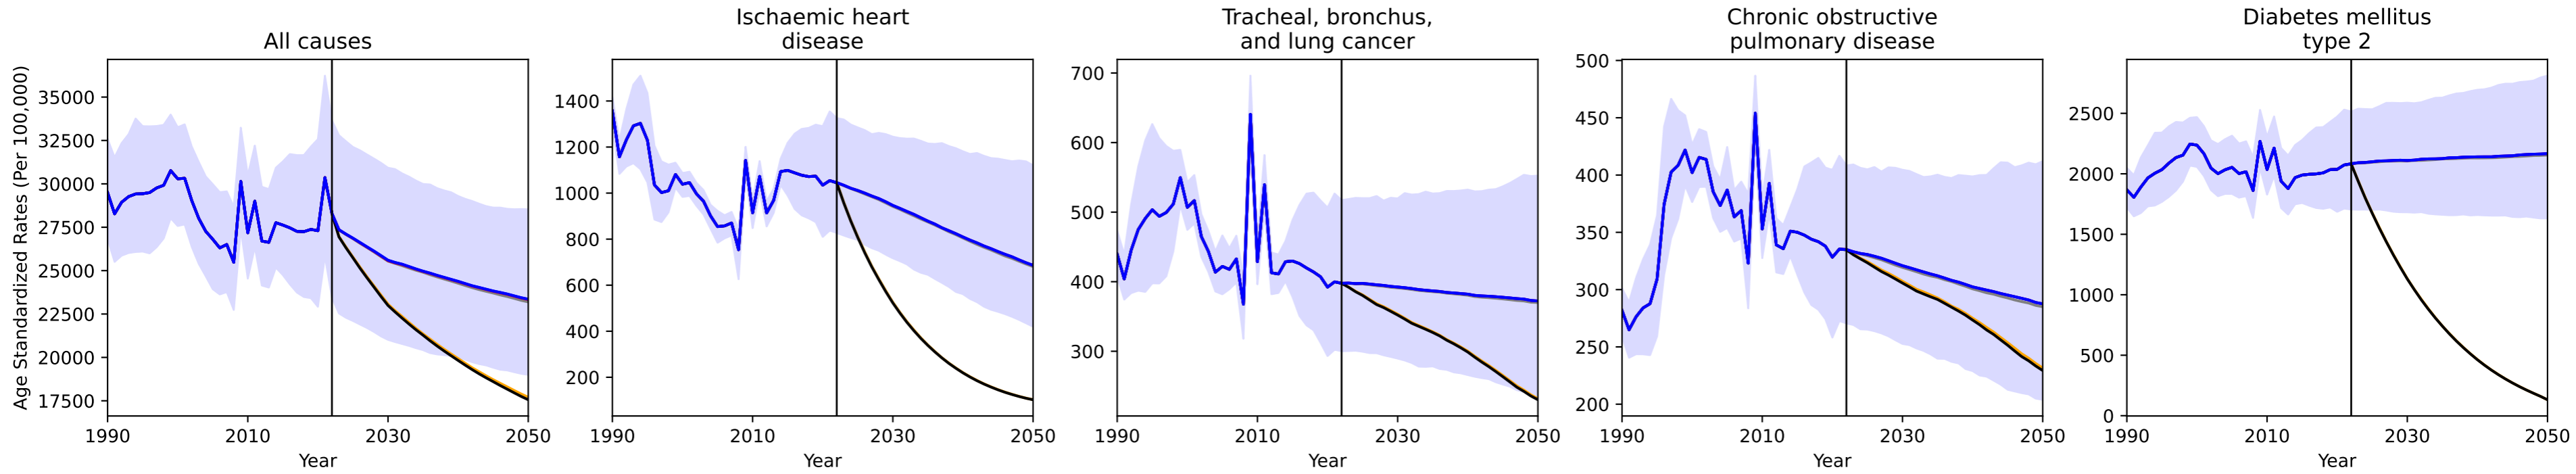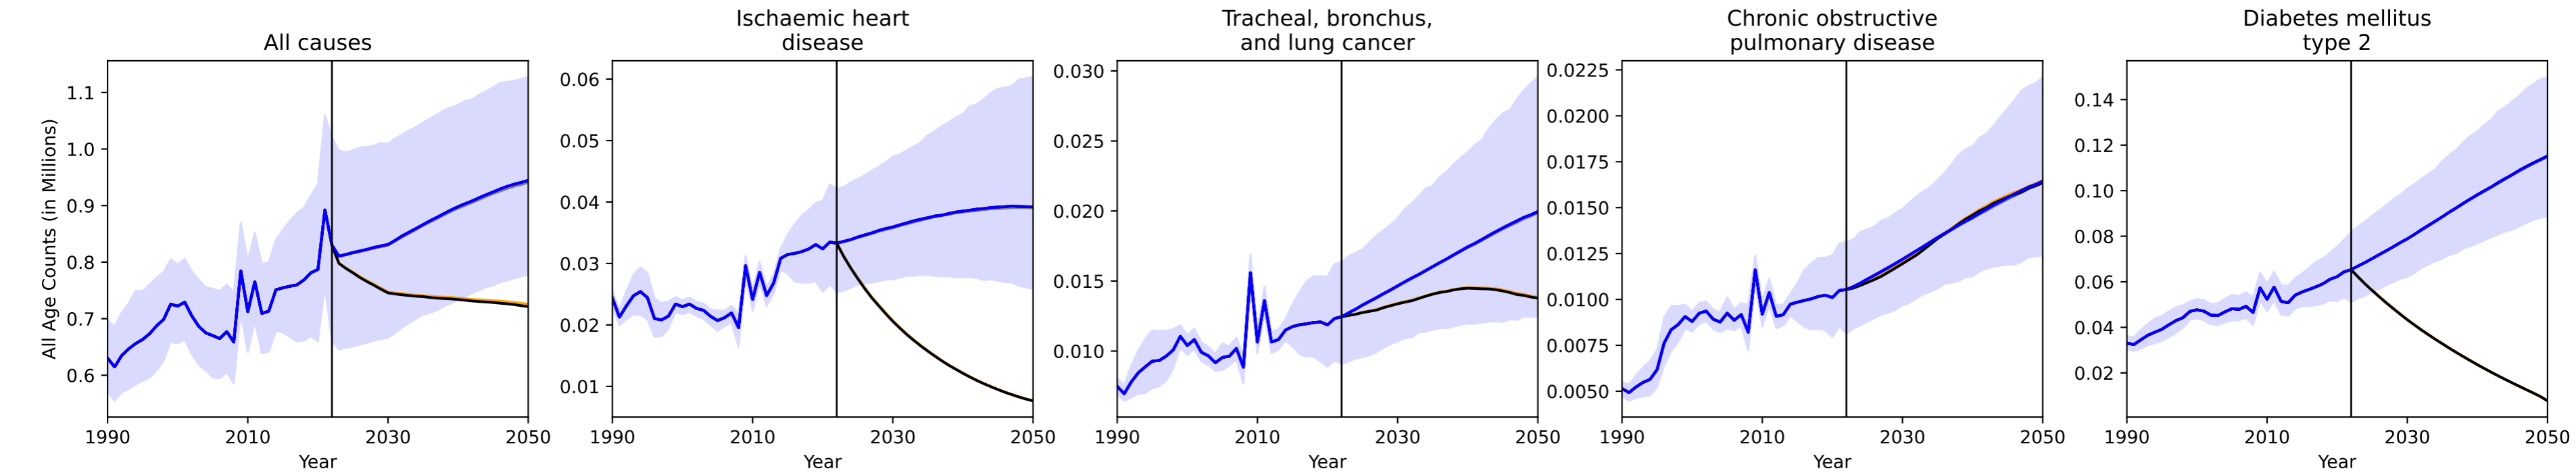

# Puerto Rico

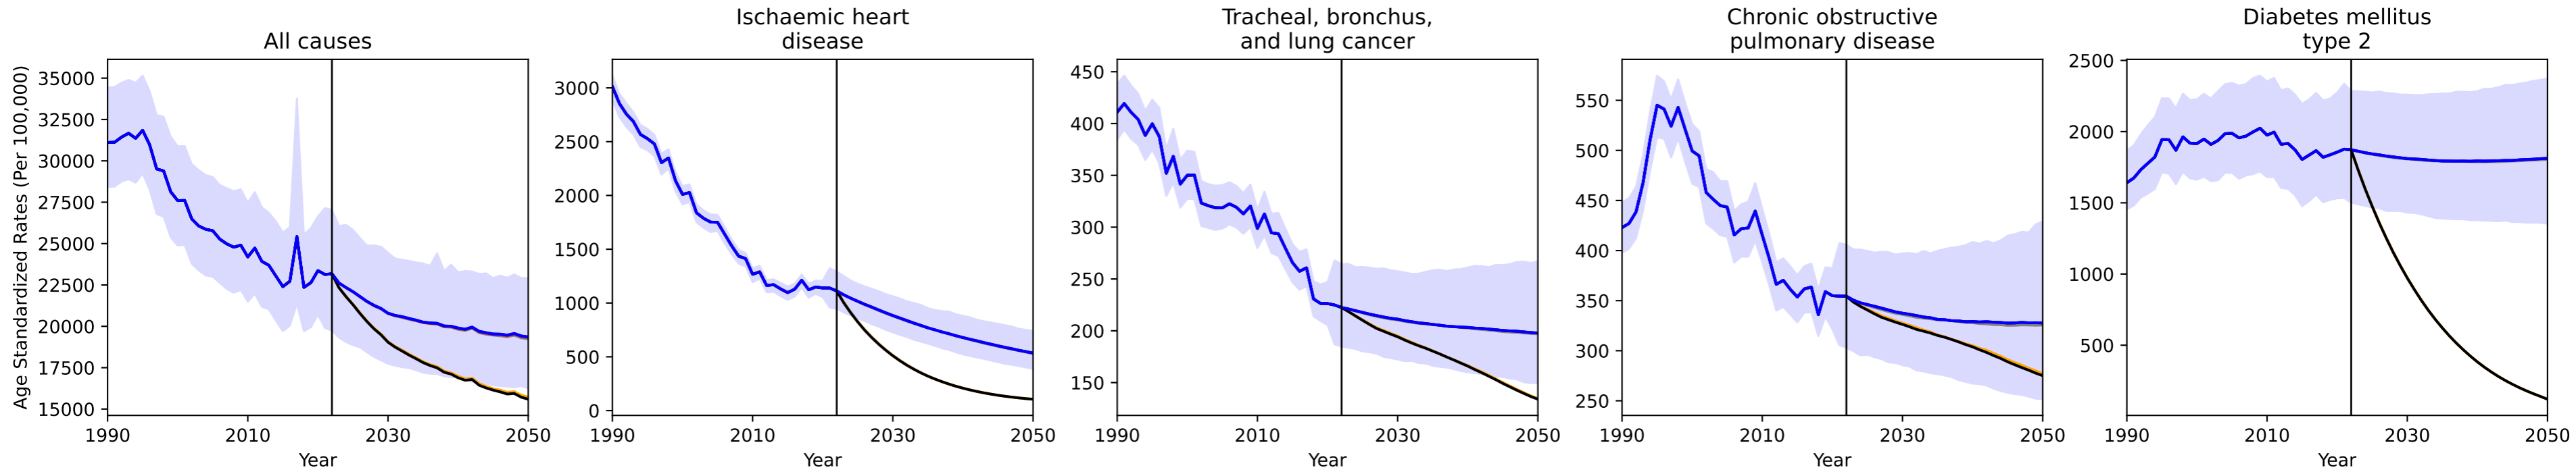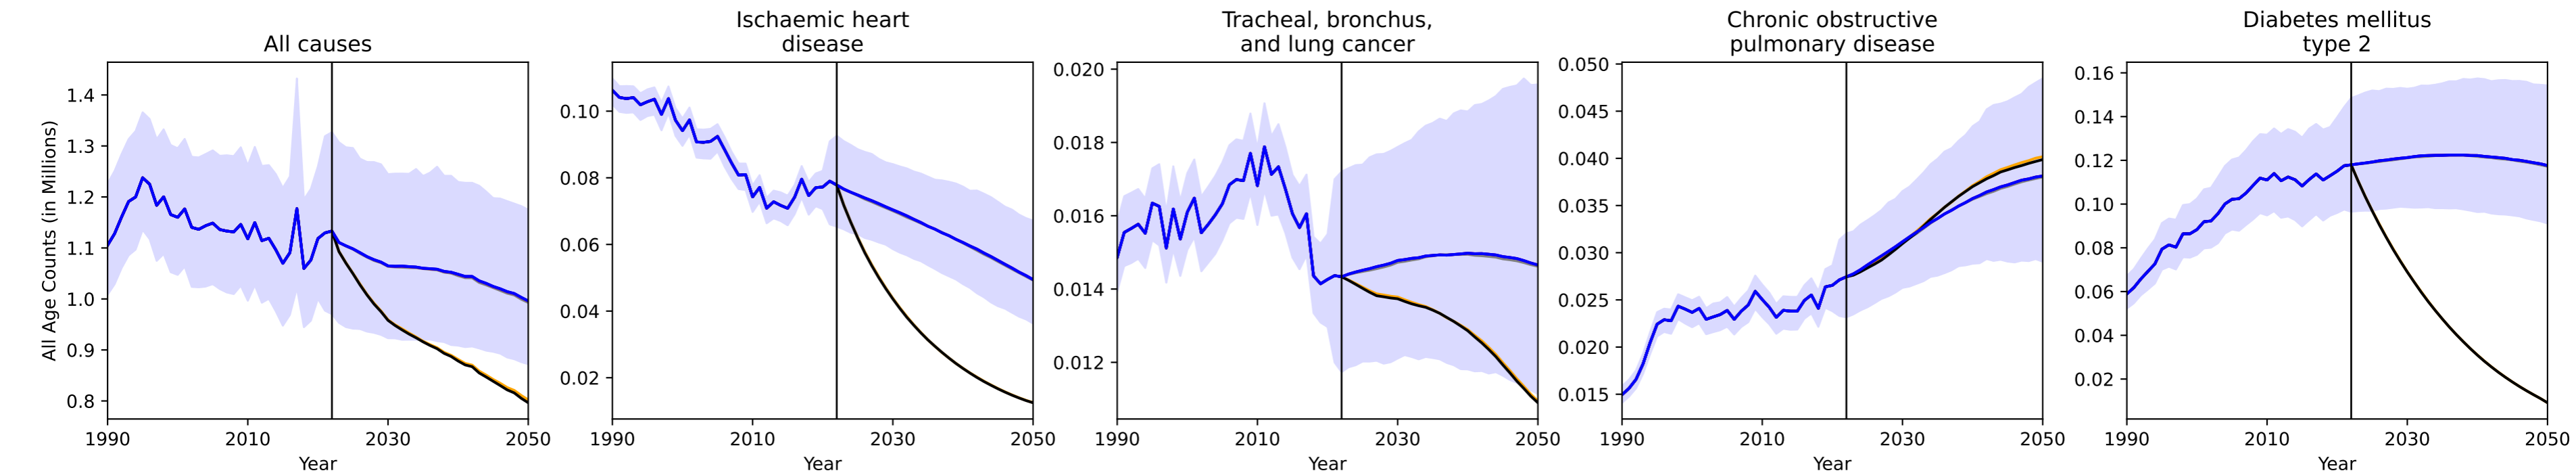

# Saint Kitts And Nevis

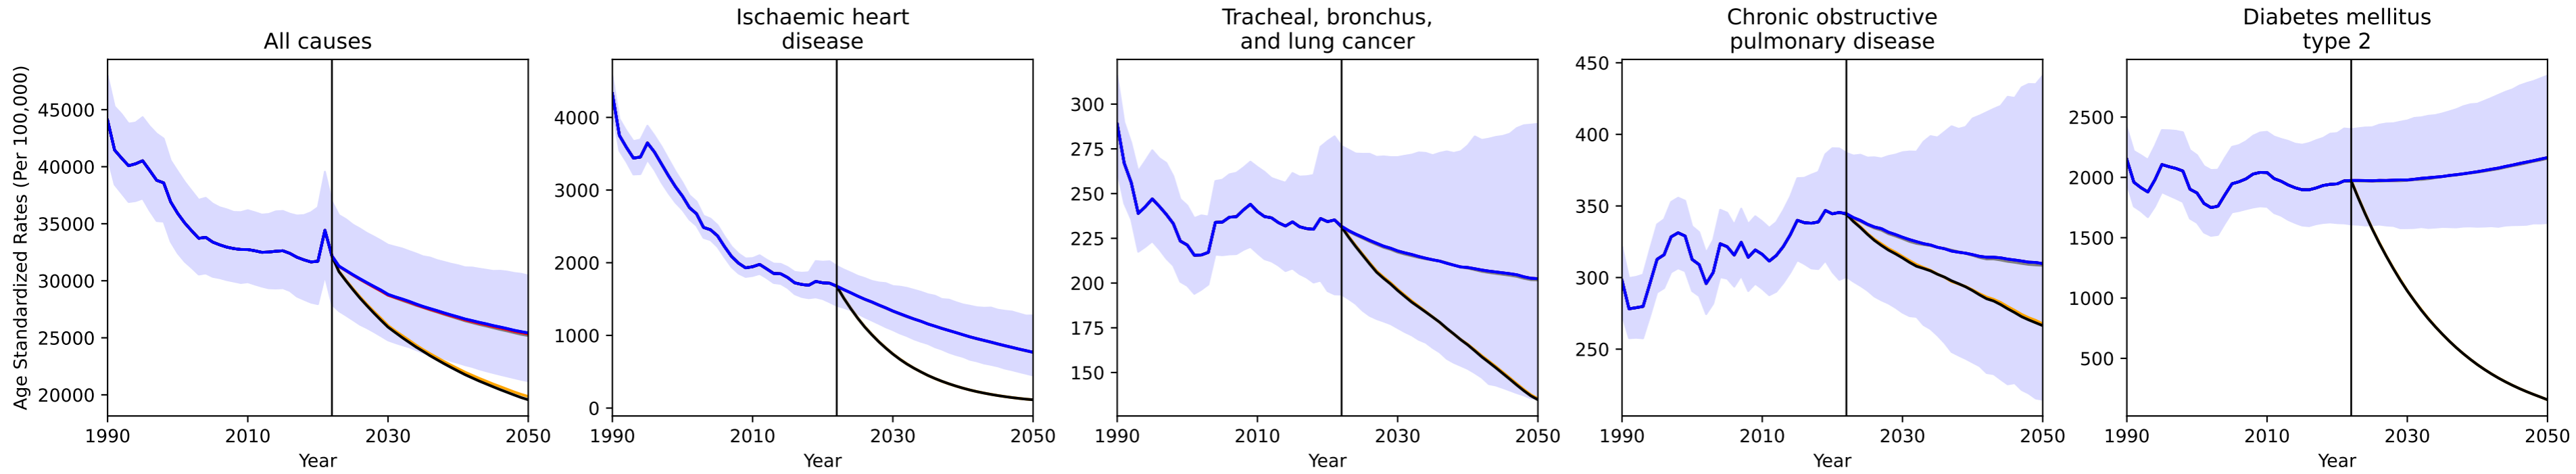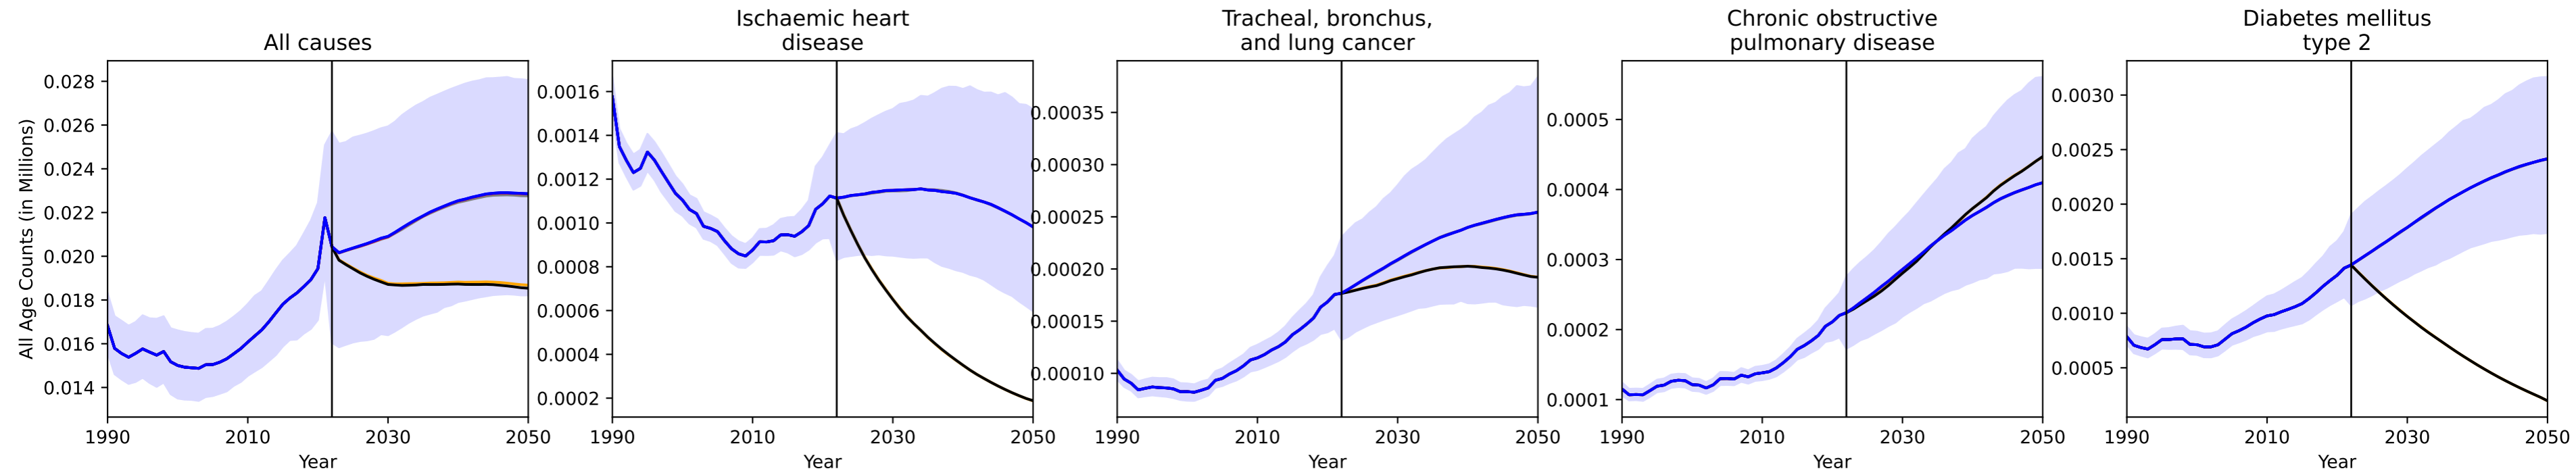

# Saint Lucia

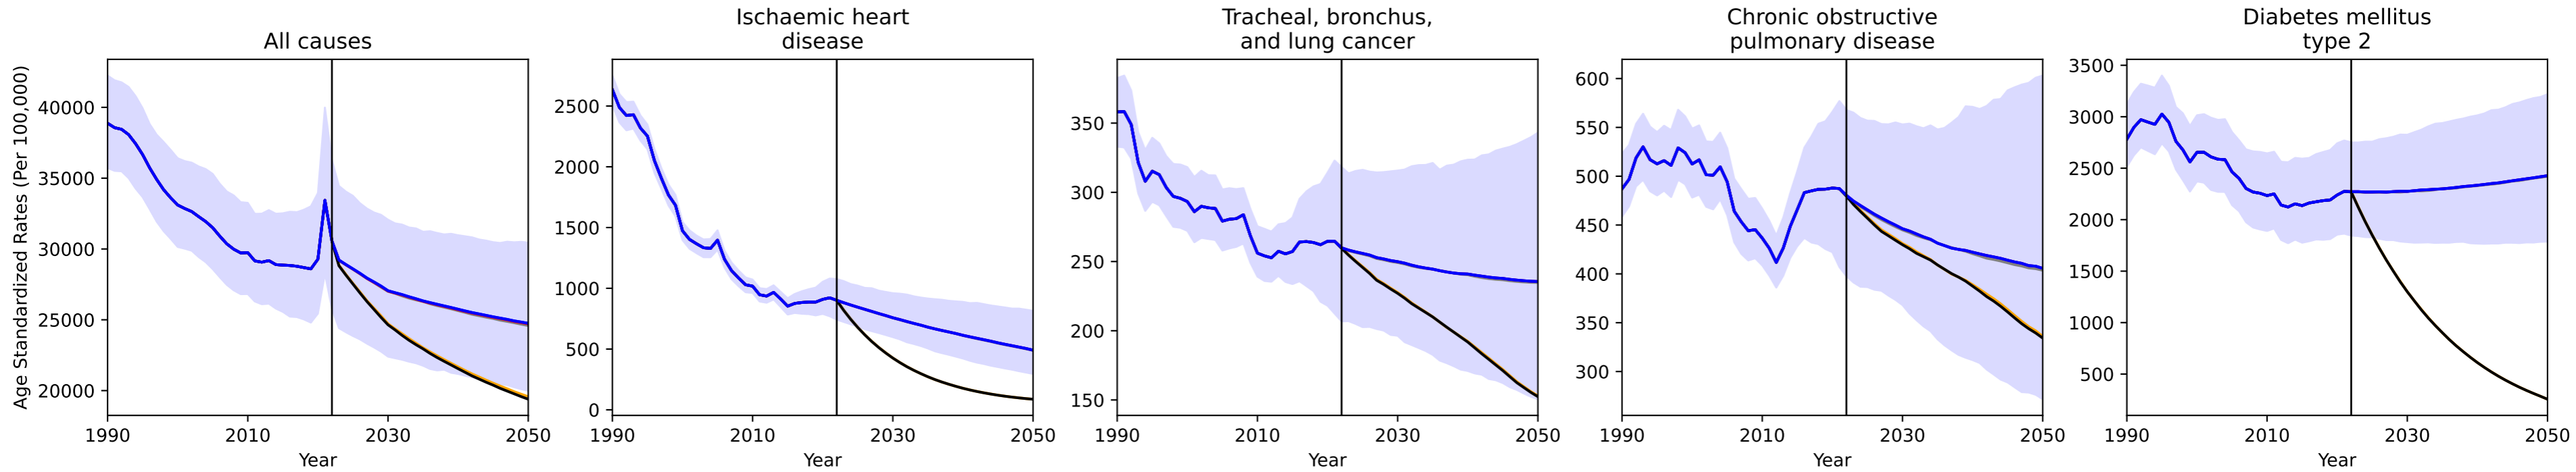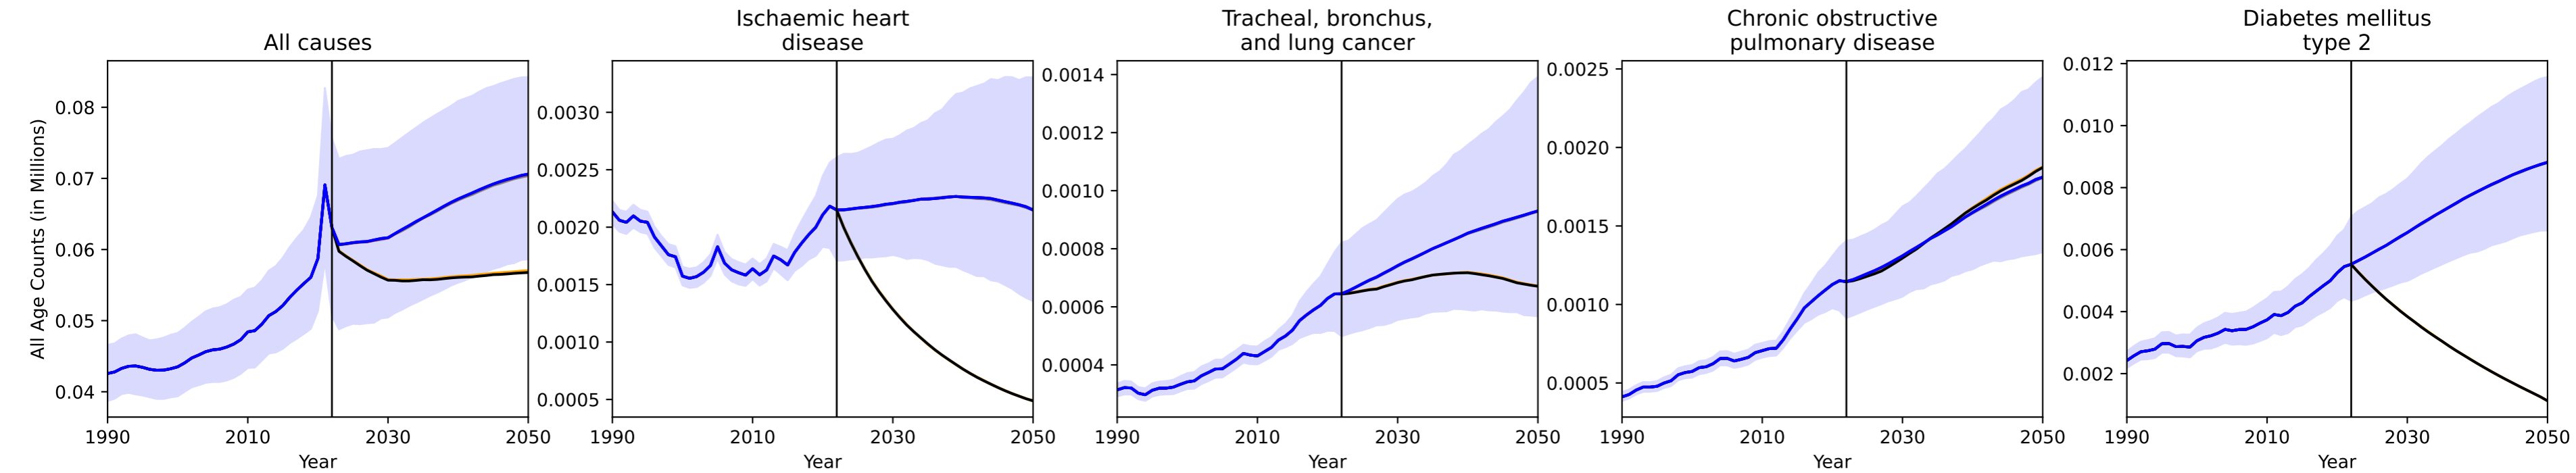



# Saint Vincent And The Grenadines

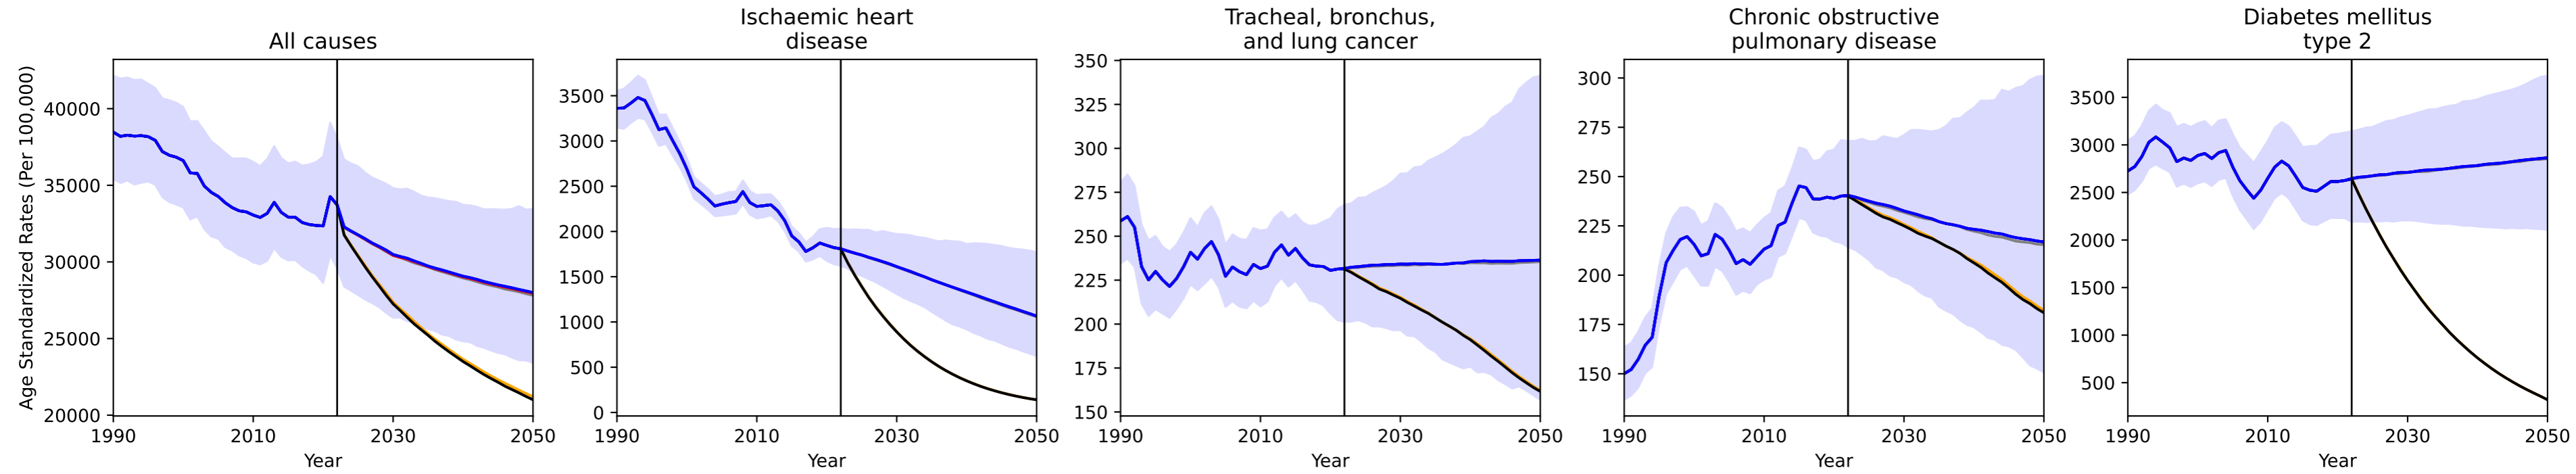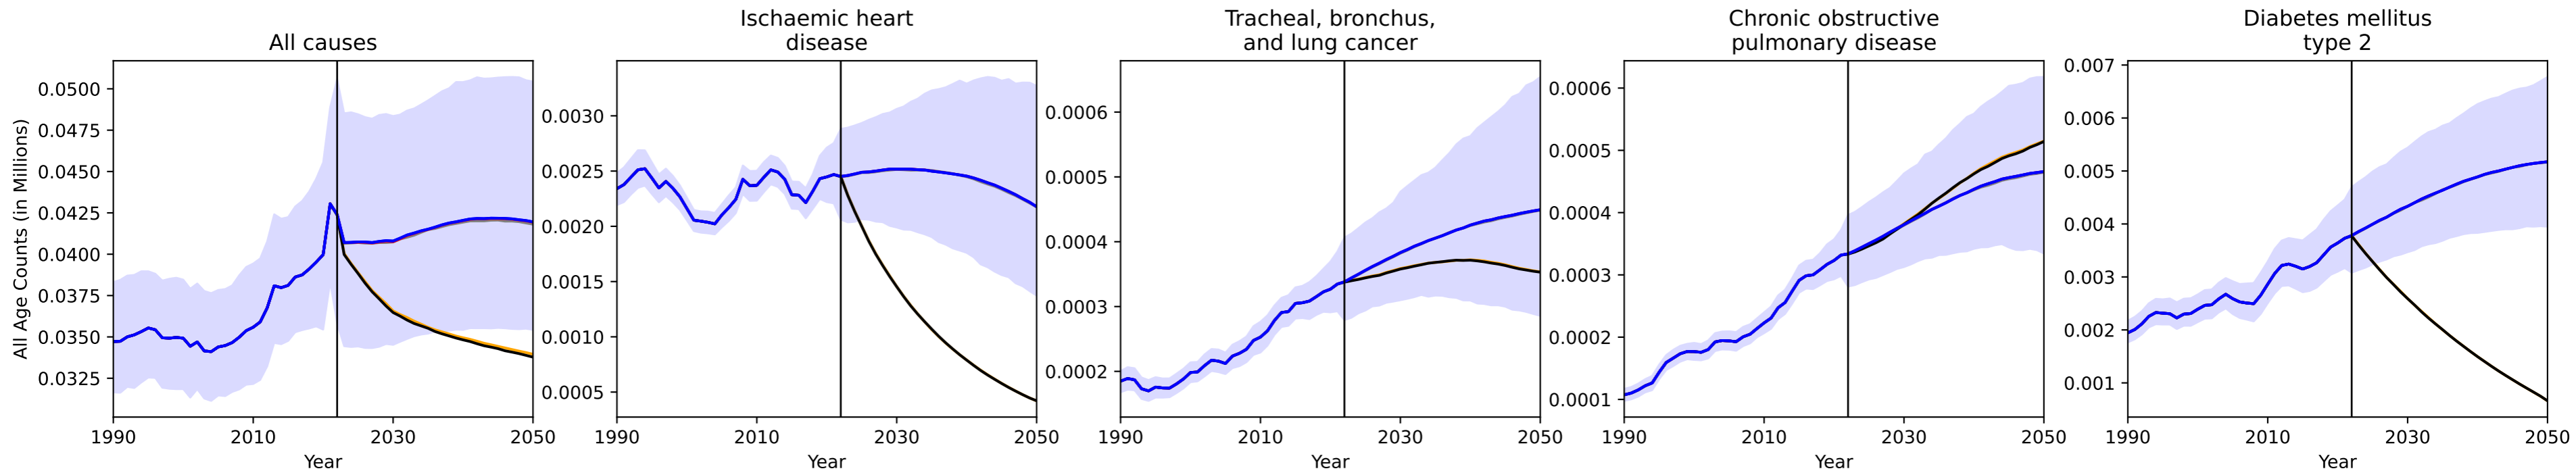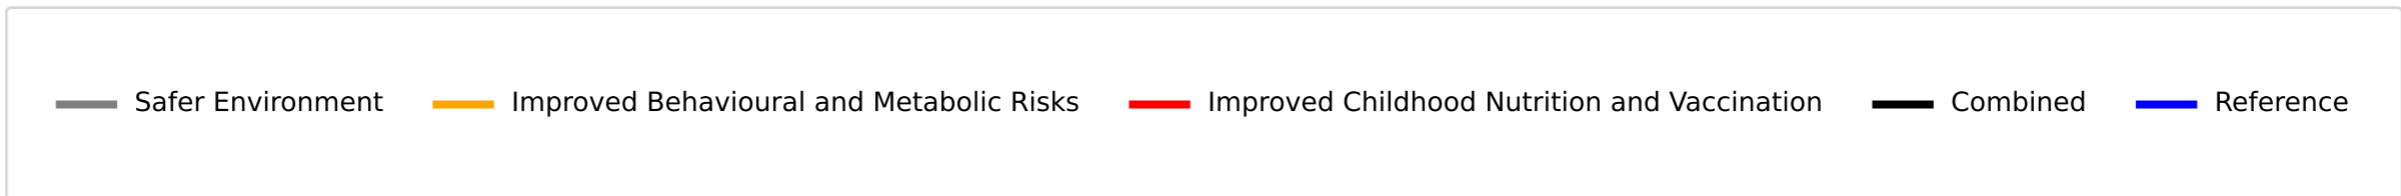

# Suriname

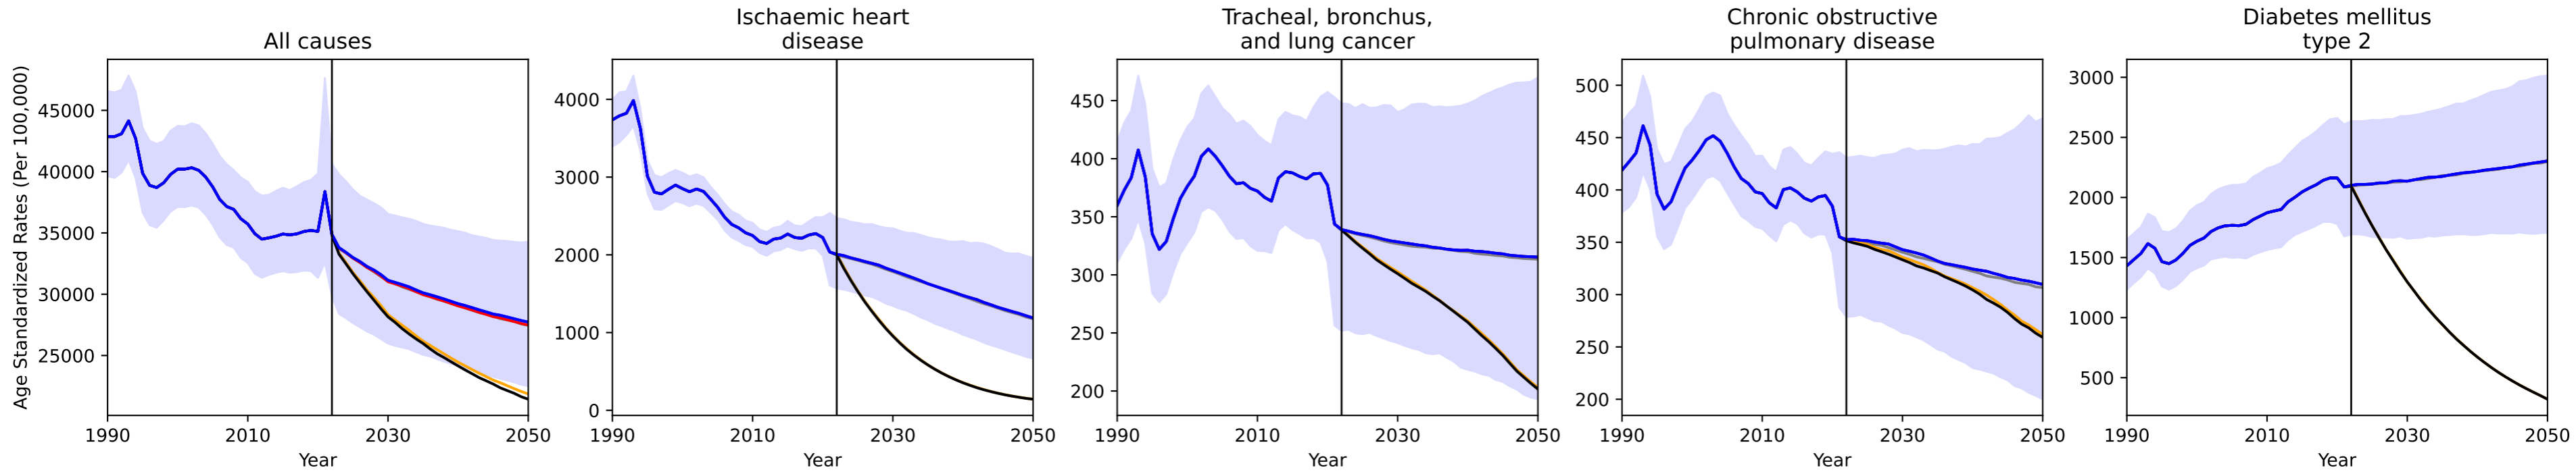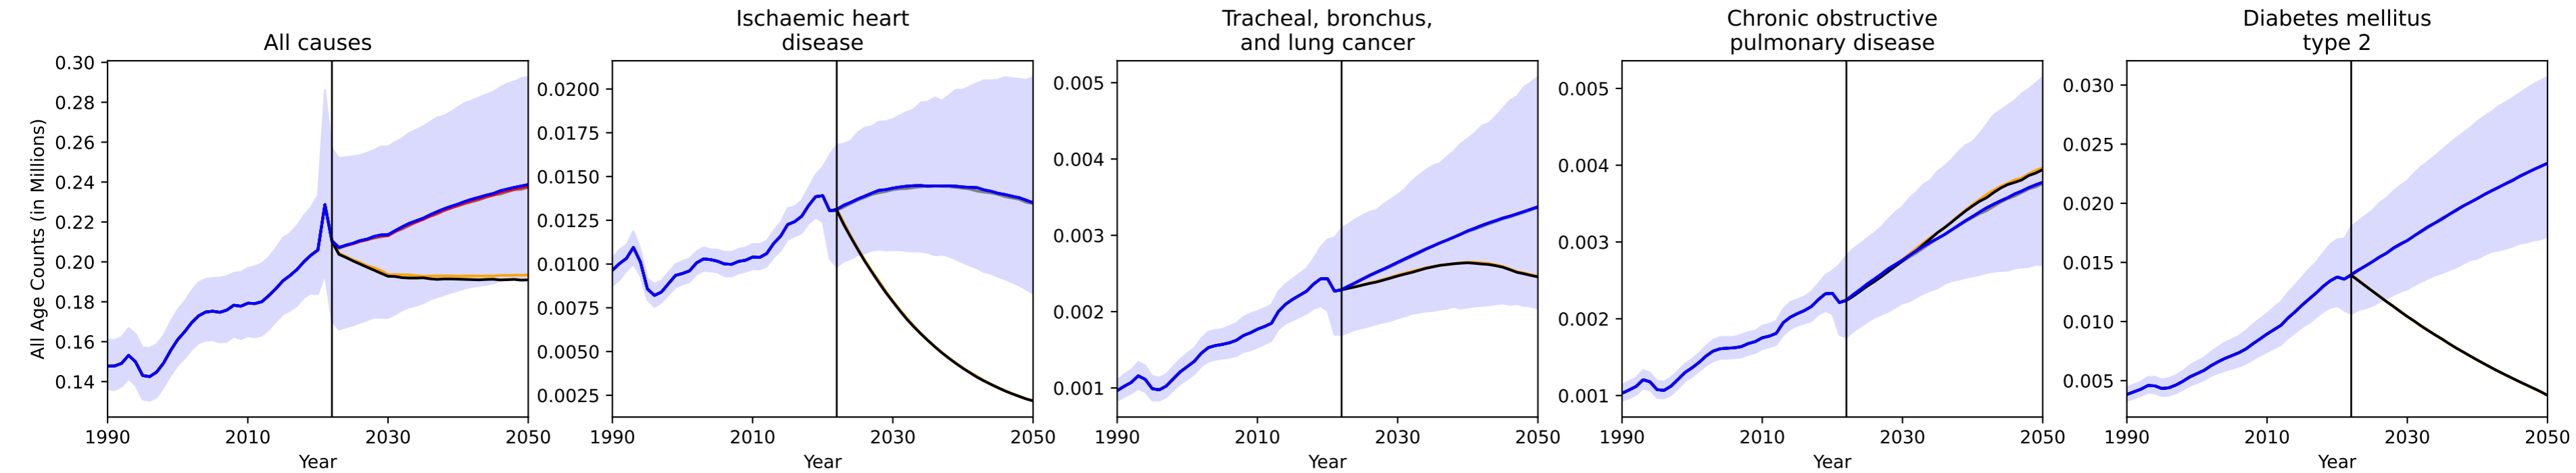

# Trinidad And Tobago

Supplemental Results Figure S12. All cause and top NCD causes age standardized DALY rates and all age counts by scenario and location, 1990-2050

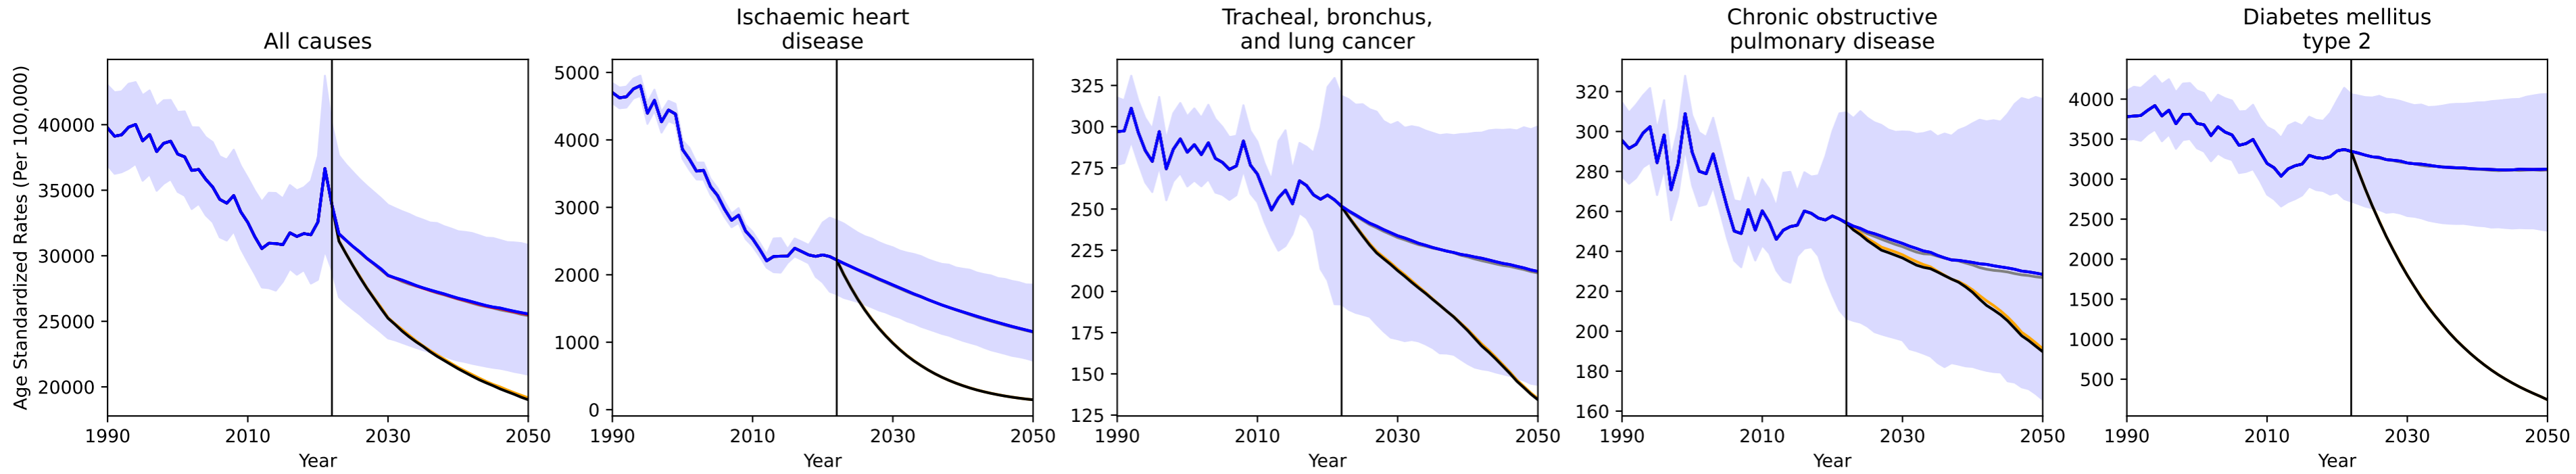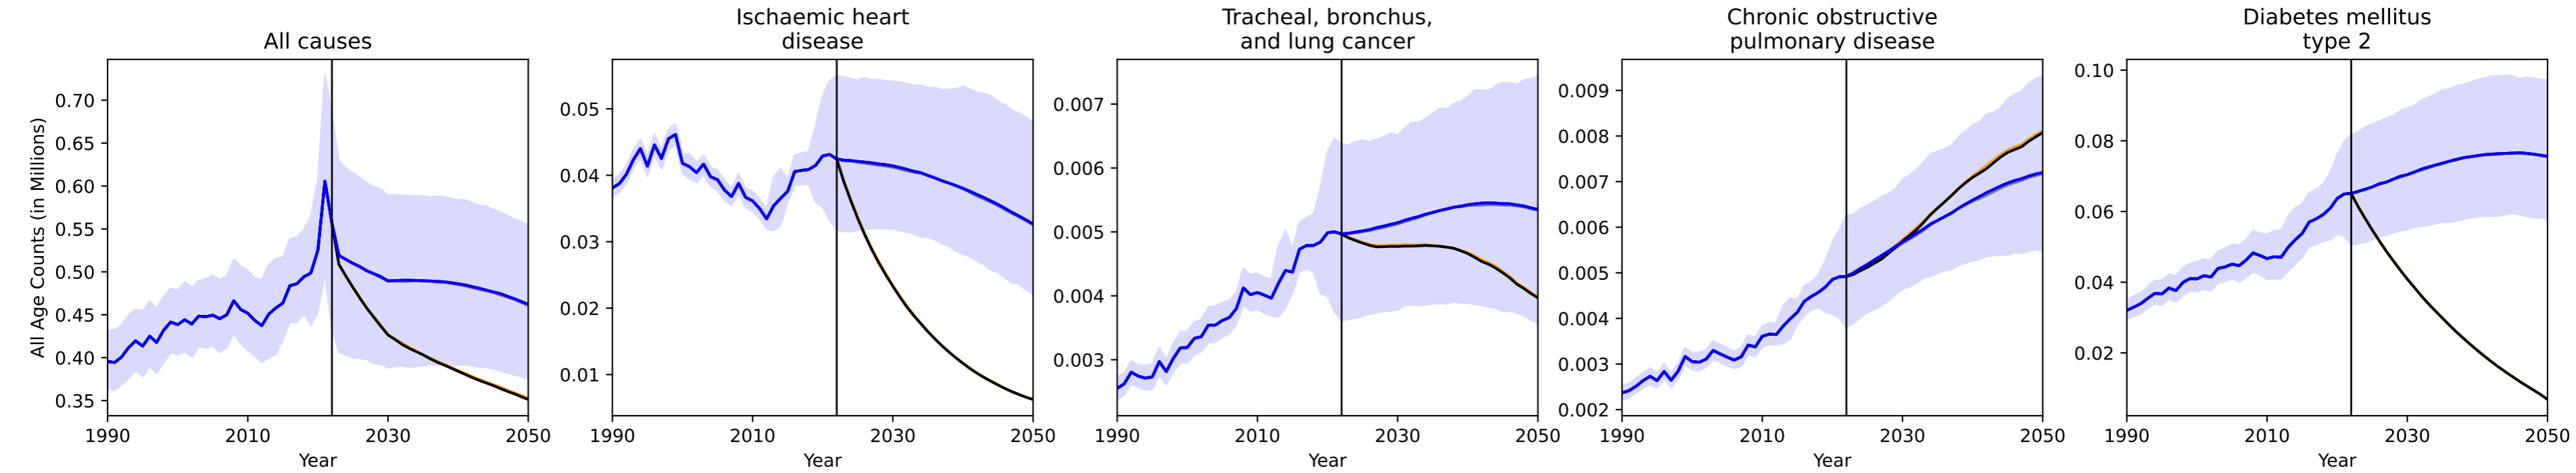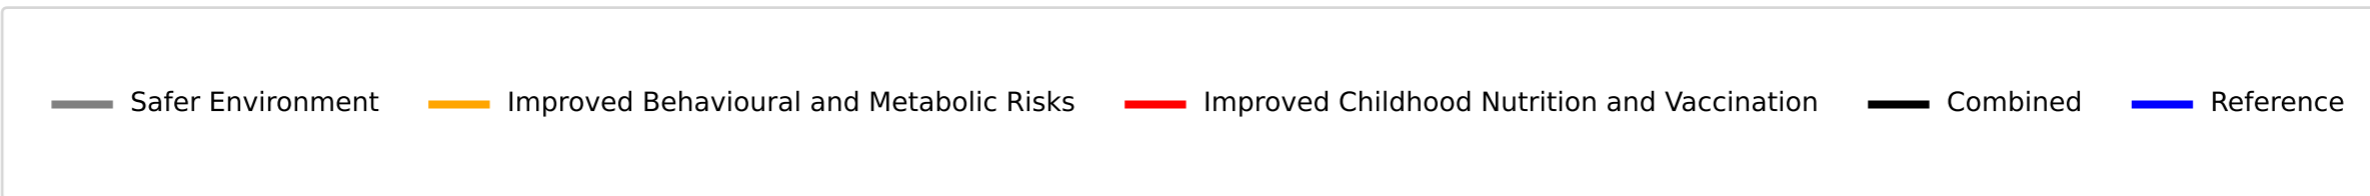

# Virgin Islands

Supplemental Results Figure S12. All cause and top NCD causes age standardized DALY rates and all age counts by scenario and location, 1990-2050

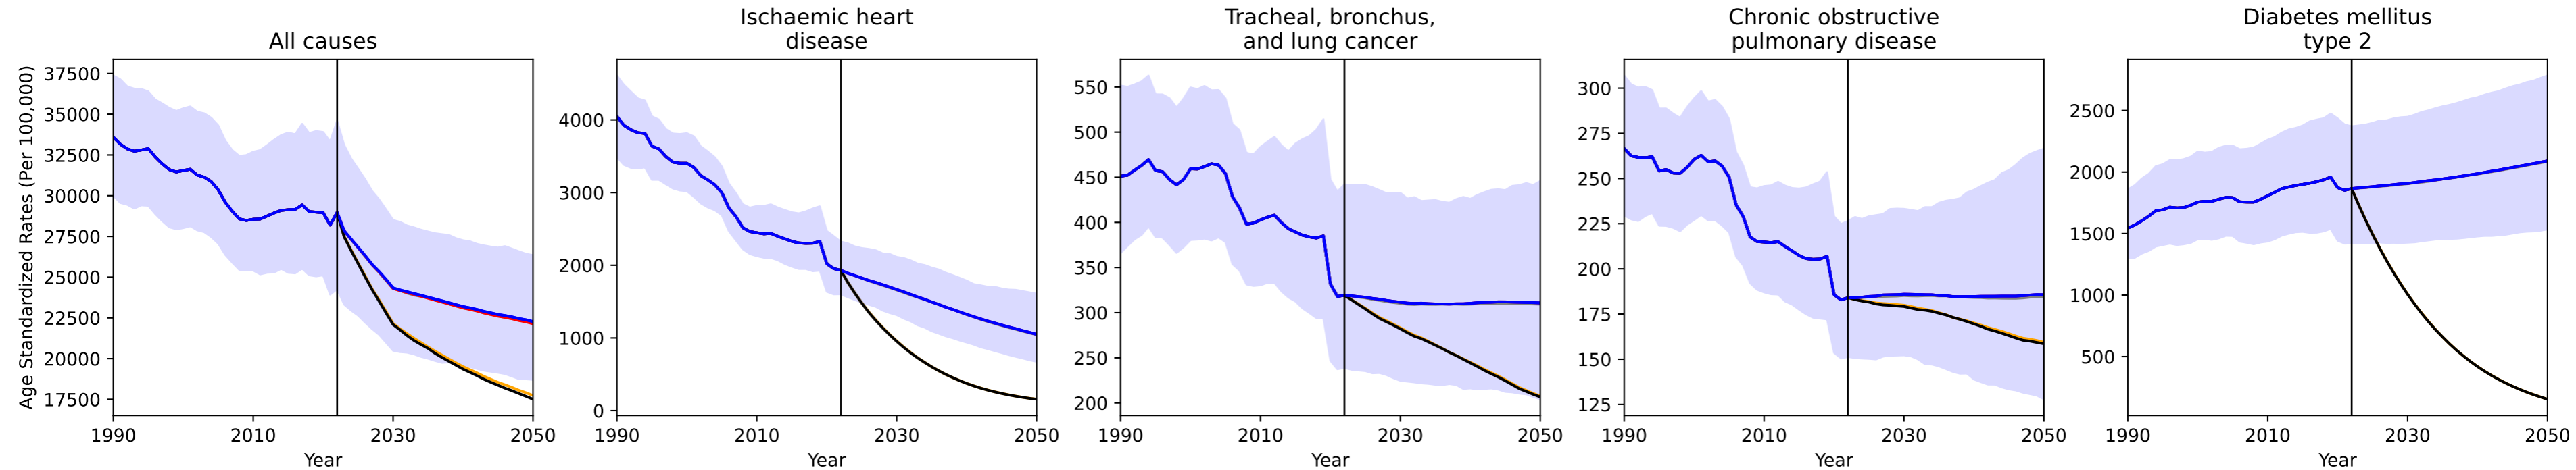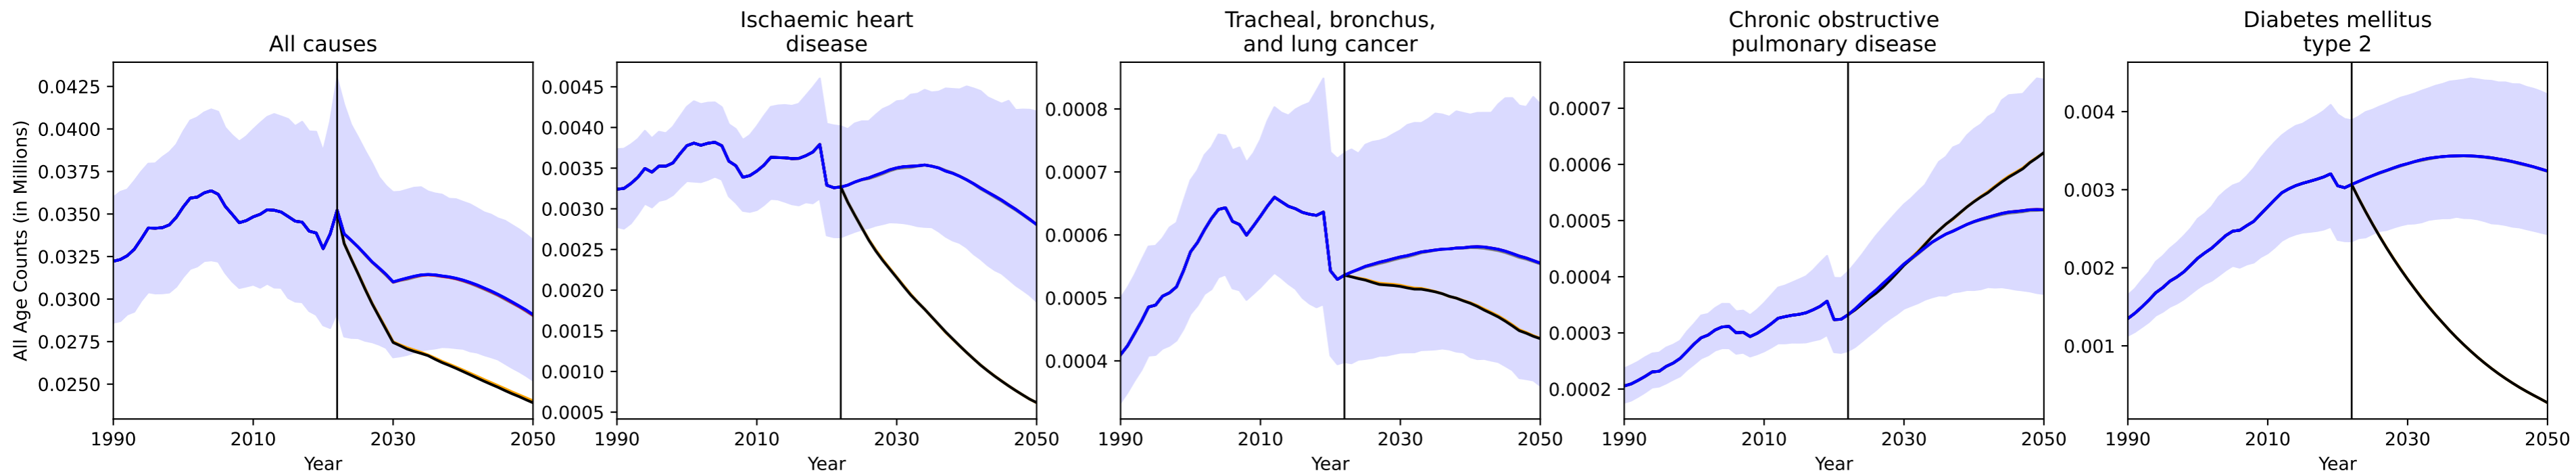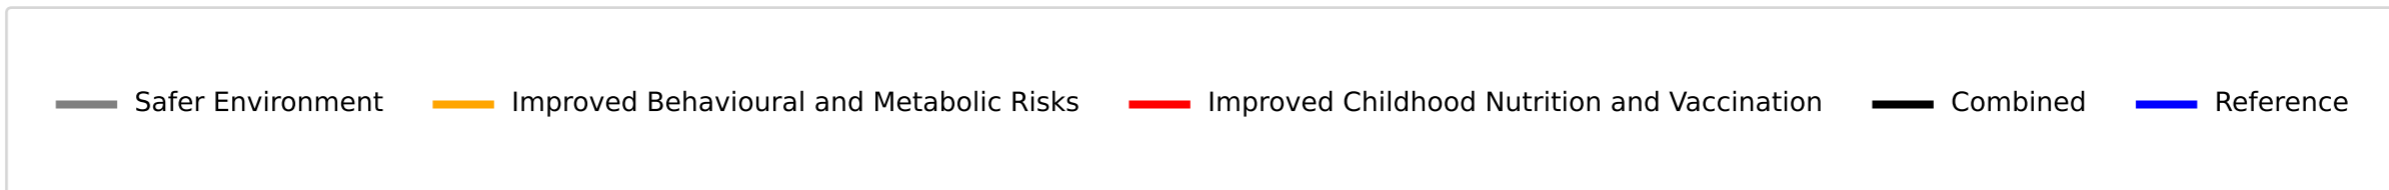

# Colombia

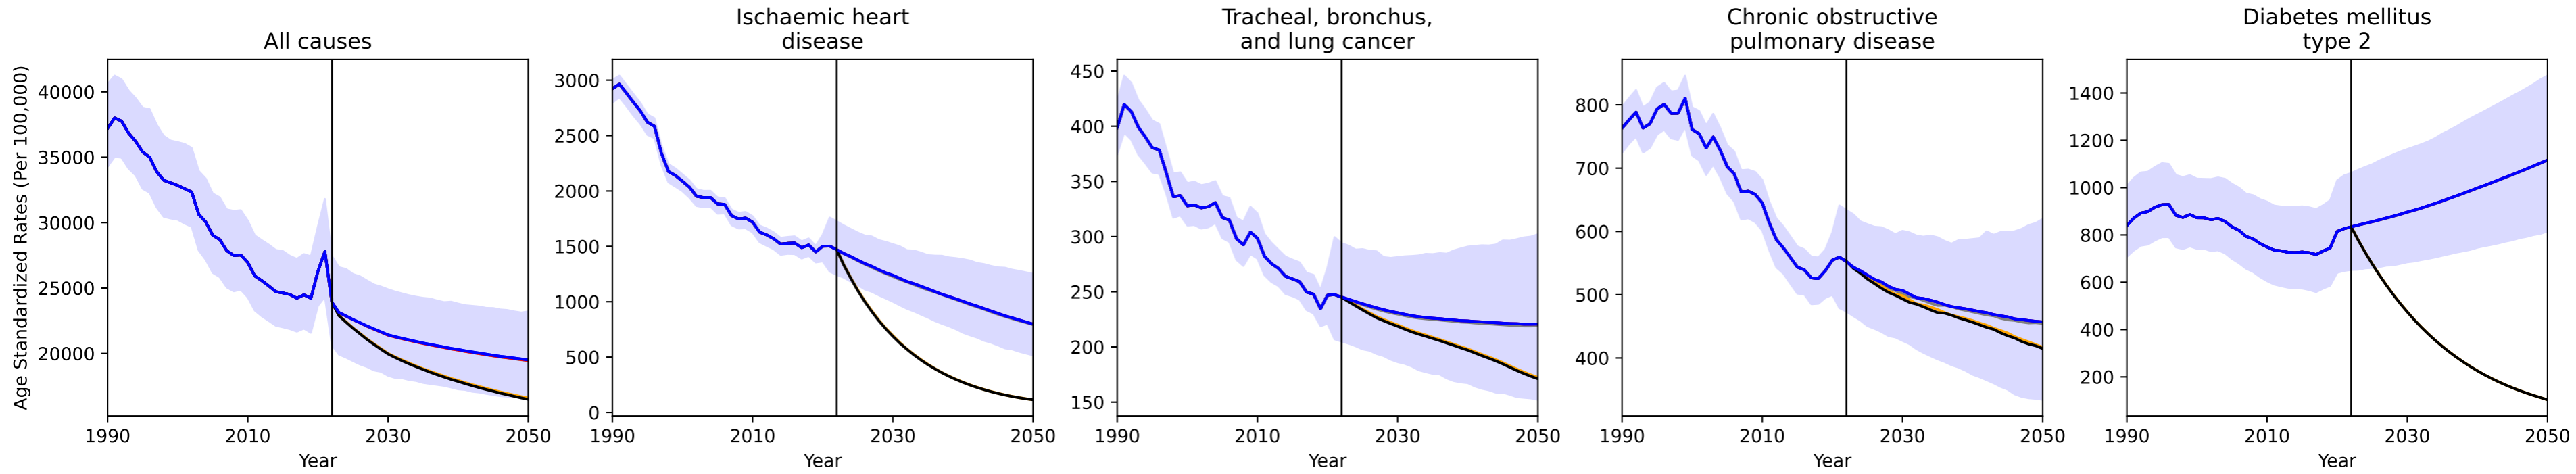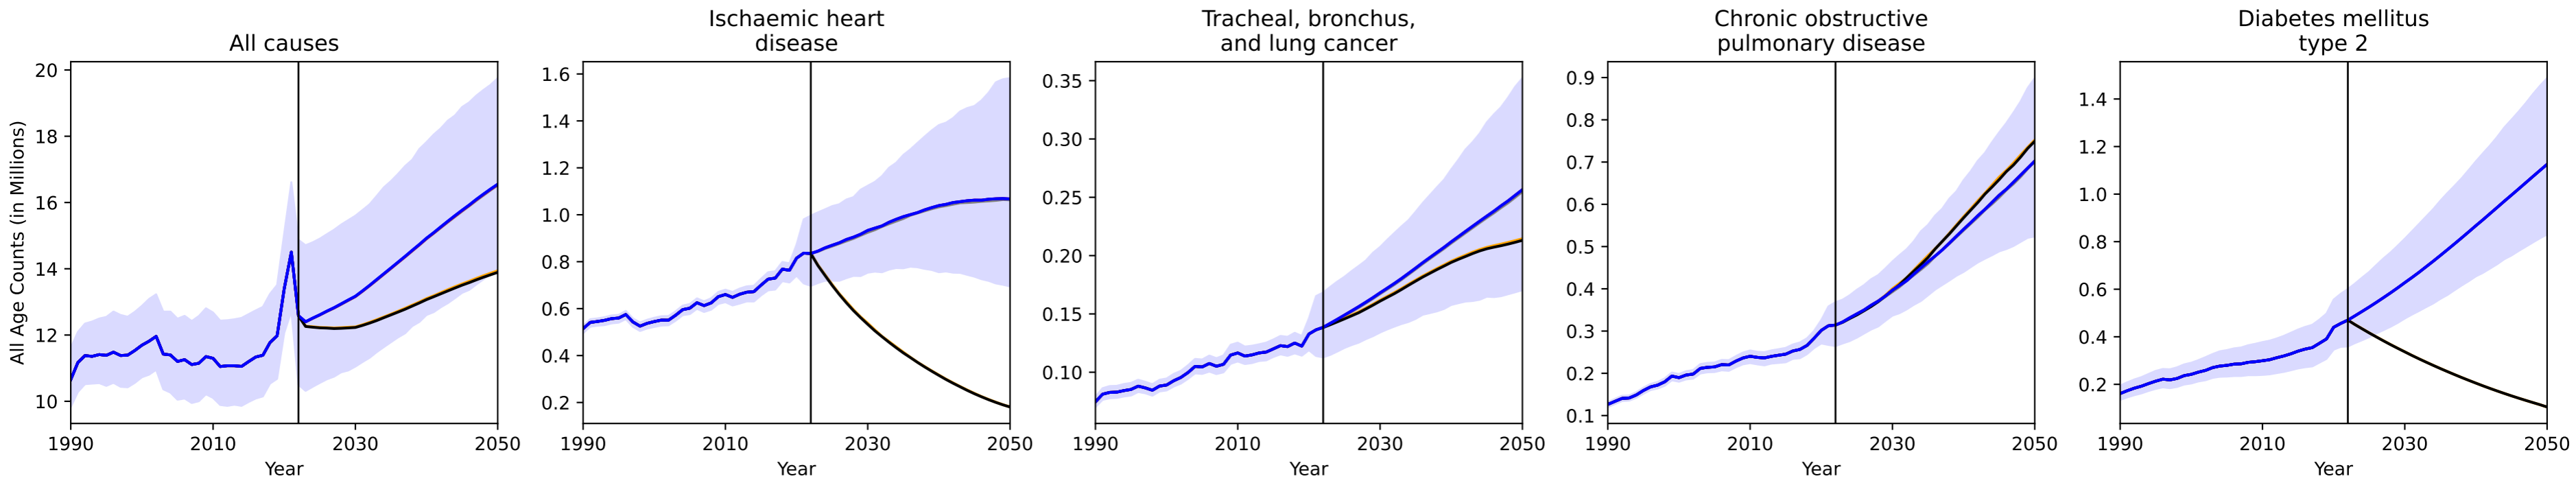

# Costa Rica

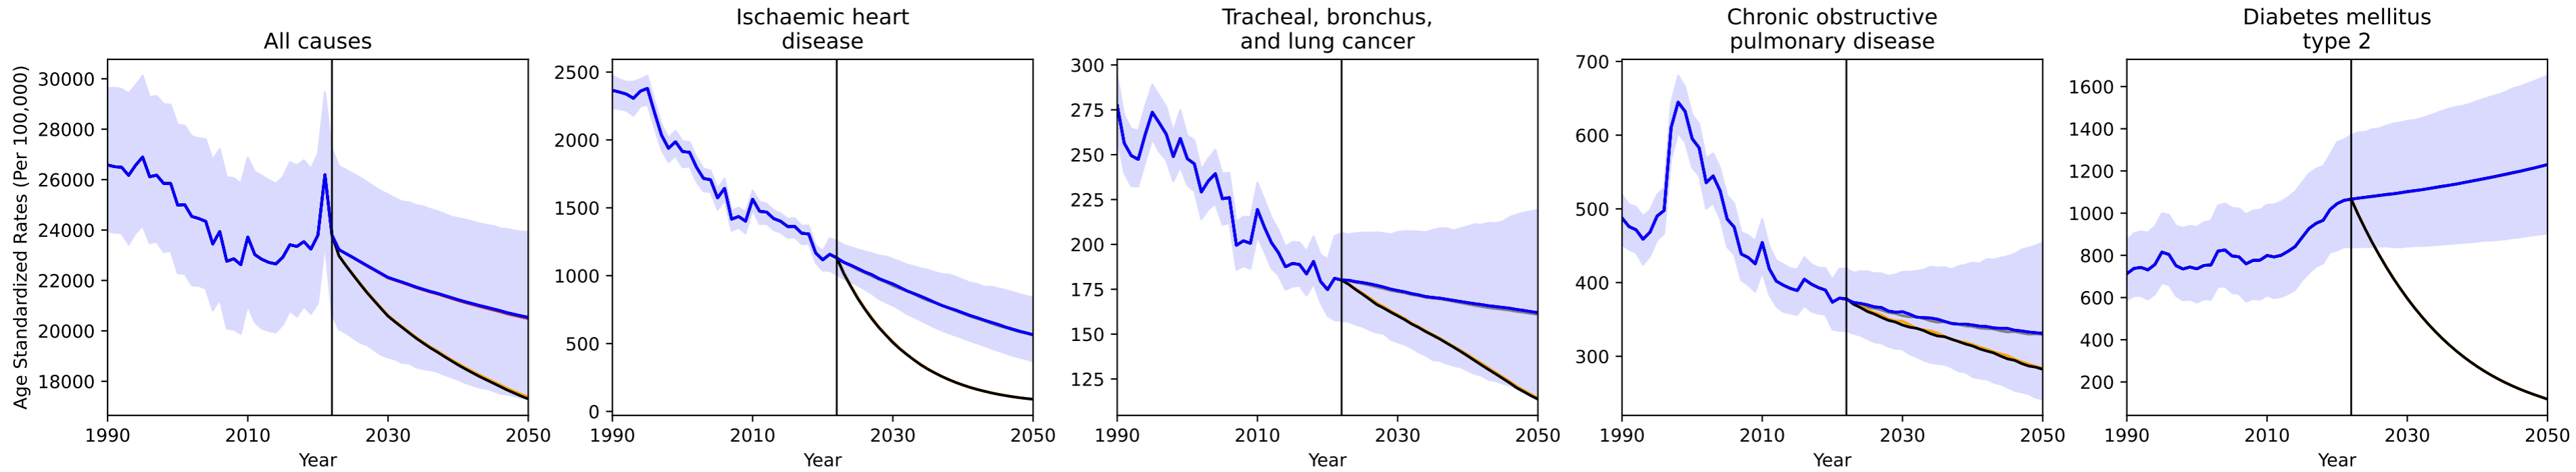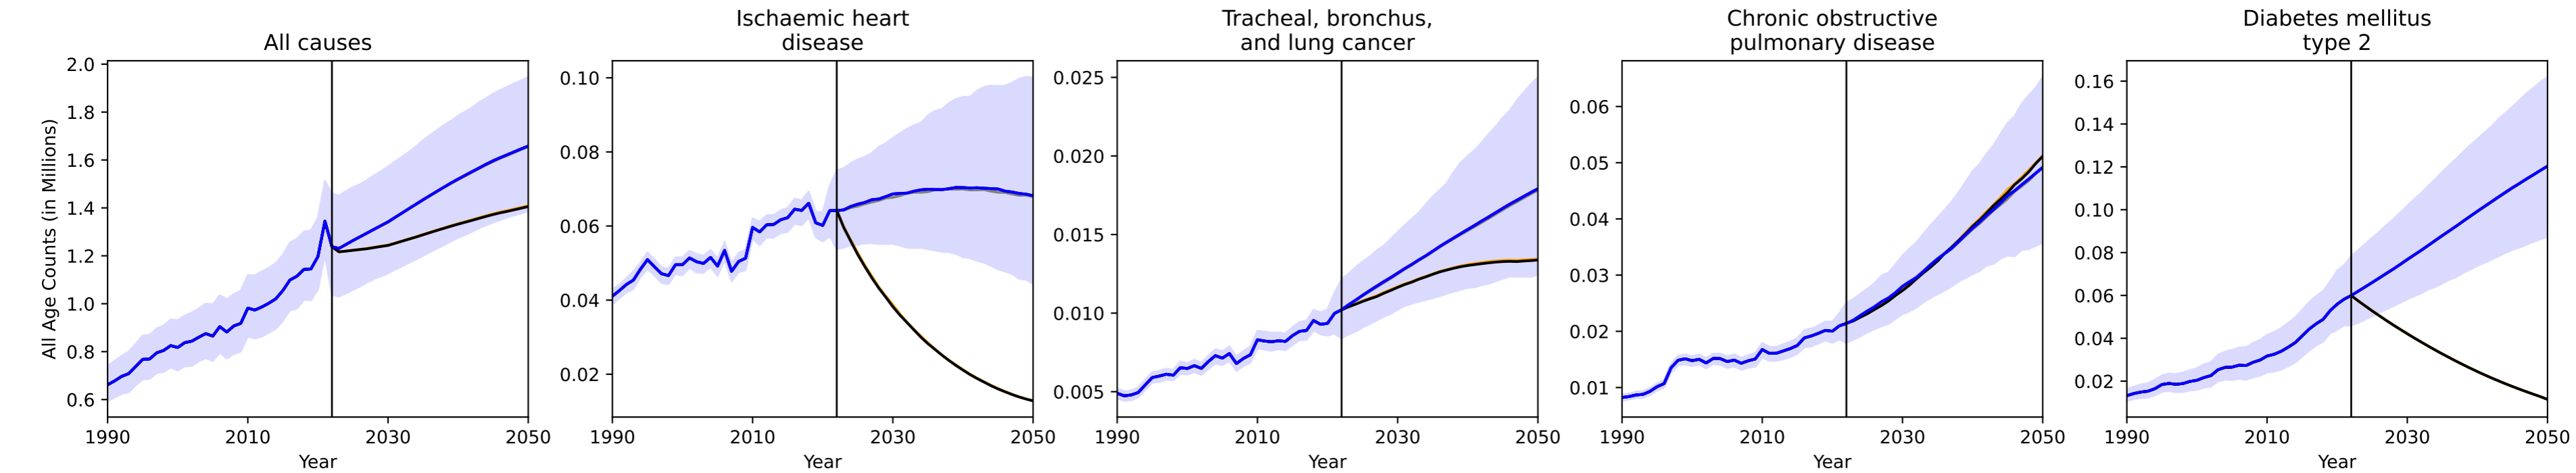

# El Salvador

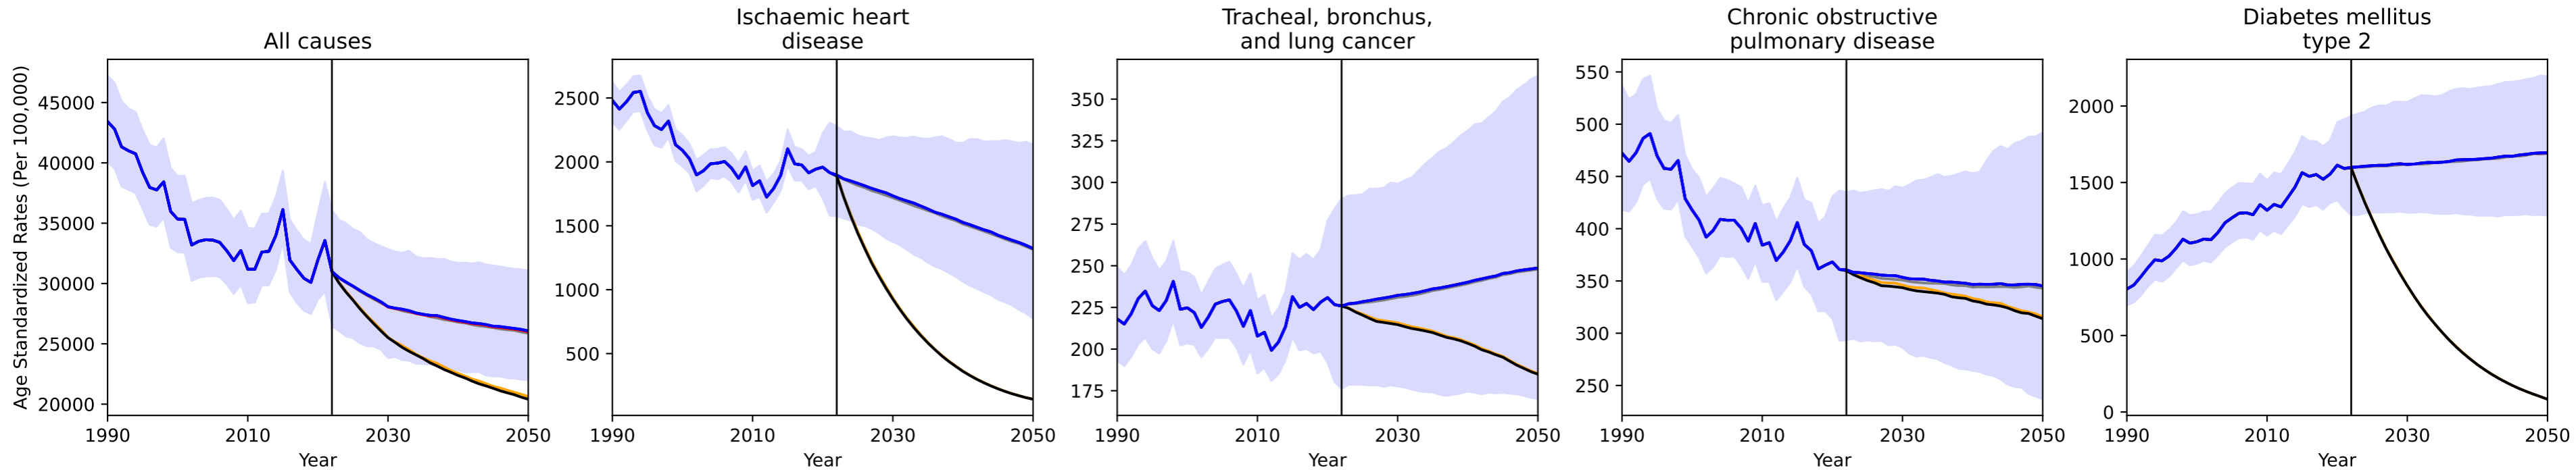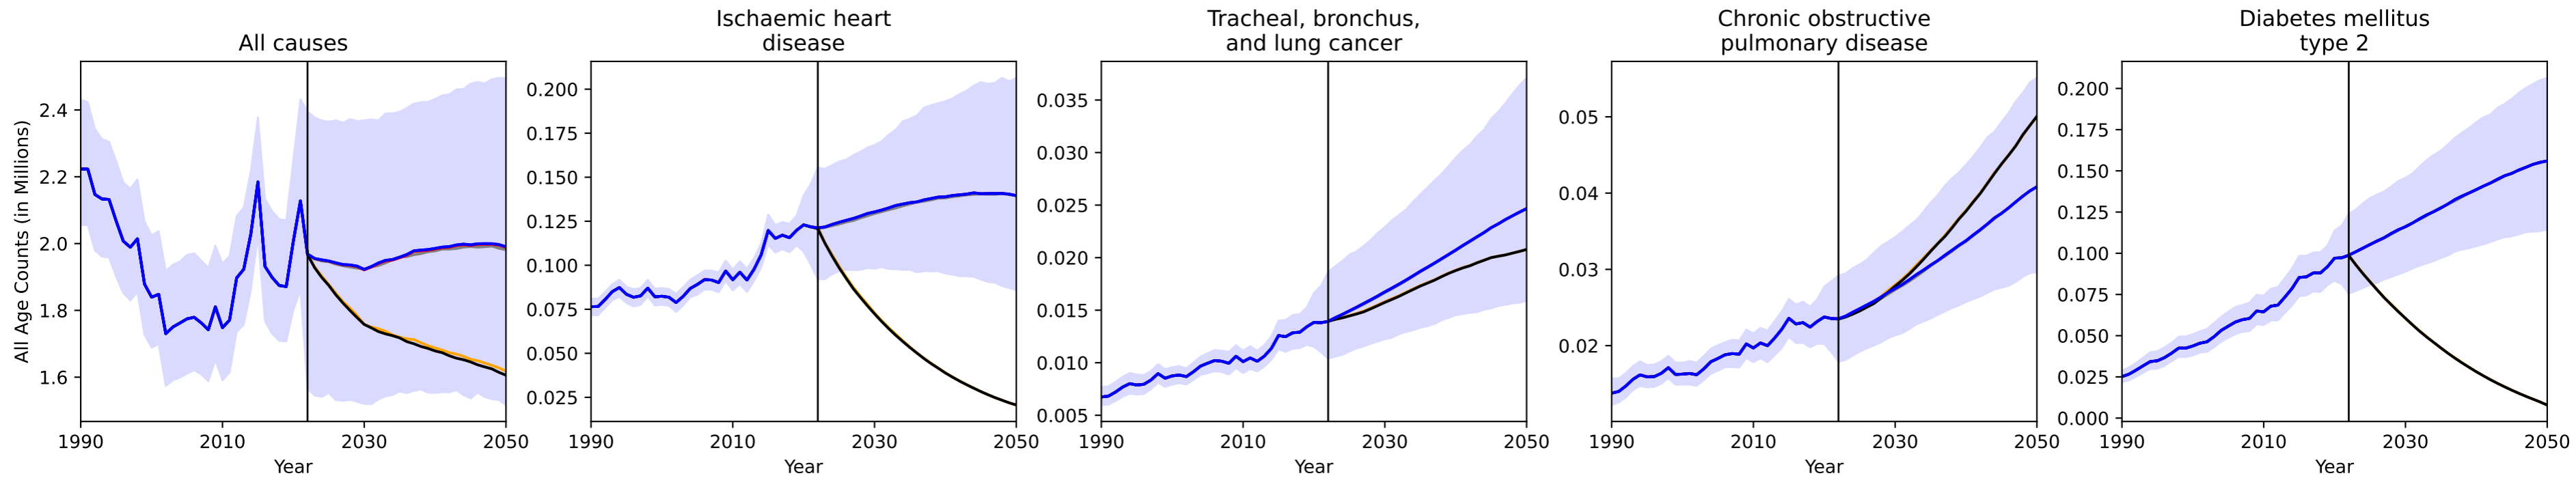

# Guatemala

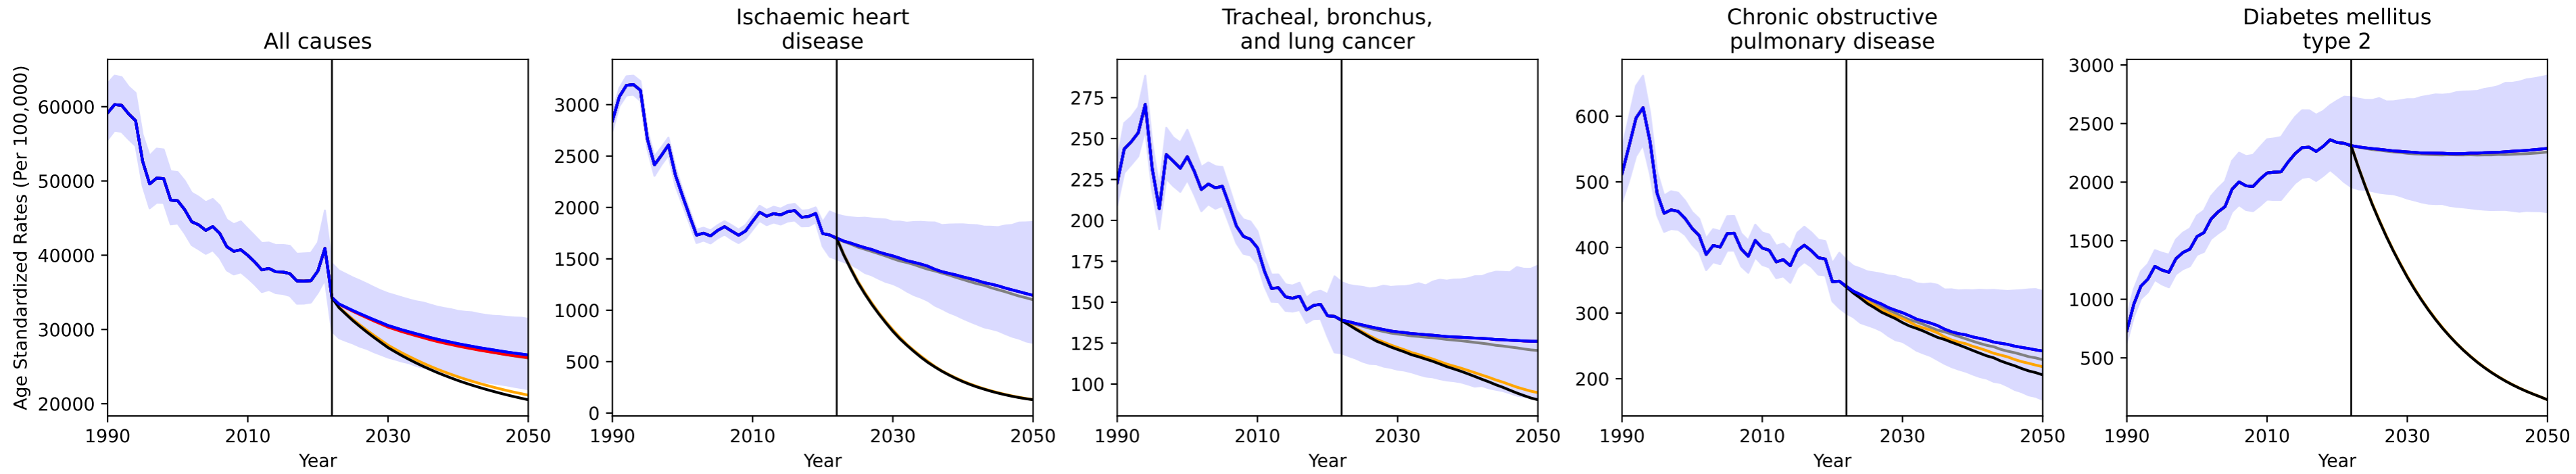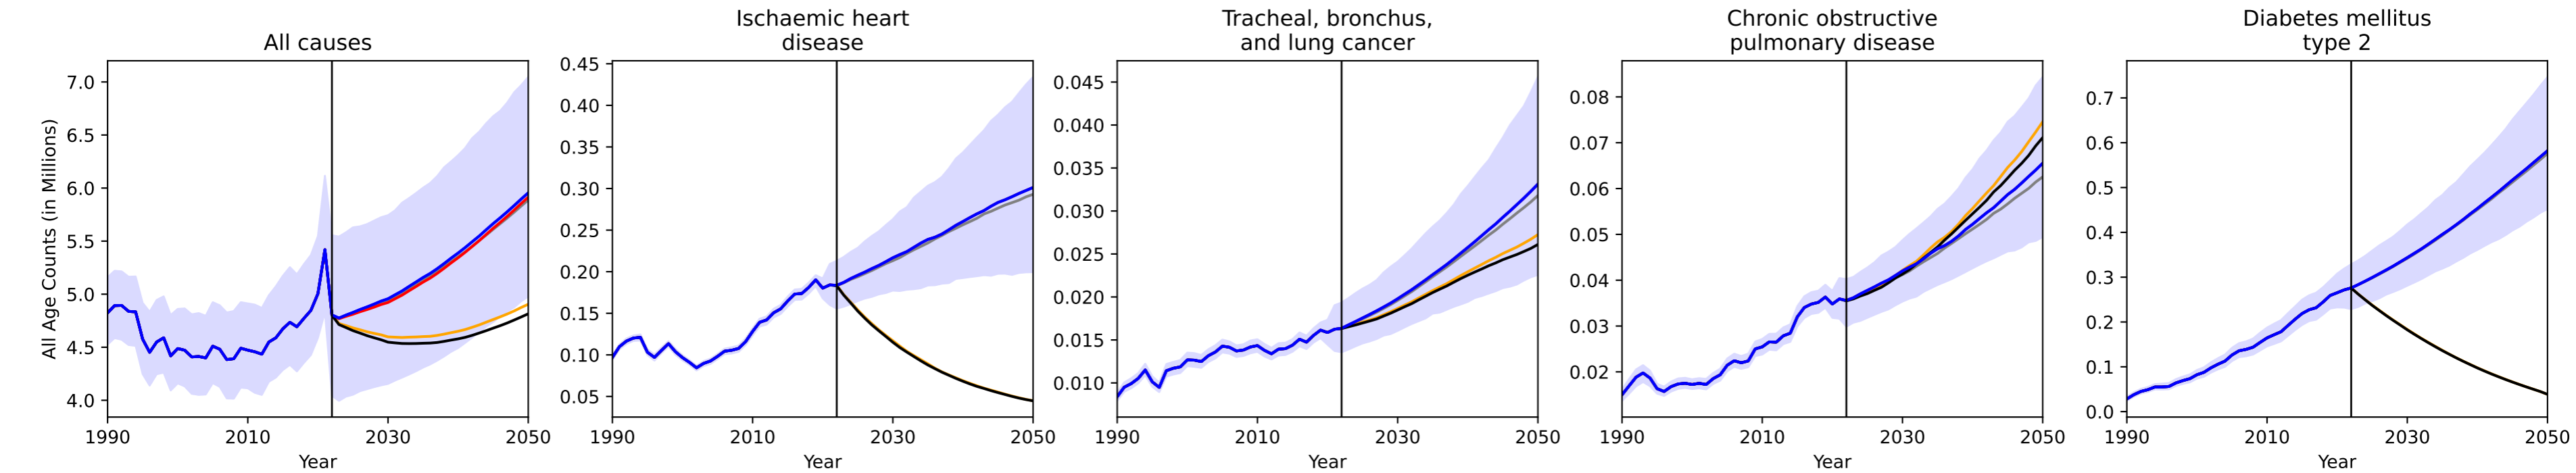



# Honduras

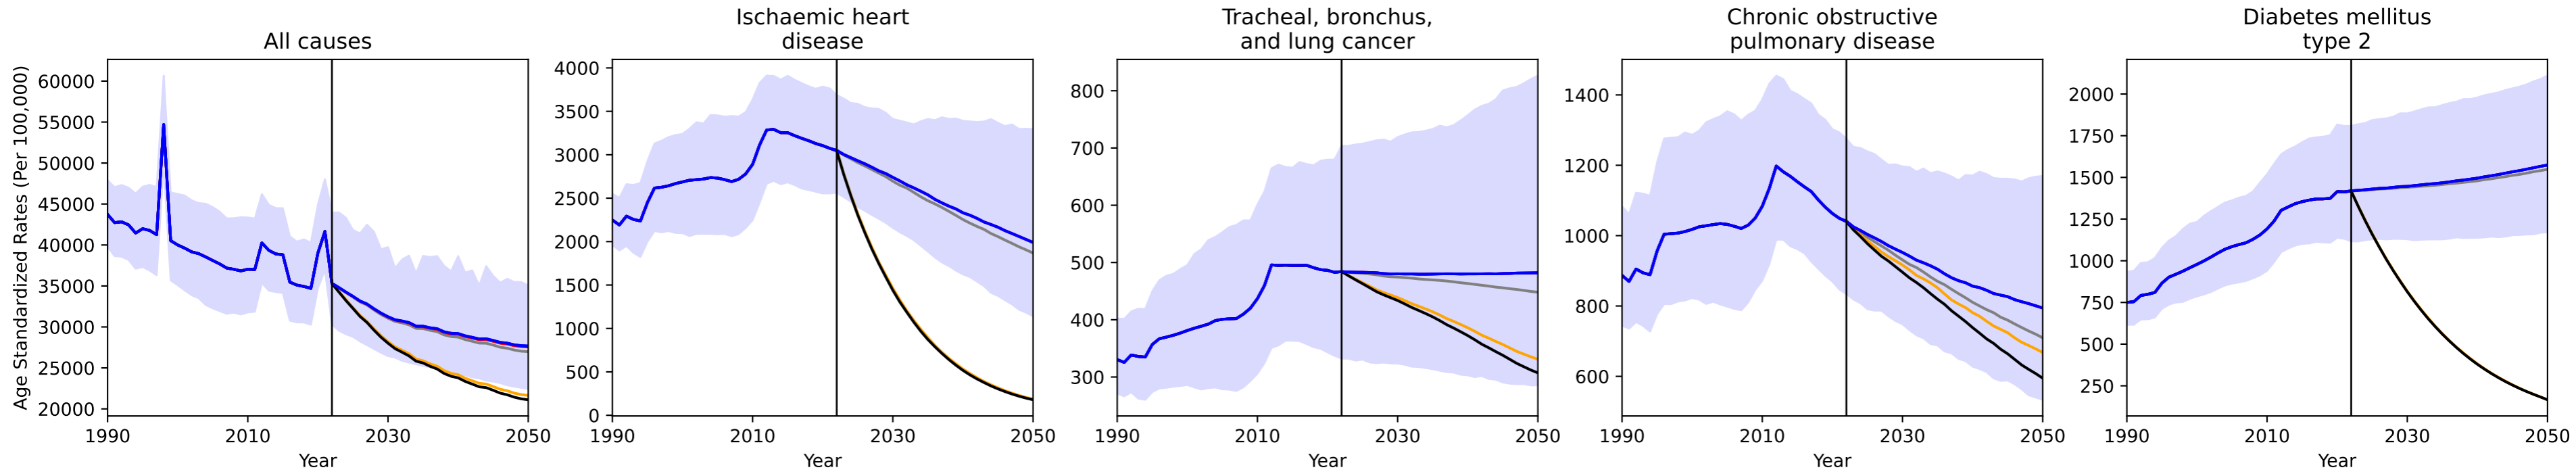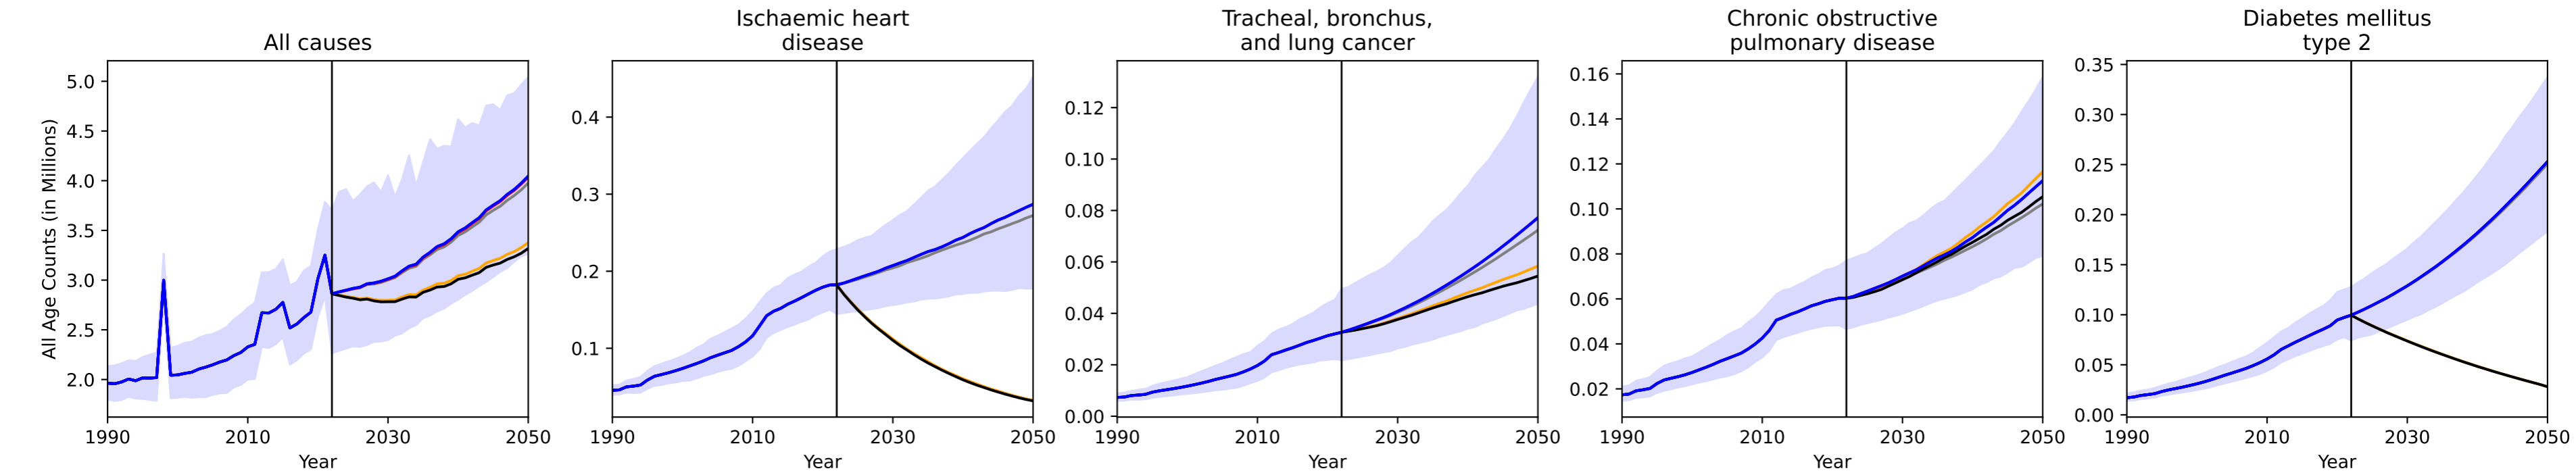

# Mexico

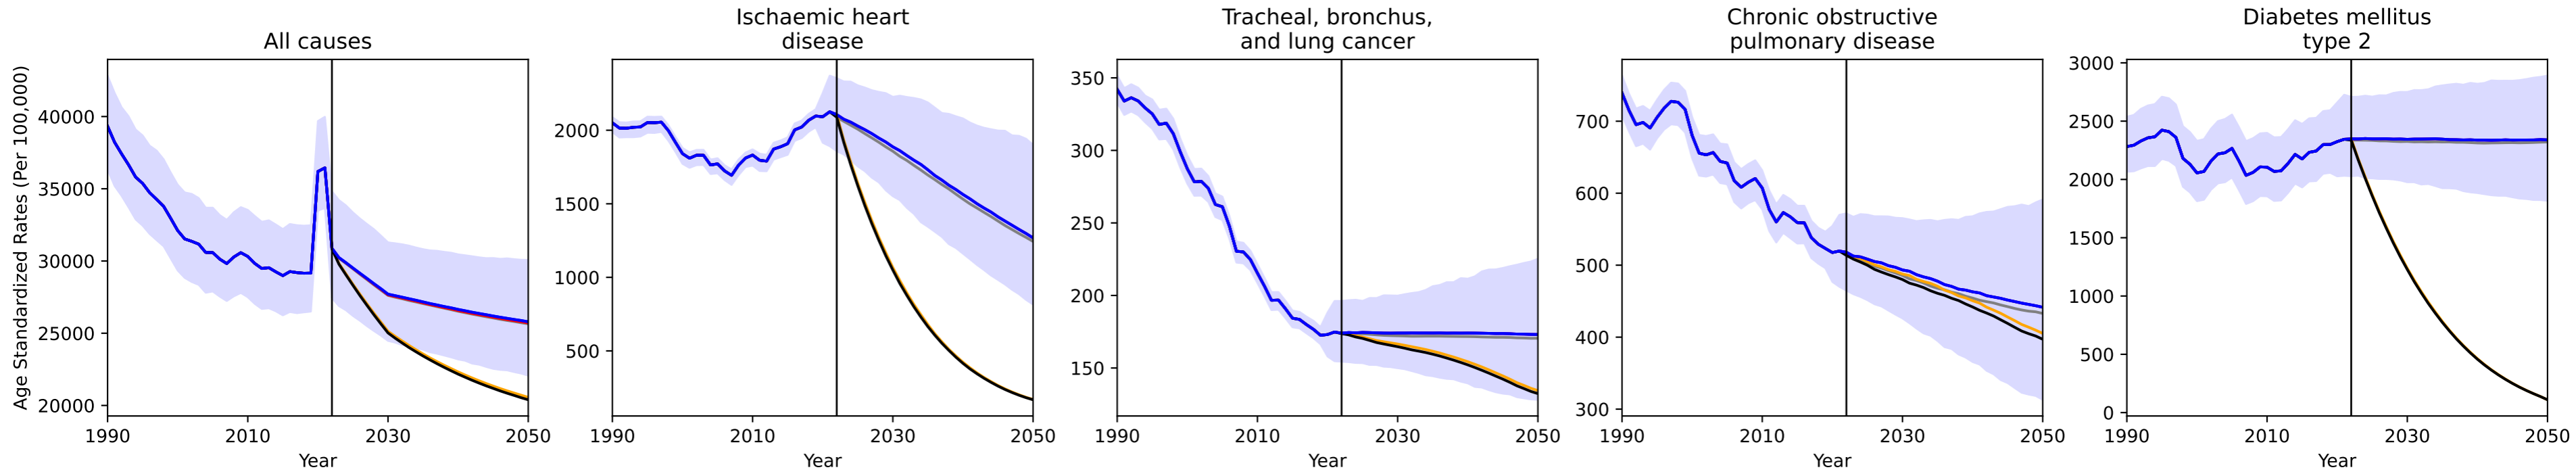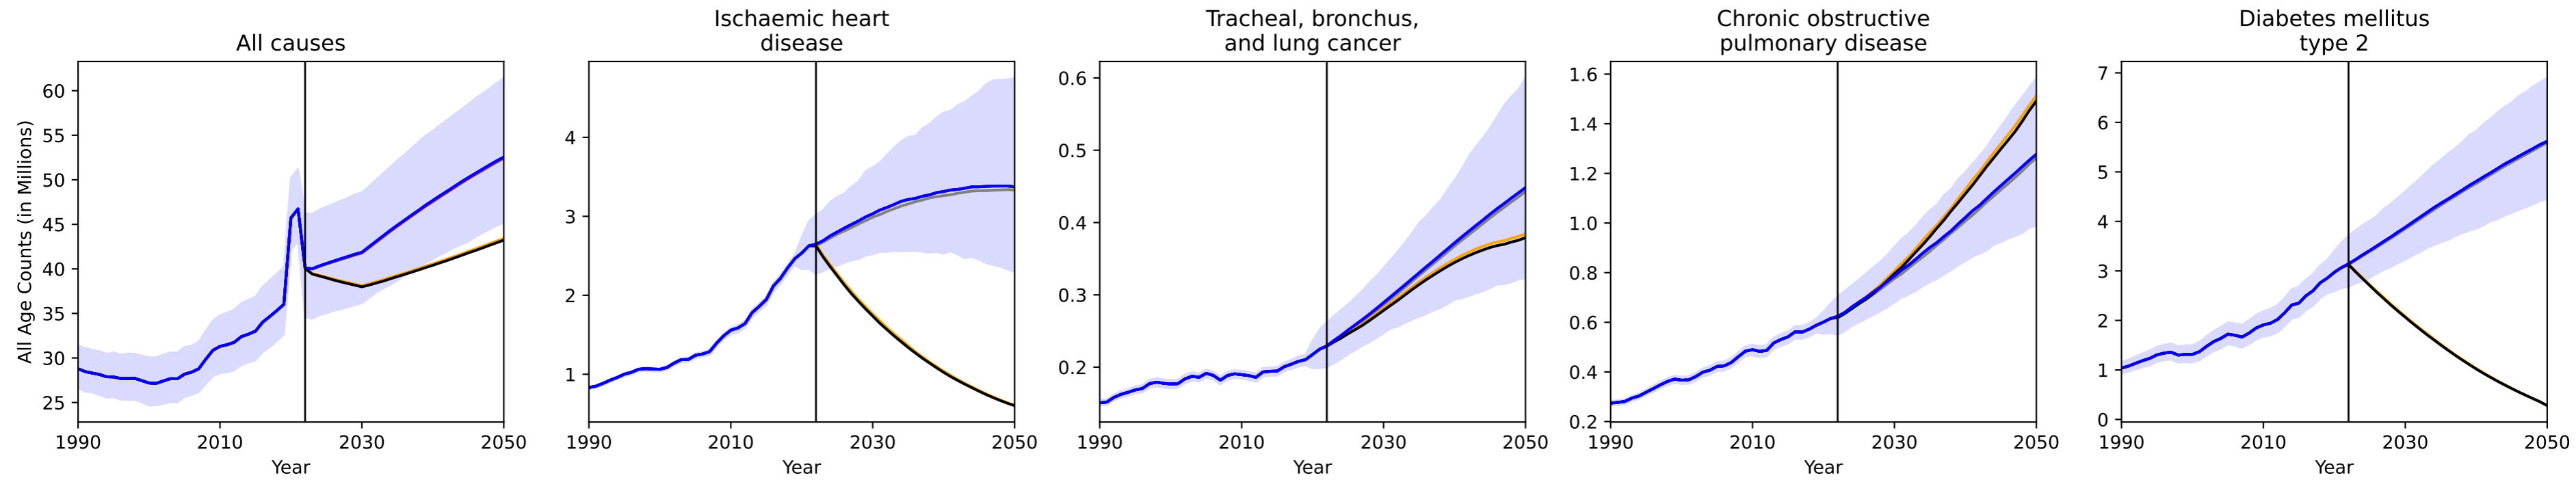

# Nicaragua

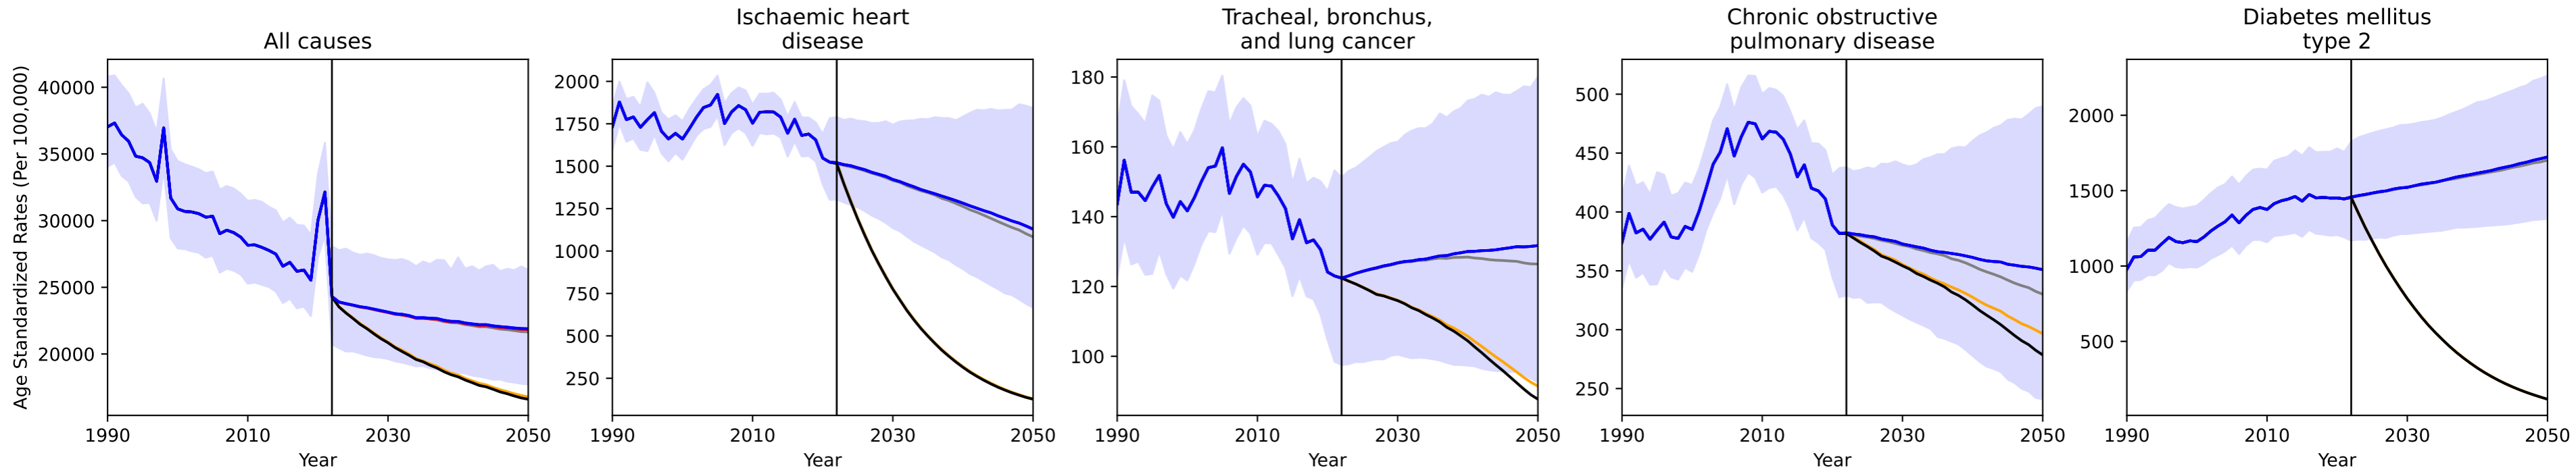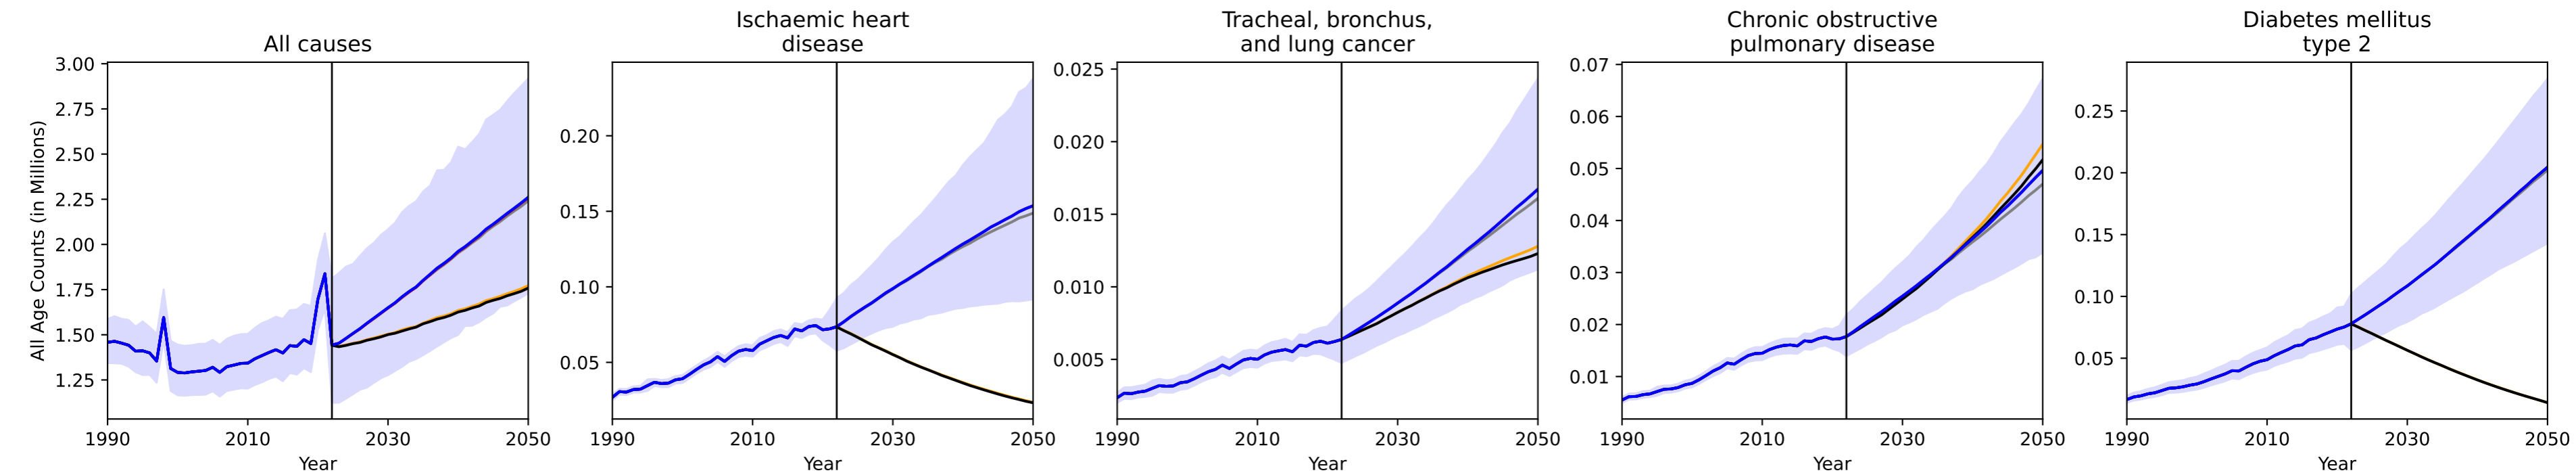

# Panama

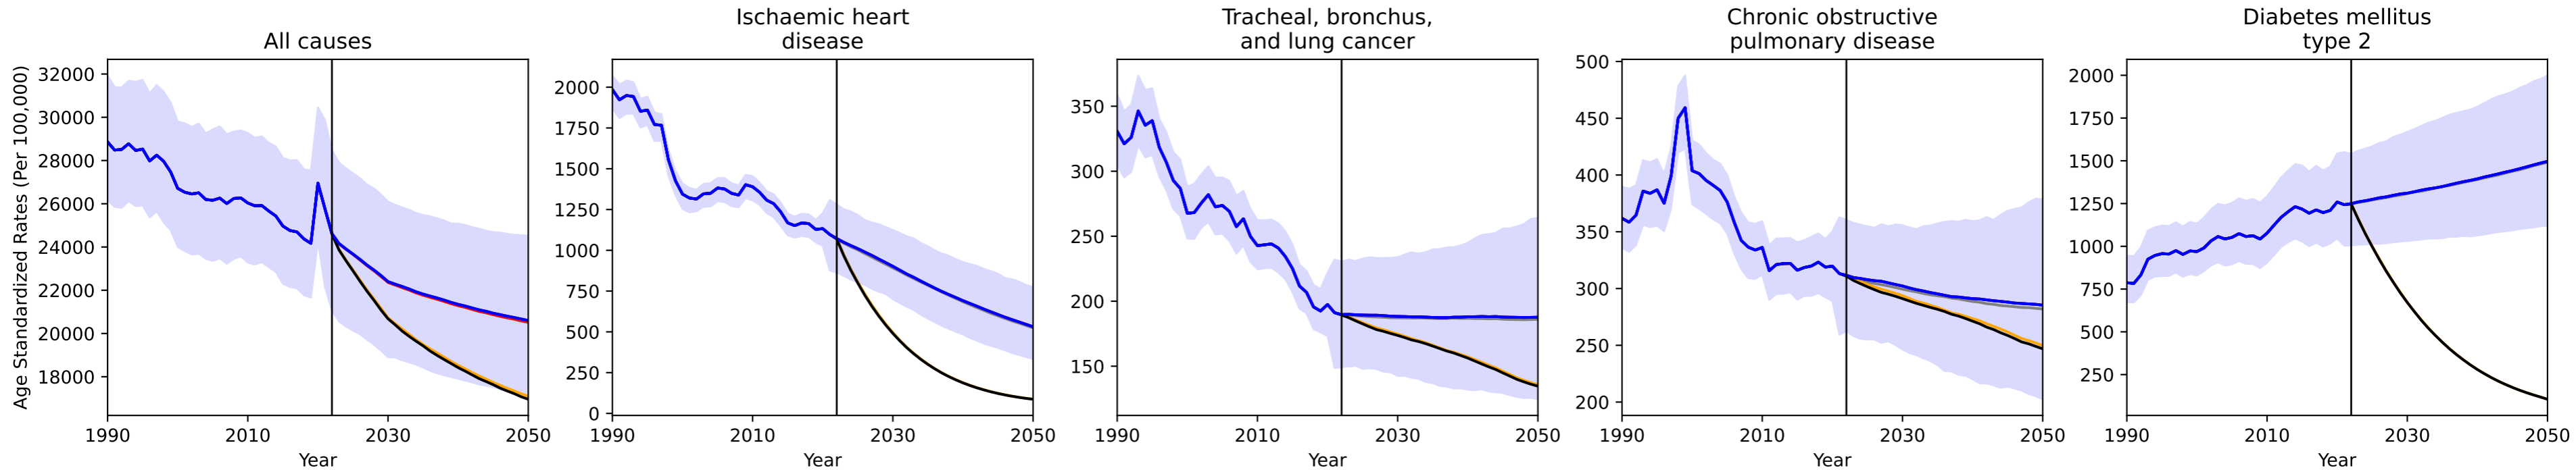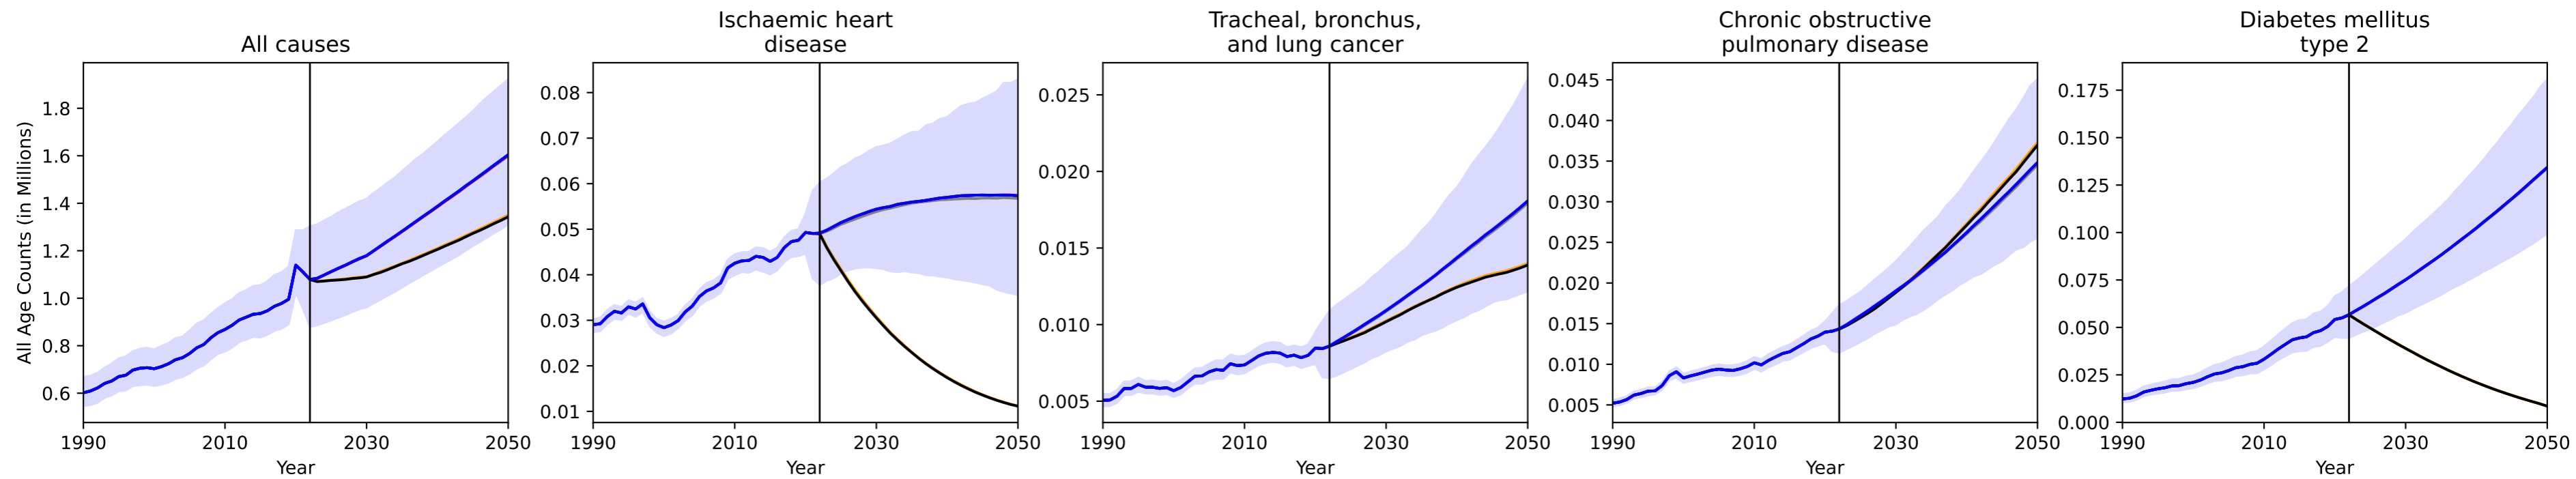

# Venezuela

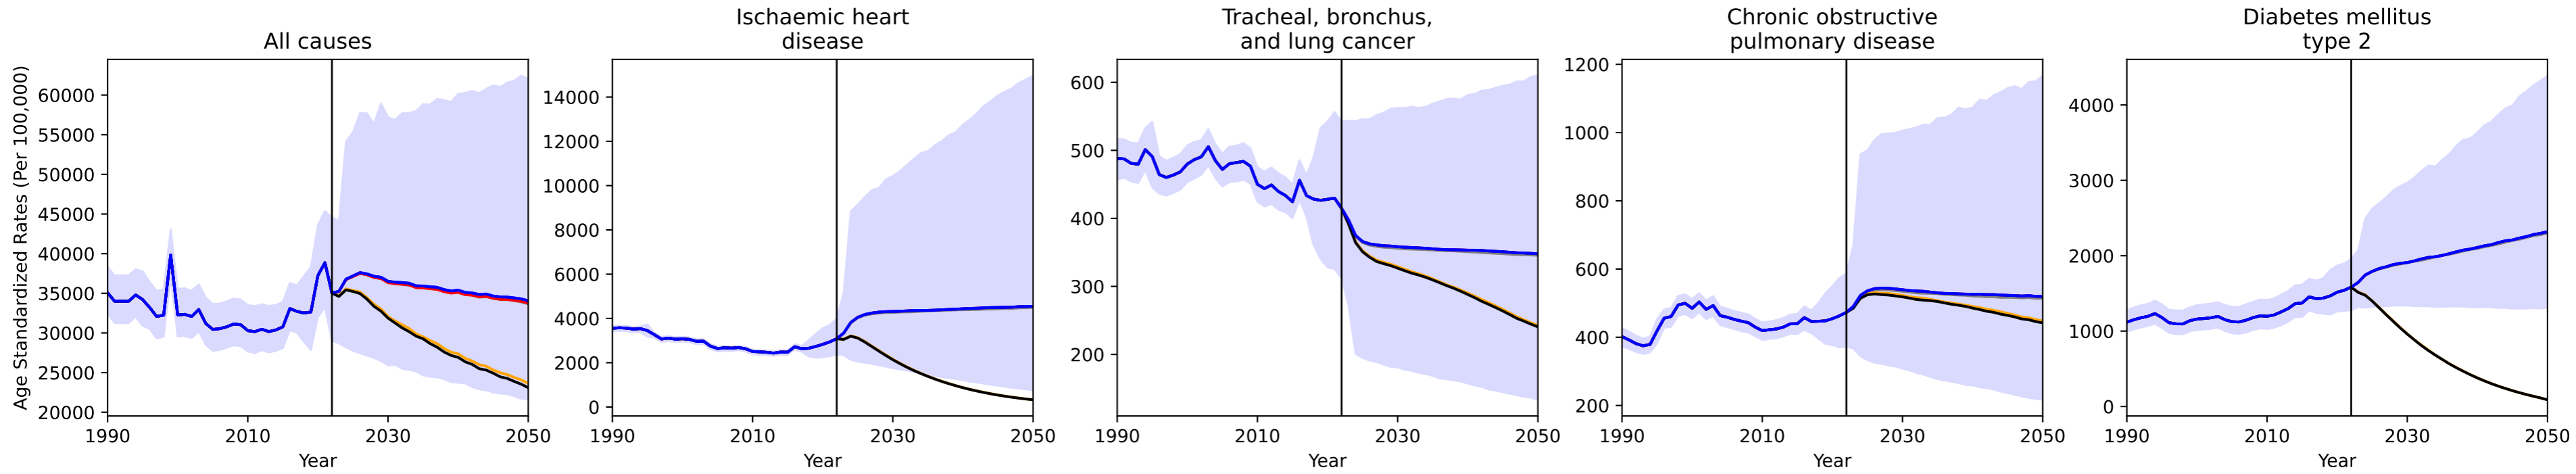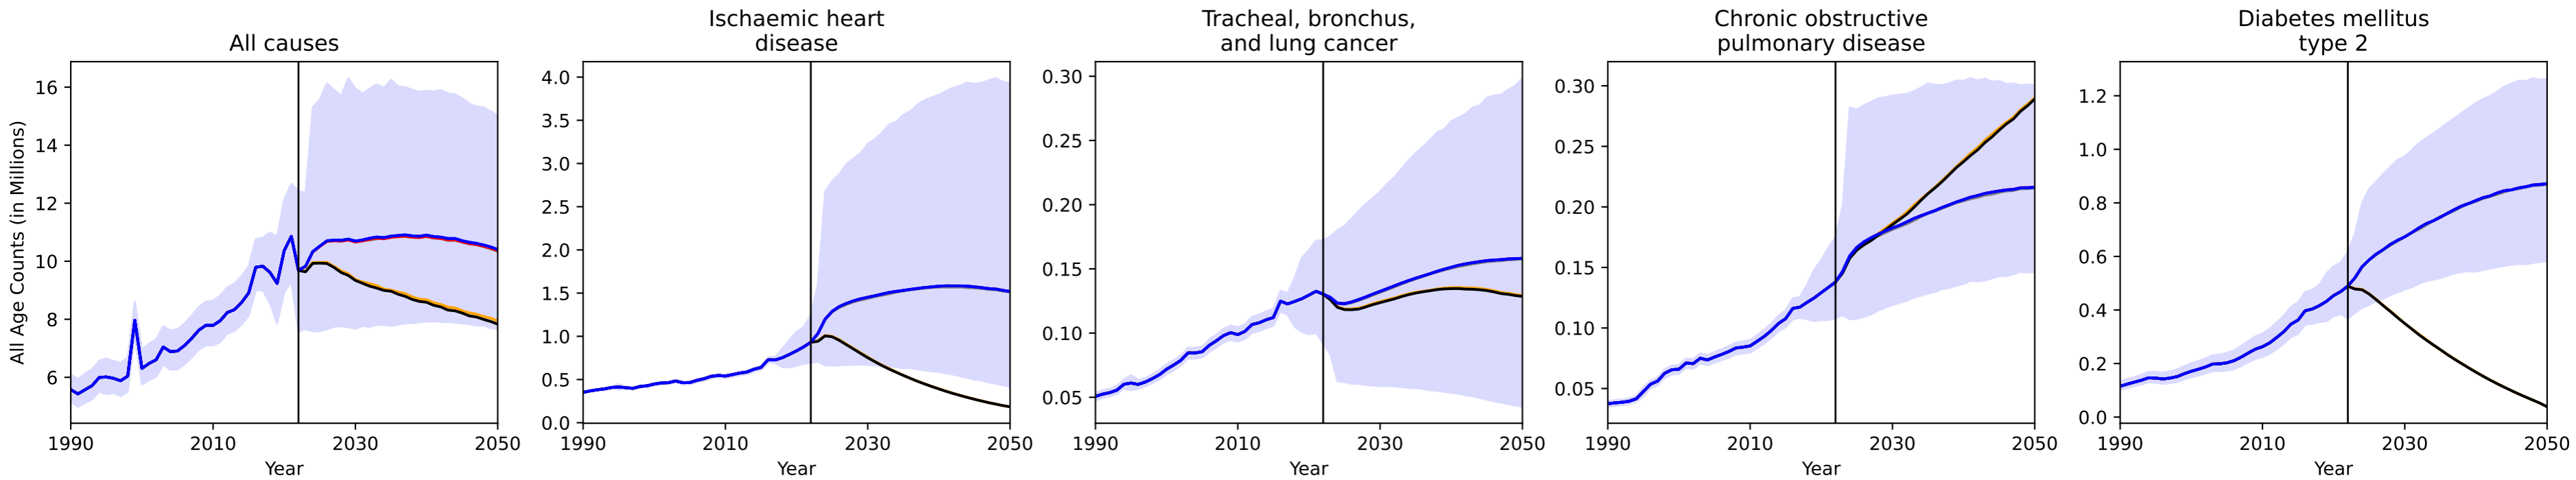

# Brazil

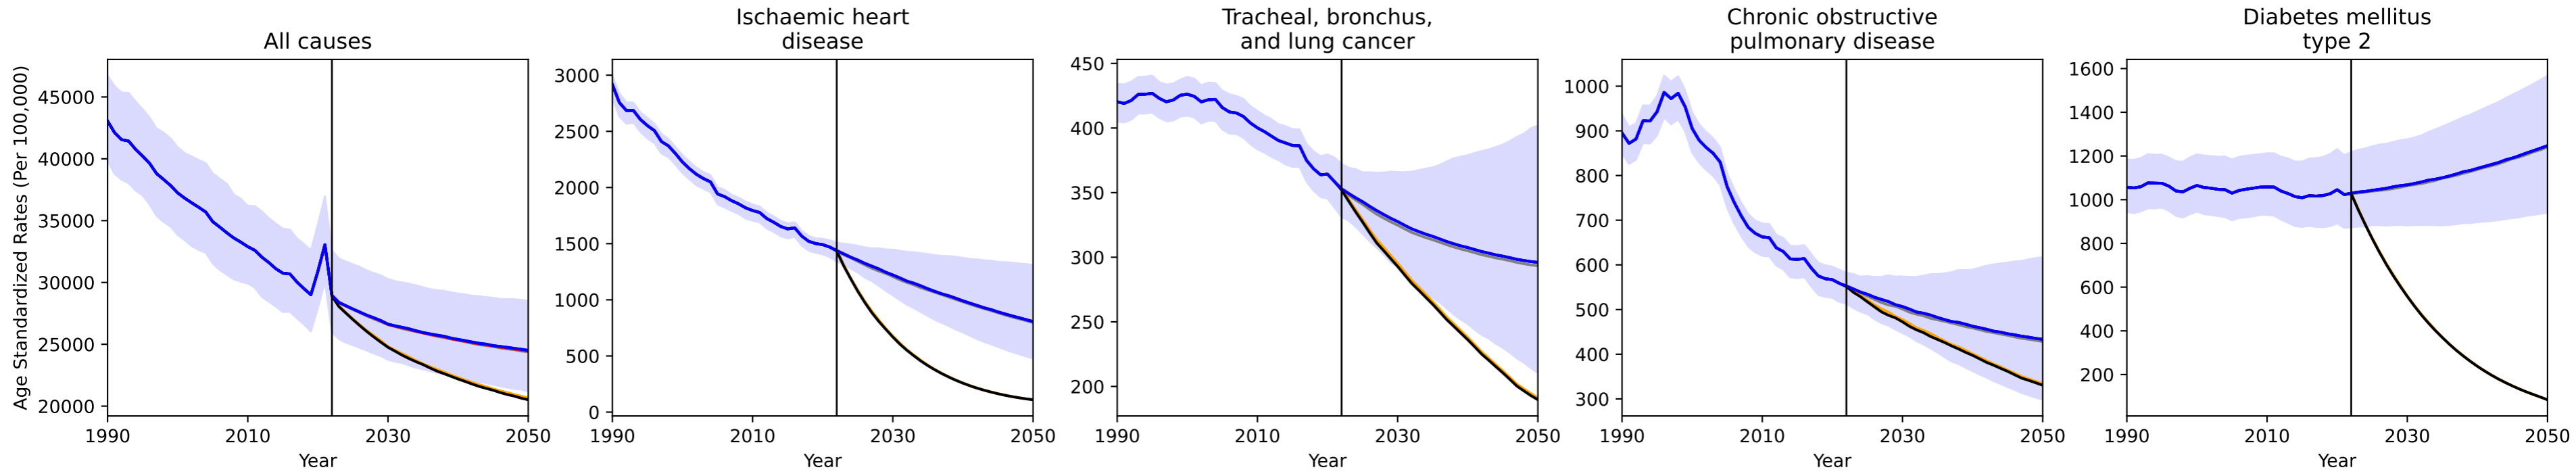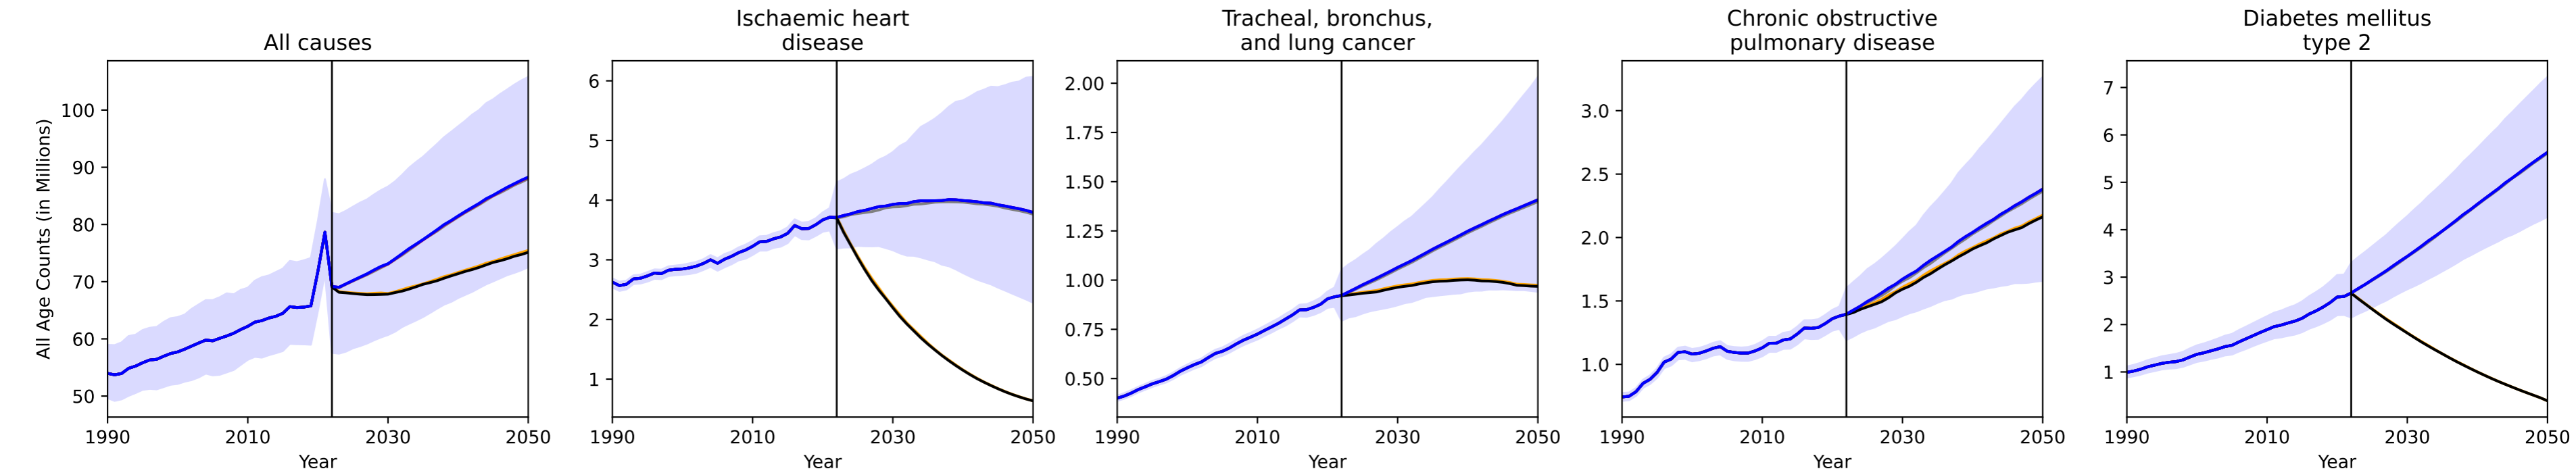

# Paraguay

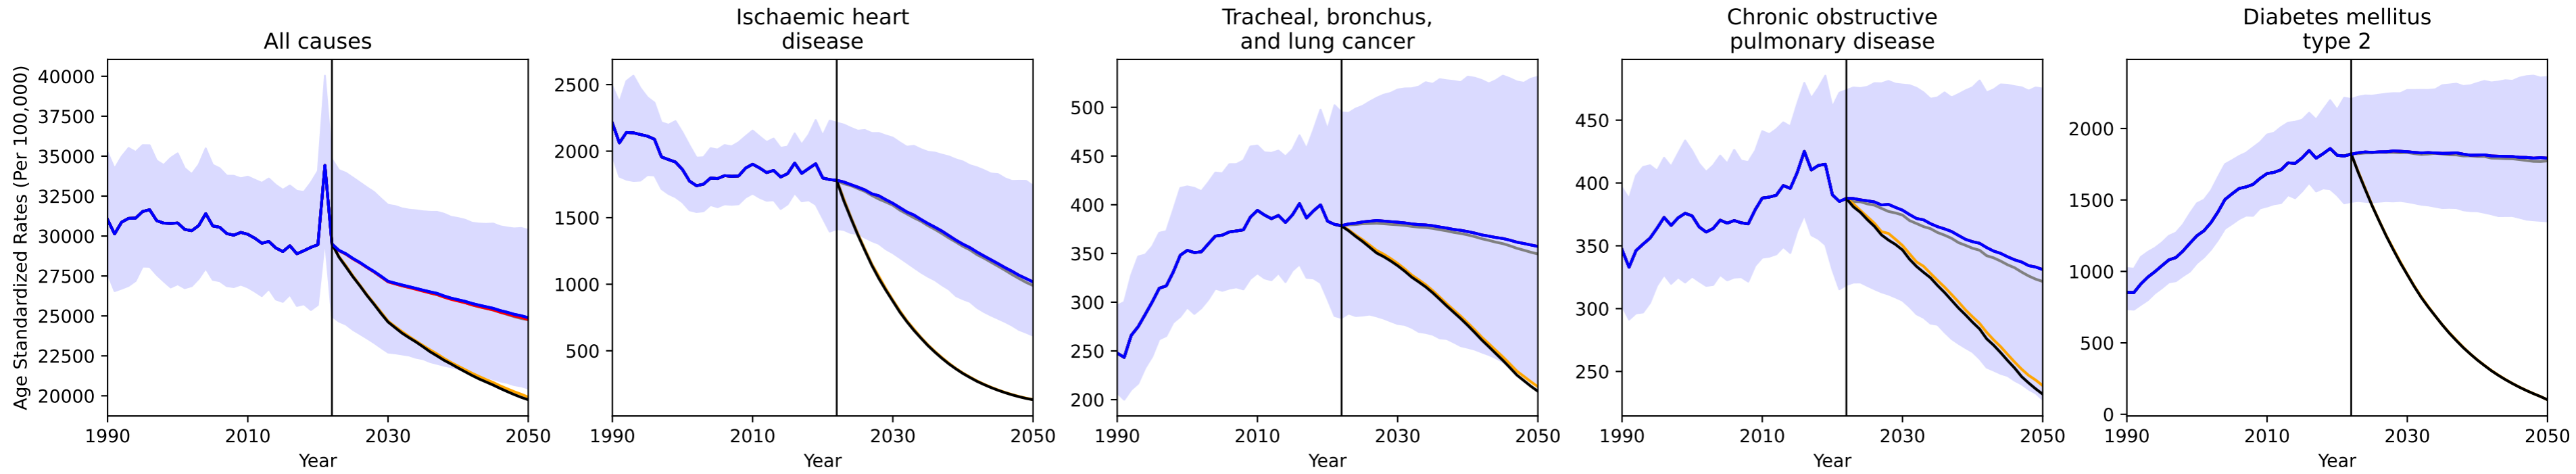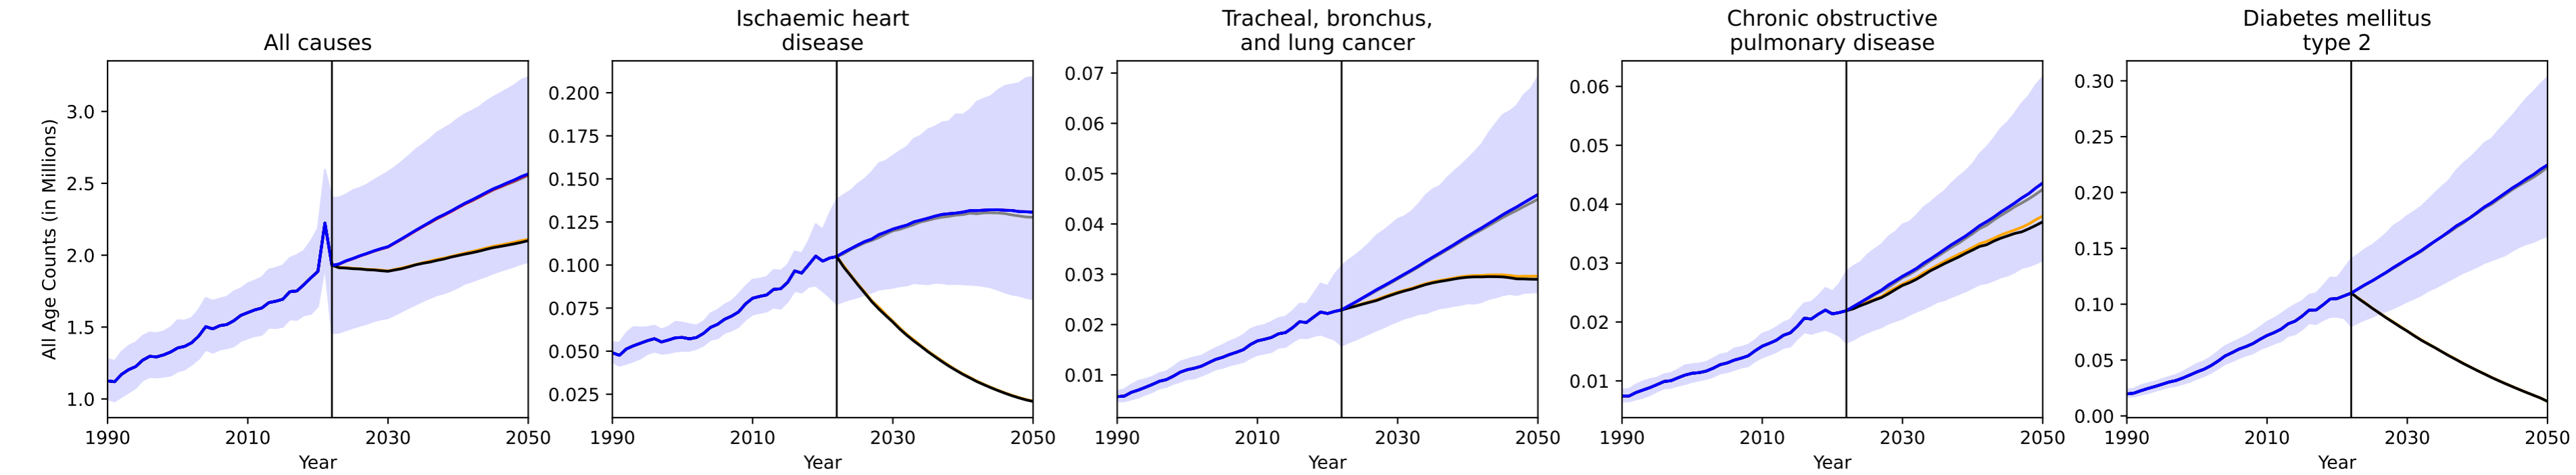

# Afghanistan

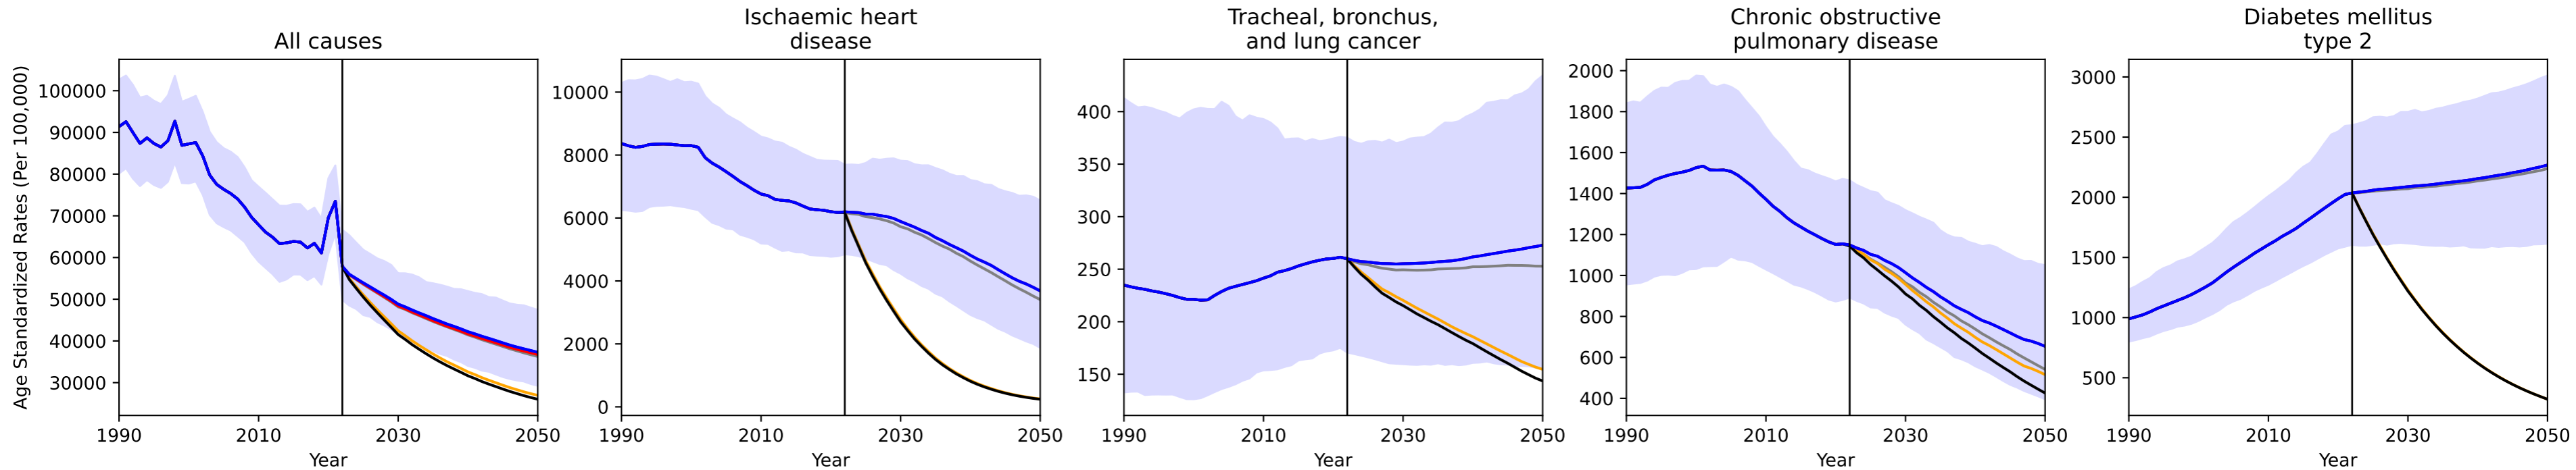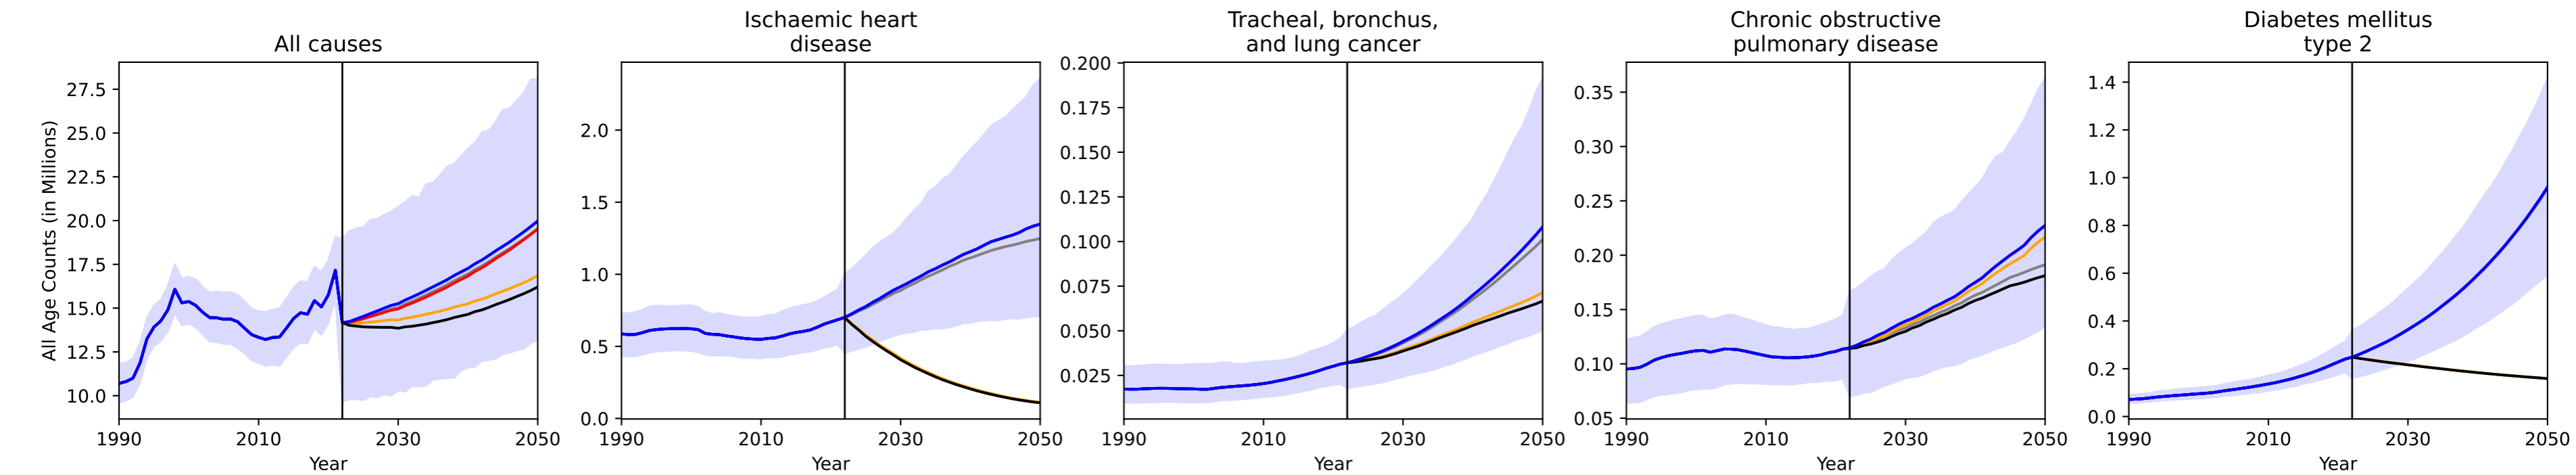



# Algeria

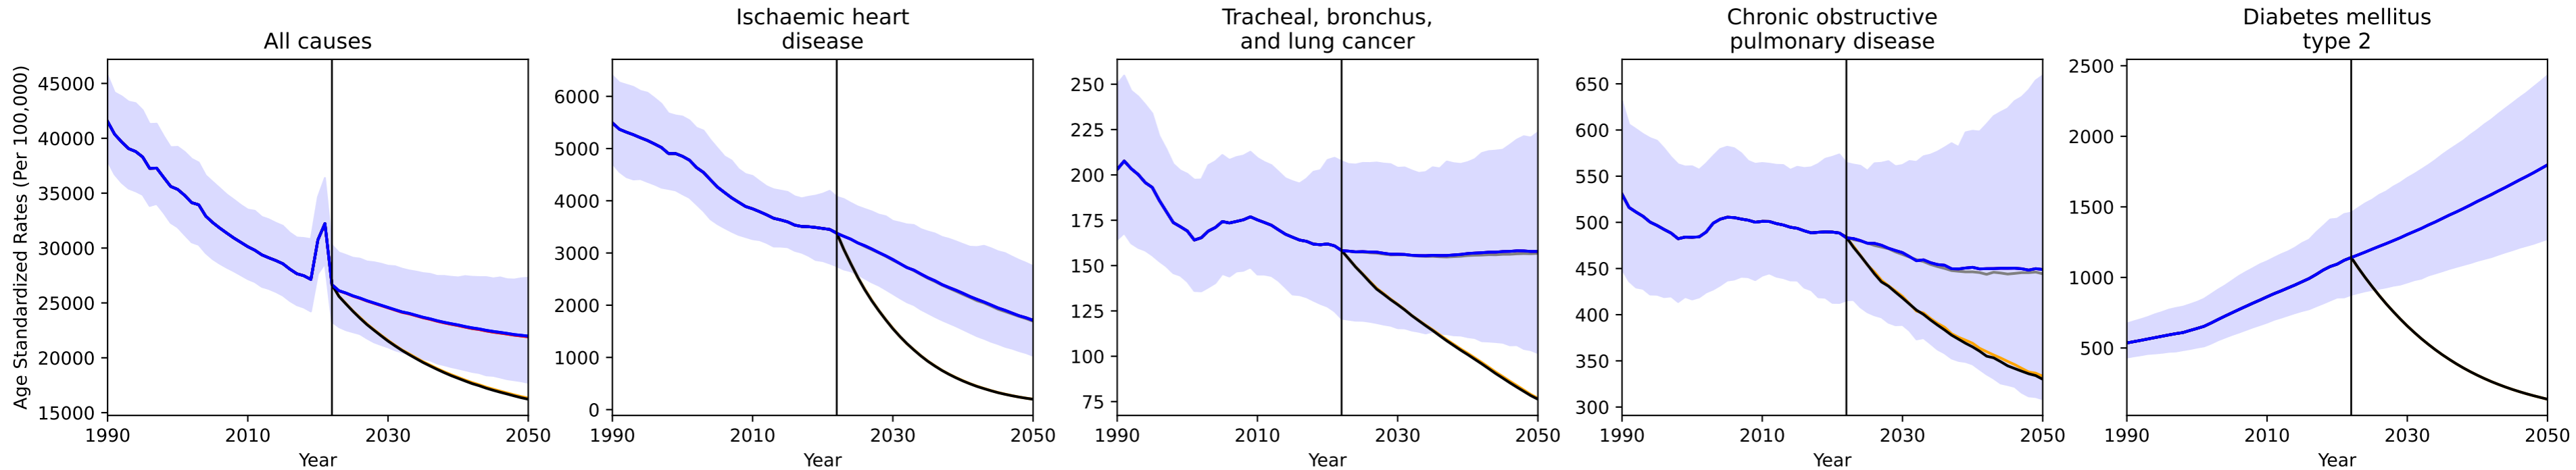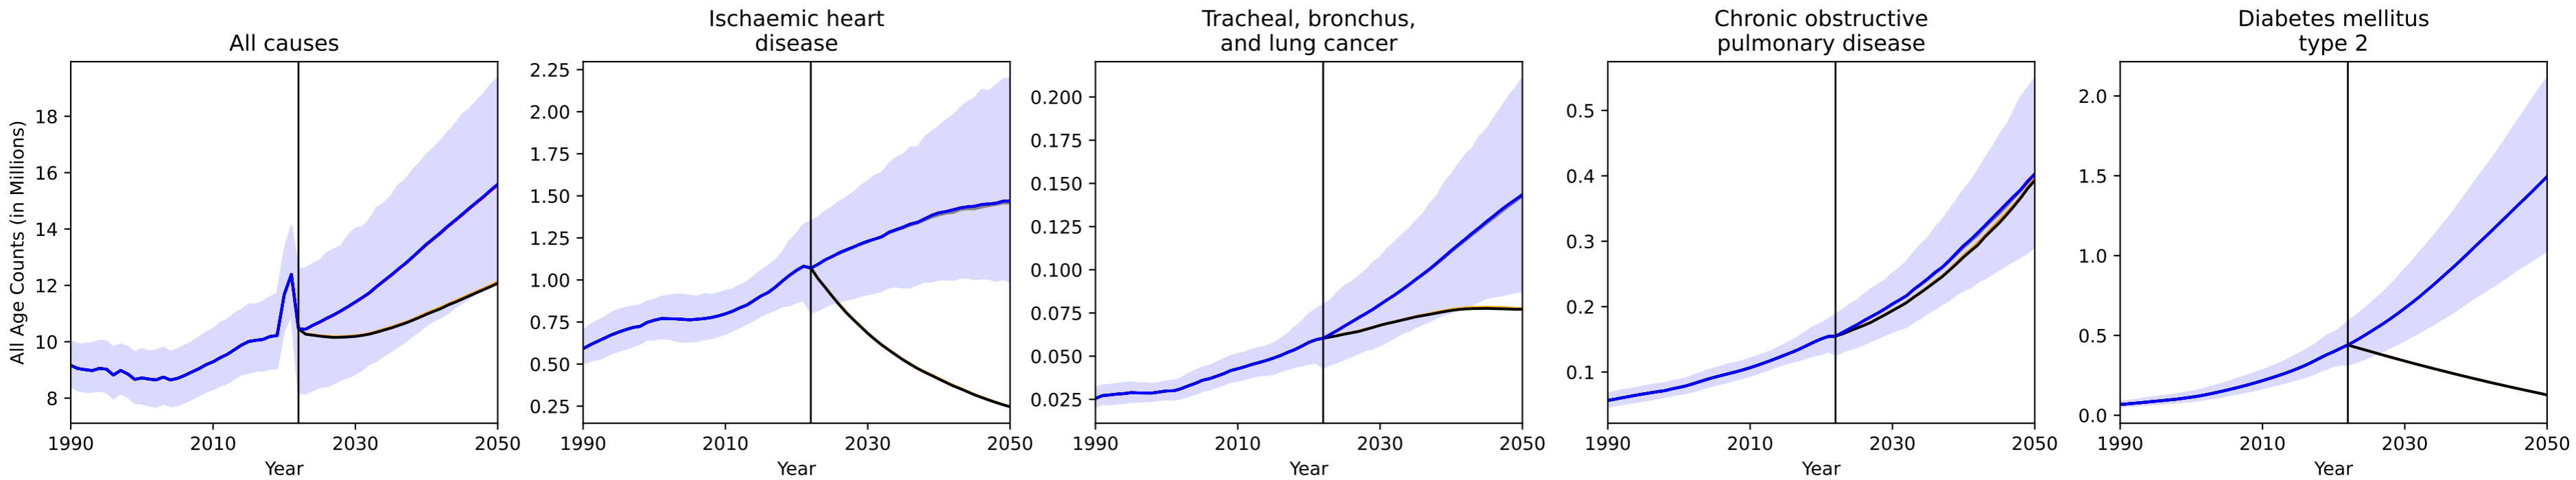

# Bahrain

Supplemental Results Figure S12. All cause and top NCD causes age standardized DALY rates and all age counts by scenario and location, 1990-2050

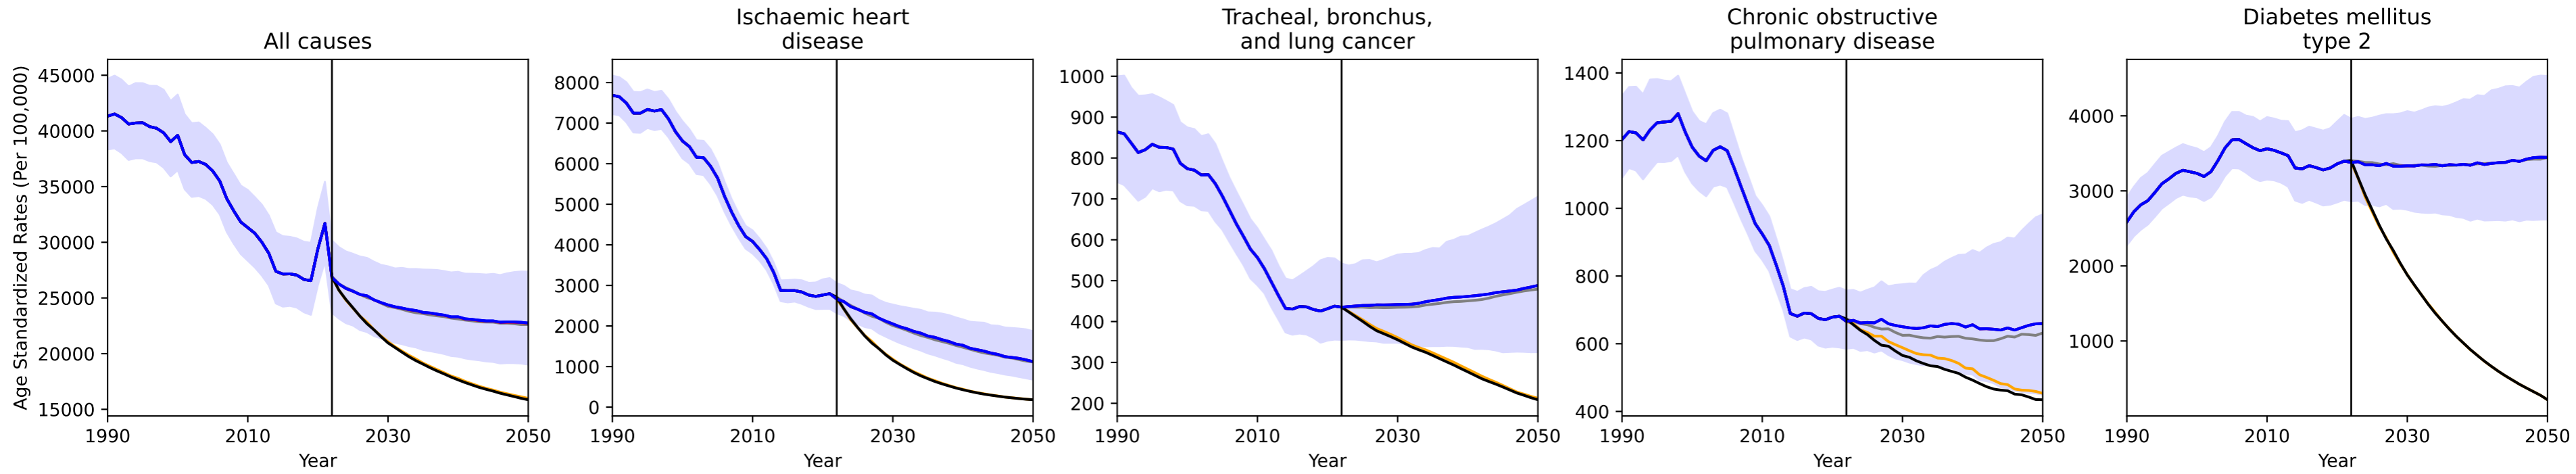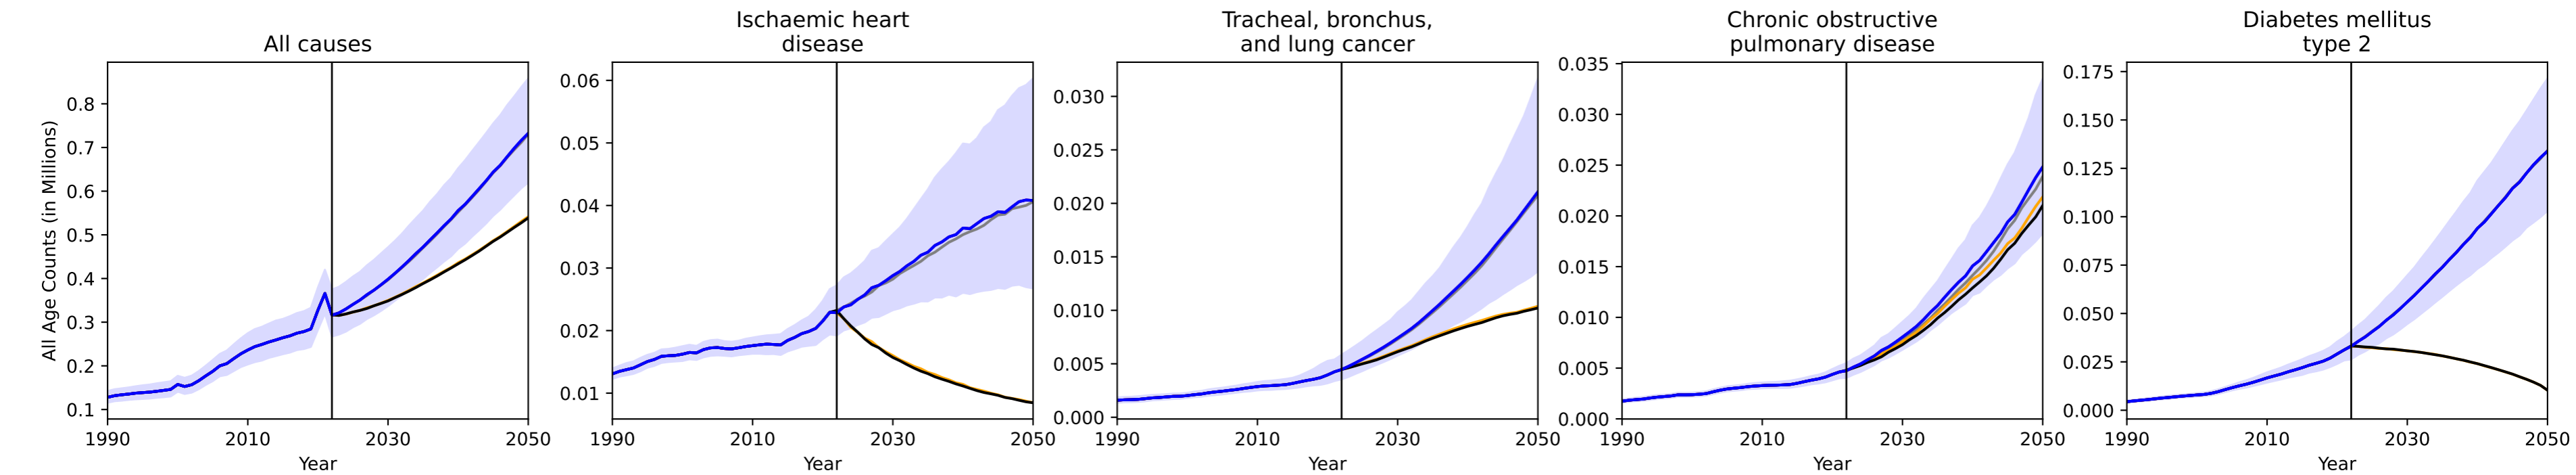

# Egypt

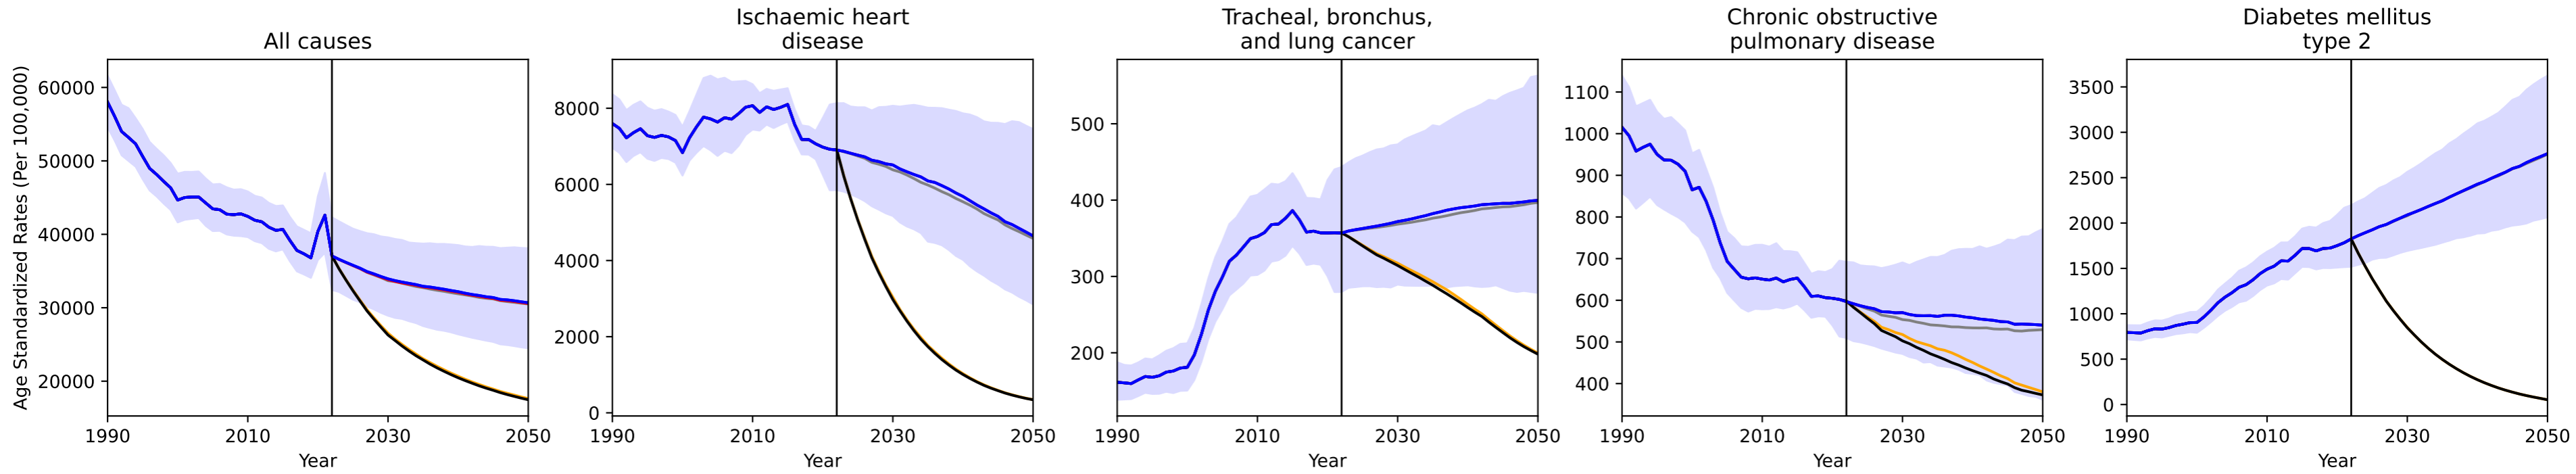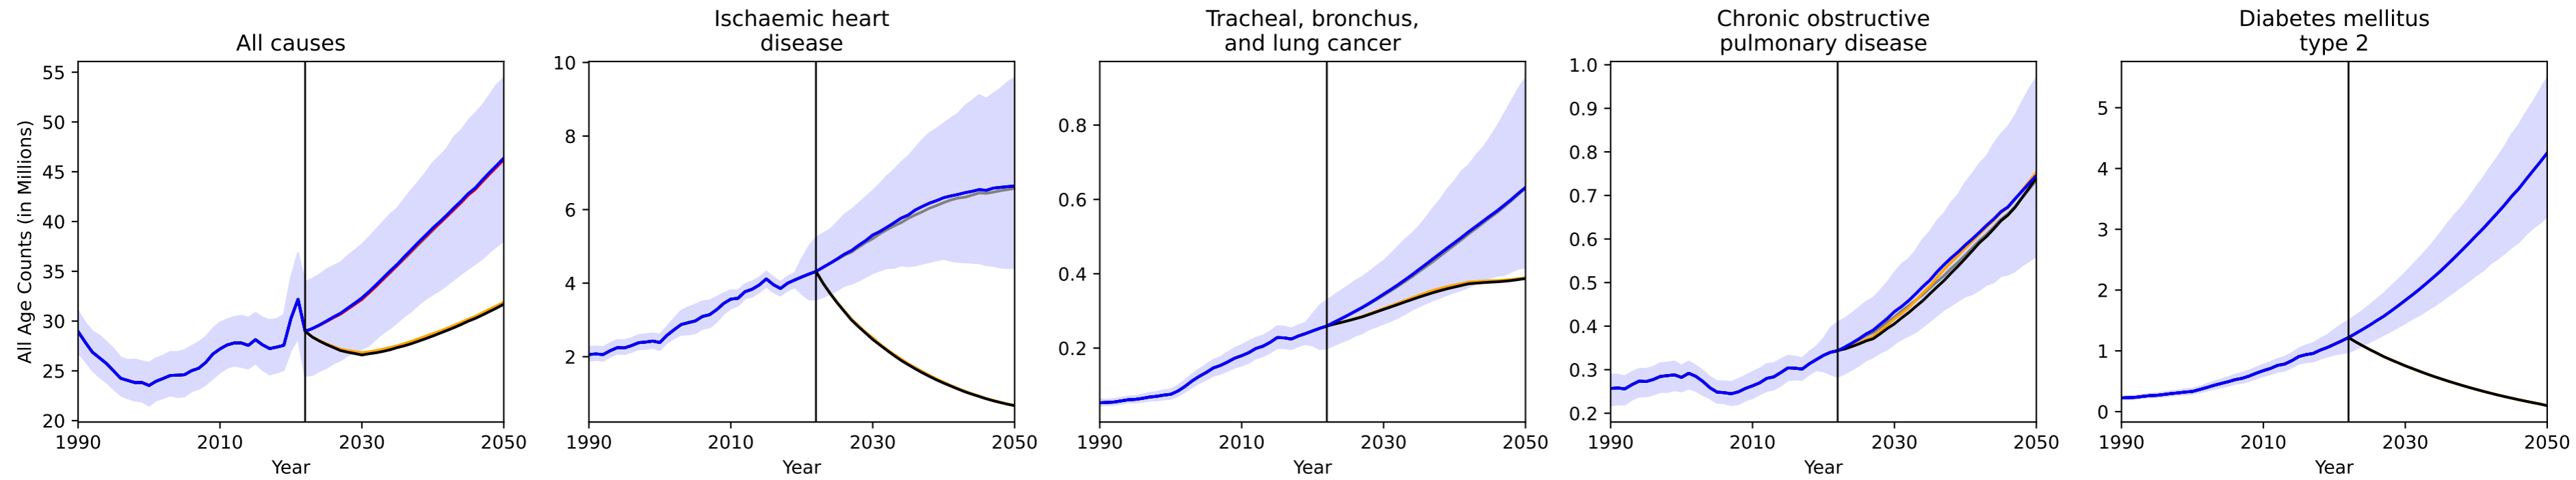

— Safer Environment — Improved Behavioural and Metabolic Risks — Improved Childhood Nutrition and Vaccination — Combined — Reference

# Iran

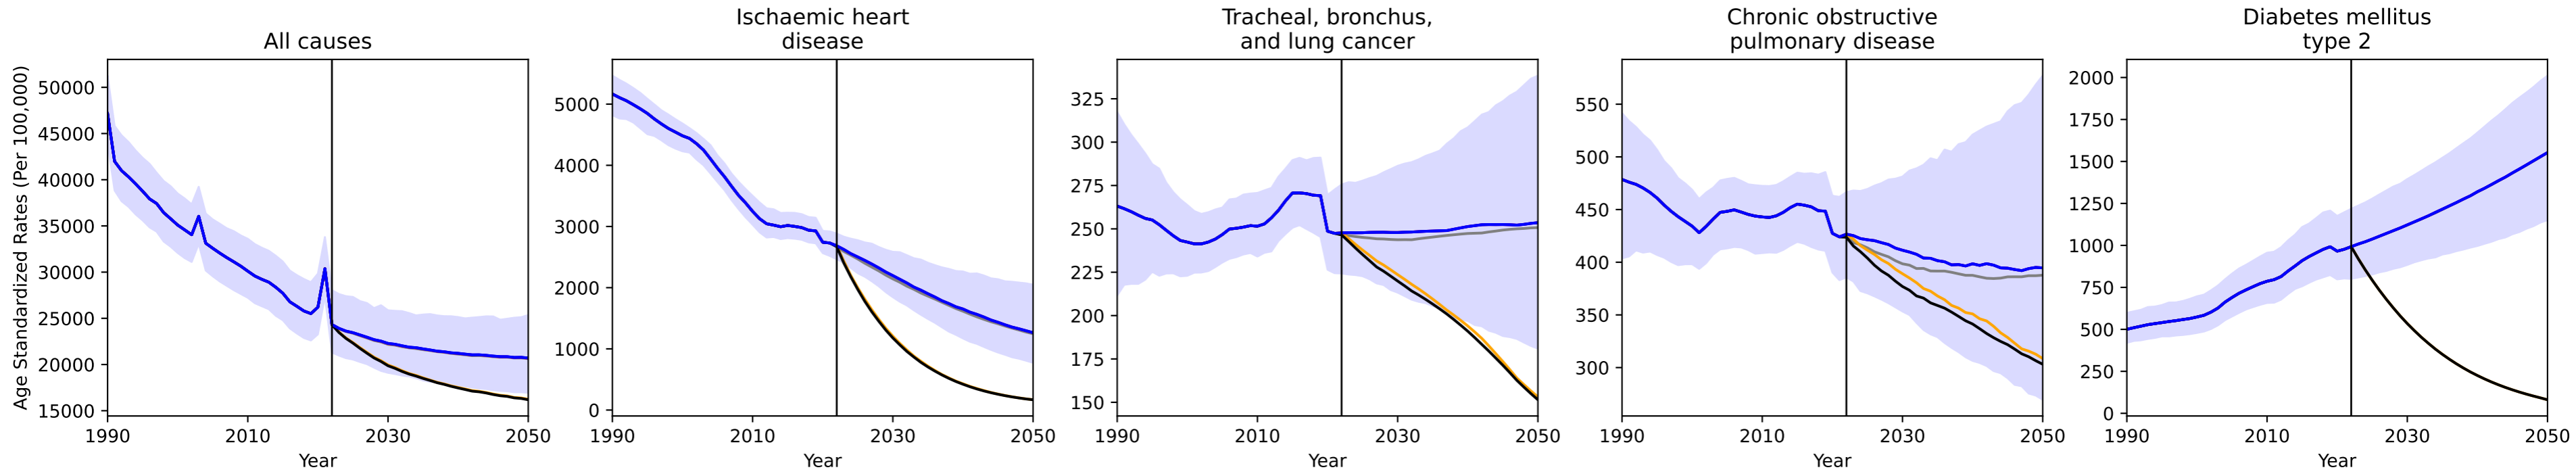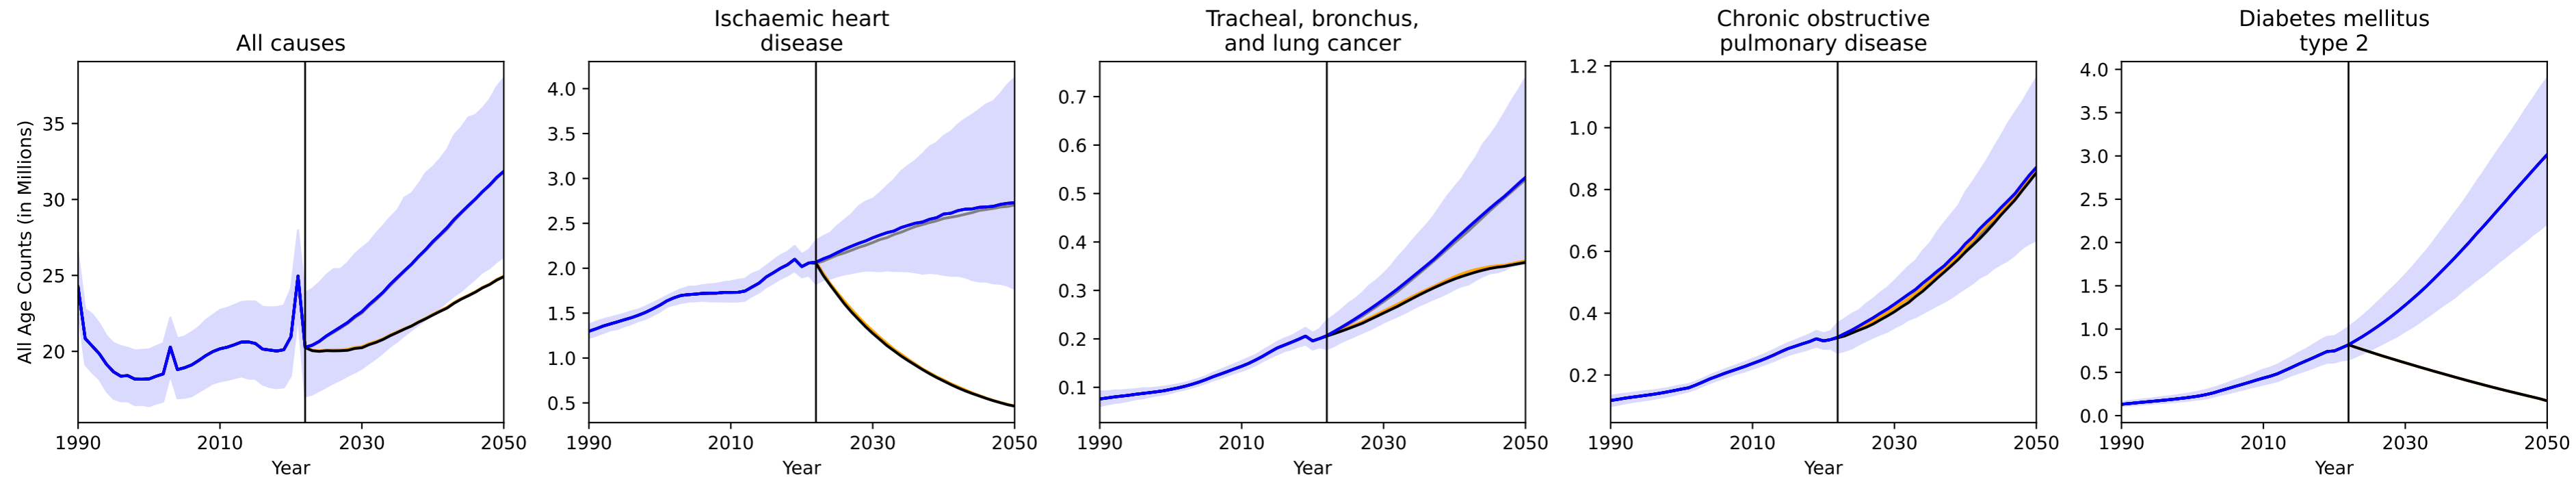

# Iraq

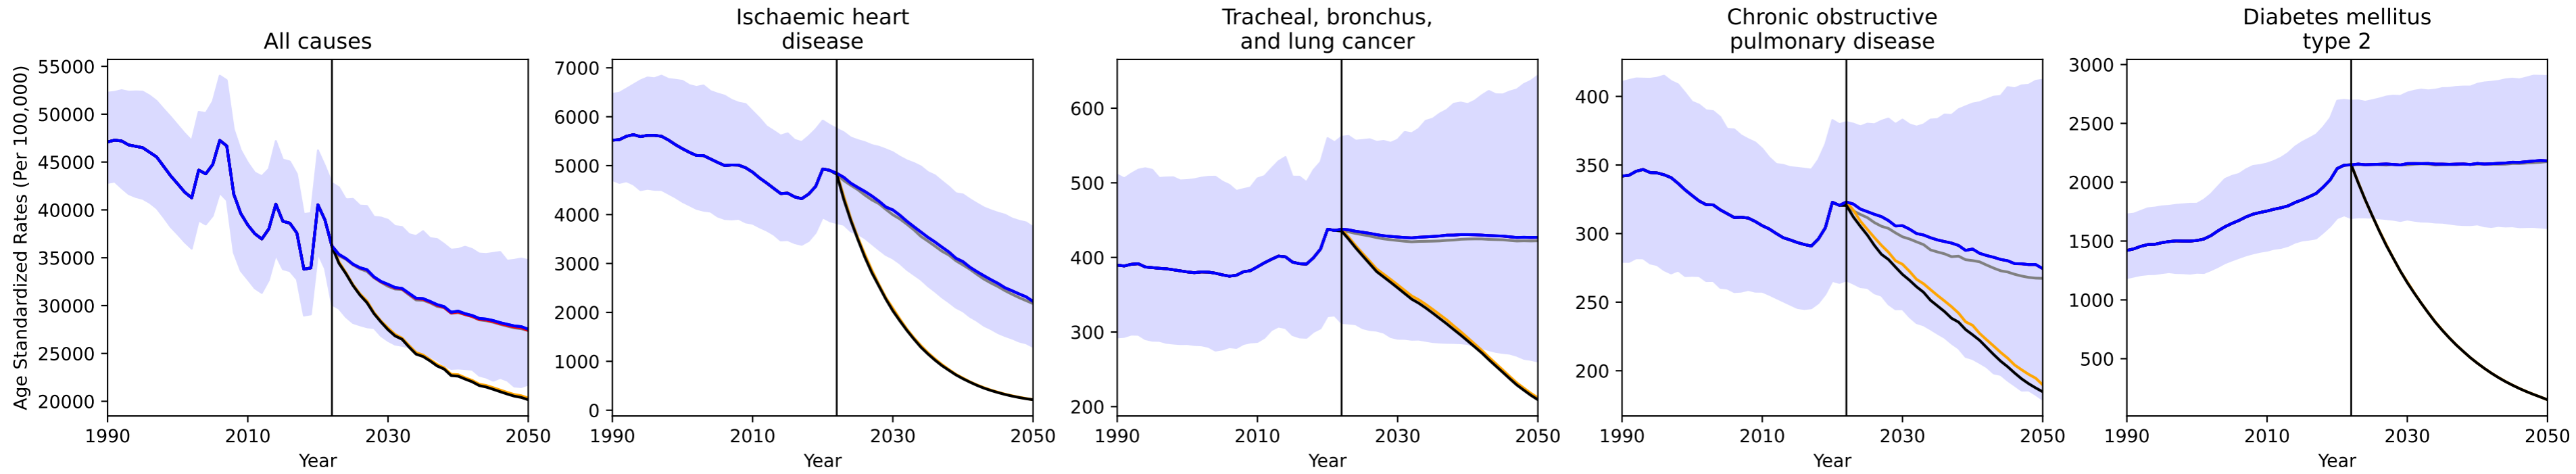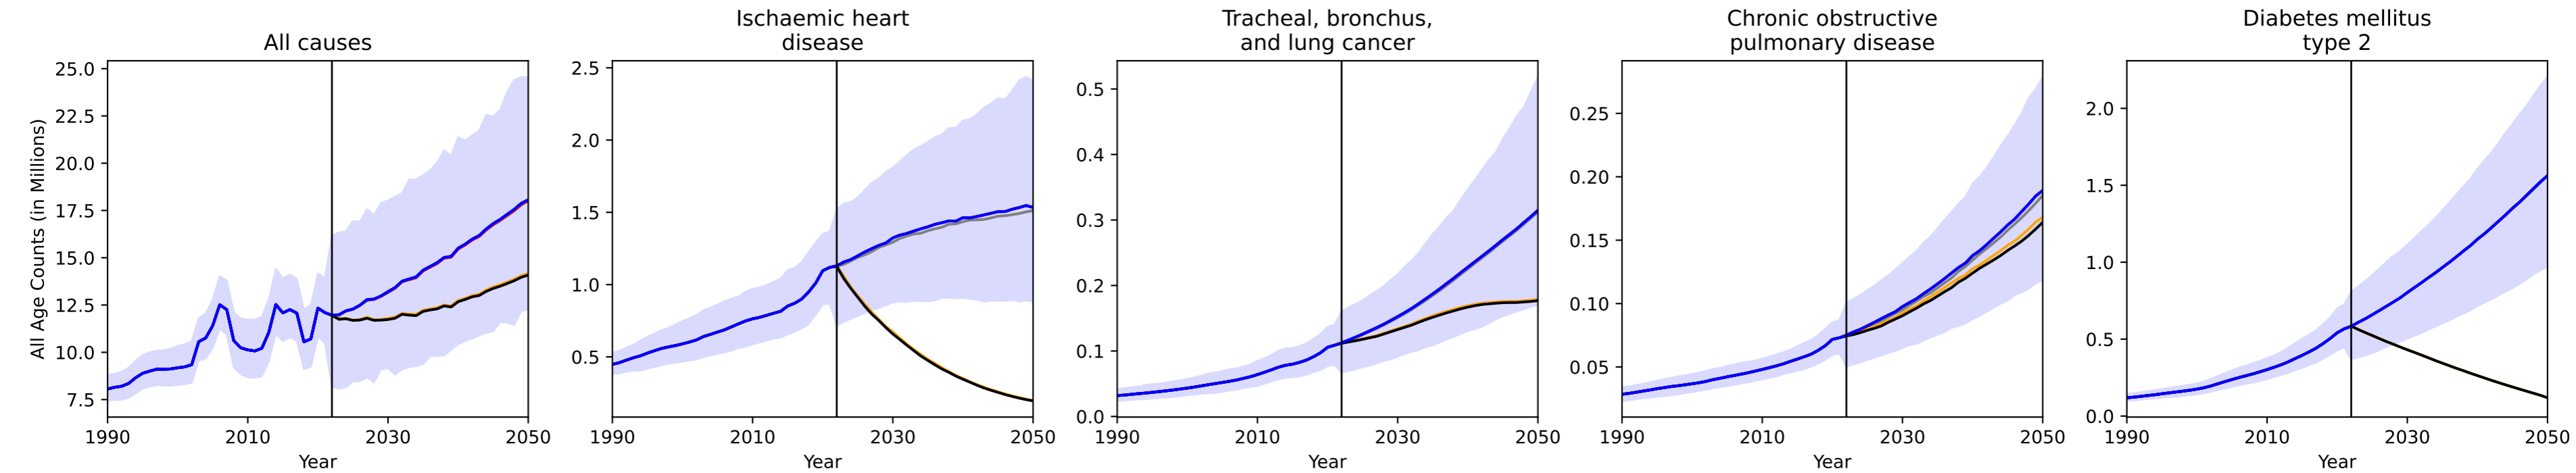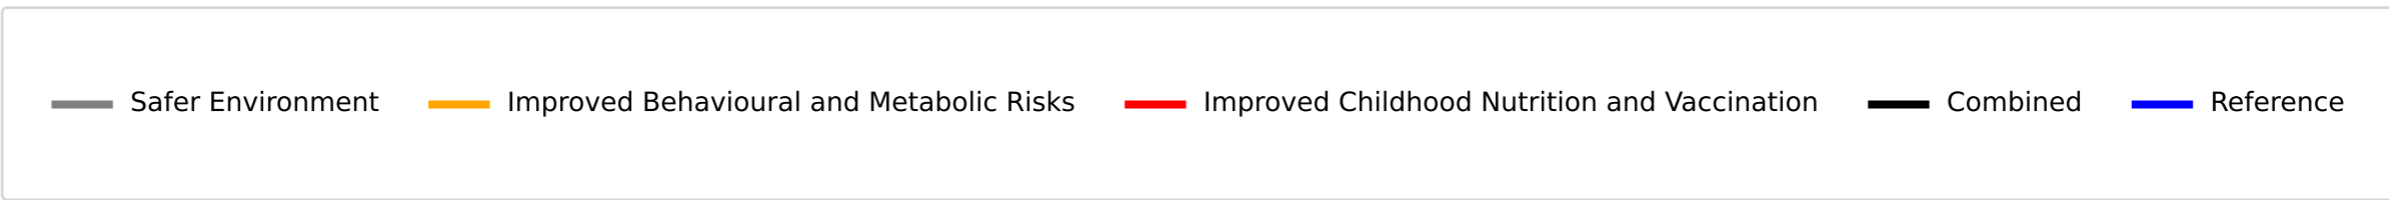

# Jordan

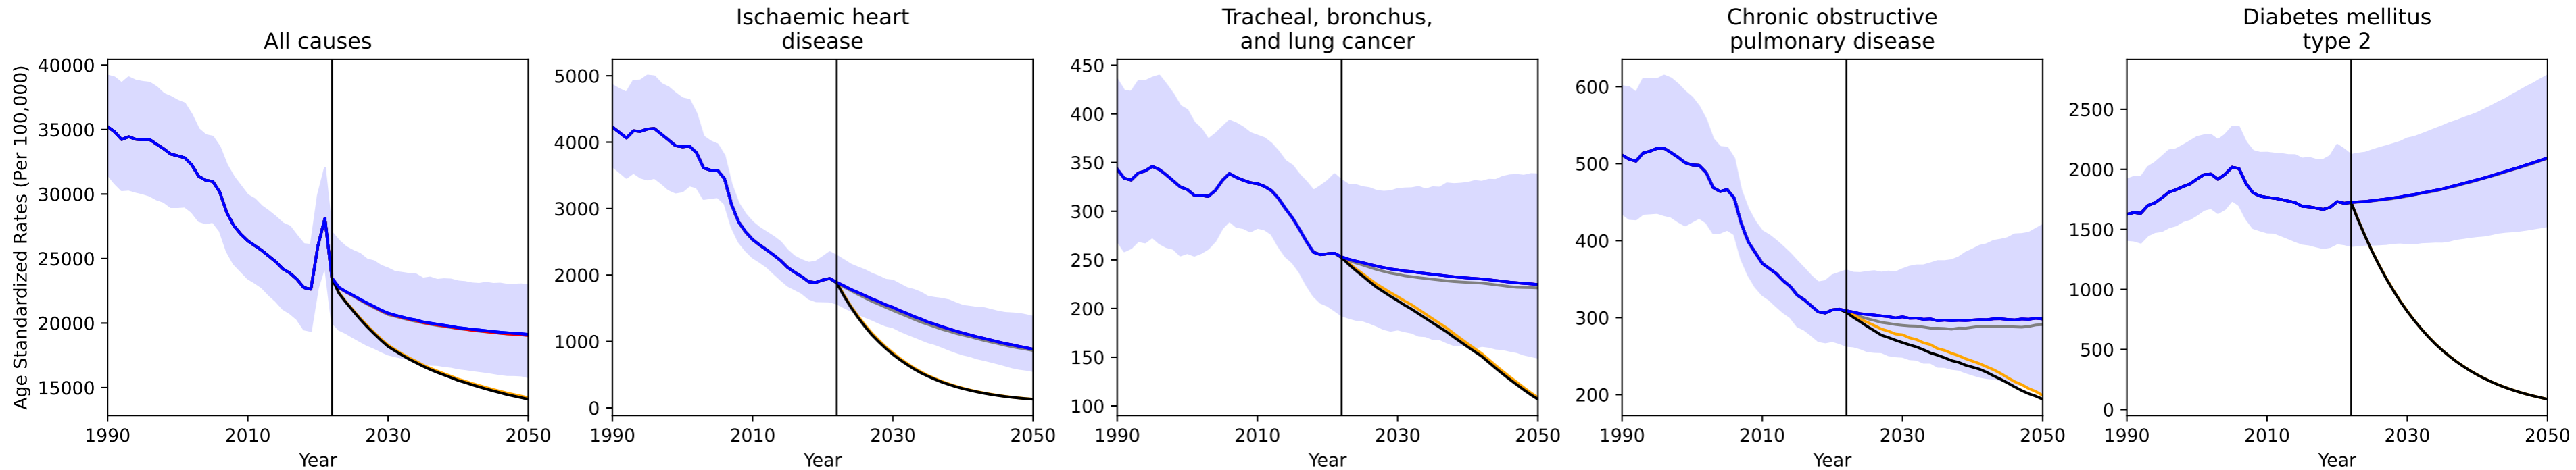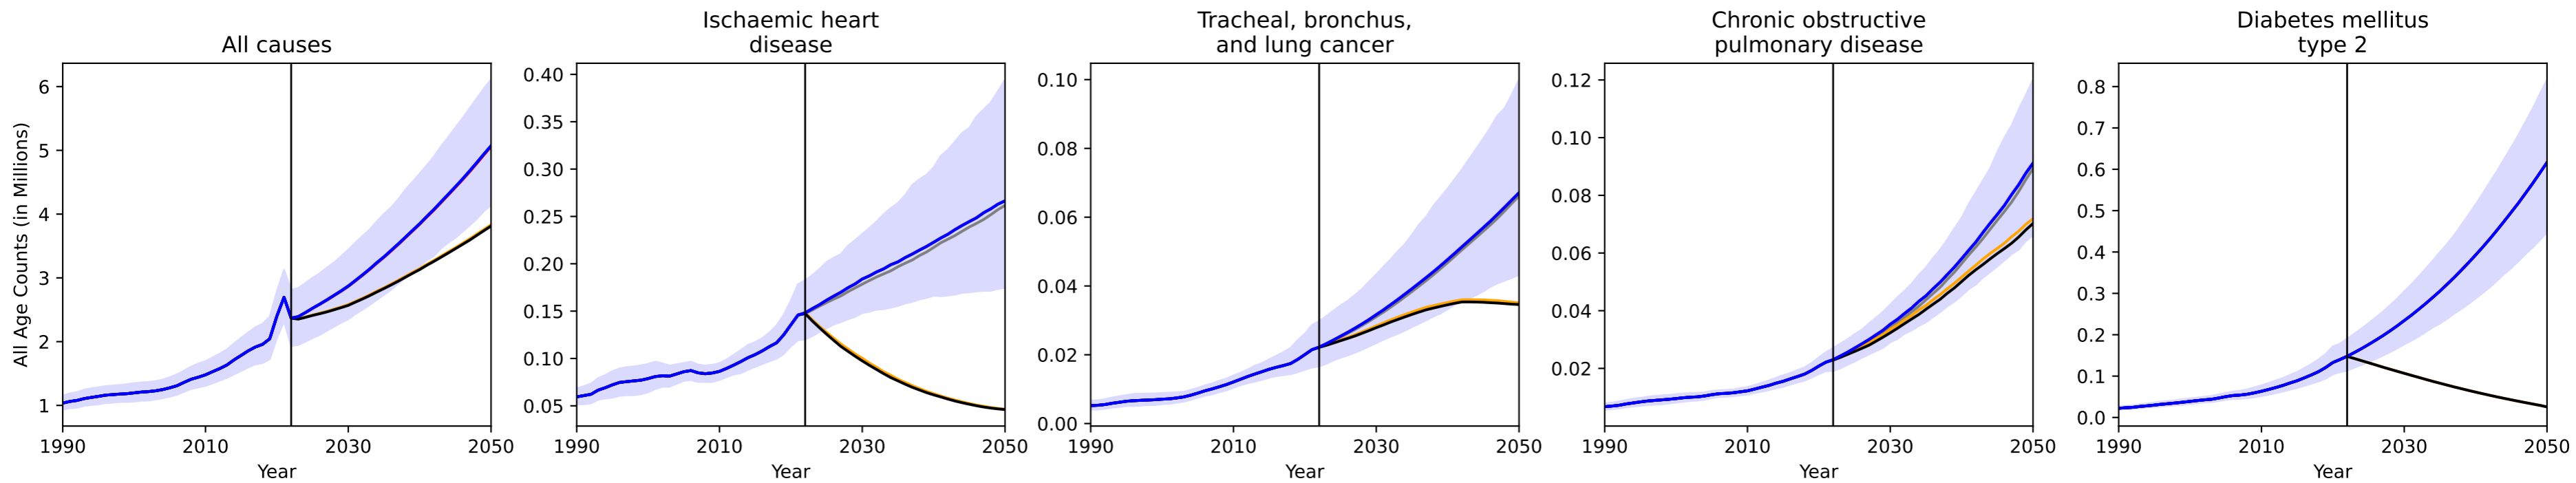

# Kuwait

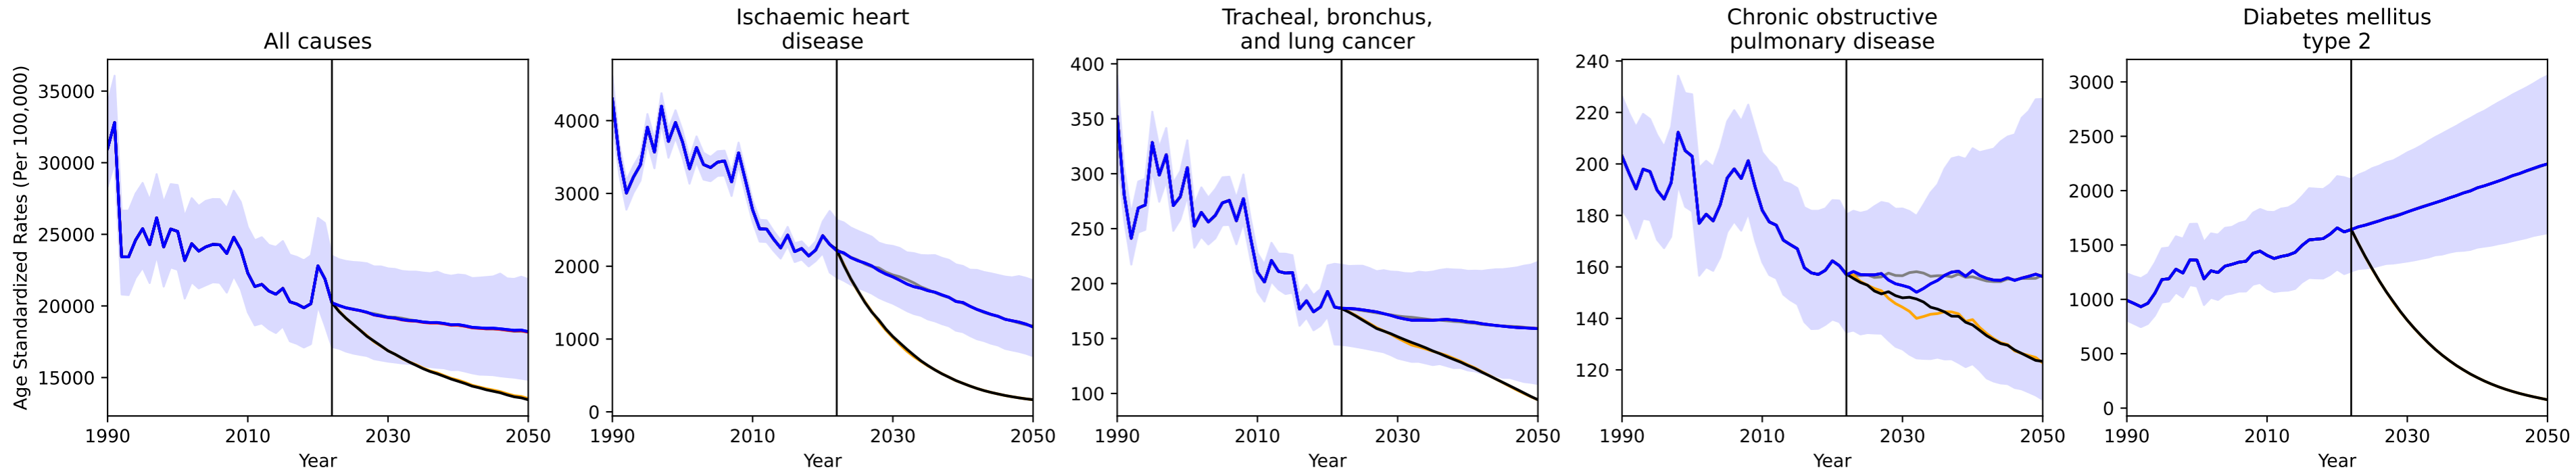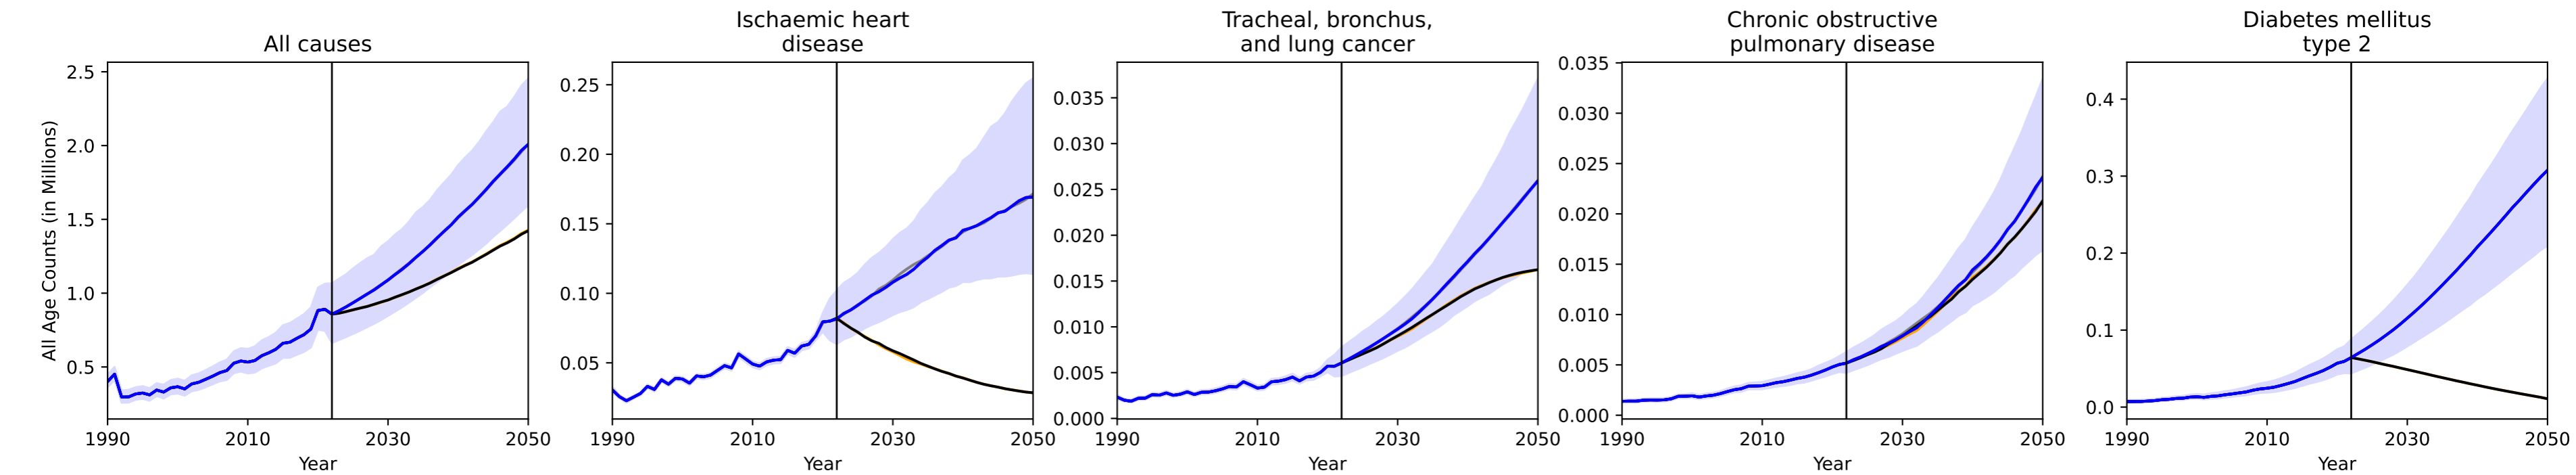

# Lebanon

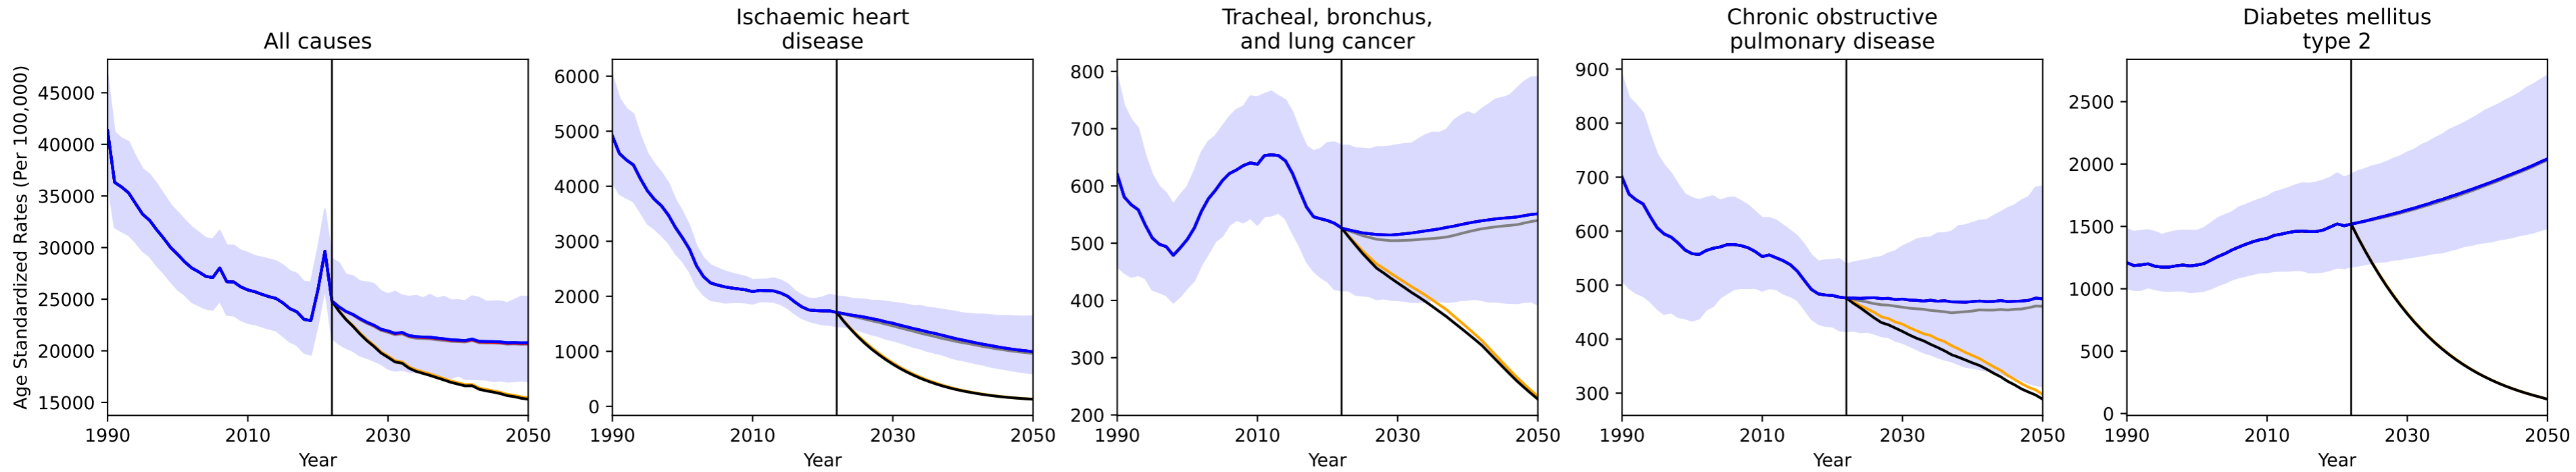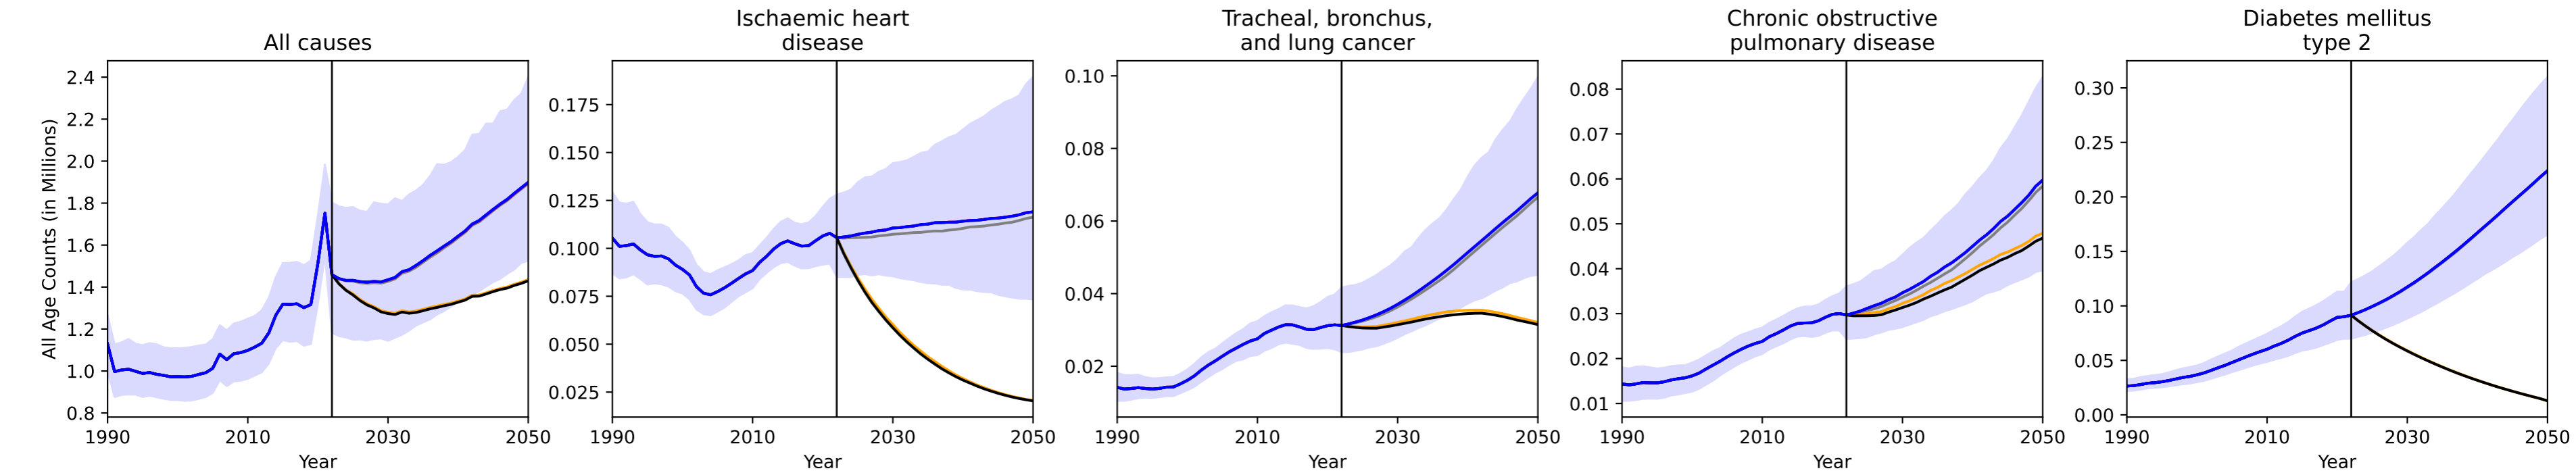



# Libya

Supplemental Results Figure S12. All cause and top NCD causes age standardized DALY rates and all age counts by scenario and location, 1990-2050

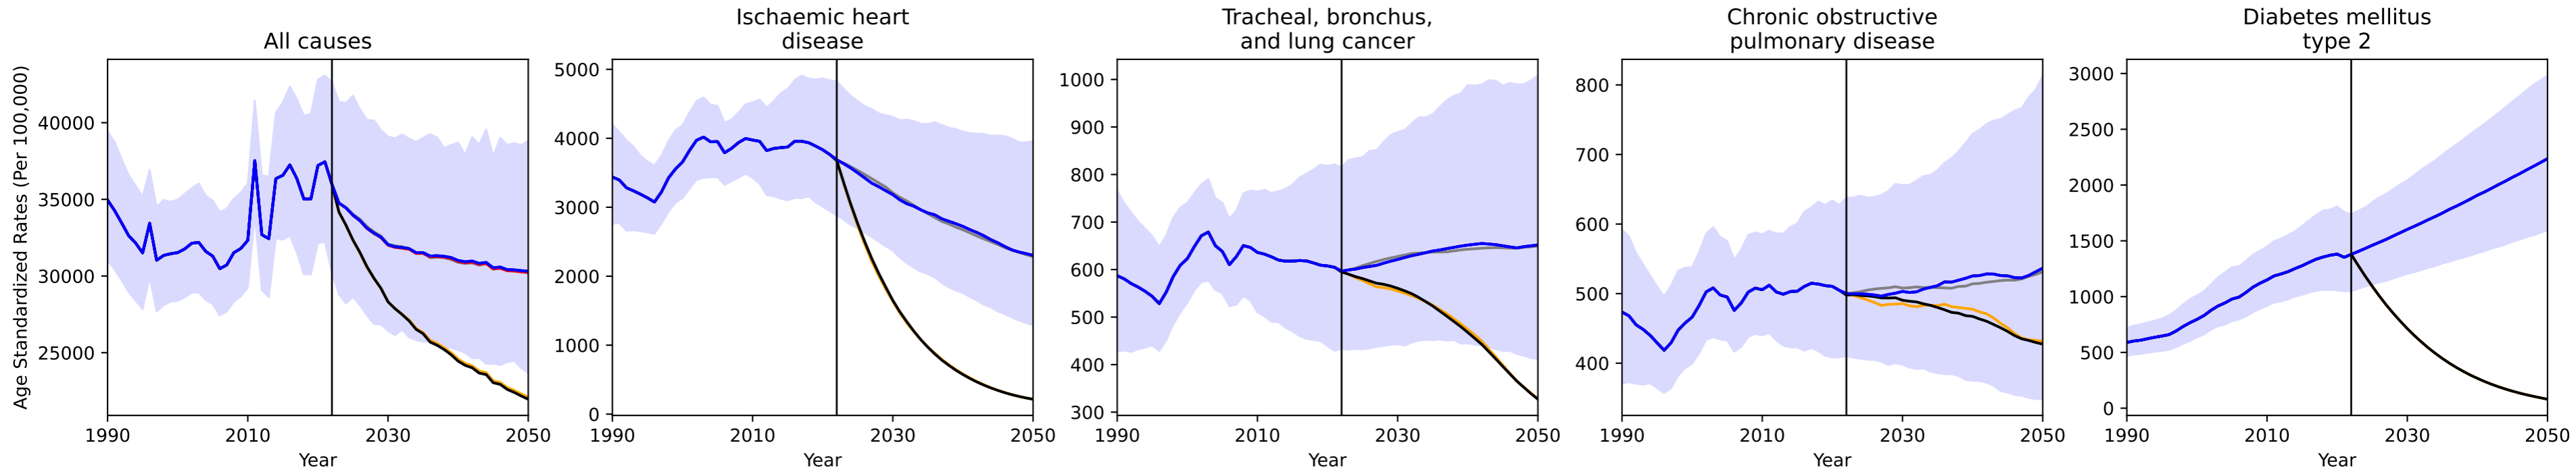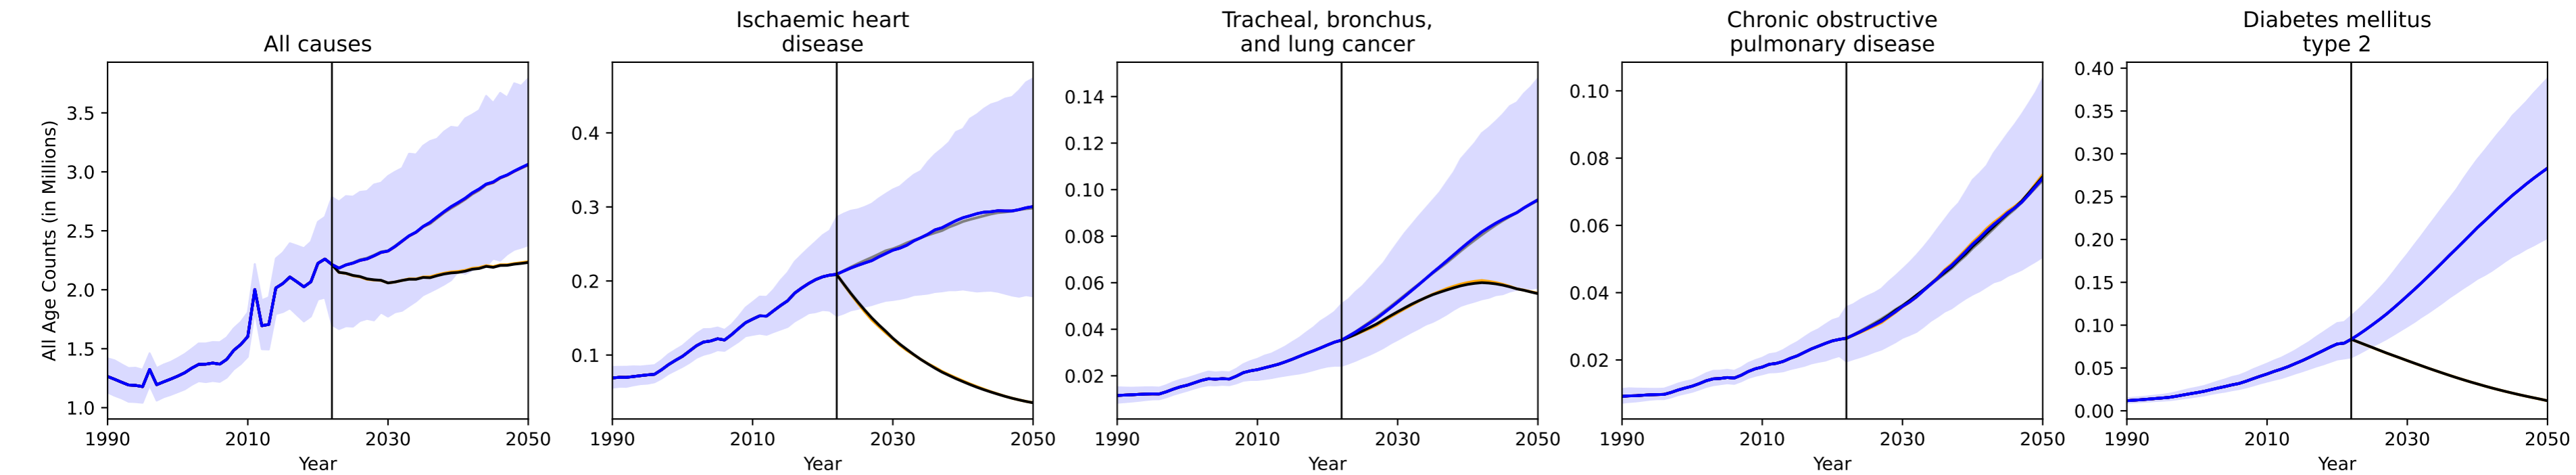

# Morocco

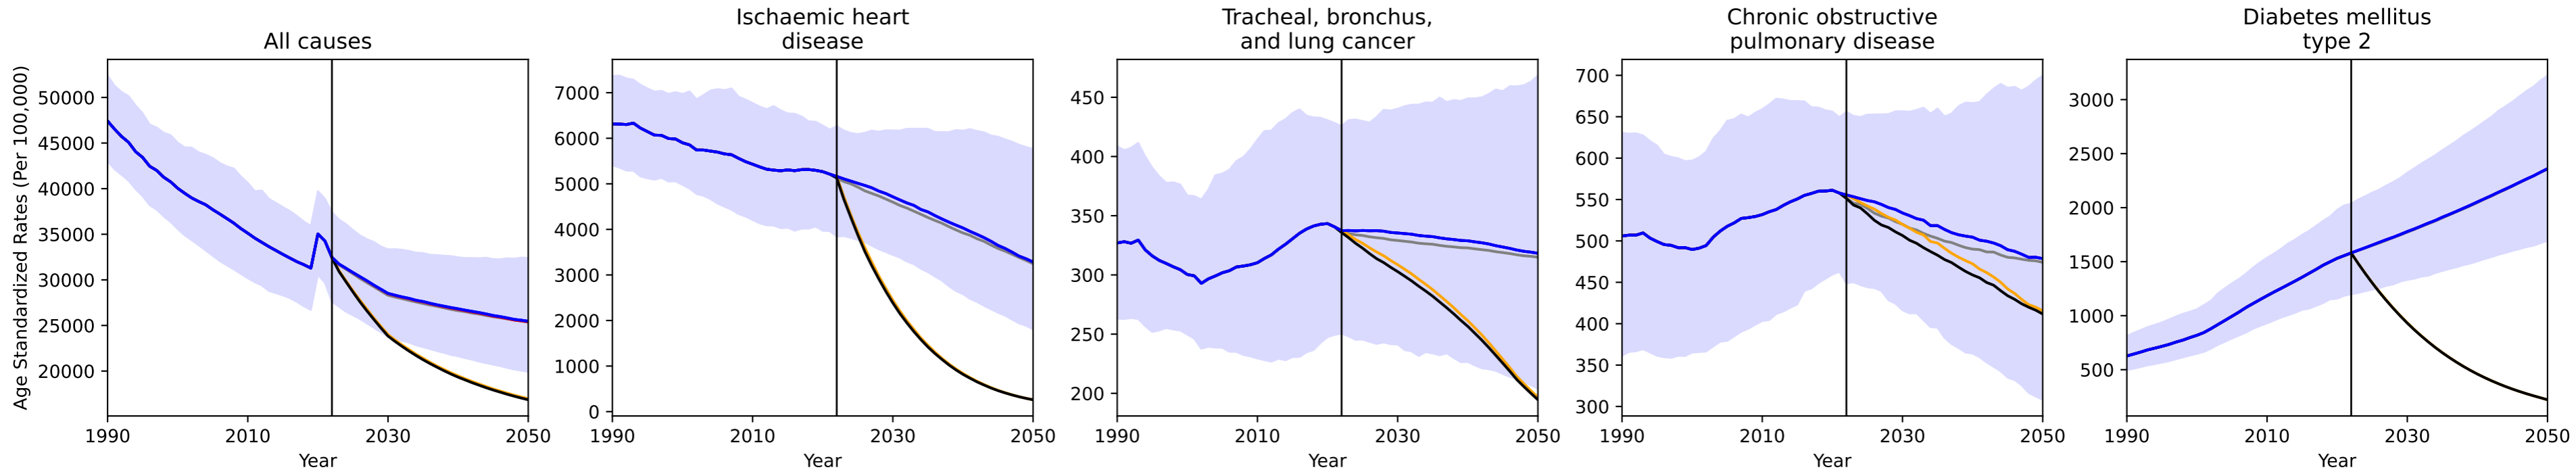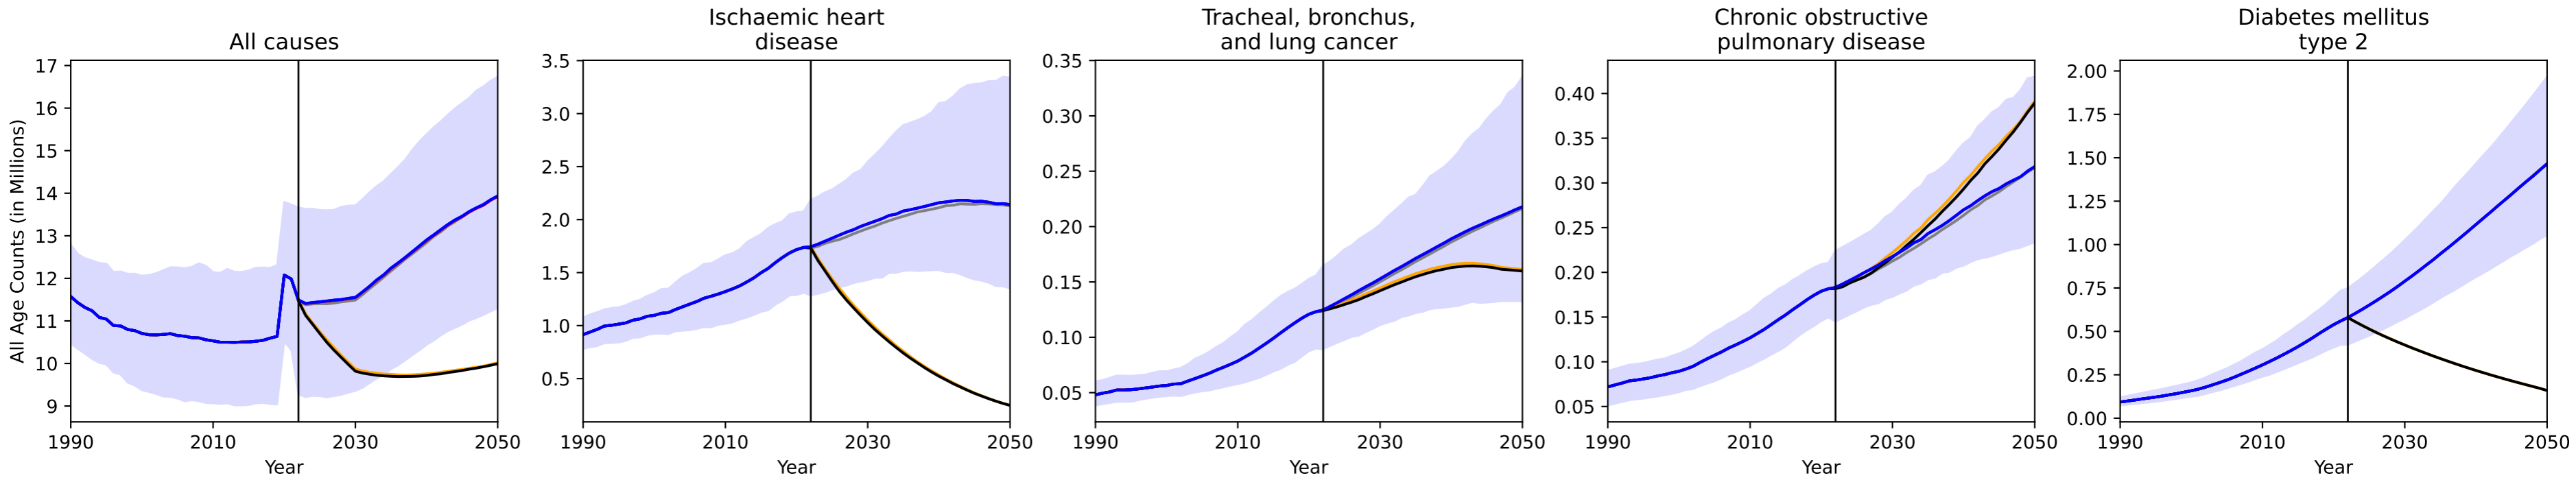

# Oman

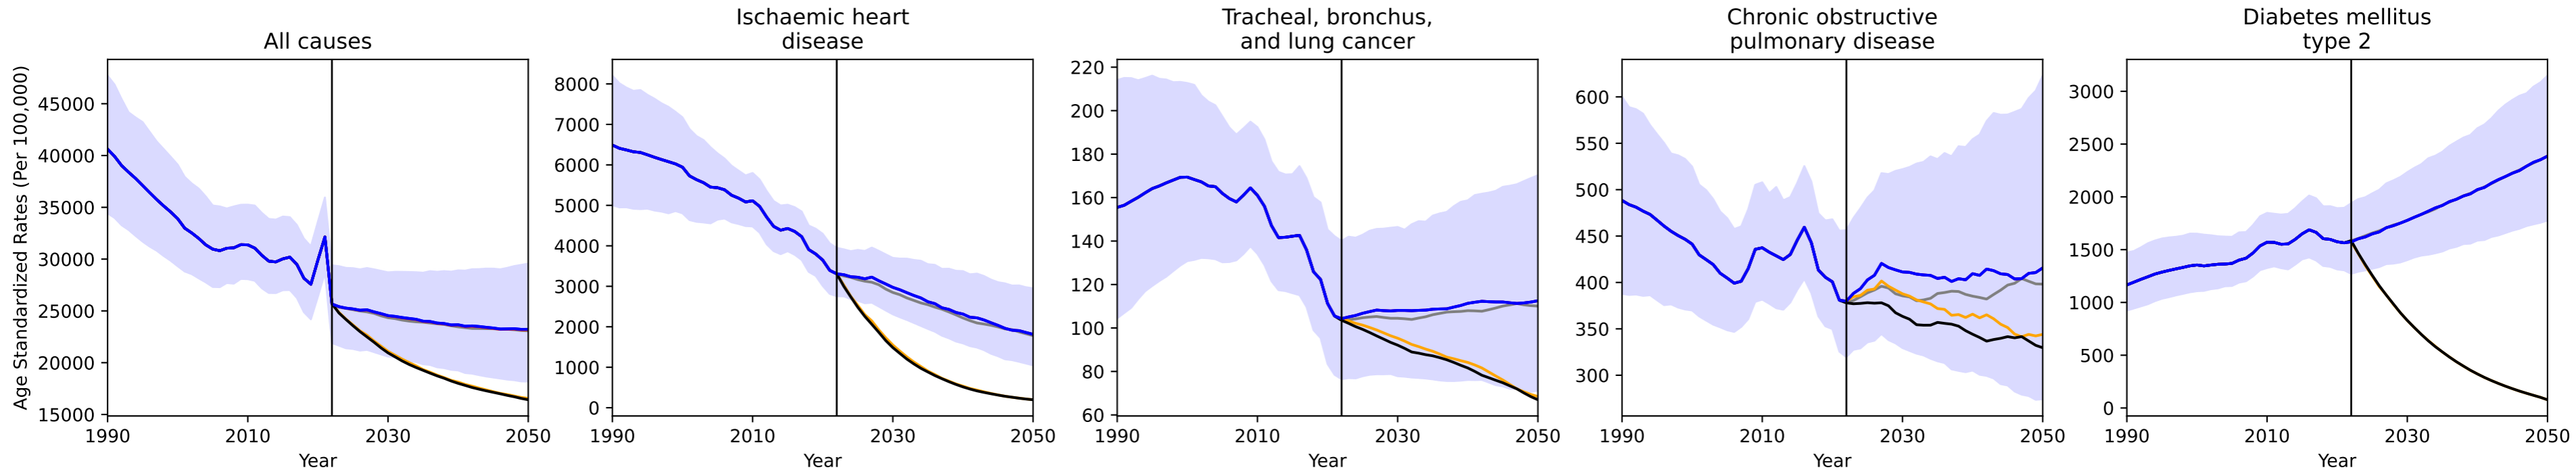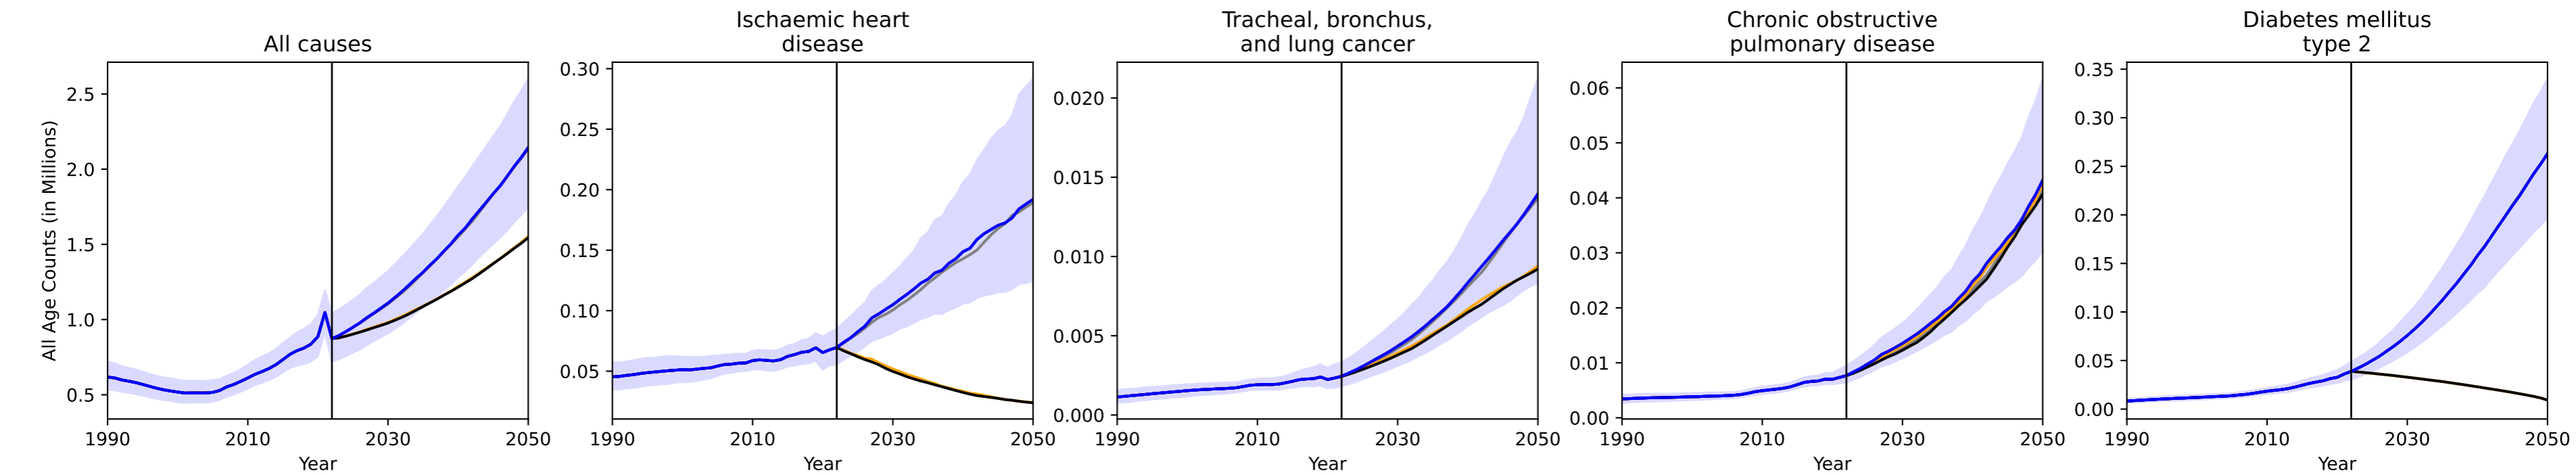

# Palestine

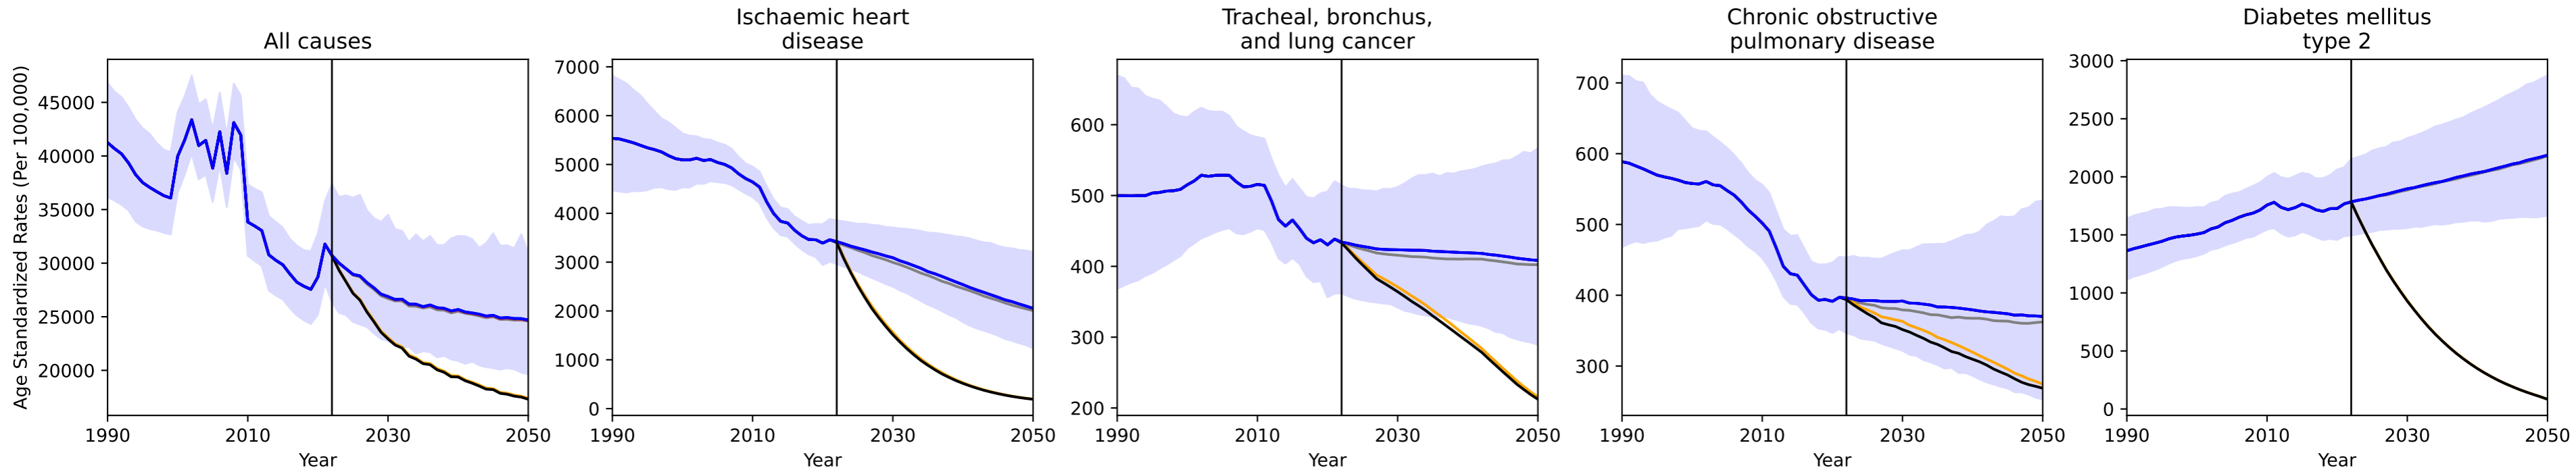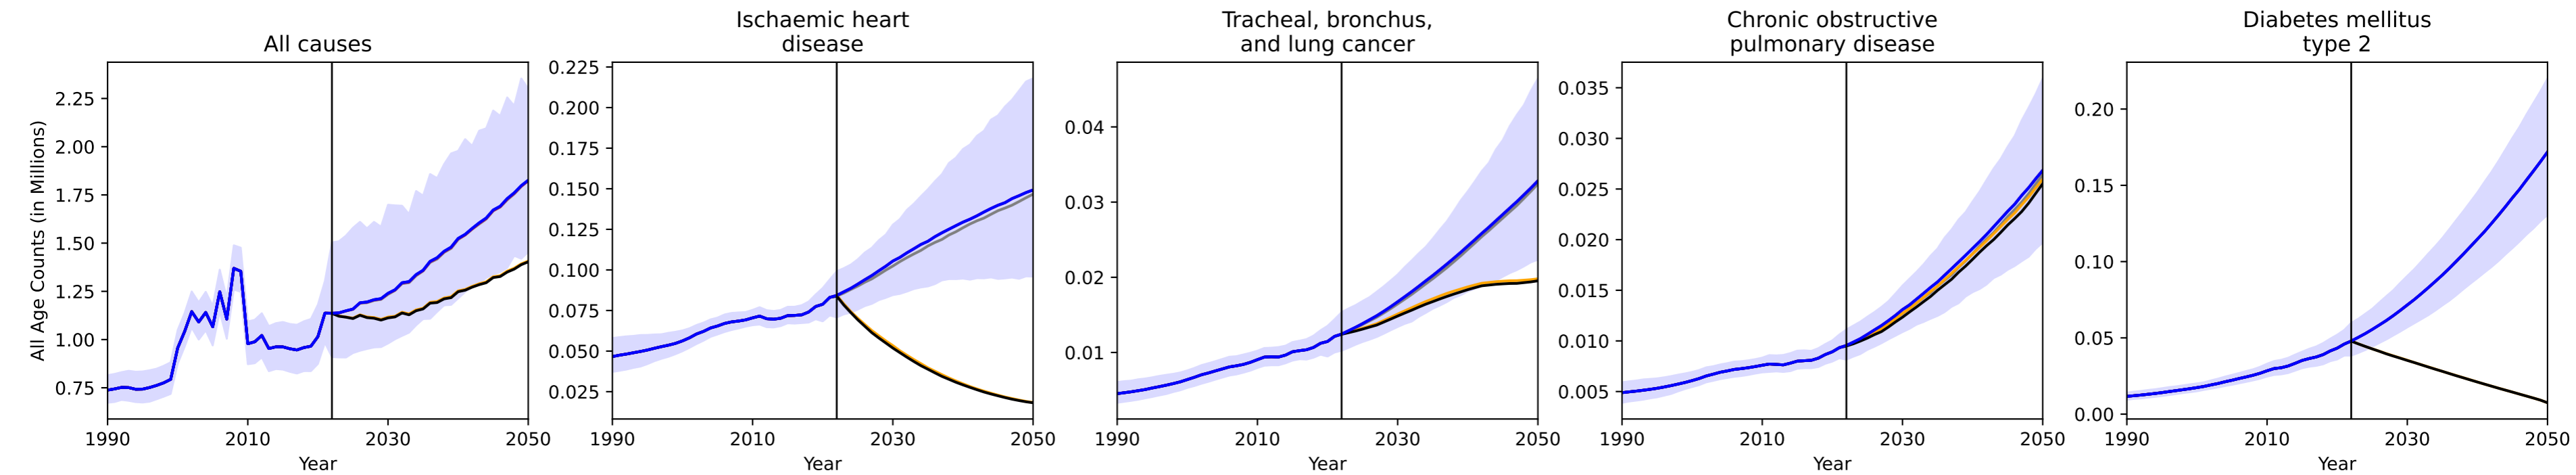

# Qatar

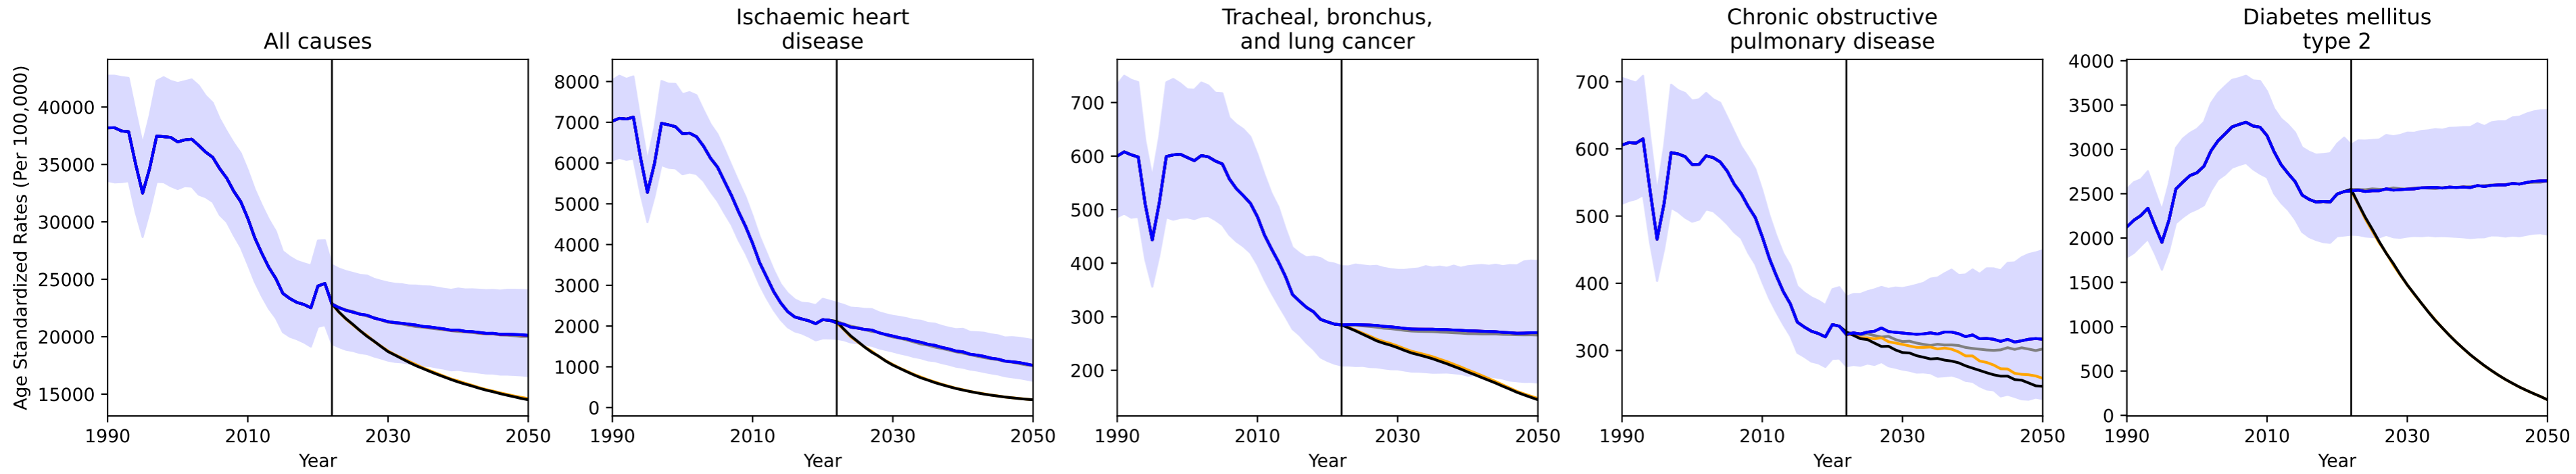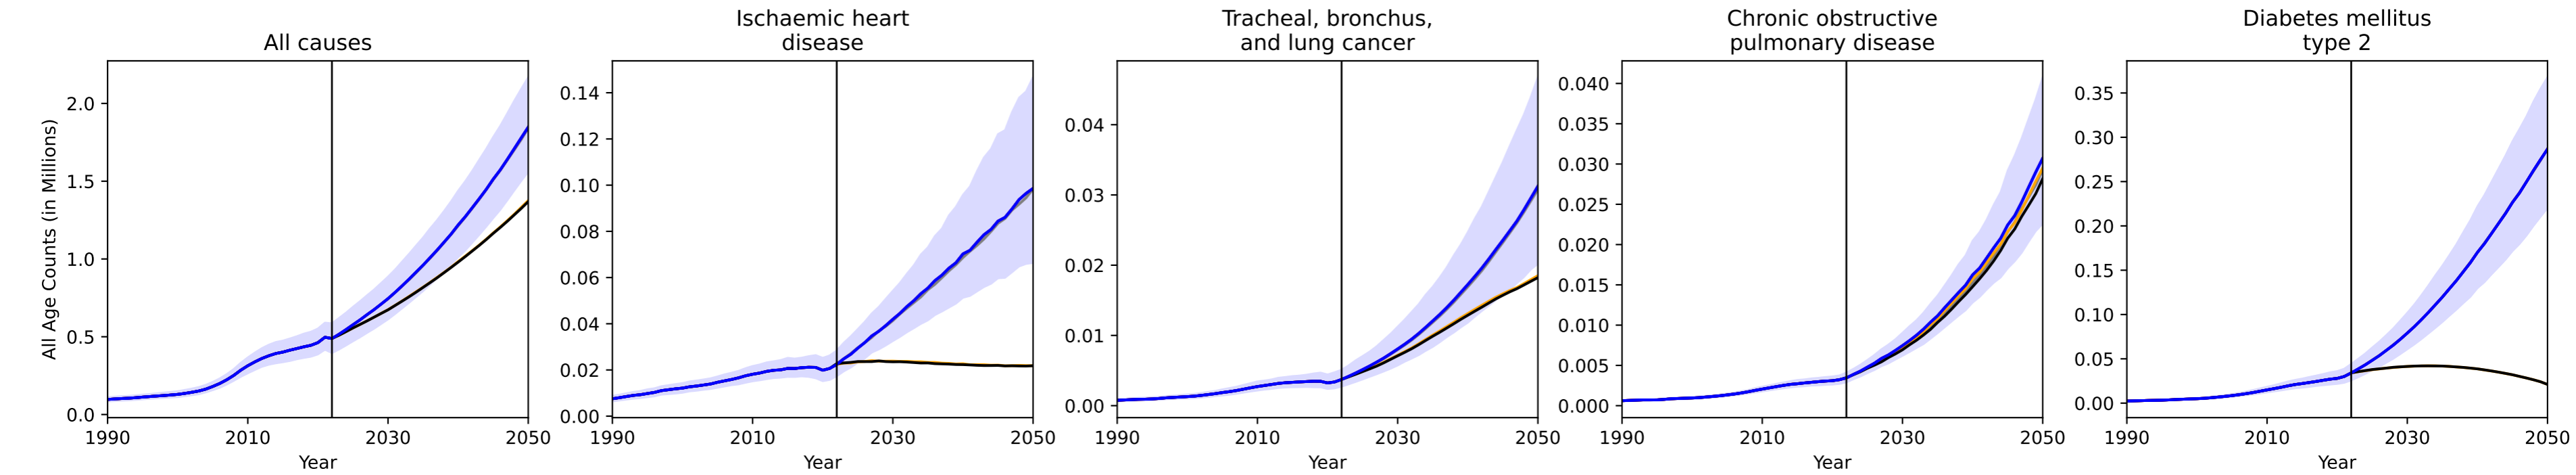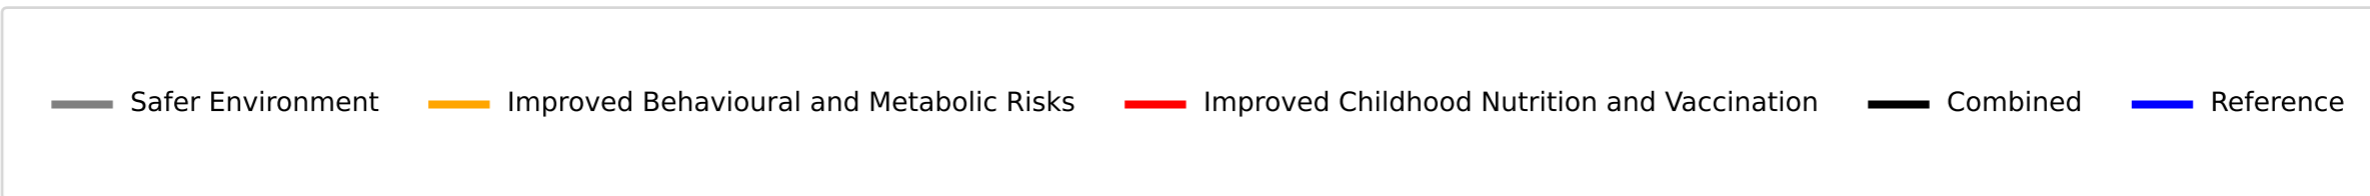

# Saudi Arabia

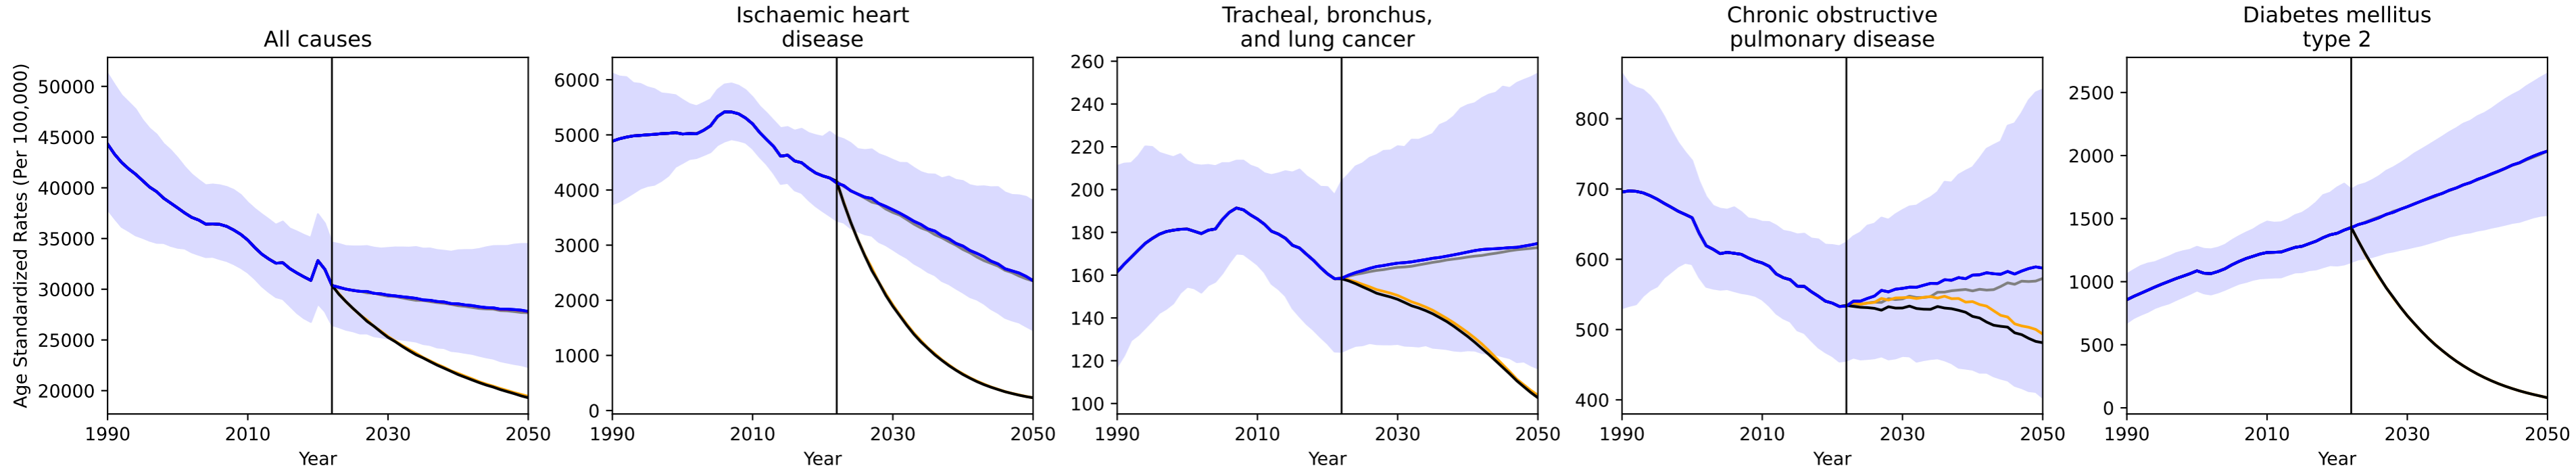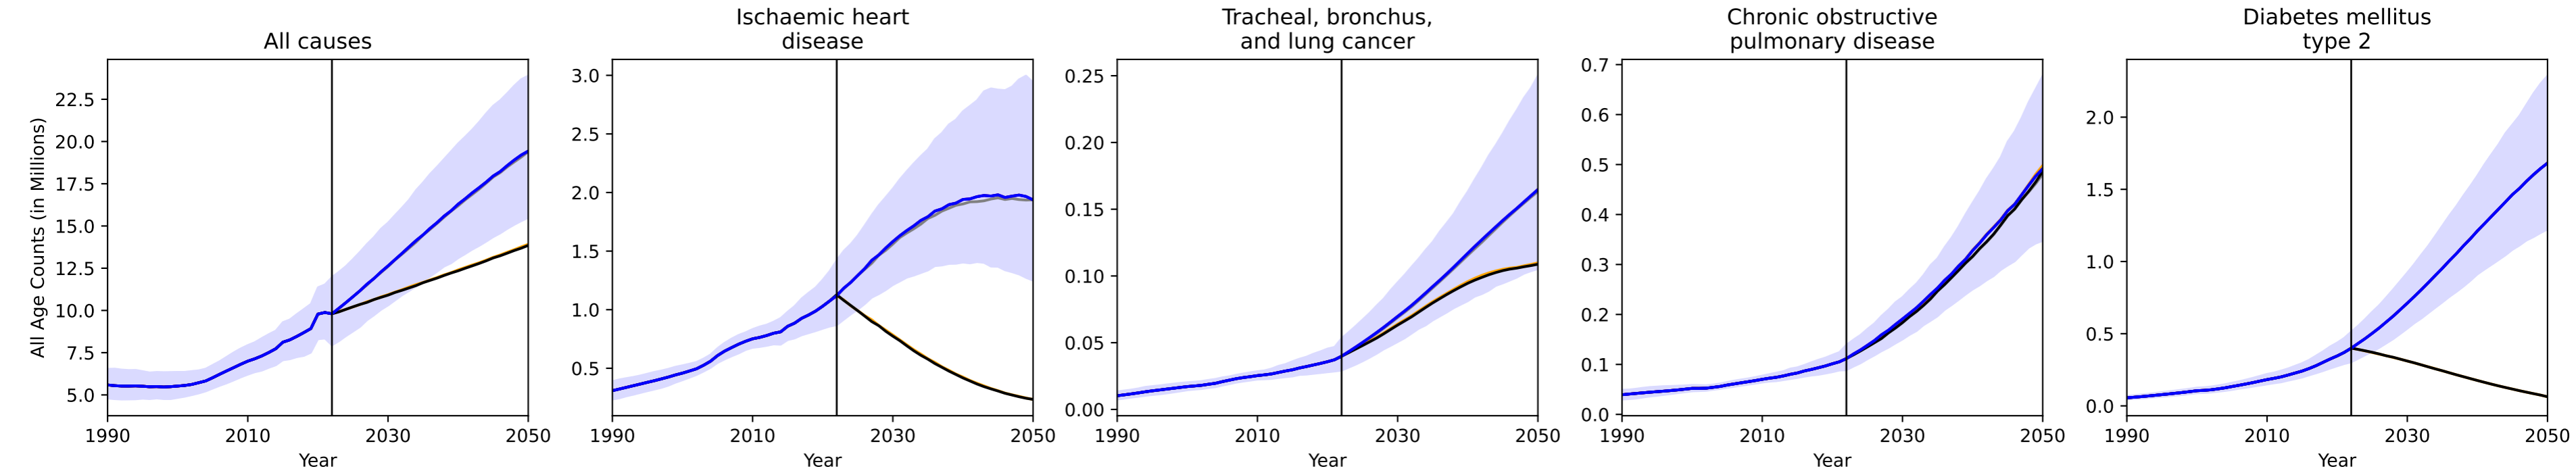

# Sudan

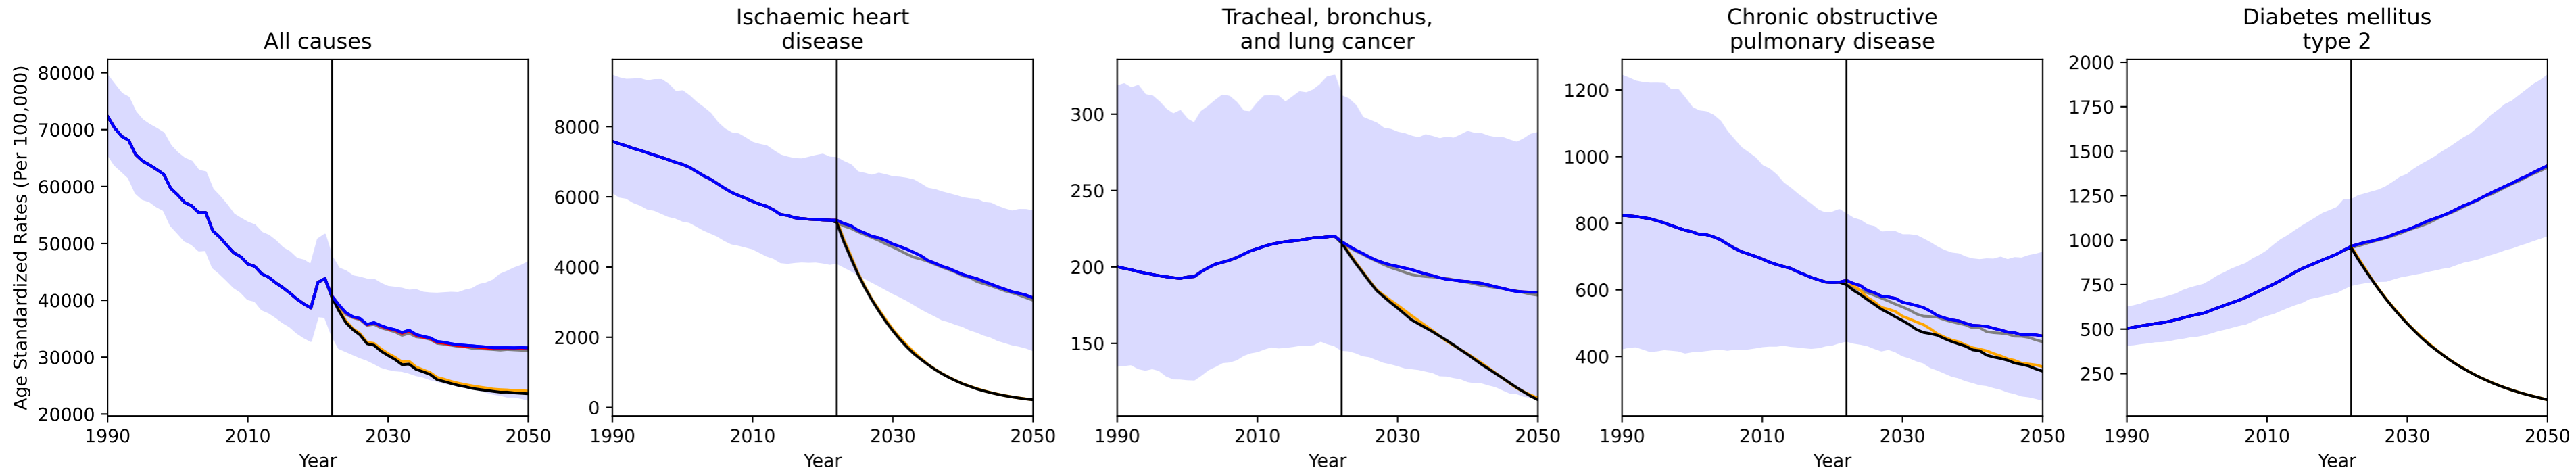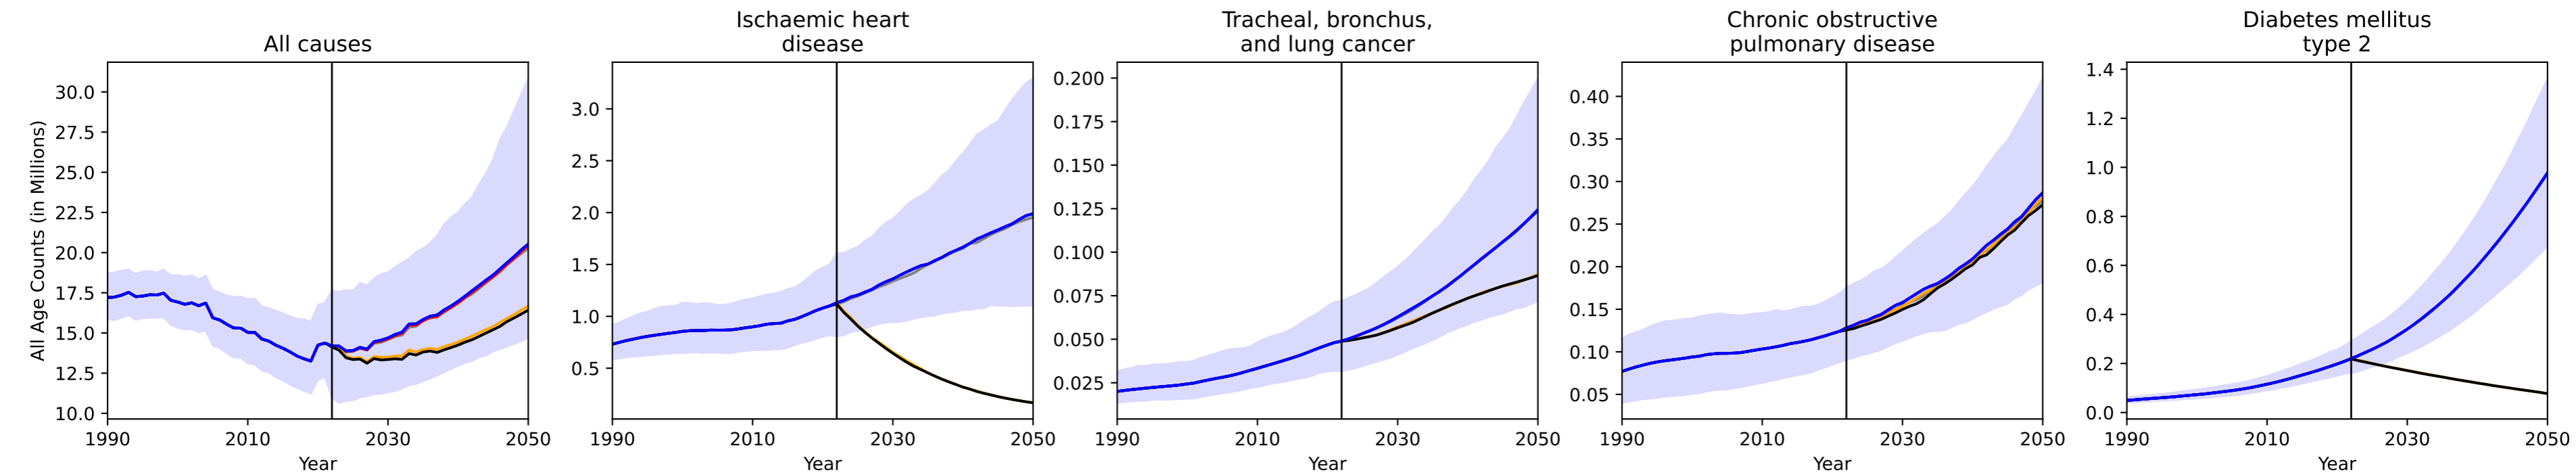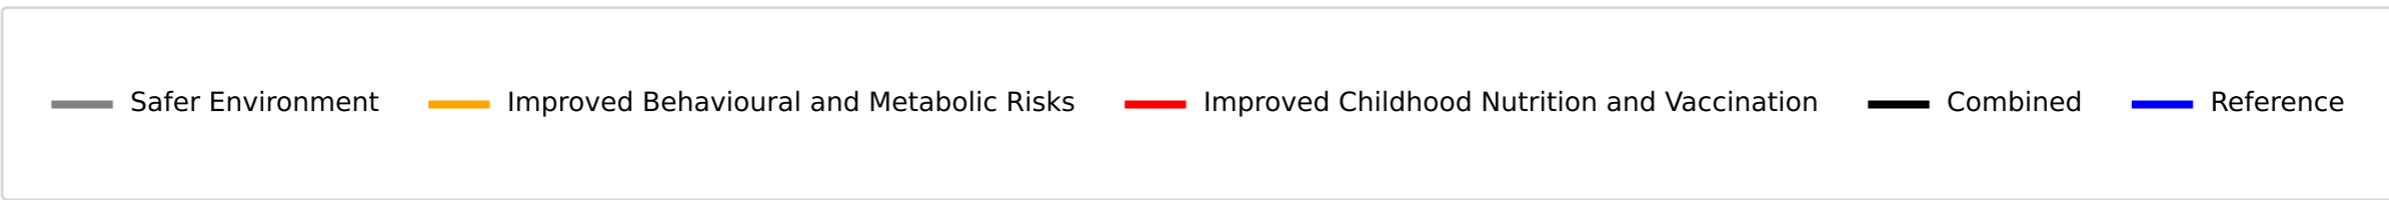

# Syria

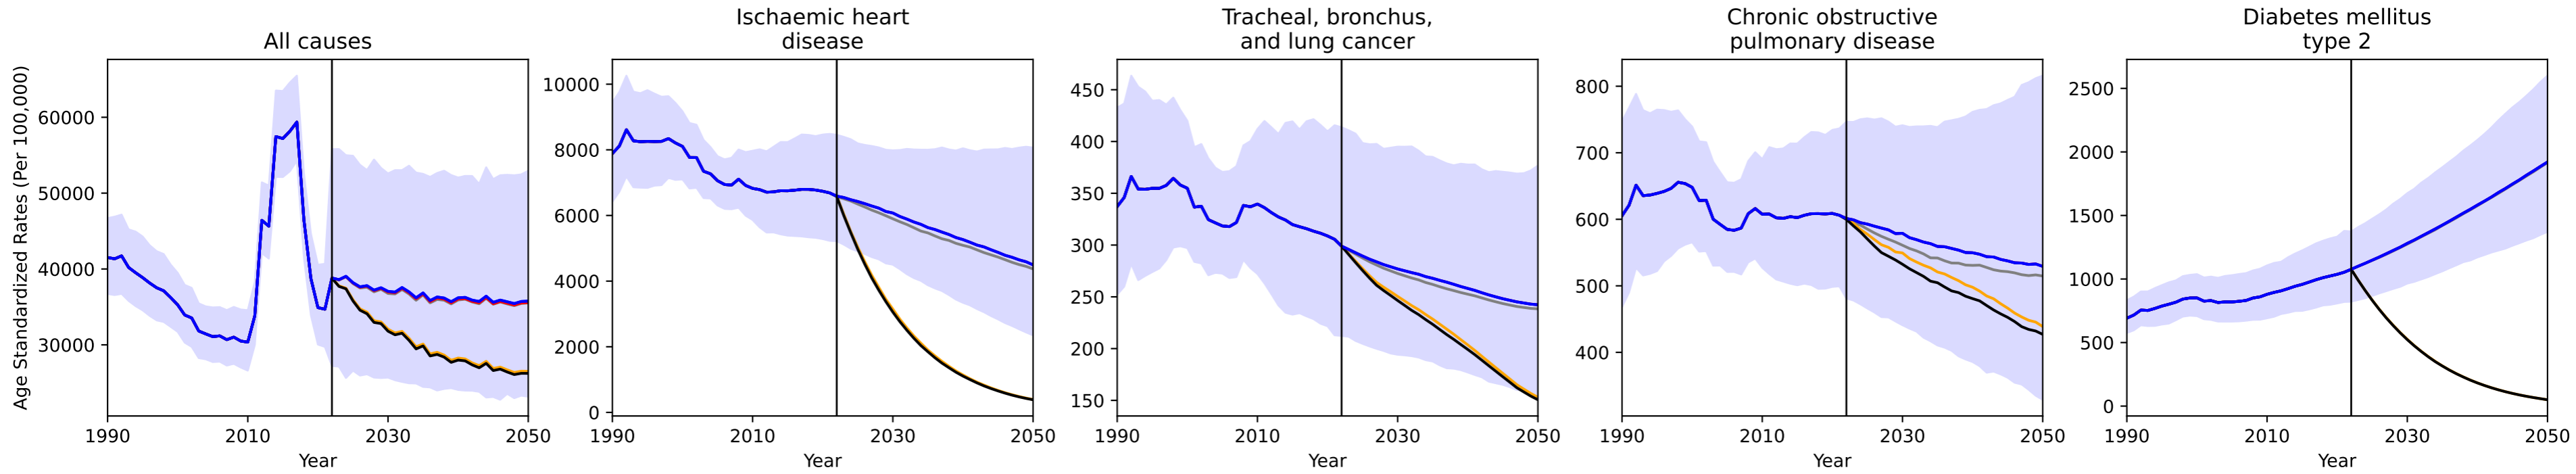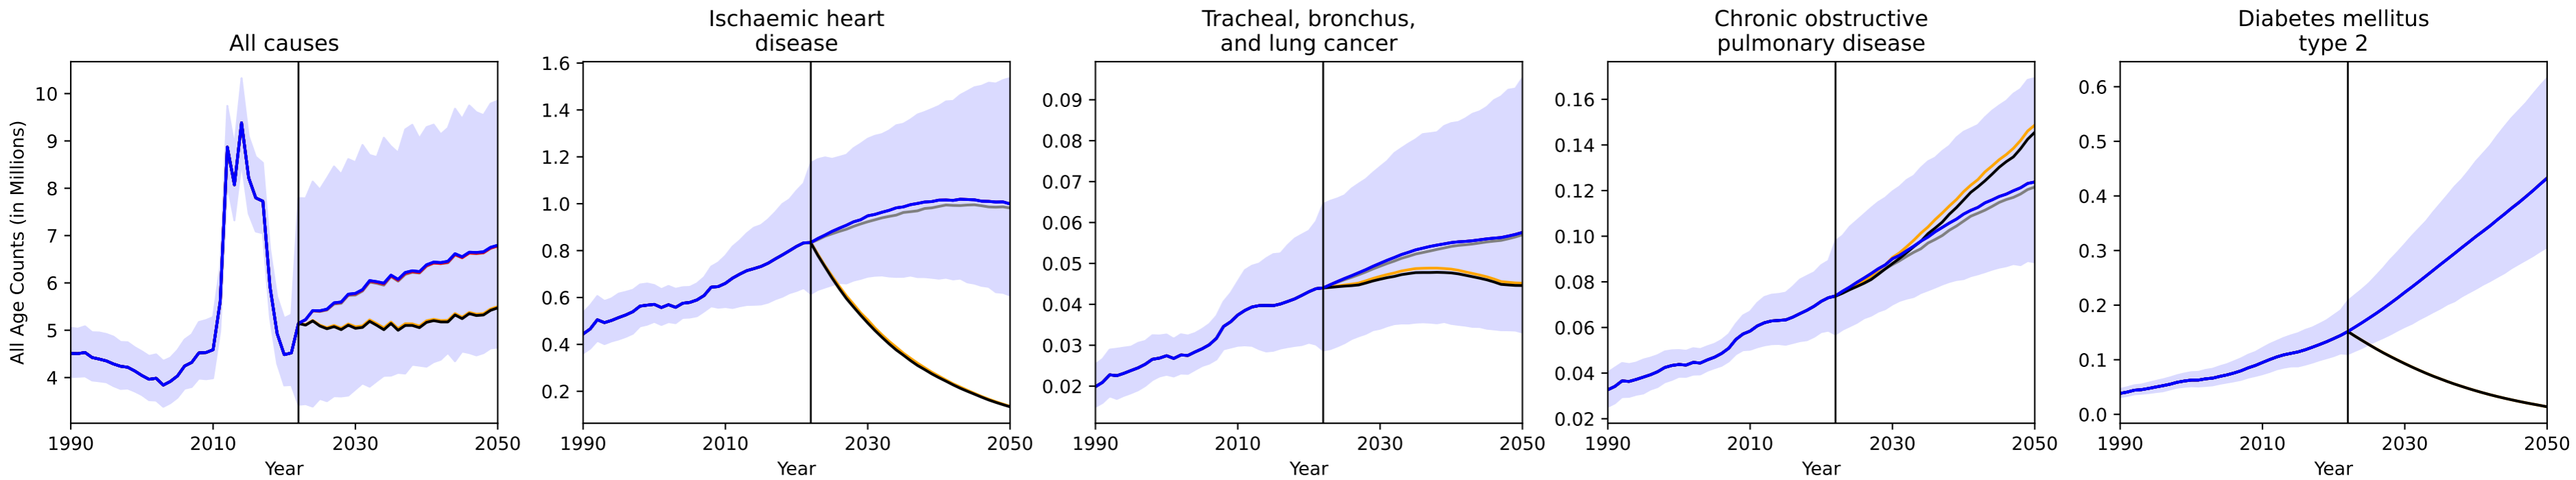



# Tunisia

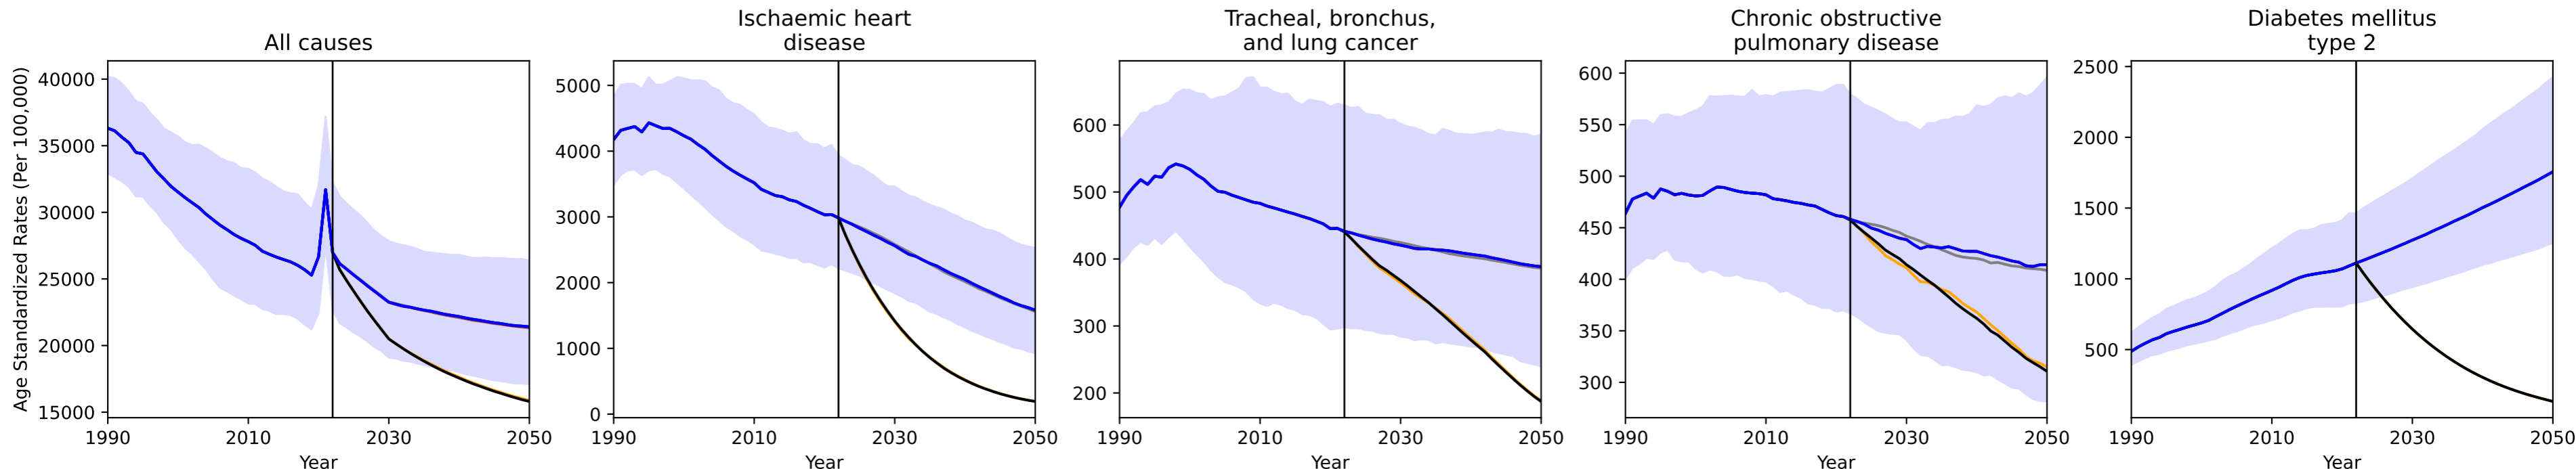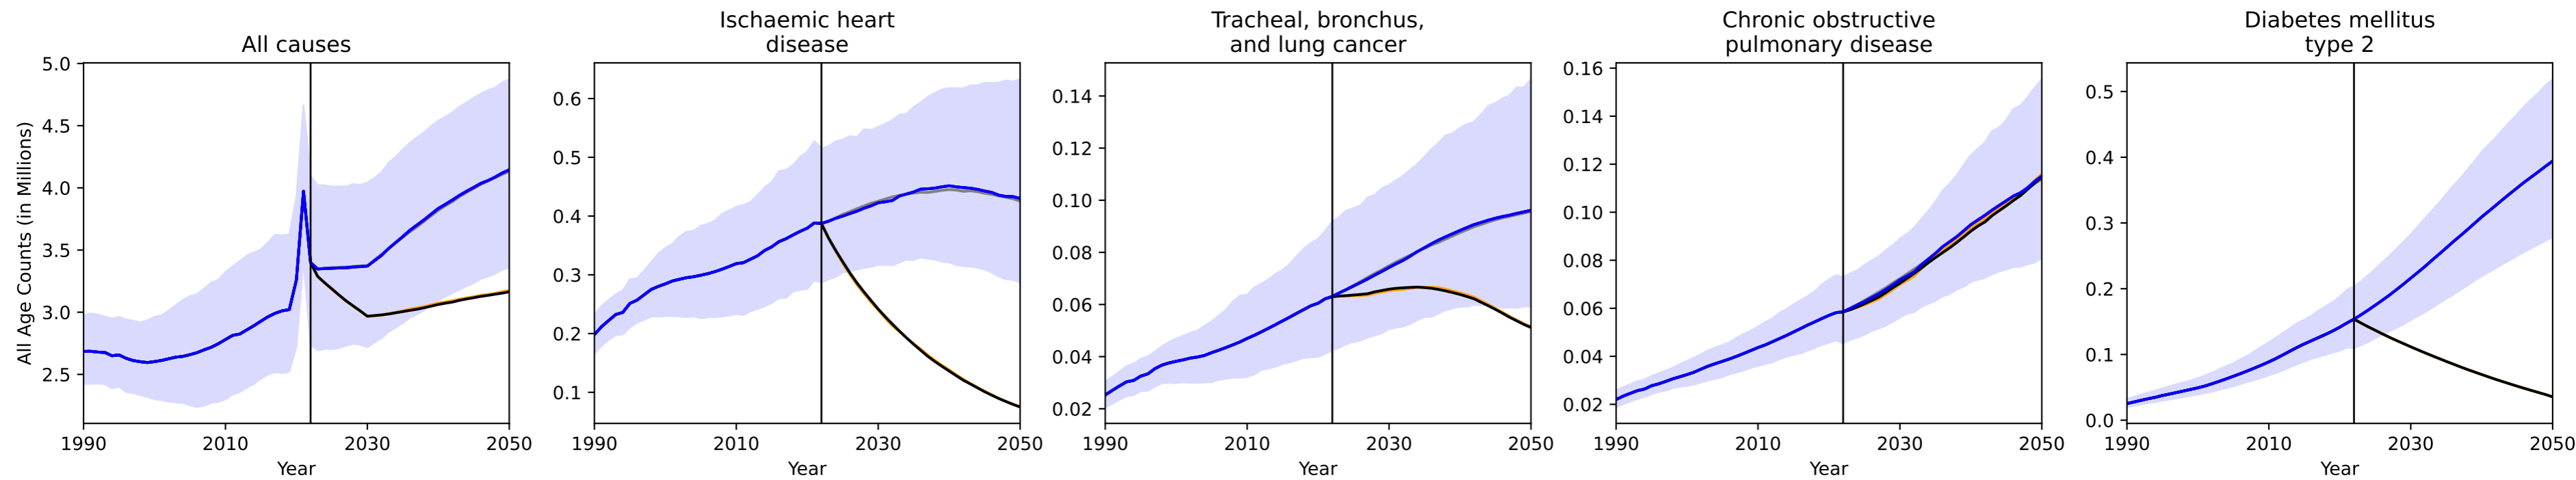

# Türkiye

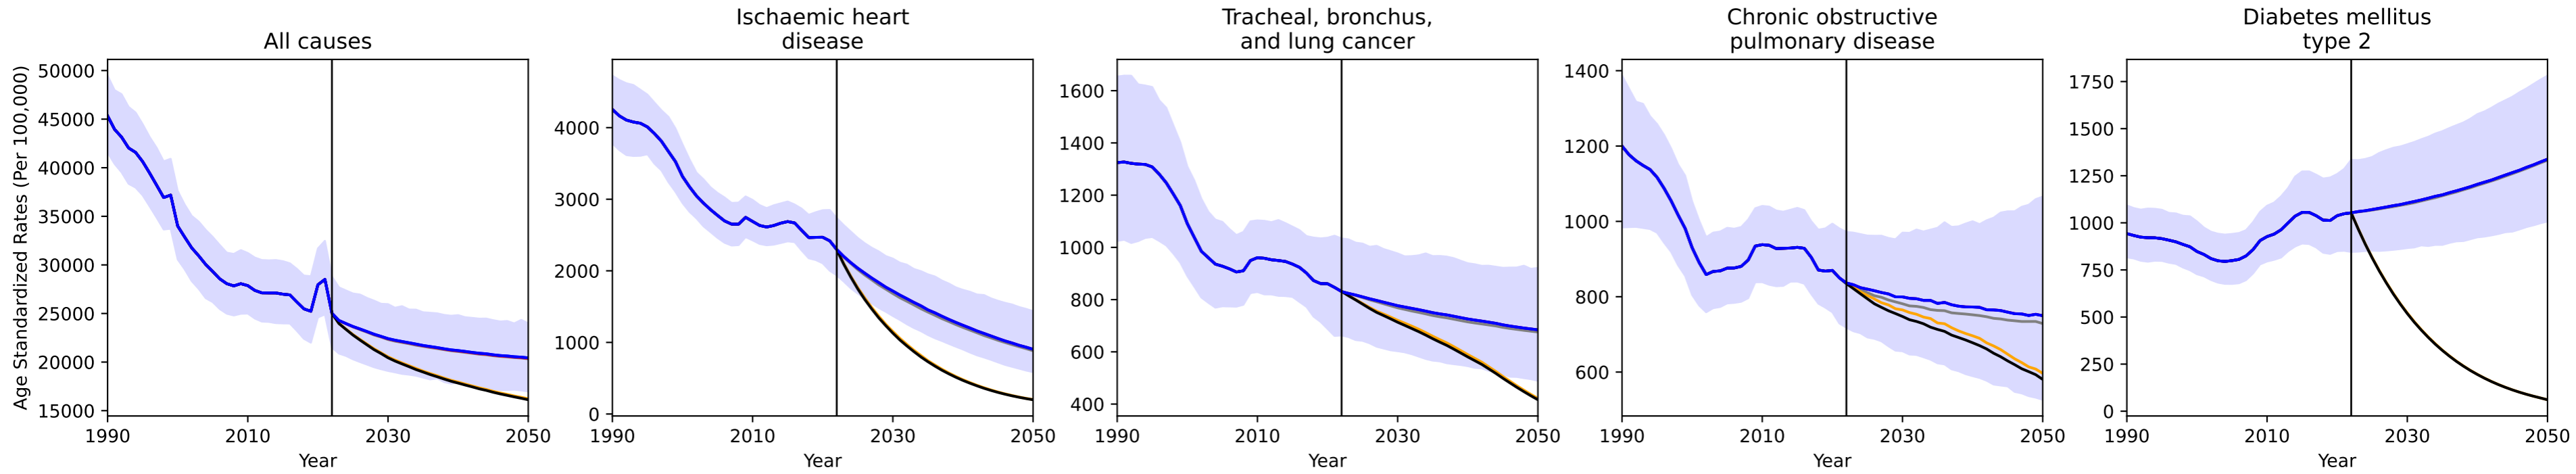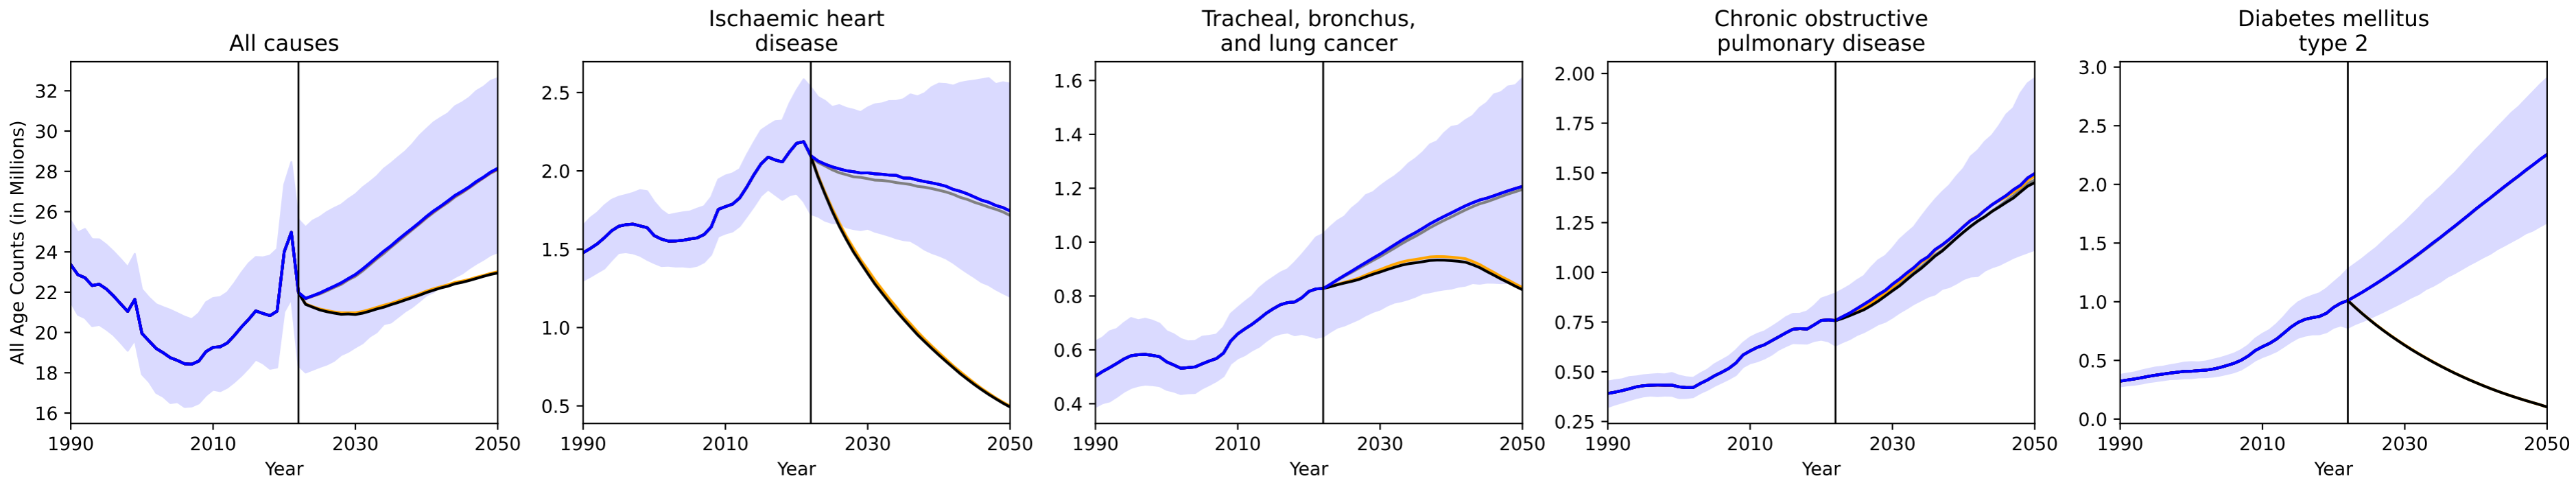

# United Arab Emirates

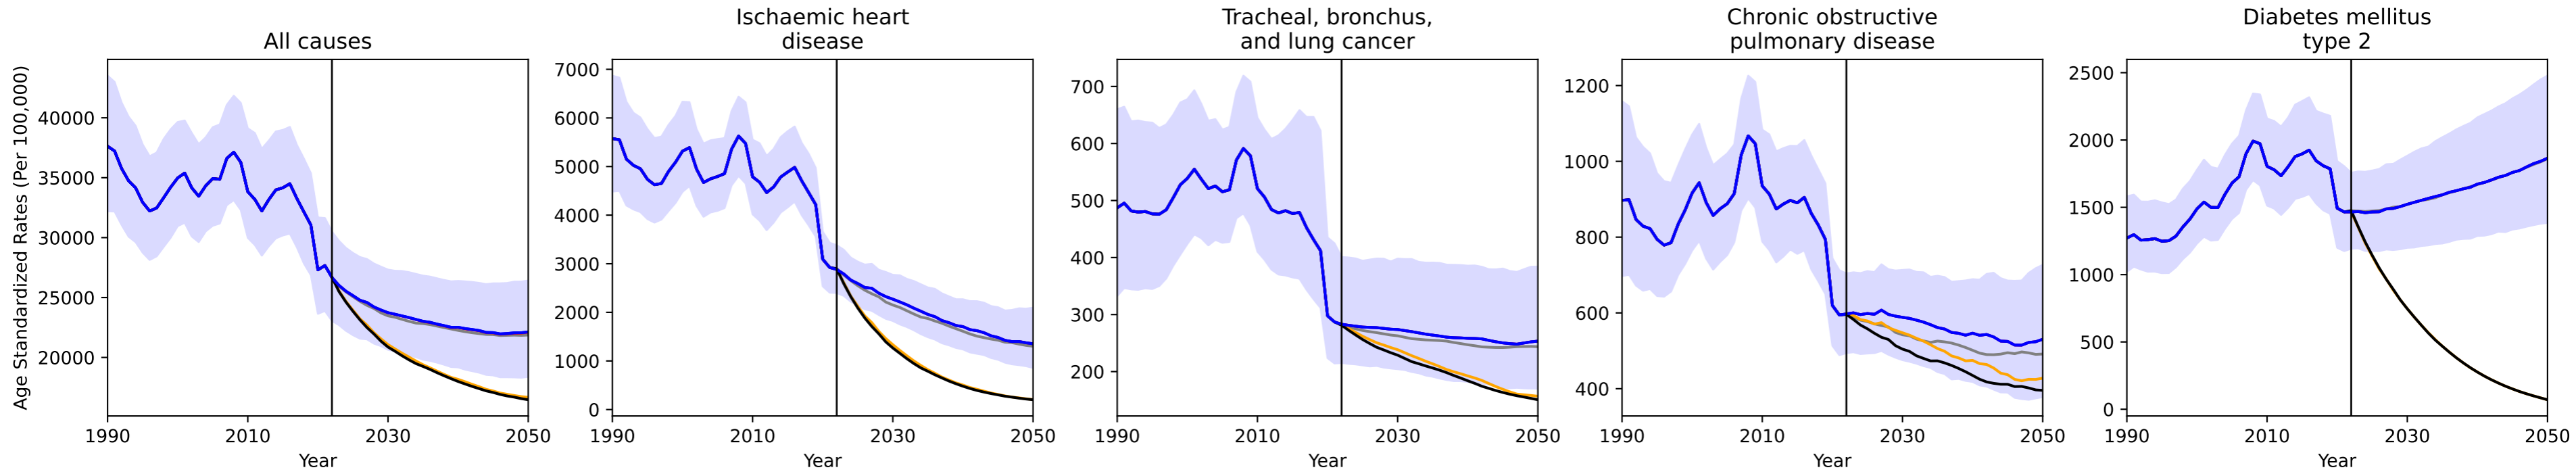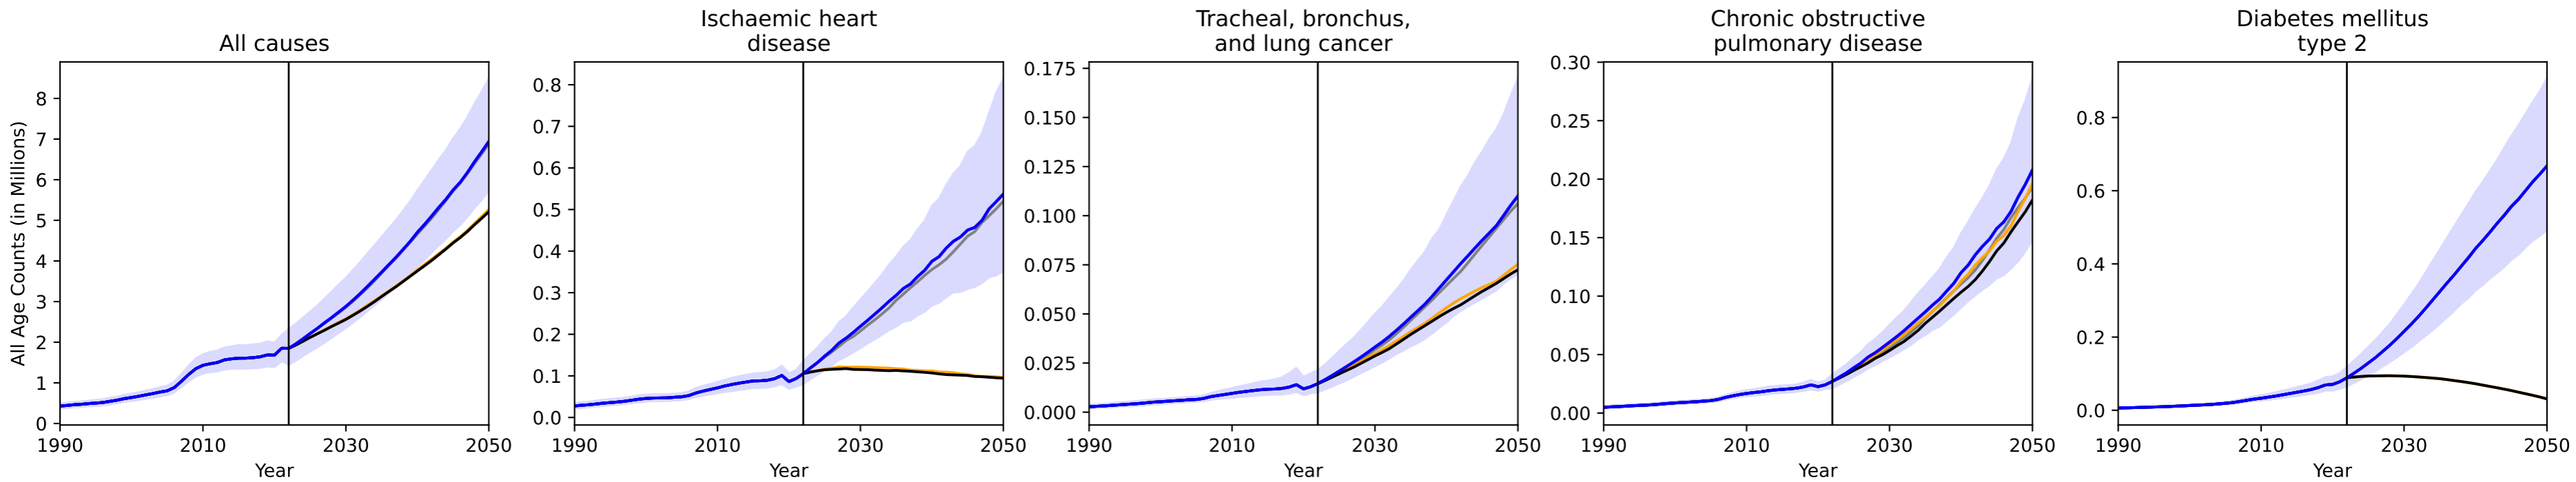

# Yemen

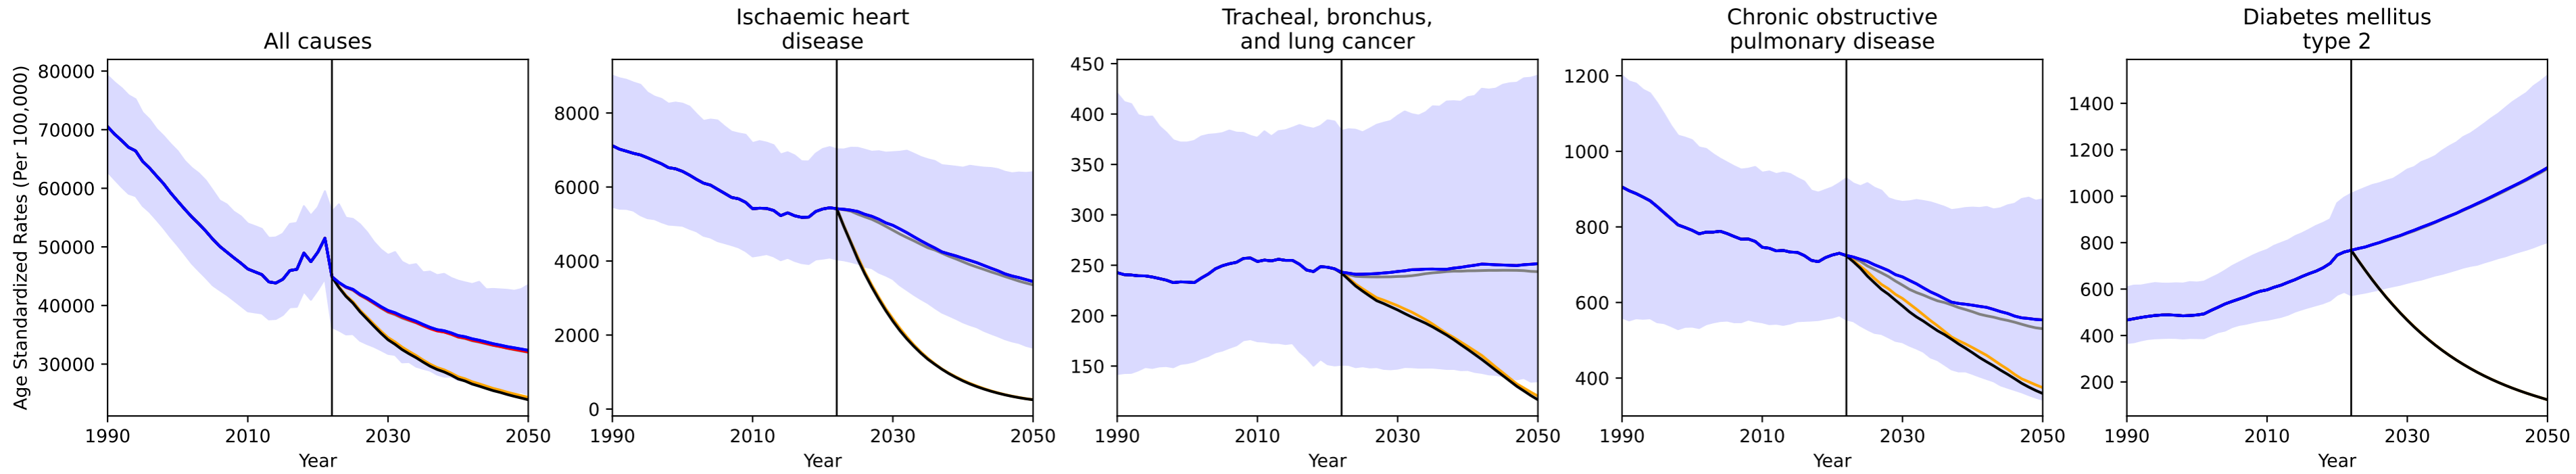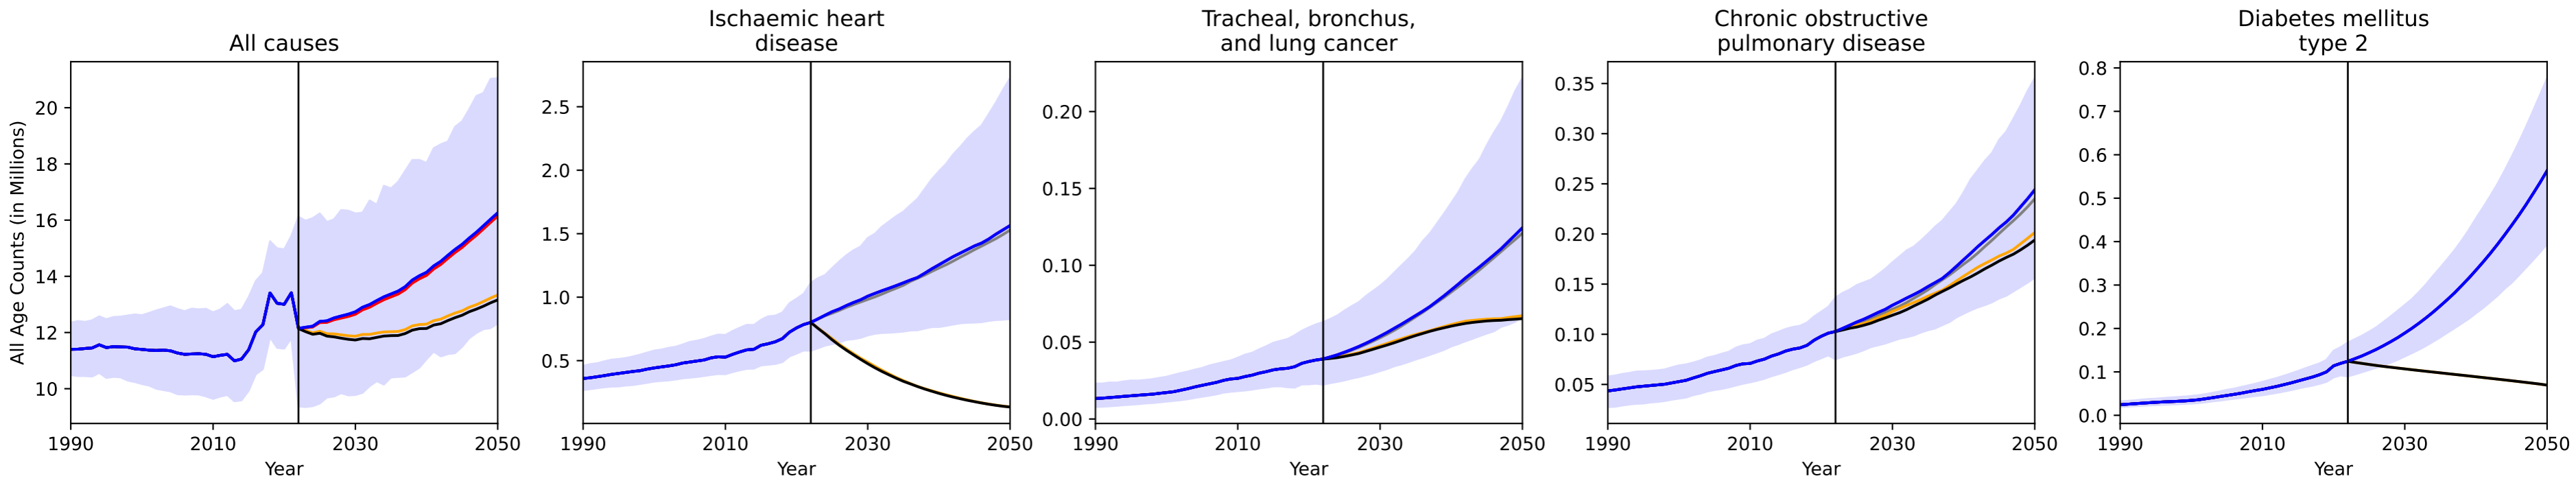

# Bangladesh

Supplemental Results Figure S12. All cause and top NCD causes age standardized DALY rates and all age counts by scenario and location, 1990-2050

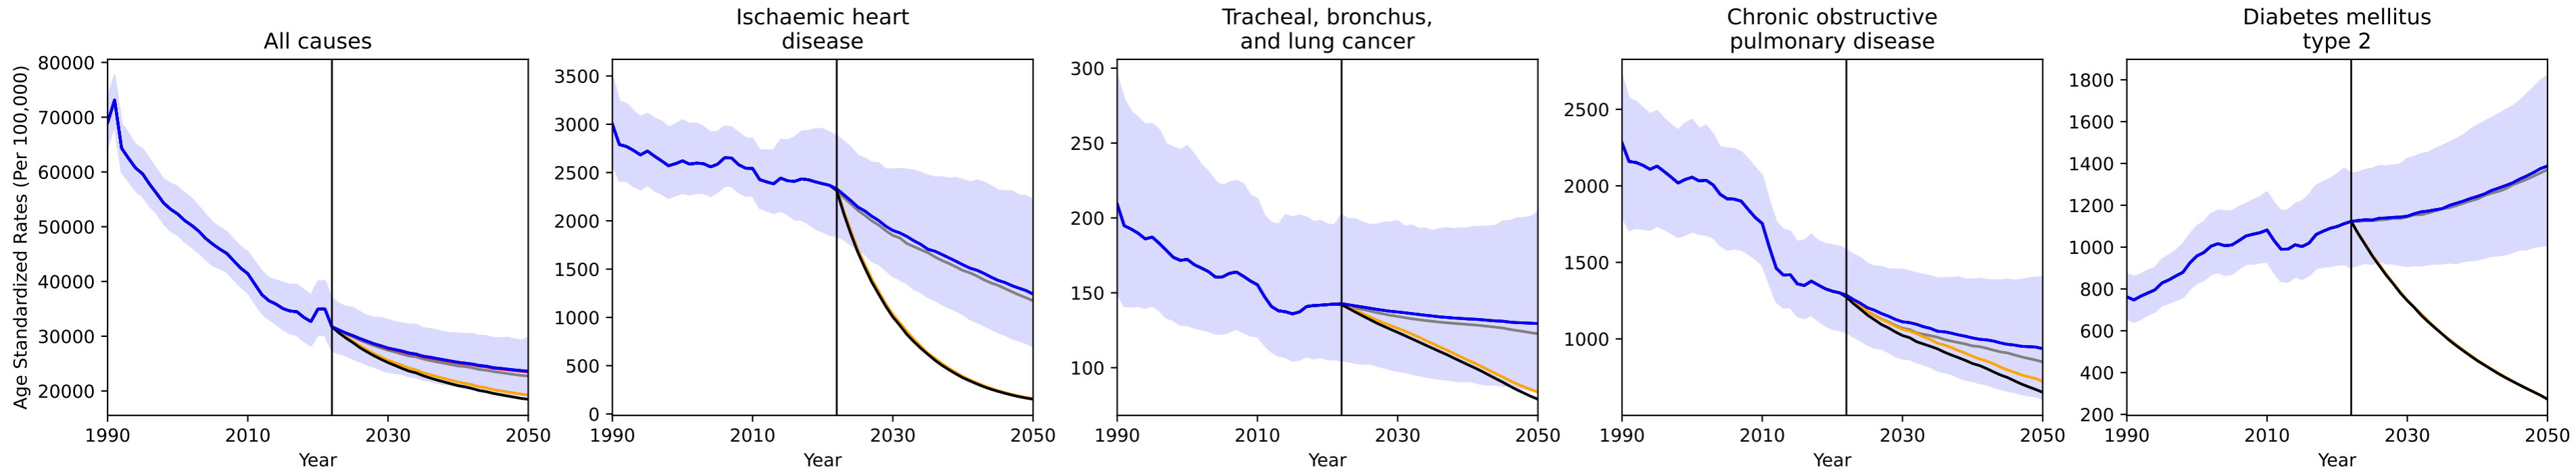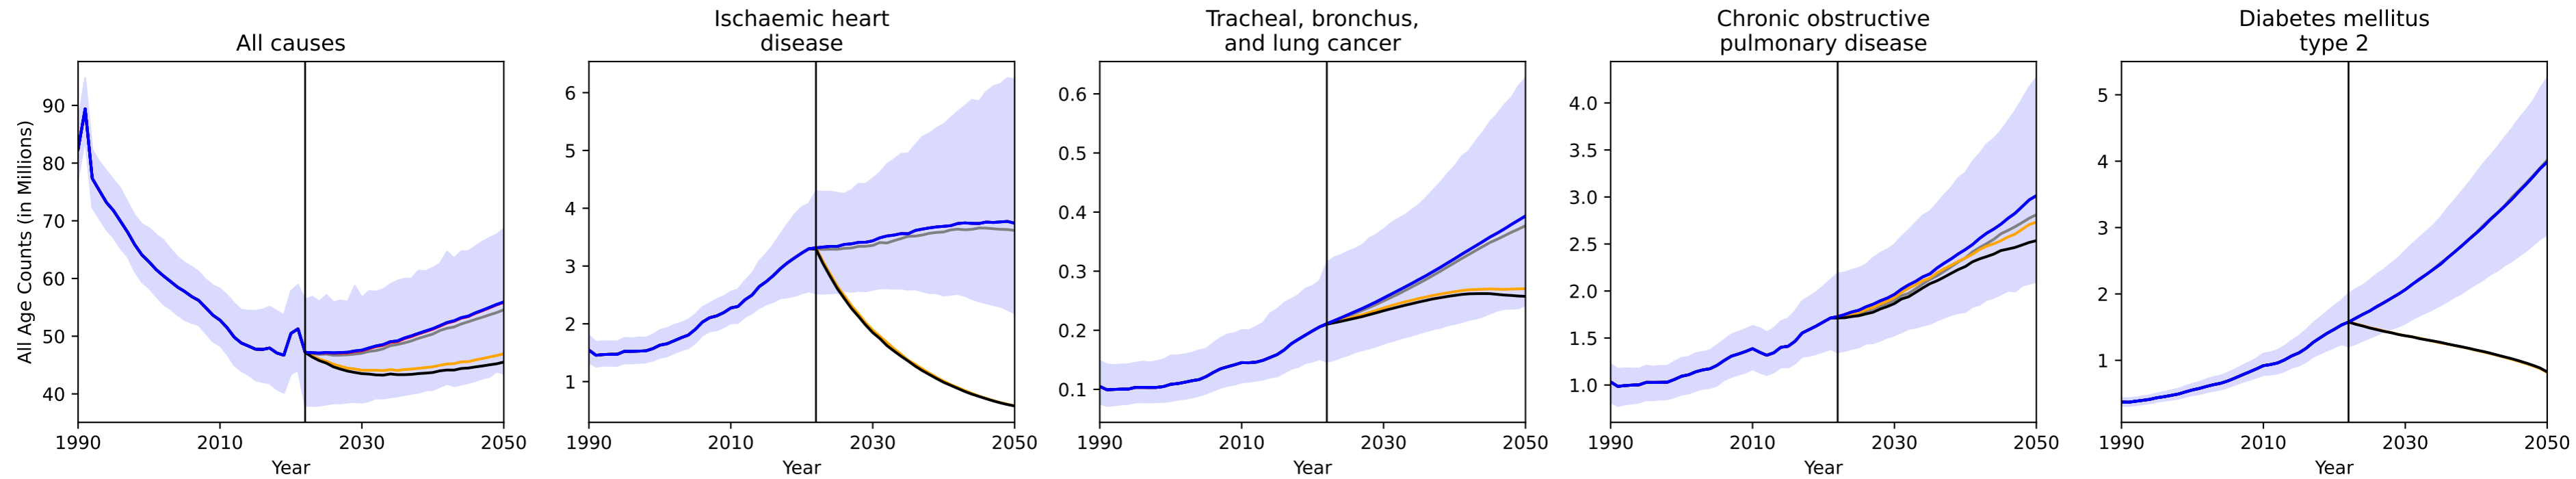

# Bhutan

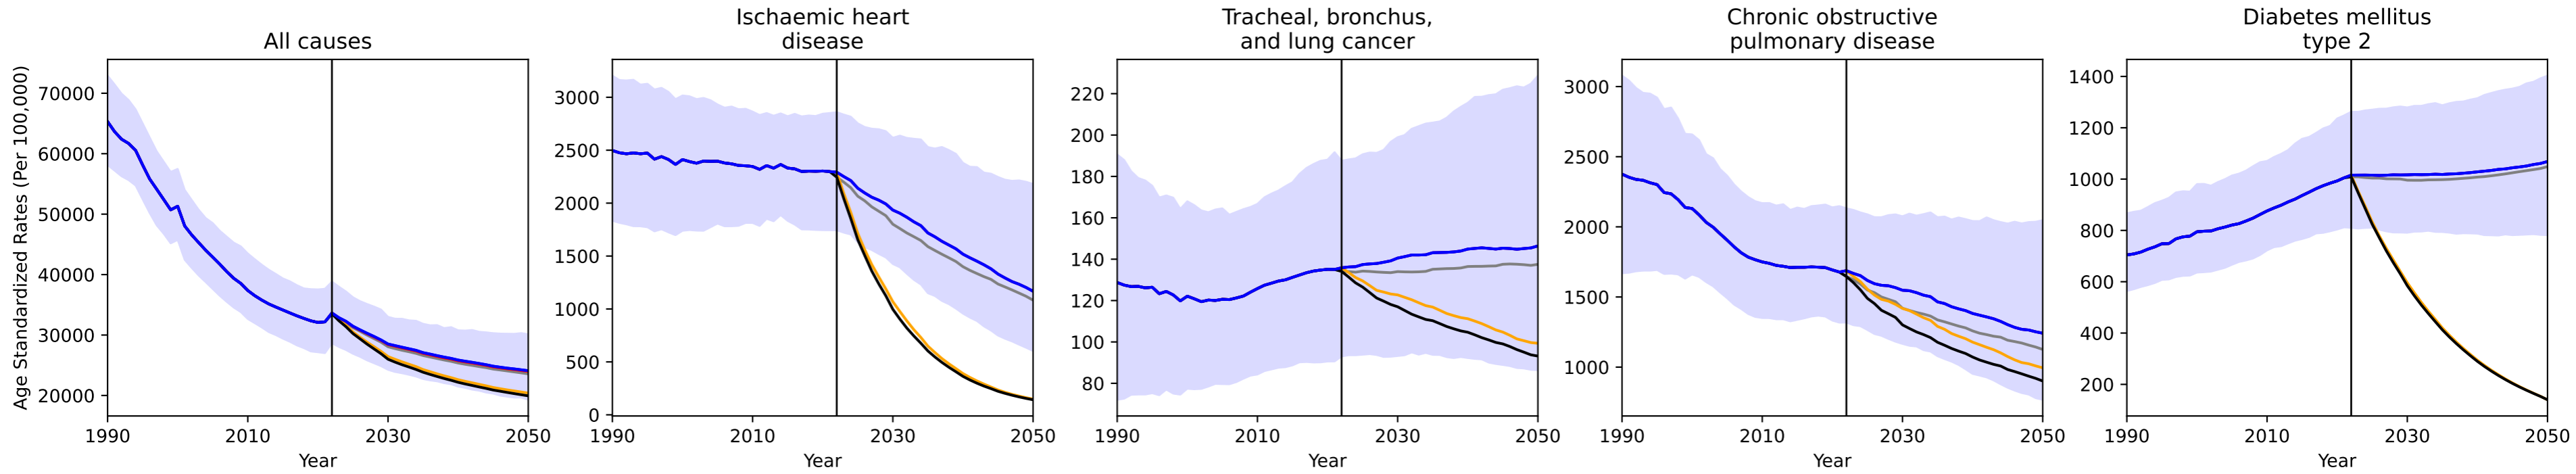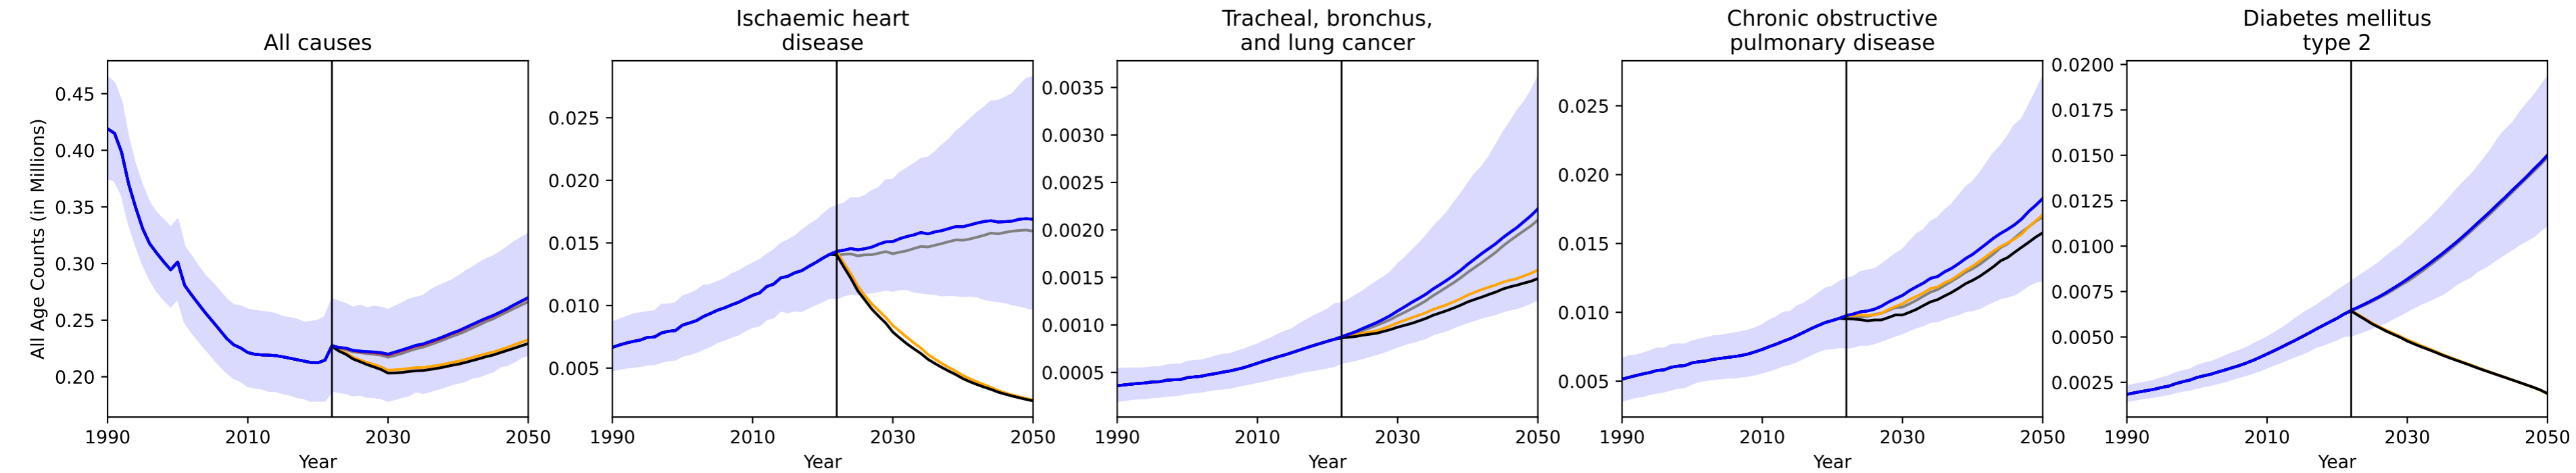

# India

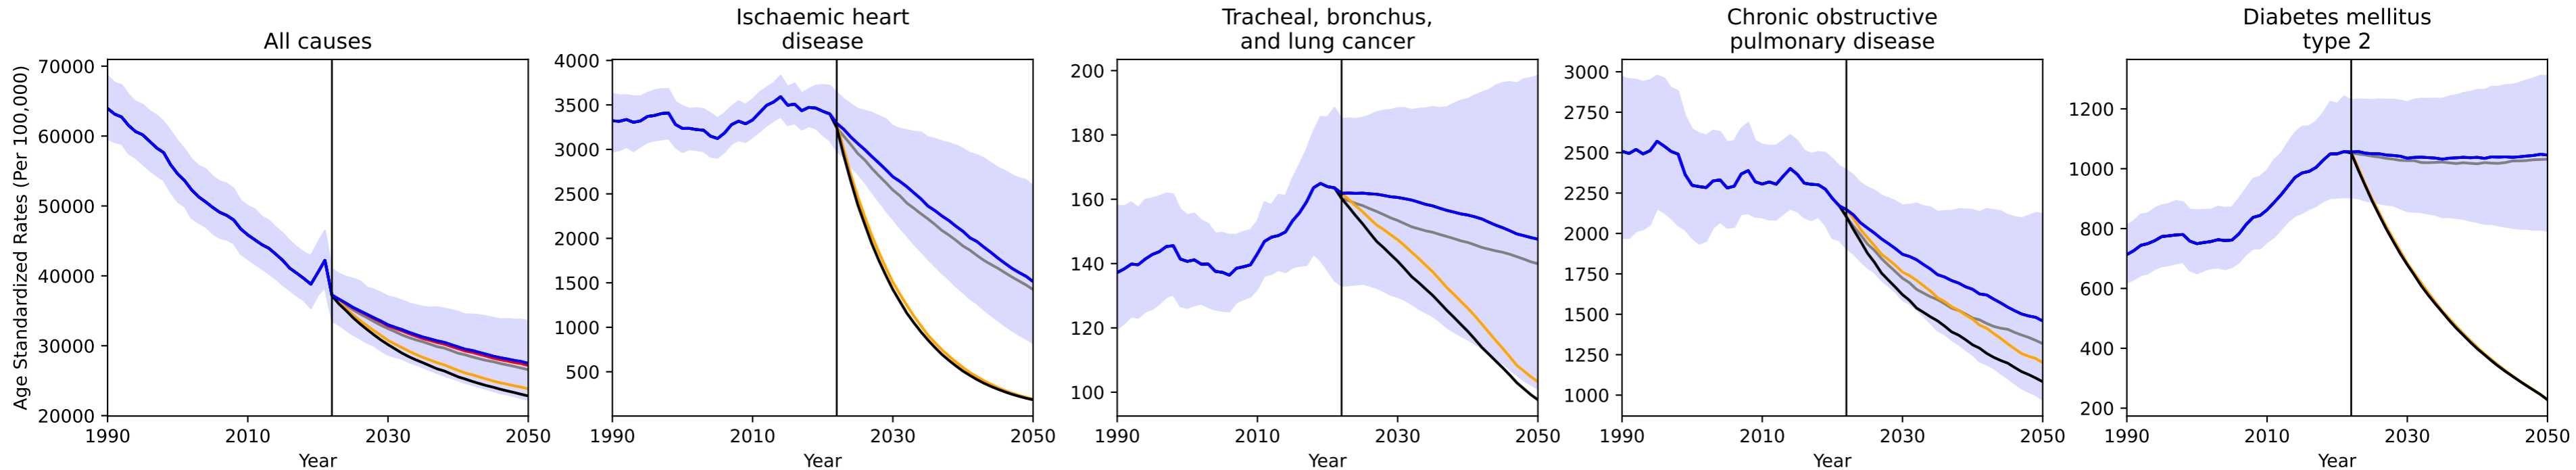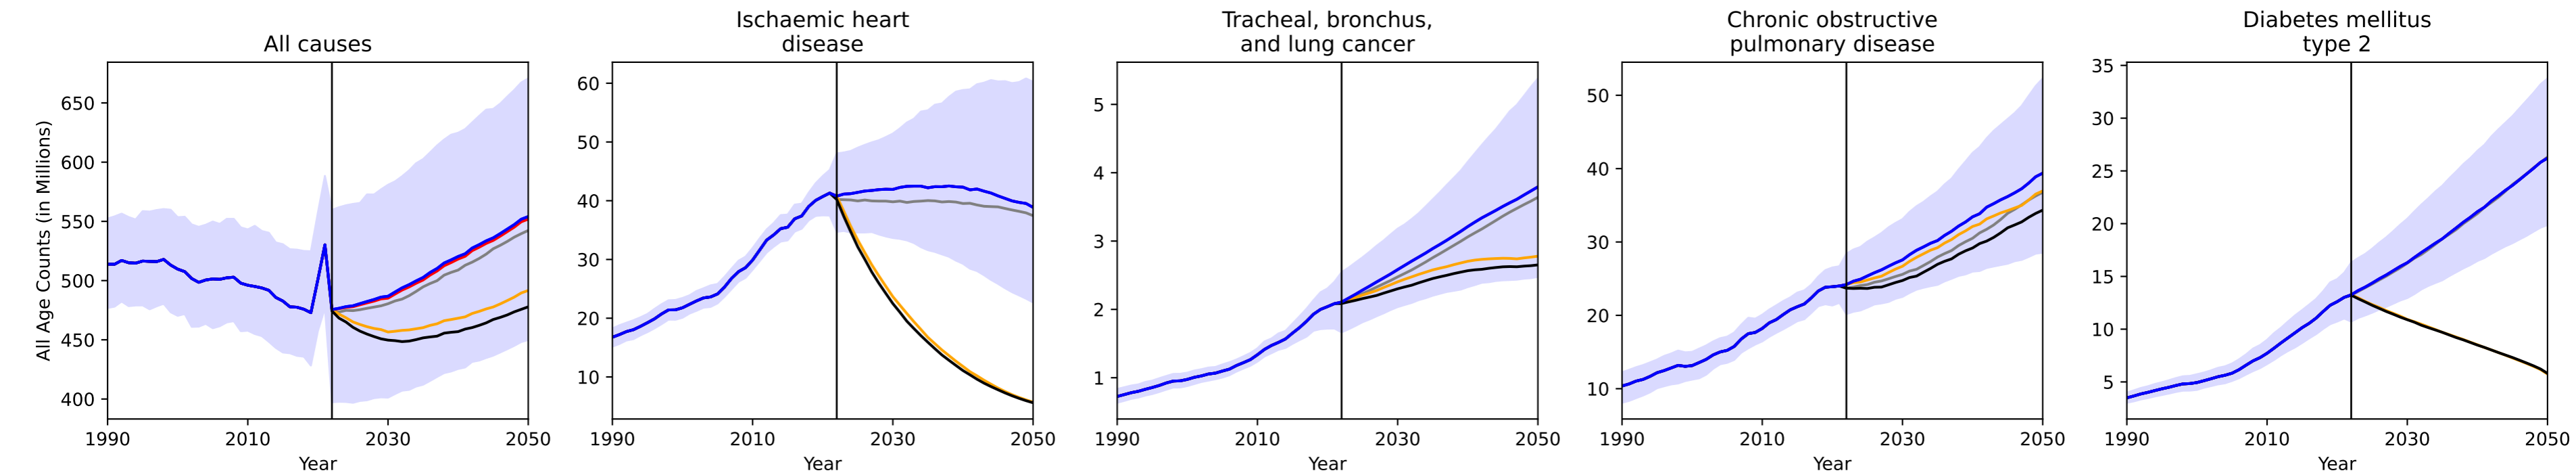

# Nepal

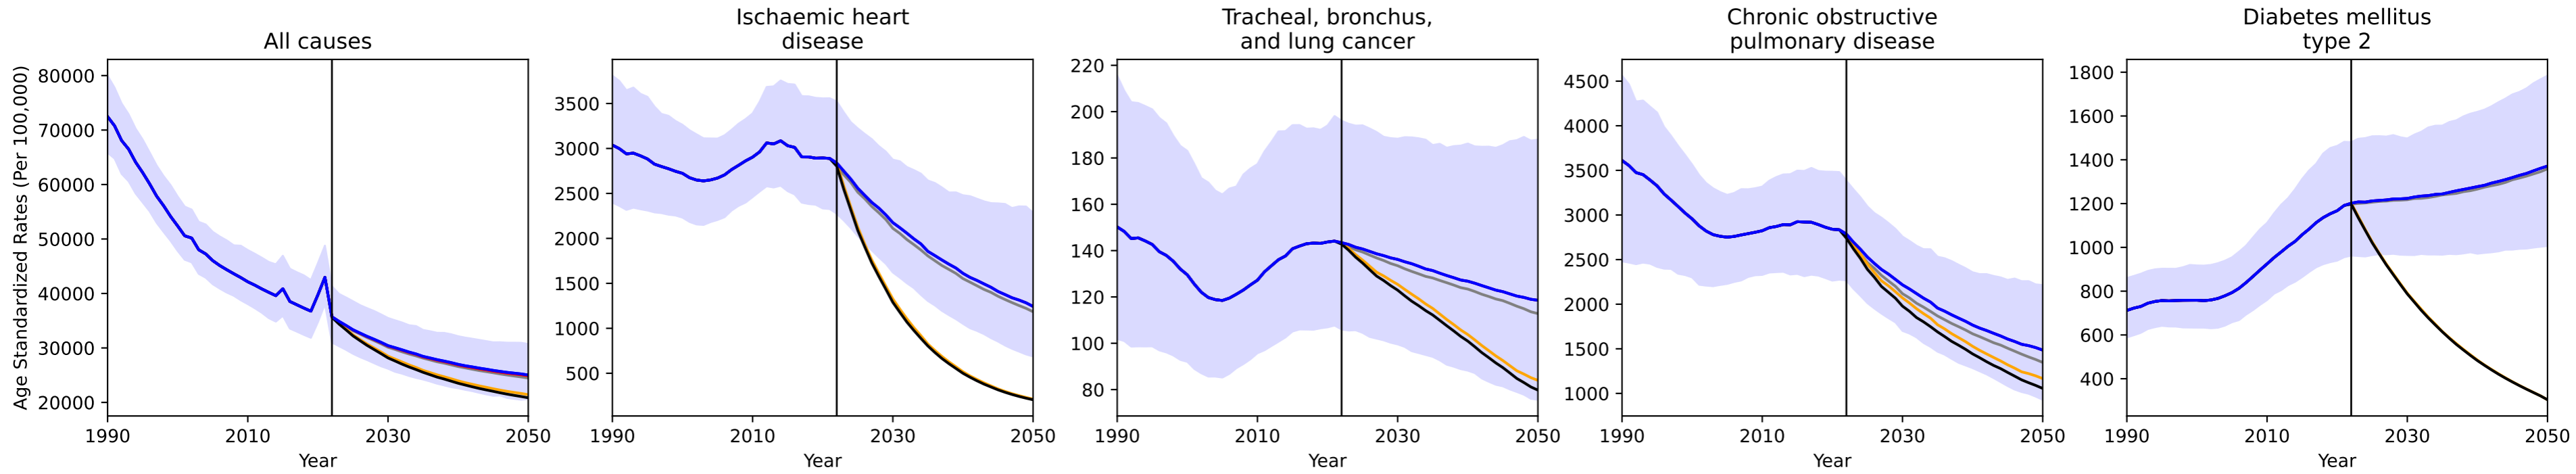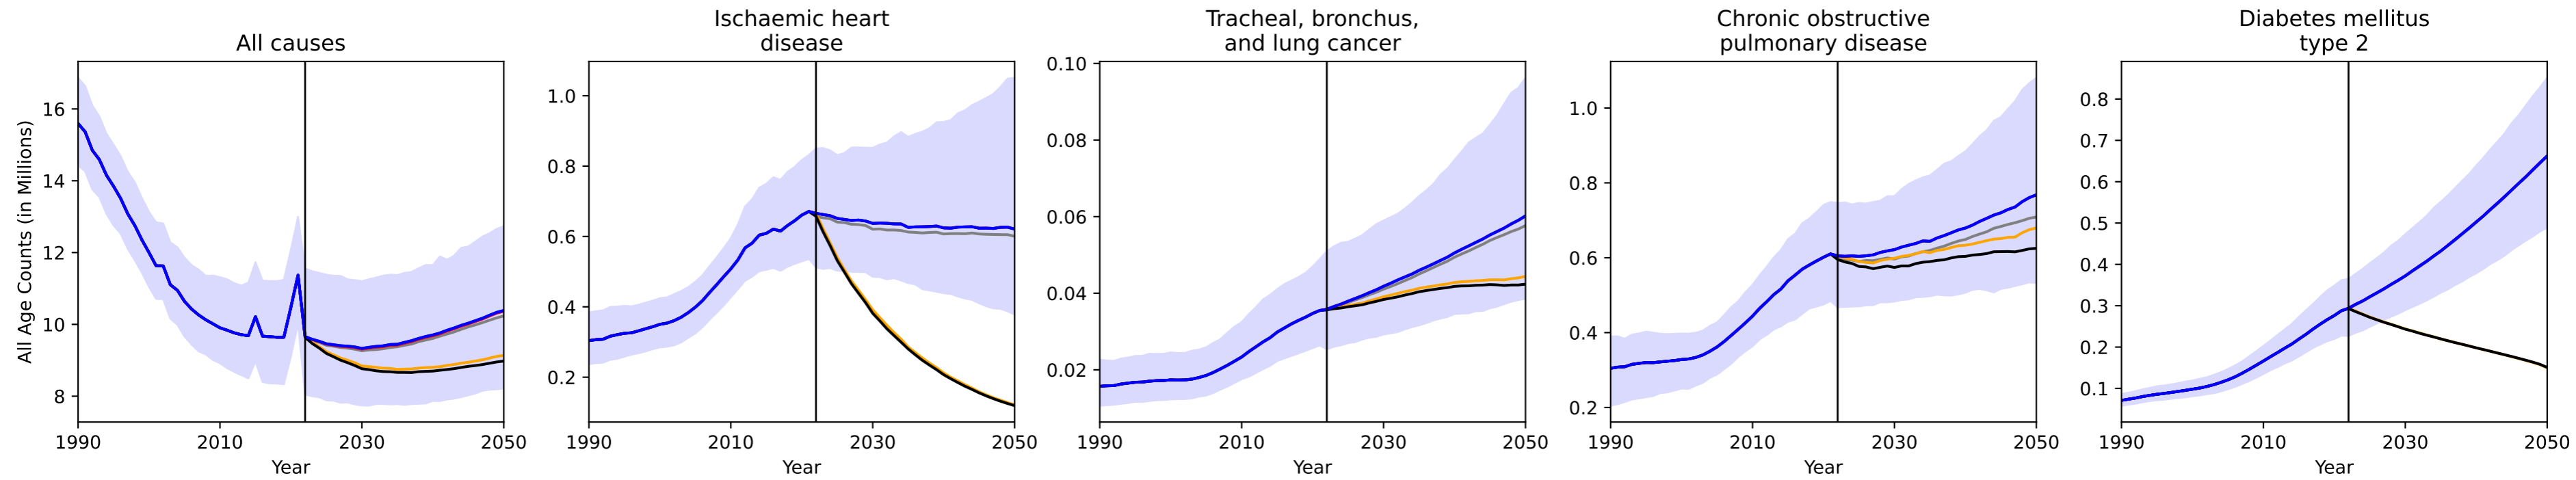



# Pakistan

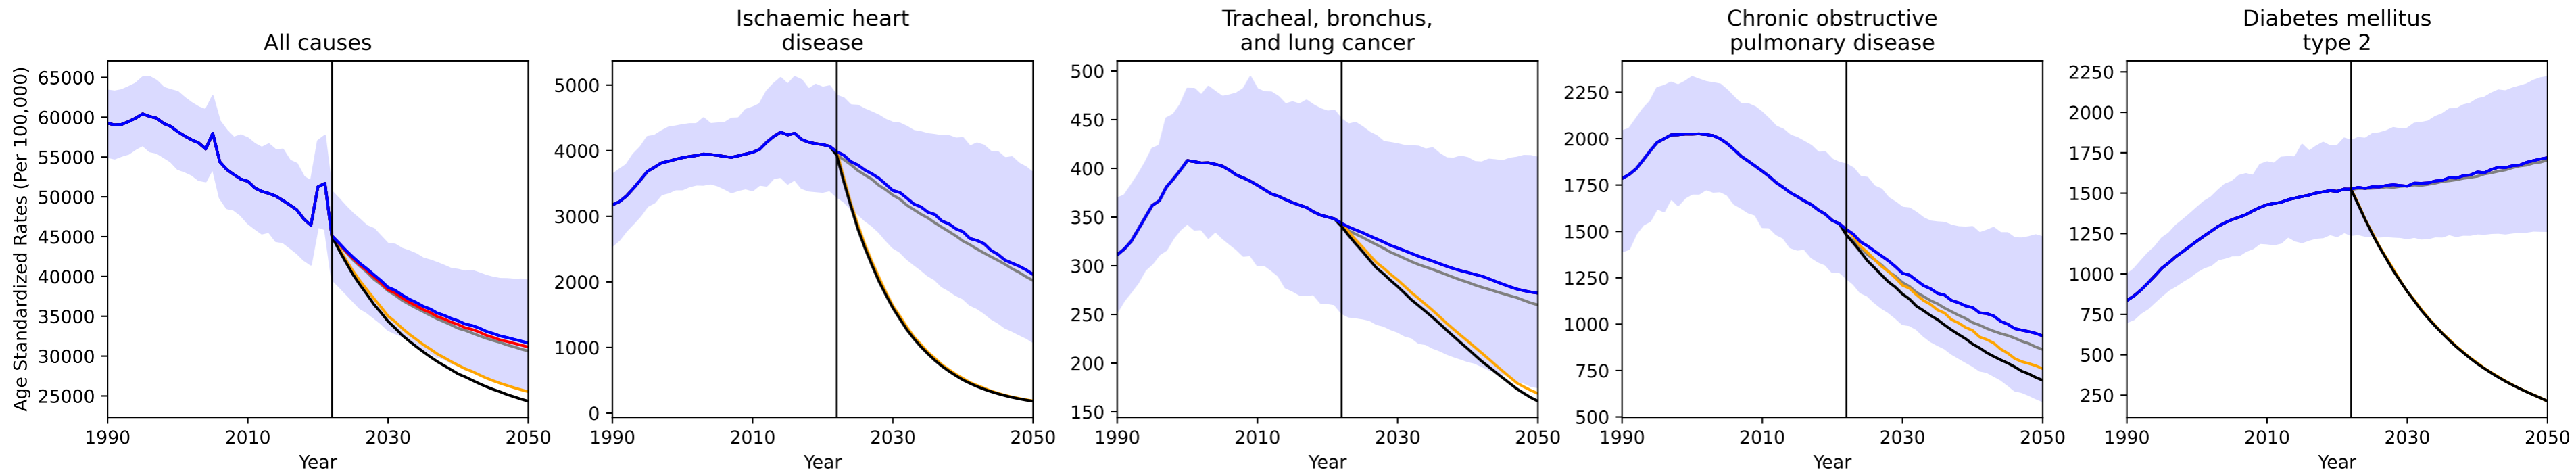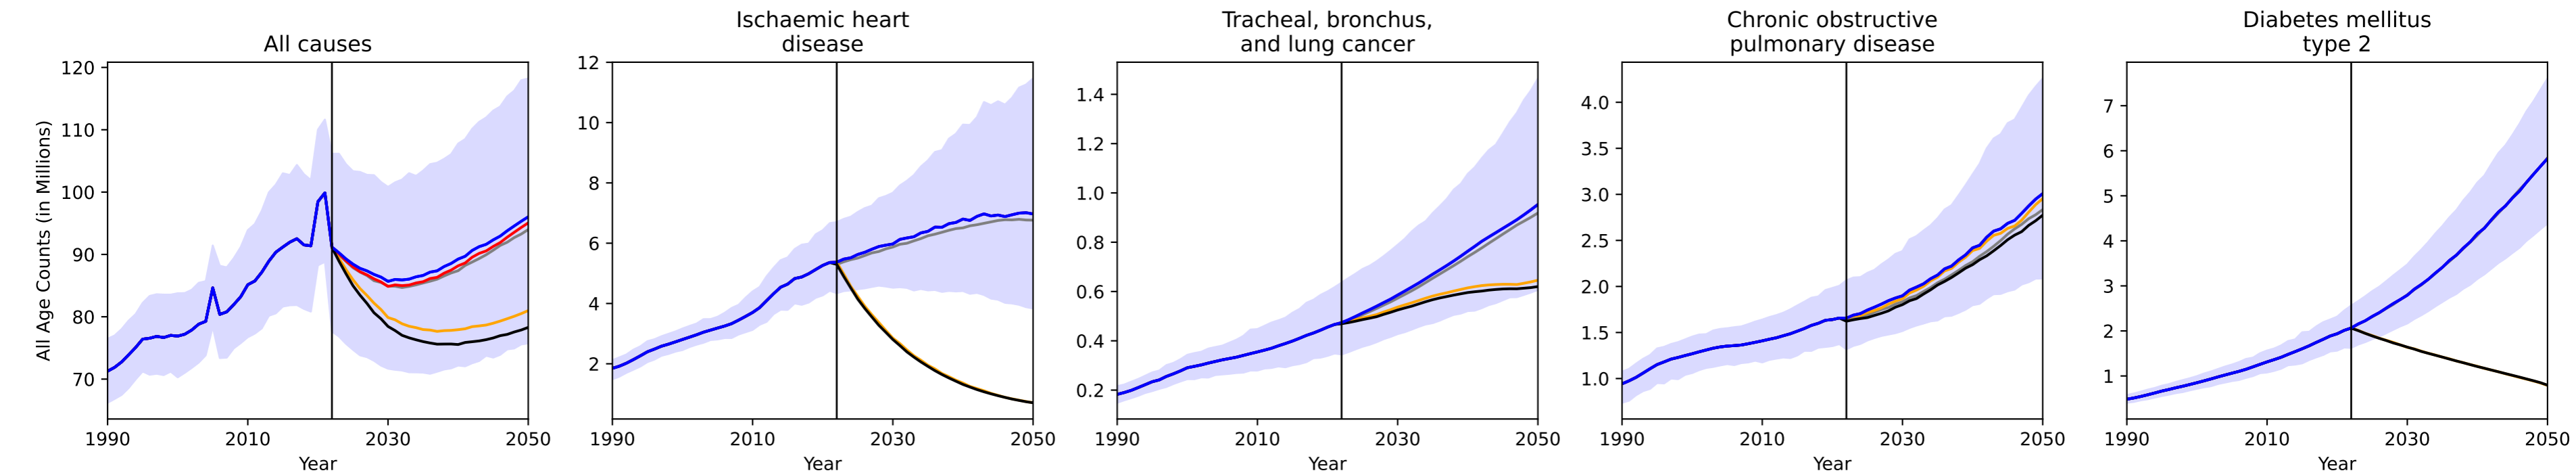

# China

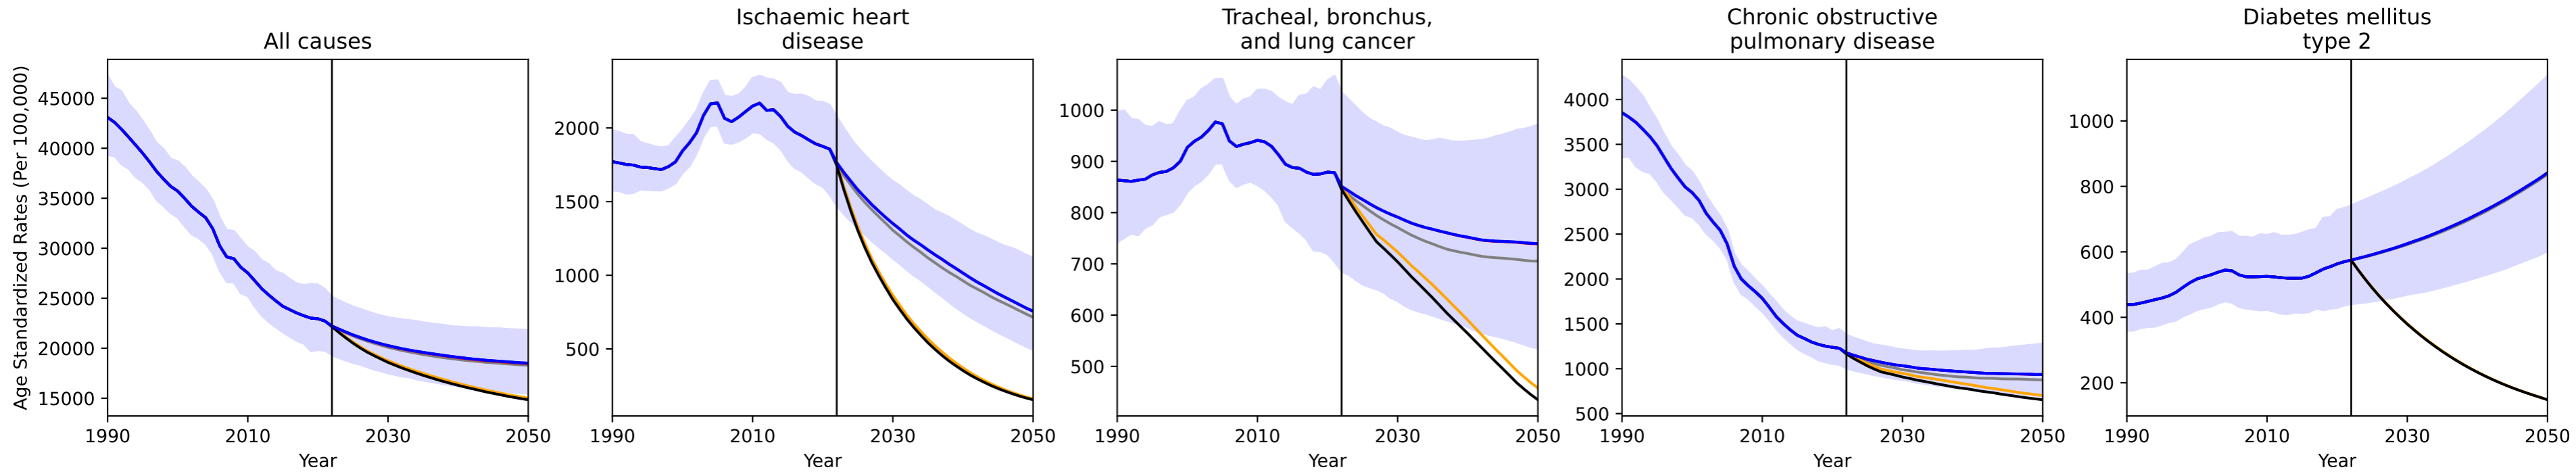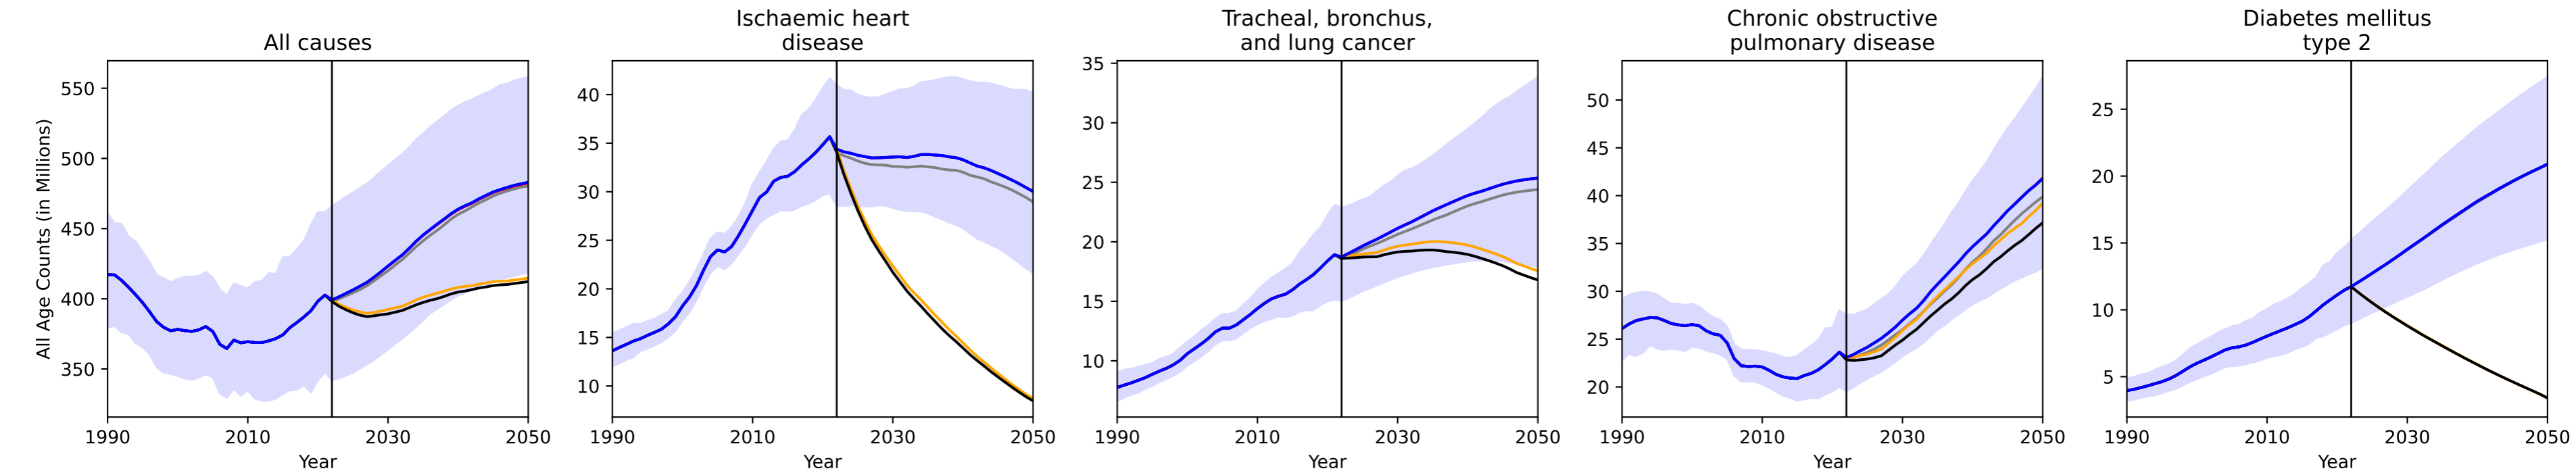

# North Korea

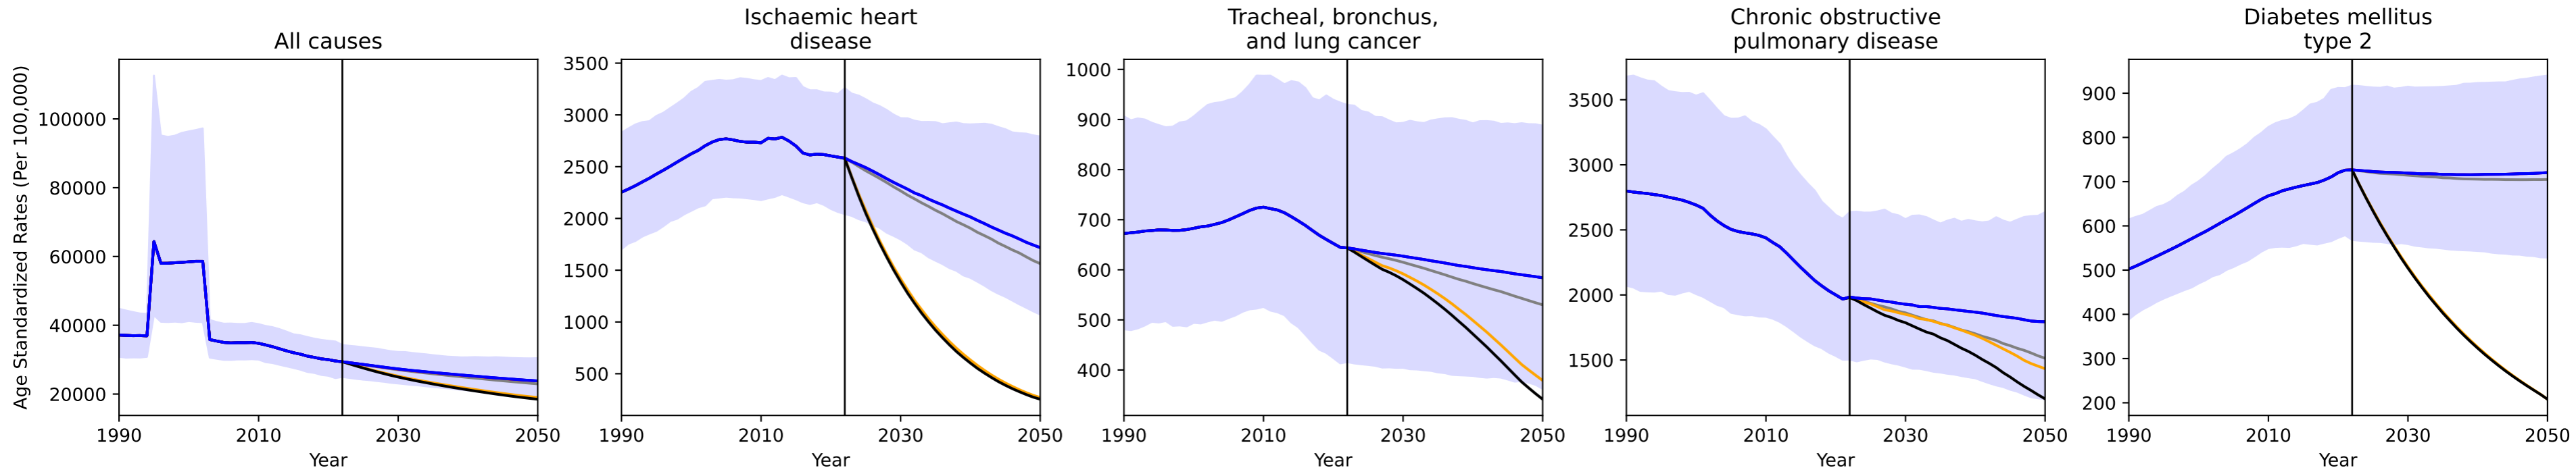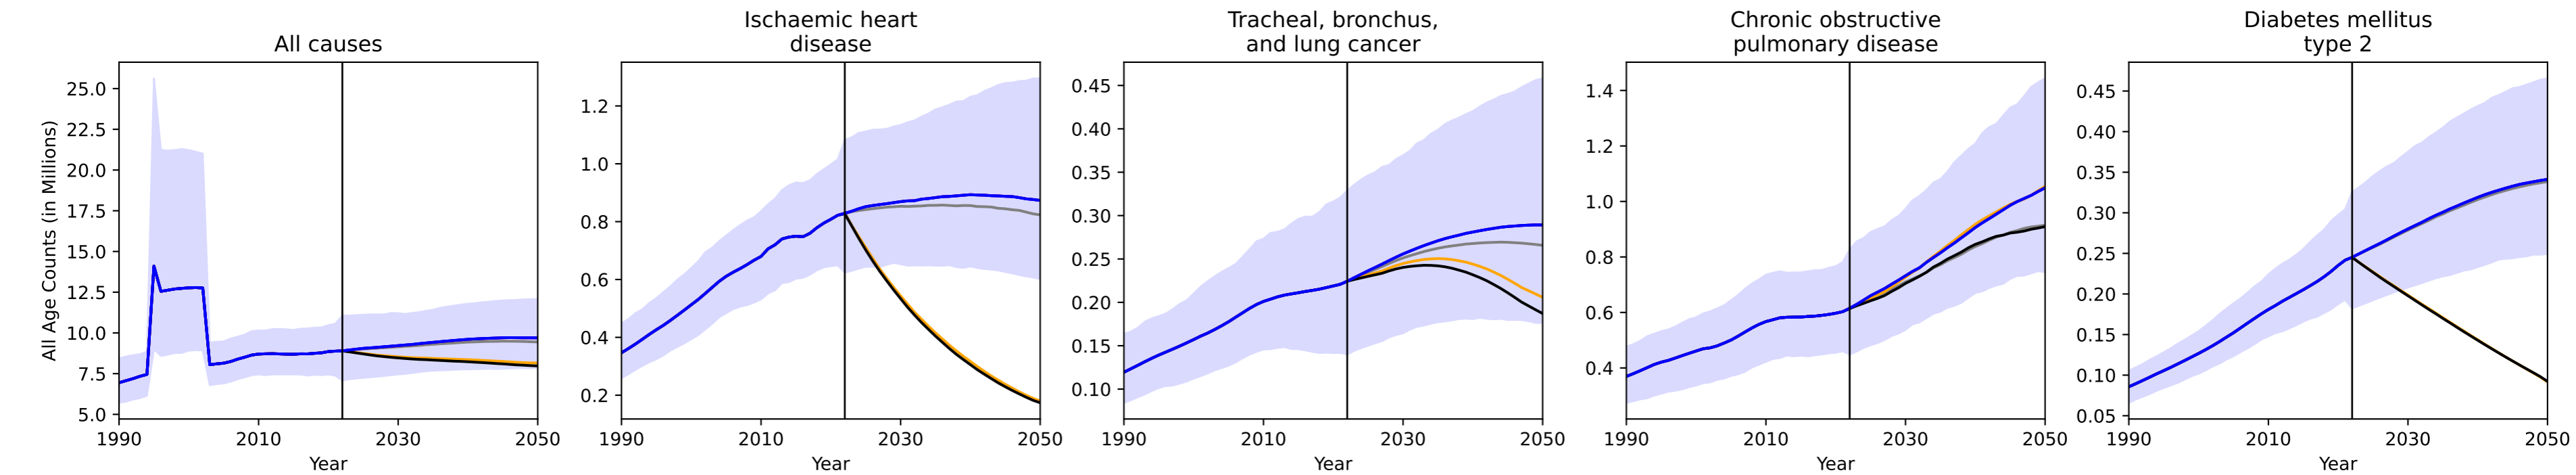

# Taiwan (Province Of China)

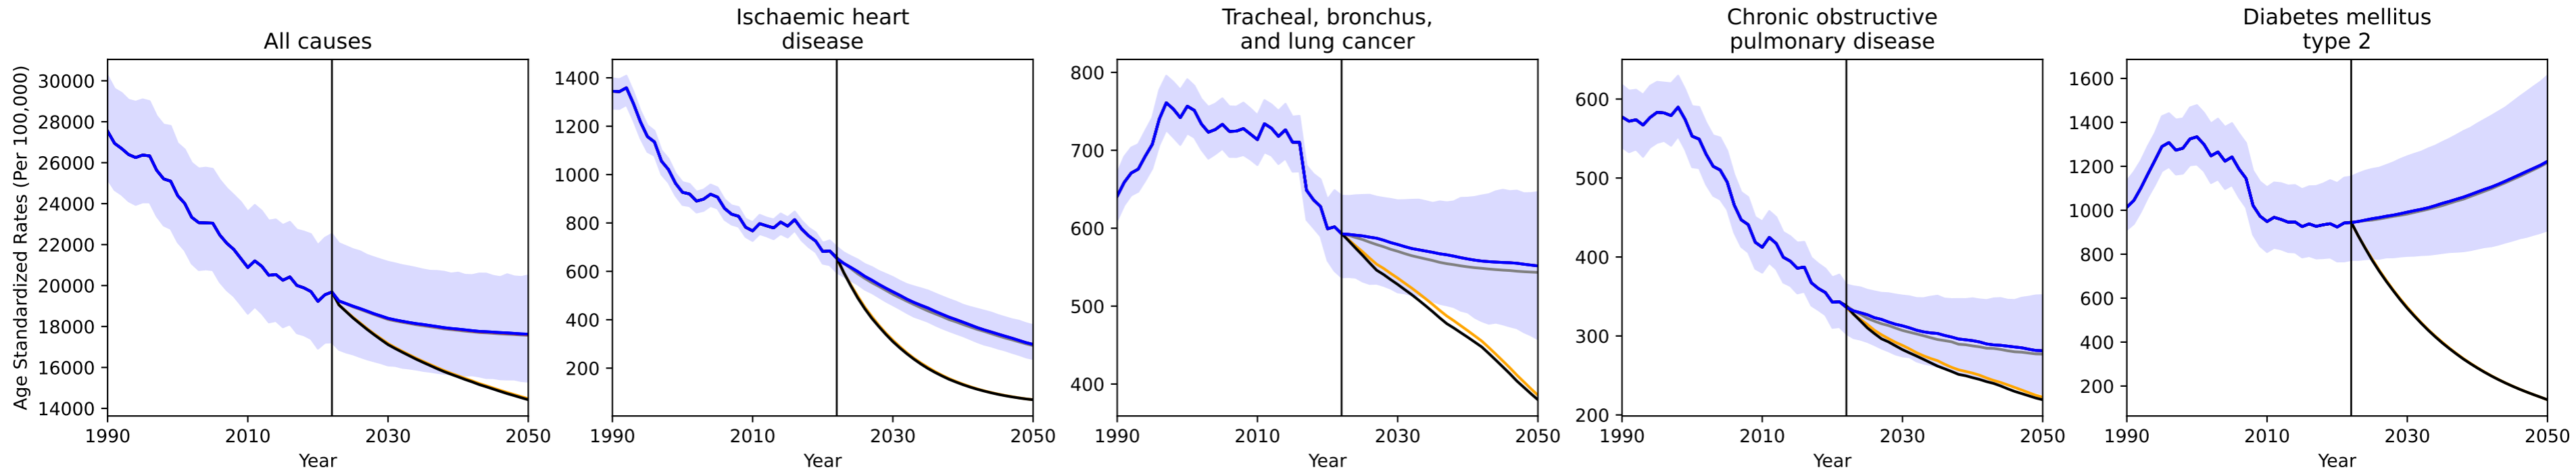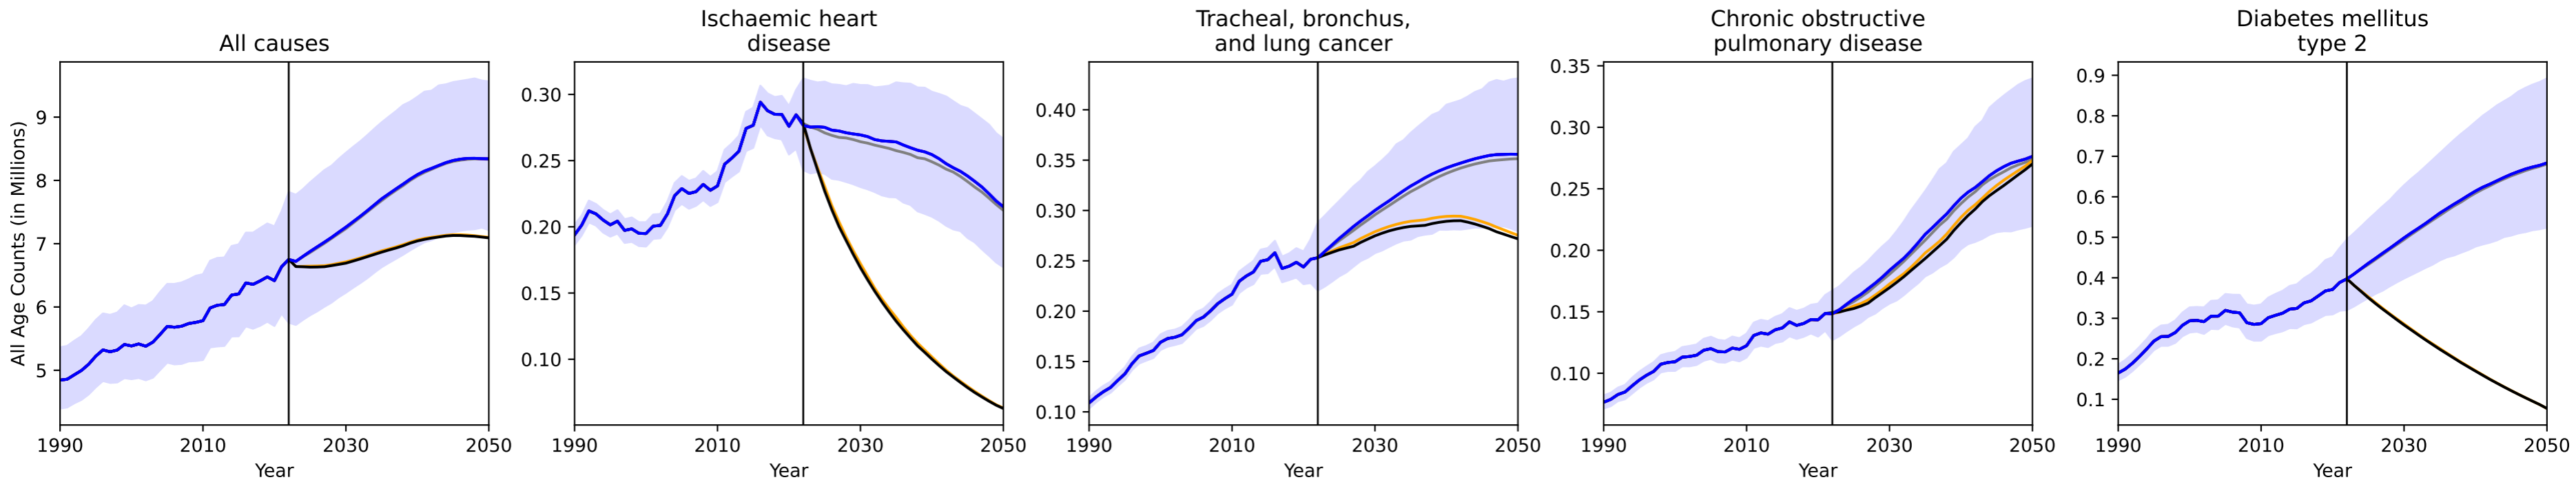

— Safer Environment    — Improved Behavioural and Metabolic Risks    — Improved Childhood Nutrition and Vaccination    — Combined    — Reference

# American Samoa

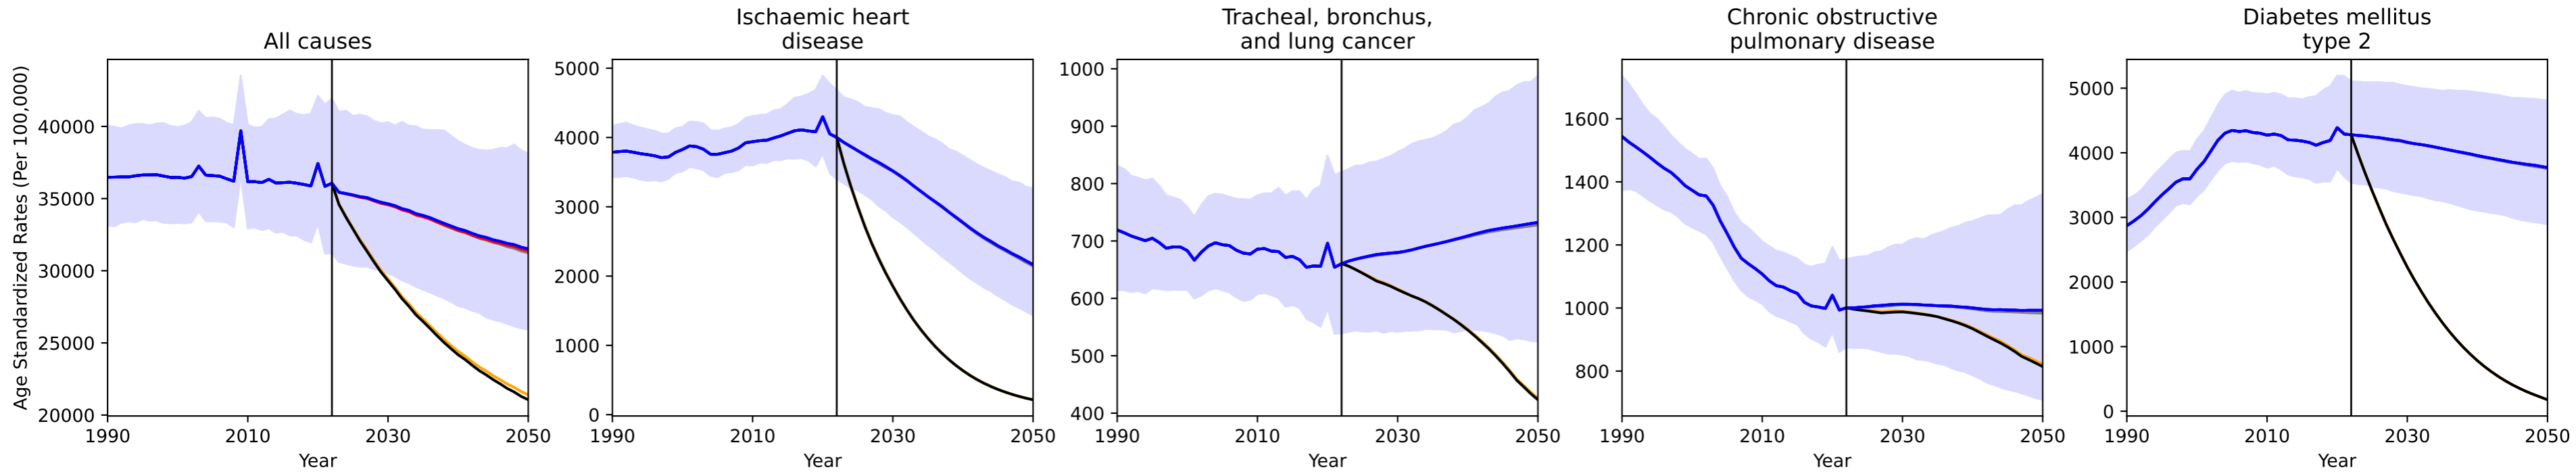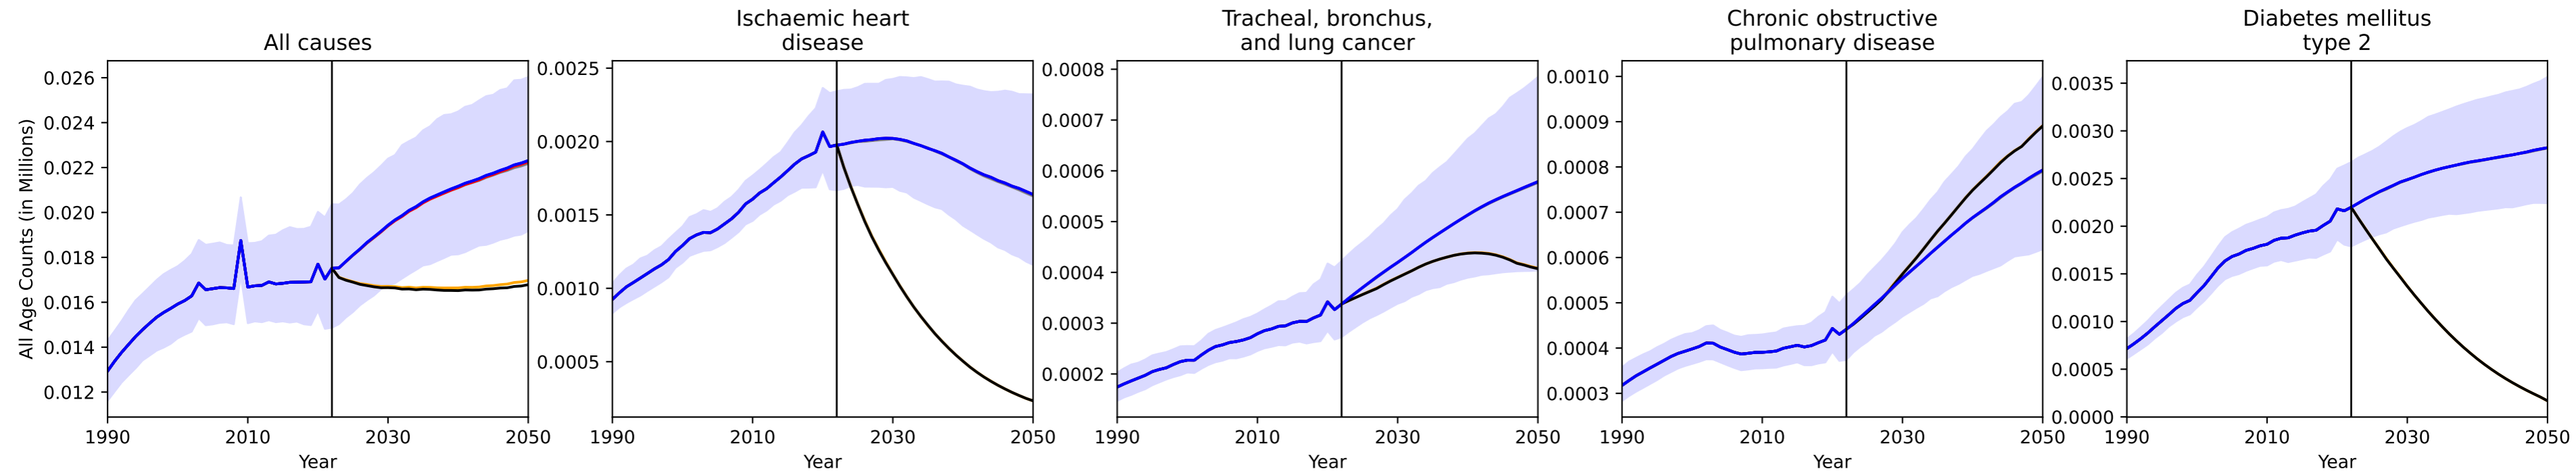

# Cook Islands

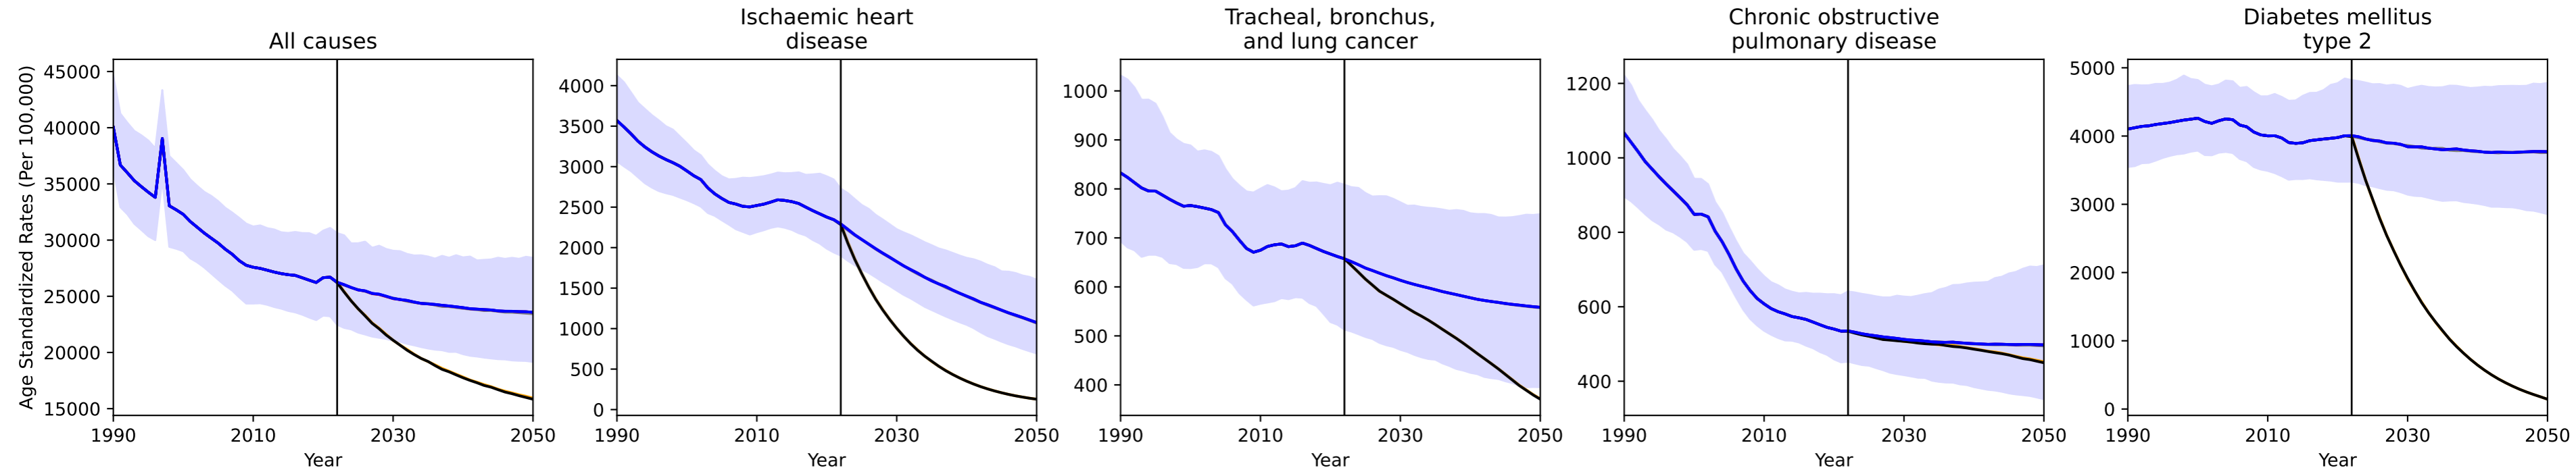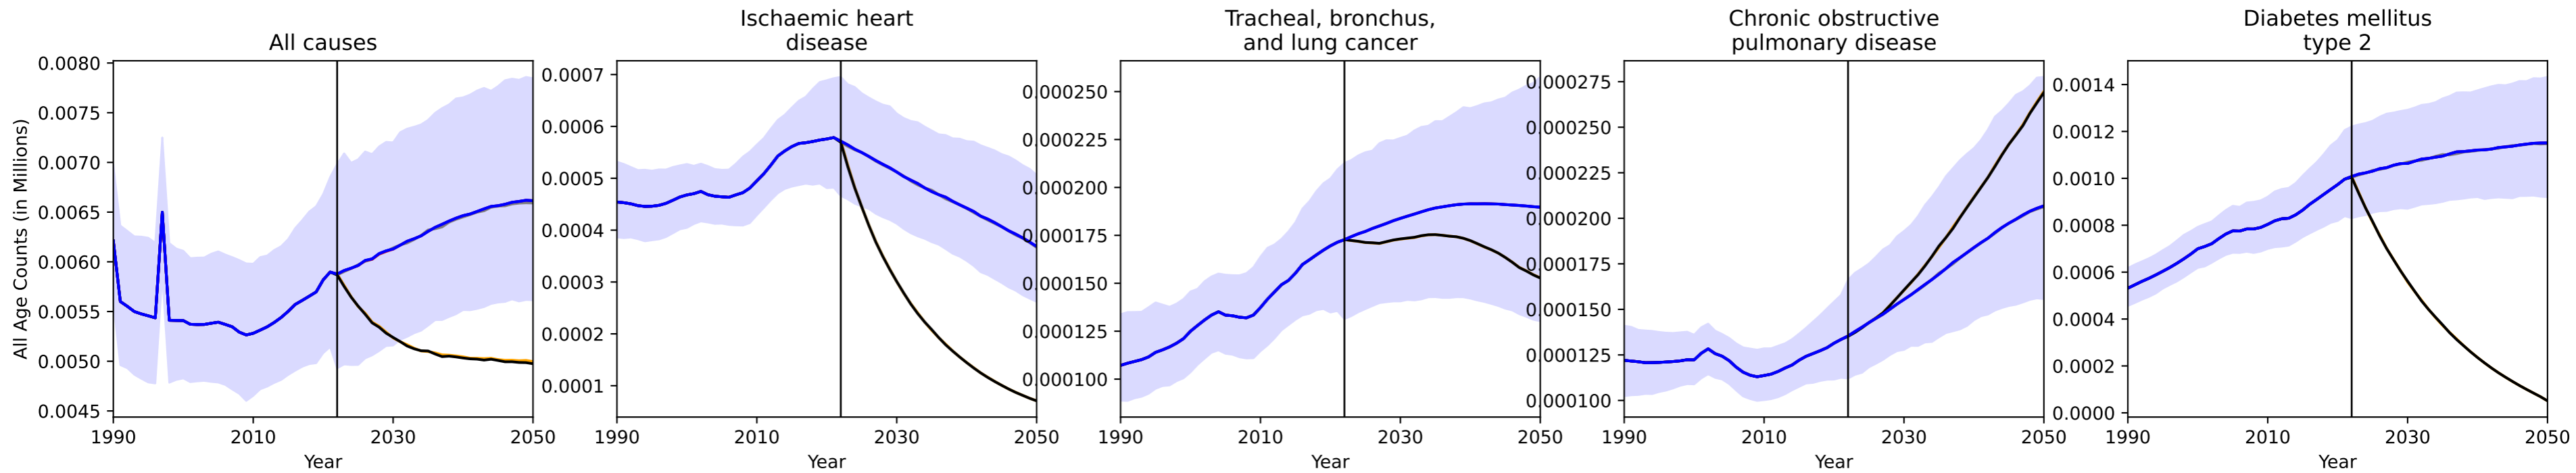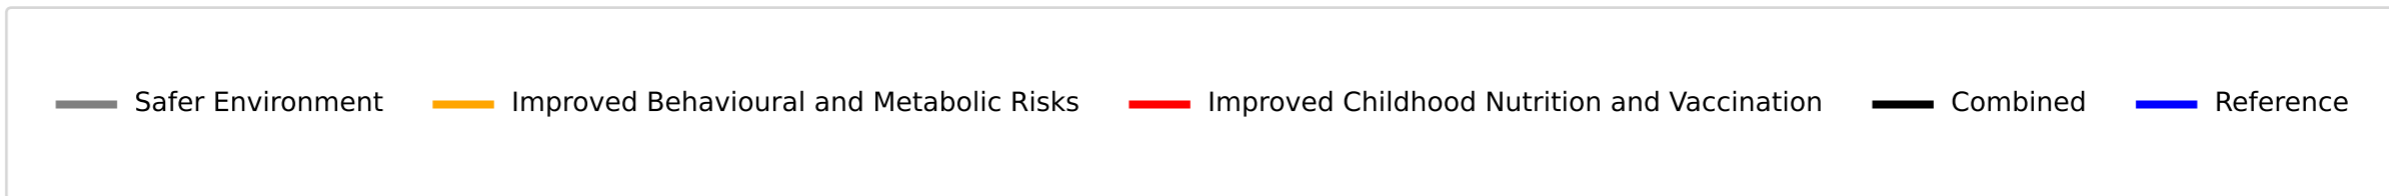

# Fiji

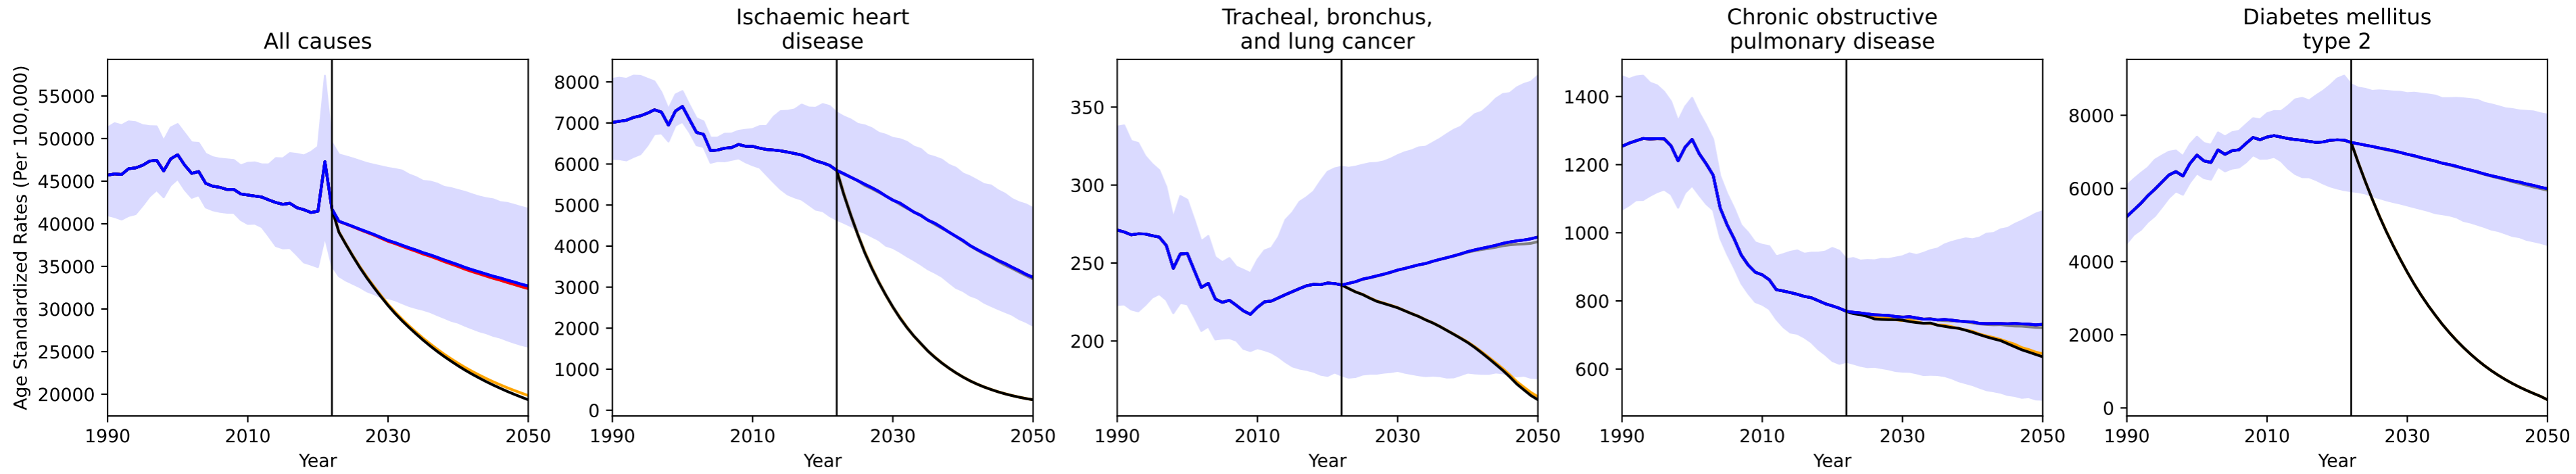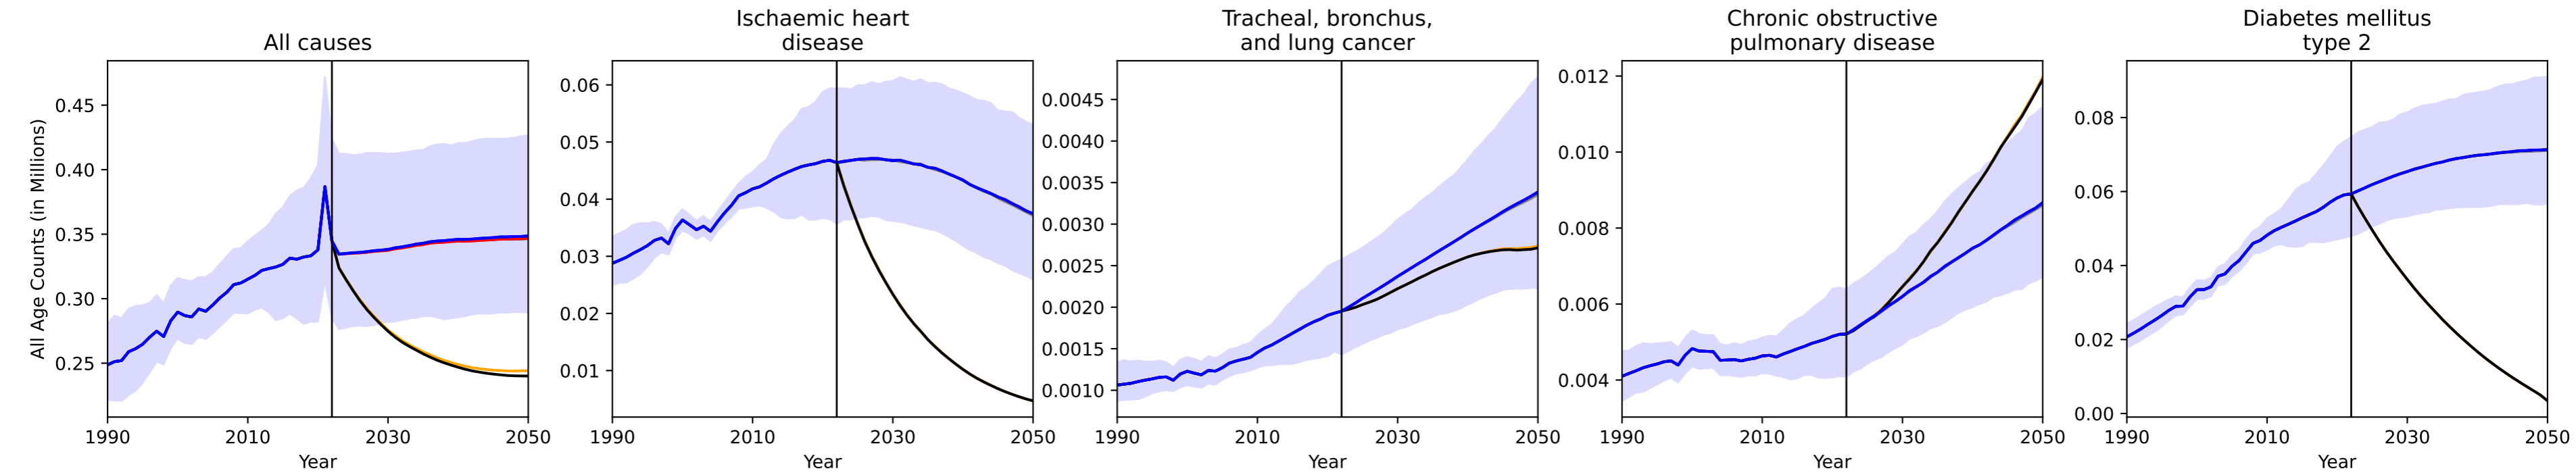

# Guam

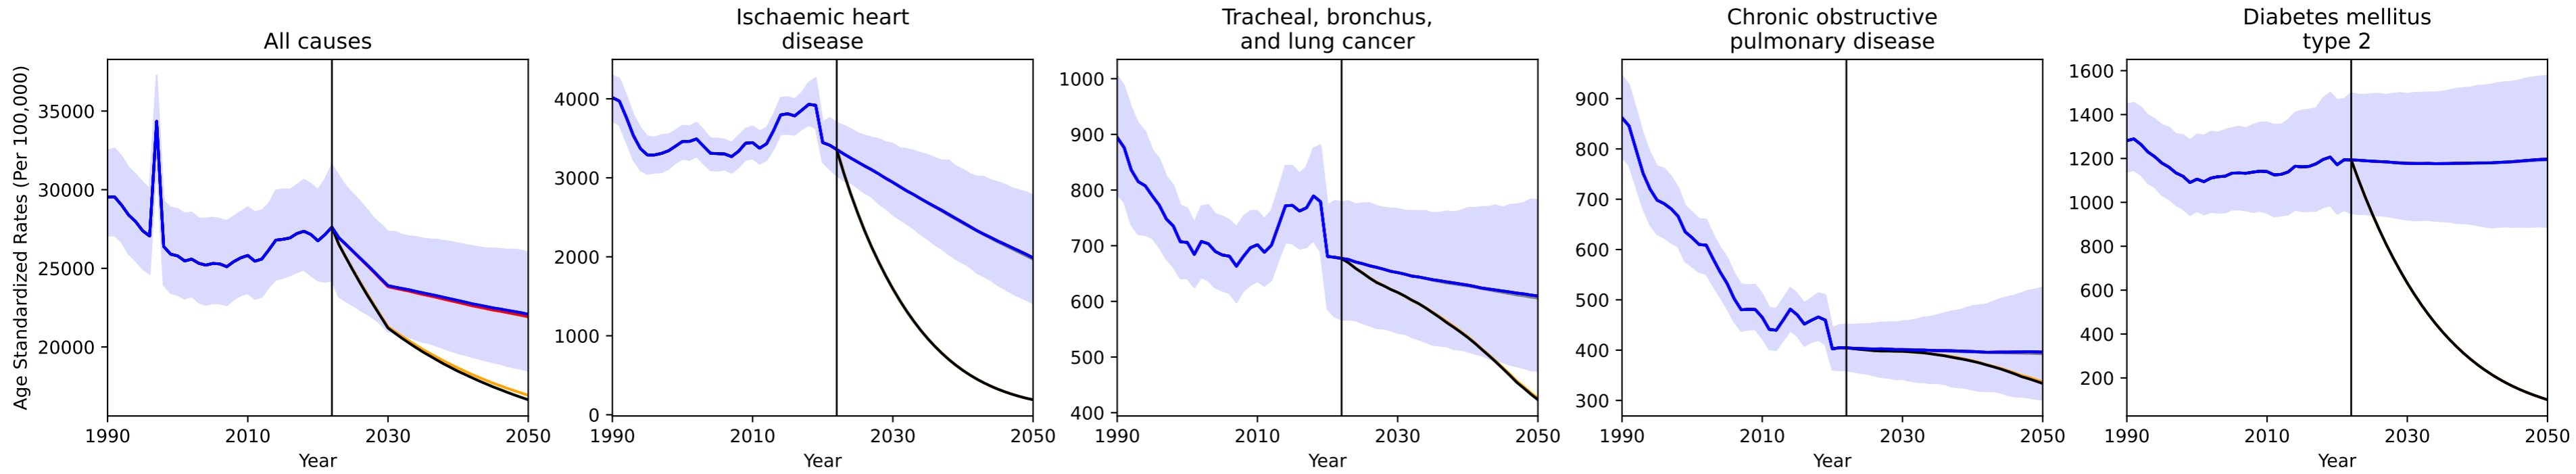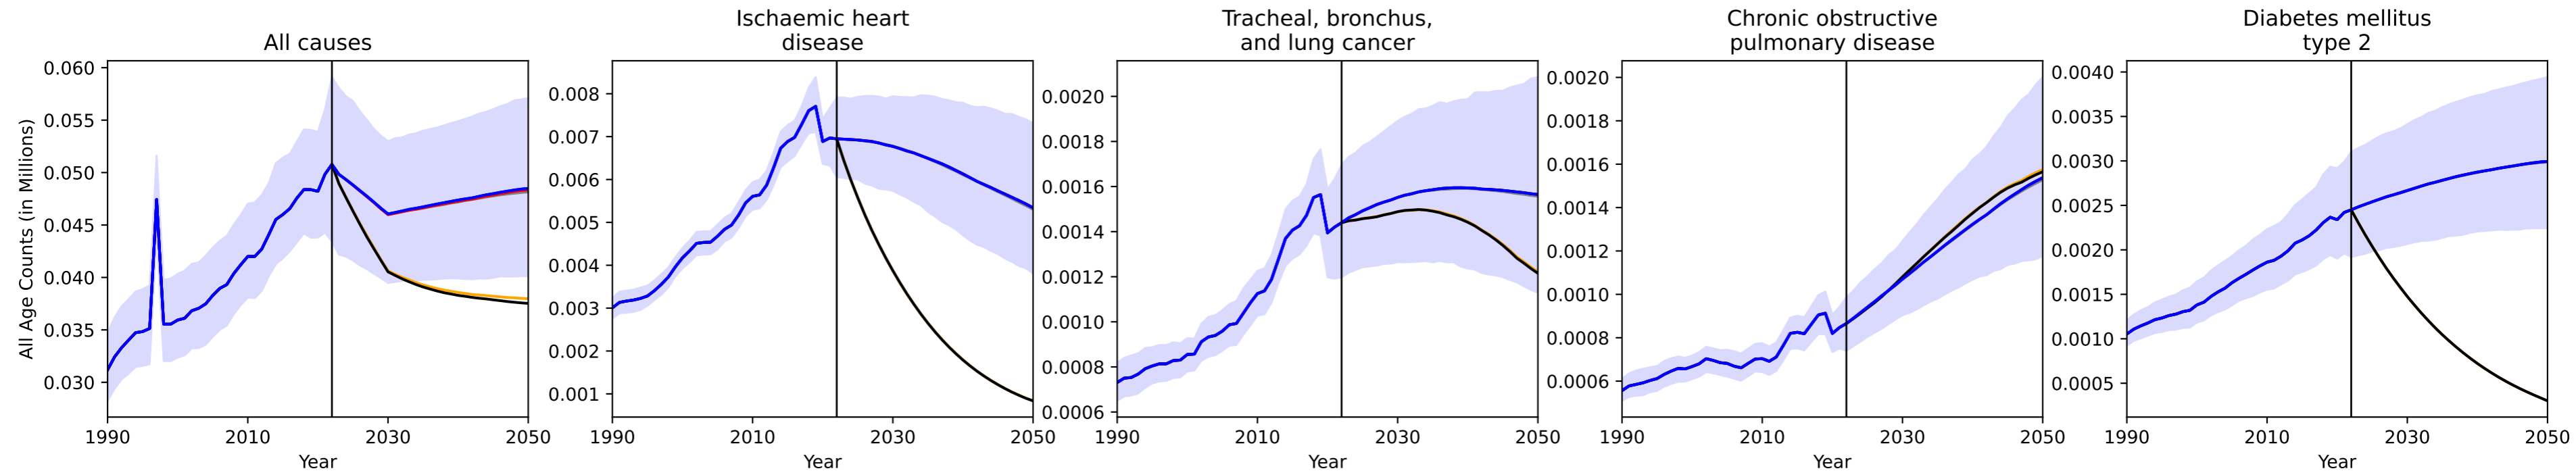



# Kiribati

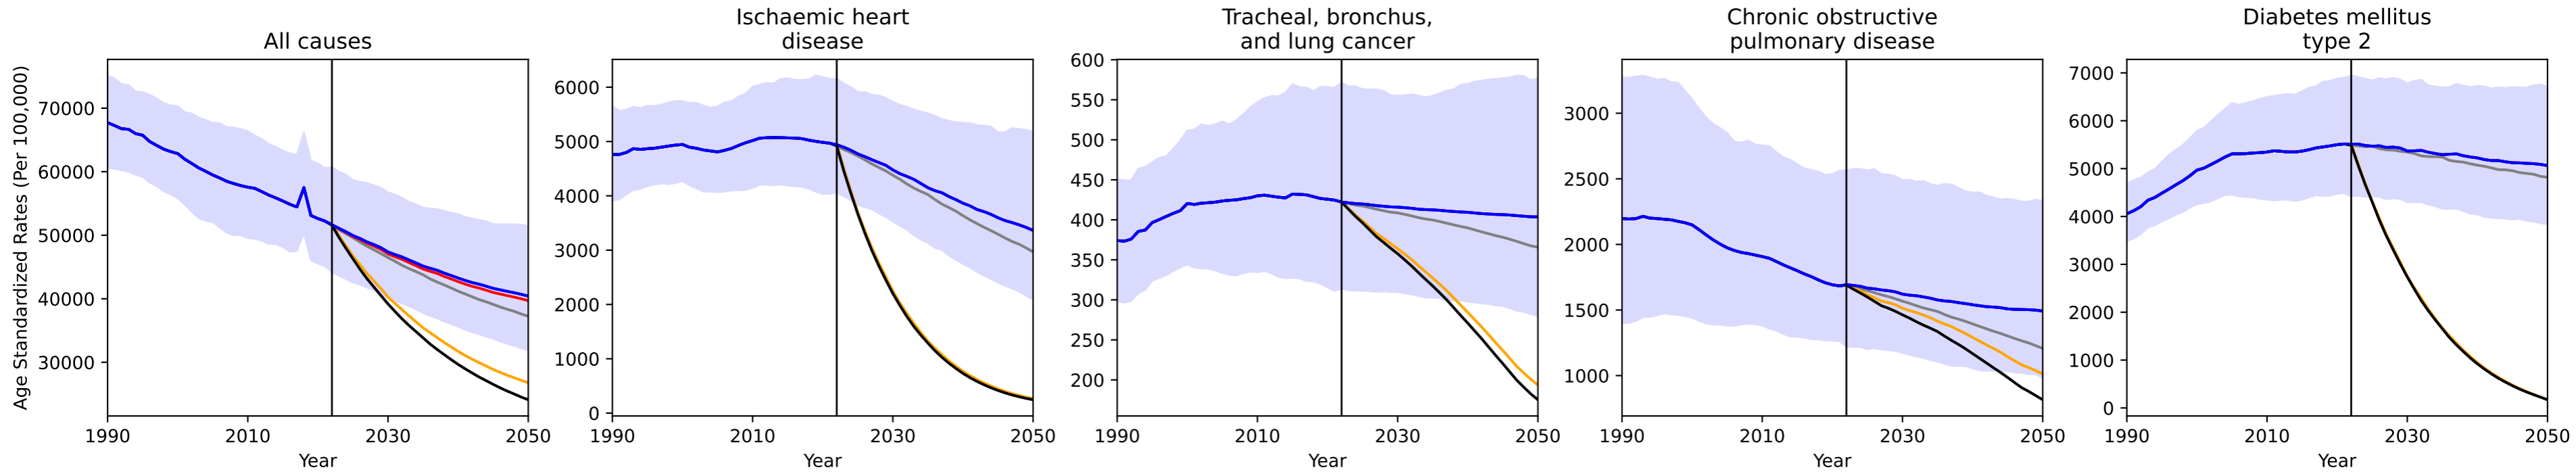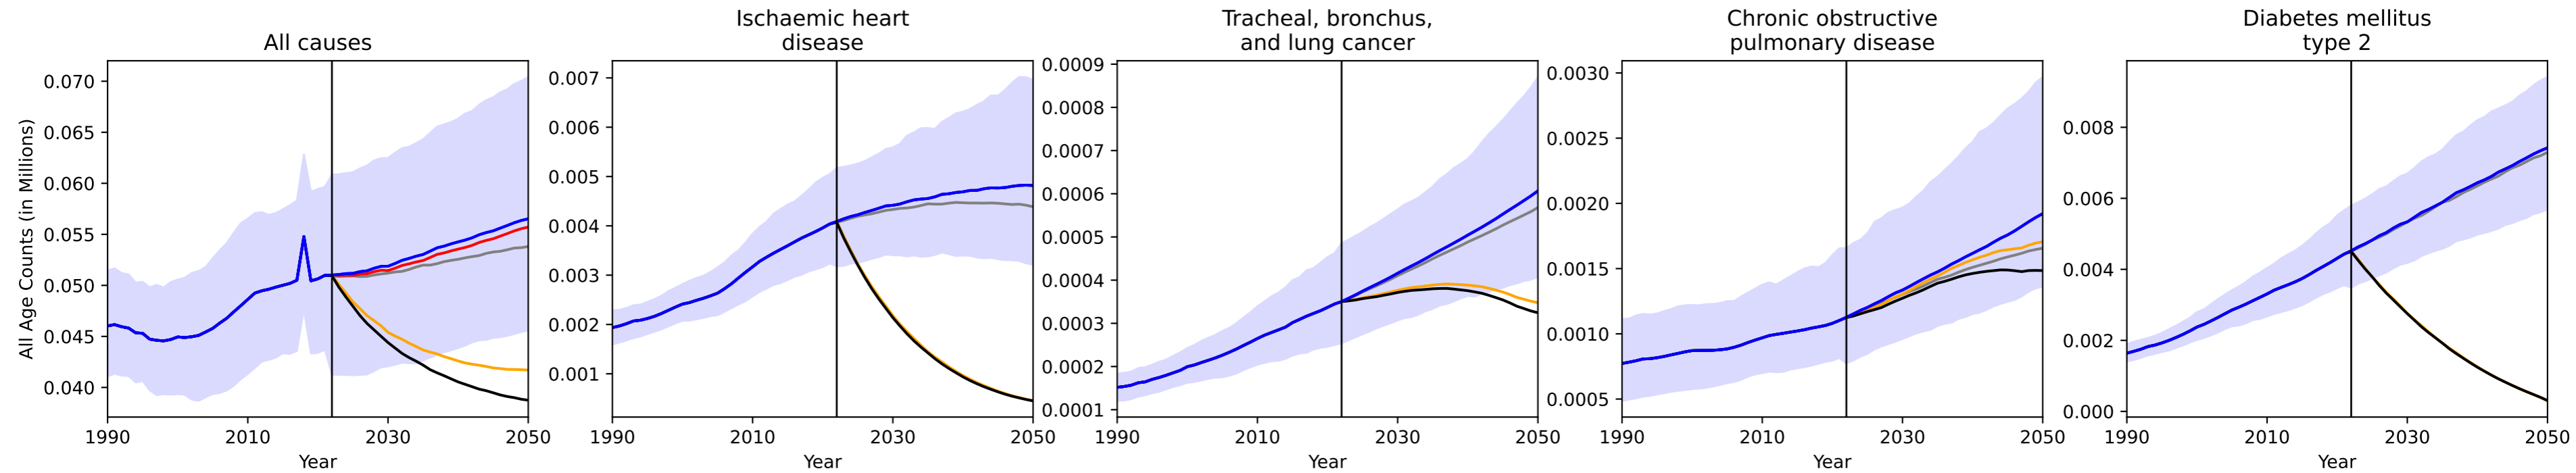

# Marshall Islands

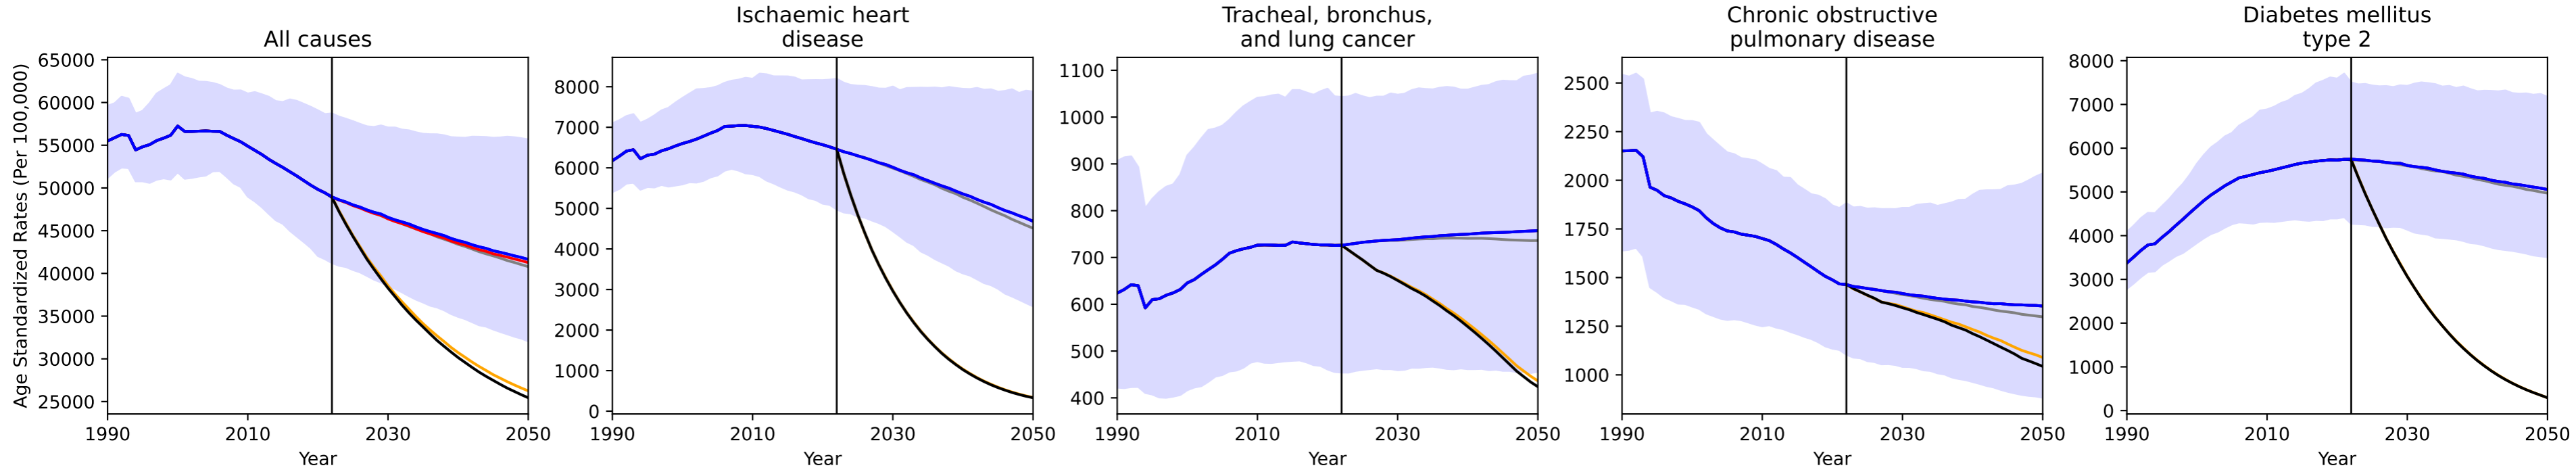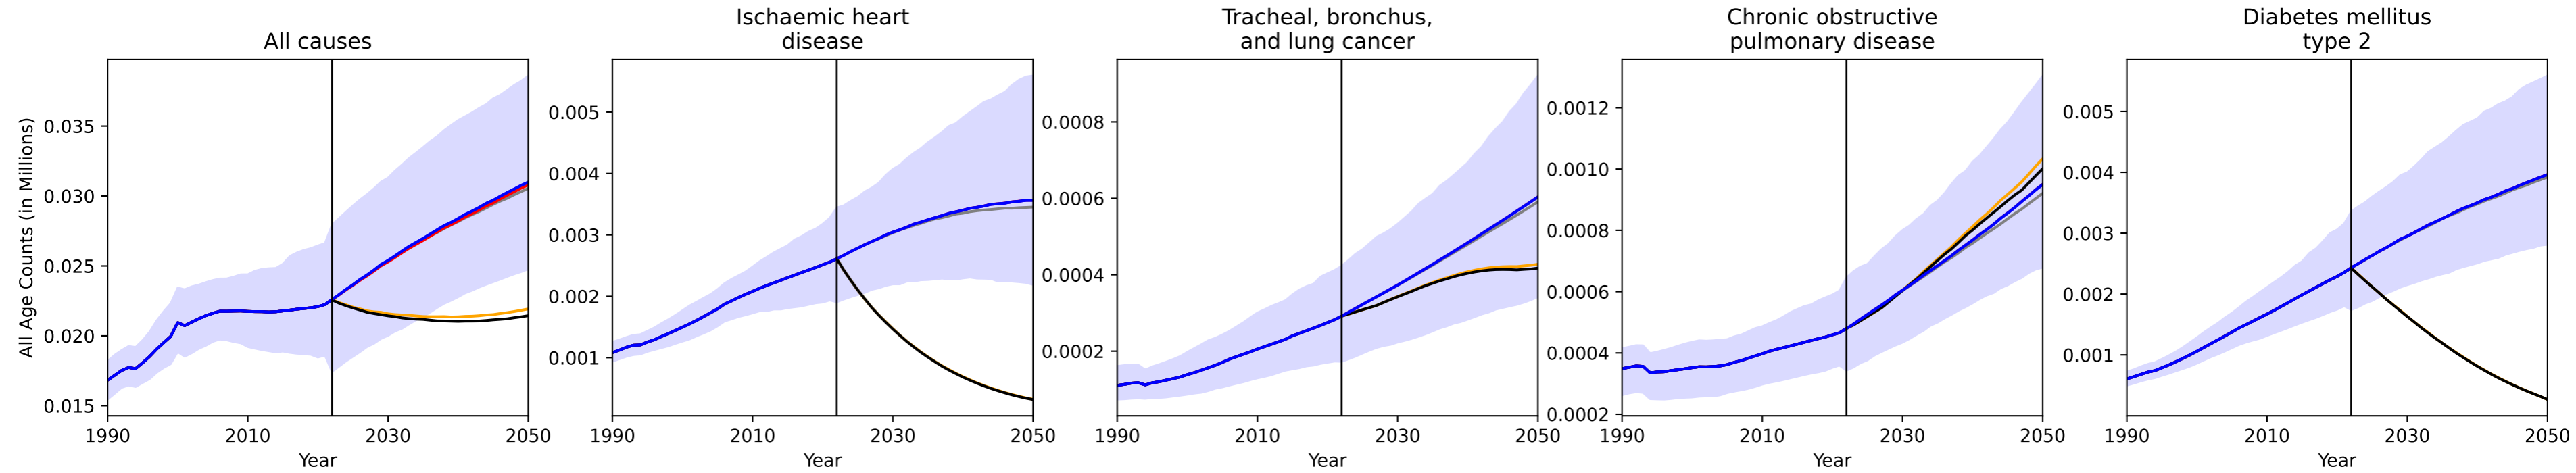

# Federated States Of Micronesia

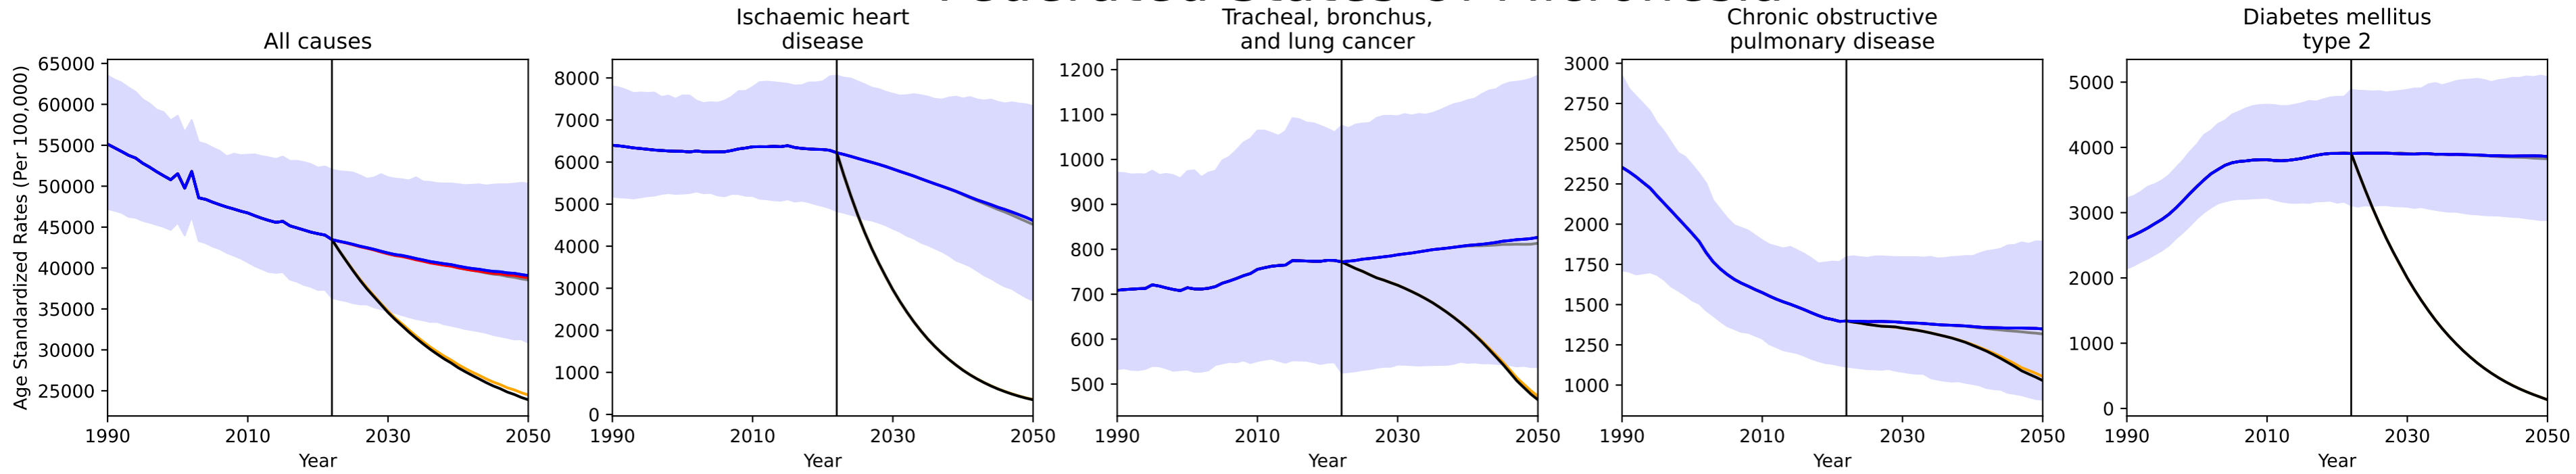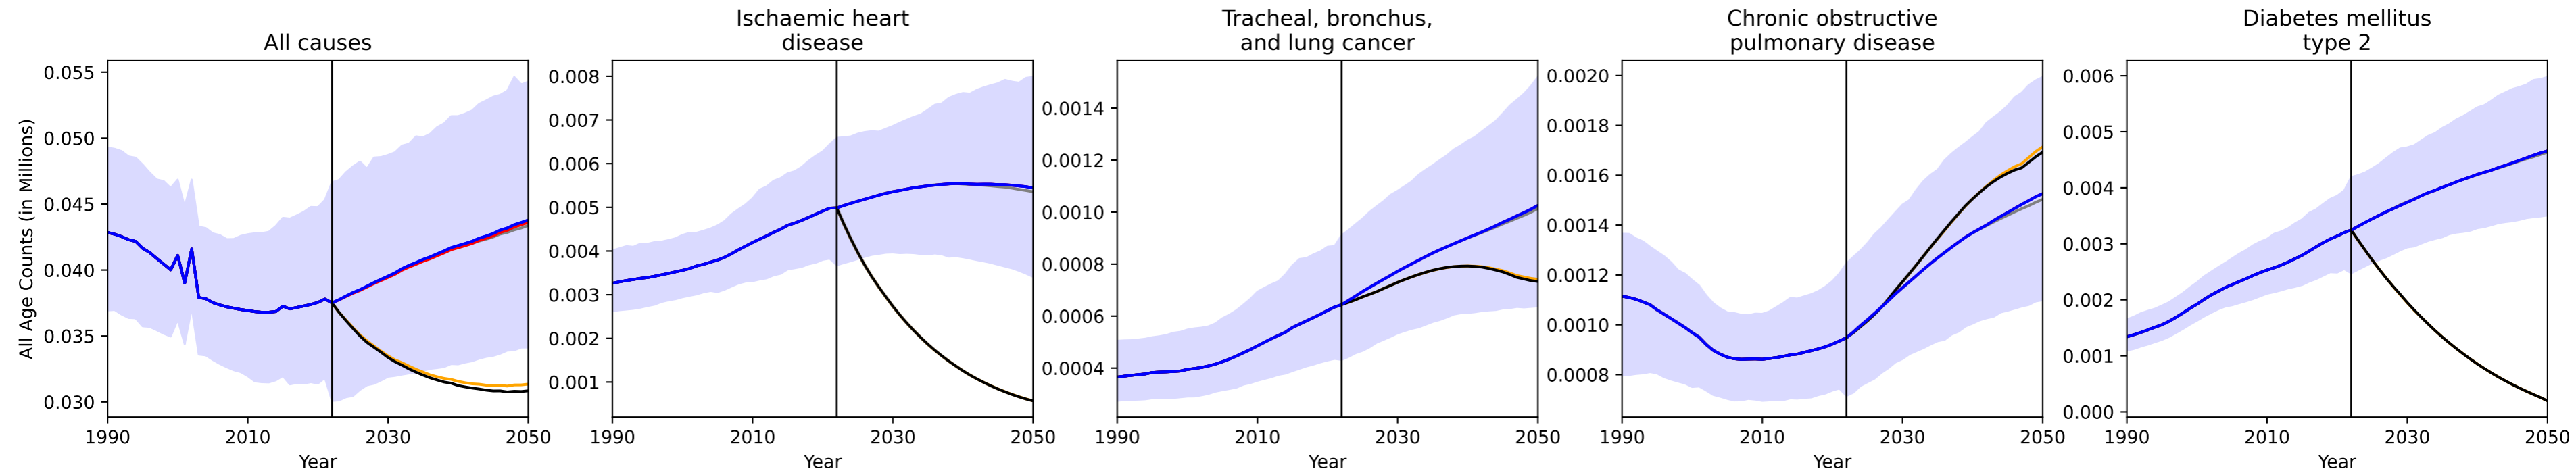

# Nauru

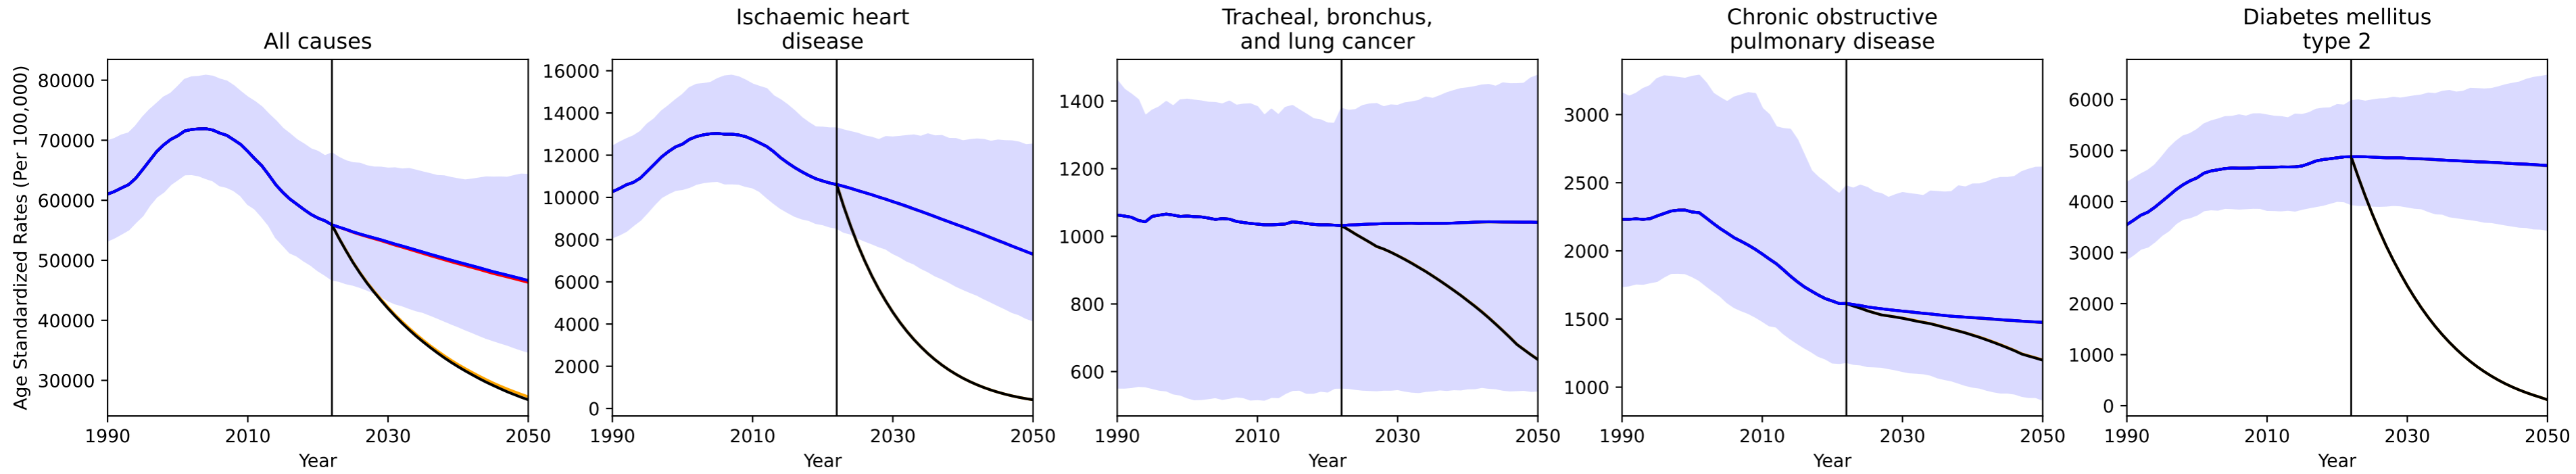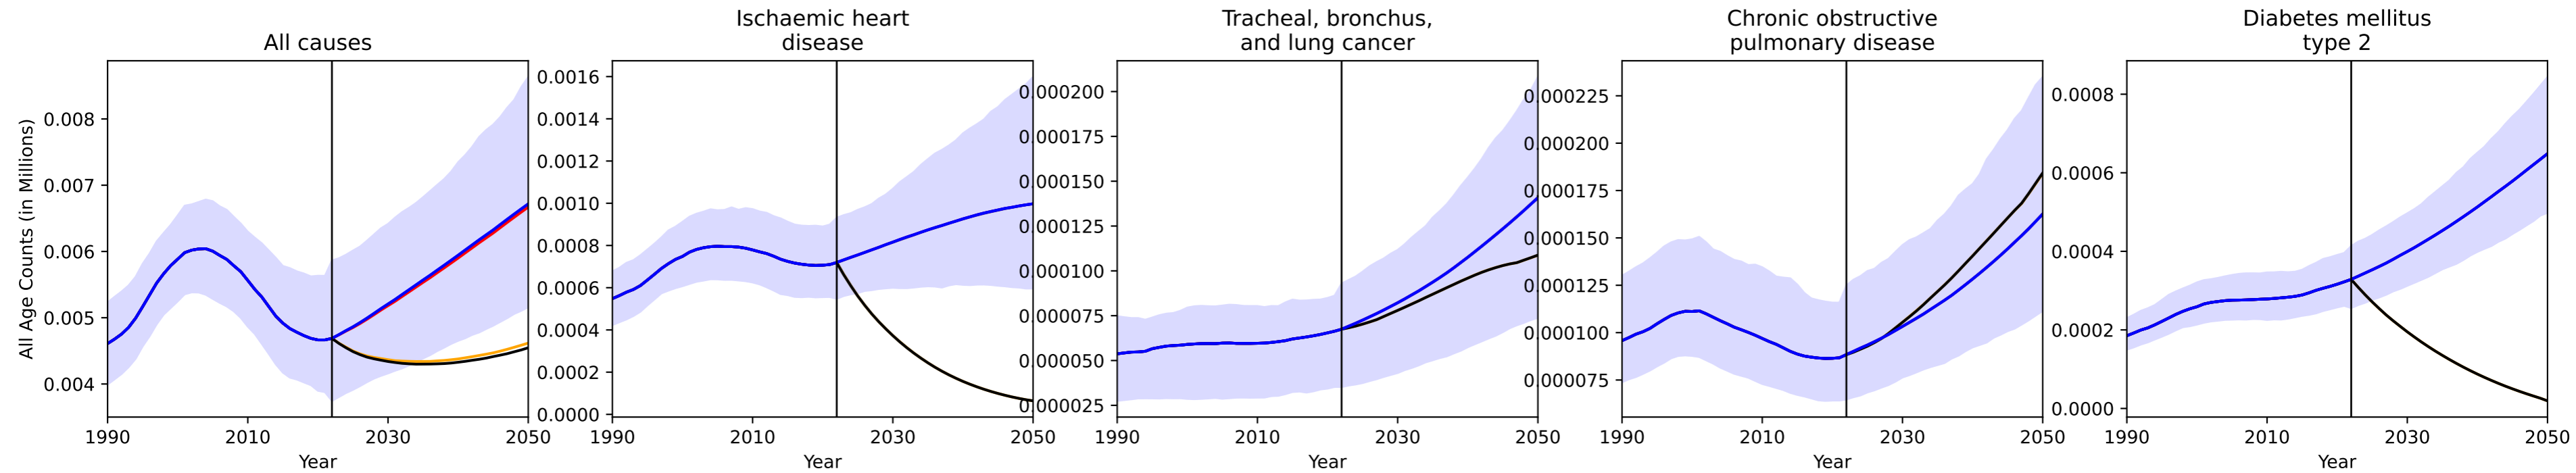

# Niue

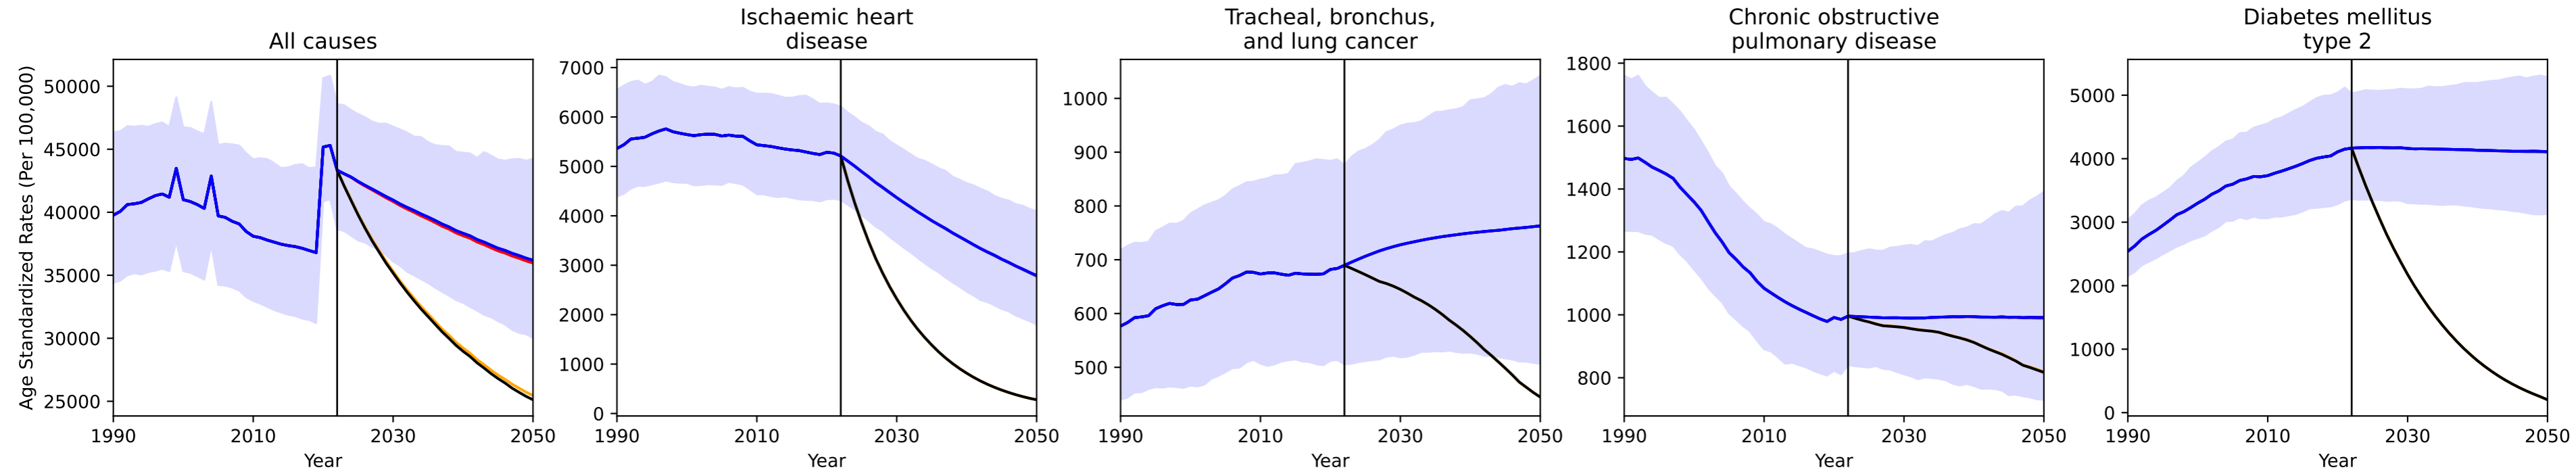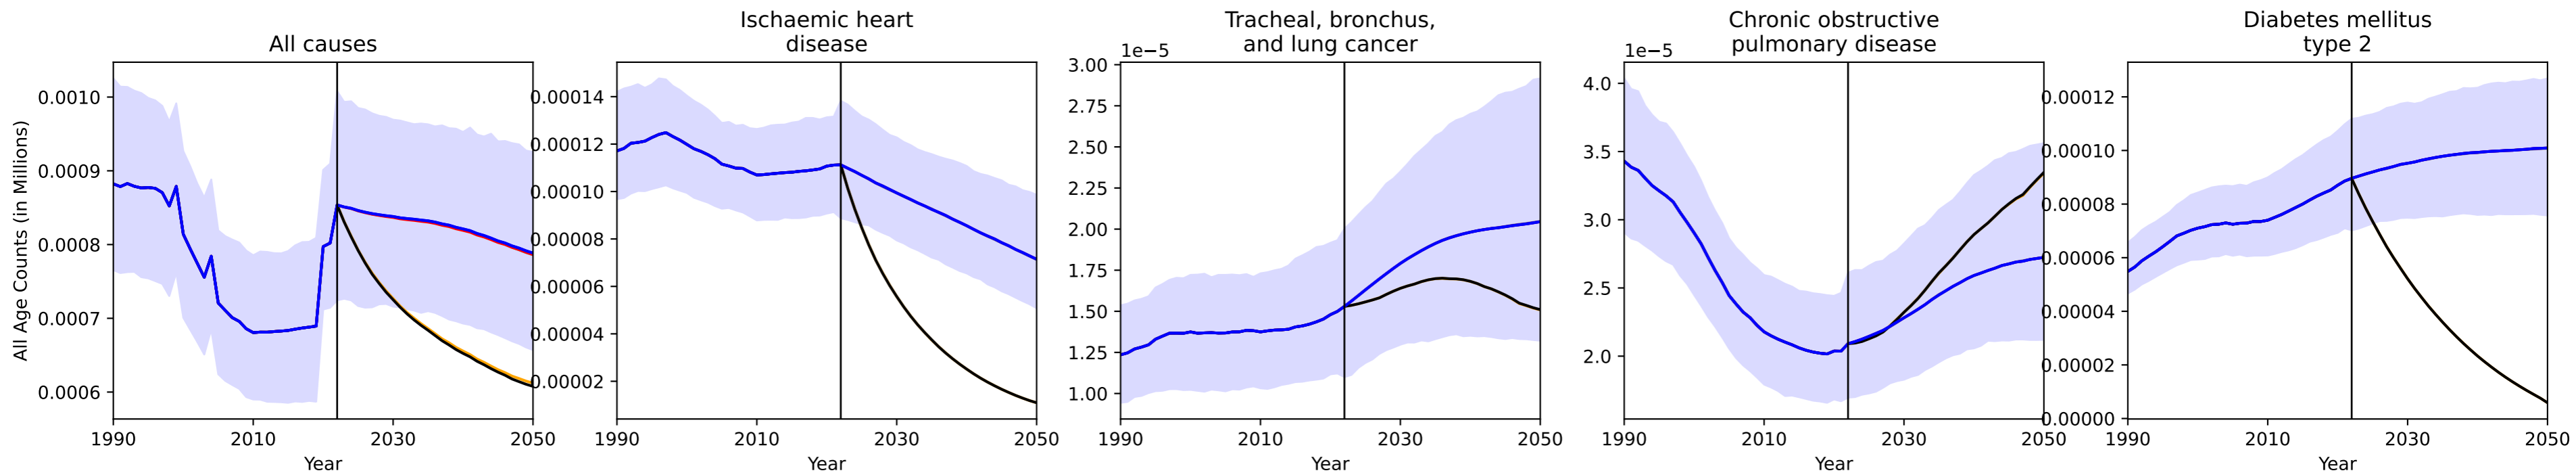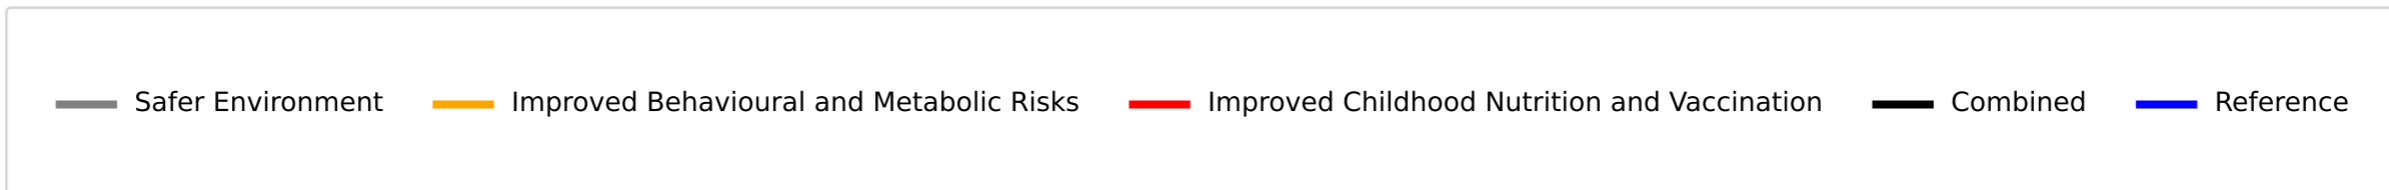

# Northern Mariana Islands

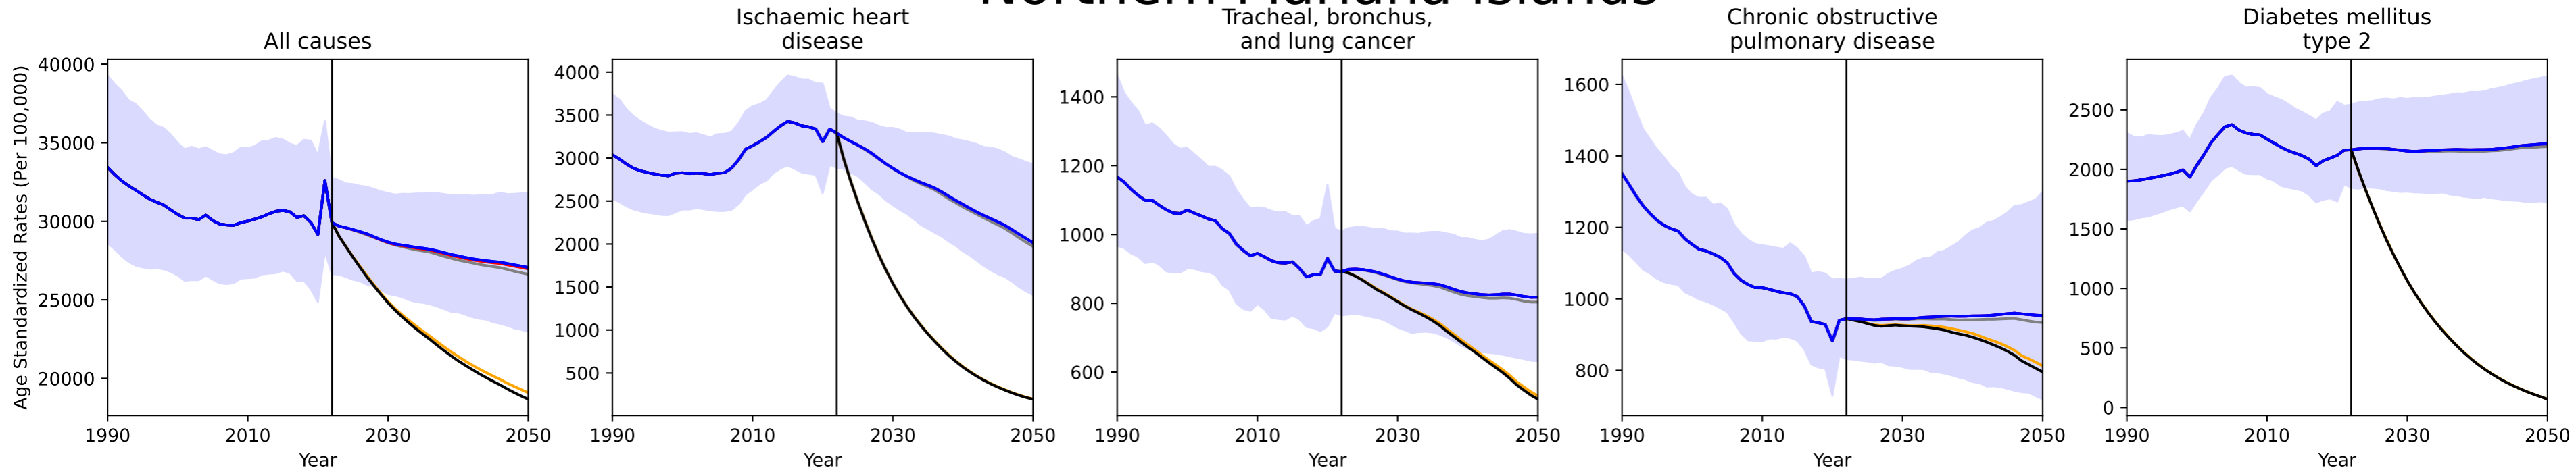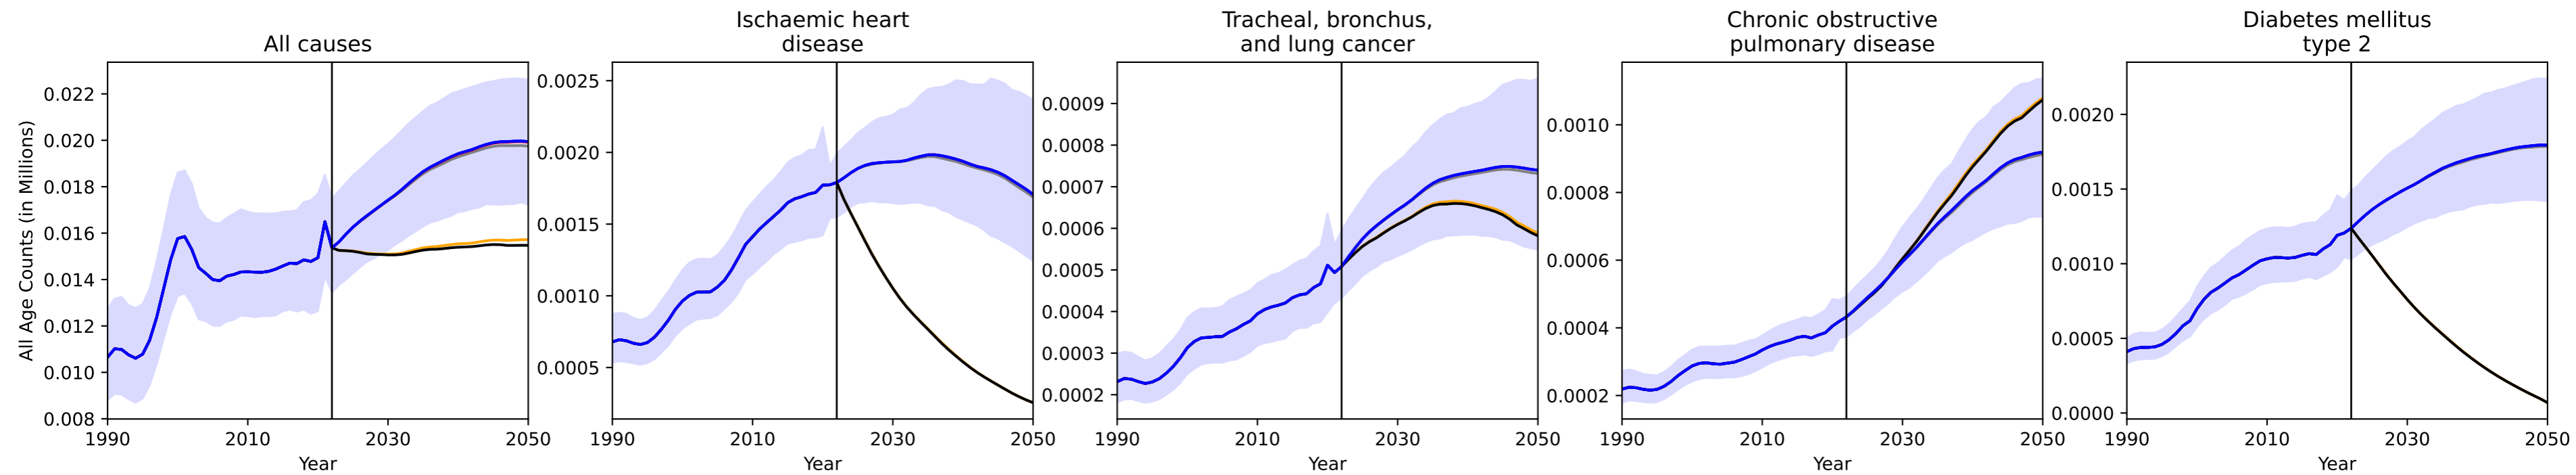

# Palau

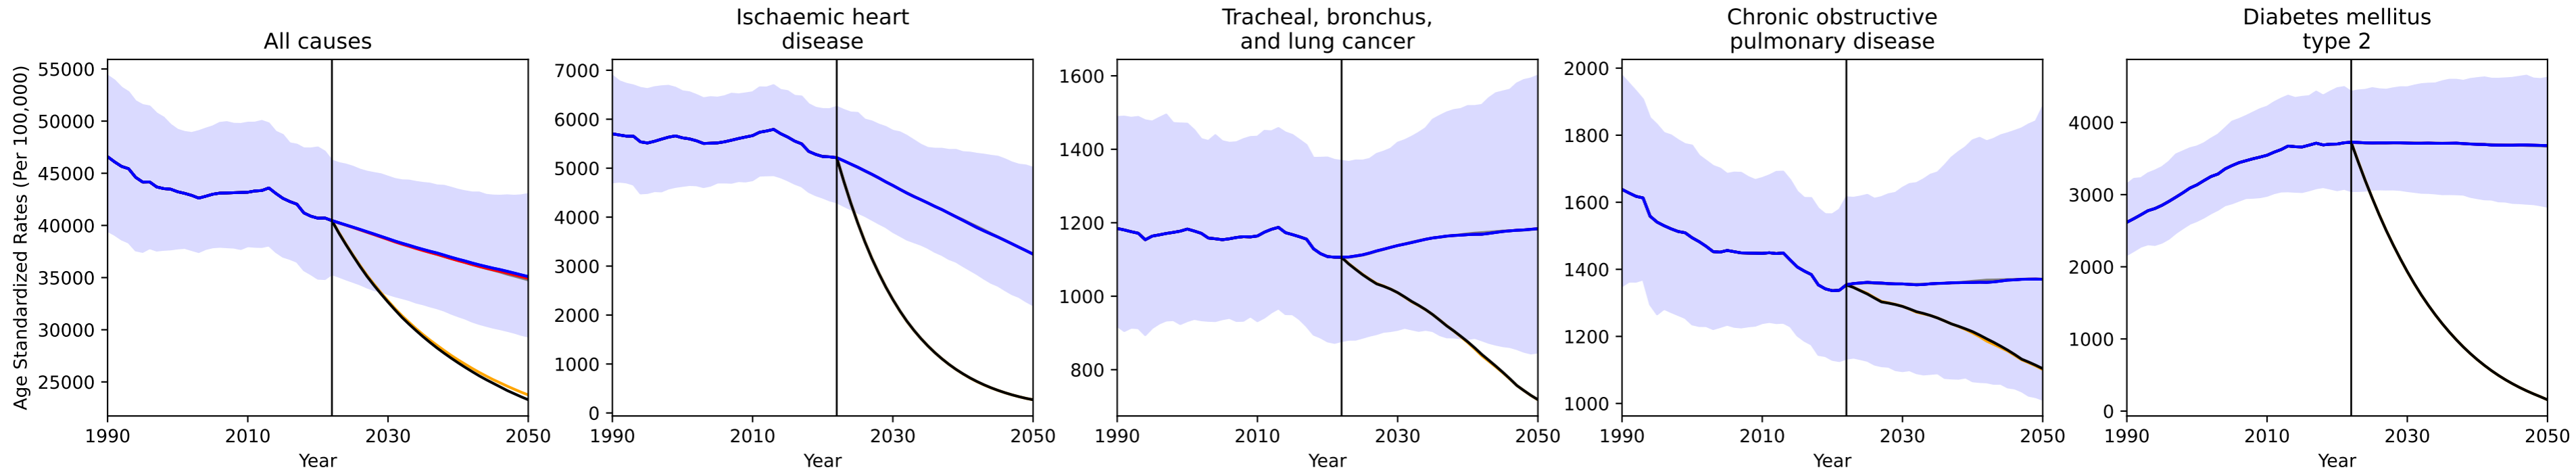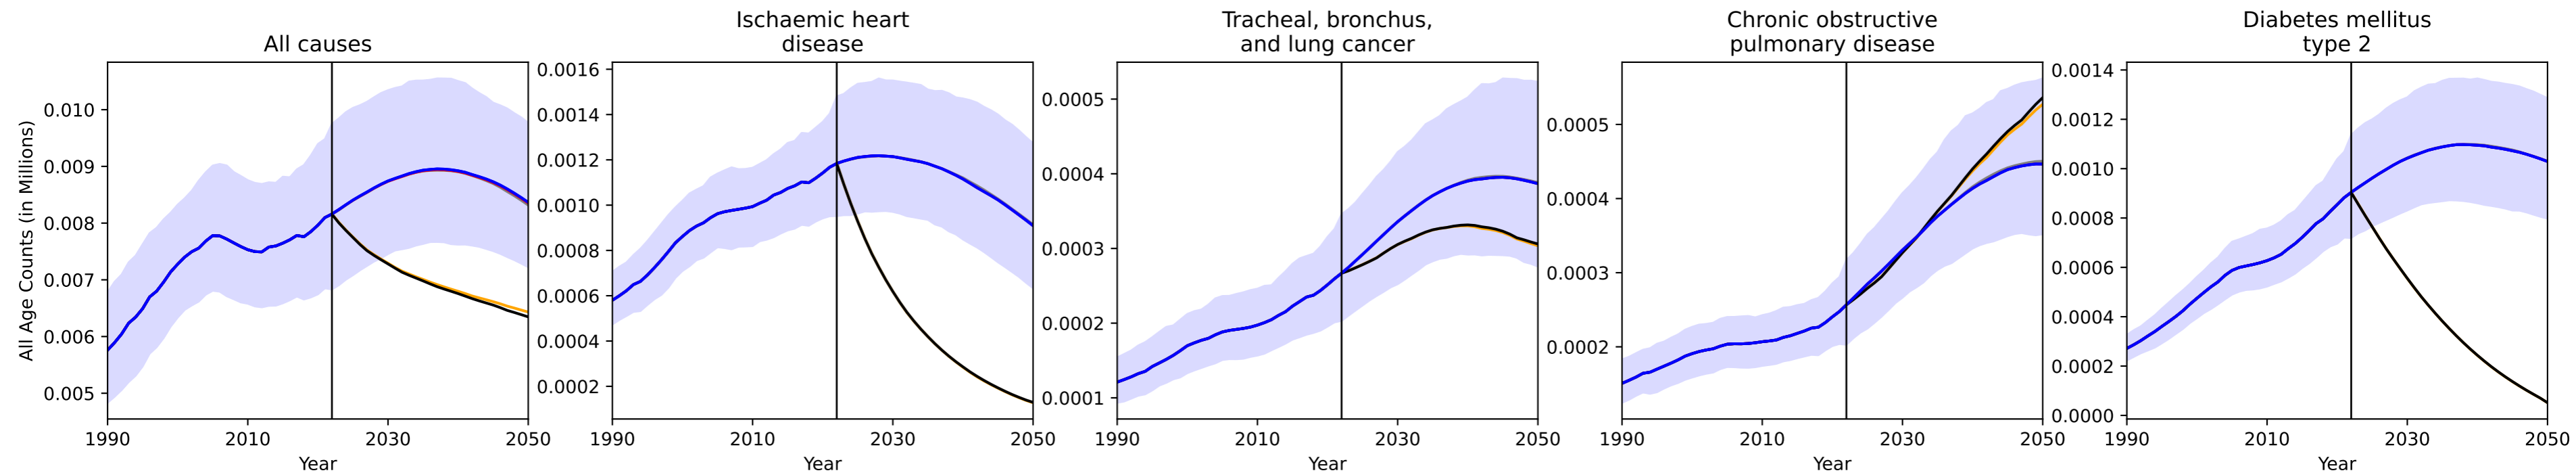

# Papua New Guinea

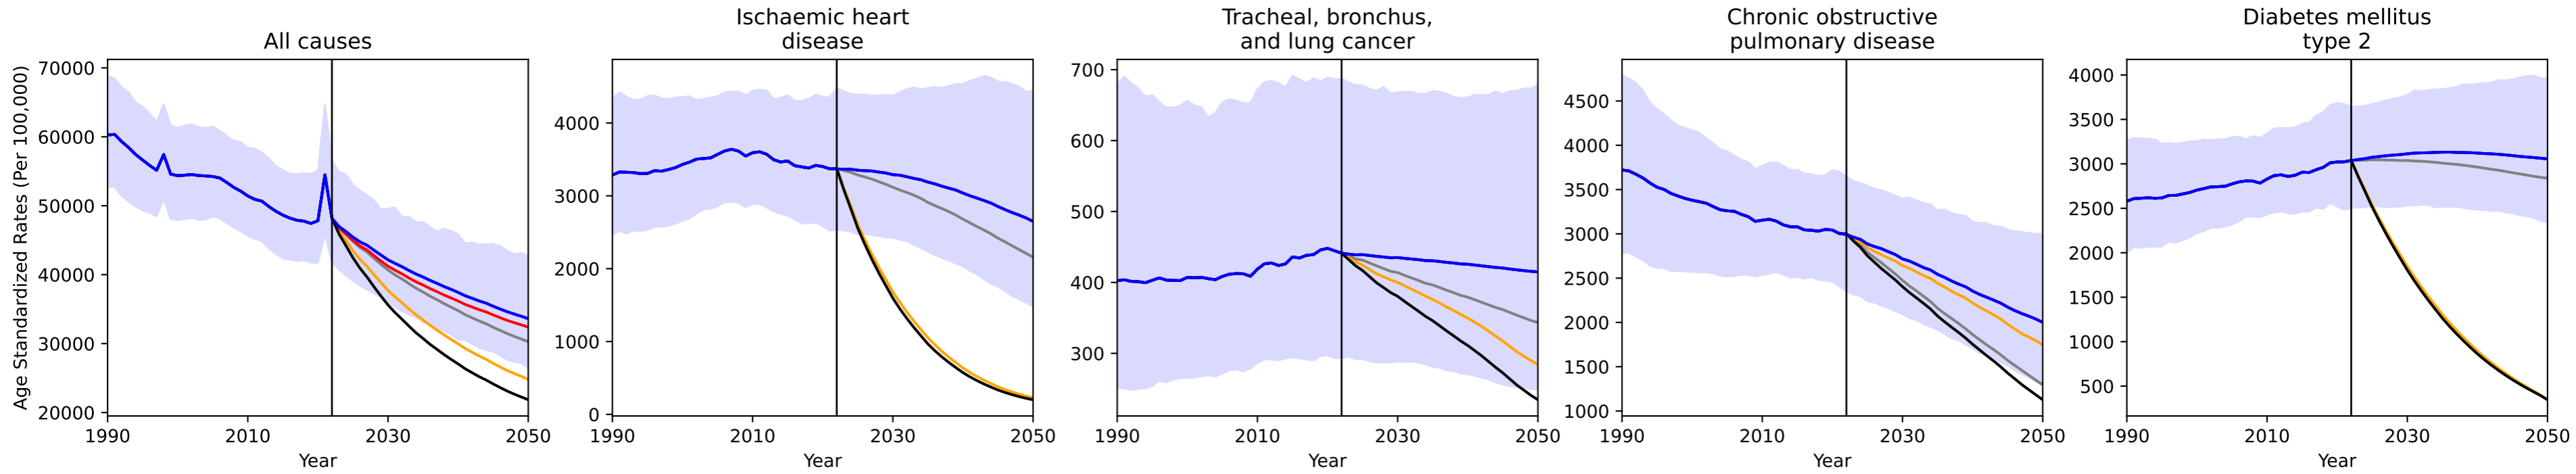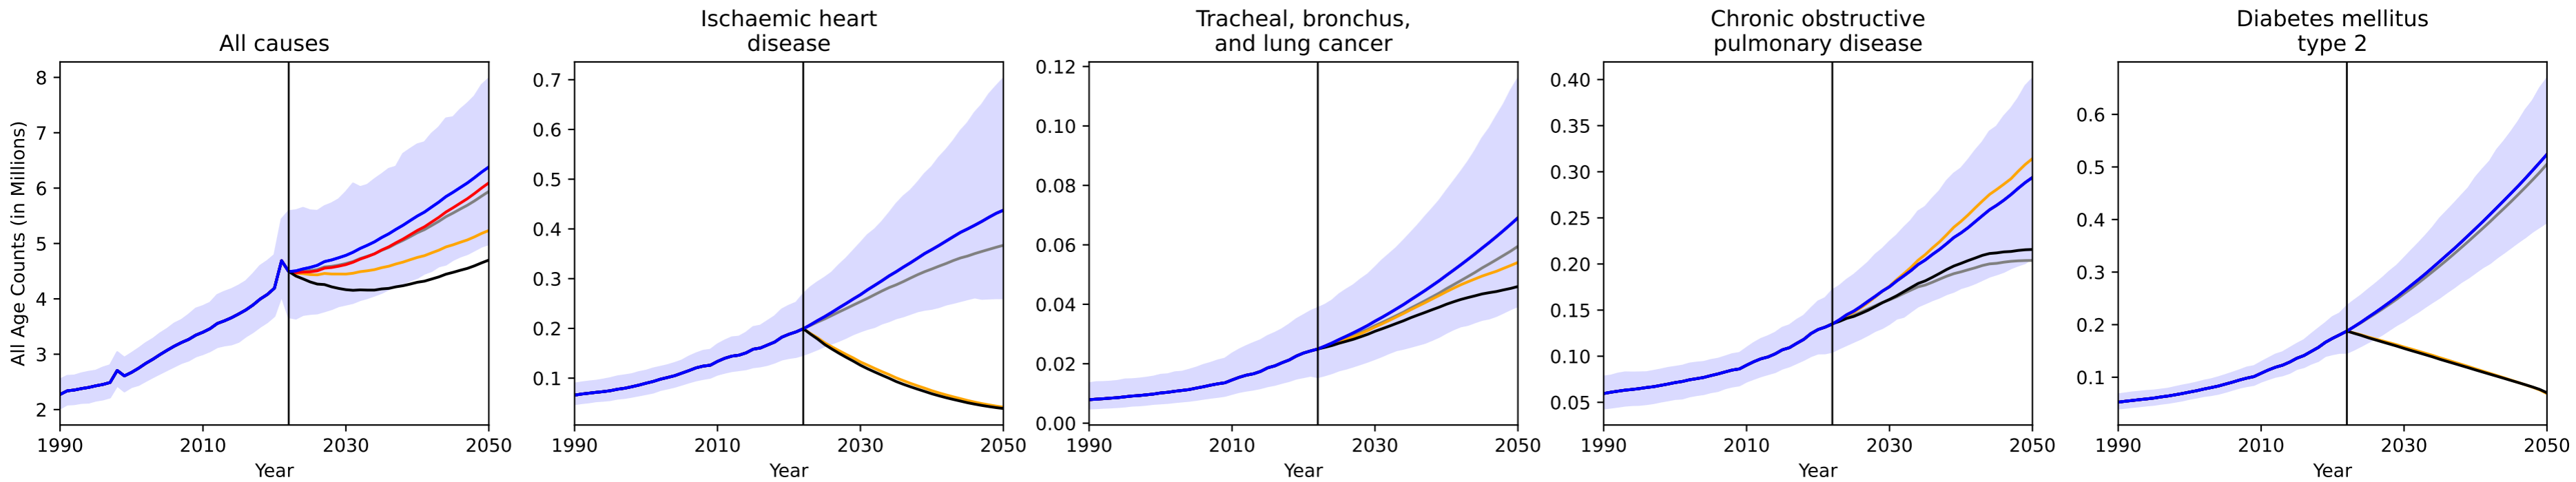

— Safer Environment    — Improved Behavioural and Metabolic Risks    — Improved Childhood Nutrition and Vaccination    — Combined    — Reference



# Samoa

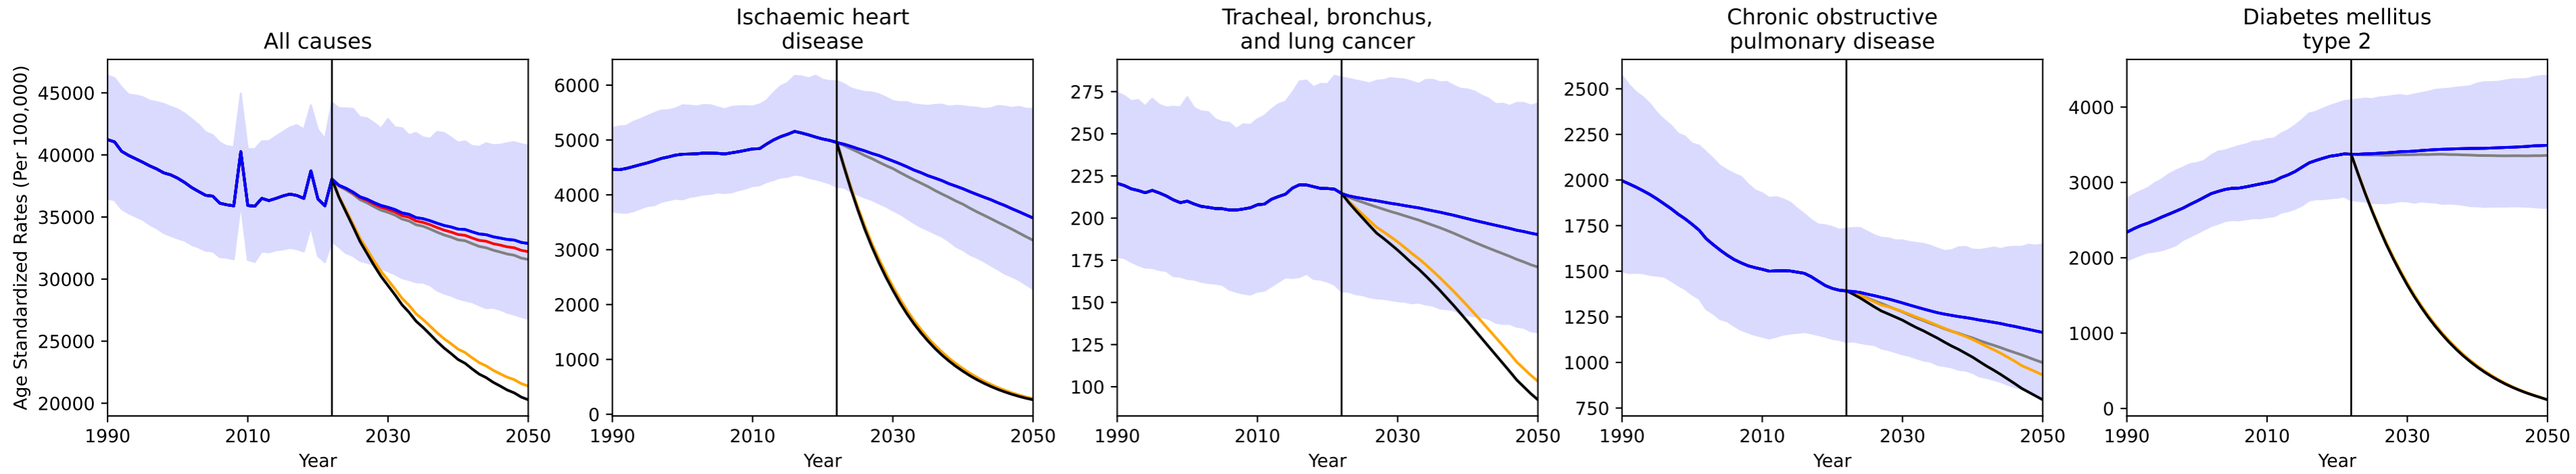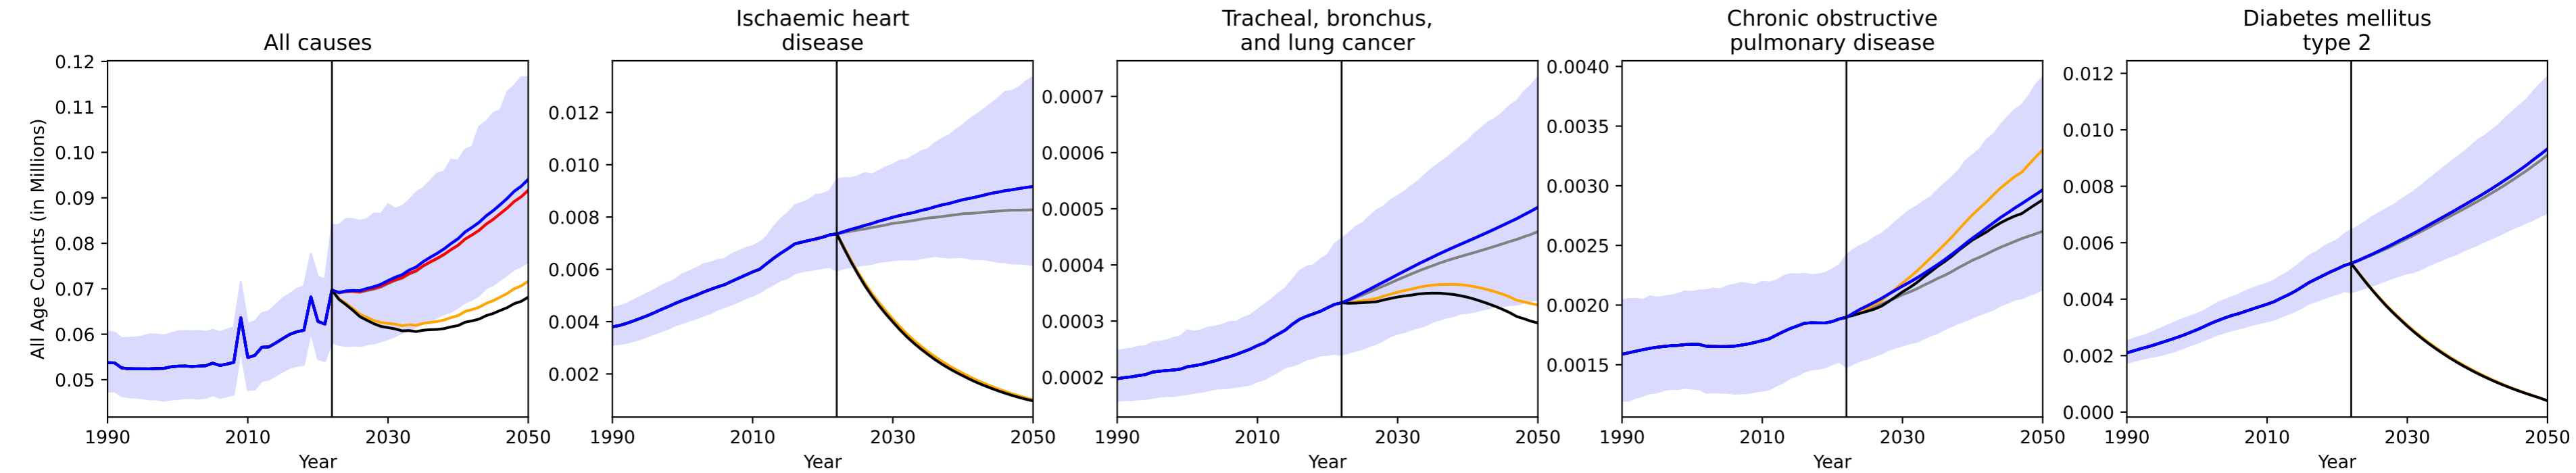

# Solomon Islands

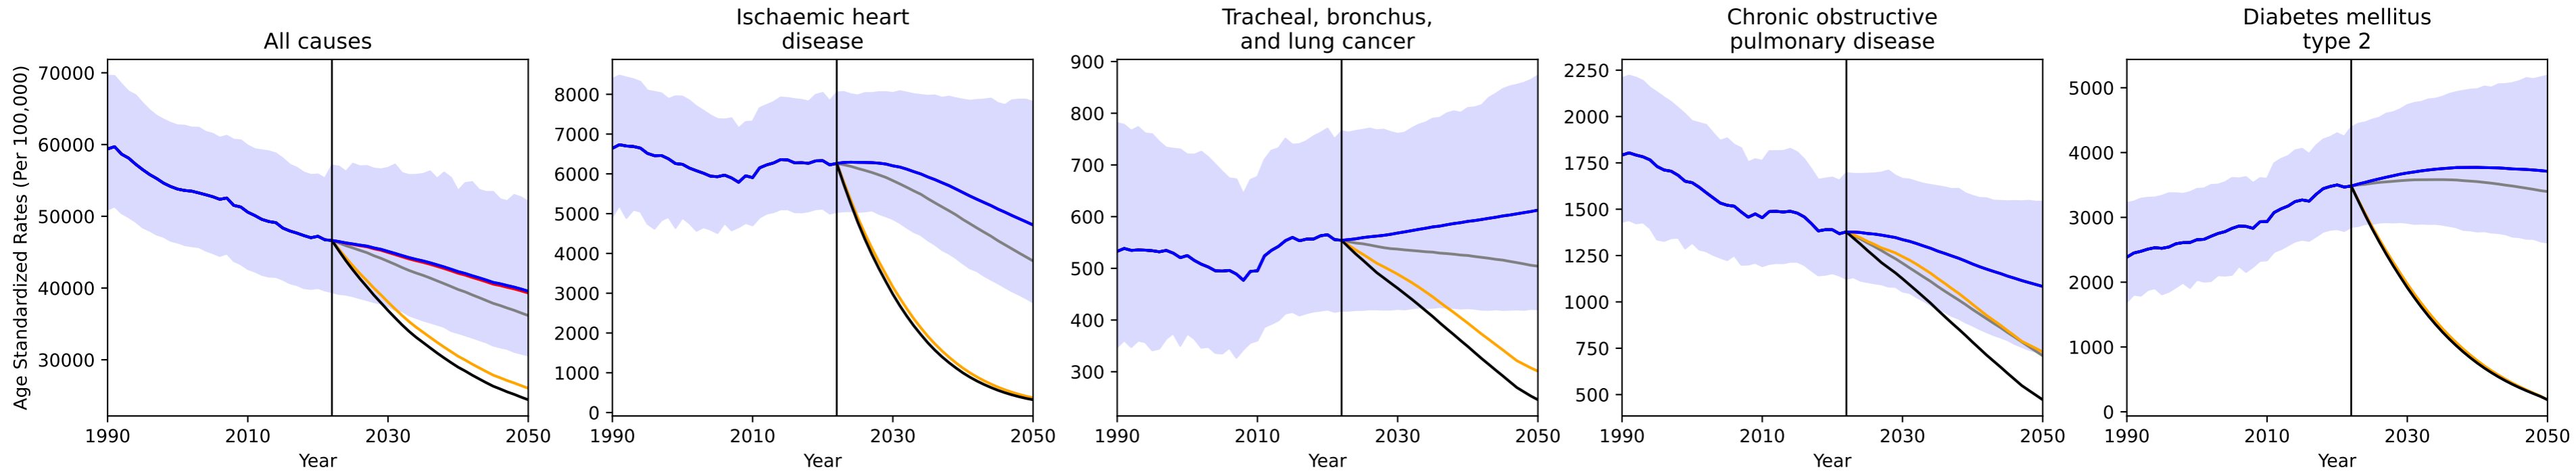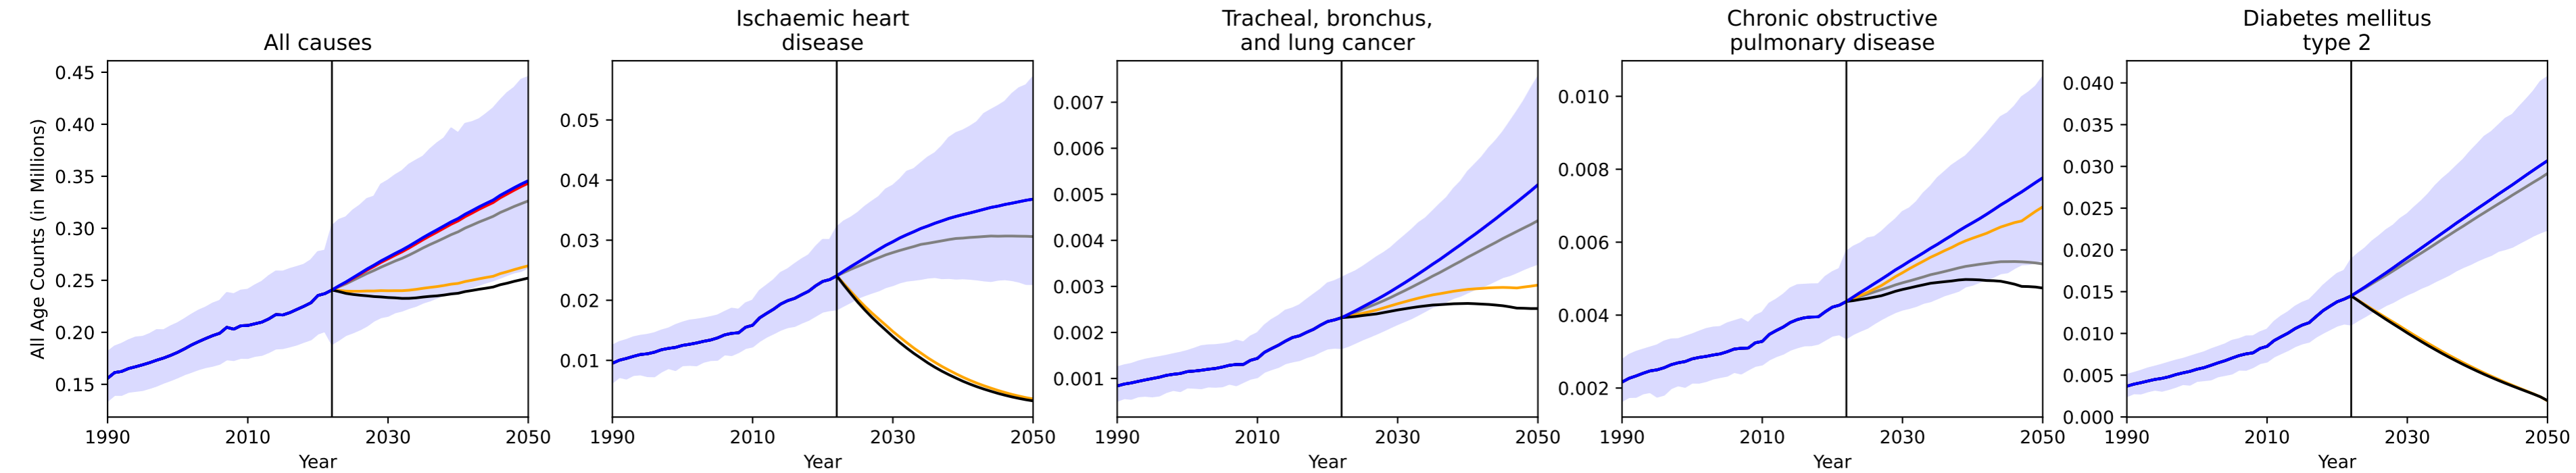

# Tokelau

Supplemental Results Figure S12. All cause and top NCD causes age standardized DALY rates and all age counts by scenario and location, 1990-2050

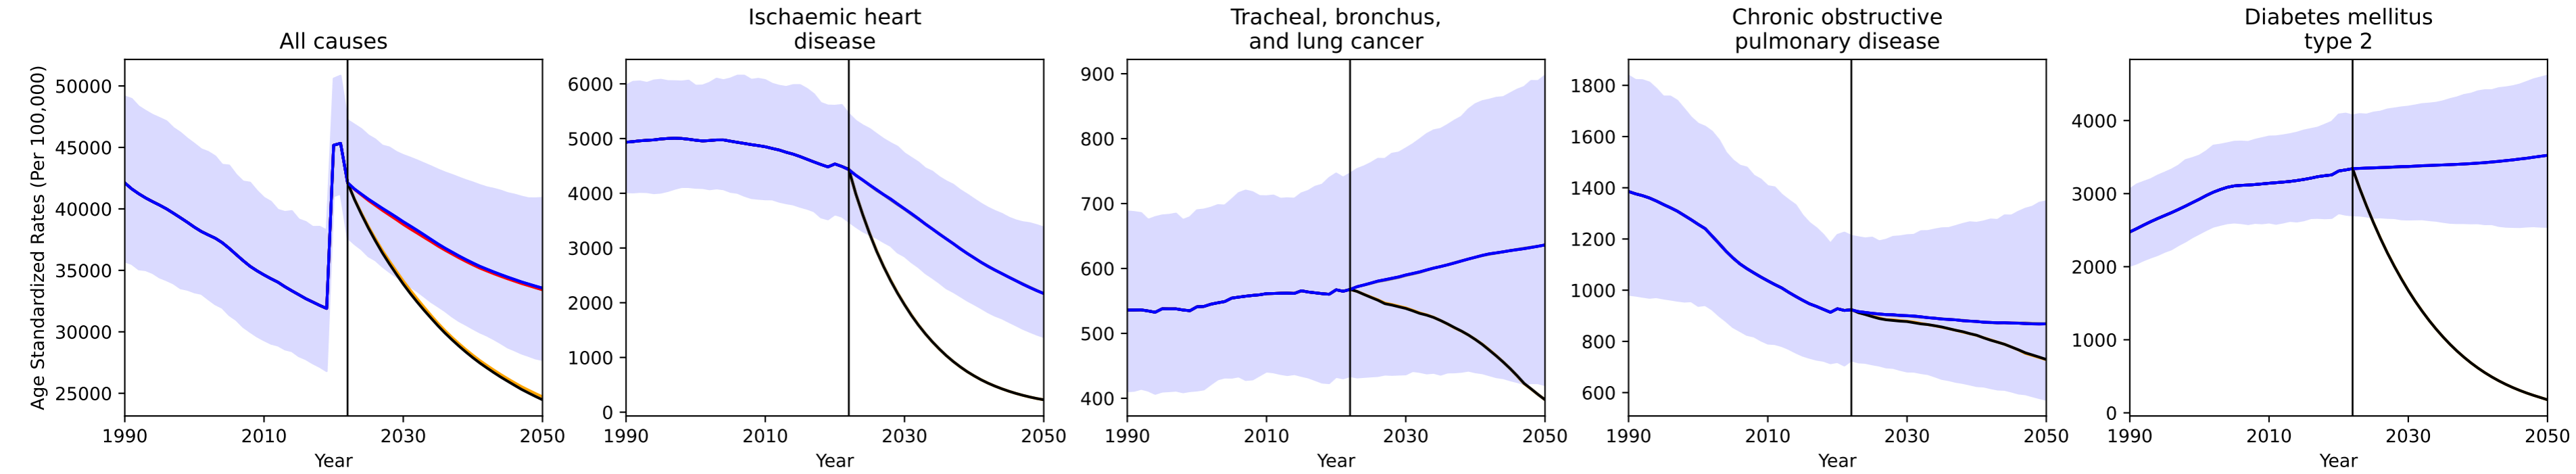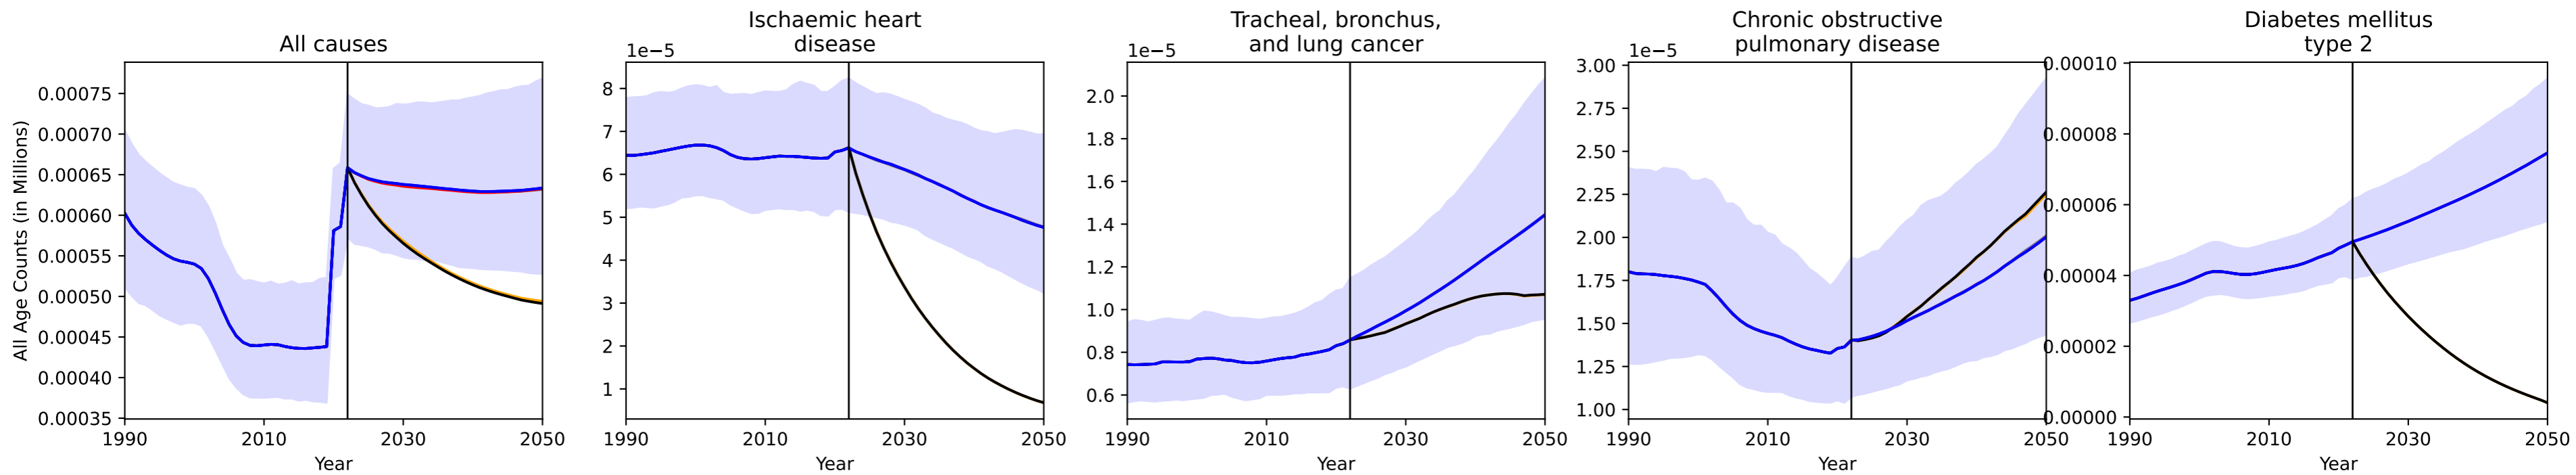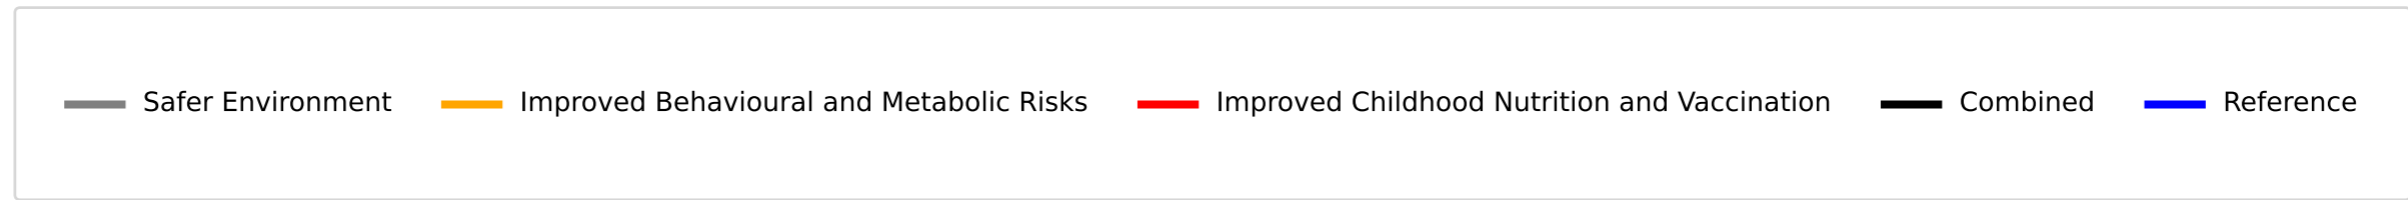

# Tonga

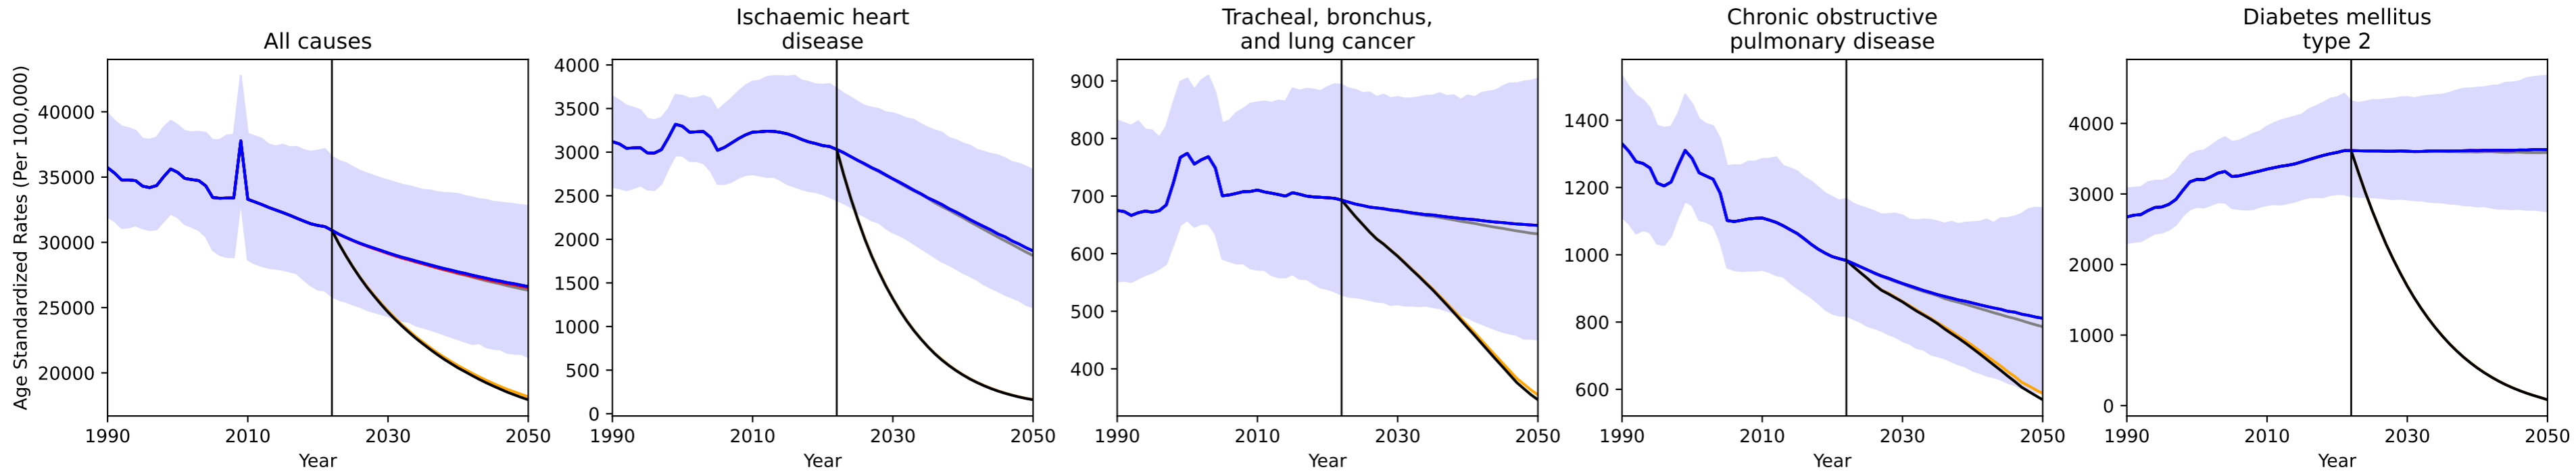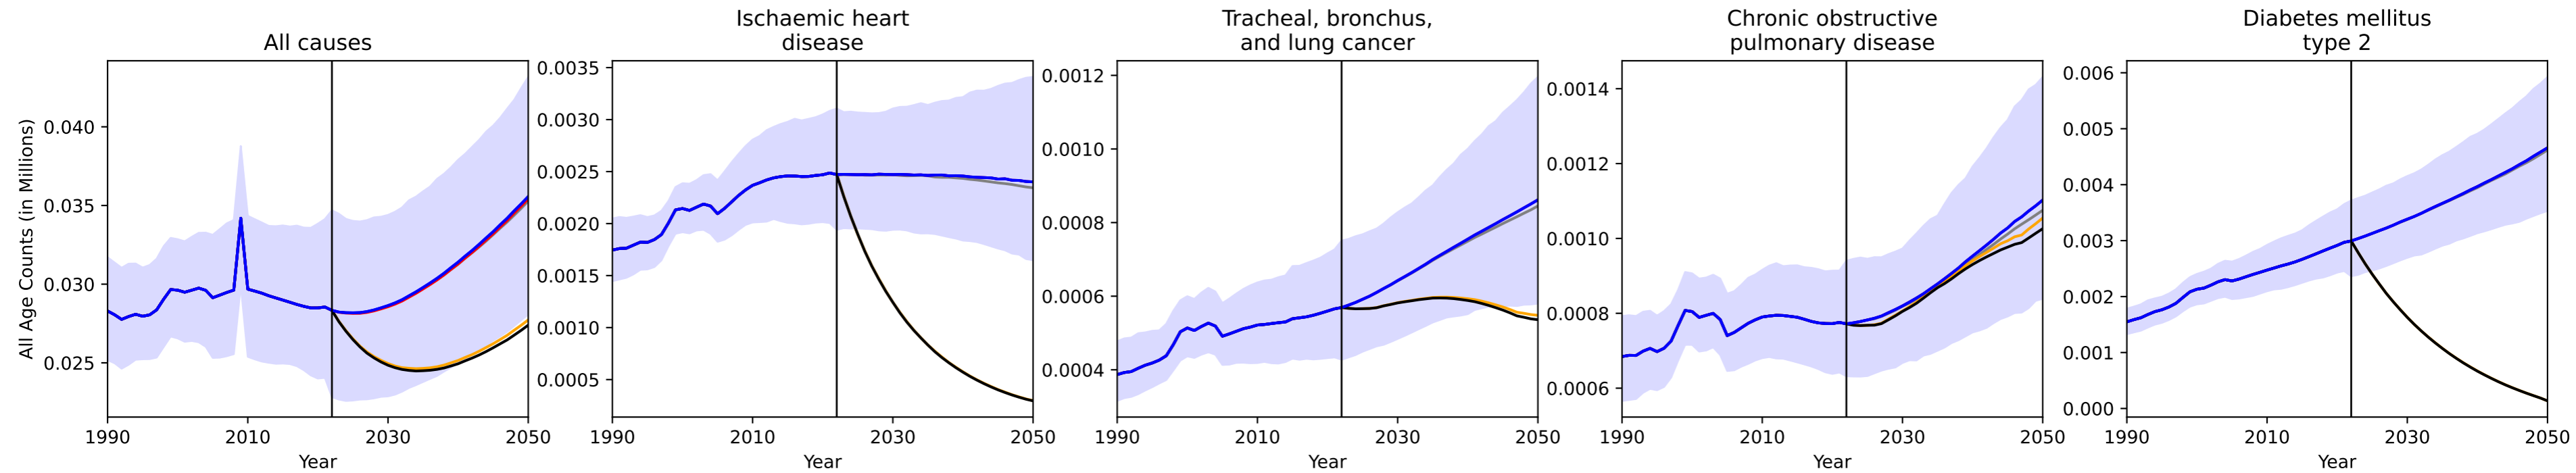

# Tuvalu

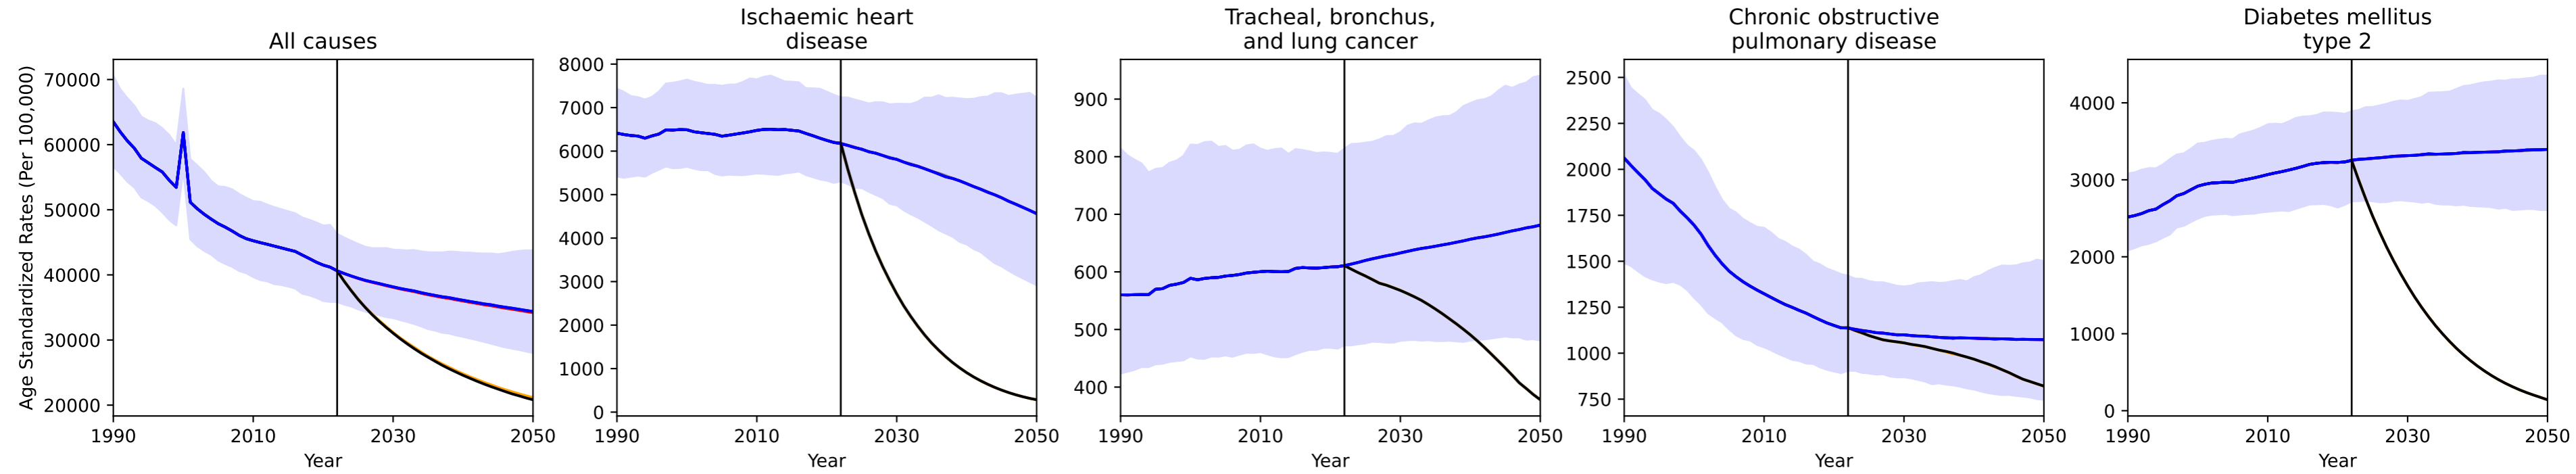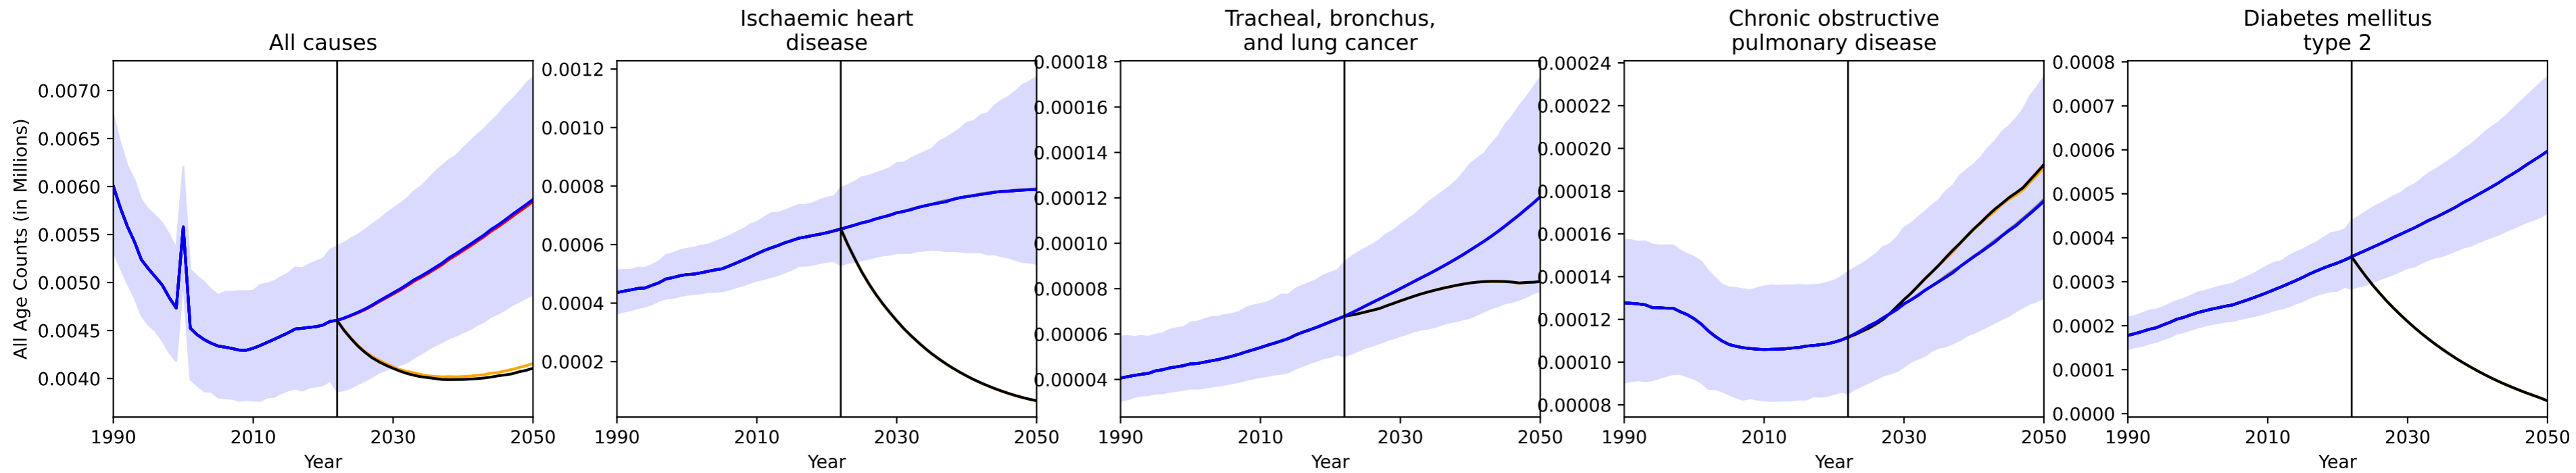

# Vanuatu

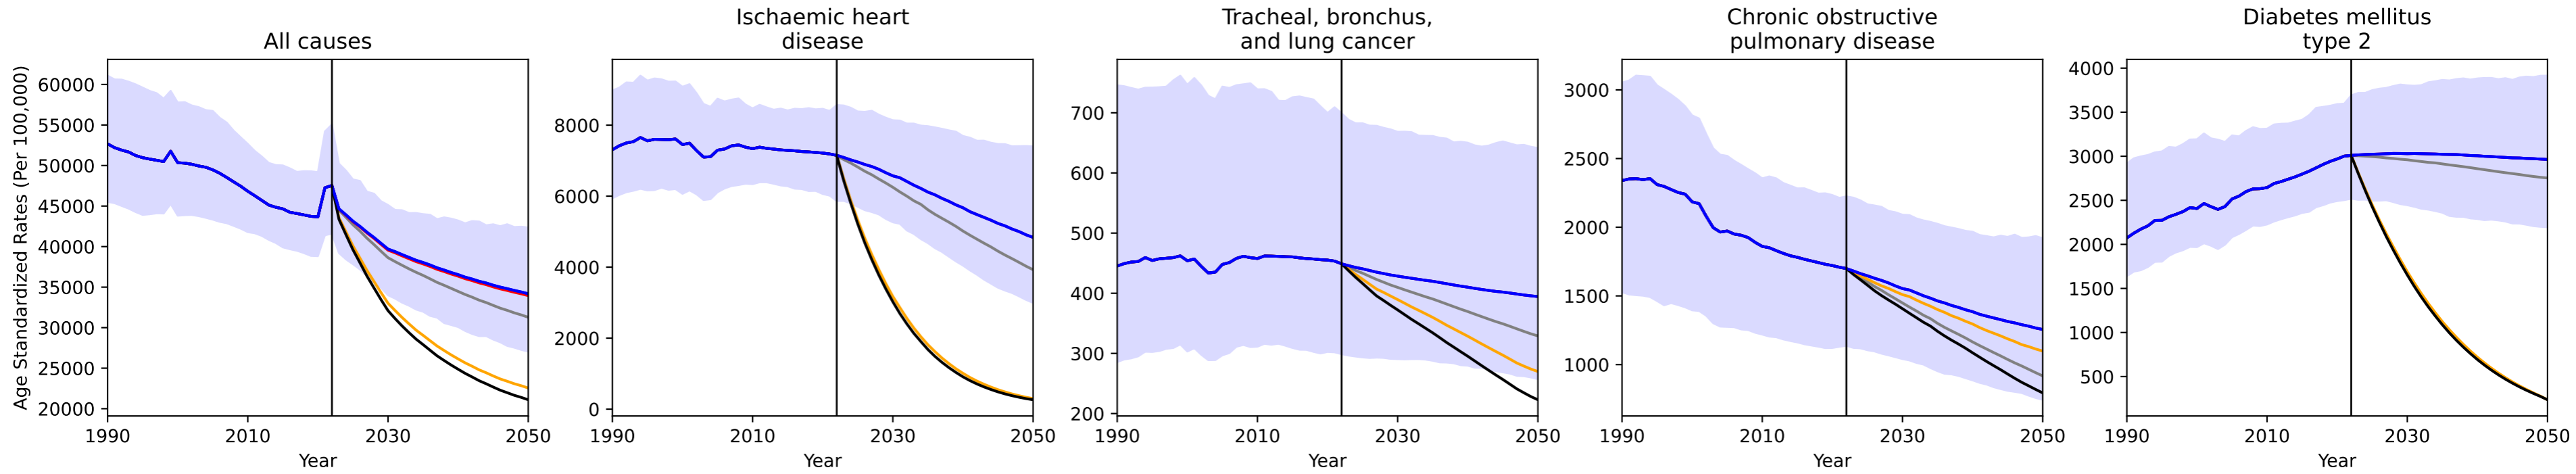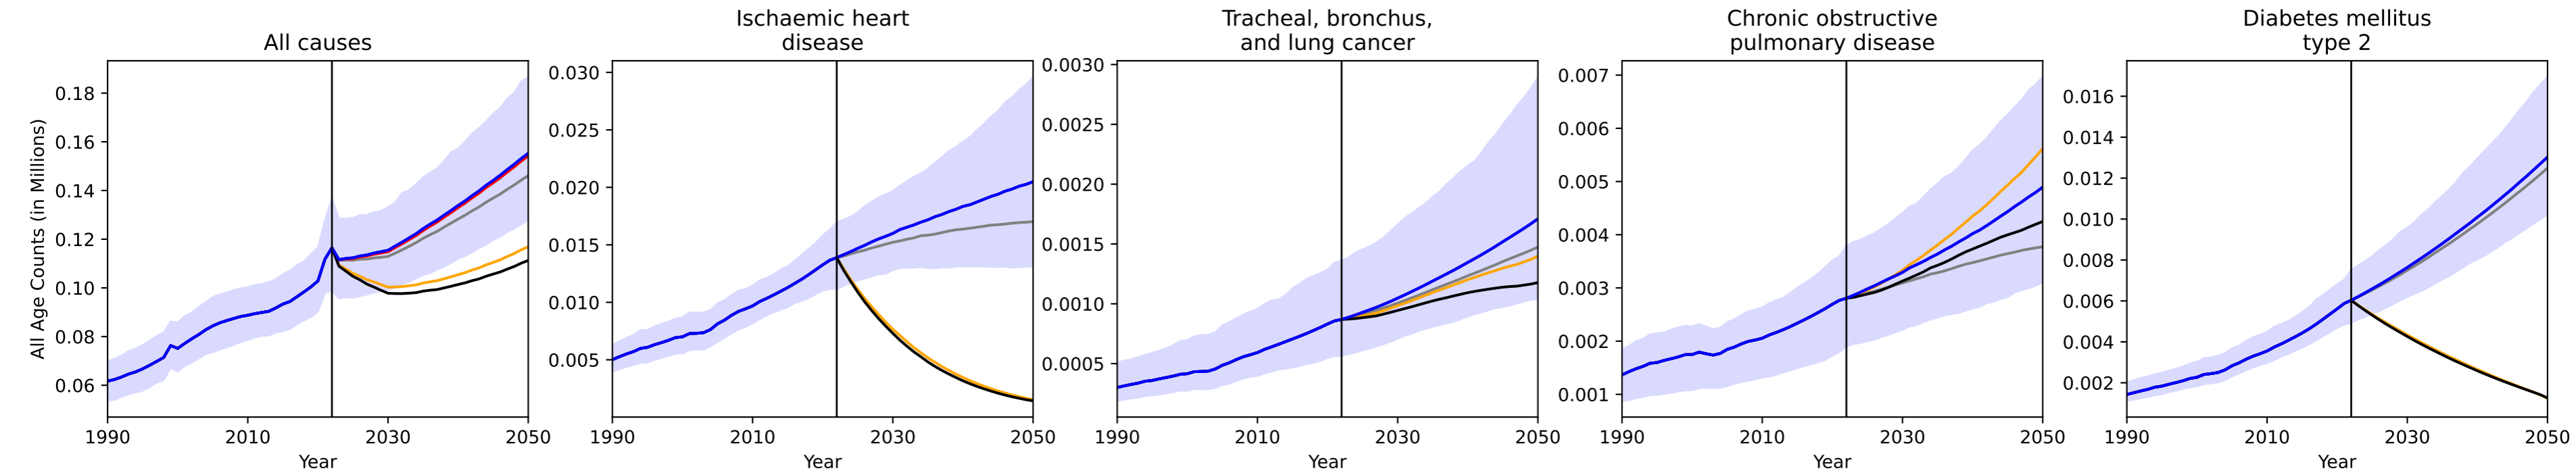

# Cambodia

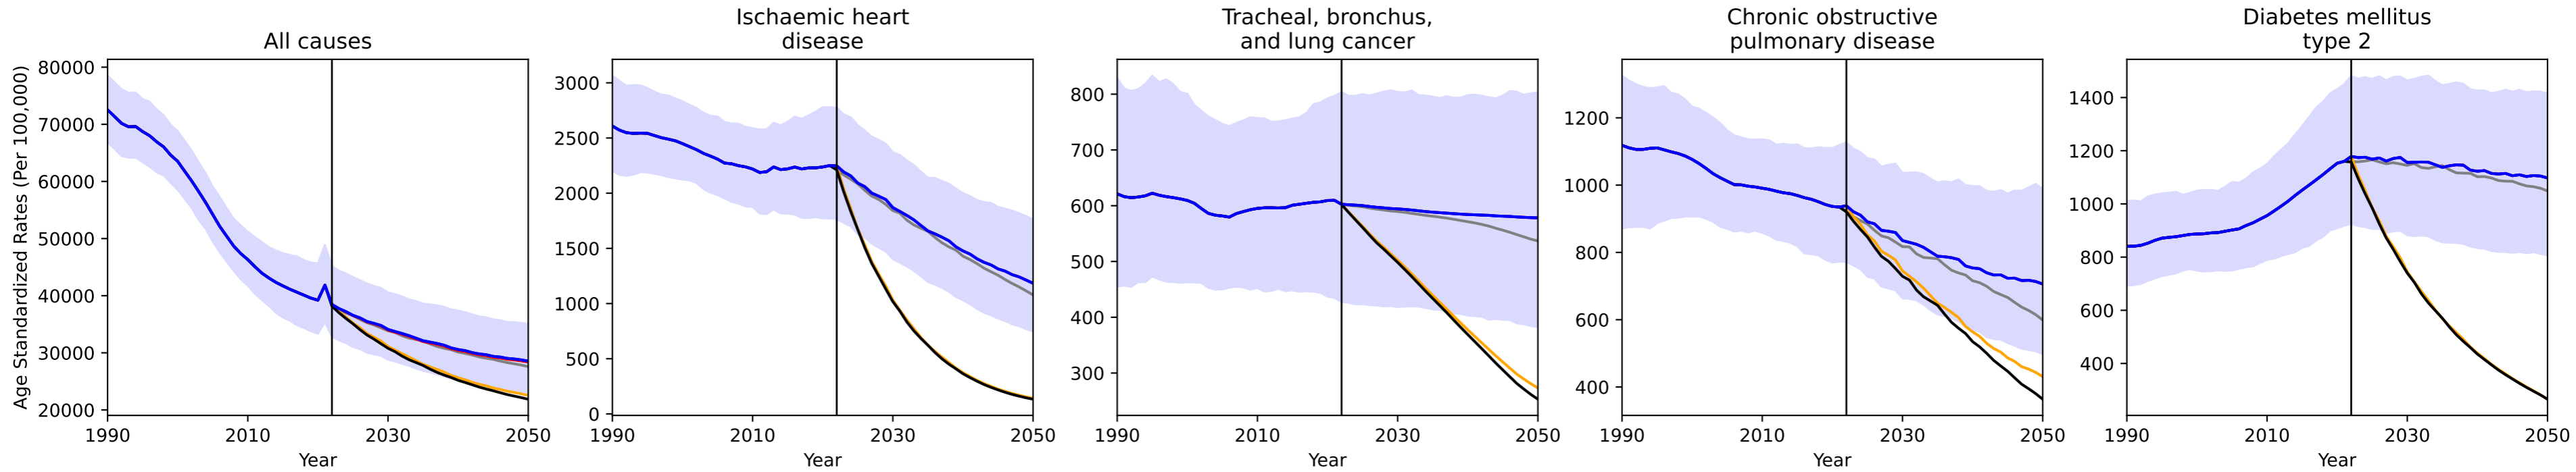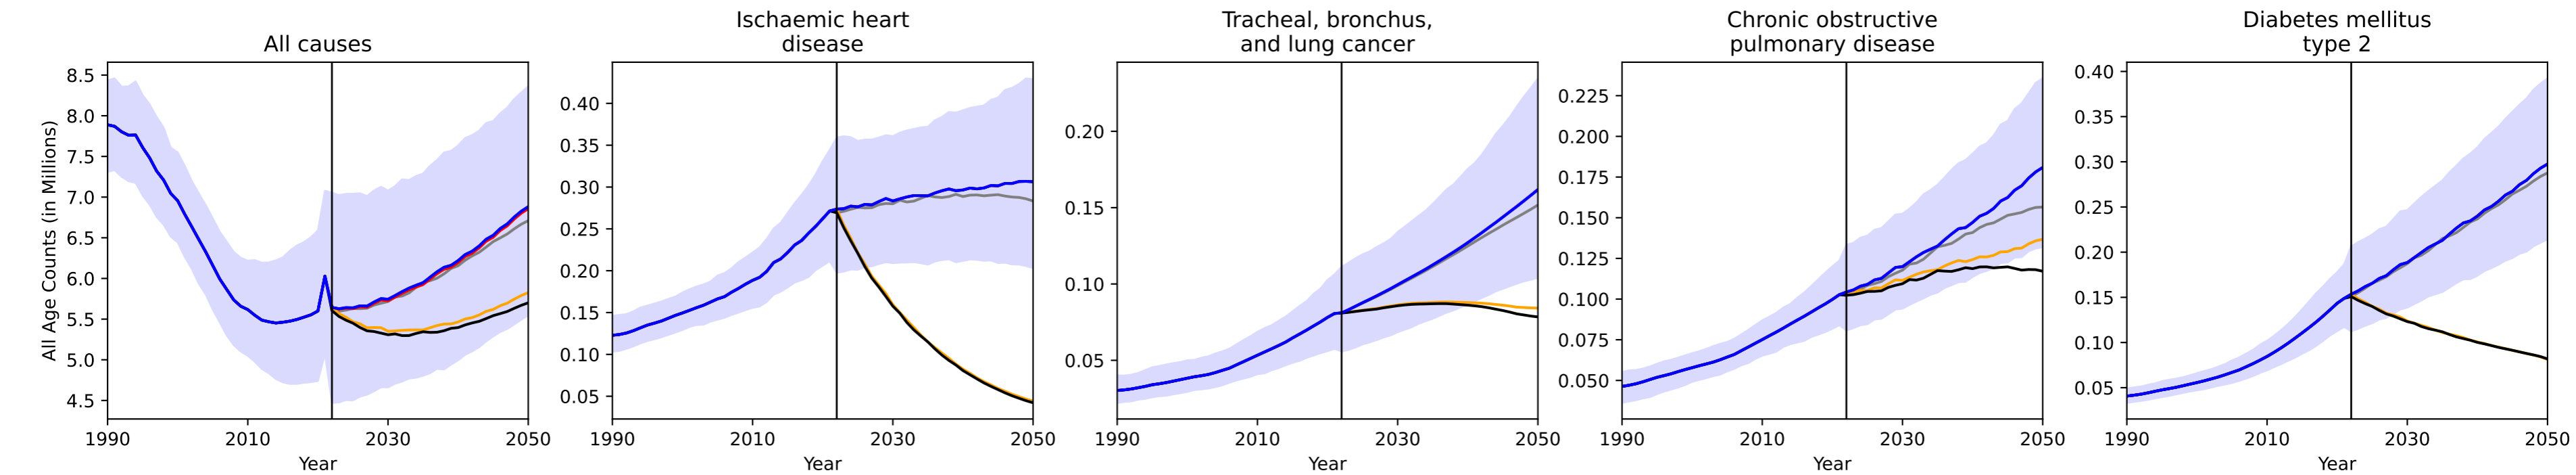

# Indonesia

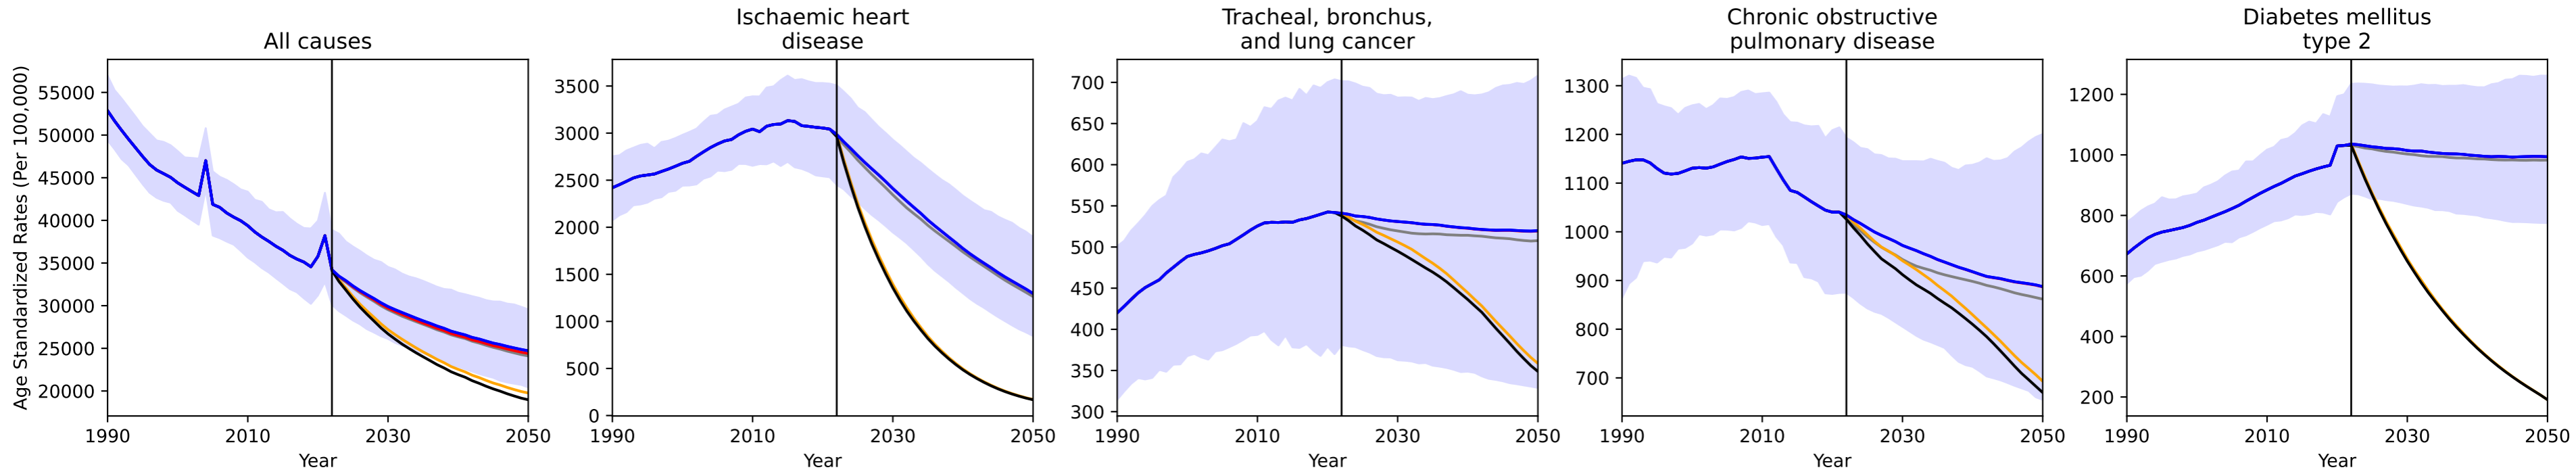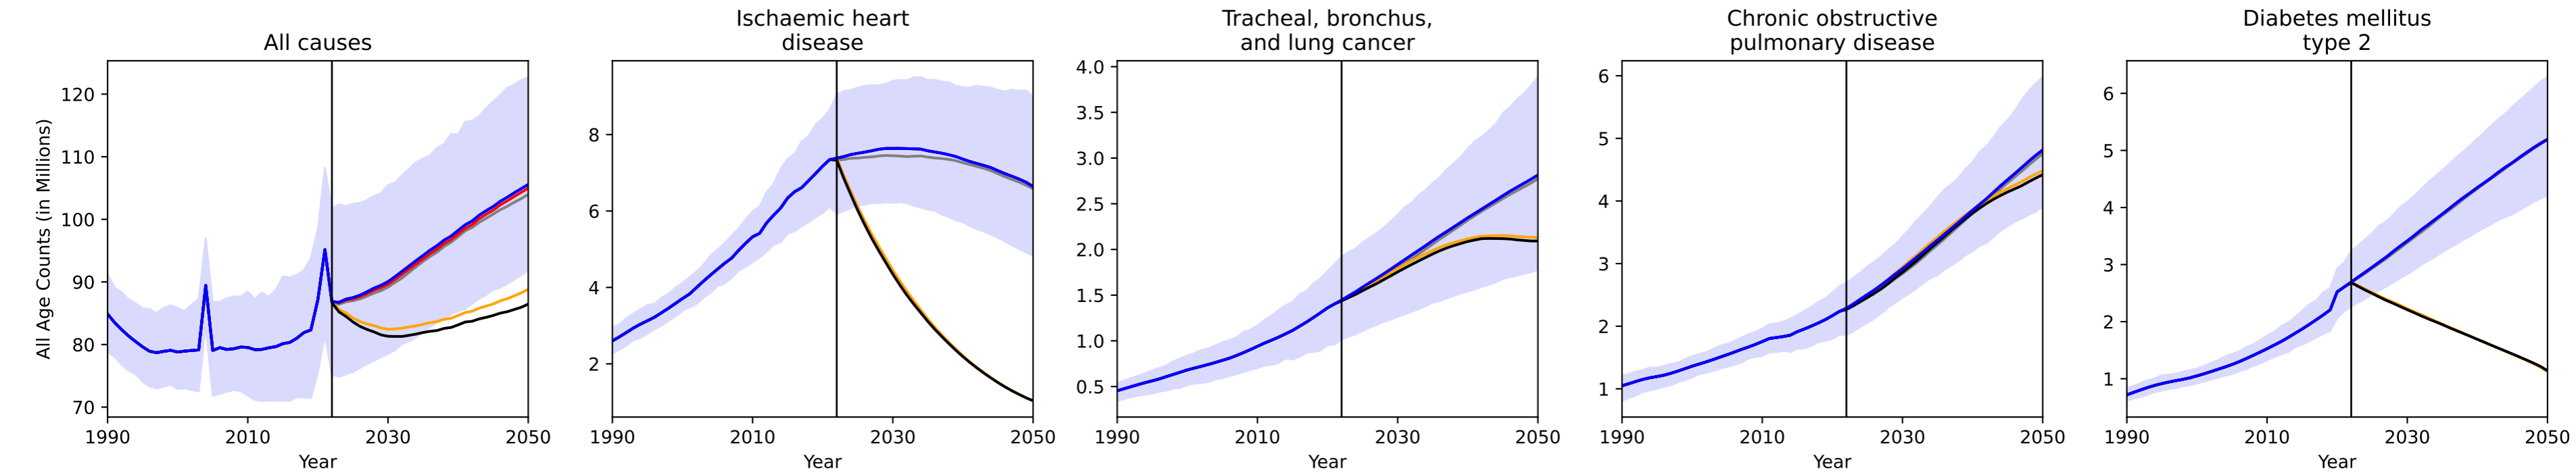



# Laos

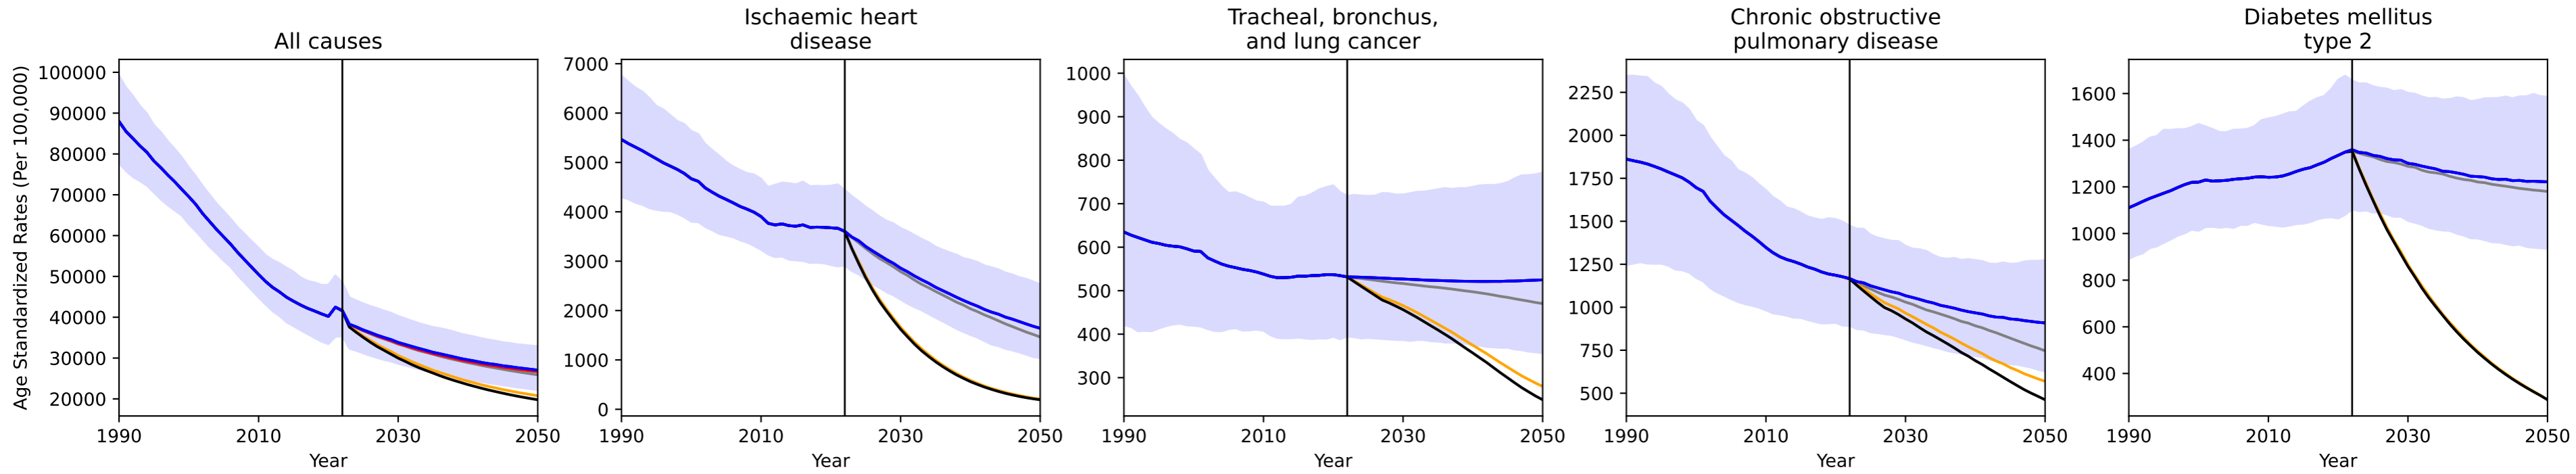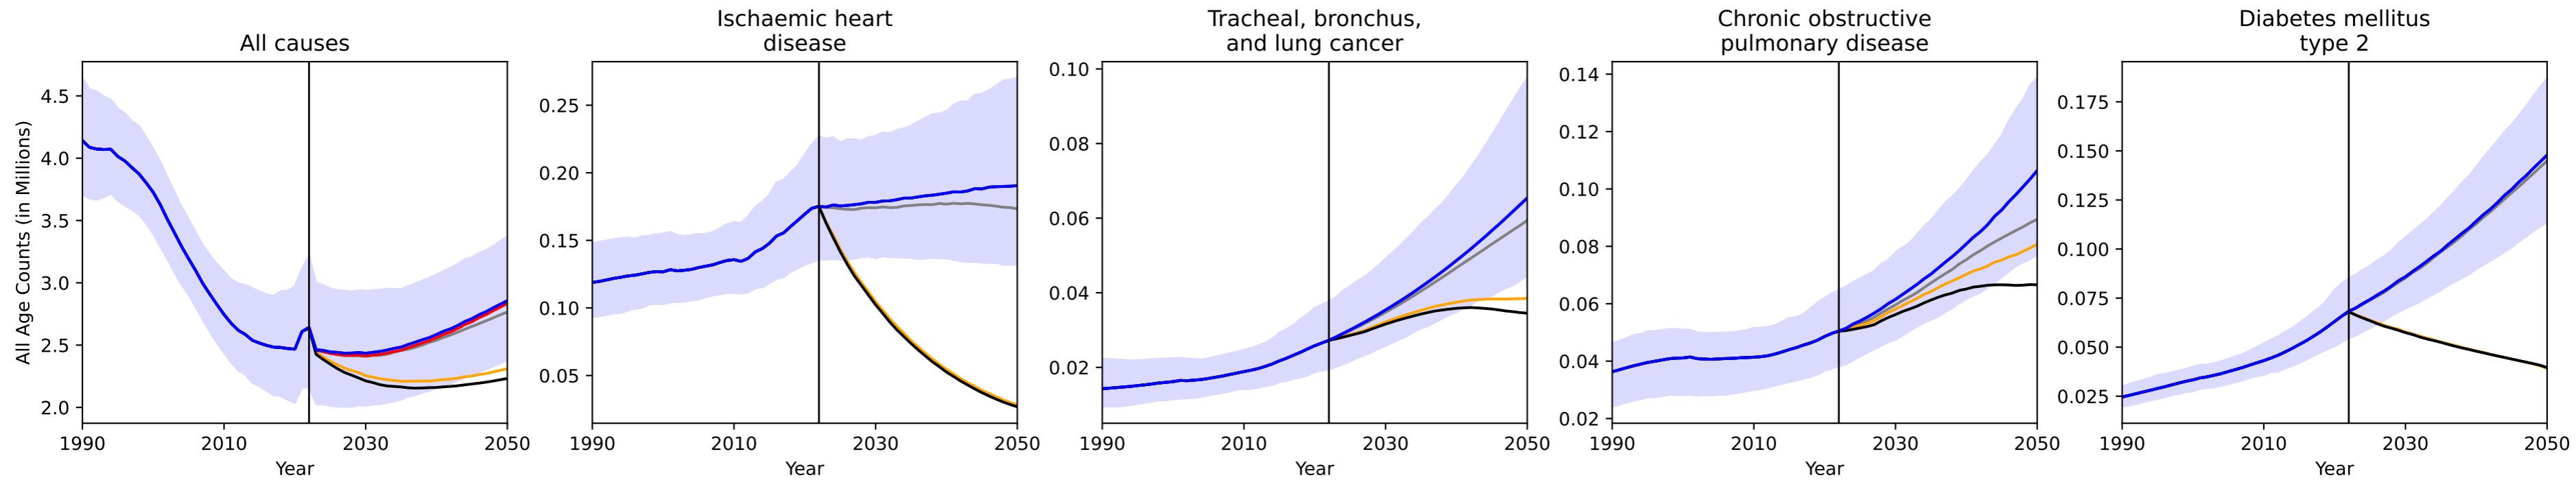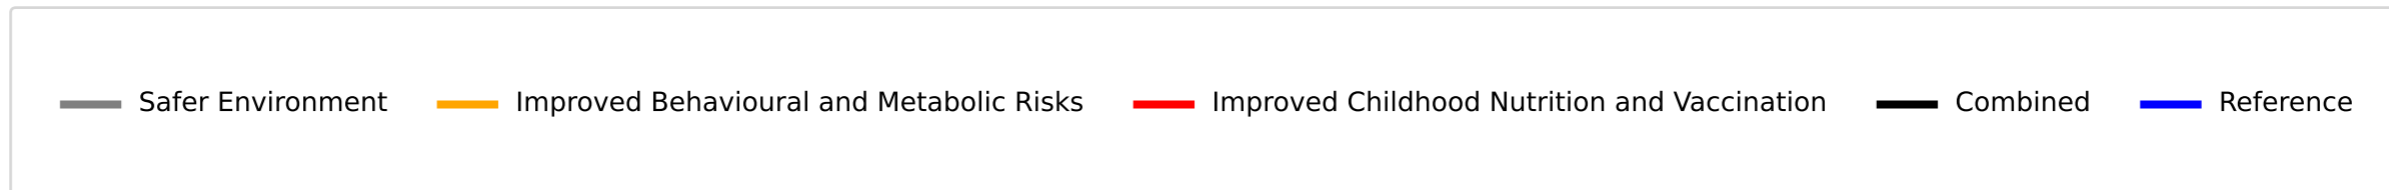

# Malaysia

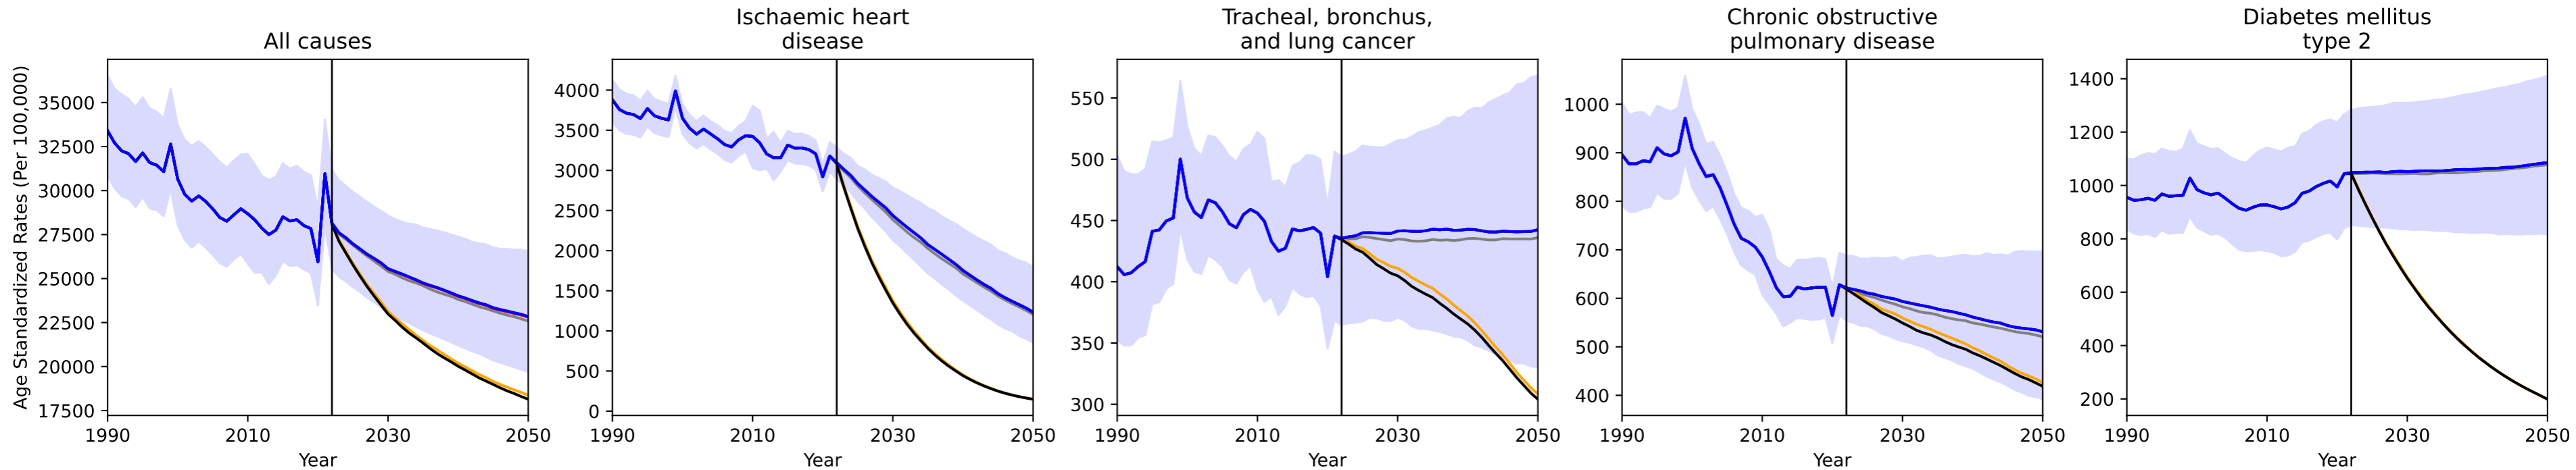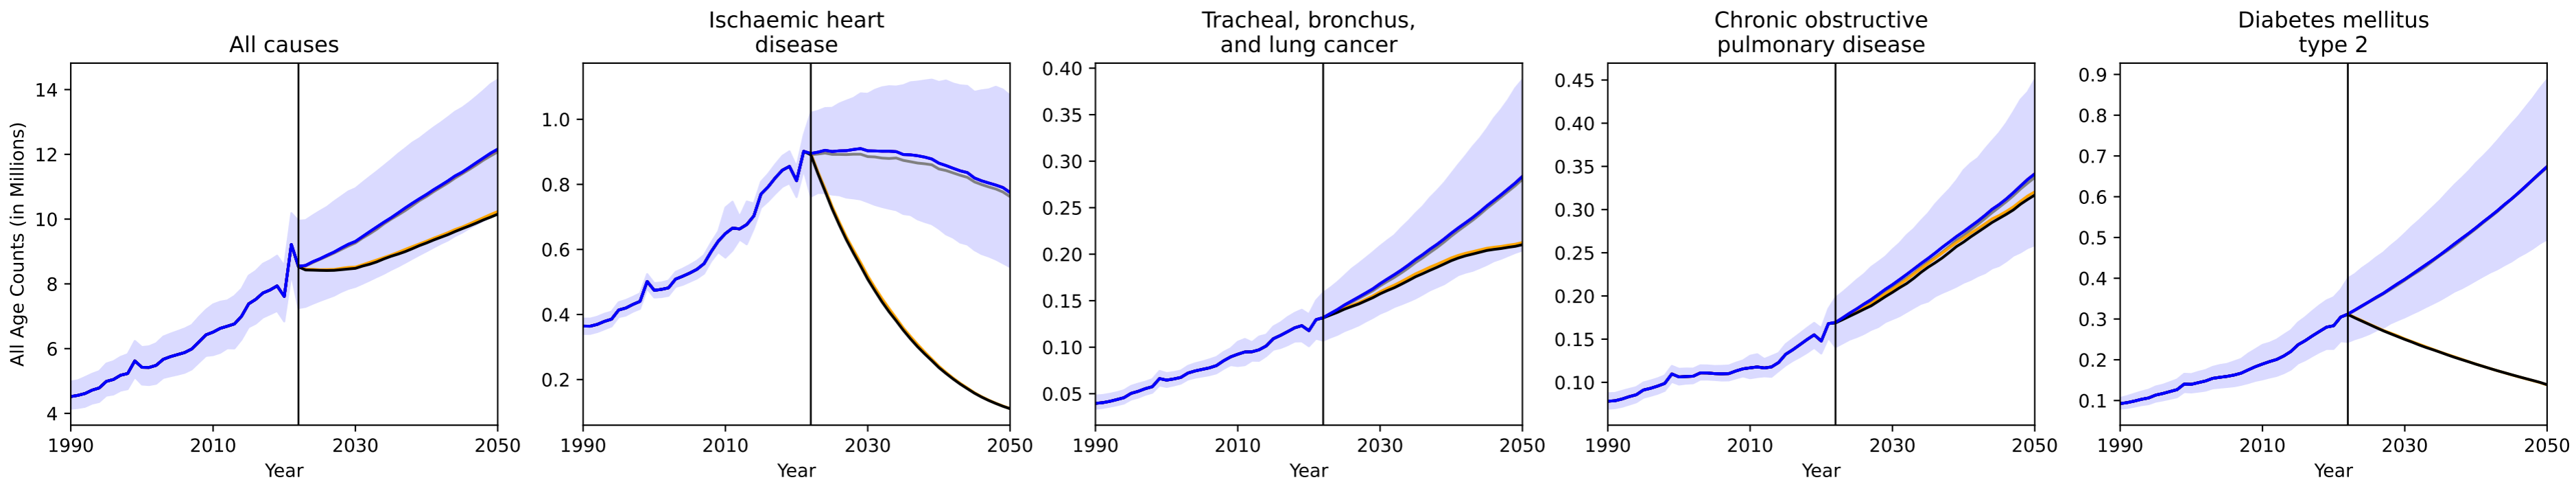

# Maldives

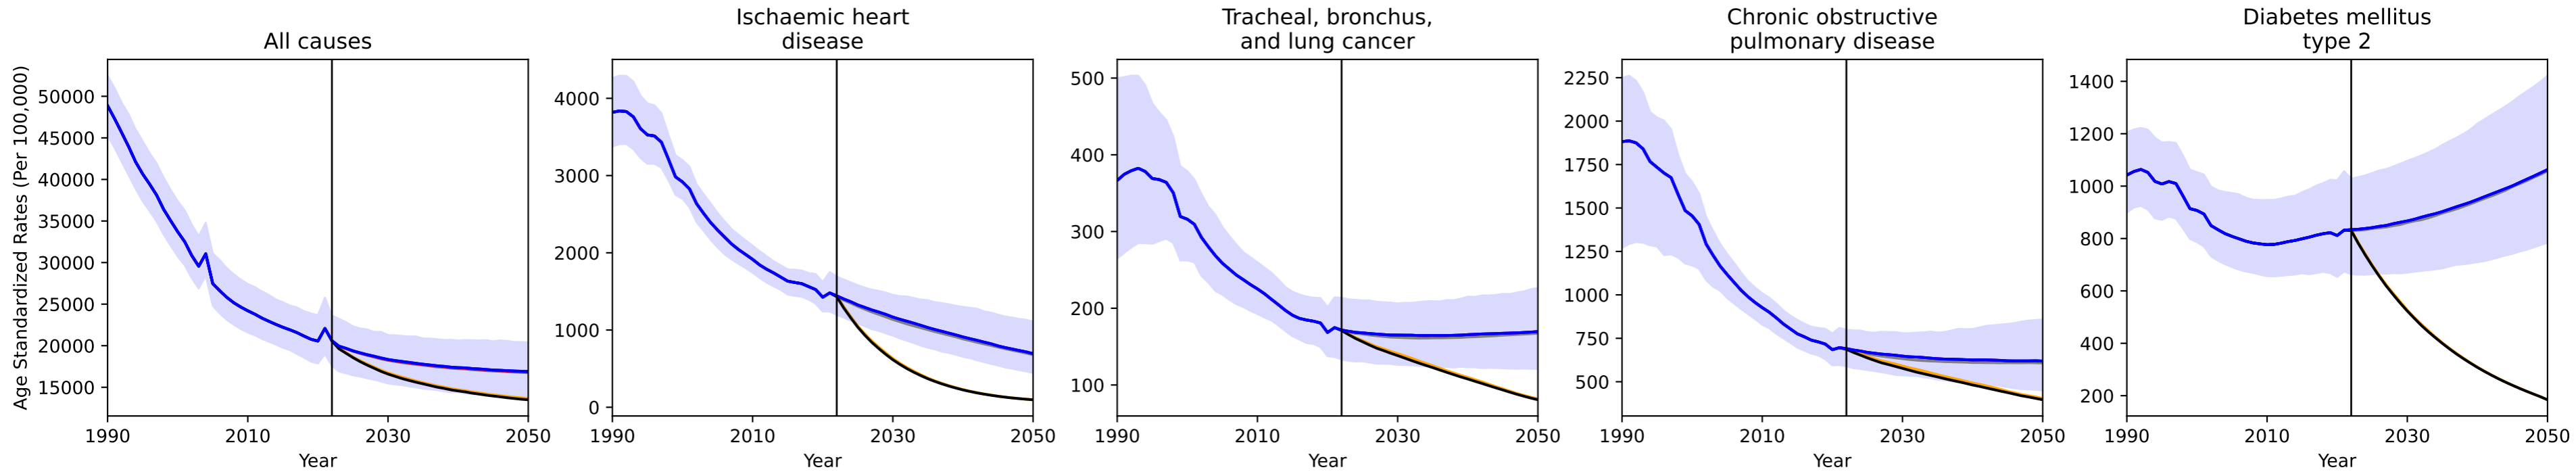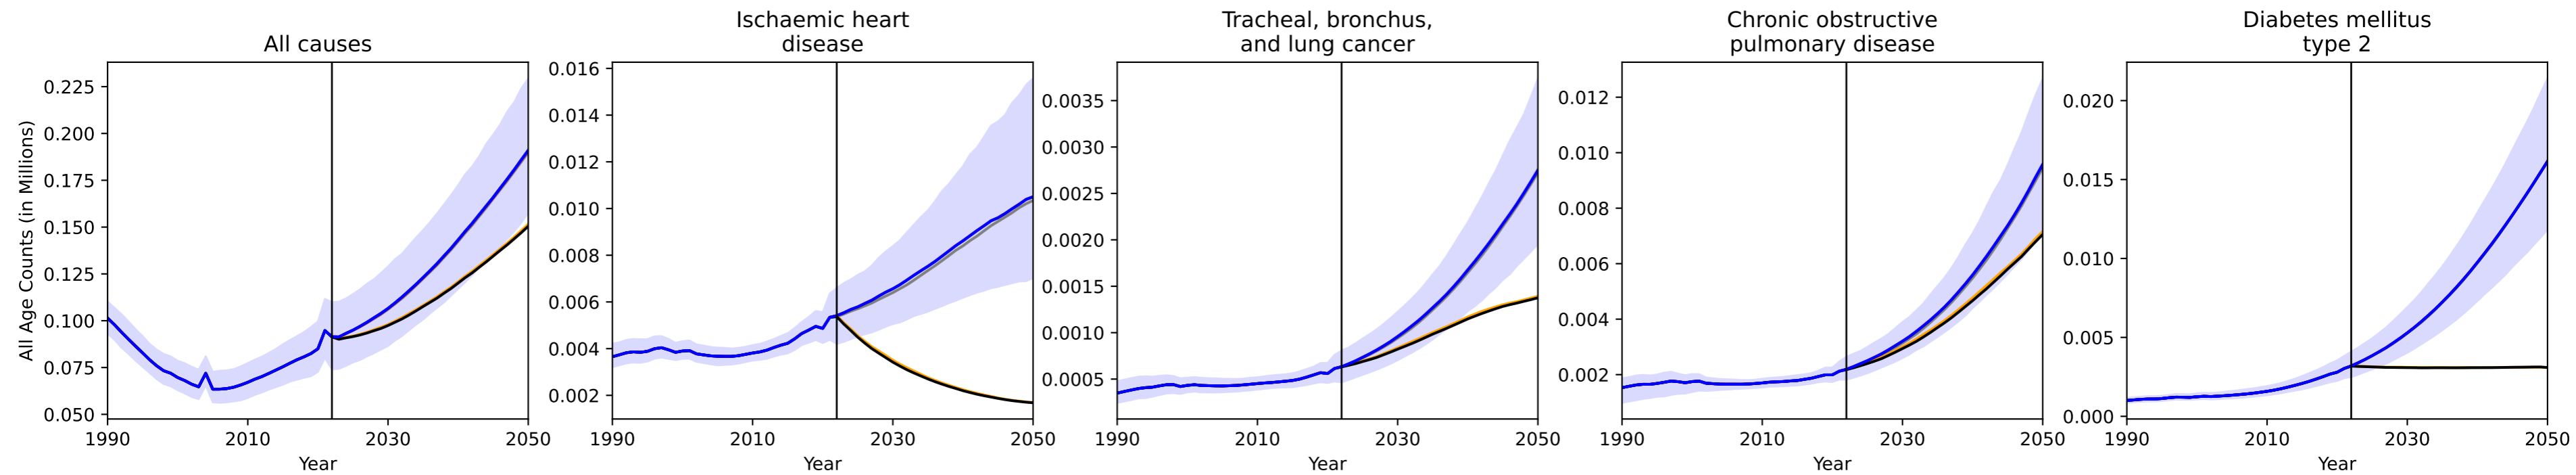

# Mauritius

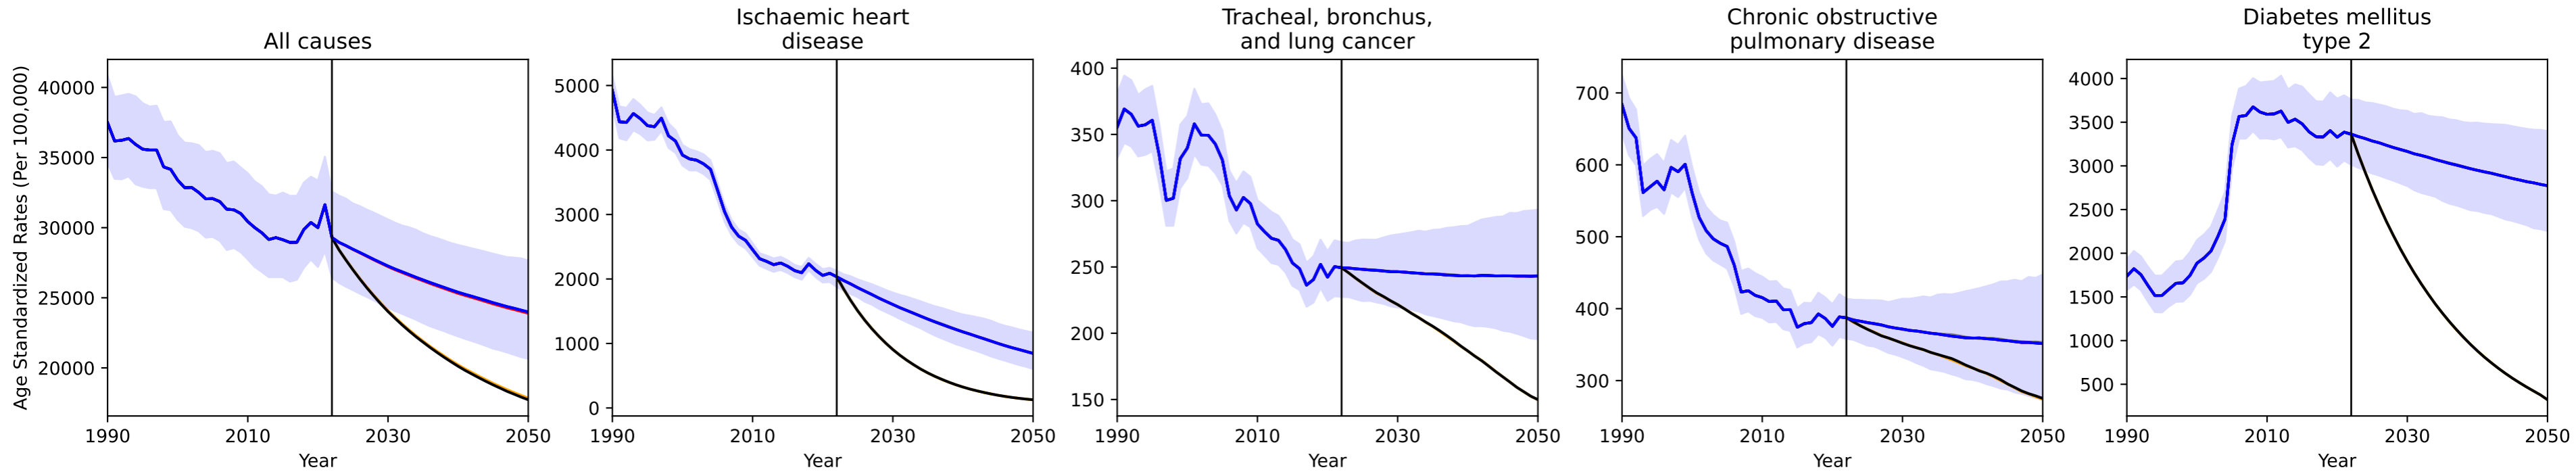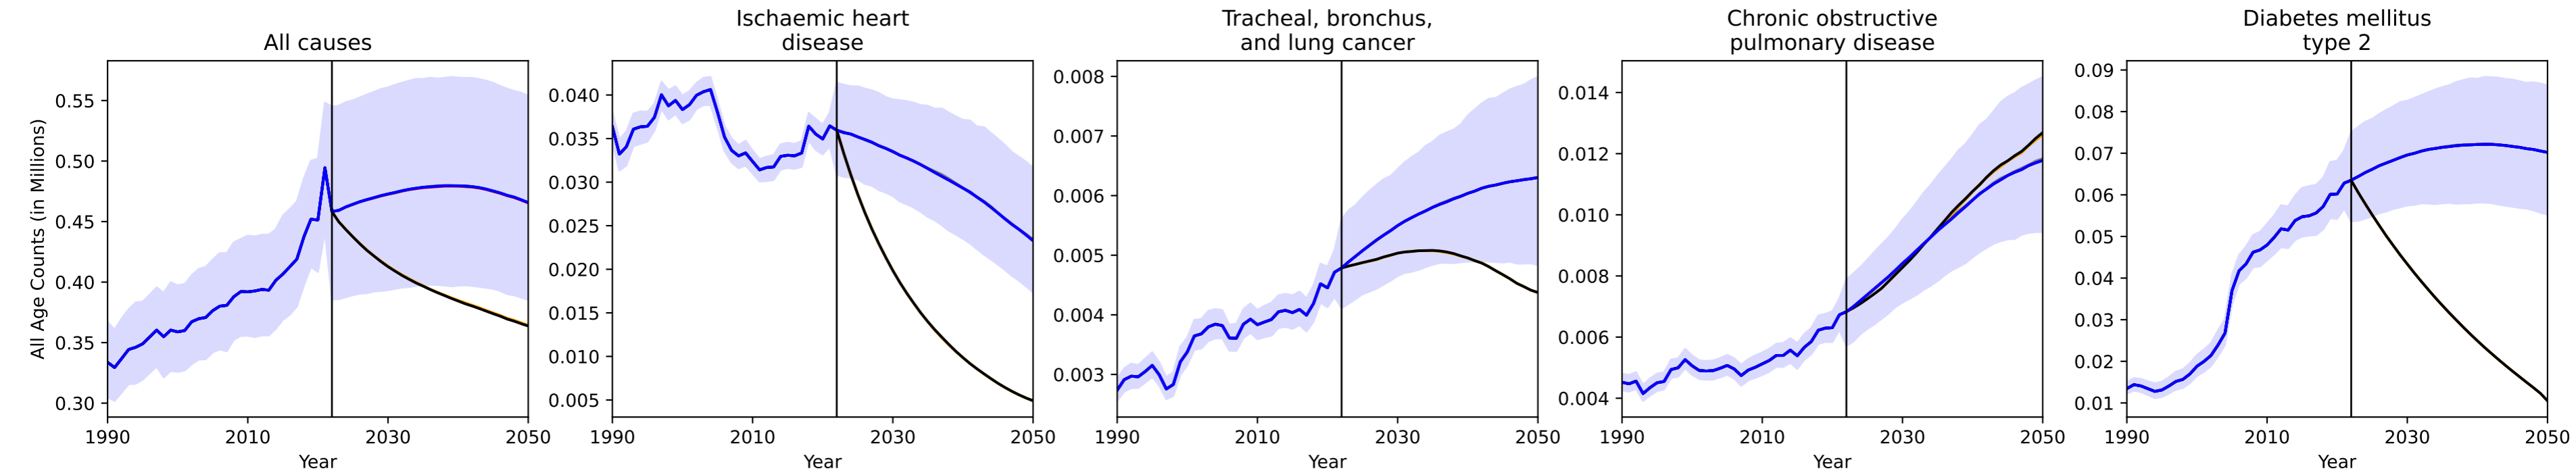

# Myanmar

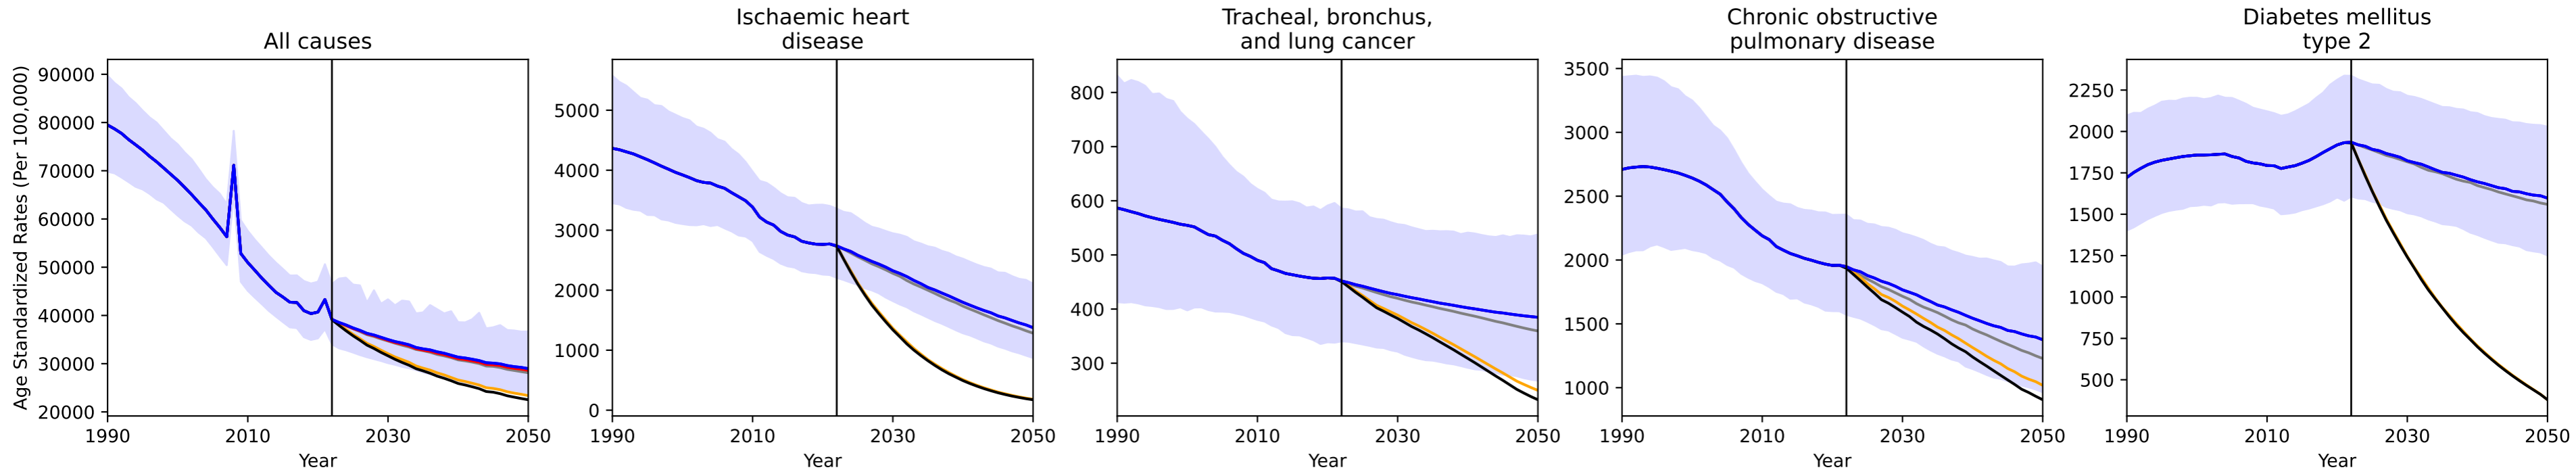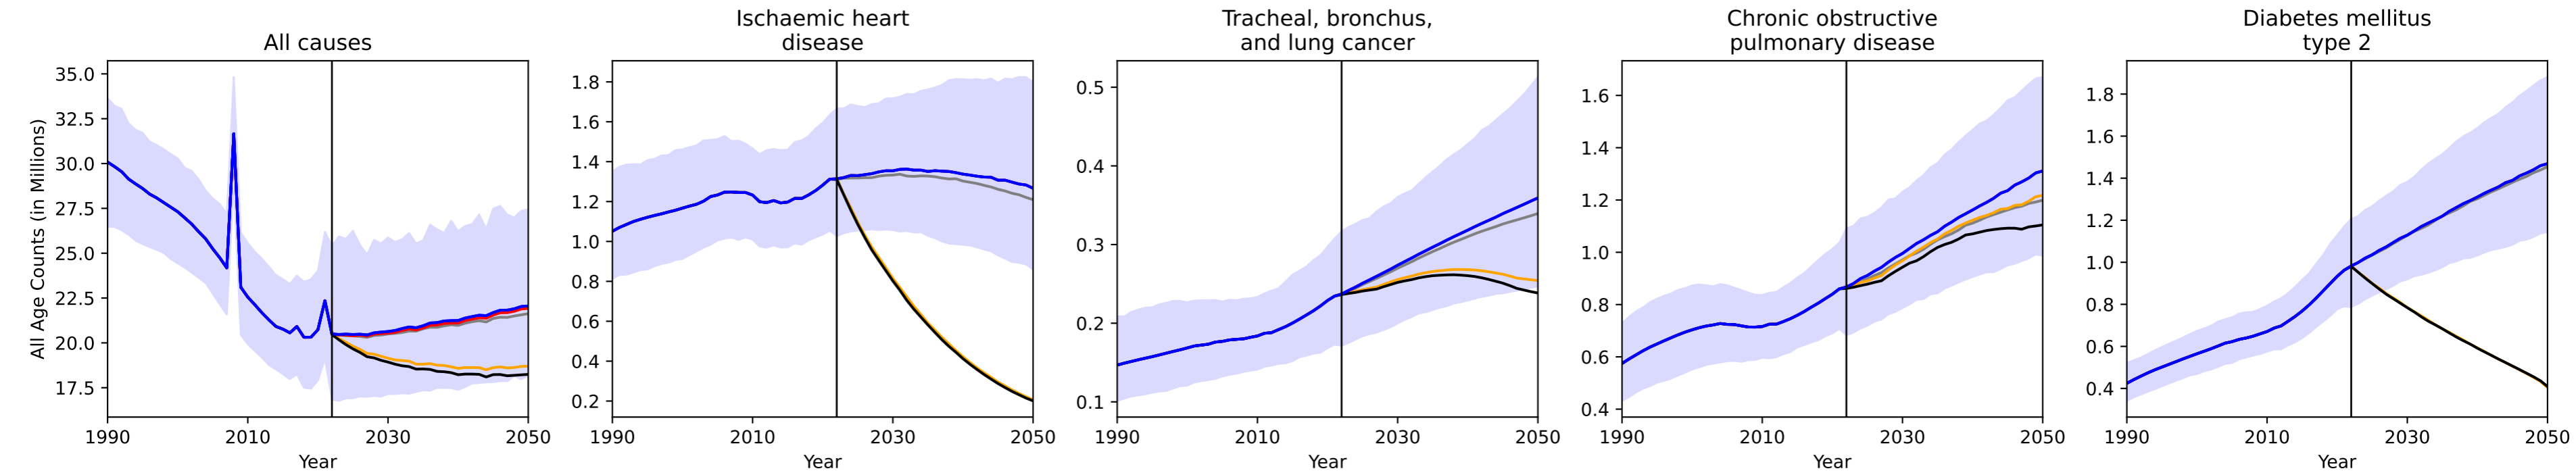

# Philippines

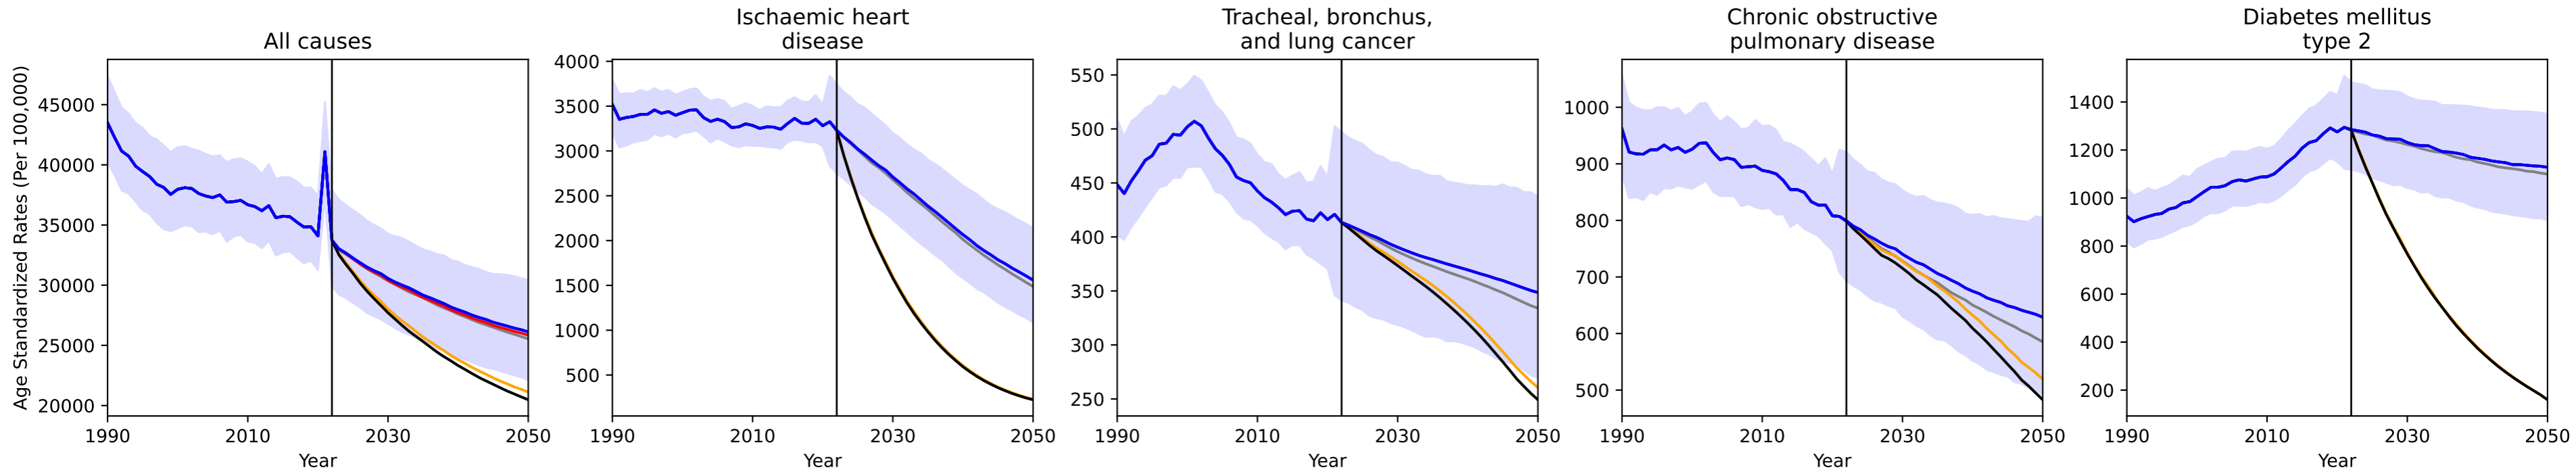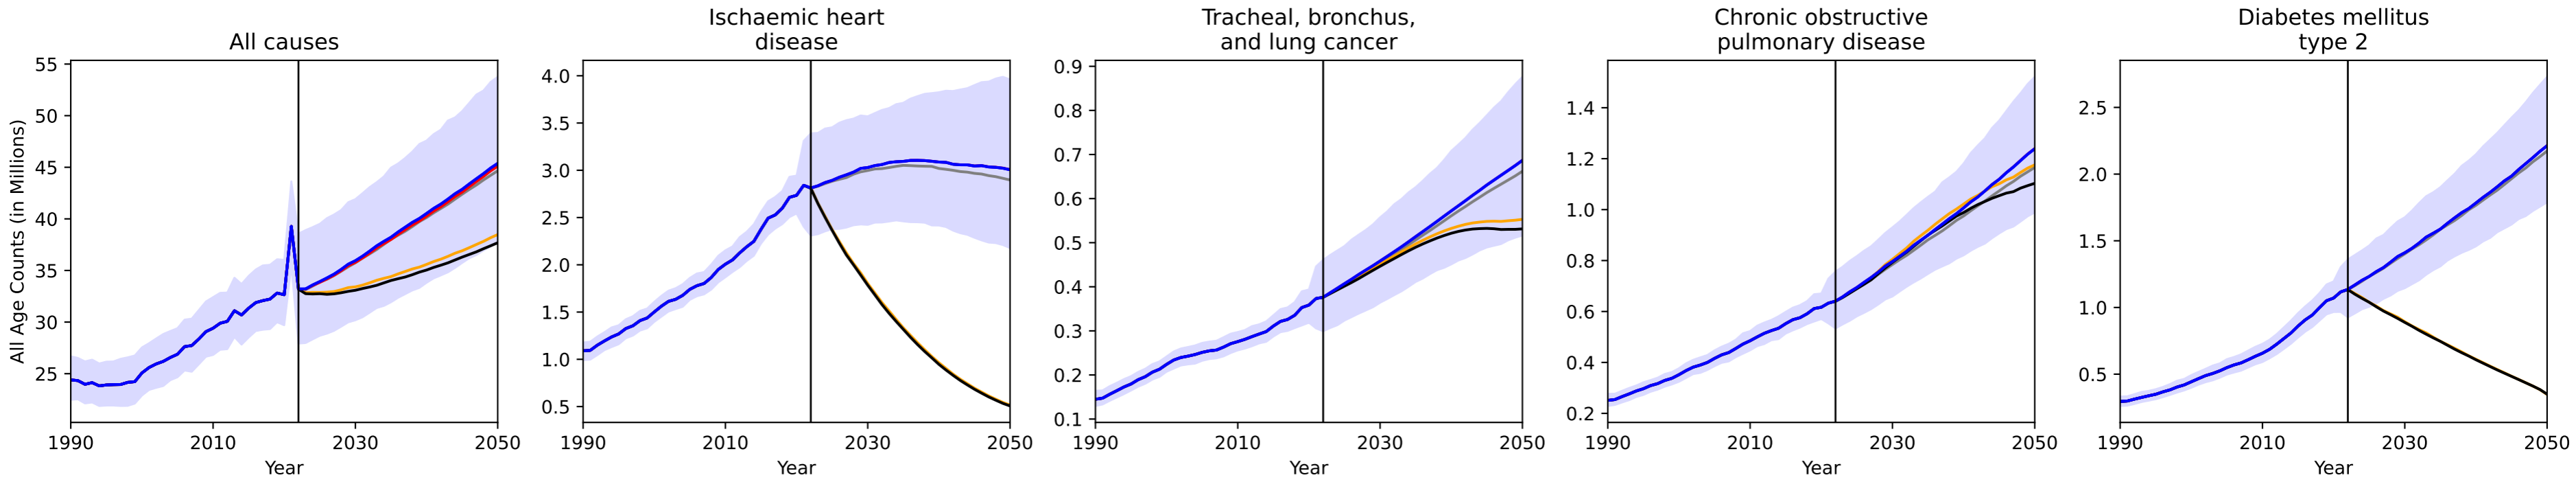

# Seychelles

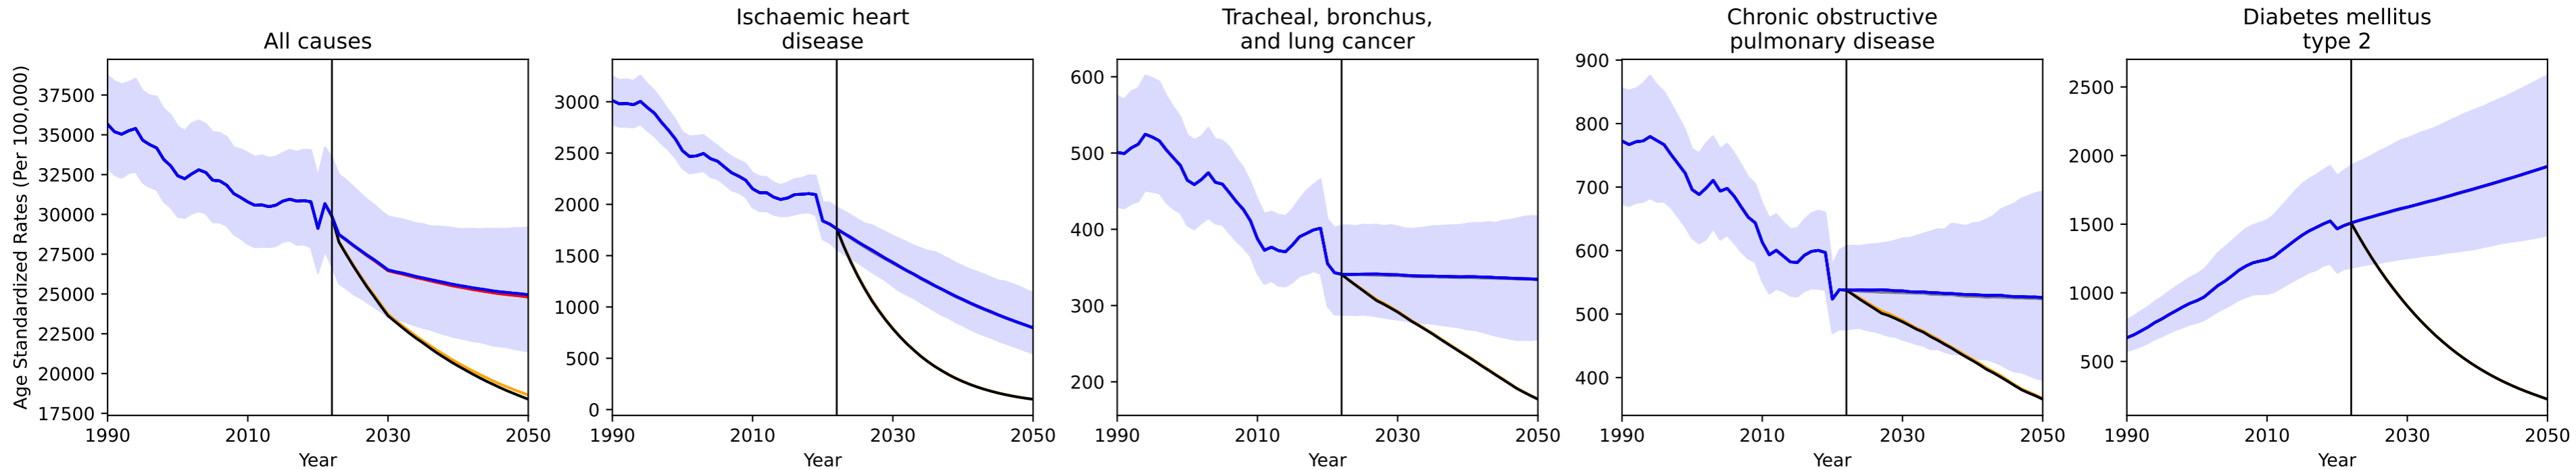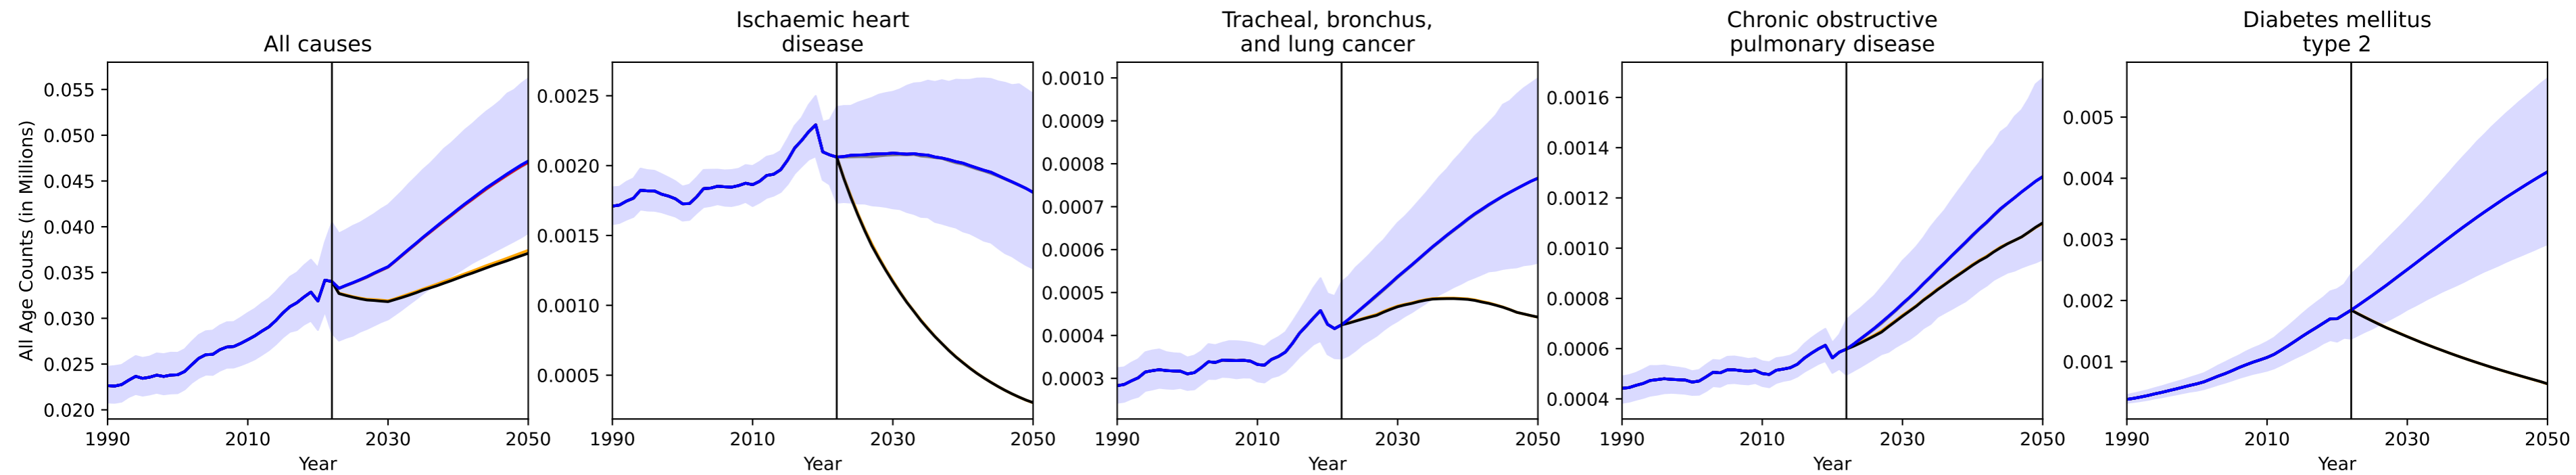

# Sri Lanka

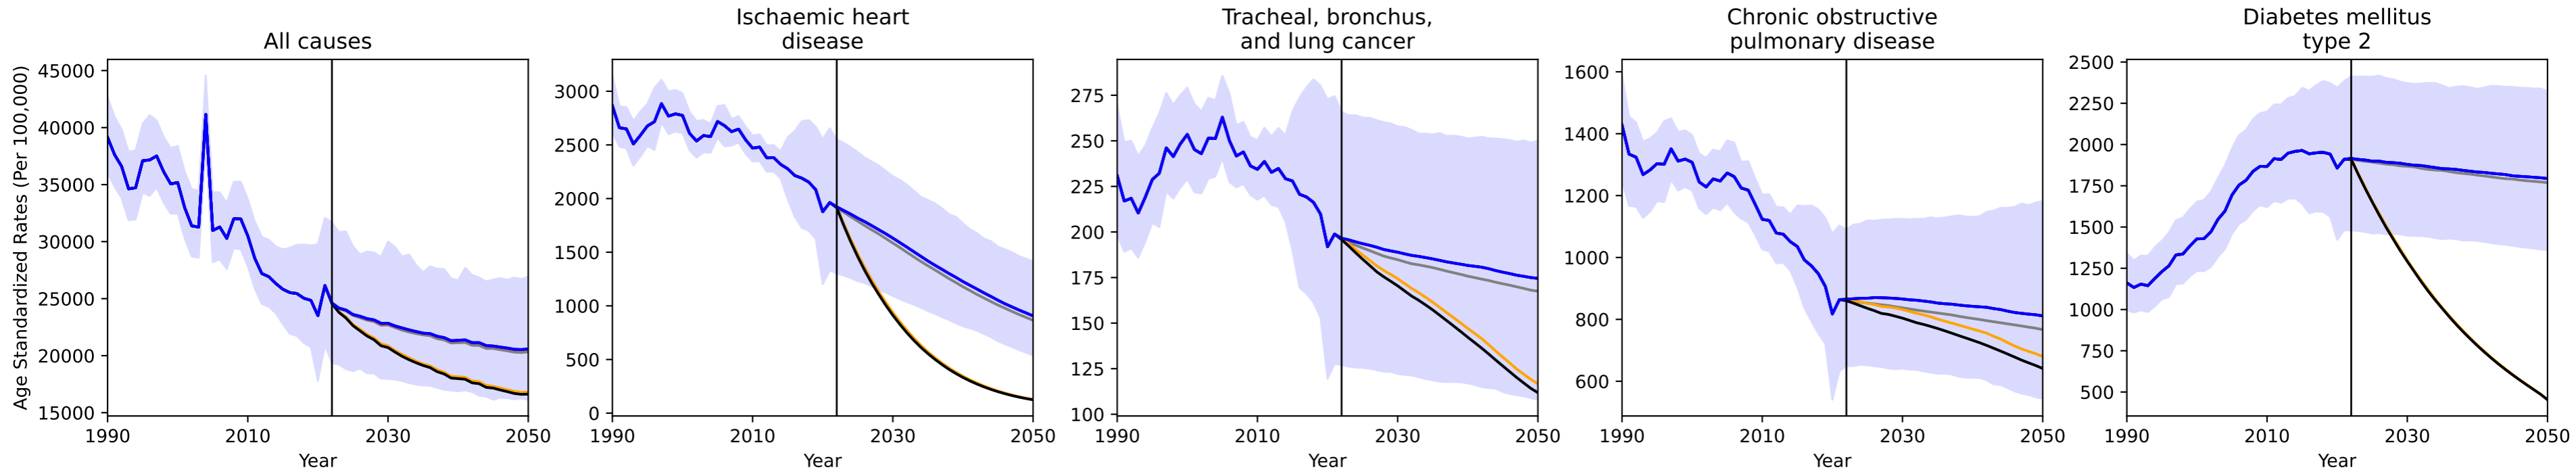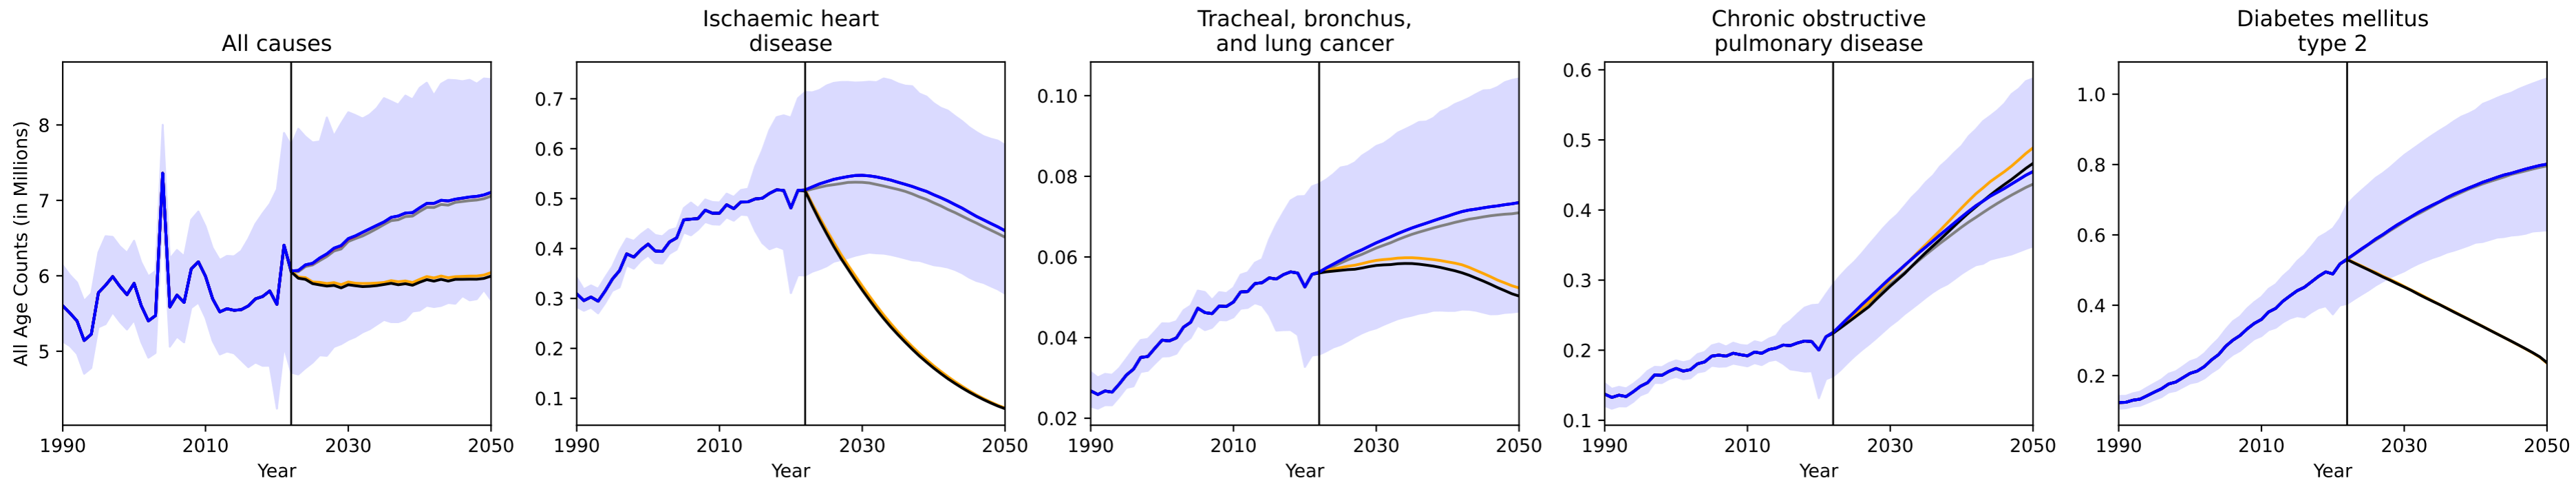

— Safer Environment — Improved Behavioural and Metabolic Risks — Improved Childhood Nutrition and Vaccination — Combined — Reference



# Thailand

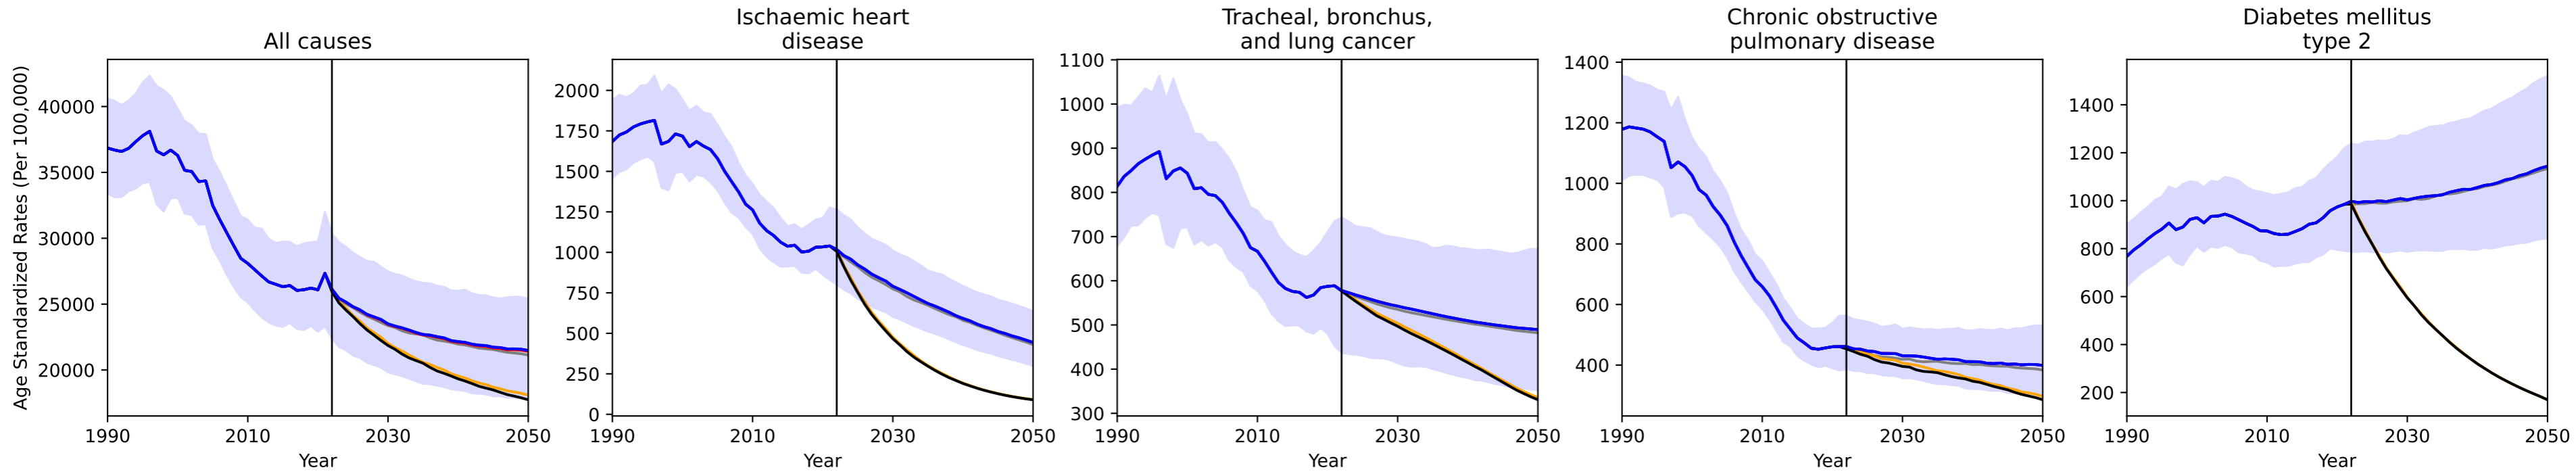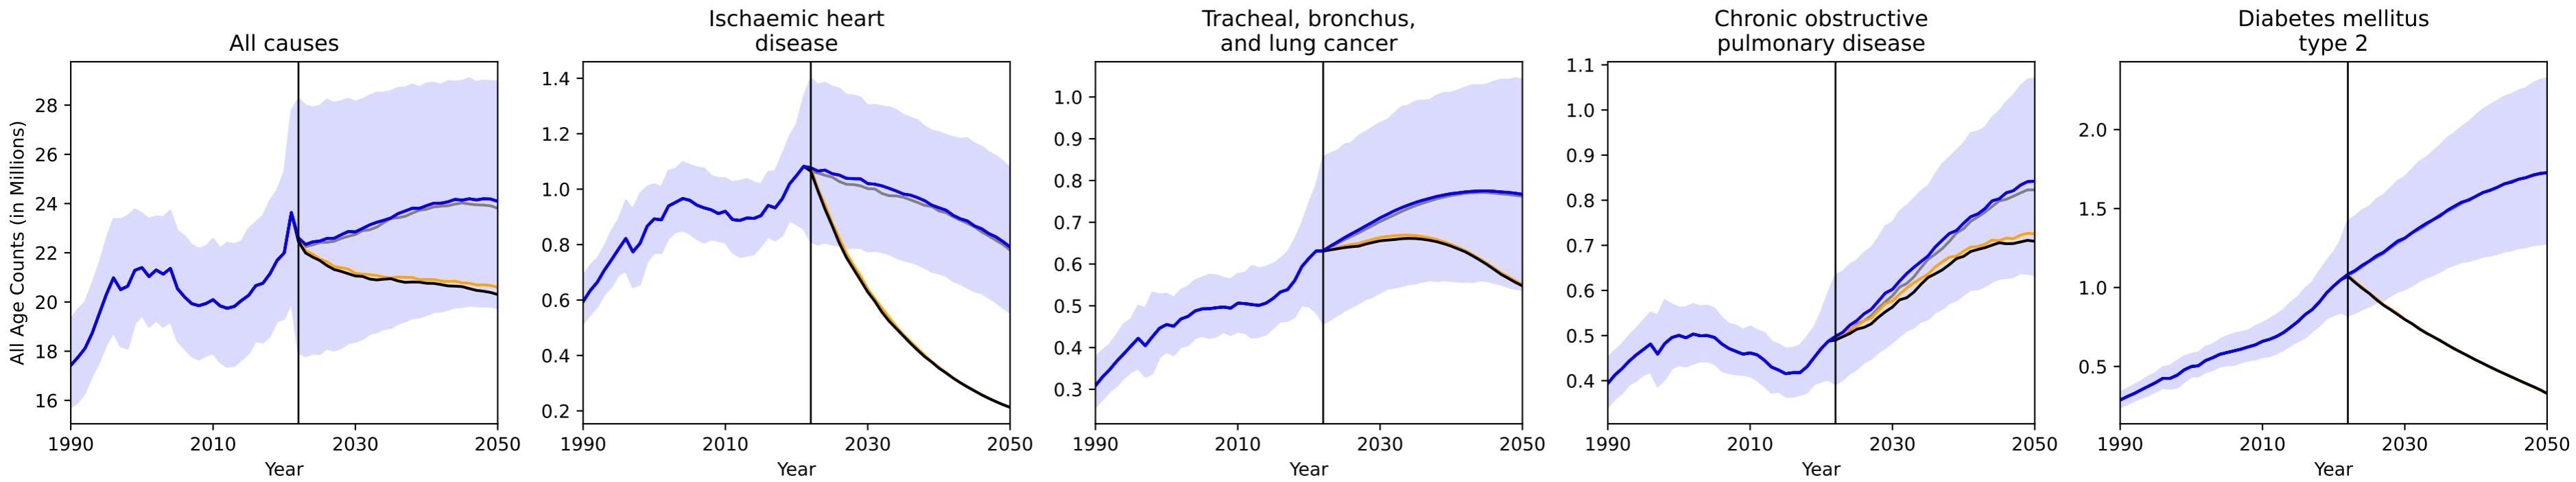

# Timor-Leste

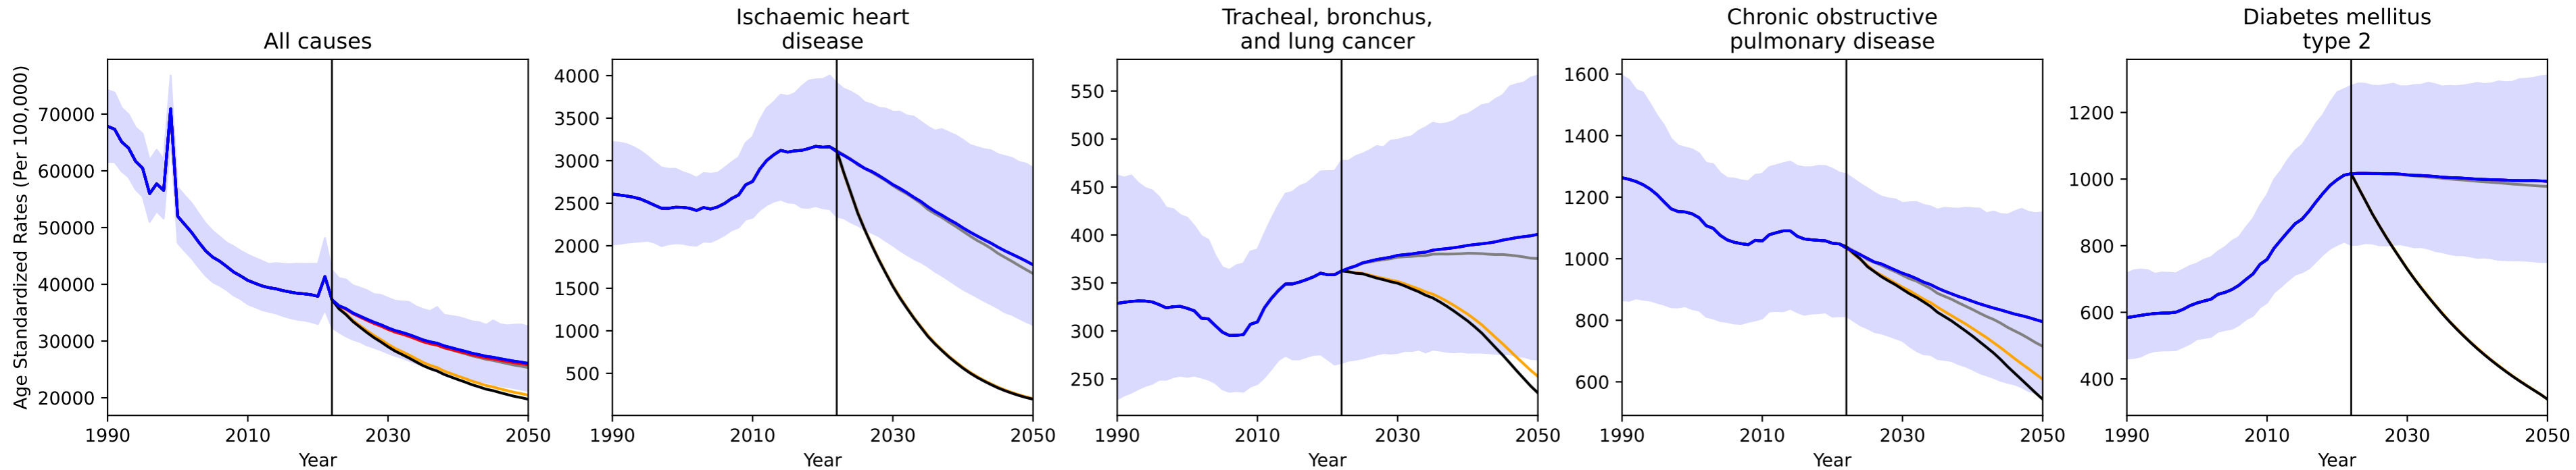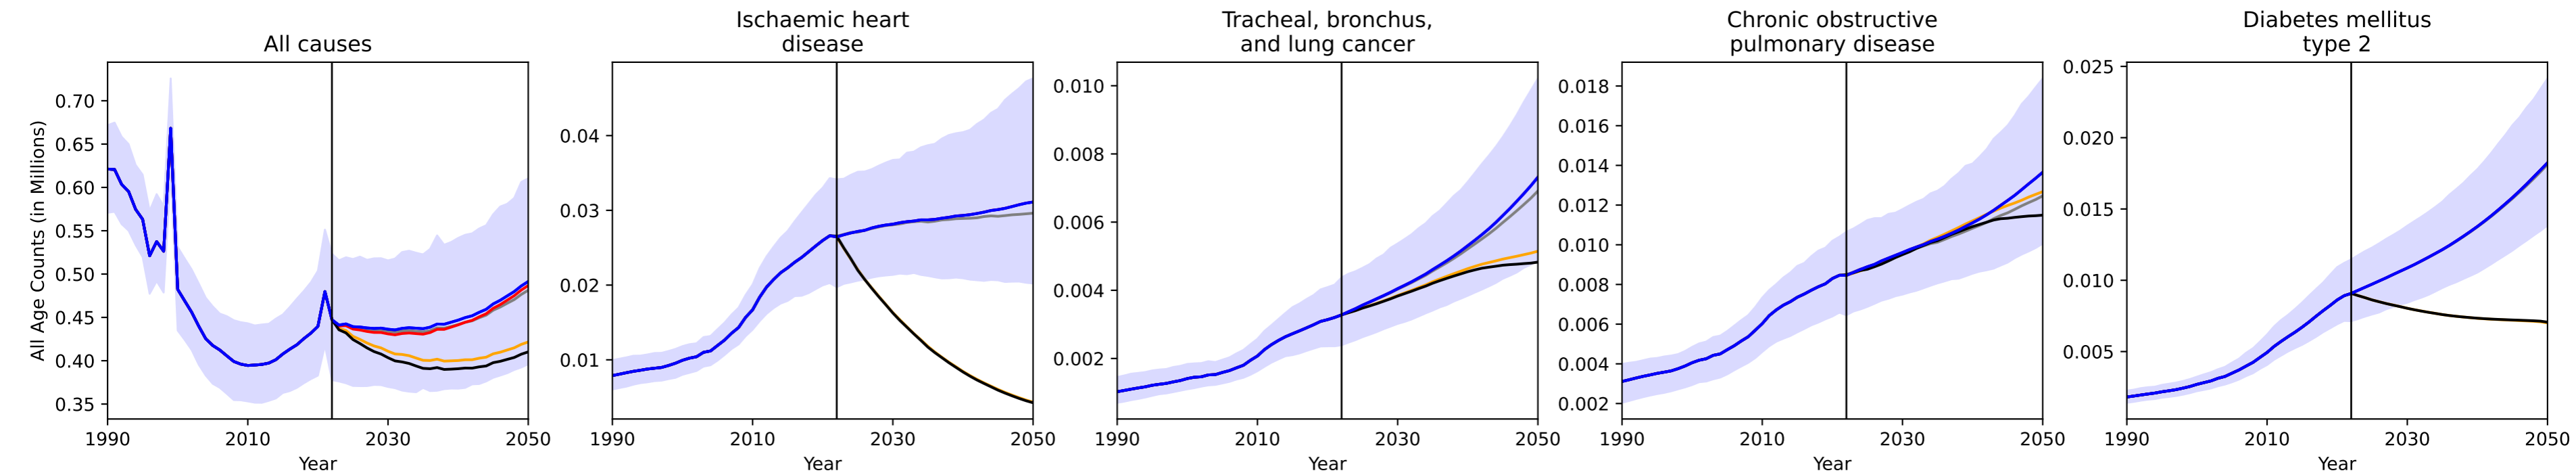

# Viet Nam

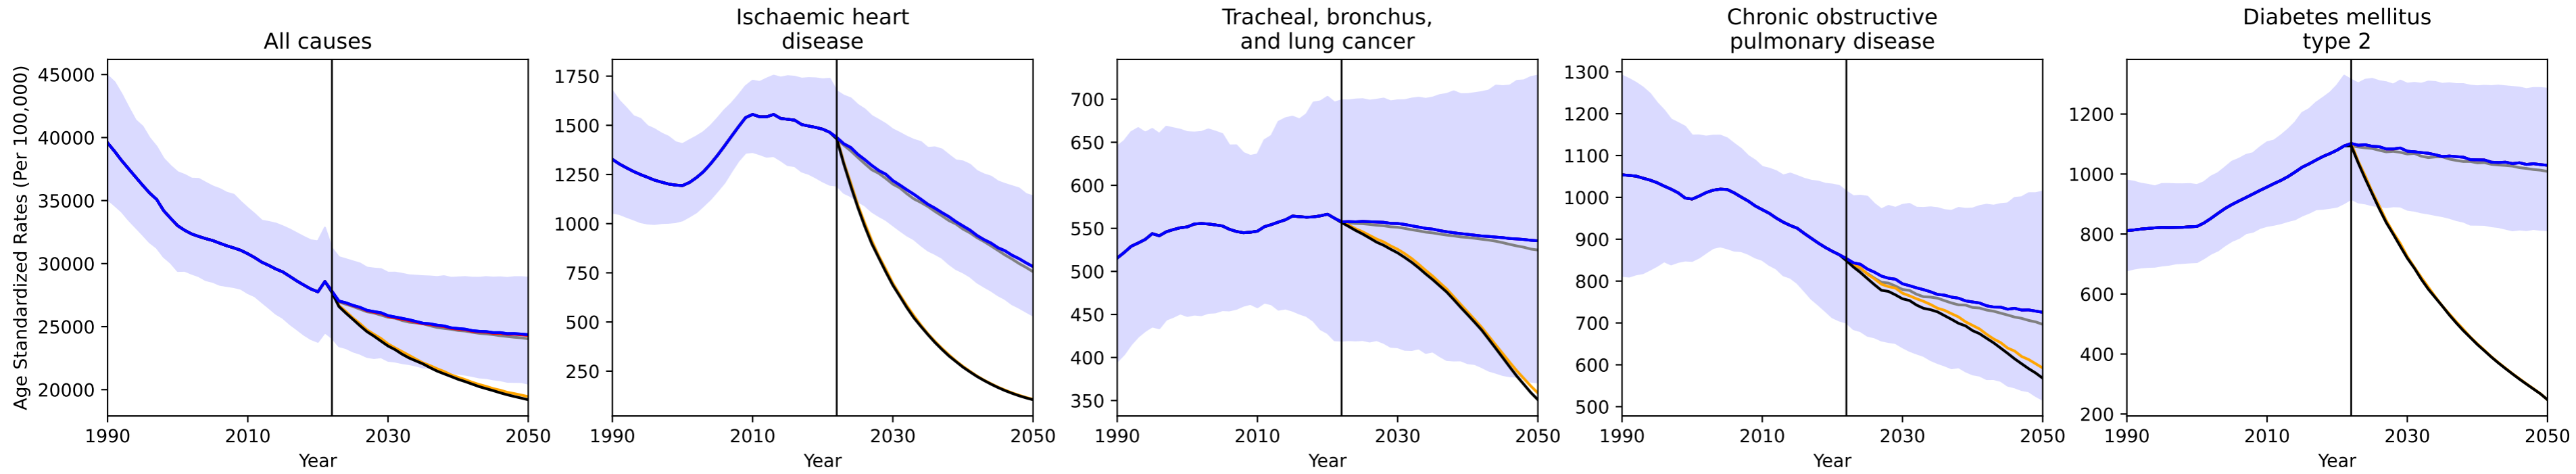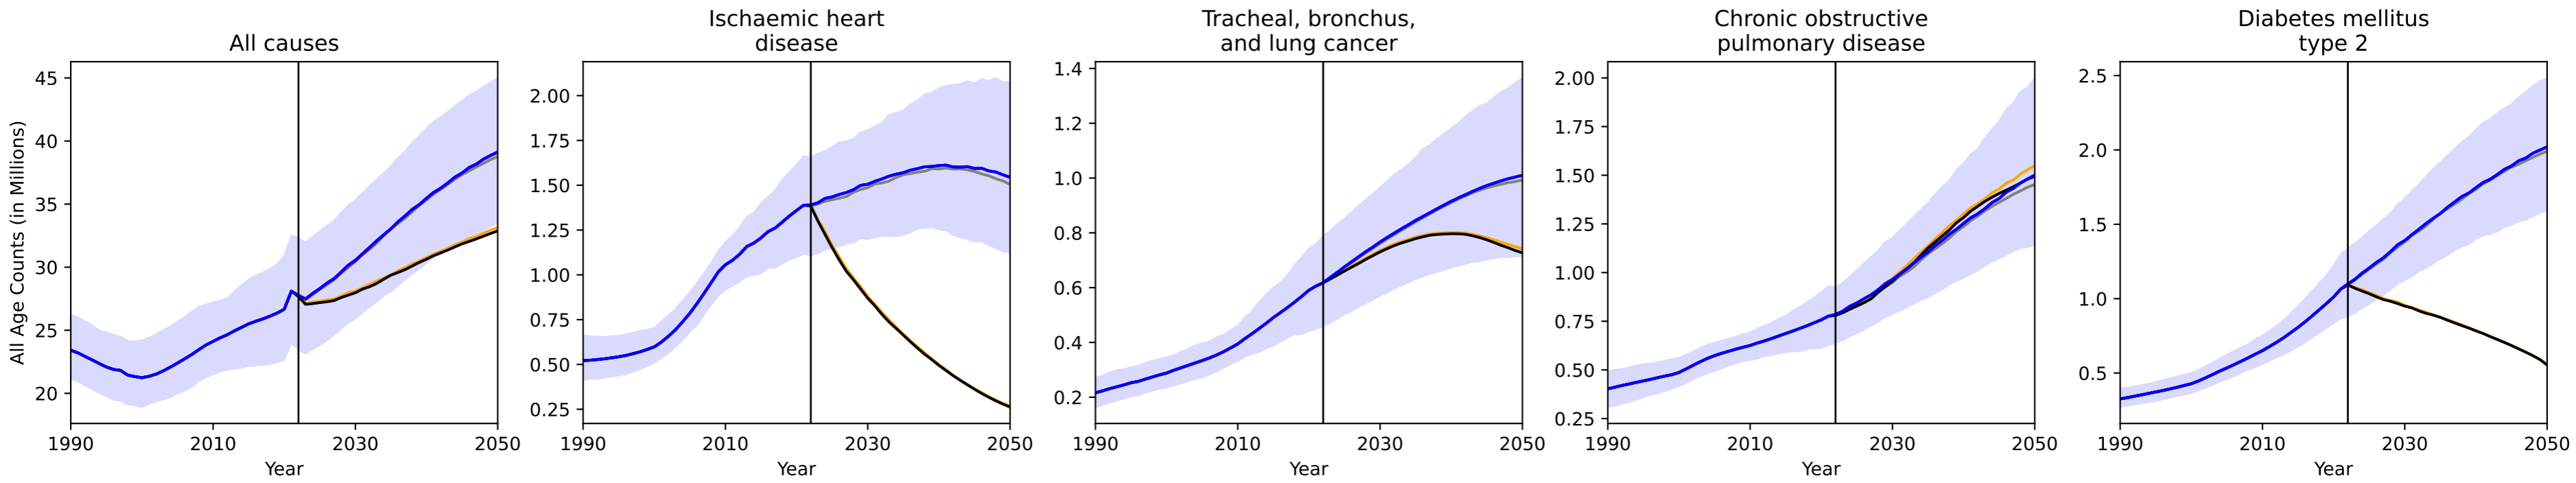

# Angola

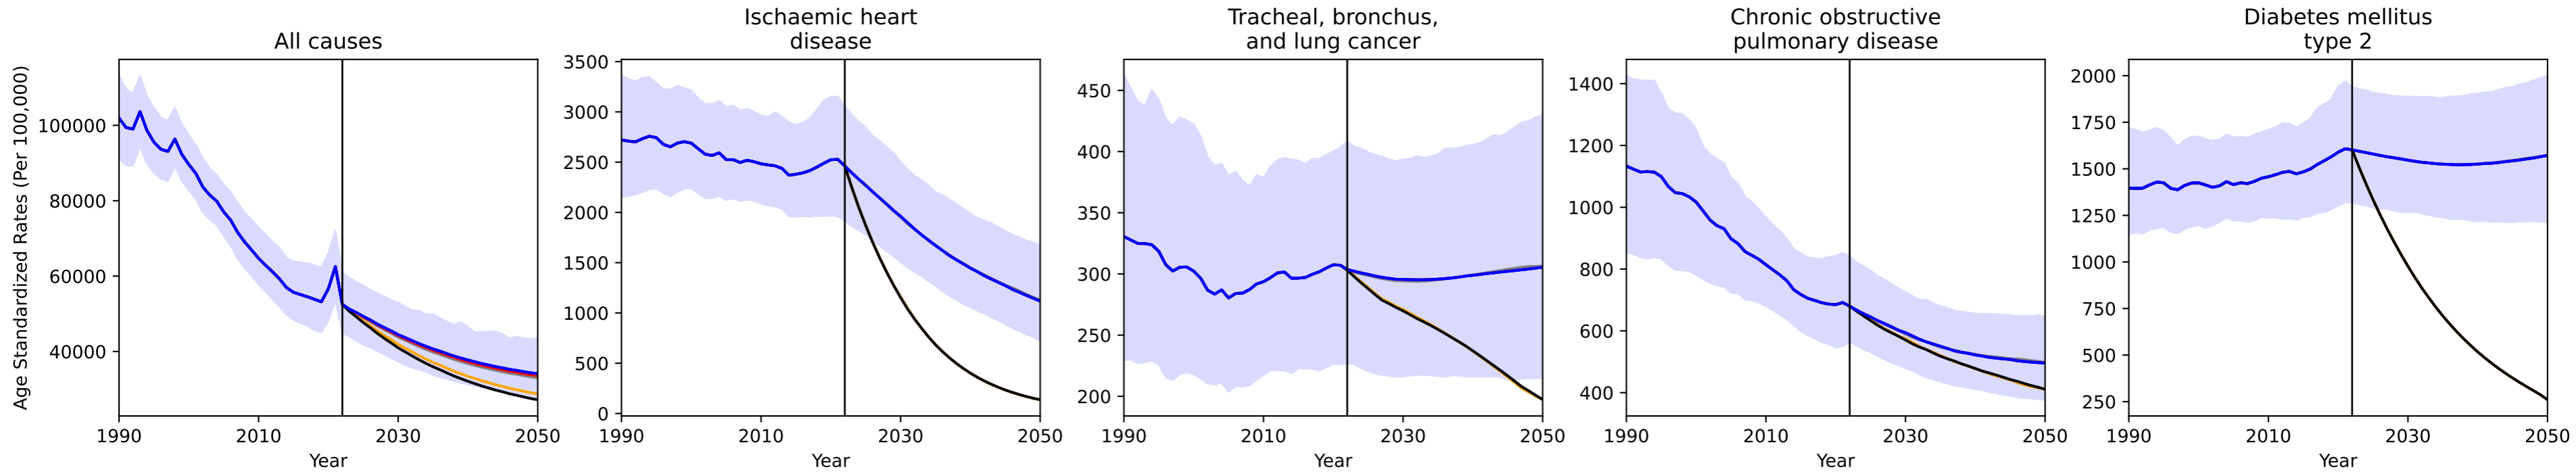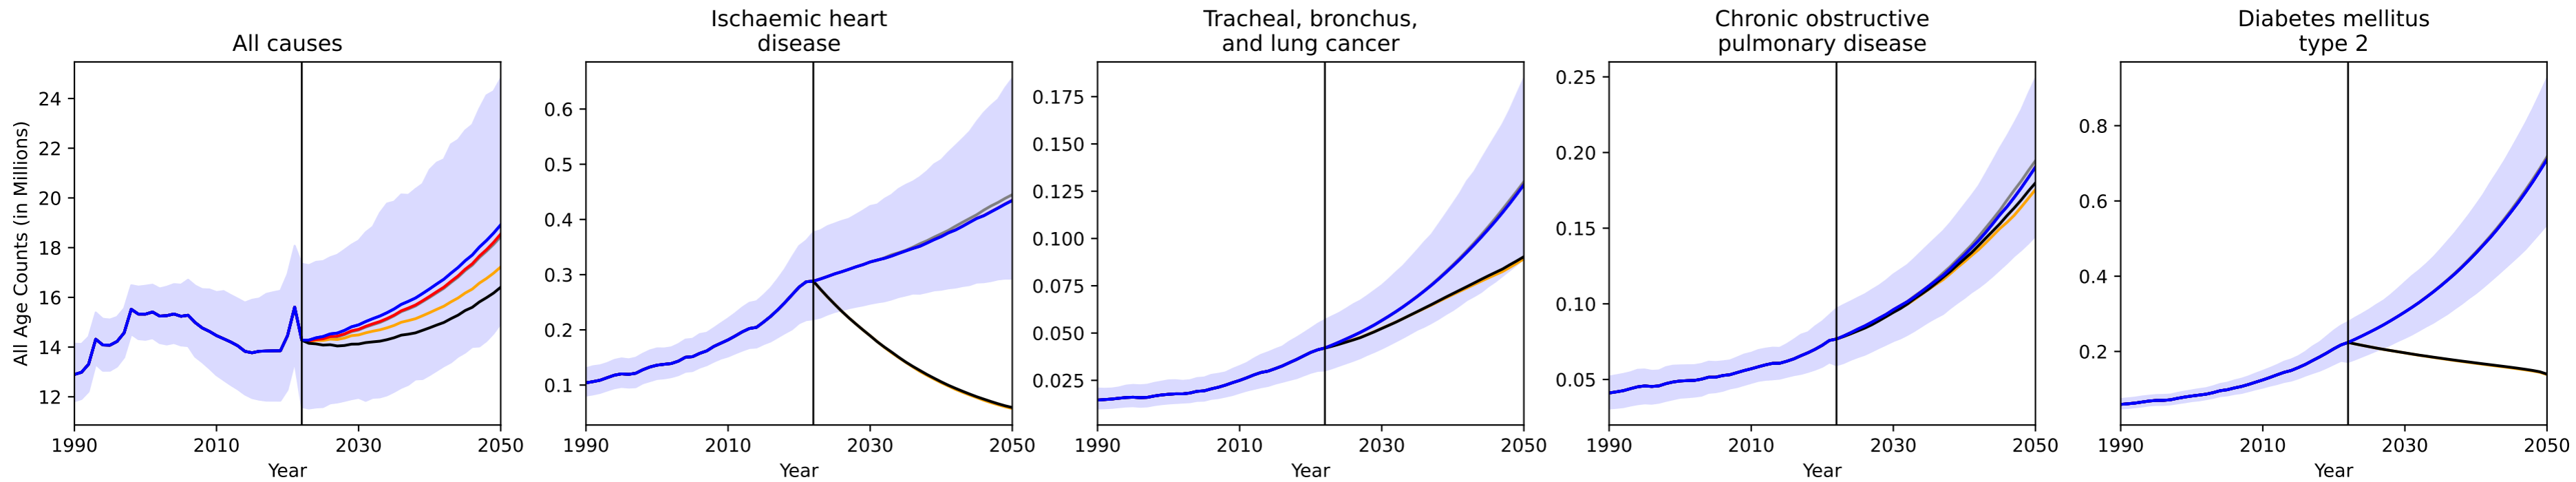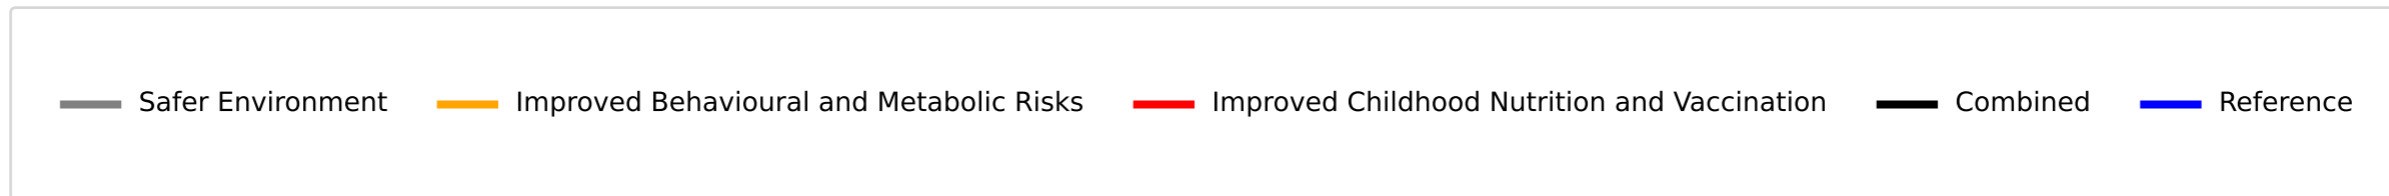

# Central African Republic

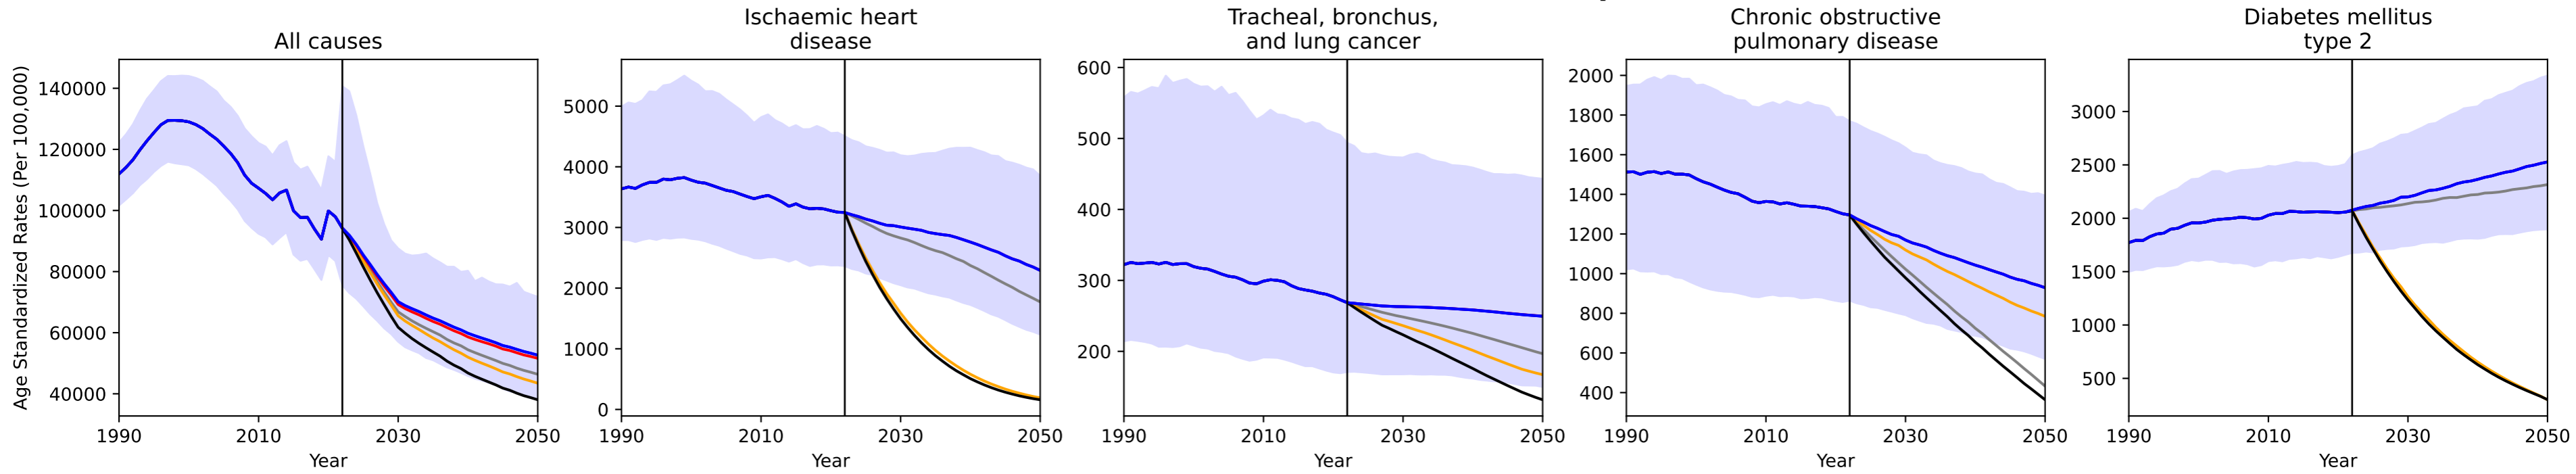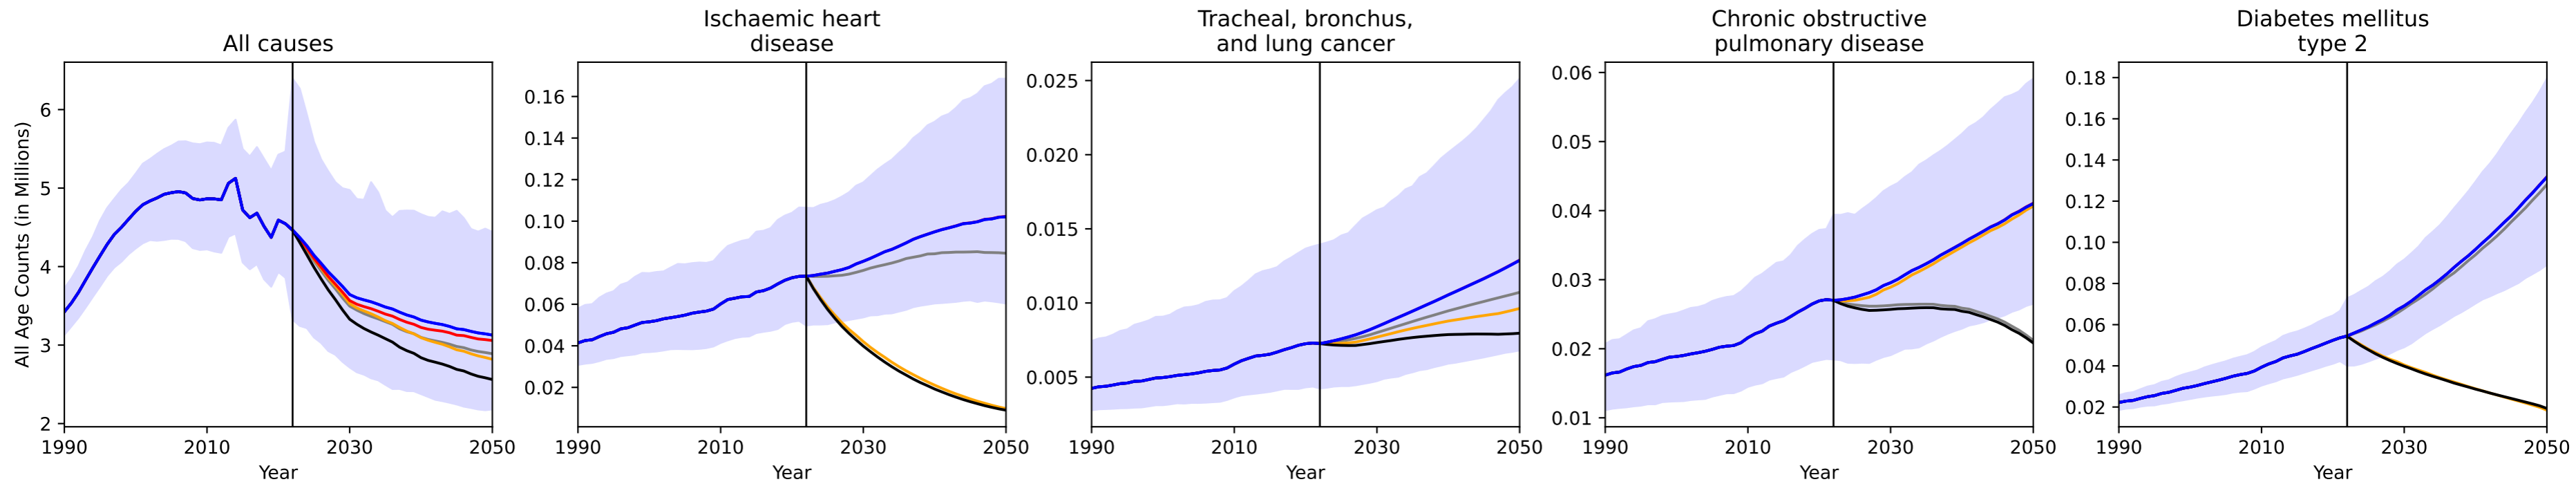

# Congo (Brazzaville)

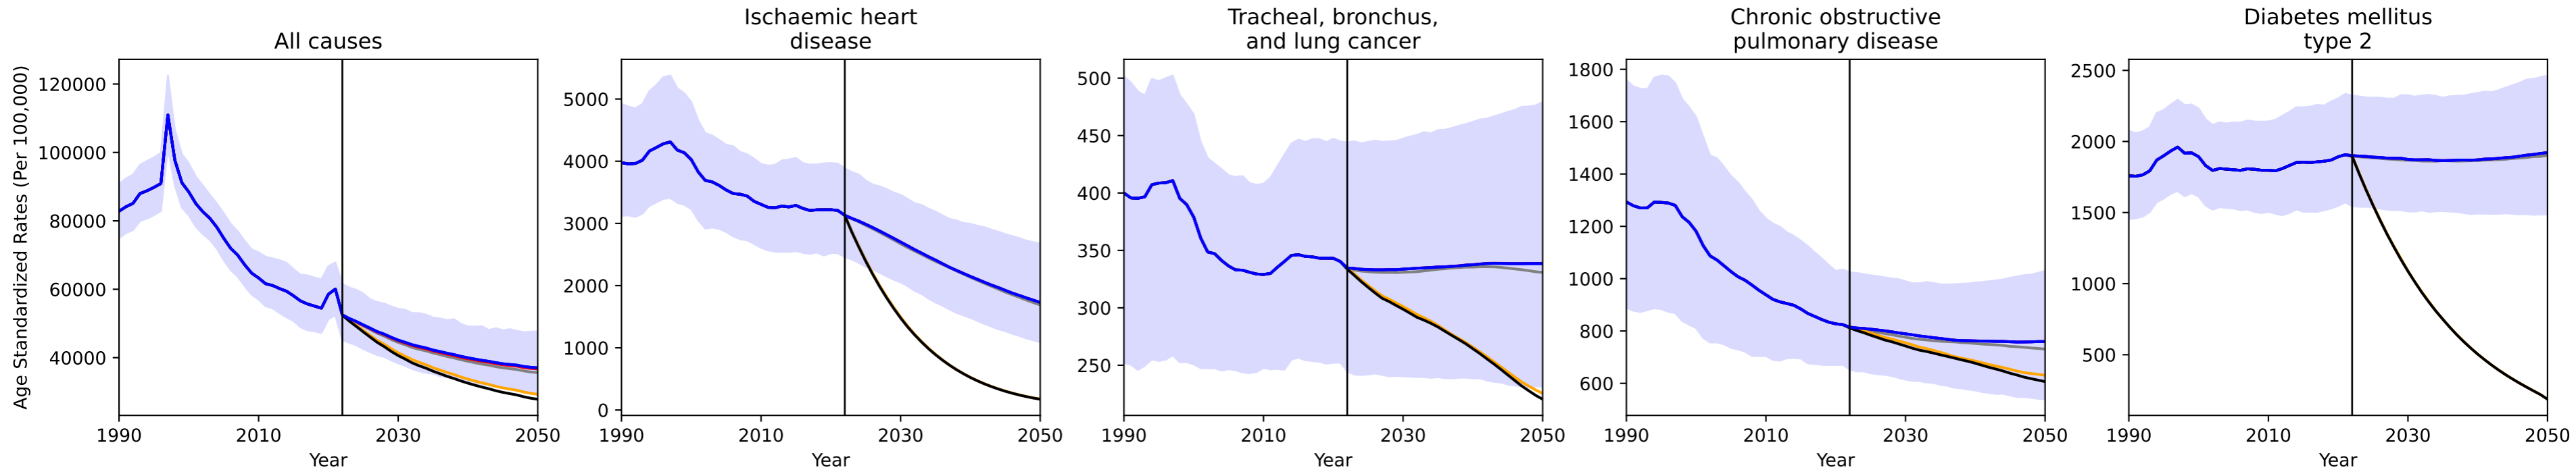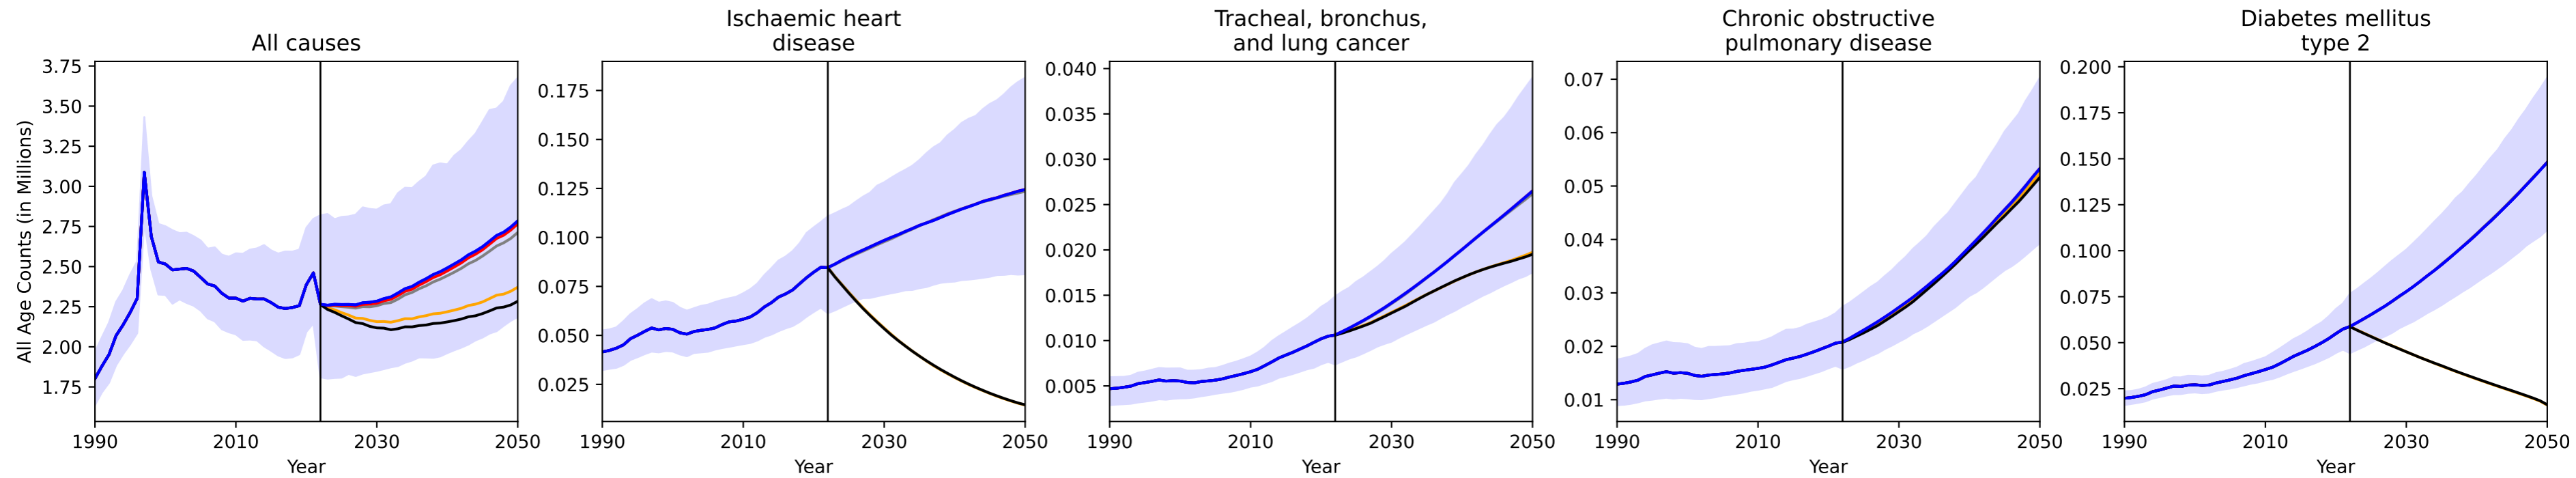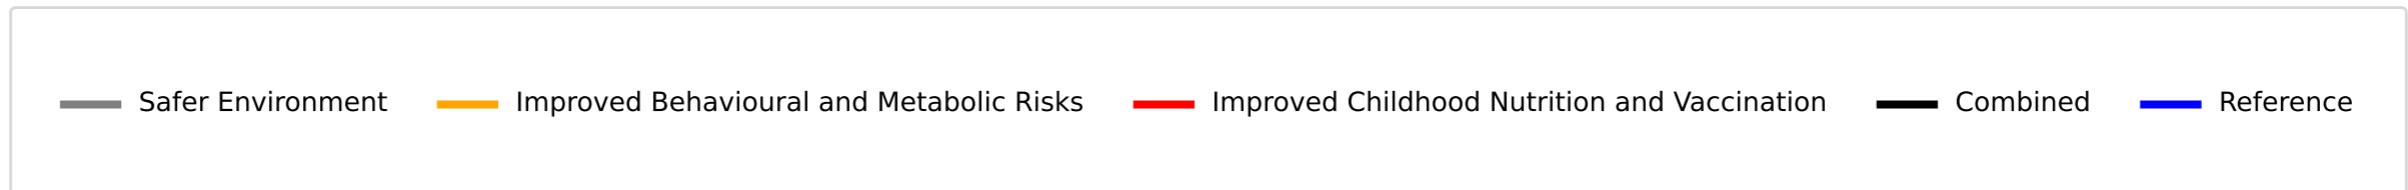

# DR Congo

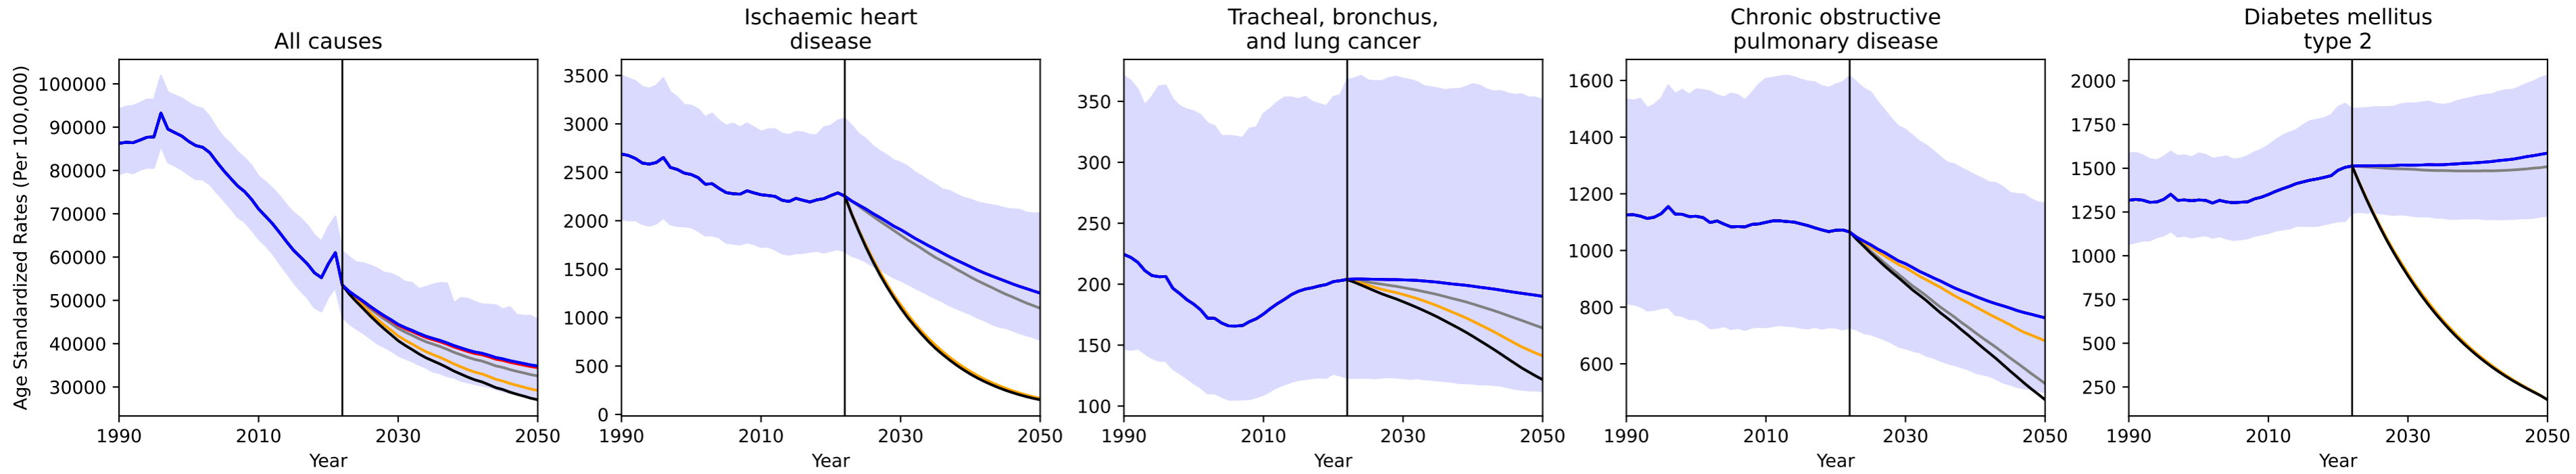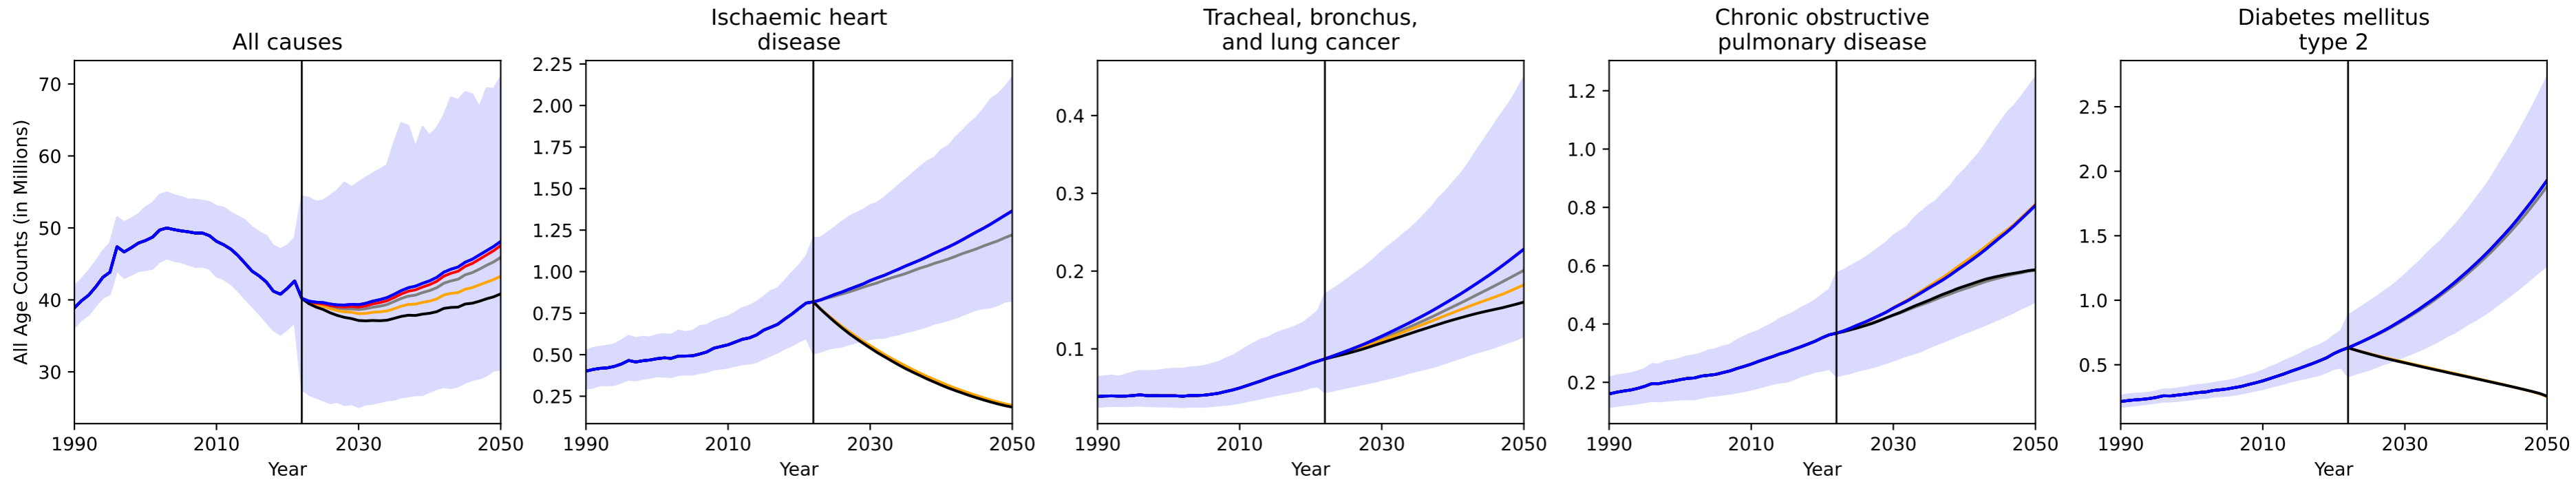

# Equatorial Guinea

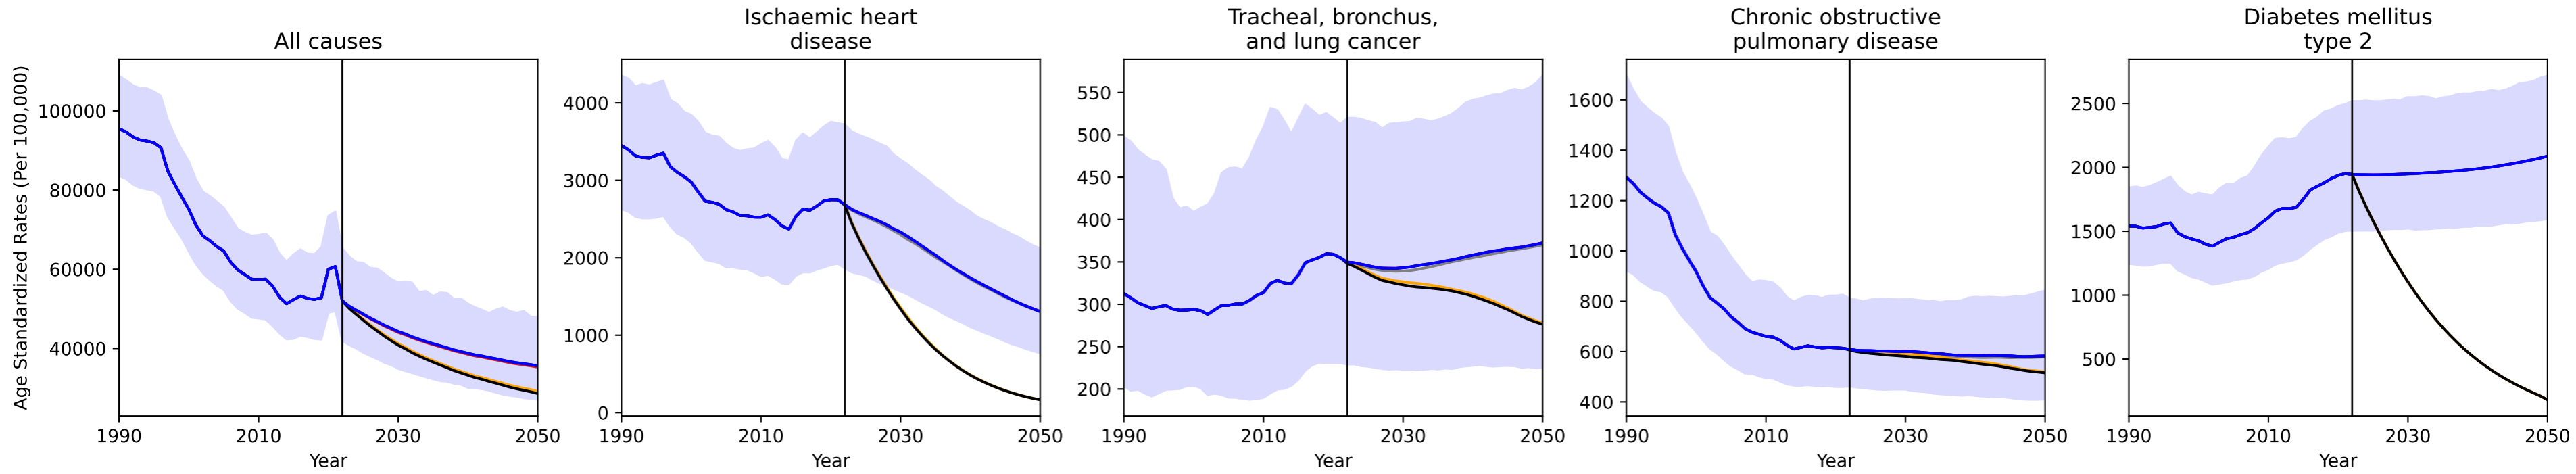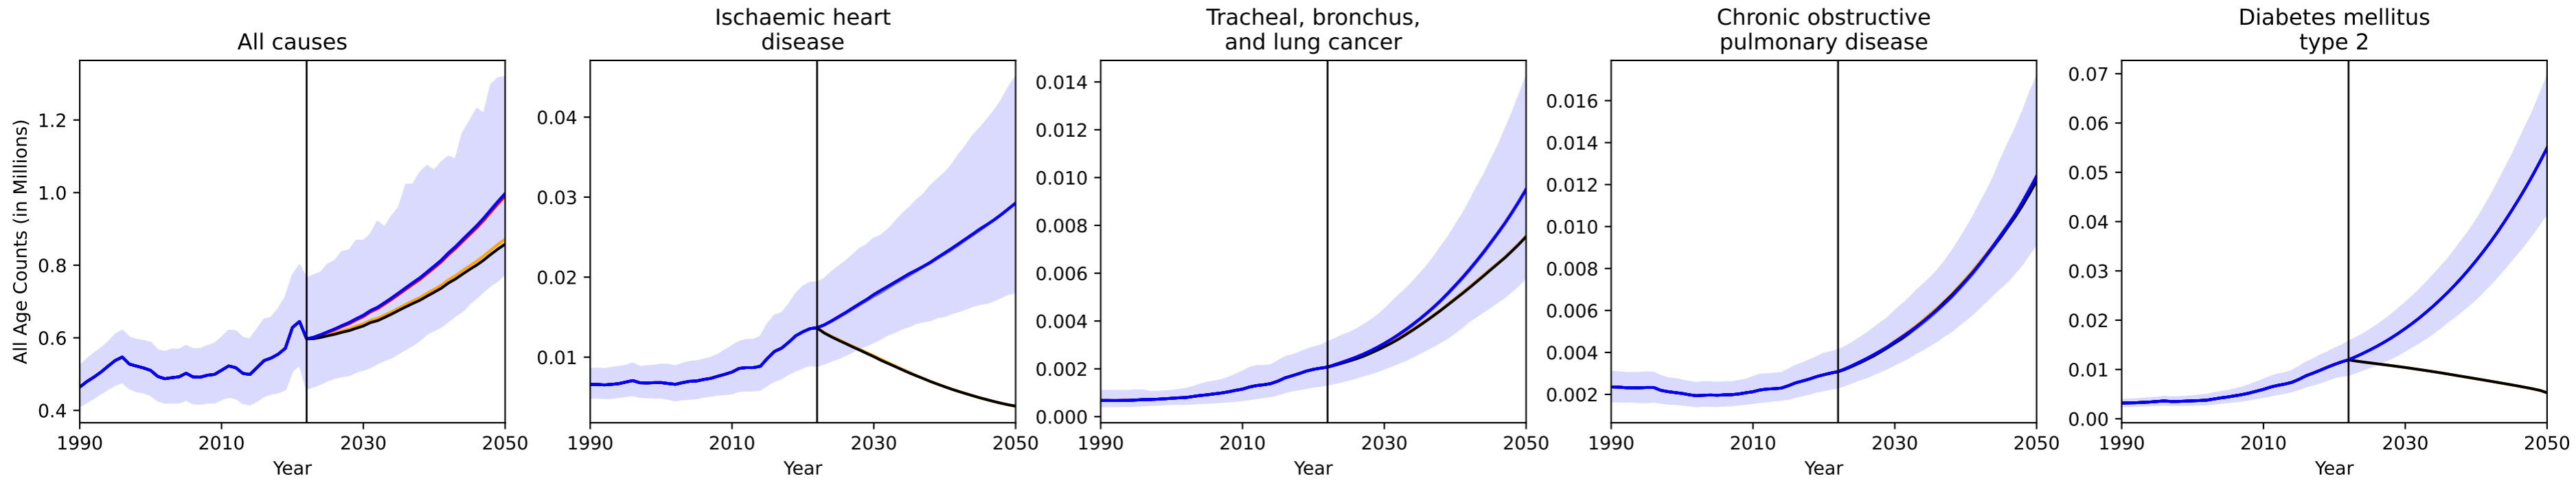



# Gabon

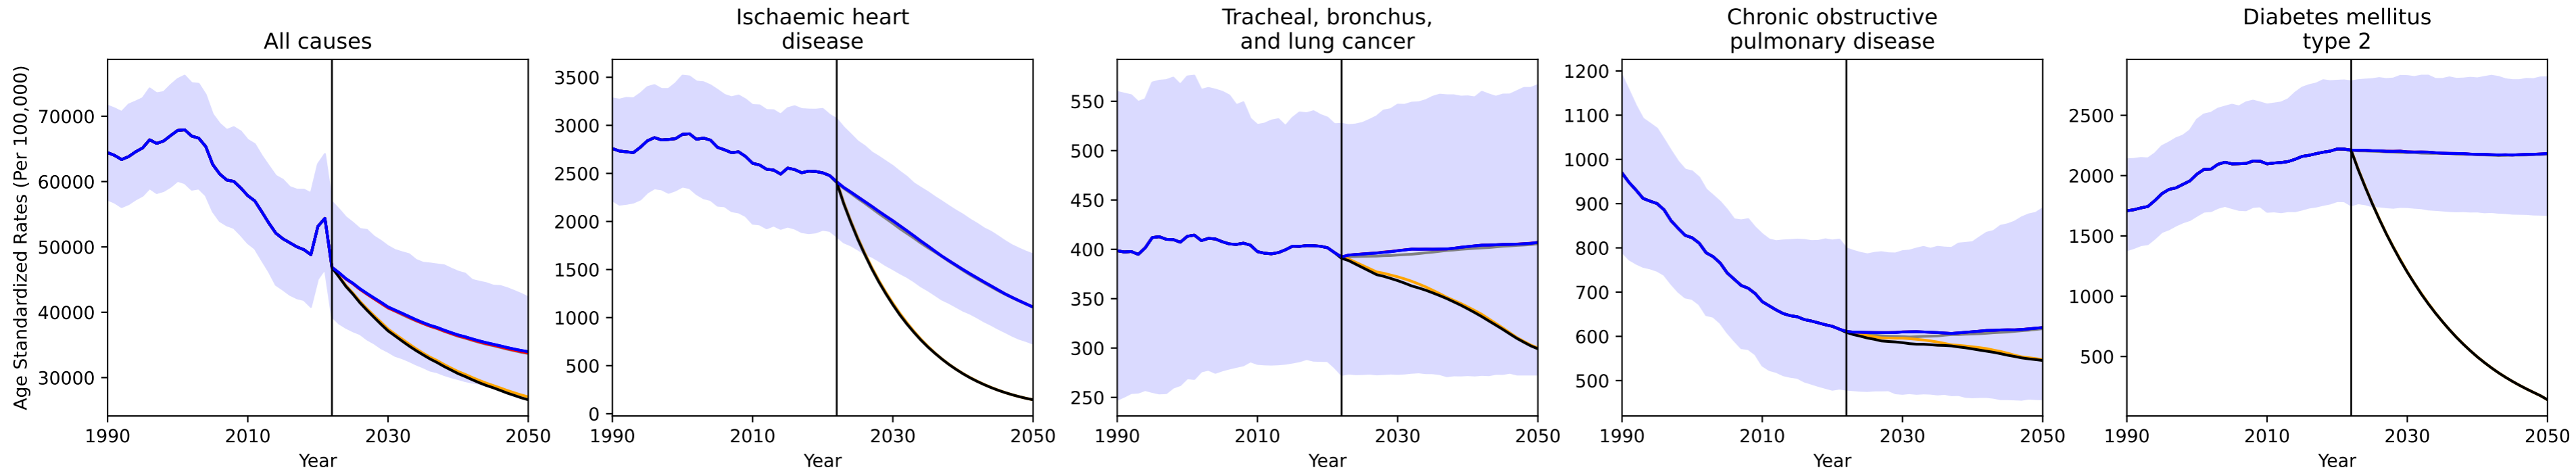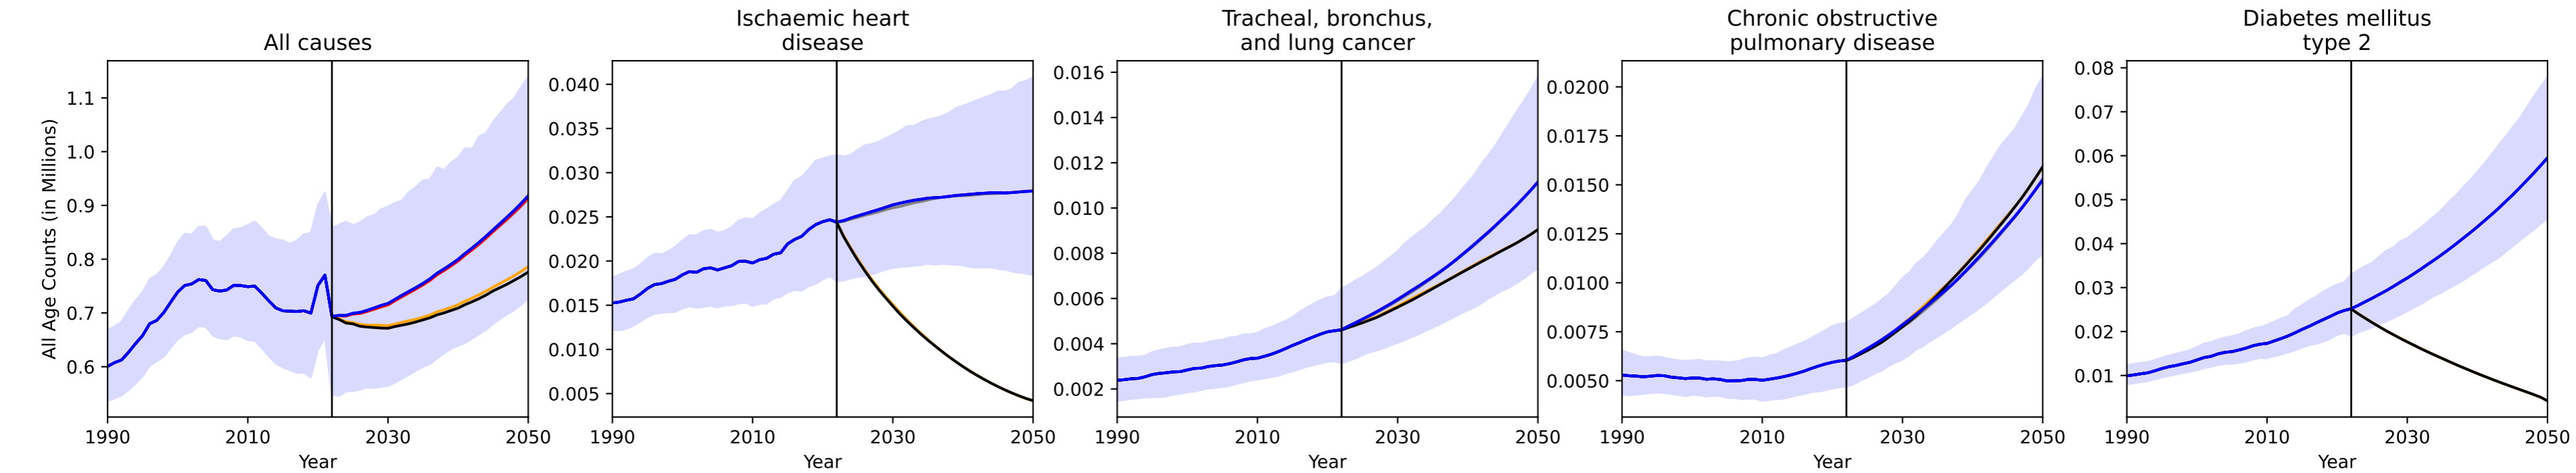

# Burundi

Supplemental Results Figure S12. All cause and top NCD causes age standardized DALY rates and all age counts by scenario and location, 1990-2050

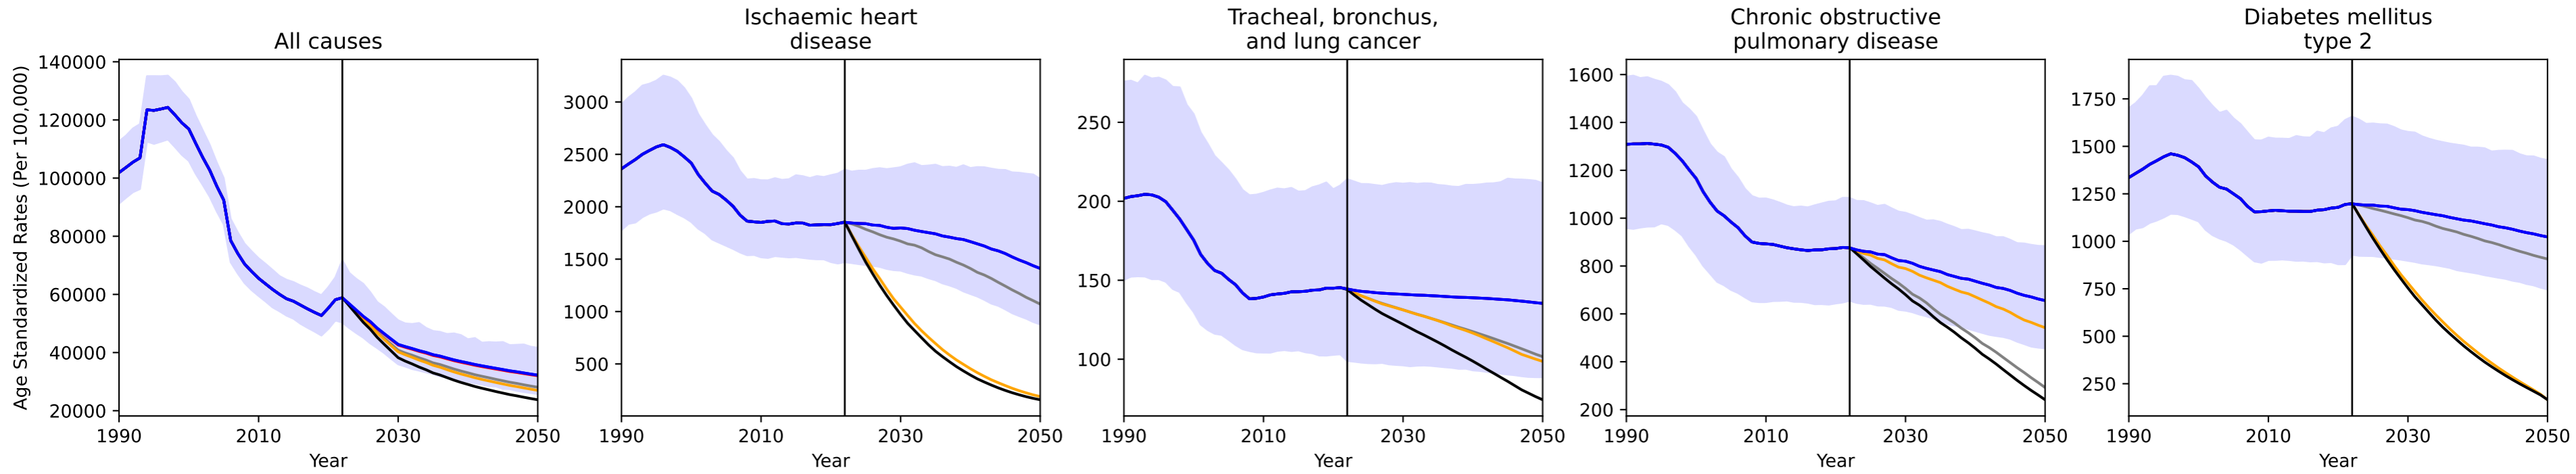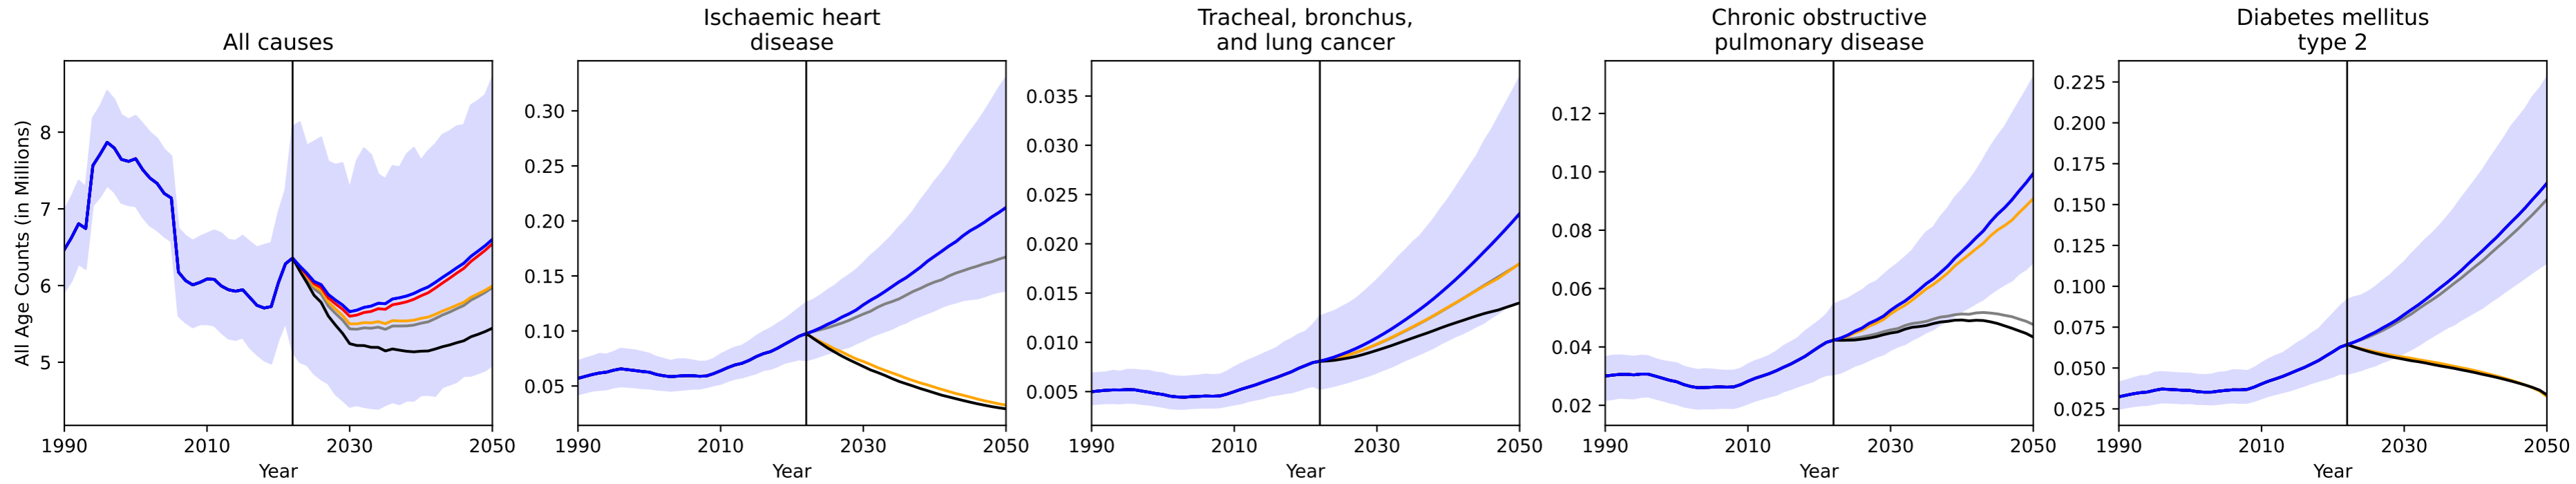

# Comoros

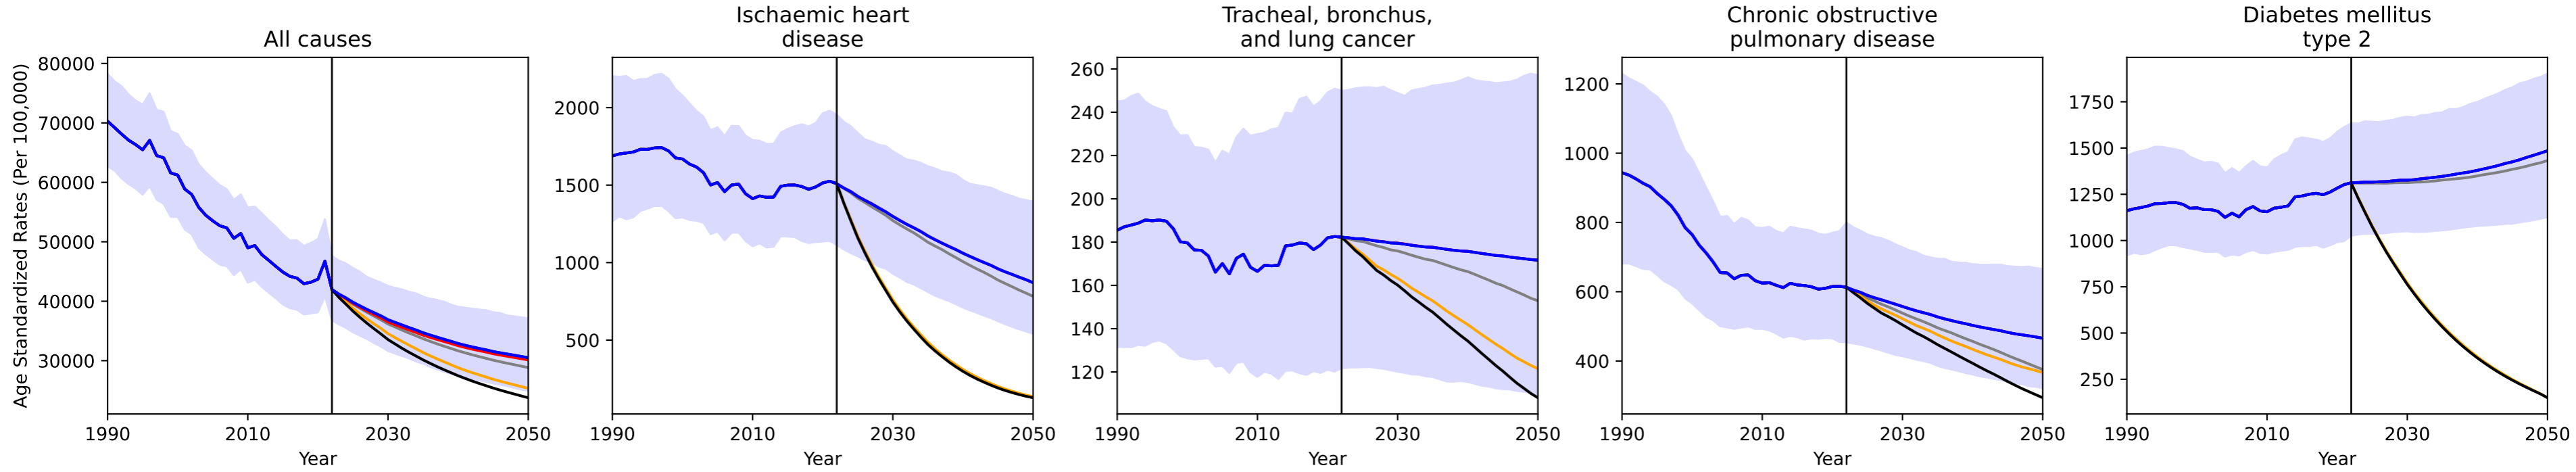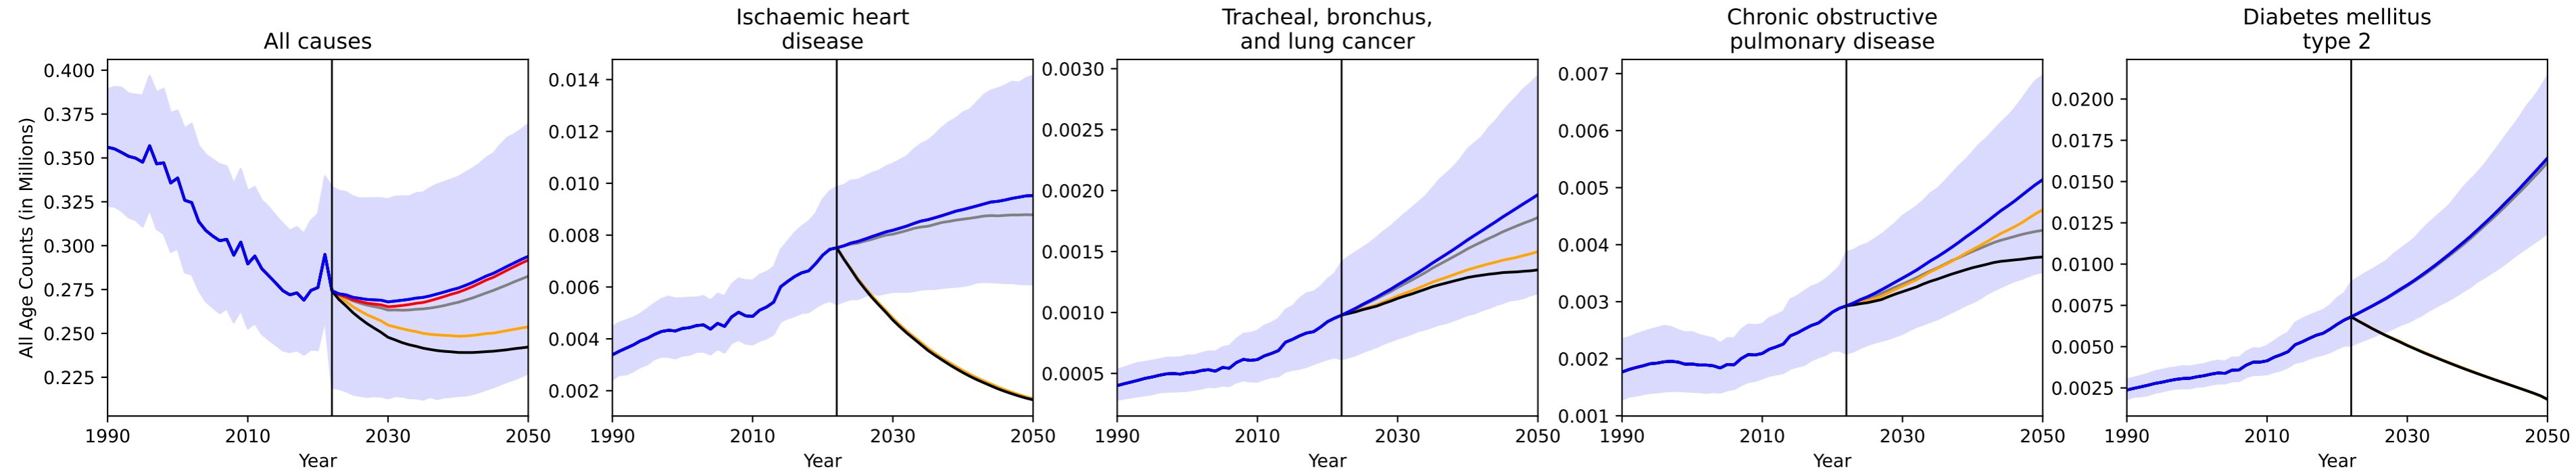

# Djibouti

Supplemental Results Figure S12. All cause and top NCD causes age standardized DALY rates and all age counts by scenario and location, 1990-2050

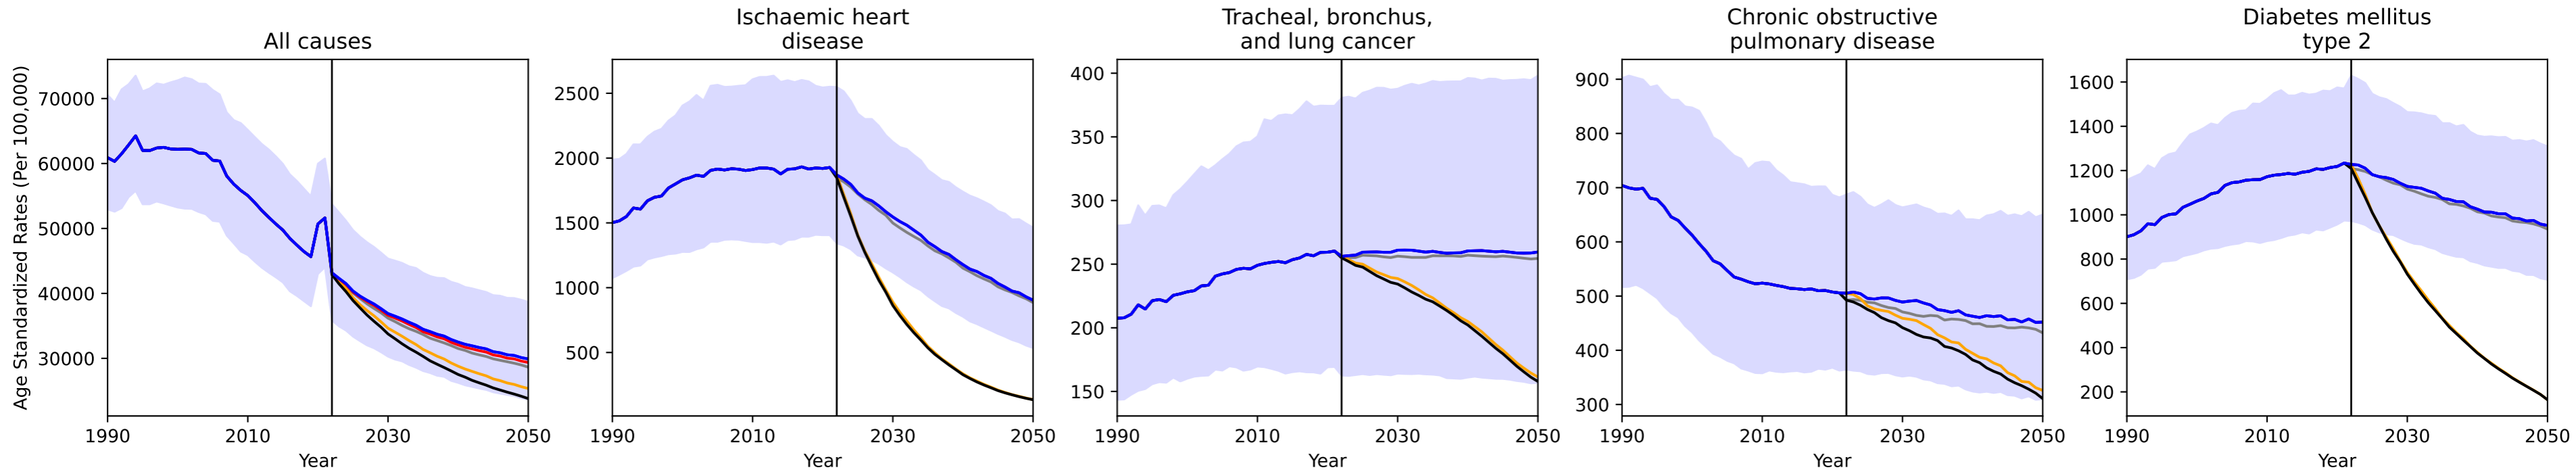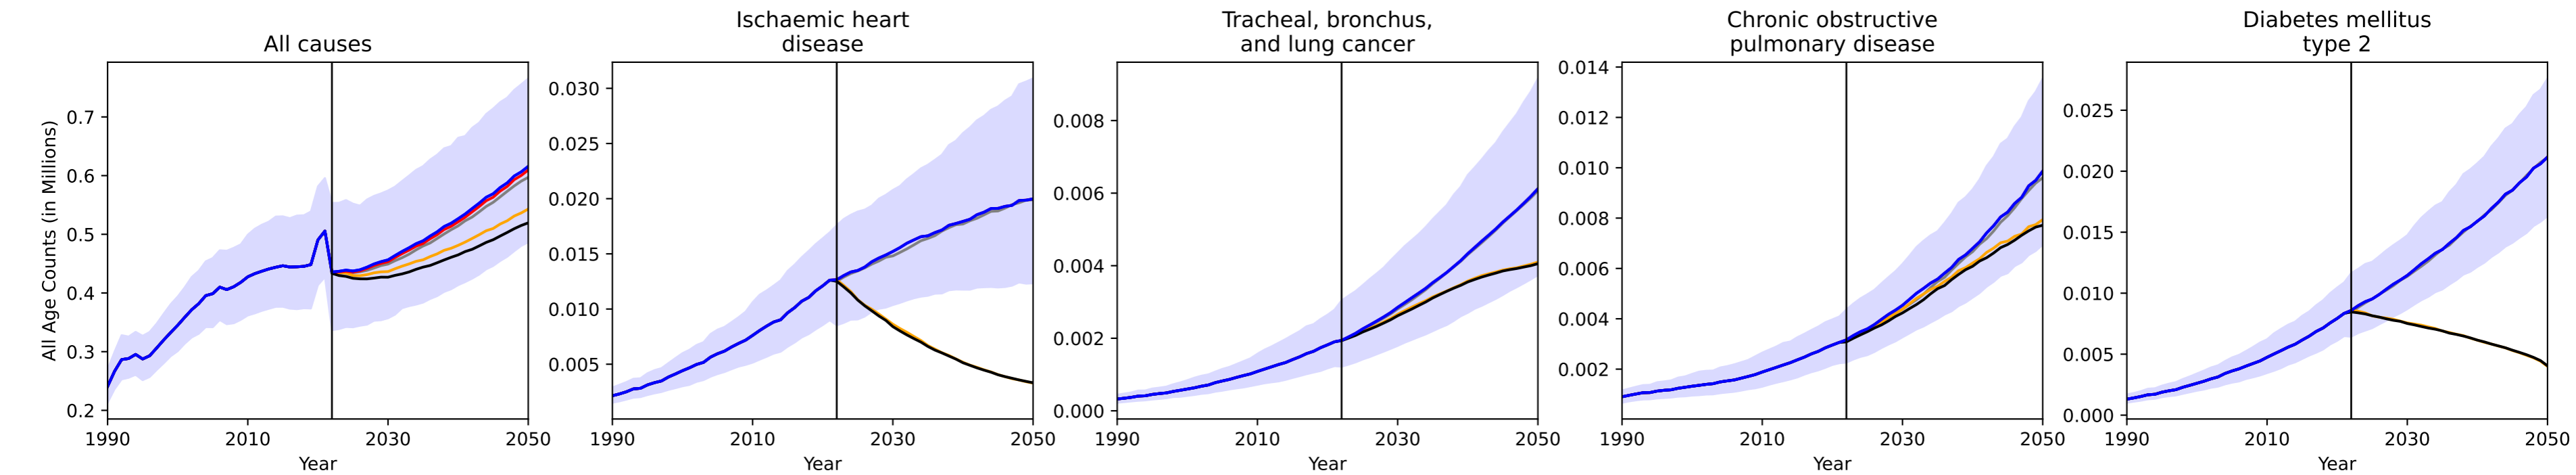

# Eritrea

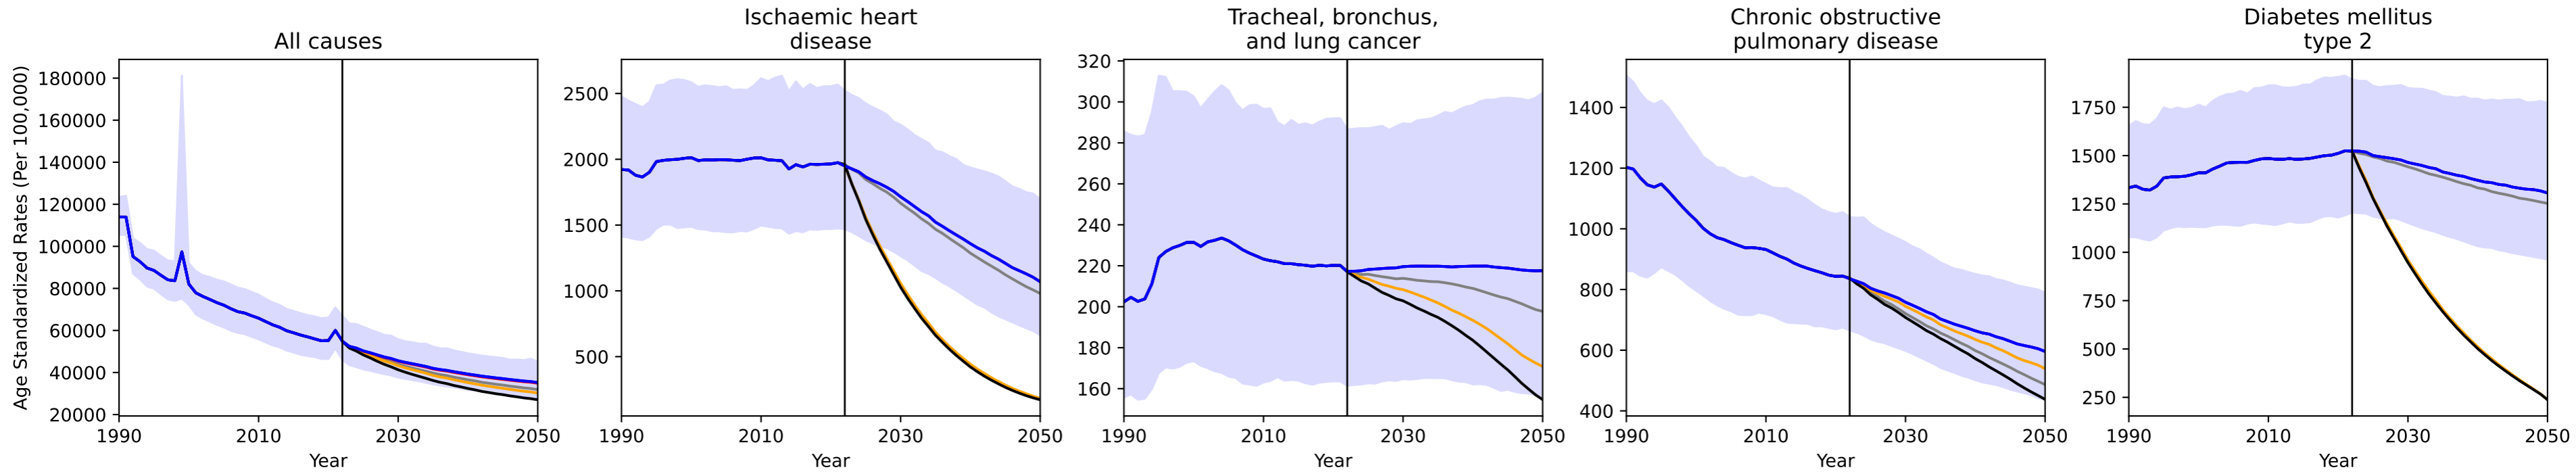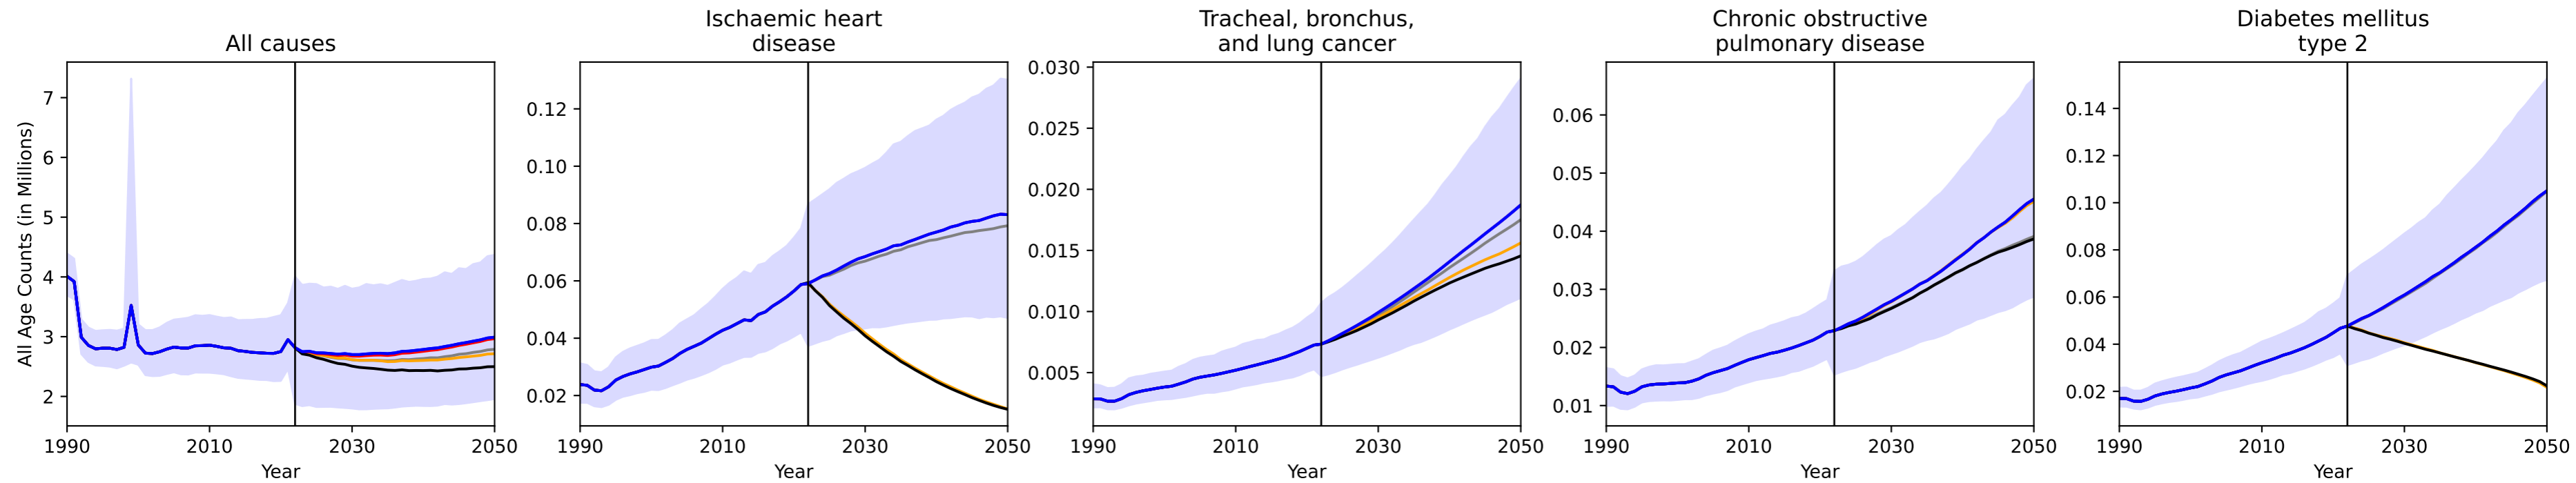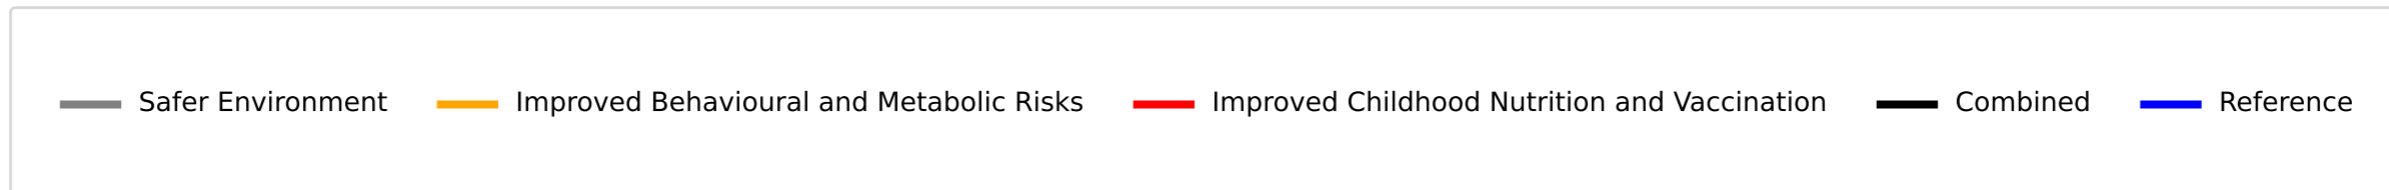

# Ethiopia

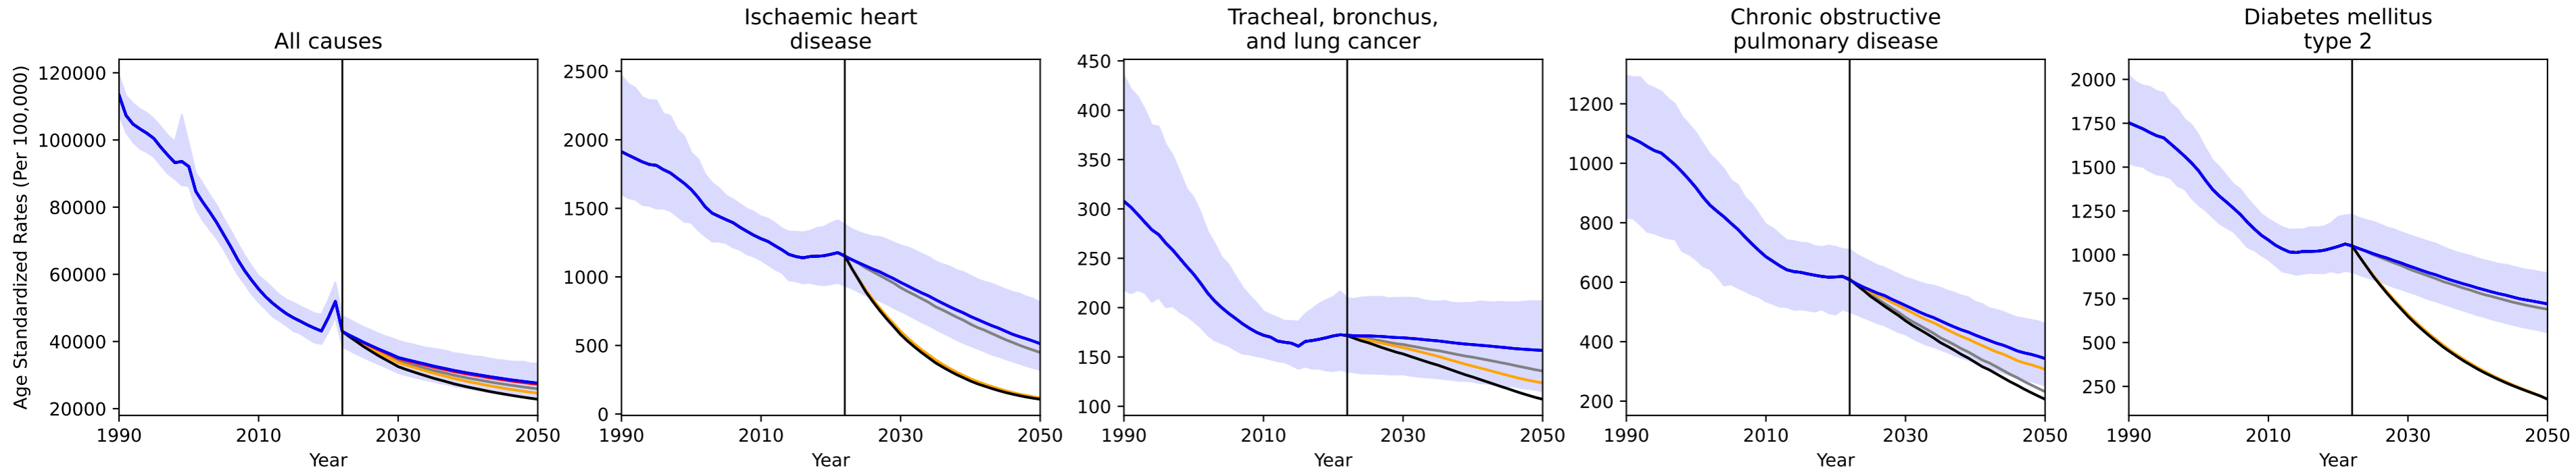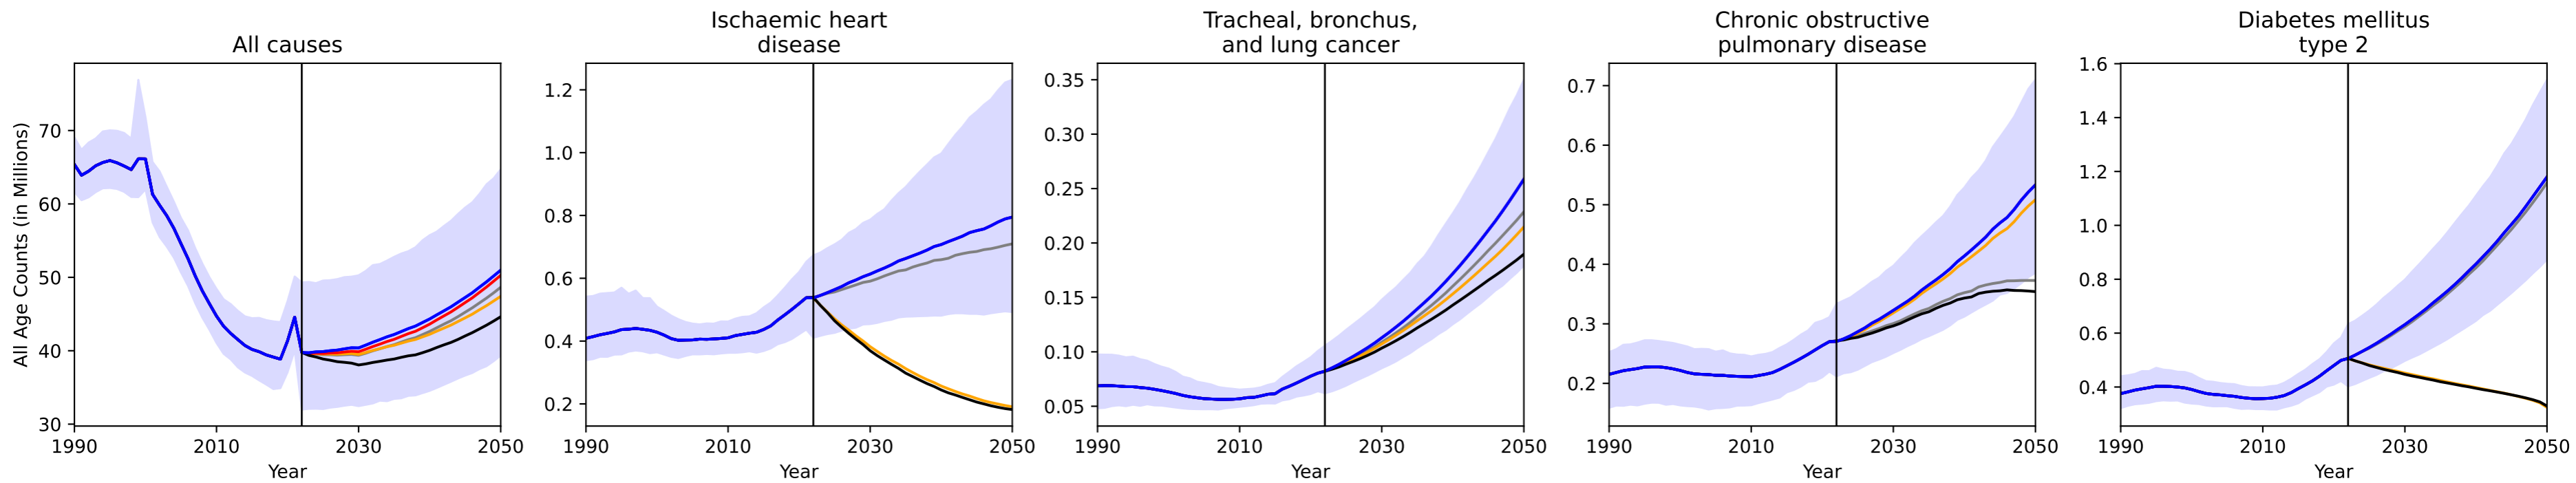

# Kenya

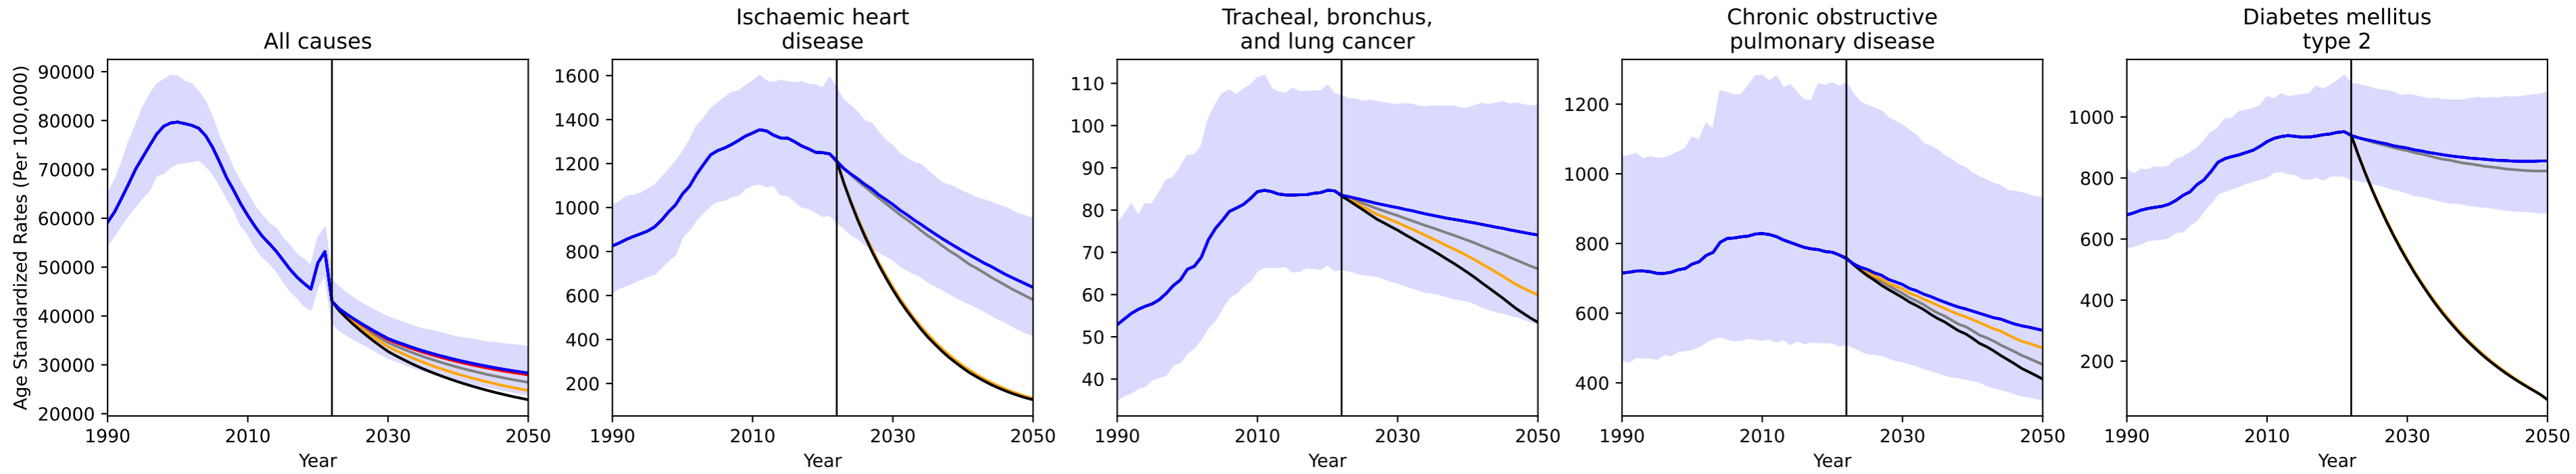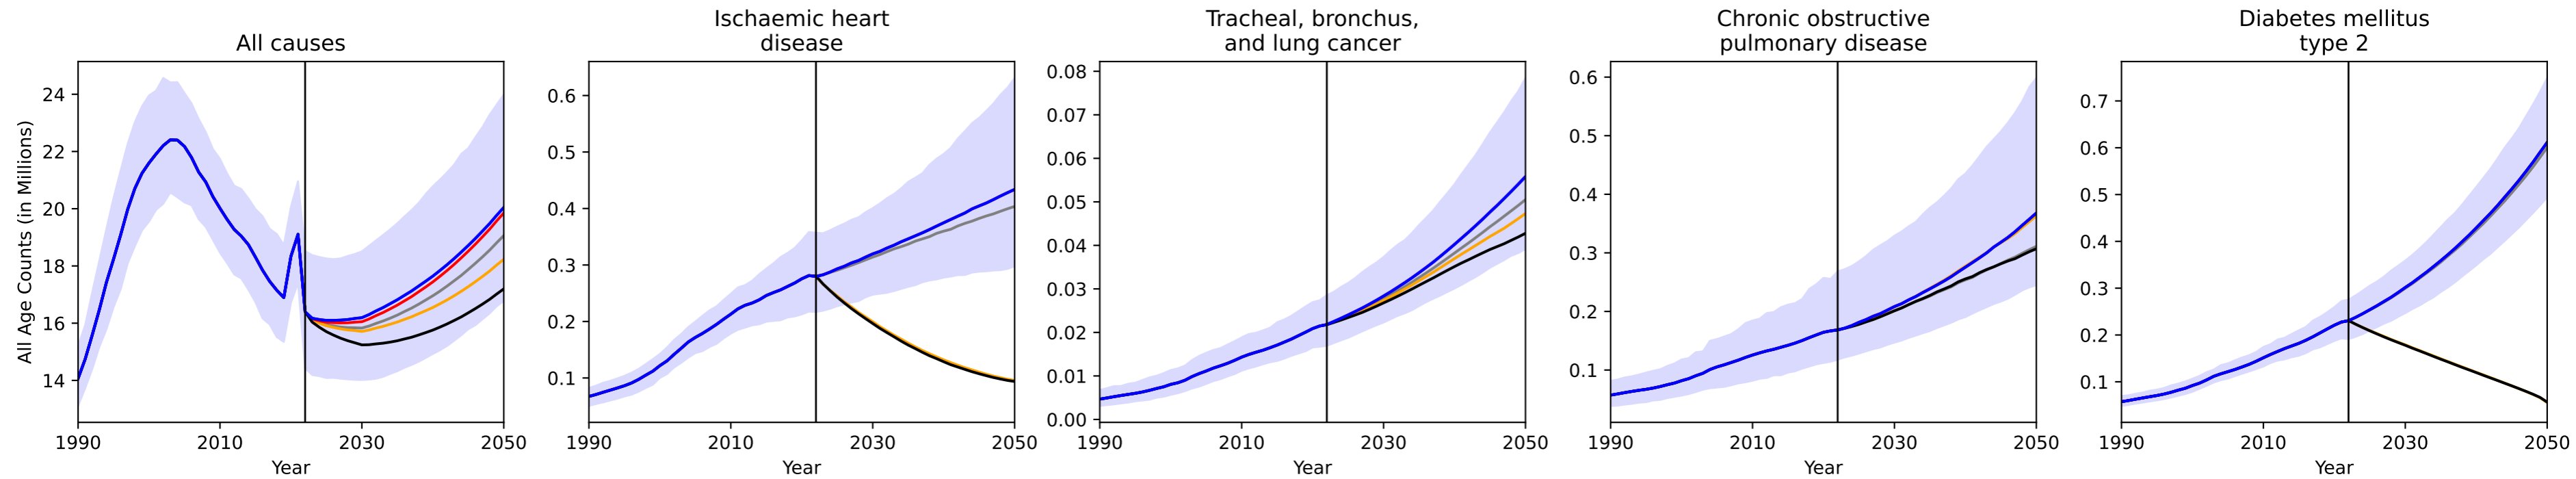

# Madagascar

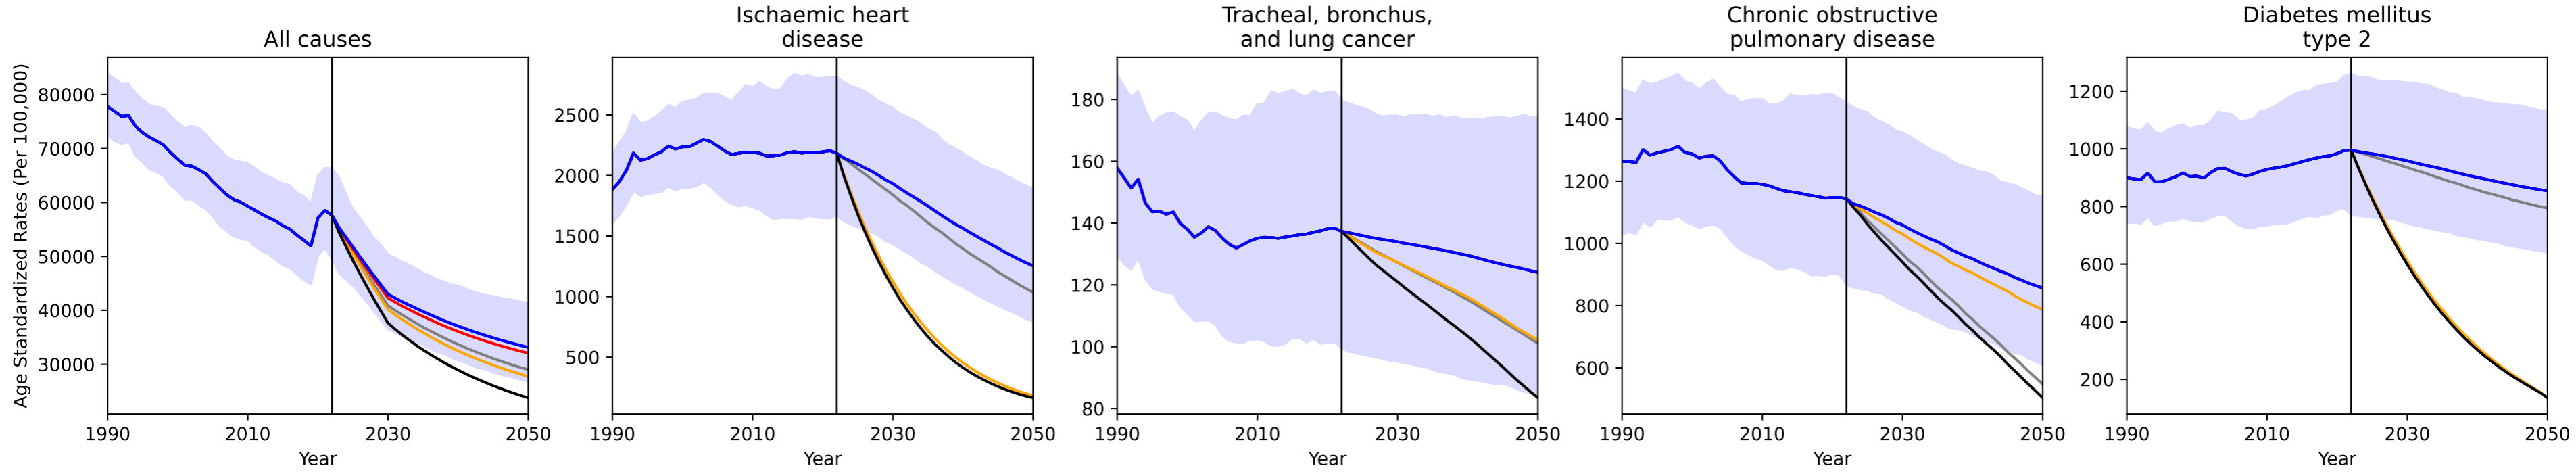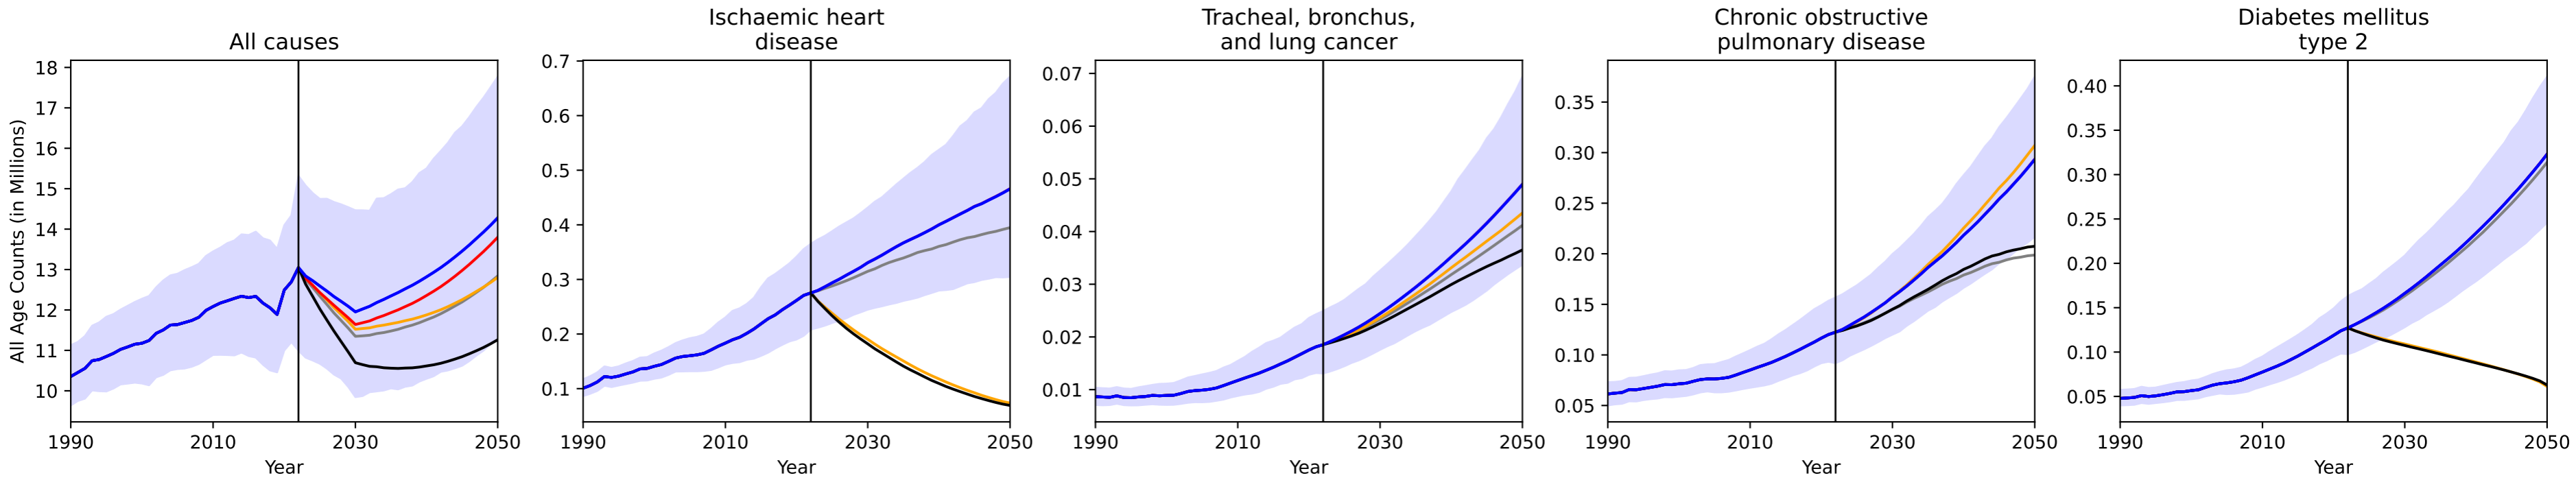



# Malawi

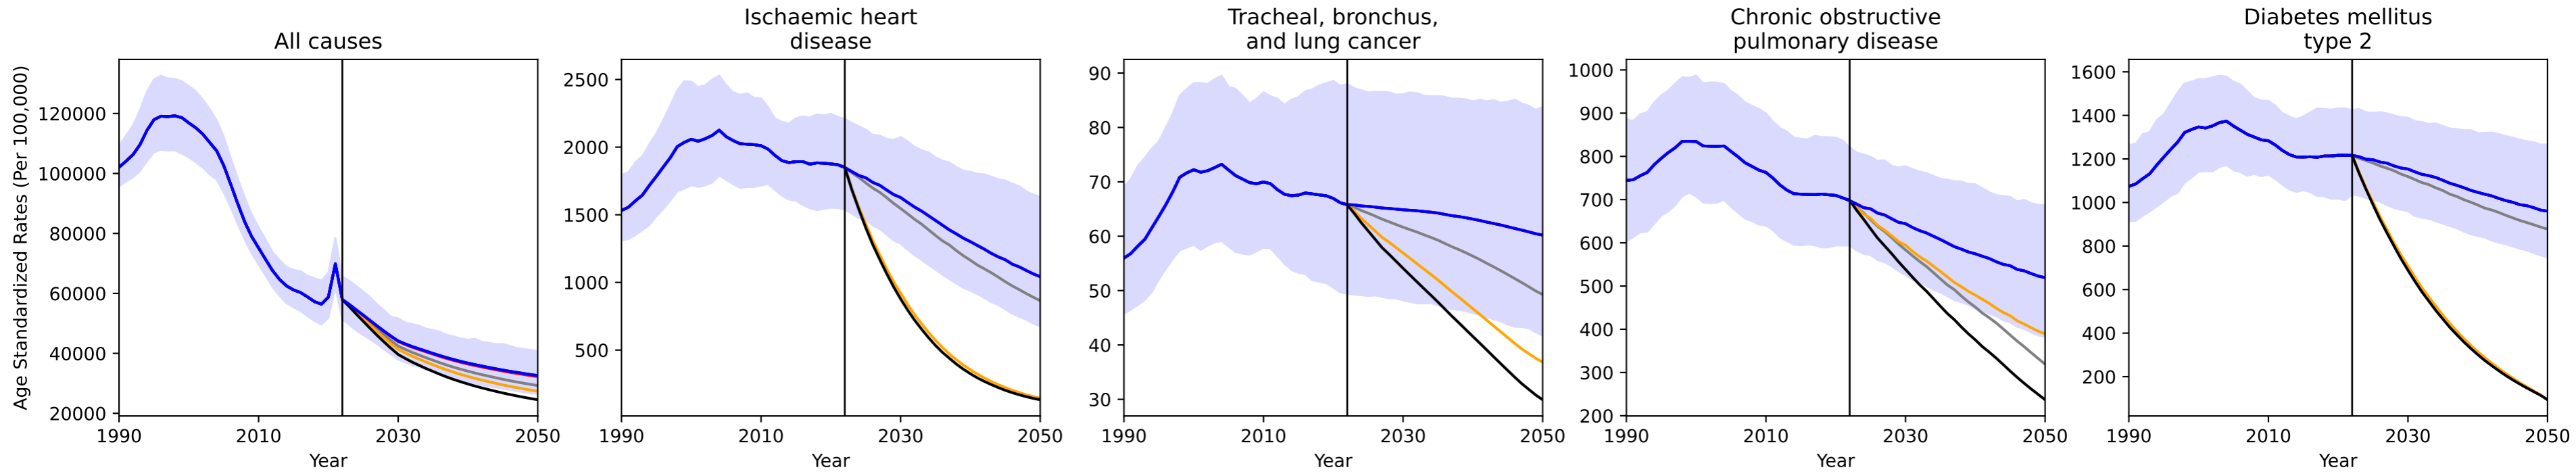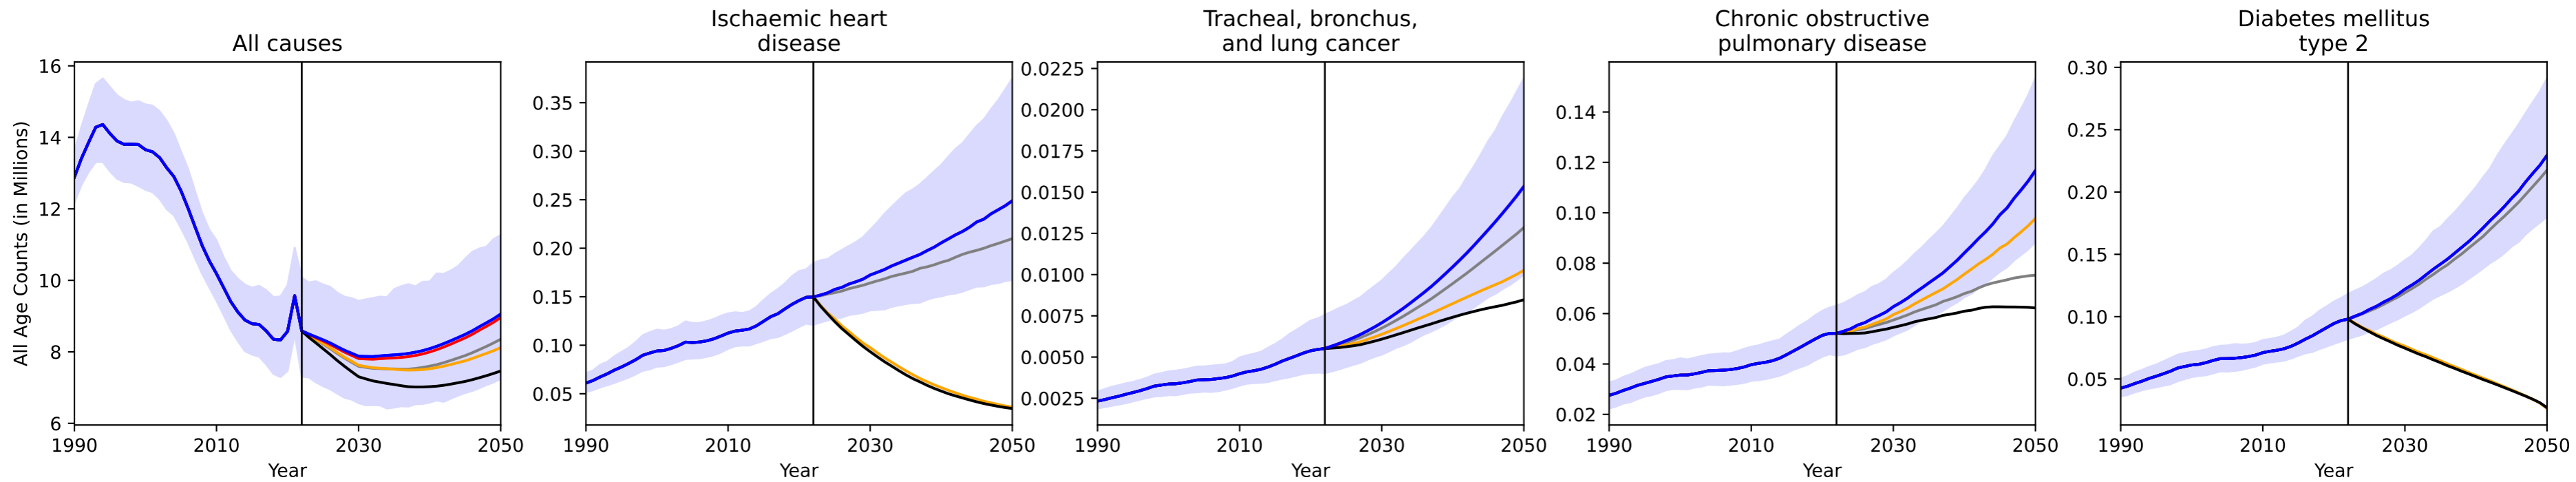

# Mozambique

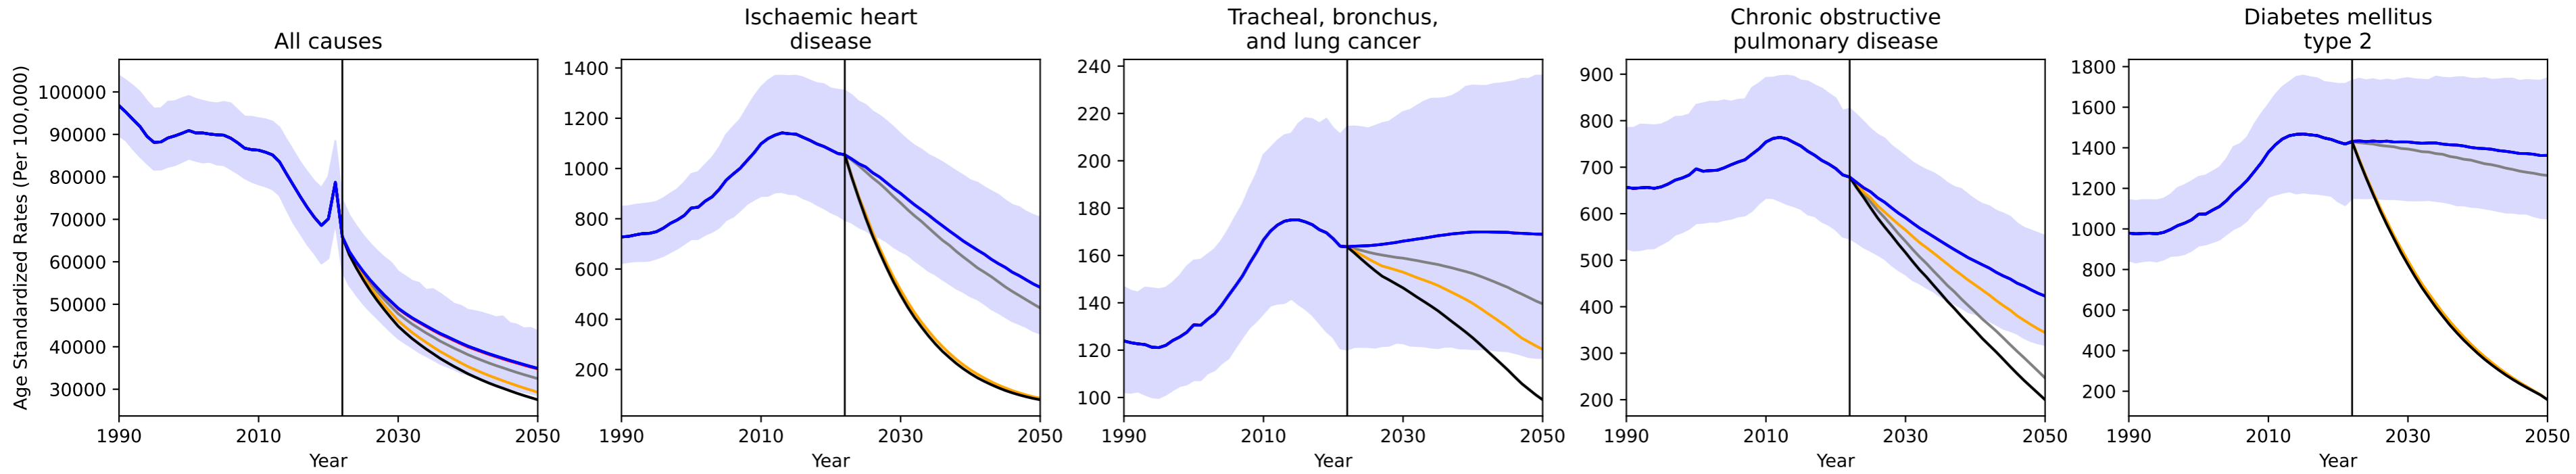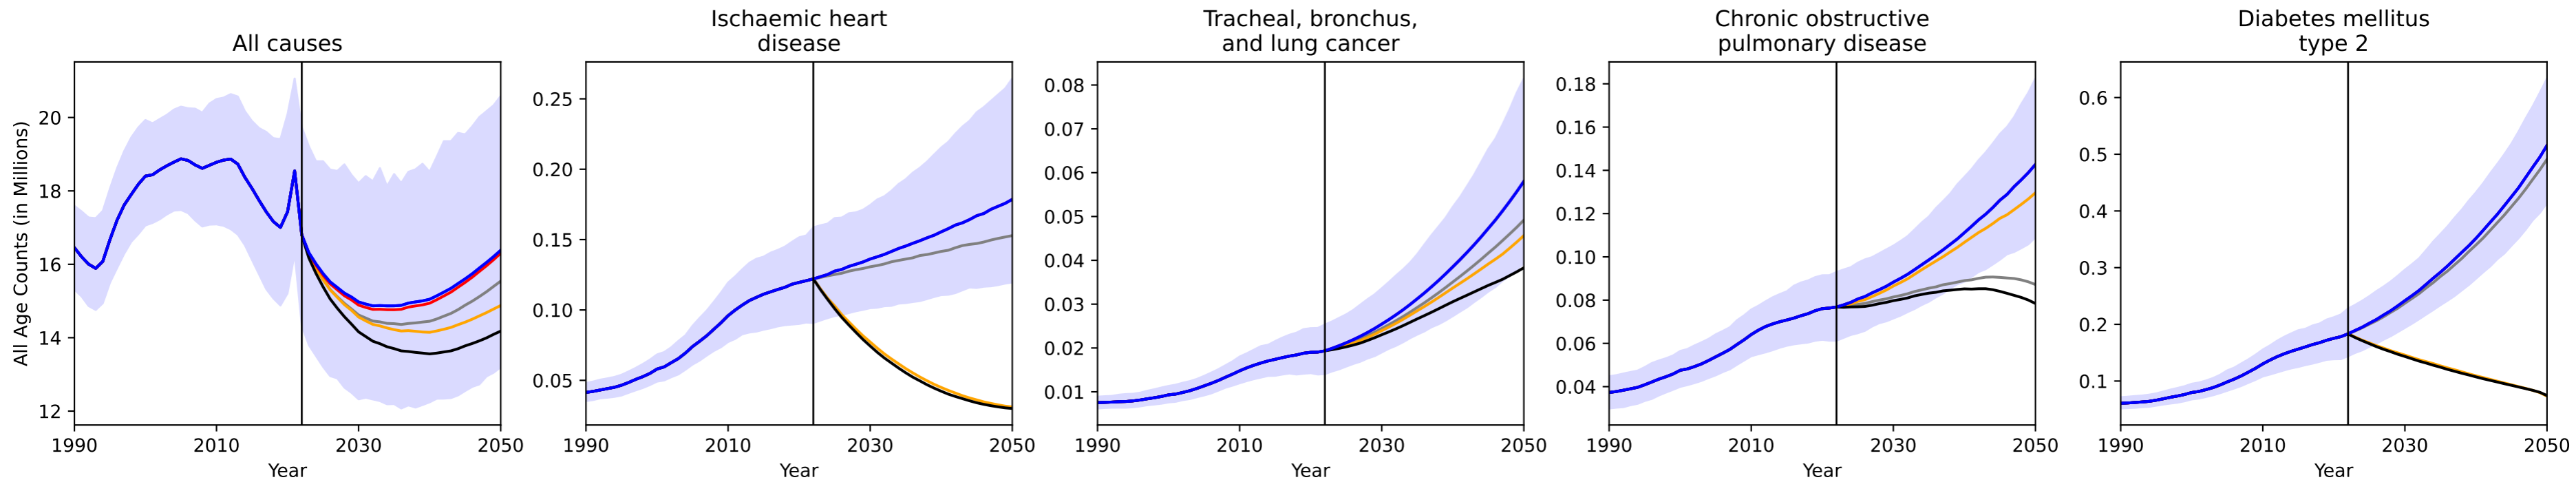

# Rwanda

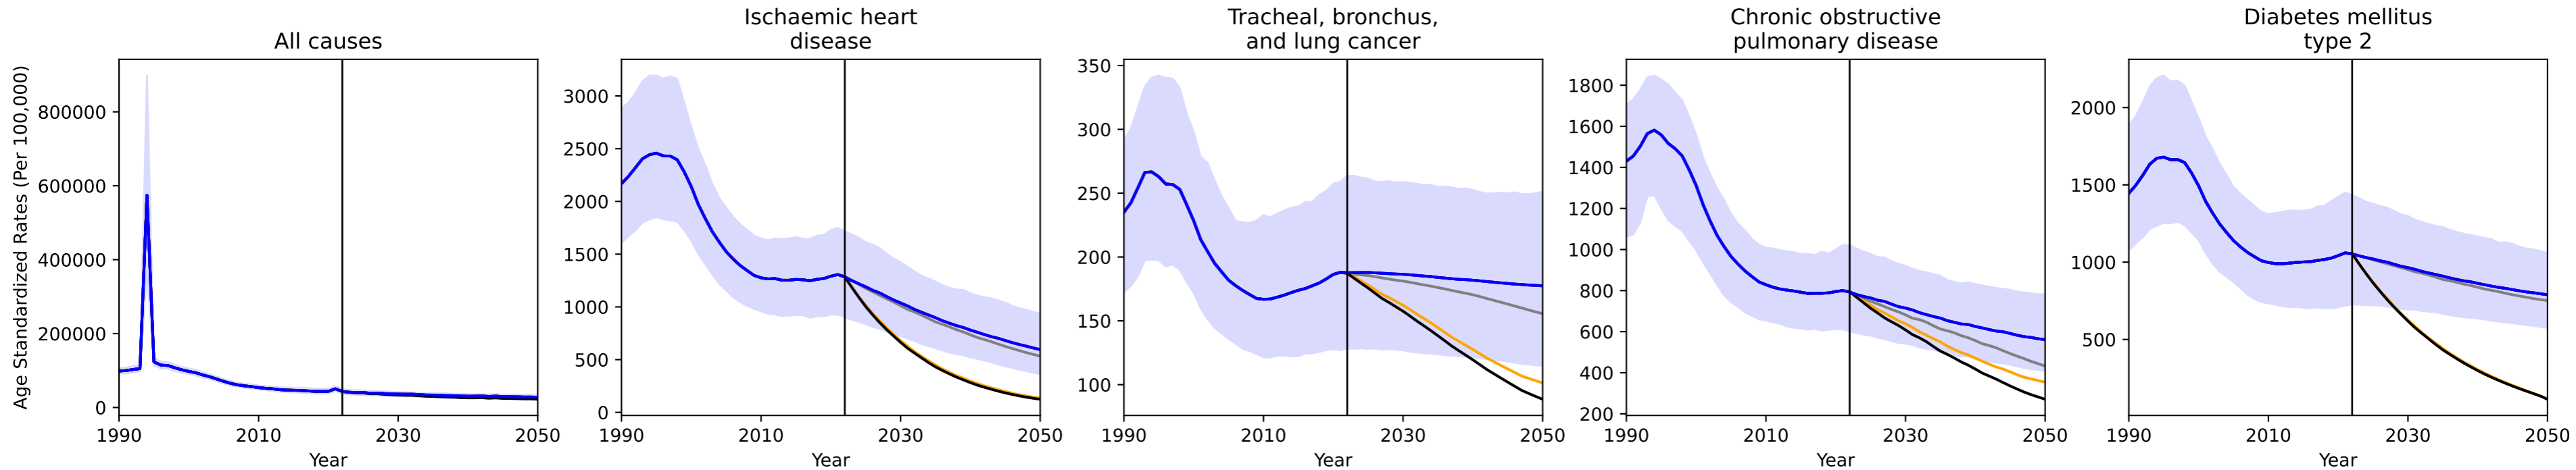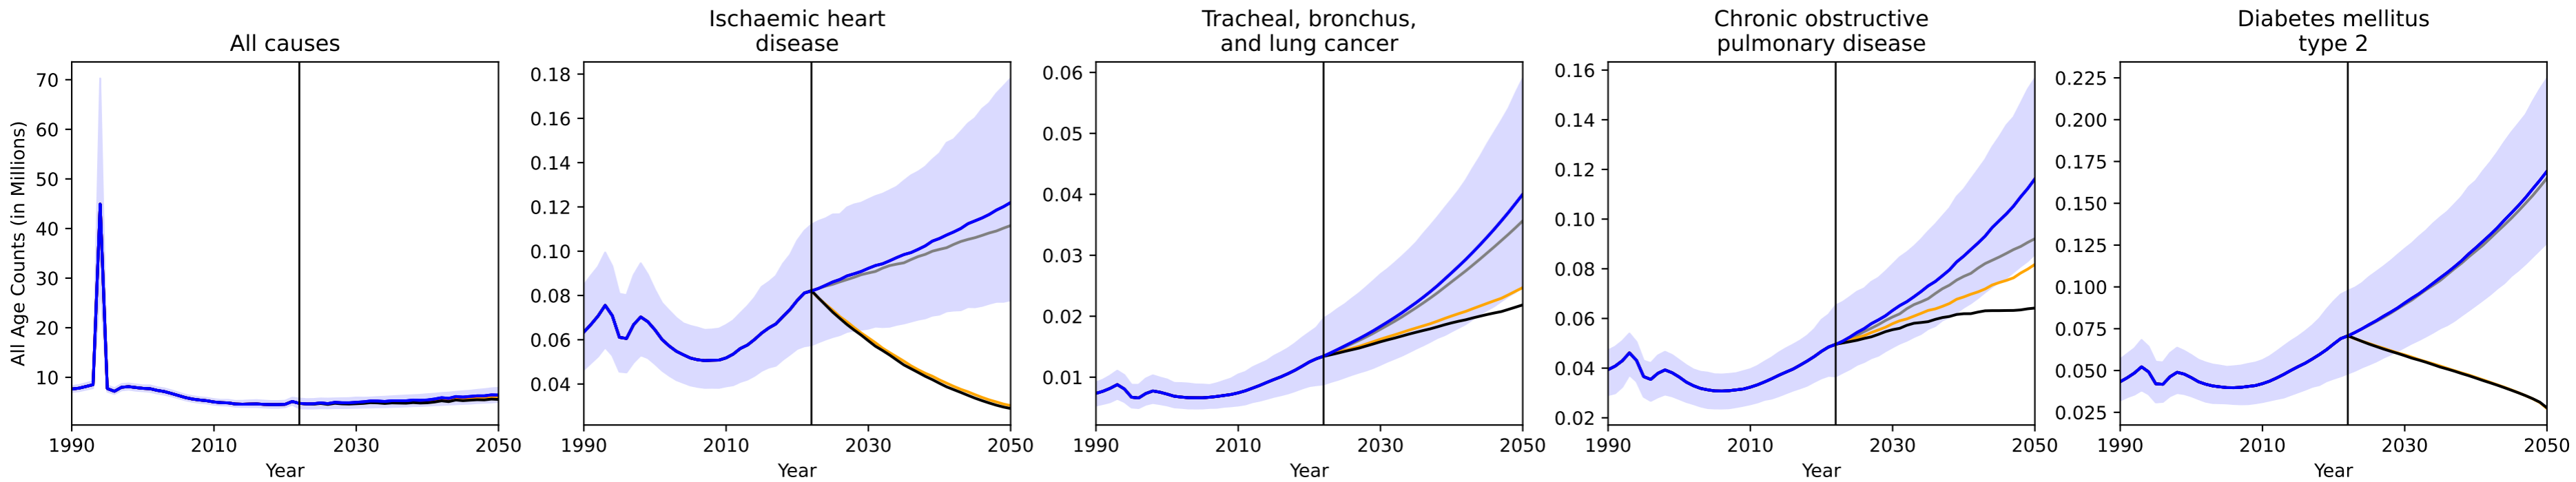

# Somalia

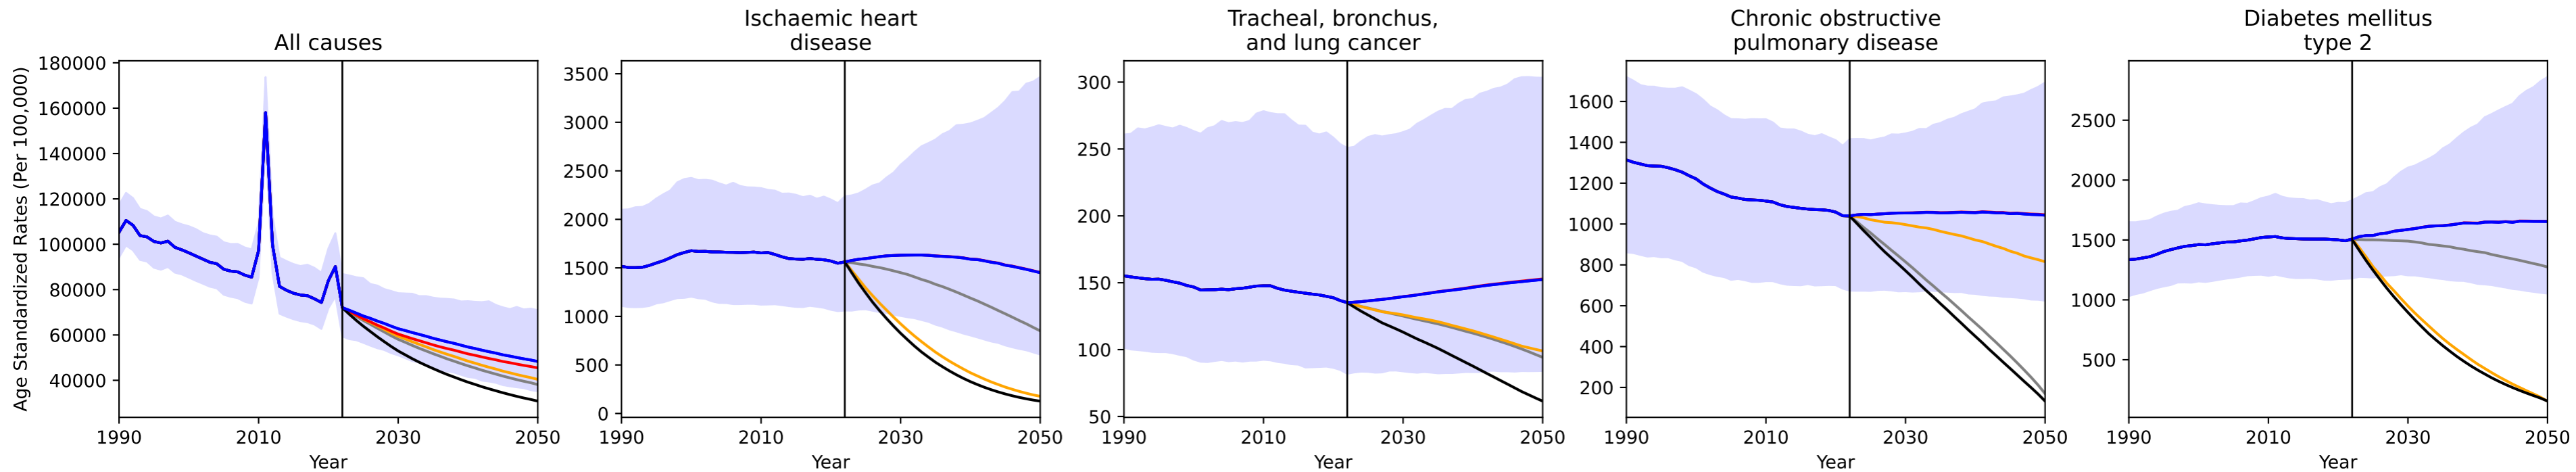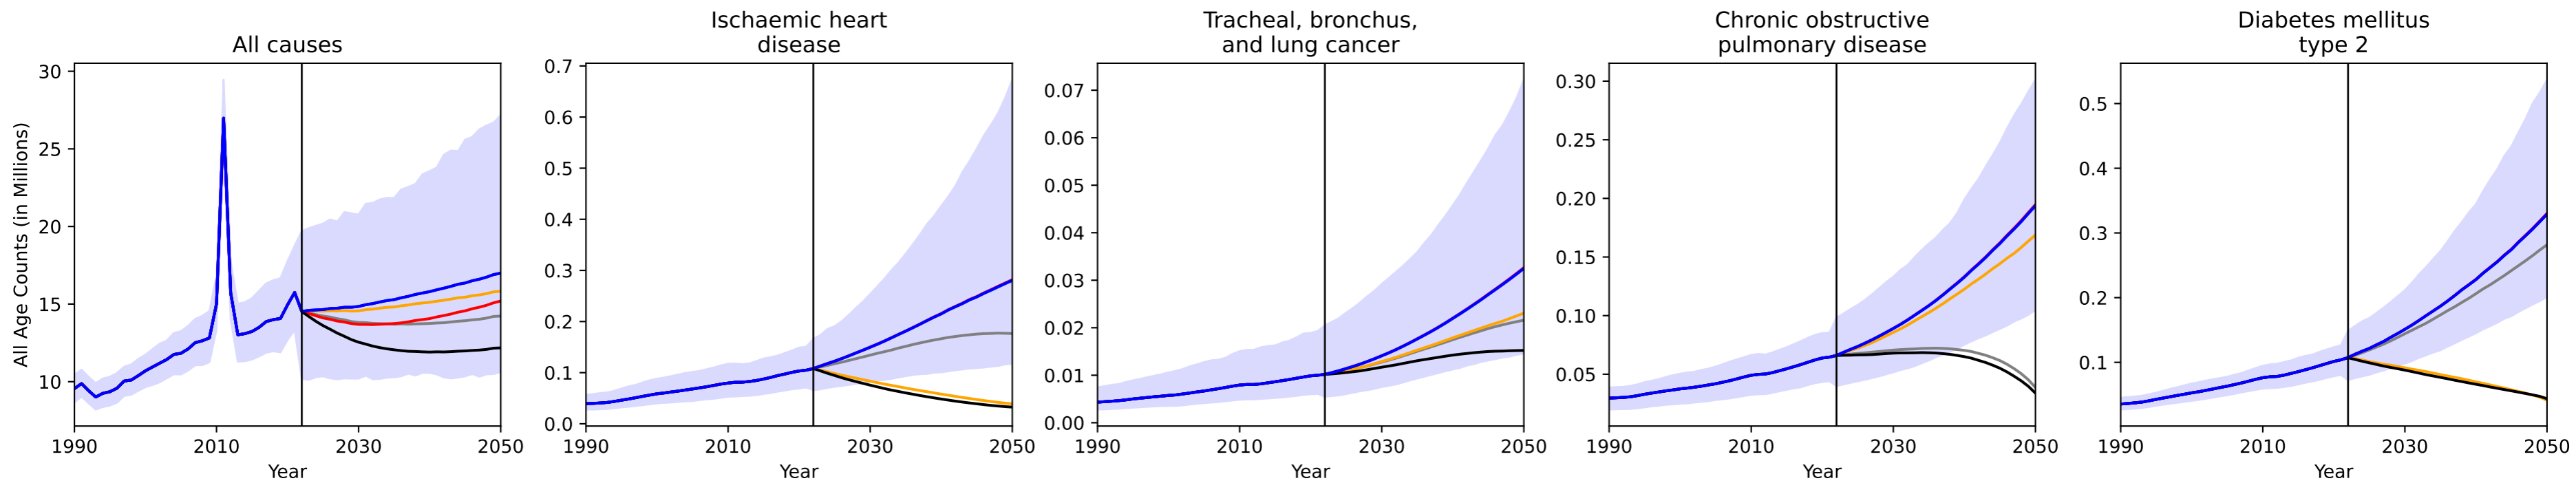

# South Sudan

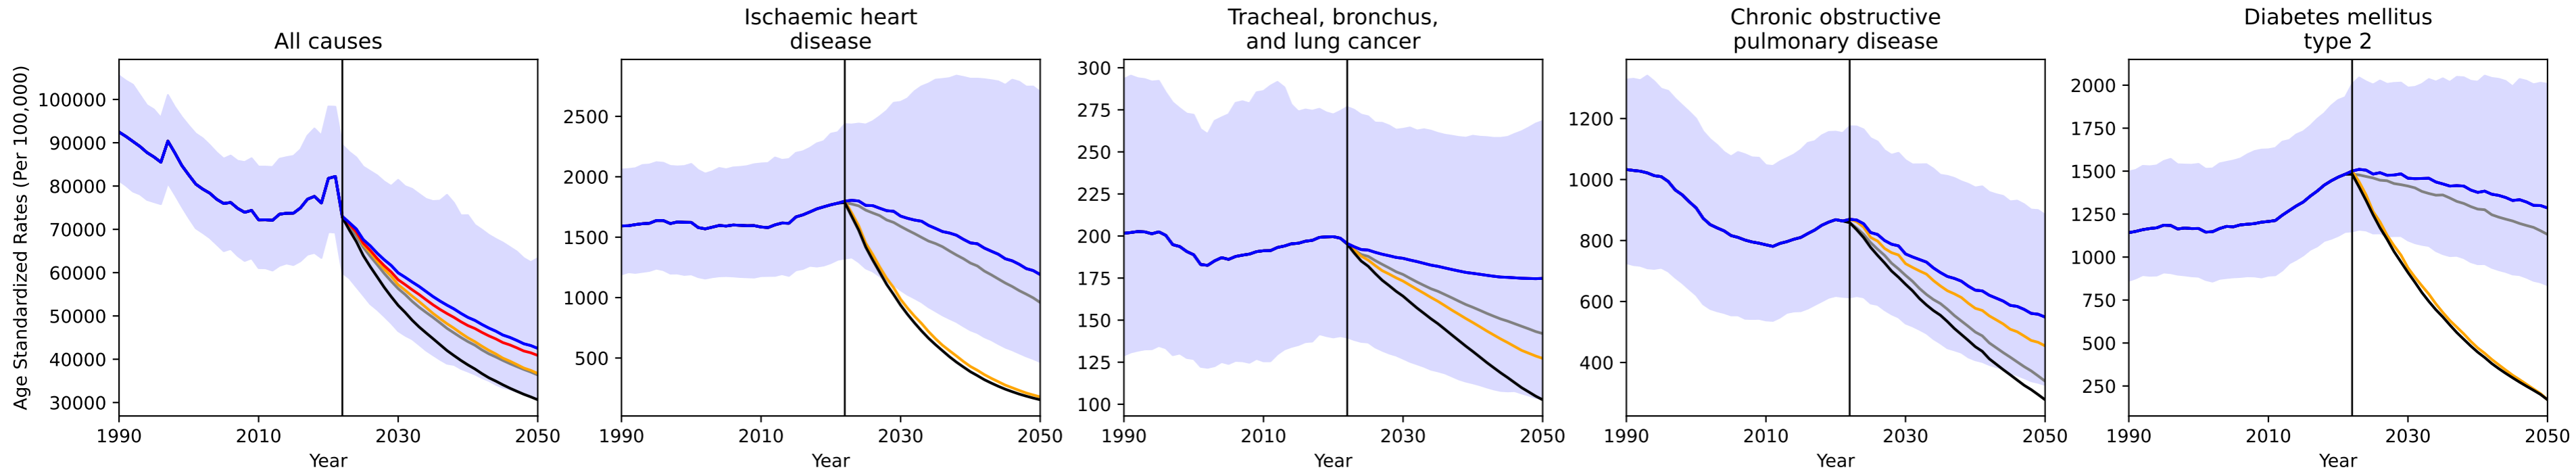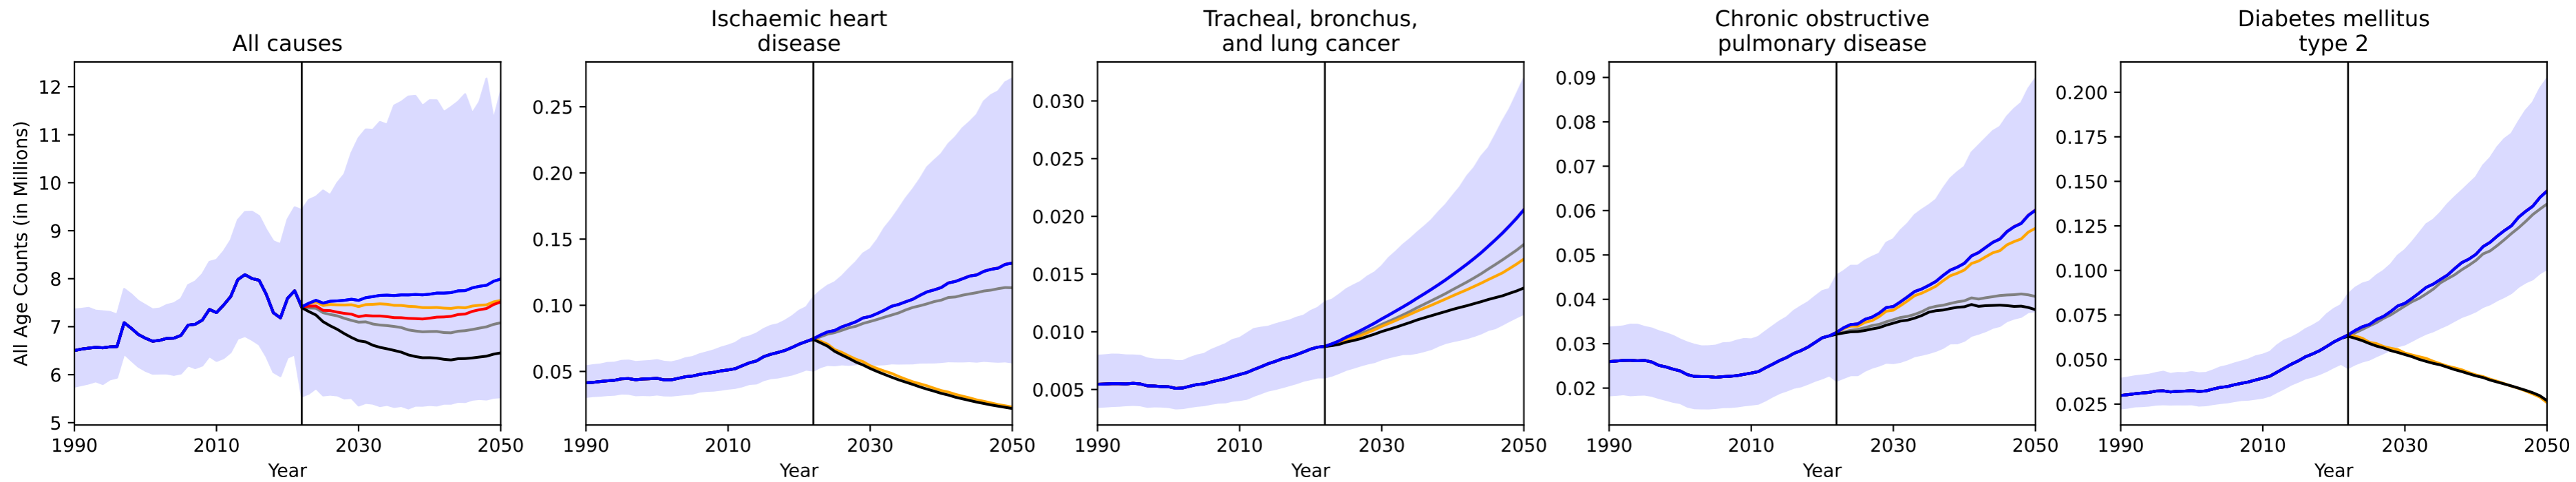

# Uganda

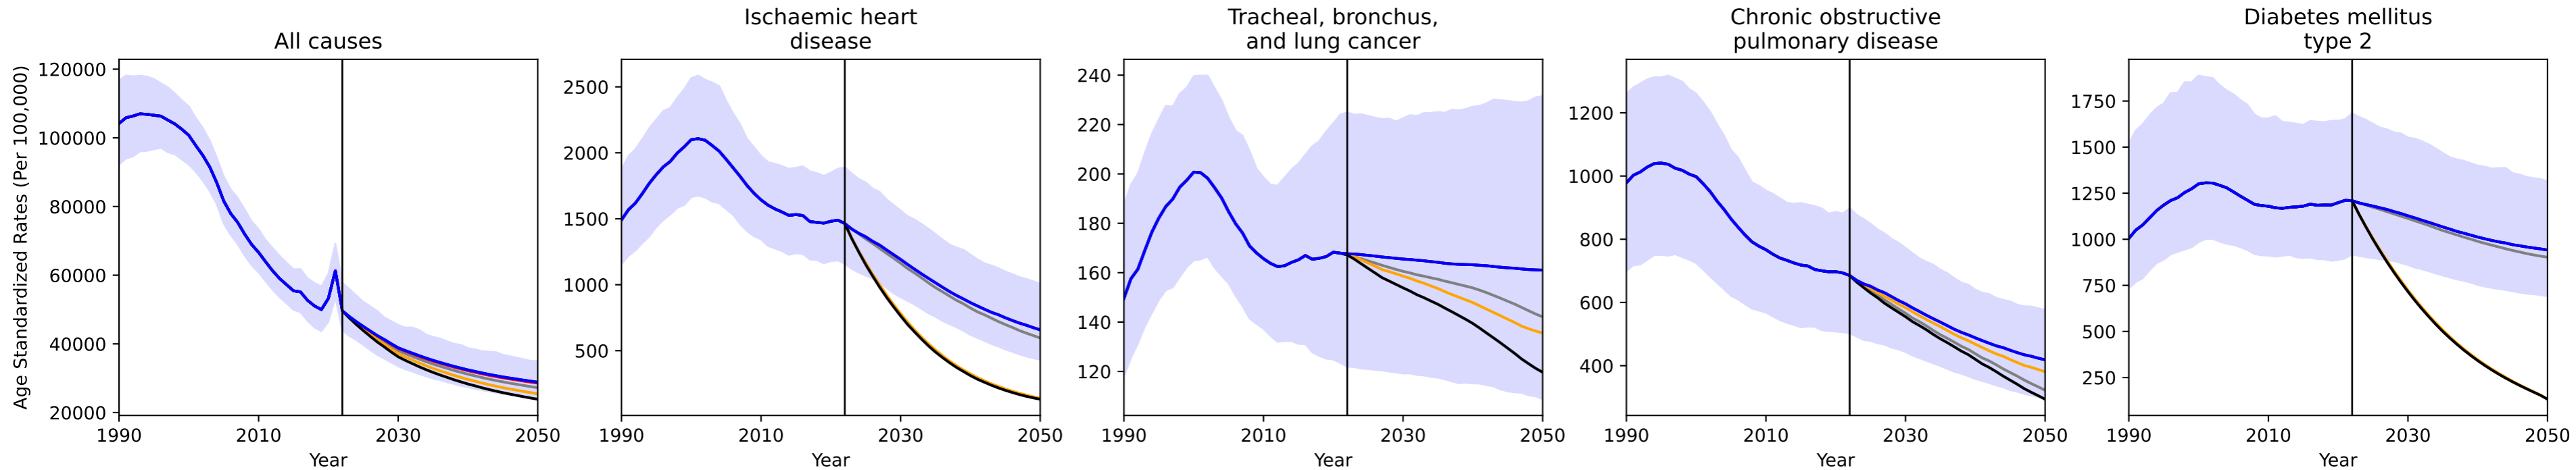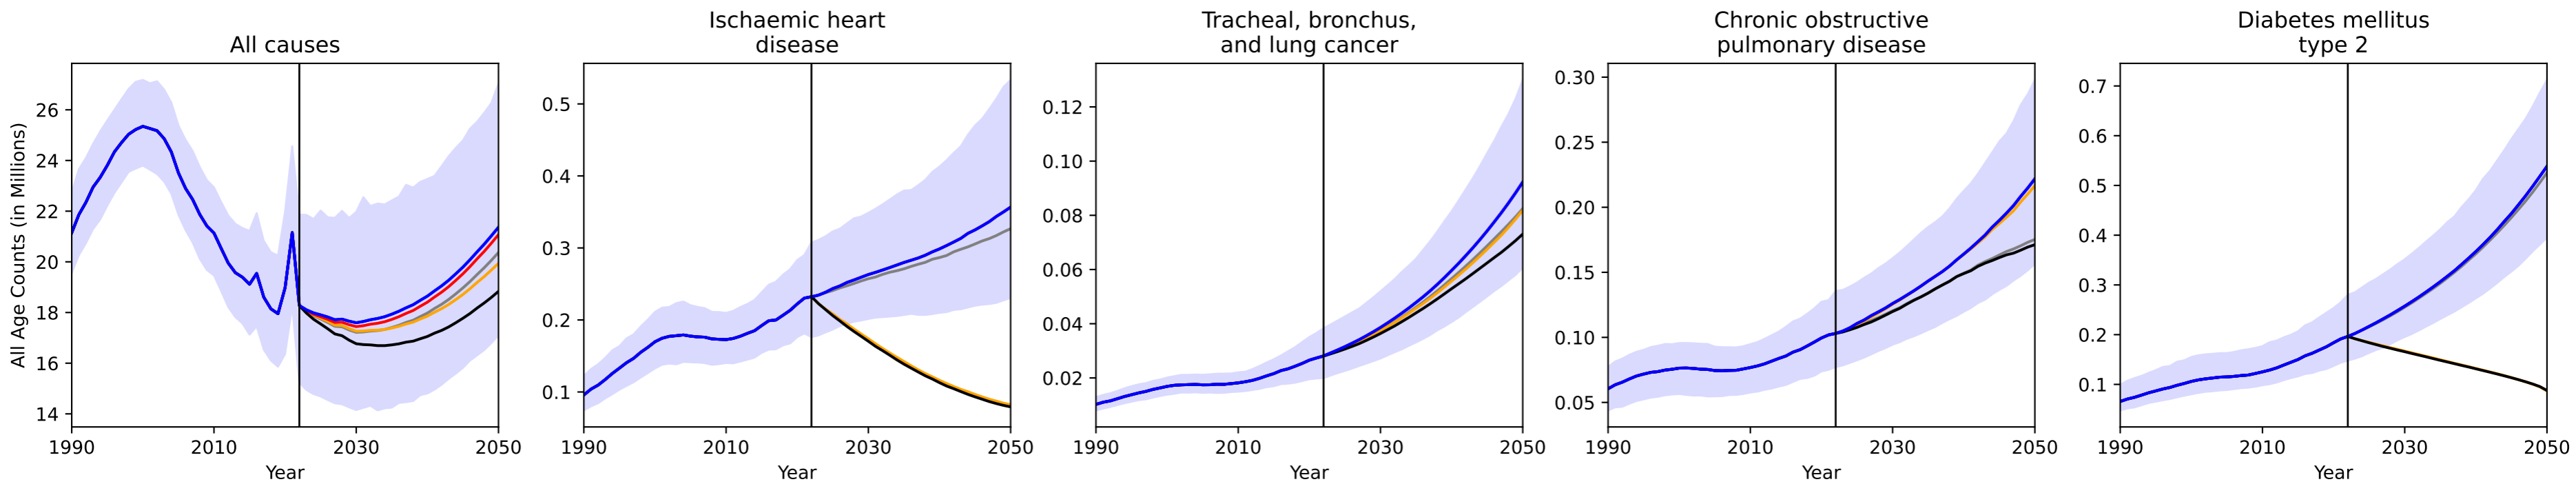

# Tanzania

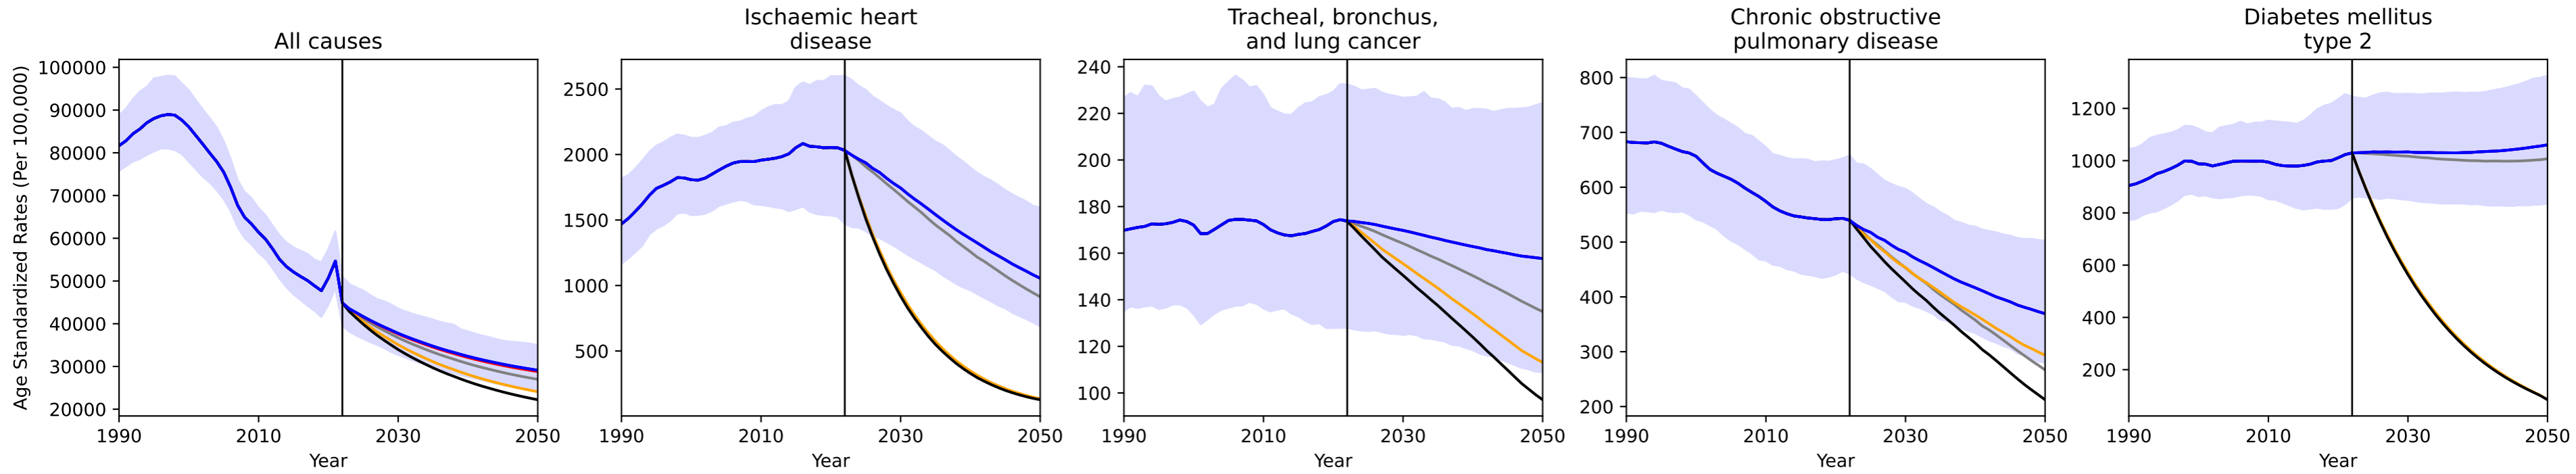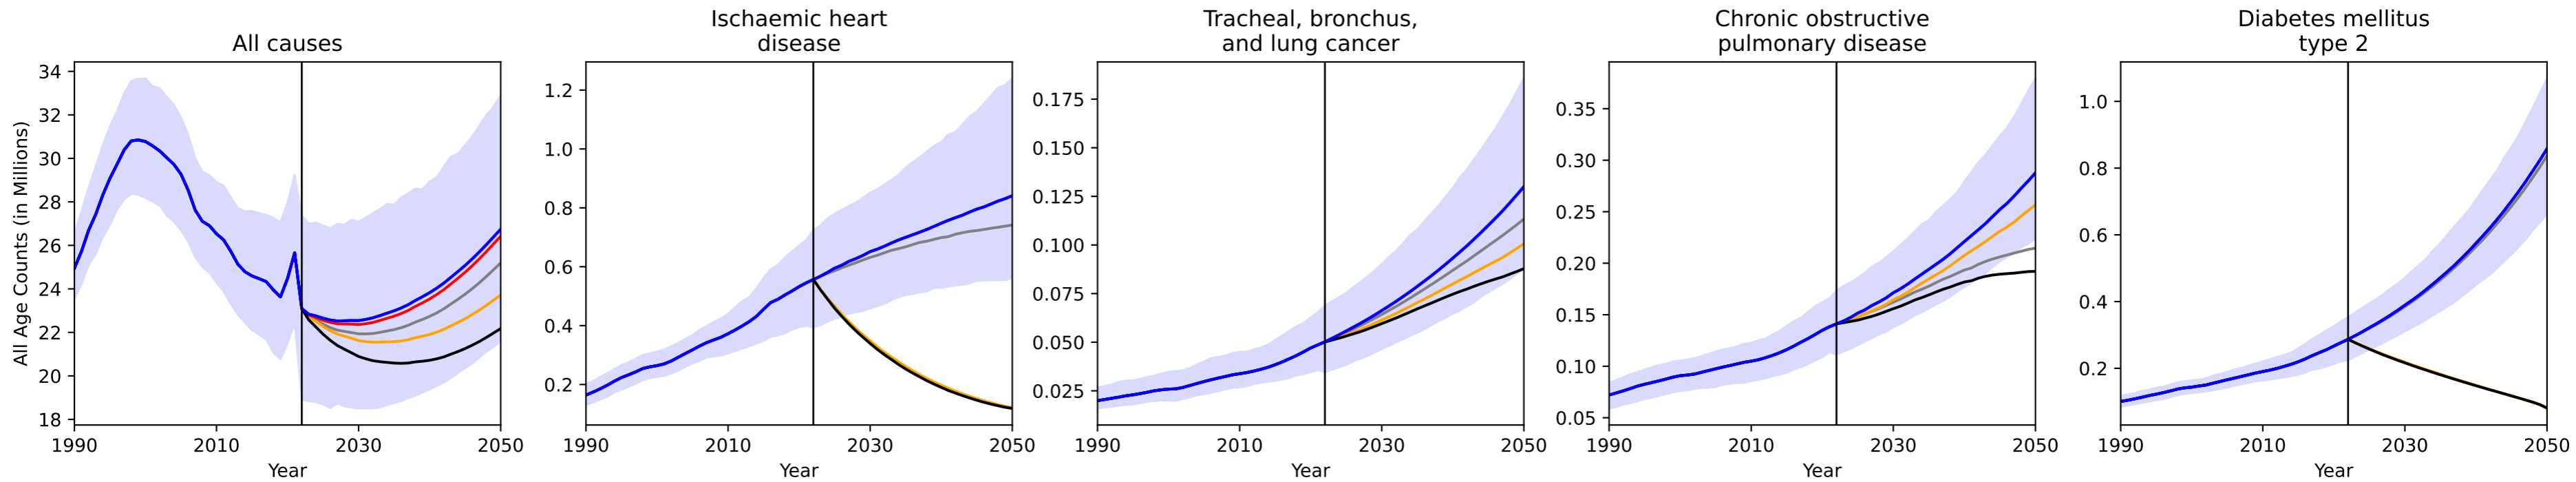

# Zambia

Supplemental Results Figure S12. All cause and top NCD causes age standardized DALY rates and all age counts by scenario and location, 1990-2050

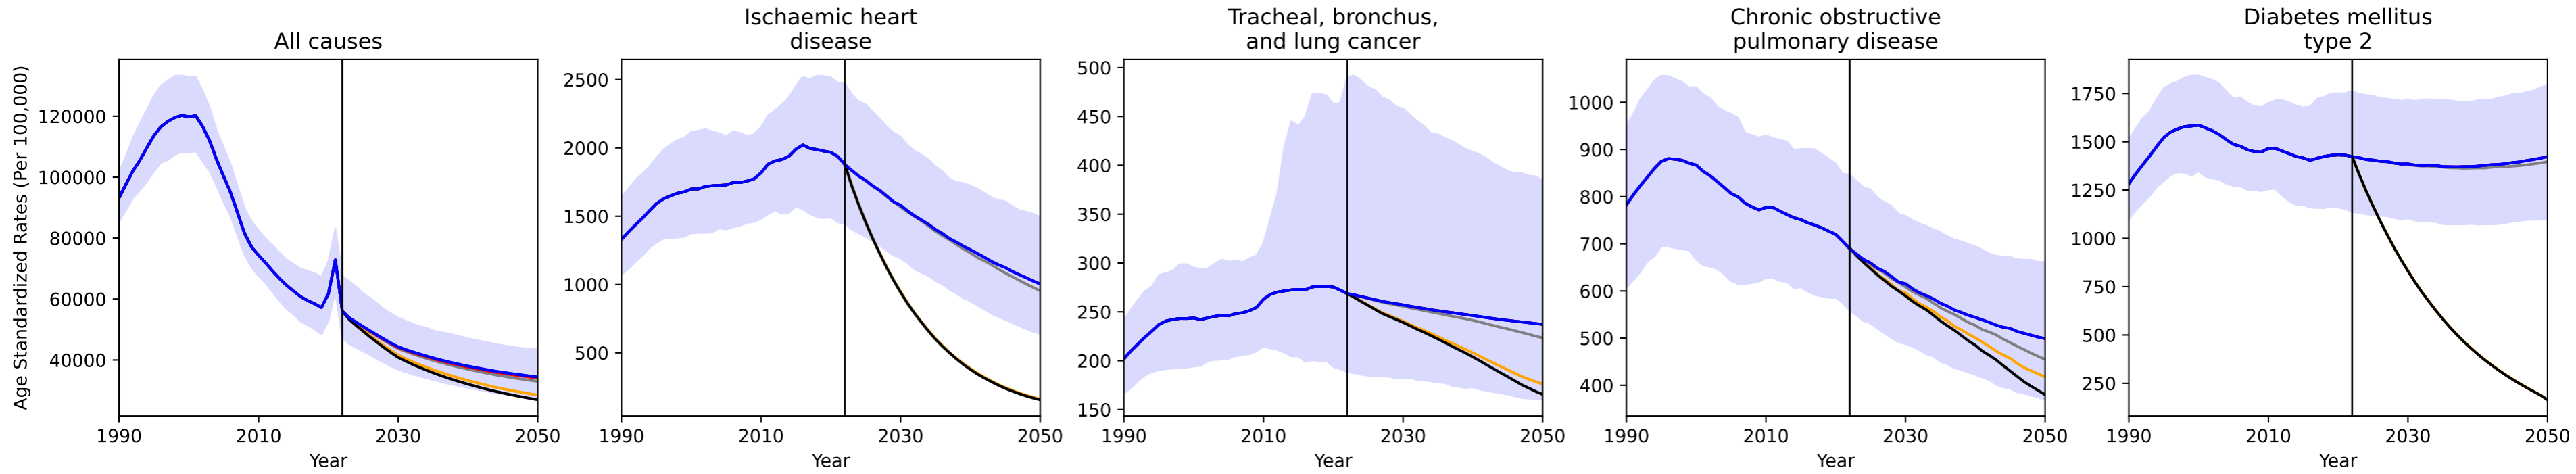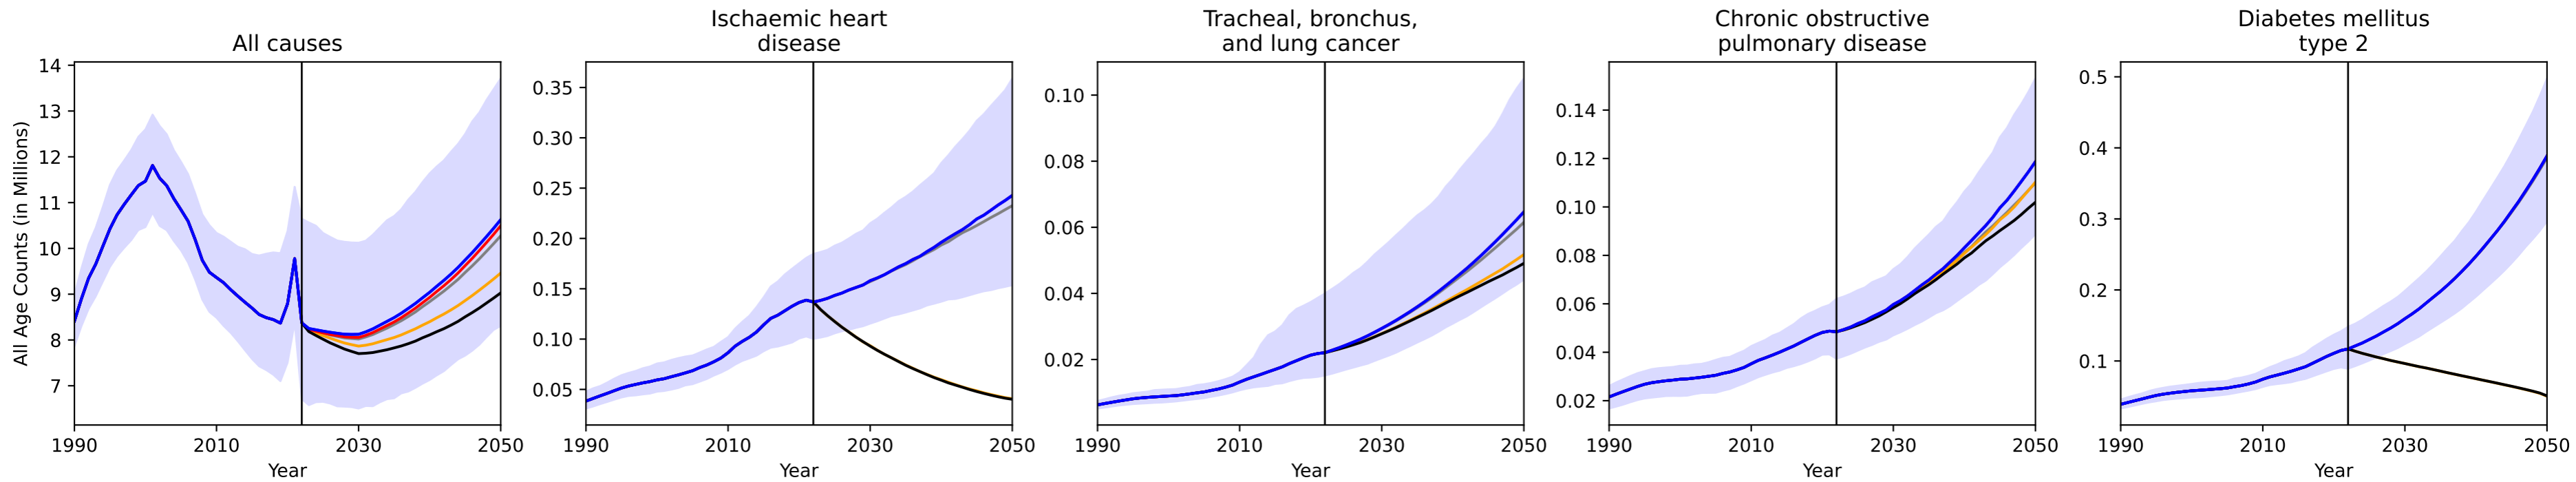



# Botswana

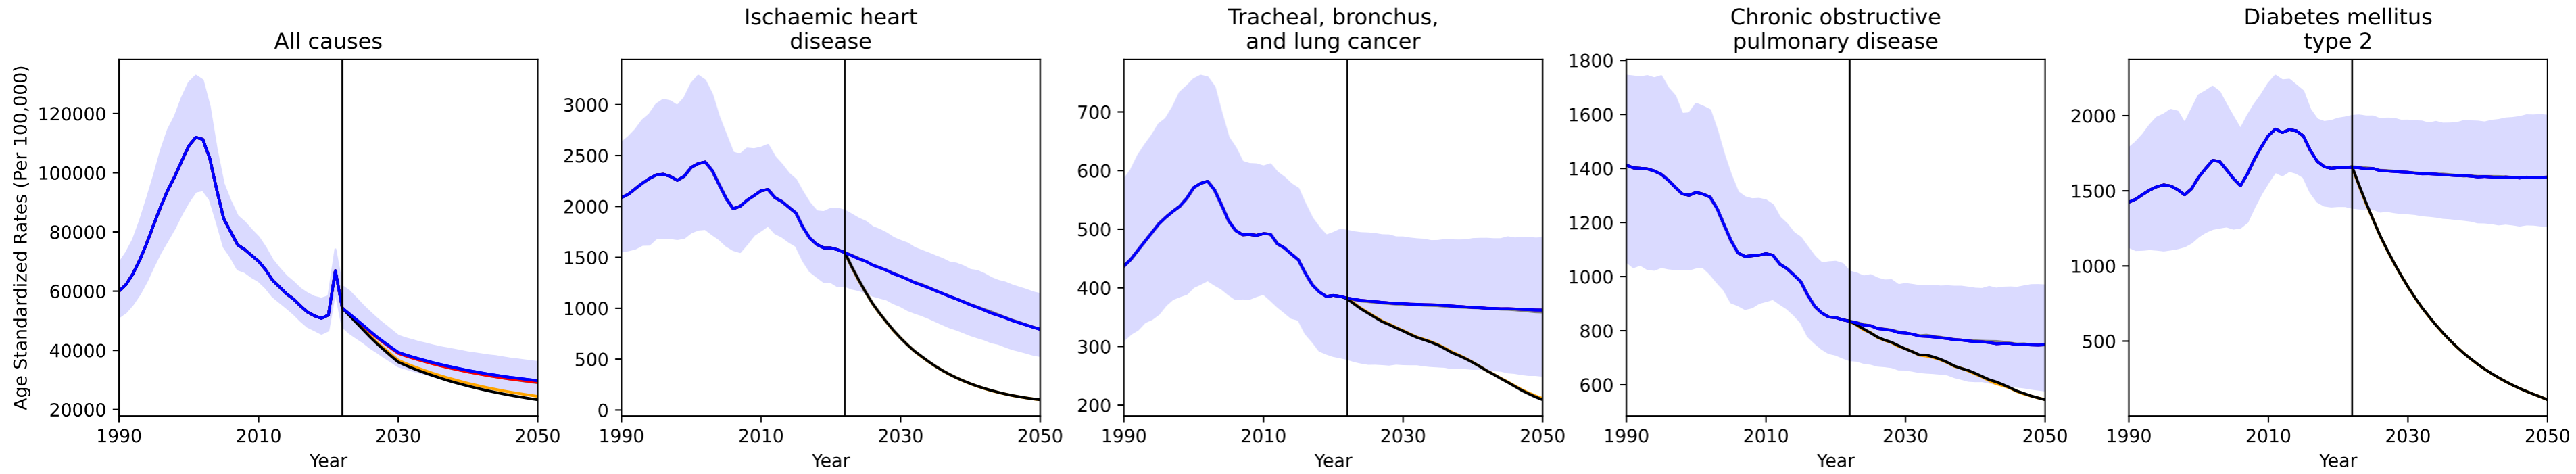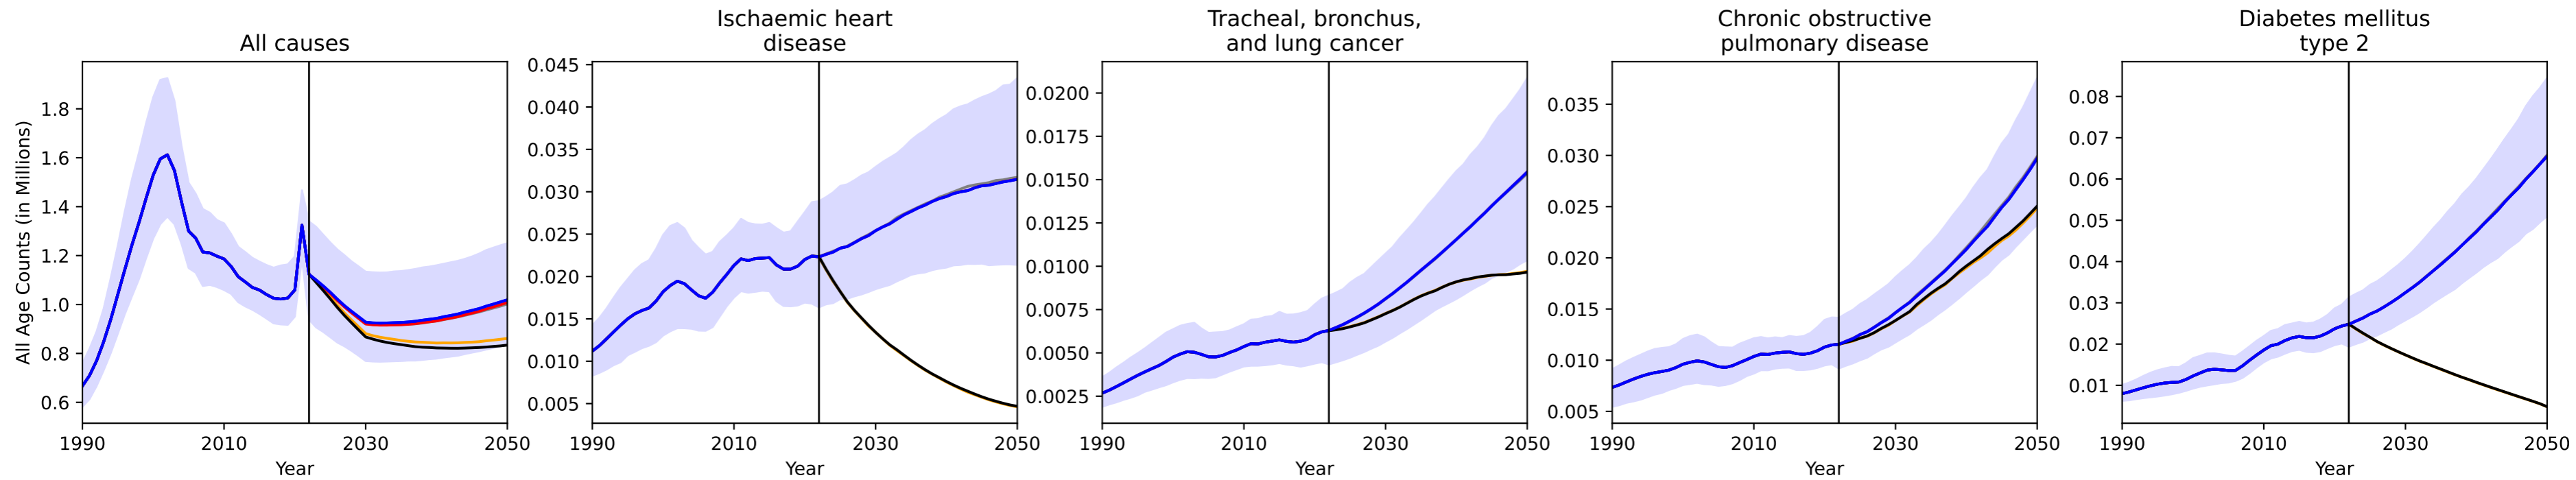

# Eswatini

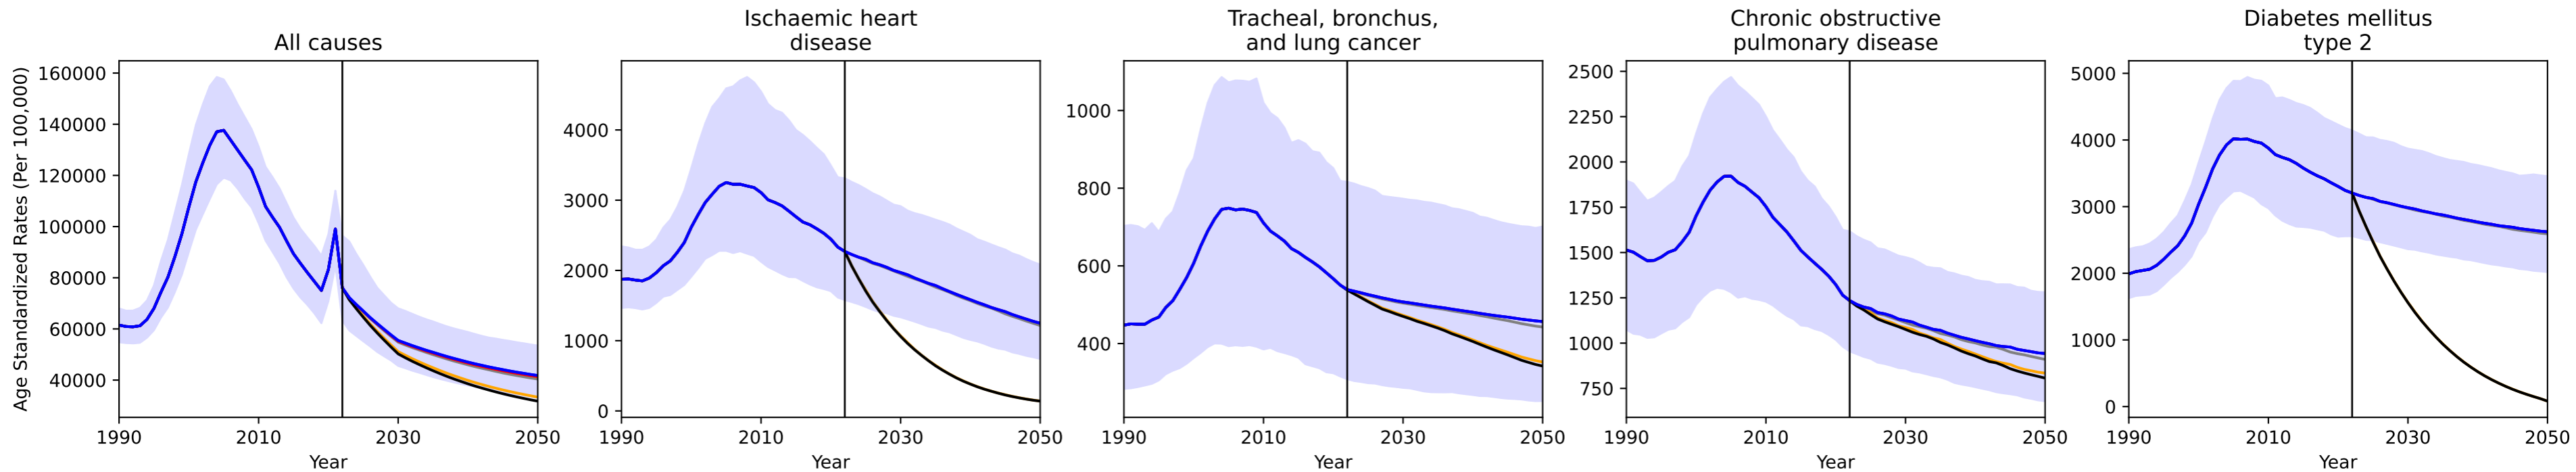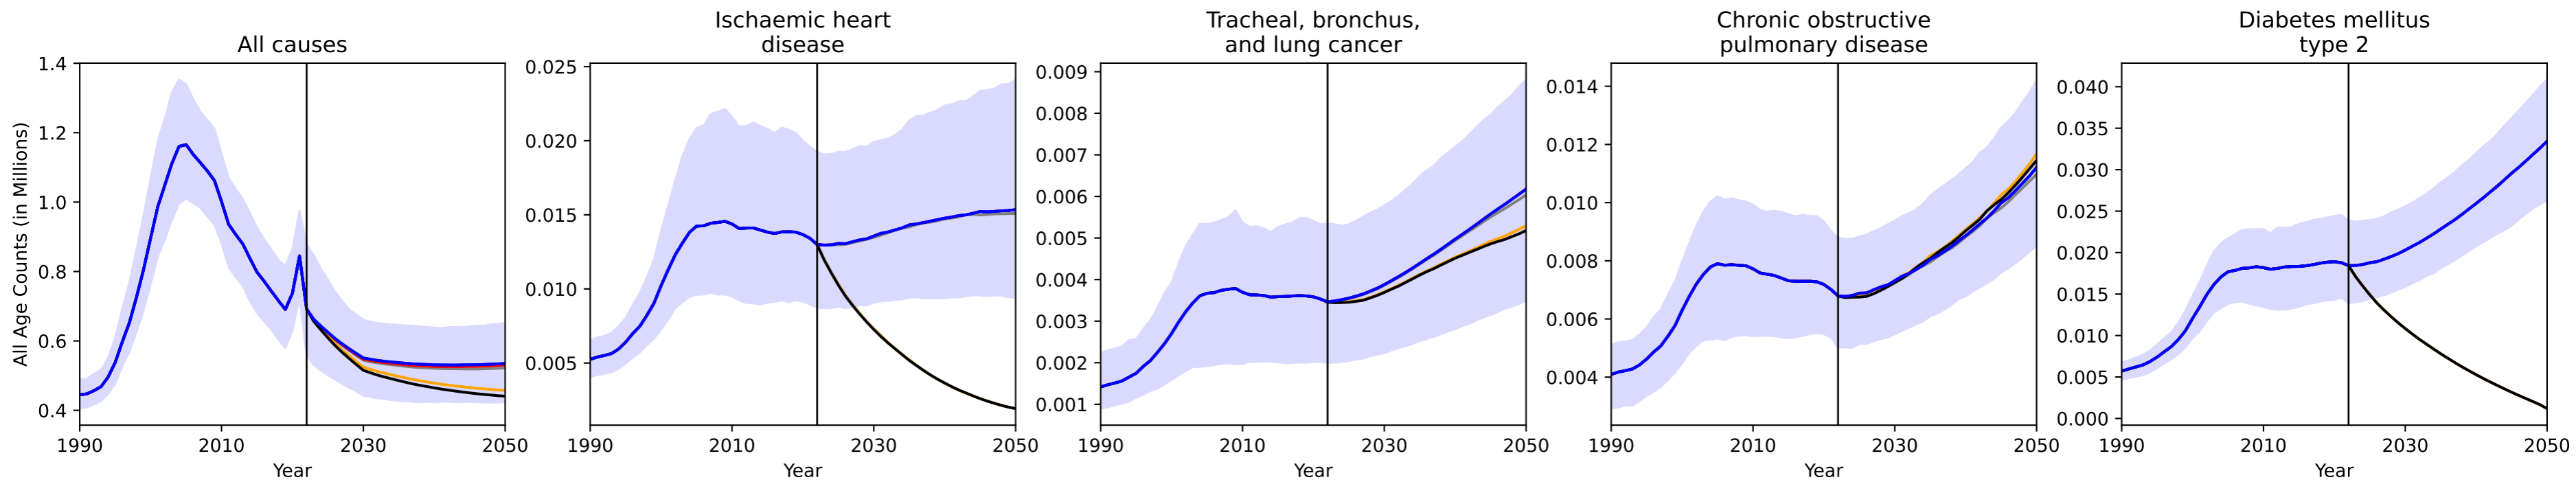

# Lesotho

Supplemental Results Figure S12. All cause and top NCD causes age standardized DALY rates and all age counts by scenario and location, 1990-2050

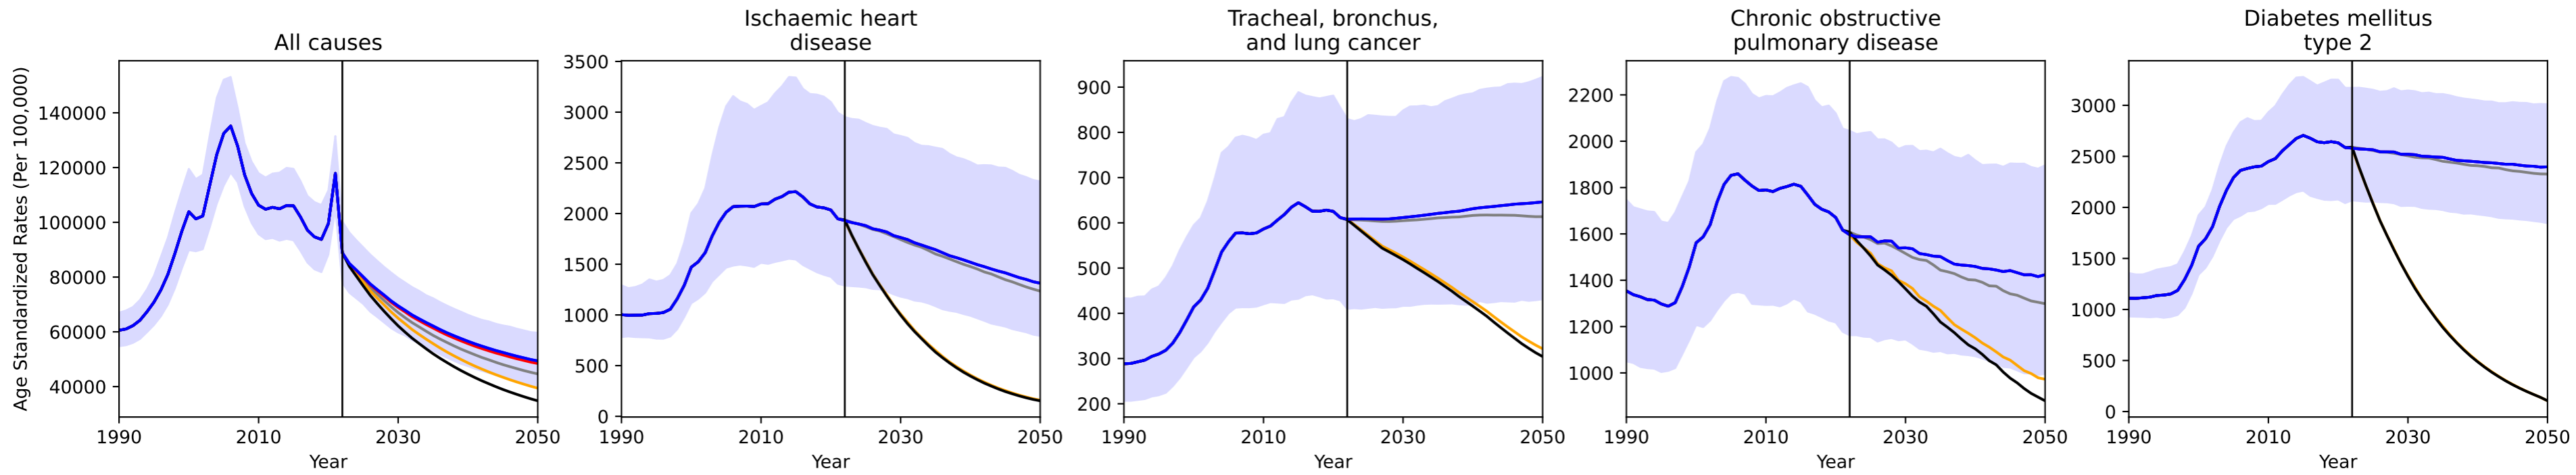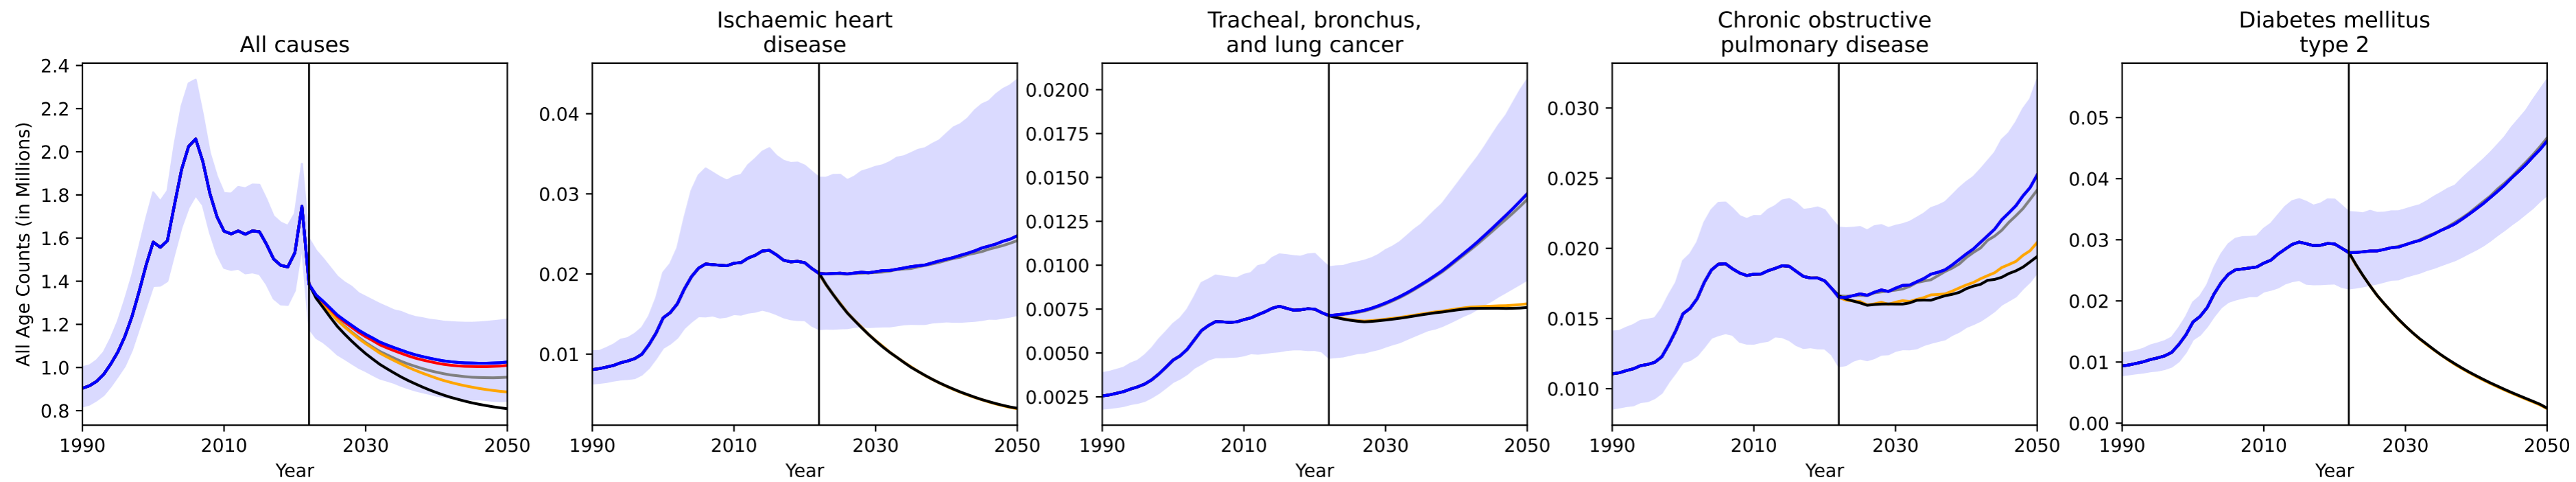

# Namibia

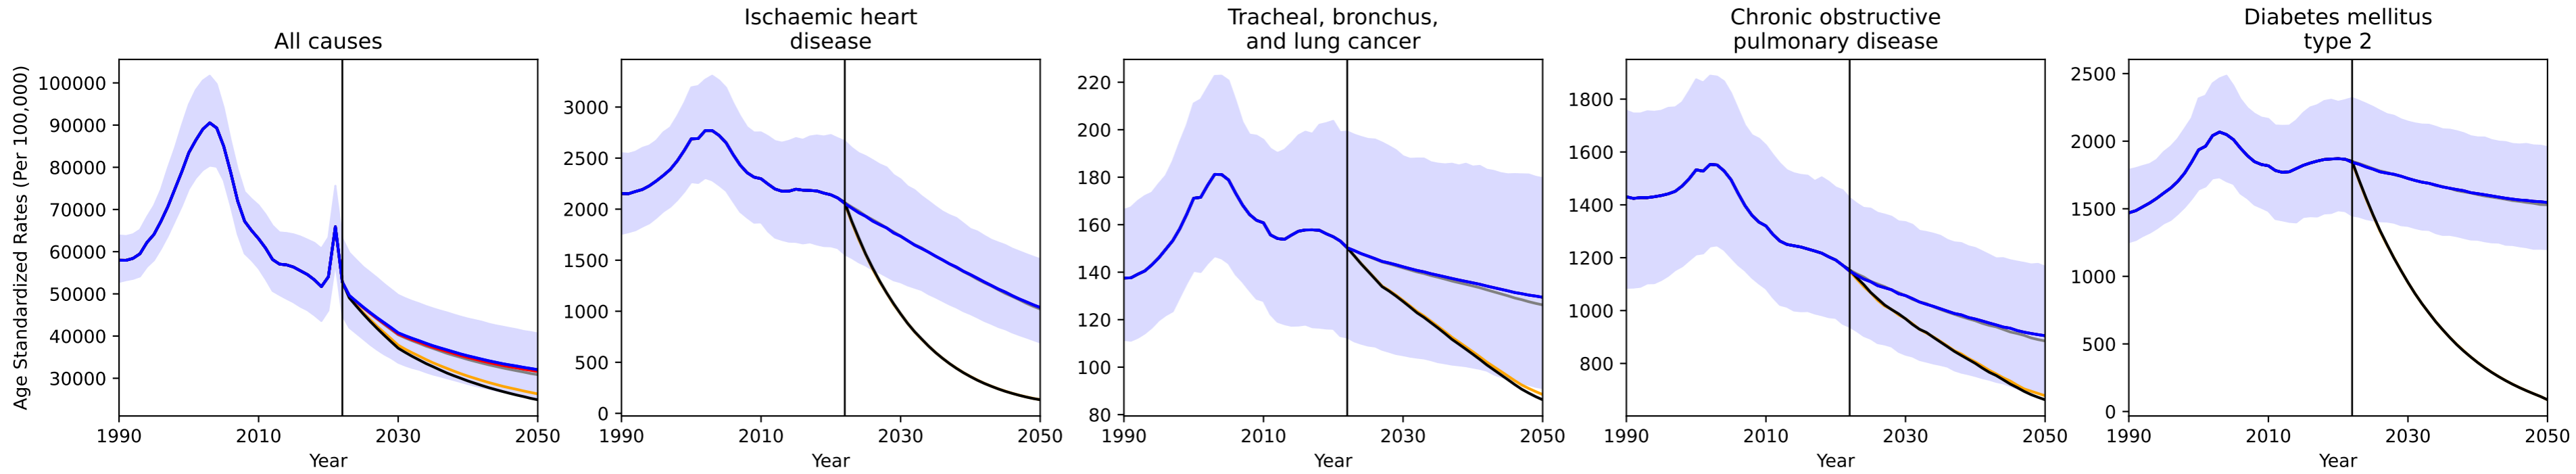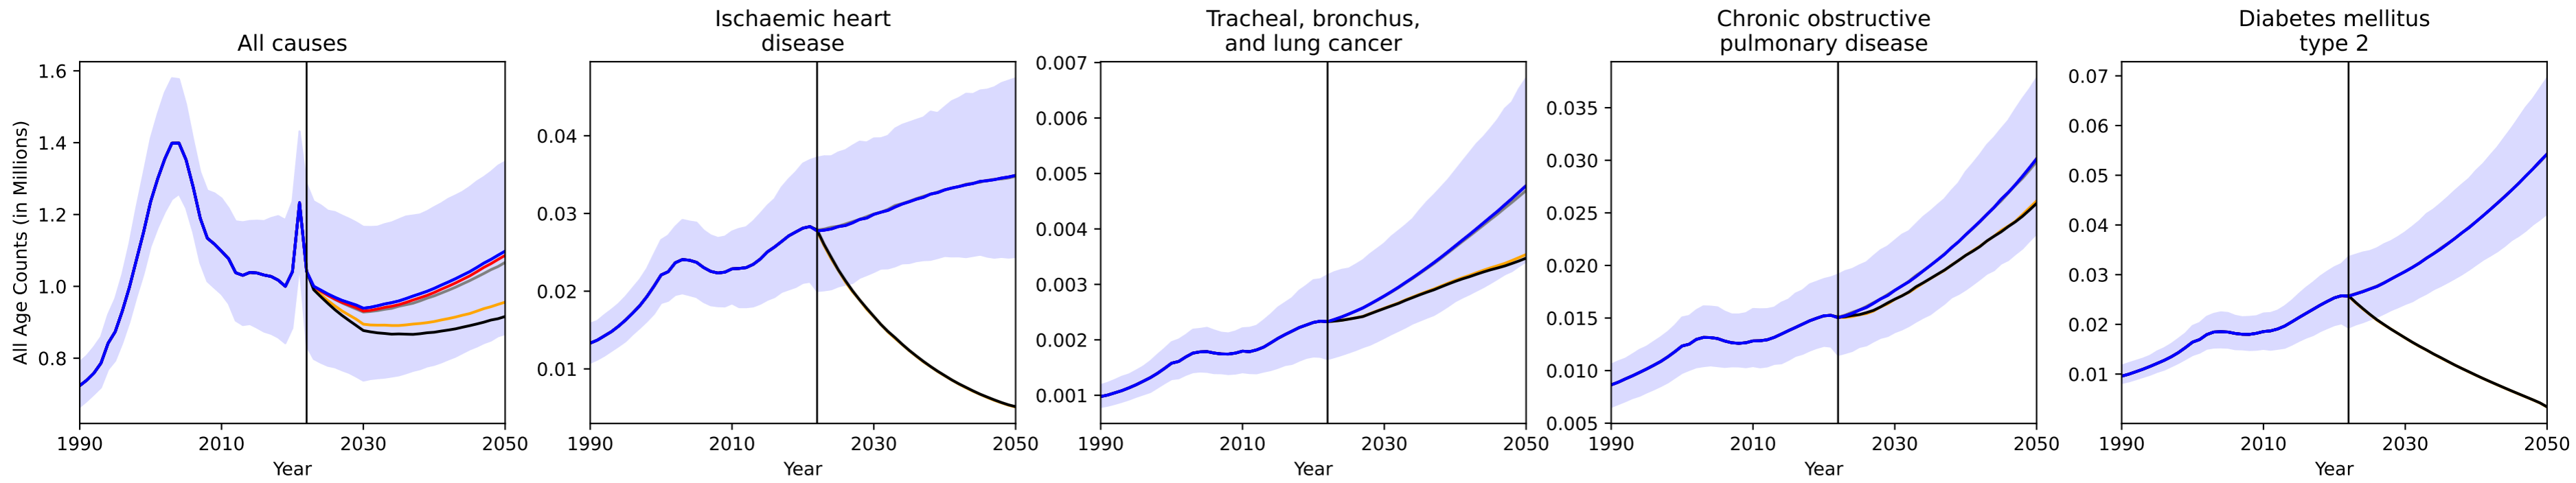

# South Africa

Supplemental Results Figure S12. All cause and top NCD causes age standardized DALY rates and all age counts by scenario and location, 1990-2050

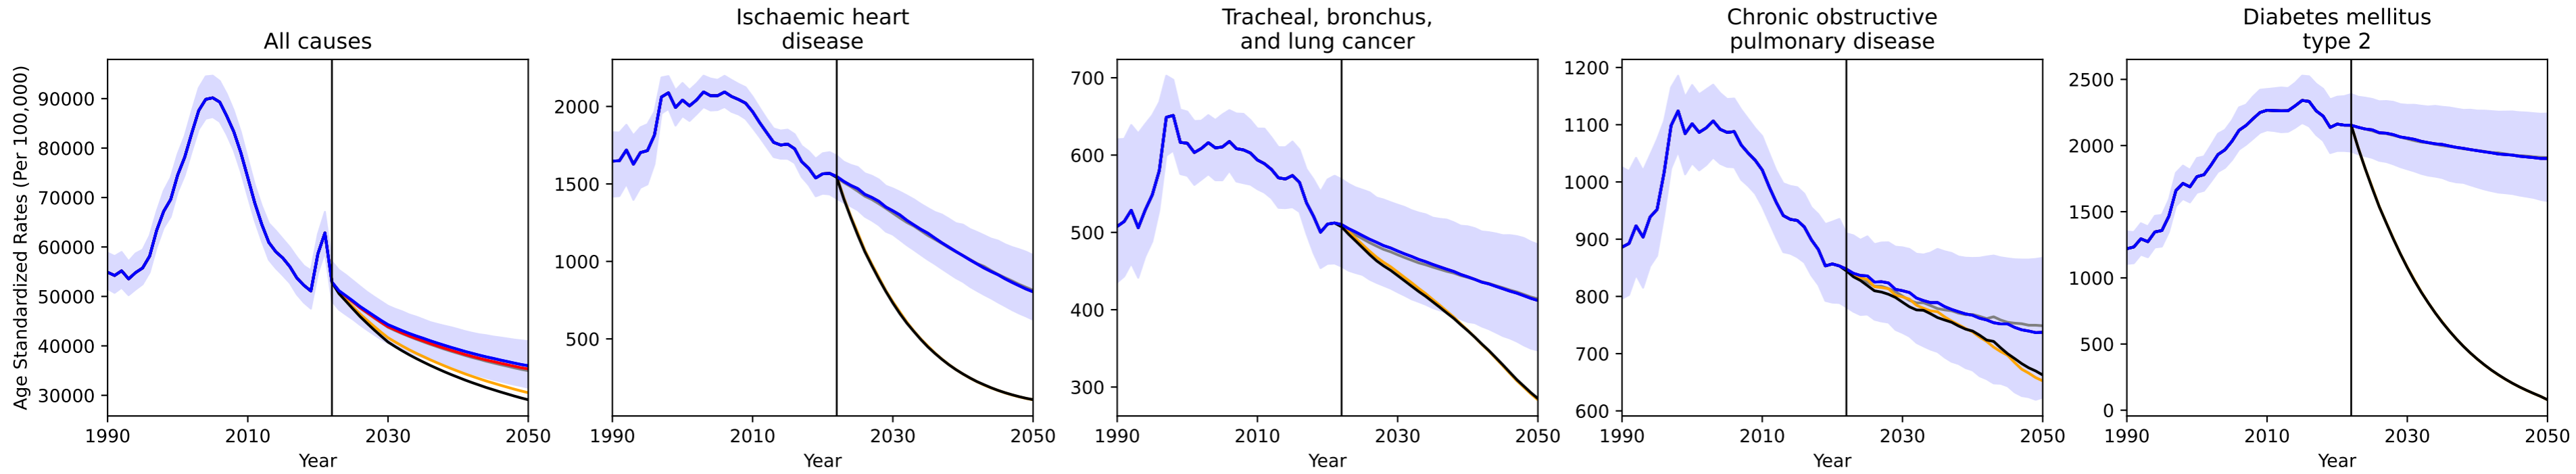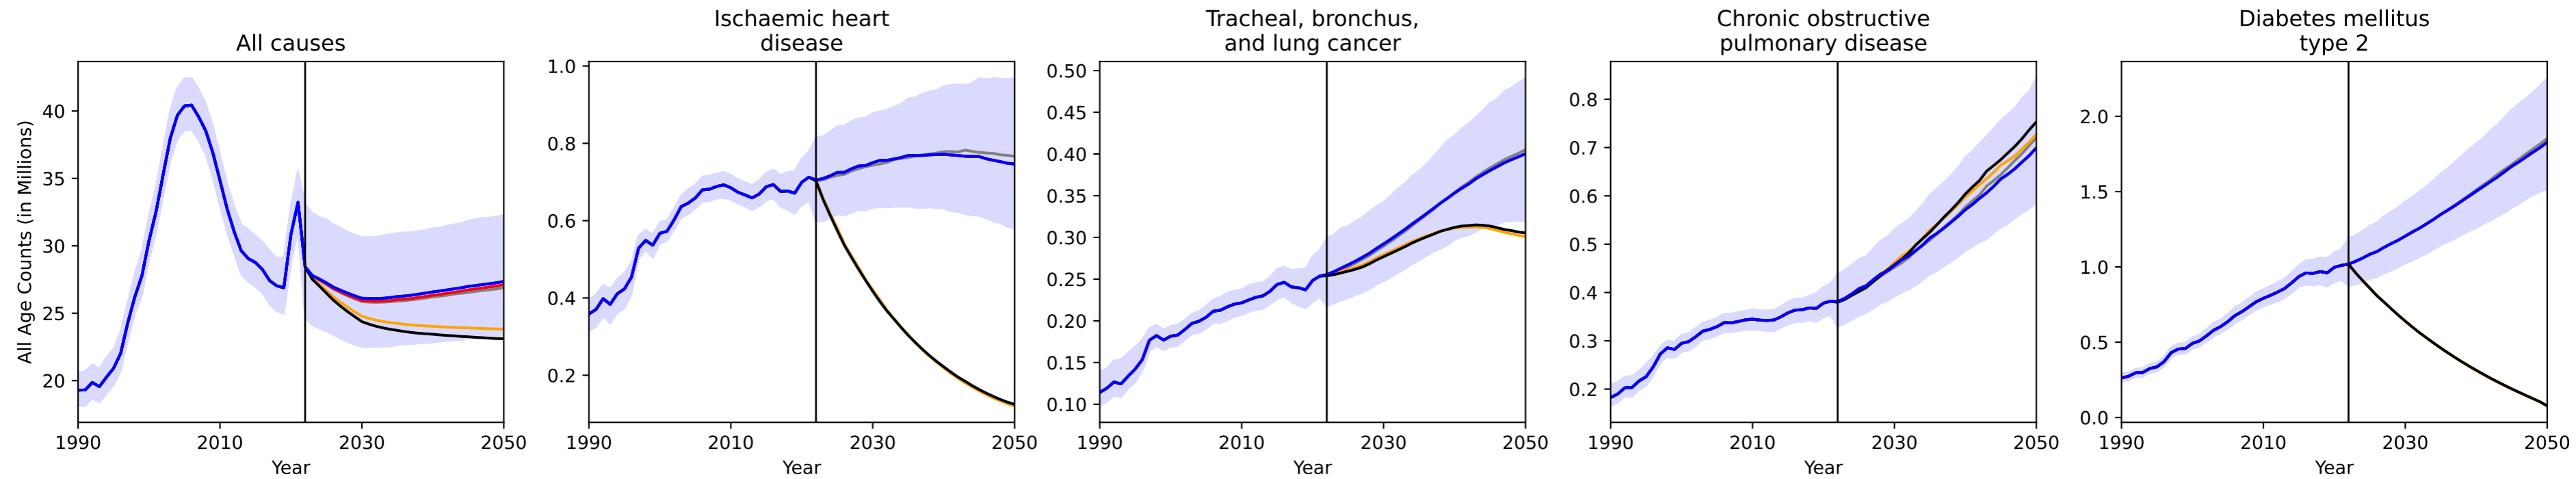

# Zimbabwe

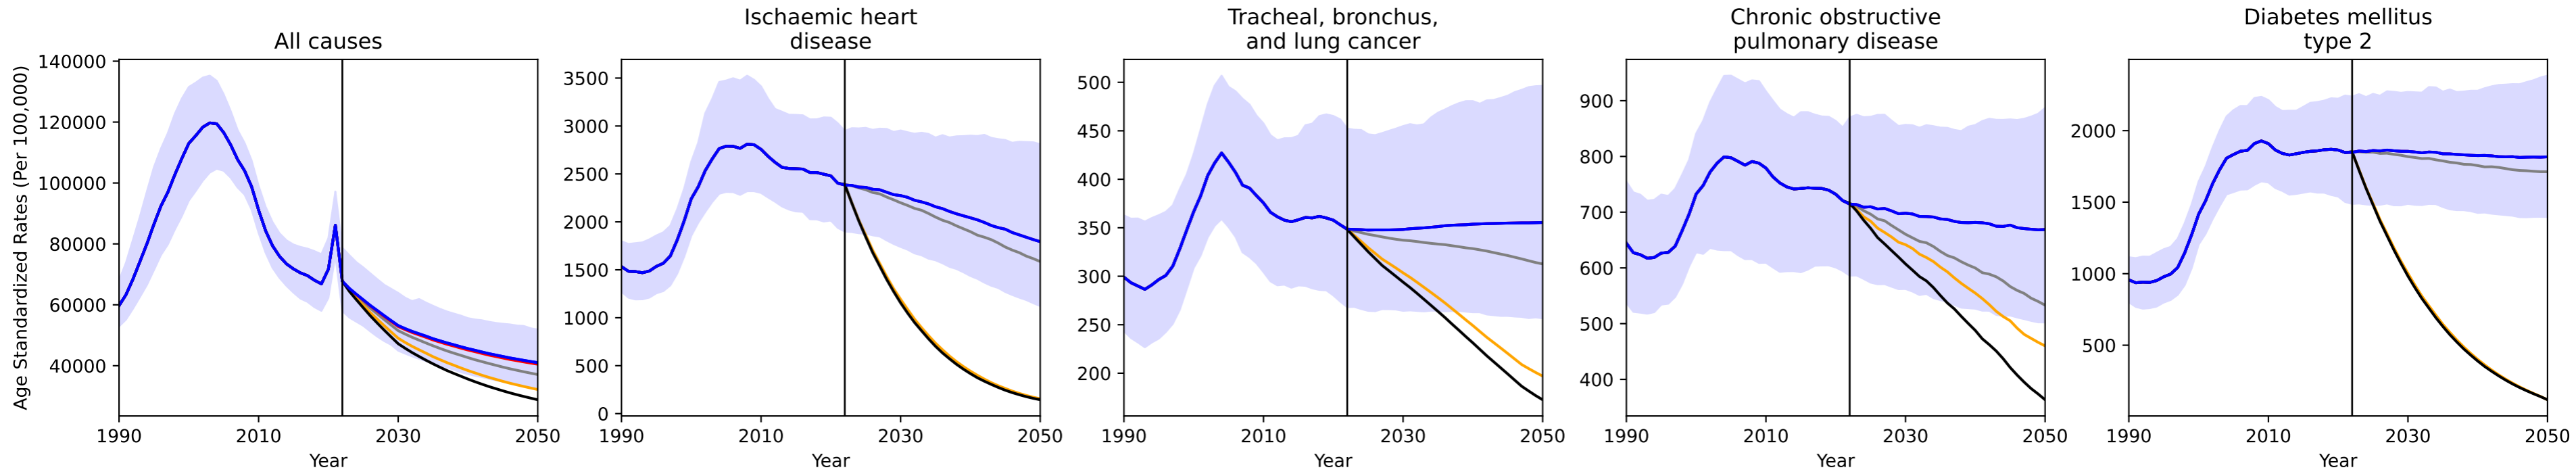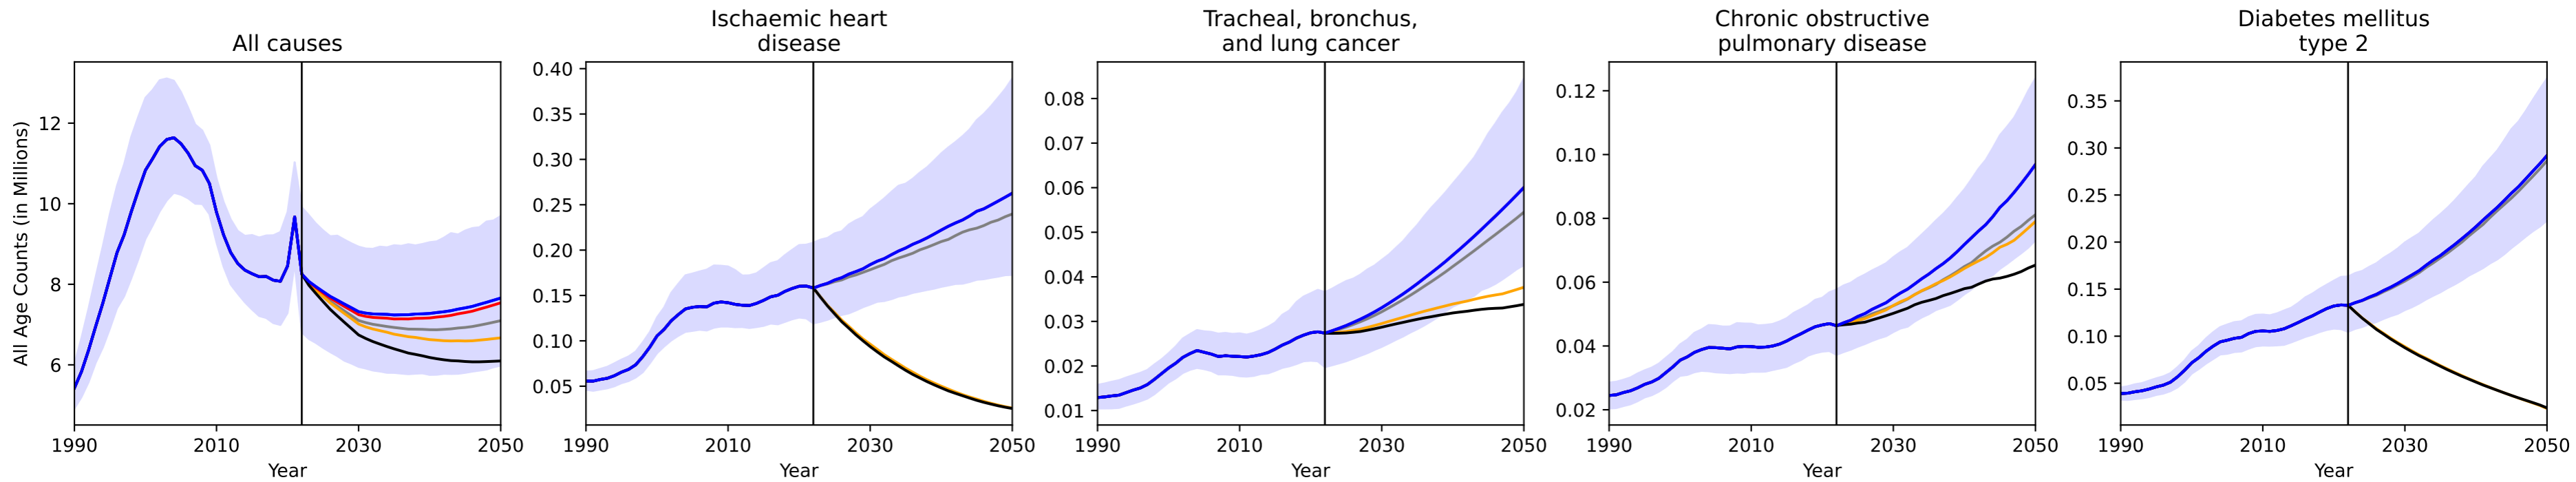

# Benin

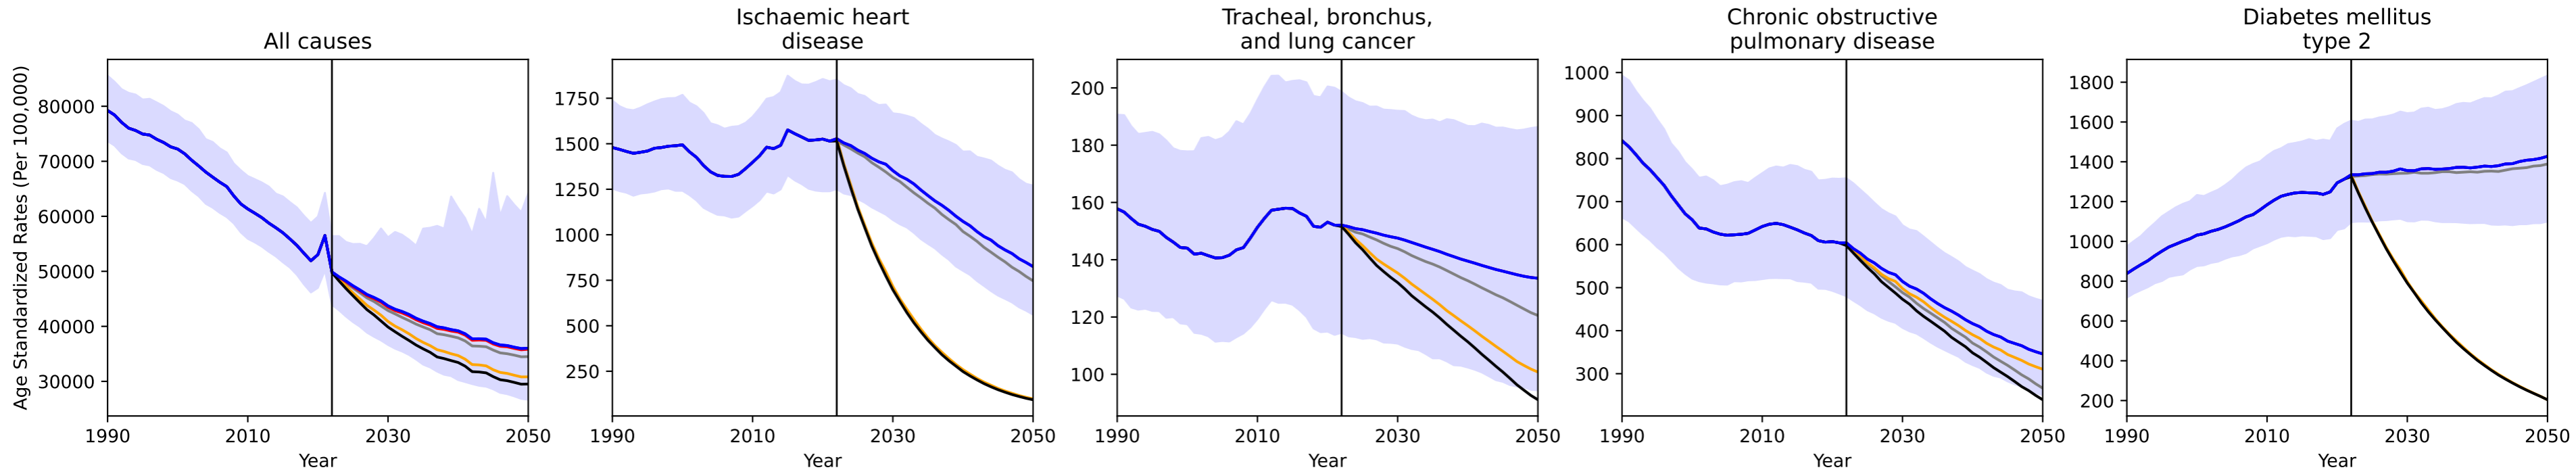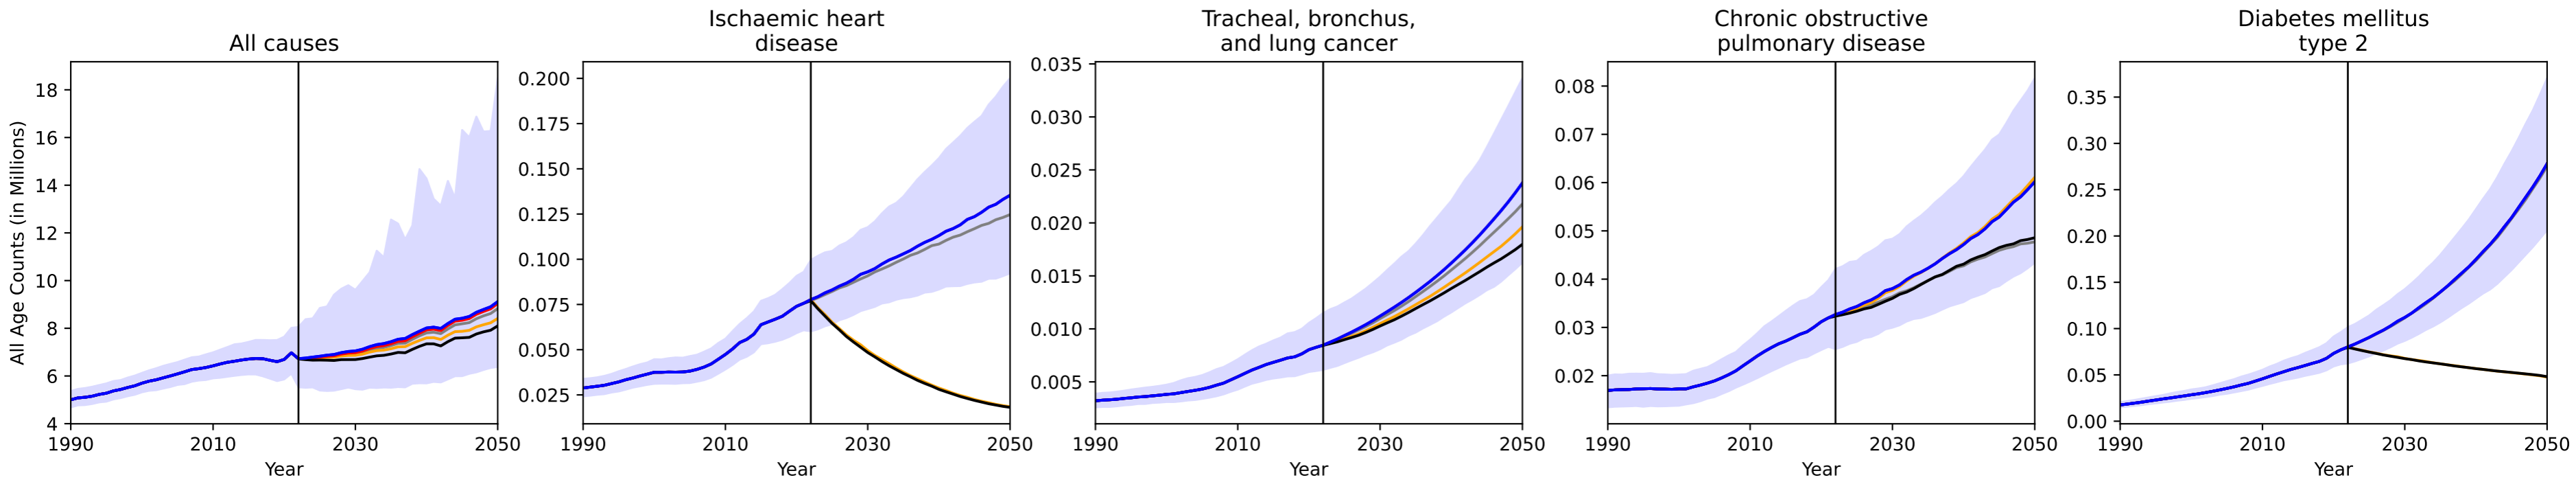

# Burkina Faso

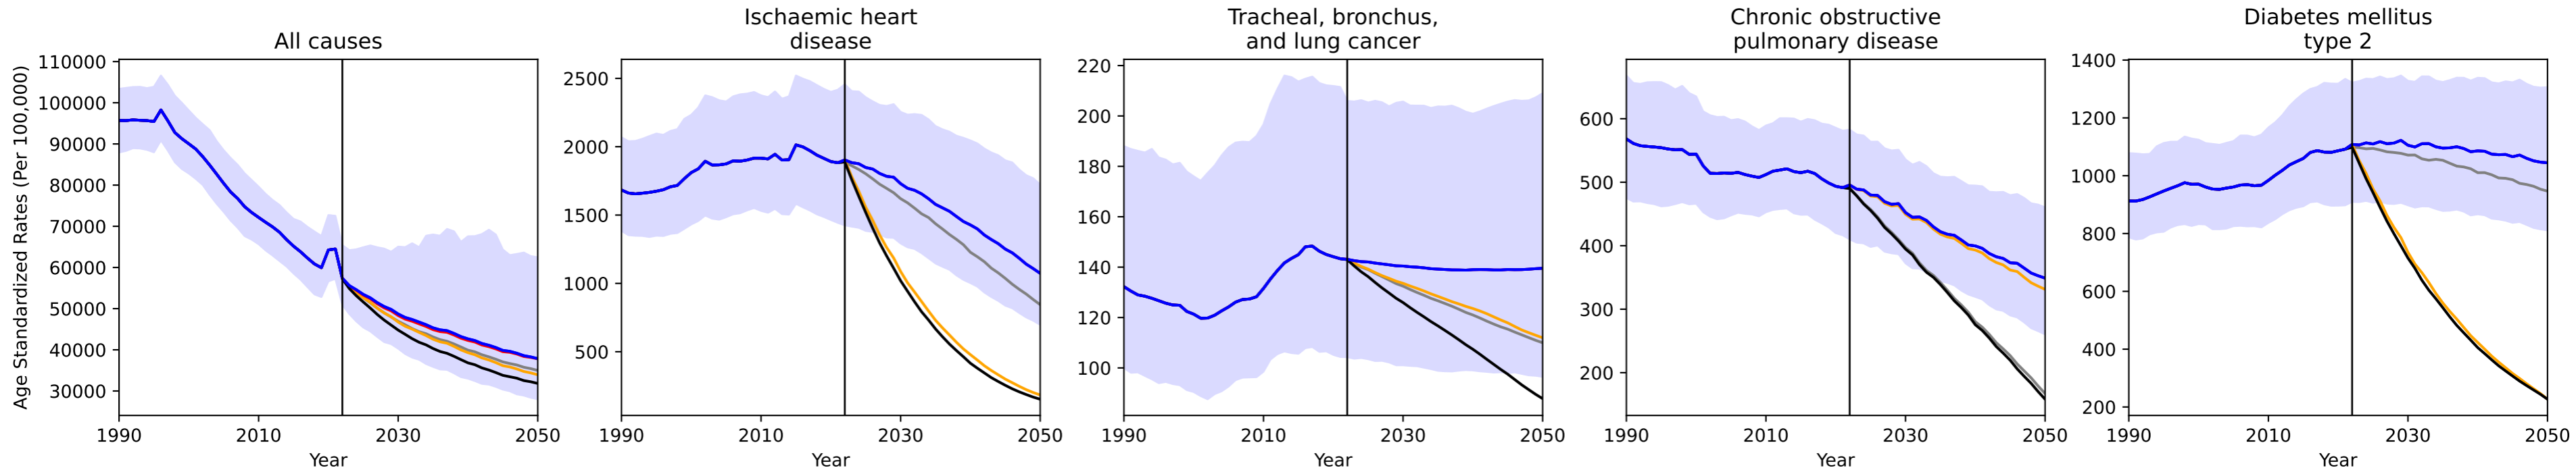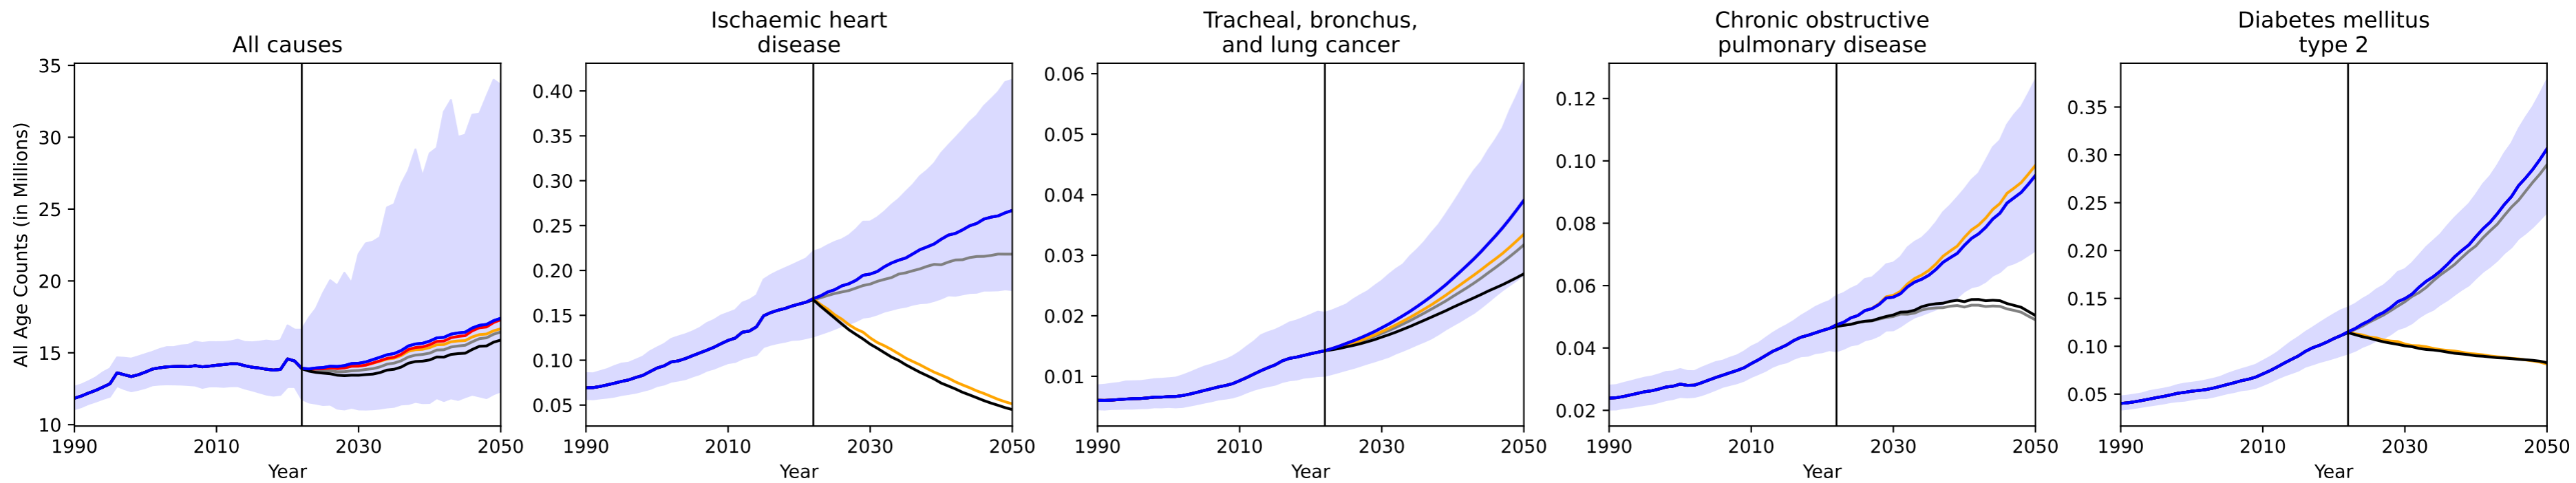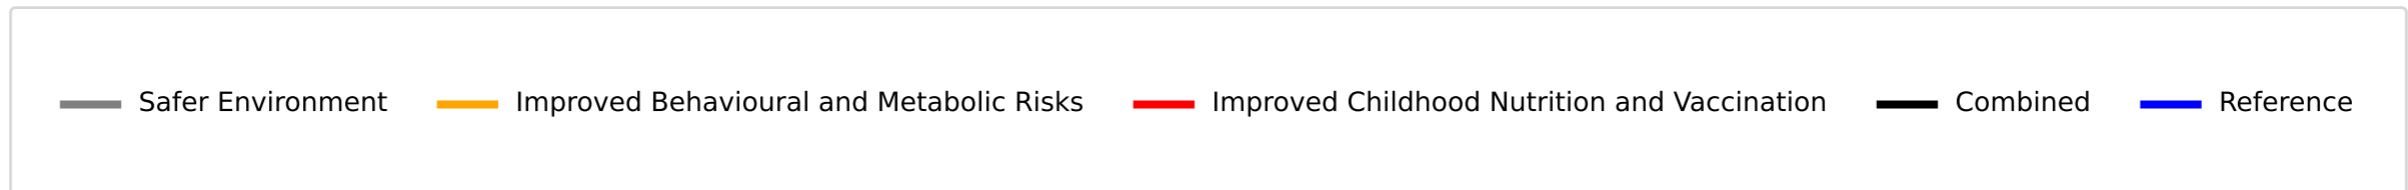



# Cabo Verde

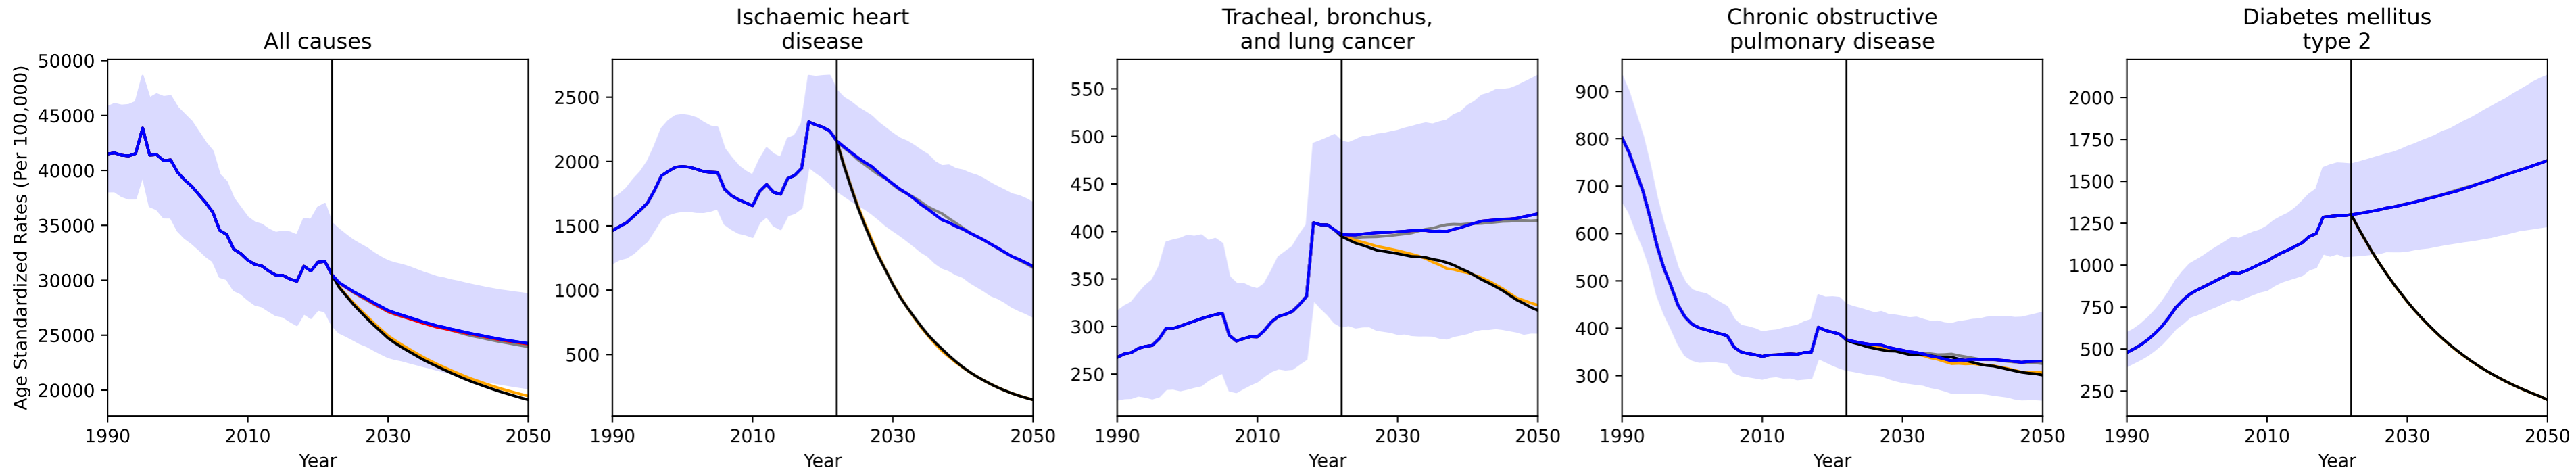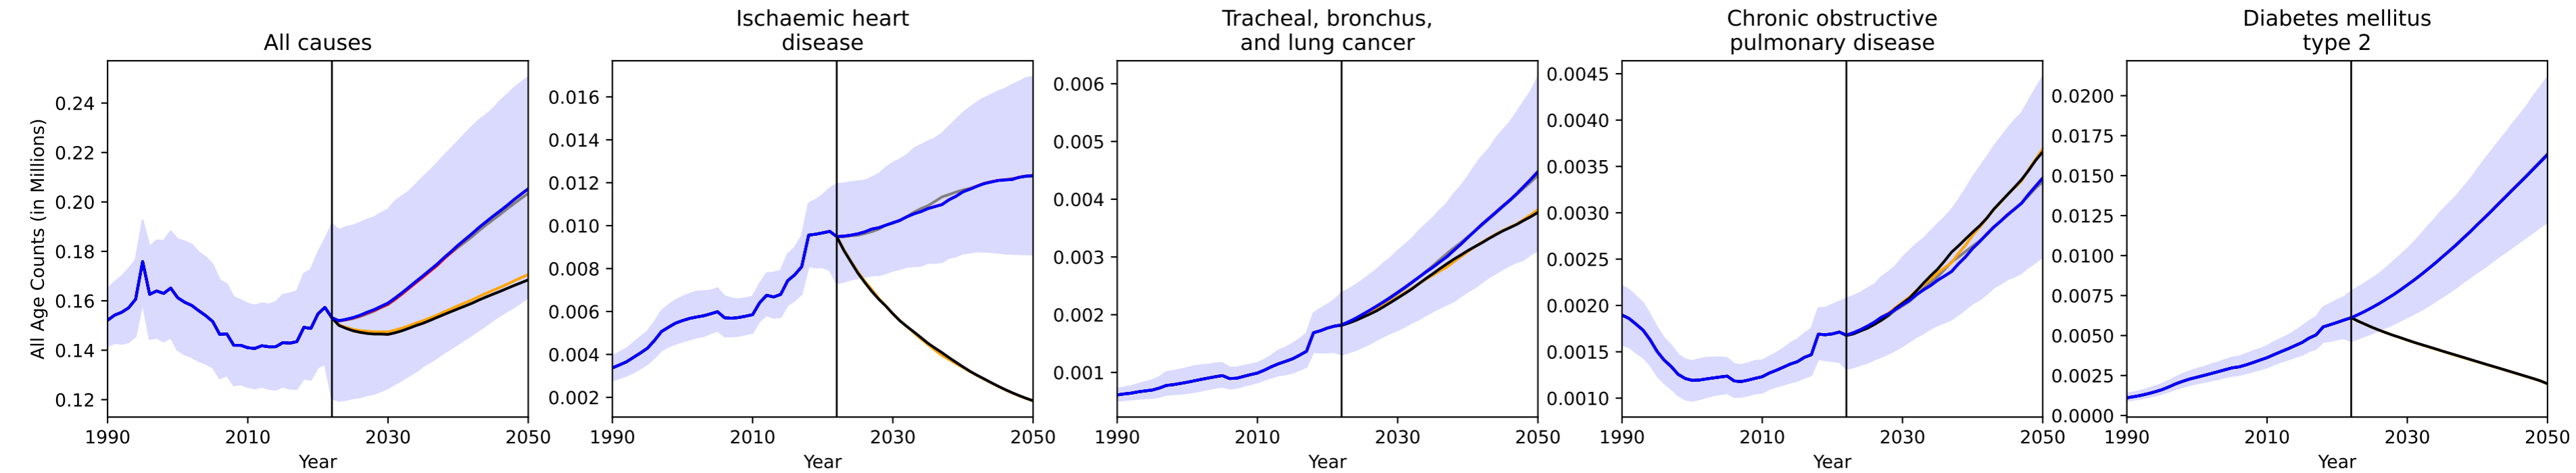

# Cameroon

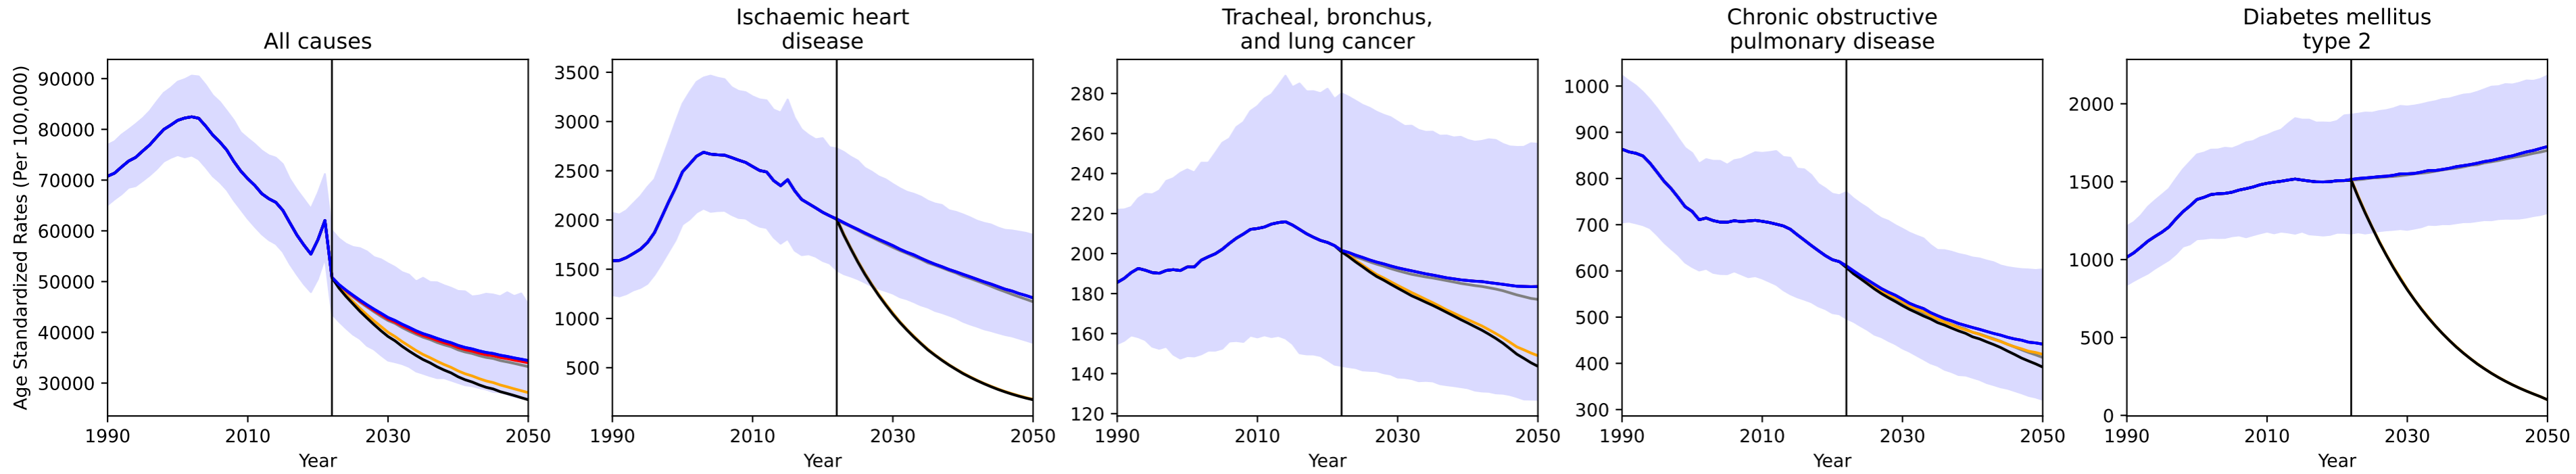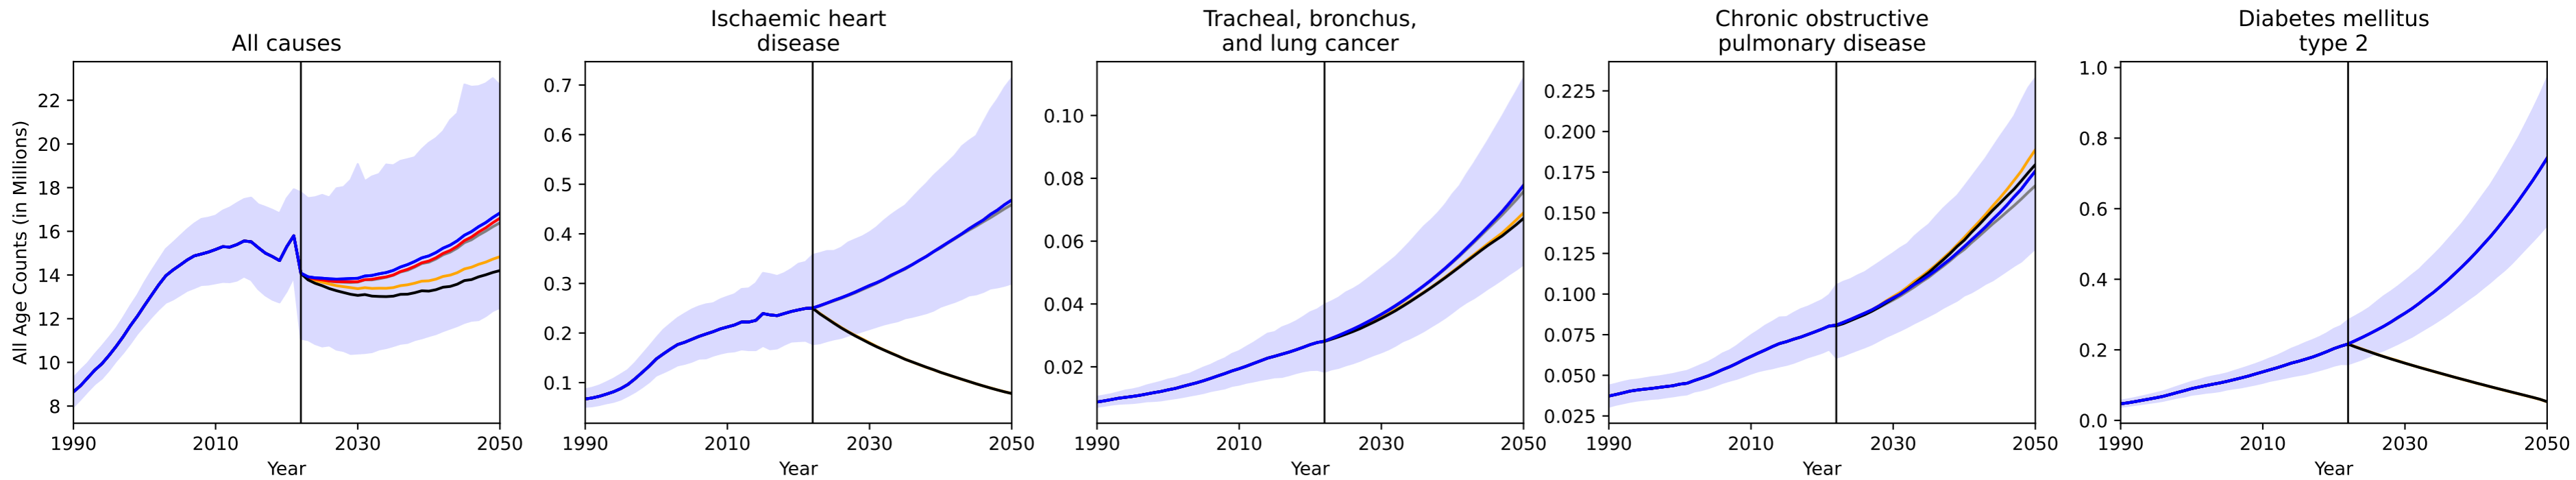

# Chad

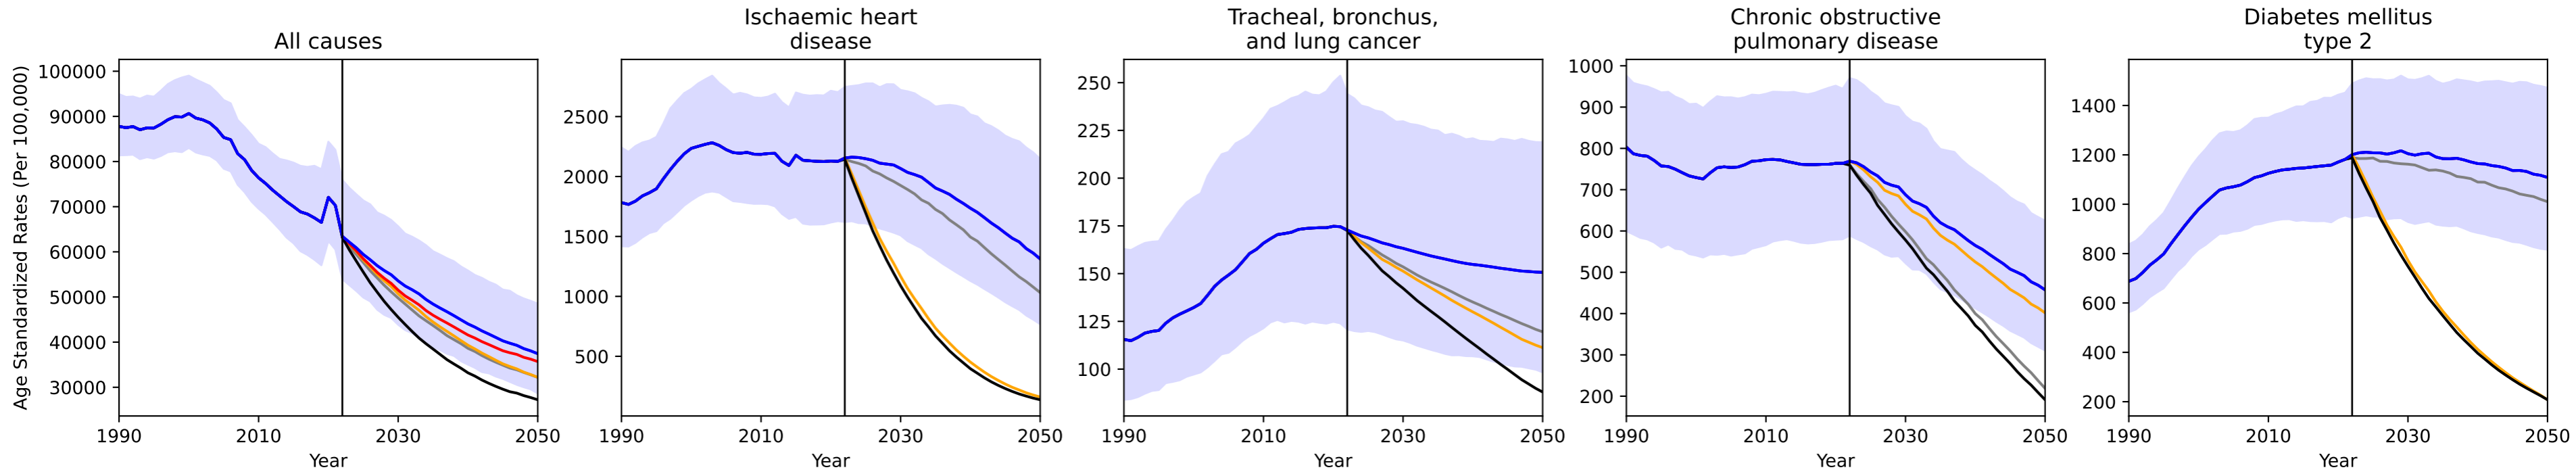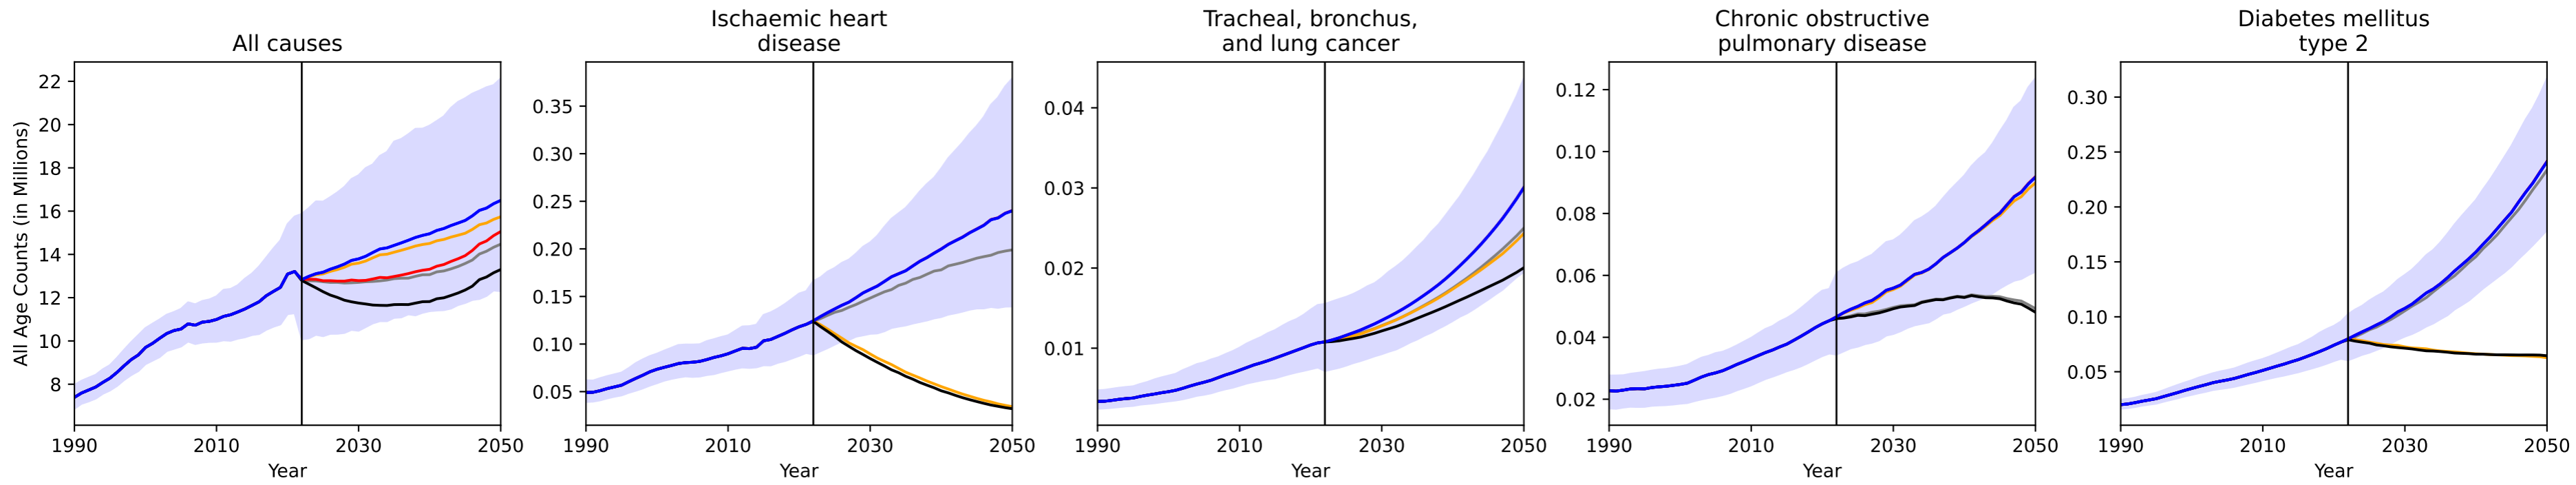

# Côte D'Ivoire

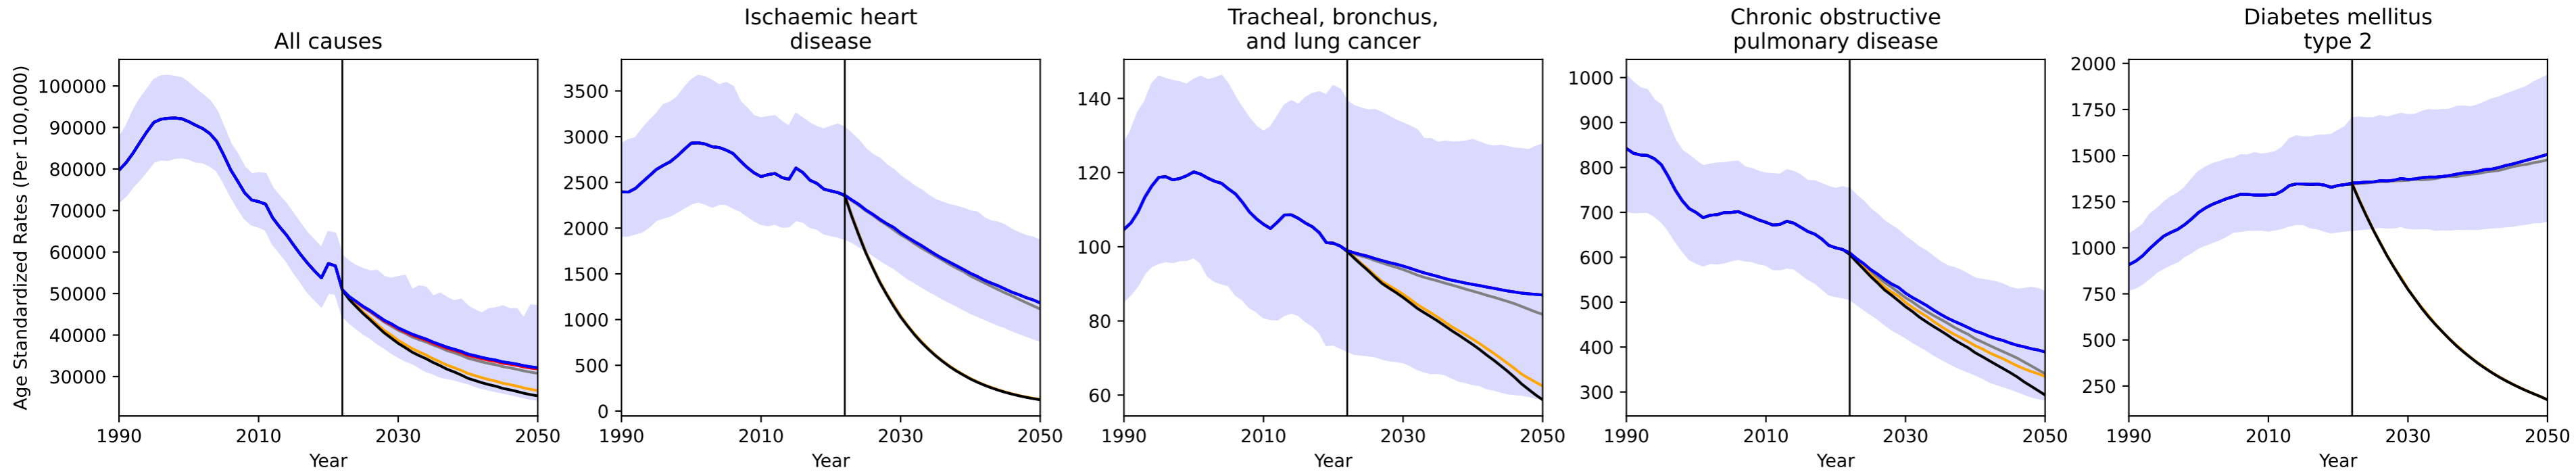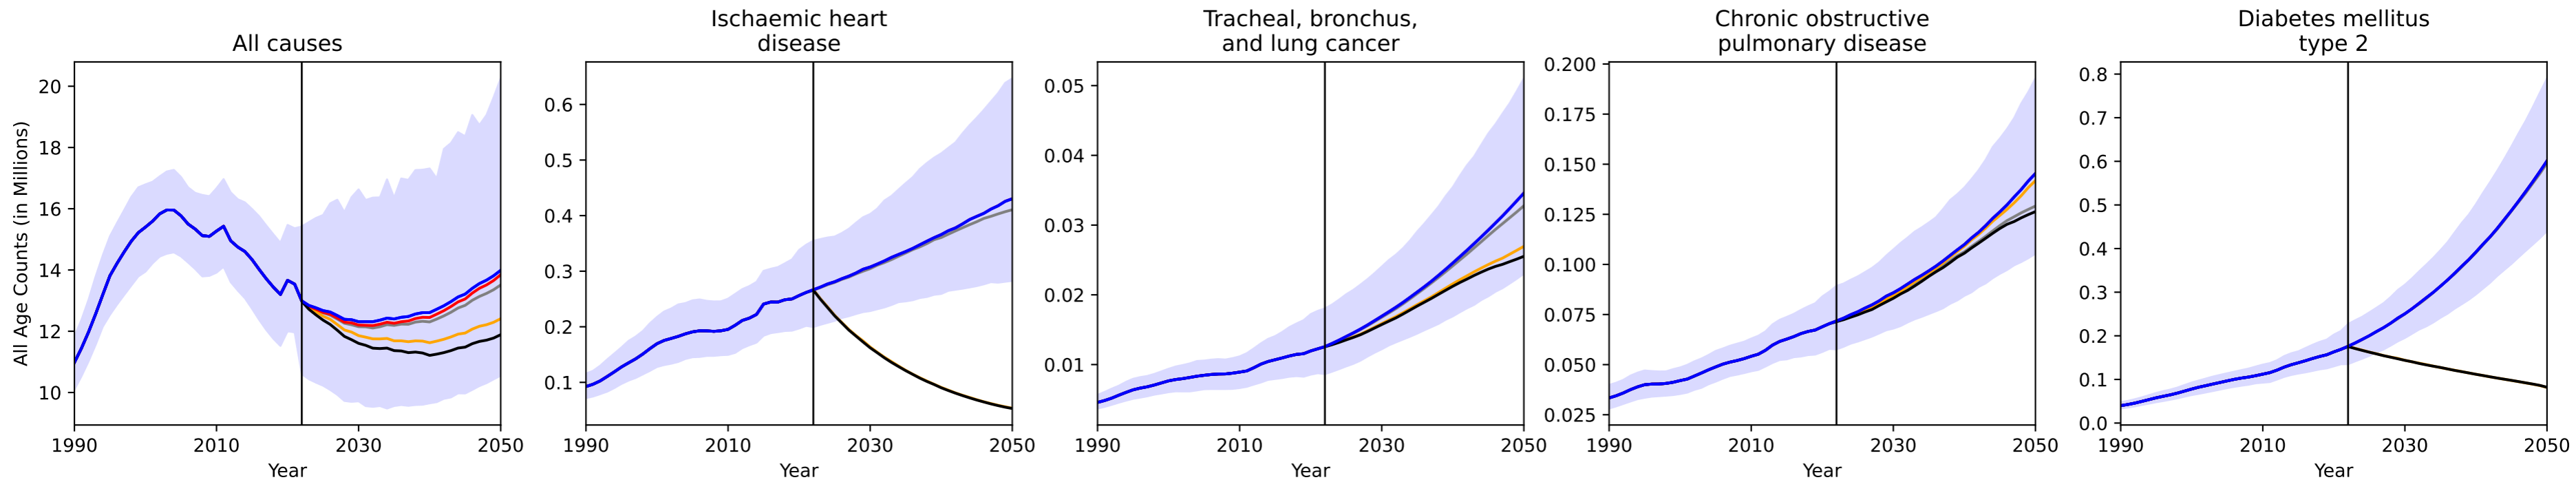

# The Gambia

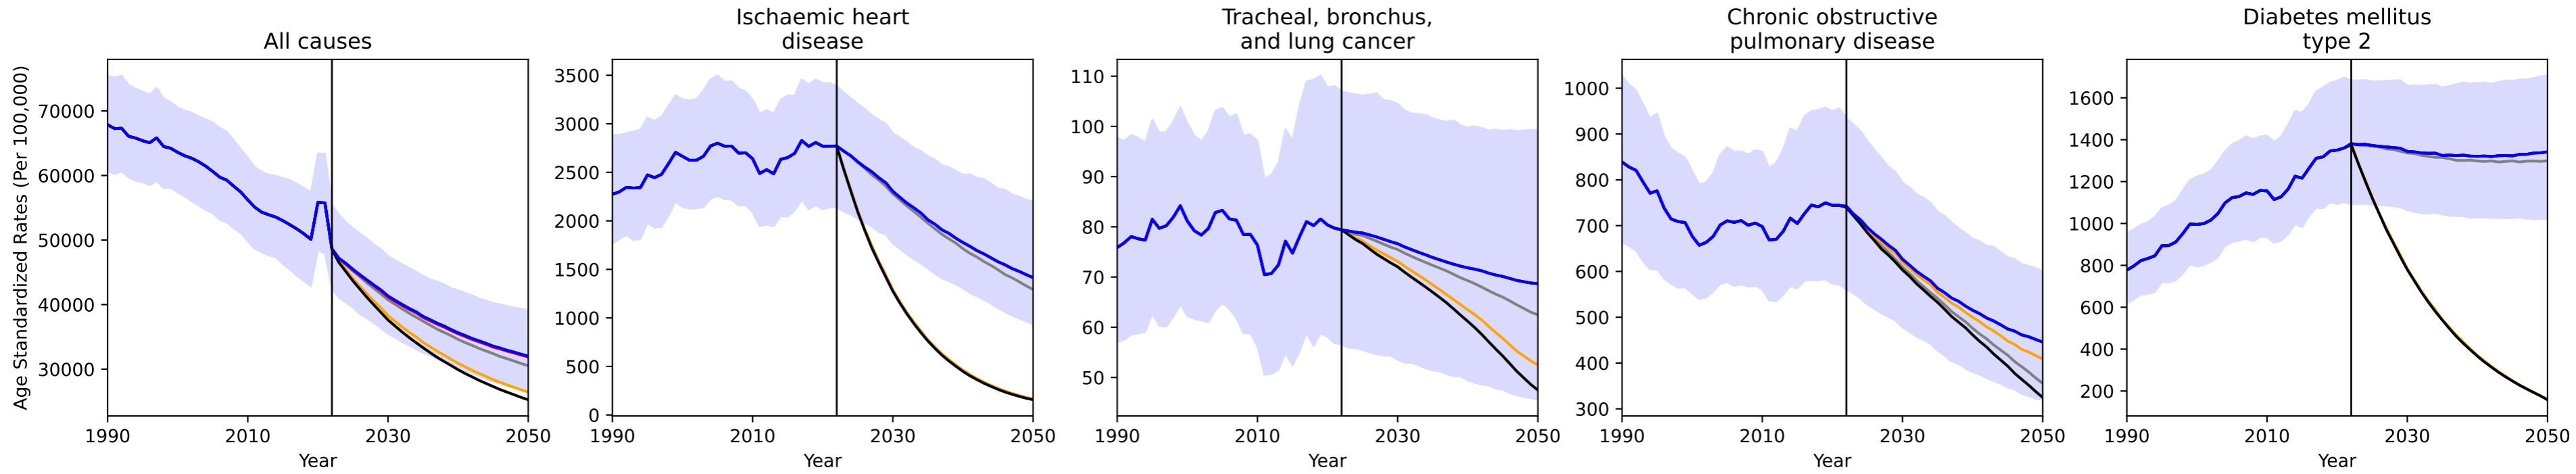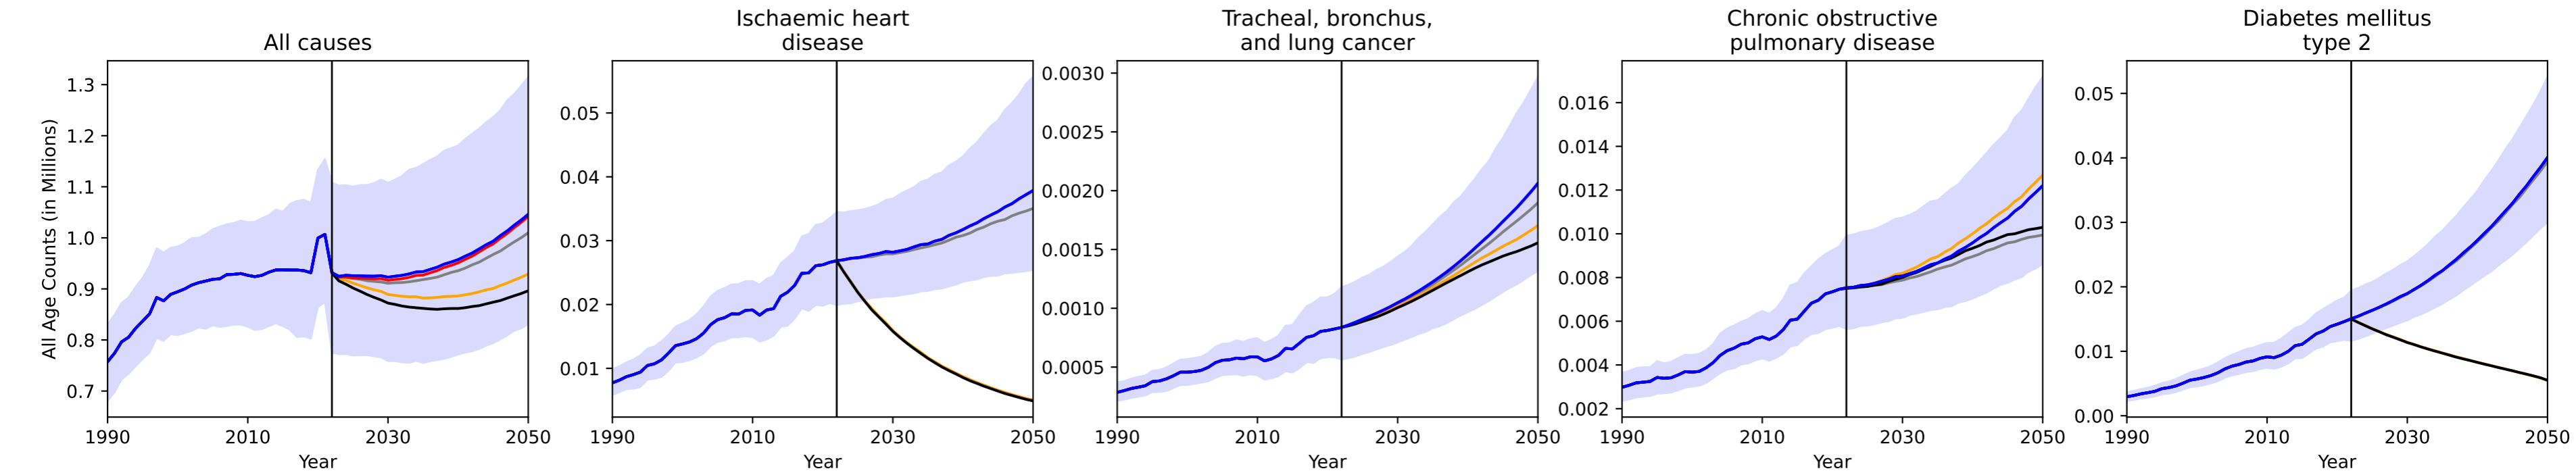

# Ghana

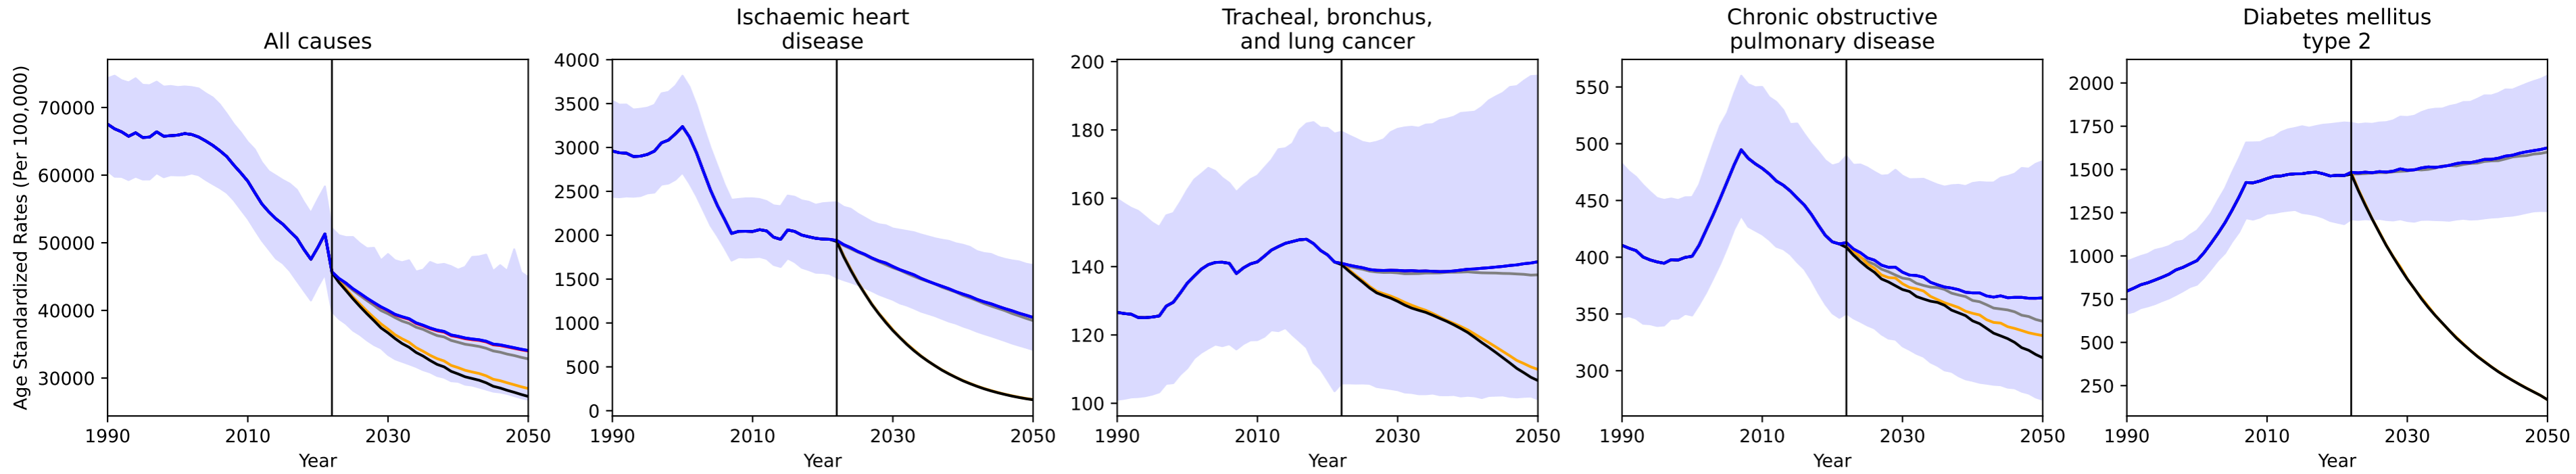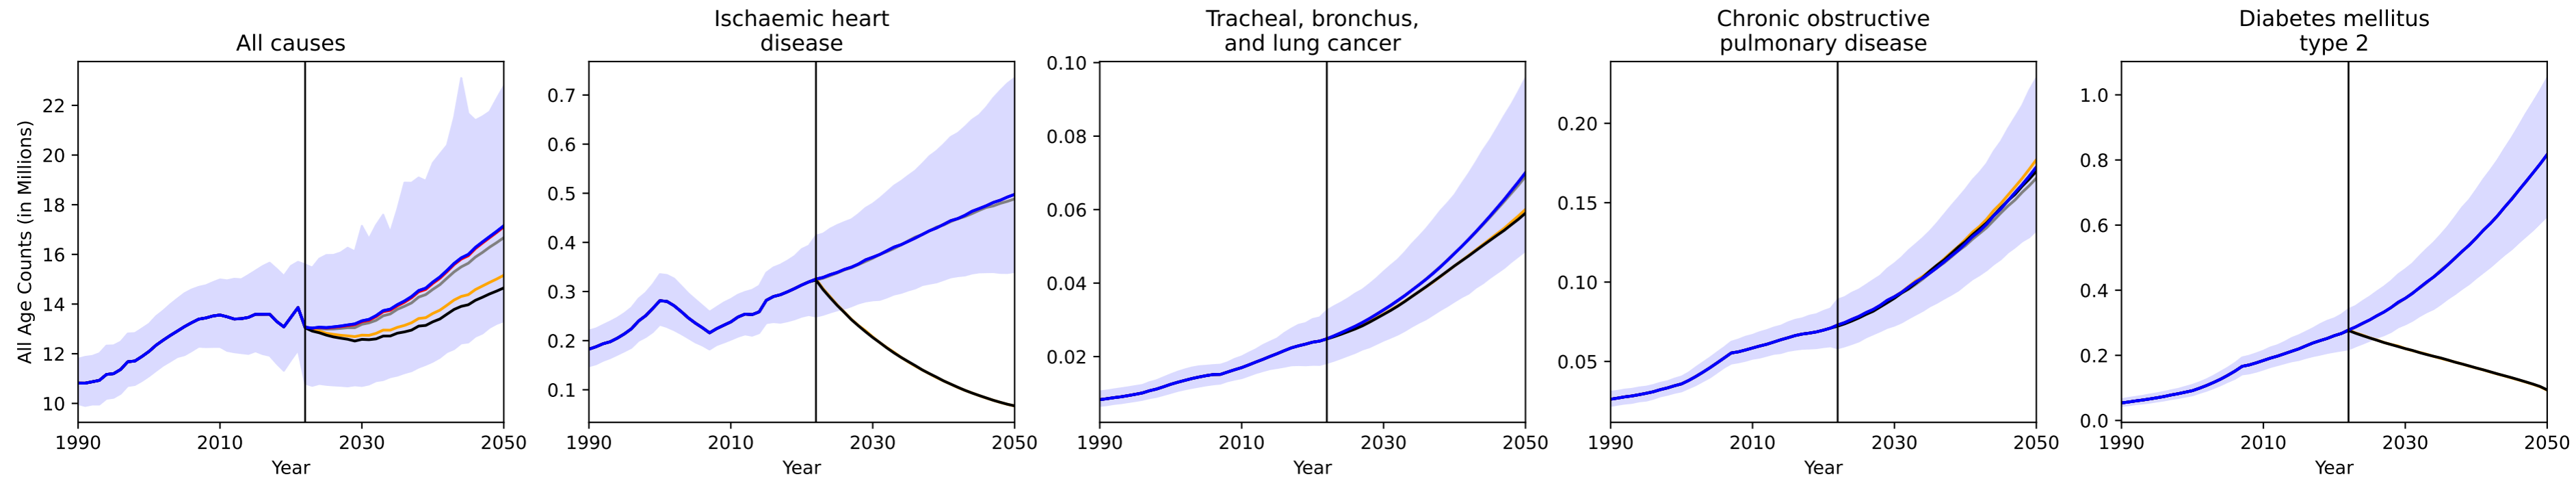

# Guinea

Supplemental Results Figure S12. All cause and top NCD causes age standardized DALY rates and all age counts by scenario and location, 1990-2050

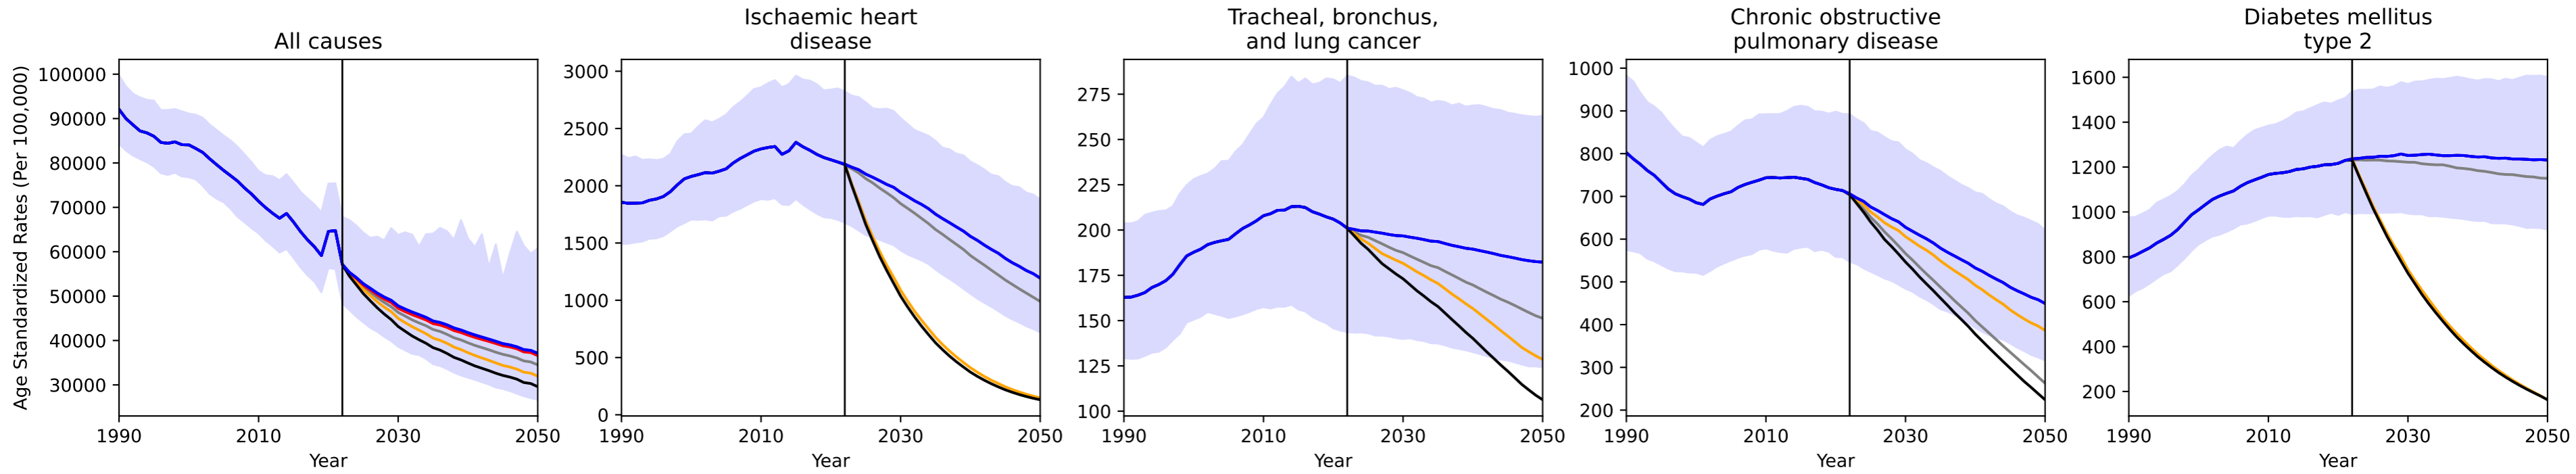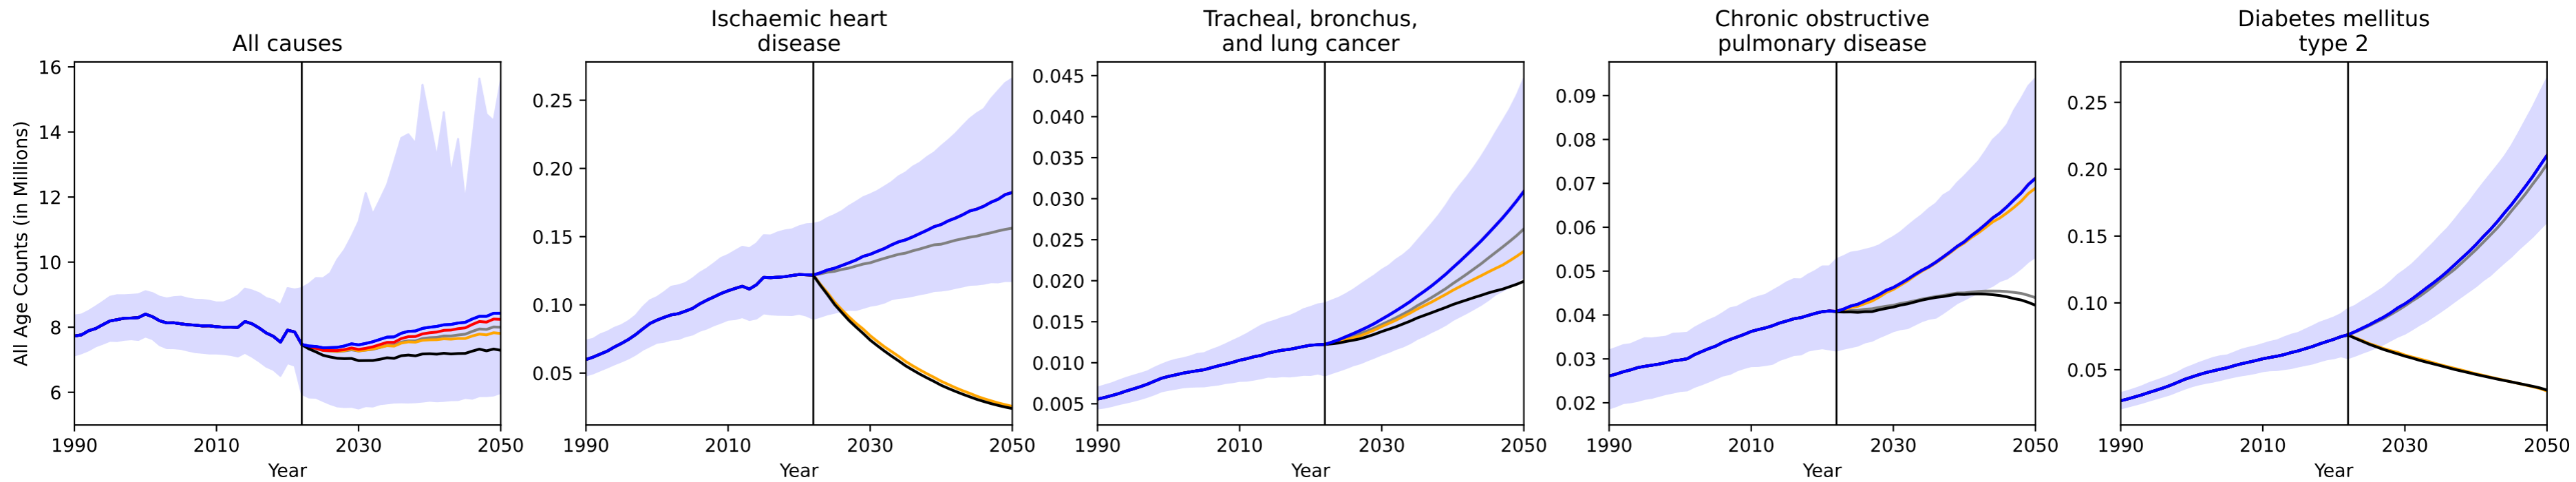

# Guinea-Bissau

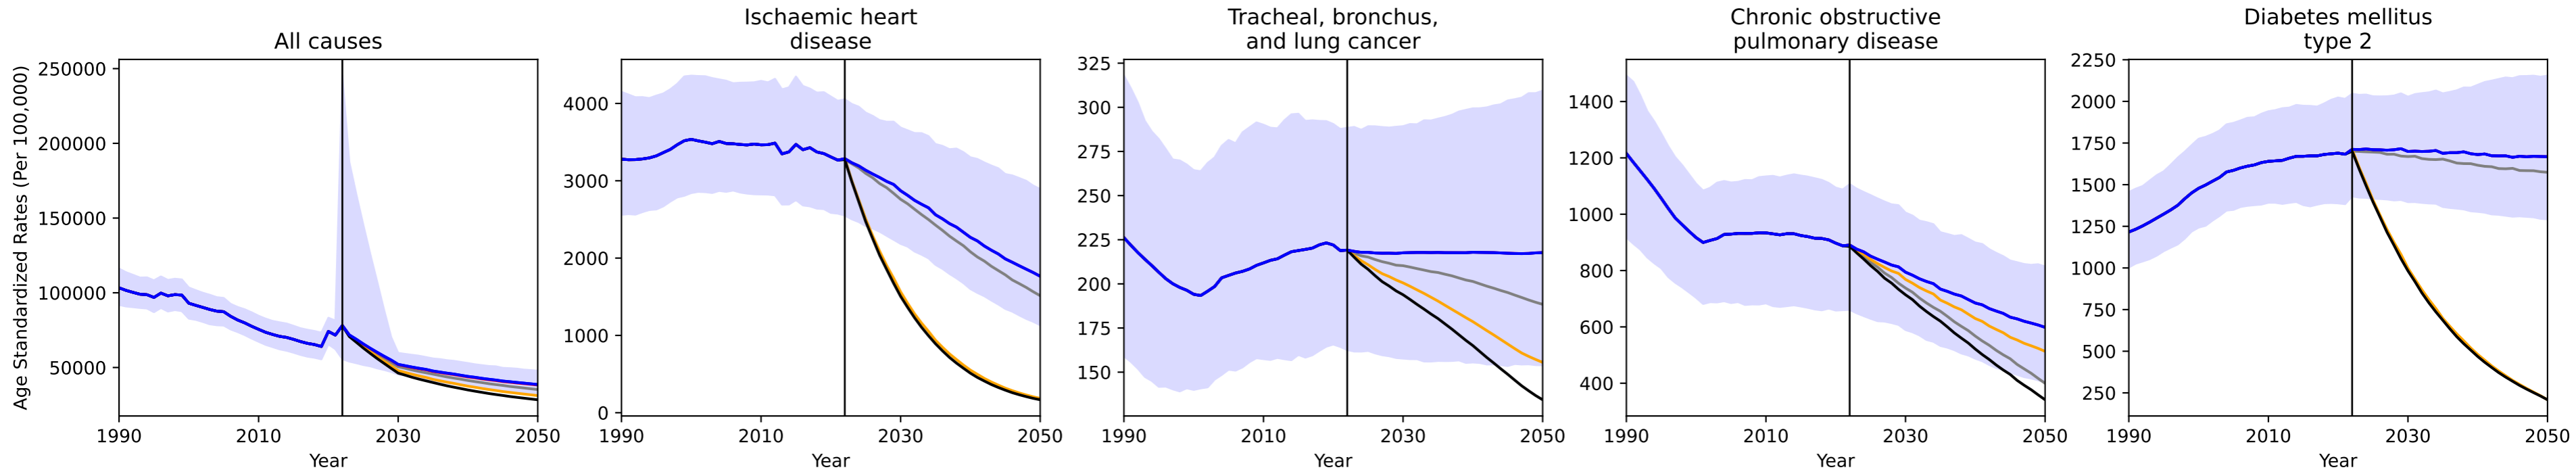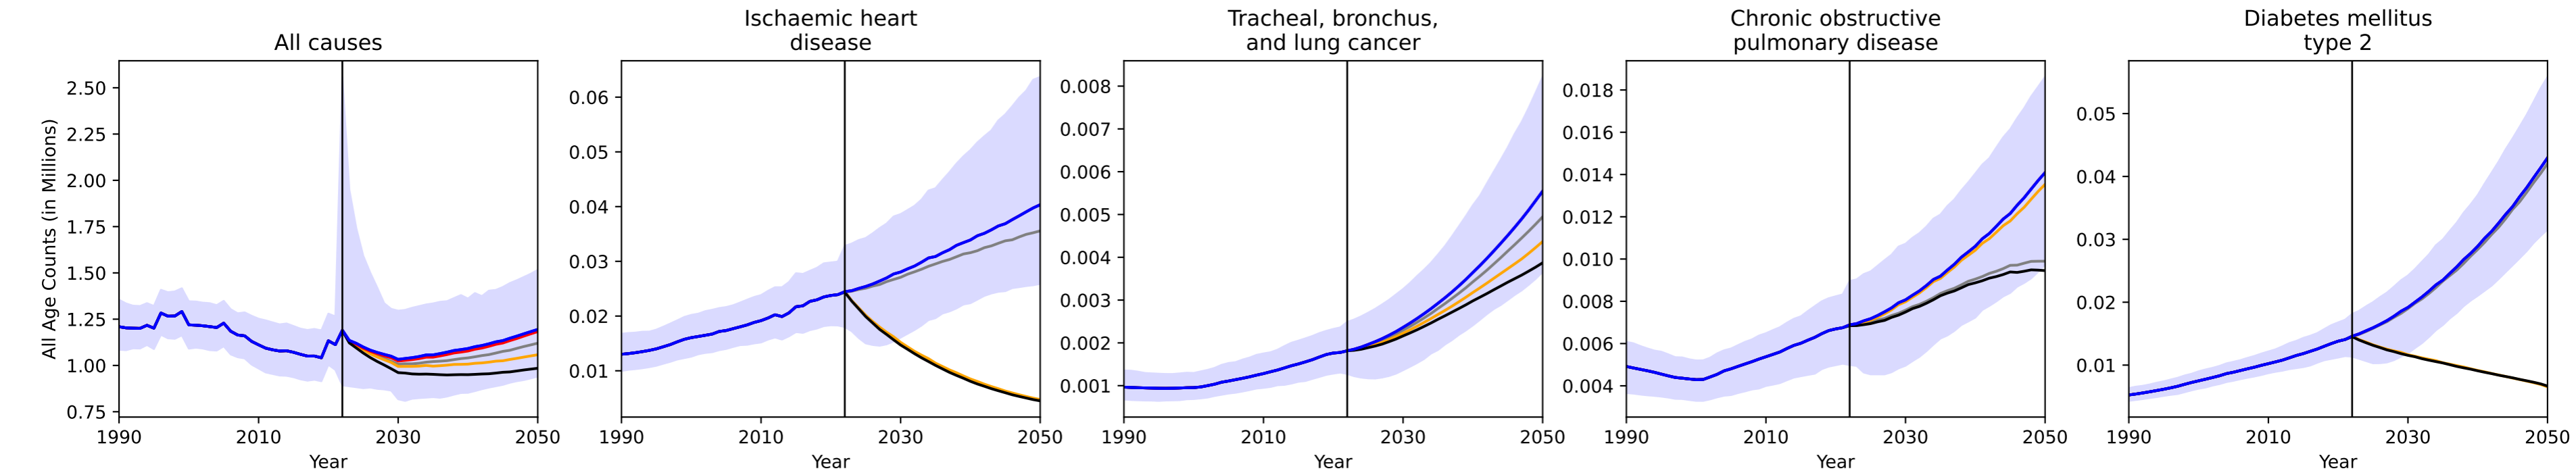



# Liberia

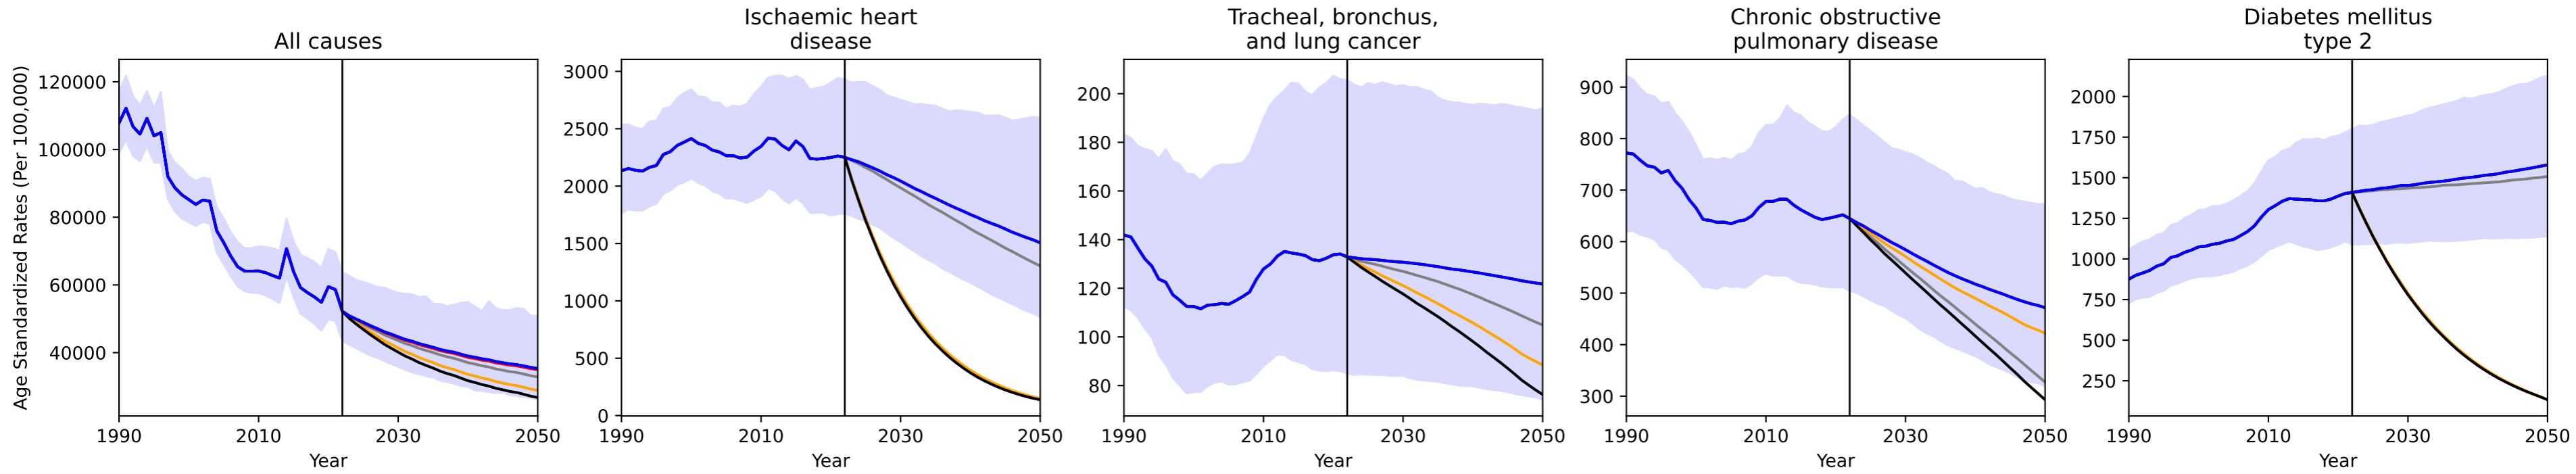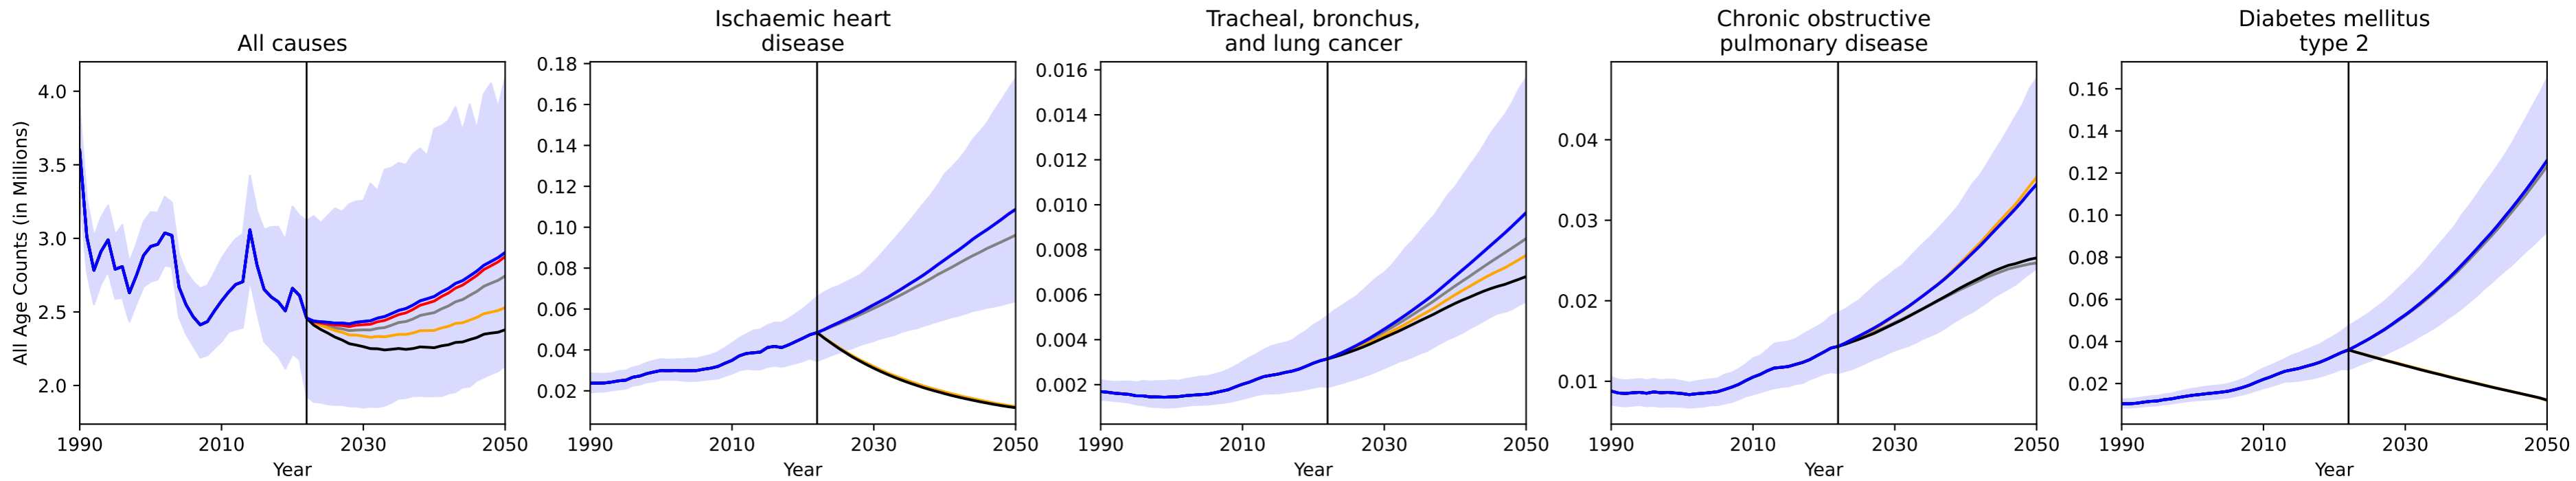

# Mali

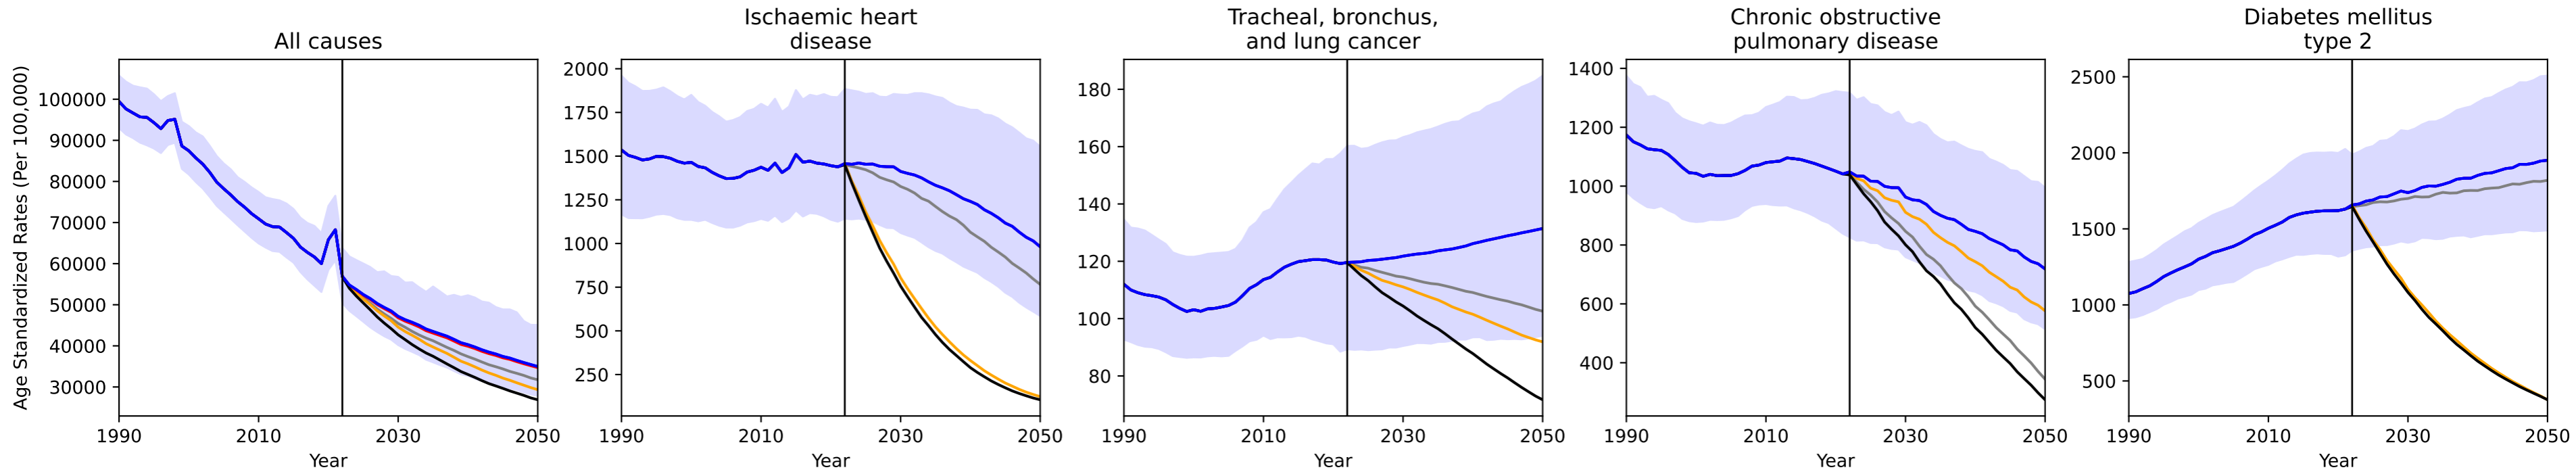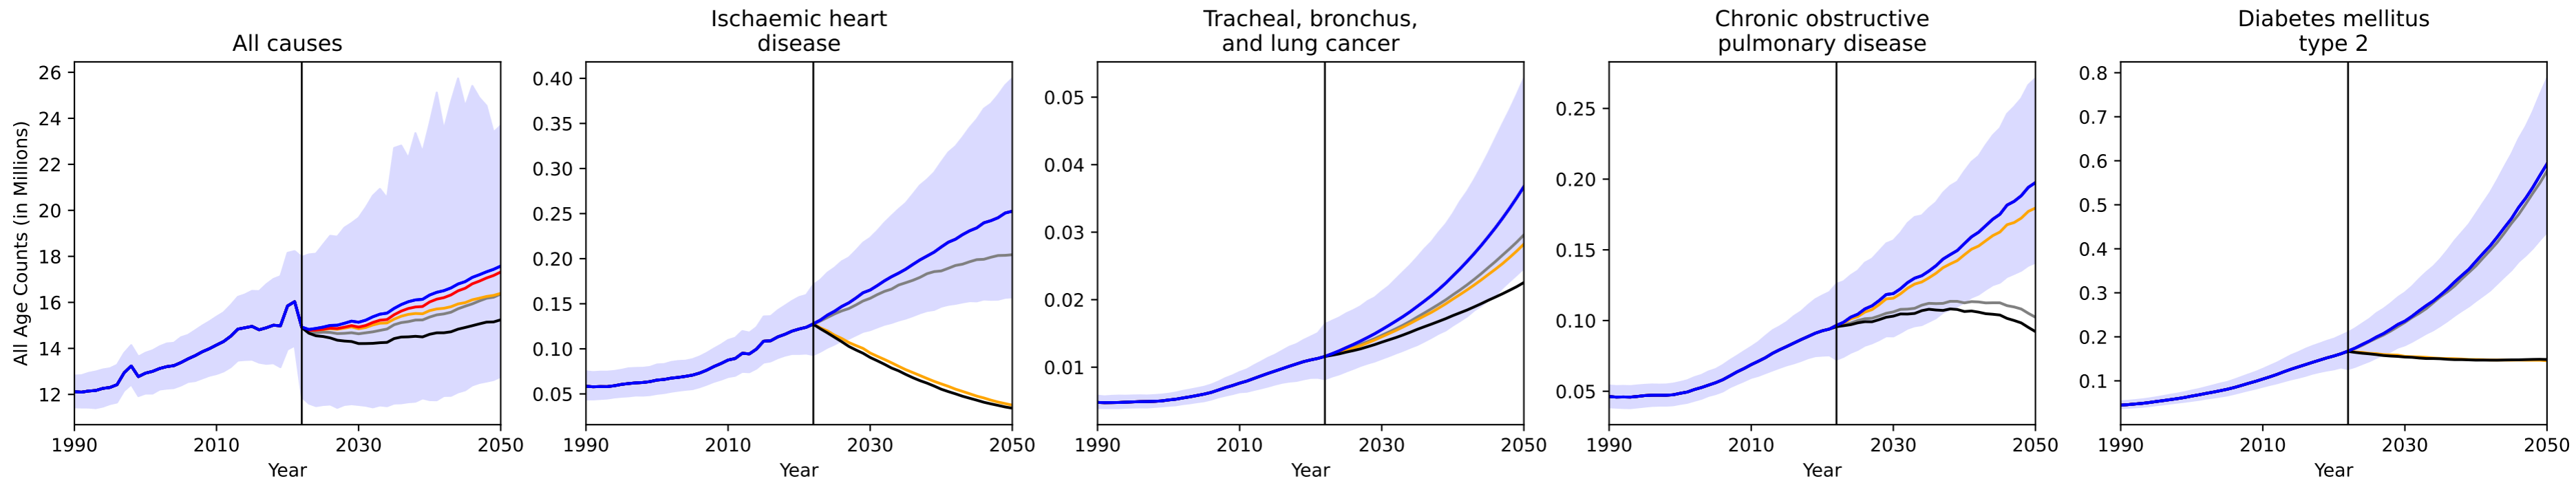

# Mauritania

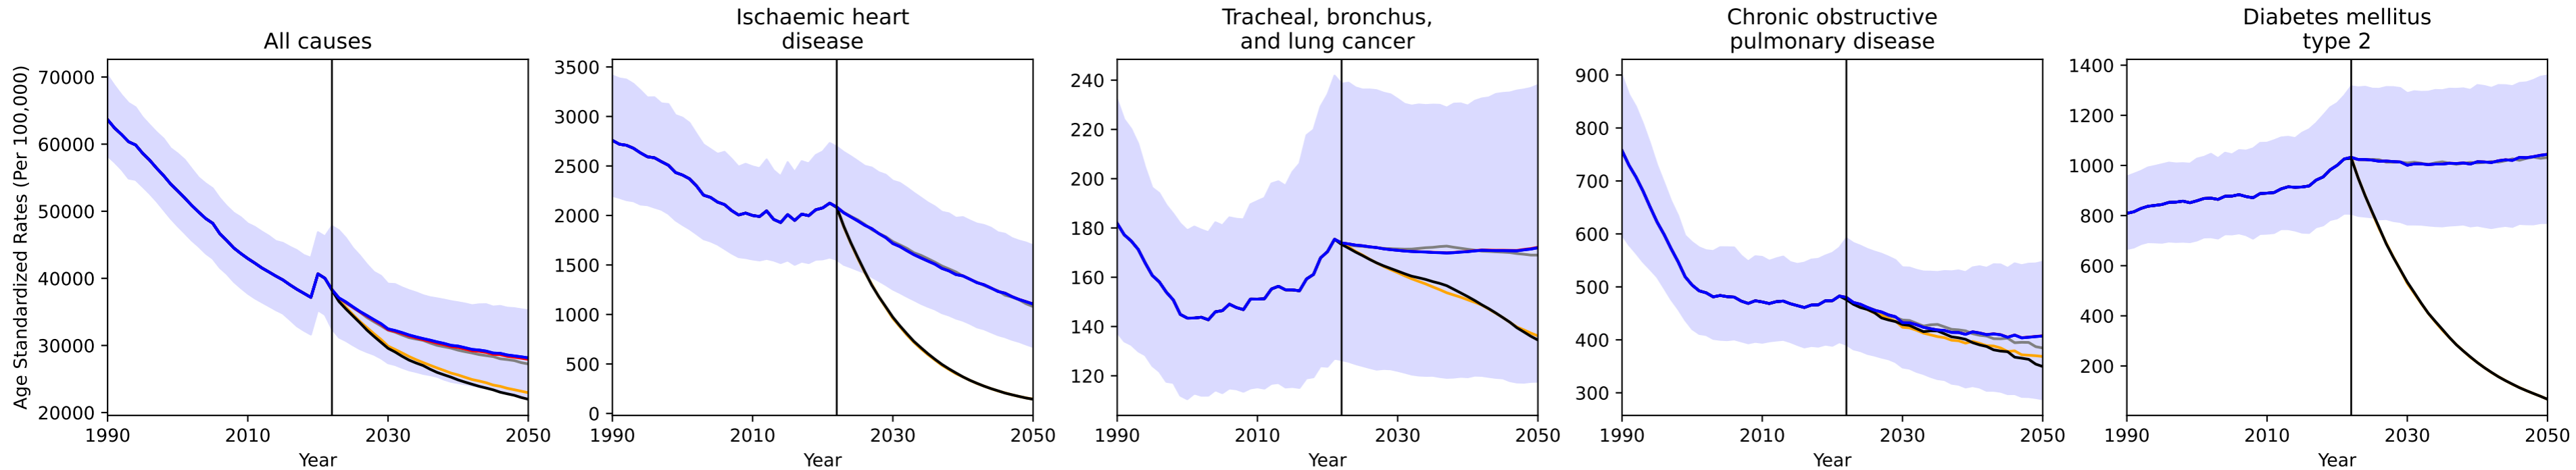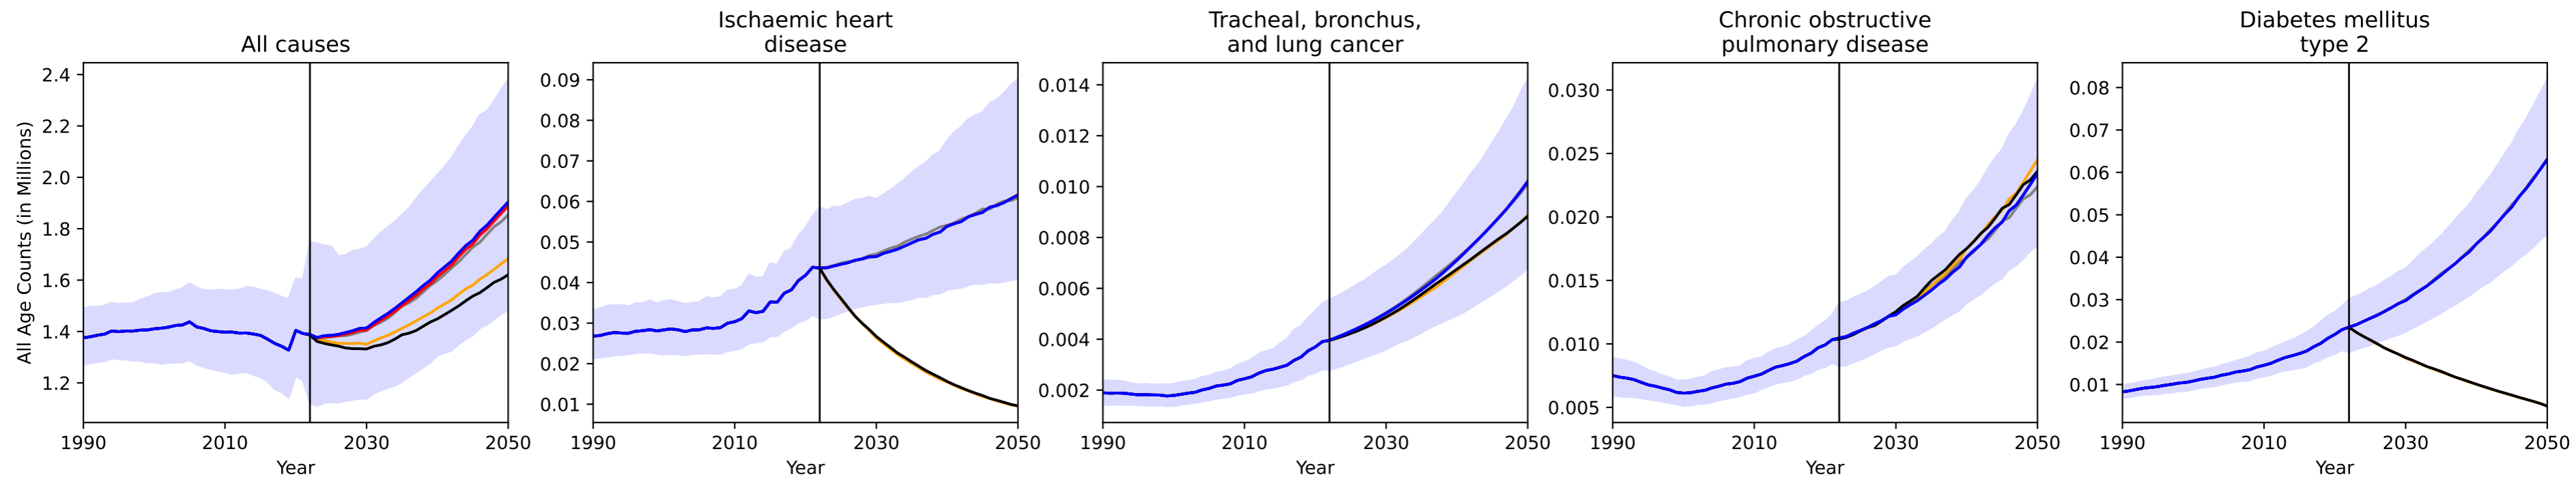

# Niger

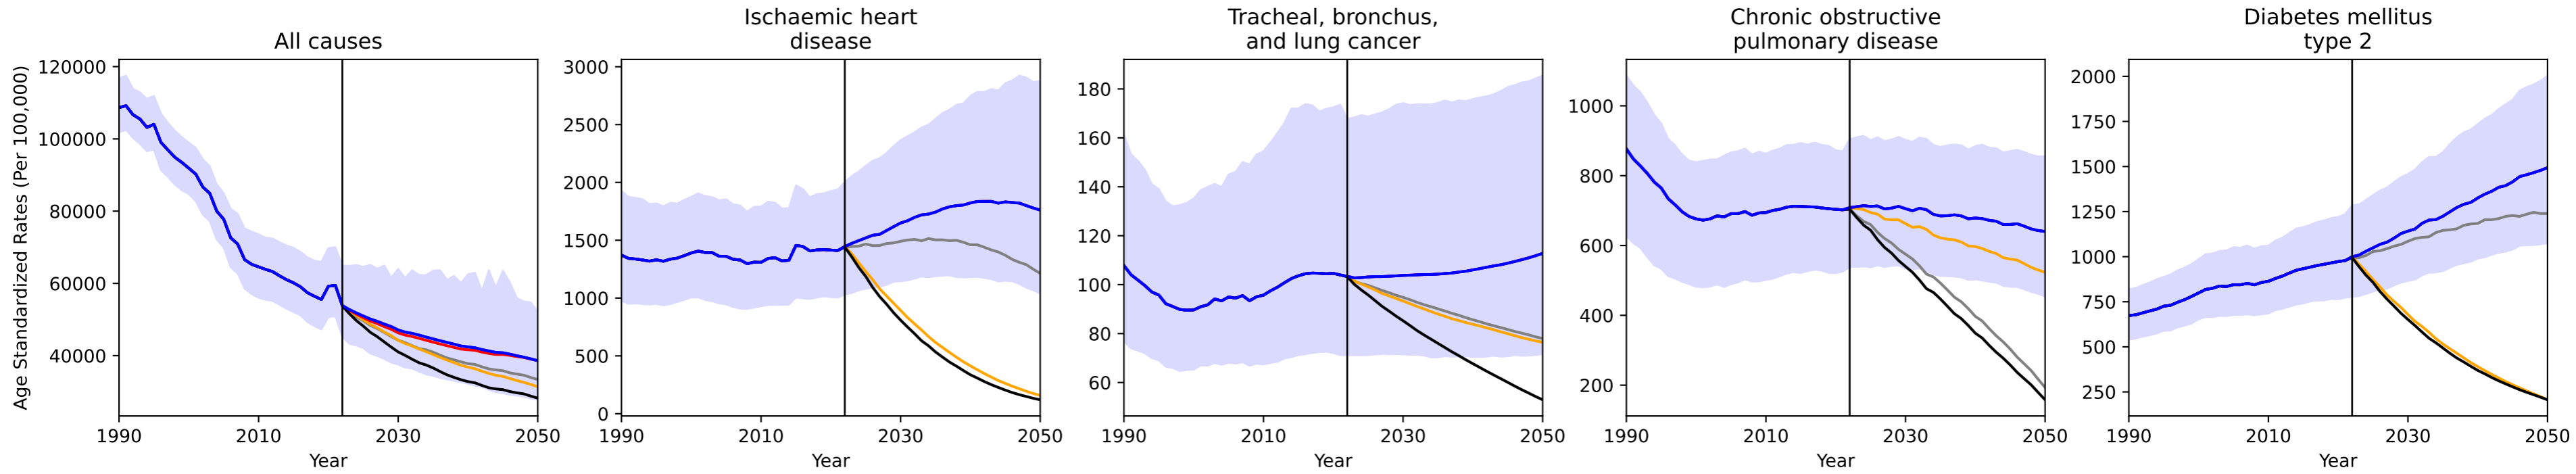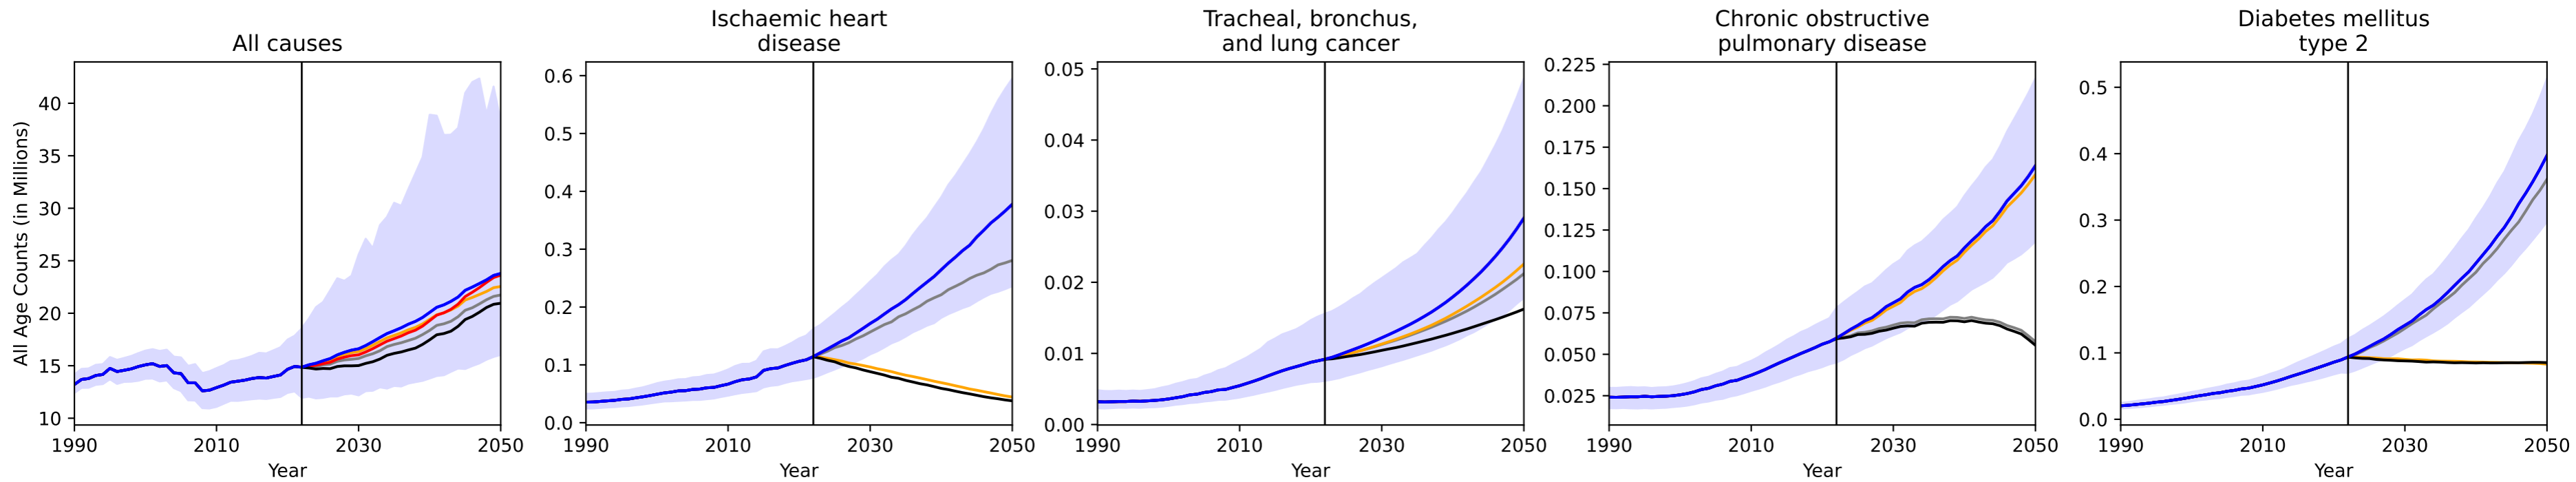

# Nigeria

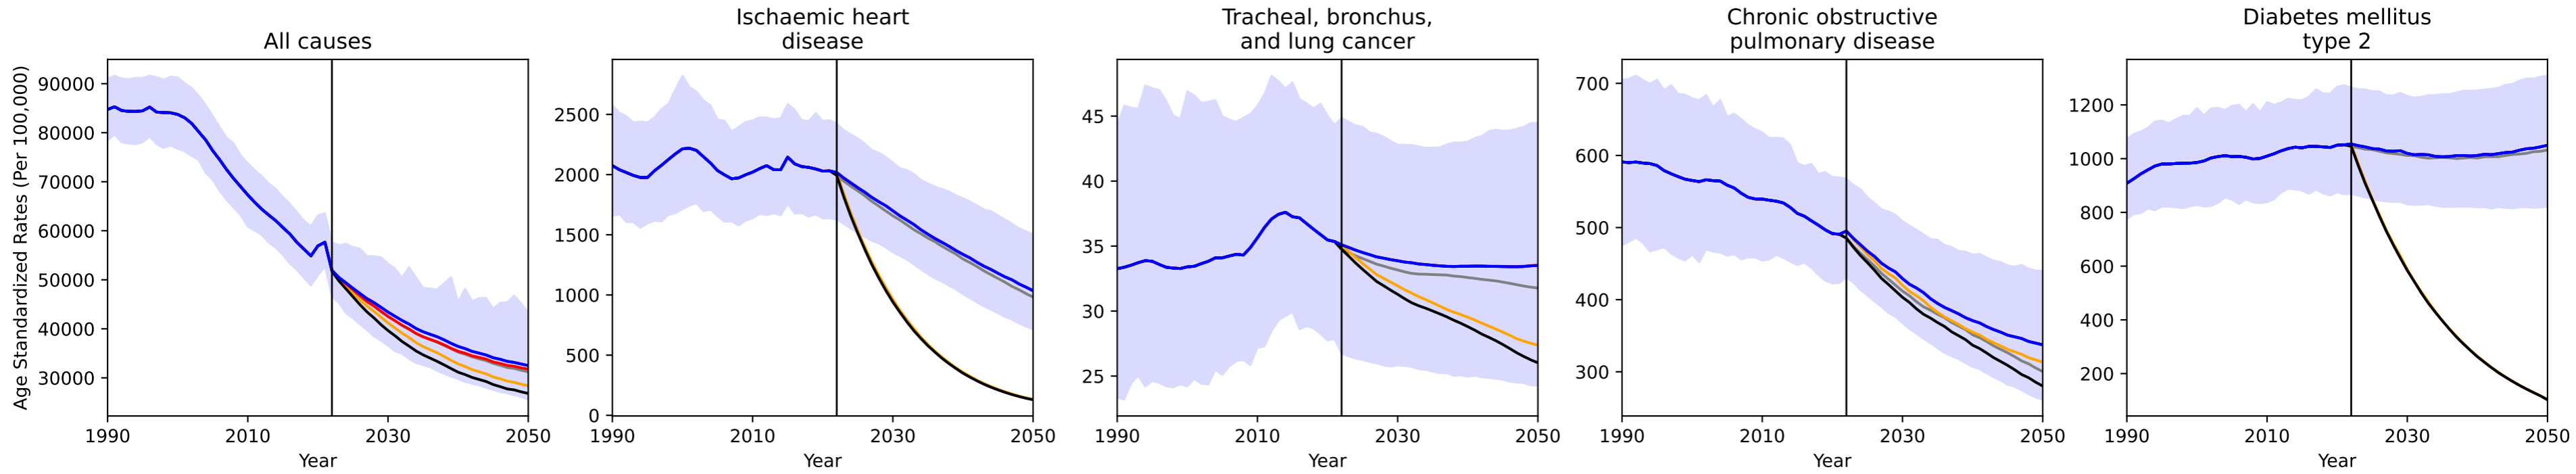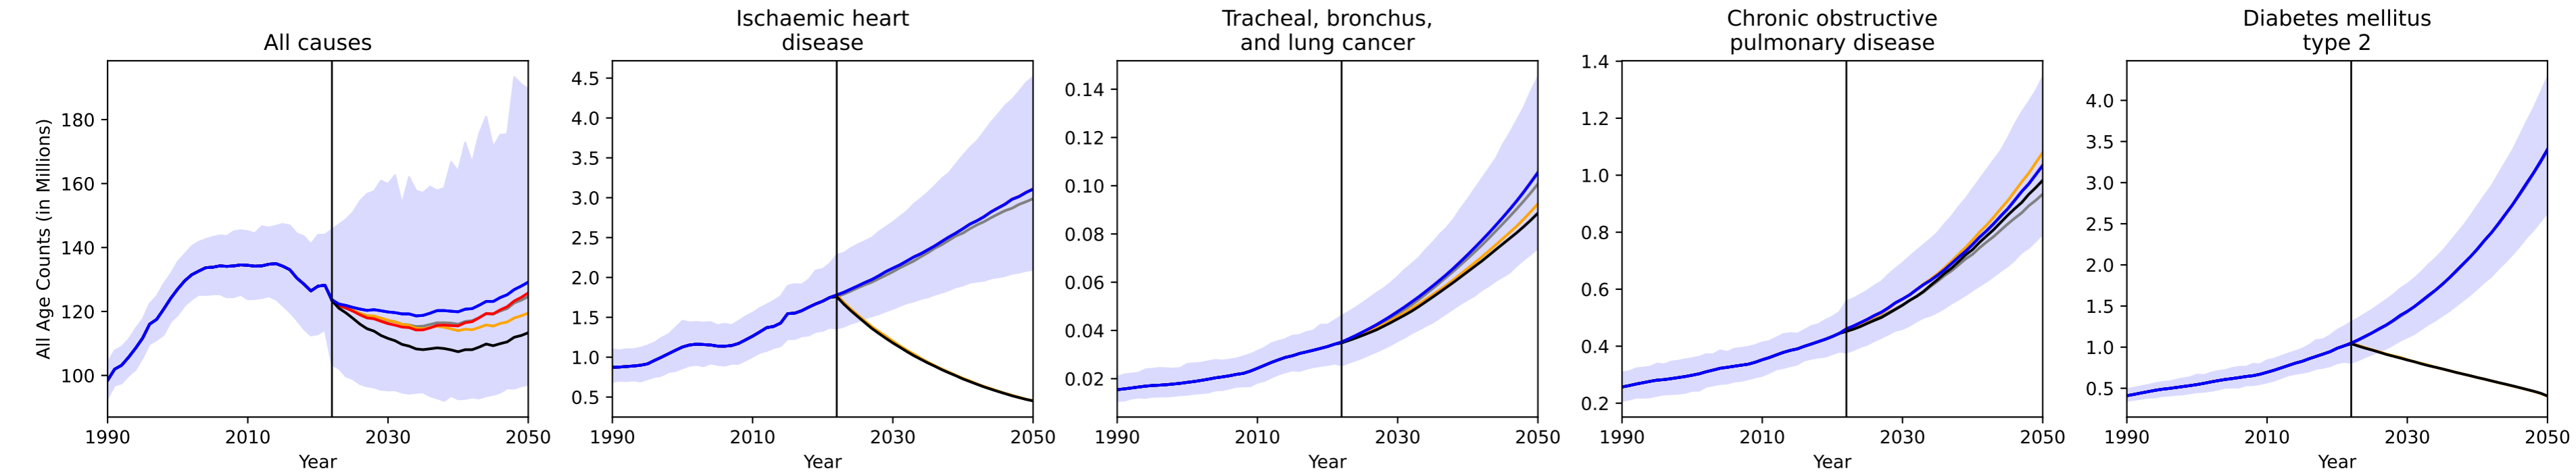

# São Tomé And Príncipe

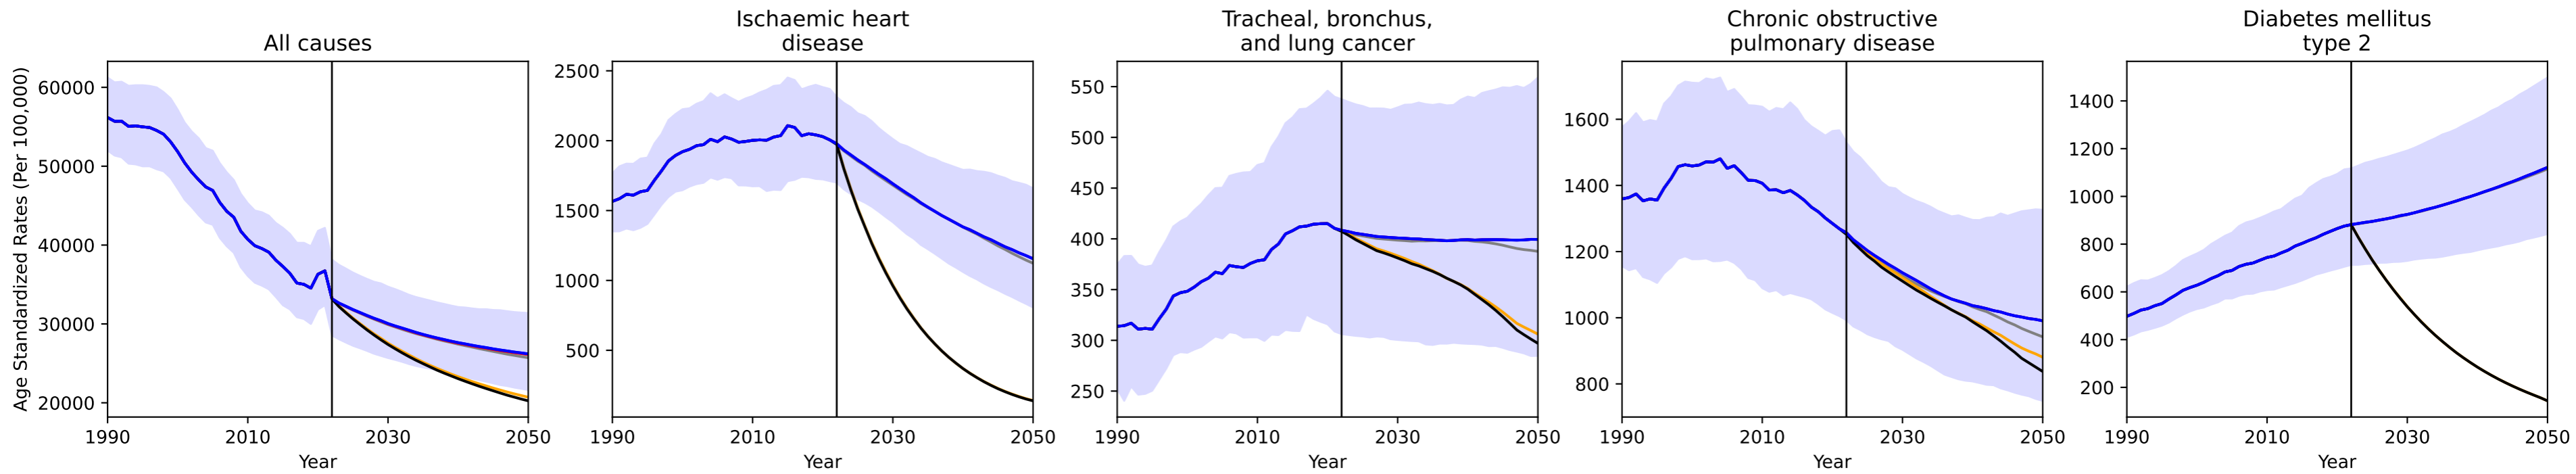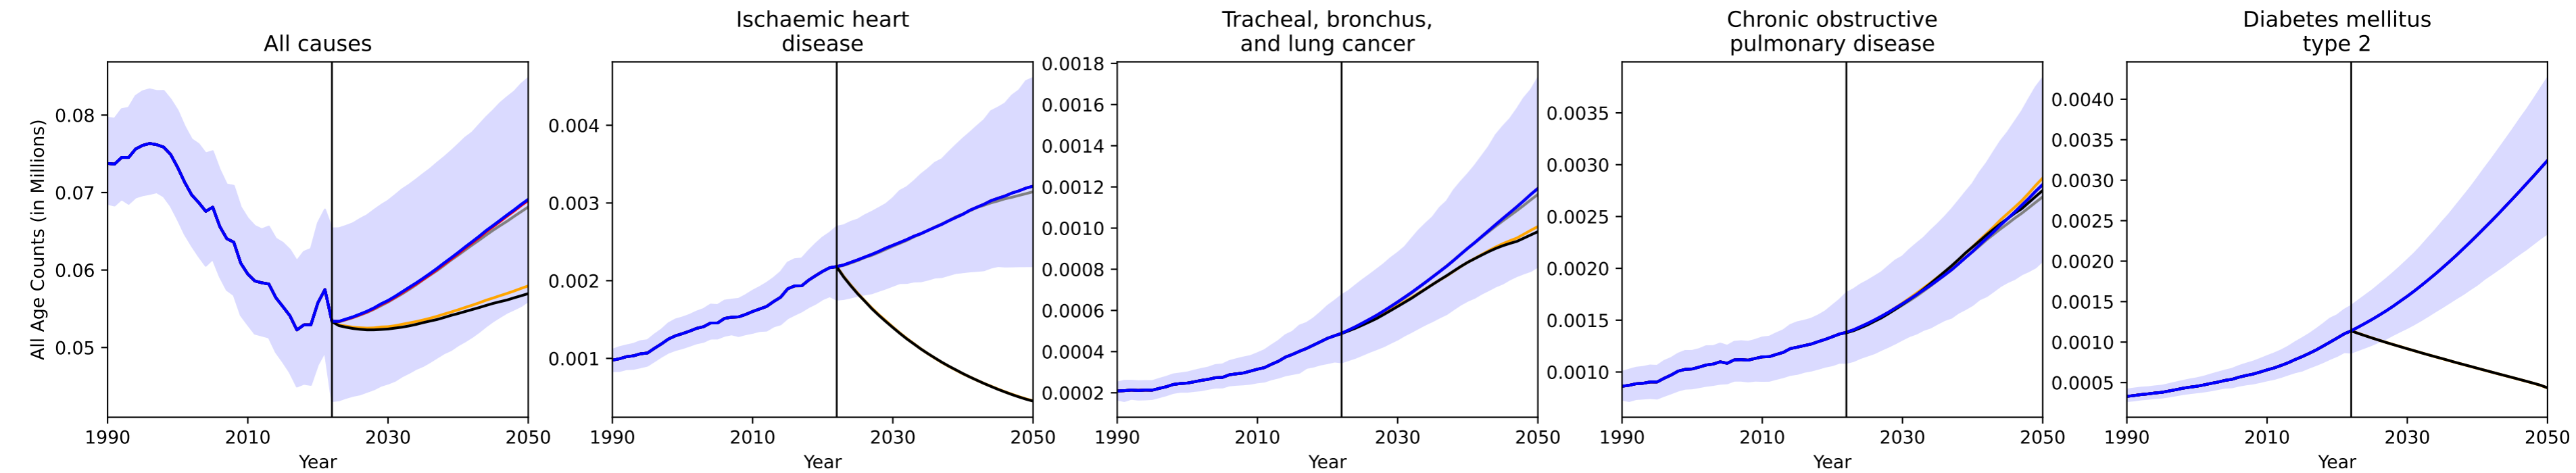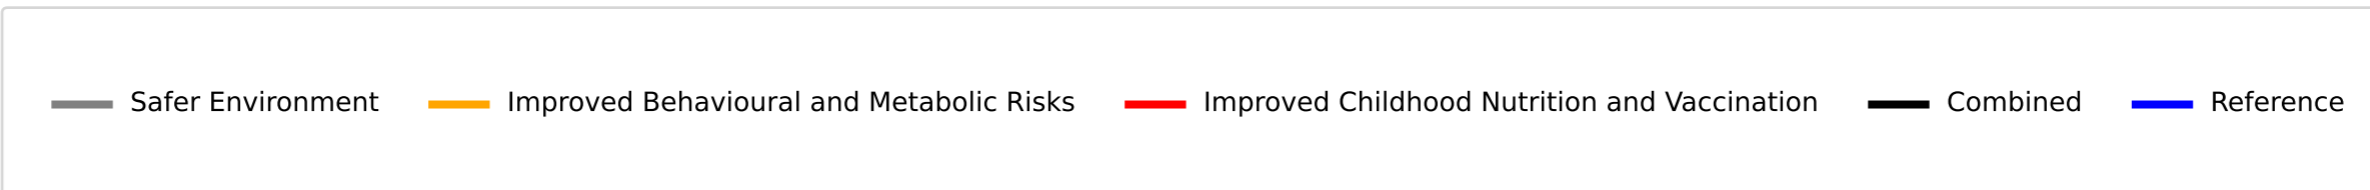

# Senegal

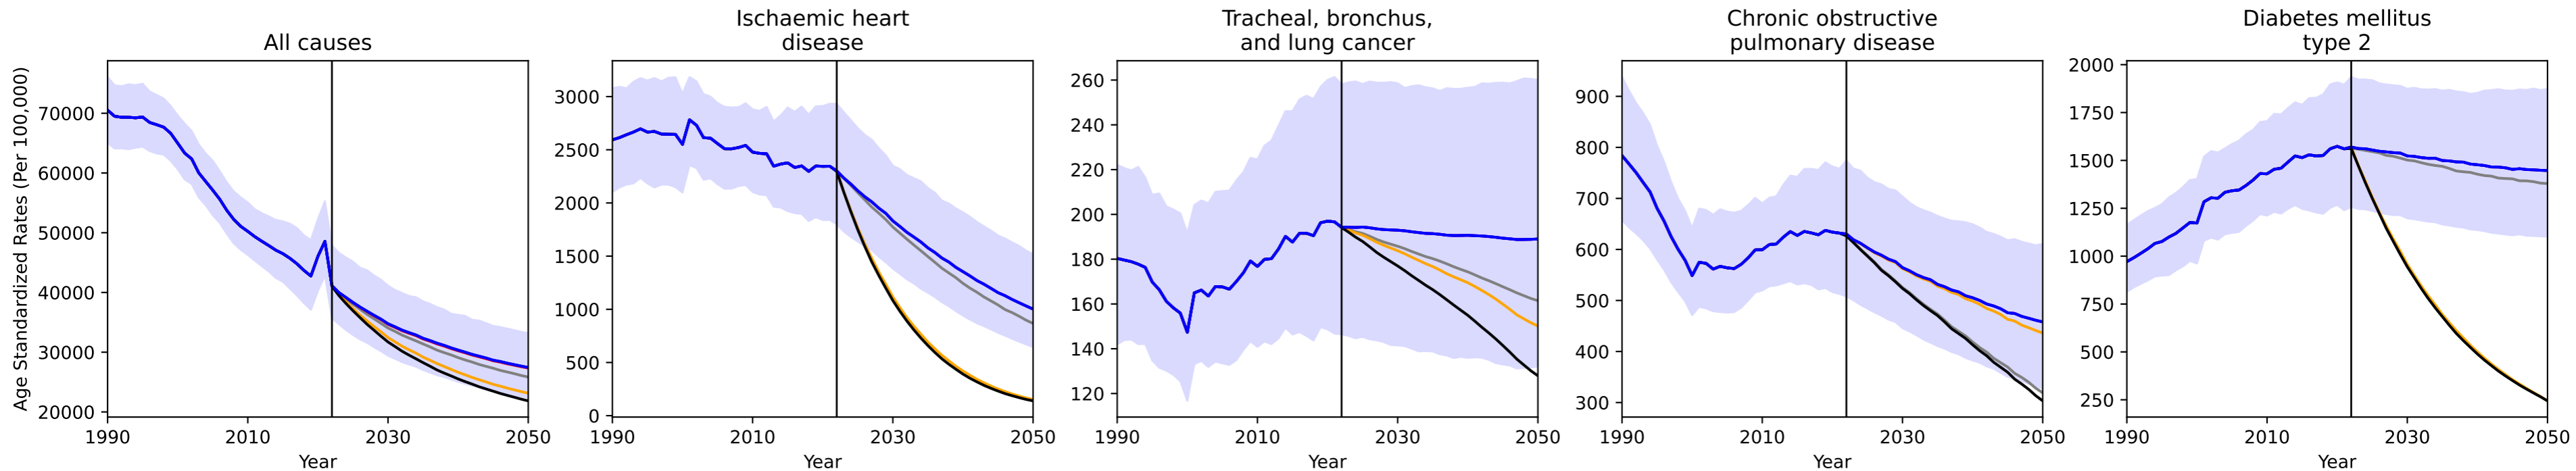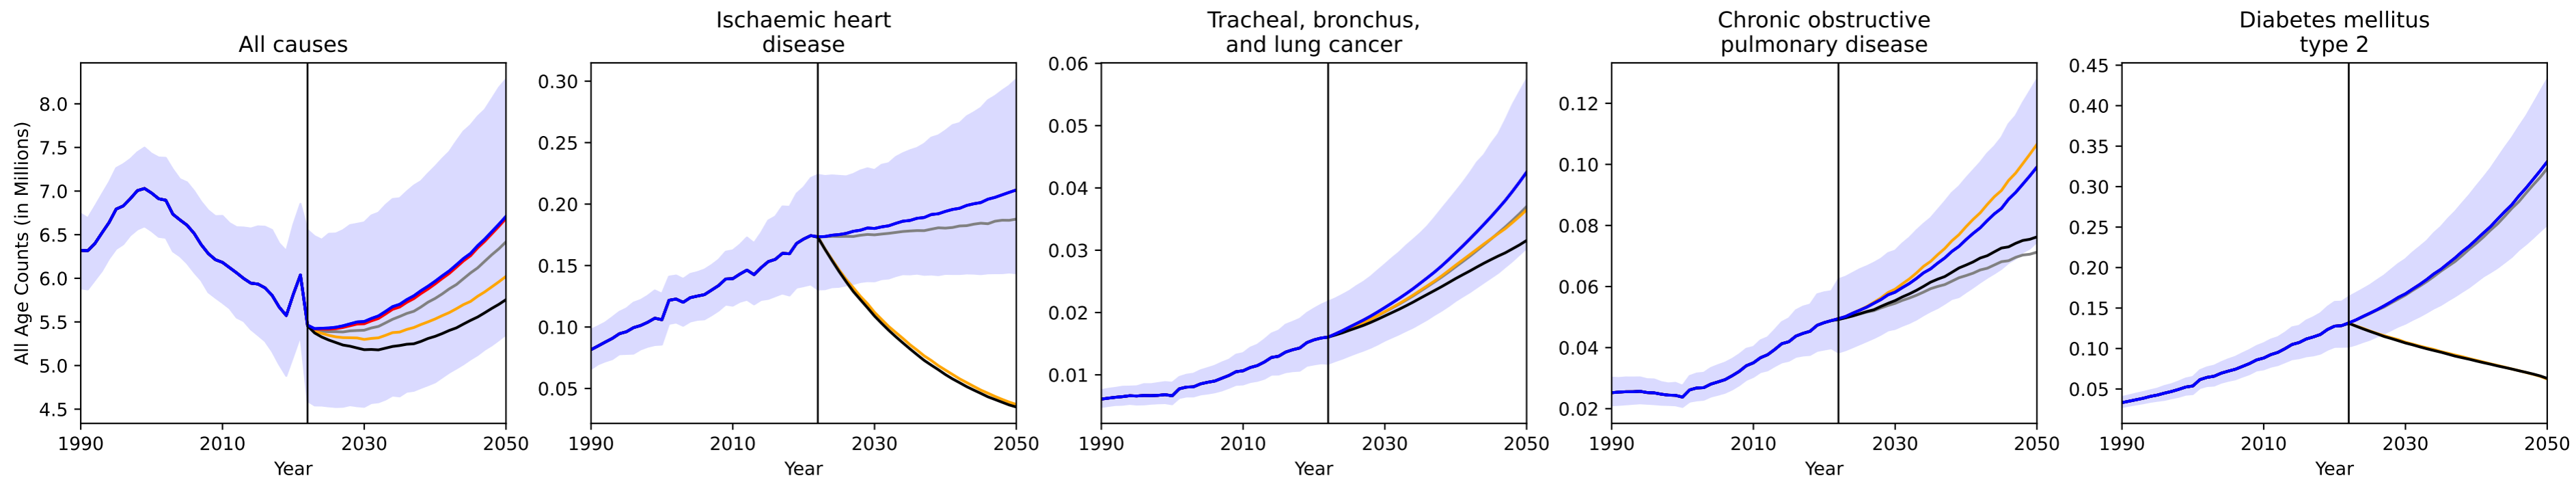

# Sierra Leone

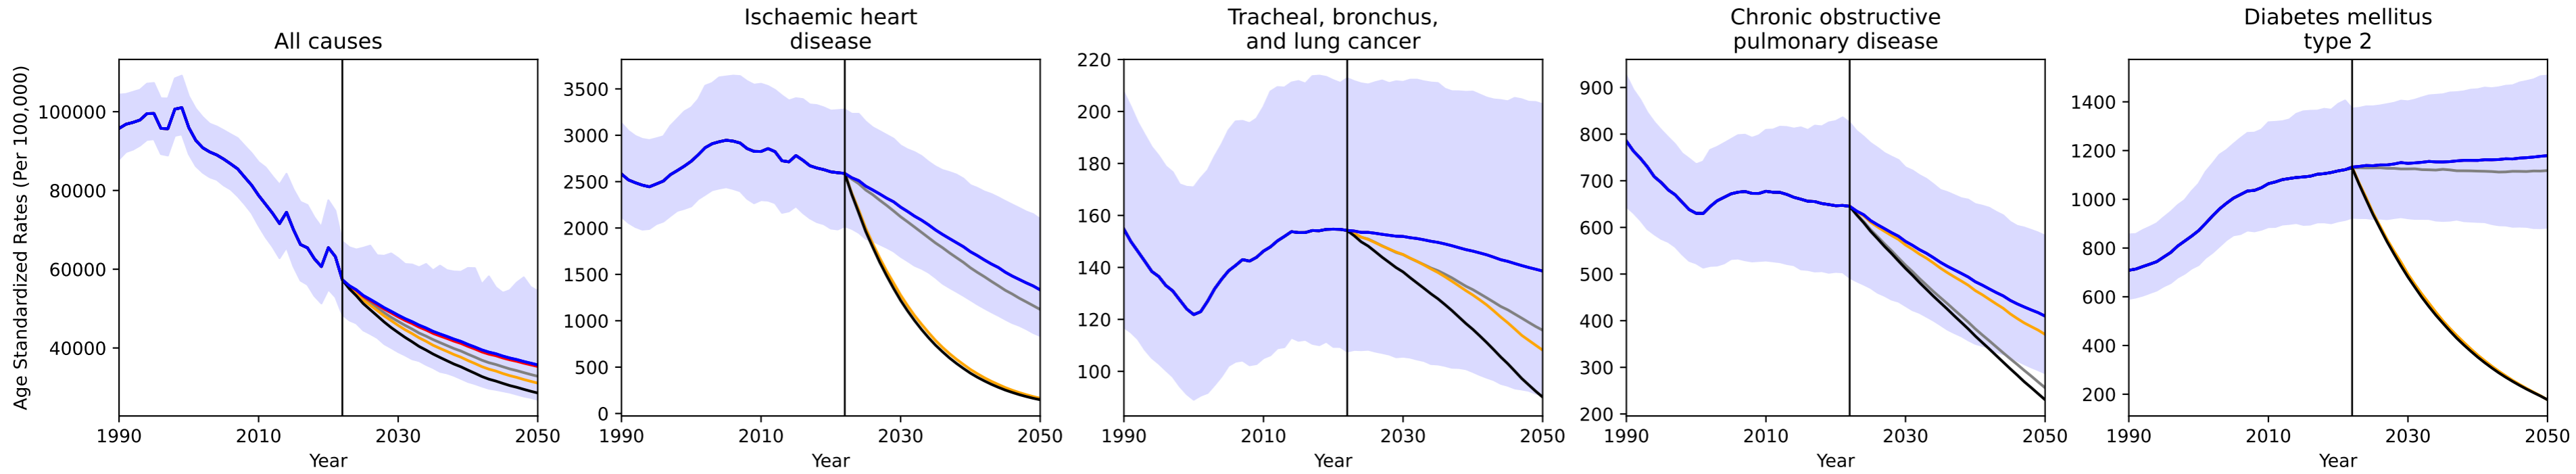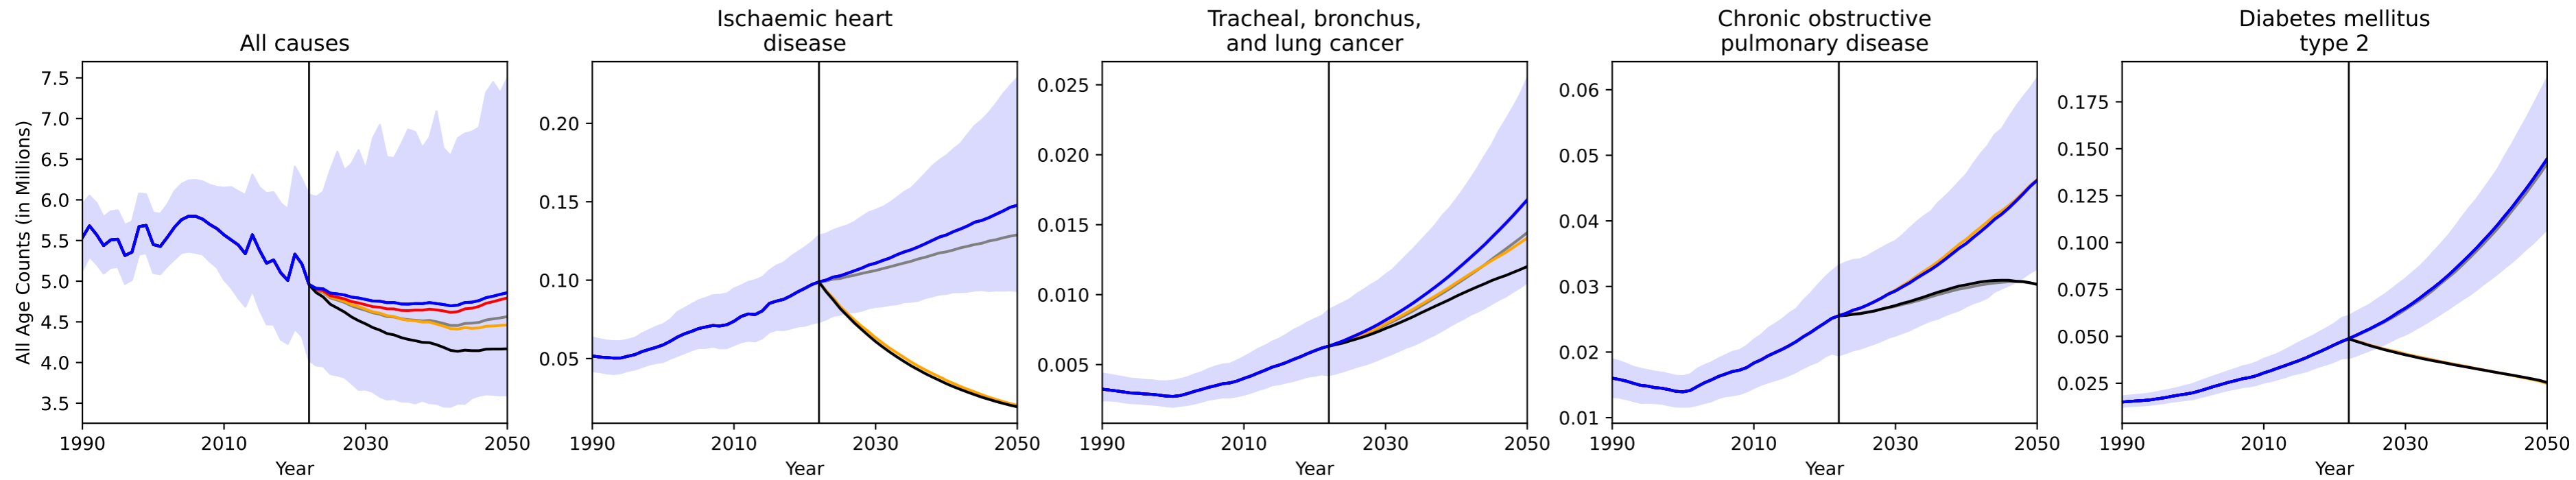



# Togo

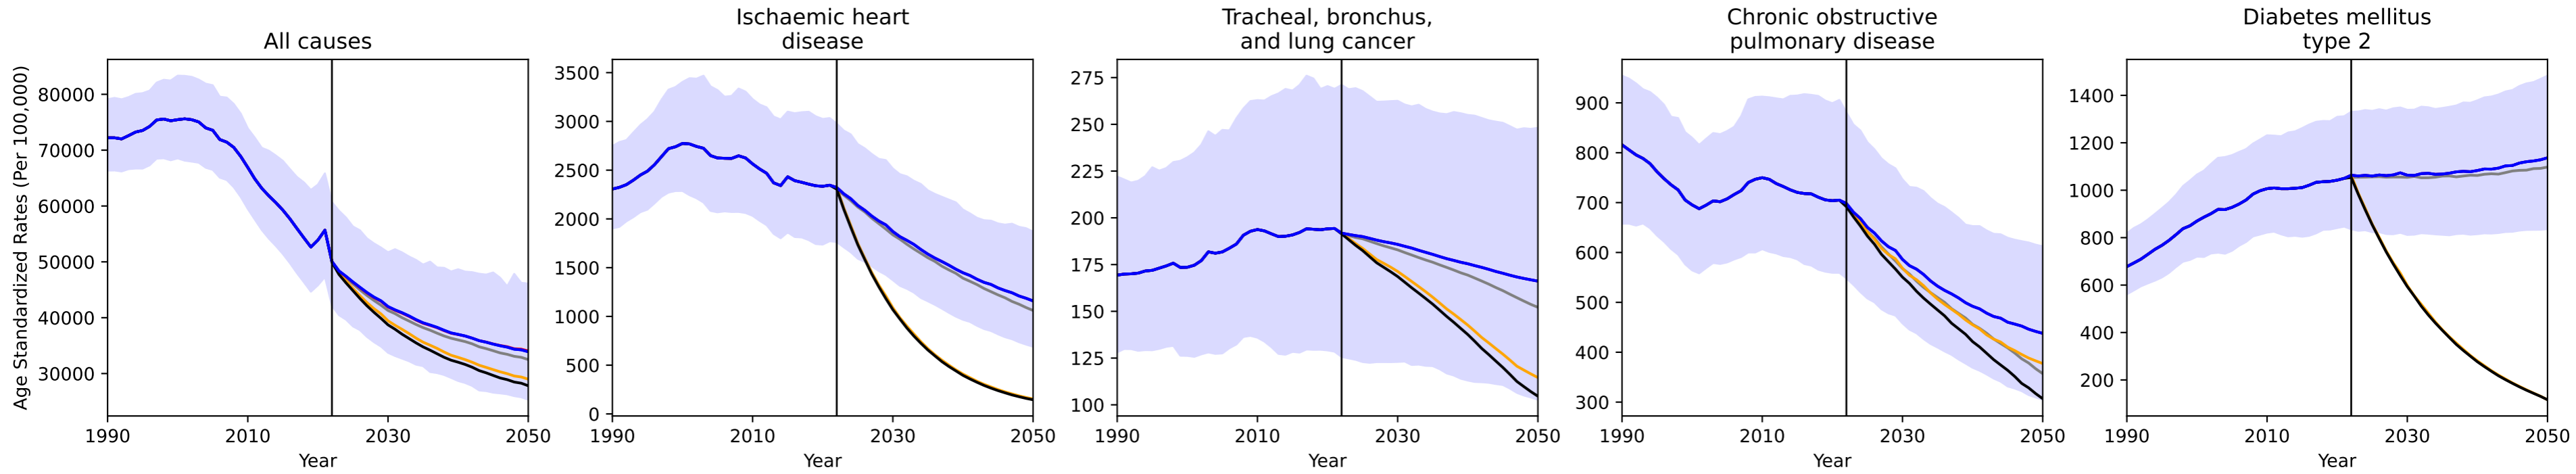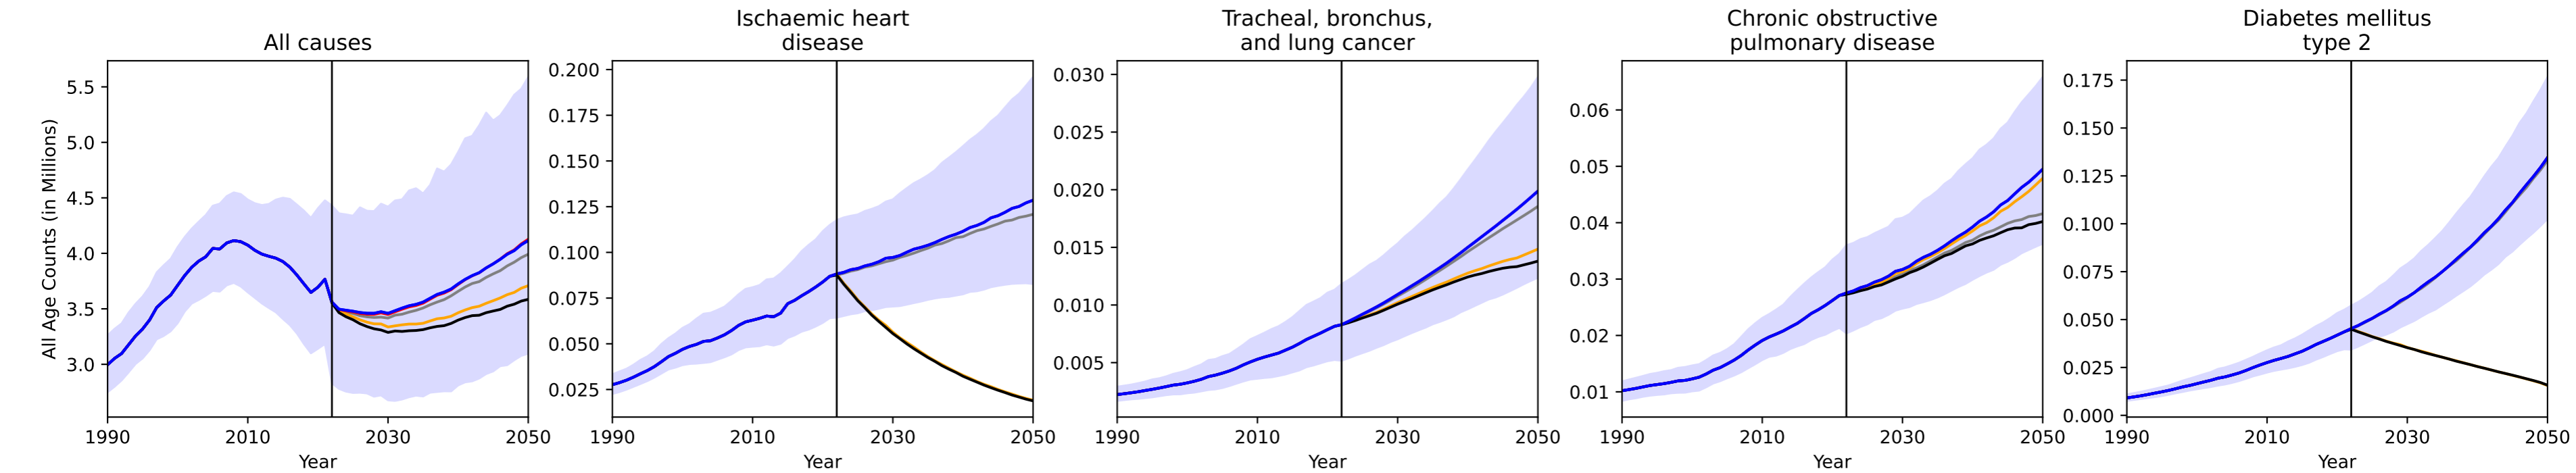

# Global

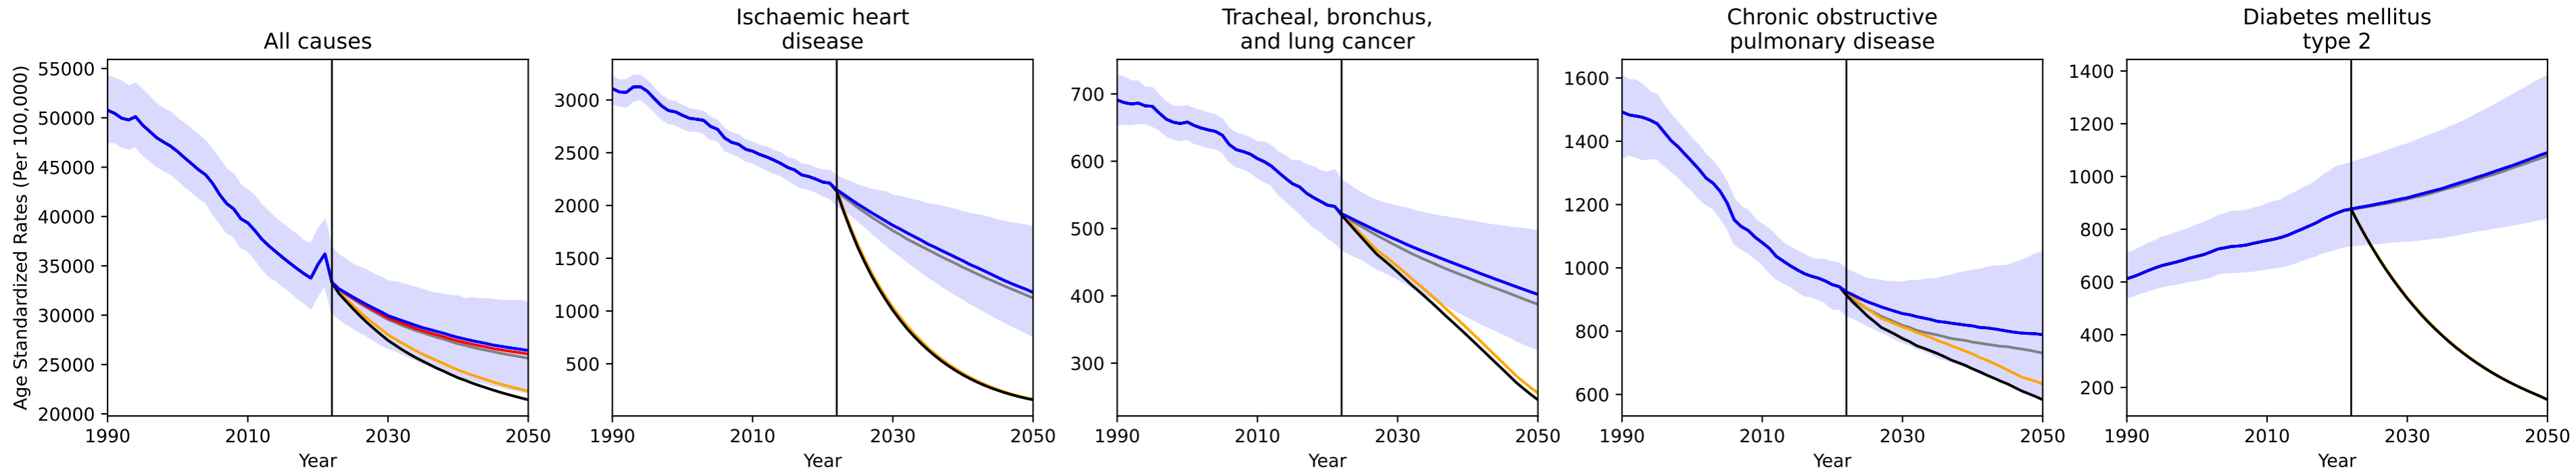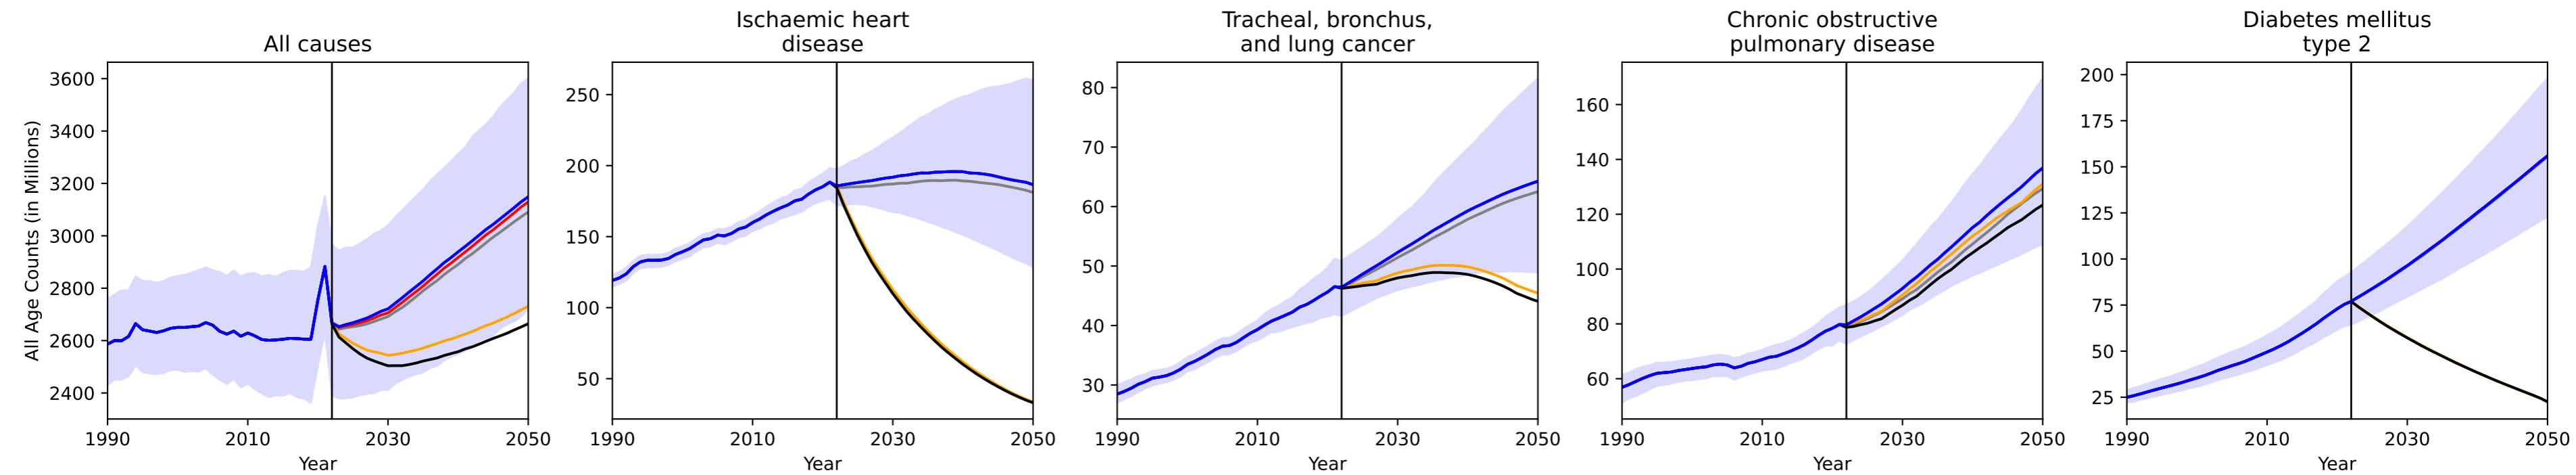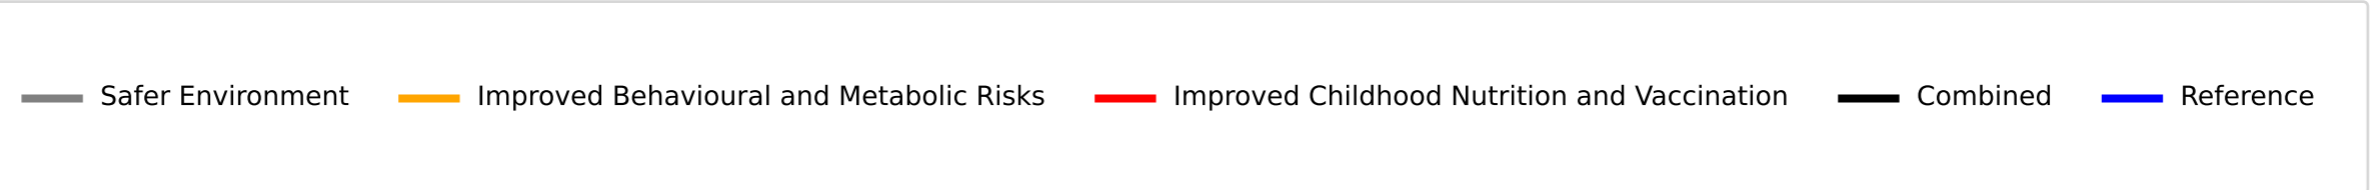

# Central Europe, Eastern Europe, And Central Asia

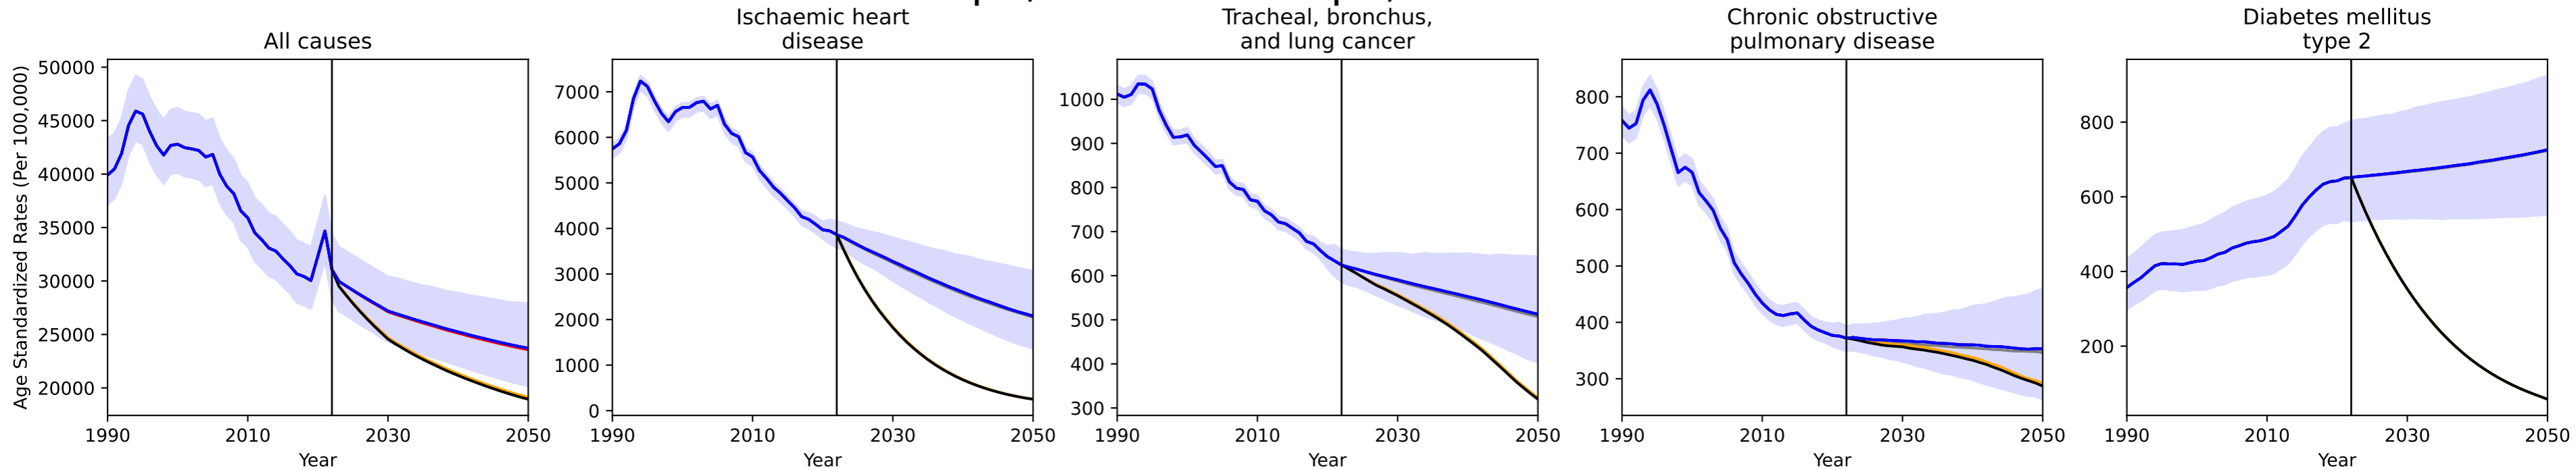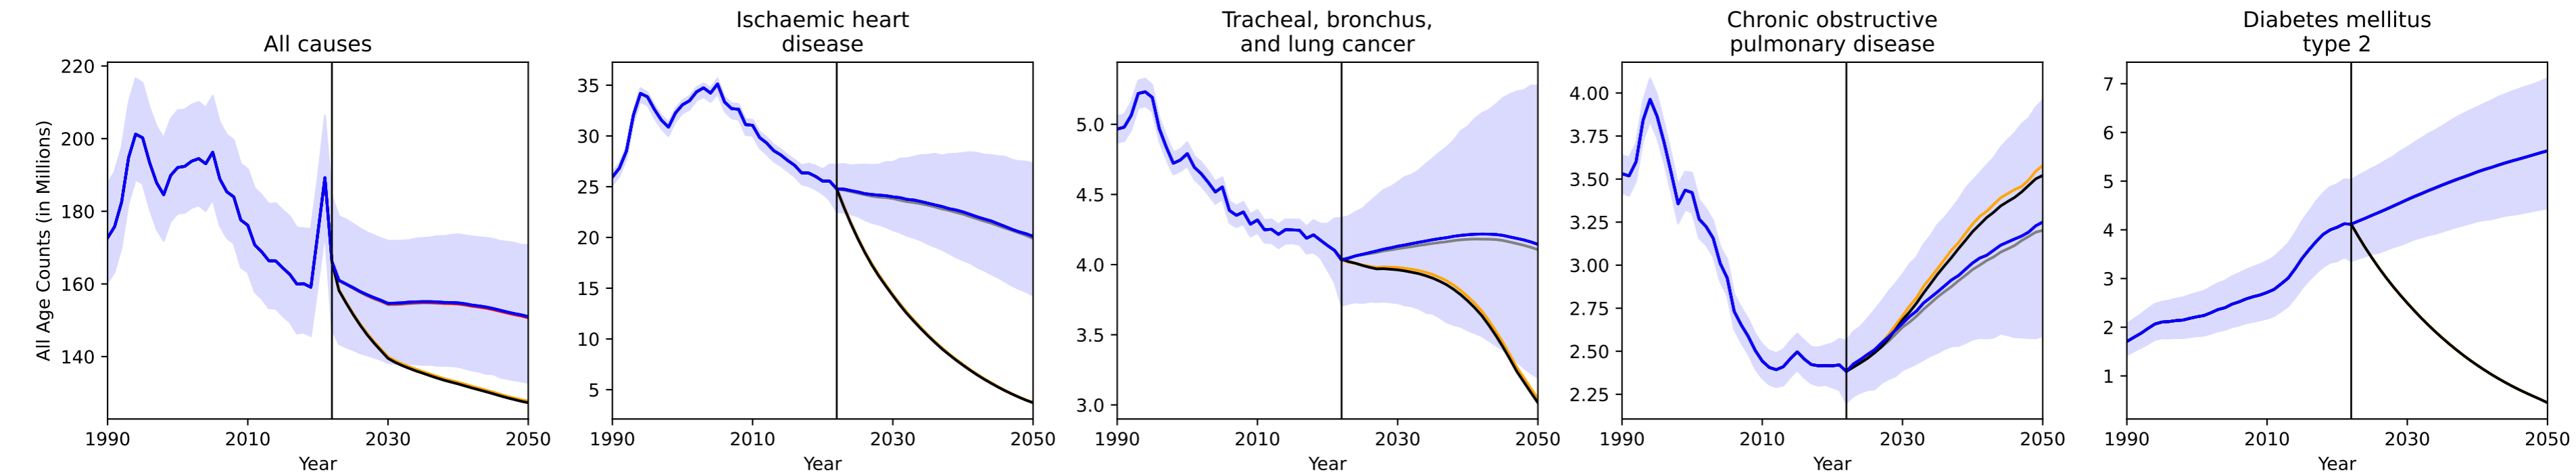

# High Income

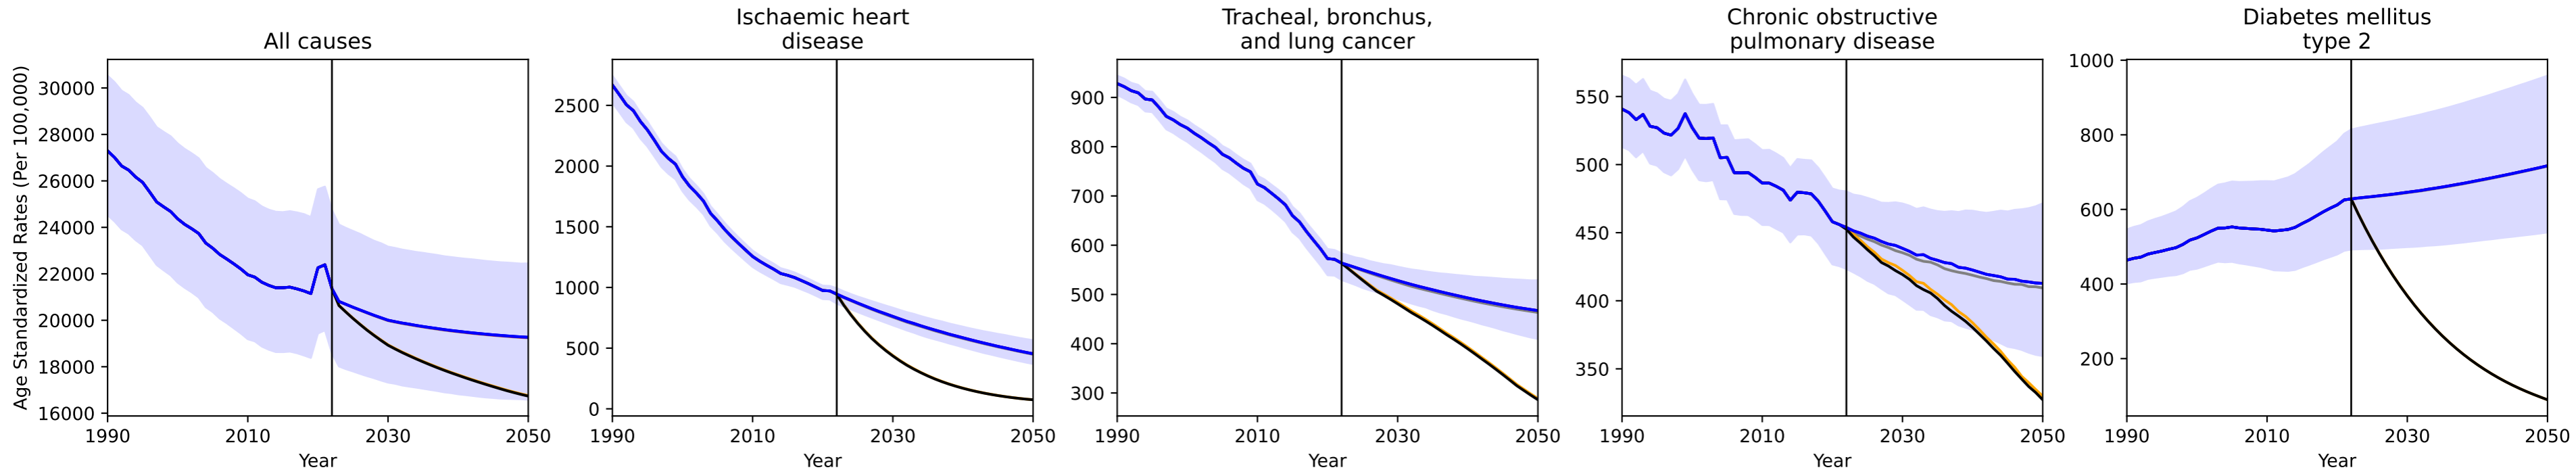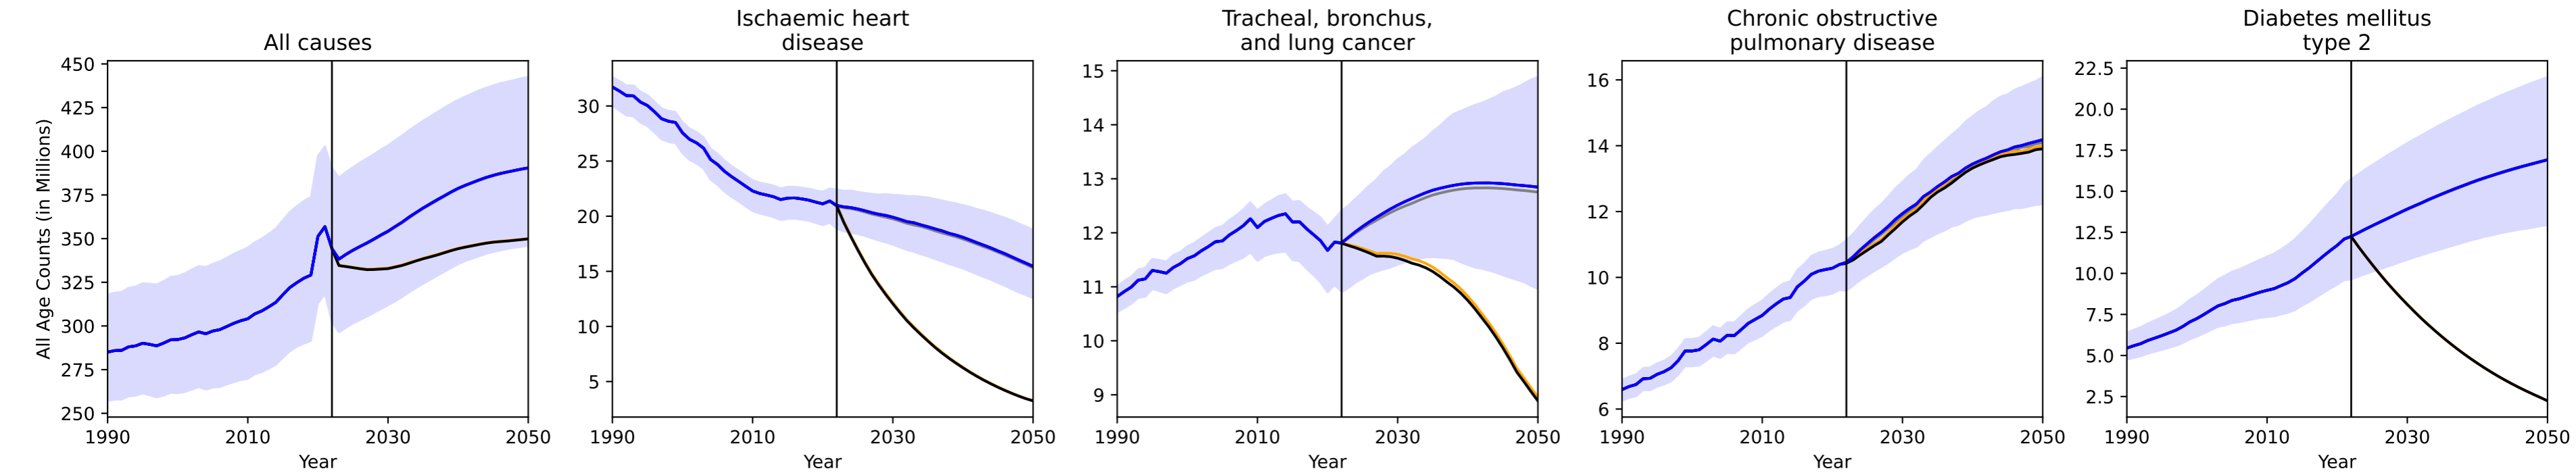

# Latin America And Caribbean

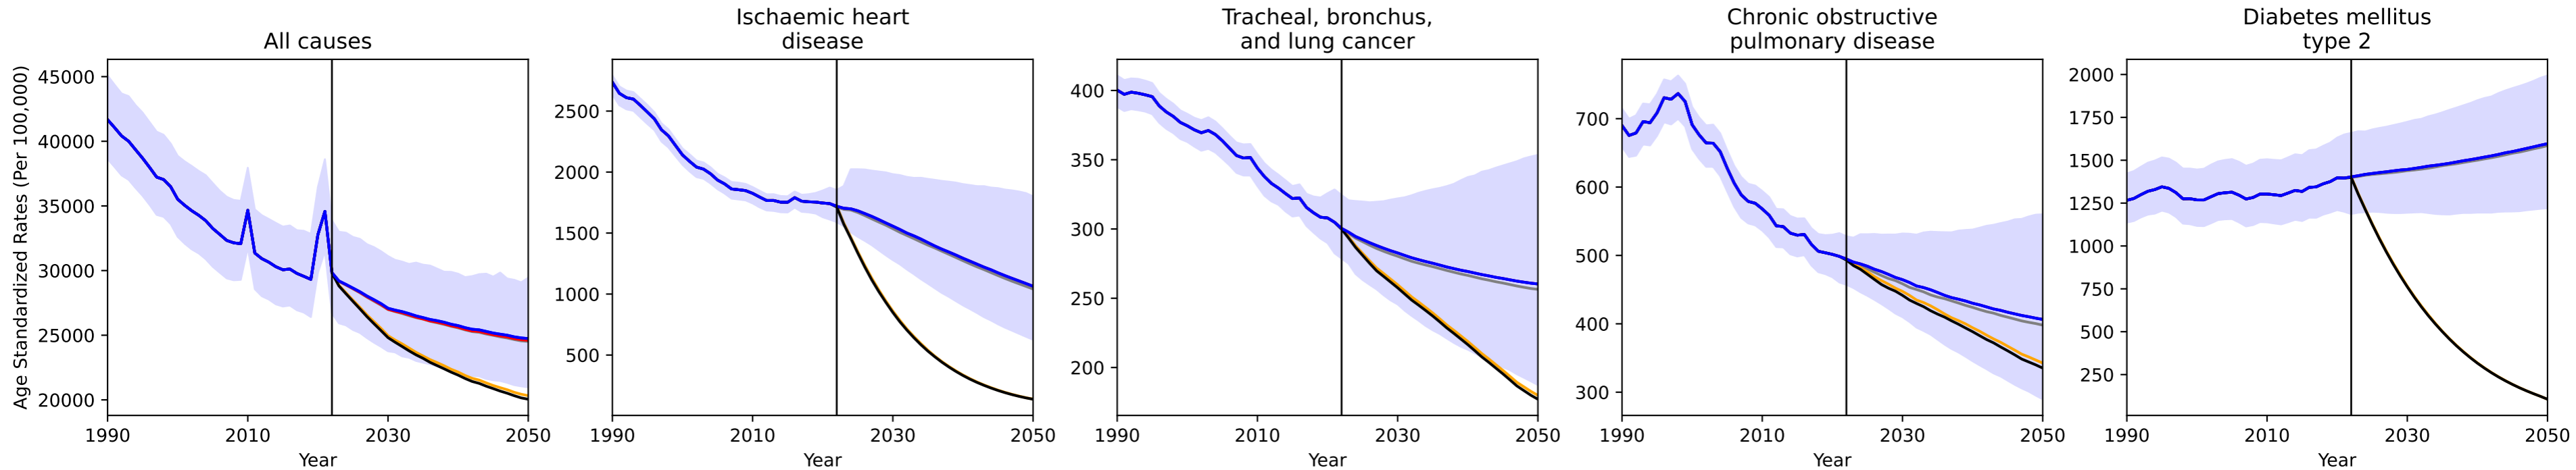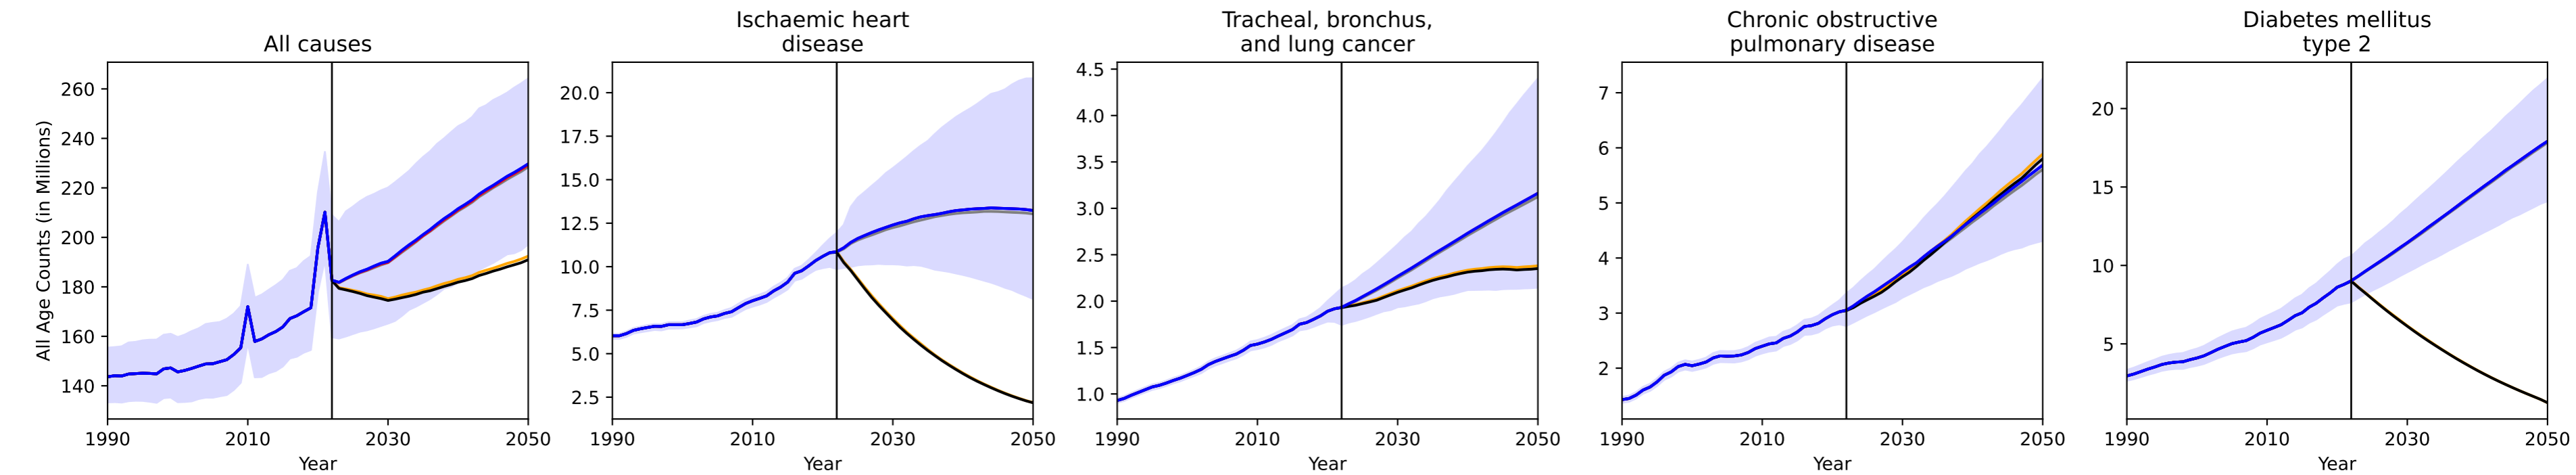

# North Africa And Middle East

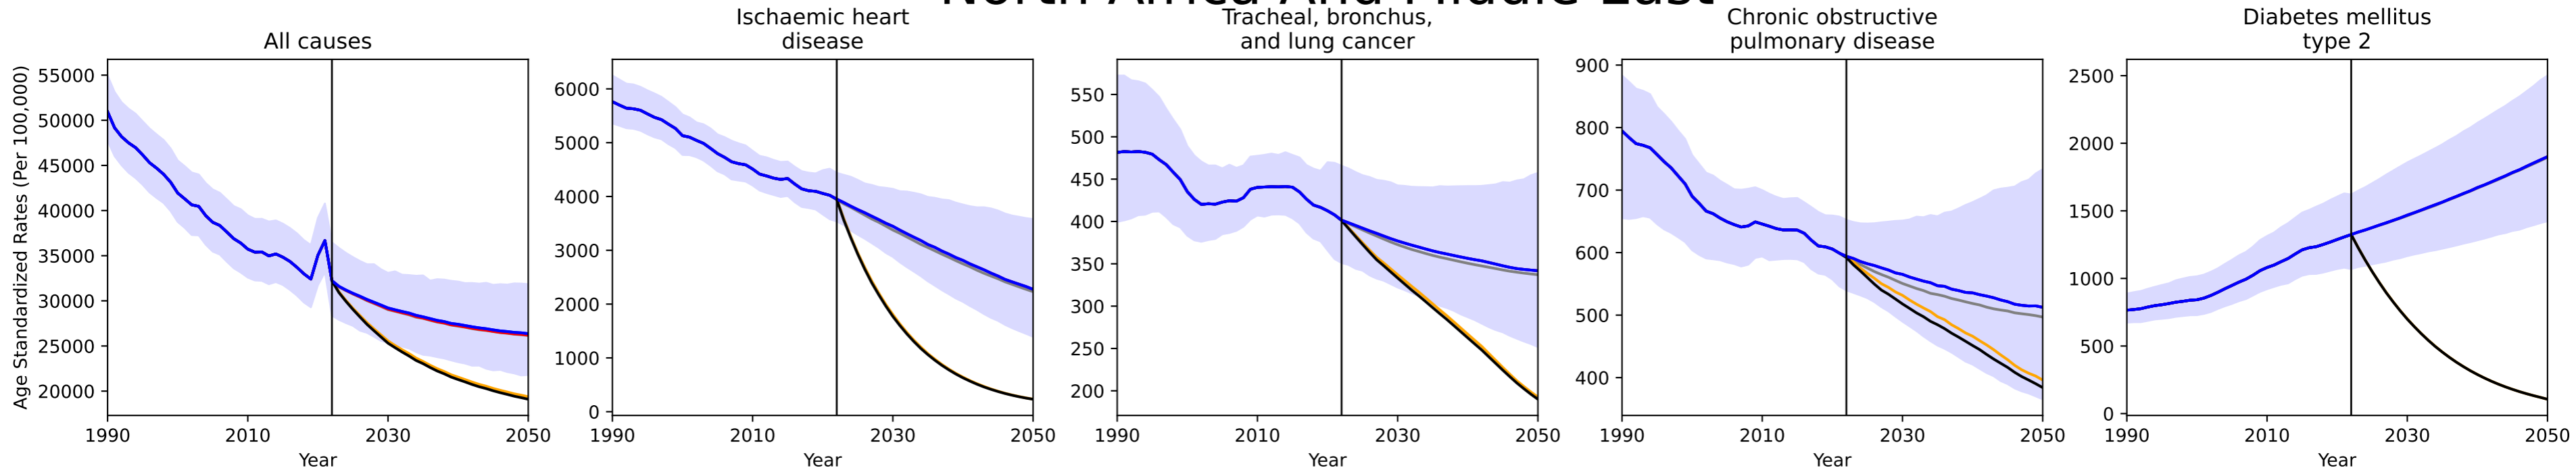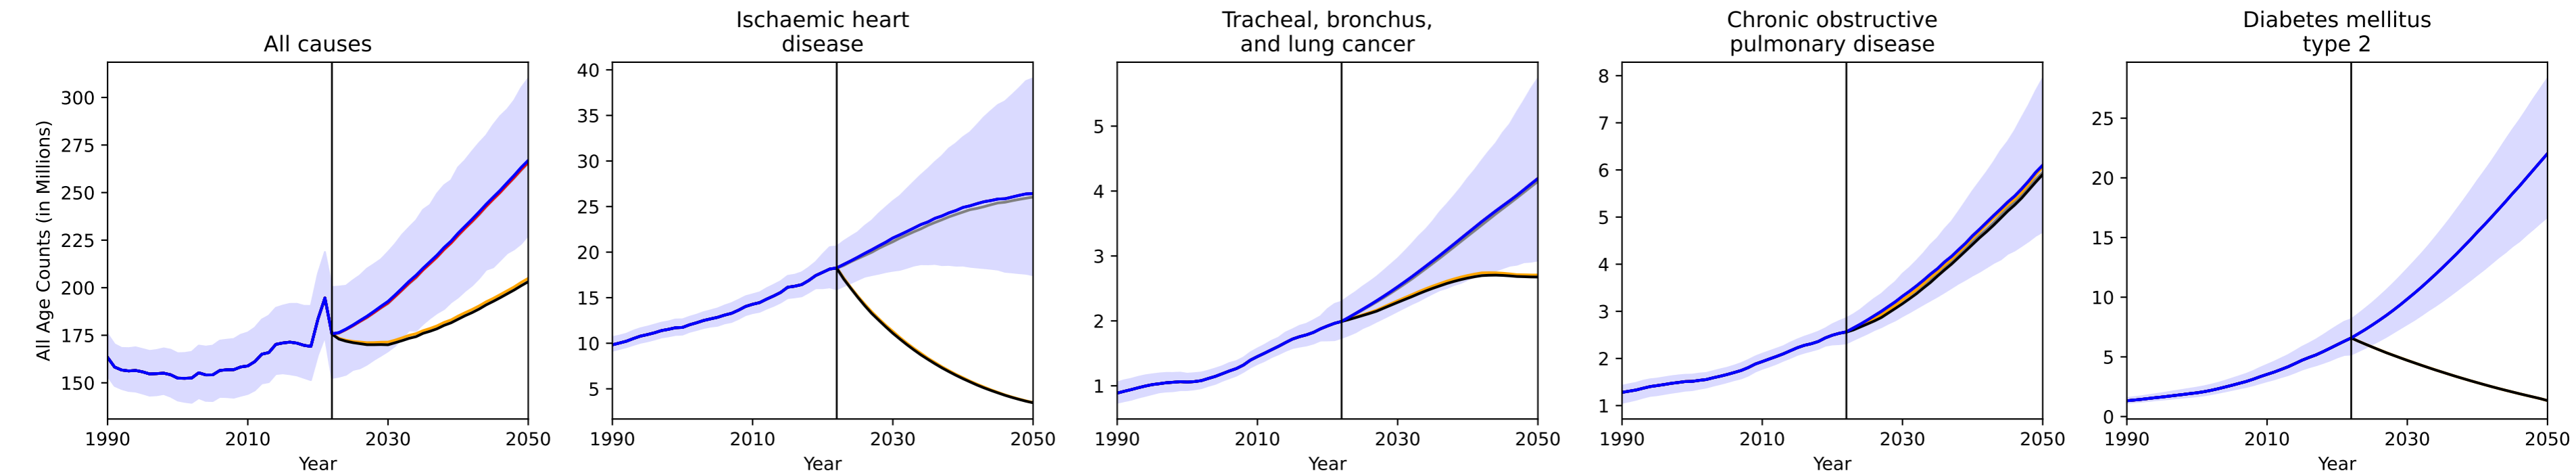

# South Asia

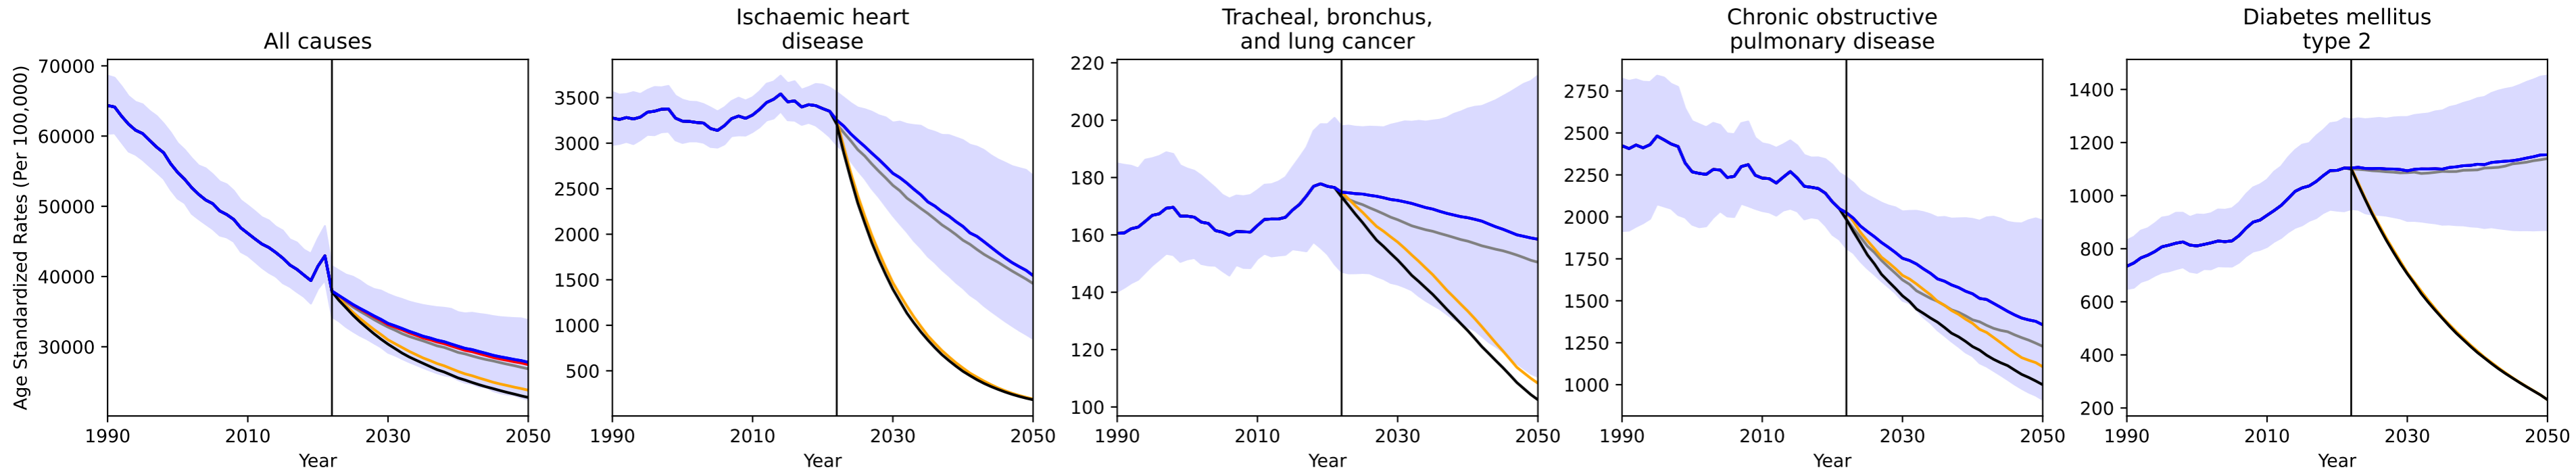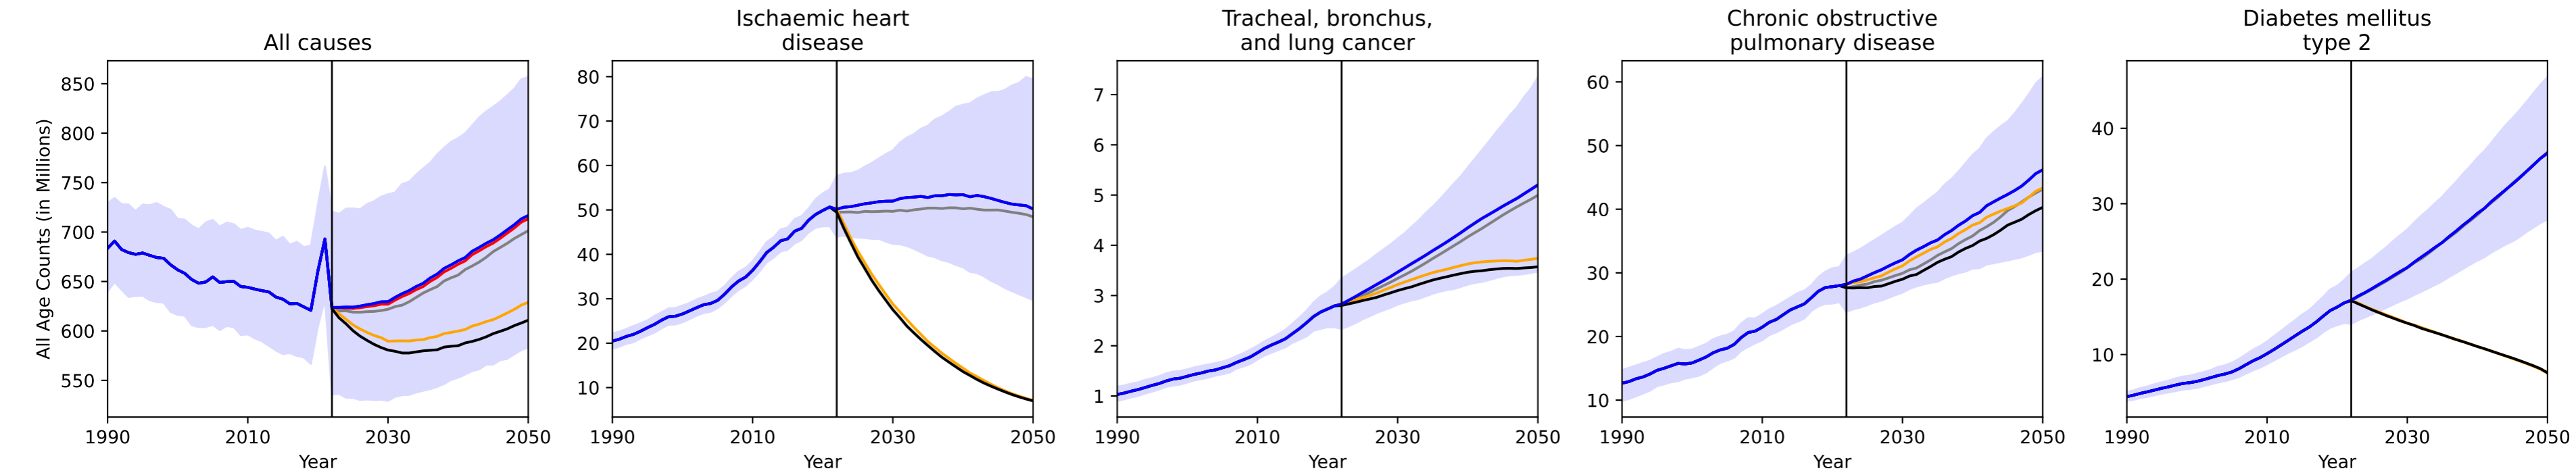

# Southeast Asia, East Asia, And Oceania

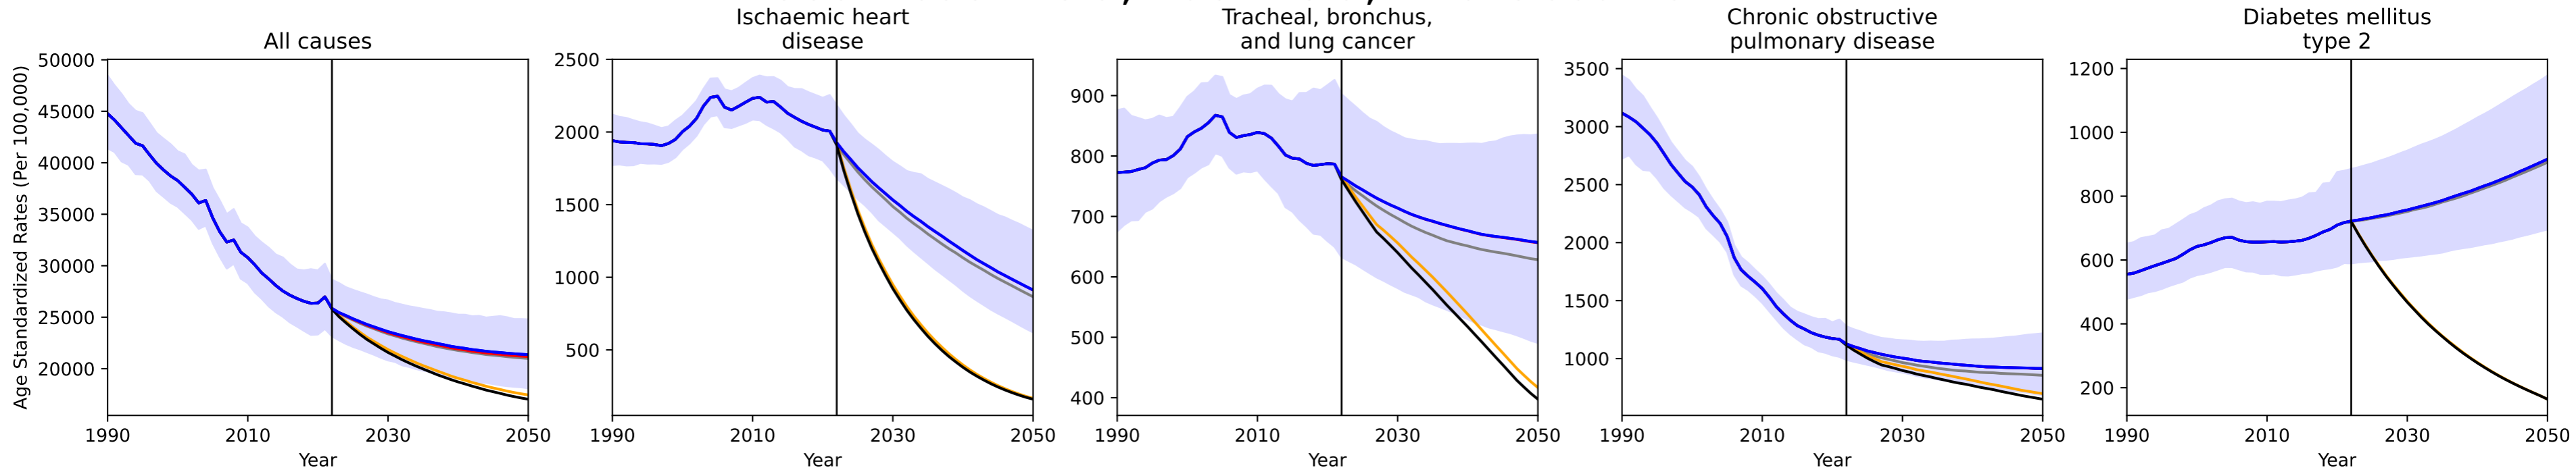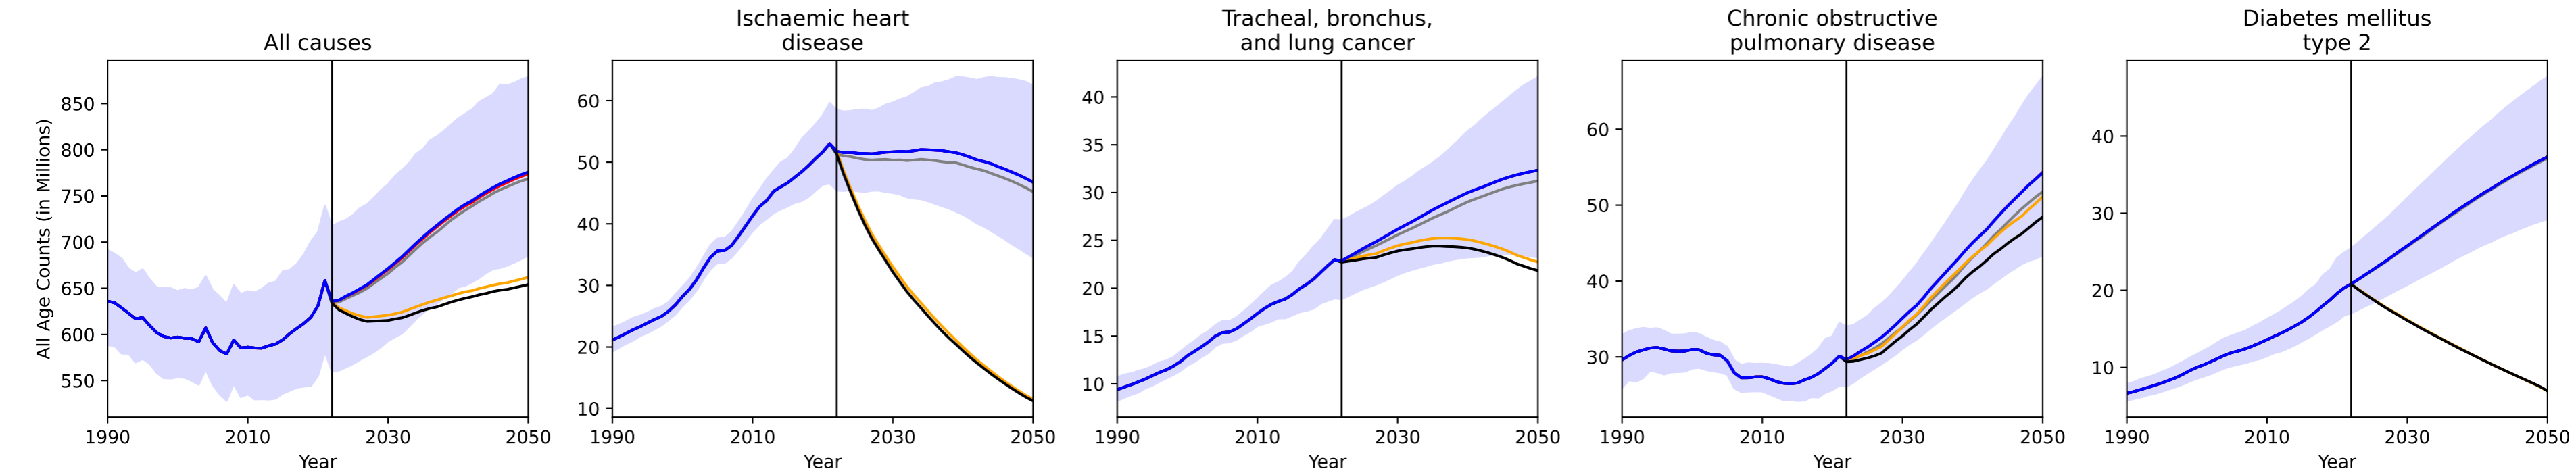



# Sub-Saharan Africa

Supplemental Results Figure S12. All cause and top NCD causes age standardized DALY rates and all age counts by scenario and location, 1990-2050

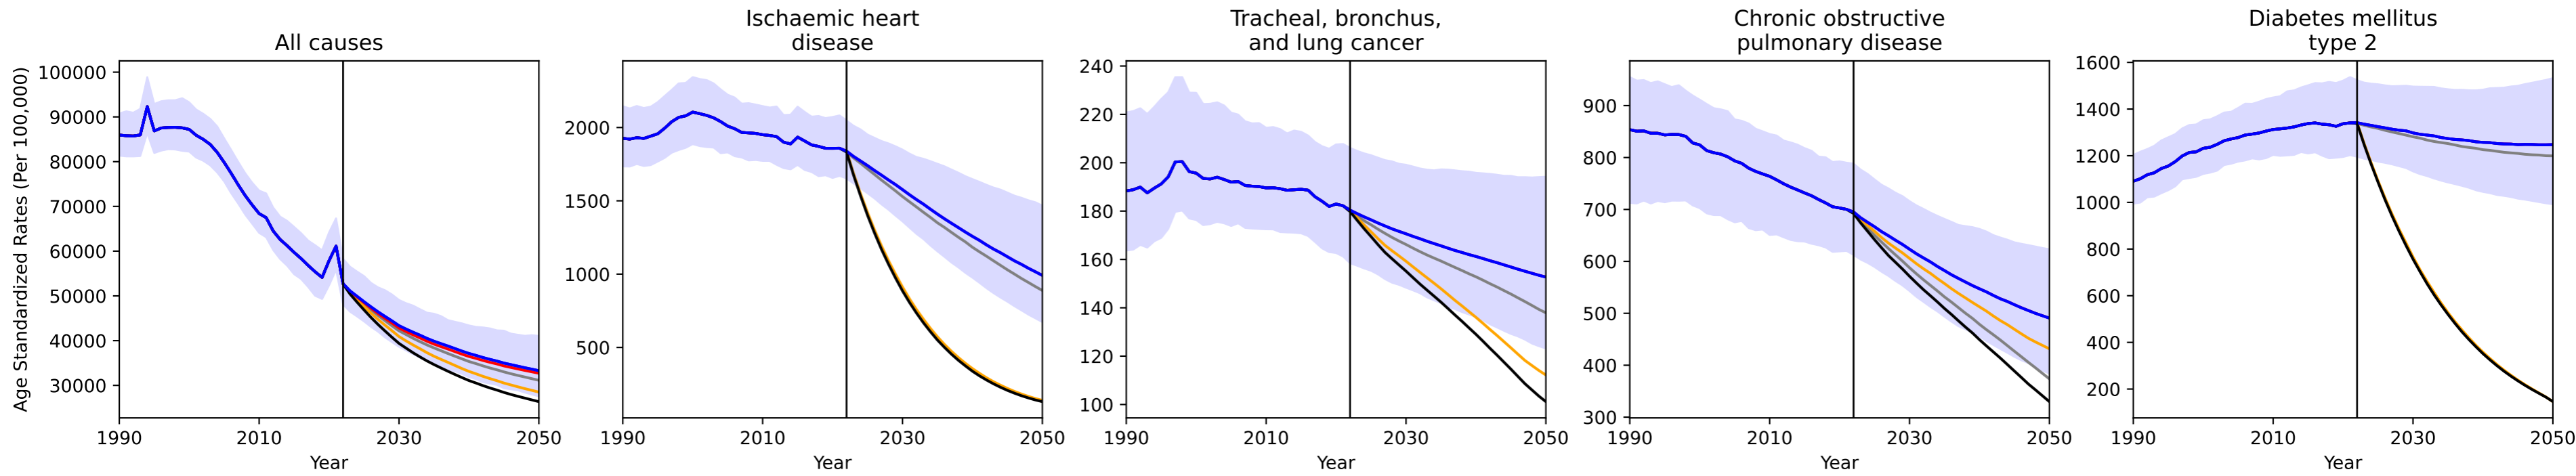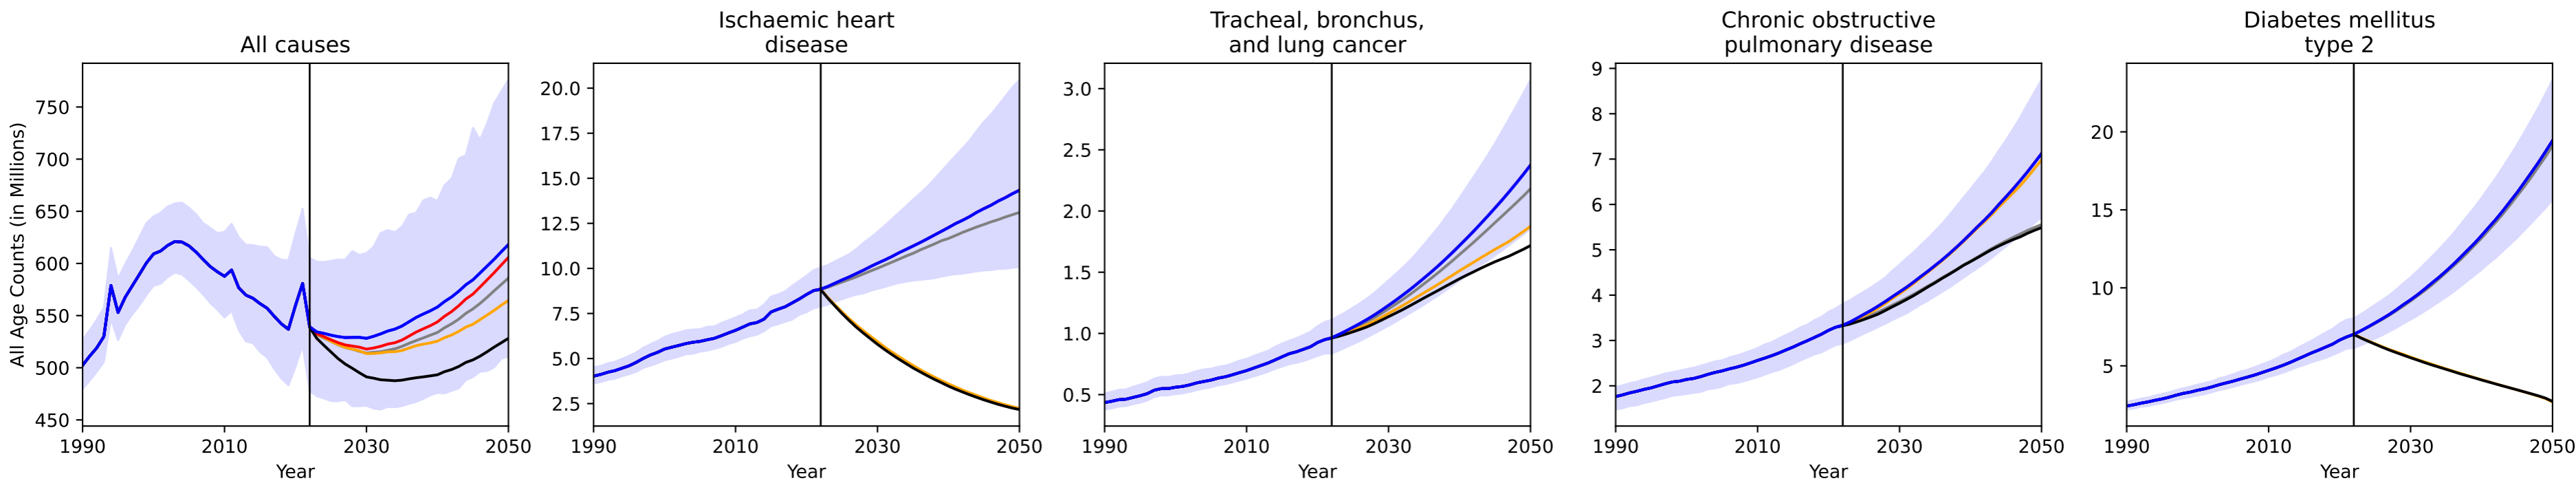

# Central Asia

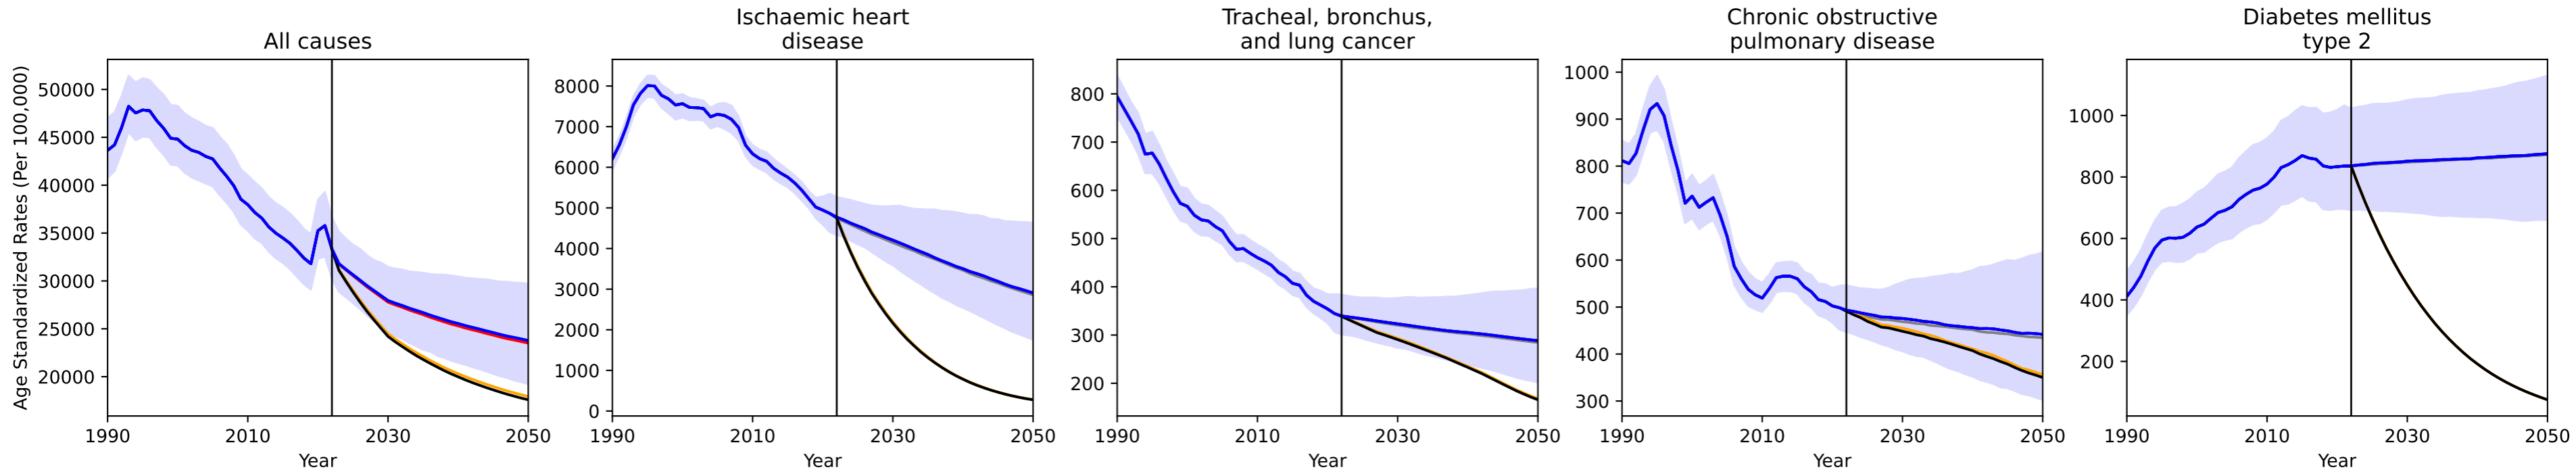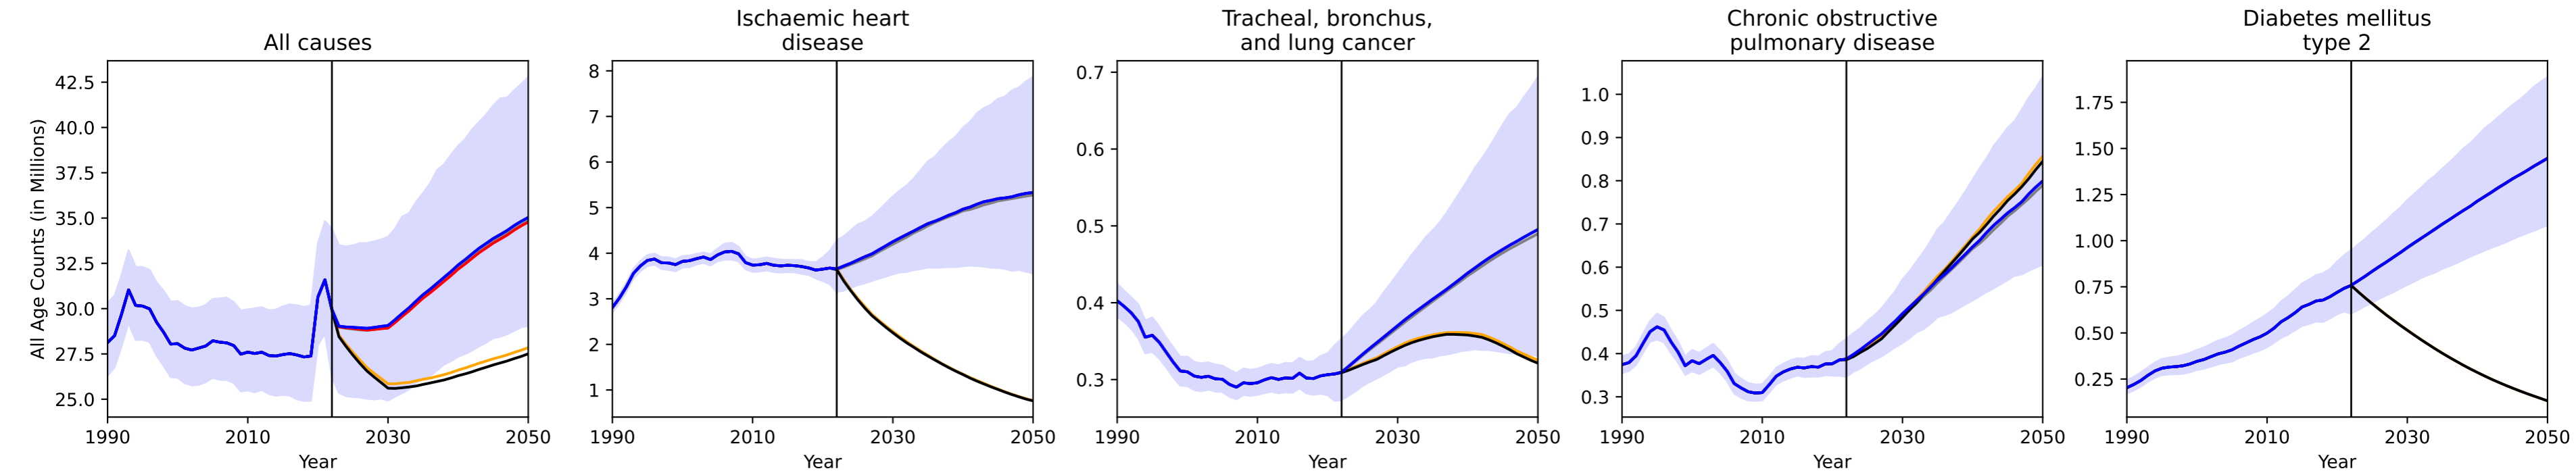

# Central Europe

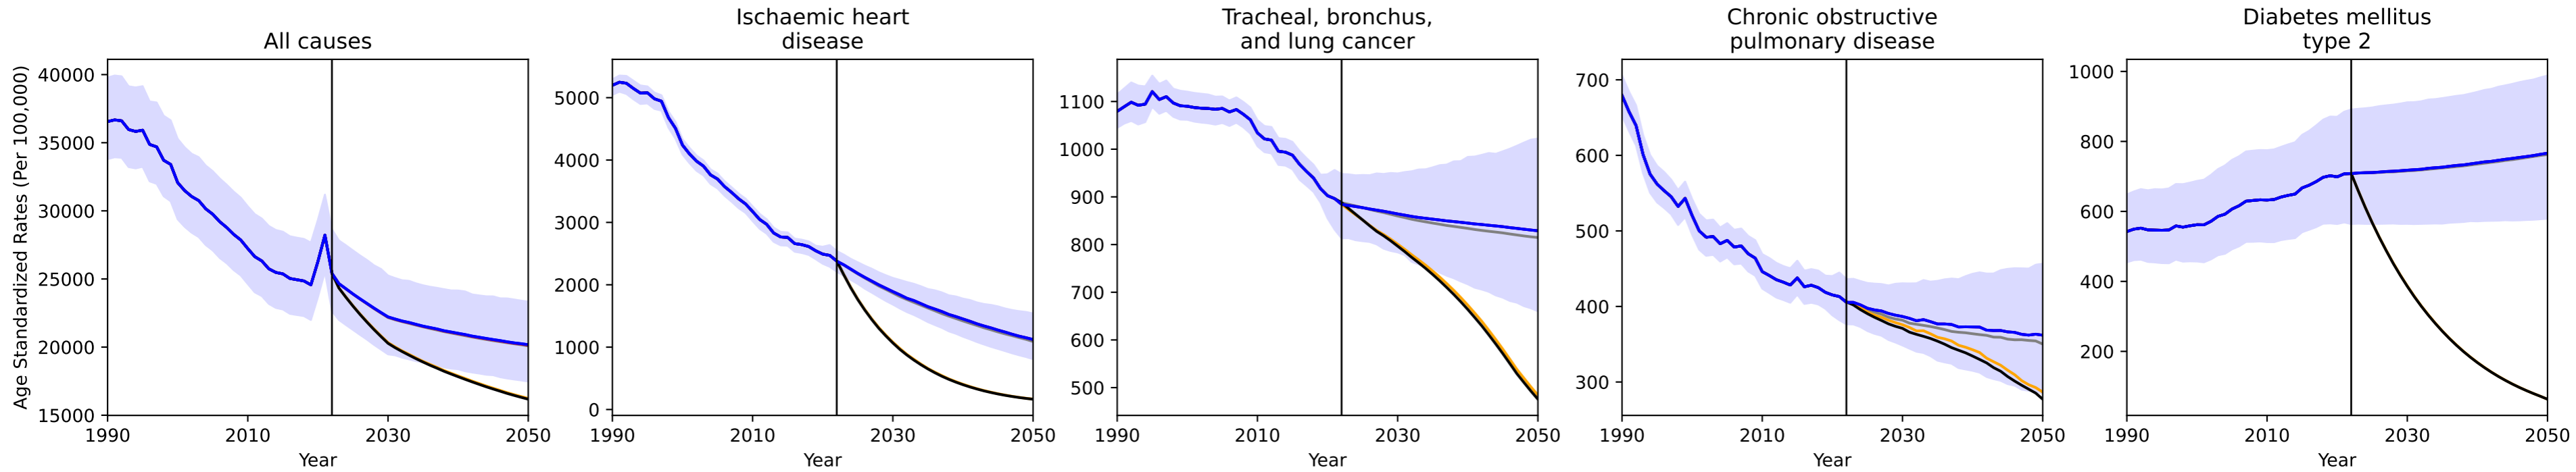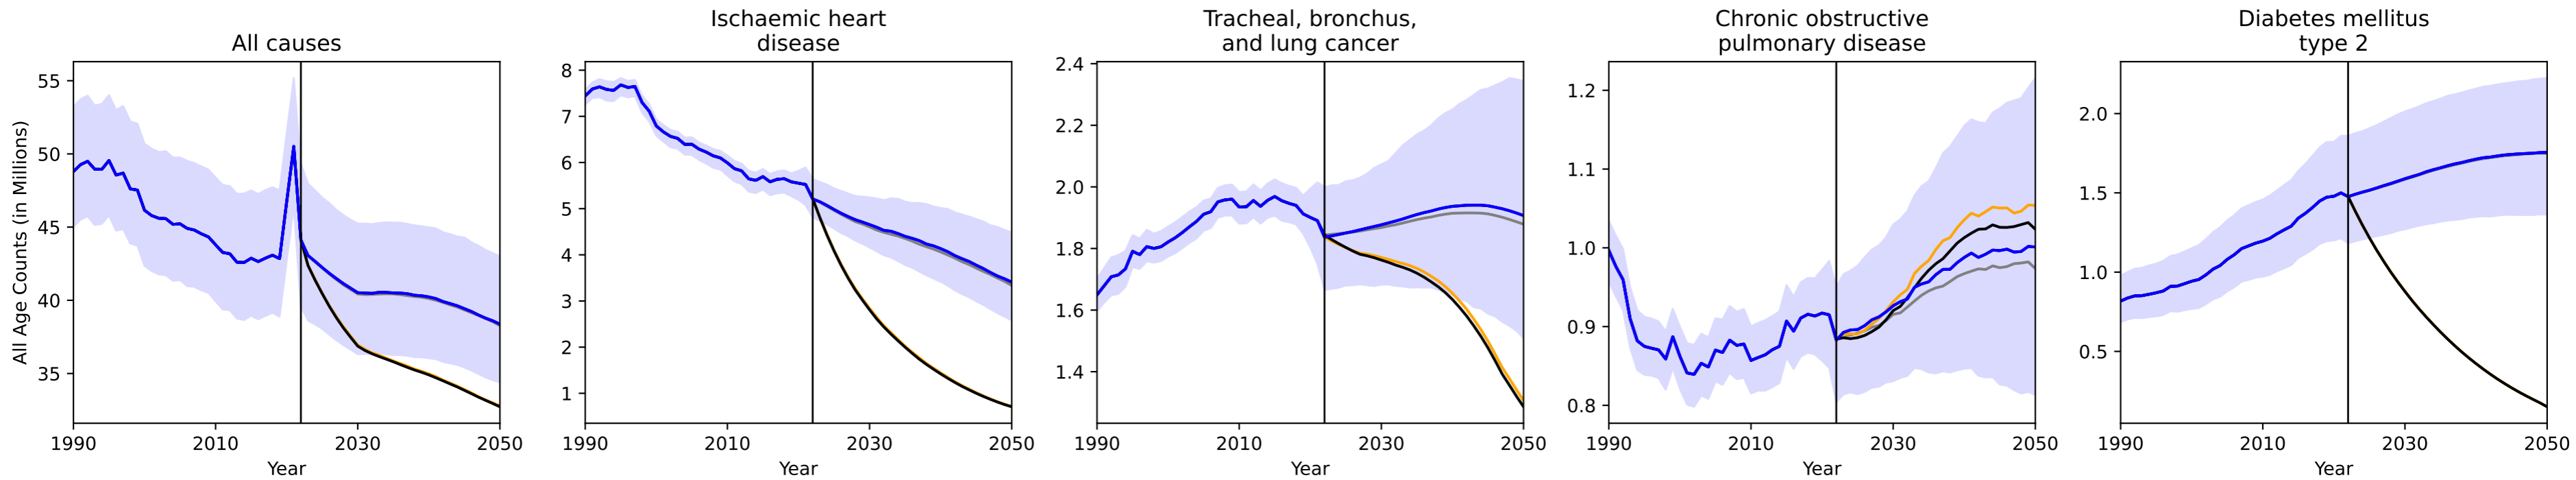

# Eastern Europe

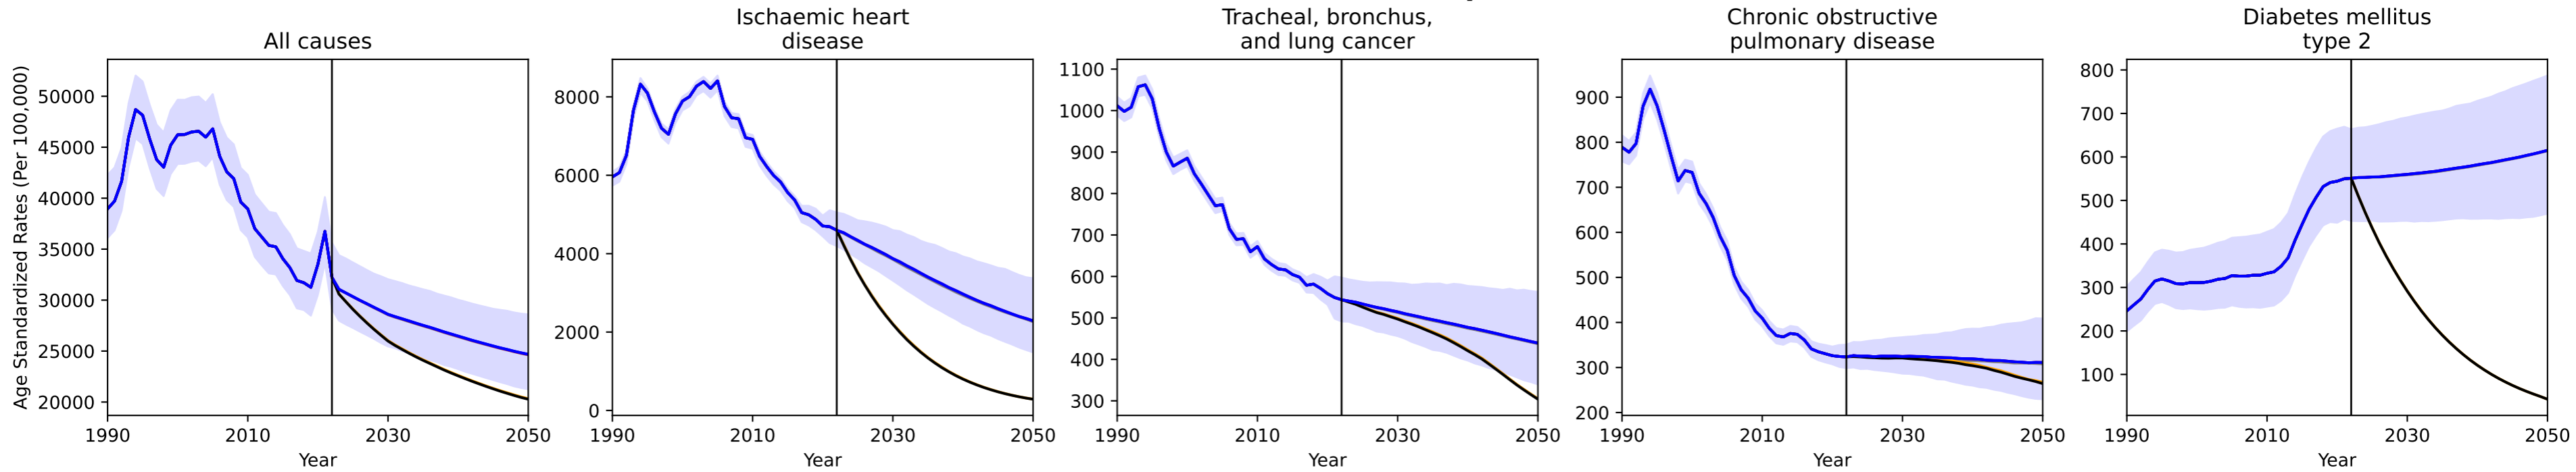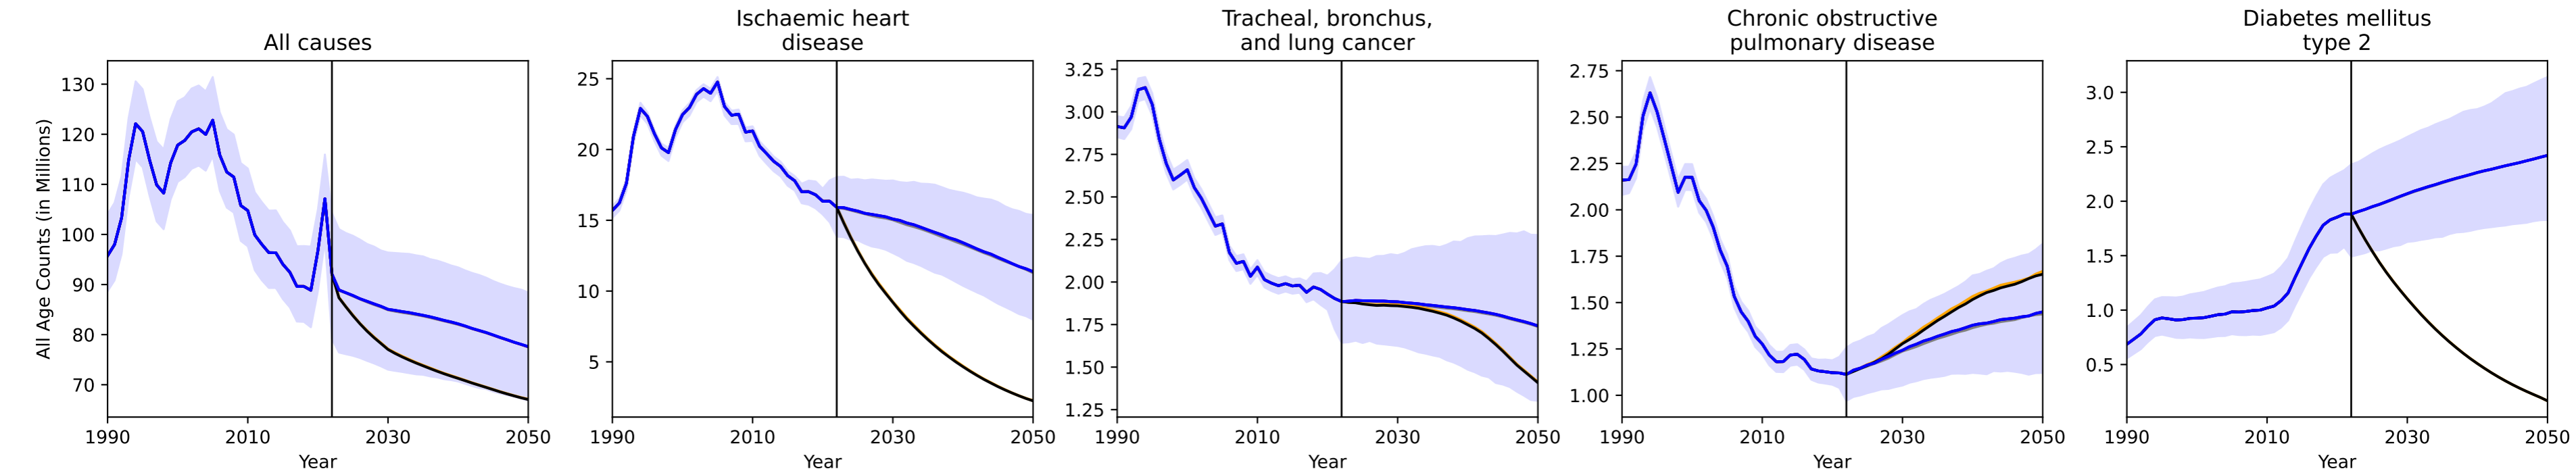

# Australasia

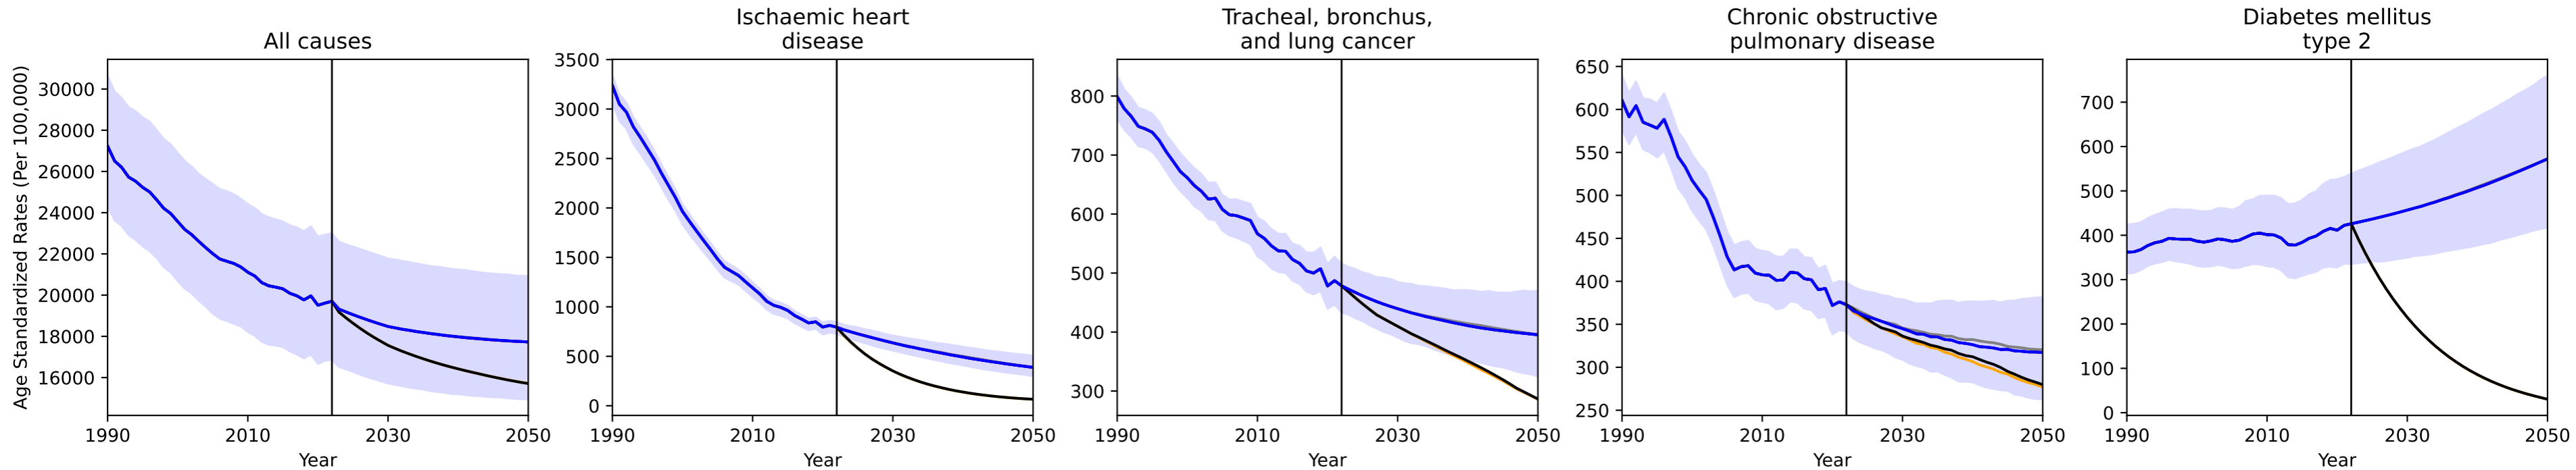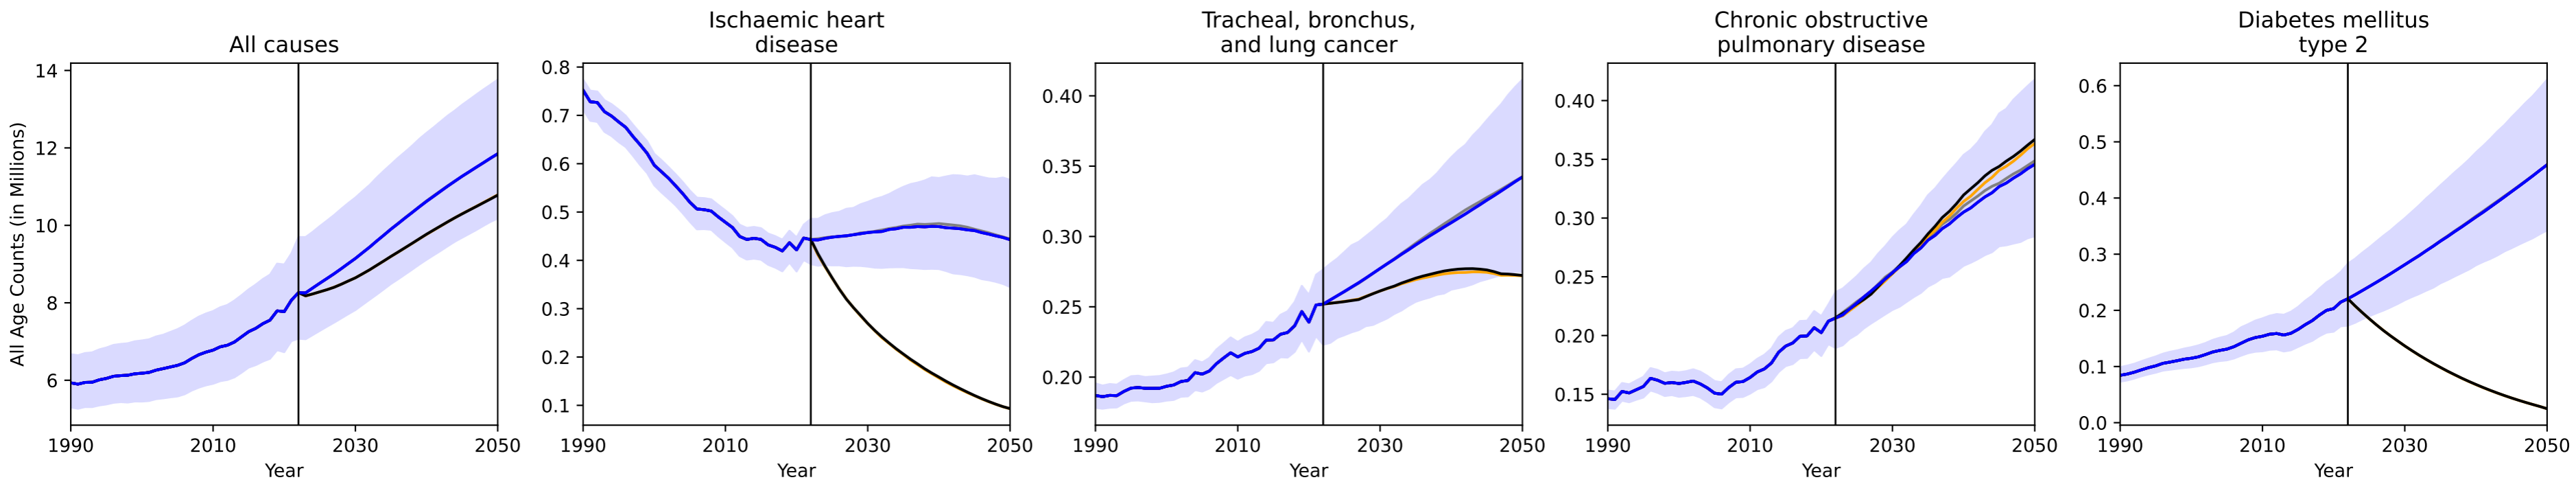

# High-Income Asia Pacific

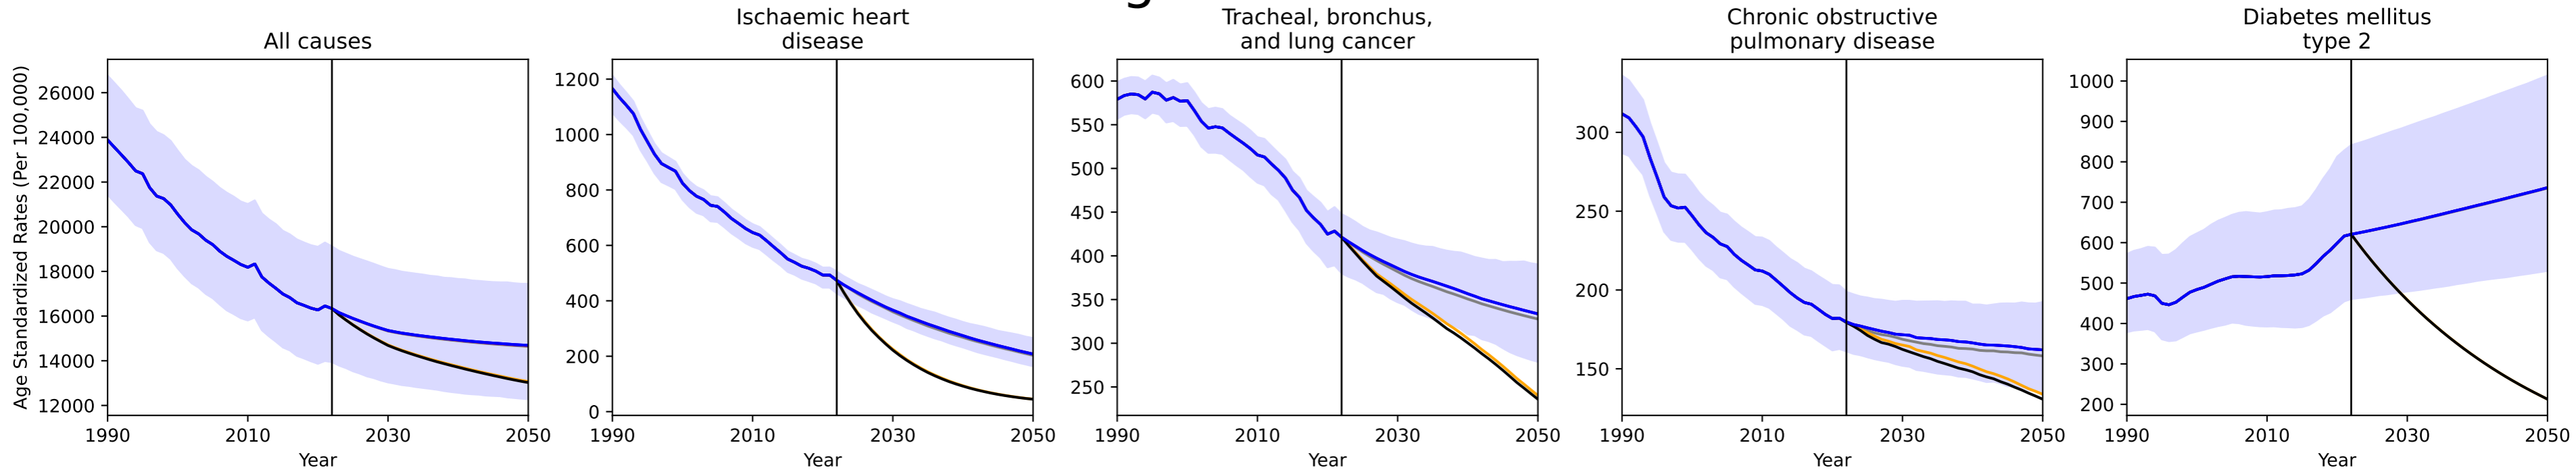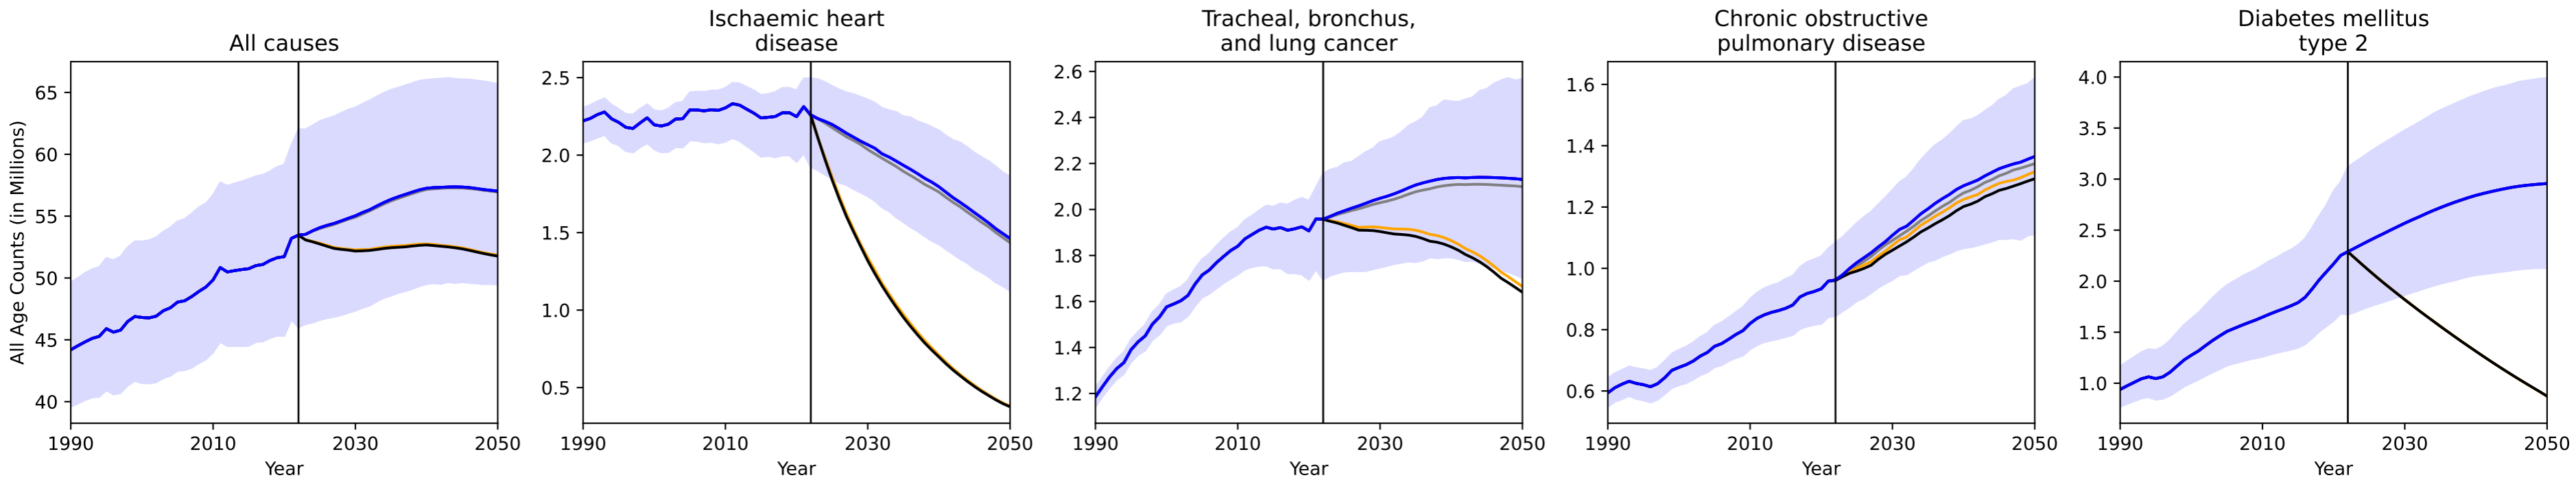

# High-Income North America

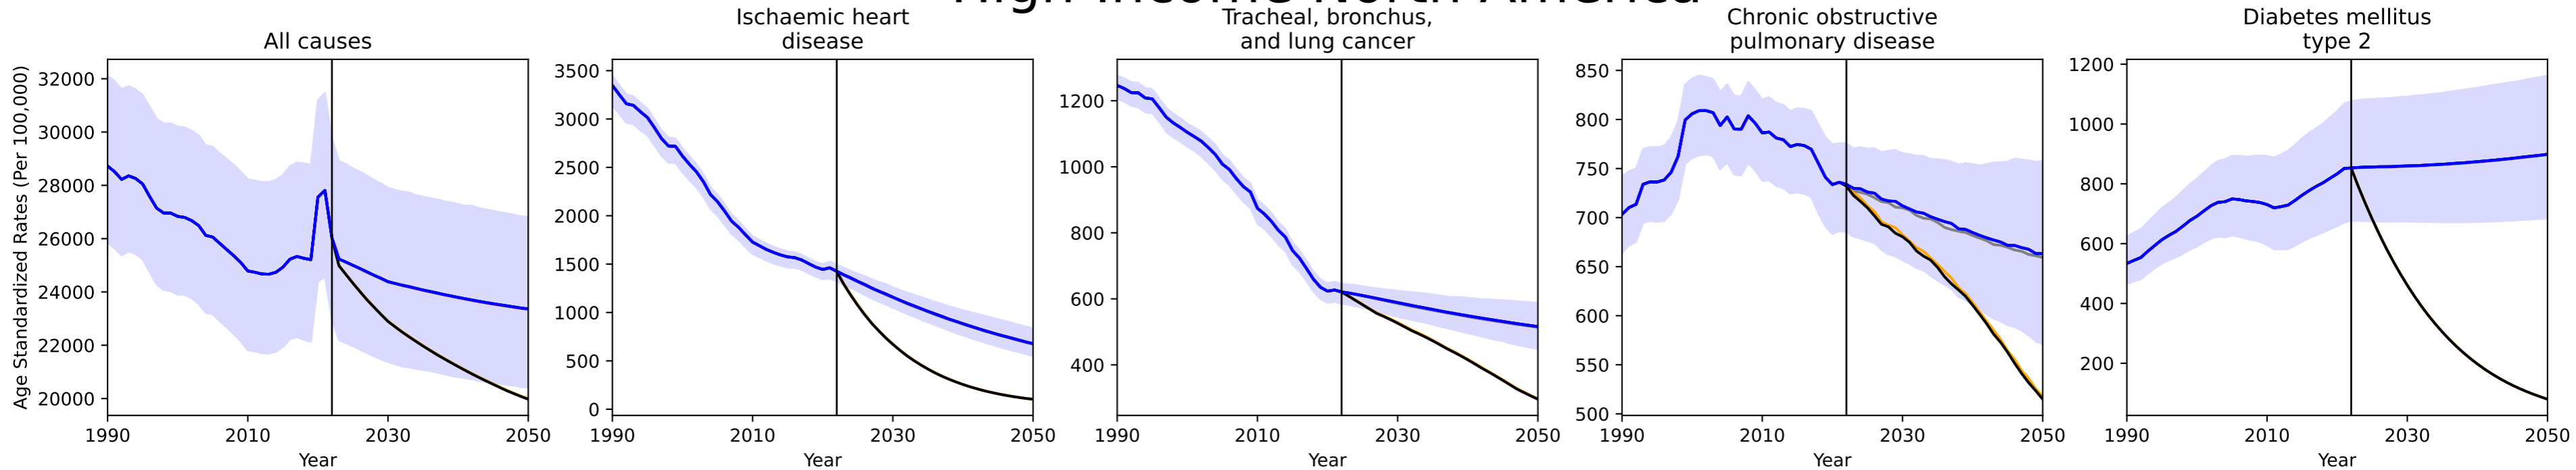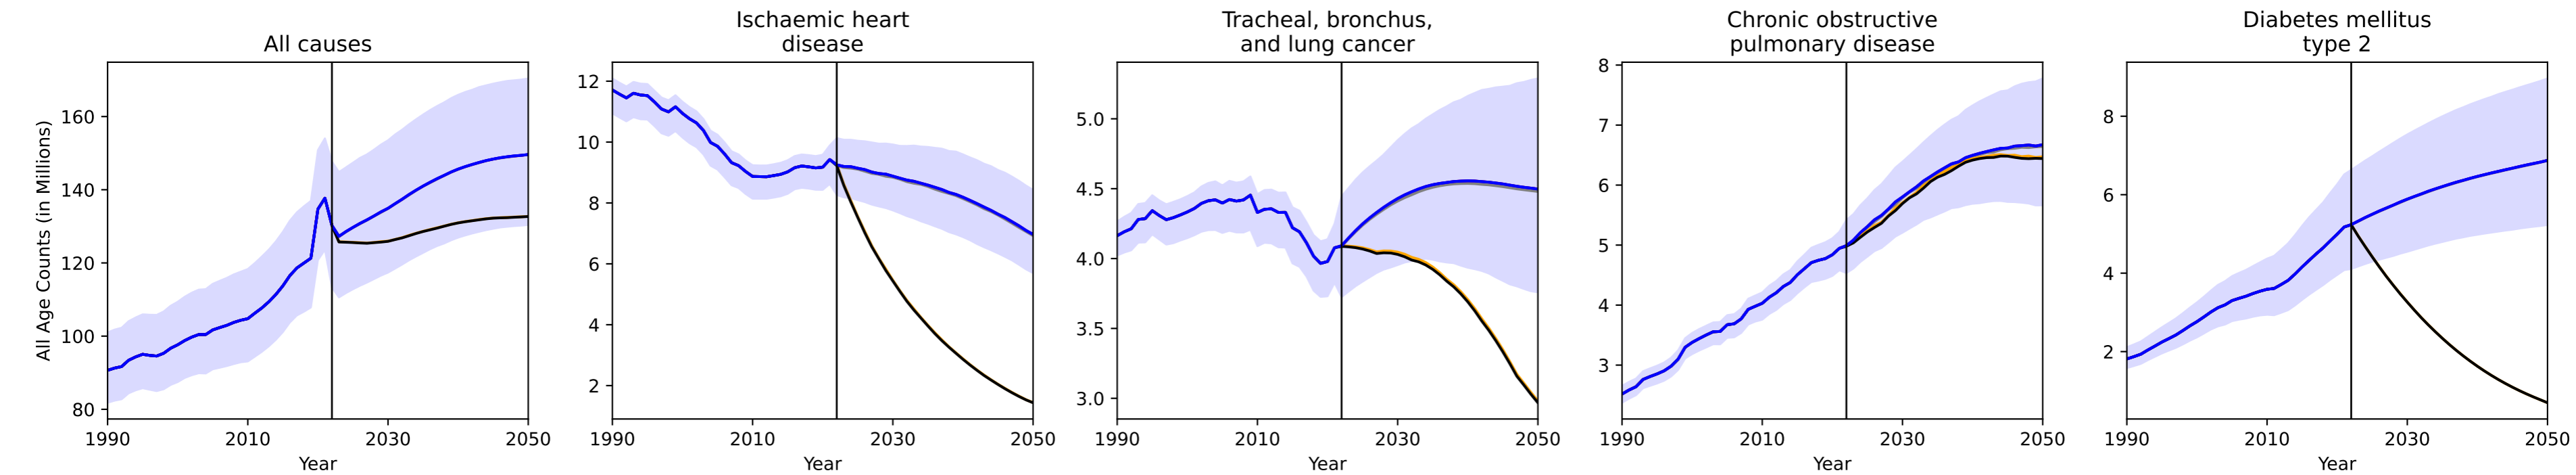

# Southern Latin America

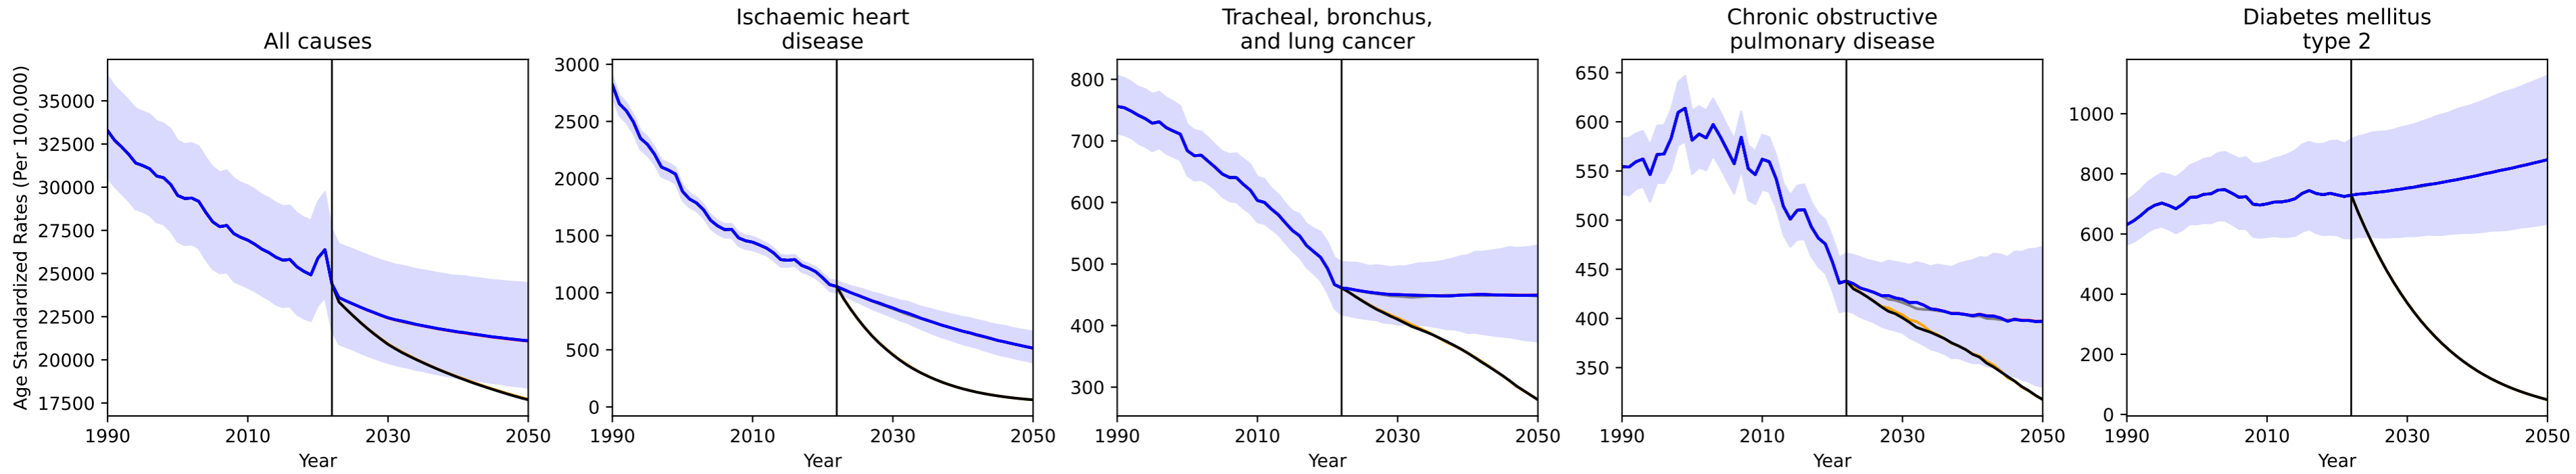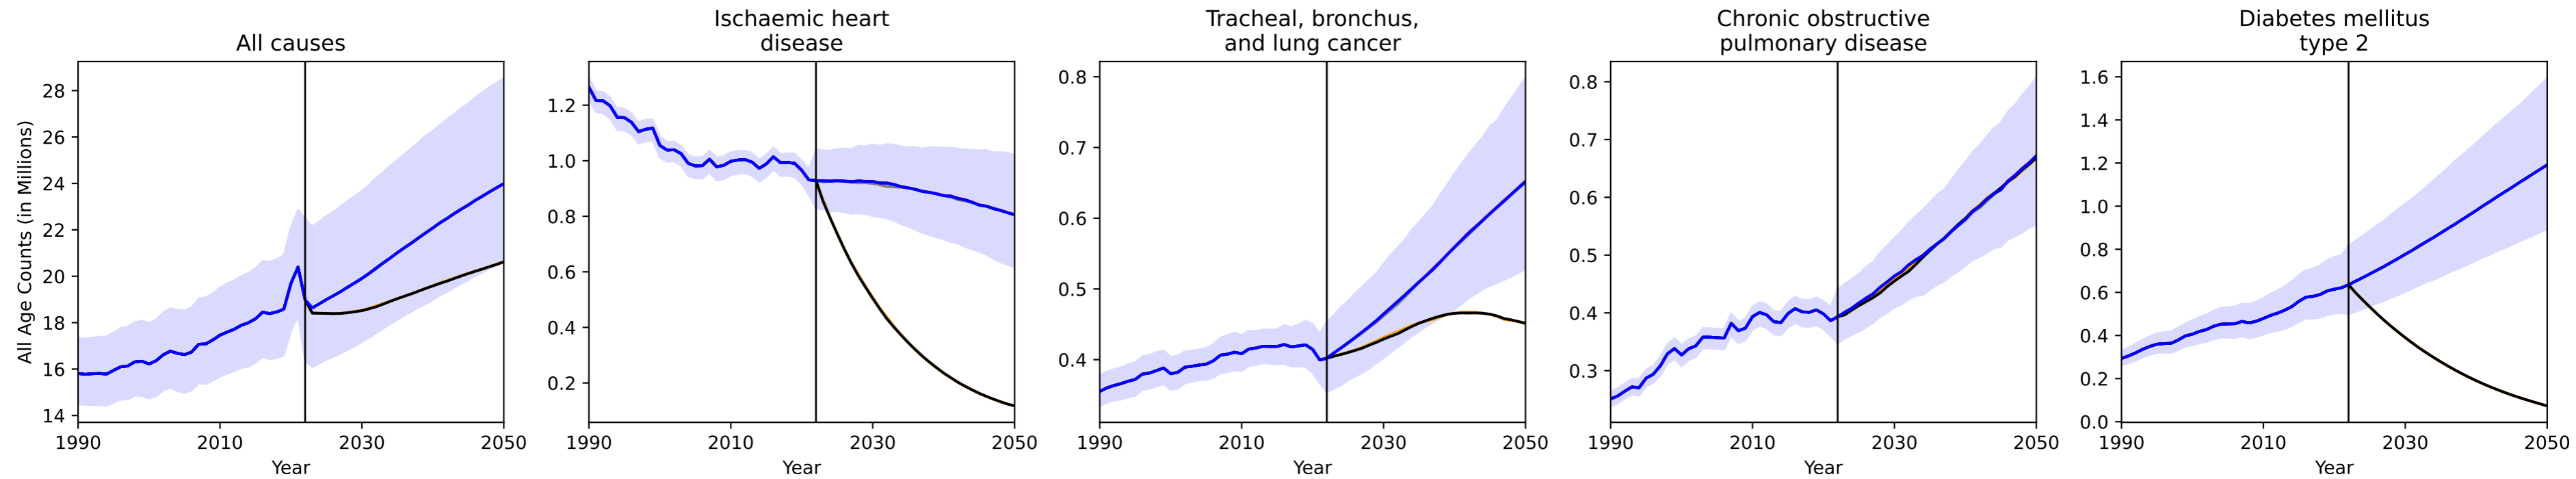

— Safer Environment — Improved Behavioural and Metabolic Risks — Improved Childhood Nutrition and Vaccination — Combined — Reference



# Western Europe

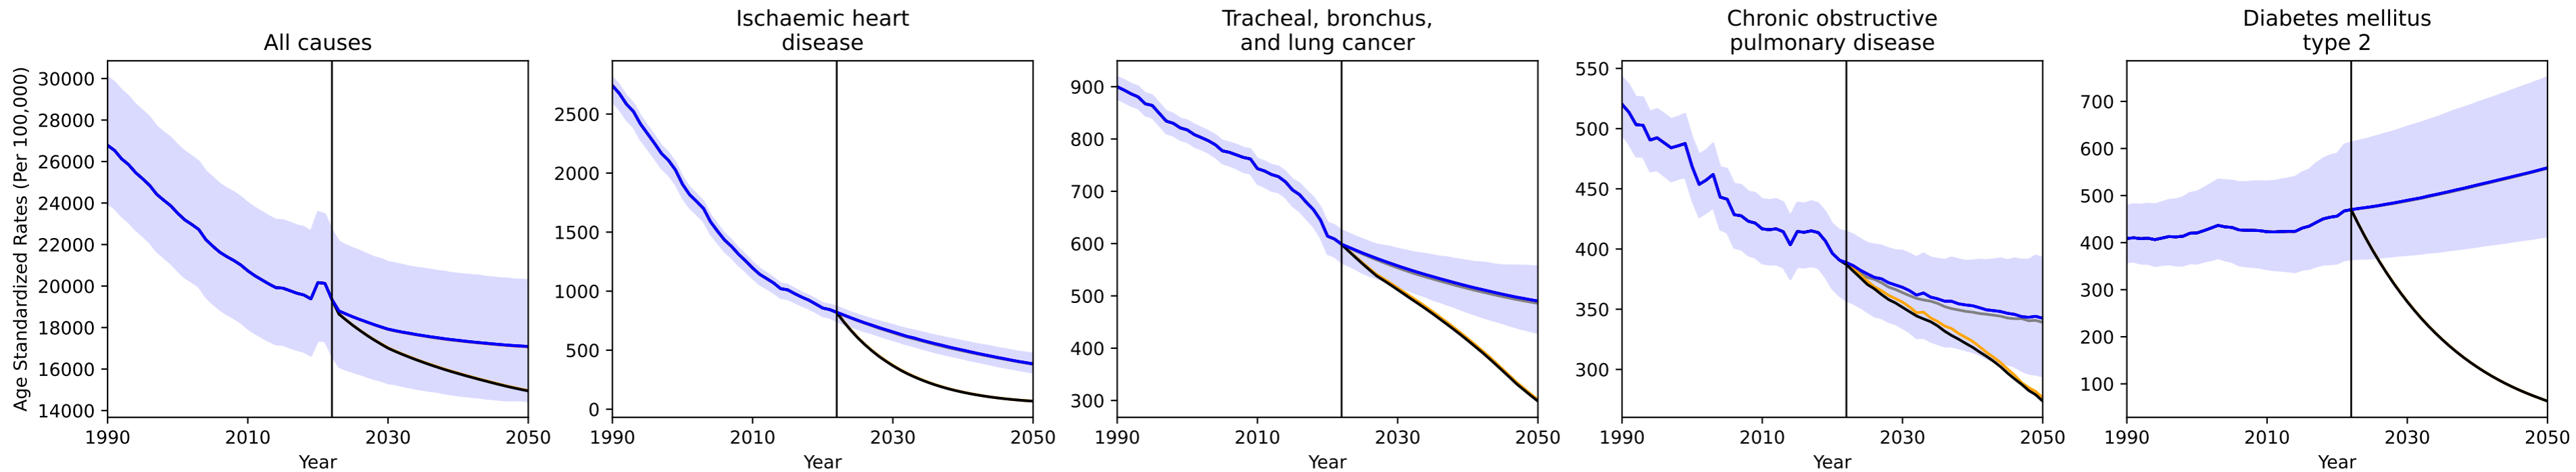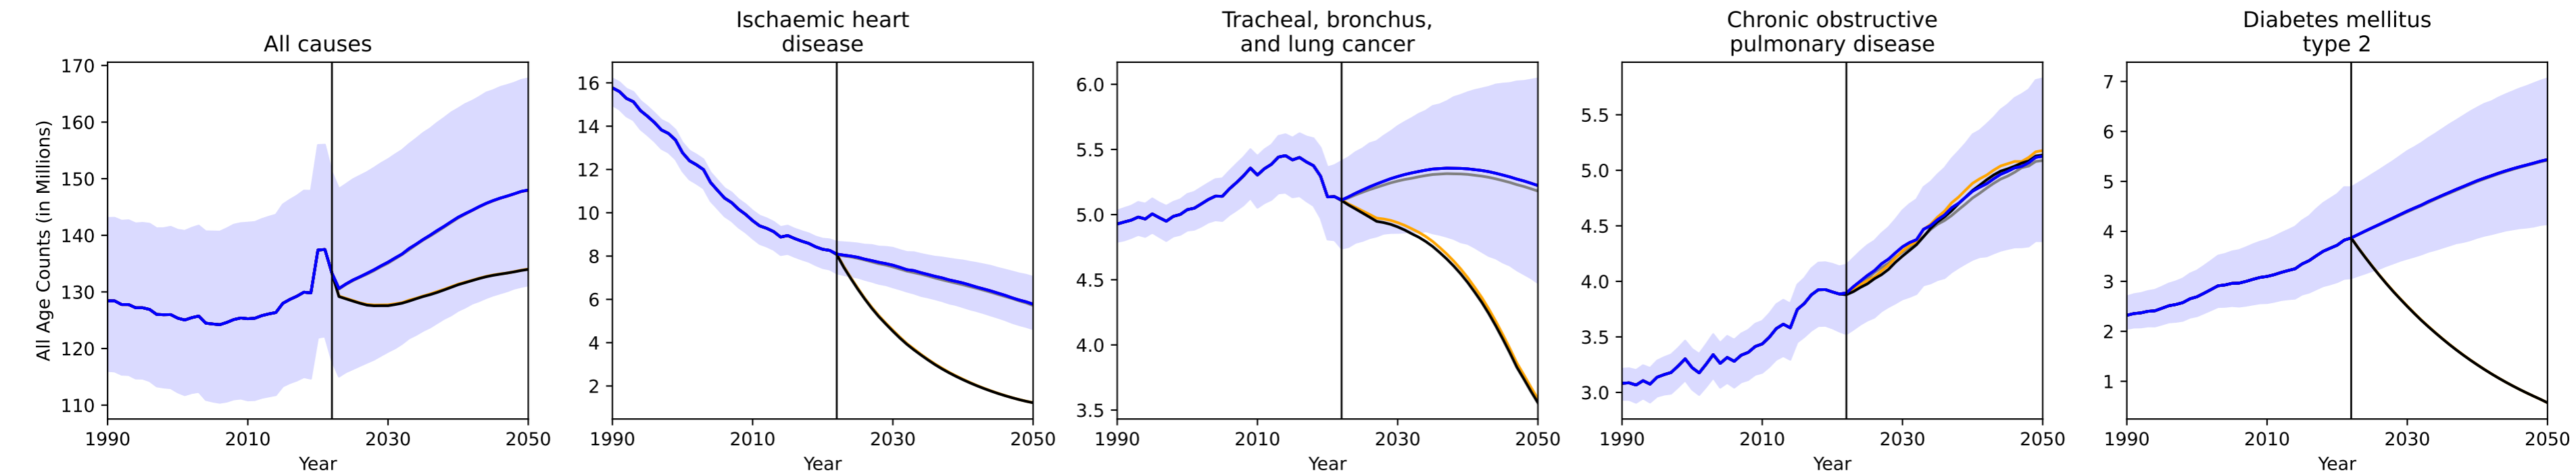

# Andean Latin America

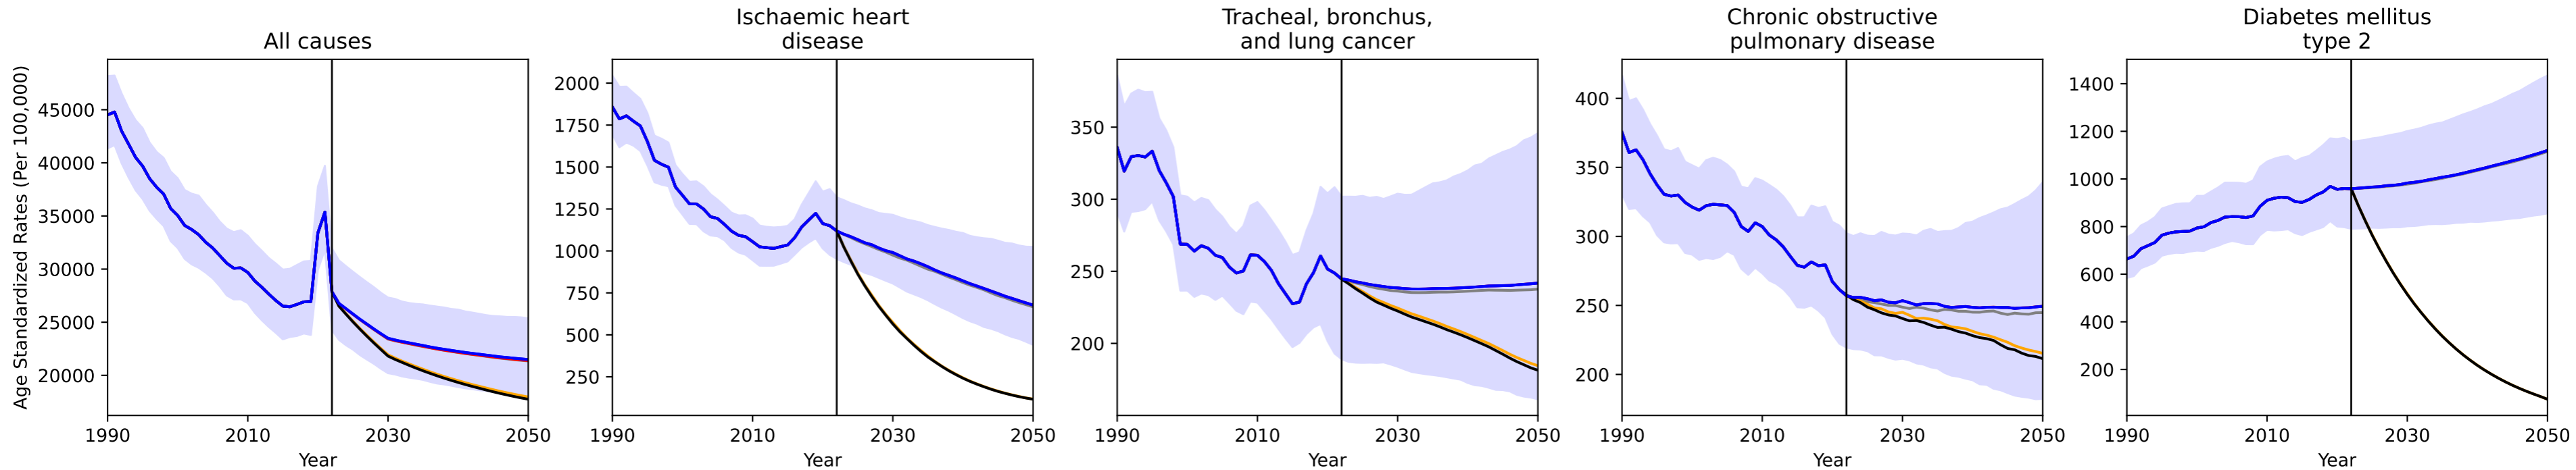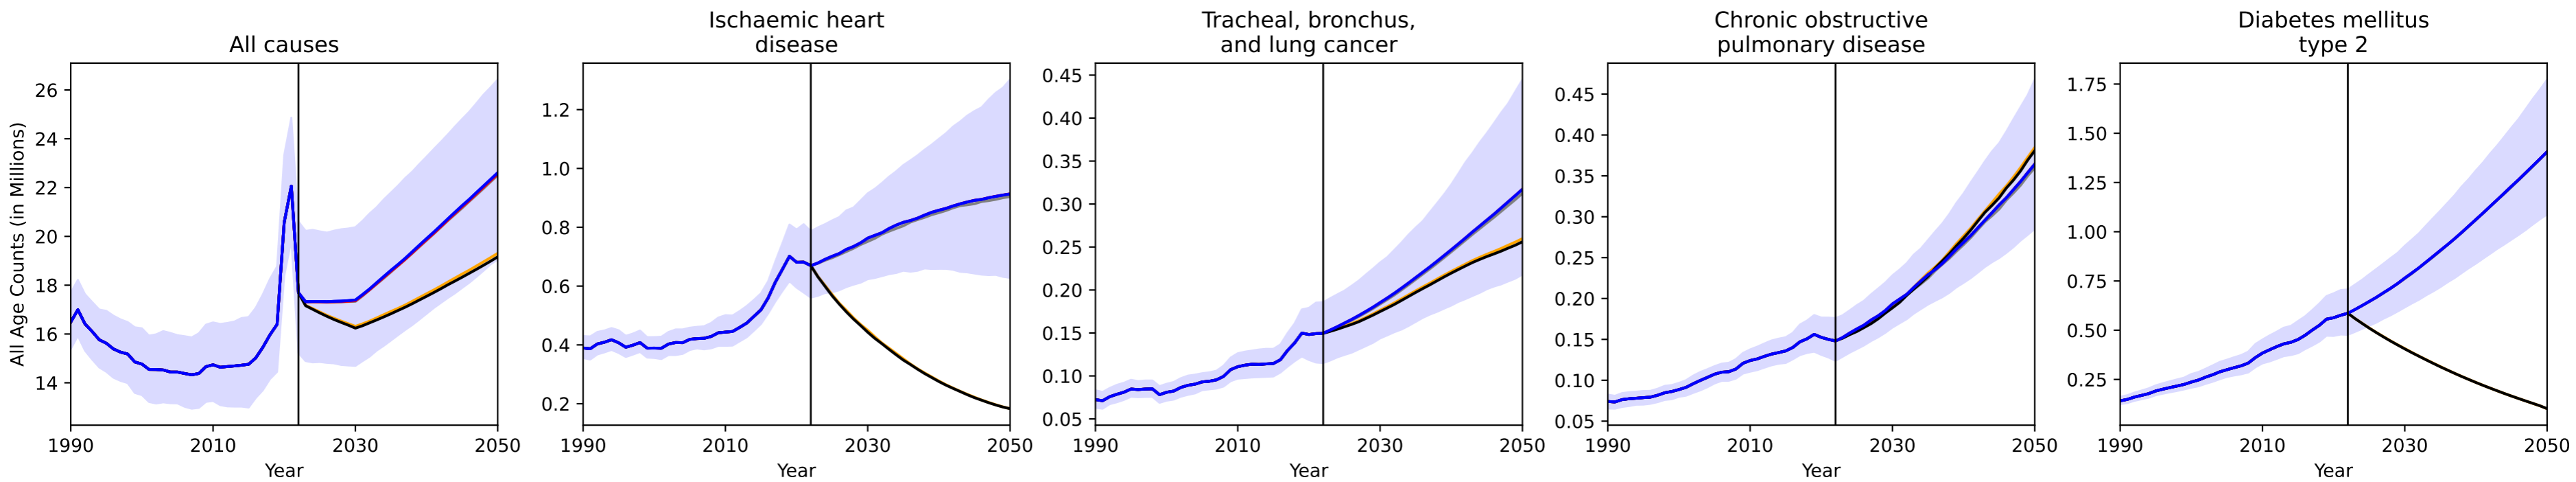

# Caribbean

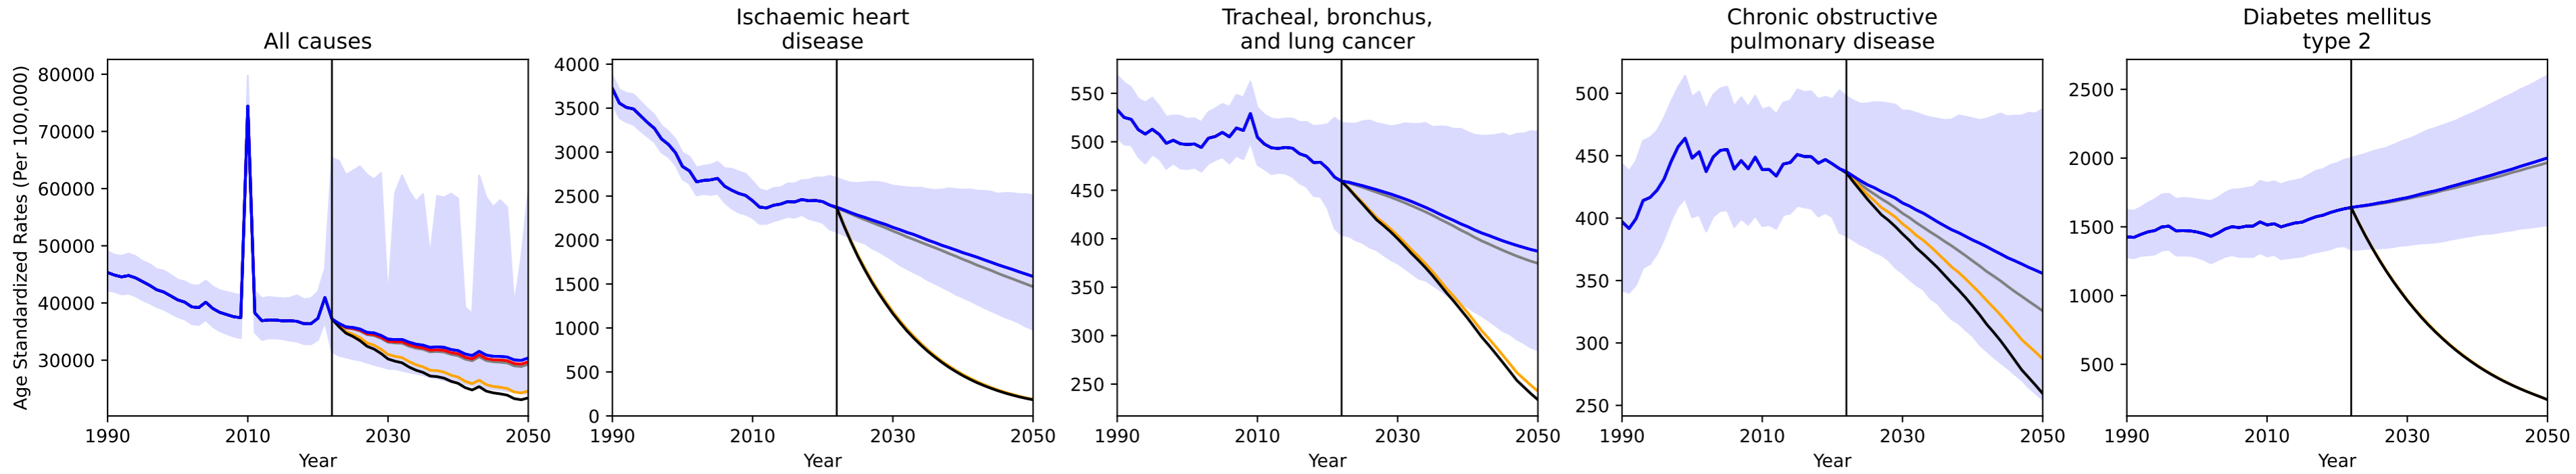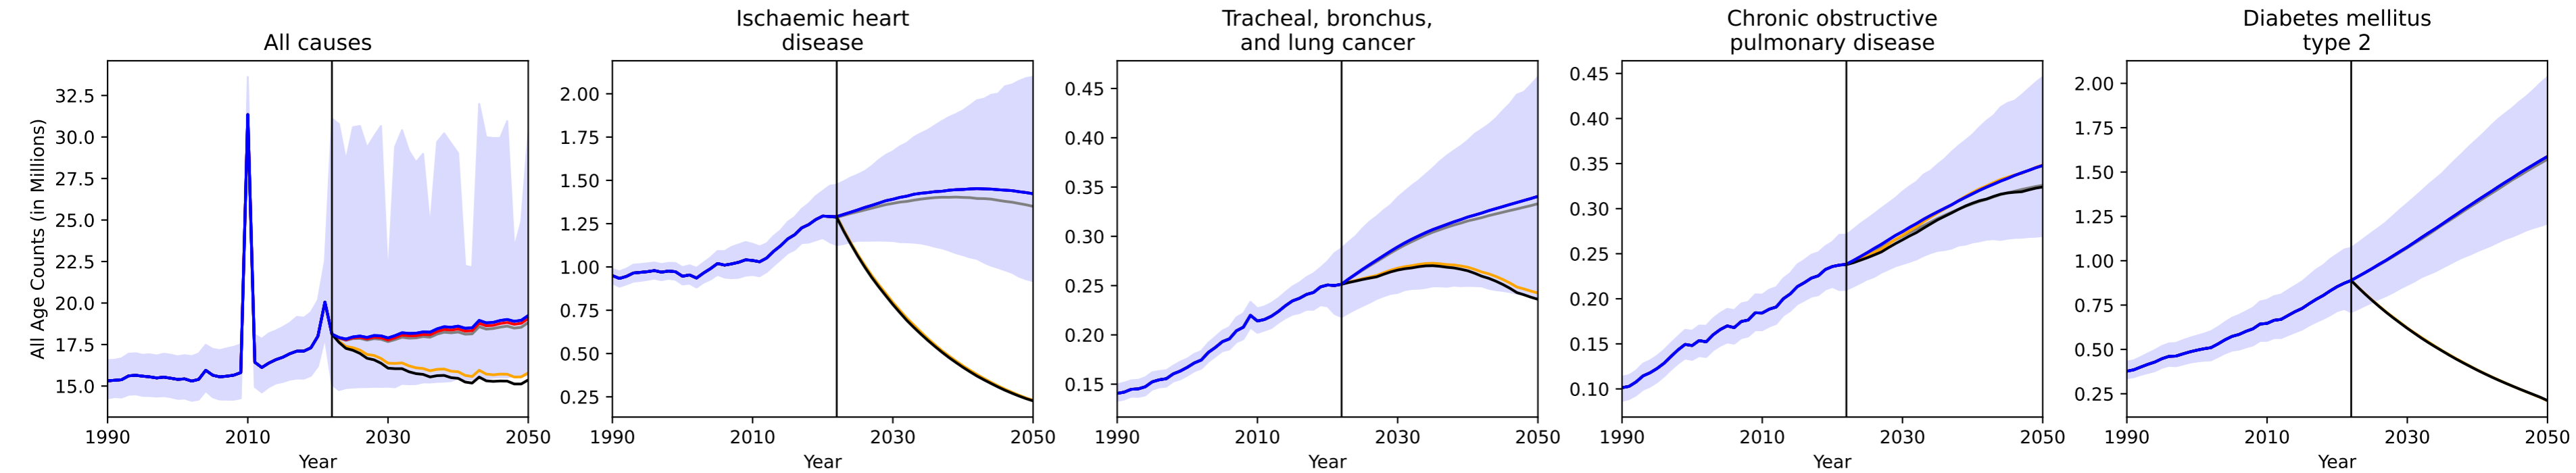

# Central Latin America

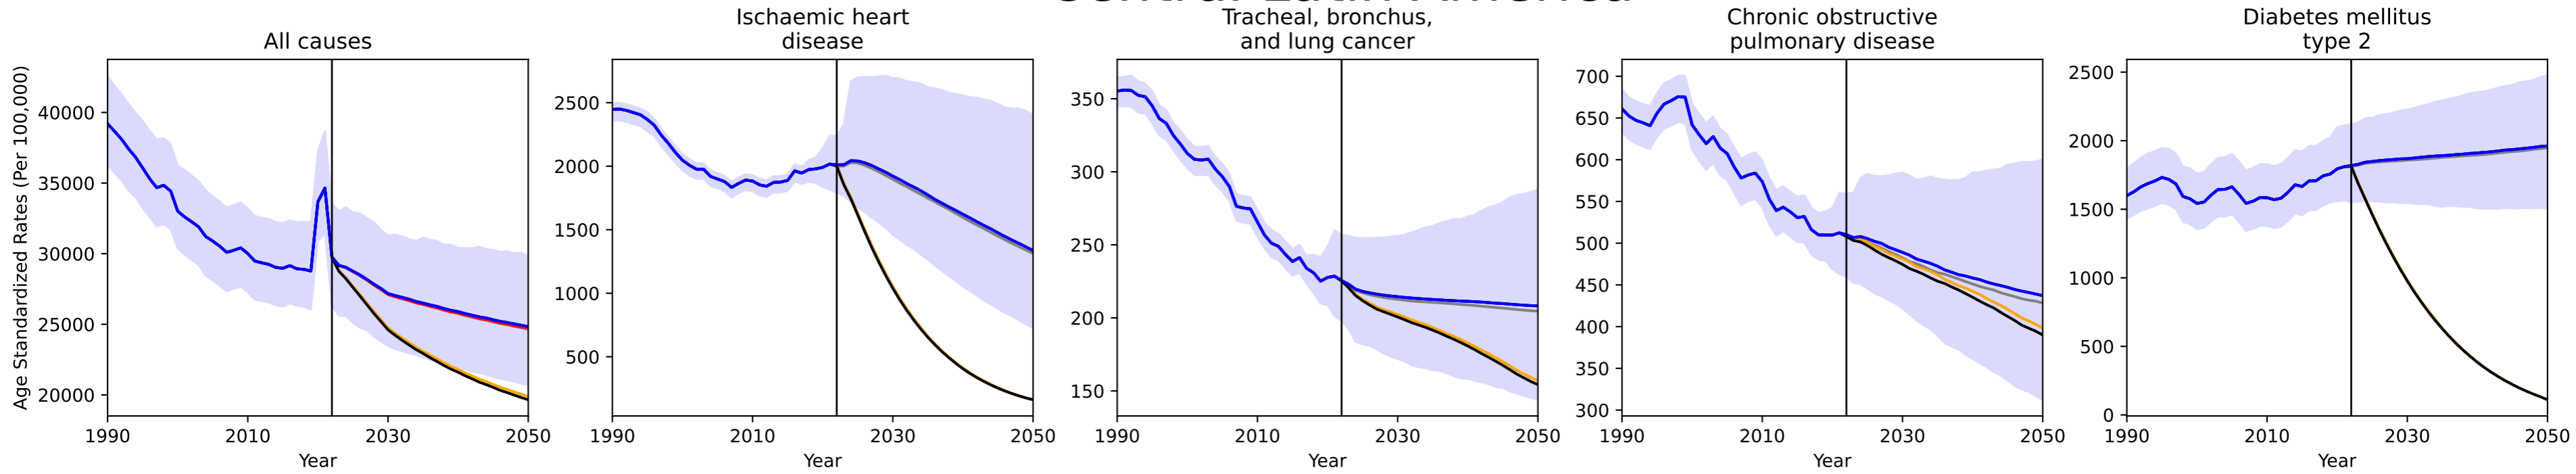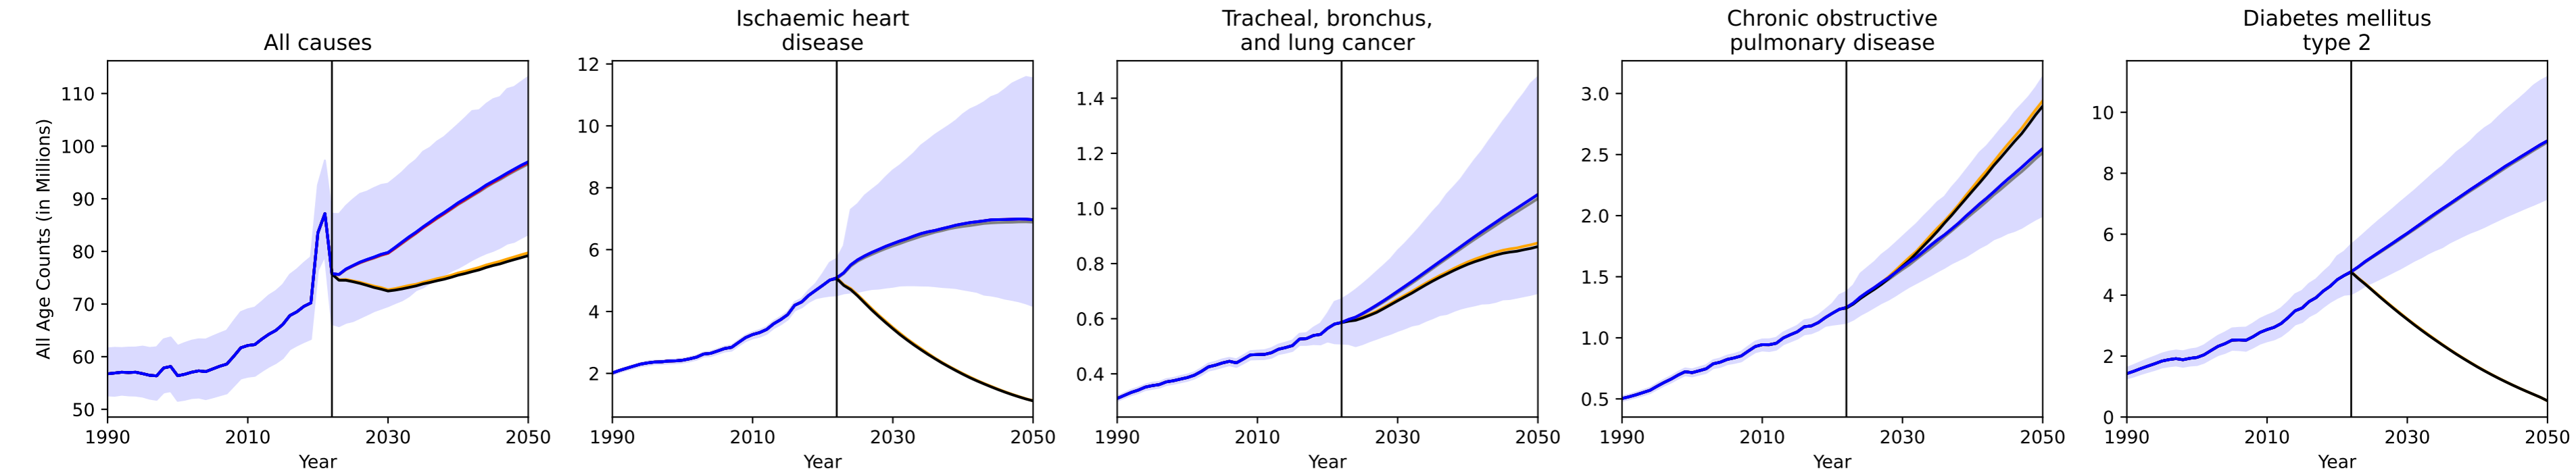

# Tropical Latin America

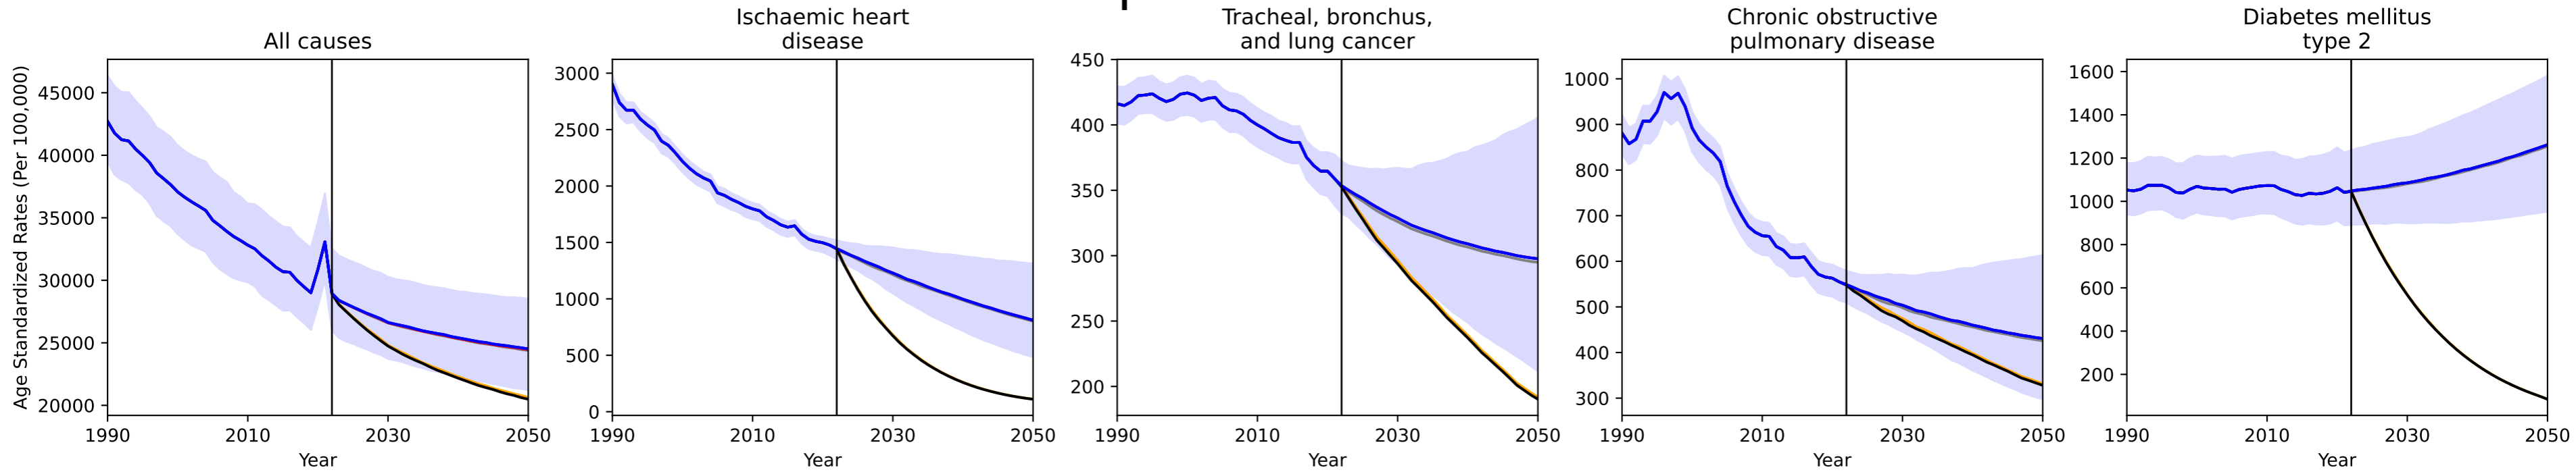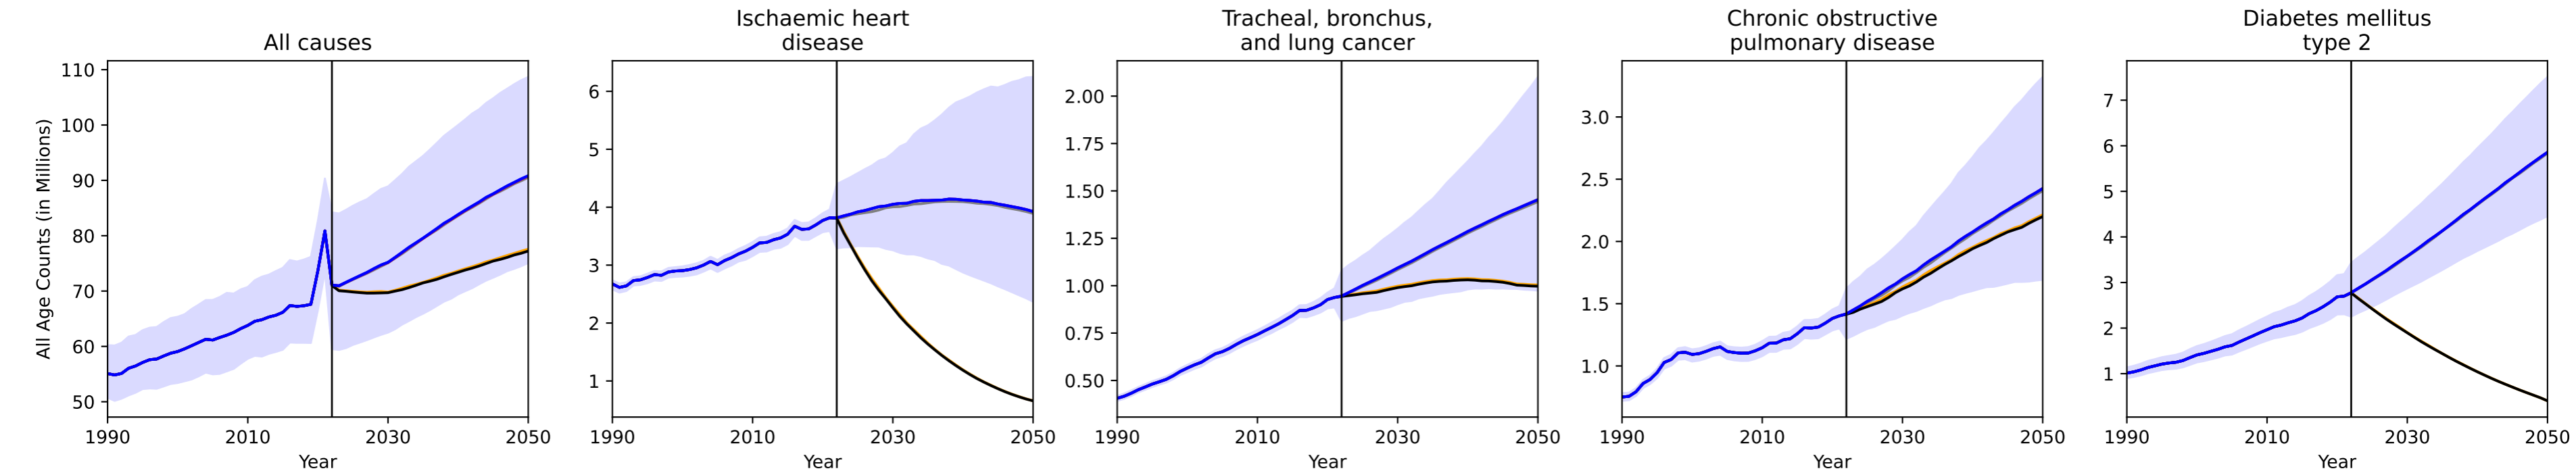

# North Africa And Middle East

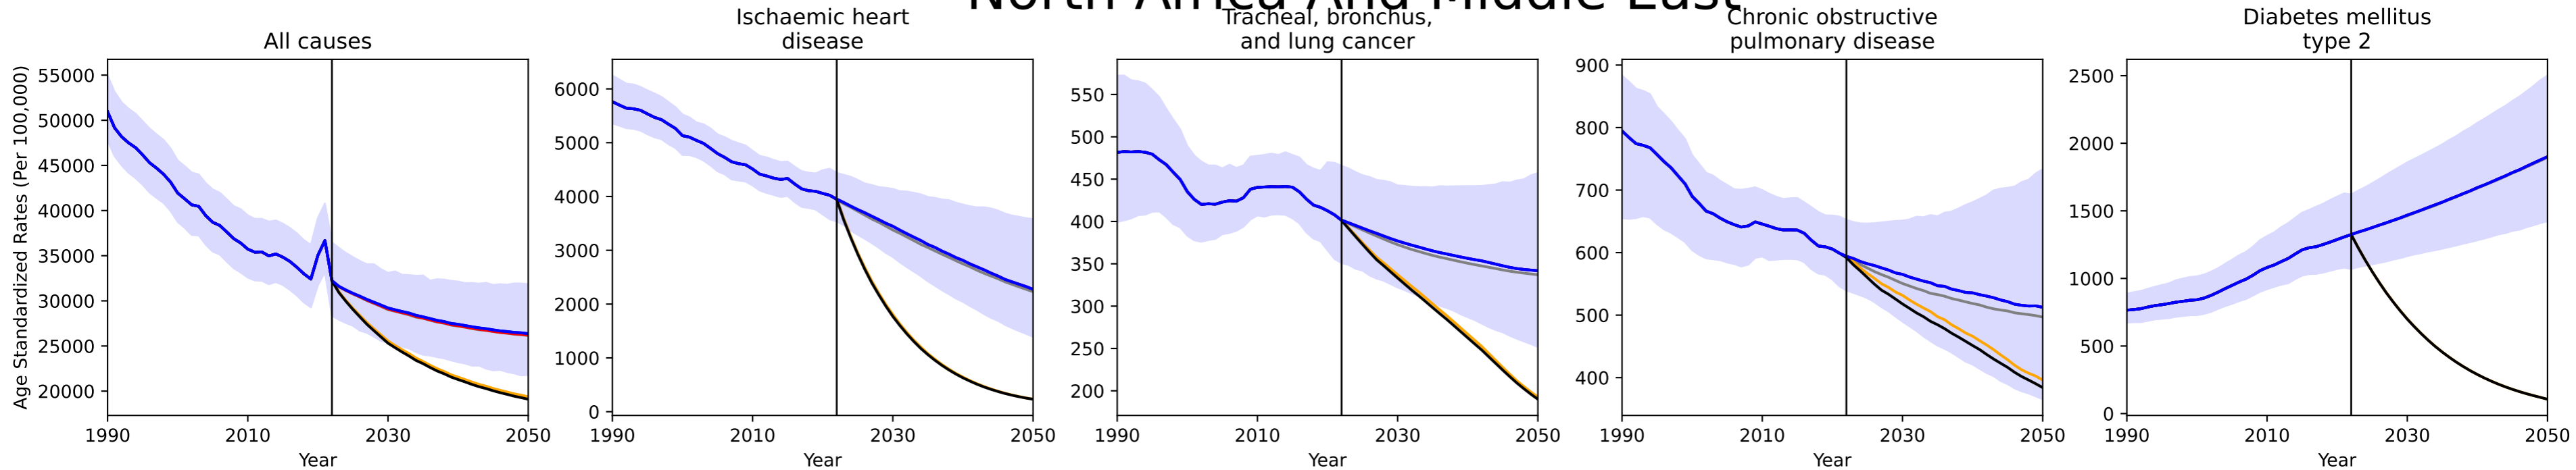

# South Asia



# East Asia

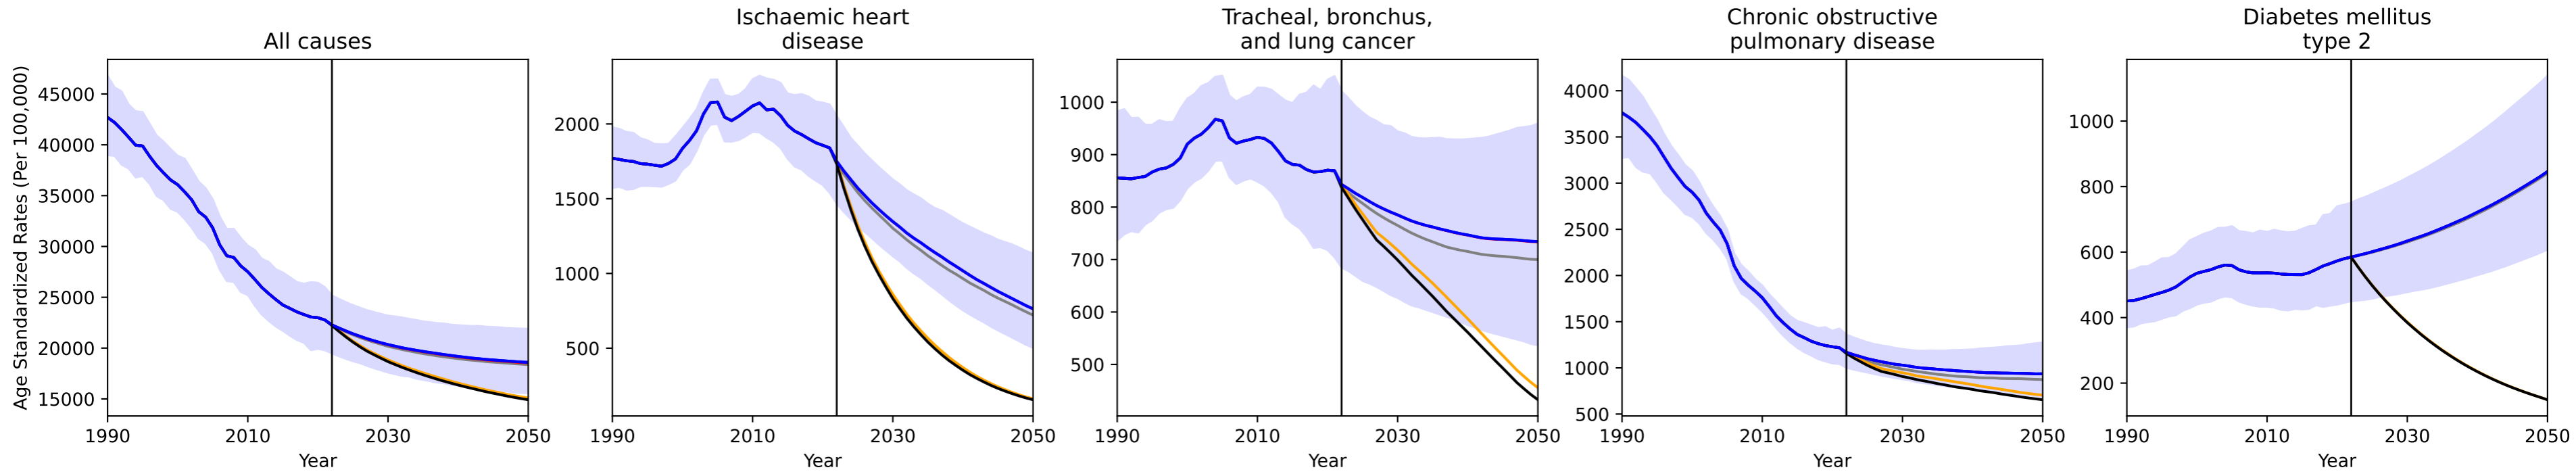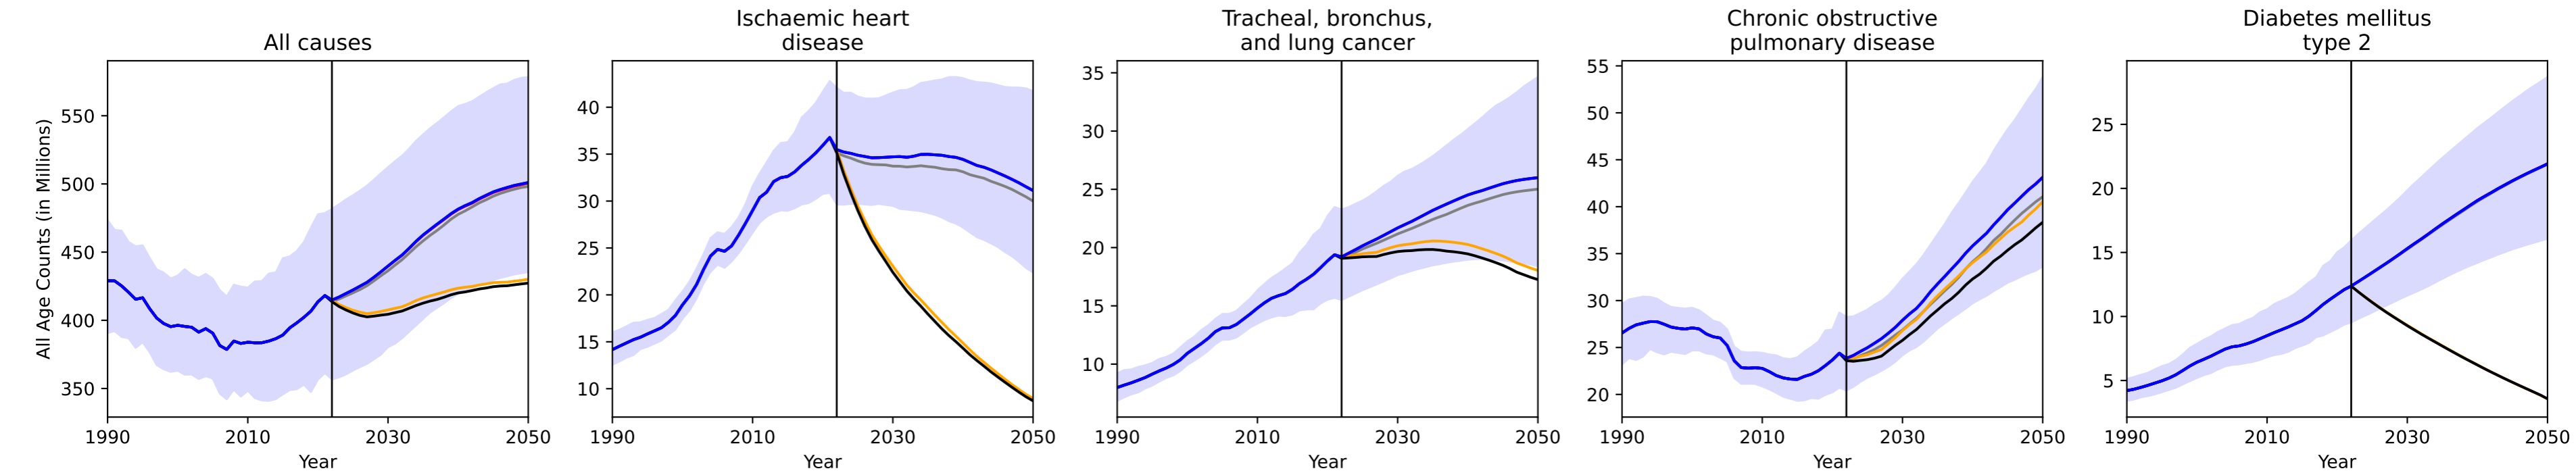



# Oceania

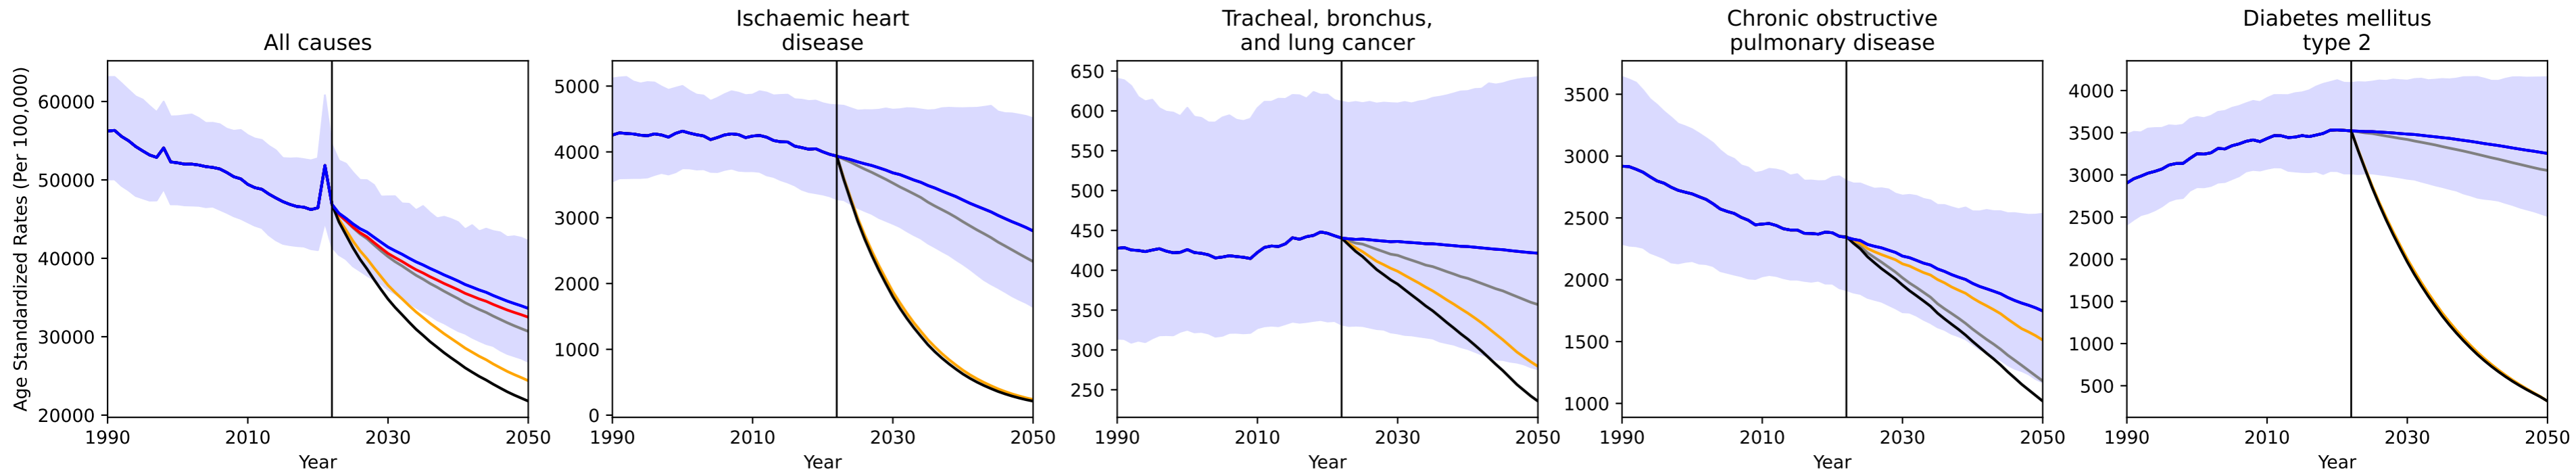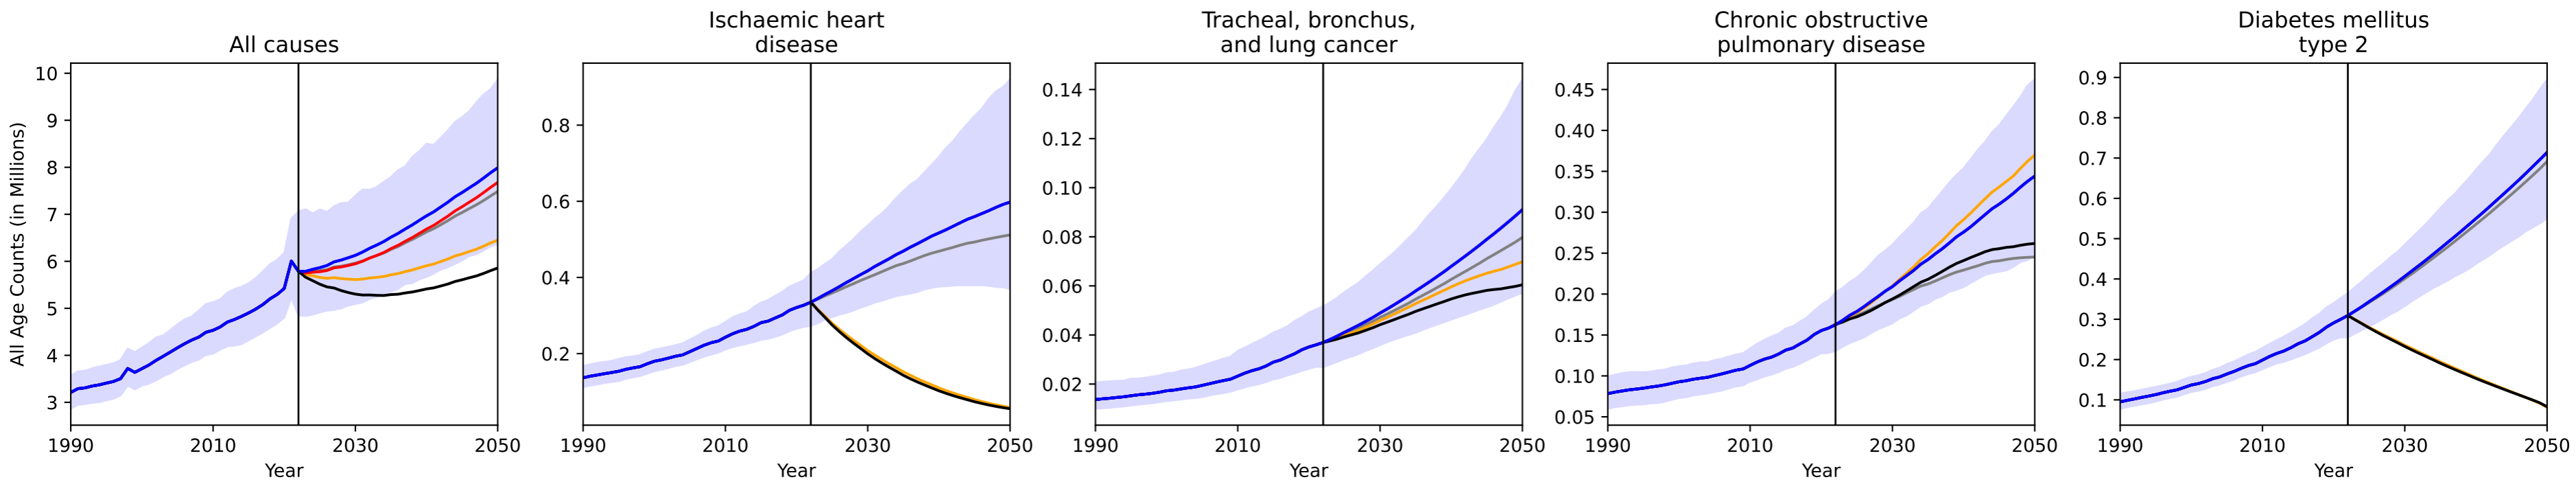

# Southeast Asia

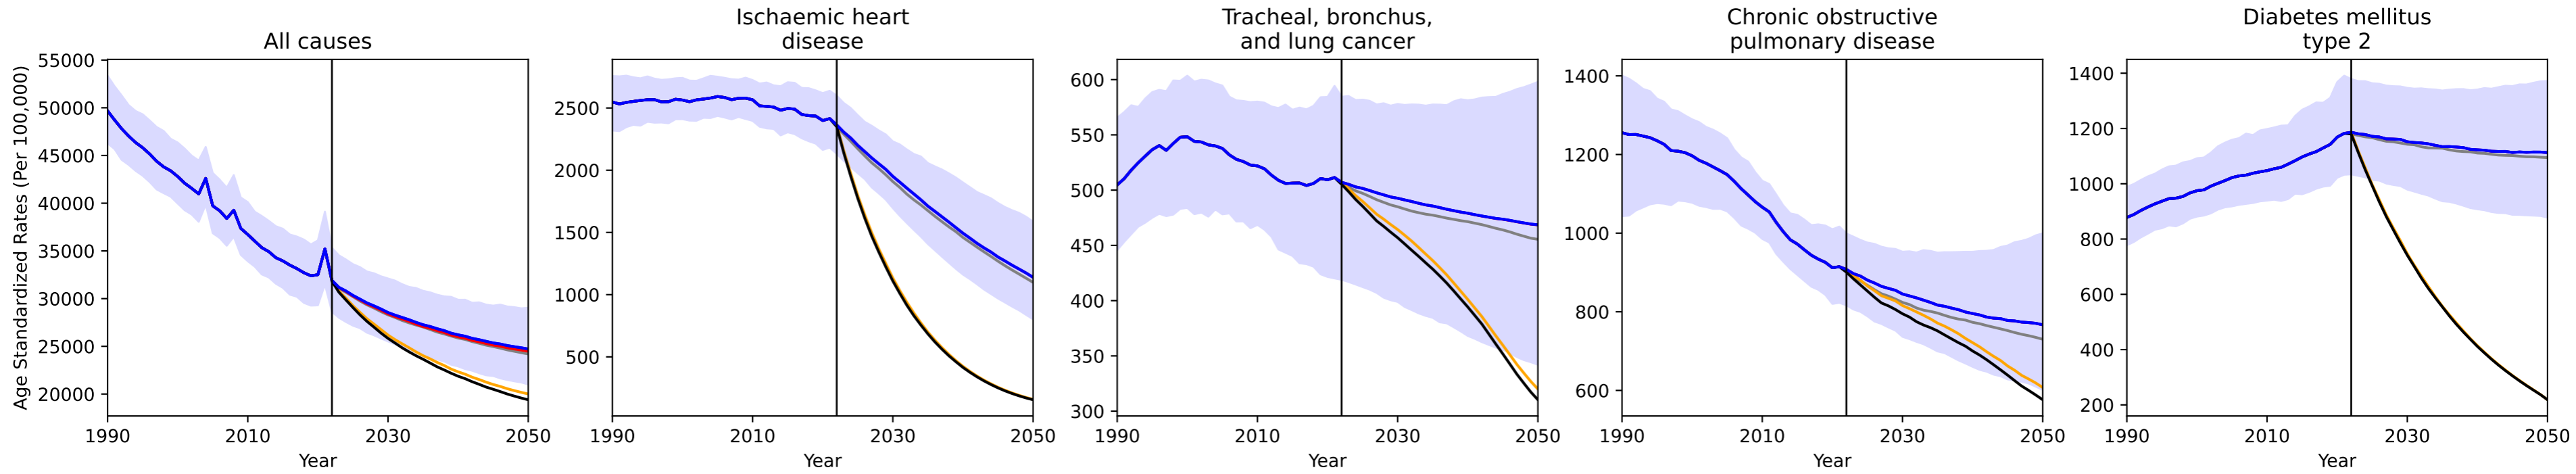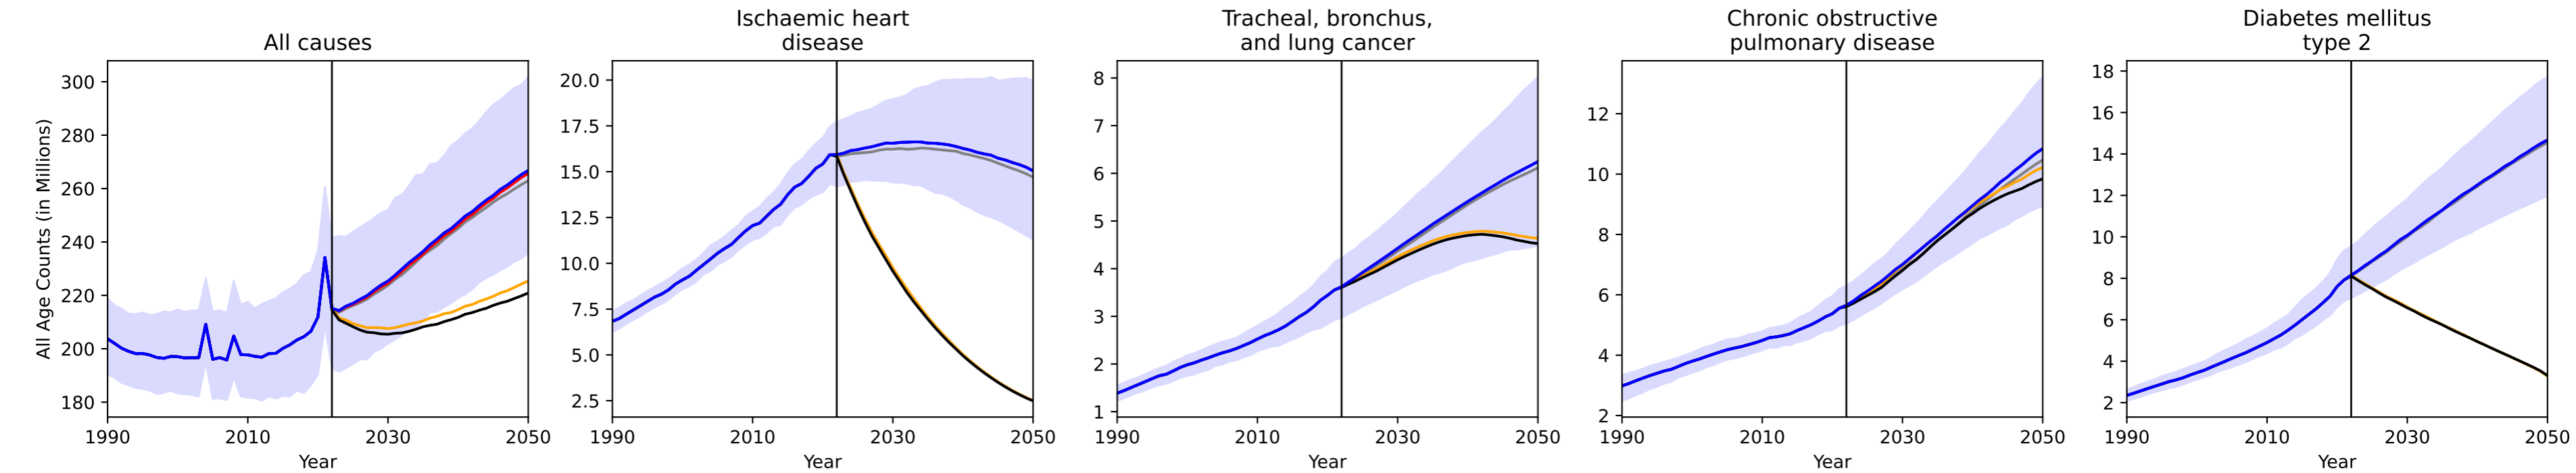

# Central Sub-Saharan Africa

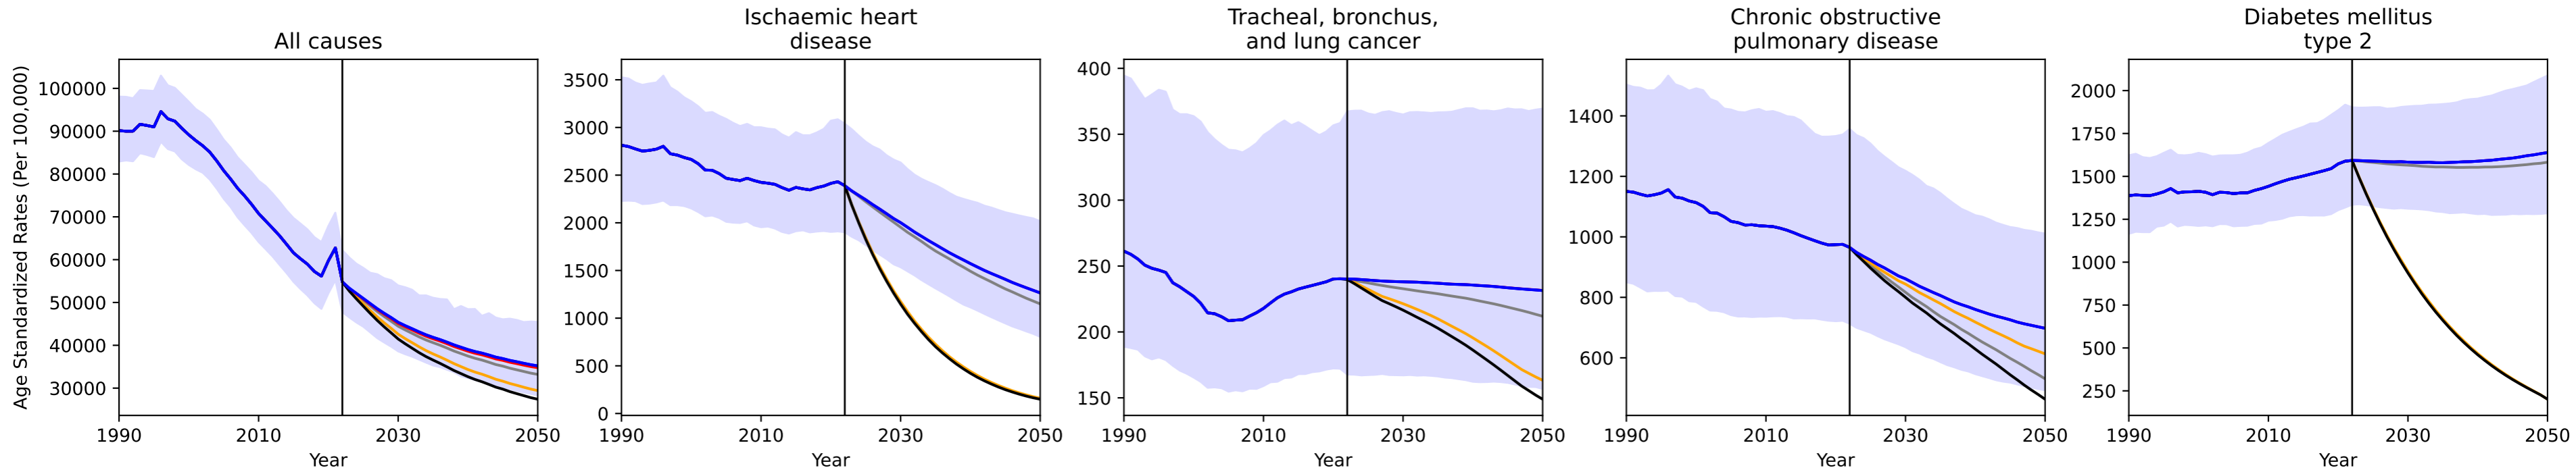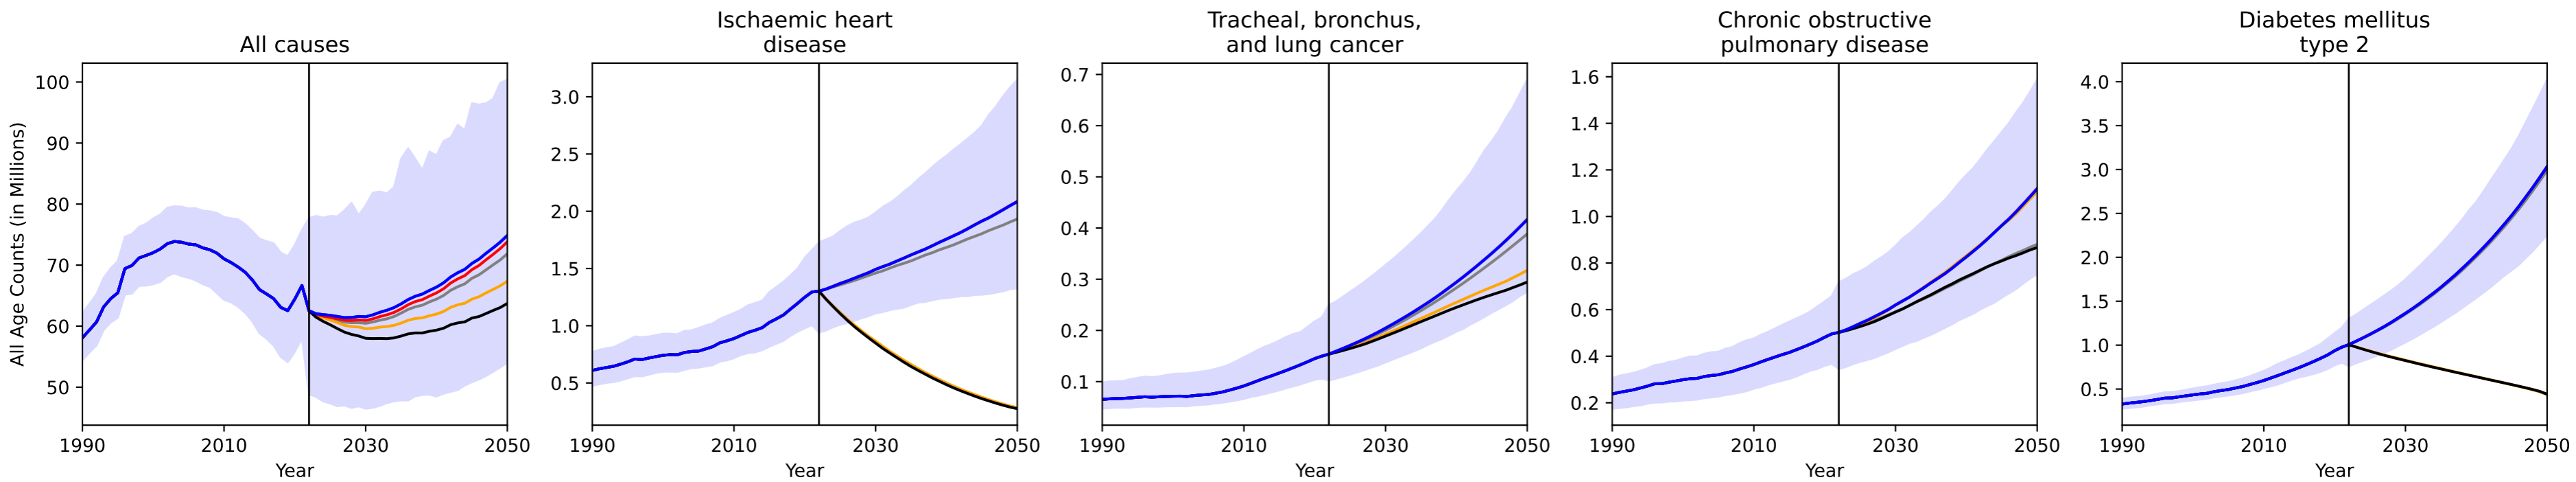

# Eastern Sub-Saharan Africa

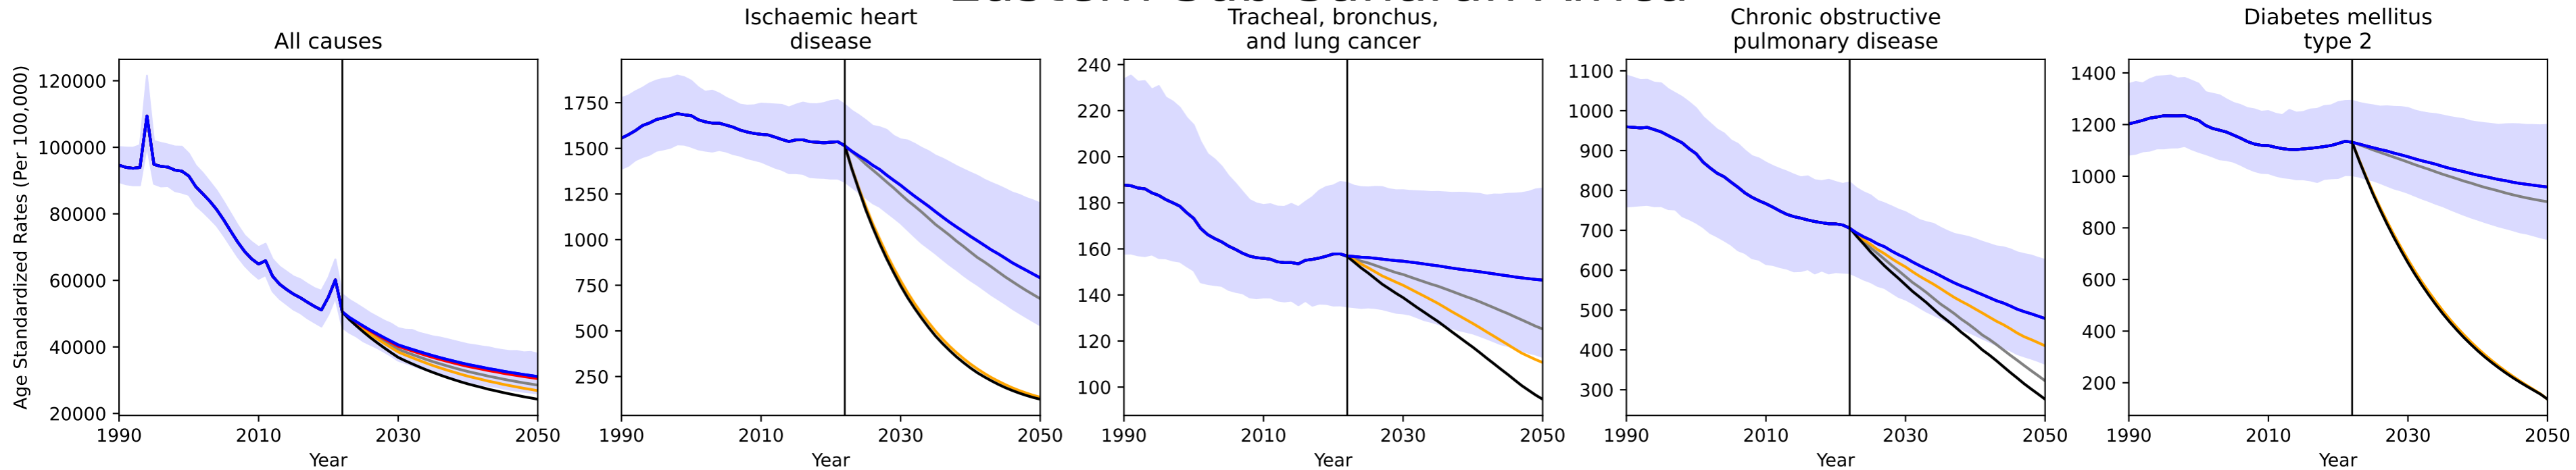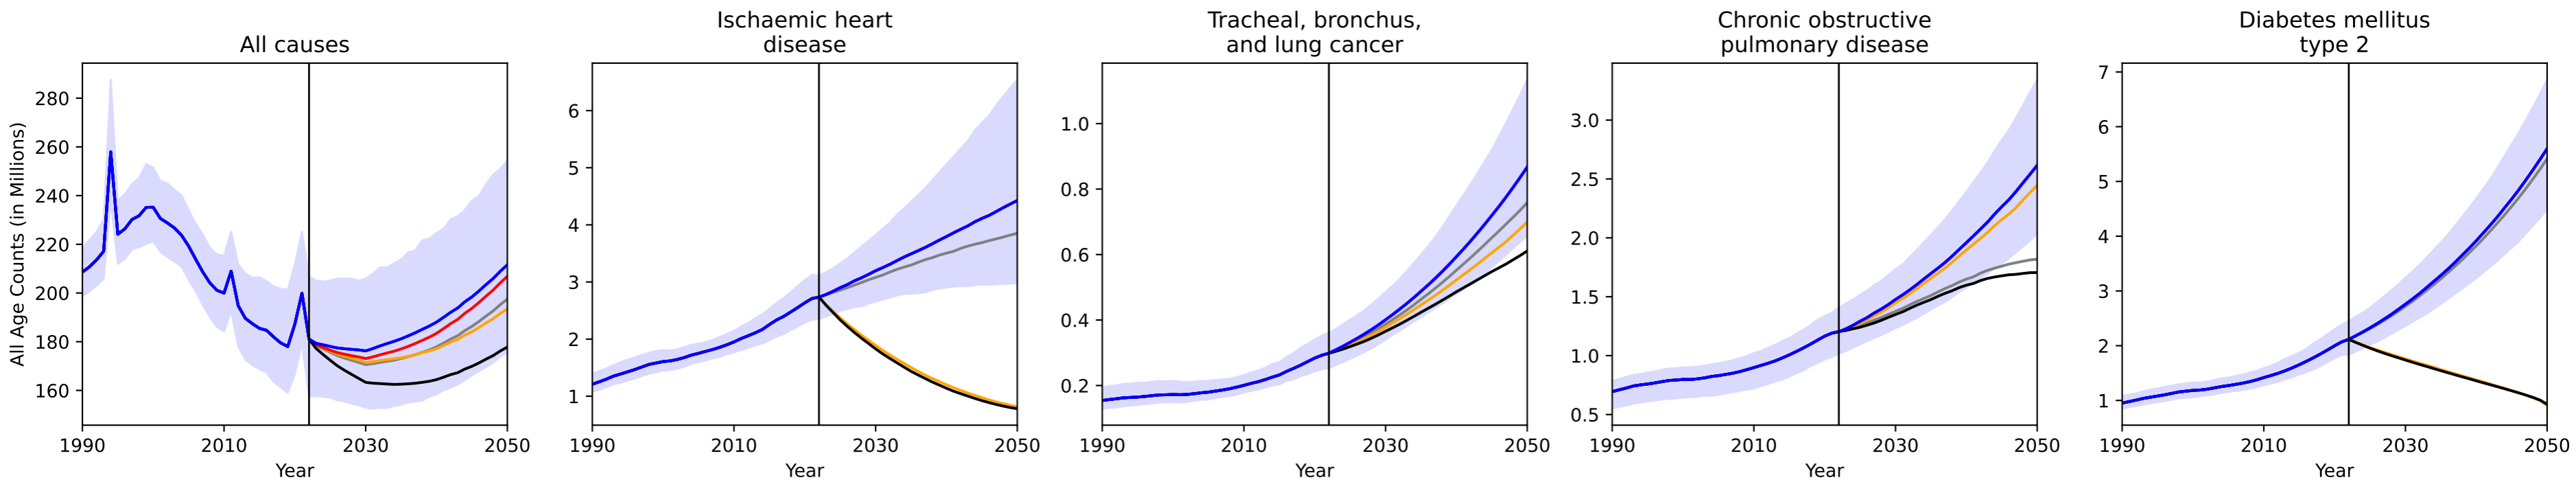

# Southern Sub-Saharan Africa

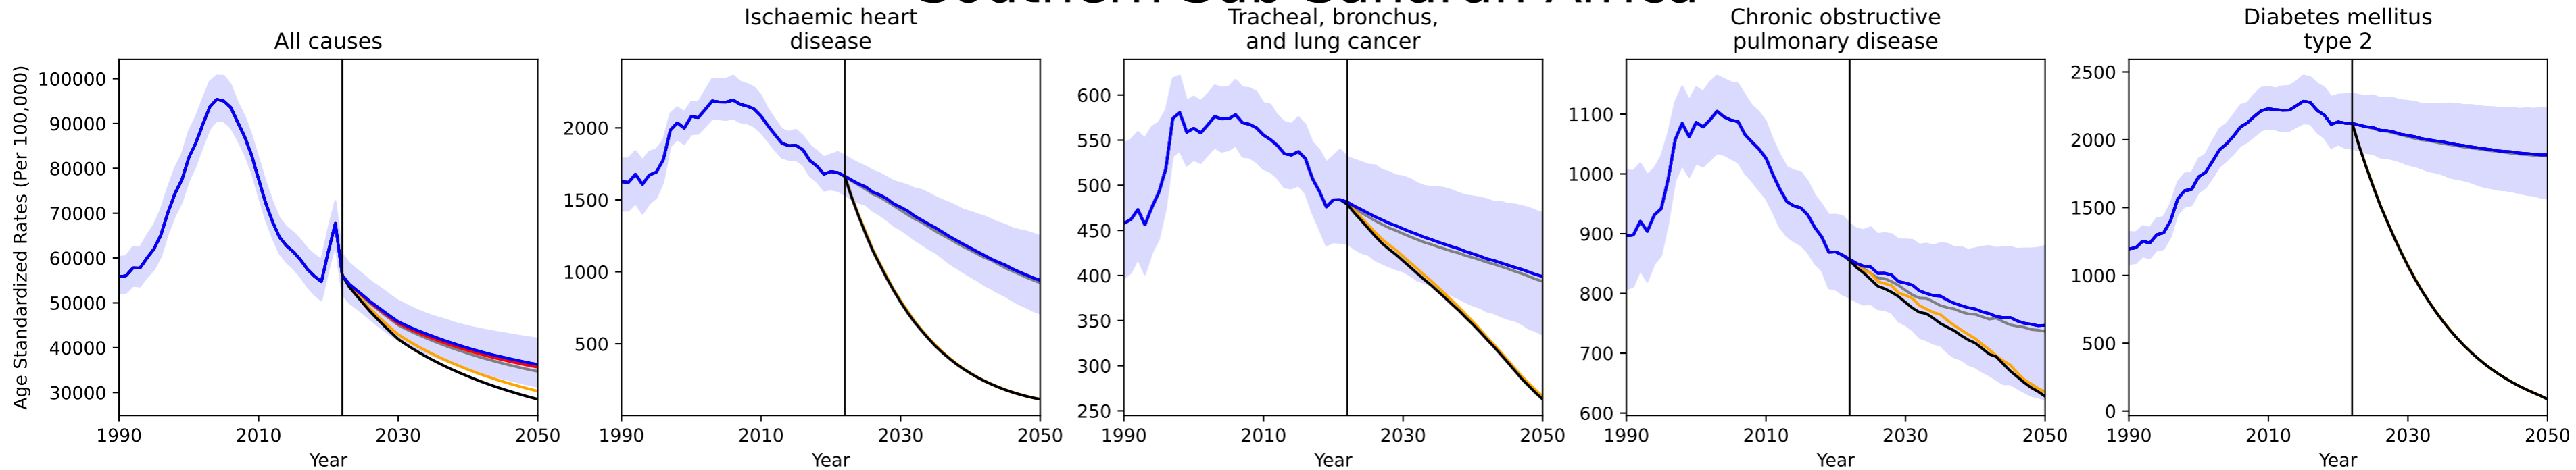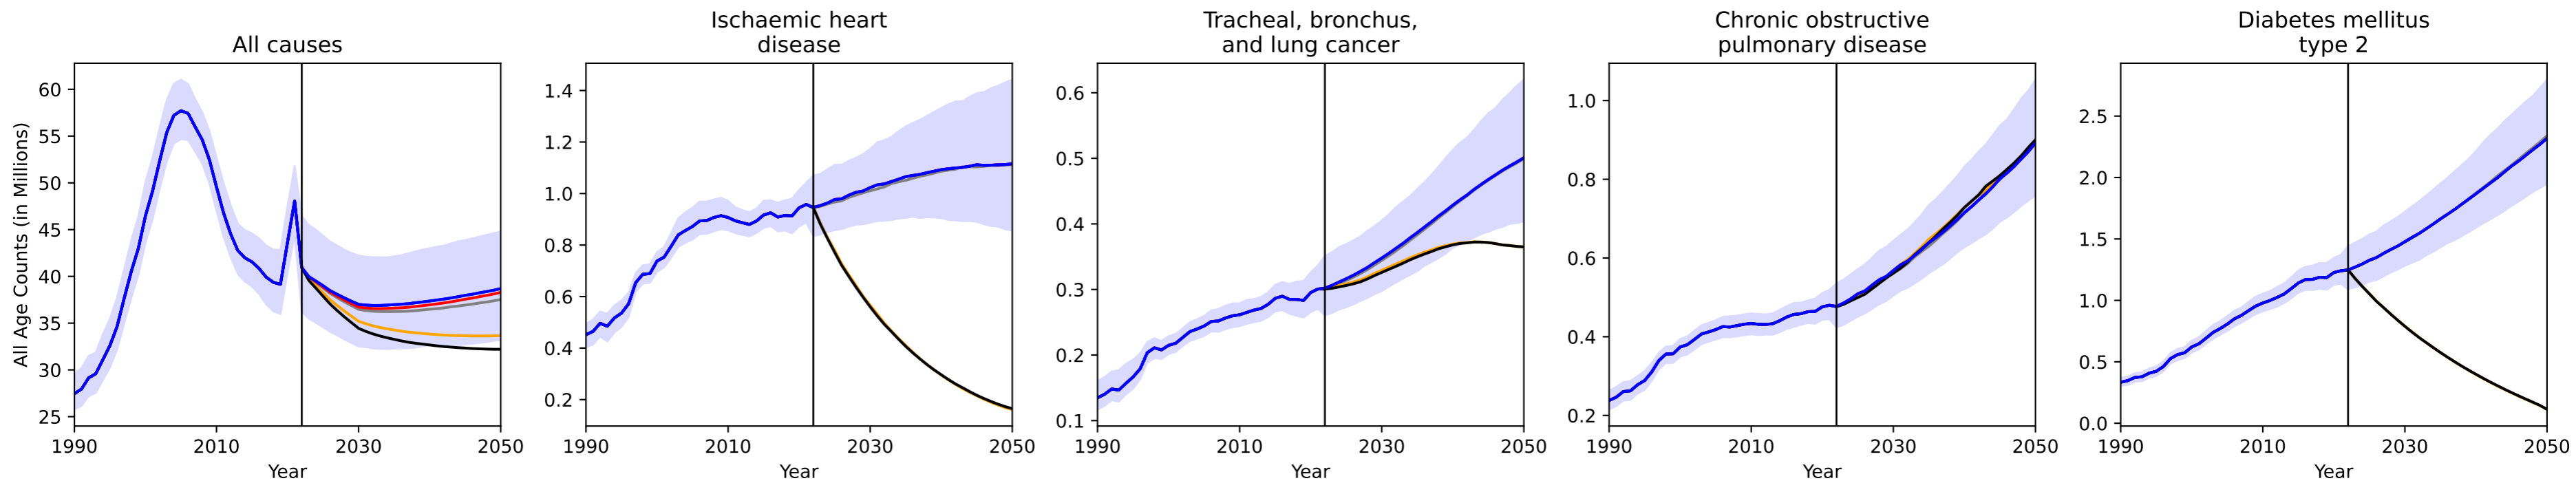

# Western Sub-Saharan Africa

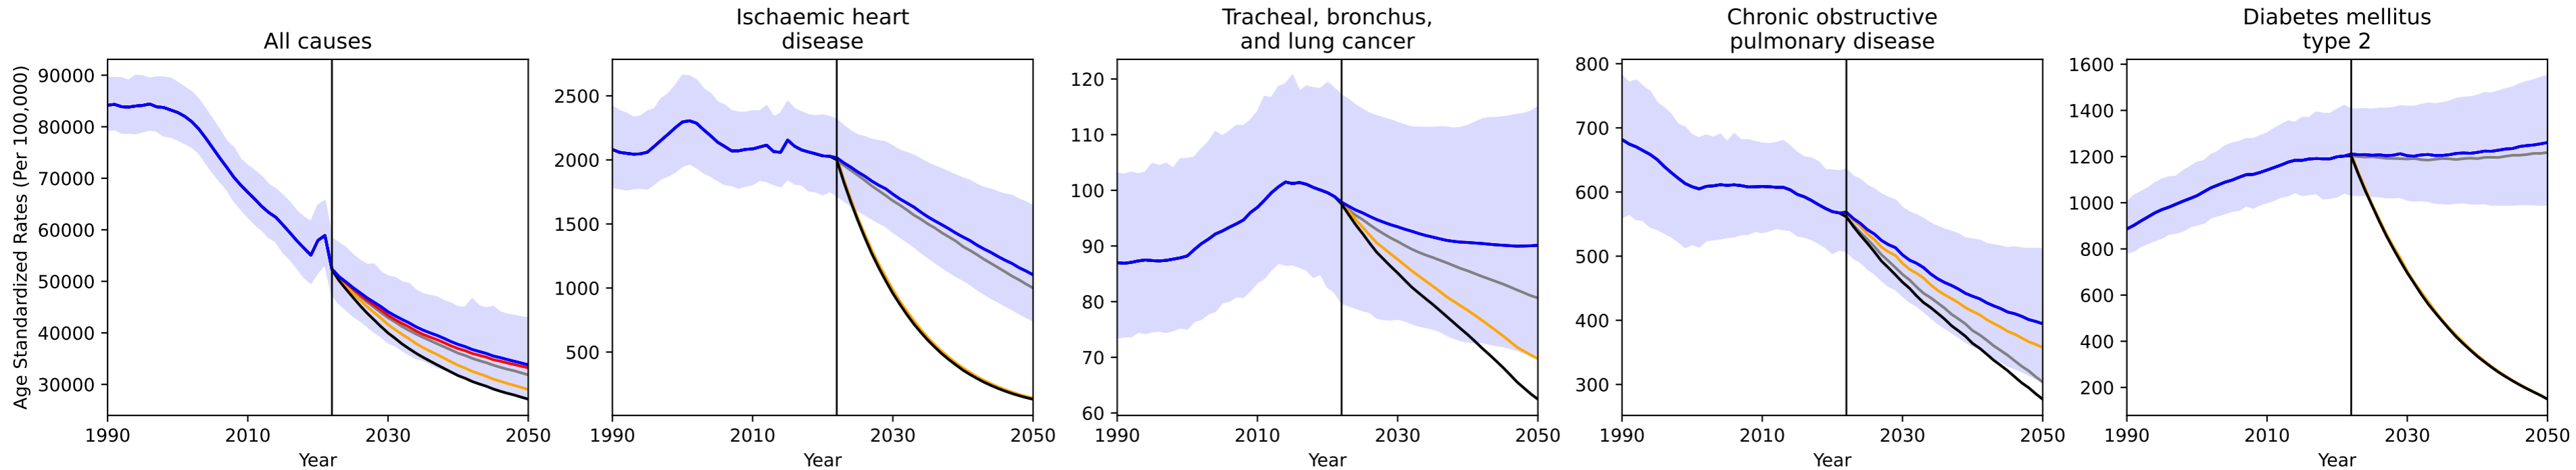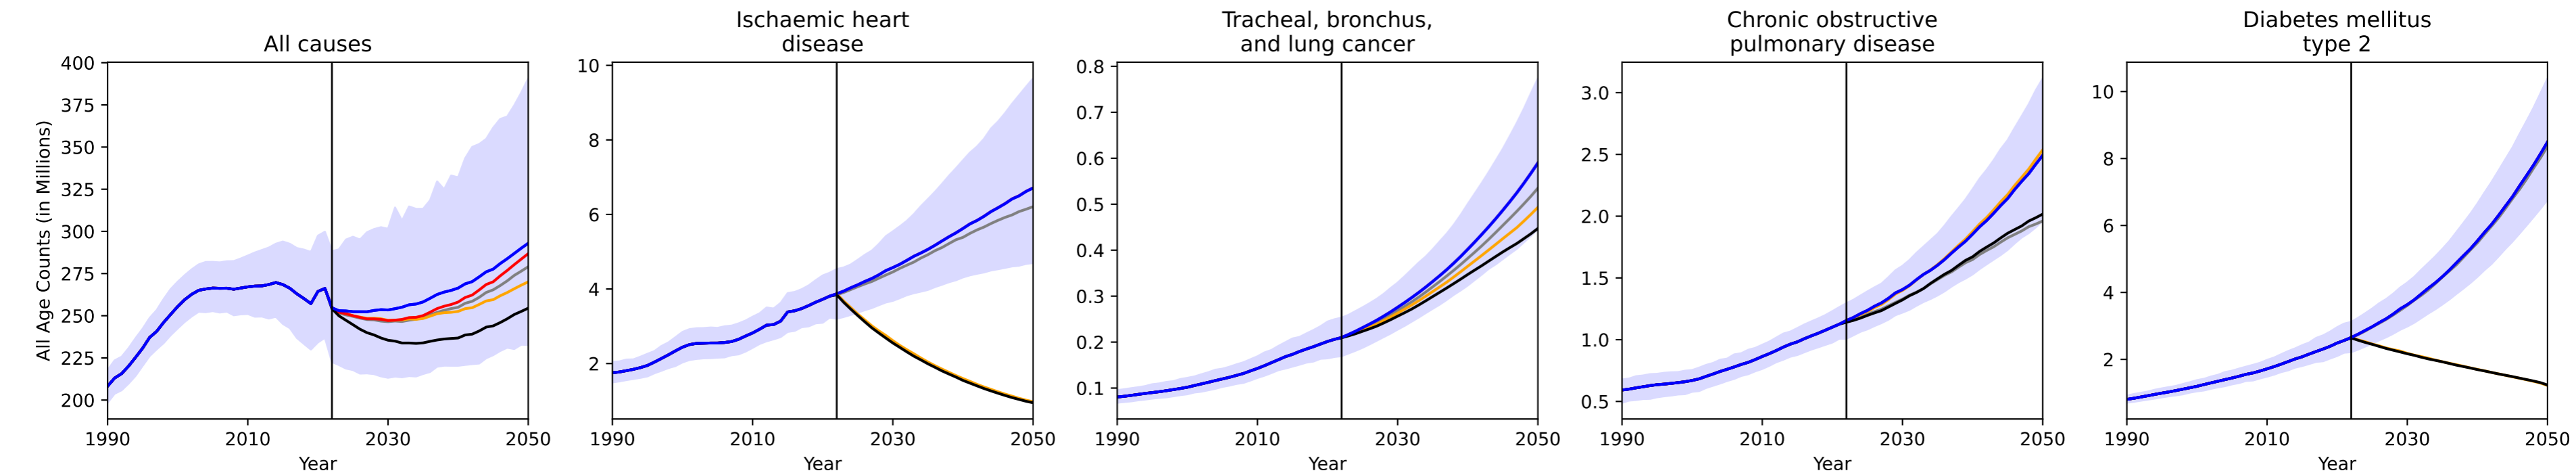

# Armenia

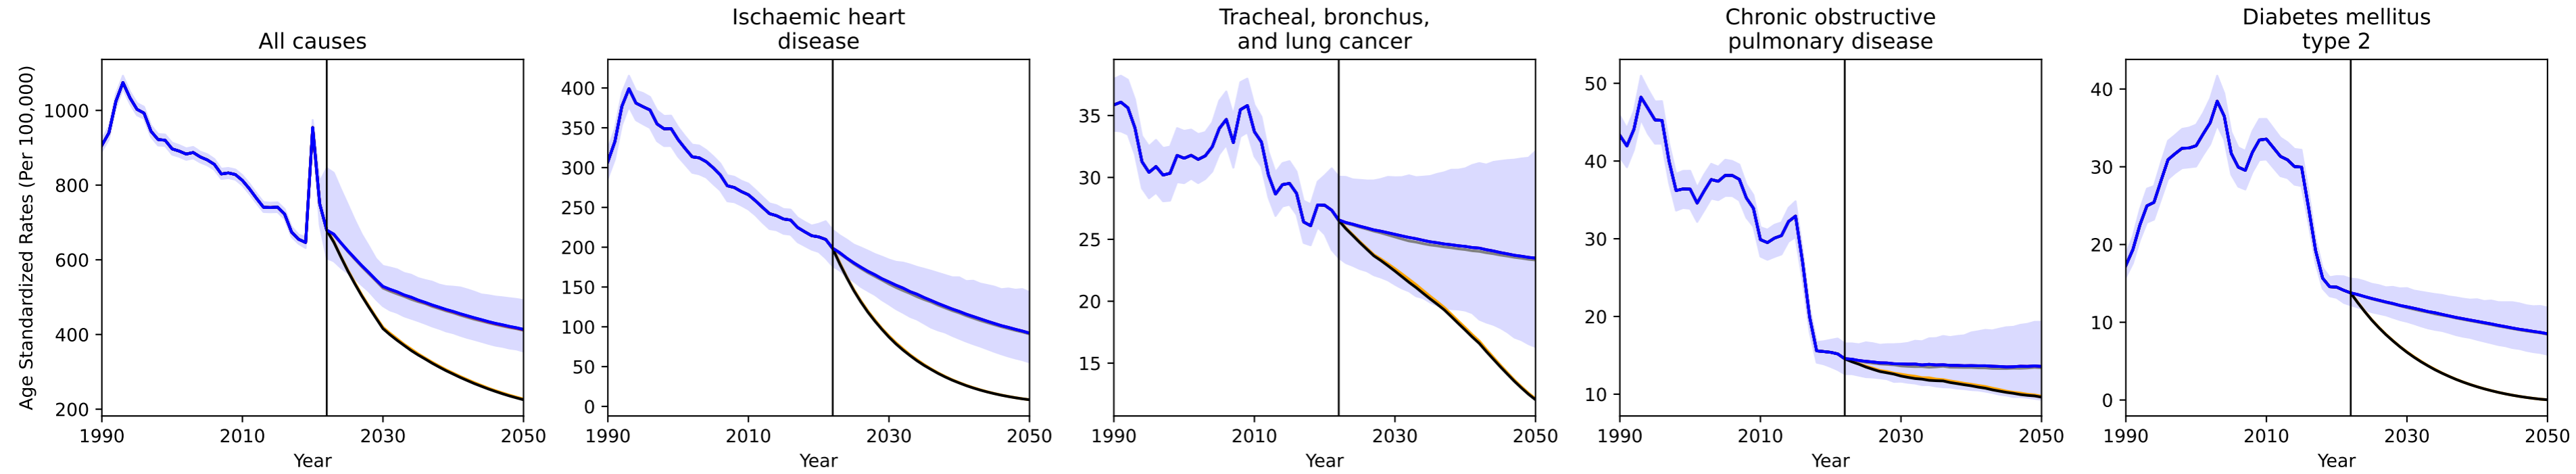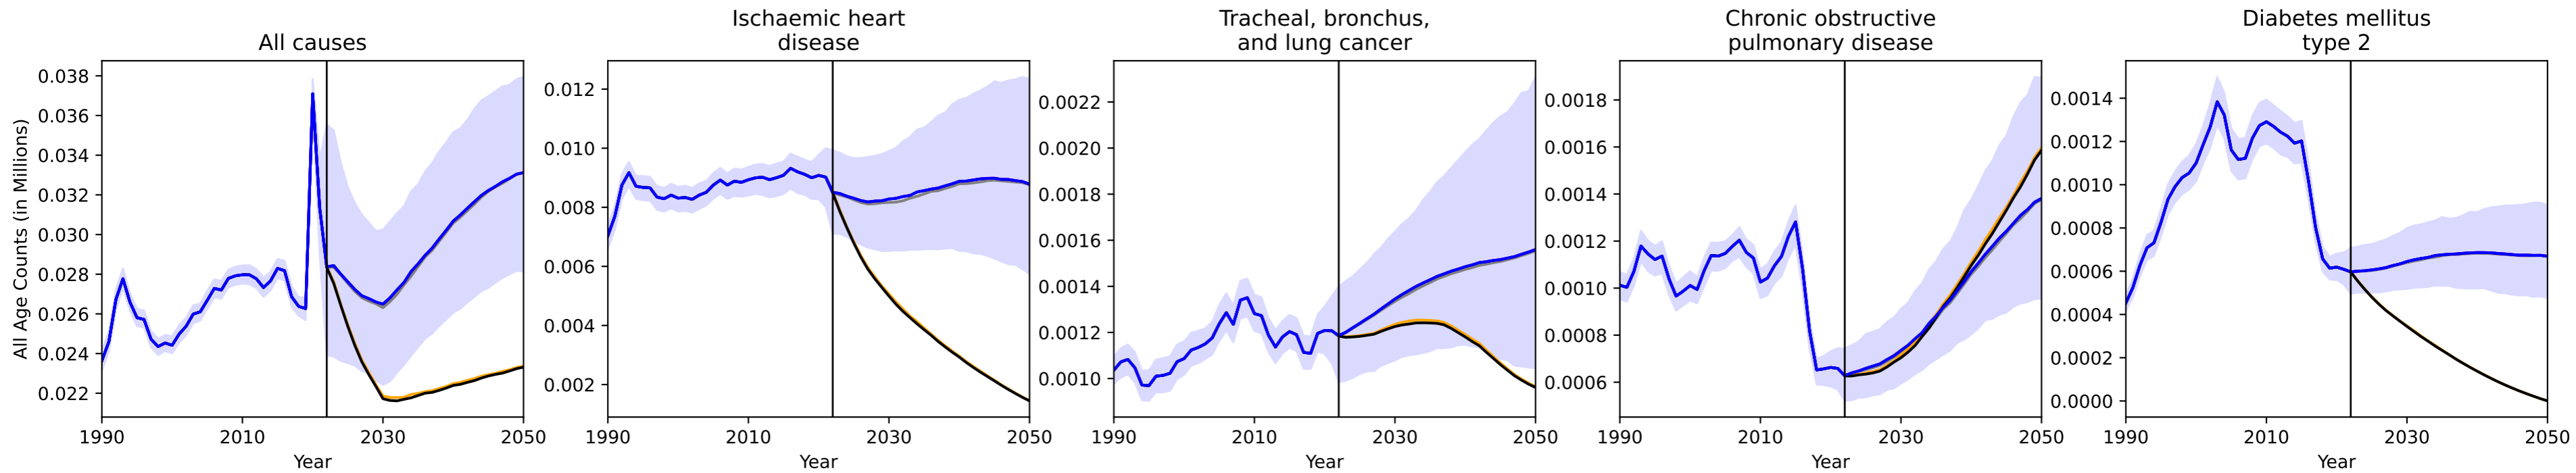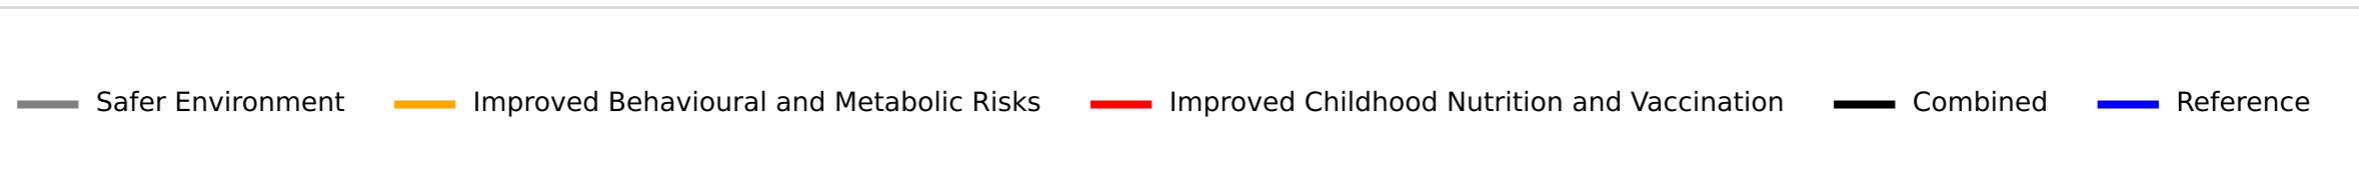

# Azerbaijan

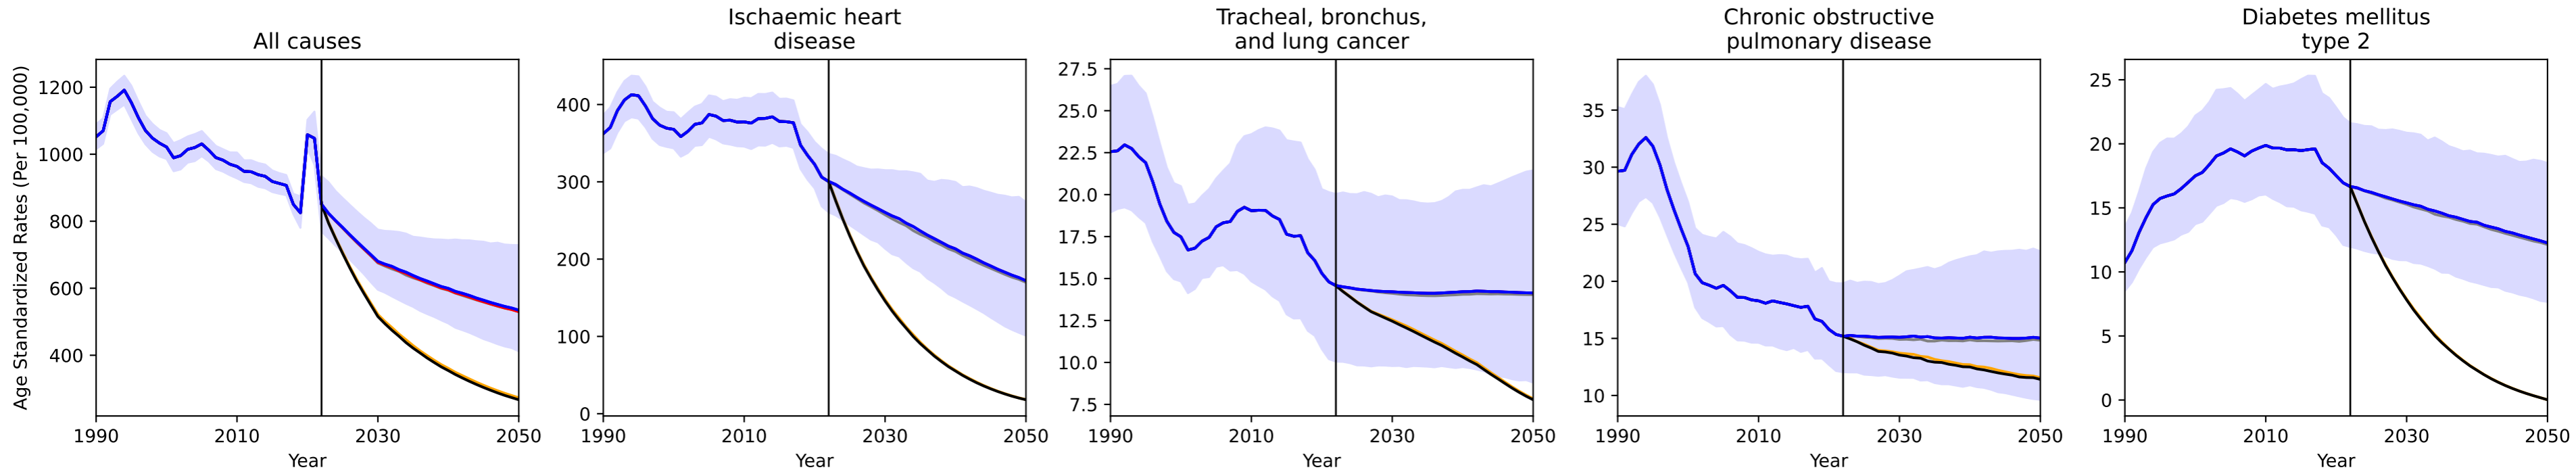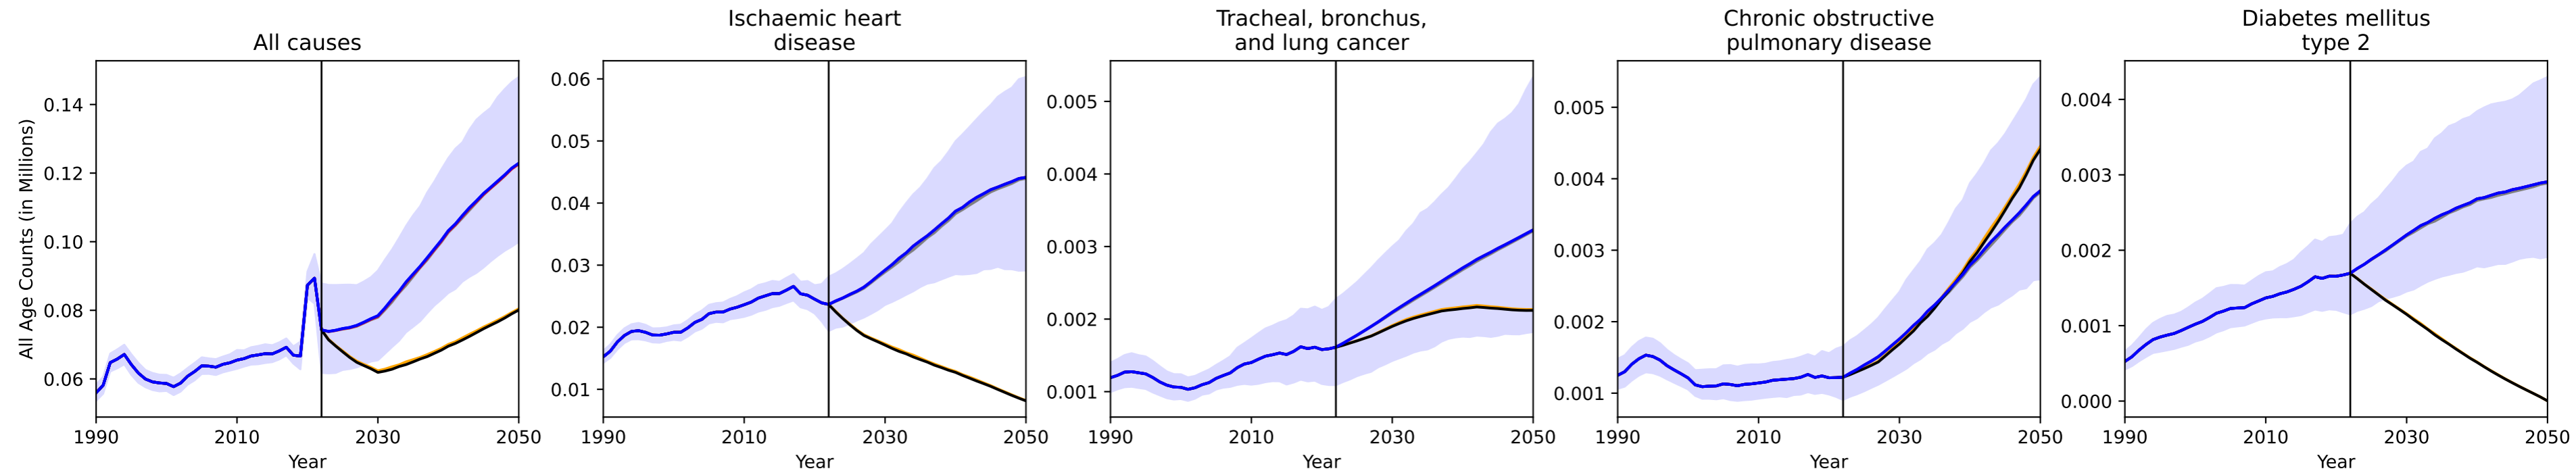

— Safer Environment — Improved Behavioural and Metabolic Risks — Improved Childhood Nutrition and Vaccination — Combined — Reference



# Georgia

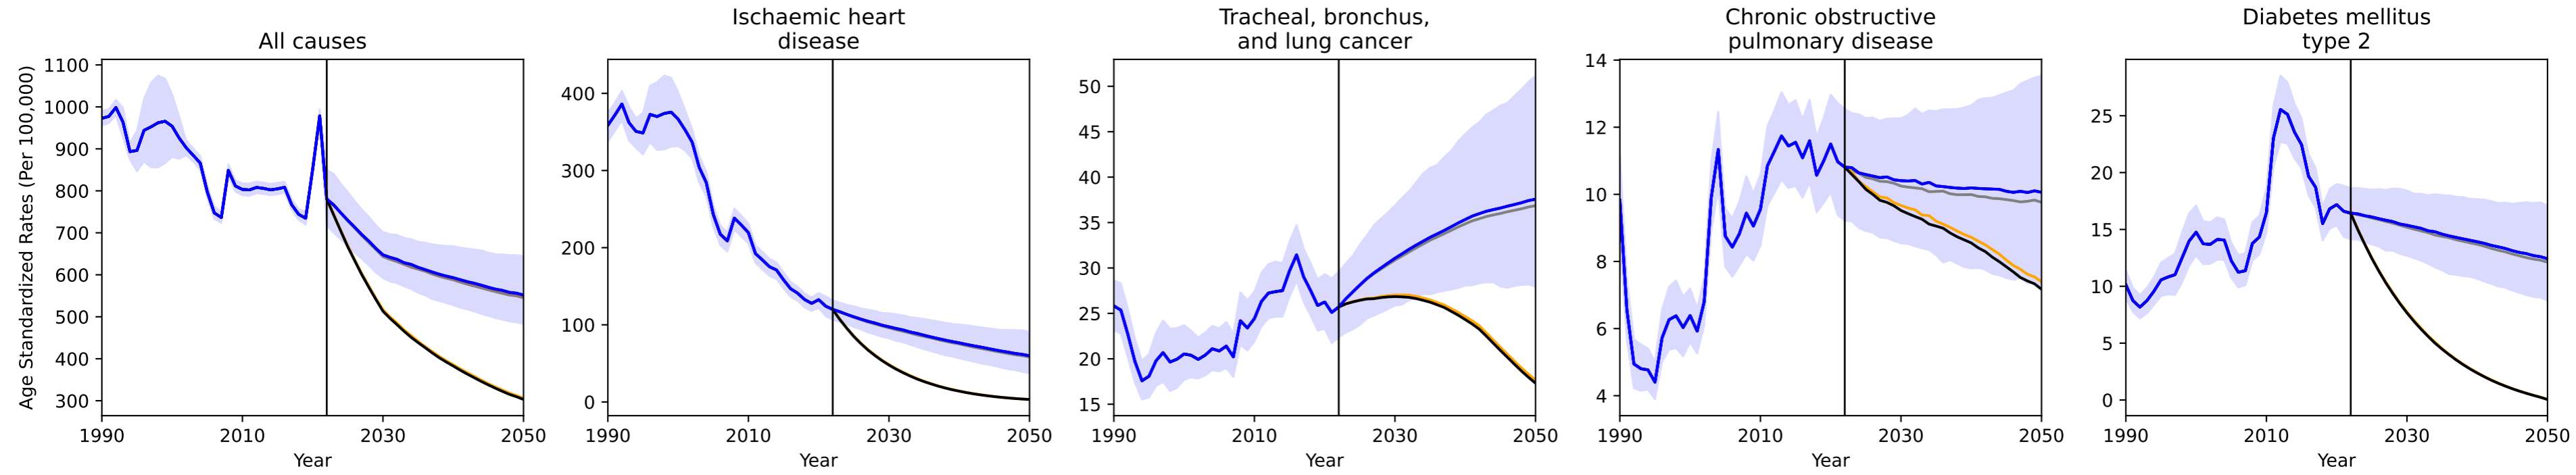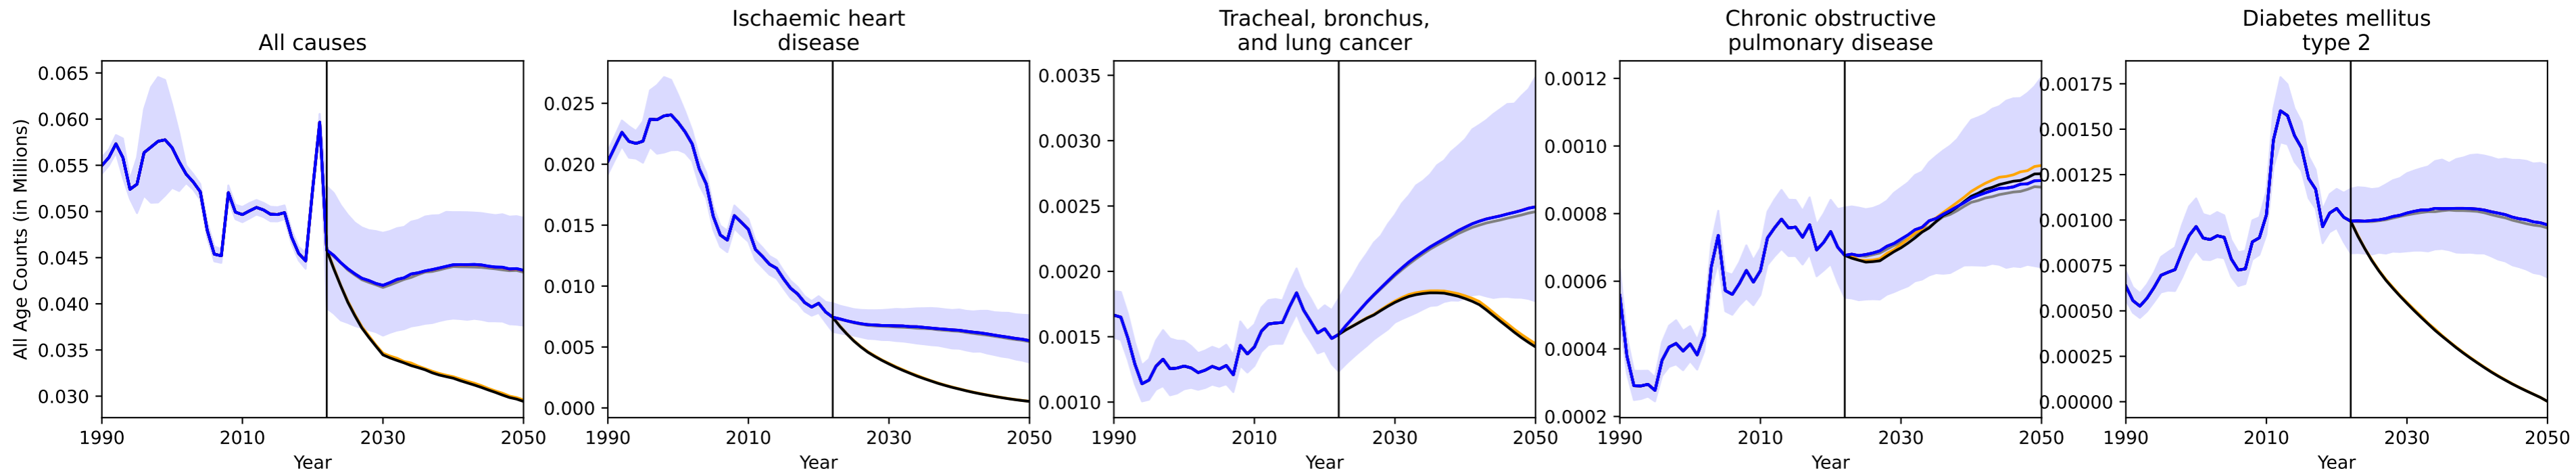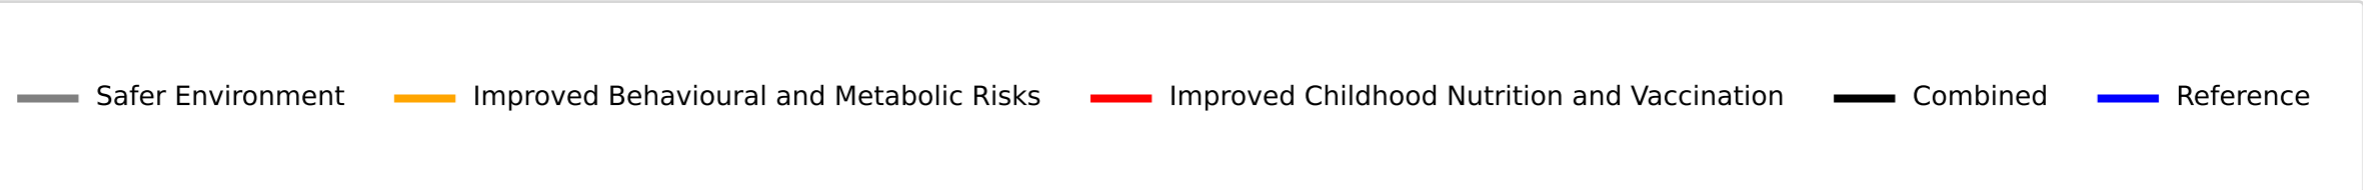

# Kazakhstan

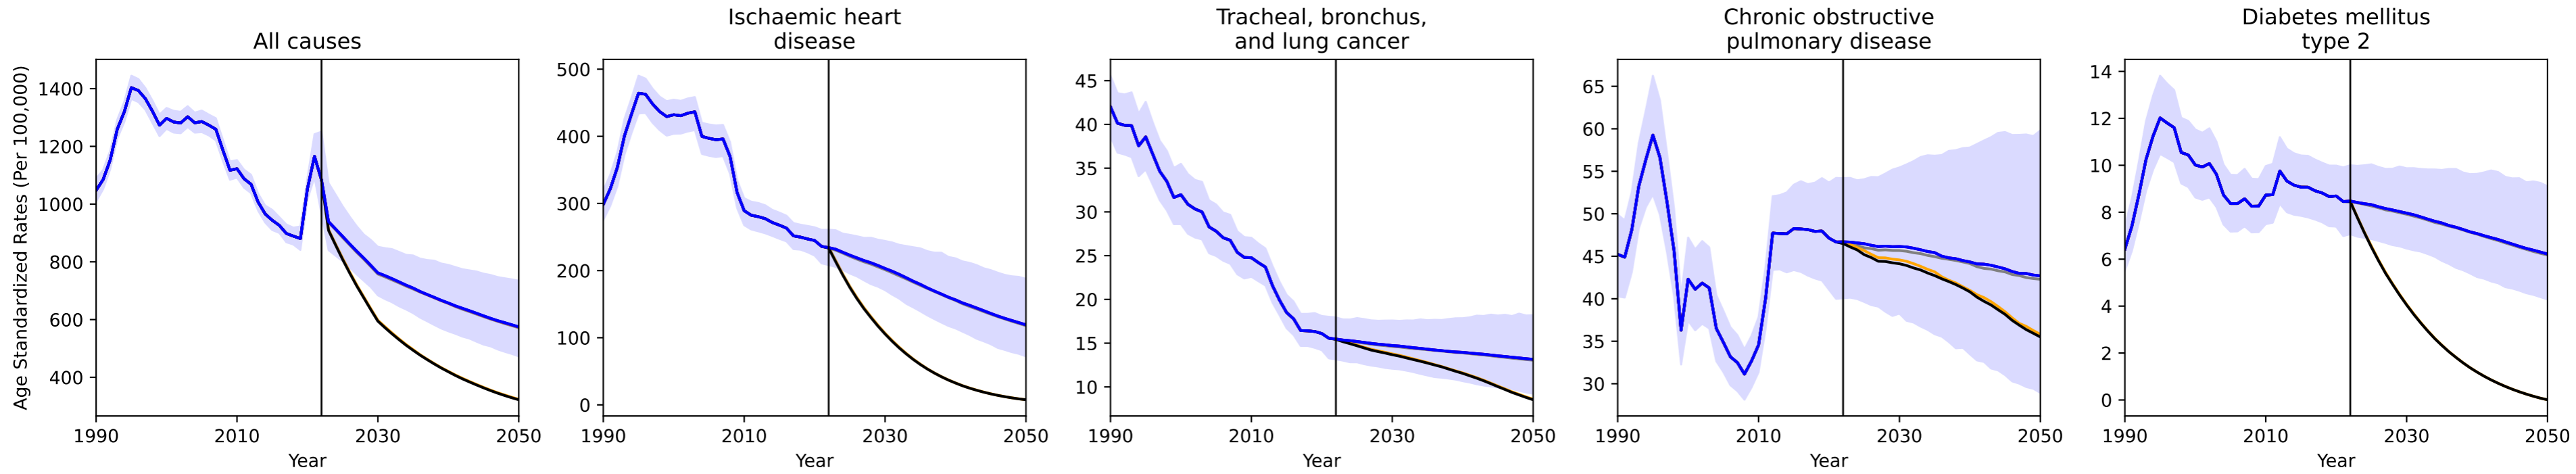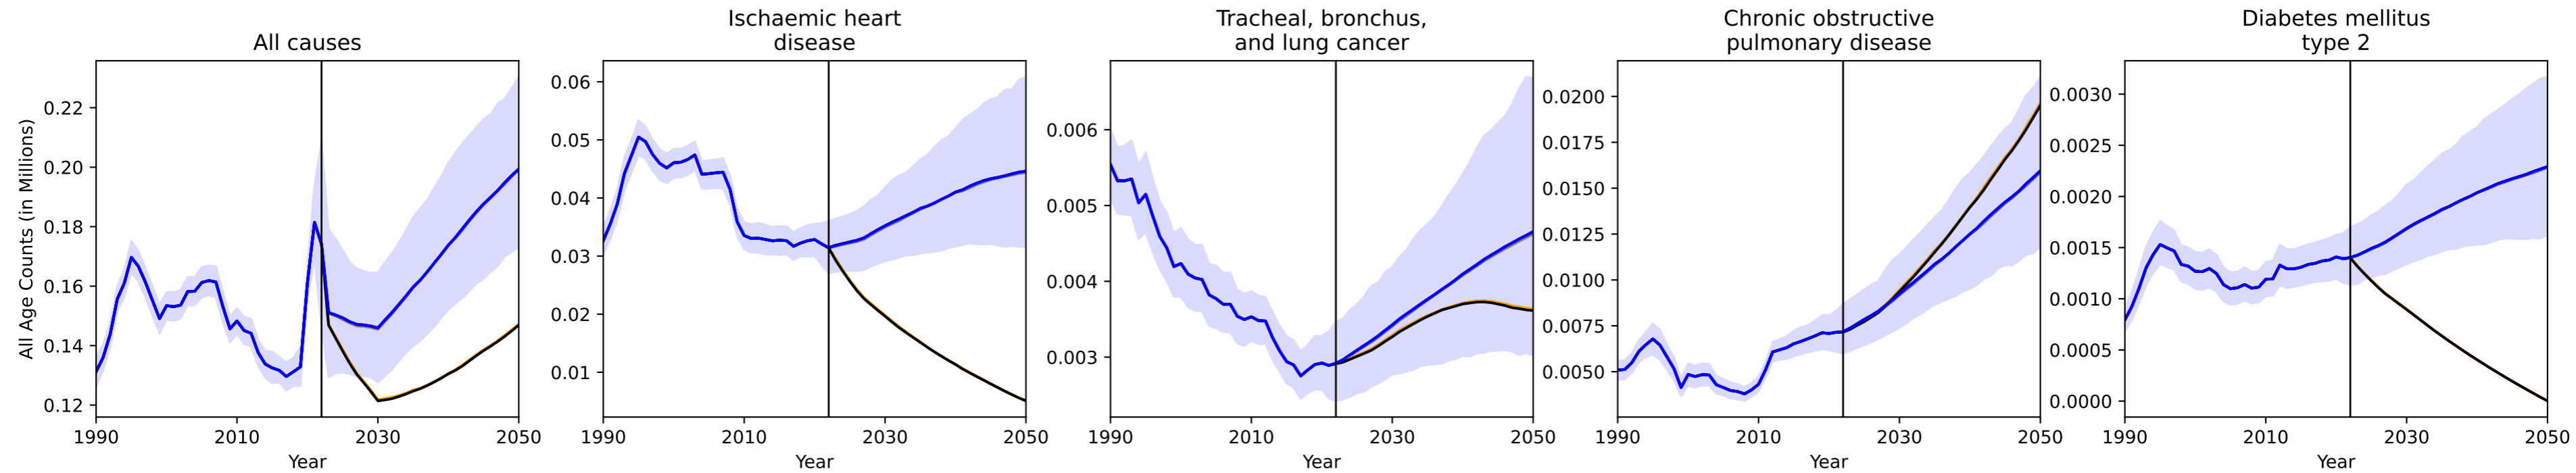

— Safer Environment    — Improved Behavioural and Metabolic Risks    — Improved Childhood Nutrition and Vaccination    — Combined    — Reference

# Kyrgyzstan

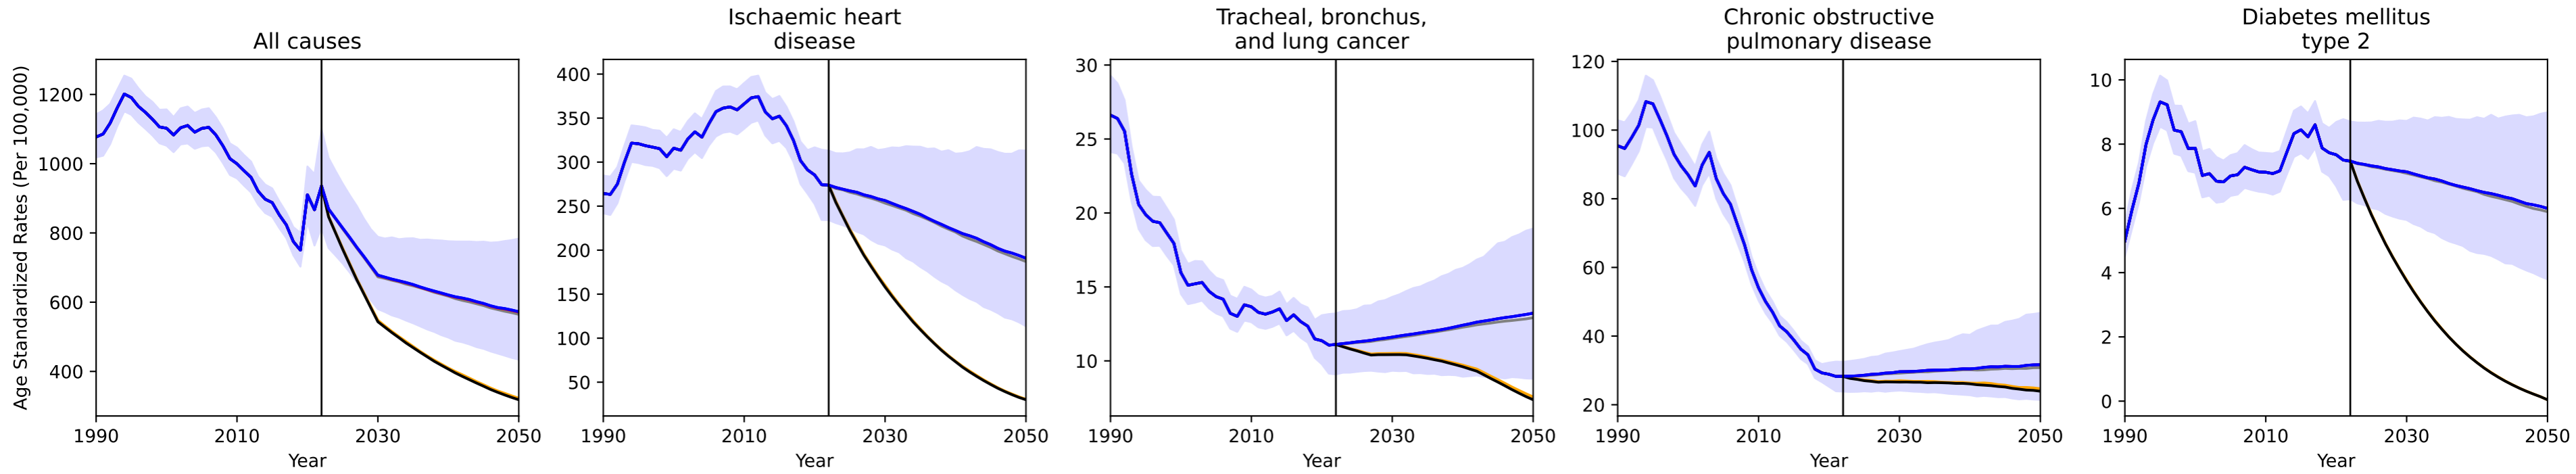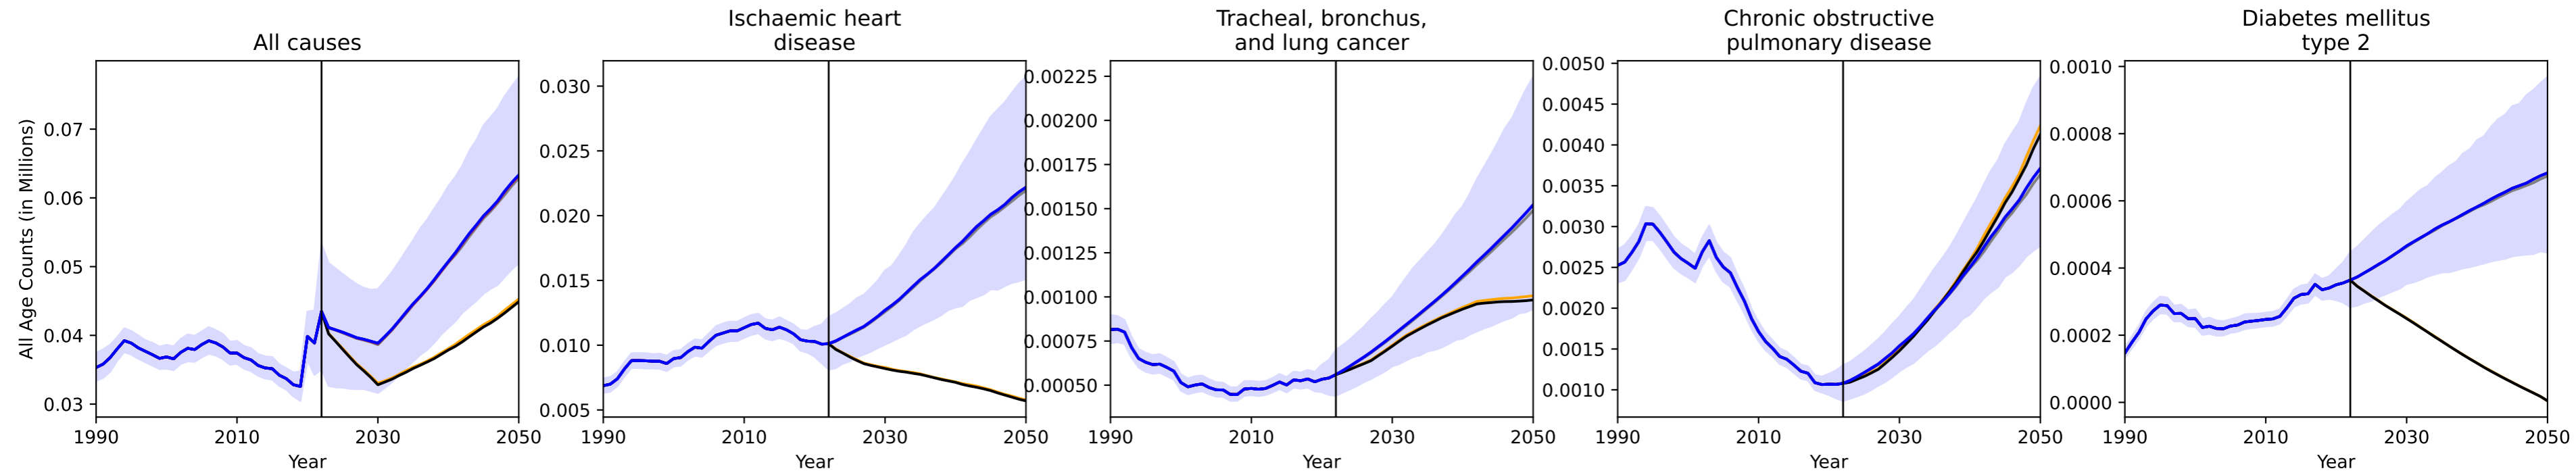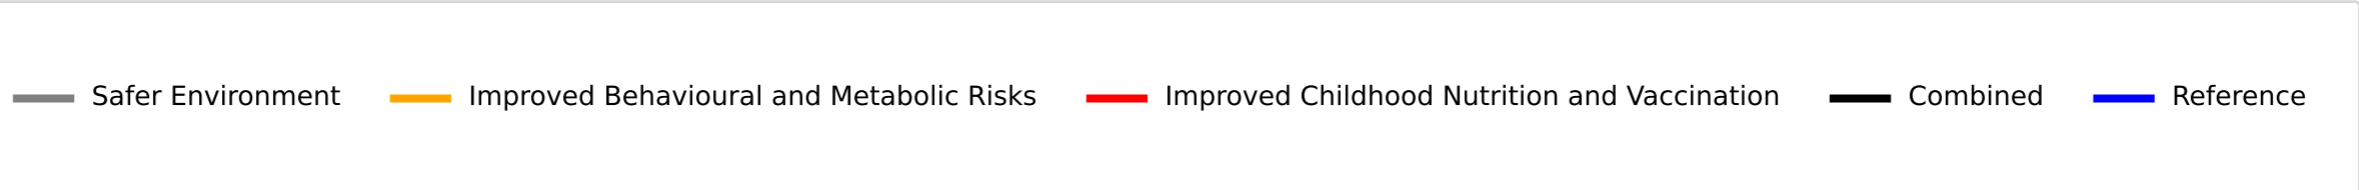

# Mongolia

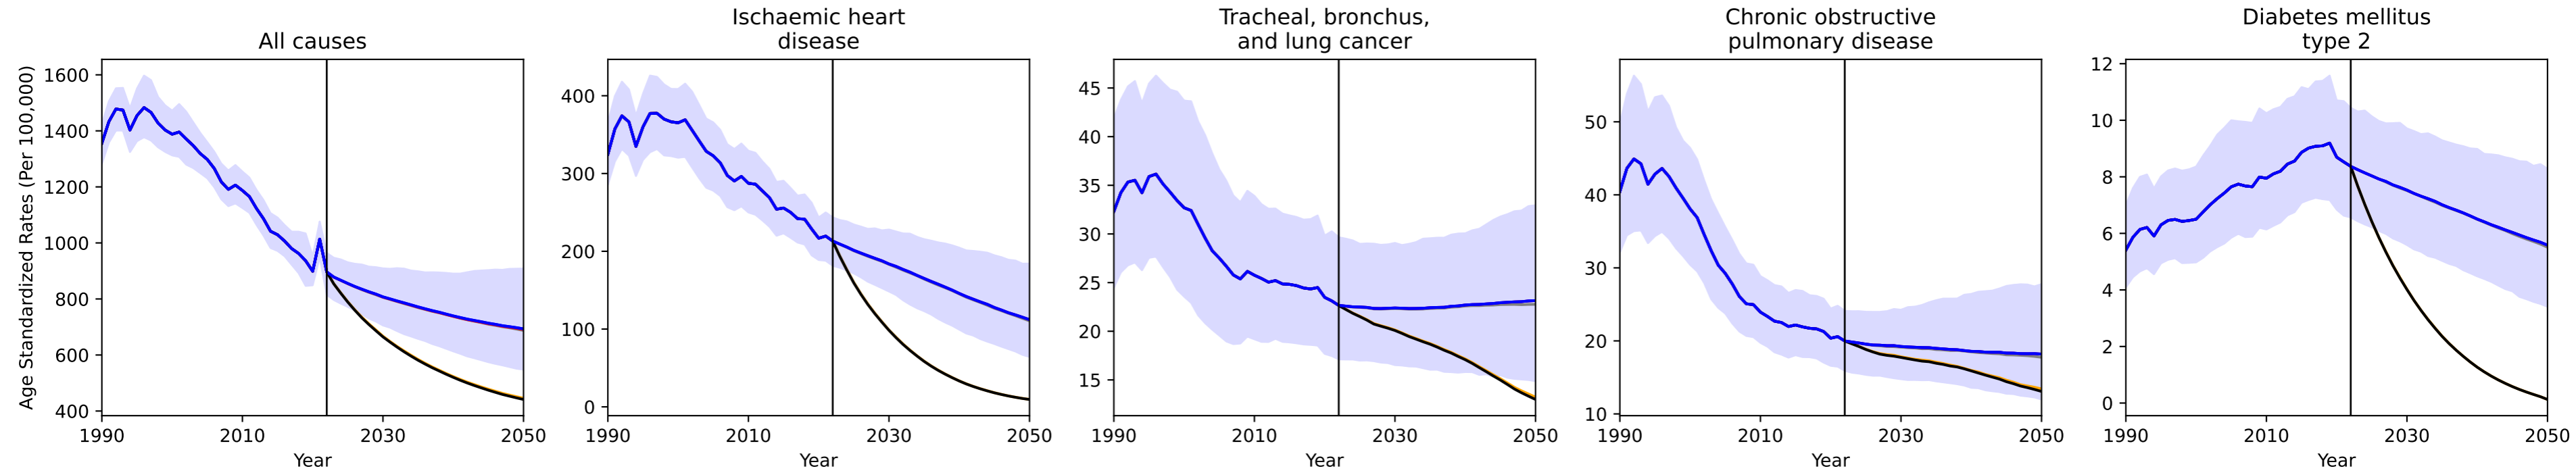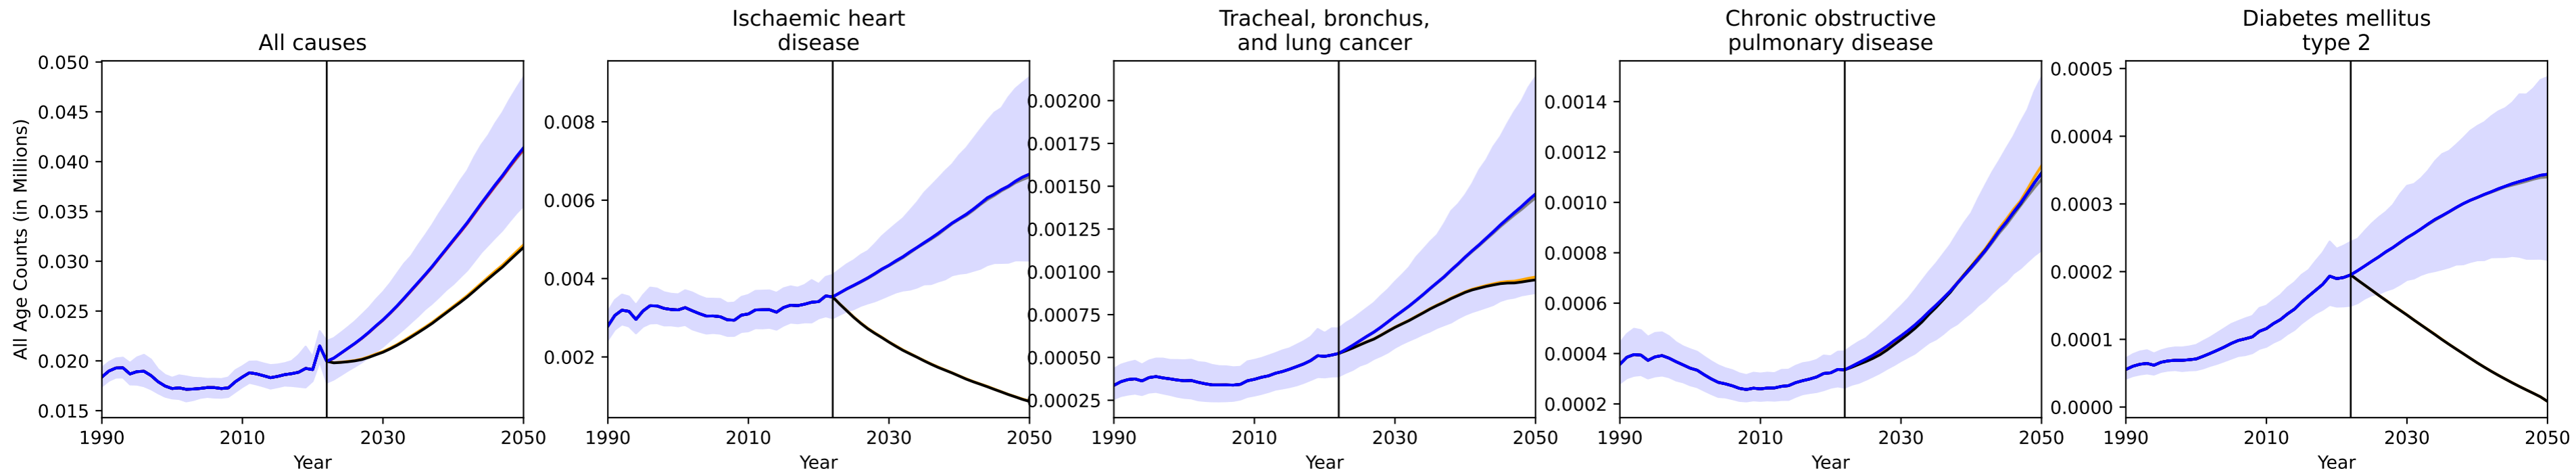

# Tajikistan

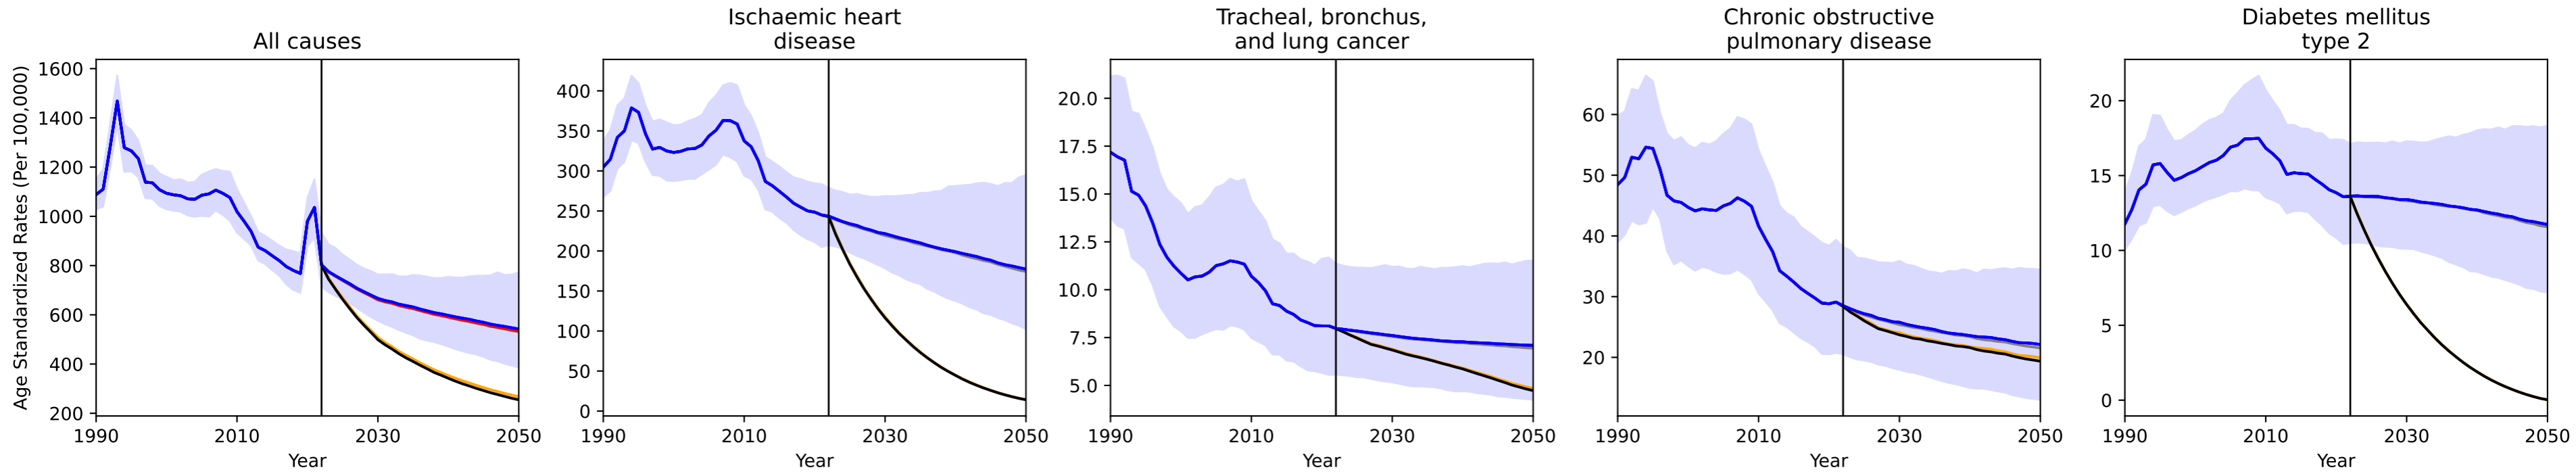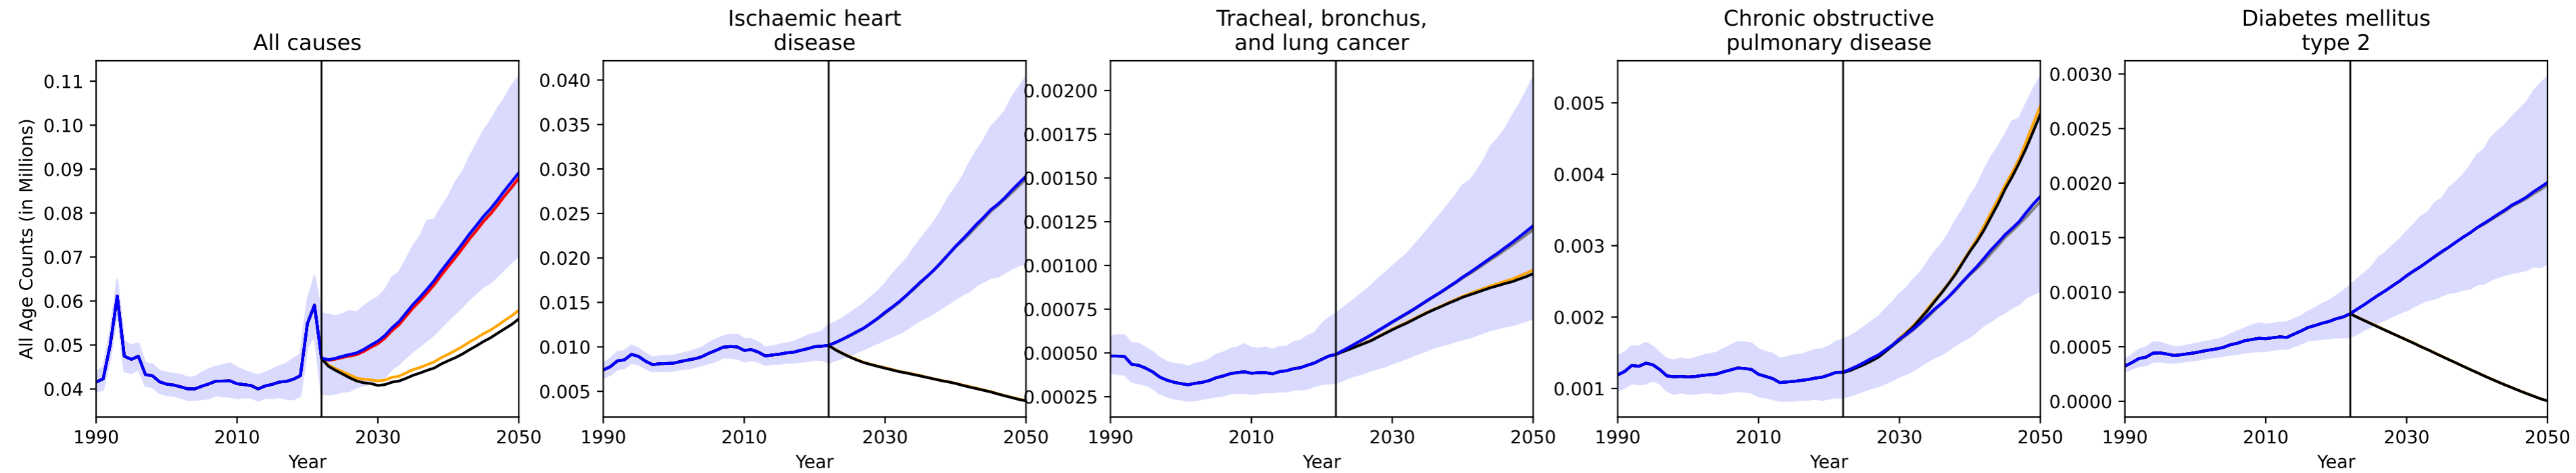

— Safer Environment — Improved Behavioural and Metabolic Risks — Improved Childhood Nutrition and Vaccination — Combined — Reference

# Turkmenistan

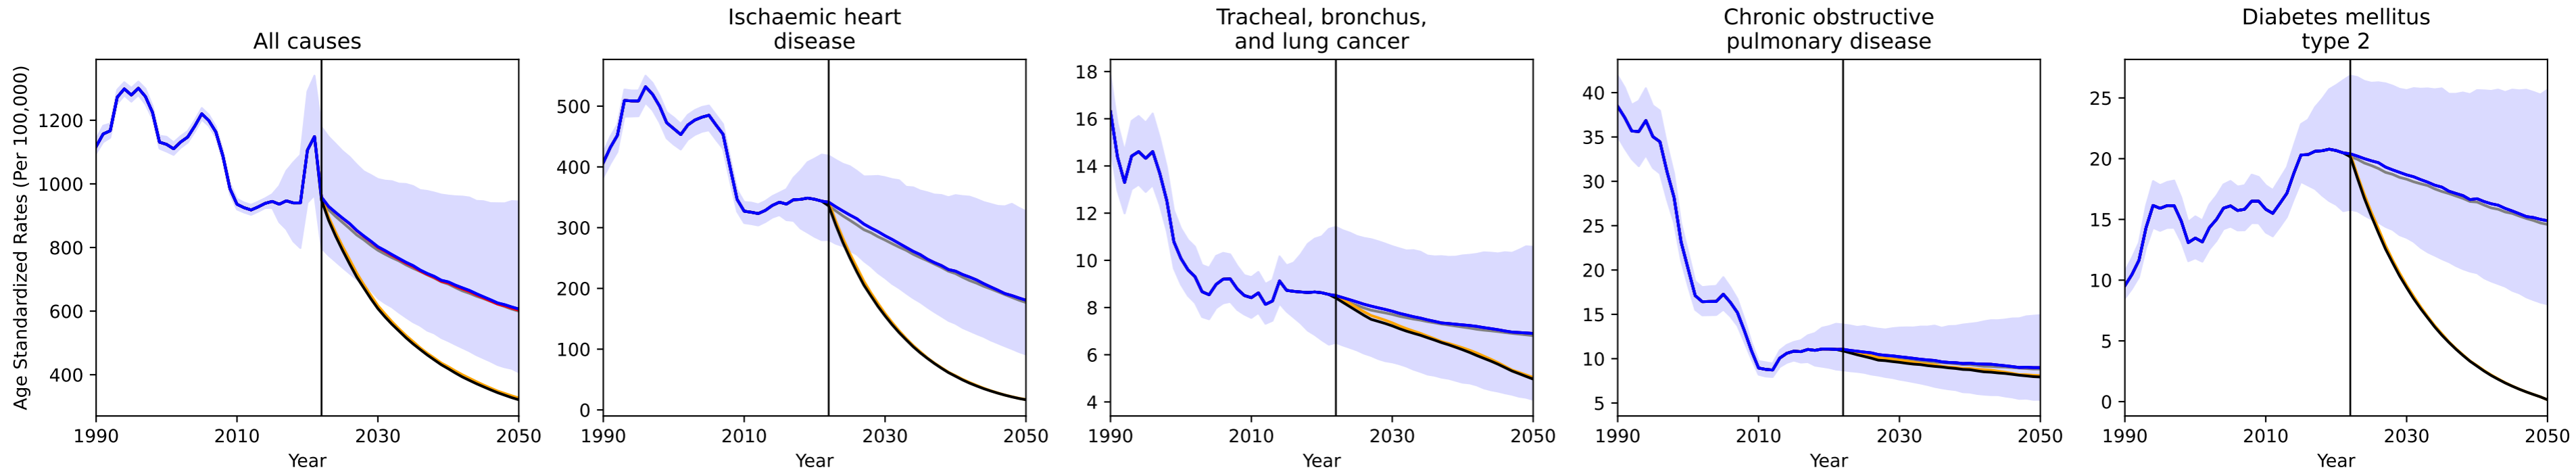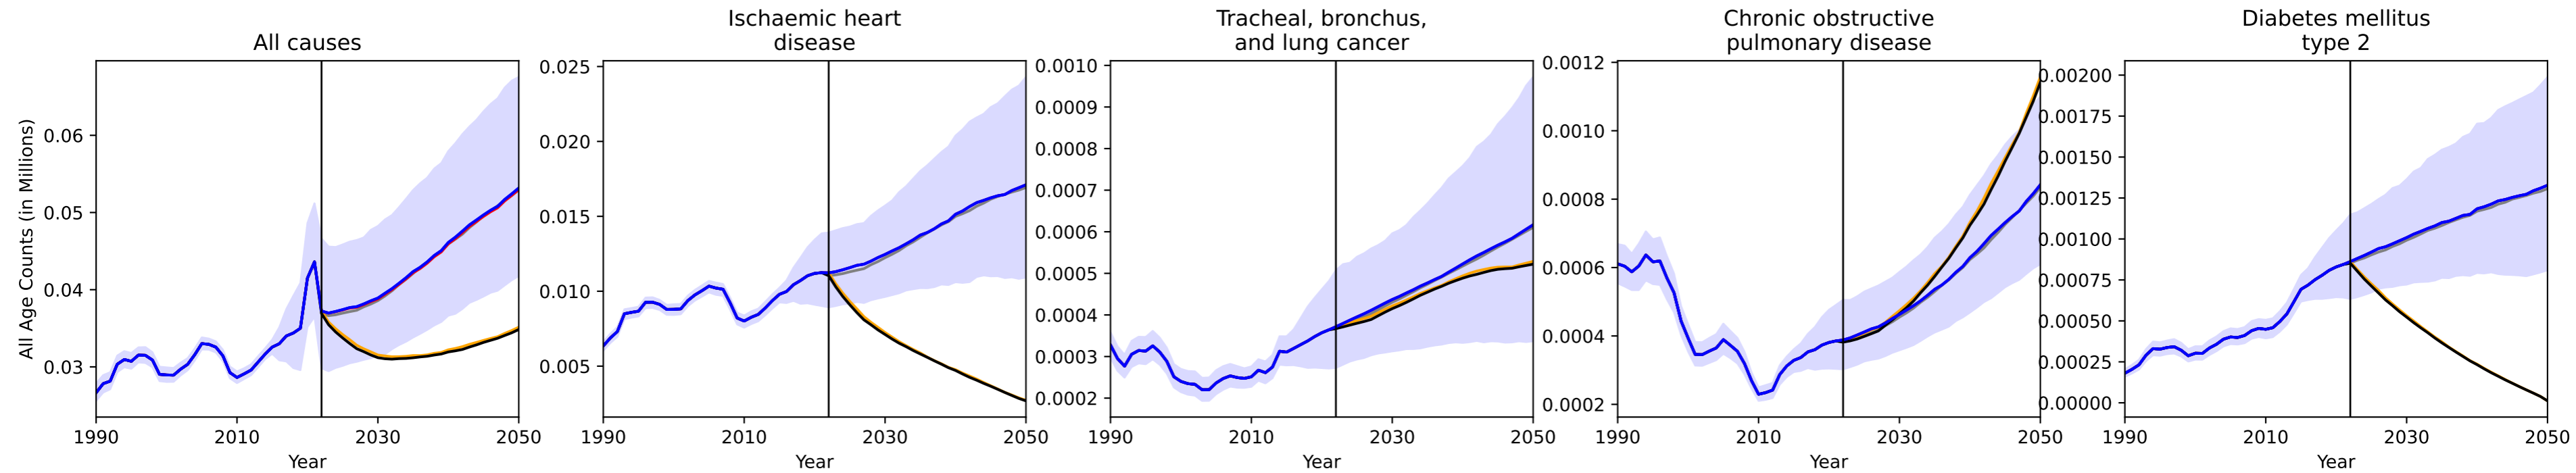

— Safer Environment    — Improved Behavioural and Metabolic Risks    — Improved Childhood Nutrition and Vaccination    — Combined    — Reference

# Uzbekistan

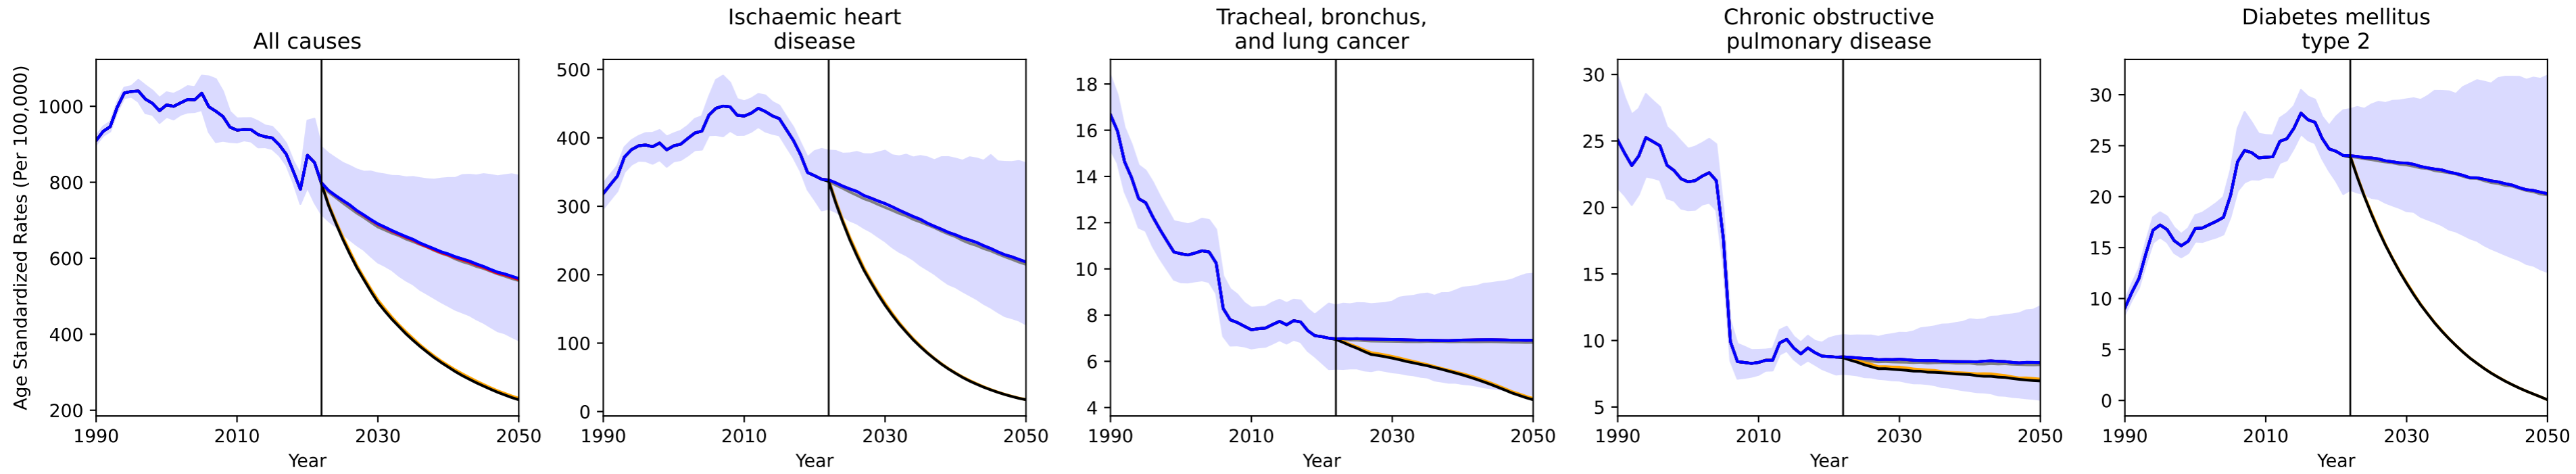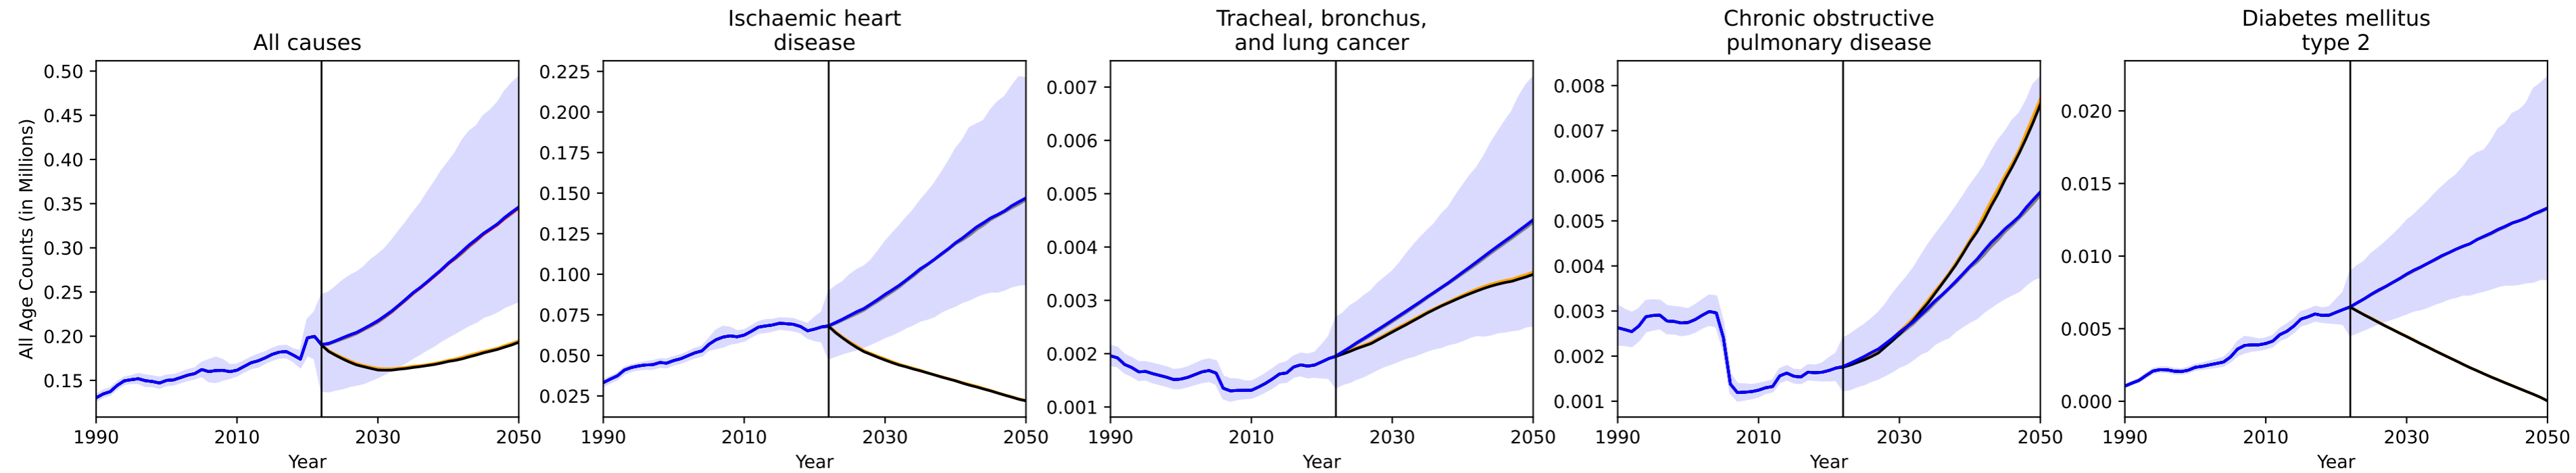

— Safer Environment — Improved Behavioural and Metabolic Risks — Improved Childhood Nutrition and Vaccination — Combined — Reference

# Albania

Supplemental Results Figure S13. All cause and top NCD causes age standardized death rates and all age counts by scenario and location, 1990-2050

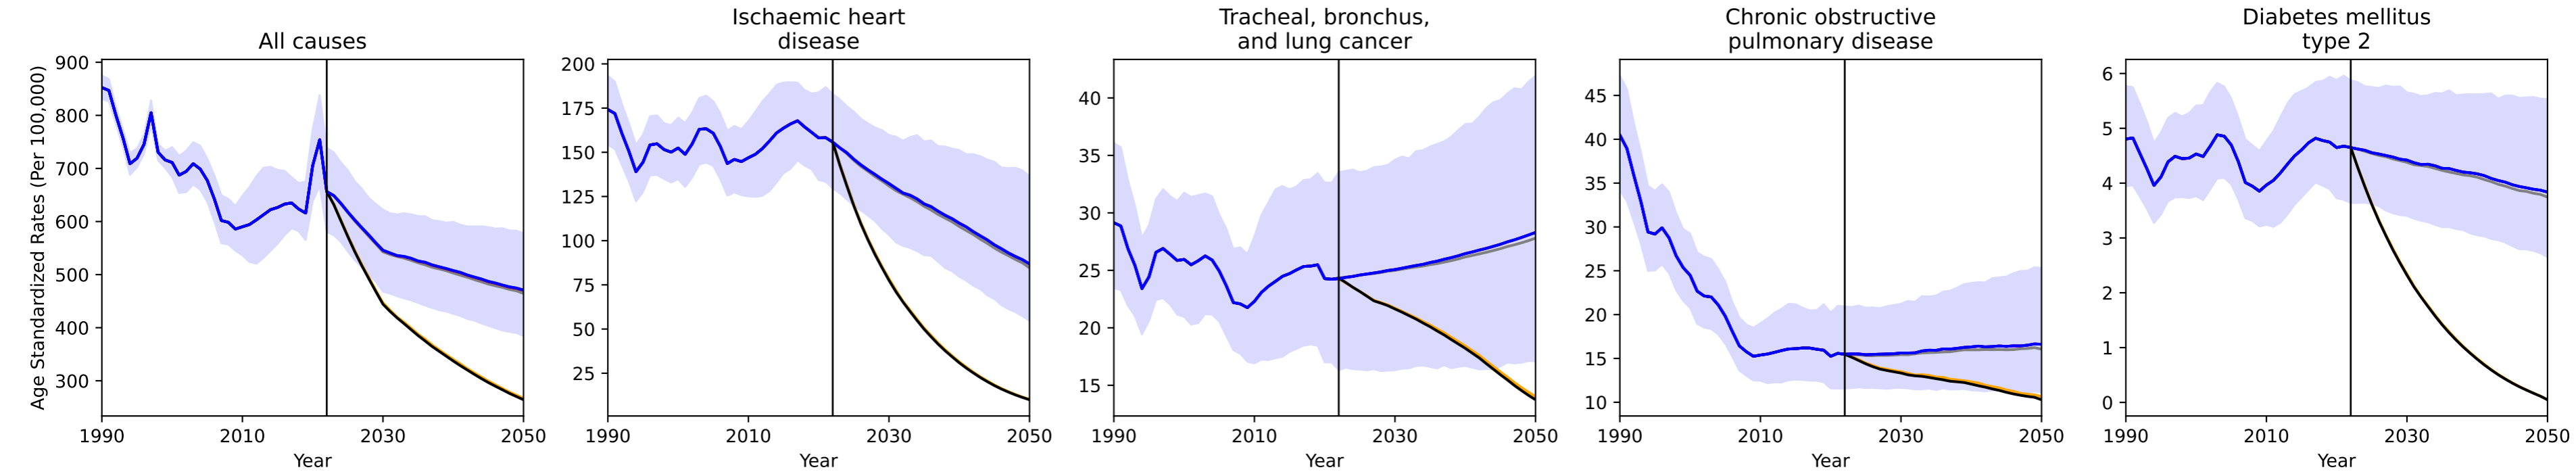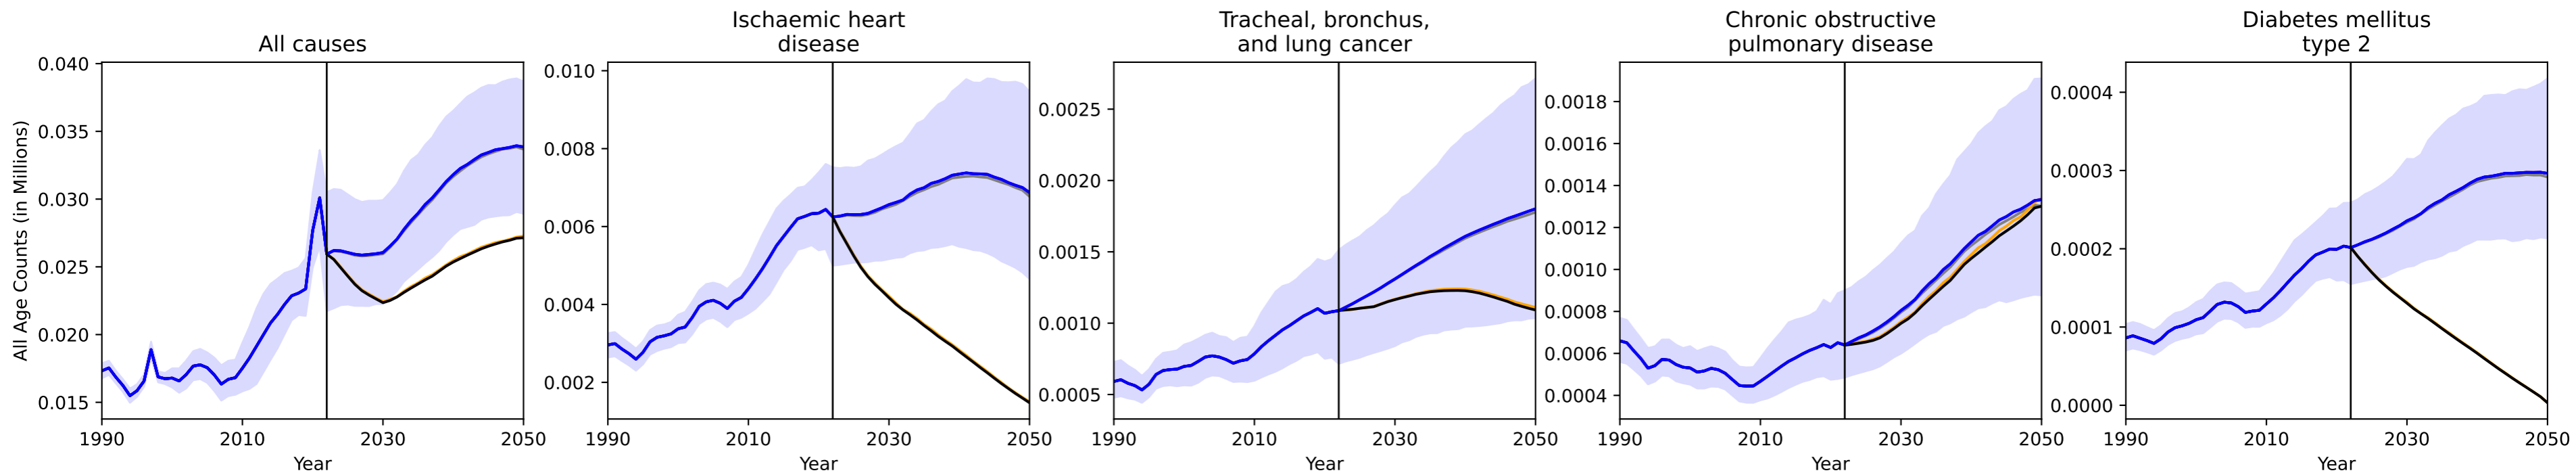



# Bosnia And Herzegovina

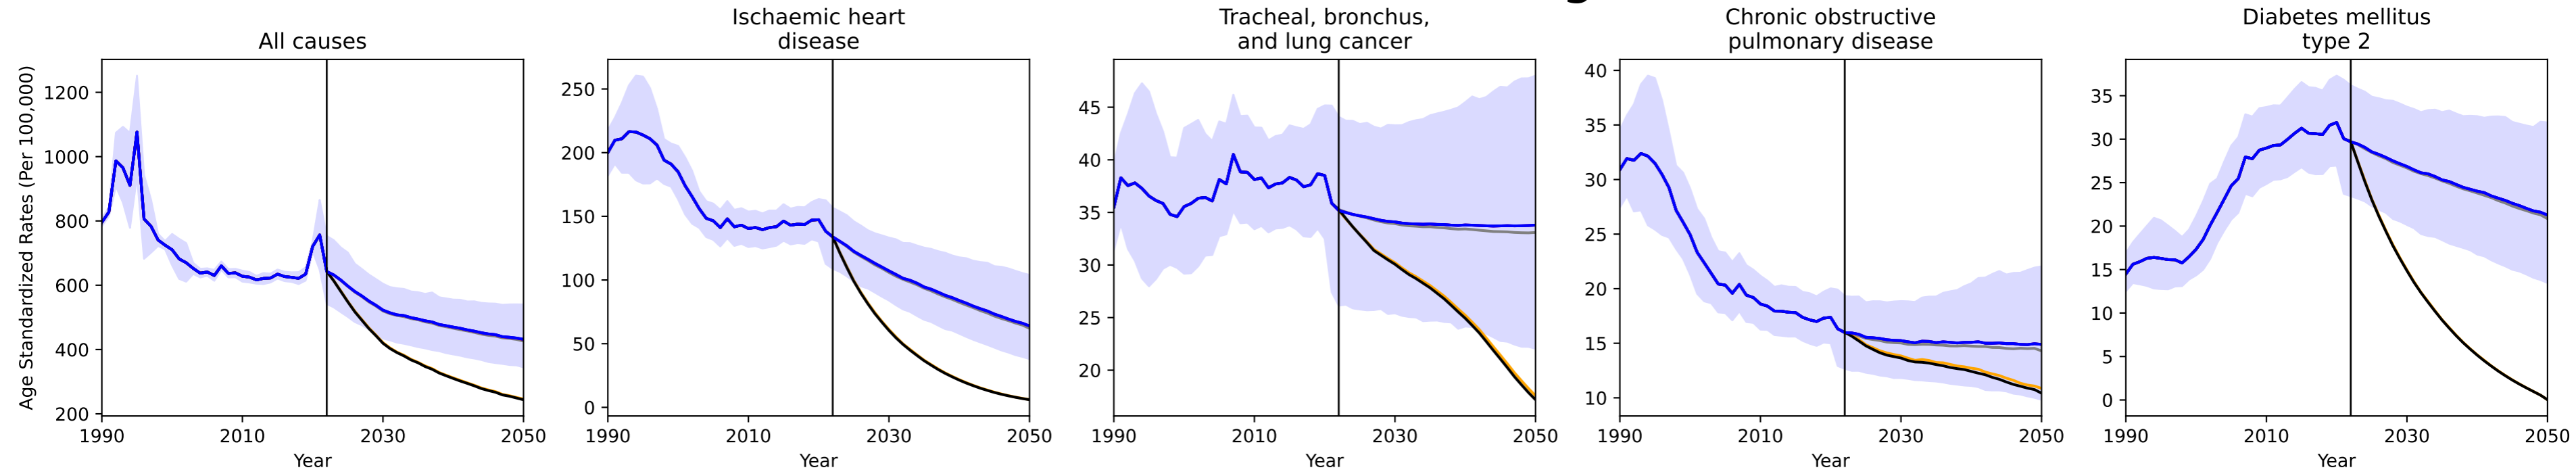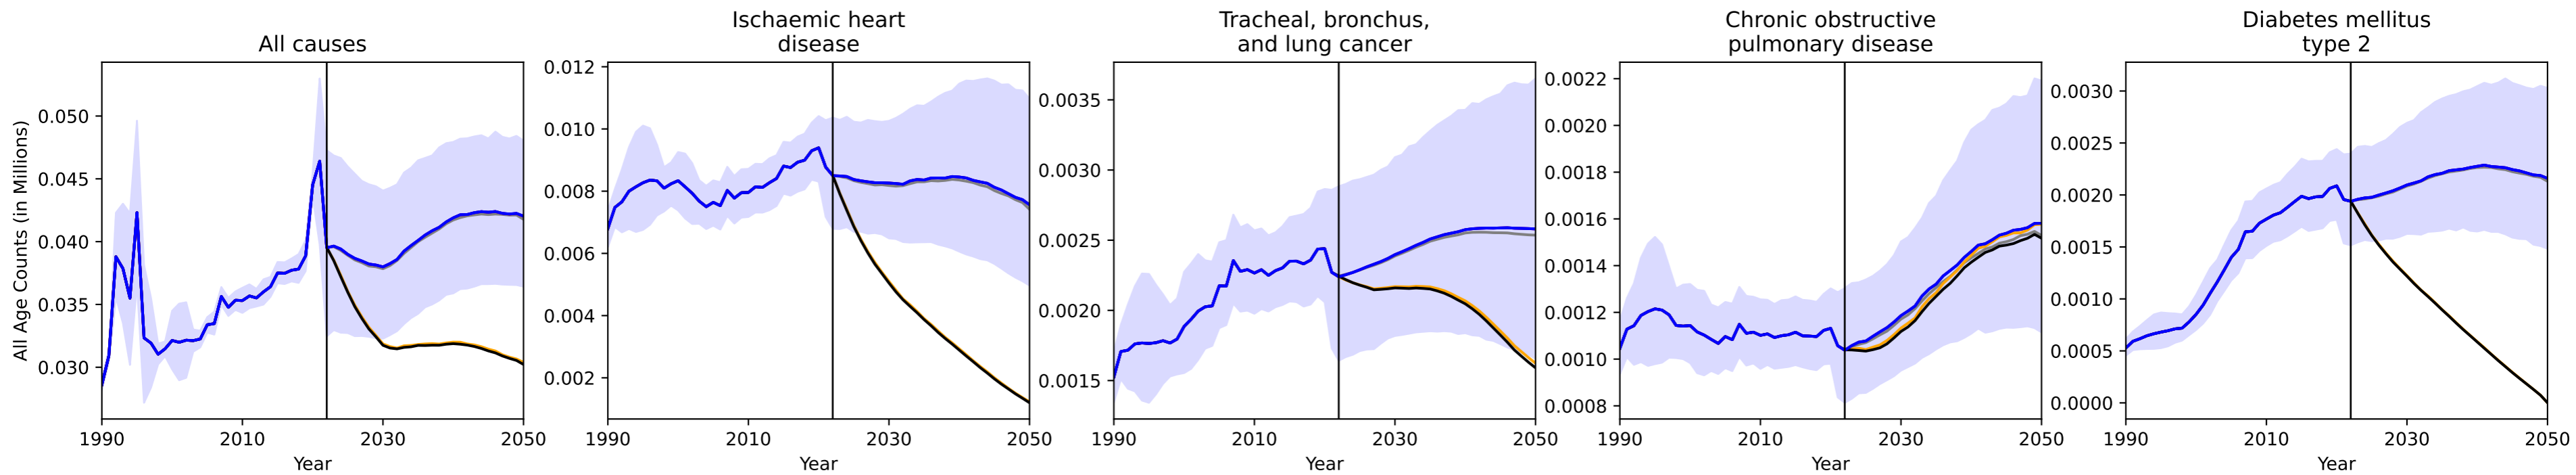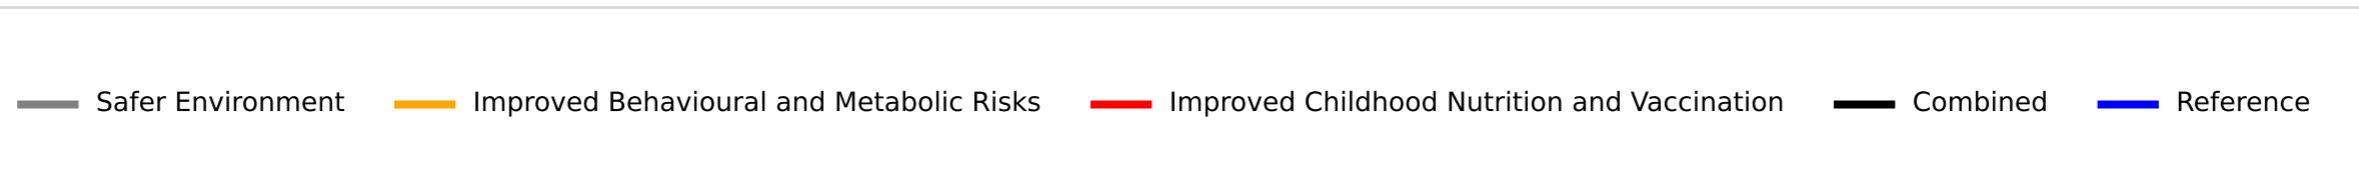

# Bulgaria

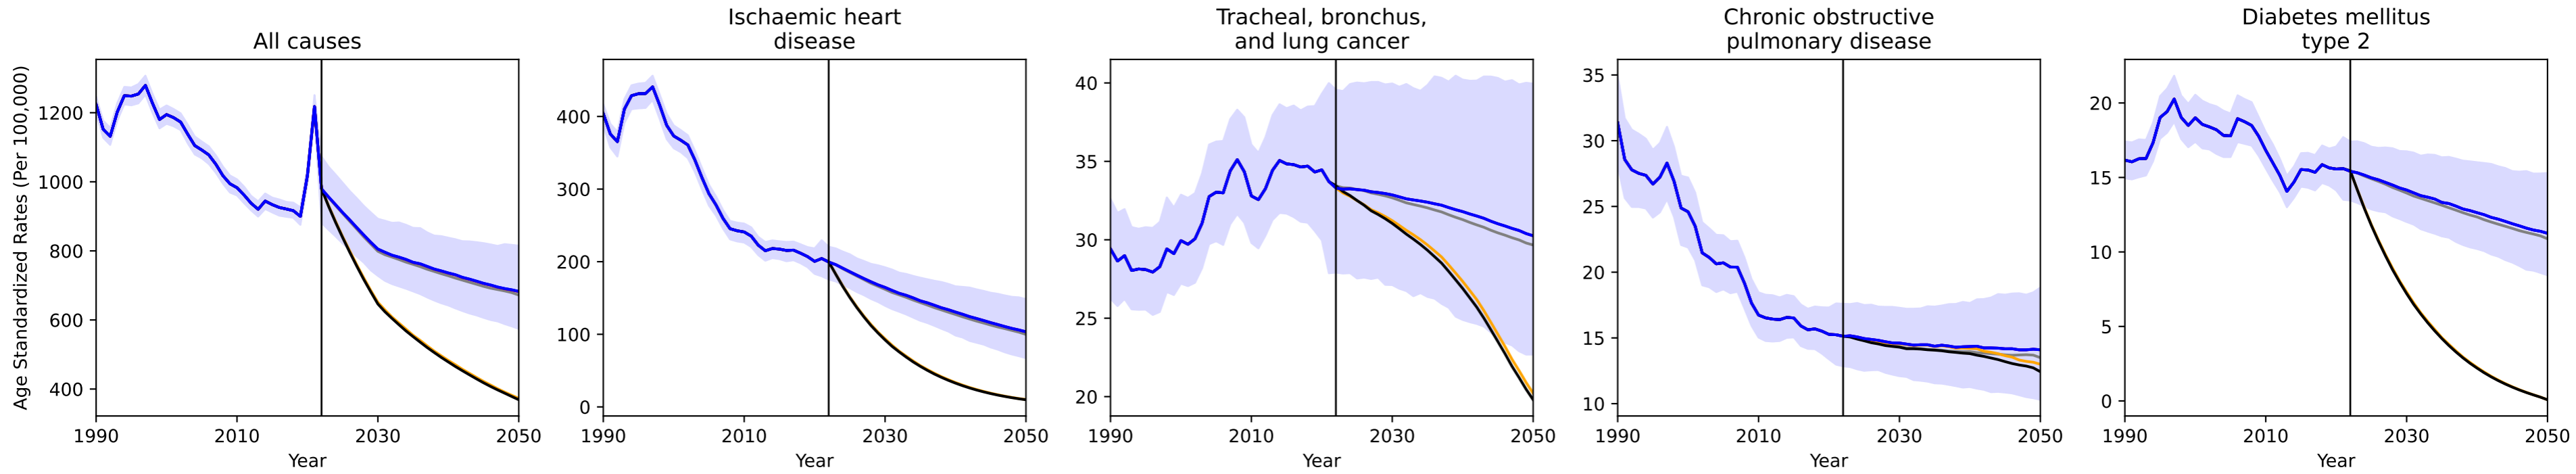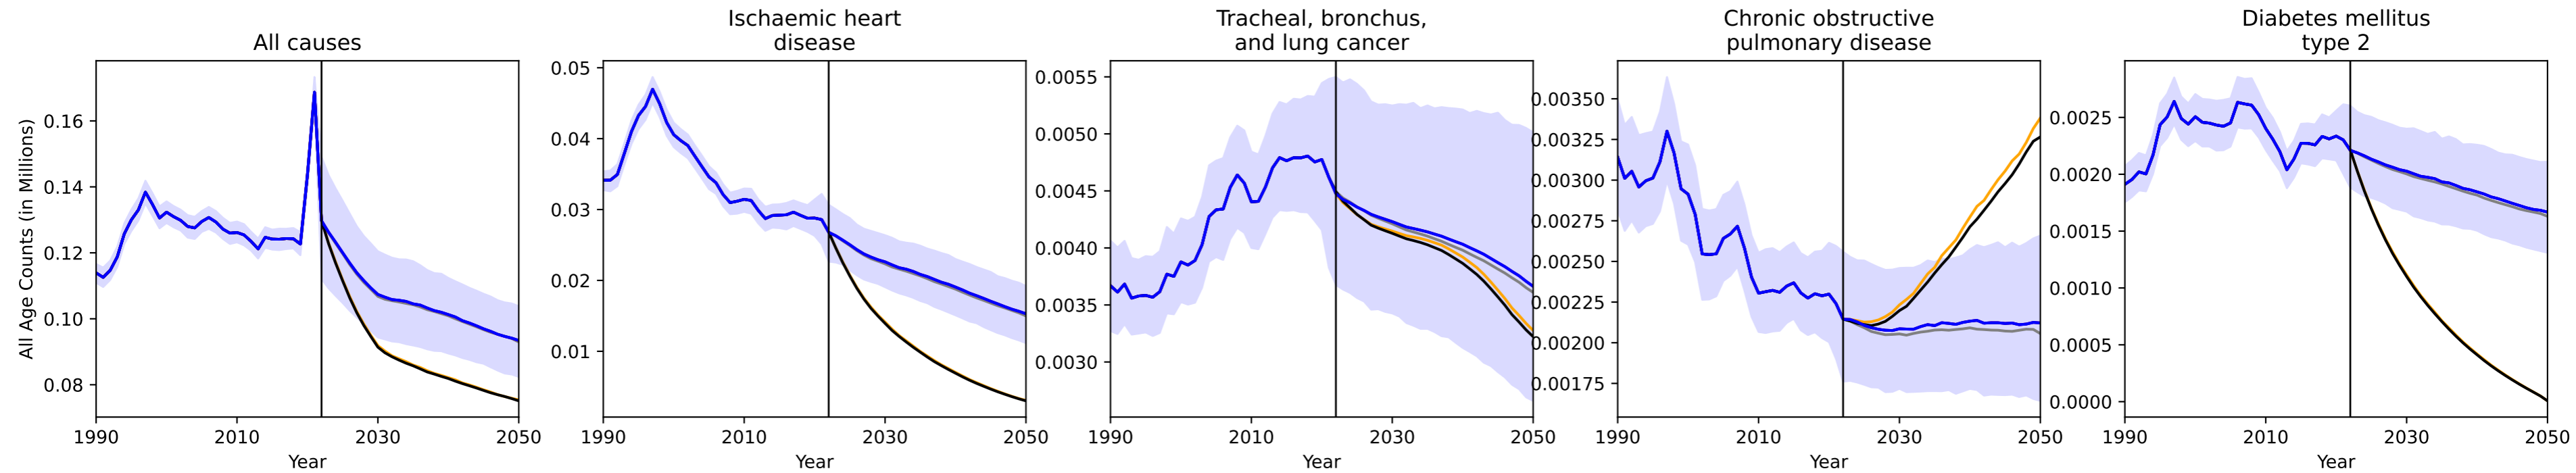

— Safer Environment — Improved Behavioural and Metabolic Risks — Improved Childhood Nutrition and Vaccination — Combined — Reference

# Croatia

Supplemental Results Figure S13. All cause and top NCD causes age standardized death rates and all age counts by scenario and location, 1990-2050

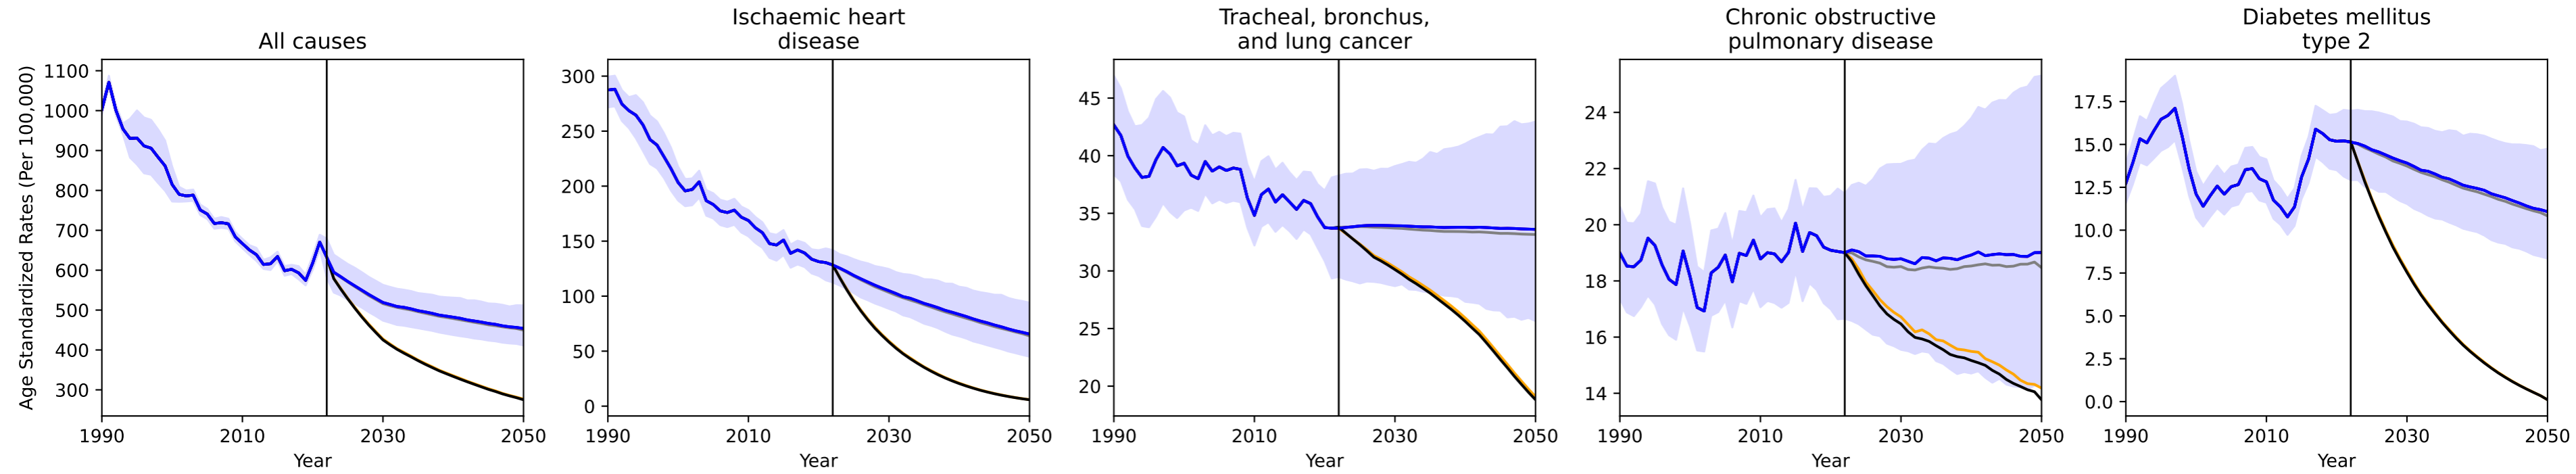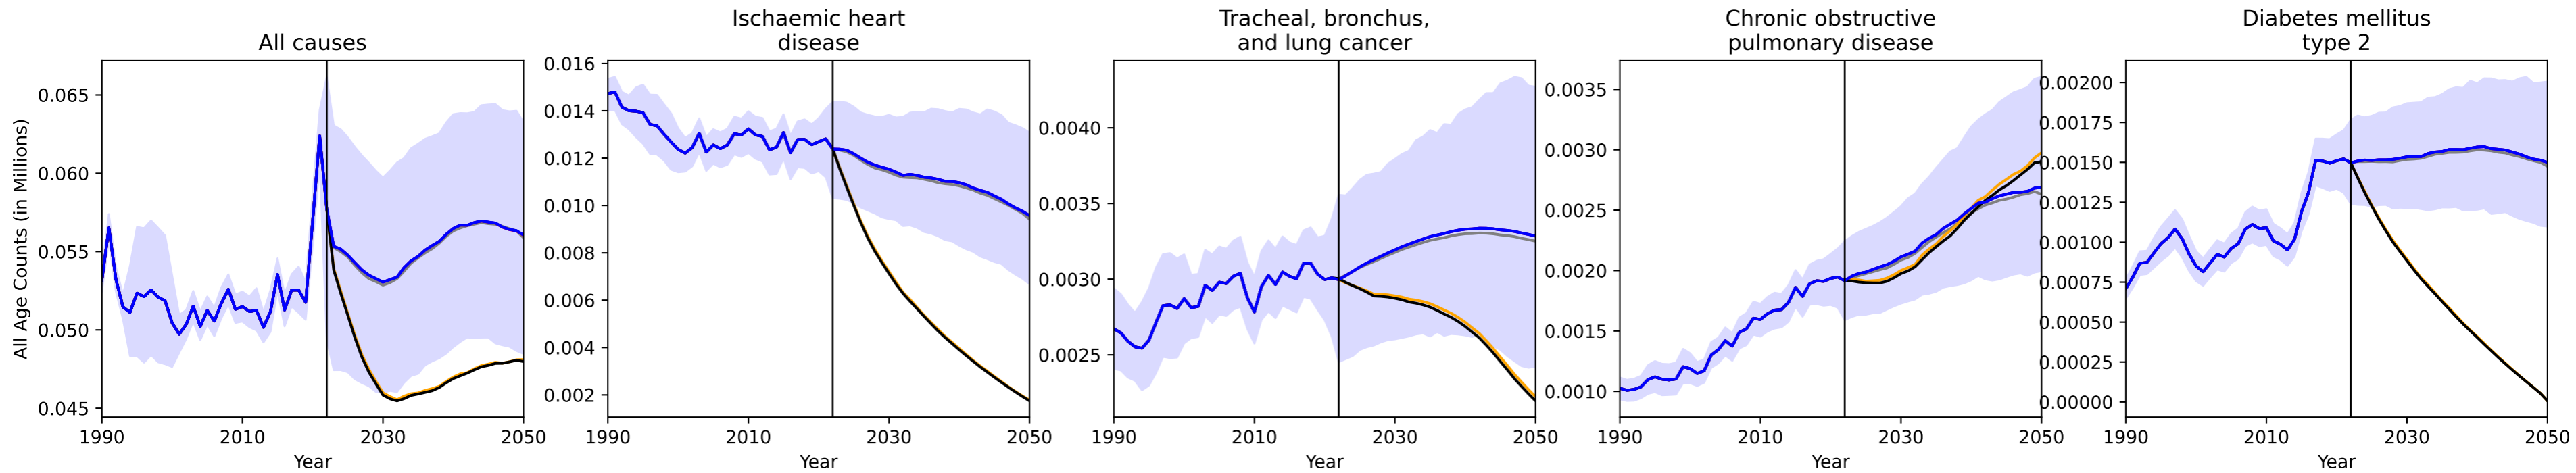

— Safer Environment — Improved Behavioural and Metabolic Risks — Improved Childhood Nutrition and Vaccination — Combined — Reference

# Czechia

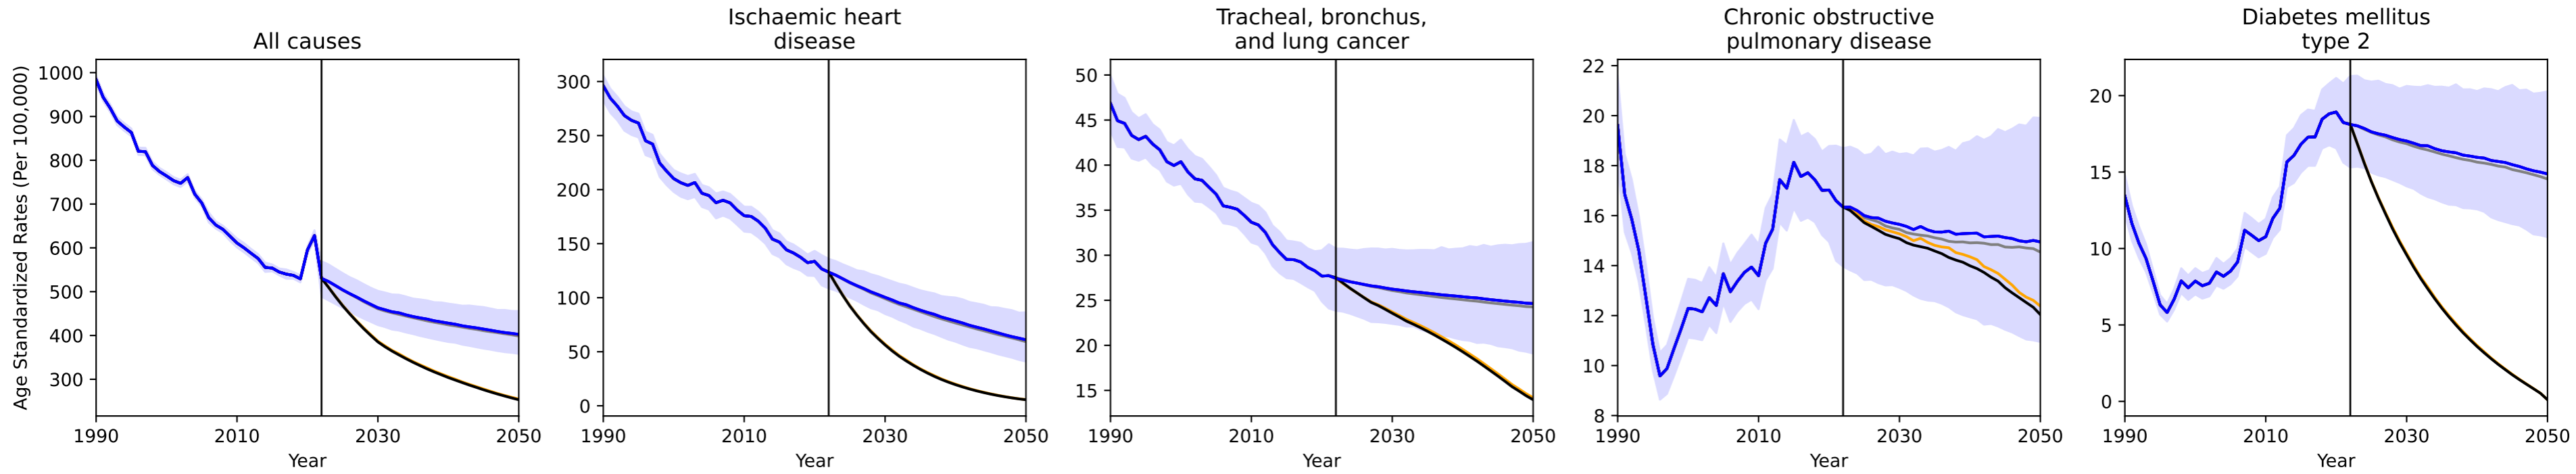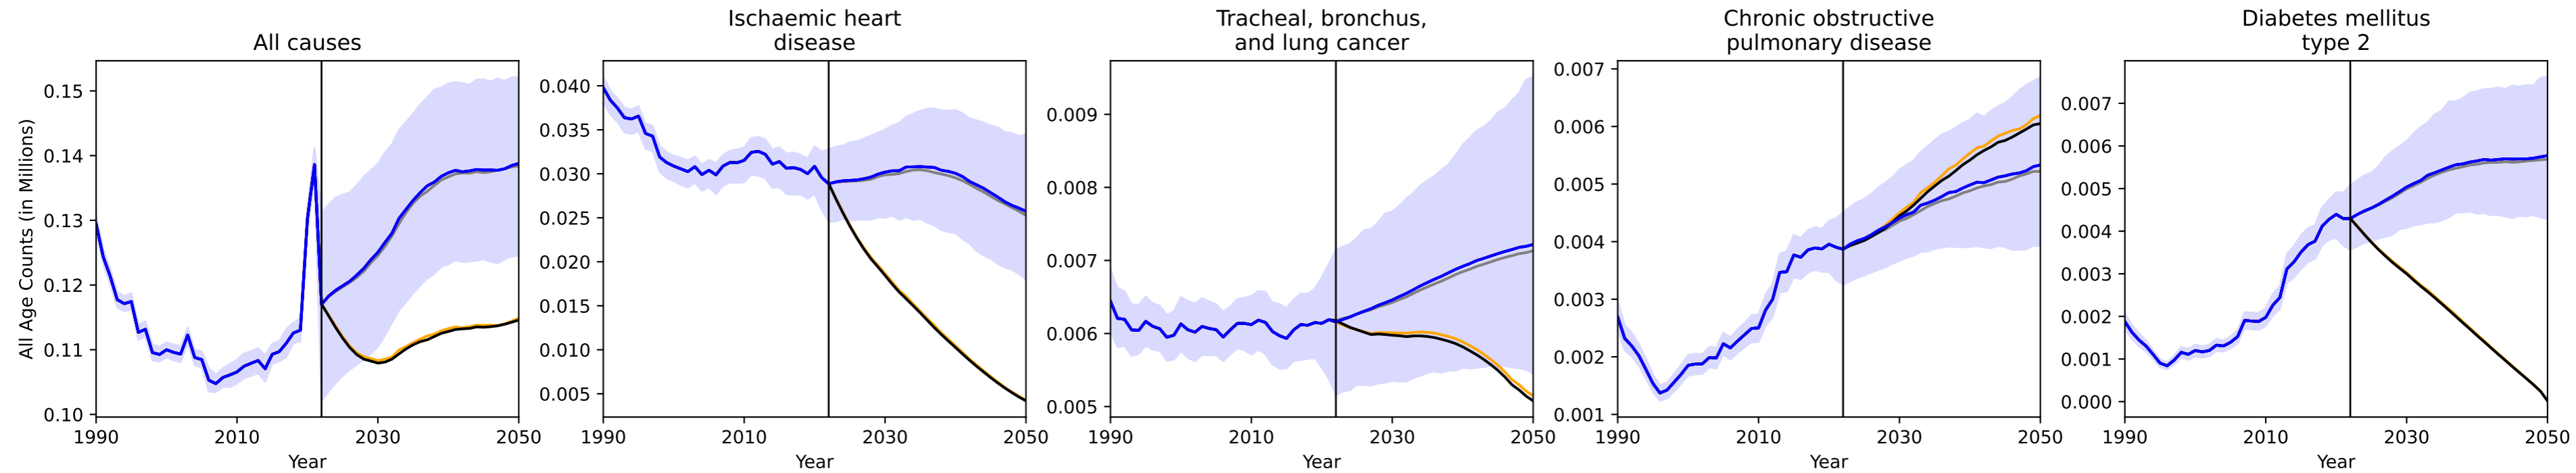

— Safer Environment — Improved Behavioural and Metabolic Risks — Improved Childhood Nutrition and Vaccination — Combined — Reference

# Hungary

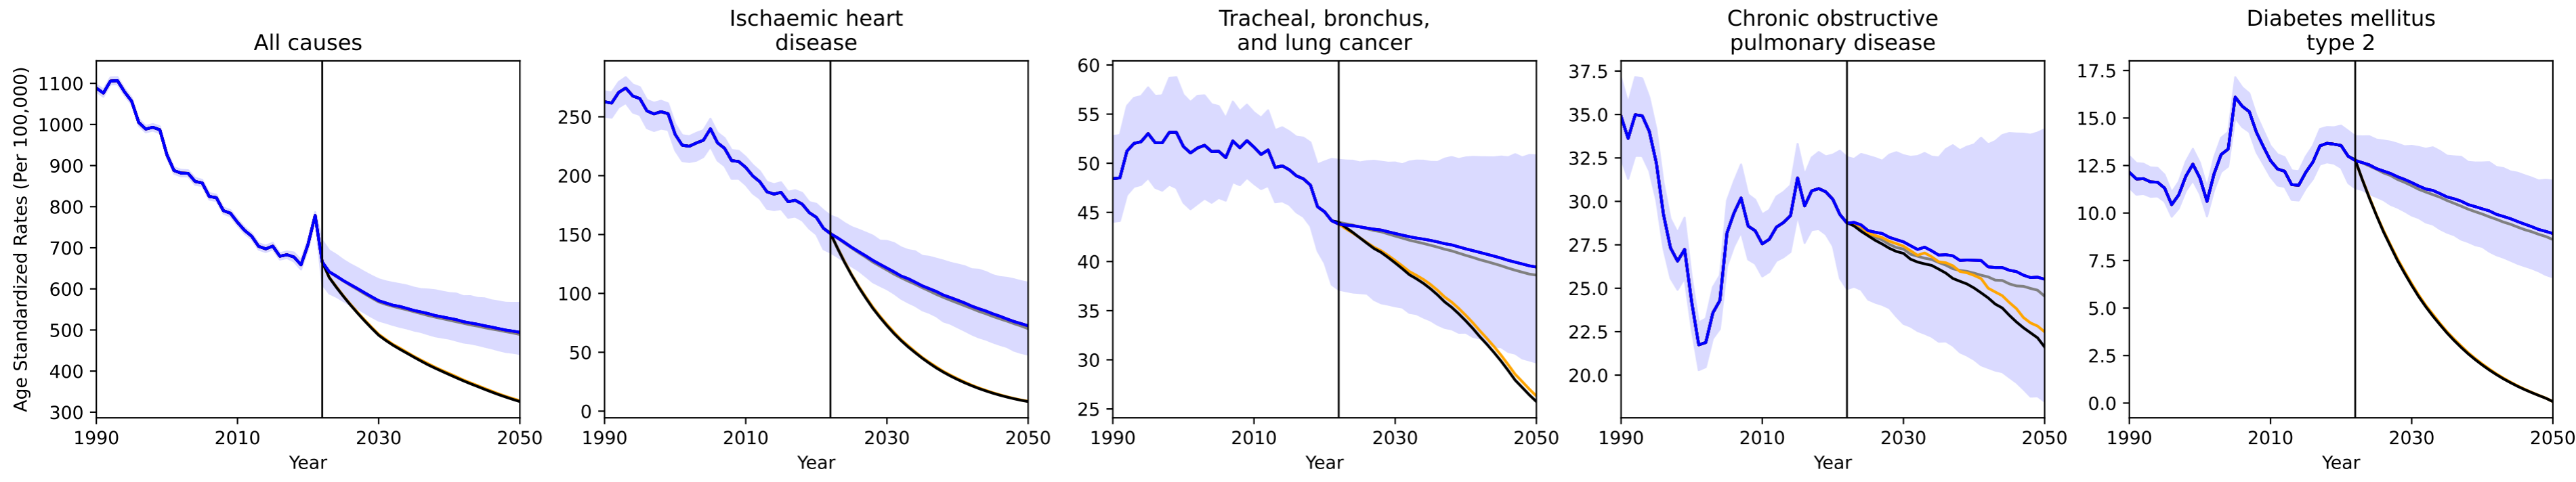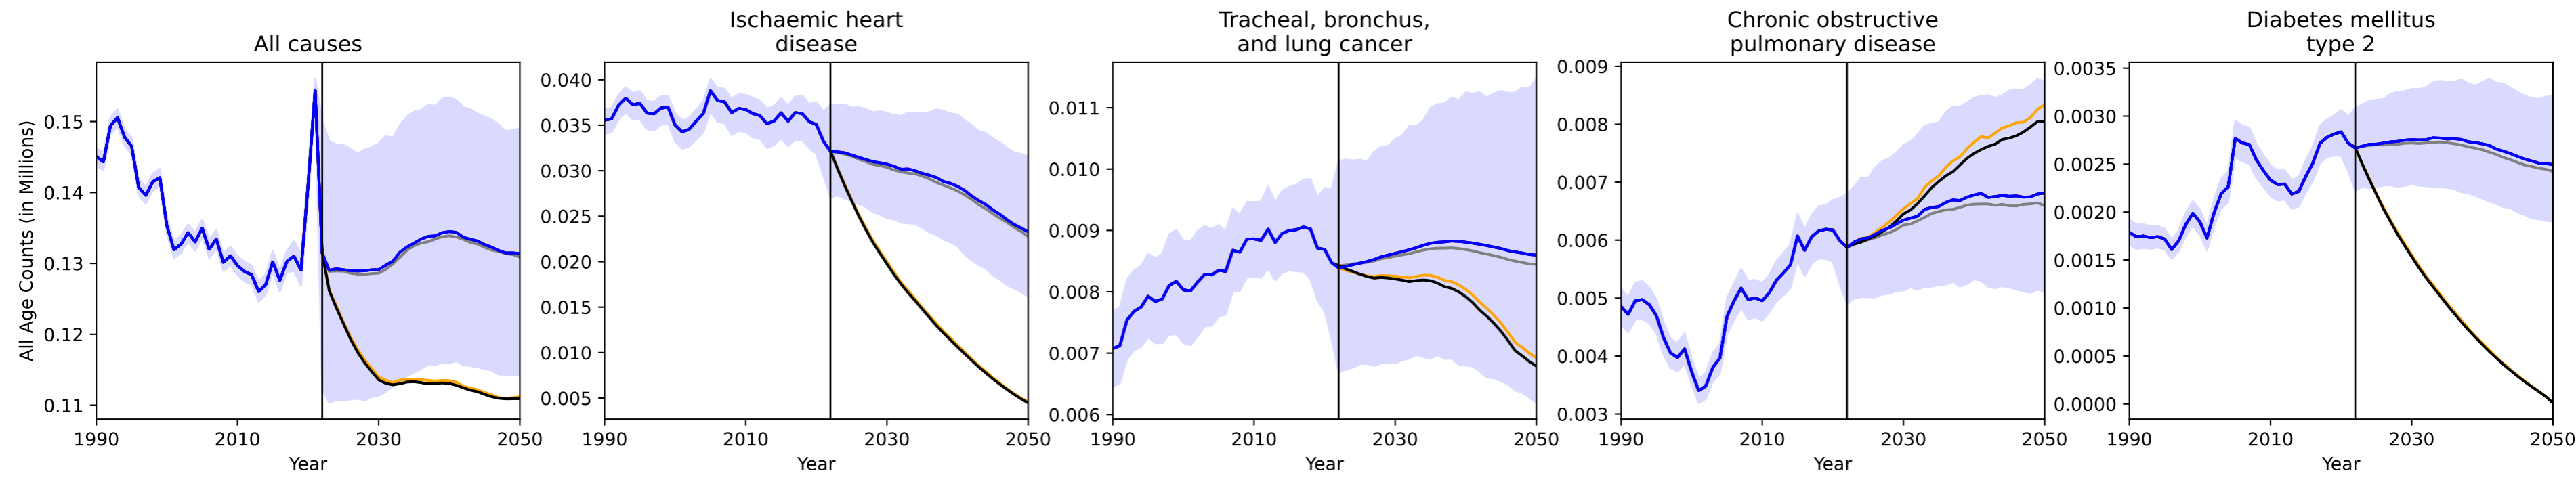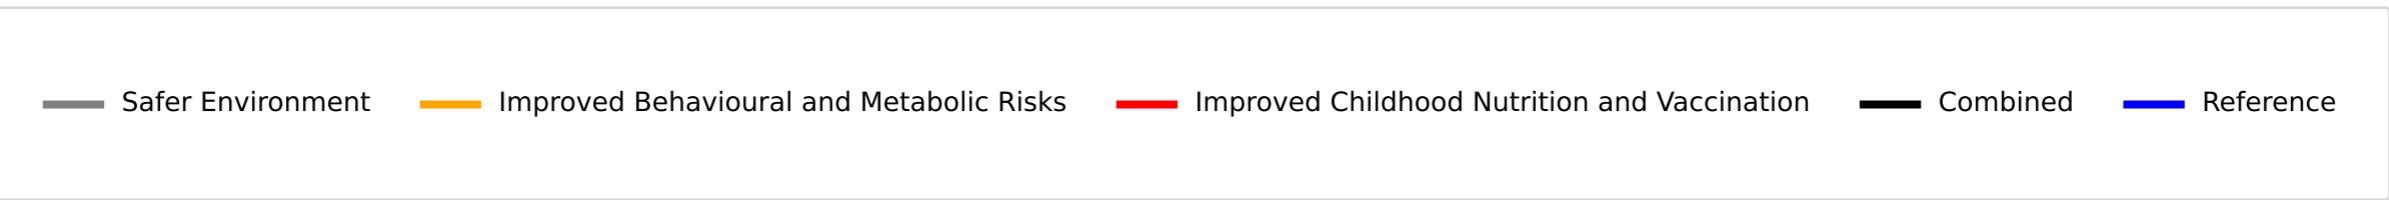

# Montenegro

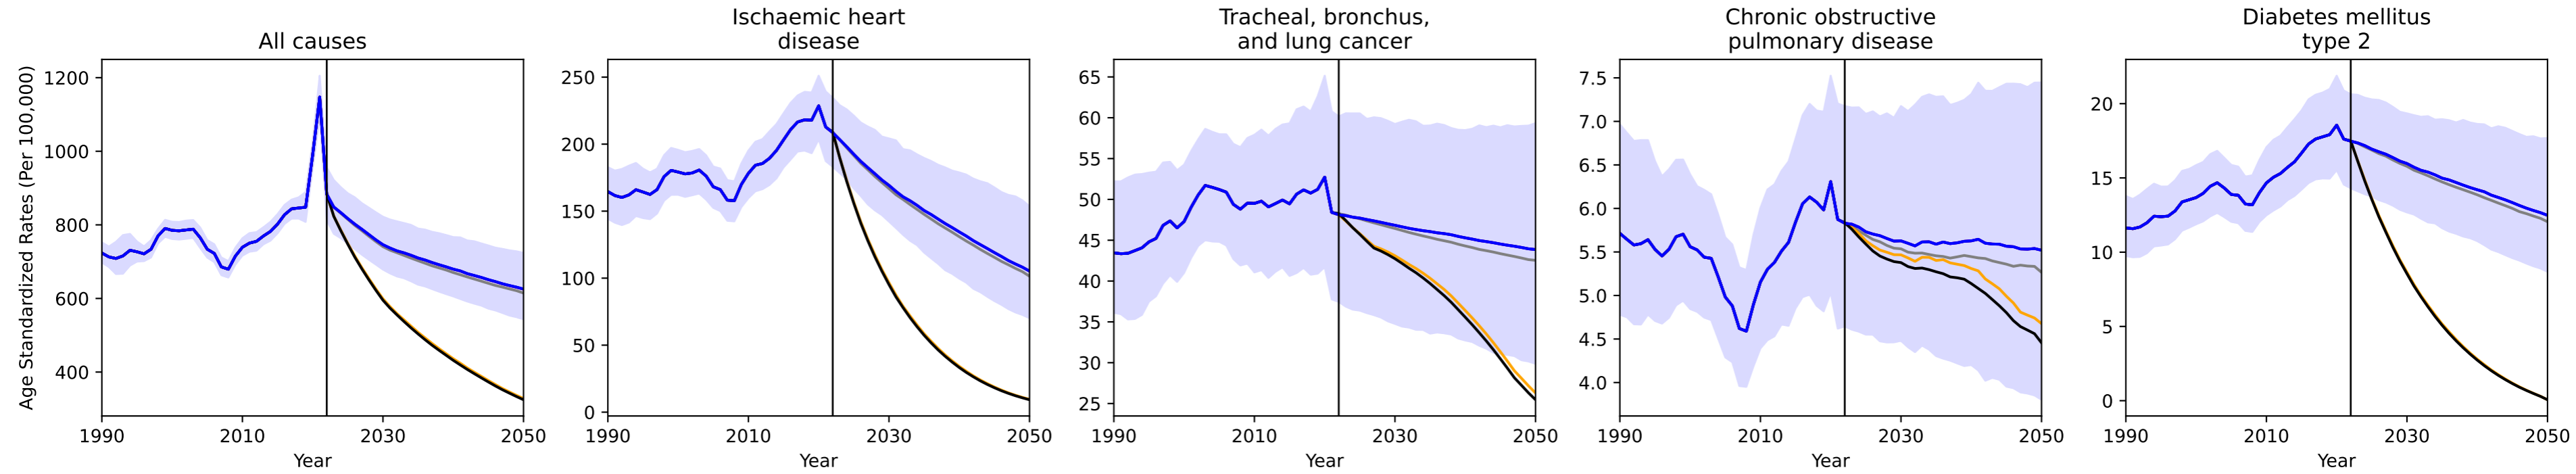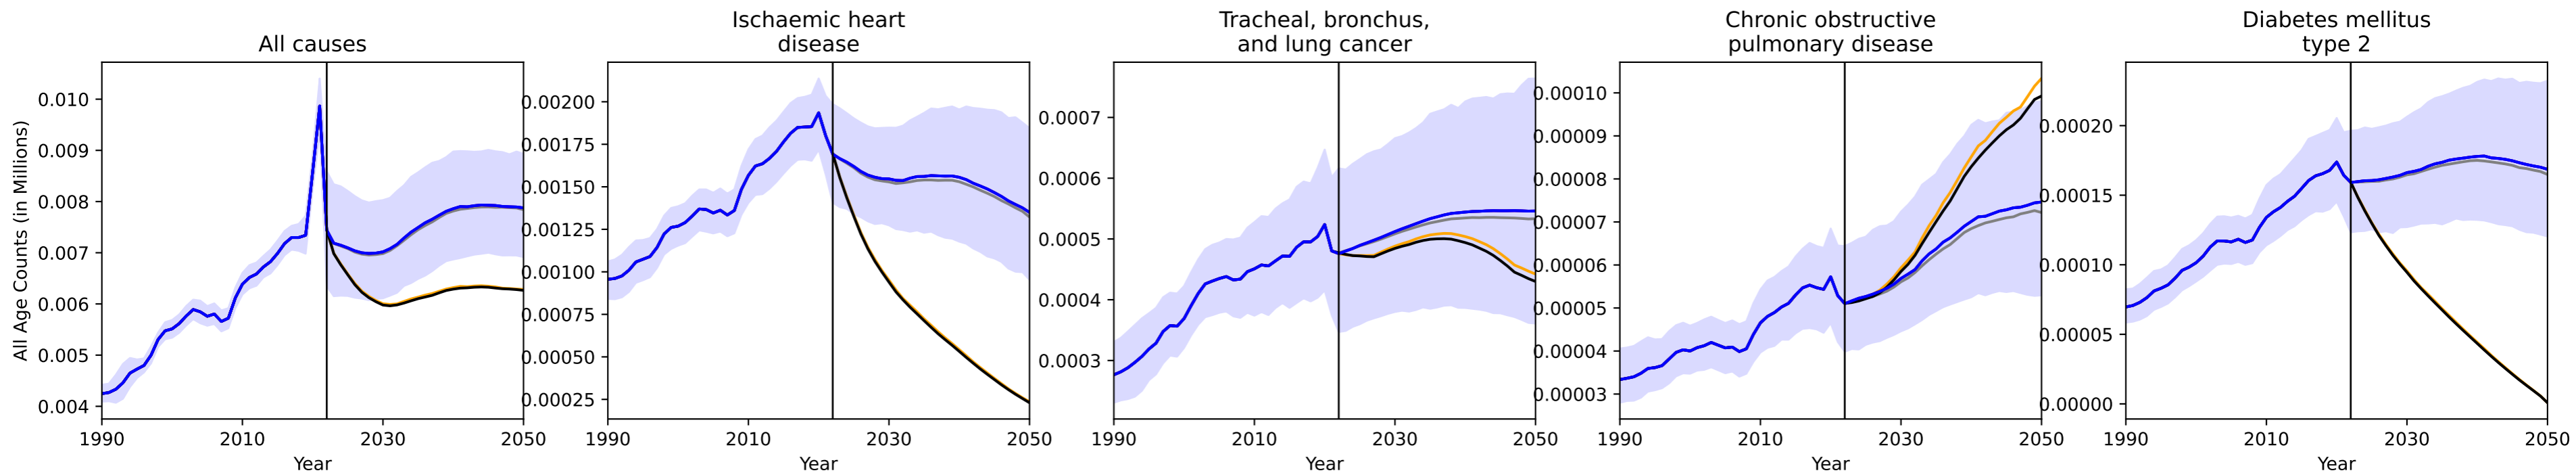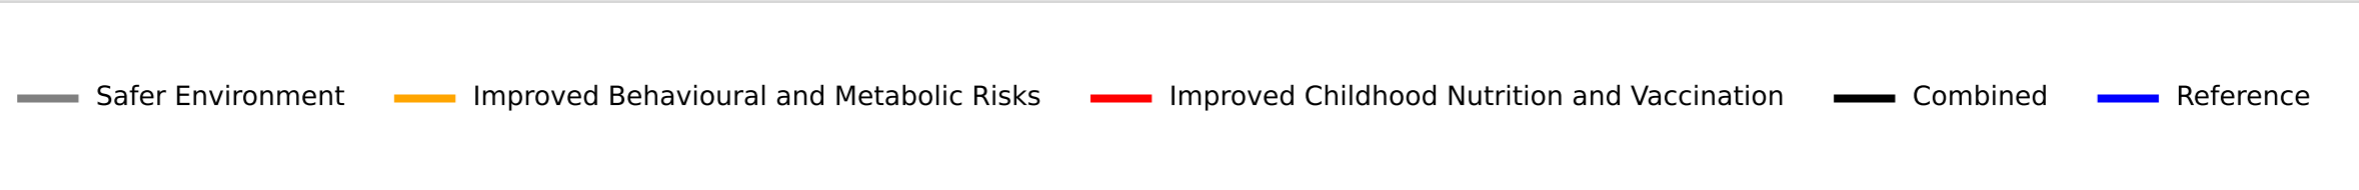

# North Macedonia

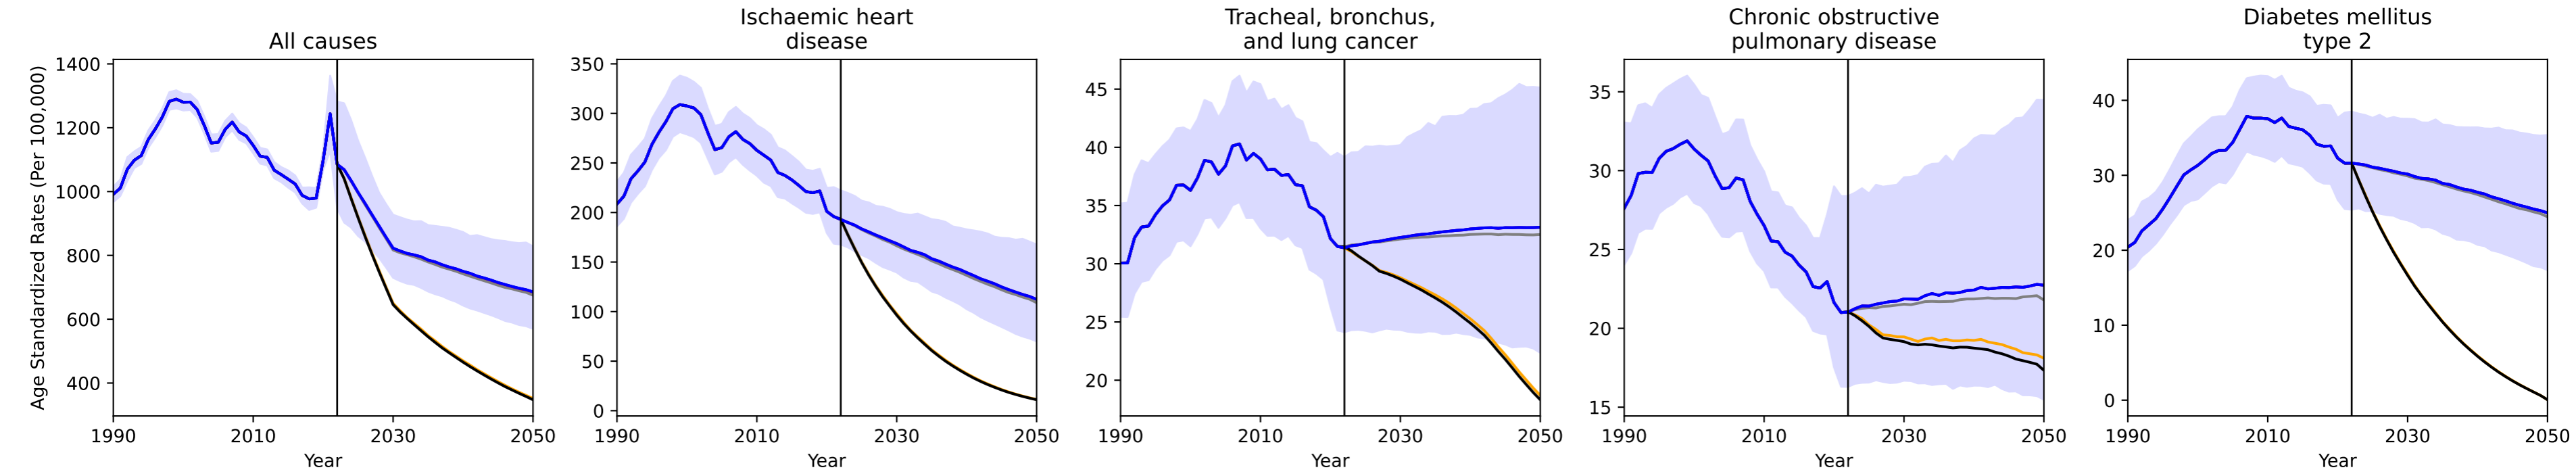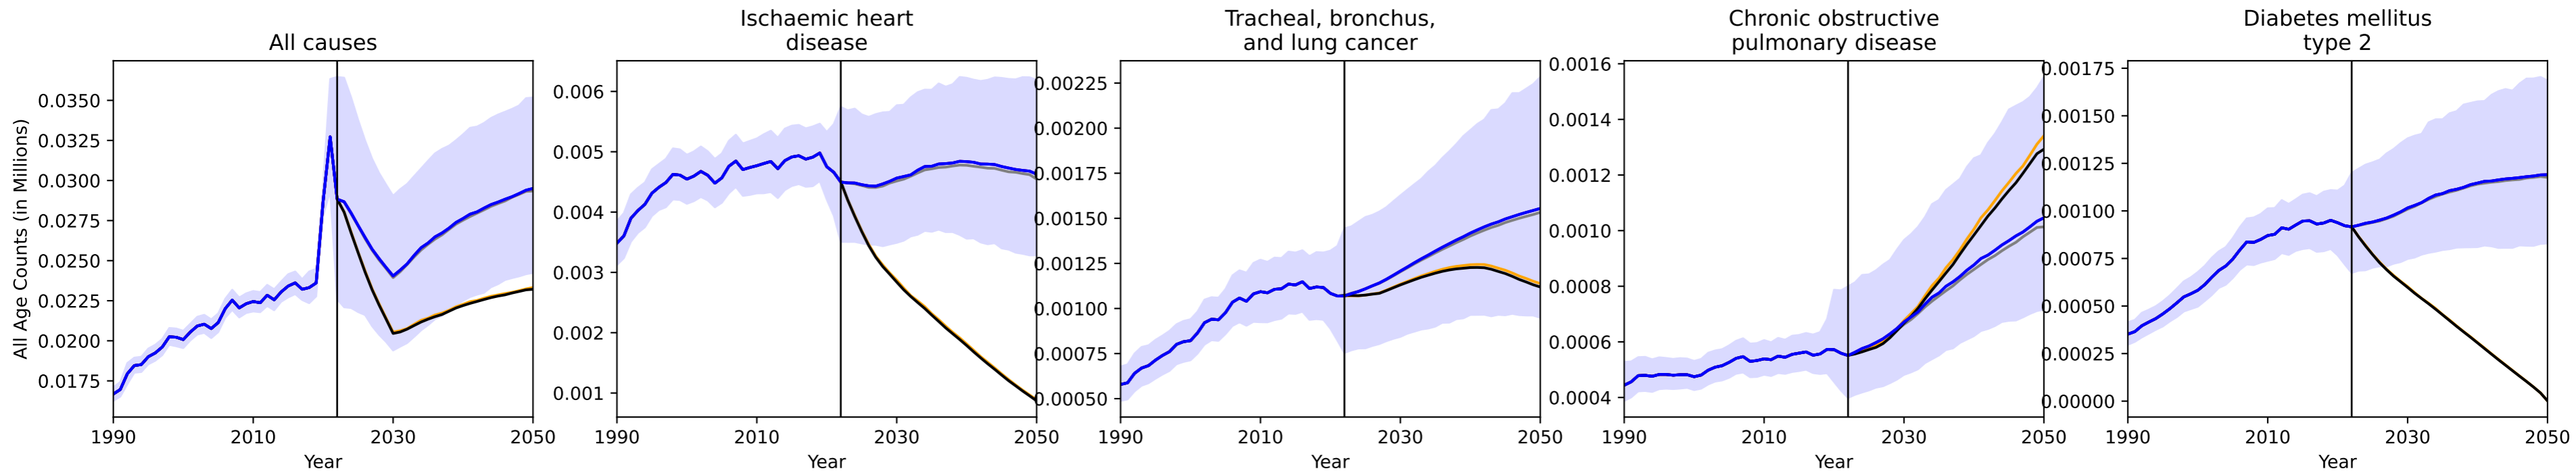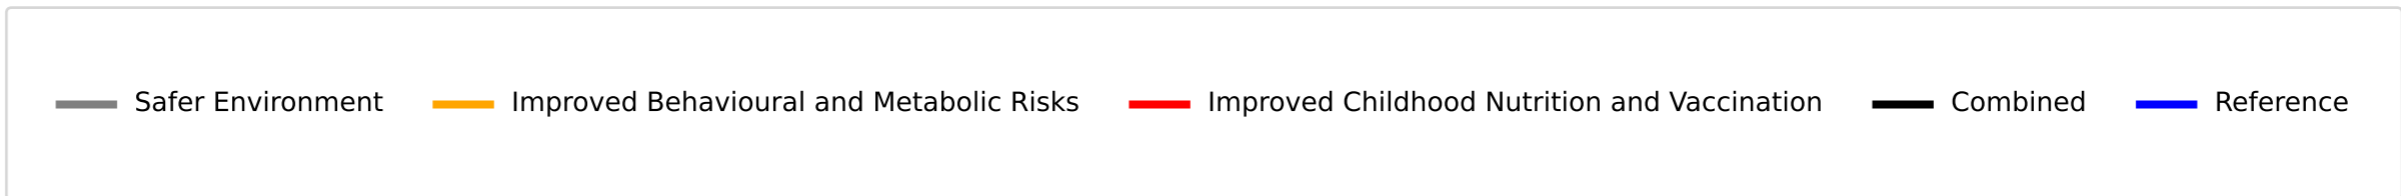

# Poland

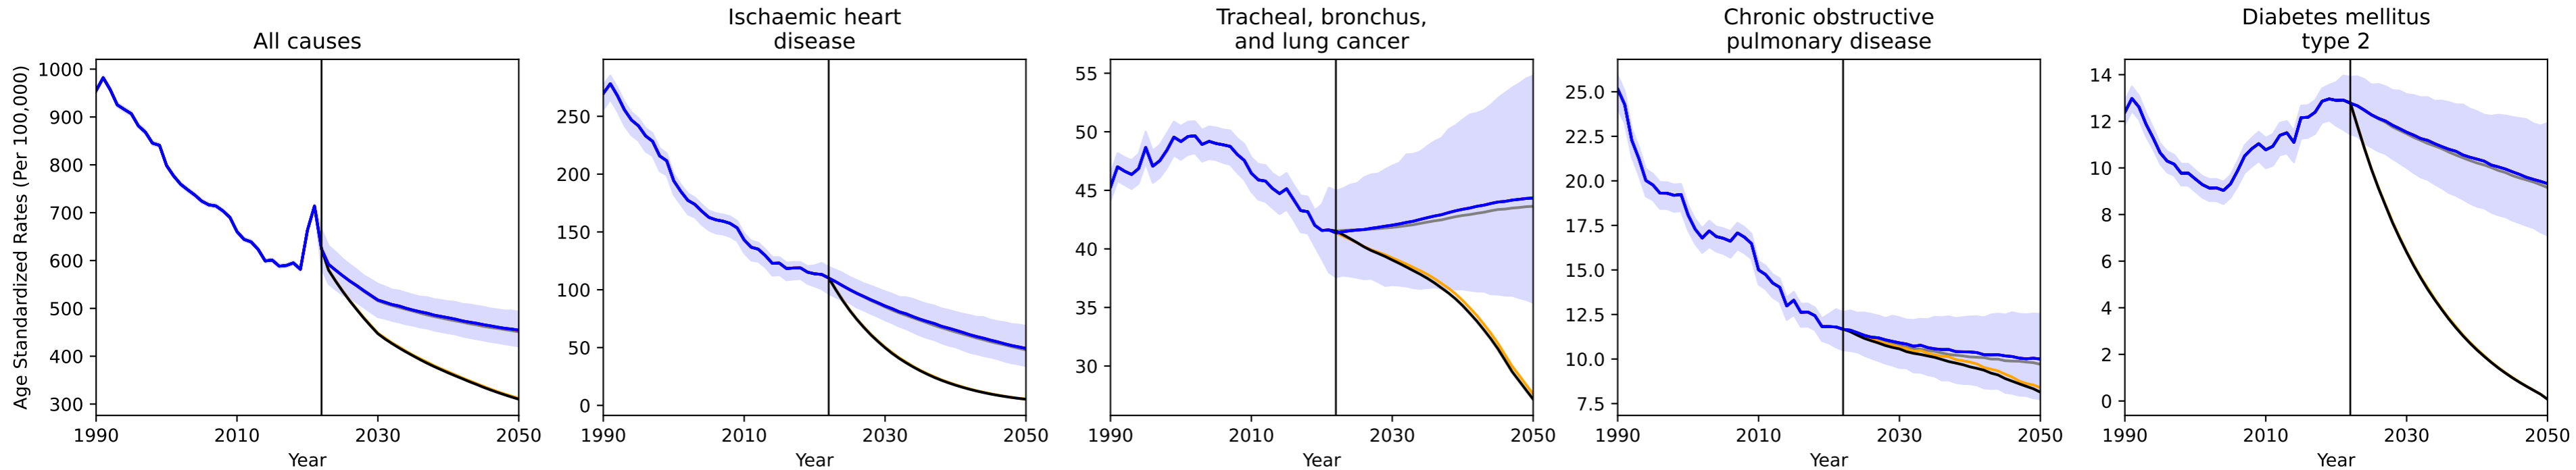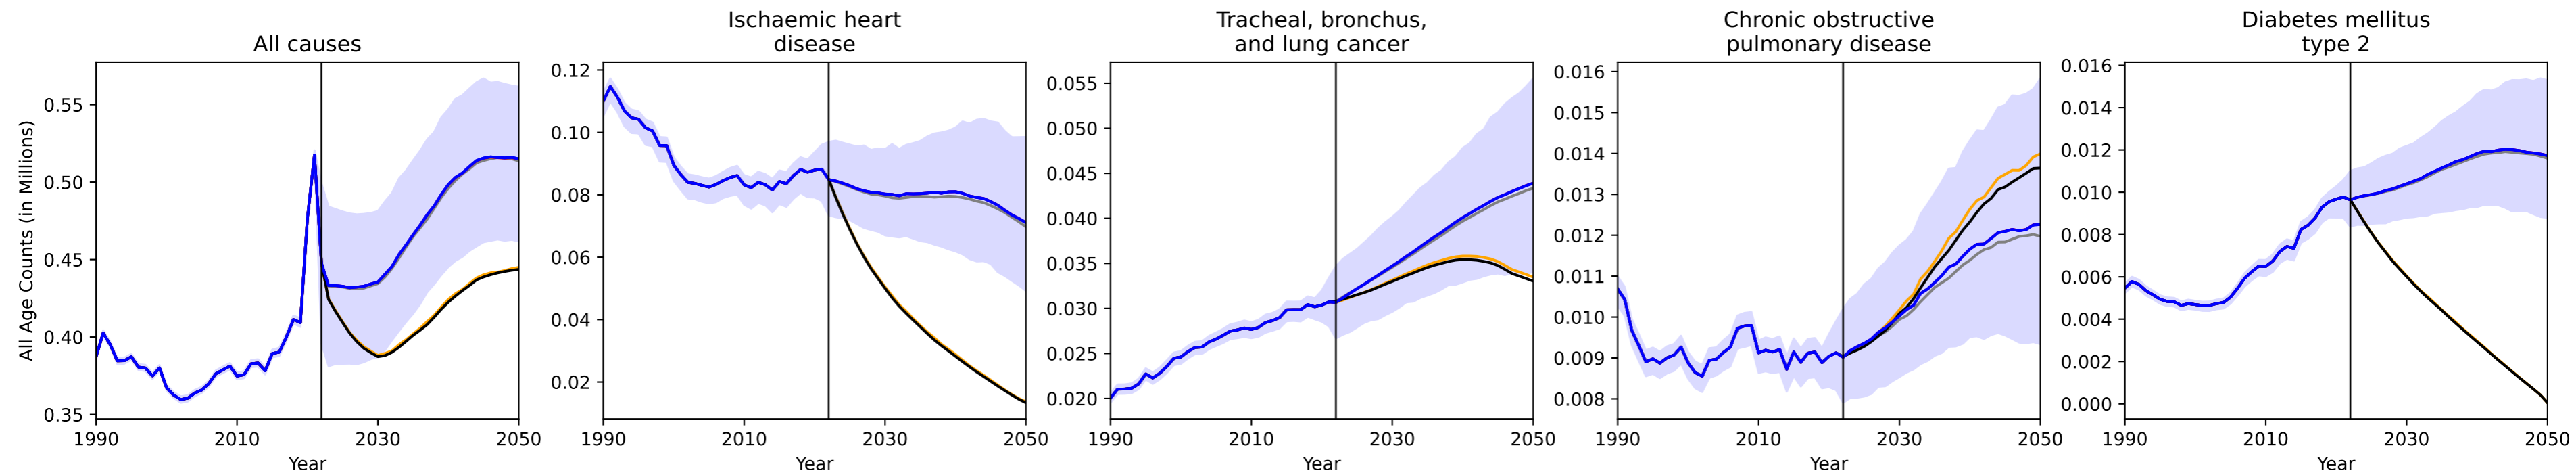

— Safer Environment — Improved Behavioural and Metabolic Risks — Improved Childhood Nutrition and Vaccination — Combined — Reference



# Romania

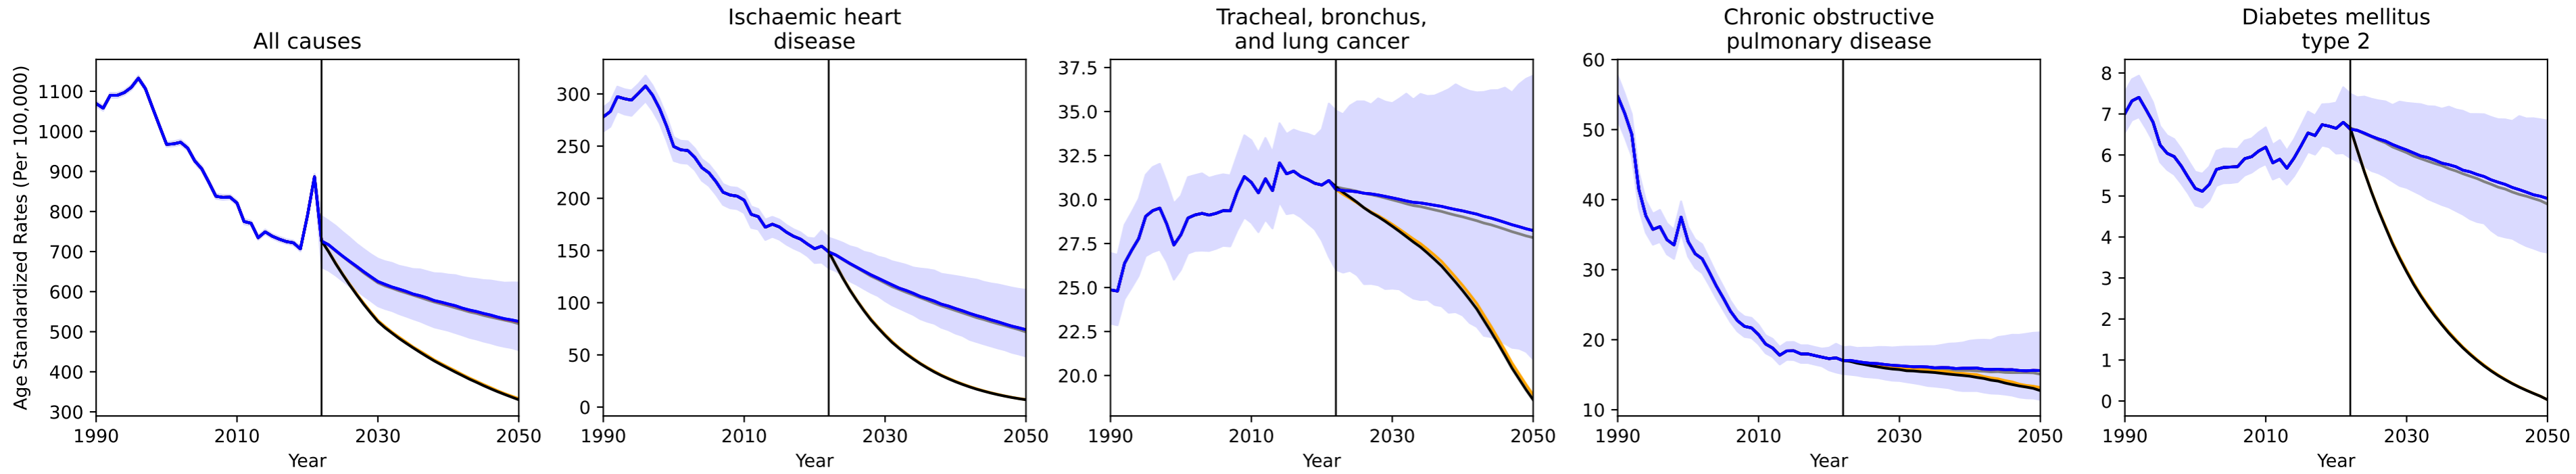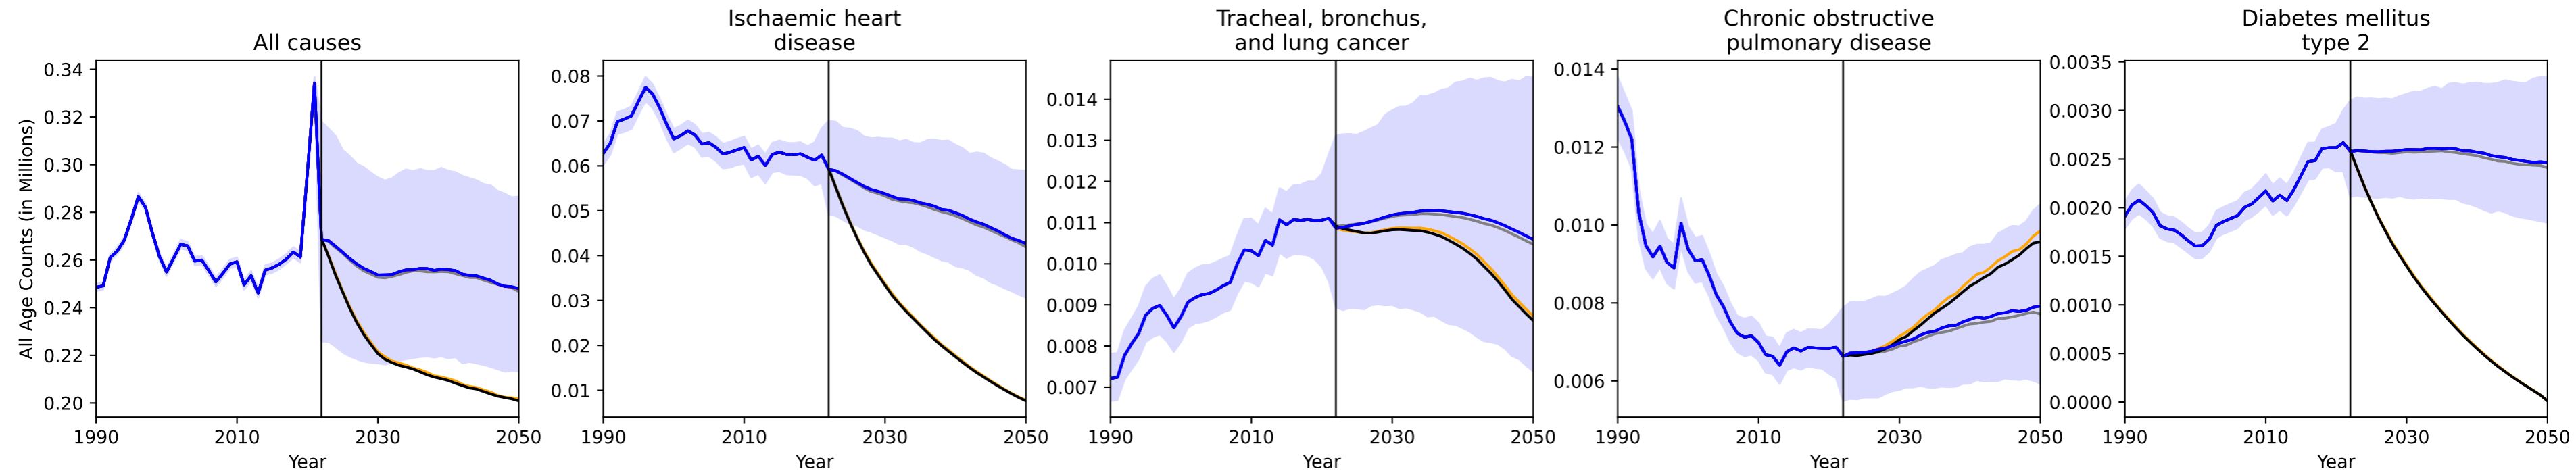

— Safer Environment — Improved Behavioural and Metabolic Risks — Improved Childhood Nutrition and Vaccination — Combined — Reference

# Serbia

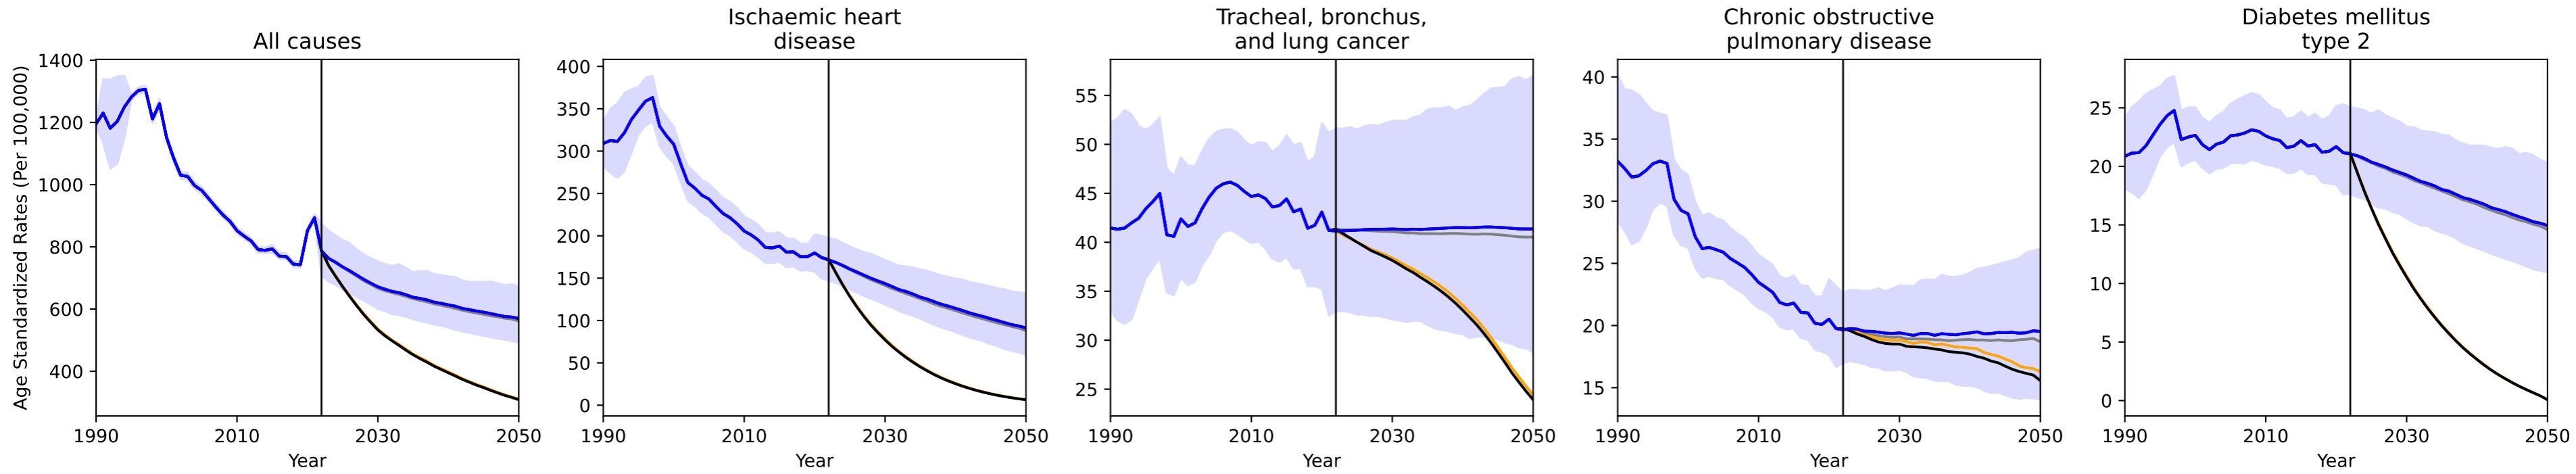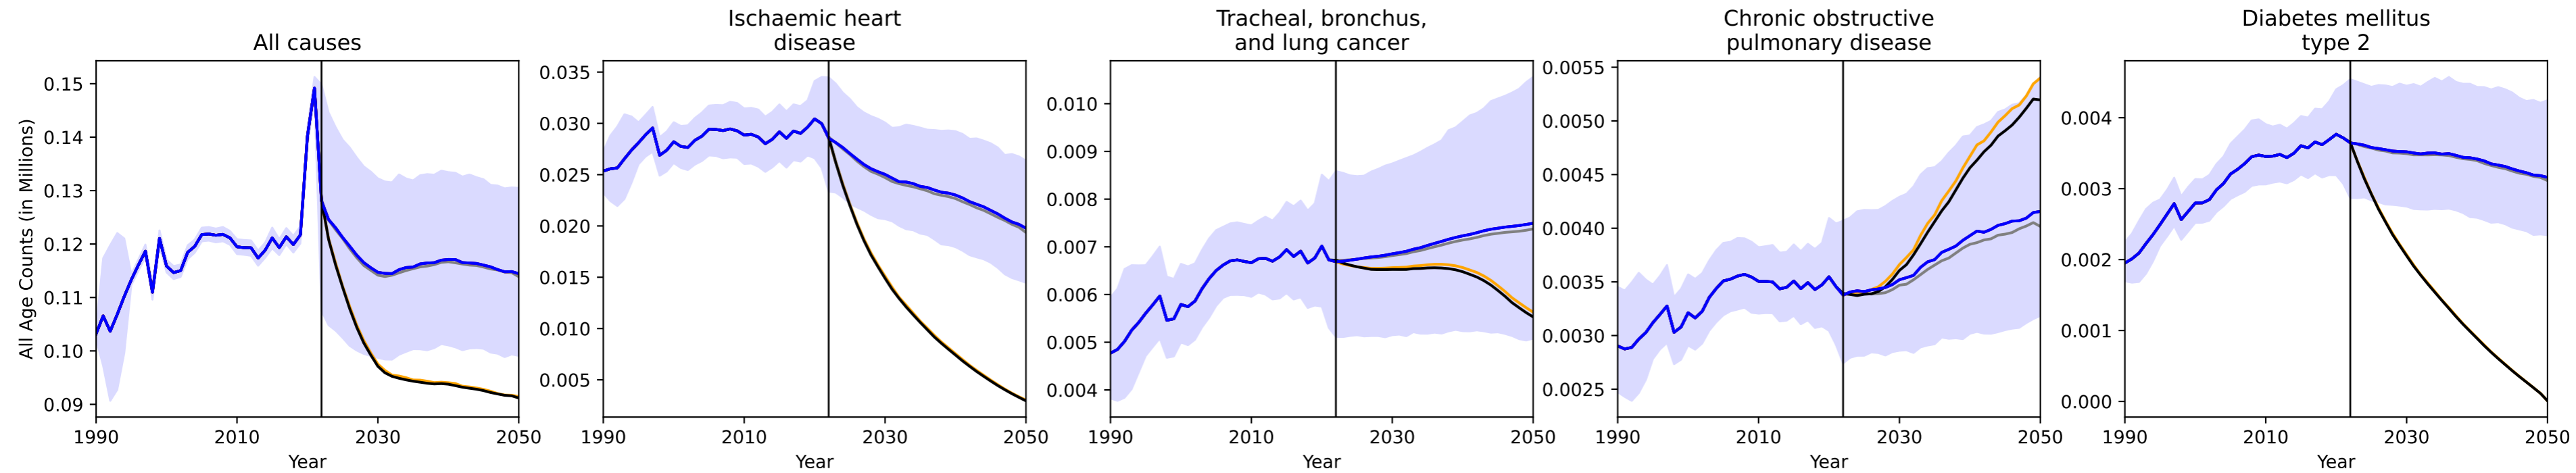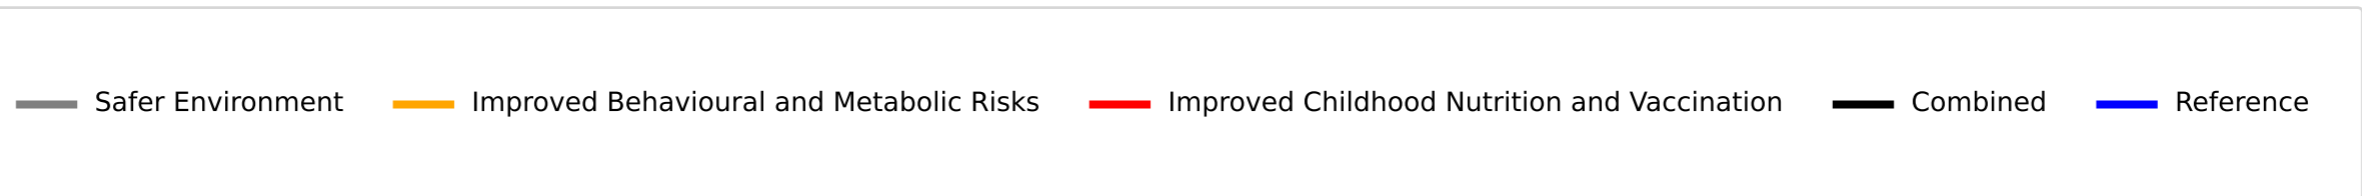

# Slovakia

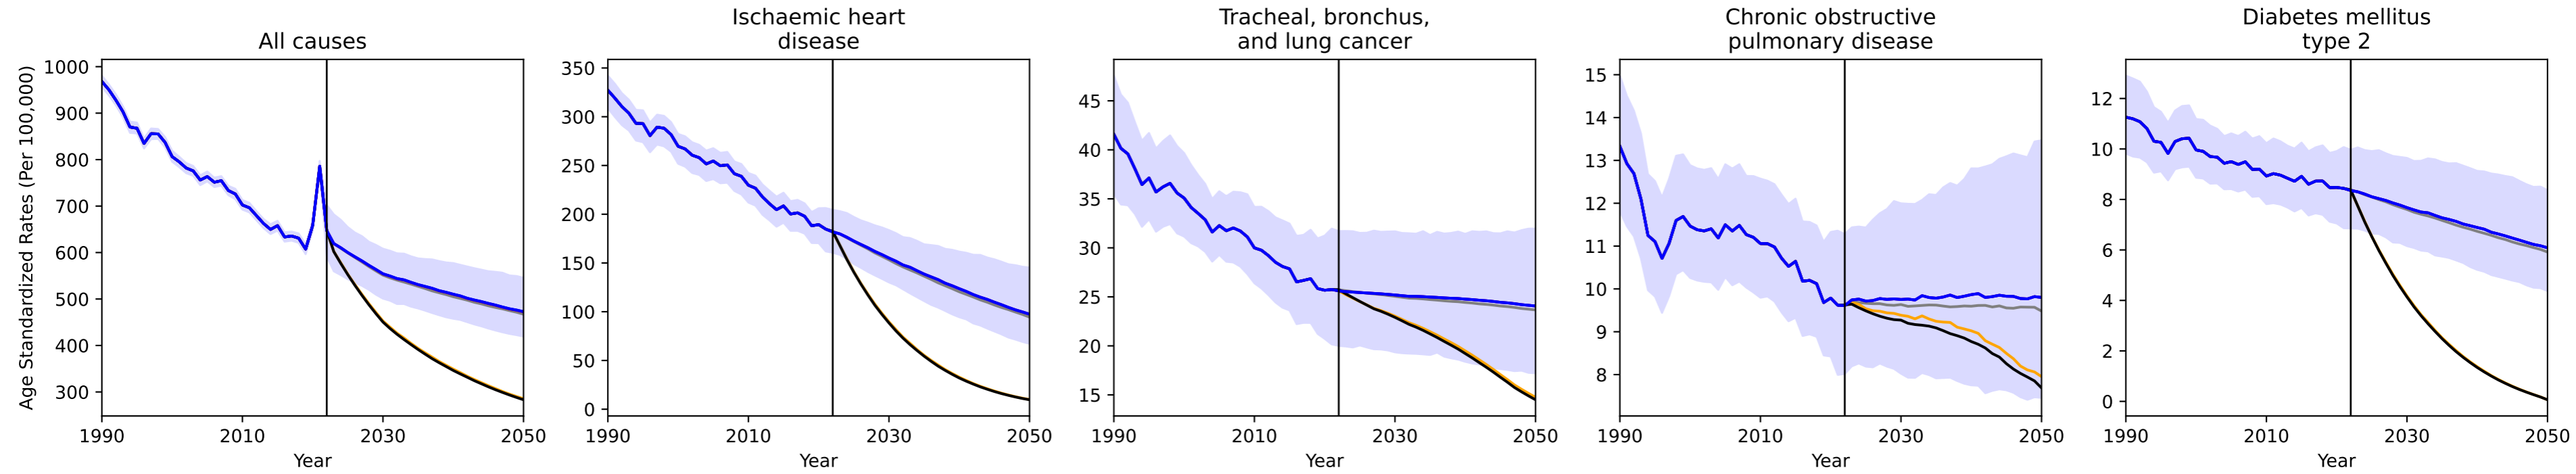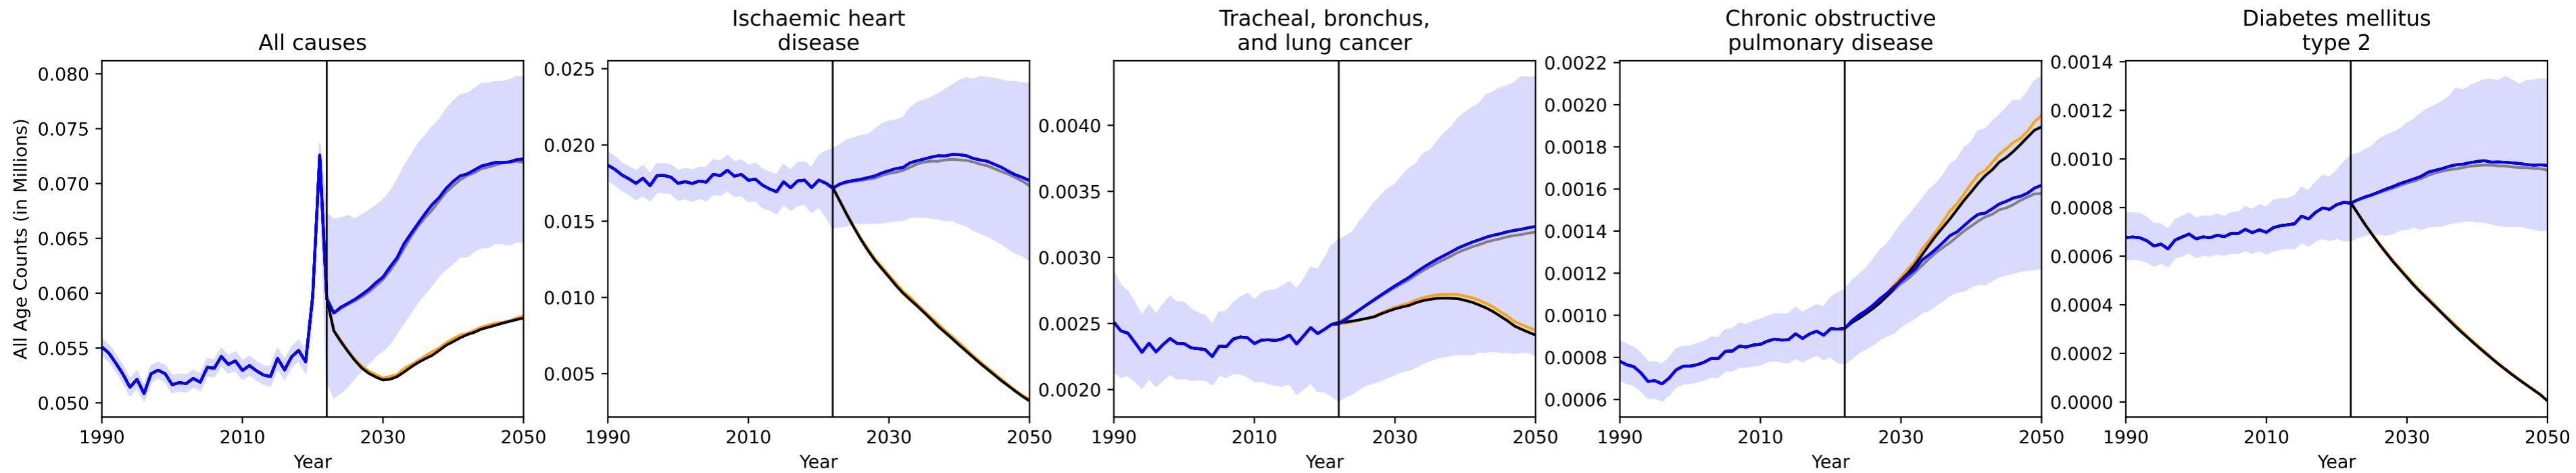

— Safer Environment — Improved Behavioural and Metabolic Risks — Improved Childhood Nutrition and Vaccination — Combined — Reference

# Slovenia

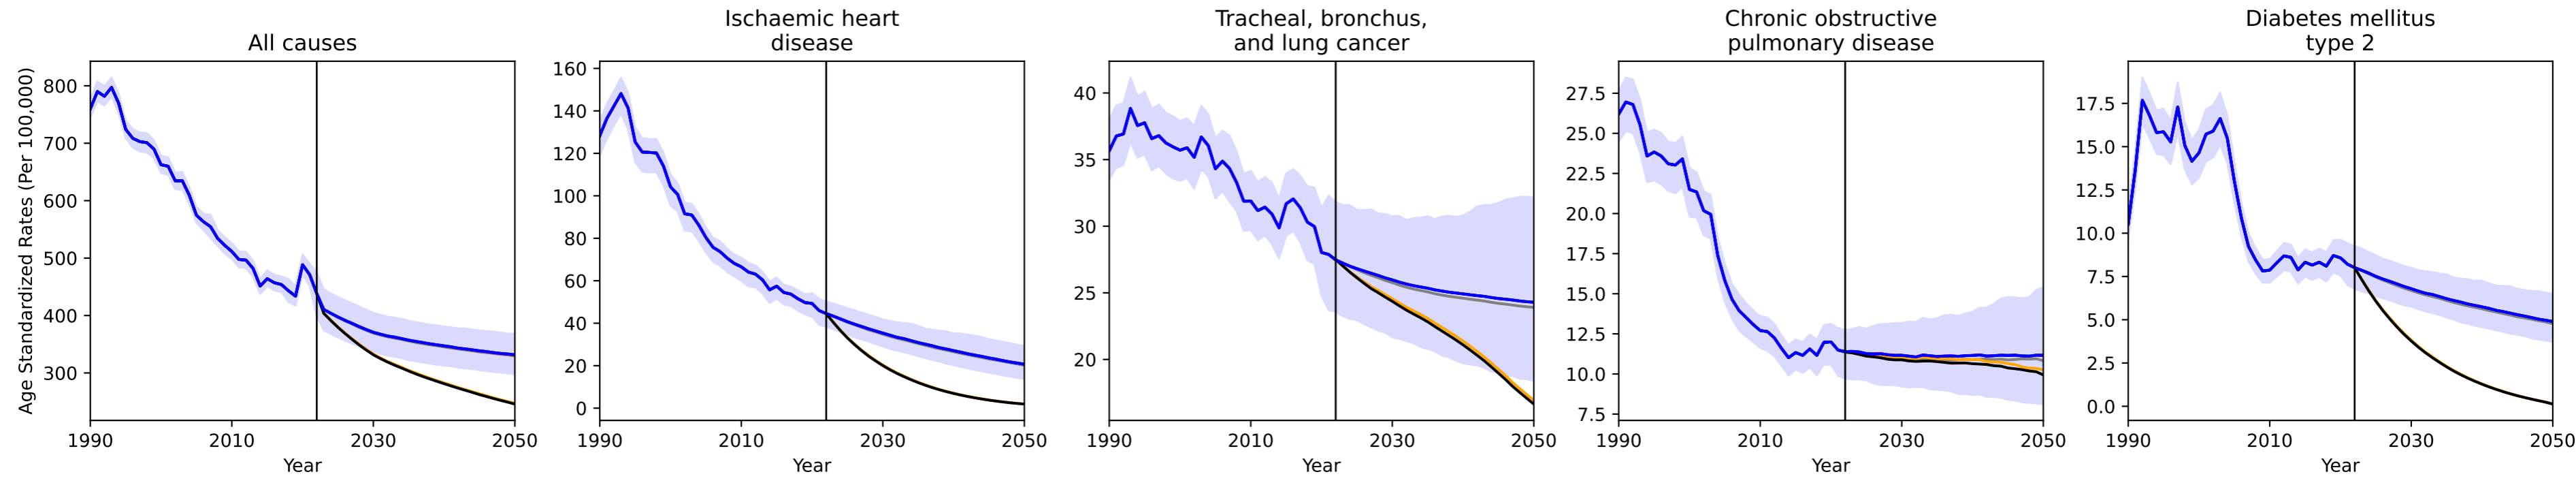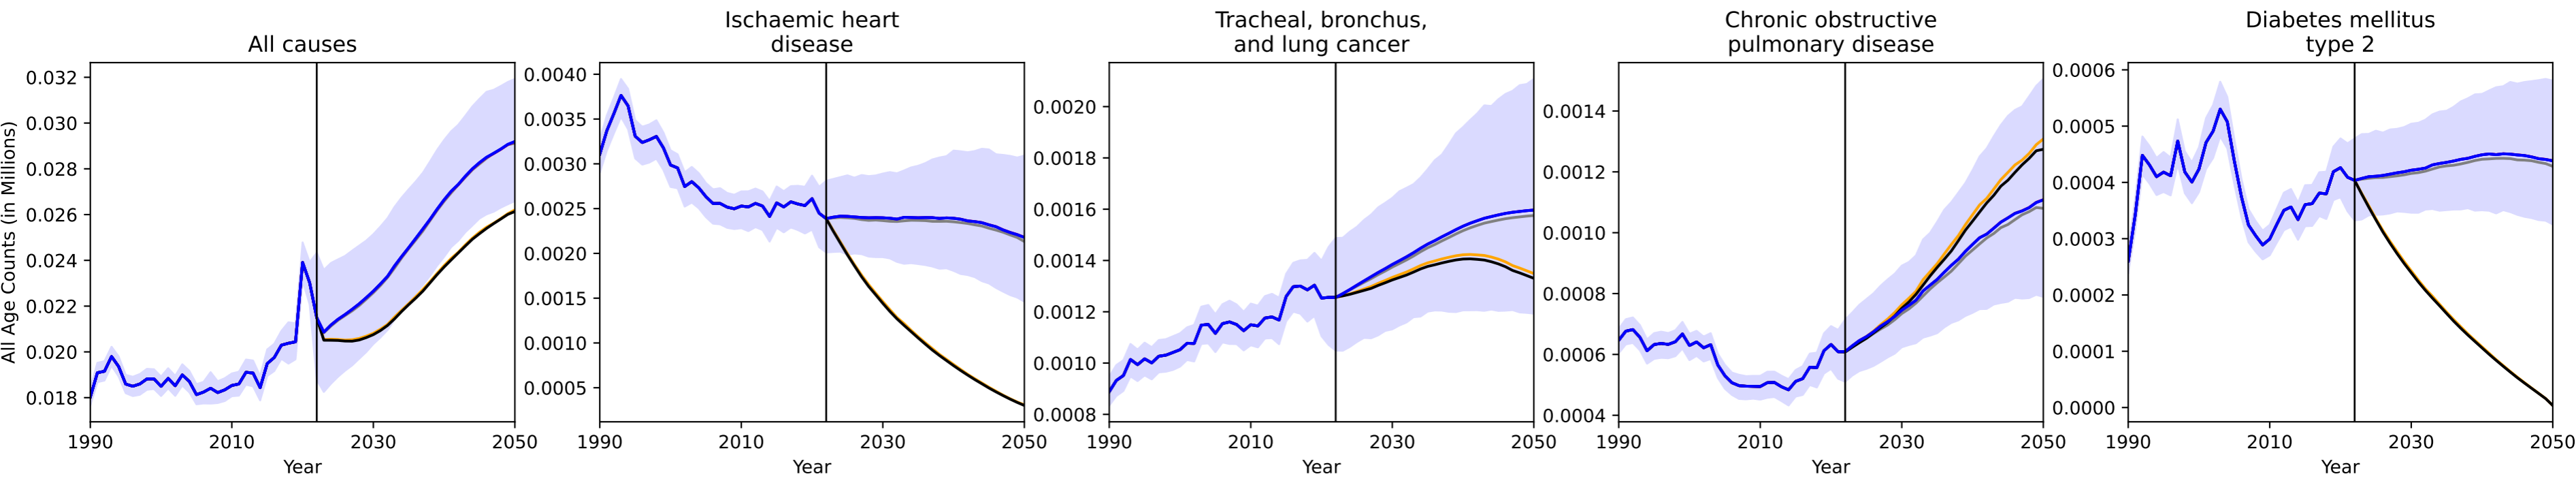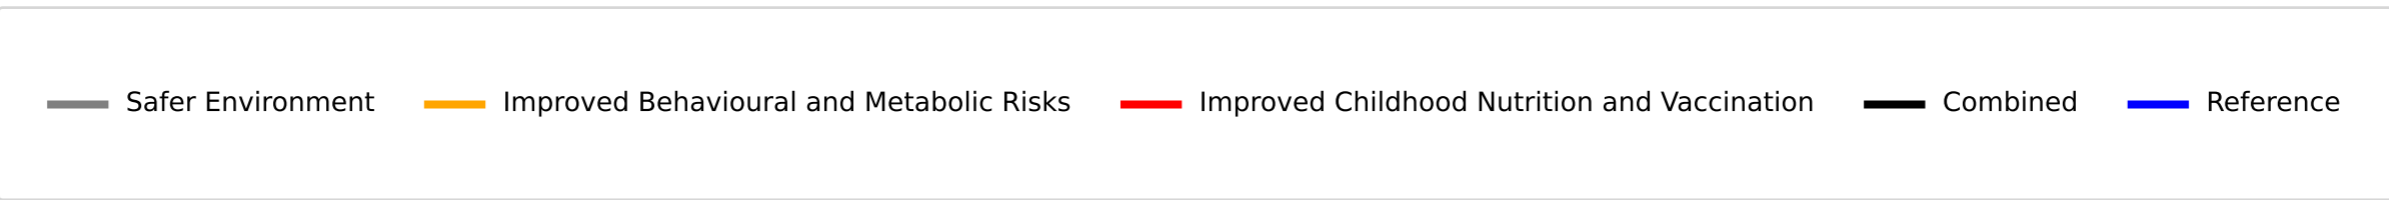

# Belarus

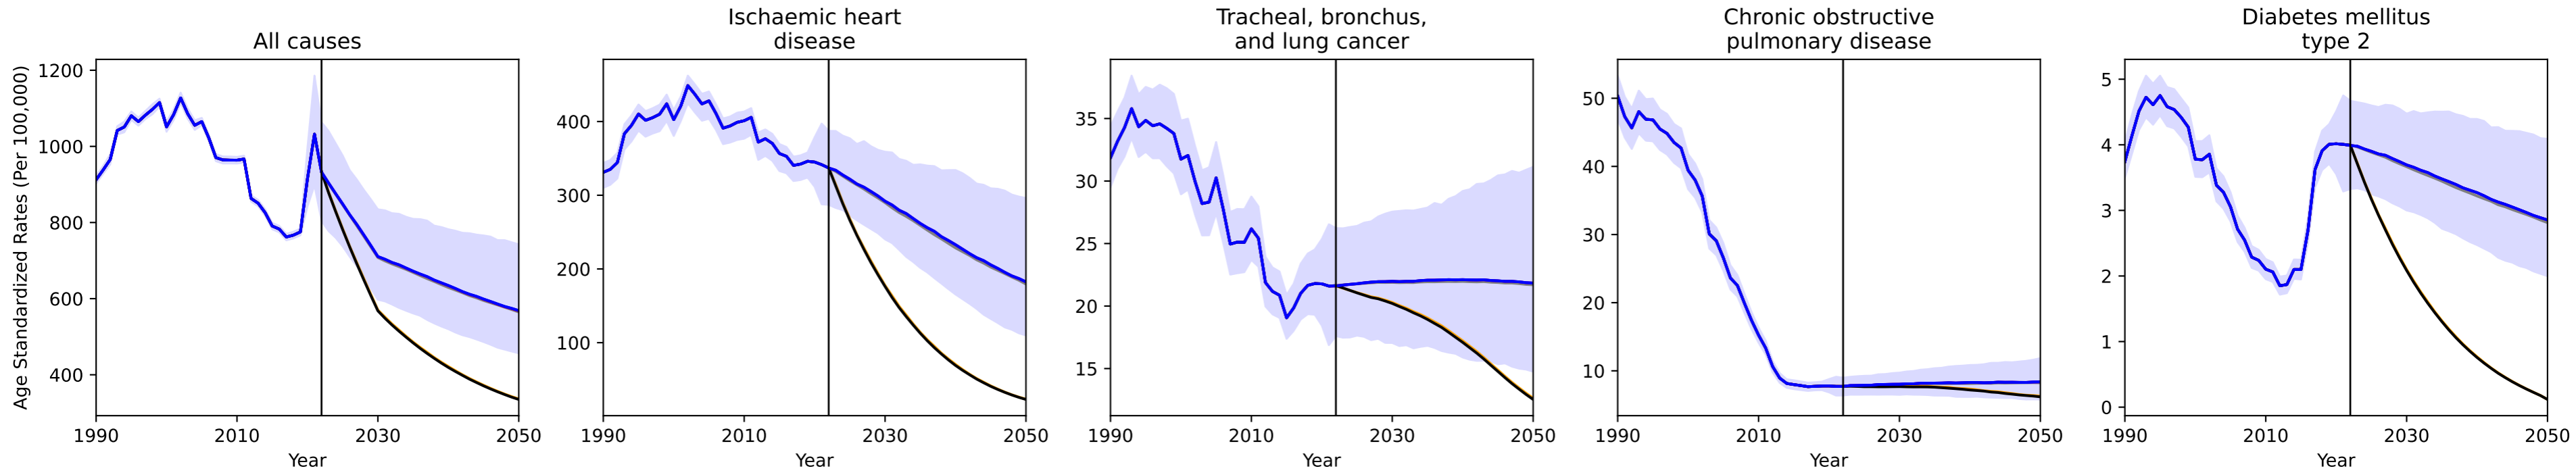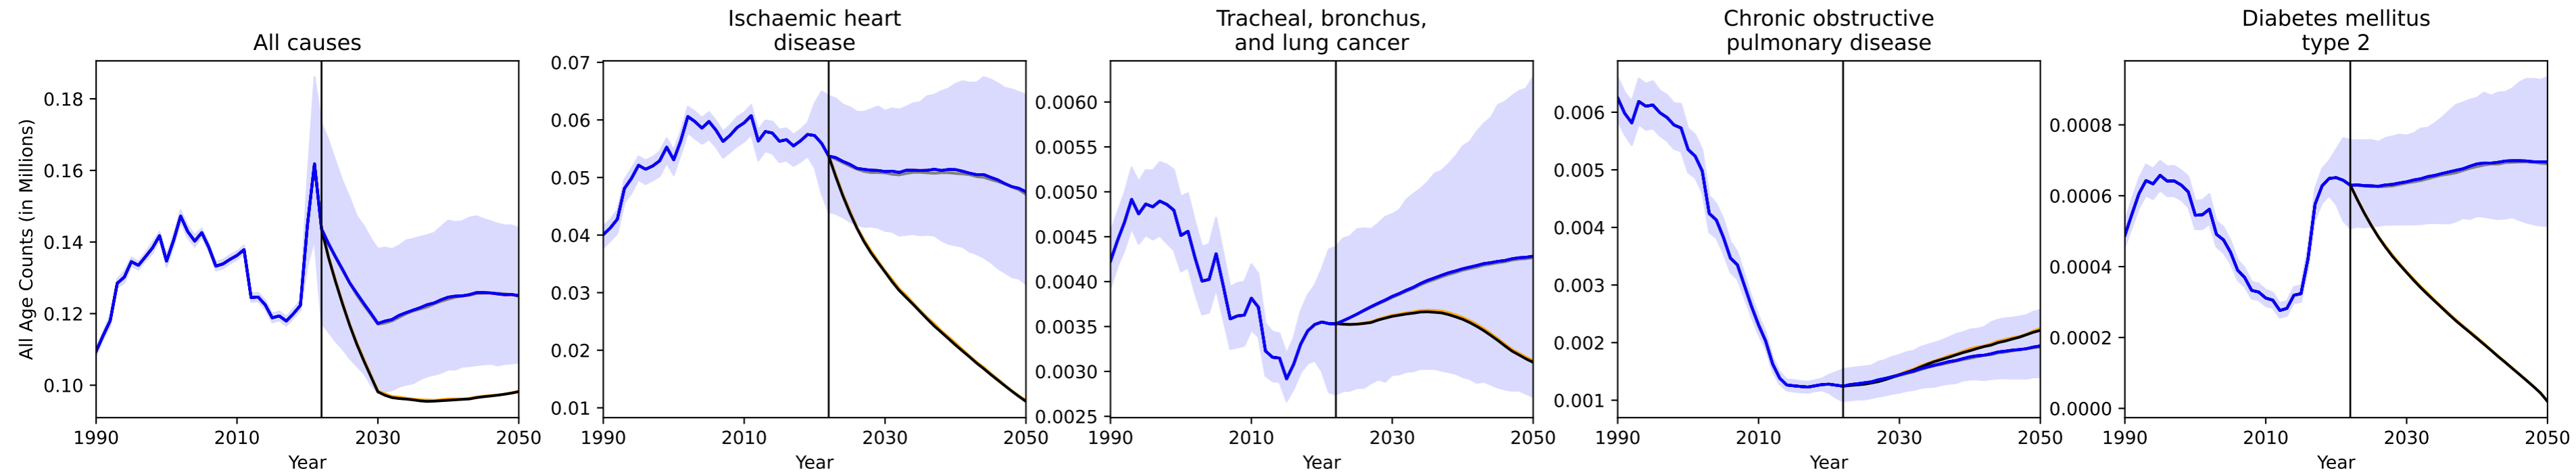

— Safer Environment — Improved Behavioural and Metabolic Risks — Improved Childhood Nutrition and Vaccination — Combined — Reference

# Estonia

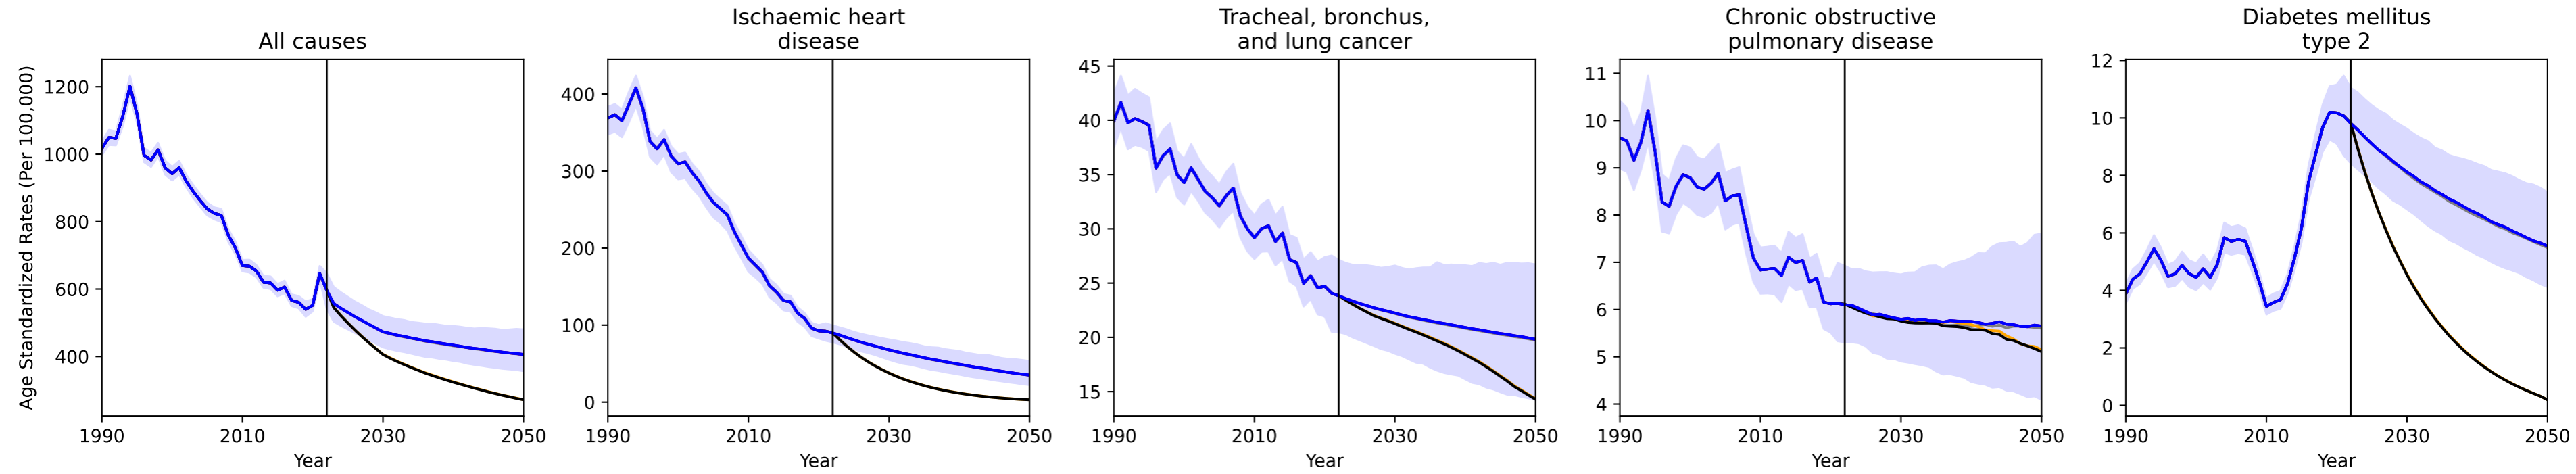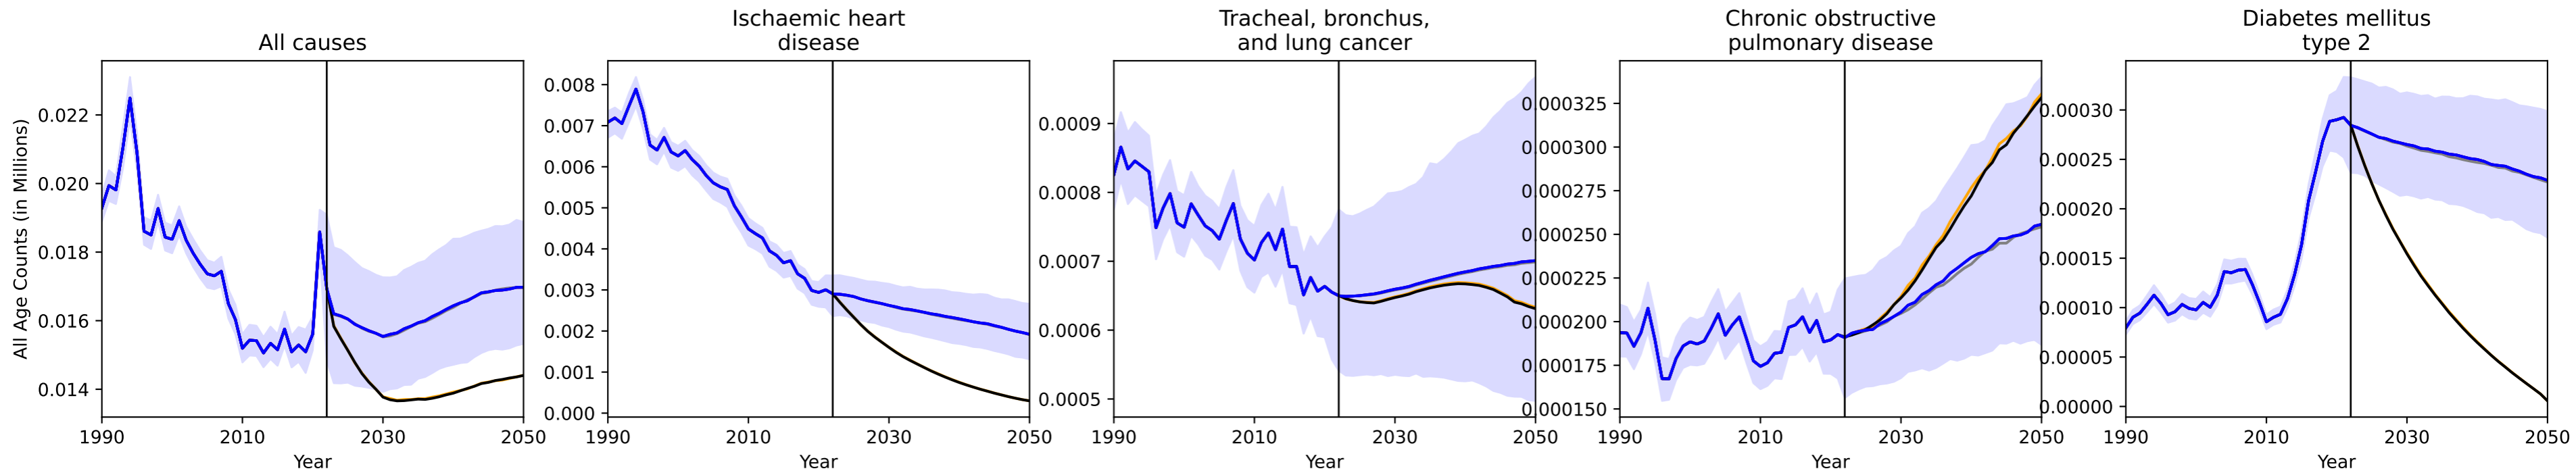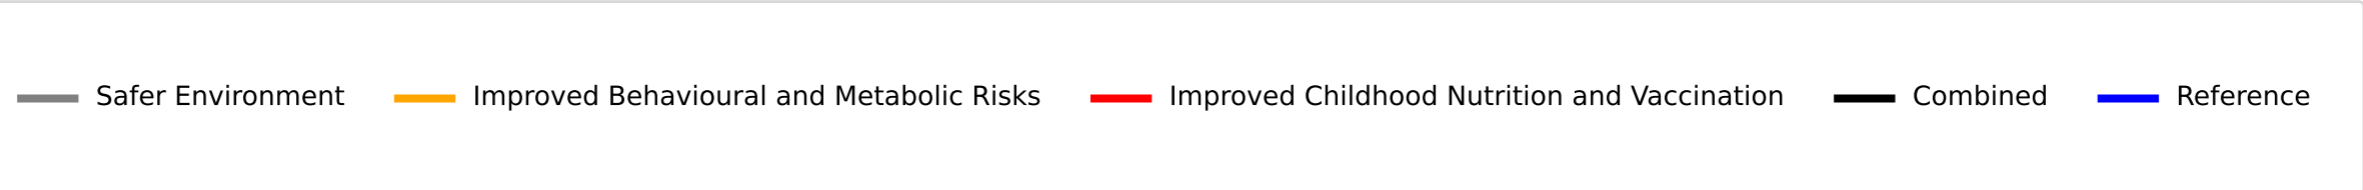

# Latvia

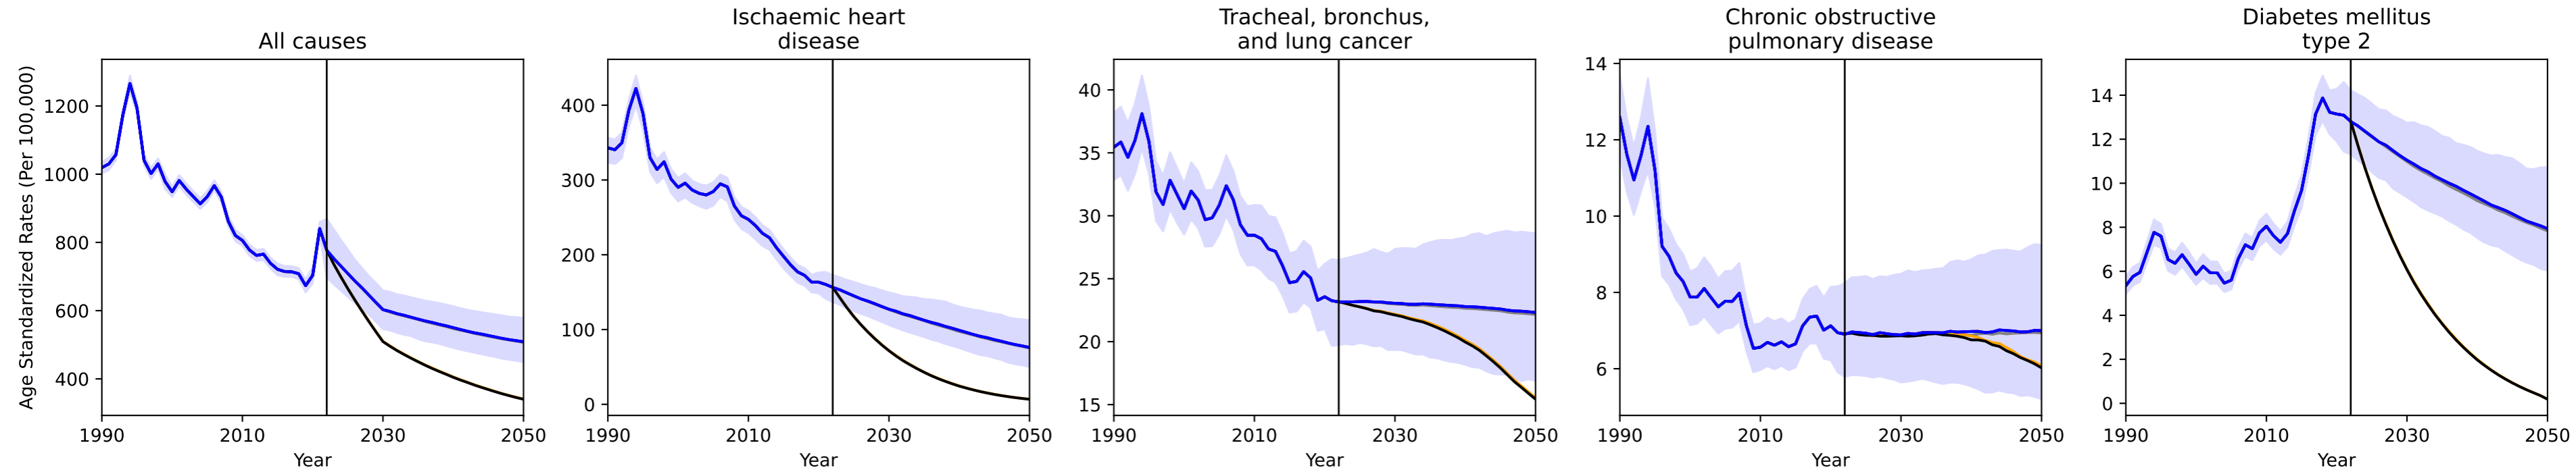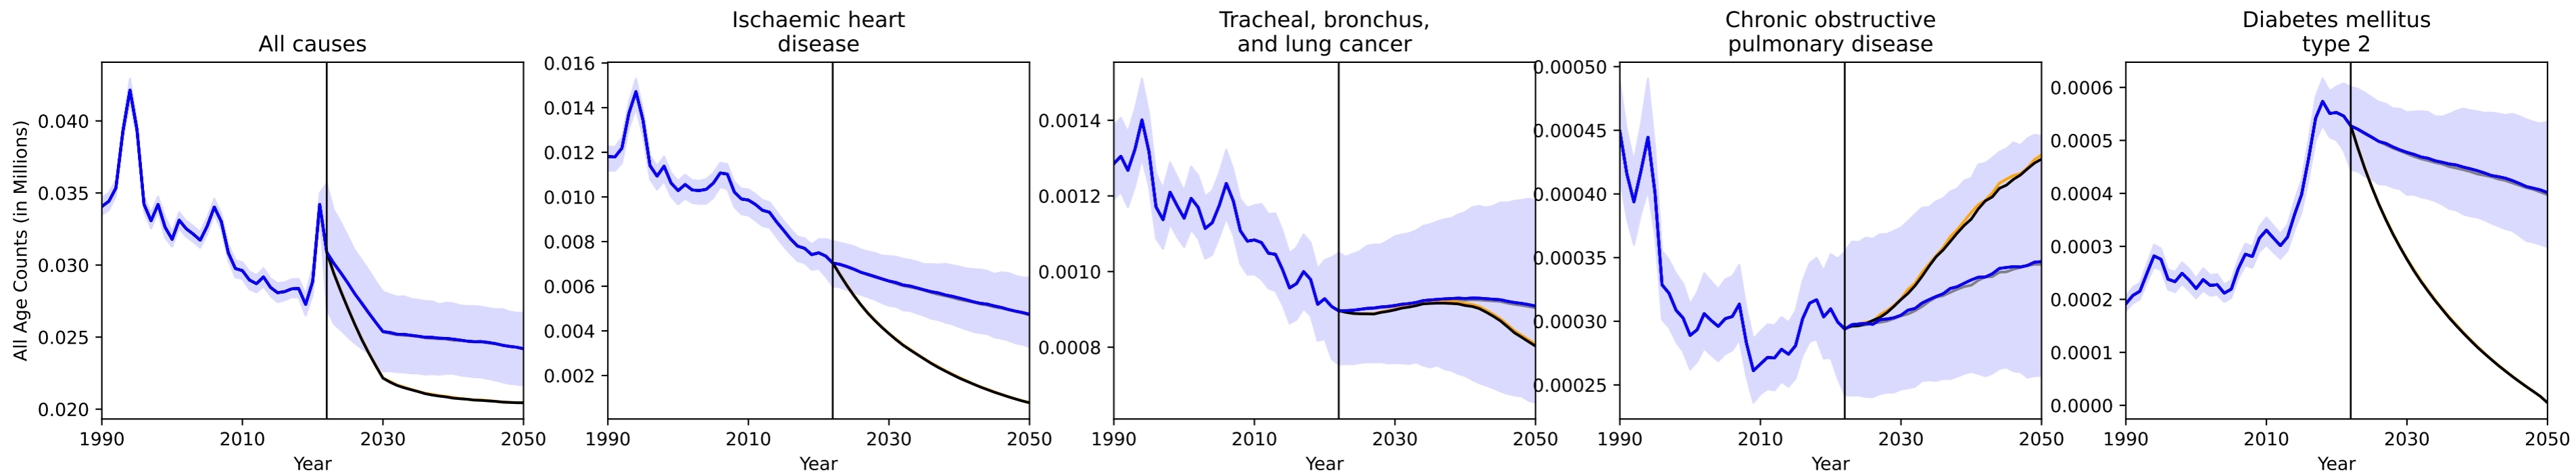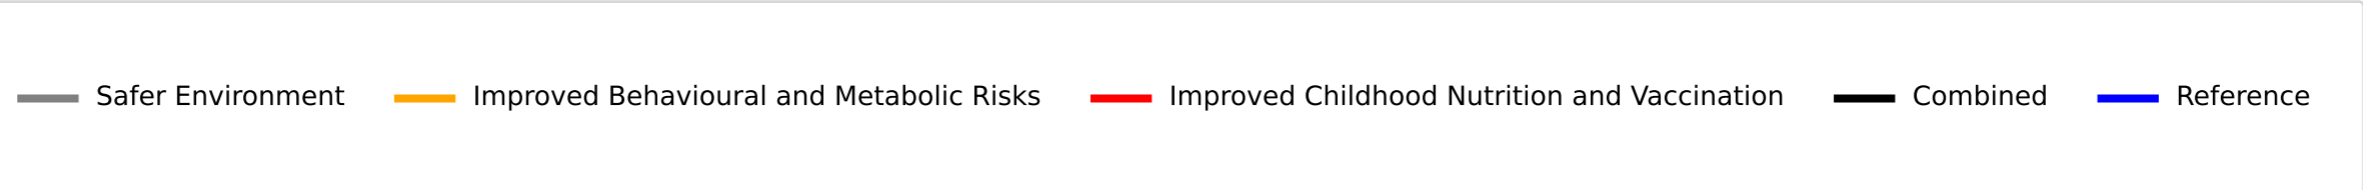

# Lithuania

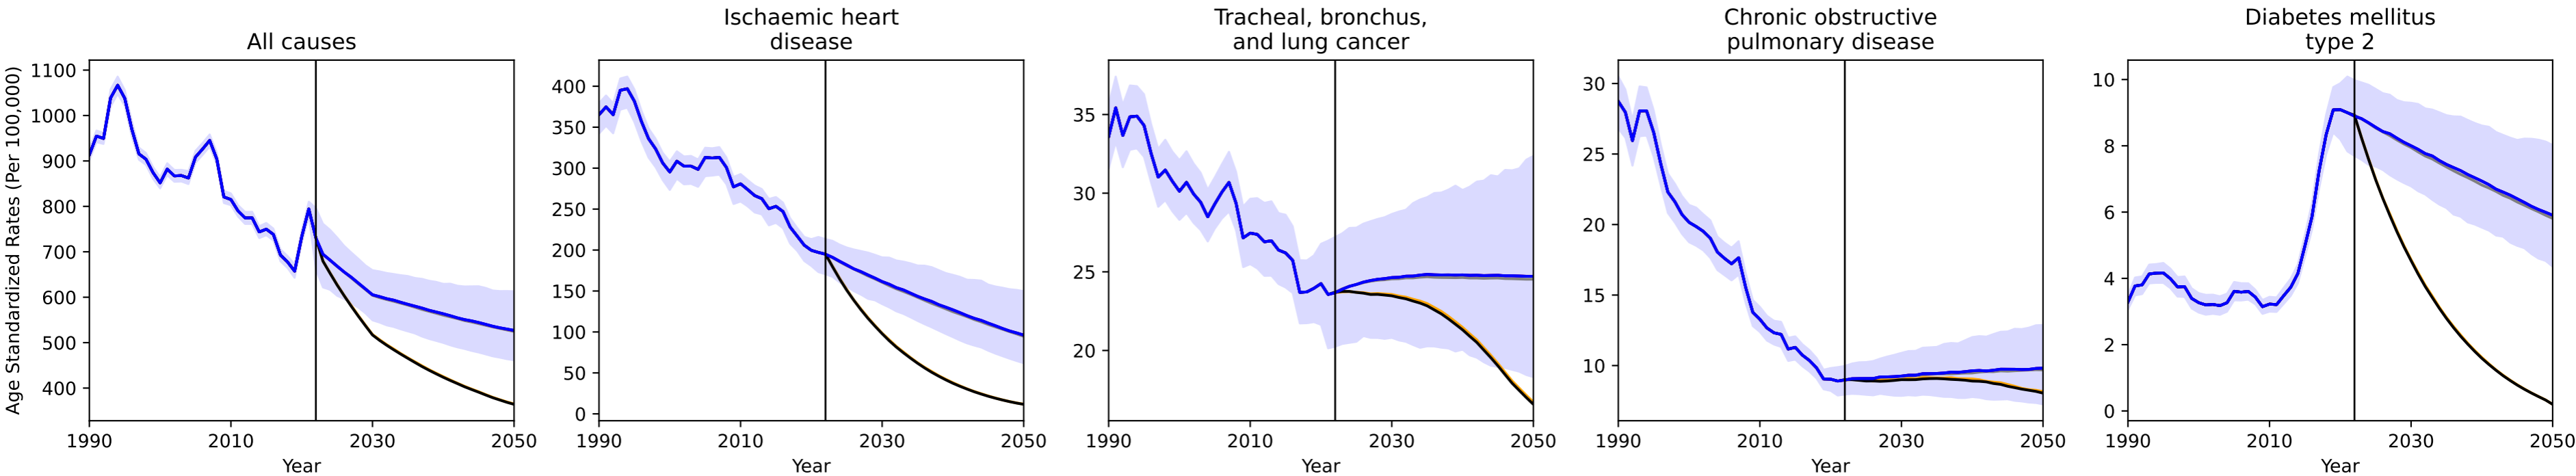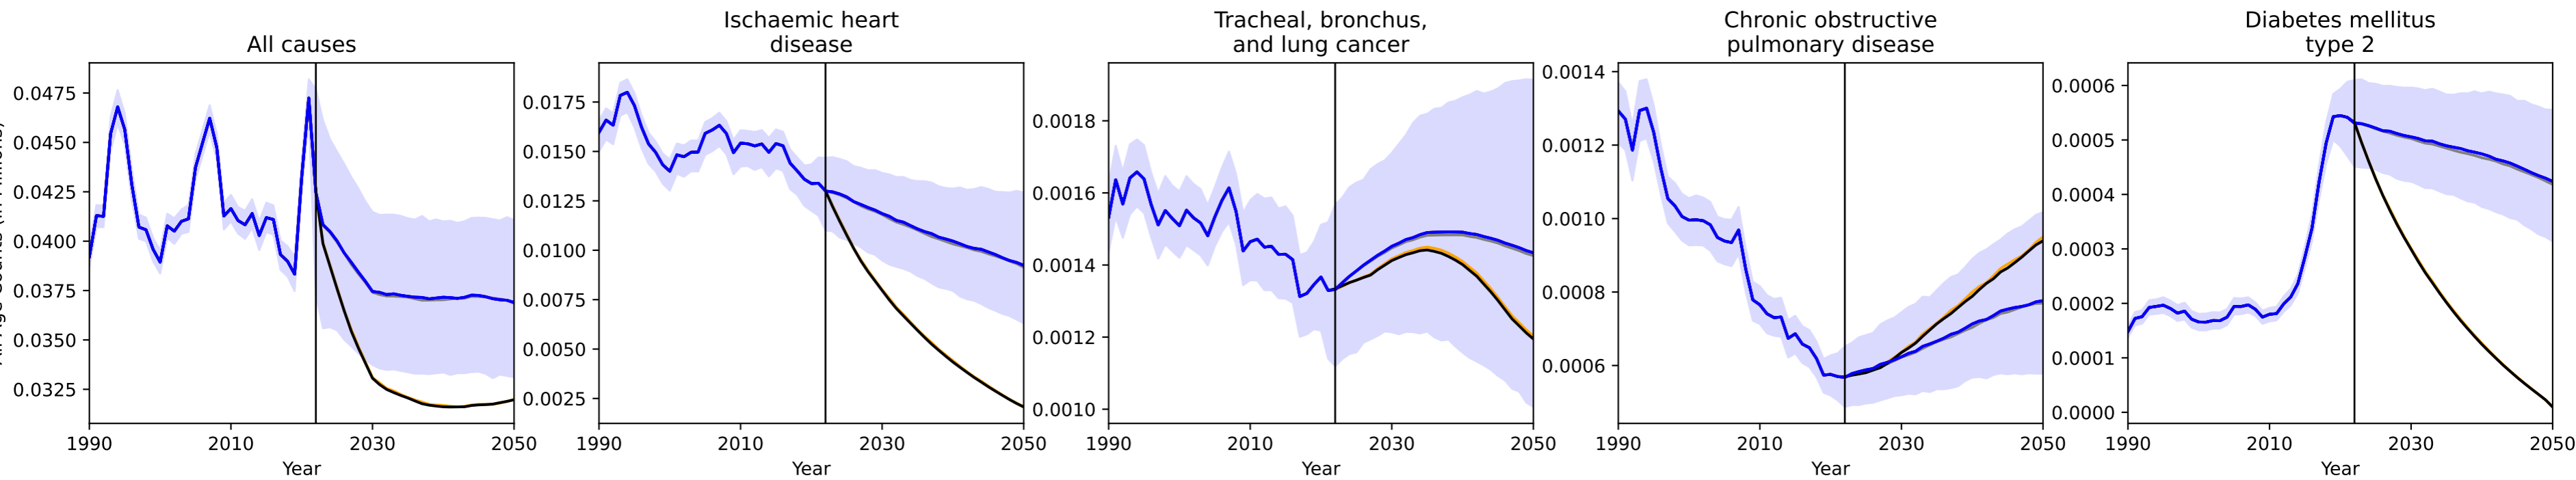



# Moldova

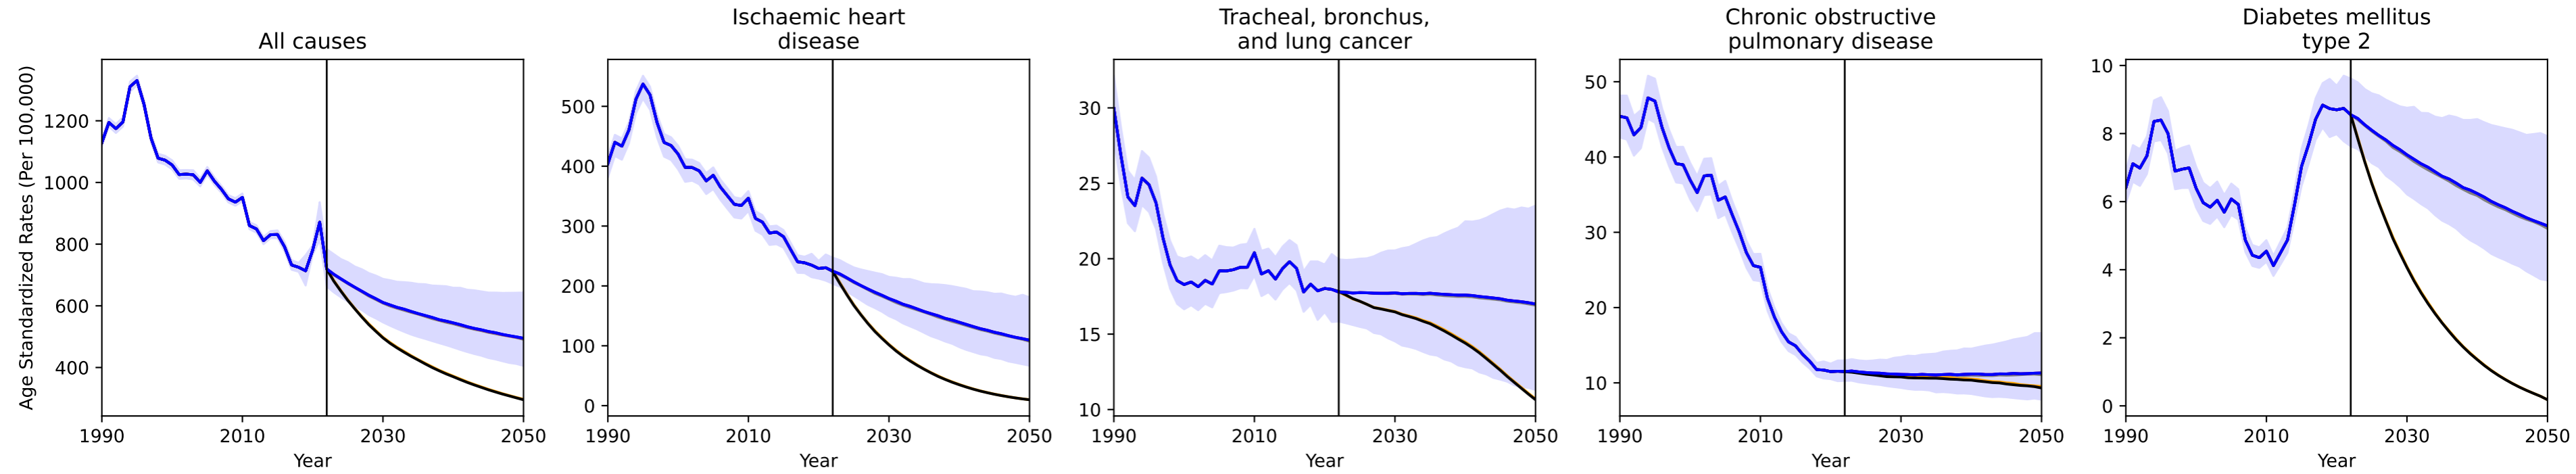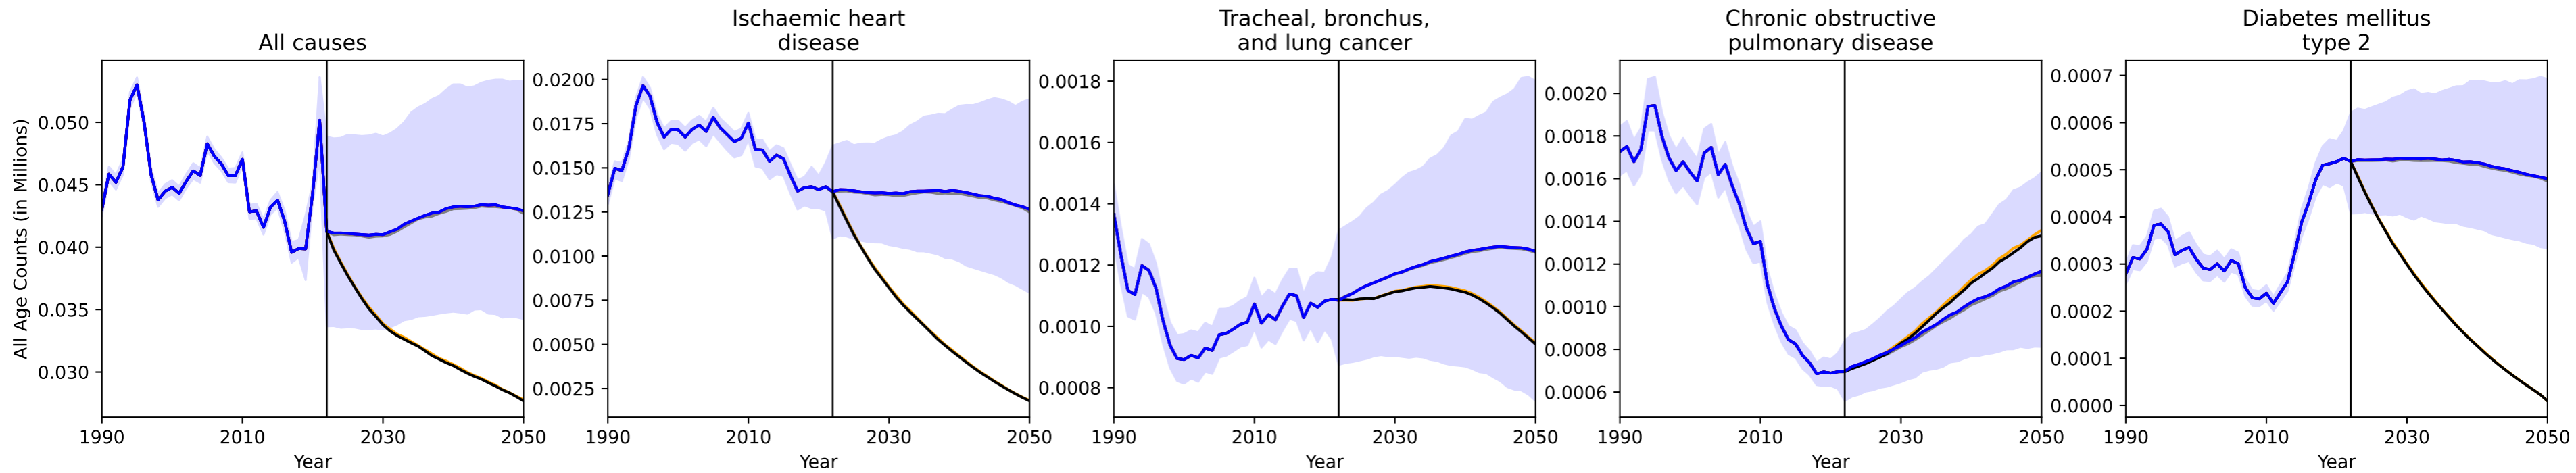

# Russia

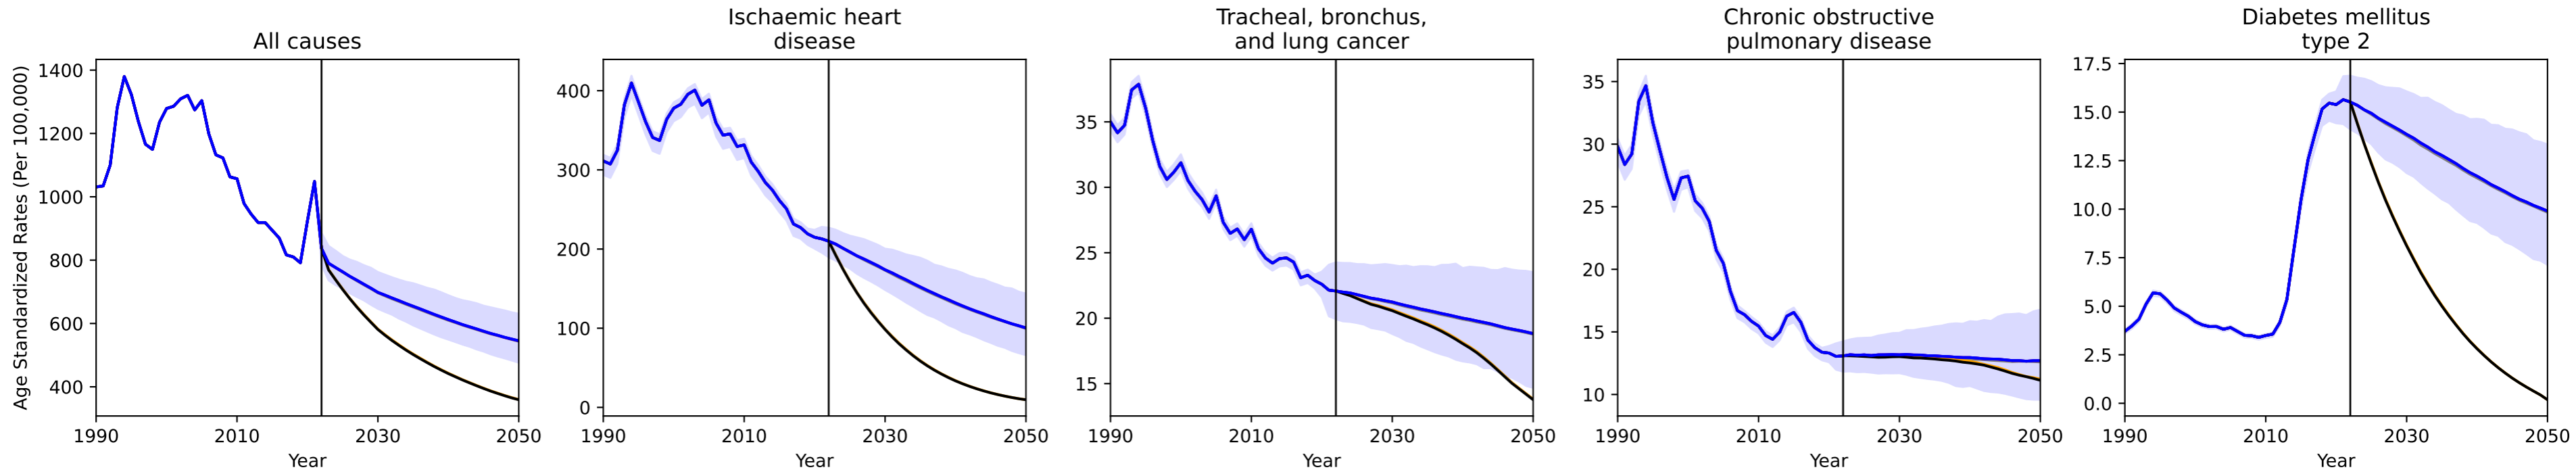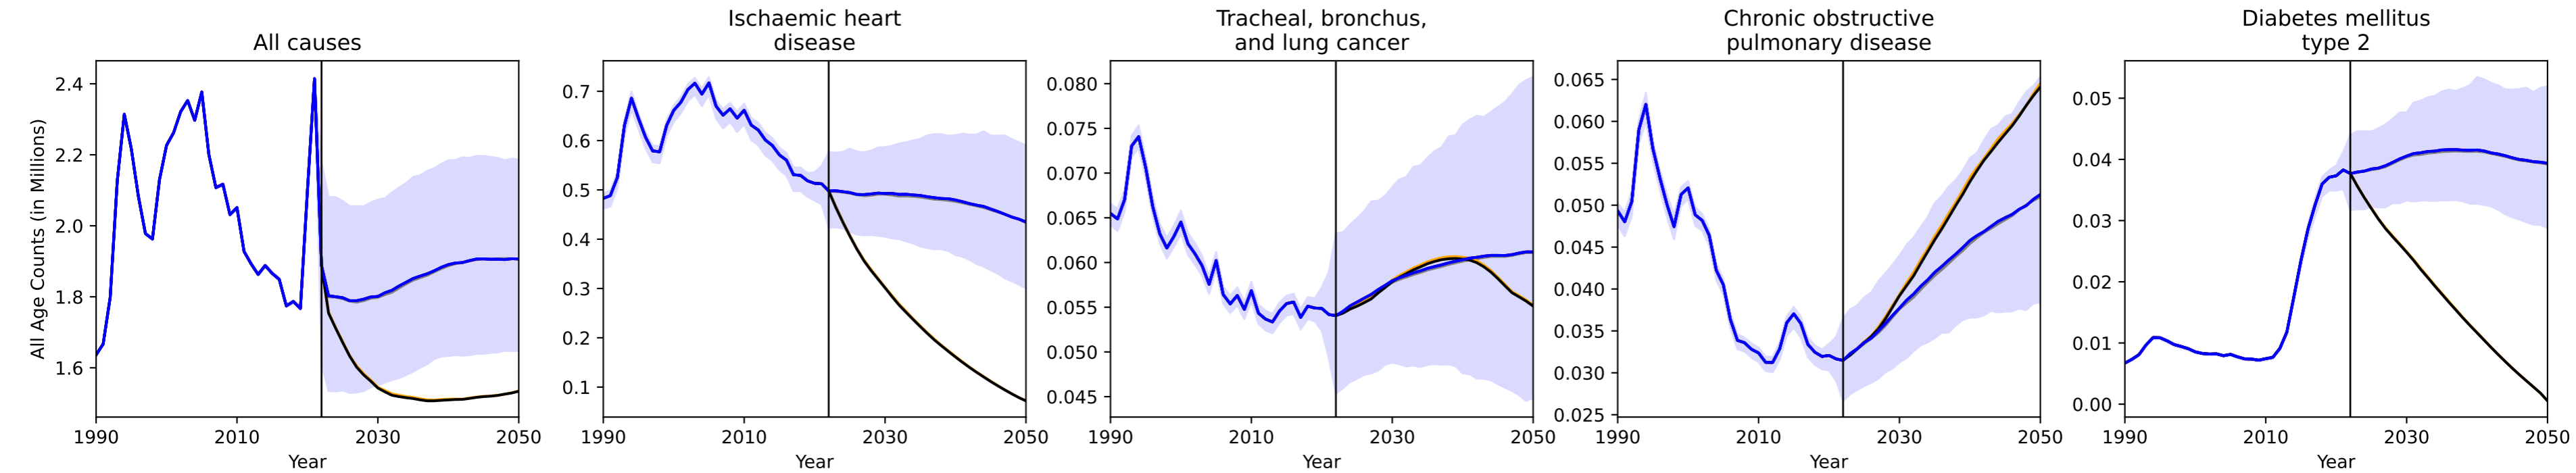

— Safer Environment — Improved Behavioural and Metabolic Risks — Improved Childhood Nutrition and Vaccination — Combined — Reference

# Ukraine

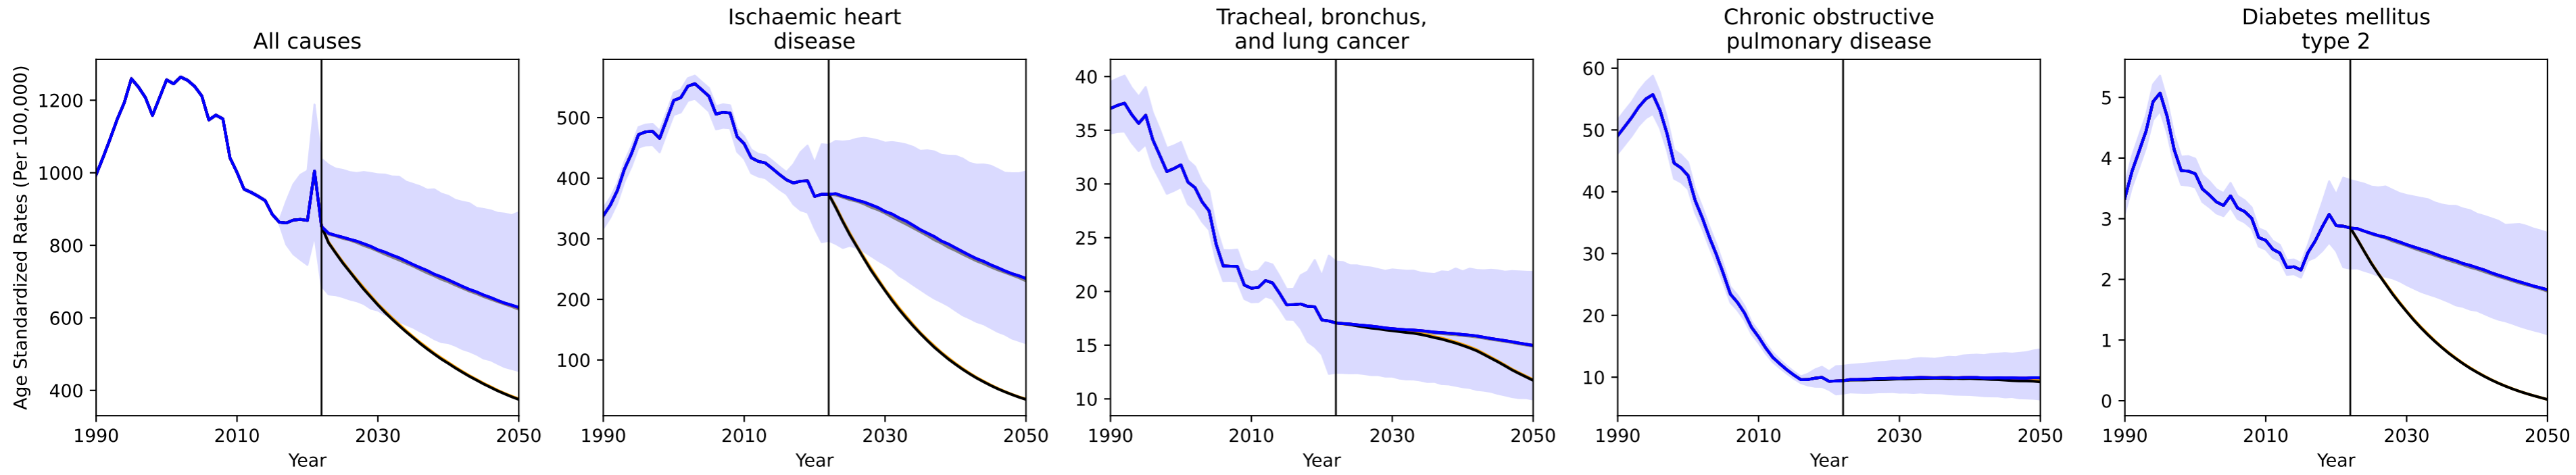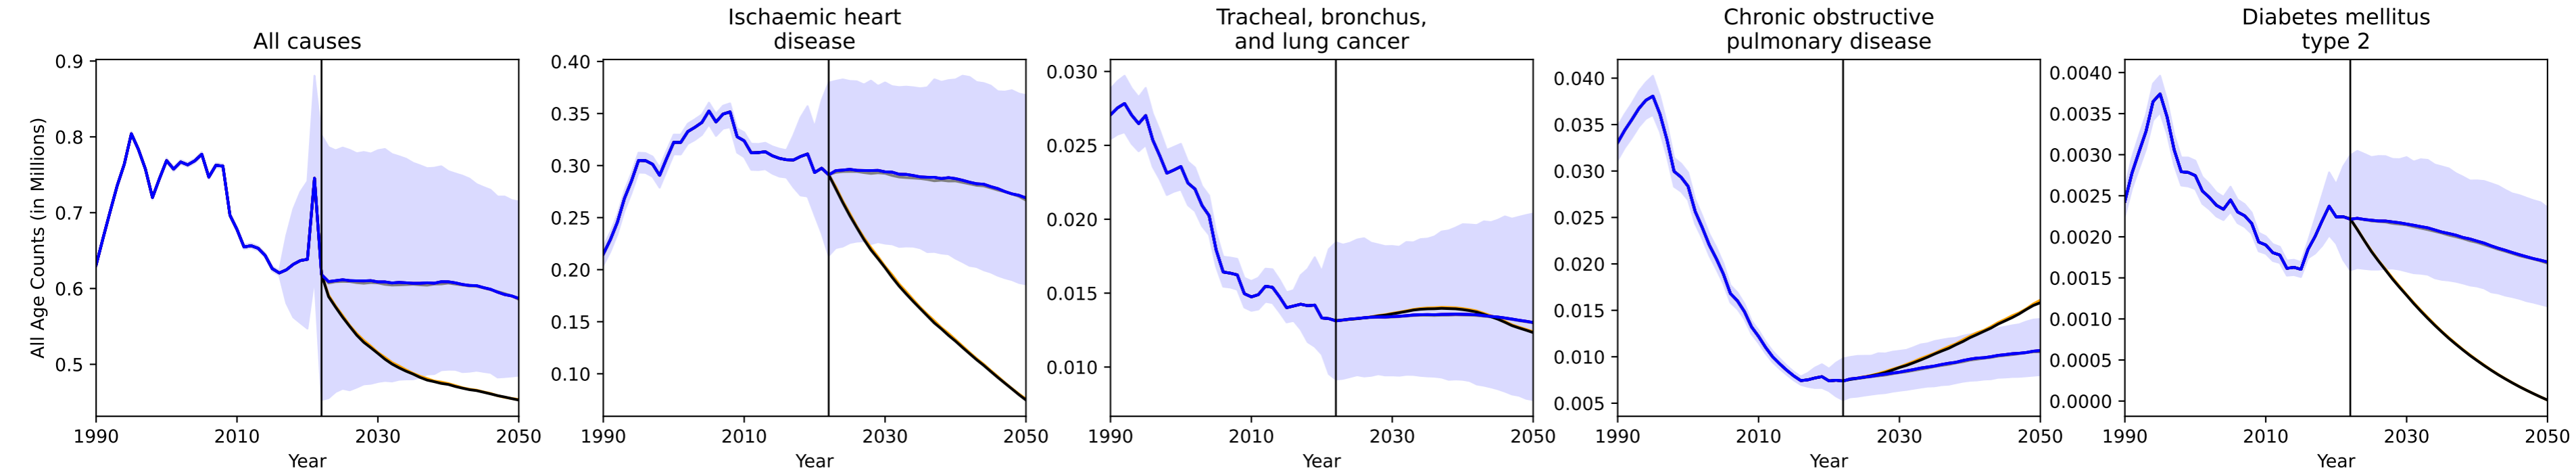

— Safer Environment — Improved Behavioural and Metabolic Risks — Improved Childhood Nutrition and Vaccination — Combined — Reference

# Australia

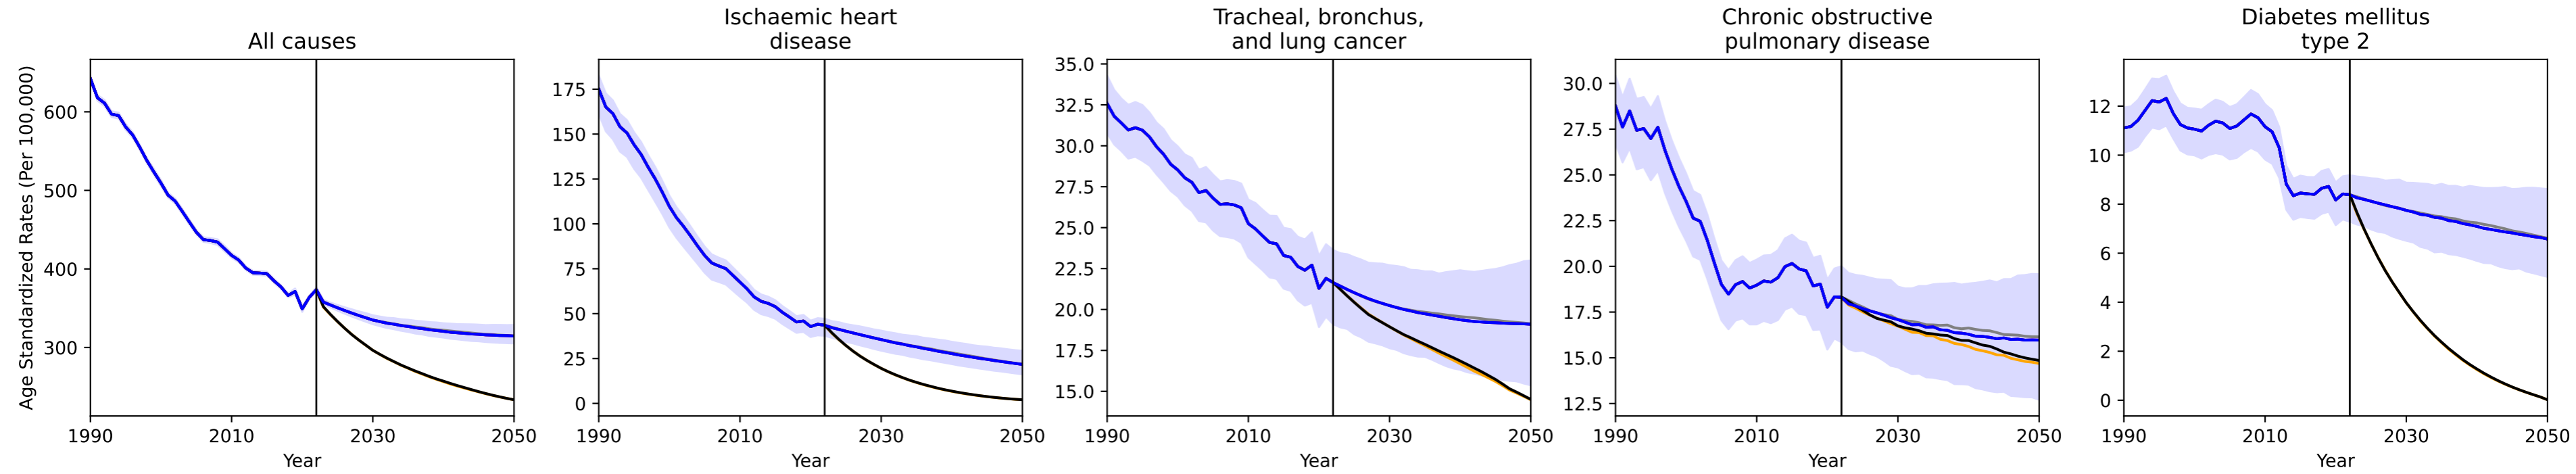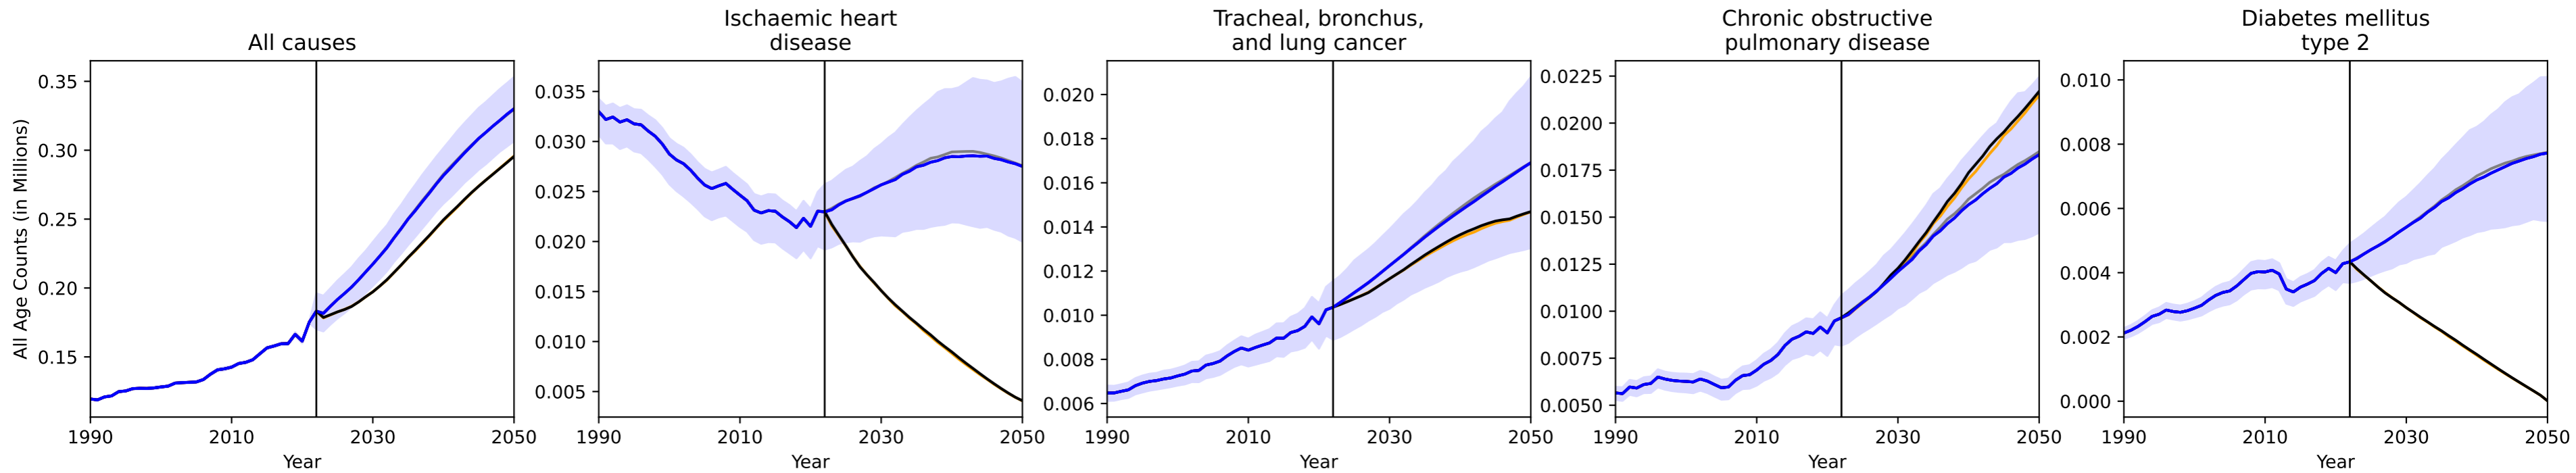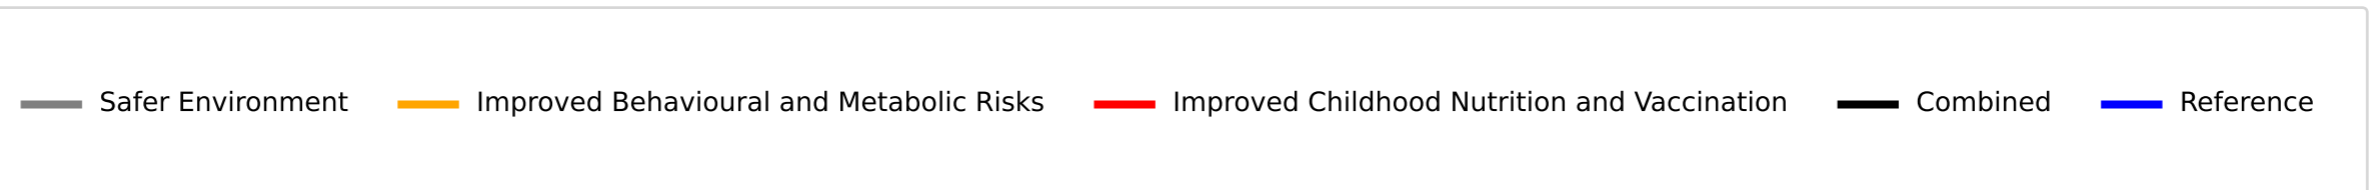

# New Zealand

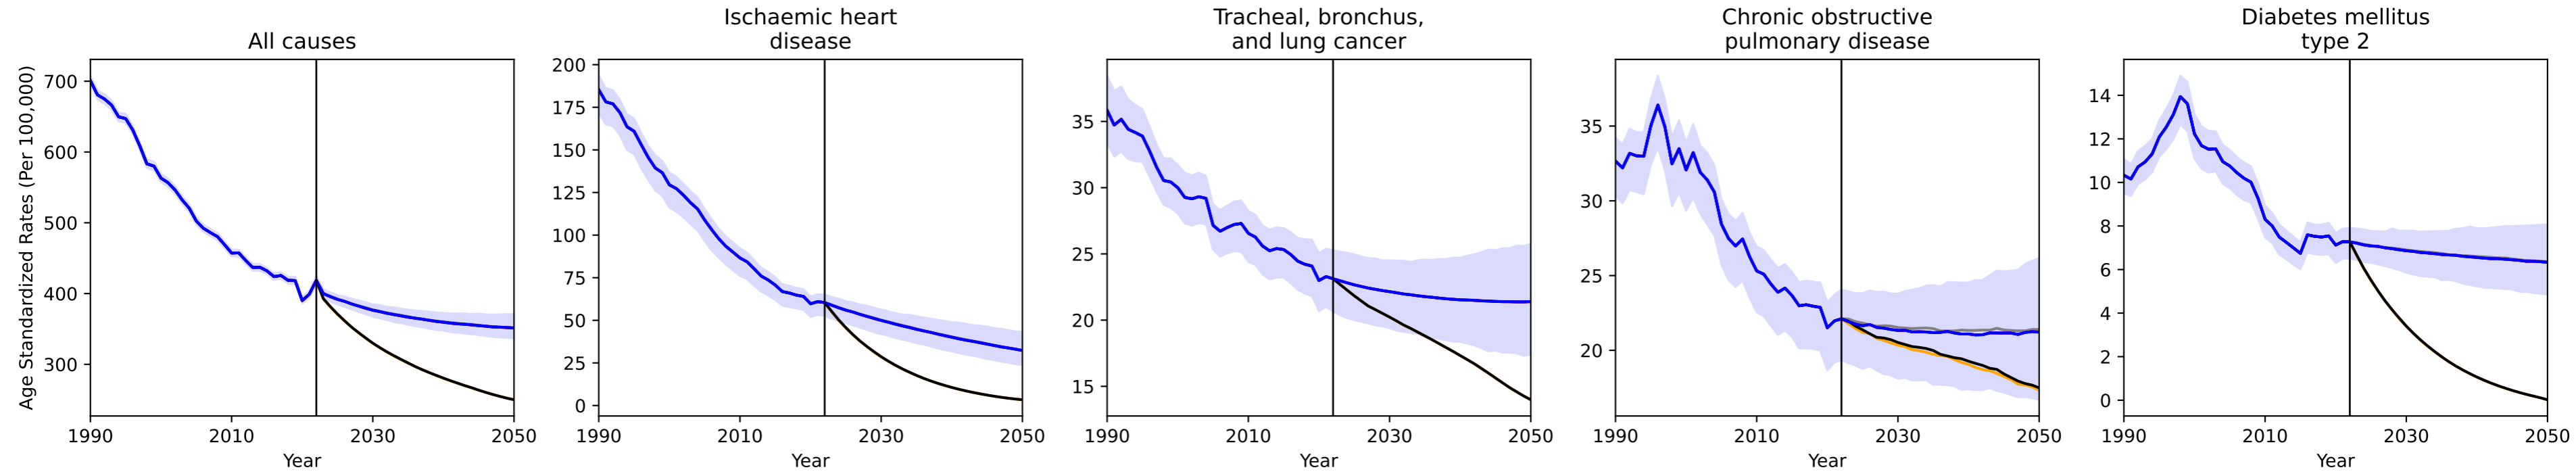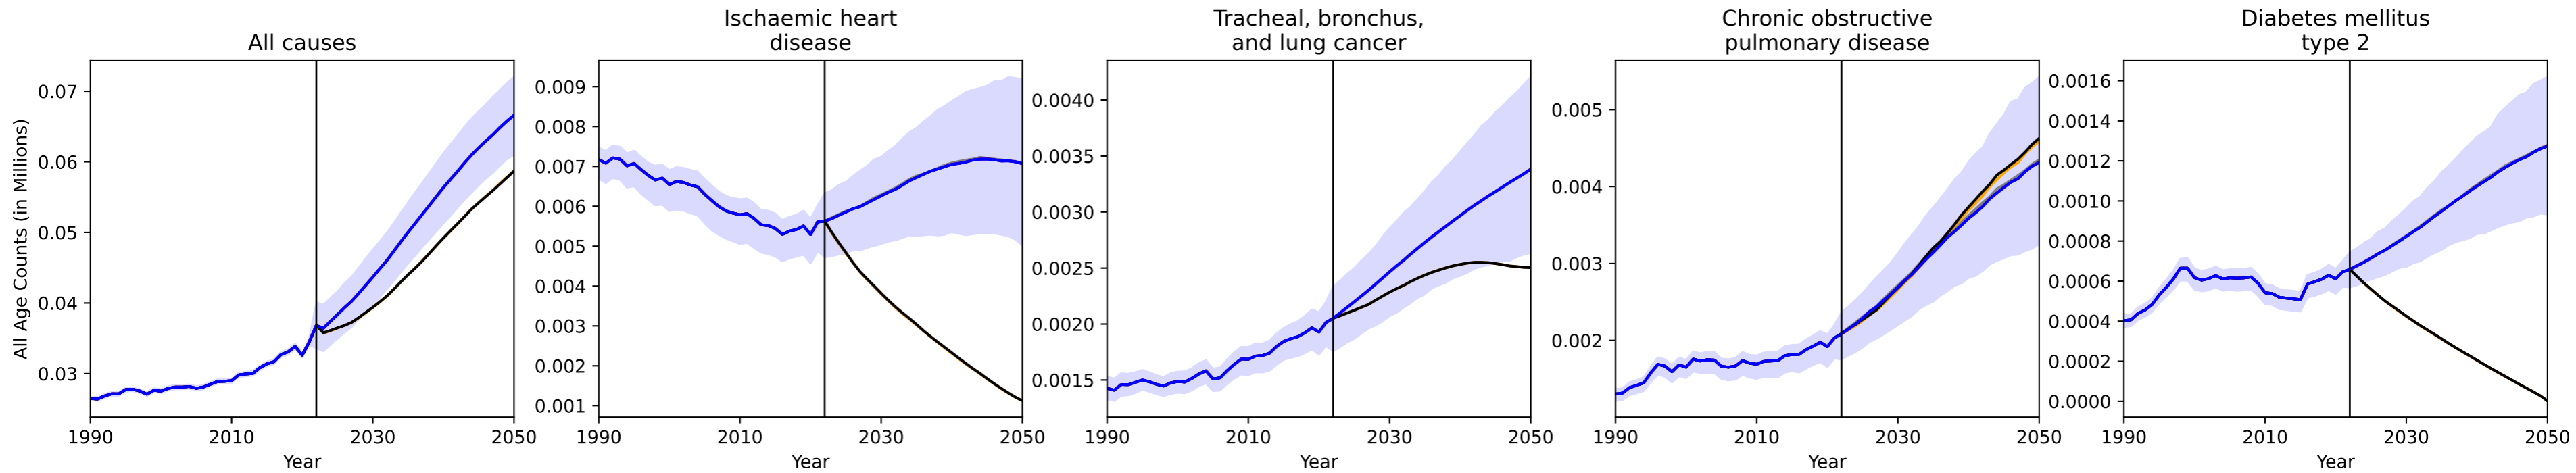

# Brunei

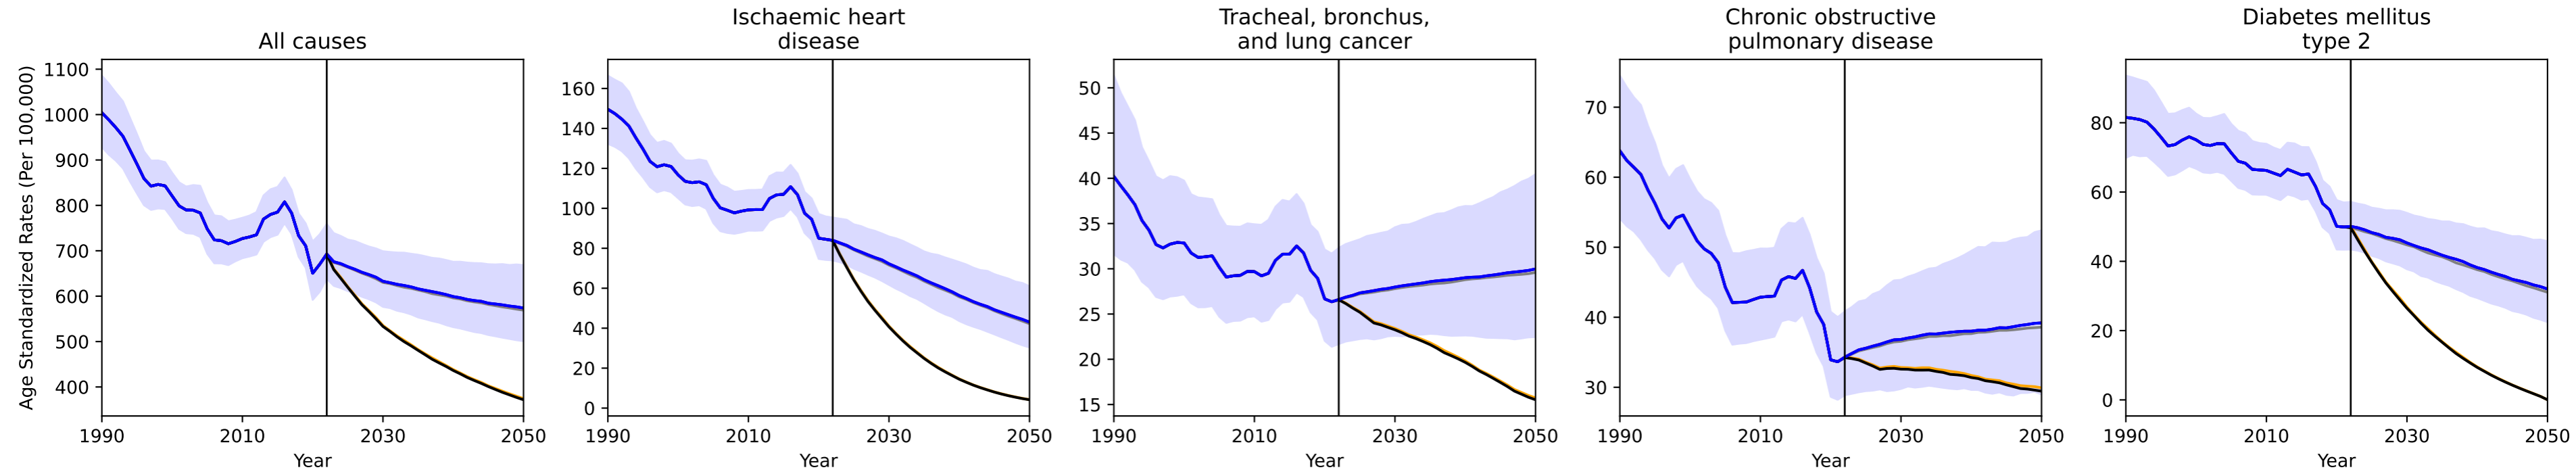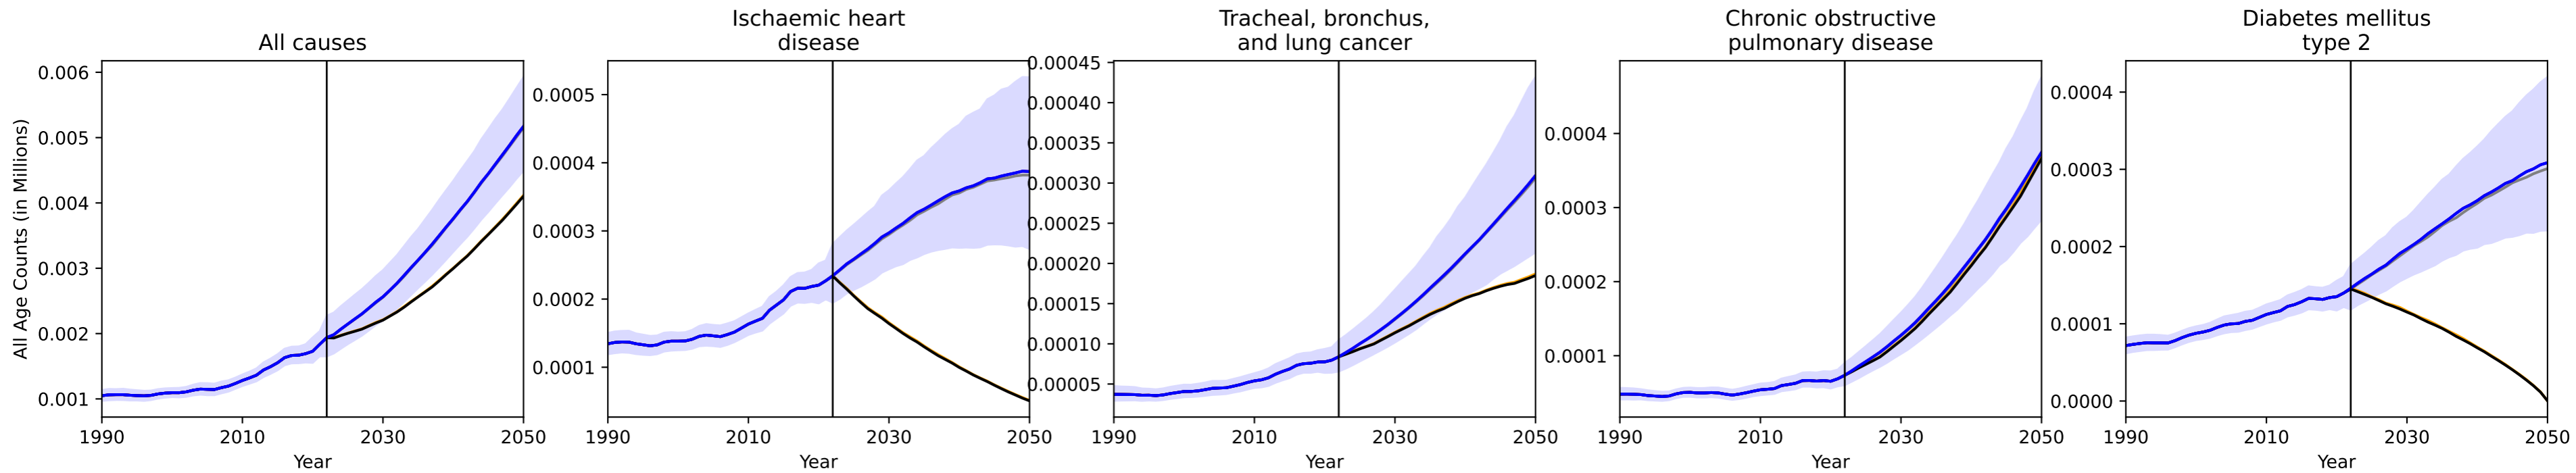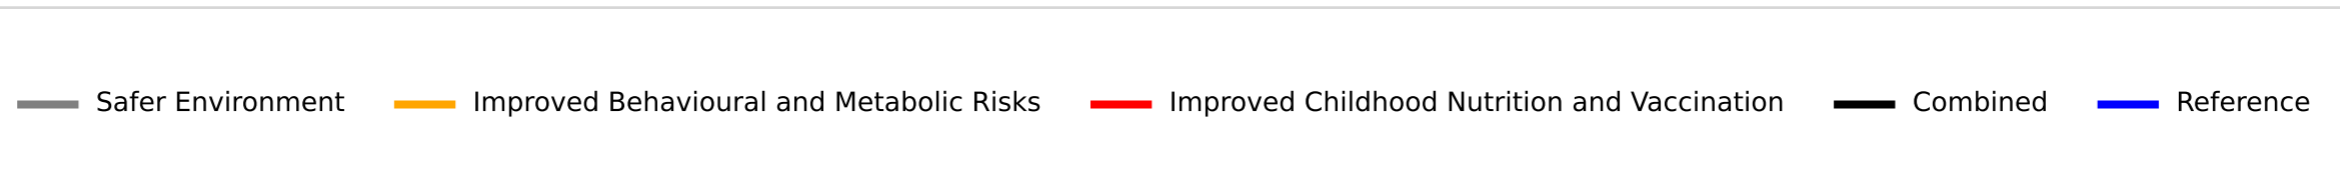

# Japan

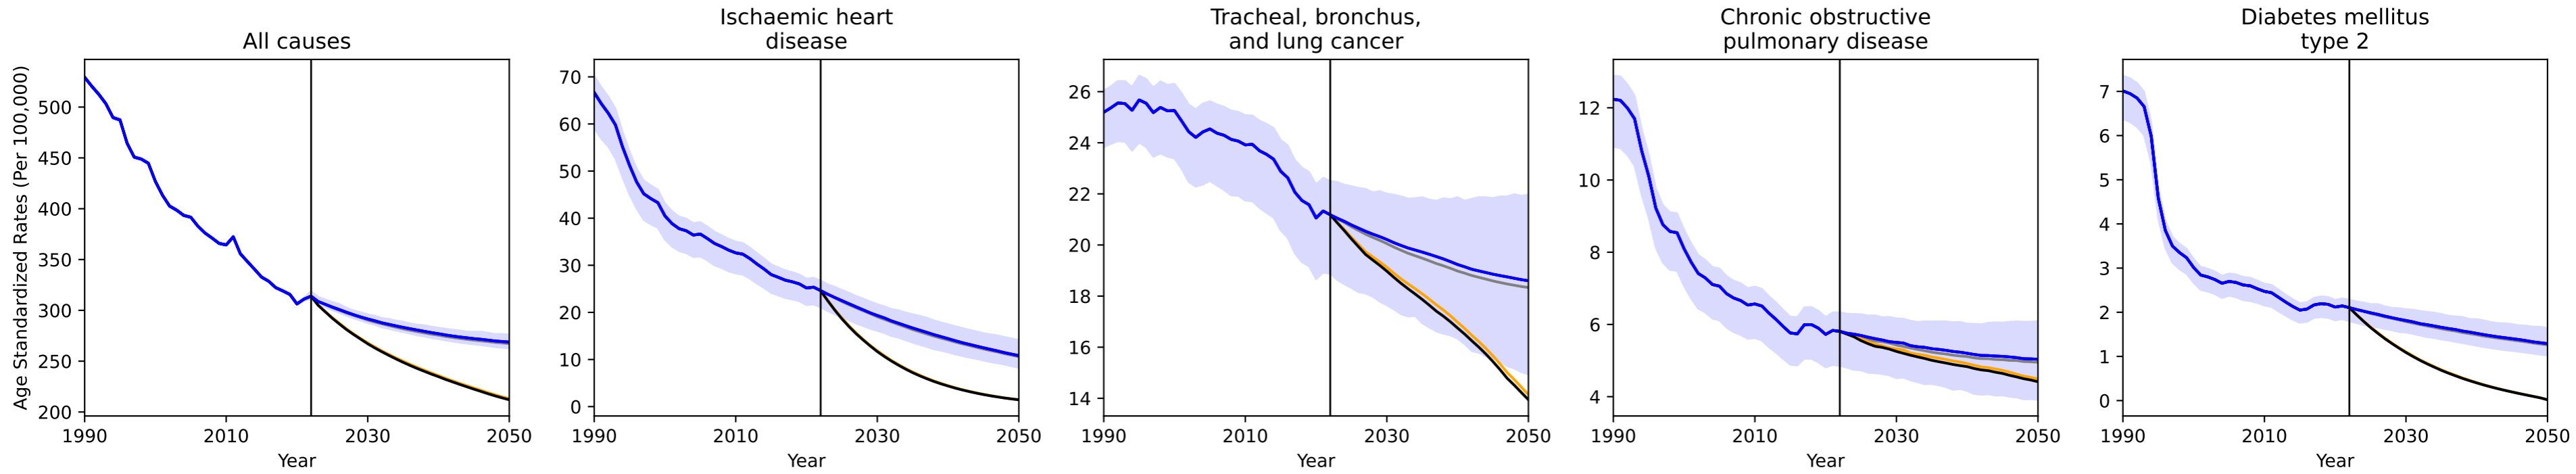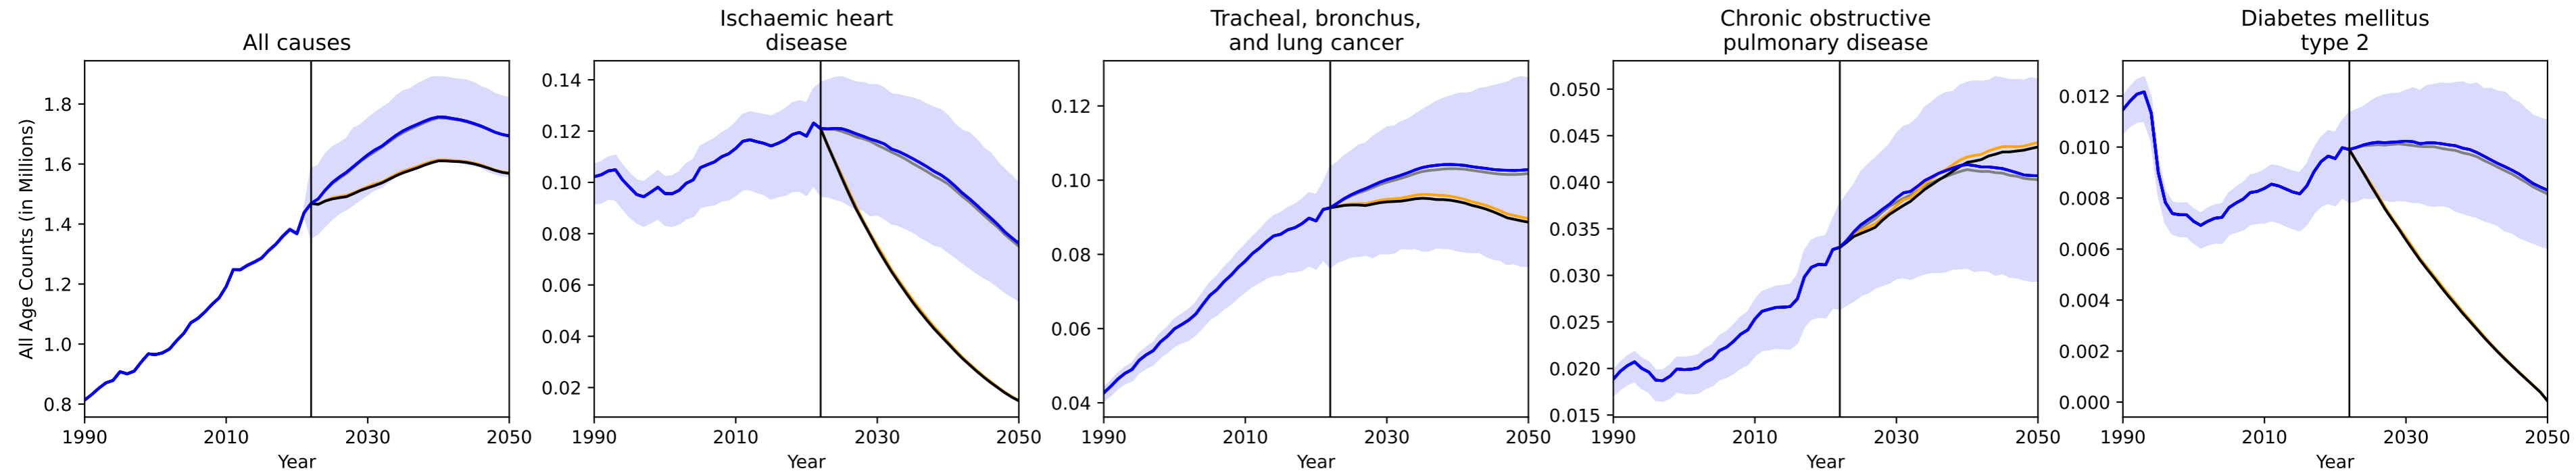

— Safer Environment — Improved Behavioural and Metabolic Risks — Improved Childhood Nutrition and Vaccination — Combined — Reference

# South Korea

Supplemental Results Figure S13. All cause and top NCD causes age standardized death rates and all age counts by scenario and location, 1990-2050

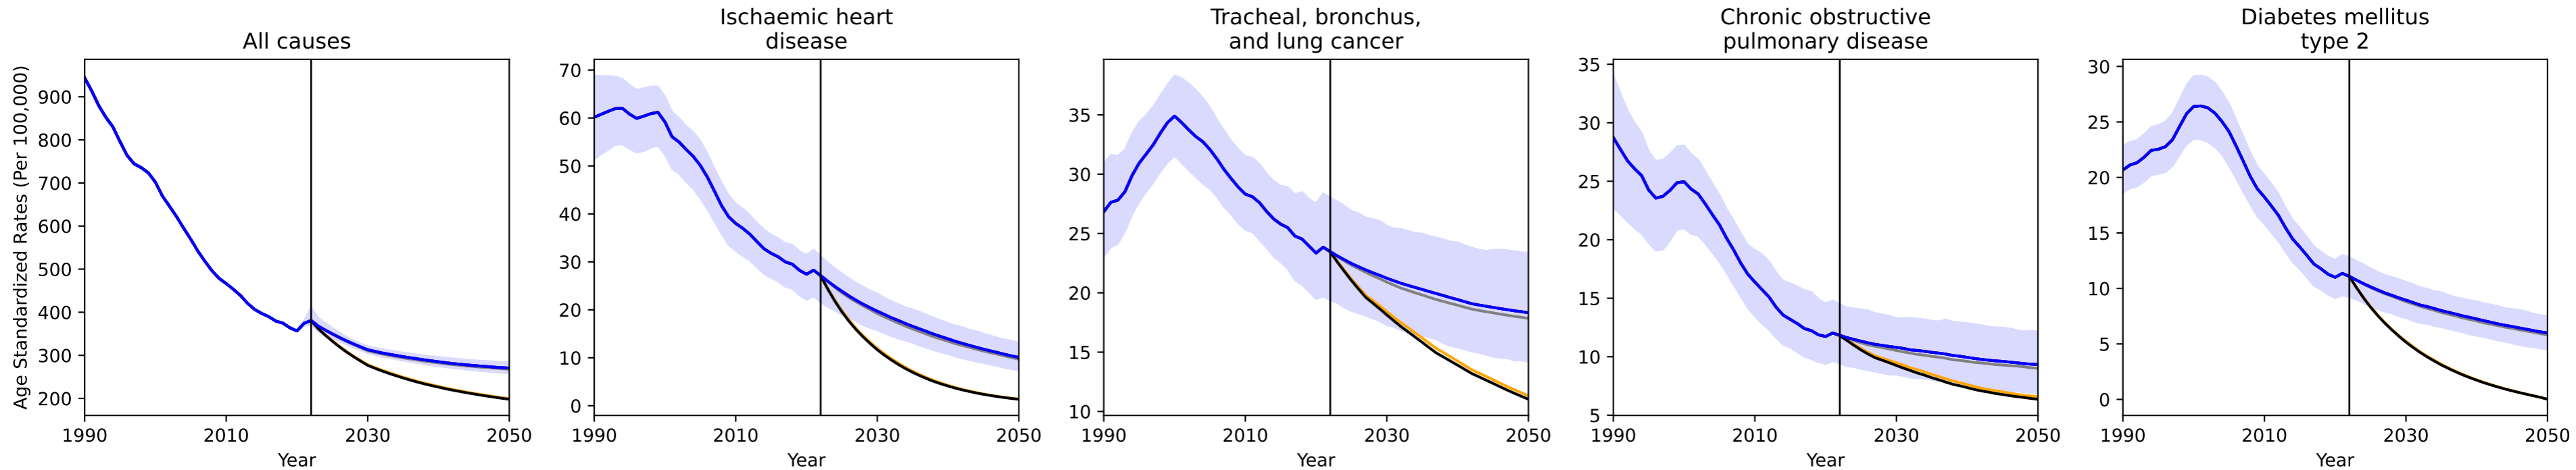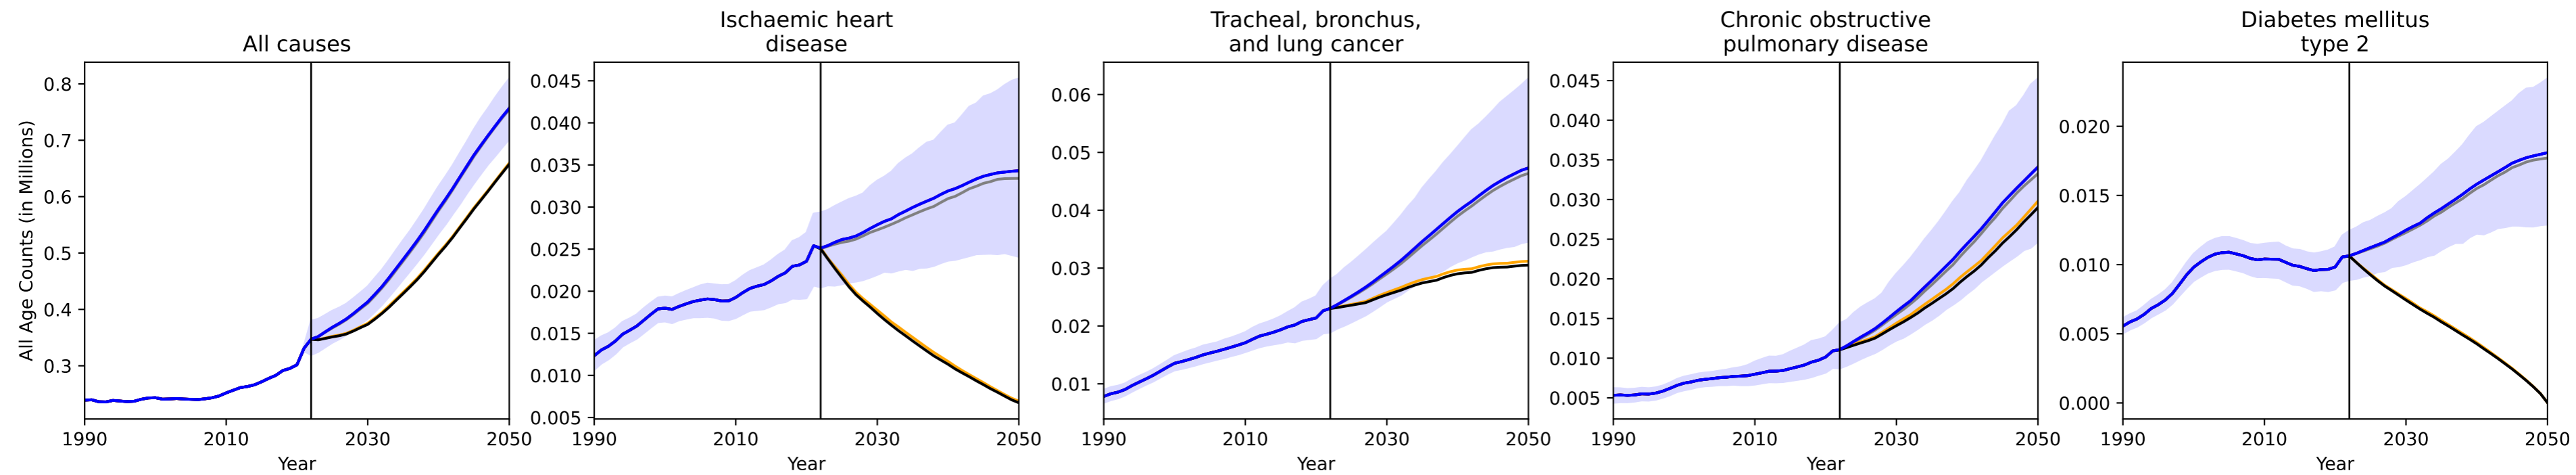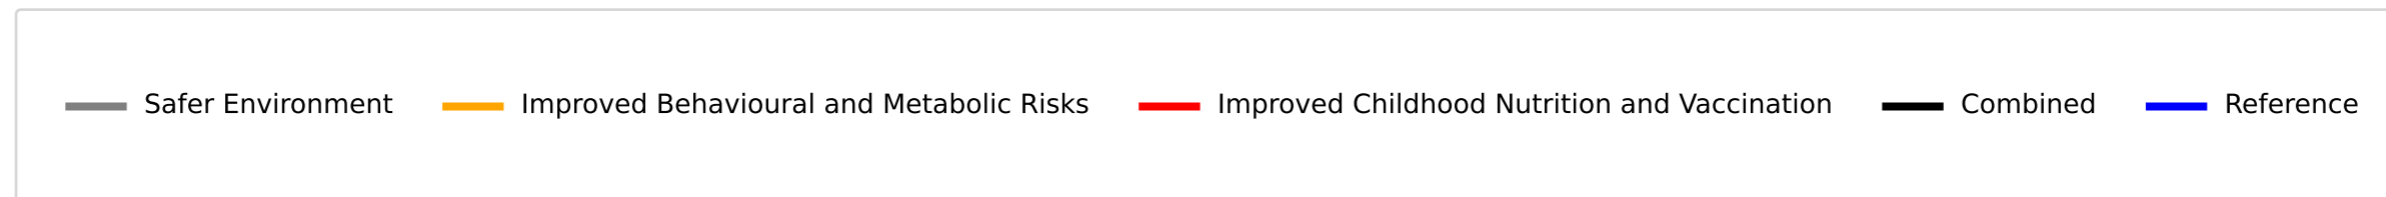



# Singapore

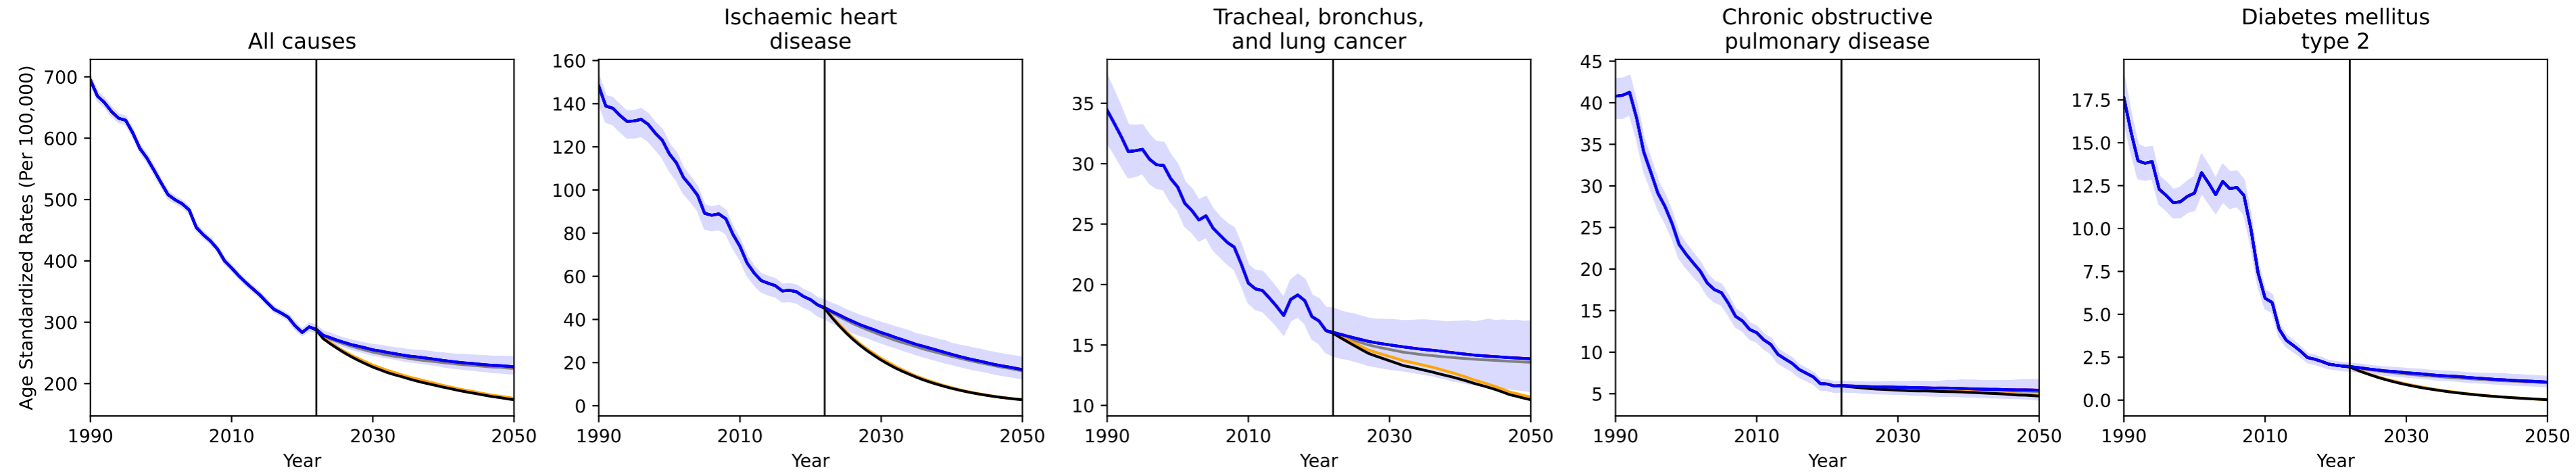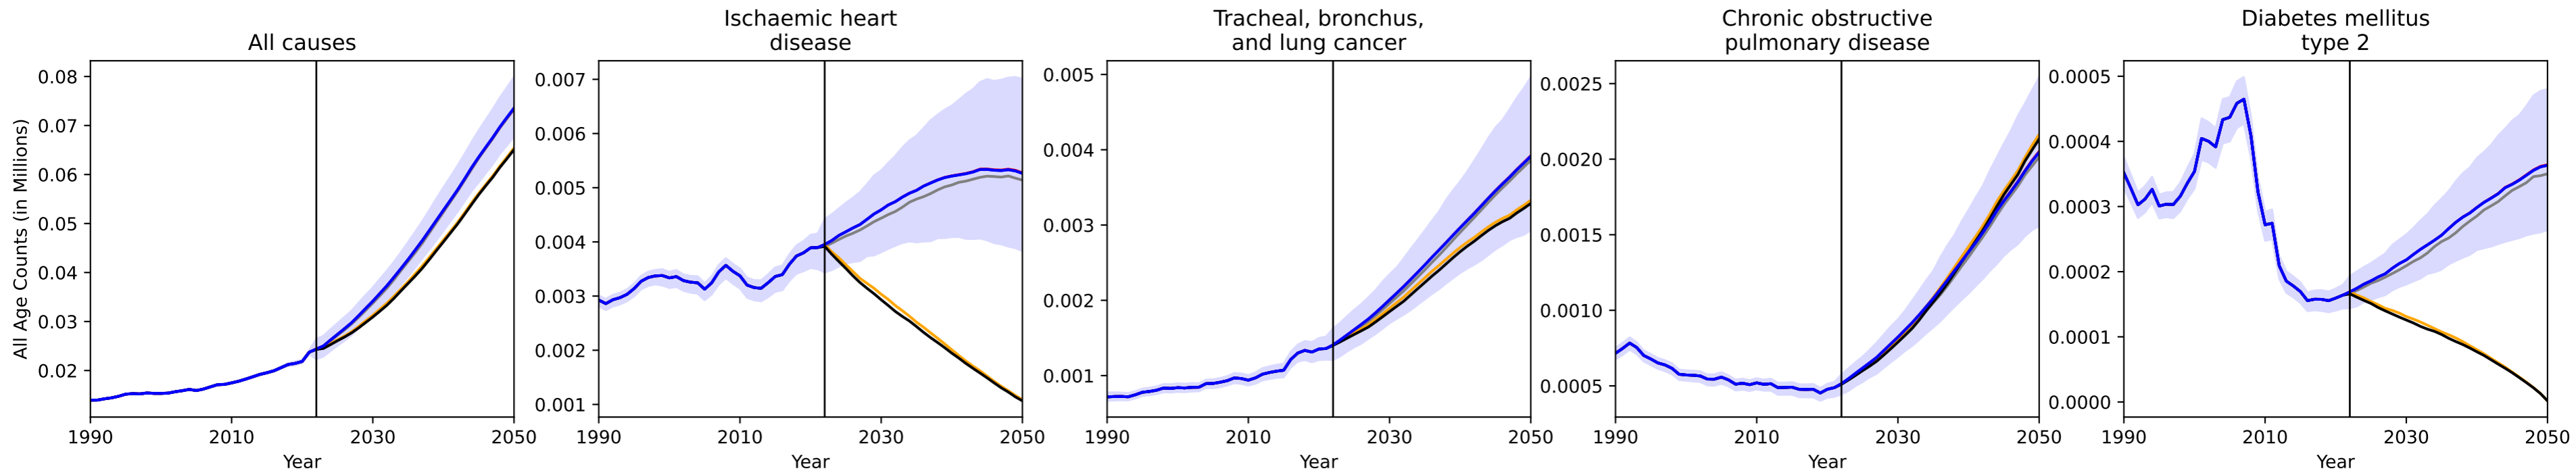

# Canada

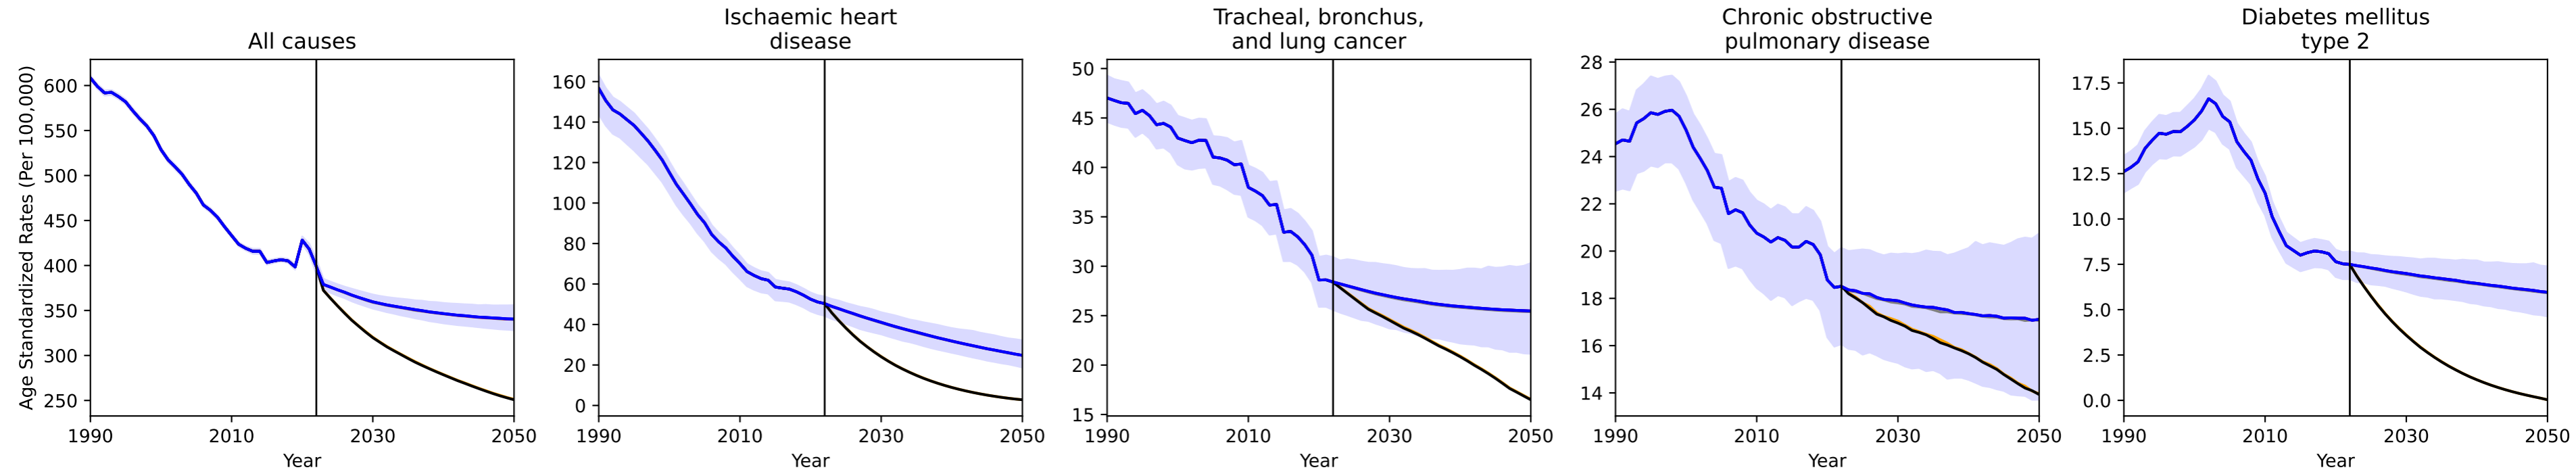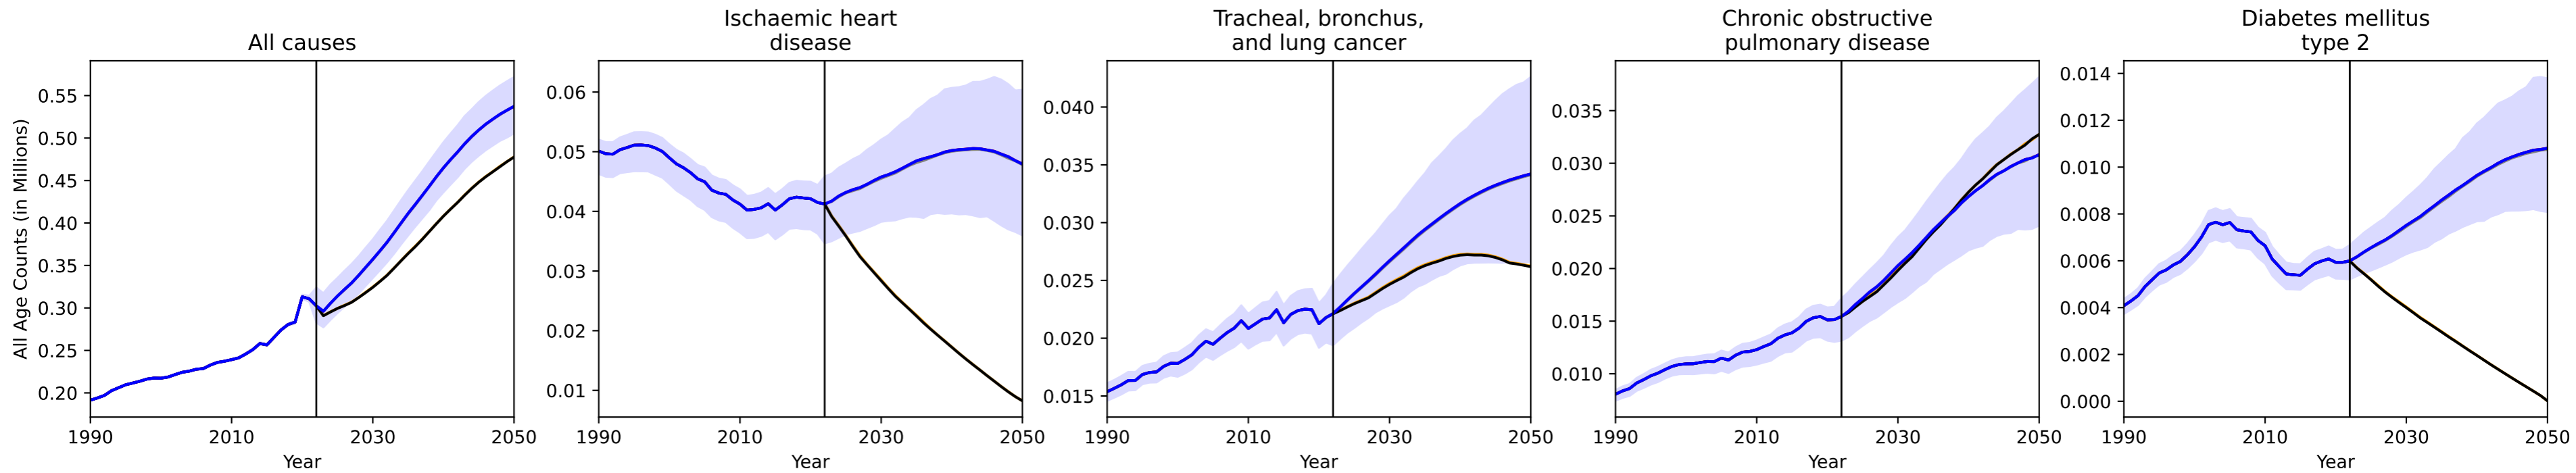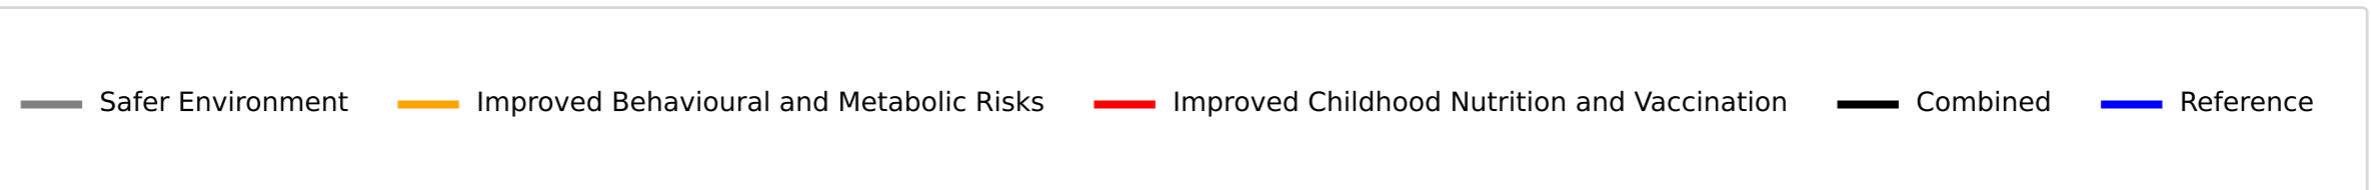

# Greenland

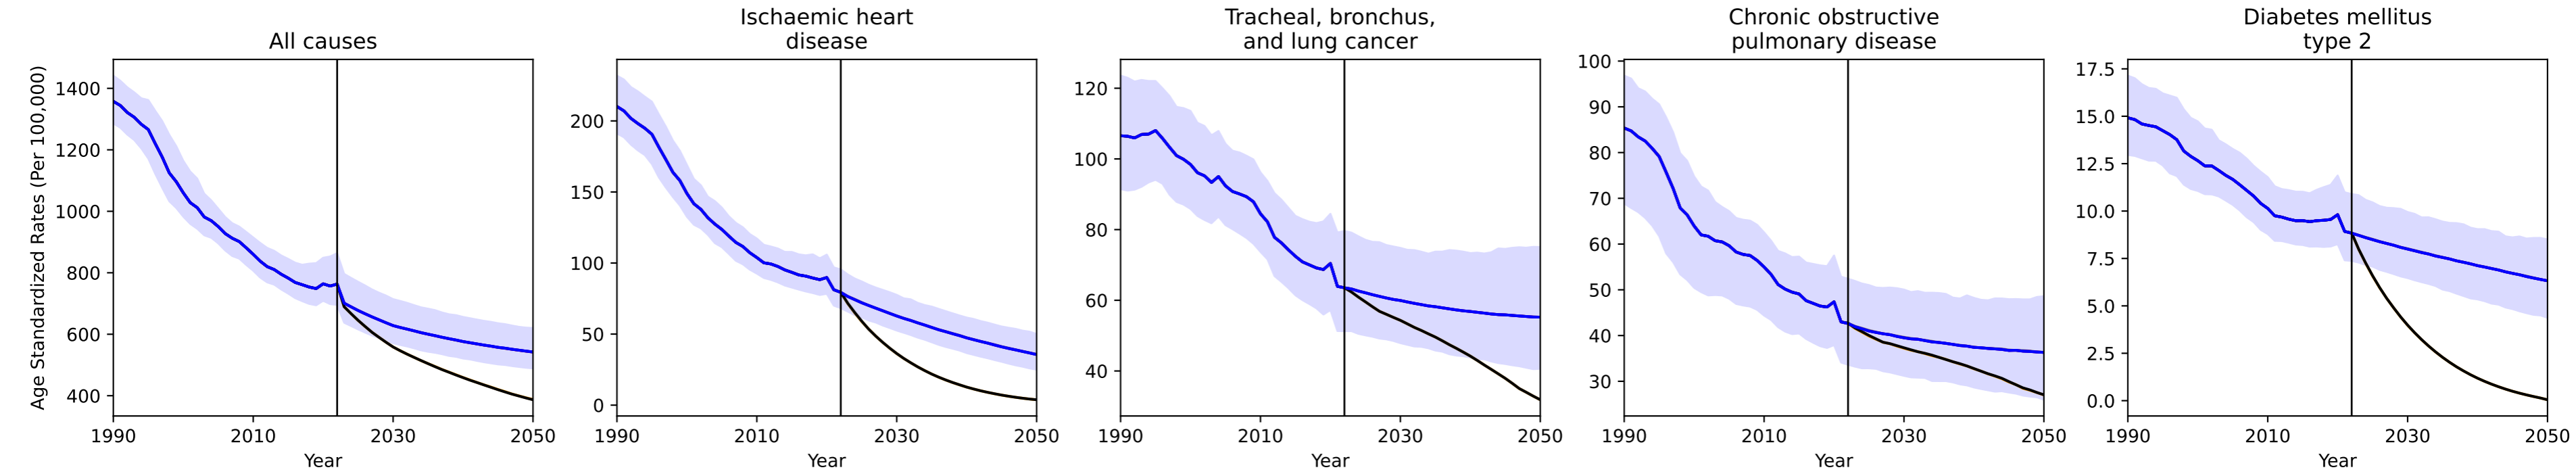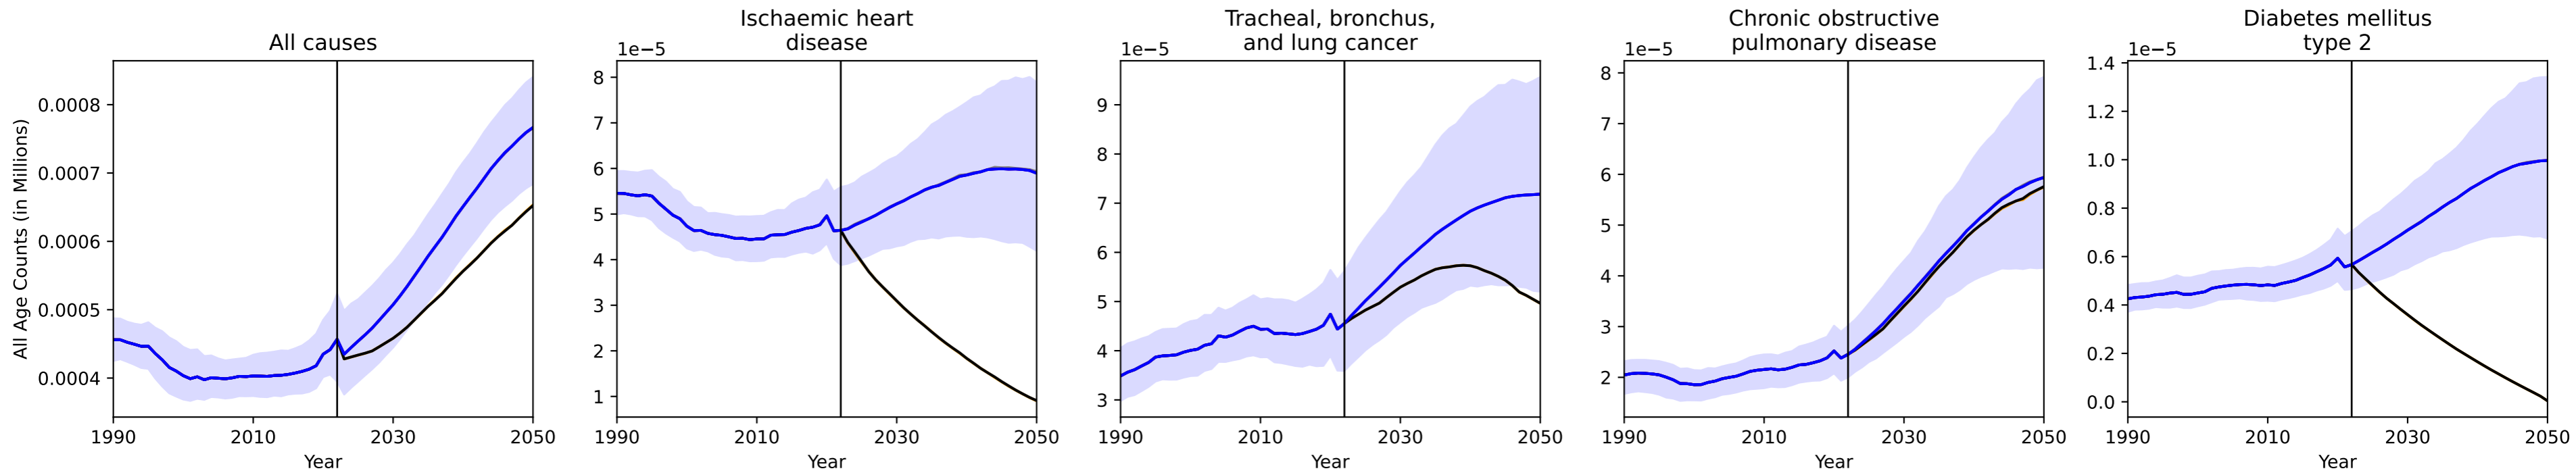

# USA

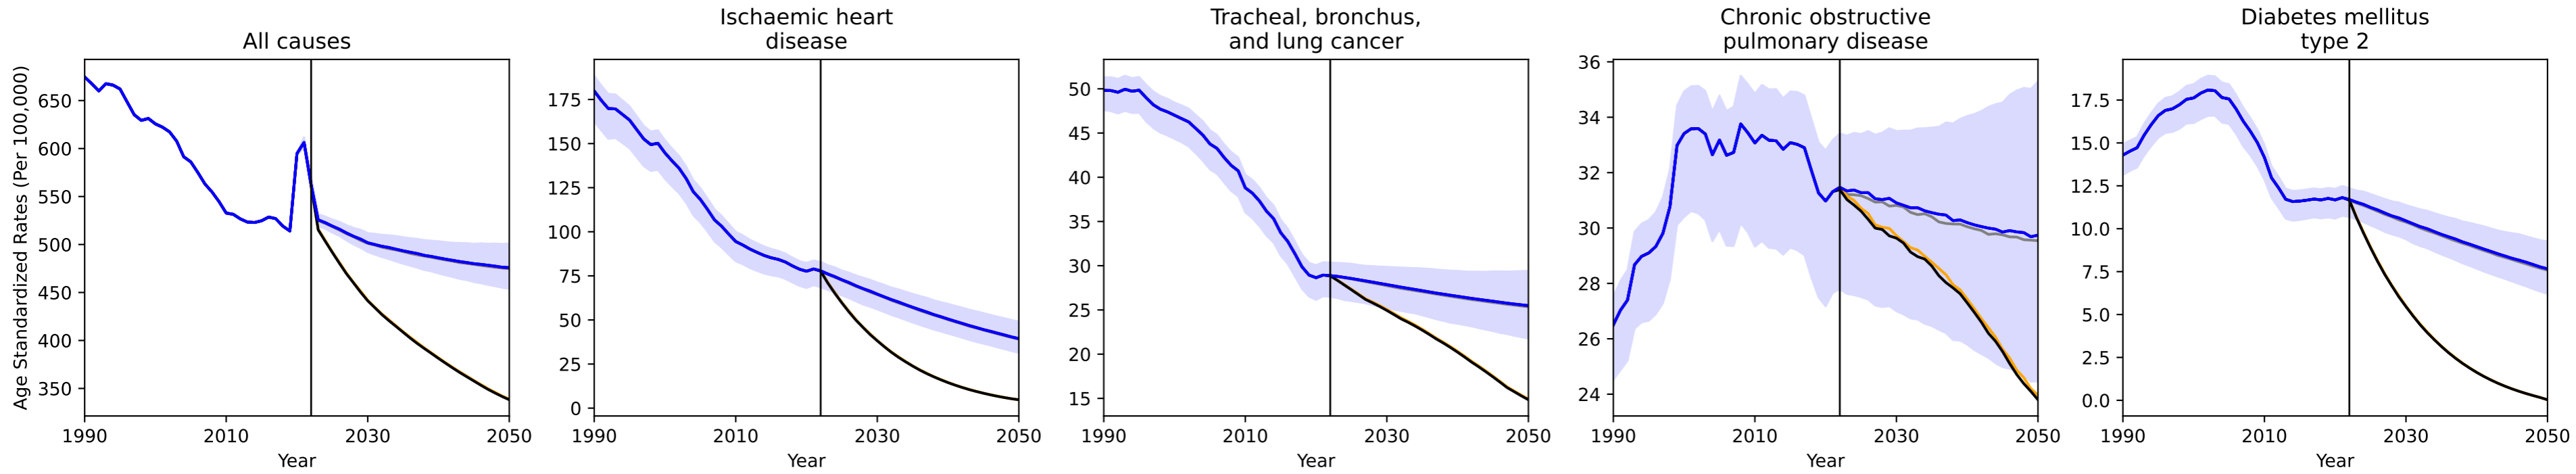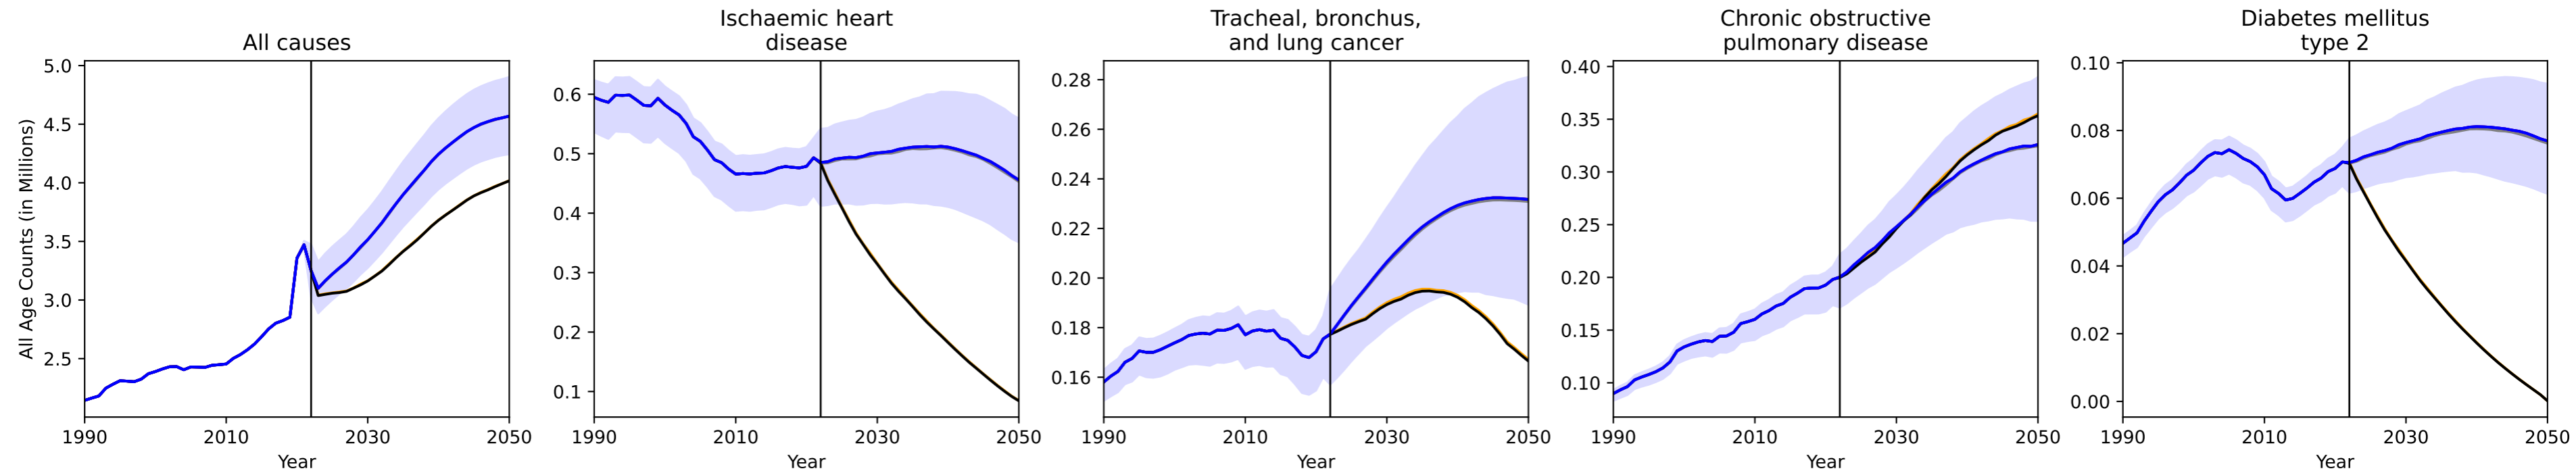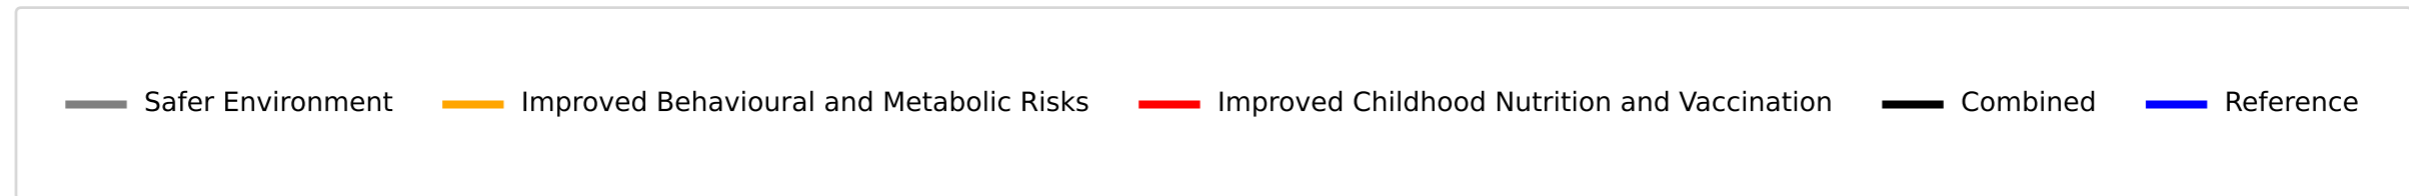

# Argentina

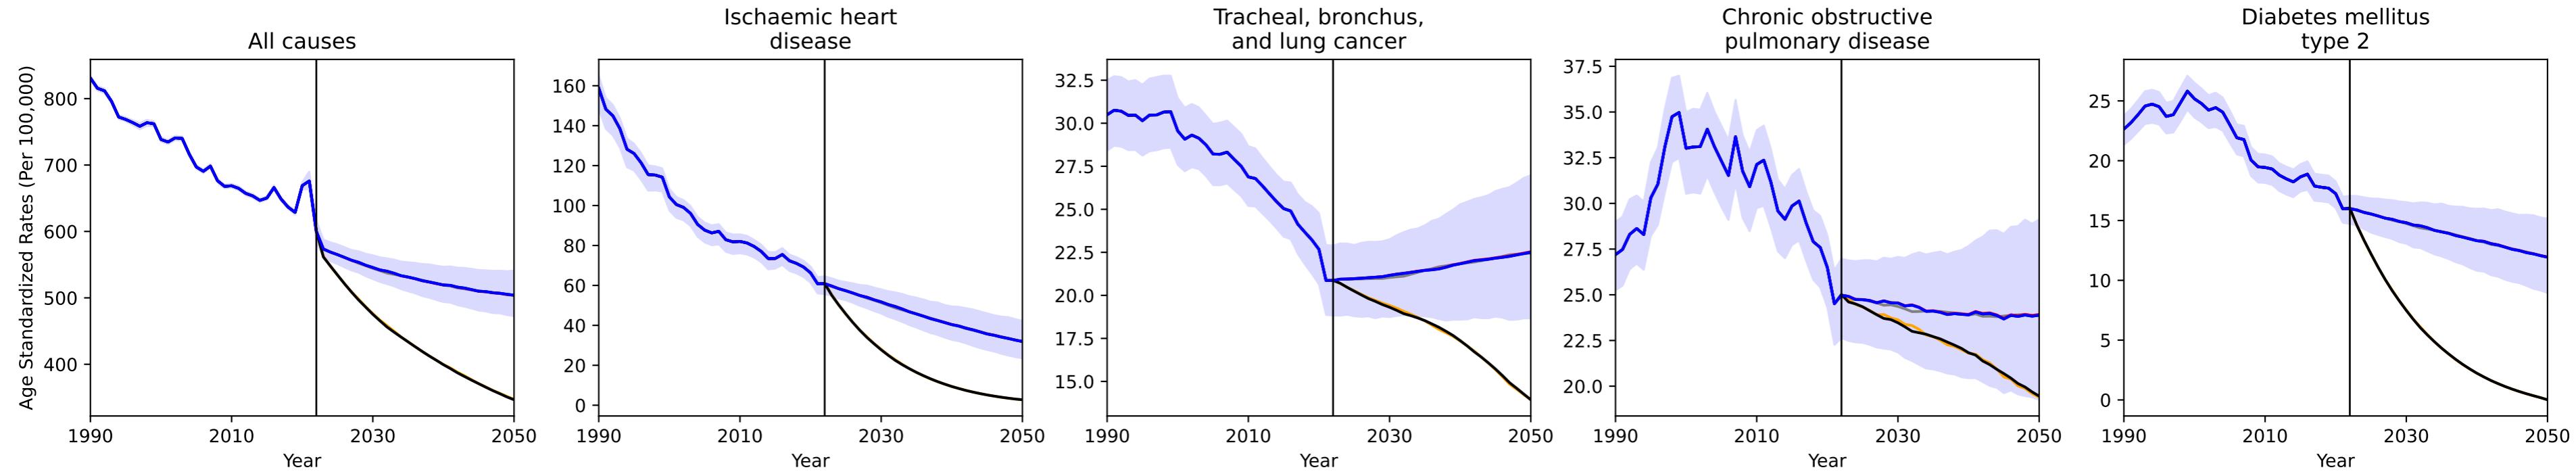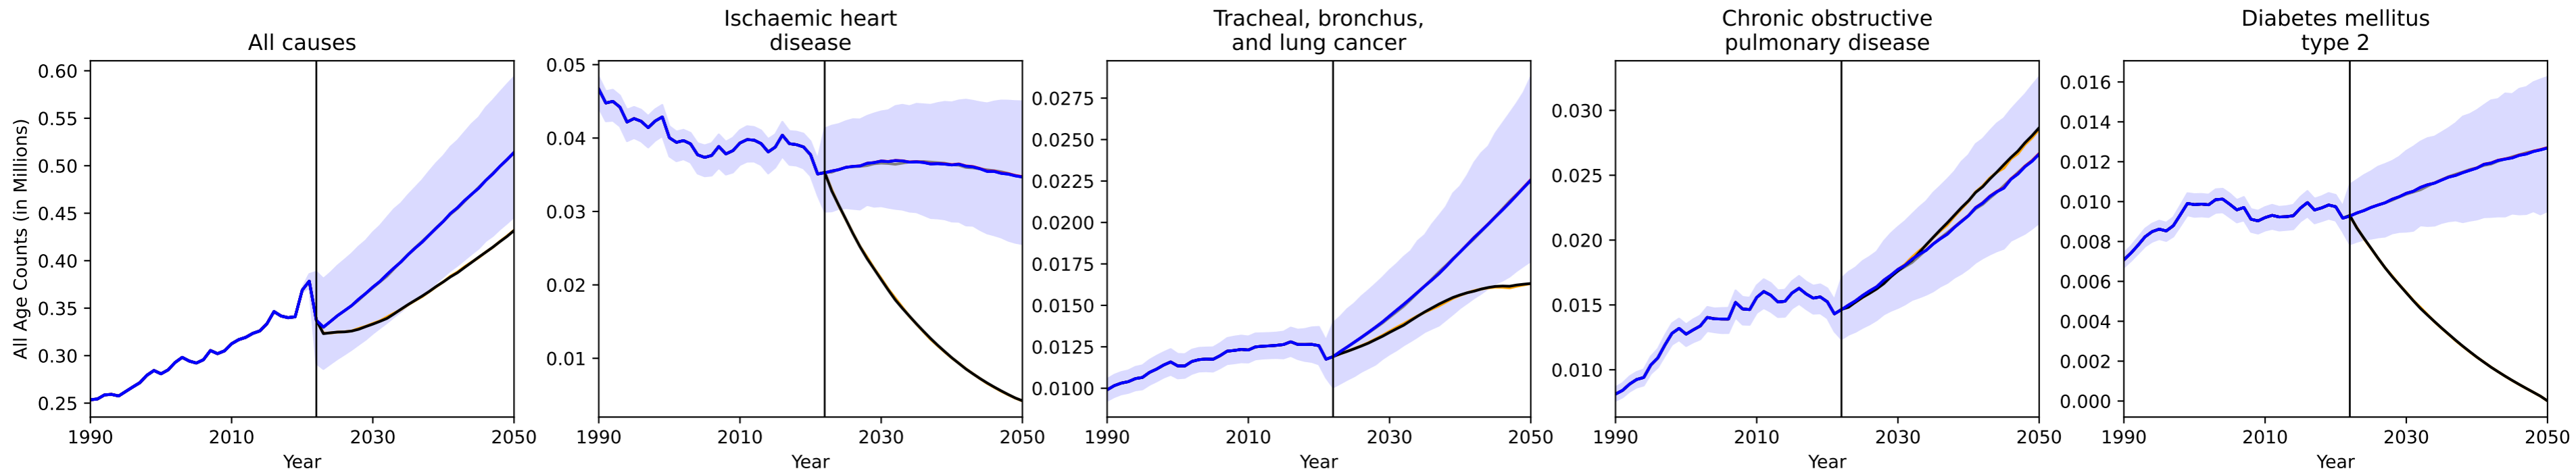

— Safer Environment — Improved Behavioural and Metabolic Risks — Improved Childhood Nutrition and Vaccination — Combined — Reference

# Chile

Supplemental Results Figure S13. All cause and top NCD causes age standardized death rates and all age counts by scenario and location, 1990-2050

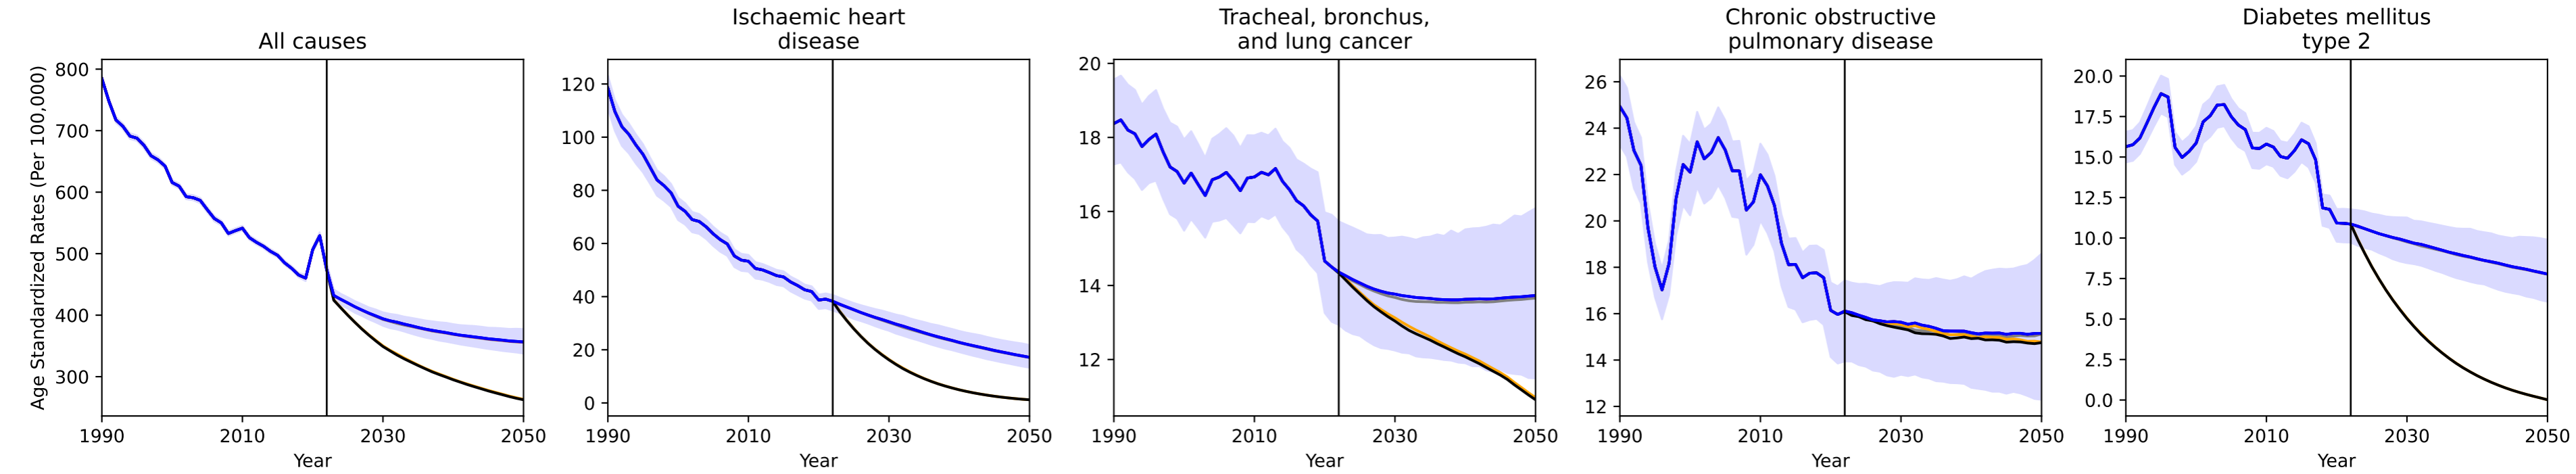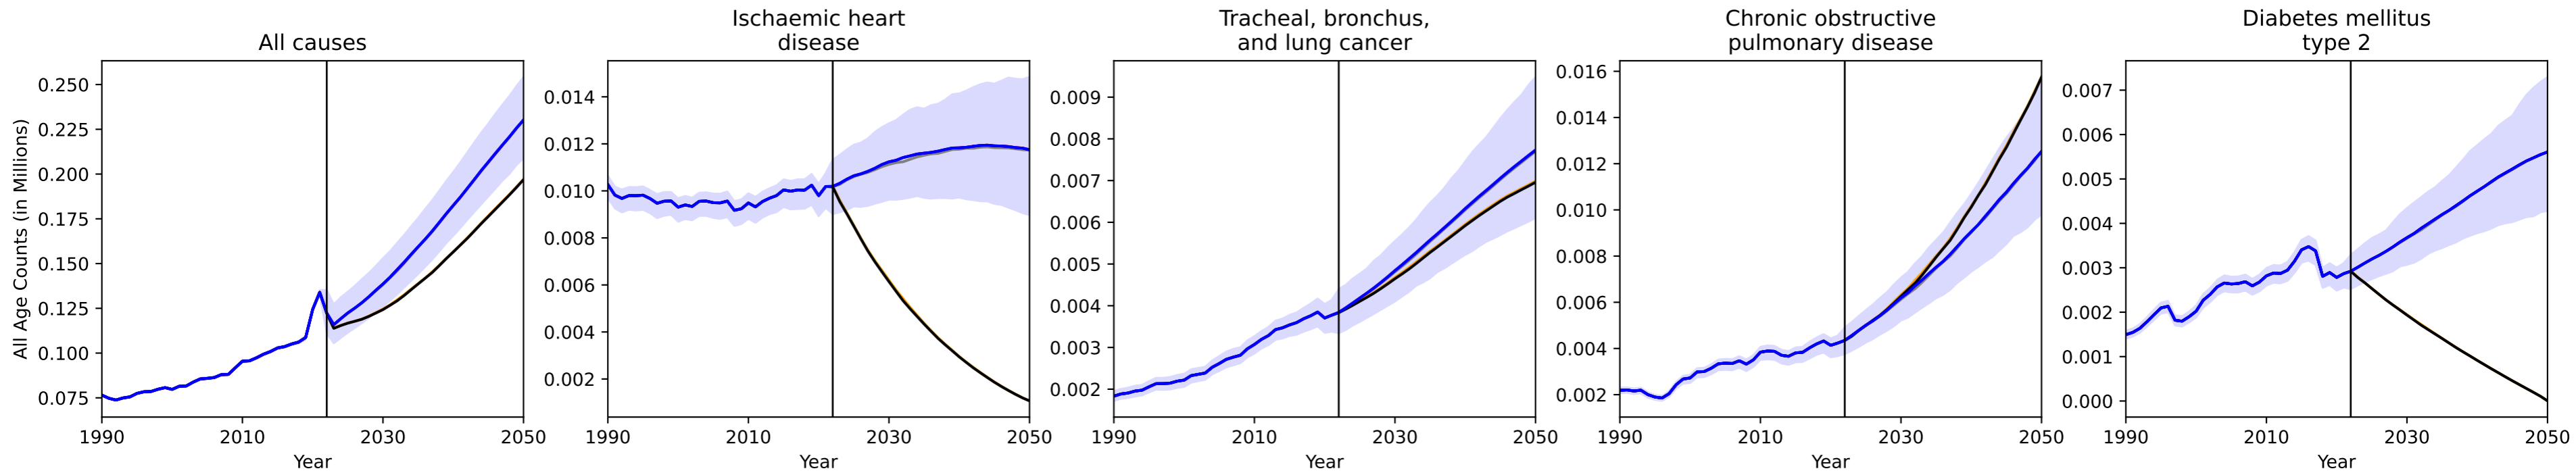

— Safer Environment — Improved Behavioural and Metabolic Risks — Improved Childhood Nutrition and Vaccination — Combined — Reference

# Uruguay

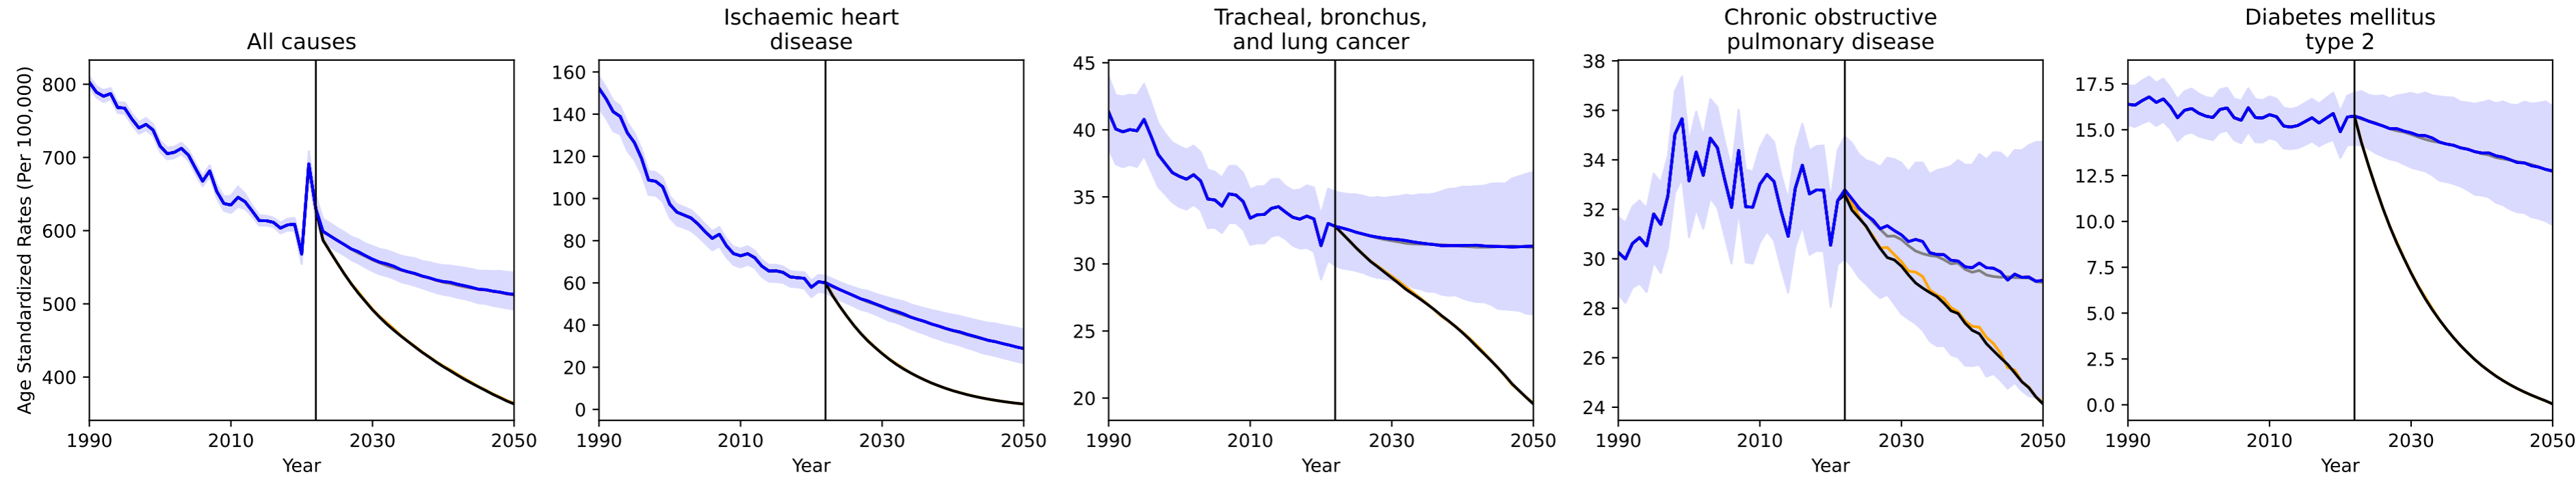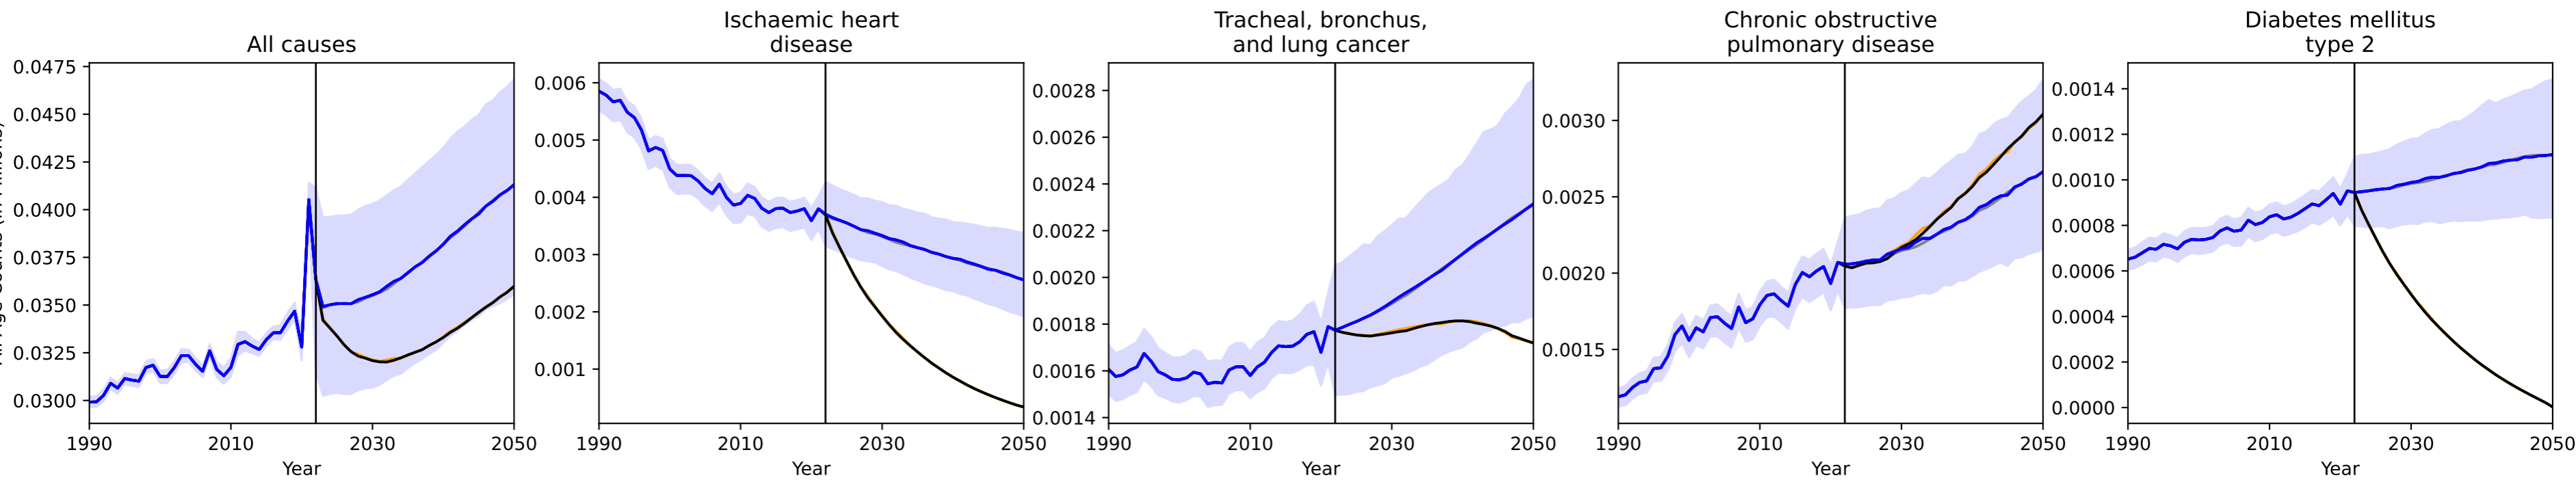

# Andorra

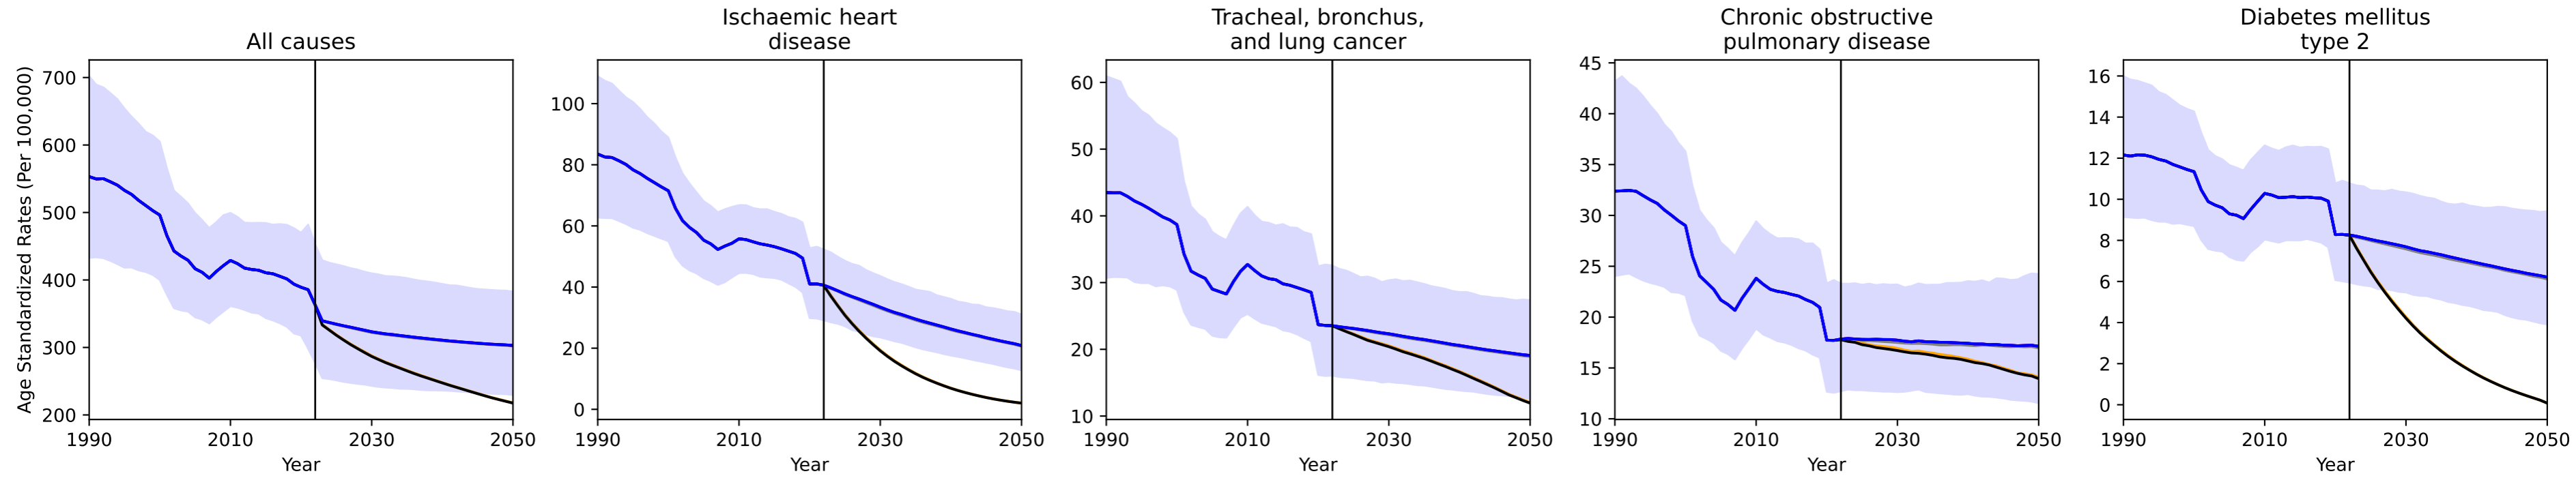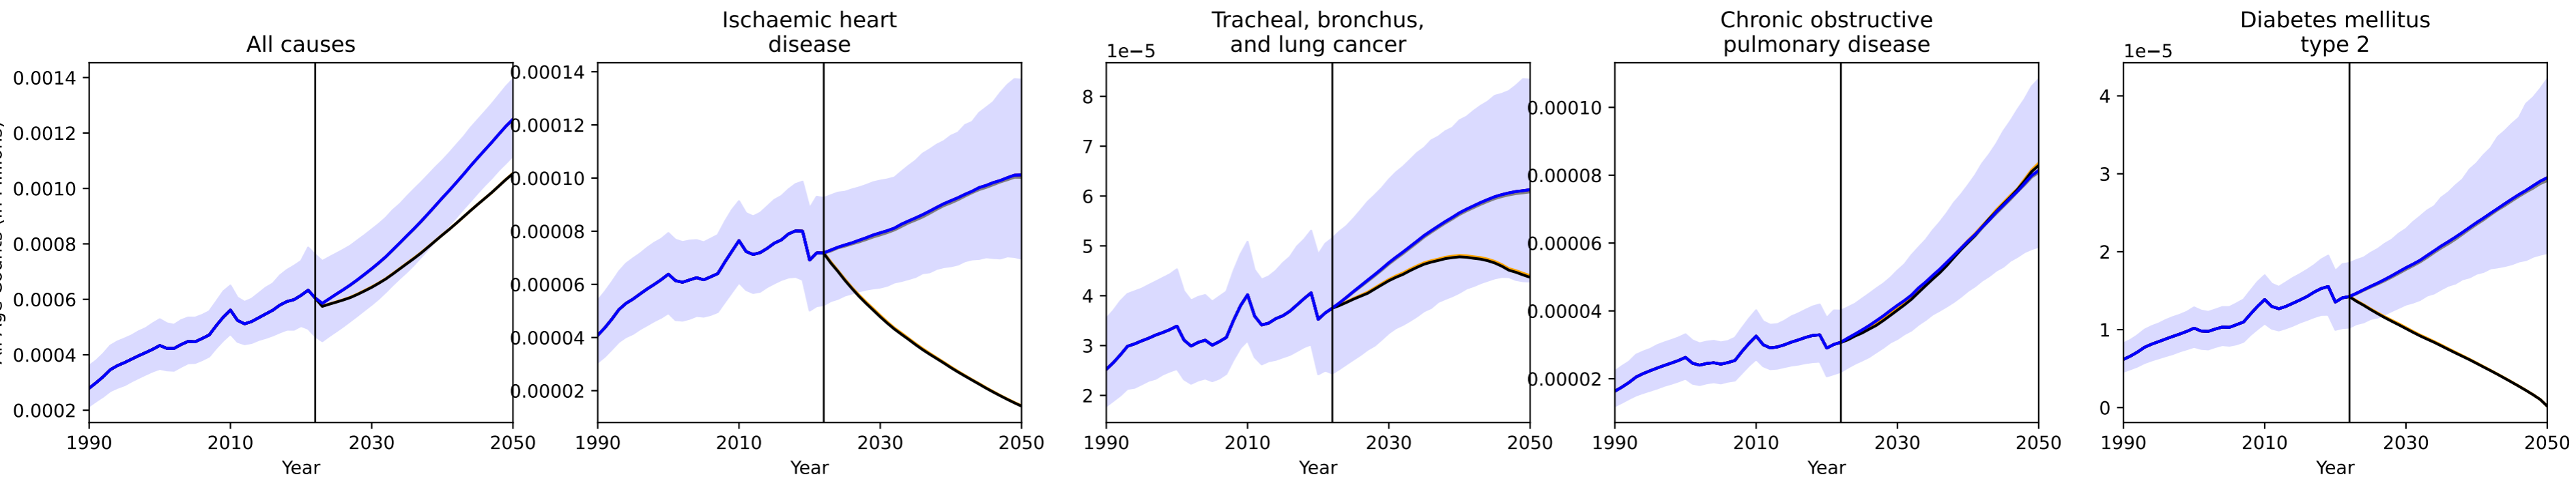



# Austria

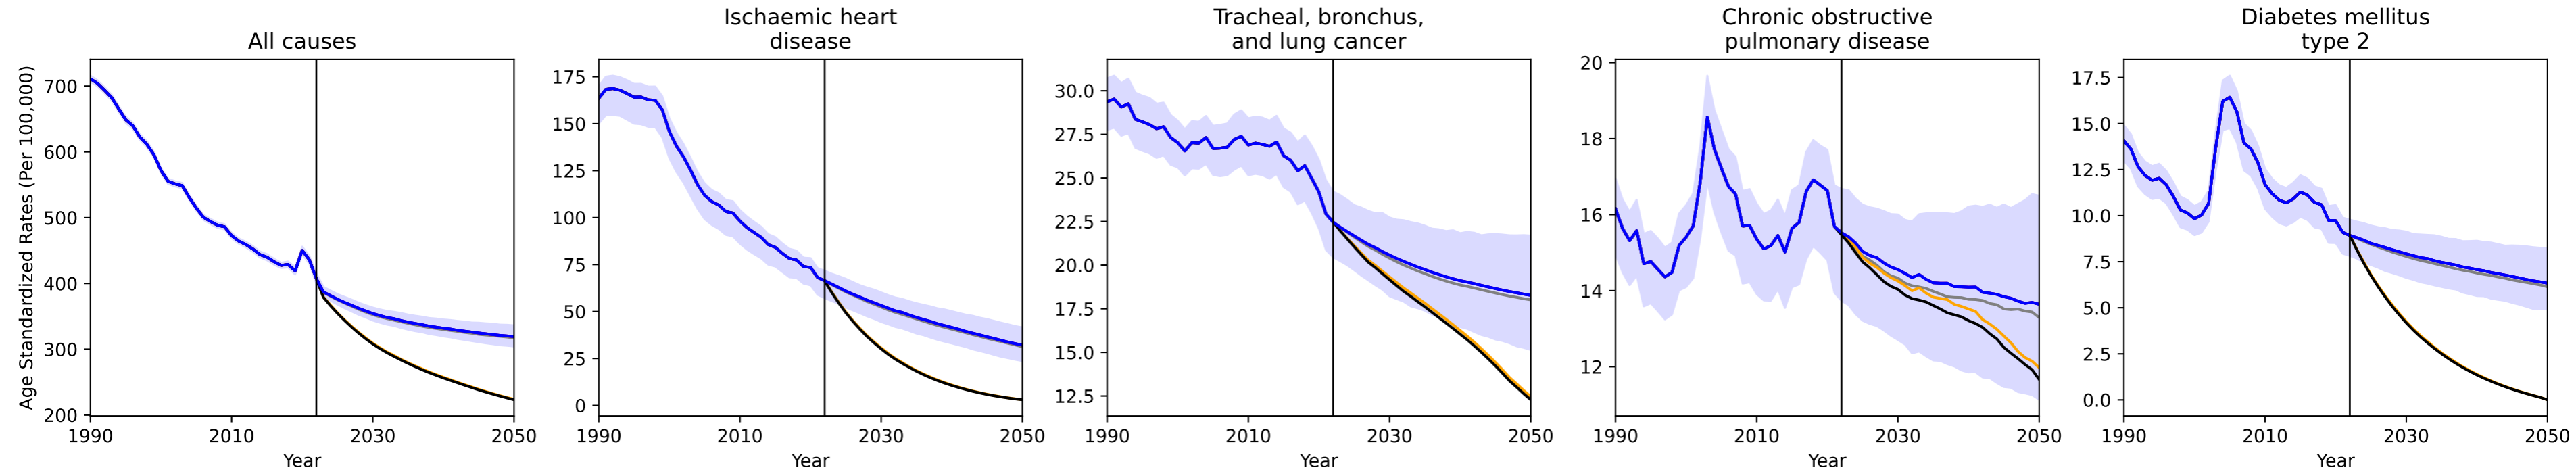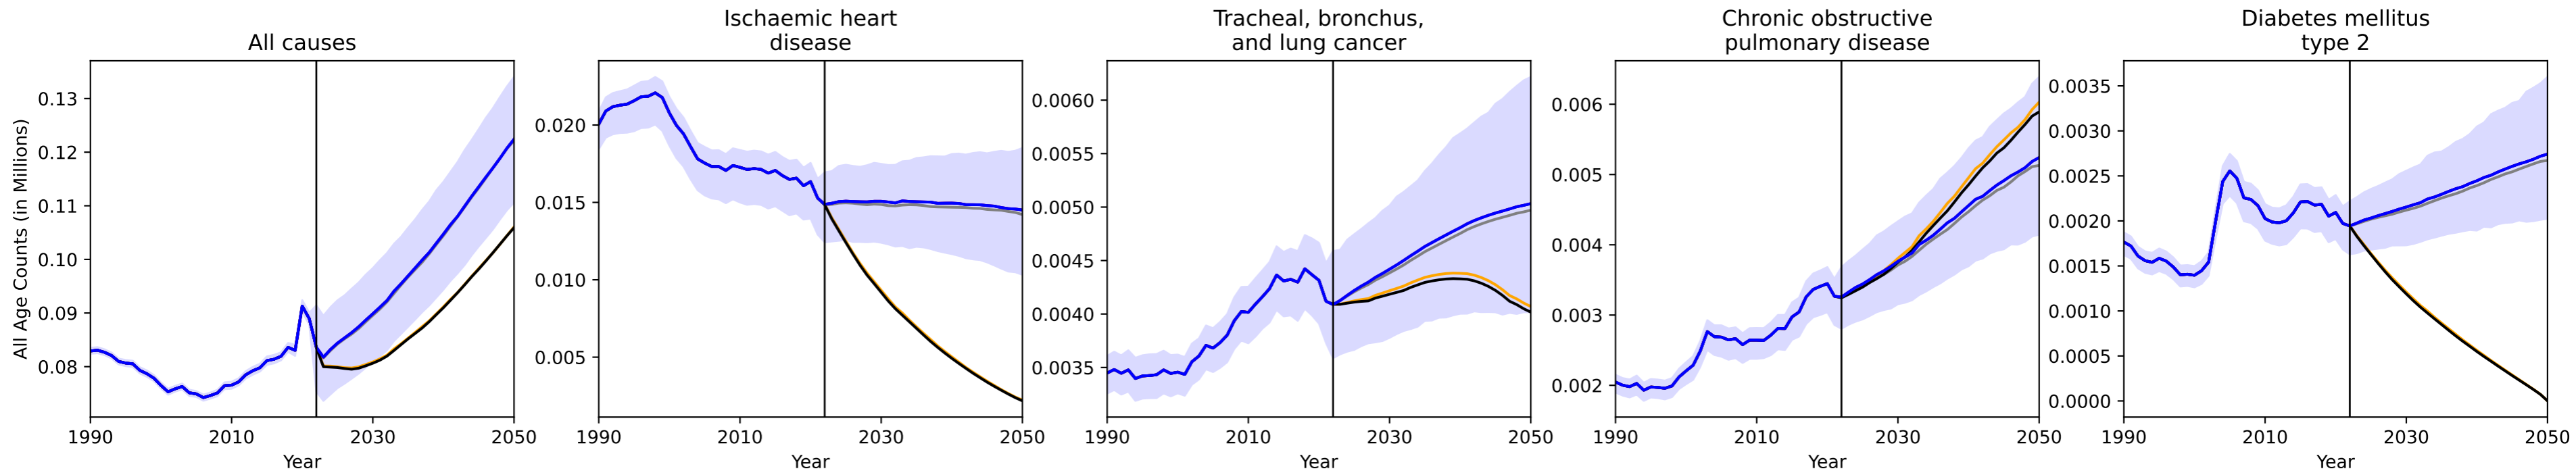

— Safer Environment — Improved Behavioural and Metabolic Risks — Improved Childhood Nutrition and Vaccination — Combined — Reference

# Belgium

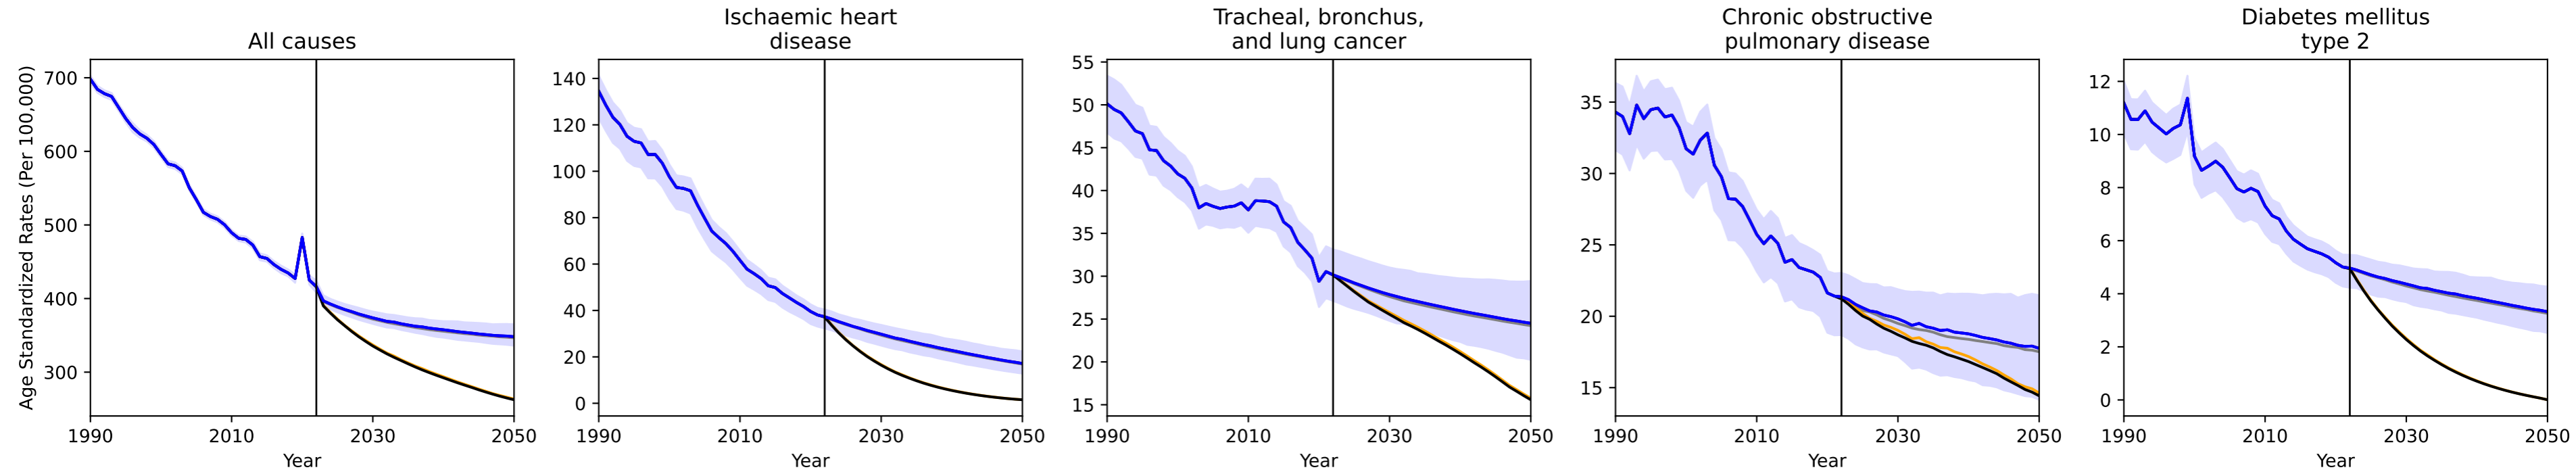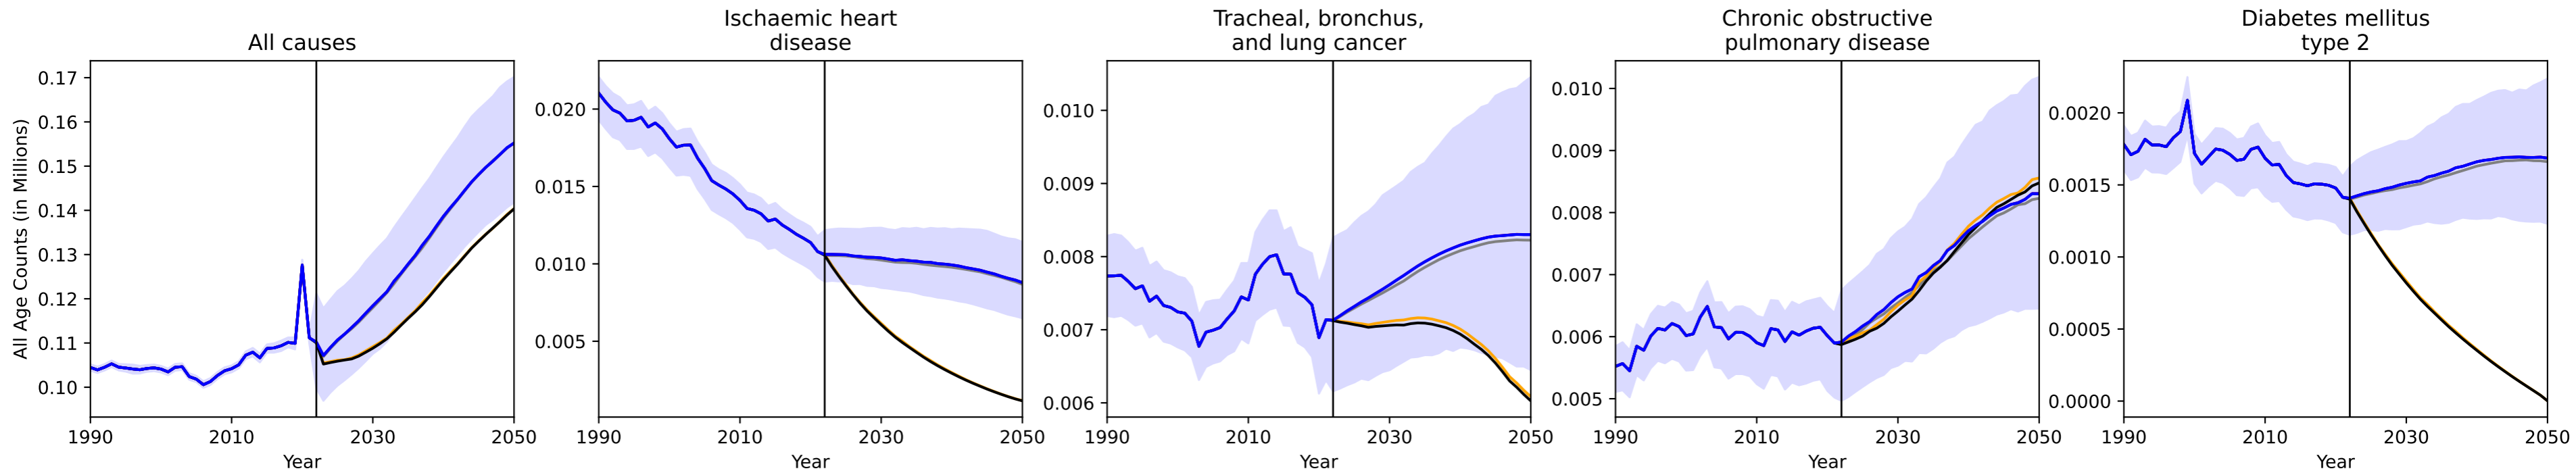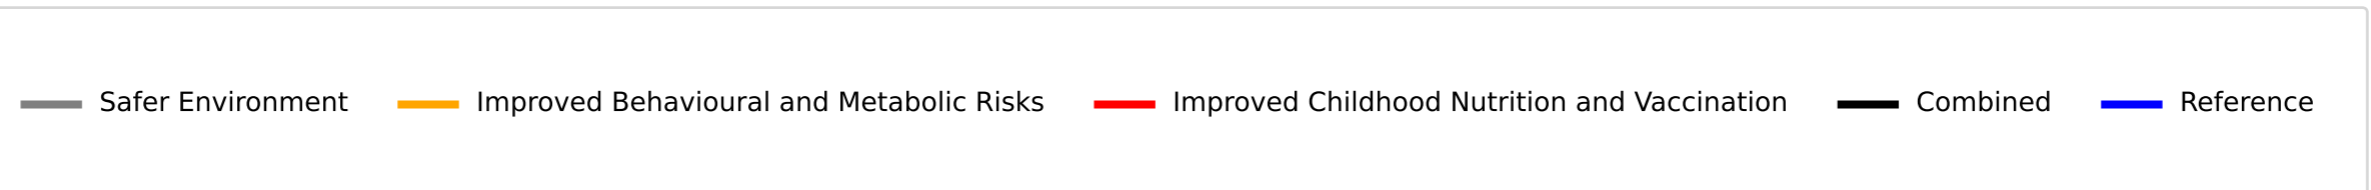

# Cyprus

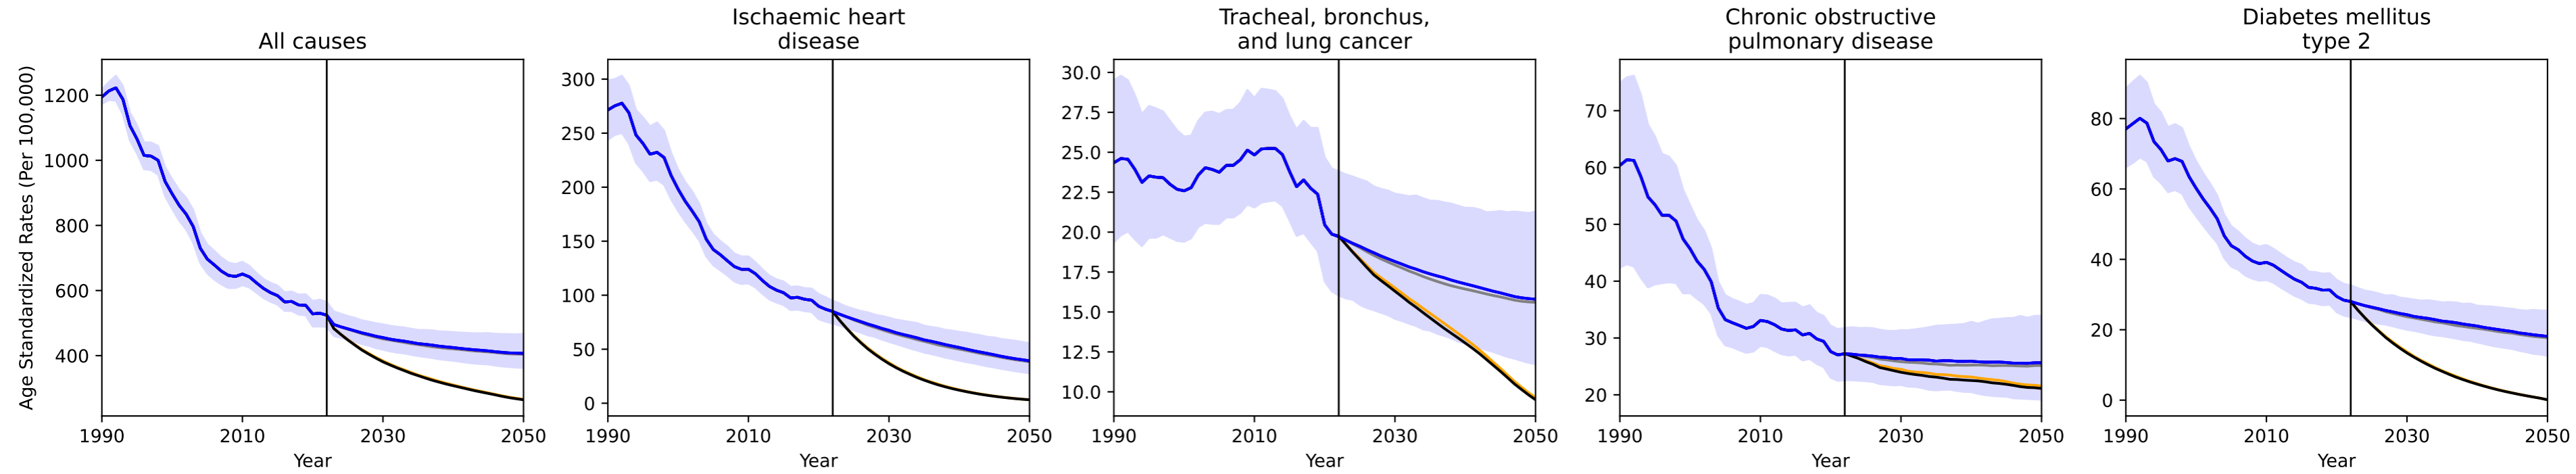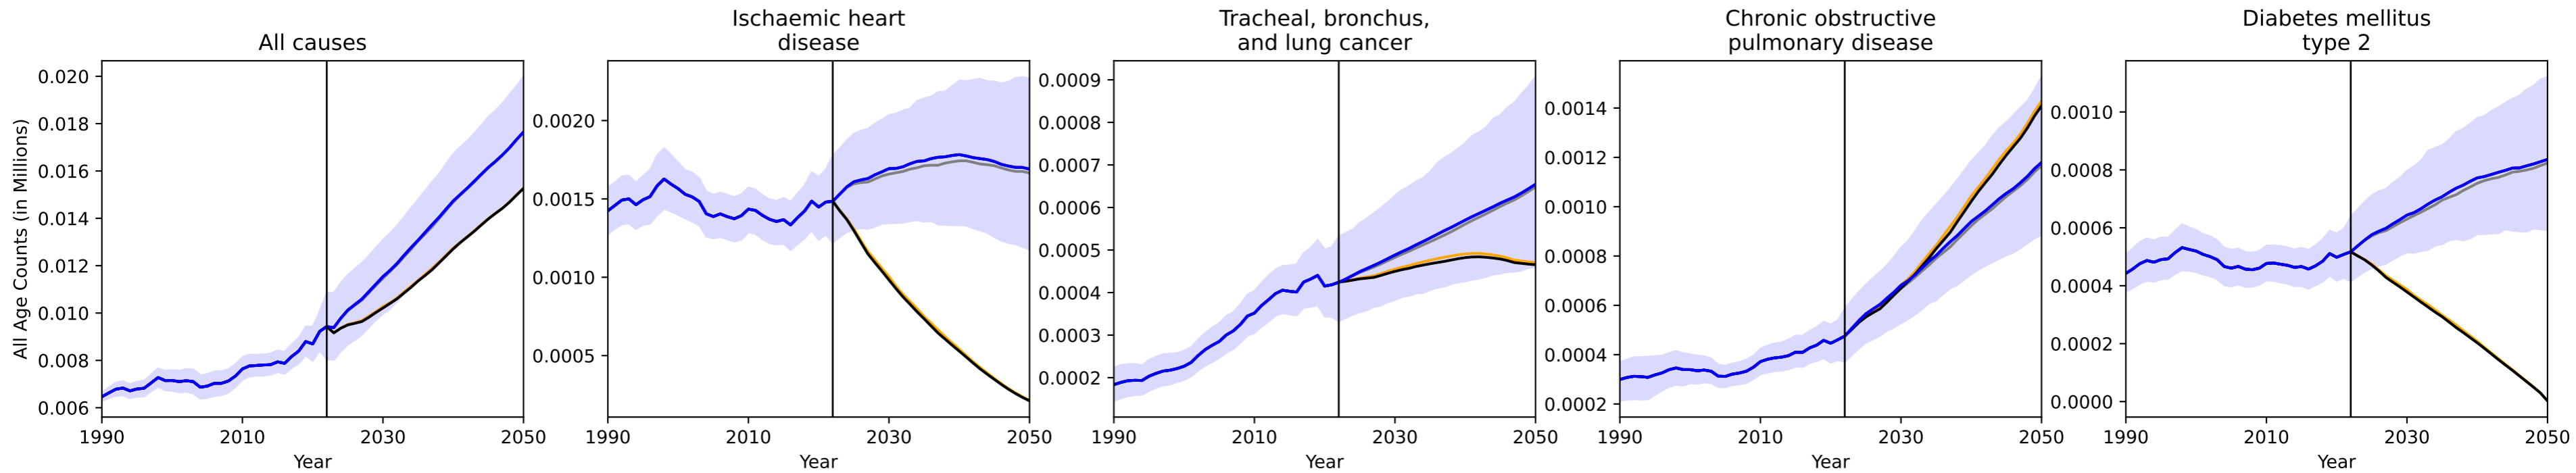

— Safer Environment    — Improved Behavioural and Metabolic Risks    — Improved Childhood Nutrition and Vaccination    — Combined    — Reference

# Denmark

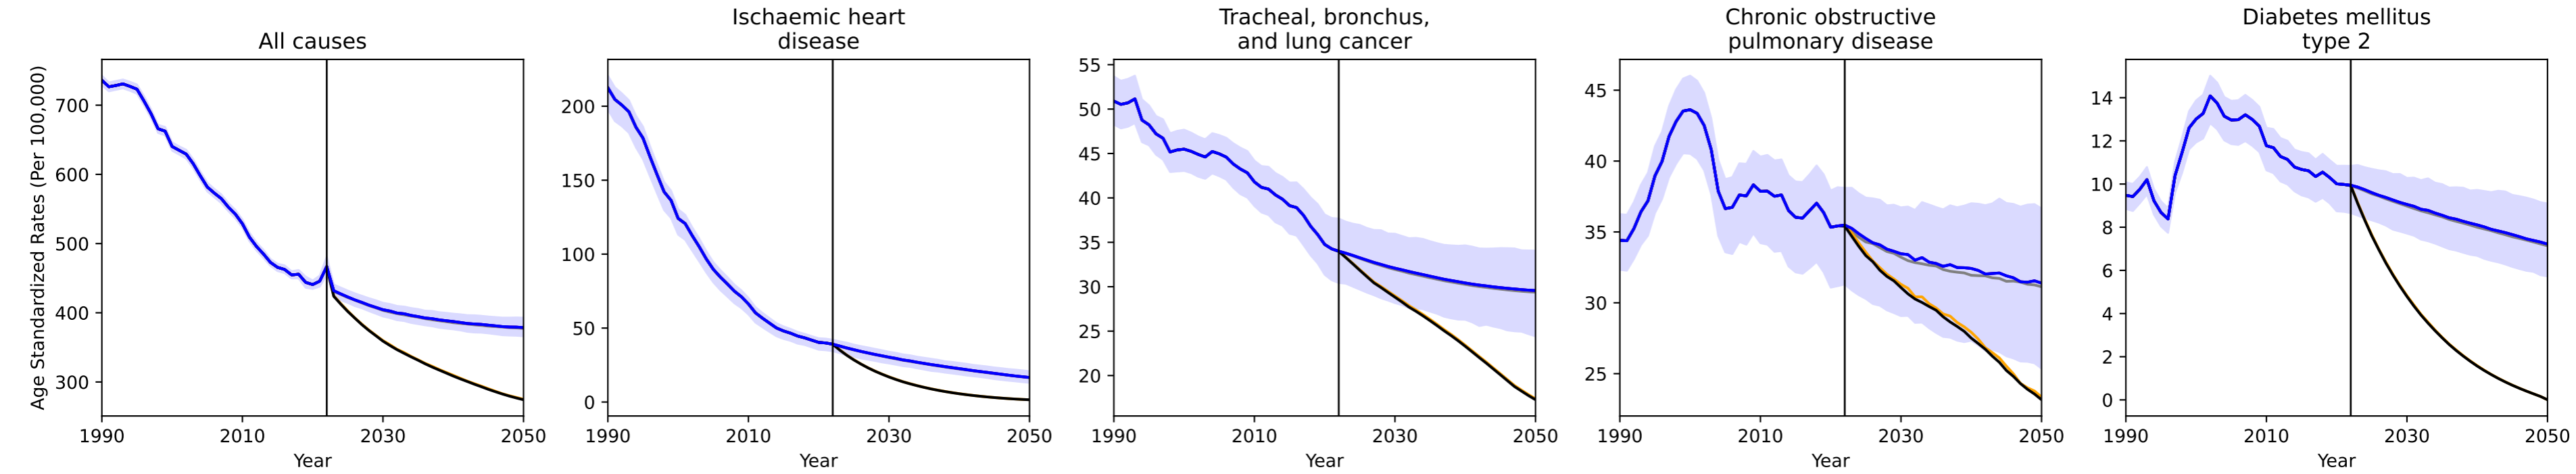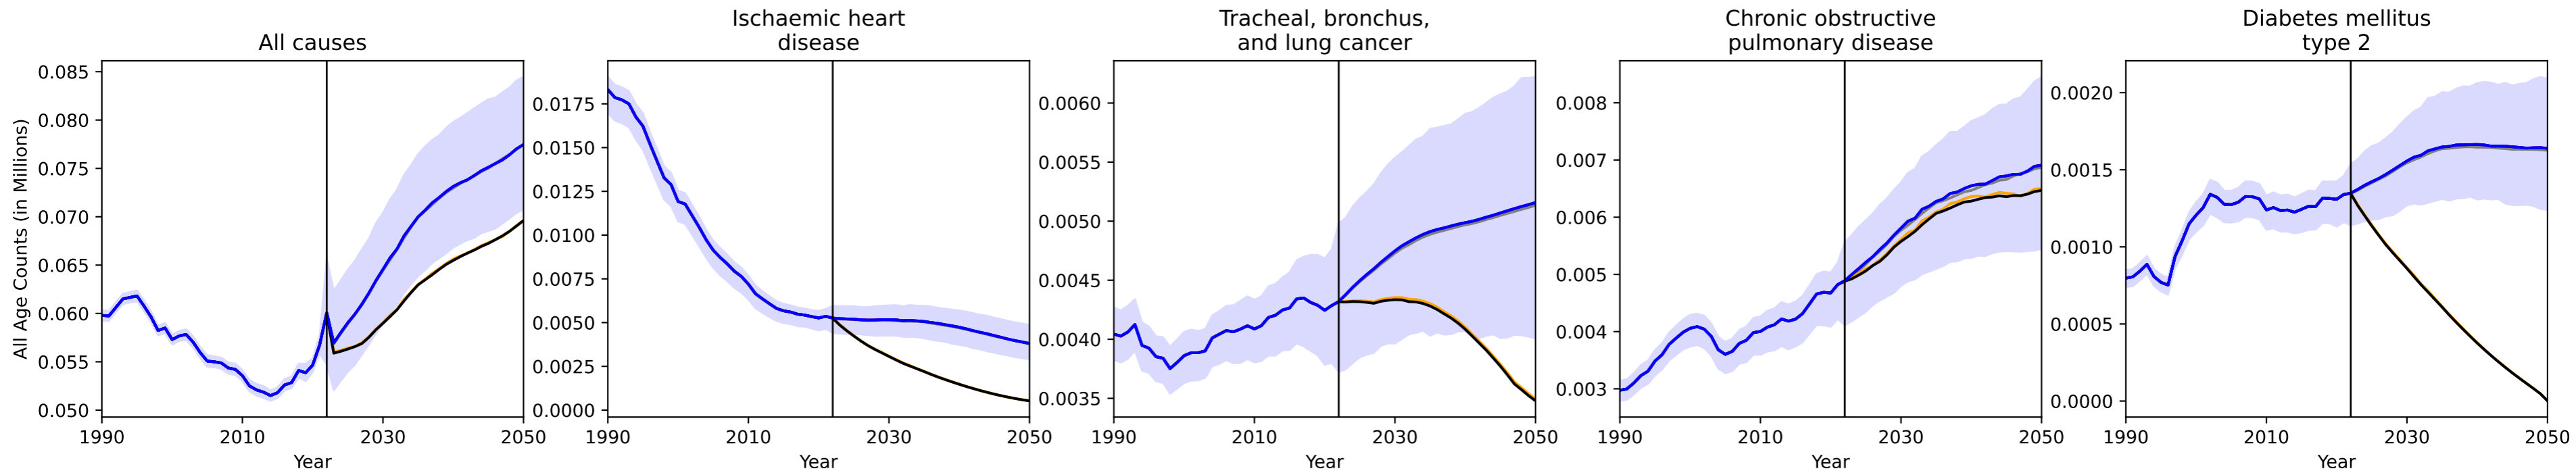

— Safer Environment — Improved Behavioural and Metabolic Risks — Improved Childhood Nutrition and Vaccination — Combined — Reference

# Finland

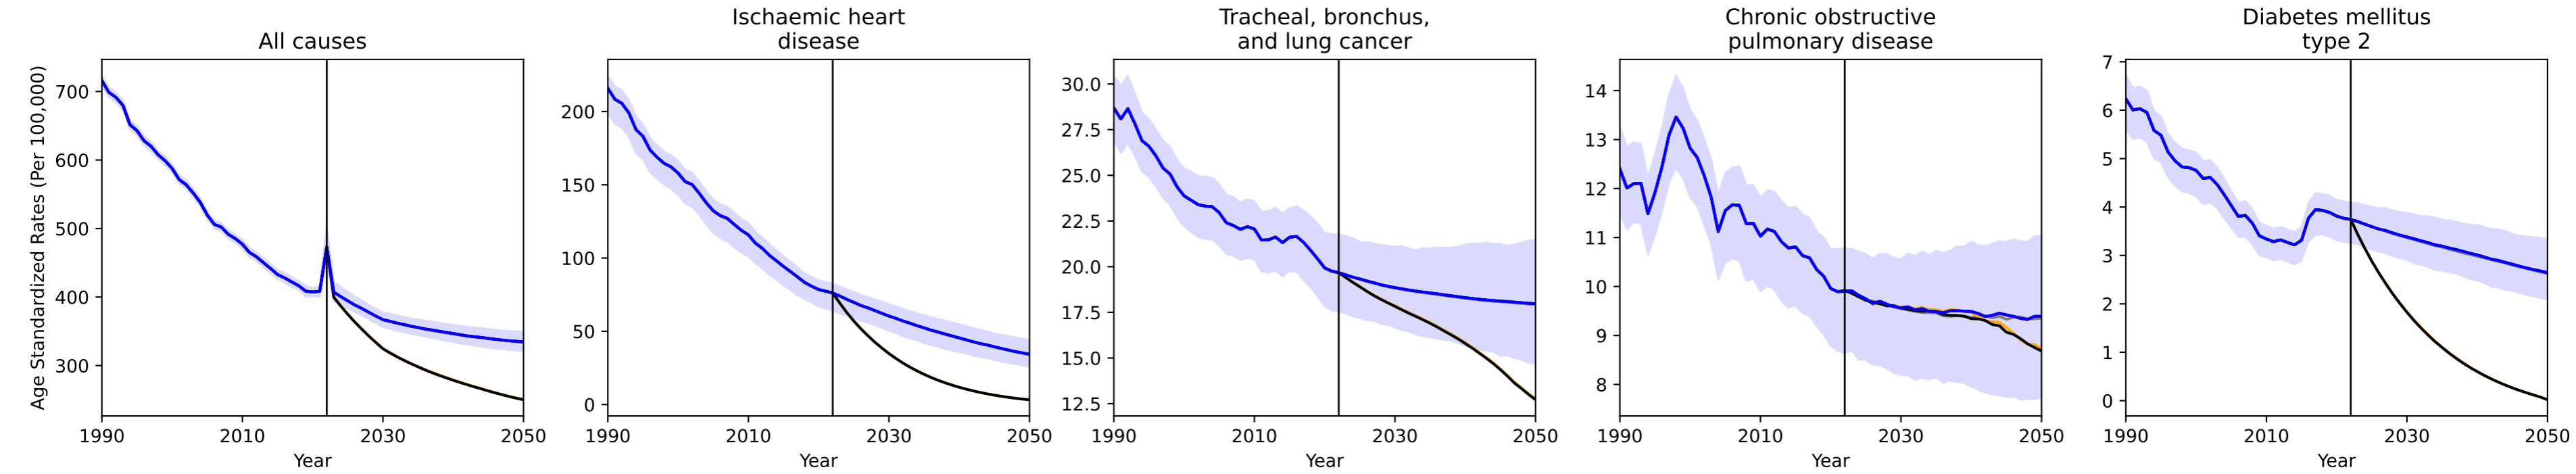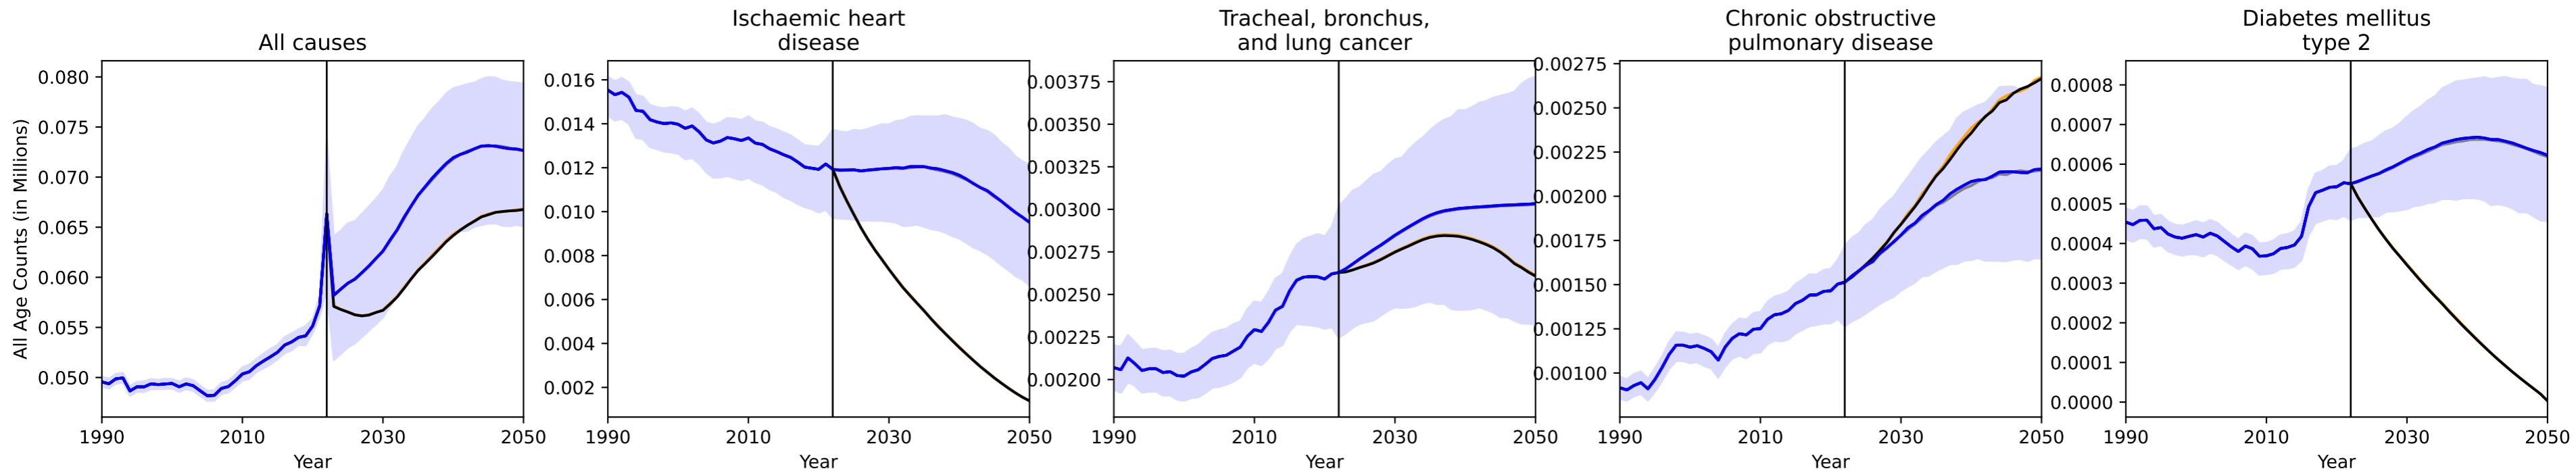

# France

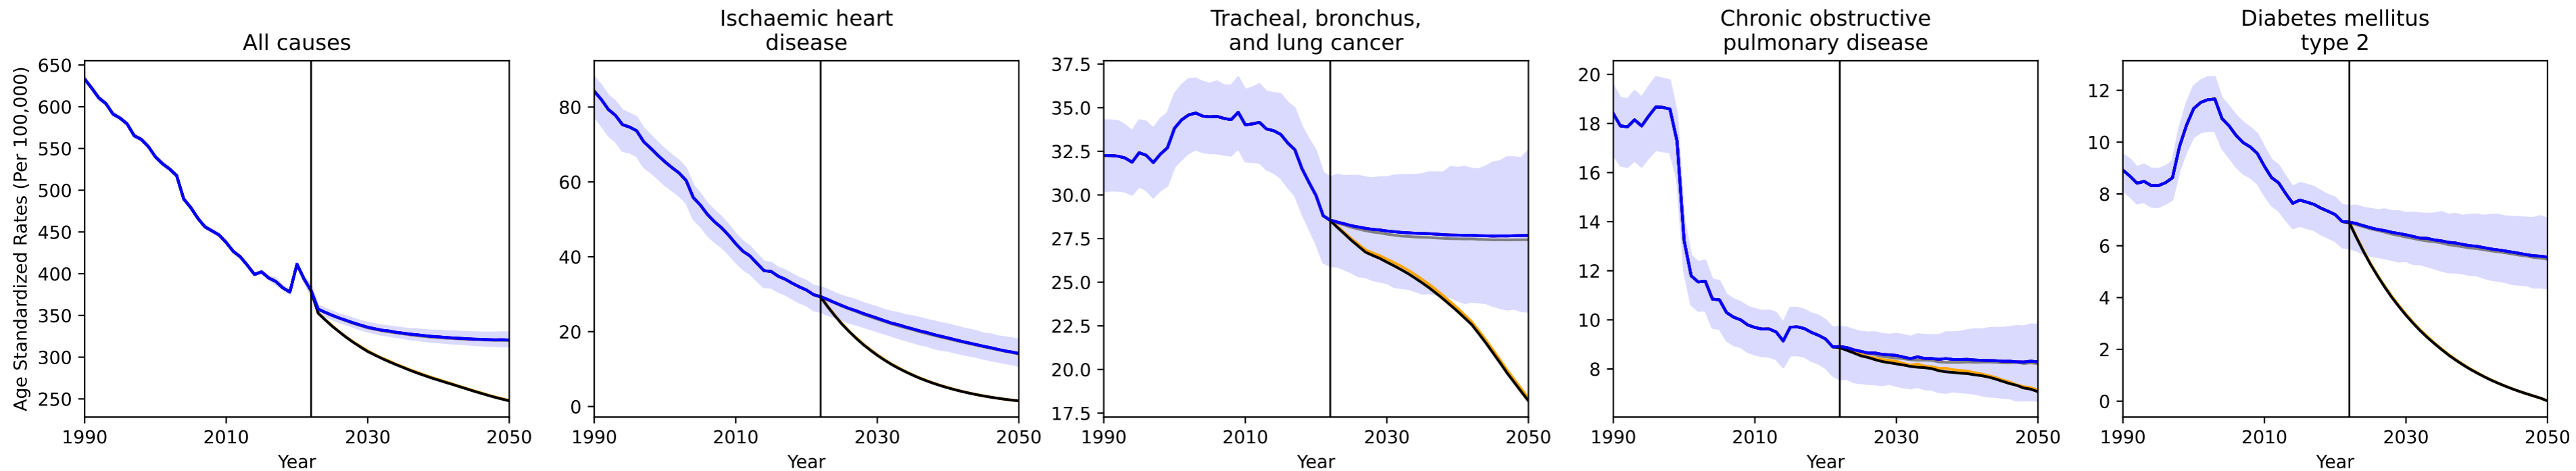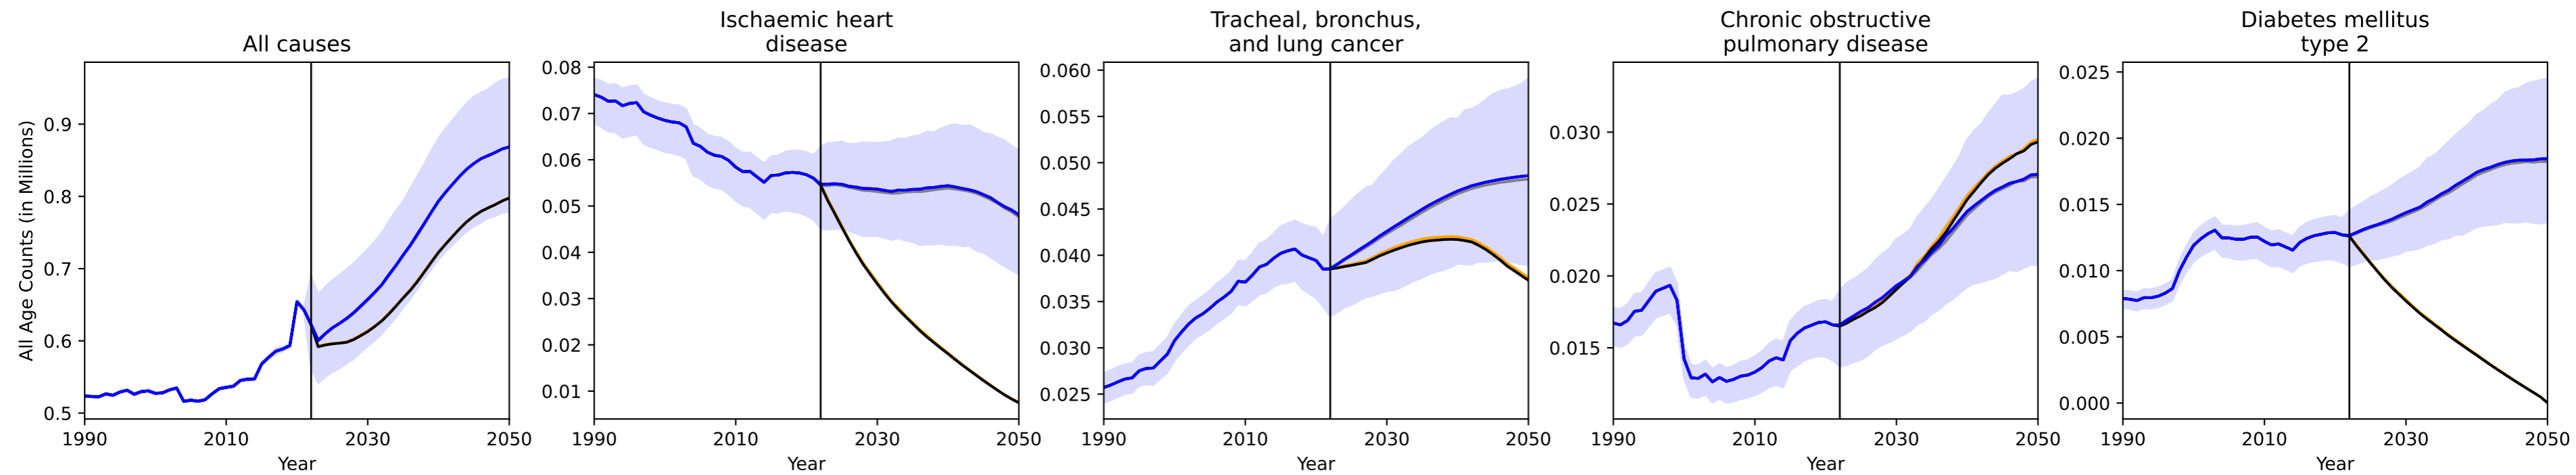

— Safer Environment — Improved Behavioural and Metabolic Risks — Improved Childhood Nutrition and Vaccination — Combined — Reference

# Germany

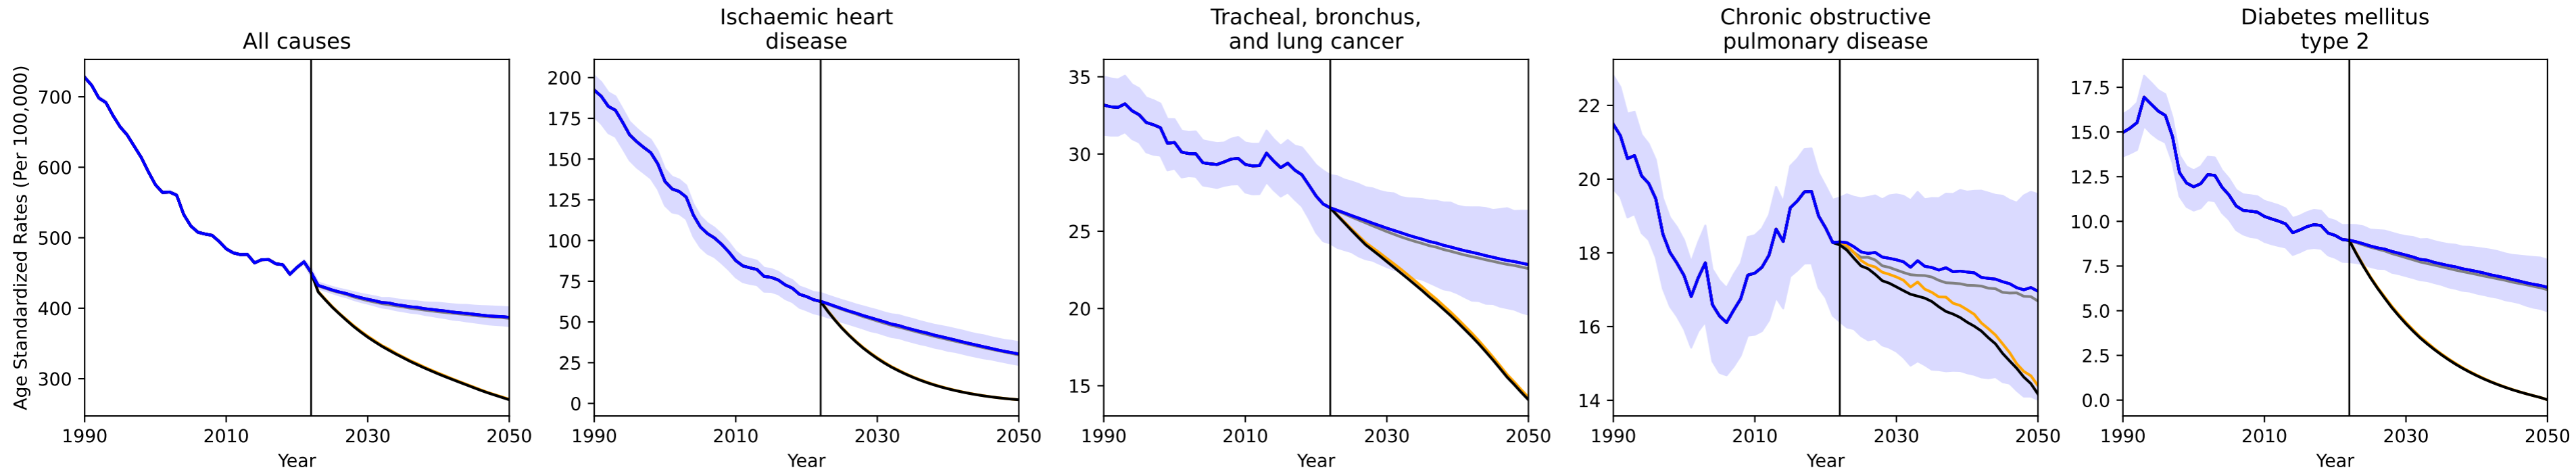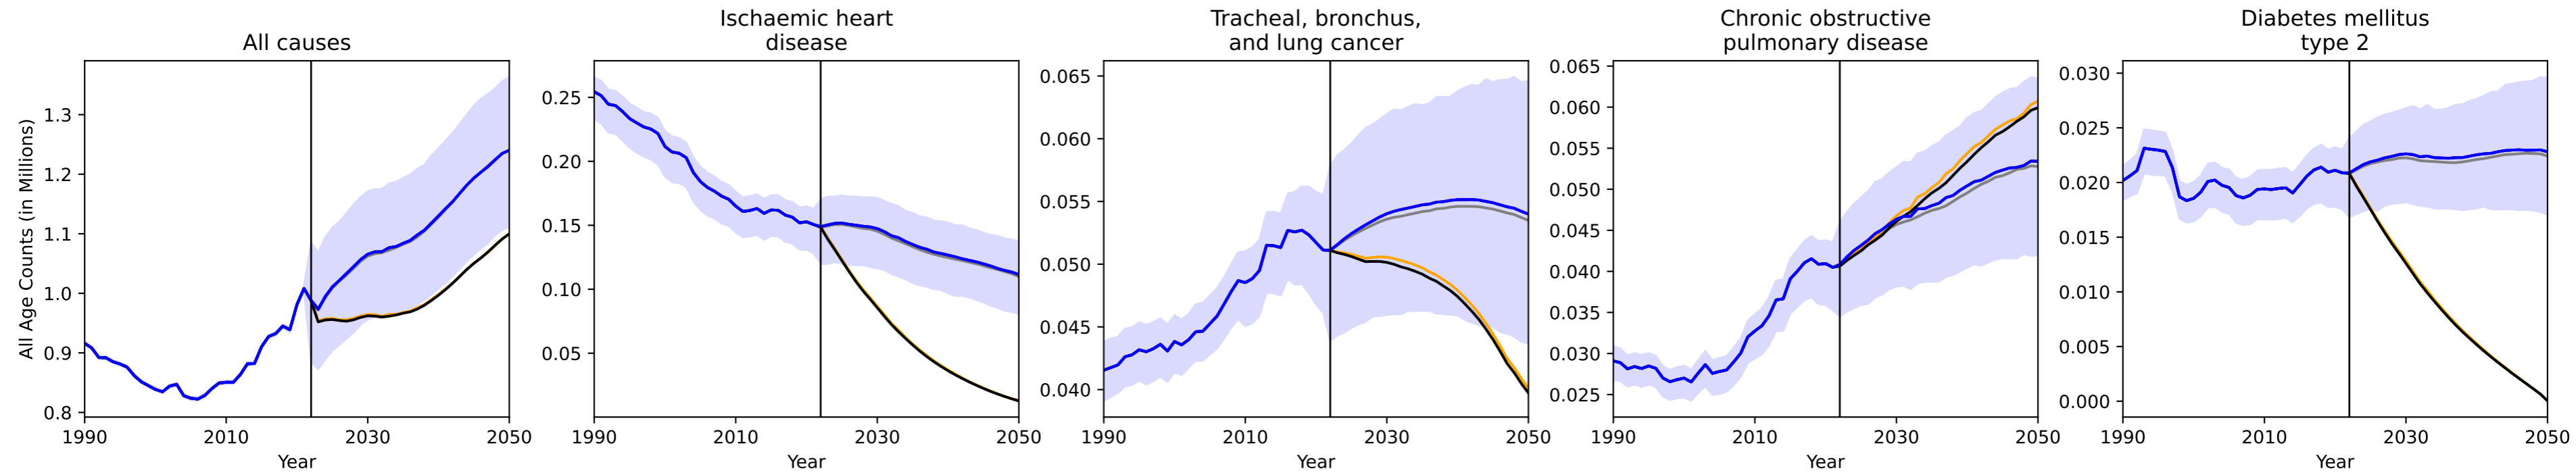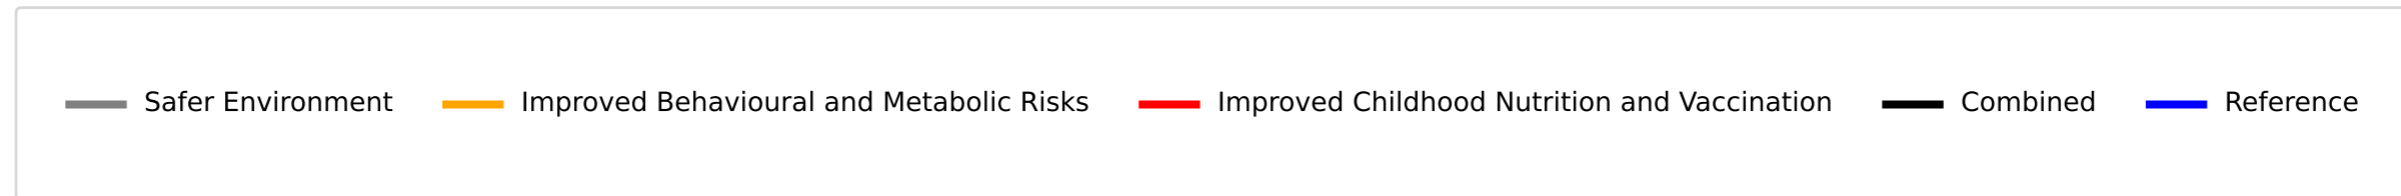

# Greece

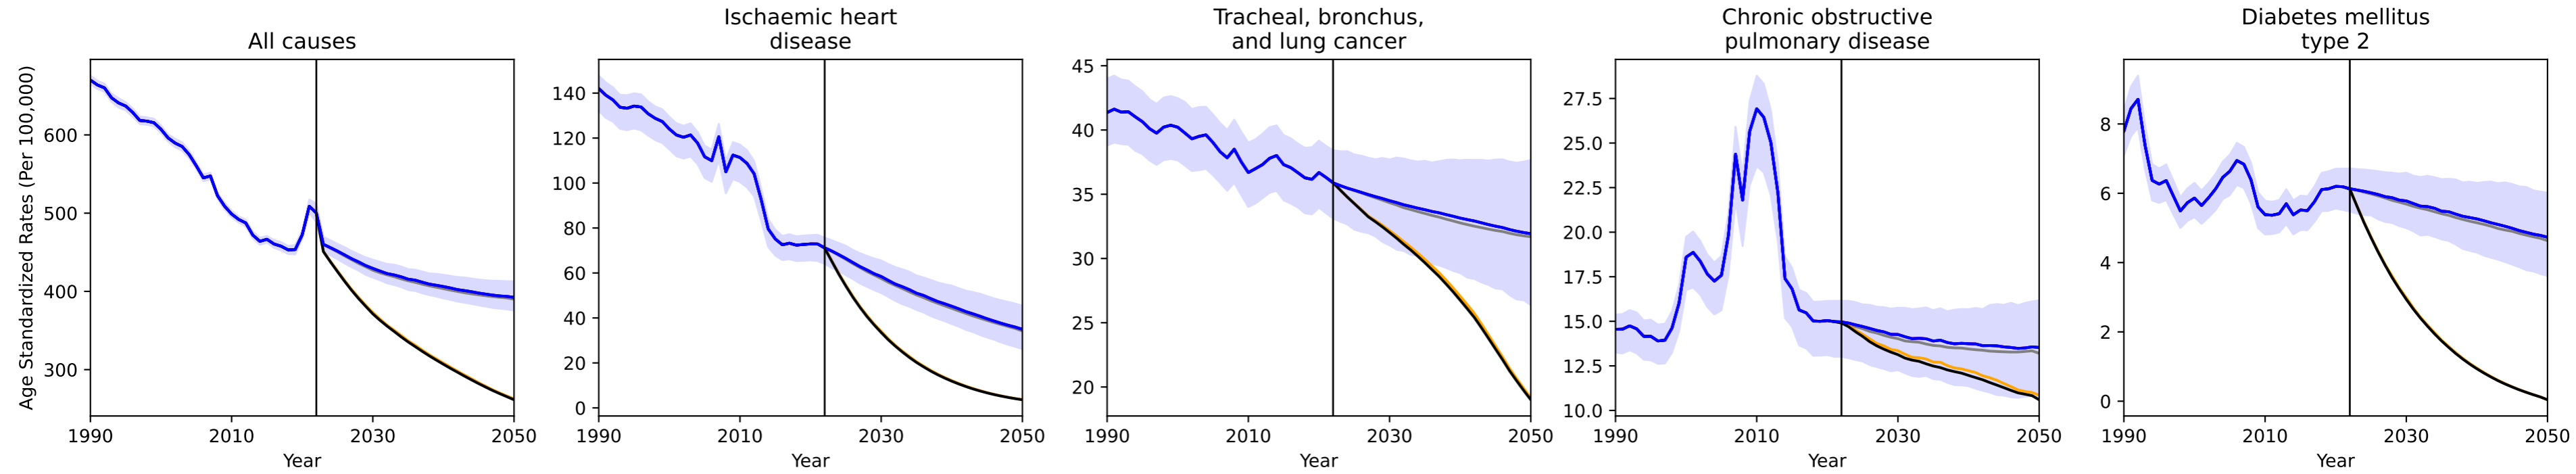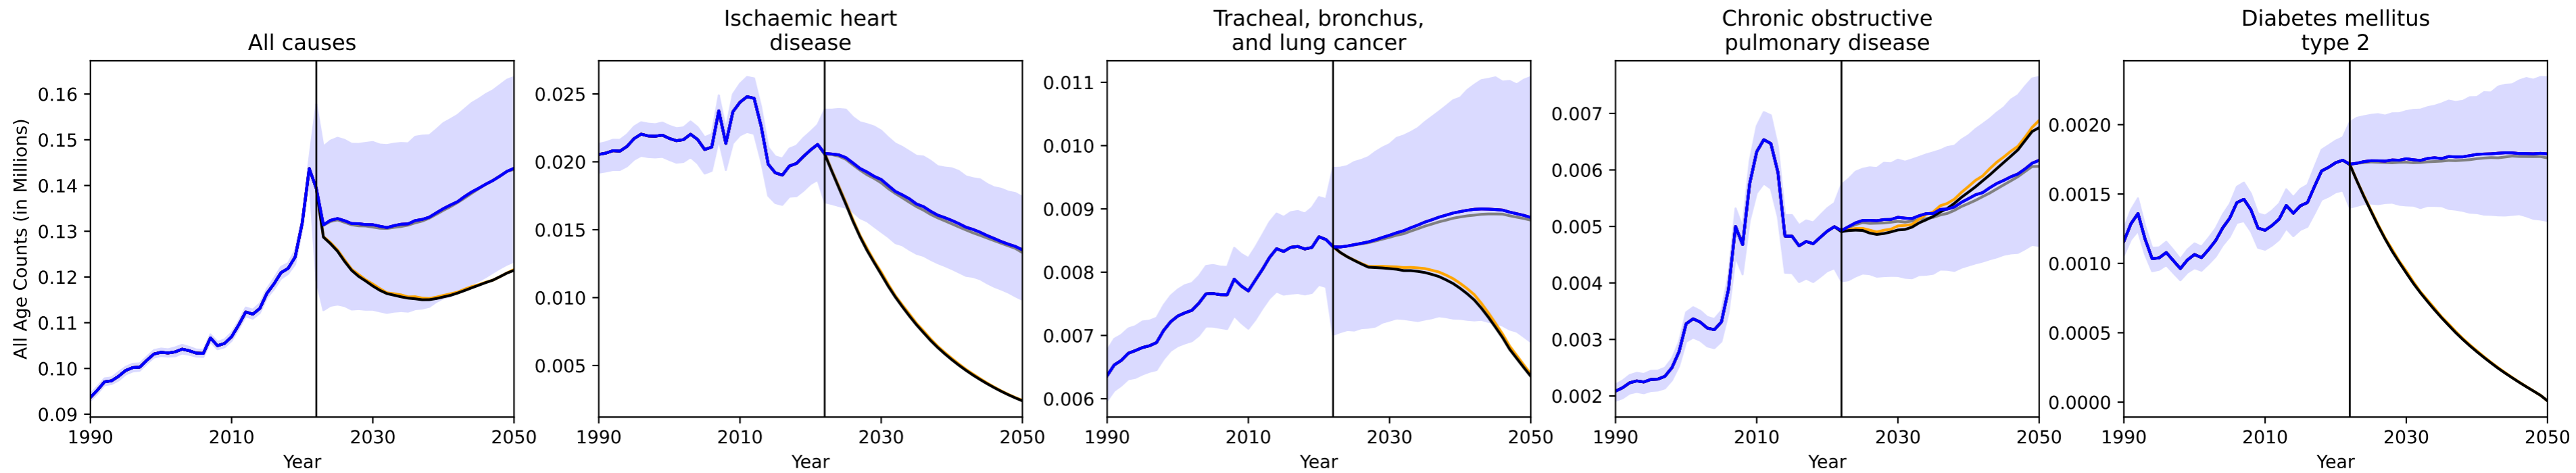

— Safer Environment — Improved Behavioural and Metabolic Risks — Improved Childhood Nutrition and Vaccination — Combined — Reference



# Iceland

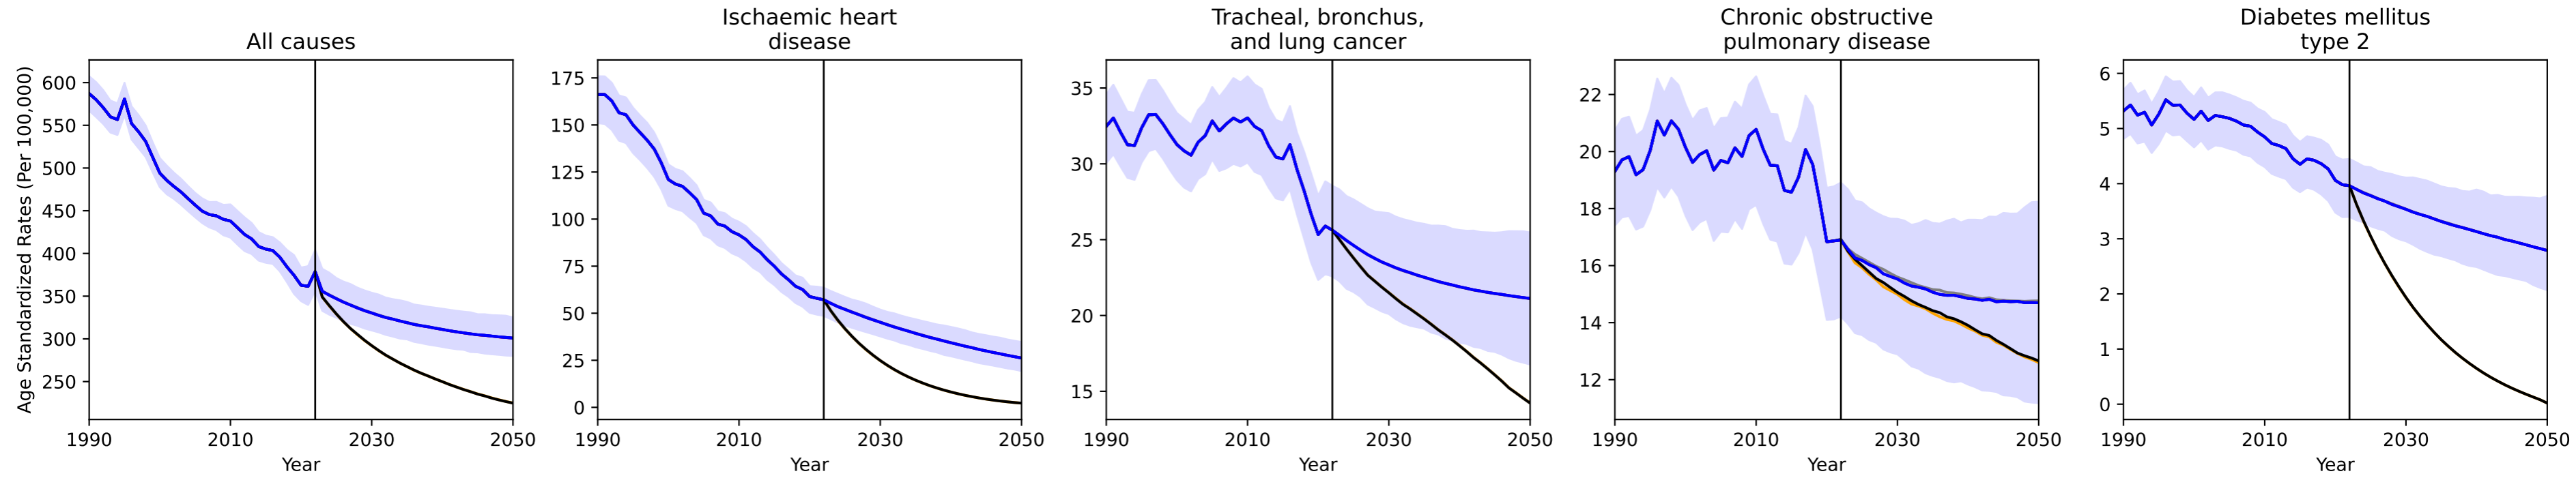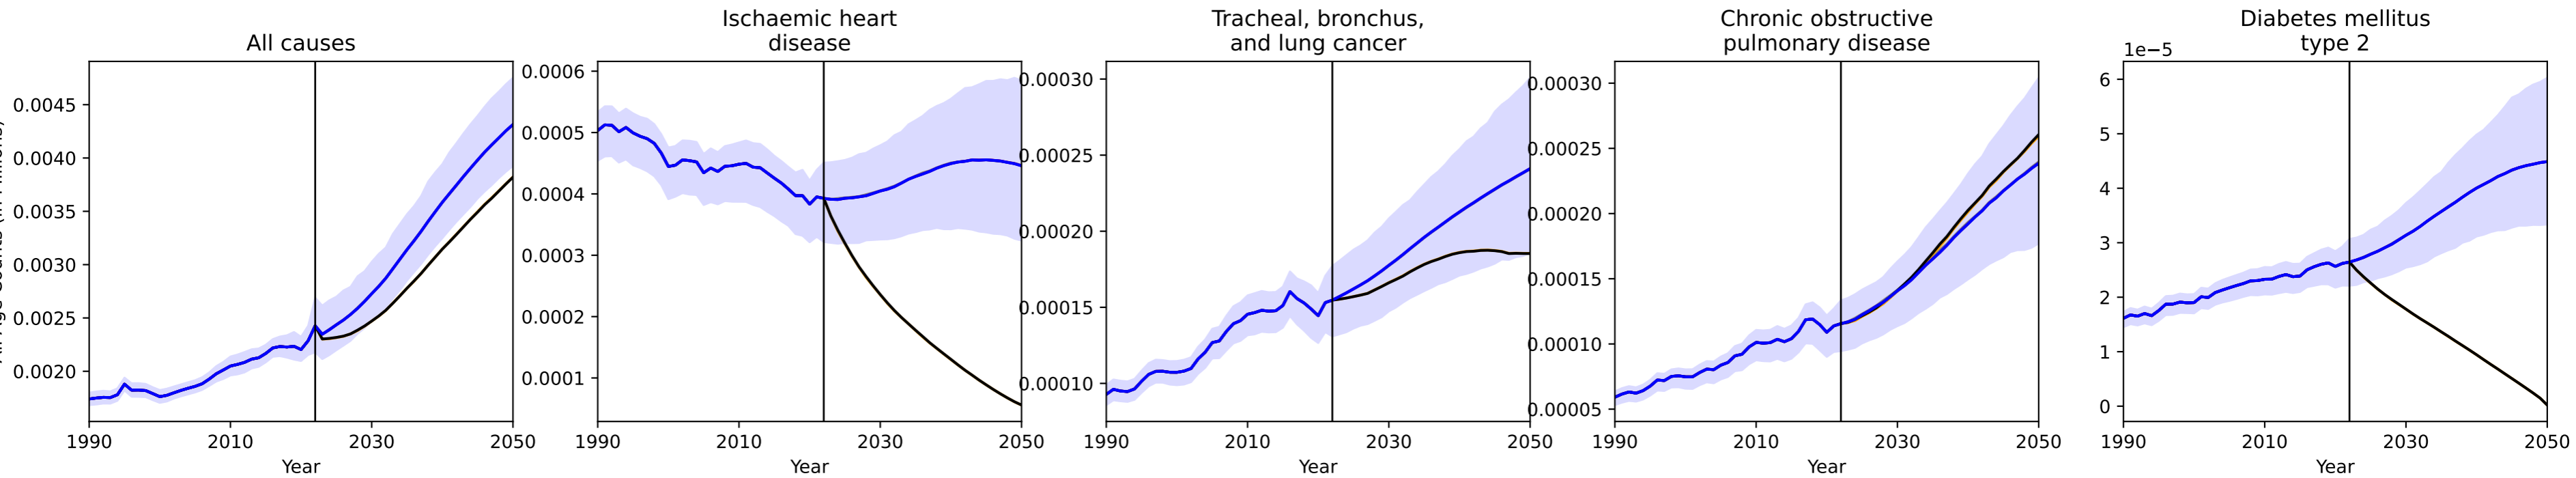

# Ireland

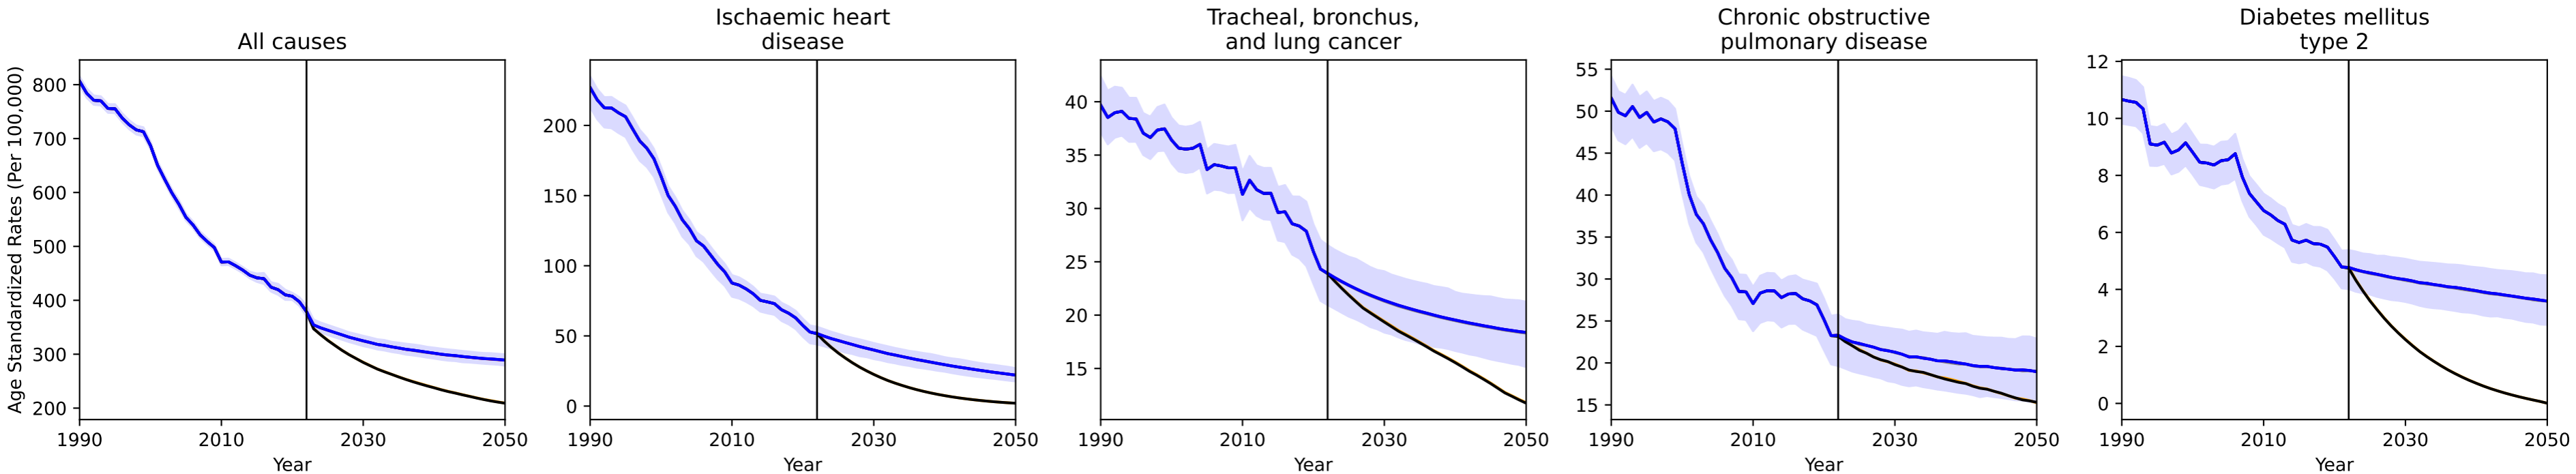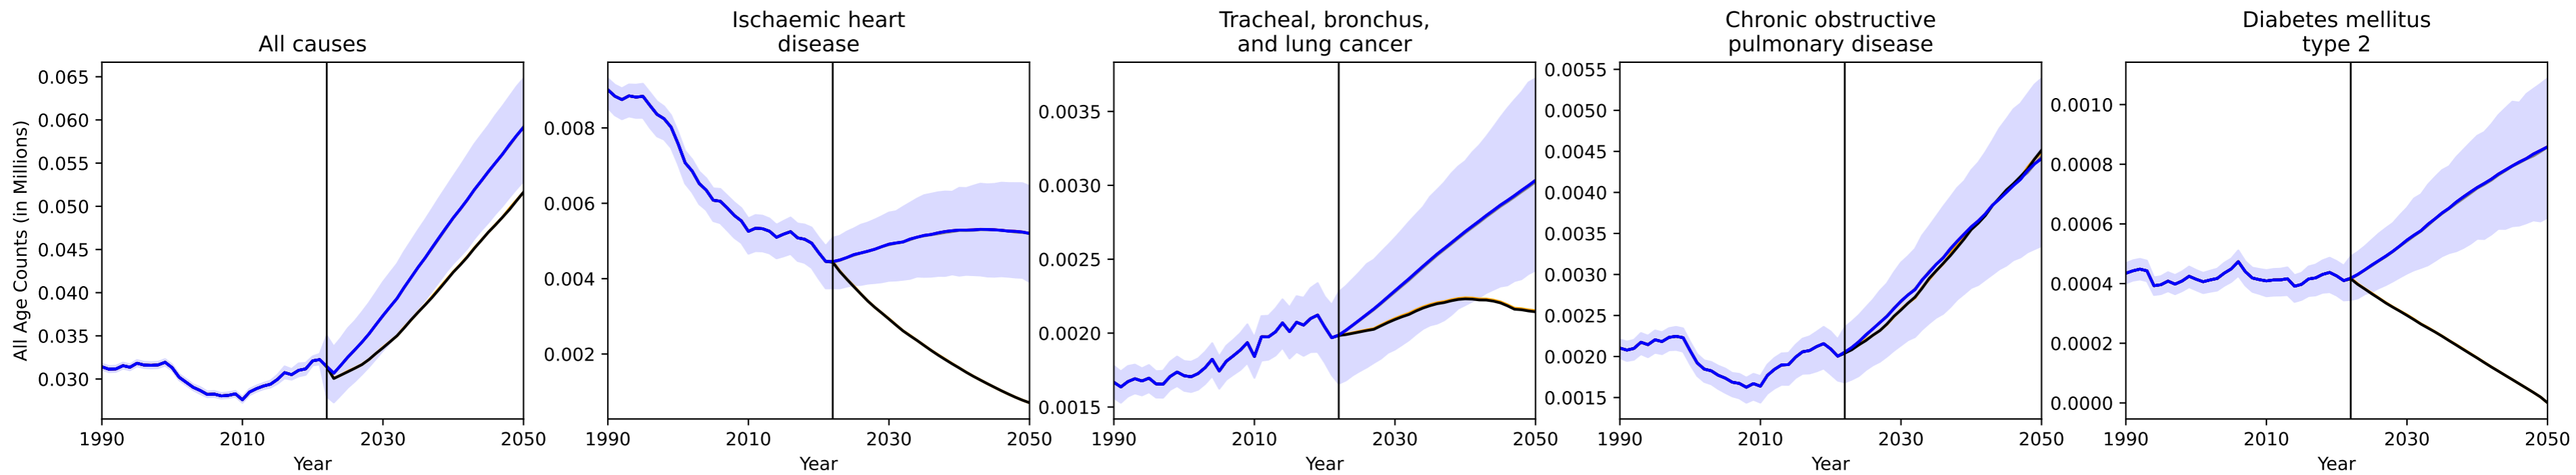

— Safer Environment — Improved Behavioural and Metabolic Risks — Improved Childhood Nutrition and Vaccination — Combined — Reference

# Israel

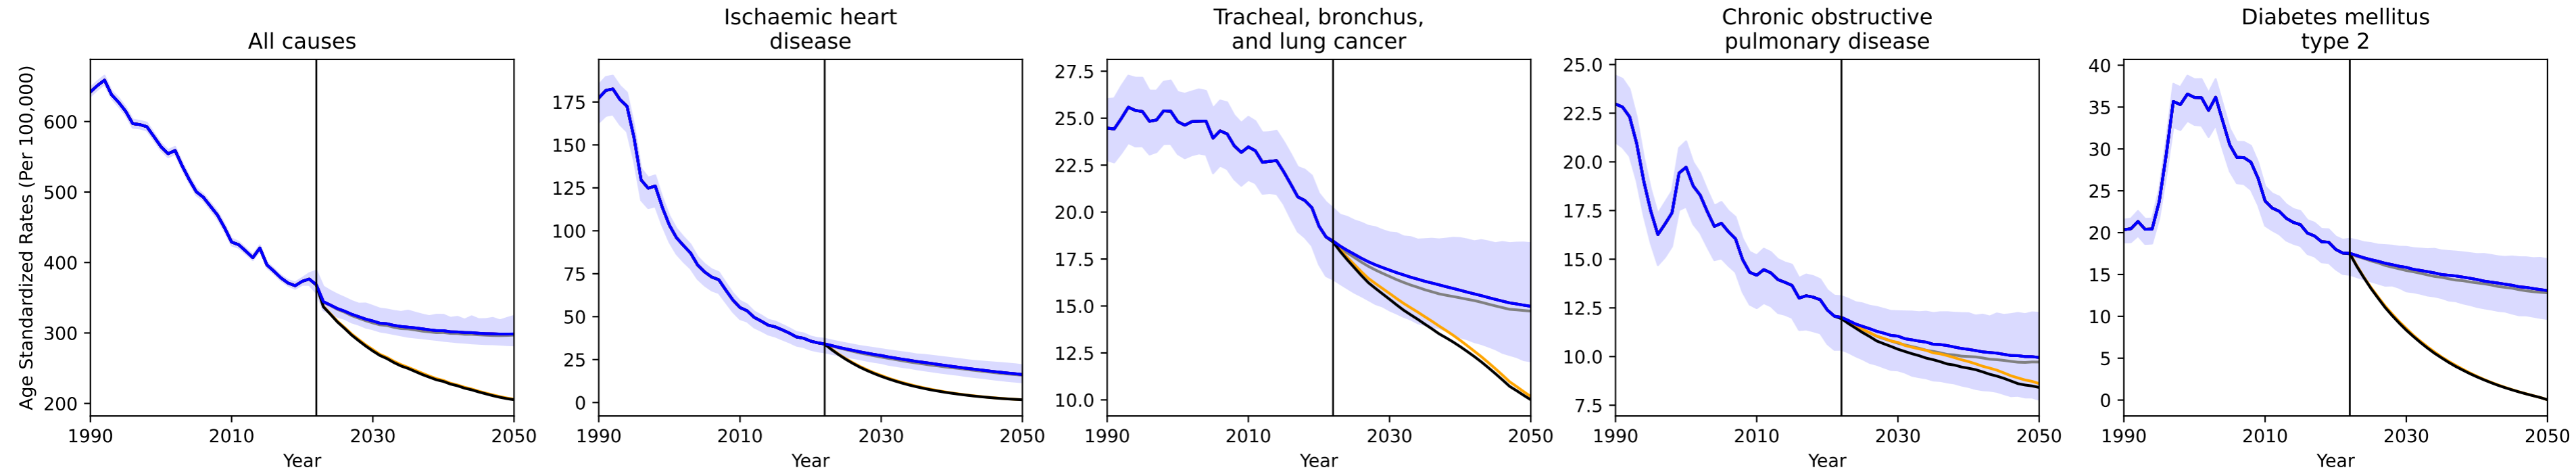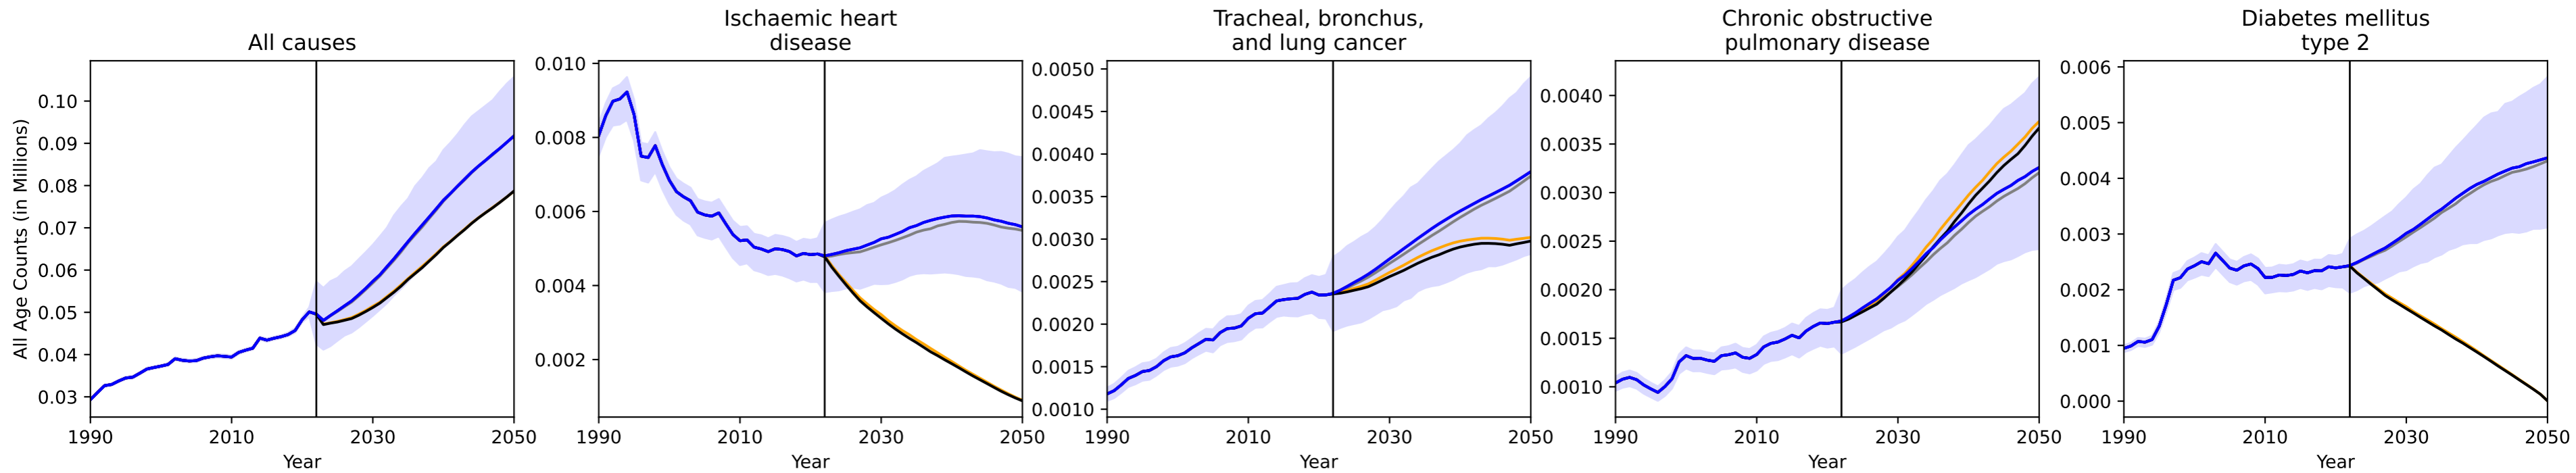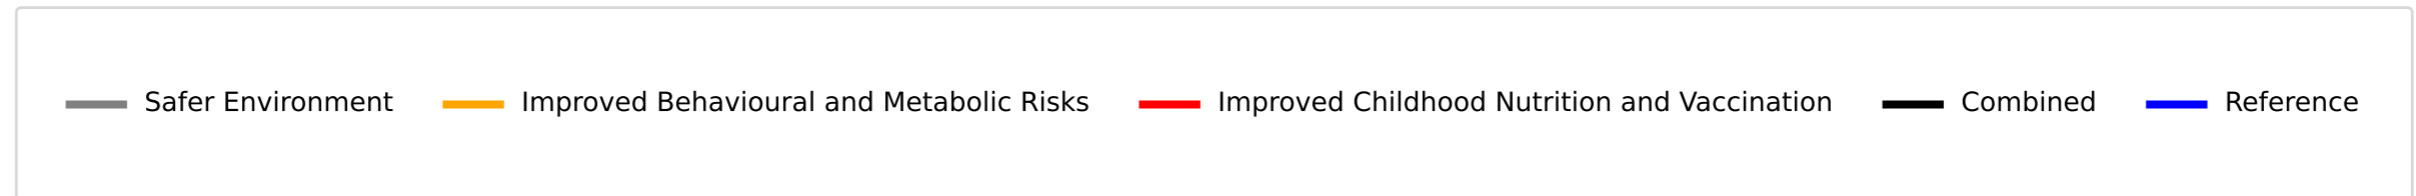

# Italy

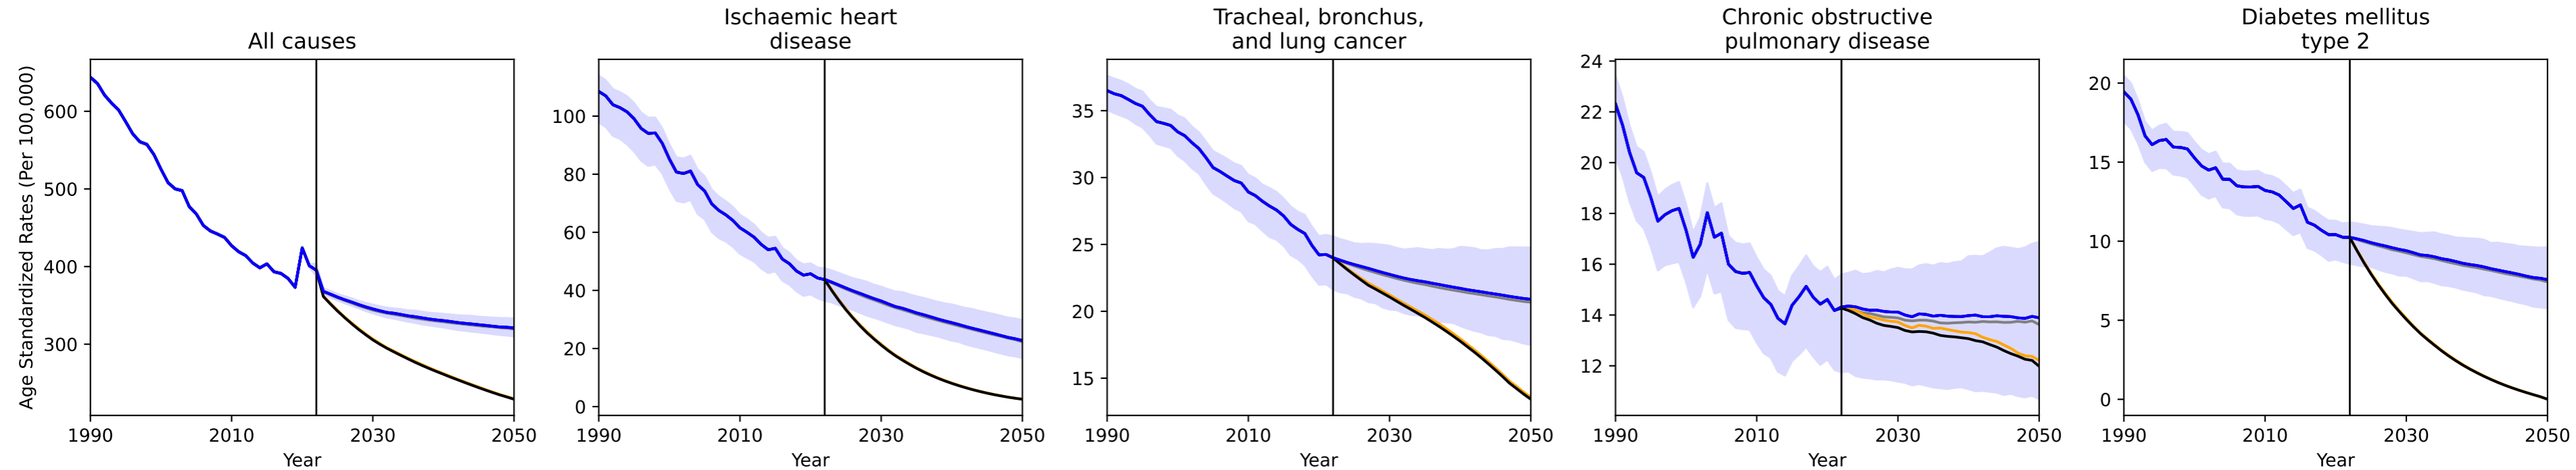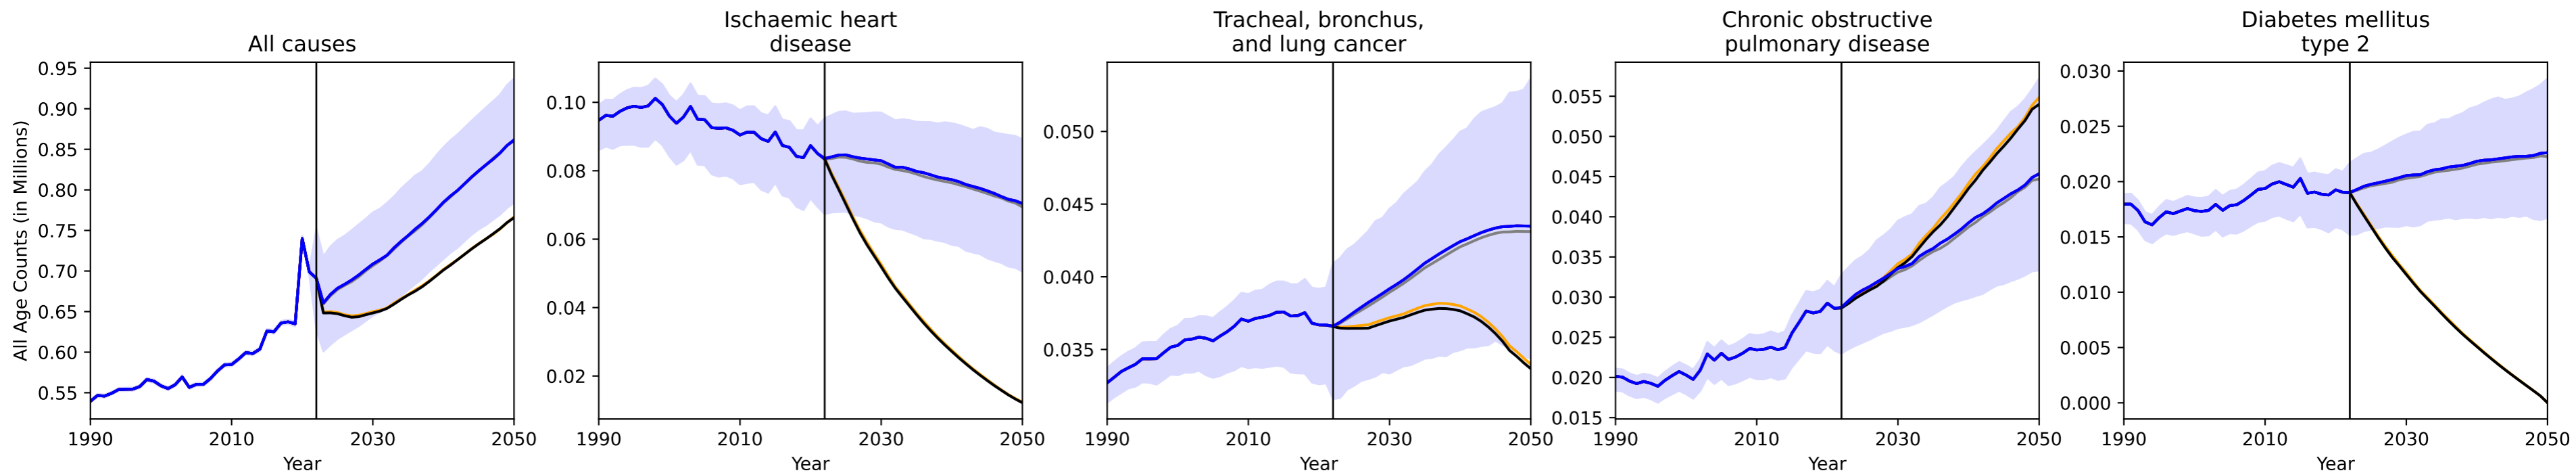

— Safer Environment — Improved Behavioural and Metabolic Risks — Improved Childhood Nutrition and Vaccination — Combined — Reference

# Luxembourg

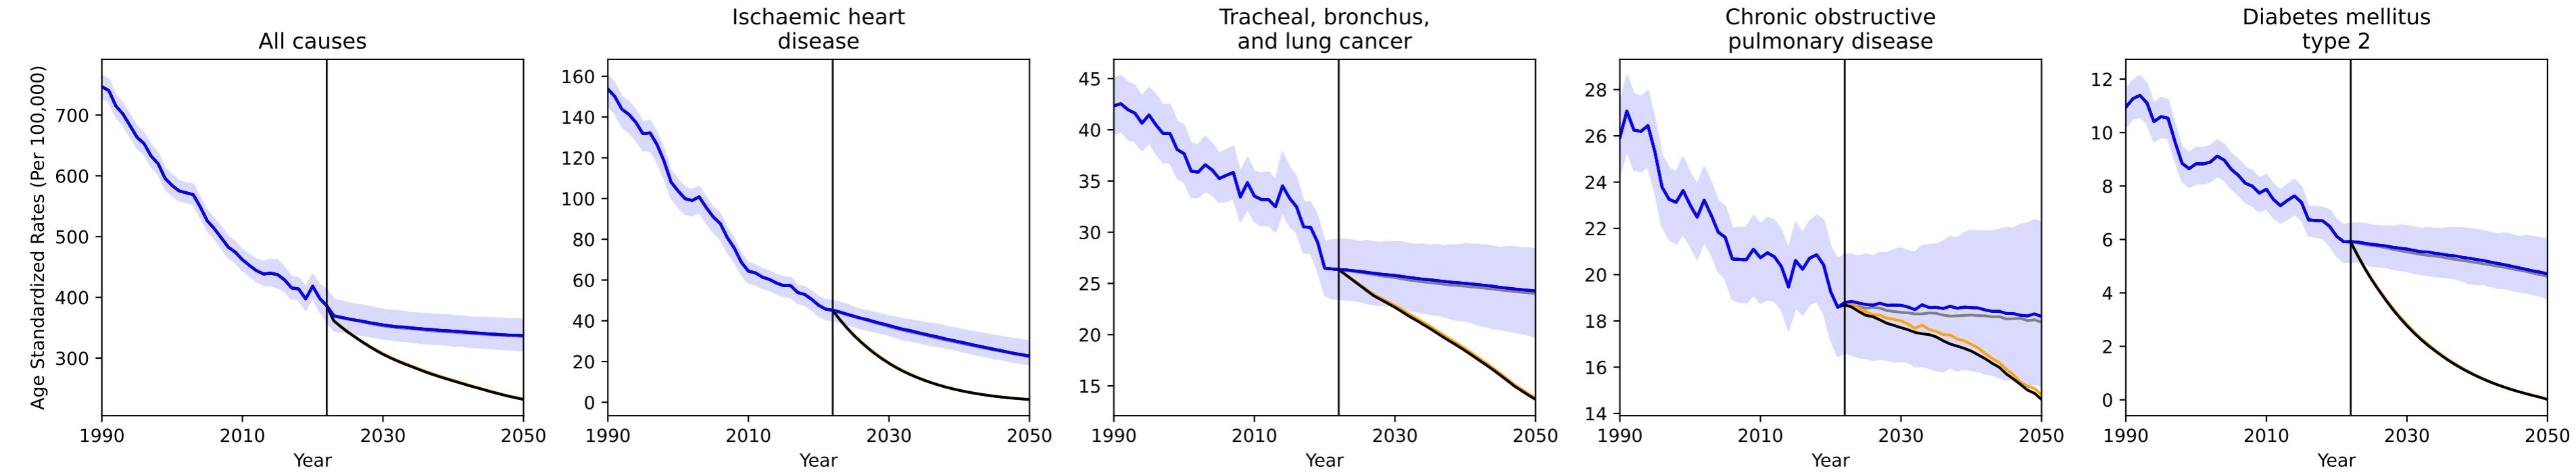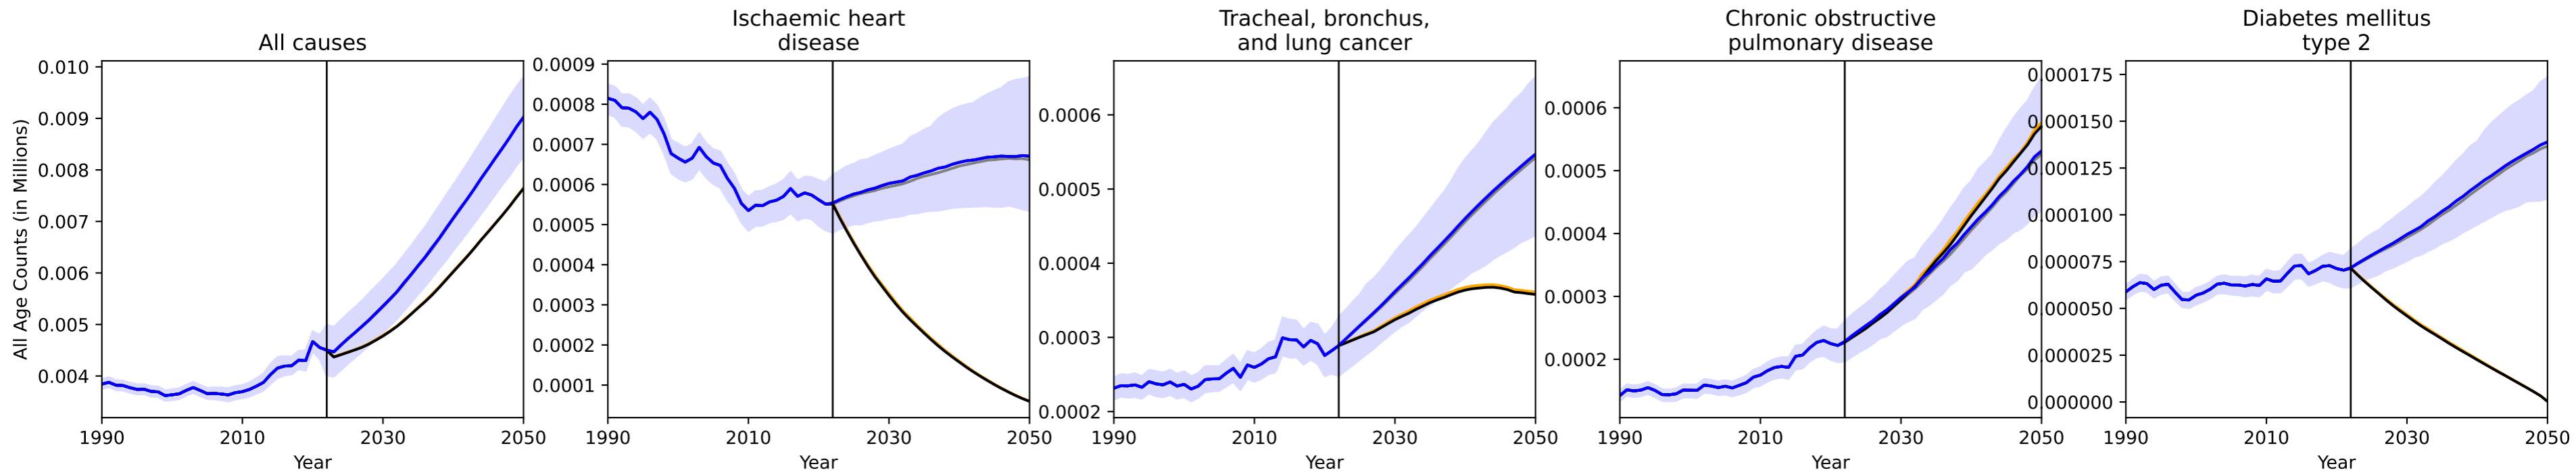

# Malta

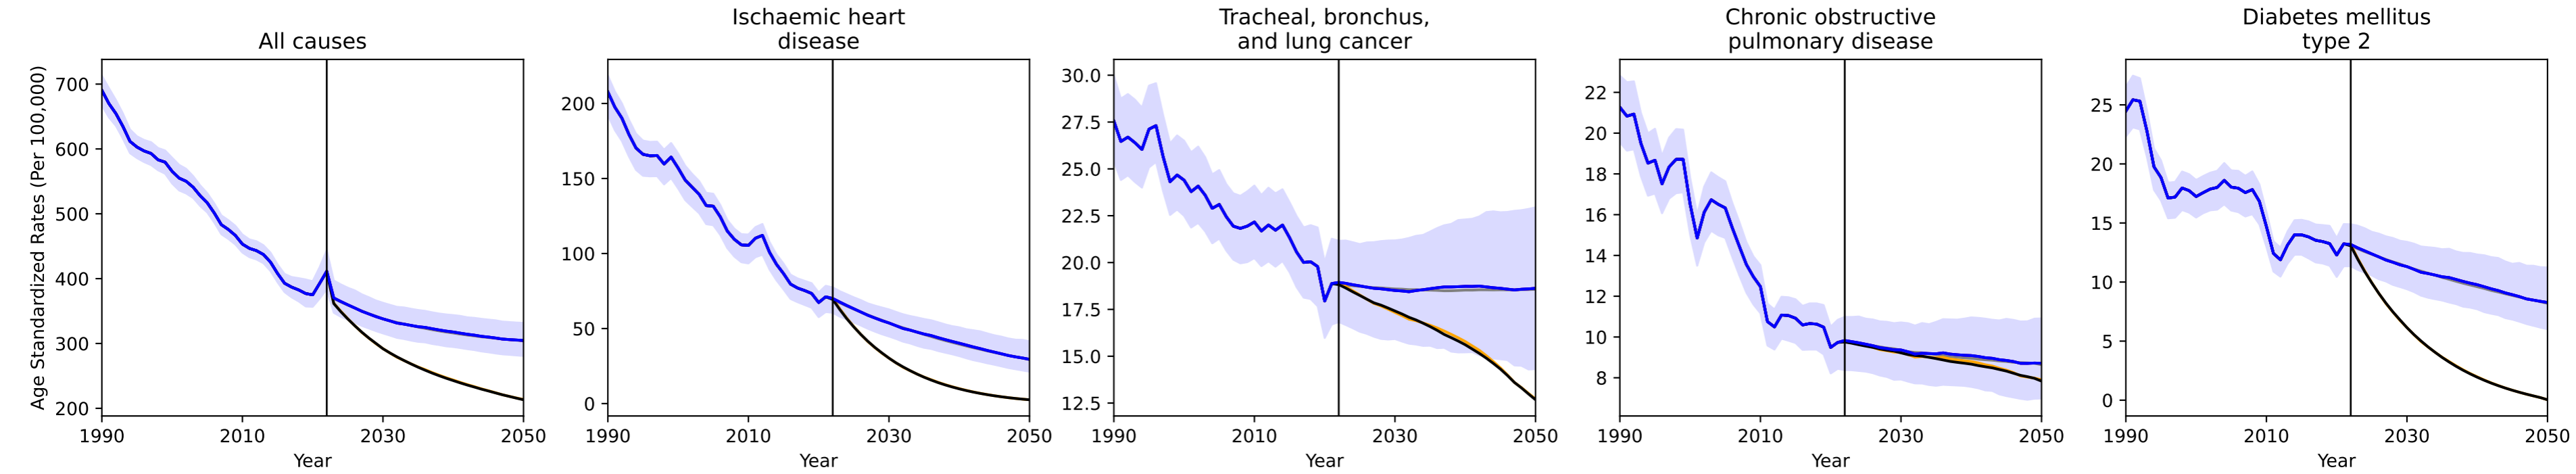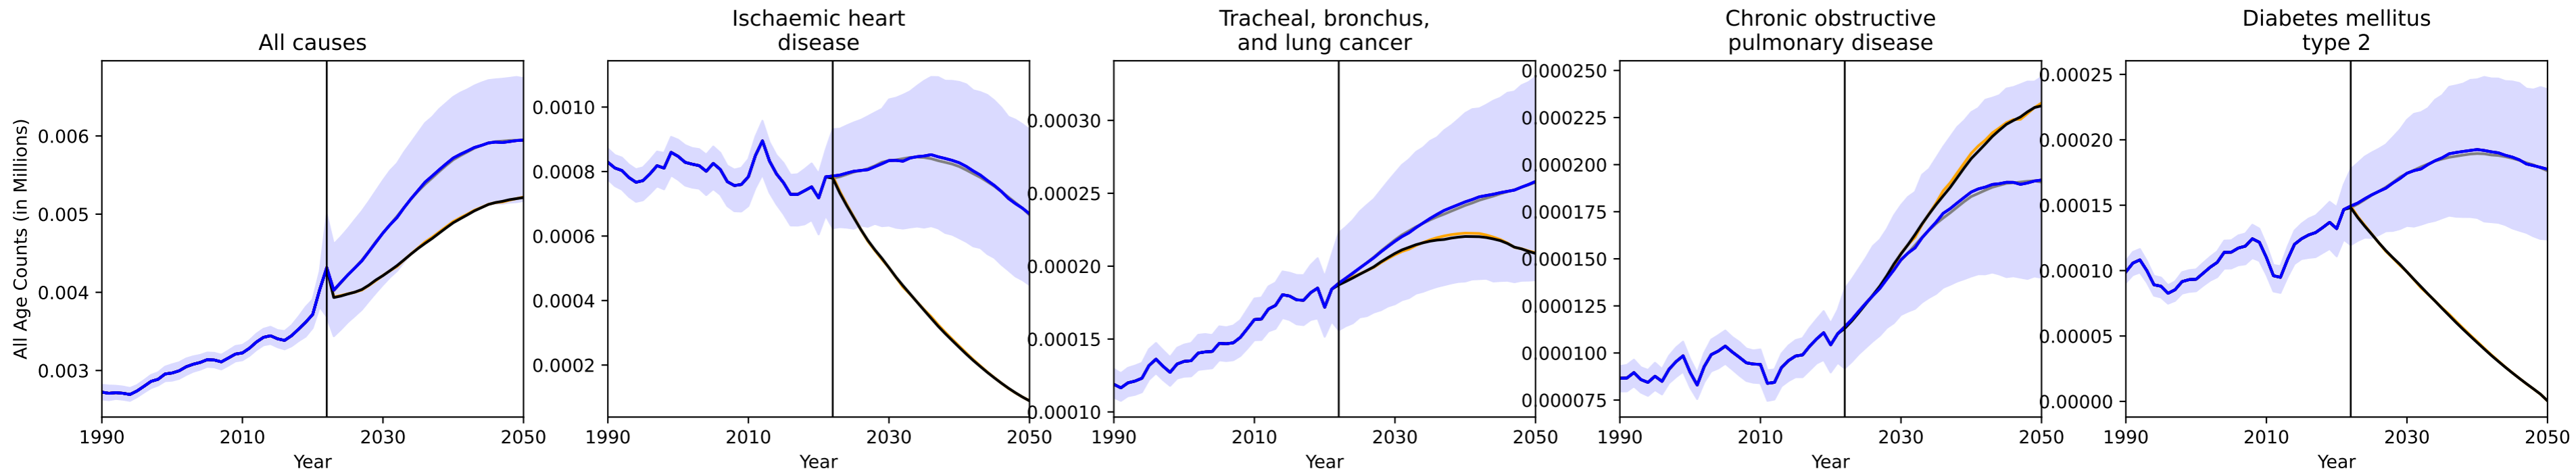

# Monaco

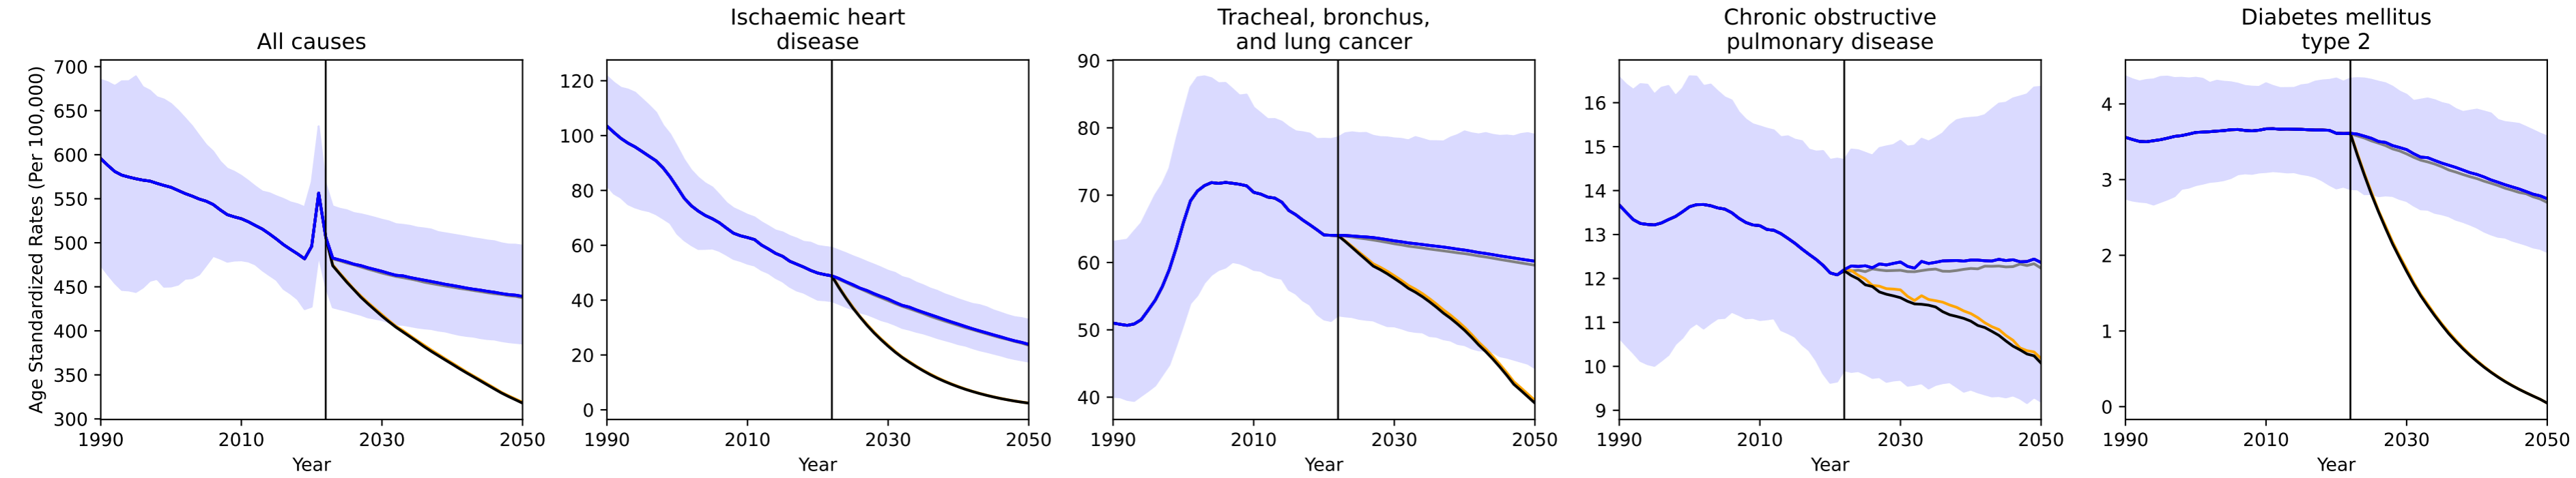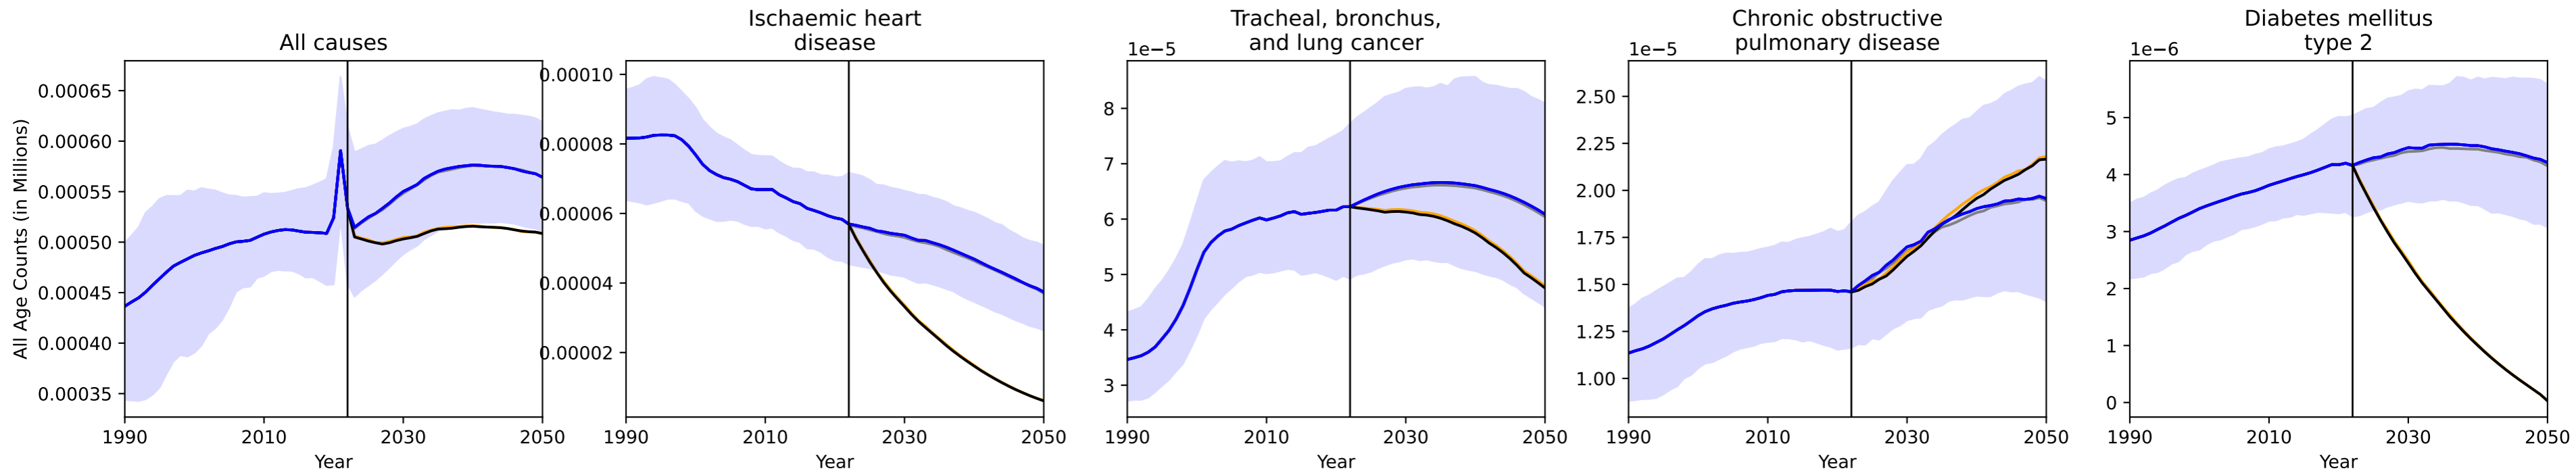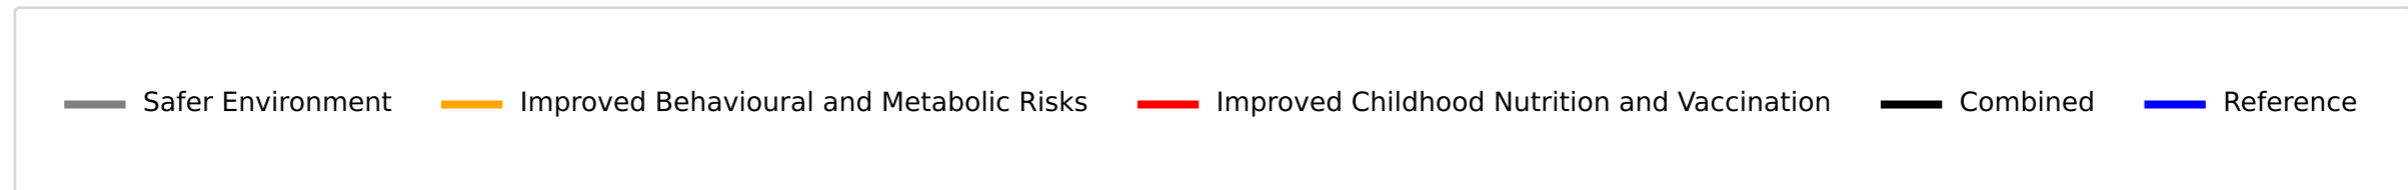

# Netherlands

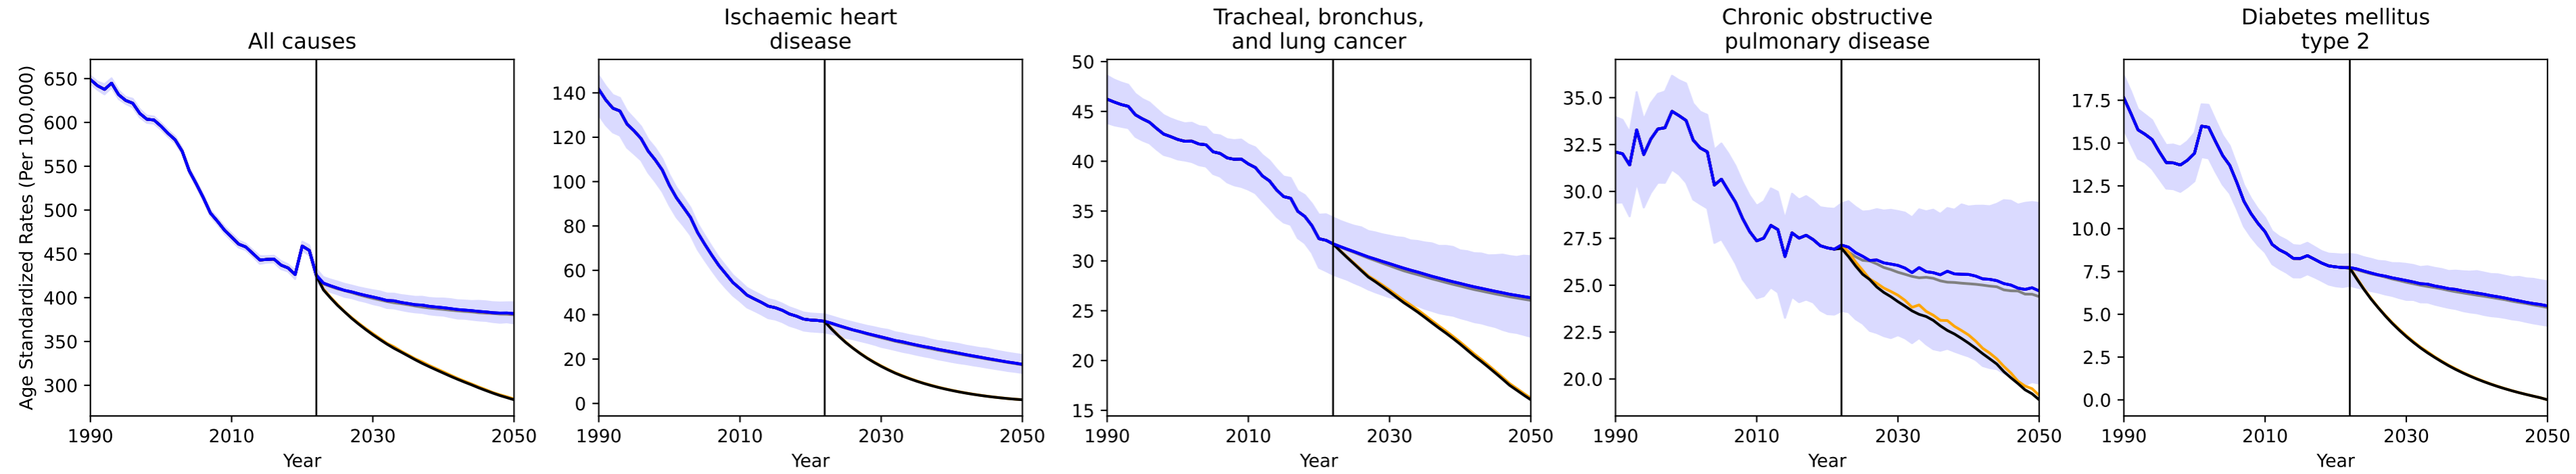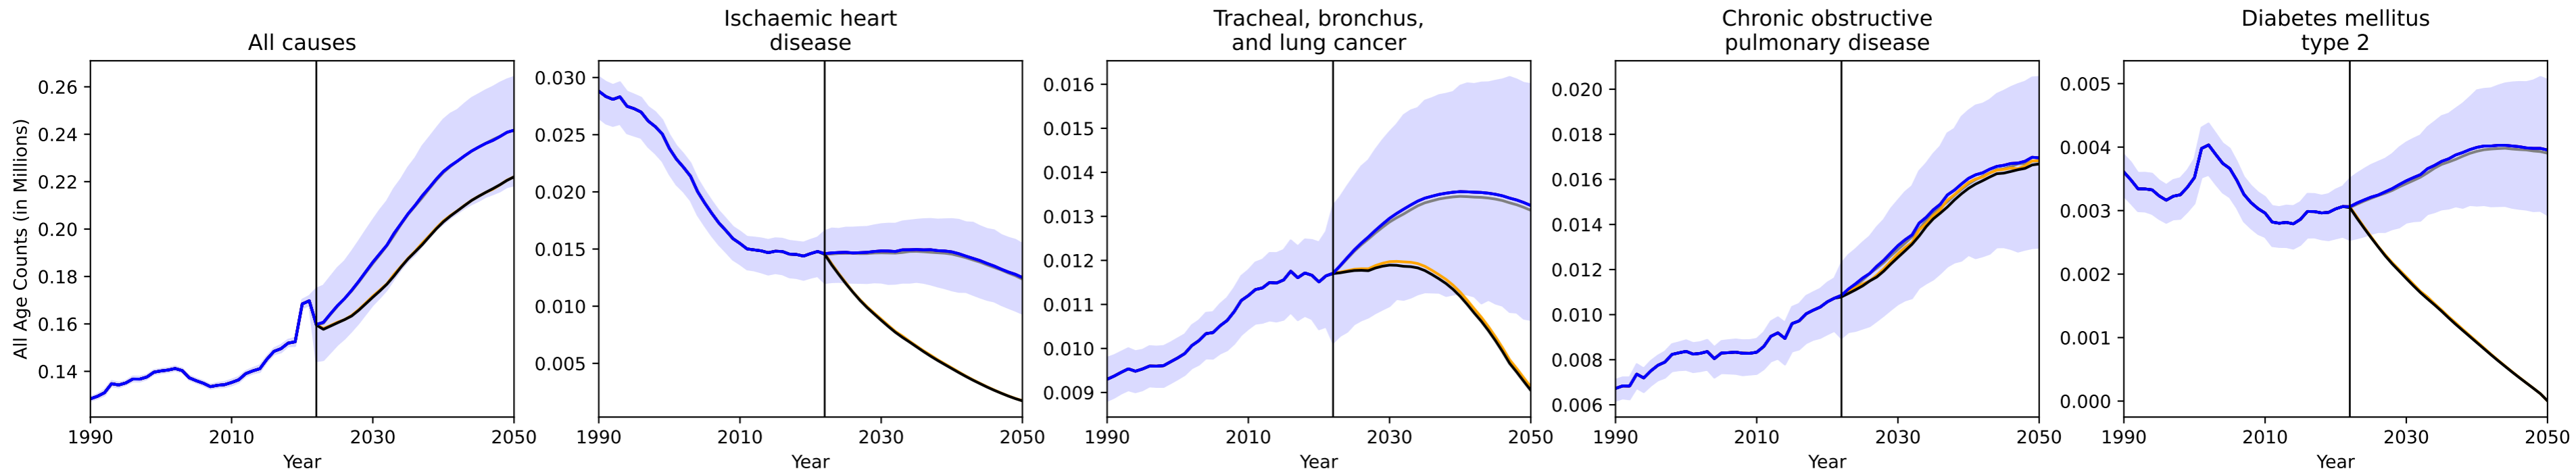

— Safer Environment — Improved Behavioural and Metabolic Risks — Improved Childhood Nutrition and Vaccination — Combined — Reference



# Norway

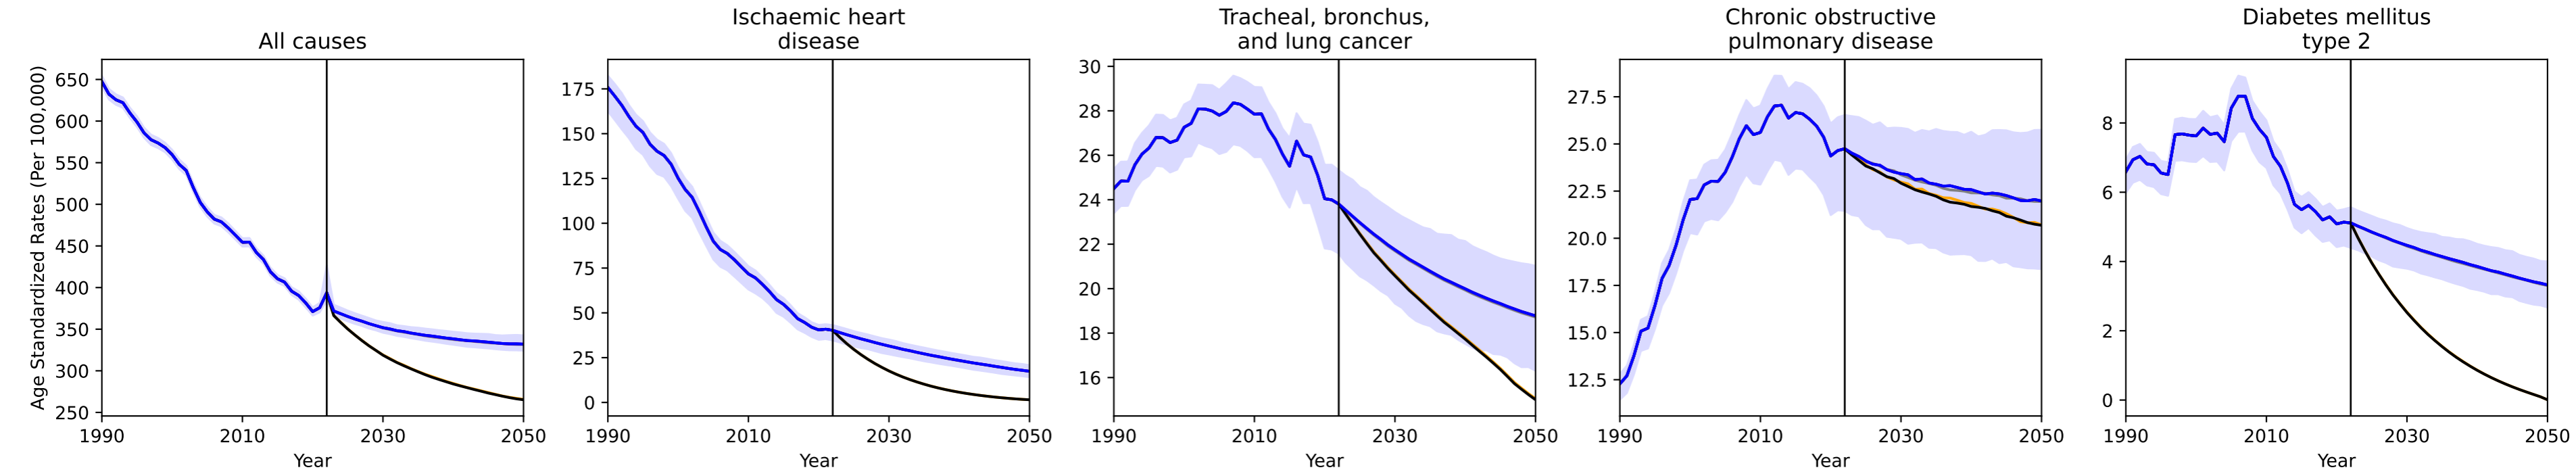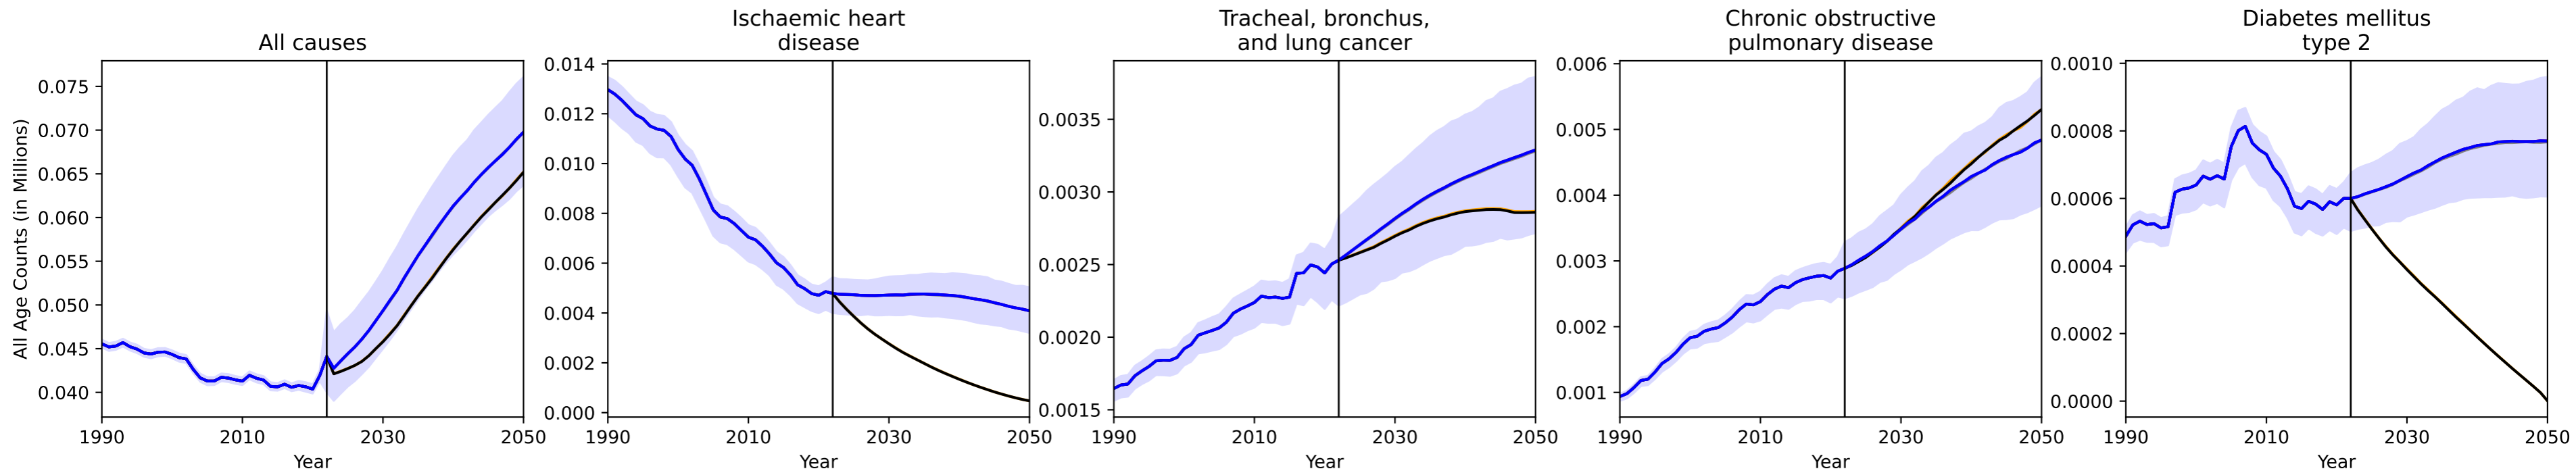

# Portugal

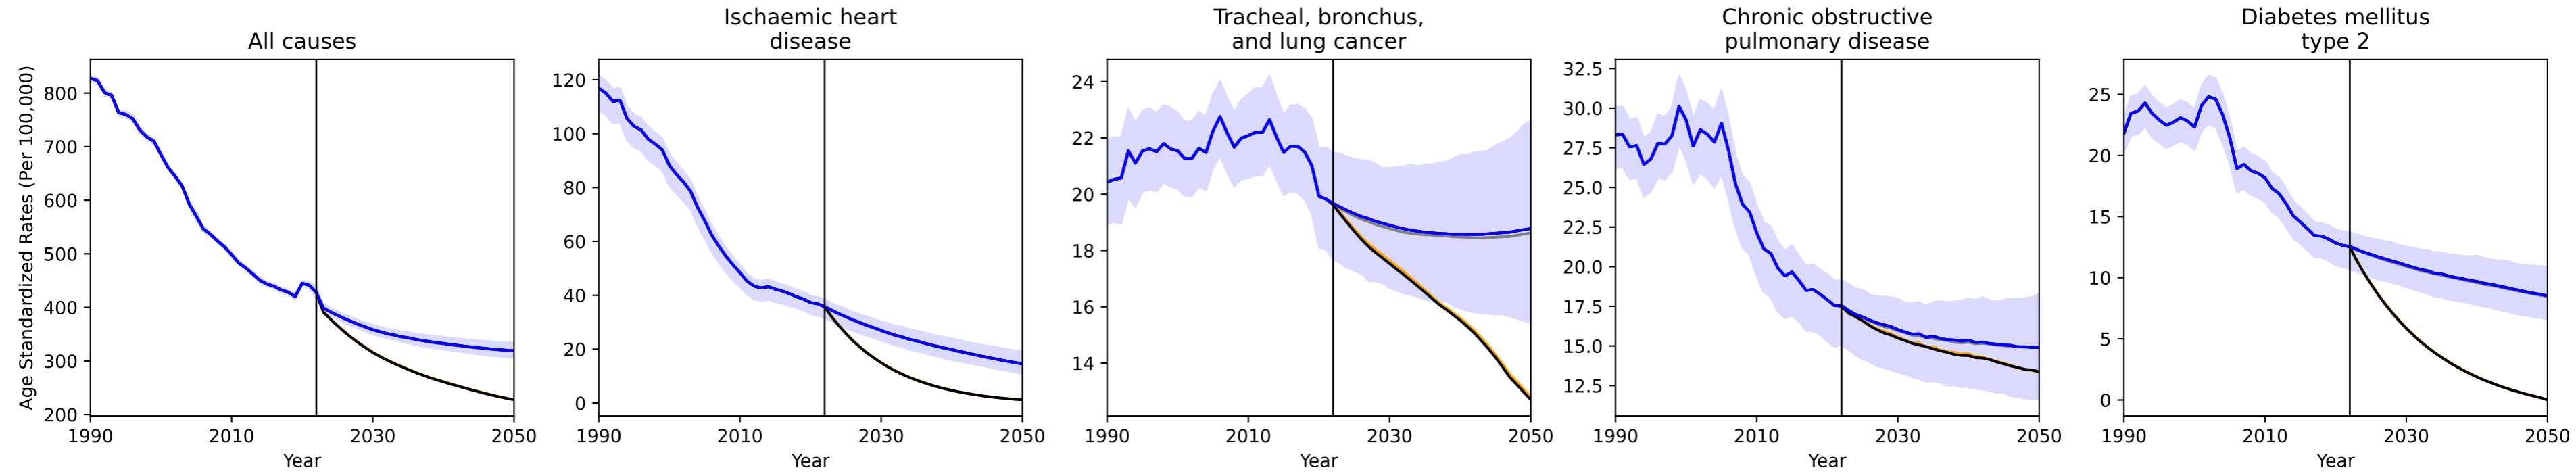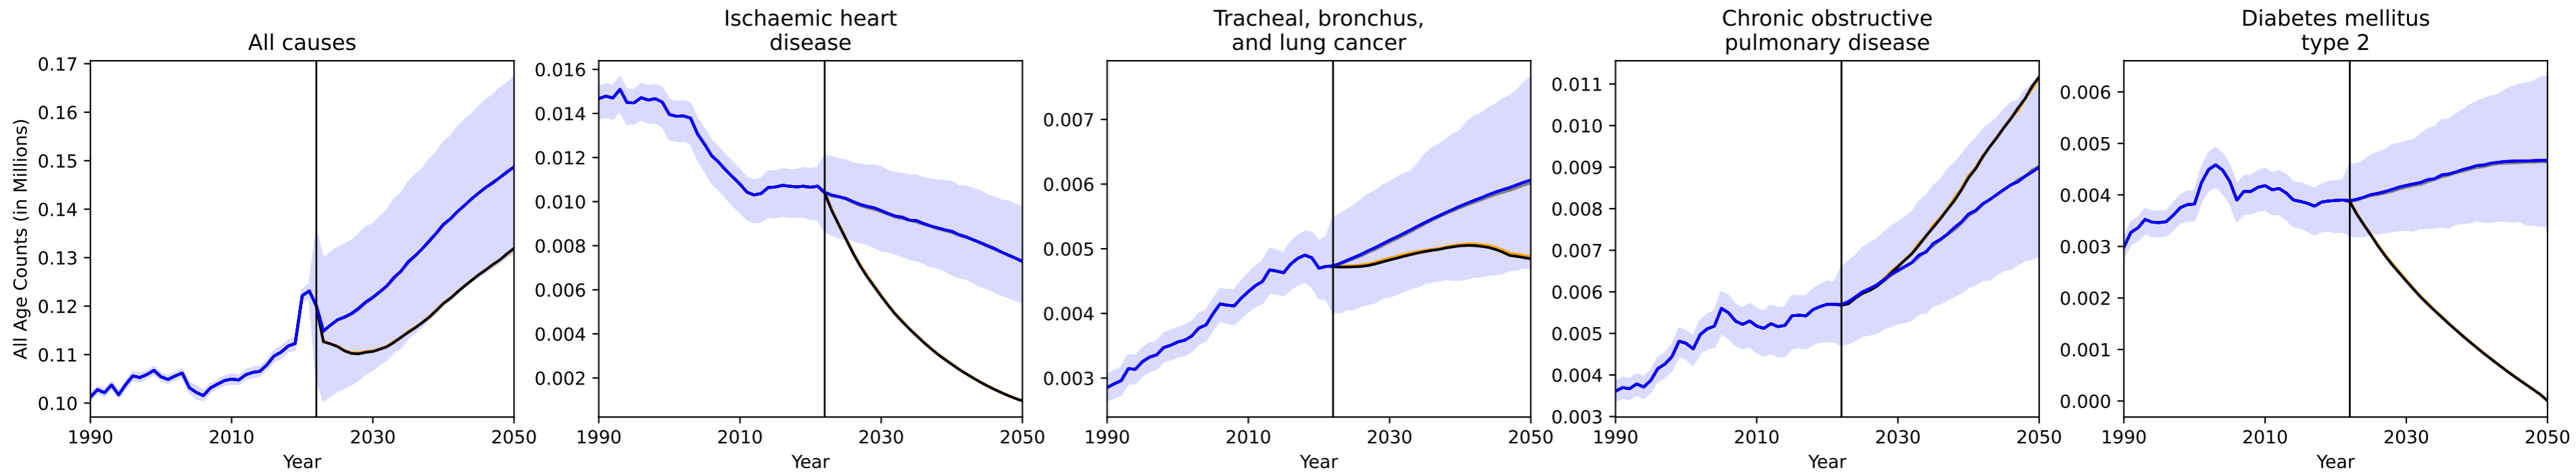

— Safer Environment — Improved Behavioural and Metabolic Risks — Improved Childhood Nutrition and Vaccination — Combined — Reference

# San Marino

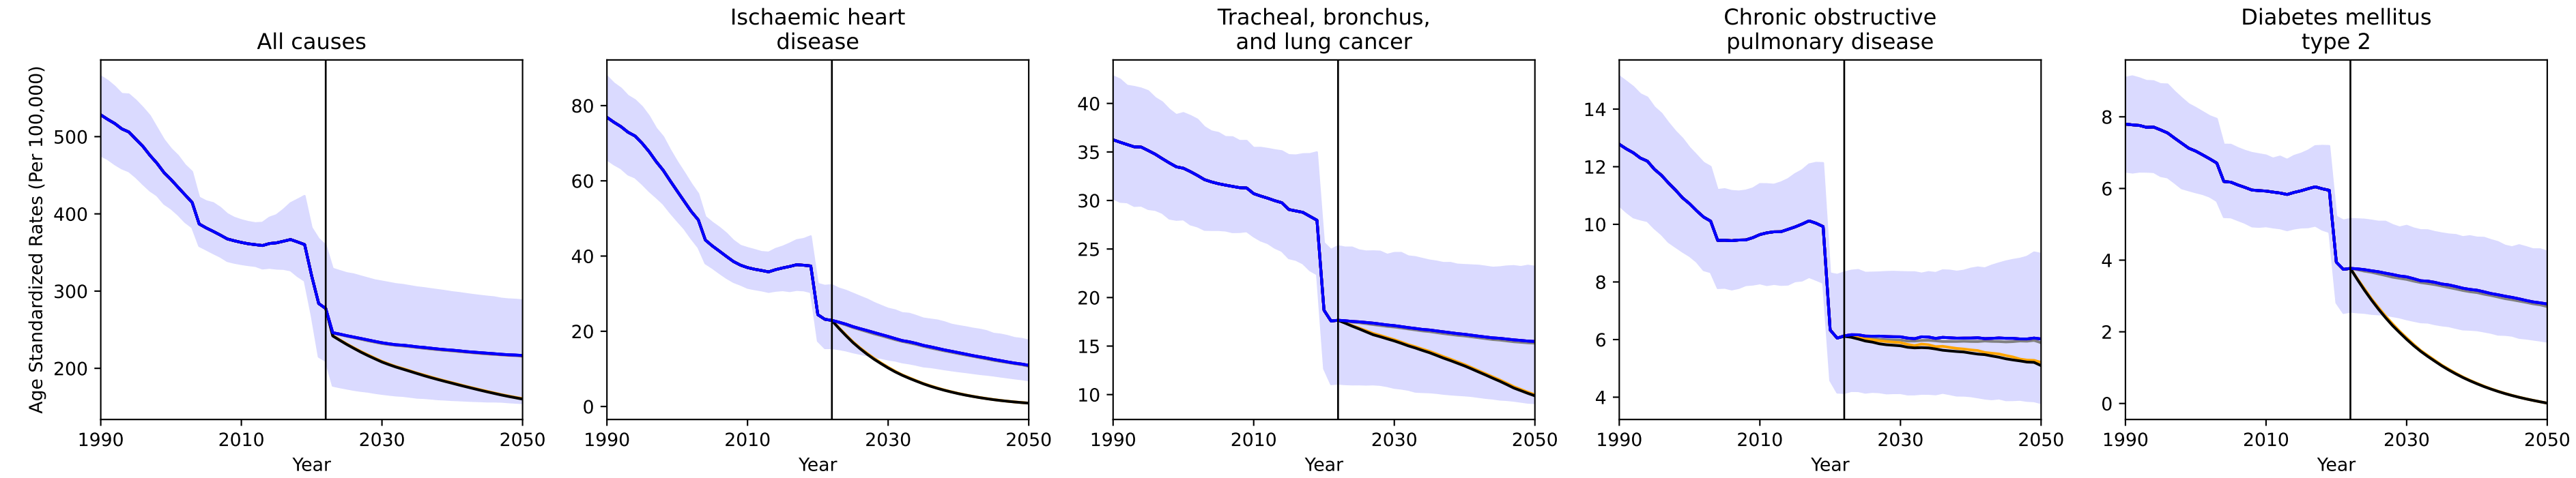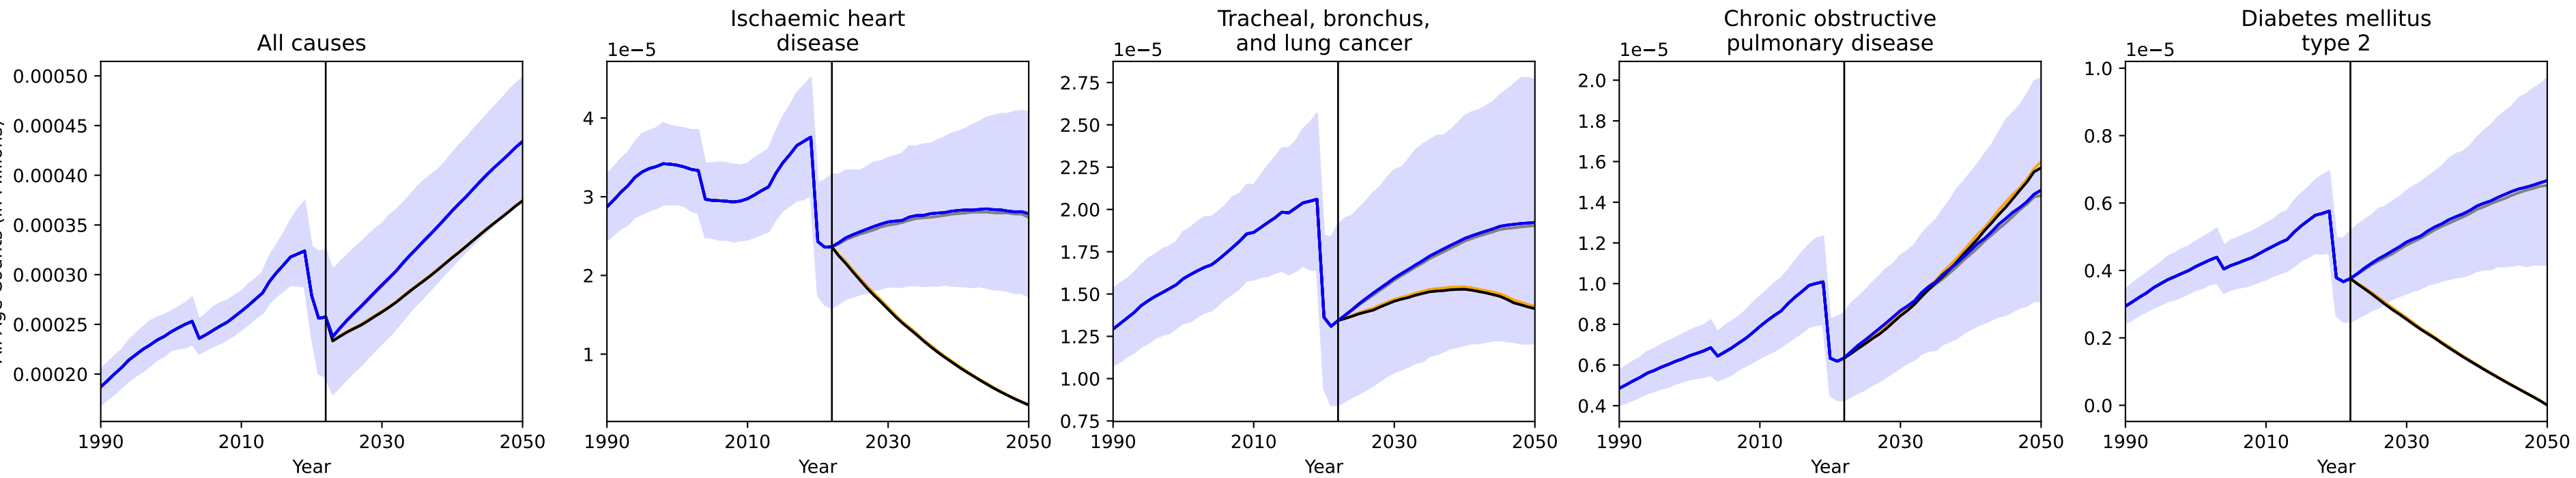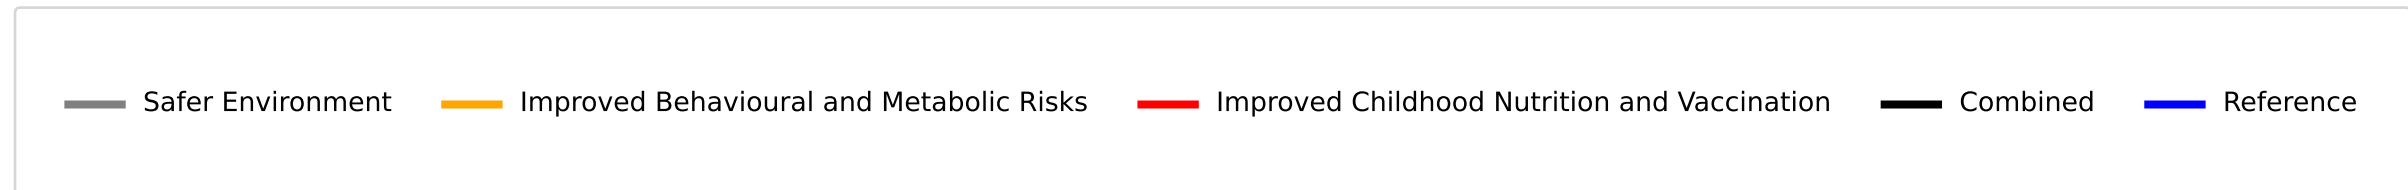

# Spain

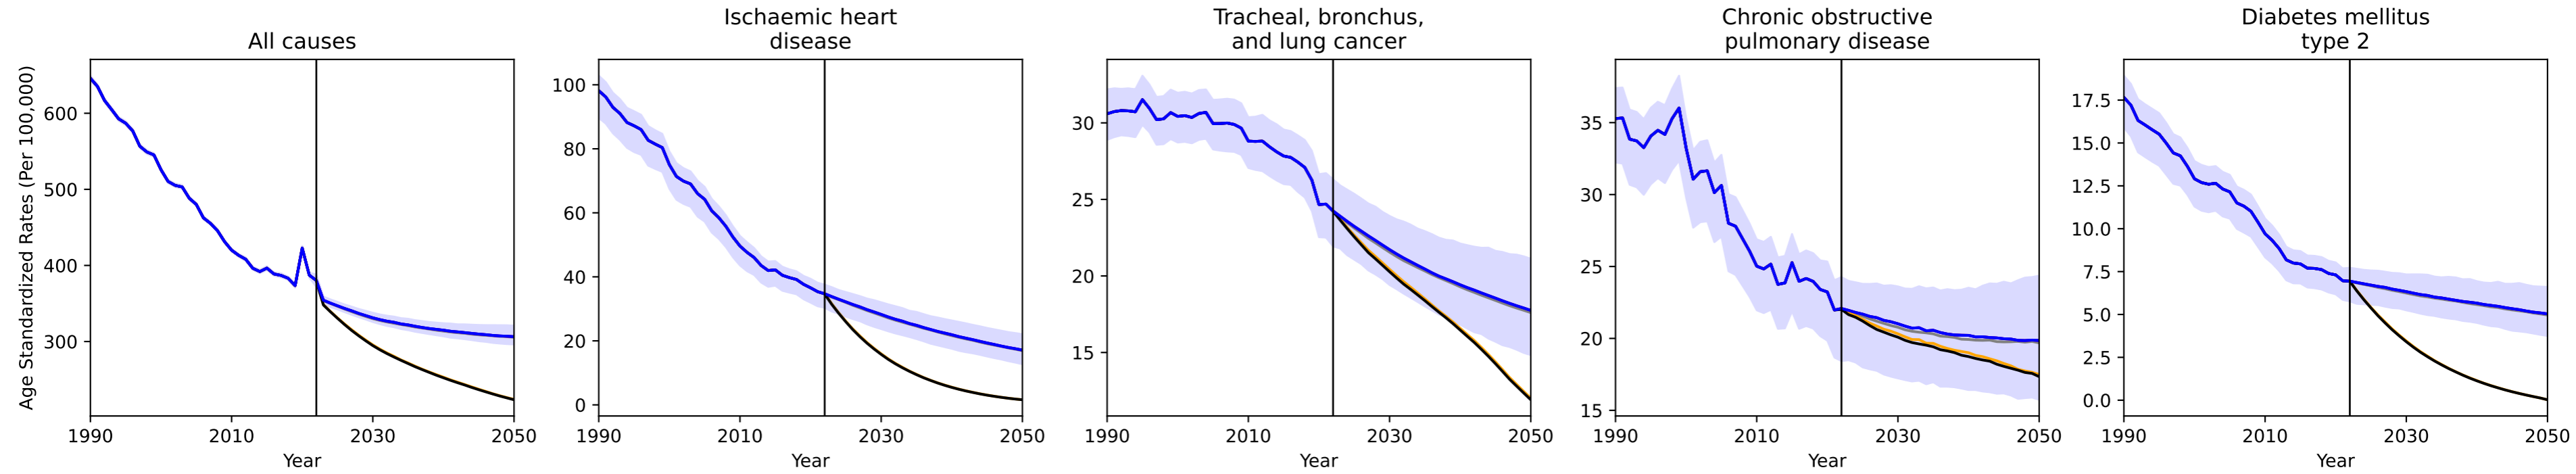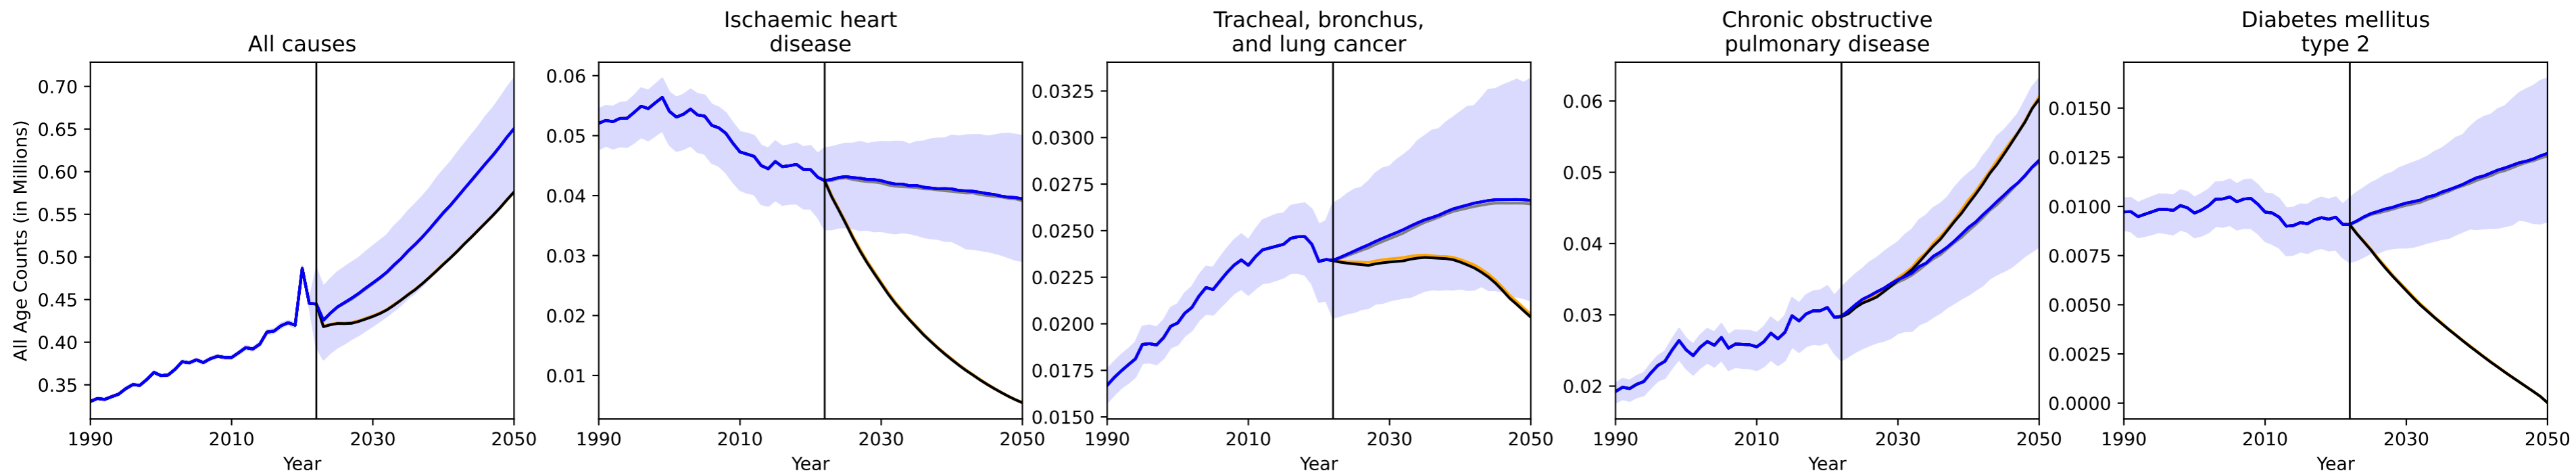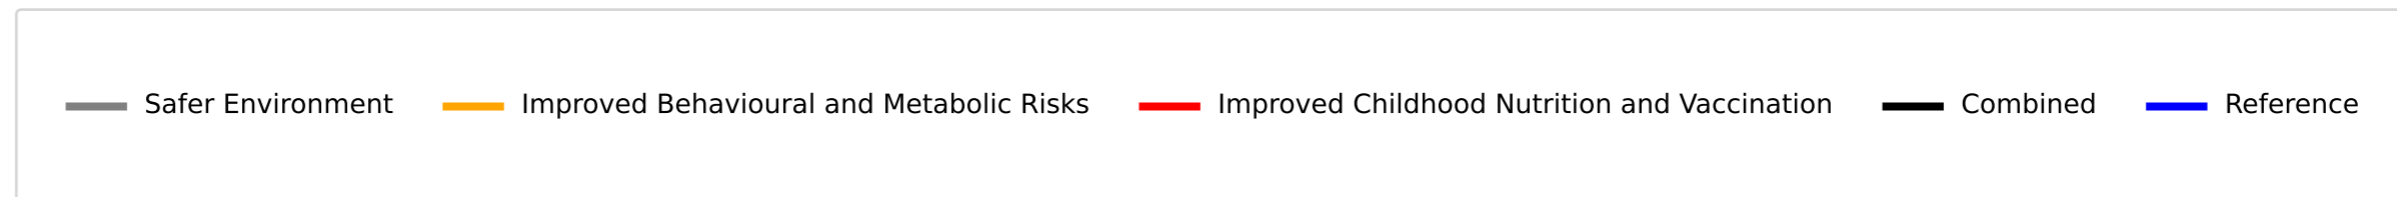

# Sweden

Supplemental Results Figure S13. All cause and top NCD causes age standardized death rates and all age counts by scenario and location, 1990-2050

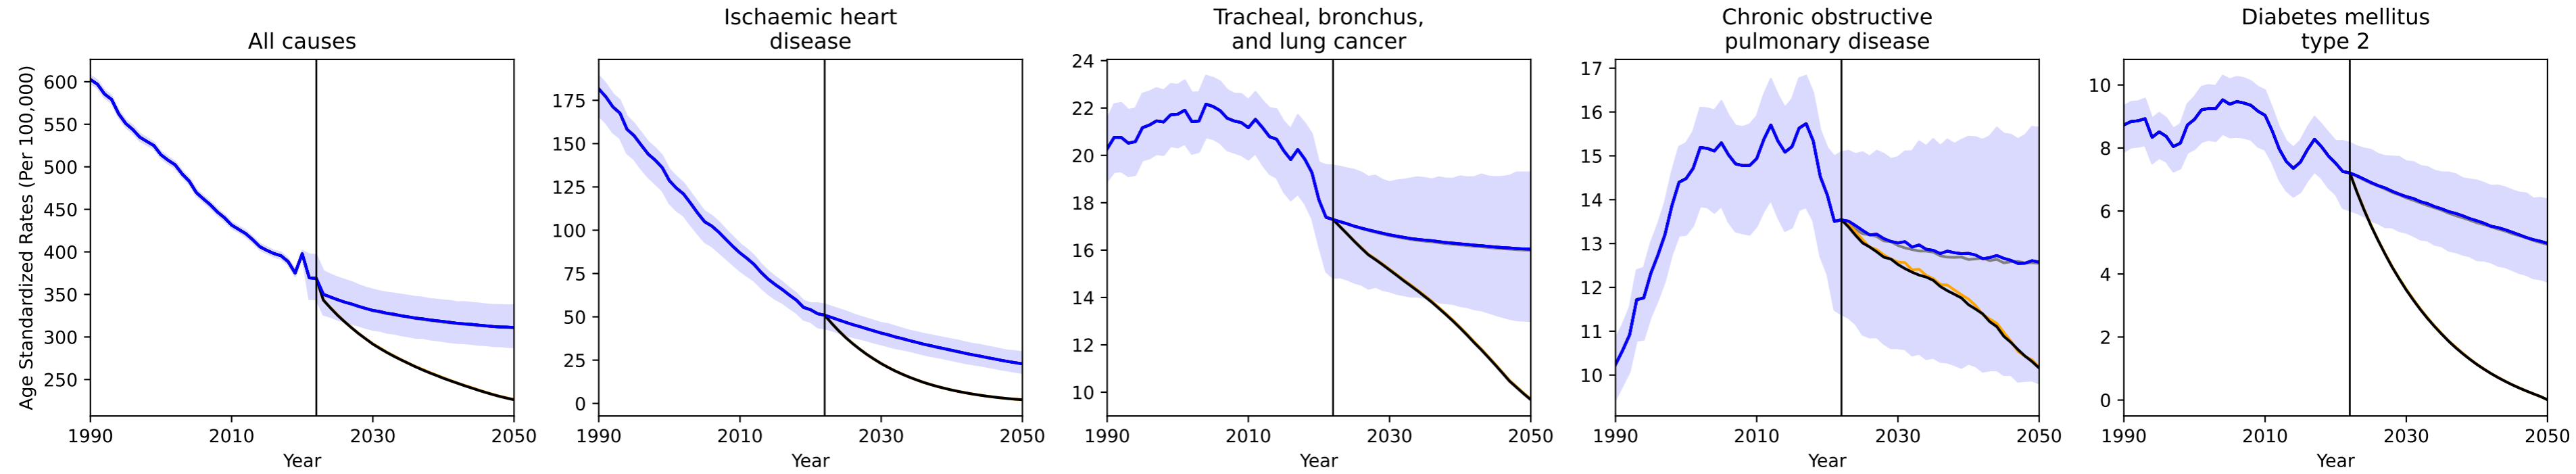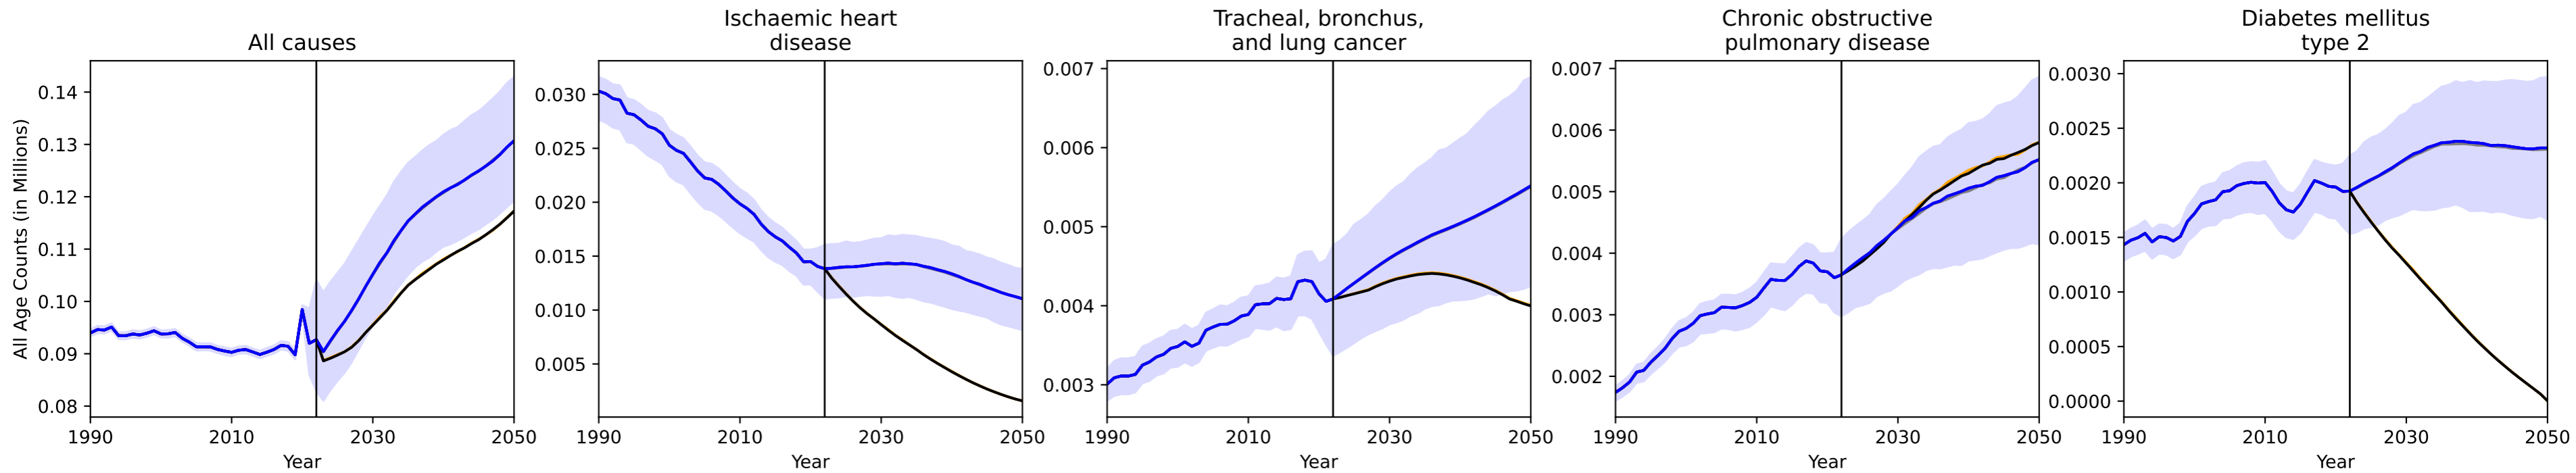

# Switzerland

Supplemental Results Figure S13. All cause and top NCD causes age standardized death rates and all age counts by scenario and location, 1990-2050

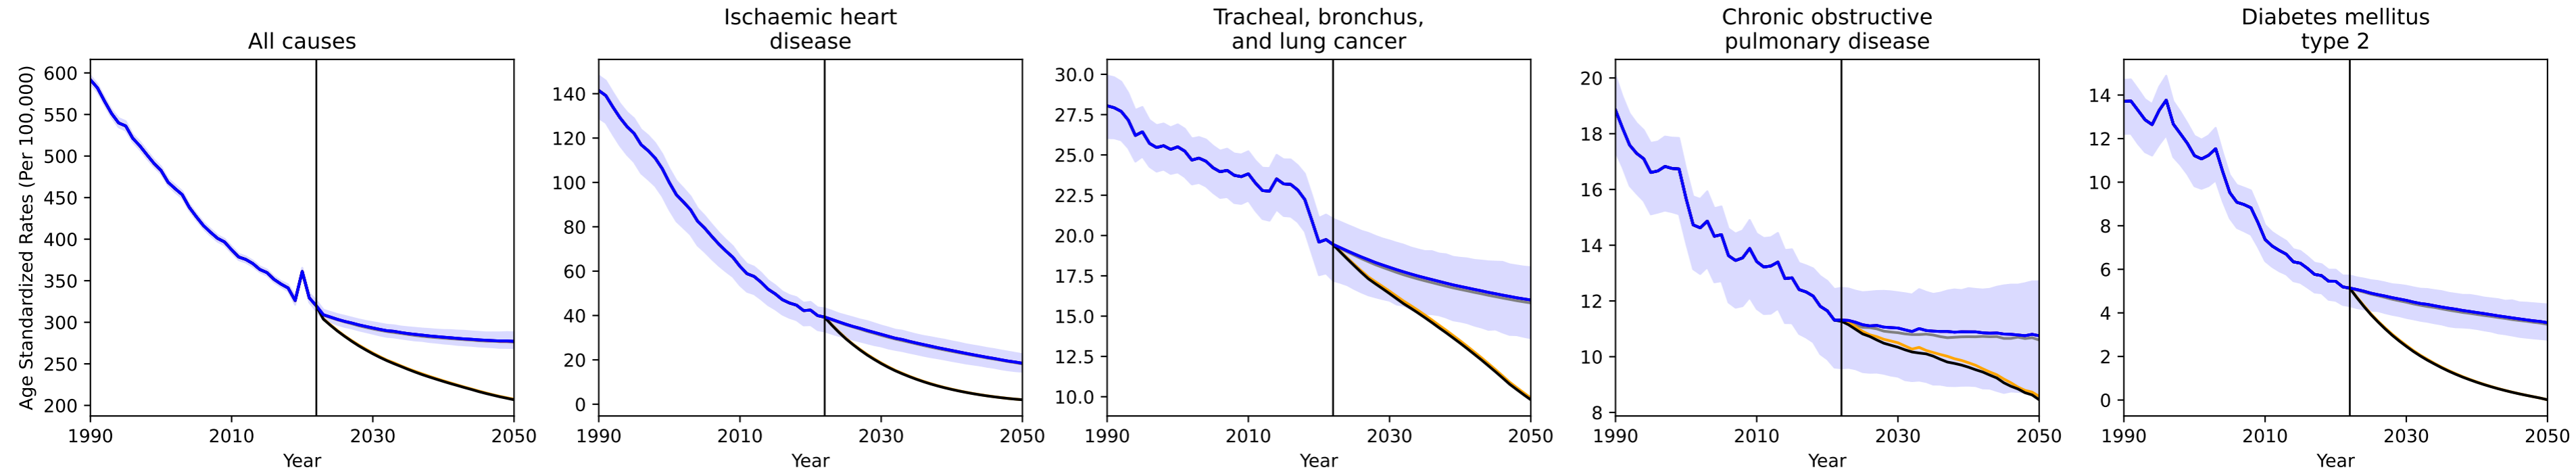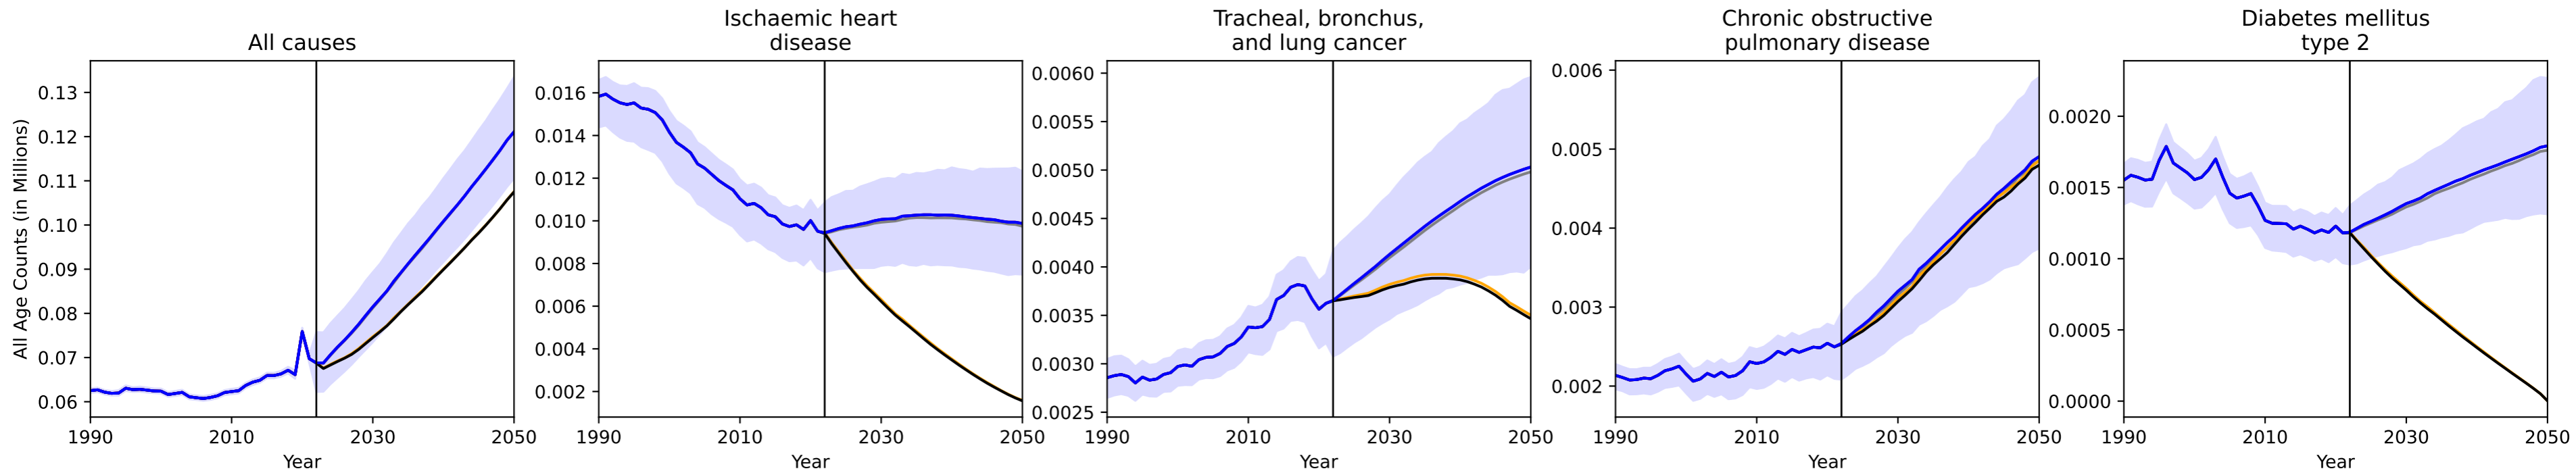

— Safer Environment — Improved Behavioural and Metabolic Risks — Improved Childhood Nutrition and Vaccination — Combined — Reference

# UK

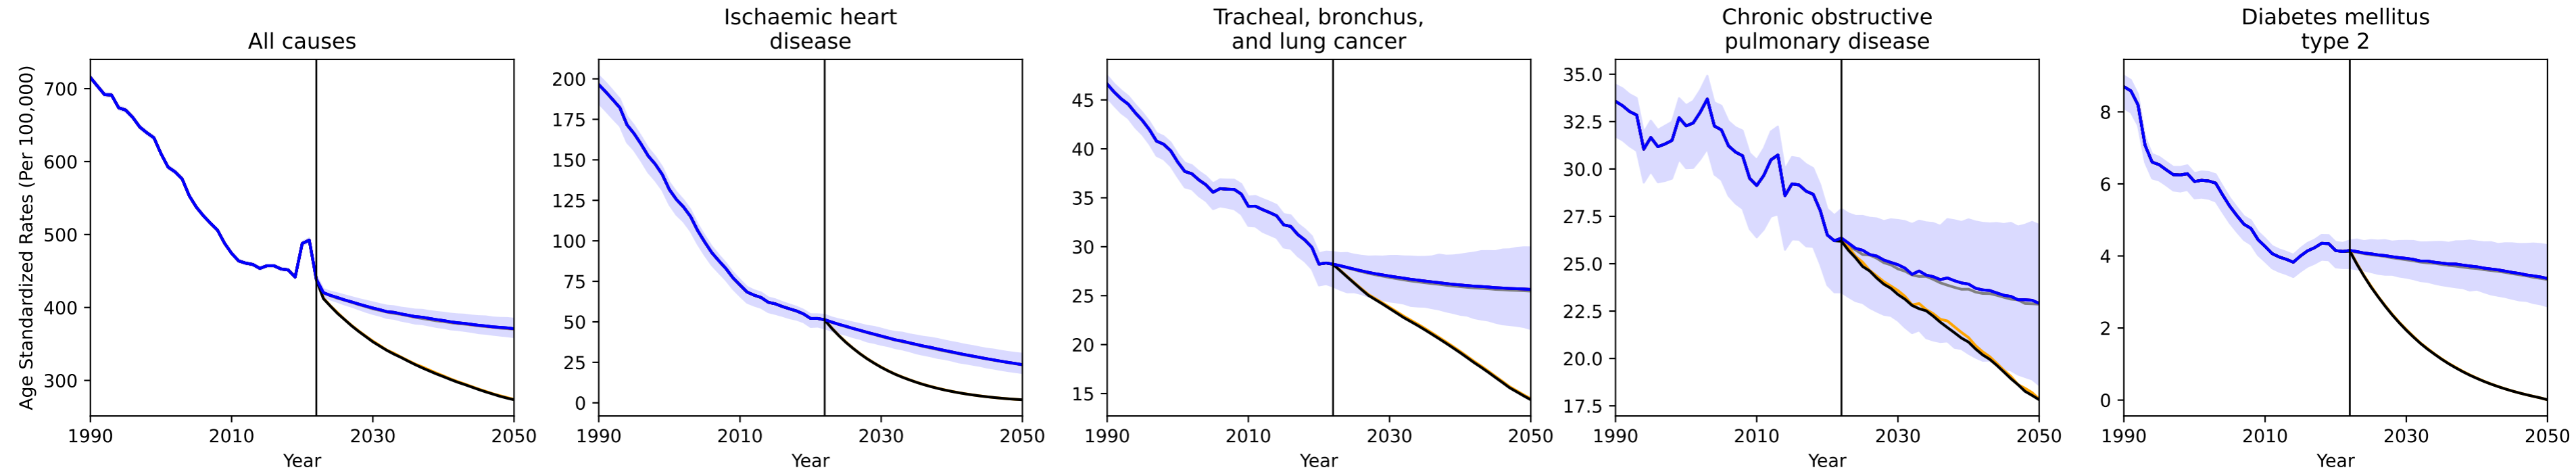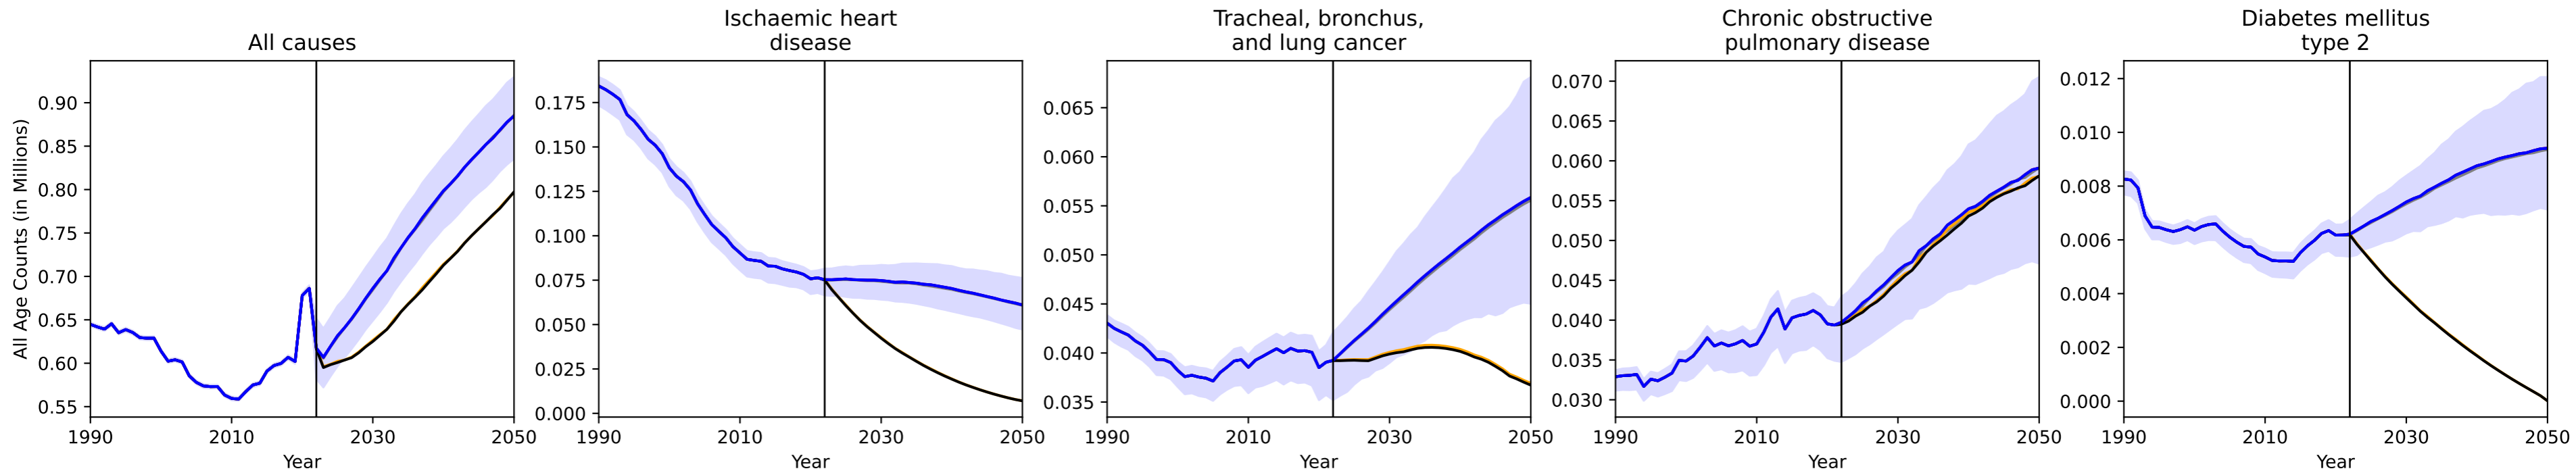

— Safer Environment — Improved Behavioural and Metabolic Risks — Improved Childhood Nutrition and Vaccination — Combined — Reference

# Bolivia

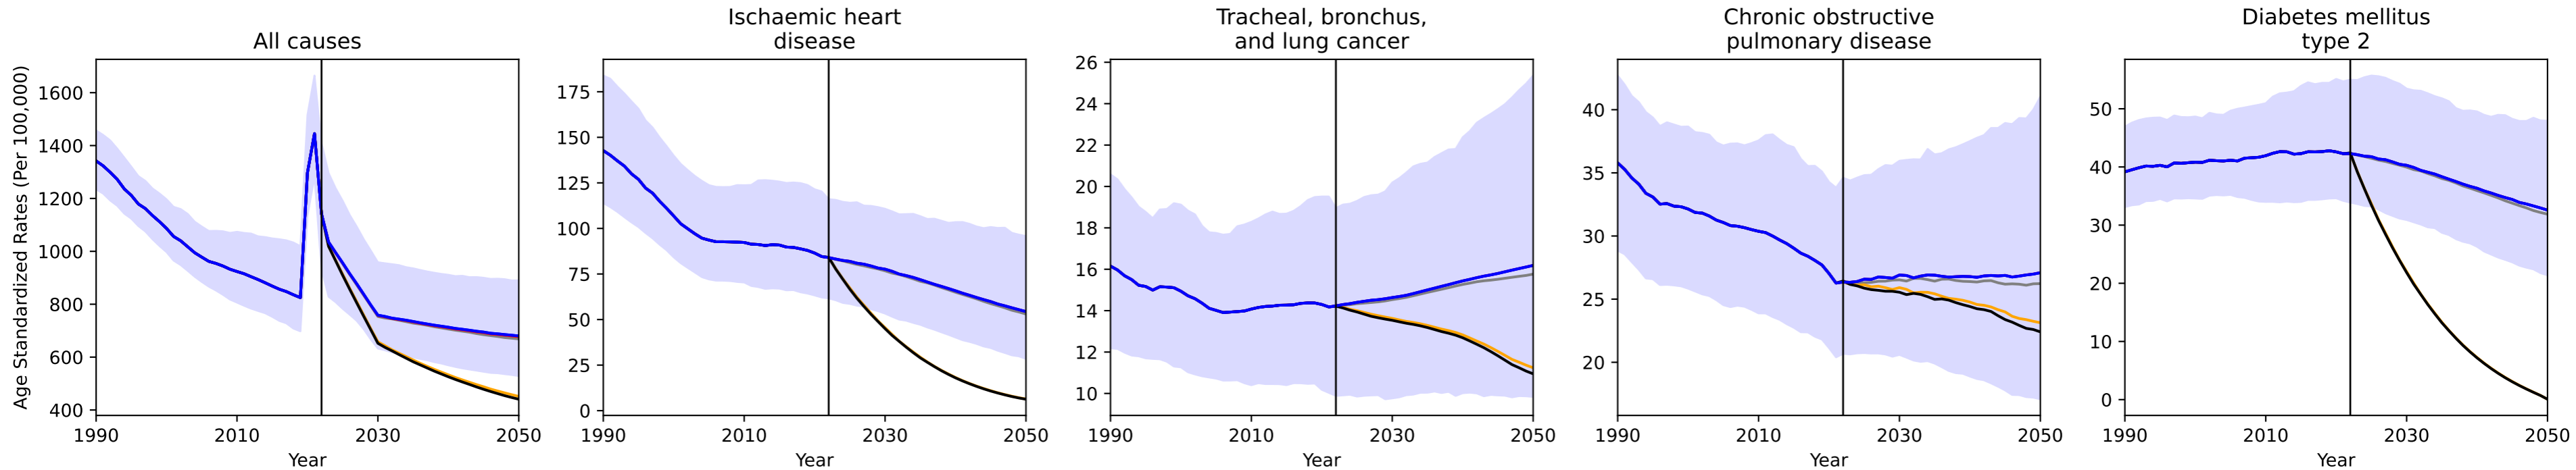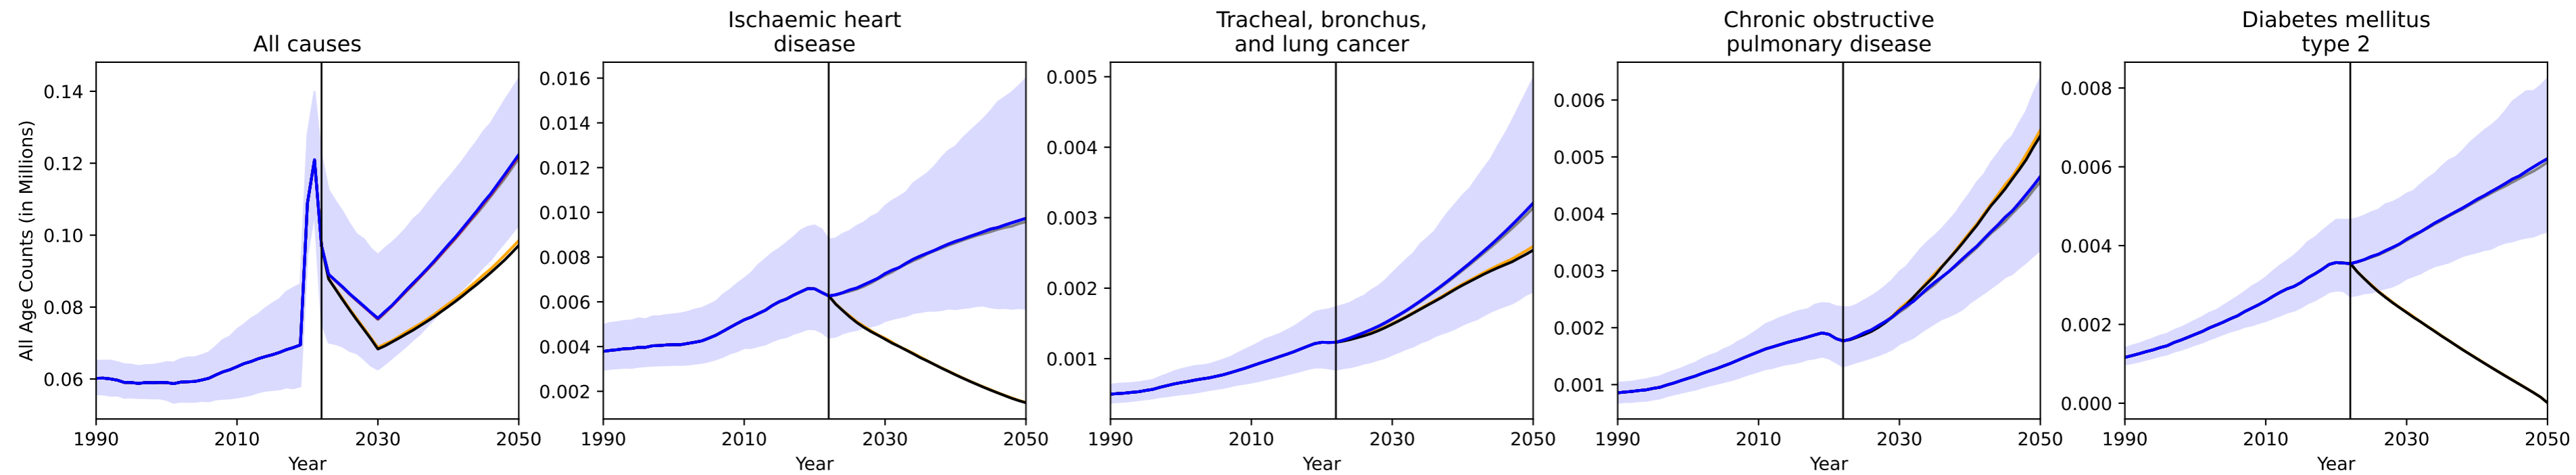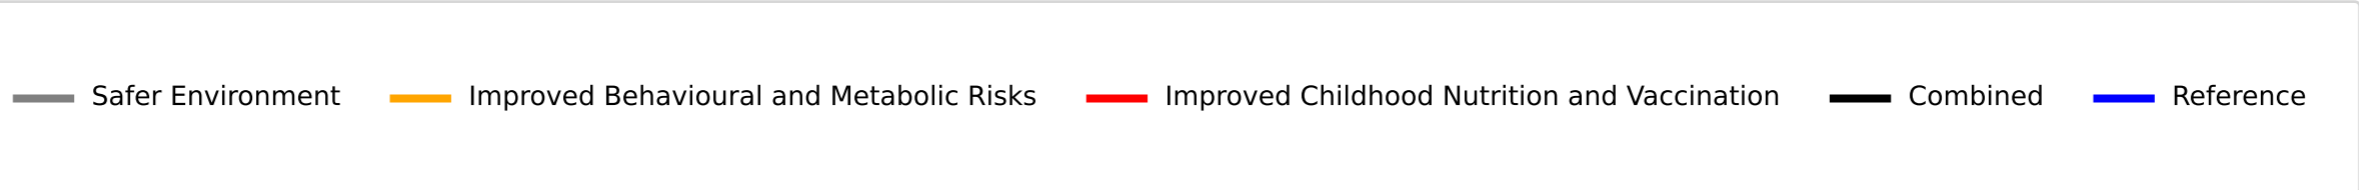



# Ecuador

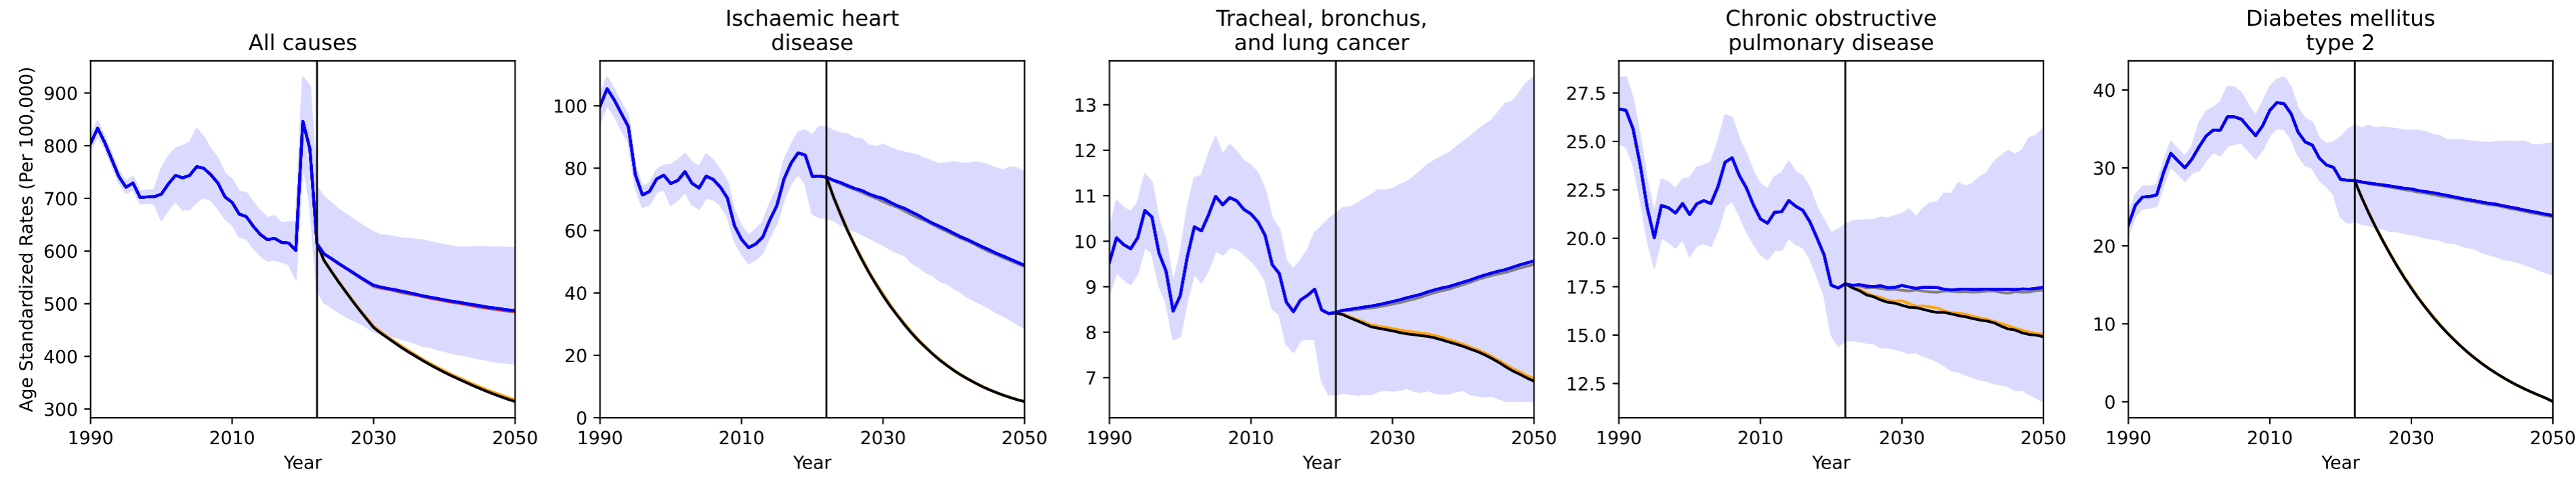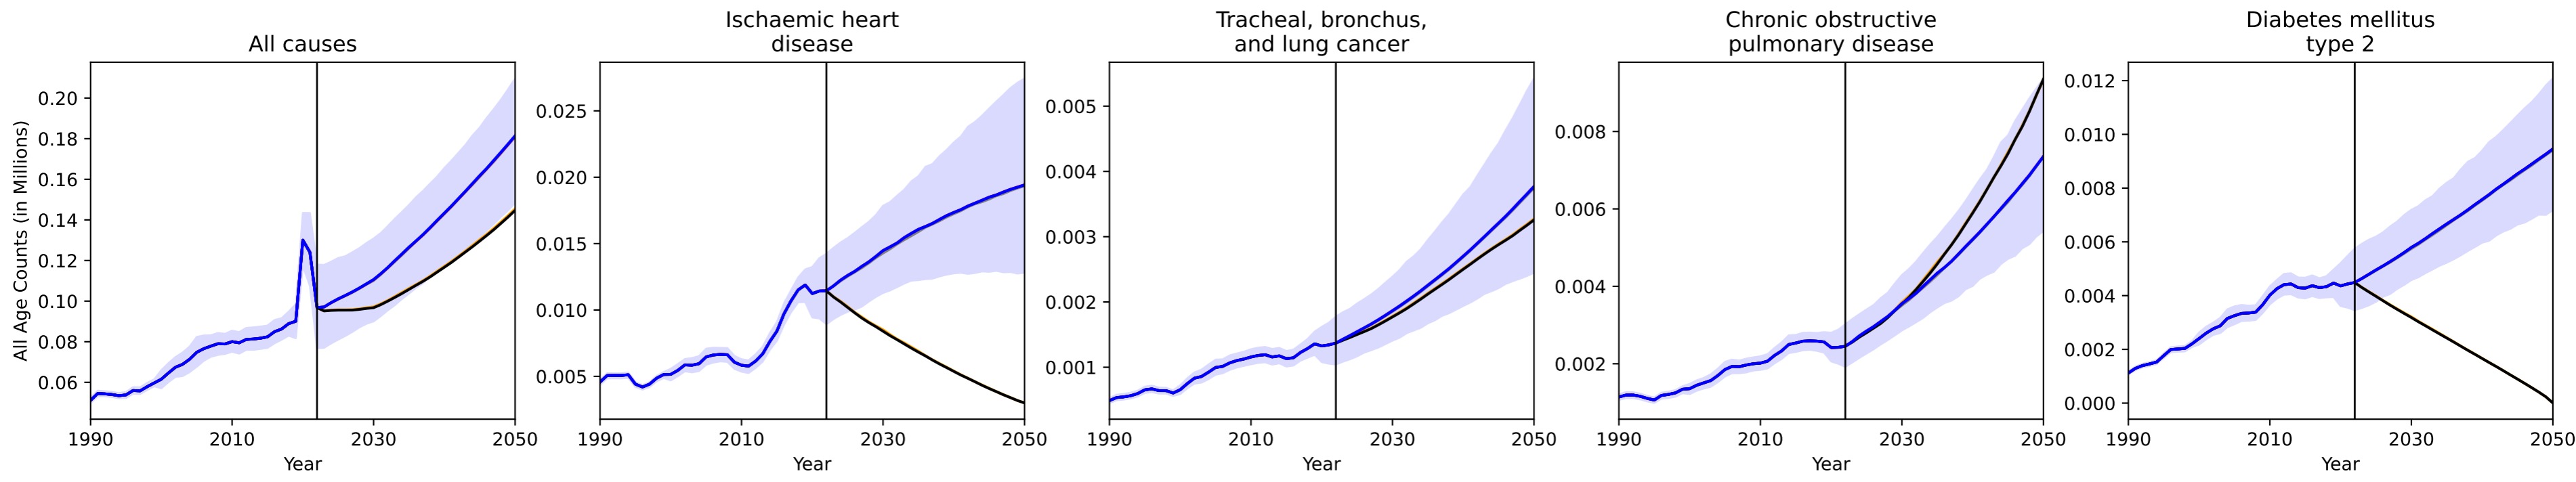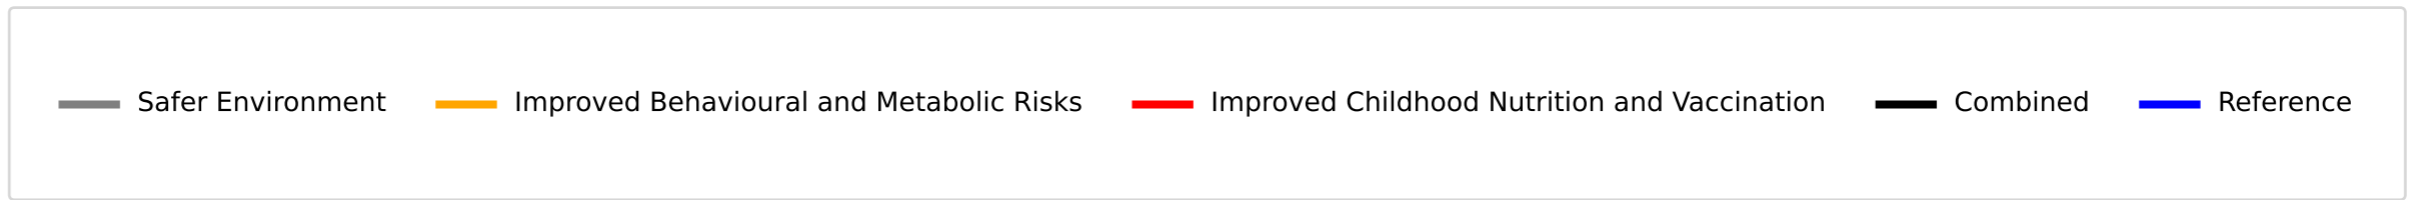

# Peru

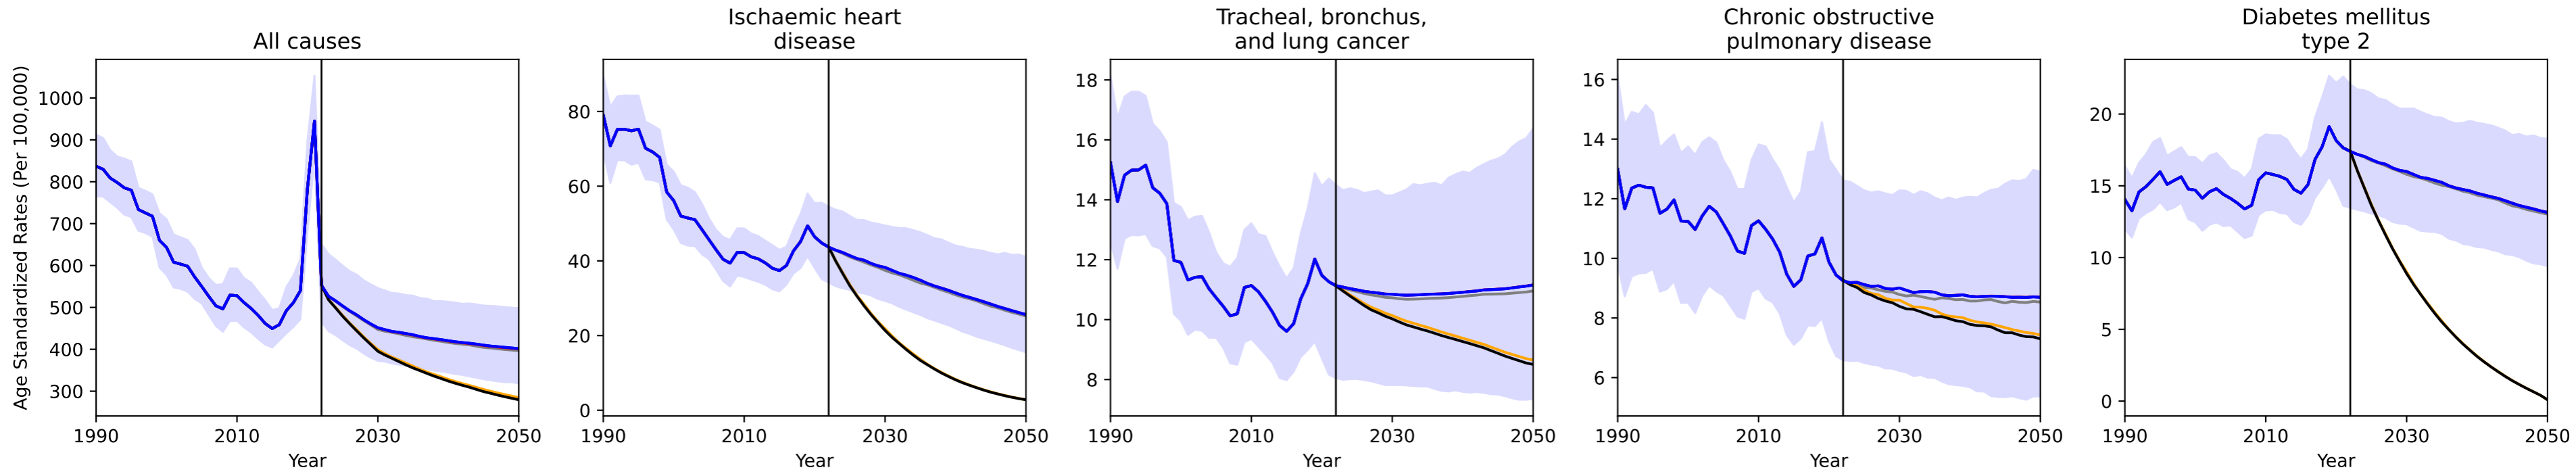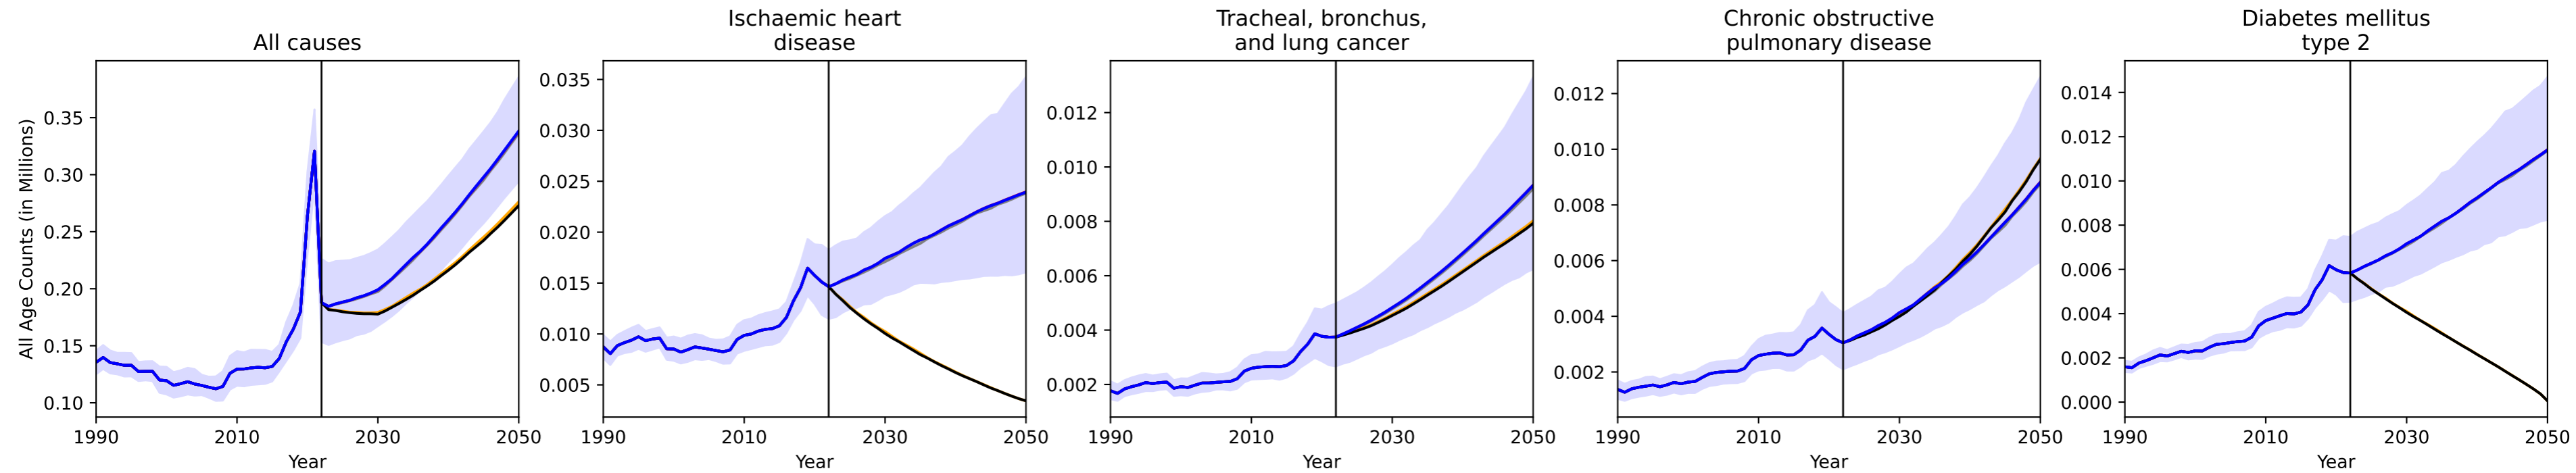

— Safer Environment — Improved Behavioural and Metabolic Risks — Improved Childhood Nutrition and Vaccination — Combined — Reference

# Antigua And Barbuda

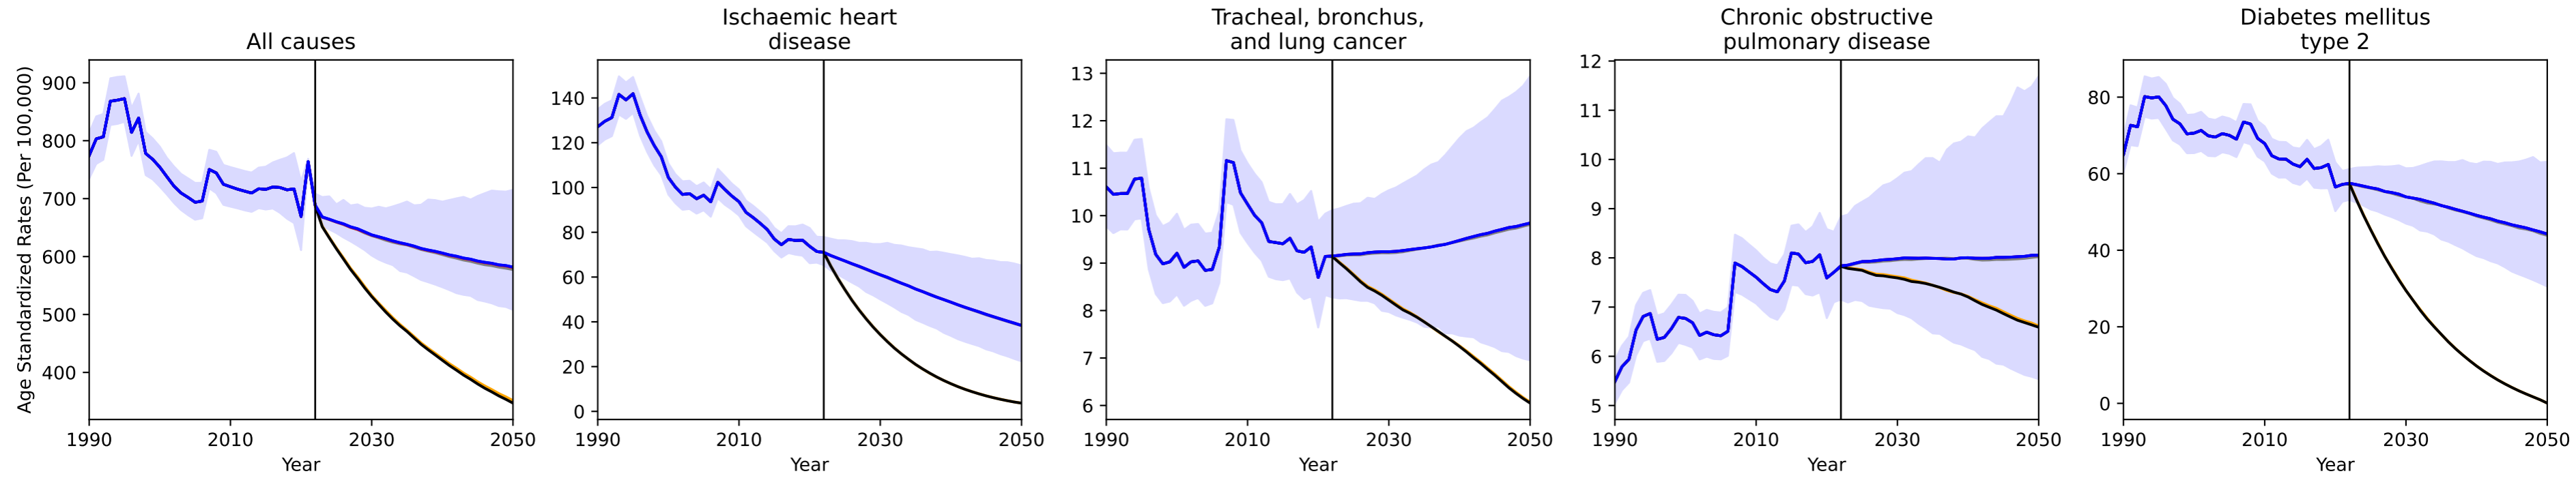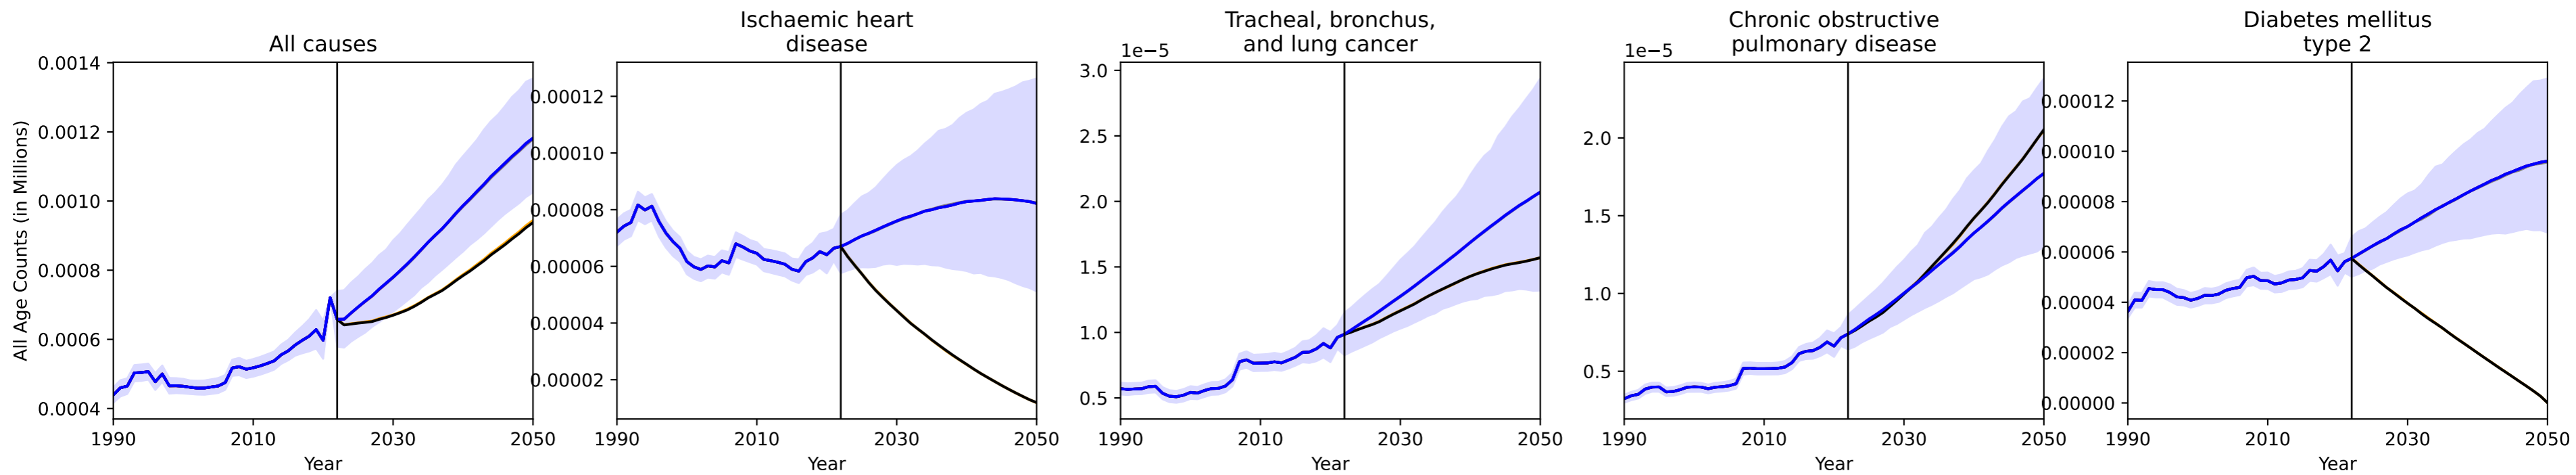

# The Bahamas

Supplemental Results Figure S13. All cause and top NCD causes age standardized death rates and all age counts by scenario and location, 1990-2050

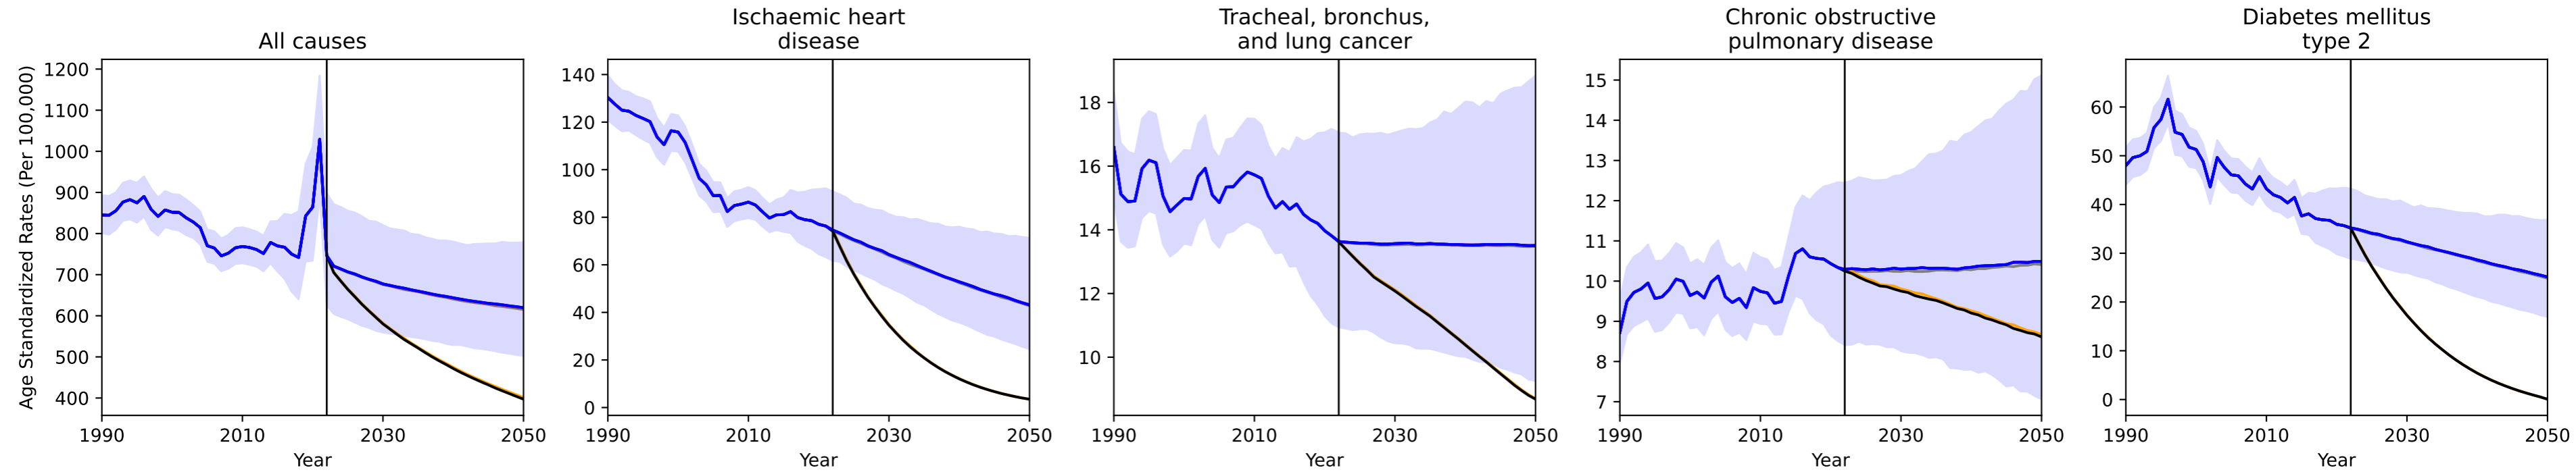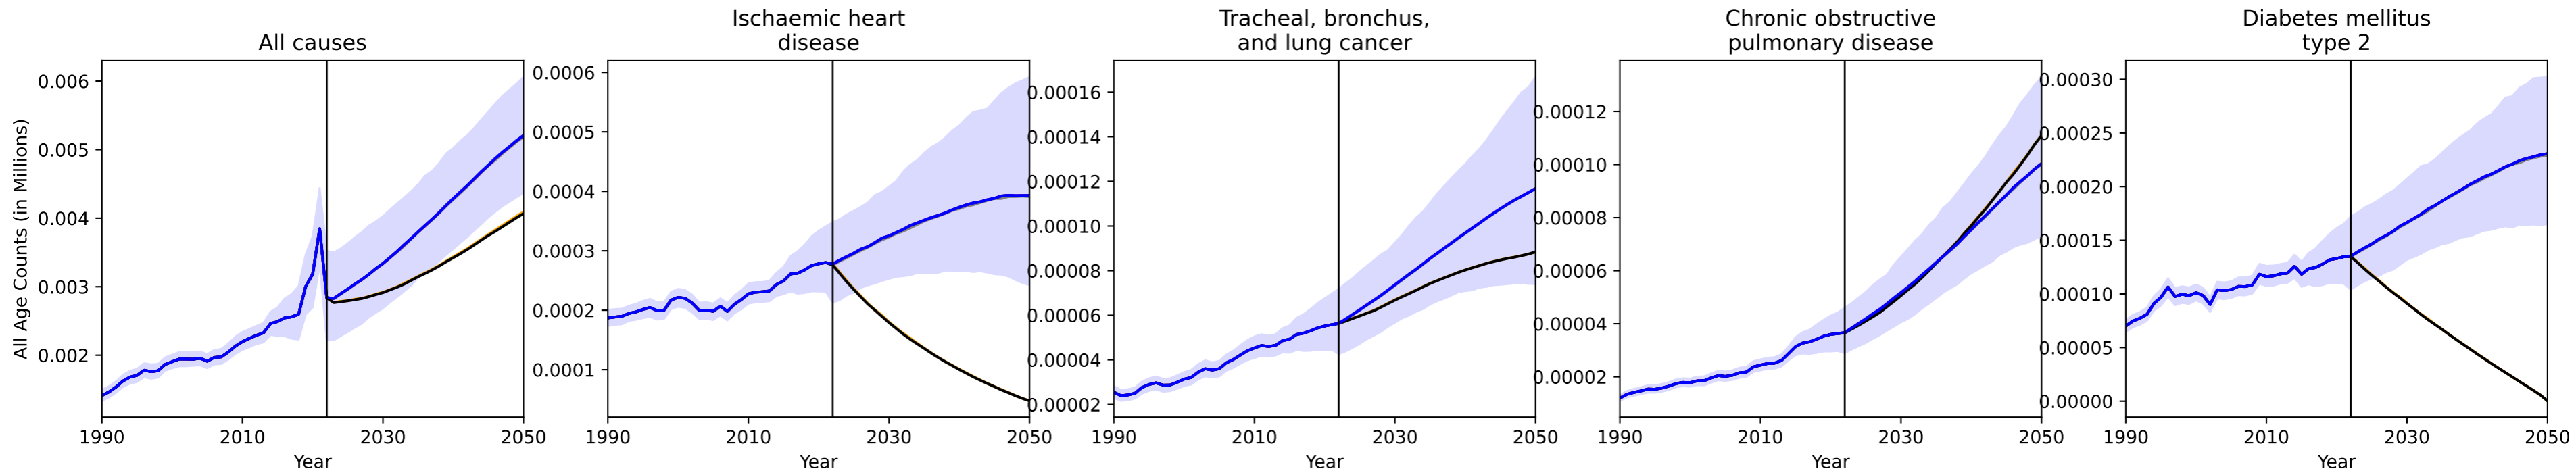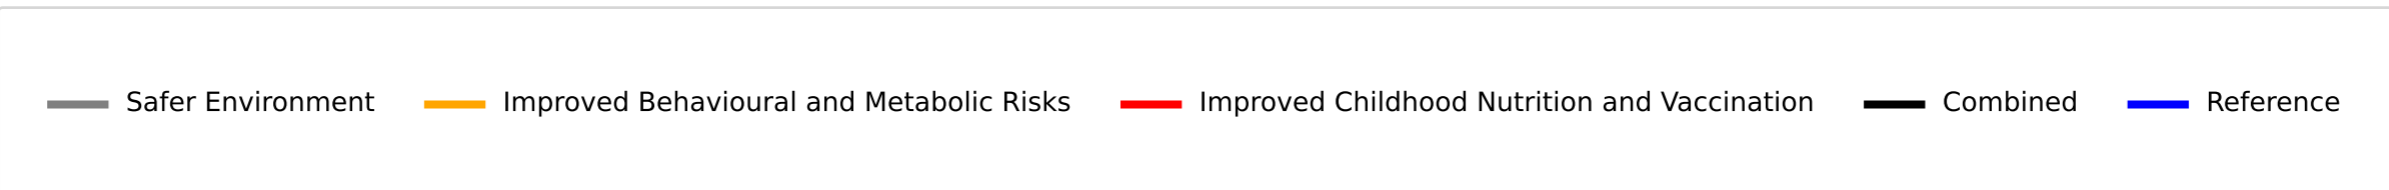

# Barbados

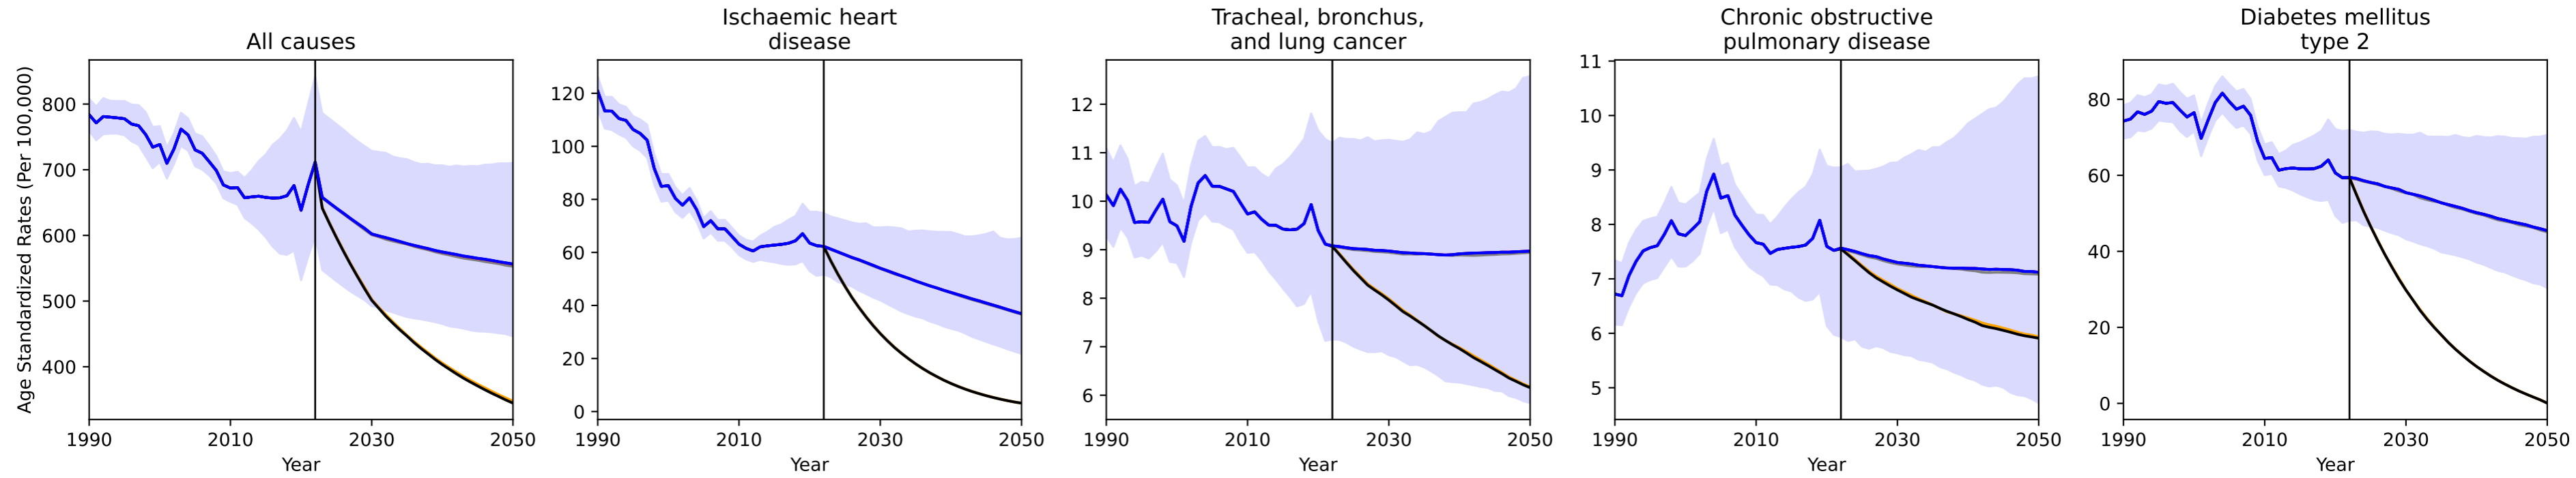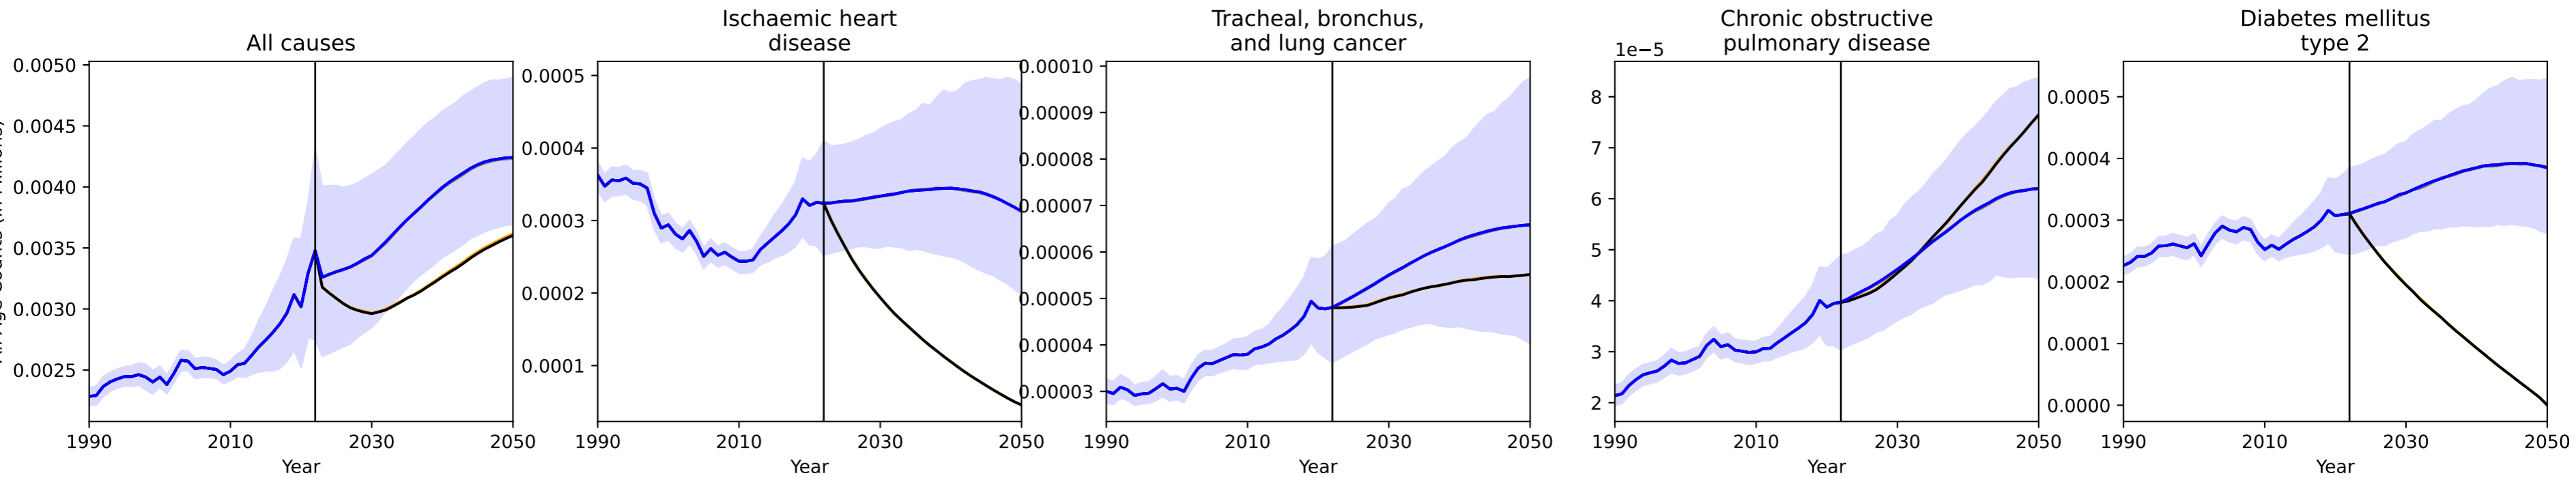

# Belize

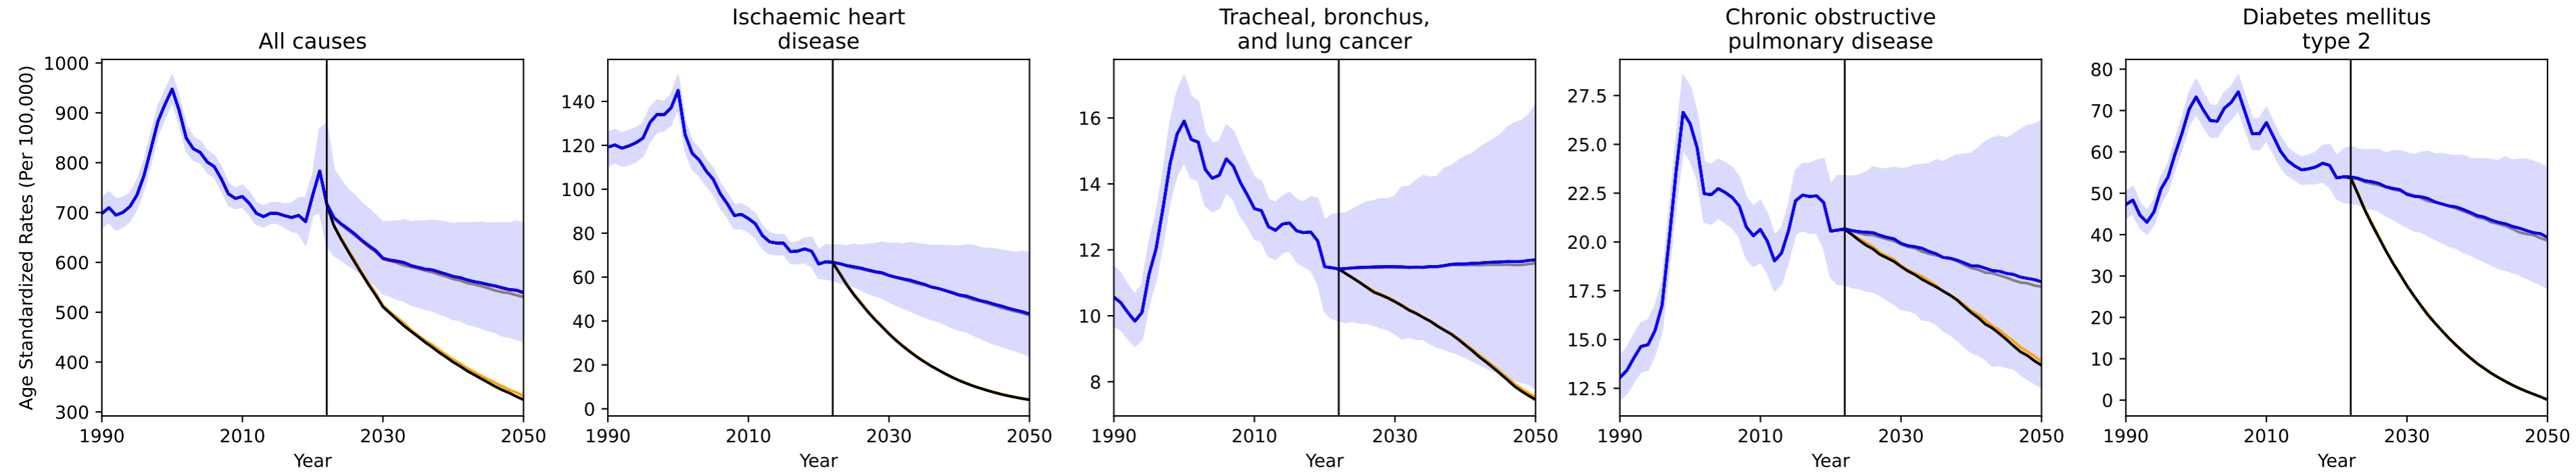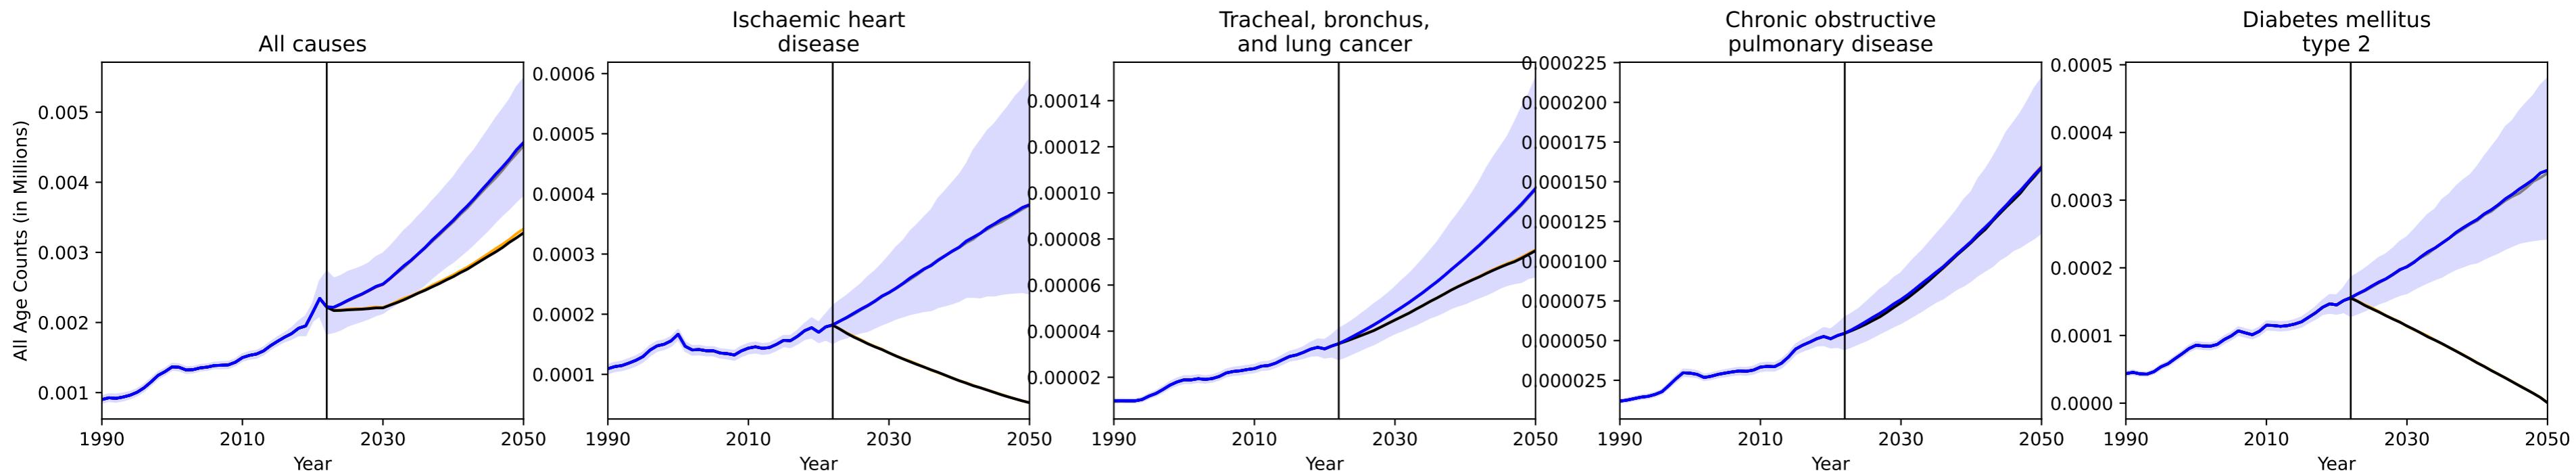

# Bermuda

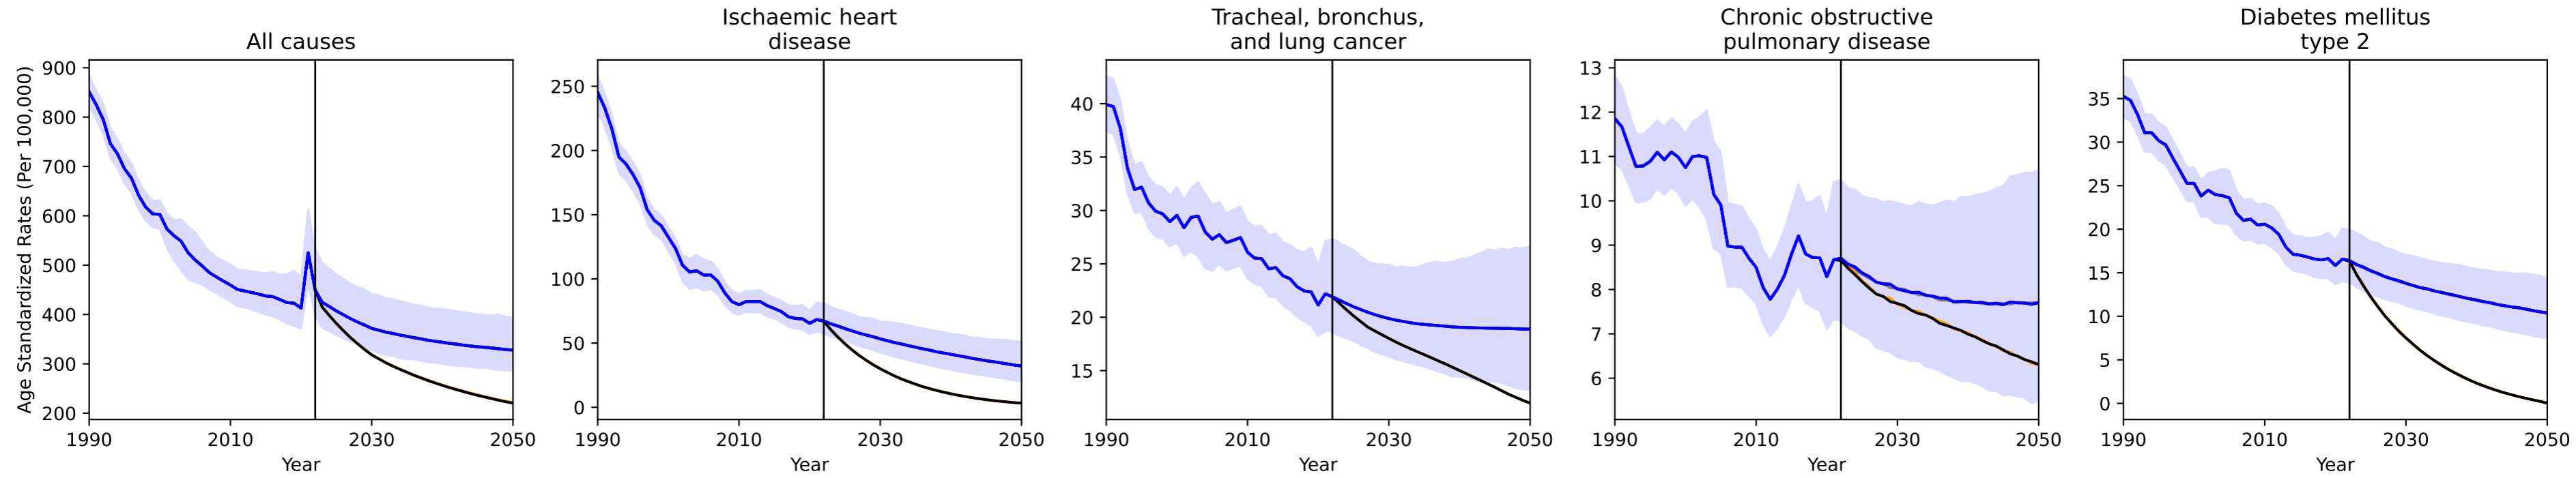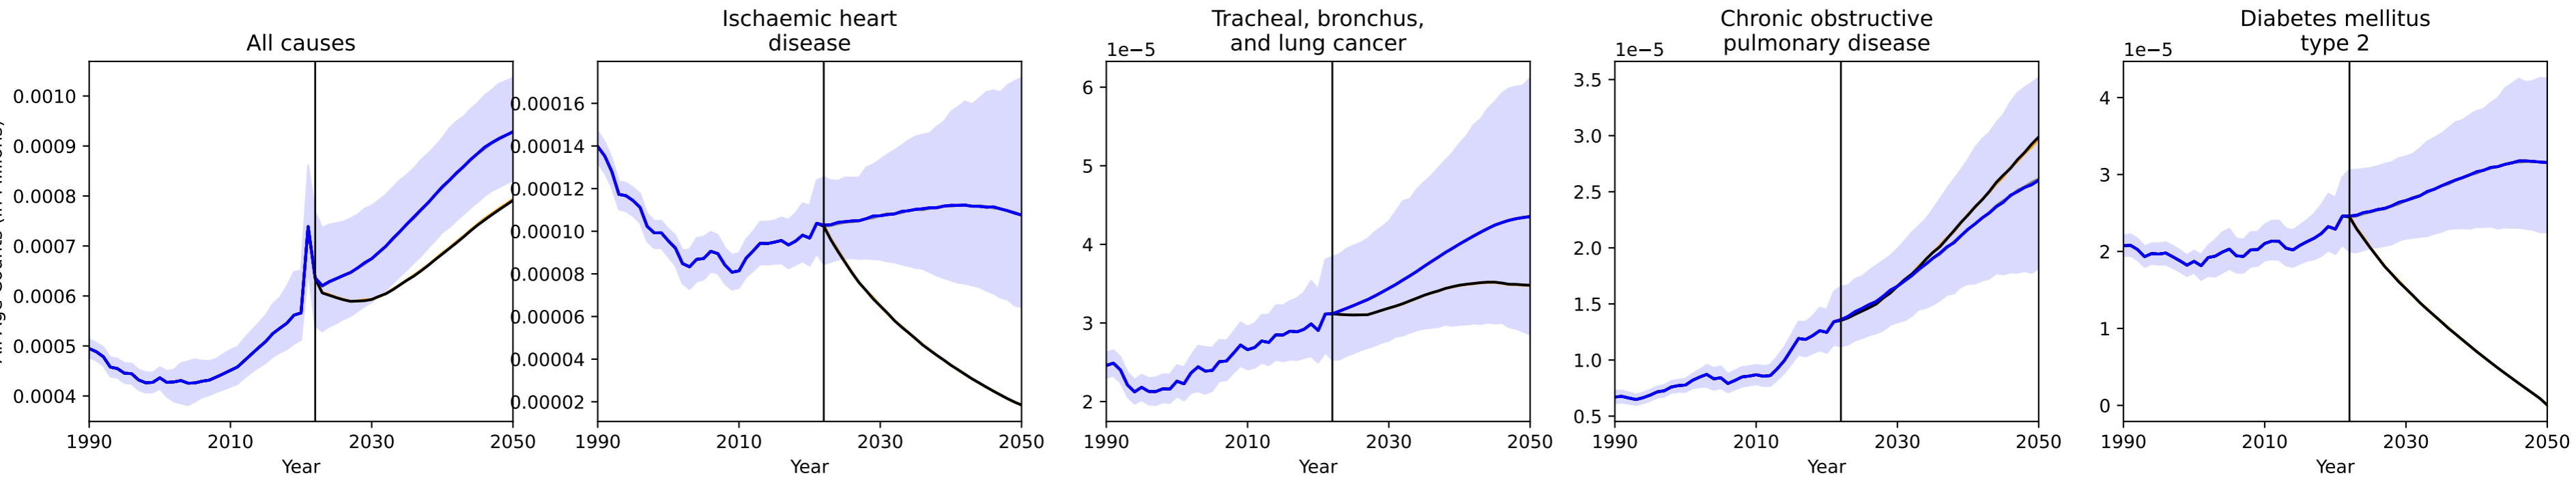

# Cuba

Supplemental Results Figure S13. All cause and top NCD causes age standardized death rates and all age counts by scenario and location, 1990-2050

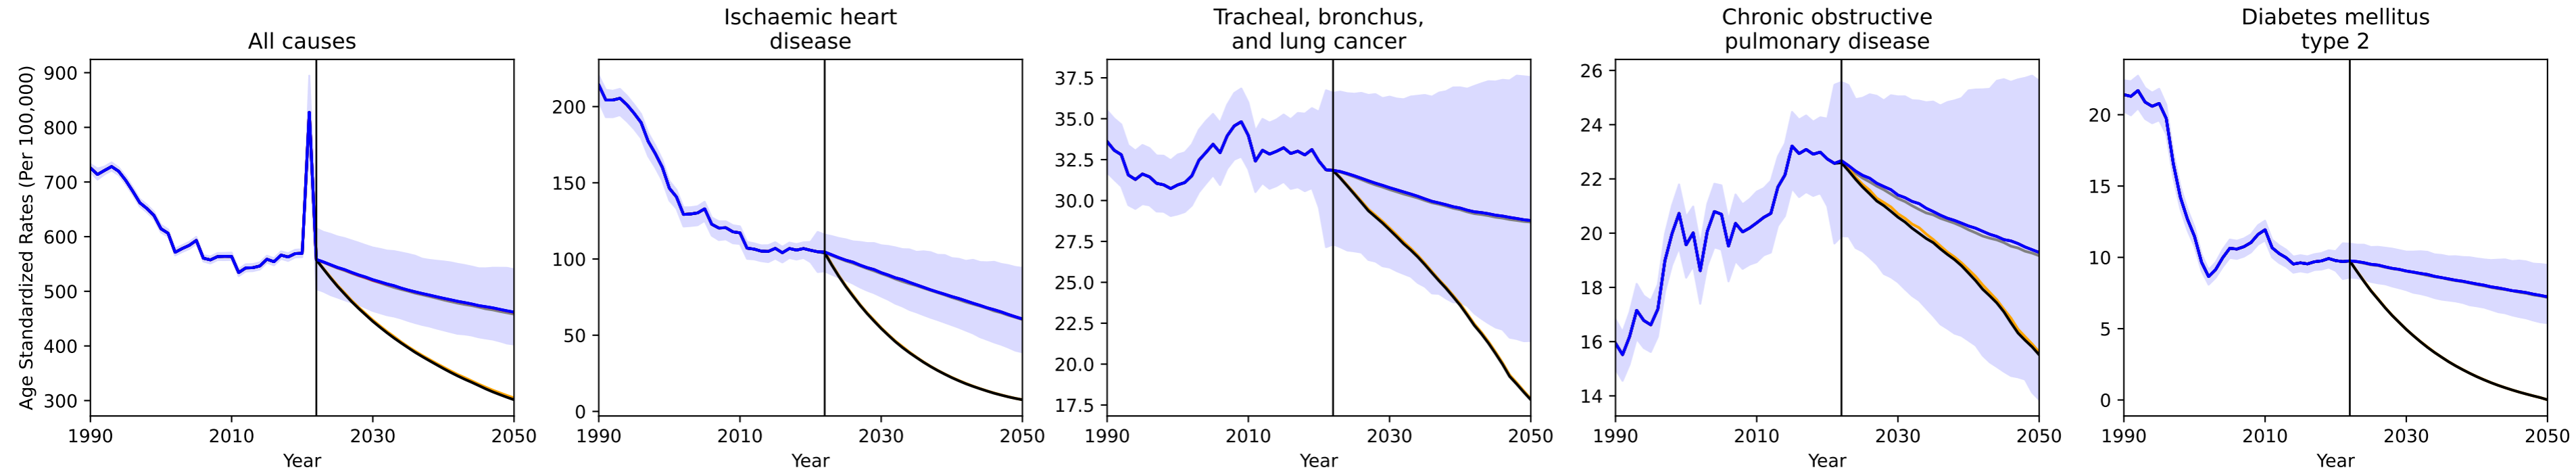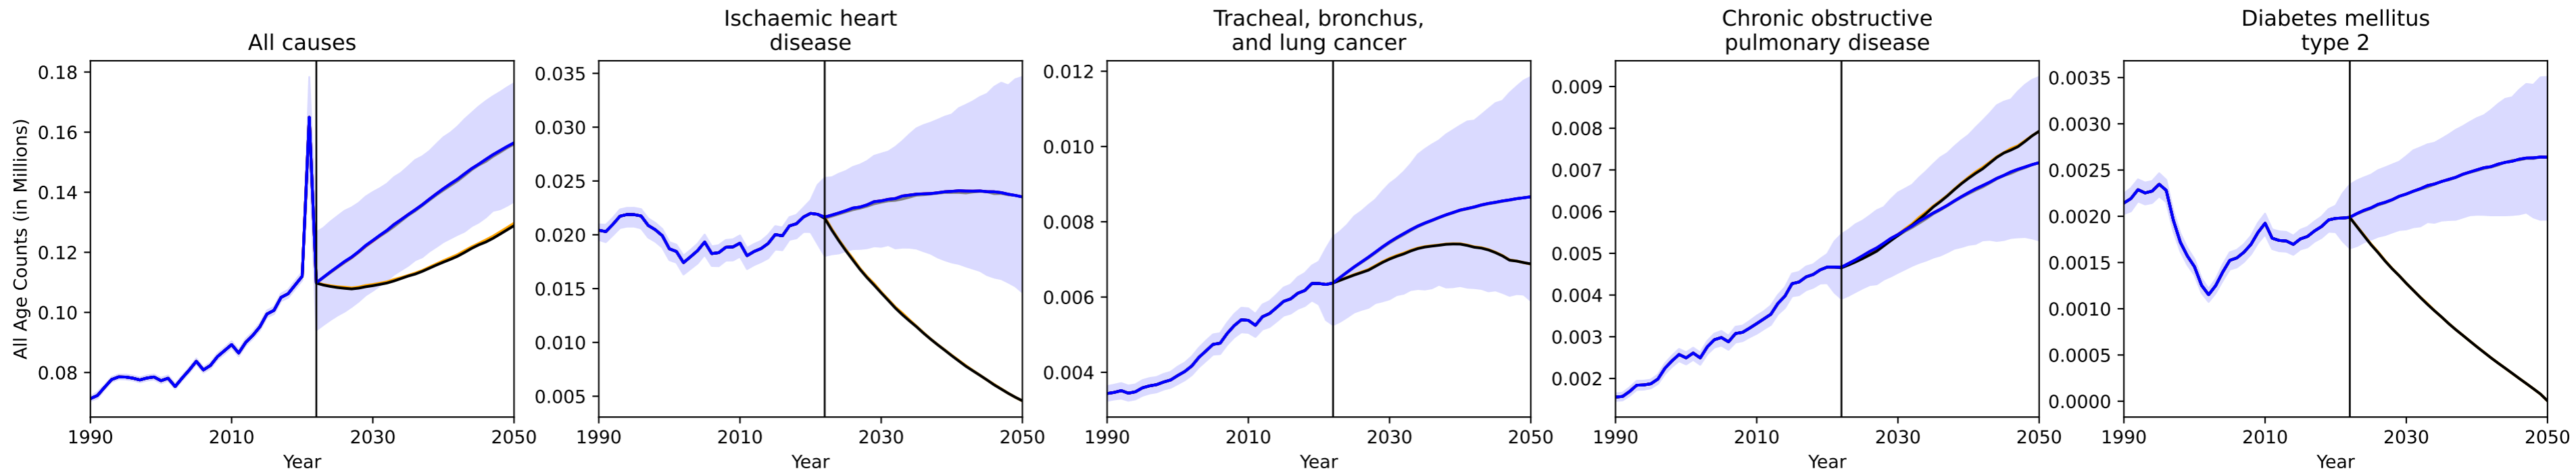



# Dominica

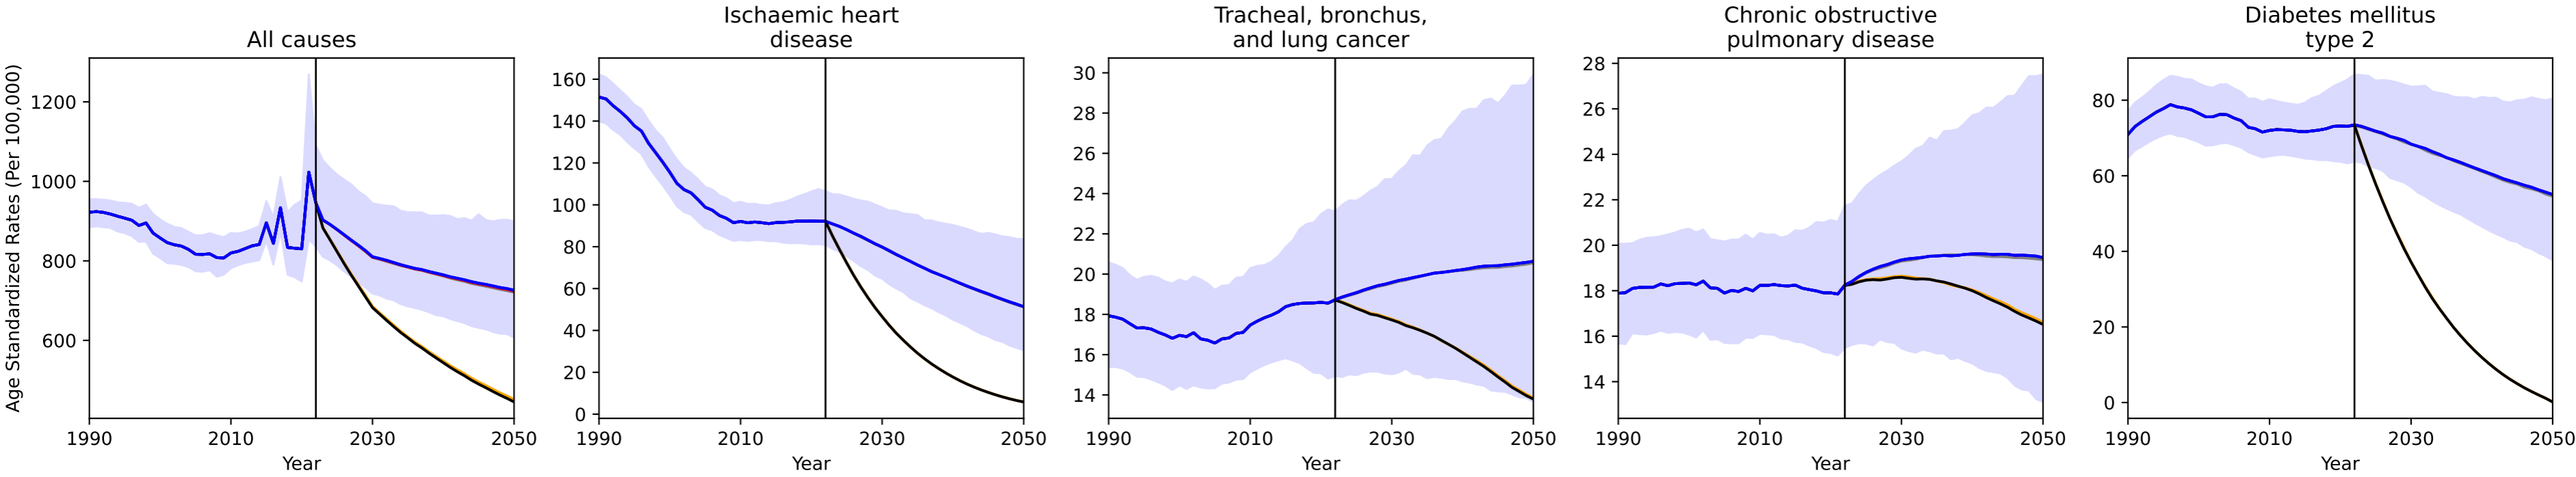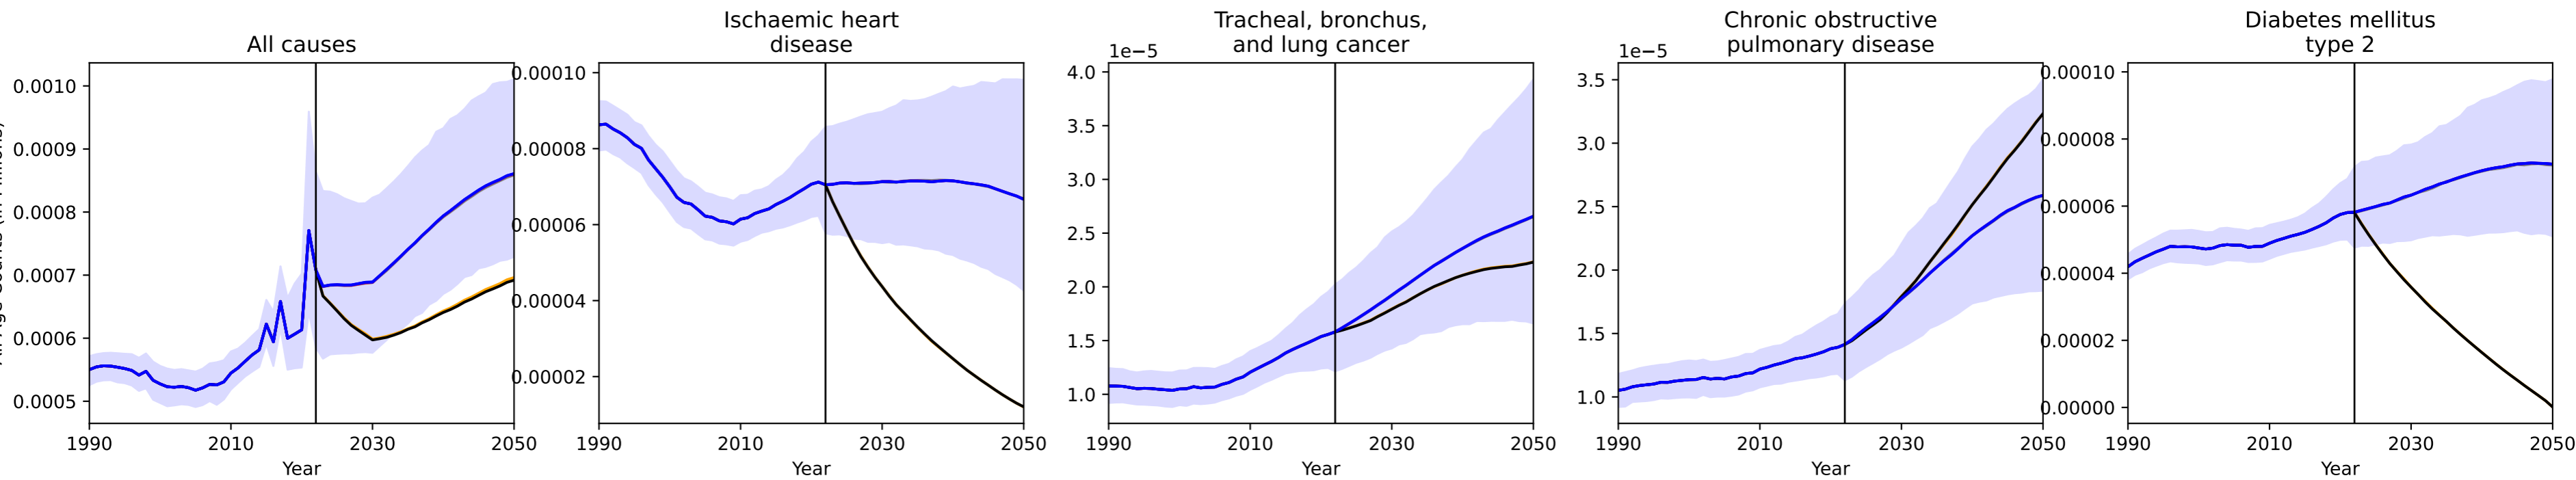

# Dominican Republic

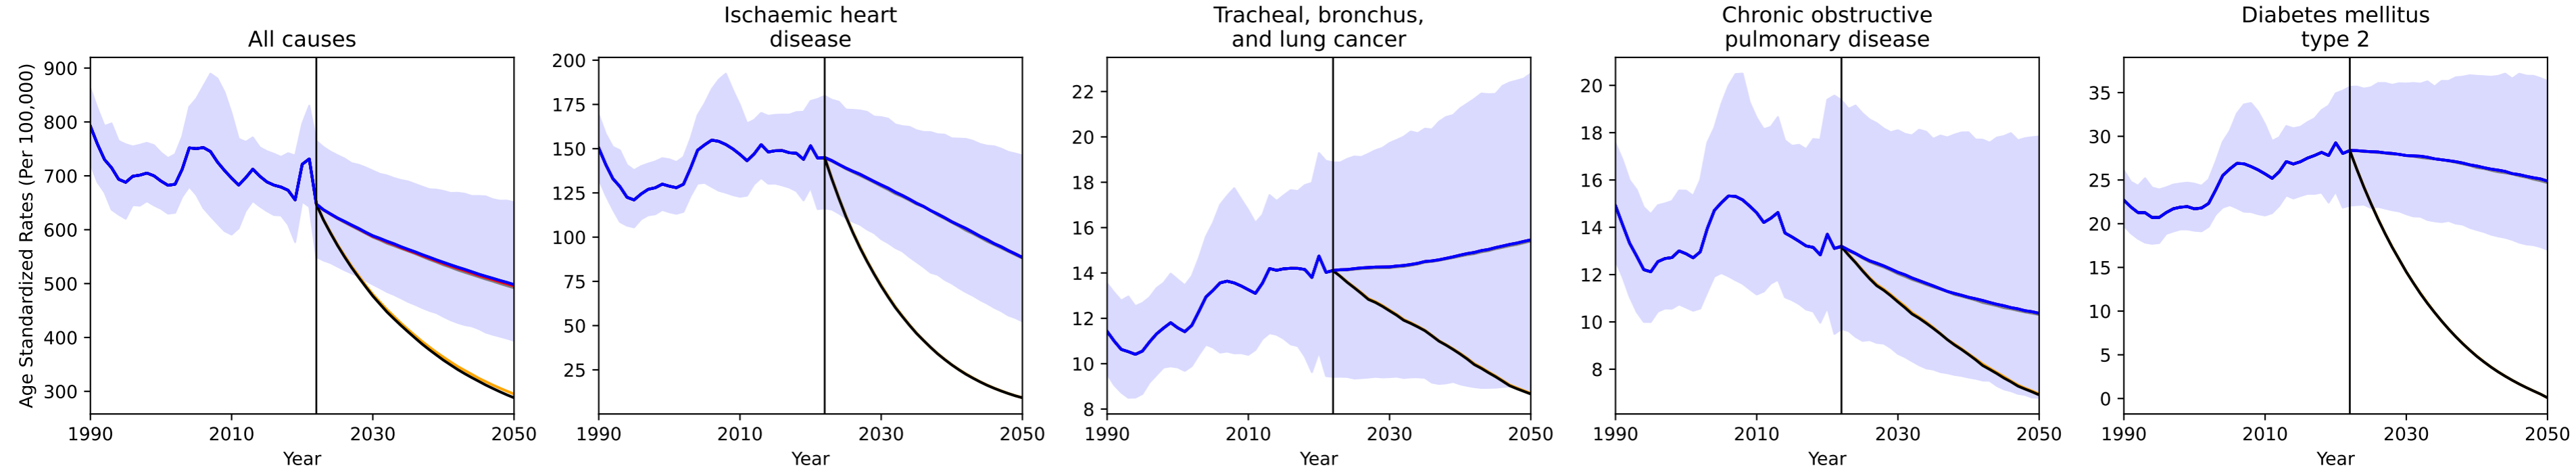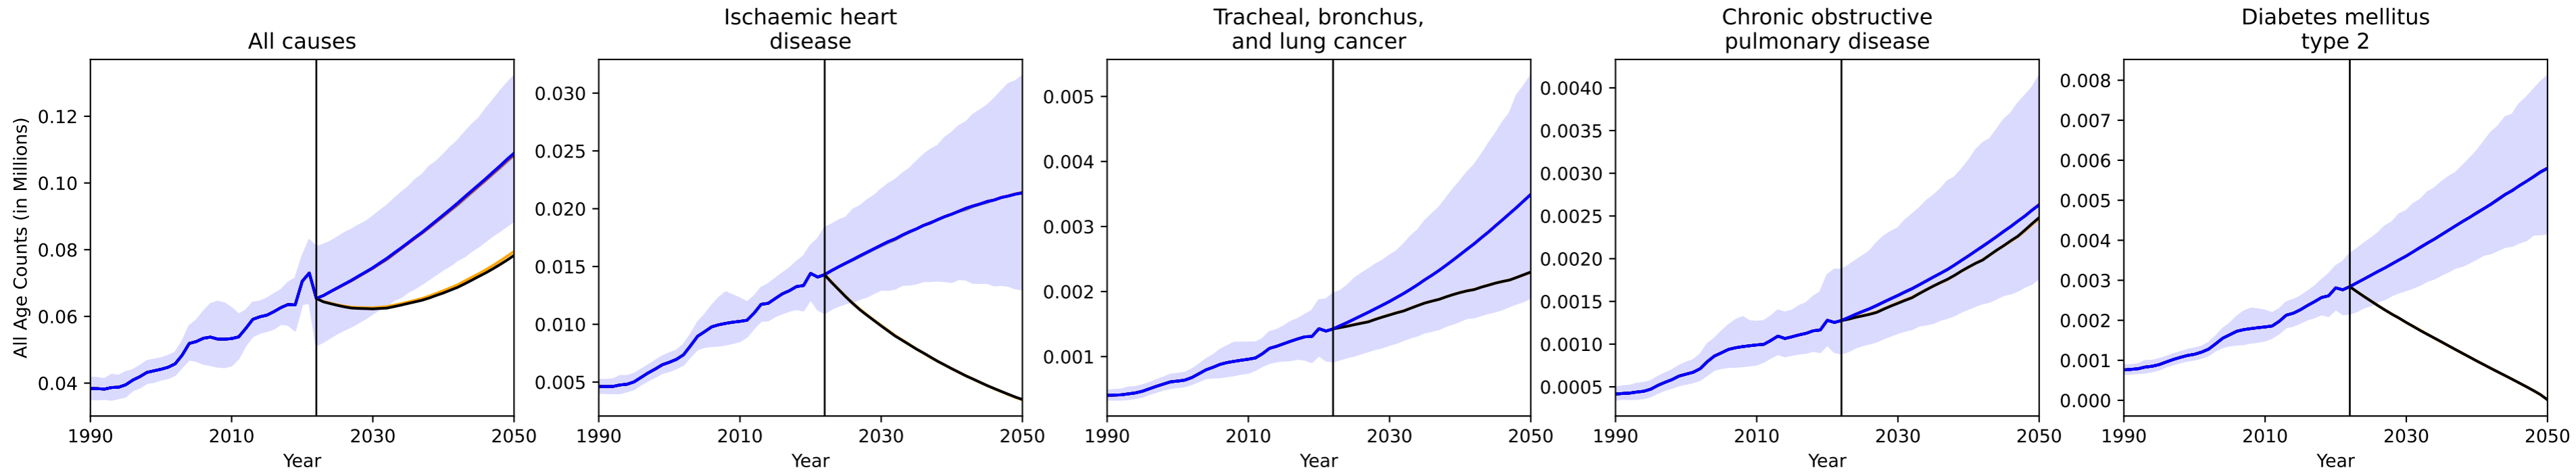

# Grenada

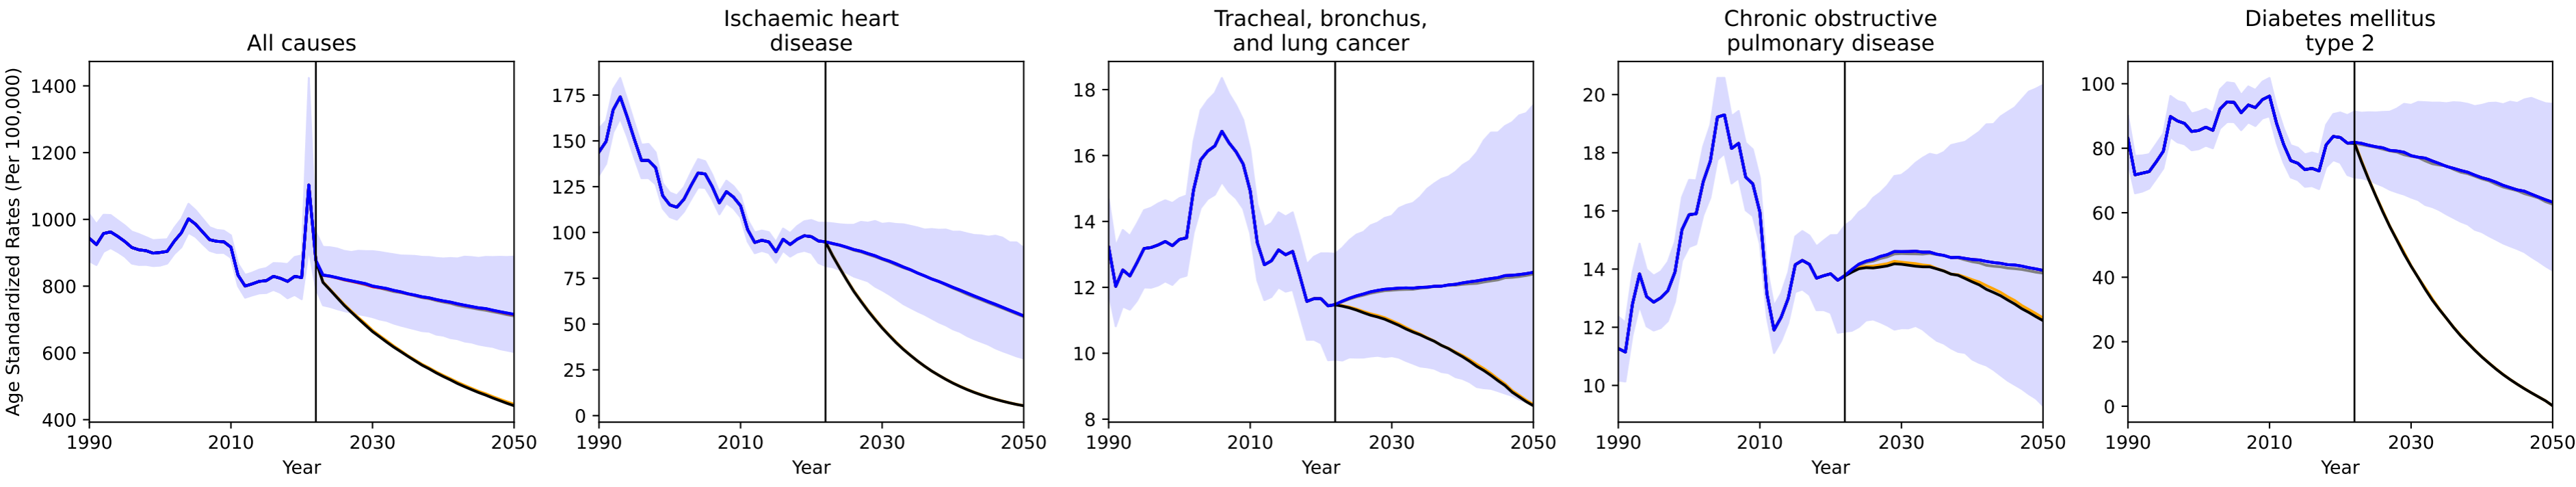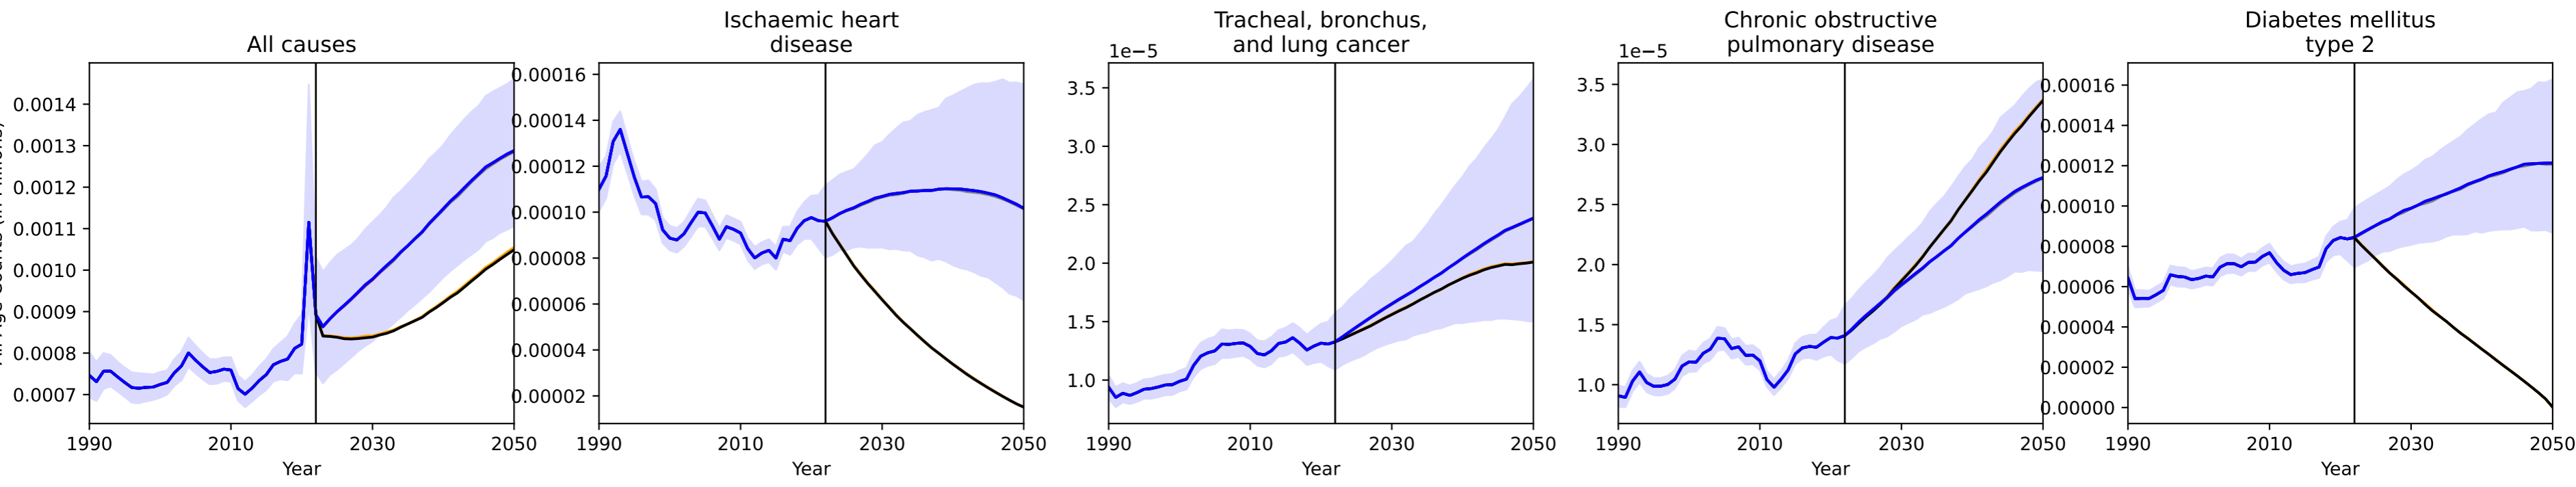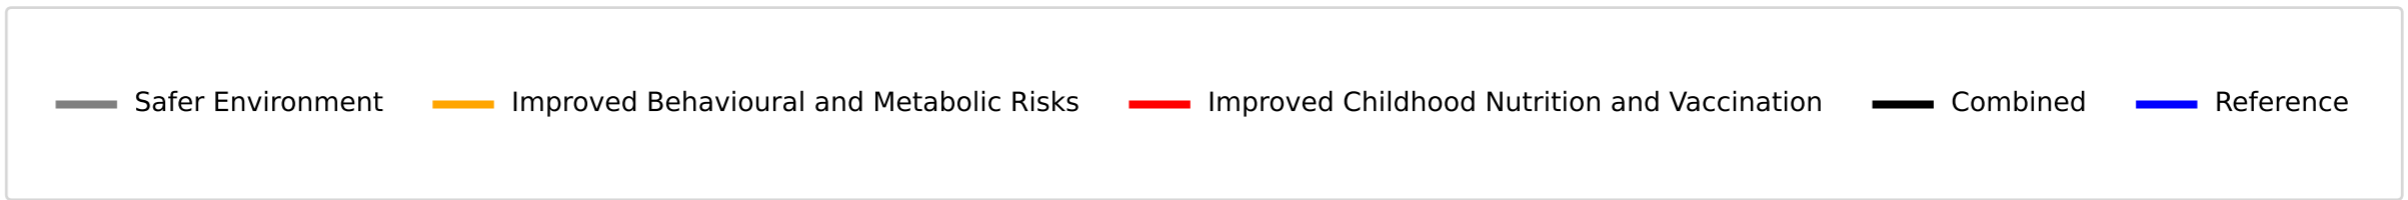

# Guyana

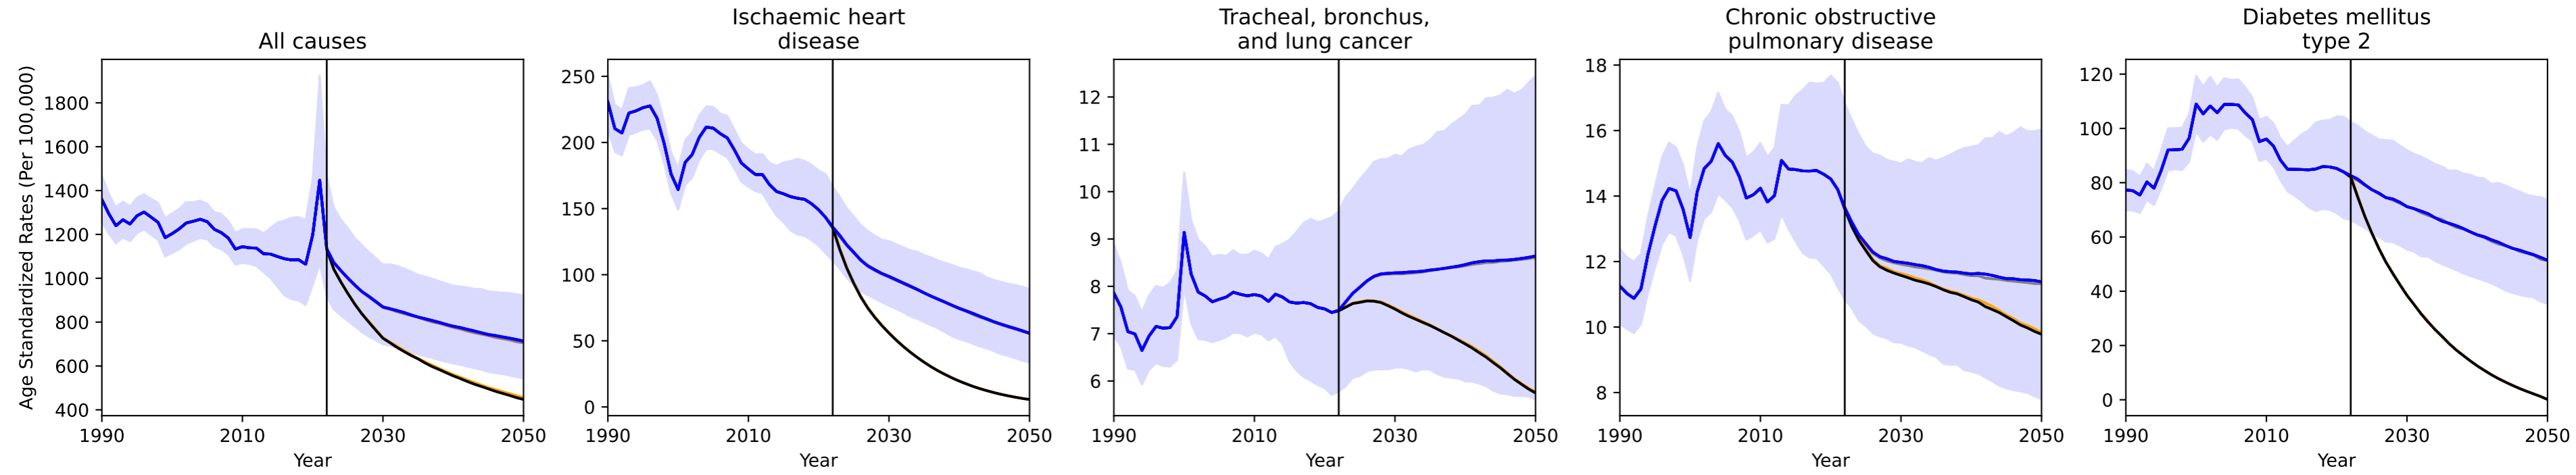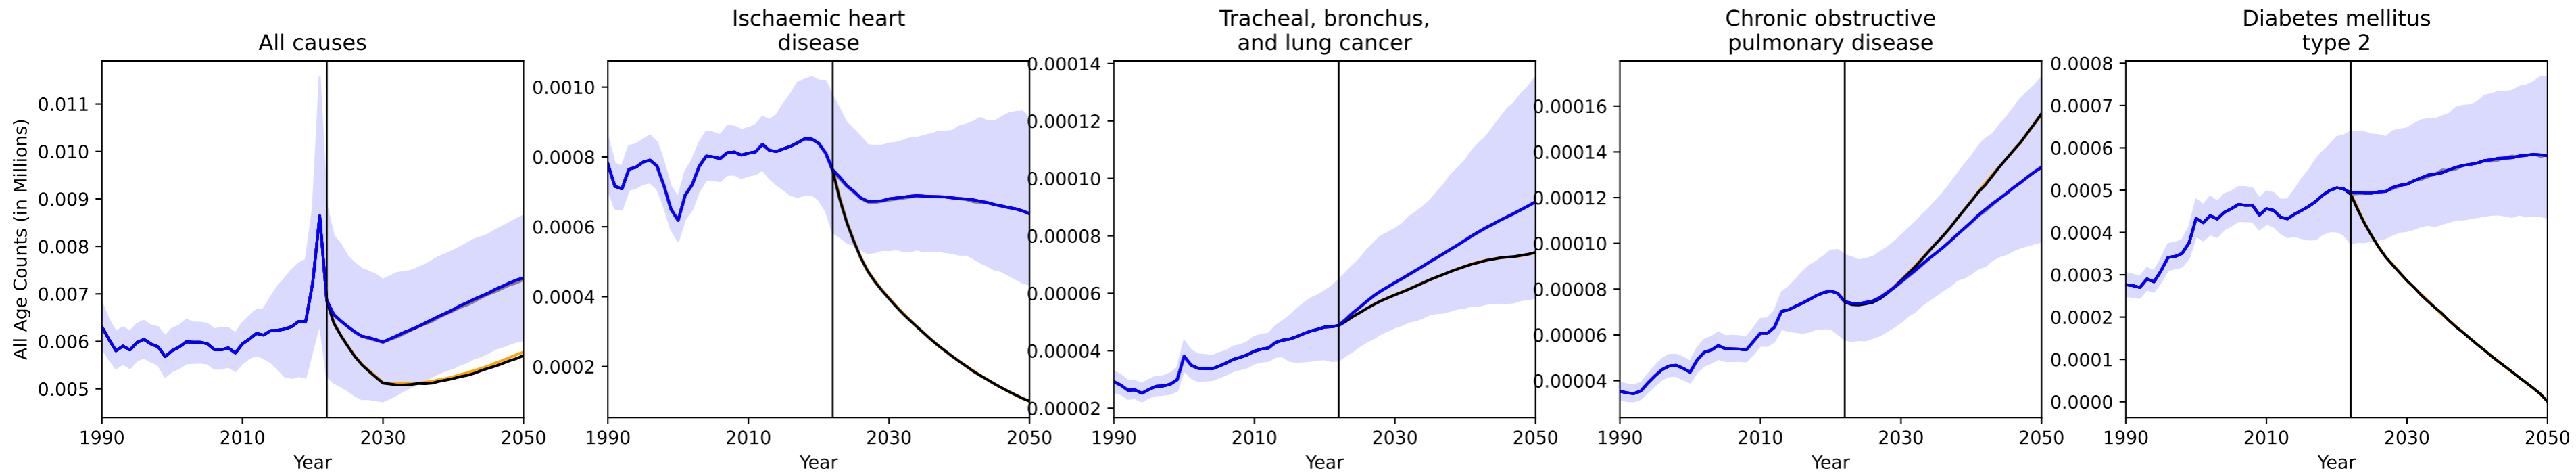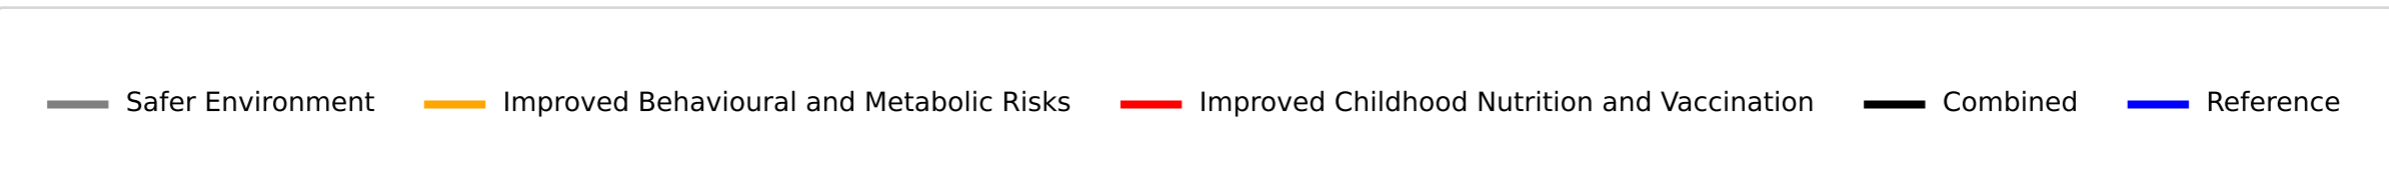

# Haiti

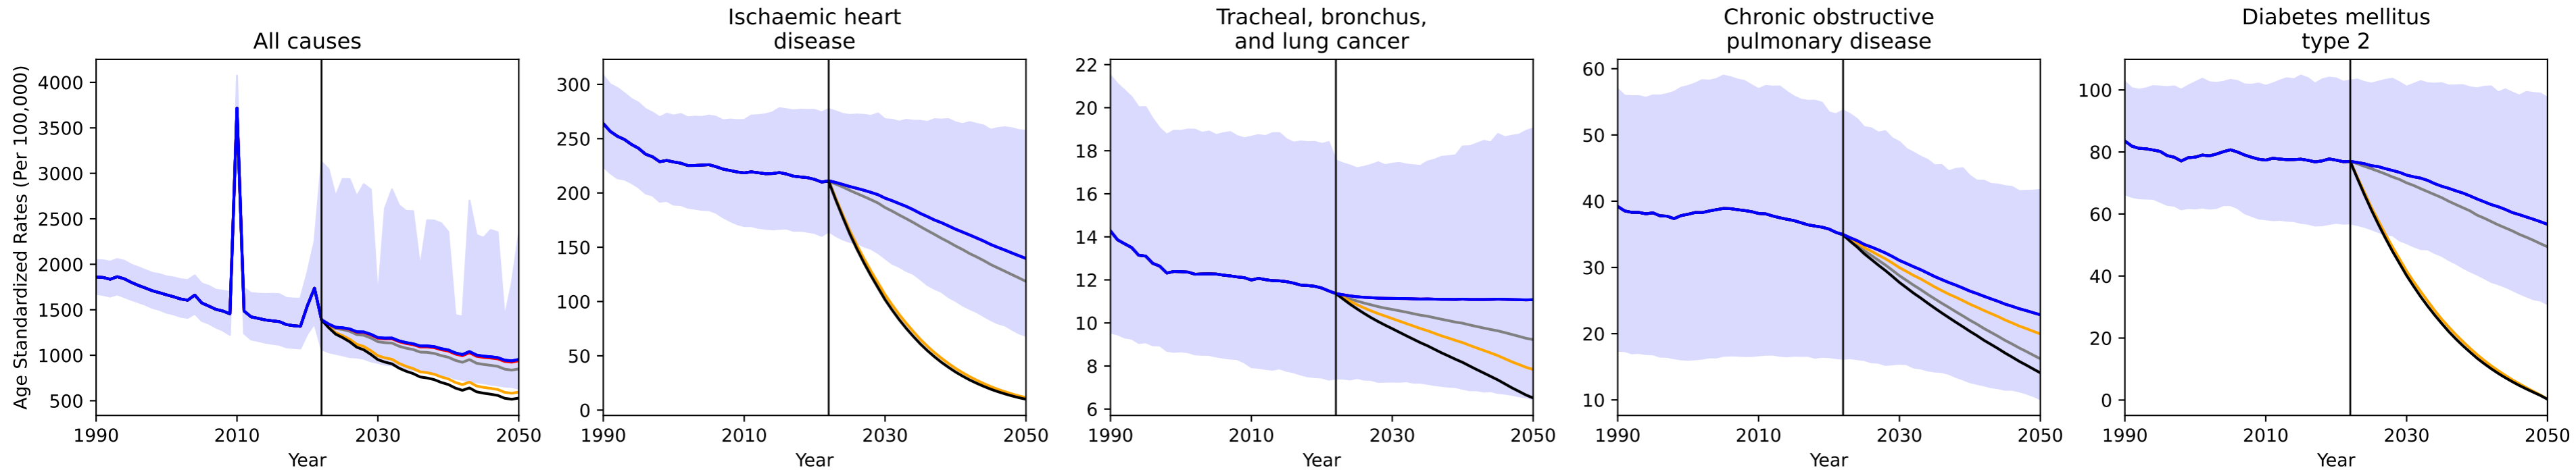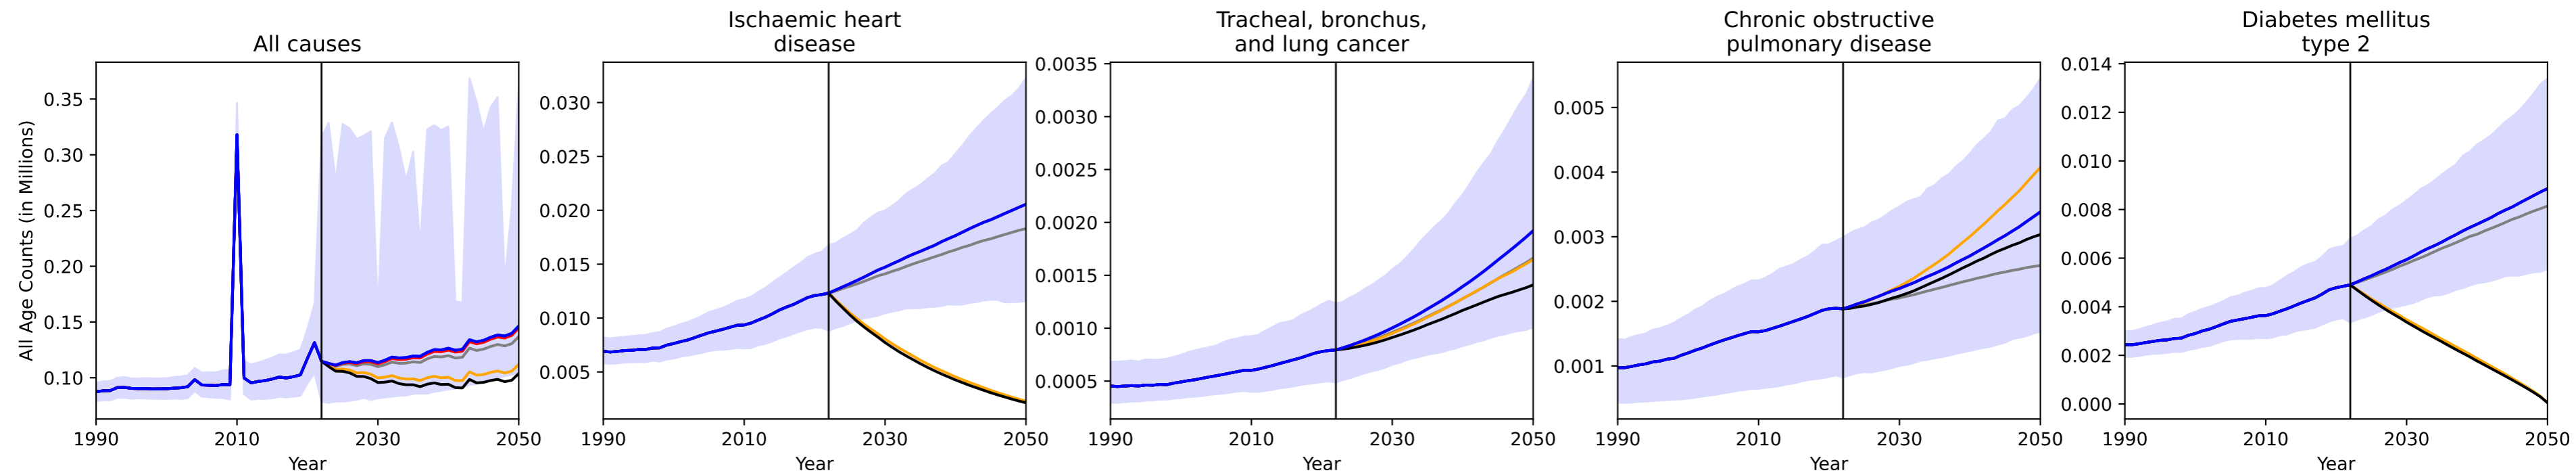

# Jamaica

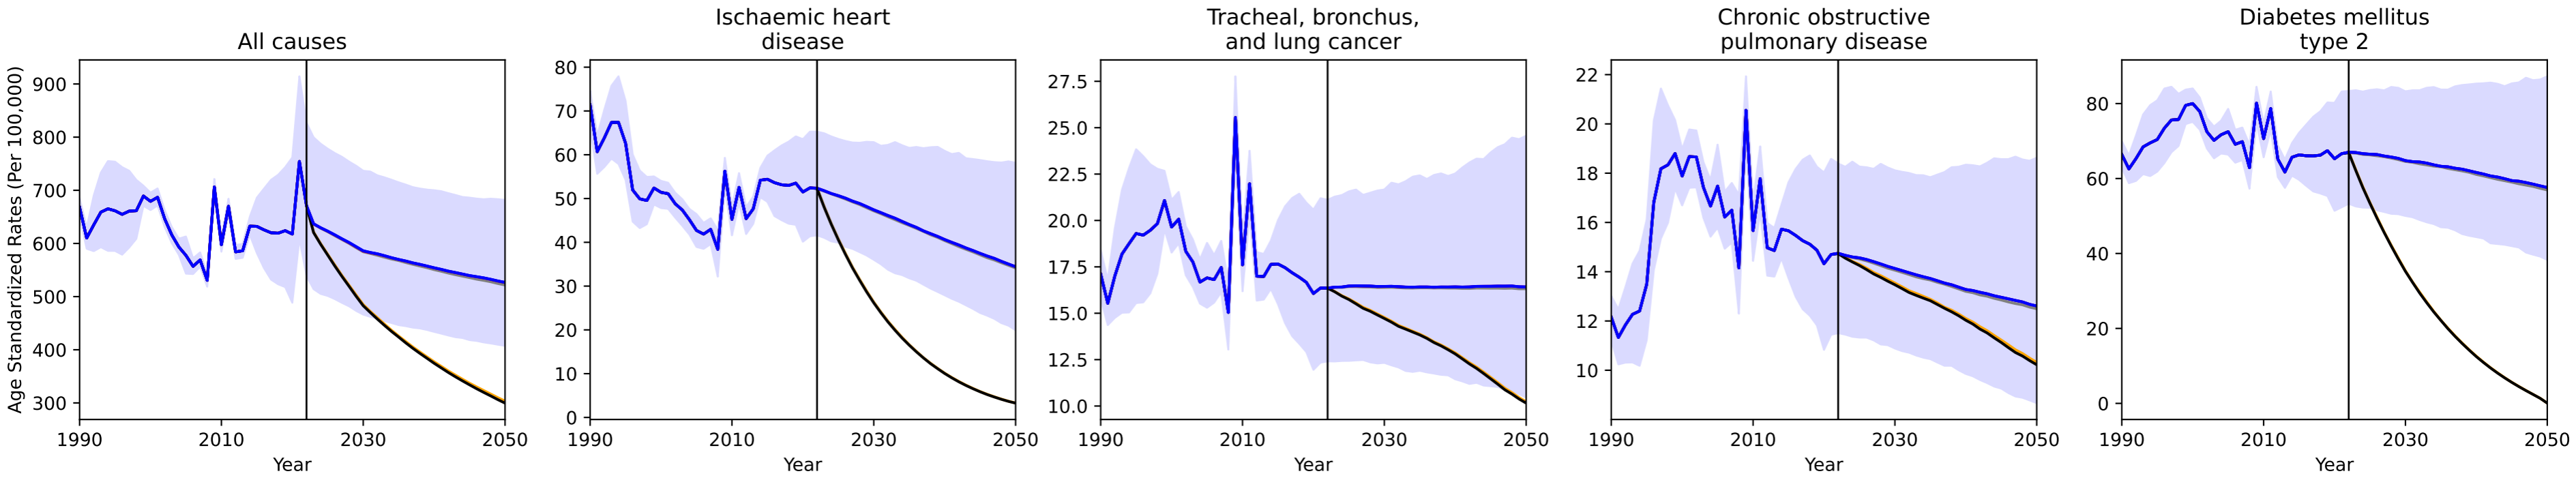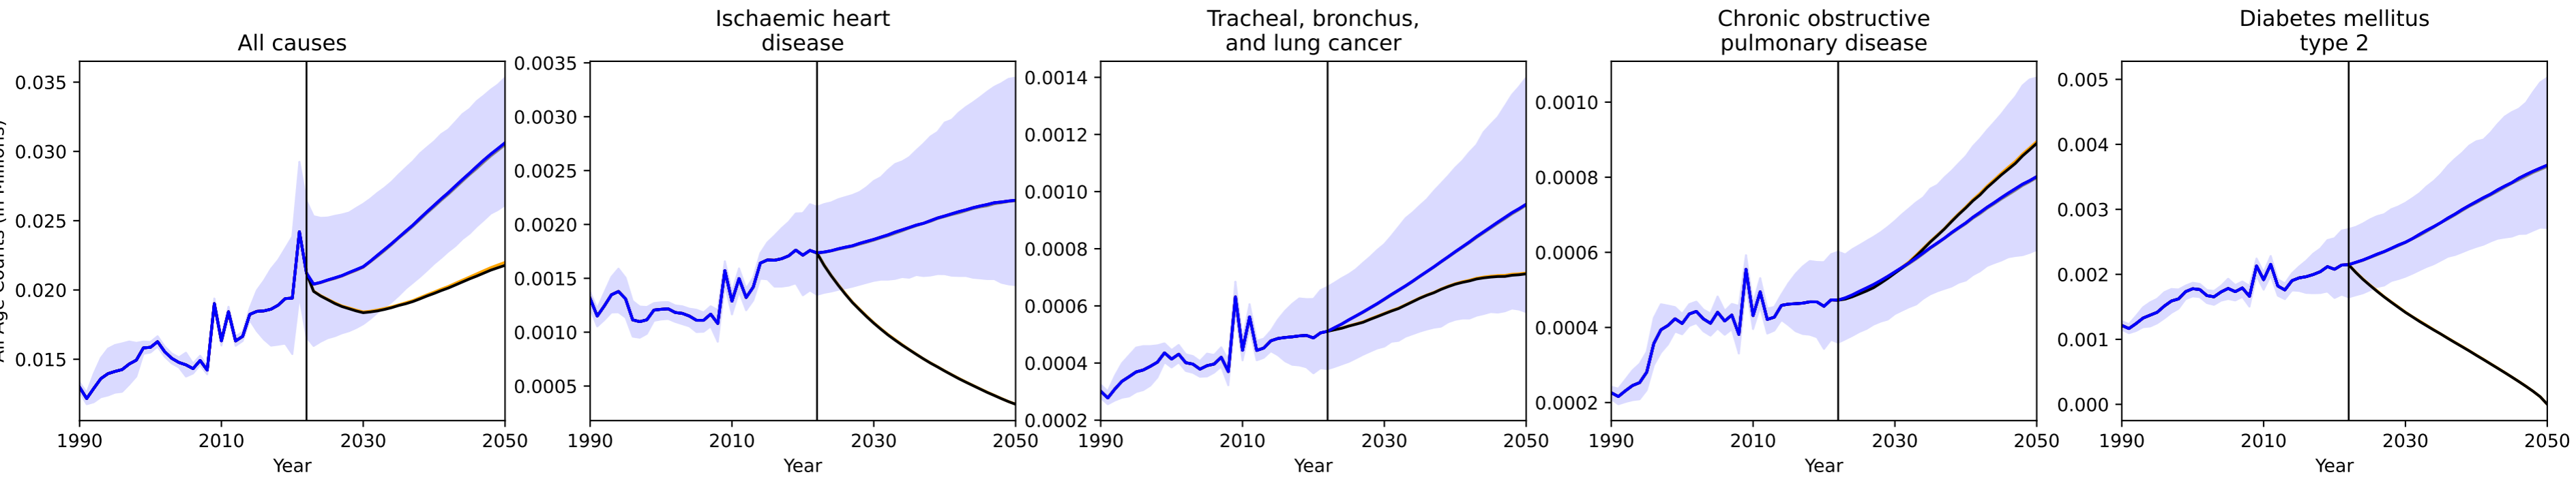

# Puerto Rico

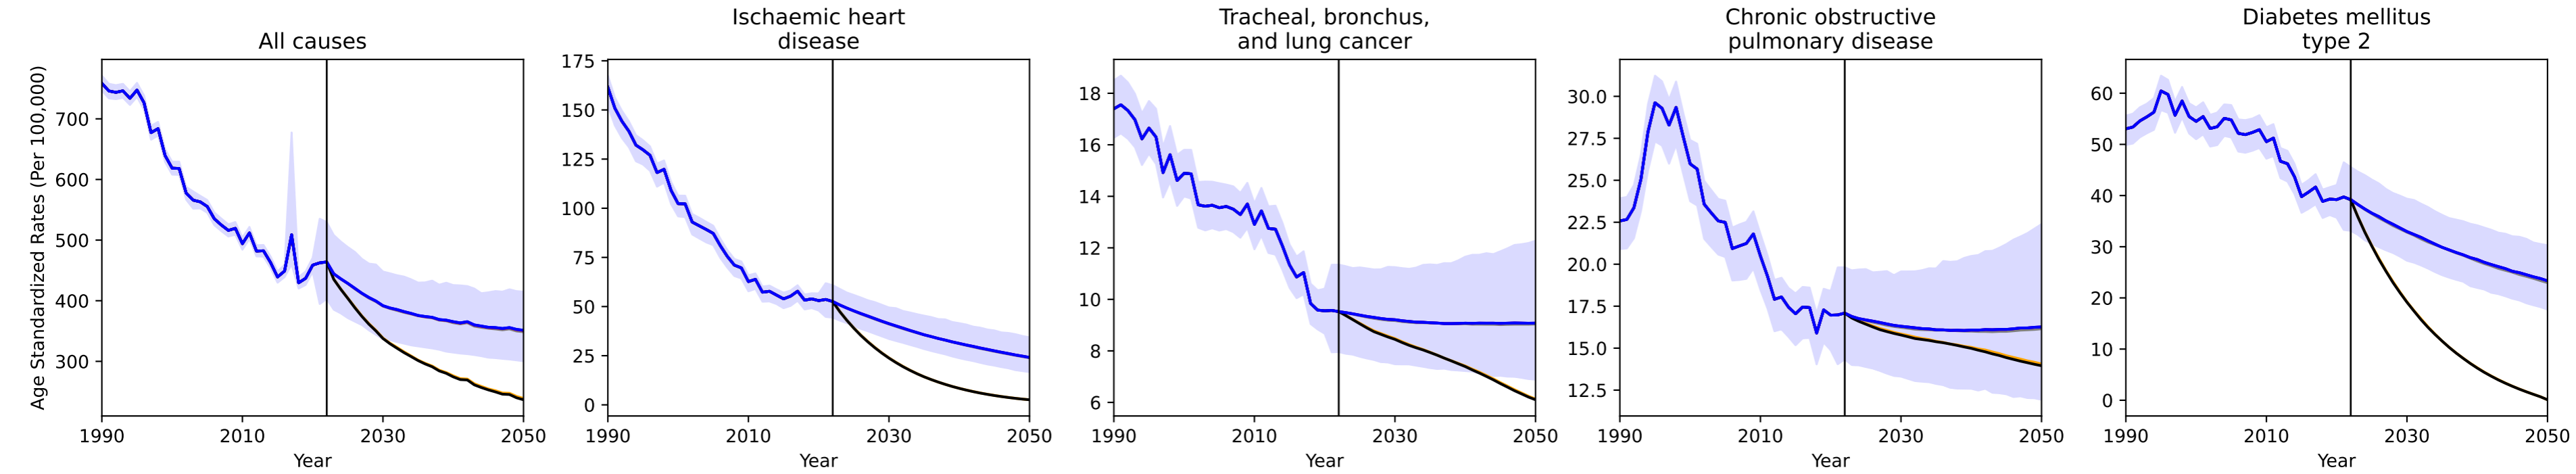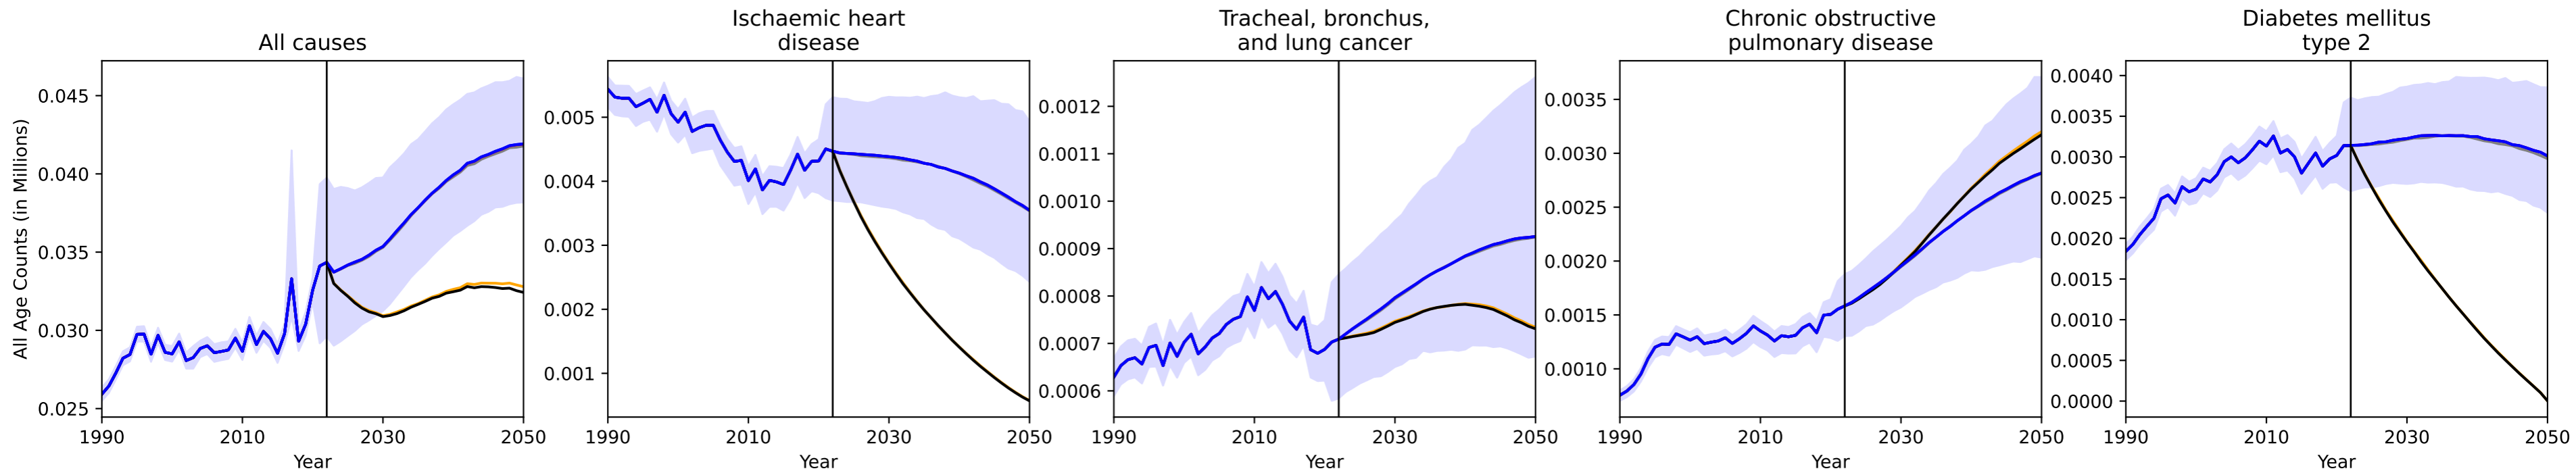

# Saint Kitts And Nevis

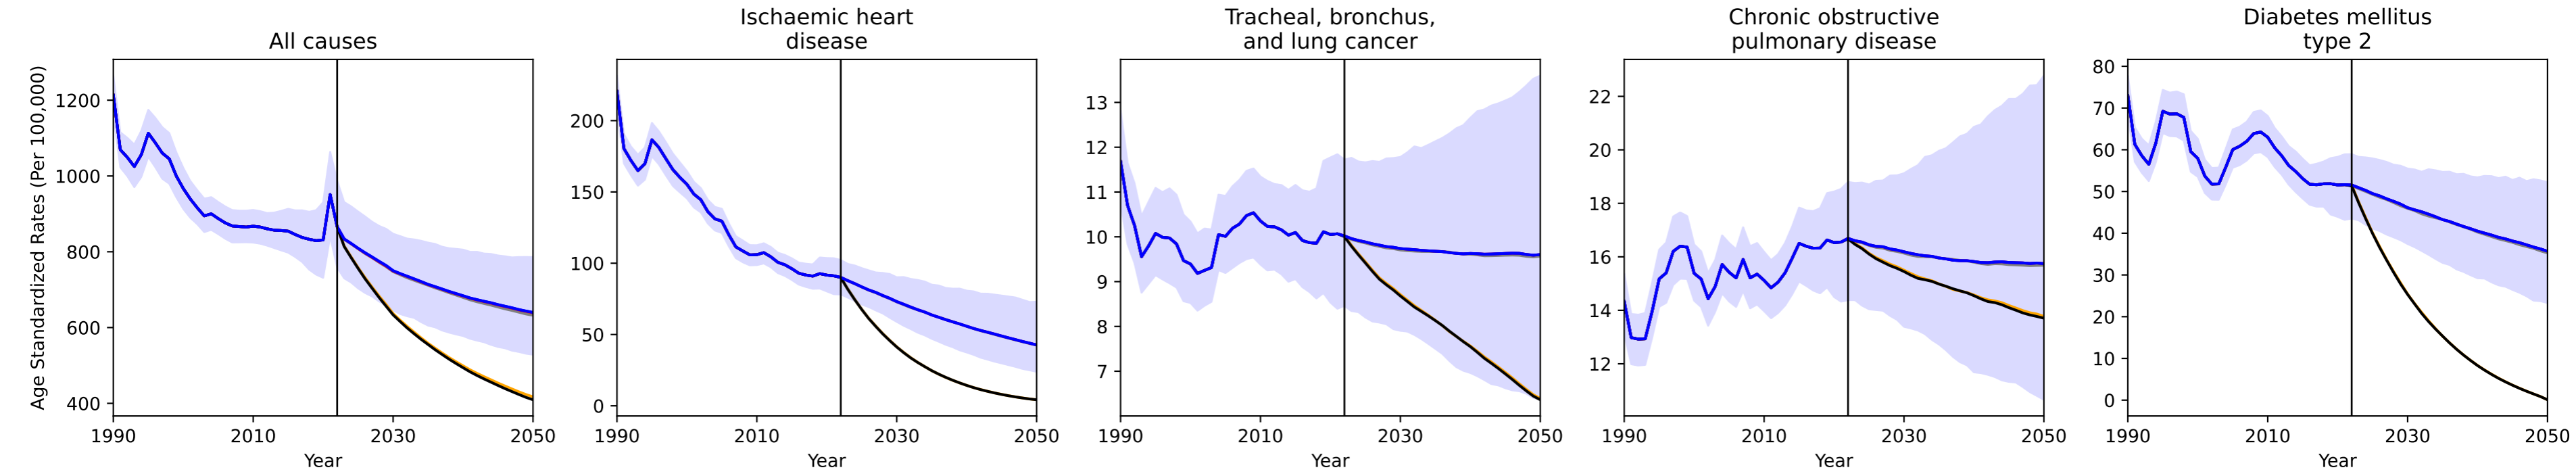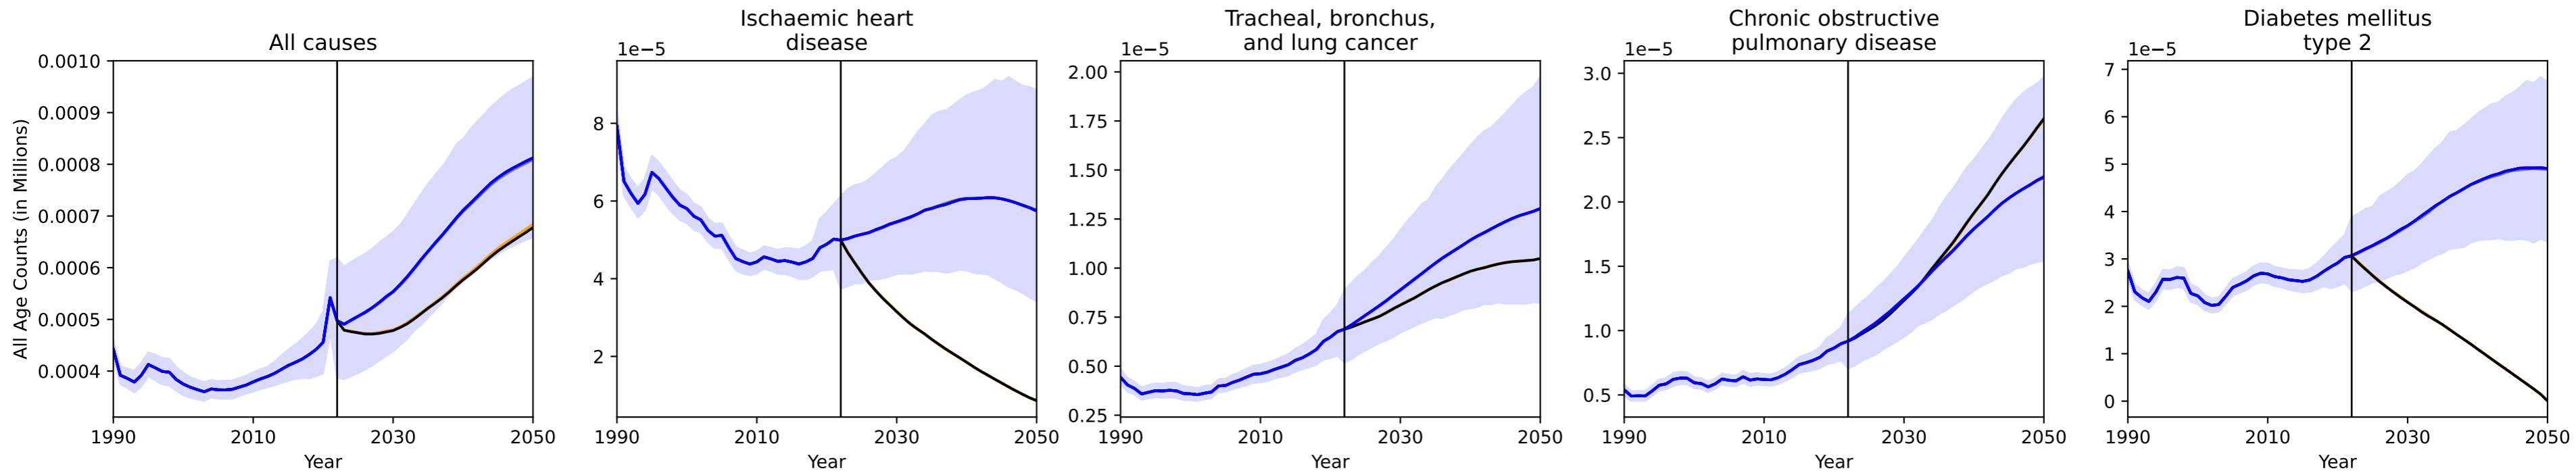



# Saint Lucia

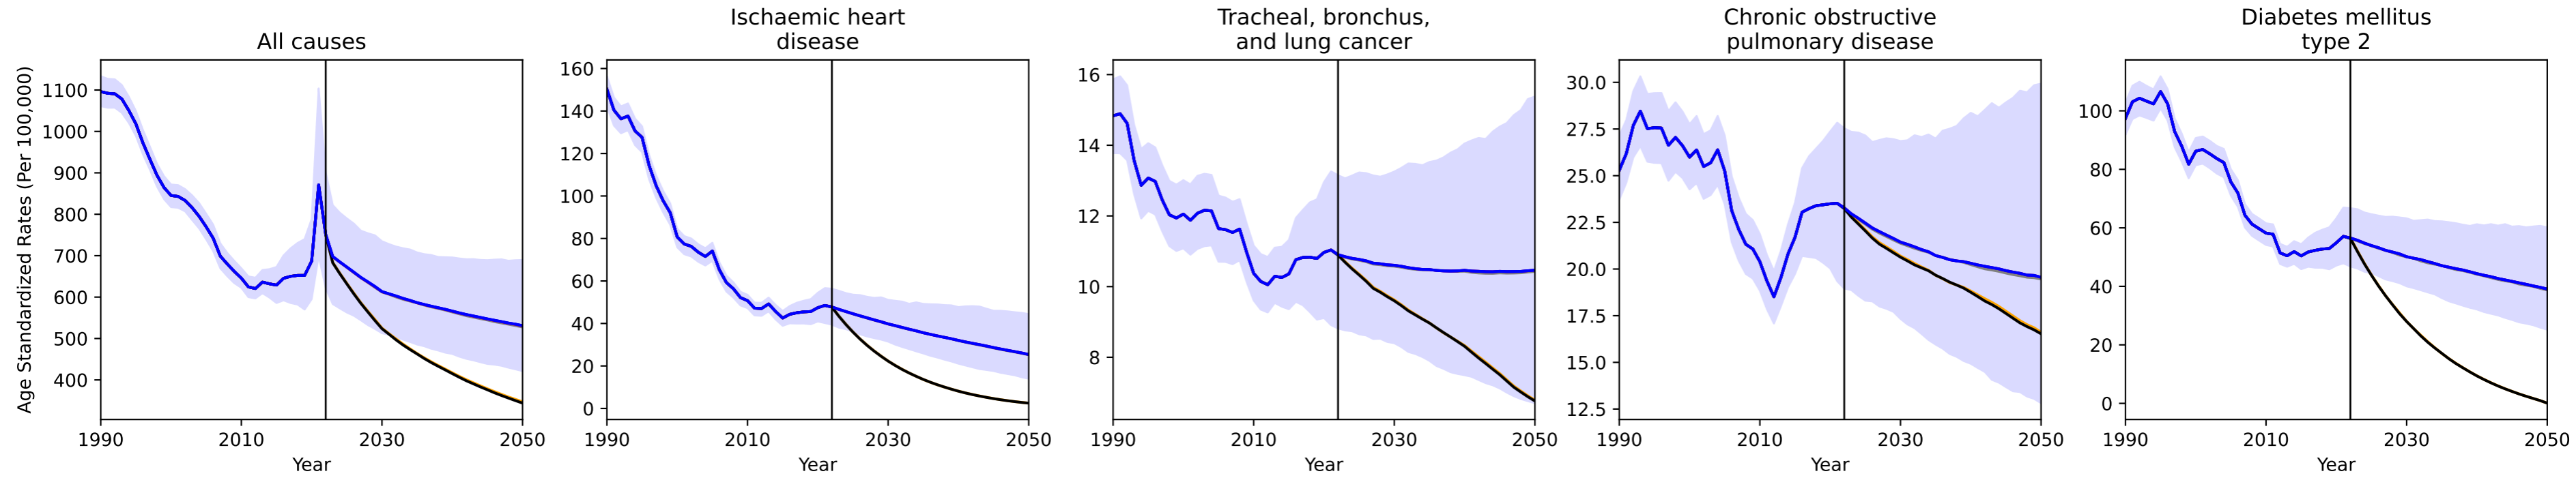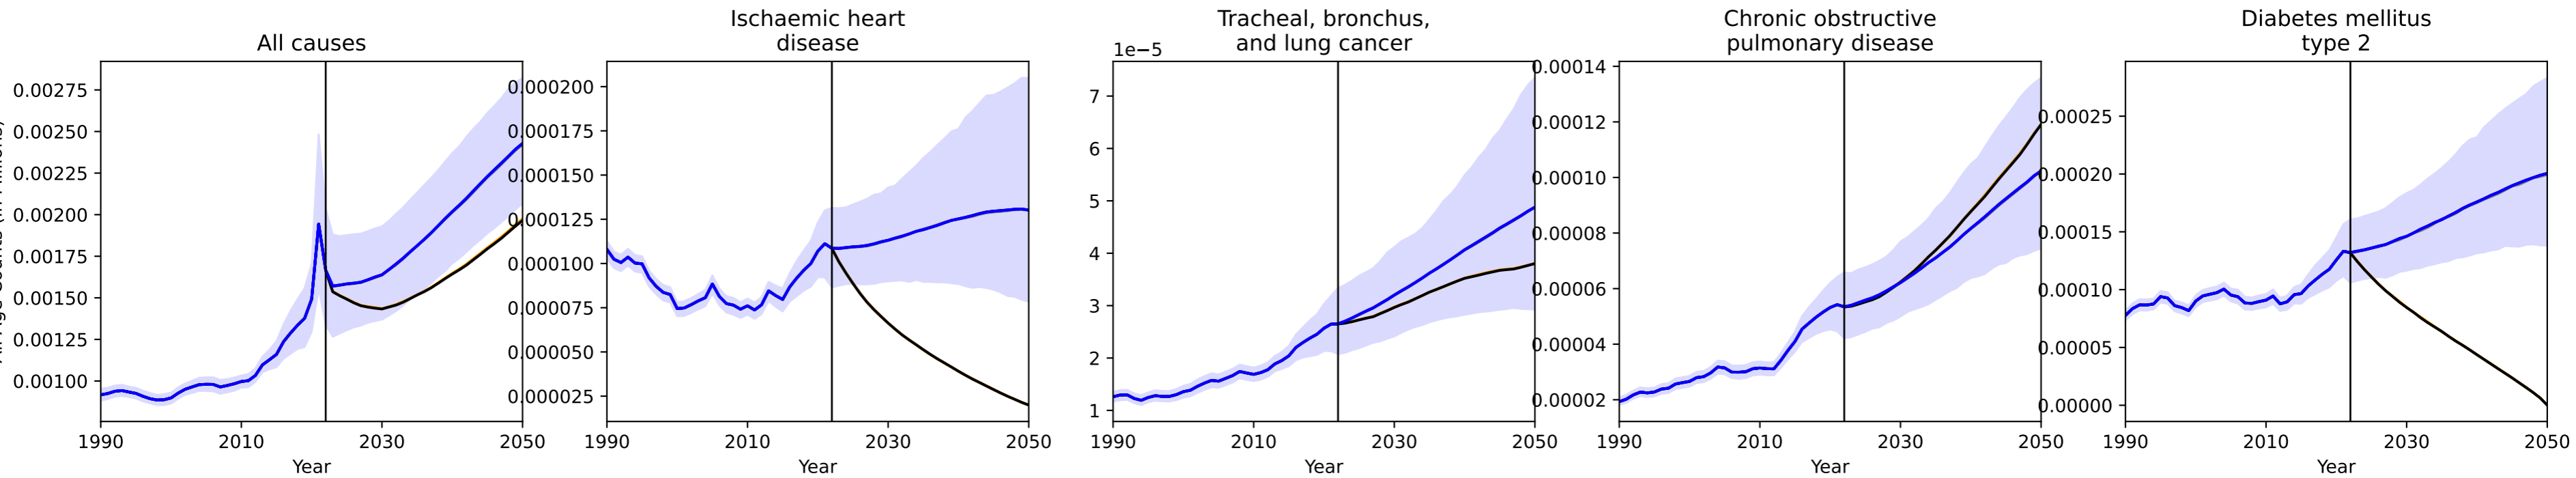

# Saint Vincent And The Grenadines

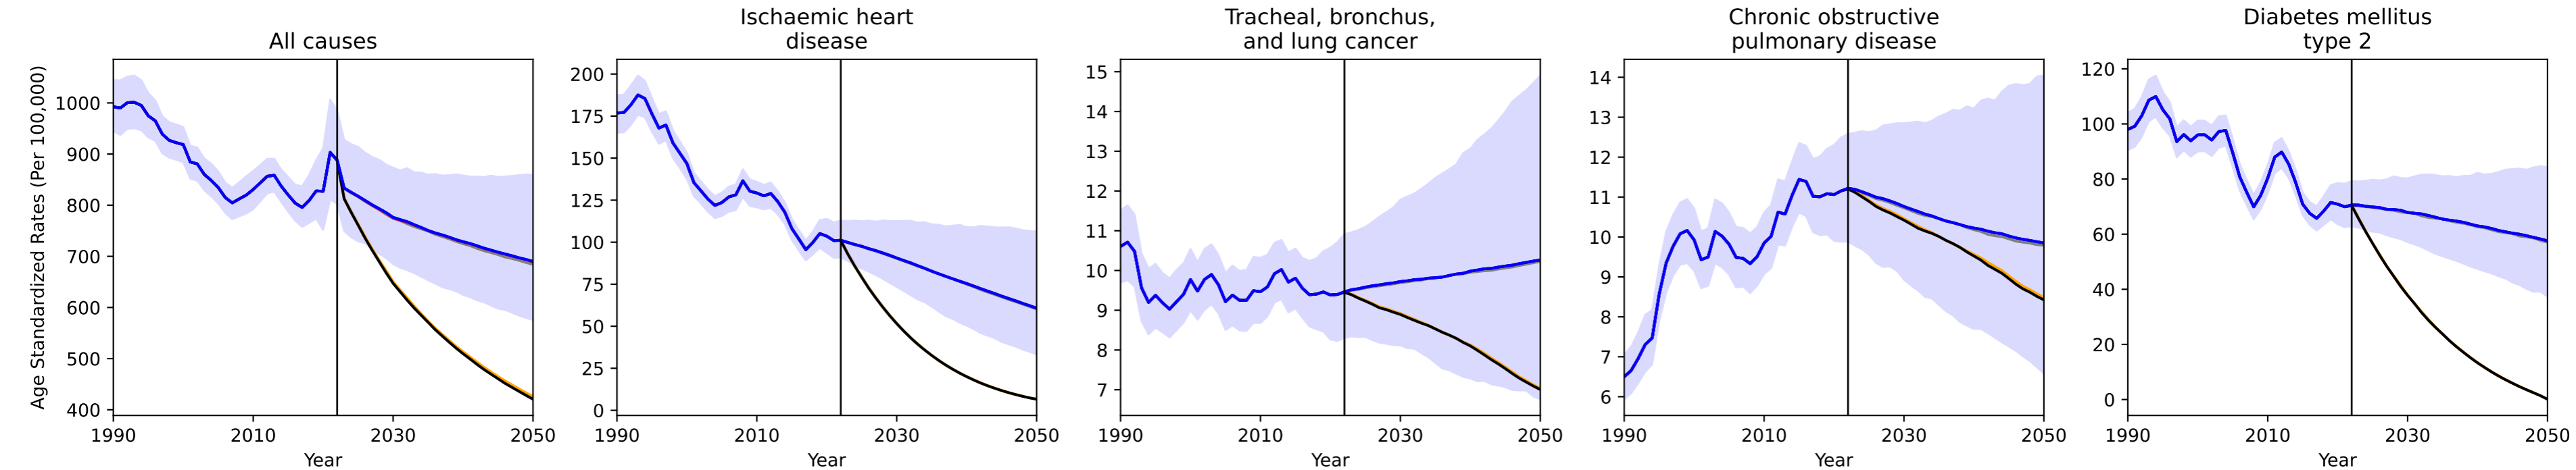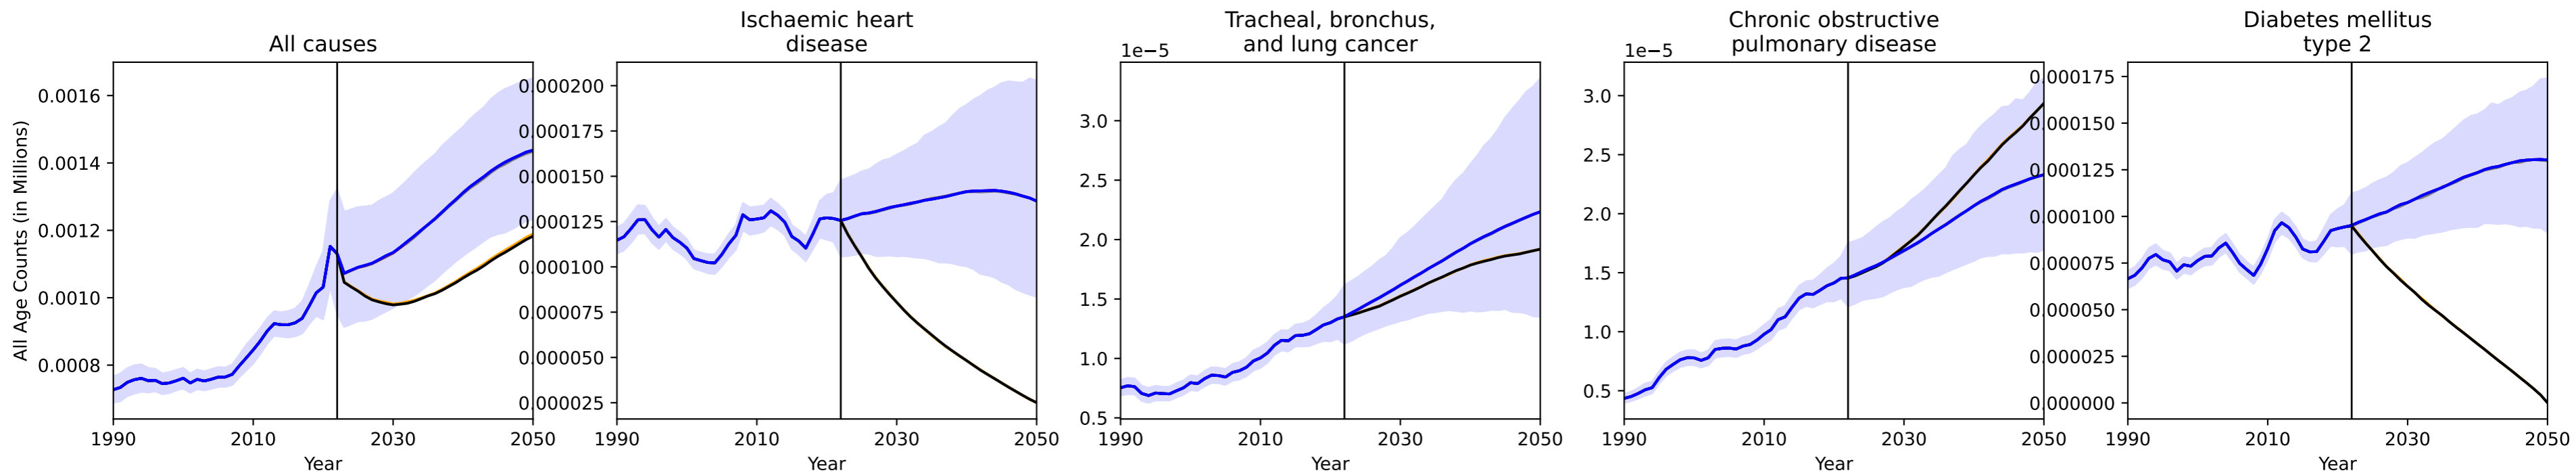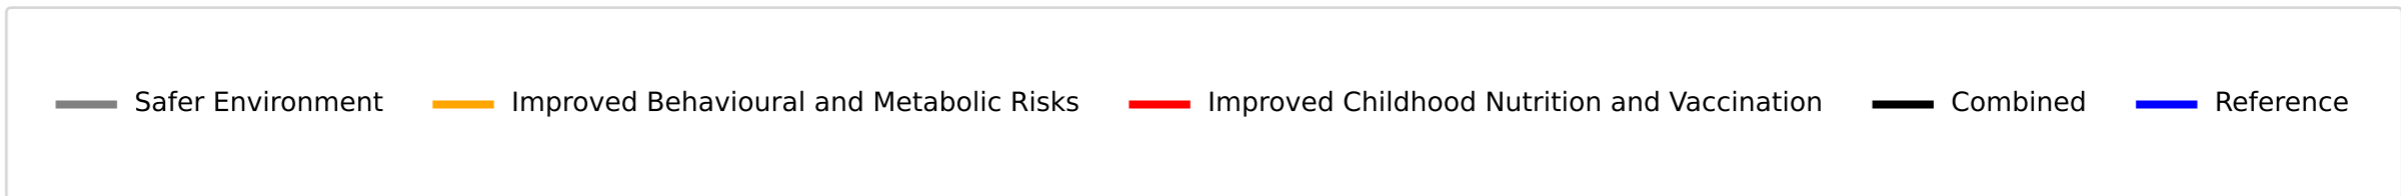

# Suriname

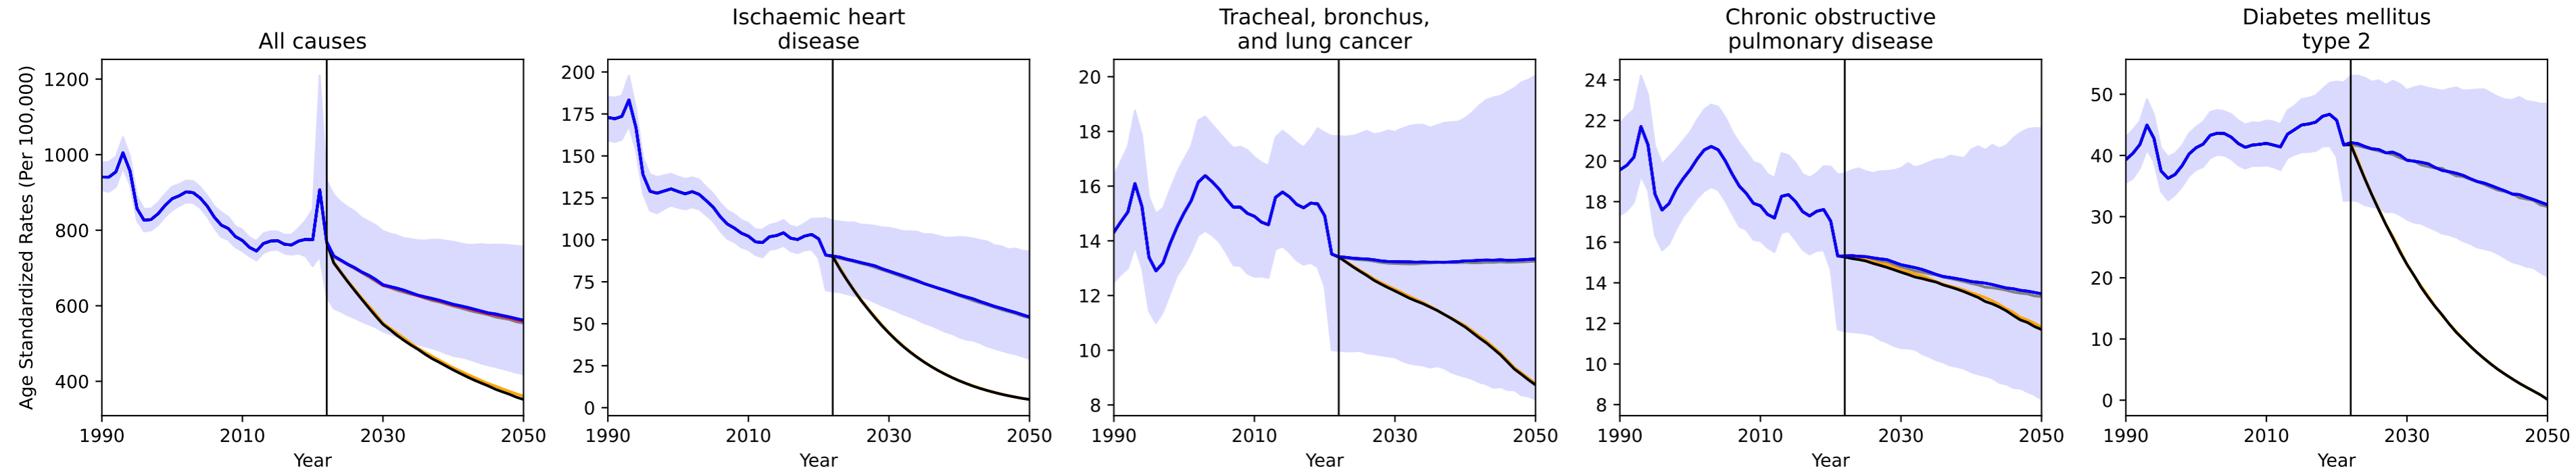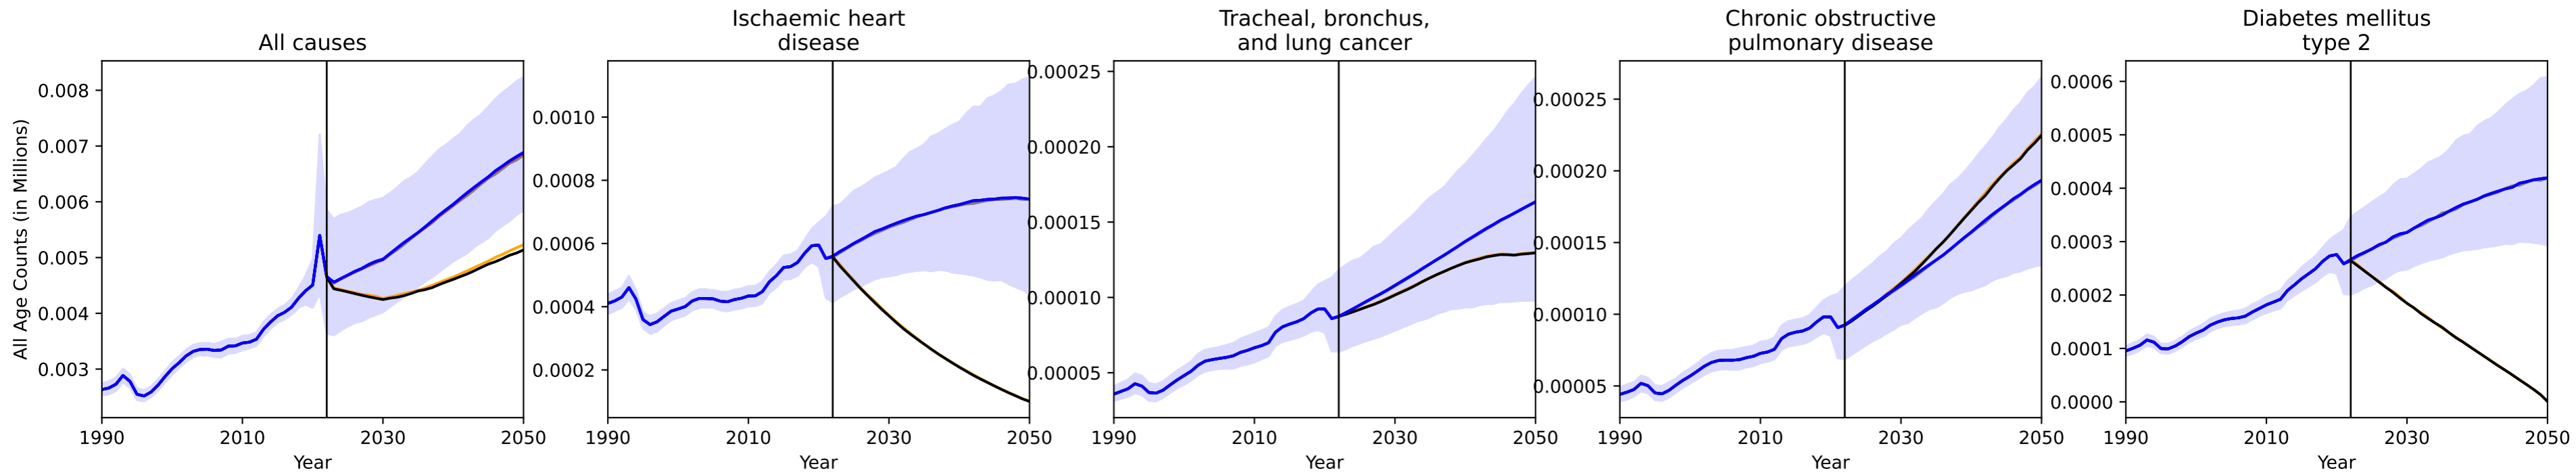

# Trinidad And Tobago

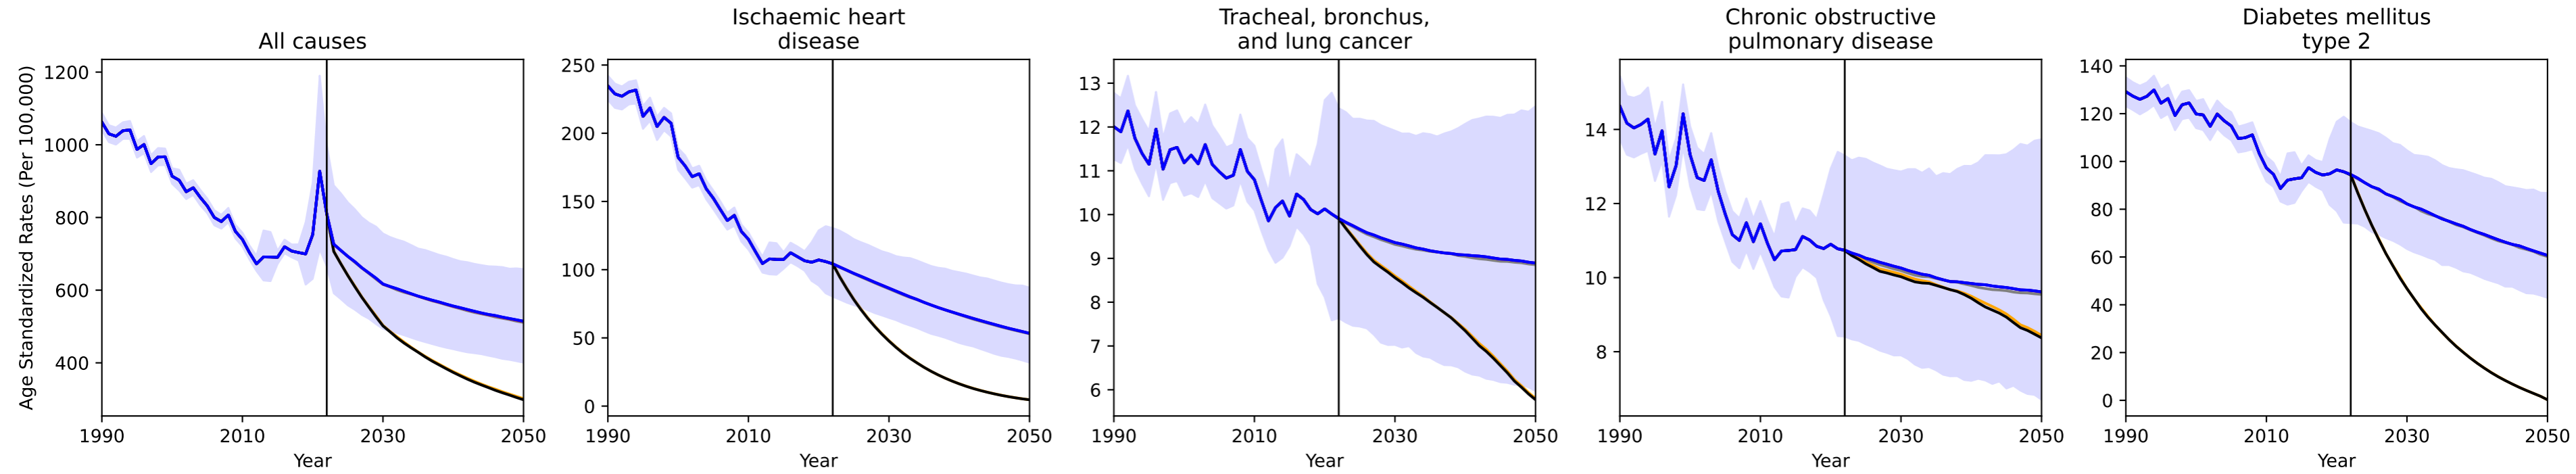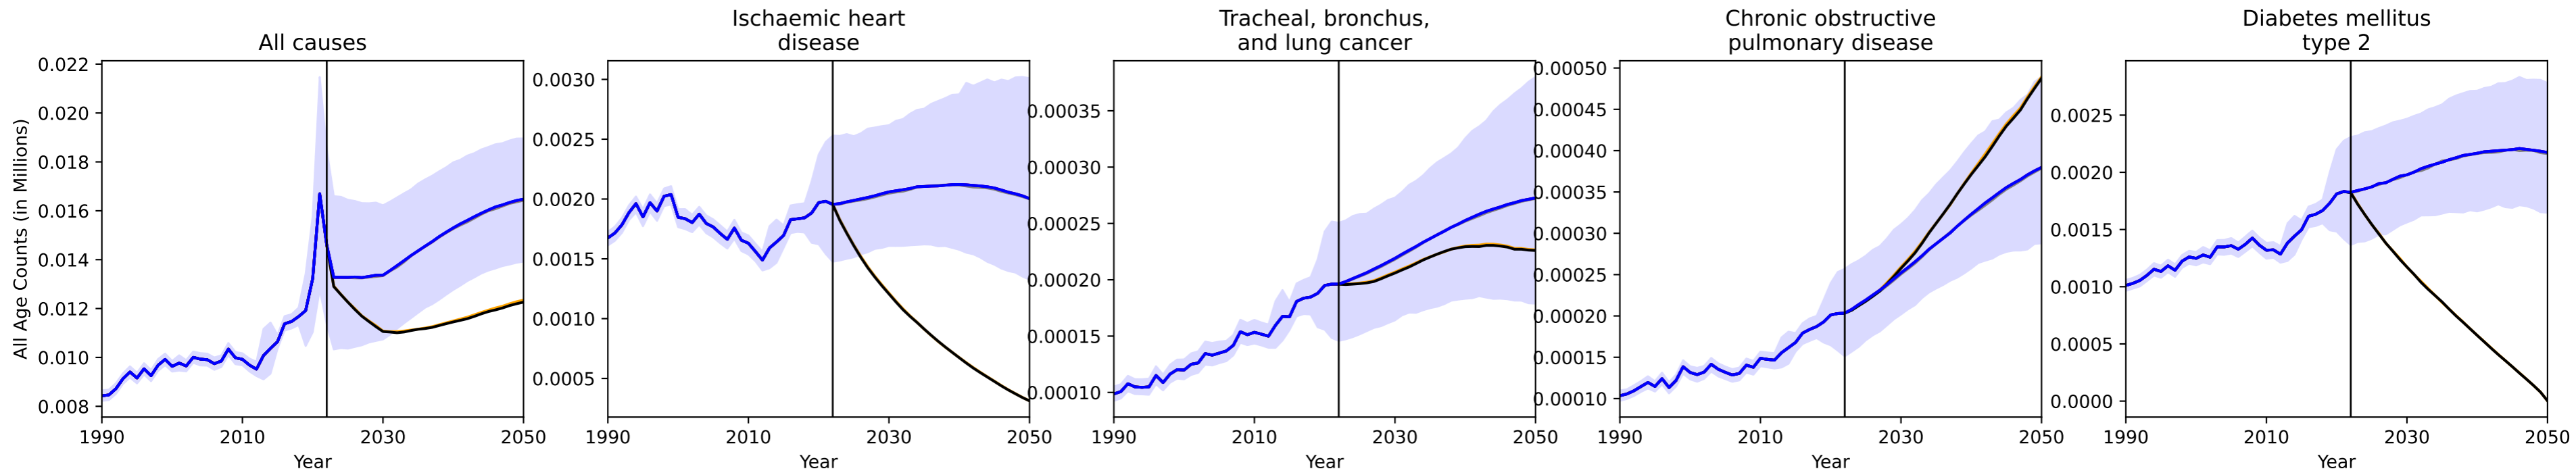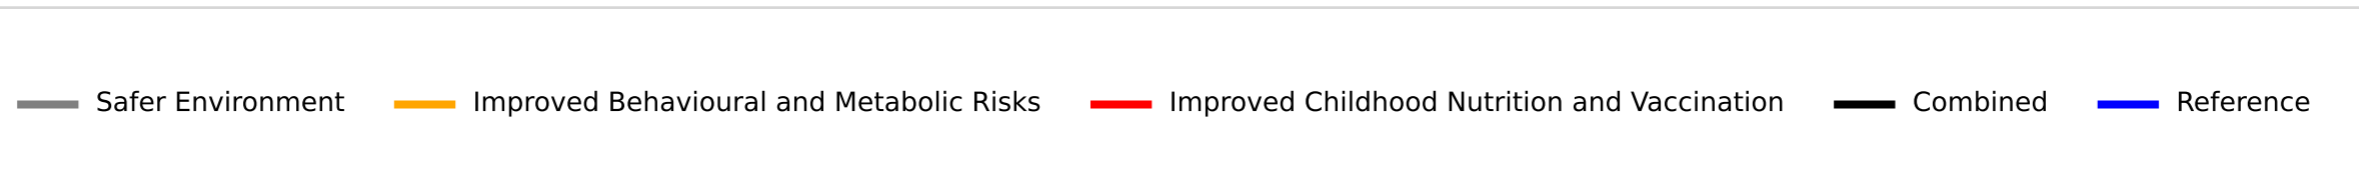

# Virgin Islands

Supplemental Results Figure S13. All cause and top NCD causes age standardized death rates and all age counts by scenario and location, 1990-2050

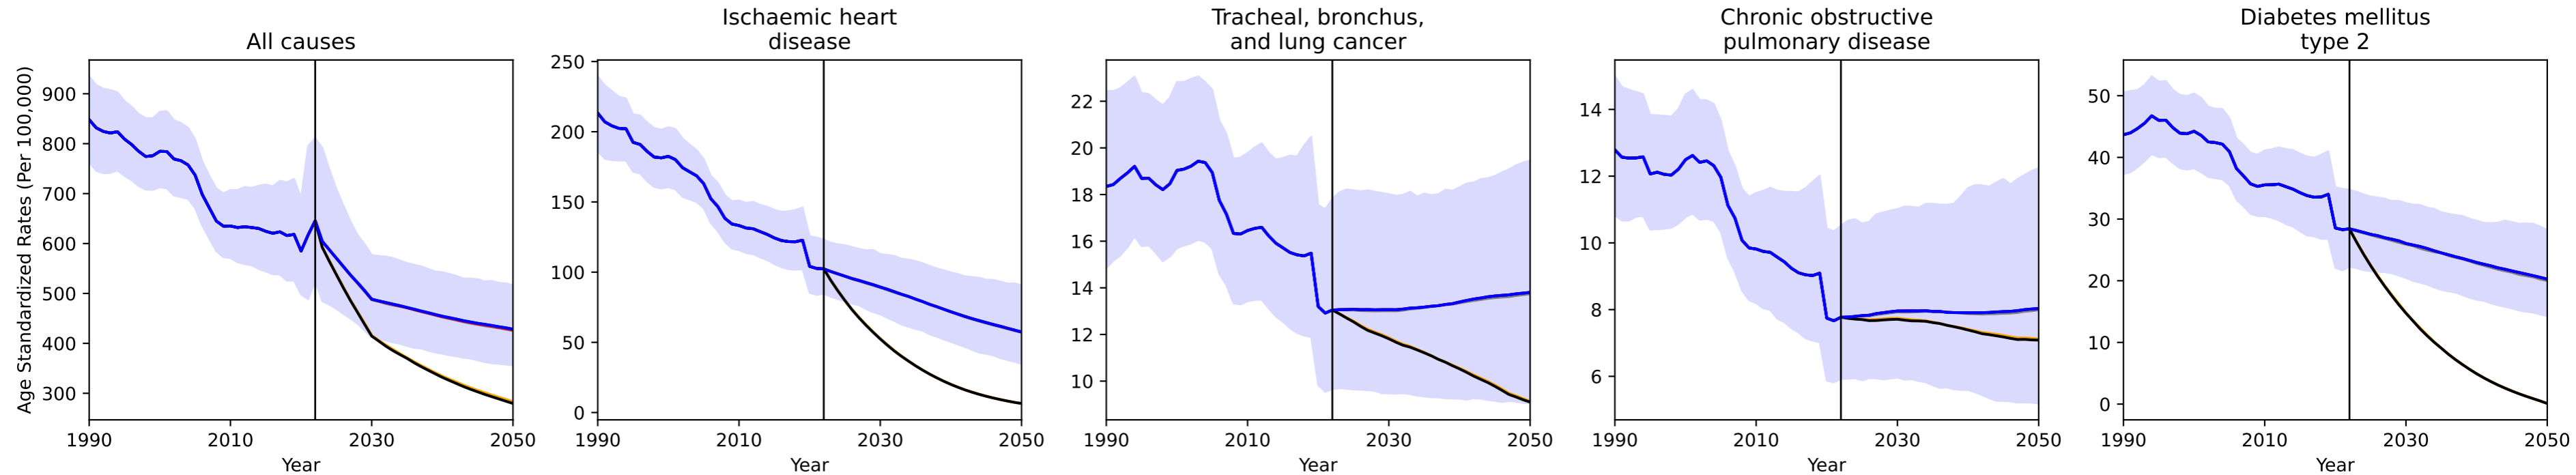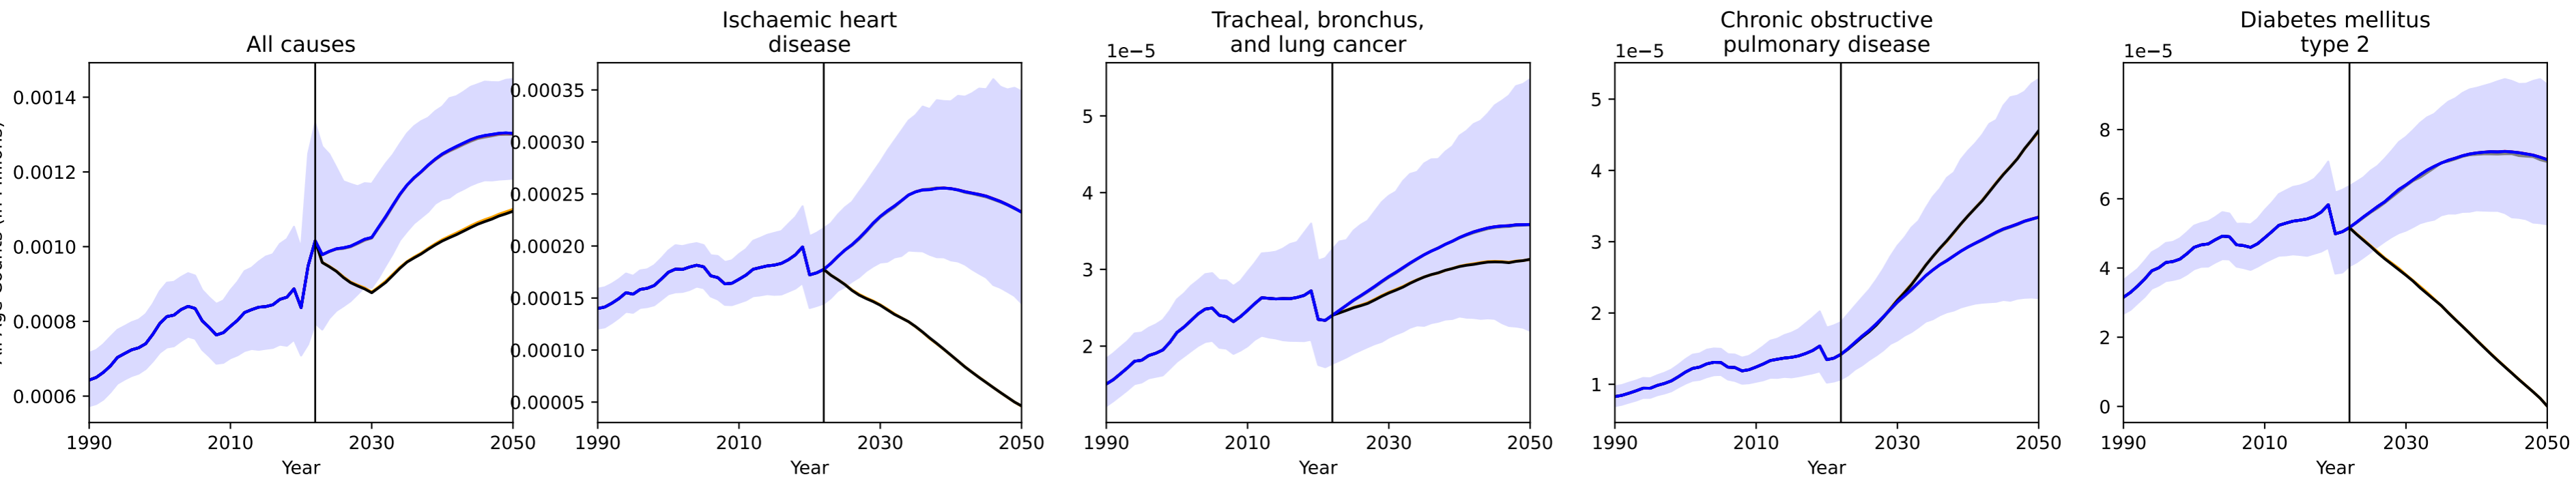

# Colombia

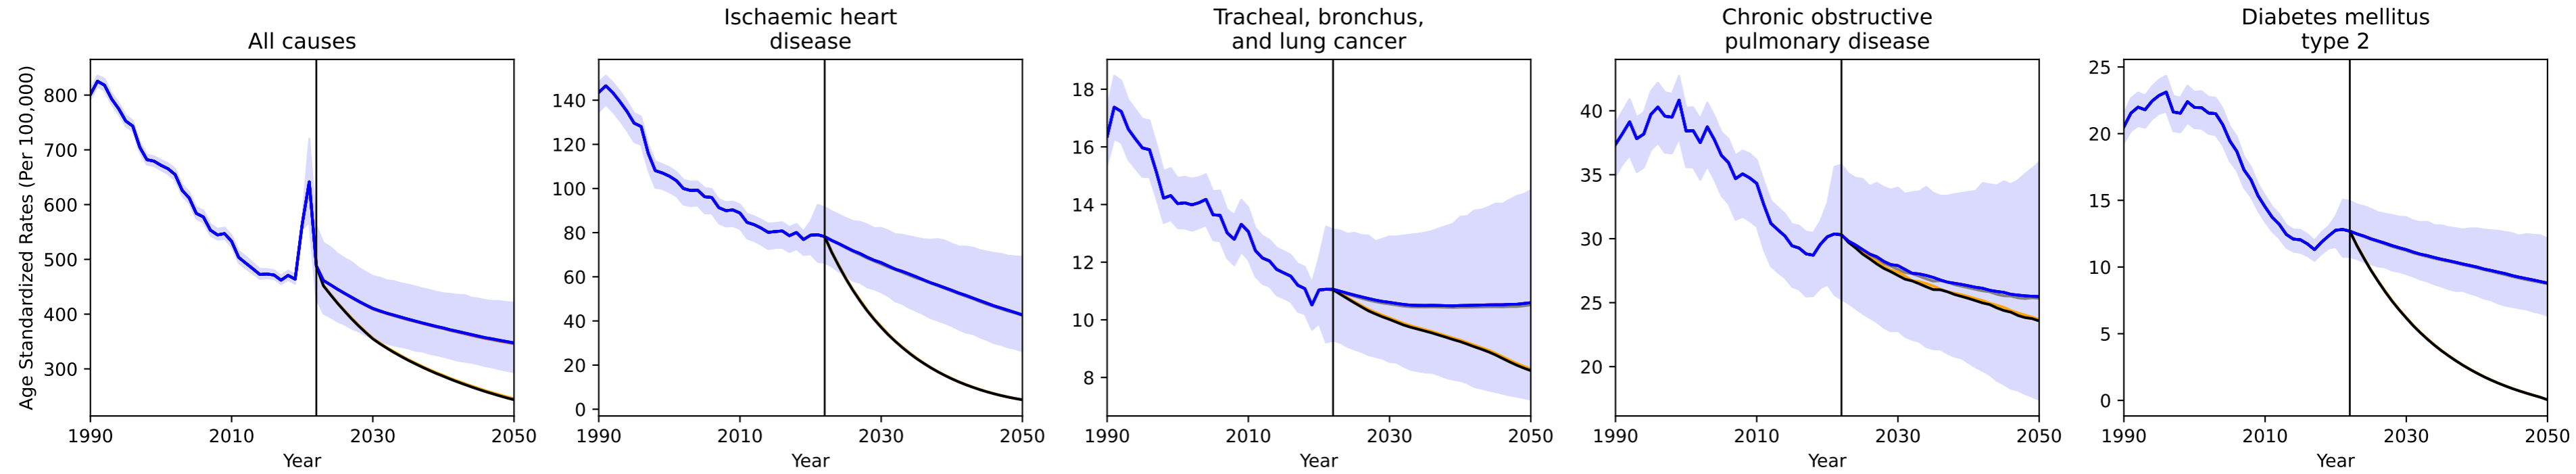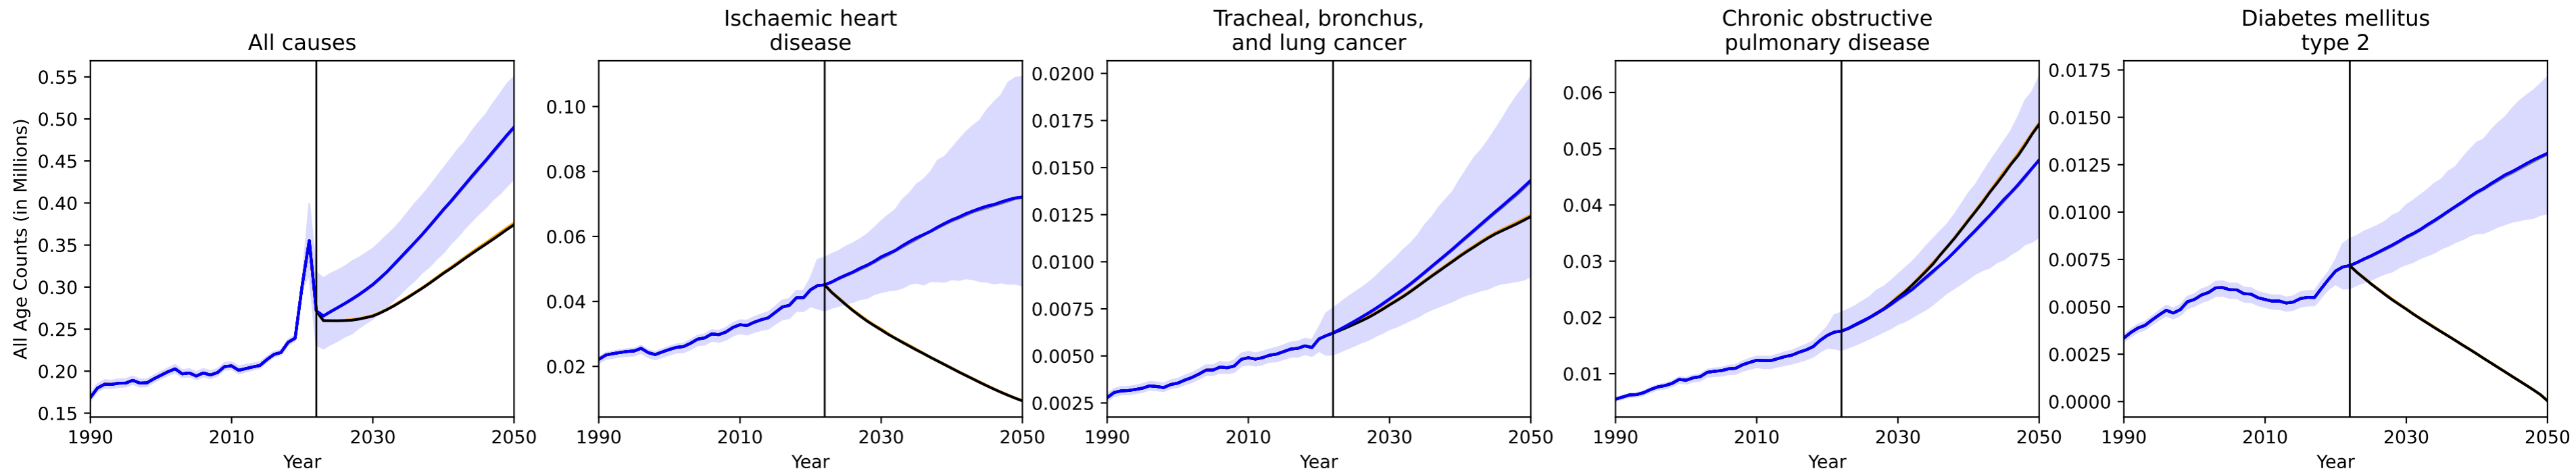

— Safer Environment    — Improved Behavioural and Metabolic Risks    — Improved Childhood Nutrition and Vaccination    — Combined    — Reference

# Costa Rica

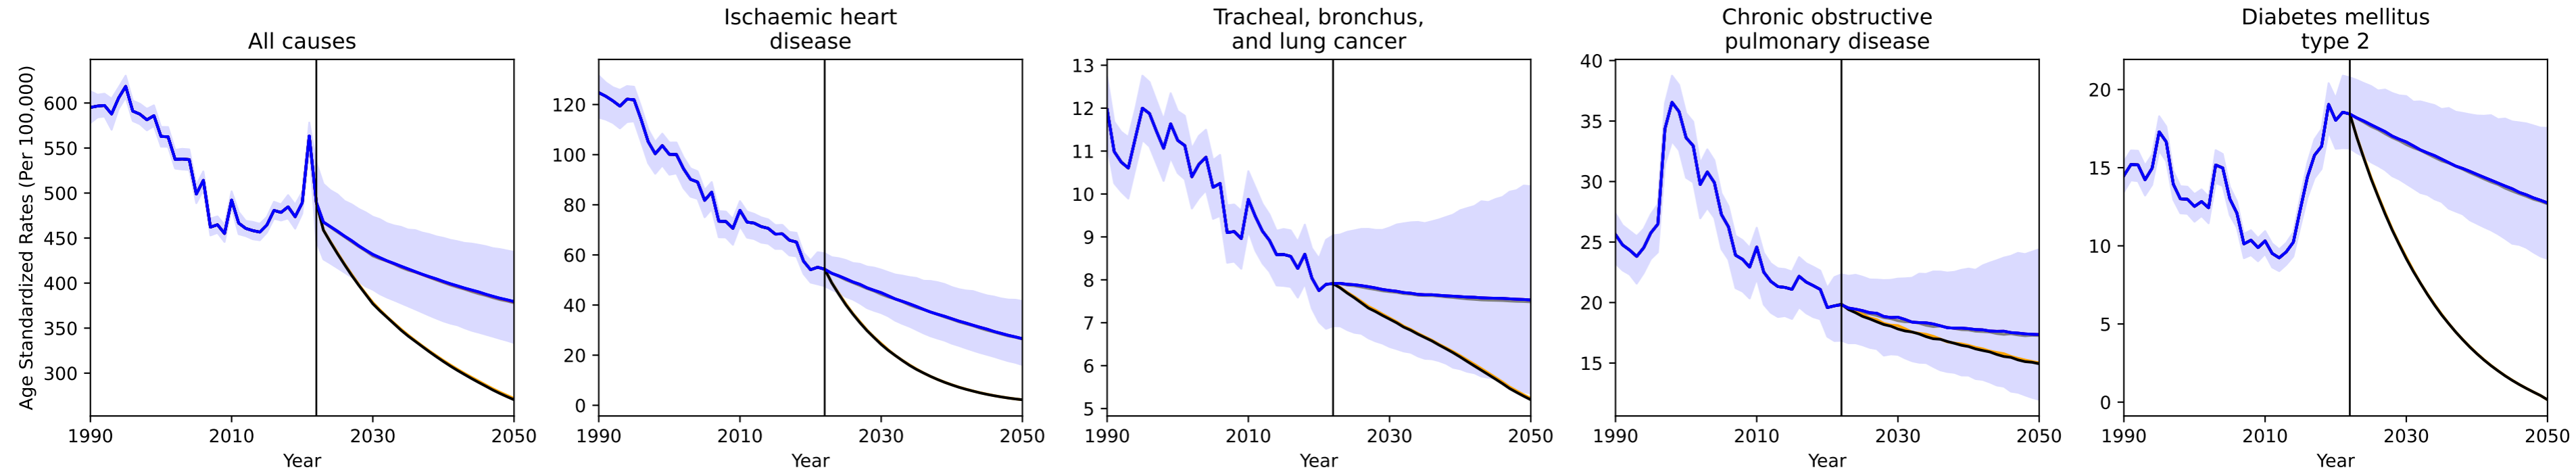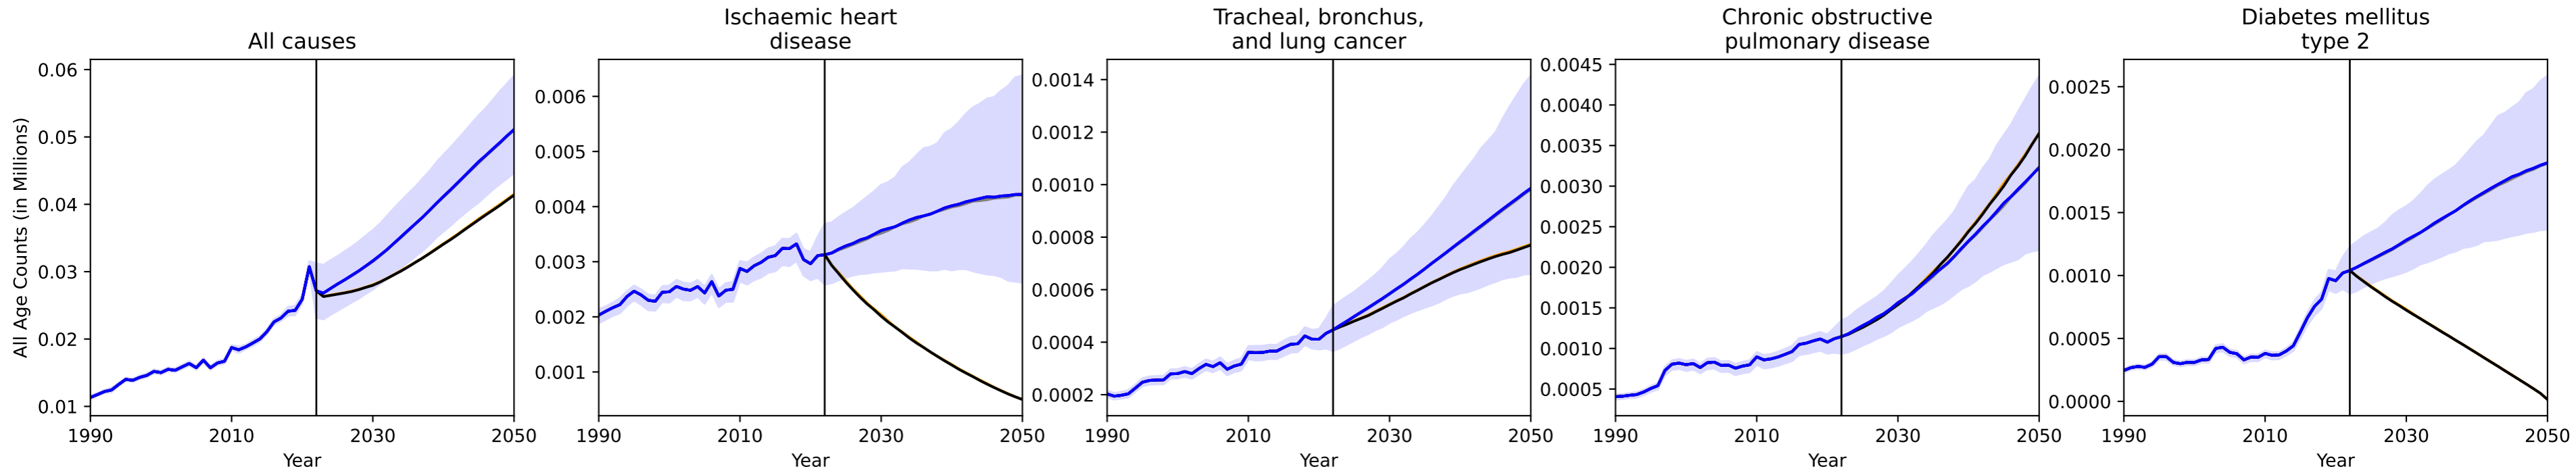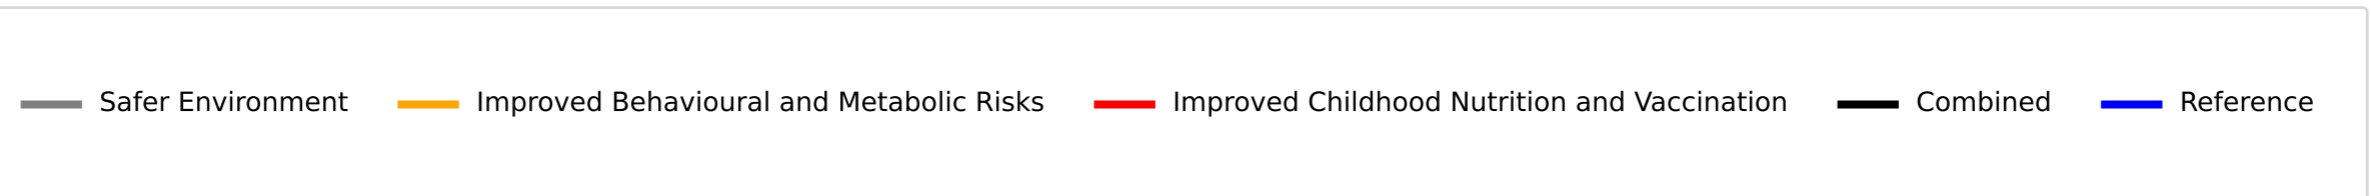

# El Salvador

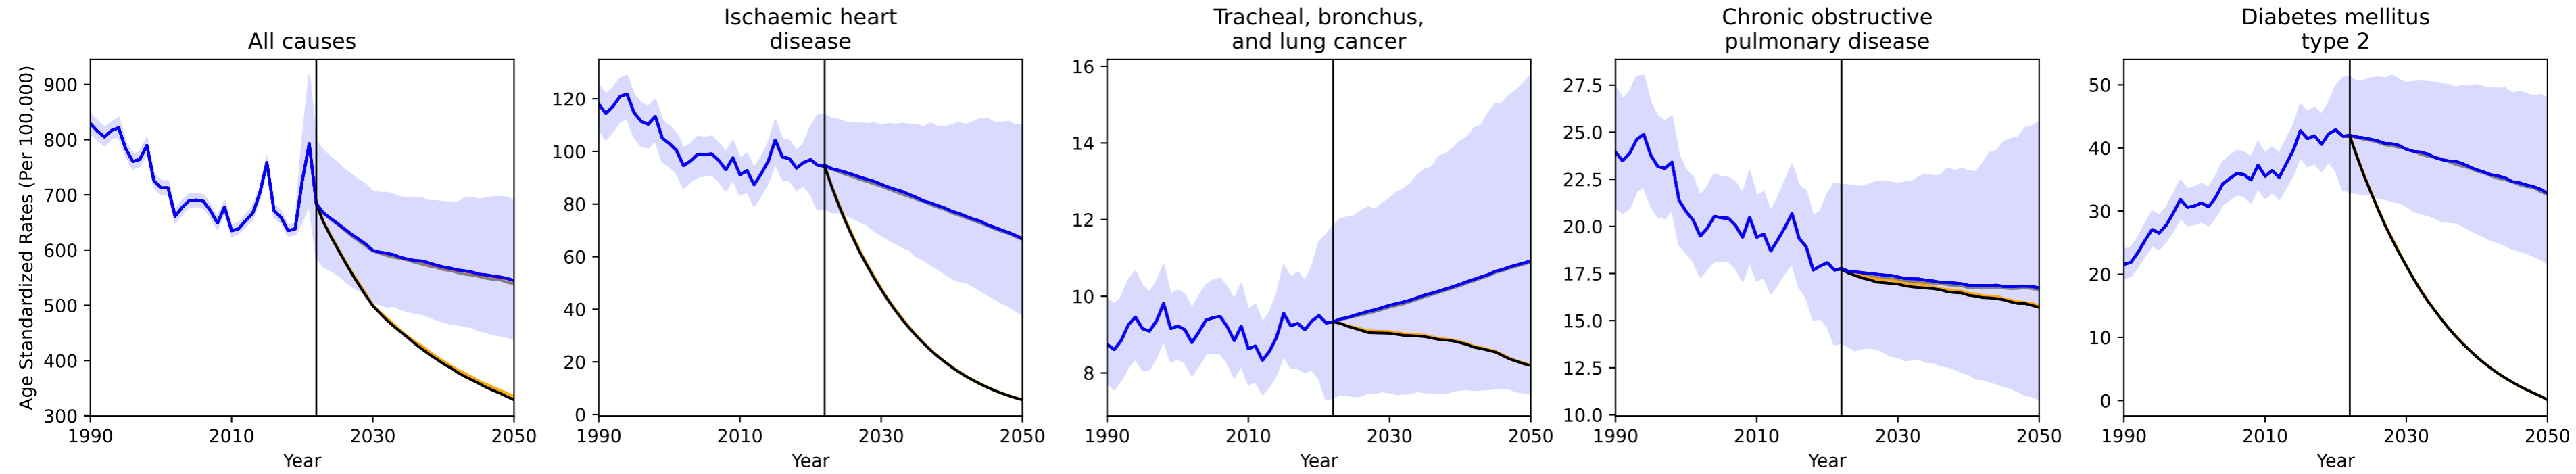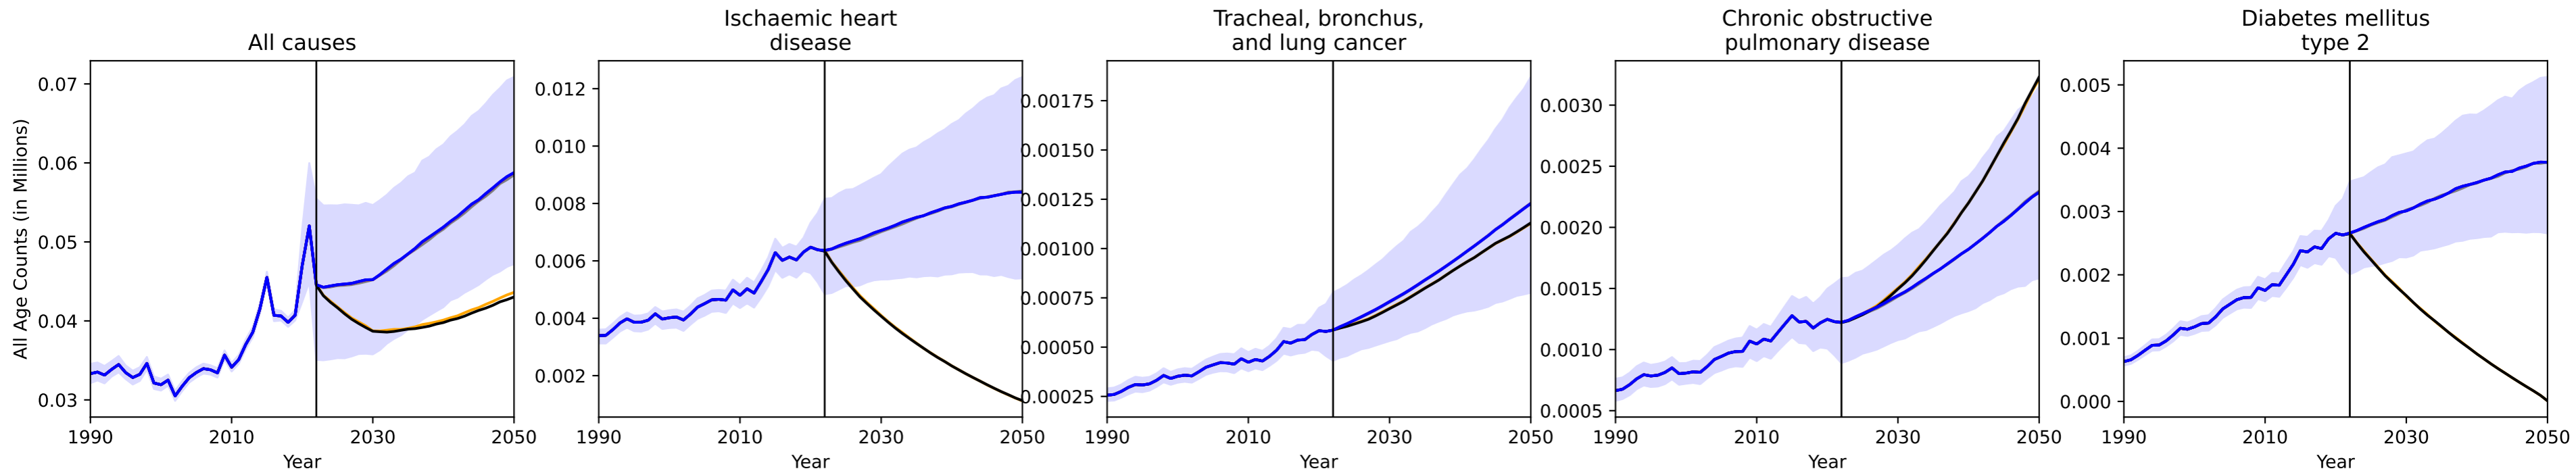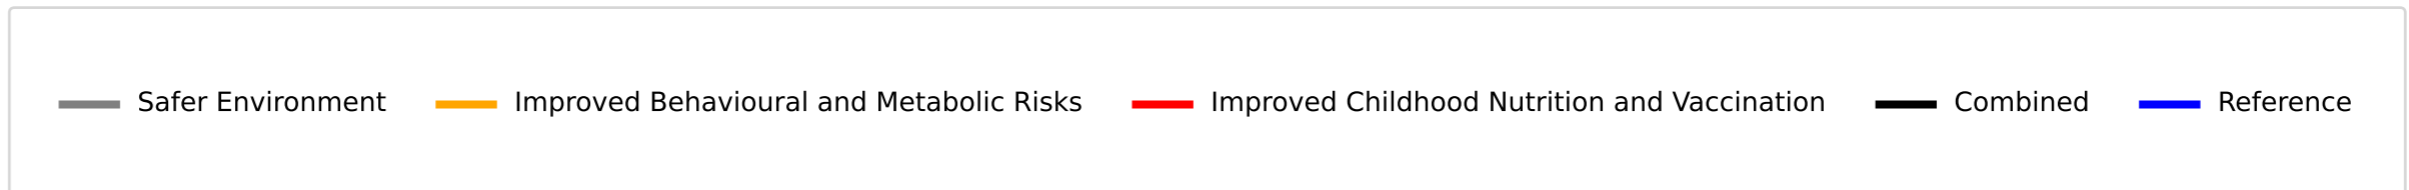



# Guatemala

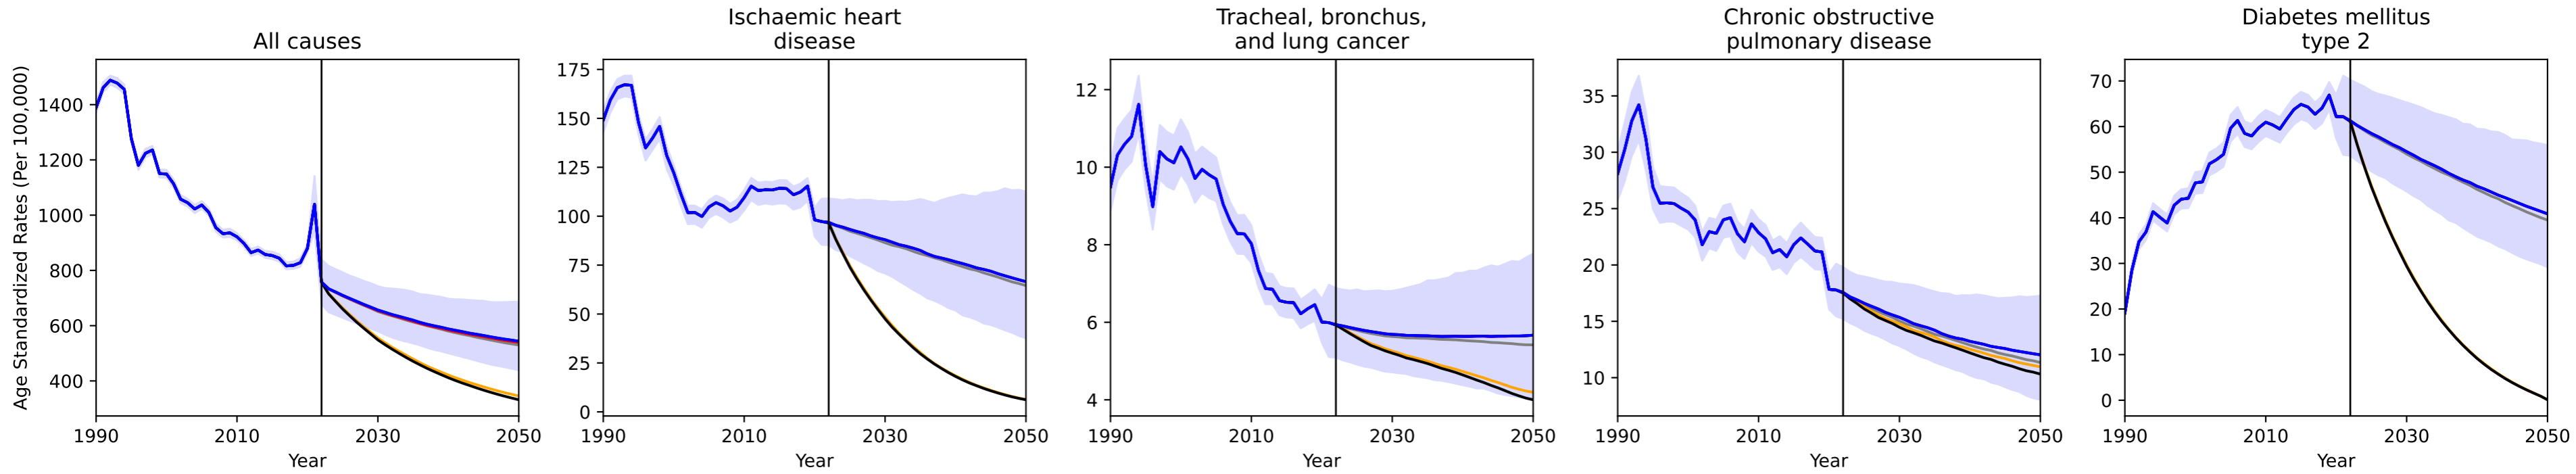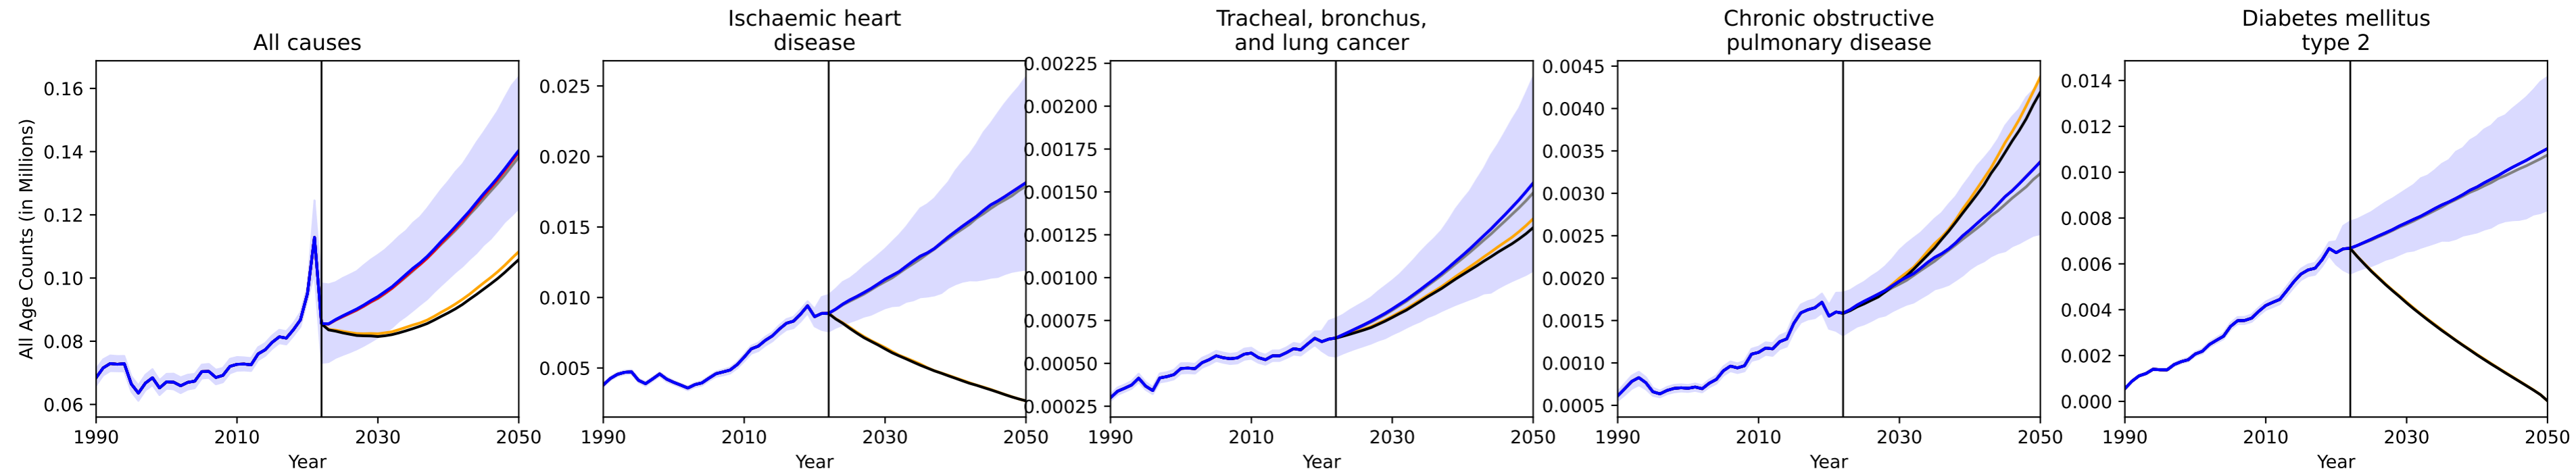

# Honduras

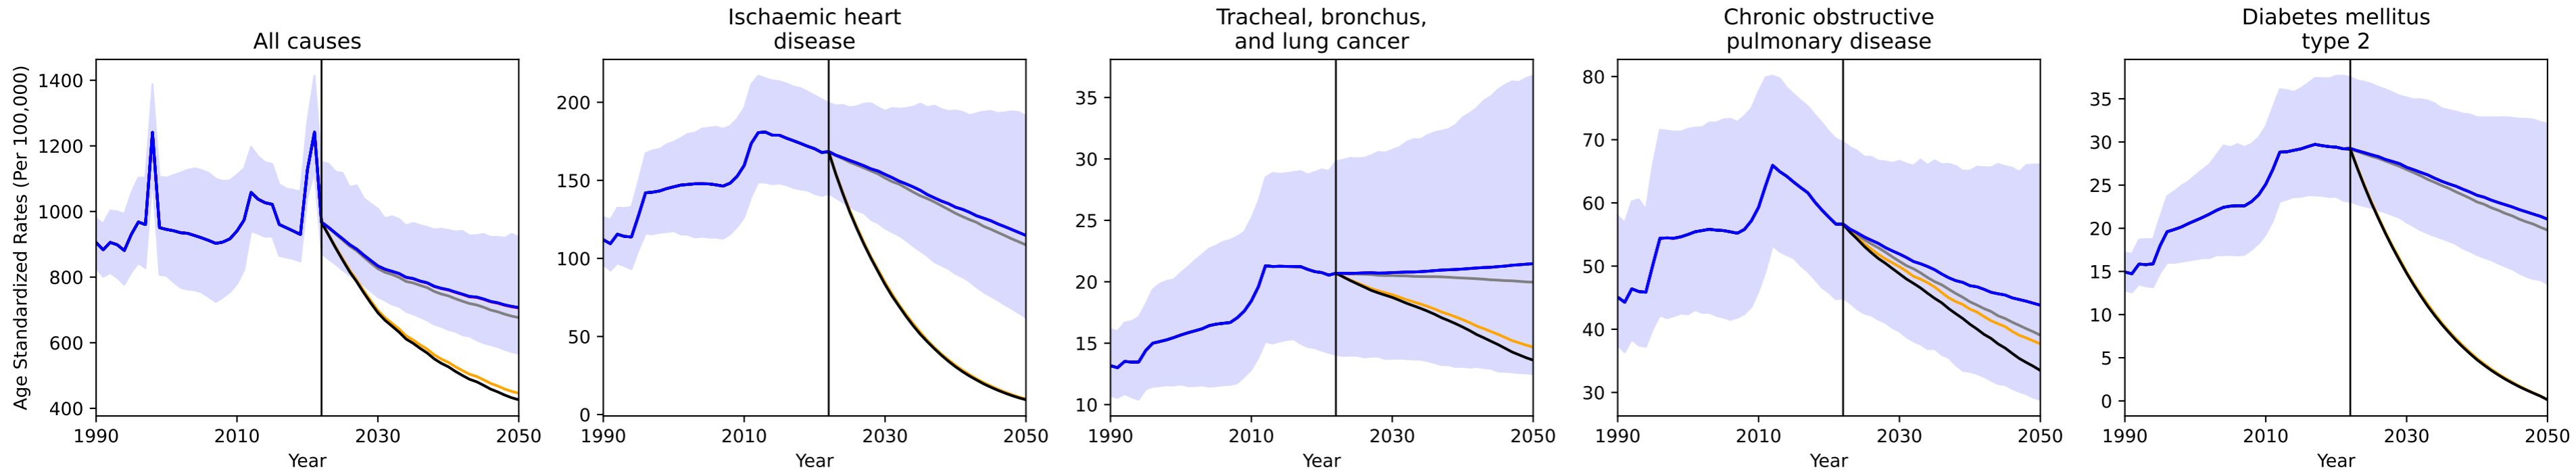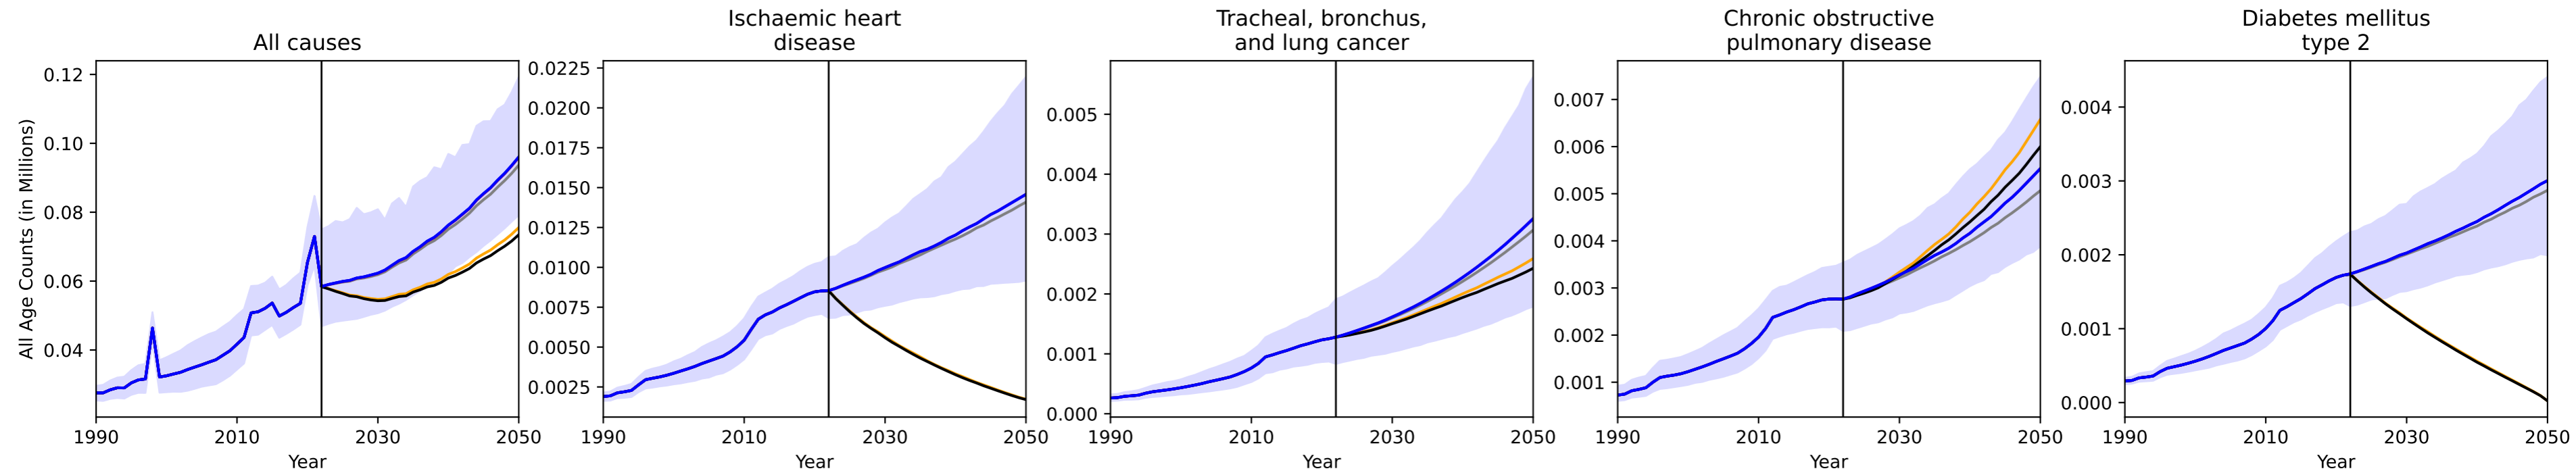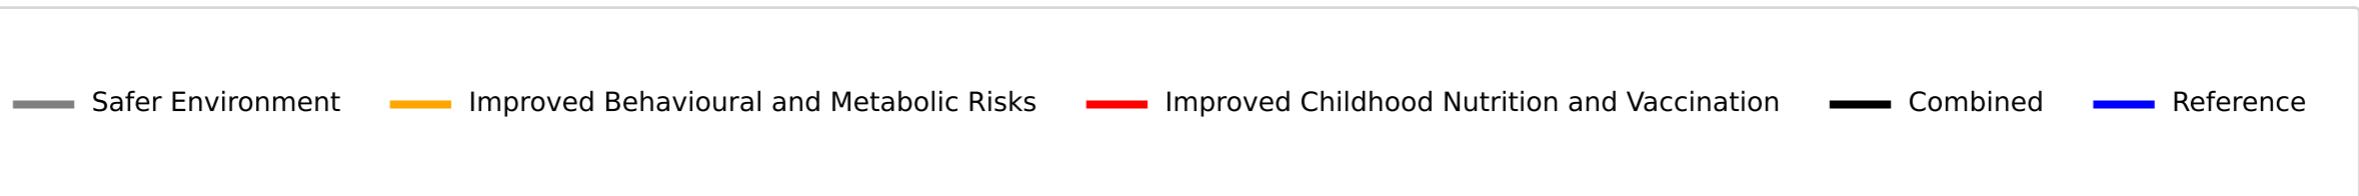

# Mexico

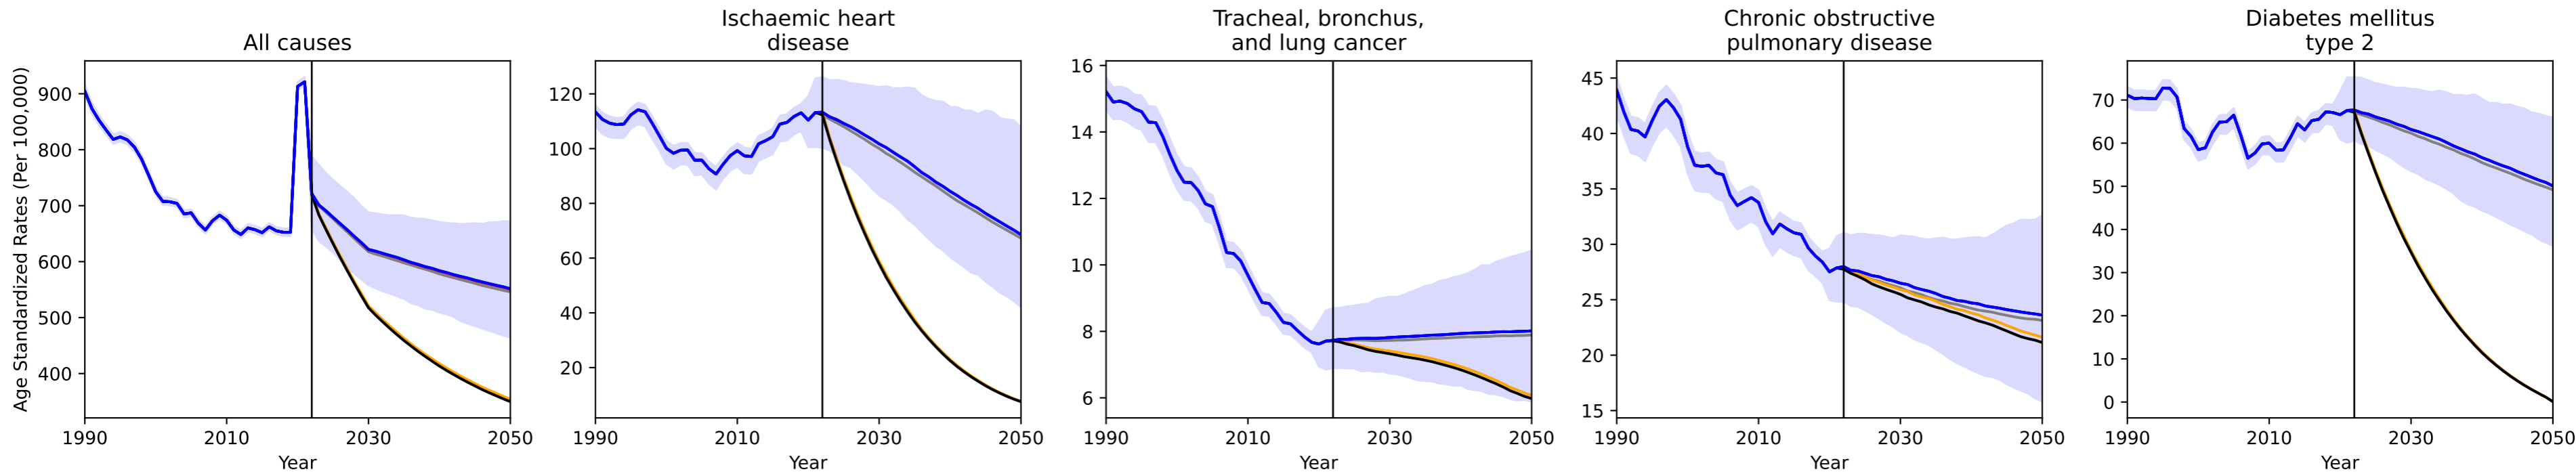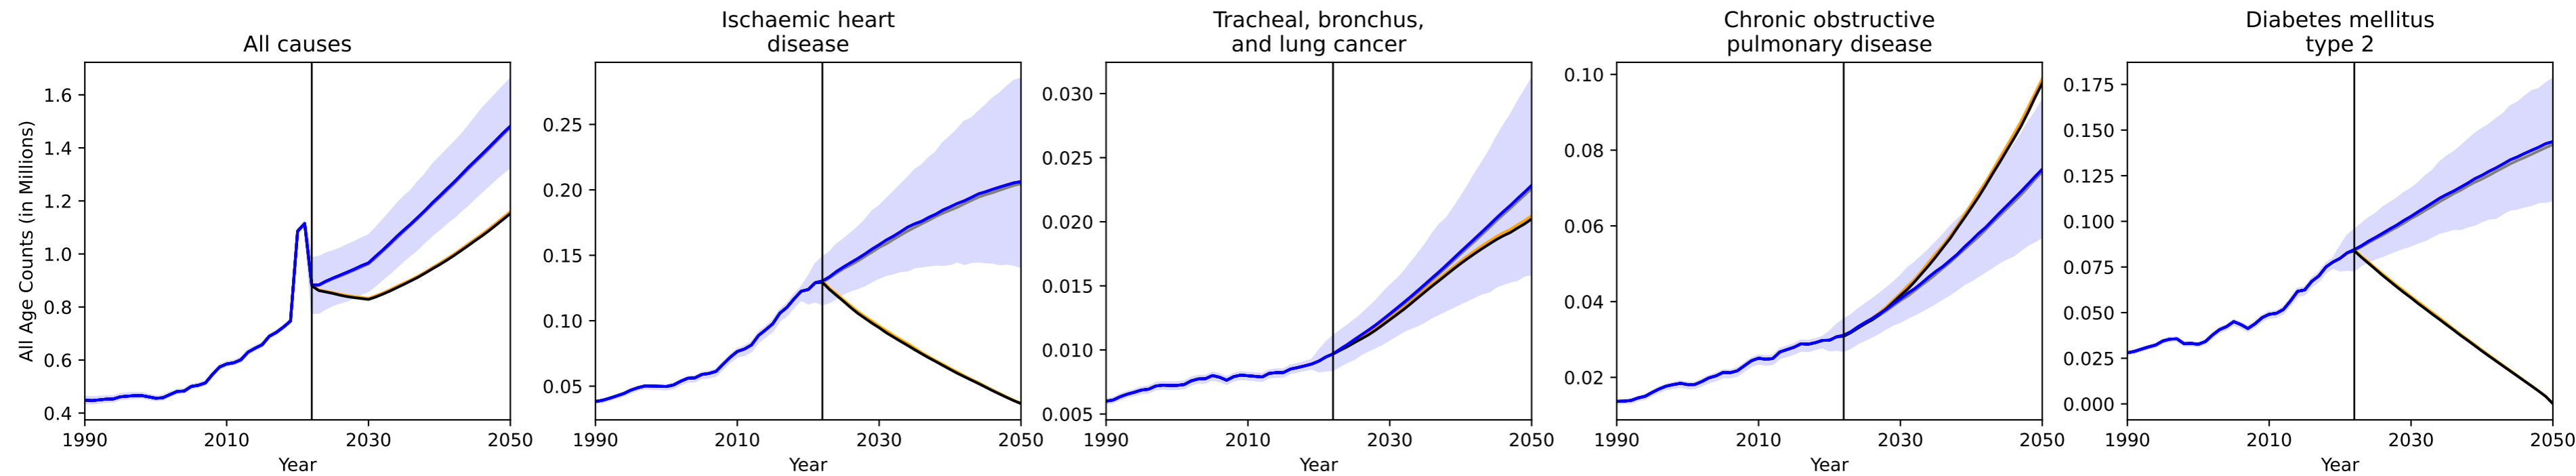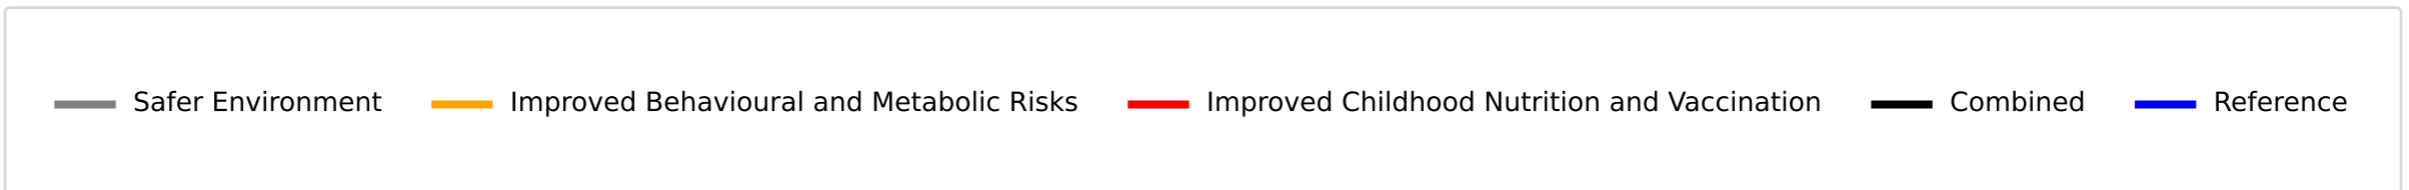

# Nicaragua

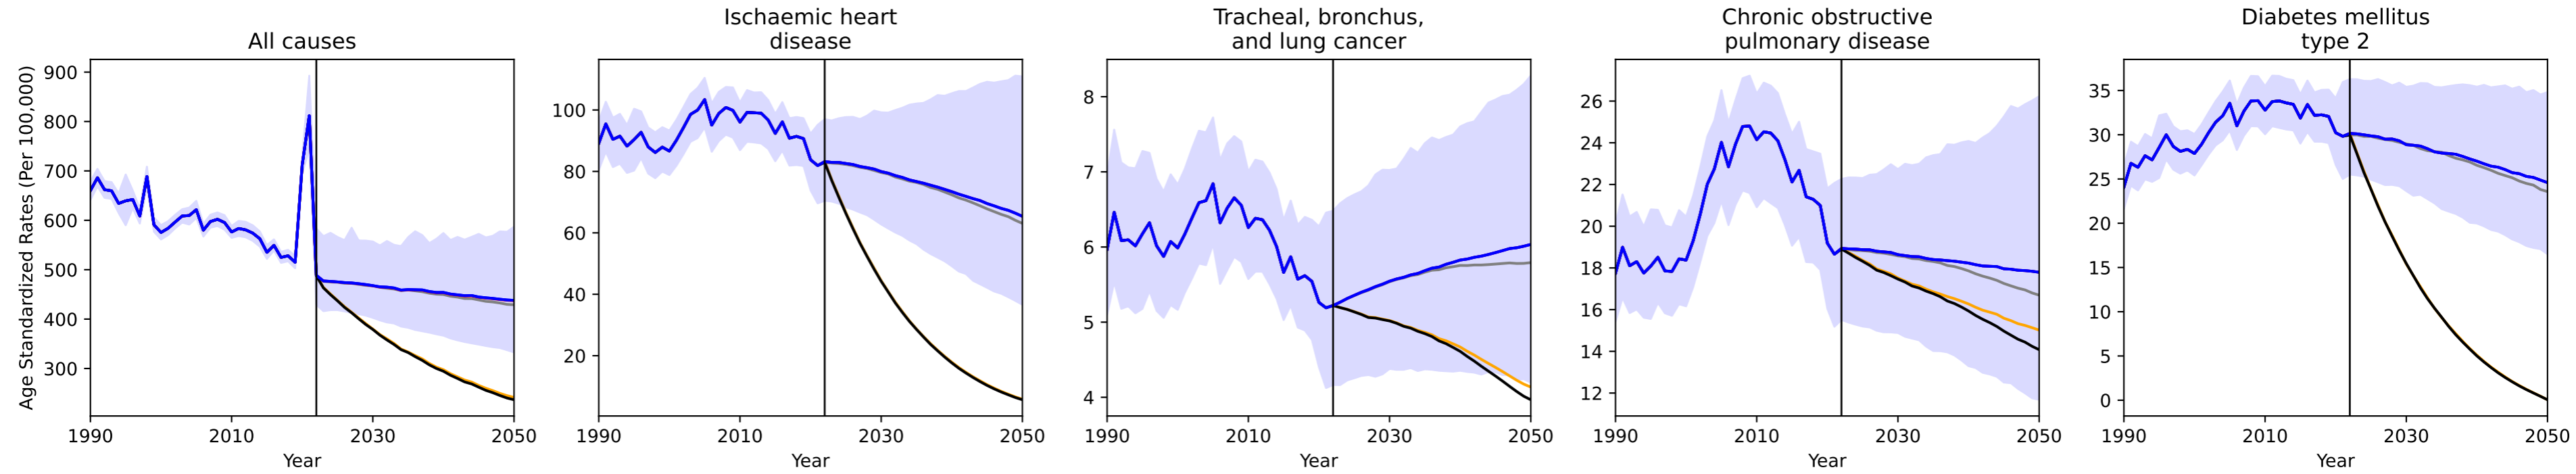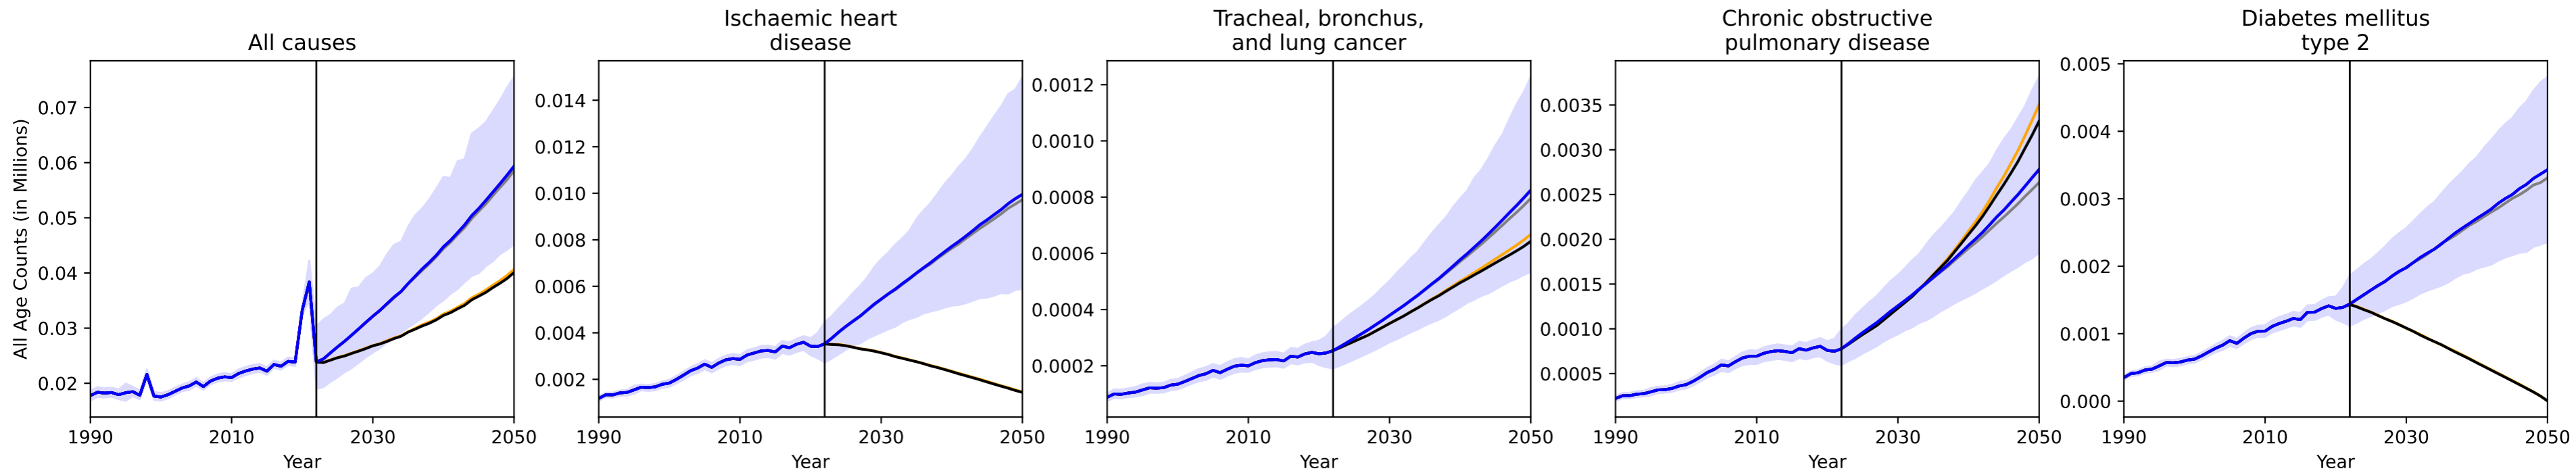

# Panama

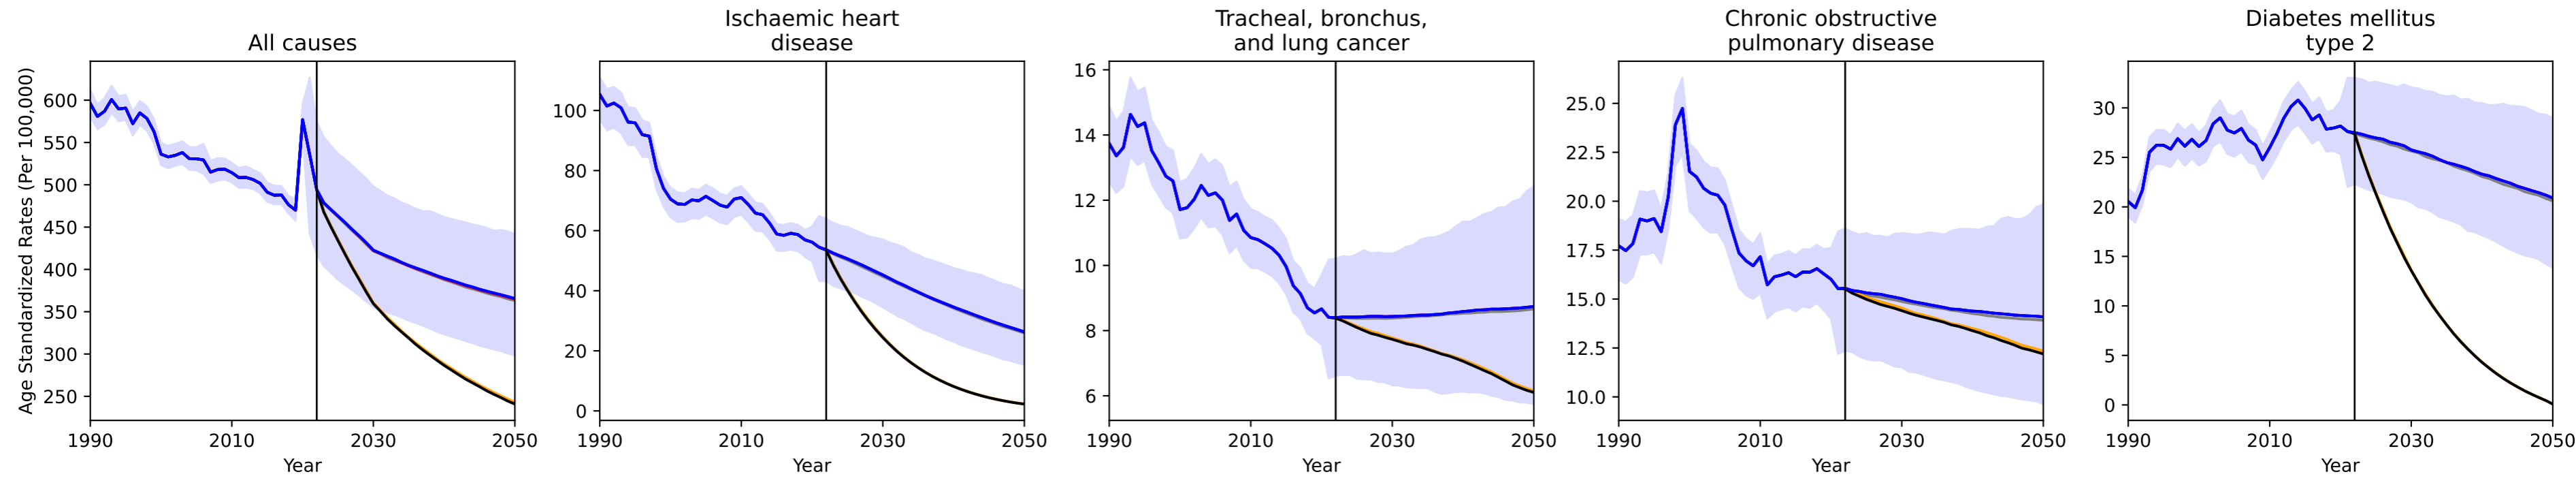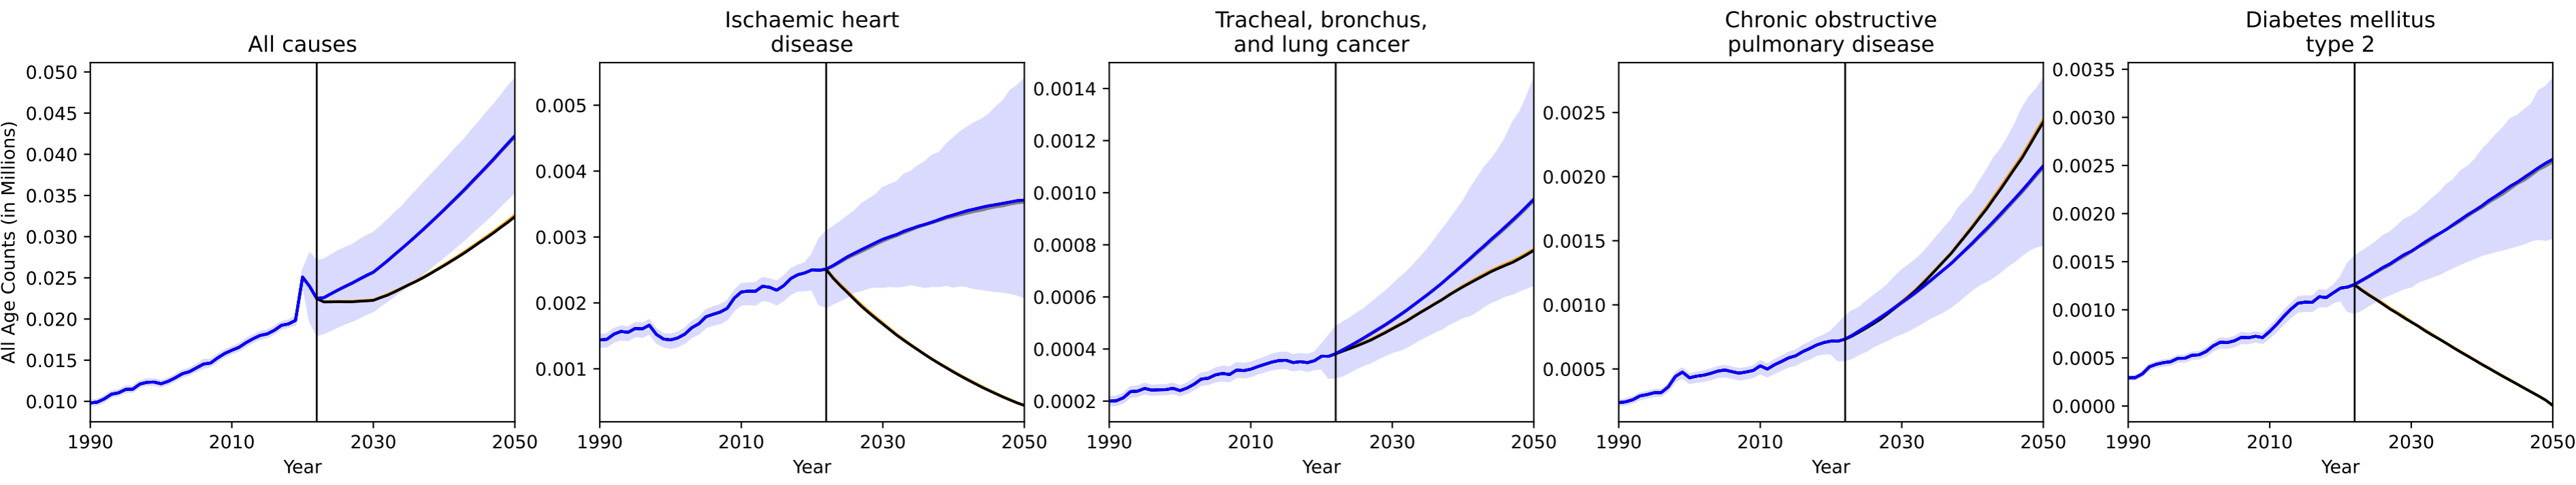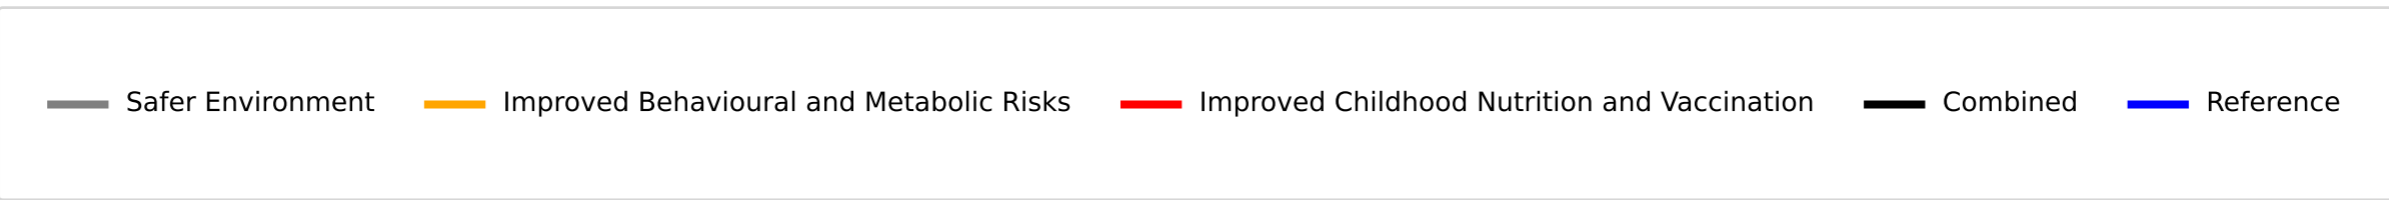

# Venezuela

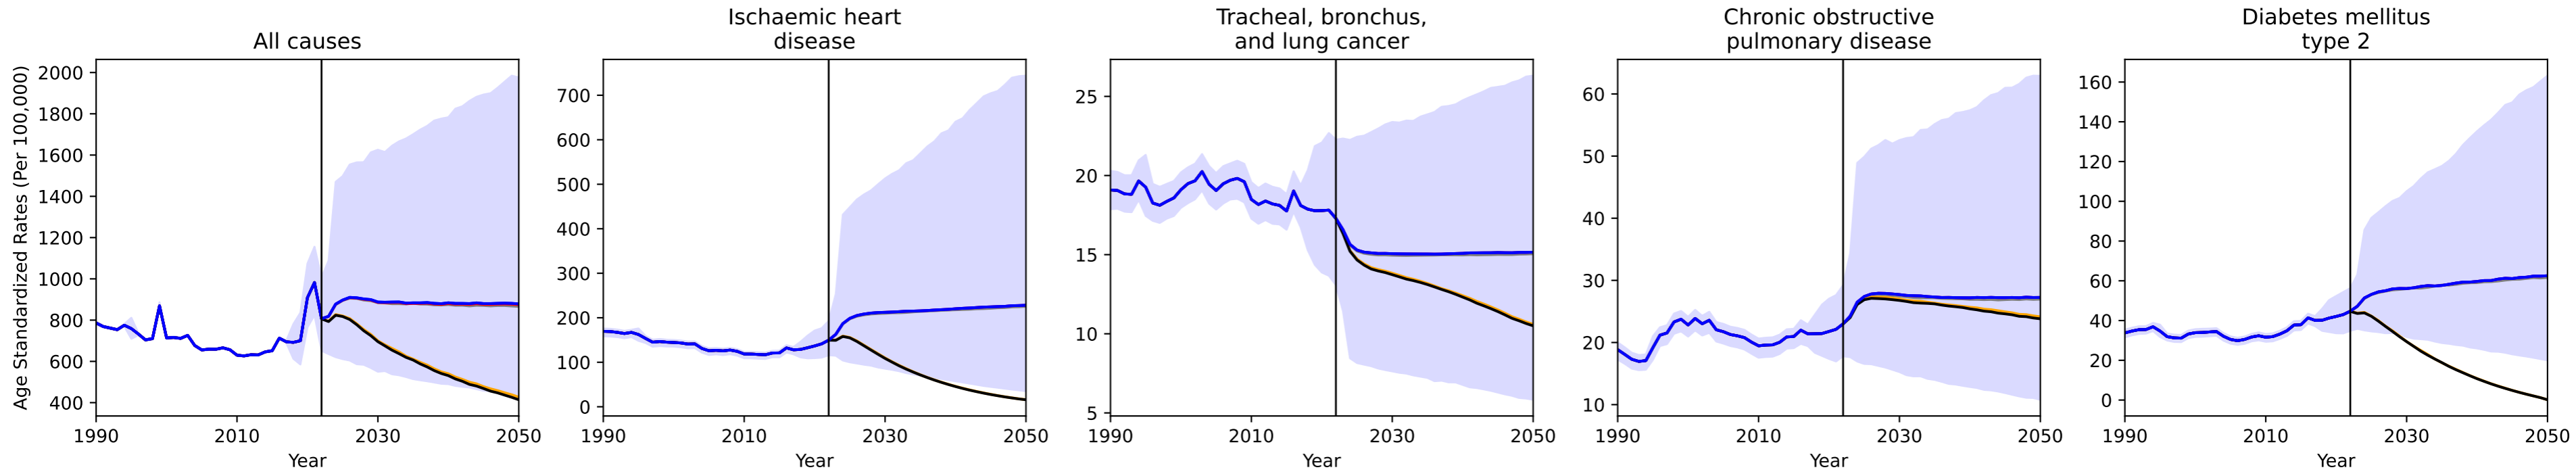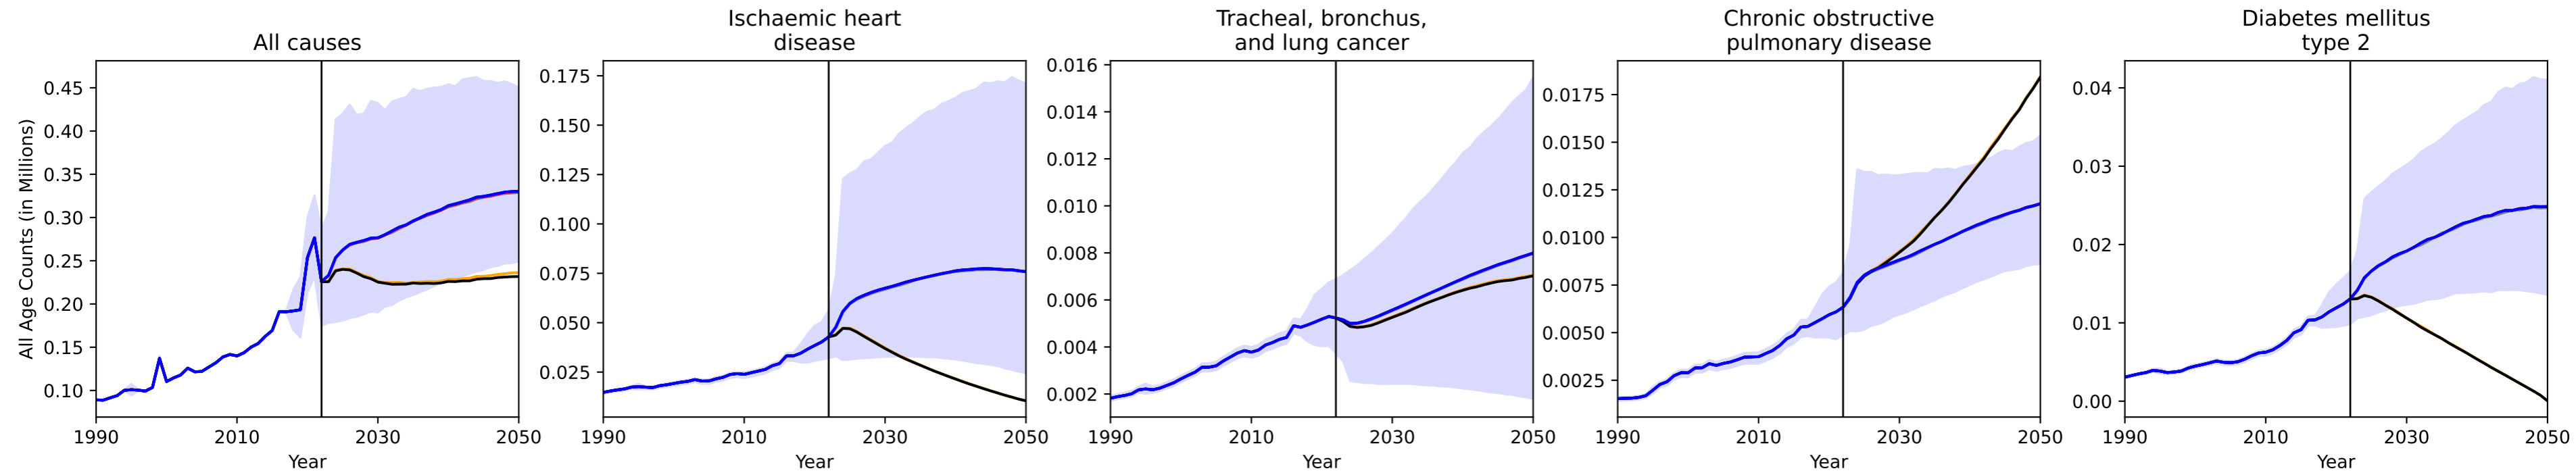

# Brazil

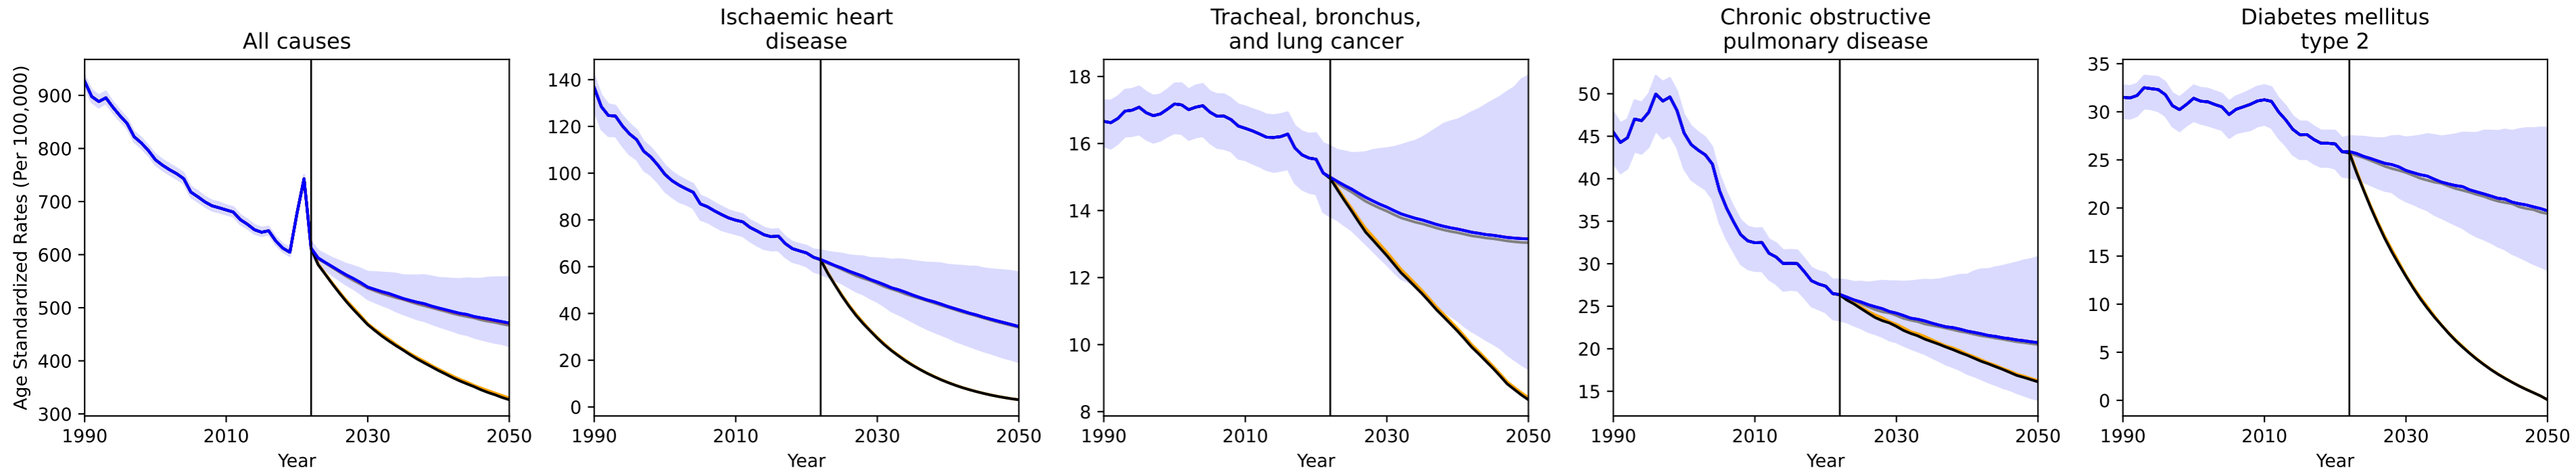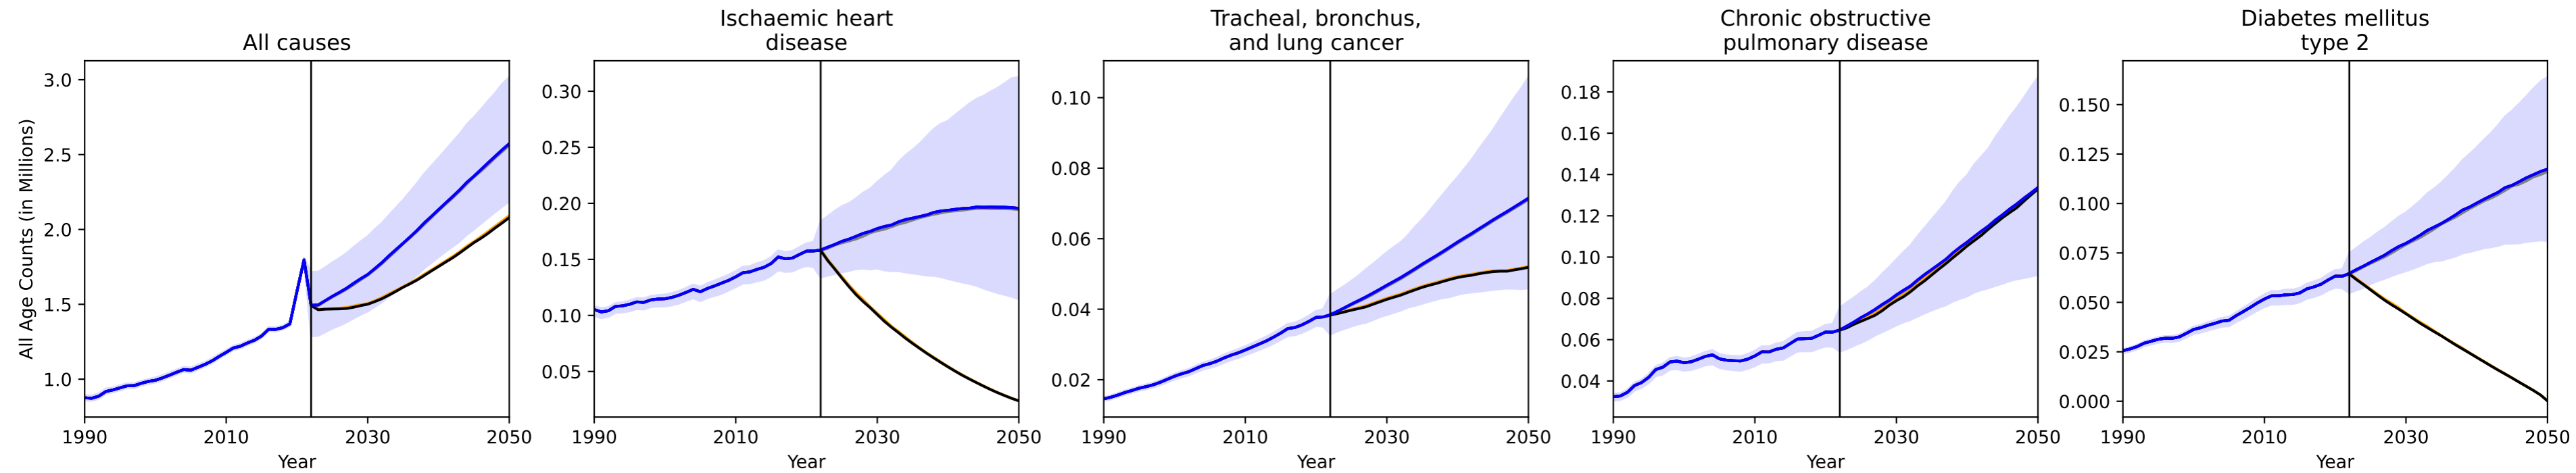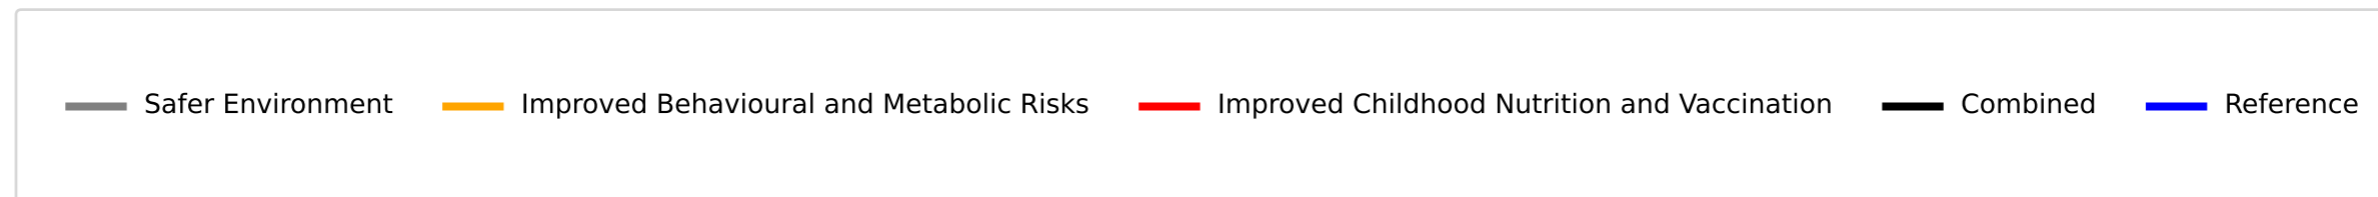

# Paraguay

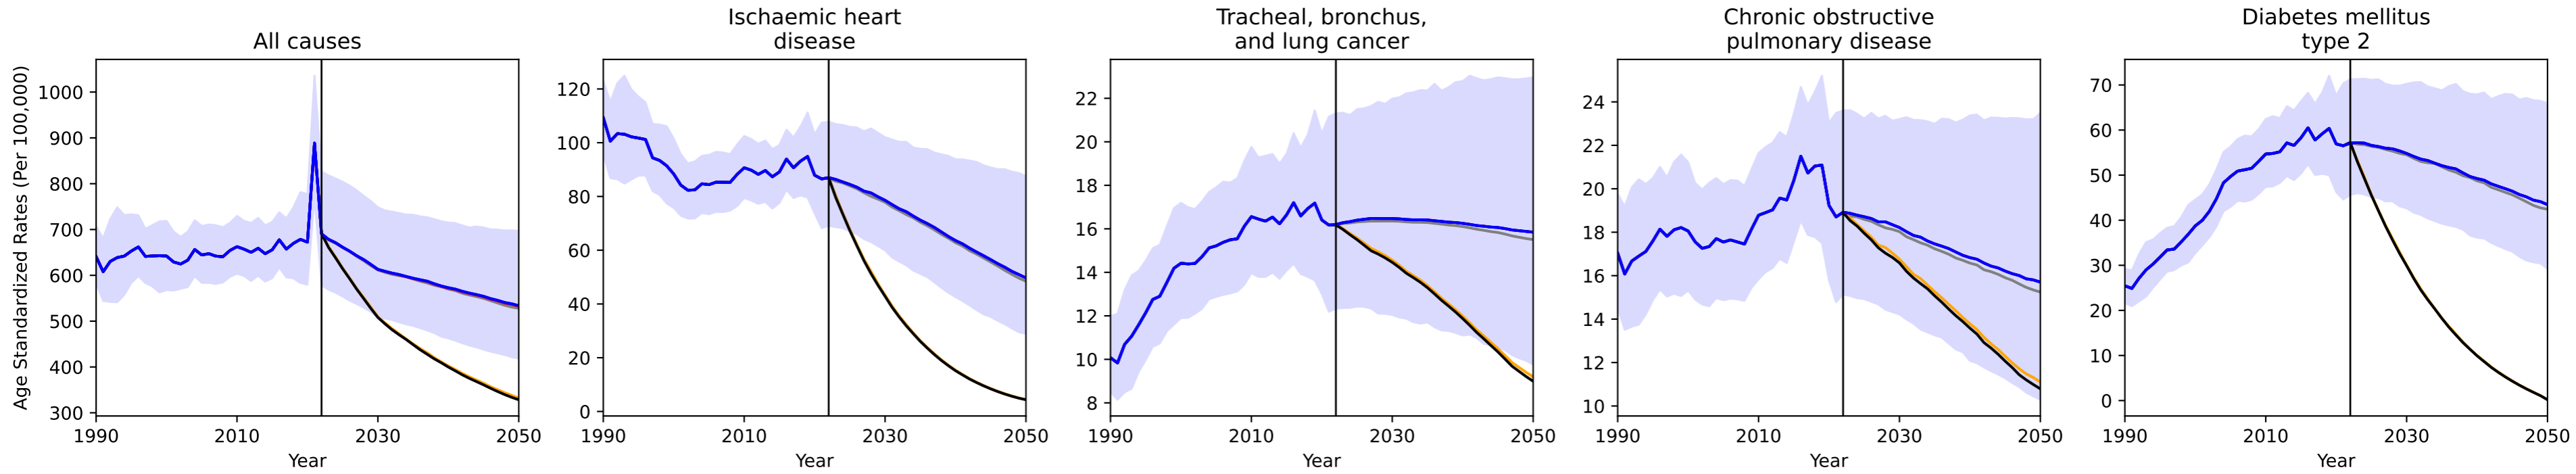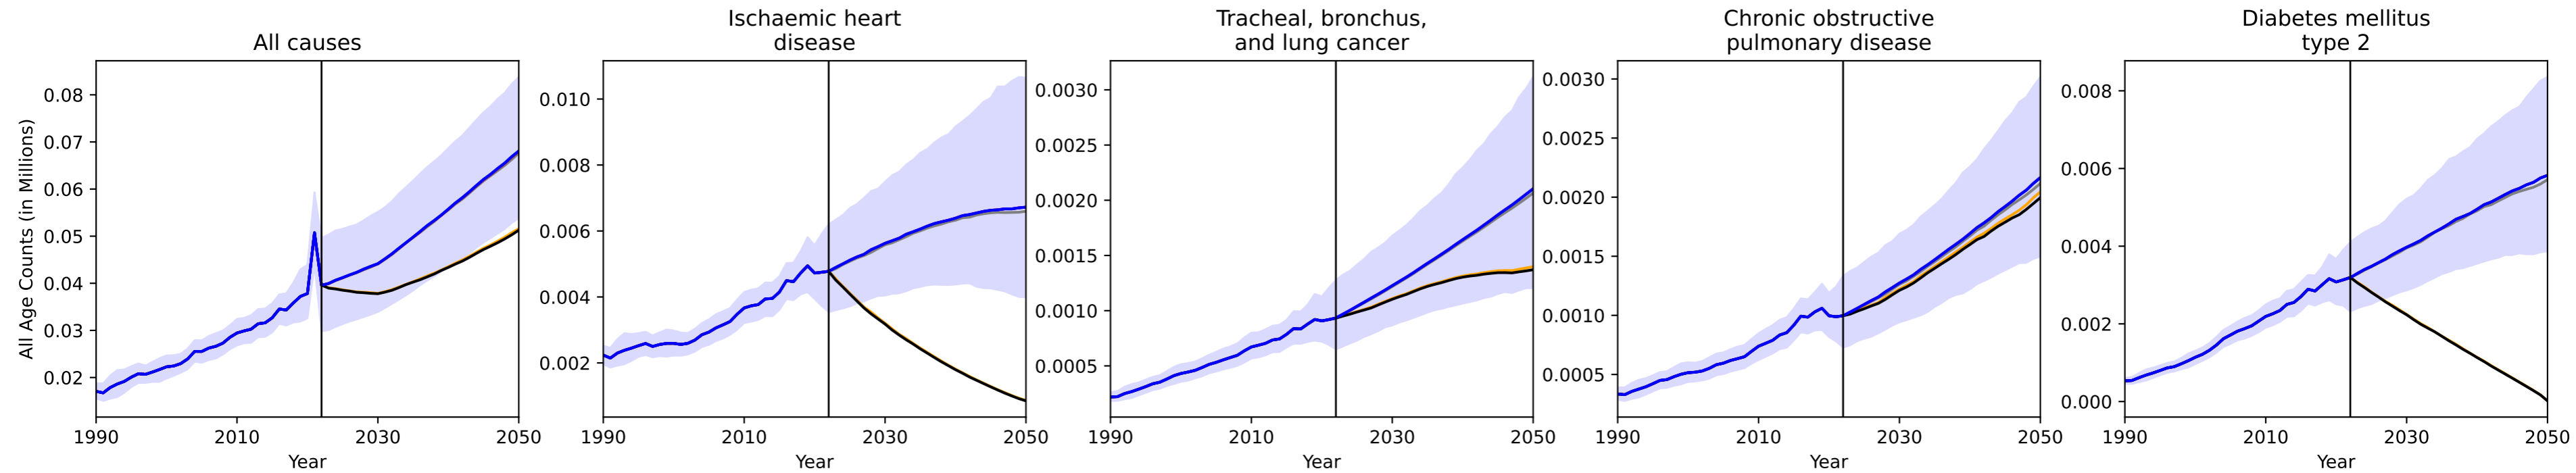

— Safer Environment    — Improved Behavioural and Metabolic Risks    — Improved Childhood Nutrition and Vaccination    — Combined    — Reference



# Afghanistan

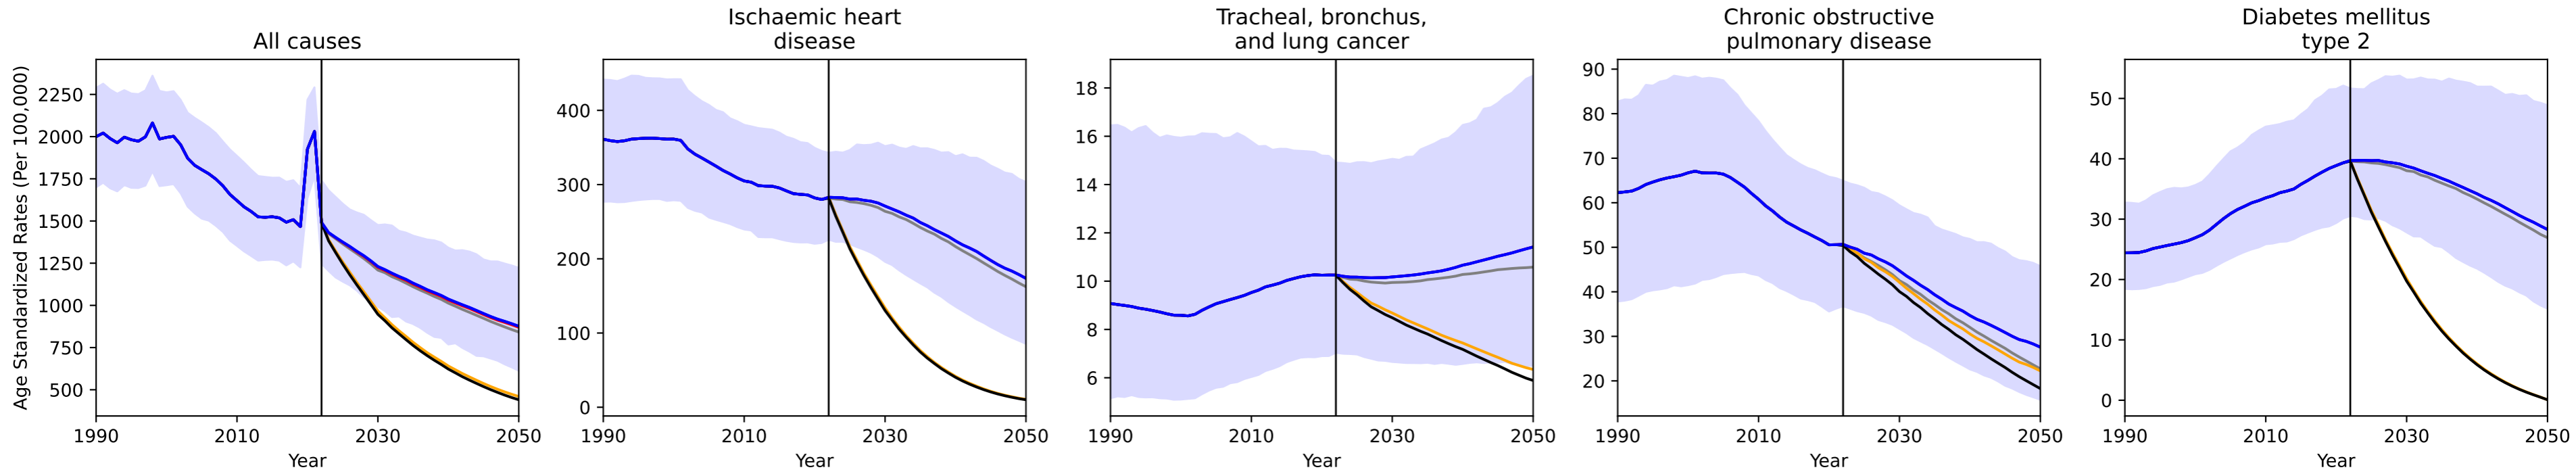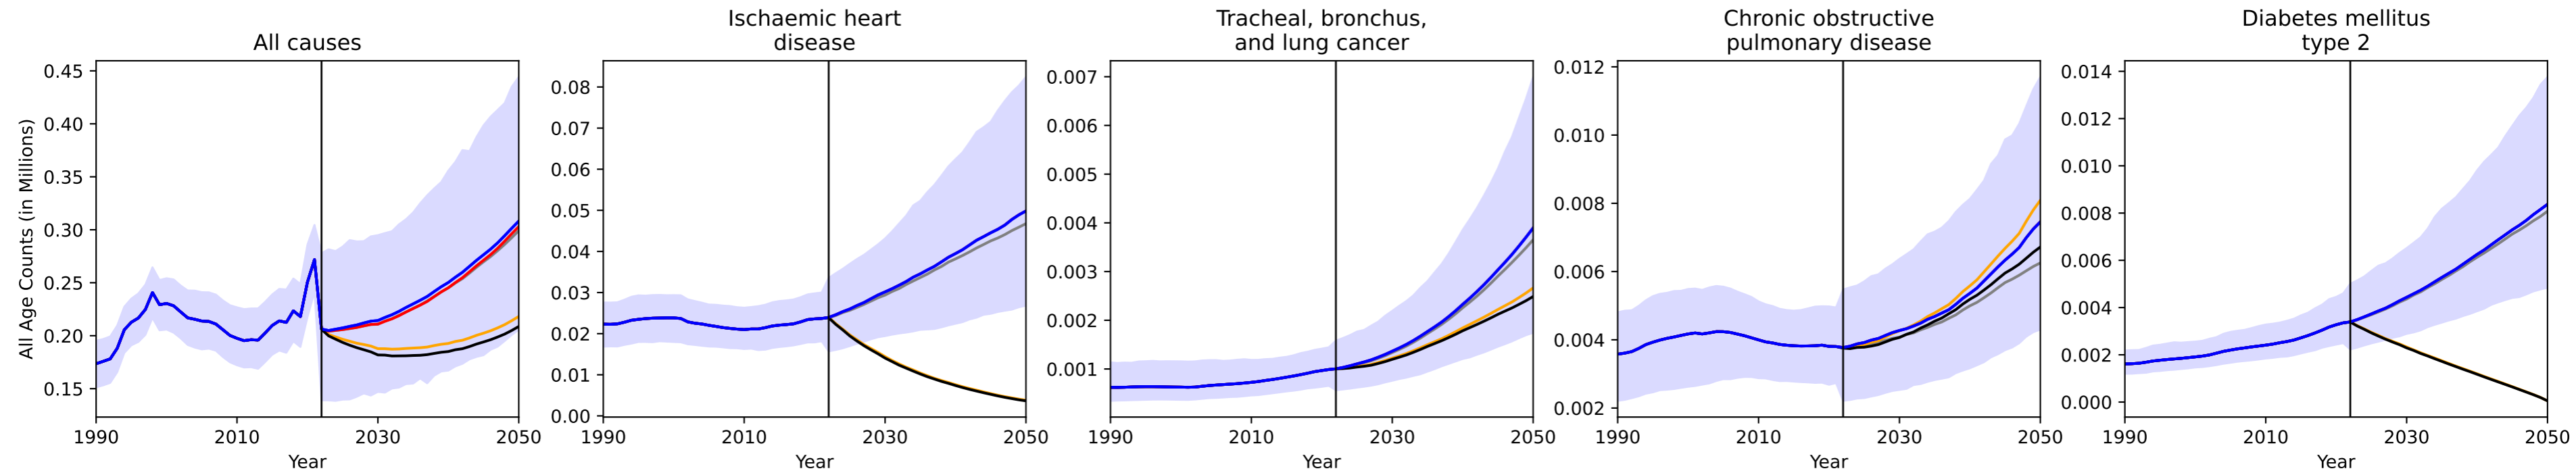

— Safer Environment    — Improved Behavioural and Metabolic Risks    — Improved Childhood Nutrition and Vaccination    — Combined    — Reference

# Algeria

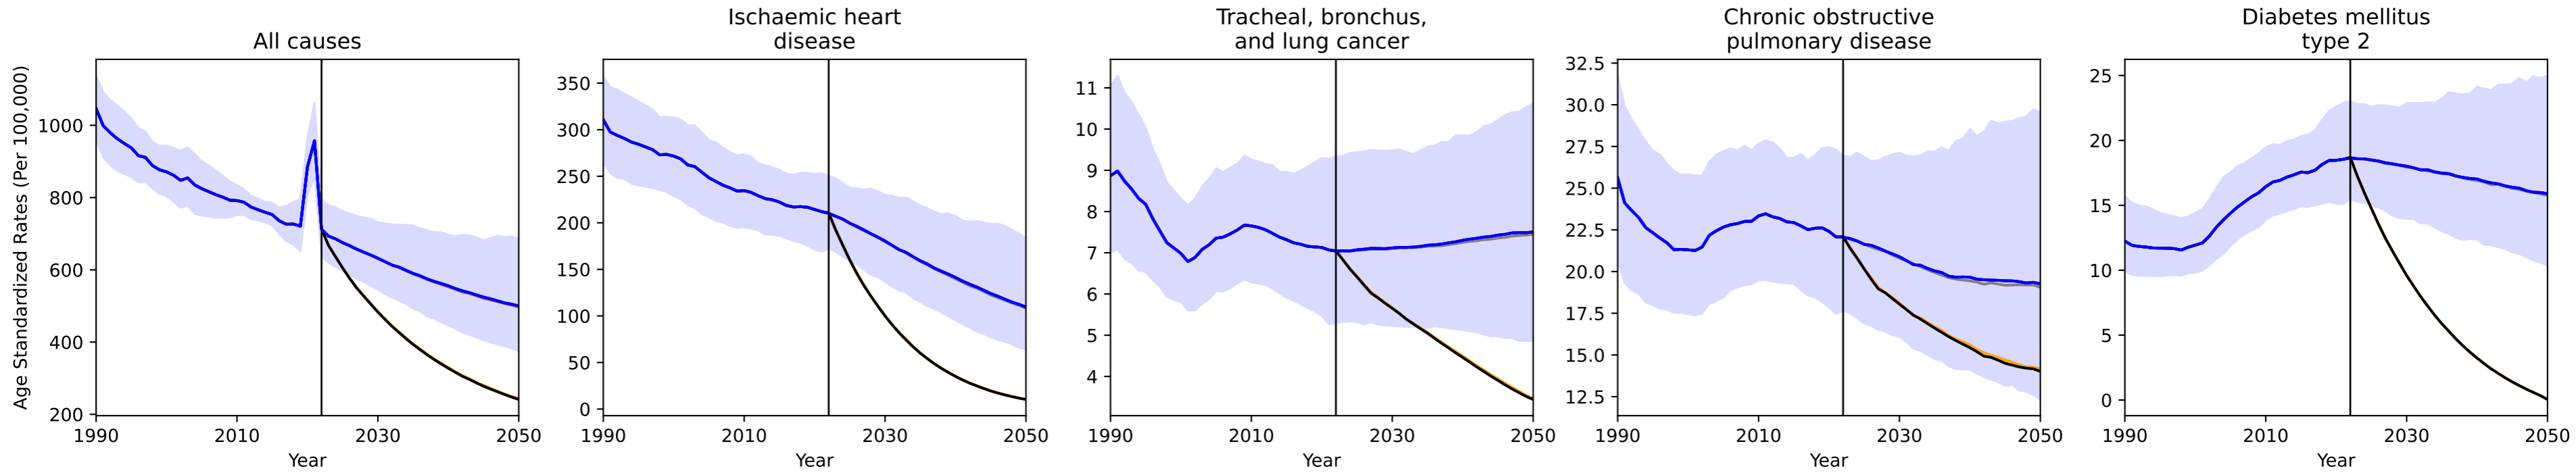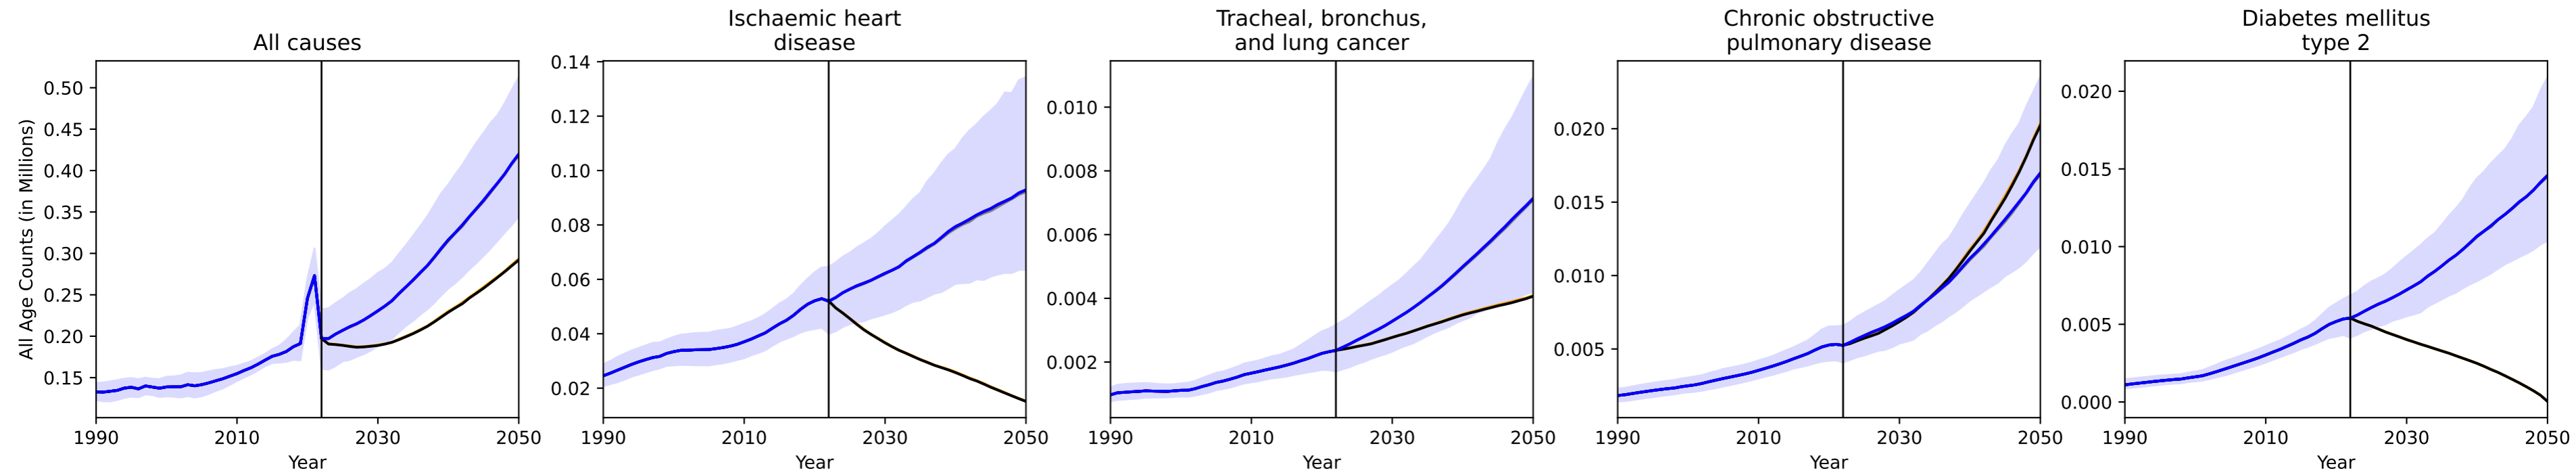

— Safer Environment    — Improved Behavioural and Metabolic Risks    — Improved Childhood Nutrition and Vaccination    — Combined    — Reference

# Bahrain

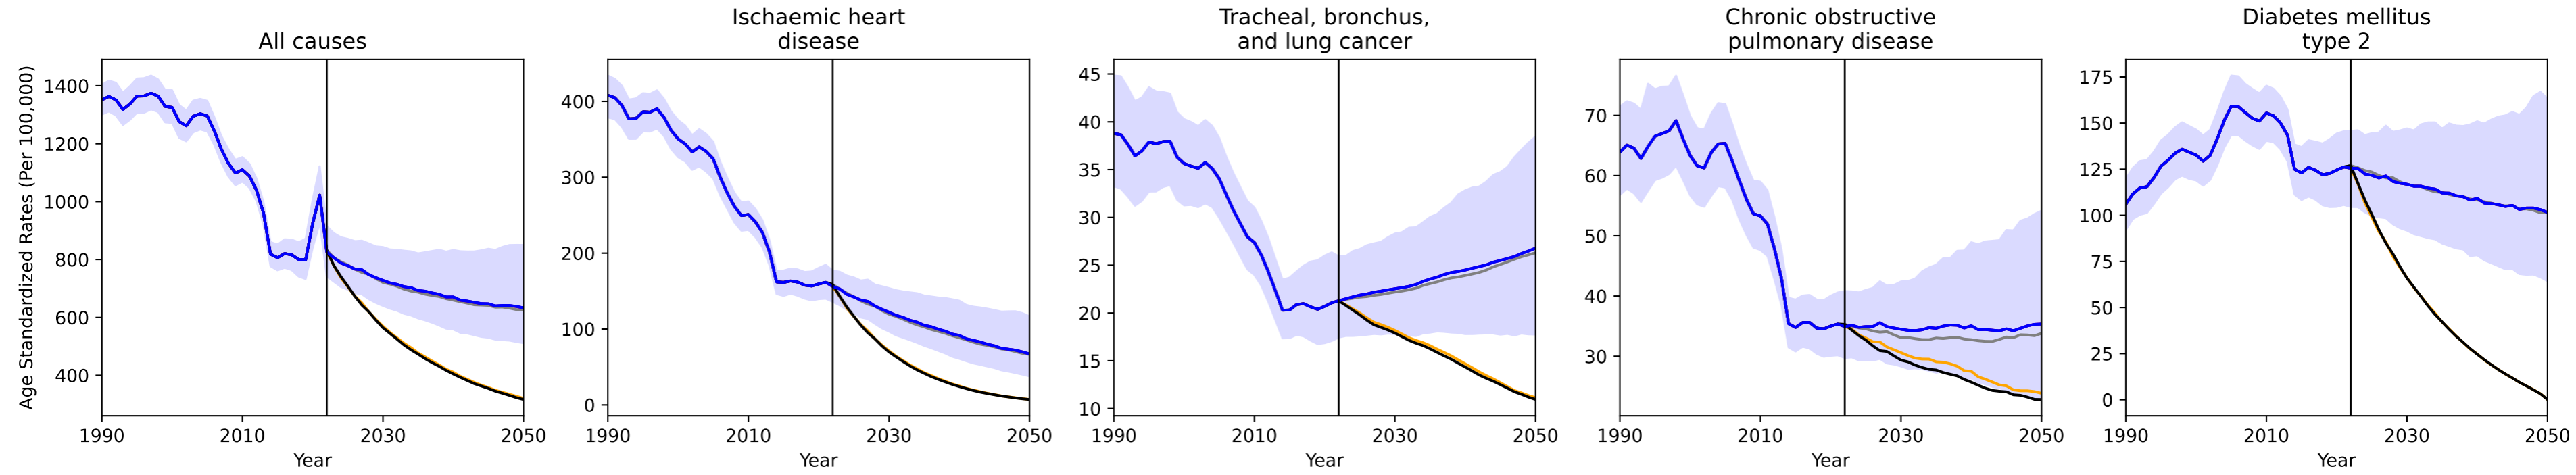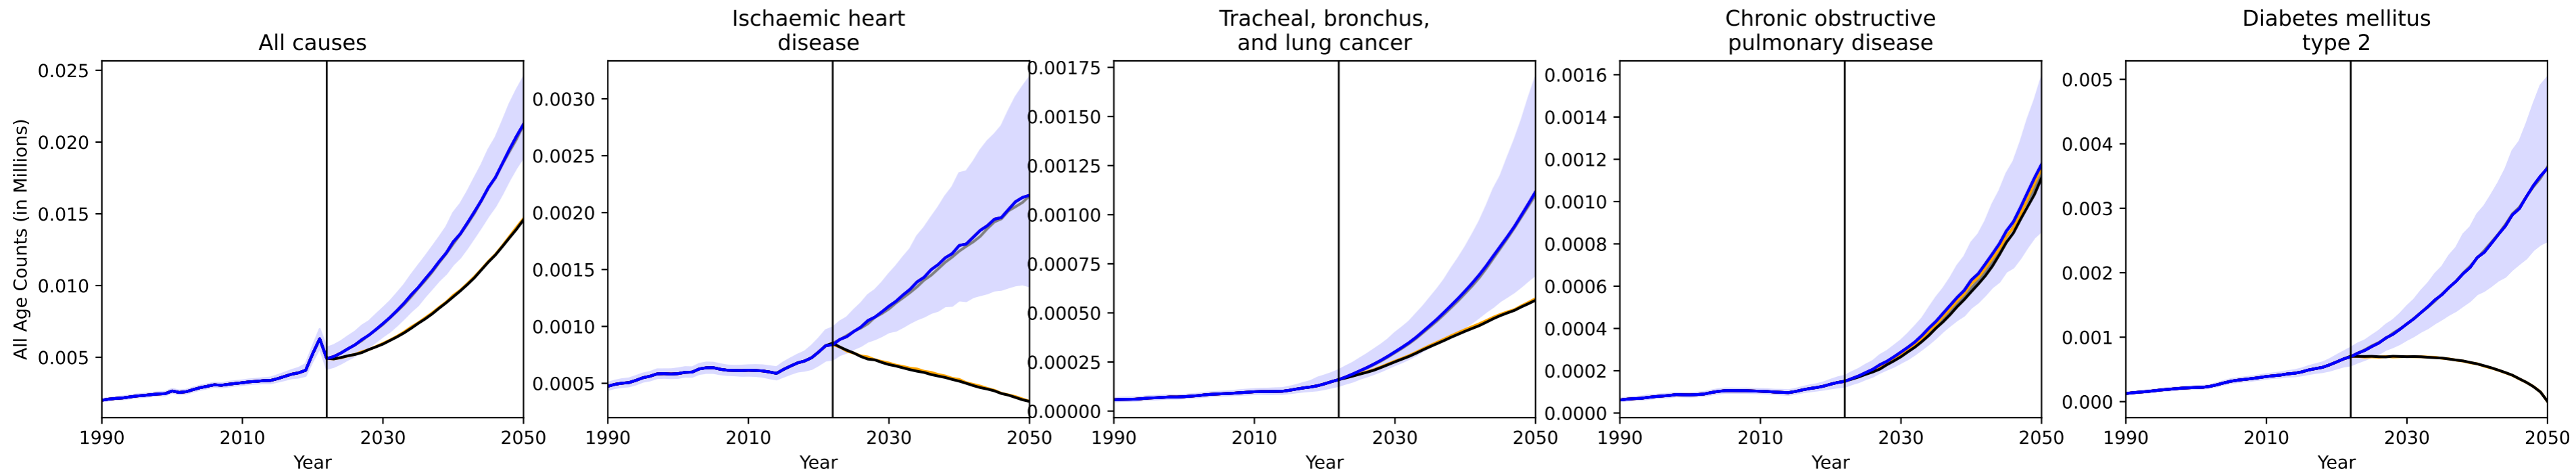

# Egypt

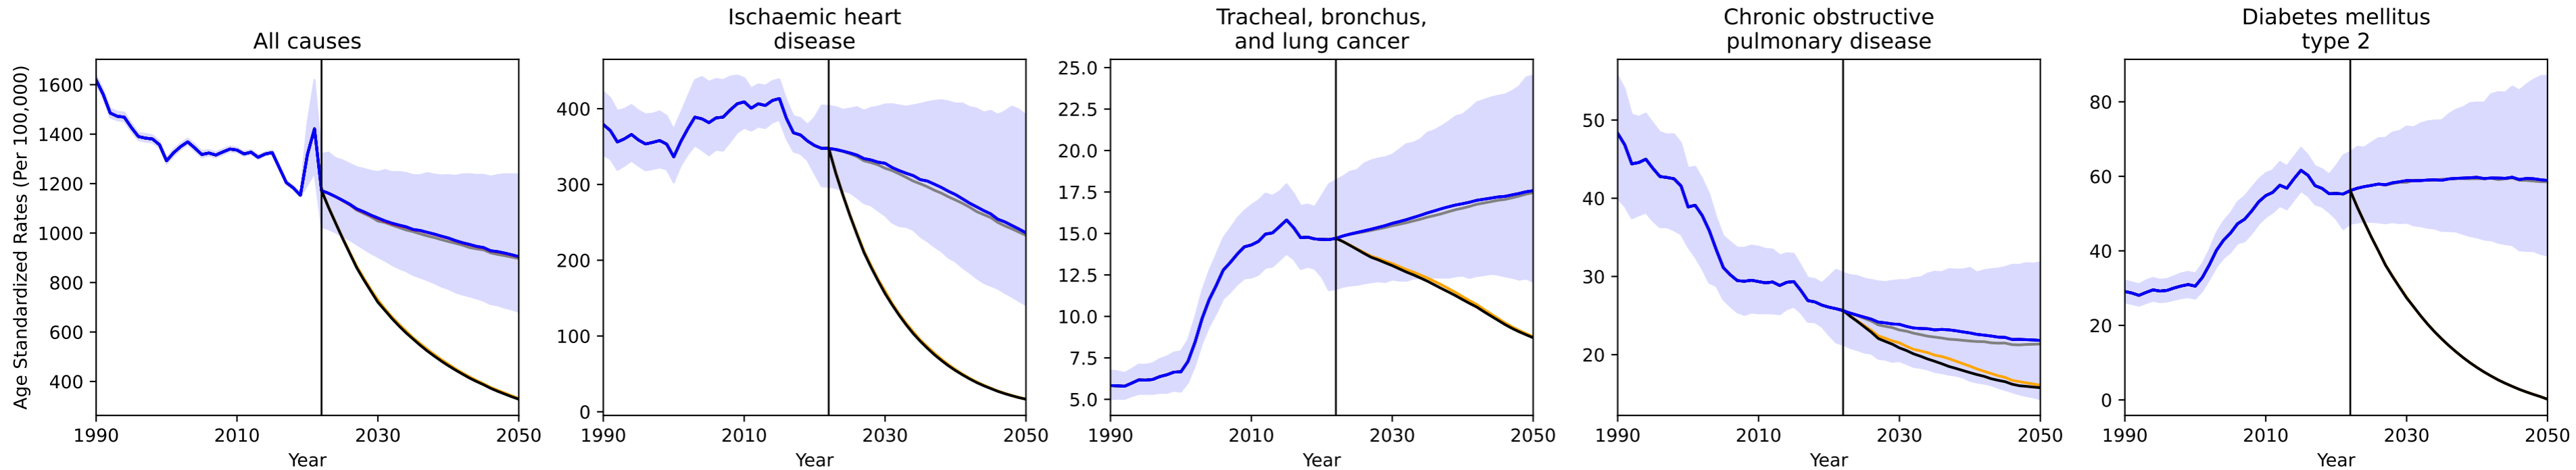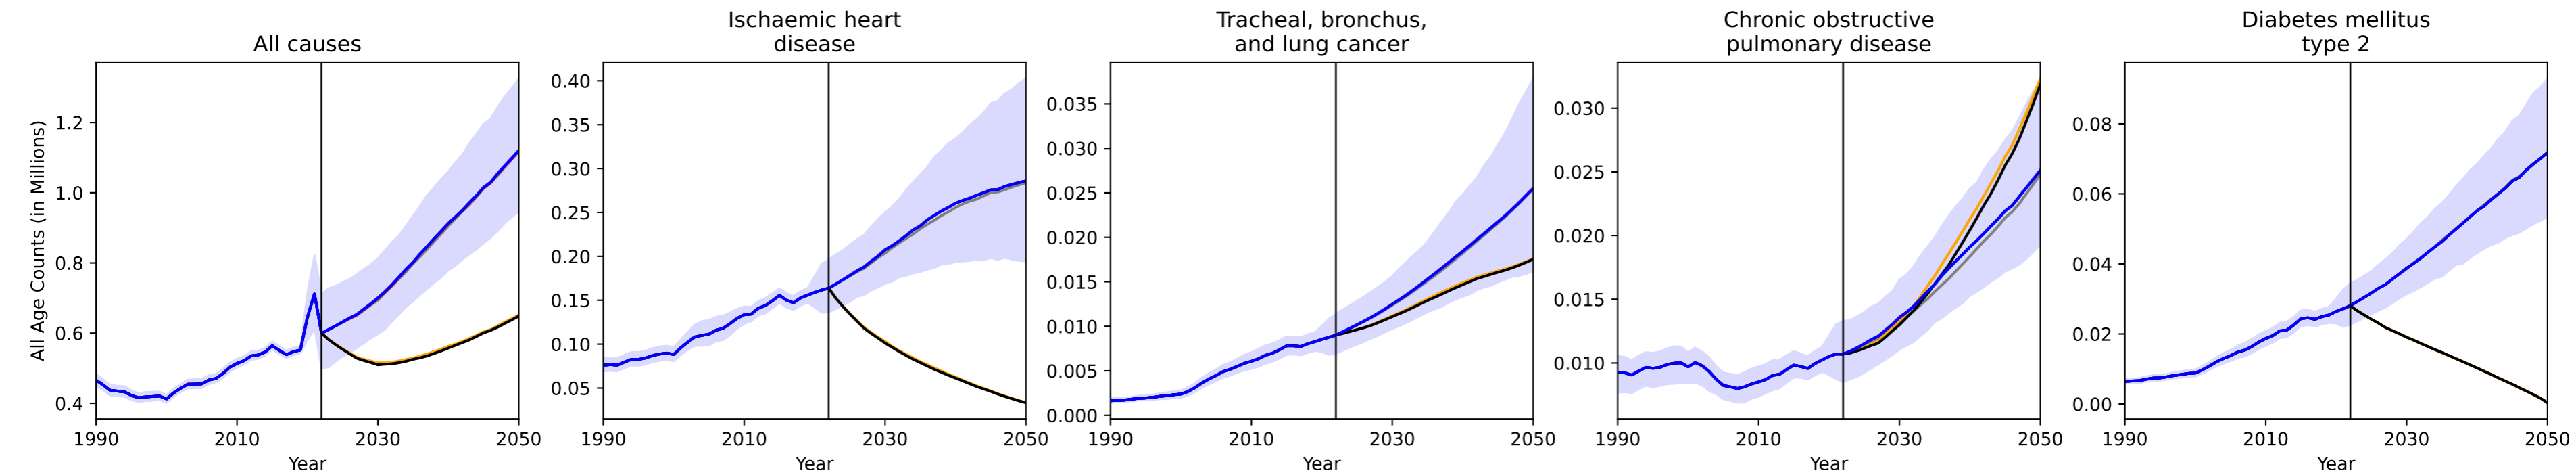

— Safer Environment    — Improved Behavioural and Metabolic Risks    — Improved Childhood Nutrition and Vaccination    — Combined    — Reference

# Iran

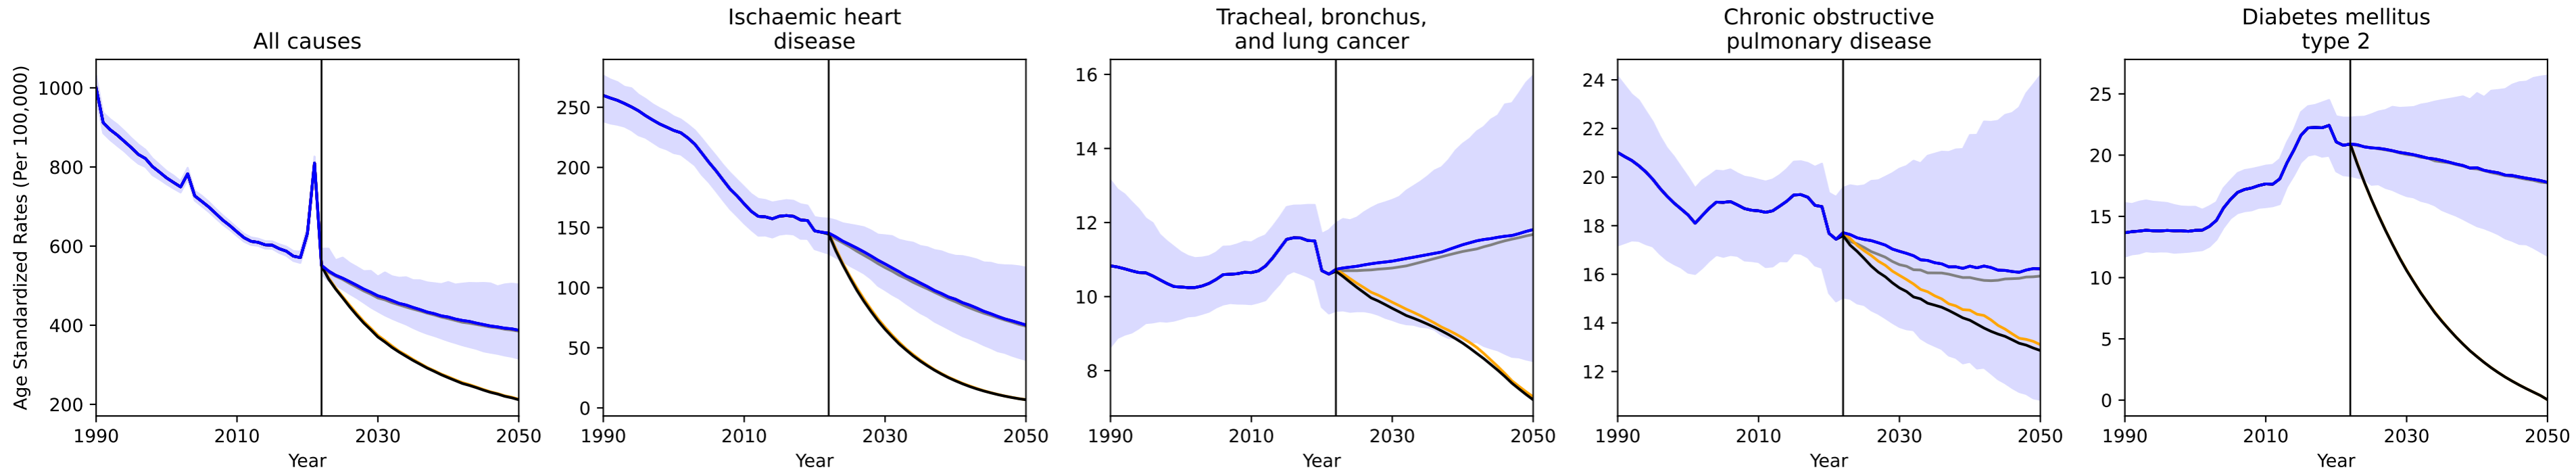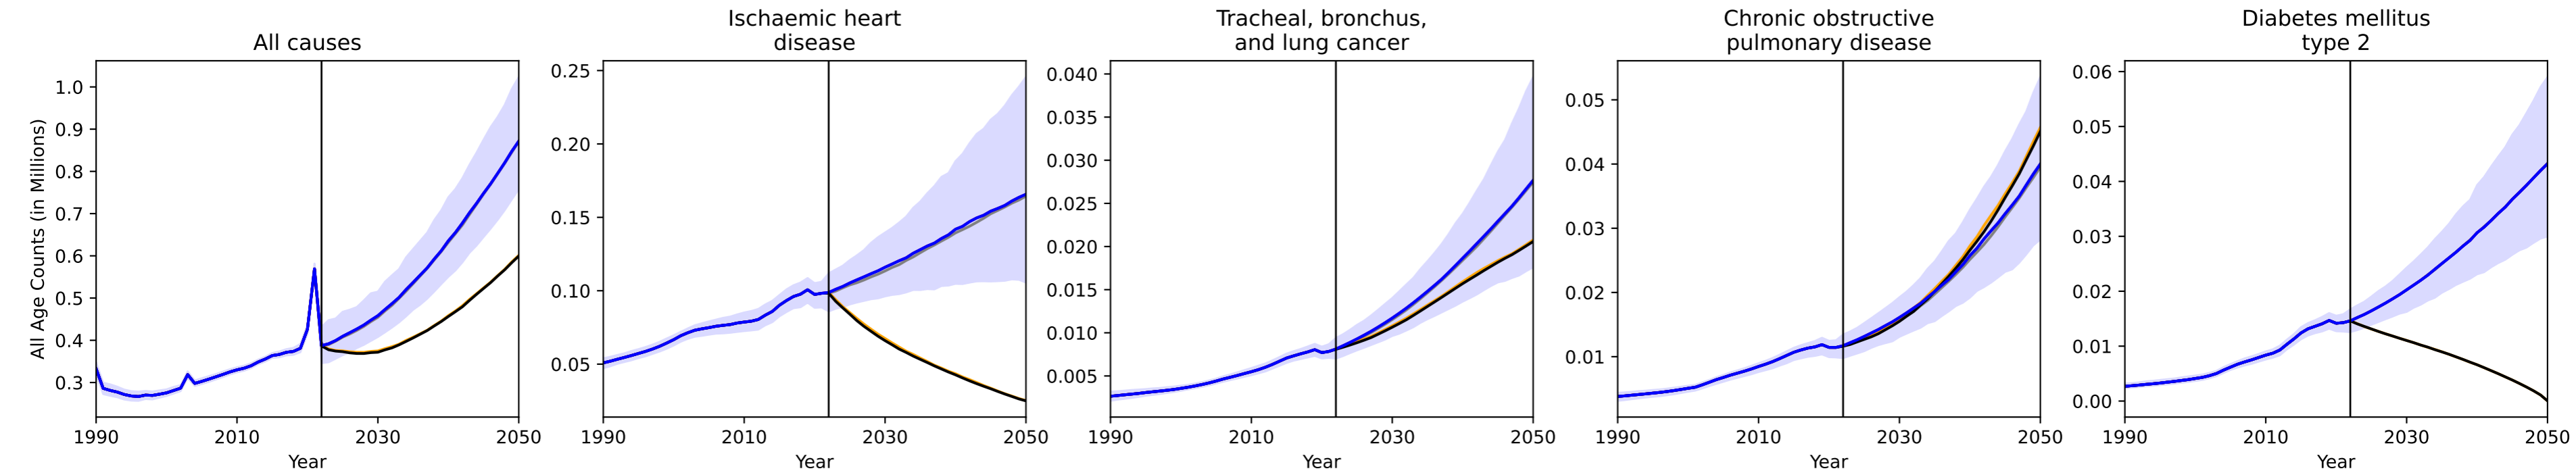

— Safer Environment — Improved Behavioural and Metabolic Risks — Improved Childhood Nutrition and Vaccination — Combined — Reference

# Iraq

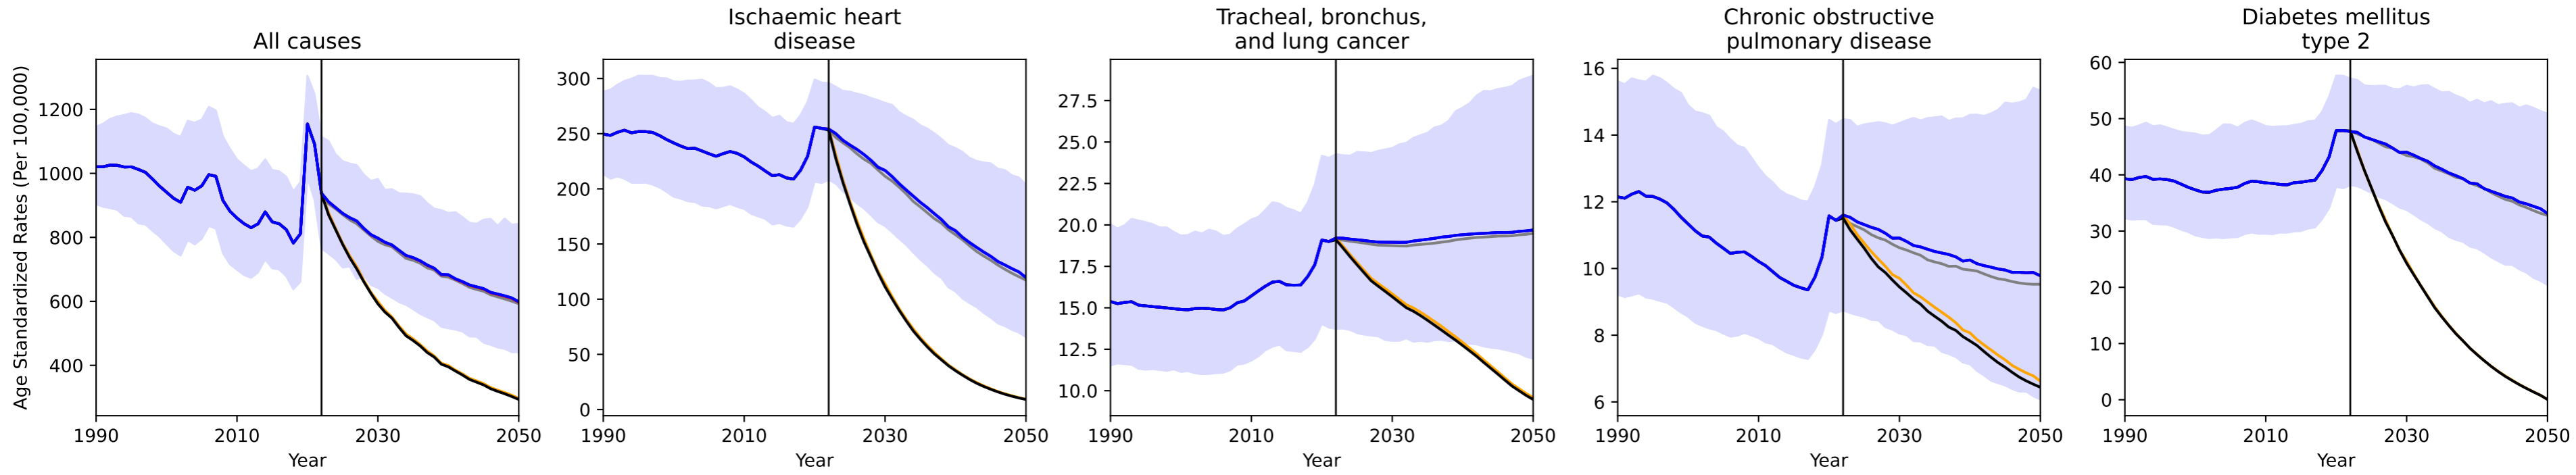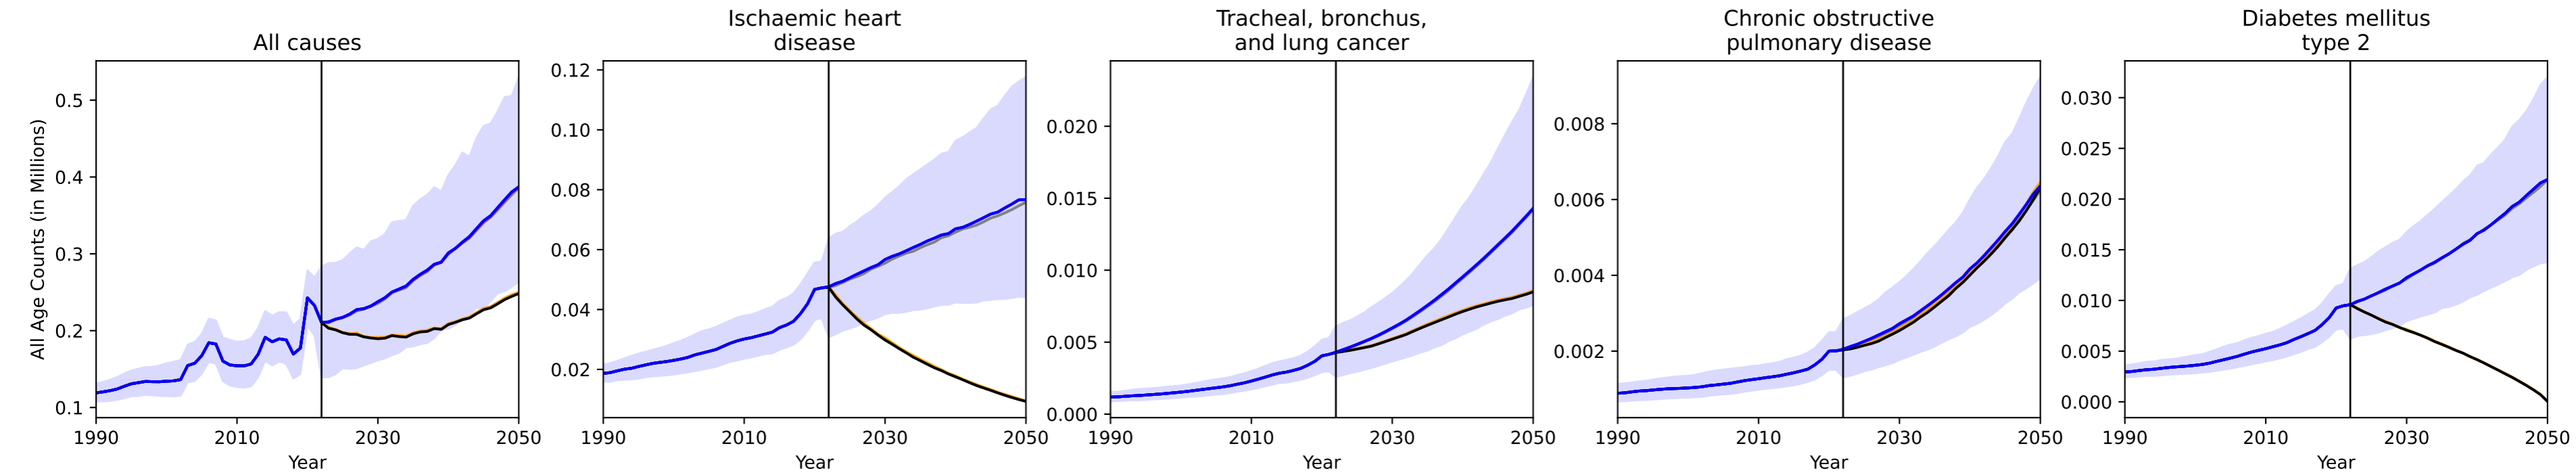

— Safer Environment — Improved Behavioural and Metabolic Risks — Improved Childhood Nutrition and Vaccination — Combined — Reference

# Jordan

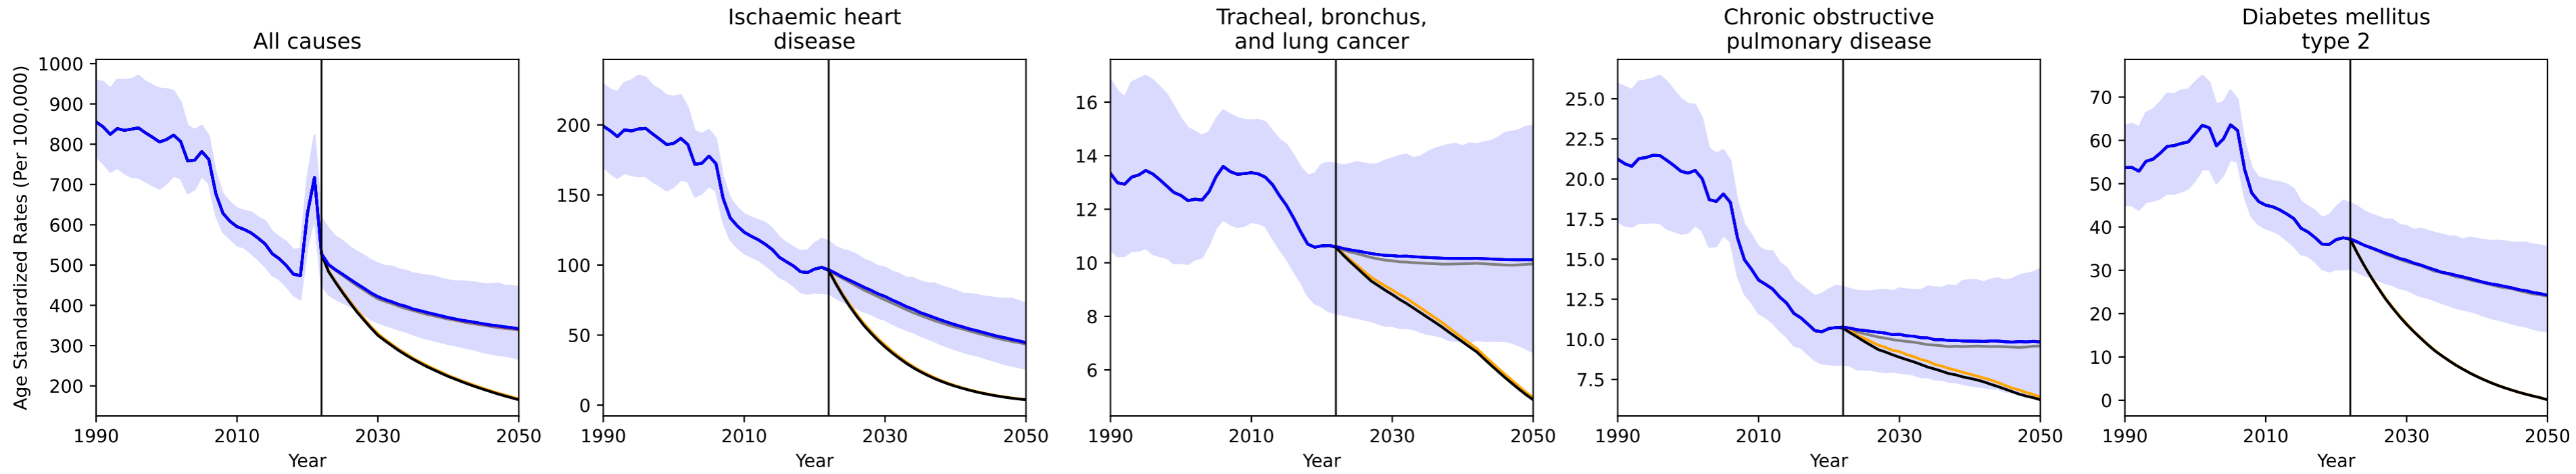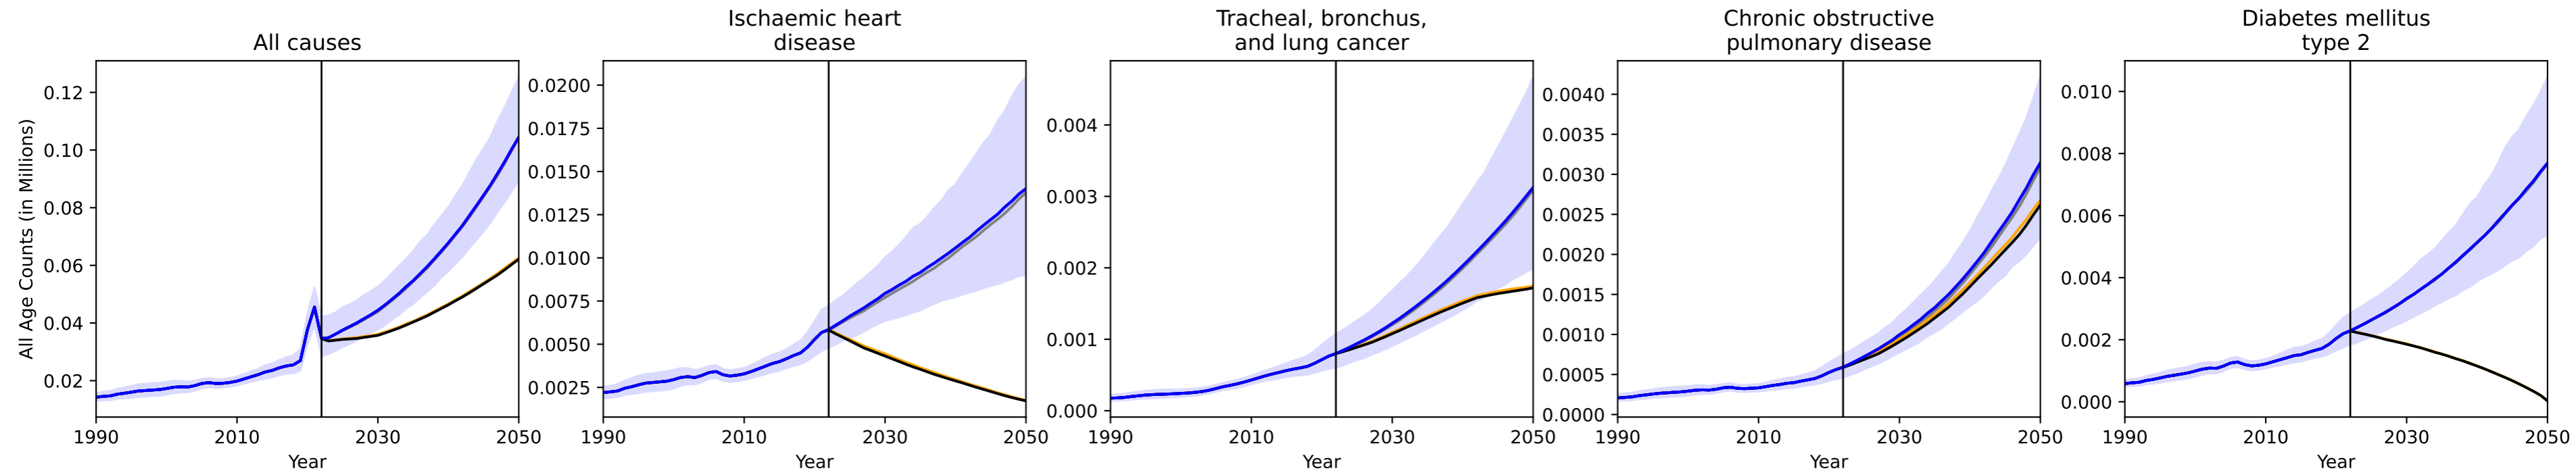

— Safer Environment — Improved Behavioural and Metabolic Risks — Improved Childhood Nutrition and Vaccination — Combined — Reference

# Kuwait

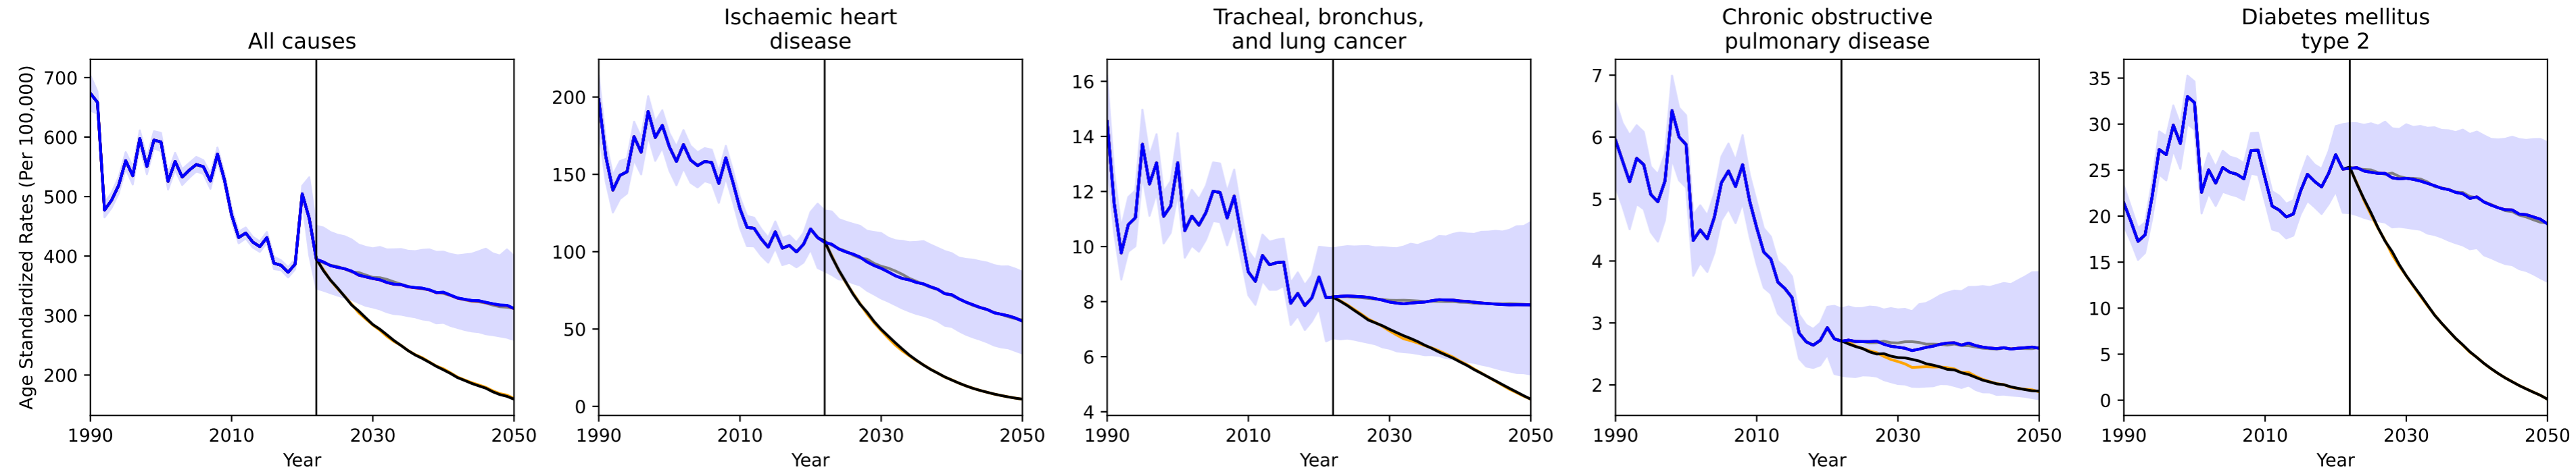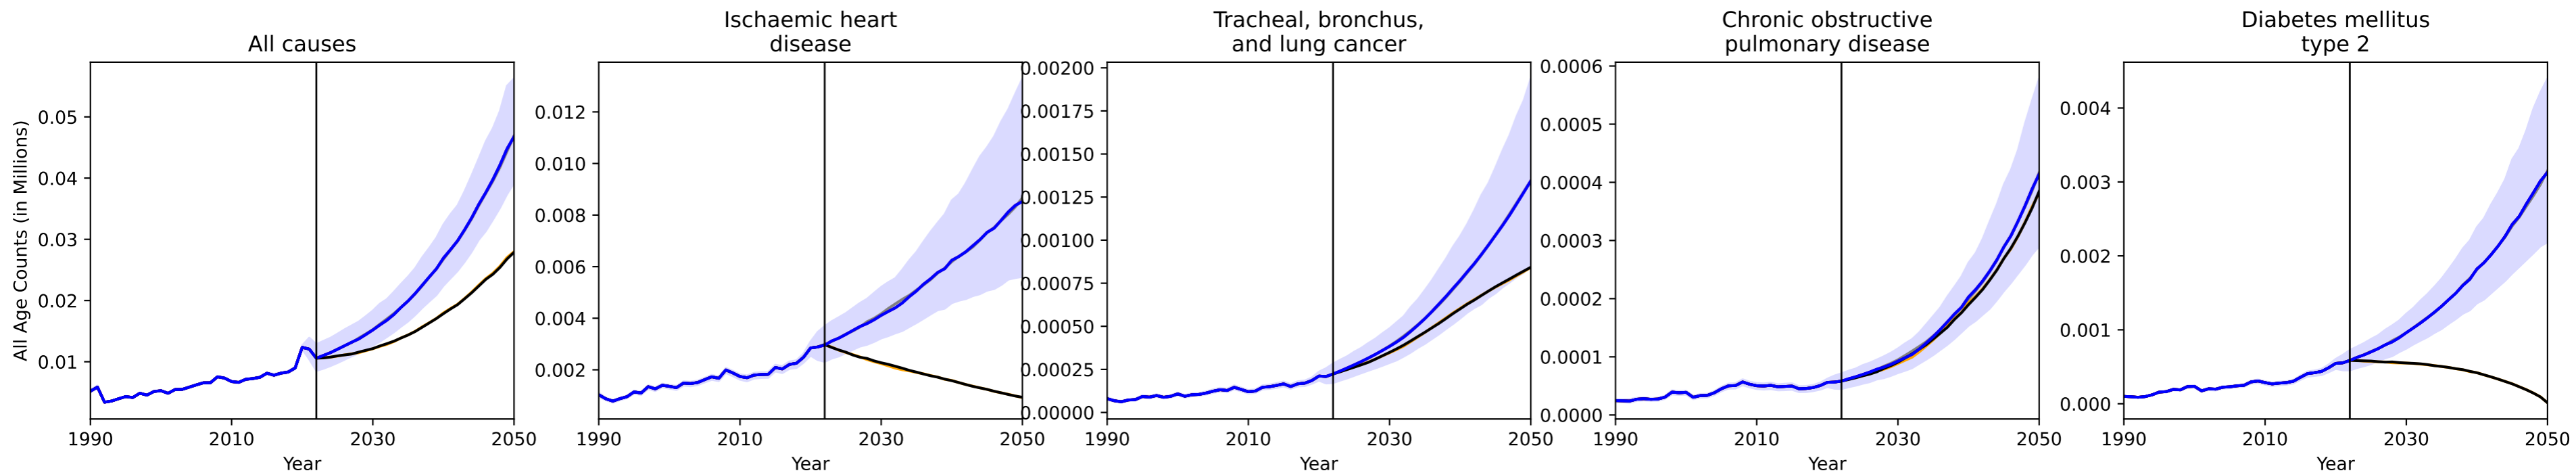



# Lebanon

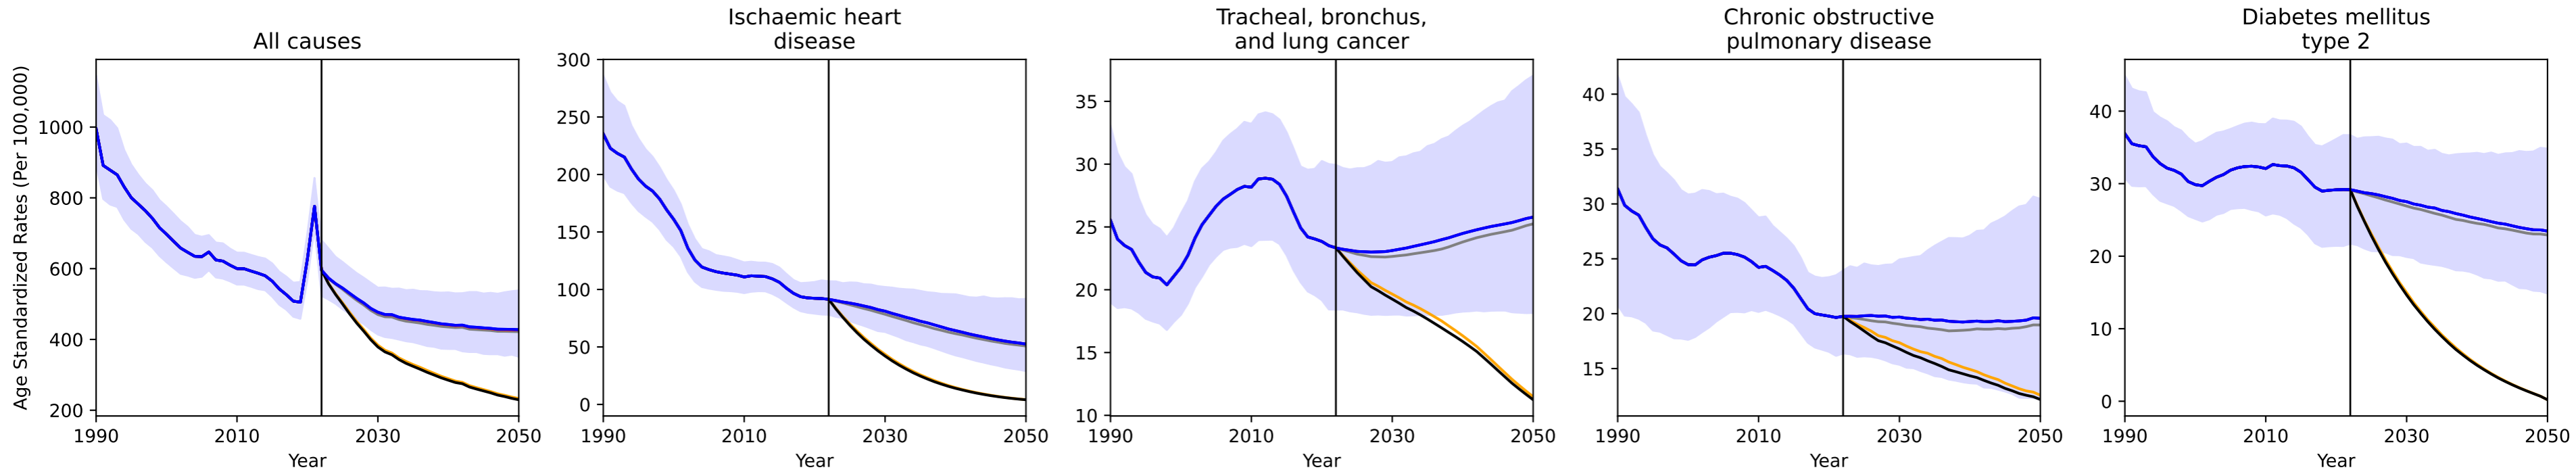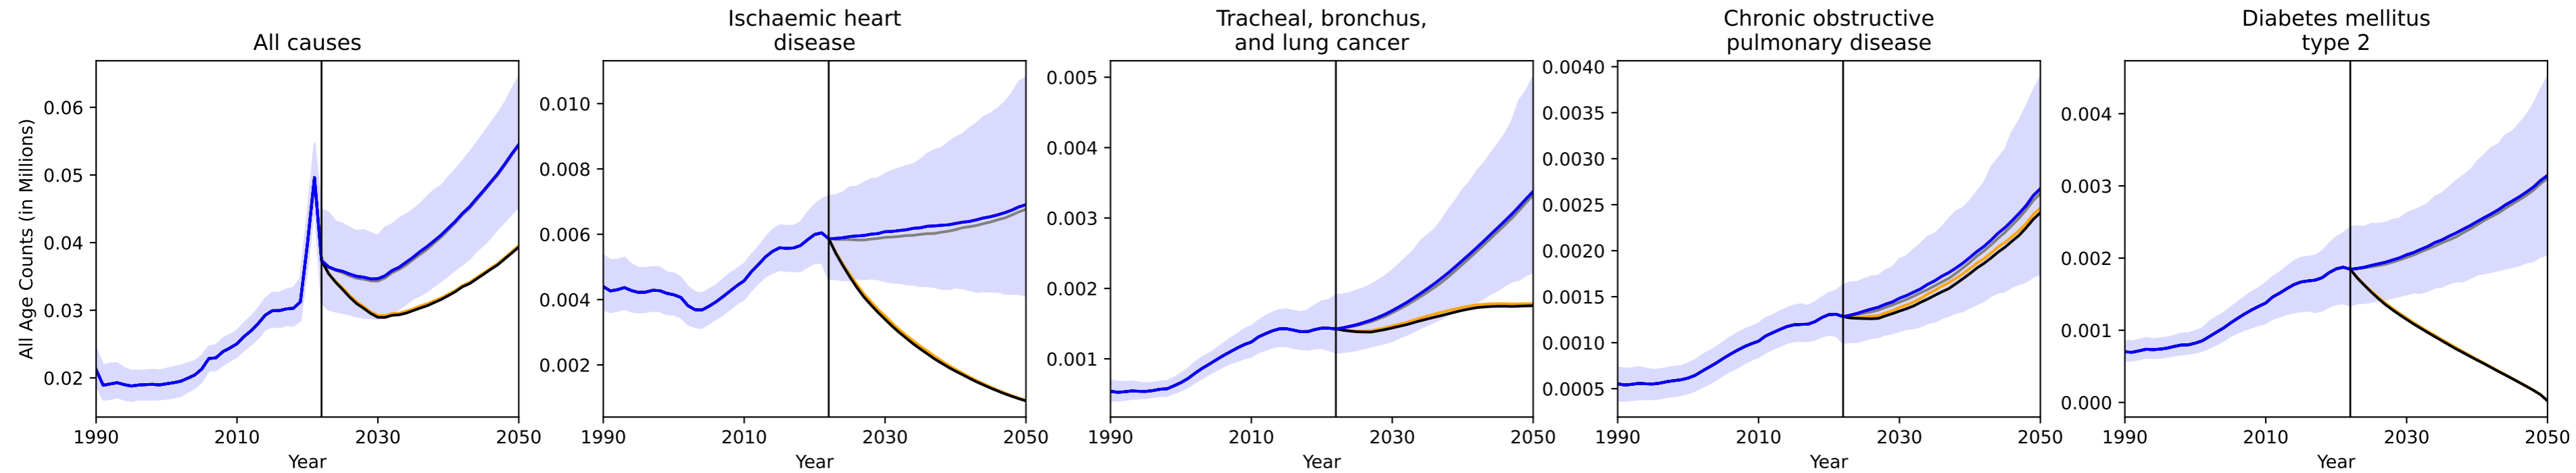

— Safer Environment — Improved Behavioural and Metabolic Risks — Improved Childhood Nutrition and Vaccination — Combined — Reference

# Libya

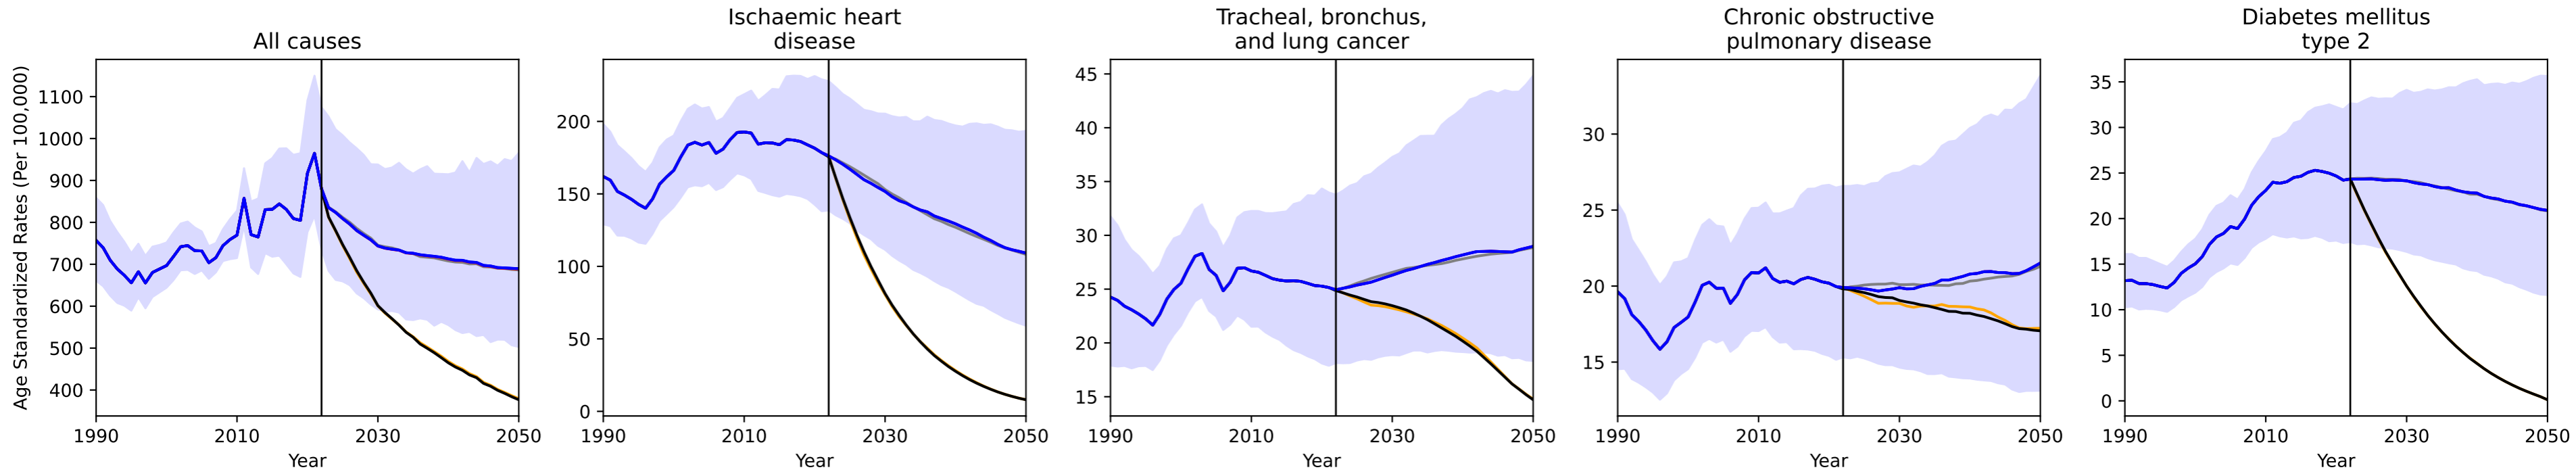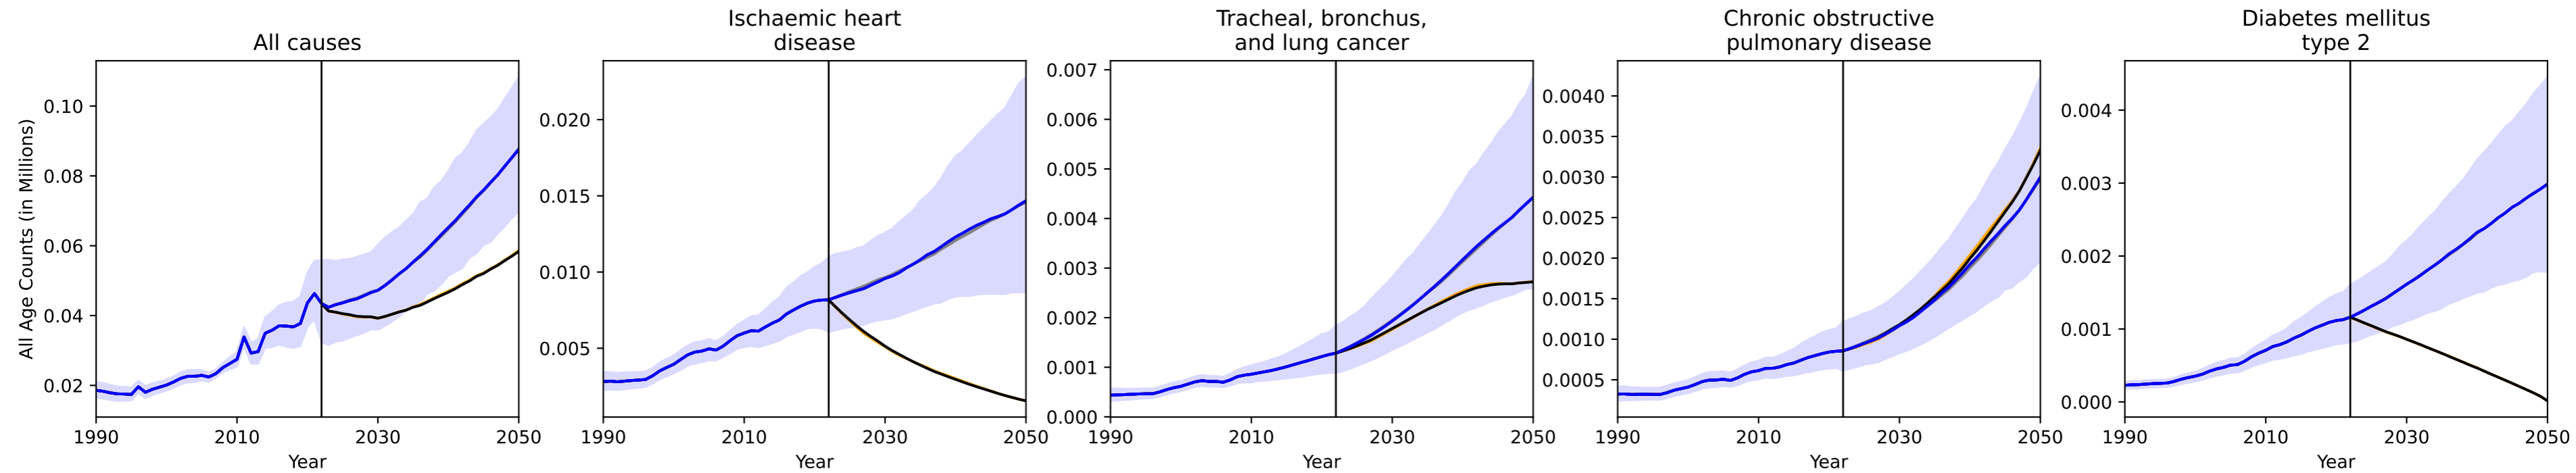

— Safer Environment — Improved Behavioural and Metabolic Risks — Improved Childhood Nutrition and Vaccination — Combined — Reference

# Morocco

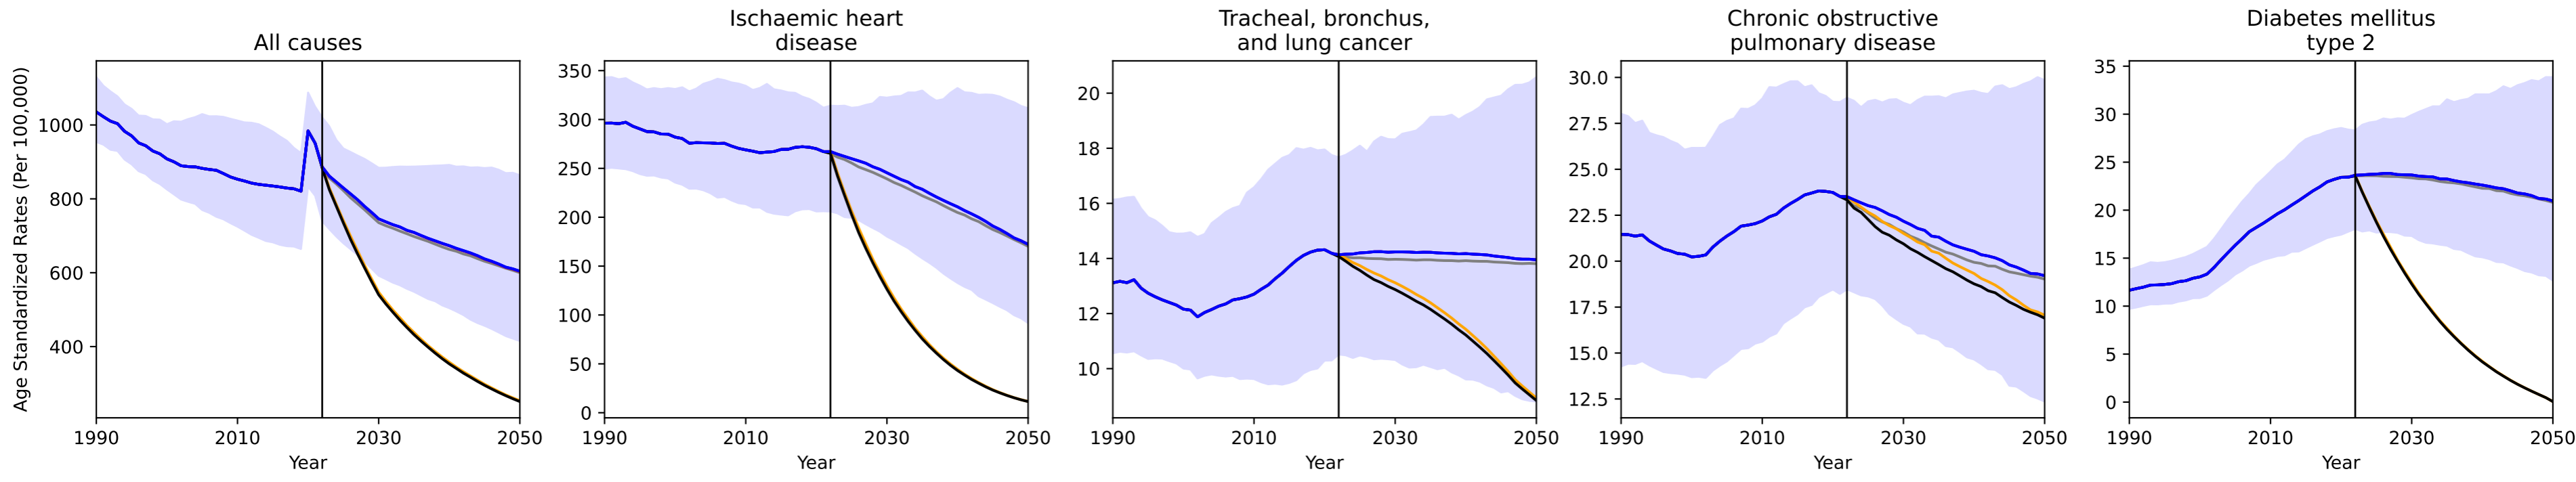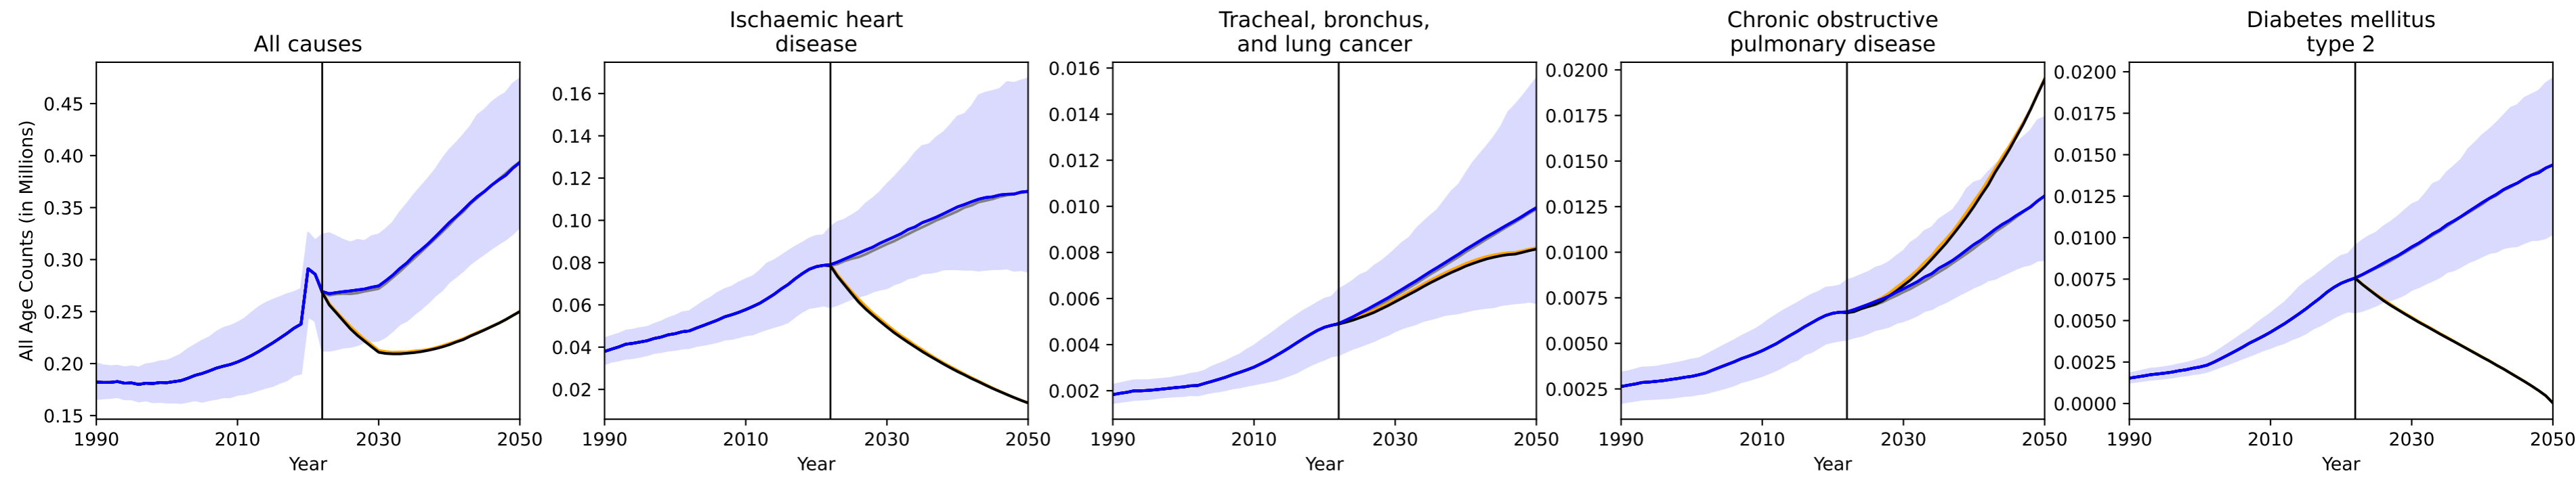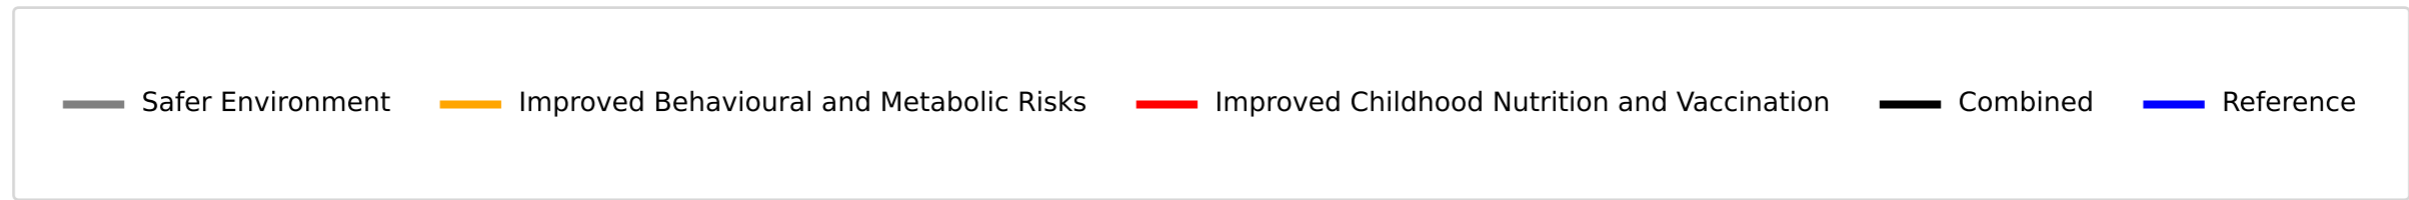

# Oman

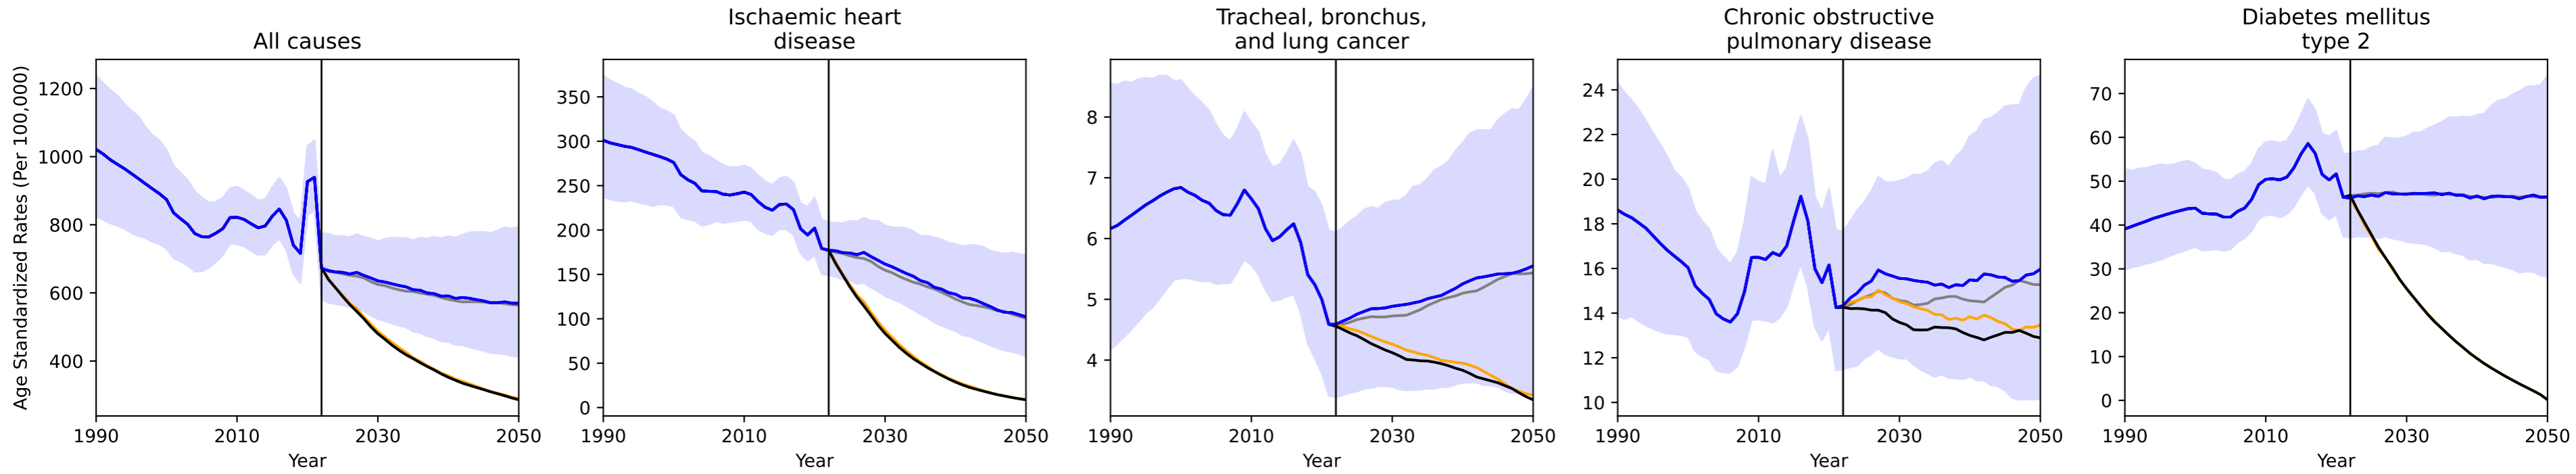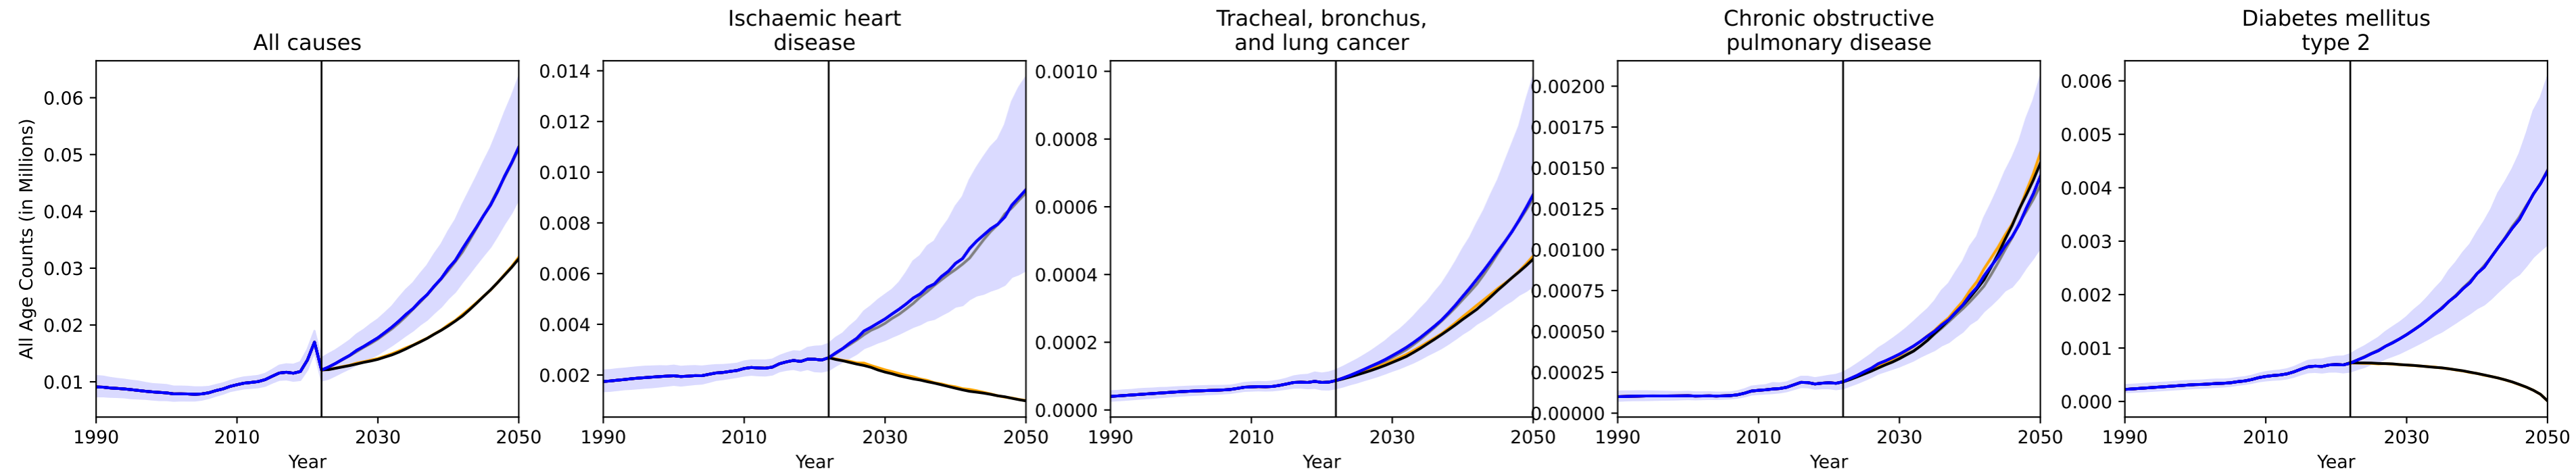

— Safer Environment — Improved Behavioural and Metabolic Risks — Improved Childhood Nutrition and Vaccination — Combined — Reference

# Palestine

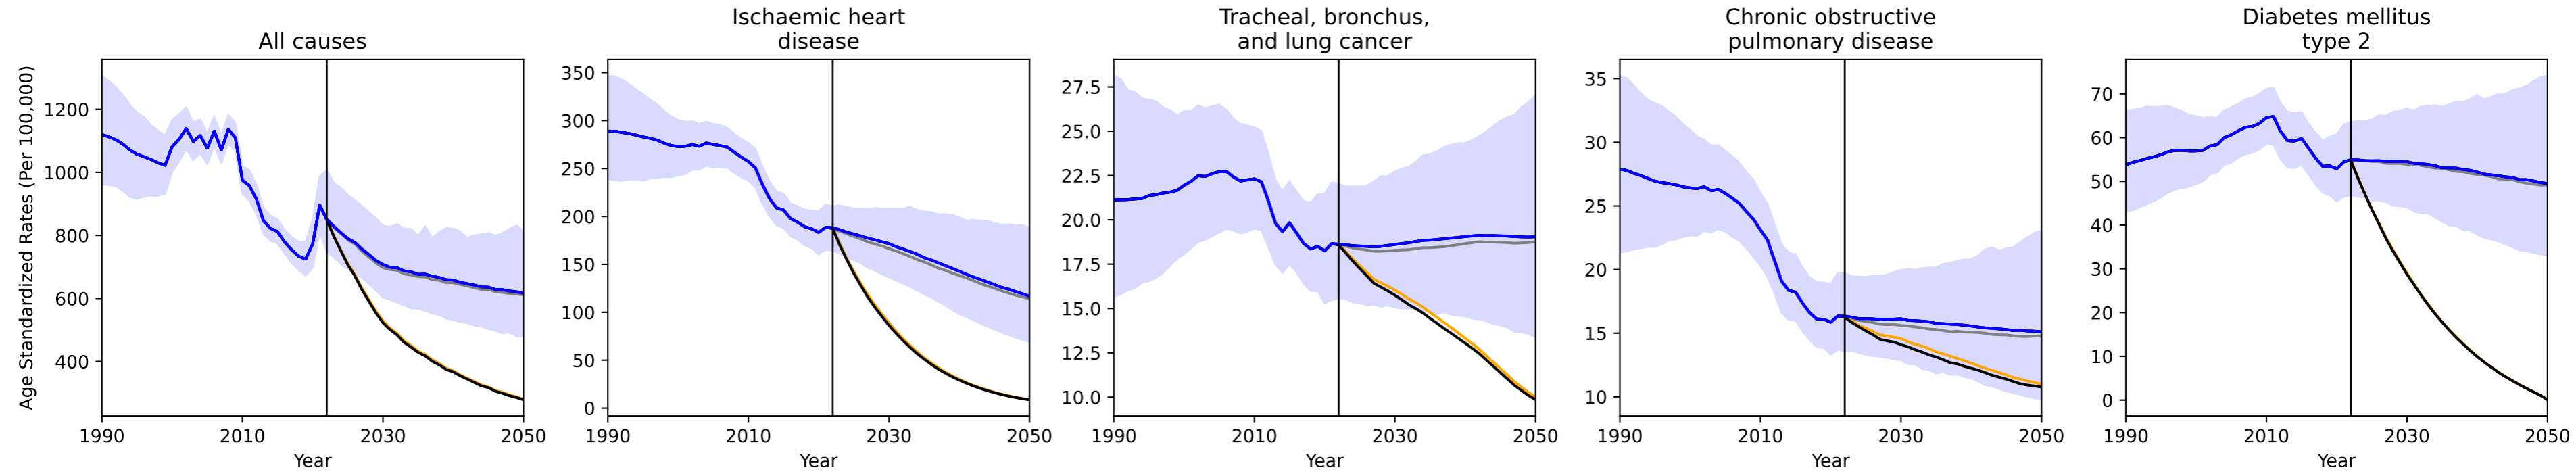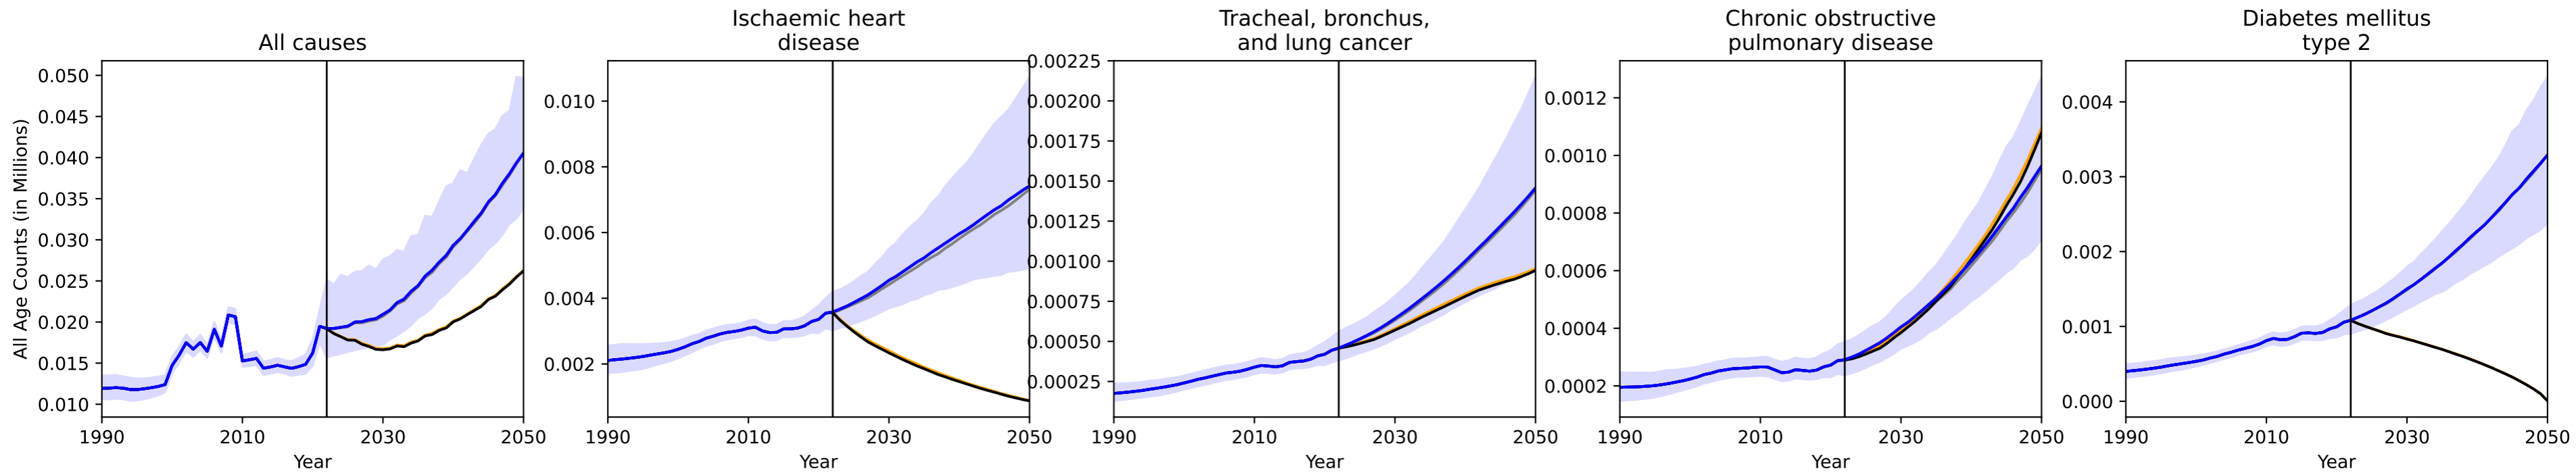

# Qatar

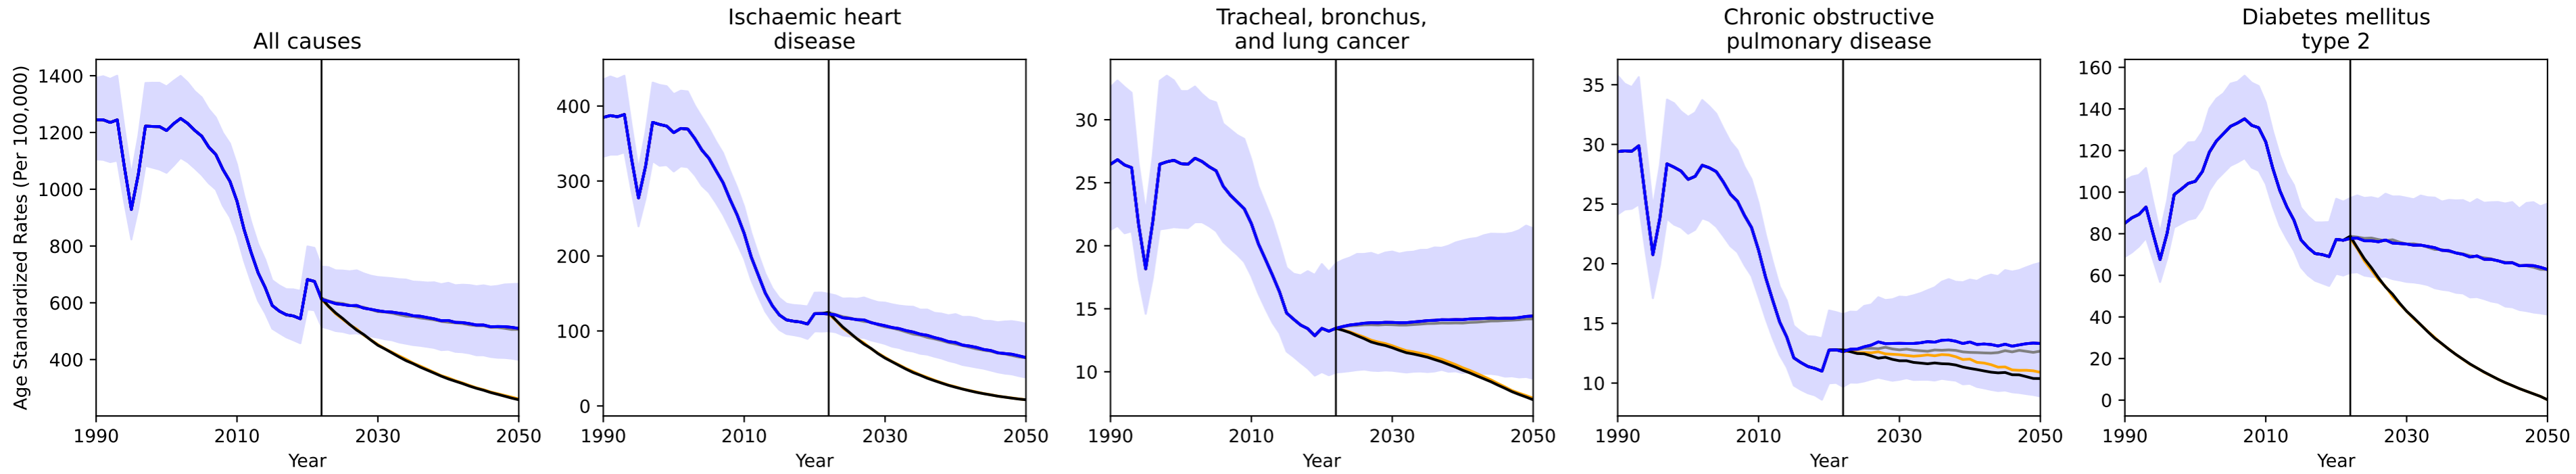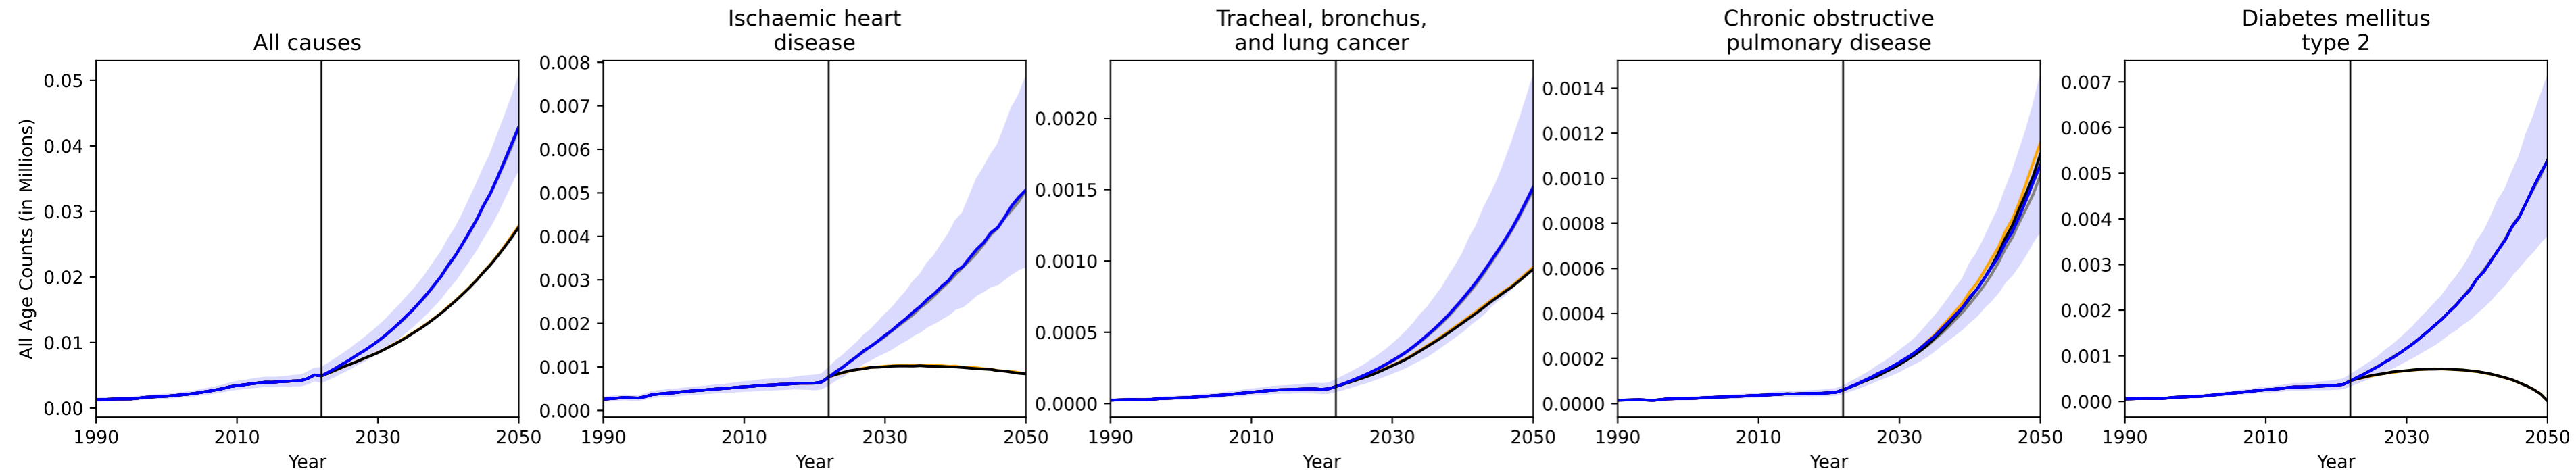

— Safer Environment — Improved Behavioural and Metabolic Risks — Improved Childhood Nutrition and Vaccination — Combined — Reference

# Saudi Arabia

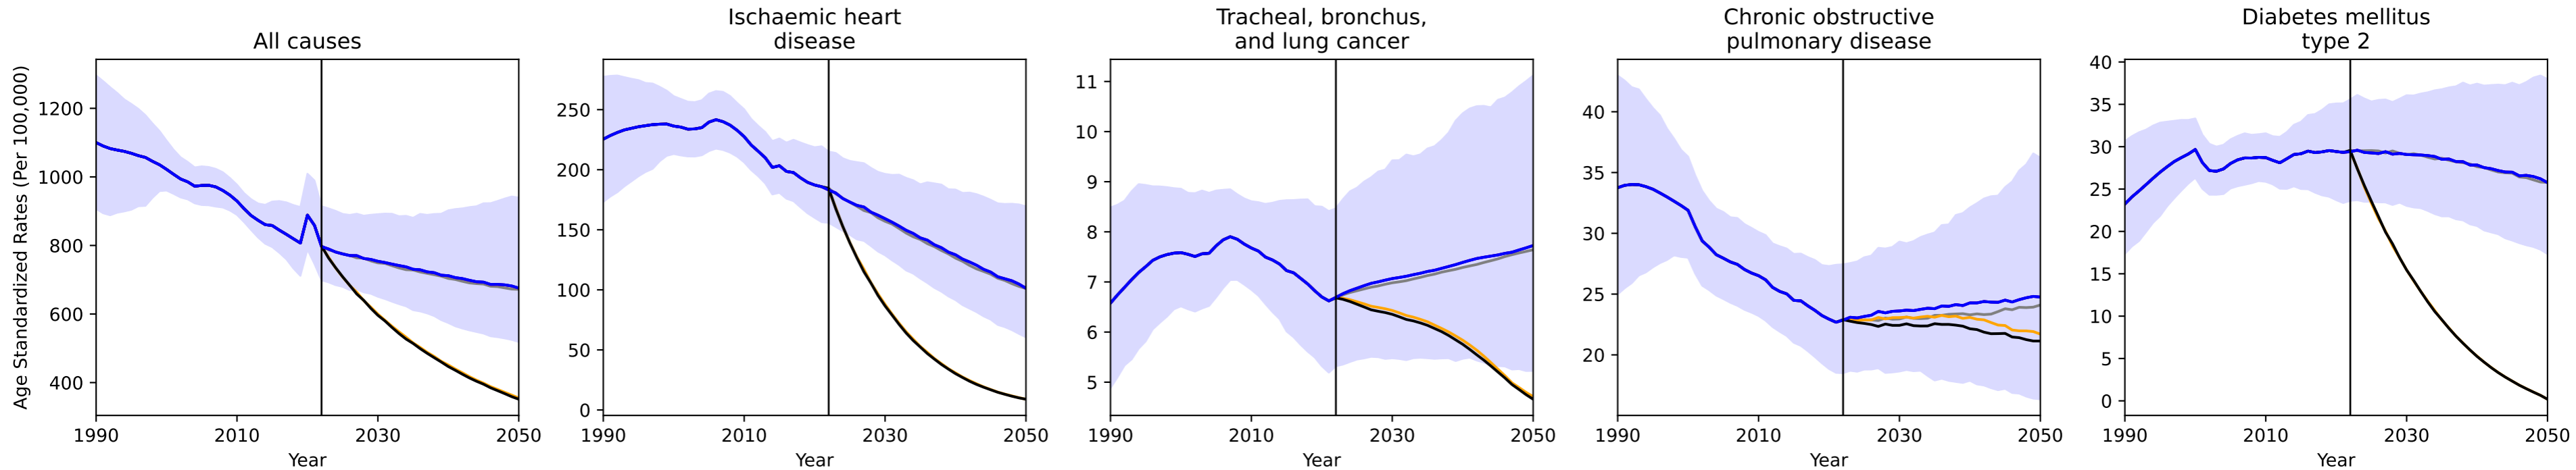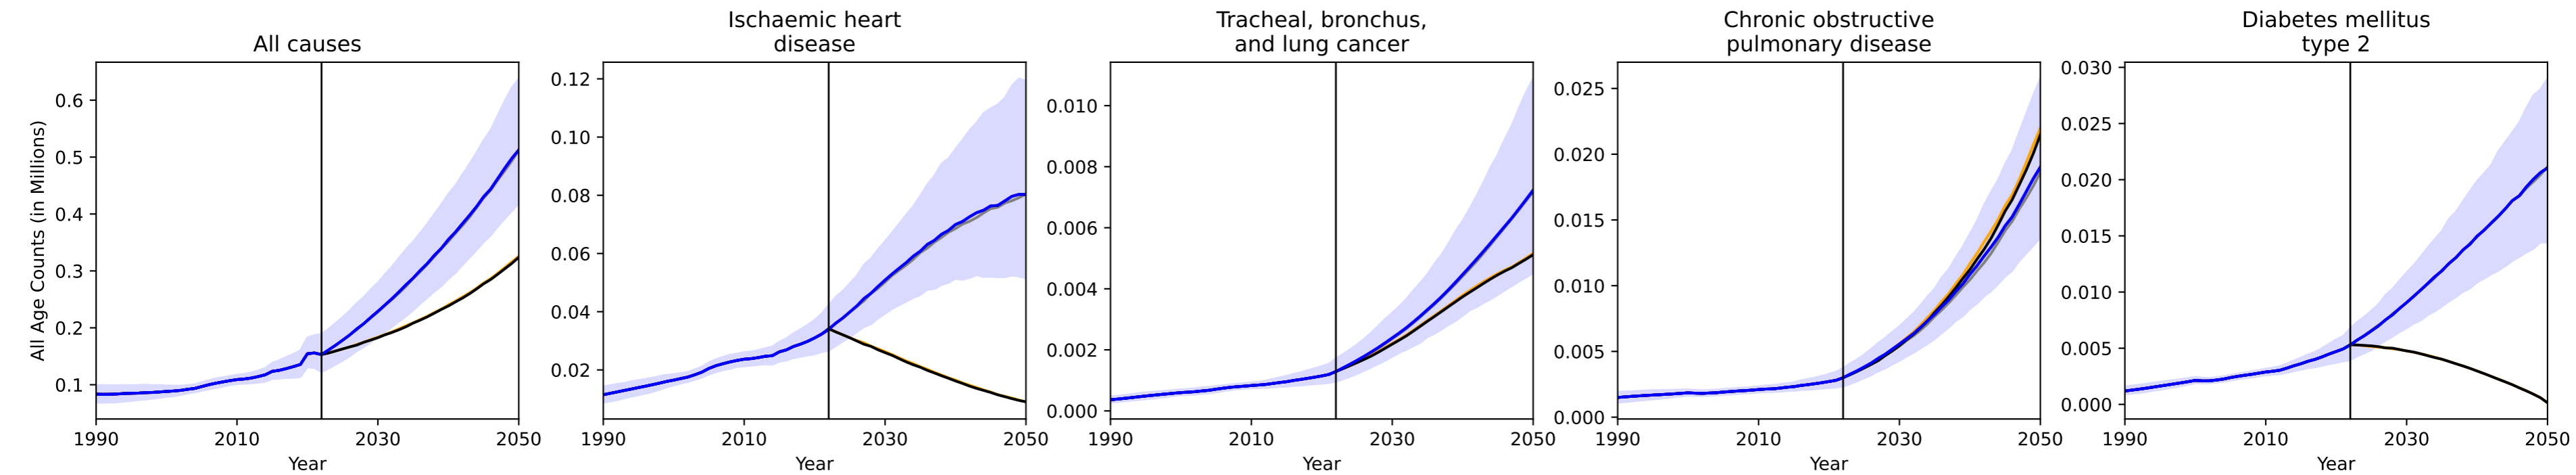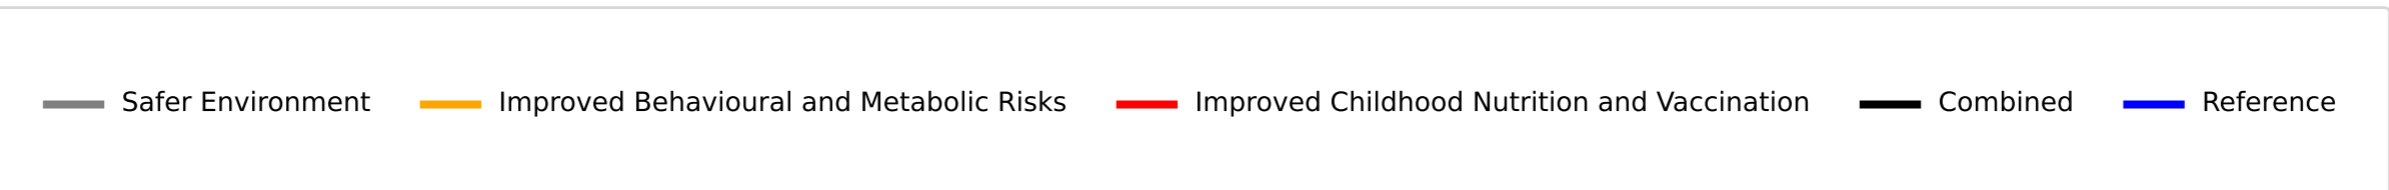

# Sudan

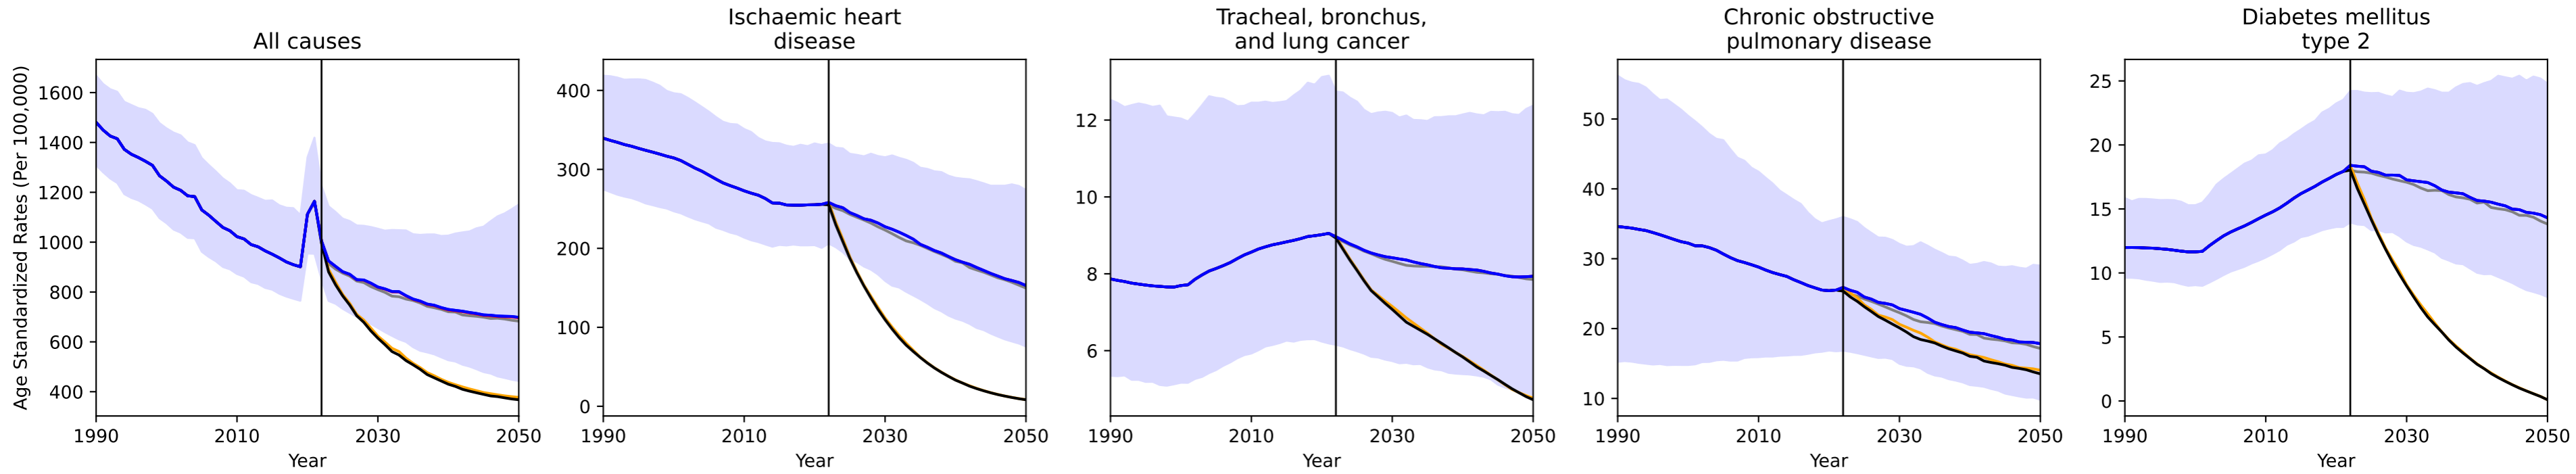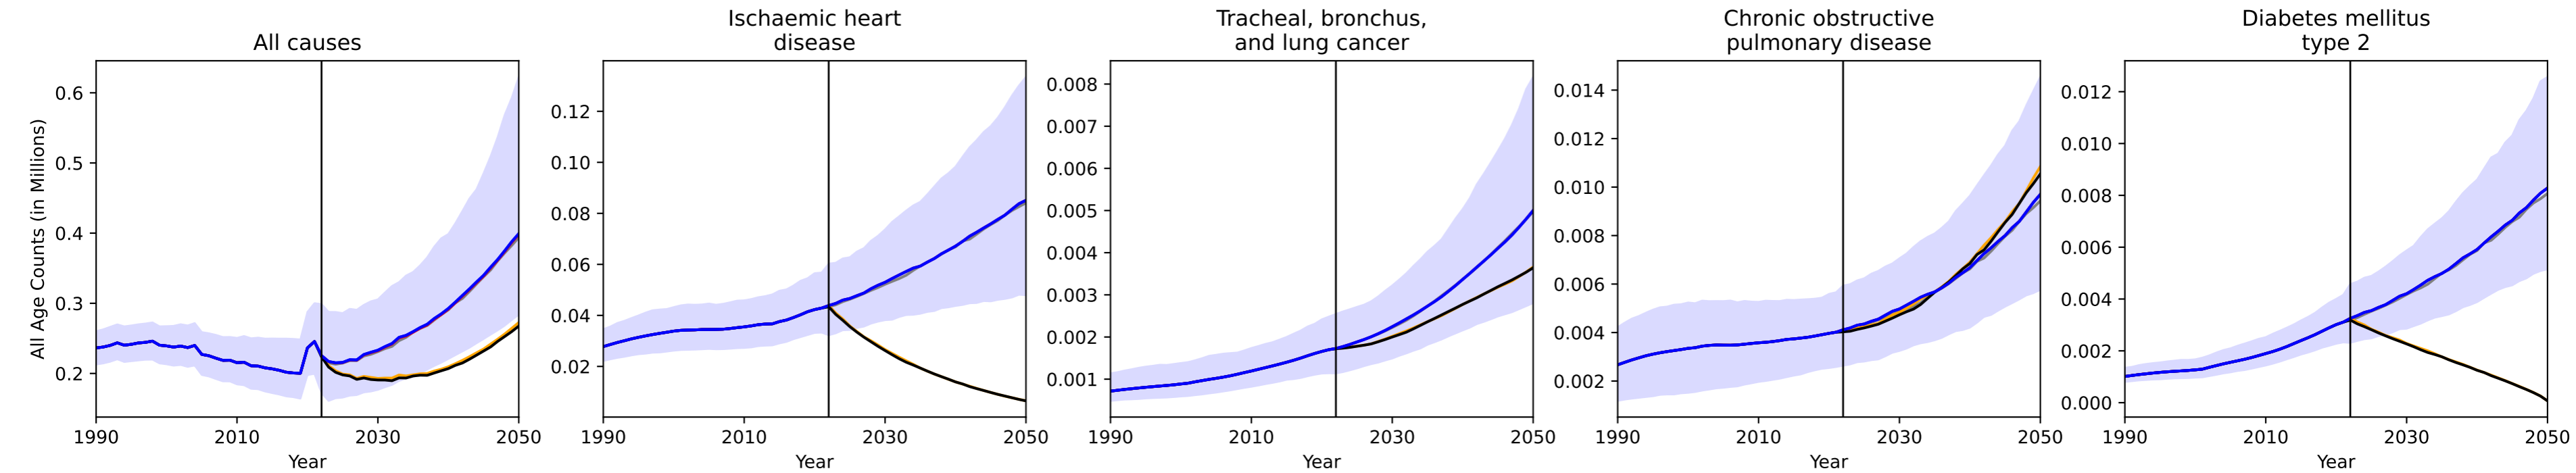

— Safer Environment    — Improved Behavioural and Metabolic Risks    — Improved Childhood Nutrition and Vaccination    — Combined    — Reference



# Syria

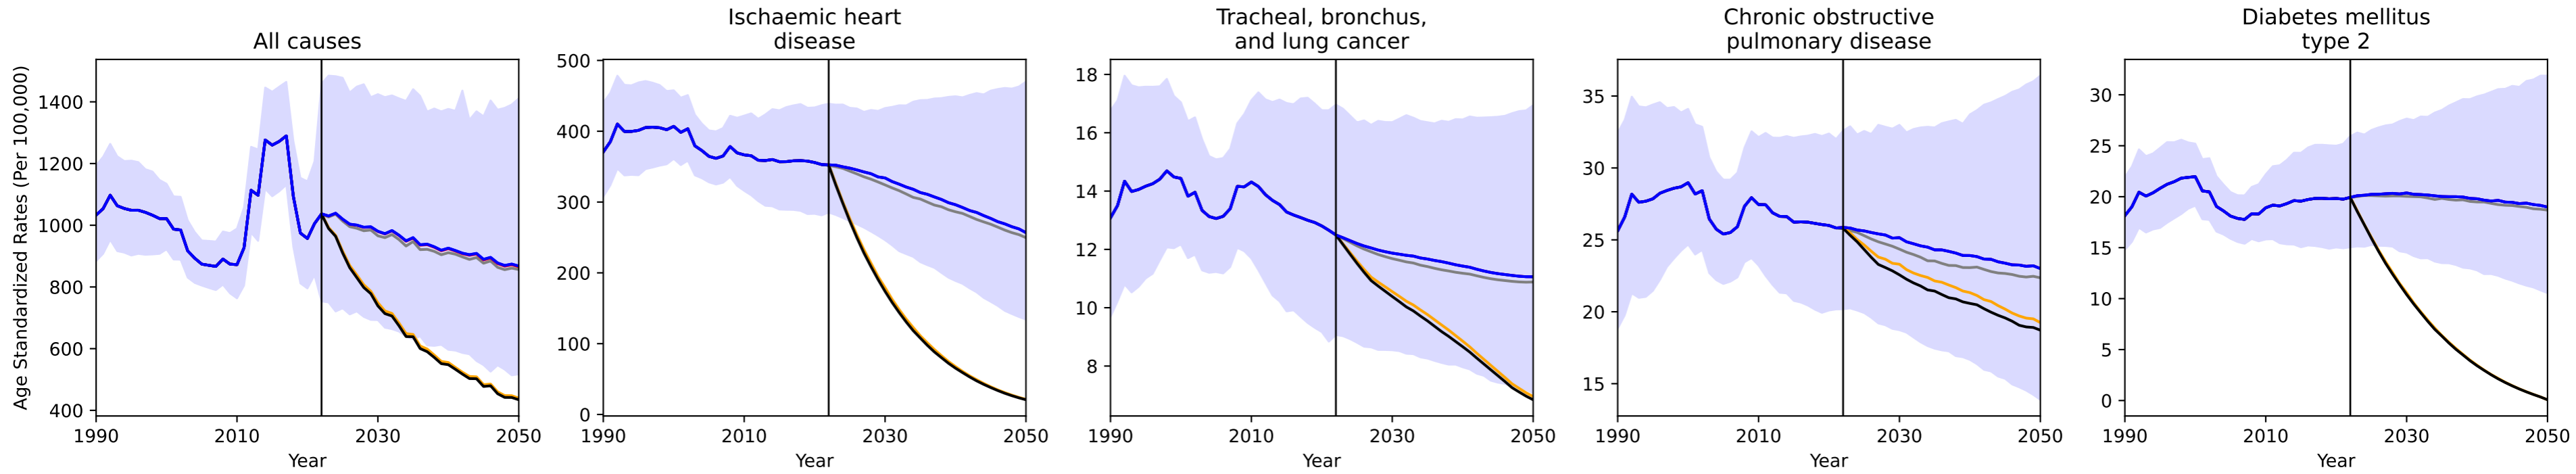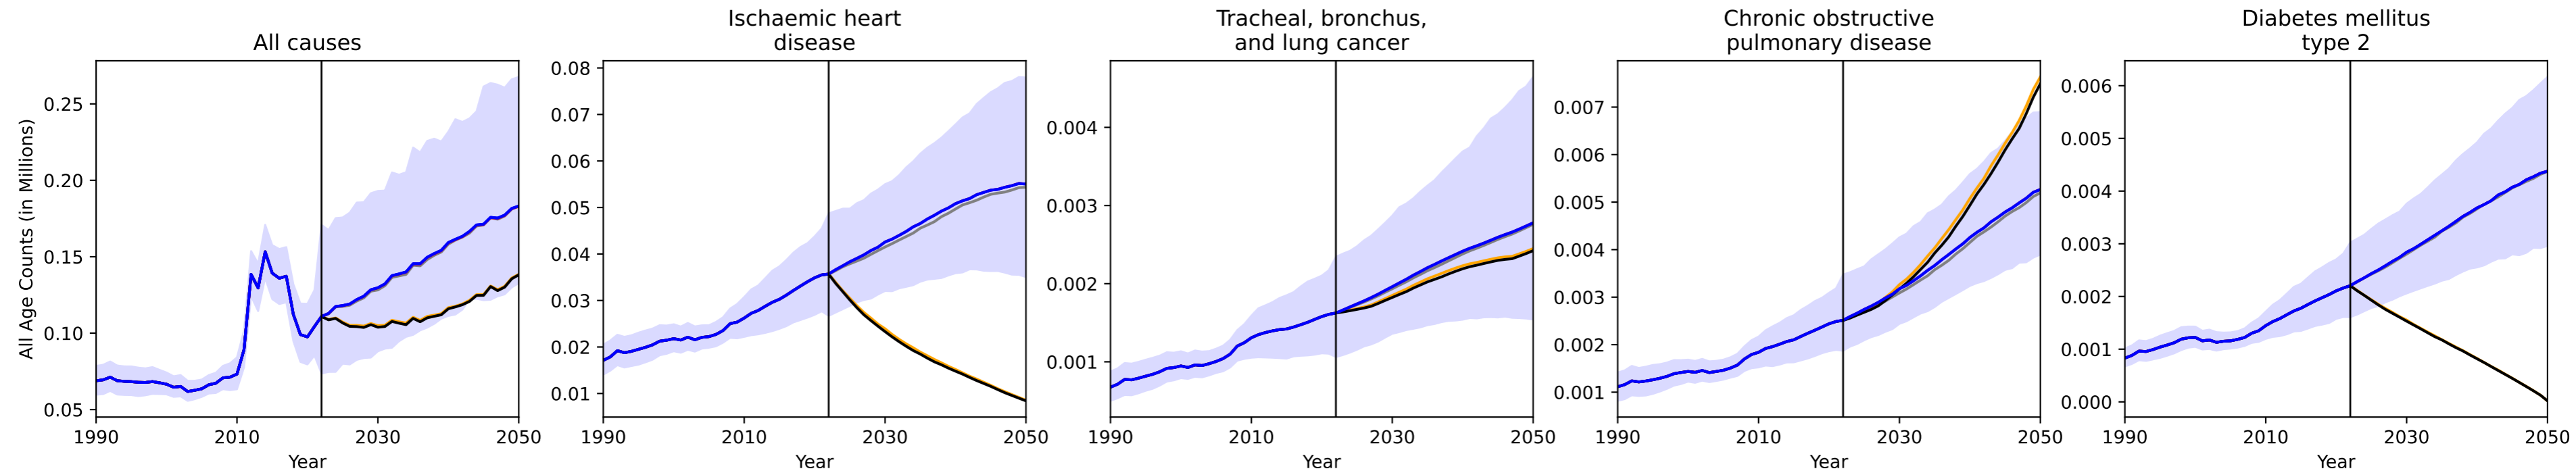

— Safer Environment — Improved Behavioural and Metabolic Risks — Improved Childhood Nutrition and Vaccination — Combined — Reference

# Tunisia

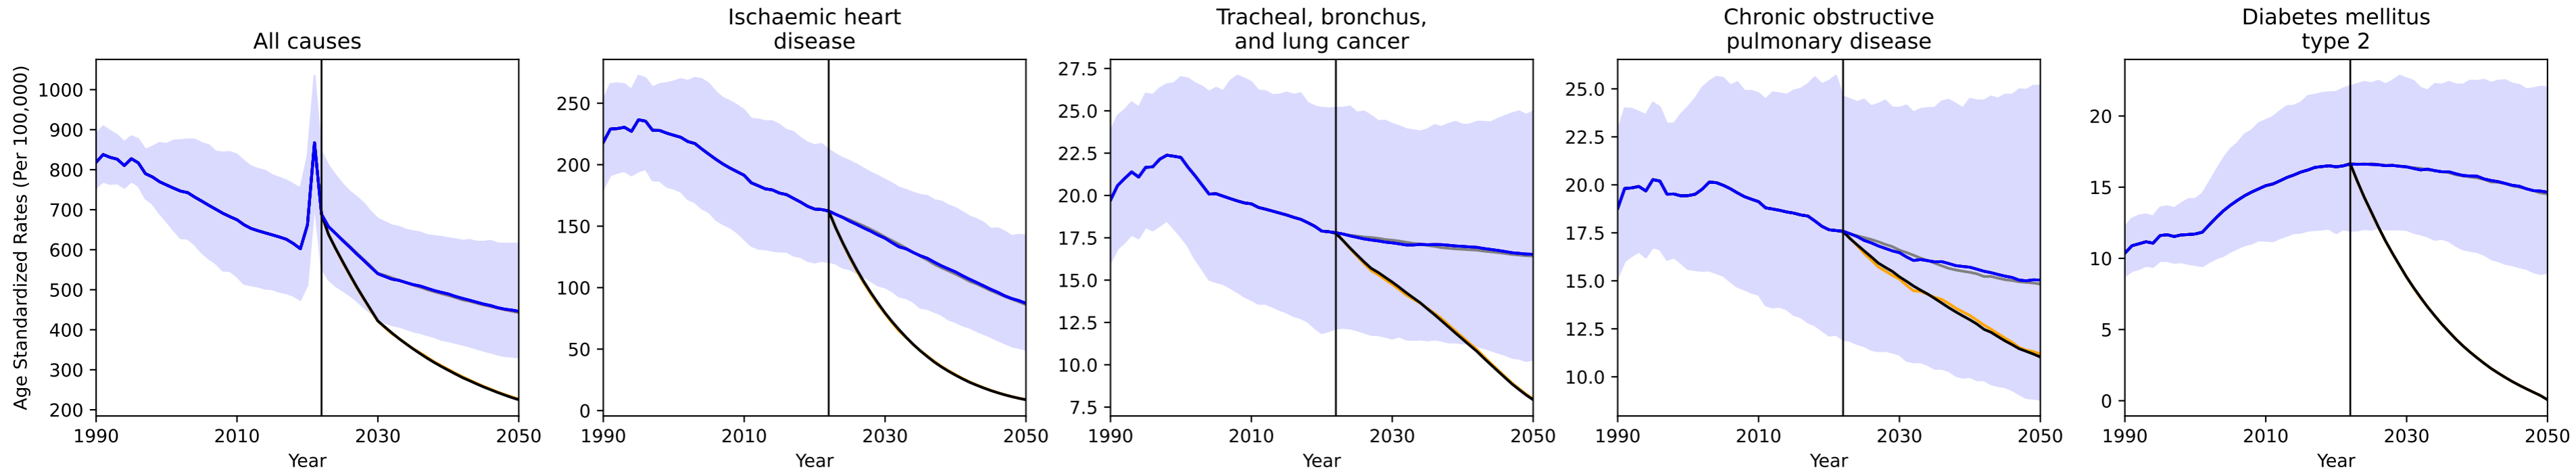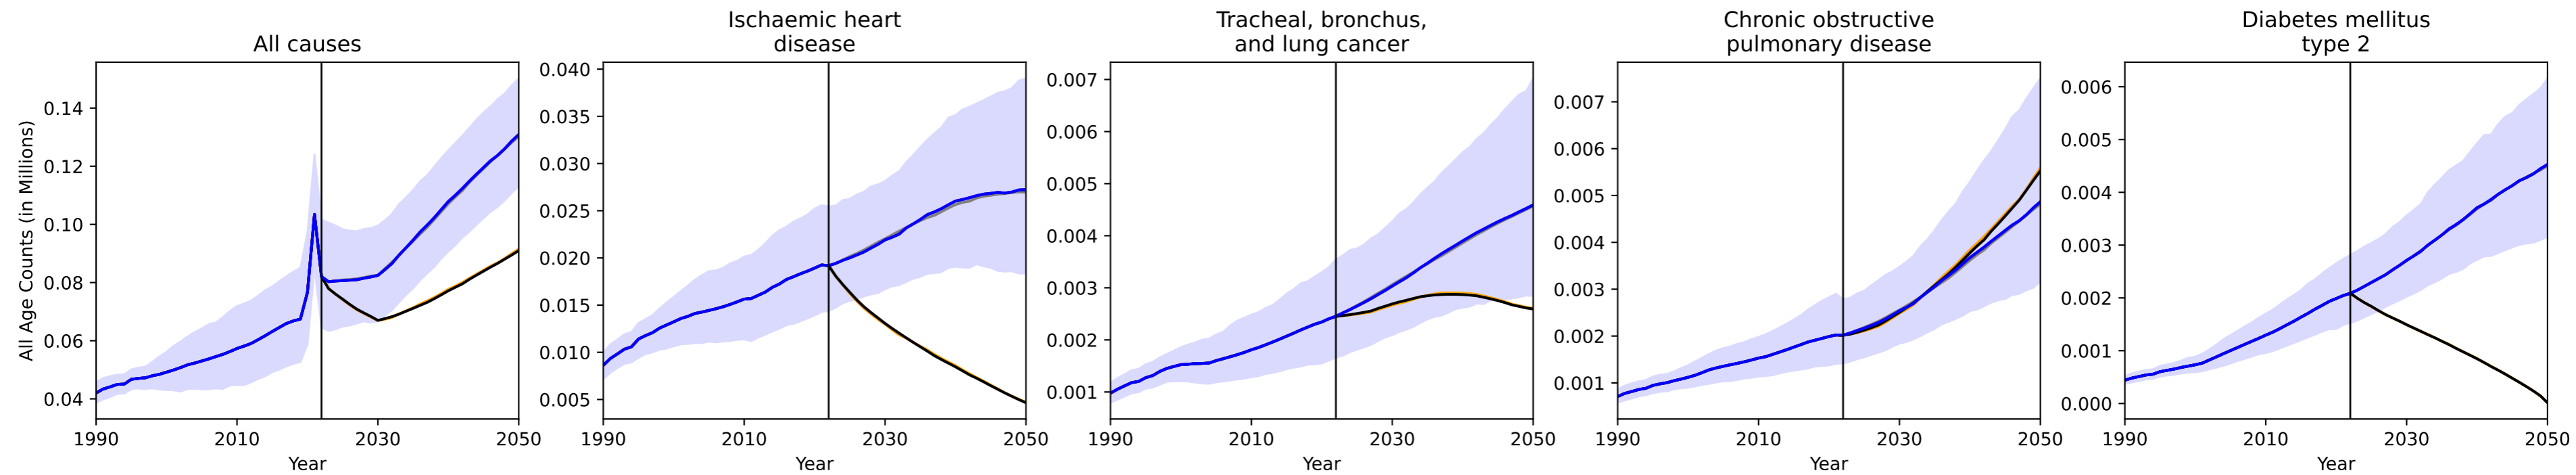

# Türkiye

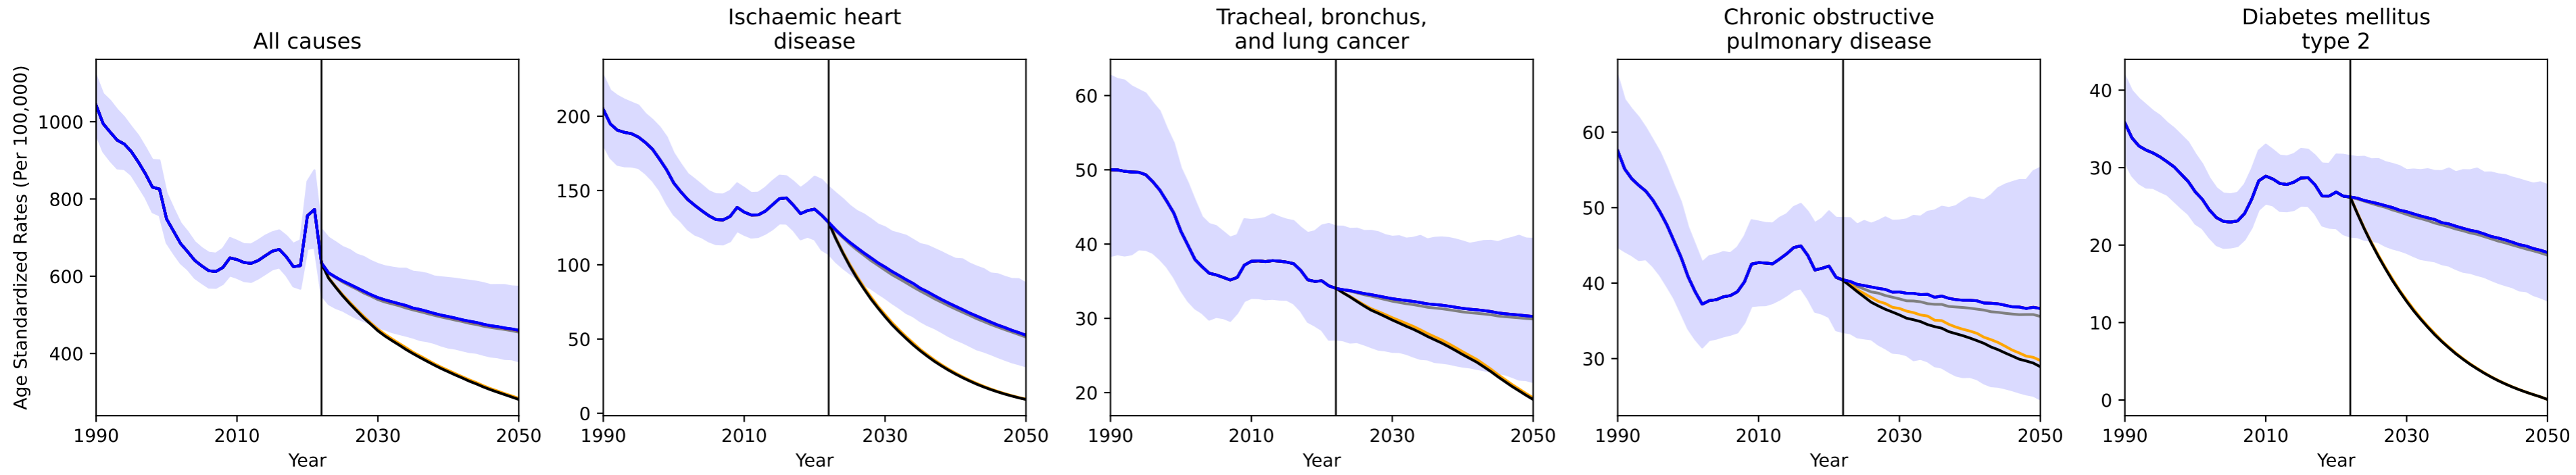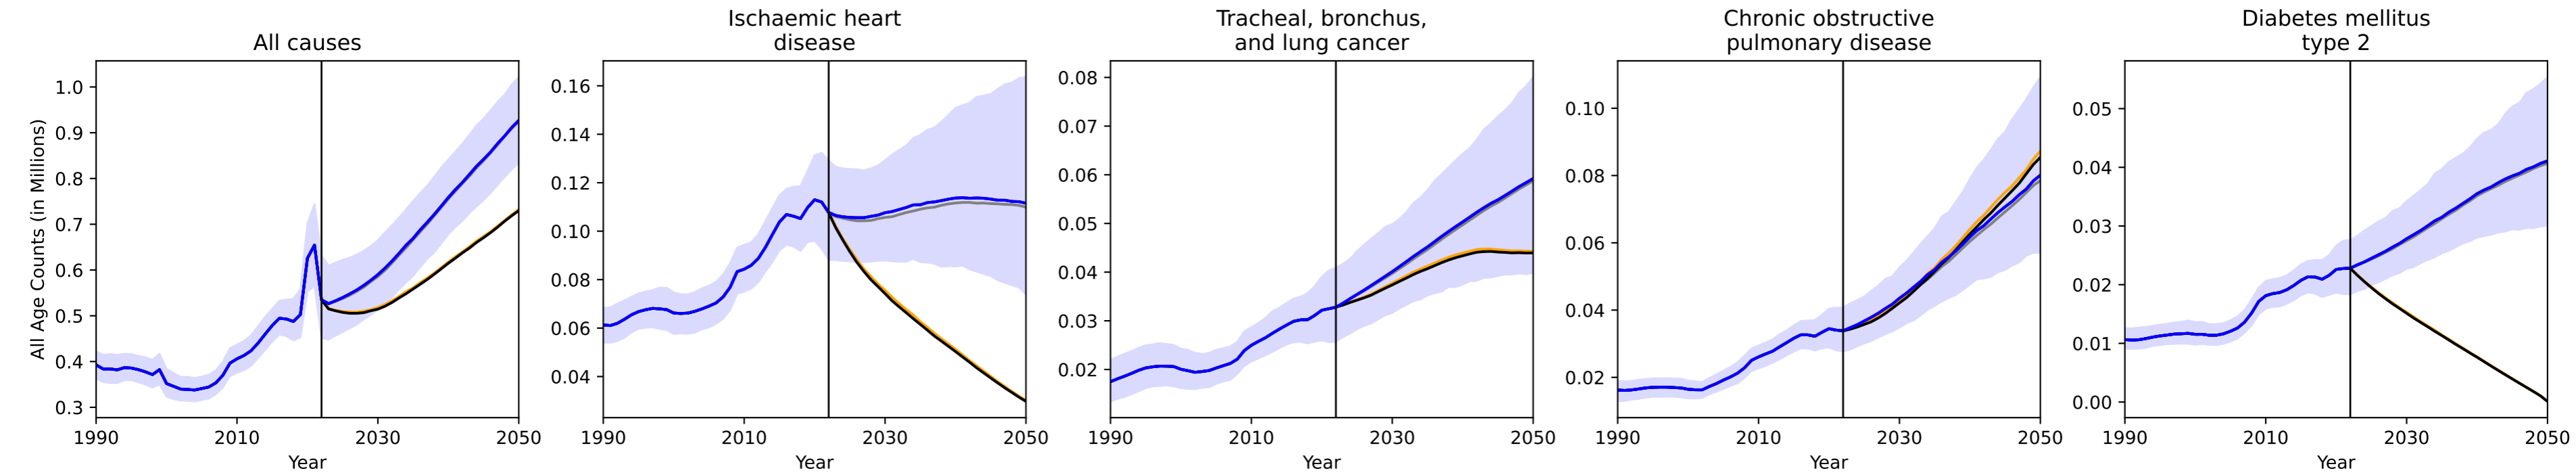

— Safer Environment    — Improved Behavioural and Metabolic Risks    — Improved Childhood Nutrition and Vaccination    — Combined    — Reference

# United Arab Emirates

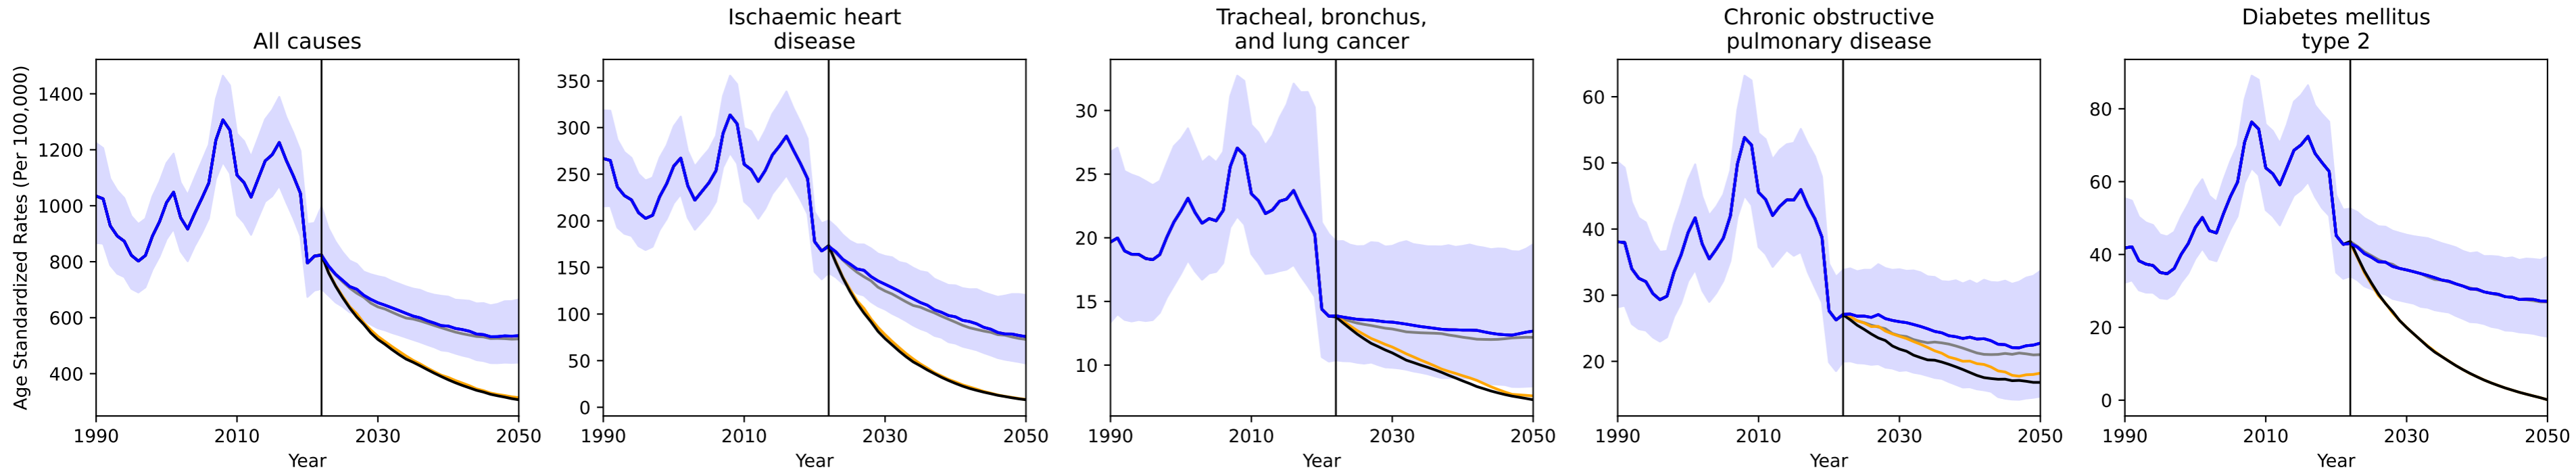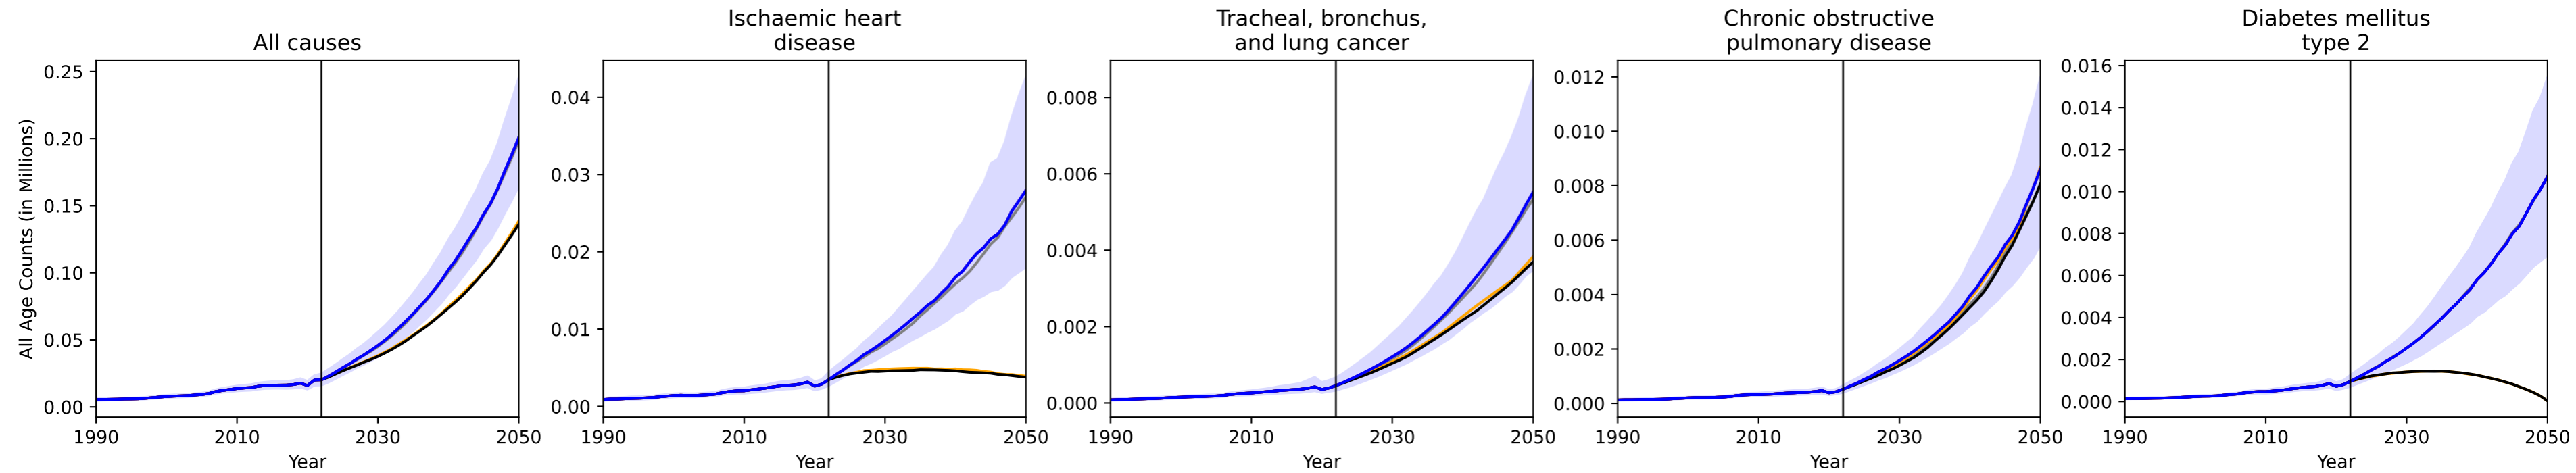

— Safer Environment — Improved Behavioural and Metabolic Risks — Improved Childhood Nutrition and Vaccination — Combined — Reference

# Yemen

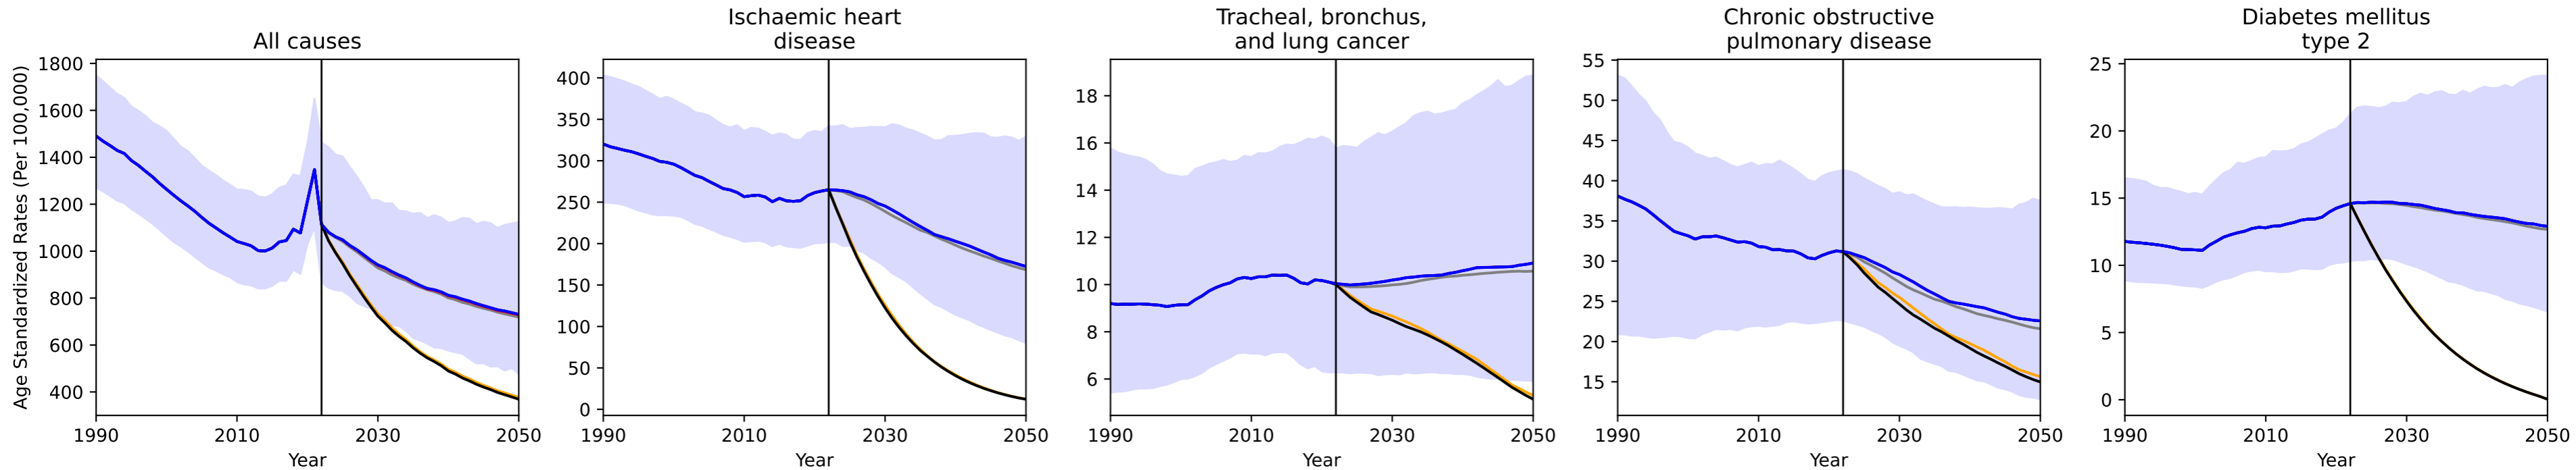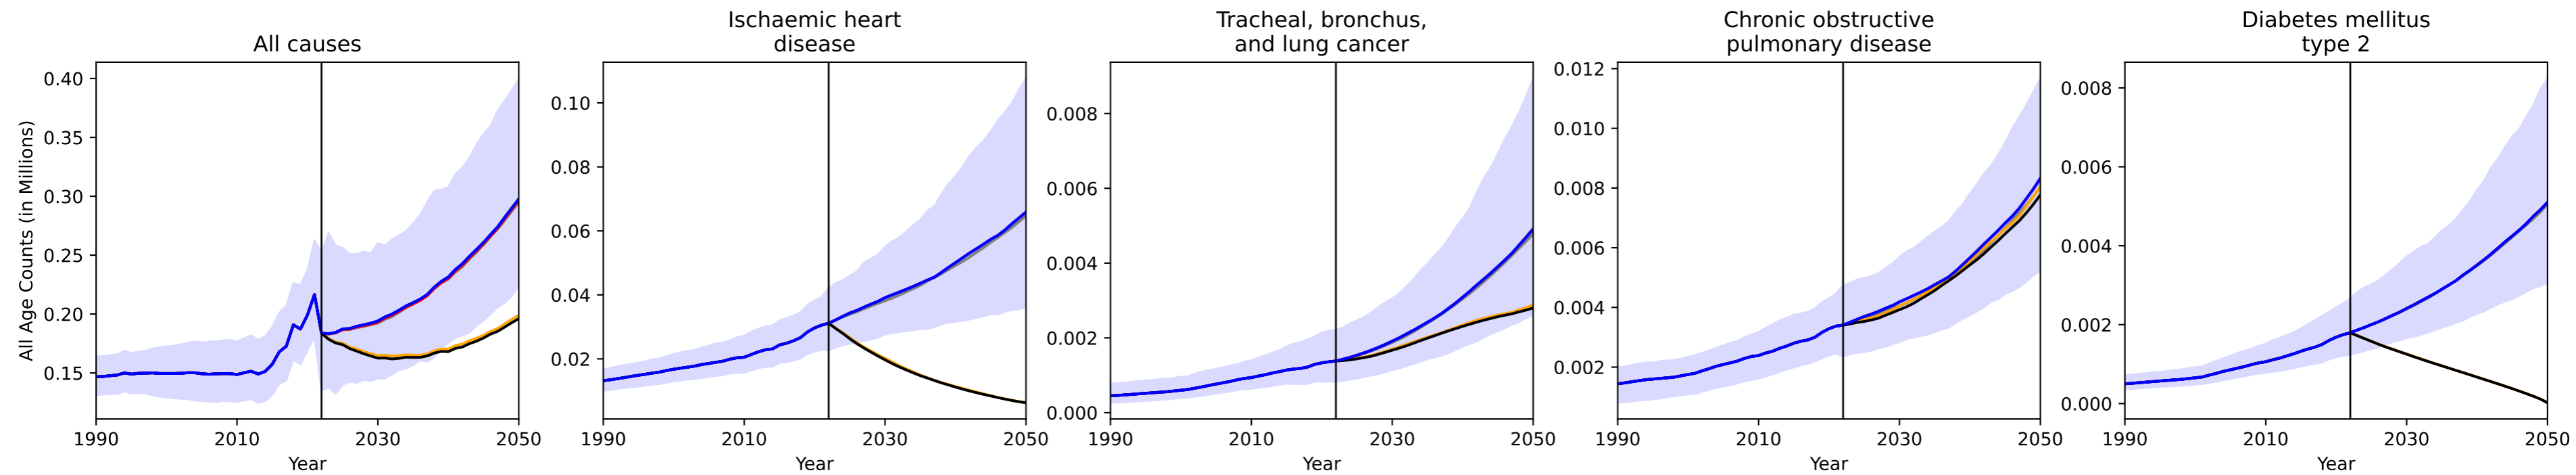

— Safer Environment — Improved Behavioural and Metabolic Risks — Improved Childhood Nutrition and Vaccination — Combined — Reference

# Bangladesh

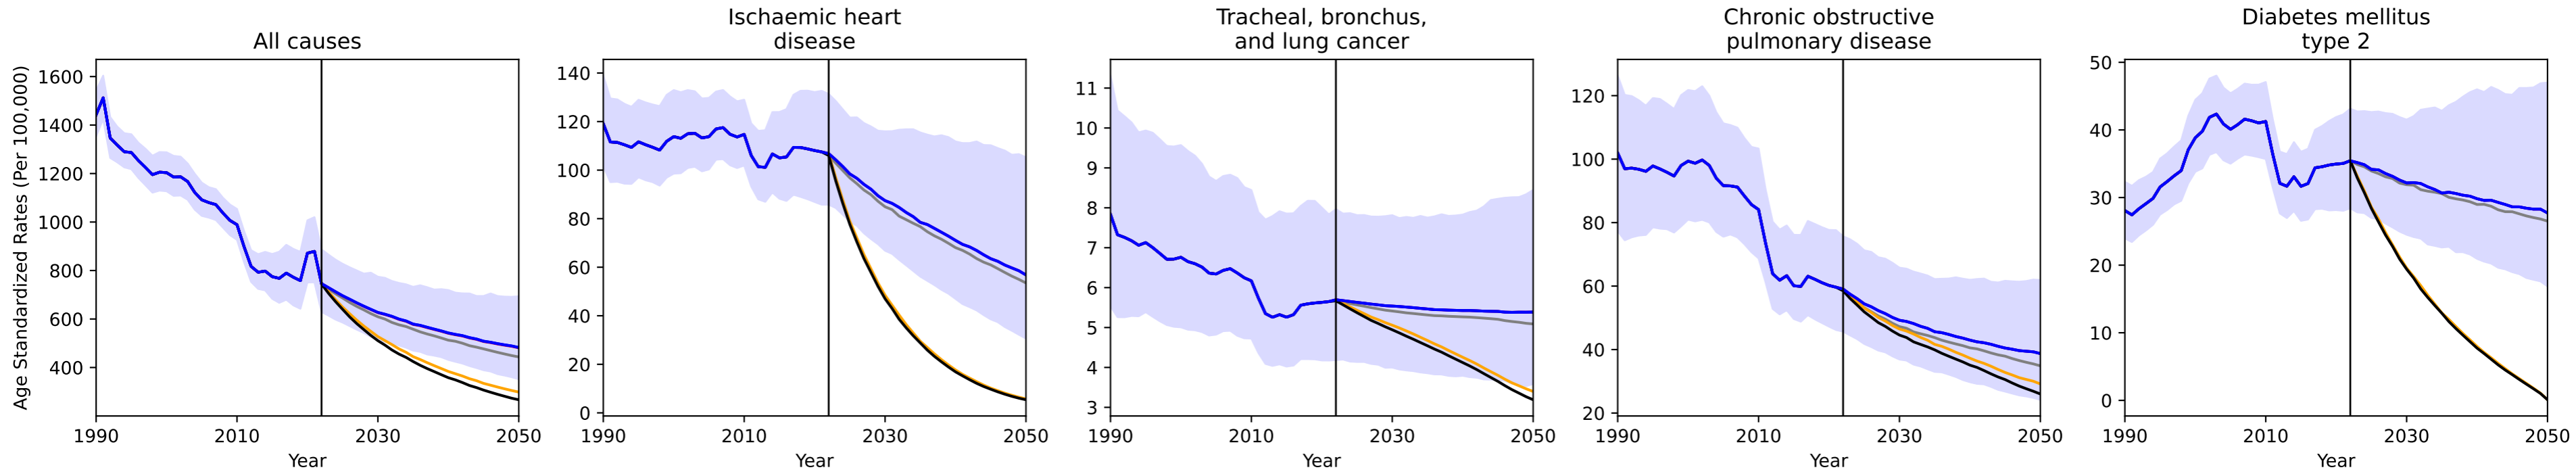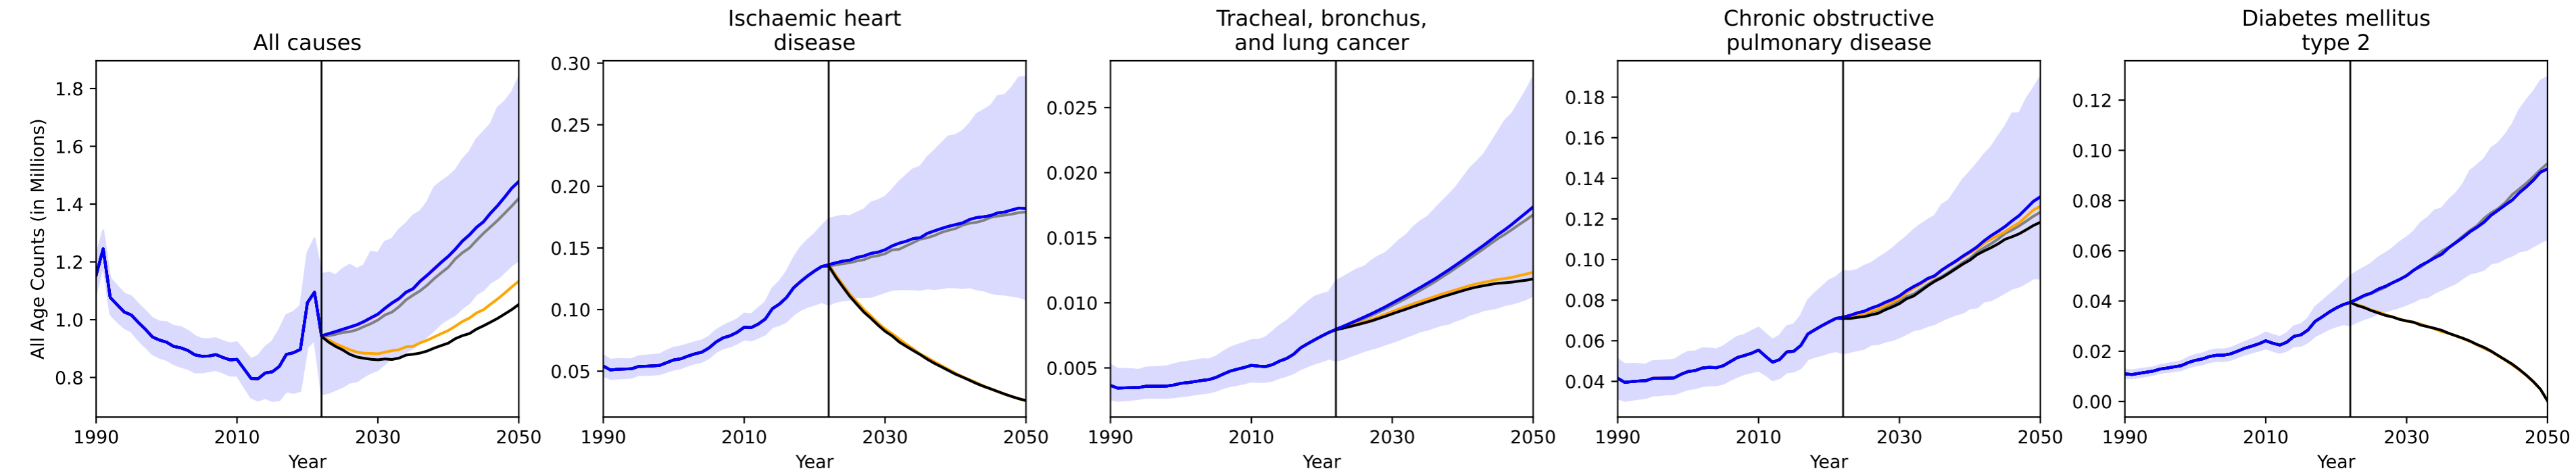

— Safer Environment — Improved Behavioural and Metabolic Risks — Improved Childhood Nutrition and Vaccination — Combined — Reference

# Bhutan

Supplemental Results Figure S13. All cause and top NCD causes age standardized death rates and all age counts by scenario and location, 1990-2050

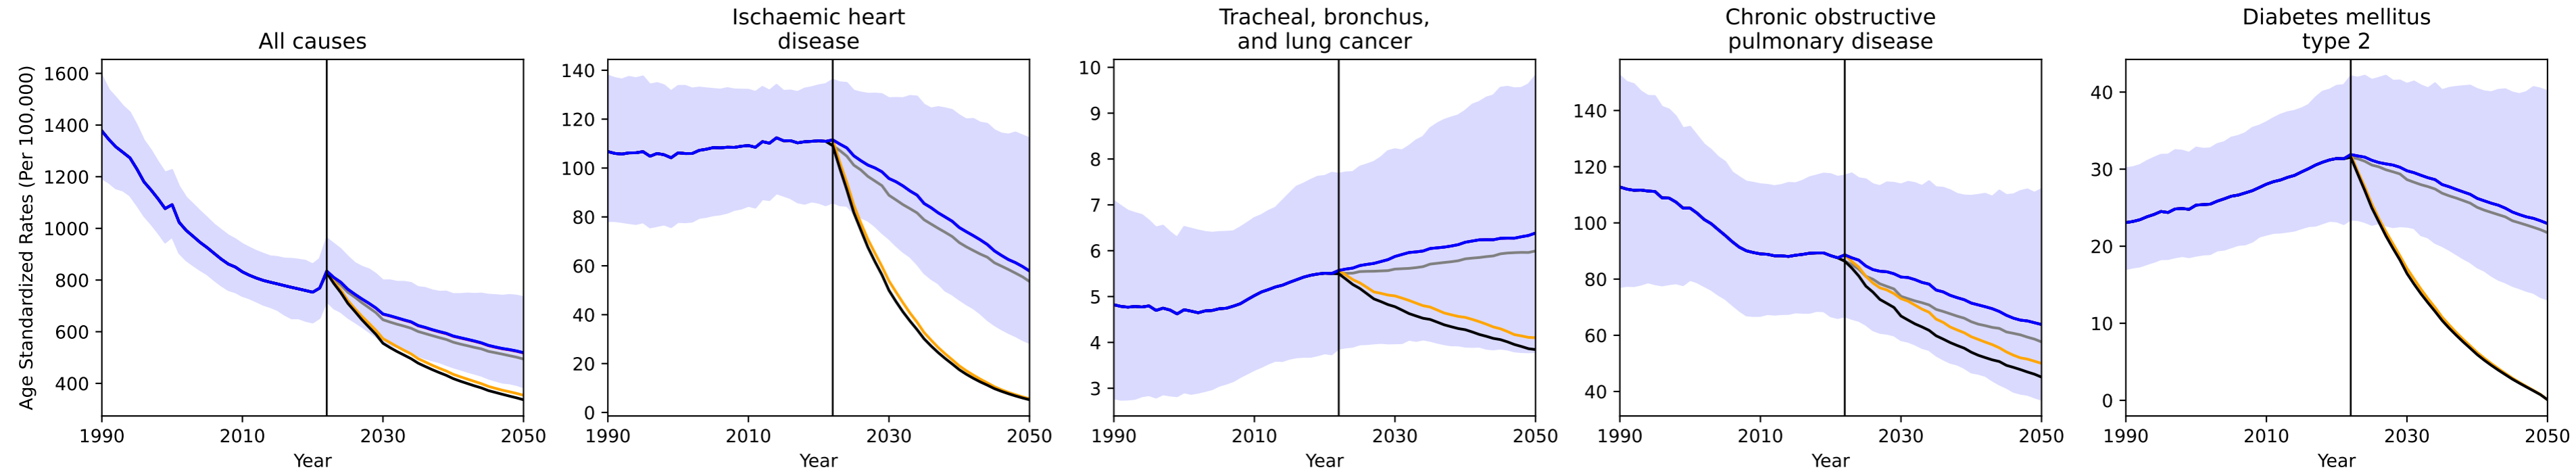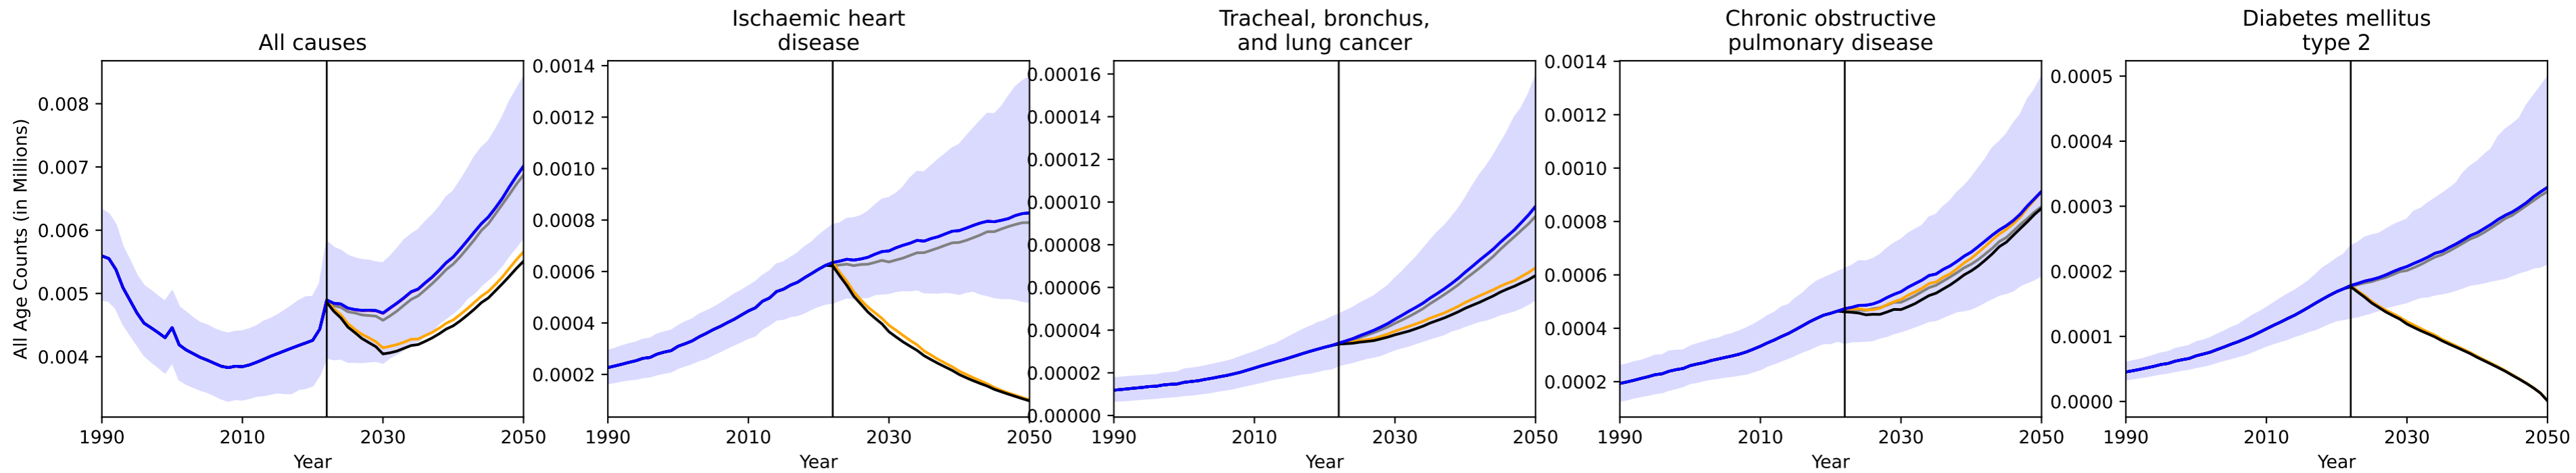

# India

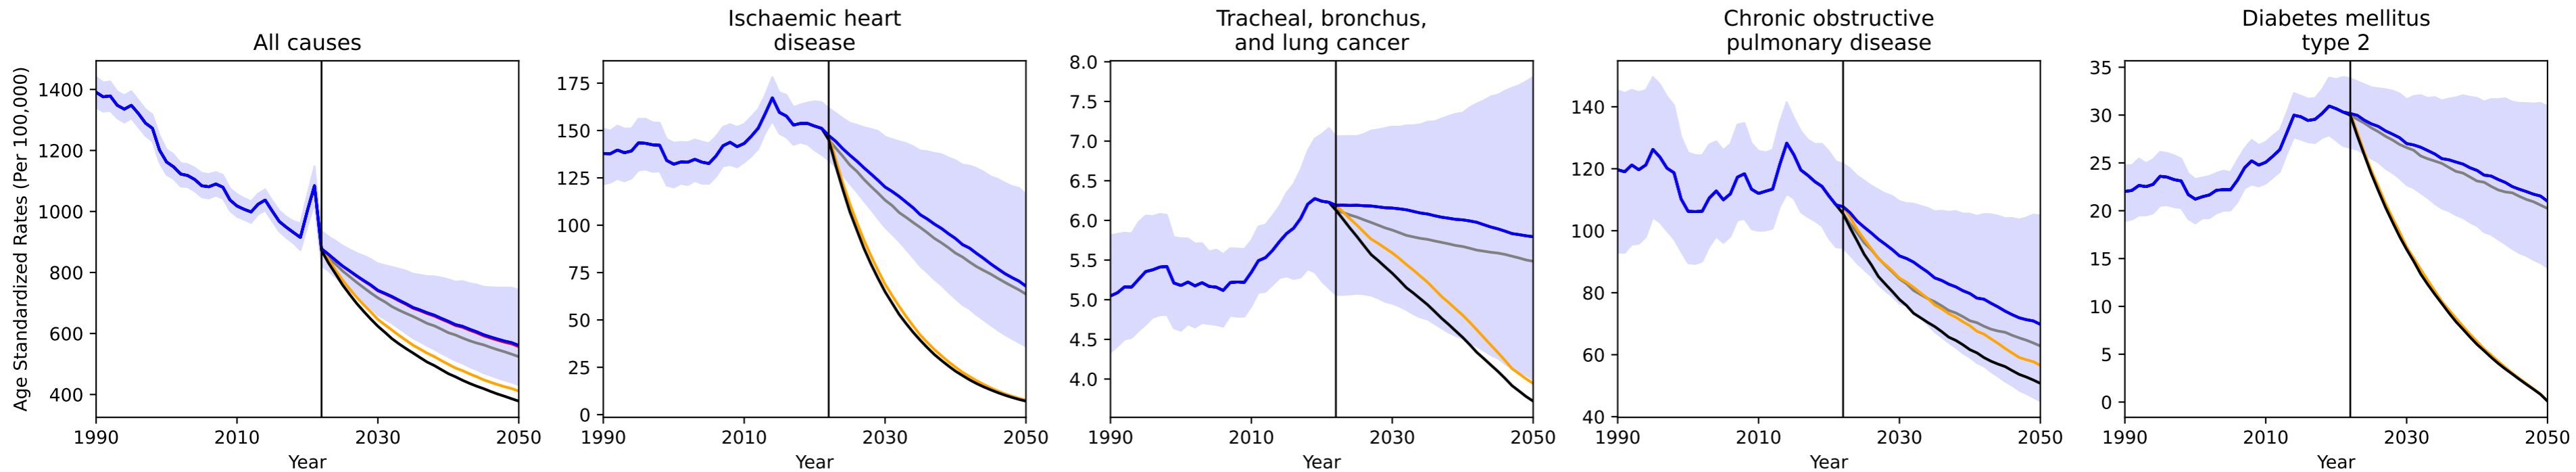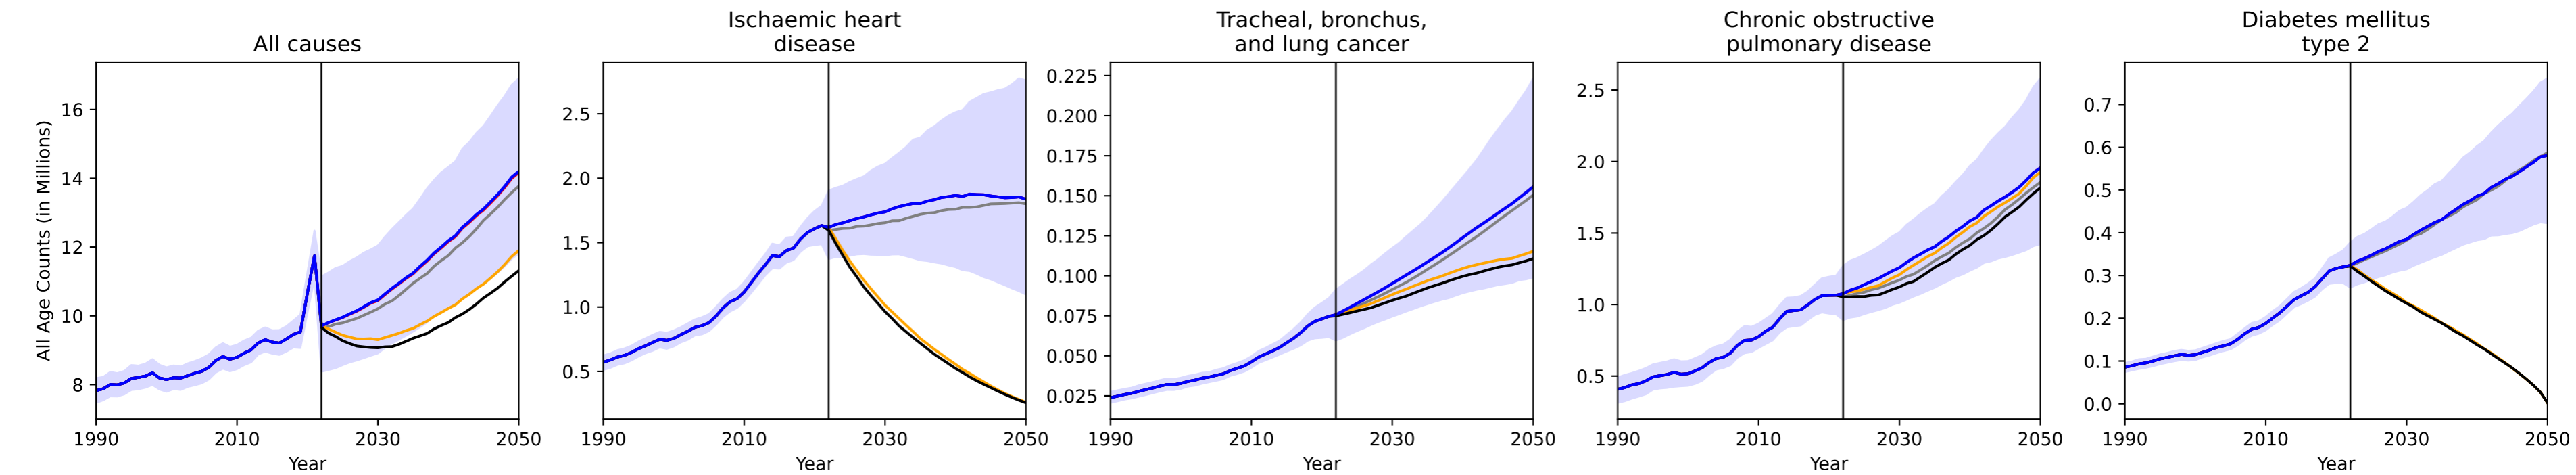

— Safer Environment — Improved Behavioural and Metabolic Risks — Improved Childhood Nutrition and Vaccination — Combined — Reference



# Nepal

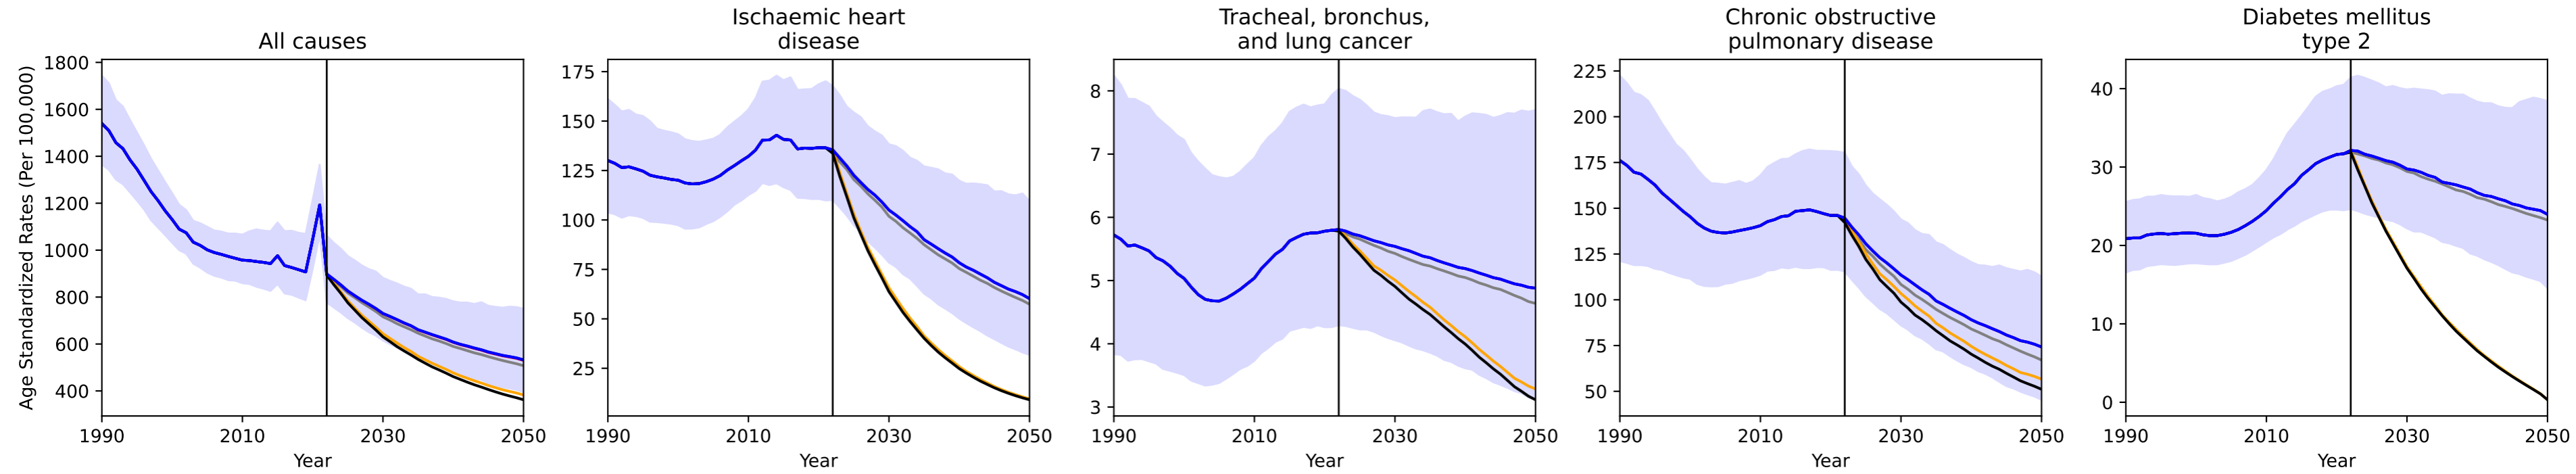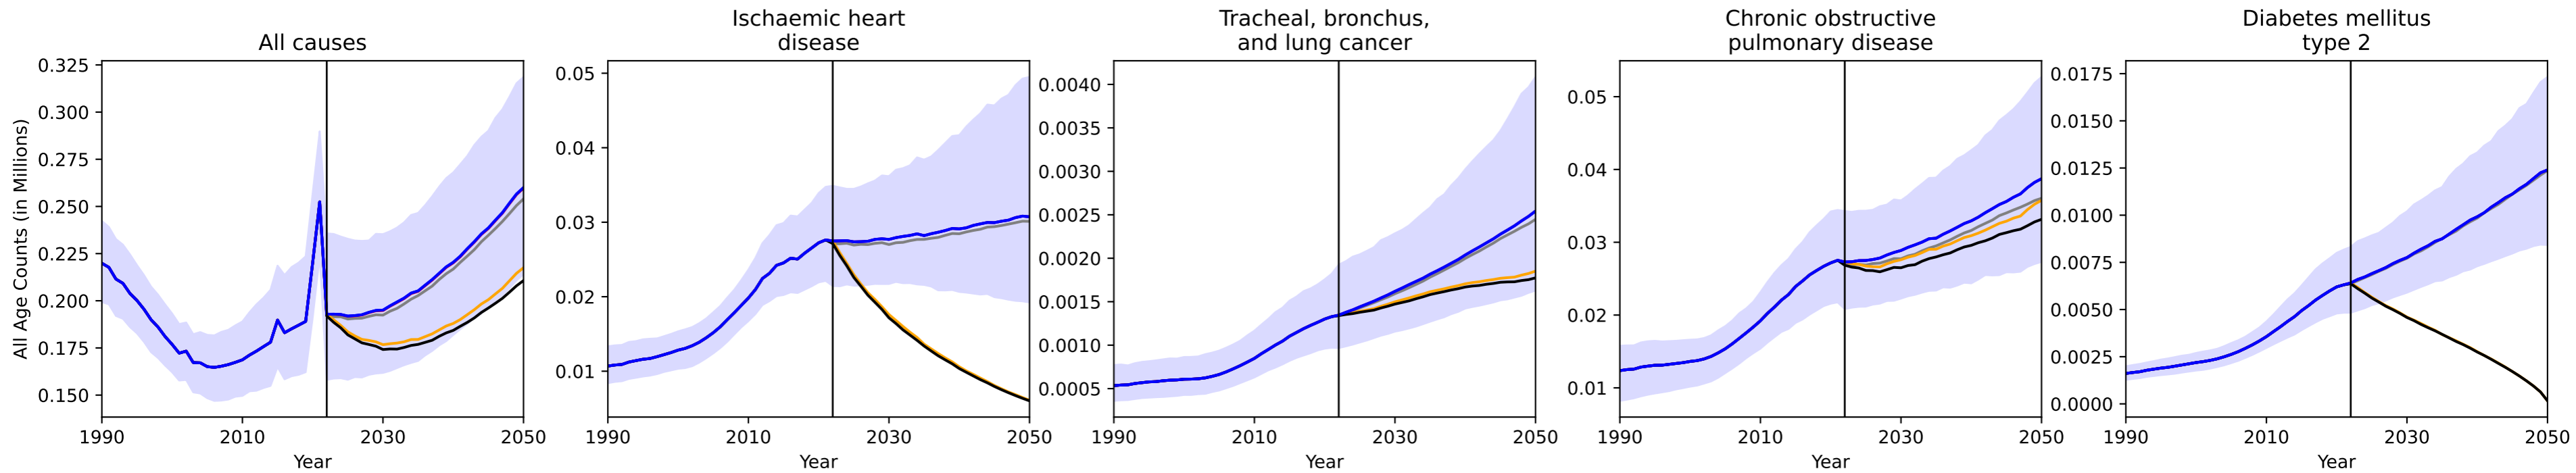

# Pakistan

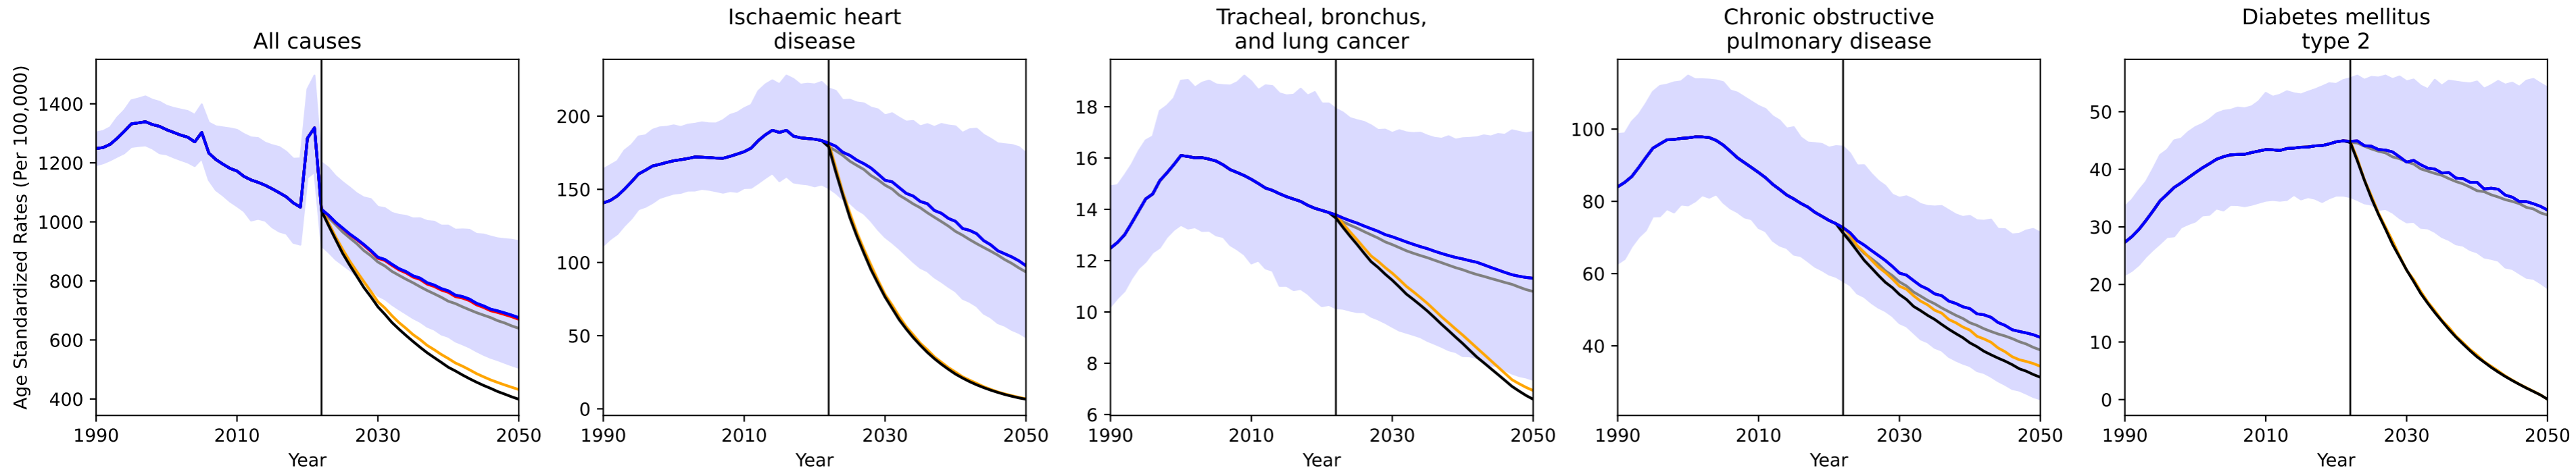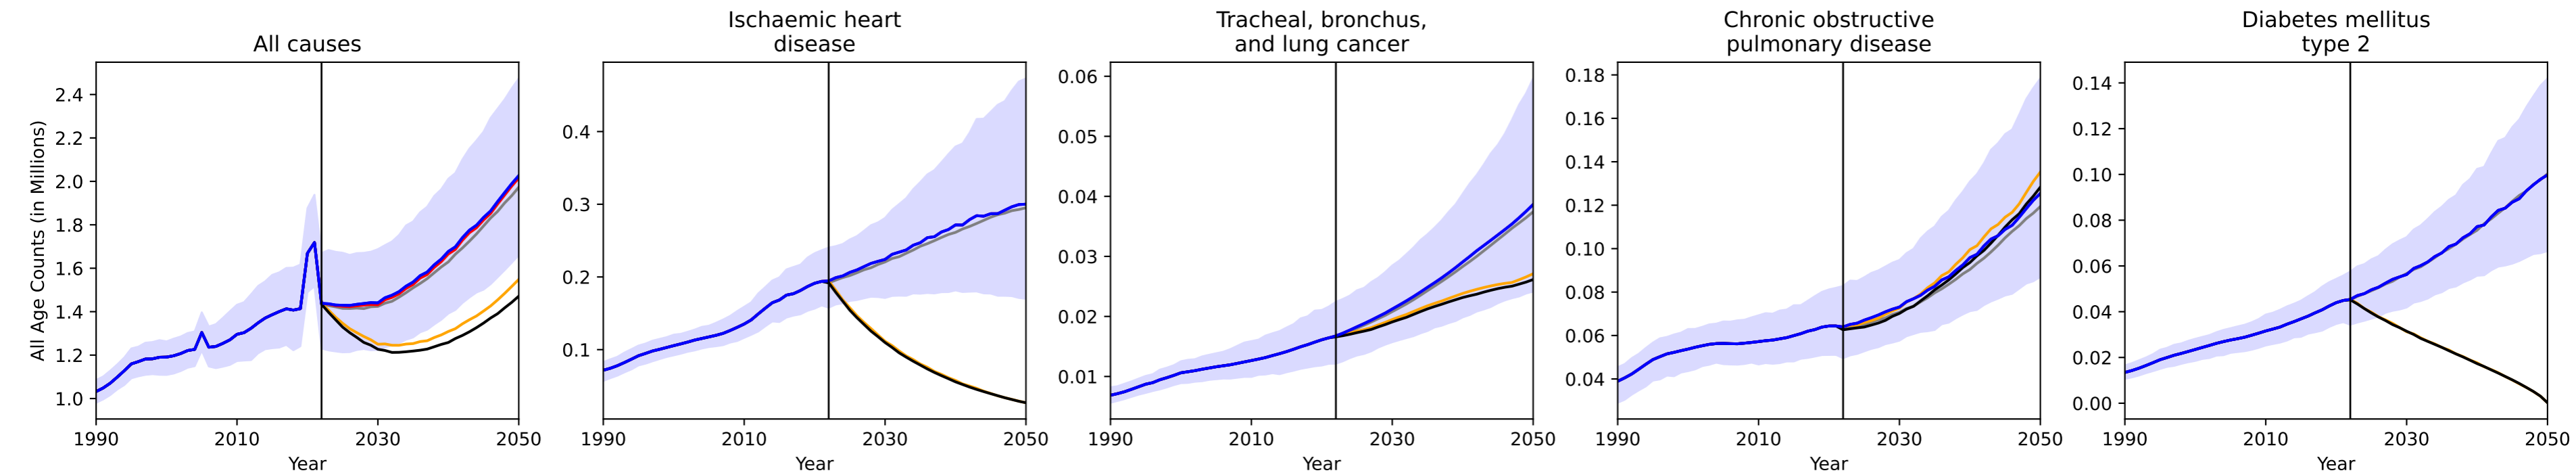

— Safer Environment — Improved Behavioural and Metabolic Risks — Improved Childhood Nutrition and Vaccination — Combined — Reference

# China

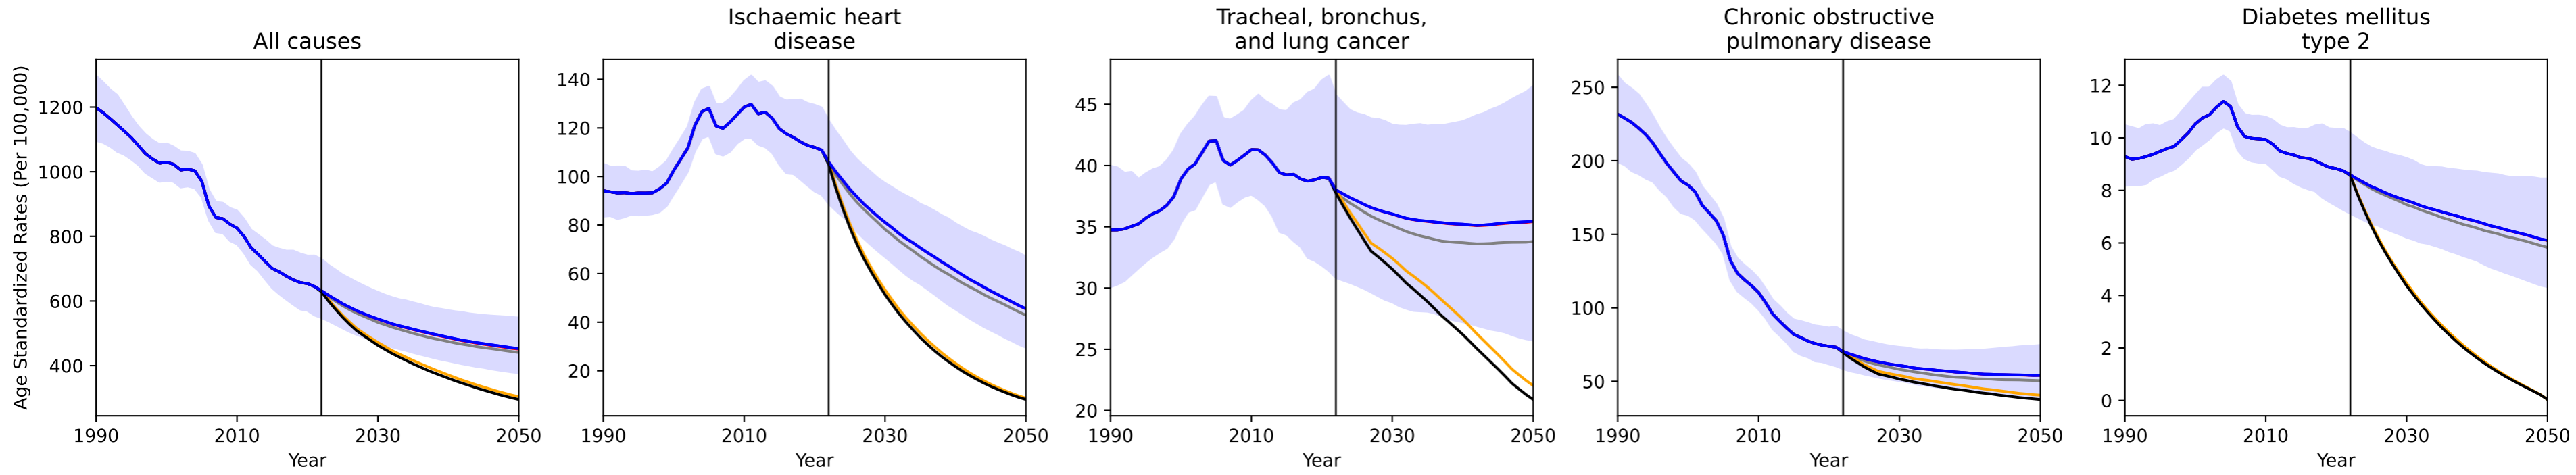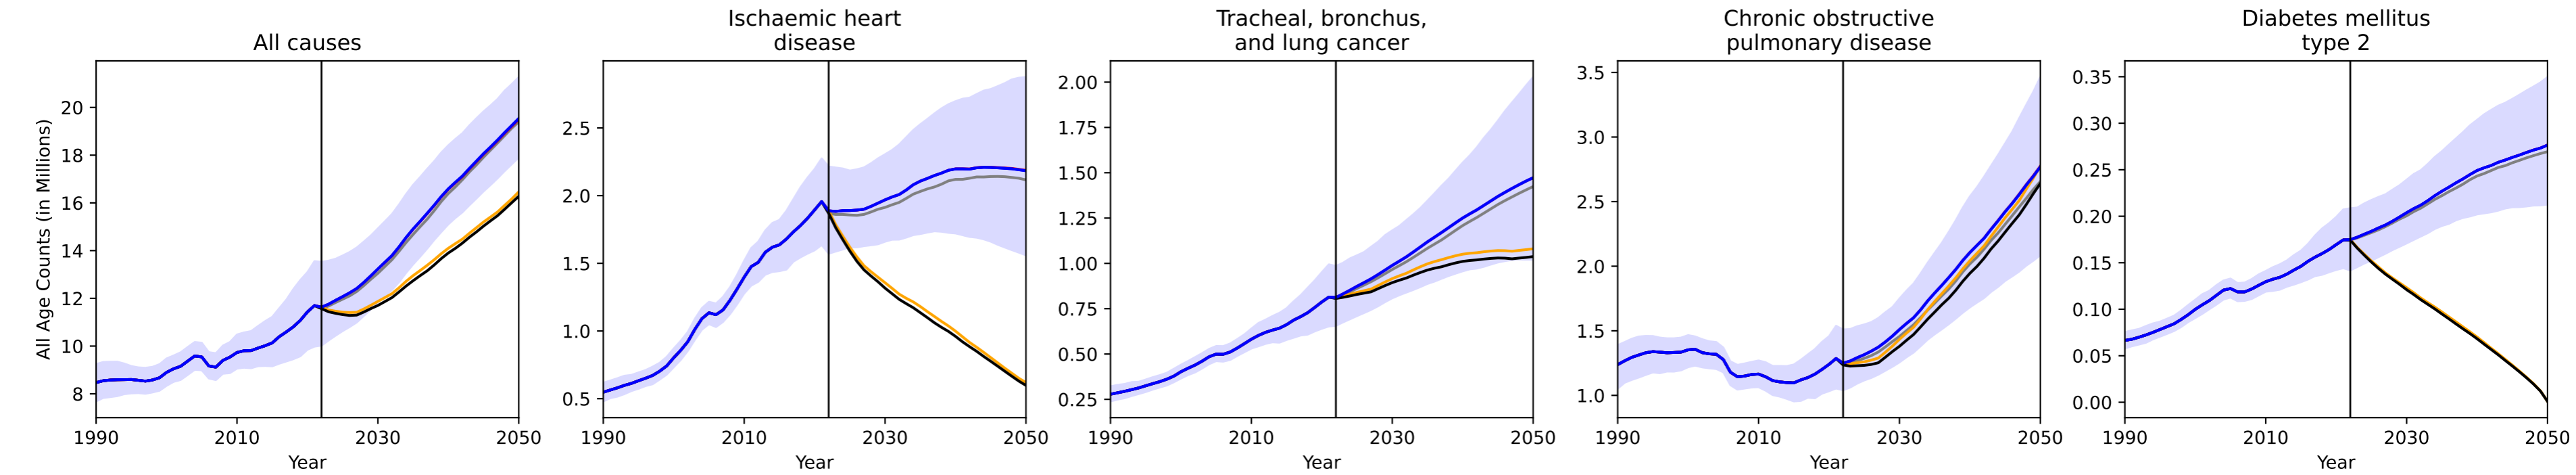

— Safer Environment — Improved Behavioural and Metabolic Risks — Improved Childhood Nutrition and Vaccination — Combined — Reference

# North Korea

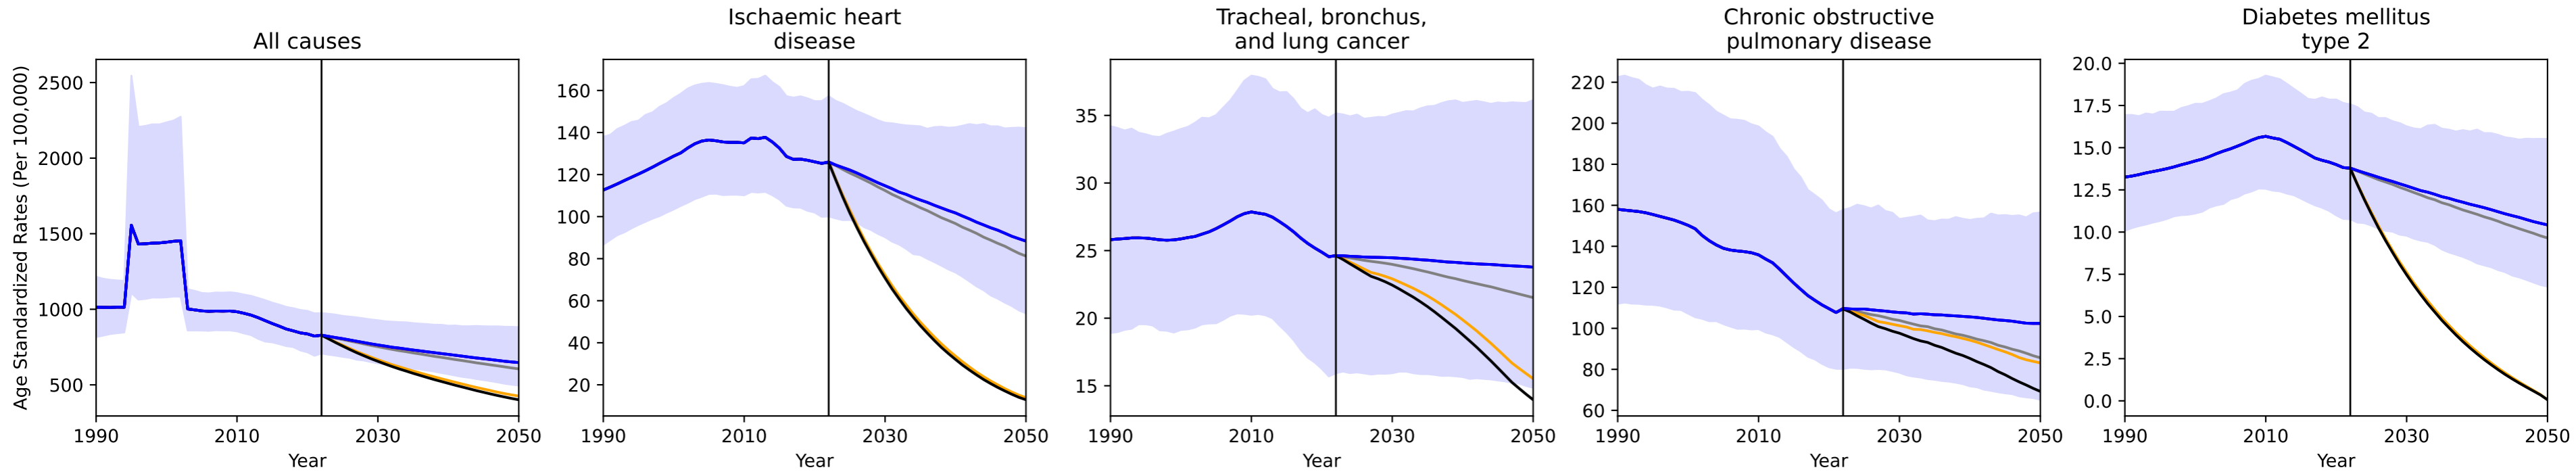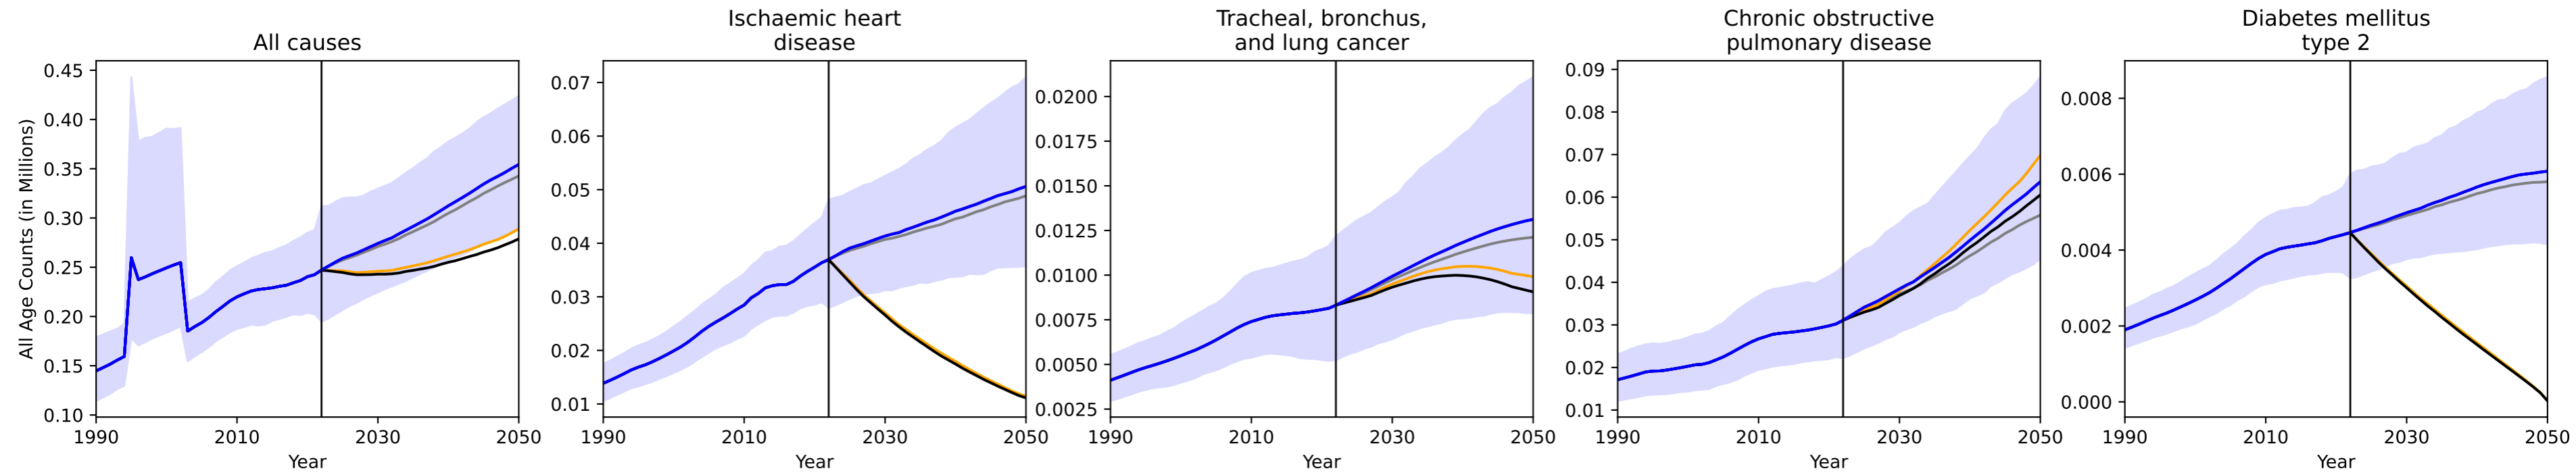

— Safer Environment — Improved Behavioural and Metabolic Risks — Improved Childhood Nutrition and Vaccination — Combined — Reference

# Taiwan (Province Of China)

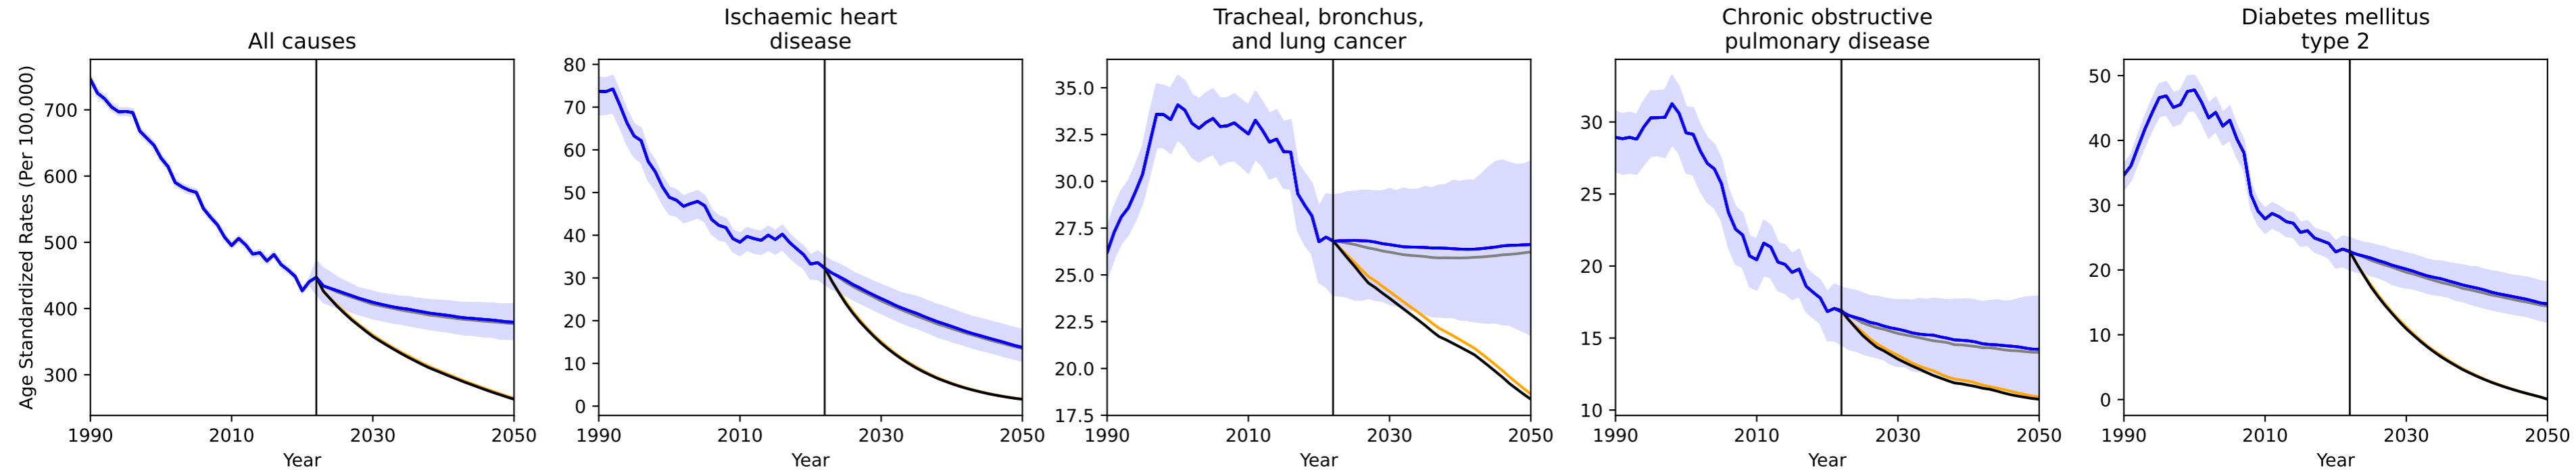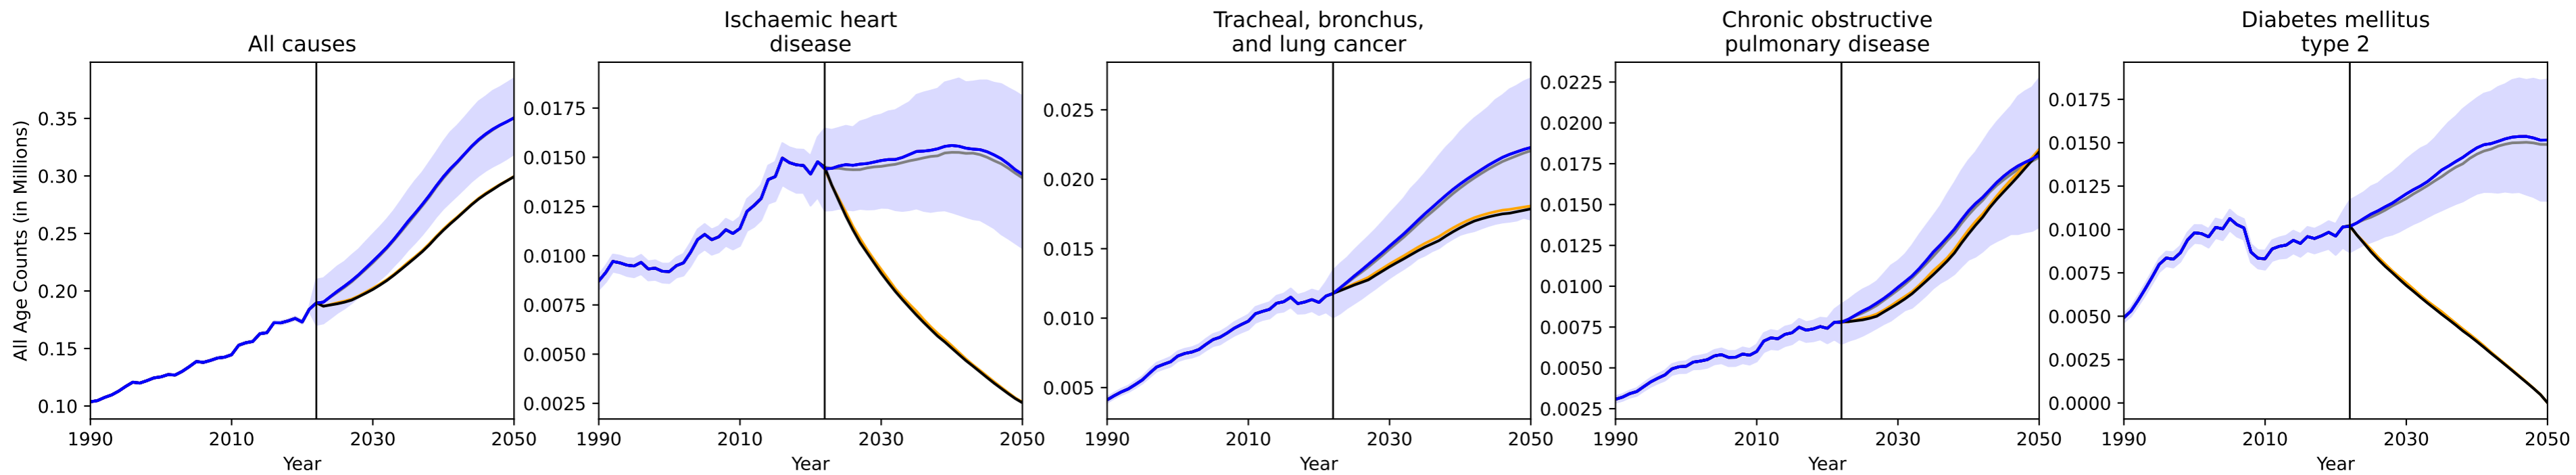

— Safer Environment — Improved Behavioural and Metabolic Risks — Improved Childhood Nutrition and Vaccination — Combined — Reference

# American Samoa

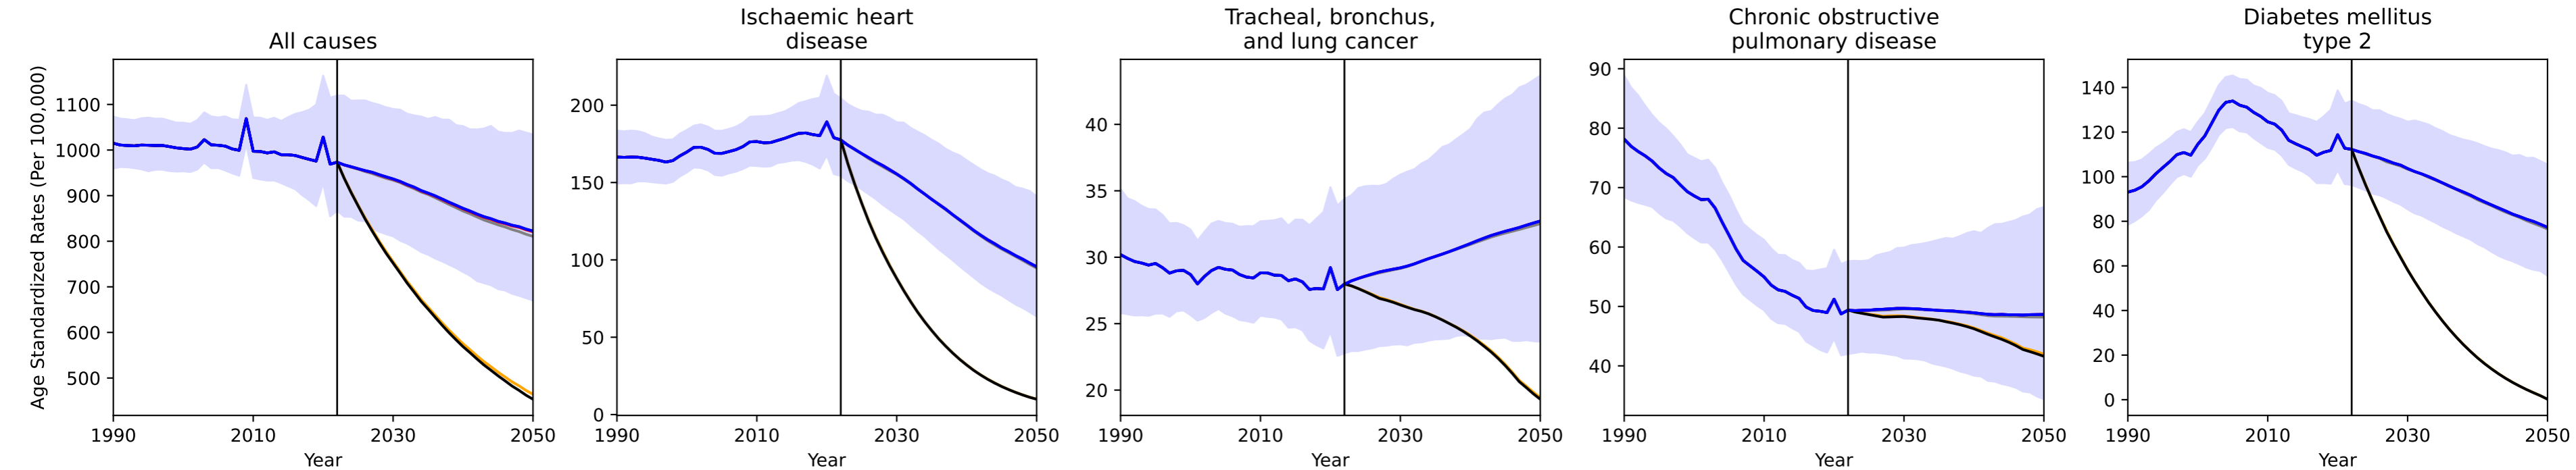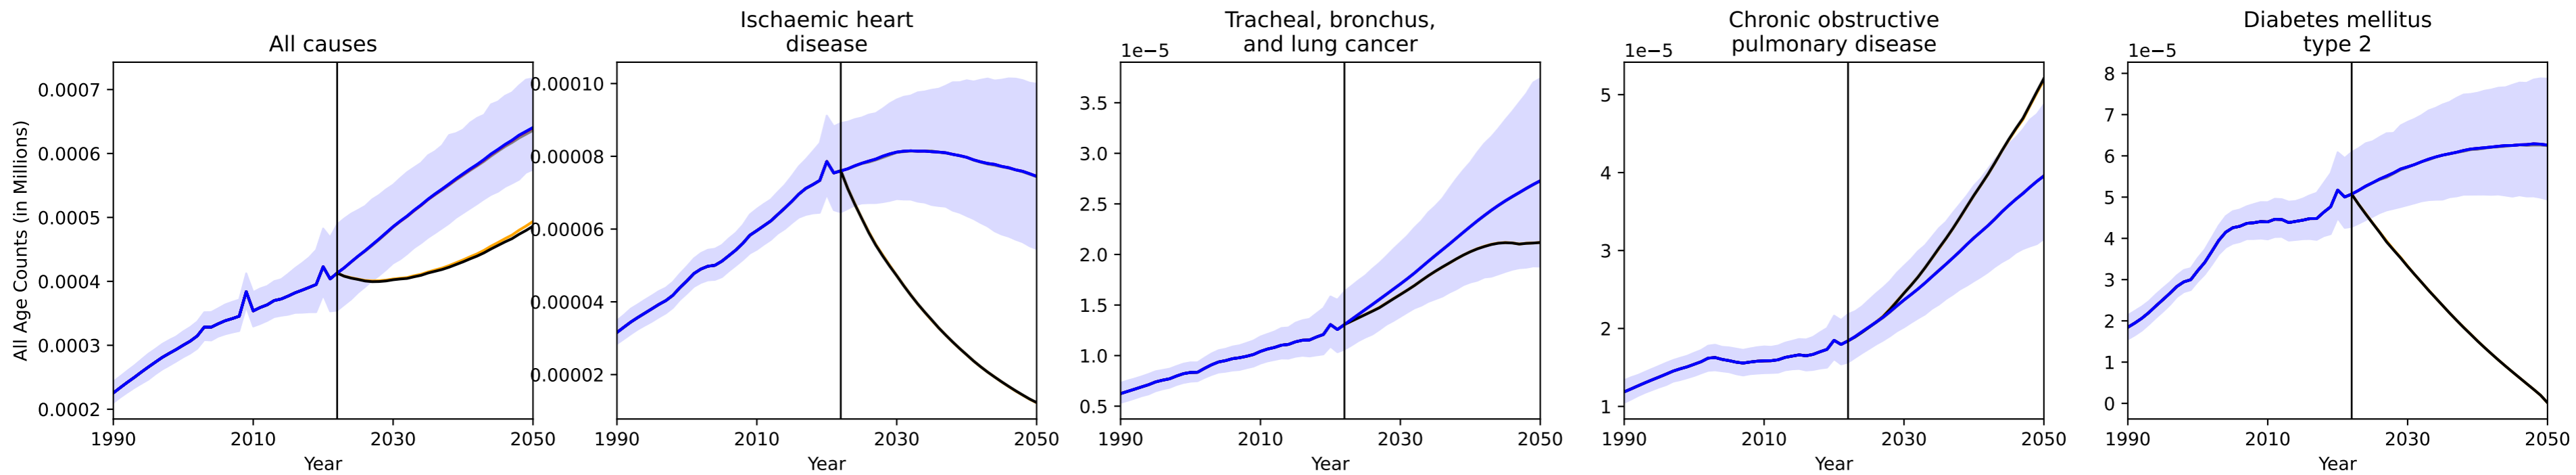

# Cook Islands

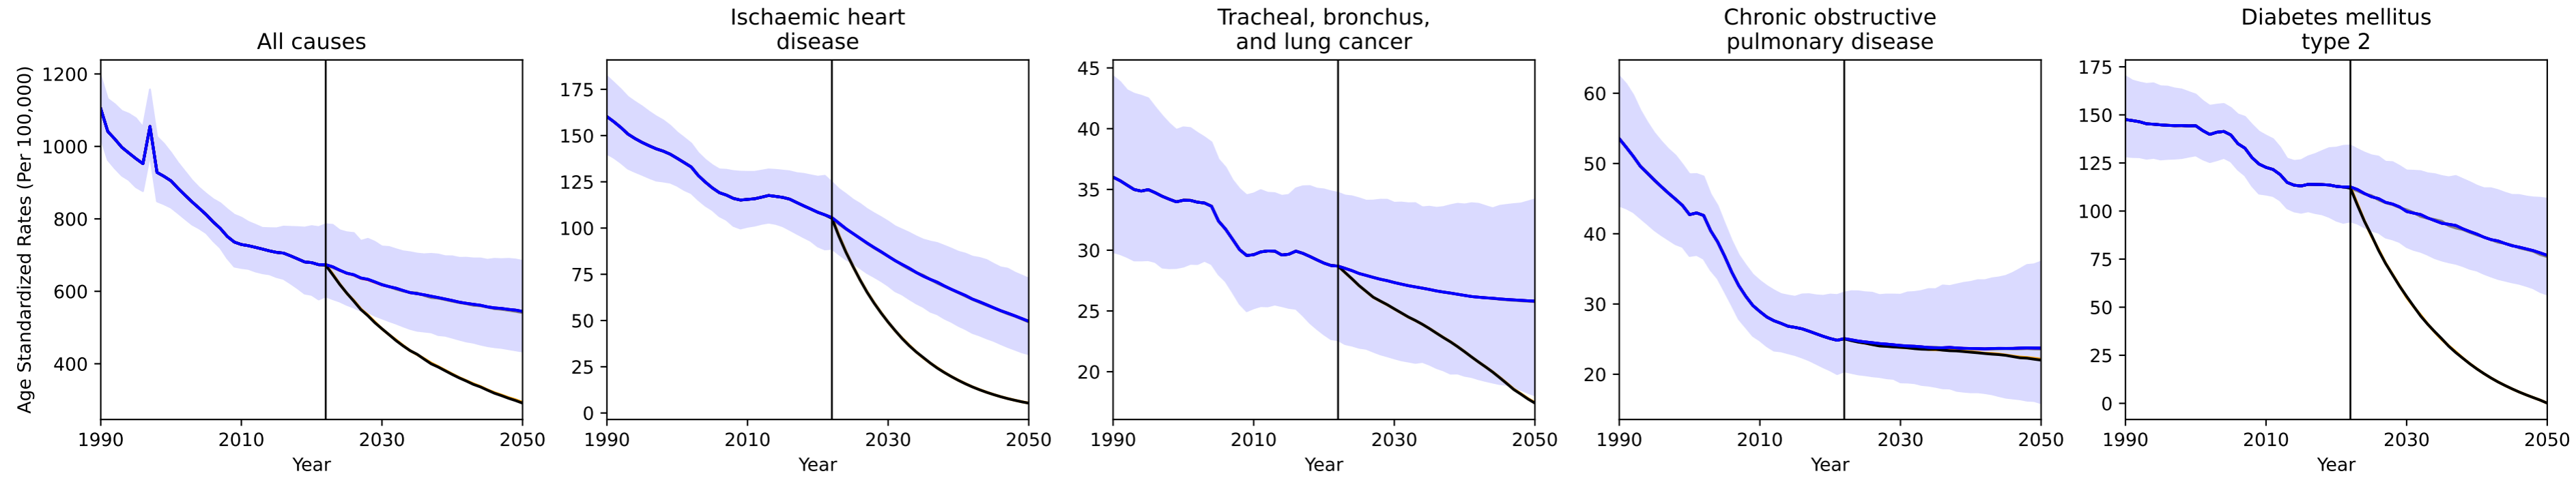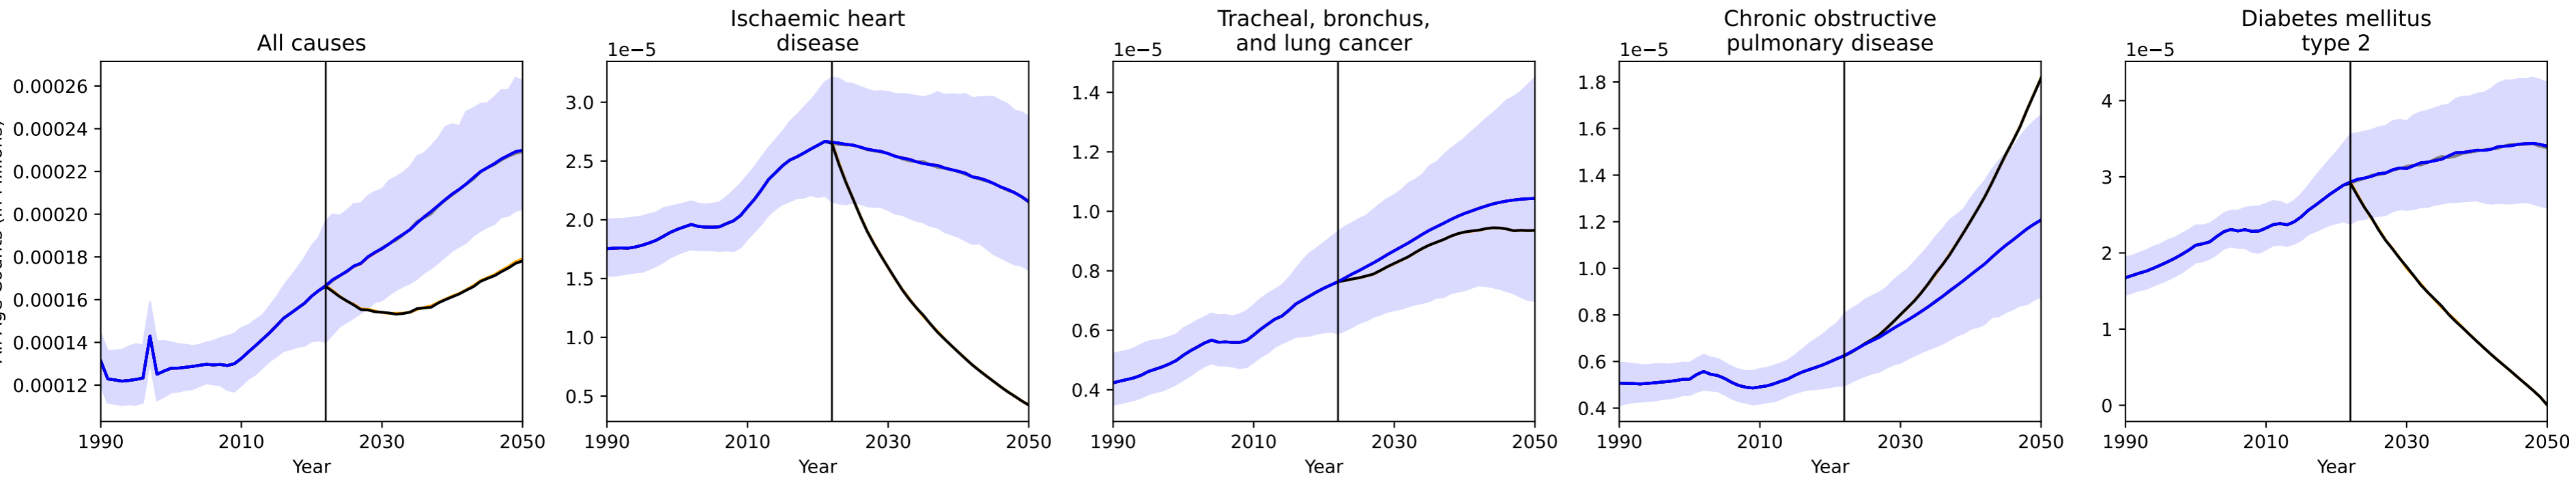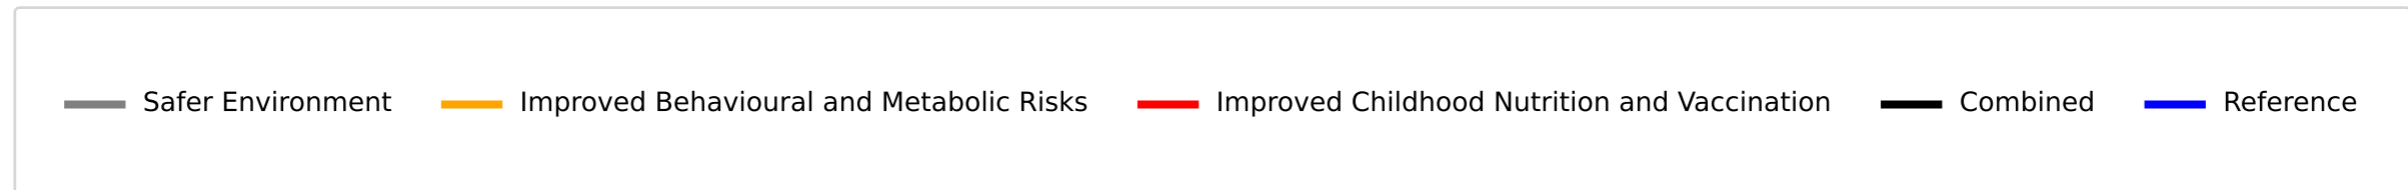

# Fiji

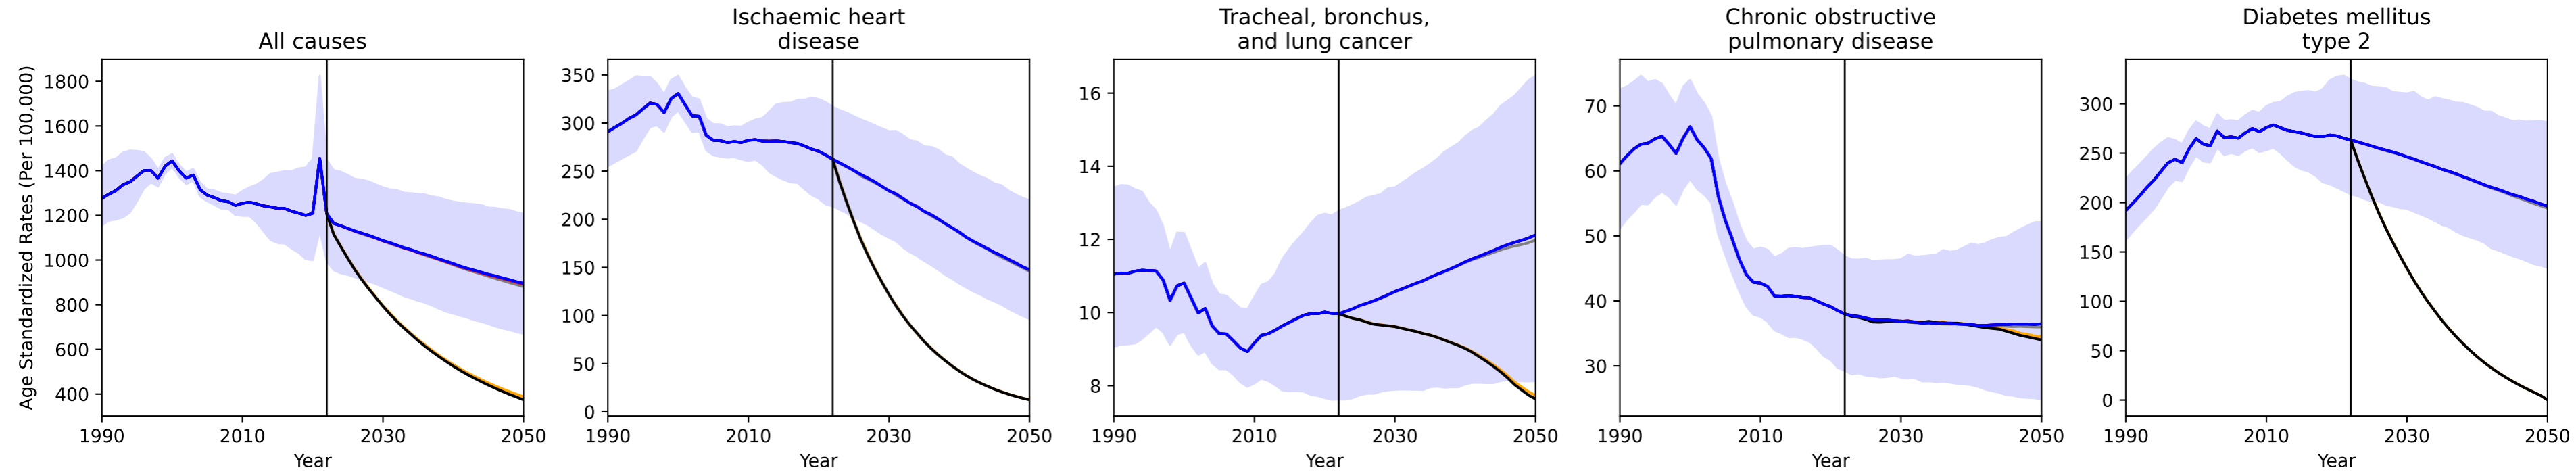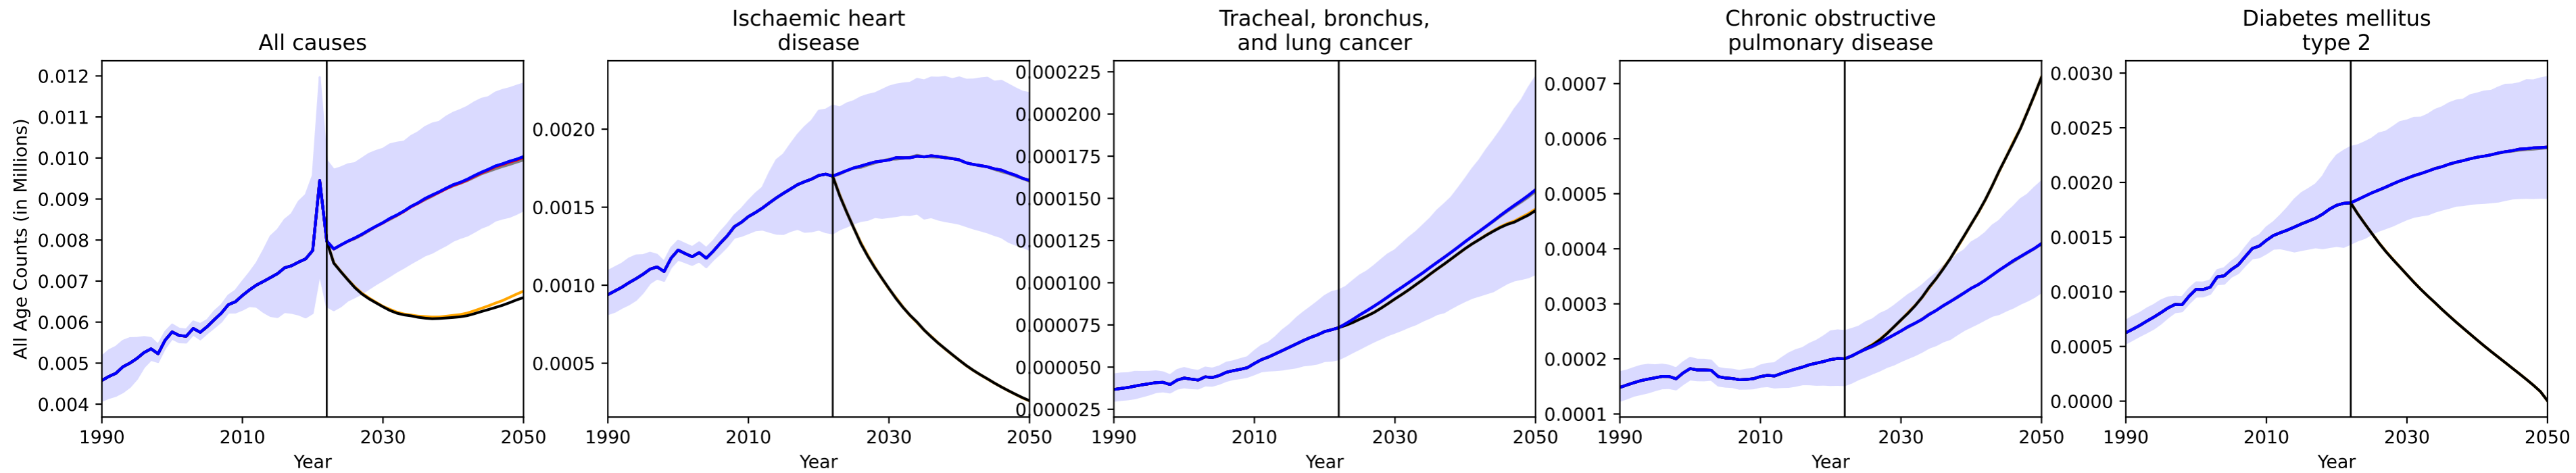



# Guam

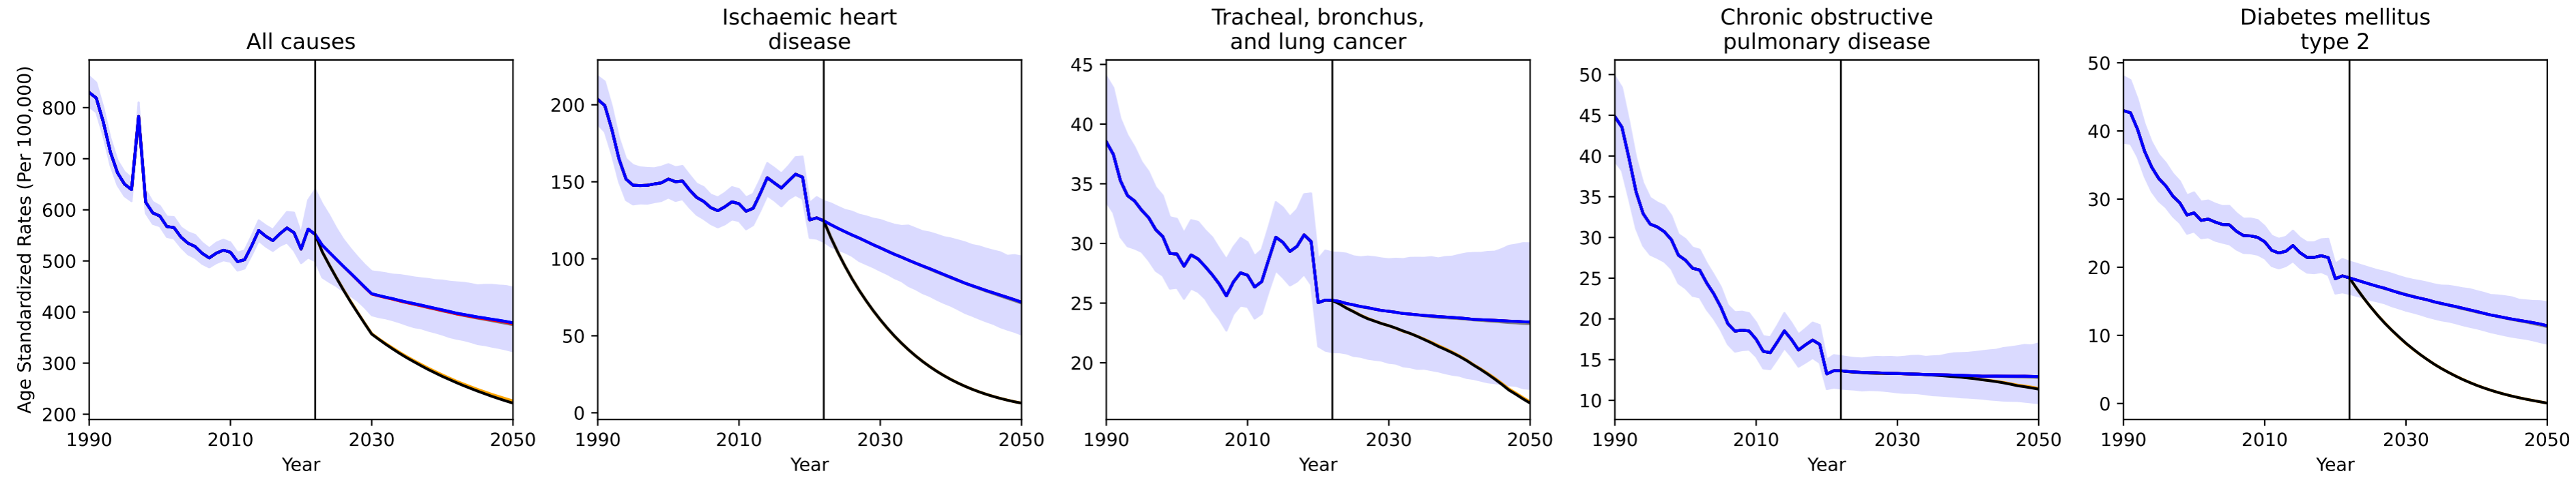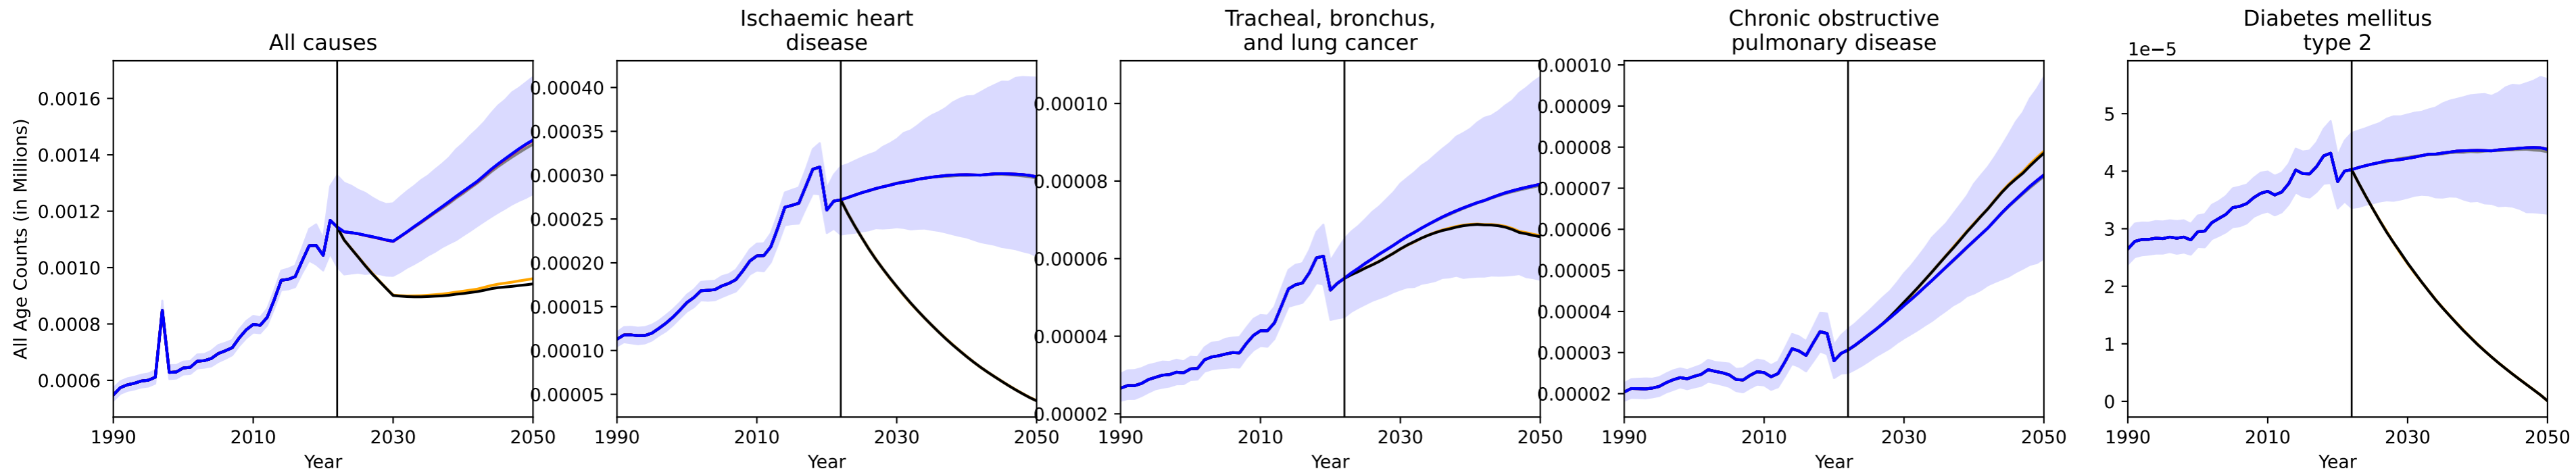

# Kiribati

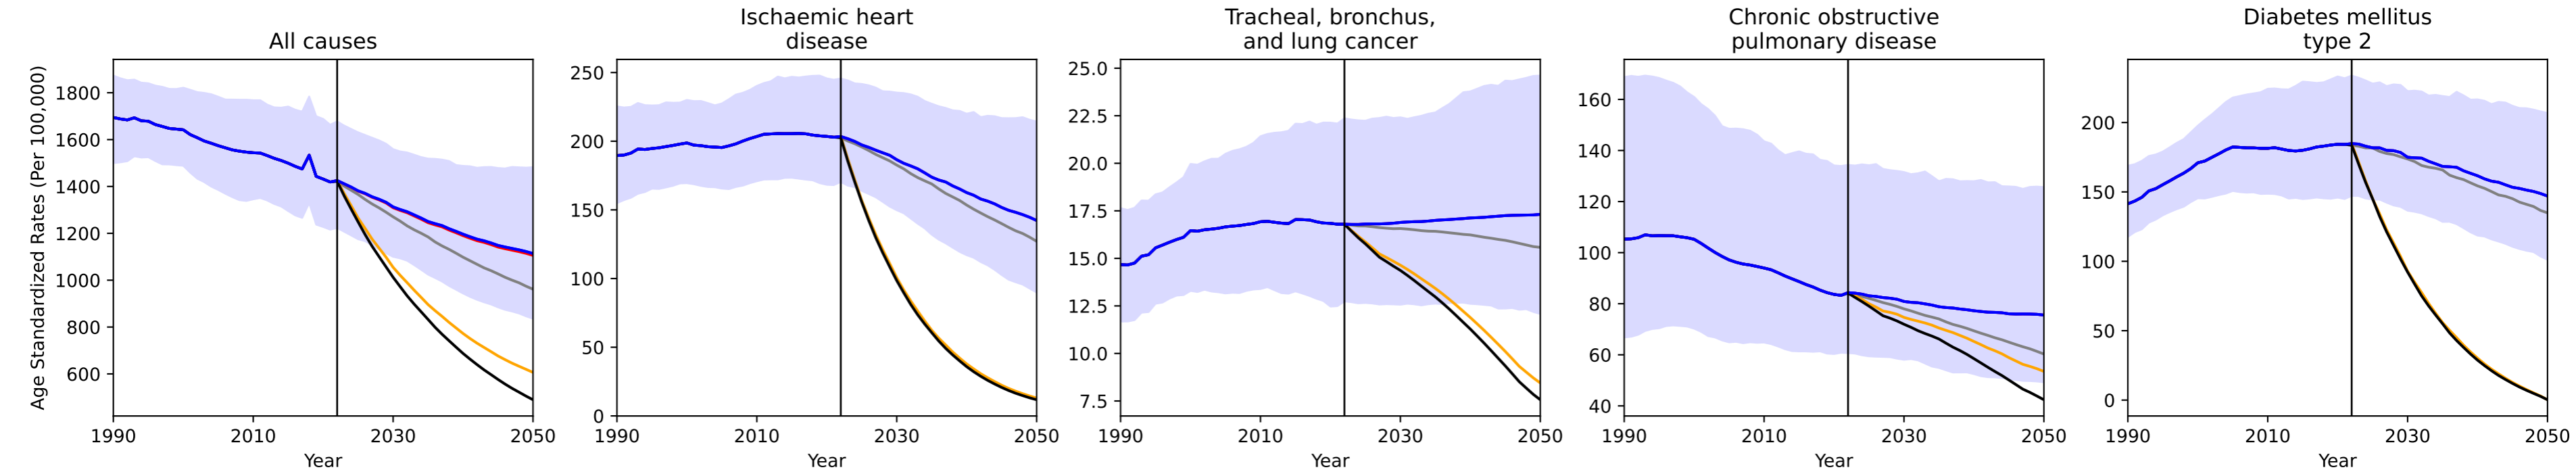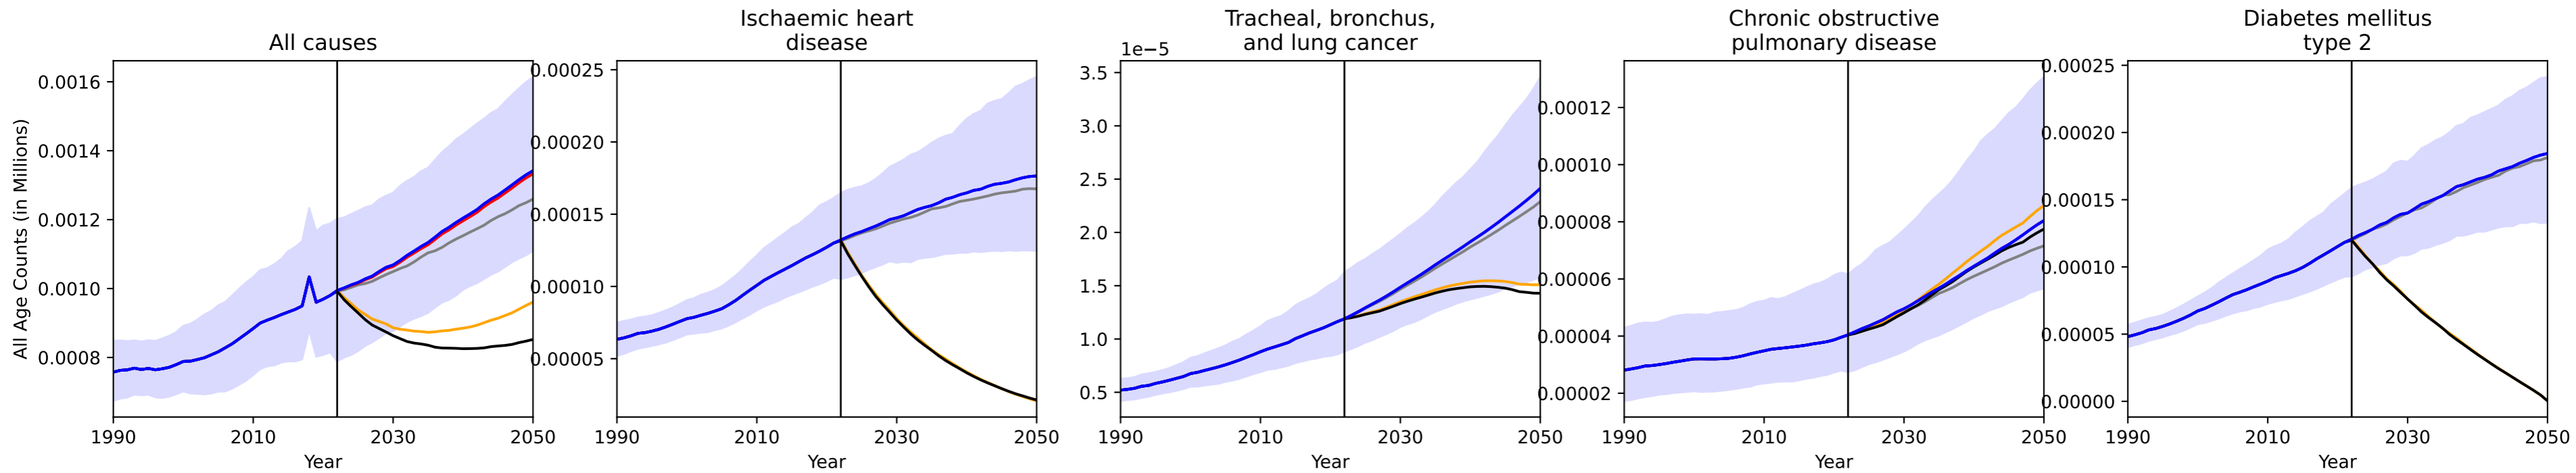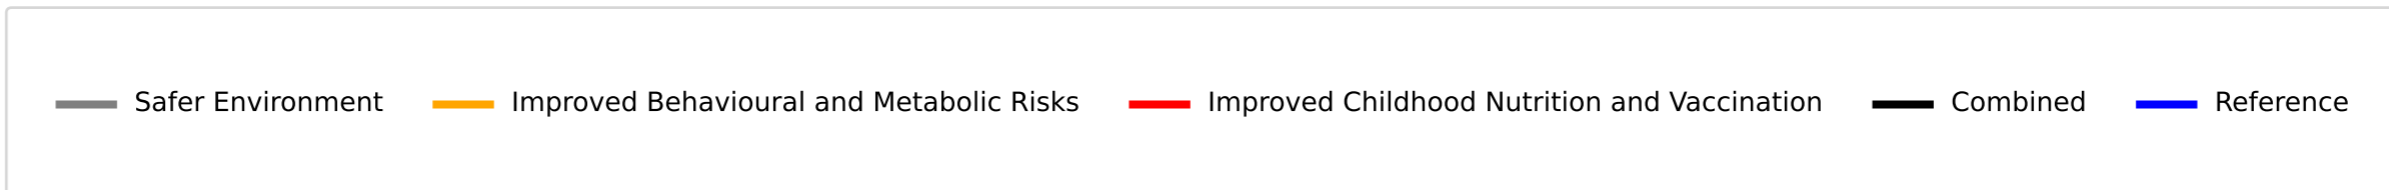

# Marshall Islands

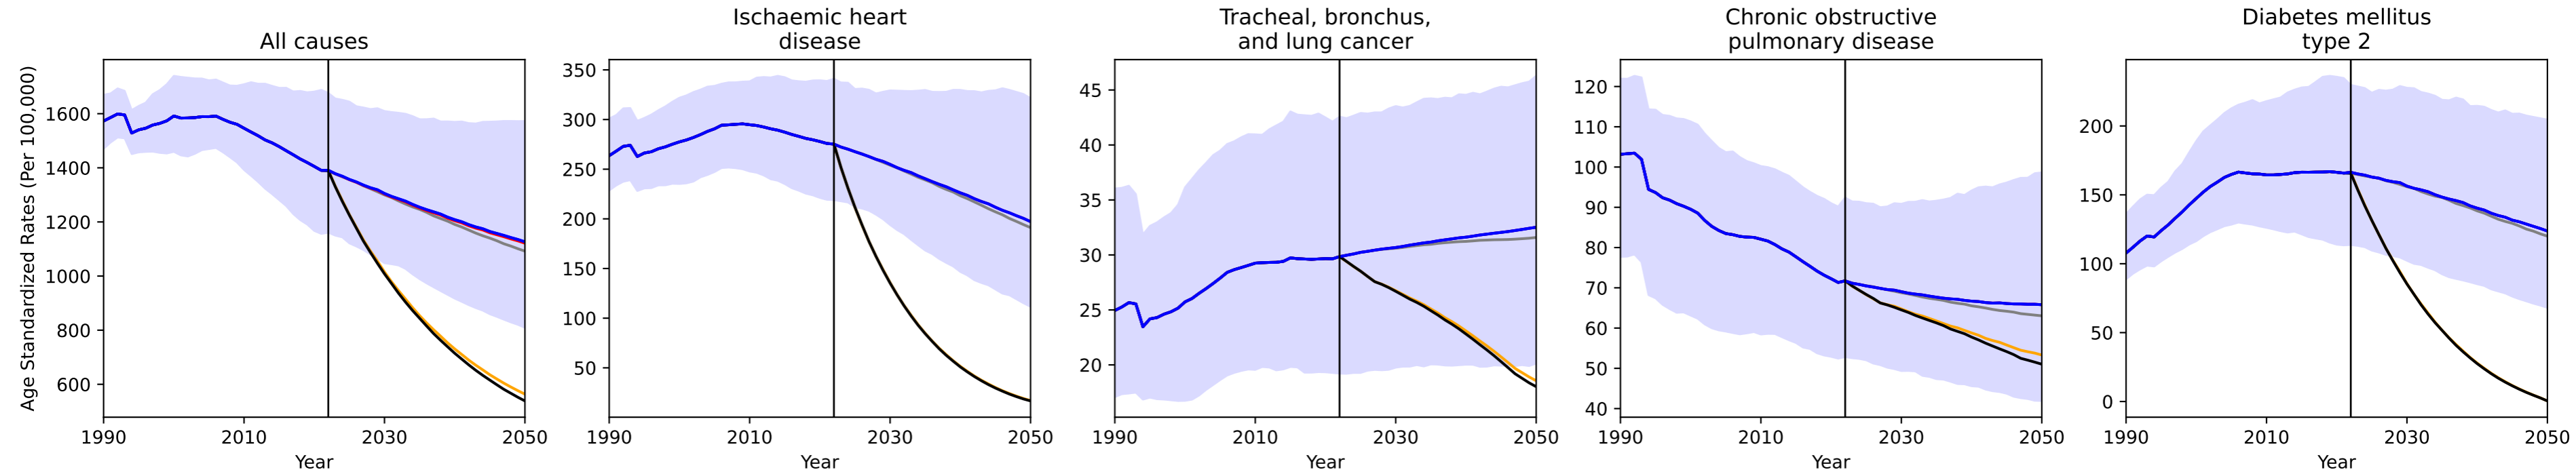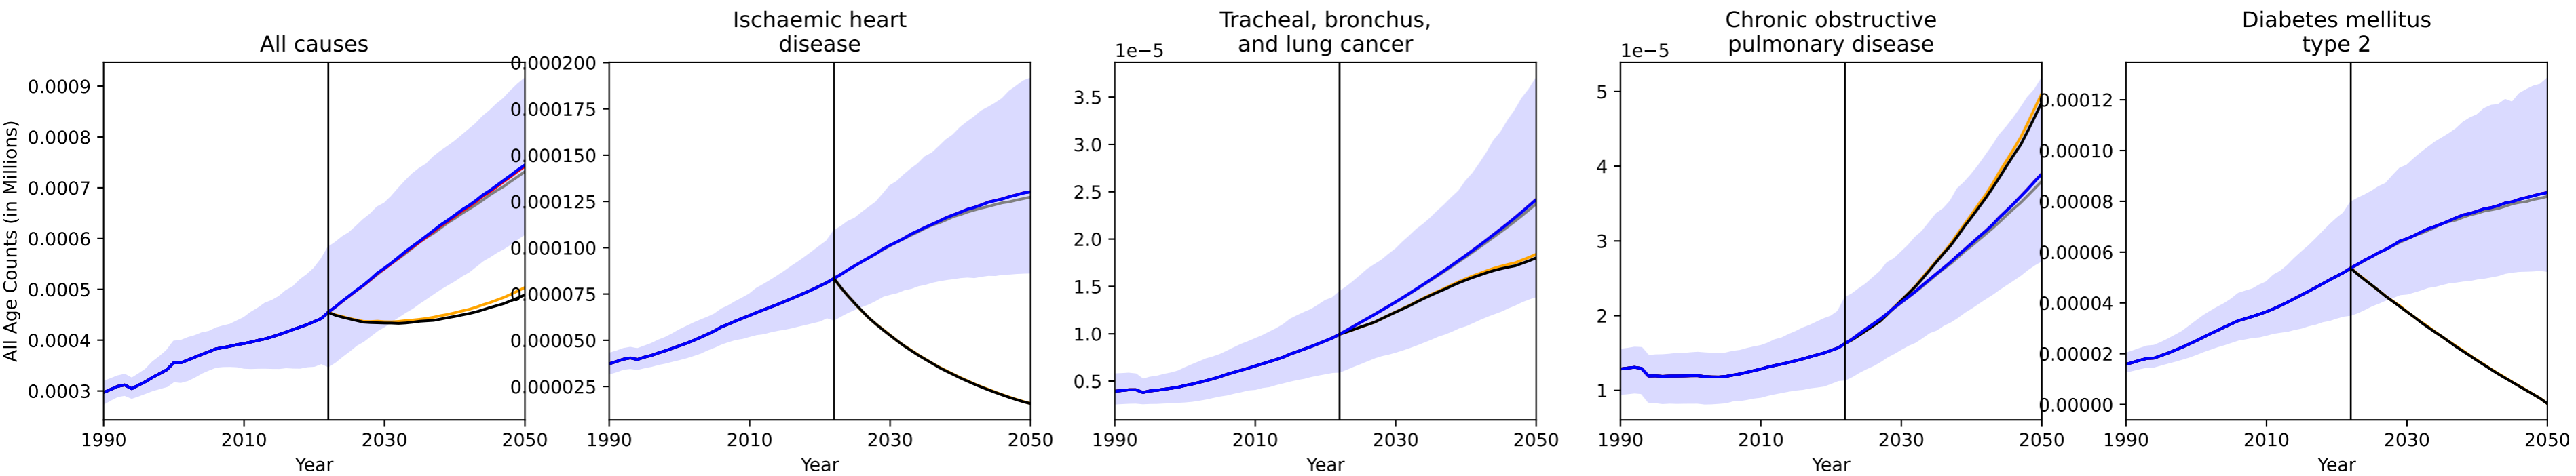

# Federated States Of Micronesia

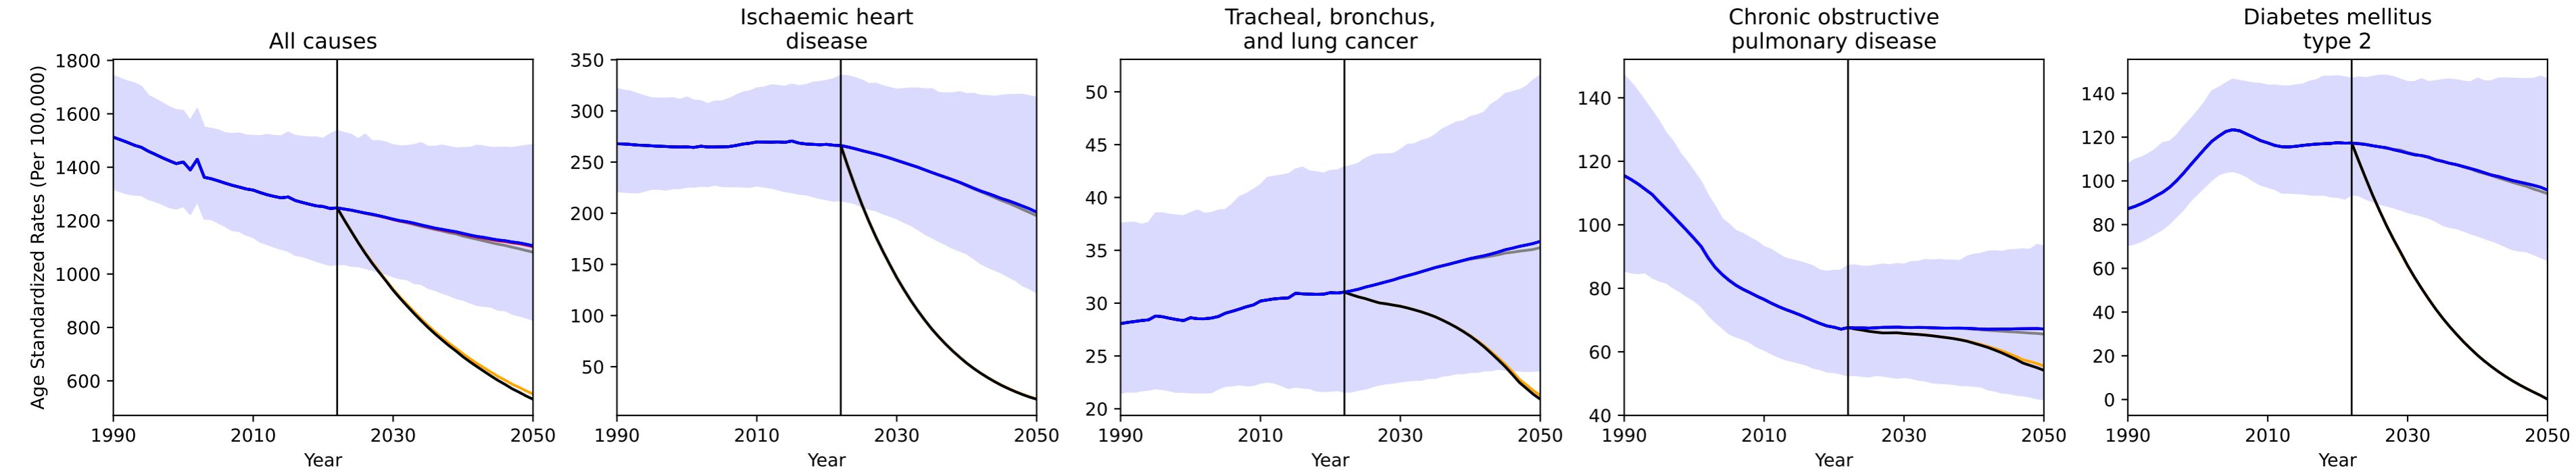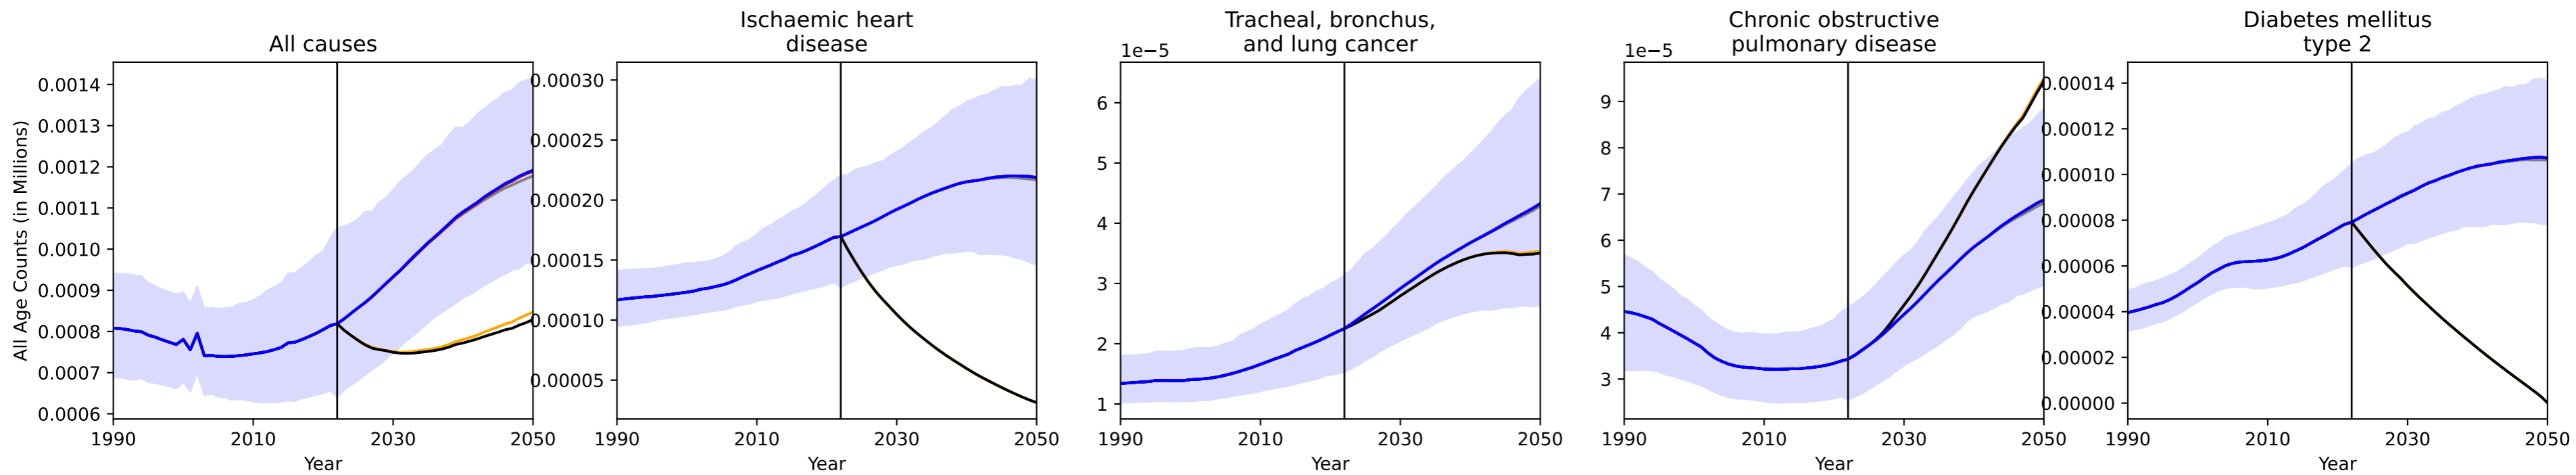

# Nauru

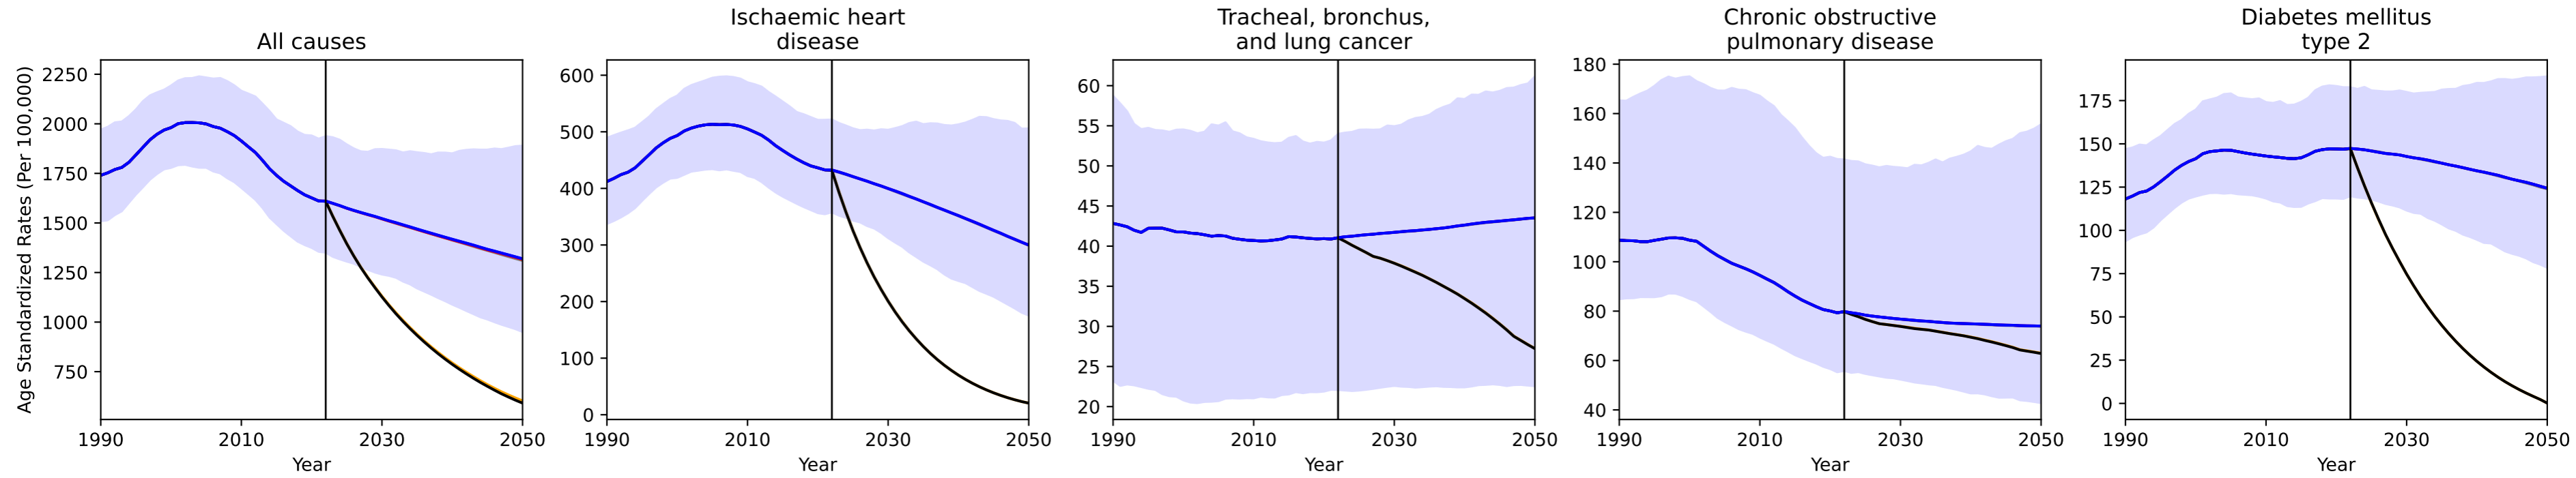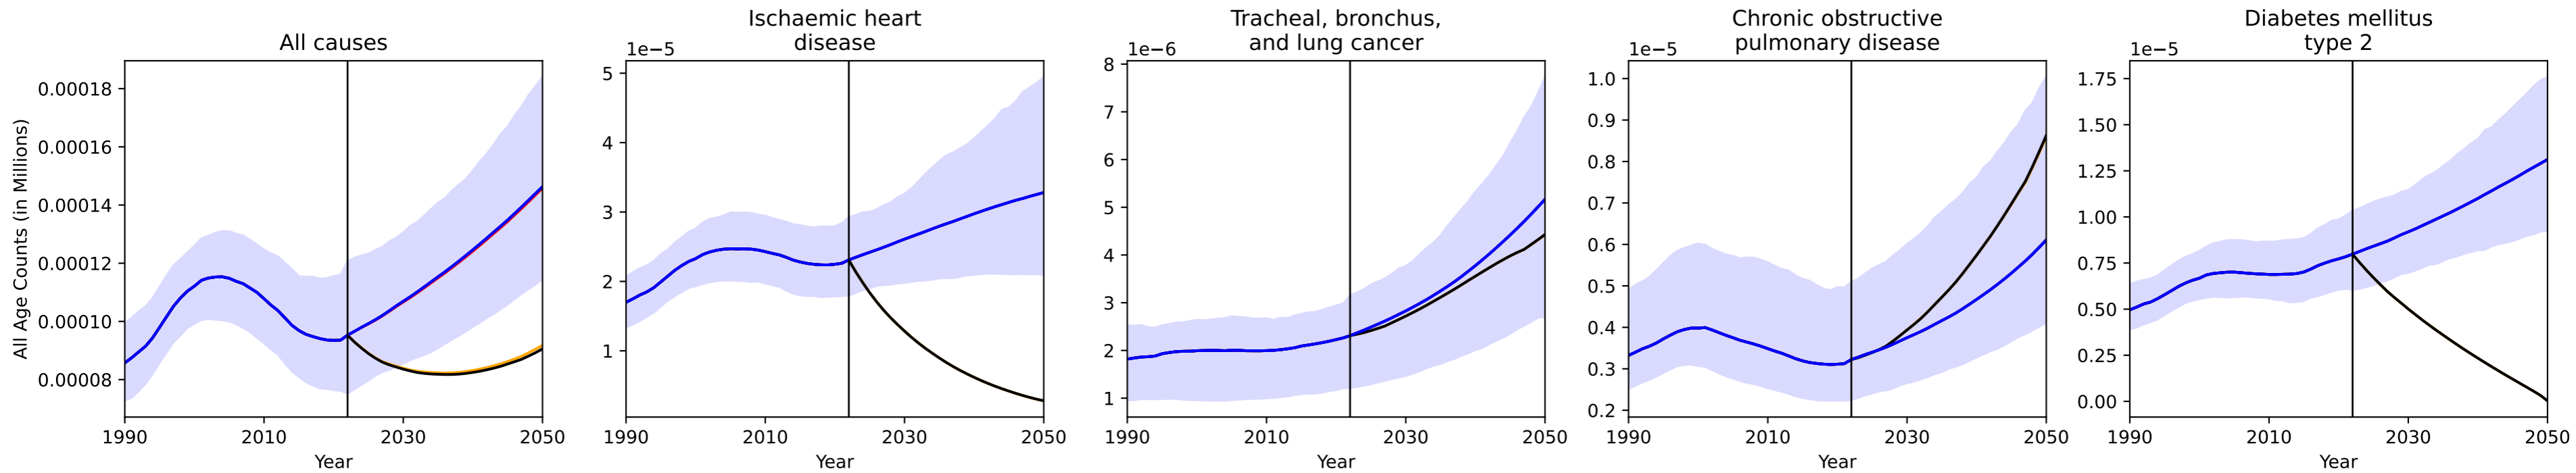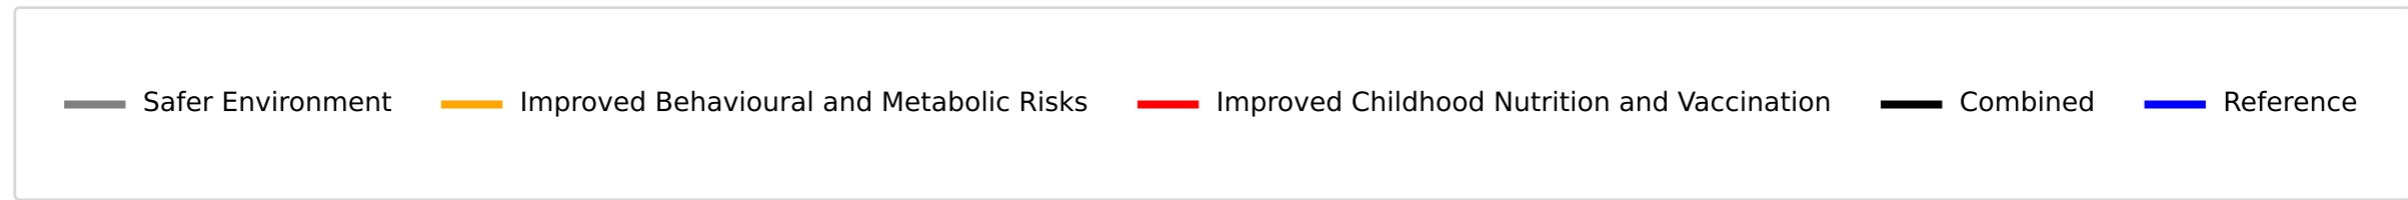

# Niue

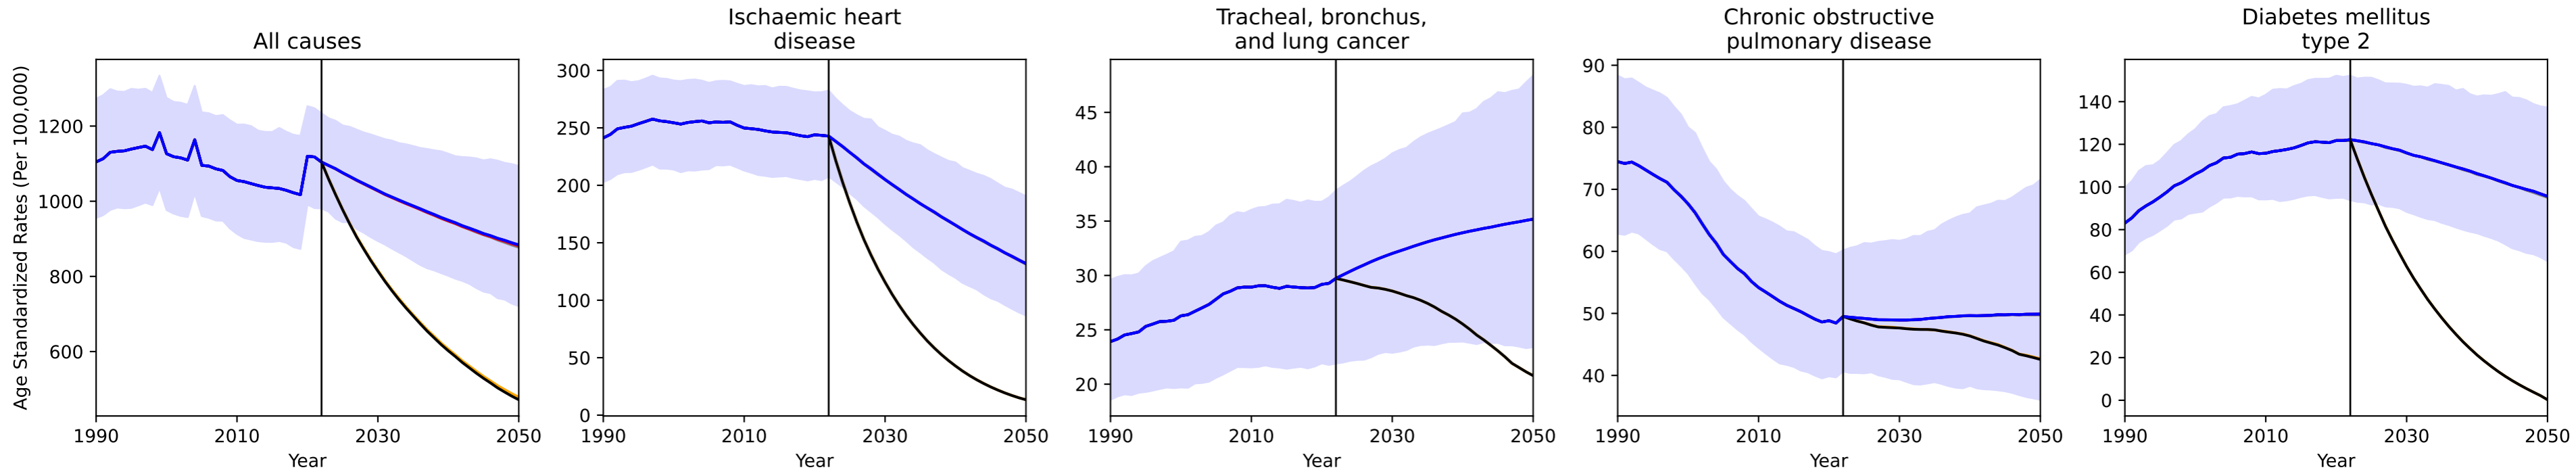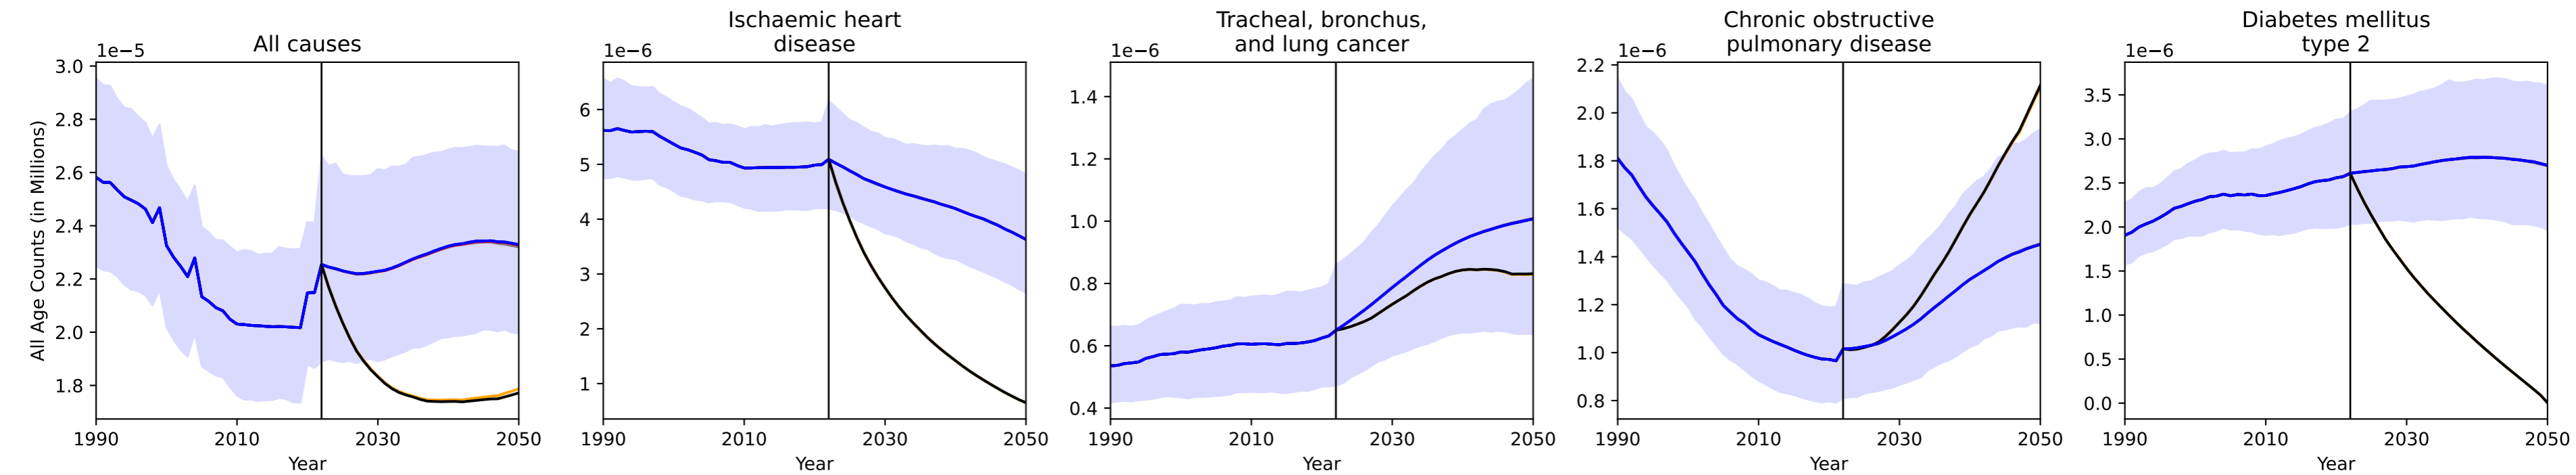

— Safer Environment — Improved Behavioural and Metabolic Risks — Improved Childhood Nutrition and Vaccination — Combined — Reference

# Northern Mariana Islands

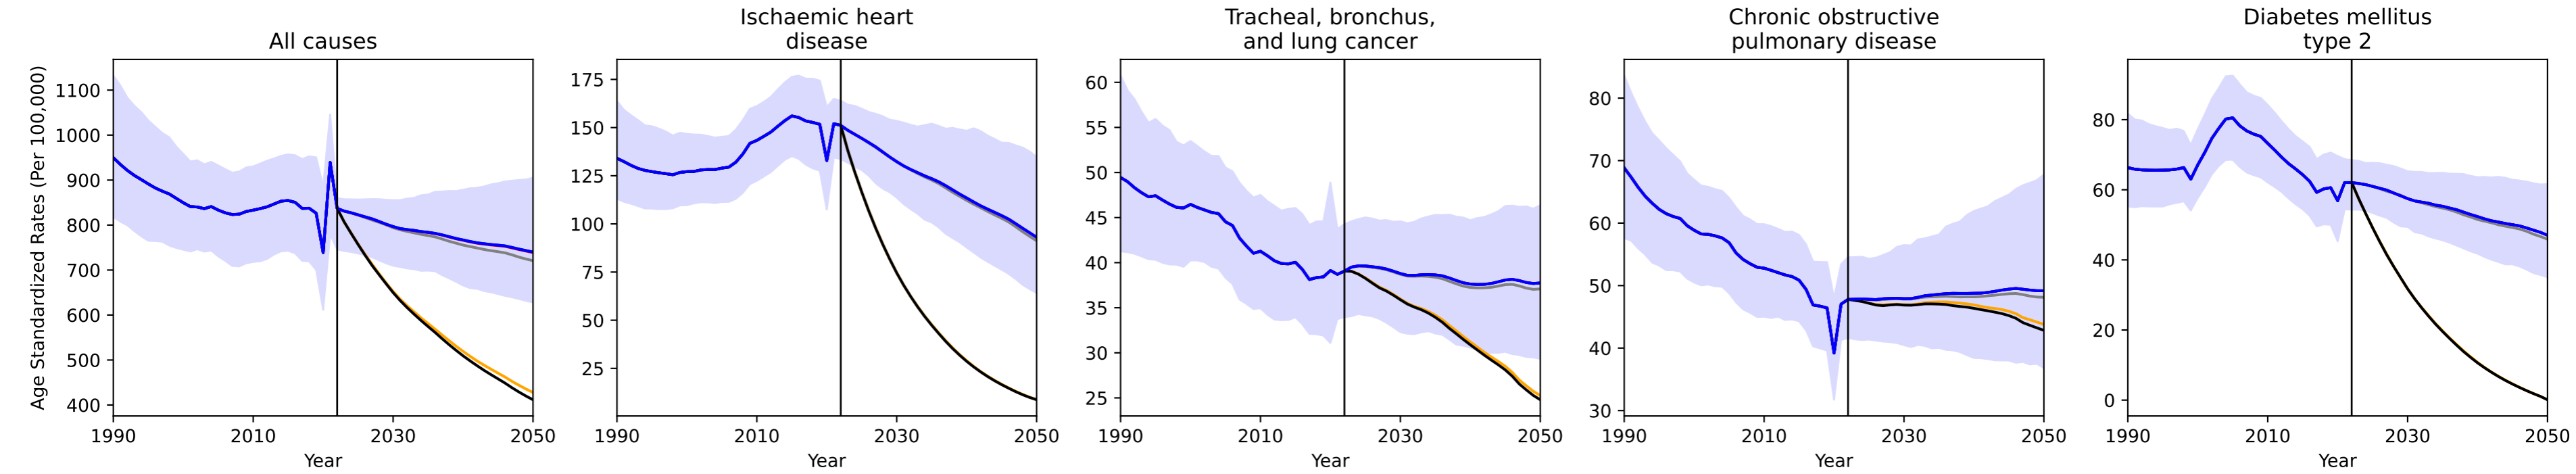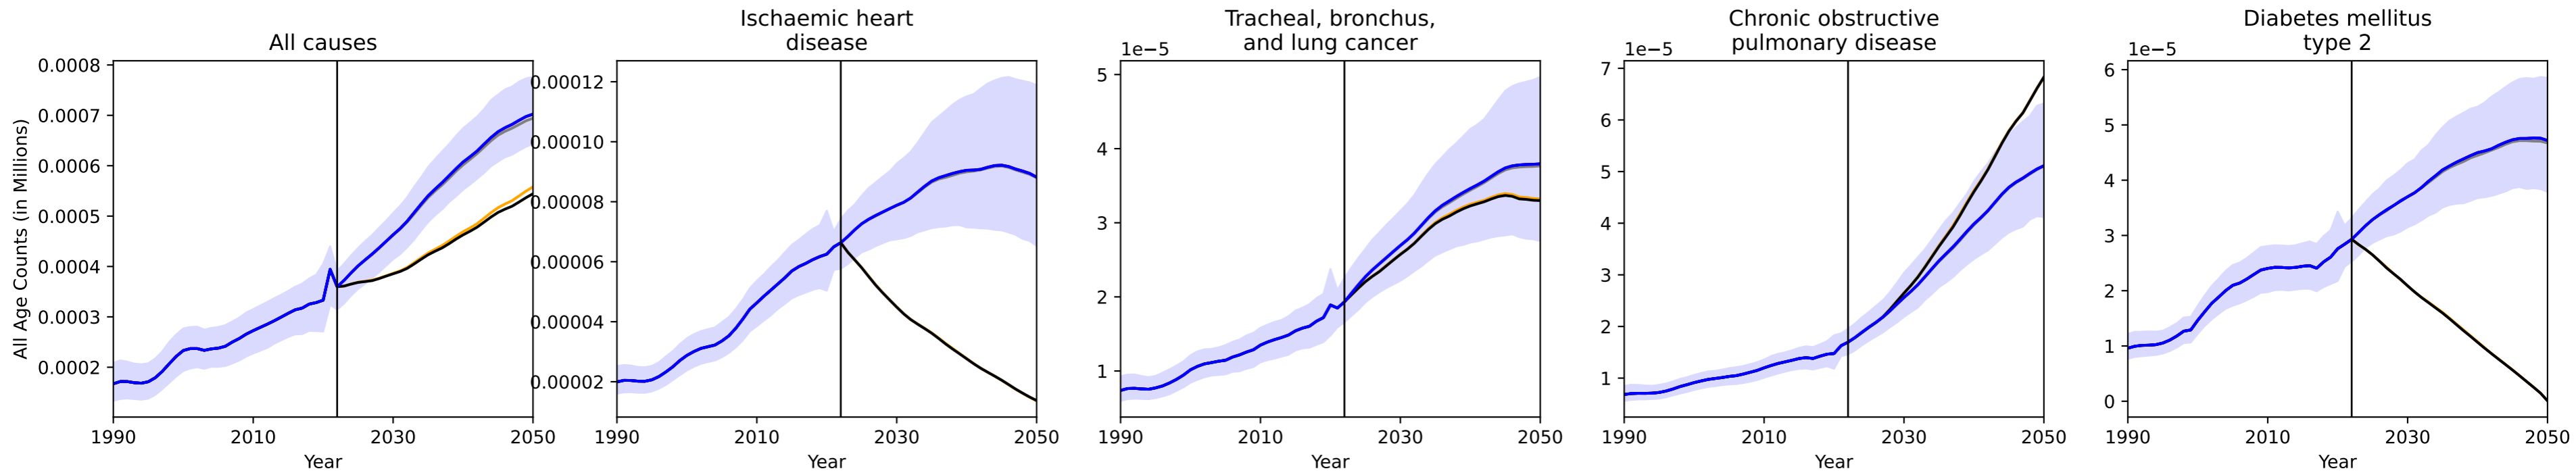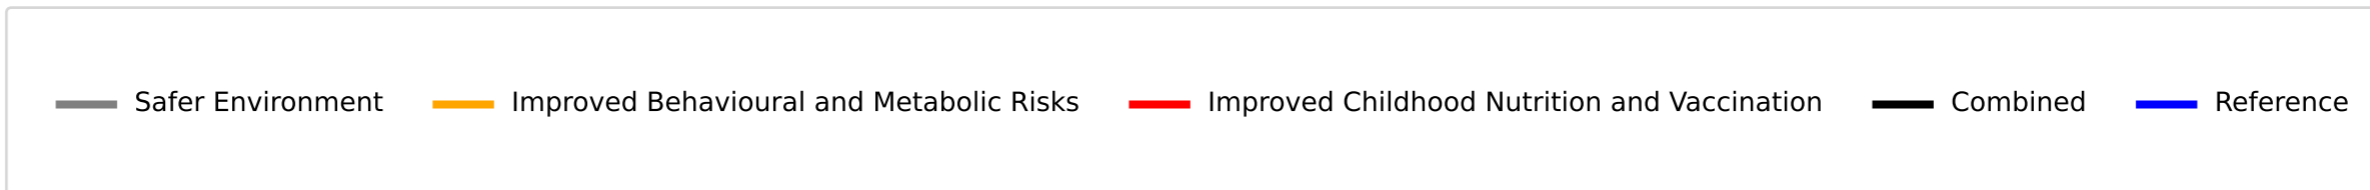

# Palau

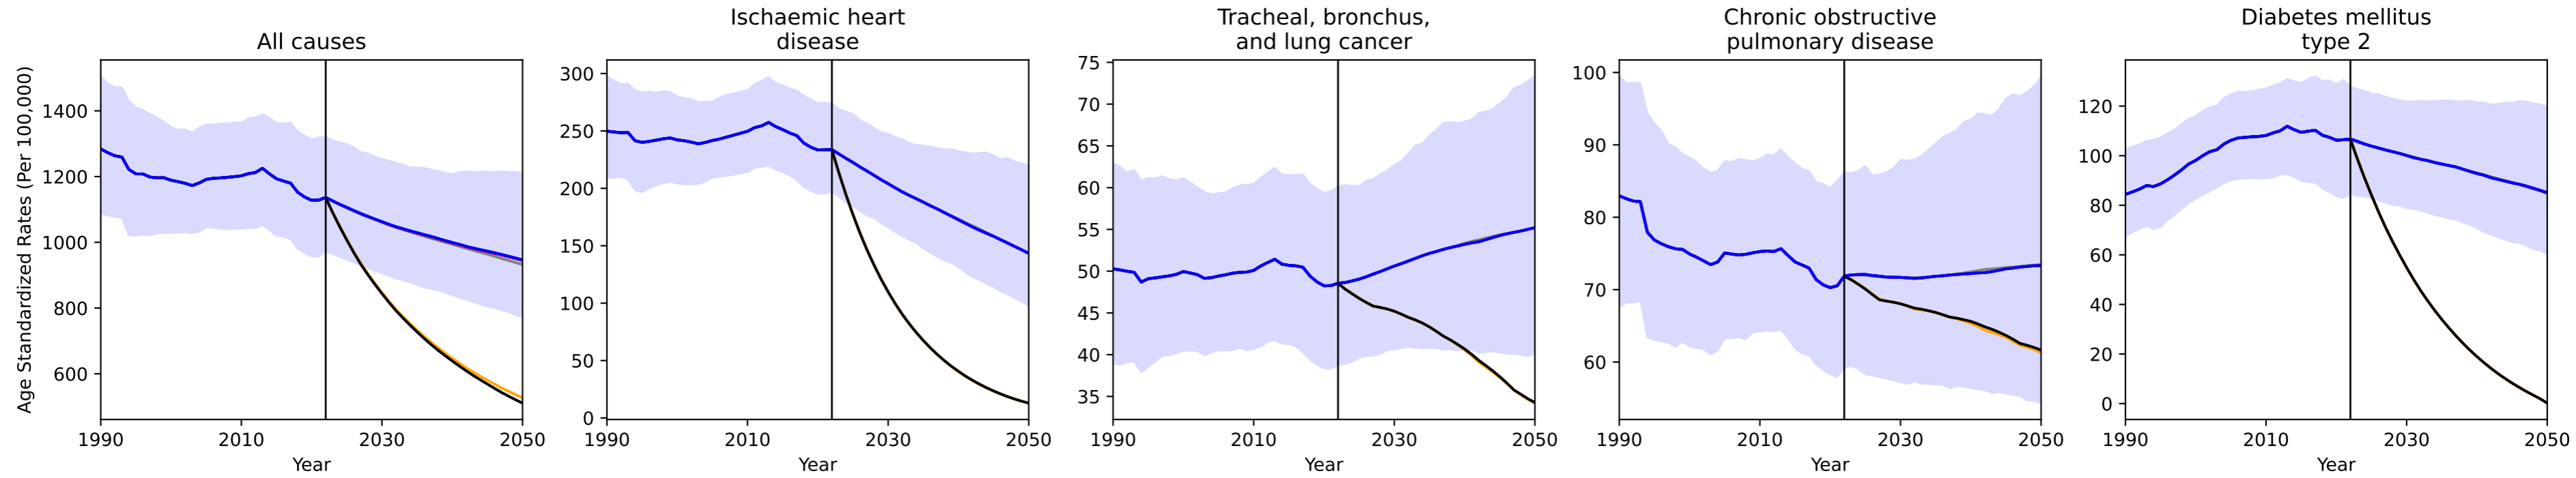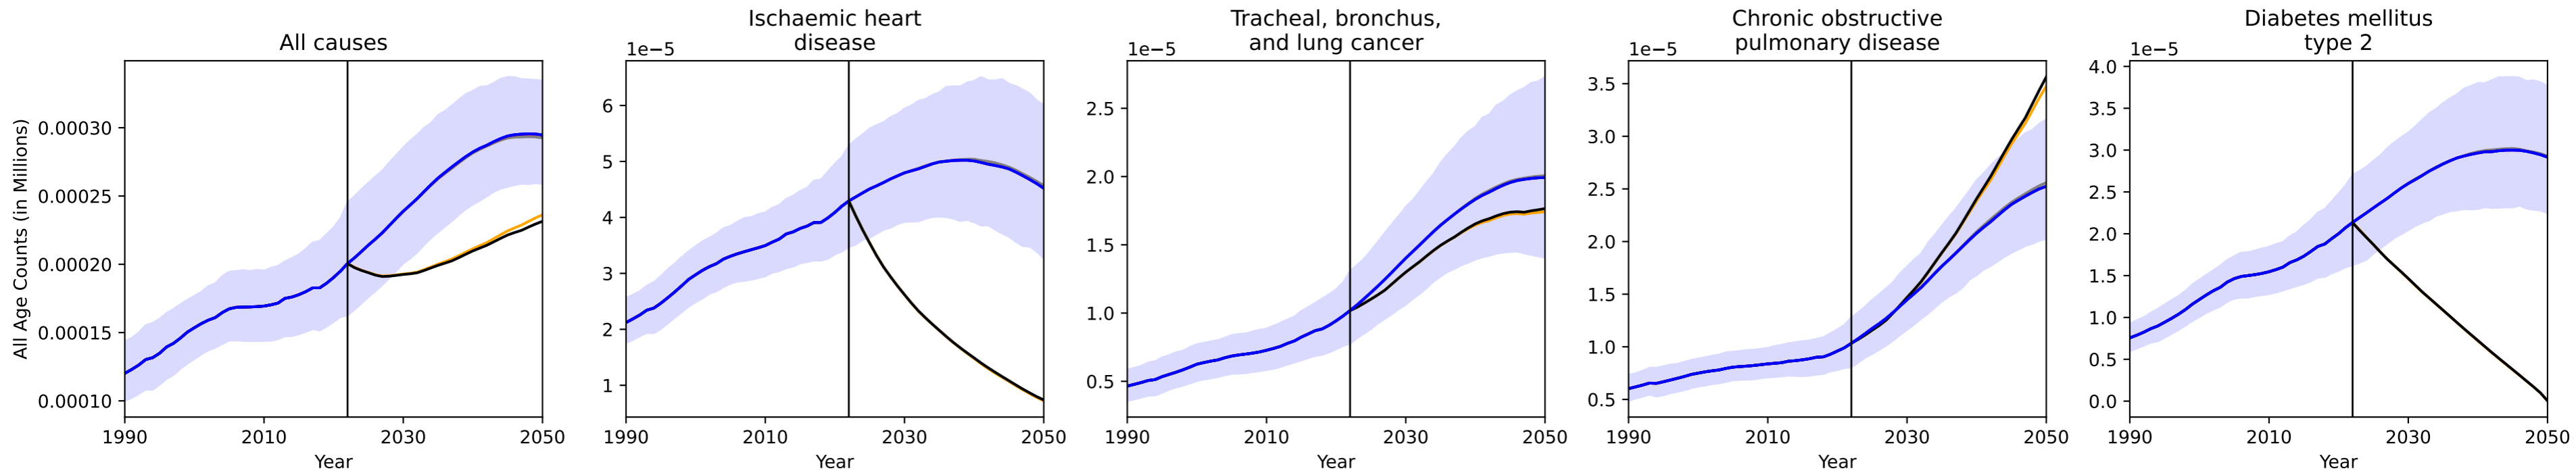



# Papua New Guinea

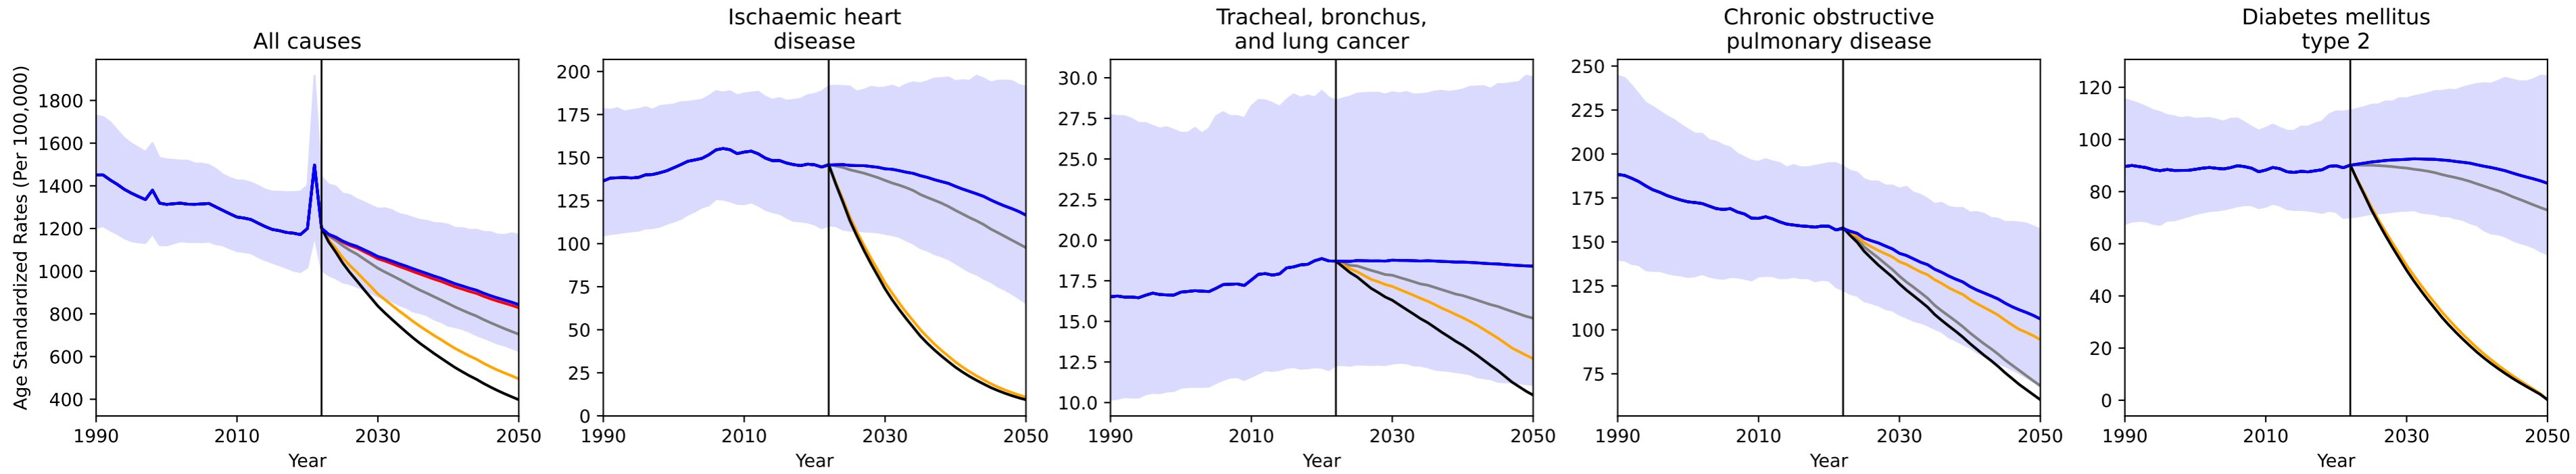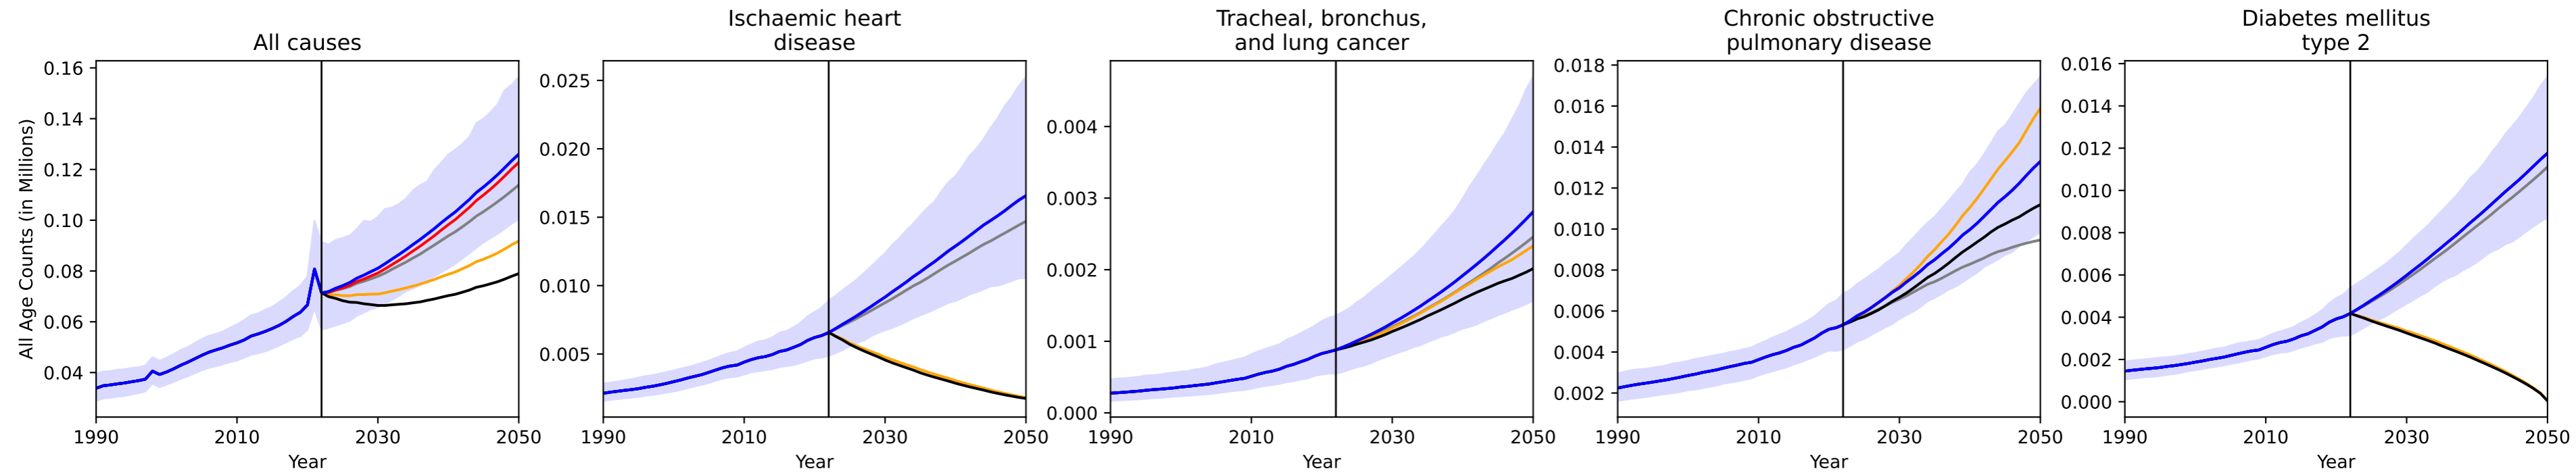

— Safer Environment — Improved Behavioural and Metabolic Risks — Improved Childhood Nutrition and Vaccination — Combined — Reference

# Samoa

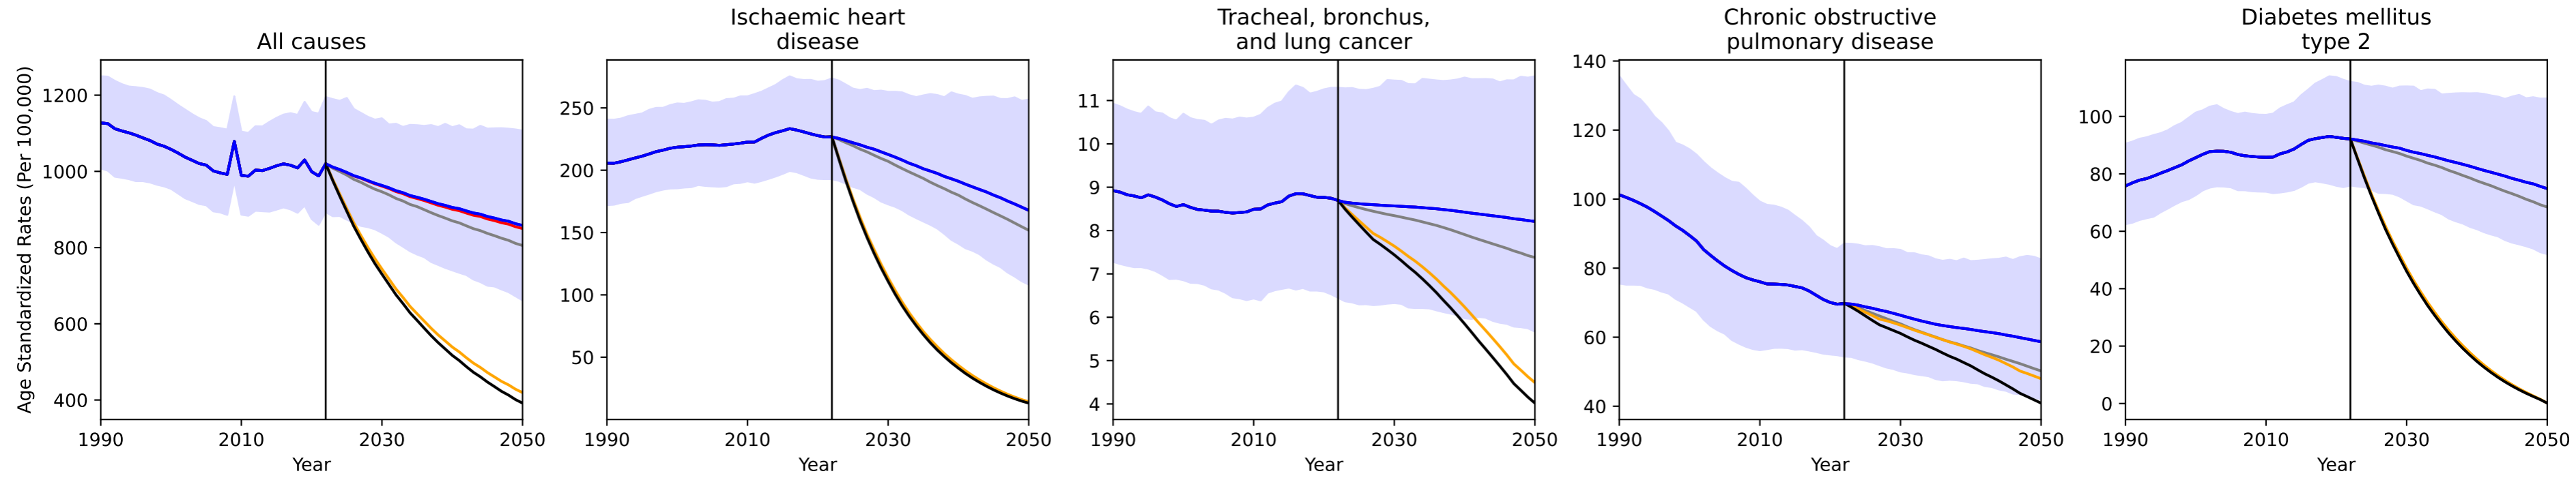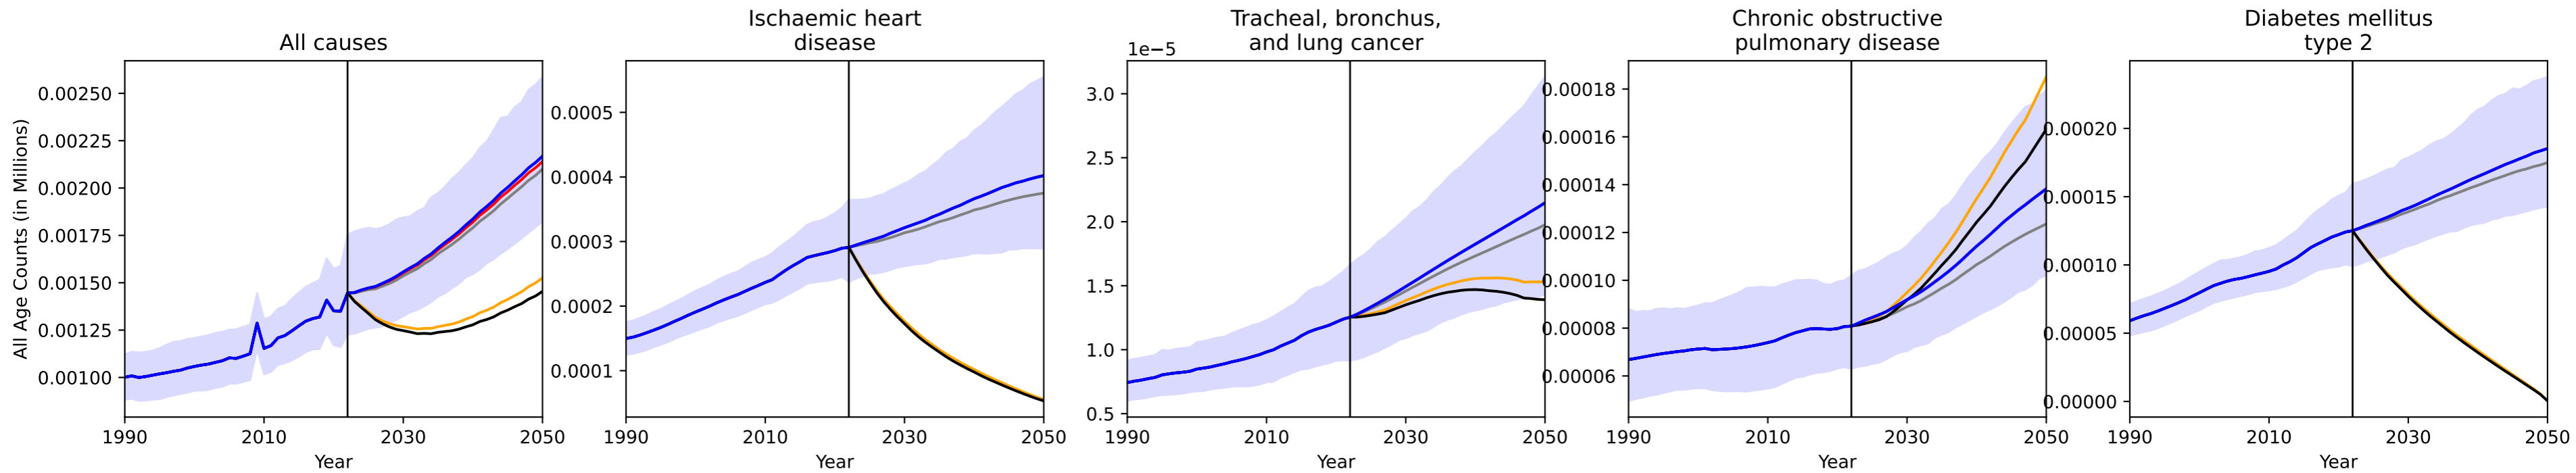

# Solomon Islands

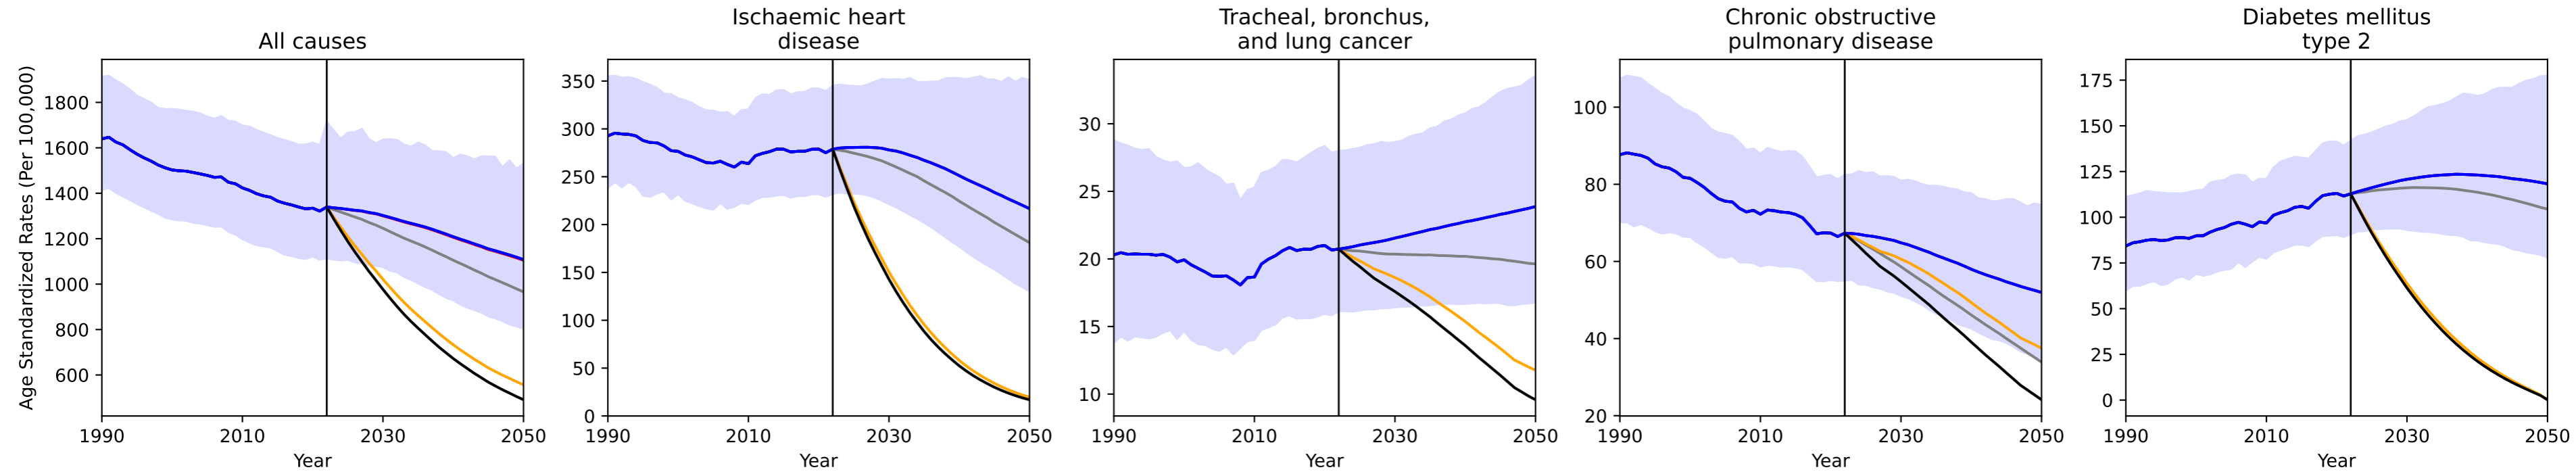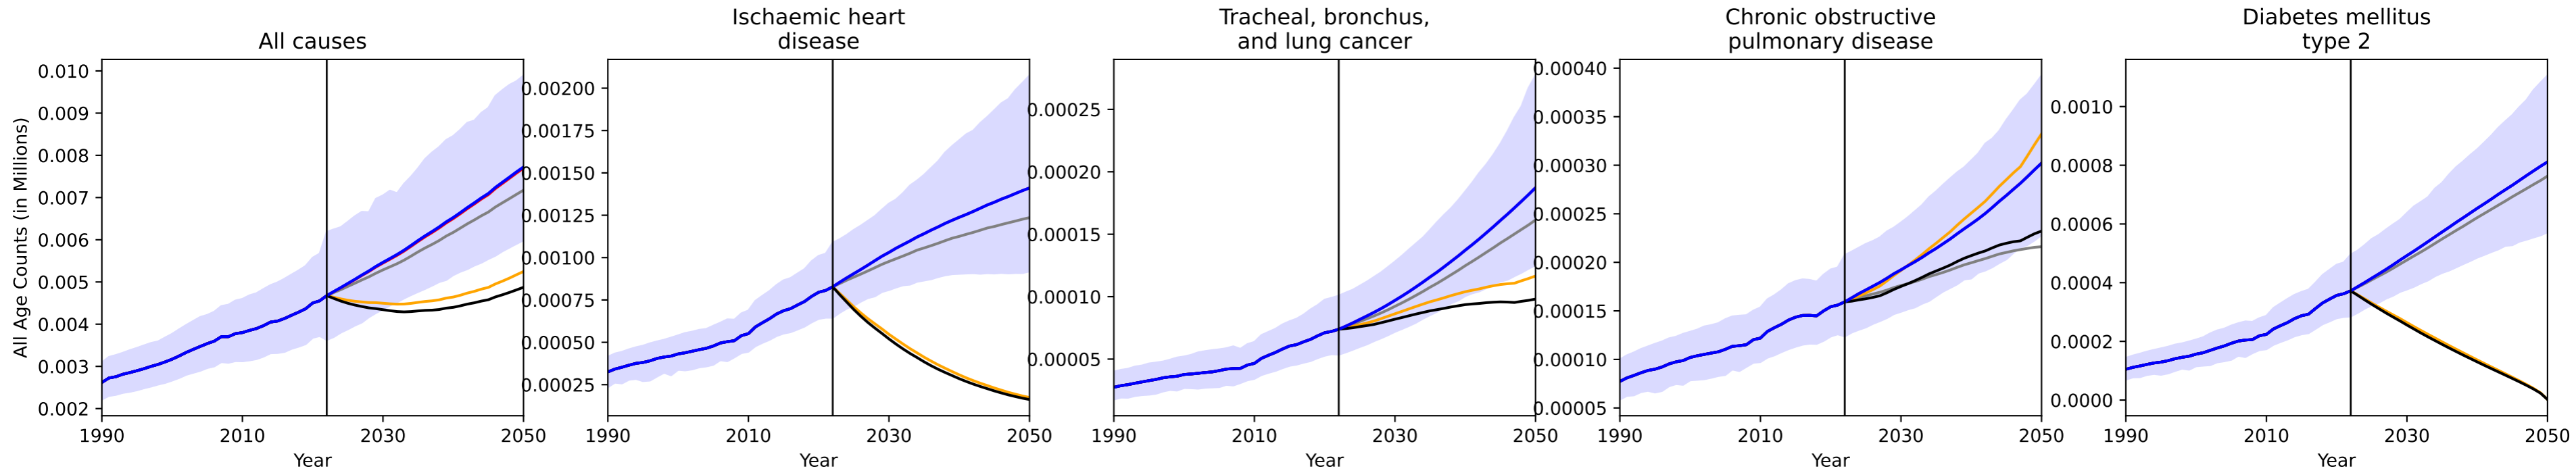

# Tokelau

Supplemental Results Figure S13. All cause and top NCD causes age standardized death rates and all age counts by scenario and location, 1990-2050

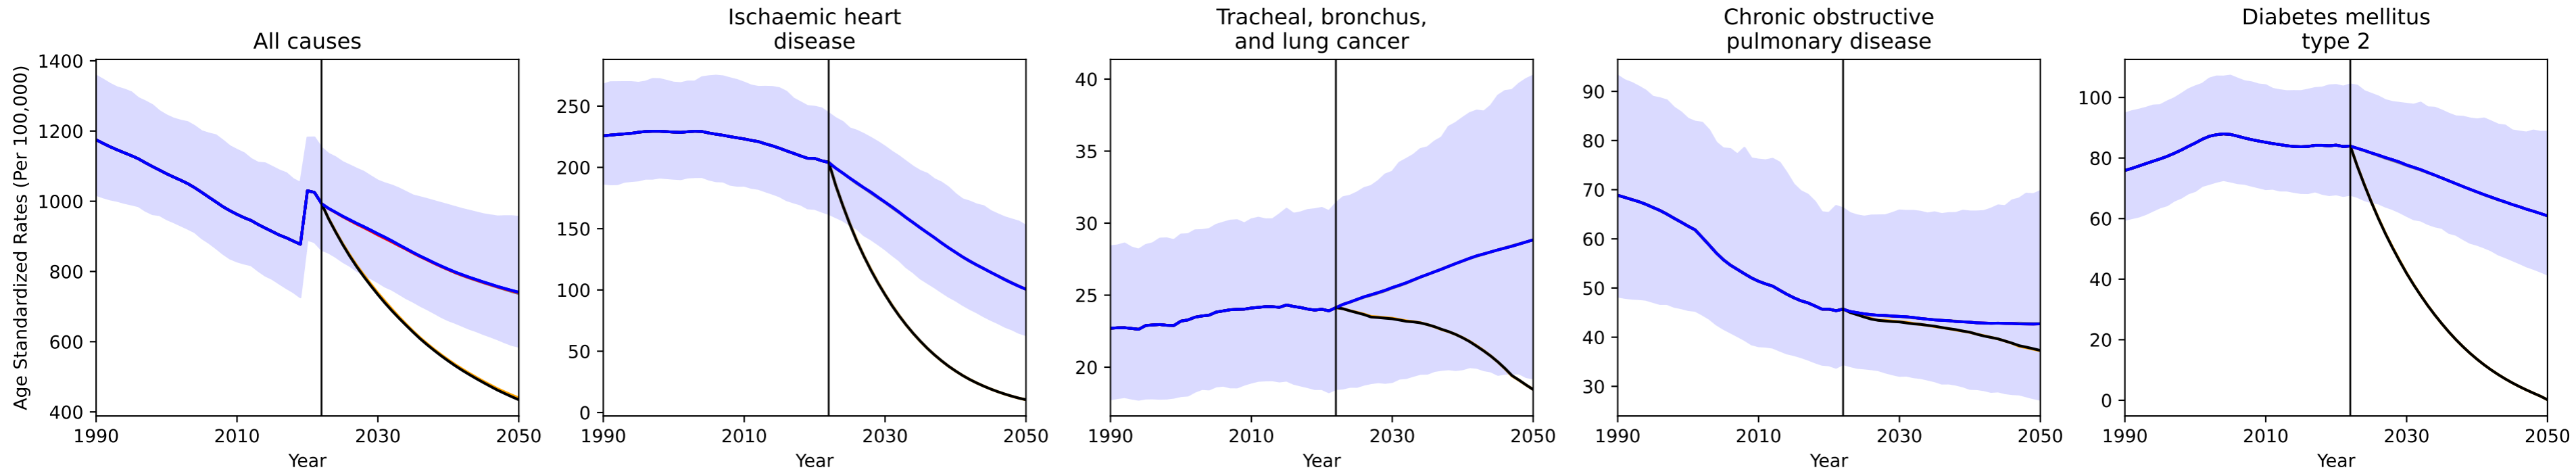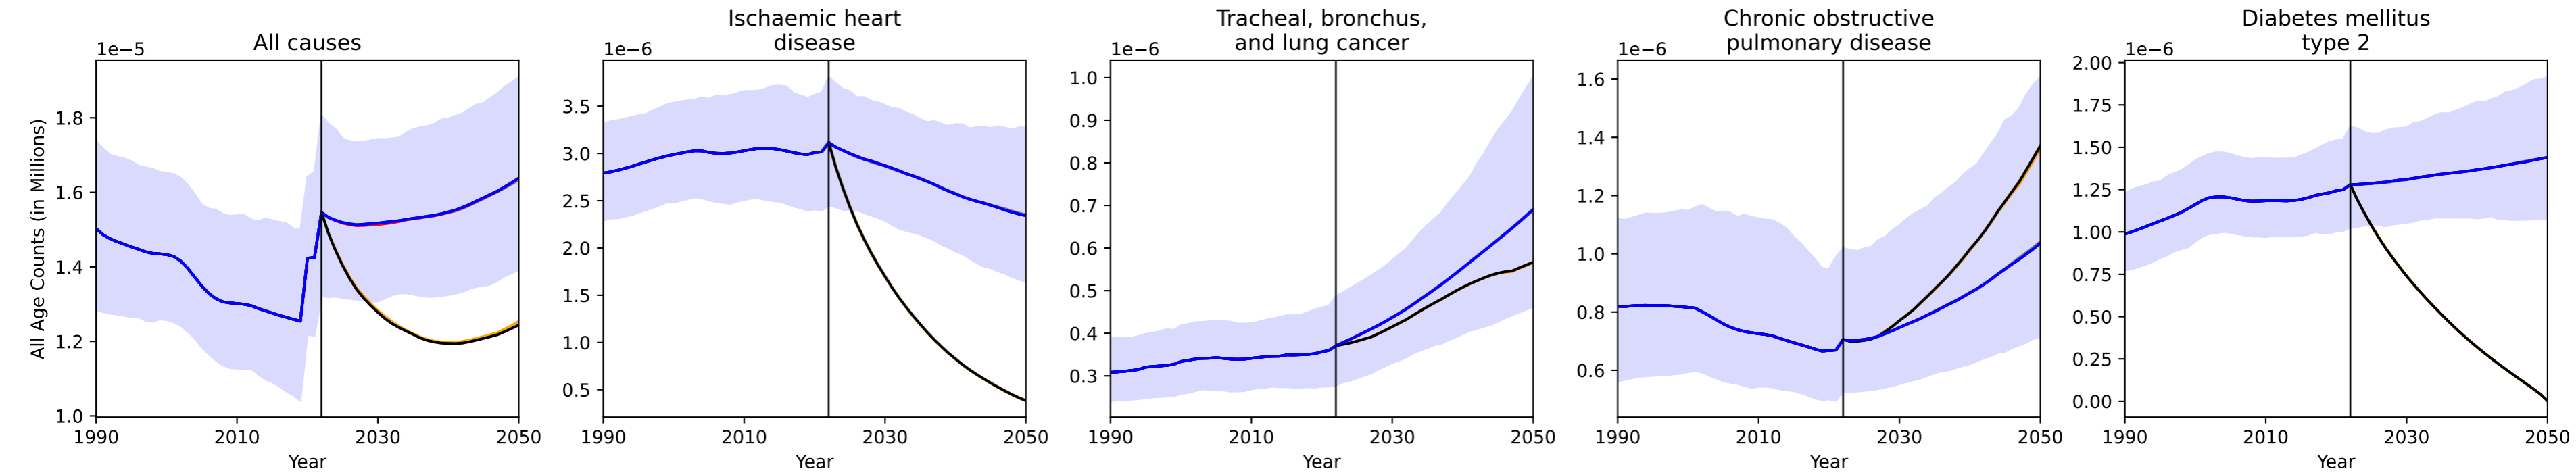

— Safer Environment — Improved Behavioural and Metabolic Risks — Improved Childhood Nutrition and Vaccination — Combined — Reference

# Tonga

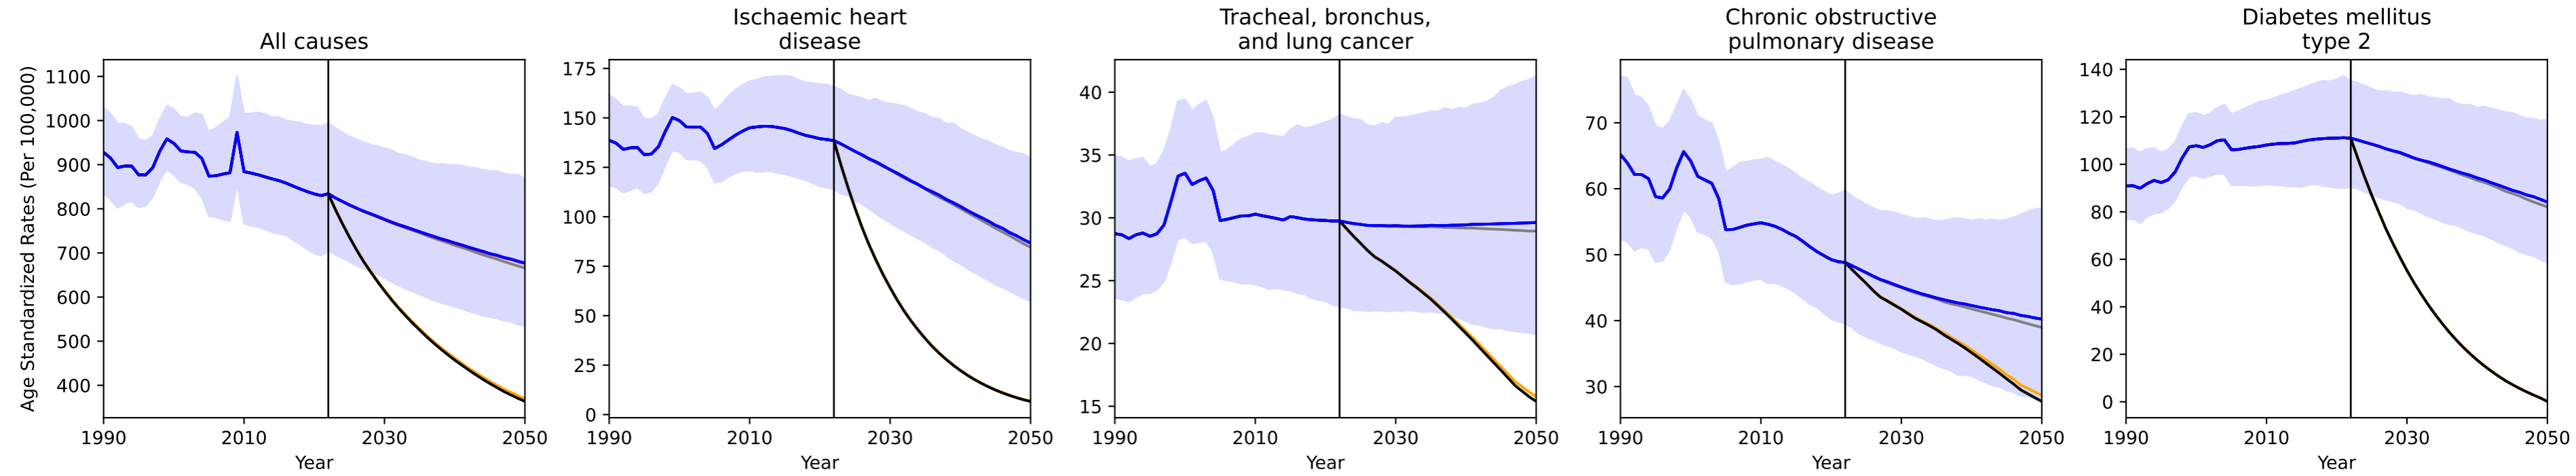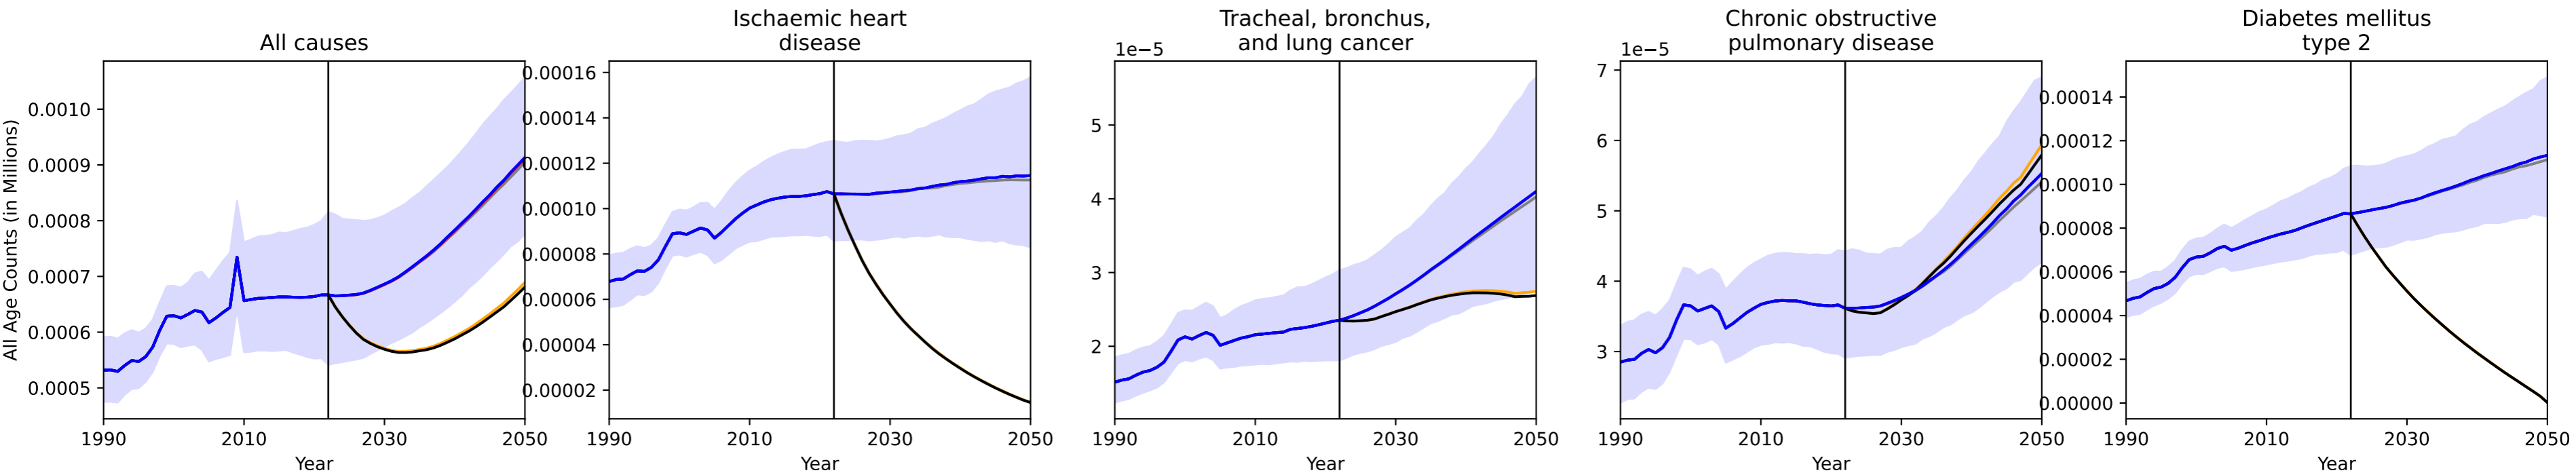

# Tuvalu

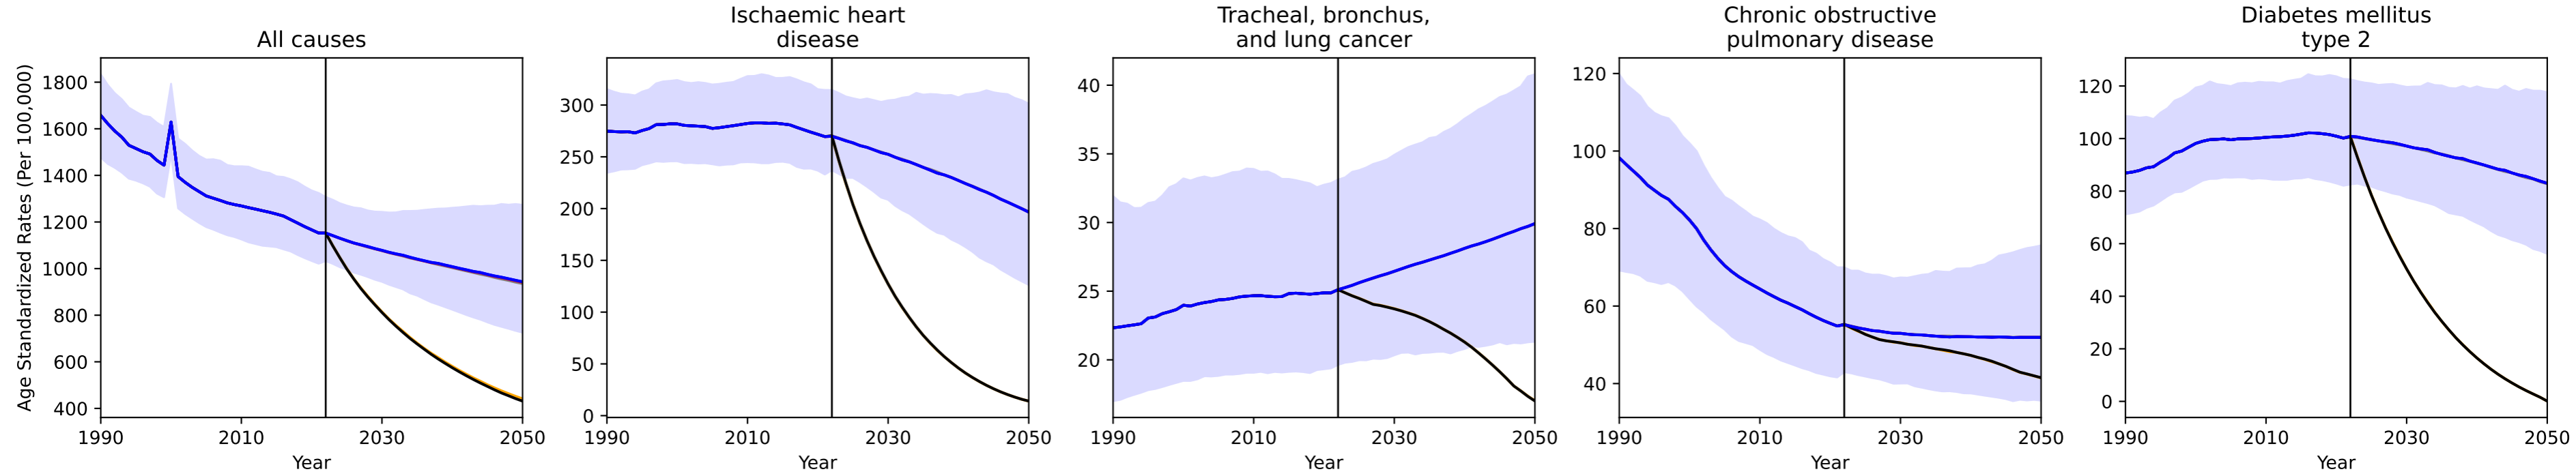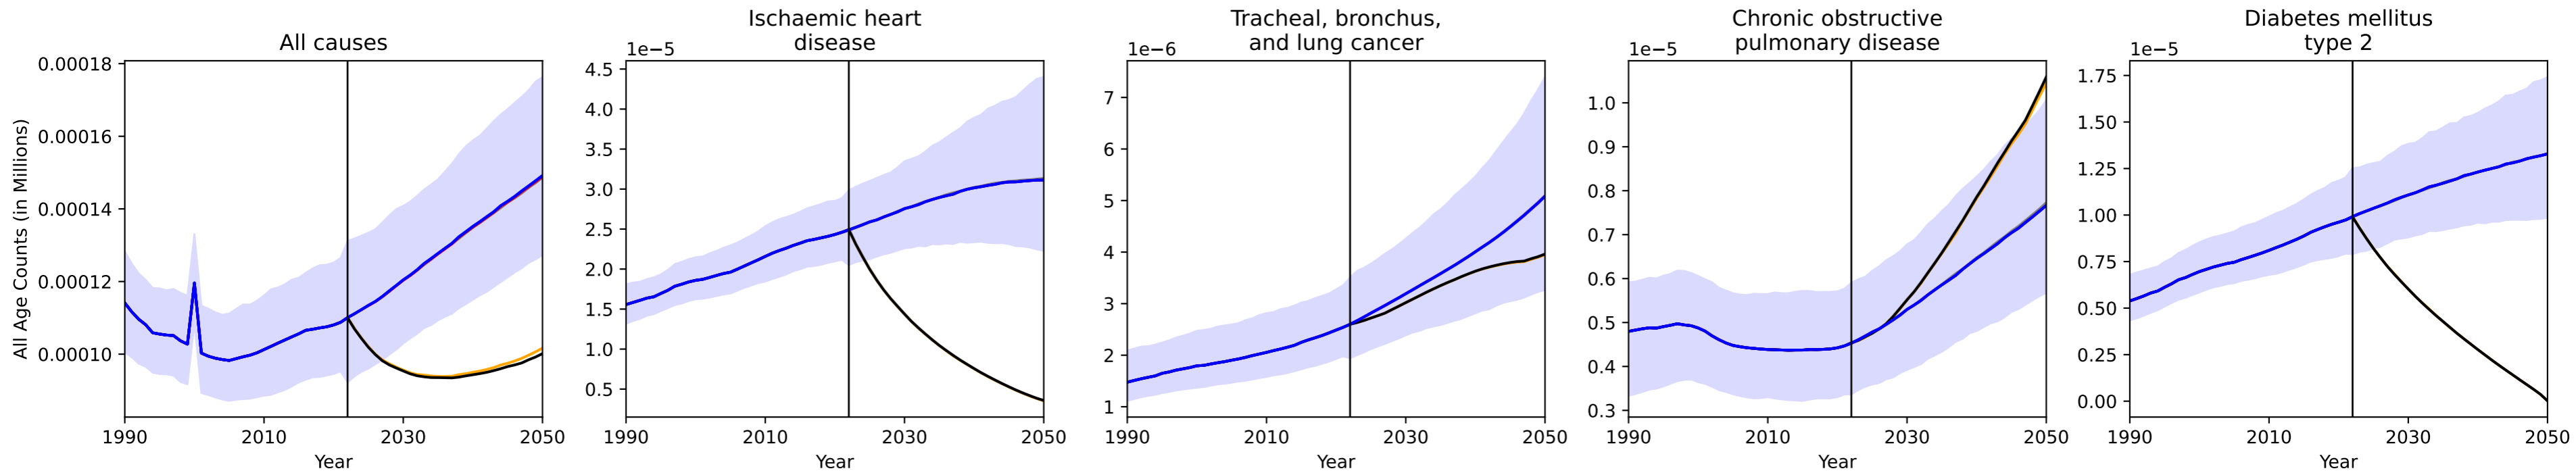

# Vanuatu

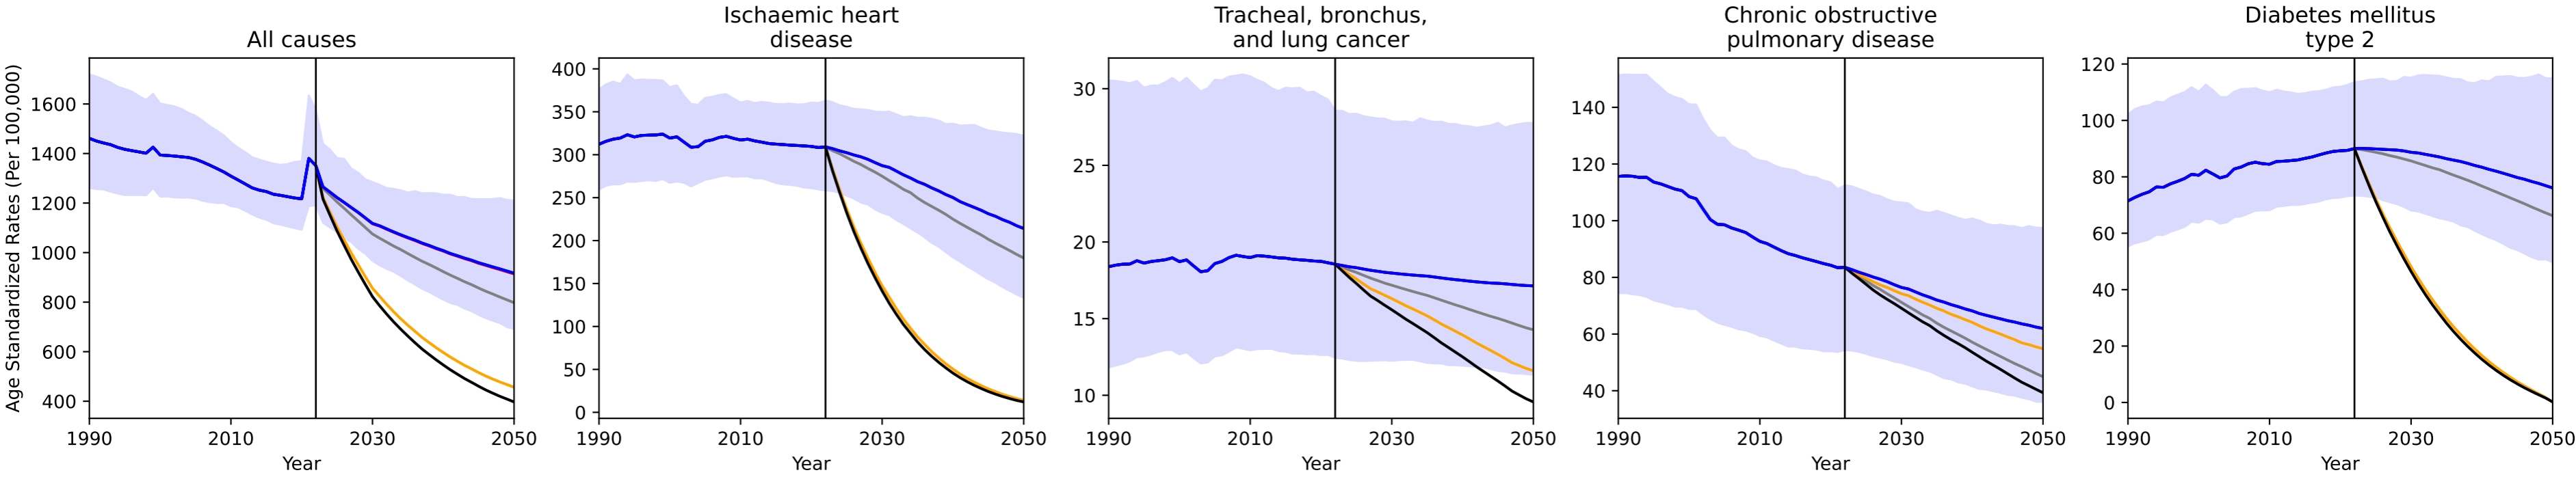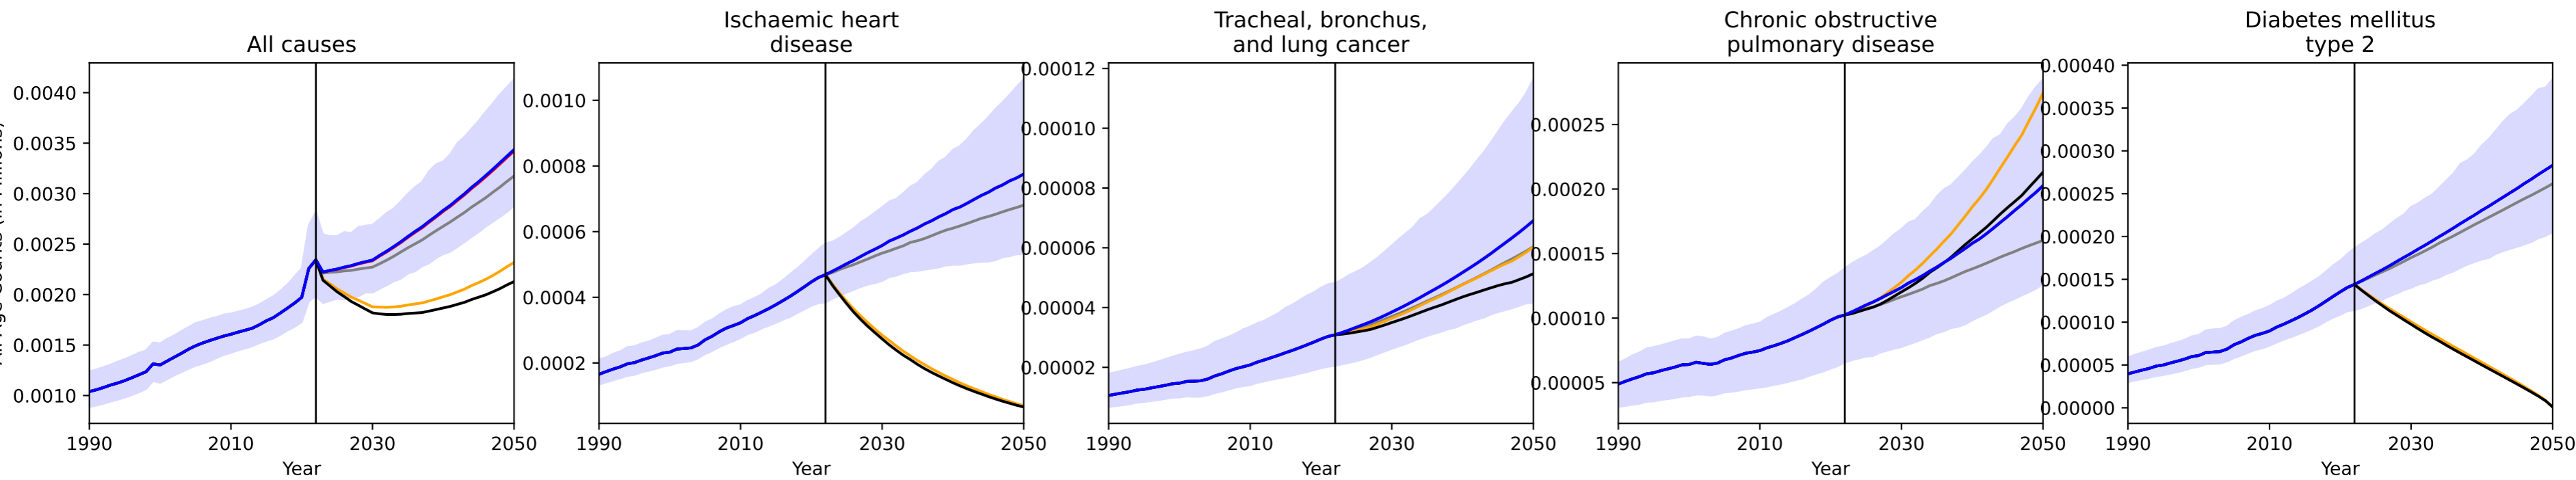

# Cambodia

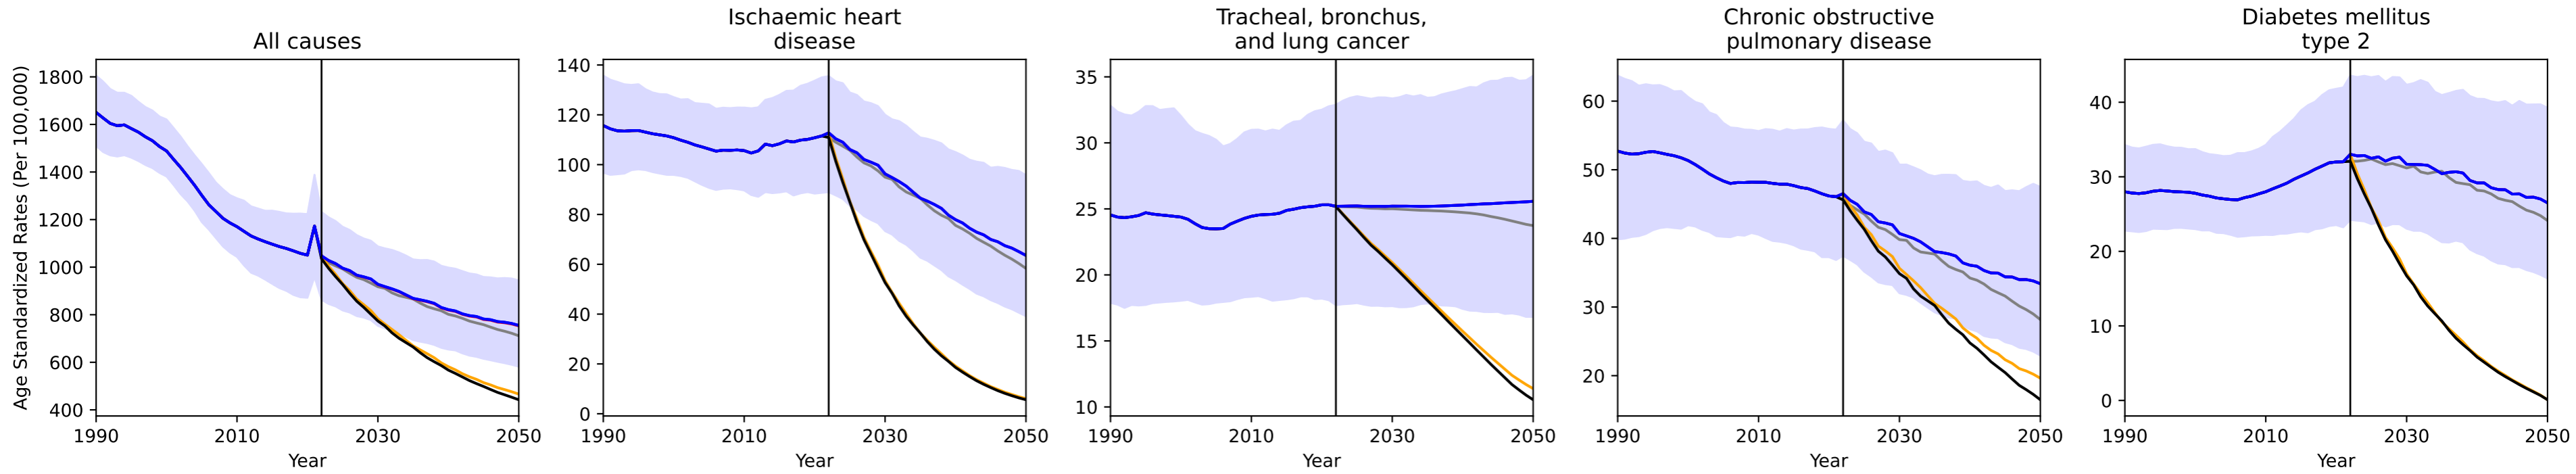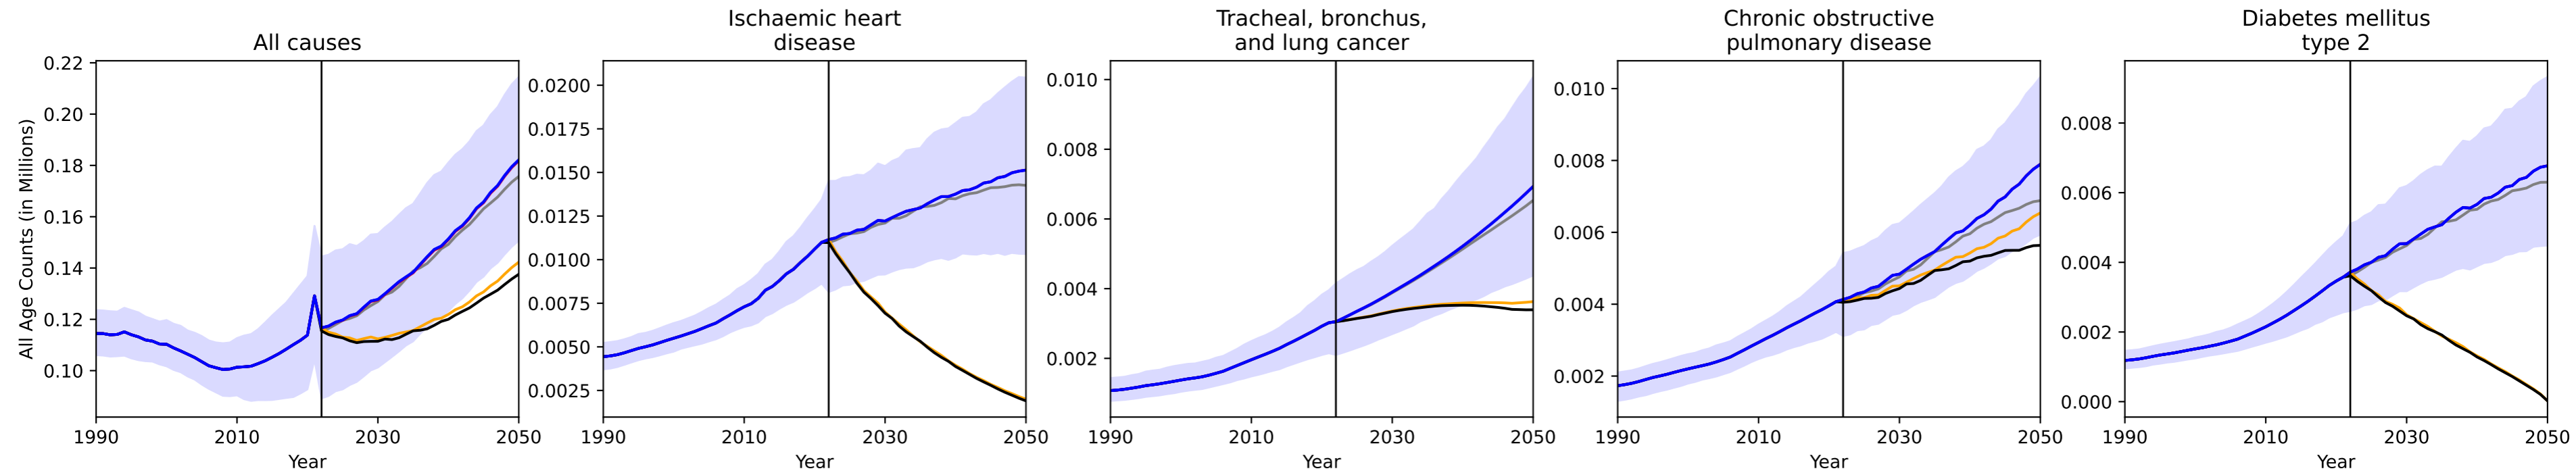



# Indonesia

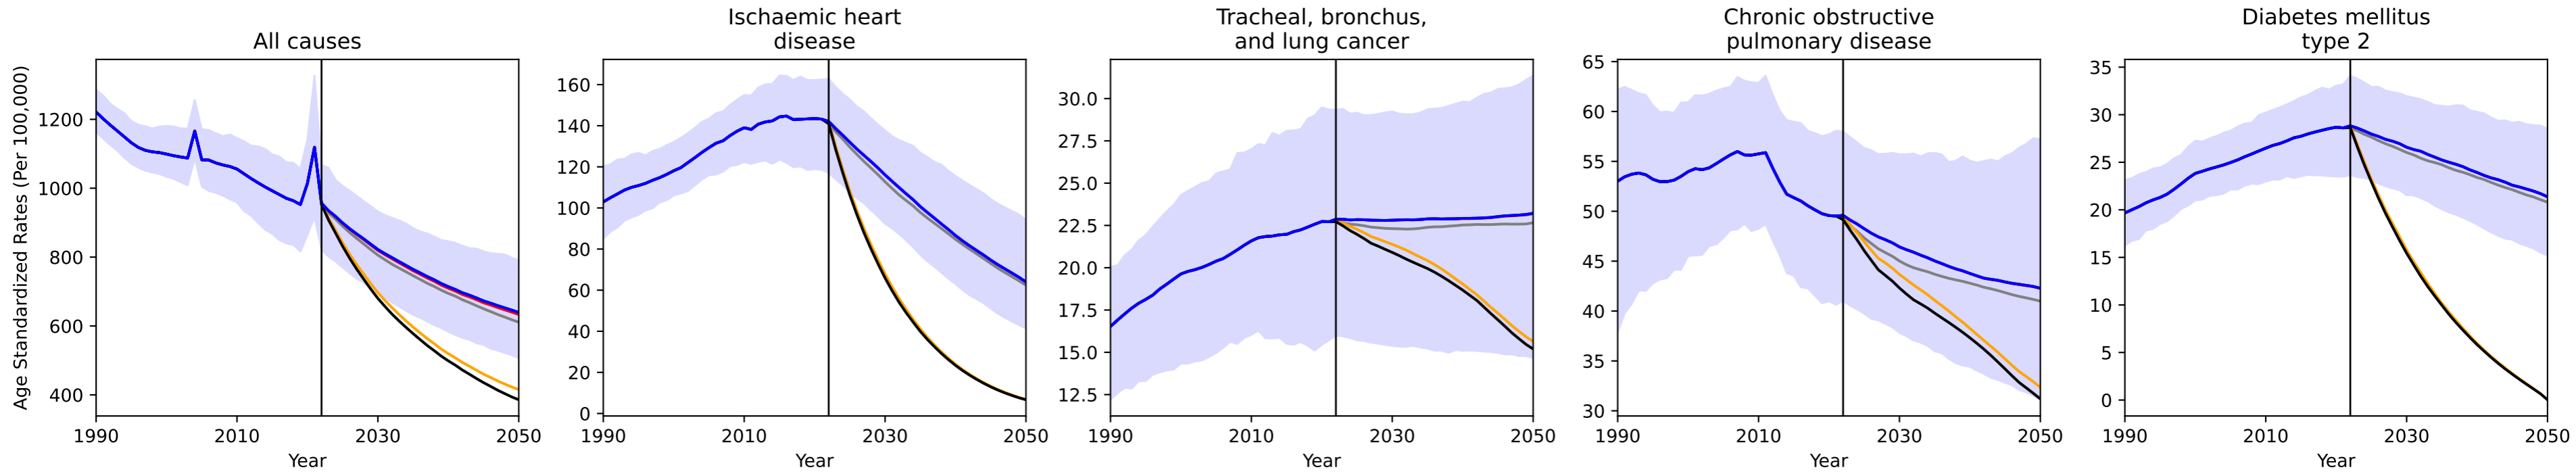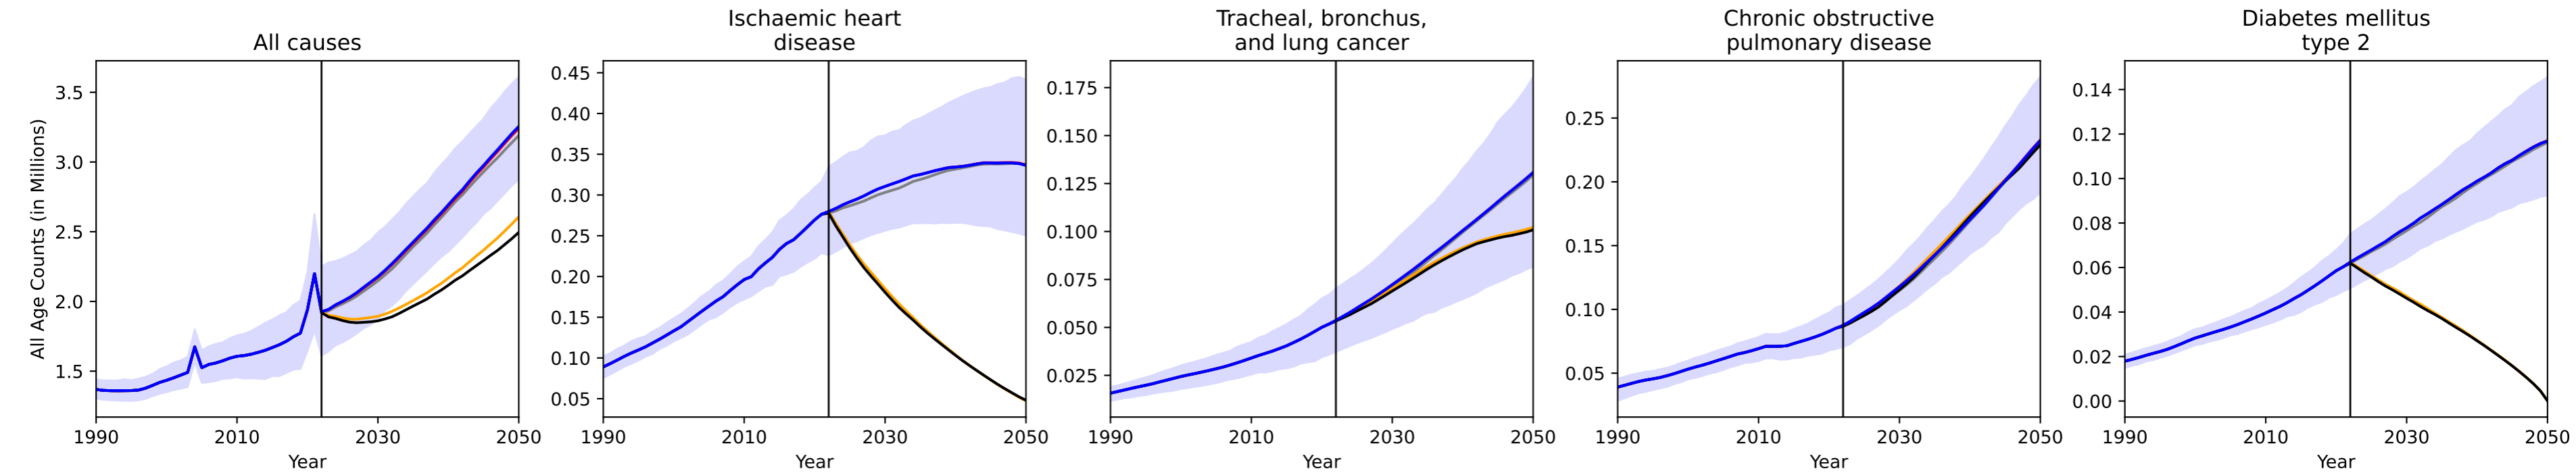

— Safer Environment — Improved Behavioural and Metabolic Risks — Improved Childhood Nutrition and Vaccination — Combined — Reference

# Laos

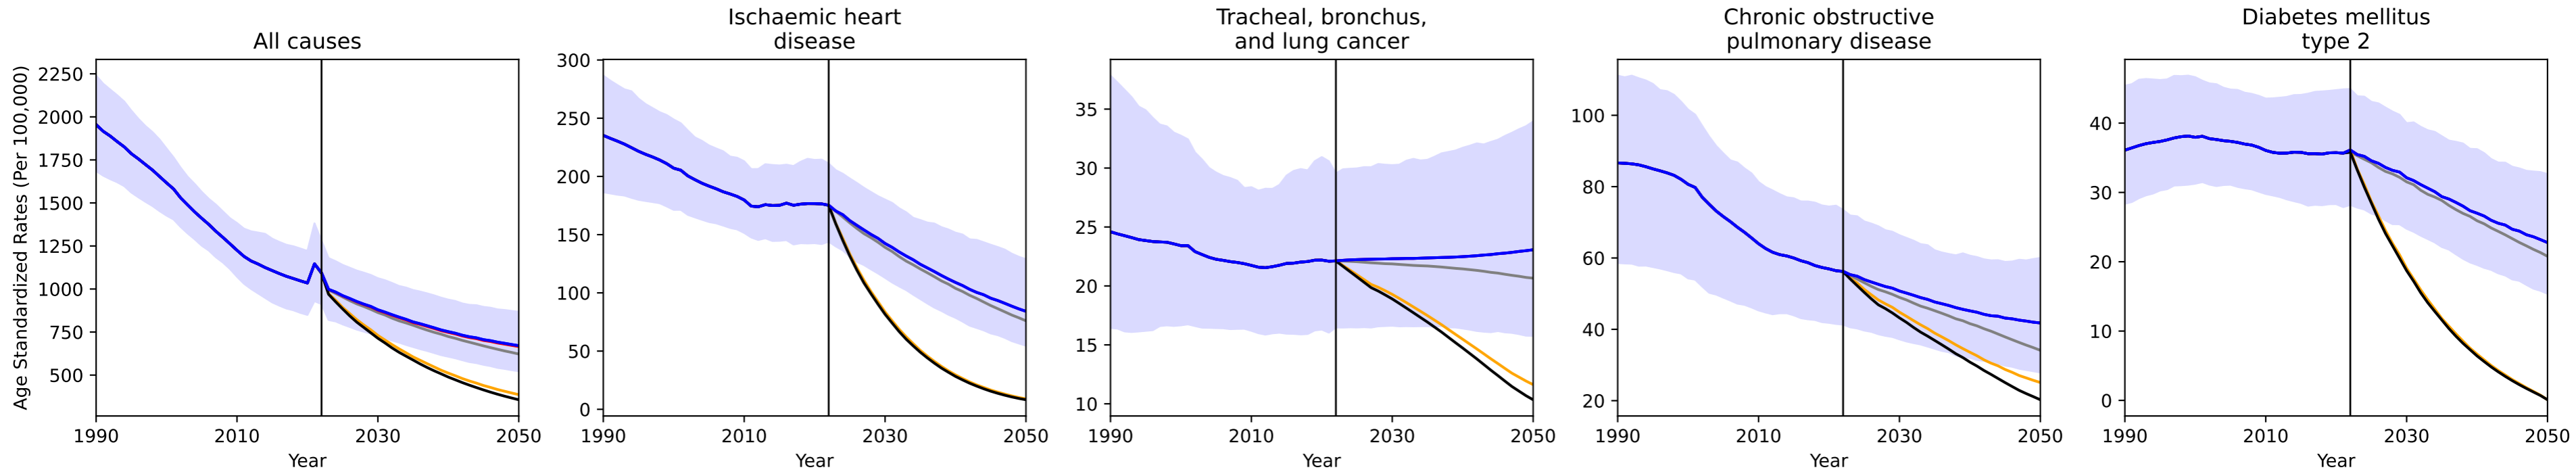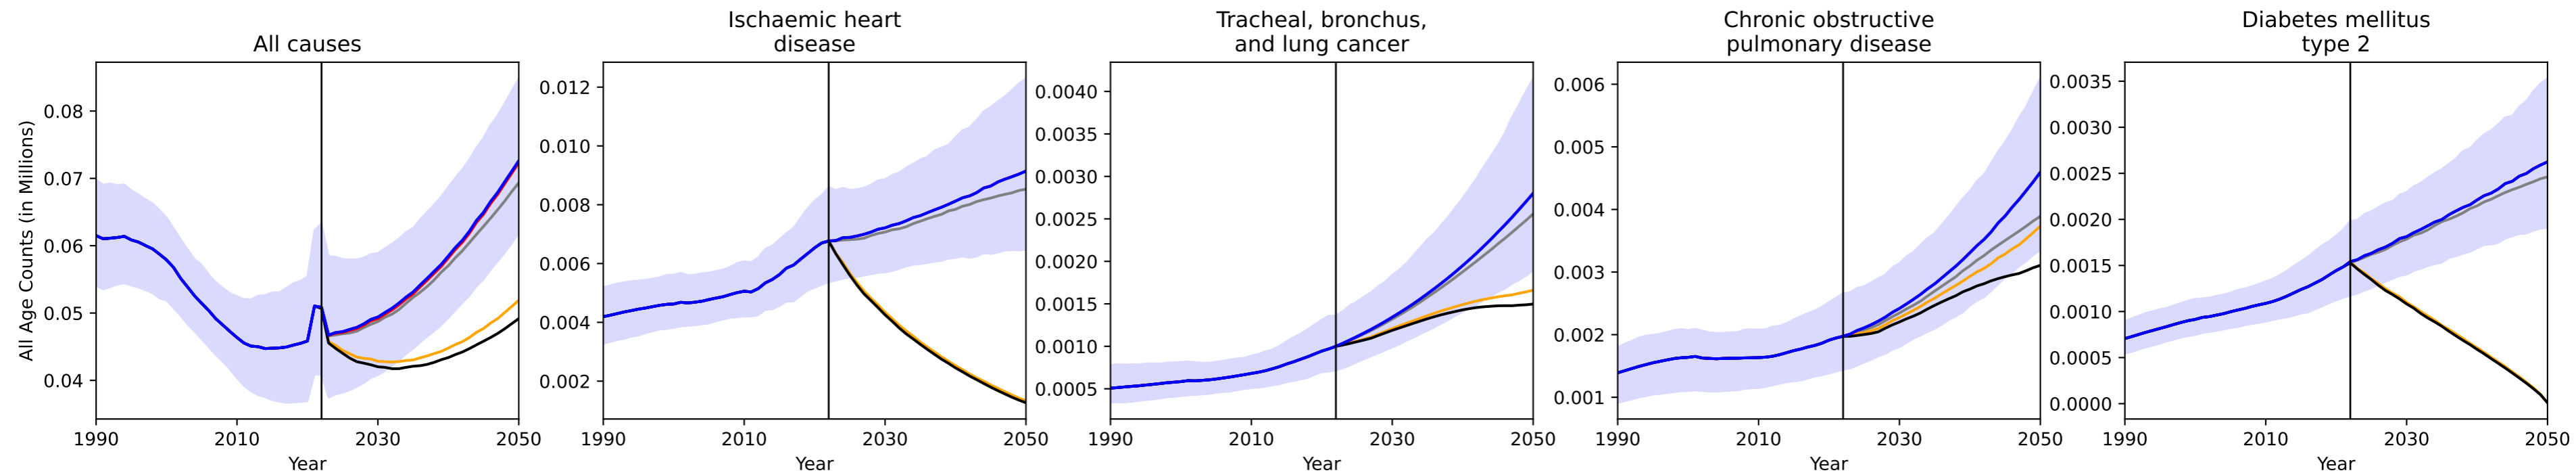

— Safer Environment — Improved Behavioural and Metabolic Risks — Improved Childhood Nutrition and Vaccination — Combined — Reference

# Malaysia

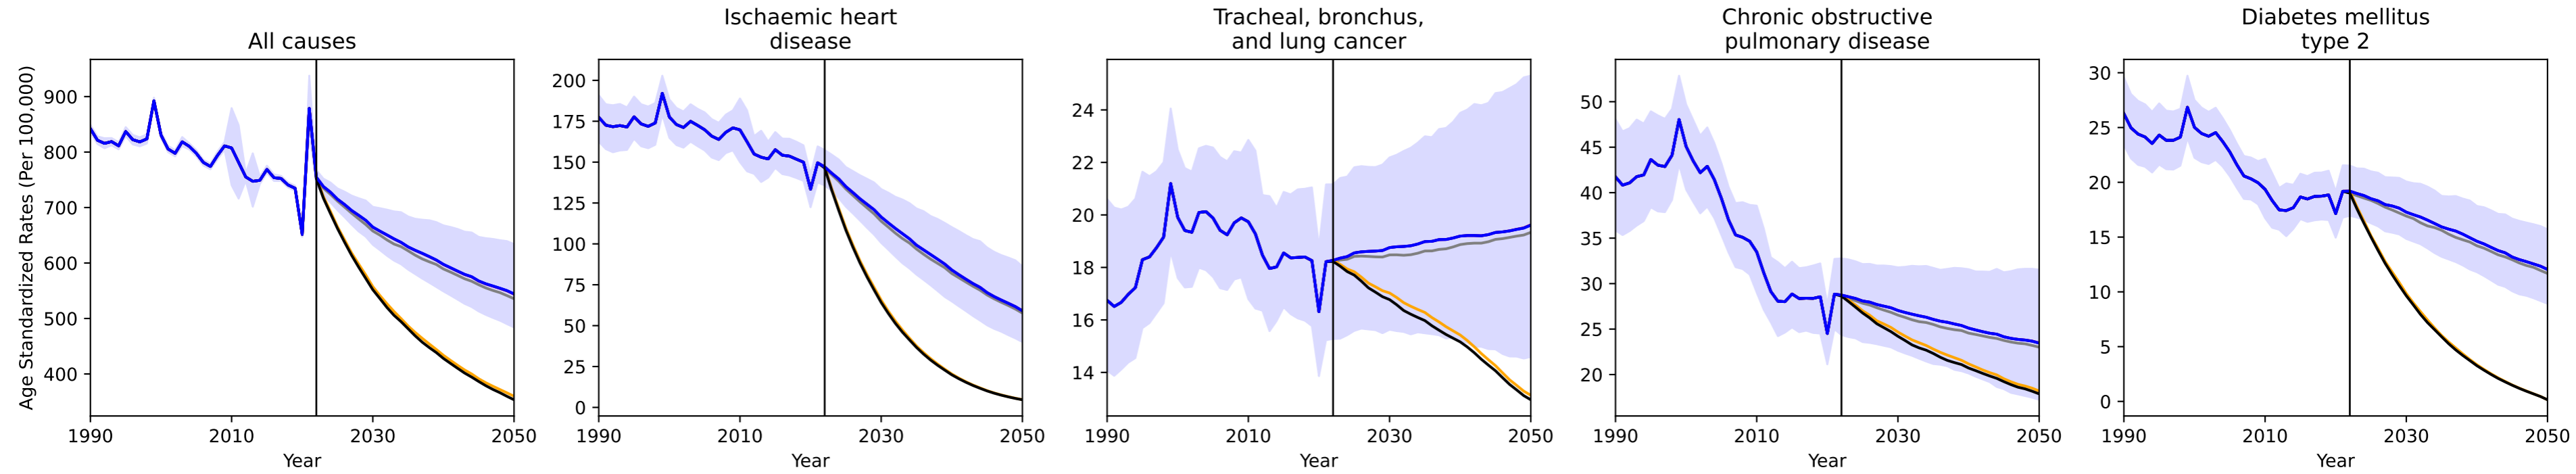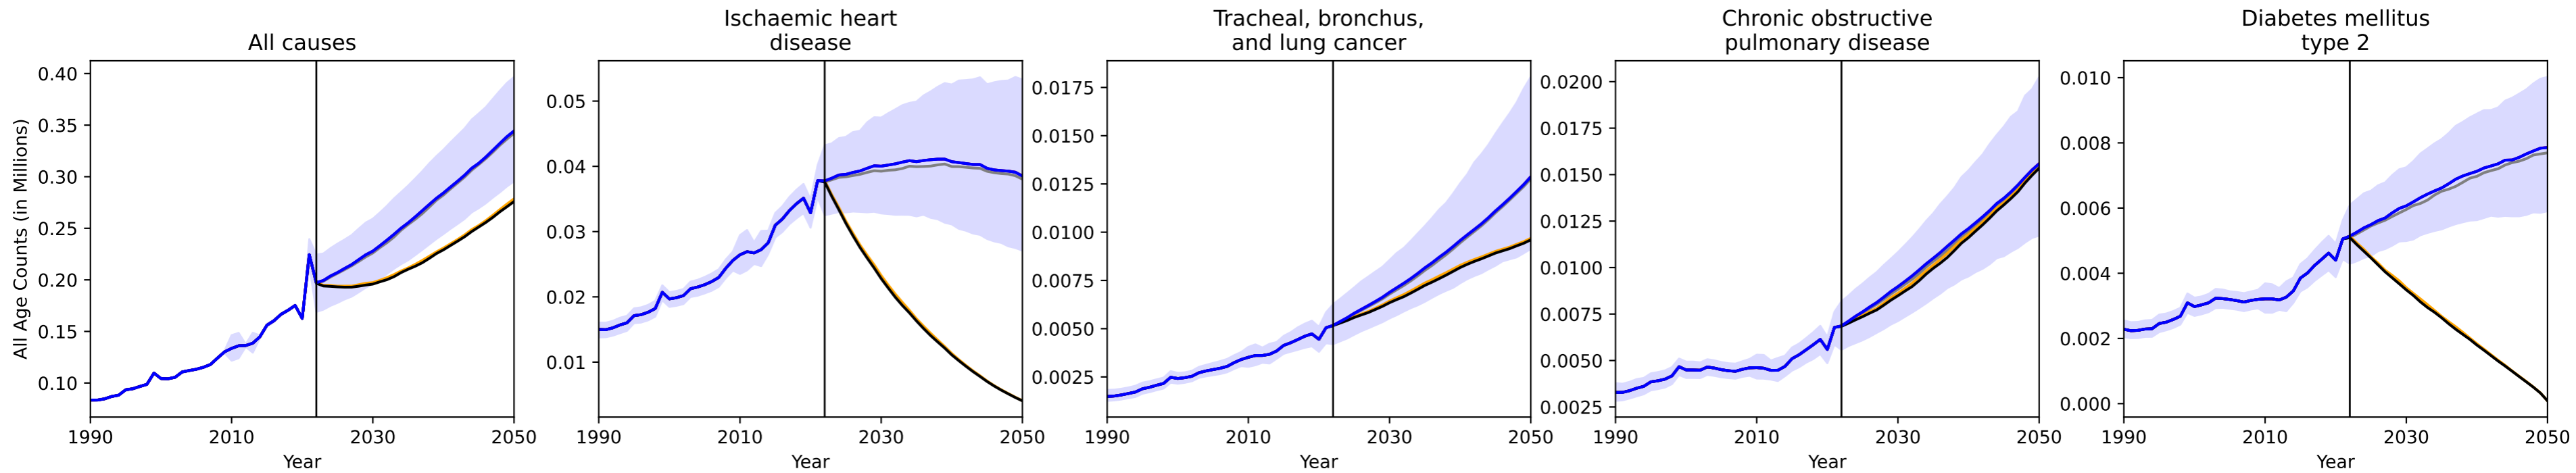

— Safer Environment    — Improved Behavioural and Metabolic Risks    — Improved Childhood Nutrition and Vaccination    — Combined    — Reference

# Maldives

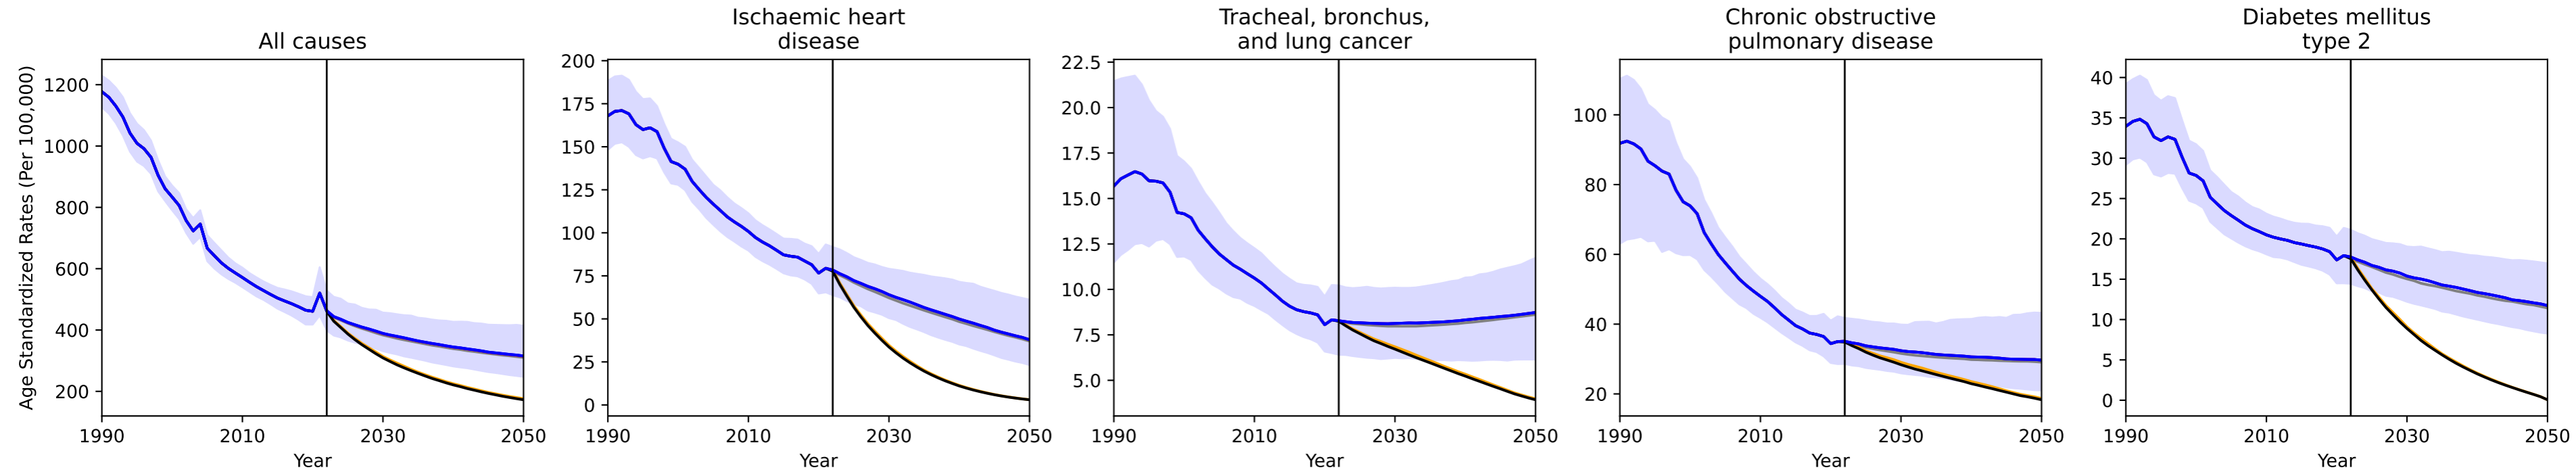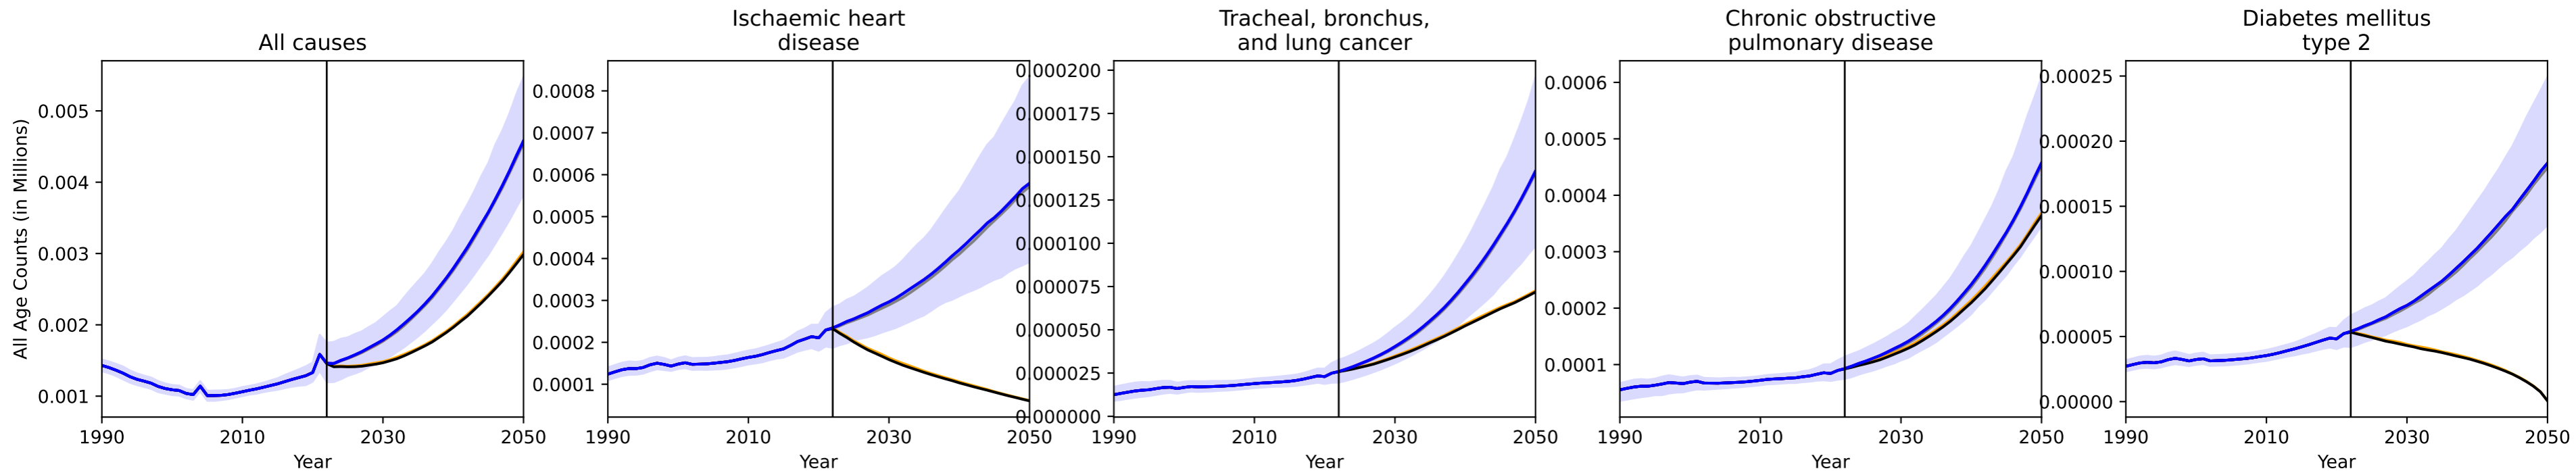

# Mauritius

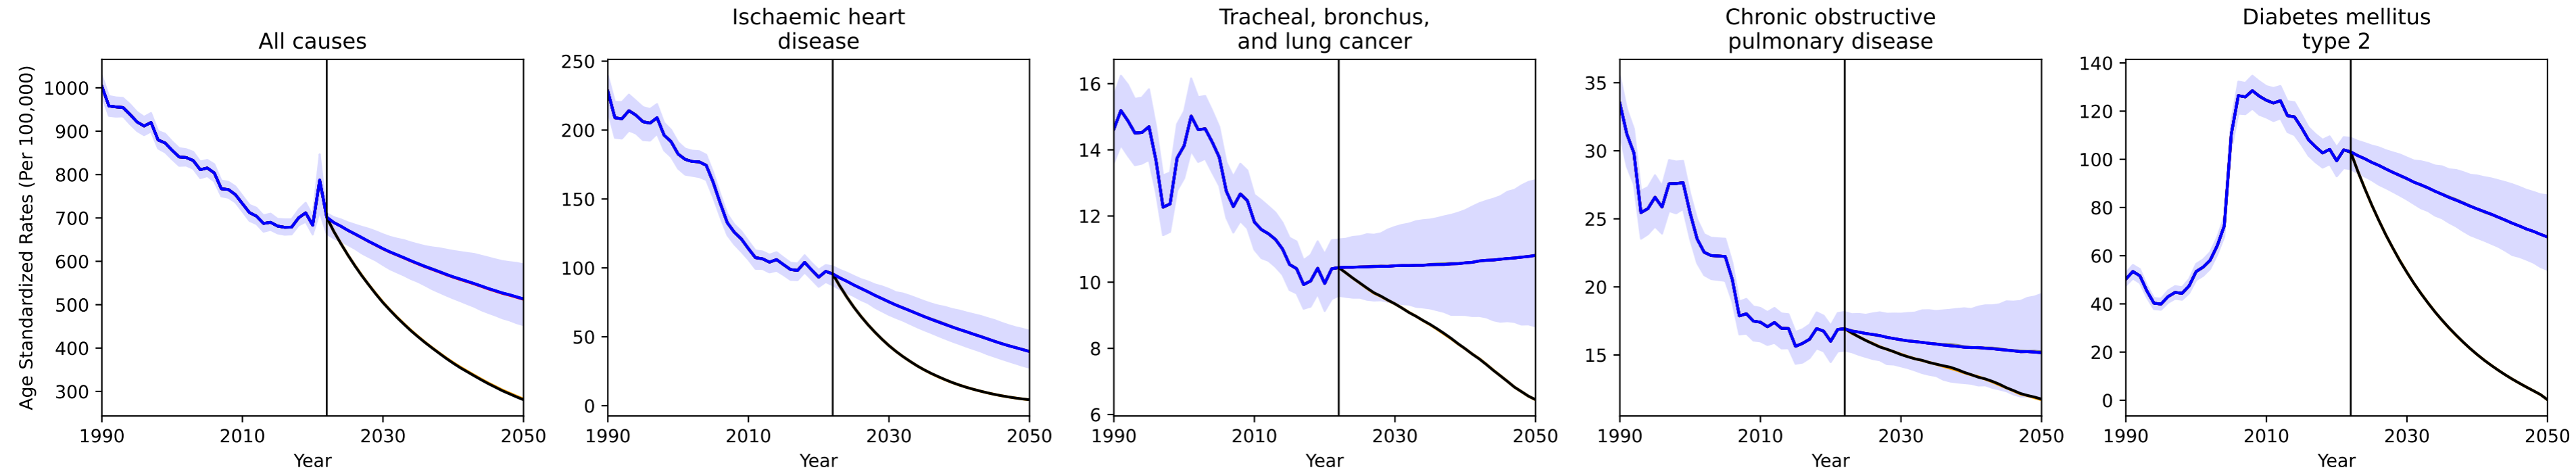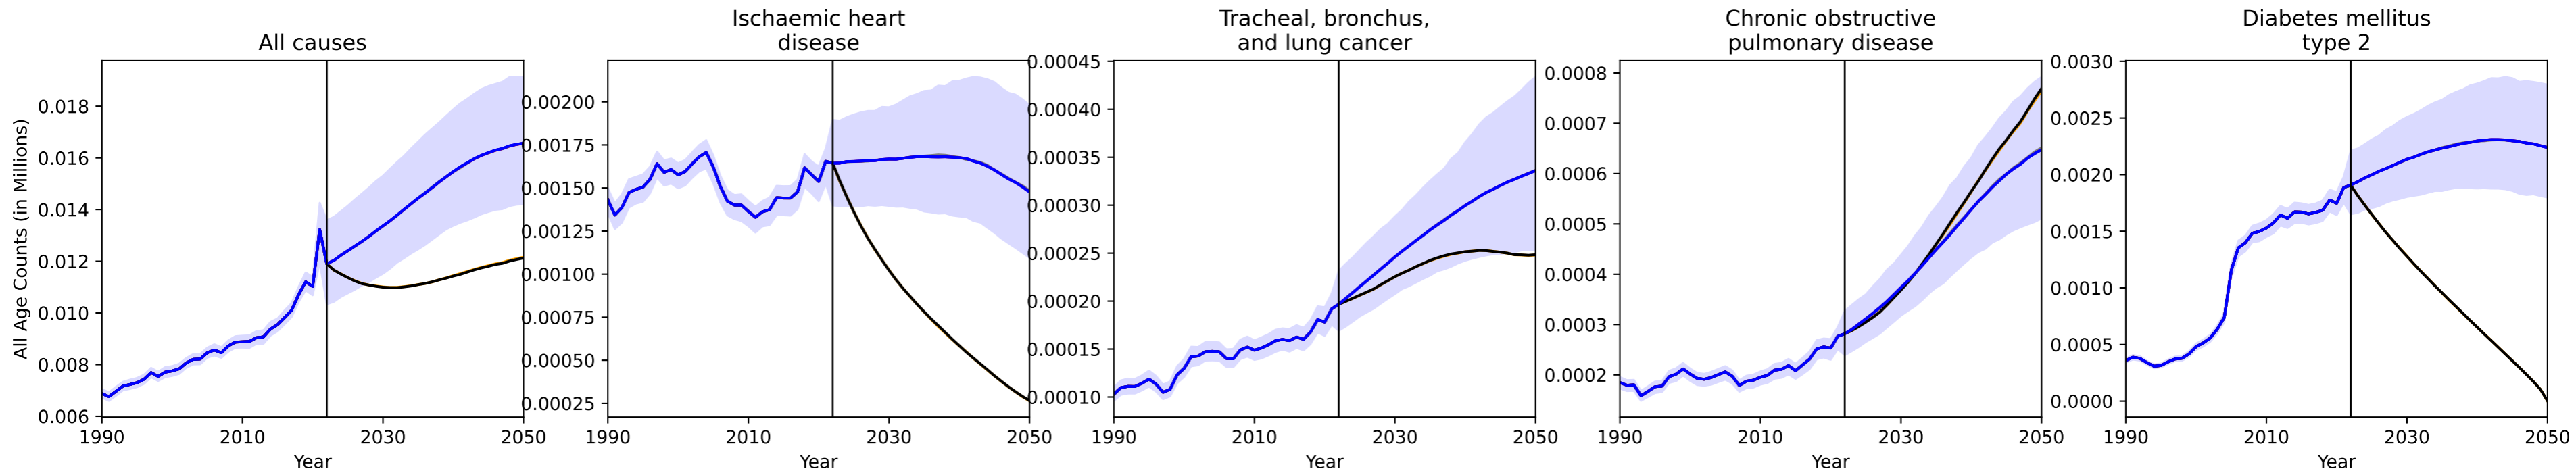

— Safer Environment — Improved Behavioural and Metabolic Risks — Improved Childhood Nutrition and Vaccination — Combined — Reference

# Myanmar

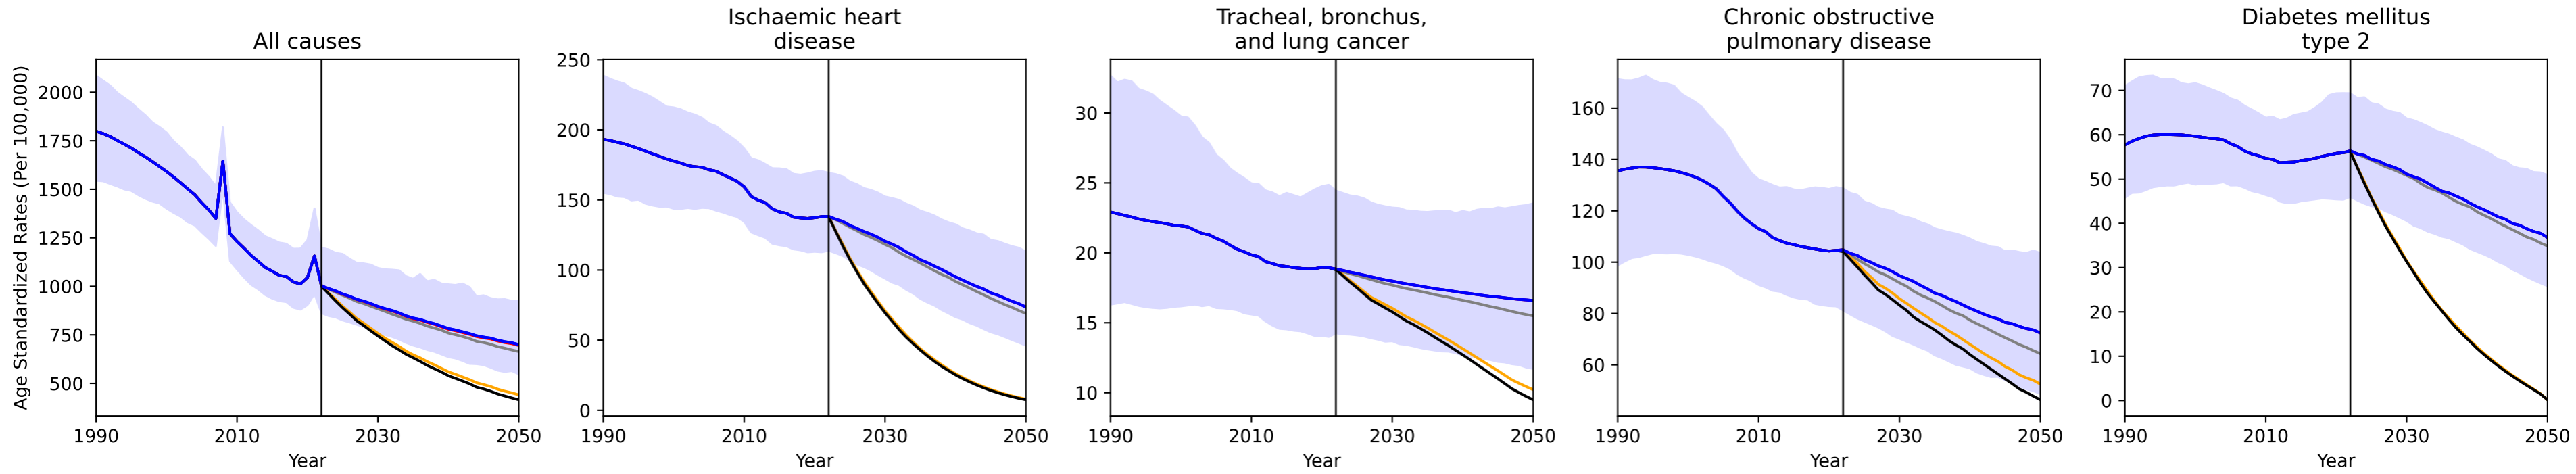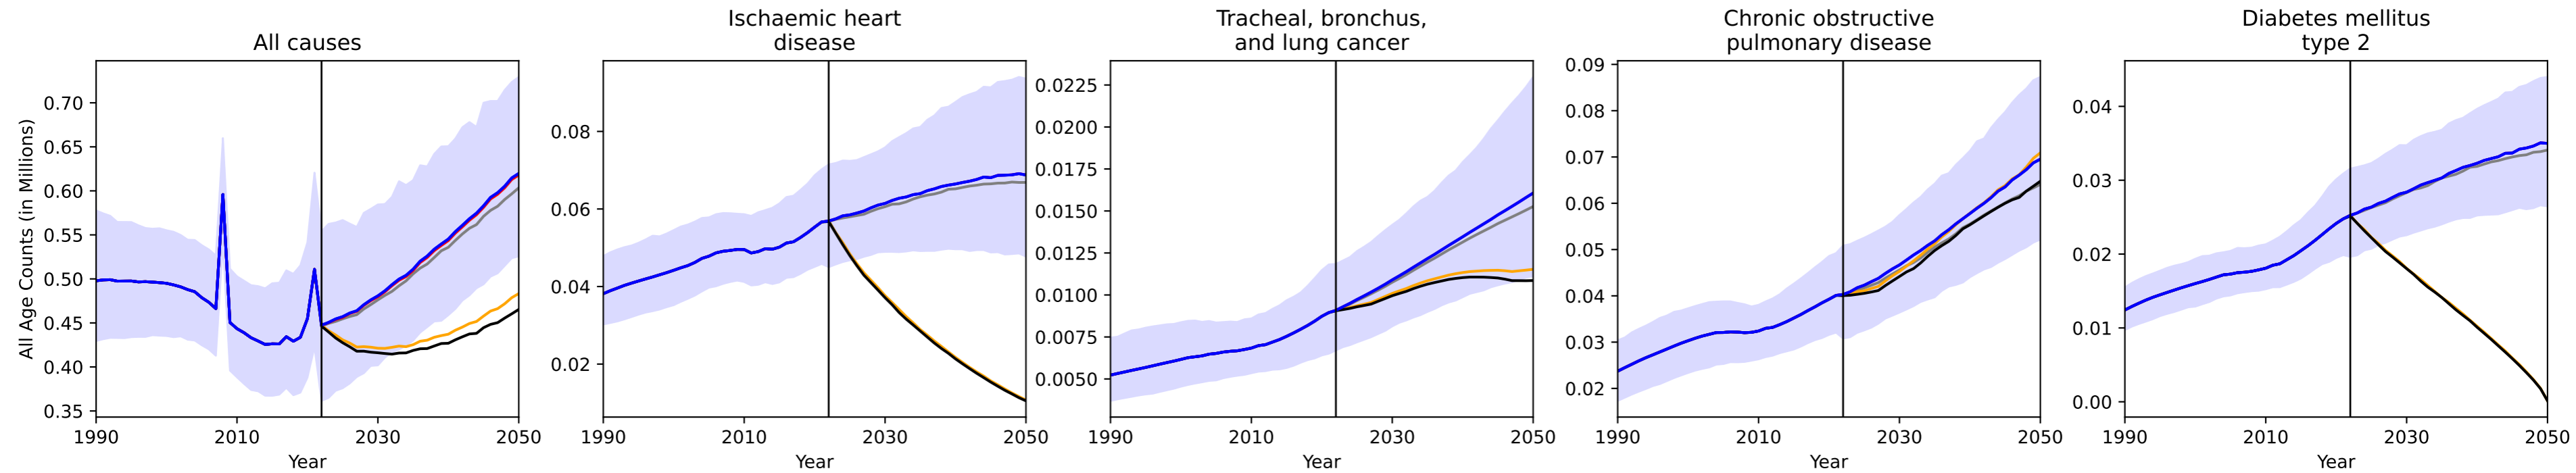

— Safer Environment — Improved Behavioural and Metabolic Risks — Improved Childhood Nutrition and Vaccination — Combined — Reference

# Philippines

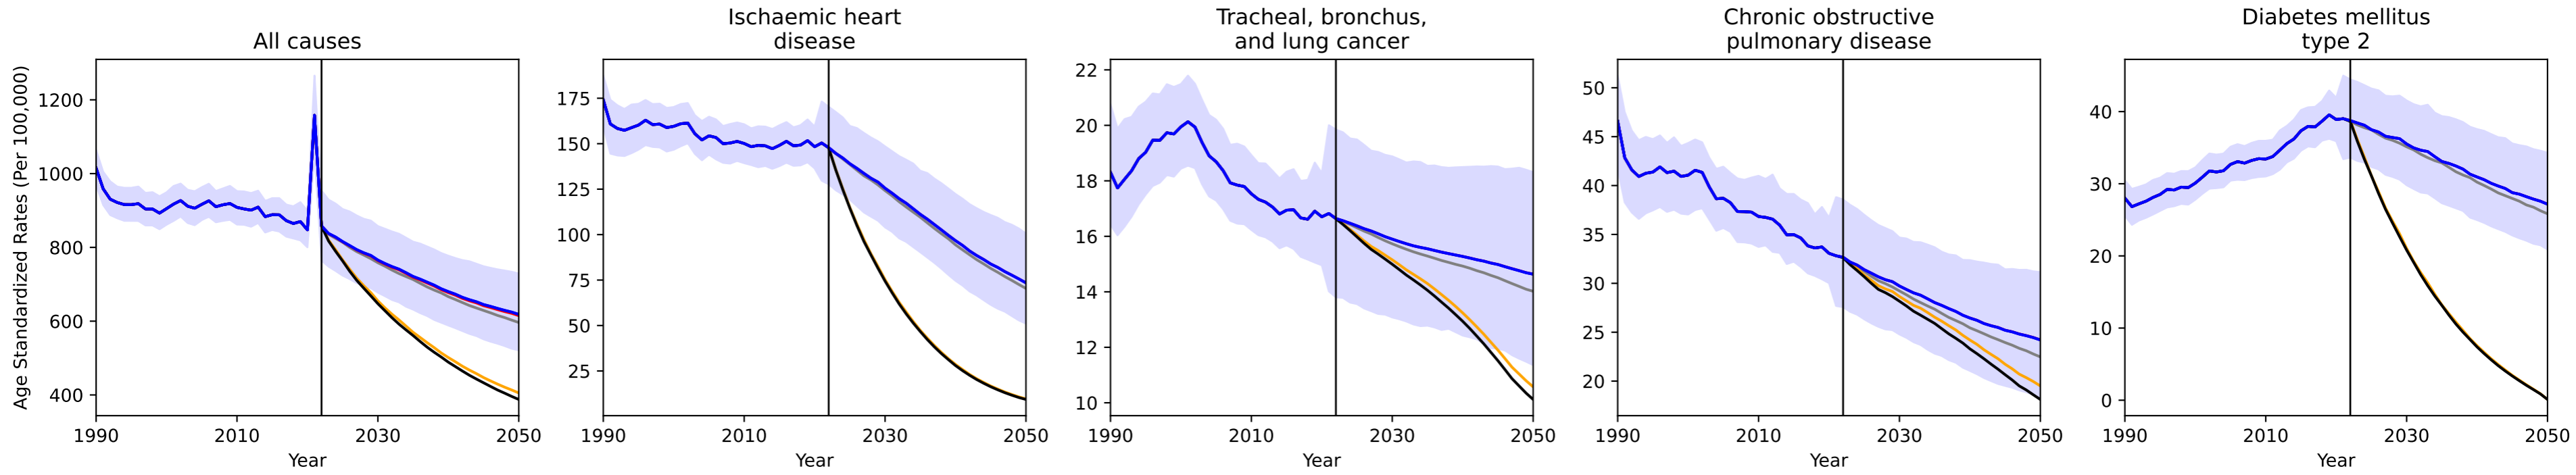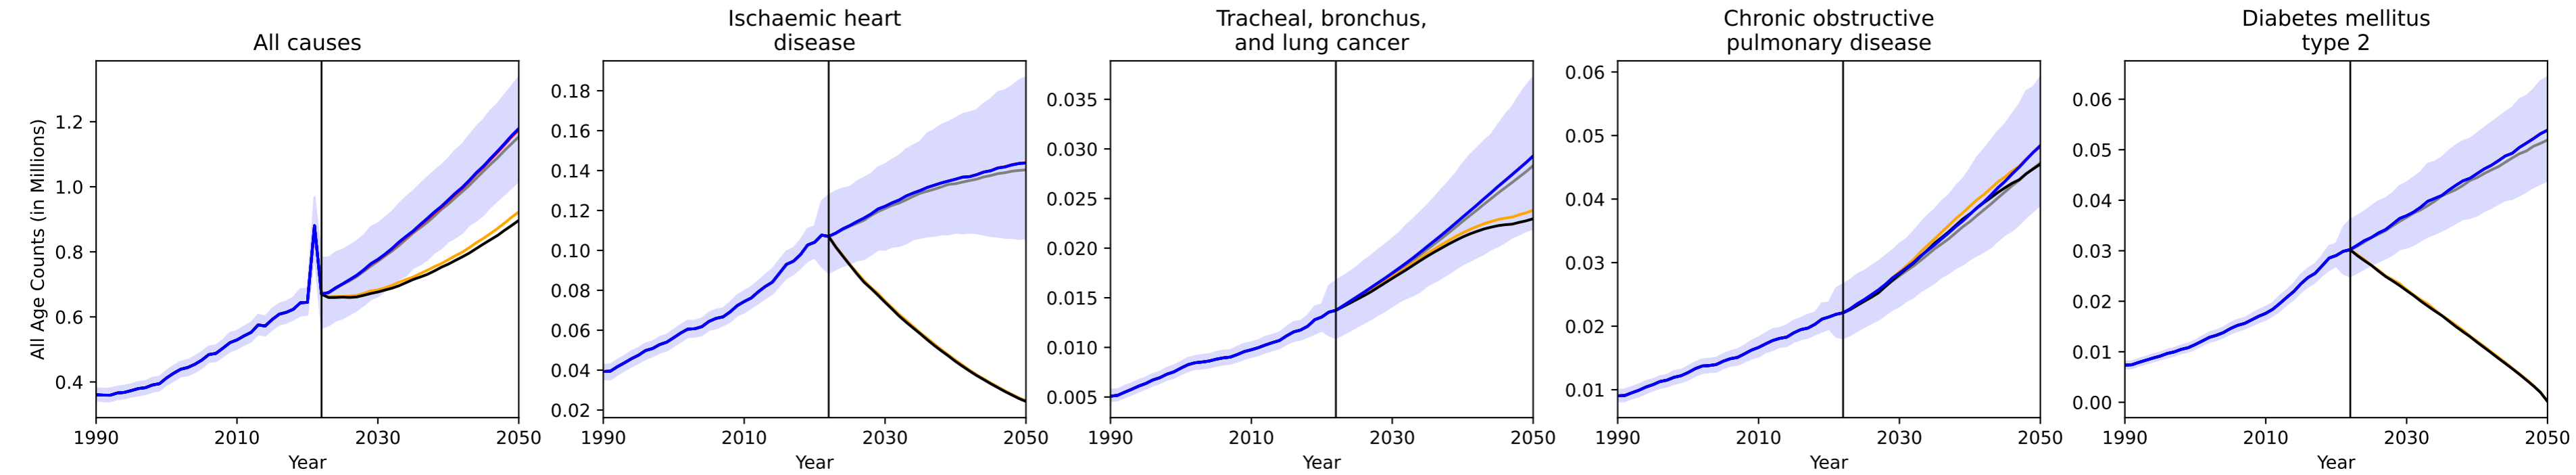

# Seychelles

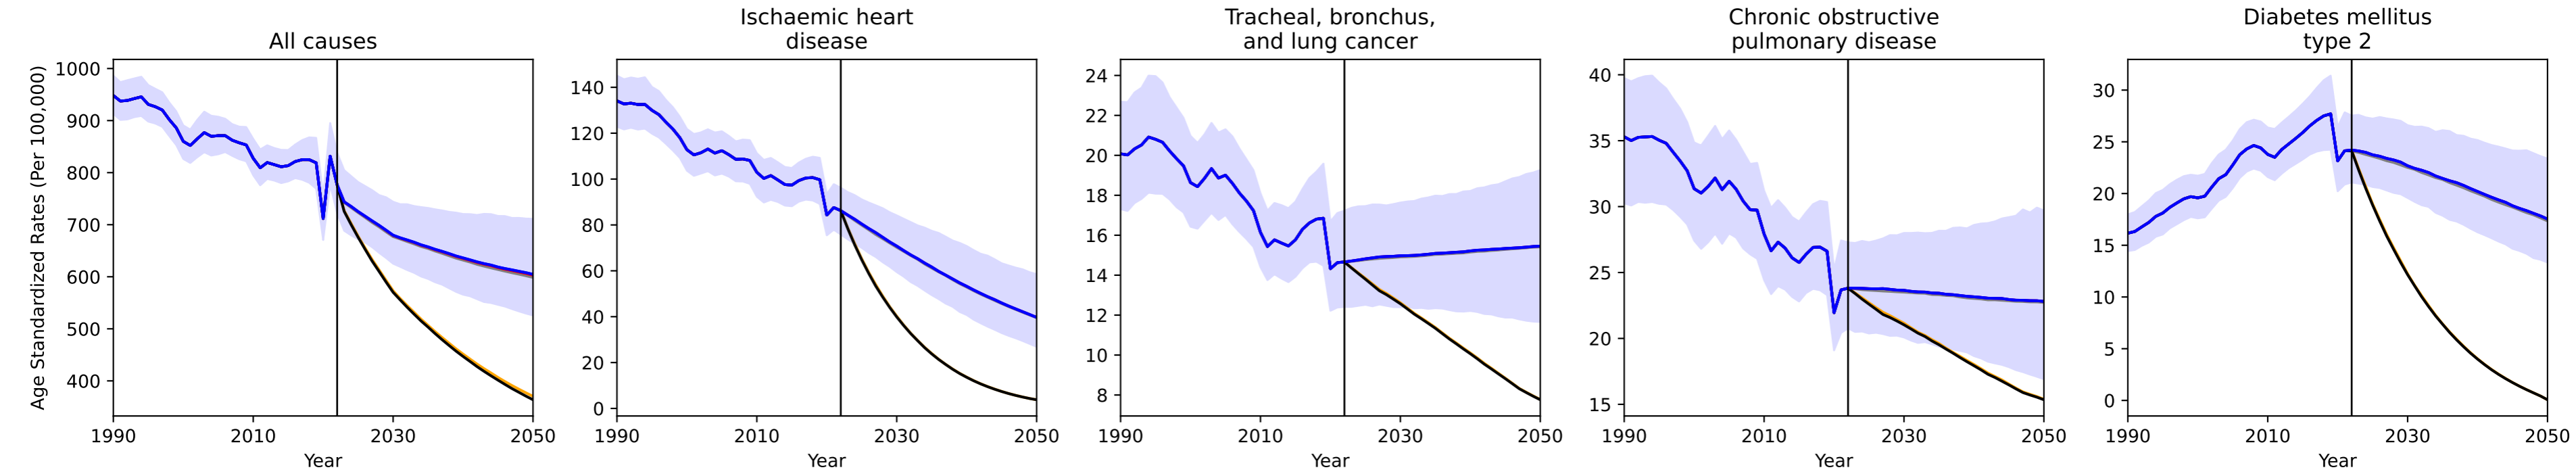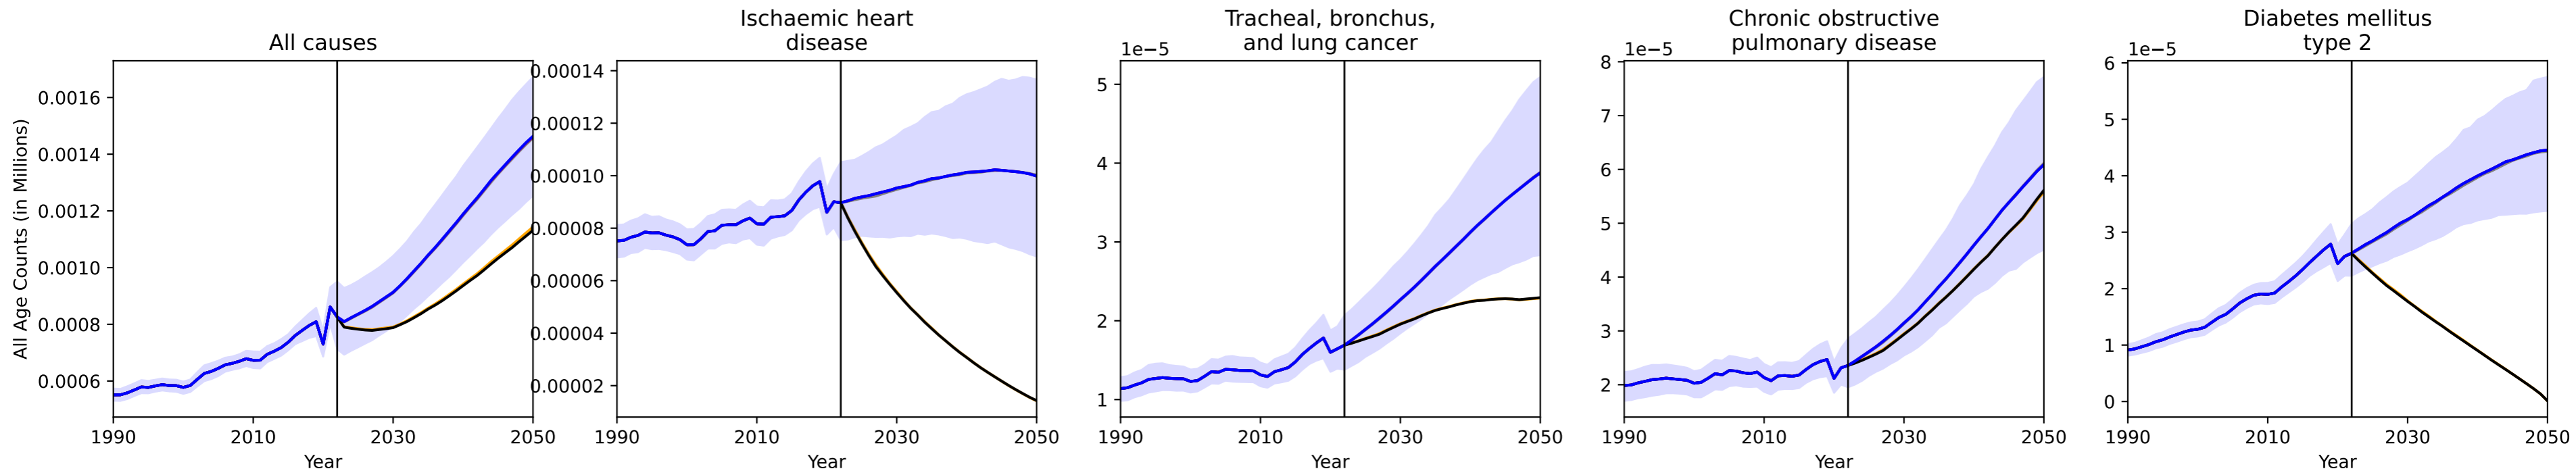



# Sri Lanka

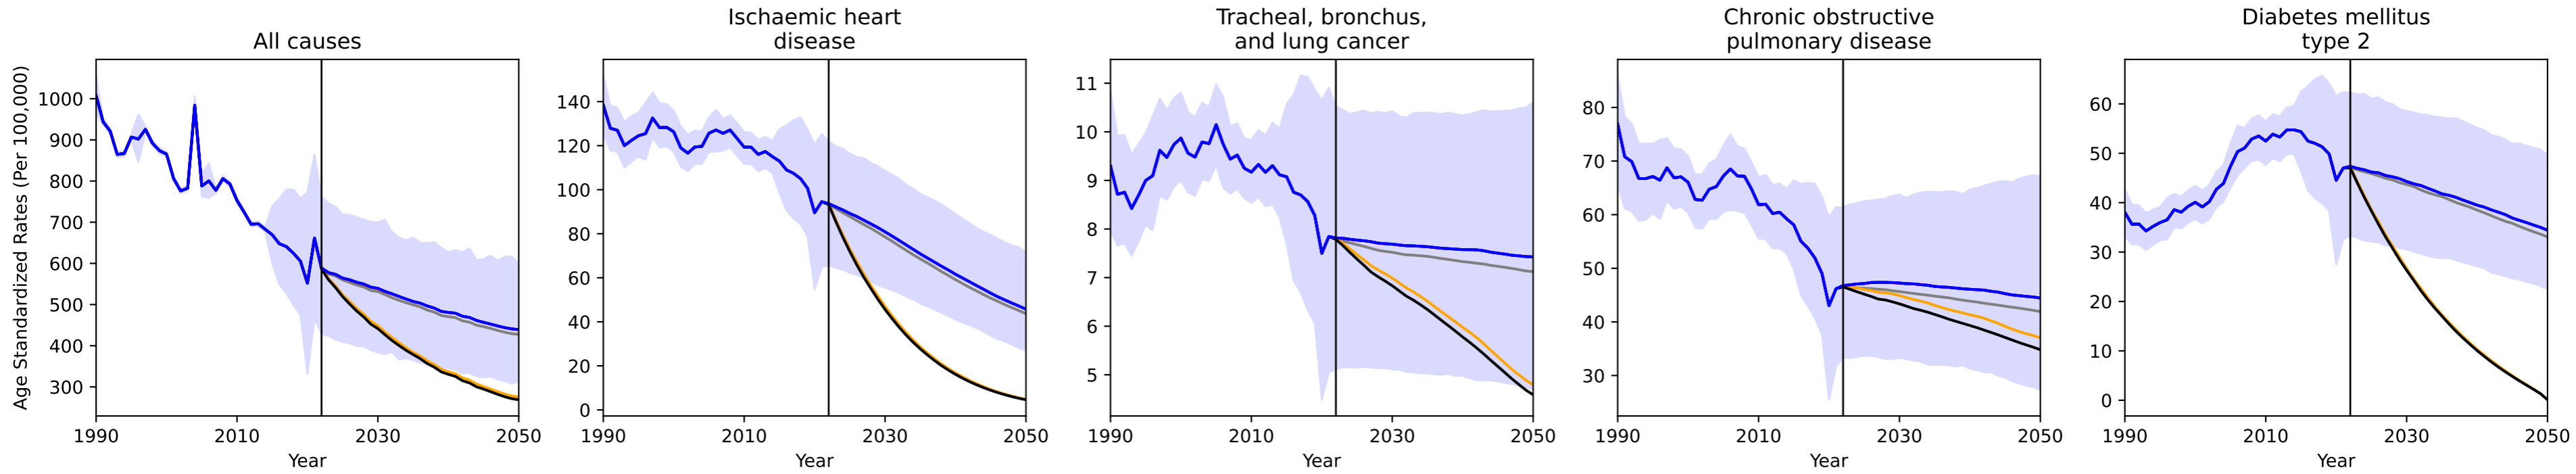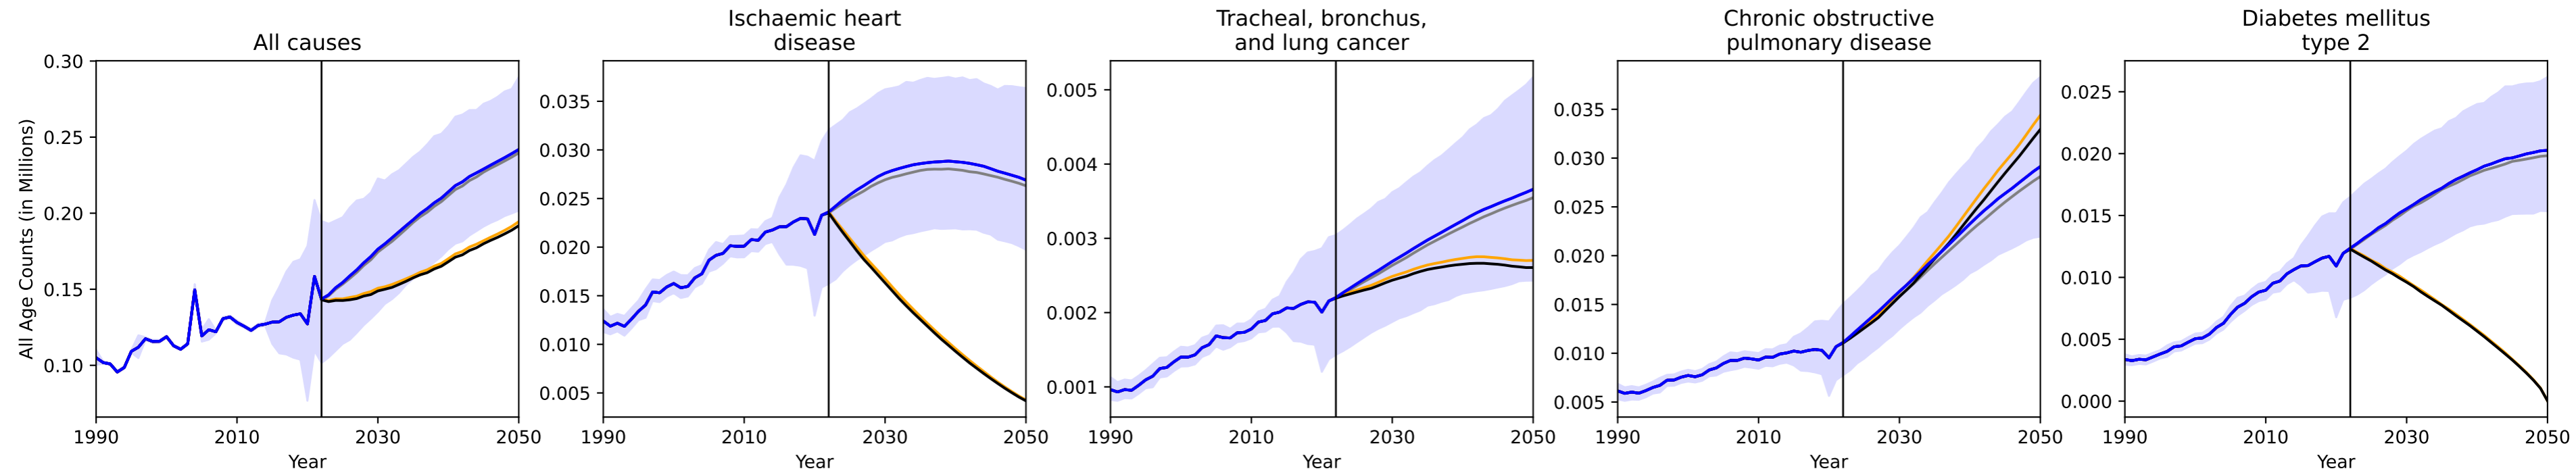

# Thailand

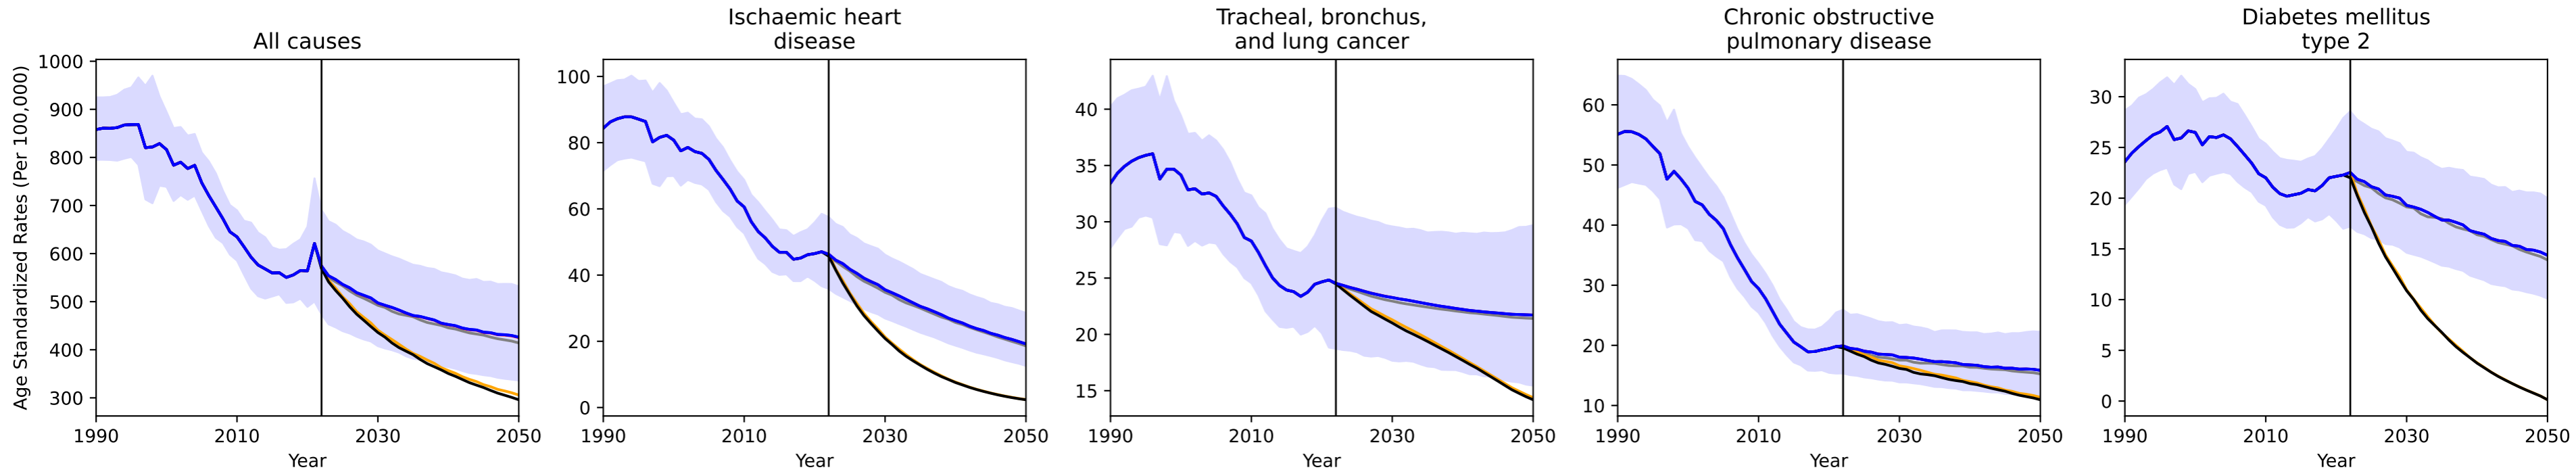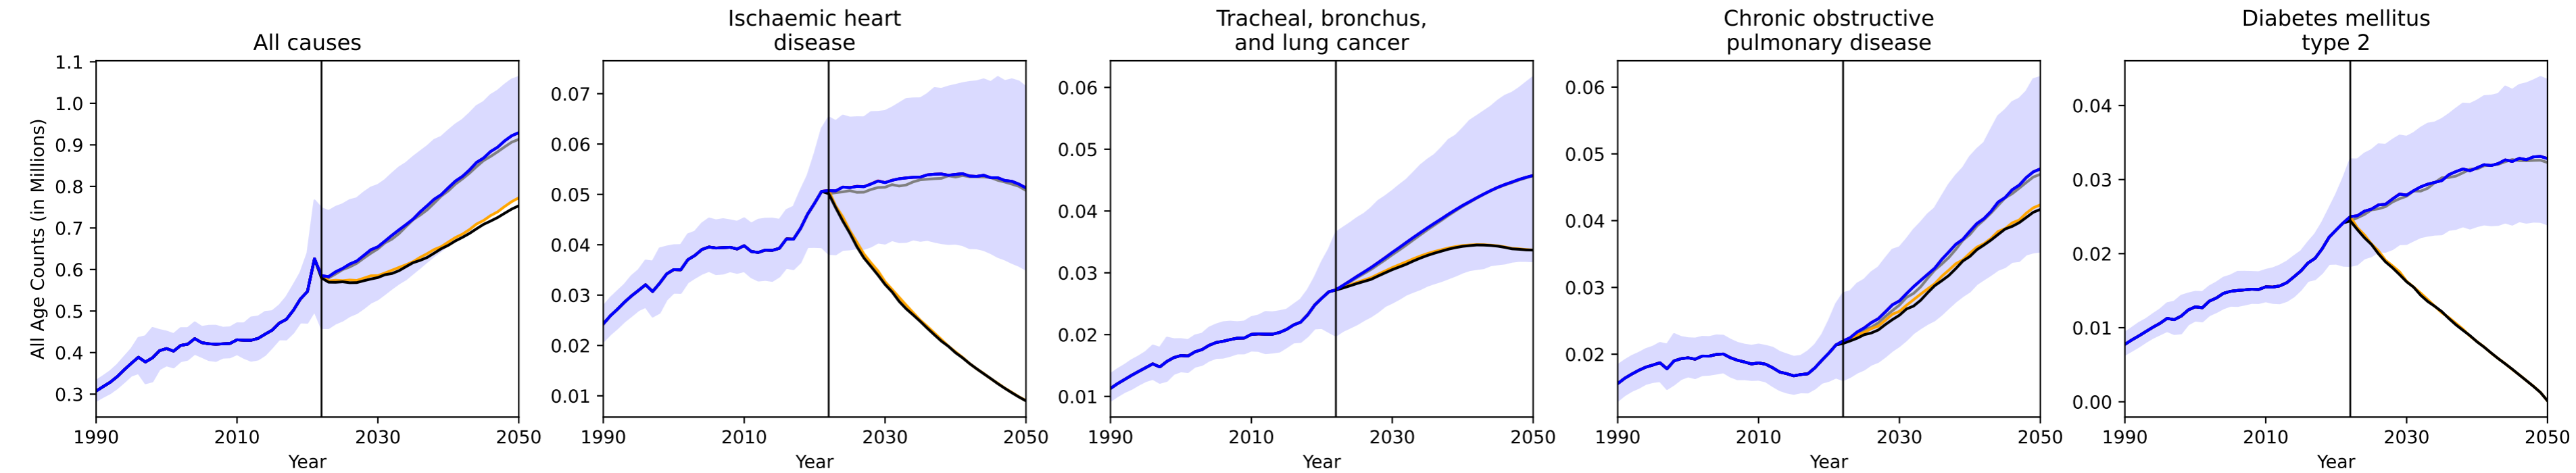

— Safer Environment    — Improved Behavioural and Metabolic Risks    — Improved Childhood Nutrition and Vaccination    — Combined    — Reference

# Timor-Leste

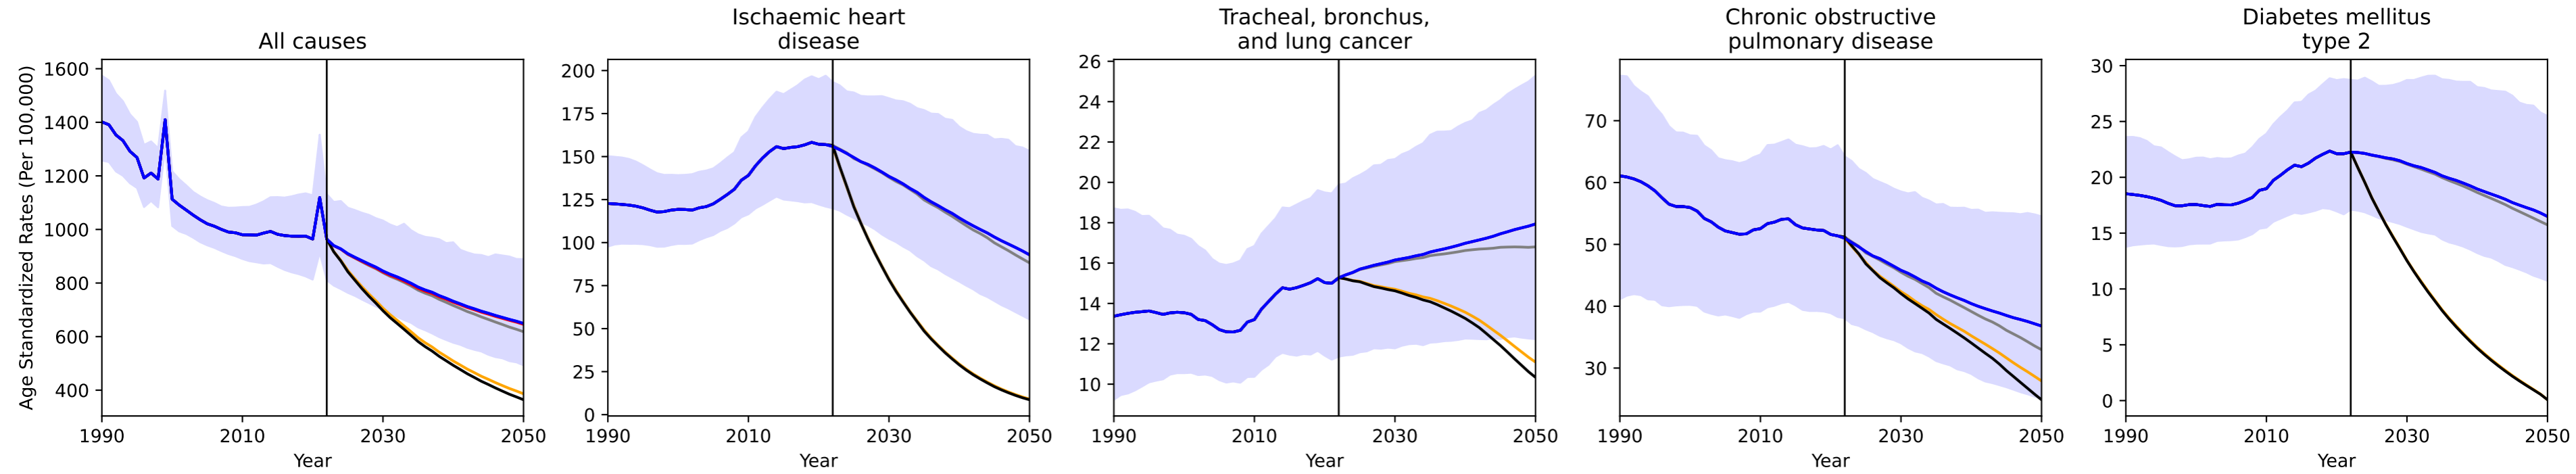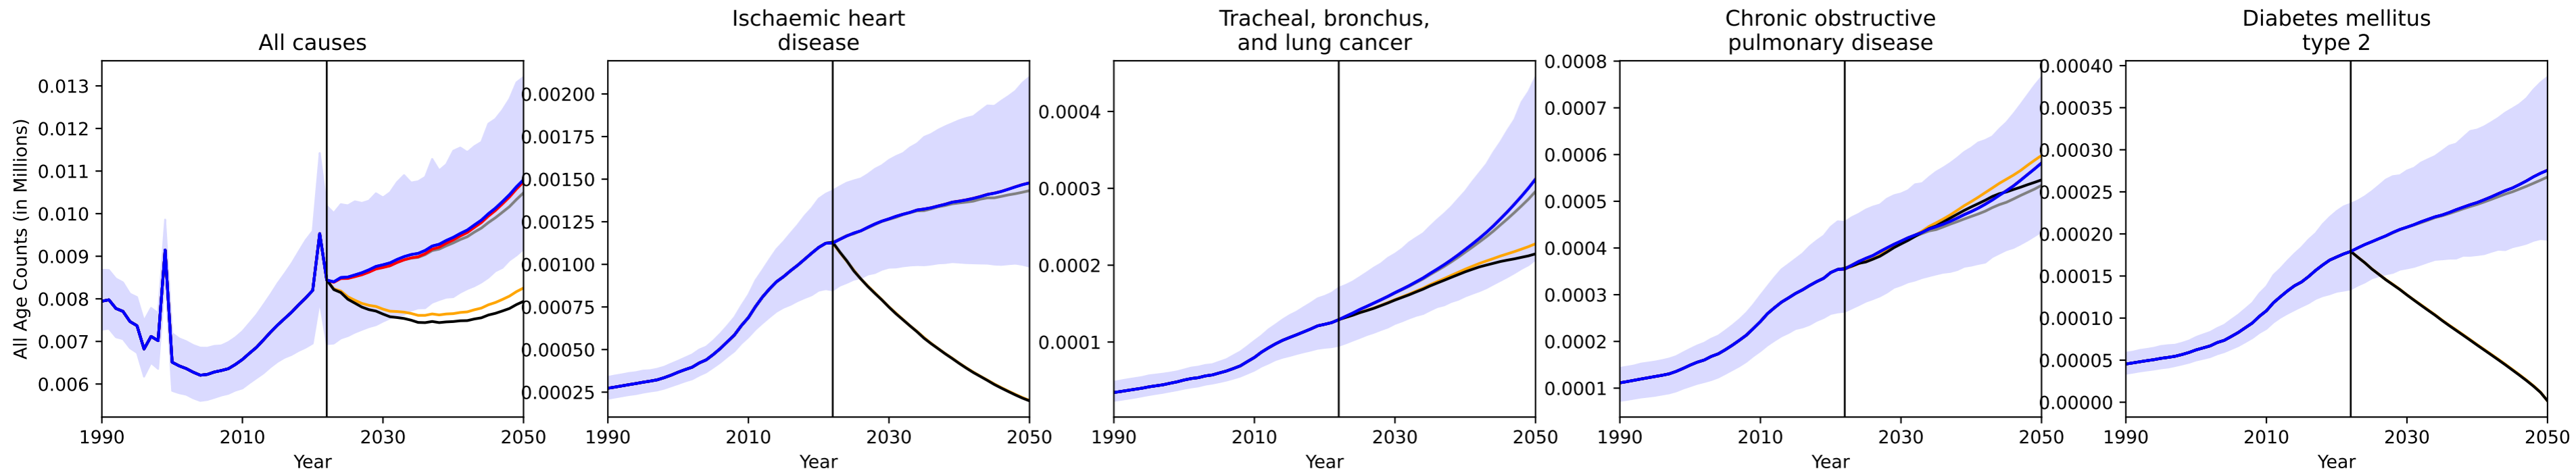

# Viet Nam

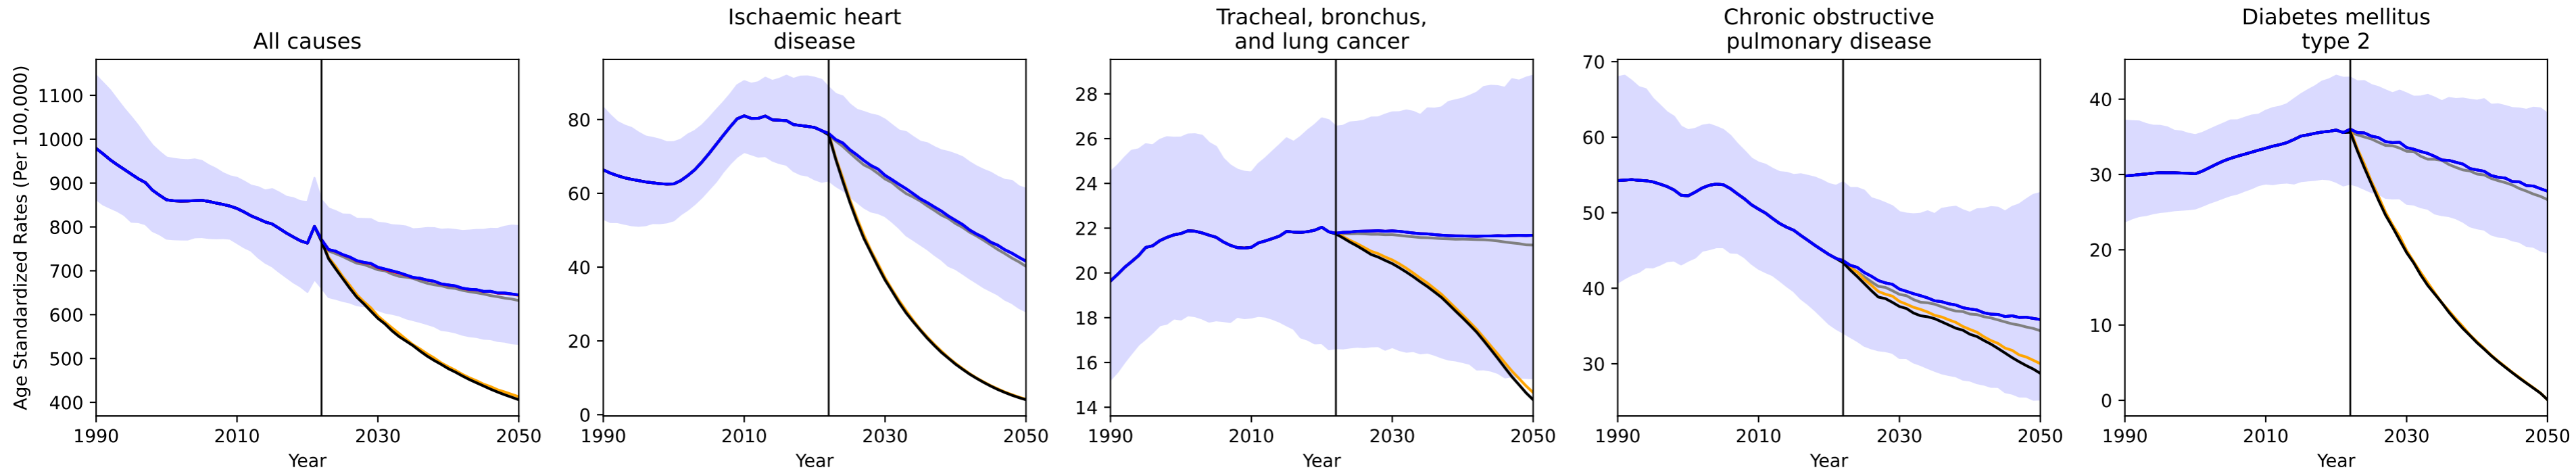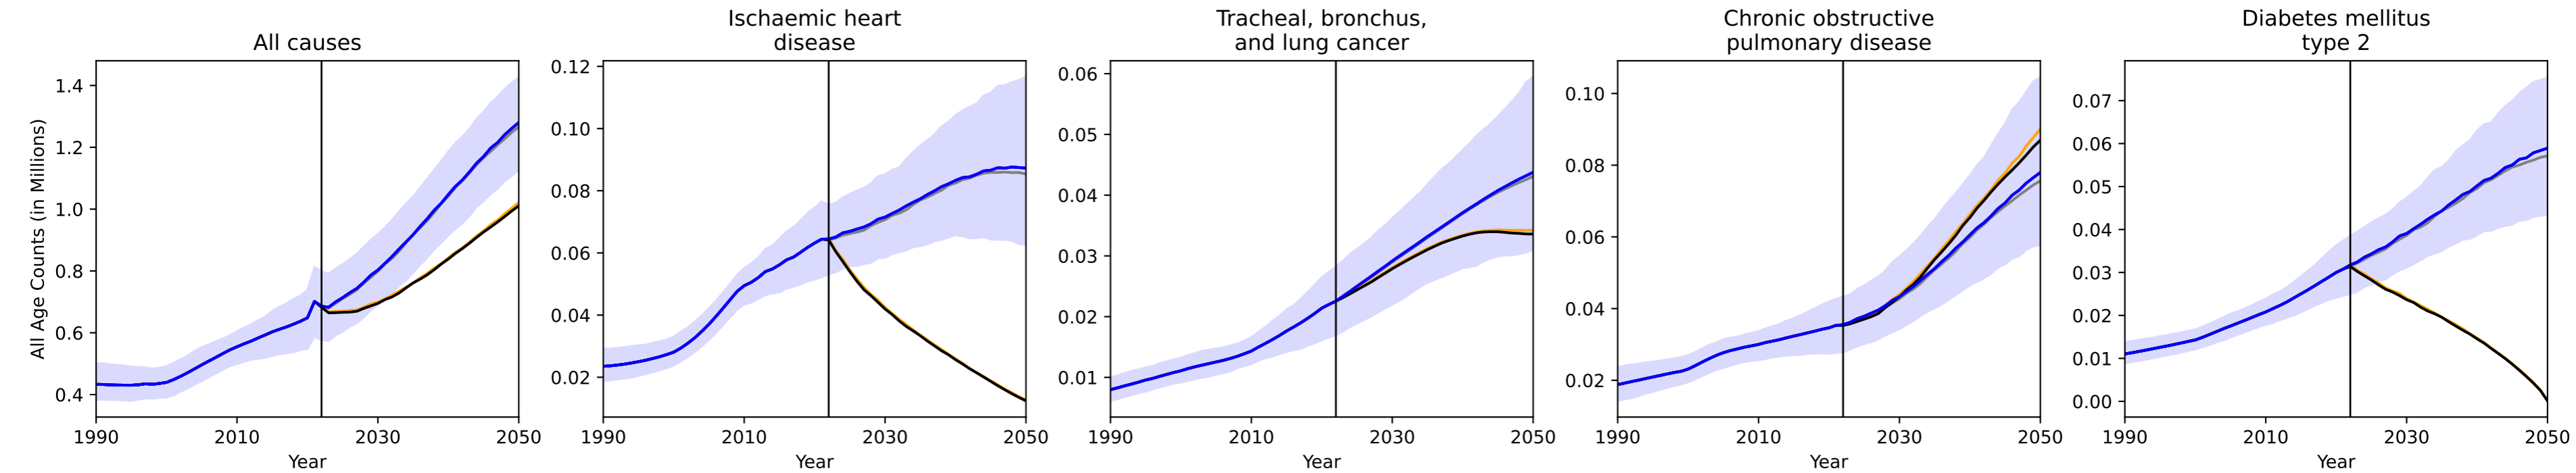

— Safer Environment — Improved Behavioural and Metabolic Risks — Improved Childhood Nutrition and Vaccination — Combined — Reference

# Angola

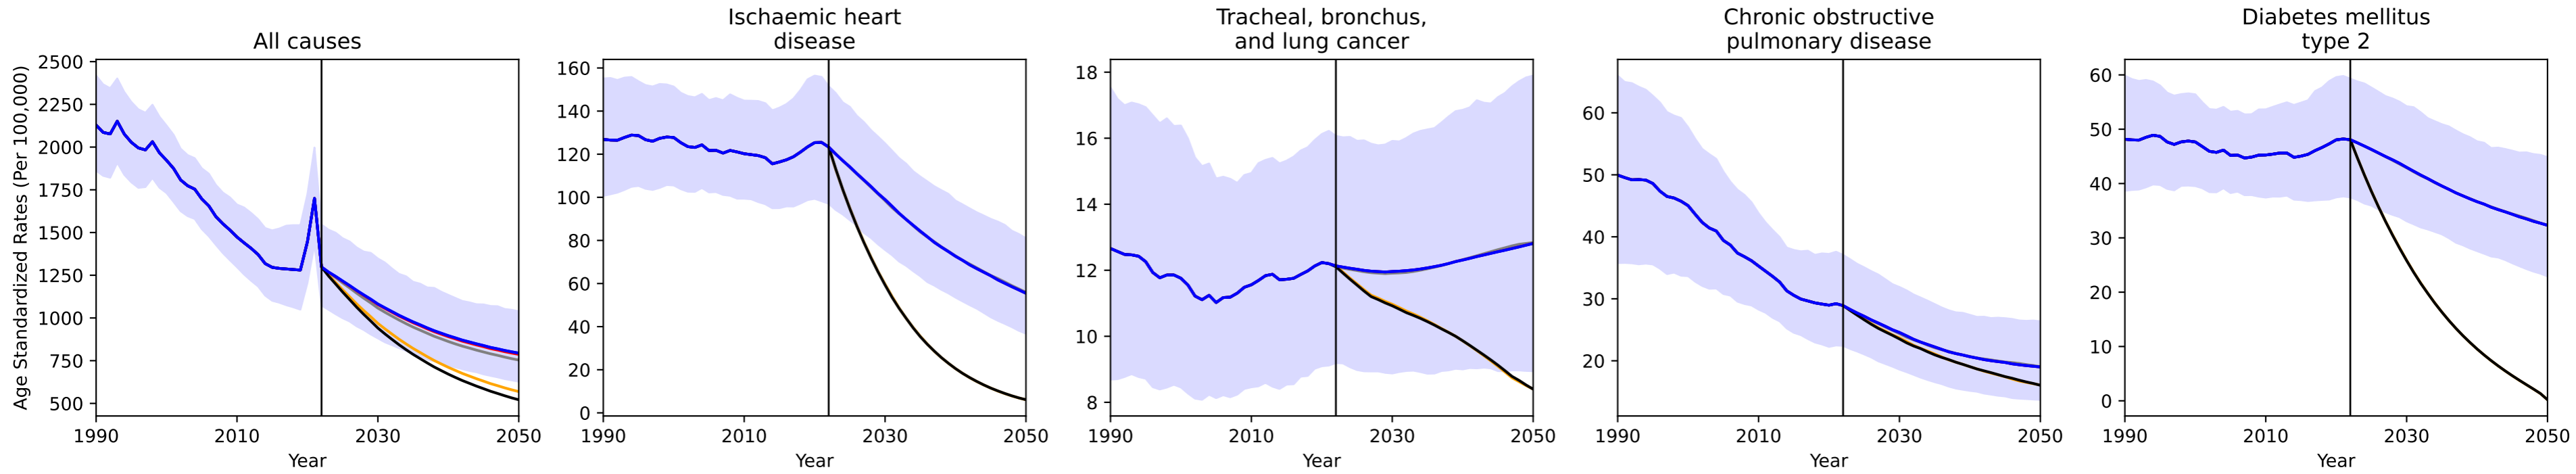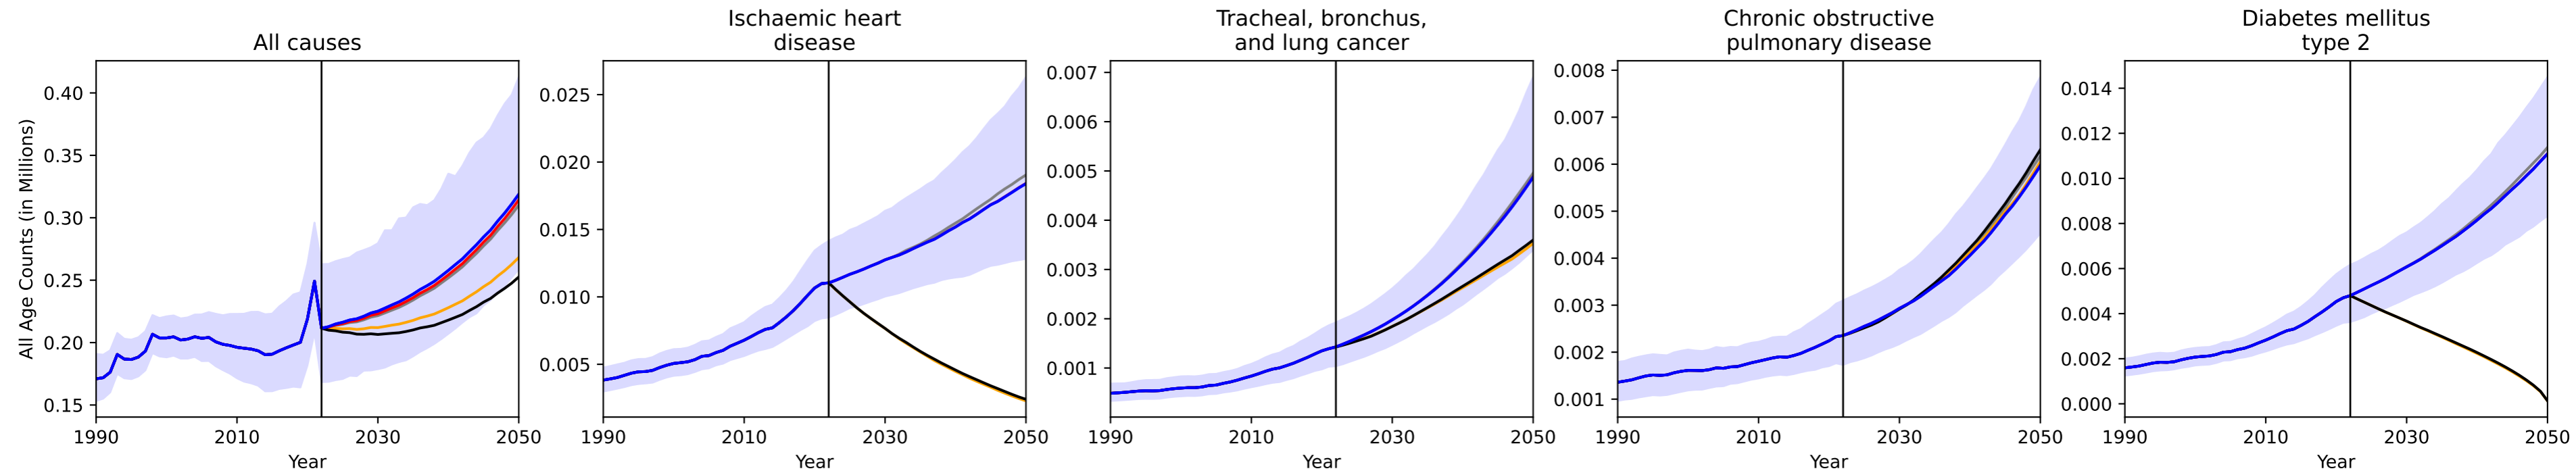

— Safer Environment    — Improved Behavioural and Metabolic Risks    — Improved Childhood Nutrition and Vaccination    — Combined    — Reference

# Central African Republic

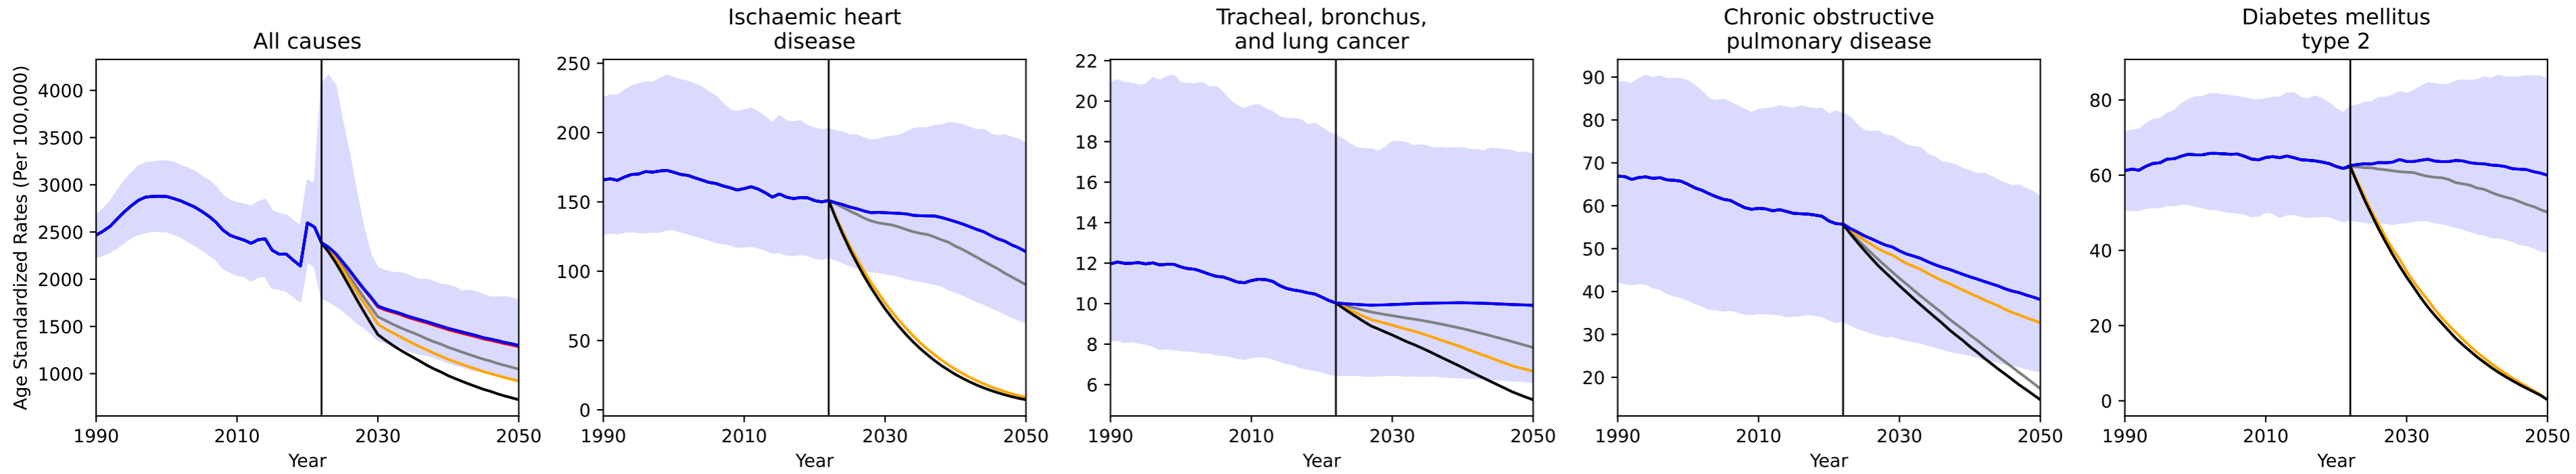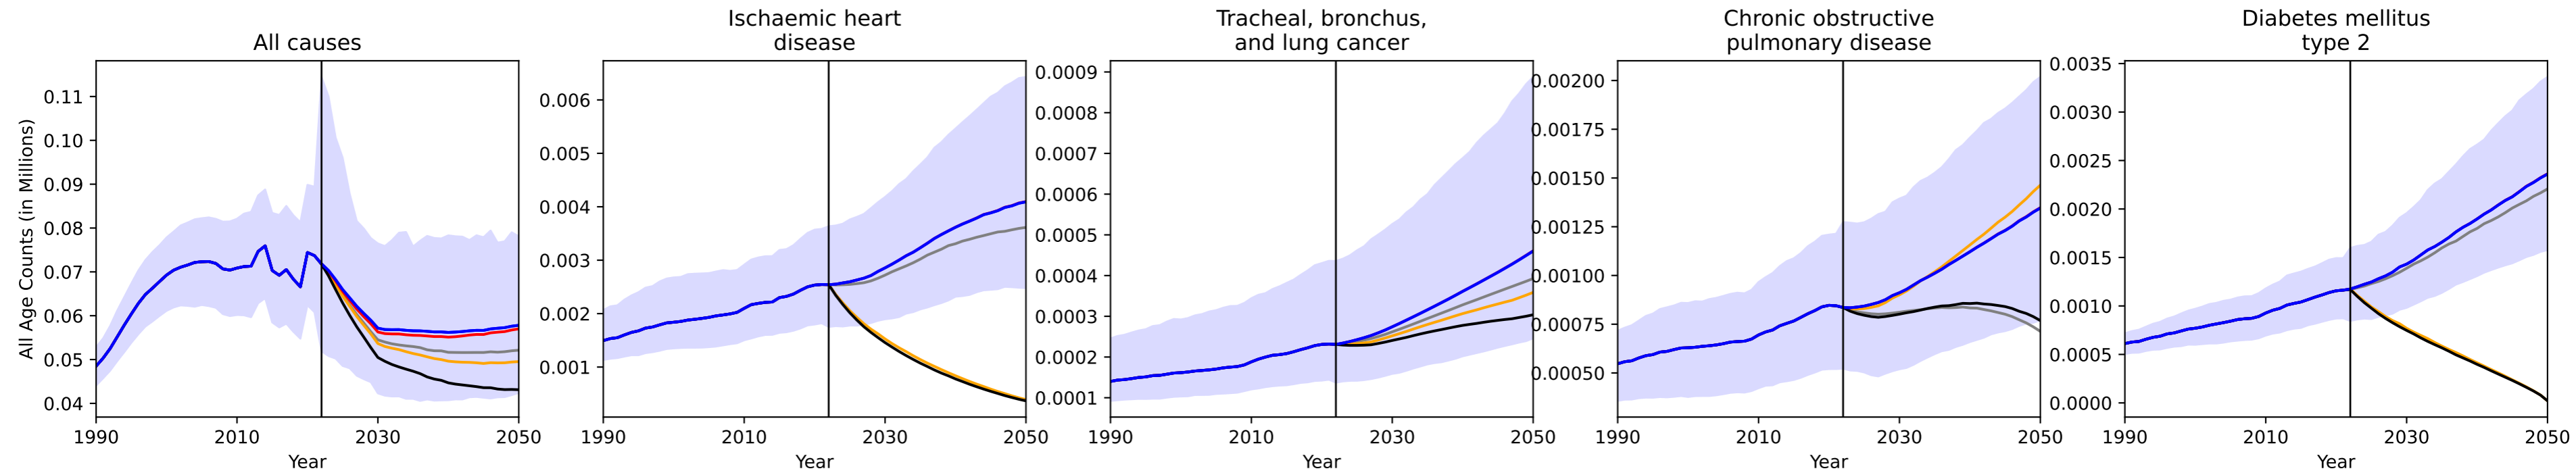

— Safer Environment — Improved Behavioural and Metabolic Risks — Improved Childhood Nutrition and Vaccination — Combined — Reference

# Congo (Brazzaville)

Supplemental Results Figure S13. All cause and top NCD causes age standardized death rates and all age counts by scenario and location, 1990-2050

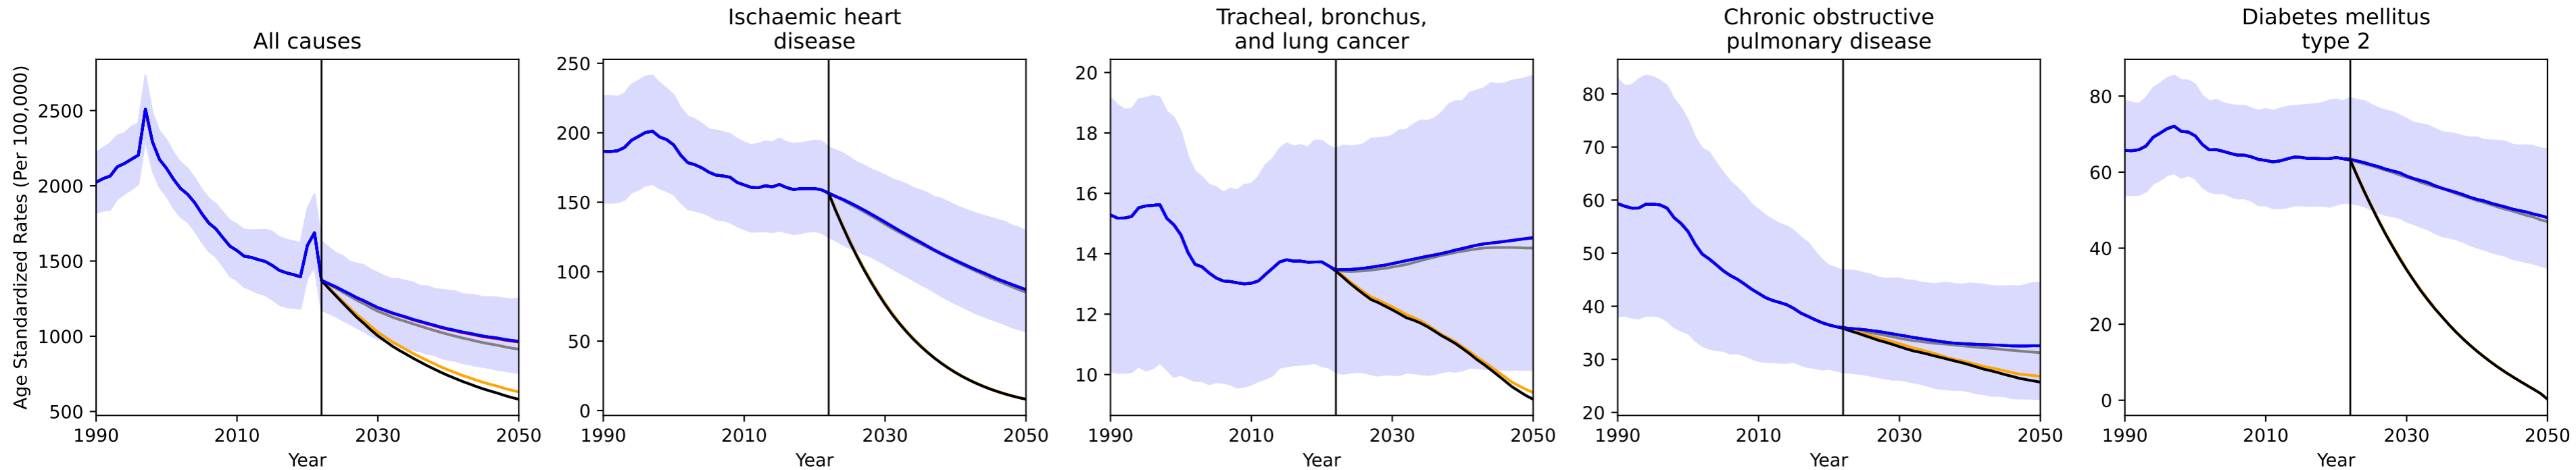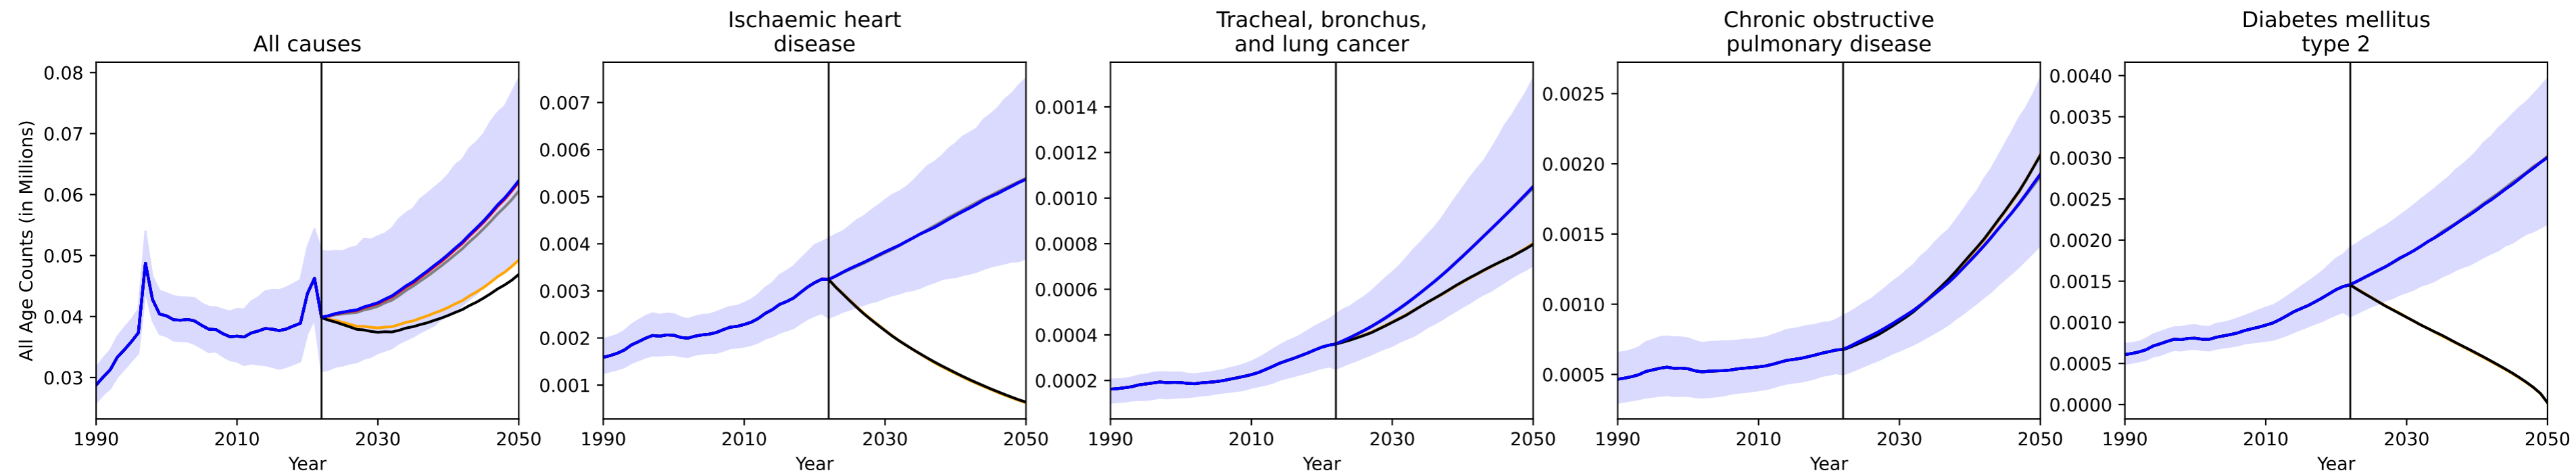

— Safer Environment — Improved Behavioural and Metabolic Risks — Improved Childhood Nutrition and Vaccination — Combined — Reference

# DR Congo

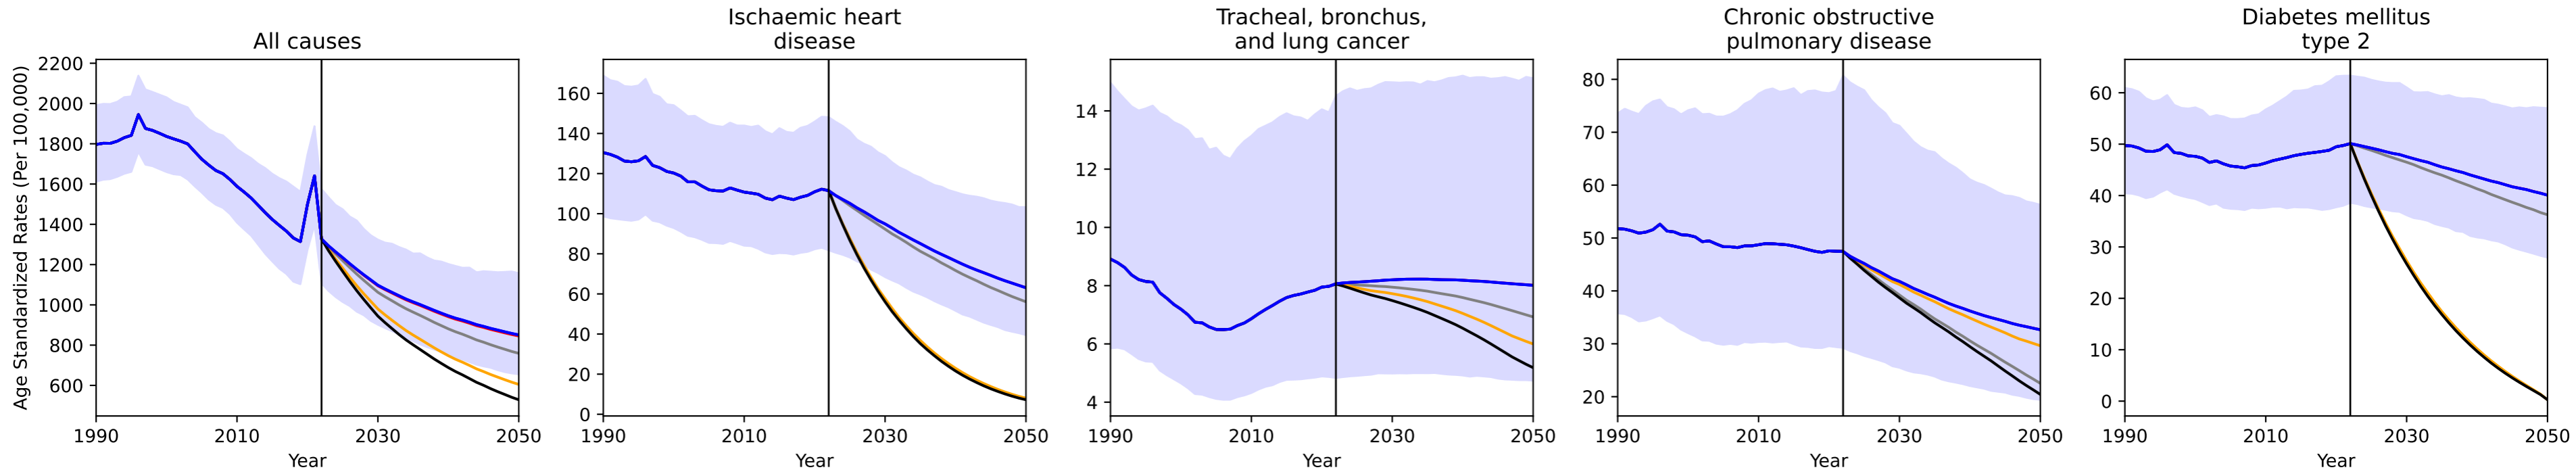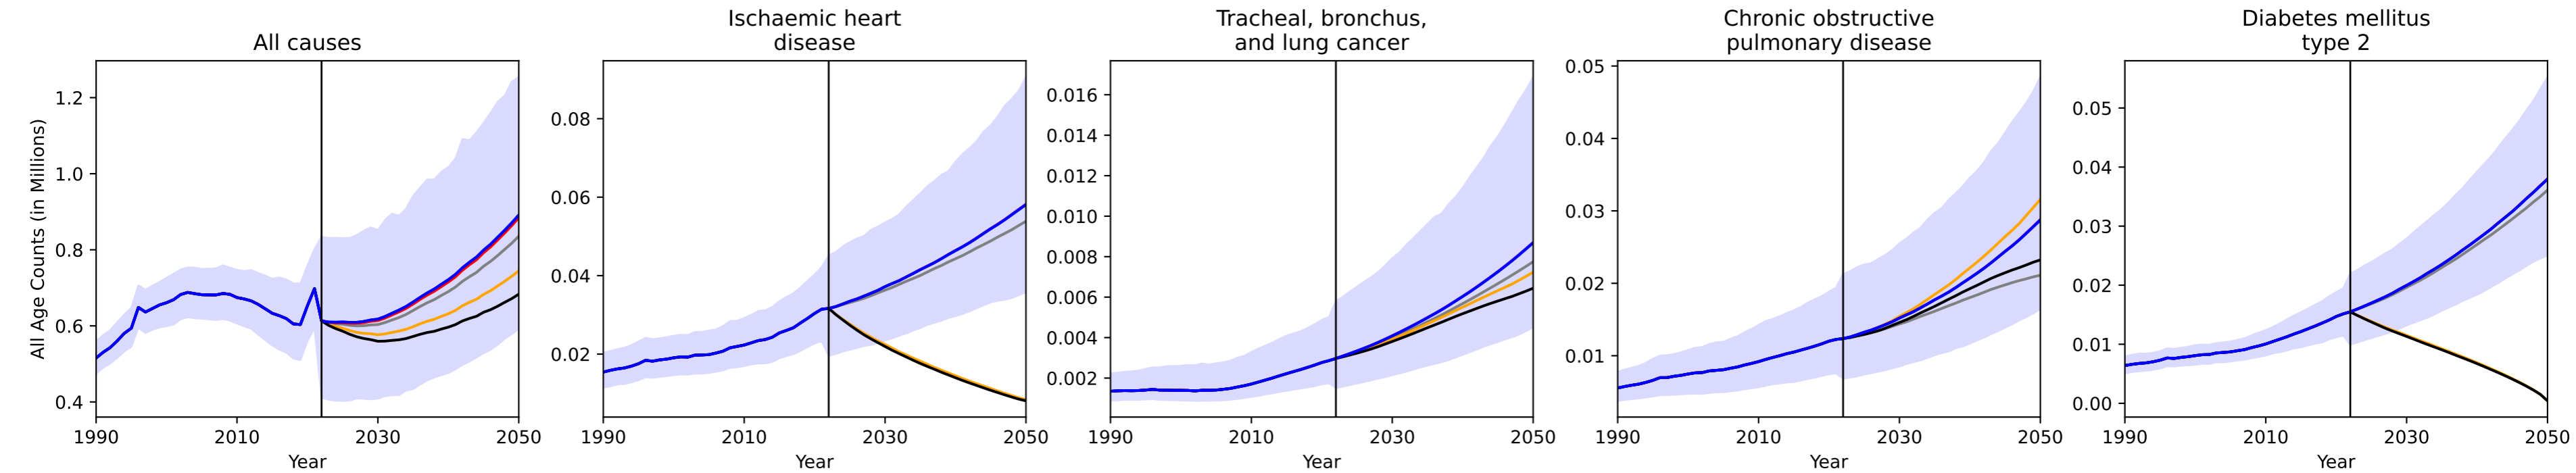

— Safer Environment — Improved Behavioural and Metabolic Risks — Improved Childhood Nutrition and Vaccination — Combined — Reference



# Equatorial Guinea

Supplemental Results Figure S13. All cause and top NCD causes age standardized death rates and all age counts by scenario and location, 1990-2050

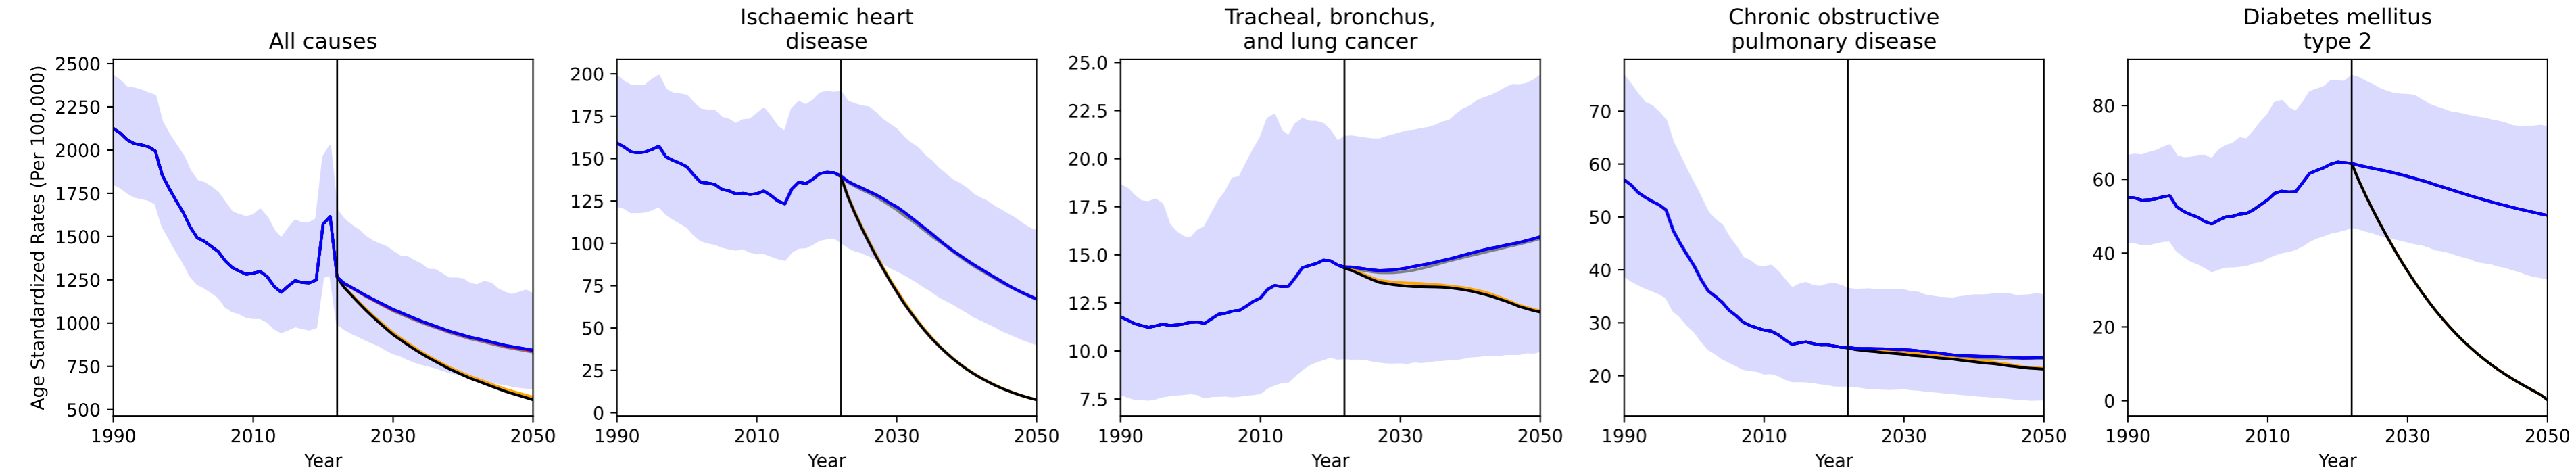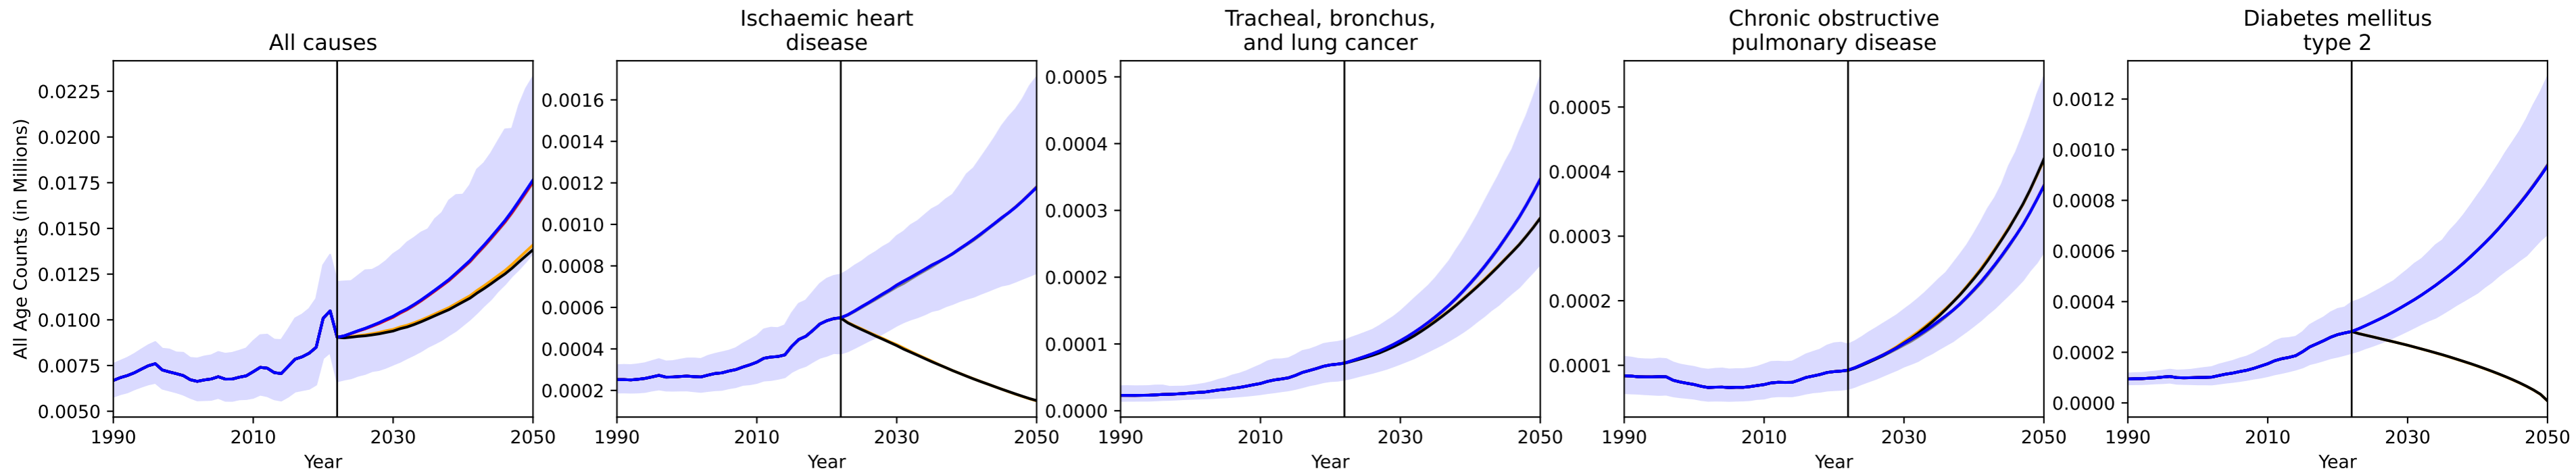

# Gabon

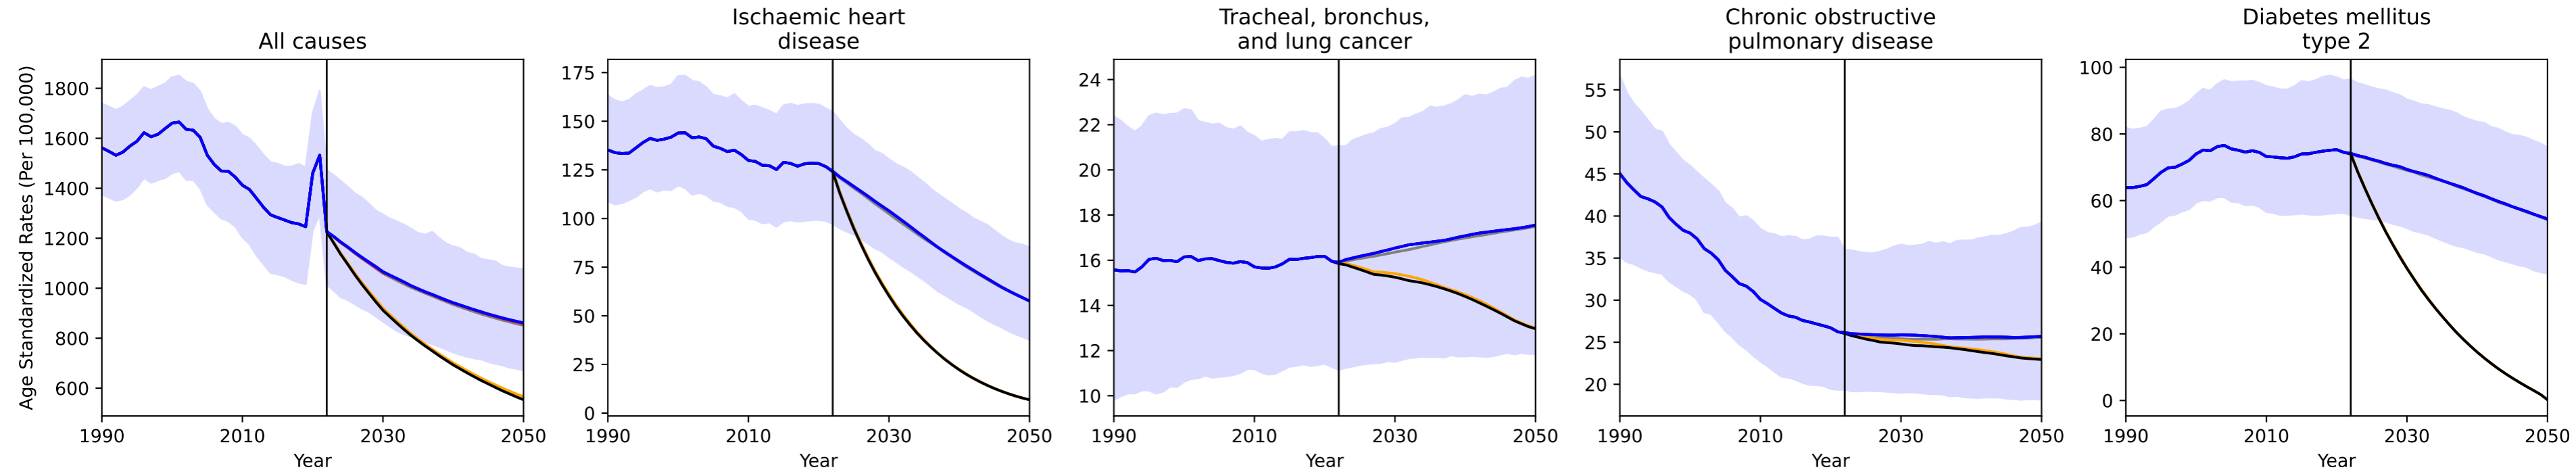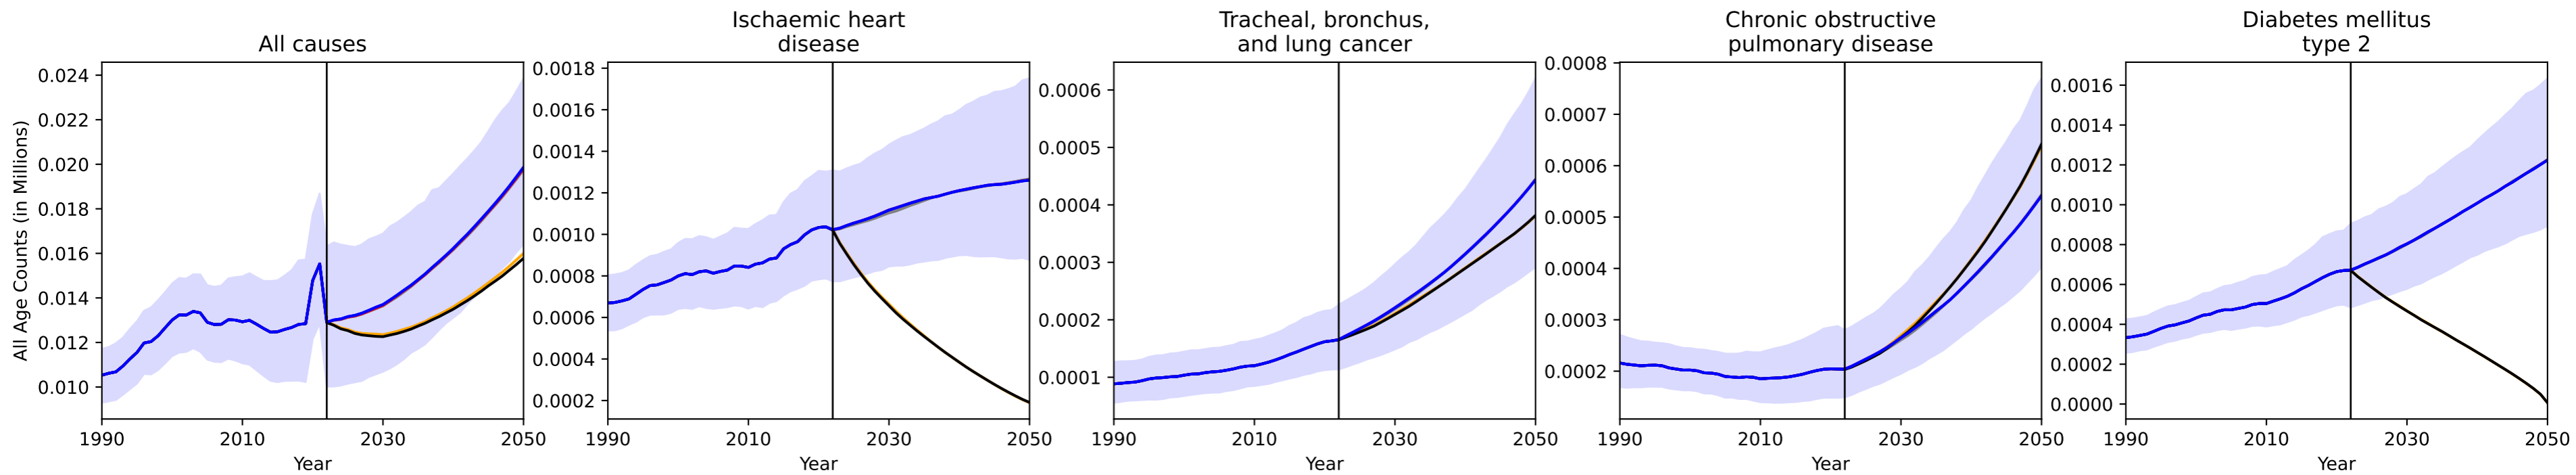

— Safer Environment — Improved Behavioural and Metabolic Risks — Improved Childhood Nutrition and Vaccination — Combined — Reference

# Burundi

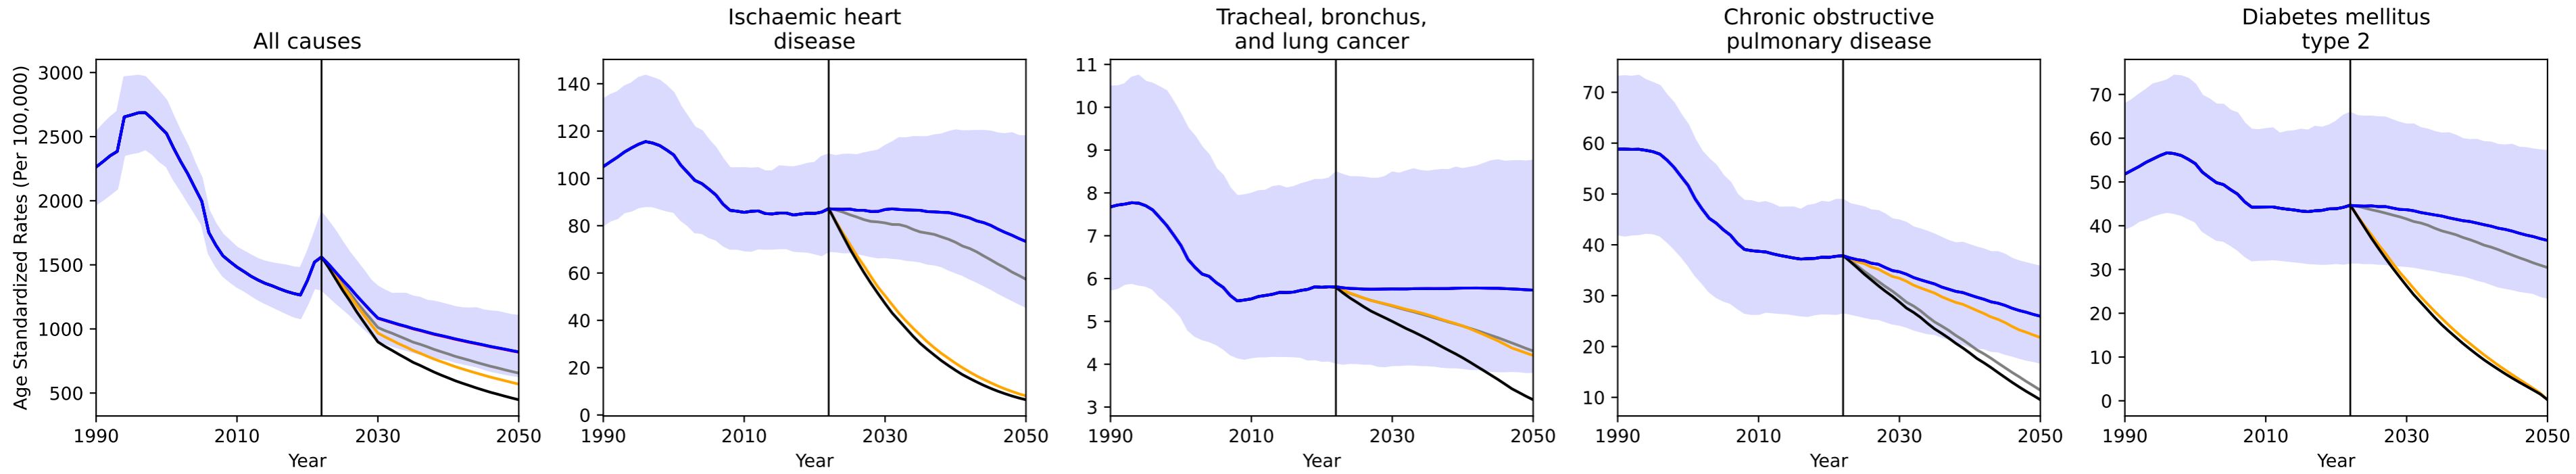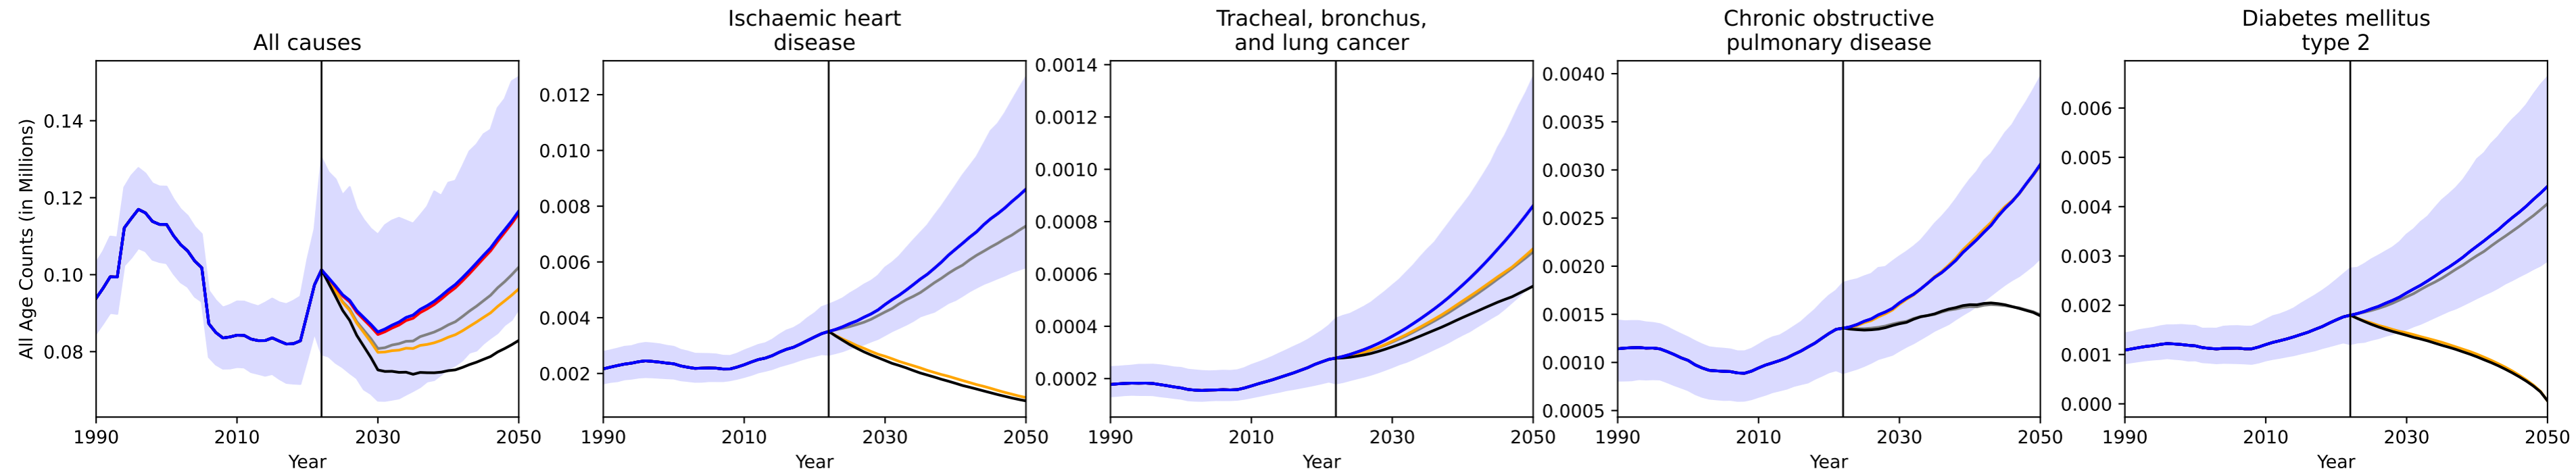

— Safer Environment — Improved Behavioural and Metabolic Risks — Improved Childhood Nutrition and Vaccination — Combined — Reference

# Comoros

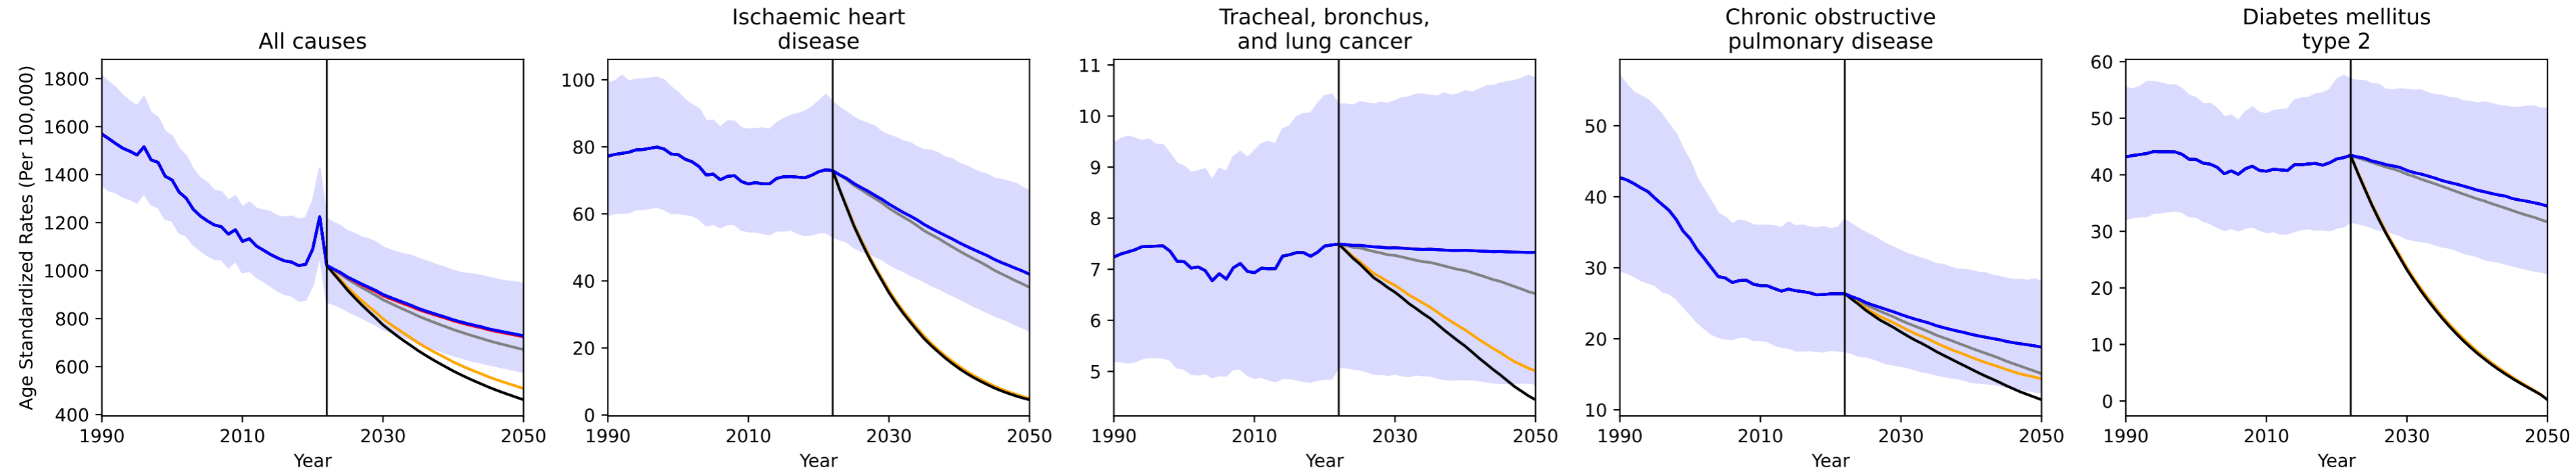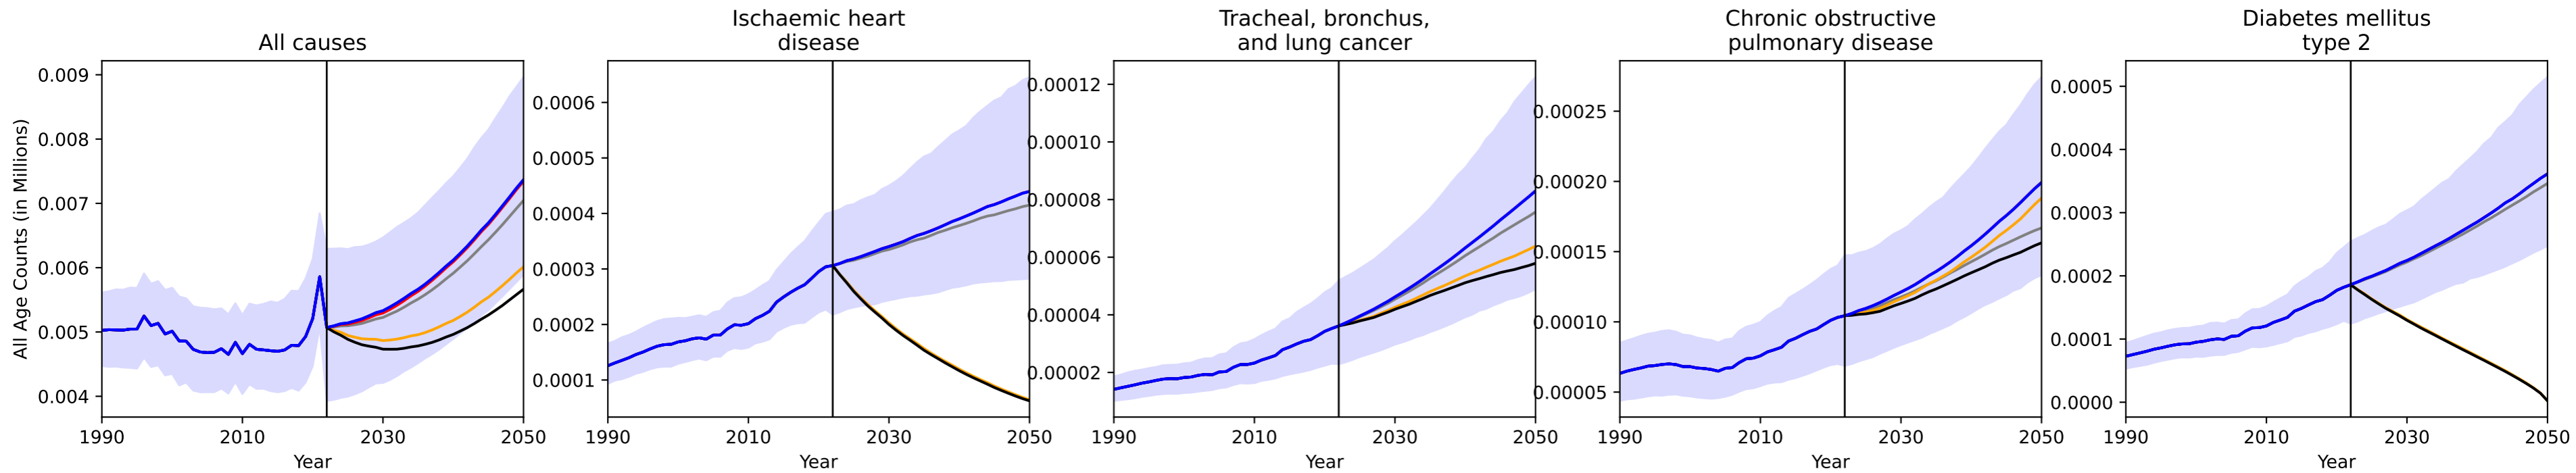

# Djibouti

Supplemental Results Figure S13. All cause and top NCD causes age standardized death rates and all age counts by scenario and location, 1990-2050

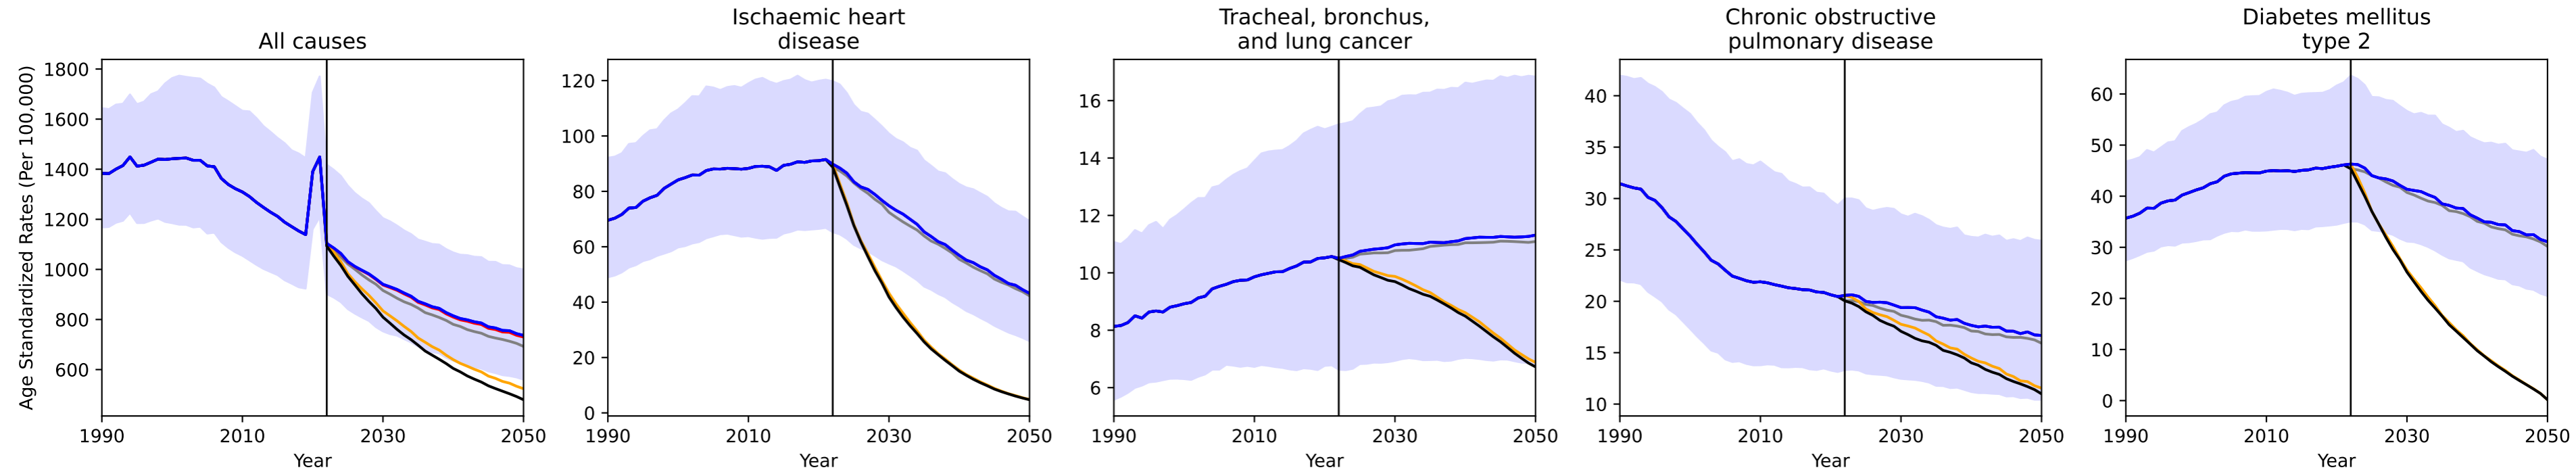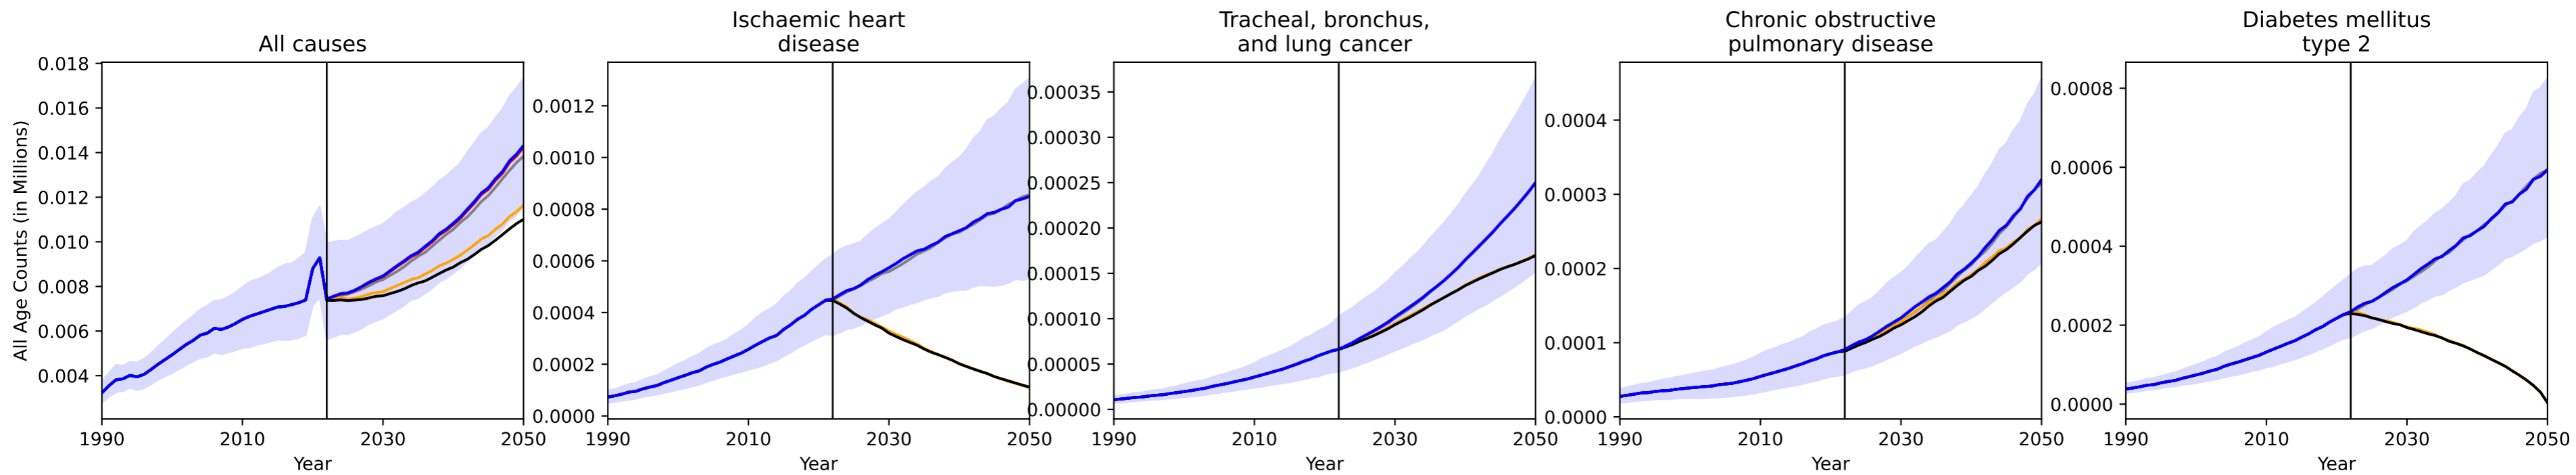

— Safer Environment — Improved Behavioural and Metabolic Risks — Improved Childhood Nutrition and Vaccination — Combined — Reference

# Eritrea

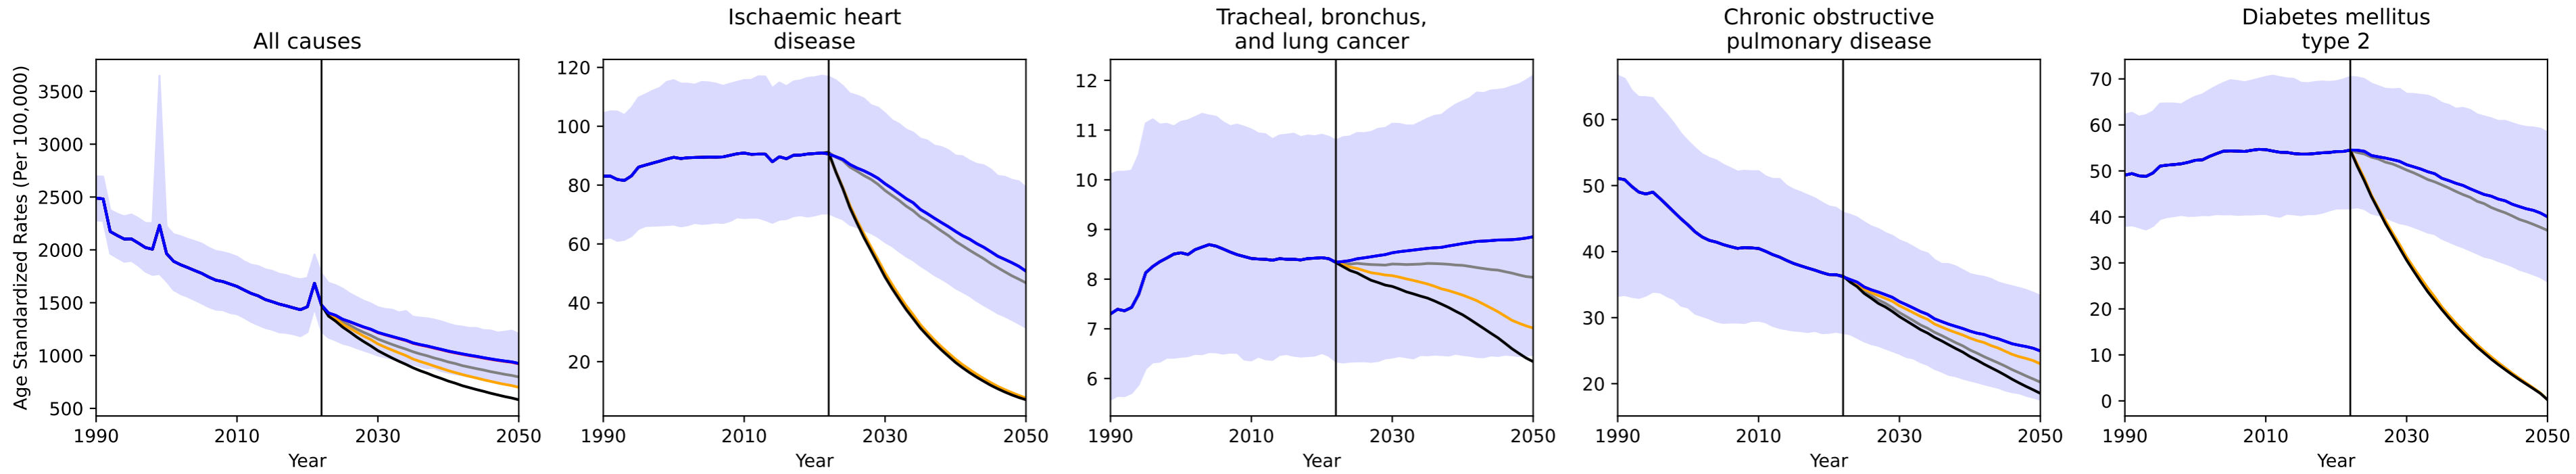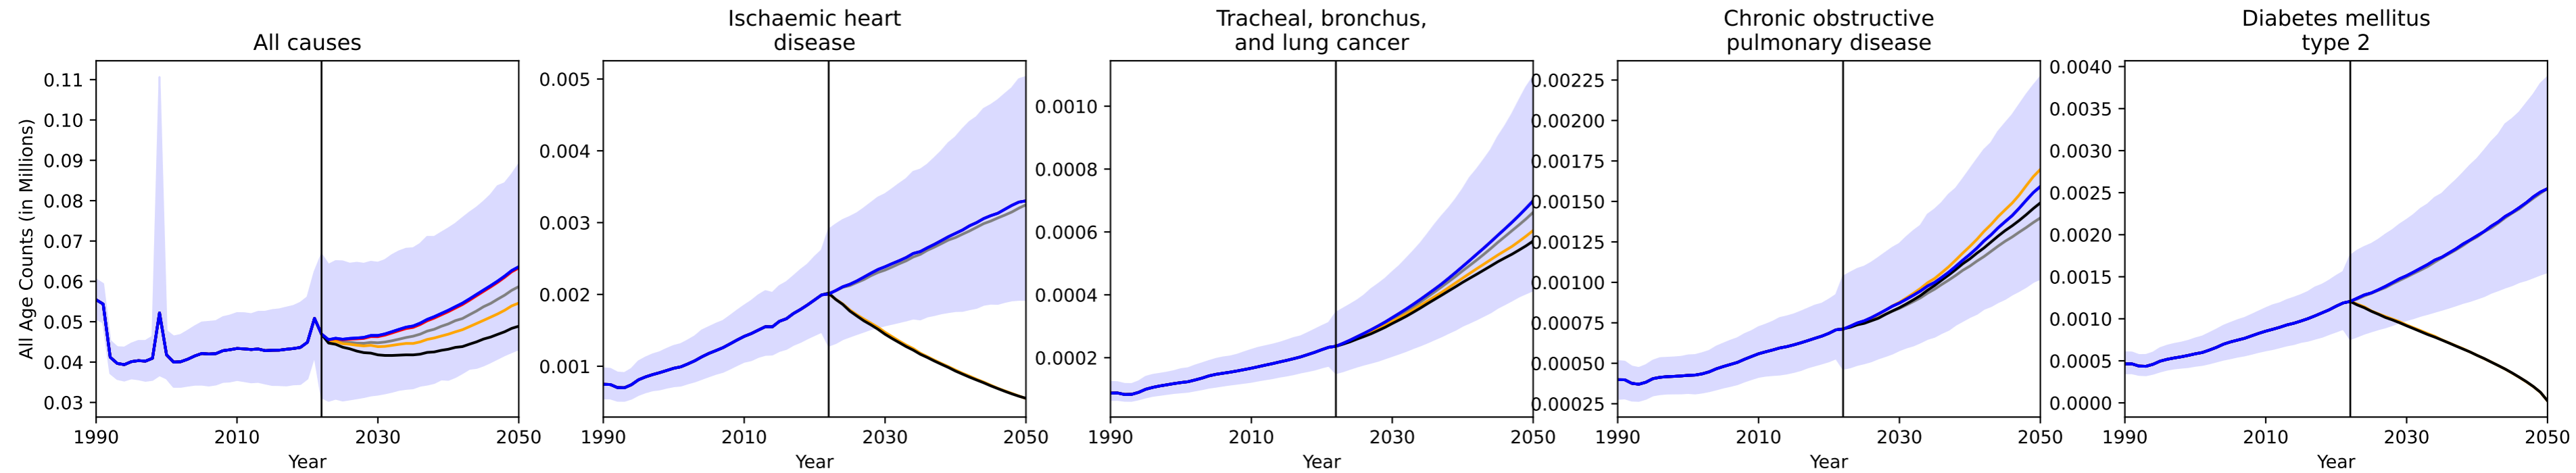

— Safer Environment — Improved Behavioural and Metabolic Risks — Improved Childhood Nutrition and Vaccination — Combined — Reference

# Ethiopia

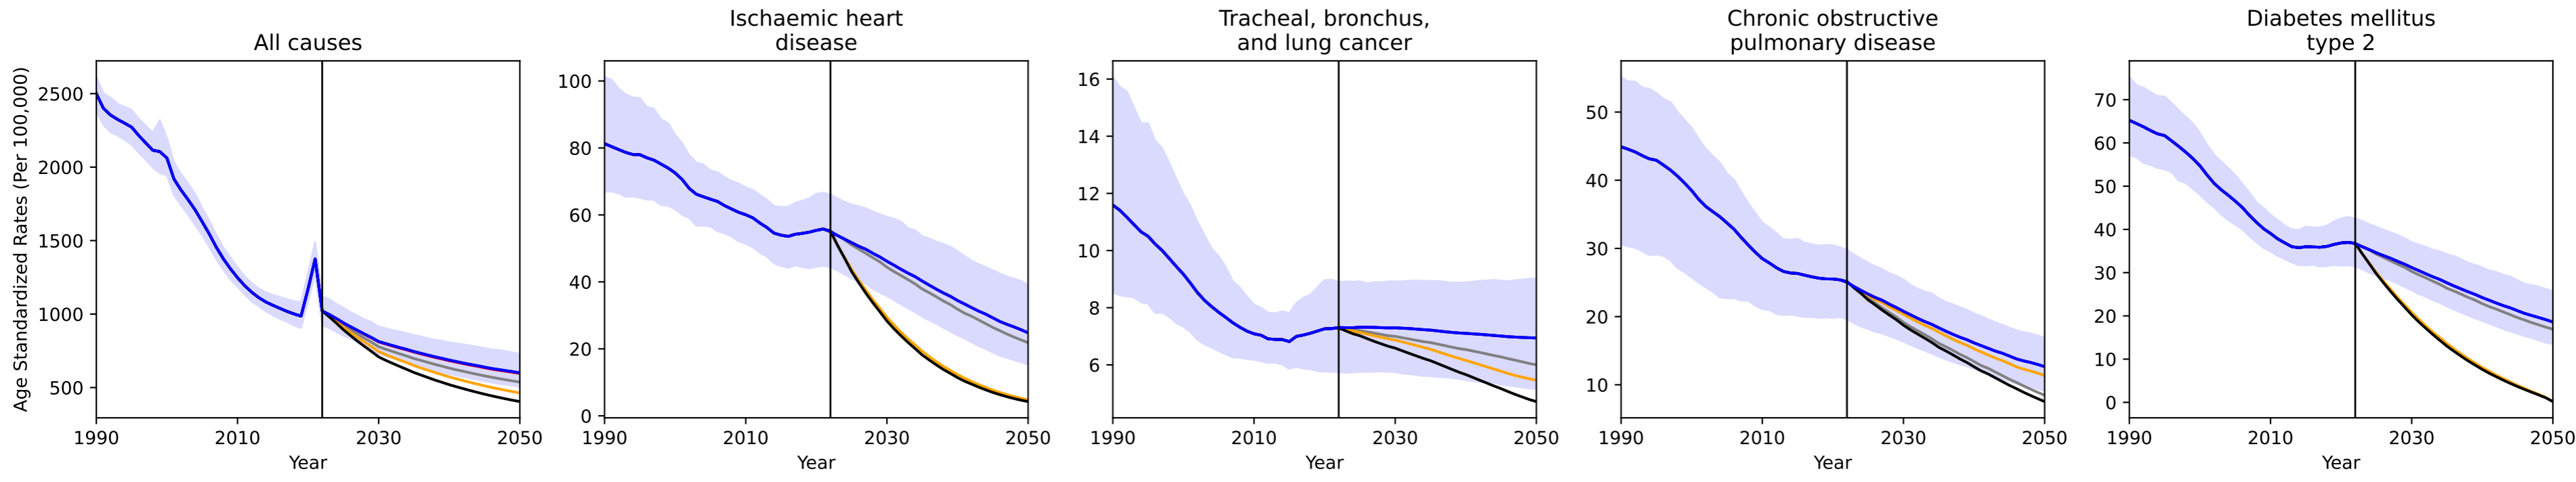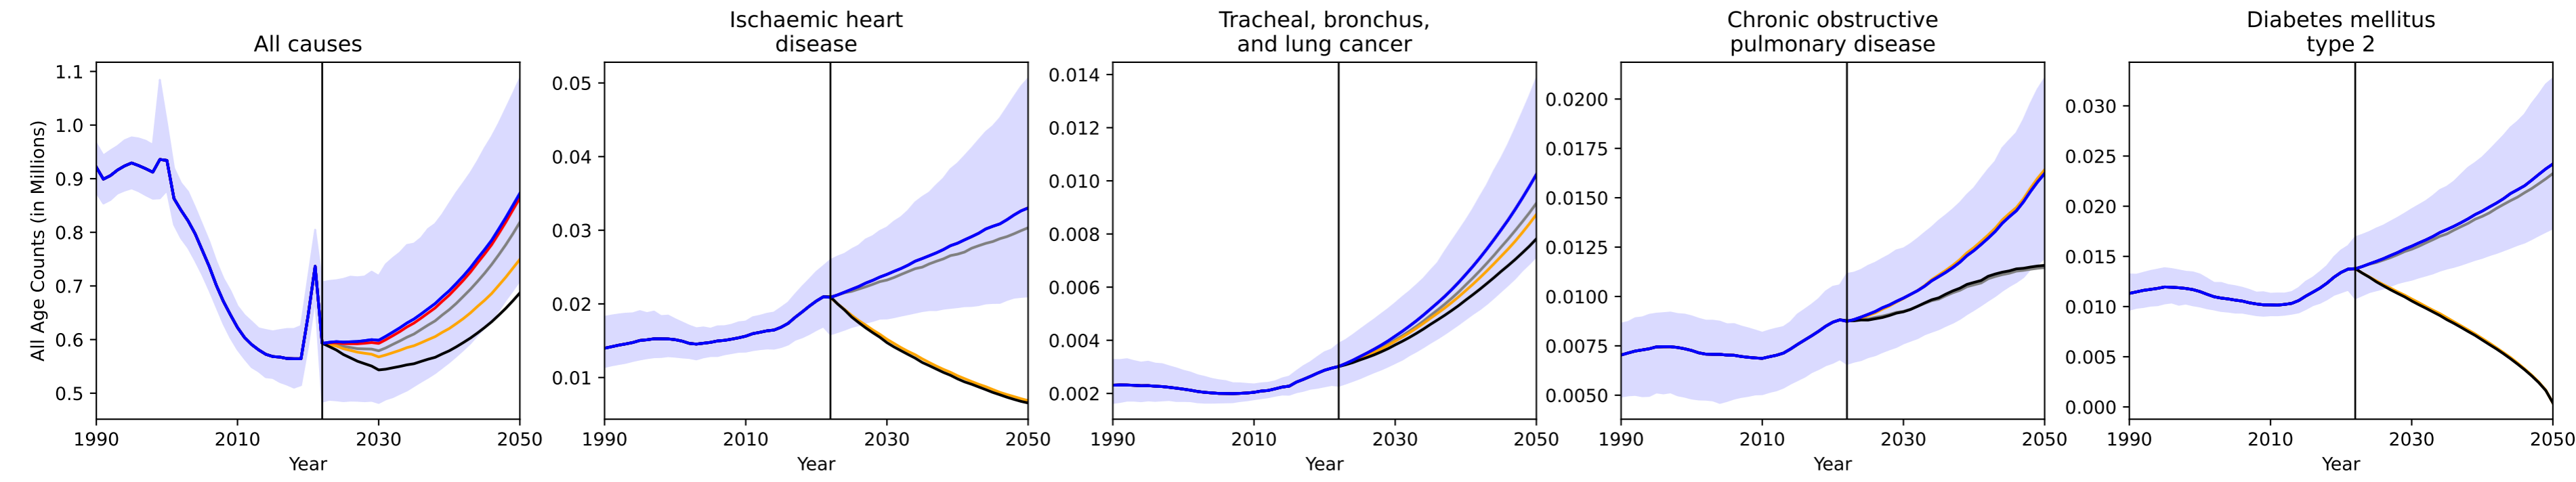

# Kenya

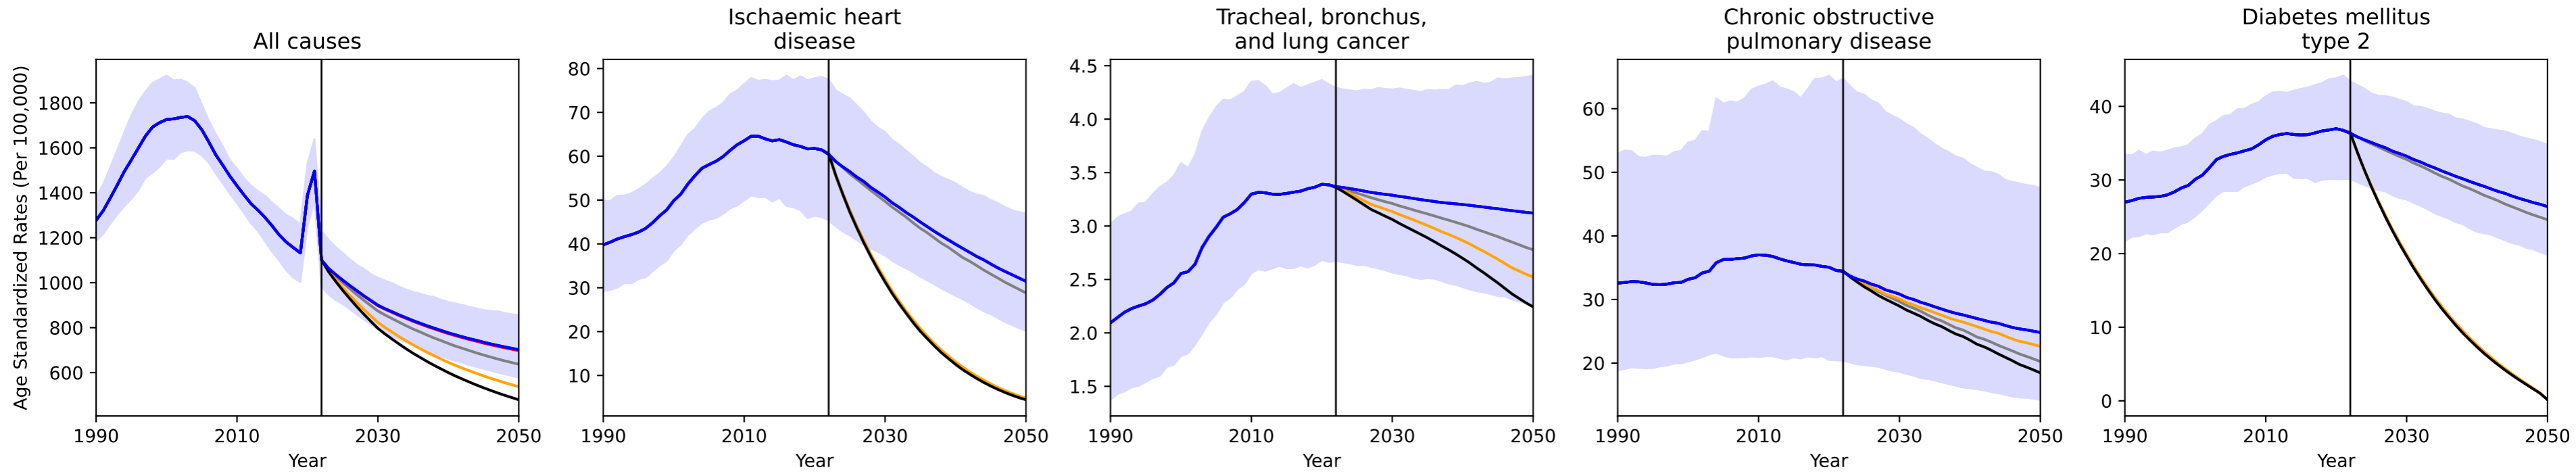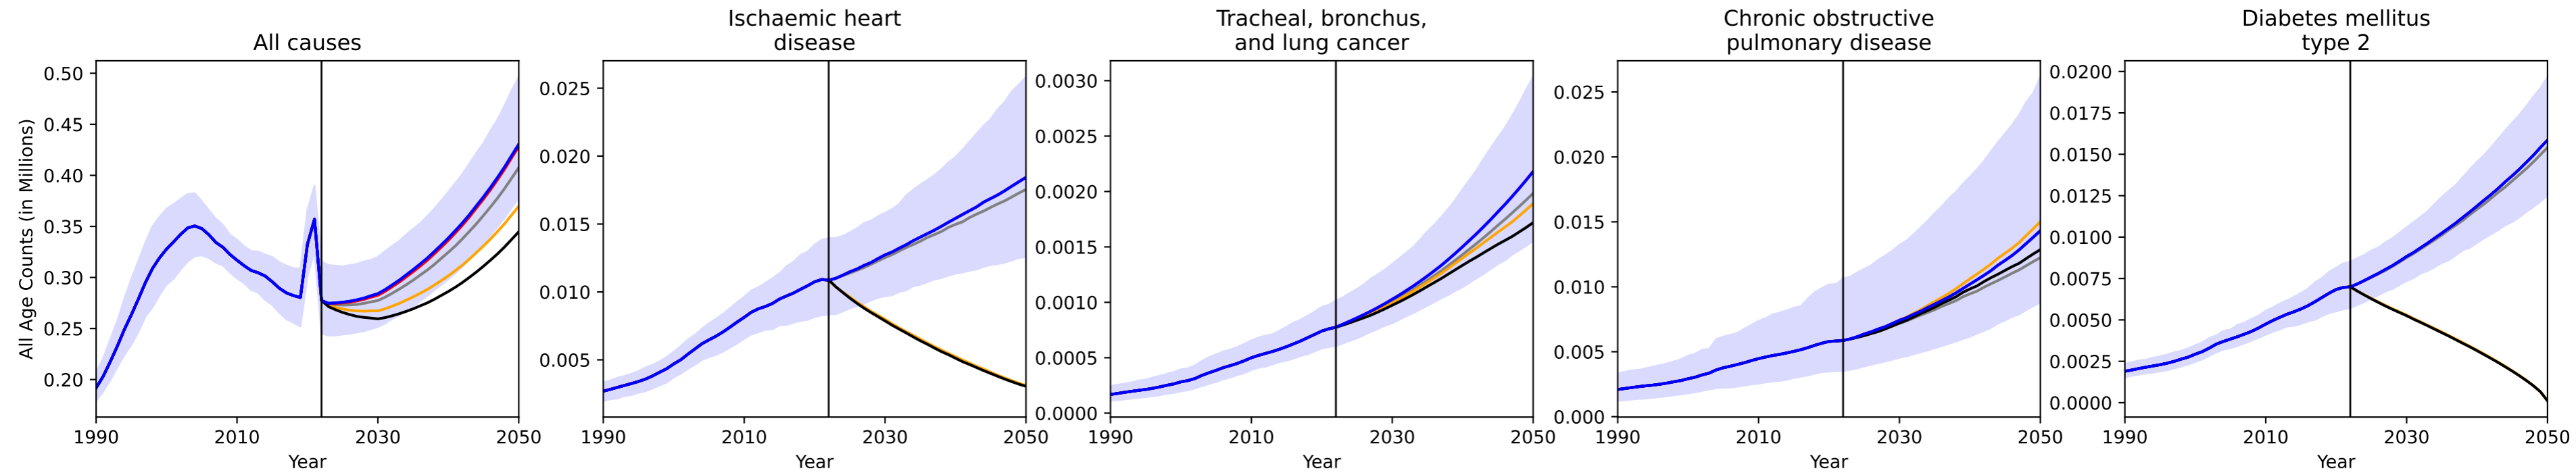

— Safer Environment — Improved Behavioural and Metabolic Risks — Improved Childhood Nutrition and Vaccination — Combined — Reference



# Madagascar

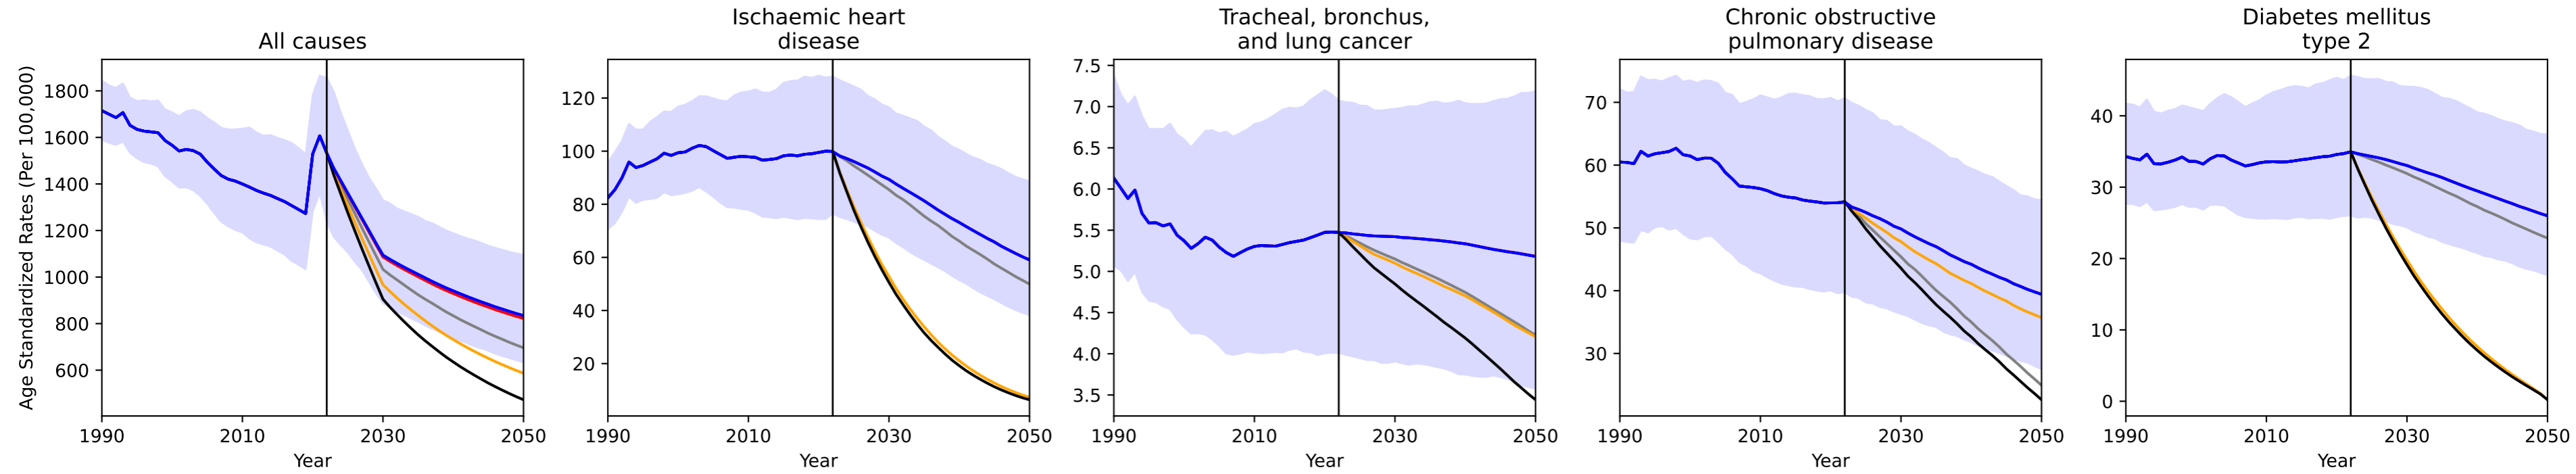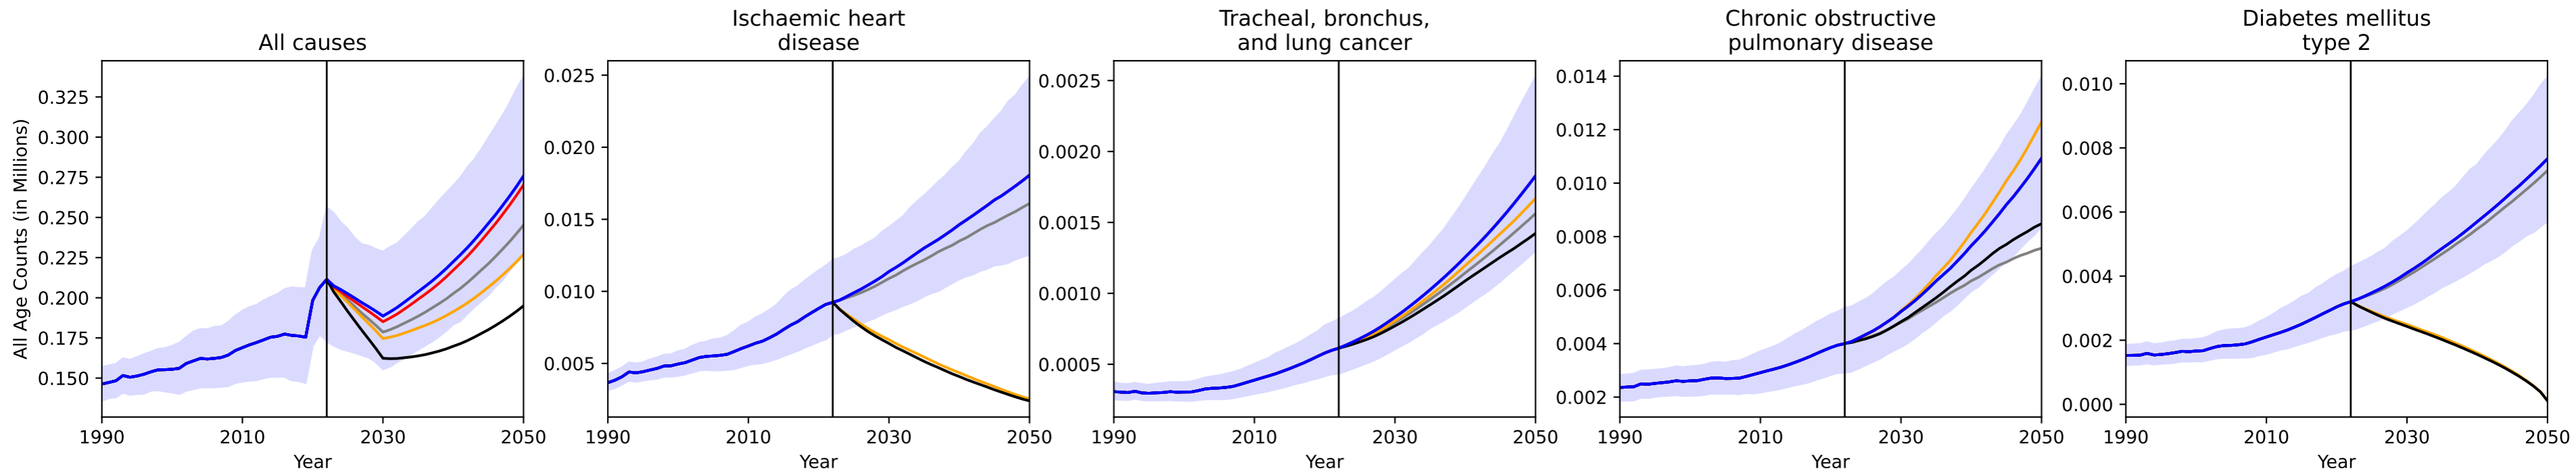

# Malawi

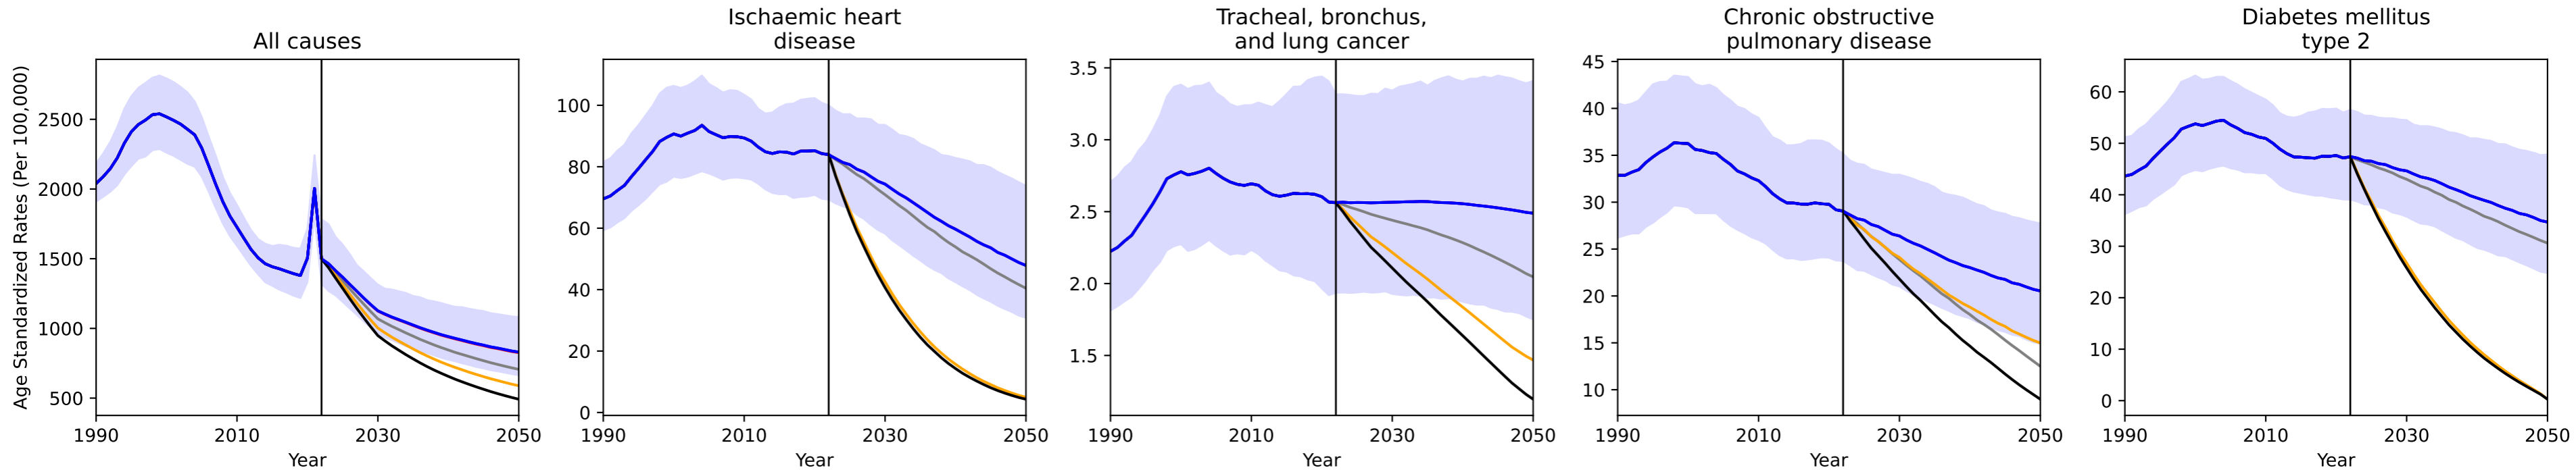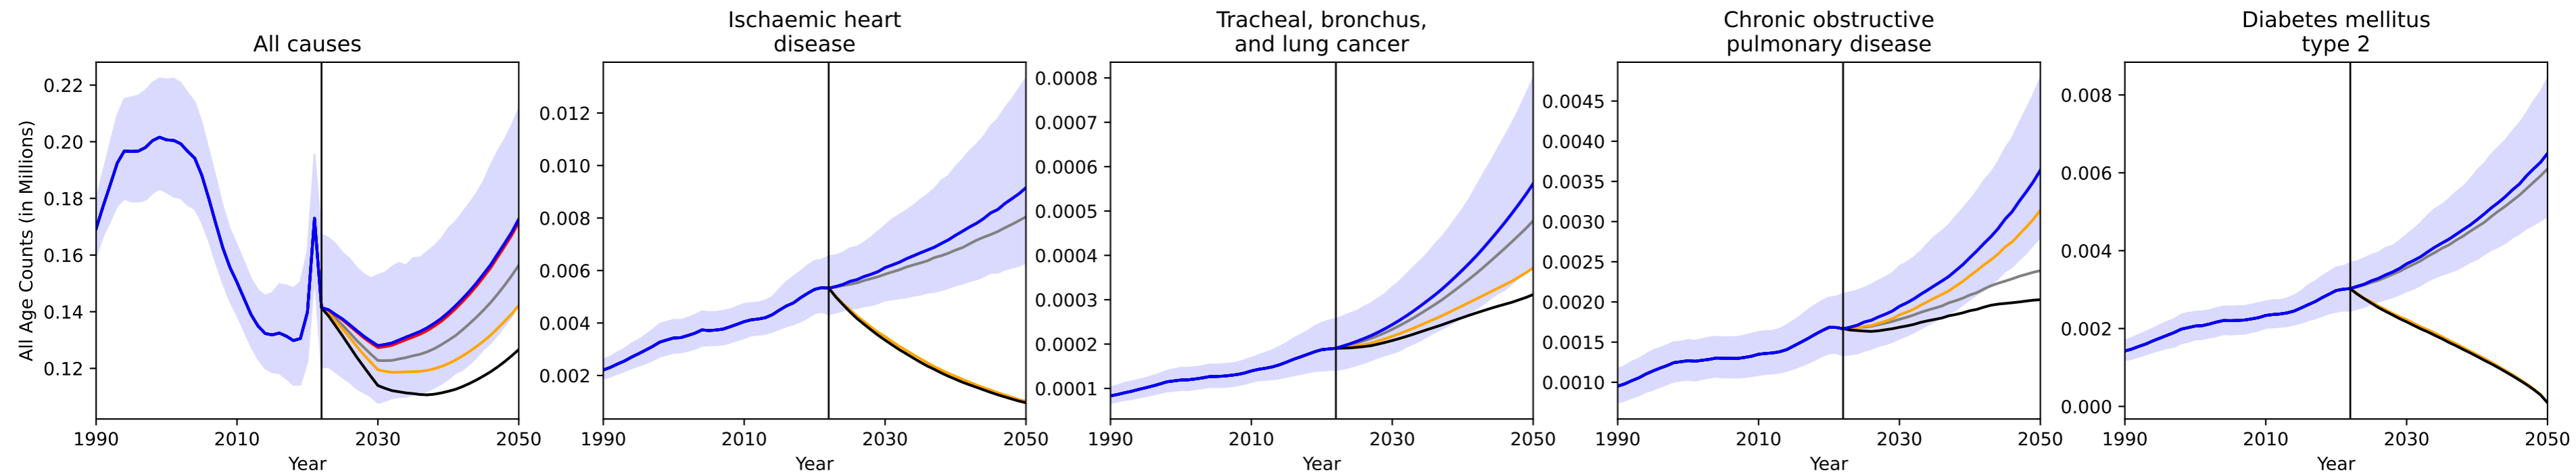

# Mozambique

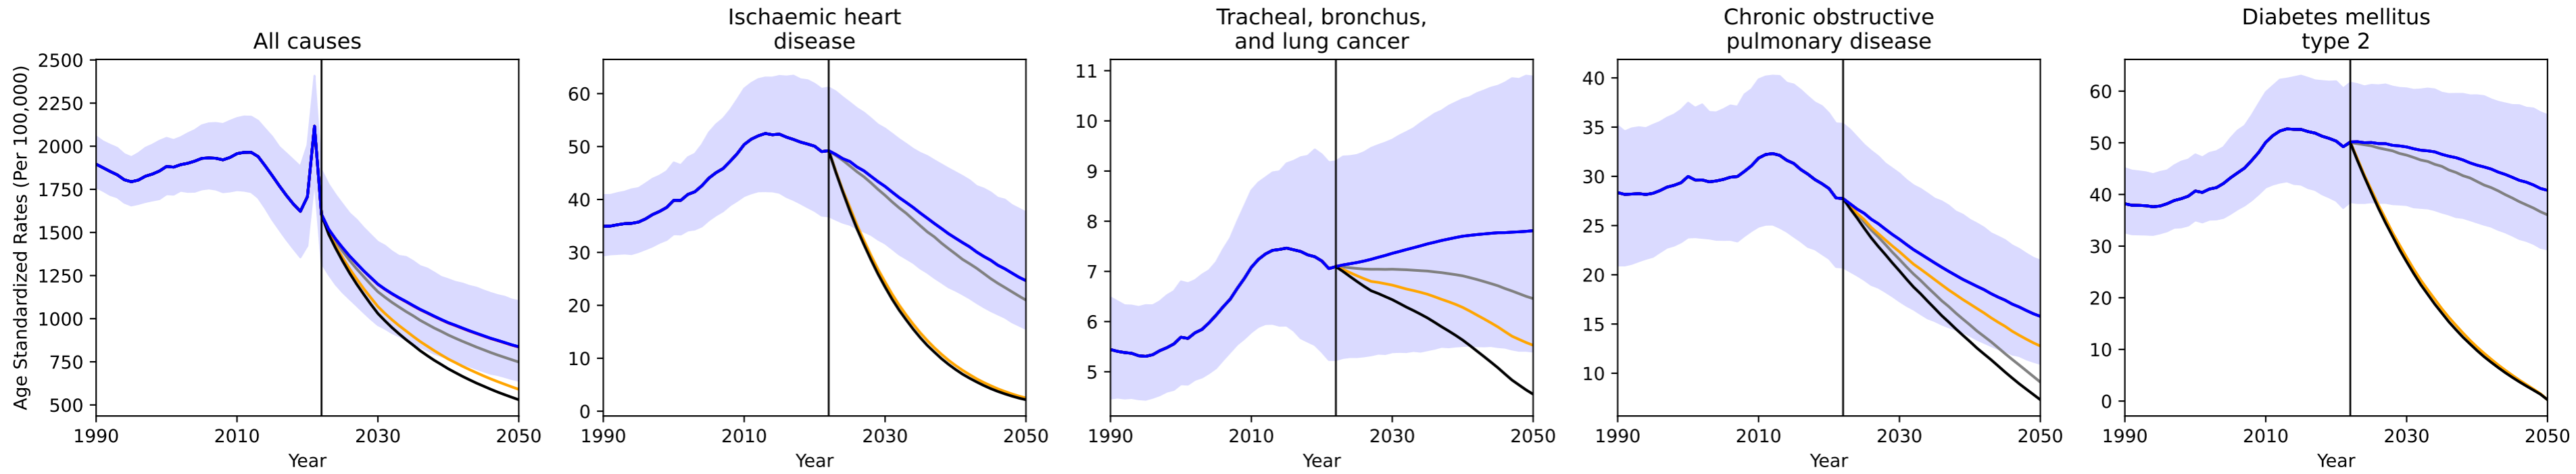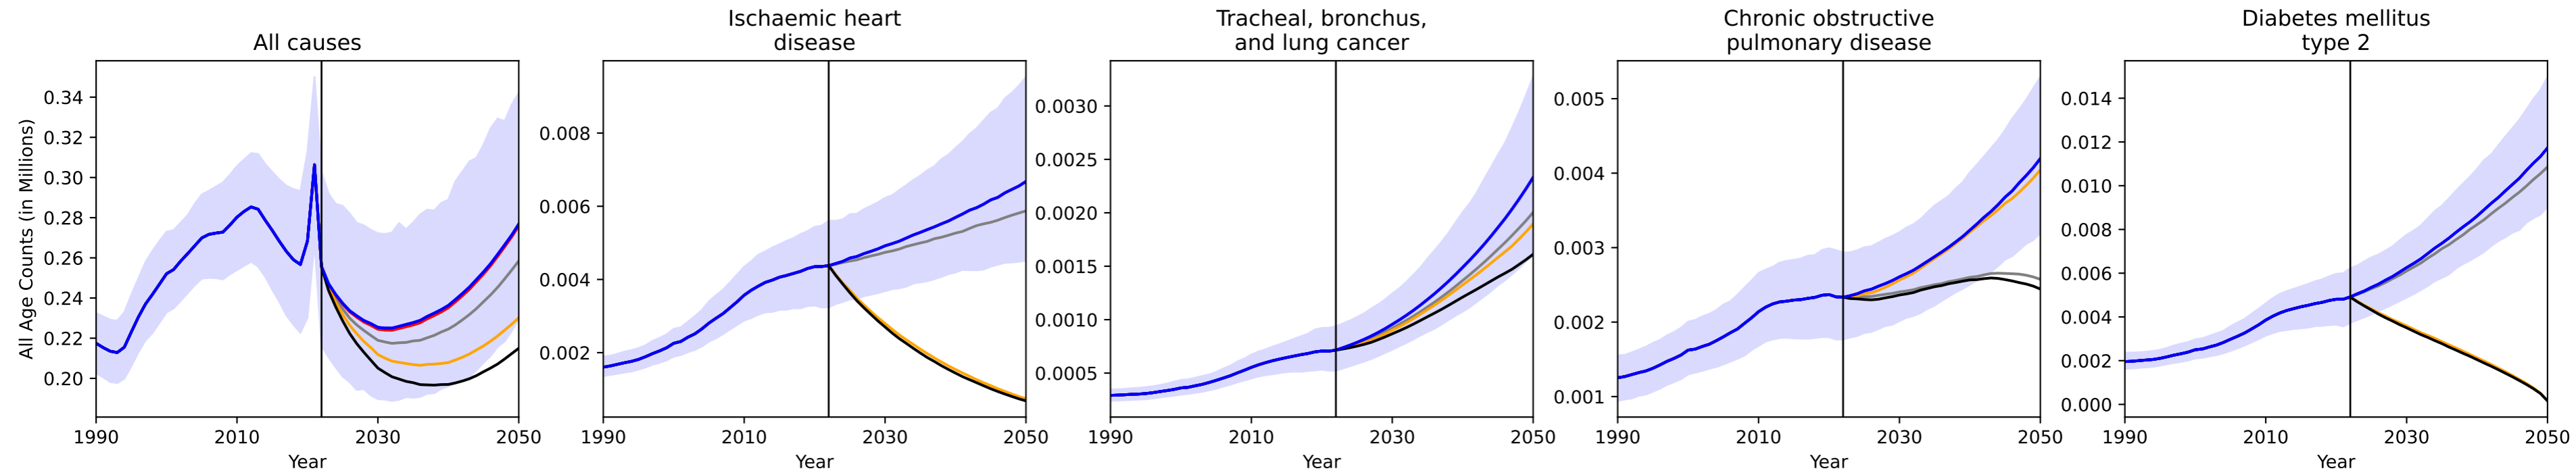

— Safer Environment — Improved Behavioural and Metabolic Risks — Improved Childhood Nutrition and Vaccination — Combined — Reference

# Rwanda

Supplemental Results Figure S13. All cause and top NCD causes age standardized death rates and all age counts by scenario and location, 1990-2050

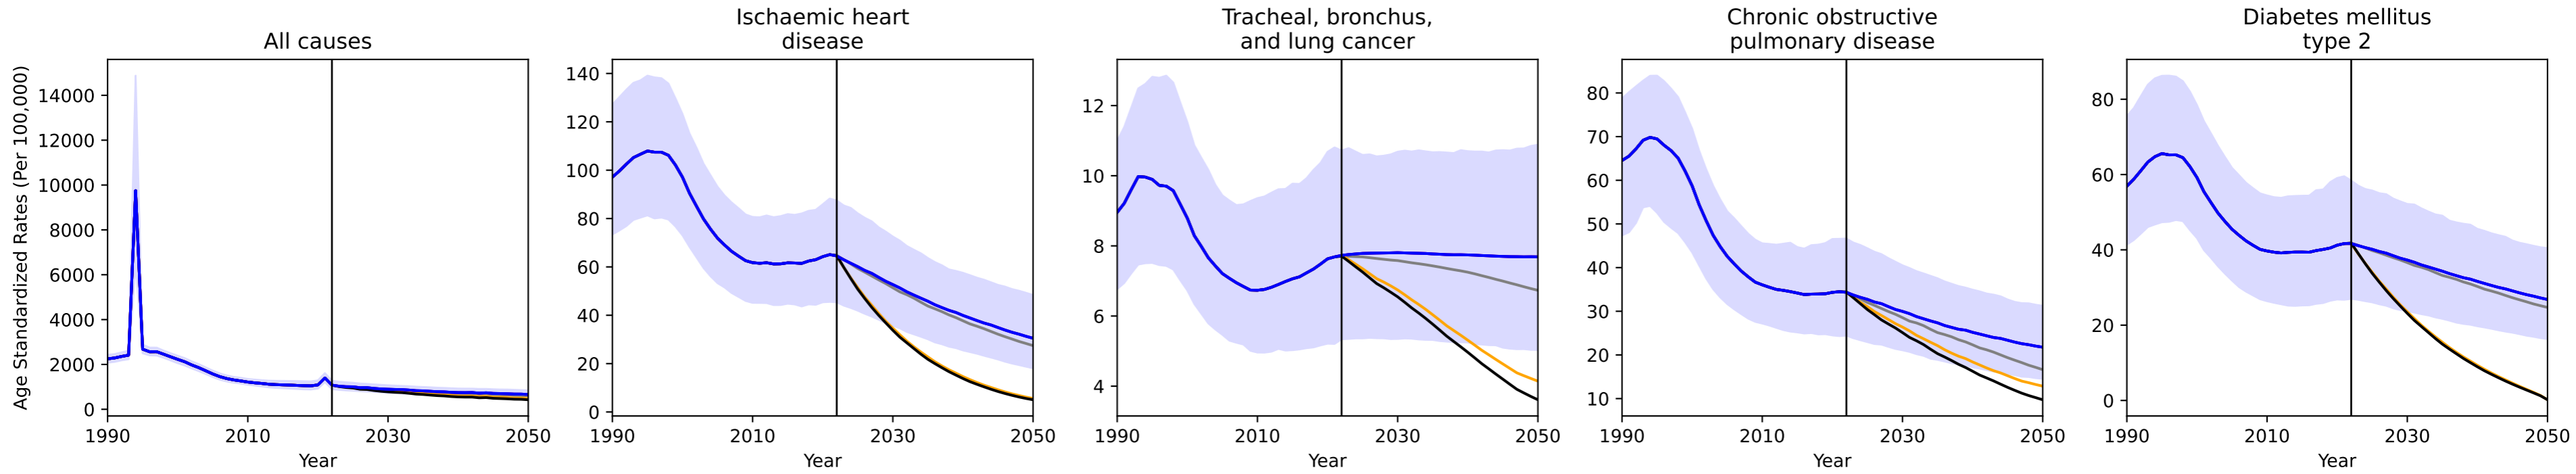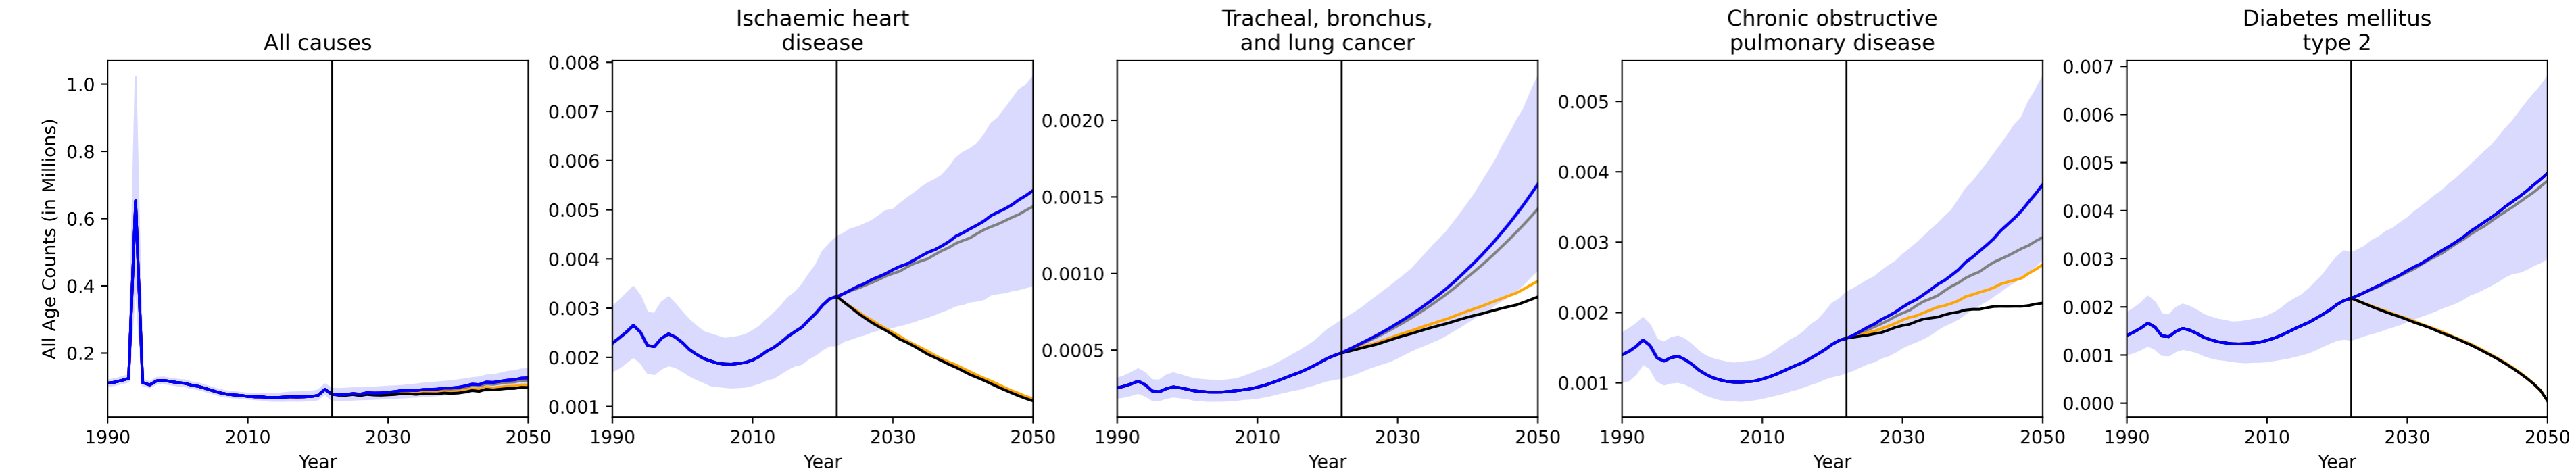

# Somalia

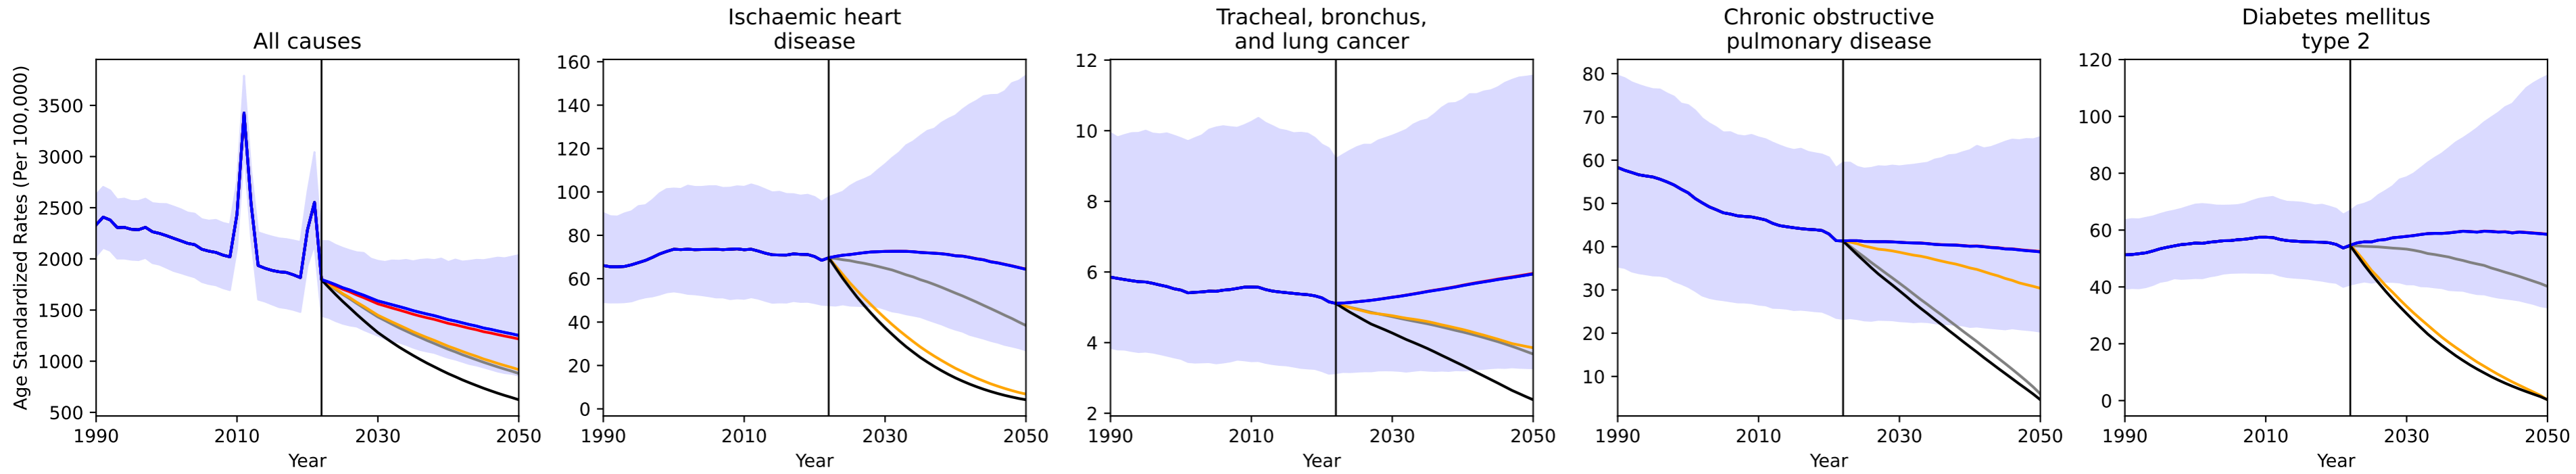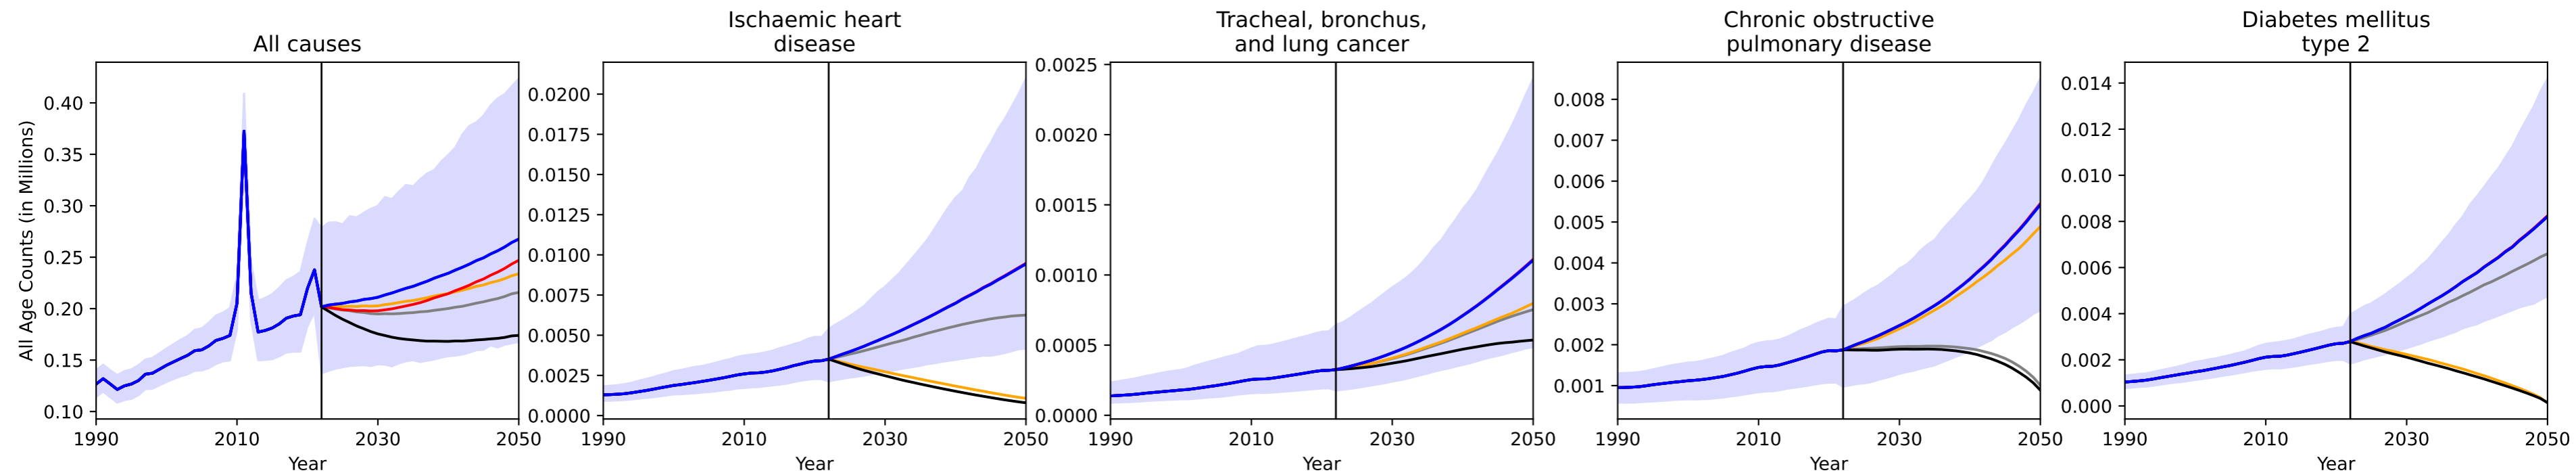

— Safer Environment    — Improved Behavioural and Metabolic Risks    — Improved Childhood Nutrition and Vaccination    — Combined    — Reference

# South Sudan

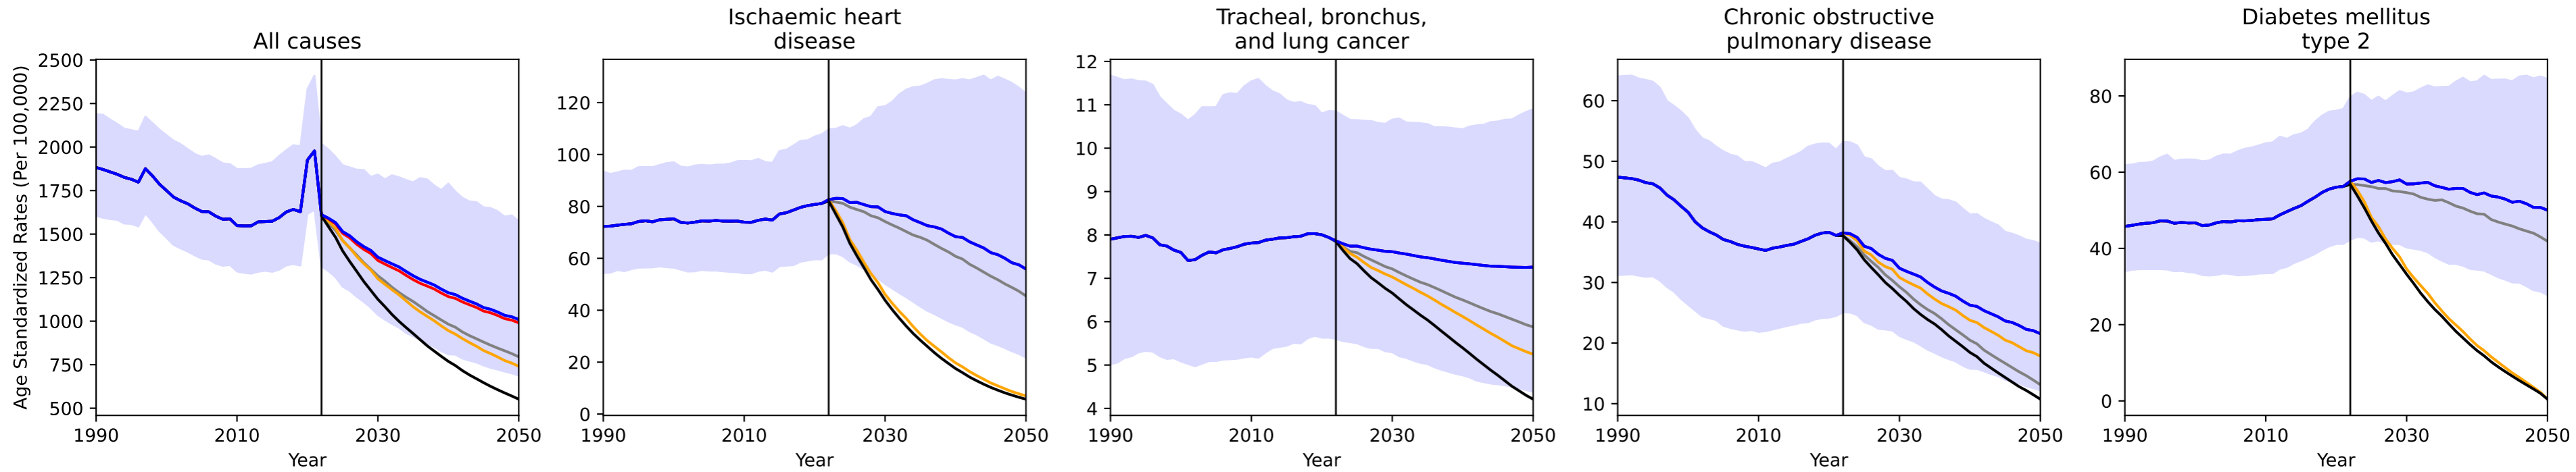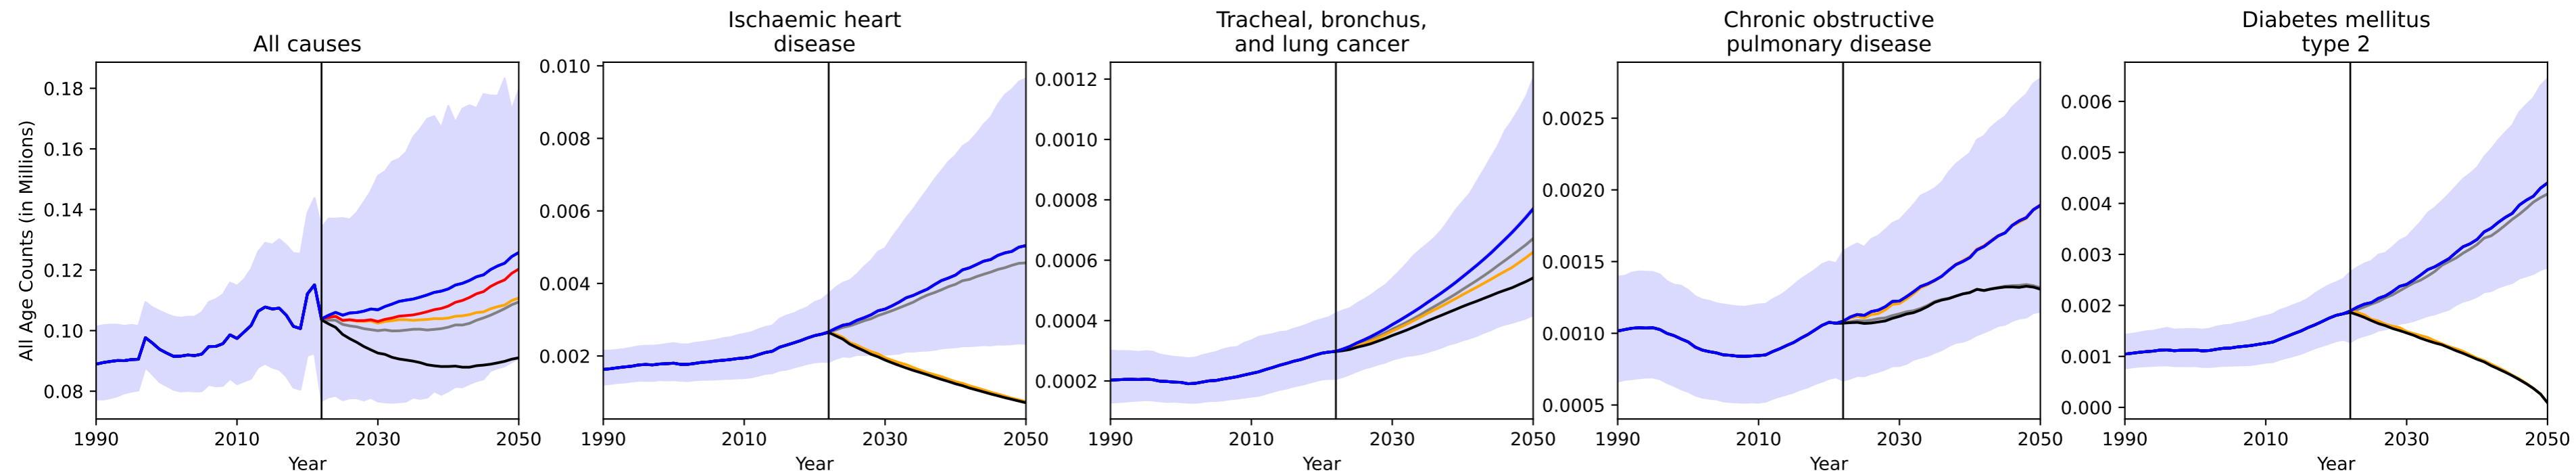

# Uganda

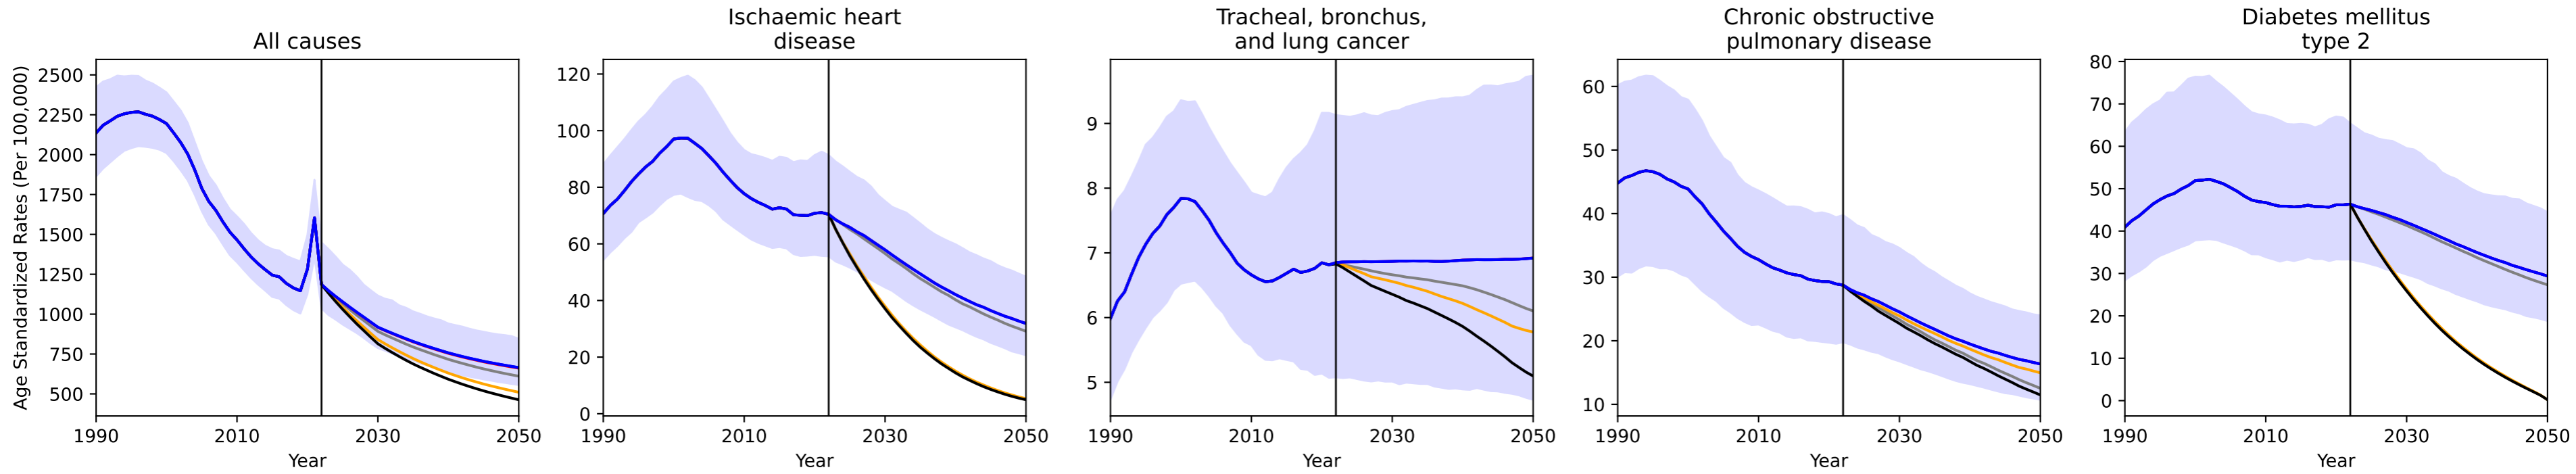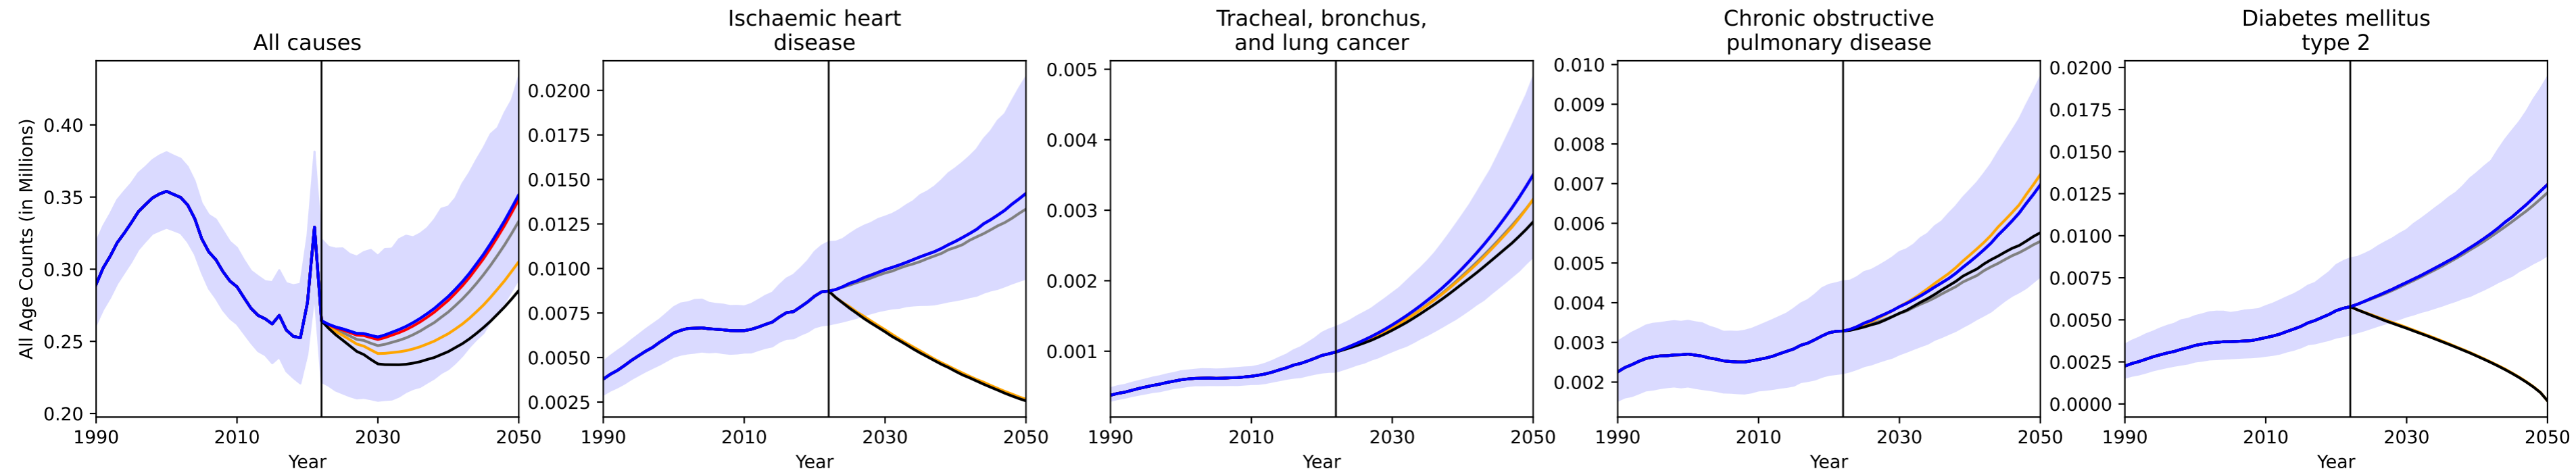

— Safer Environment — Improved Behavioural and Metabolic Risks — Improved Childhood Nutrition and Vaccination — Combined — Reference

# Tanzania

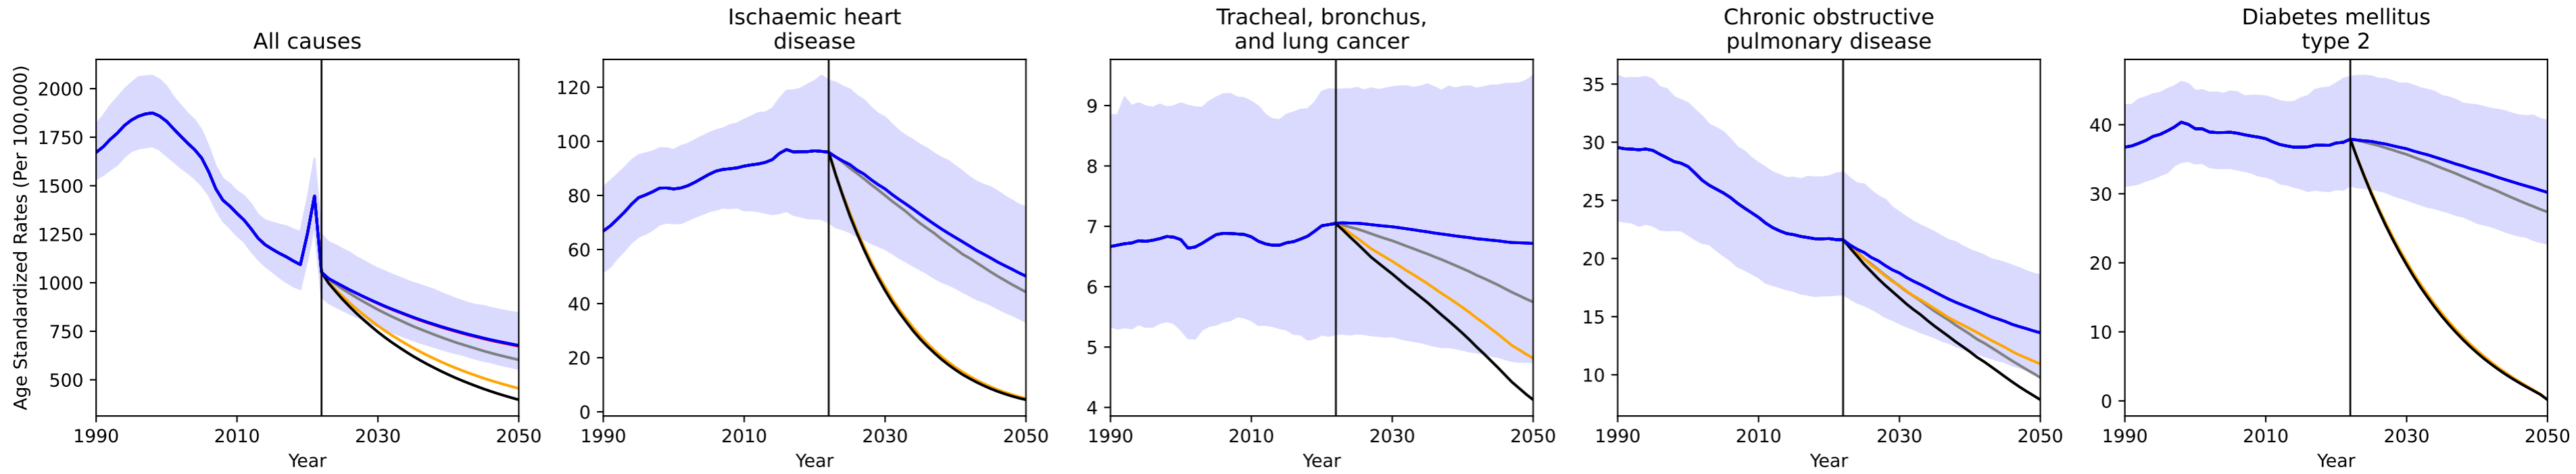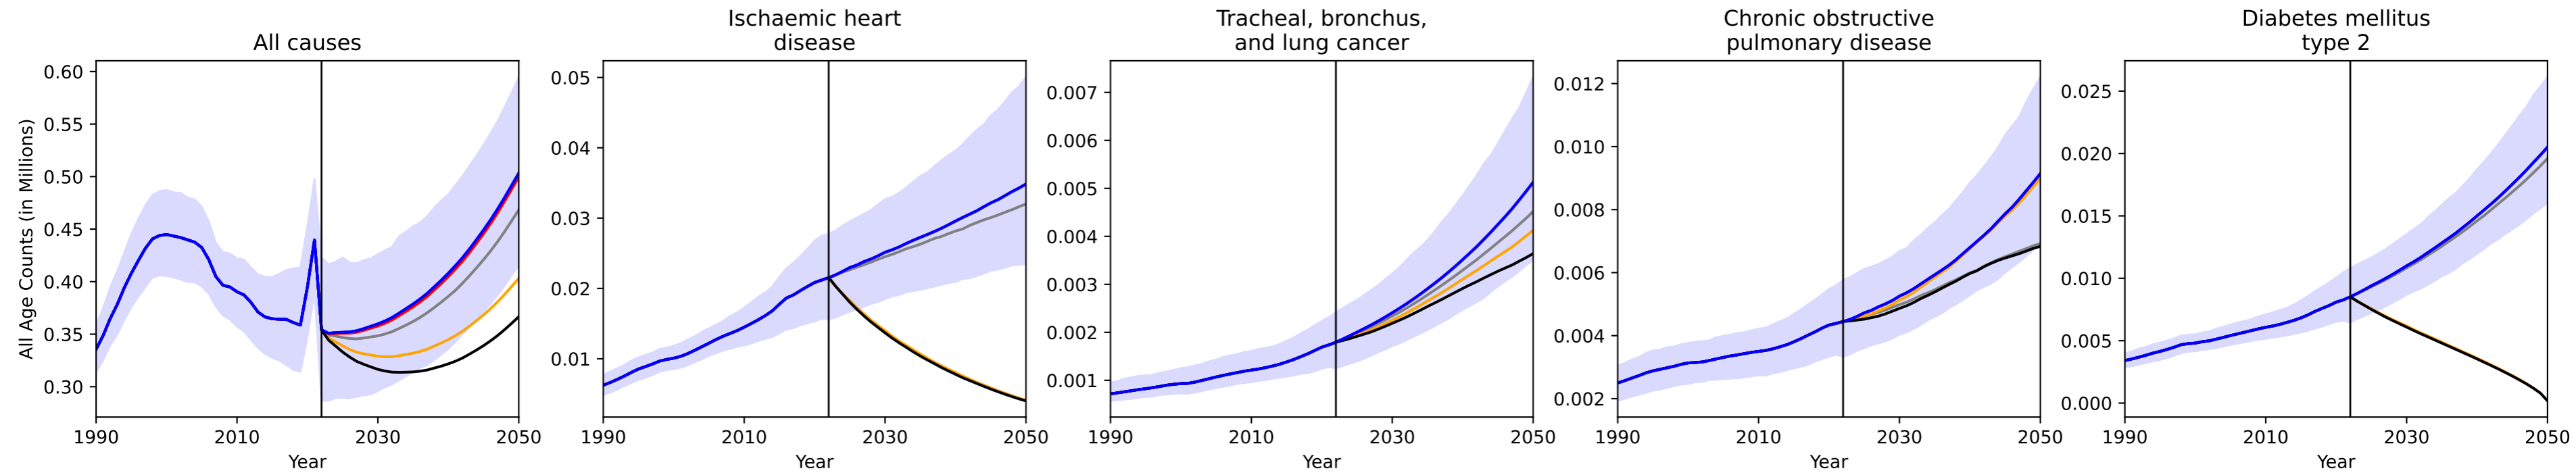

— Safer Environment — Improved Behavioural and Metabolic Risks — Improved Childhood Nutrition and Vaccination — Combined — Reference



# Zambia

Supplemental Results Figure S13. All cause and top NCD causes age standardized death rates and all age counts by scenario and location, 1990-2050

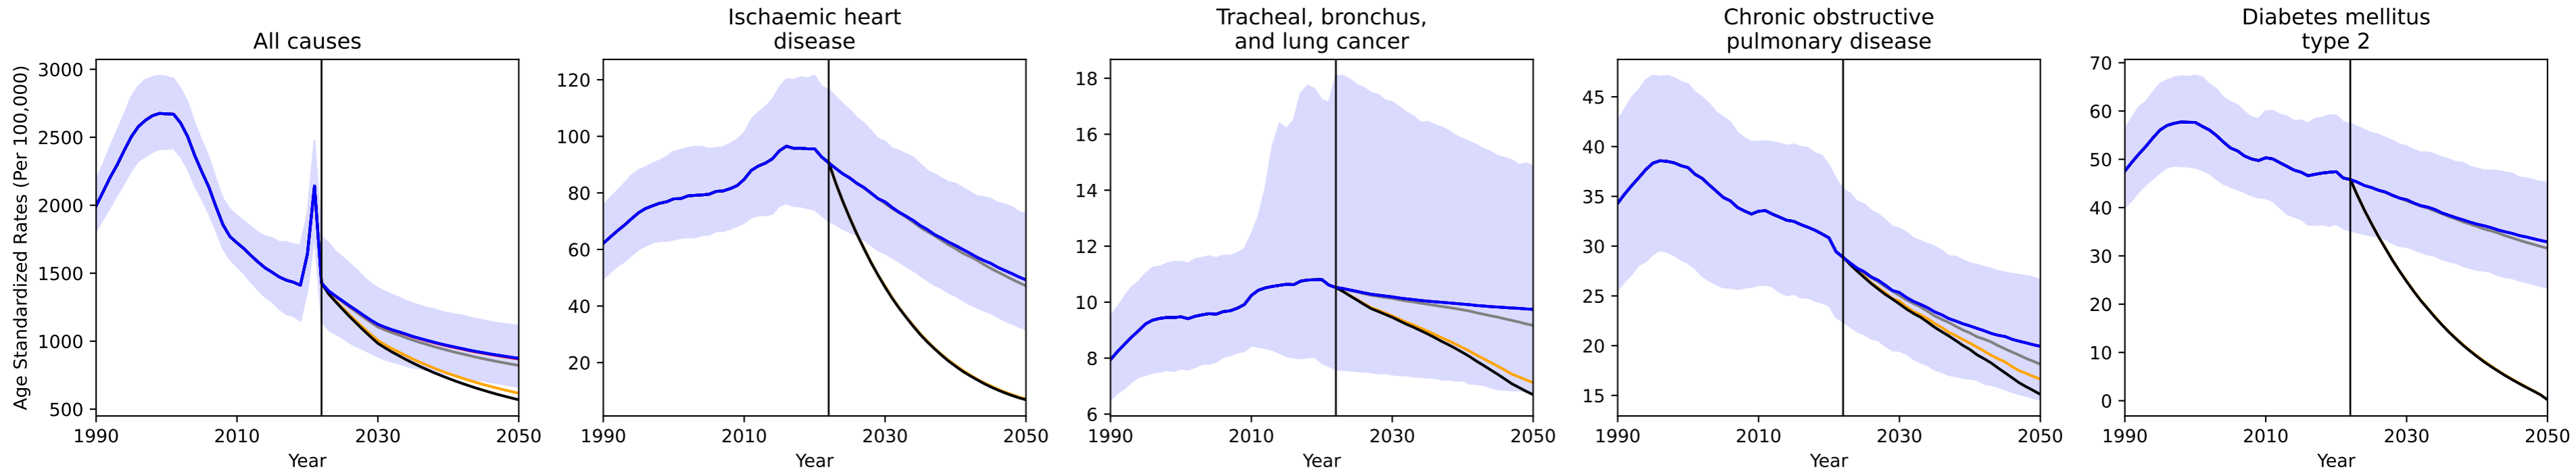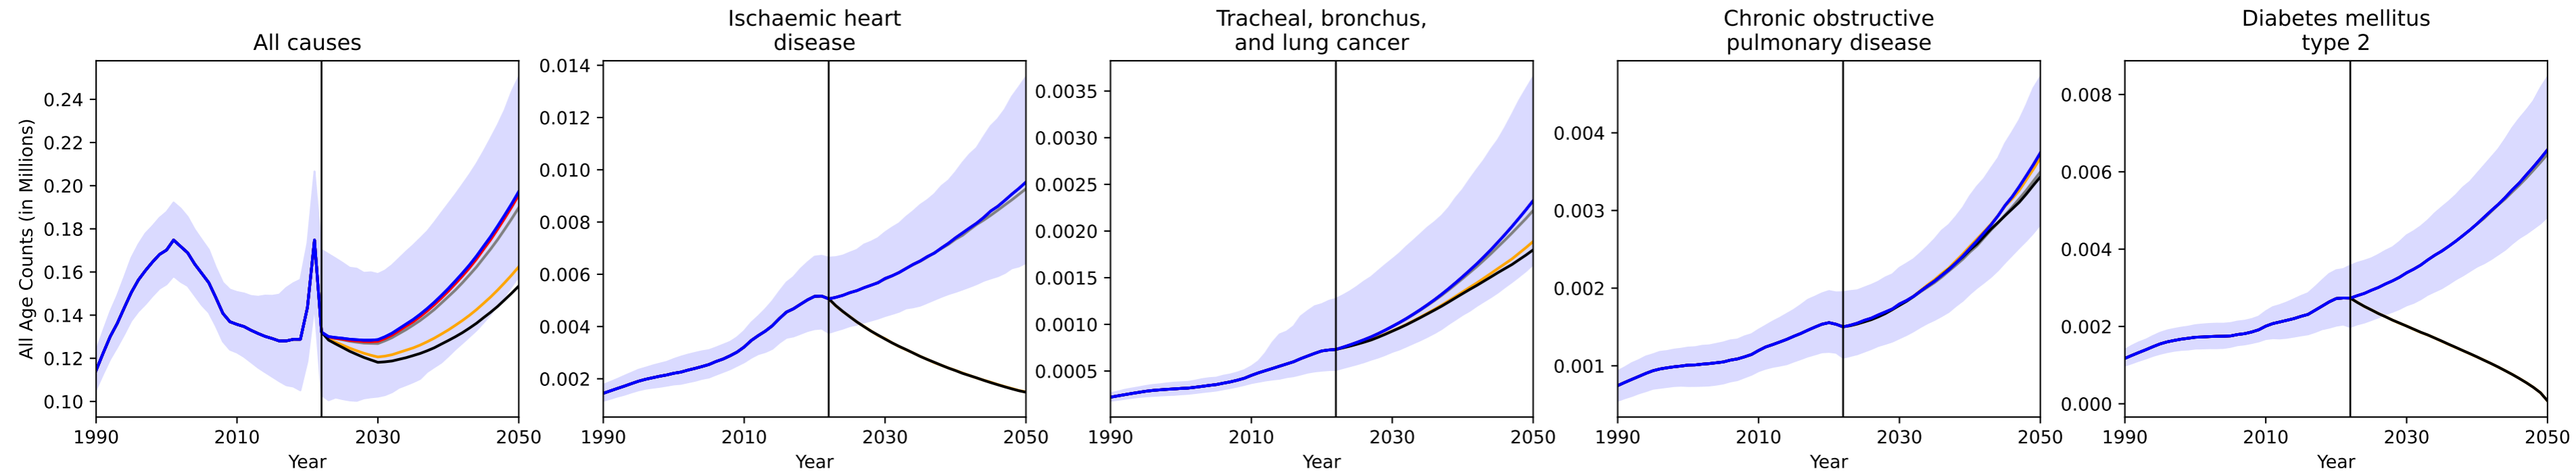

— Safer Environment — Improved Behavioural and Metabolic Risks — Improved Childhood Nutrition and Vaccination — Combined — Reference

# Botswana

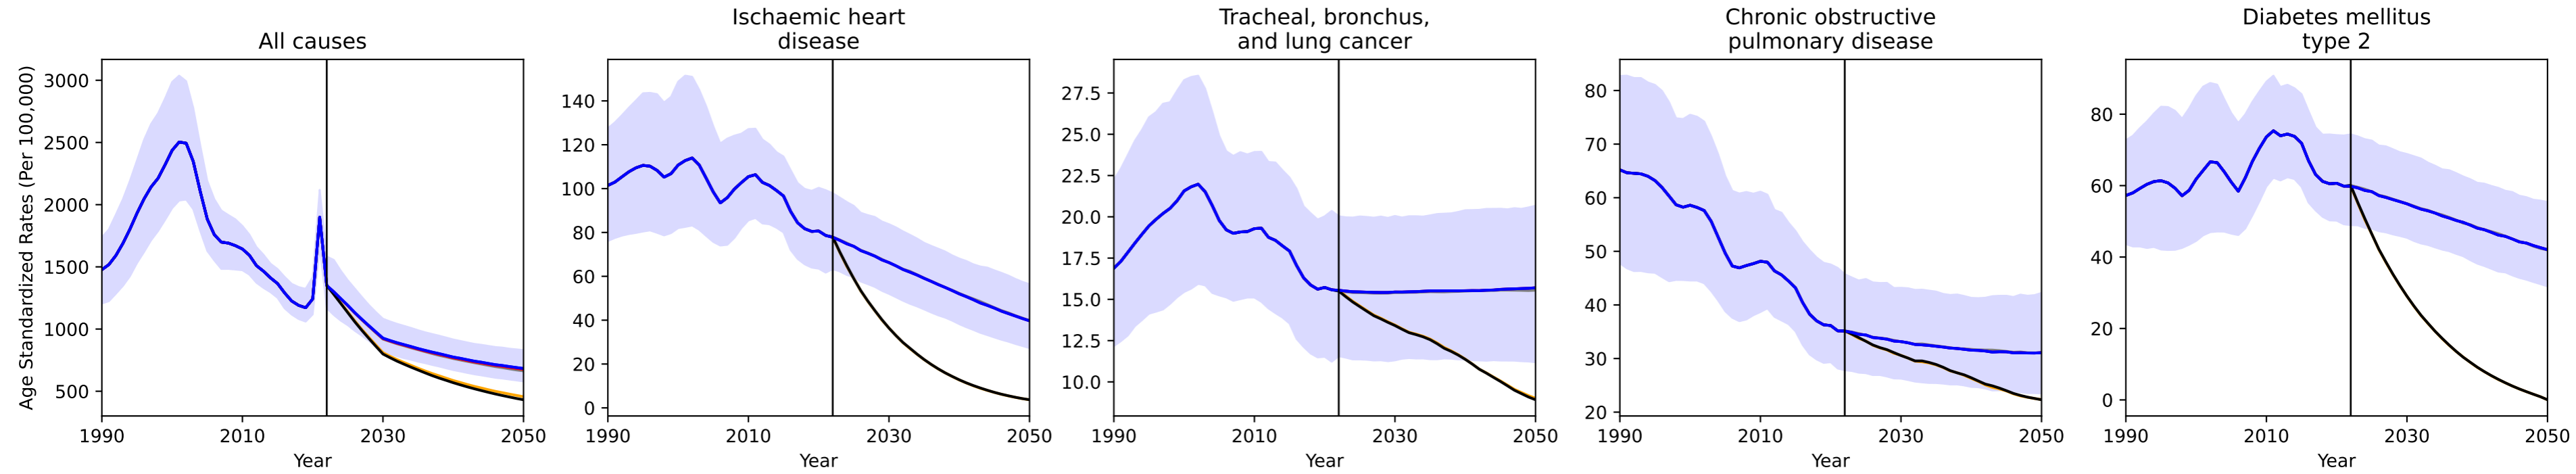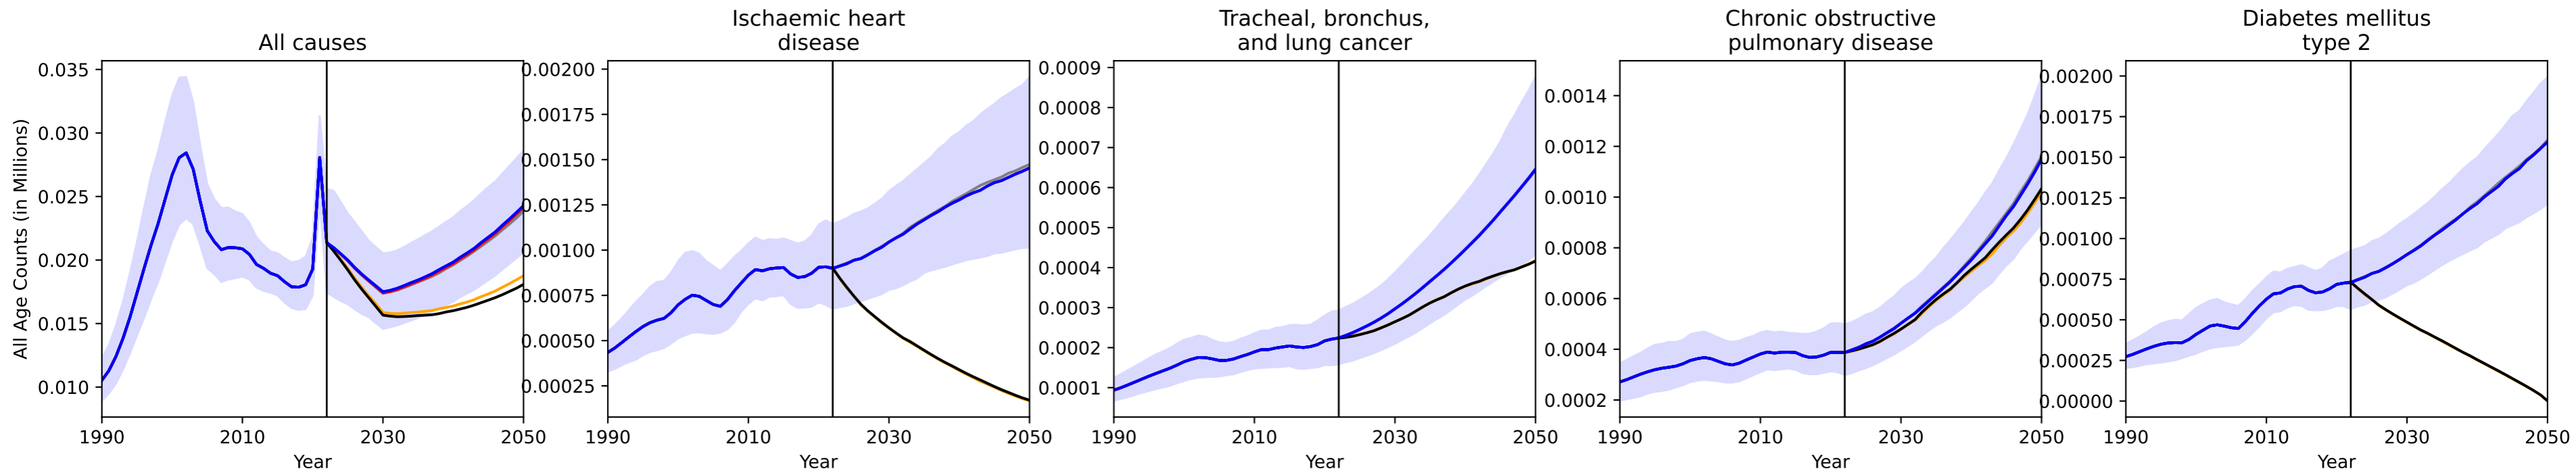

# Eswatini

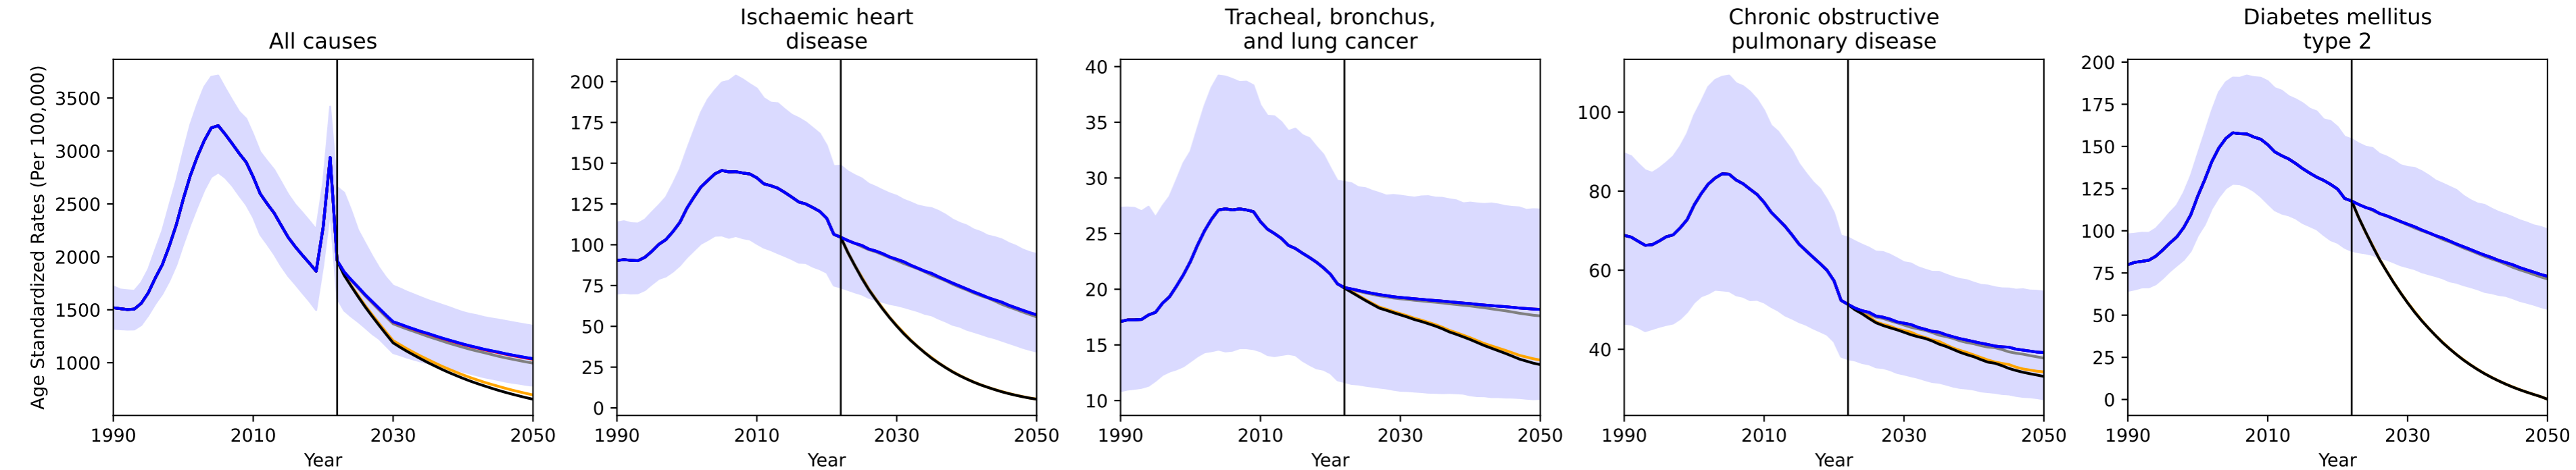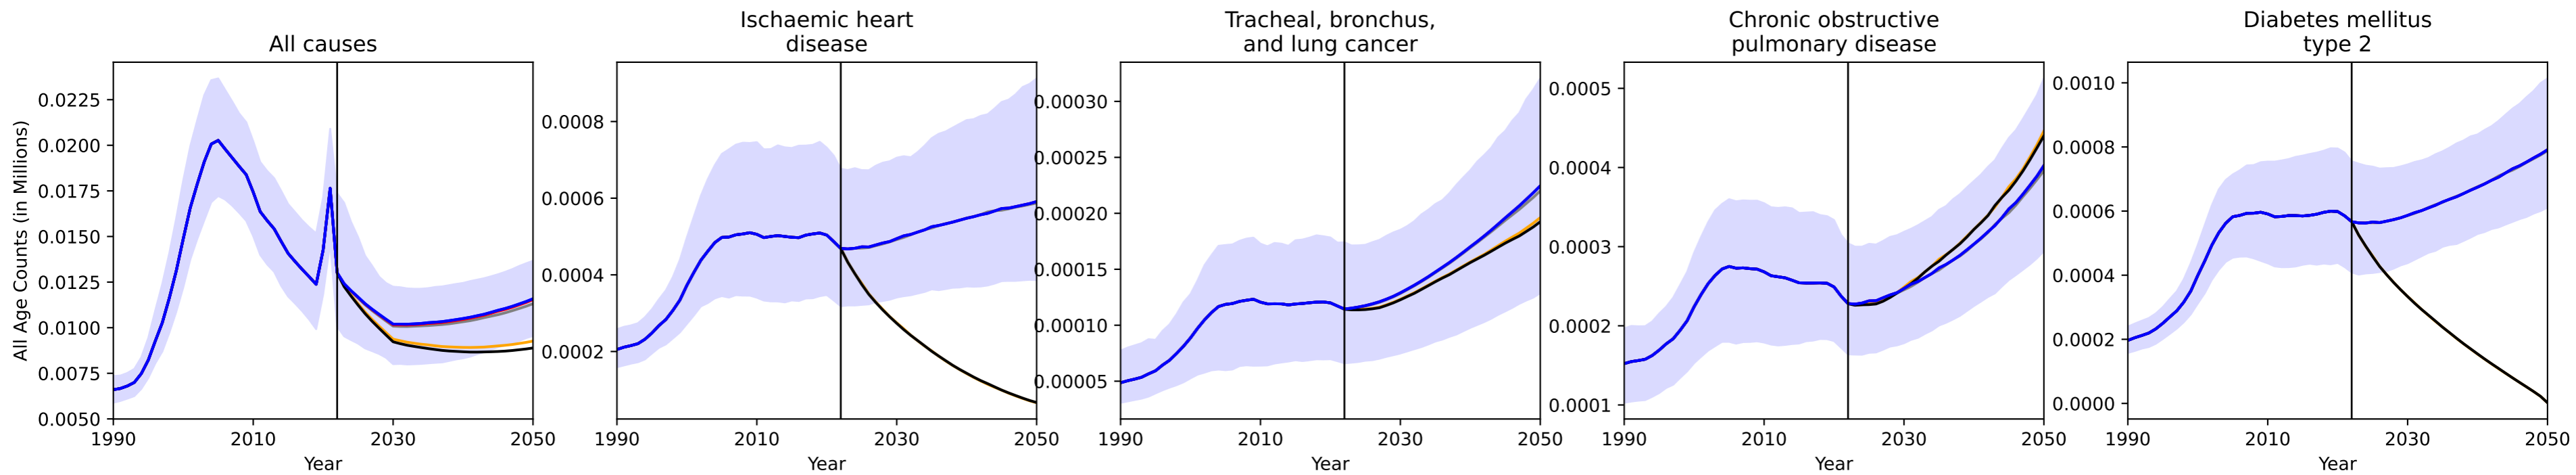

# Lesotho

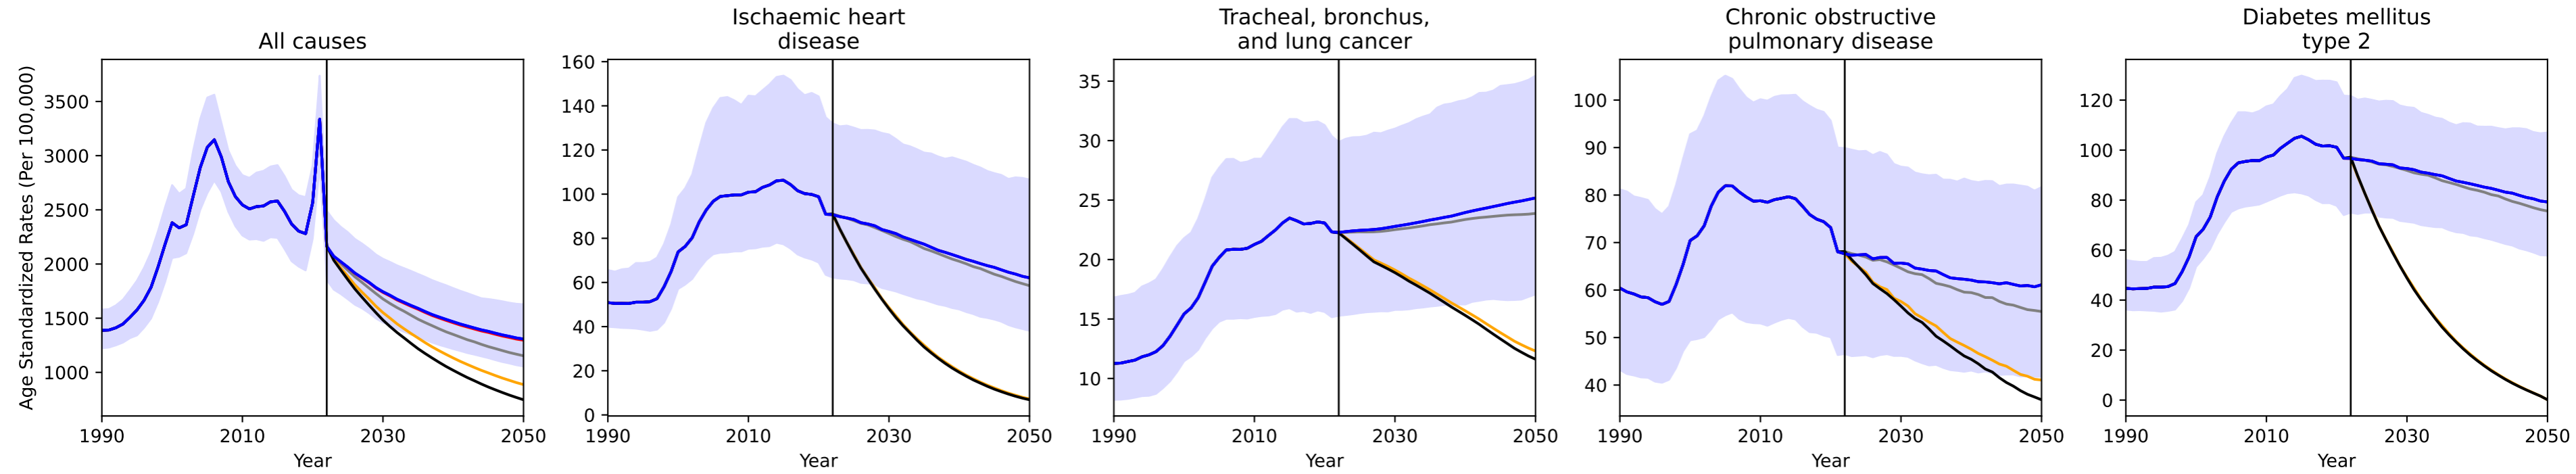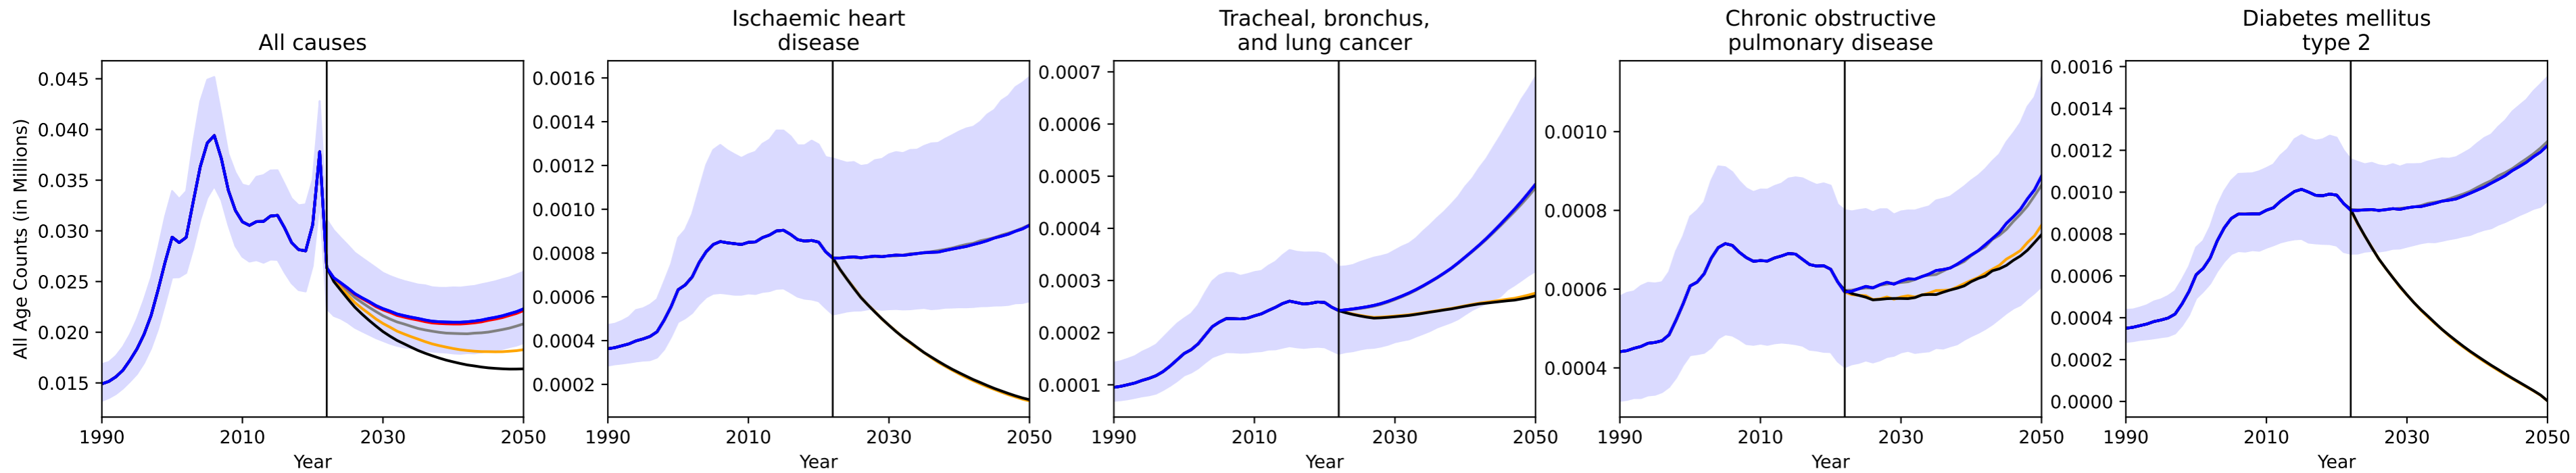

# Namibia

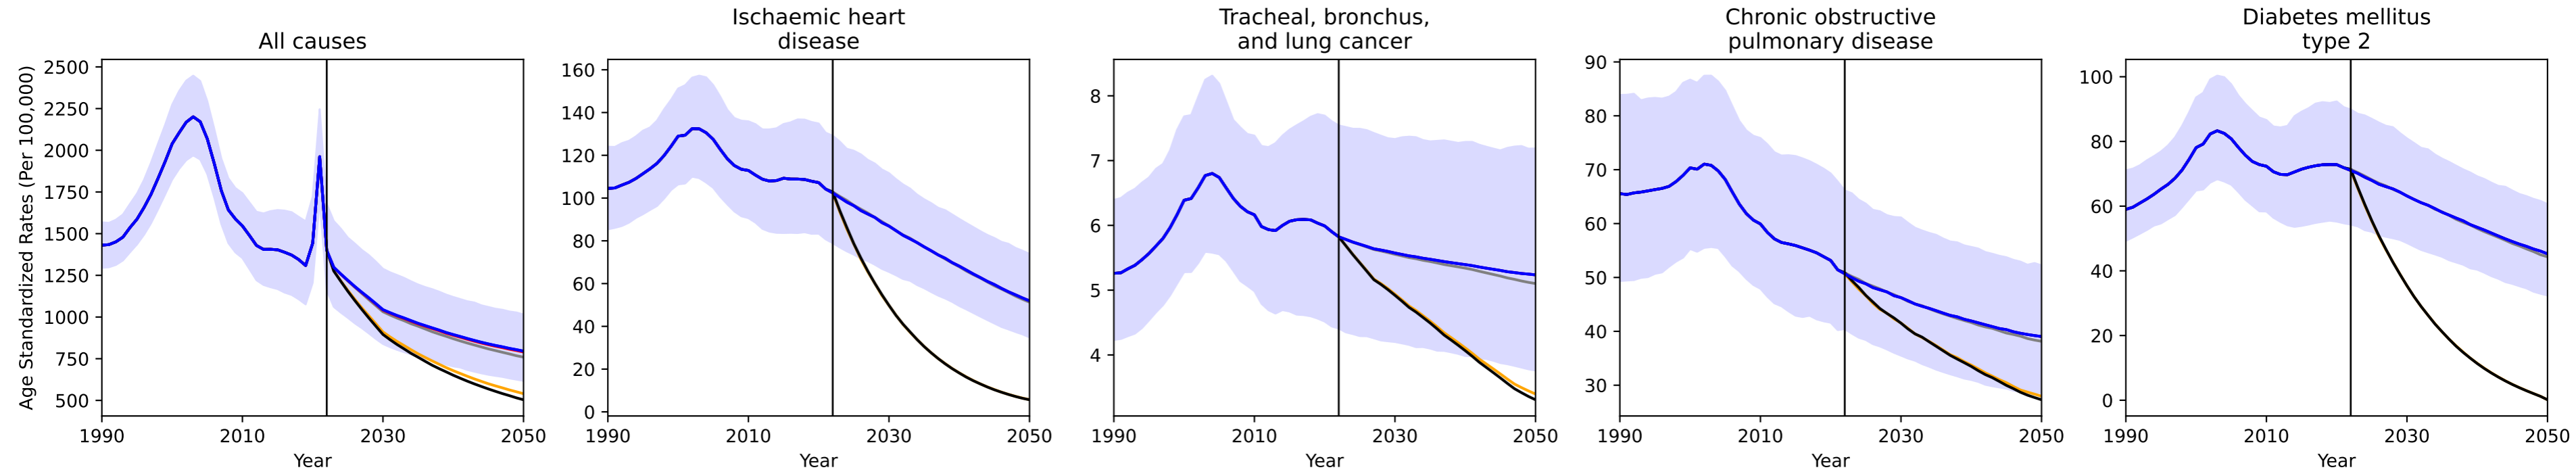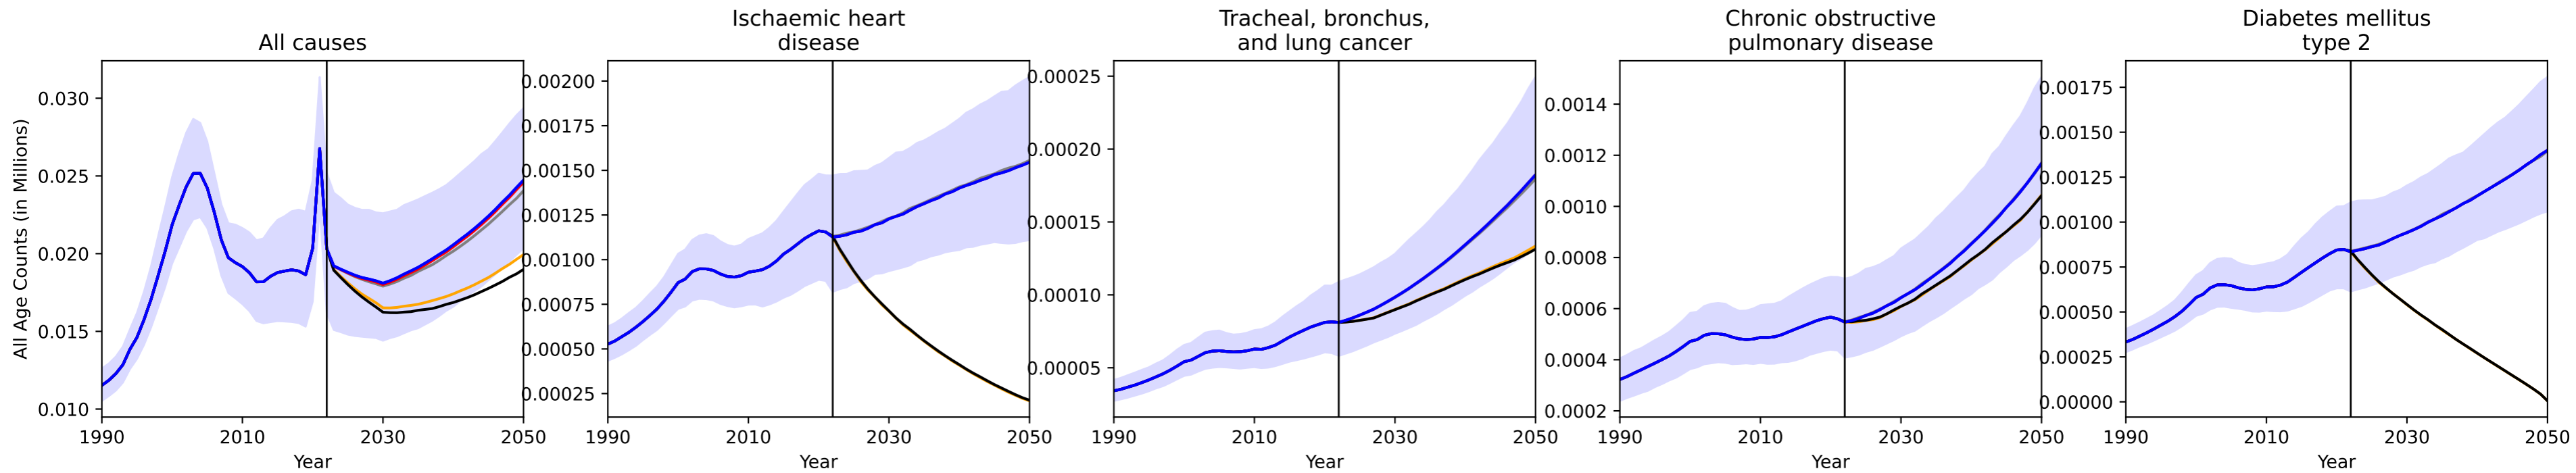

# South Africa

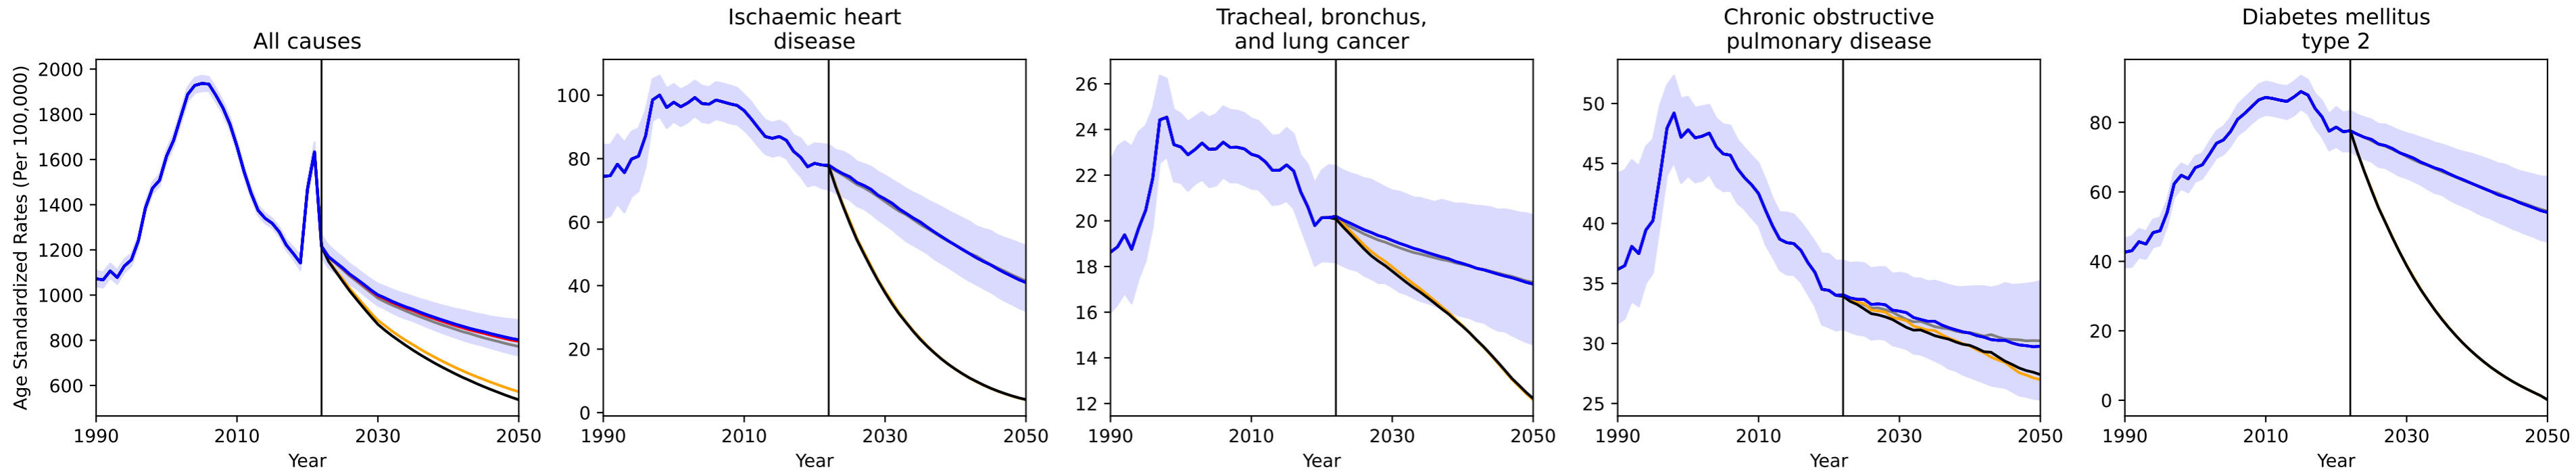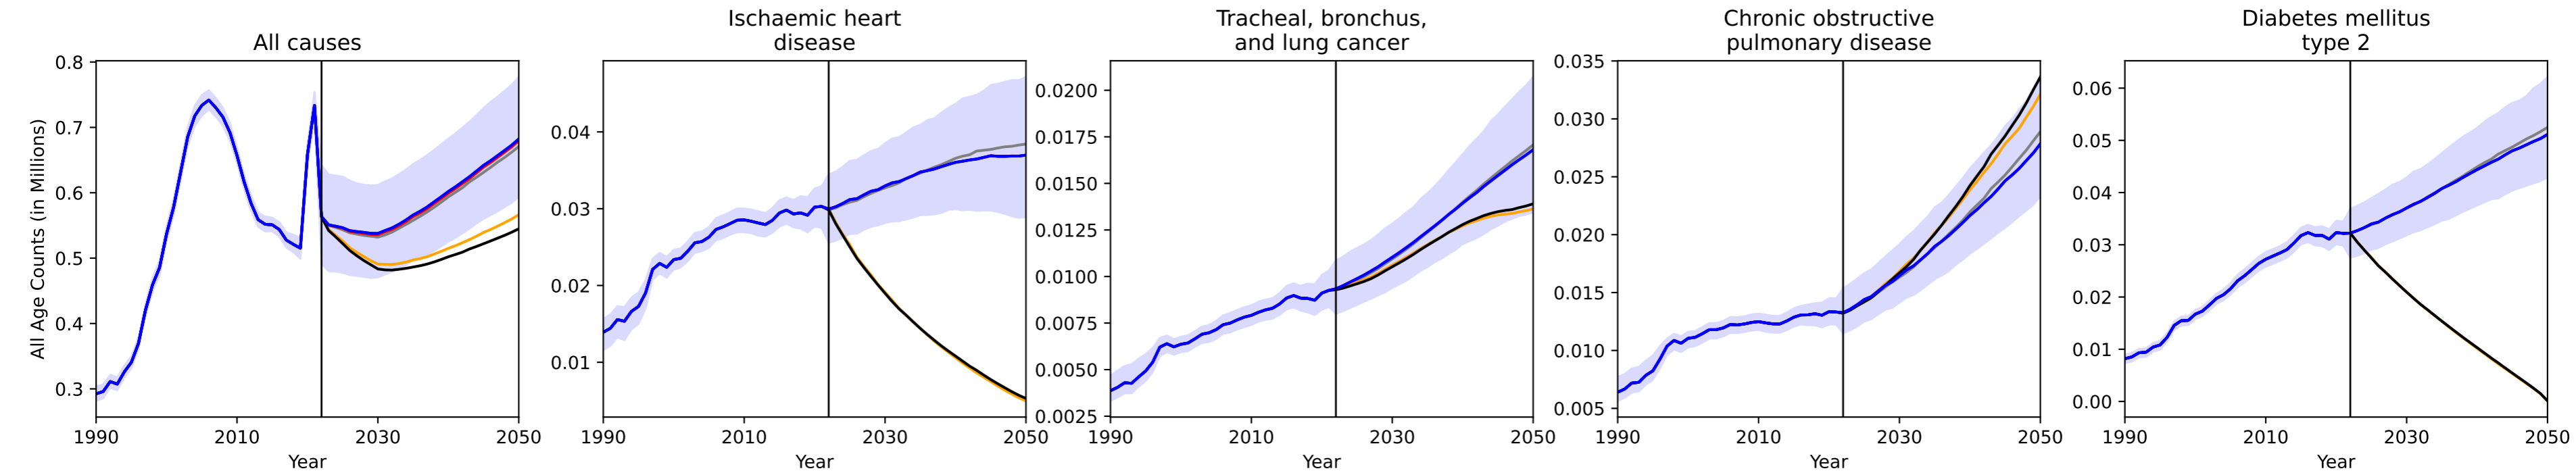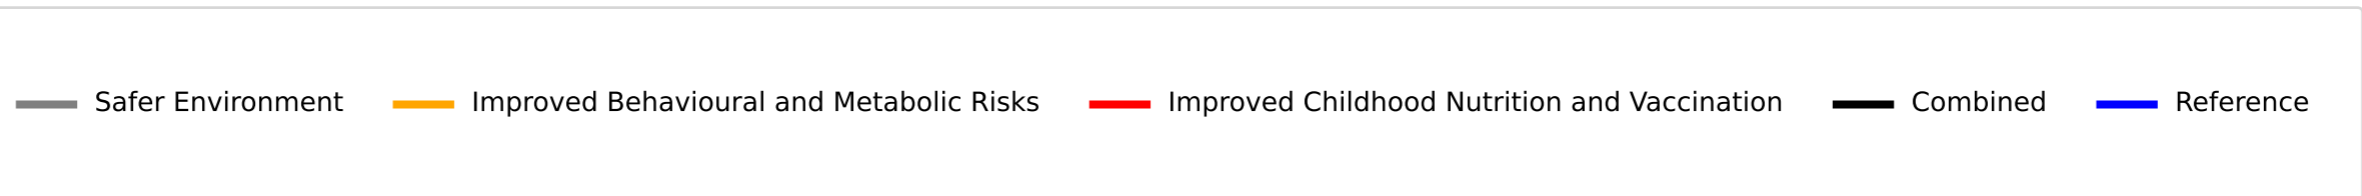

# Zimbabwe

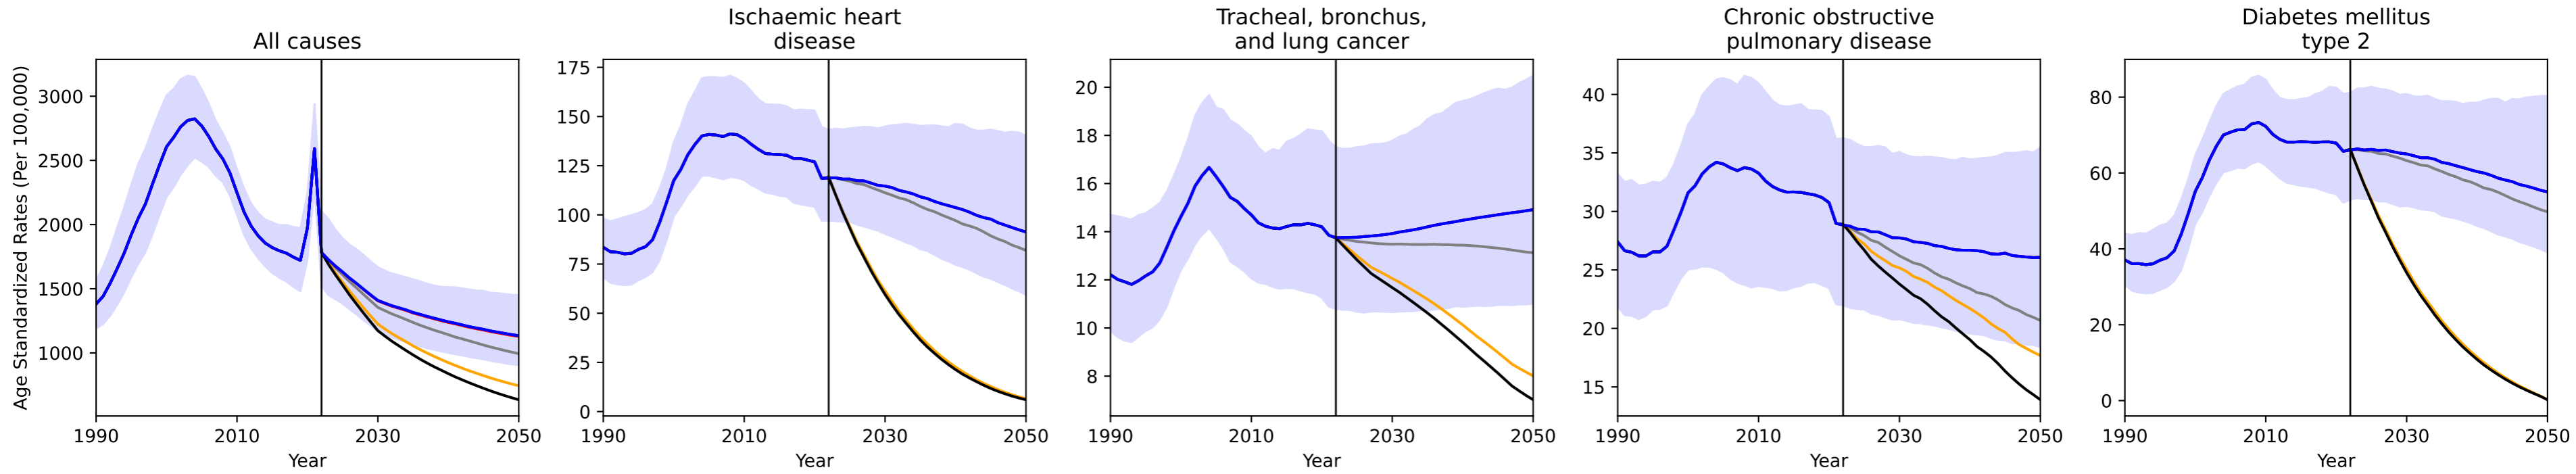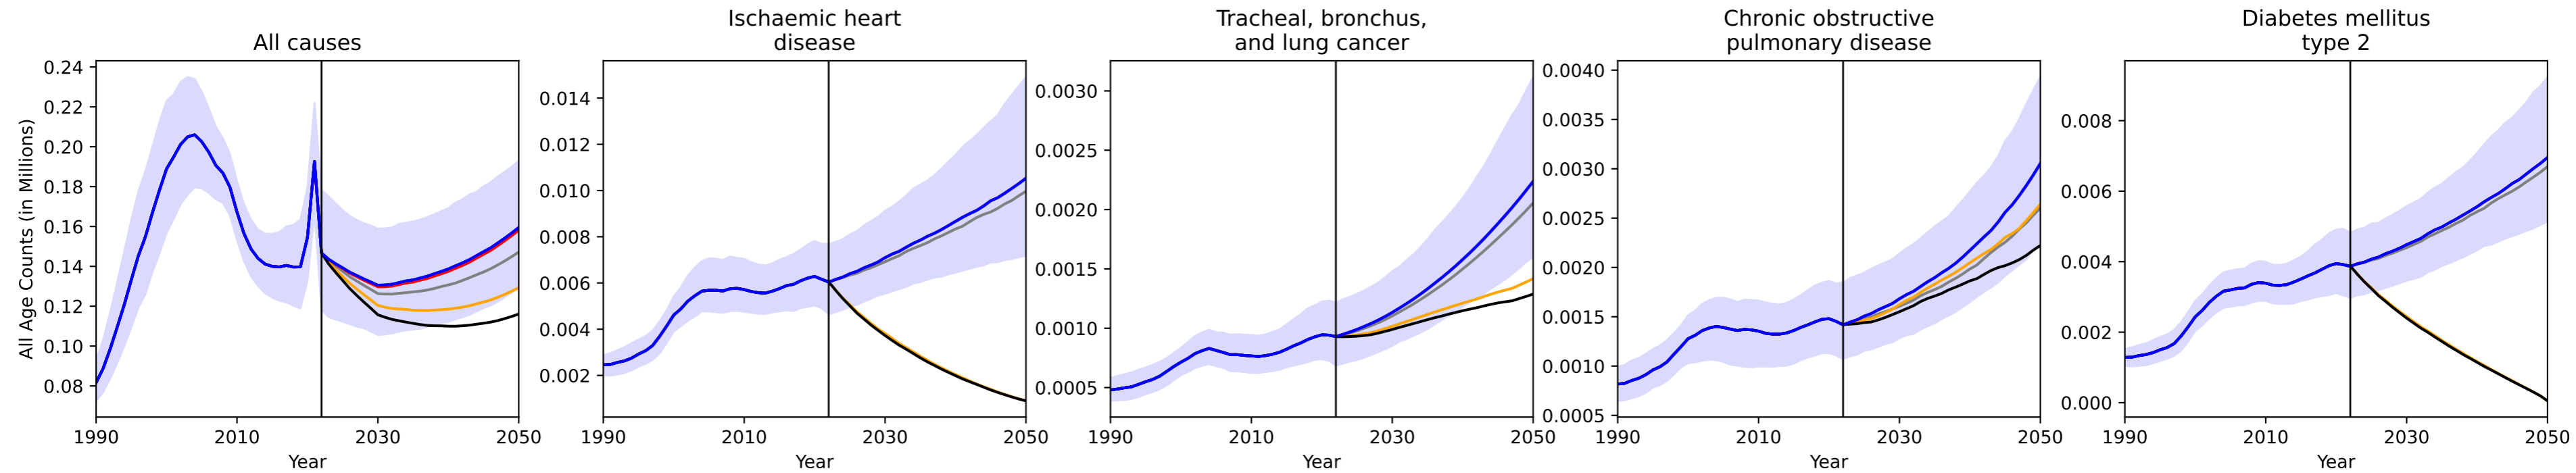

— Safer Environment — Improved Behavioural and Metabolic Risks — Improved Childhood Nutrition and Vaccination — Combined — Reference

# Benin

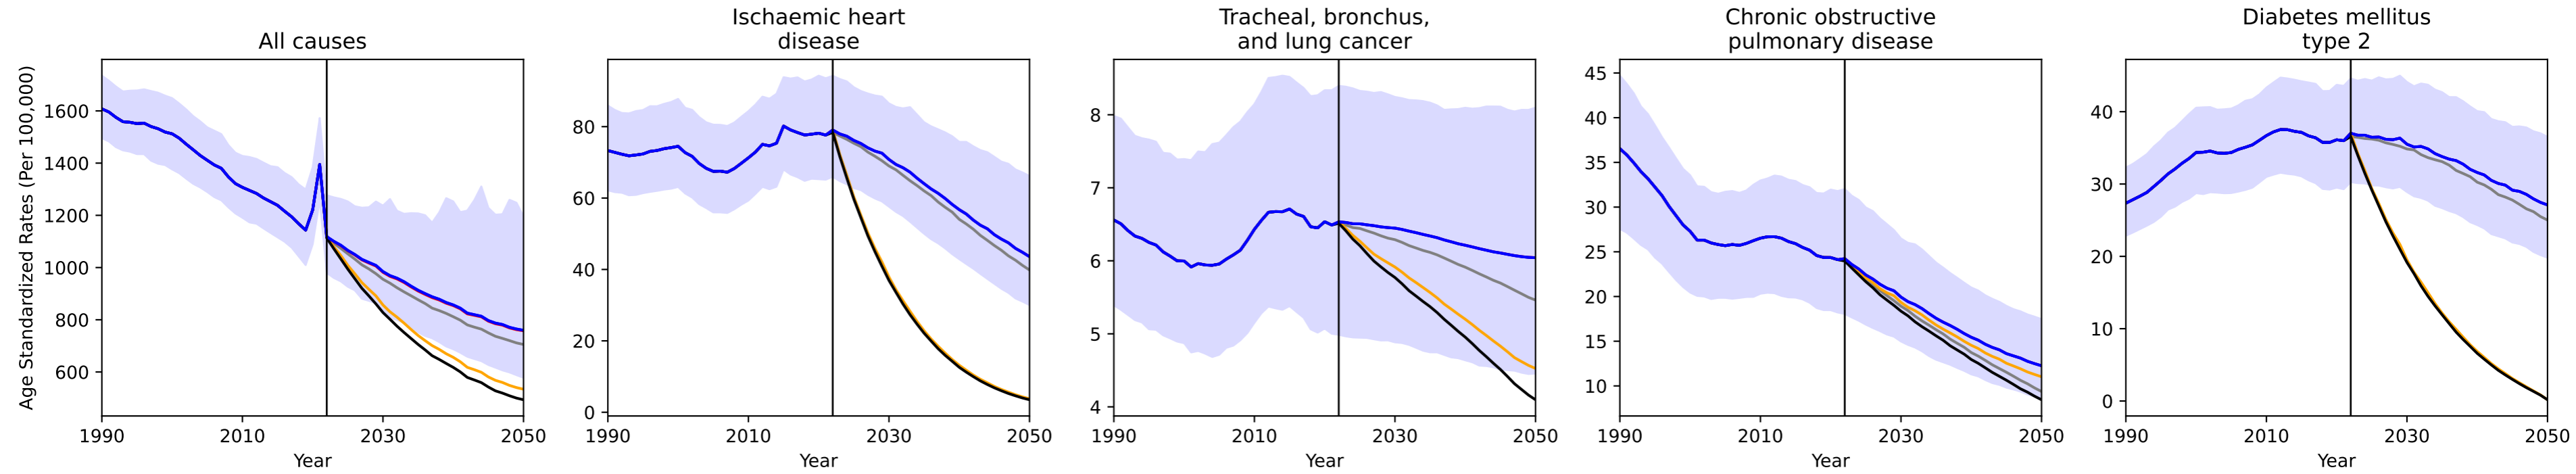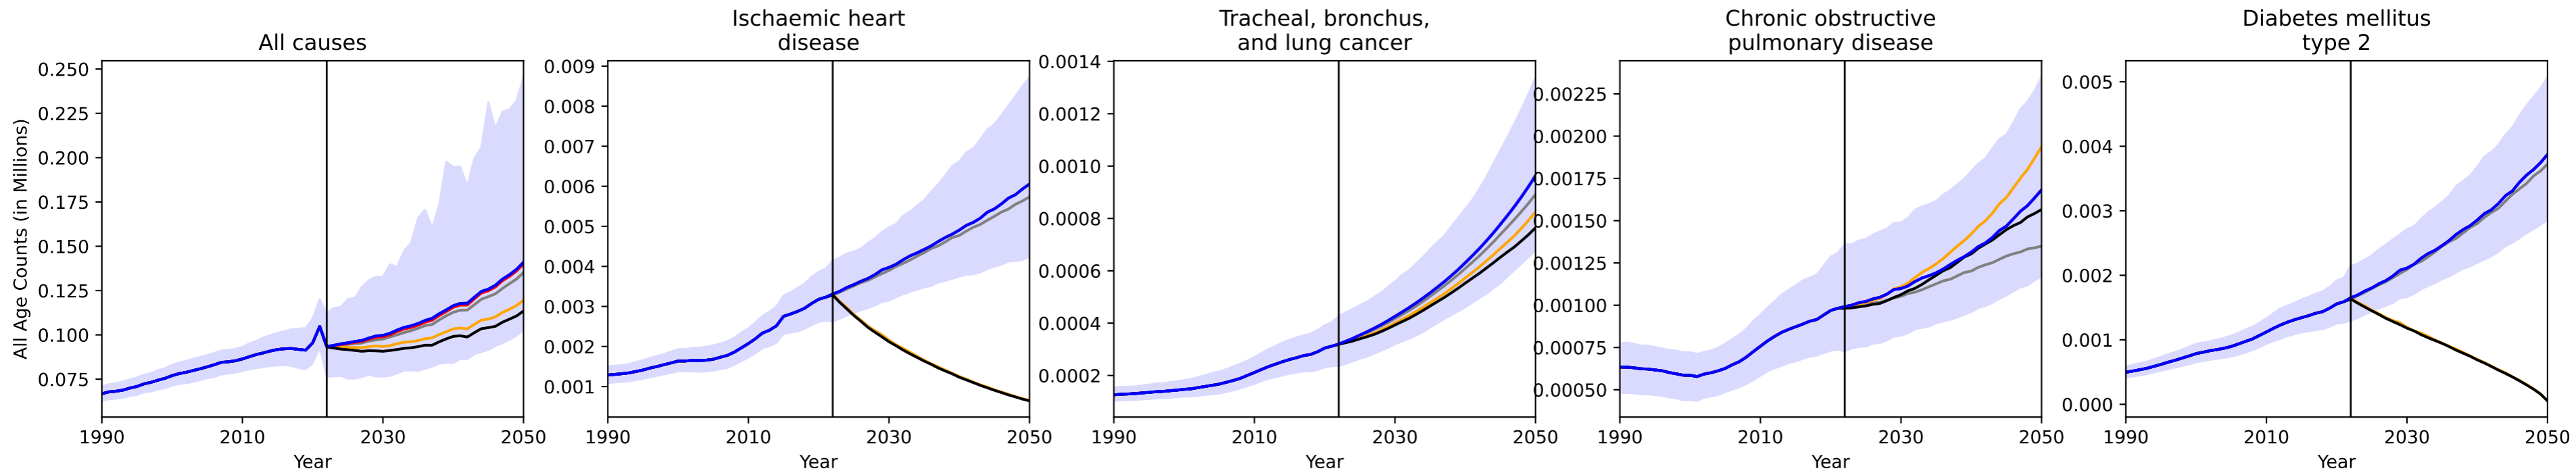



# Burkina Faso

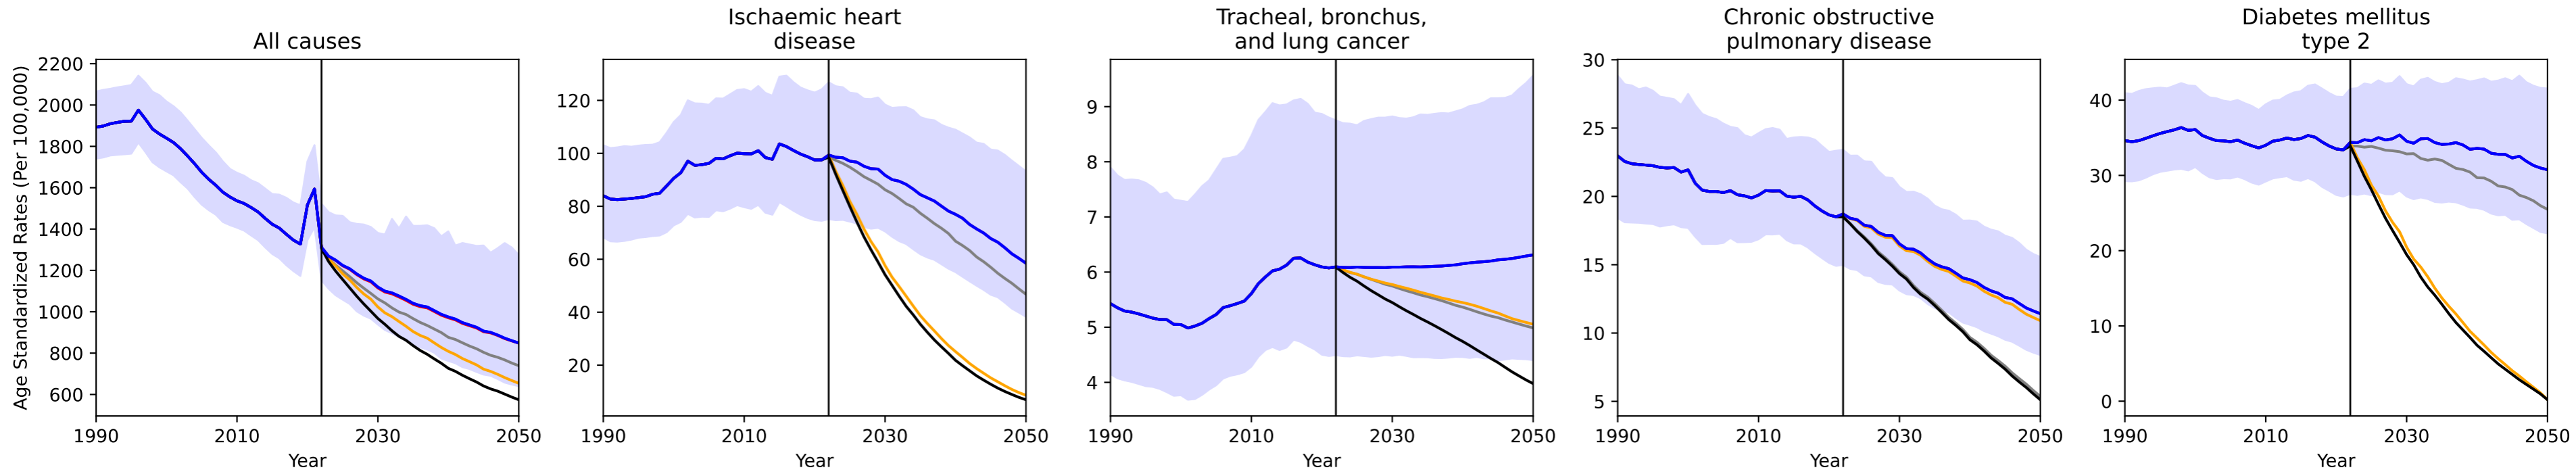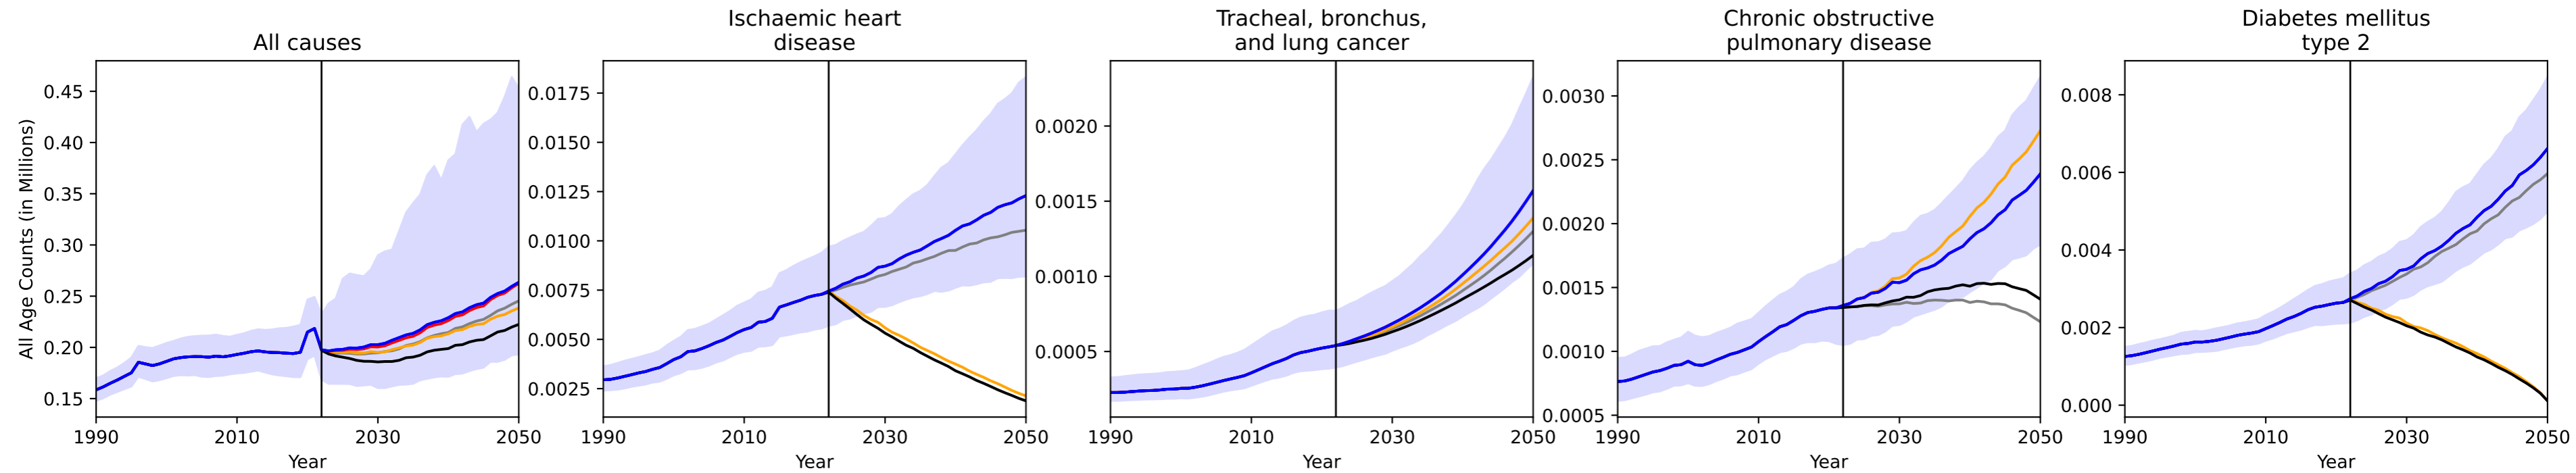

— Safer Environment — Improved Behavioural and Metabolic Risks — Improved Childhood Nutrition and Vaccination — Combined — Reference

# Cabo Verde

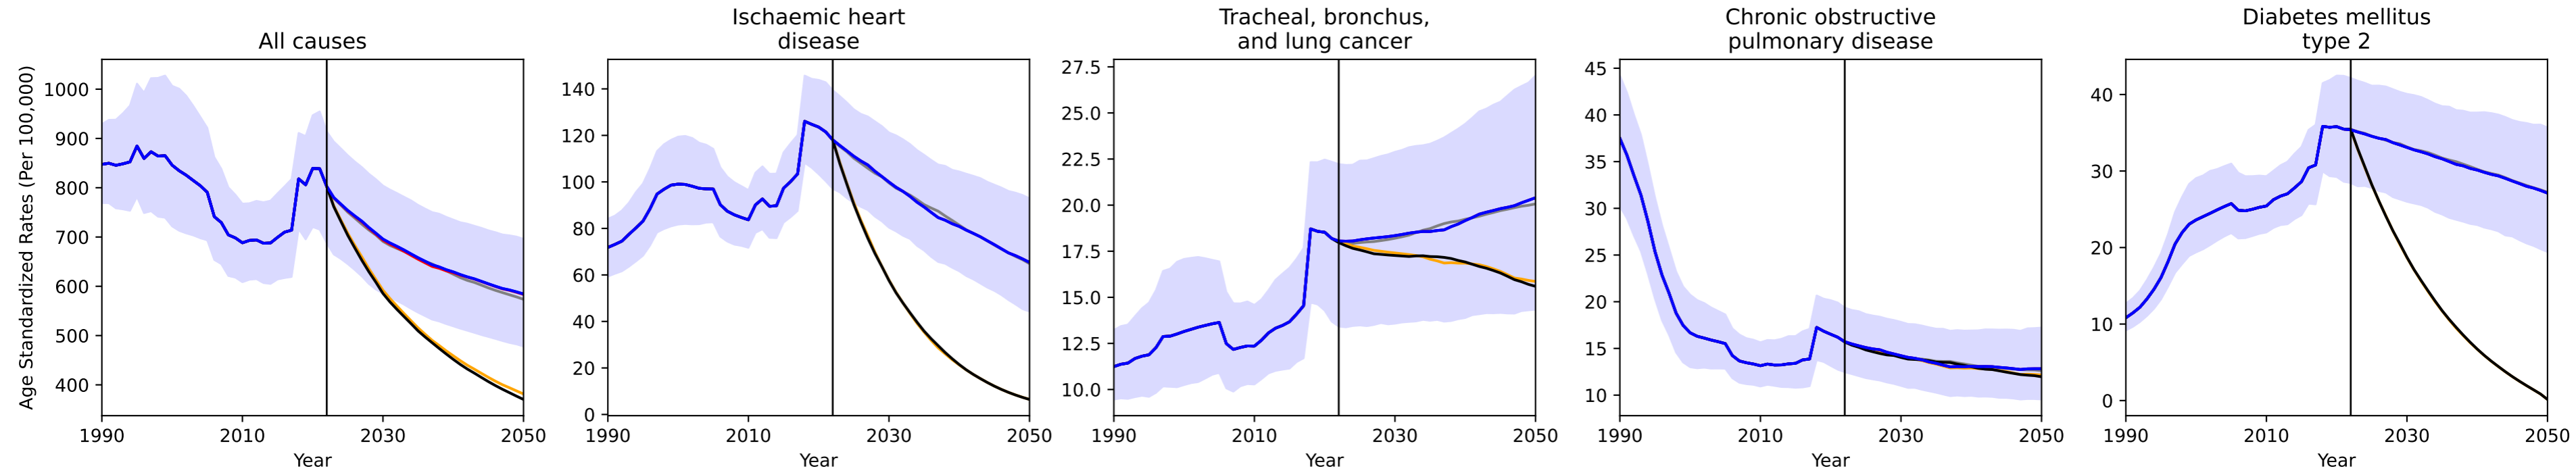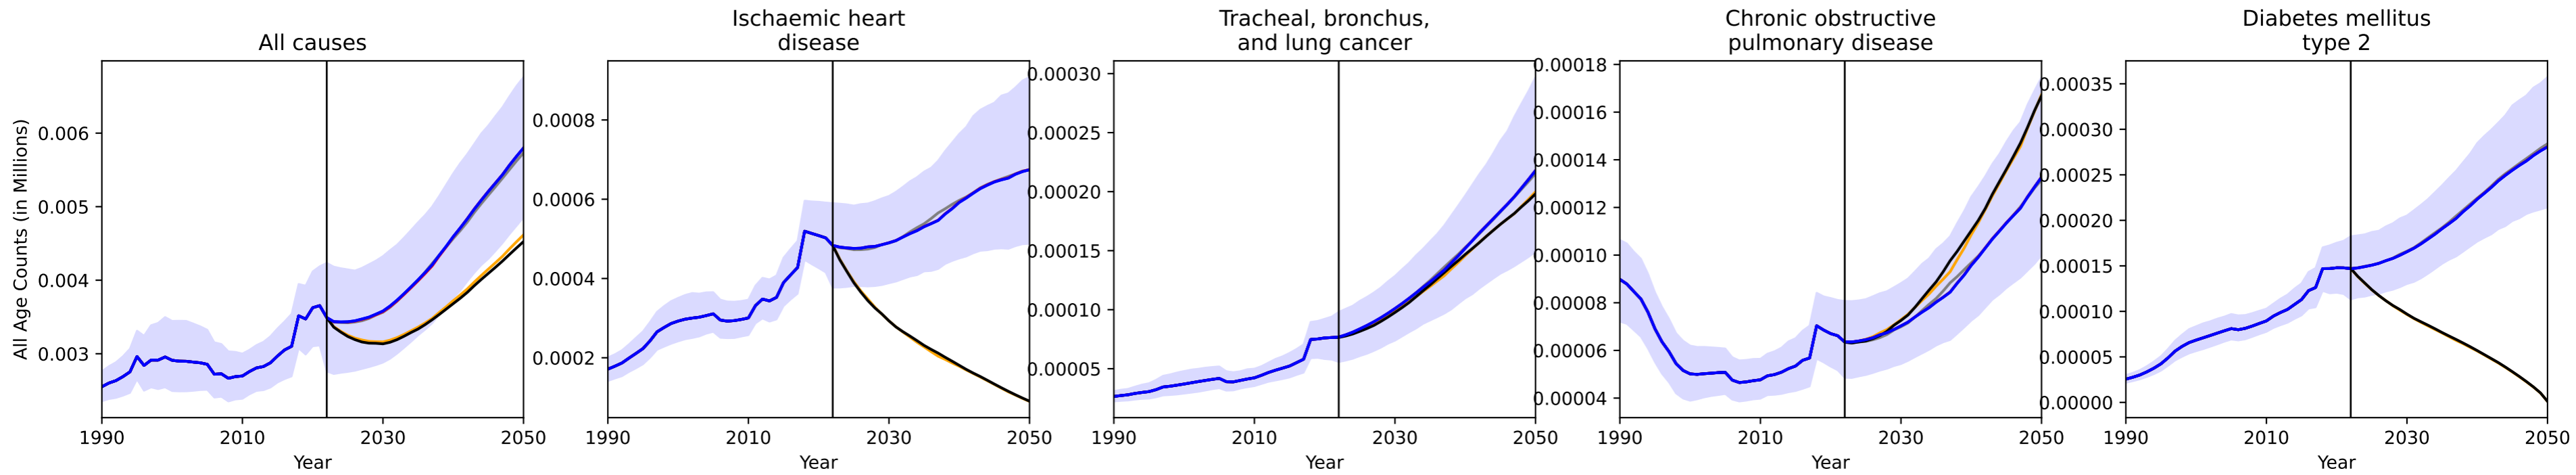

# Cameroon

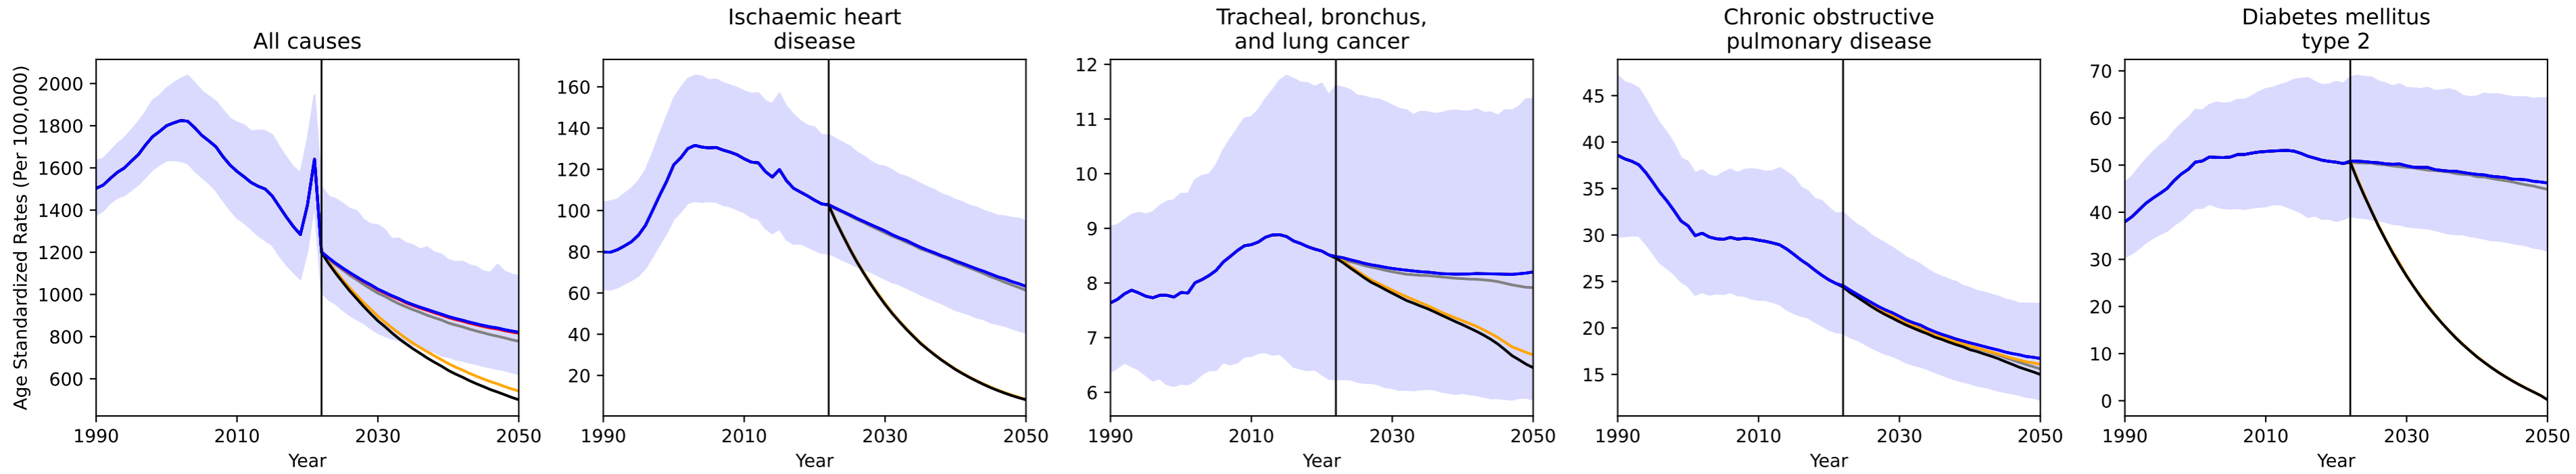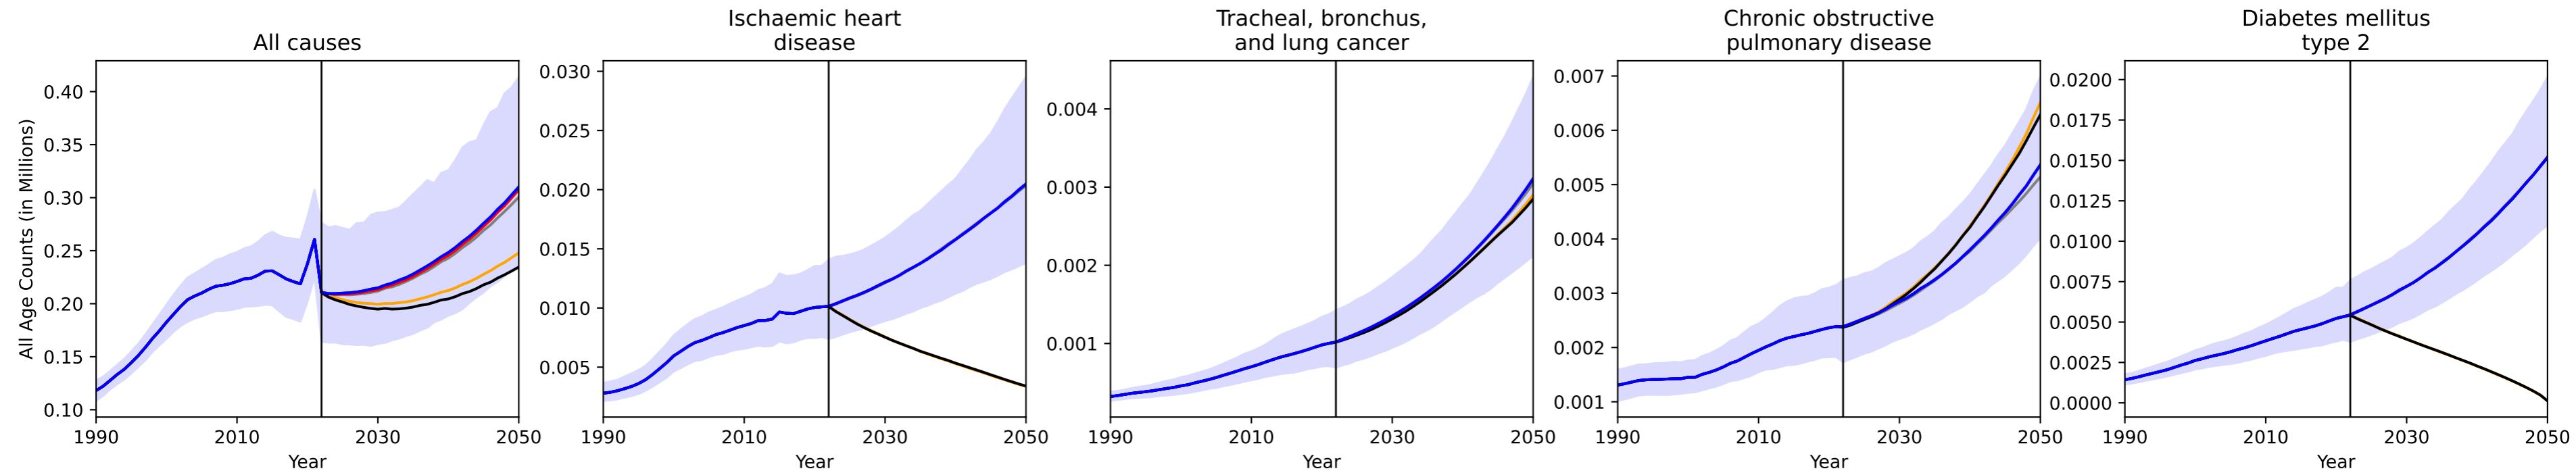

— Safer Environment — Improved Behavioural and Metabolic Risks — Improved Childhood Nutrition and Vaccination — Combined — Reference

# Chad

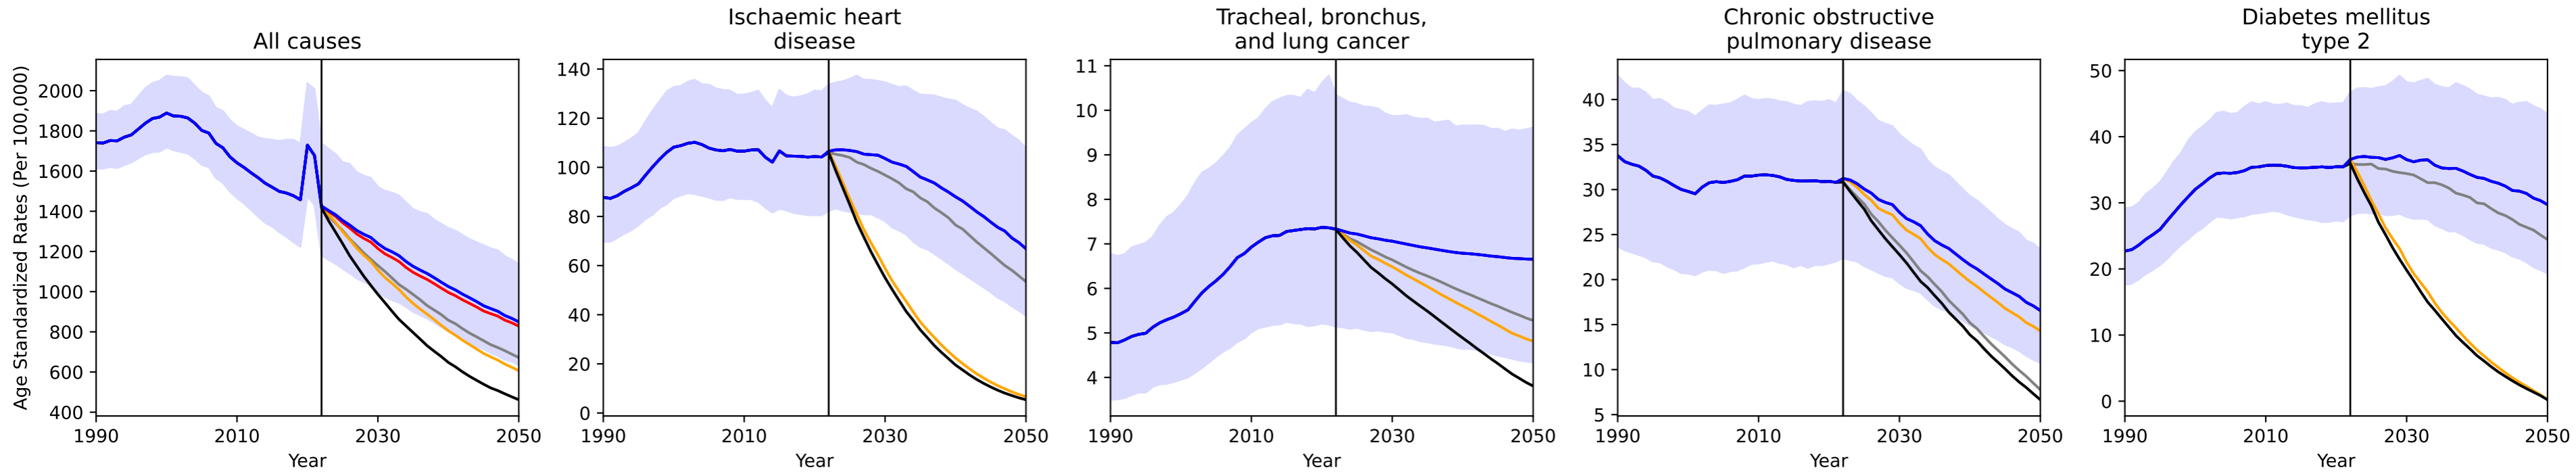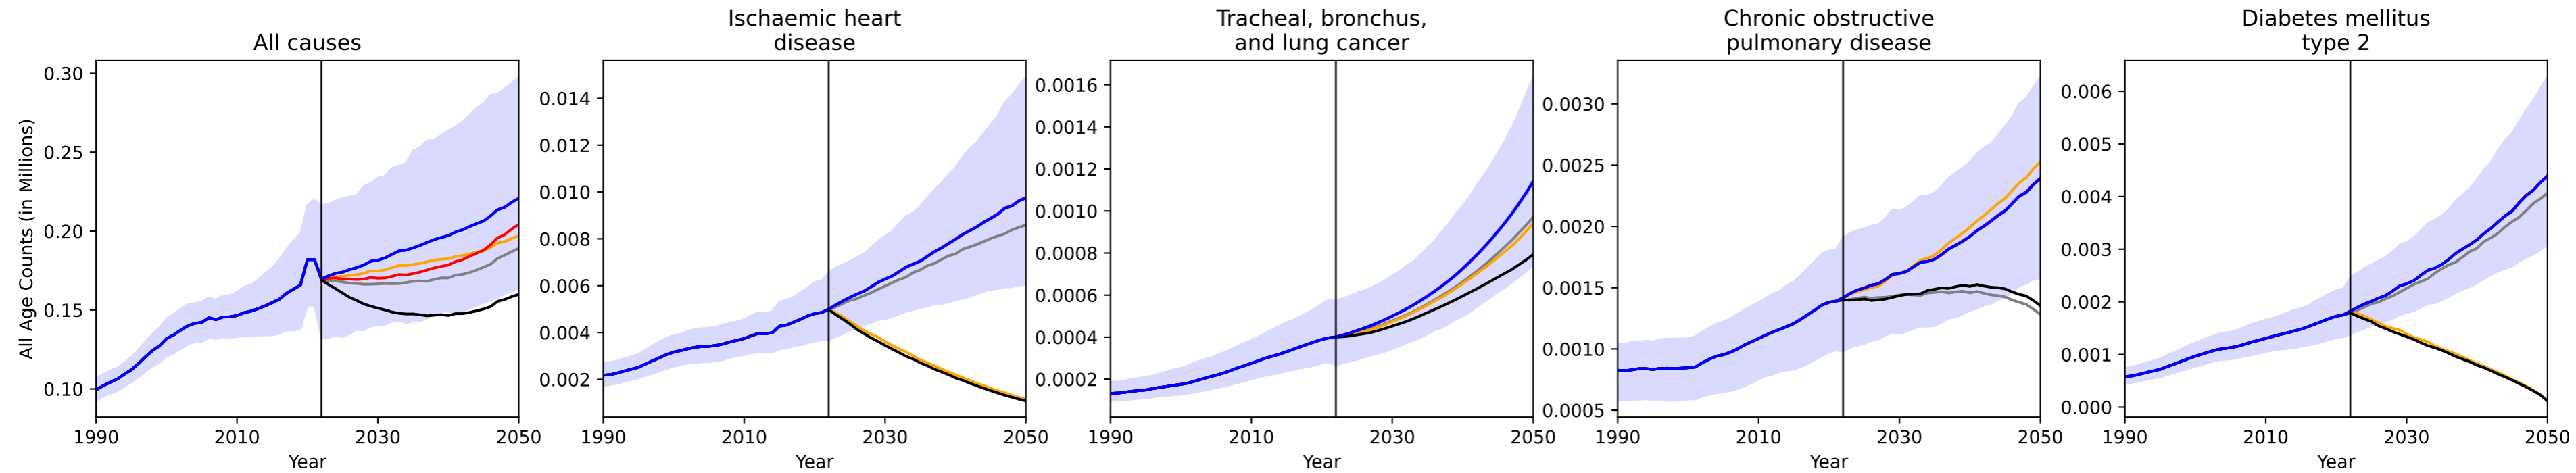

— Safer Environment — Improved Behavioural and Metabolic Risks — Improved Childhood Nutrition and Vaccination — Combined — Reference

# Côte D'Ivoire

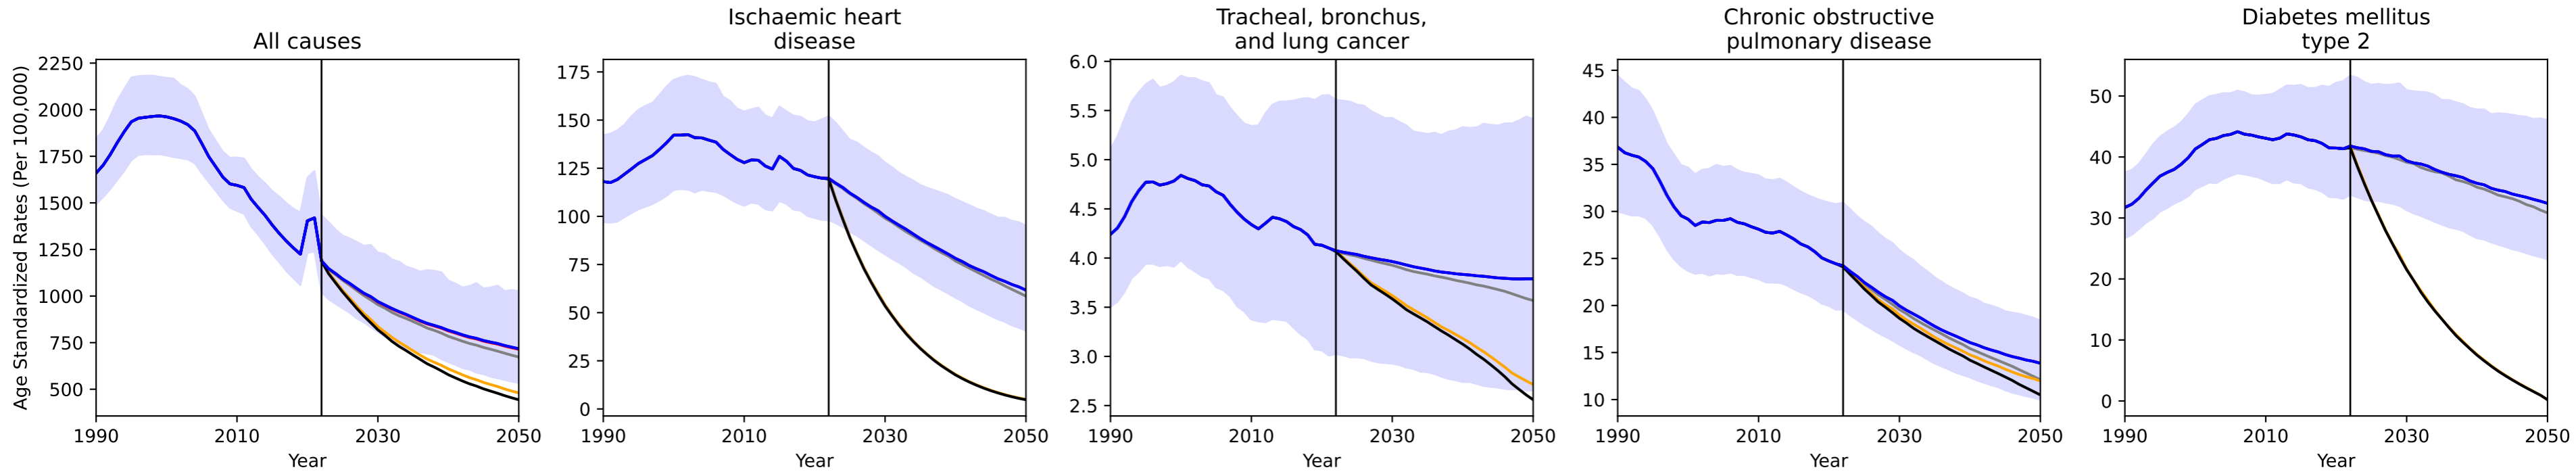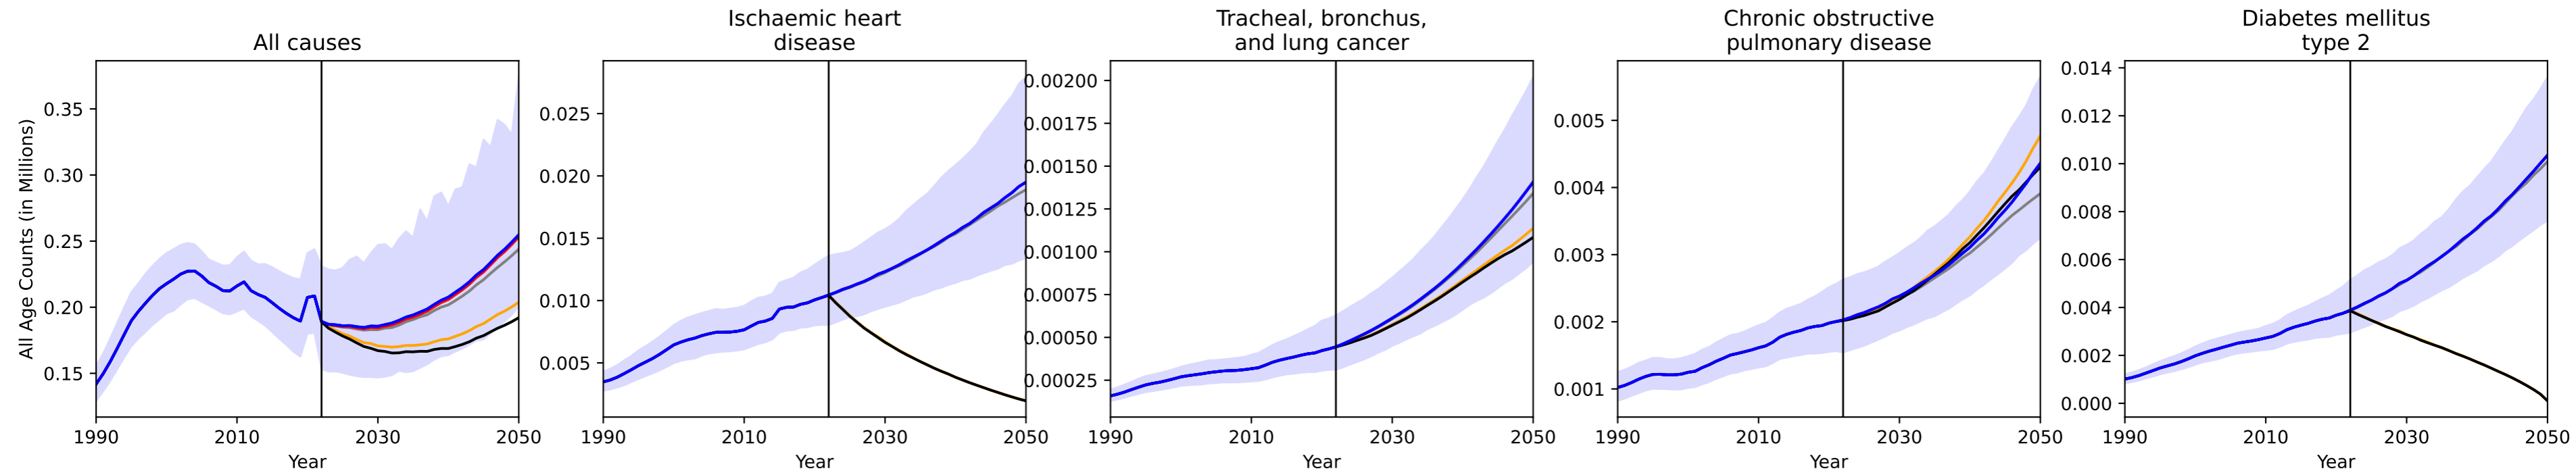

— Safer Environment — Improved Behavioural and Metabolic Risks — Improved Childhood Nutrition and Vaccination — Combined — Reference

# The Gambia

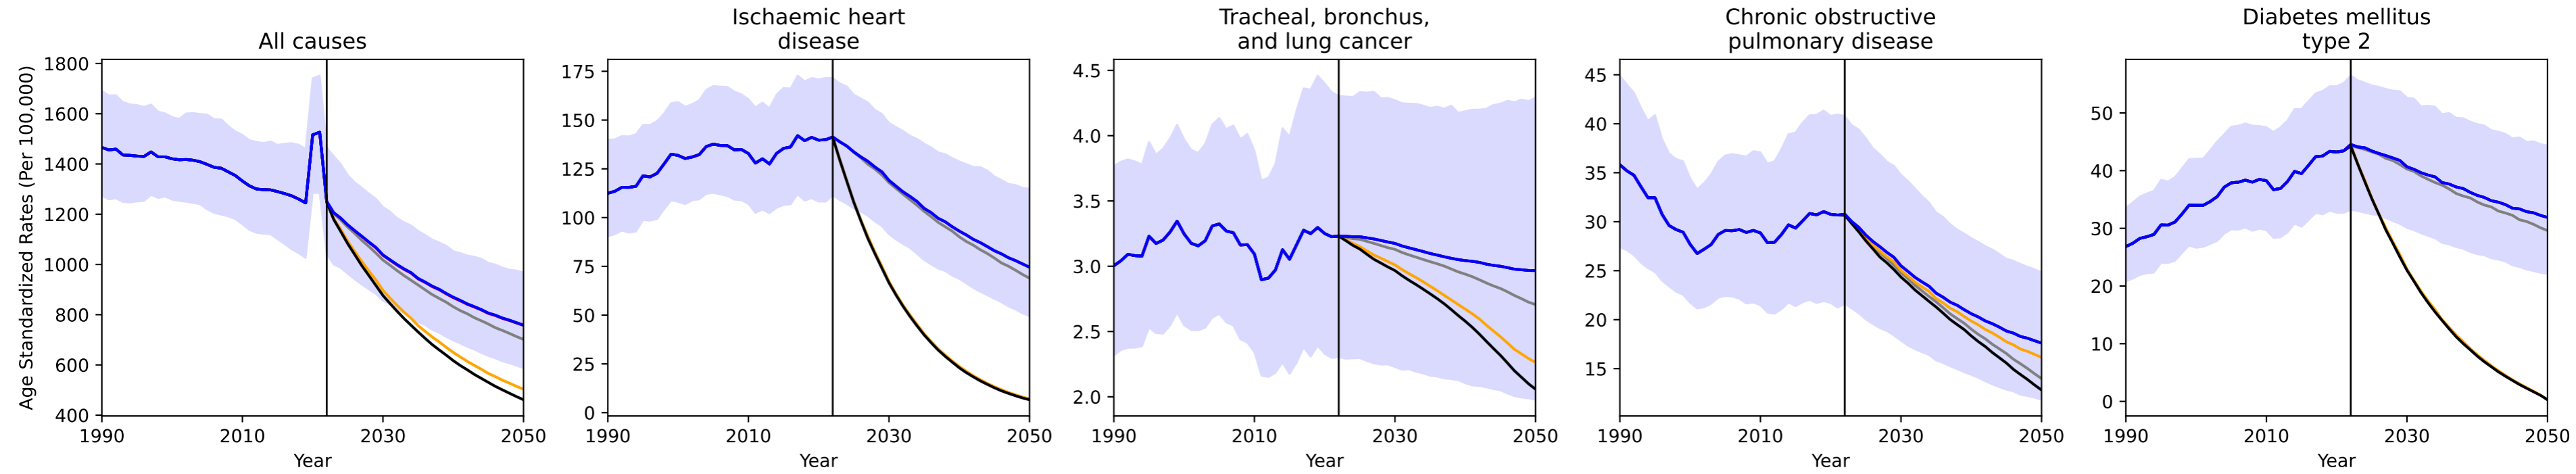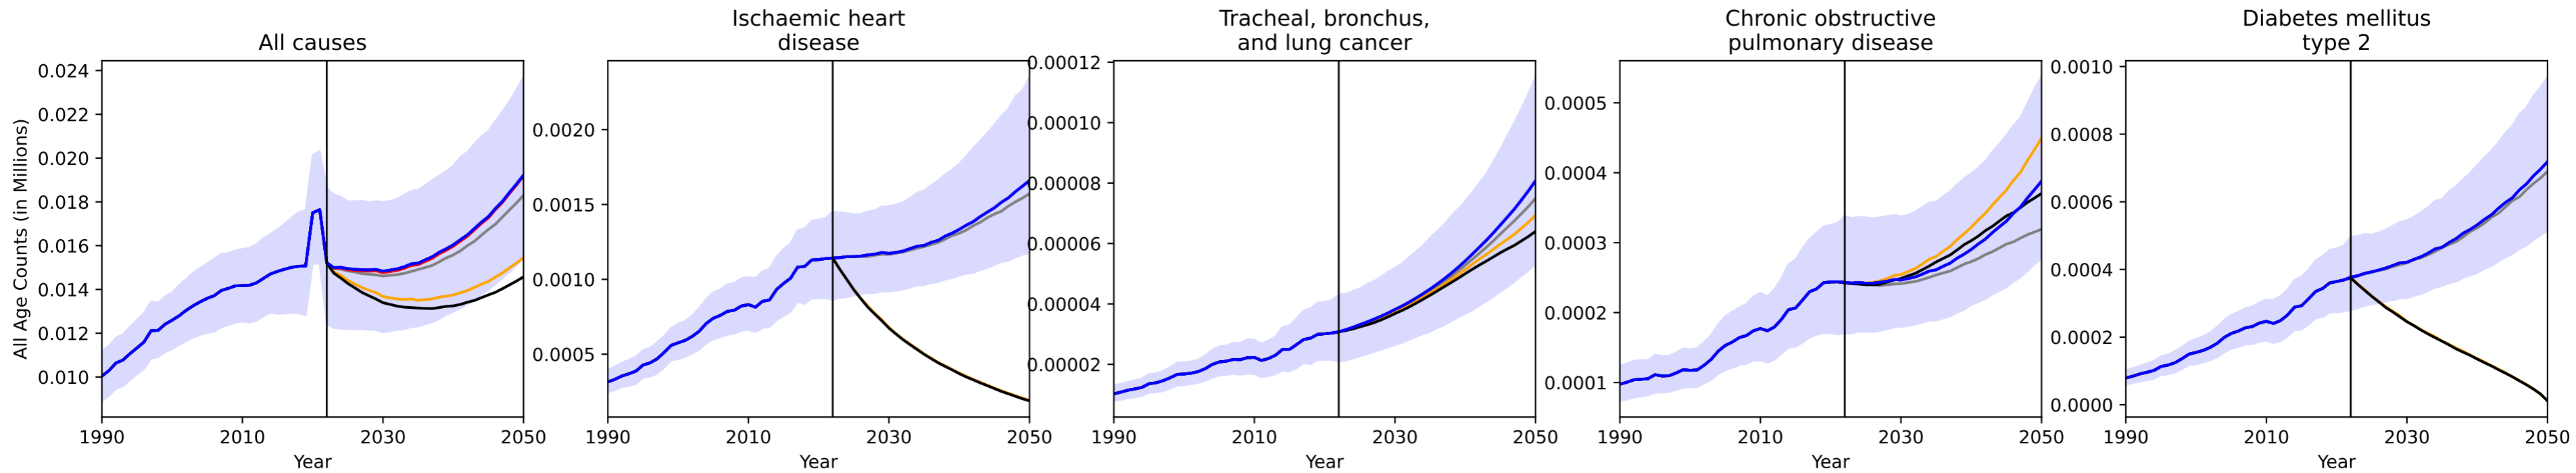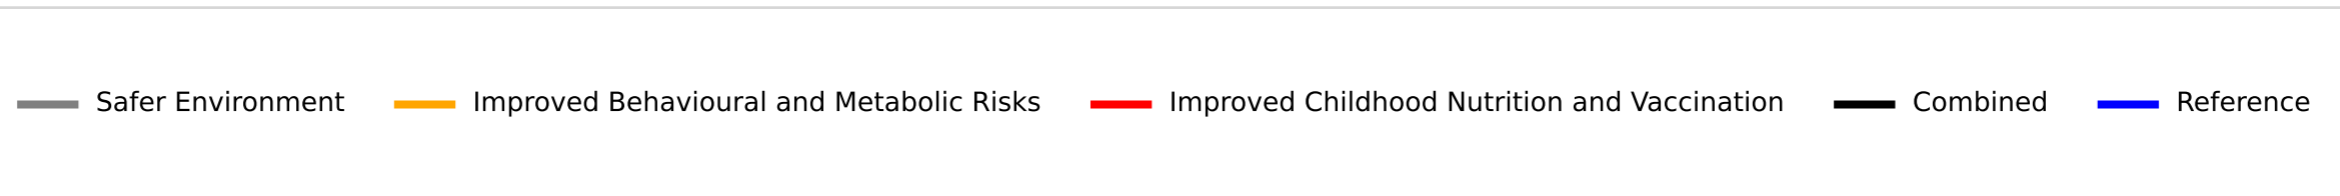

# Ghana

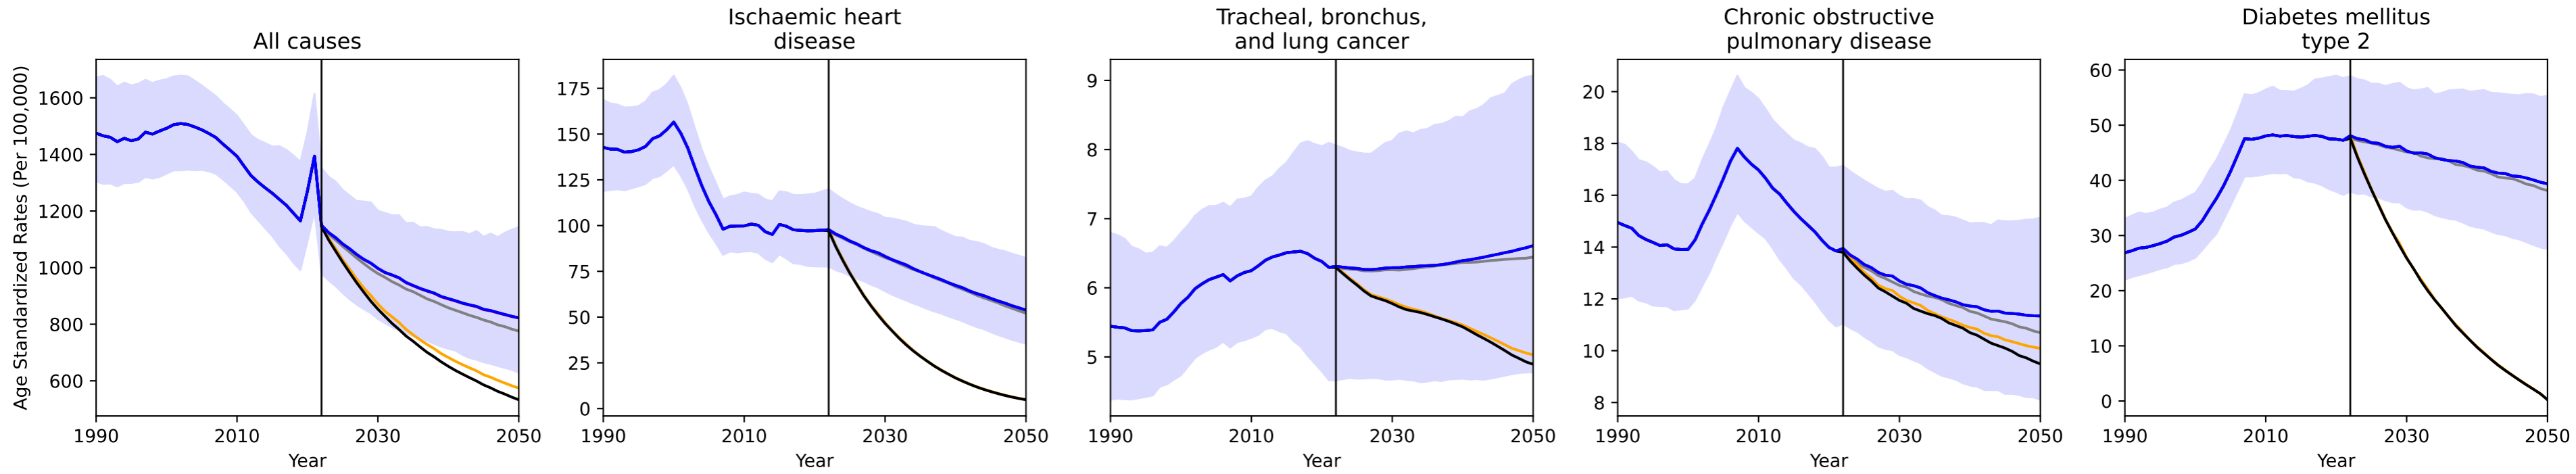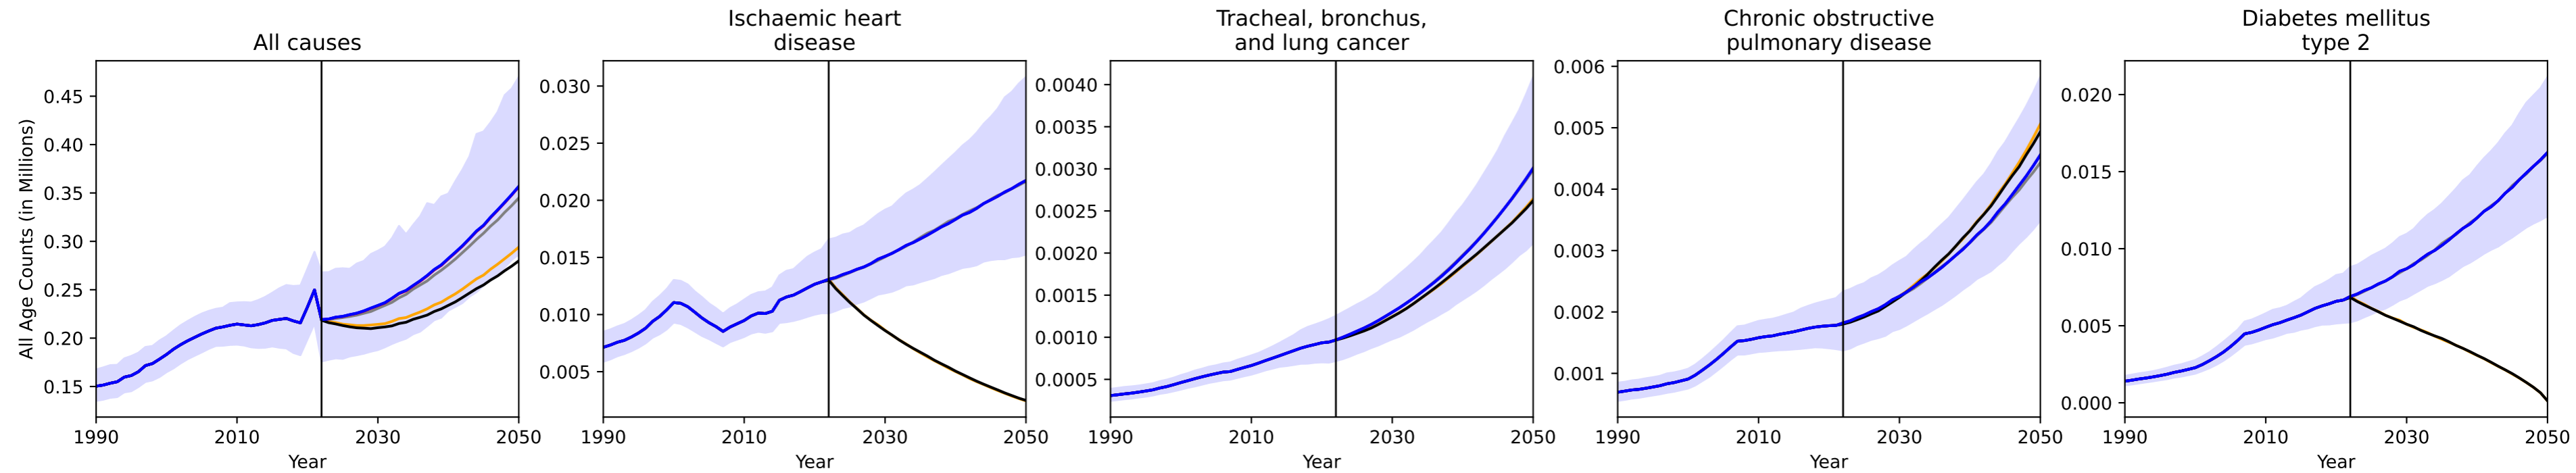

— Safer Environment — Improved Behavioural and Metabolic Risks — Improved Childhood Nutrition and Vaccination — Combined — Reference

# Guinea

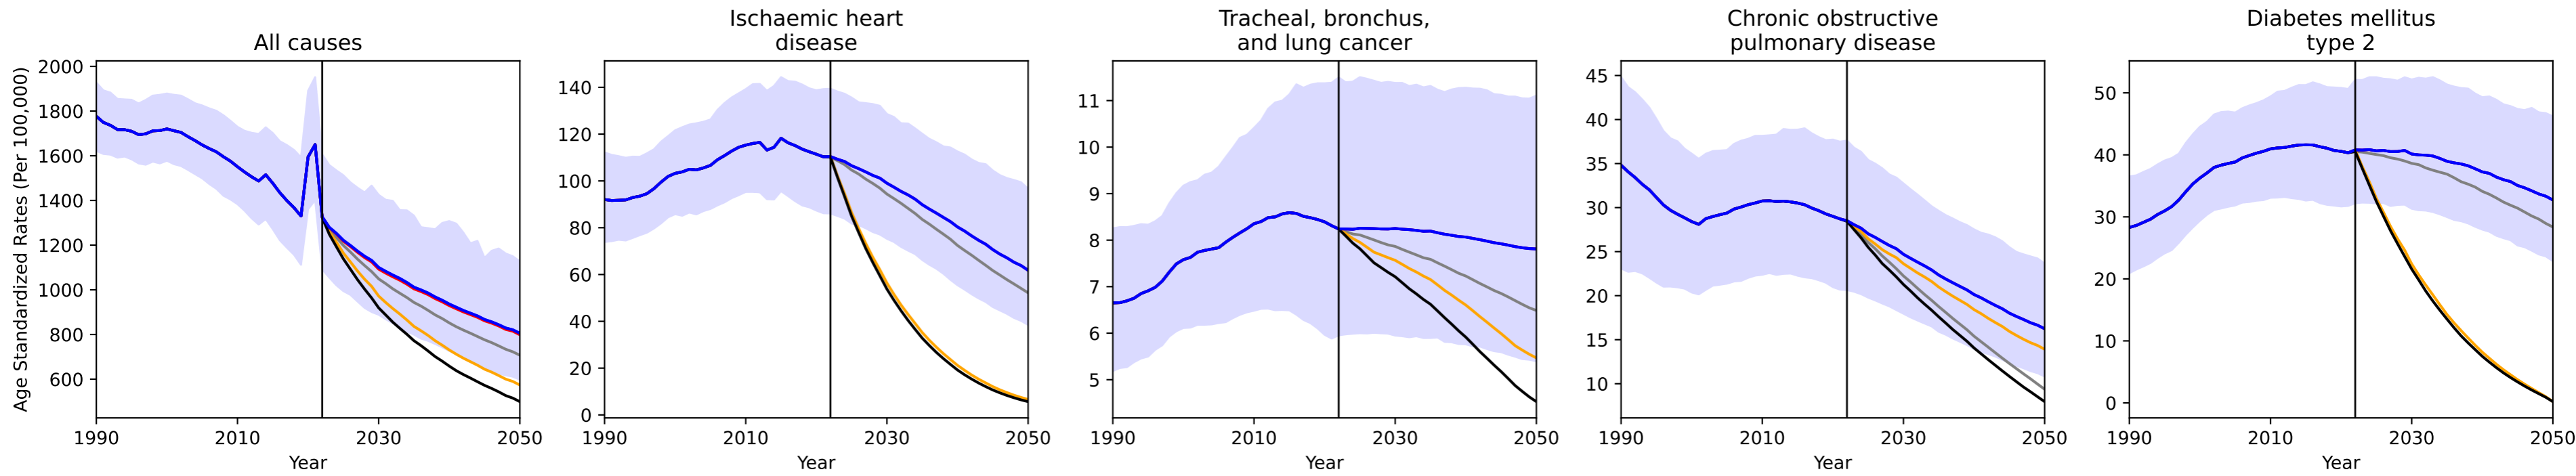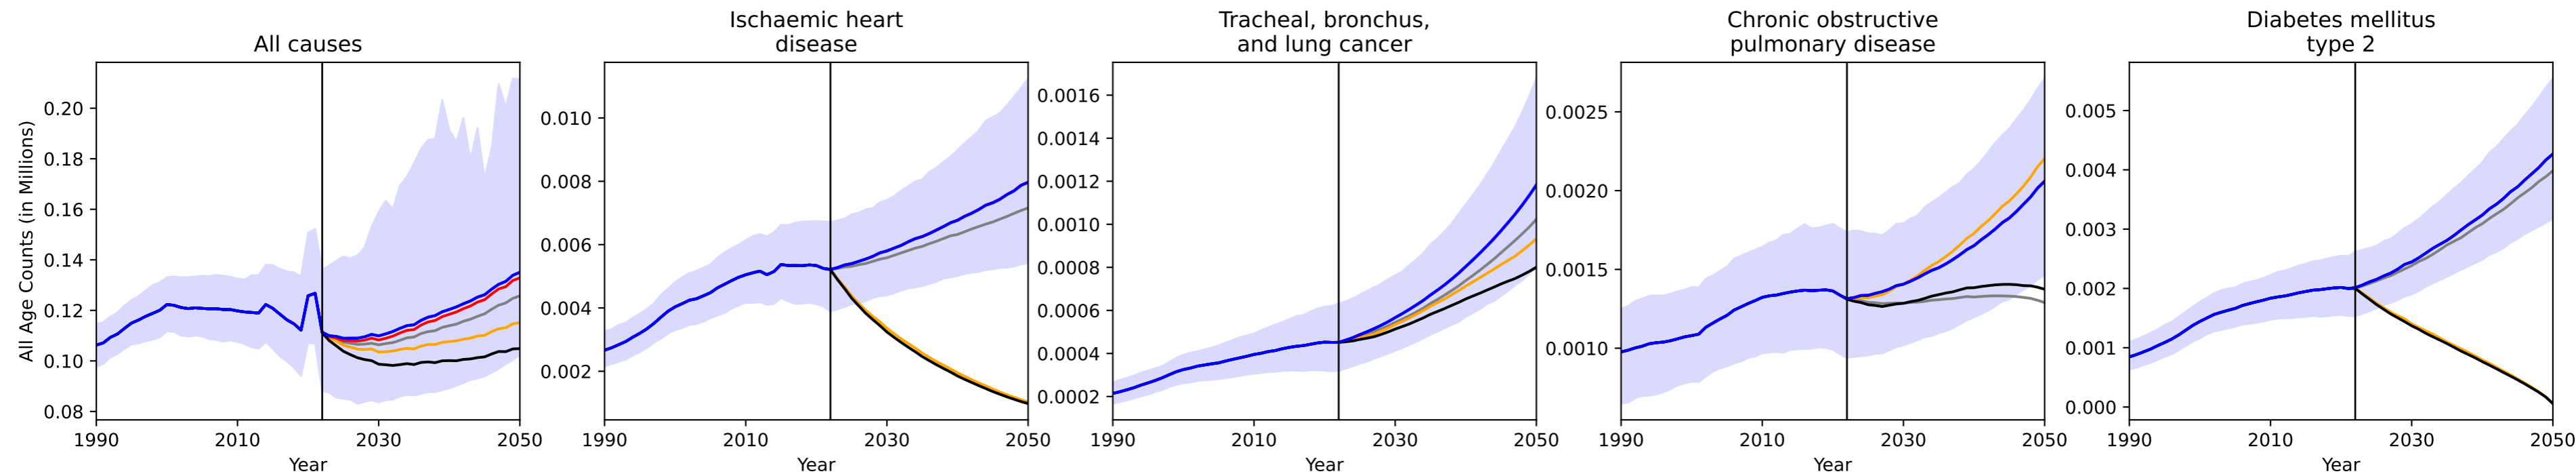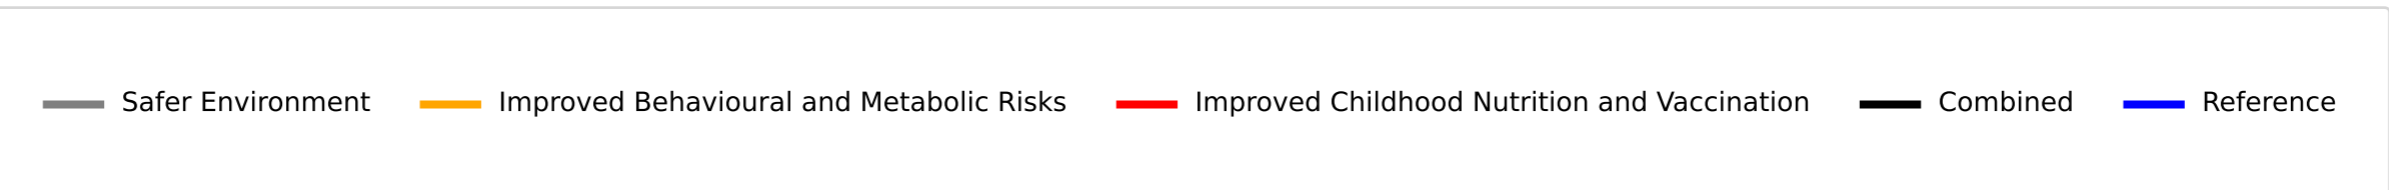



# Guinea-Bissau

Supplemental Results Figure S13. All cause and top NCD causes age standardized death rates and all age counts by scenario and location, 1990-2050

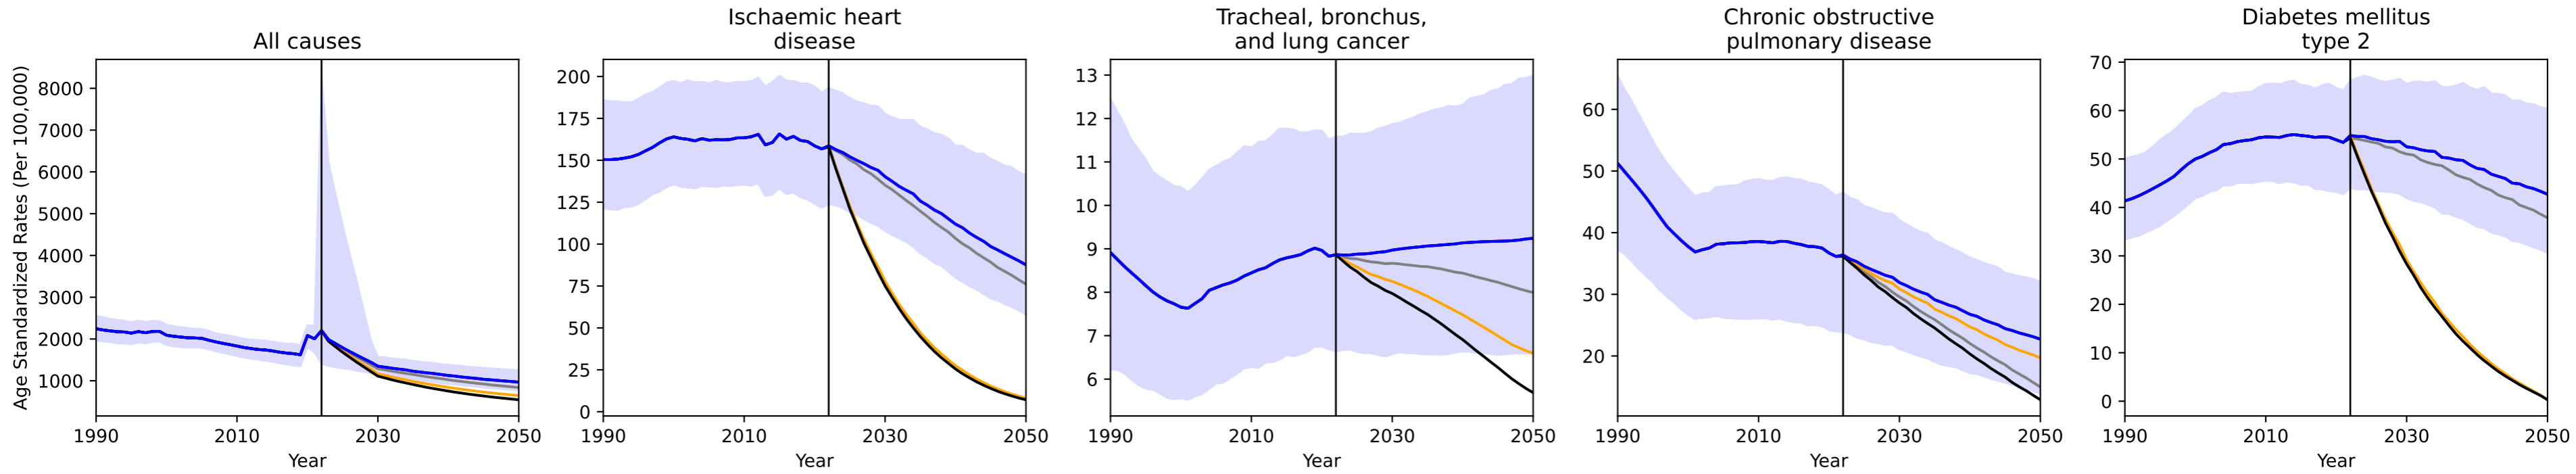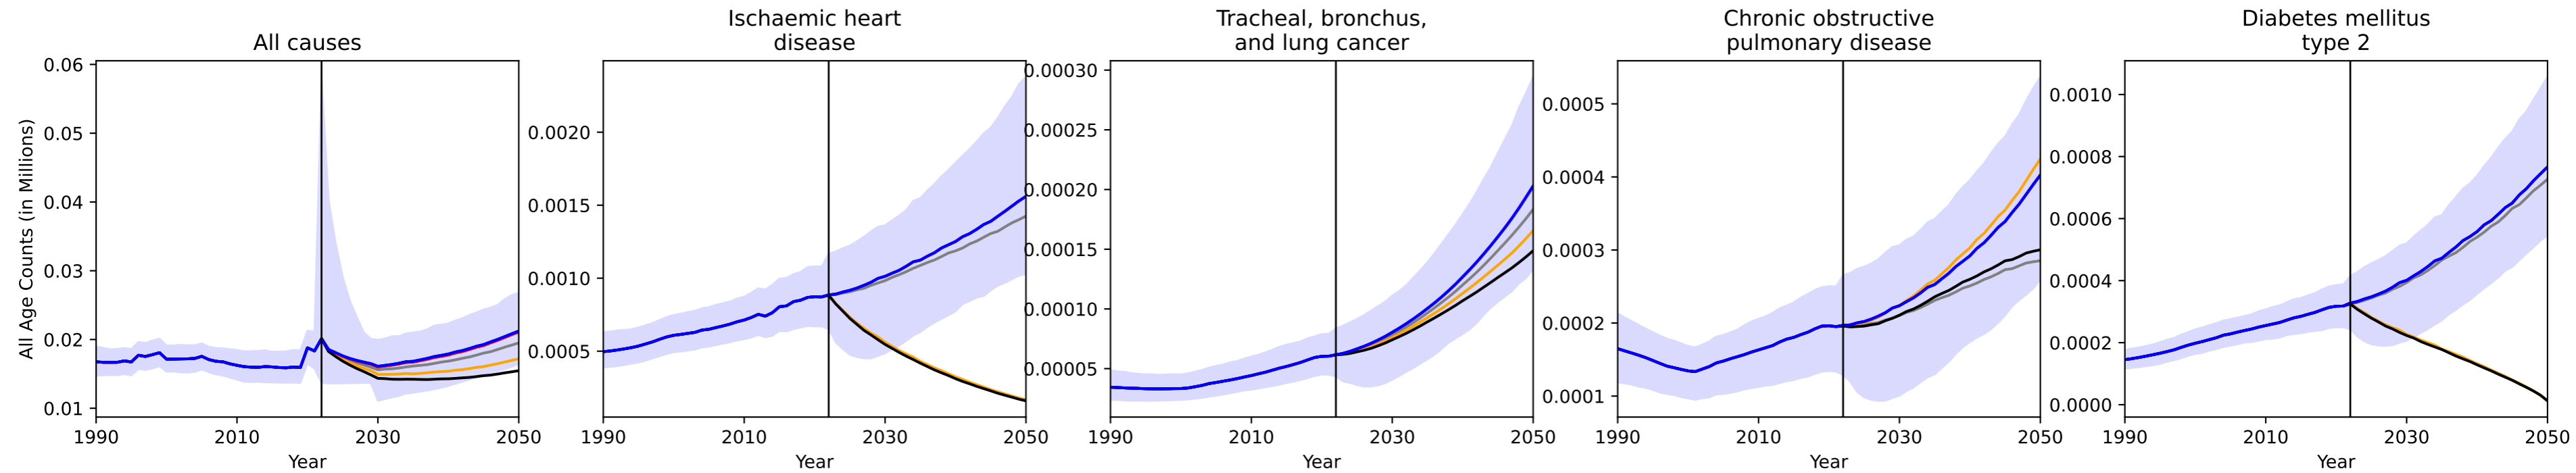

— Safer Environment — Improved Behavioural and Metabolic Risks — Improved Childhood Nutrition and Vaccination — Combined — Reference

# Liberia

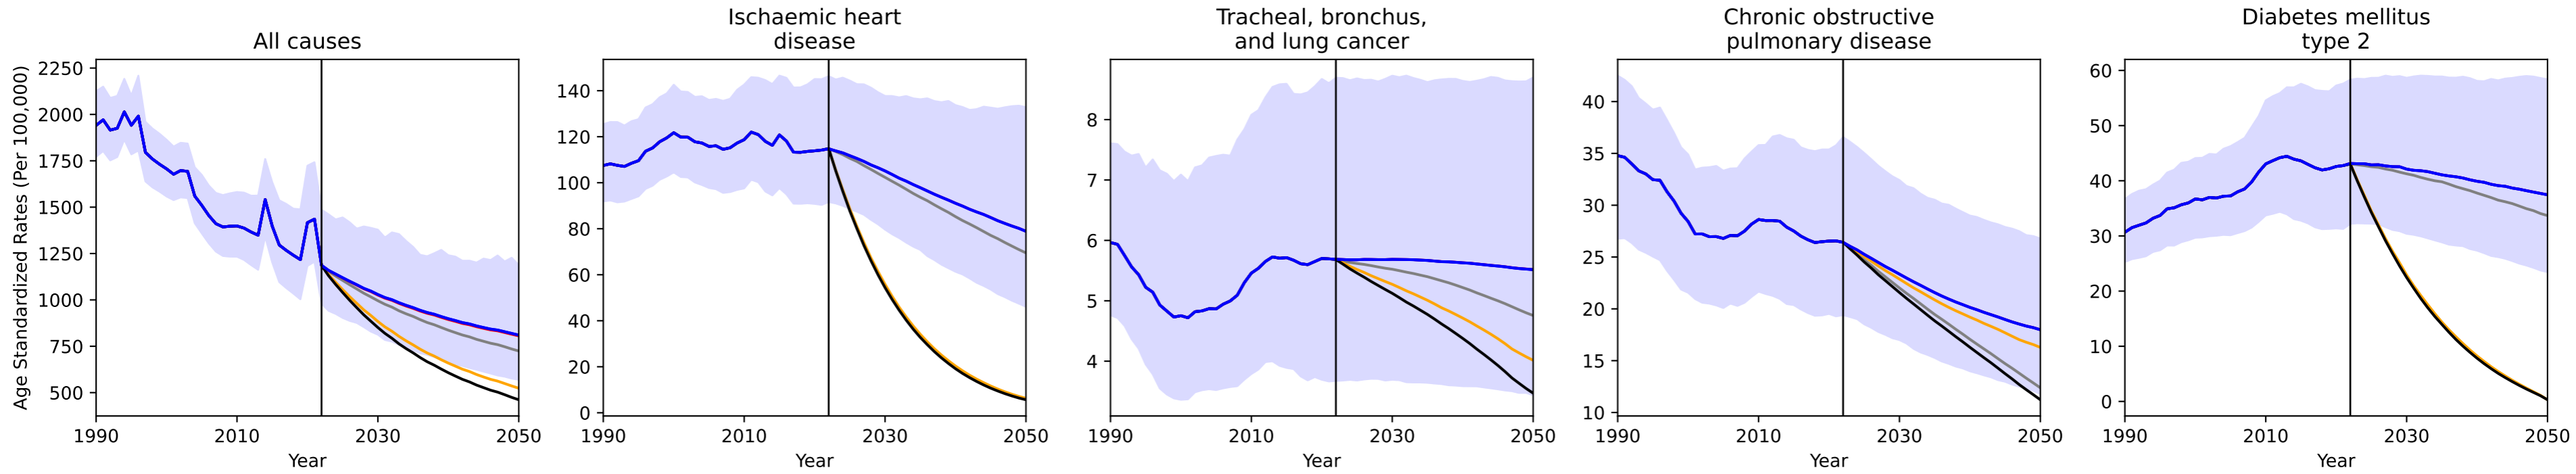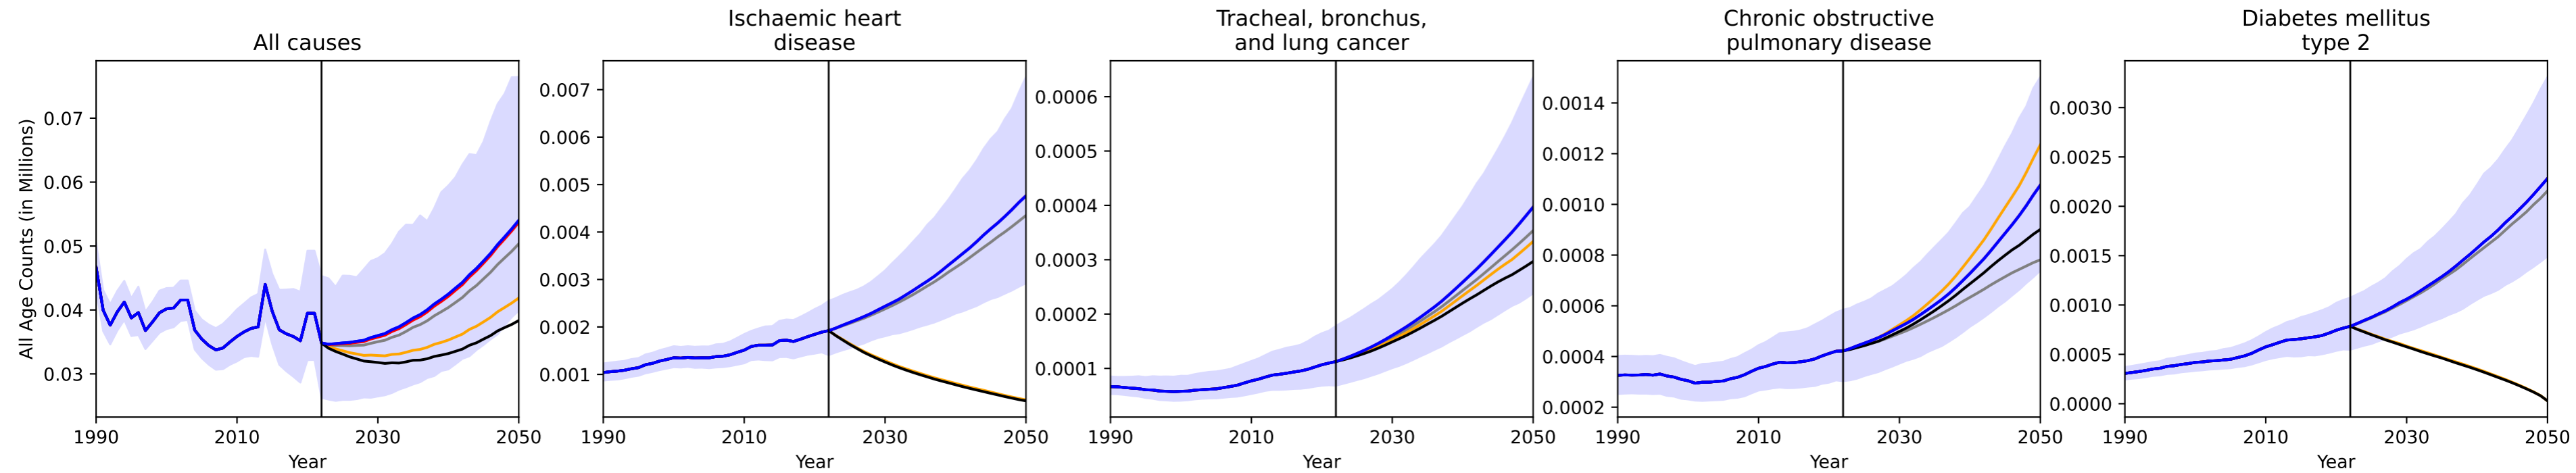

— Safer Environment — Improved Behavioural and Metabolic Risks — Improved Childhood Nutrition and Vaccination — Combined — Reference

# Mali

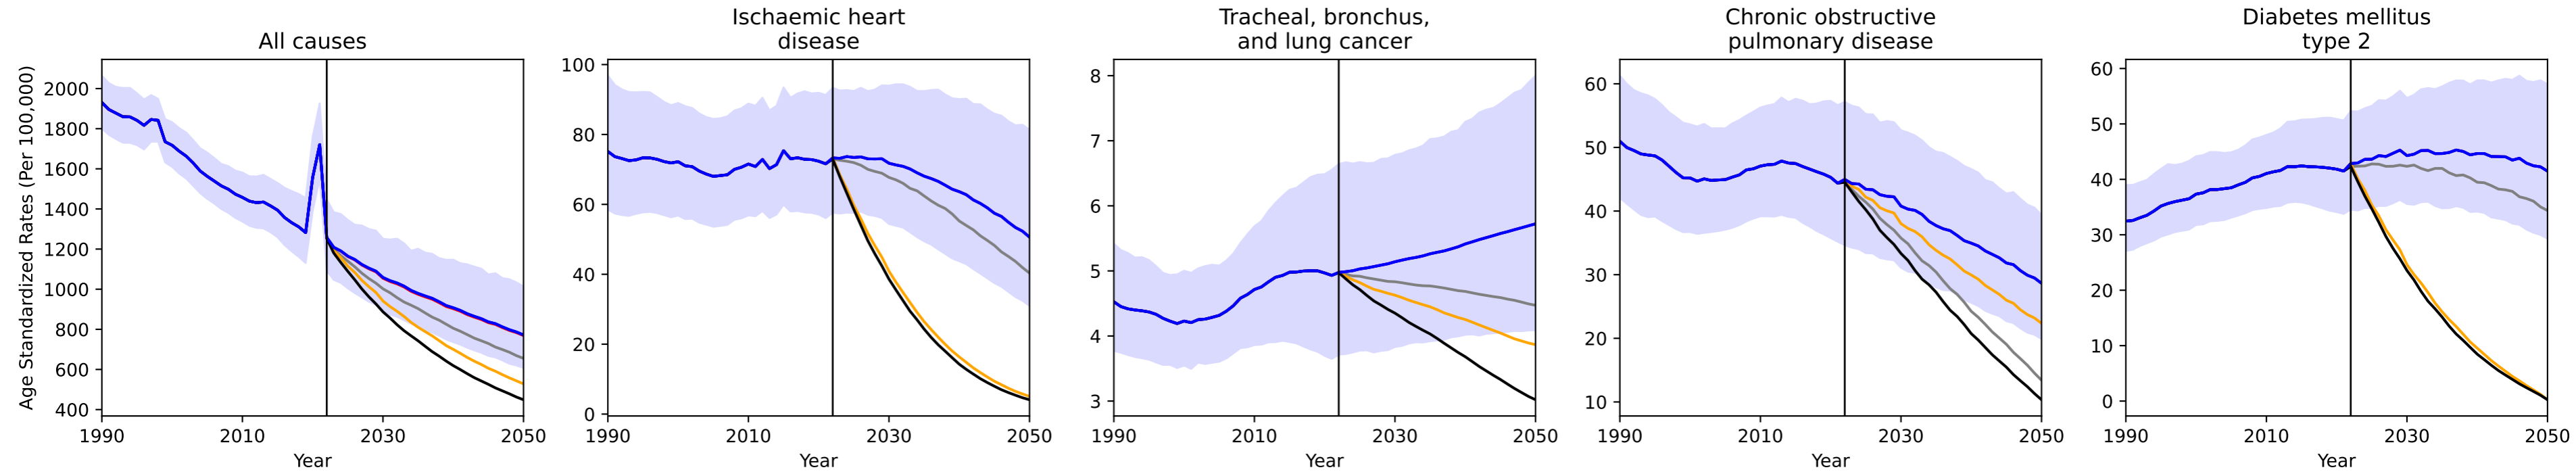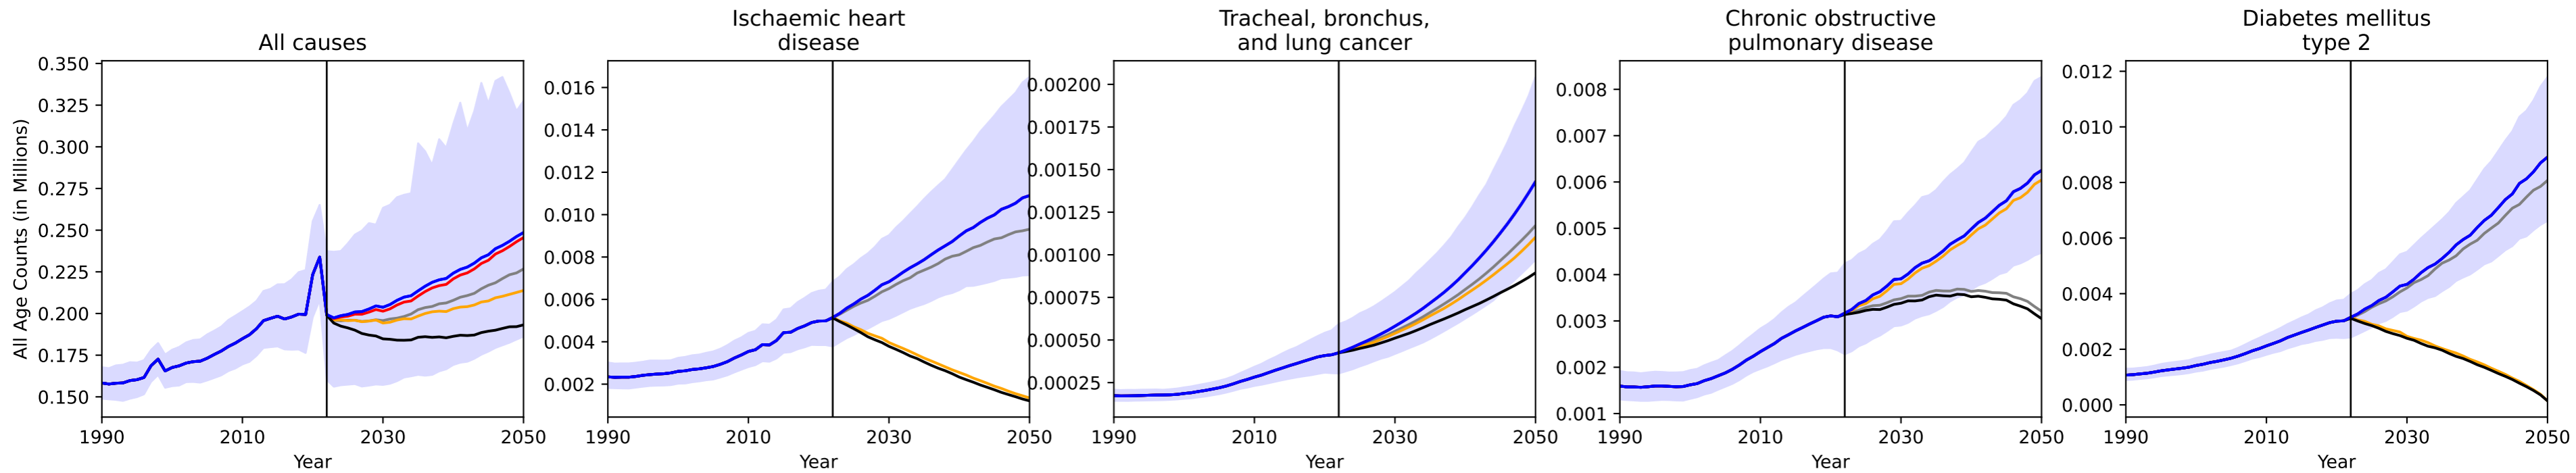

# Mauritania

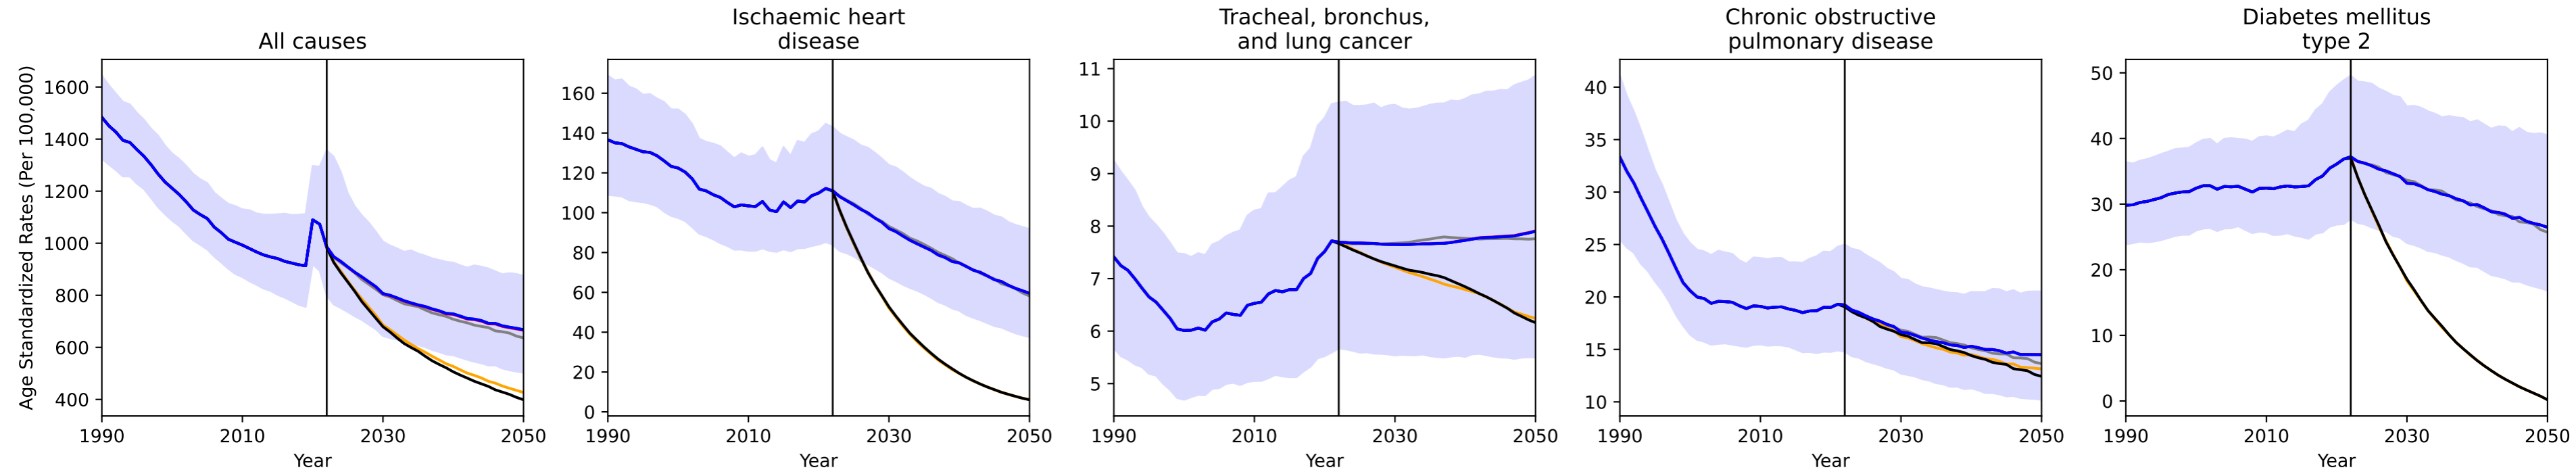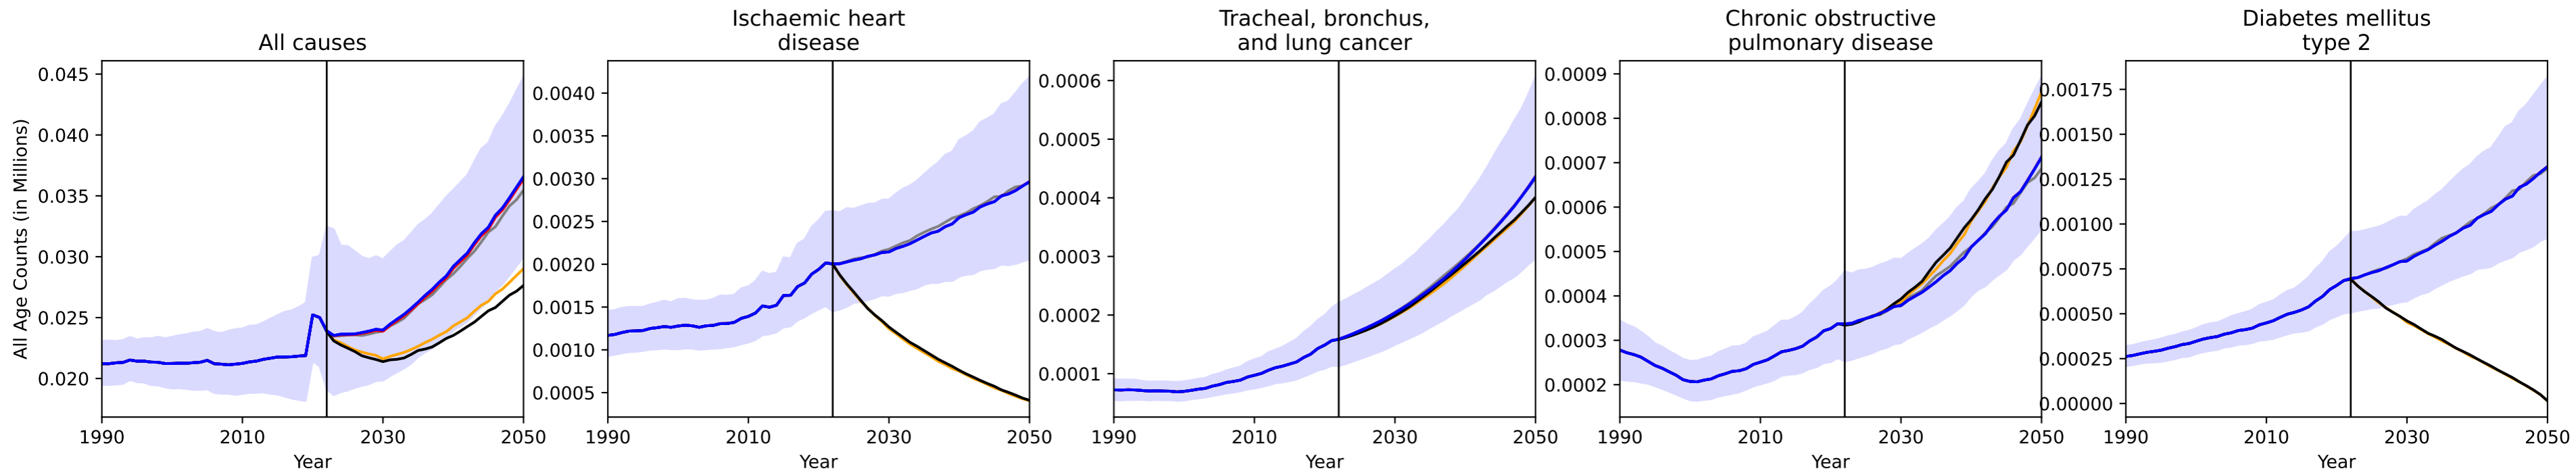

— Safer Environment — Improved Behavioural and Metabolic Risks — Improved Childhood Nutrition and Vaccination — Combined — Reference

# Niger

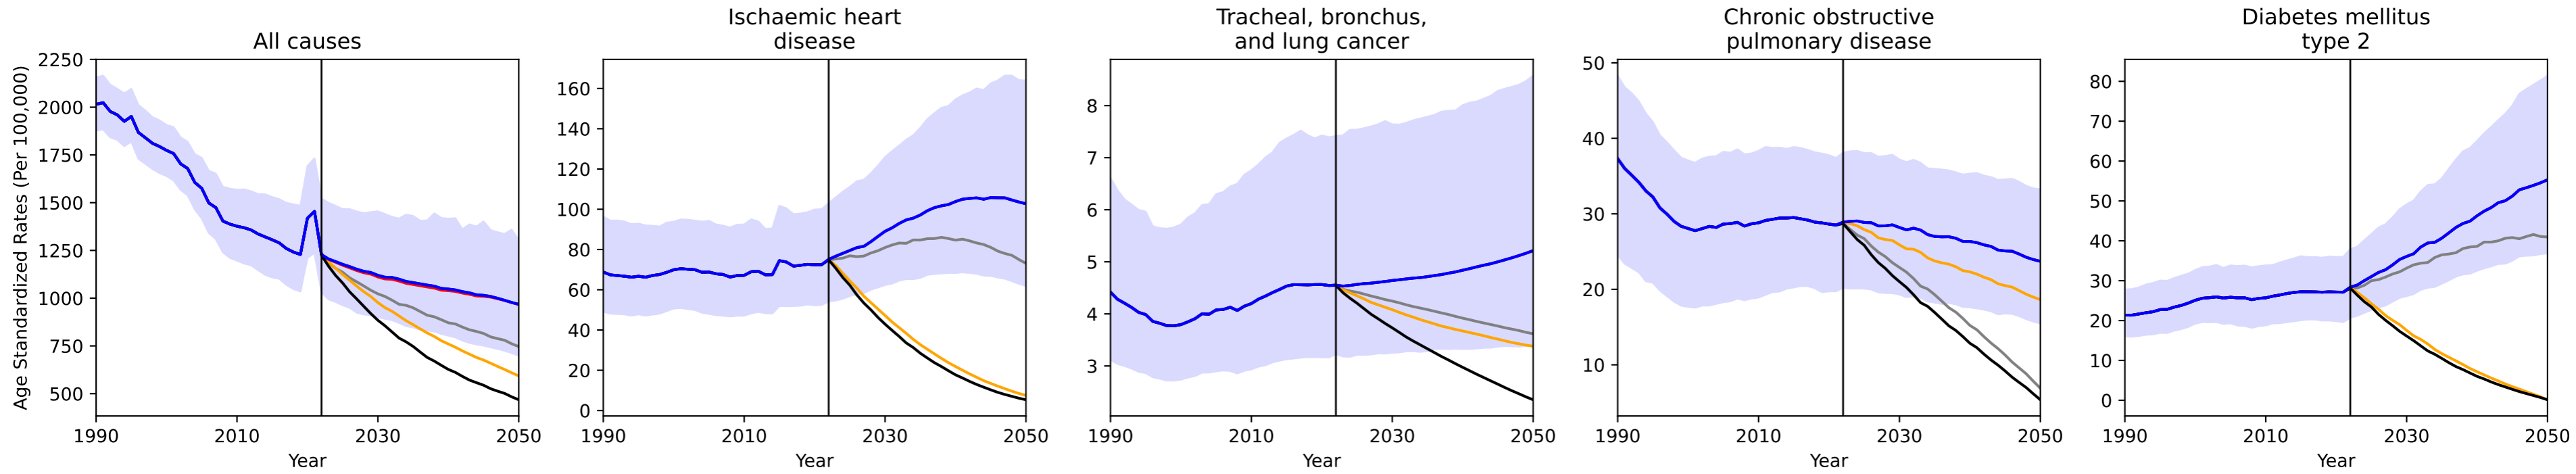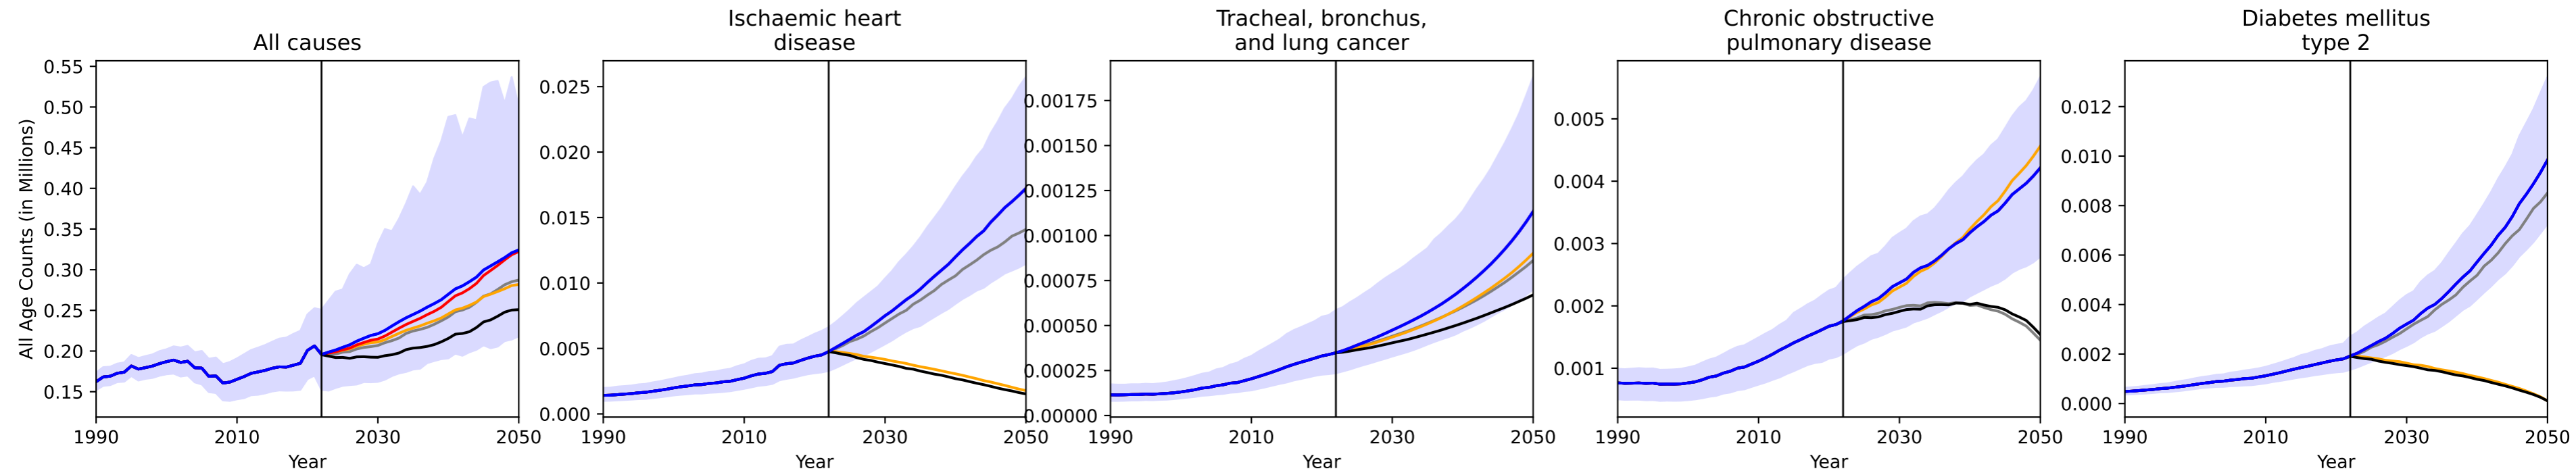

— Safer Environment — Improved Behavioural and Metabolic Risks — Improved Childhood Nutrition and Vaccination — Combined — Reference

# Nigeria

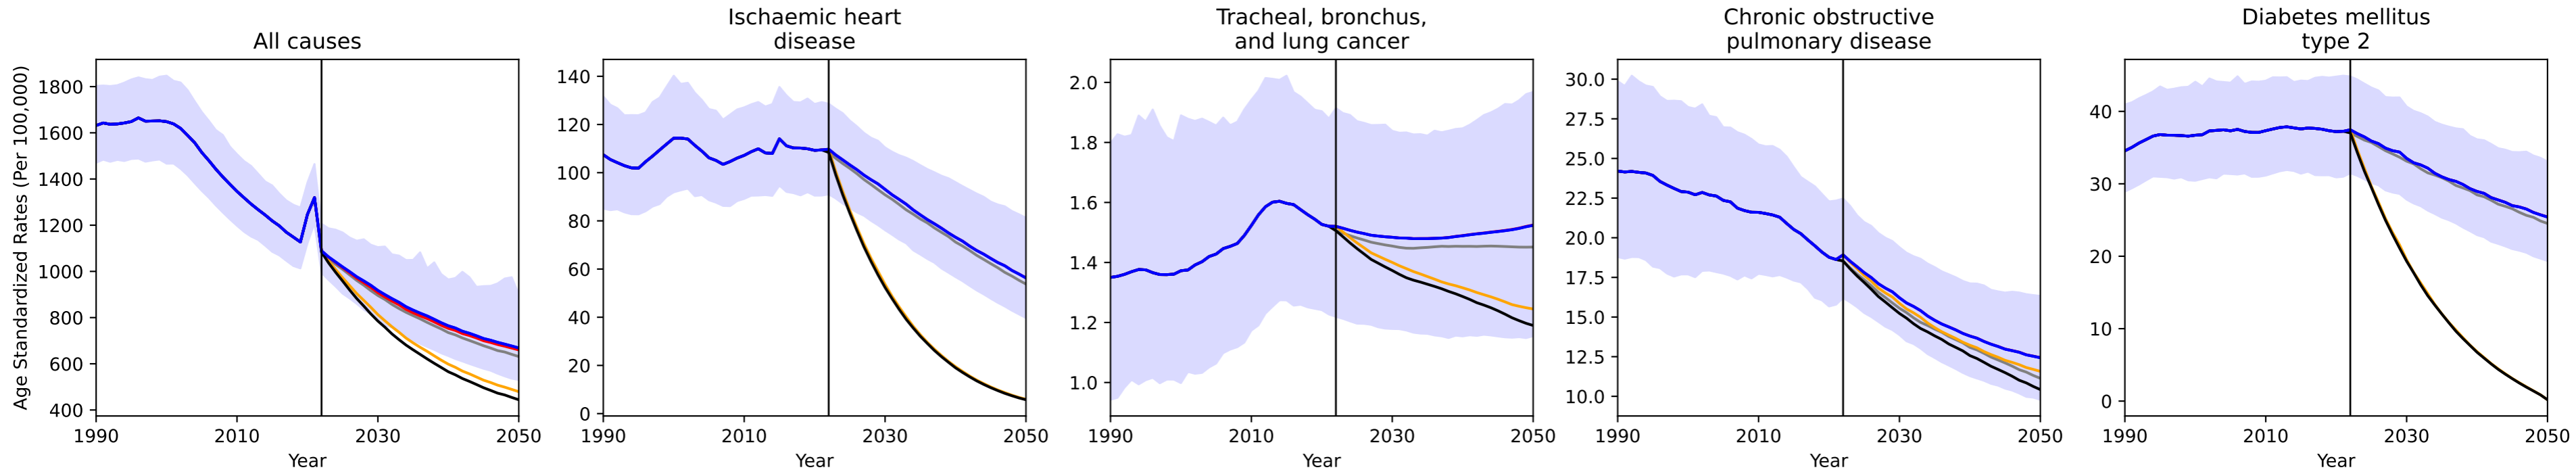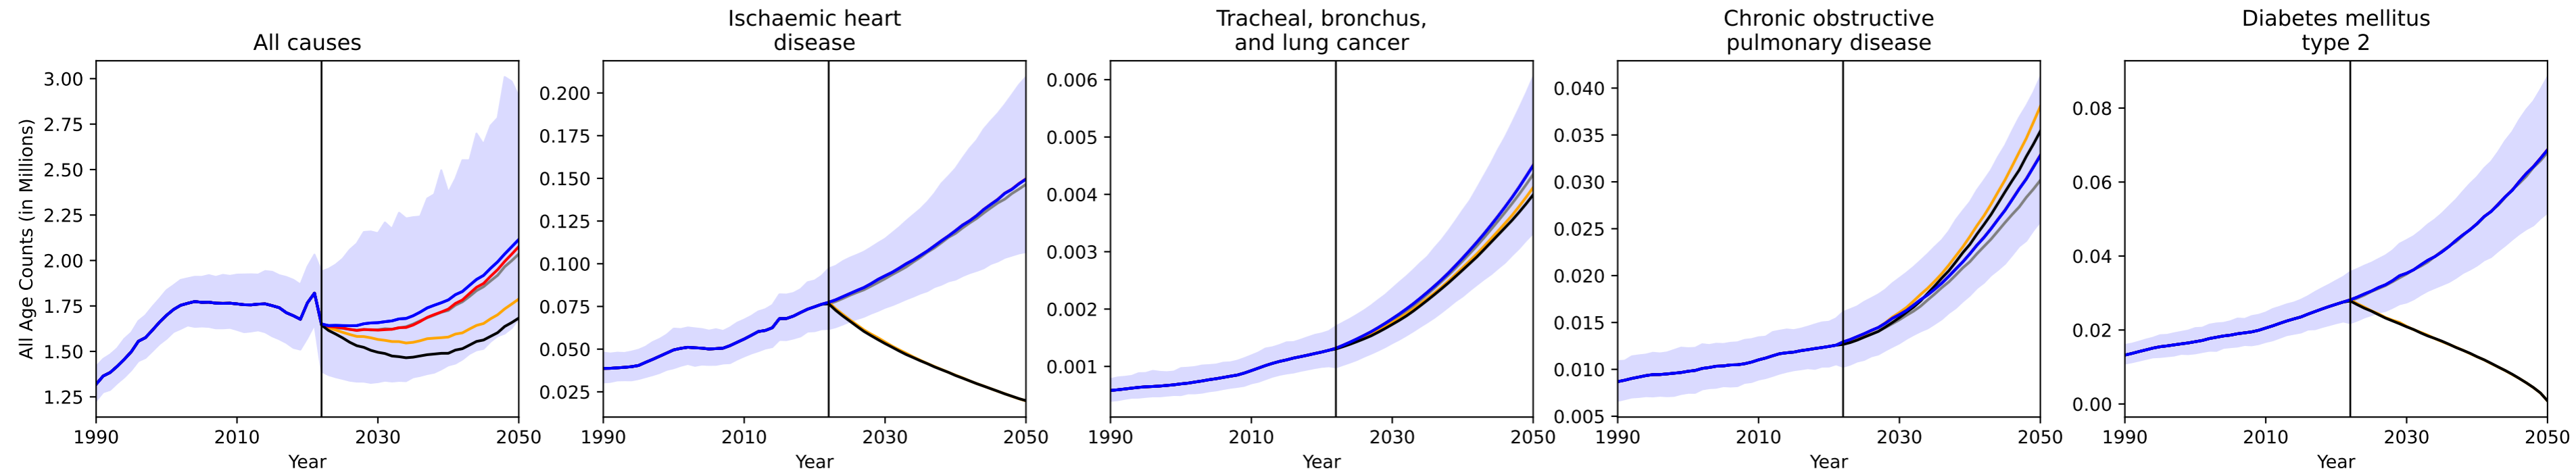

— Safer Environment — Improved Behavioural and Metabolic Risks — Improved Childhood Nutrition and Vaccination — Combined — Reference

# São Tomé And Príncipe

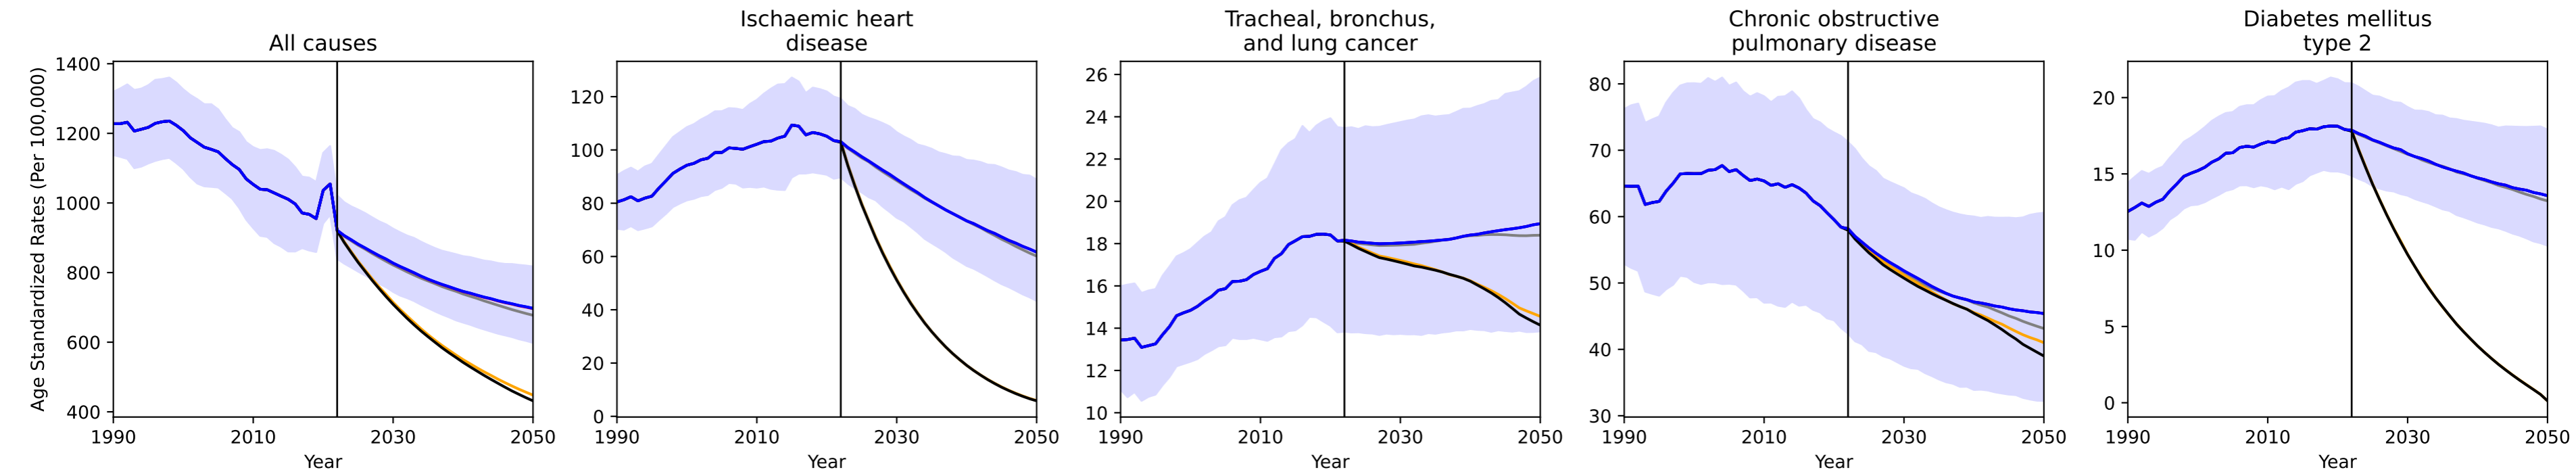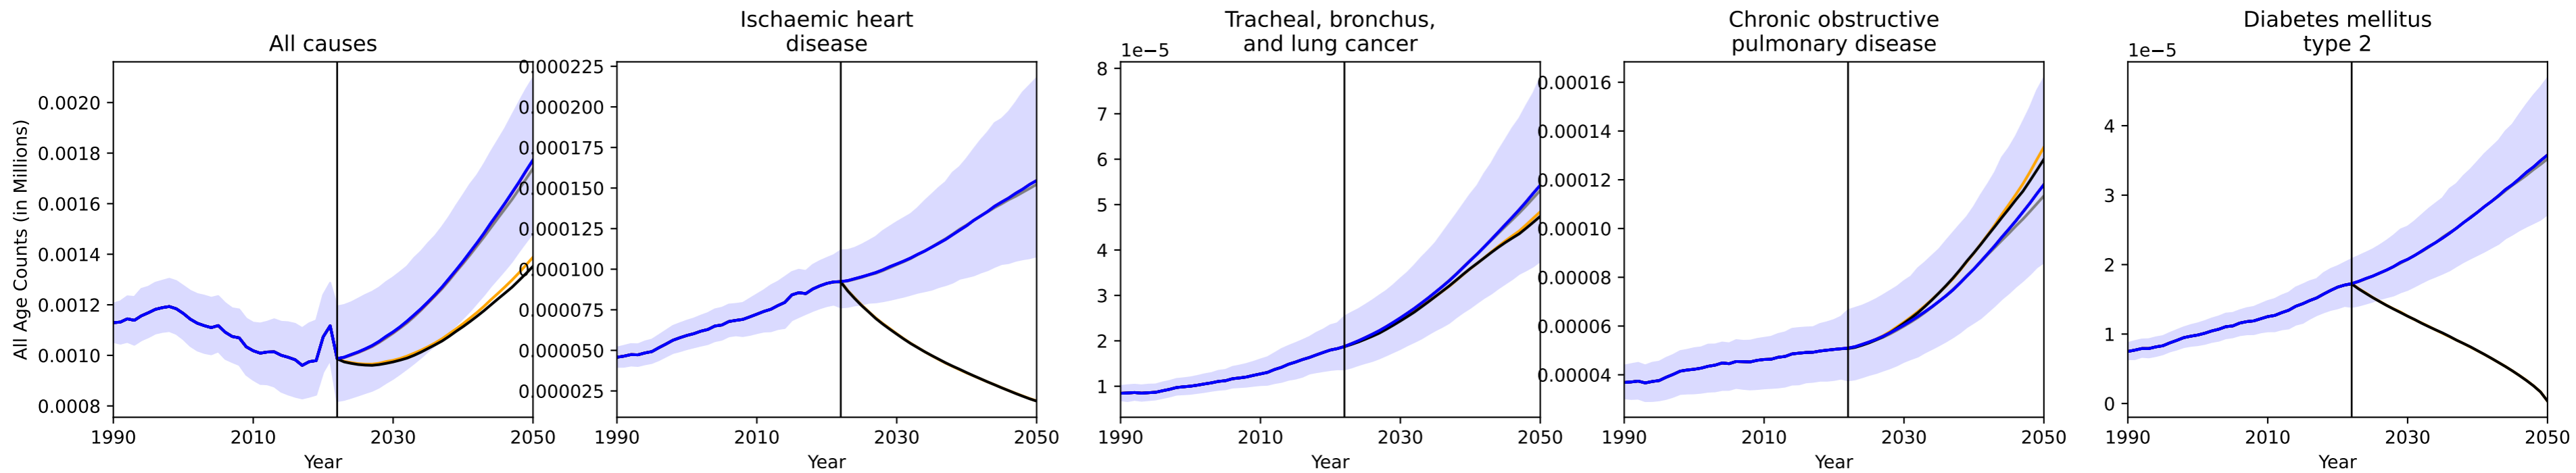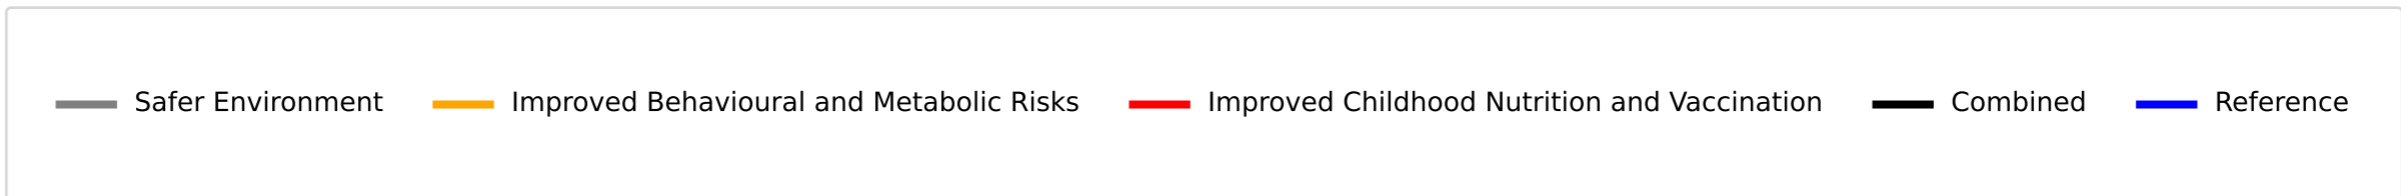

# Senegal

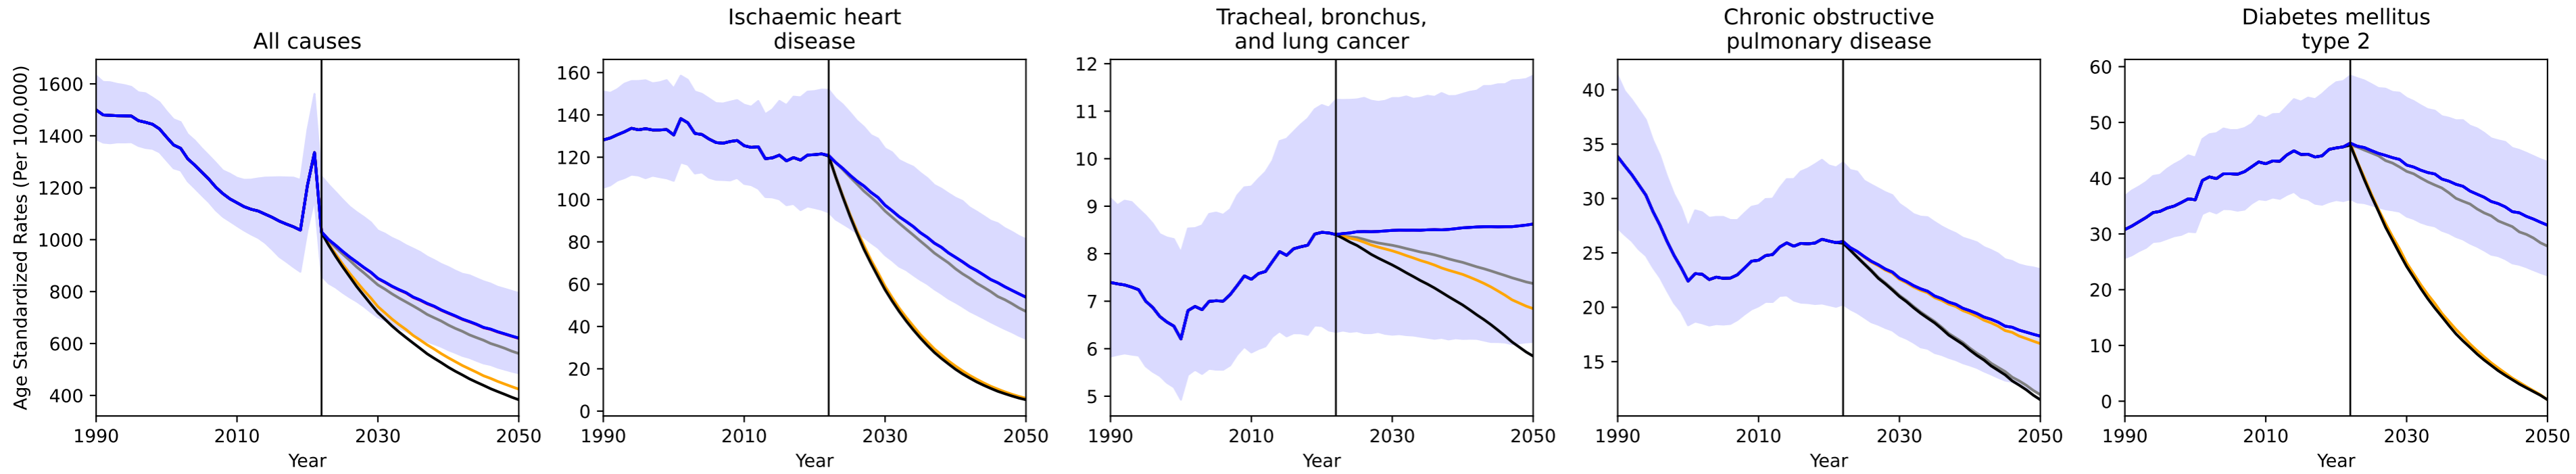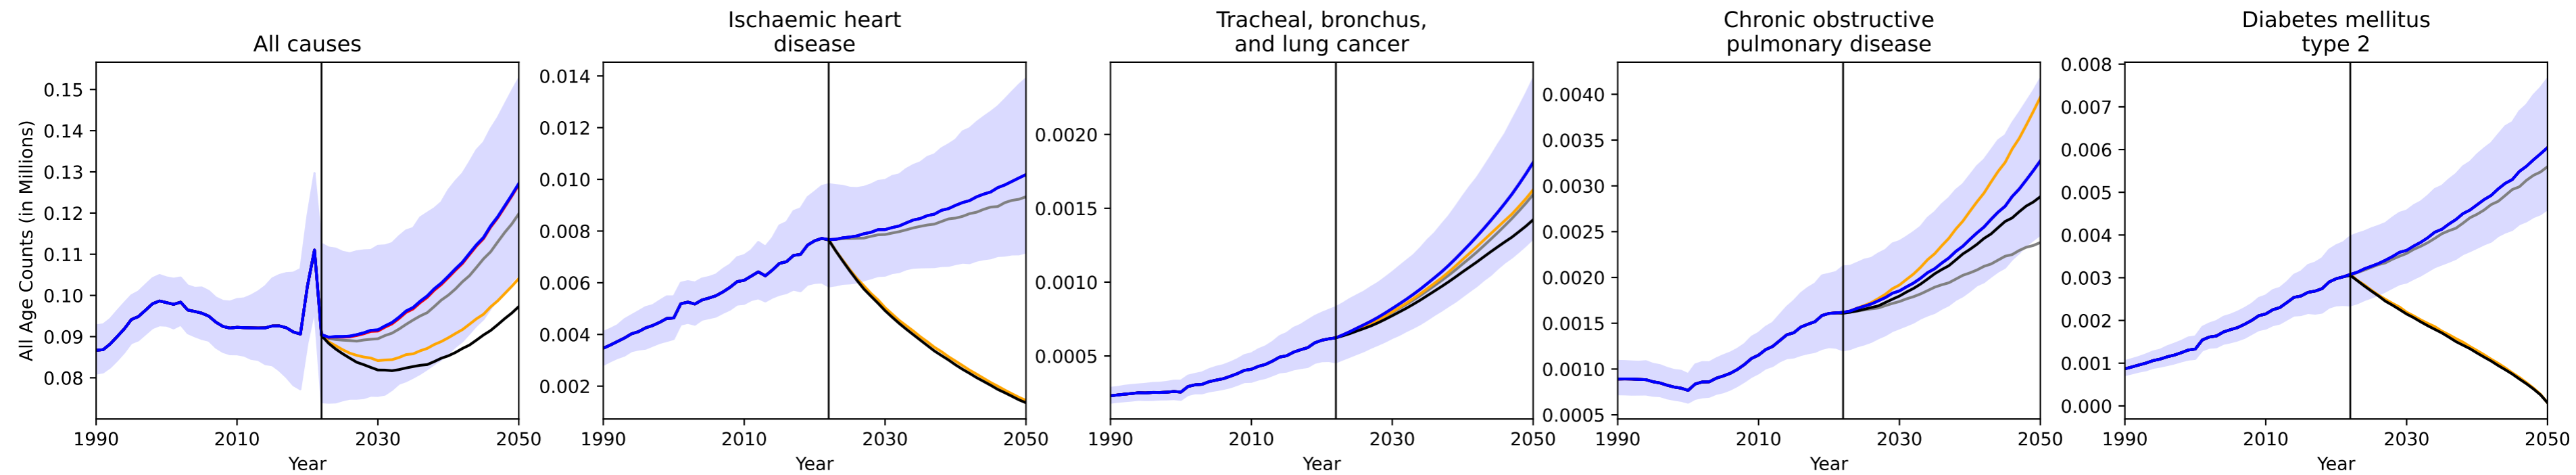

— Safer Environment    — Improved Behavioural and Metabolic Risks    — Improved Childhood Nutrition and Vaccination    — Combined    — Reference



# Sierra Leone

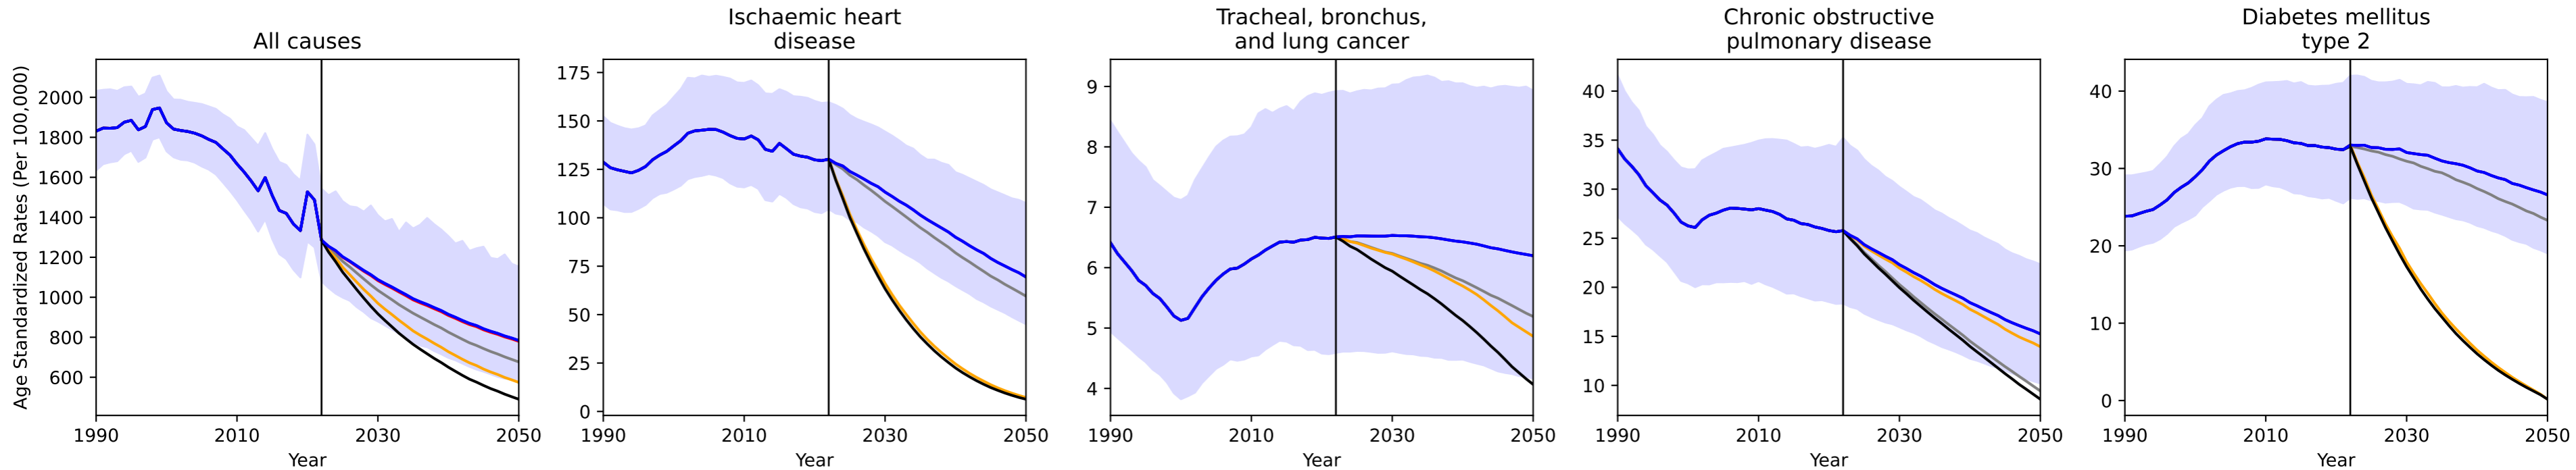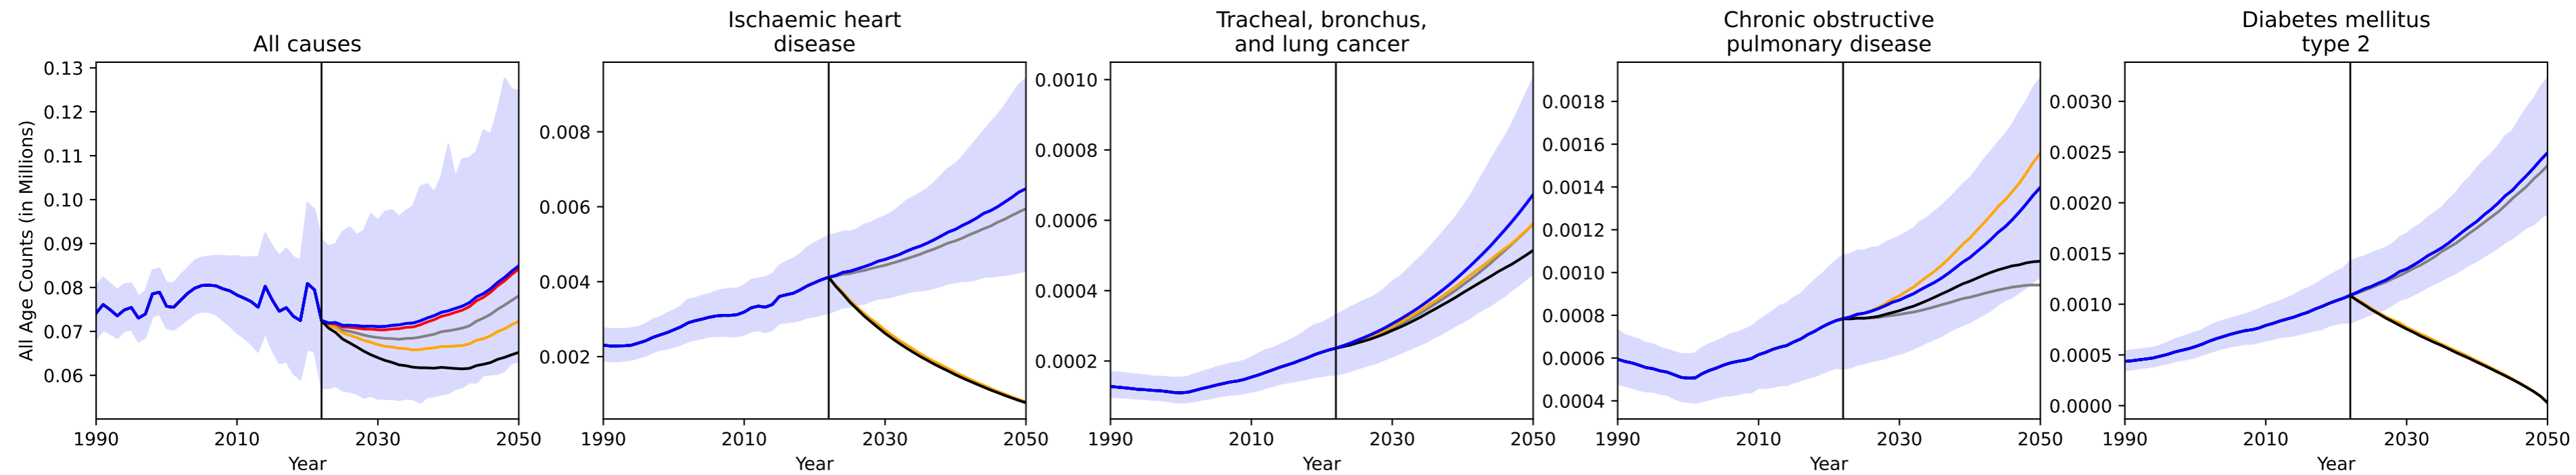

# Togo

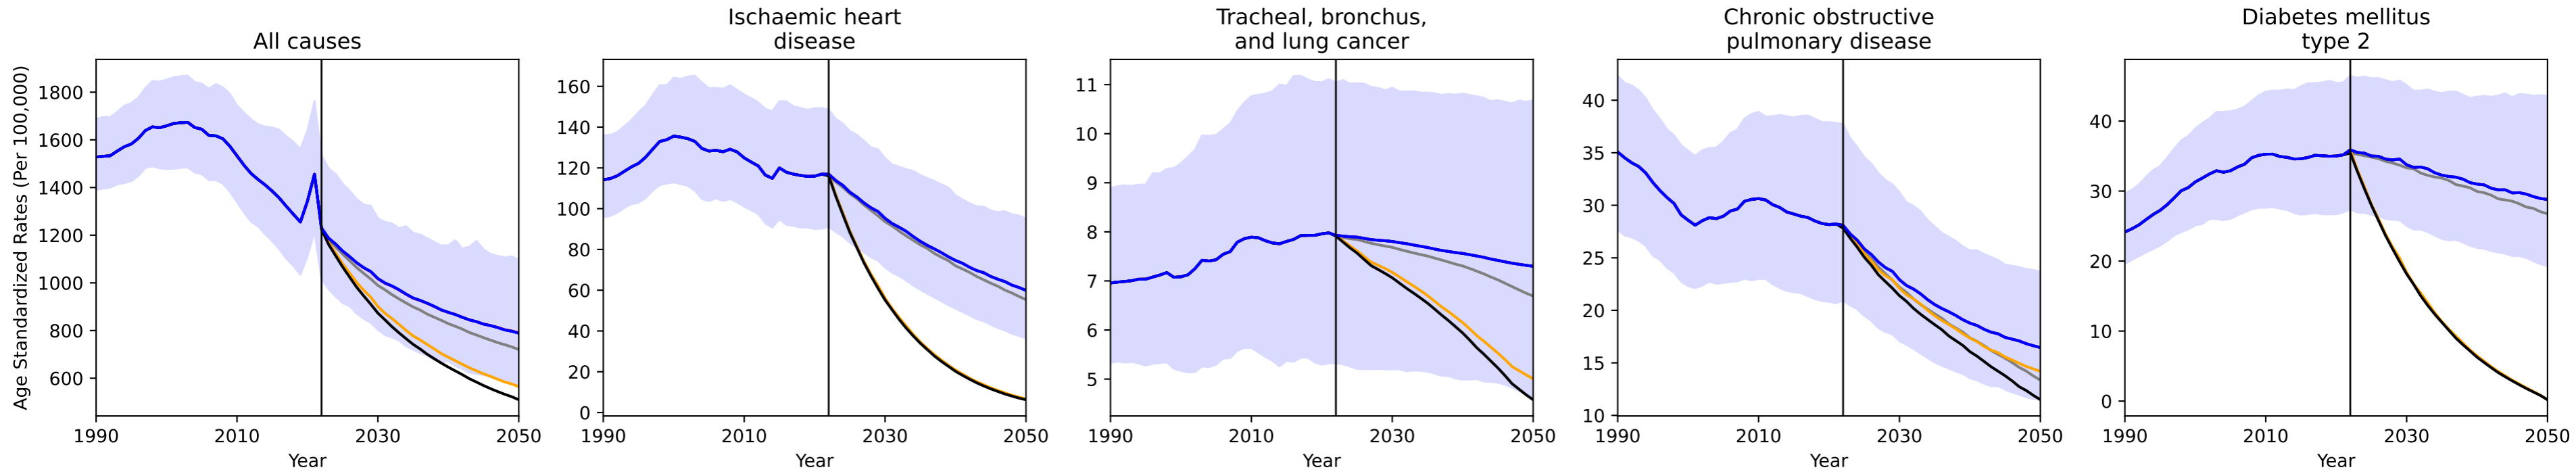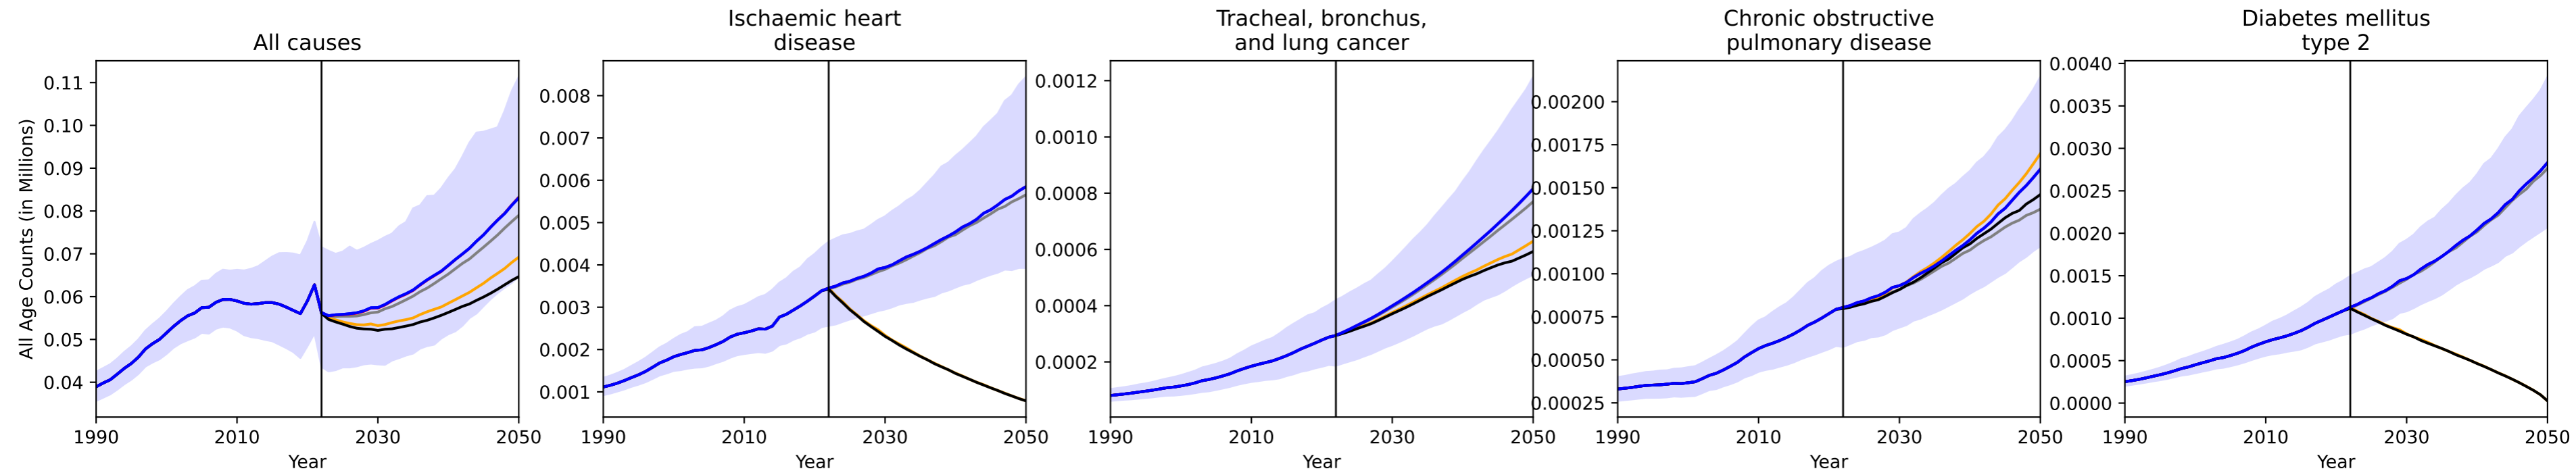

— Safer Environment — Improved Behavioural and Metabolic Risks — Improved Childhood Nutrition and Vaccination — Combined — Reference

# Global

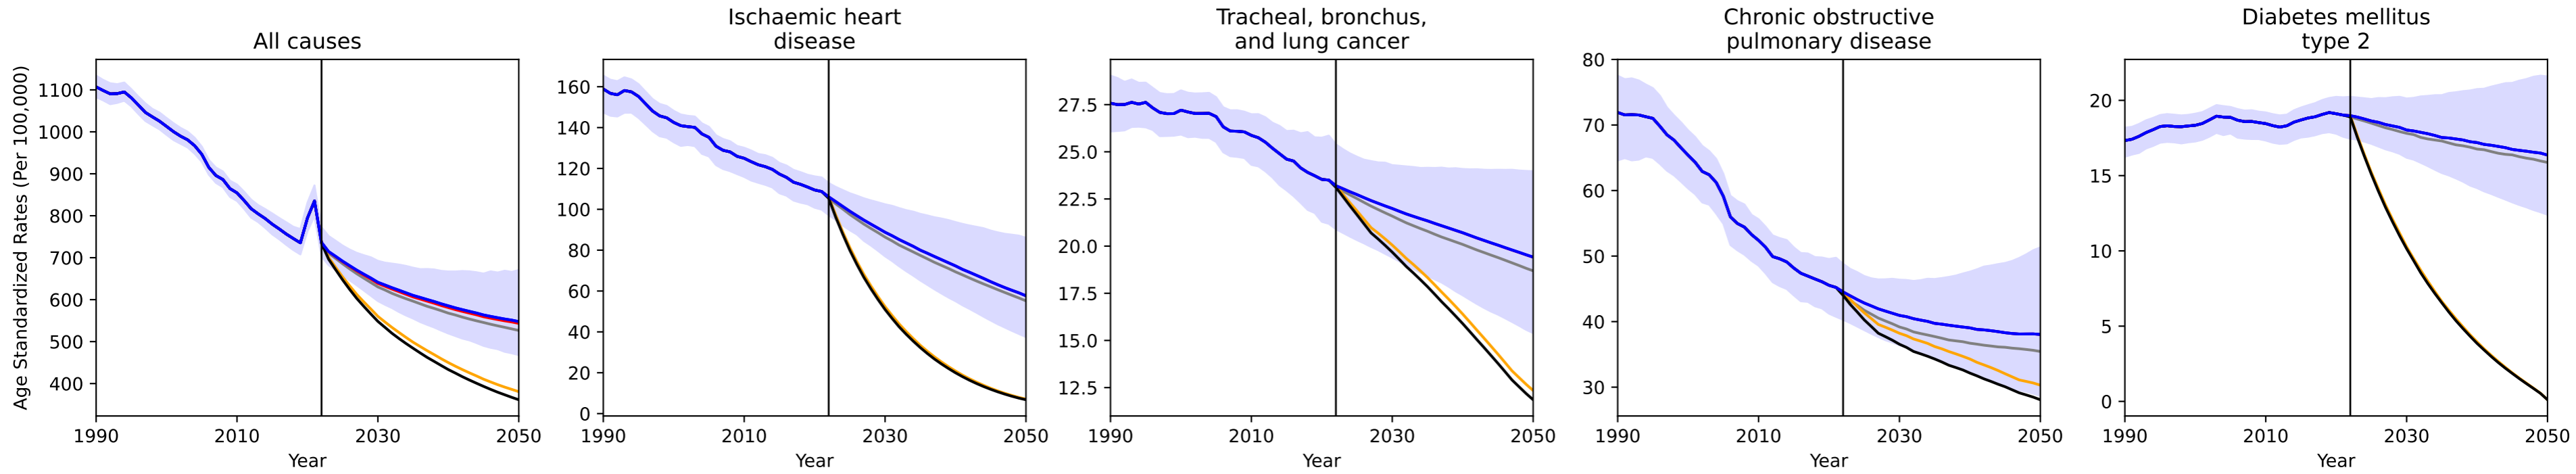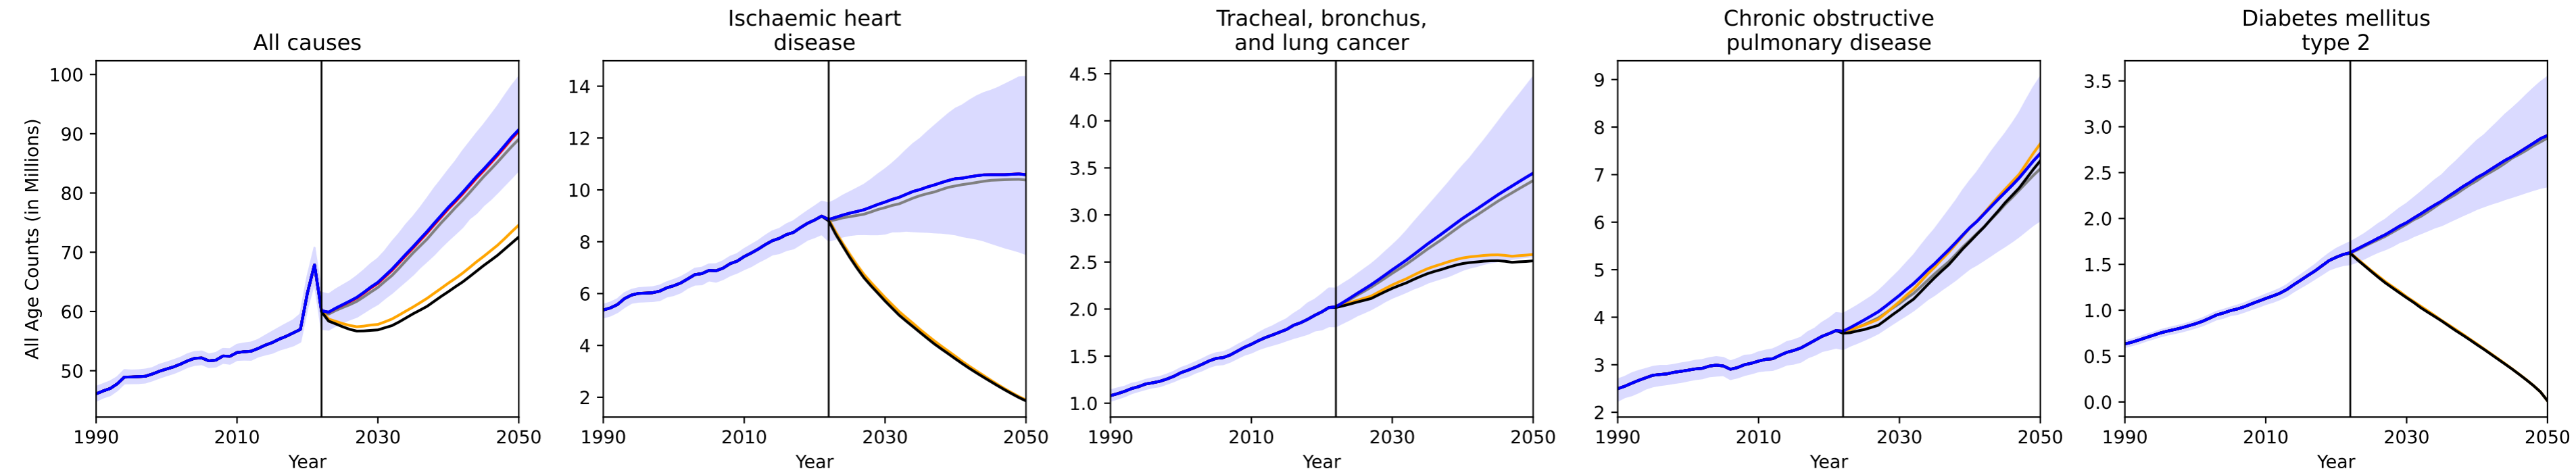

— Safer Environment    — Improved Behavioural and Metabolic Risks    — Improved Childhood Nutrition and Vaccination    — Combined    — Reference

# Central Europe, Eastern Europe, And Central Asia

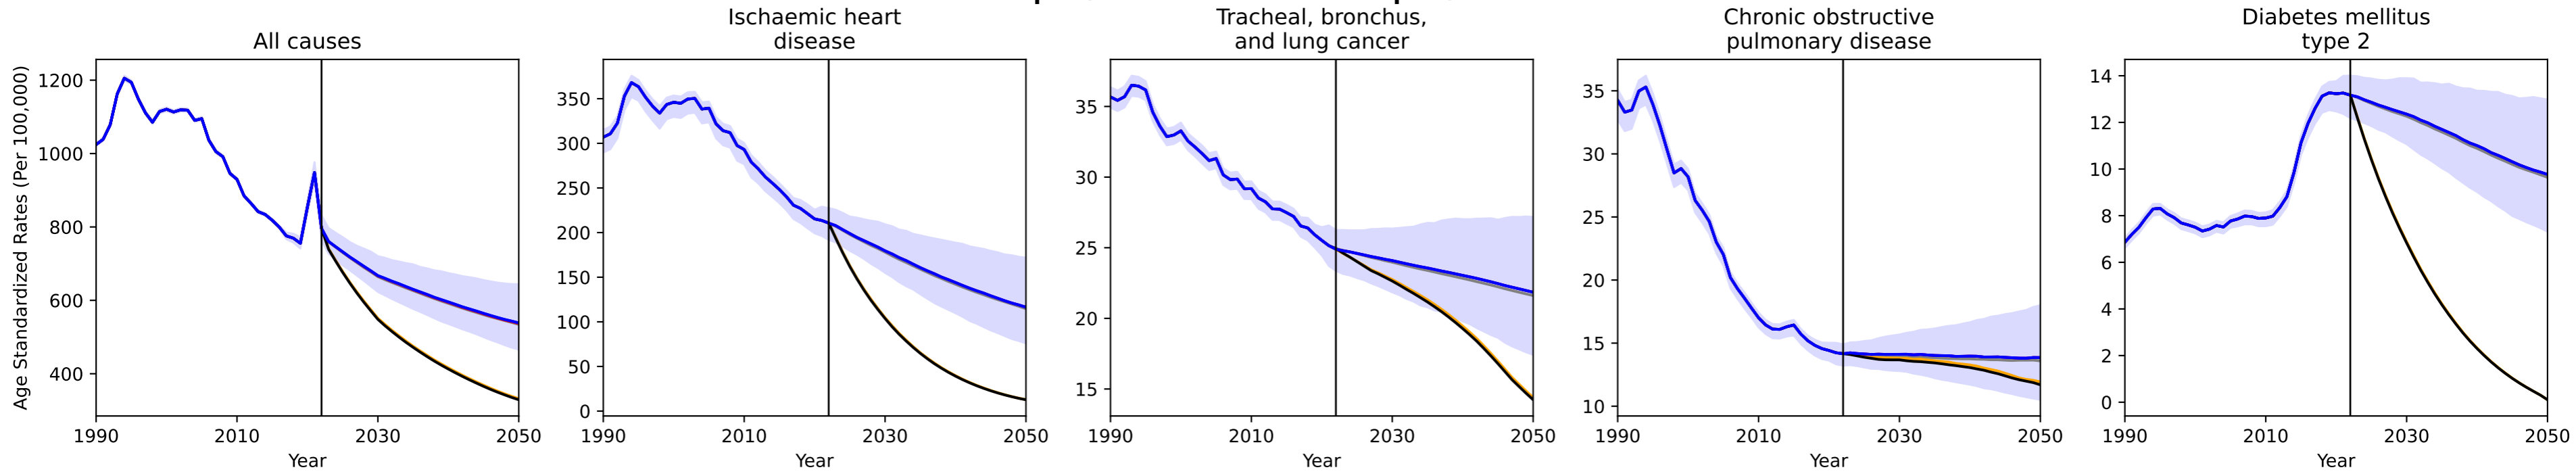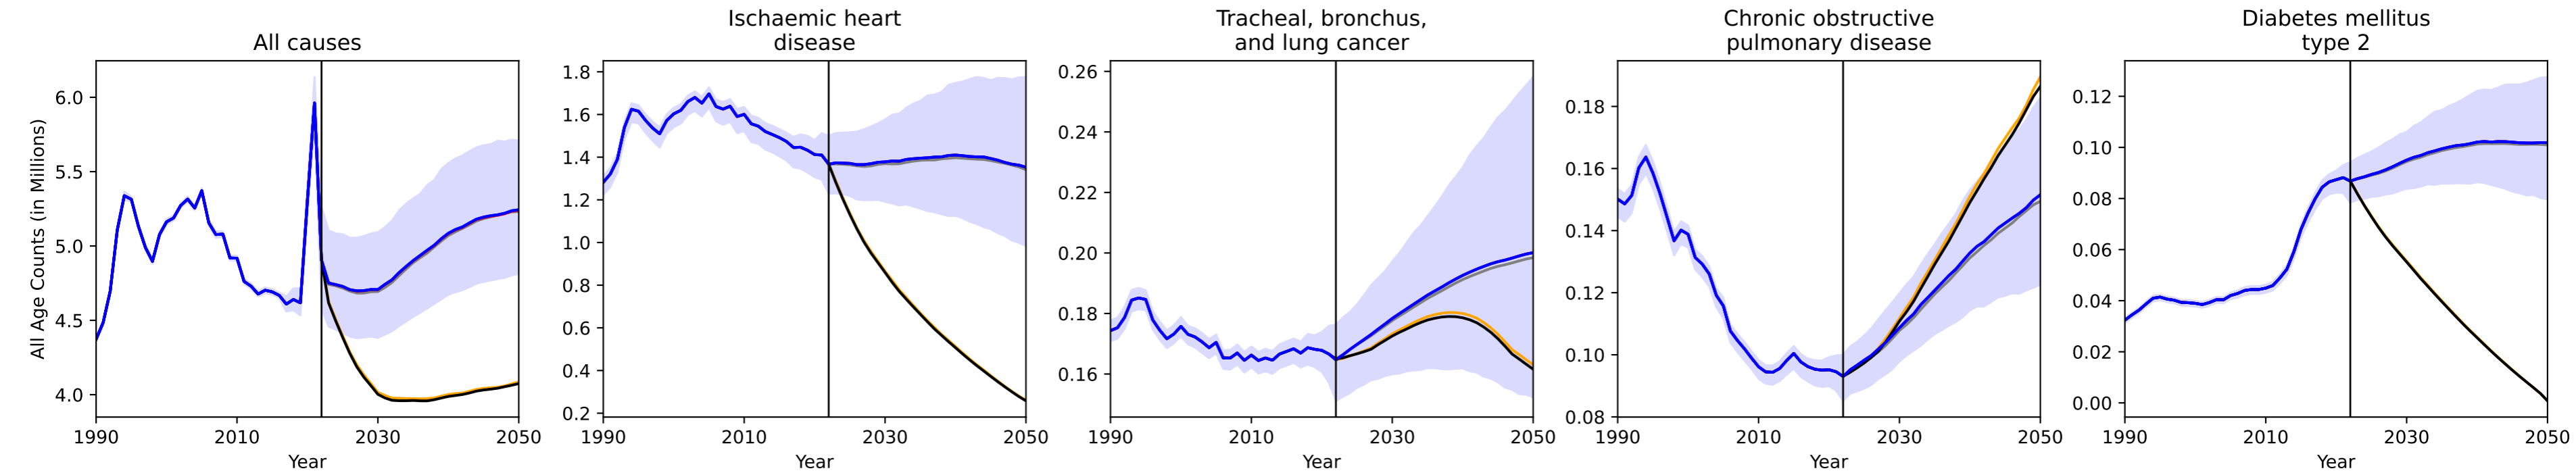

— Safer Environment — Improved Behavioural and Metabolic Risks — Improved Childhood Nutrition and Vaccination — Combined — Reference

# High Income

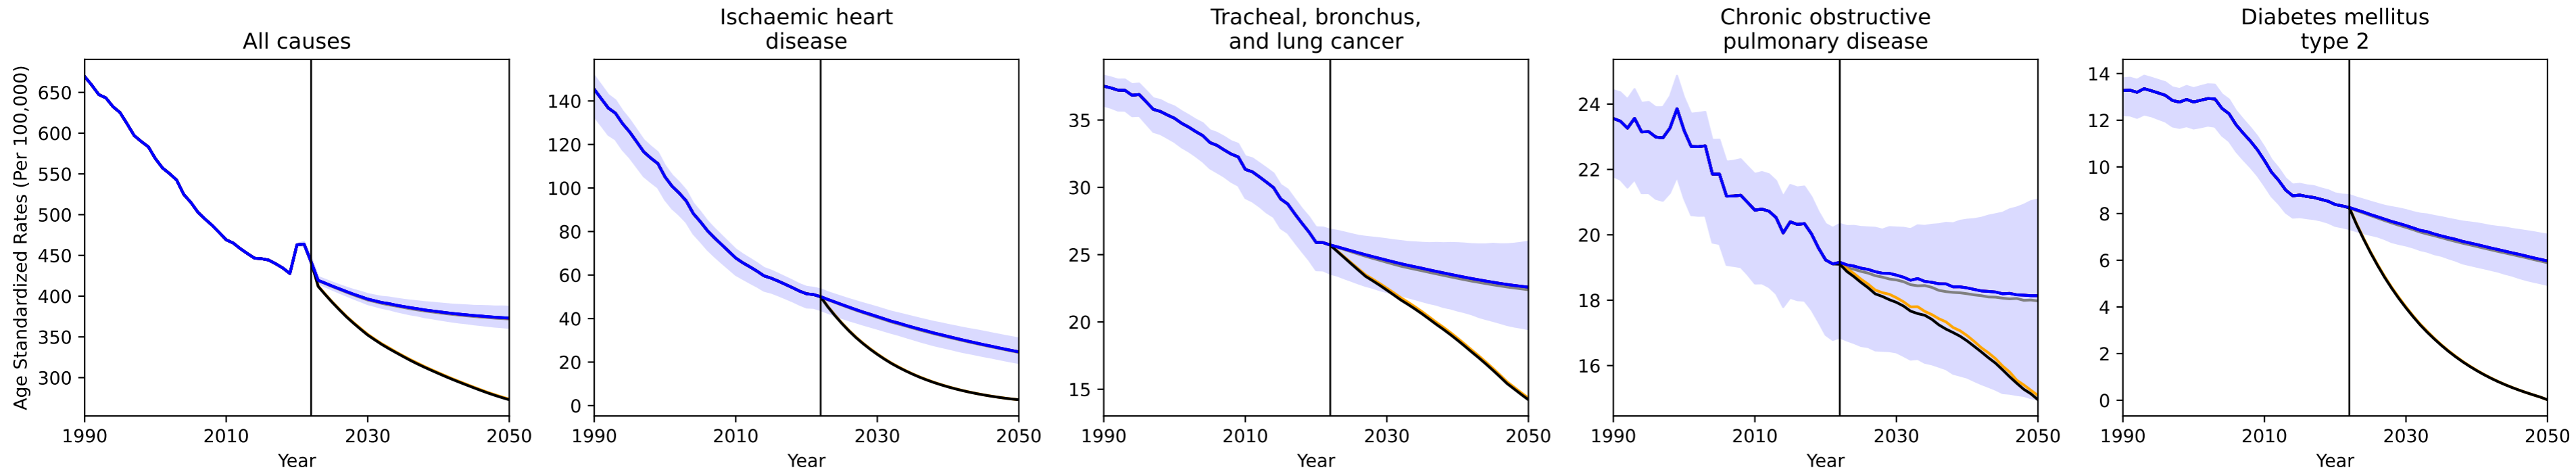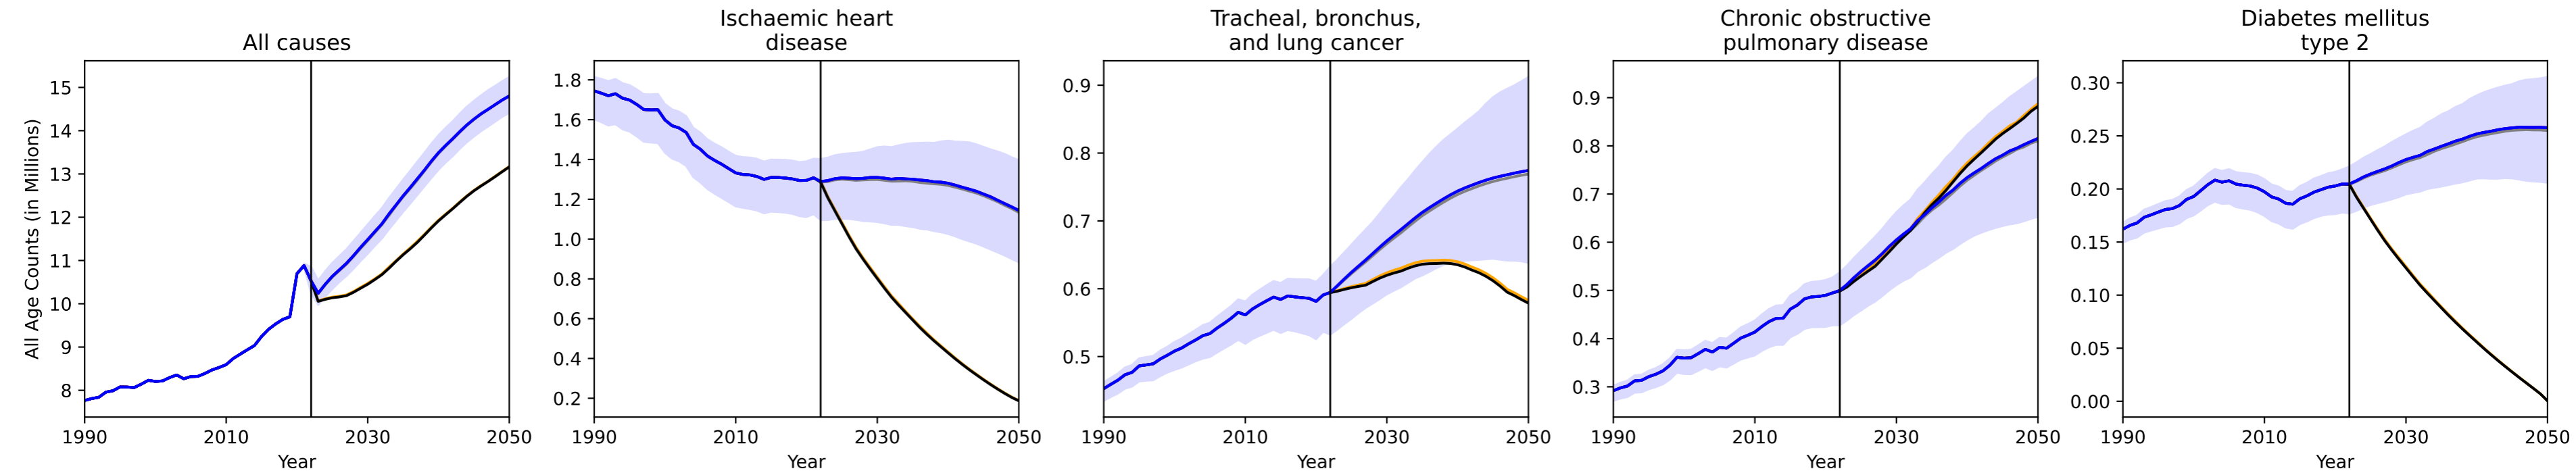

— Safer Environment    — Improved Behavioural and Metabolic Risks    — Improved Childhood Nutrition and Vaccination    — Combined    — Reference

# Latin America And Caribbean

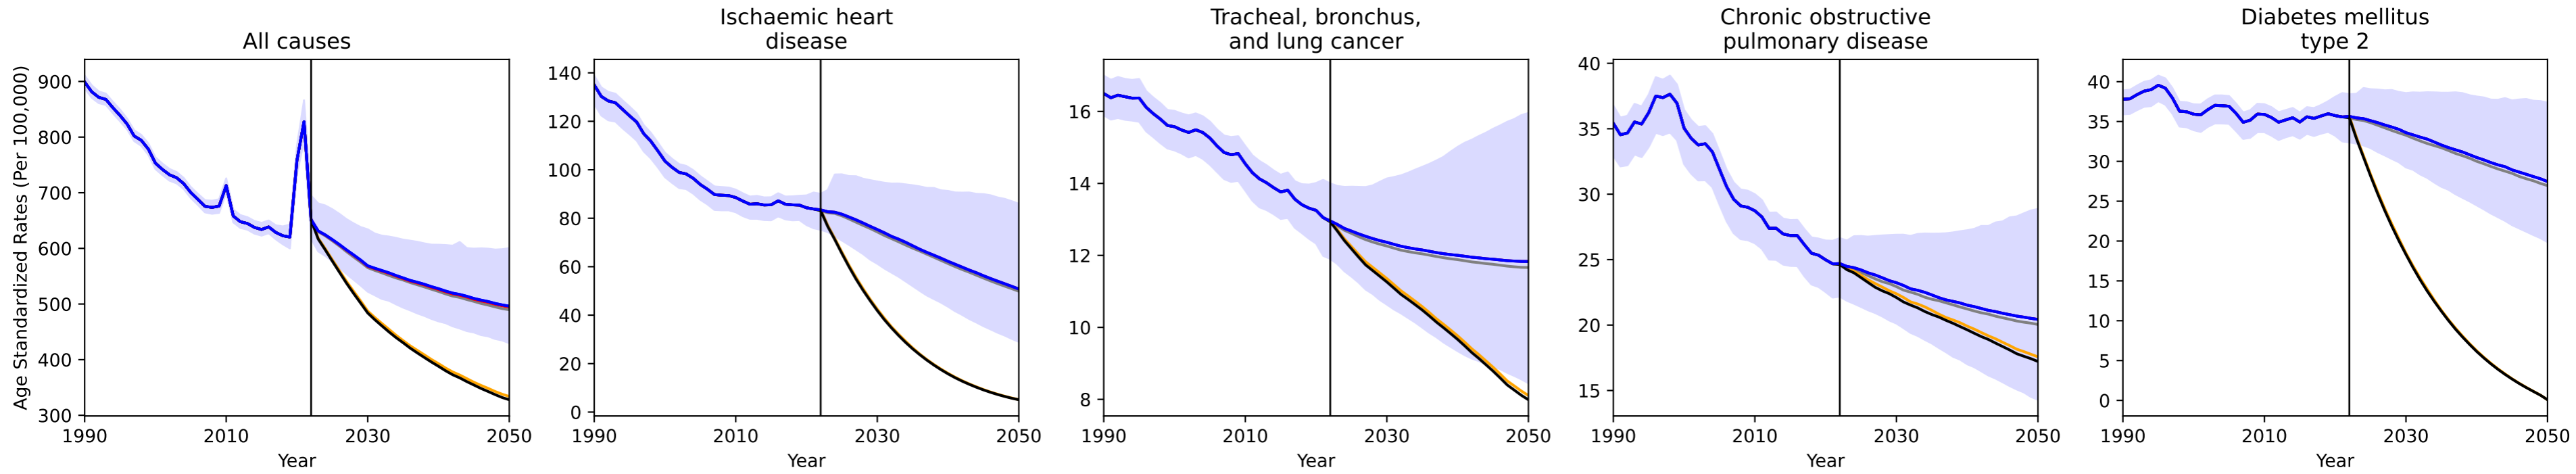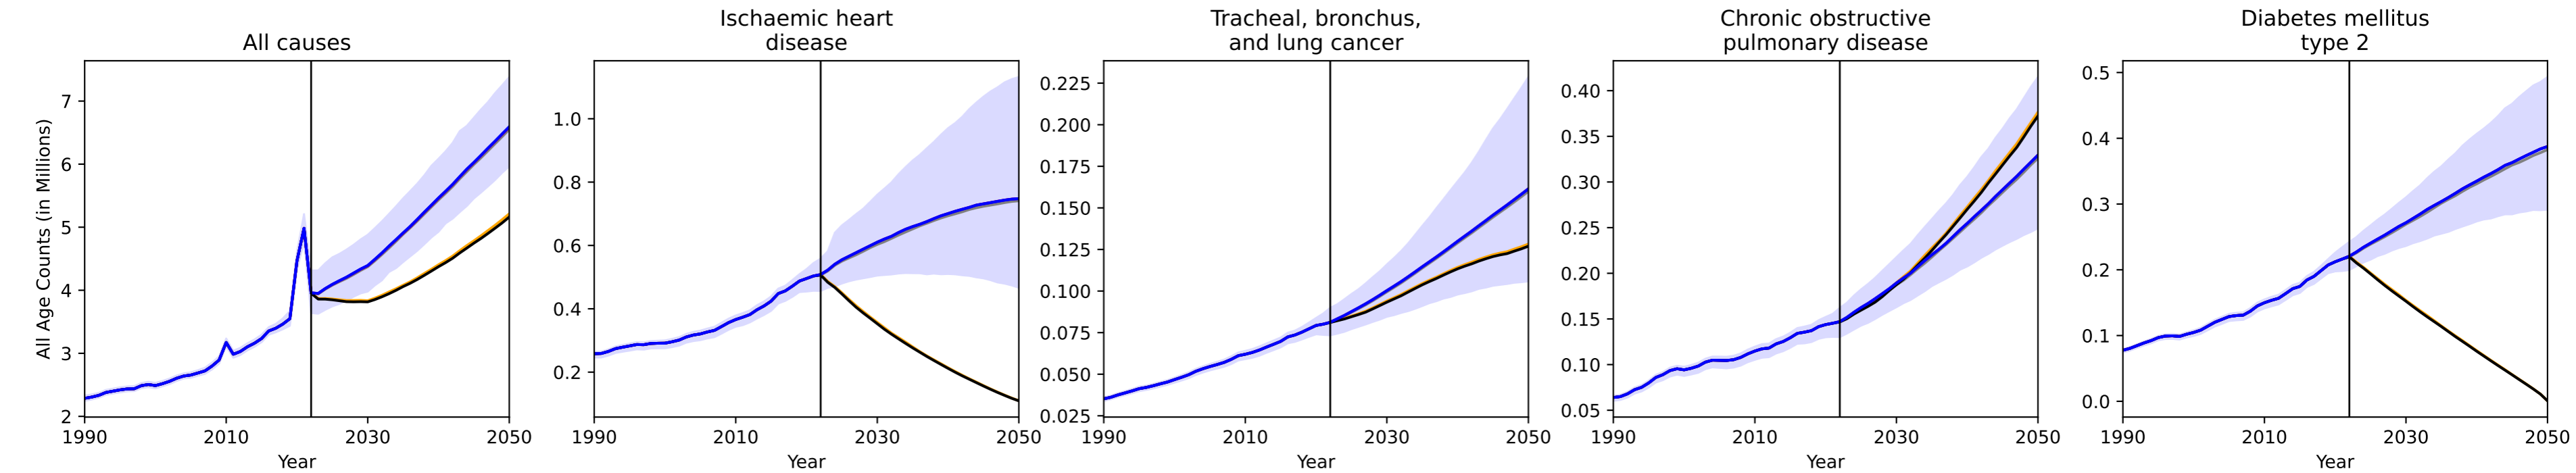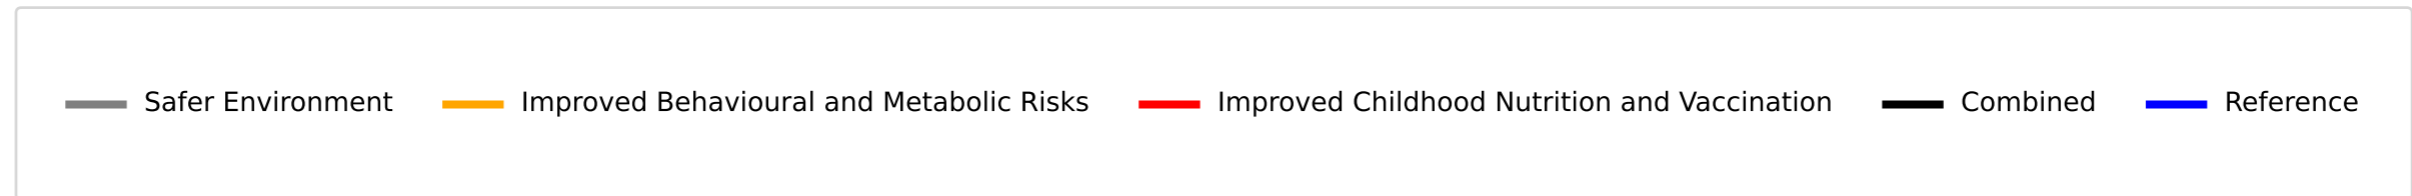

# North Africa And Middle East

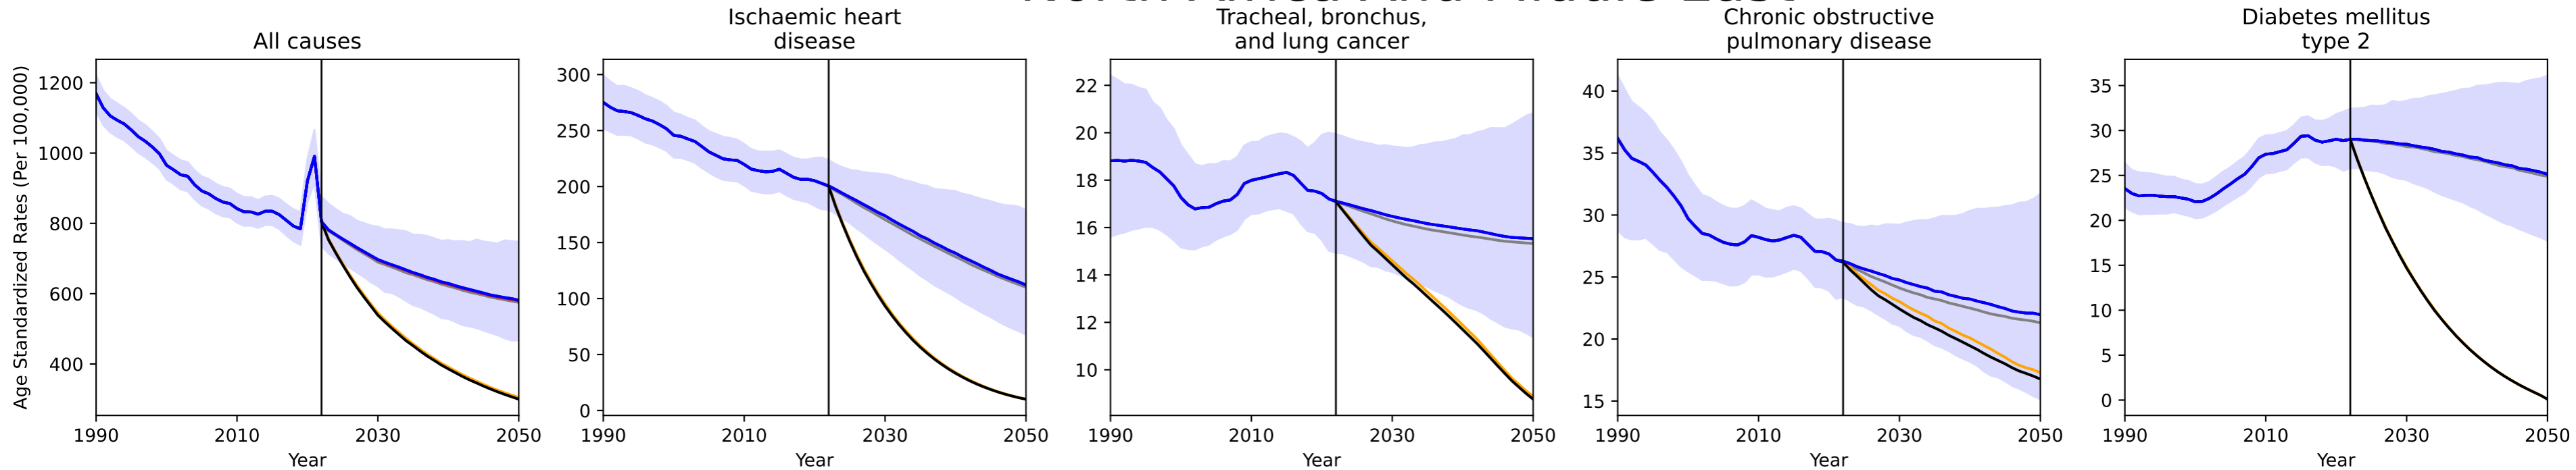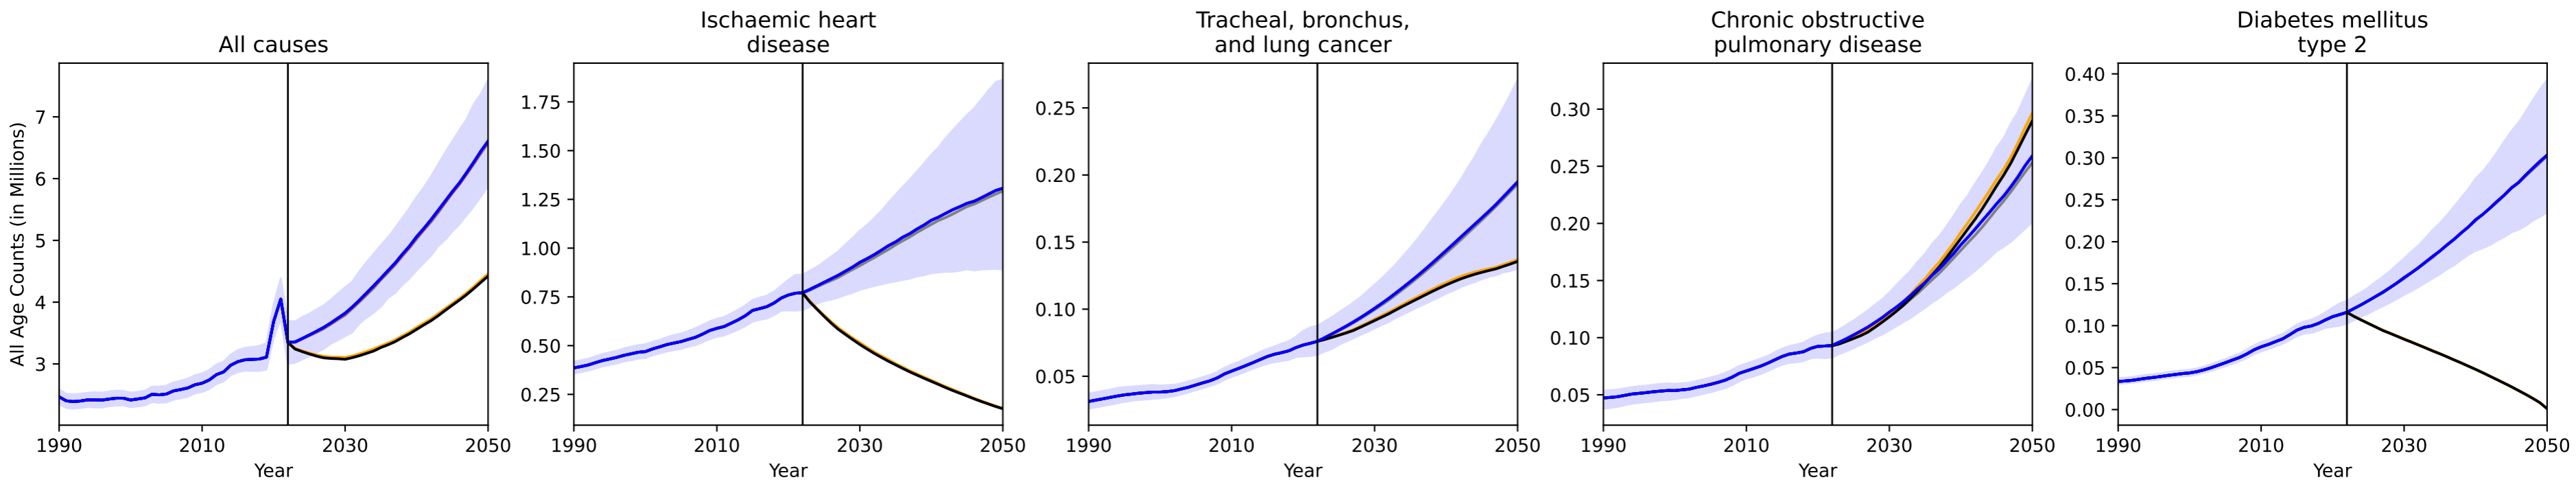

— Safer Environment    — Improved Behavioural and Metabolic Risks    — Improved Childhood Nutrition and Vaccination    — Combined    — Reference

# South Asia

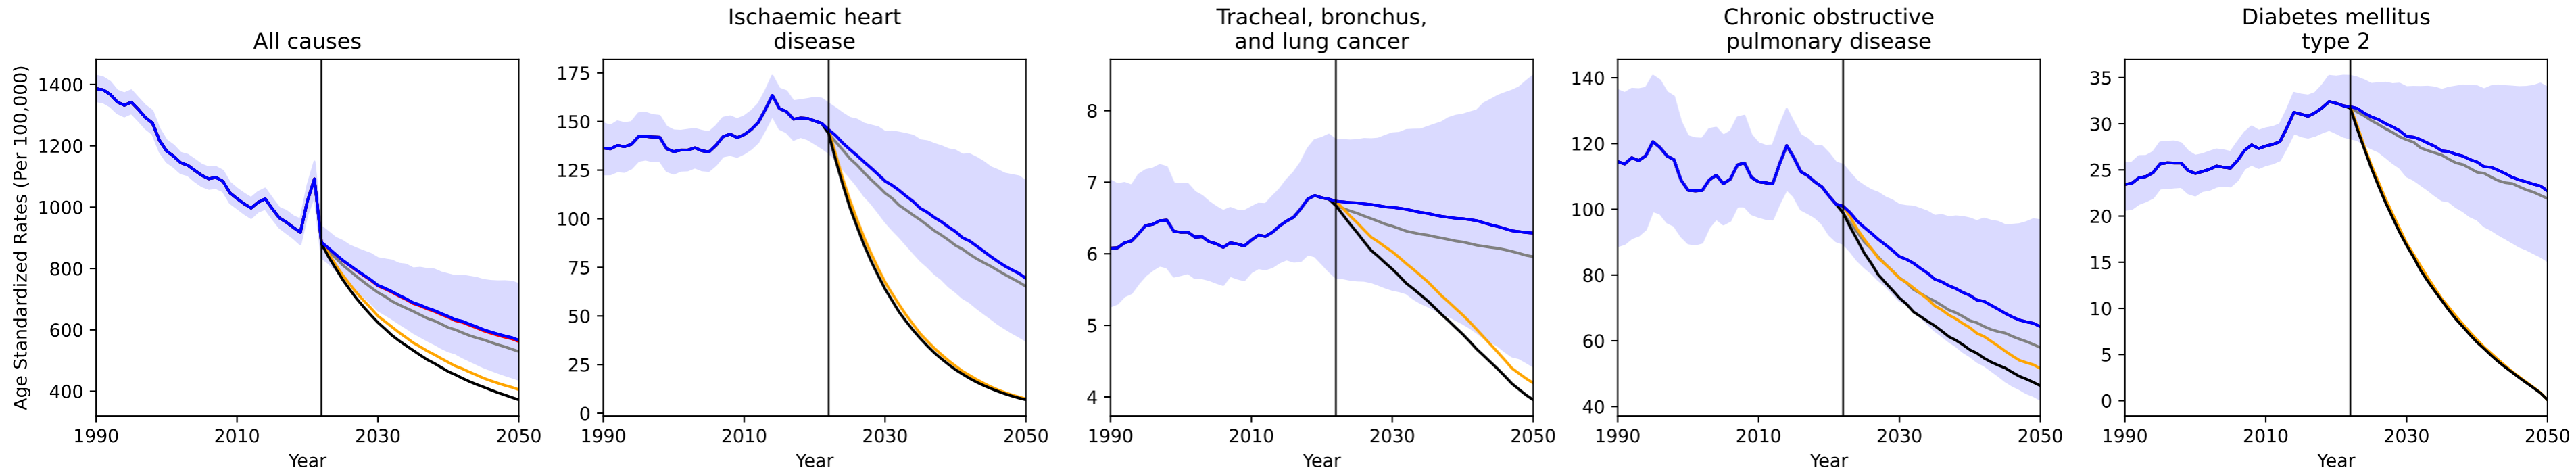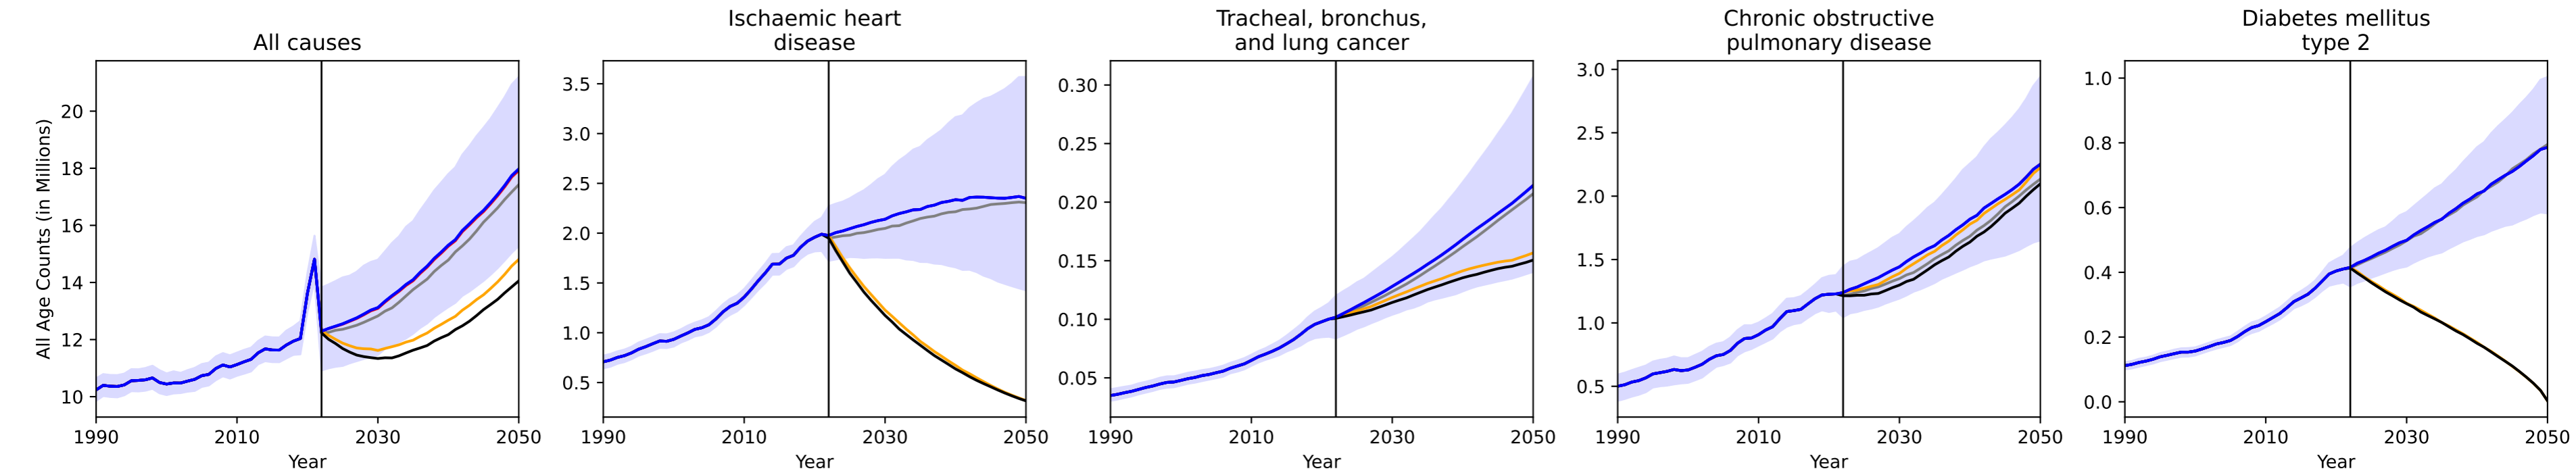

— Safer Environment — Improved Behavioural and Metabolic Risks — Improved Childhood Nutrition and Vaccination — Combined — Reference



# Southeast Asia, East Asia, And Oceania

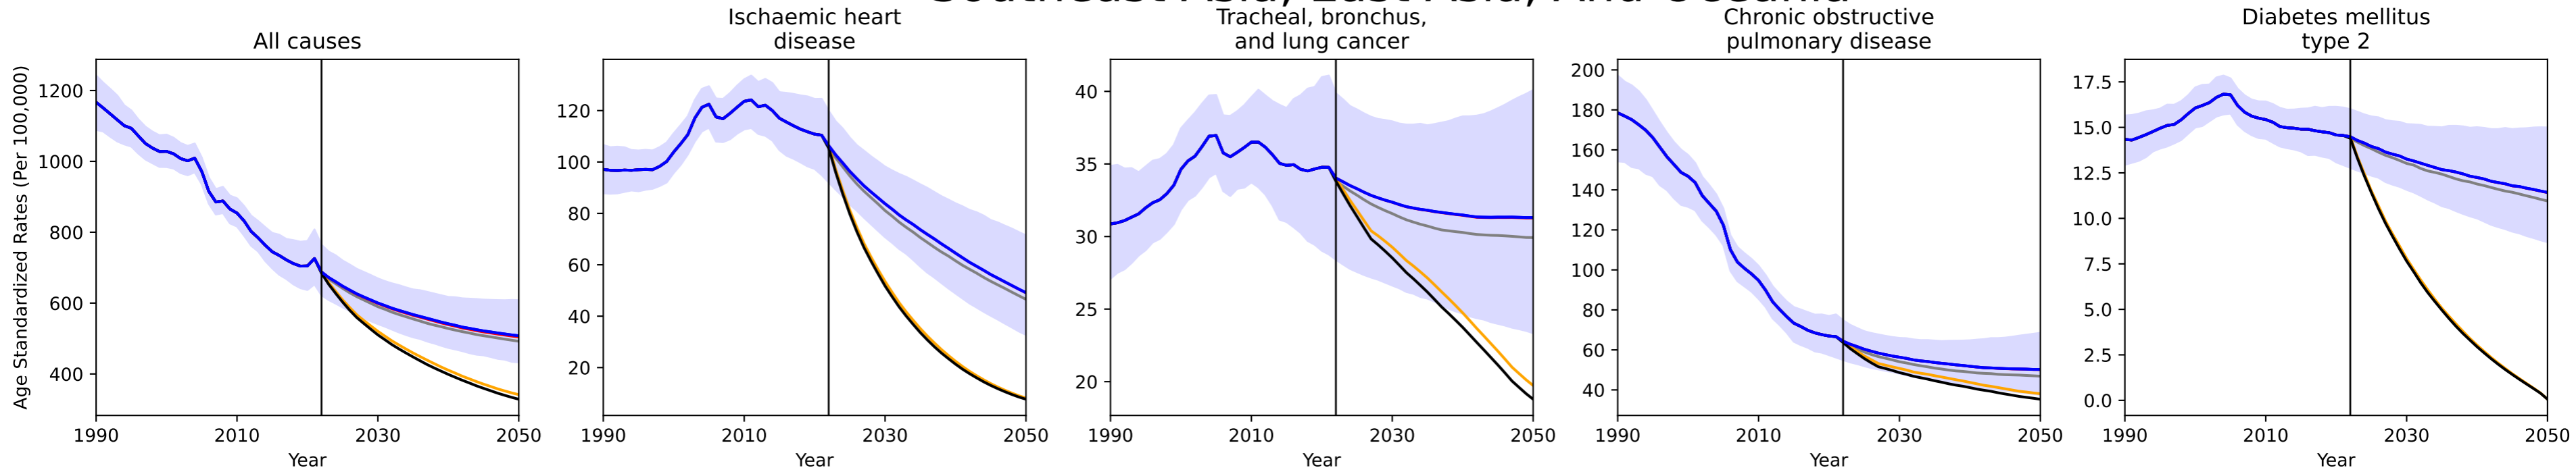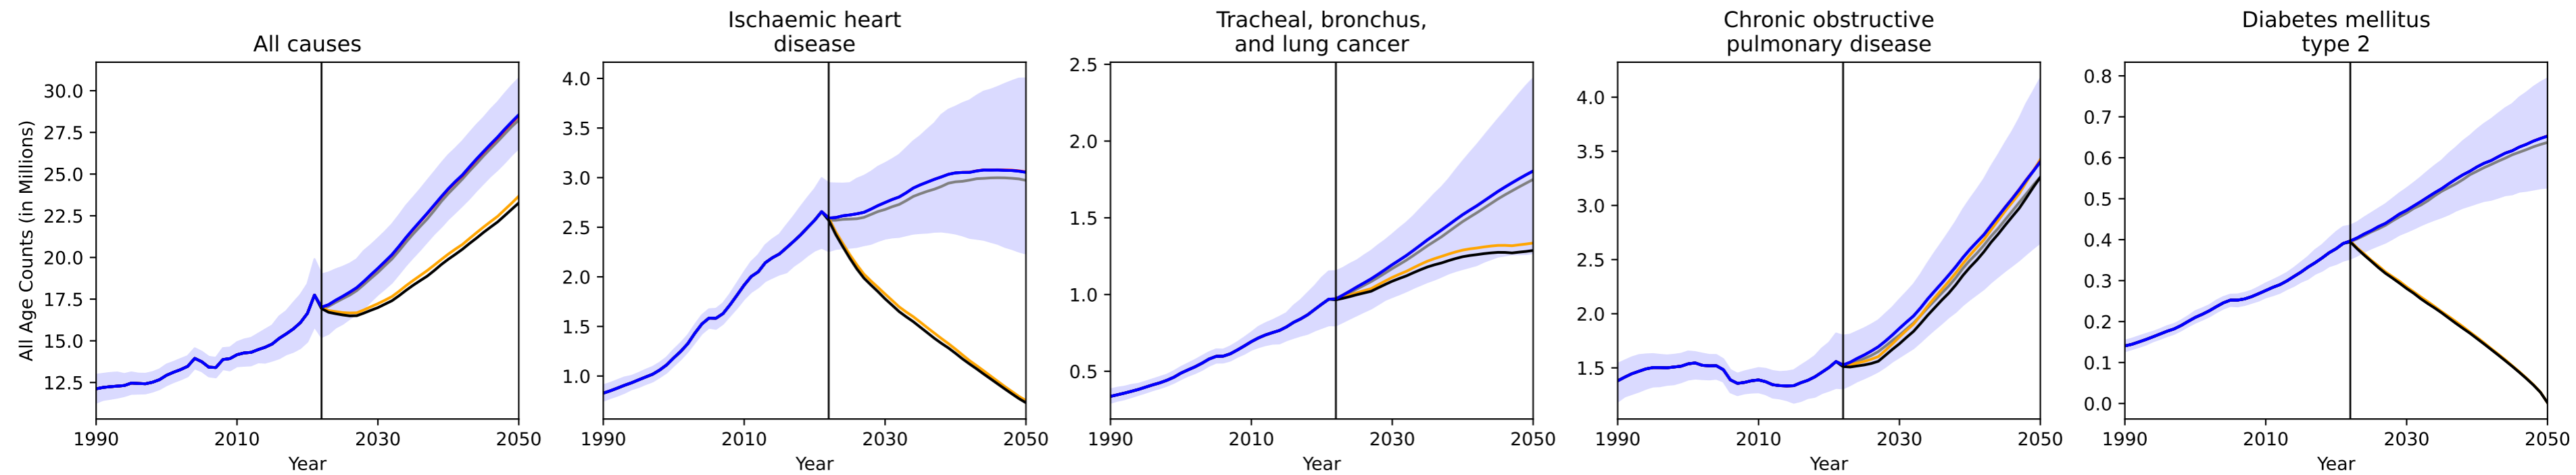

— Safer Environment — Improved Behavioural and Metabolic Risks — Improved Childhood Nutrition and Vaccination — Combined — Reference

# Sub-Saharan Africa

Supplemental Results Figure S13. All cause and top NCD causes age standardized death rates and all age counts by scenario and location, 1990-2050

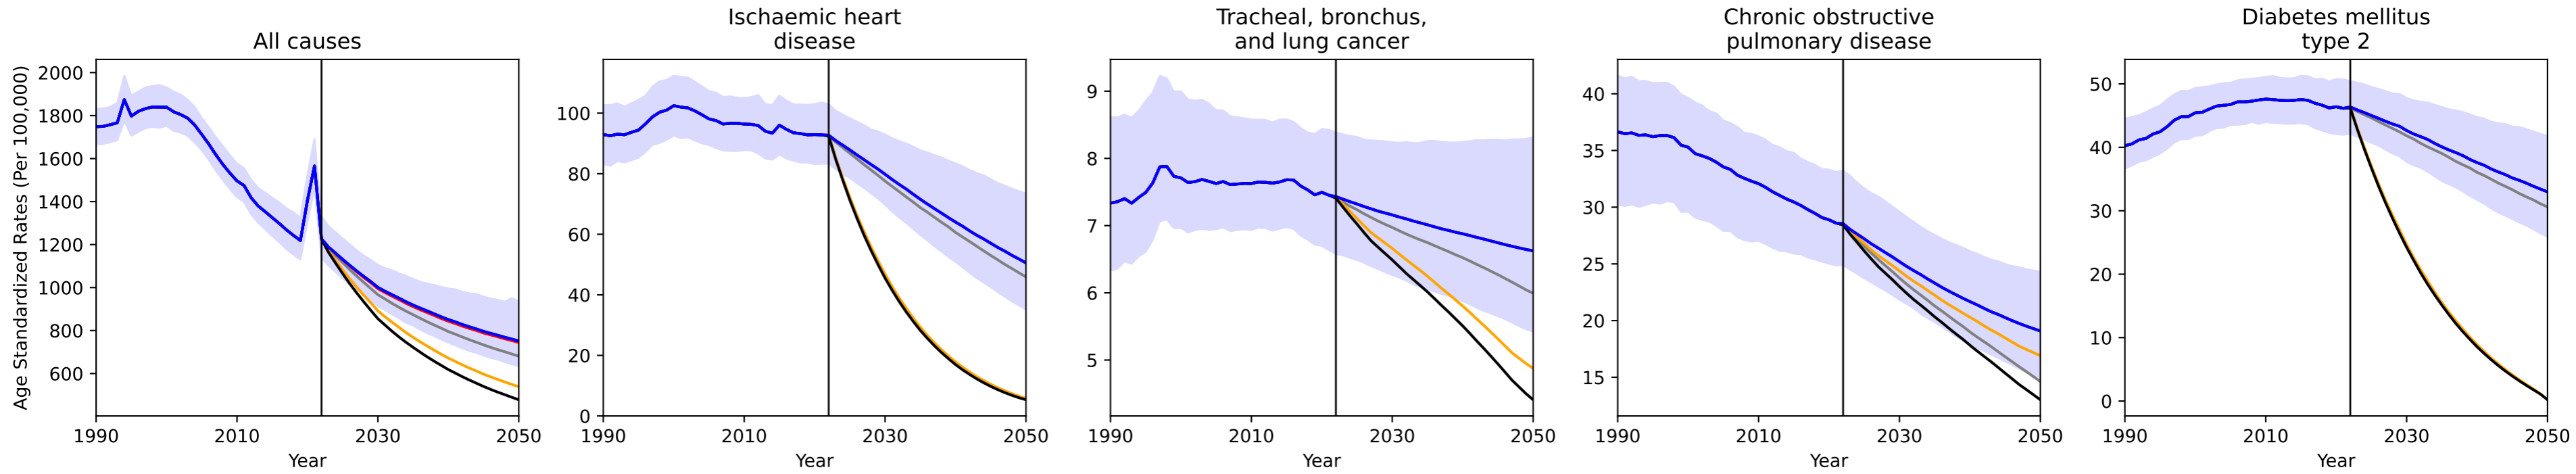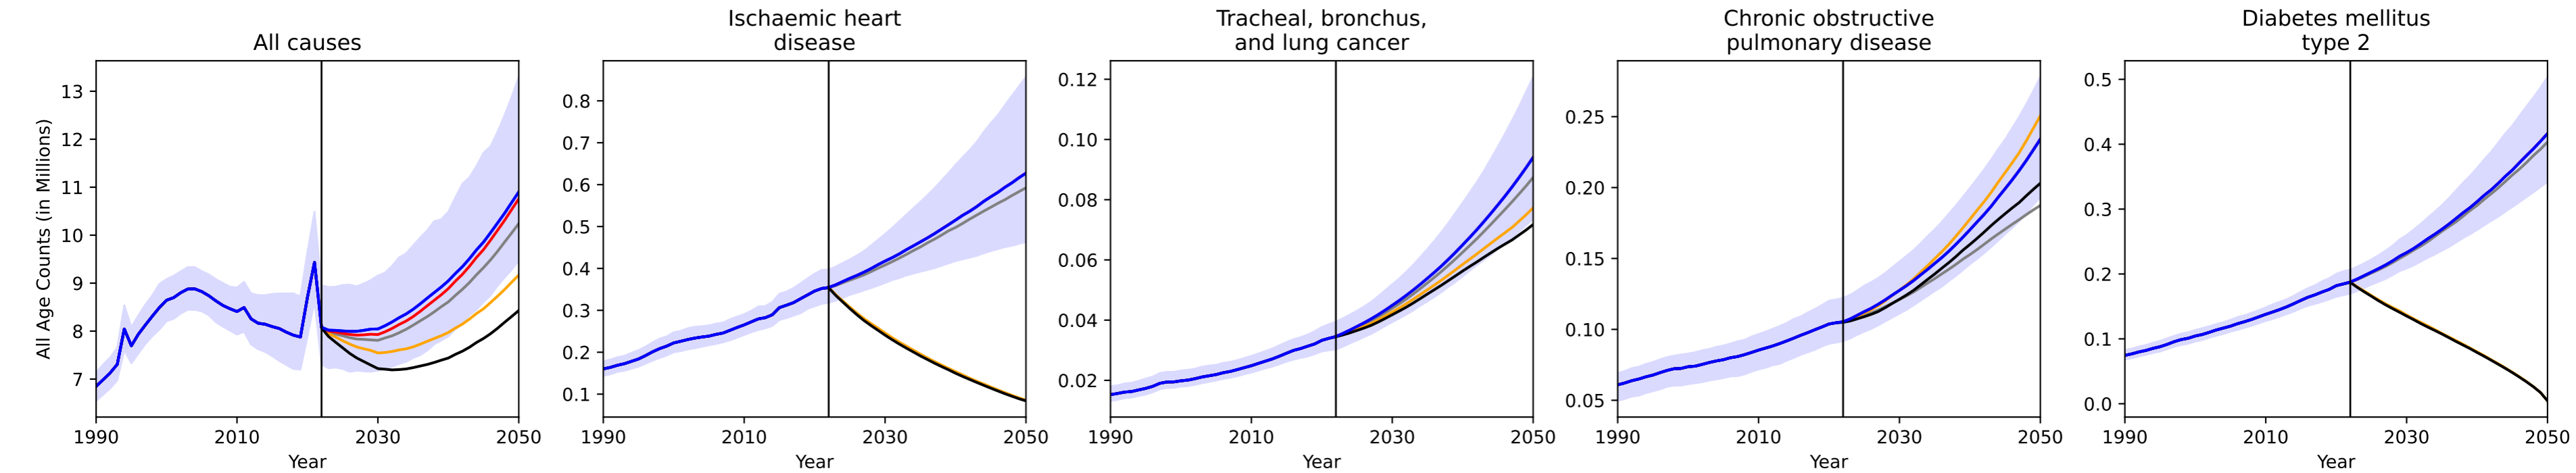

— Safer Environment — Improved Behavioural and Metabolic Risks — Improved Childhood Nutrition and Vaccination — Combined — Reference

# Central Asia

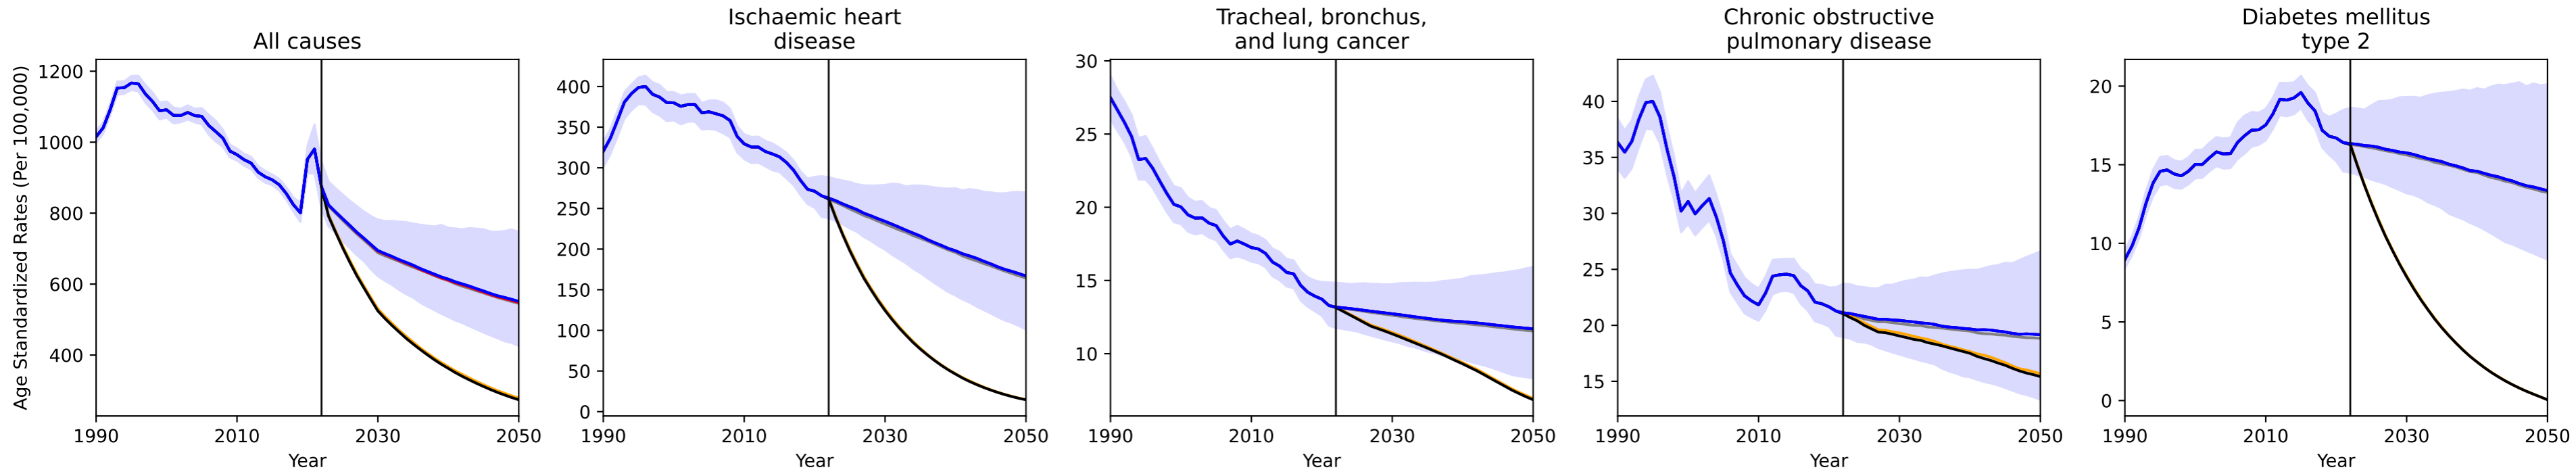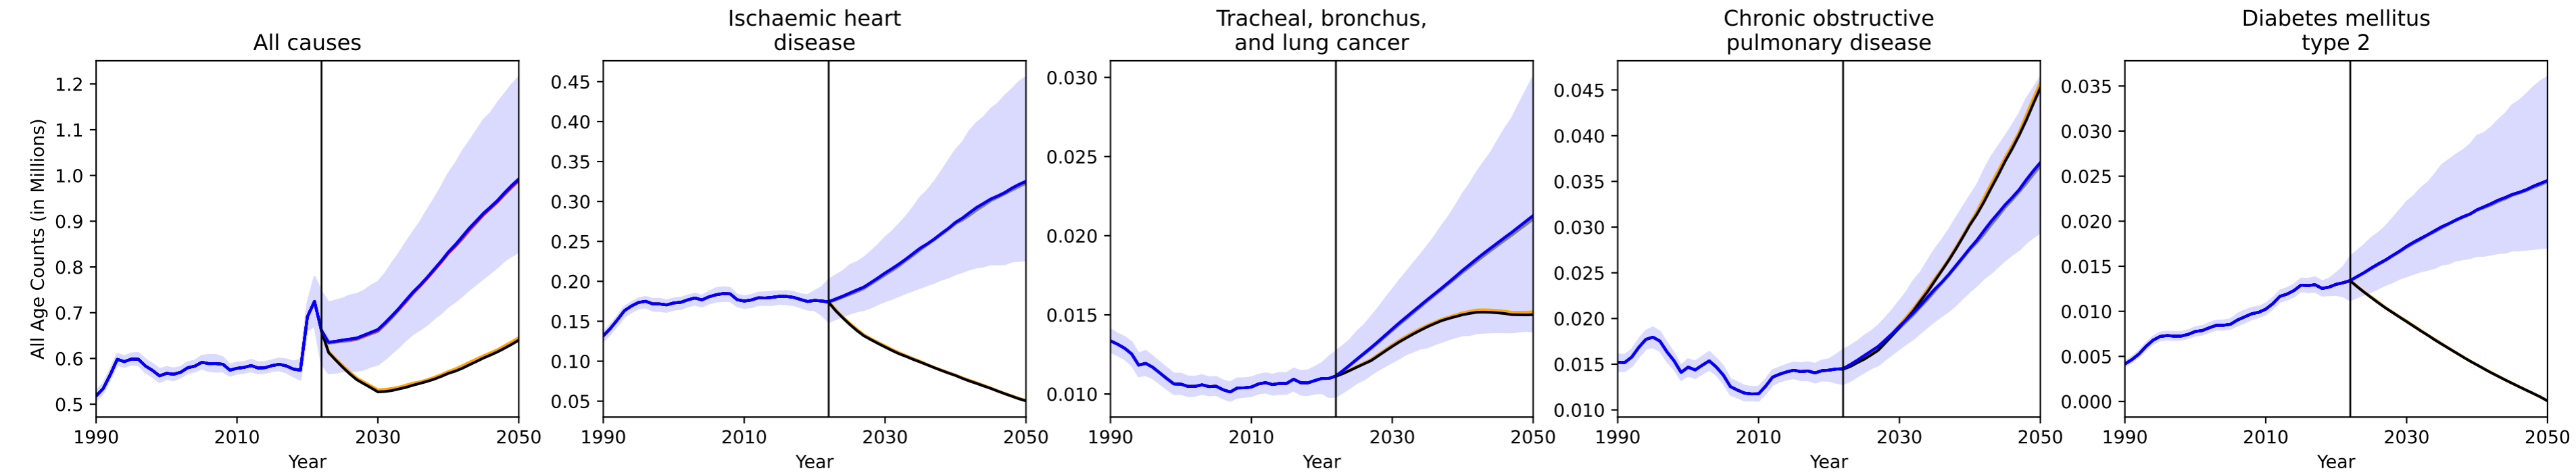

— Safer Environment — Improved Behavioural and Metabolic Risks — Improved Childhood Nutrition and Vaccination — Combined — Reference

# Central Europe

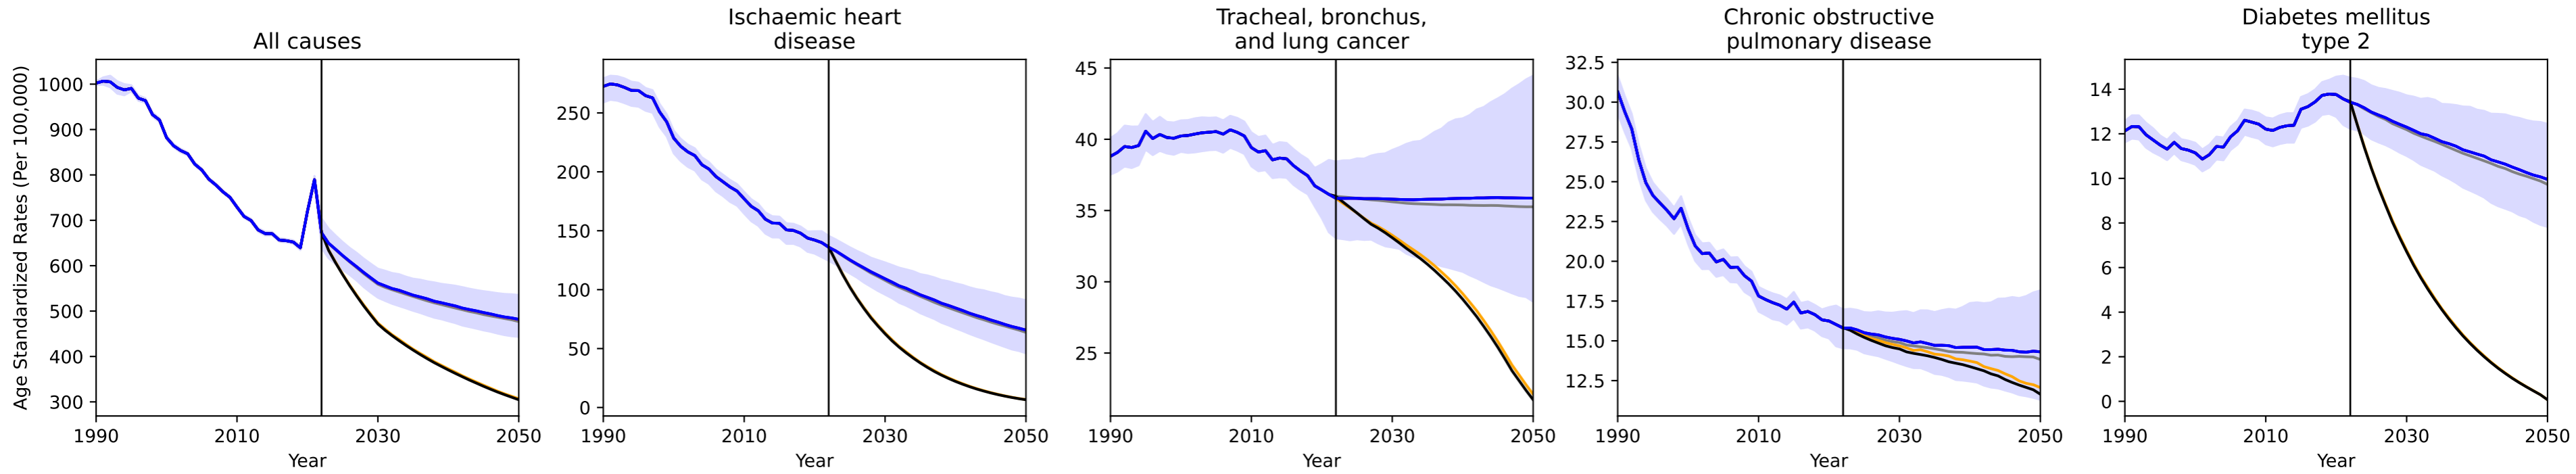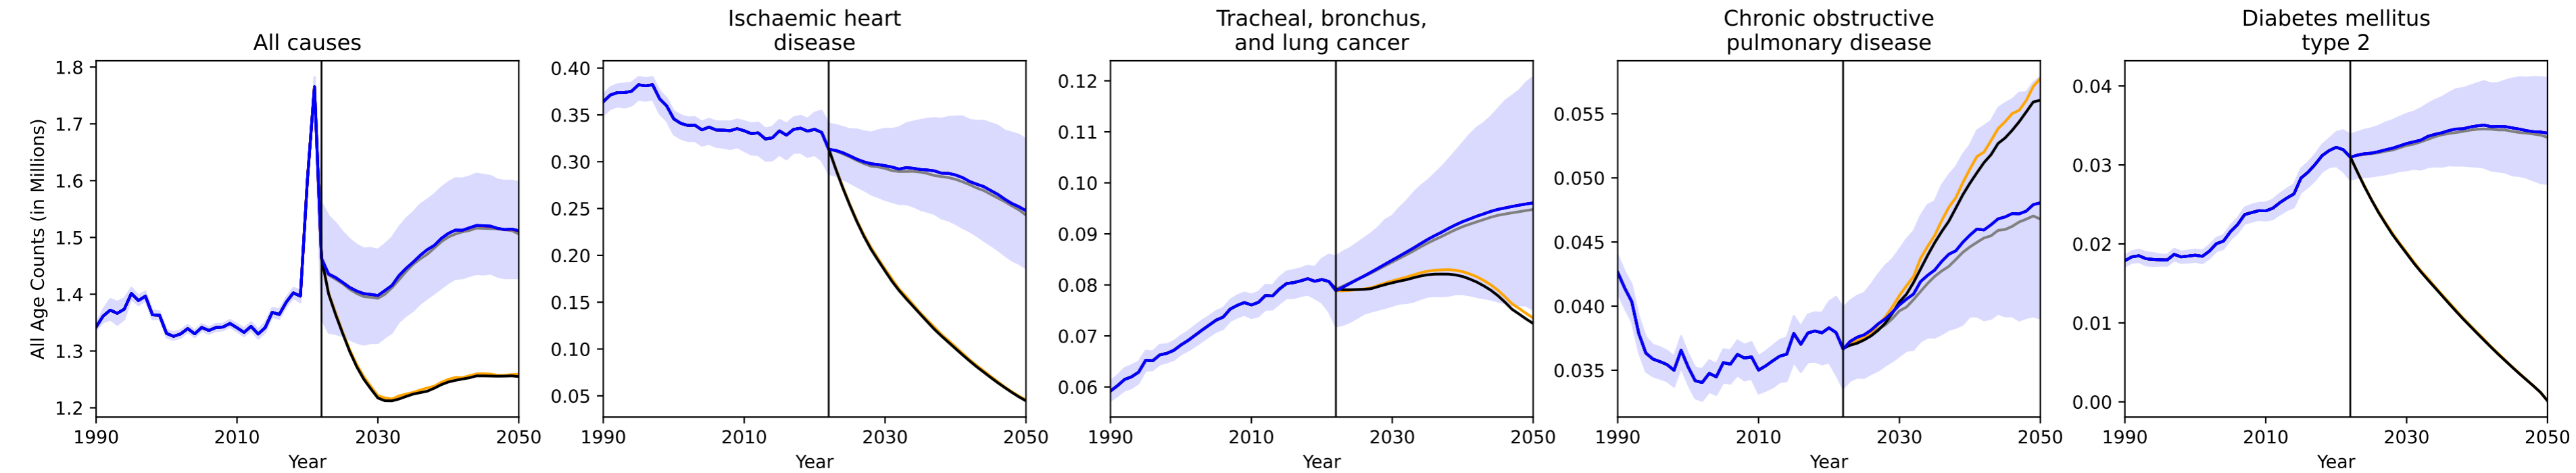

— Safer Environment    — Improved Behavioural and Metabolic Risks    — Improved Childhood Nutrition and Vaccination    — Combined    — Reference

# Eastern Europe

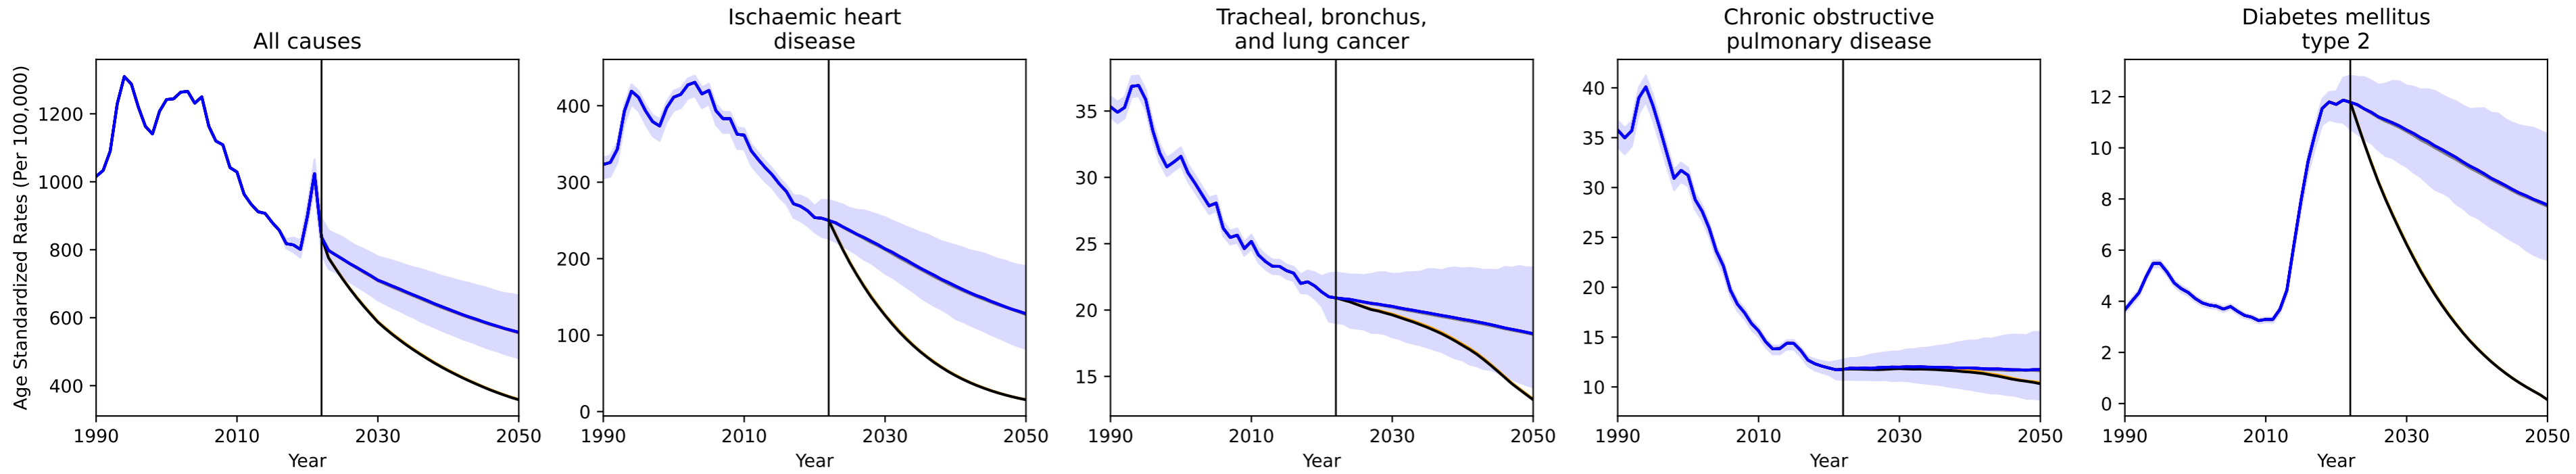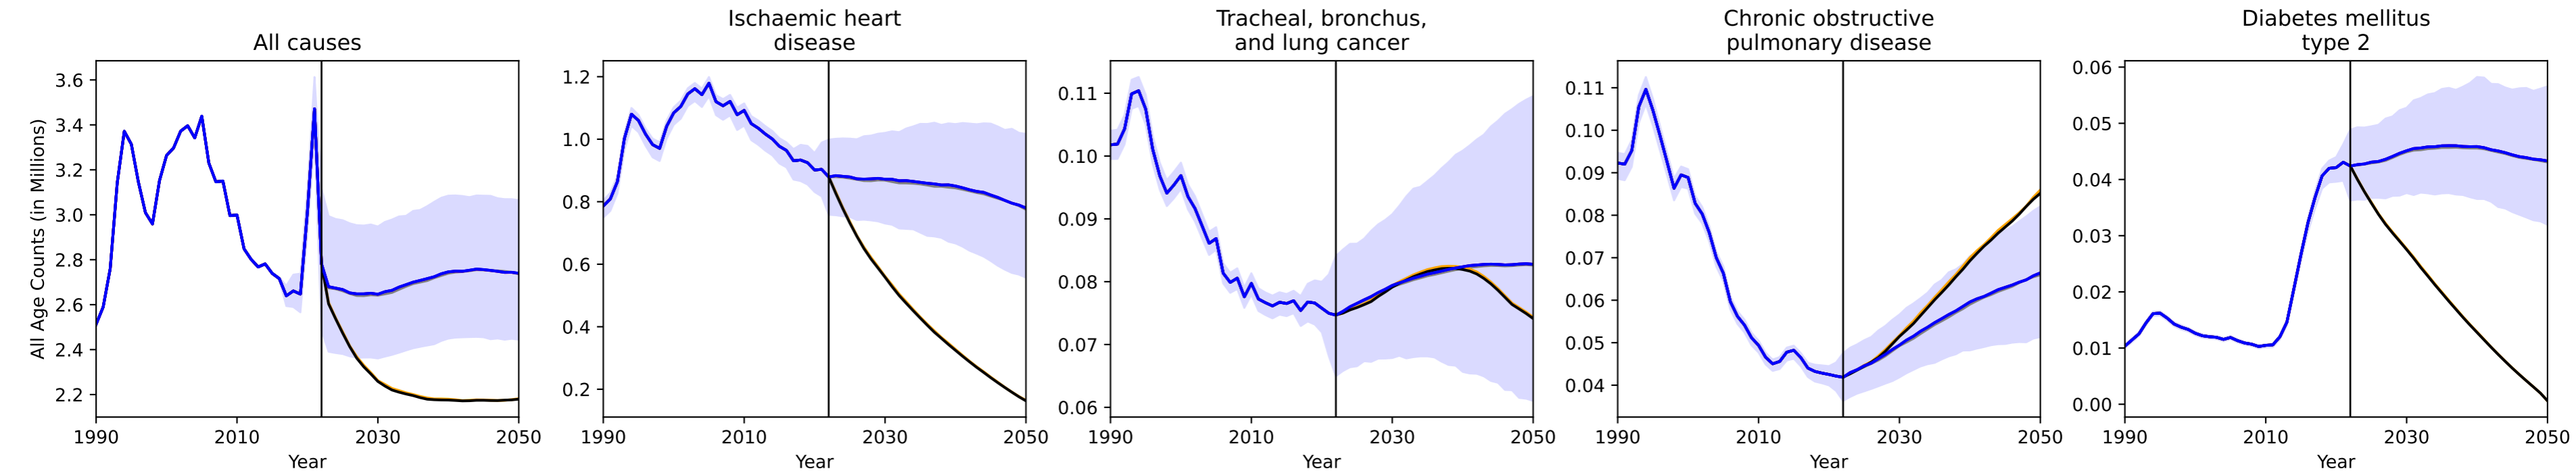

— Safer Environment — Improved Behavioural and Metabolic Risks — Improved Childhood Nutrition and Vaccination — Combined — Reference

# Australasia

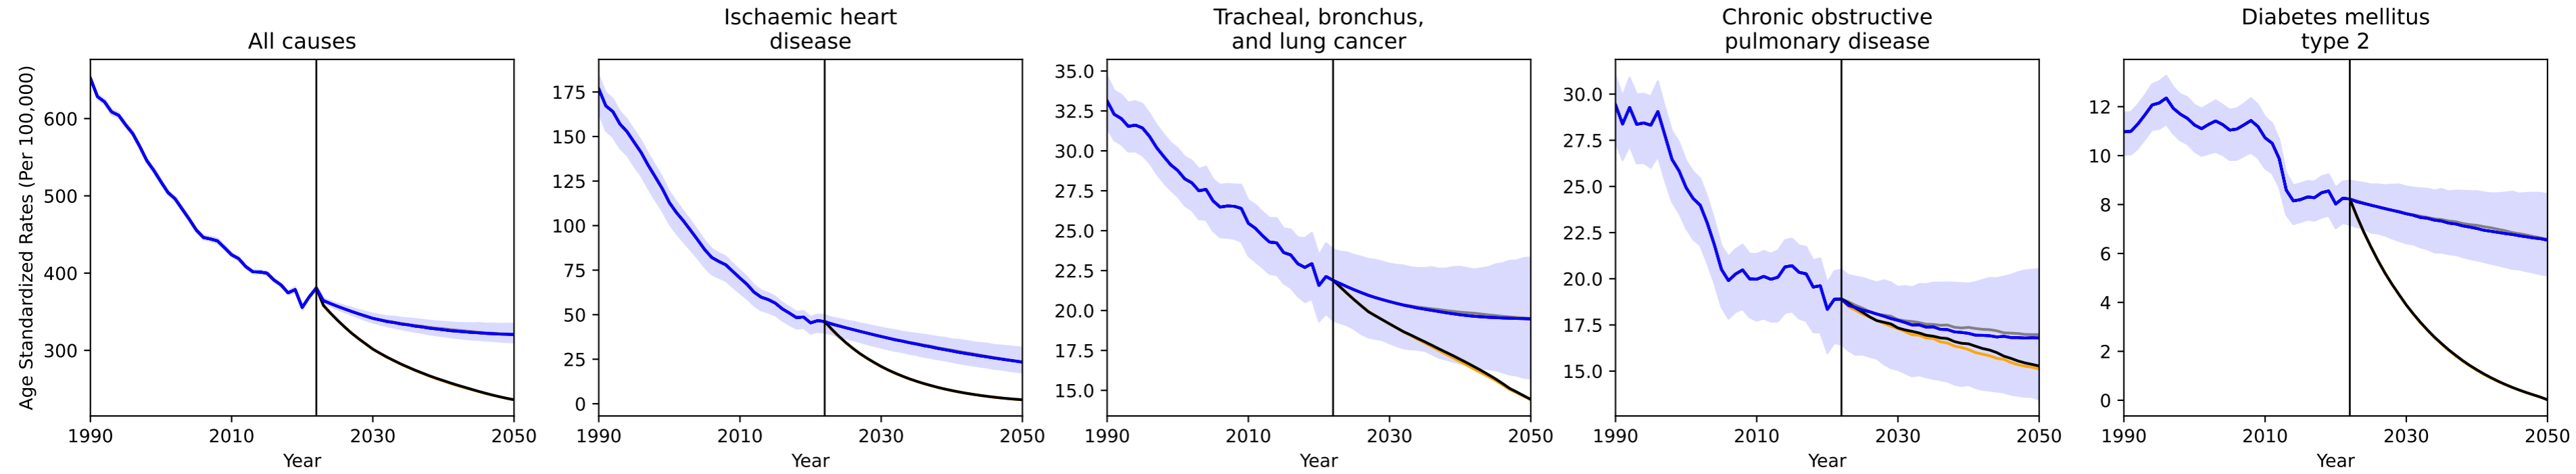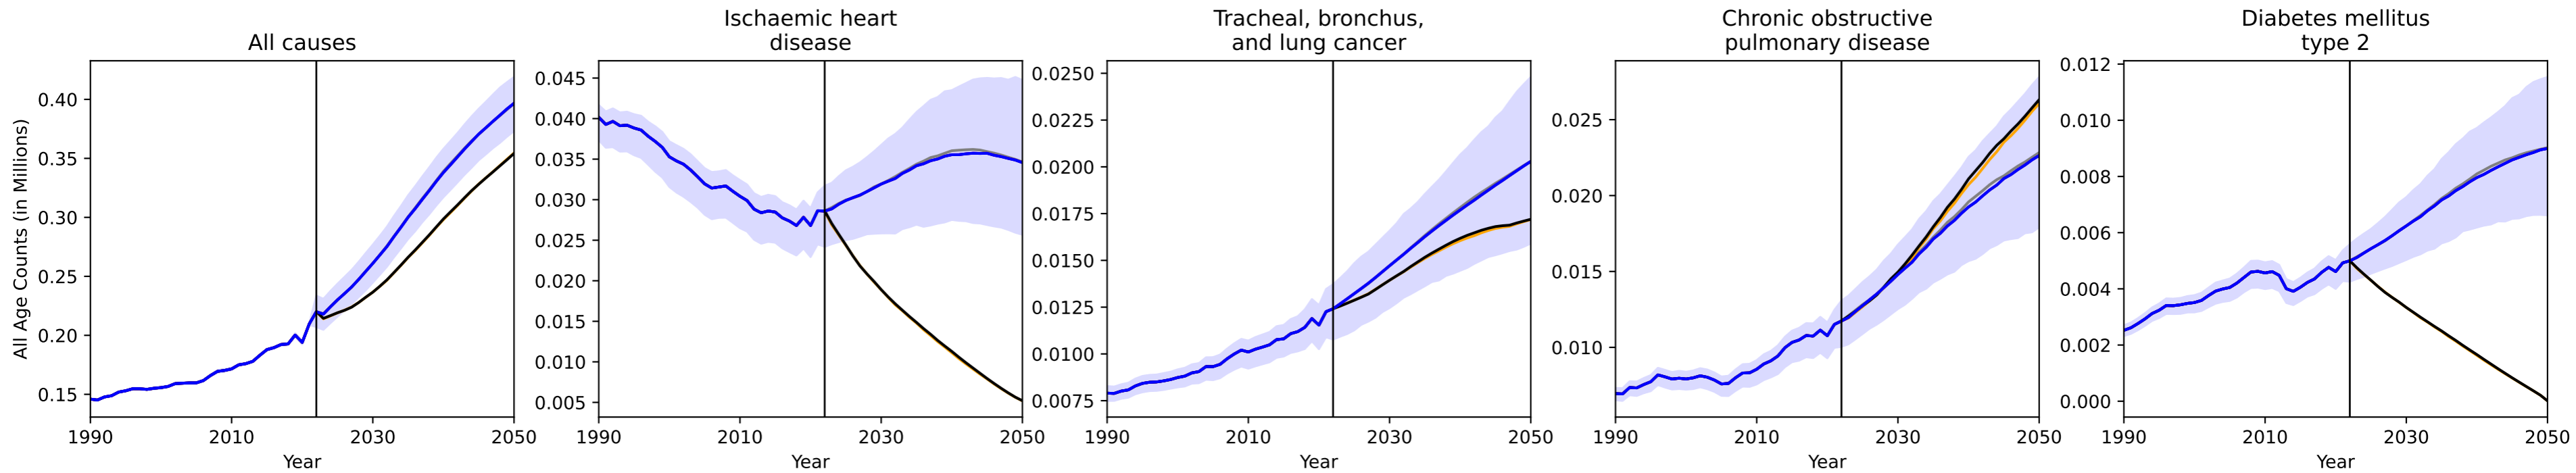

# High-Income Asia Pacific

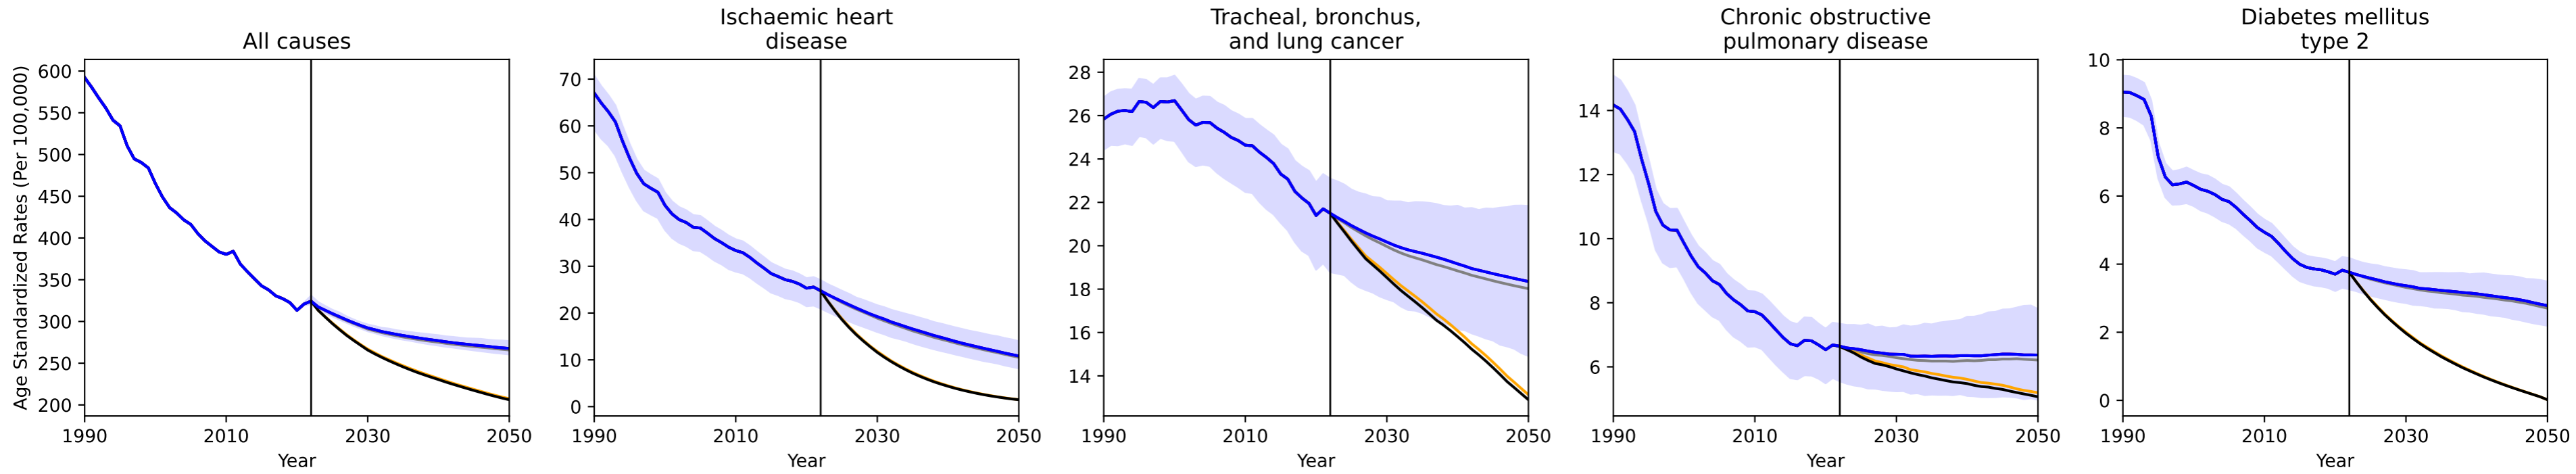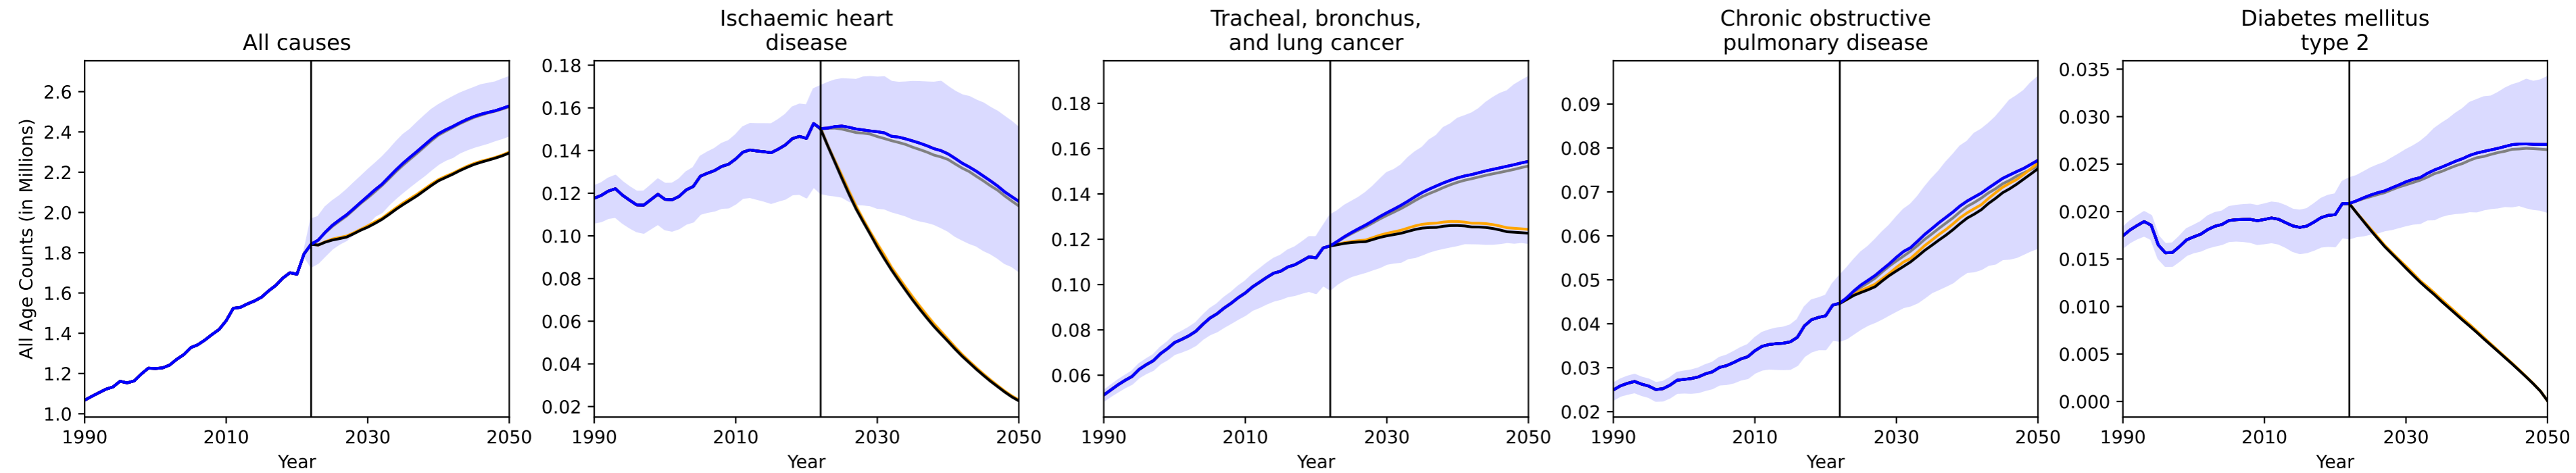

— Safer Environment    — Improved Behavioural and Metabolic Risks    — Improved Childhood Nutrition and Vaccination    — Combined    — Reference

# High-Income North America

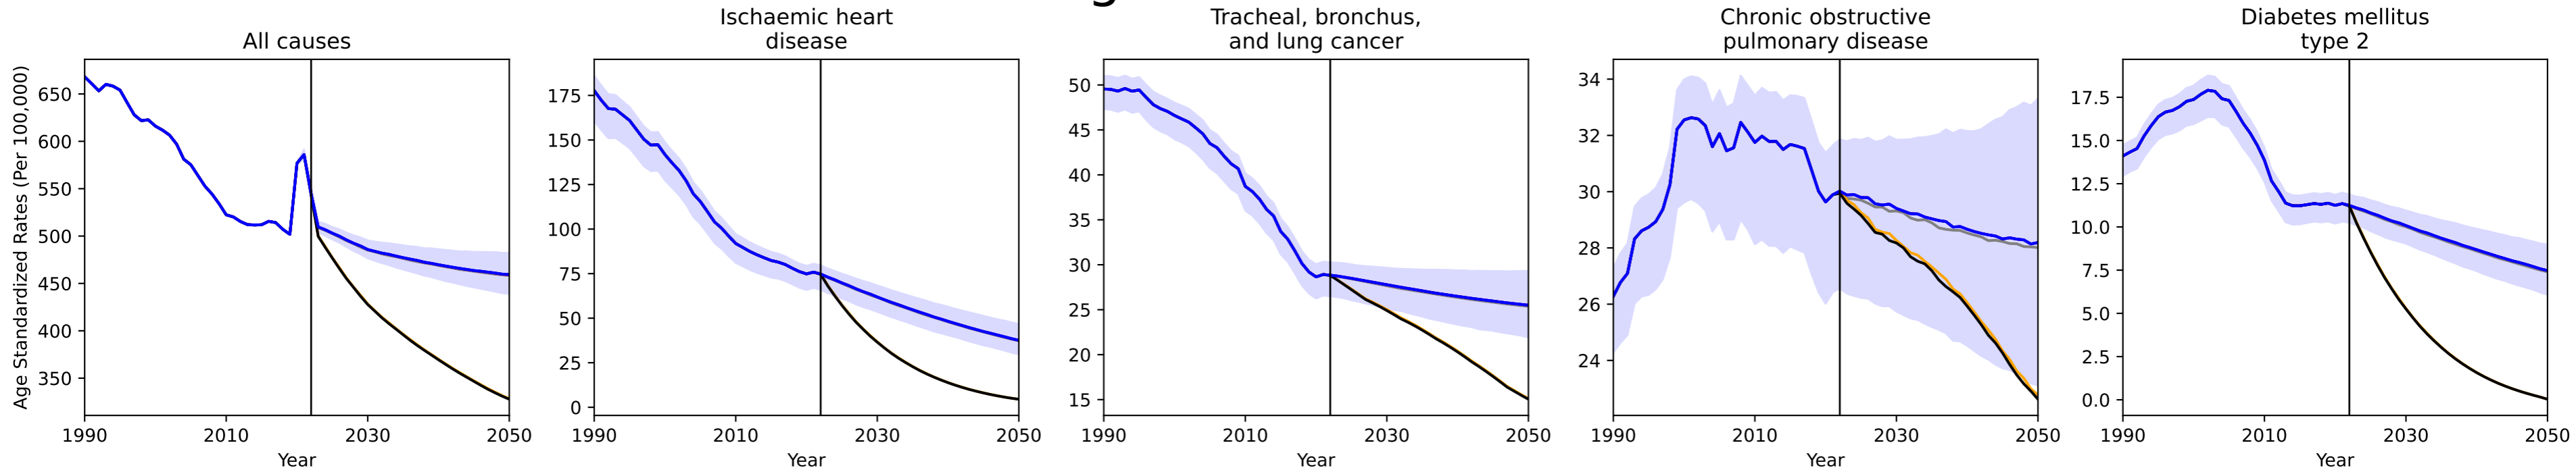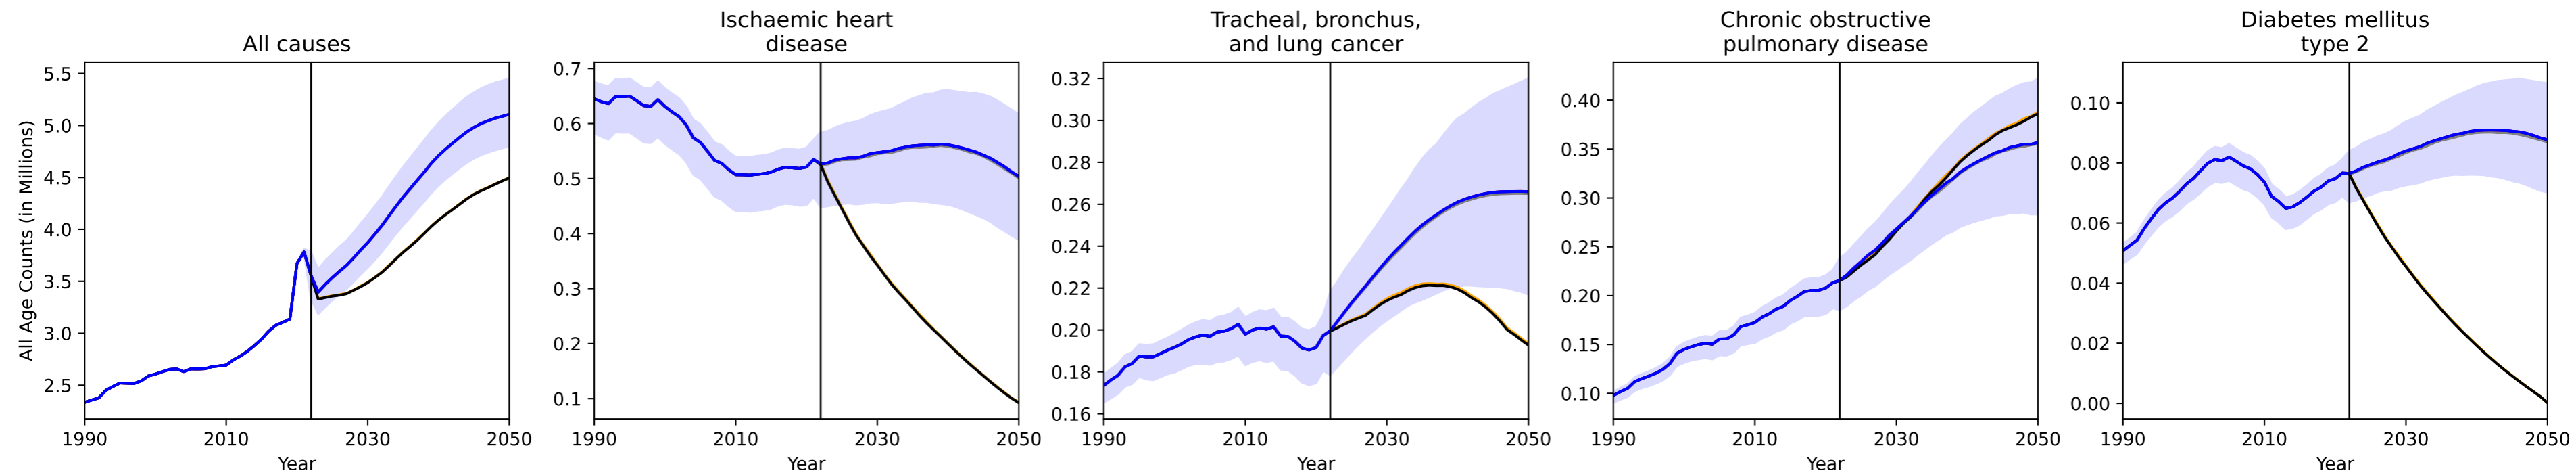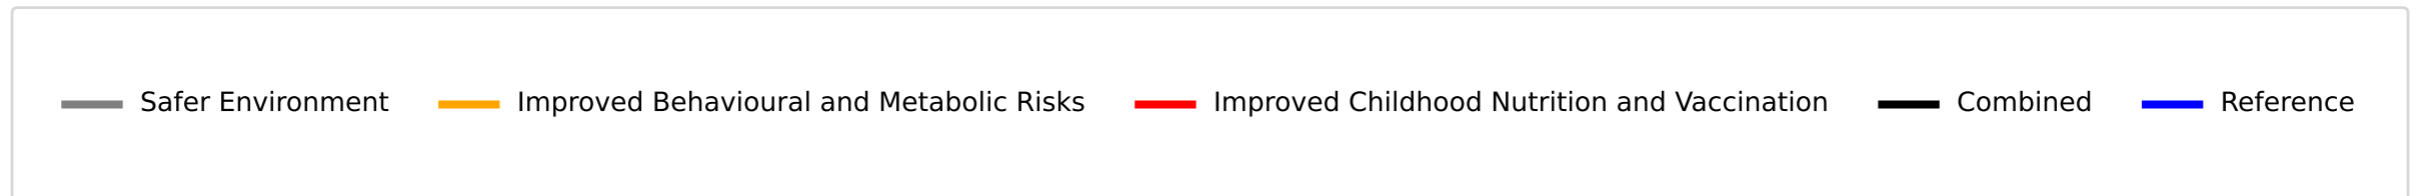



# Southern Latin America

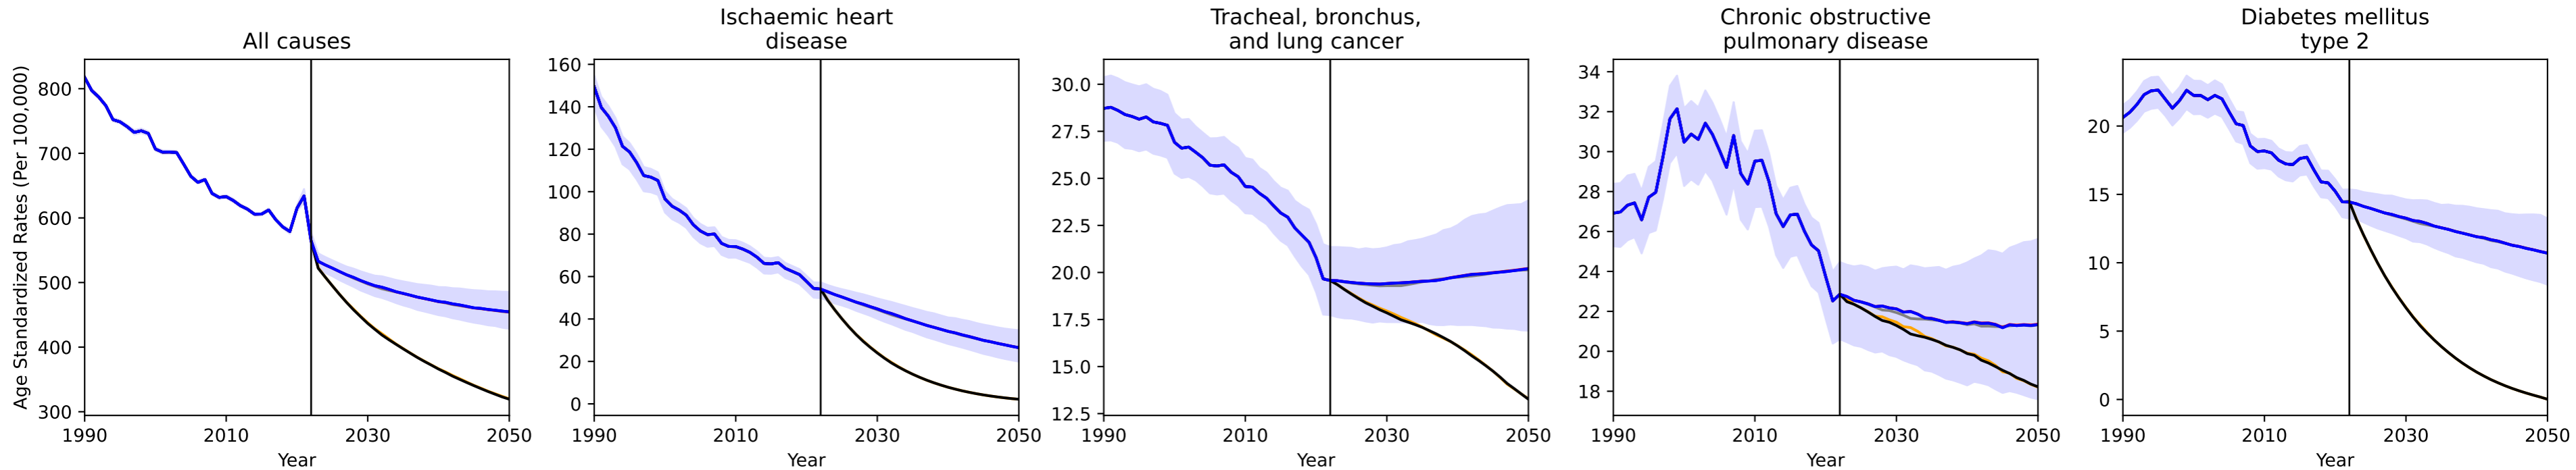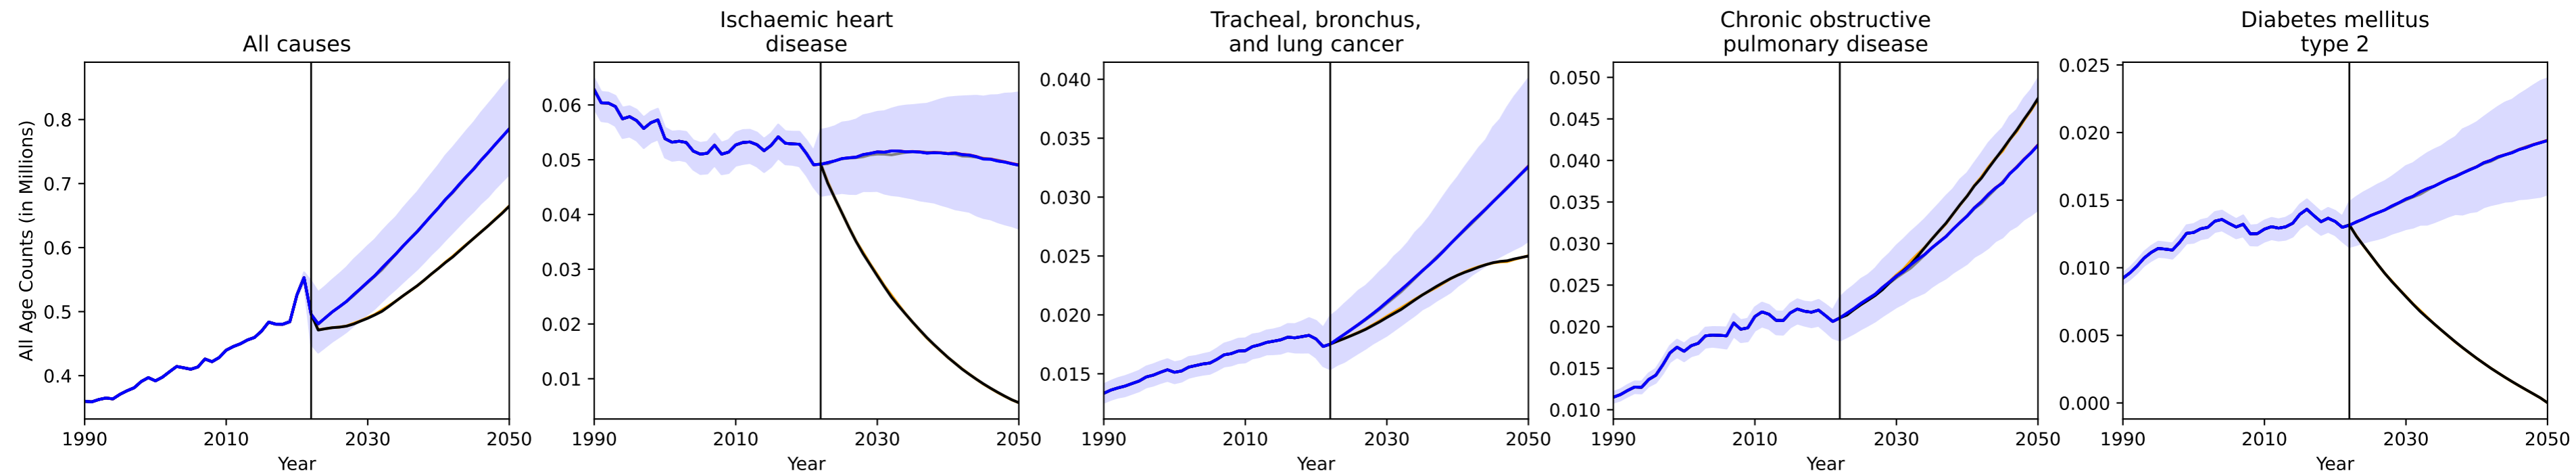

# Western Europe

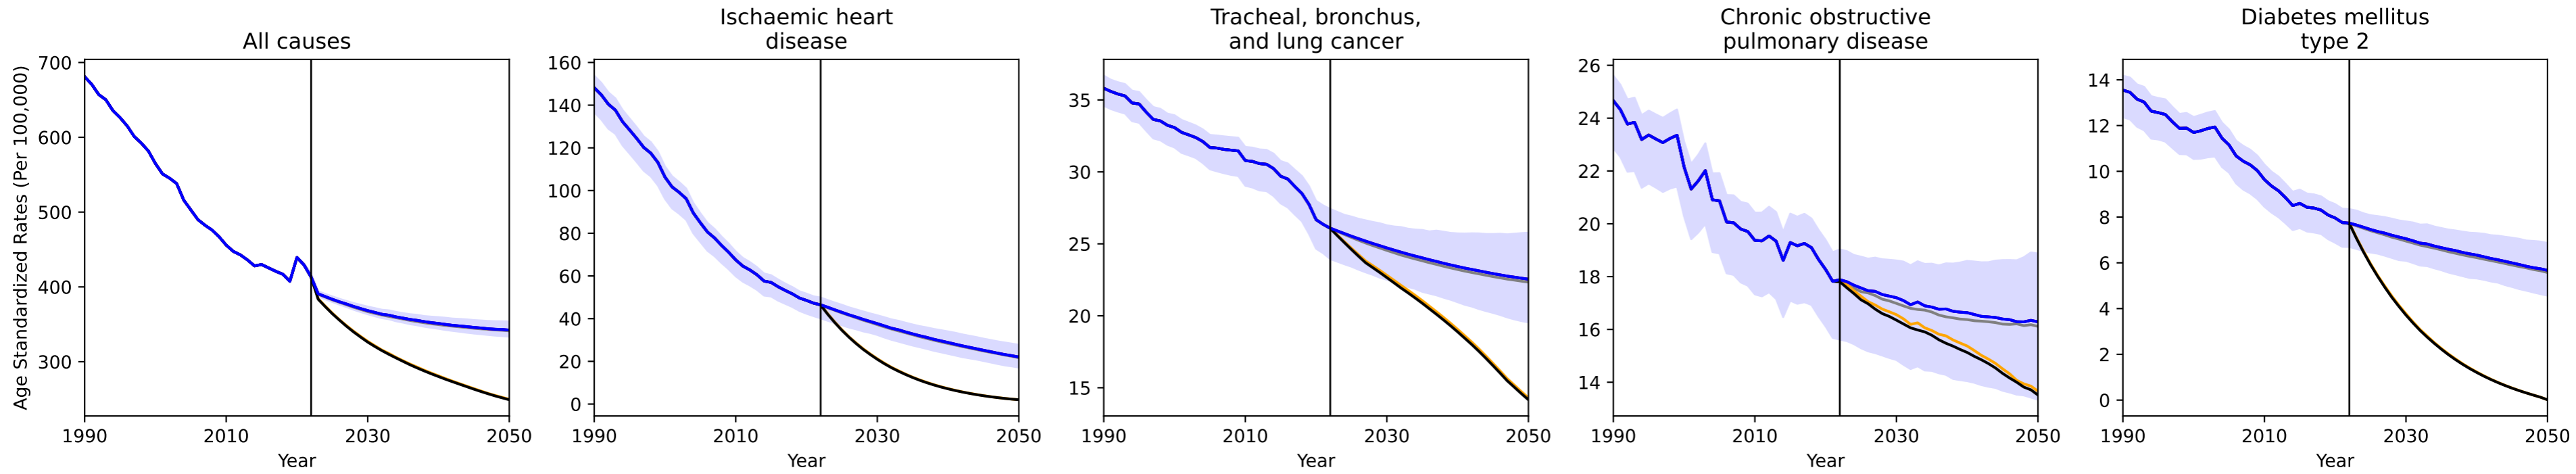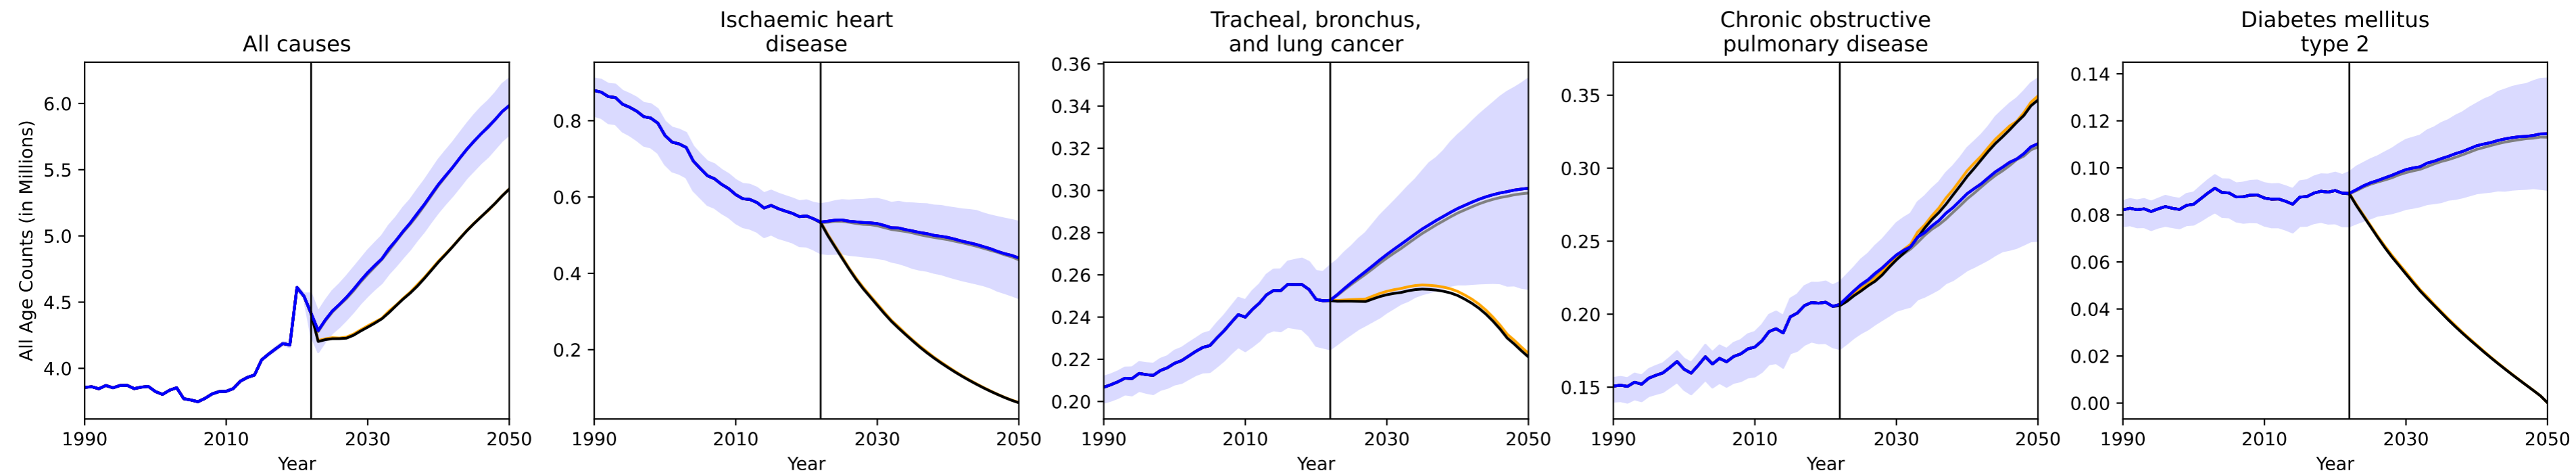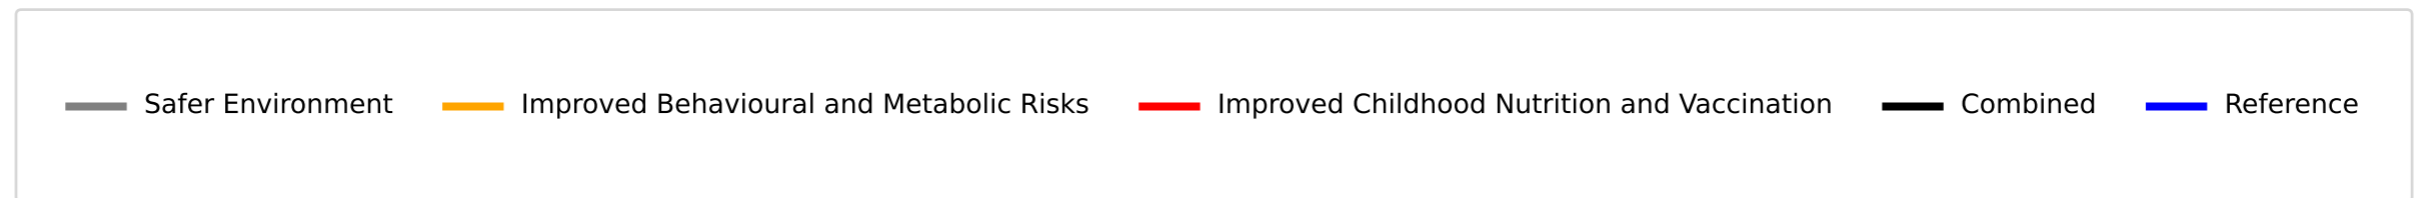

# Andean Latin America

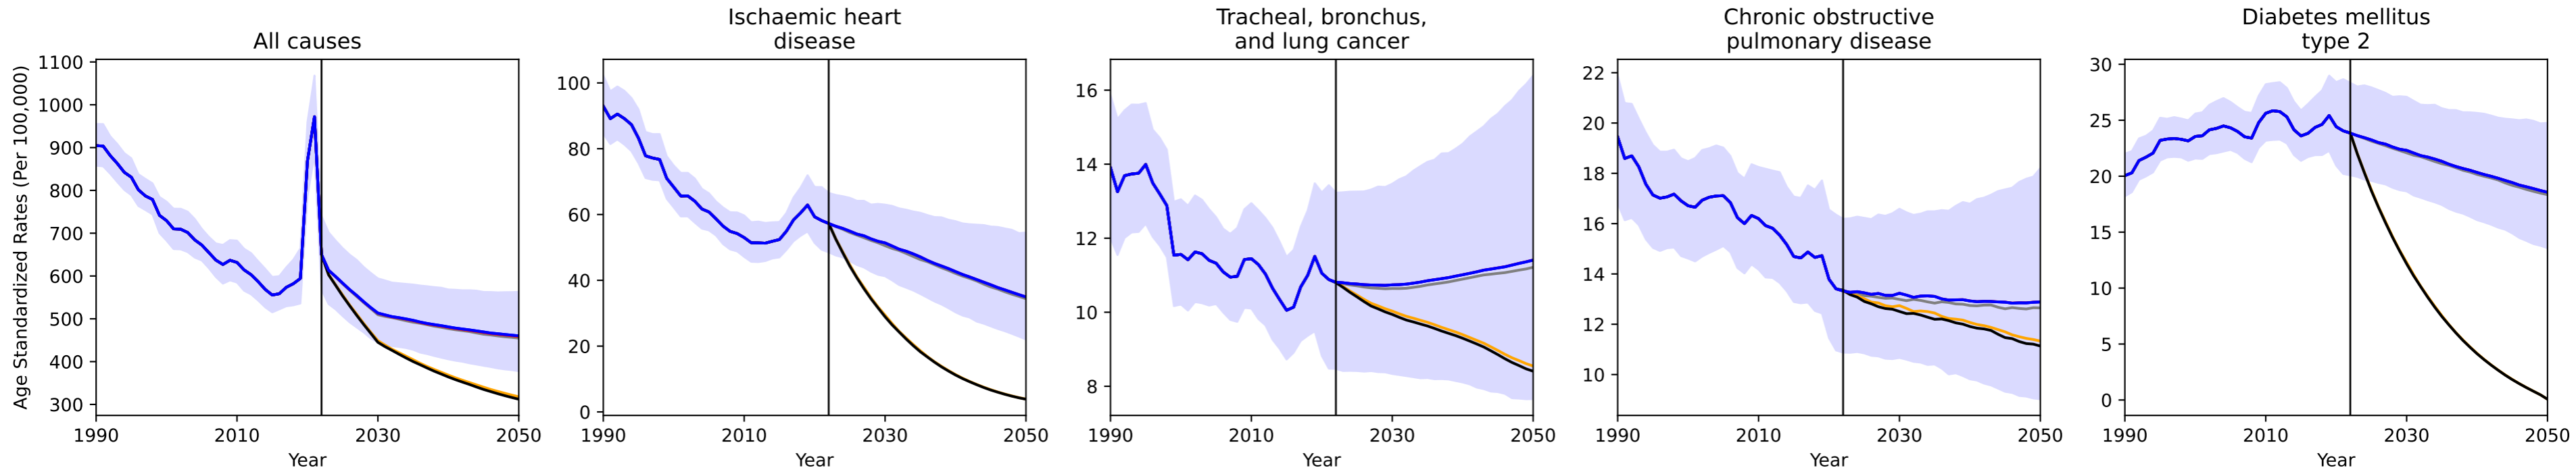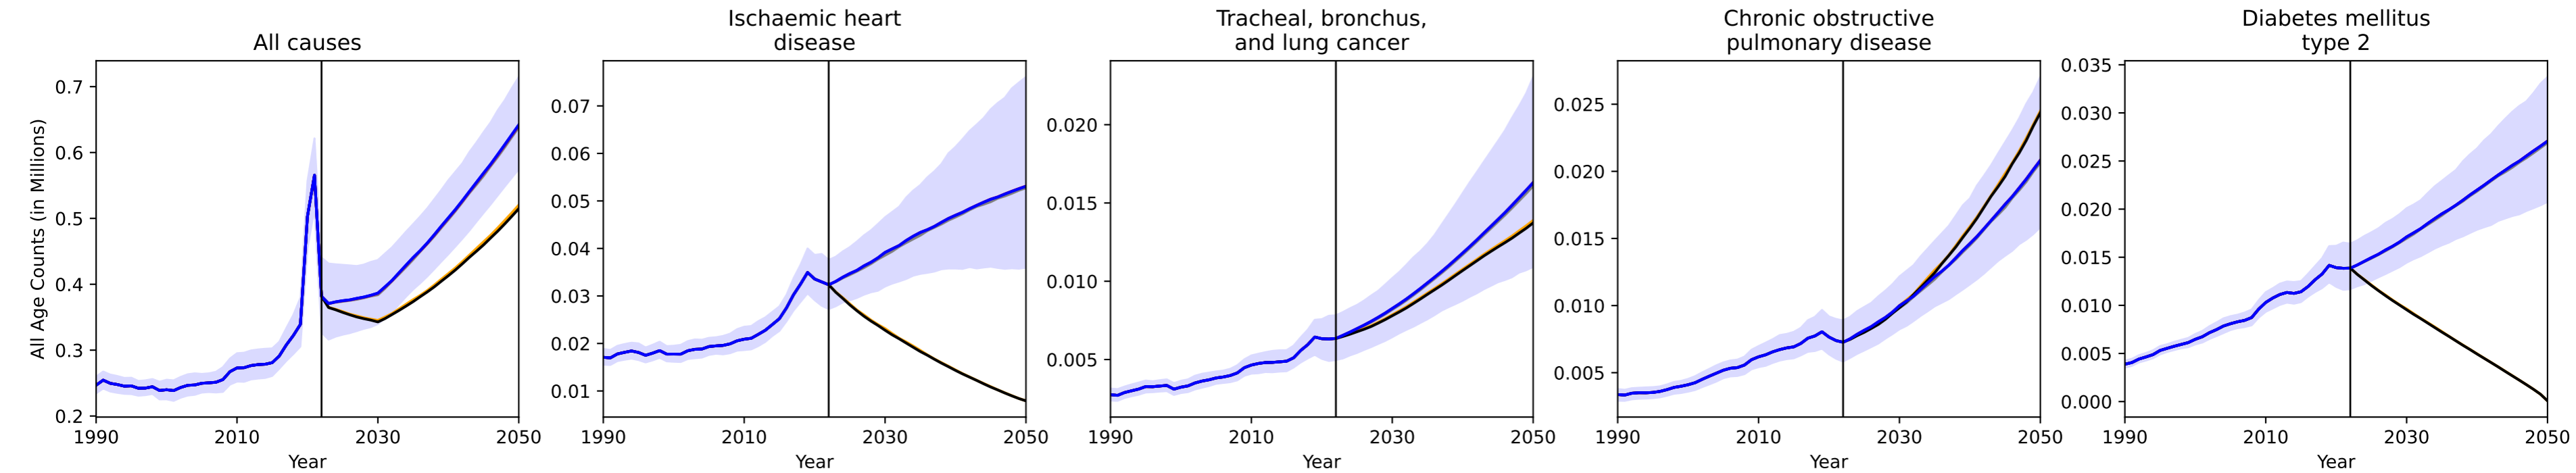

— Safer Environment — Improved Behavioural and Metabolic Risks — Improved Childhood Nutrition and Vaccination — Combined — Reference

# Caribbean

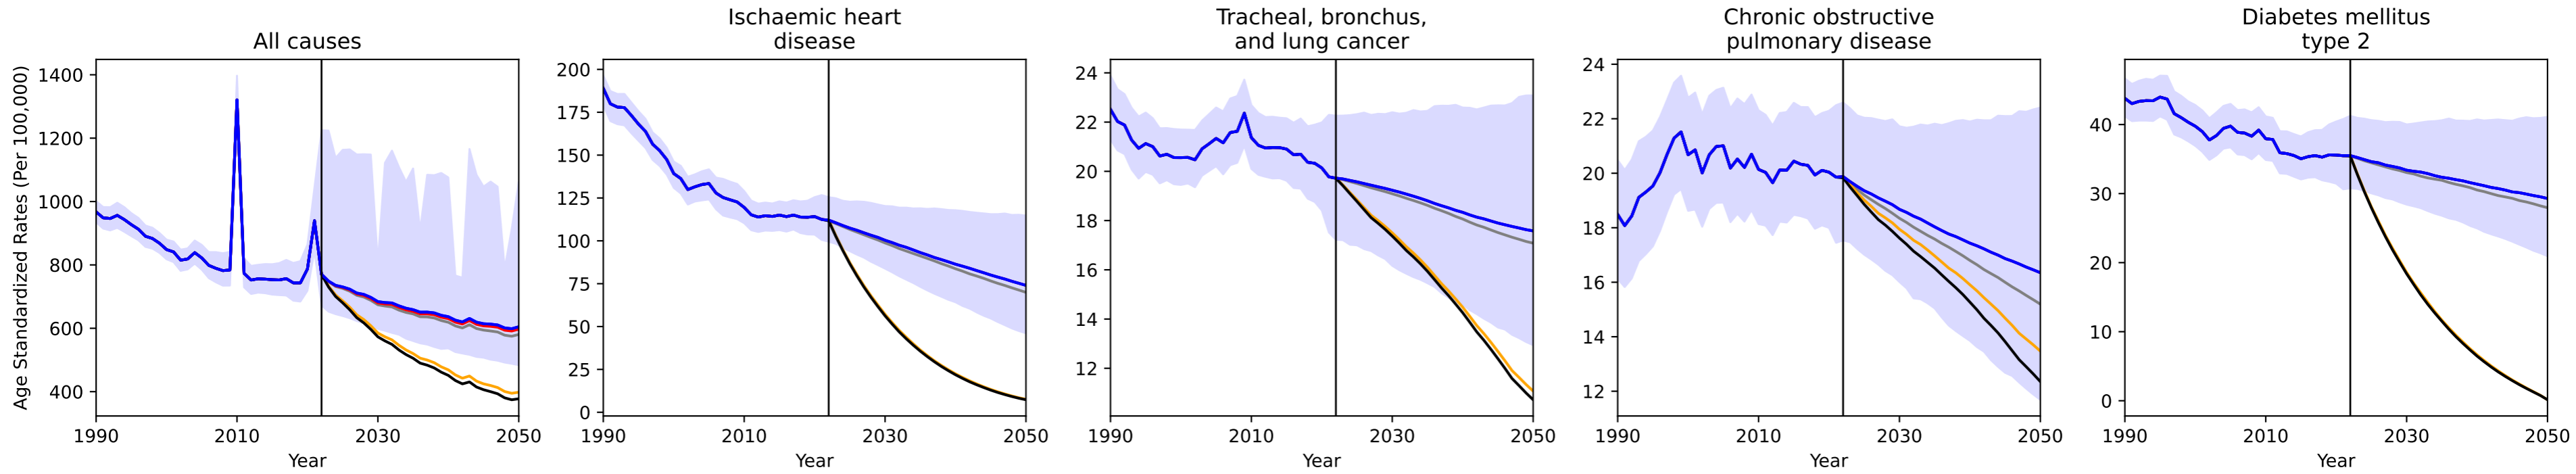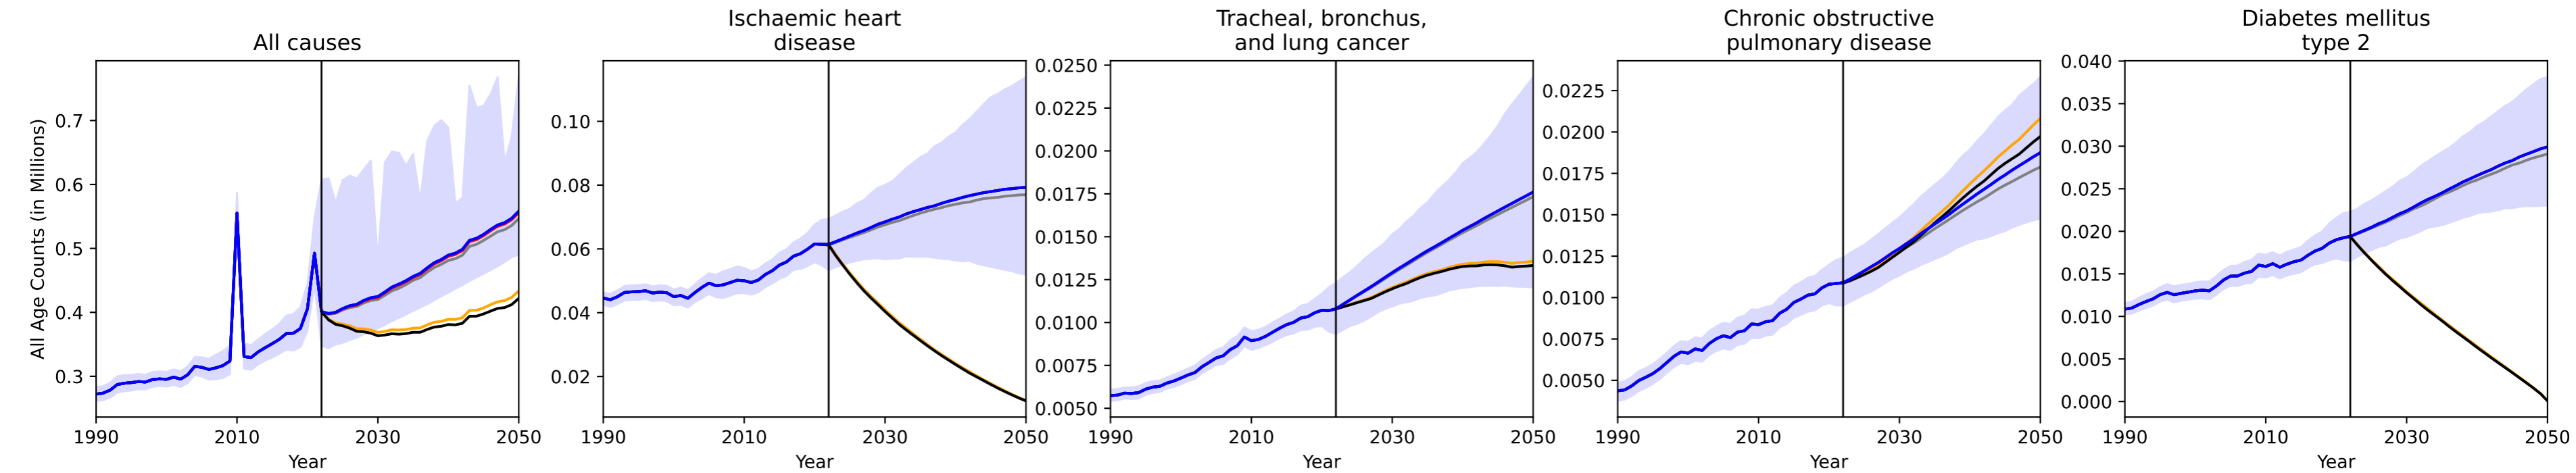

— Safer Environment — Improved Behavioural and Metabolic Risks — Improved Childhood Nutrition and Vaccination — Combined — Reference

# Central Latin America

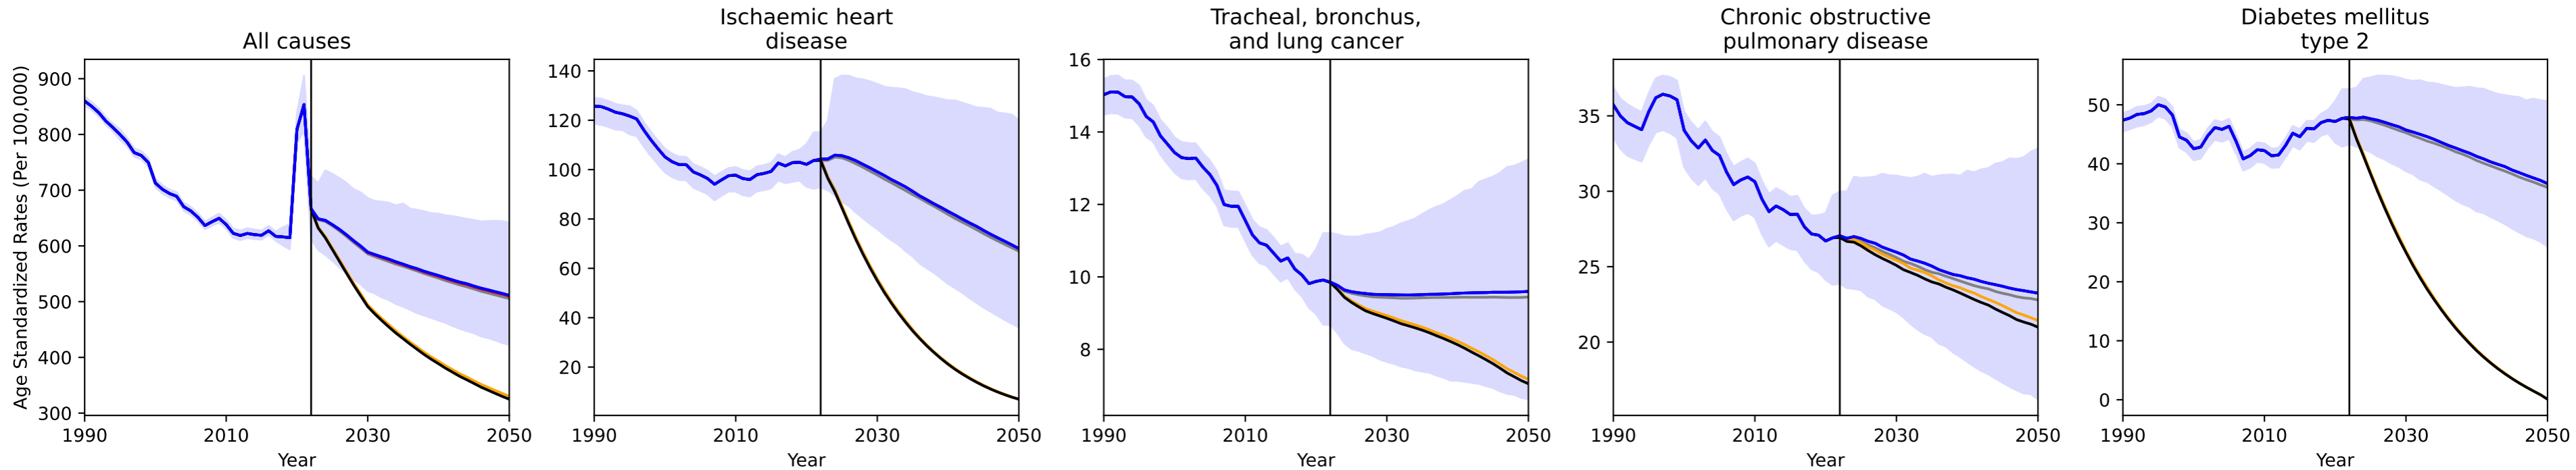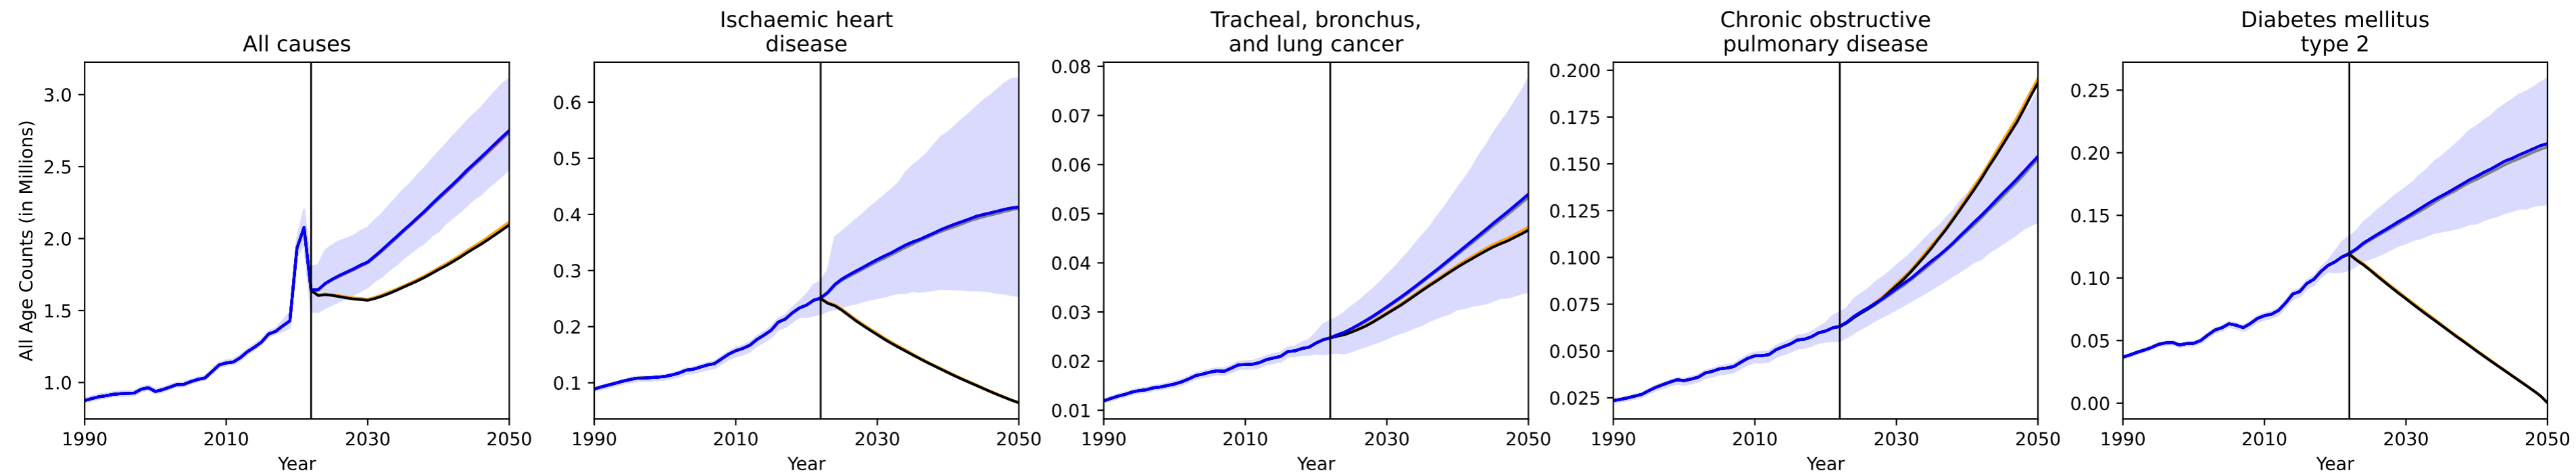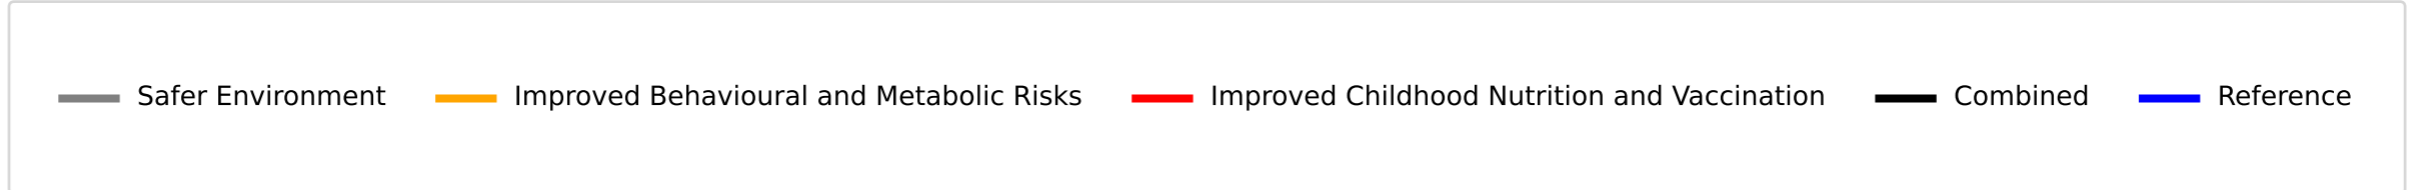

# Tropical Latin America

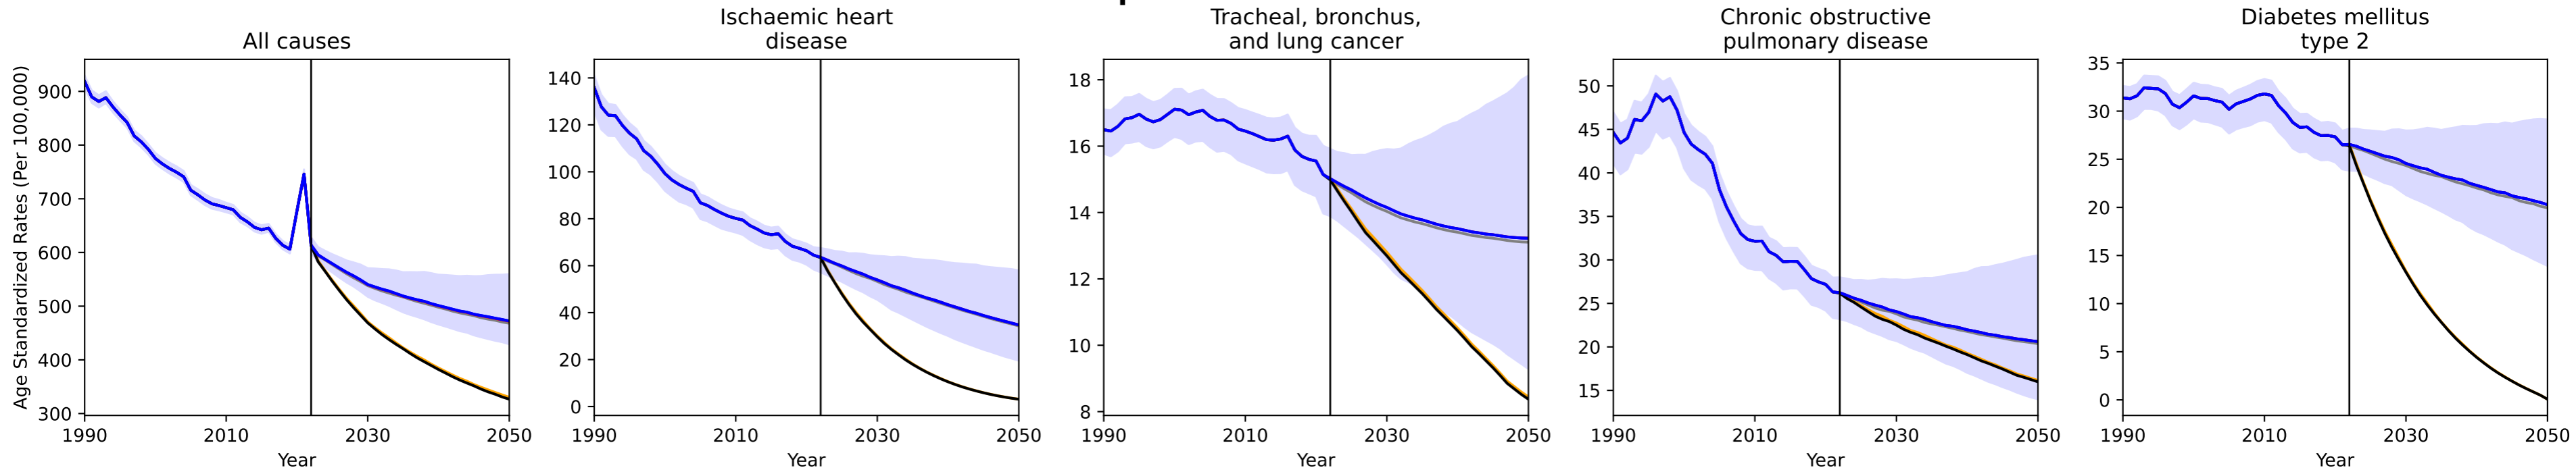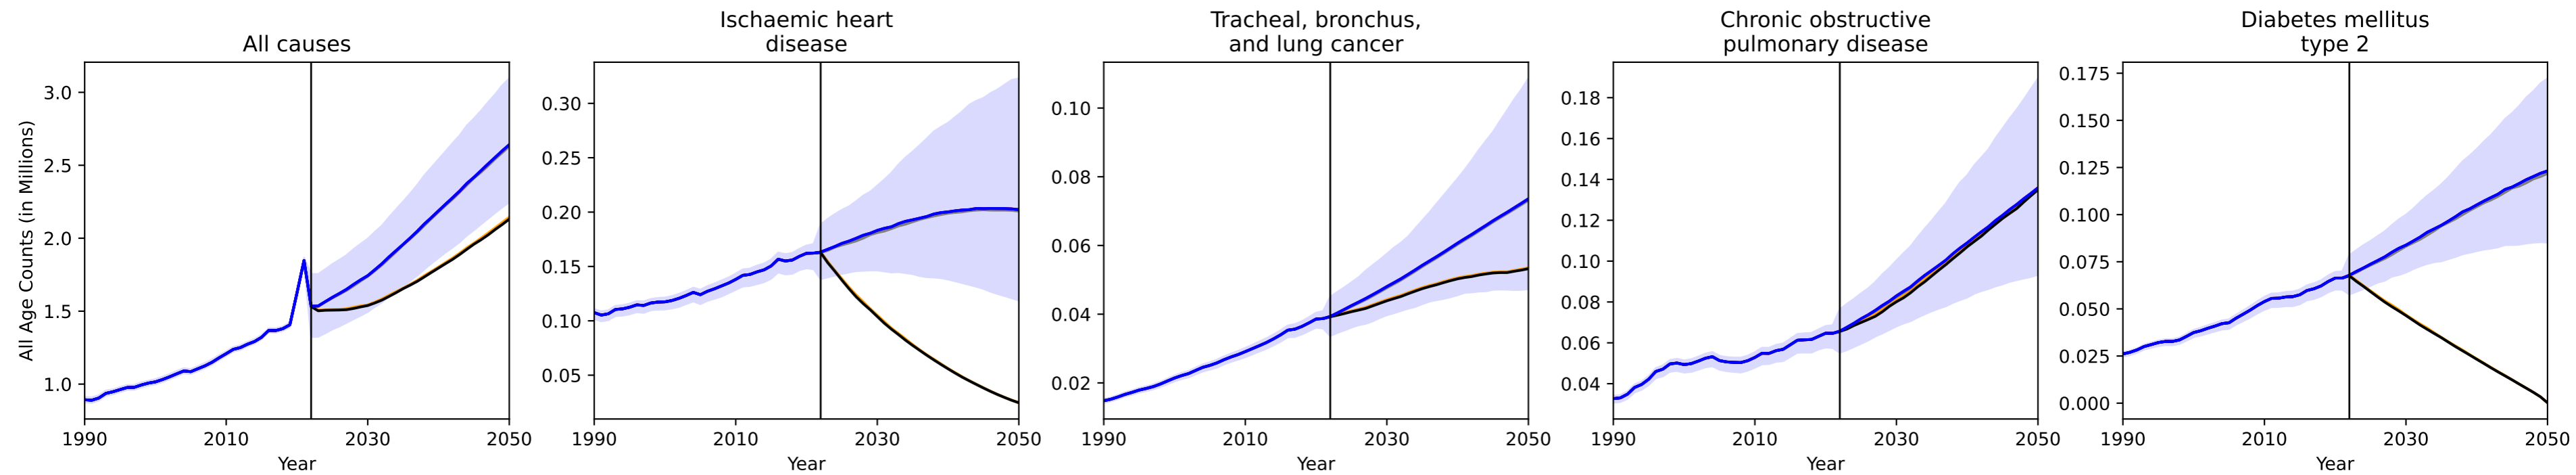

# North Africa And Middle East

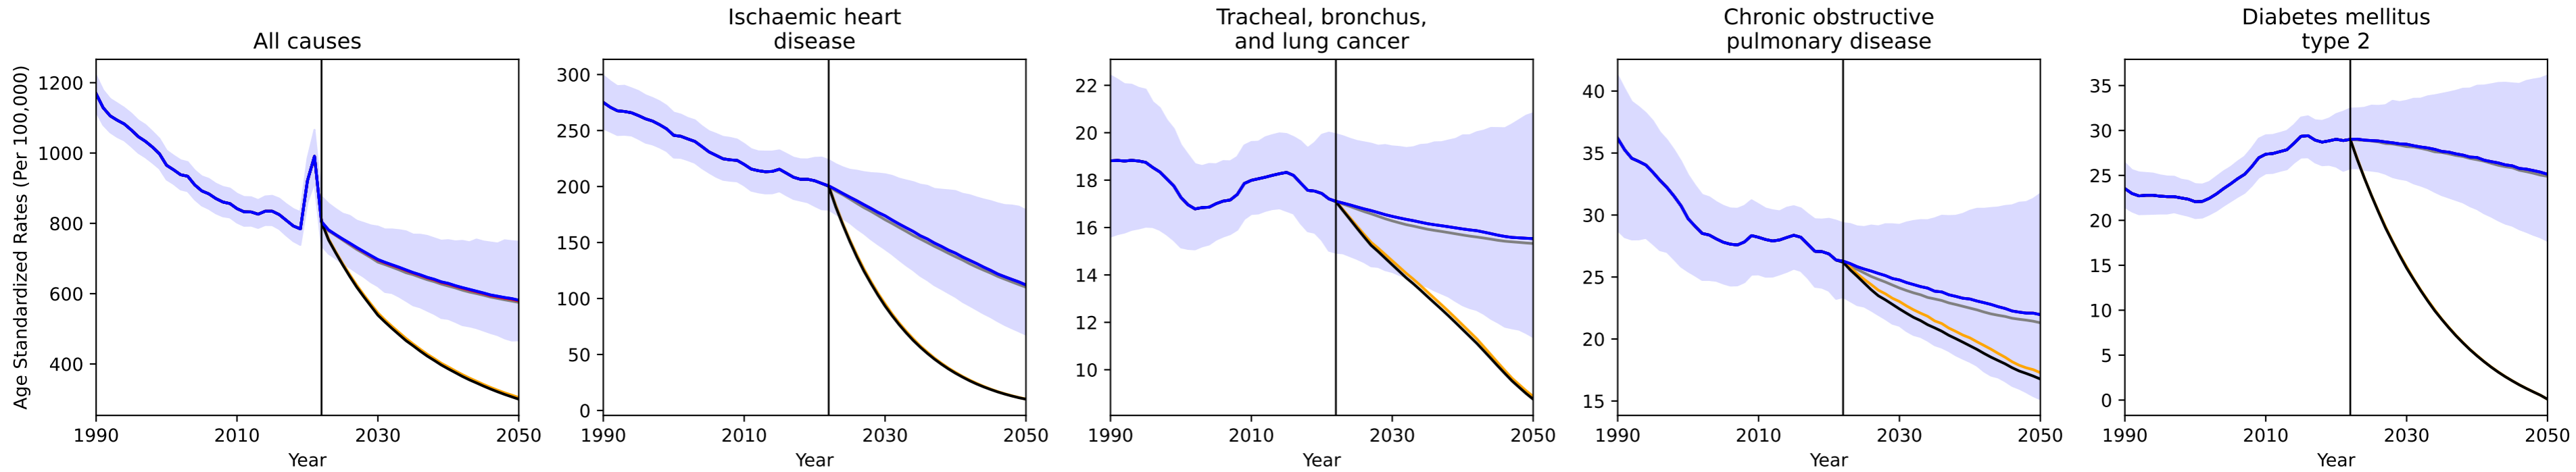

— Safer Environment    — Improved Behavioural and Metabolic Risks    — Improved Childhood Nutrition and Vaccination    — Combined    — Reference

# South Asia



— Safer Environment — Improved Behavioural and Metabolic Risks — Improved Childhood Nutrition and Vaccination — Combined — Reference



# East Asia

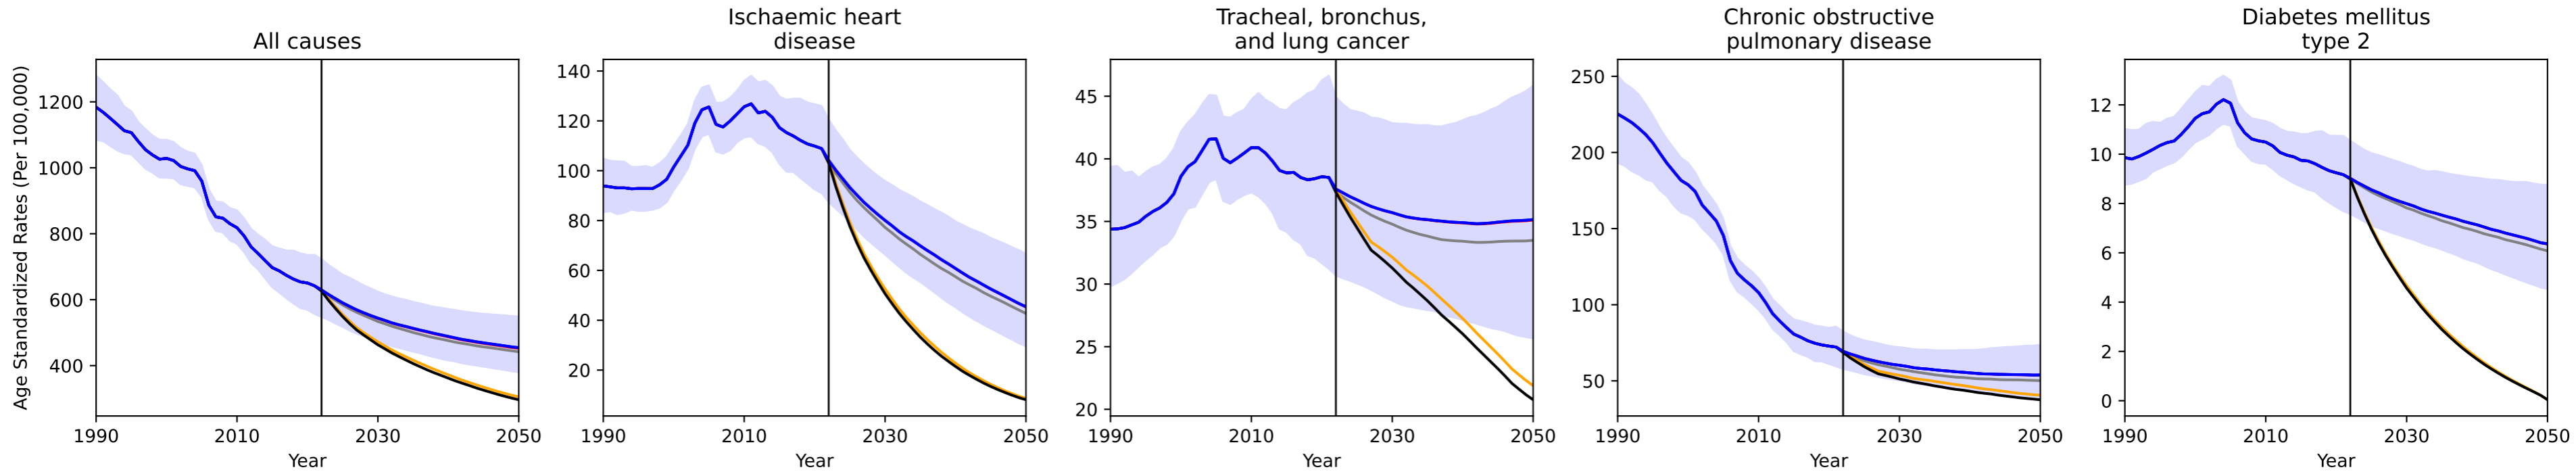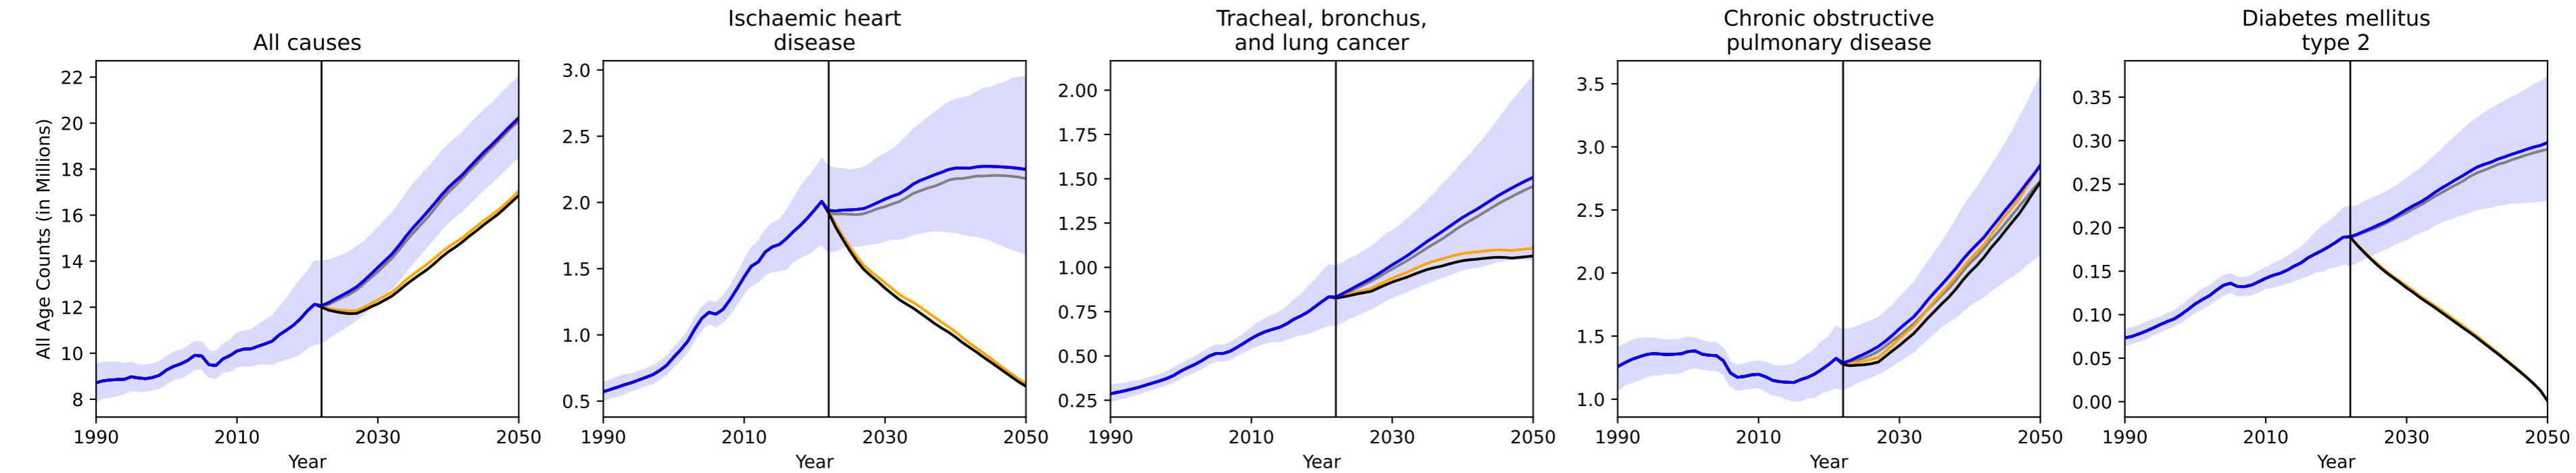

— Safer Environment    — Improved Behavioural and Metabolic Risks    — Improved Childhood Nutrition and Vaccination    — Combined    — Reference

# Oceania

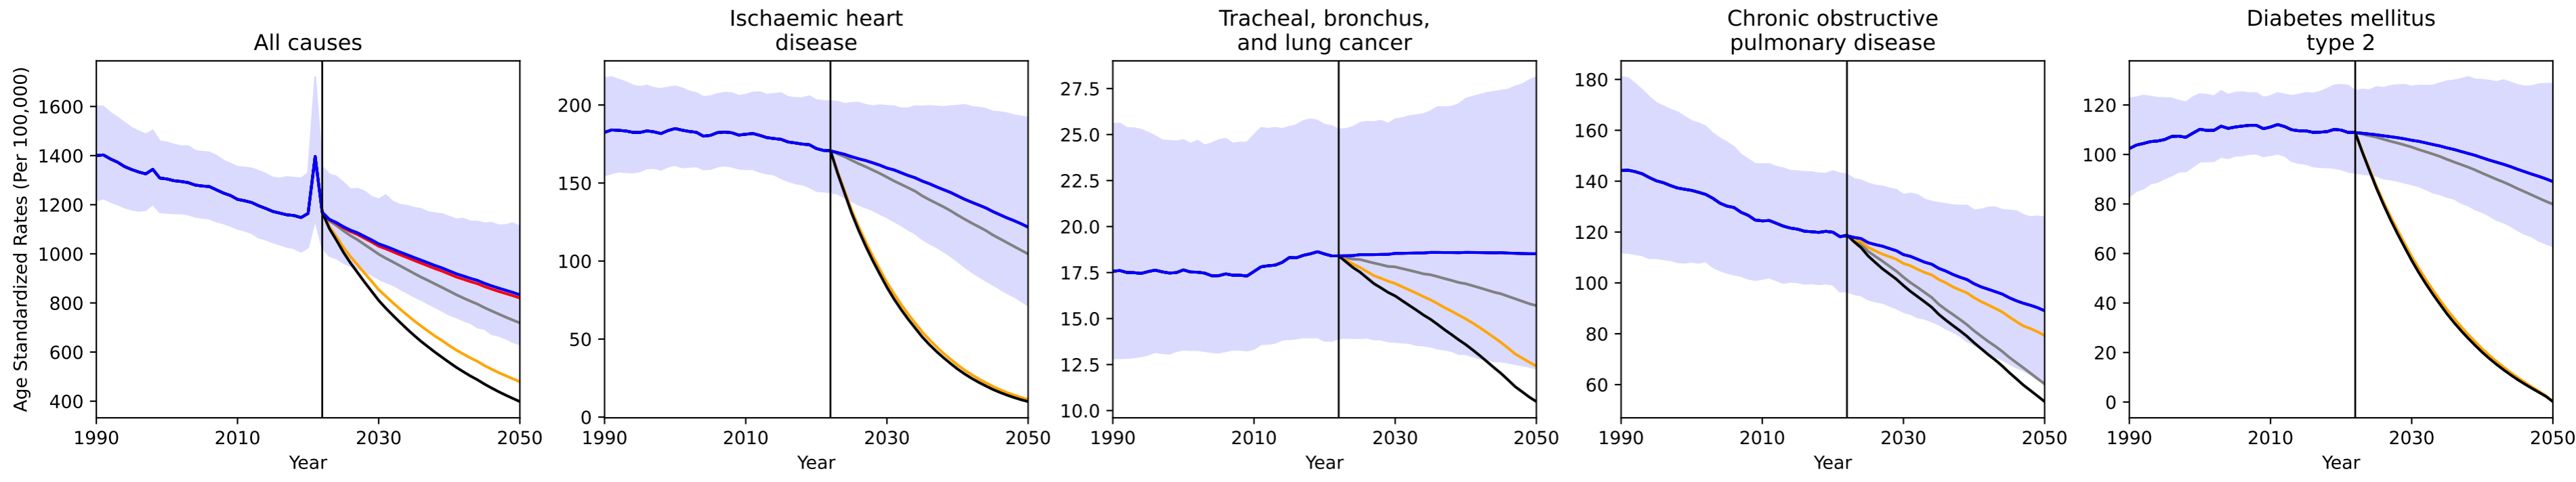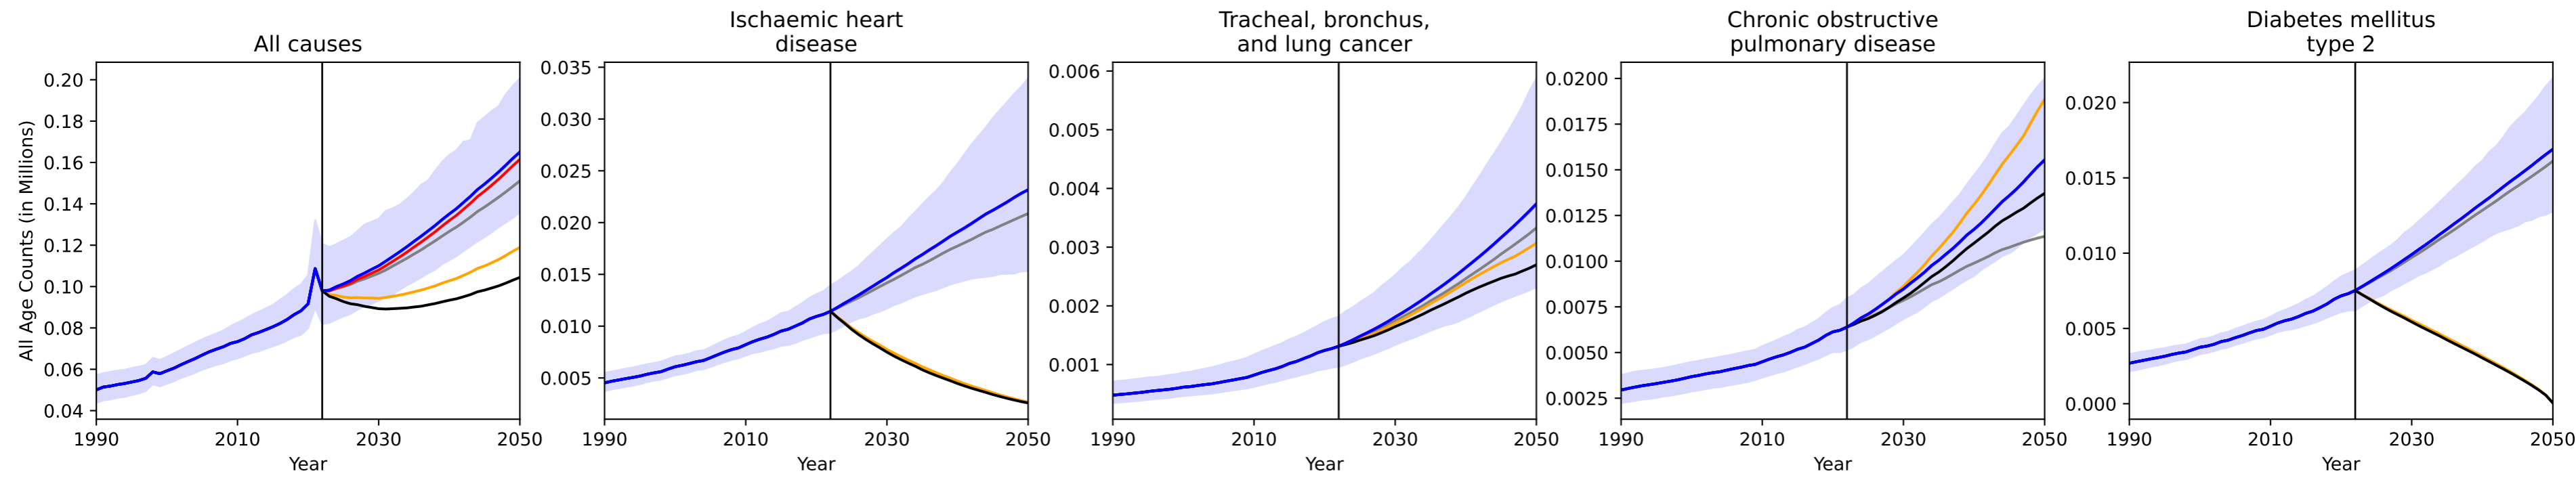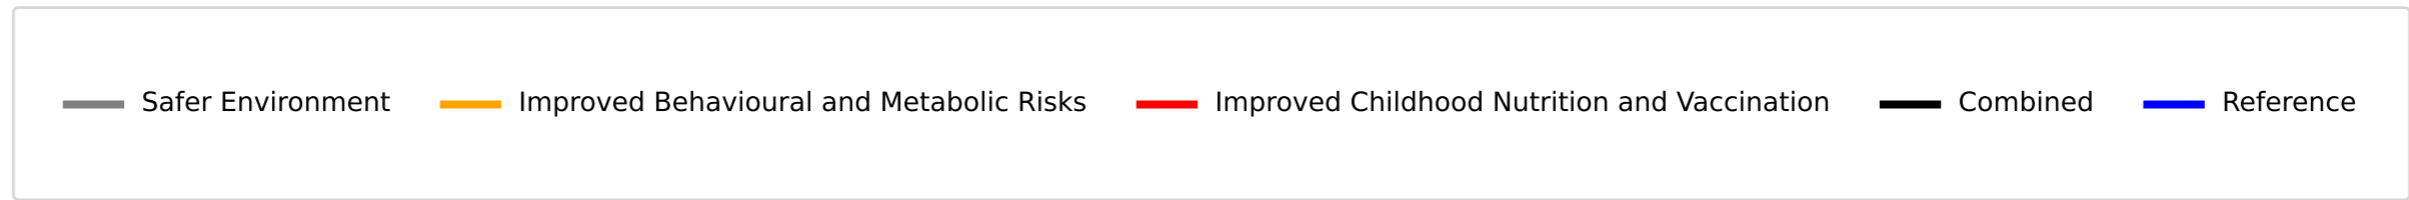

# Southeast Asia

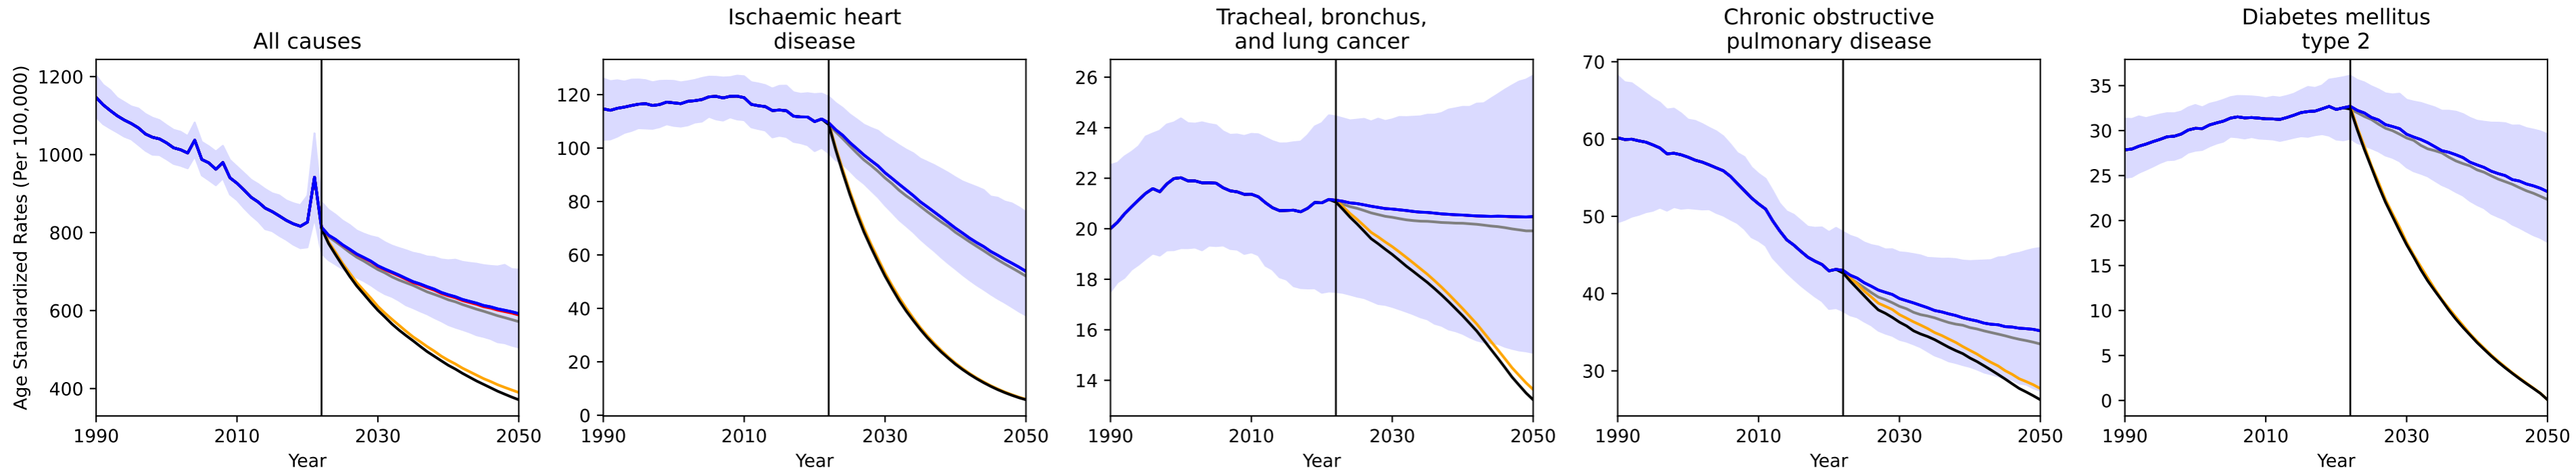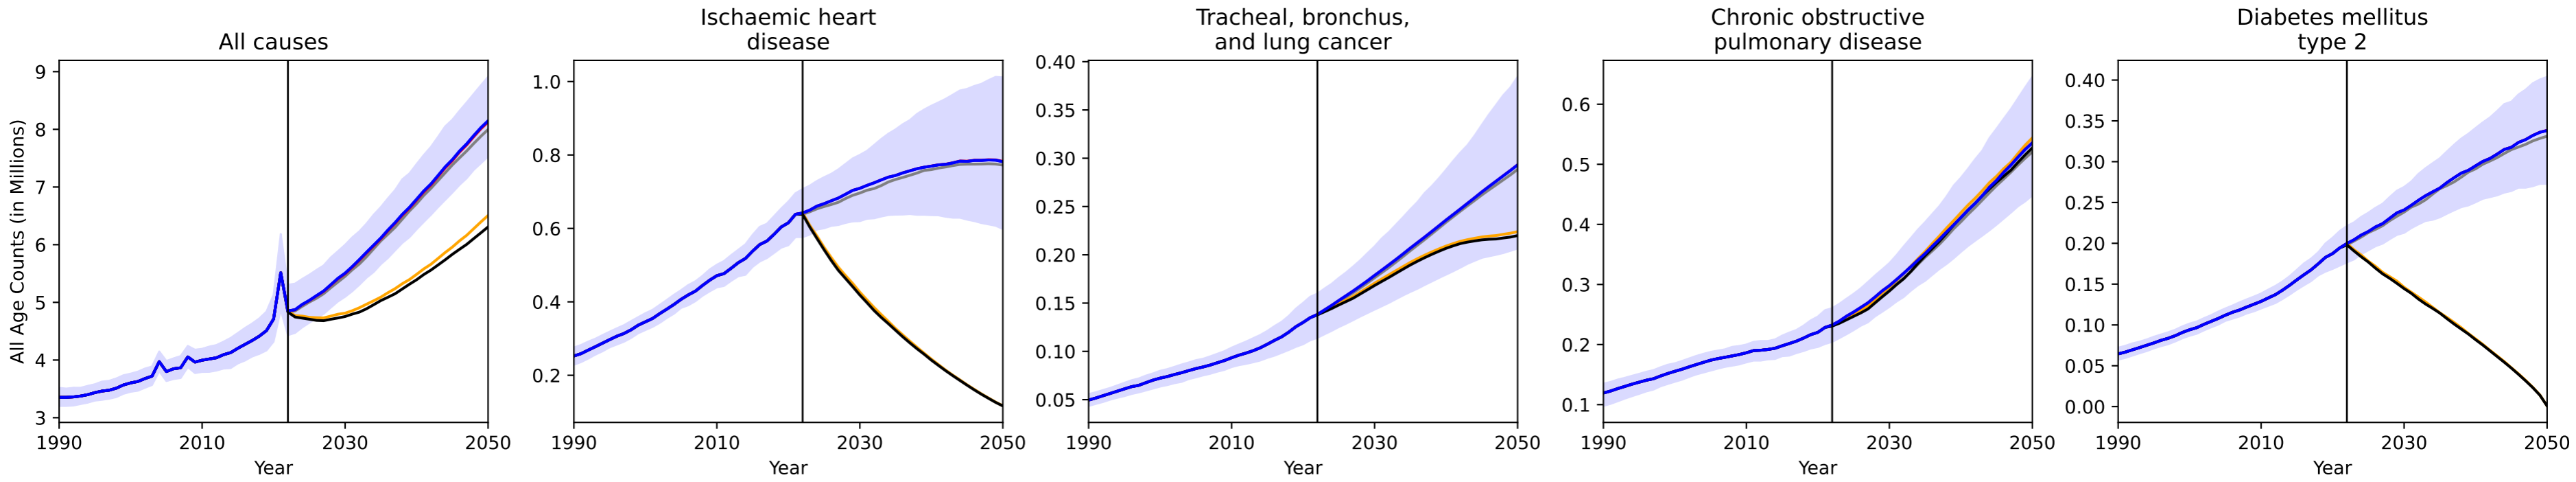

— Safer Environment — Improved Behavioural and Metabolic Risks — Improved Childhood Nutrition and Vaccination — Combined — Reference

# Central Sub-Saharan Africa

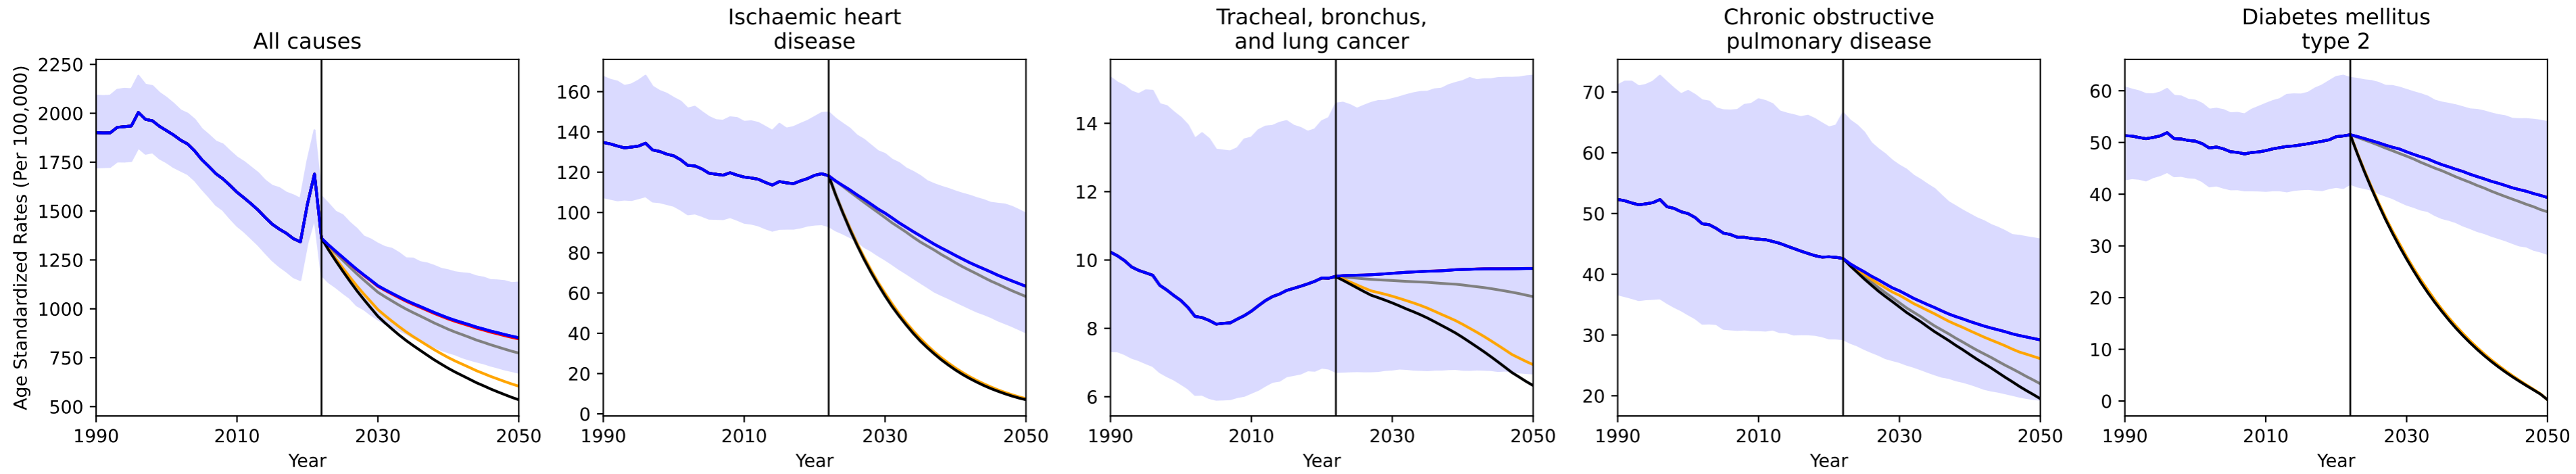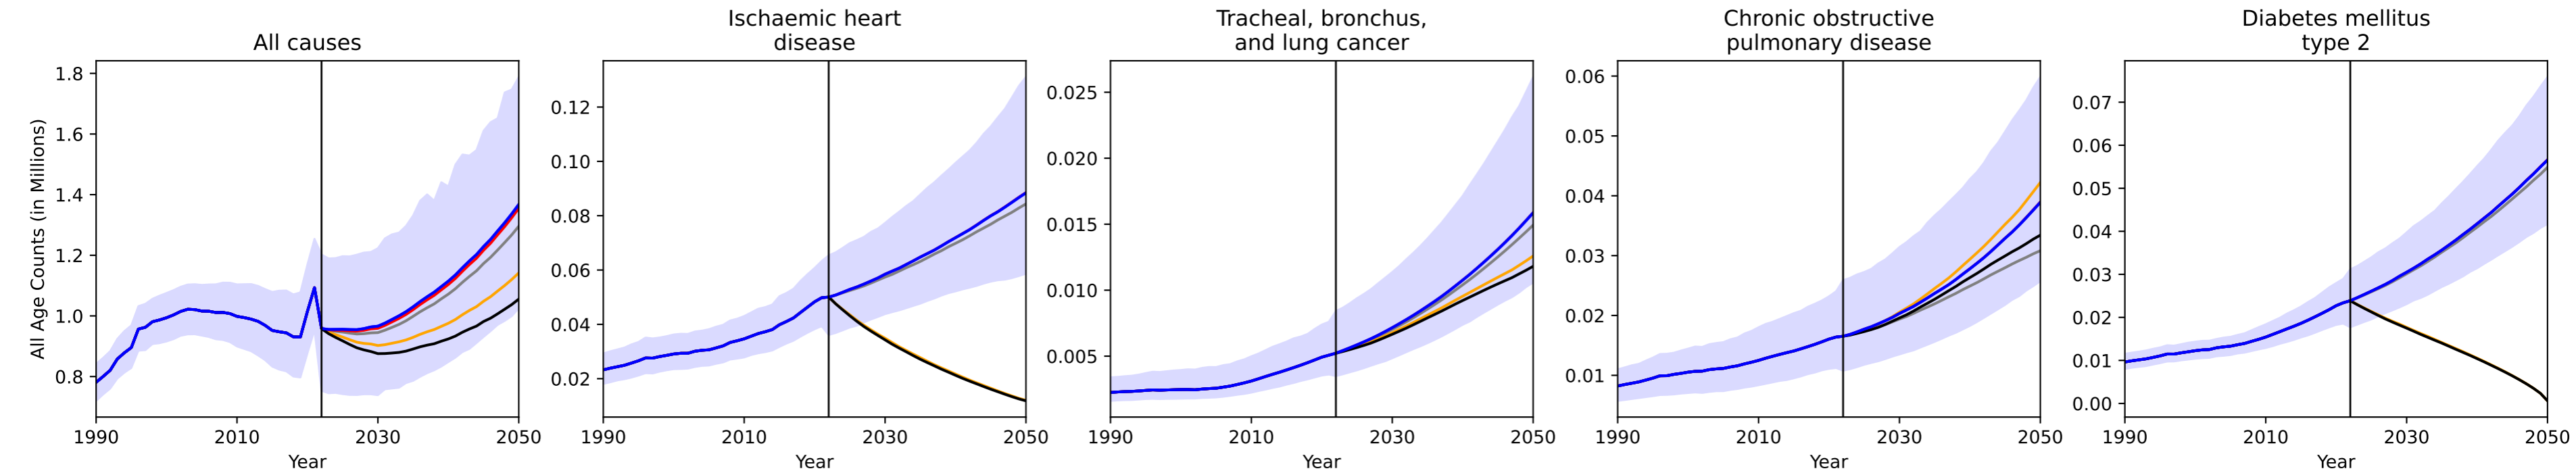

— Safer Environment — Improved Behavioural and Metabolic Risks — Improved Childhood Nutrition and Vaccination — Combined — Reference

# Eastern Sub-Saharan Africa

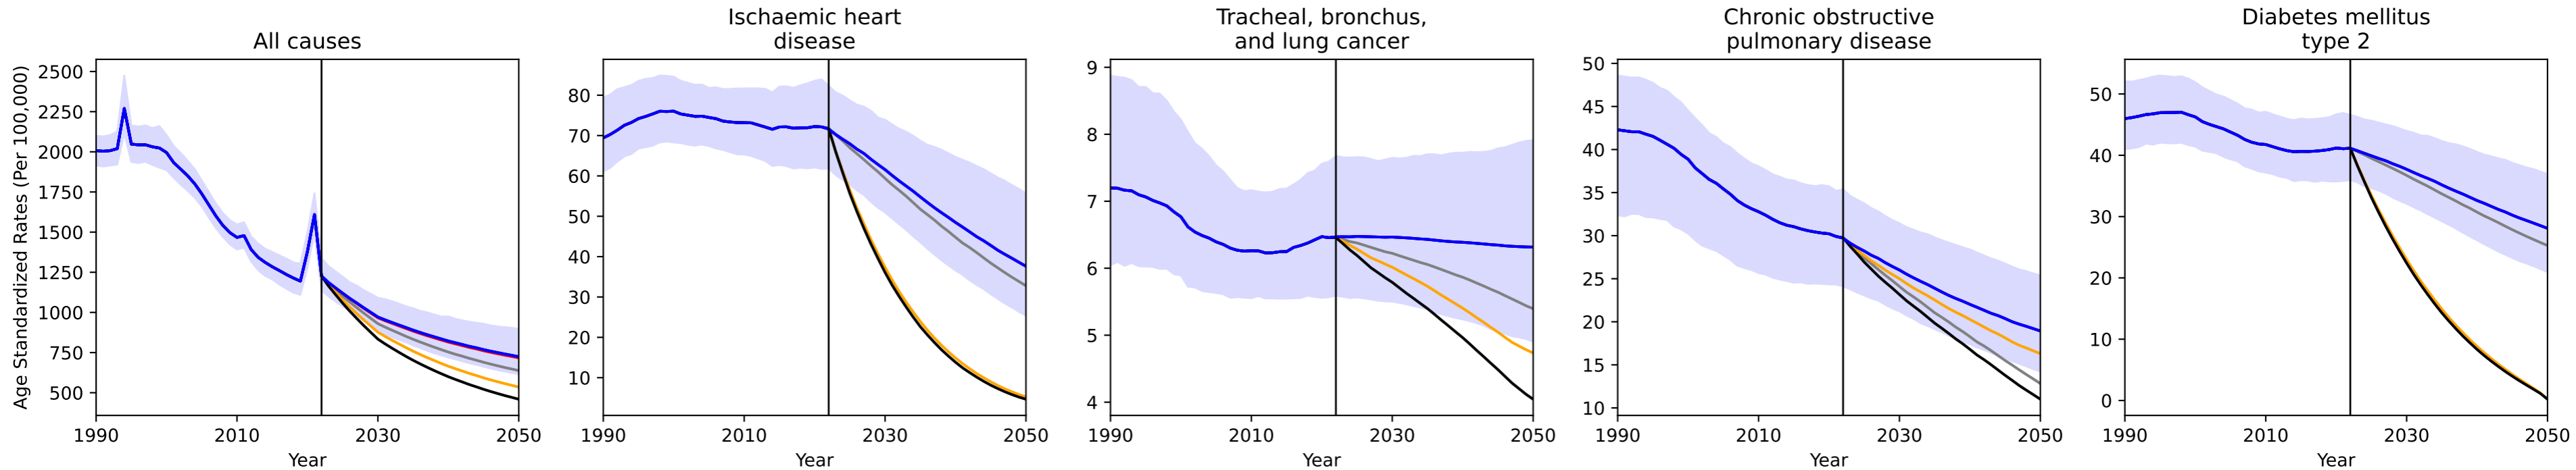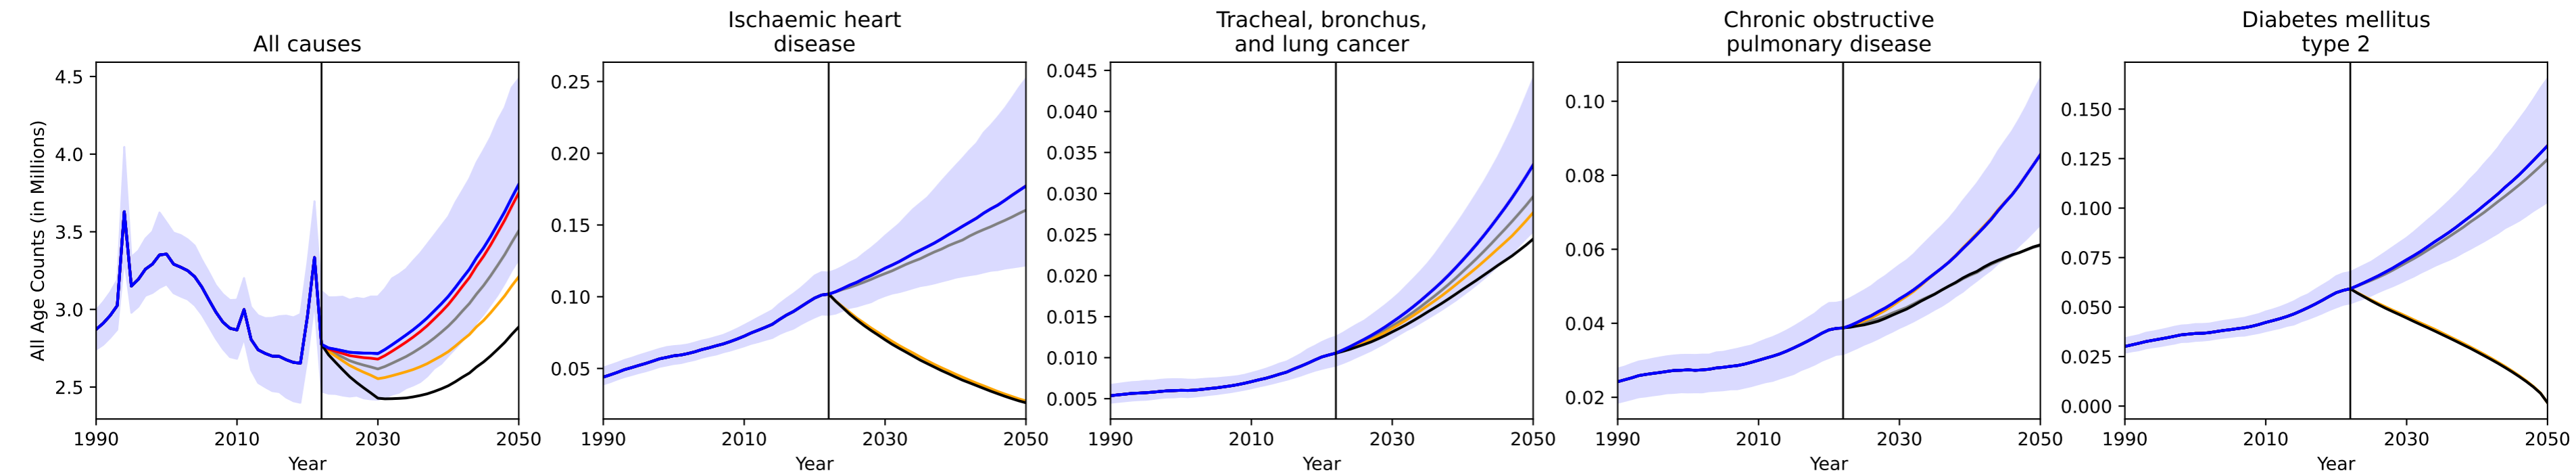

— Safer Environment — Improved Behavioural and Metabolic Risks — Improved Childhood Nutrition and Vaccination — Combined — Reference

# Southern Sub-Saharan Africa

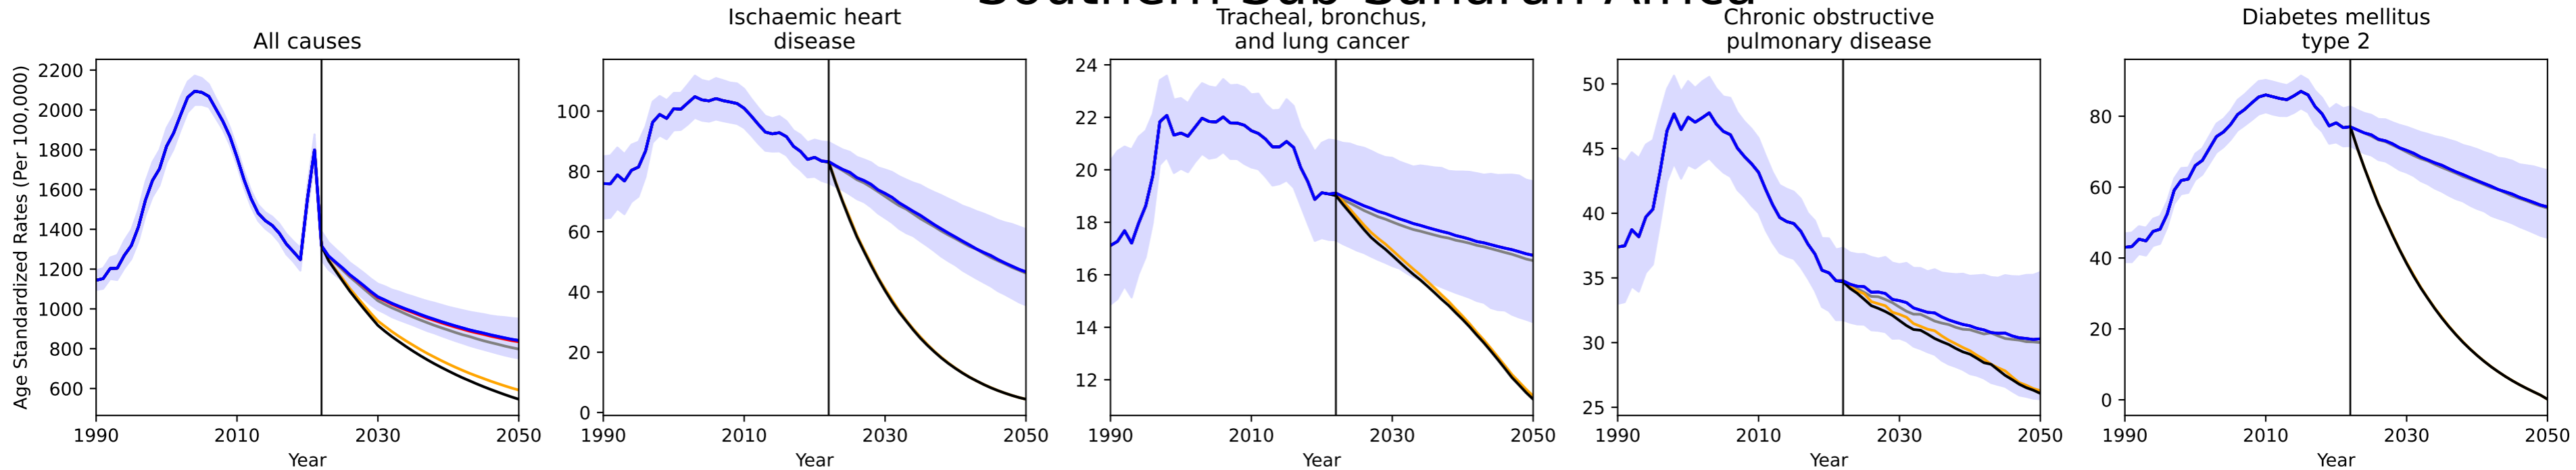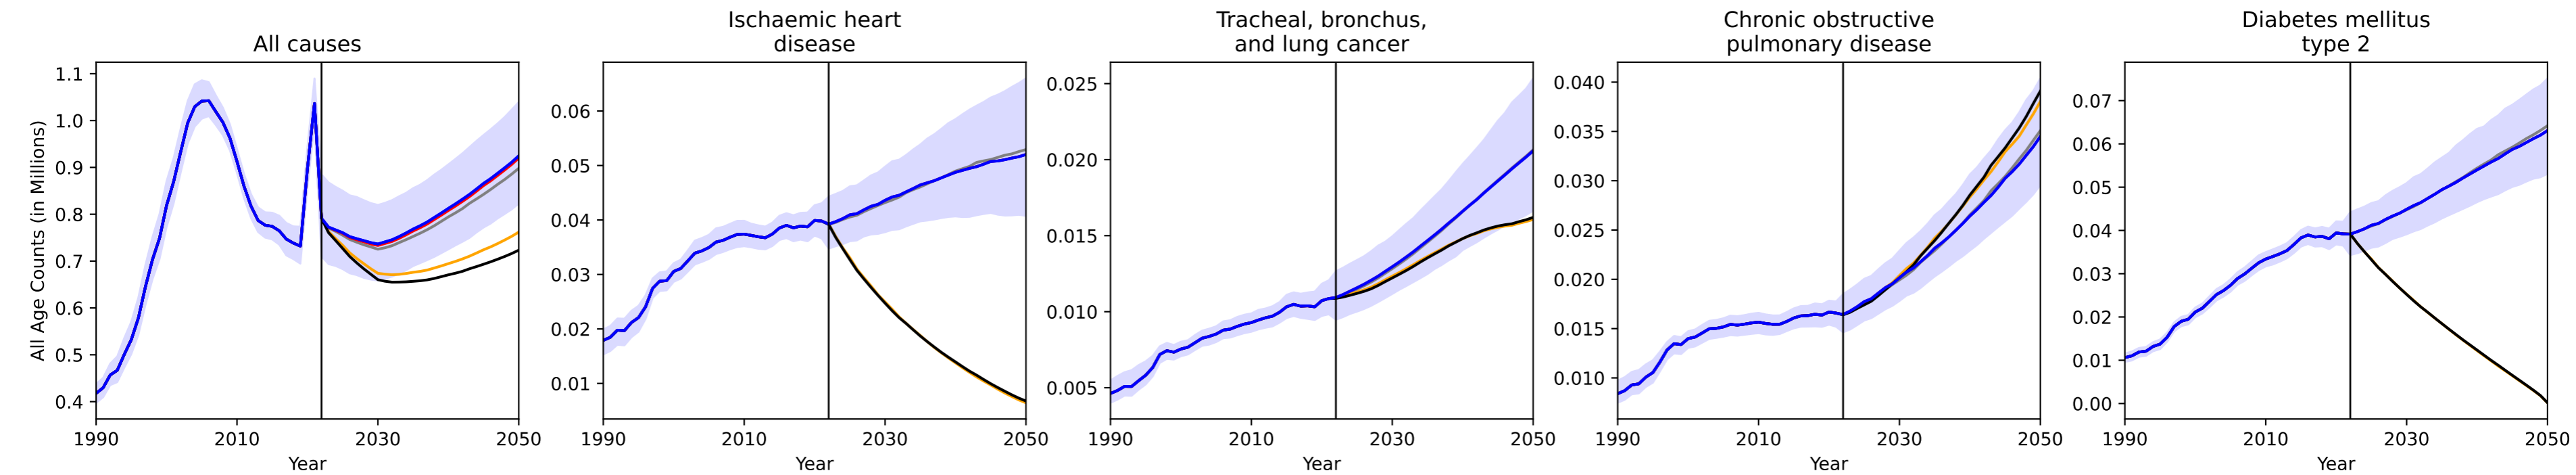

— Safer Environment — Improved Behavioural and Metabolic Risks — Improved Childhood Nutrition and Vaccination — Combined — Reference

# Western Sub-Saharan Africa

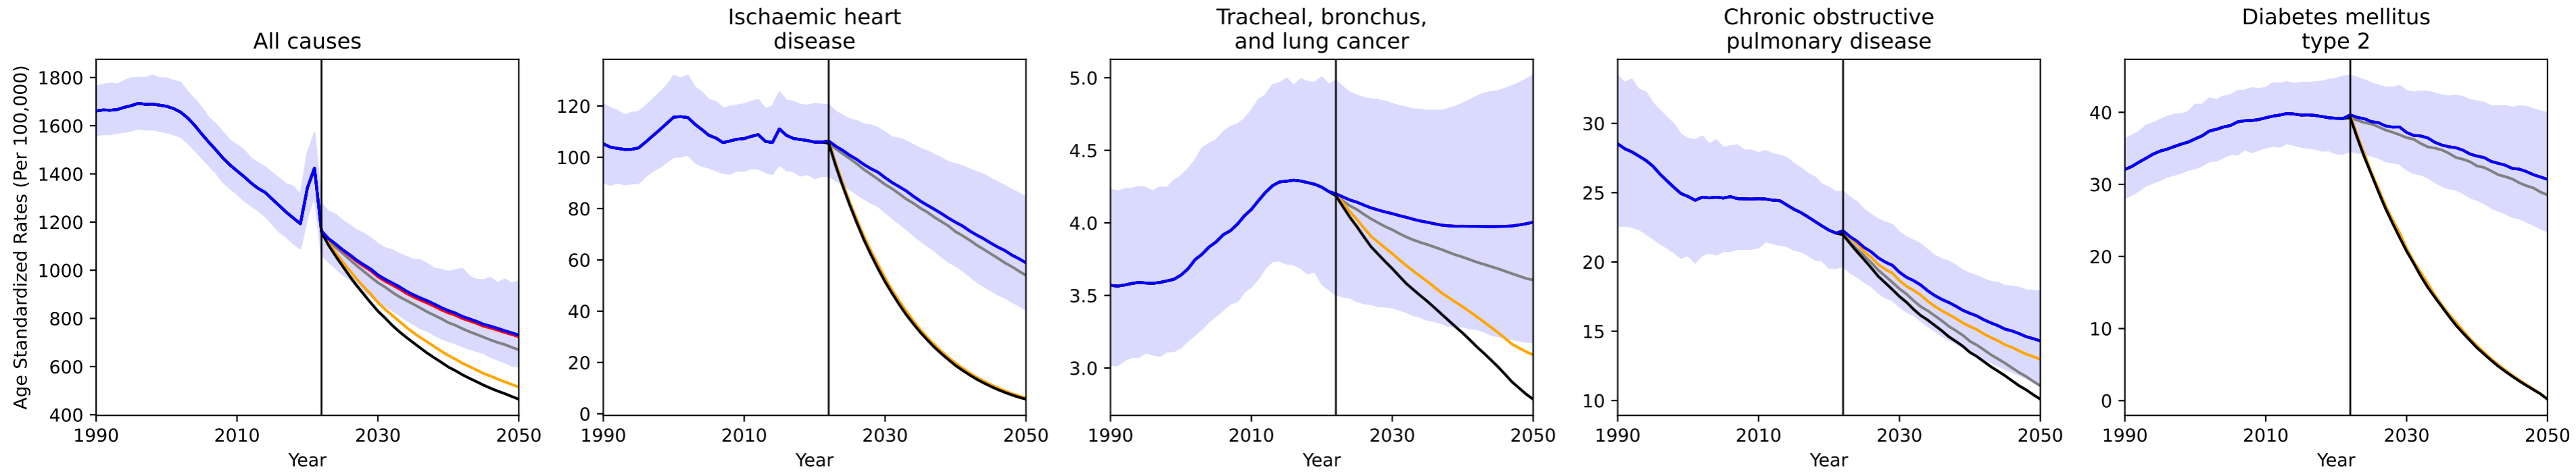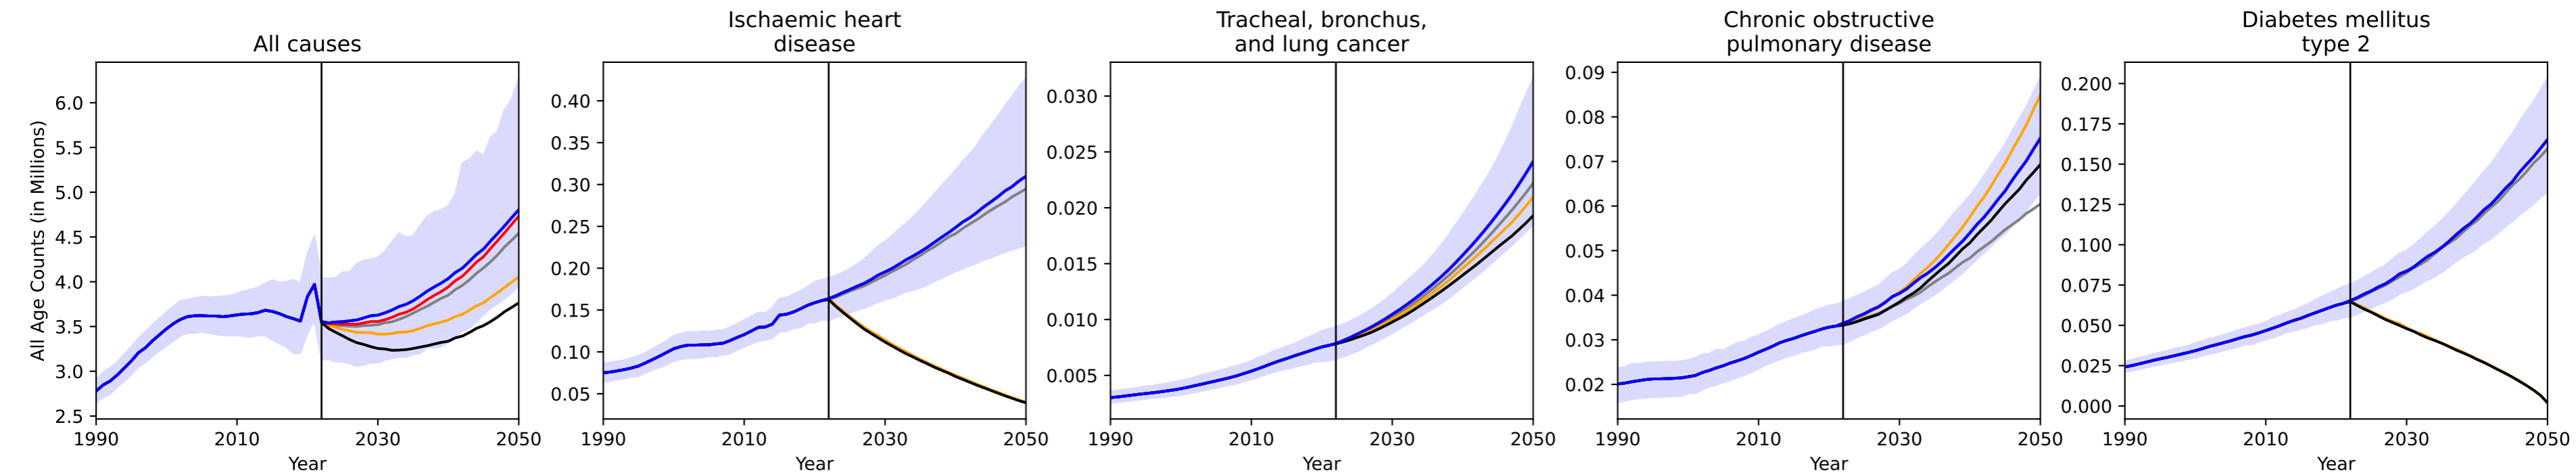

— Safer Environment — Improved Behavioural and Metabolic Risks — Improved Childhood Nutrition and Vaccination — Combined — Reference

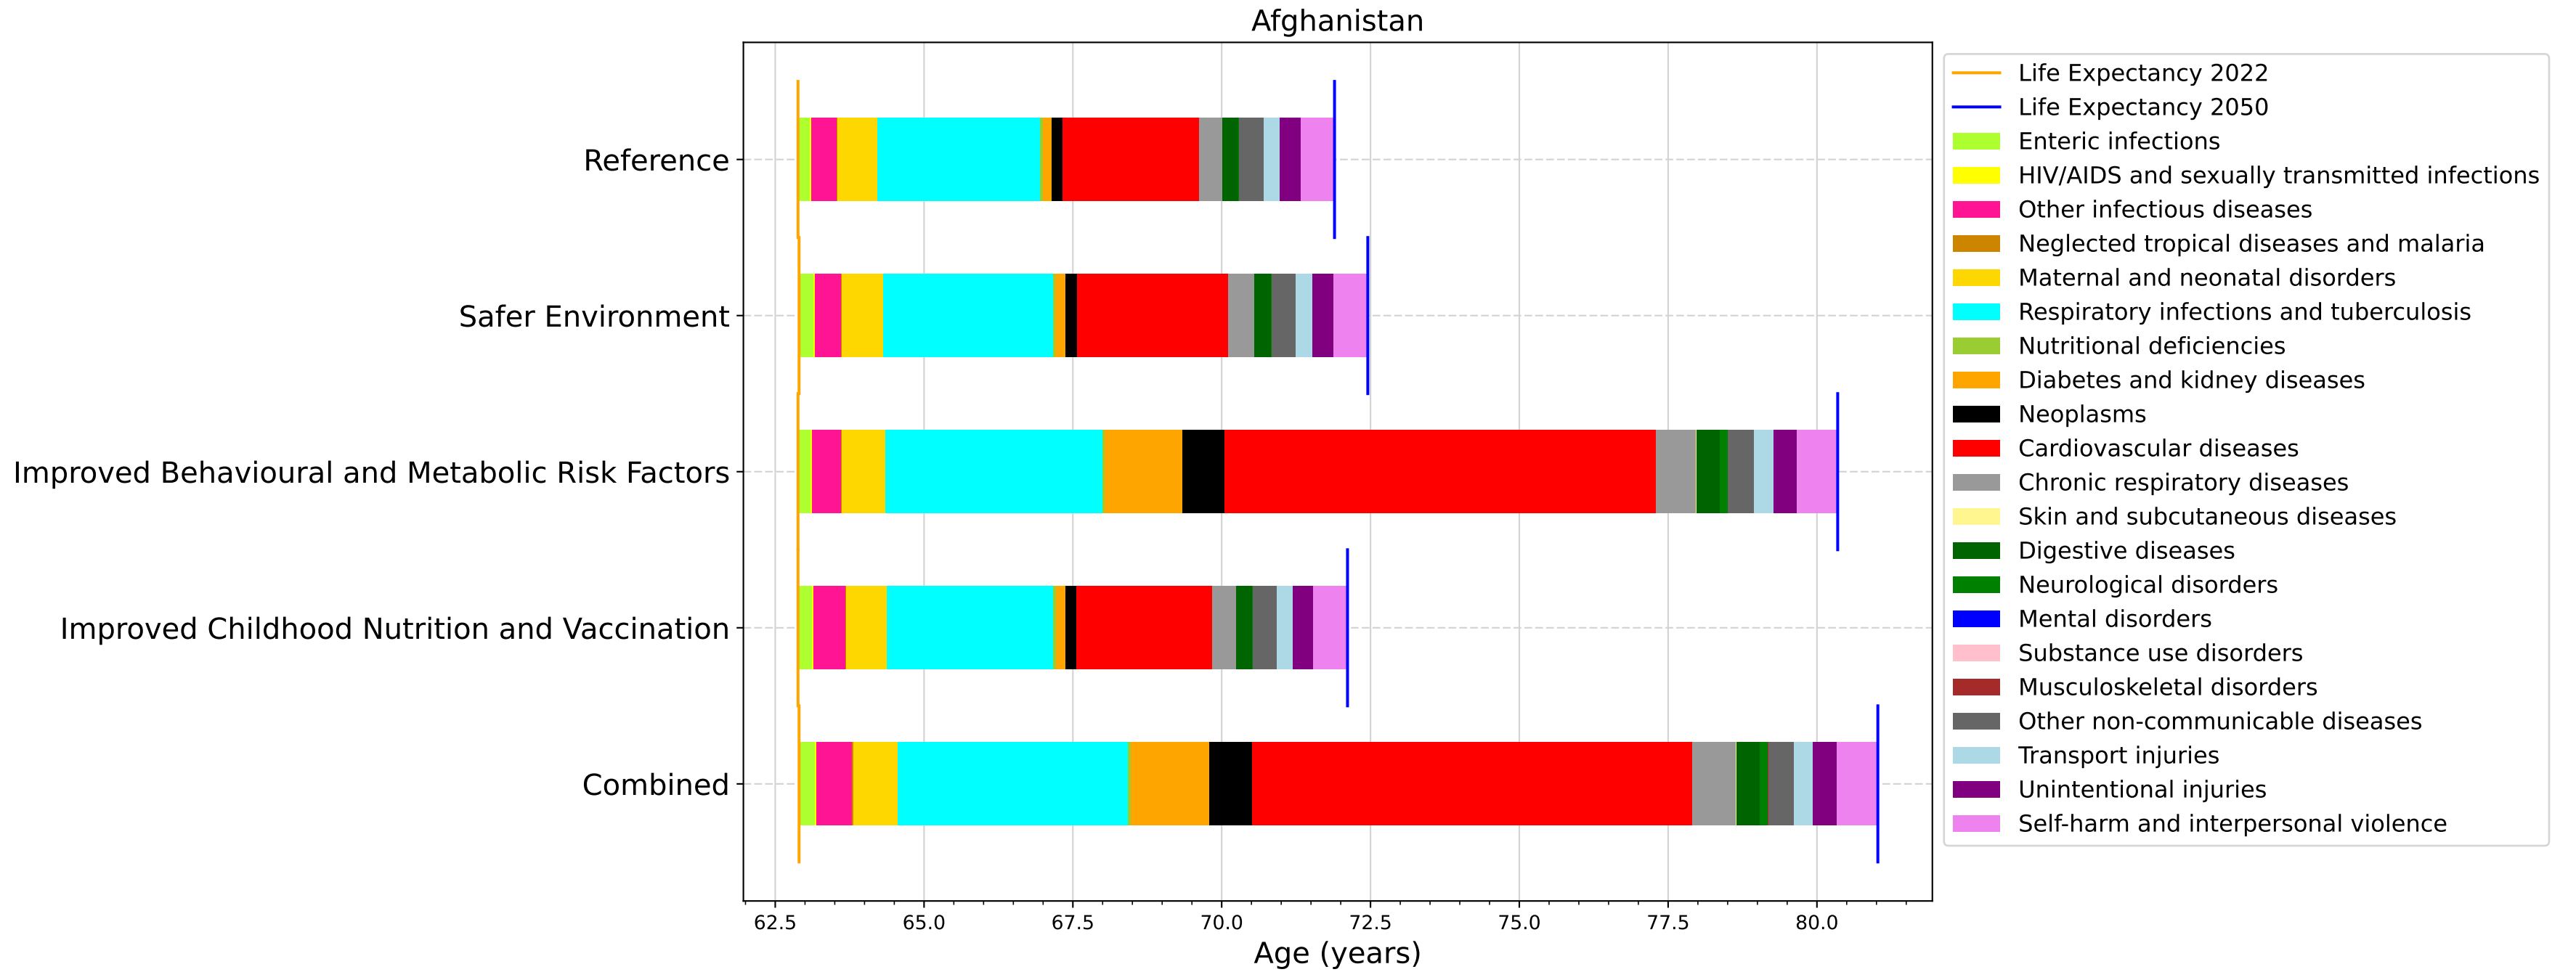



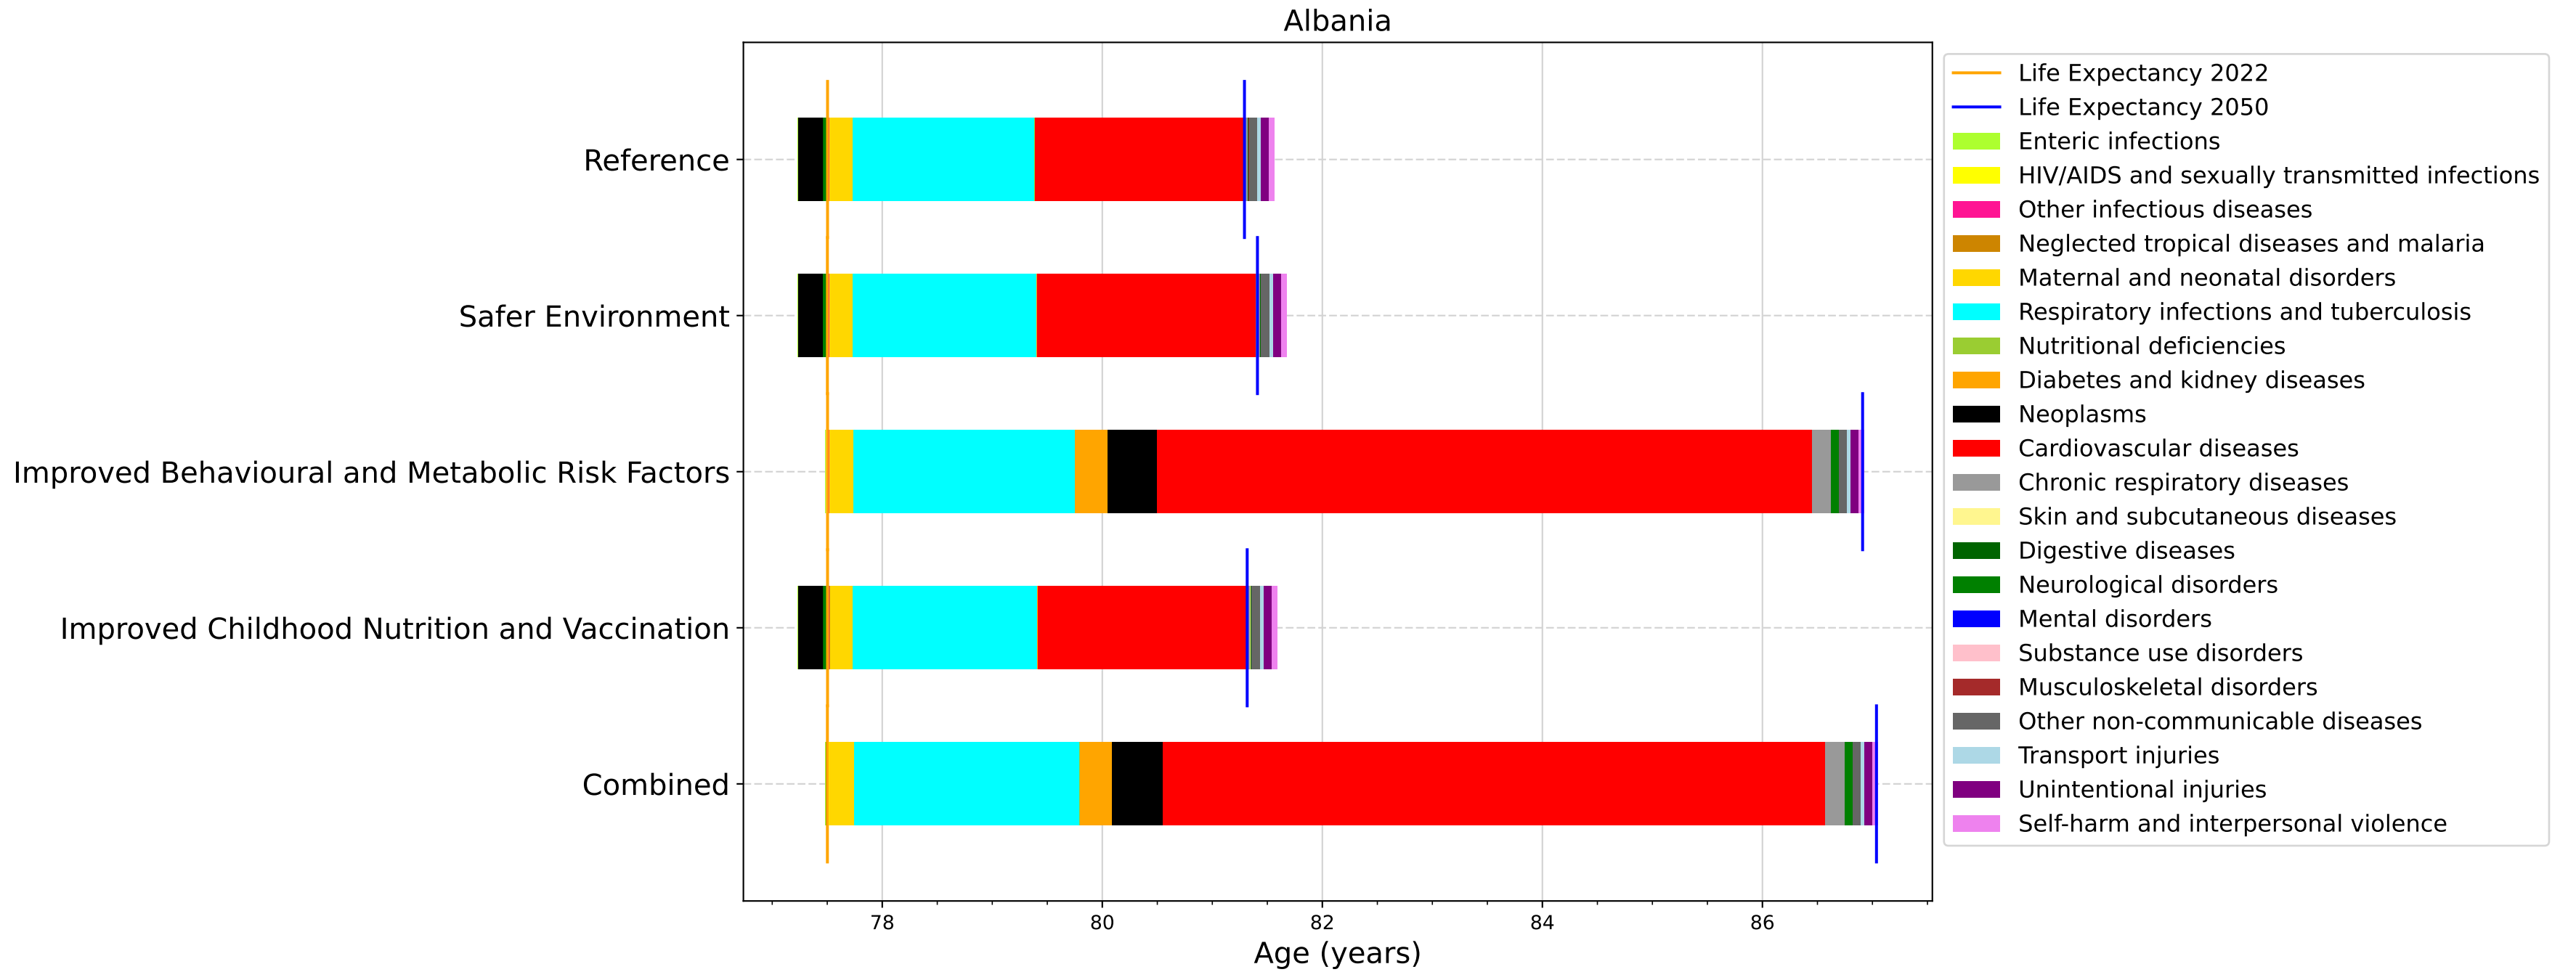

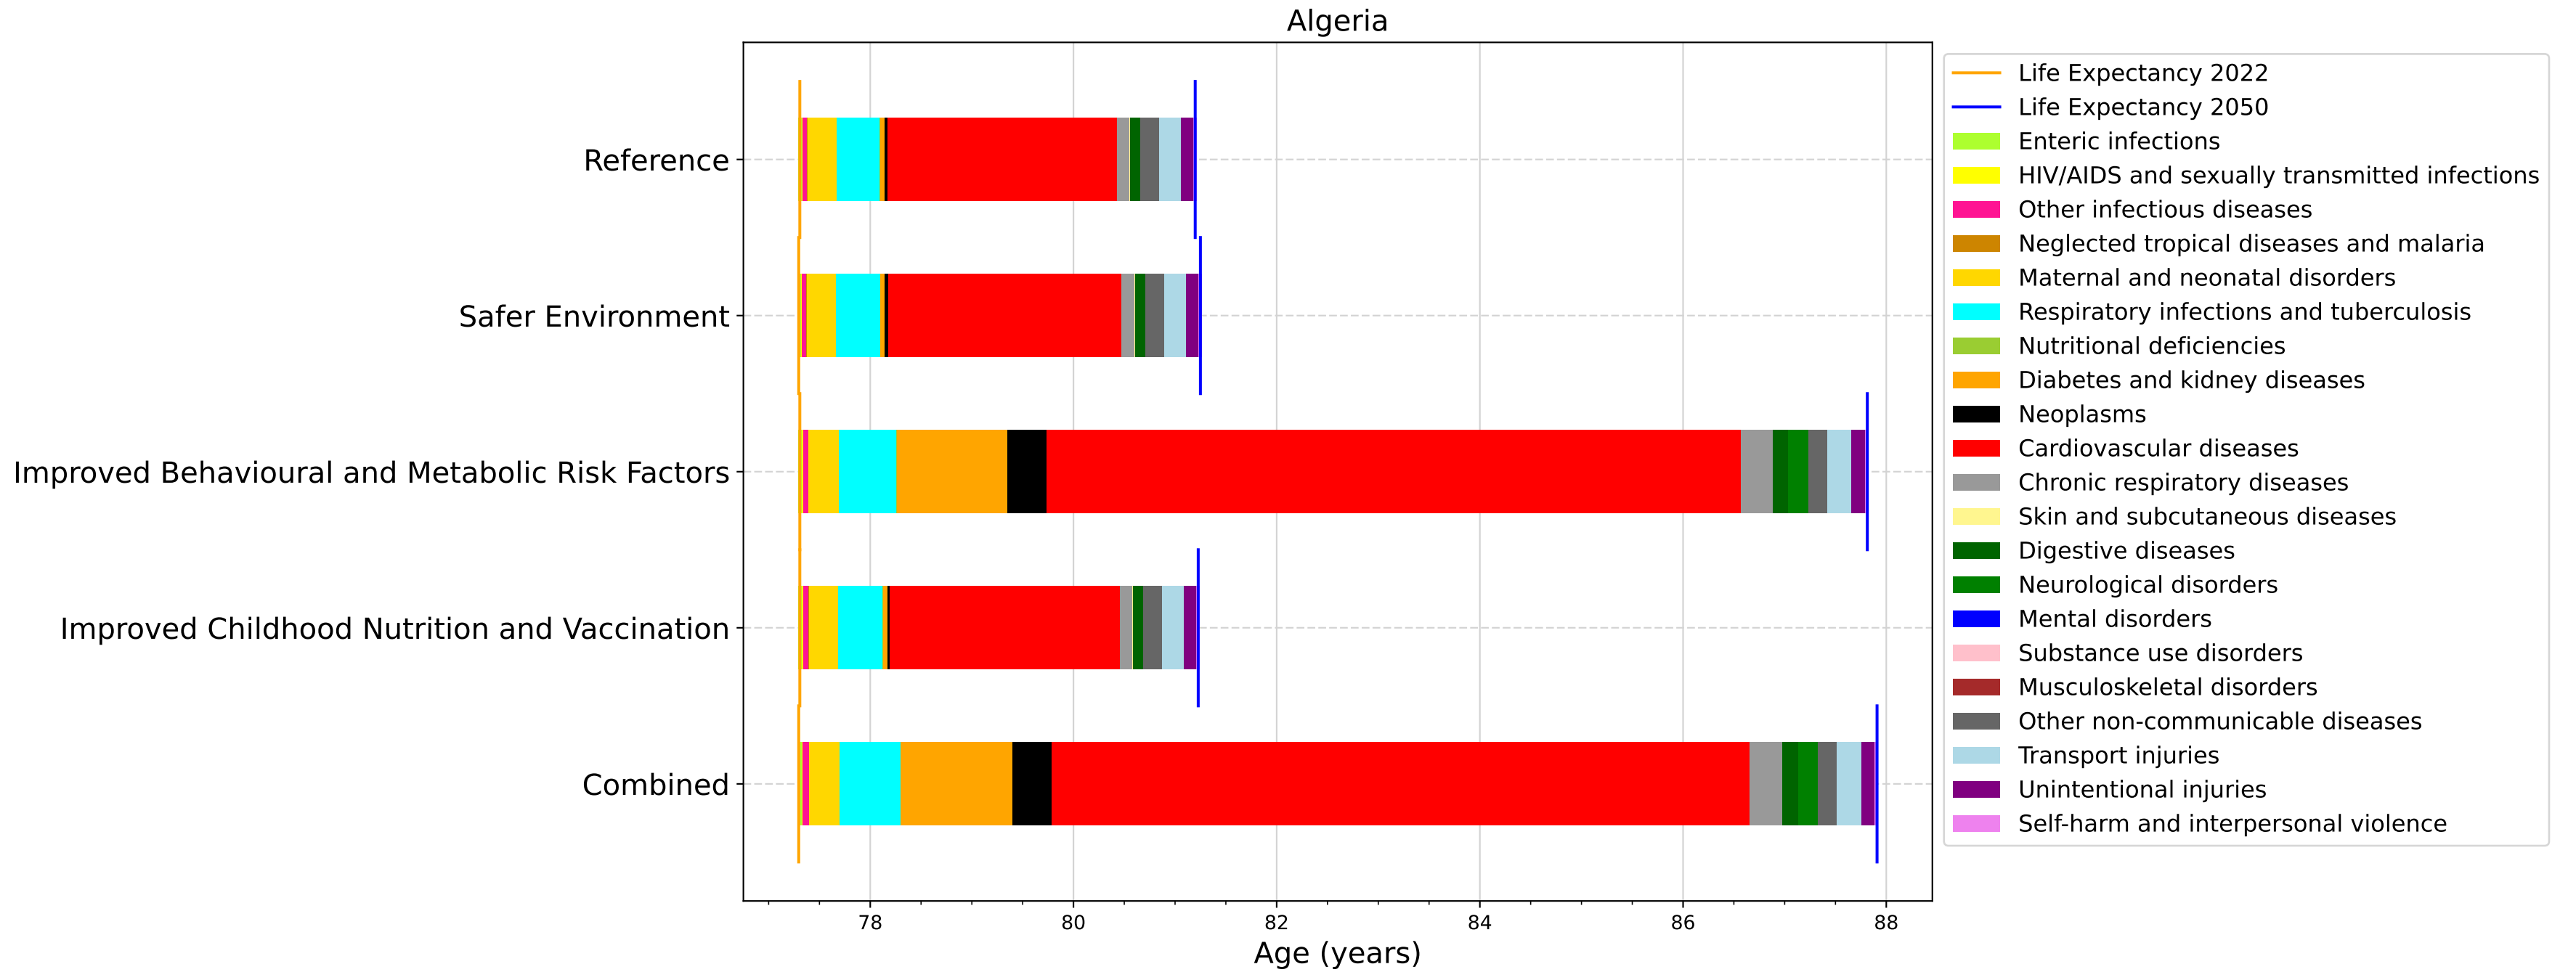

### American Samoa

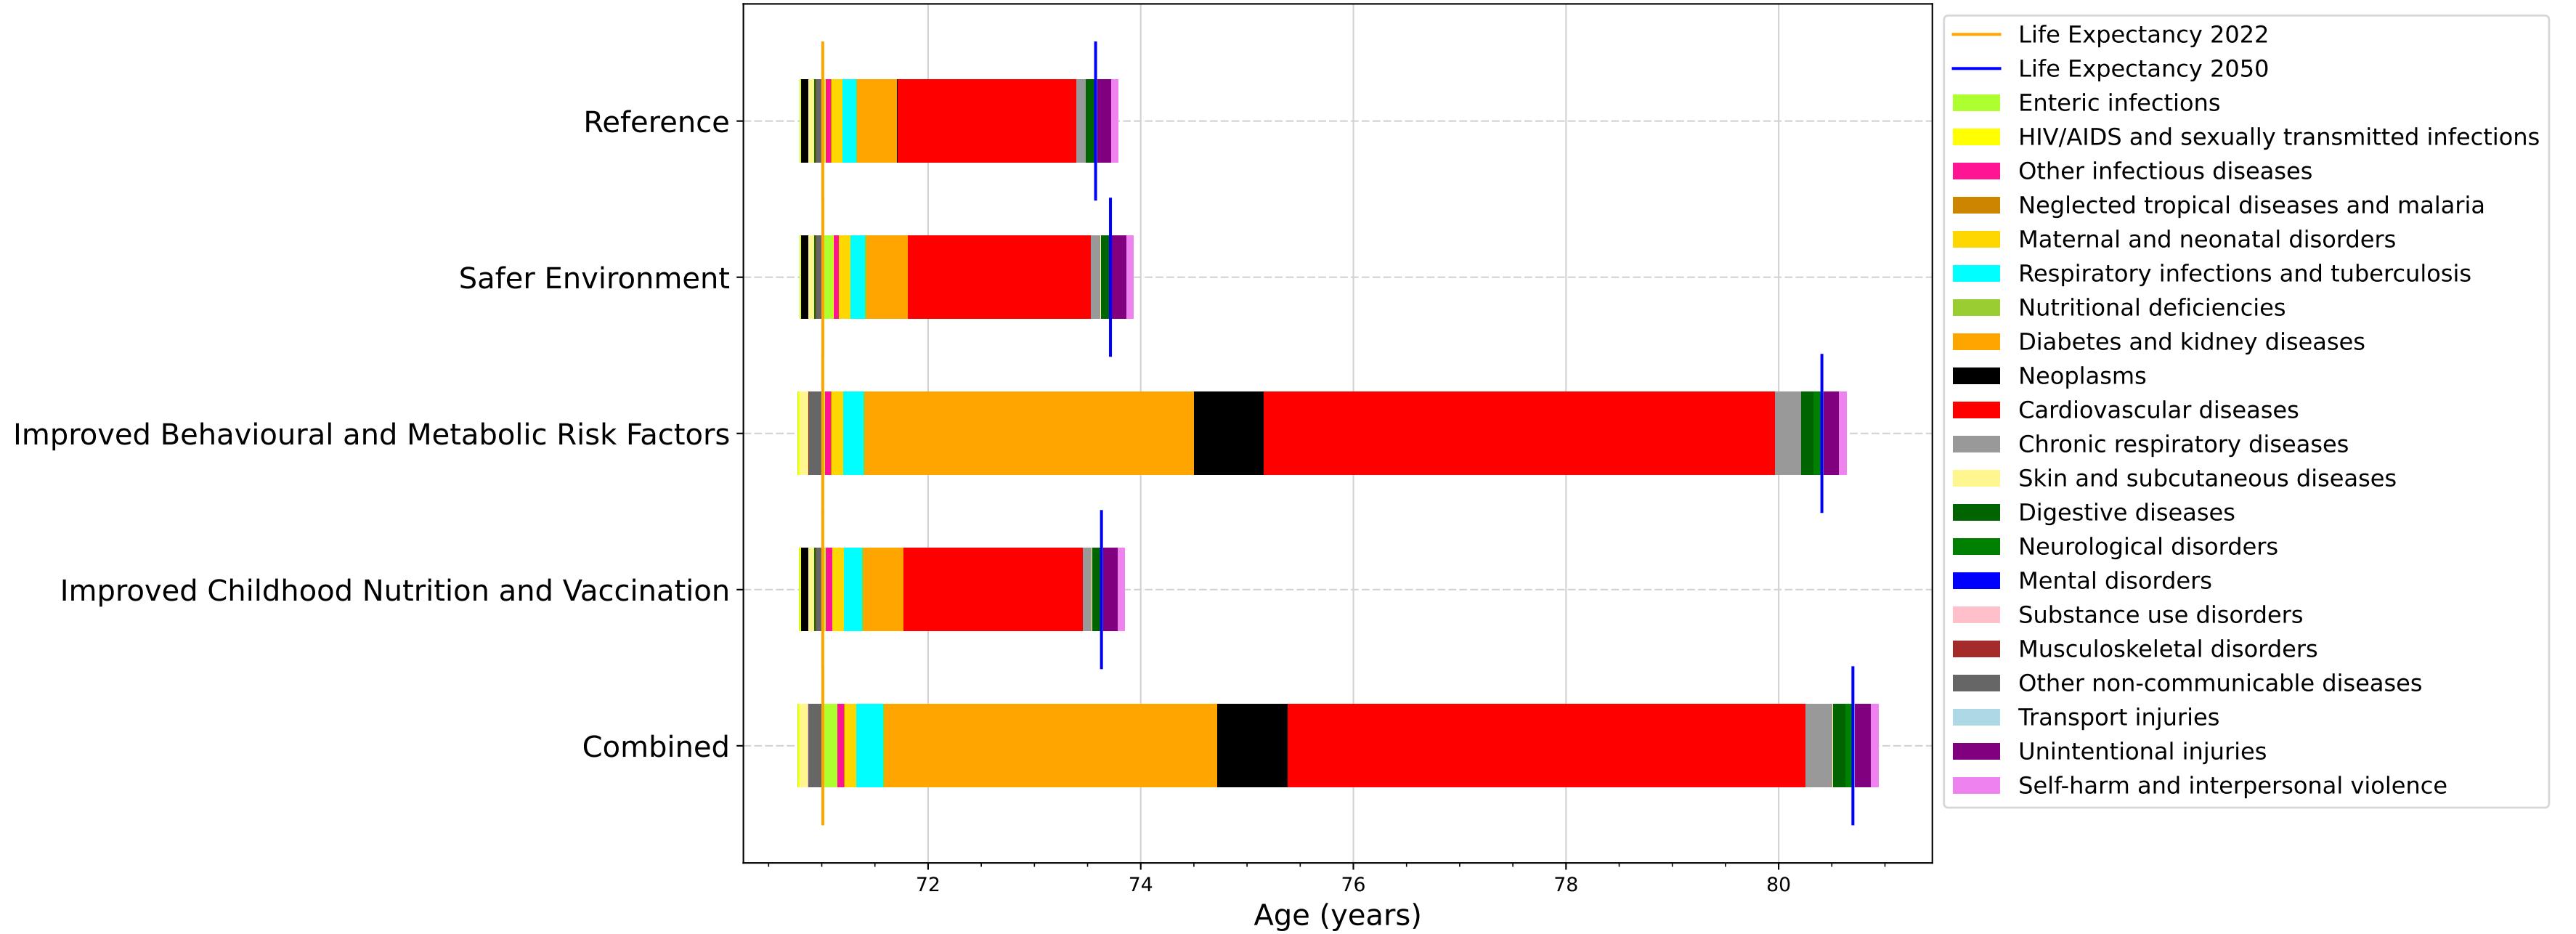

Andorra

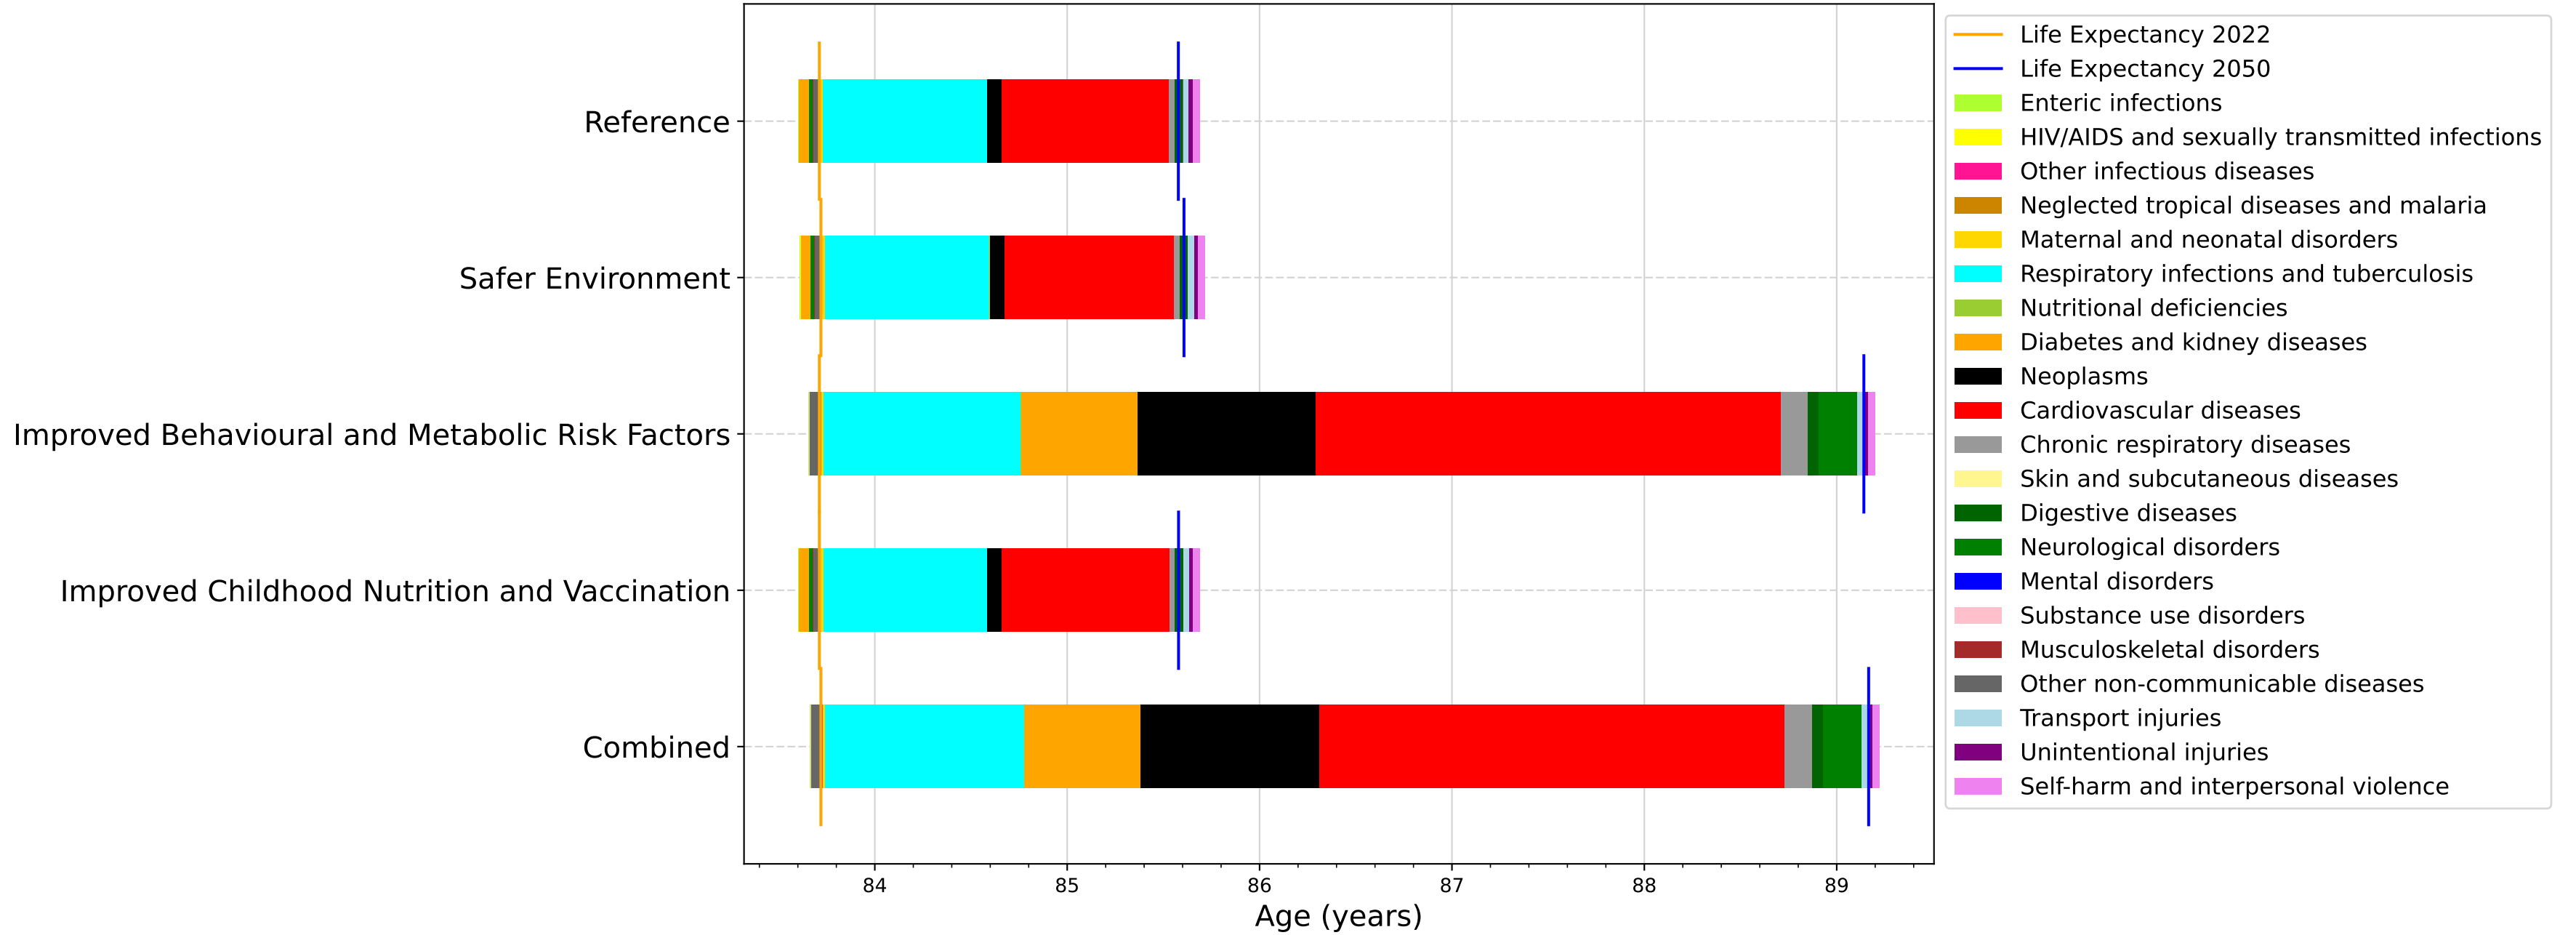

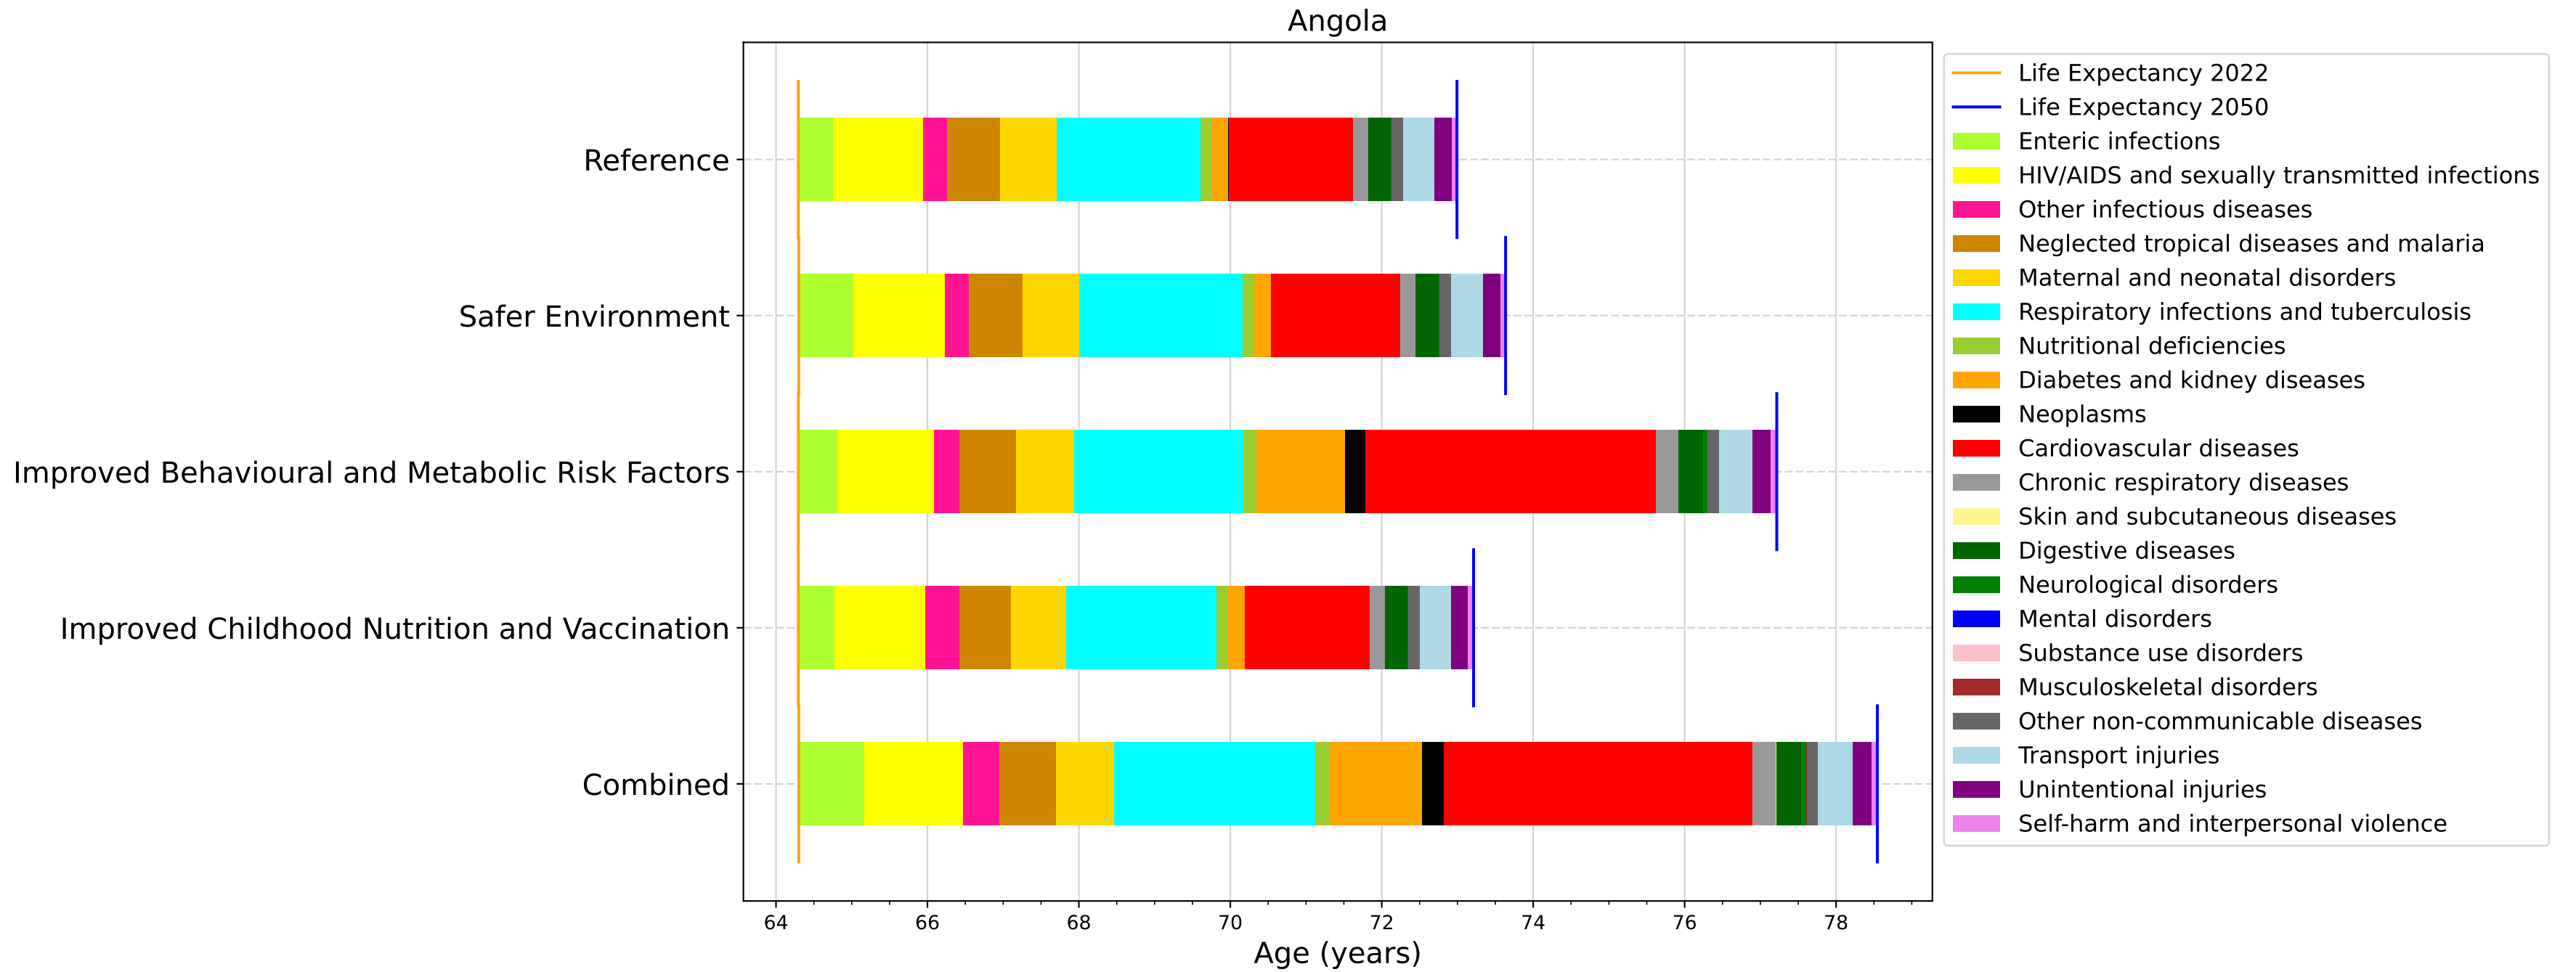

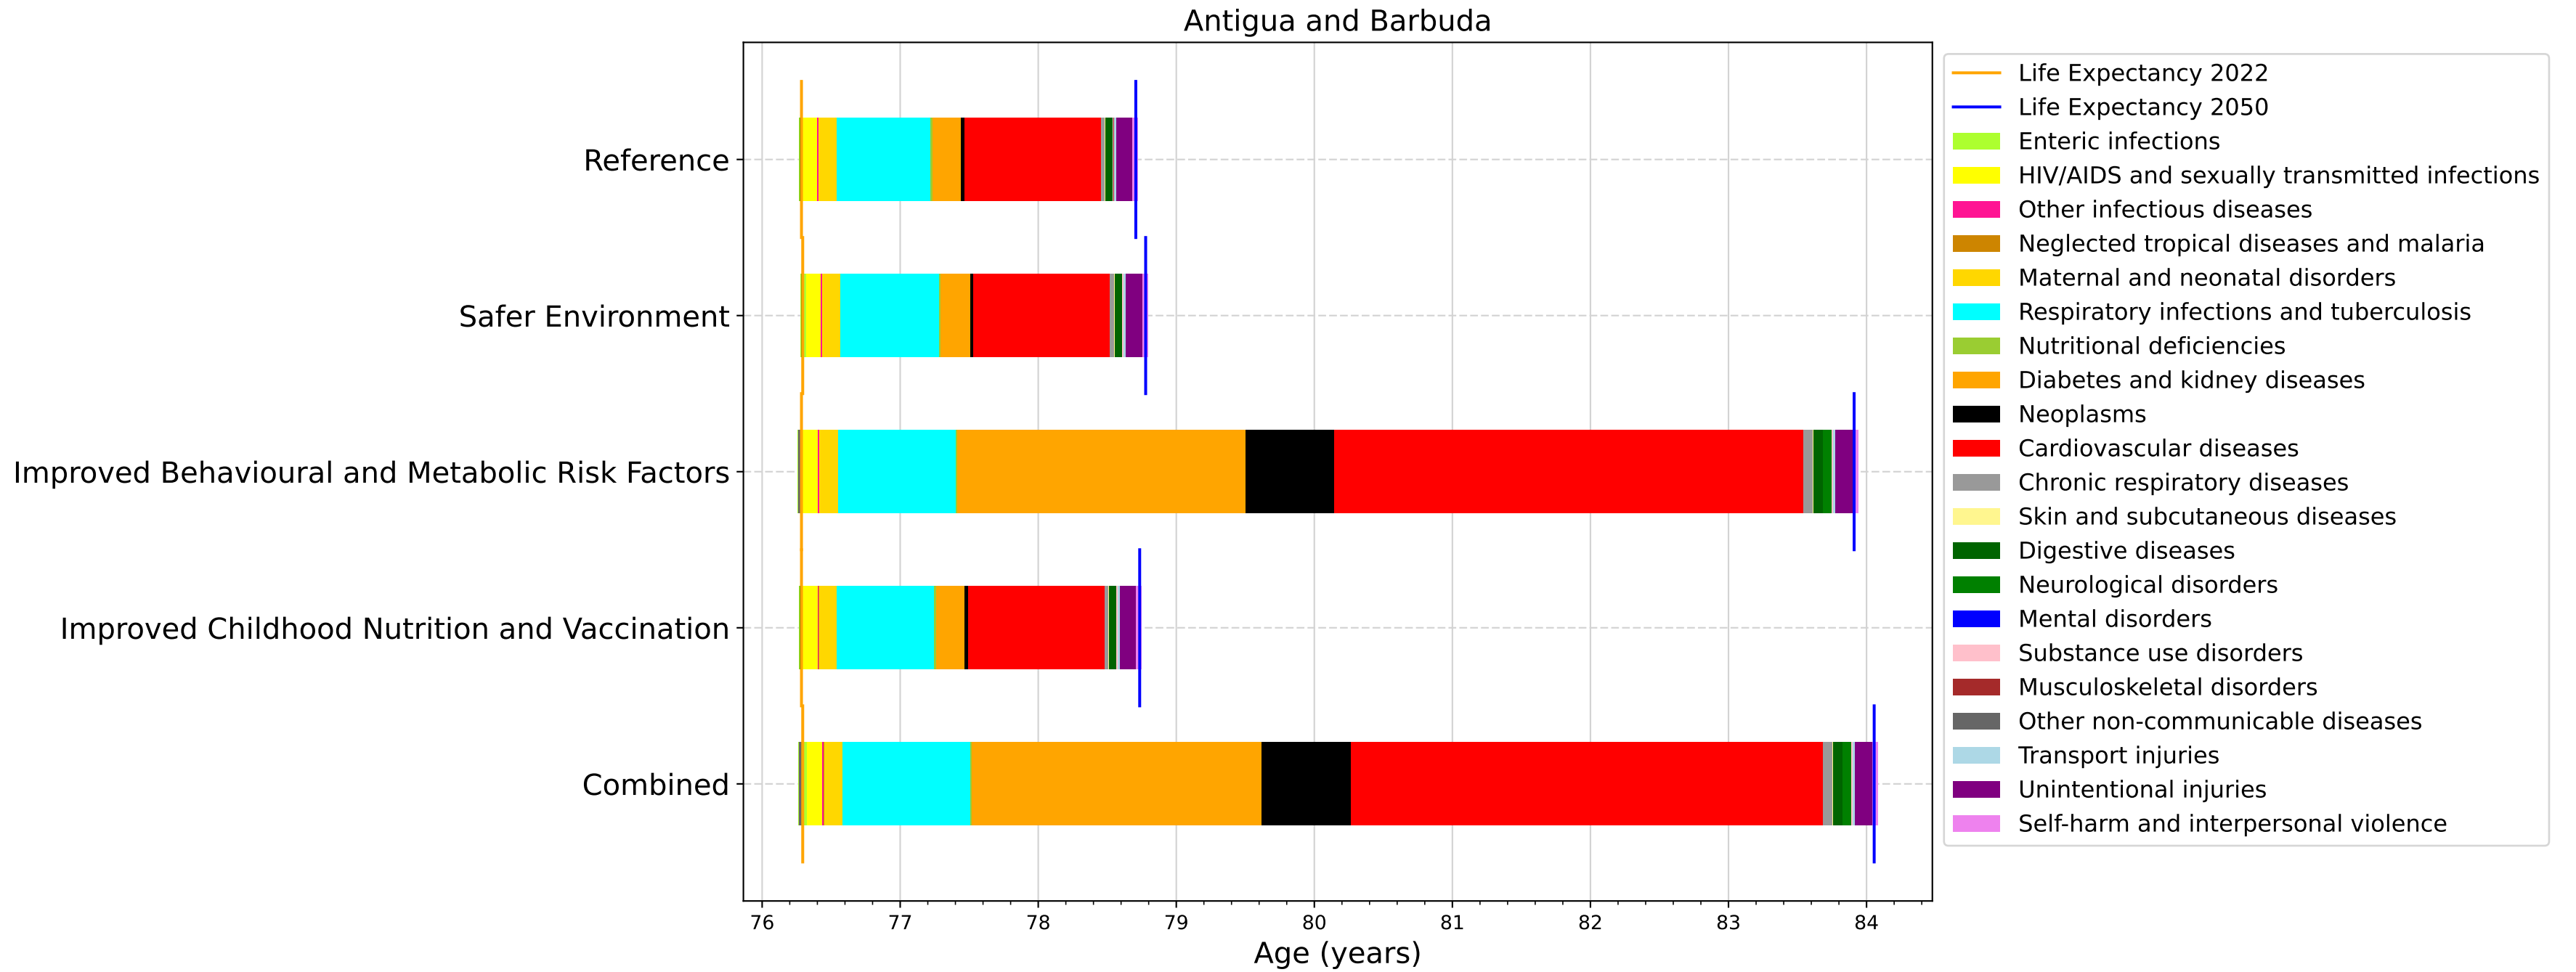

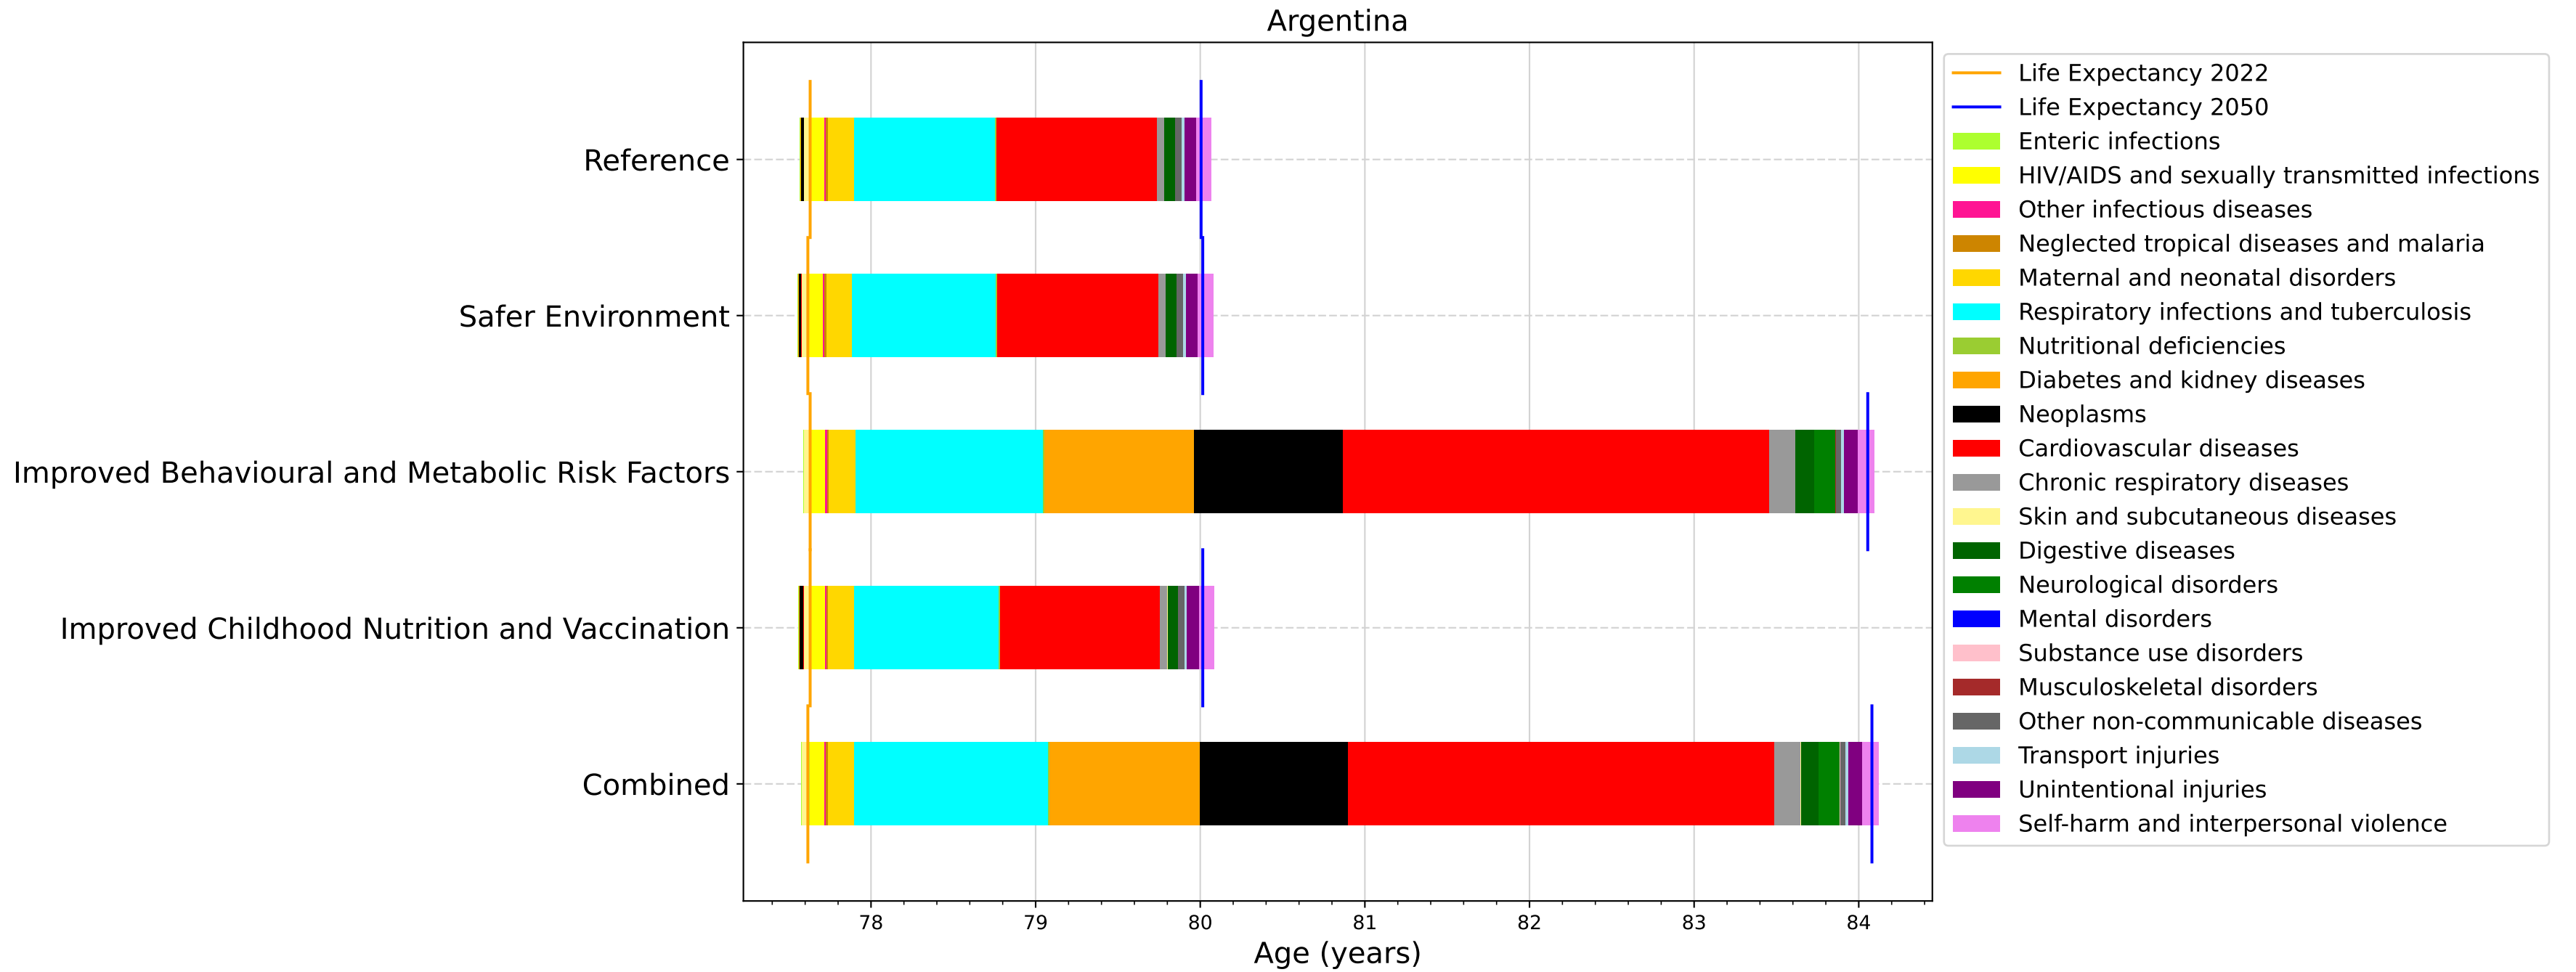

Armenia

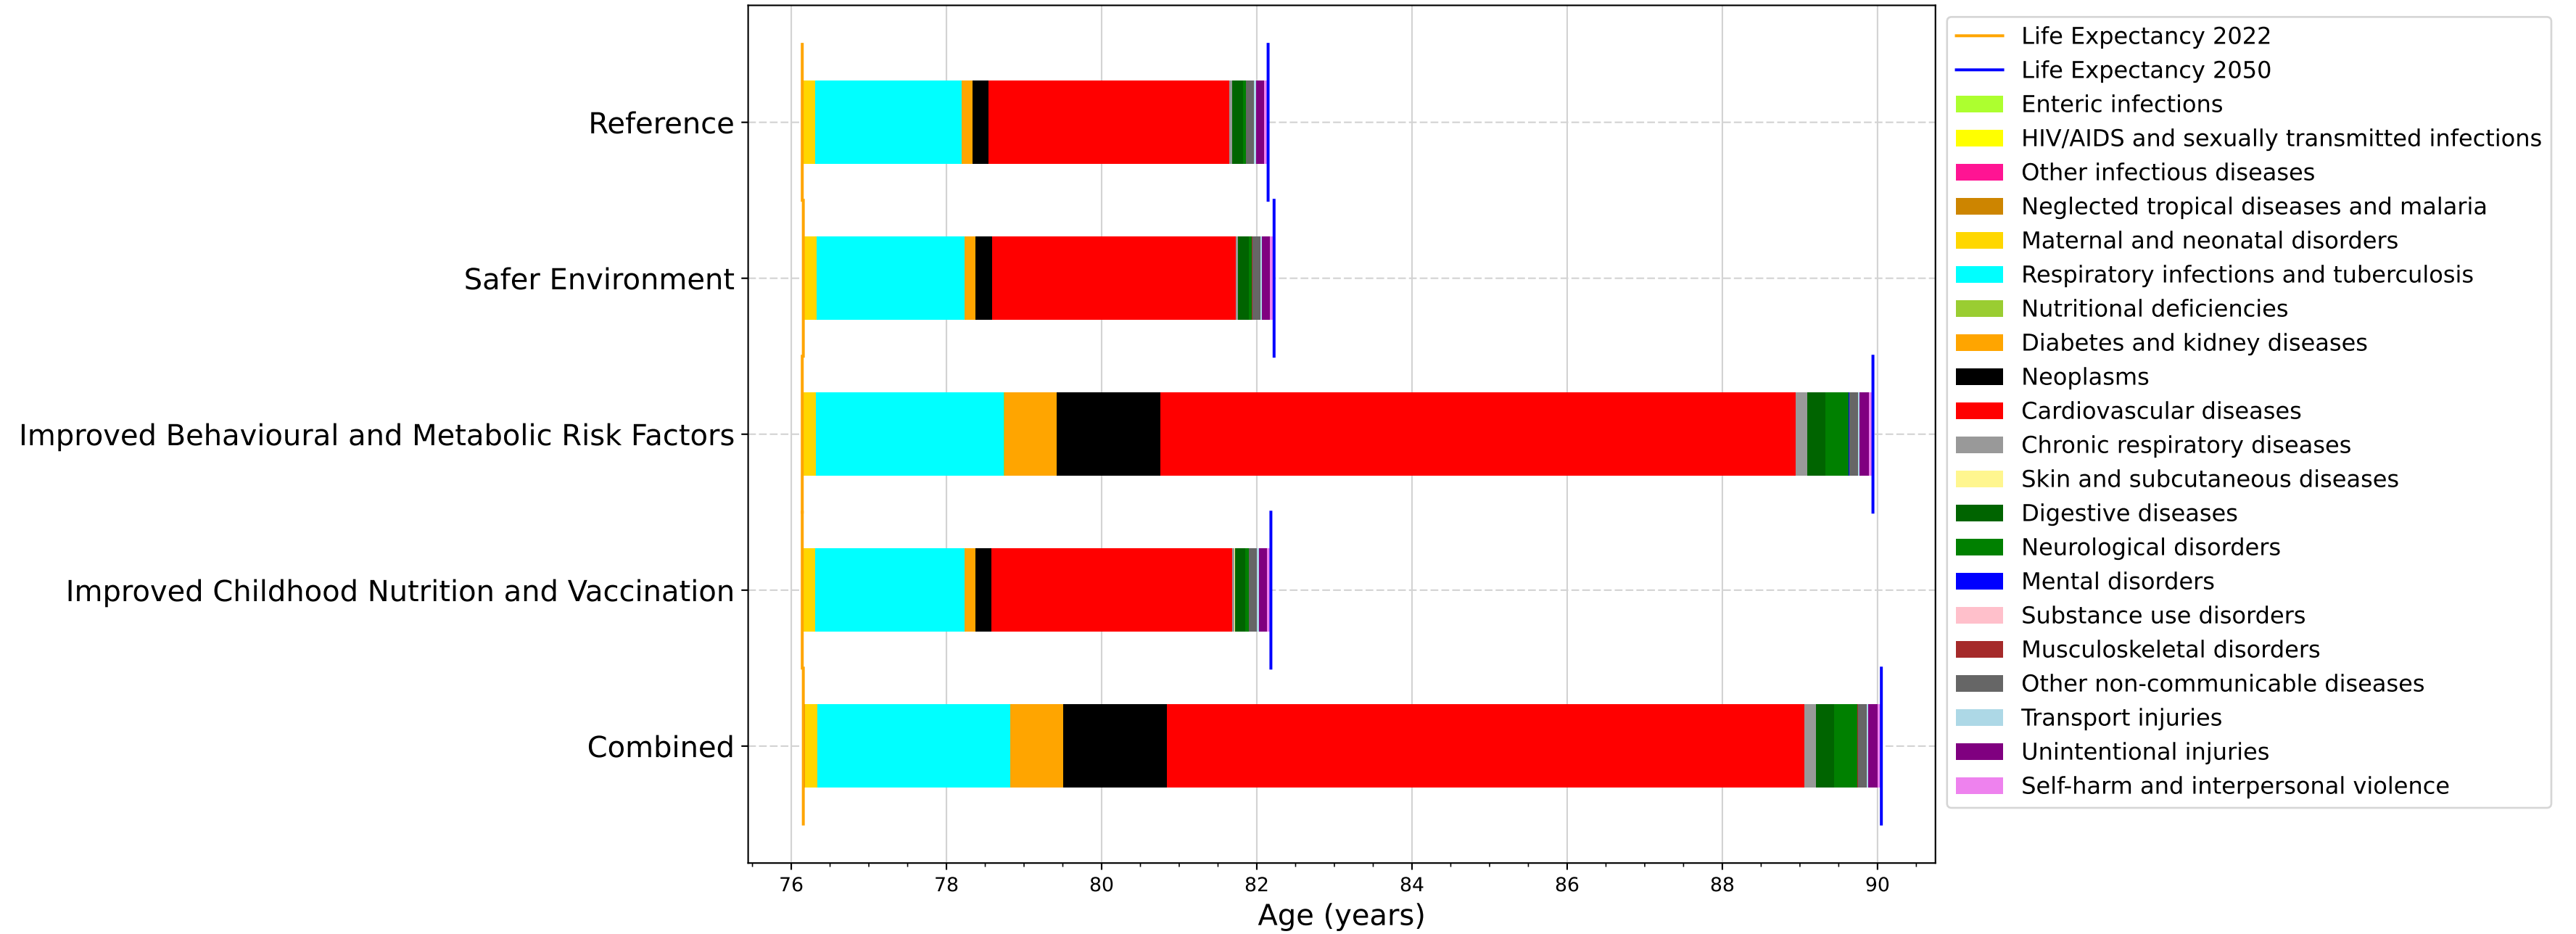



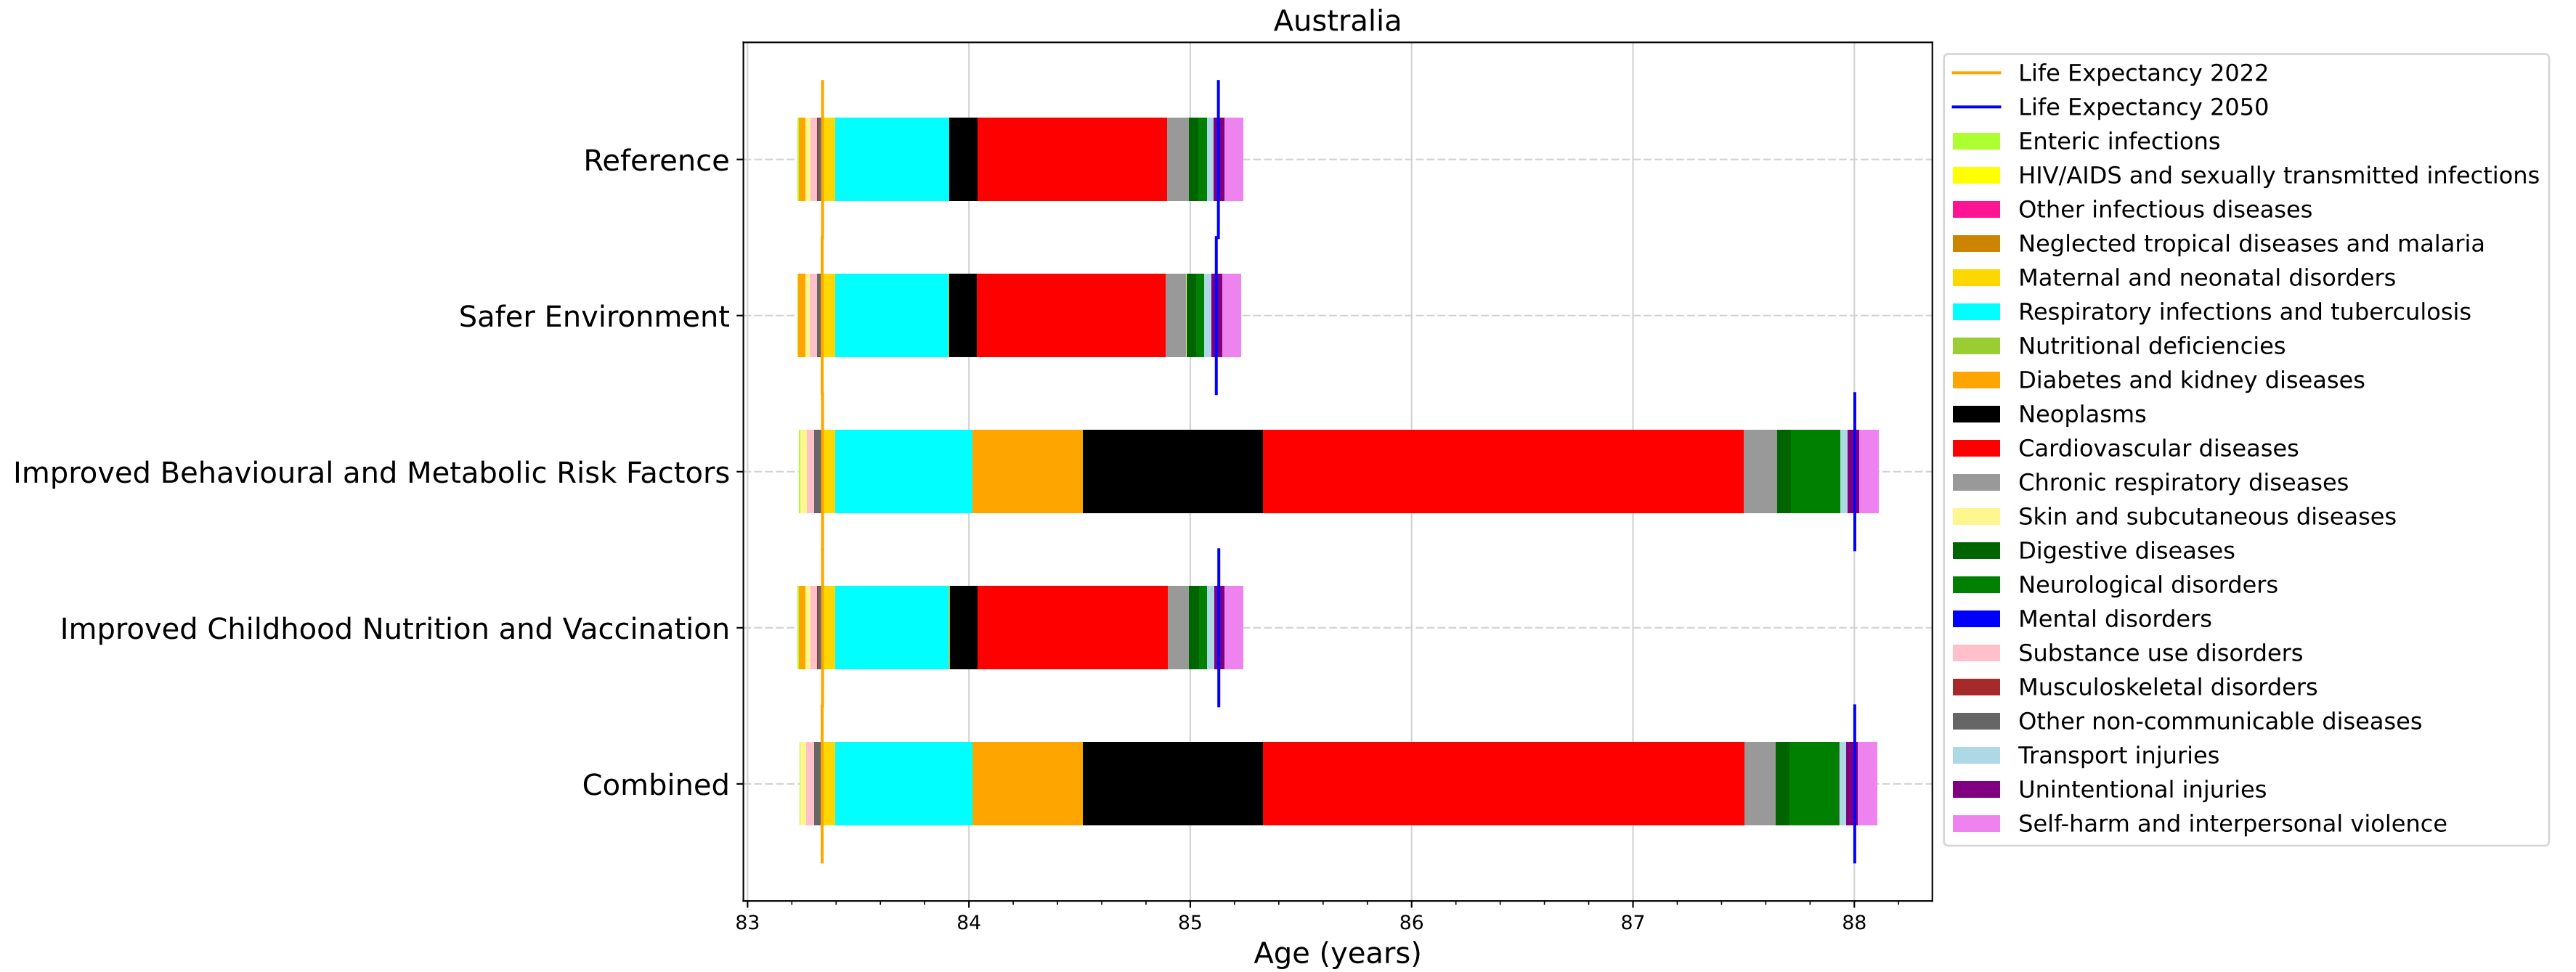

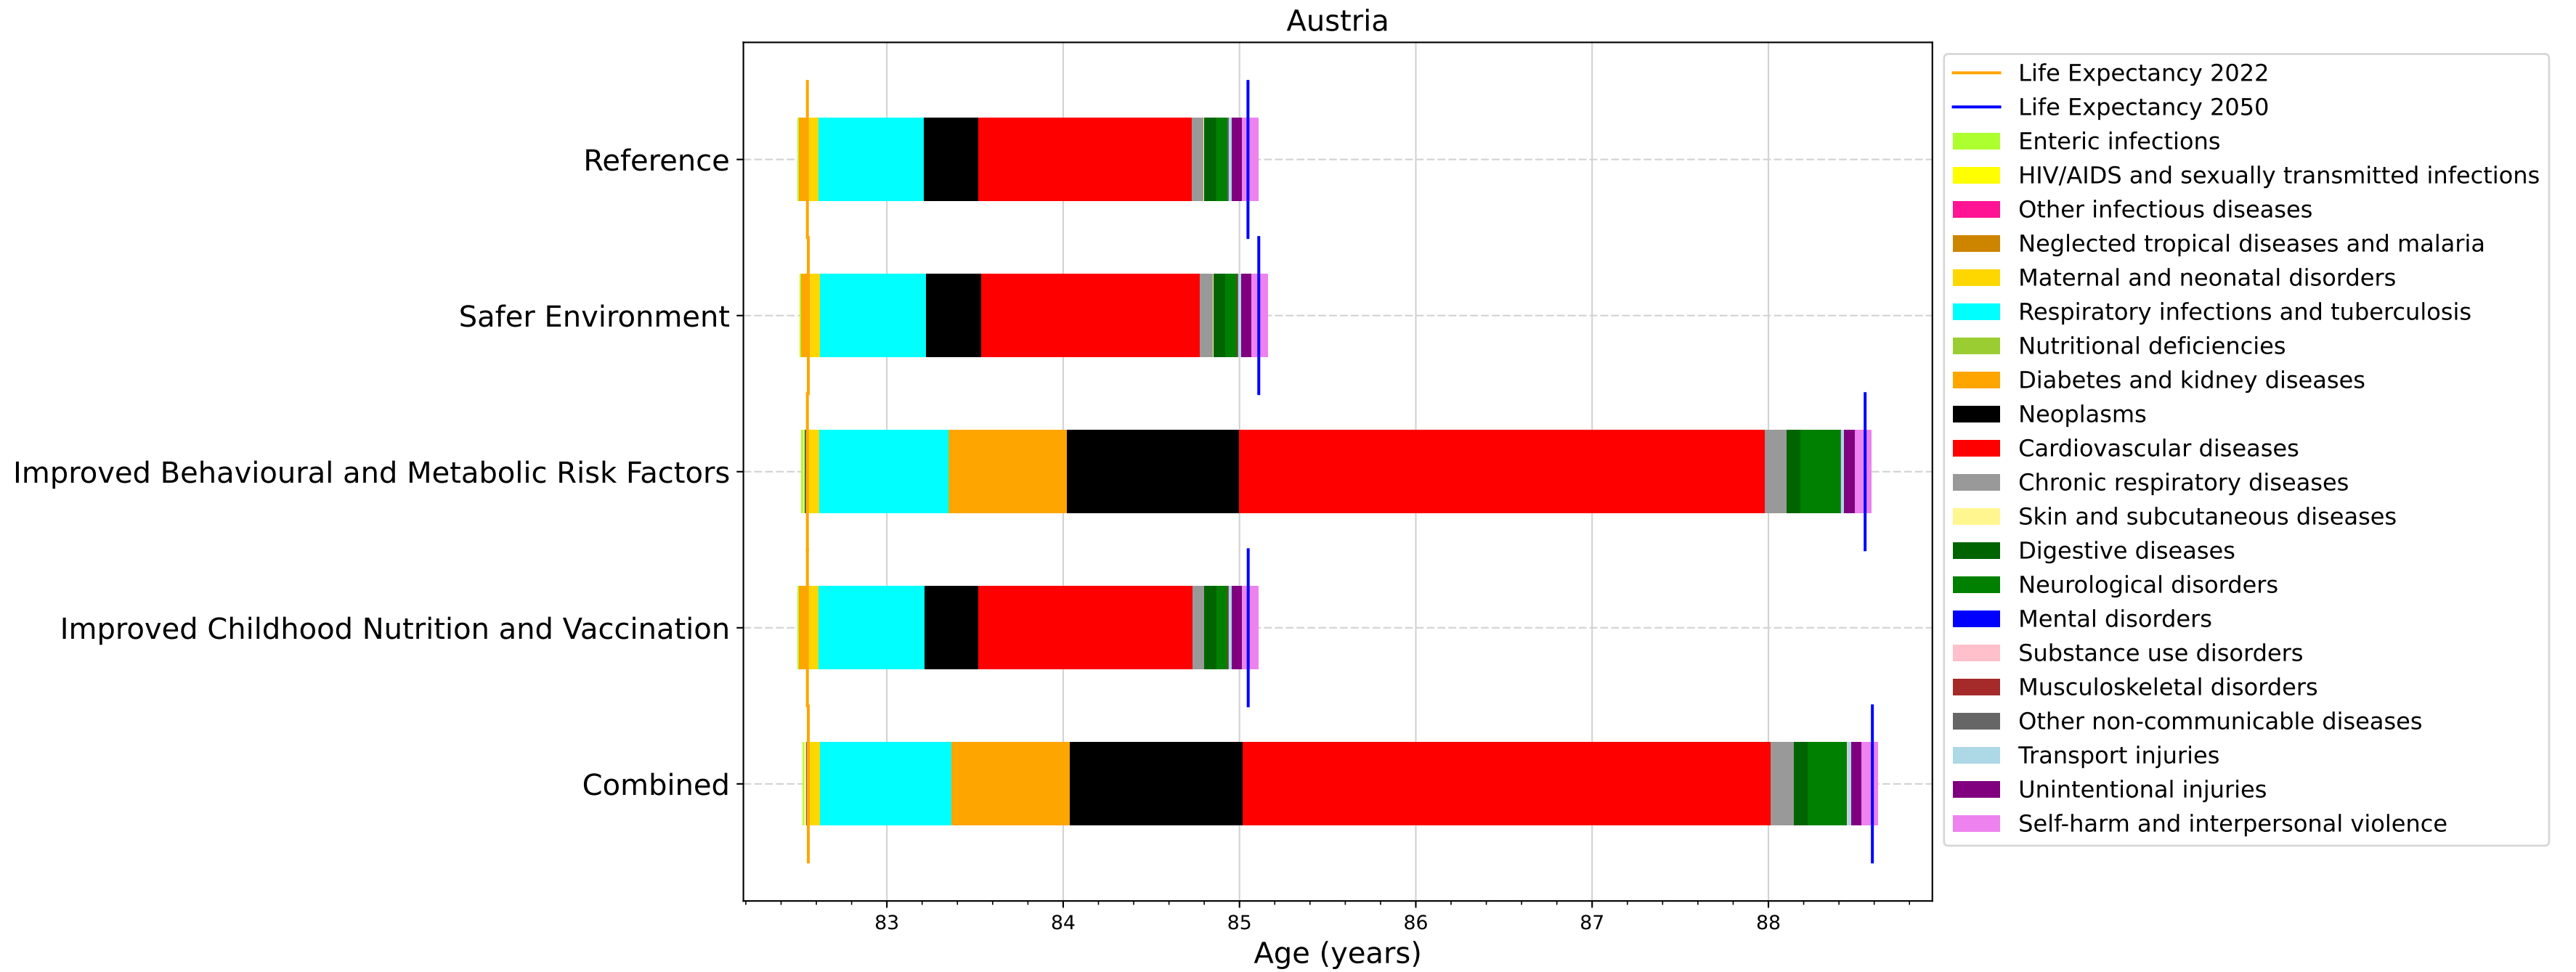

Azerbaijan

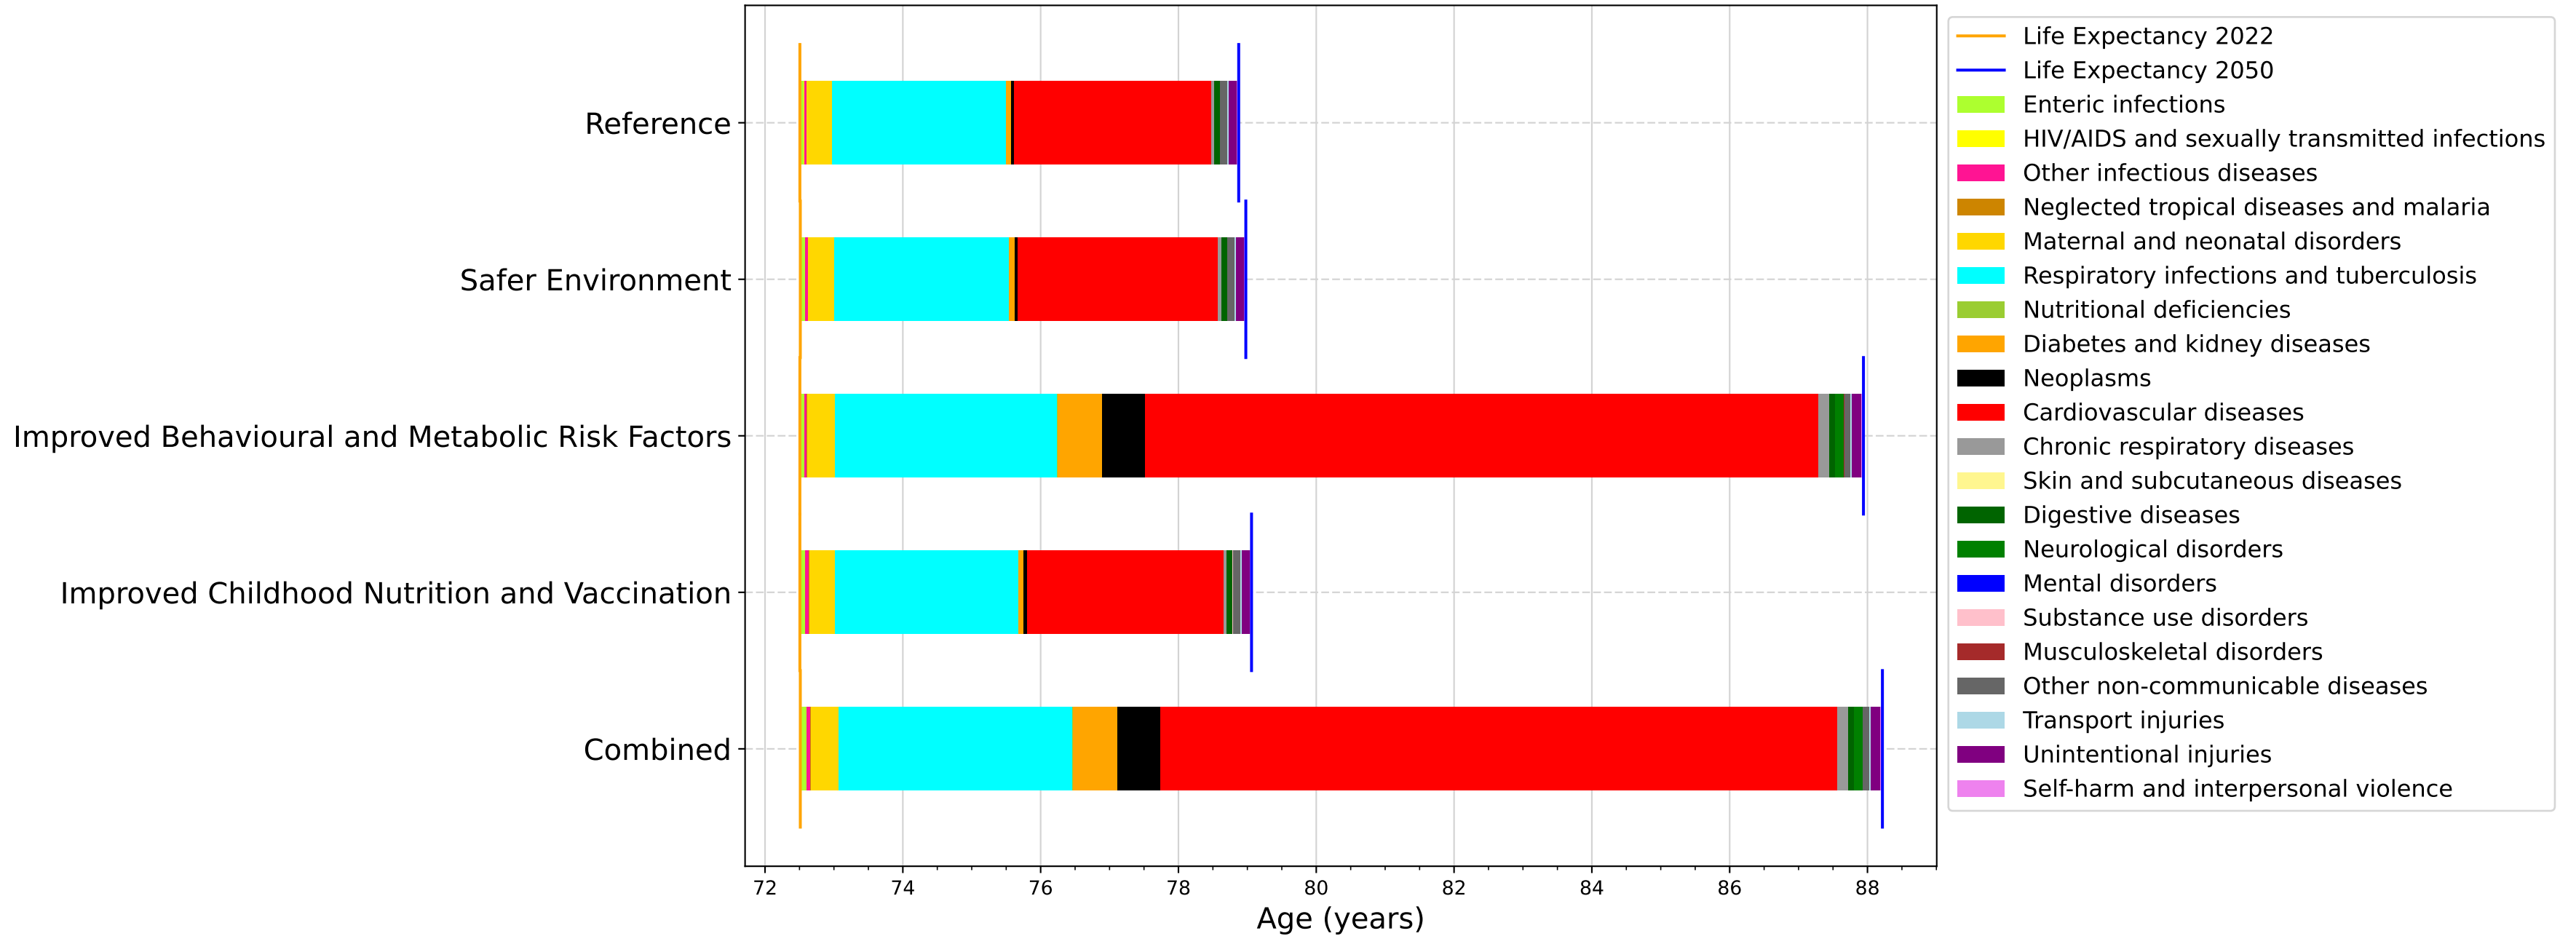

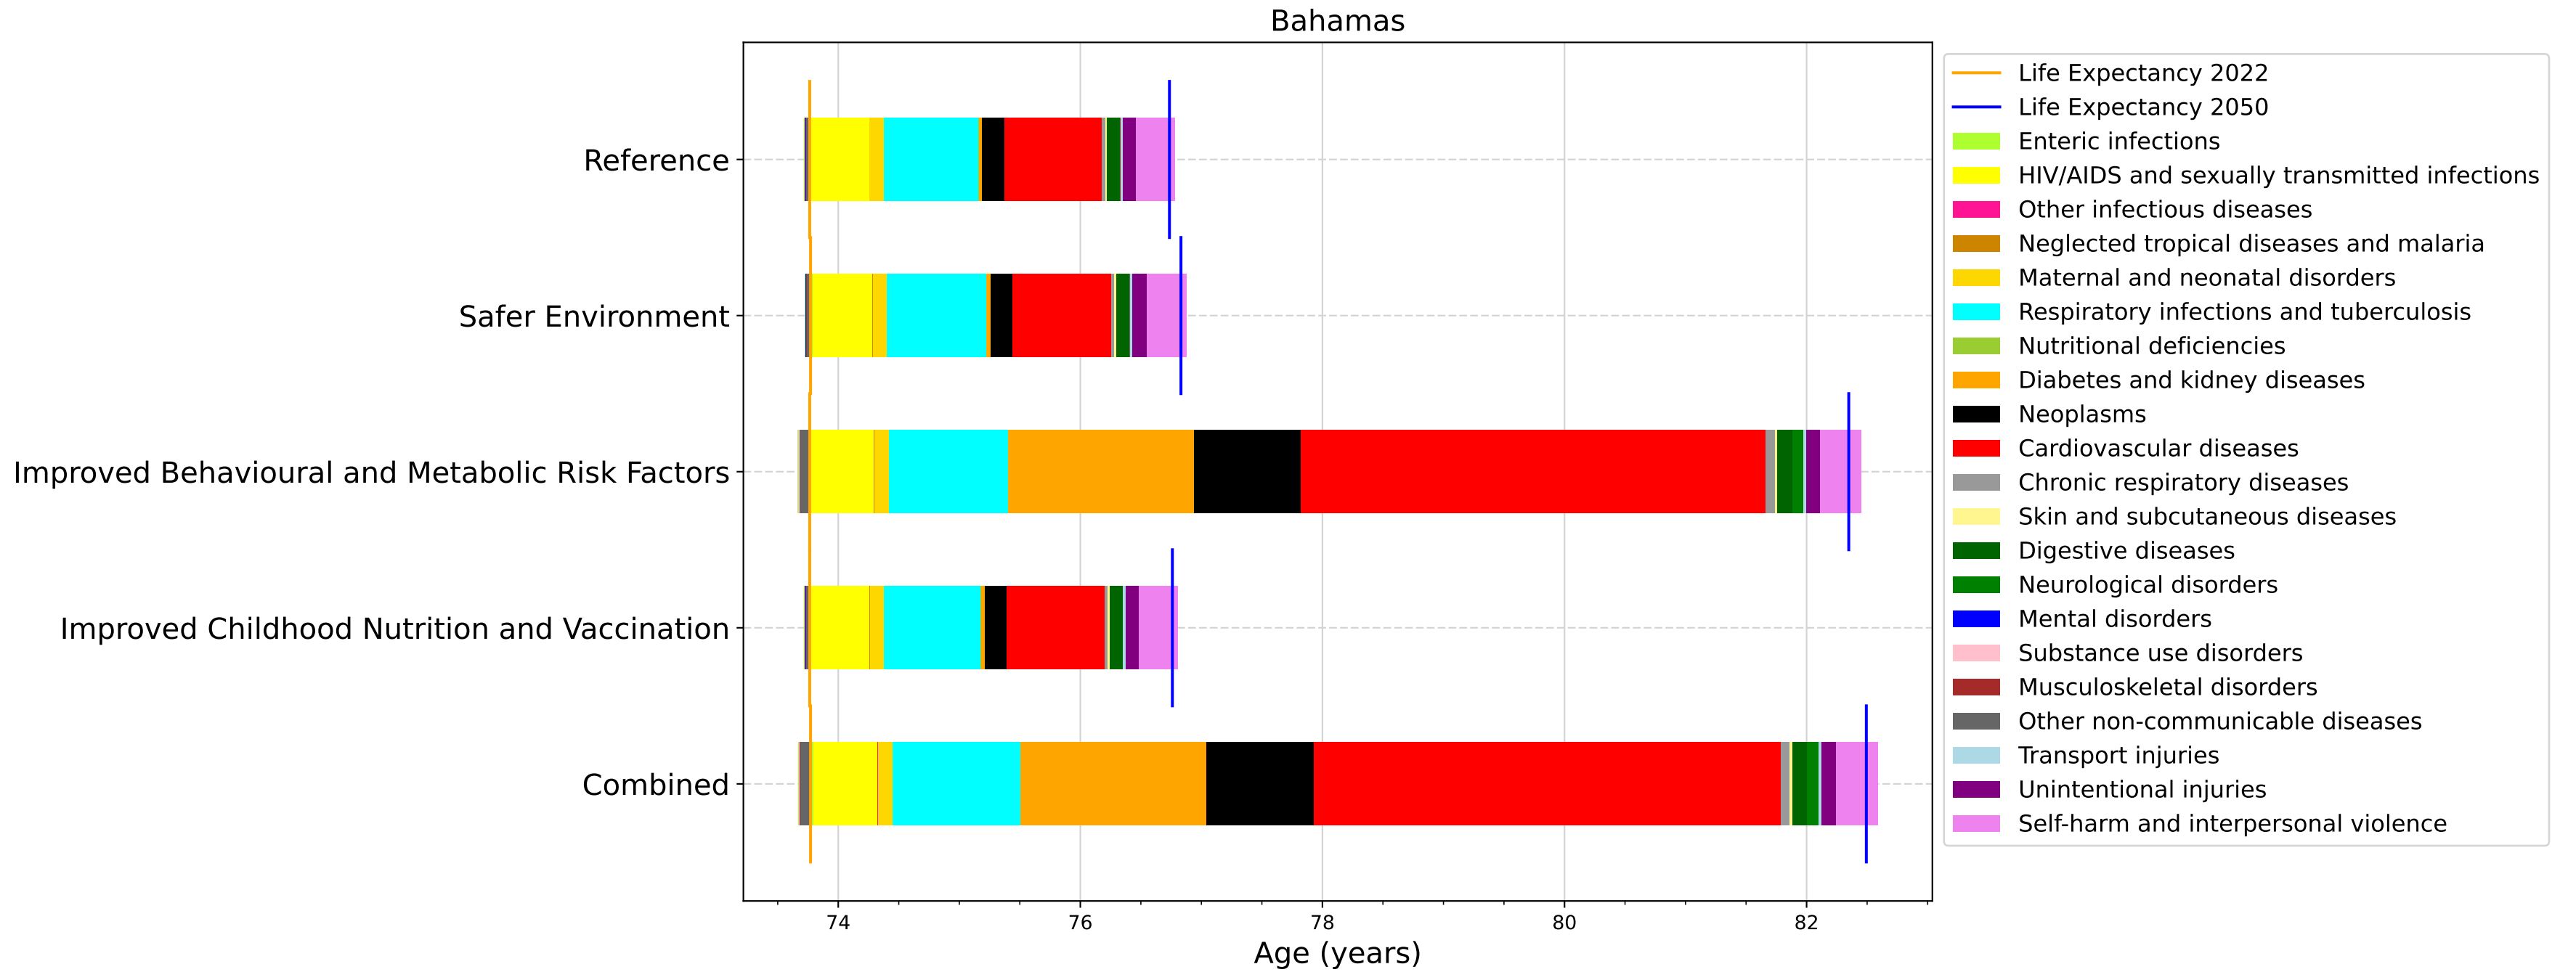

Bahrain

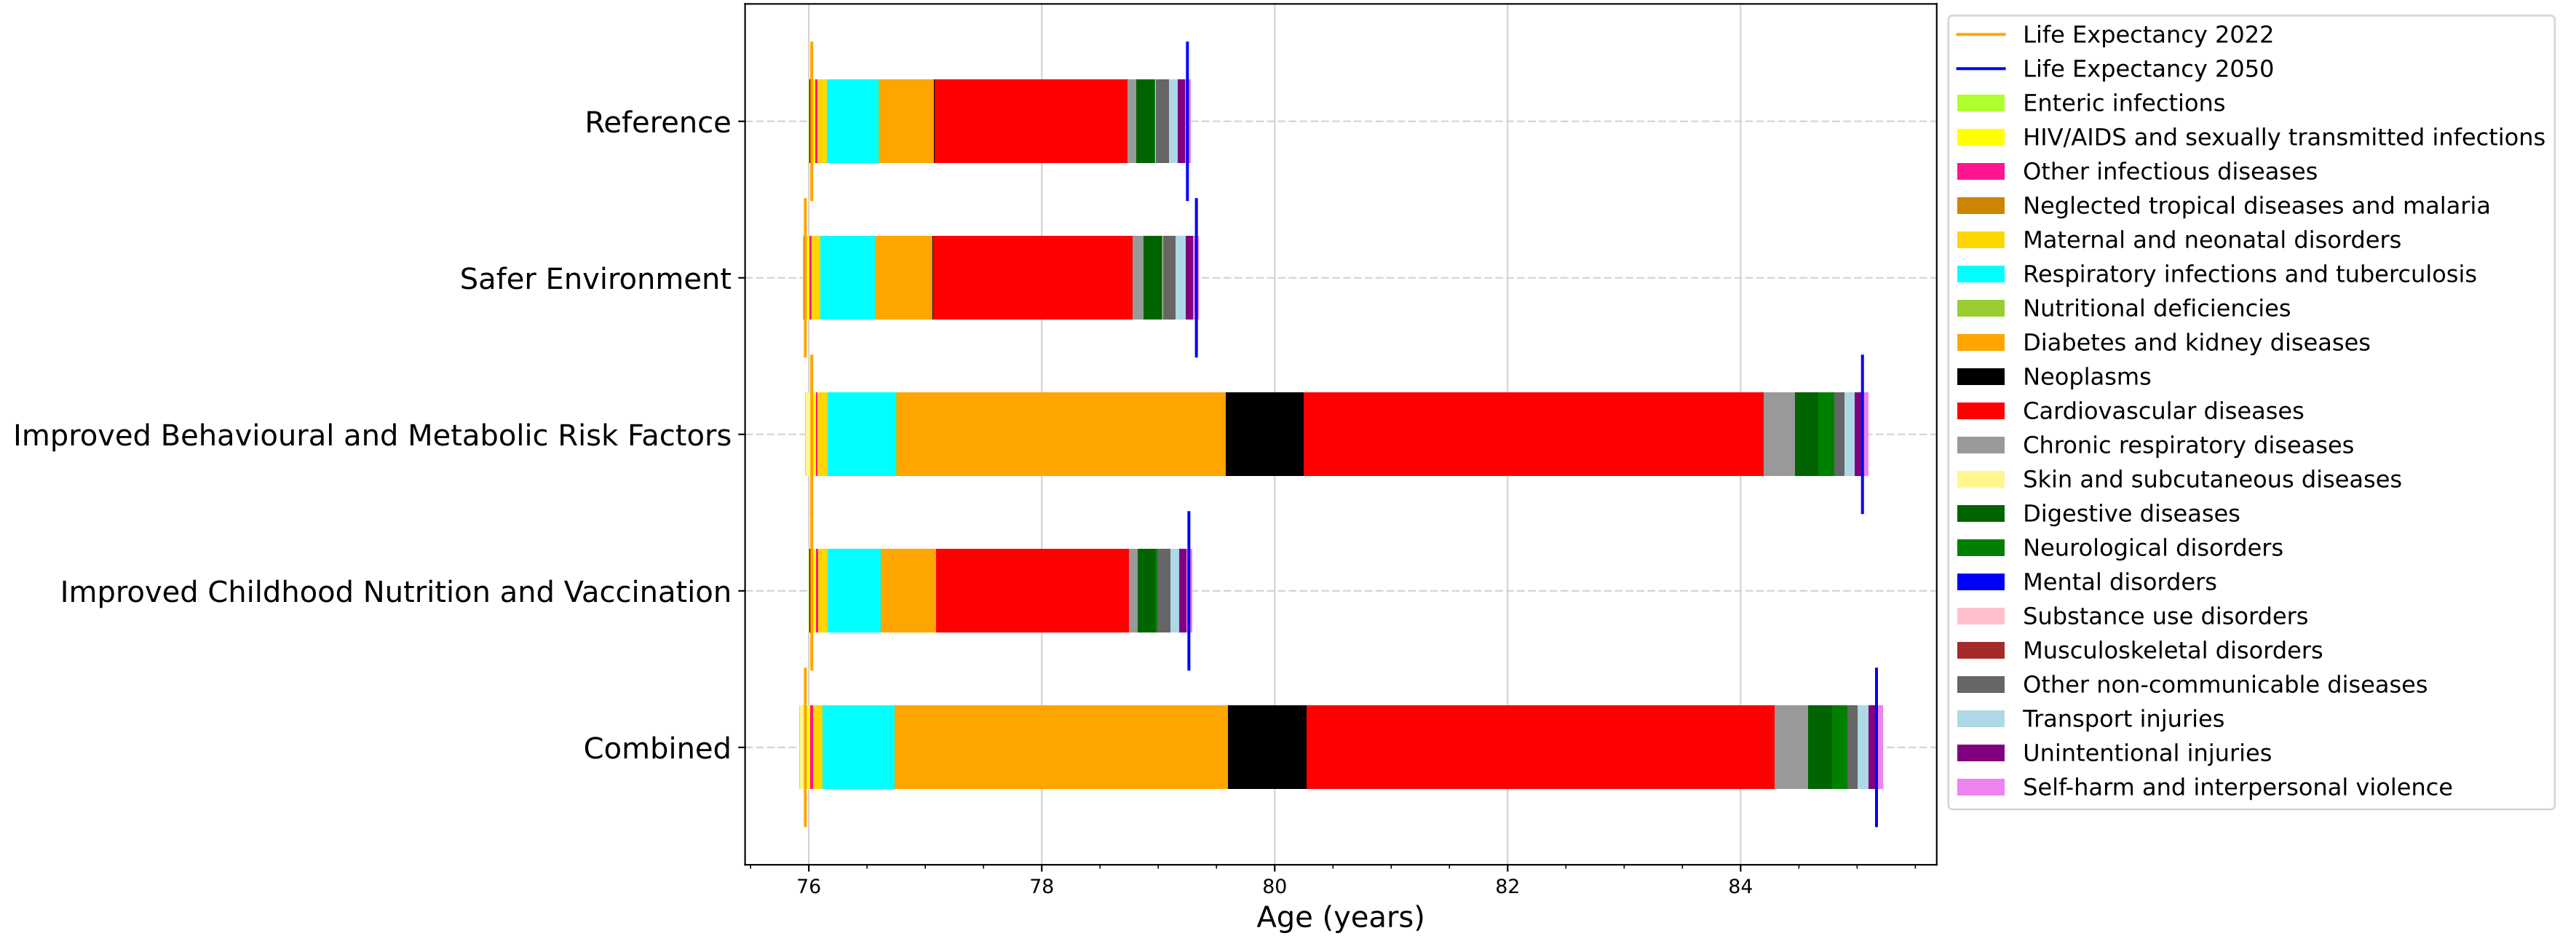

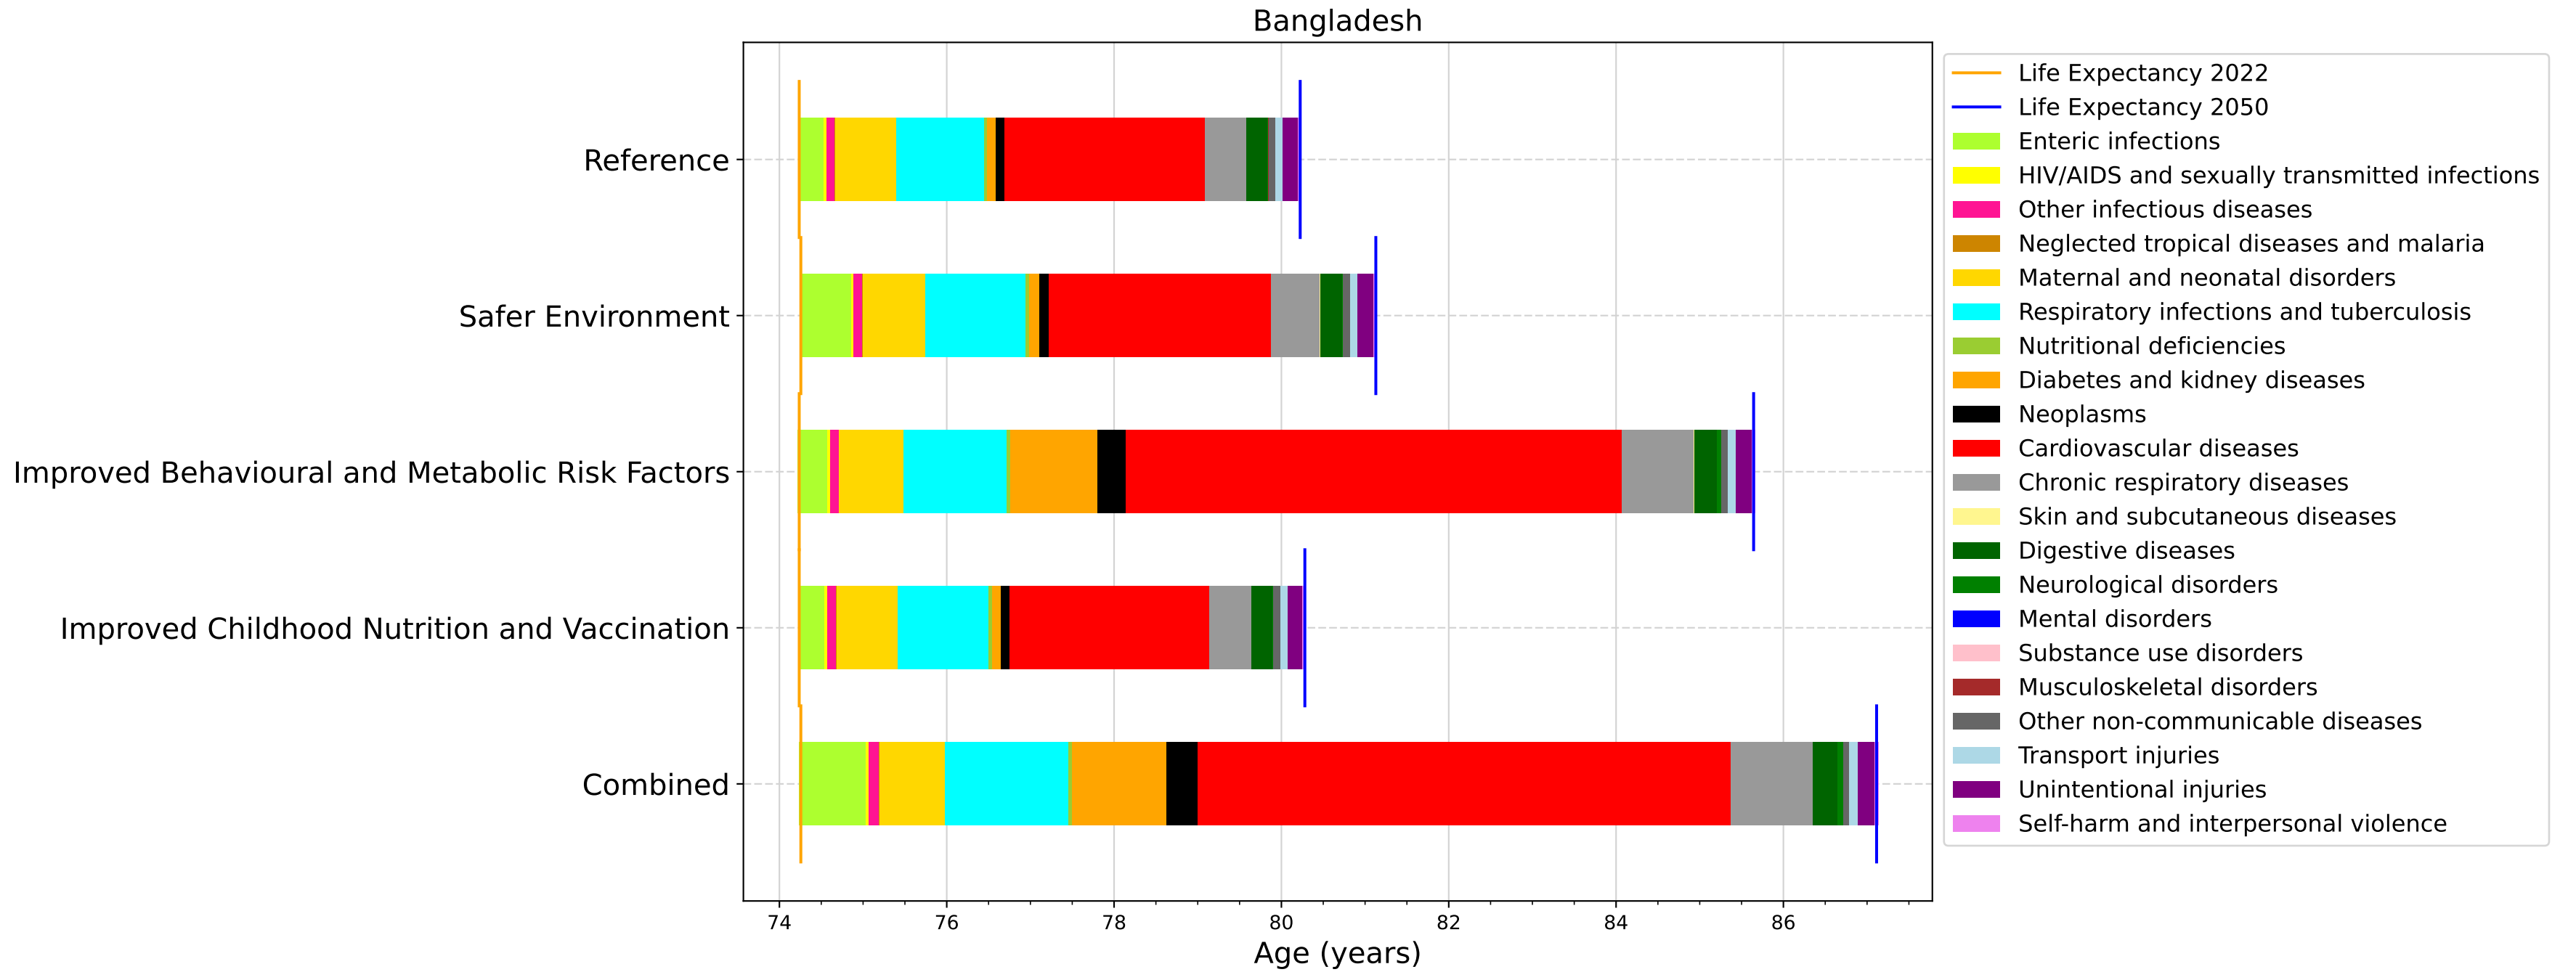

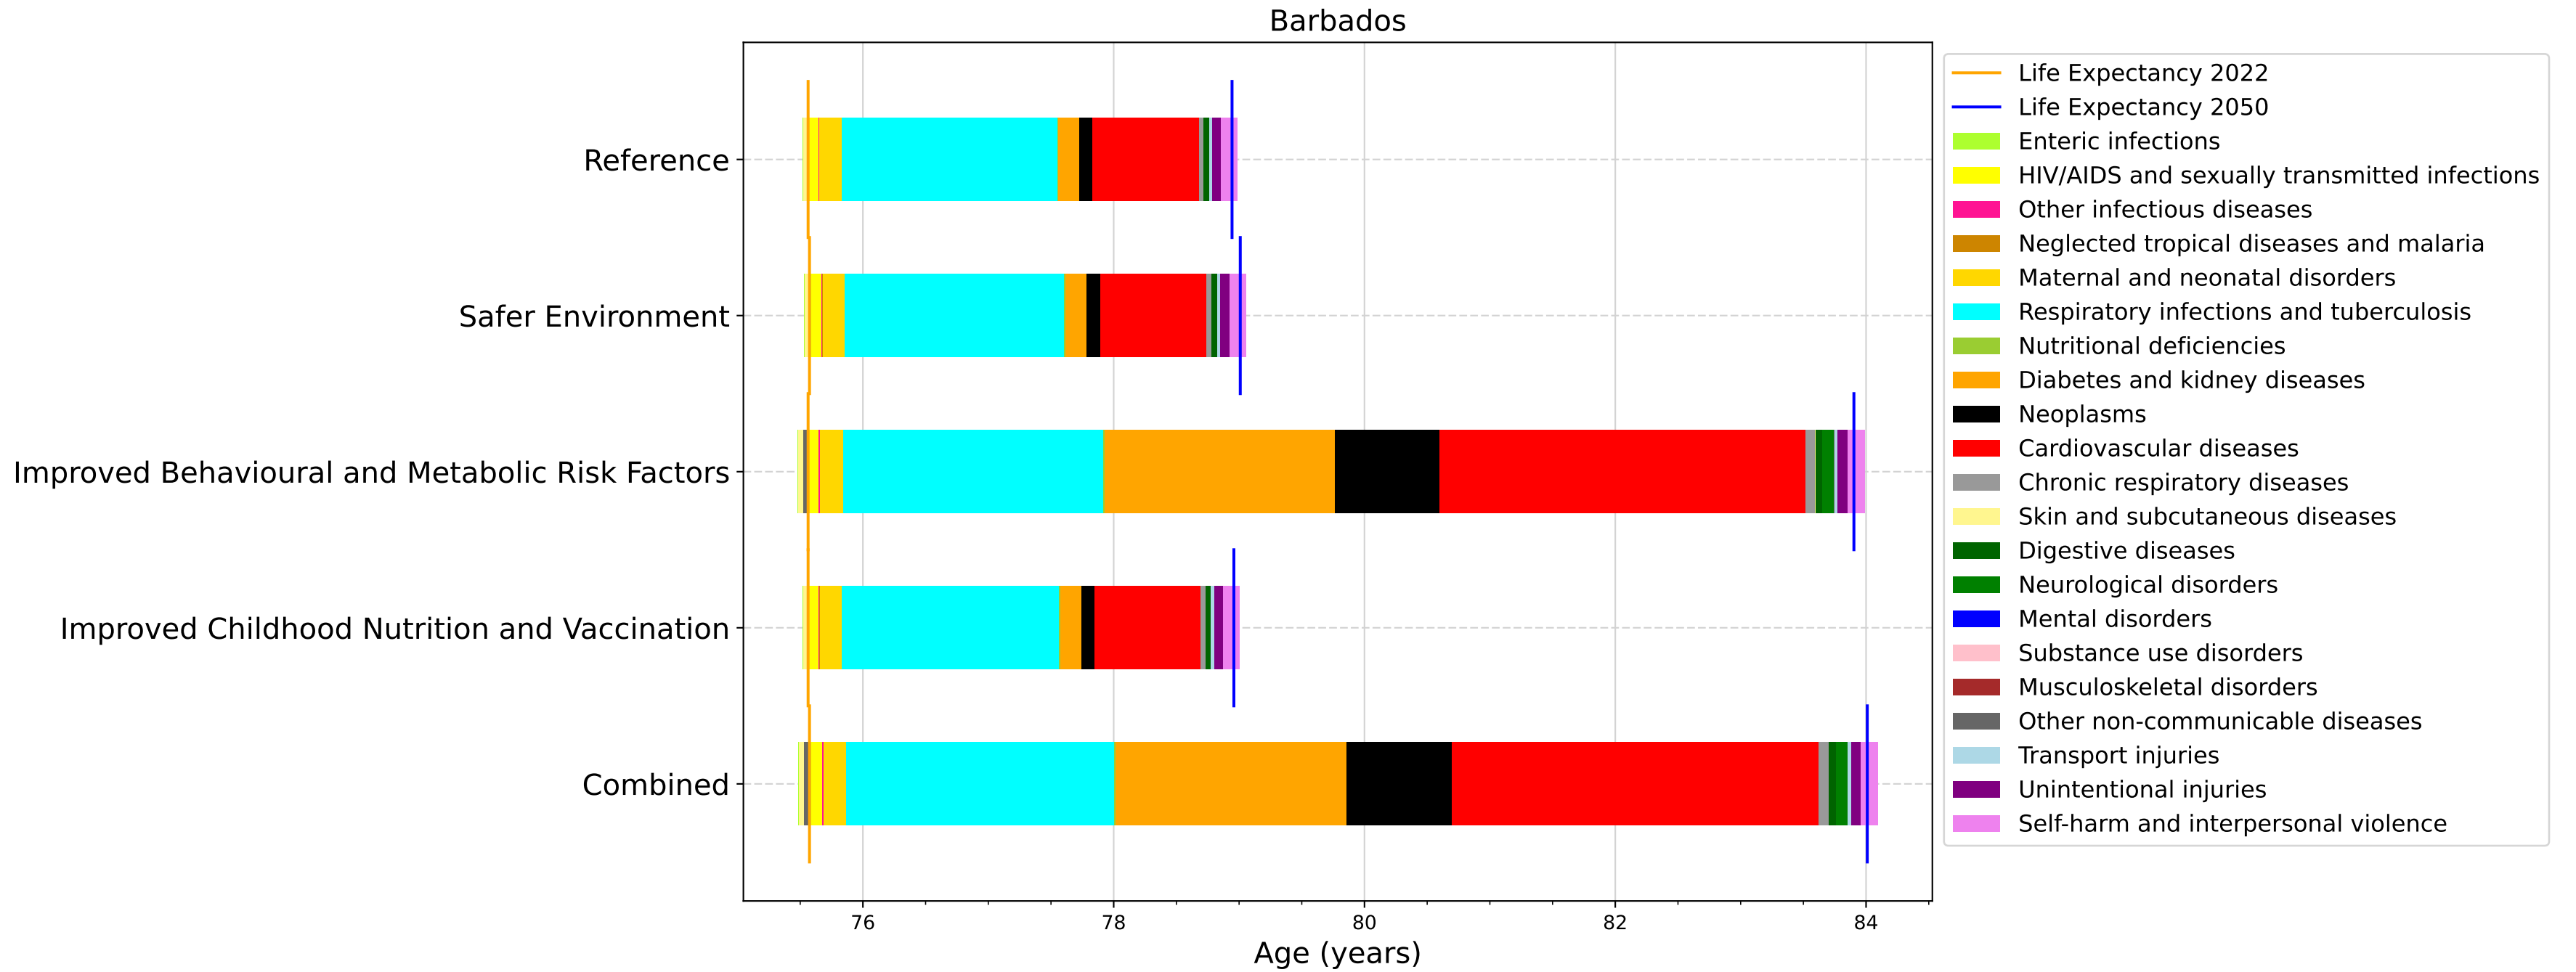

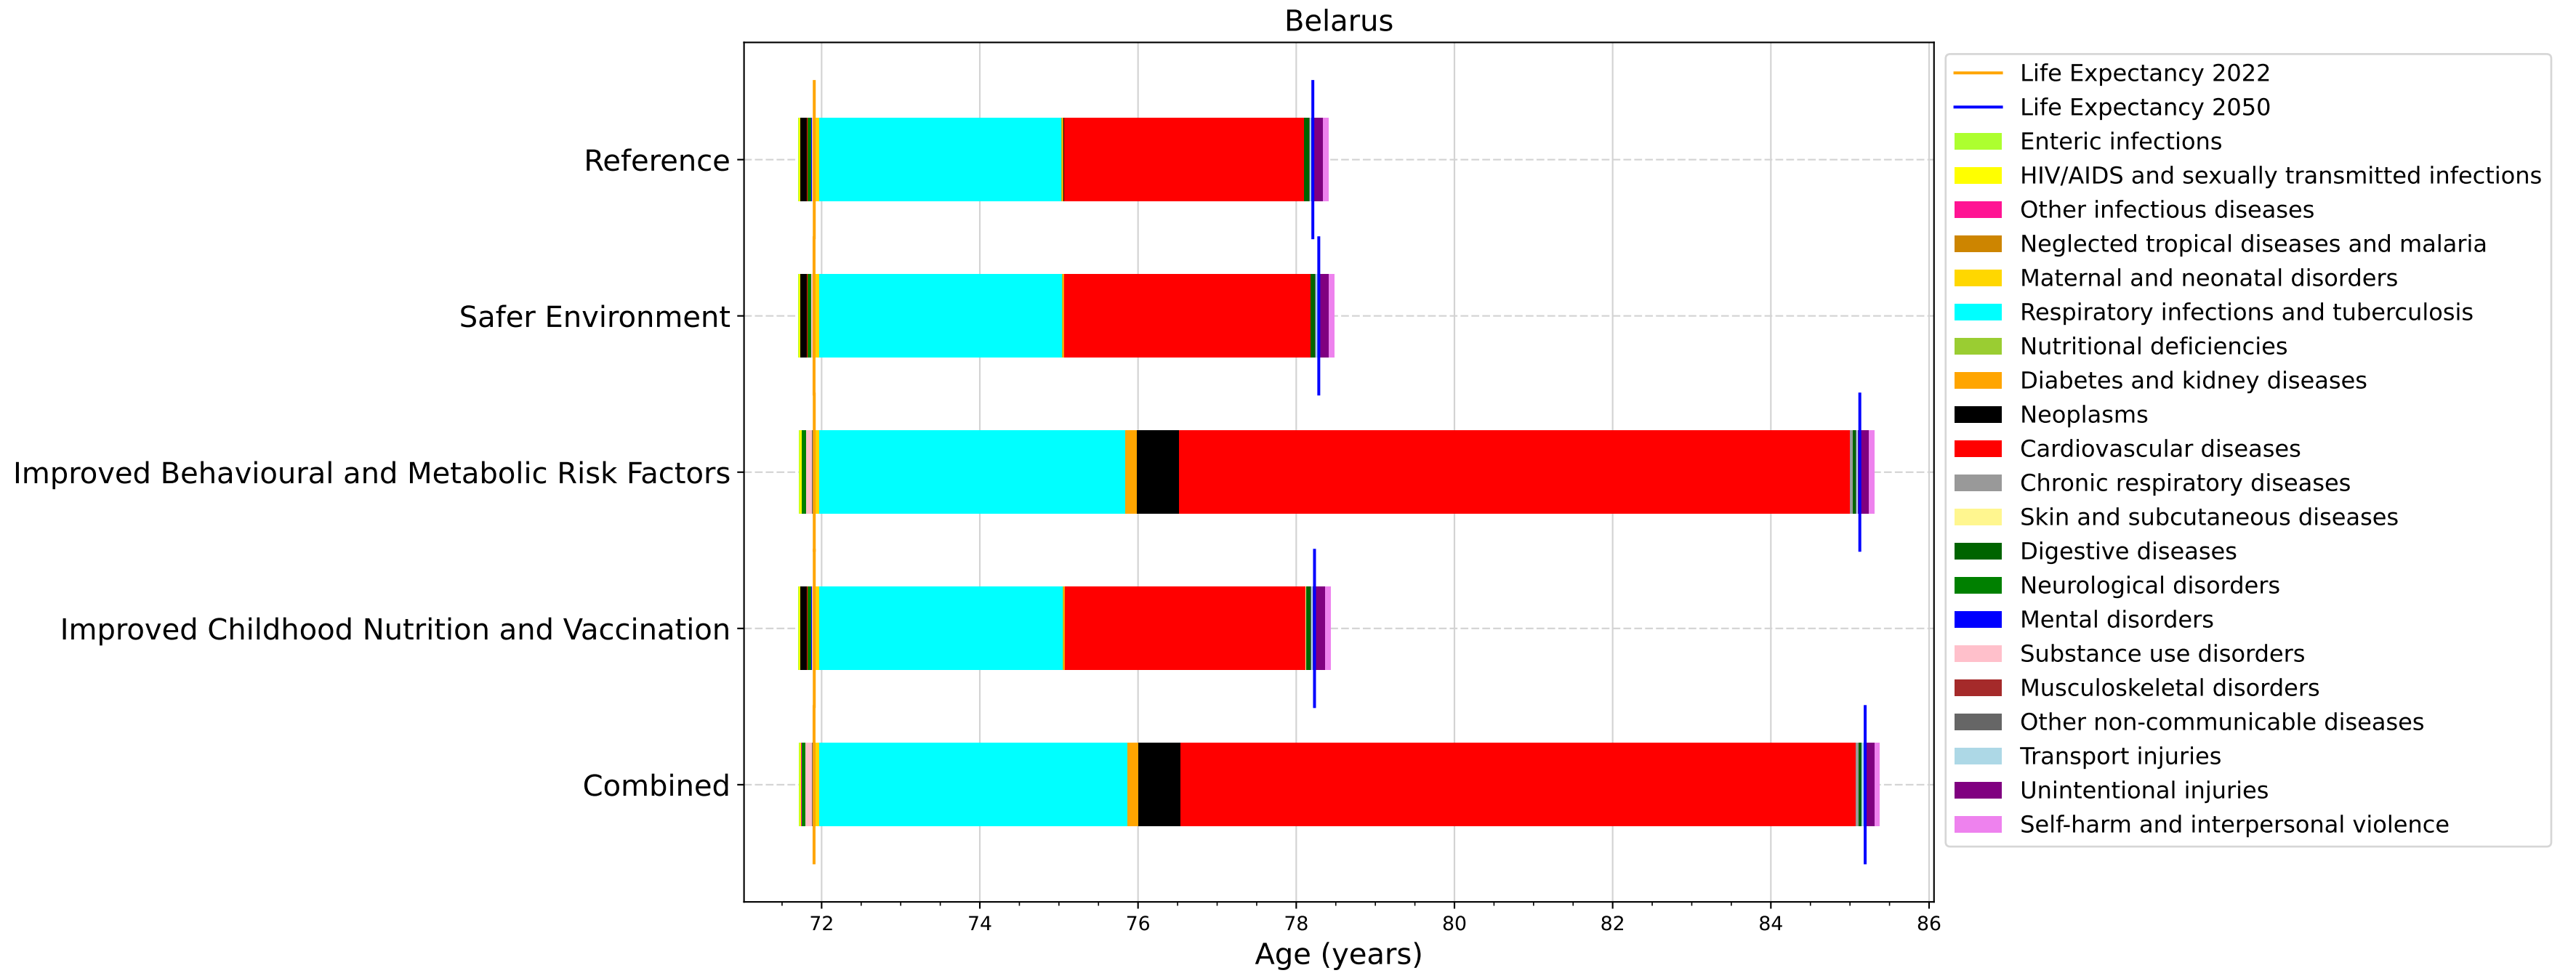



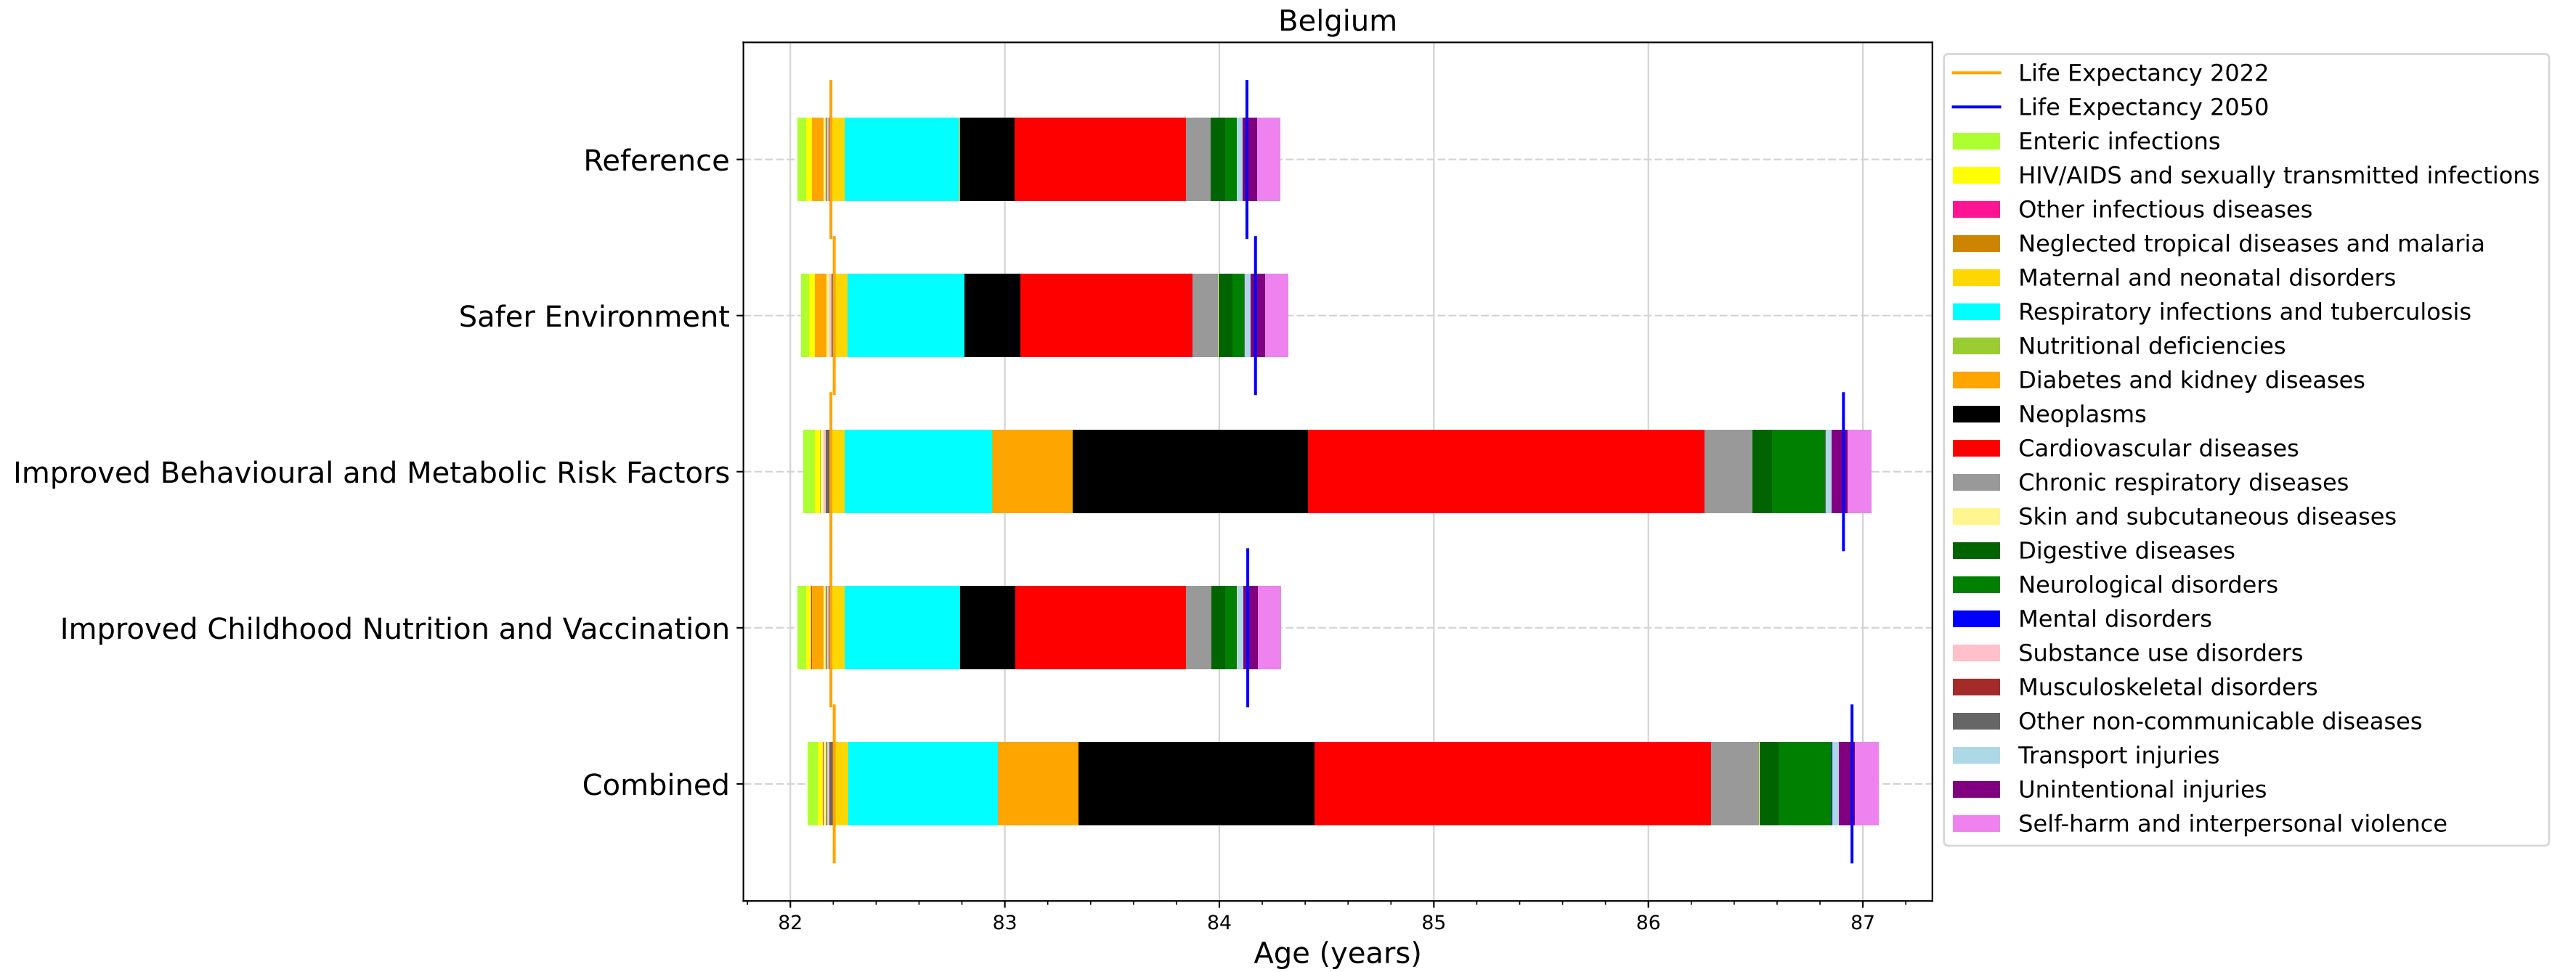

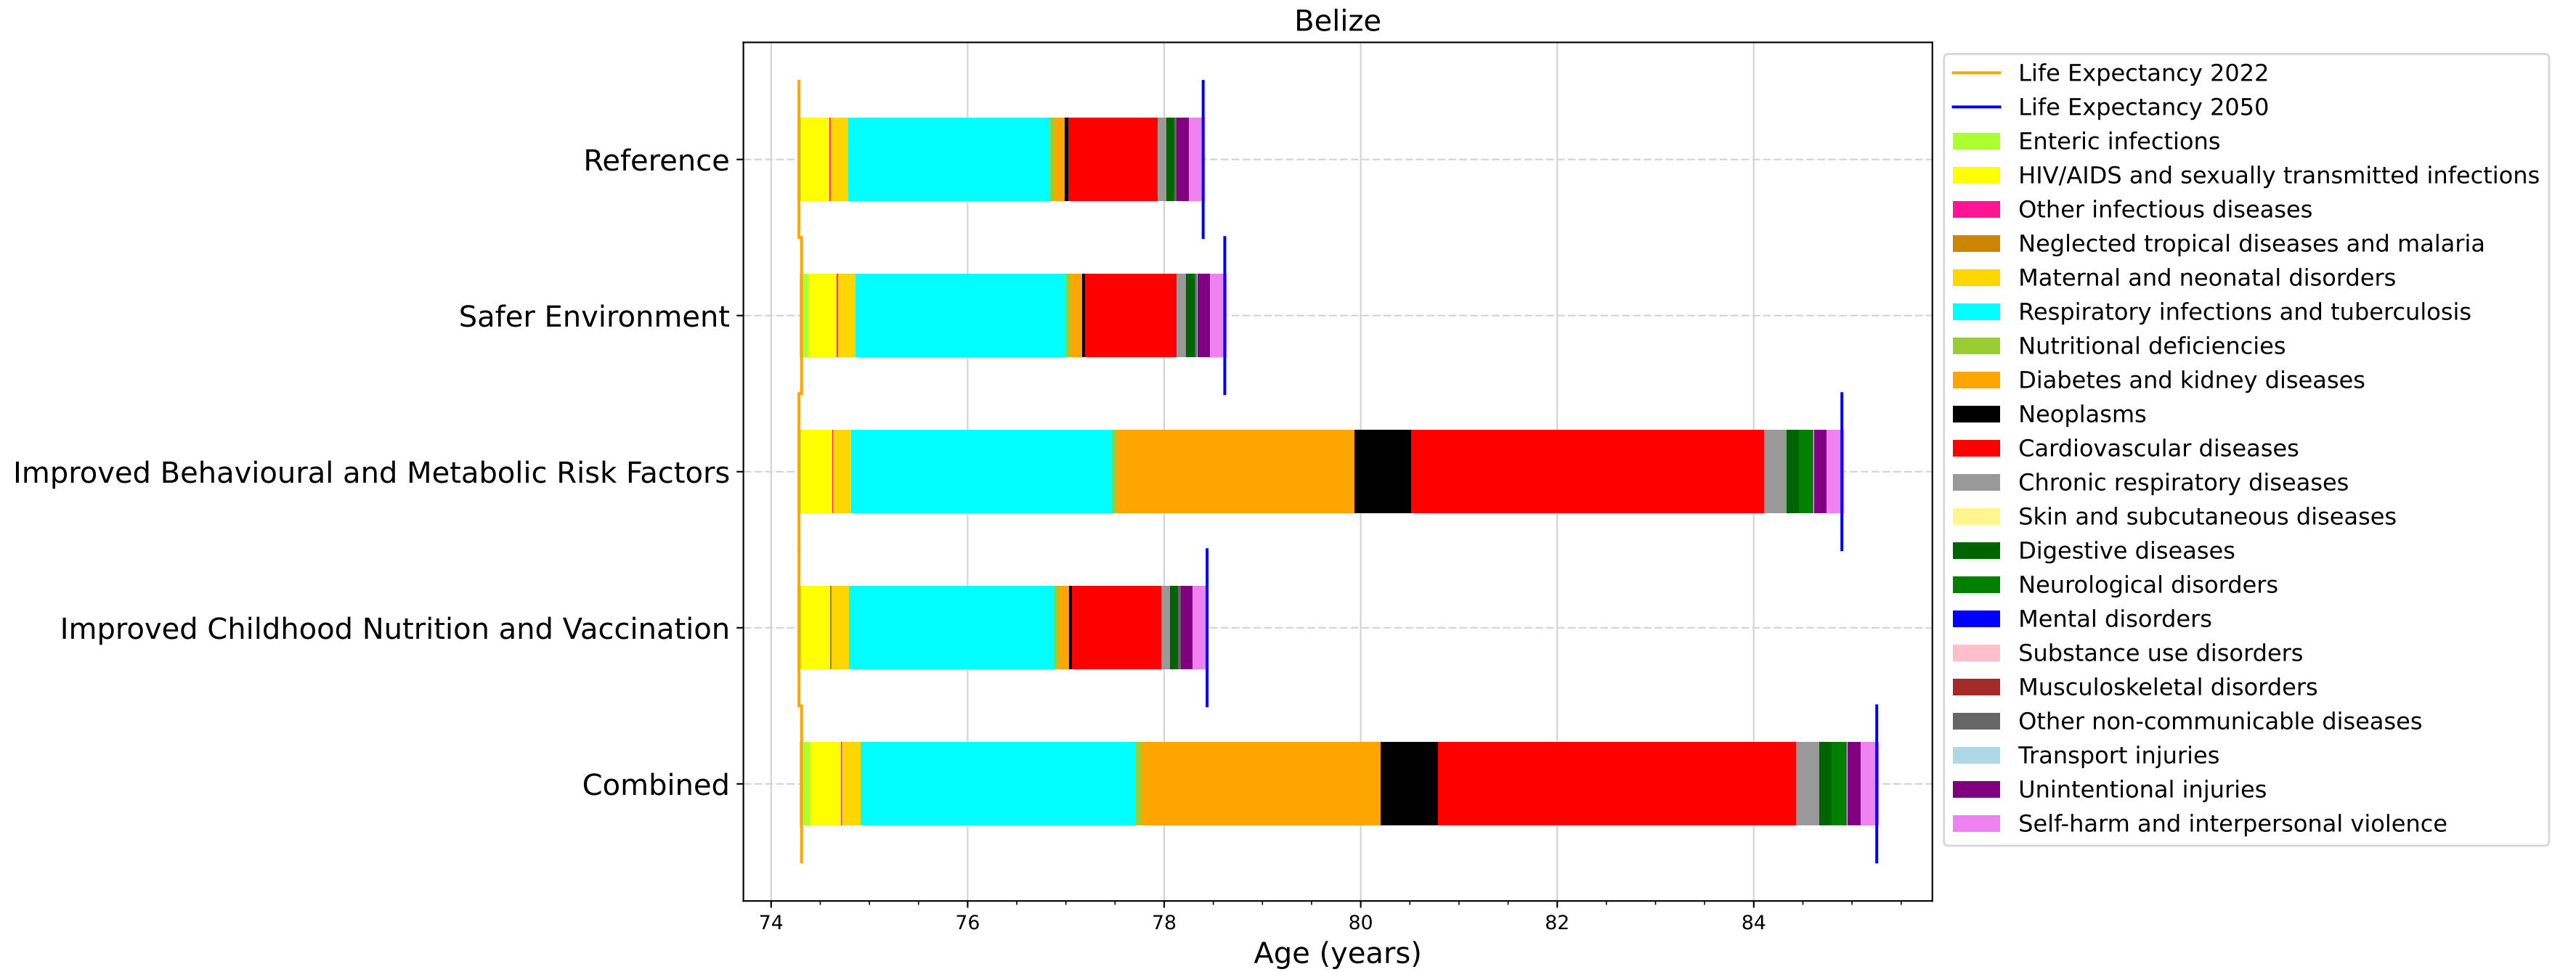

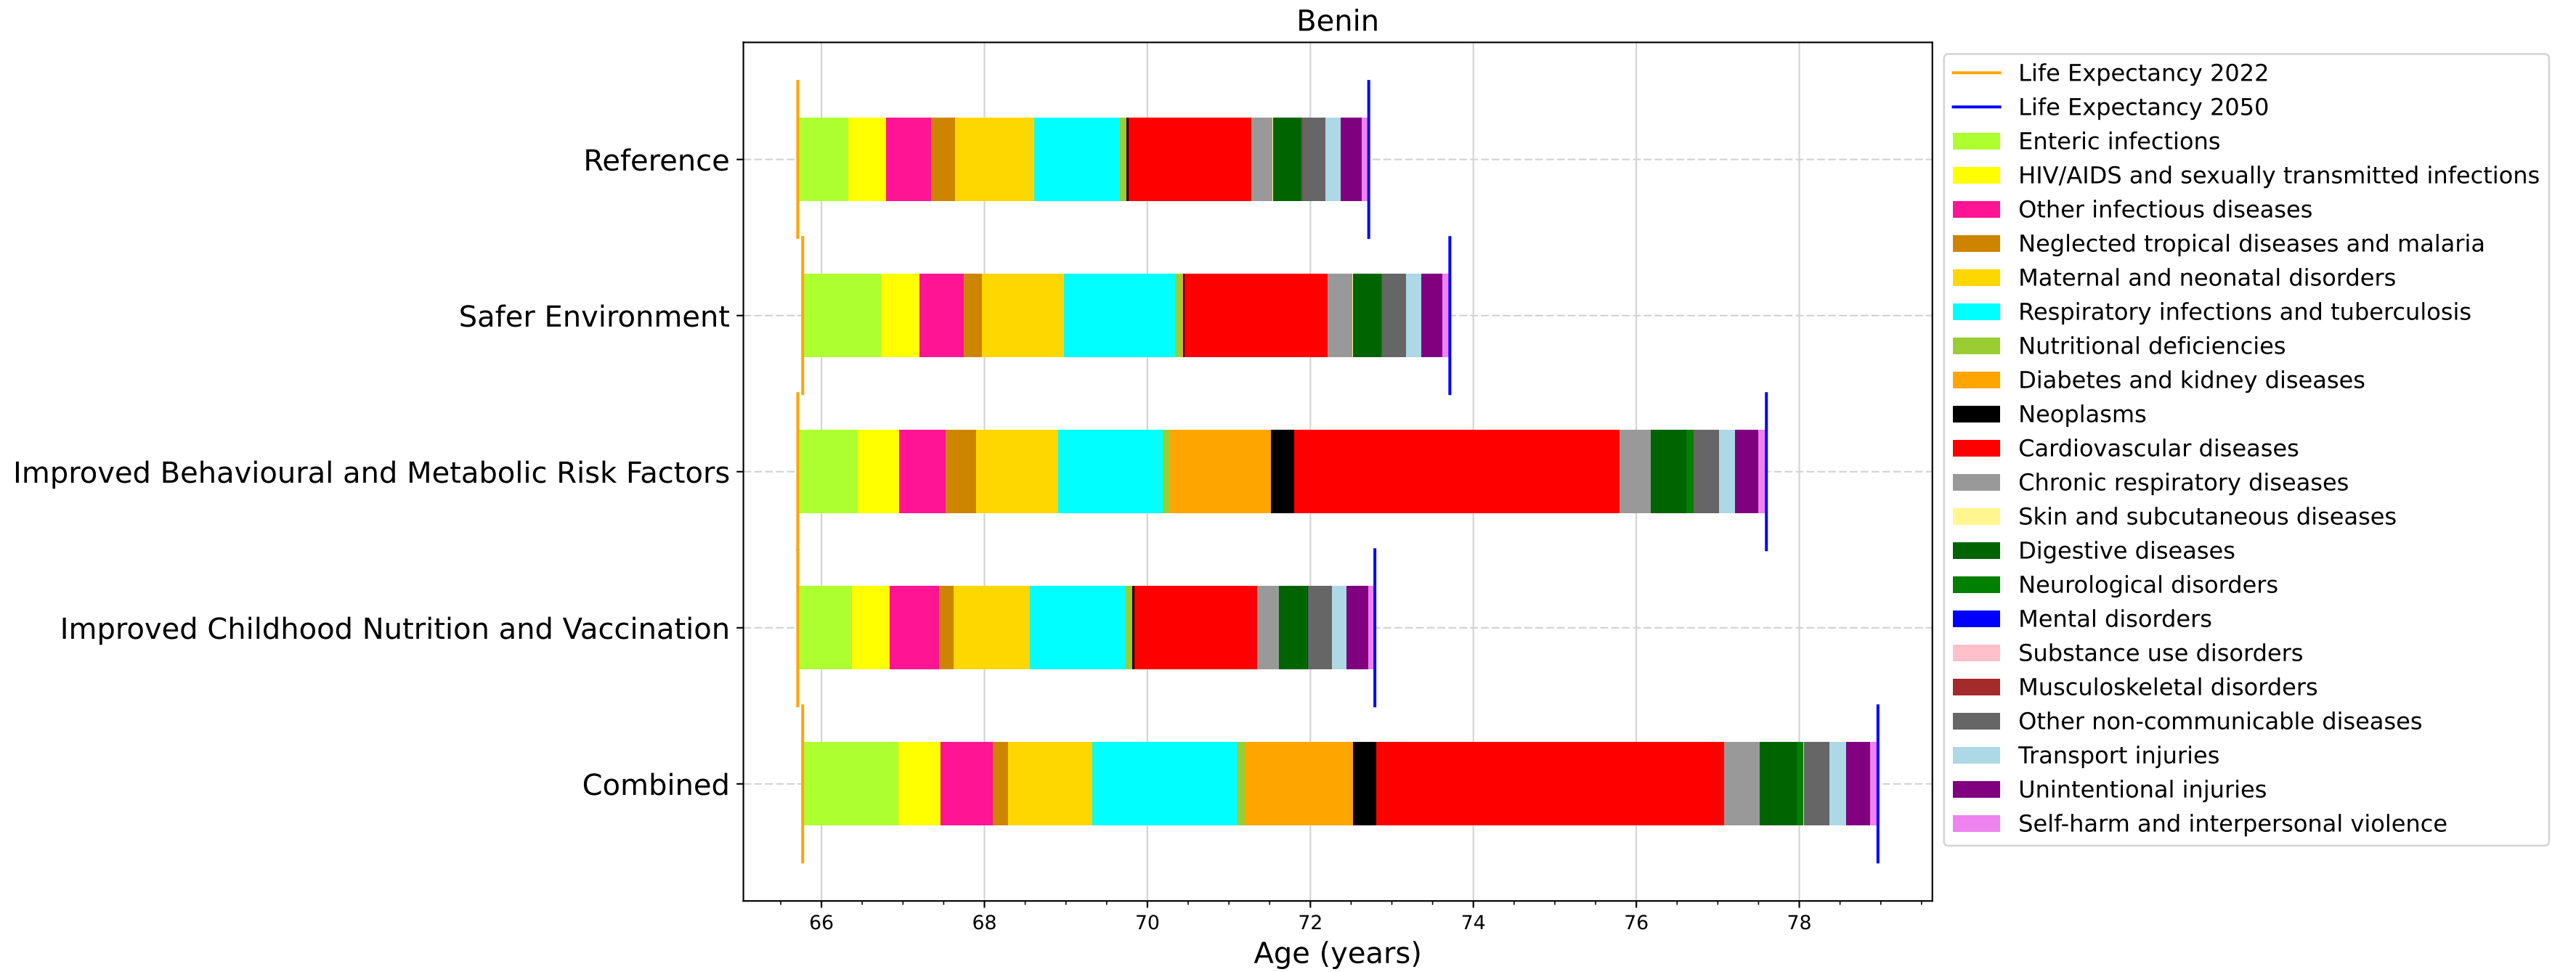

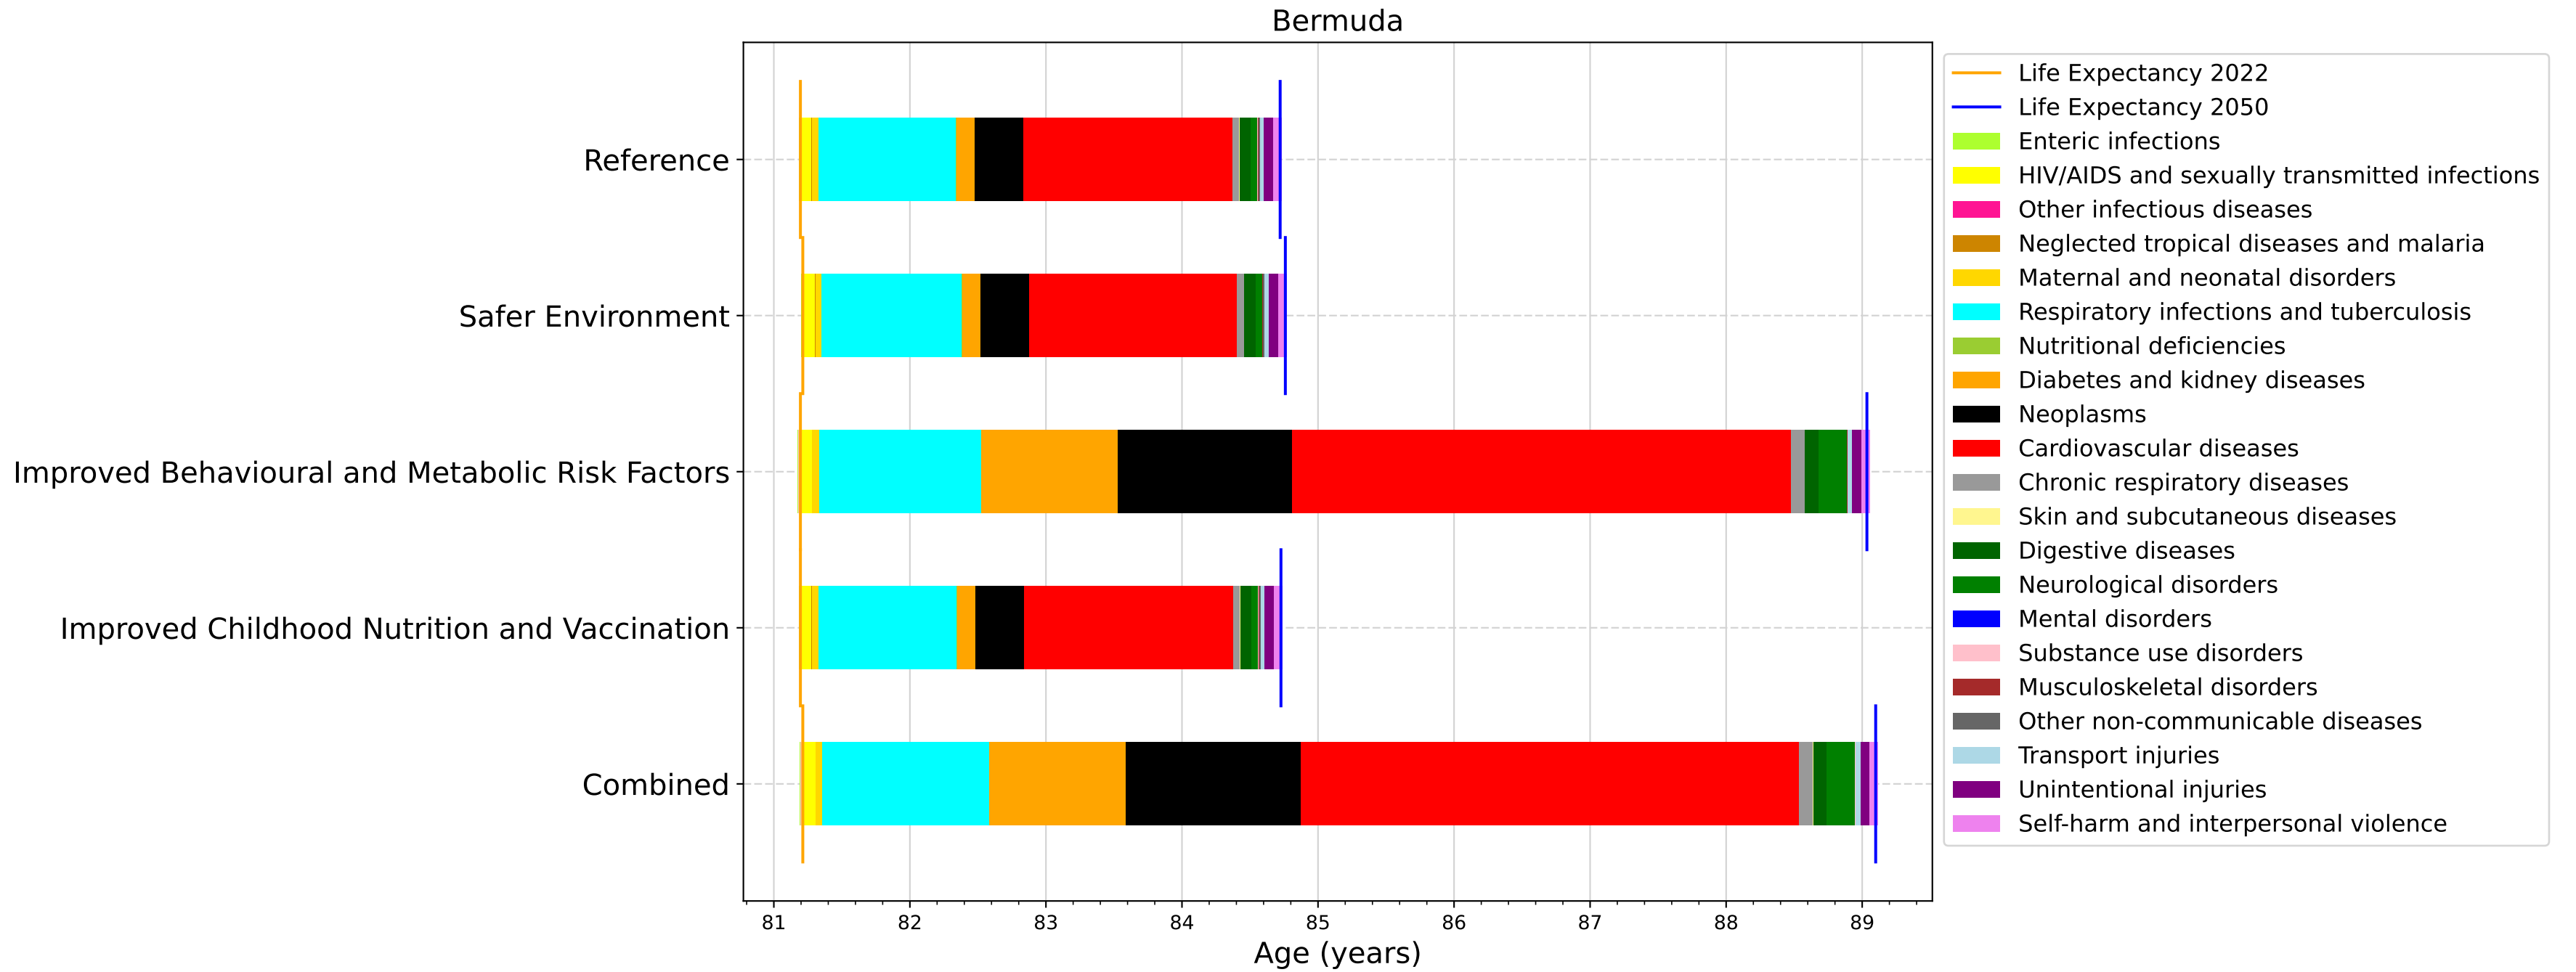

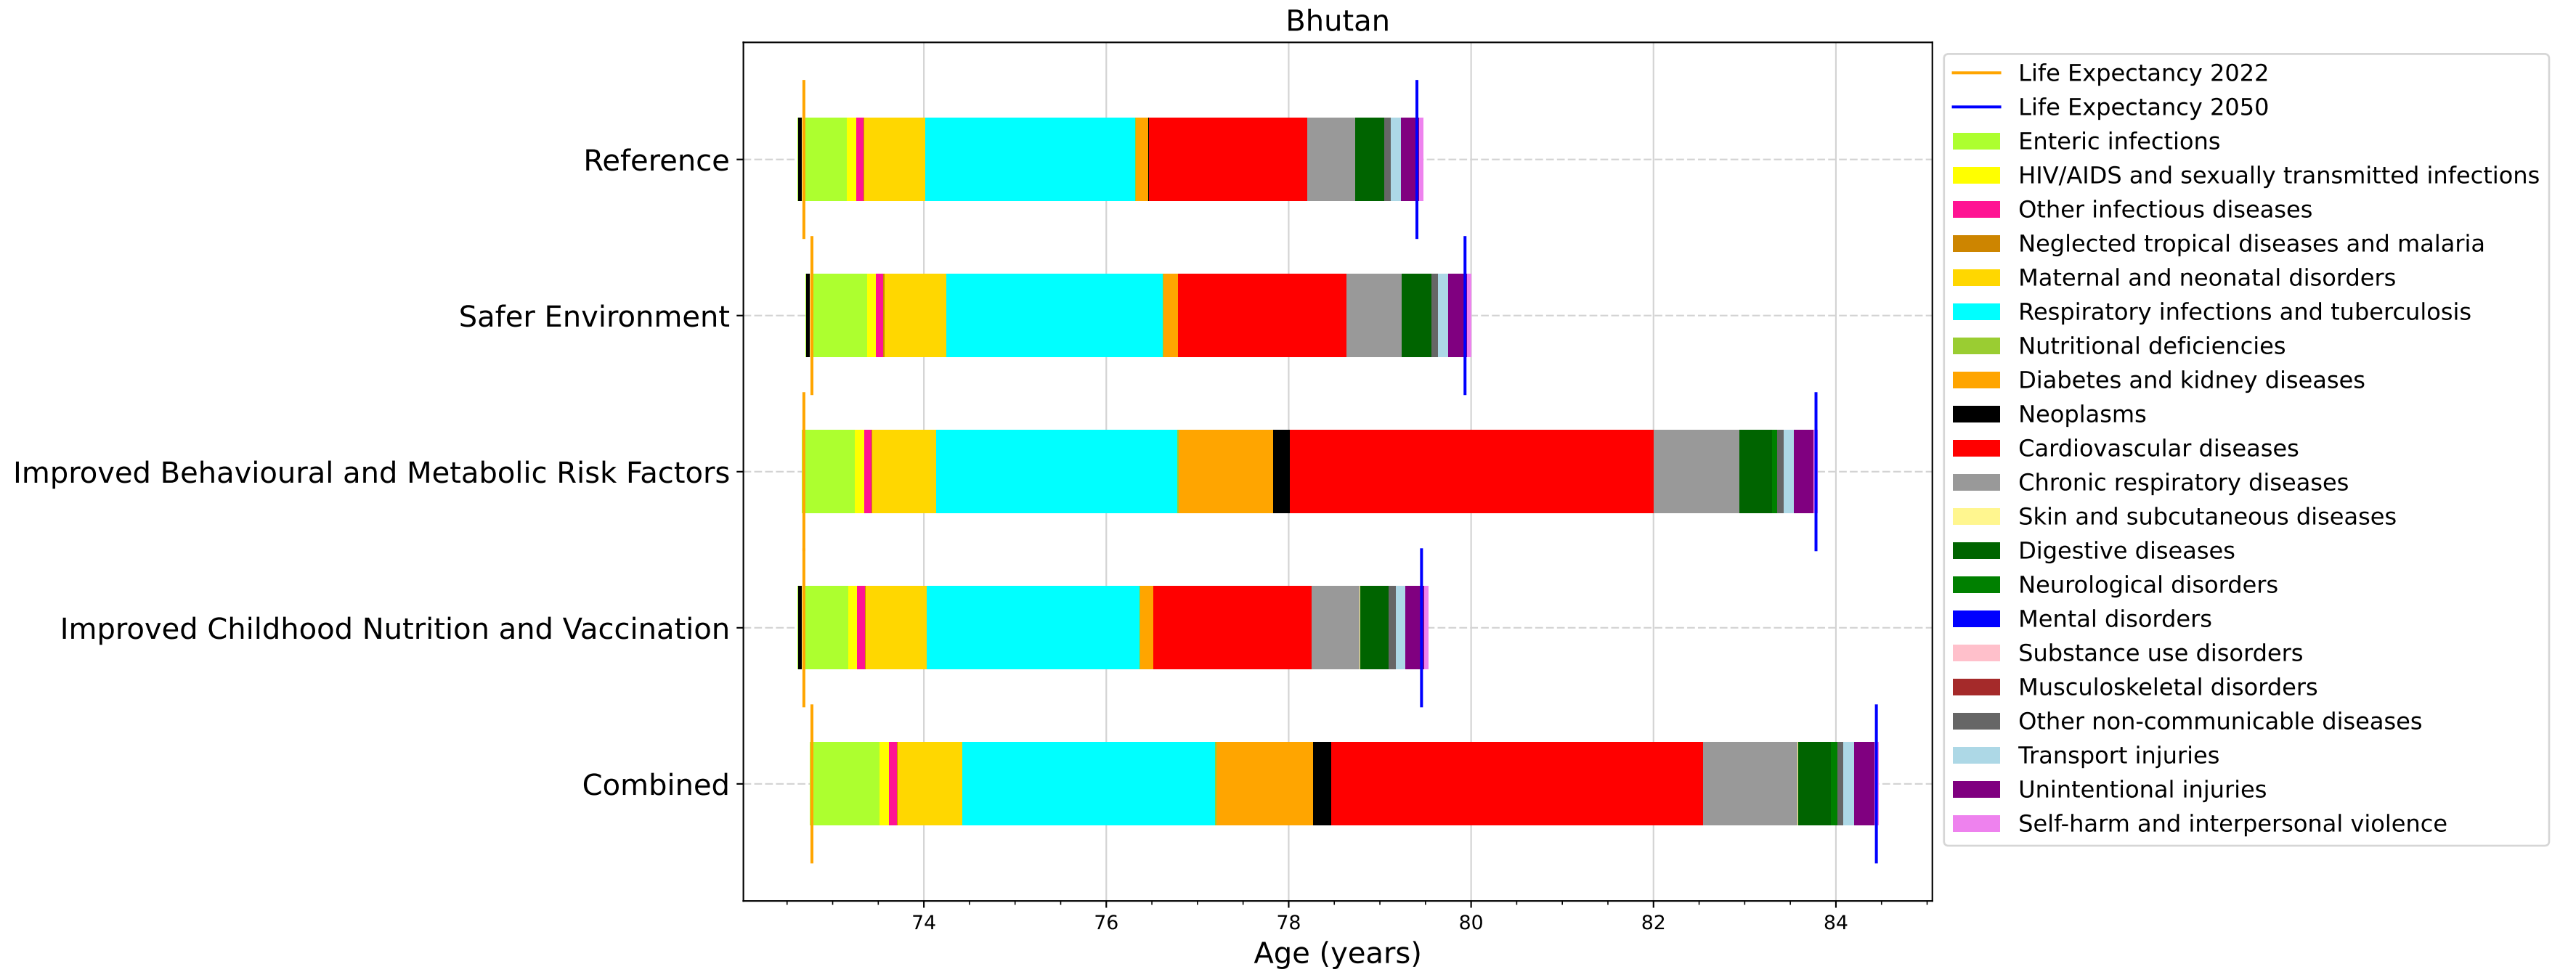

Bolivia (Plurinational State of)

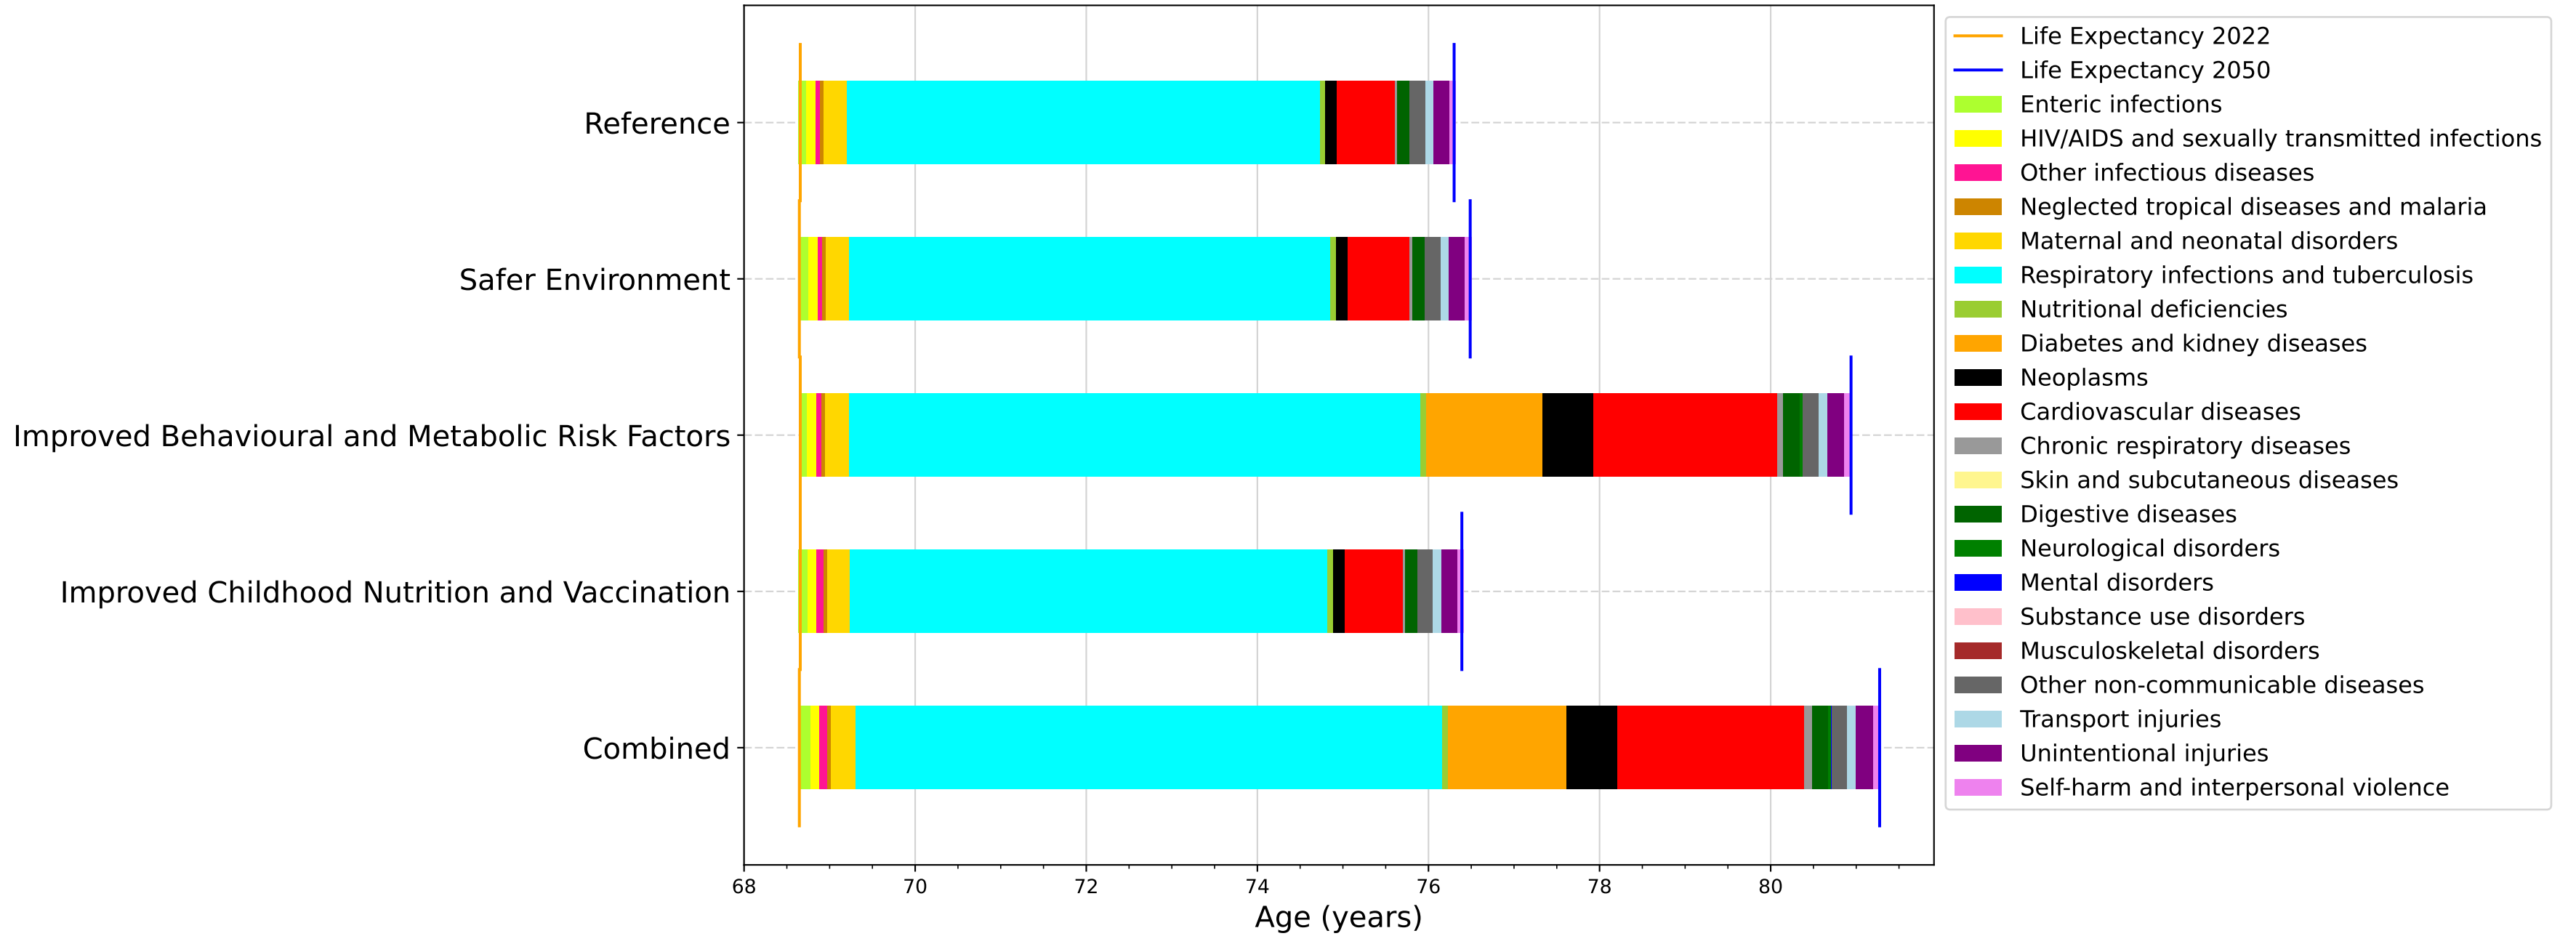

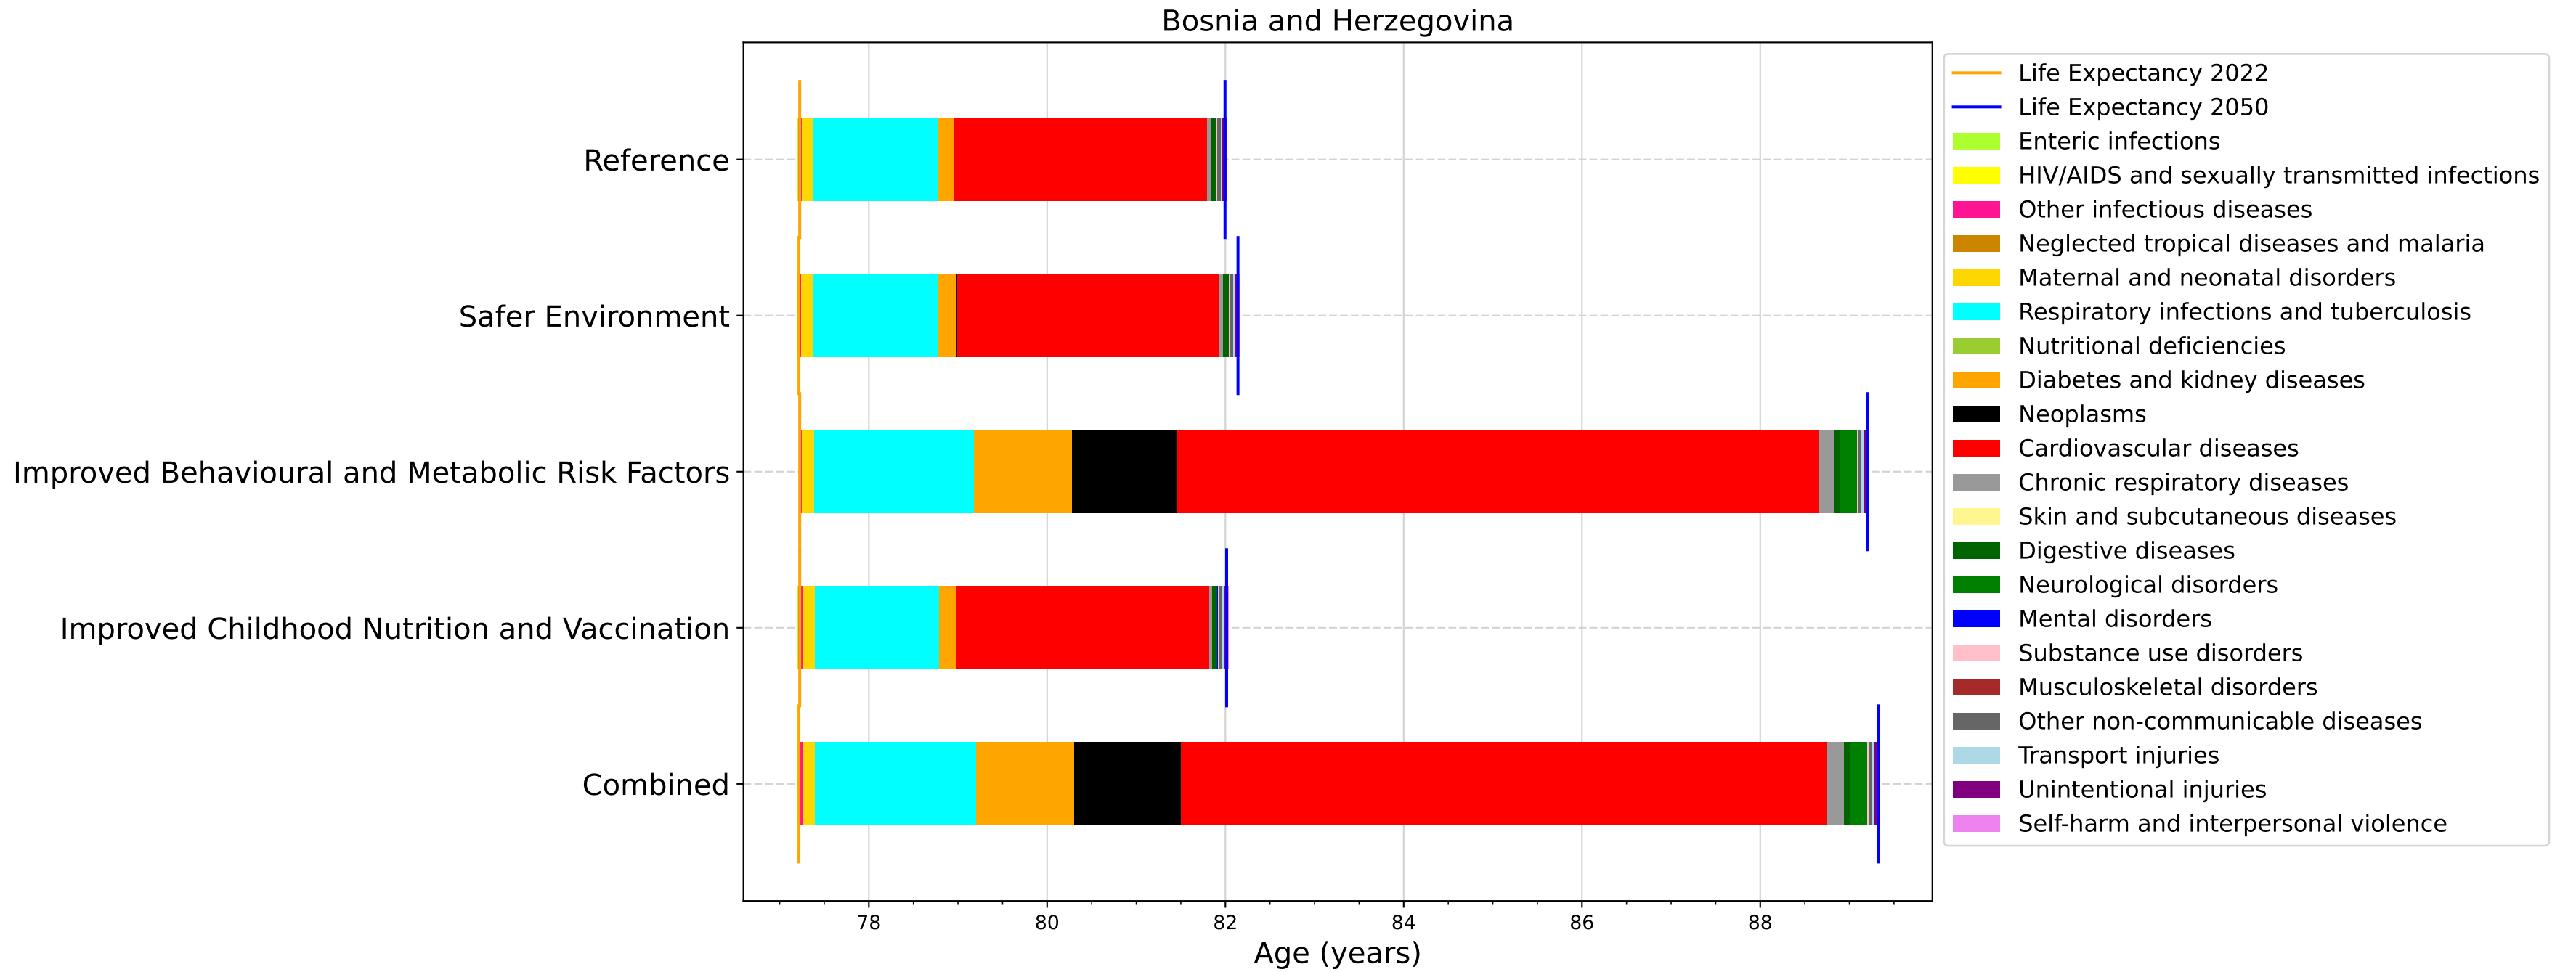

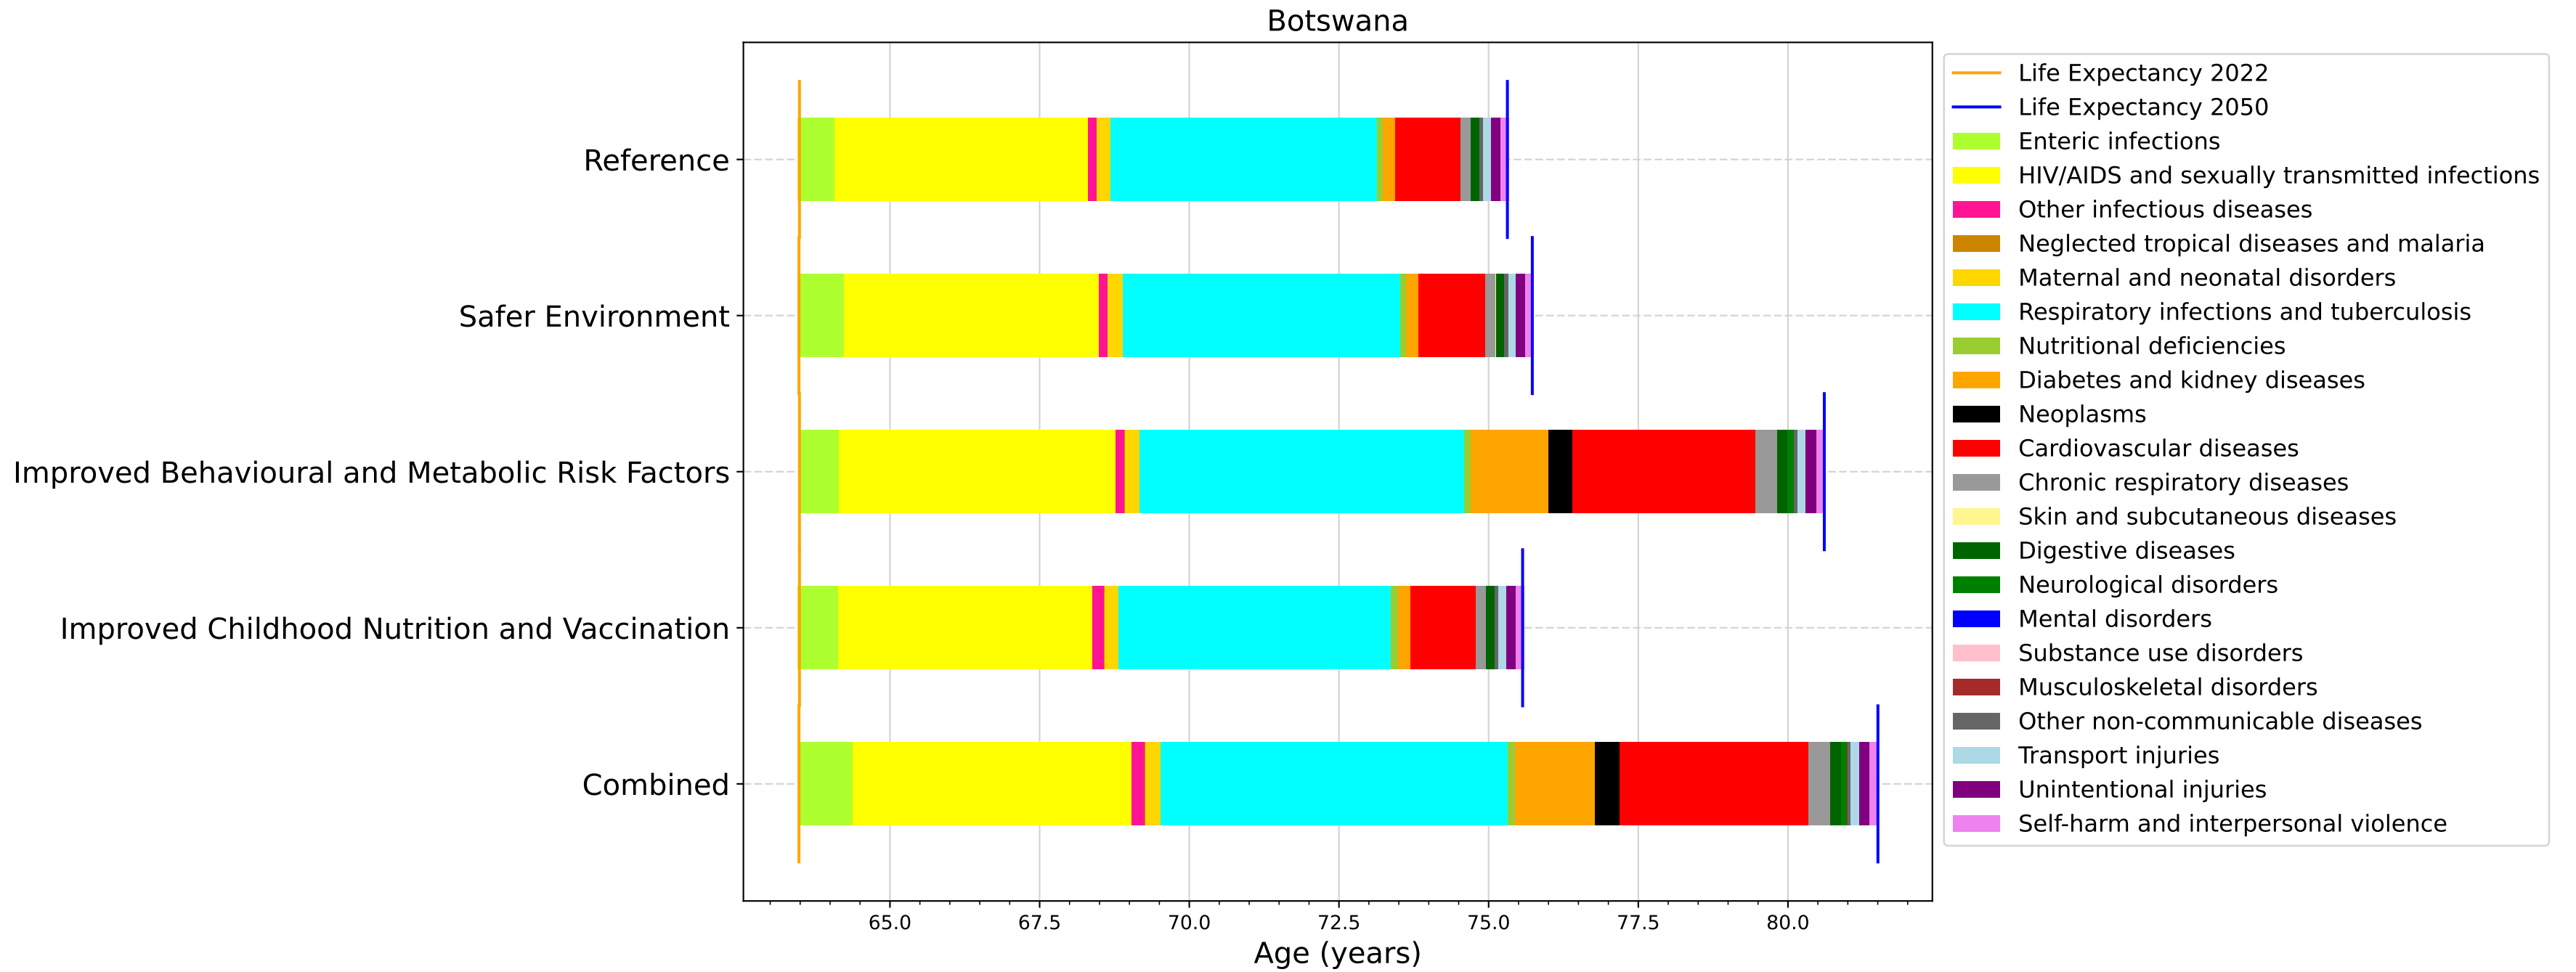



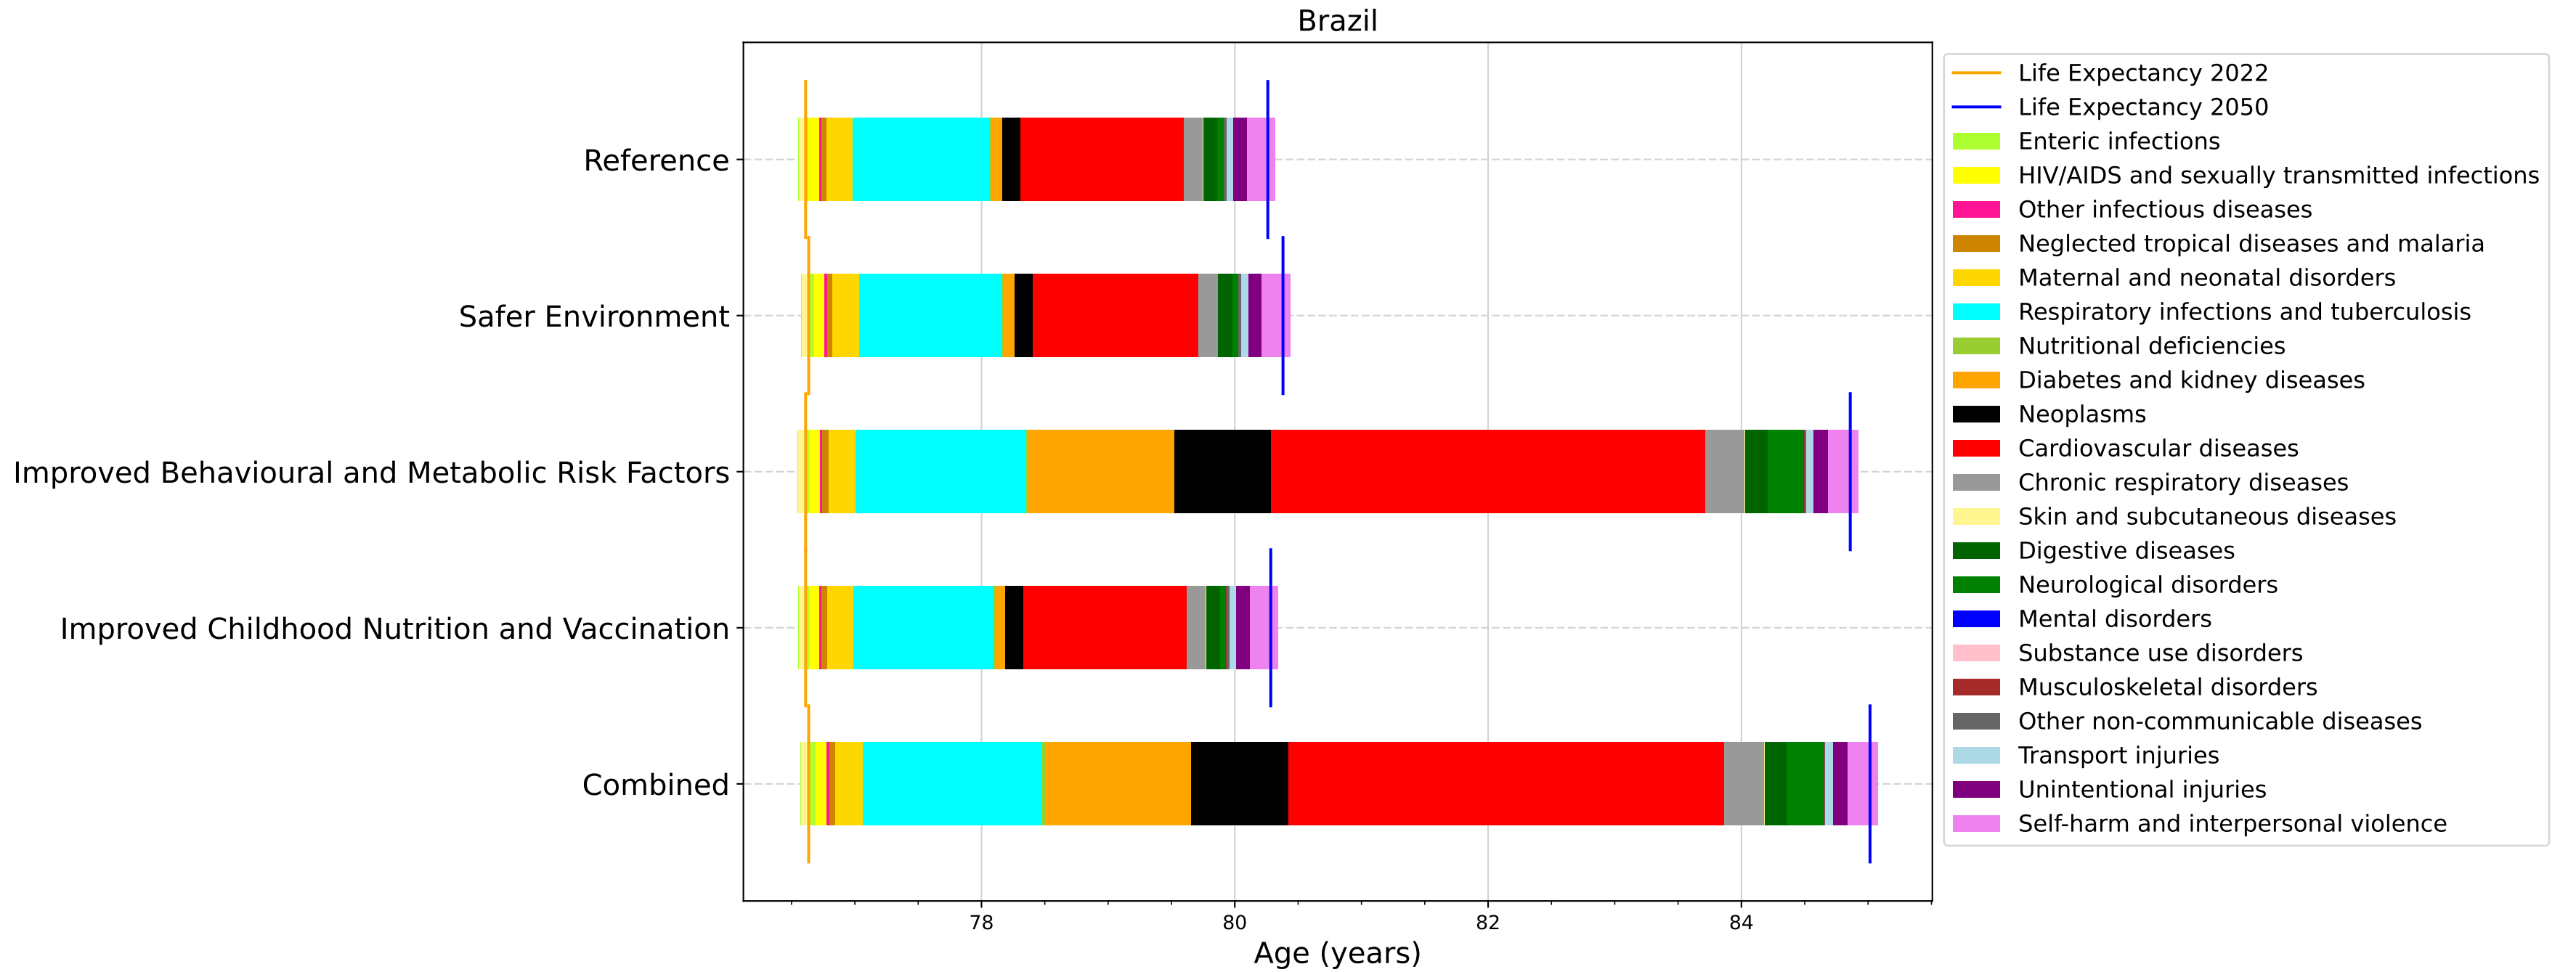

Brunei Darussalam

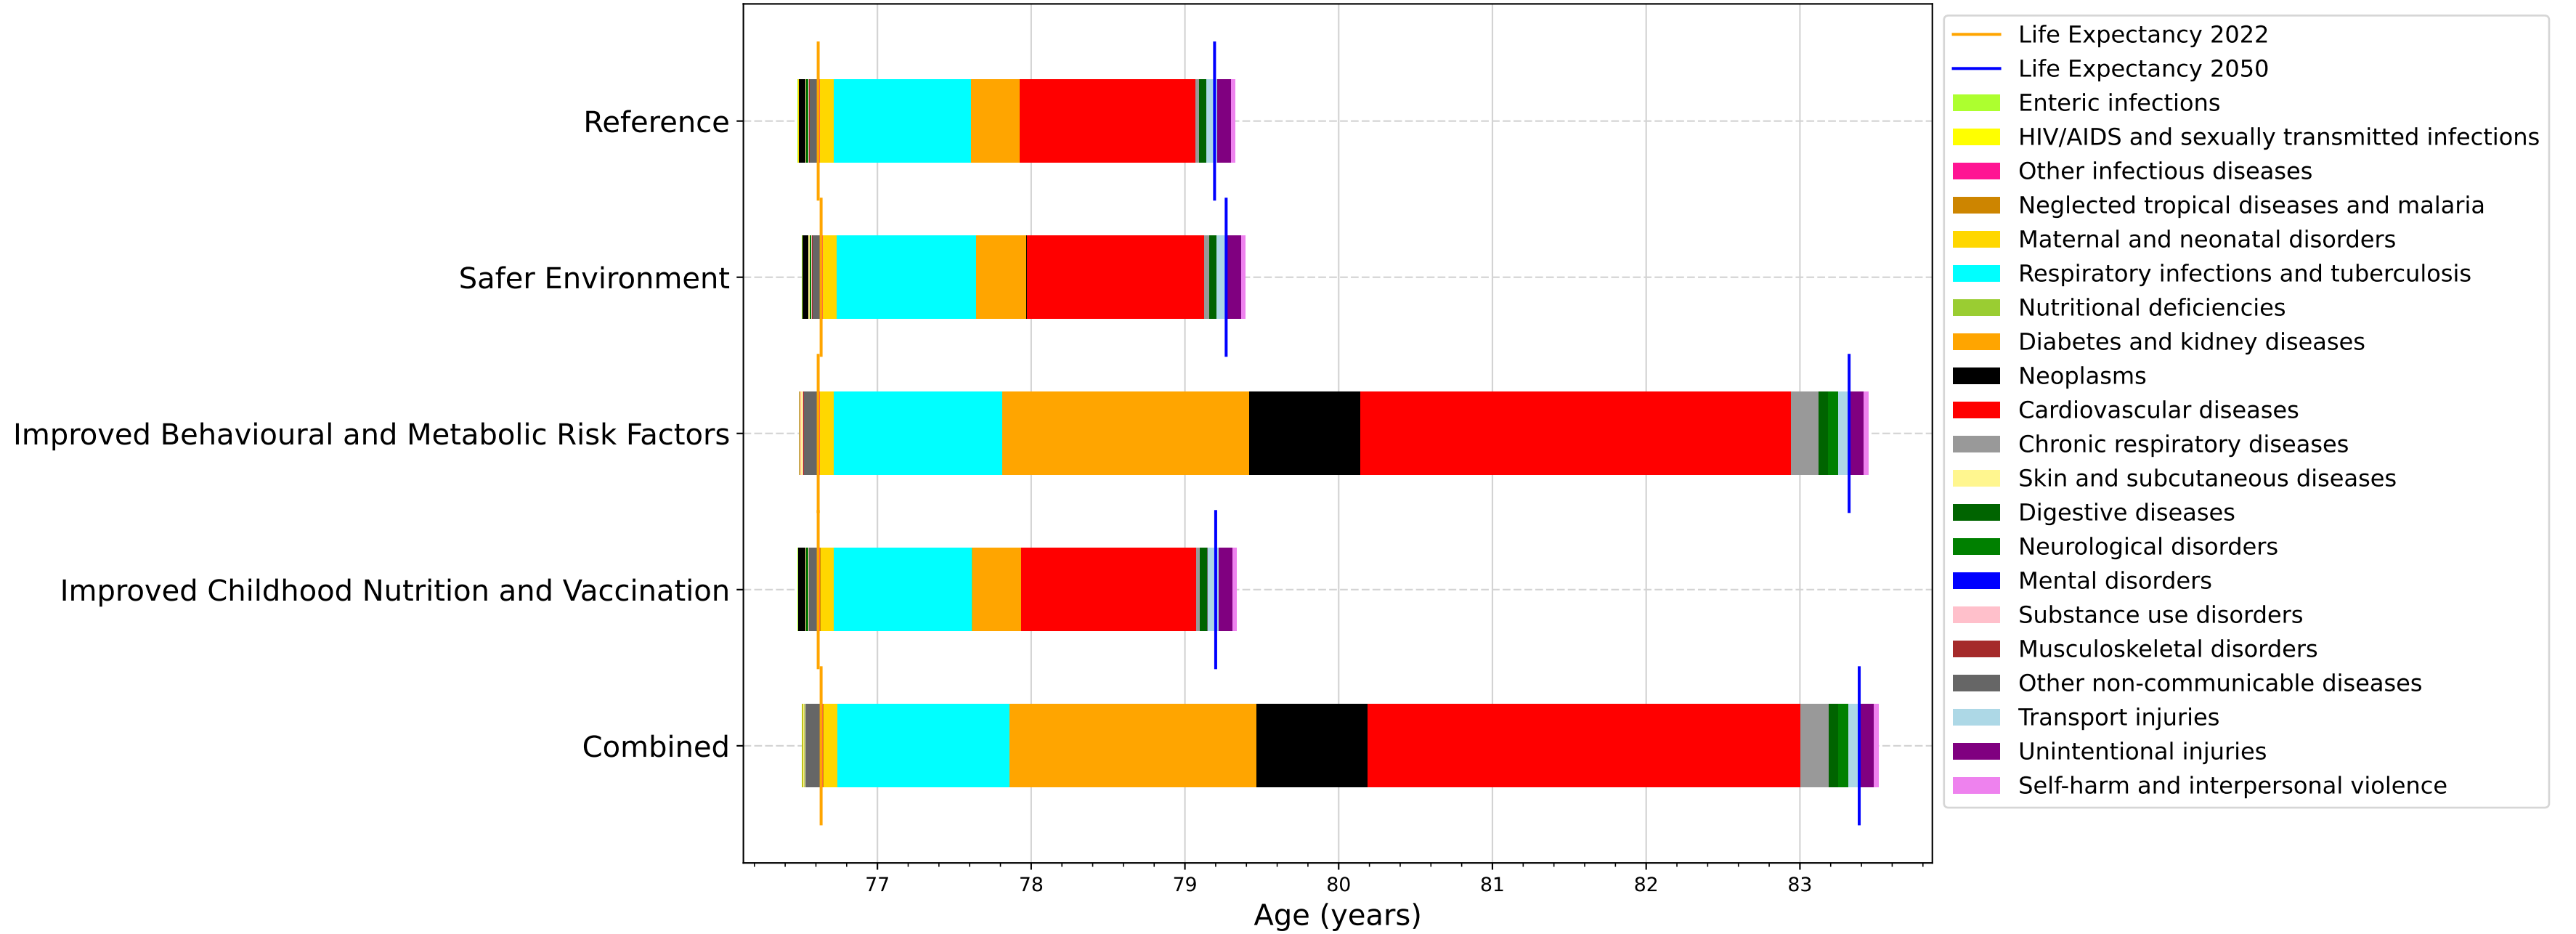

Bulgaria

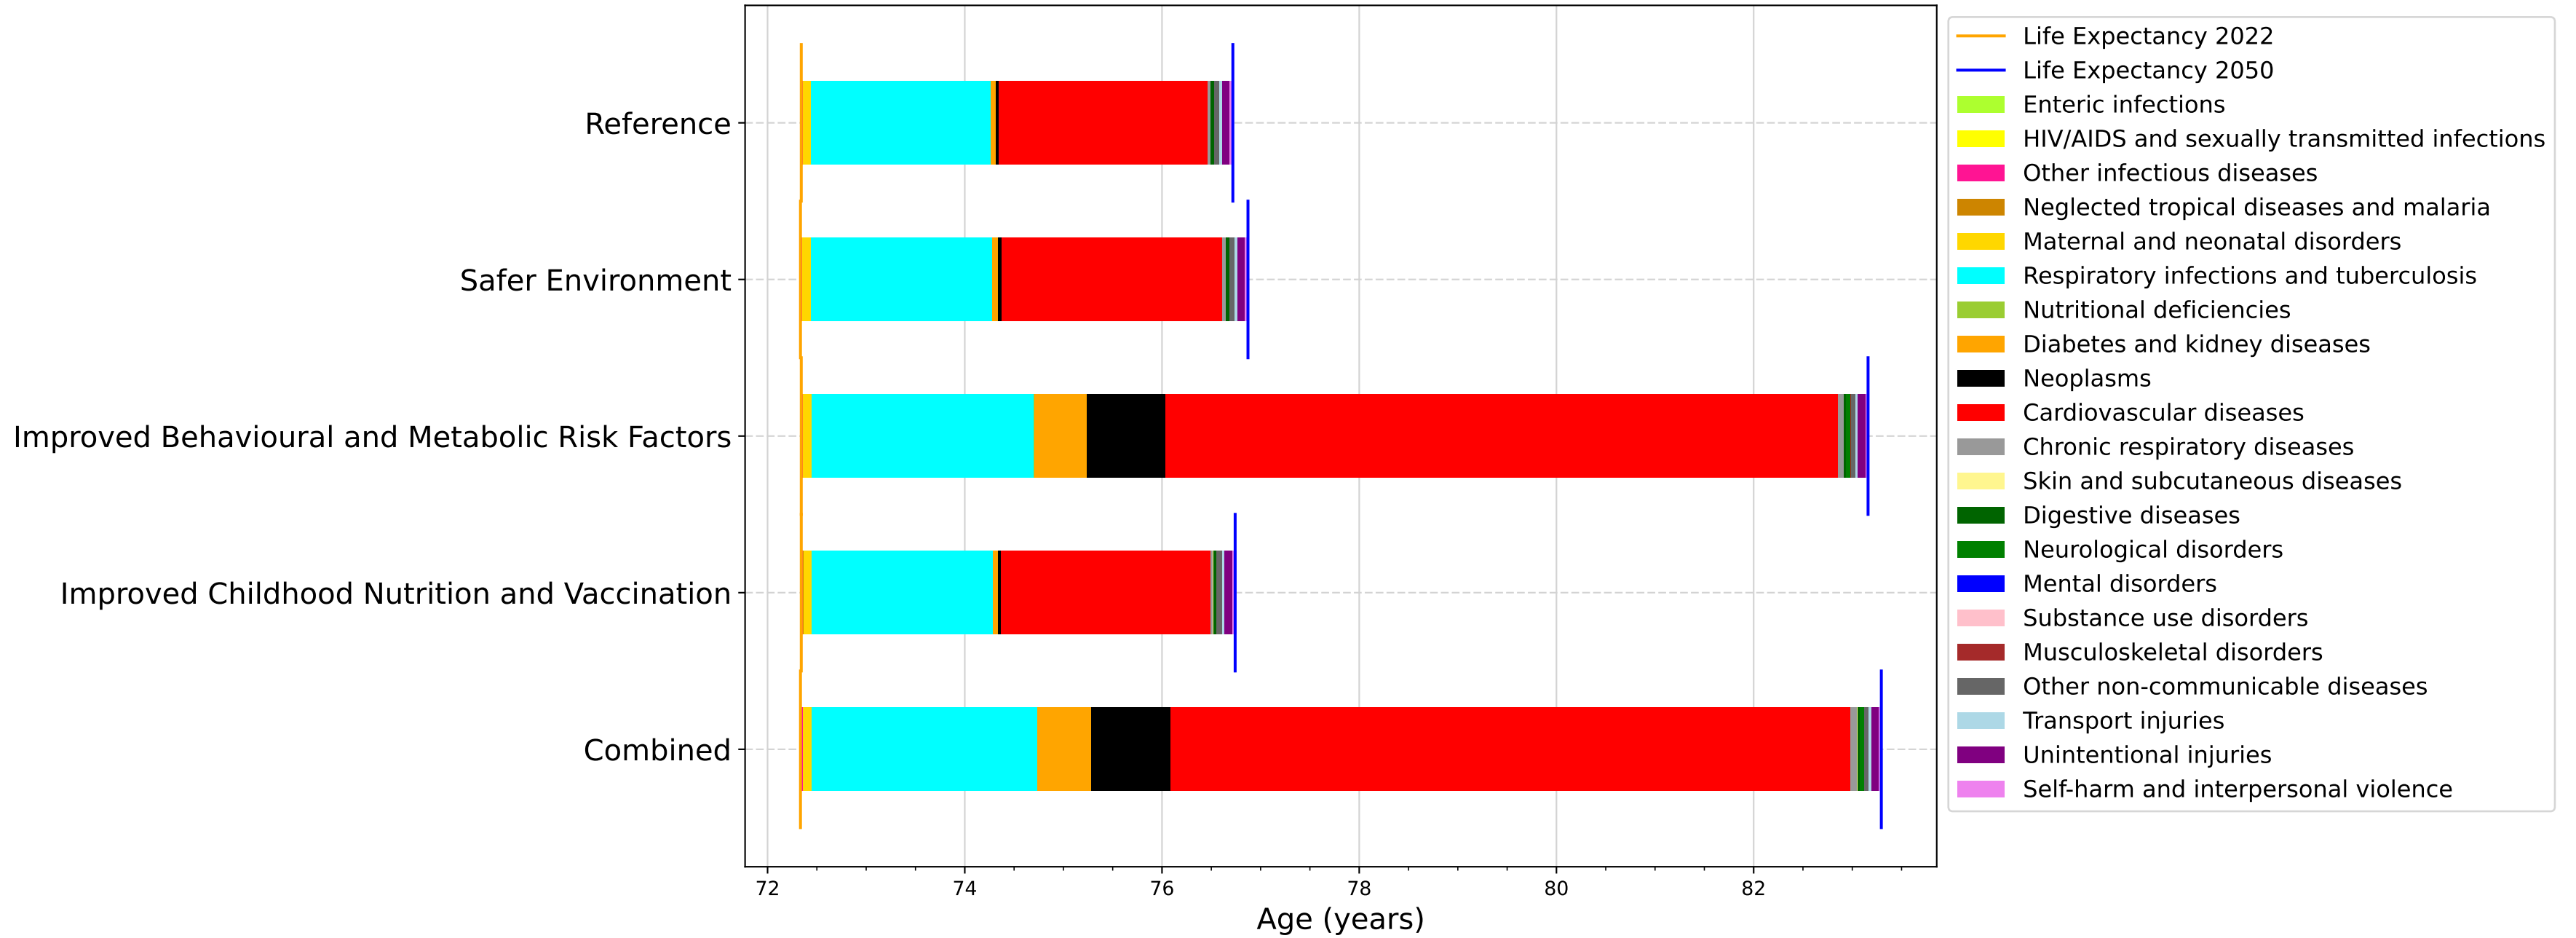

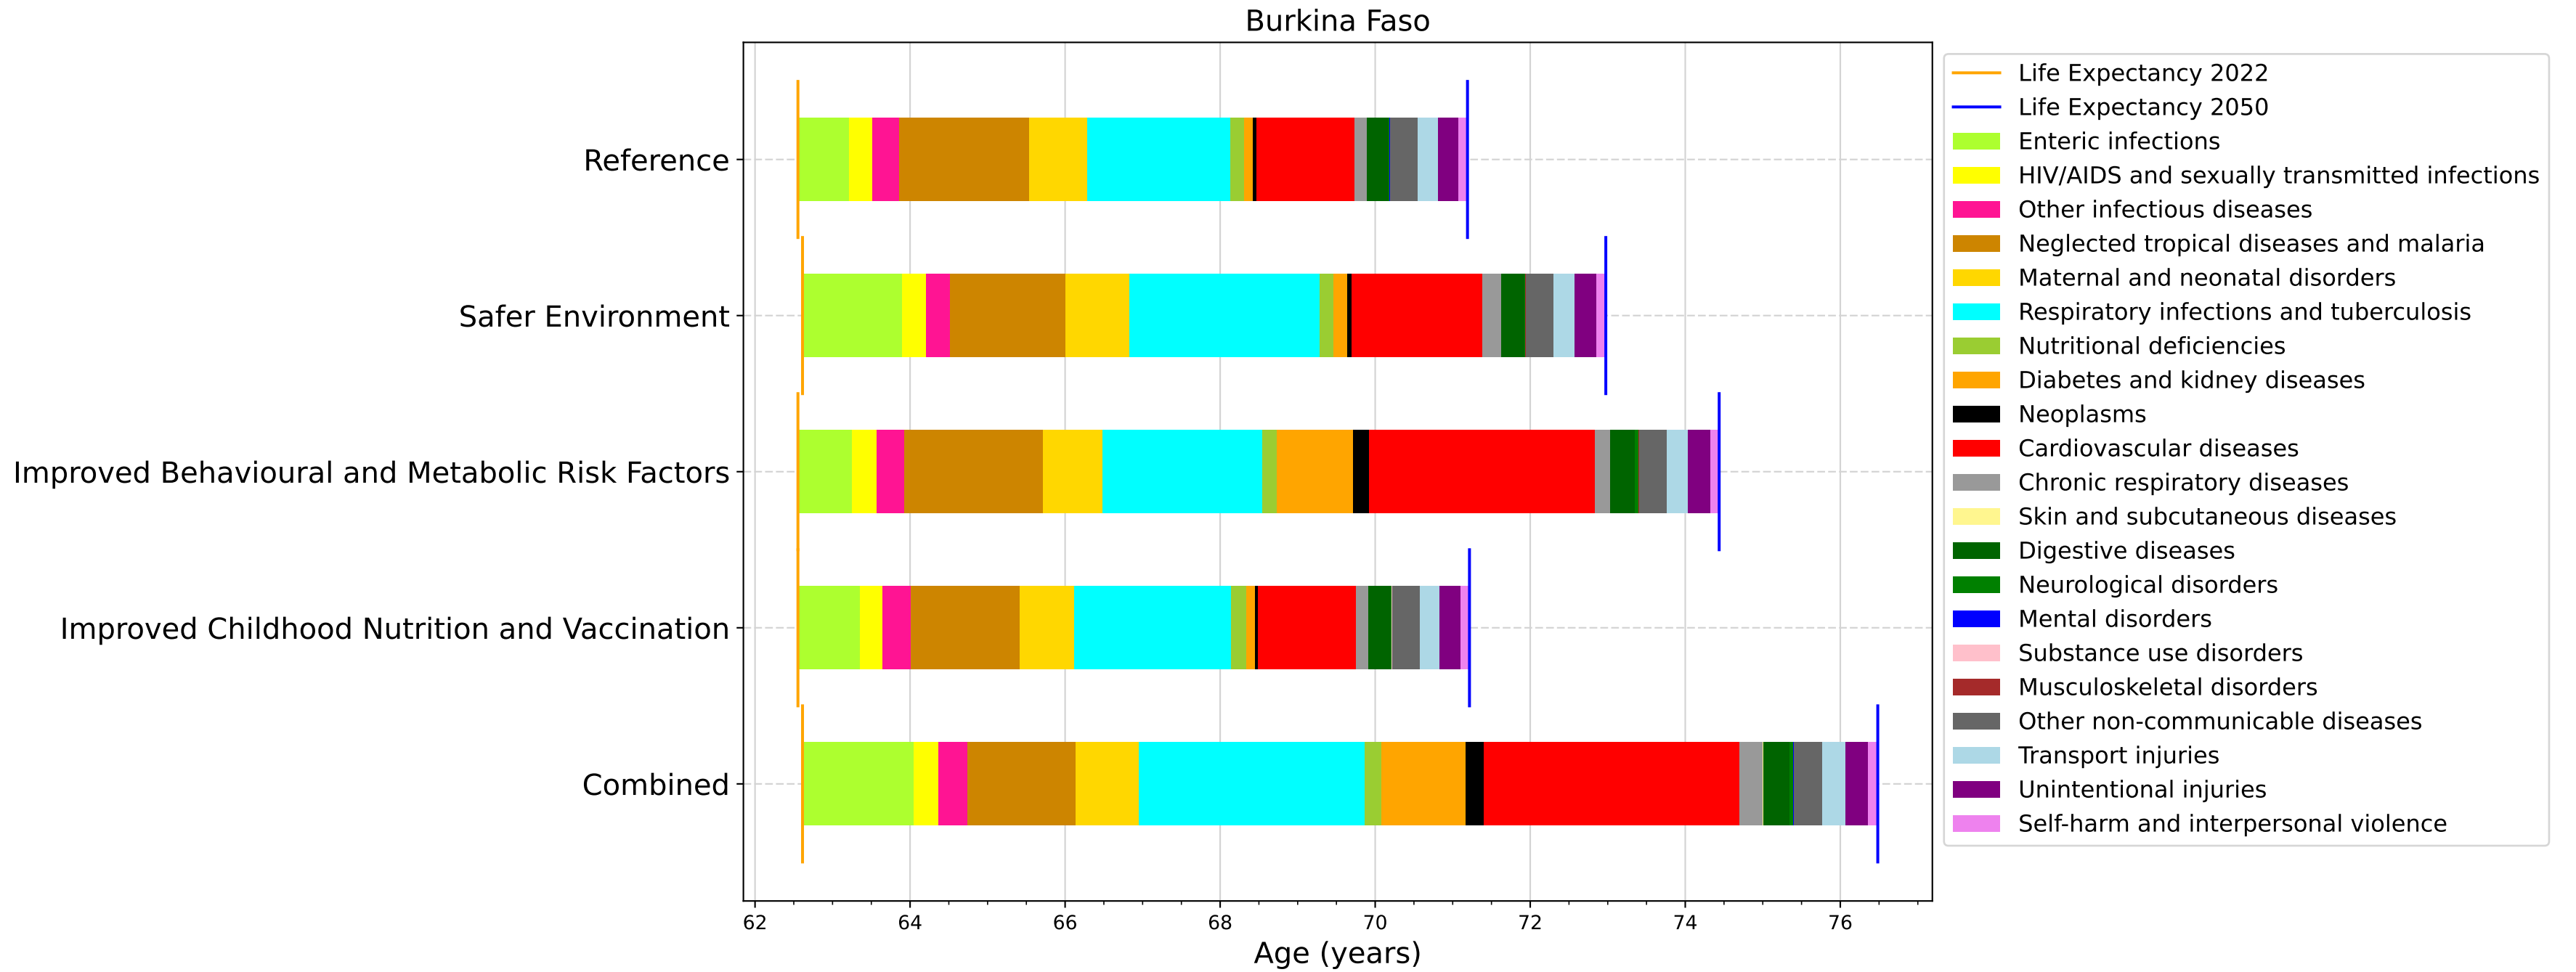

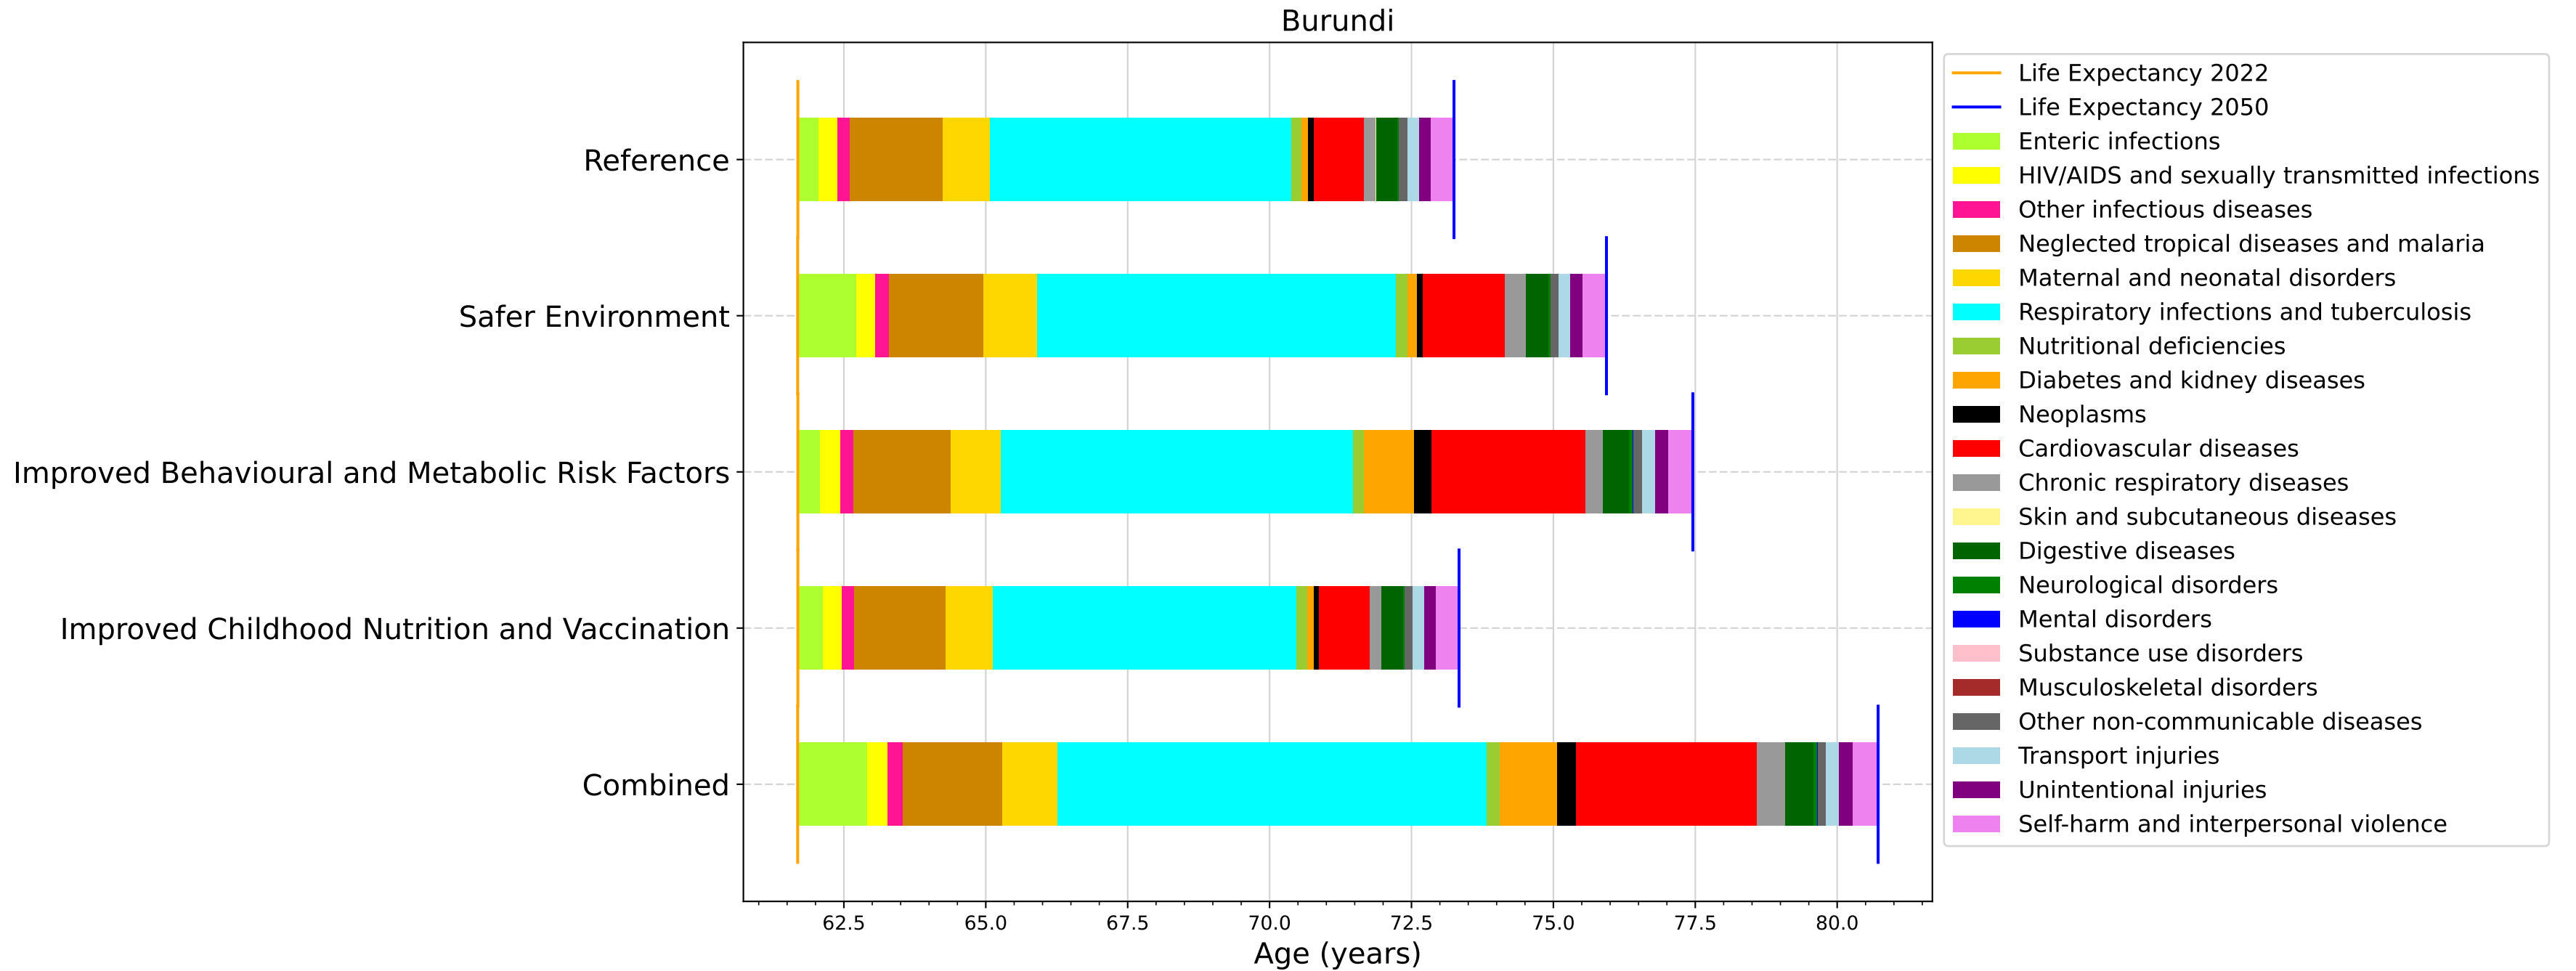

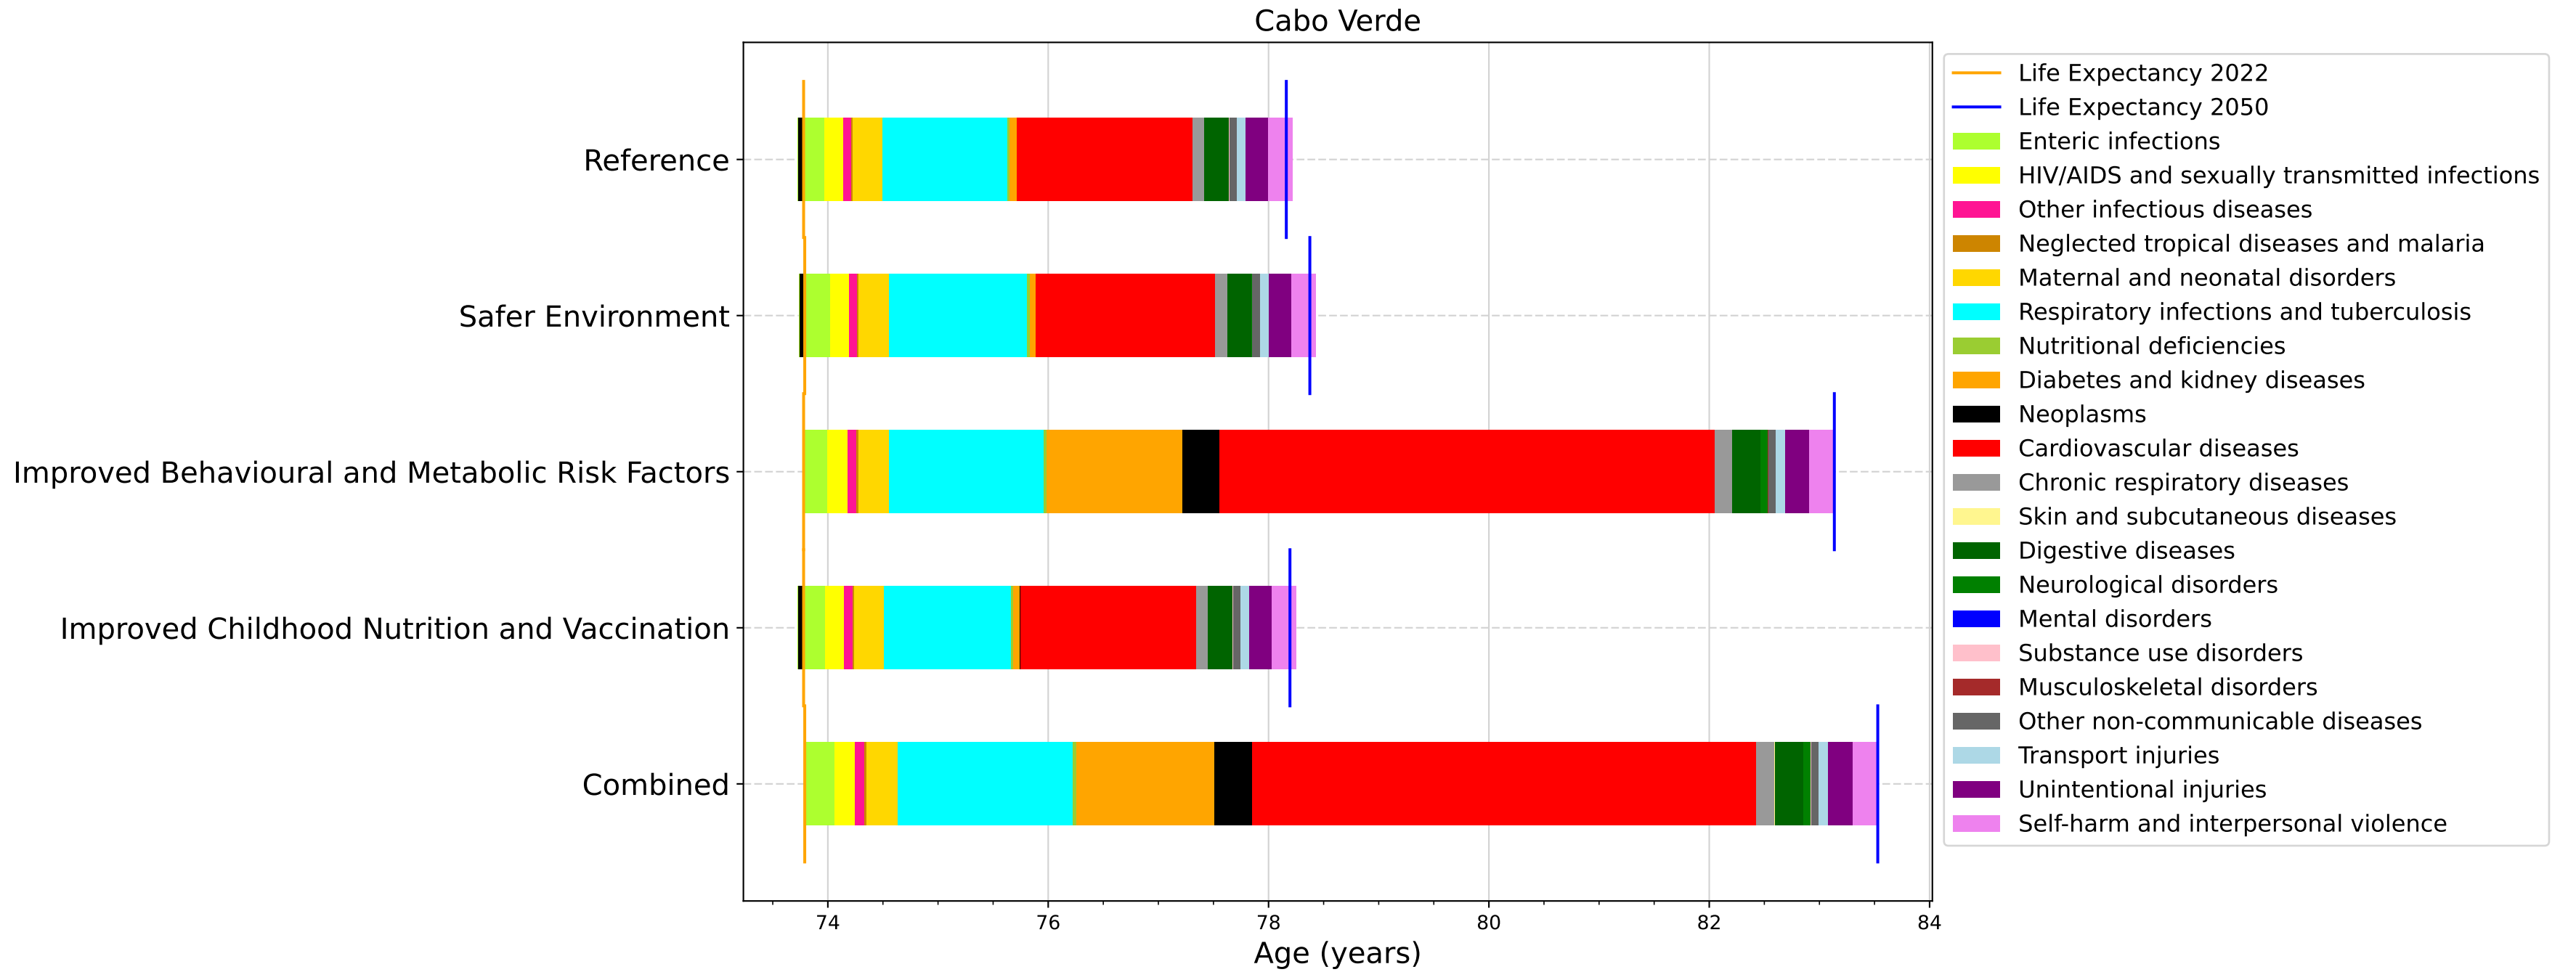

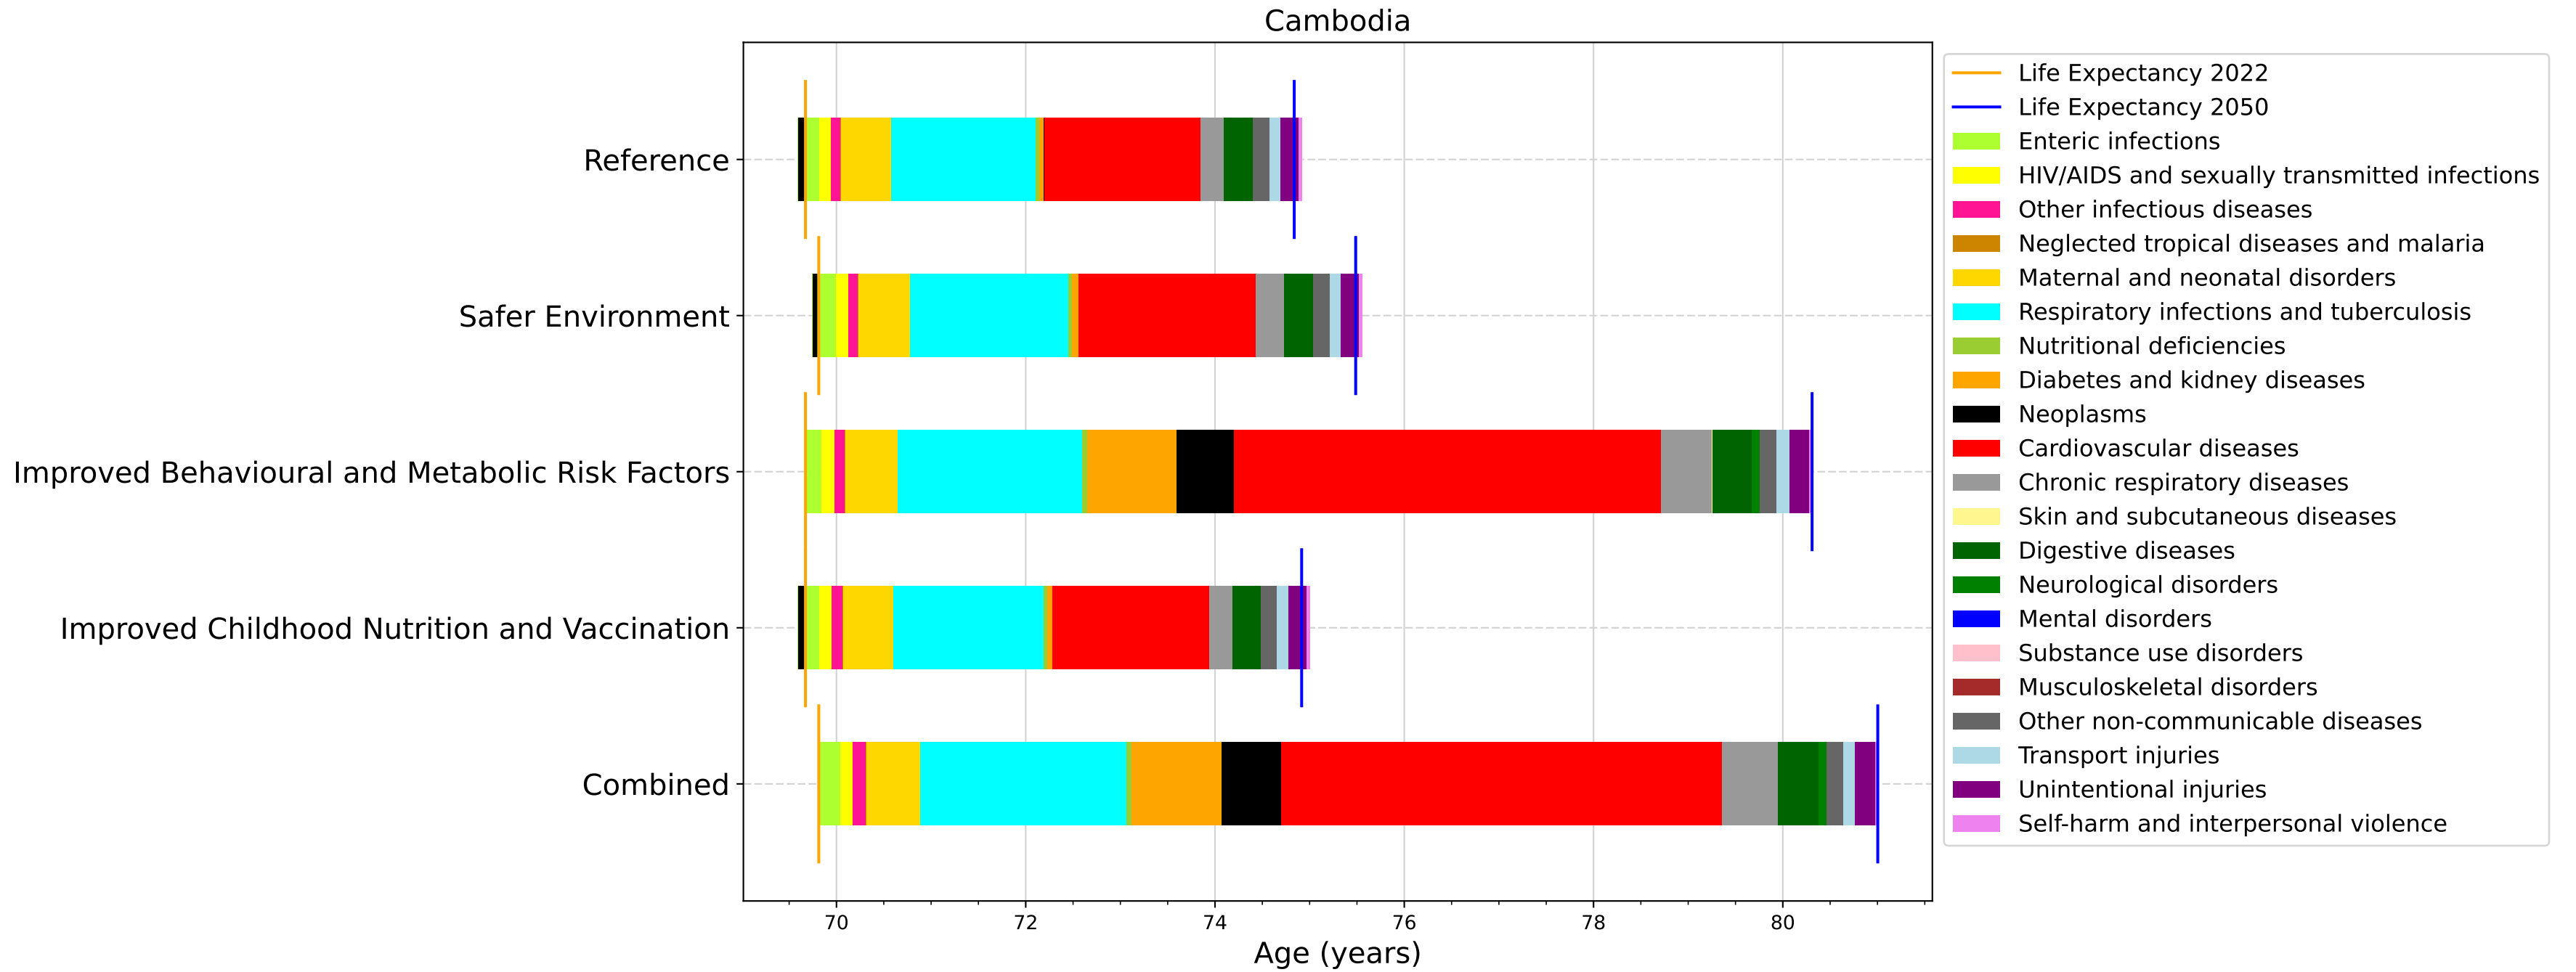

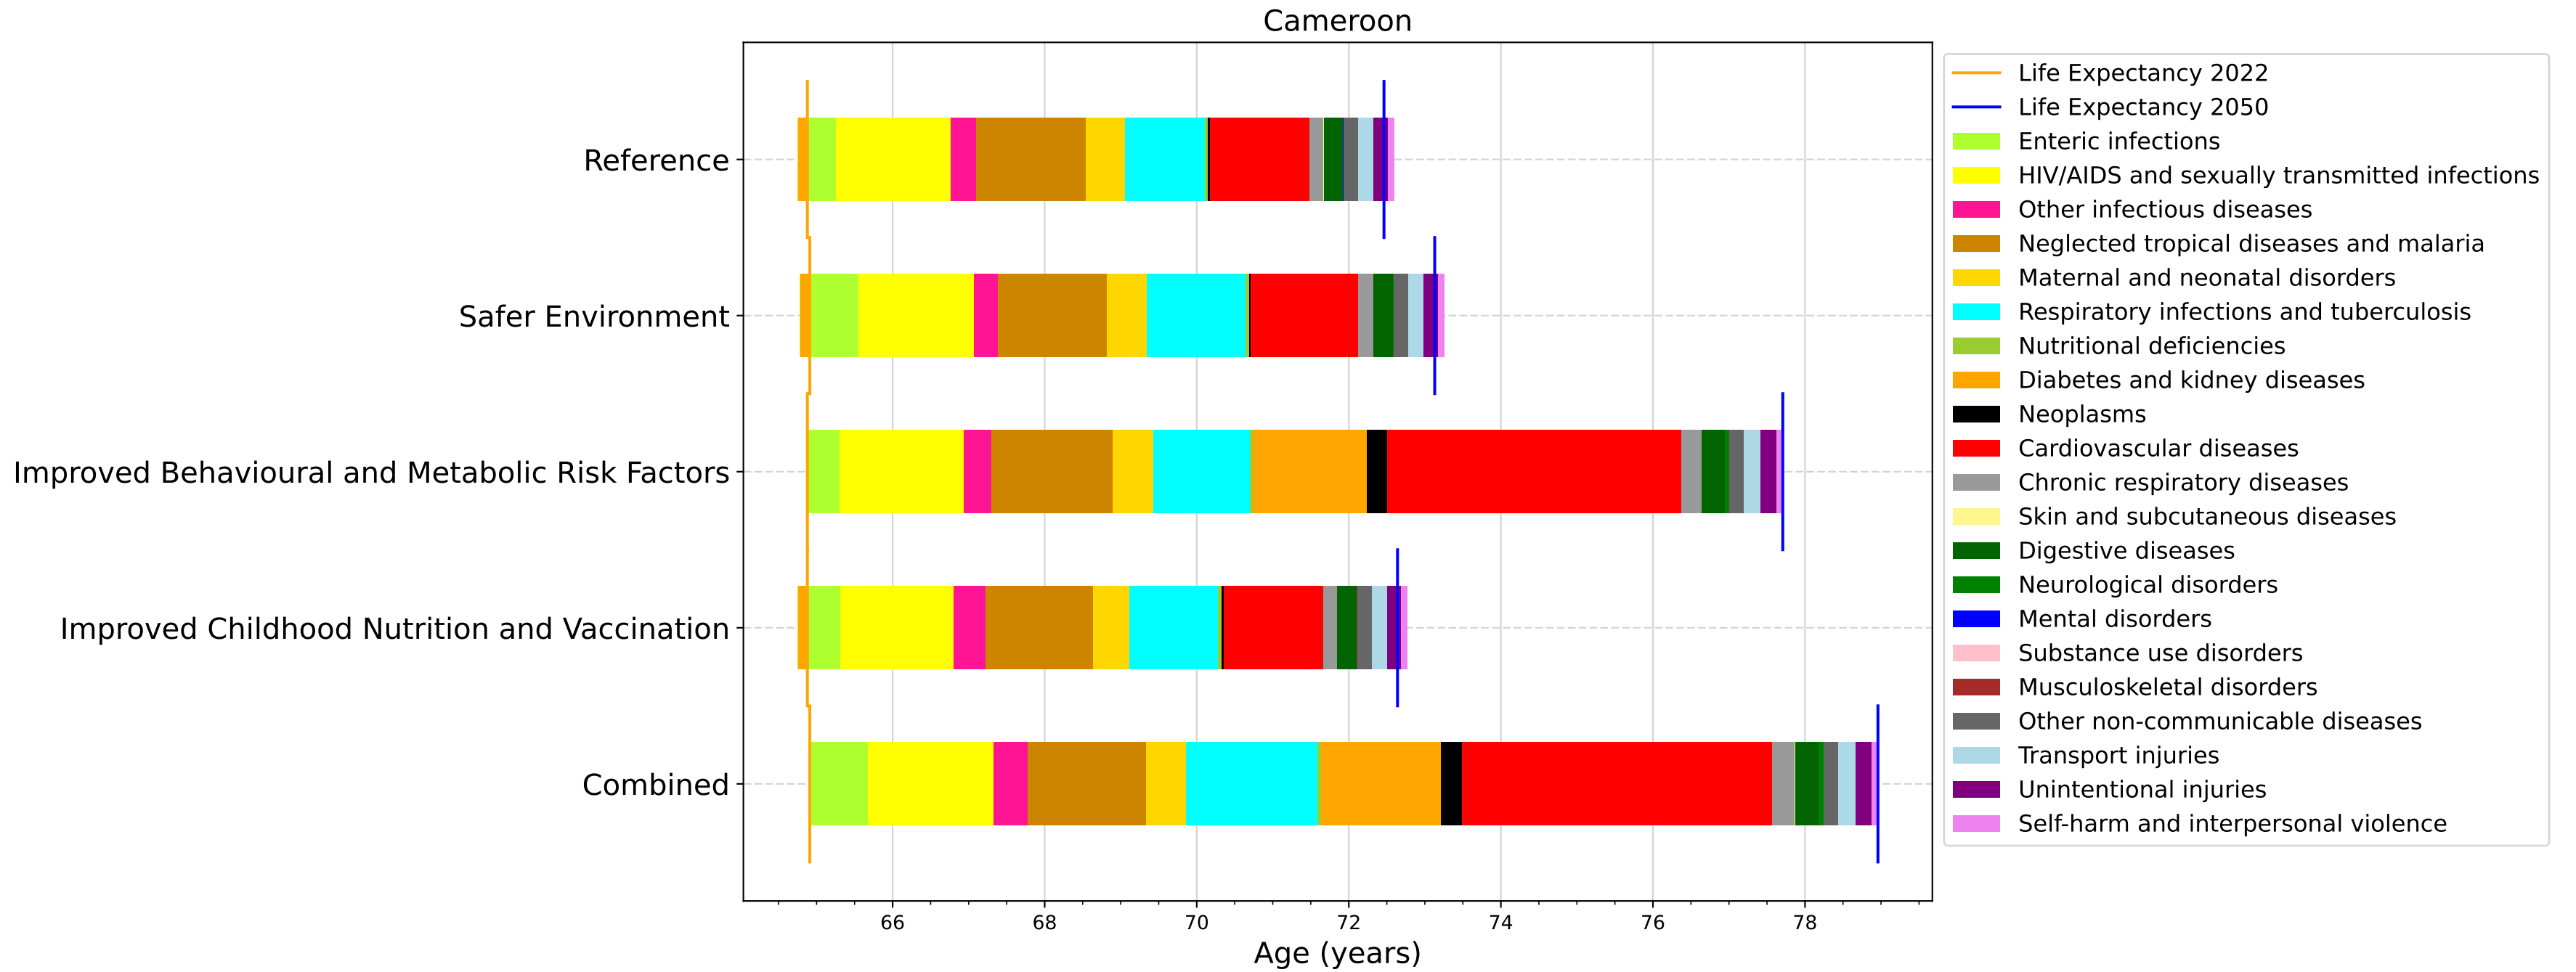



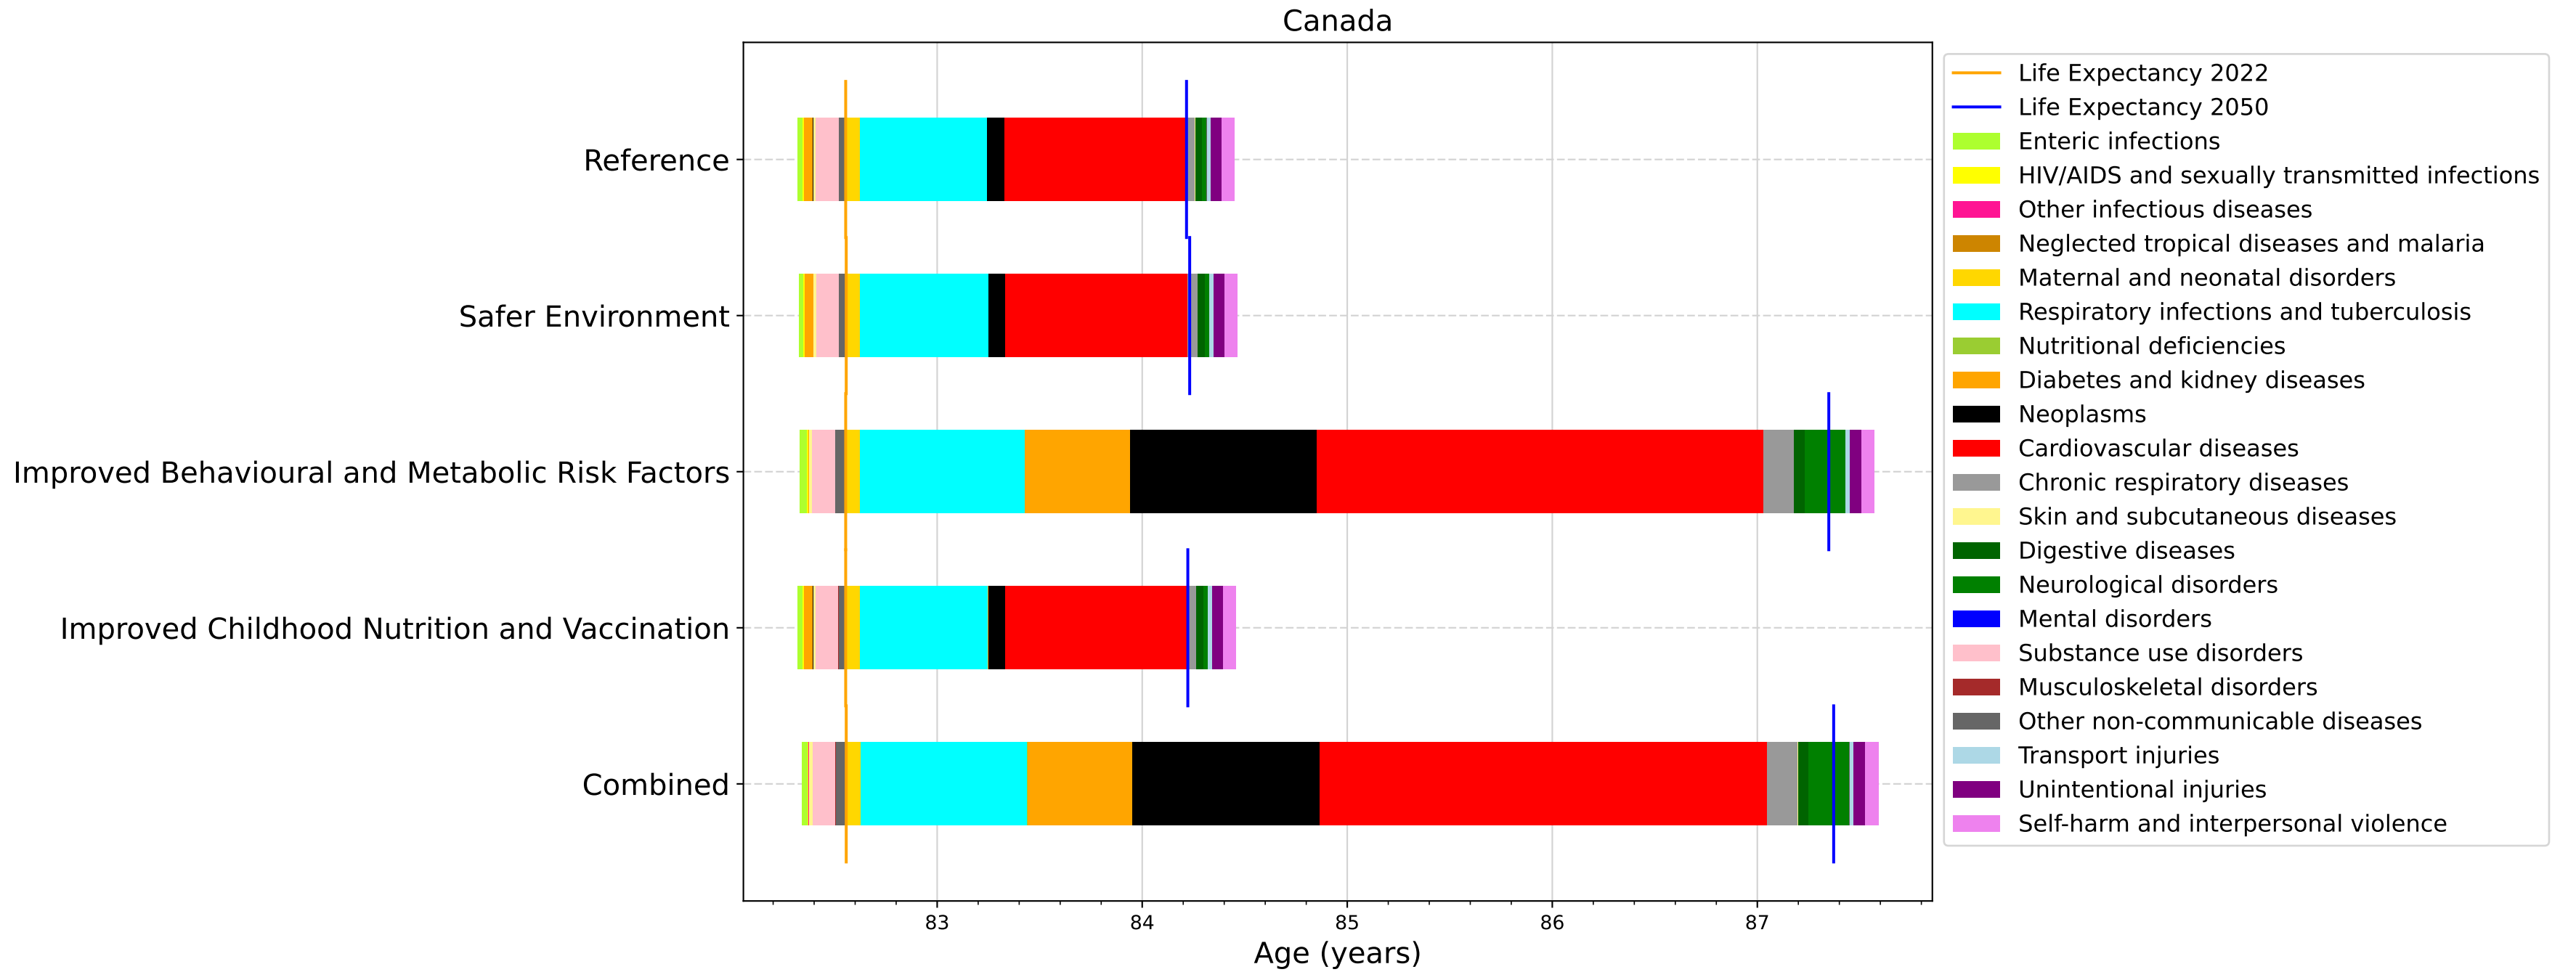

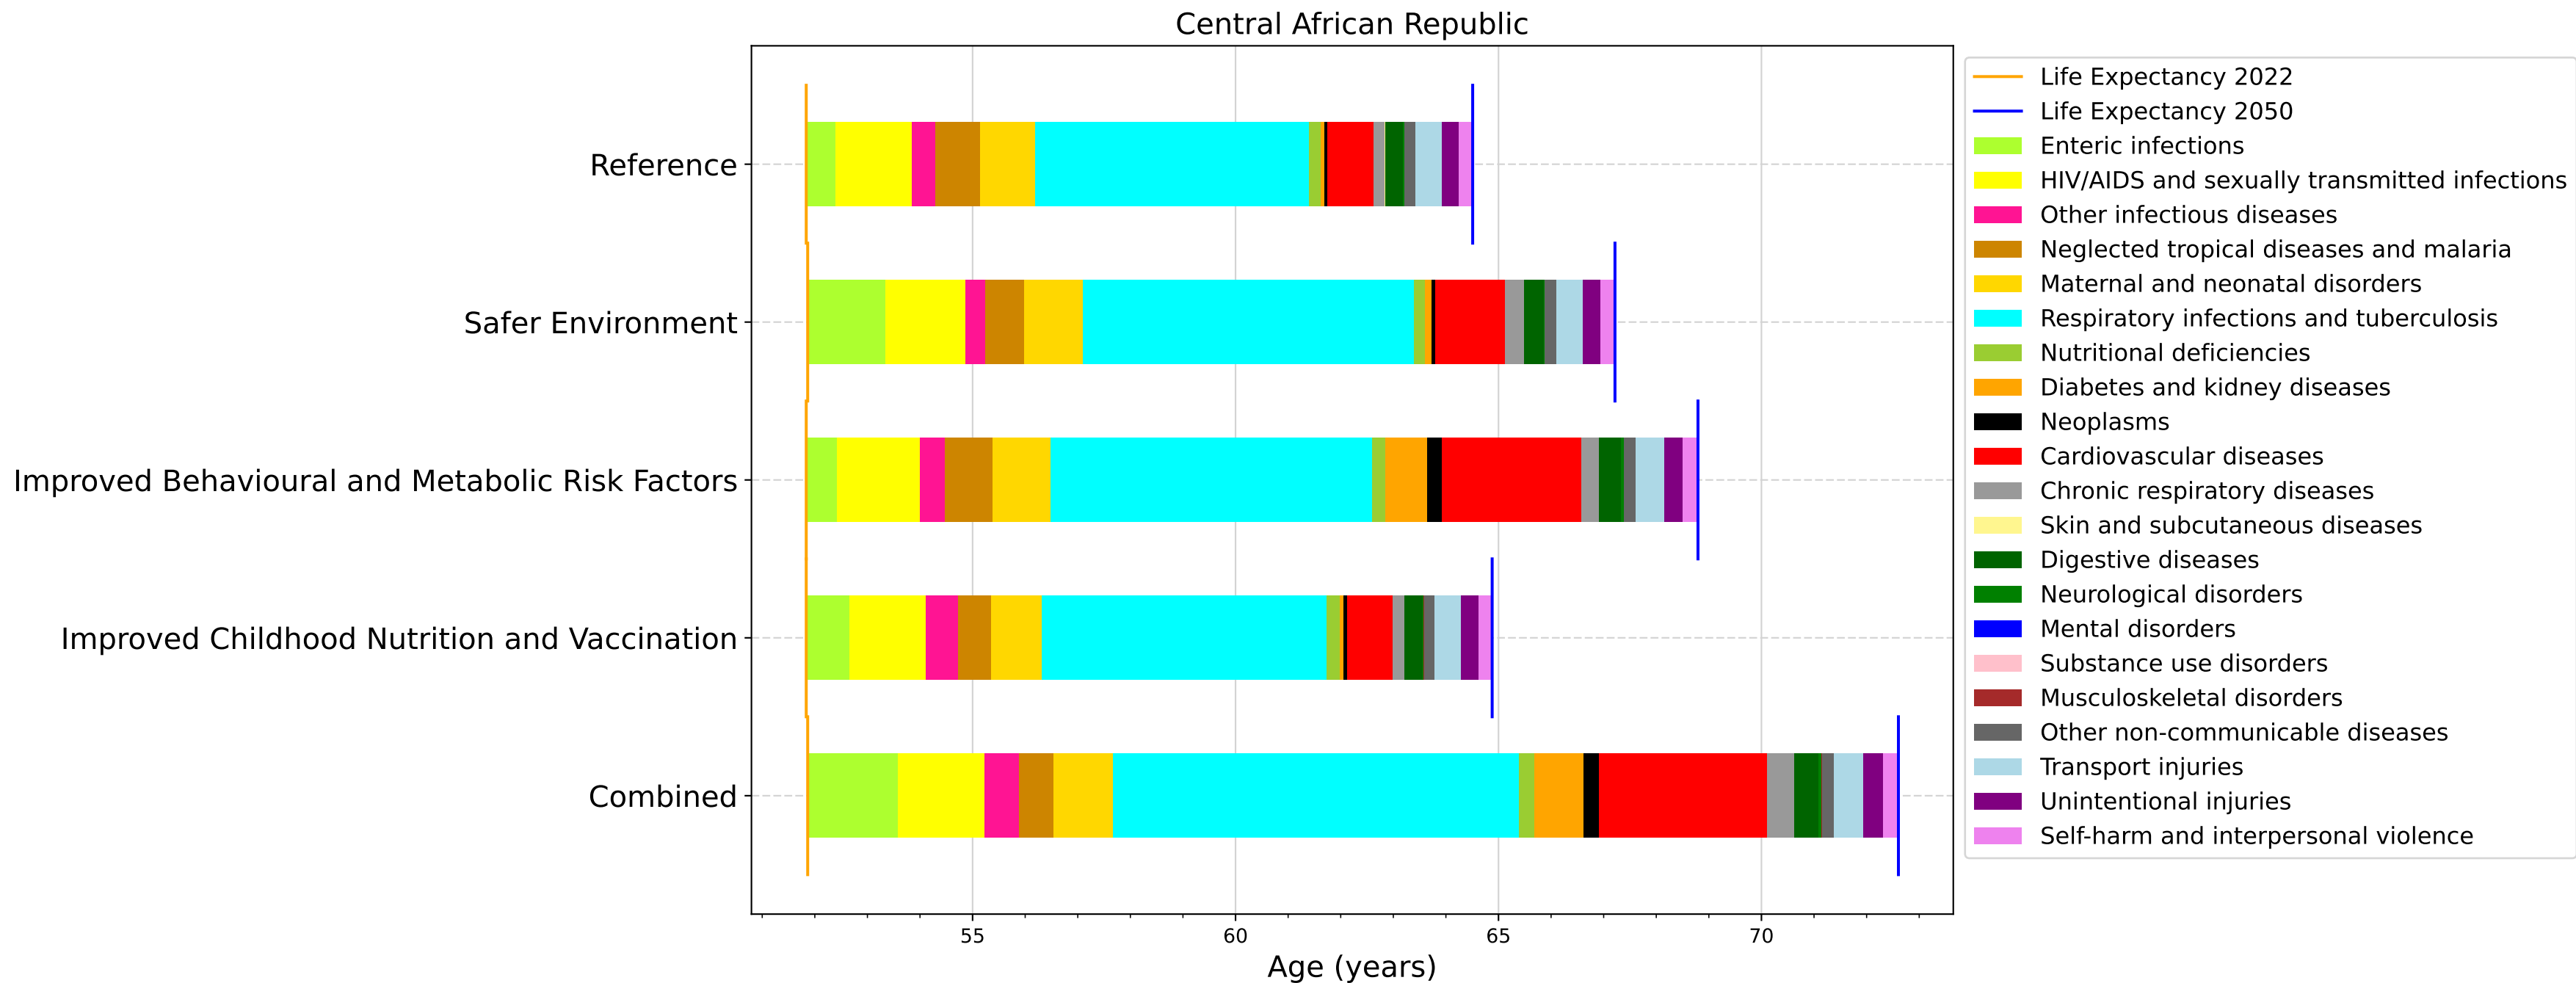

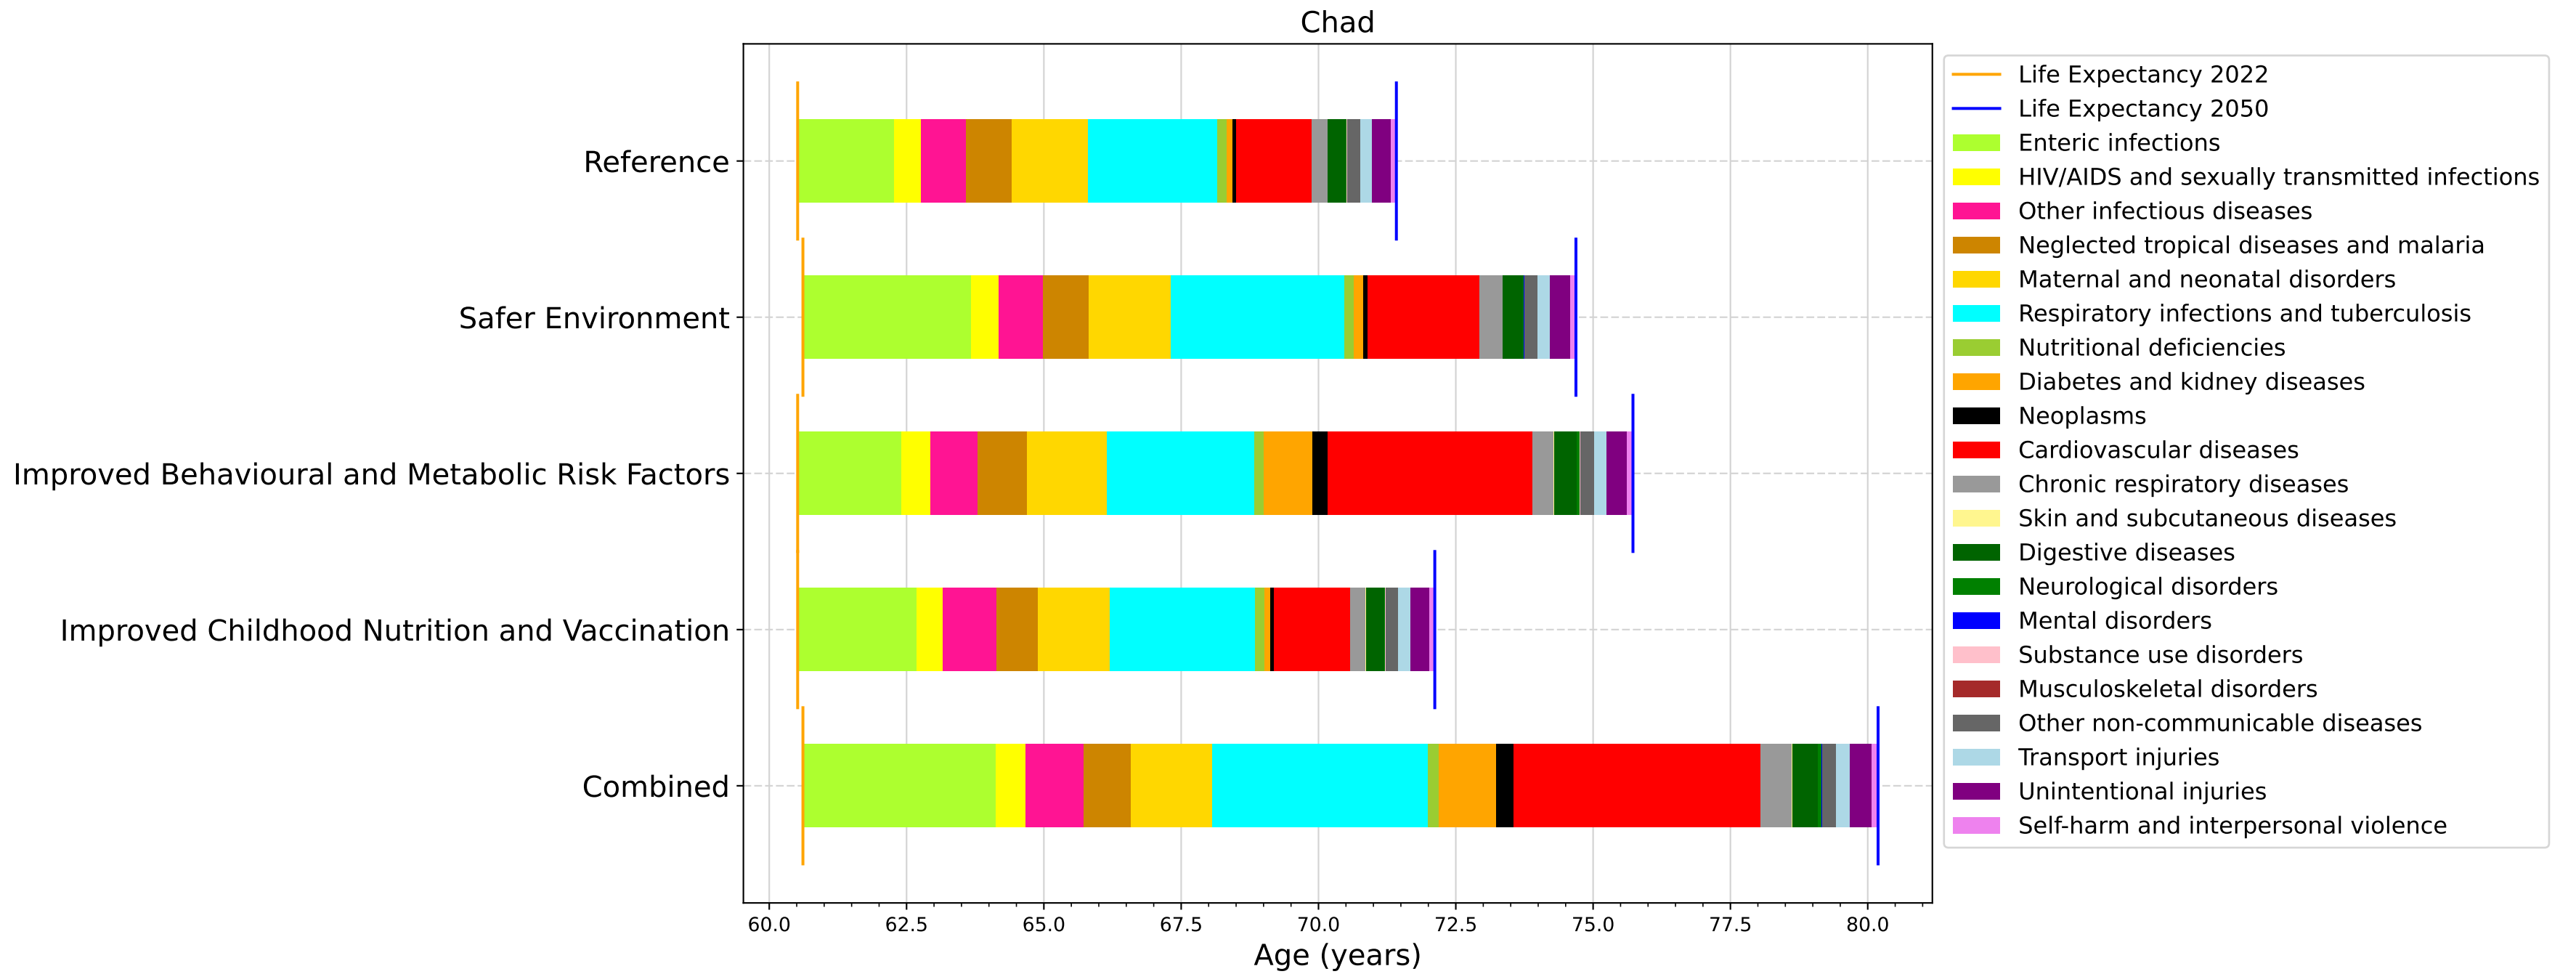

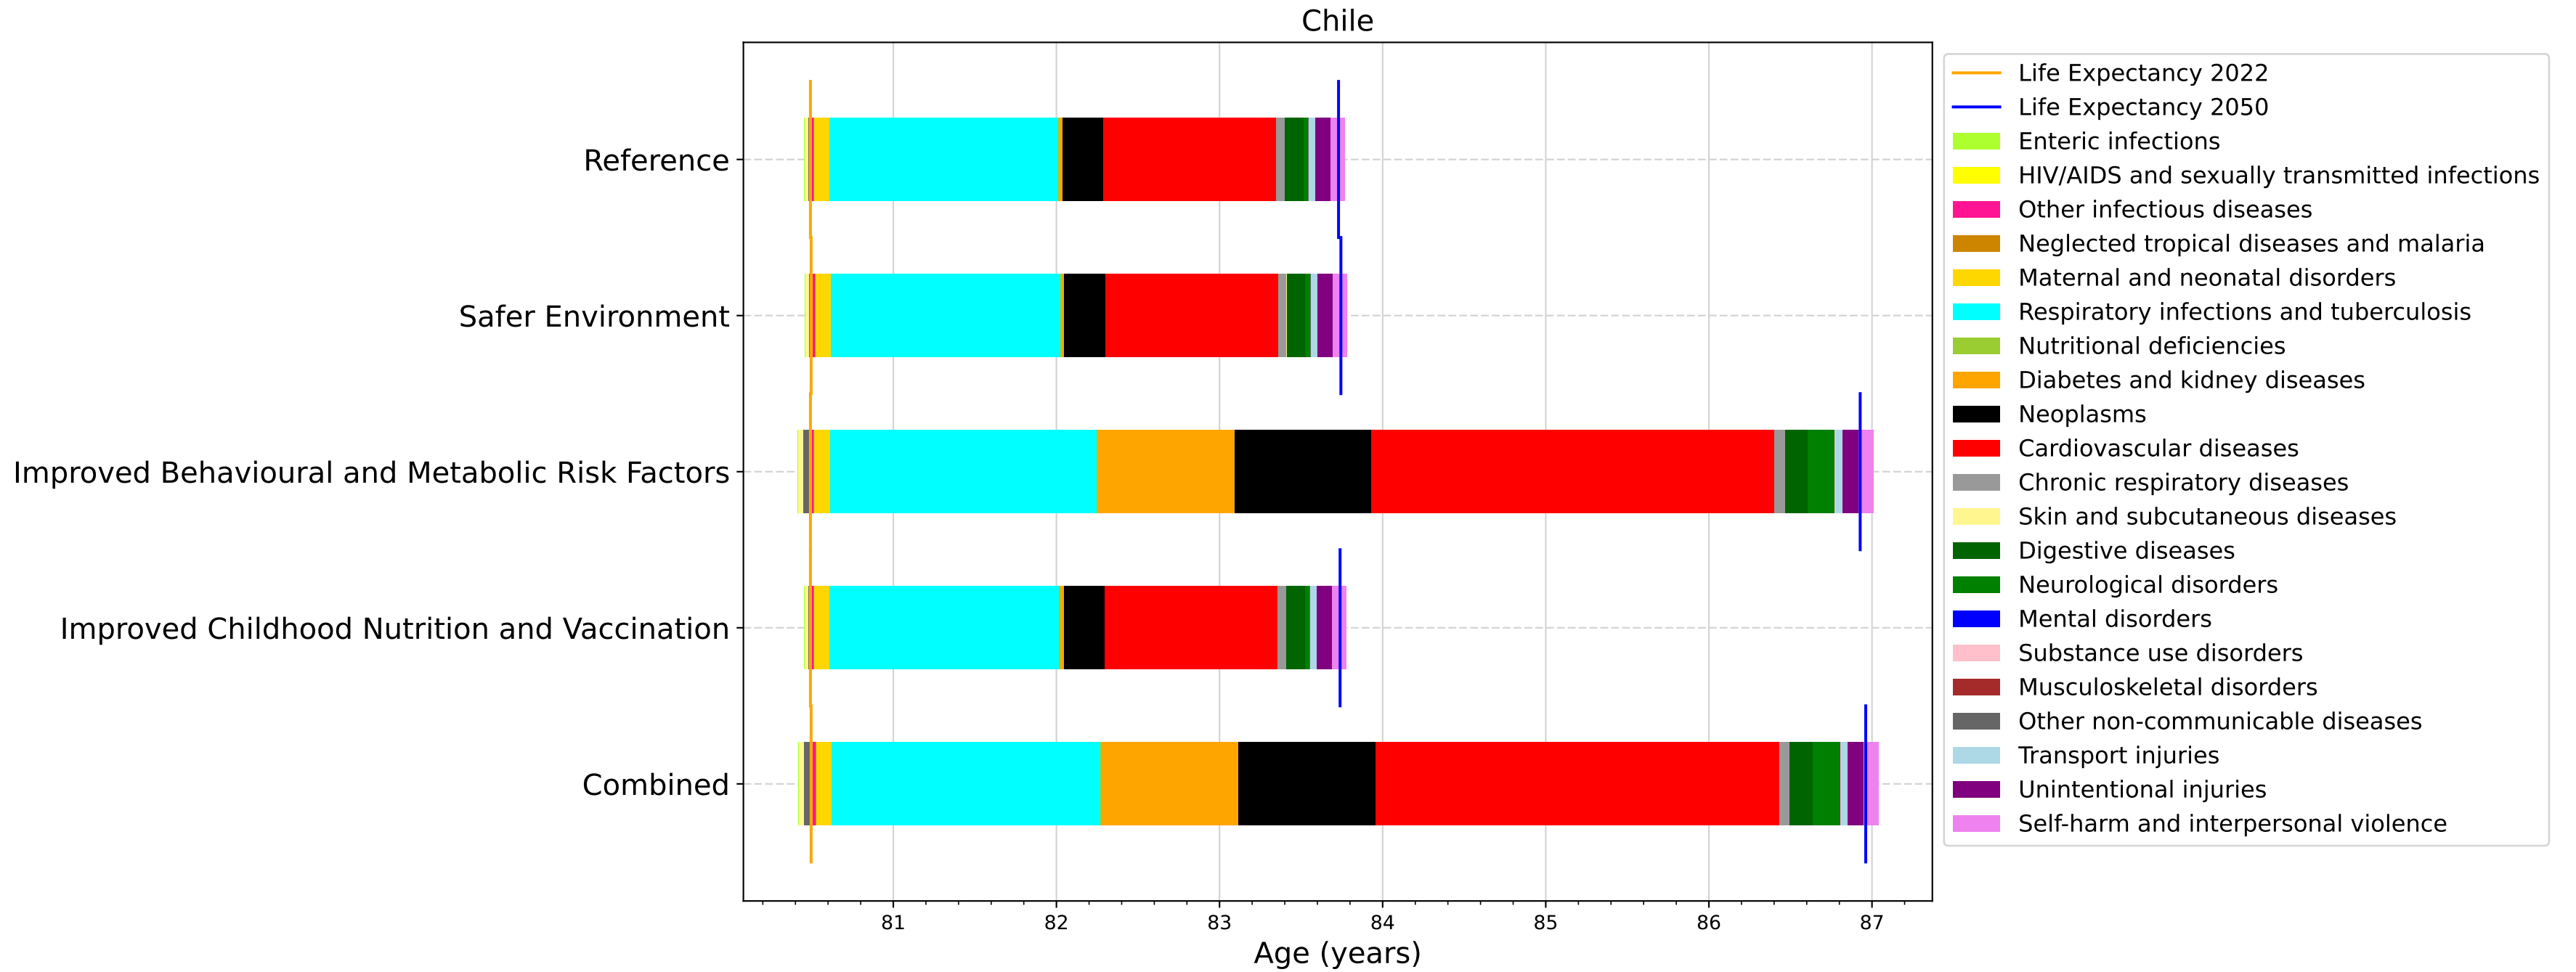

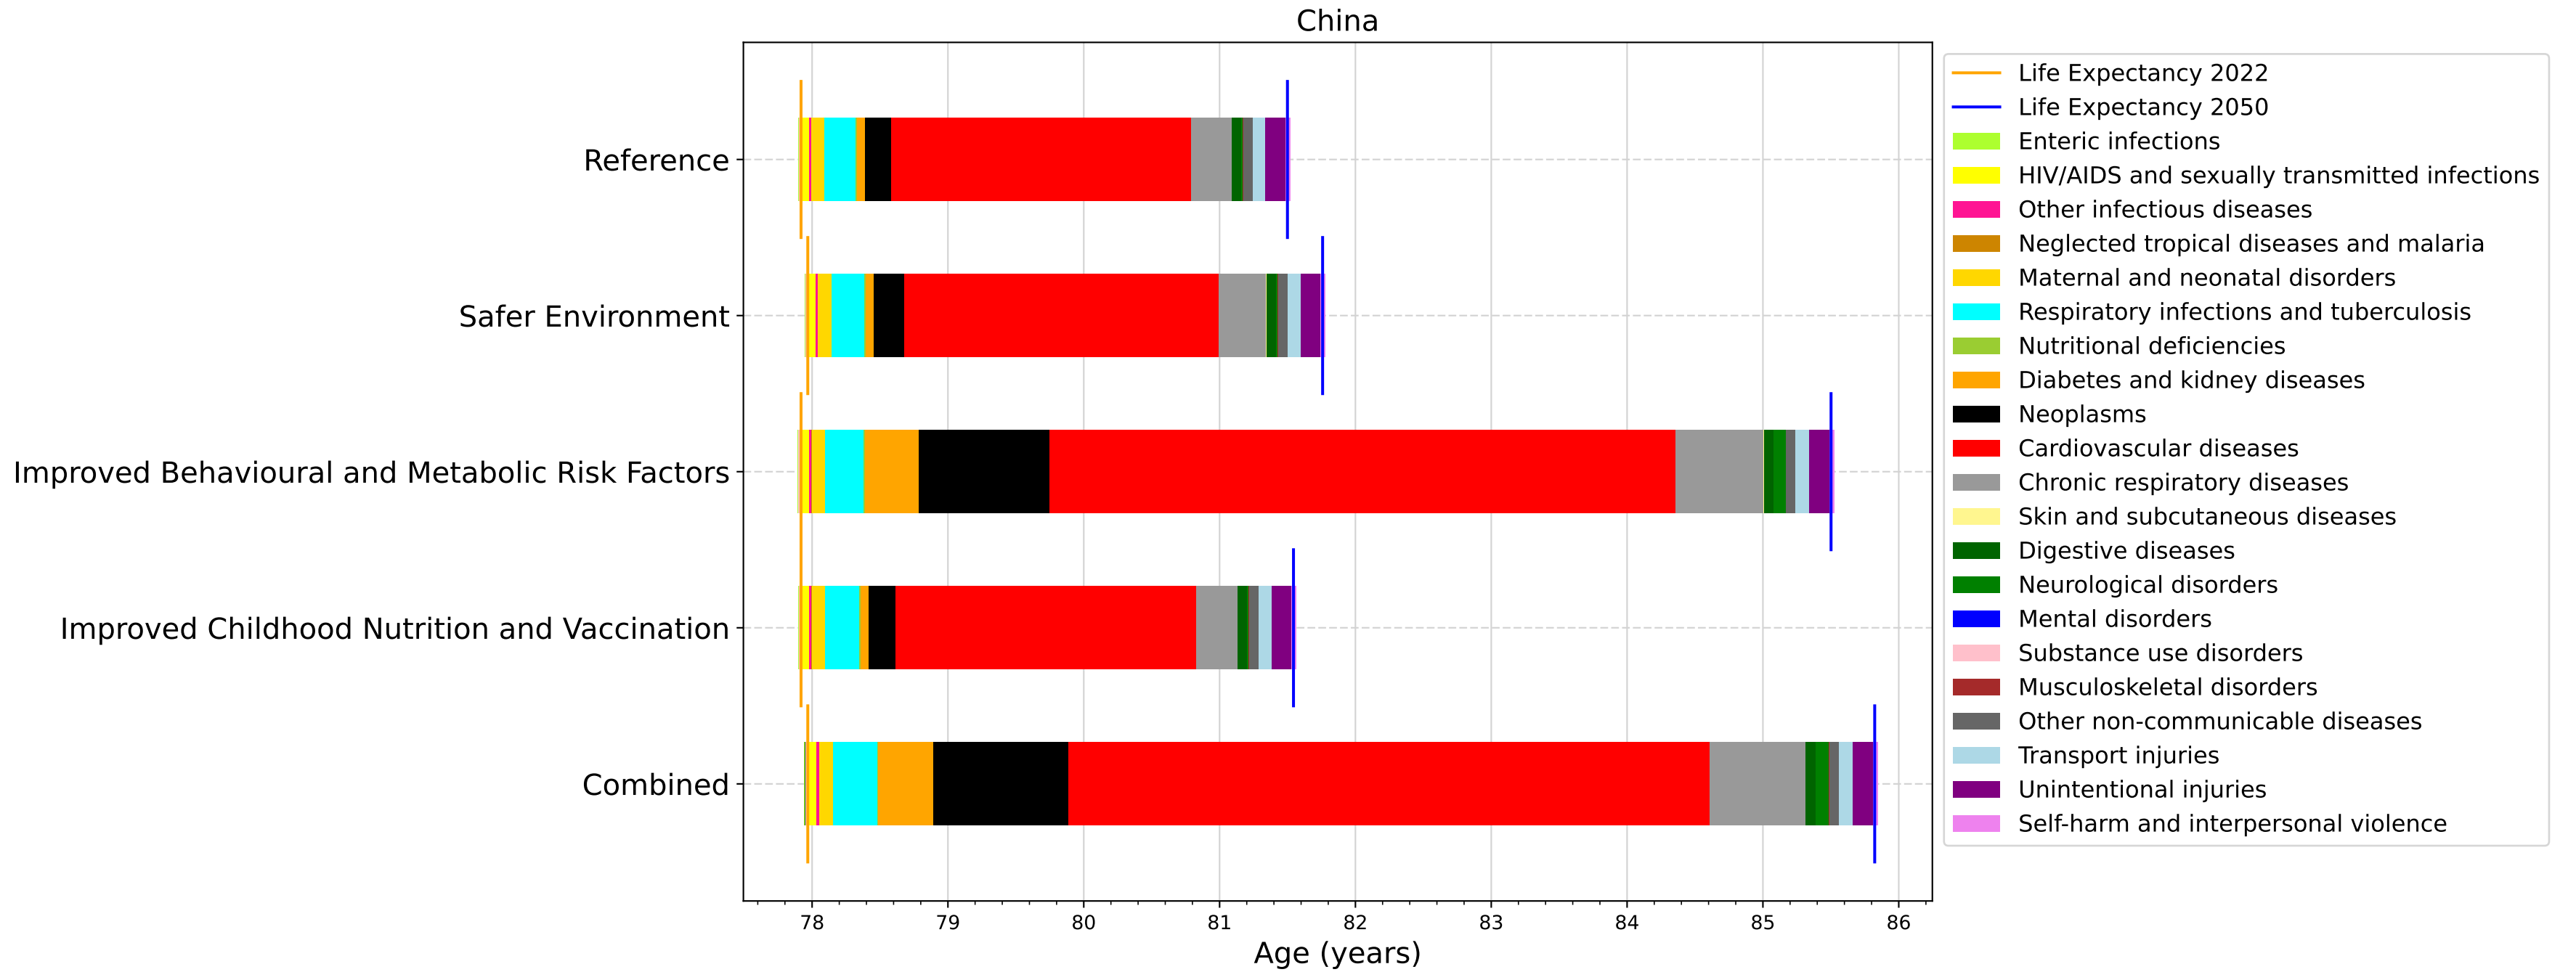

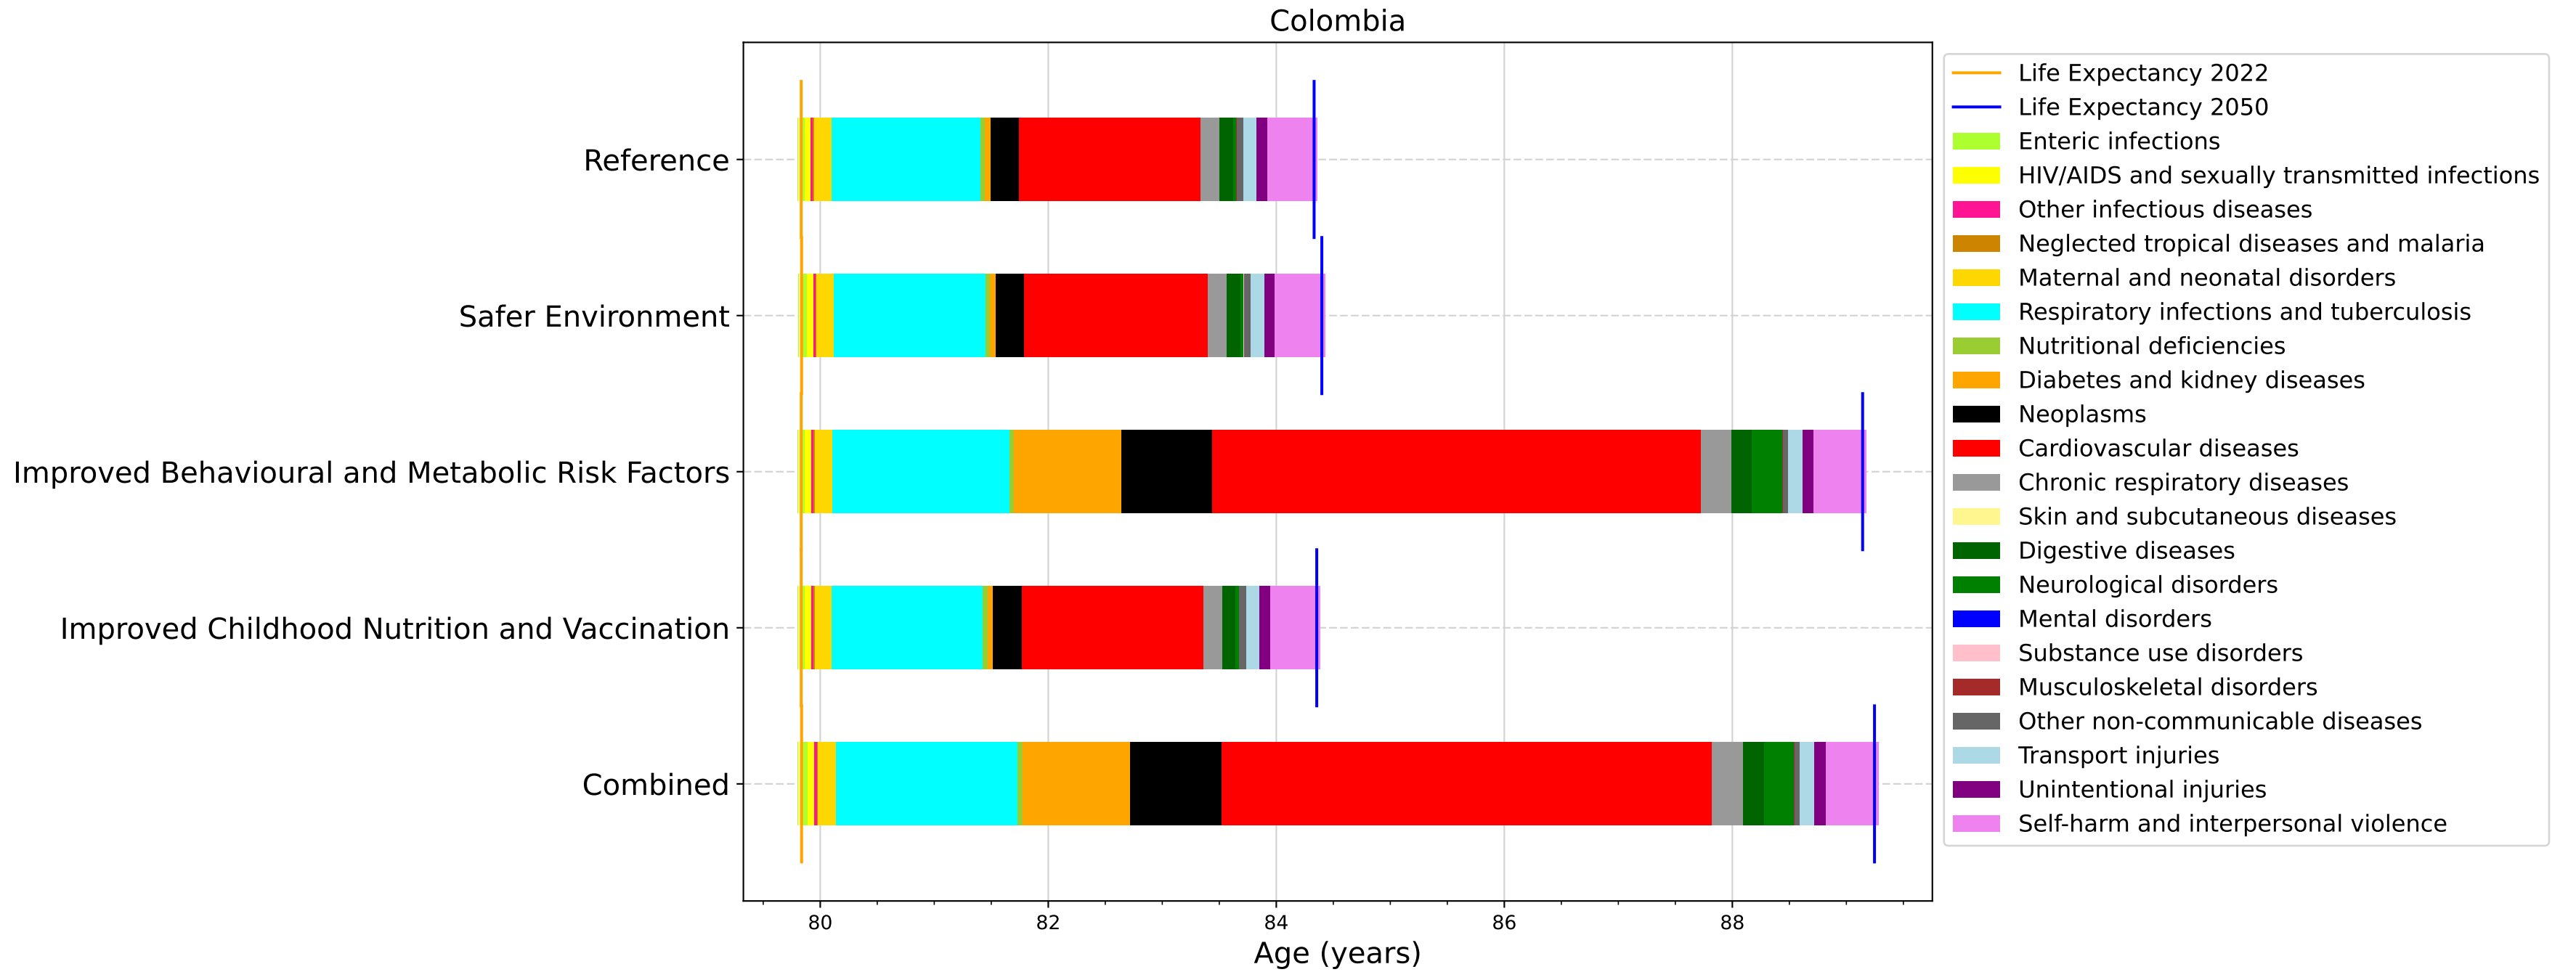

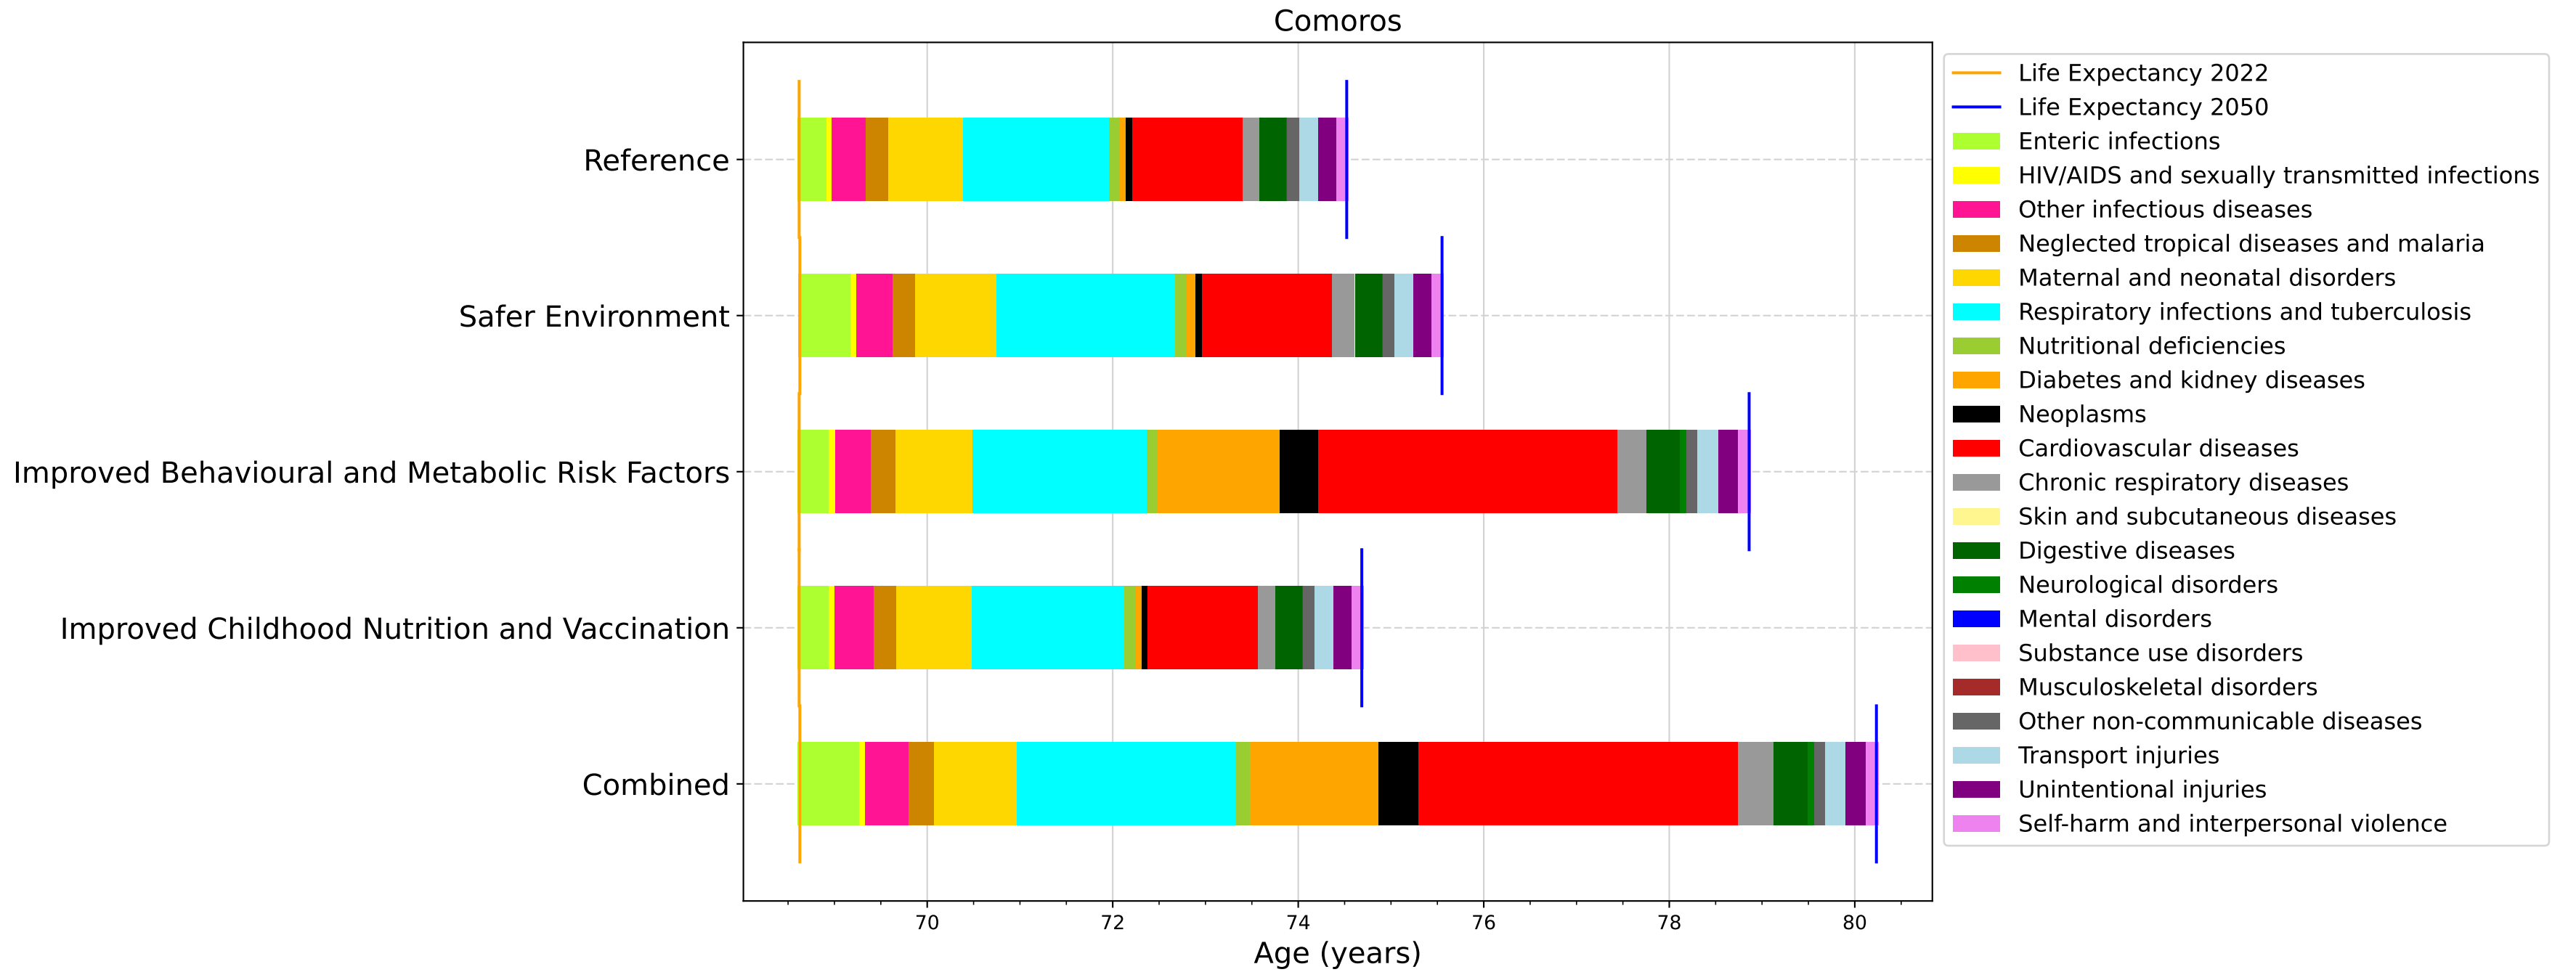

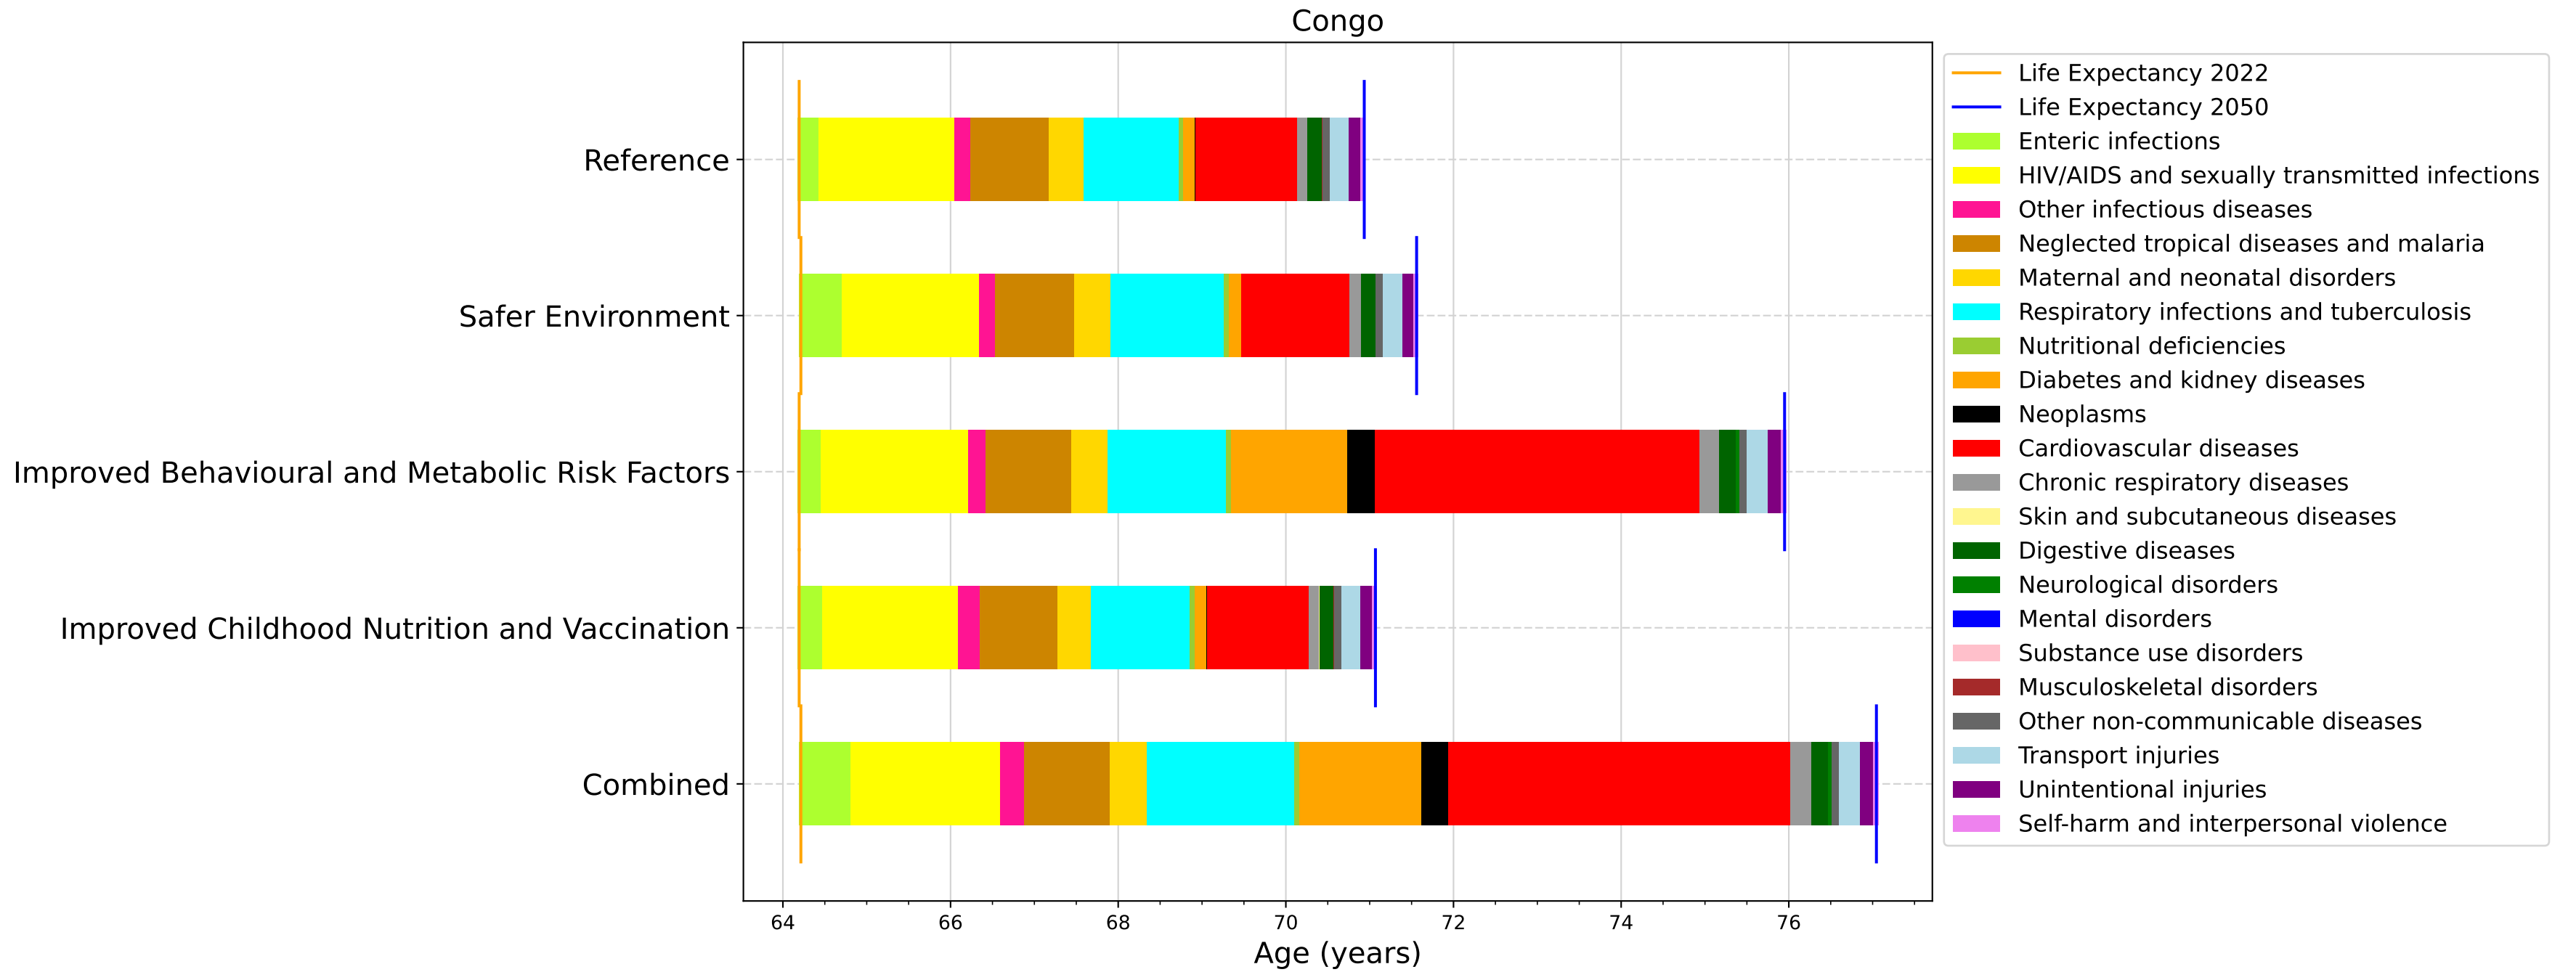



### Cook Islands

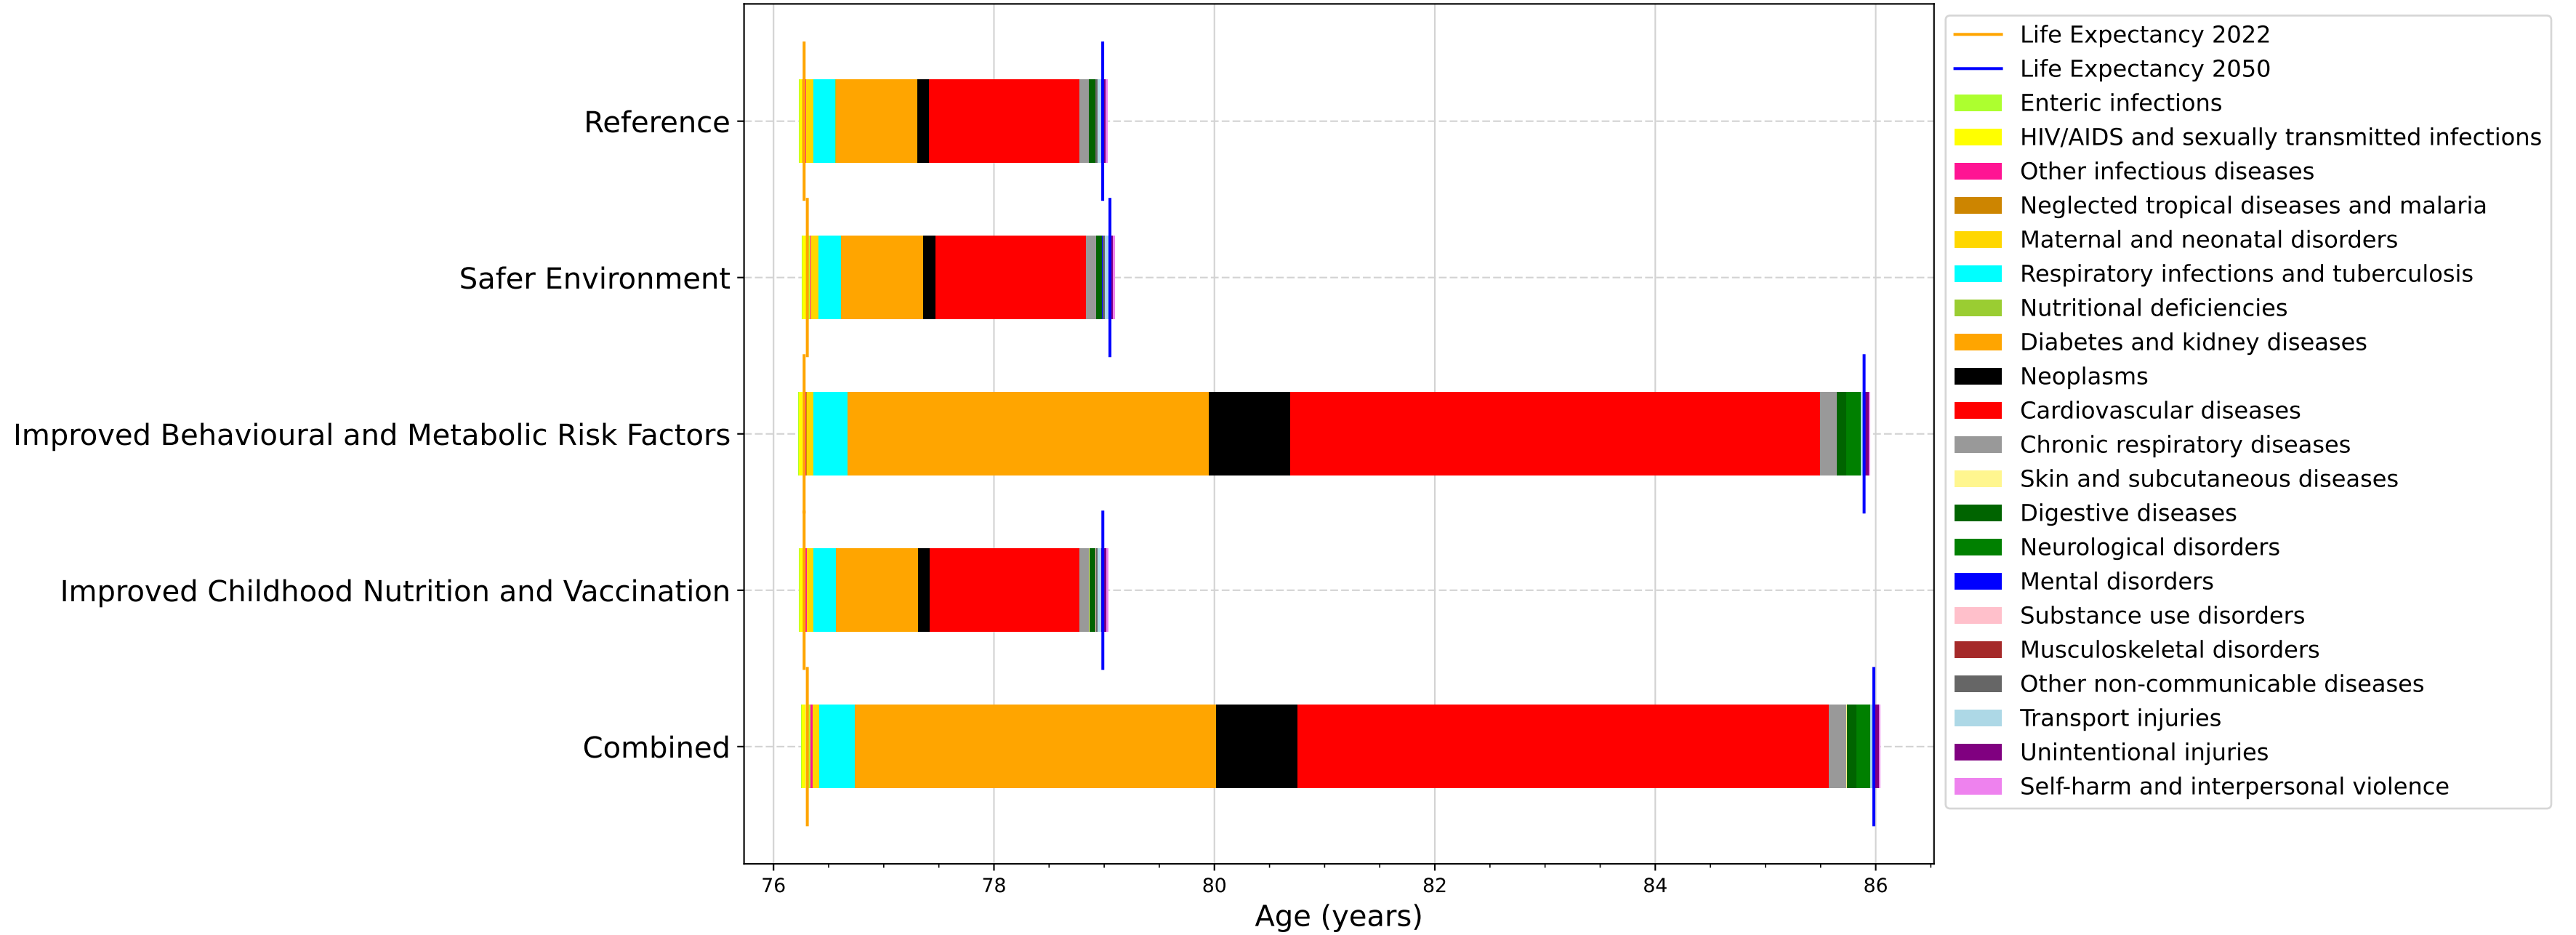

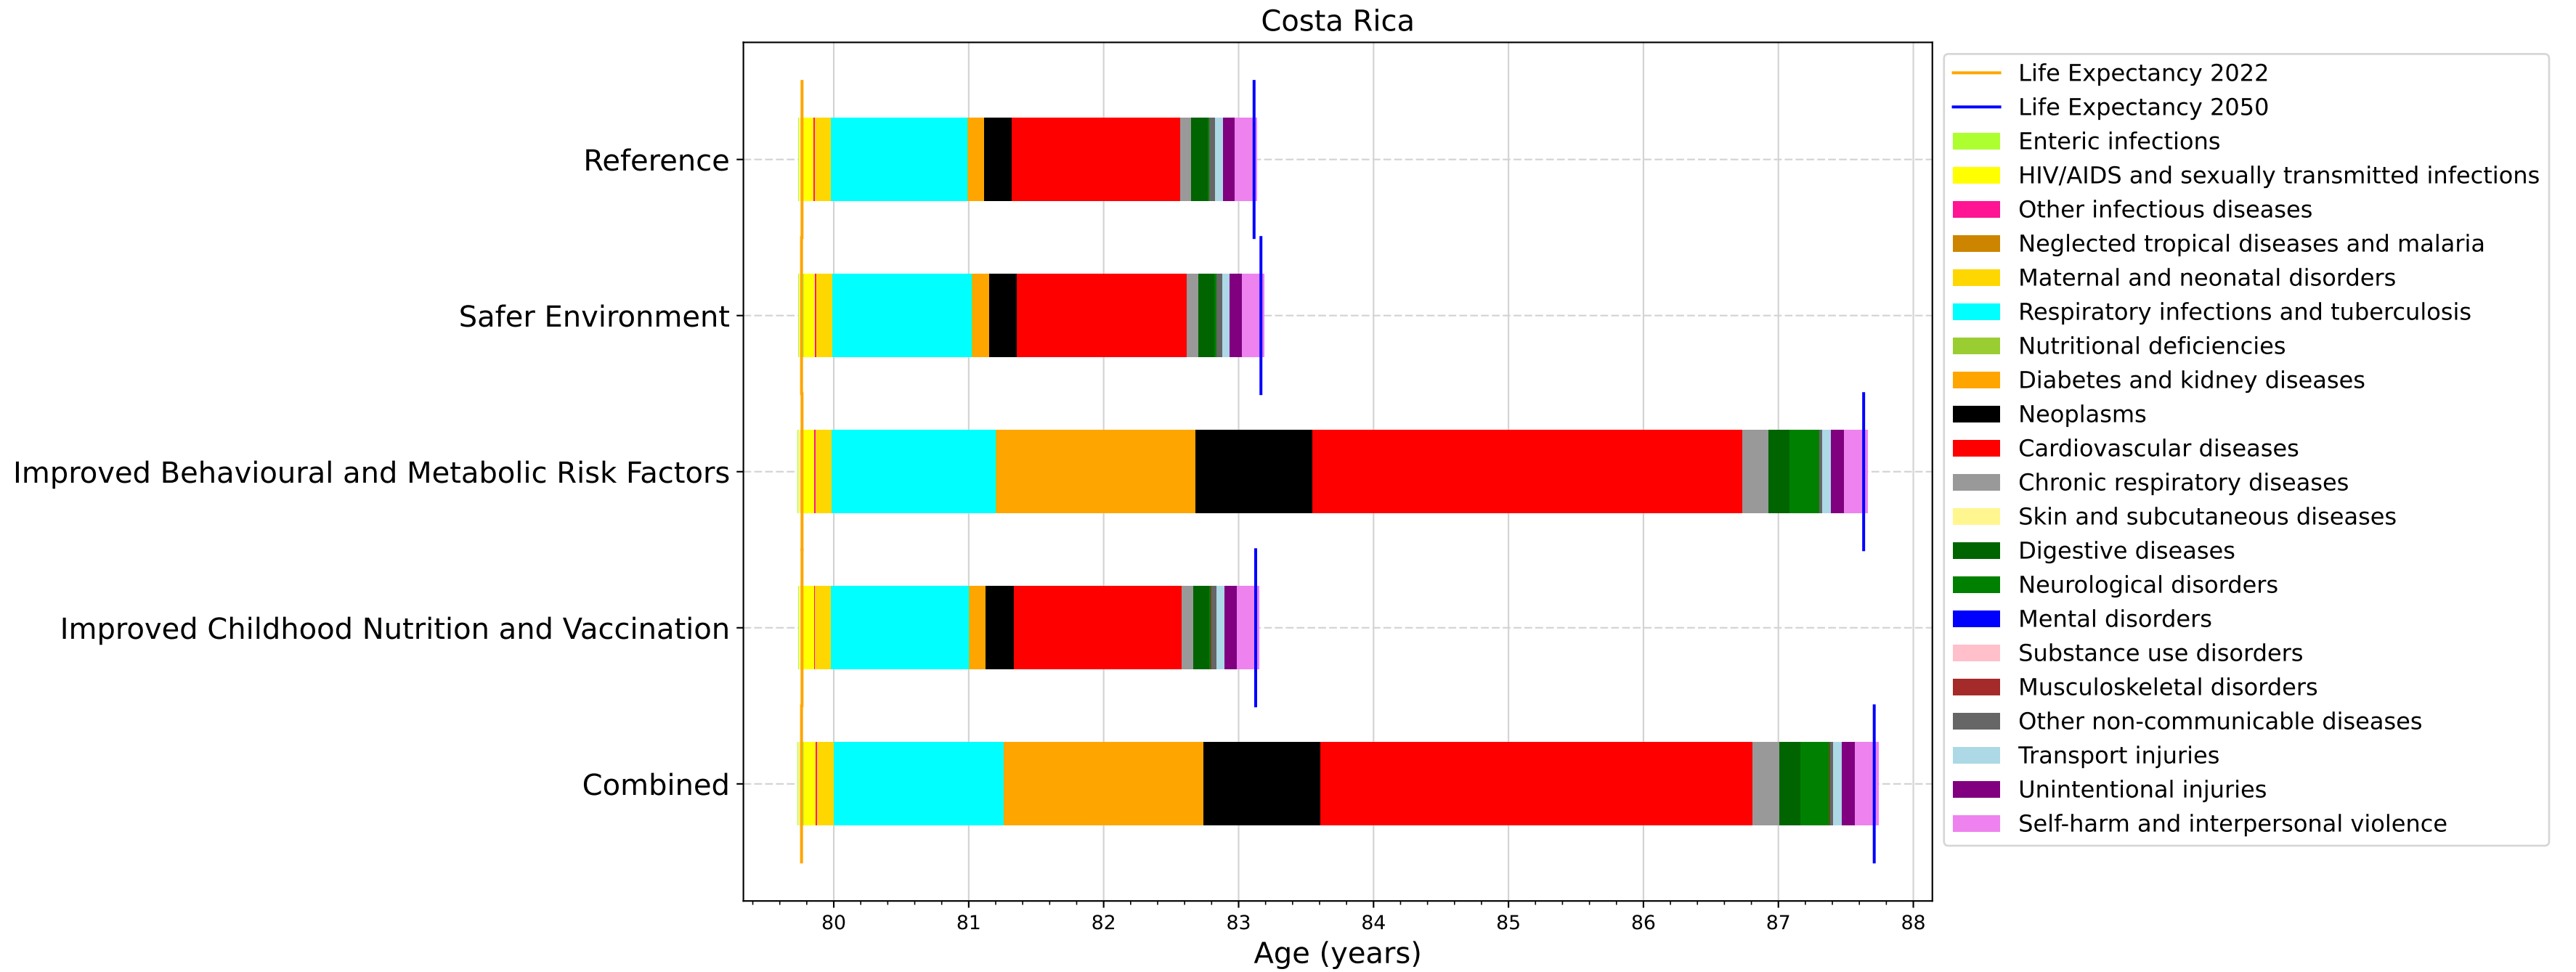

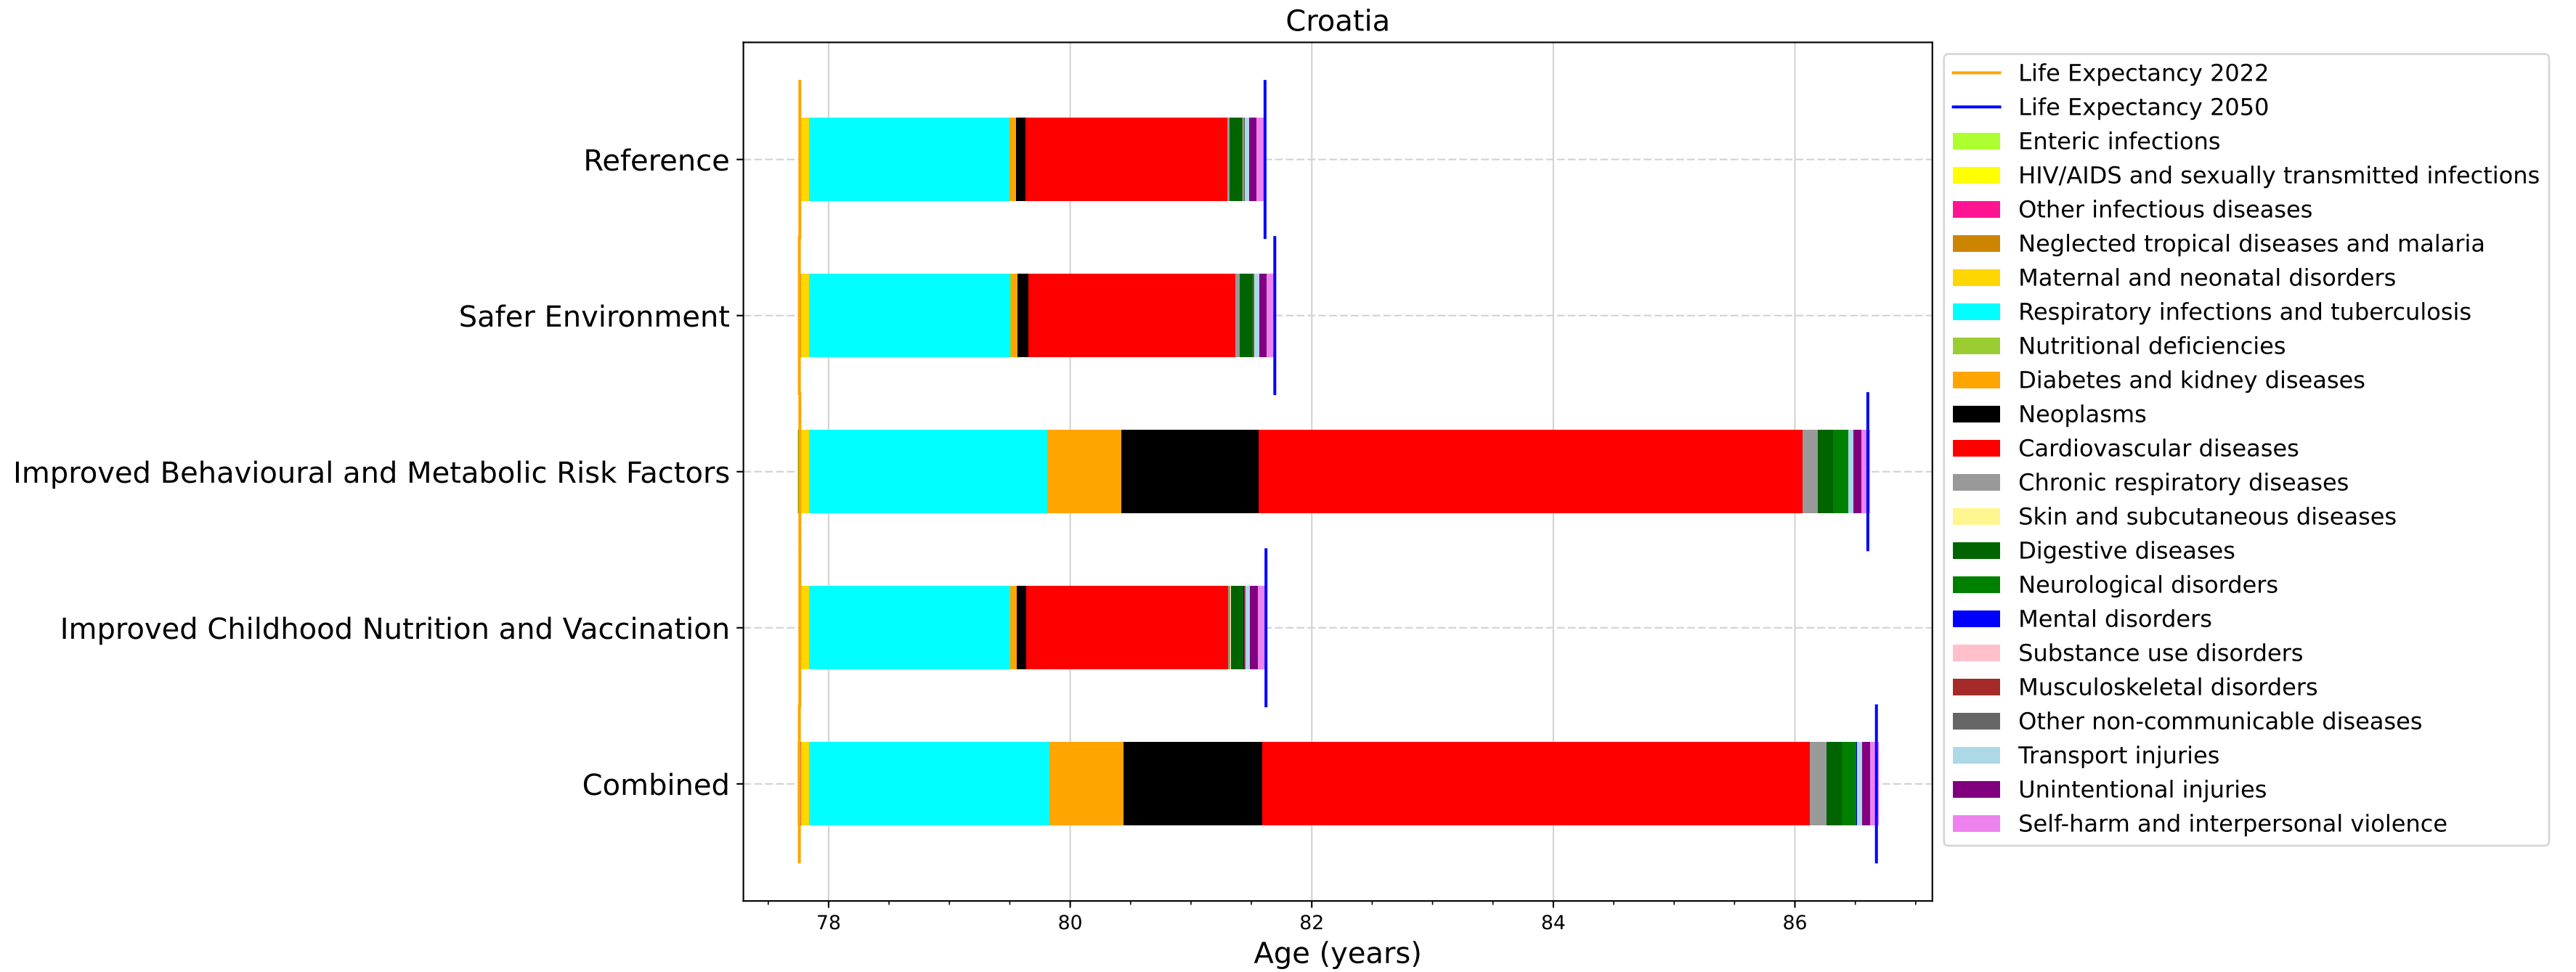

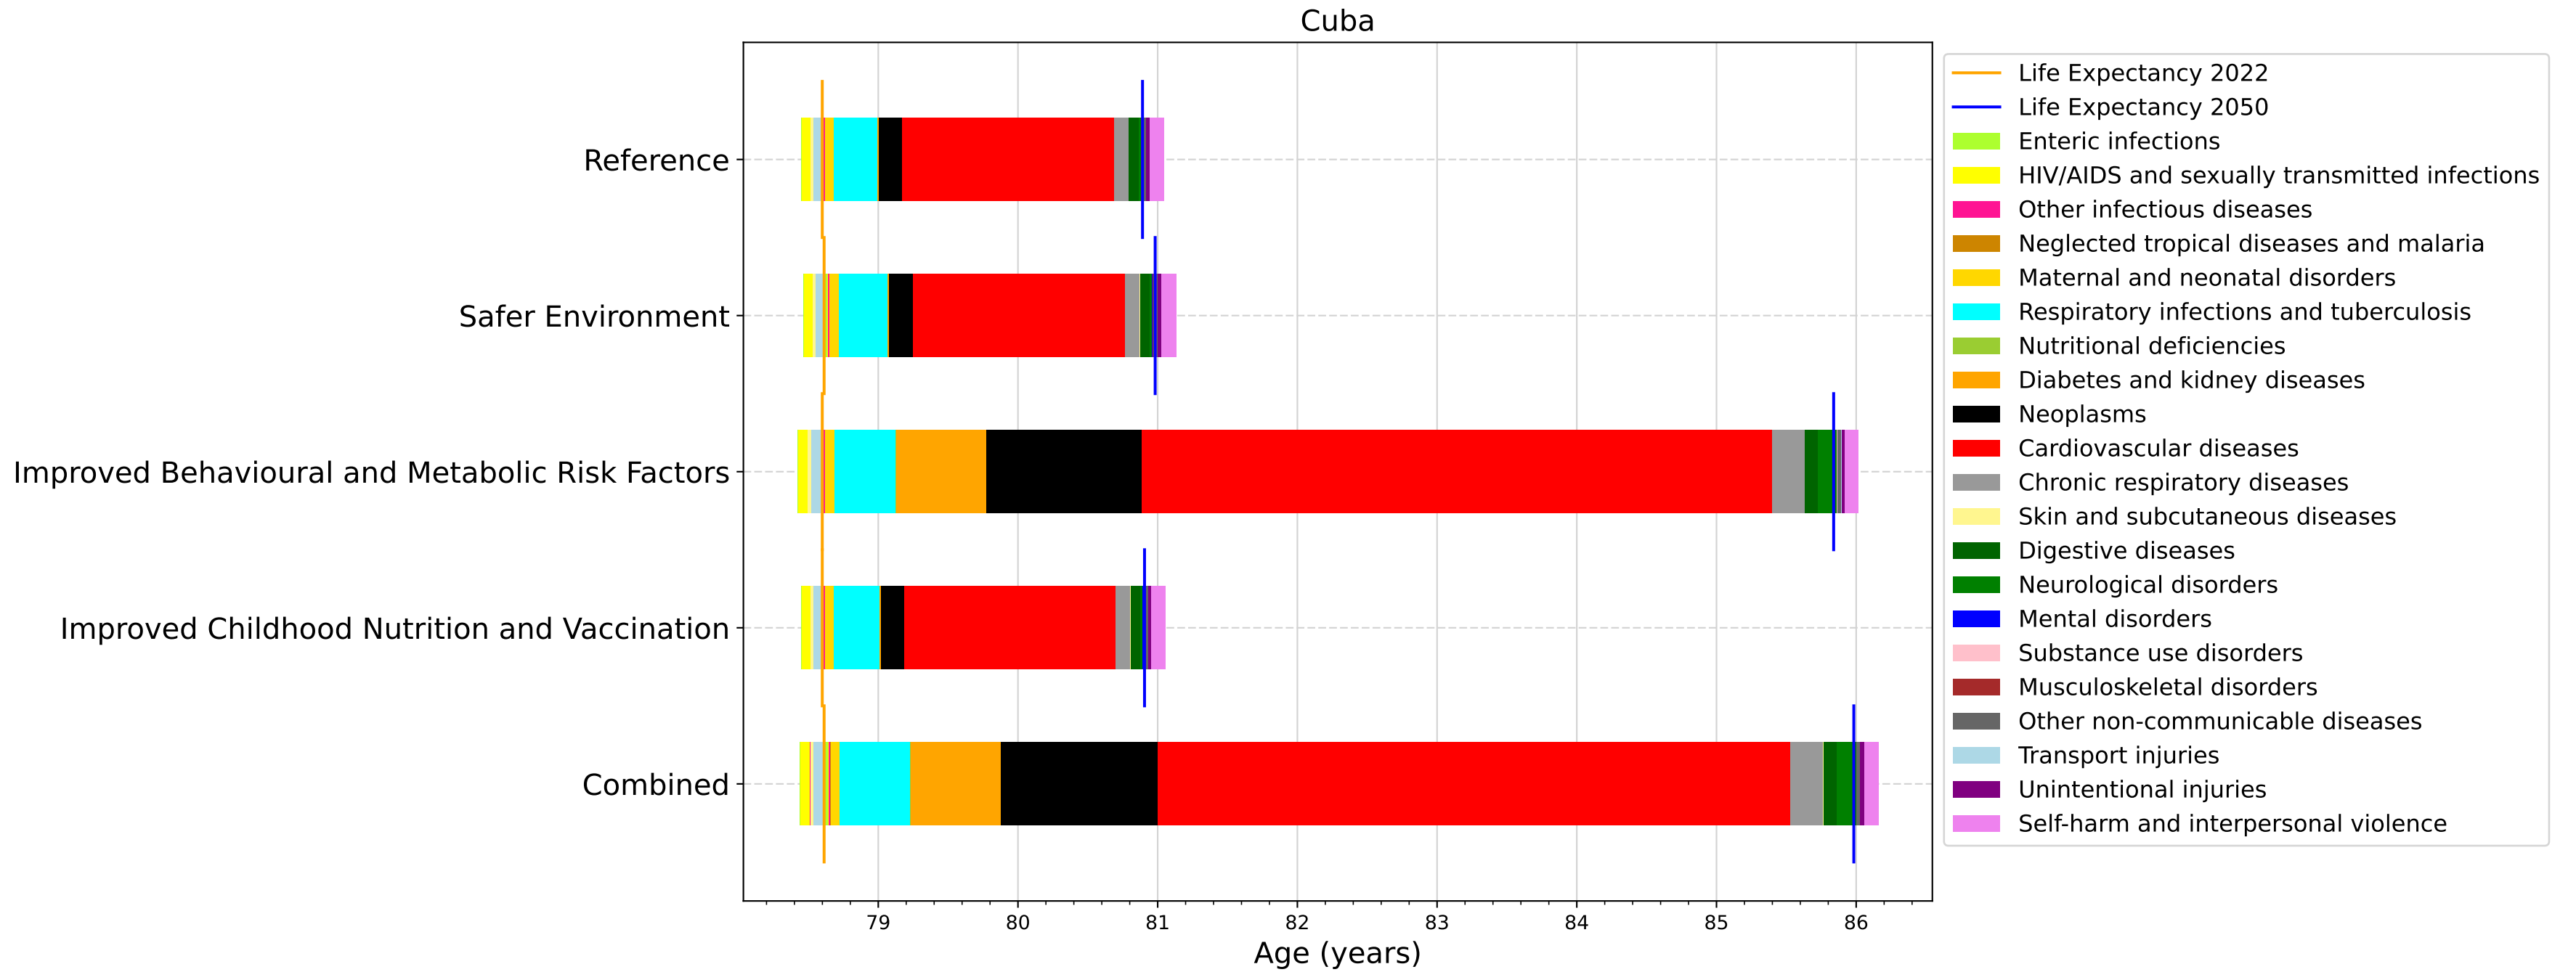

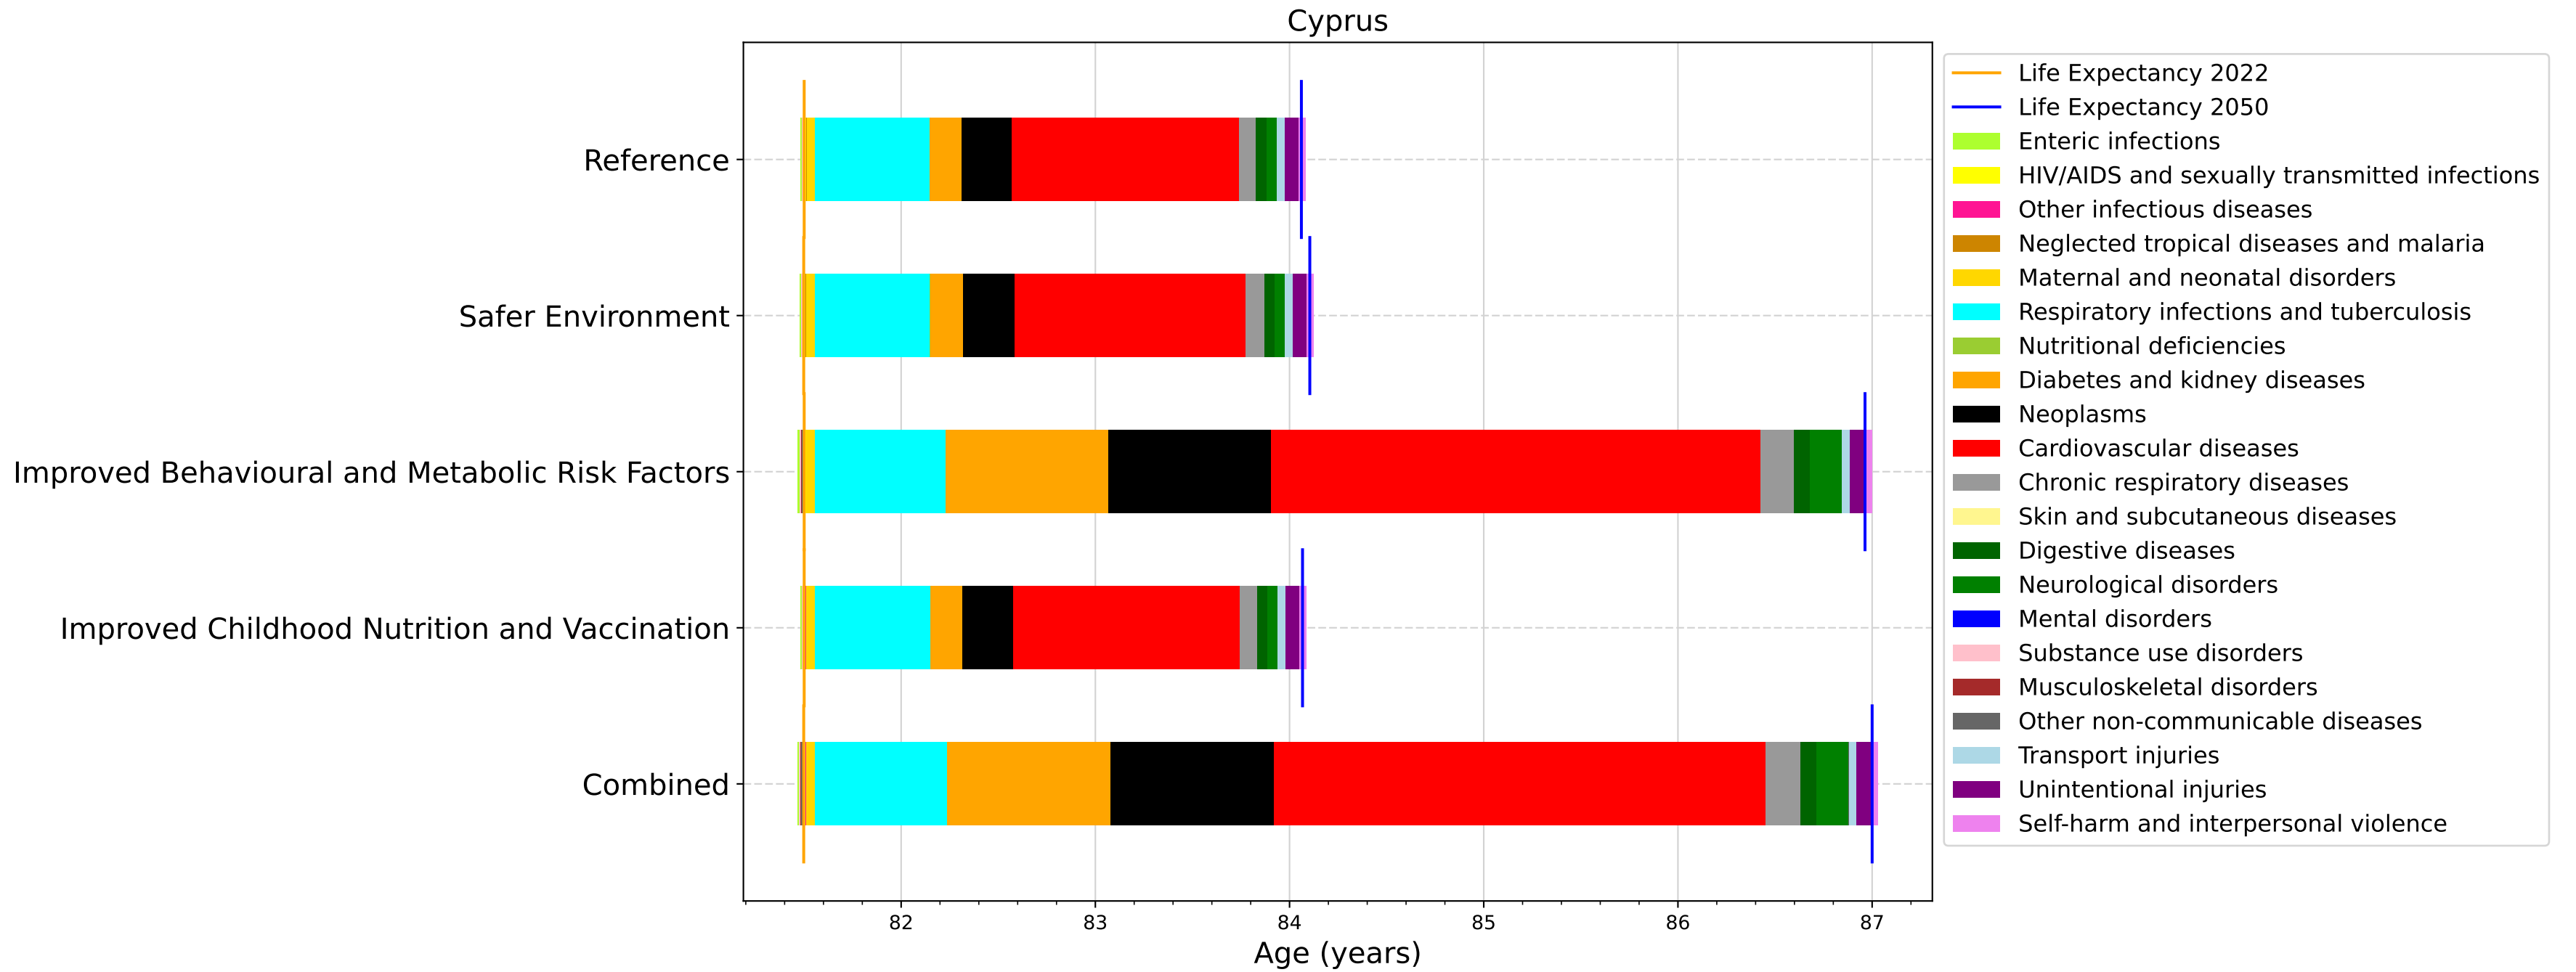

Czechia

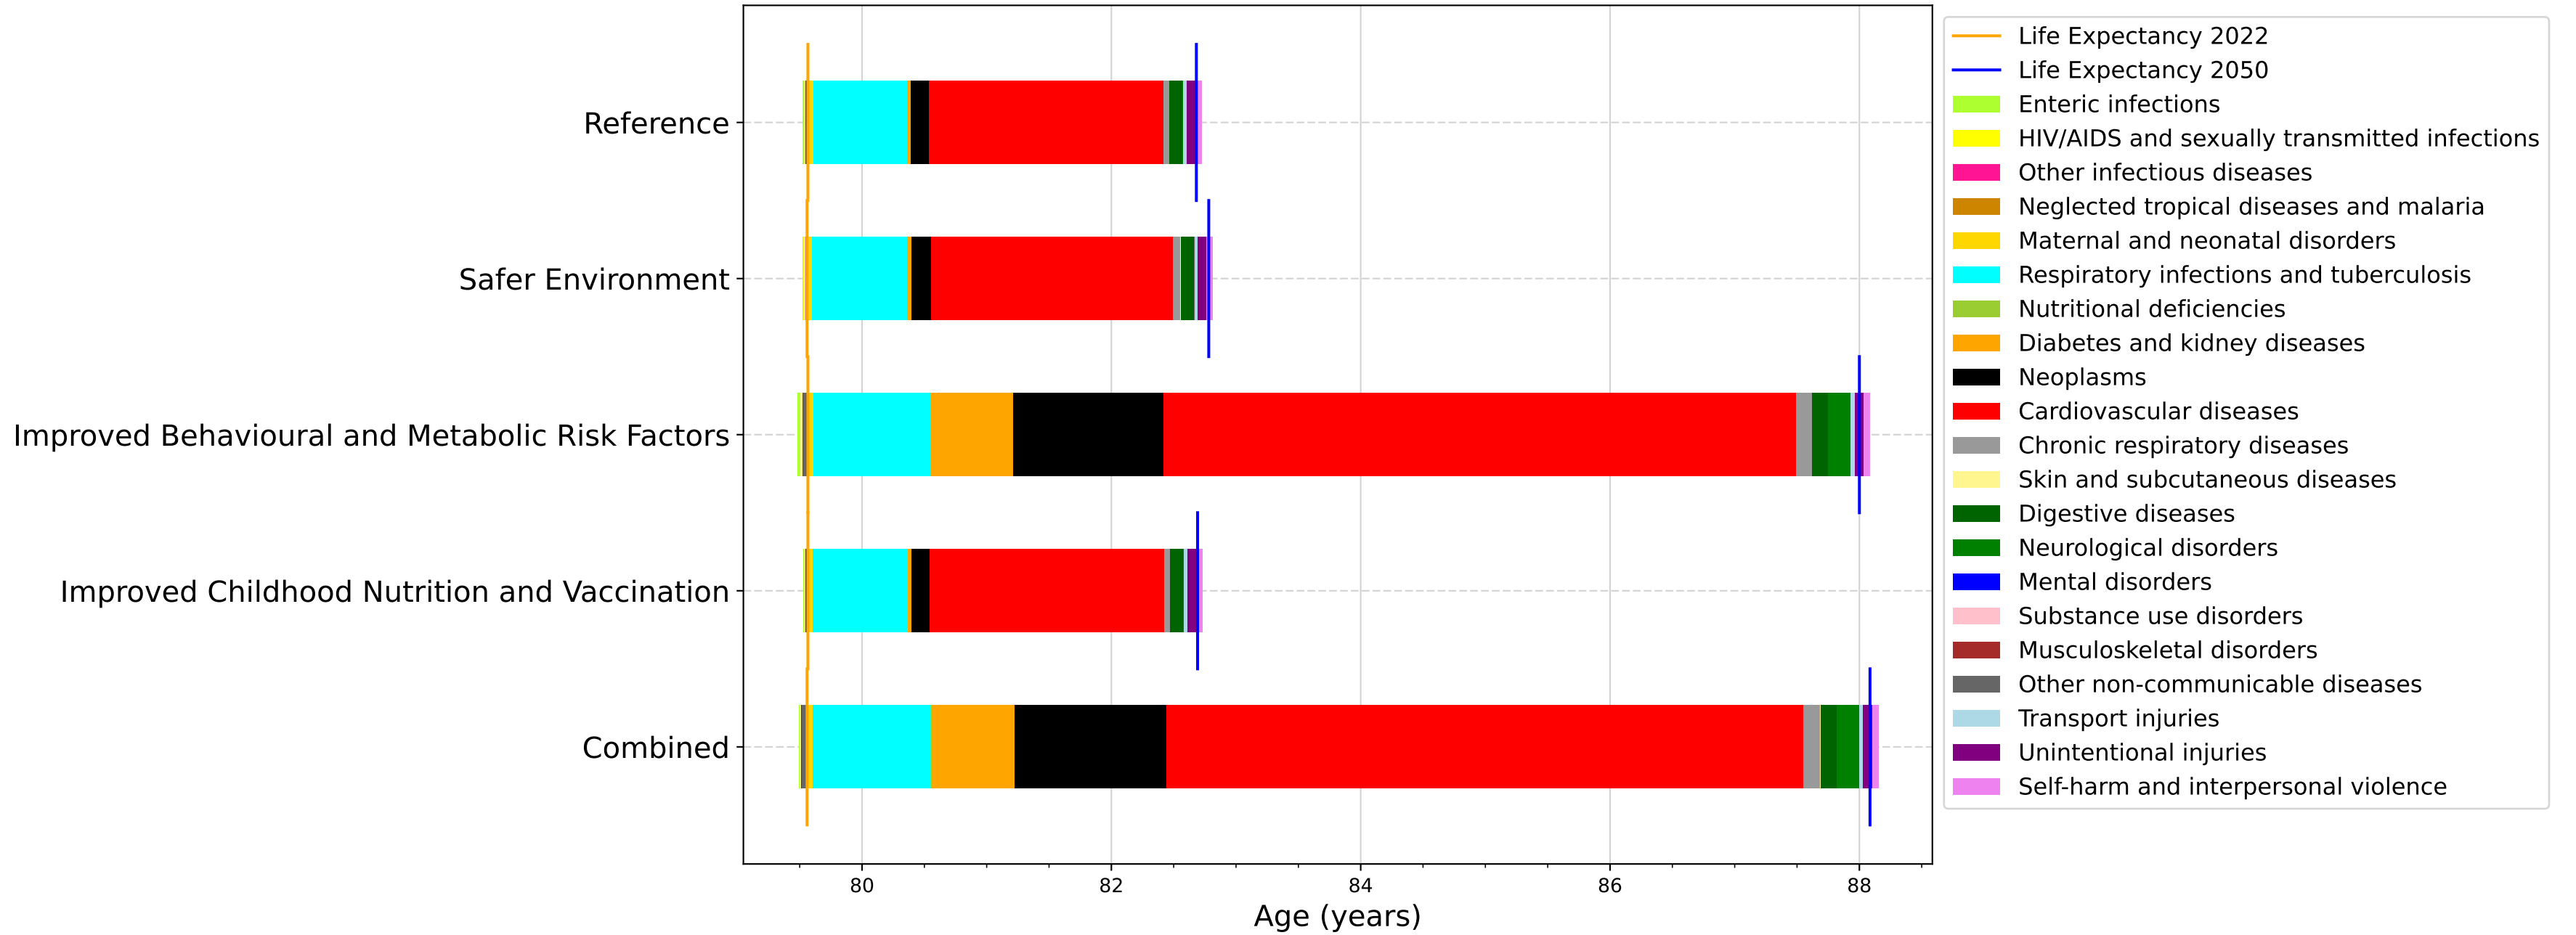

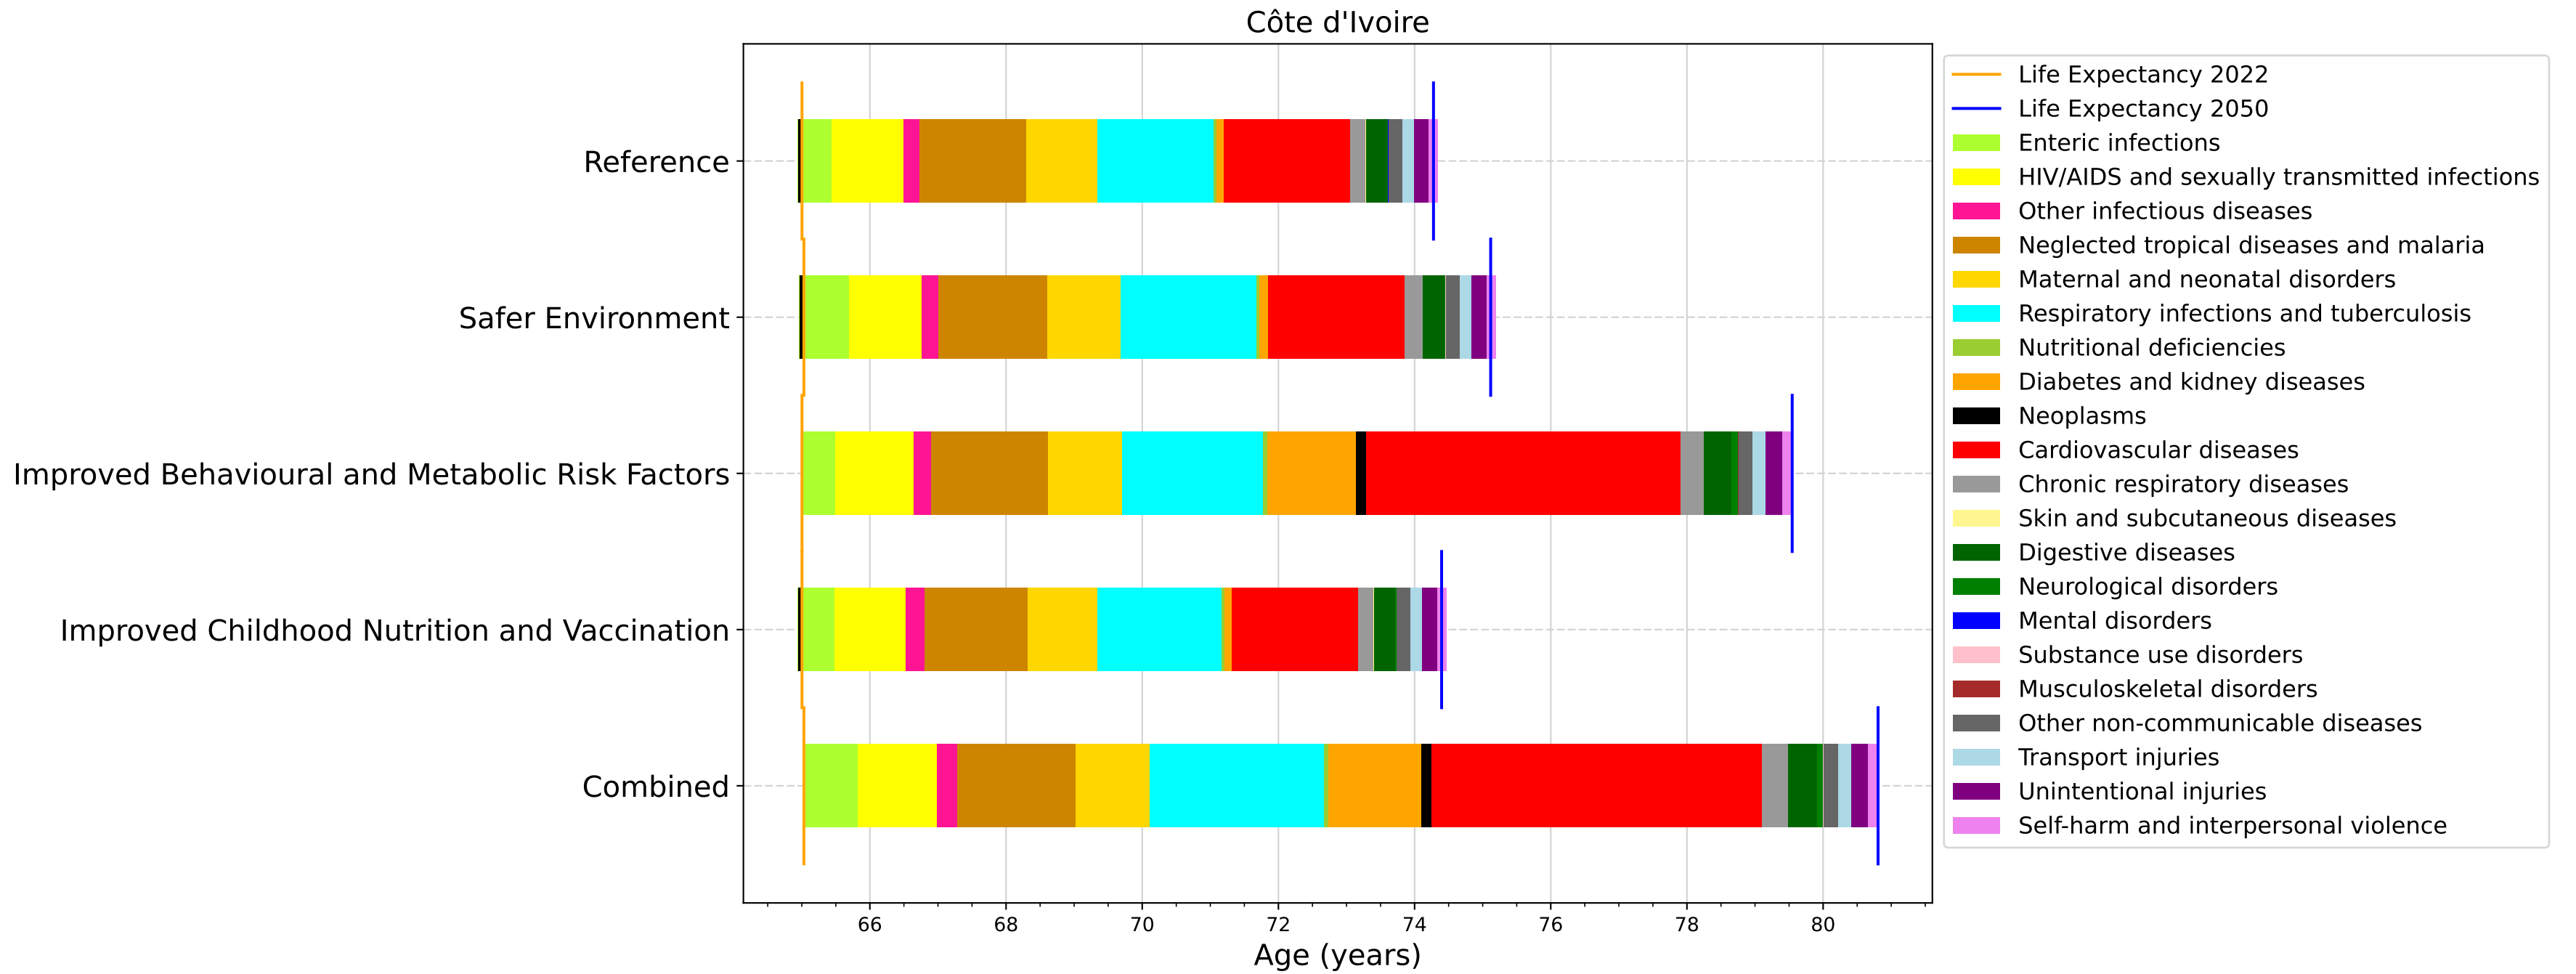

### North Korea

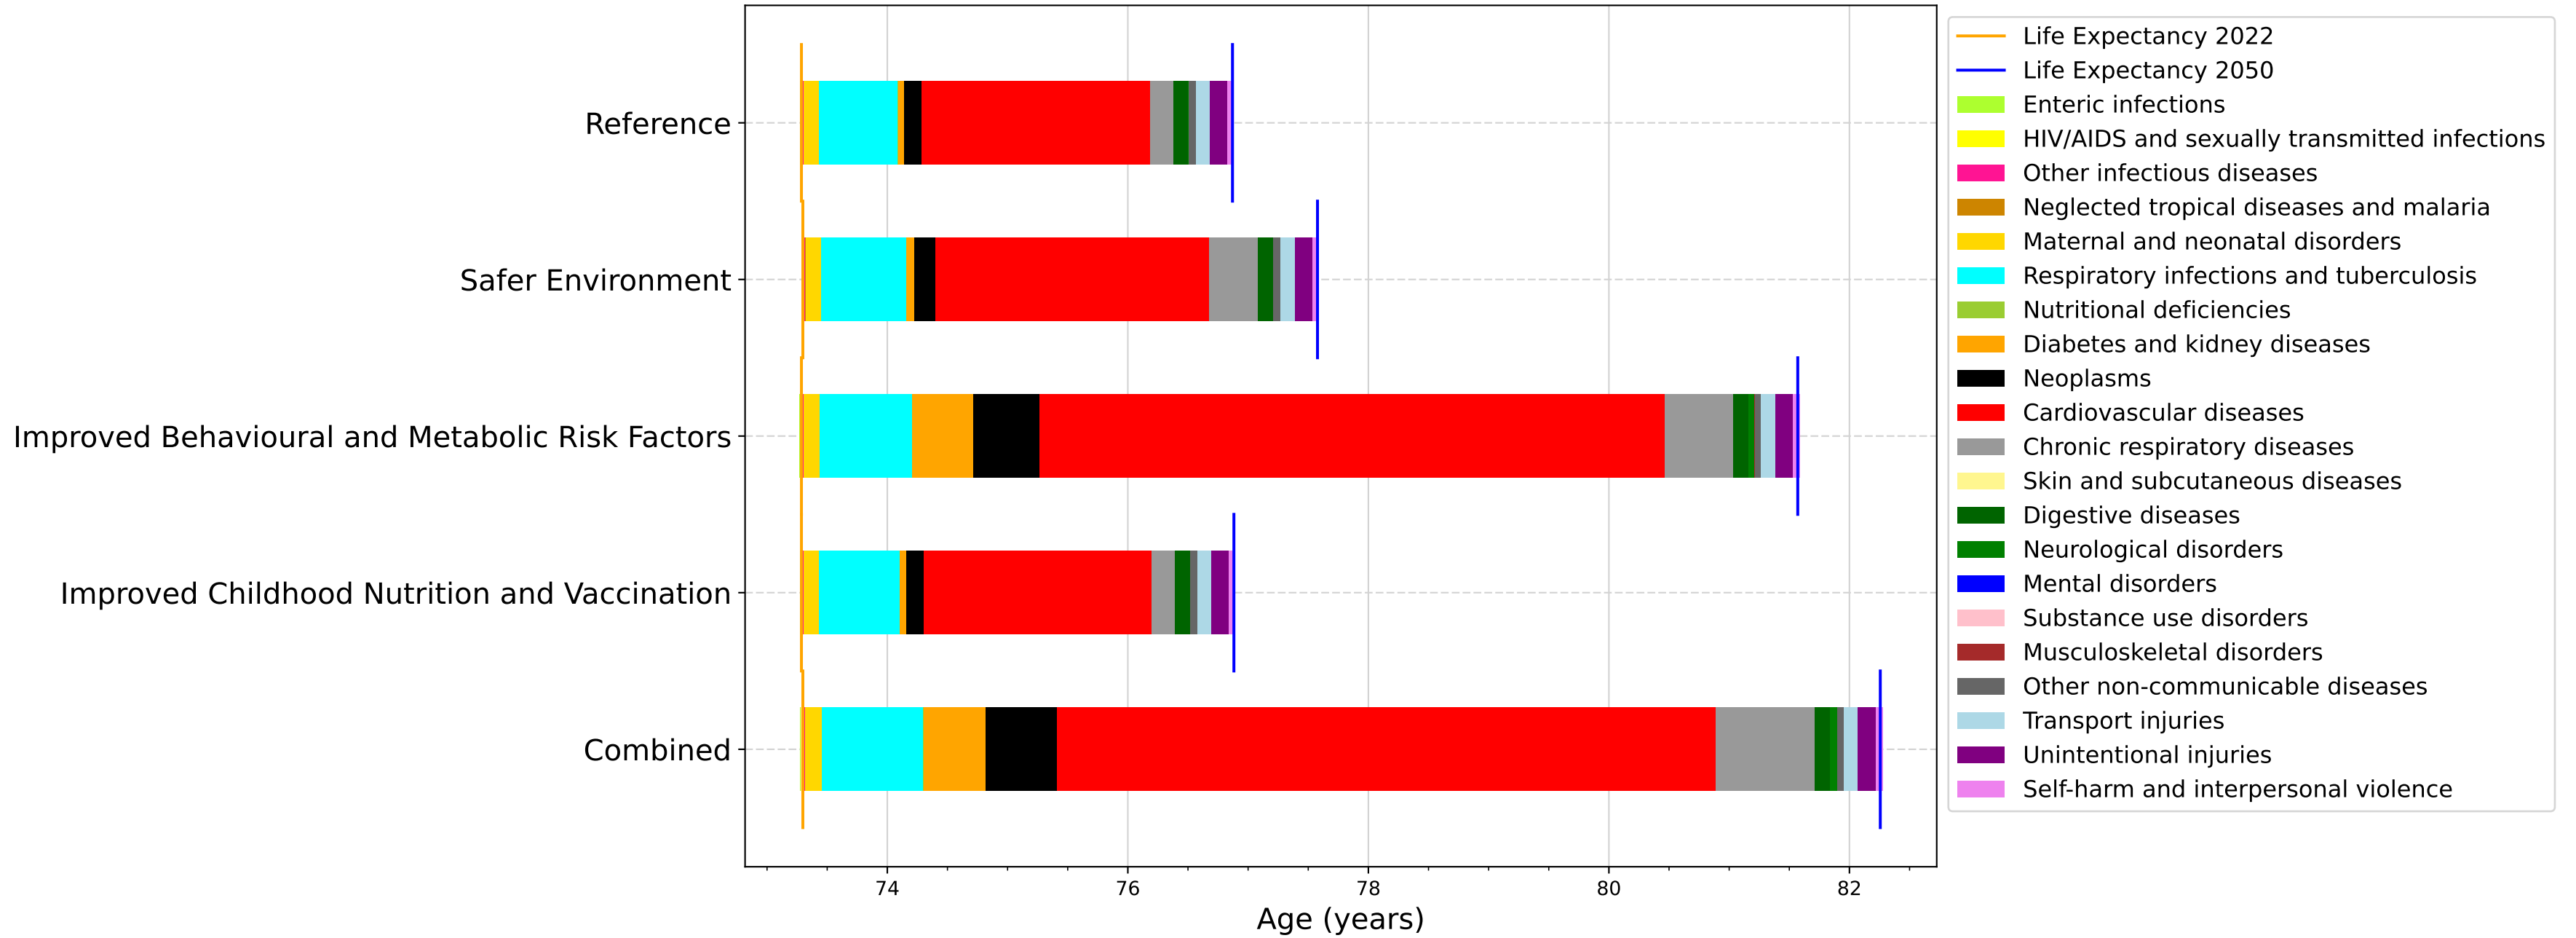



### DR Congo

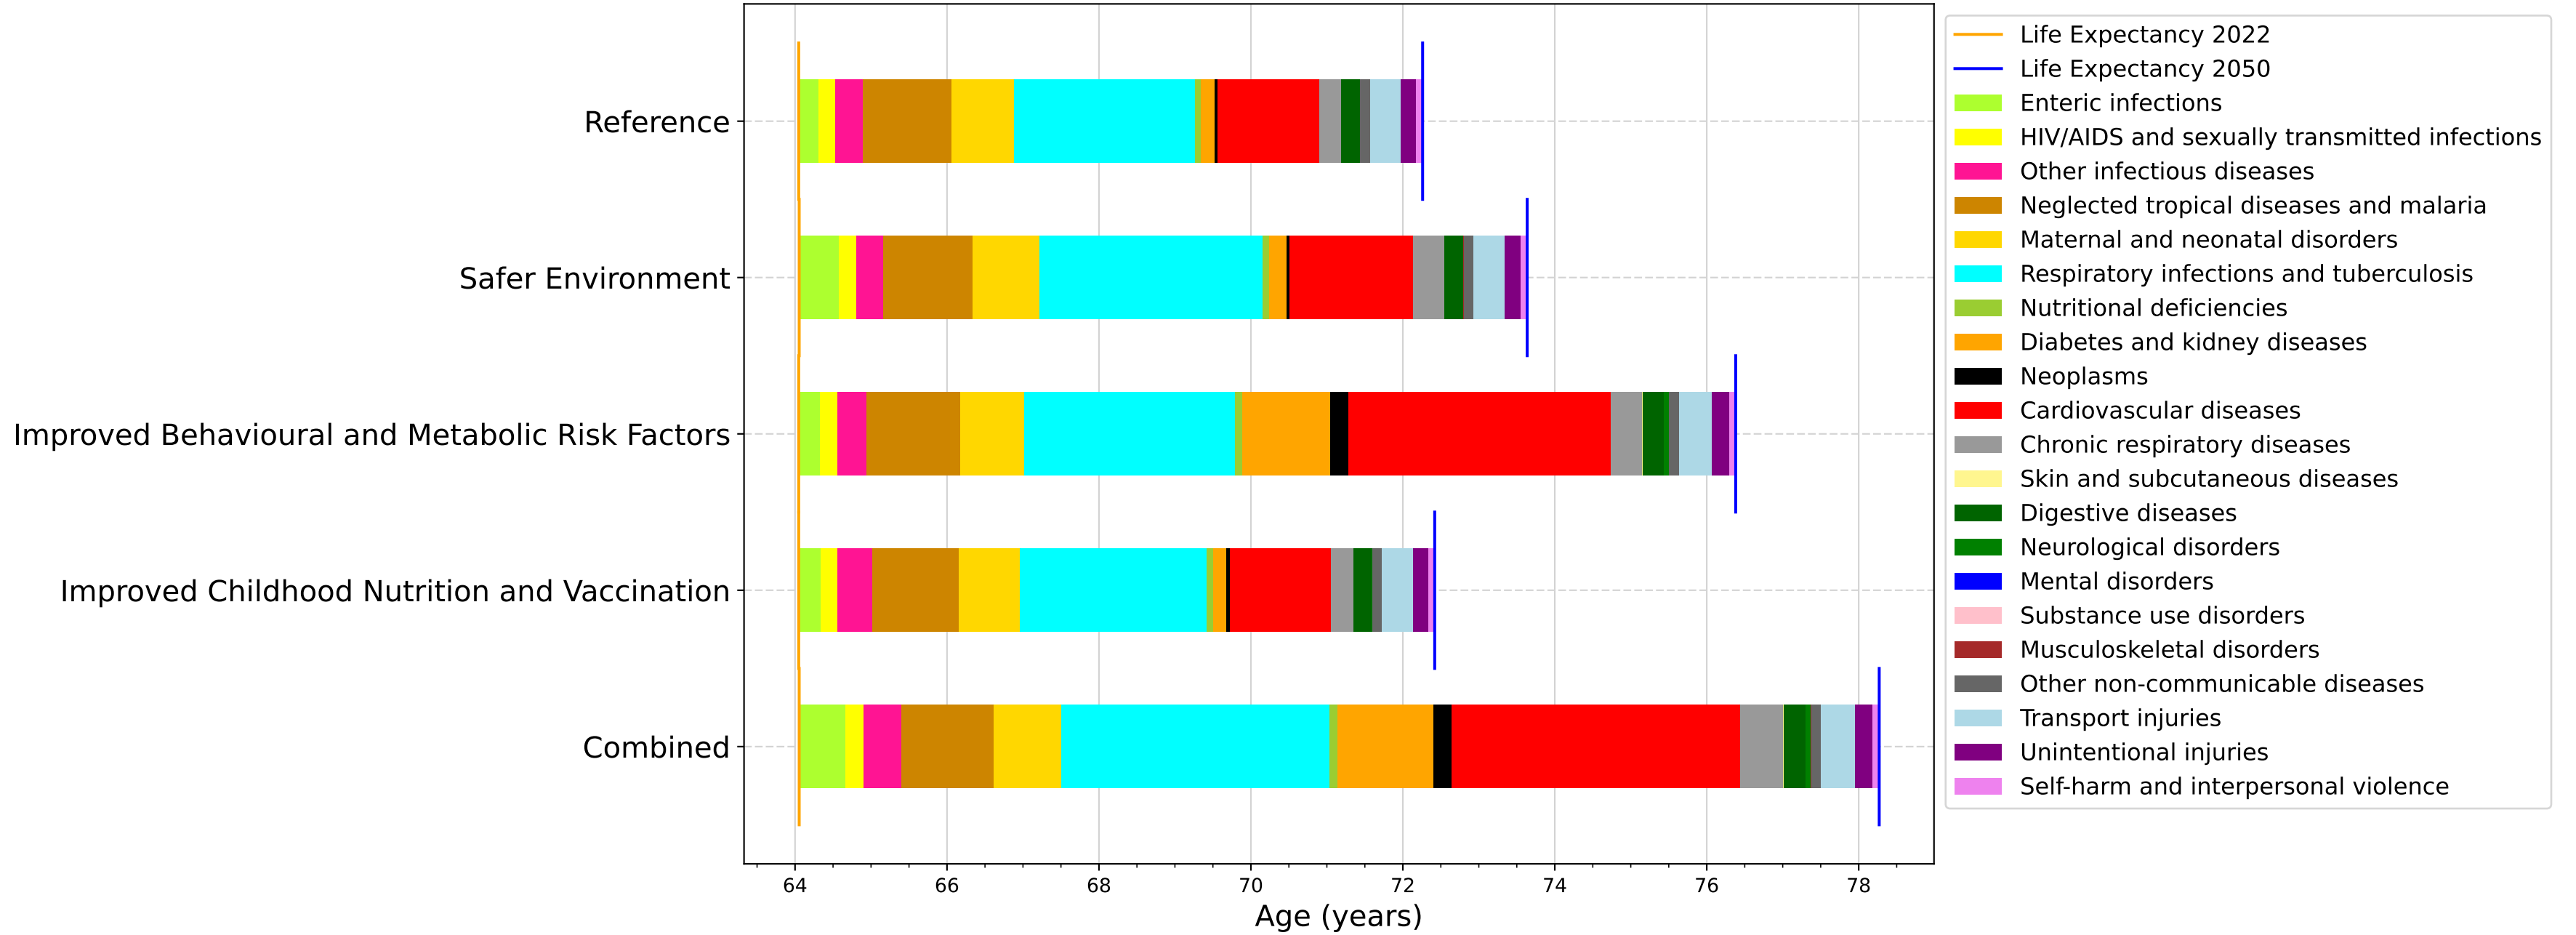

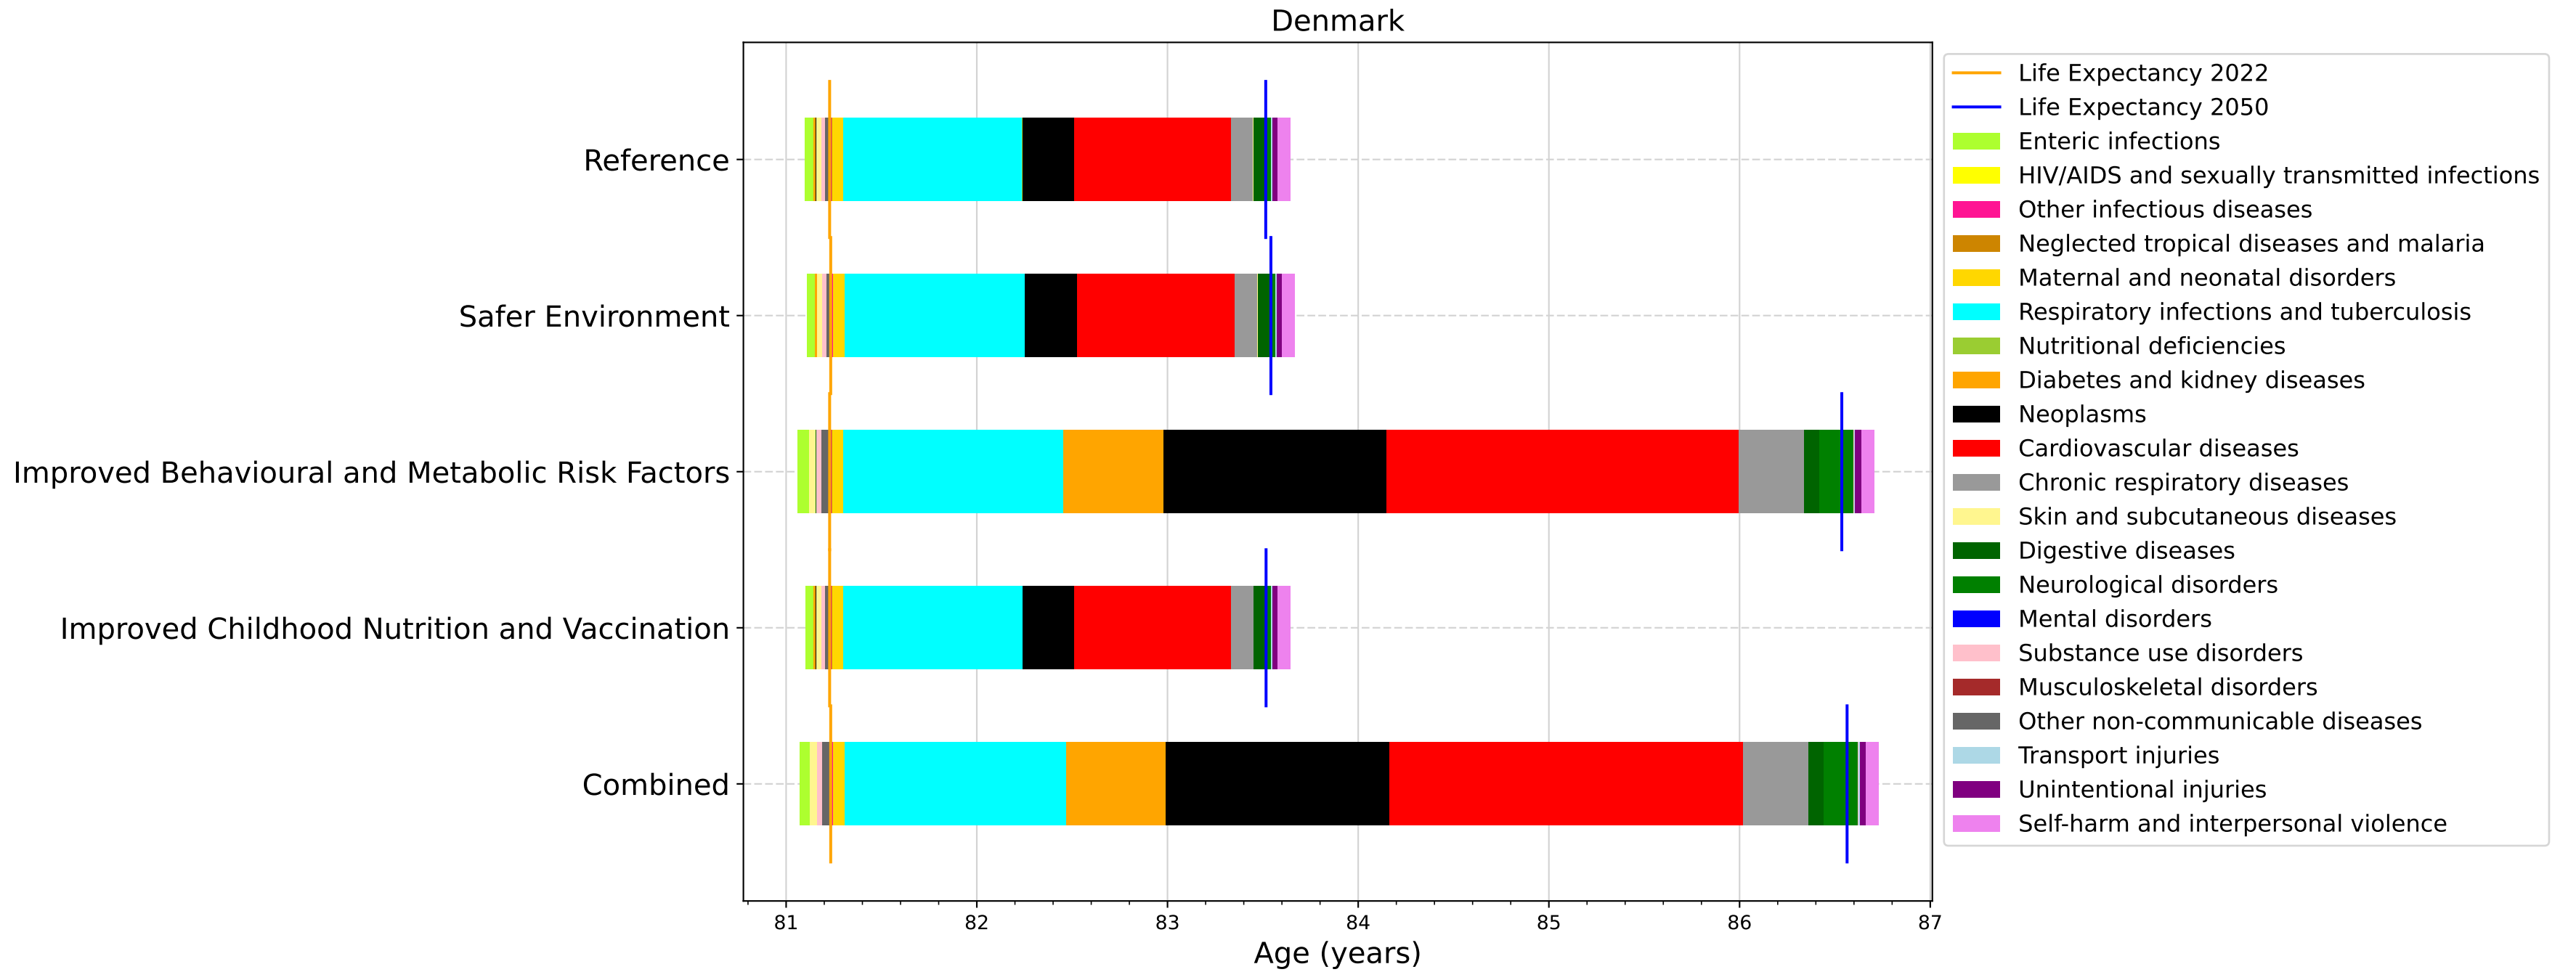

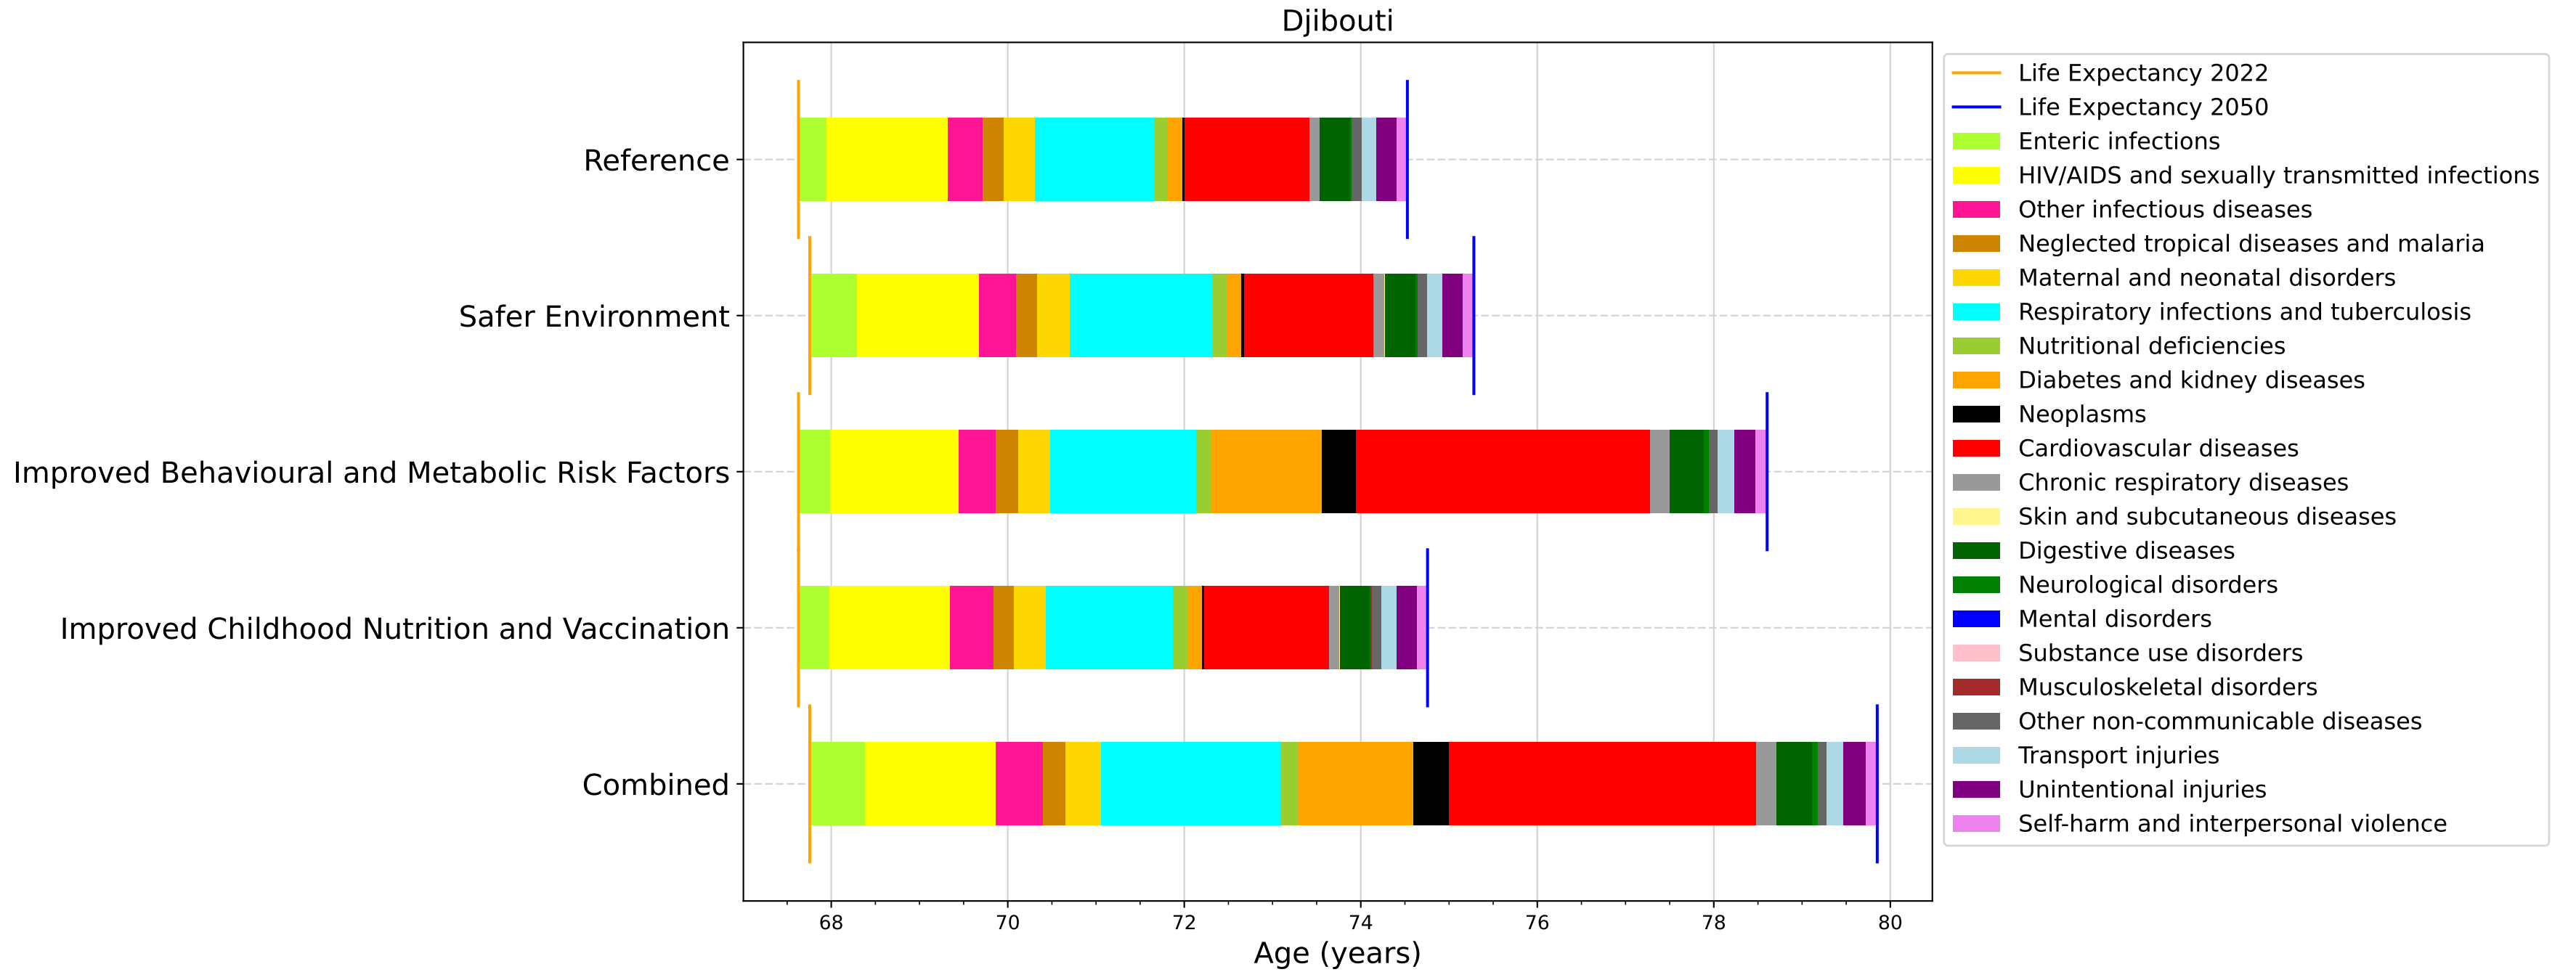

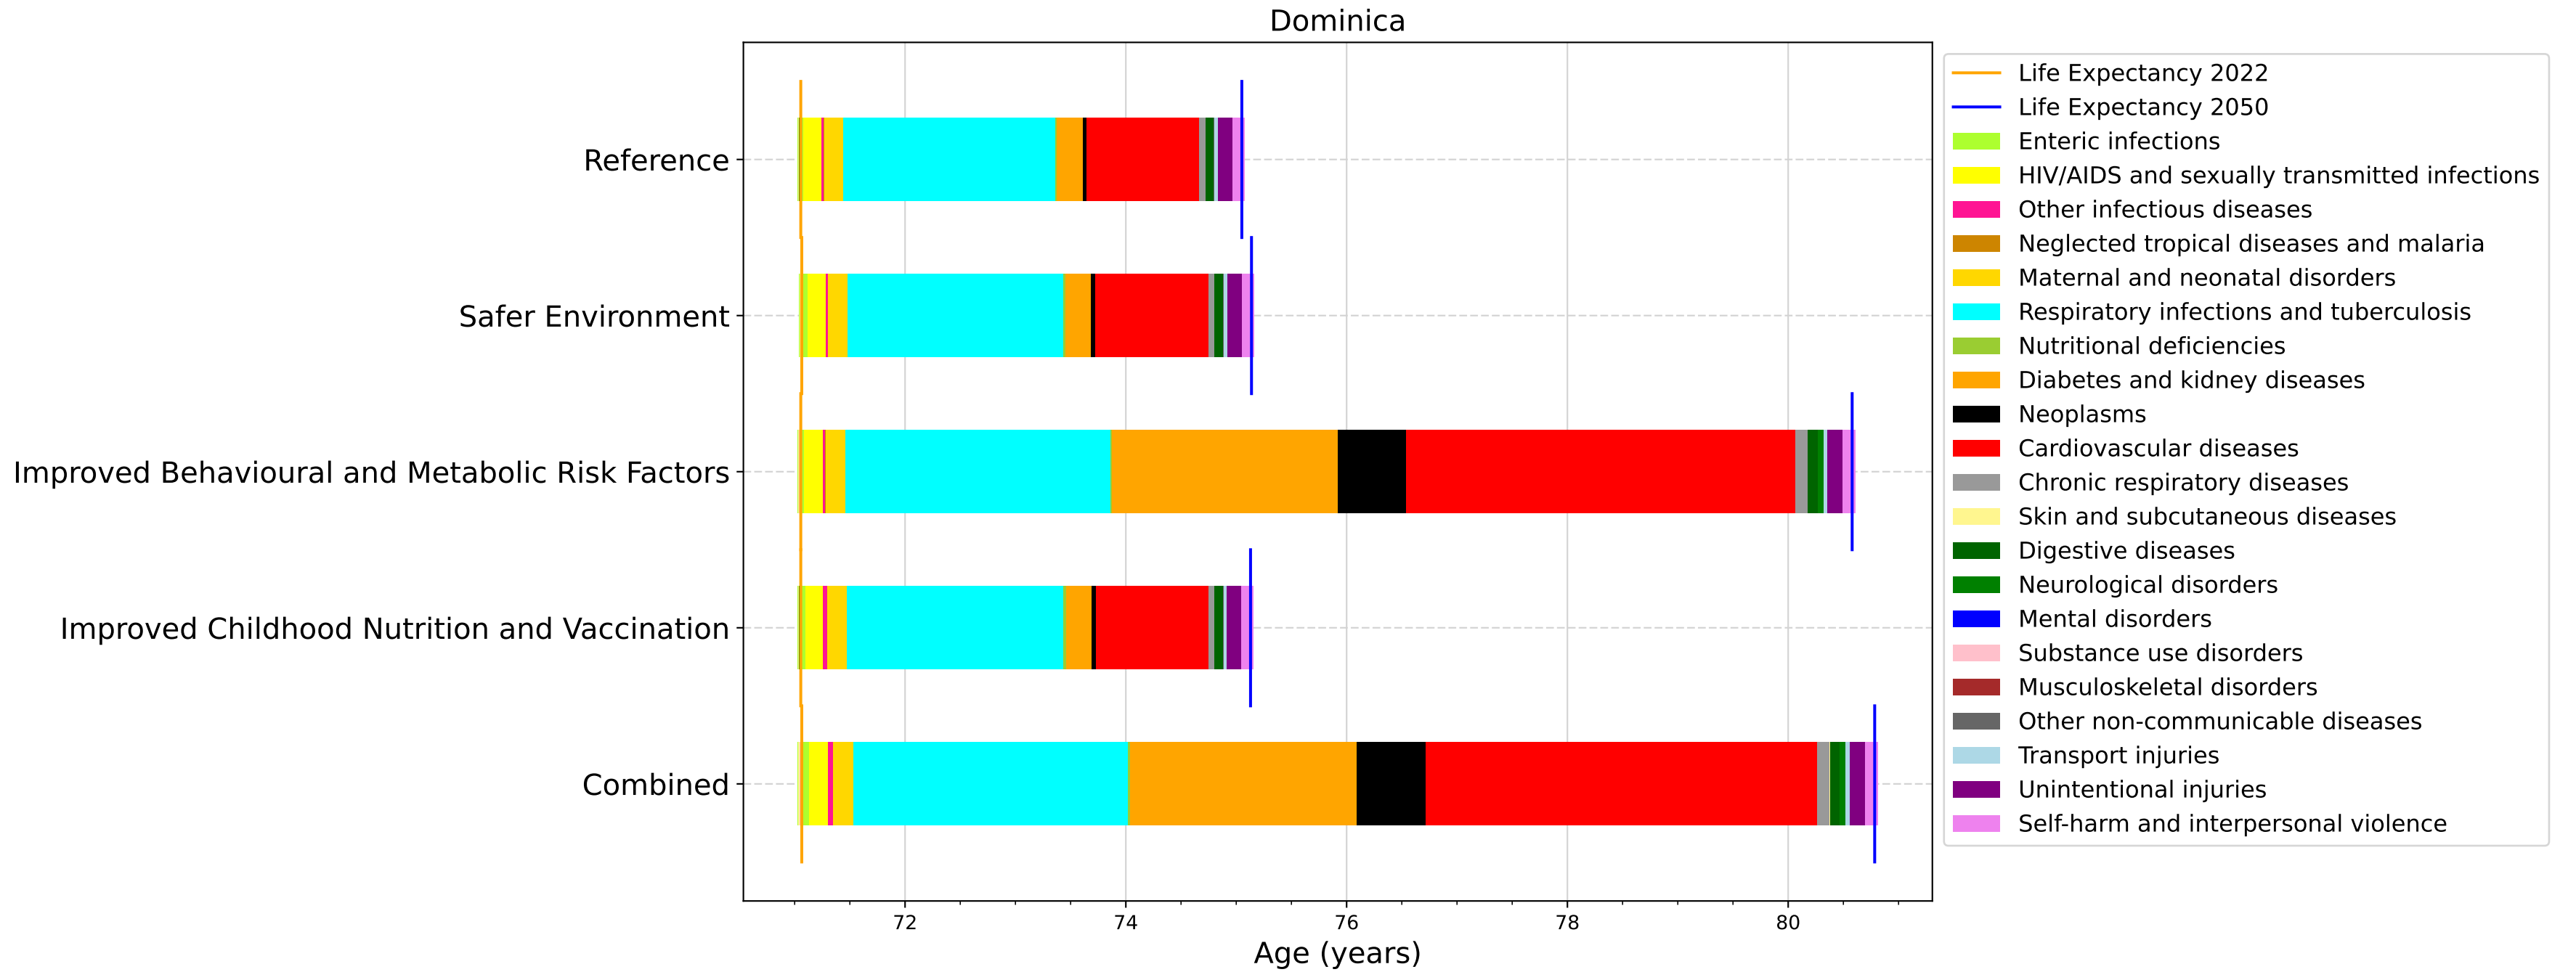

### Dominican Republic

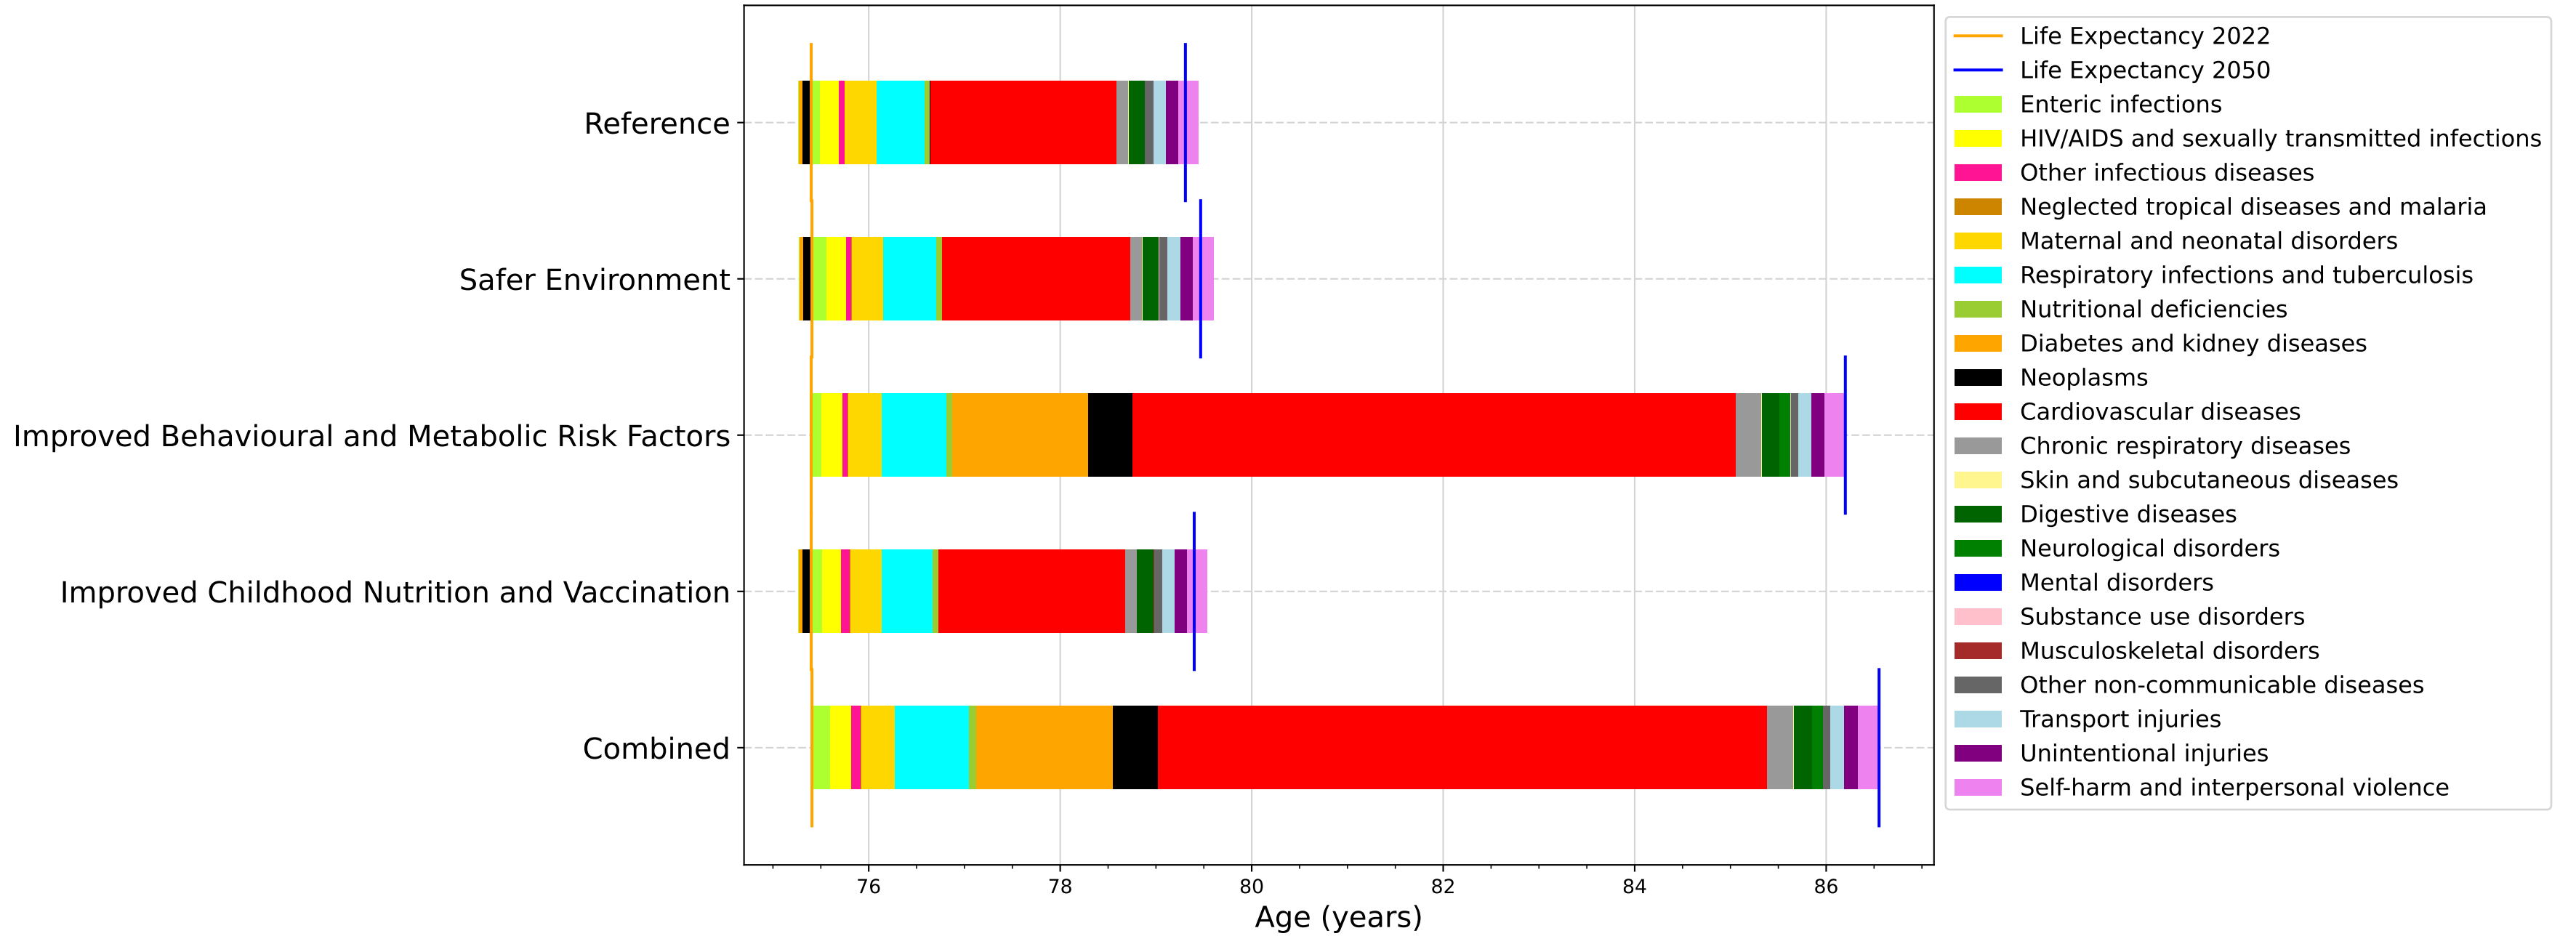

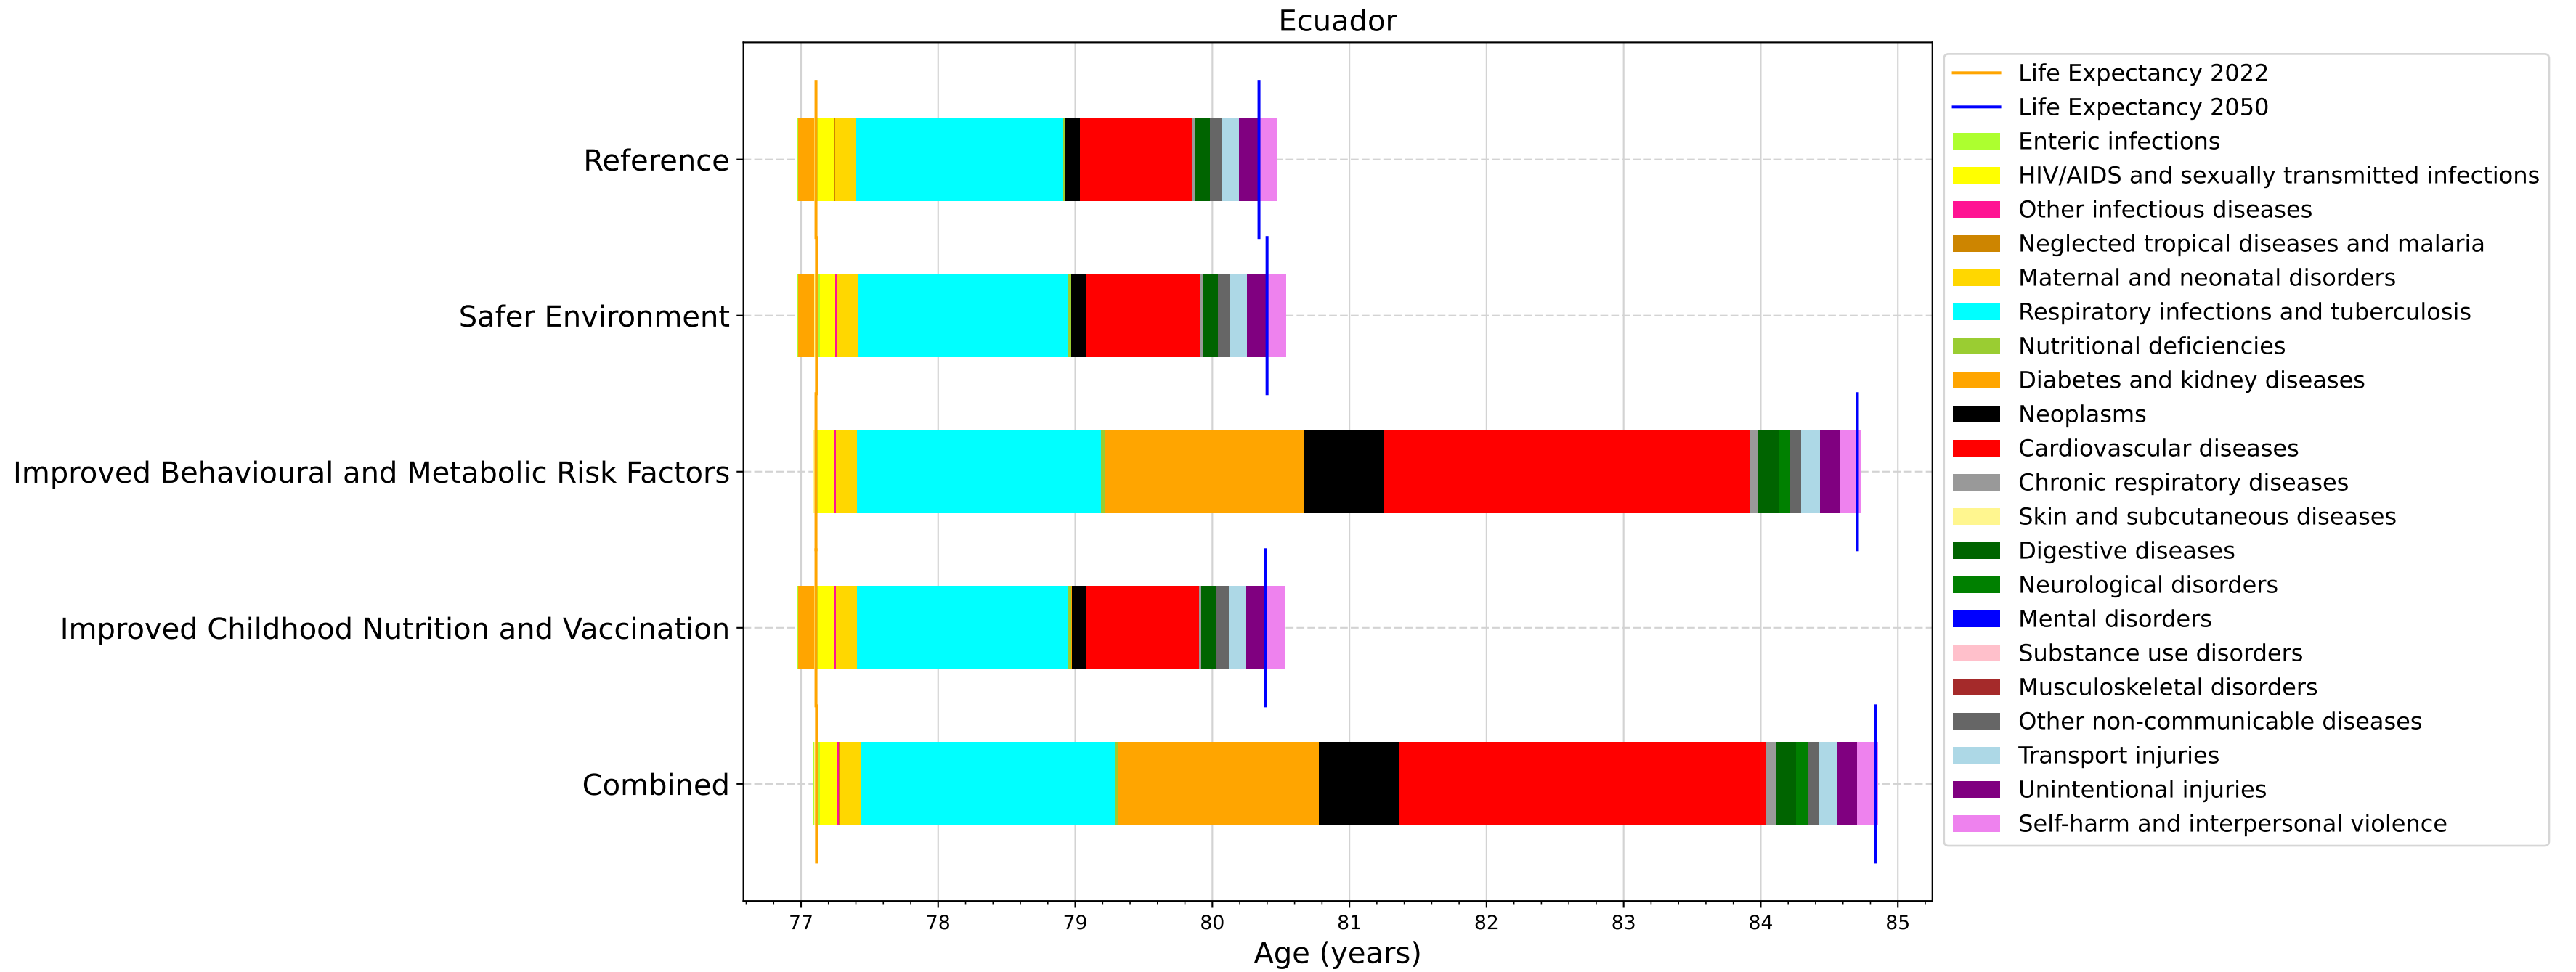

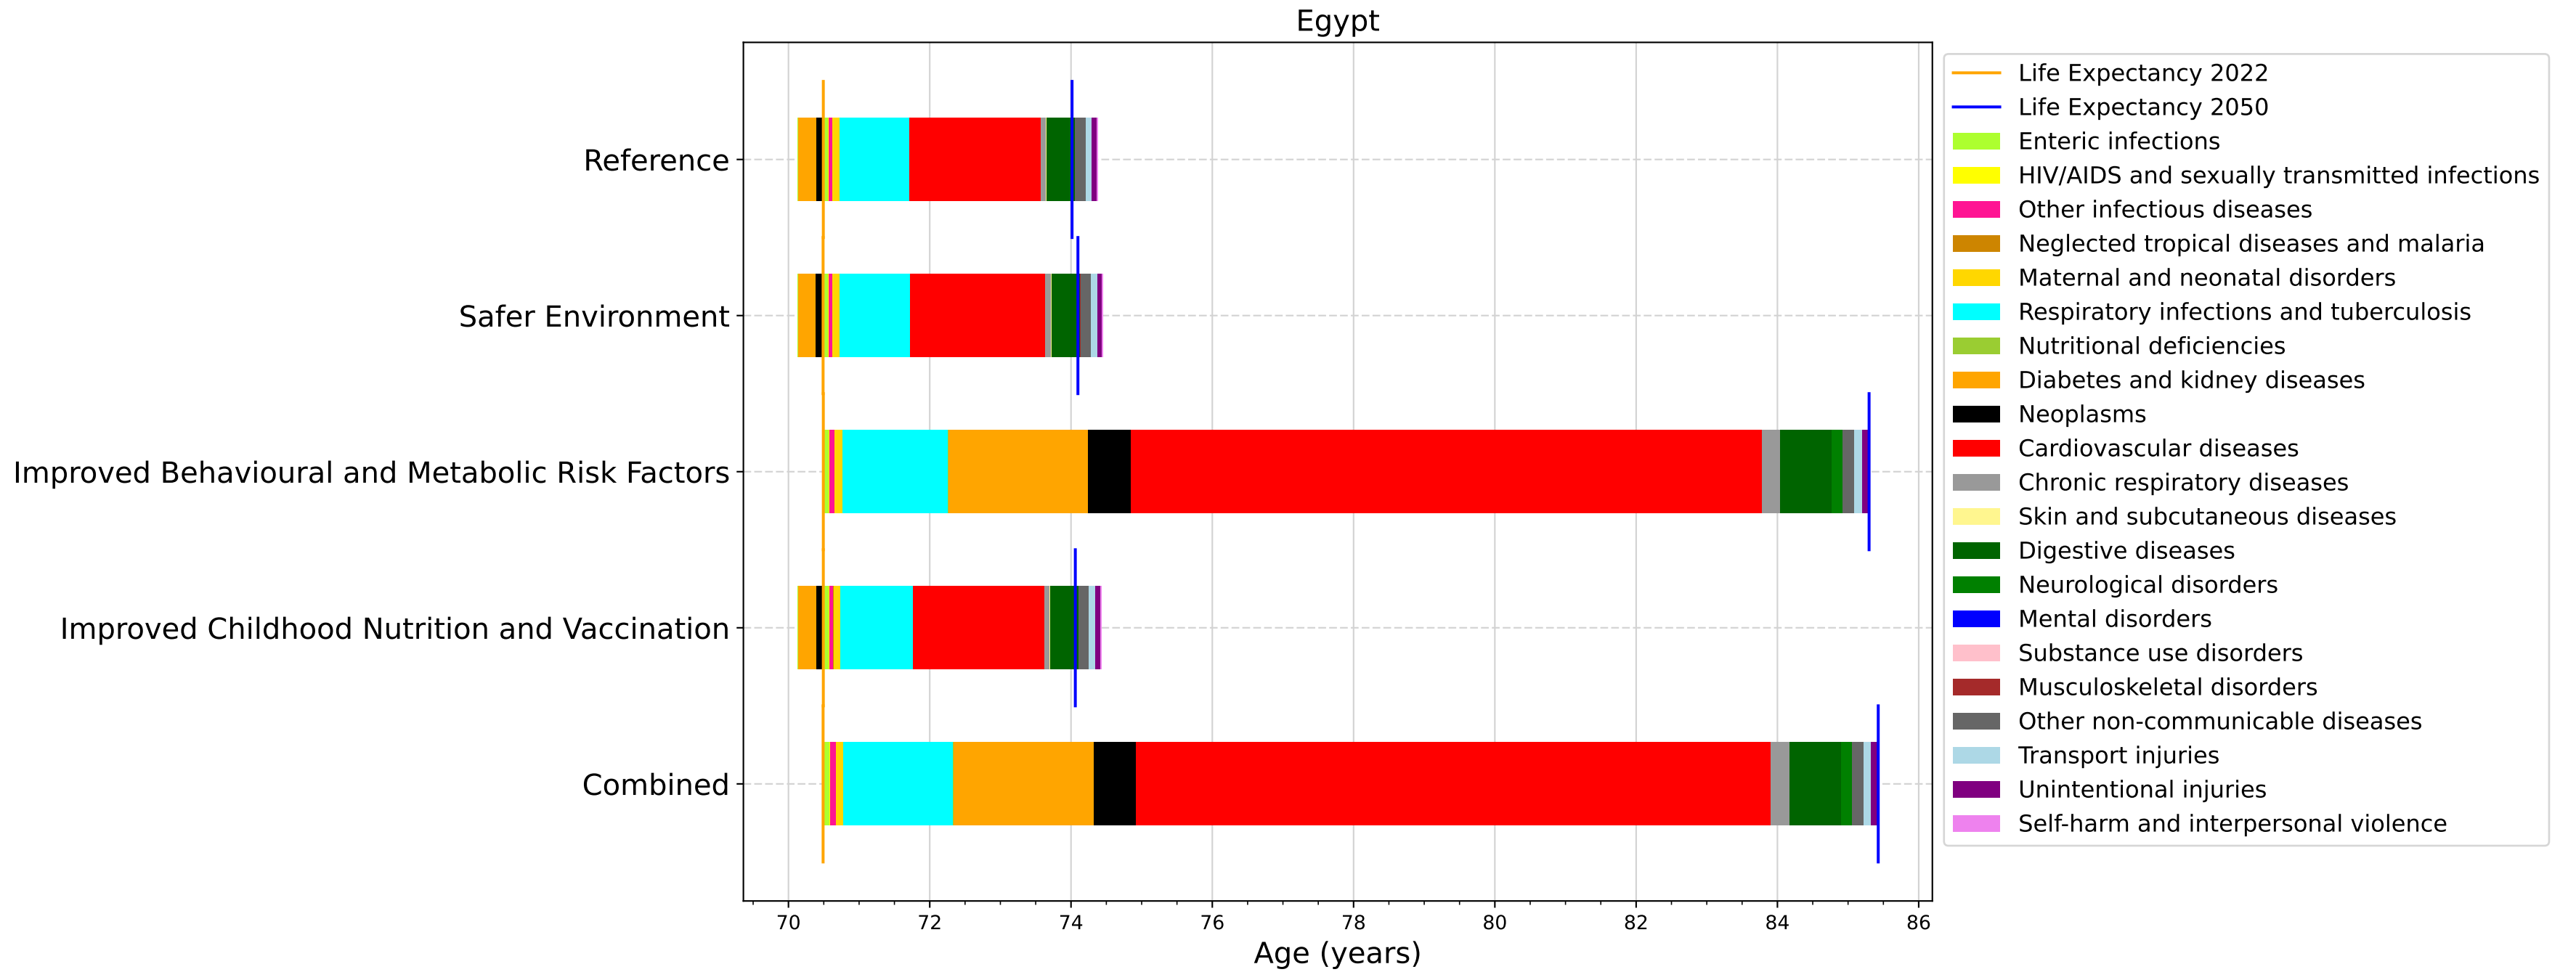

El Salvador

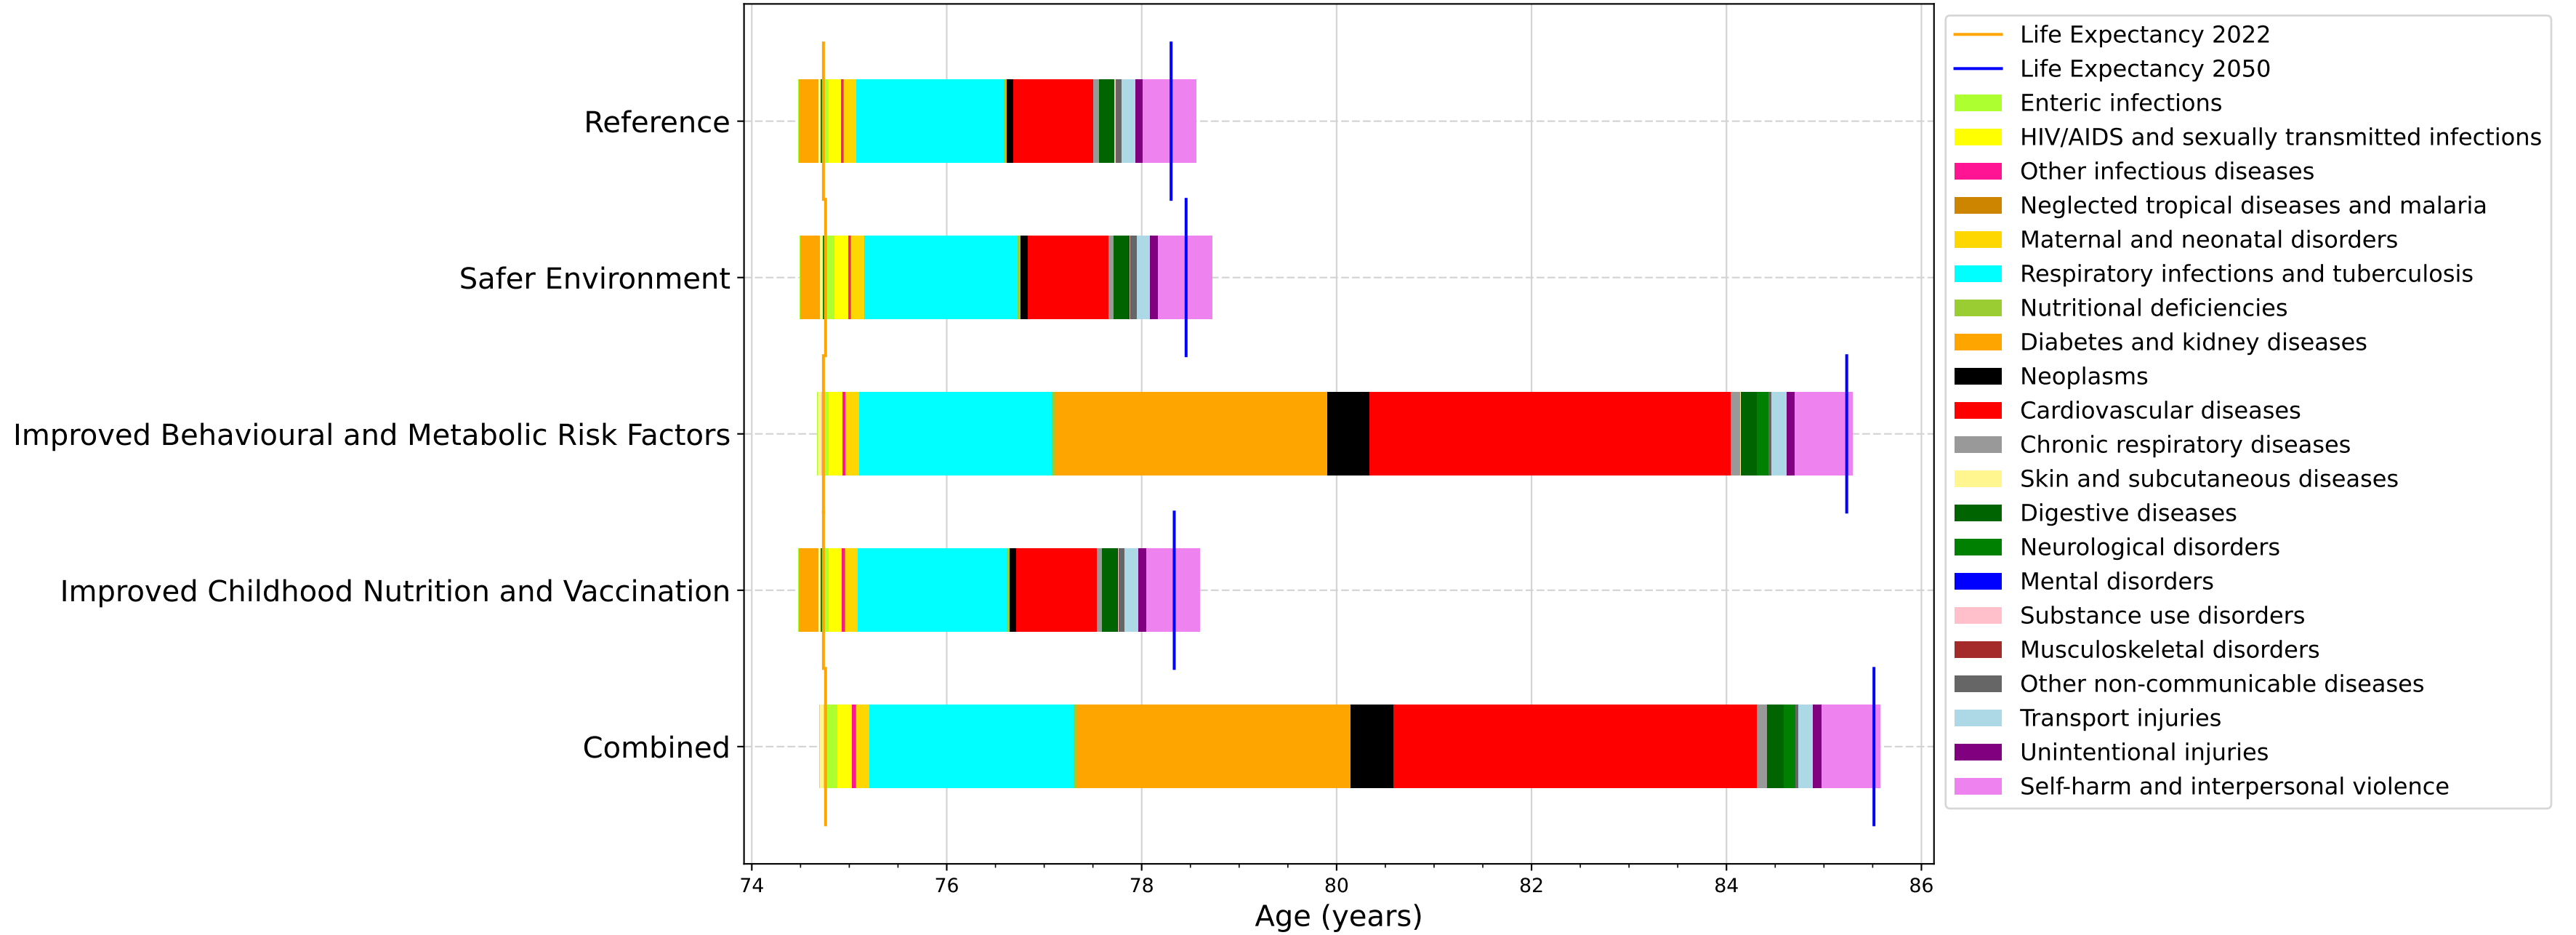



### Equatorial Guinea

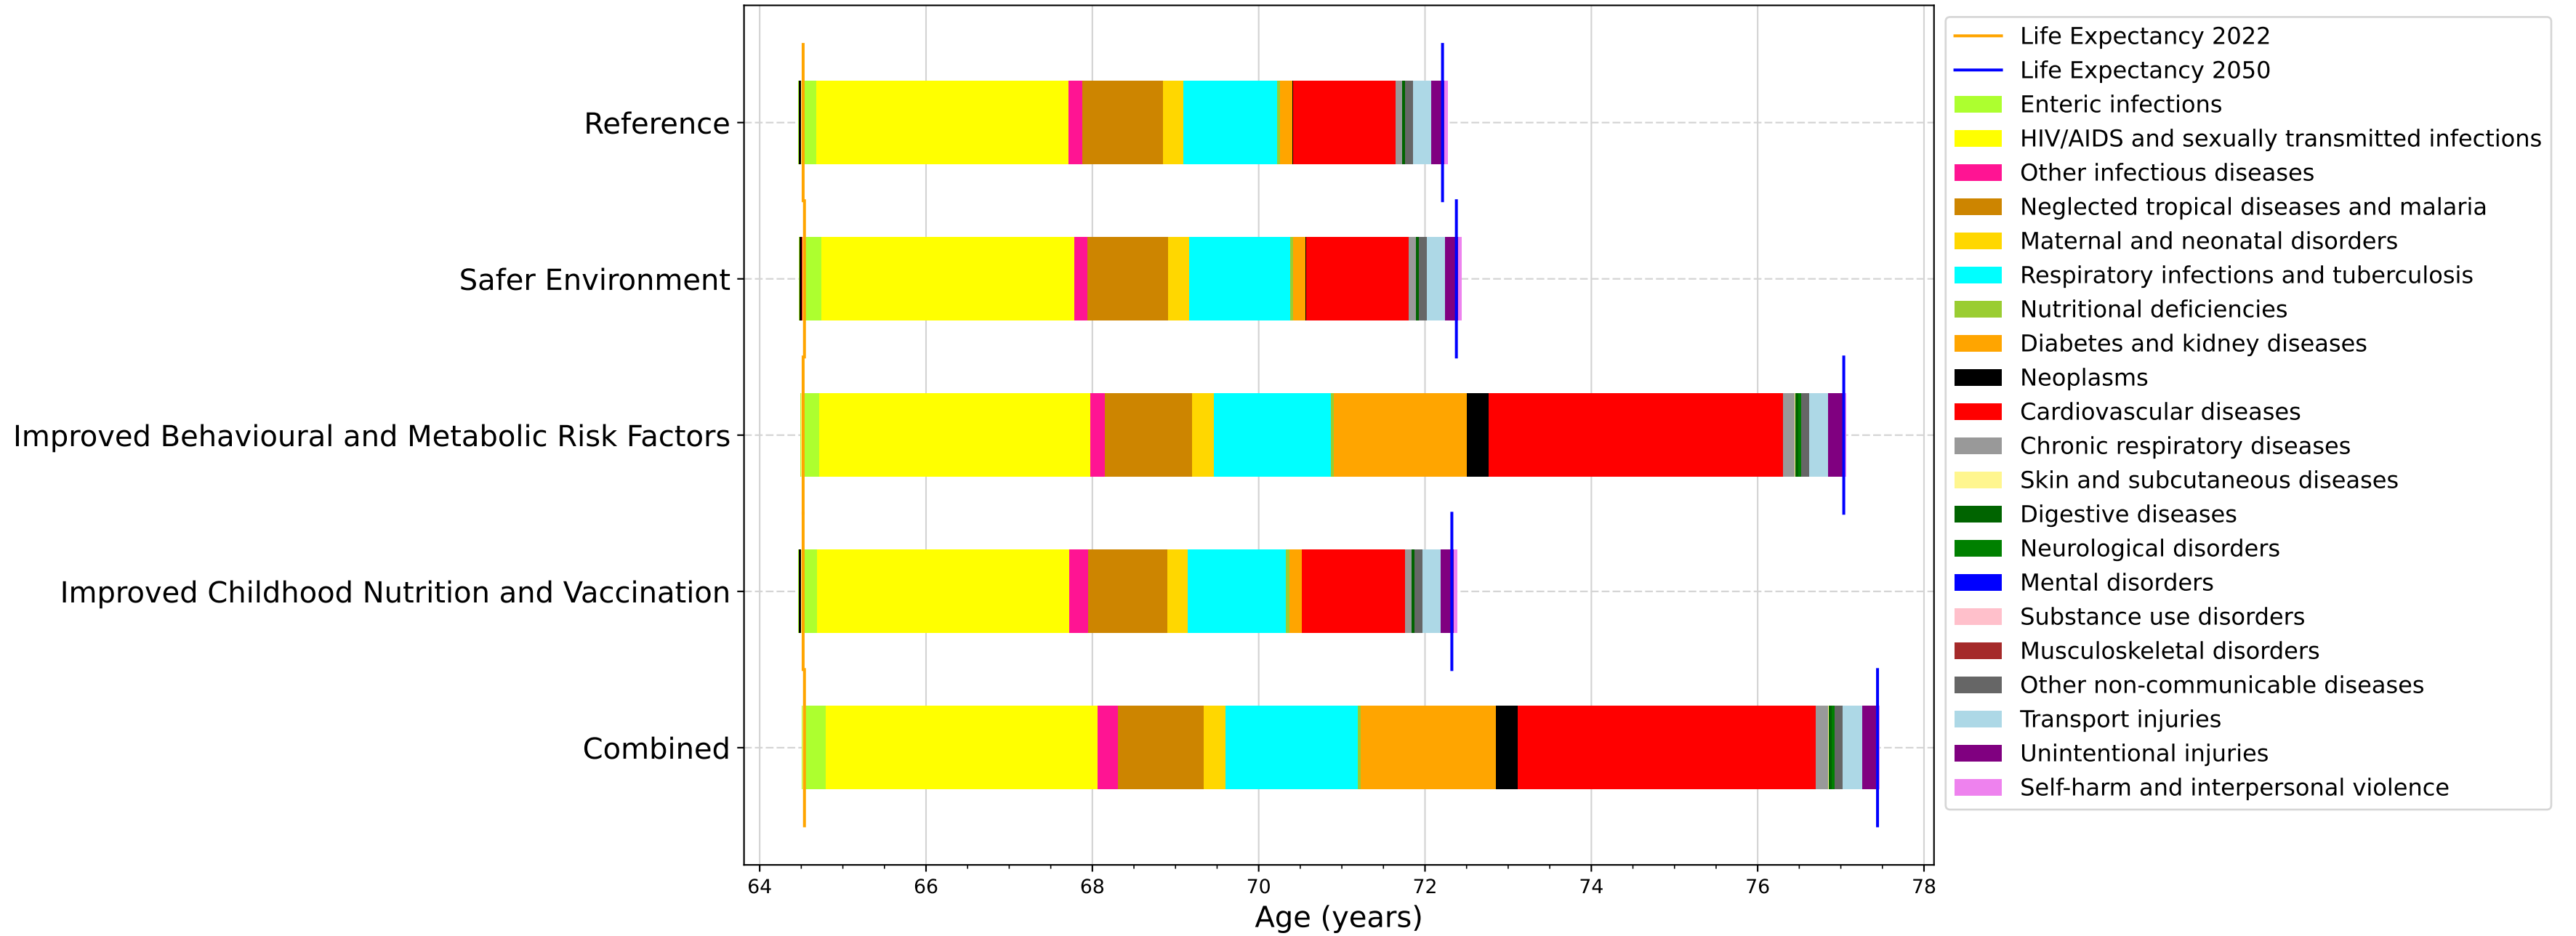

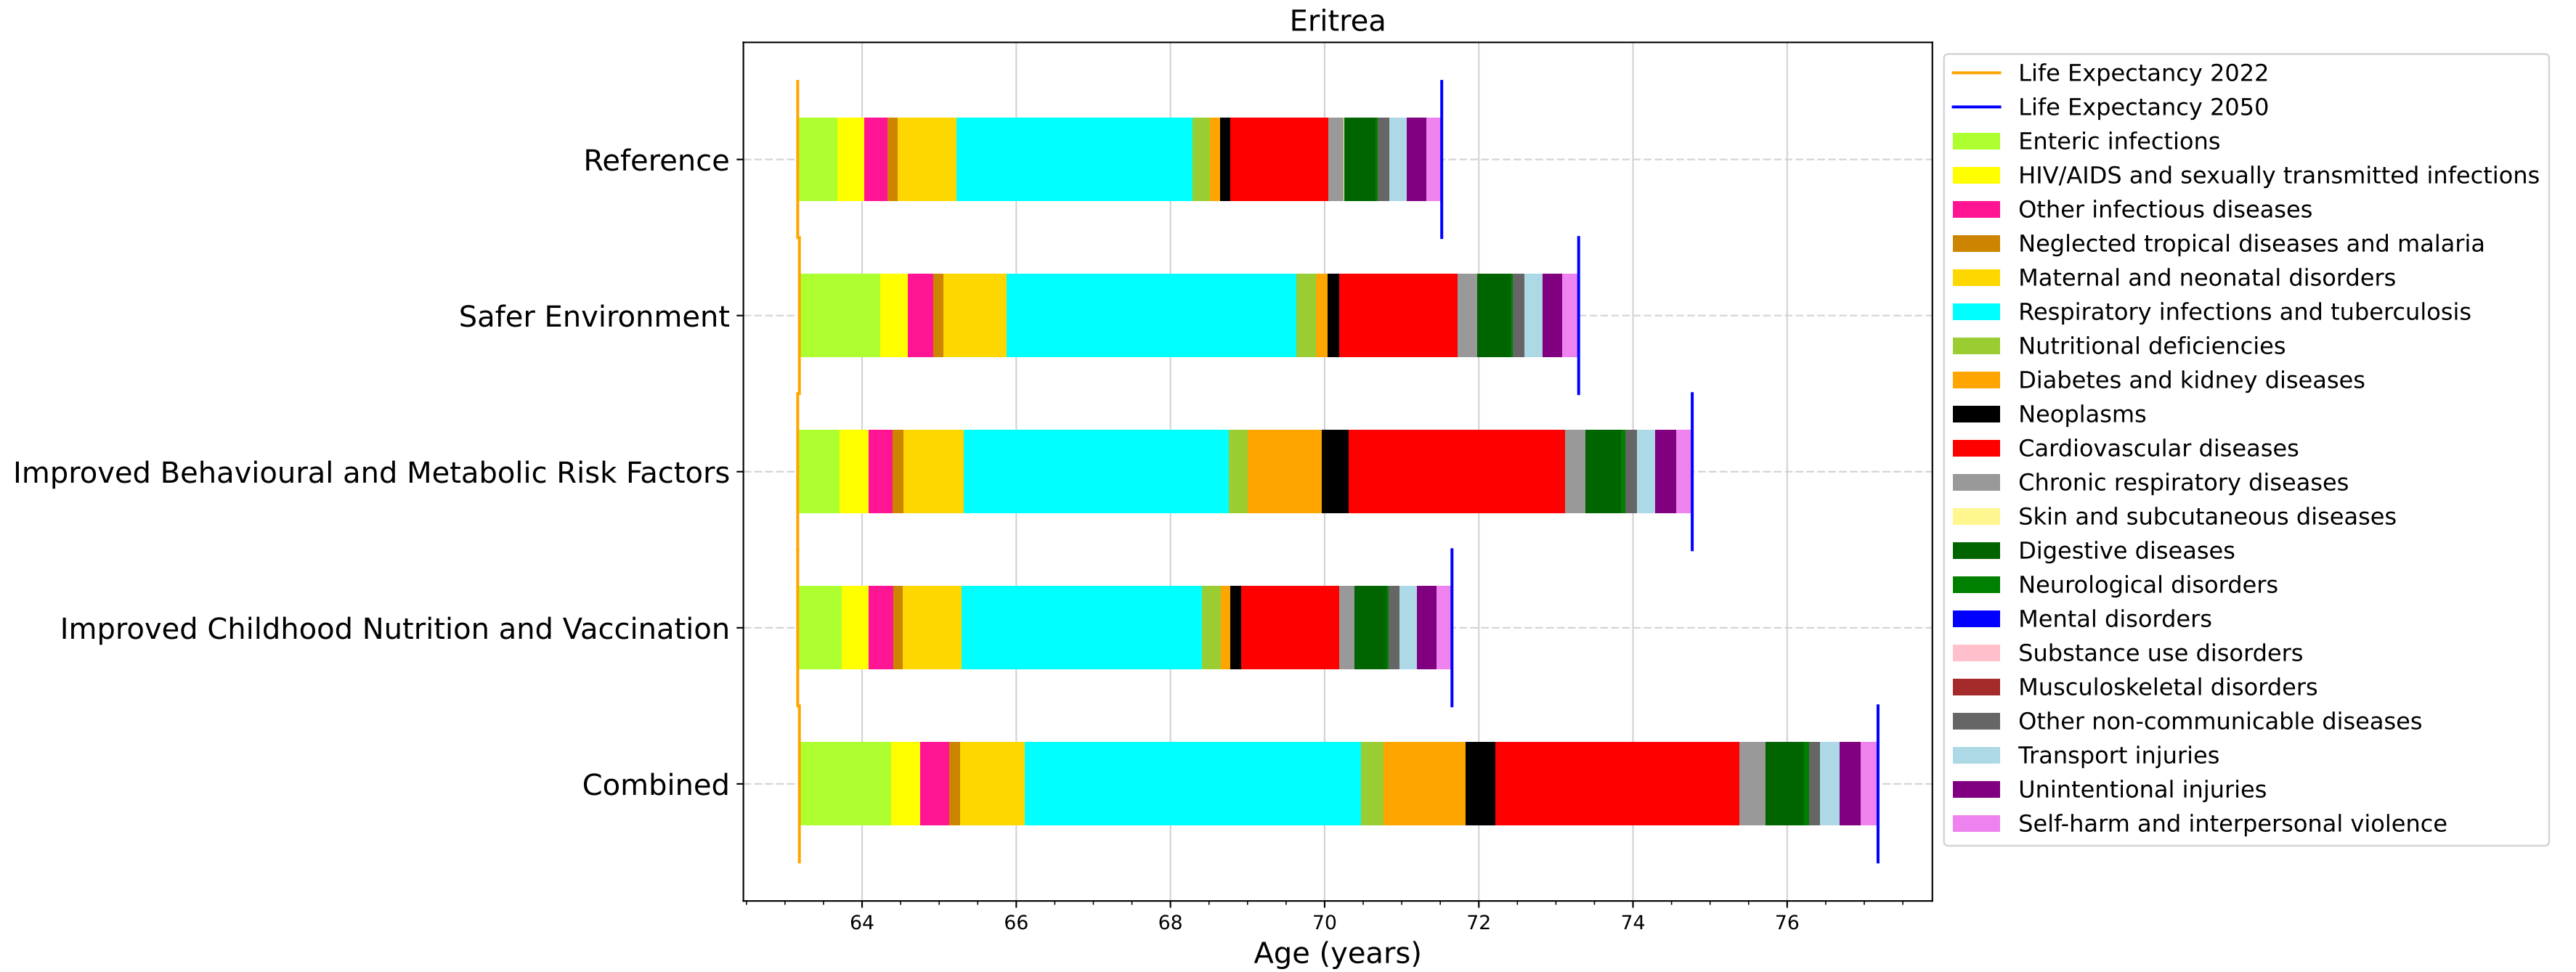

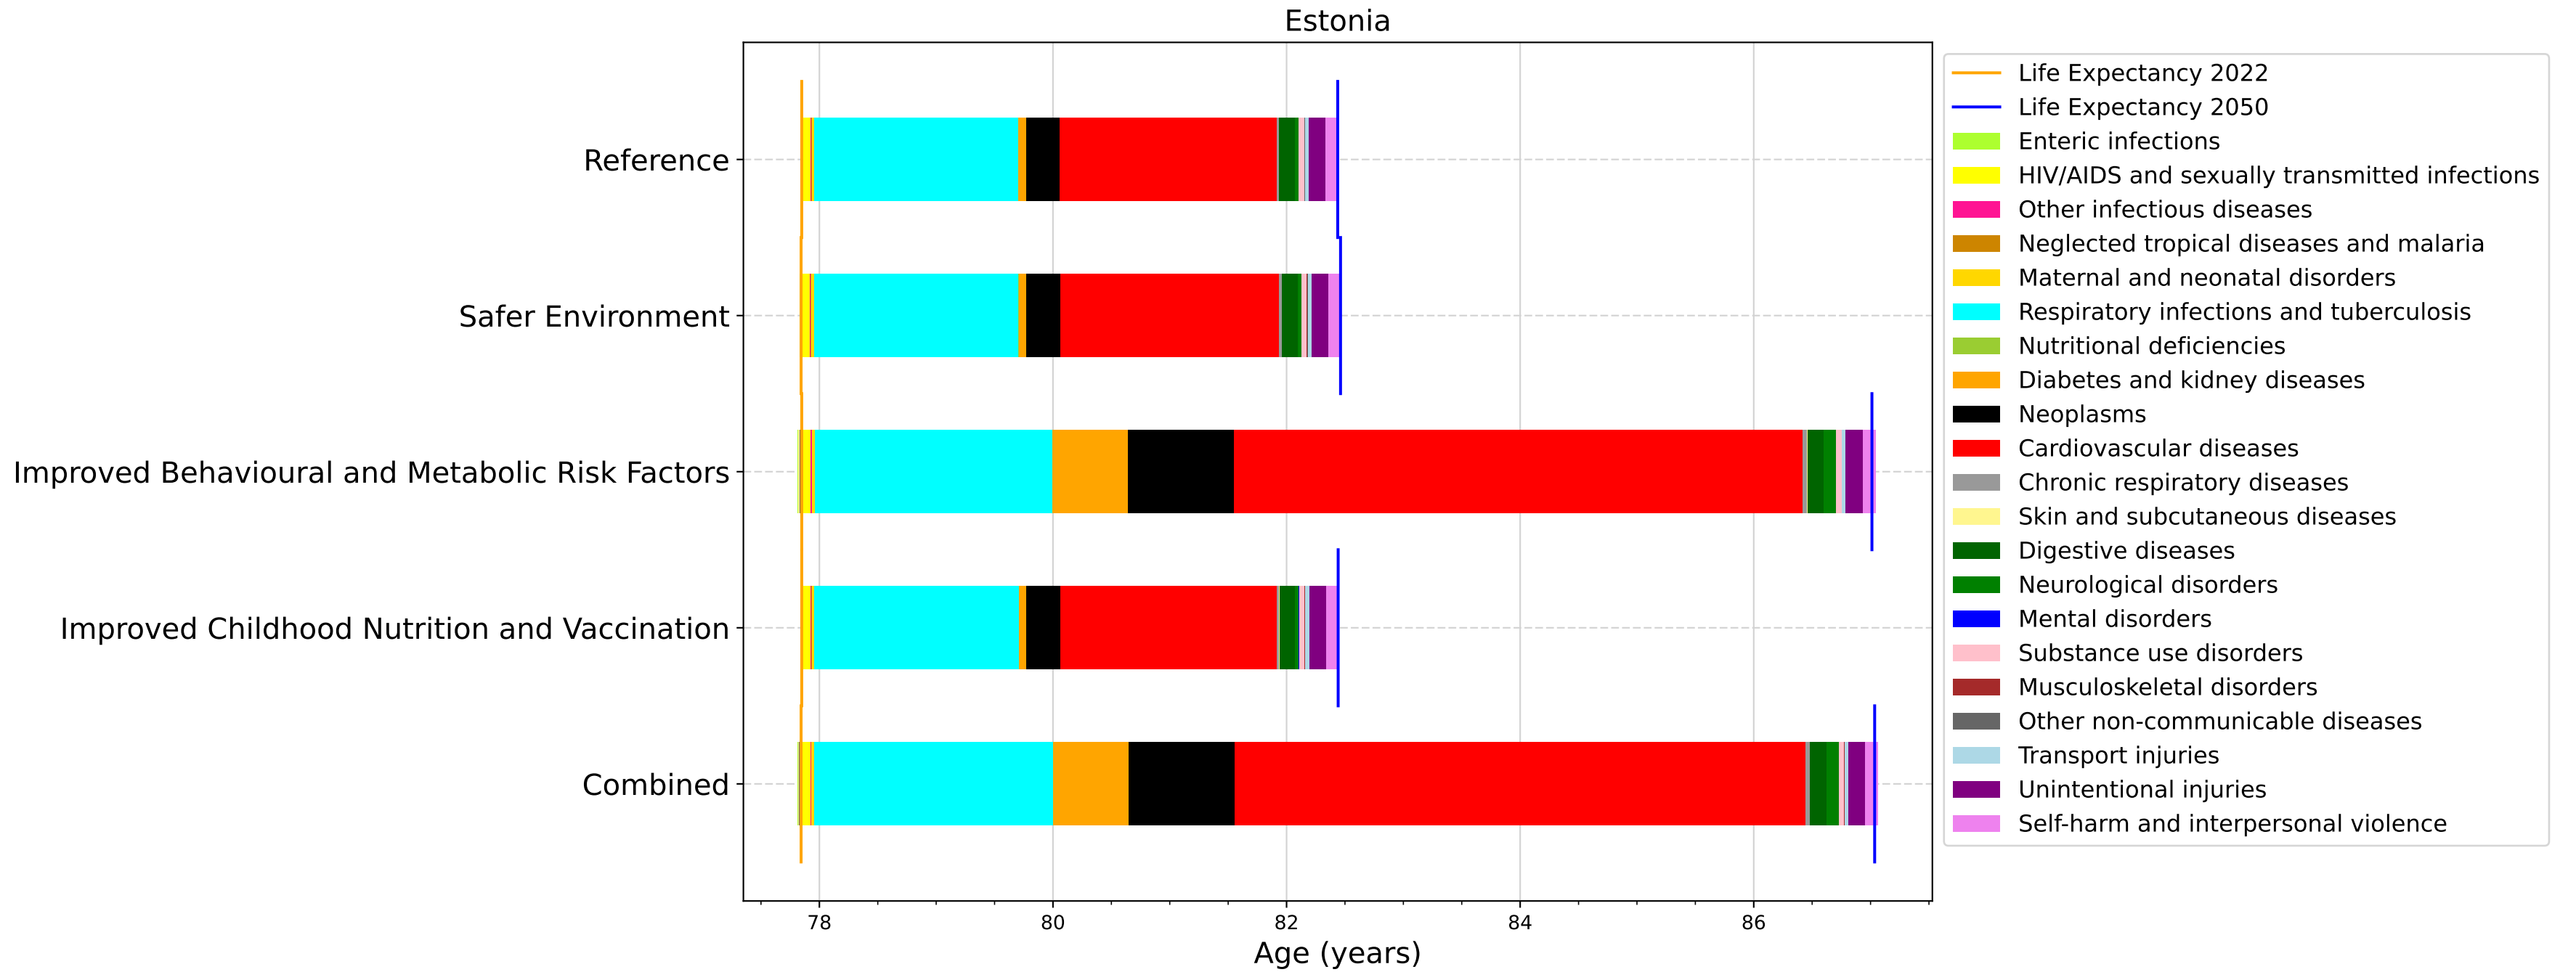

Eswatini

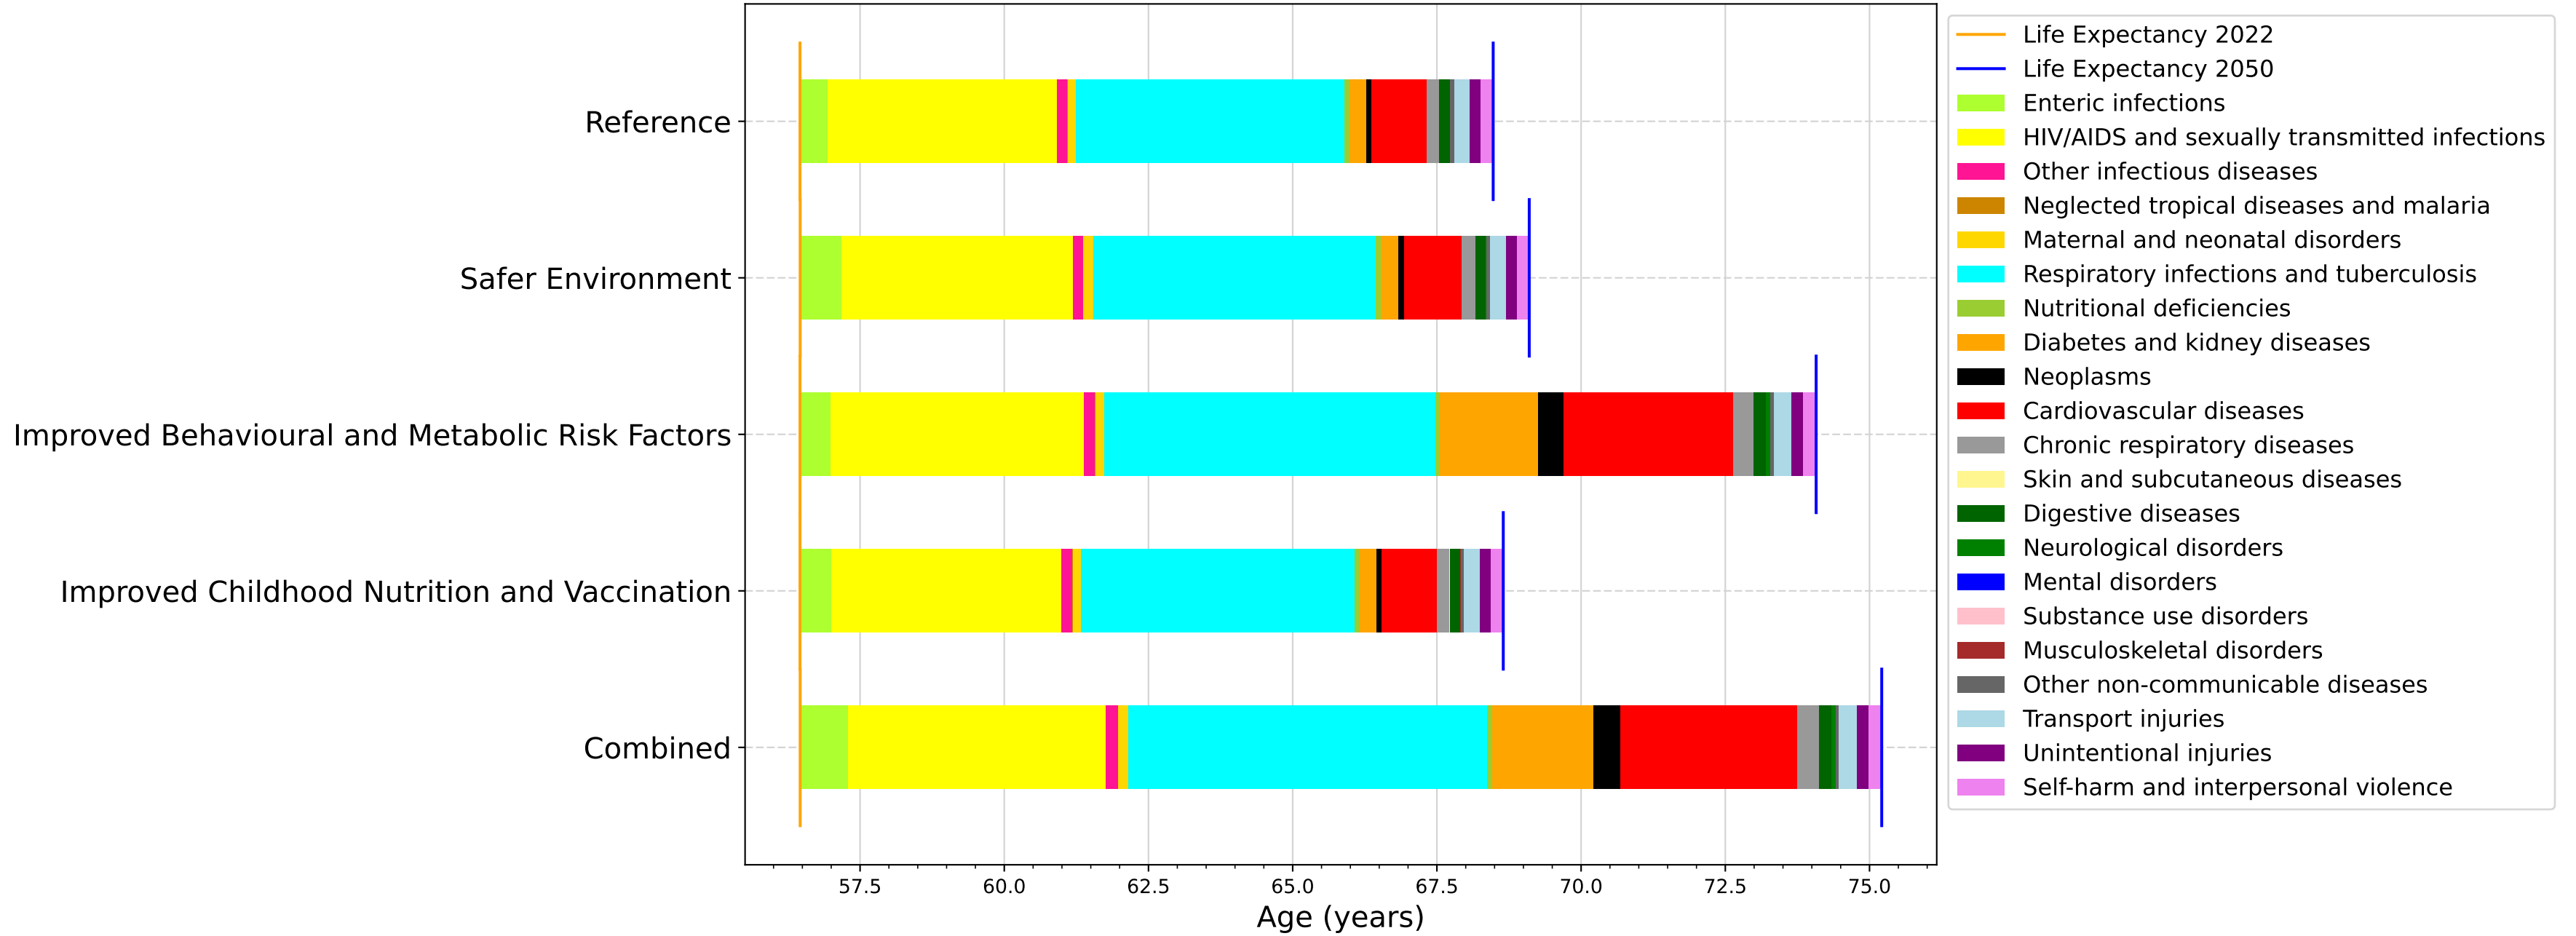

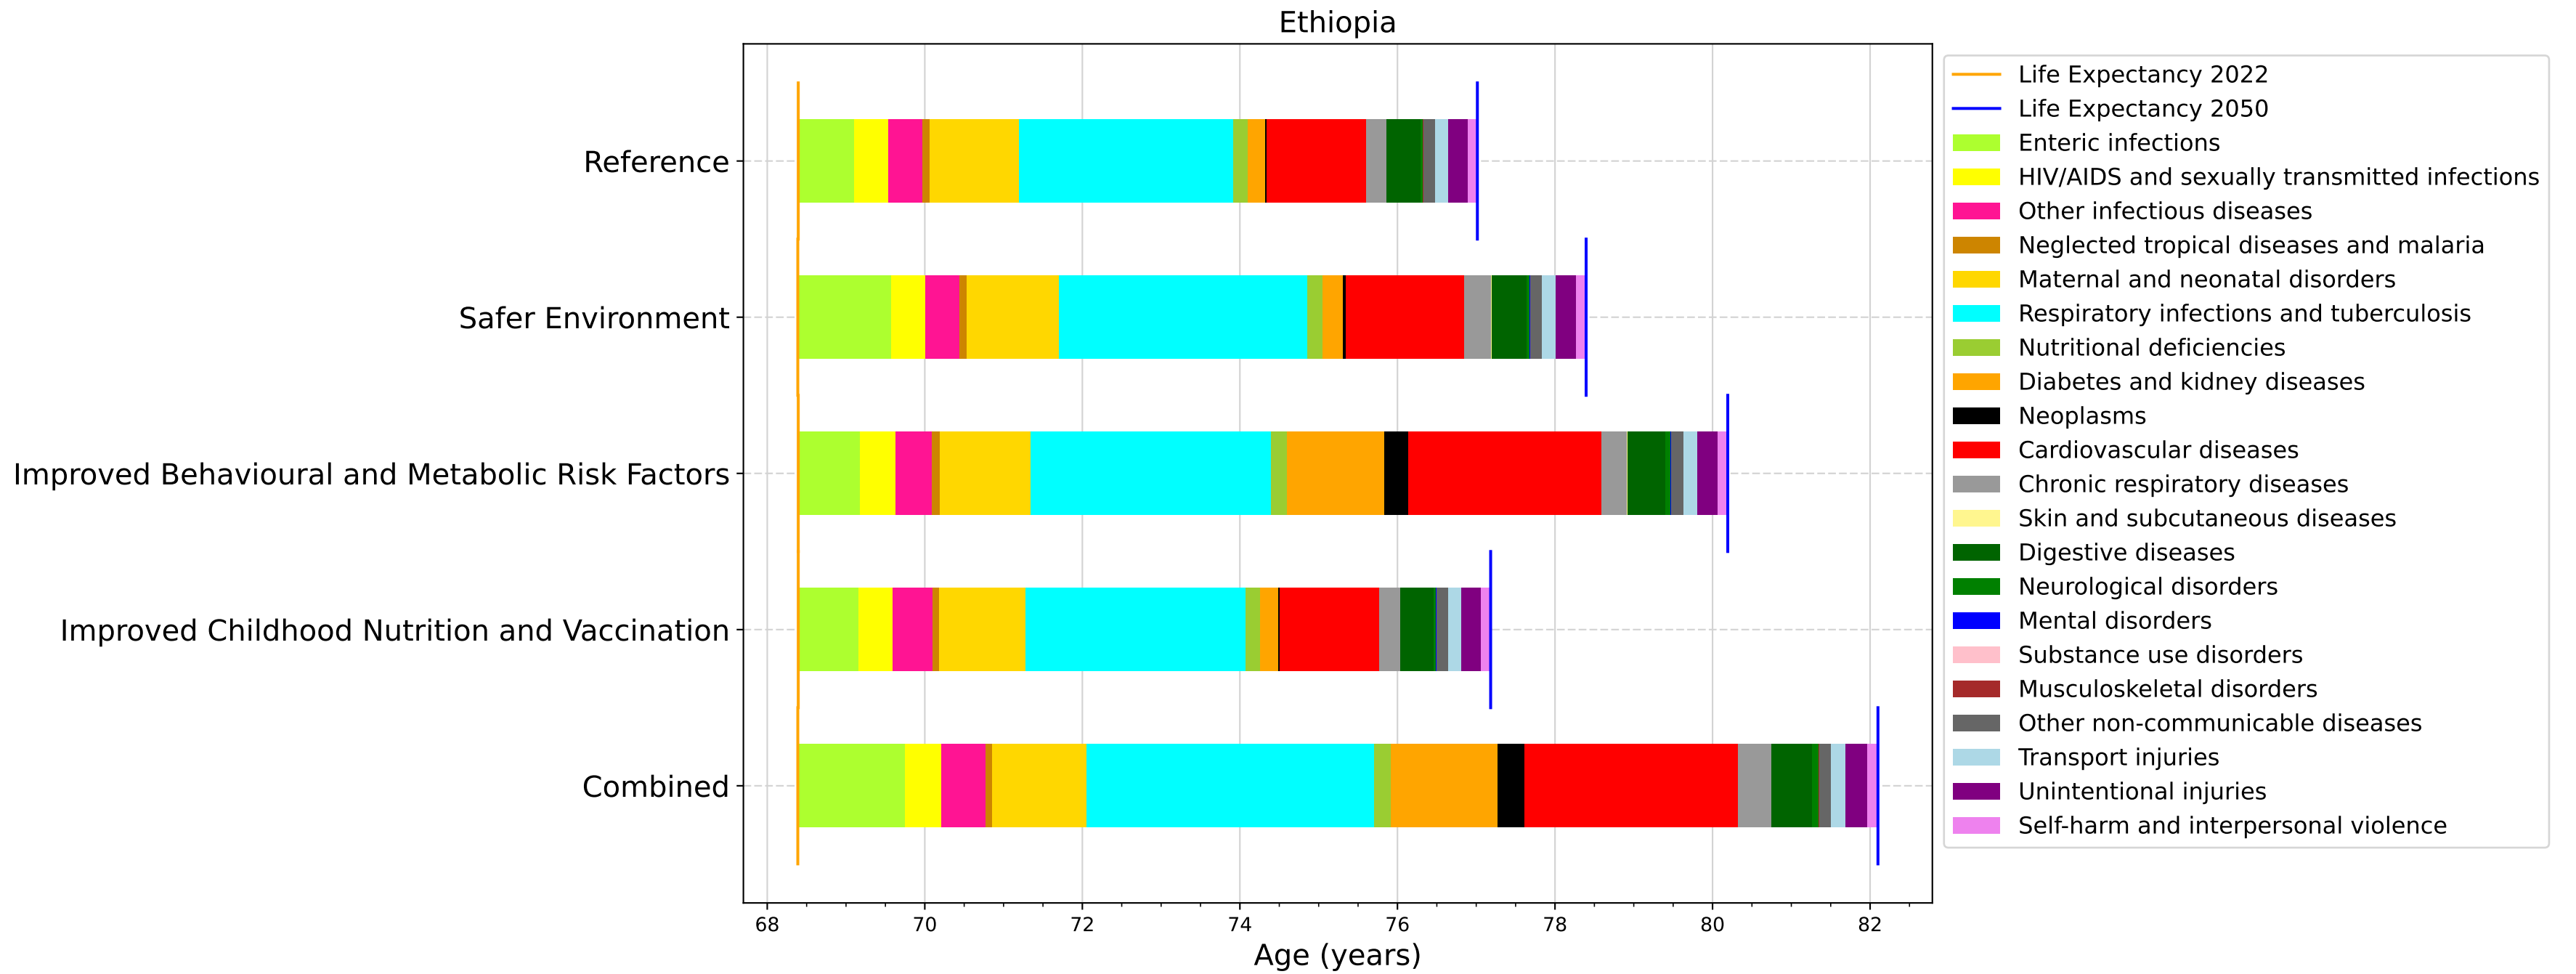

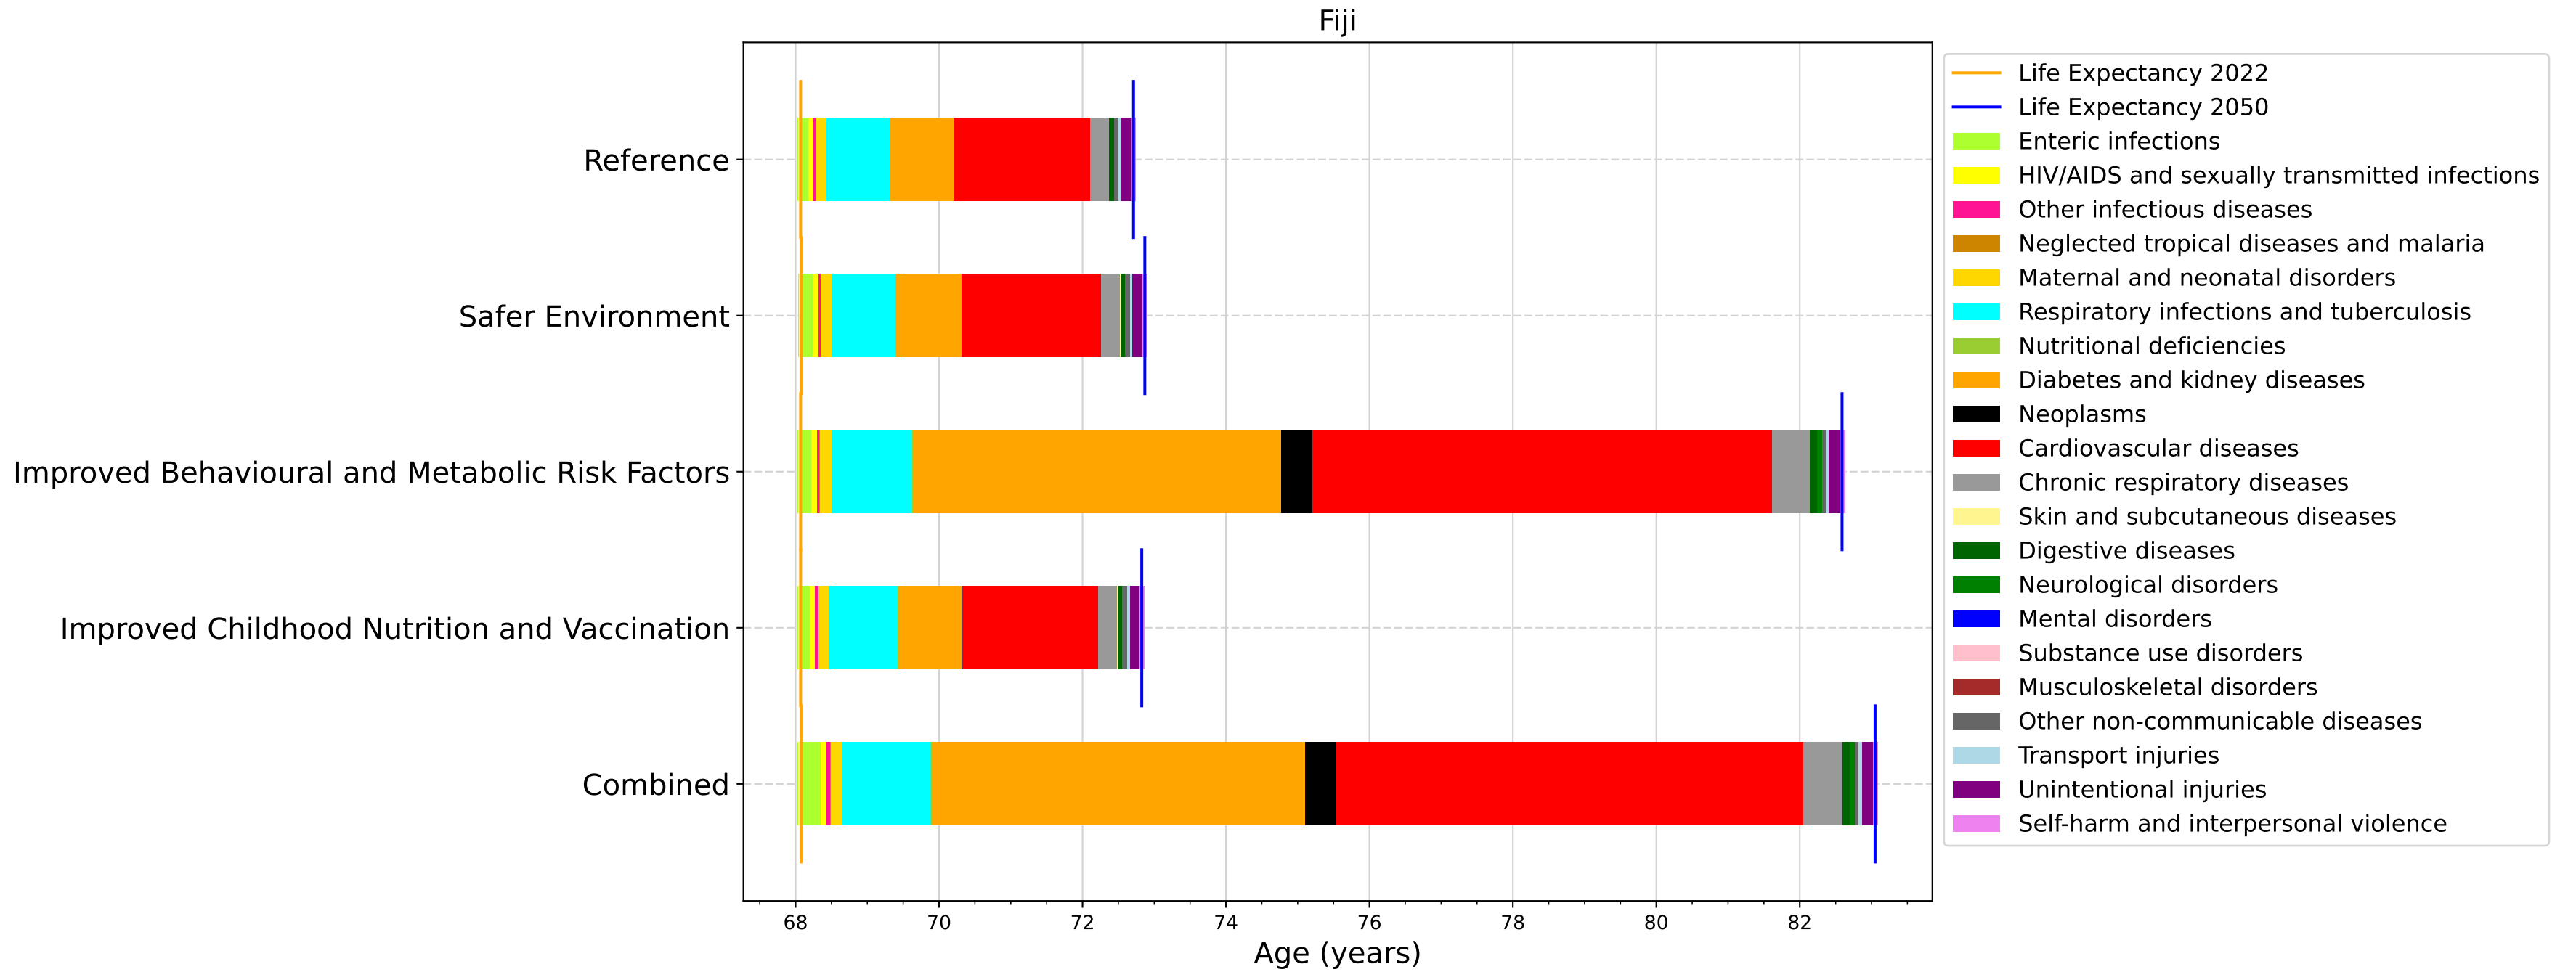

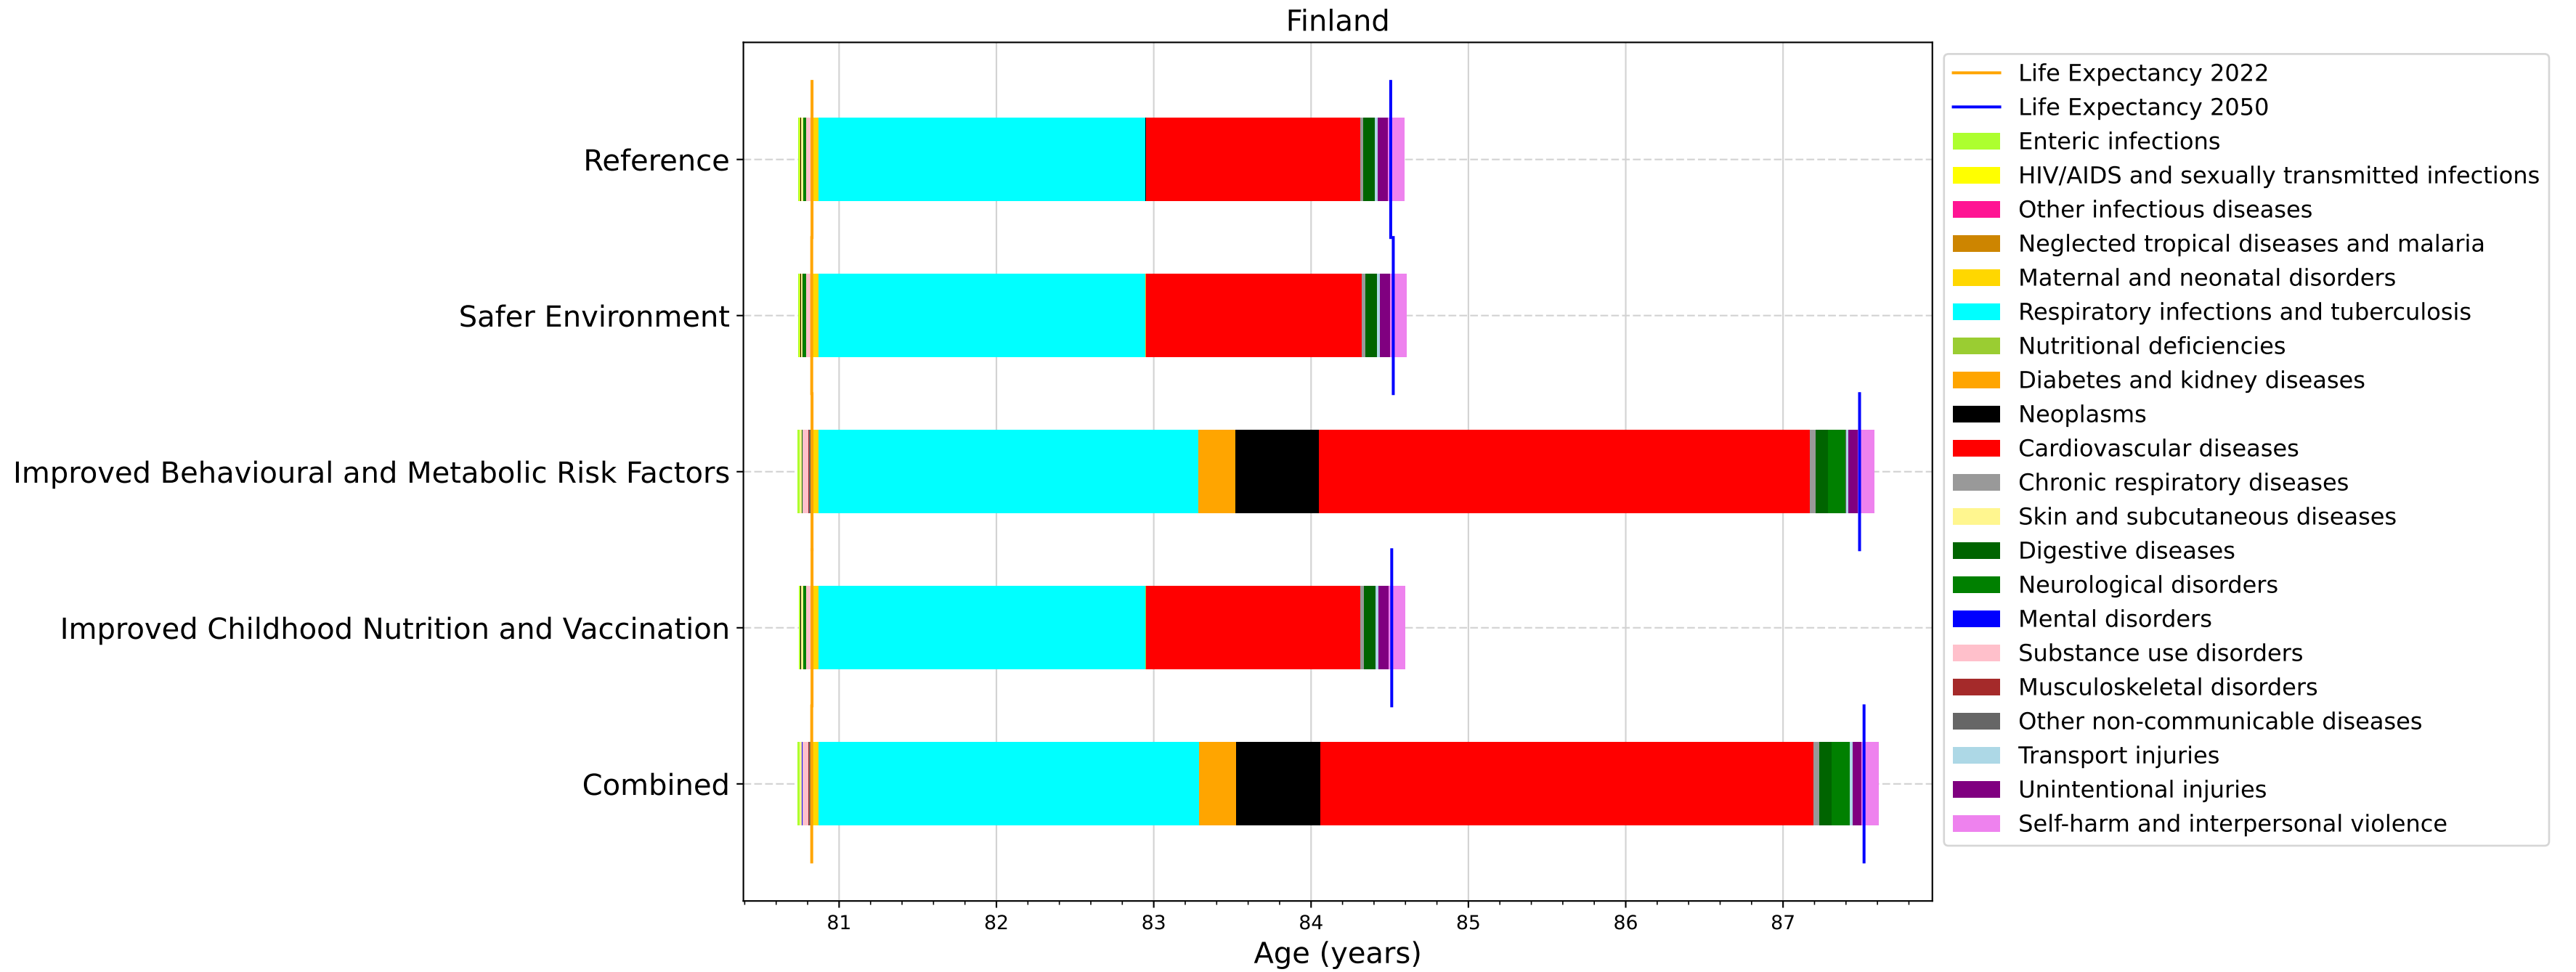

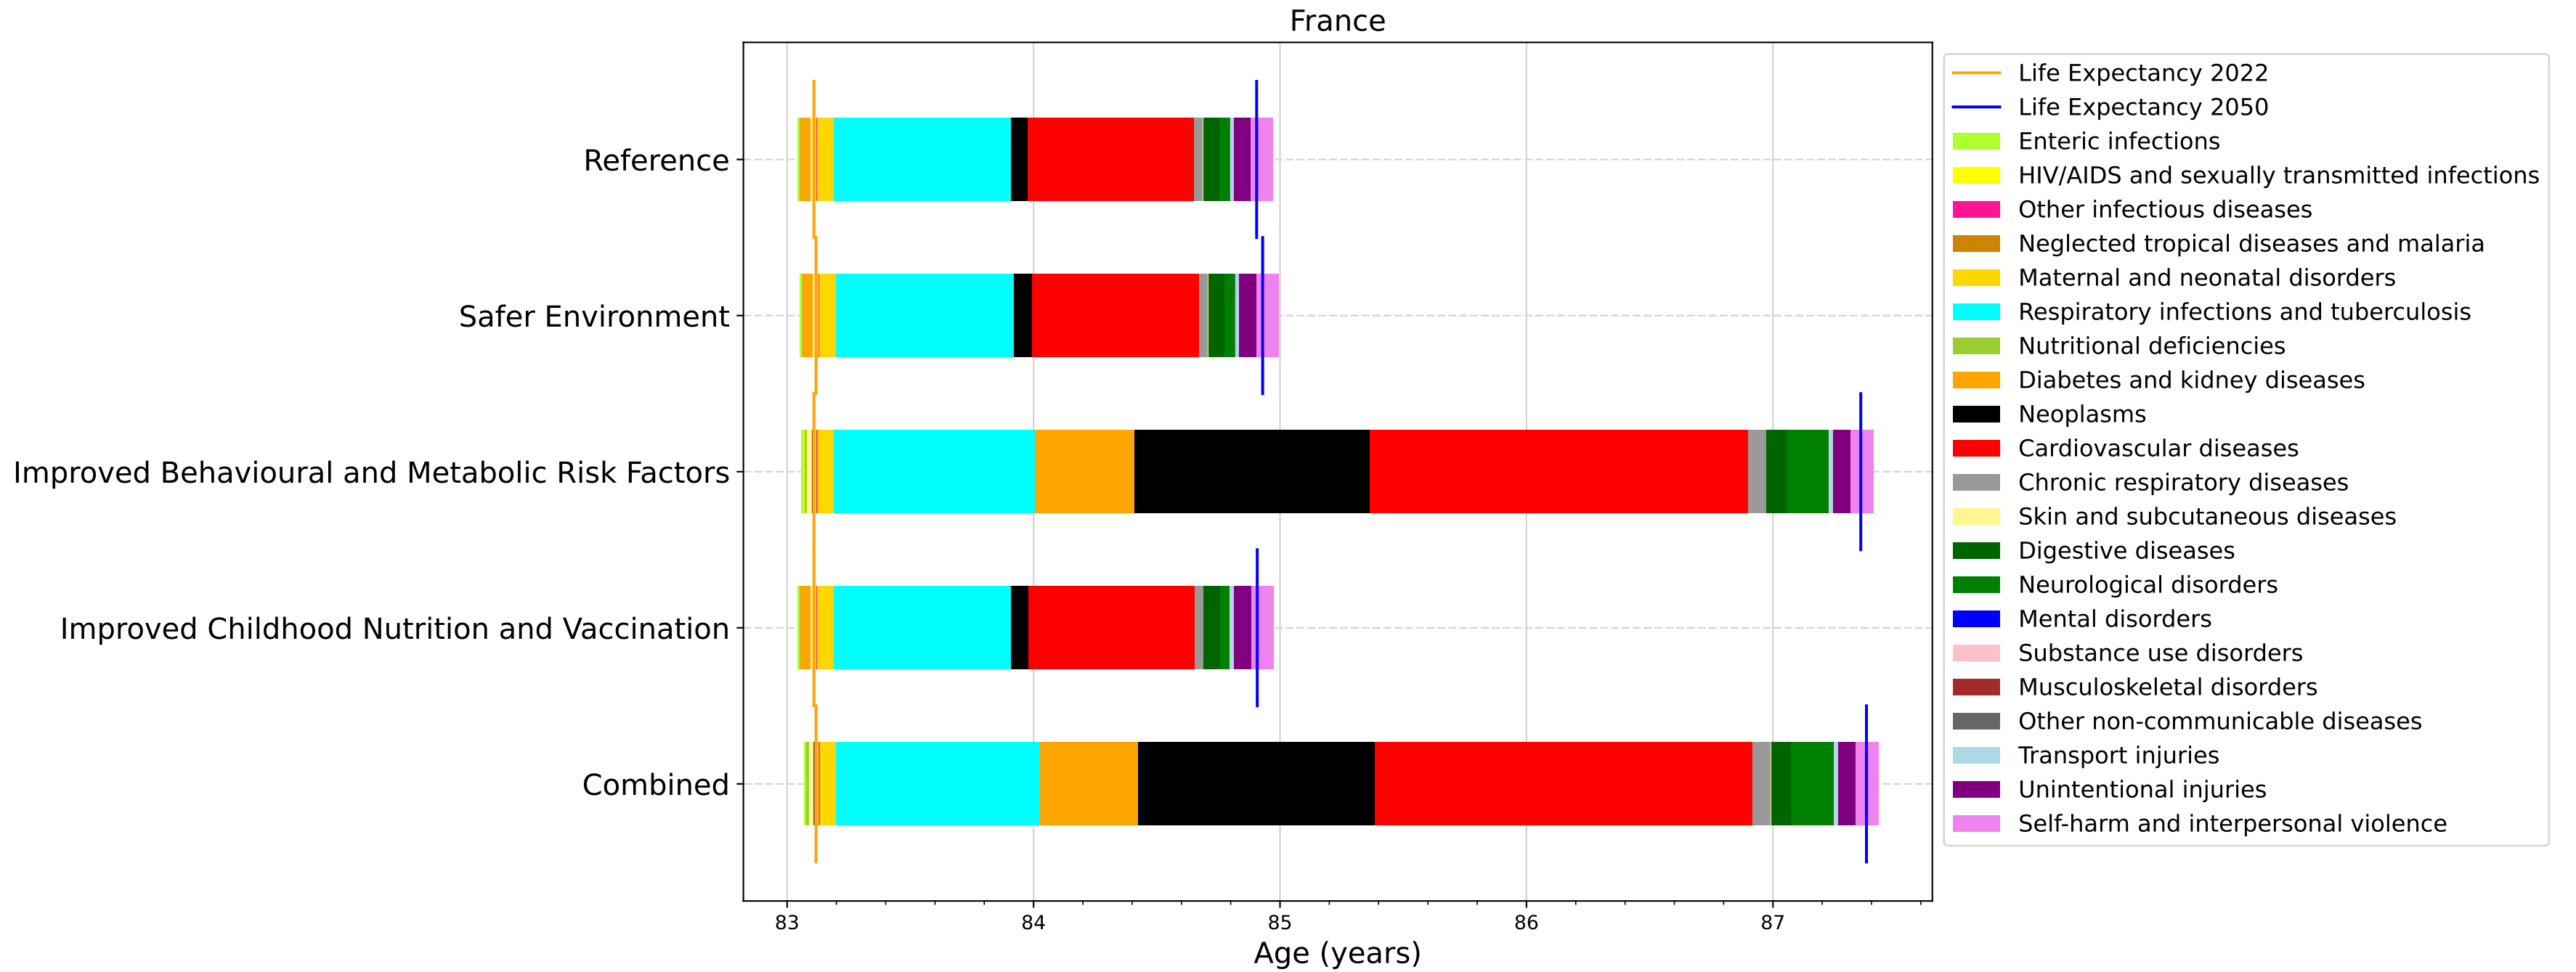



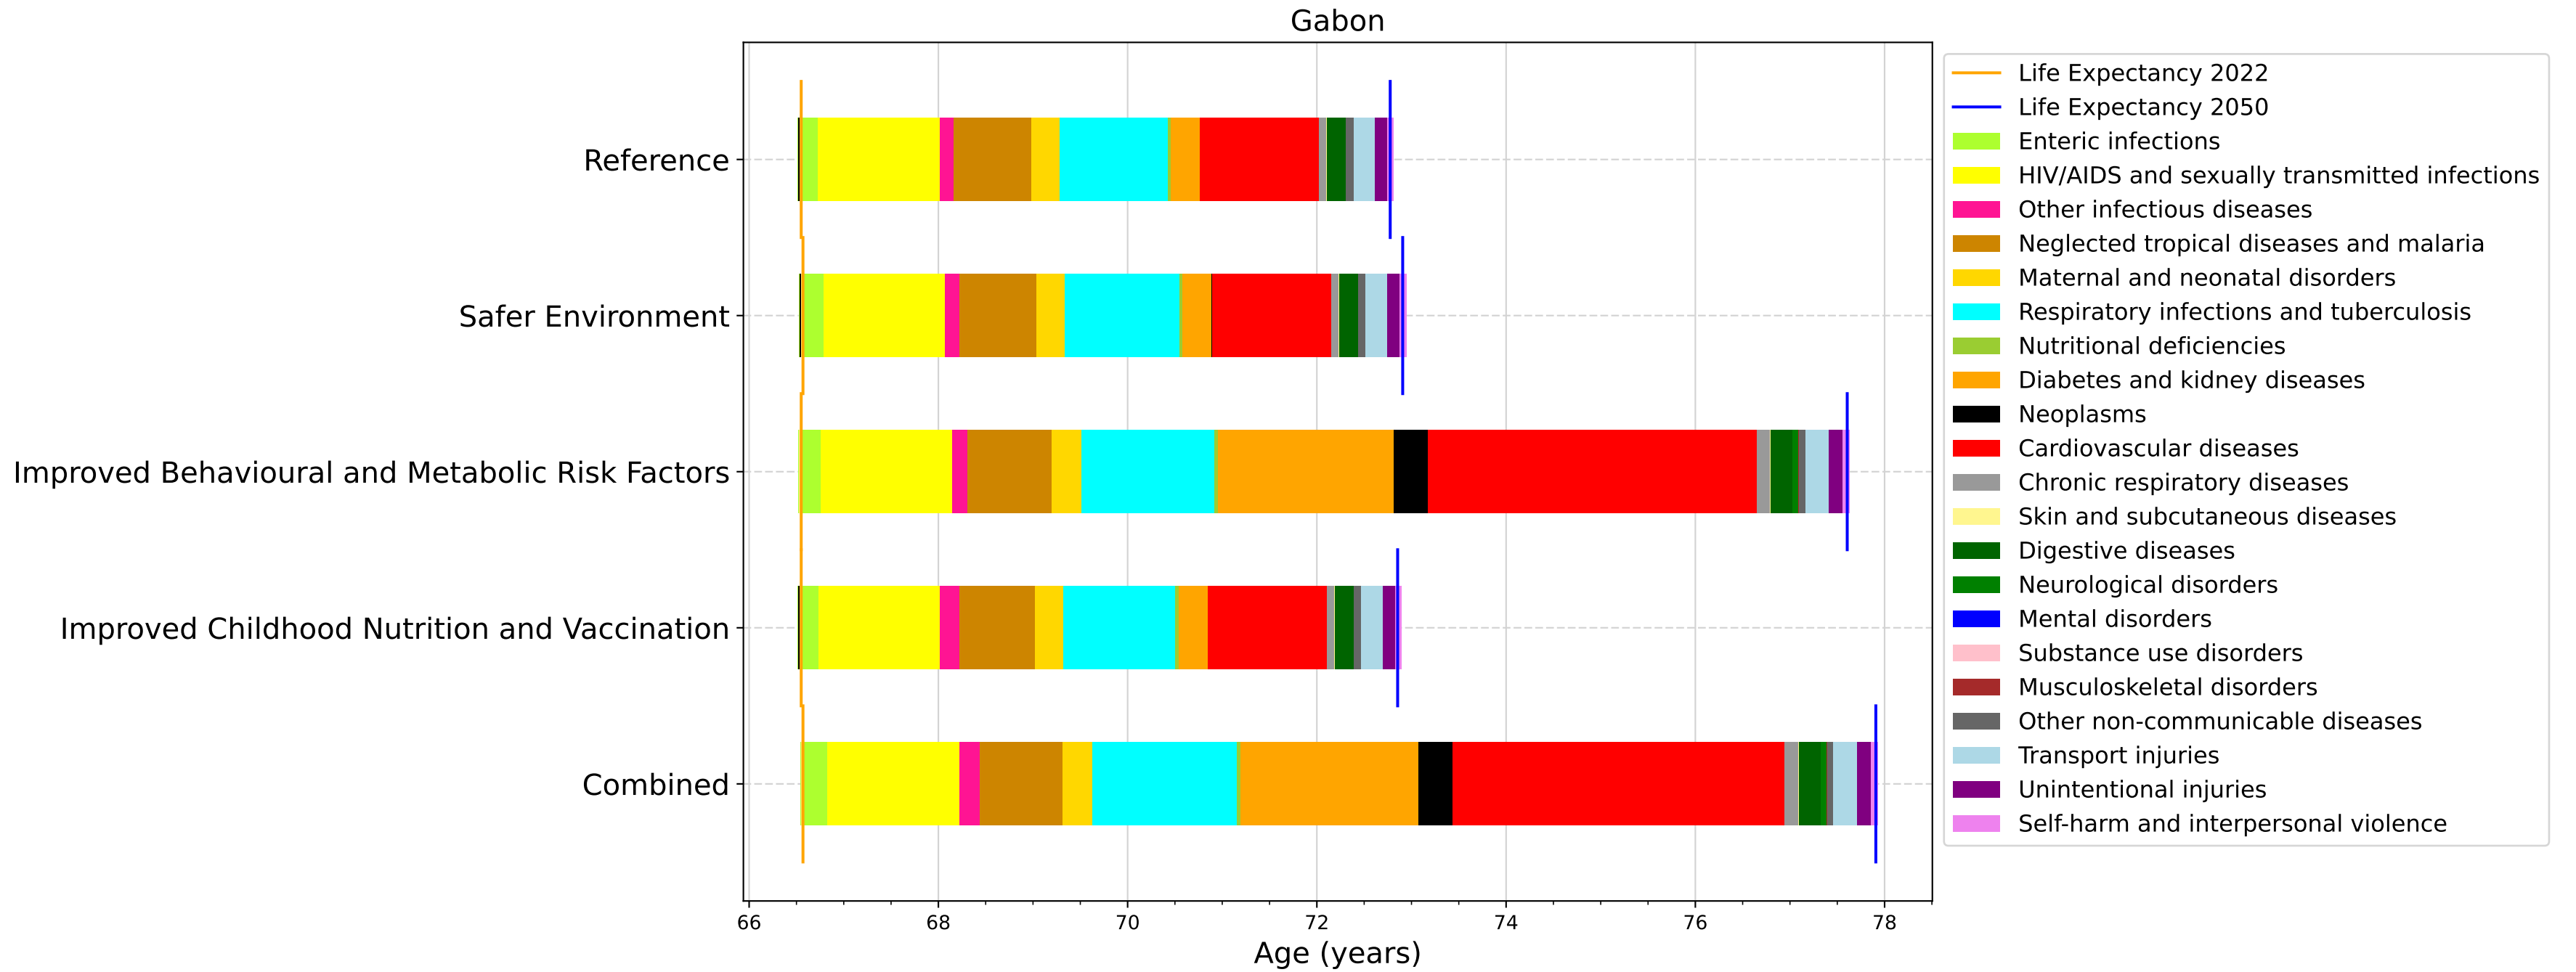

The Gambia

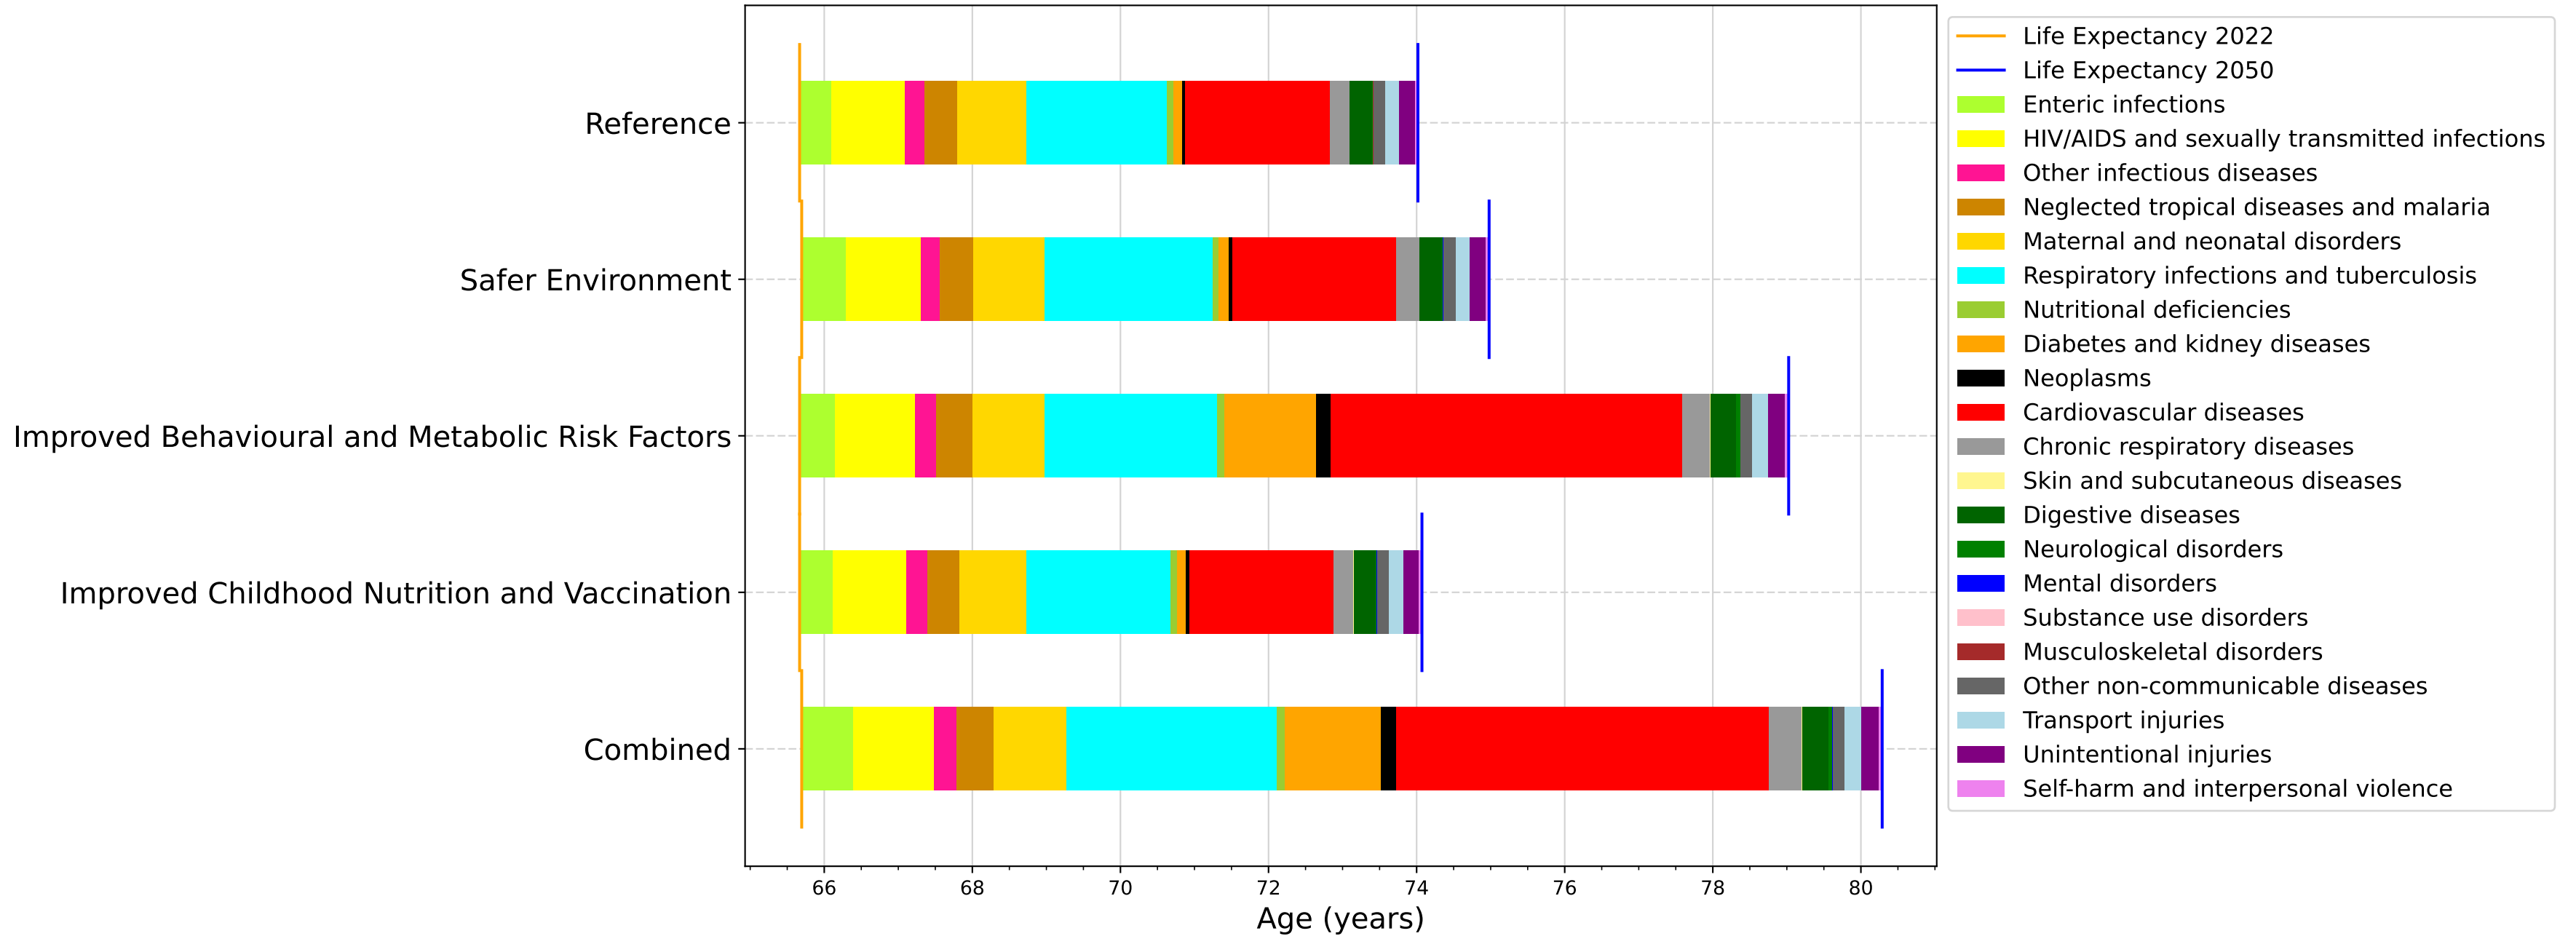

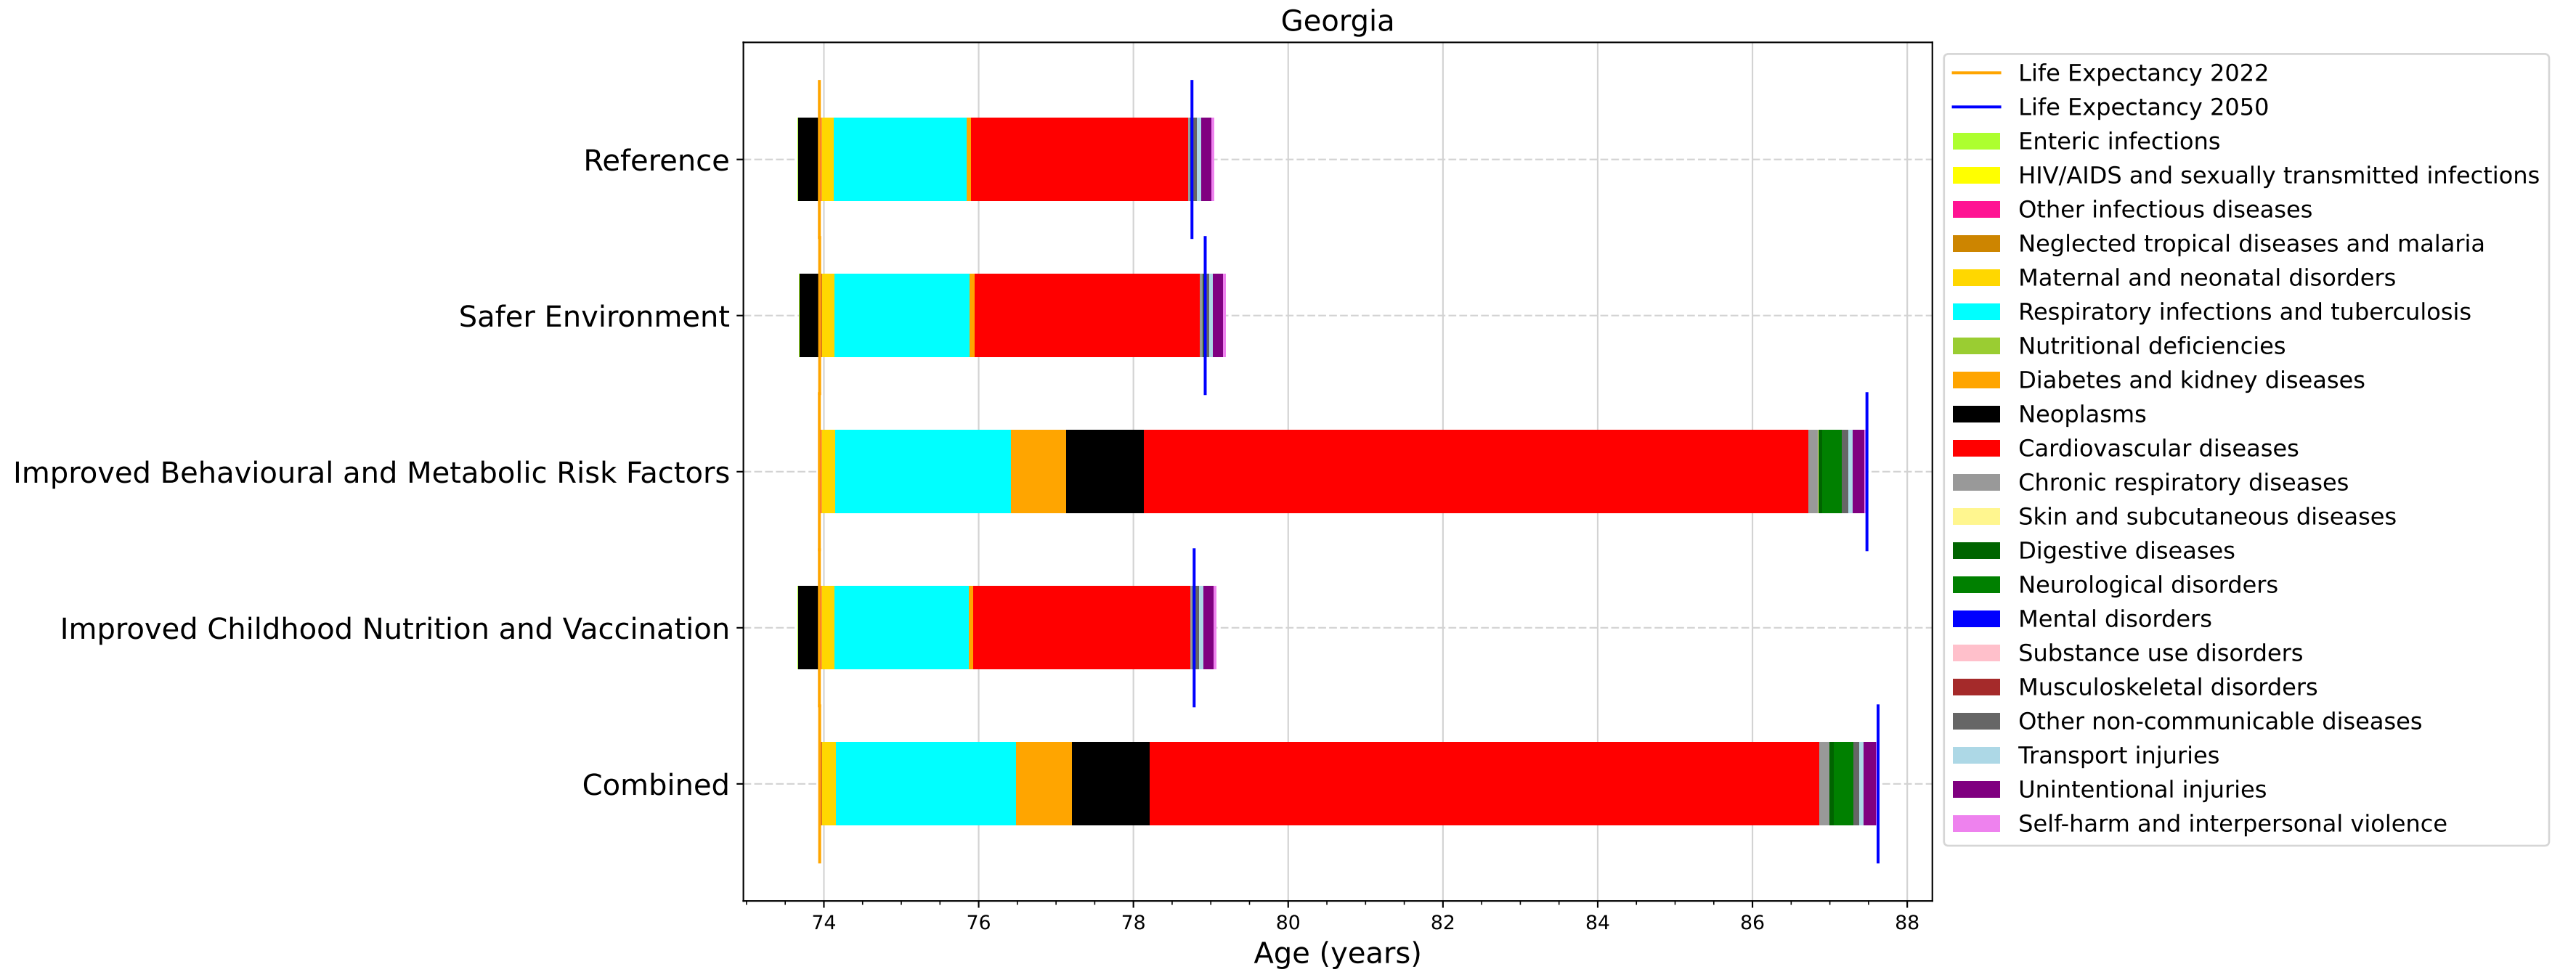

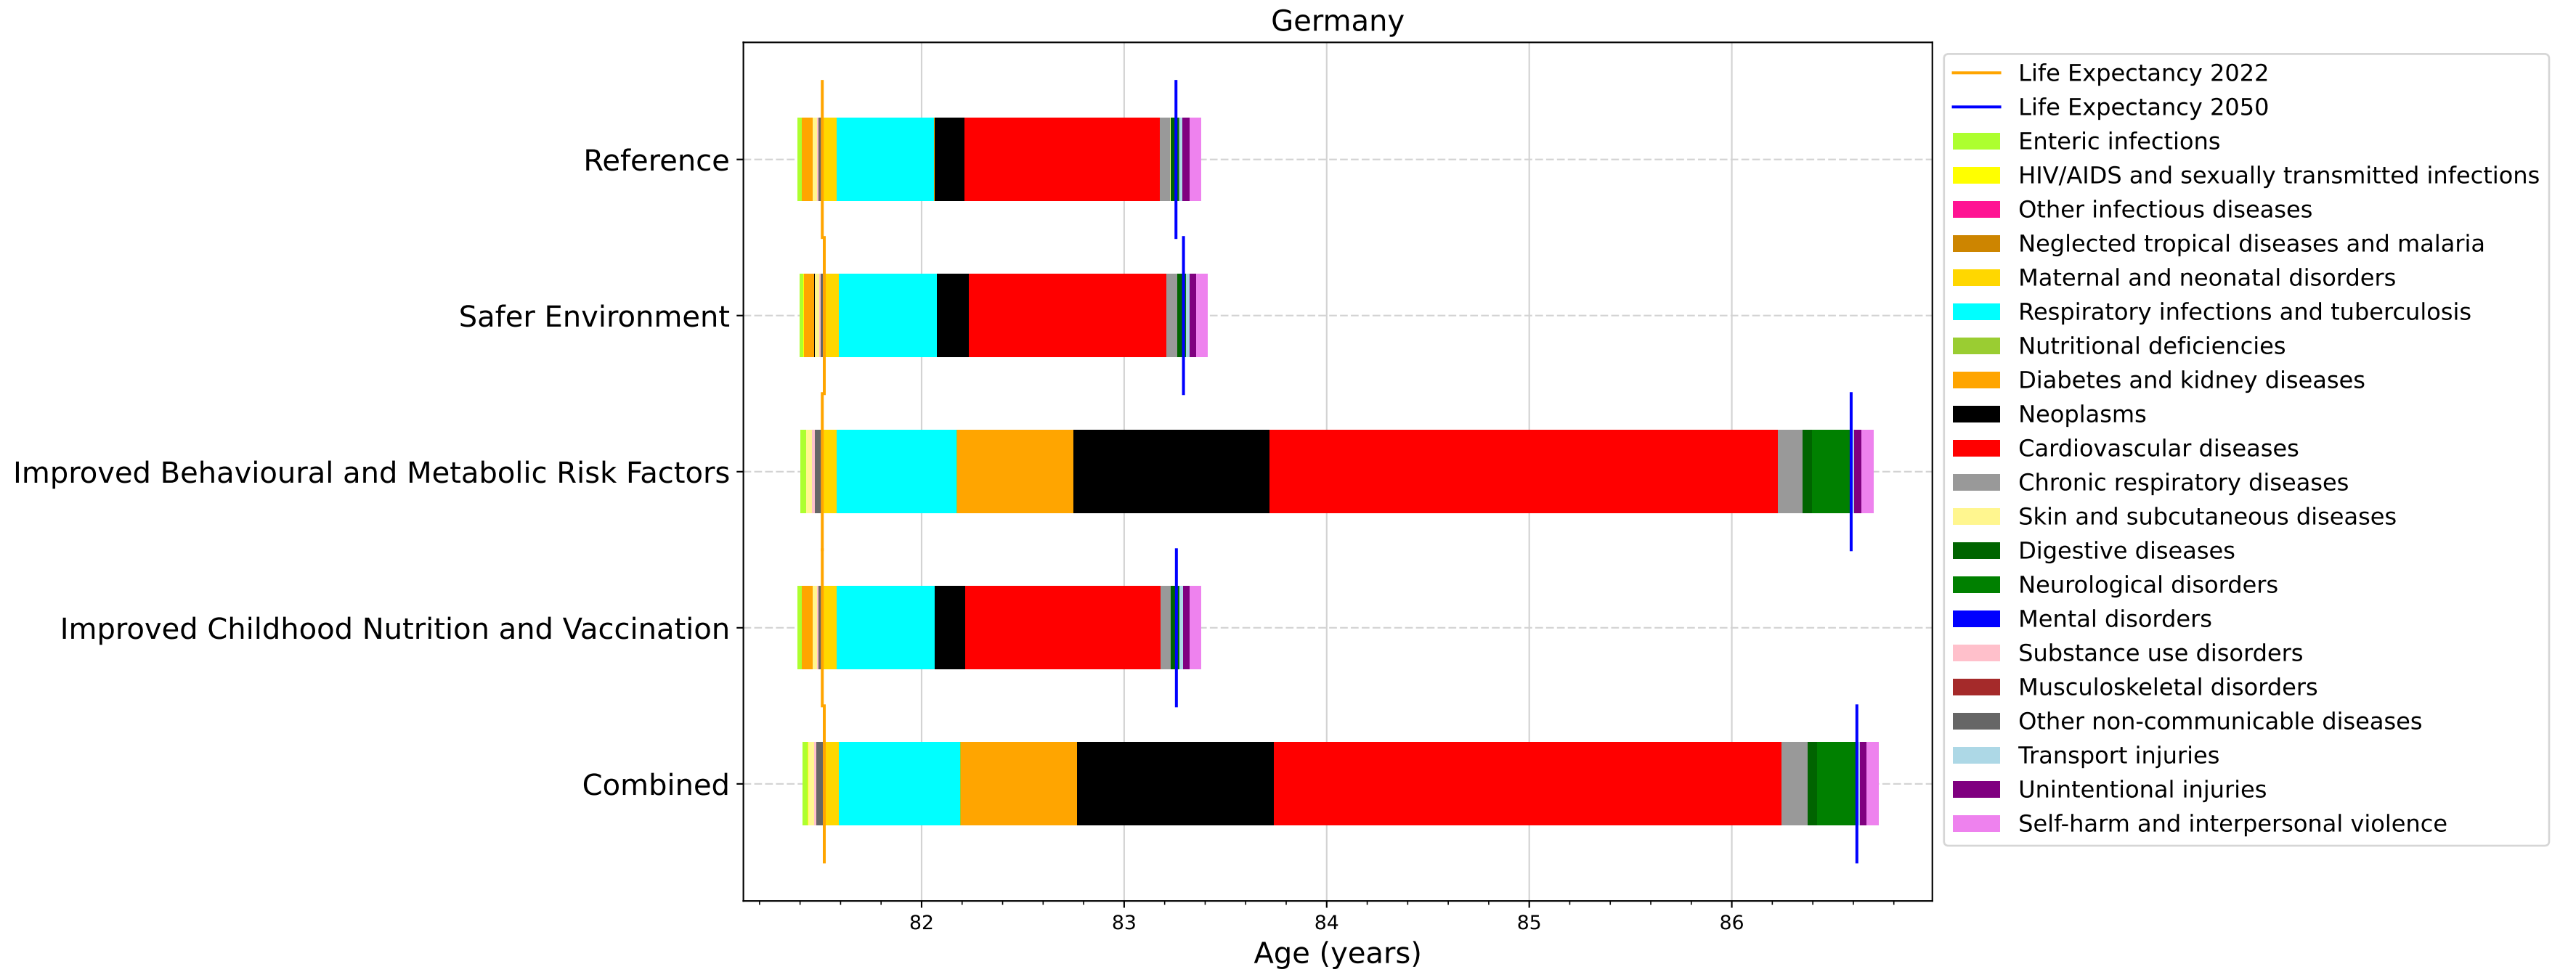

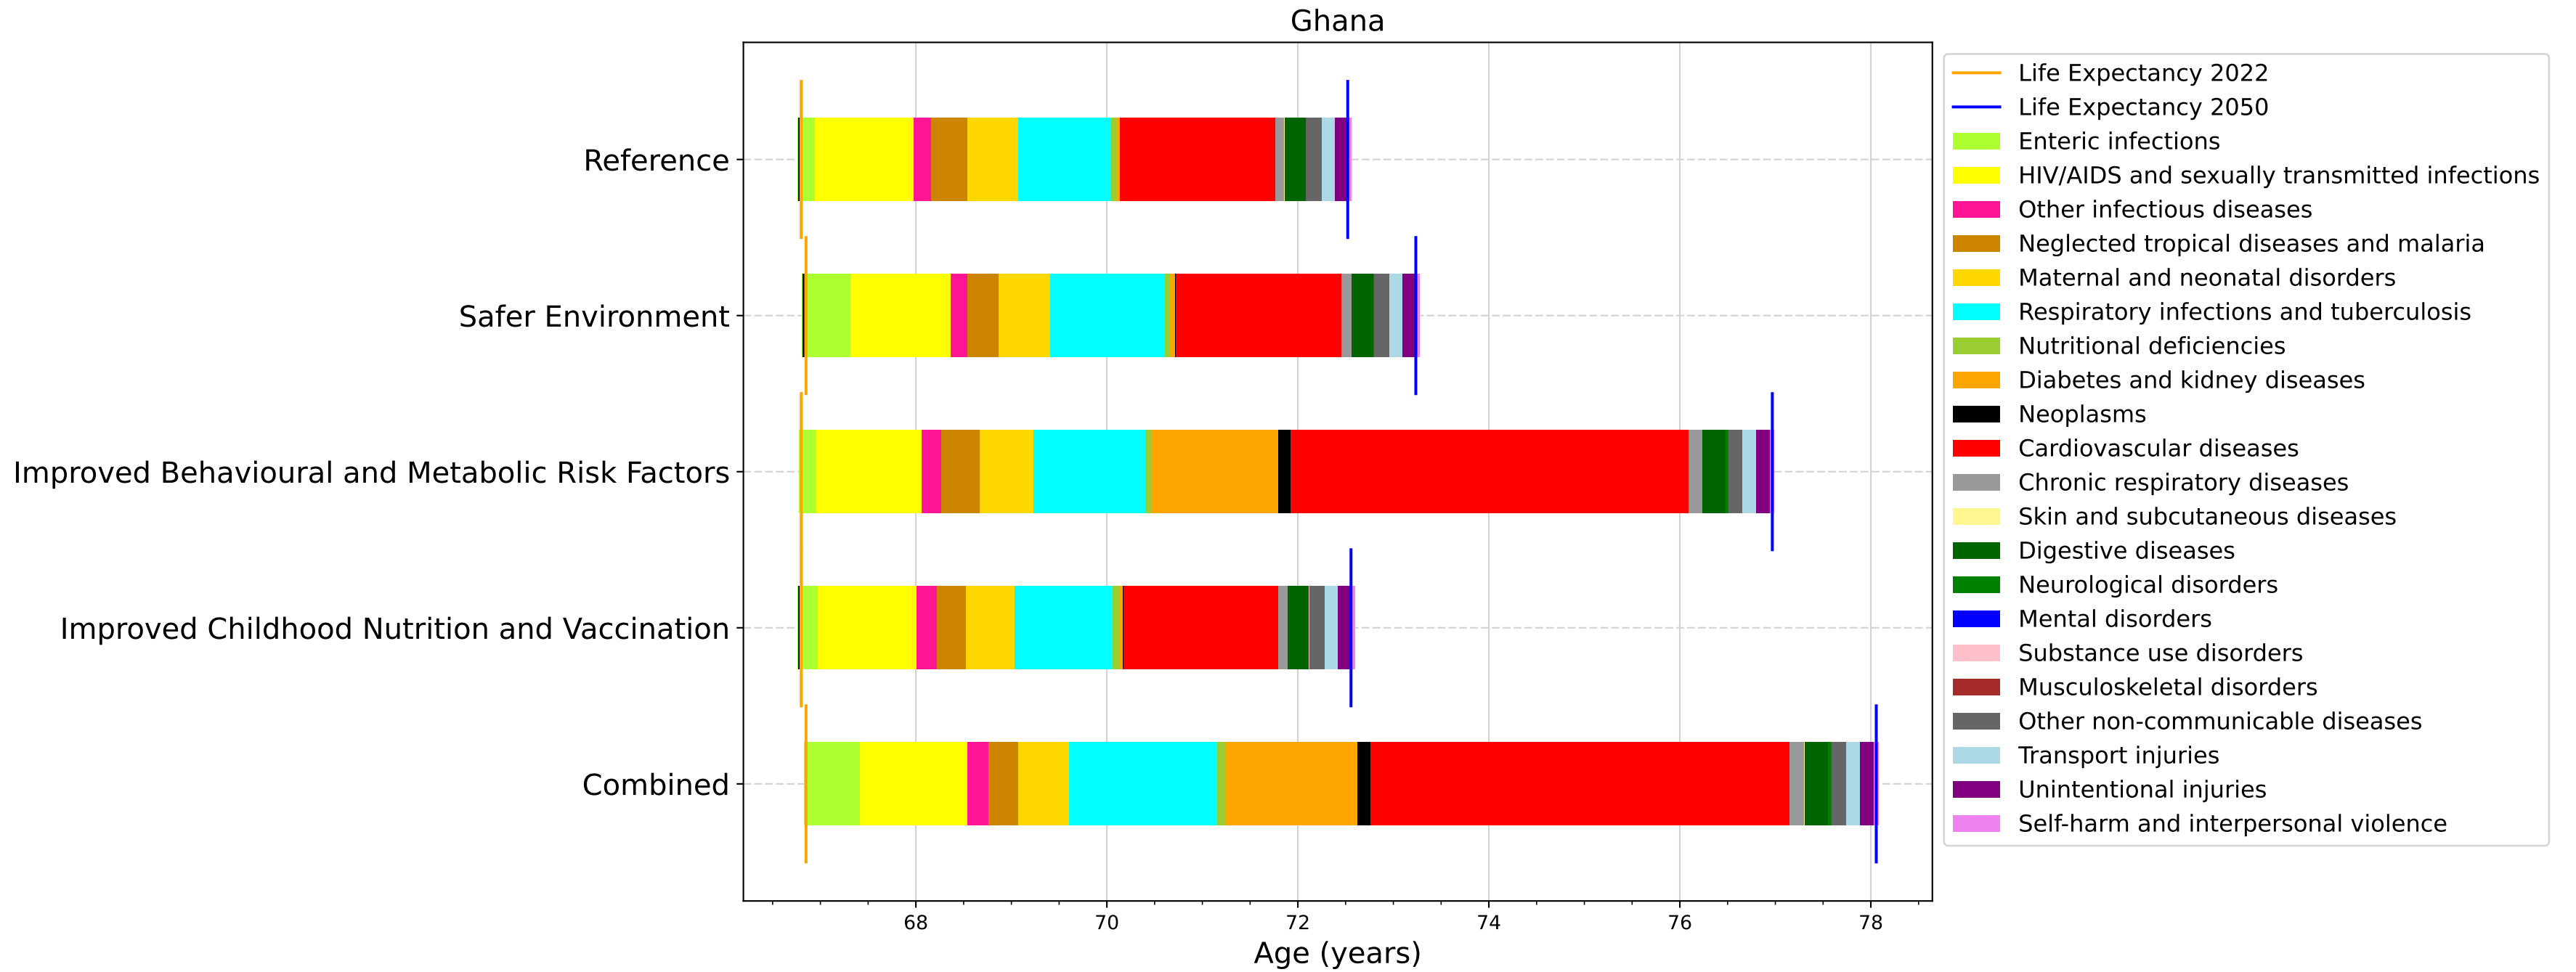

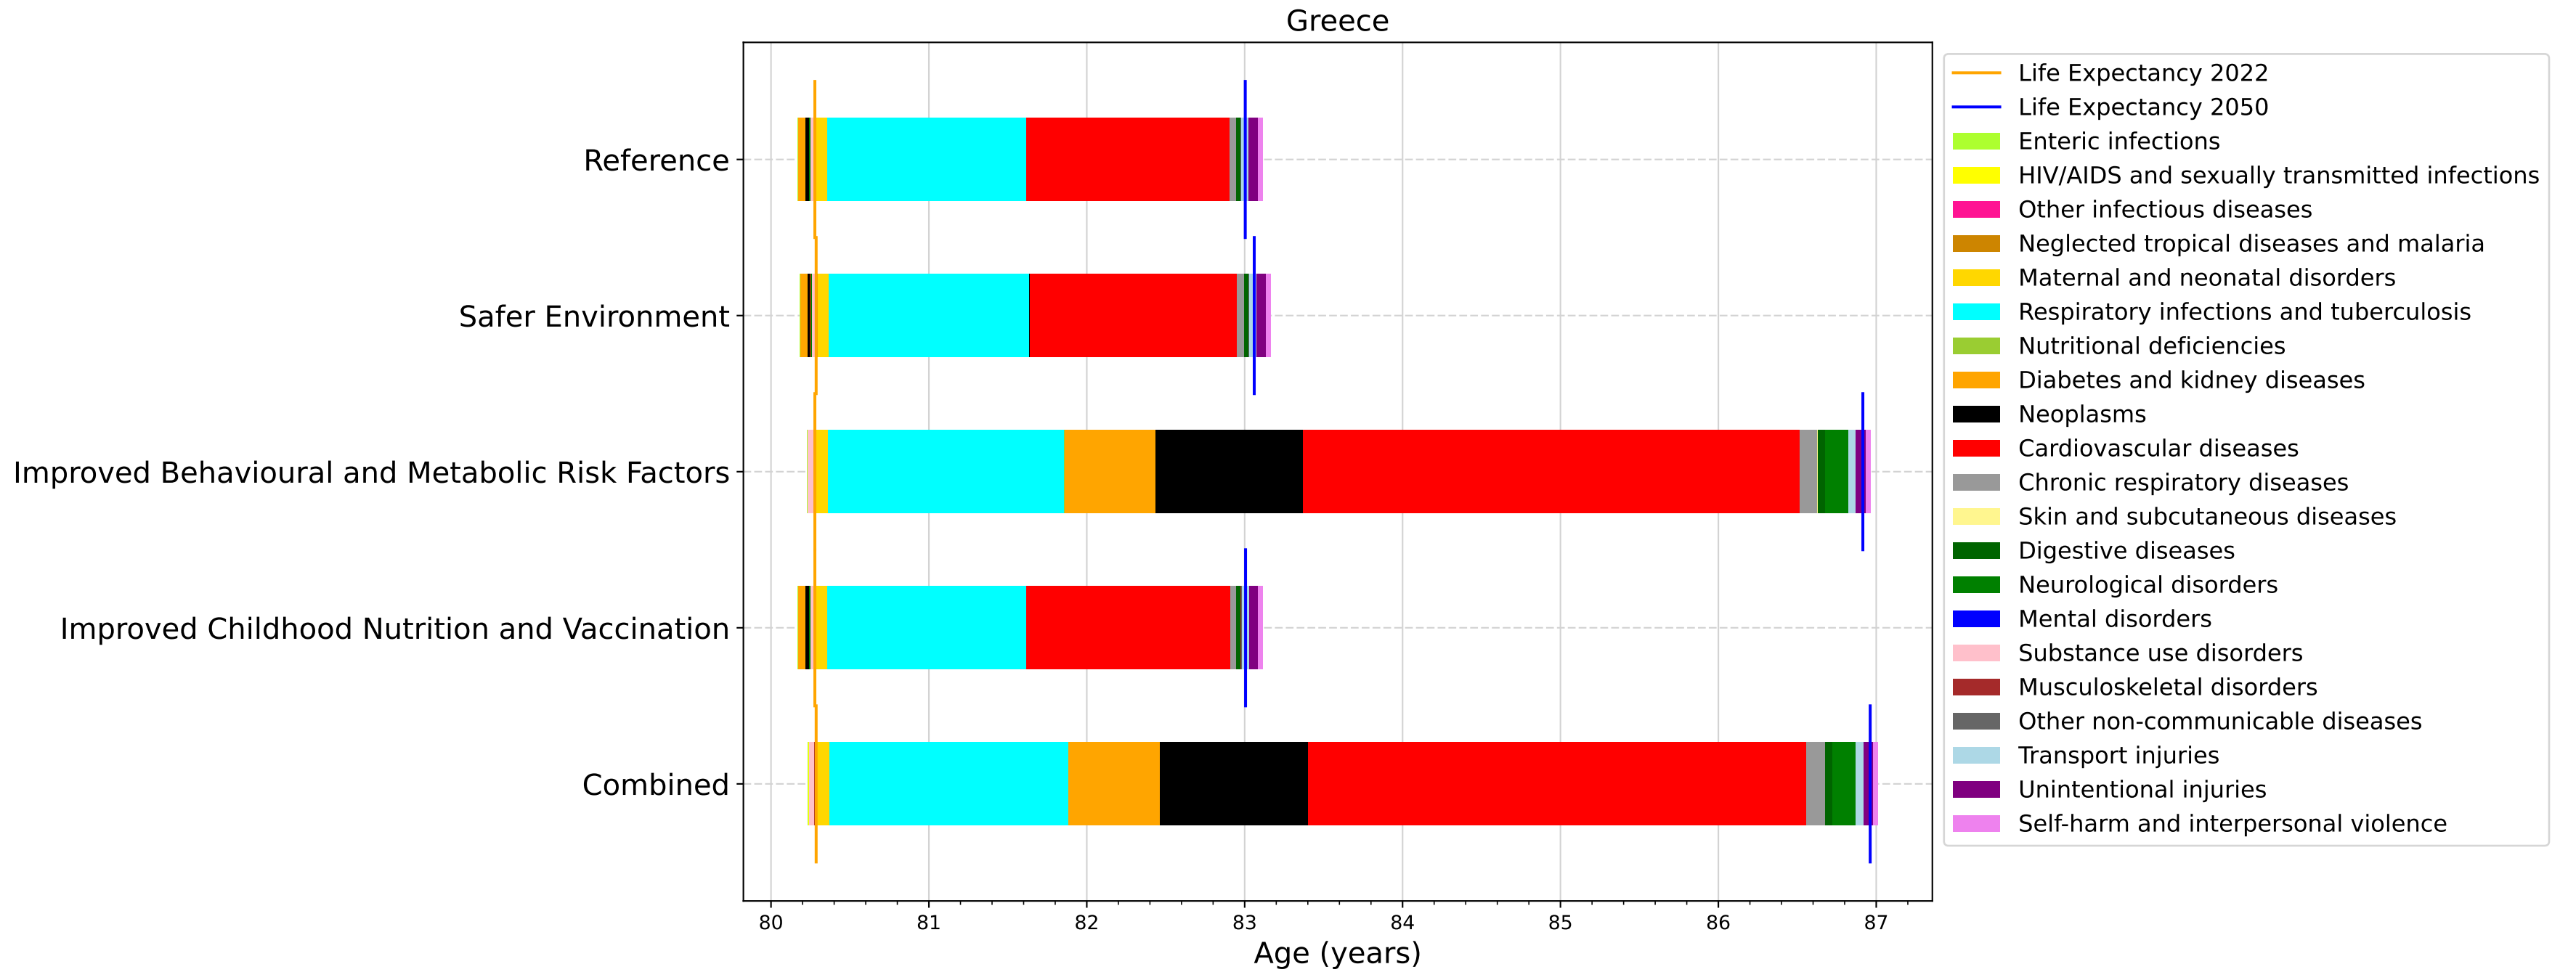

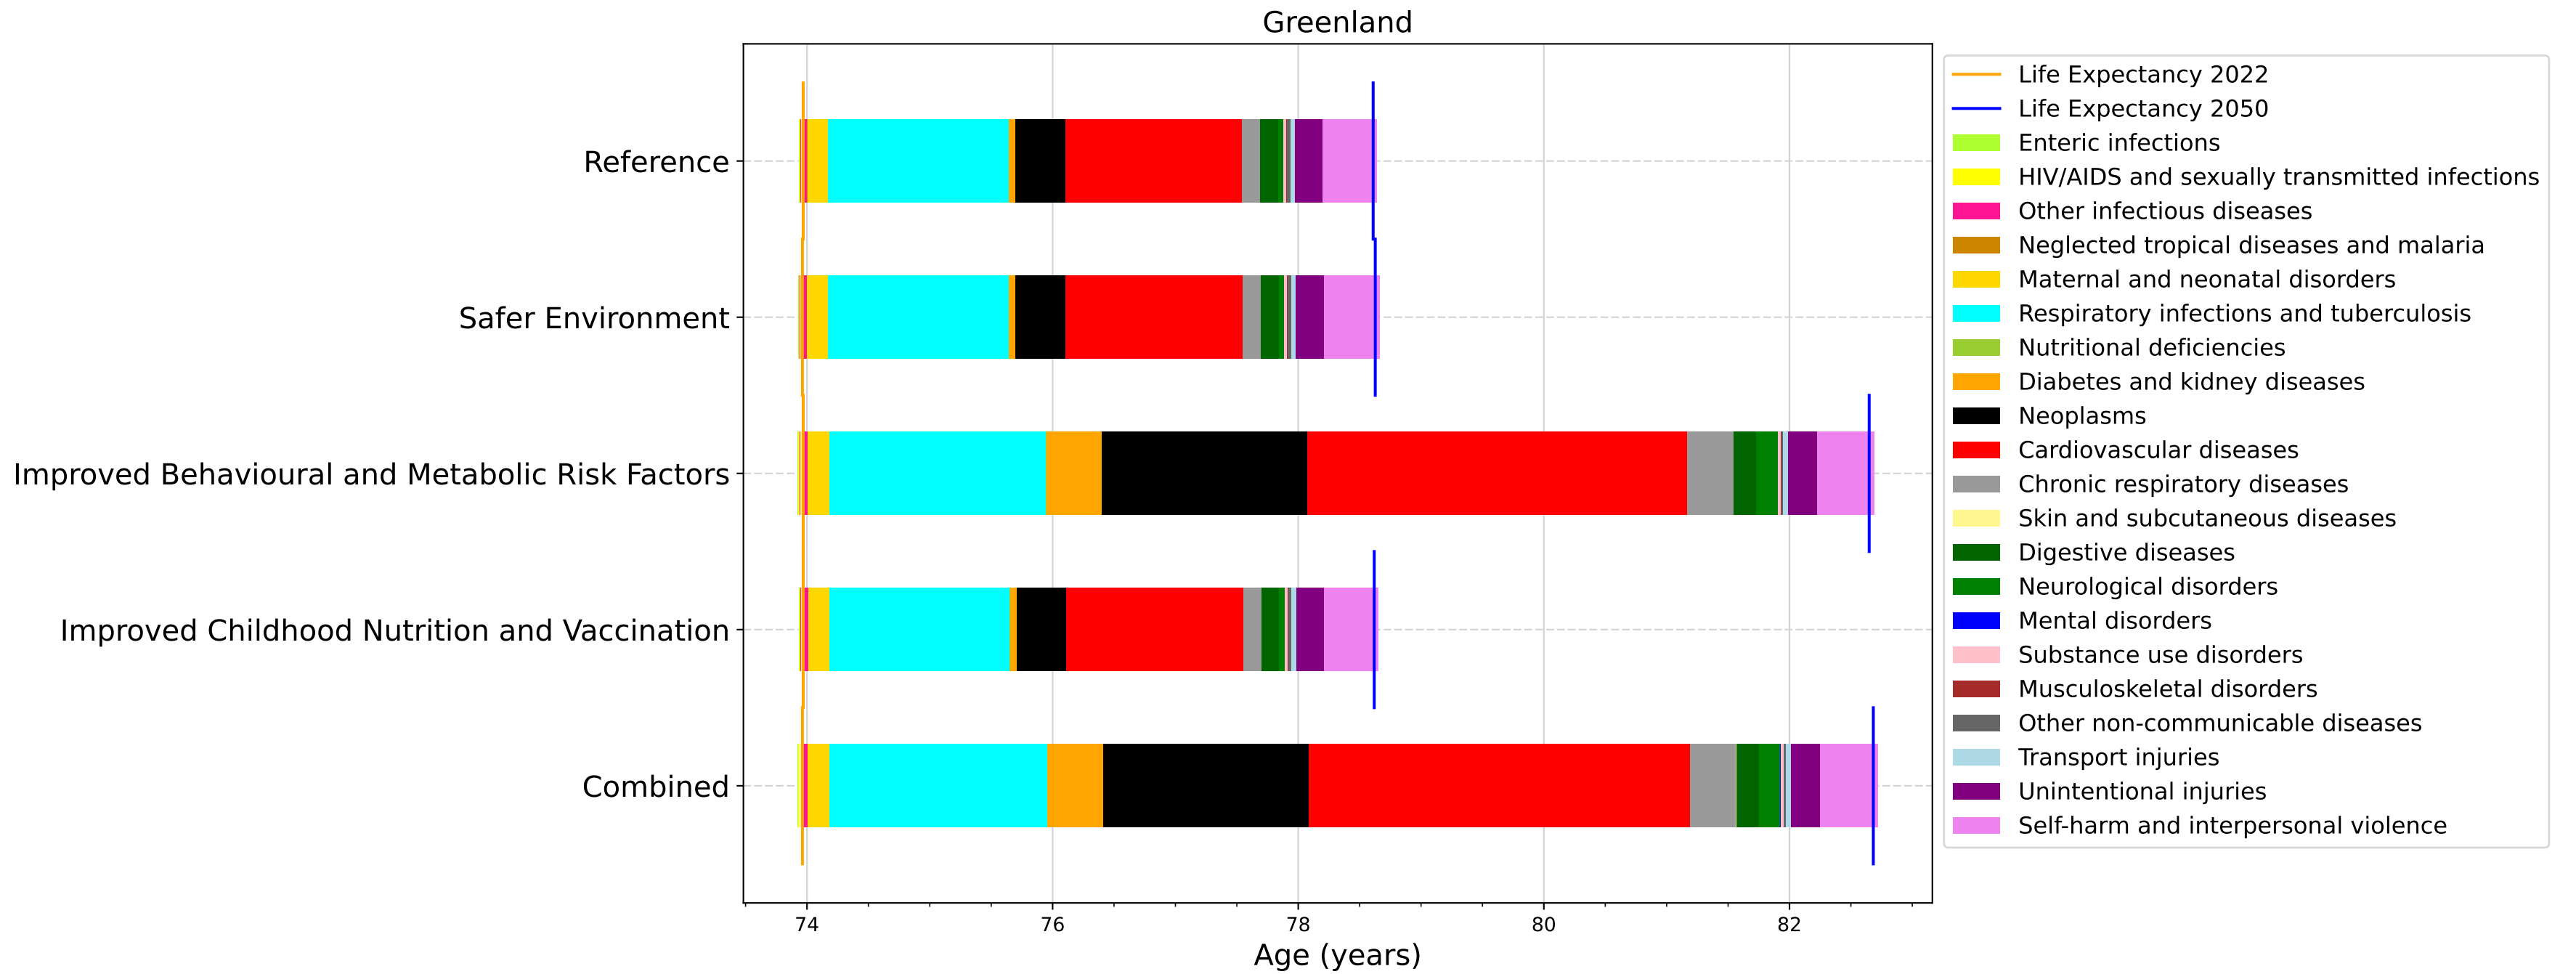

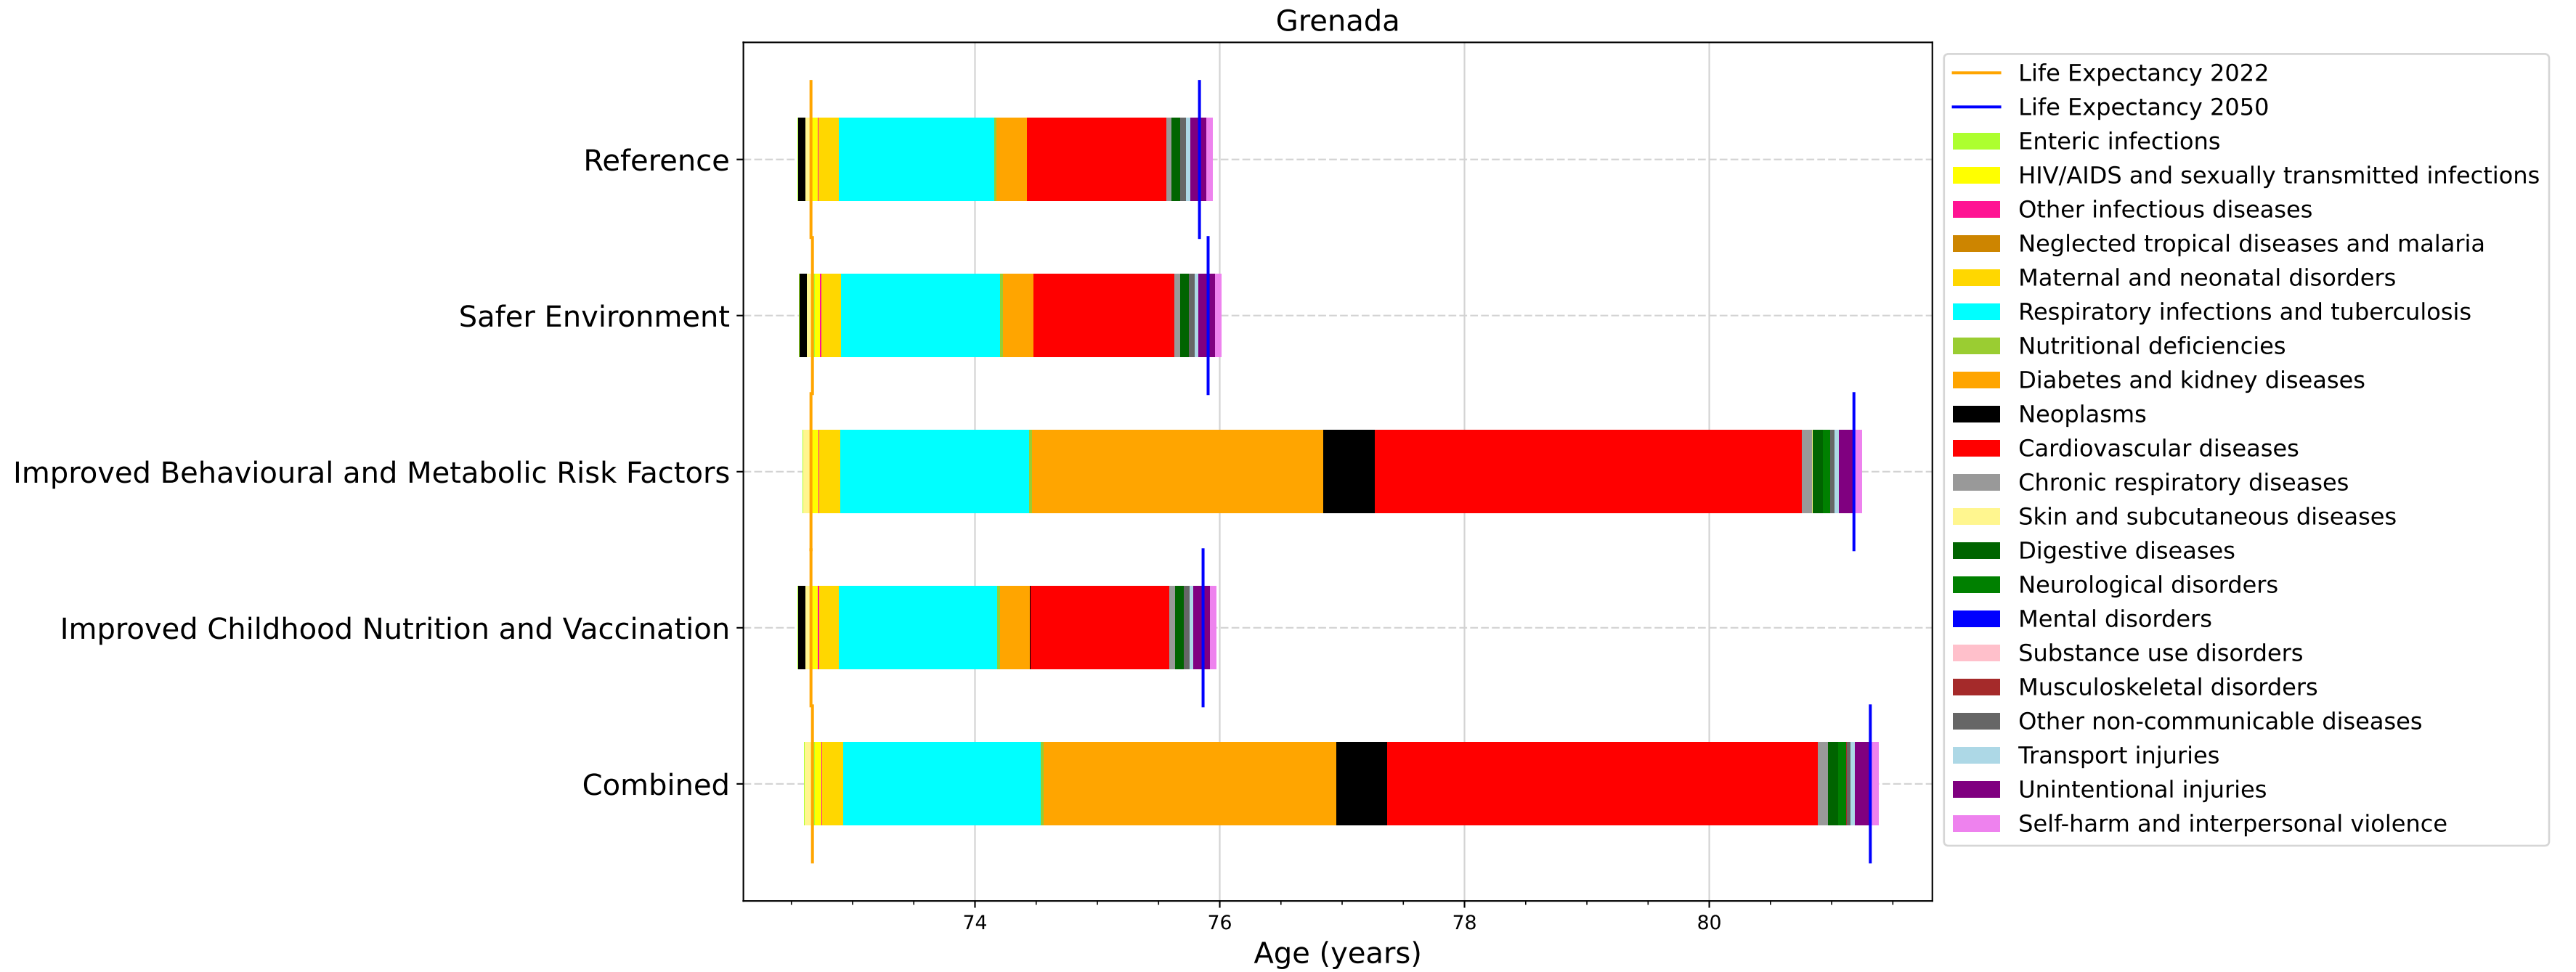



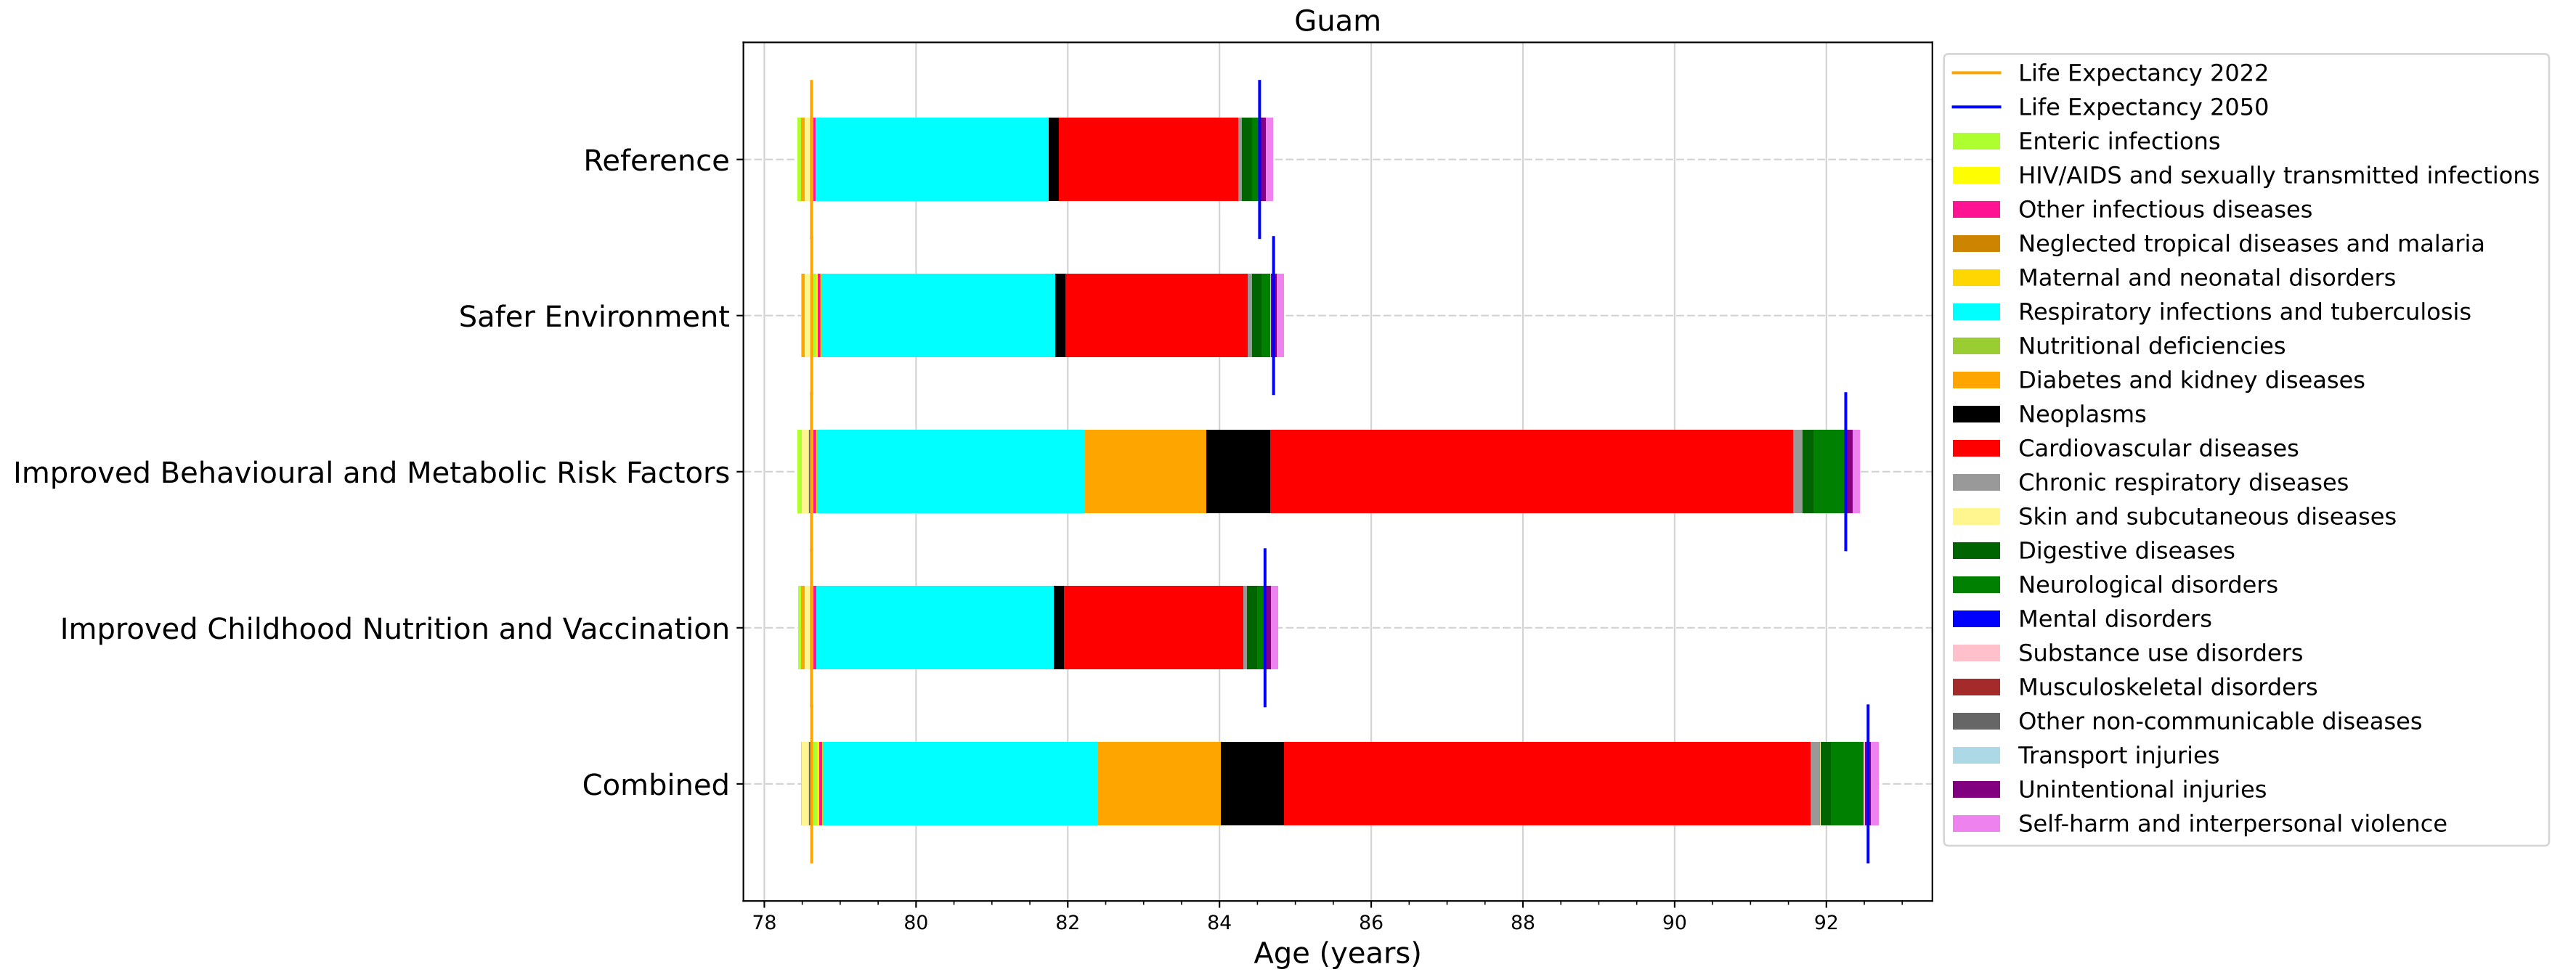

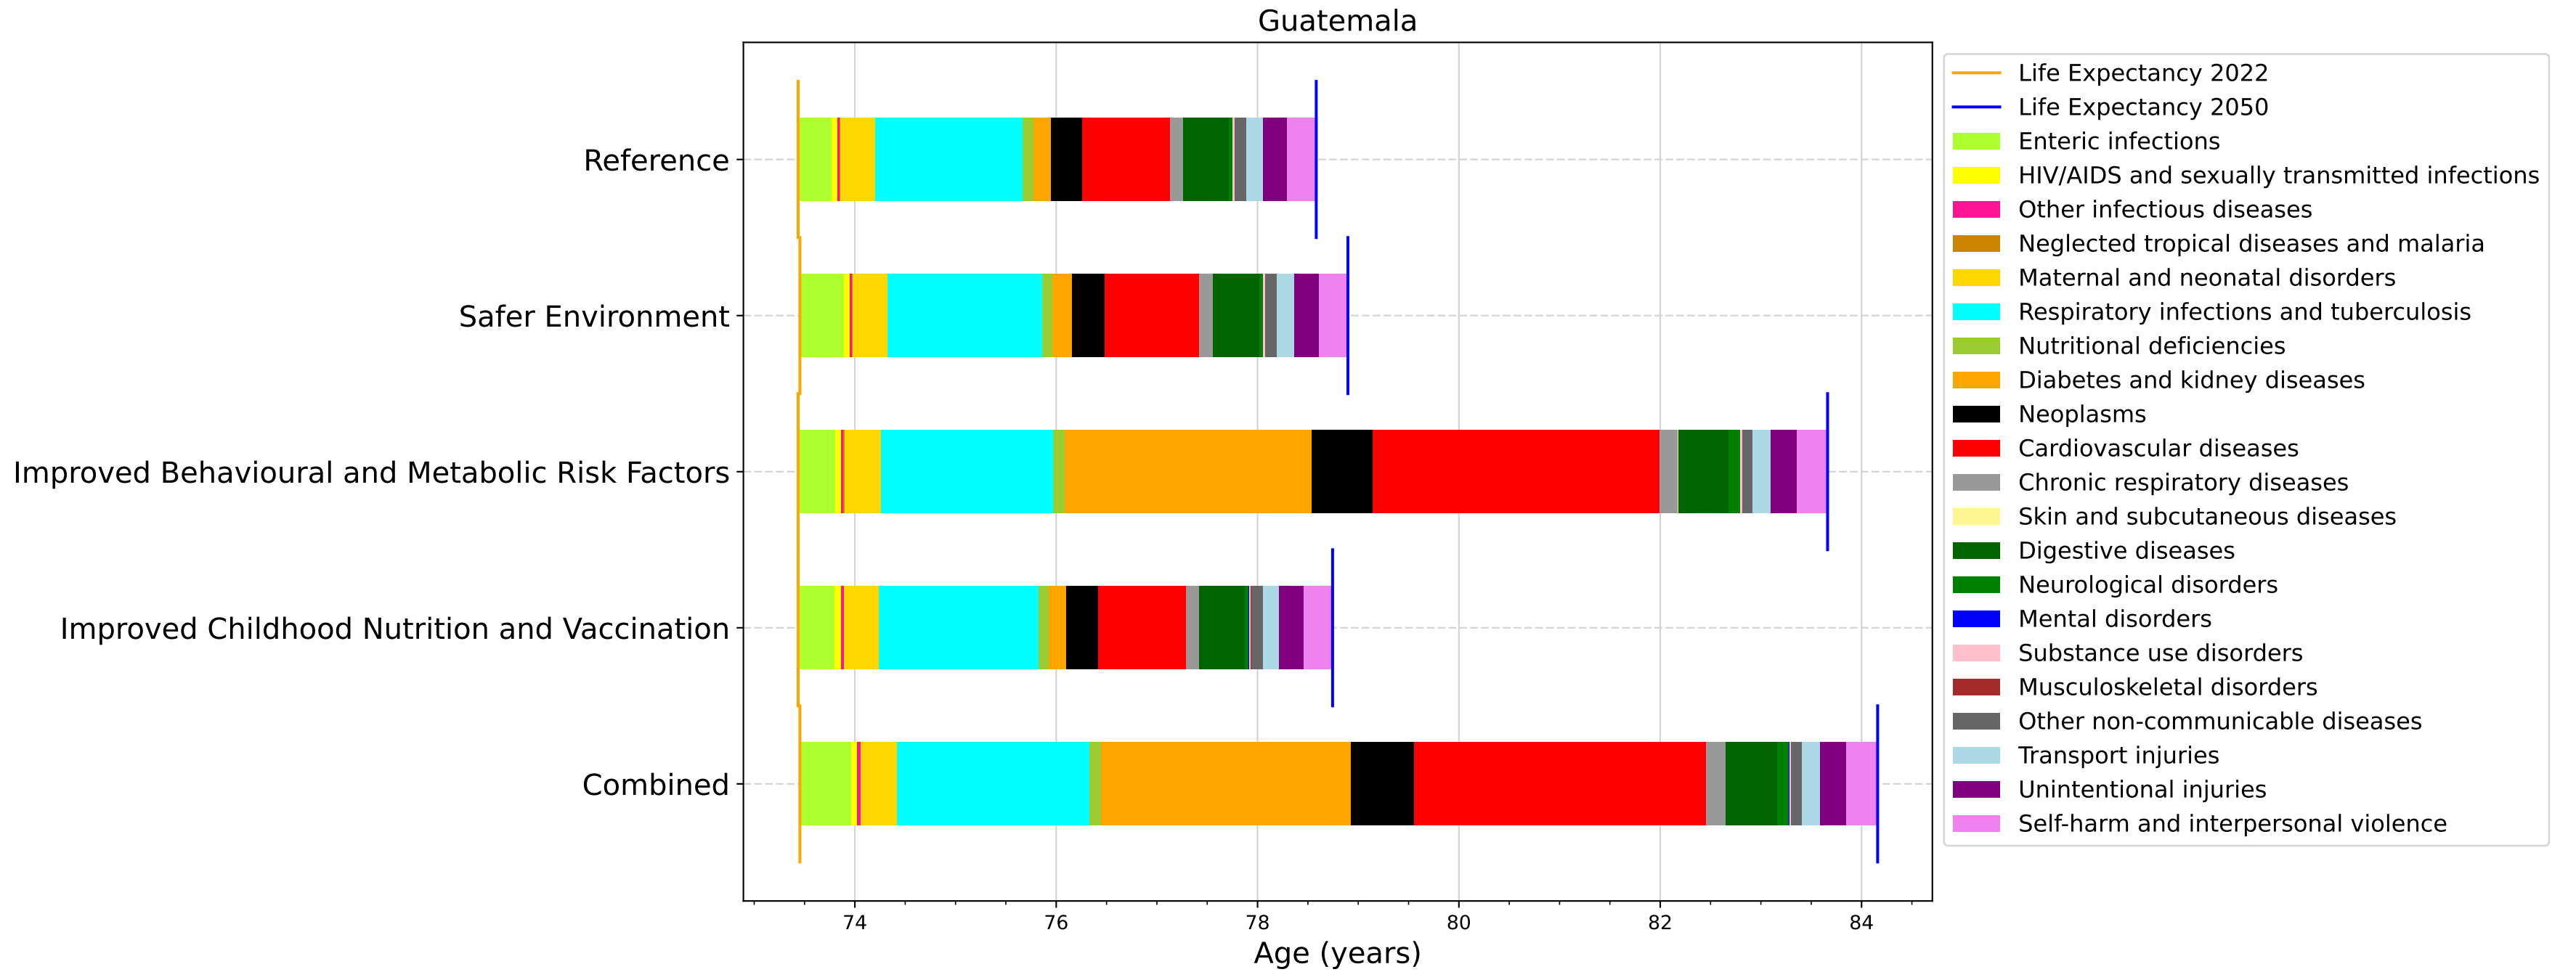

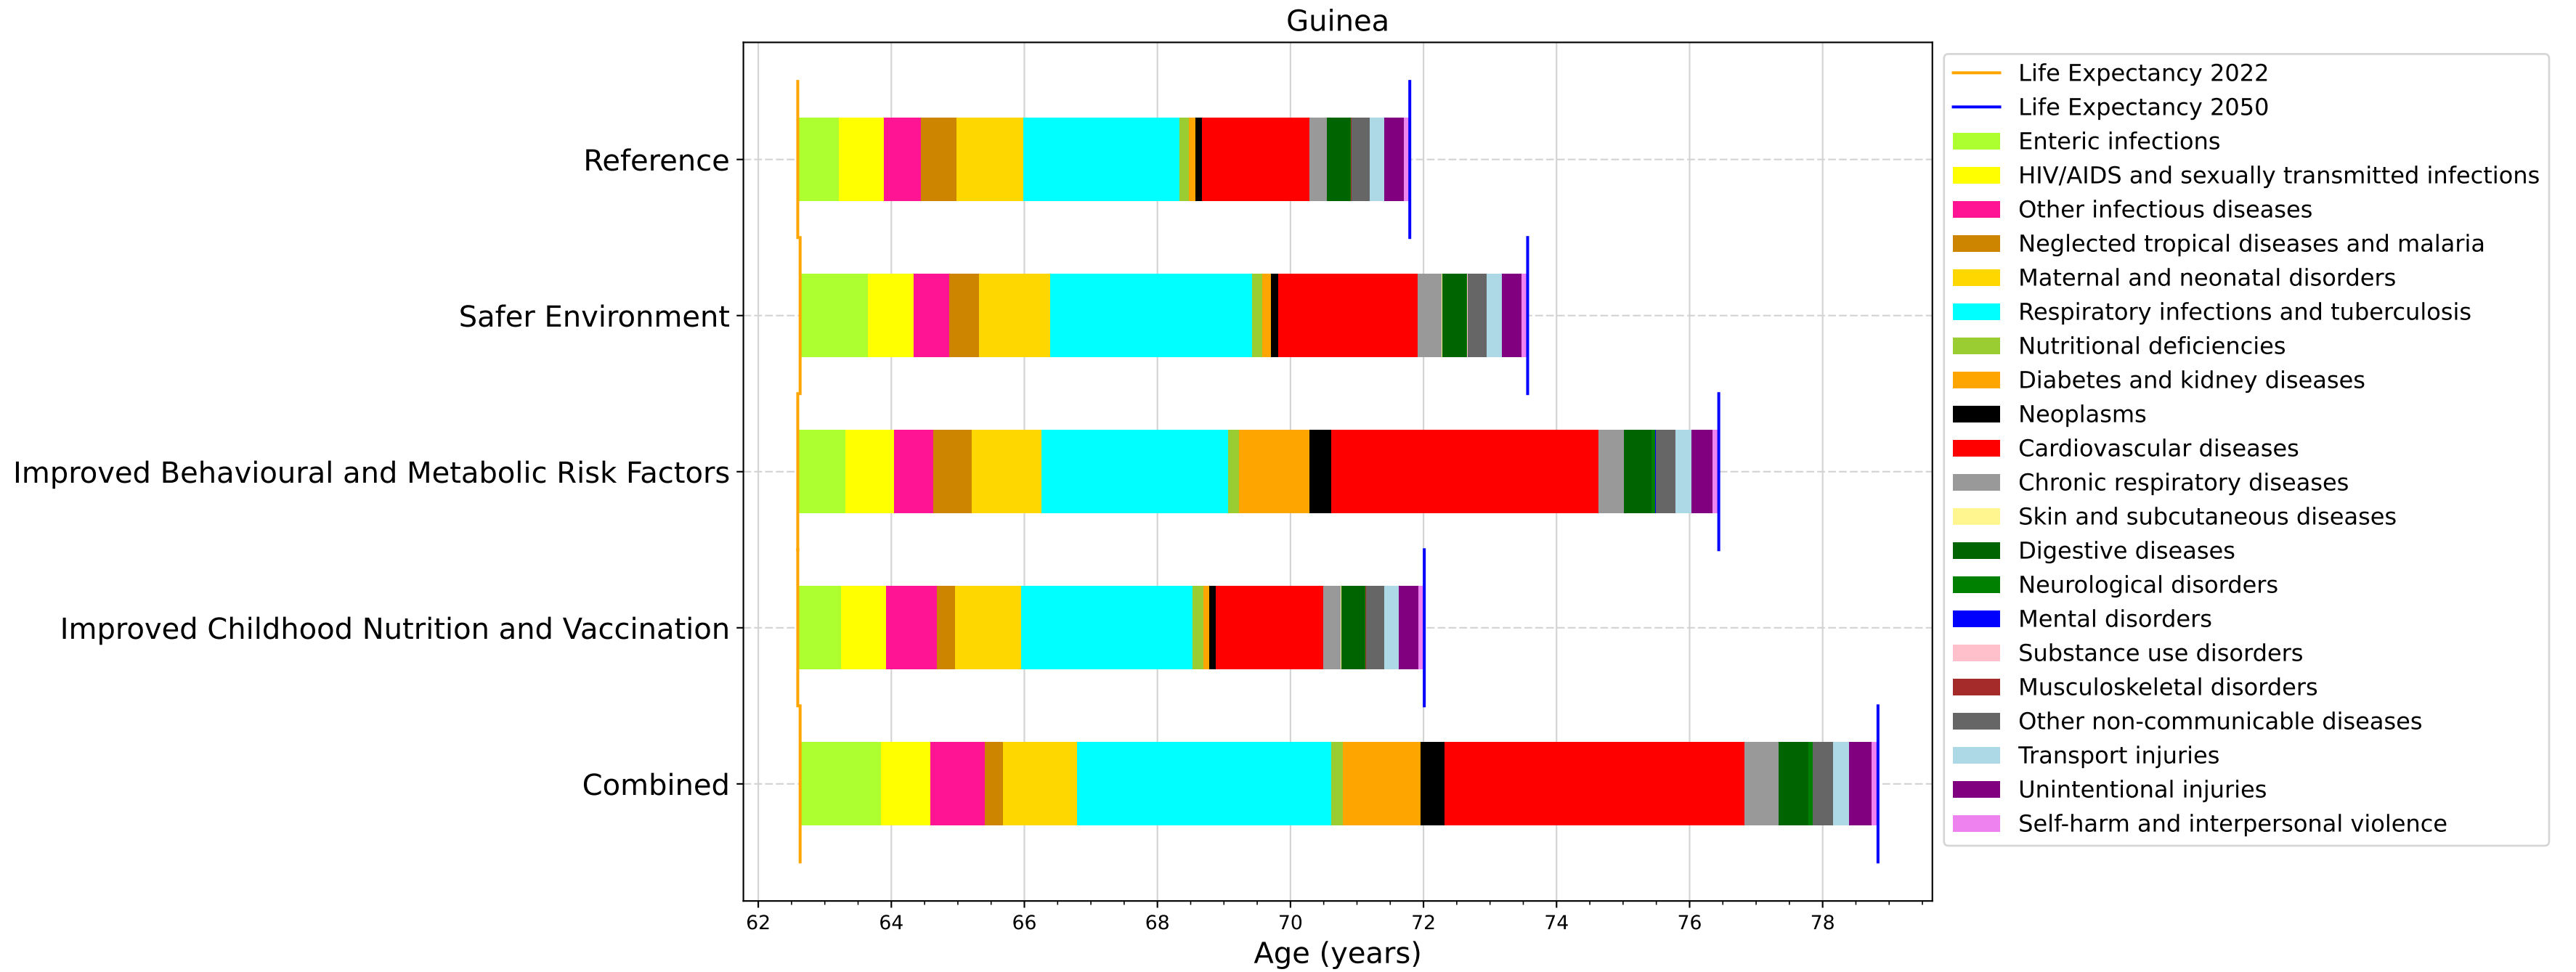

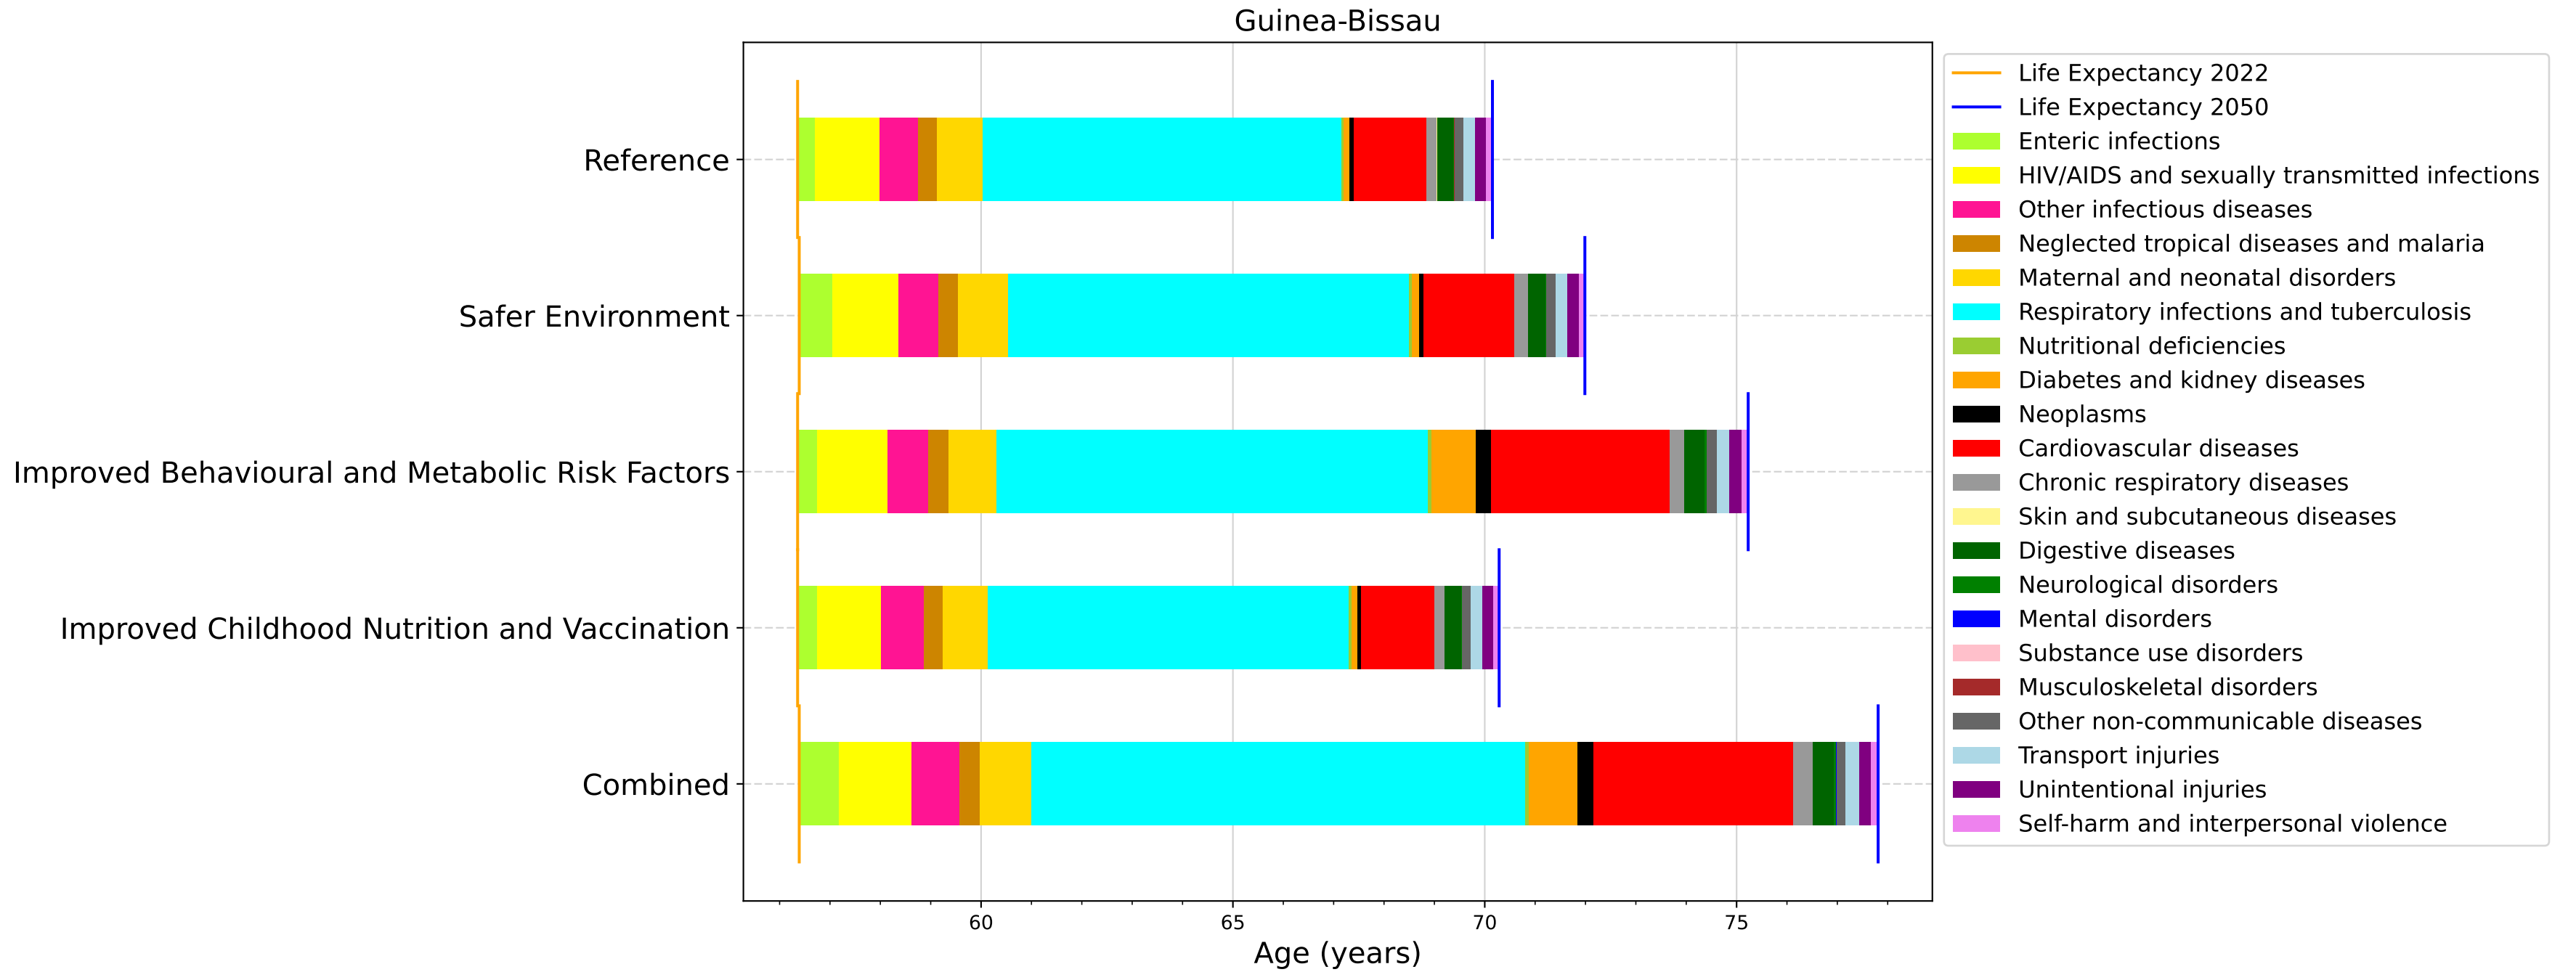

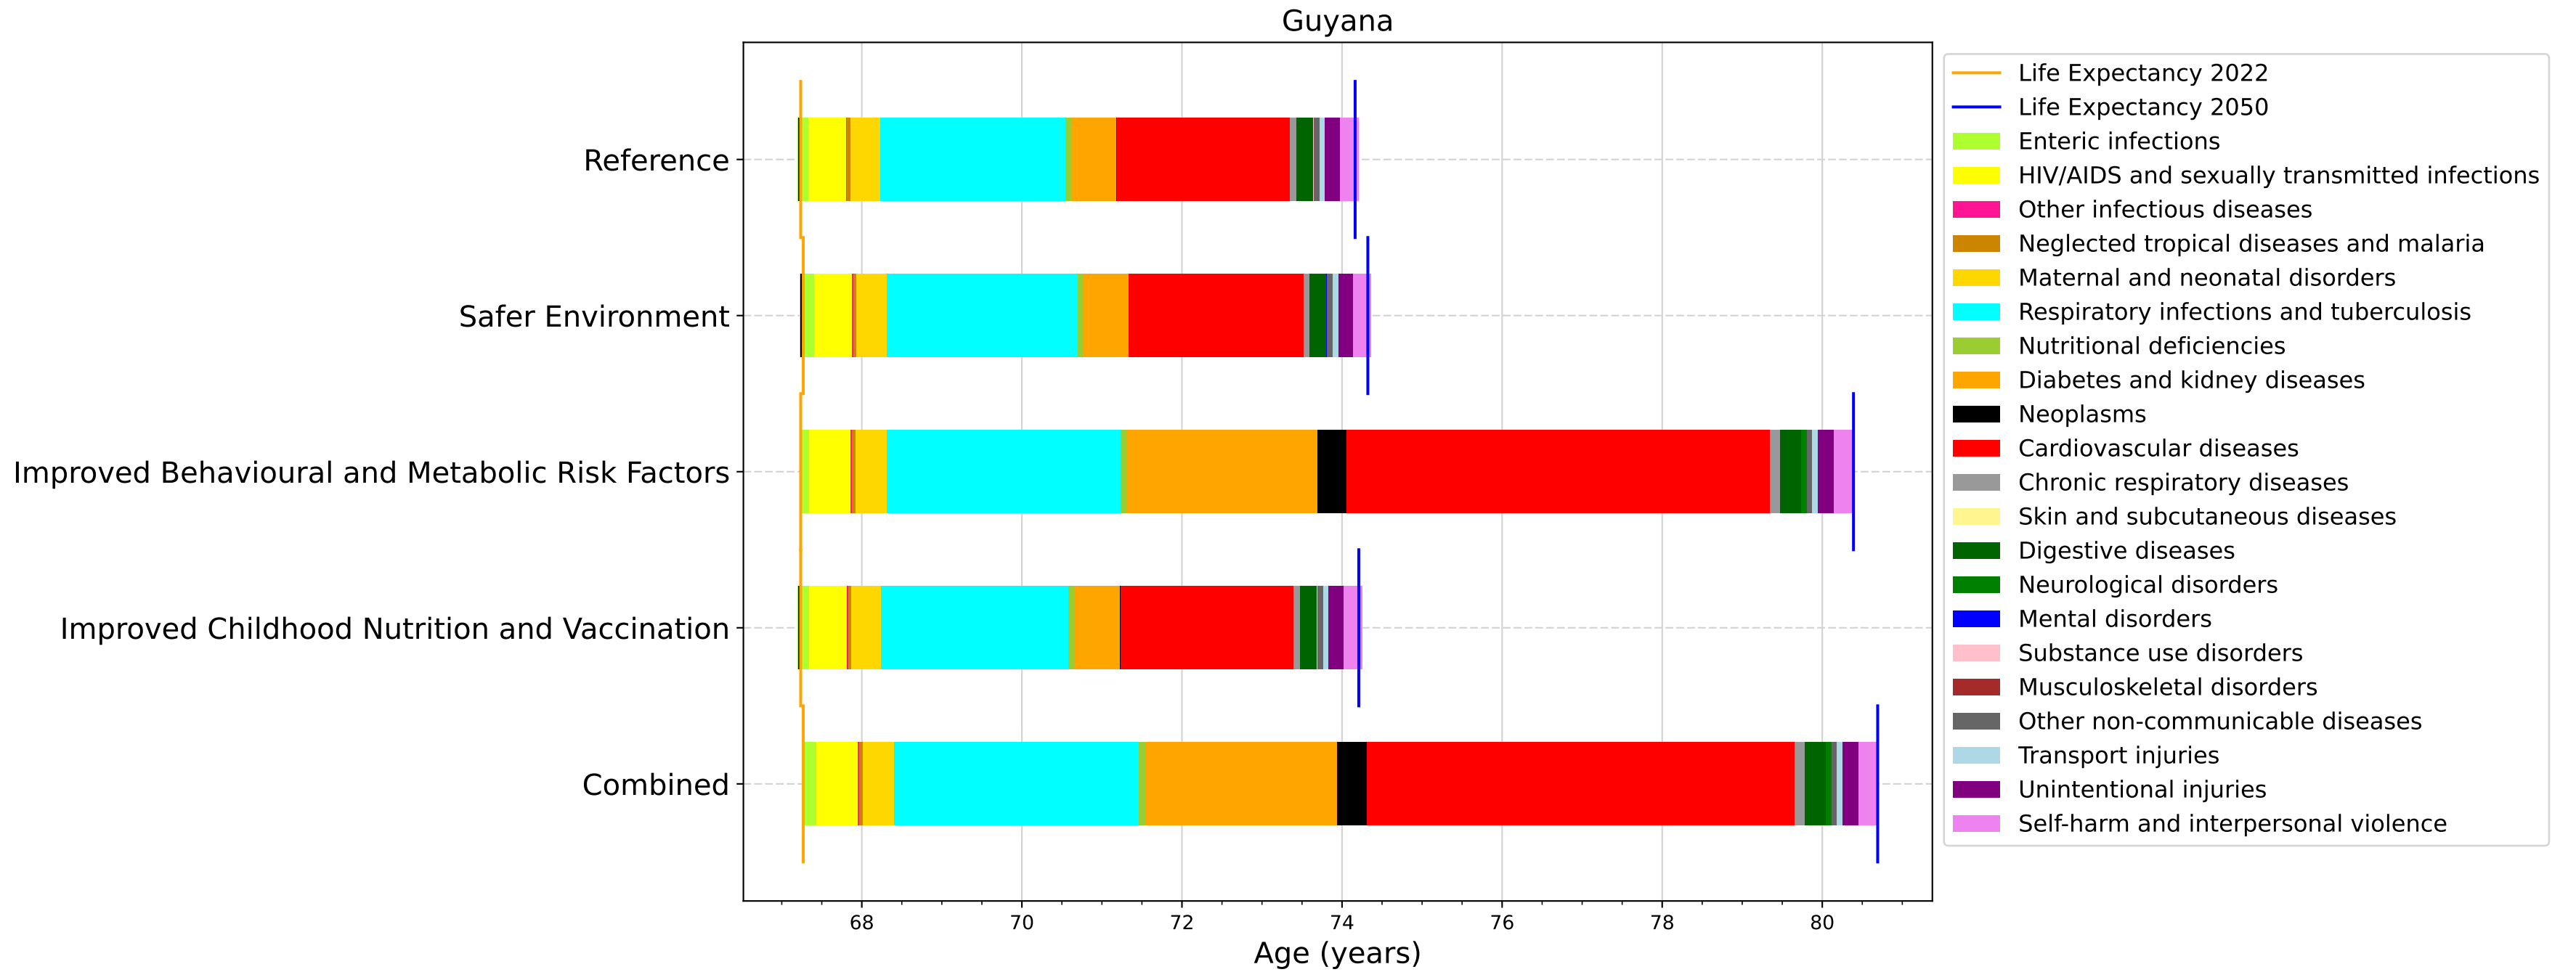

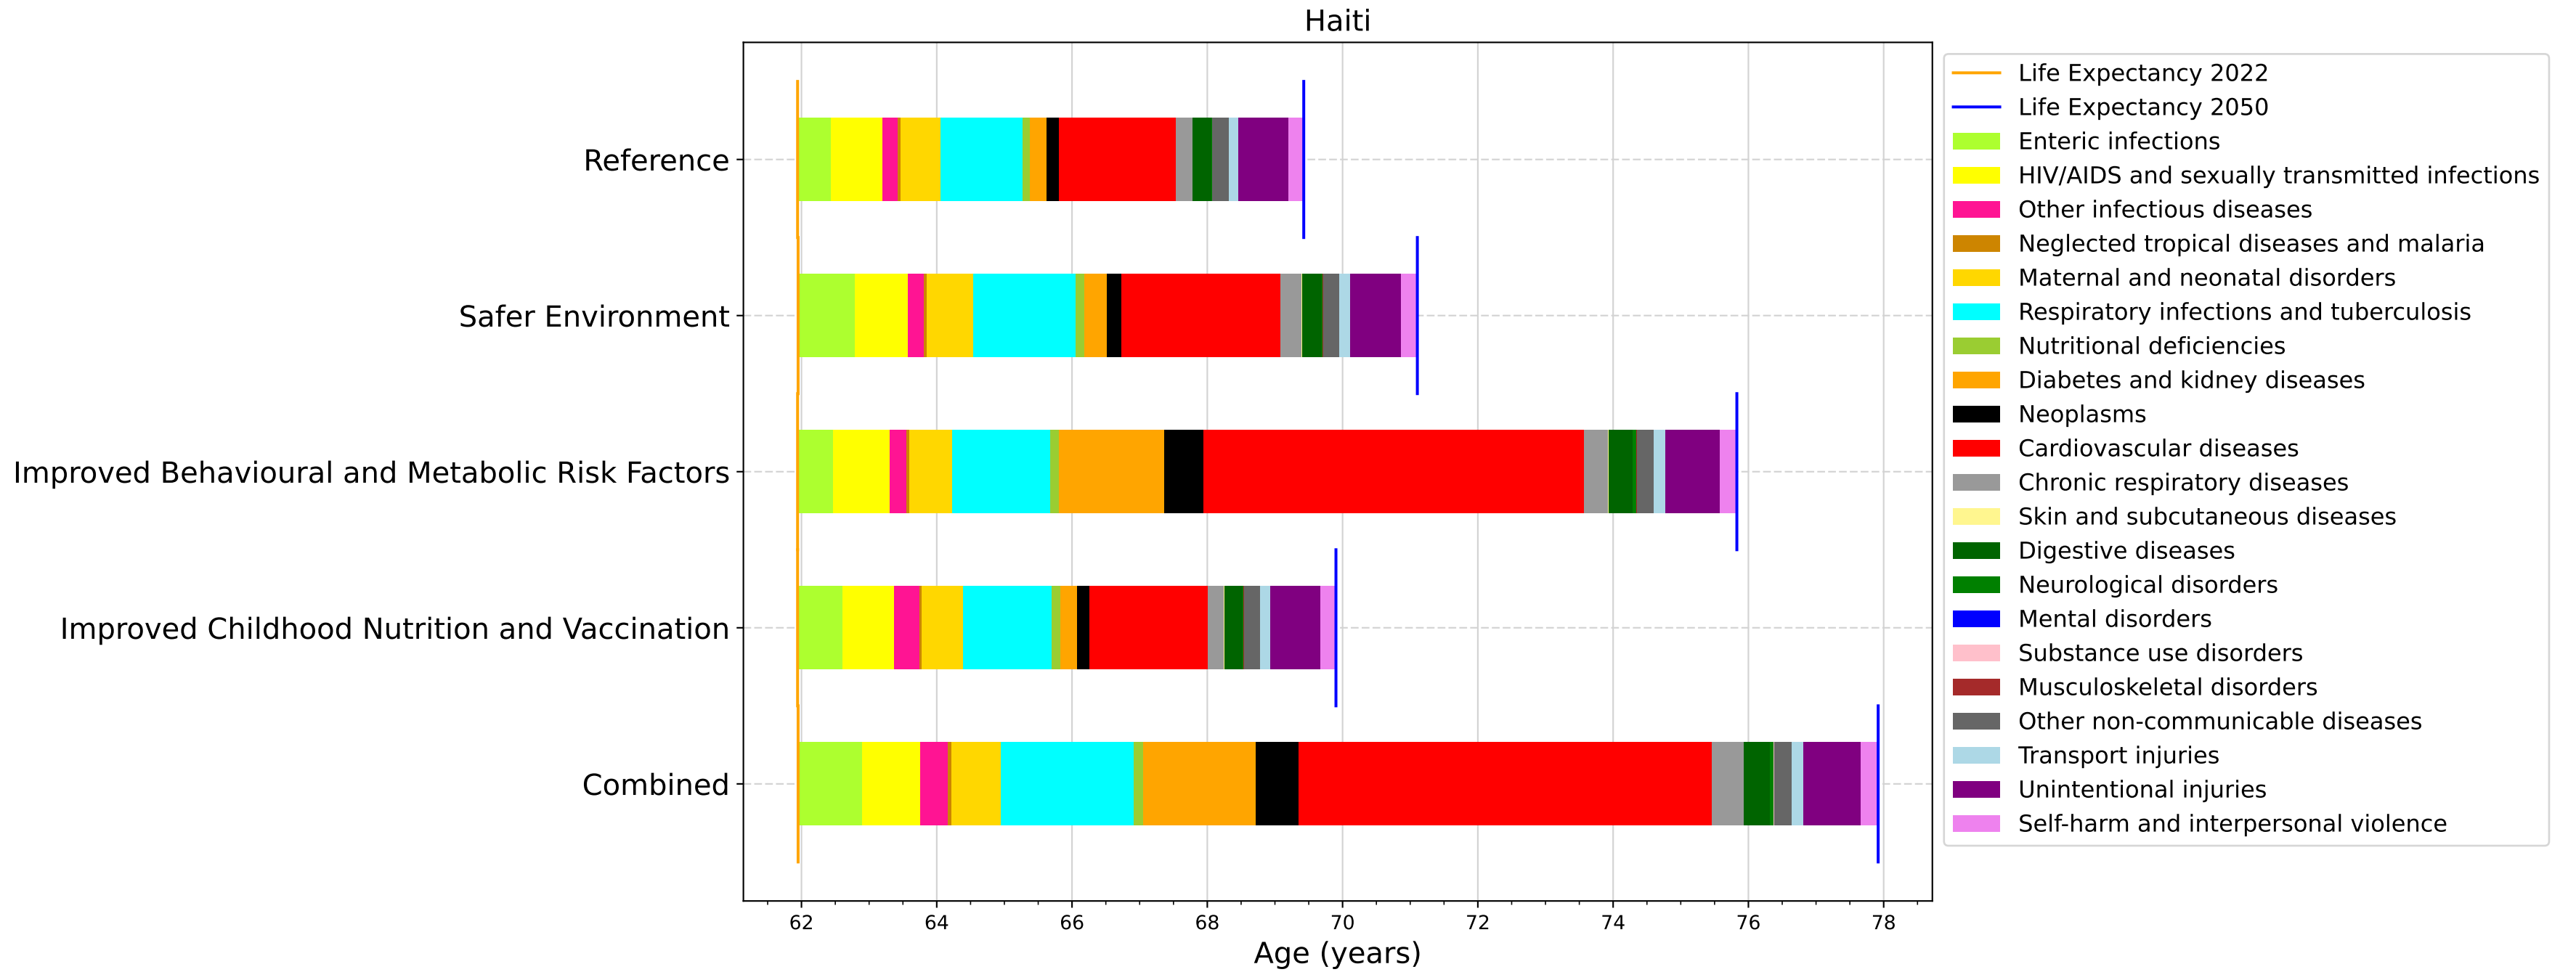

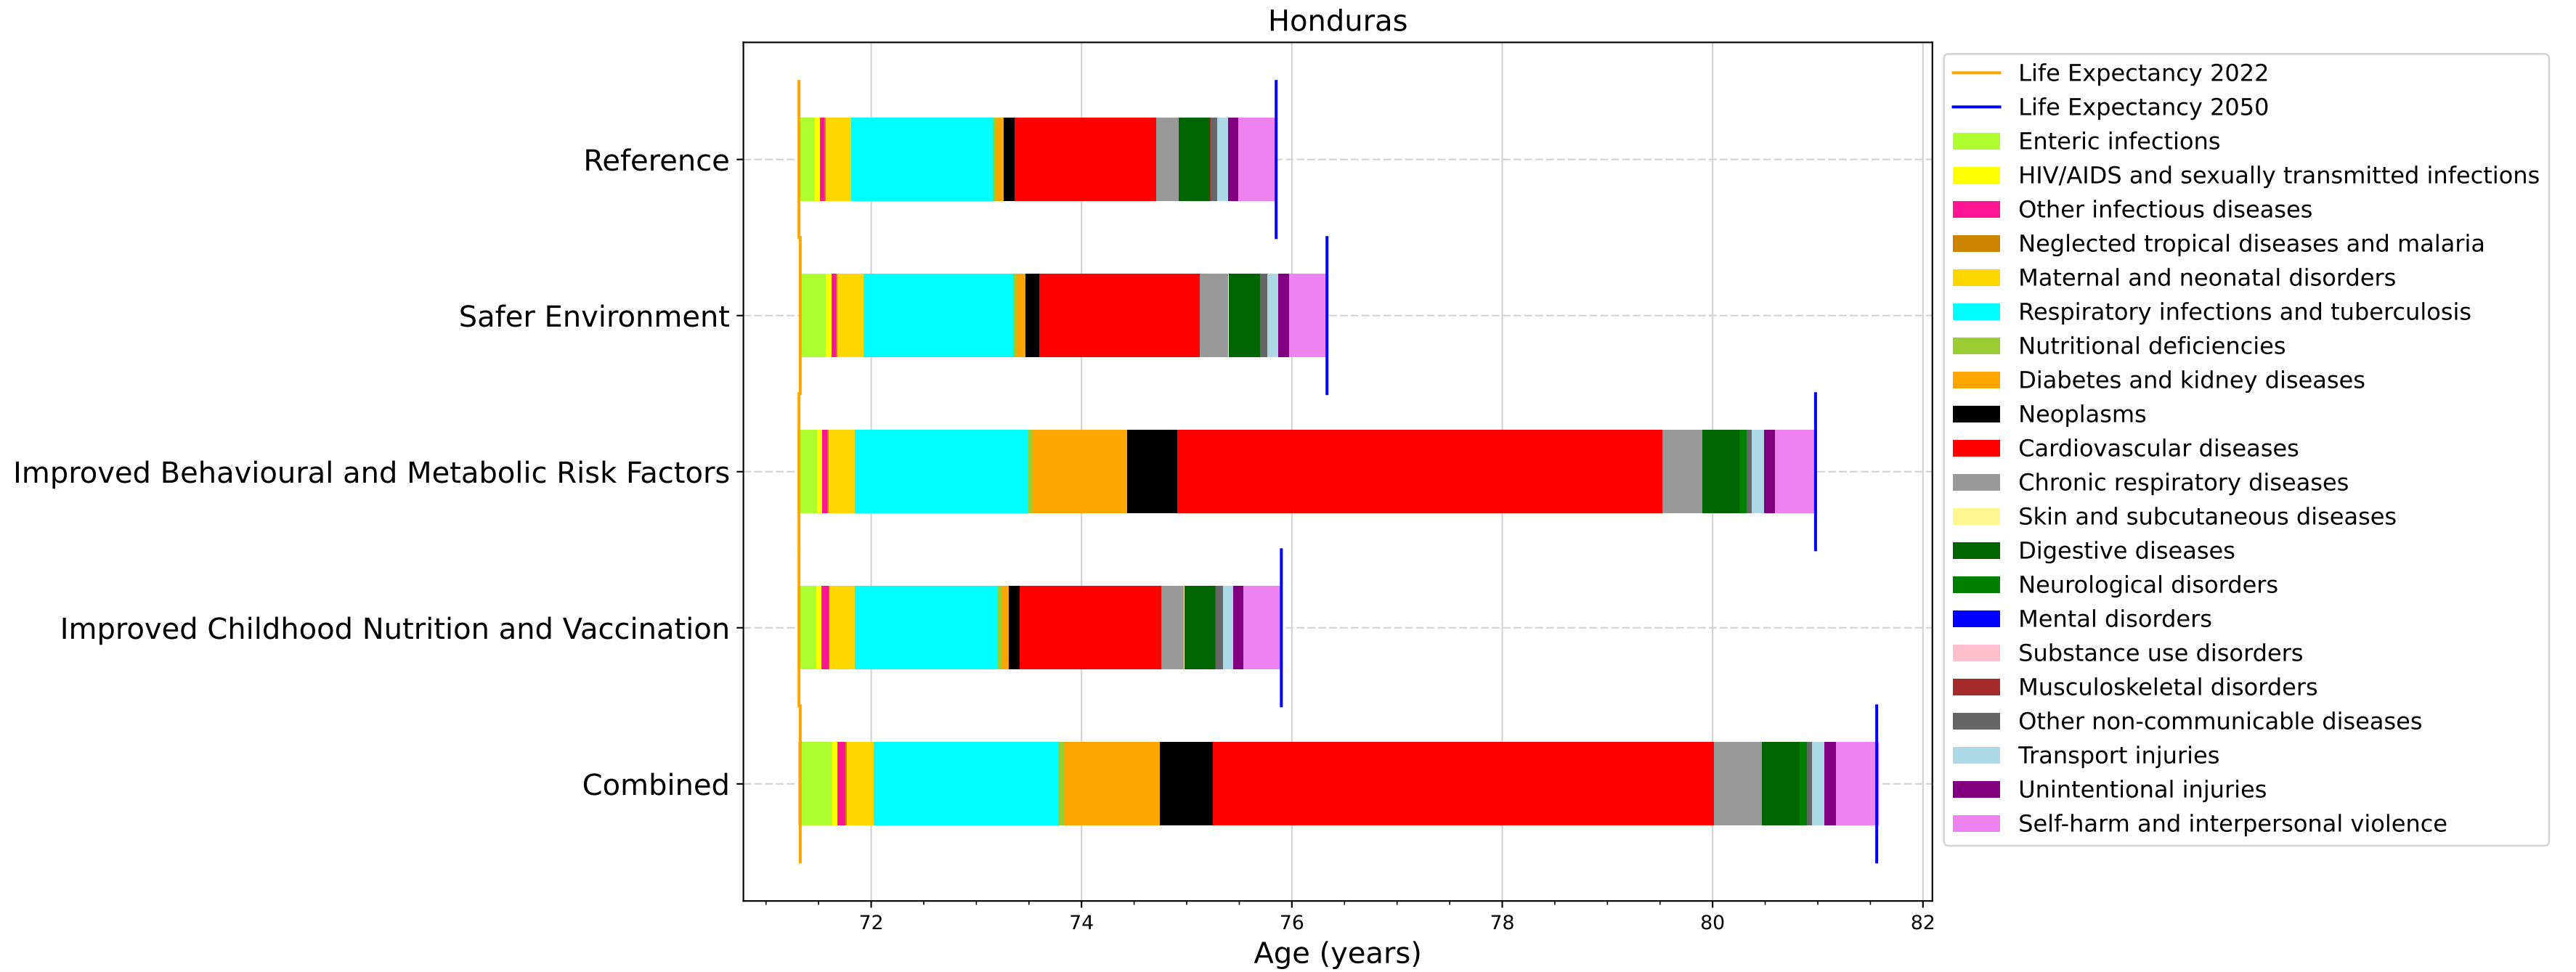

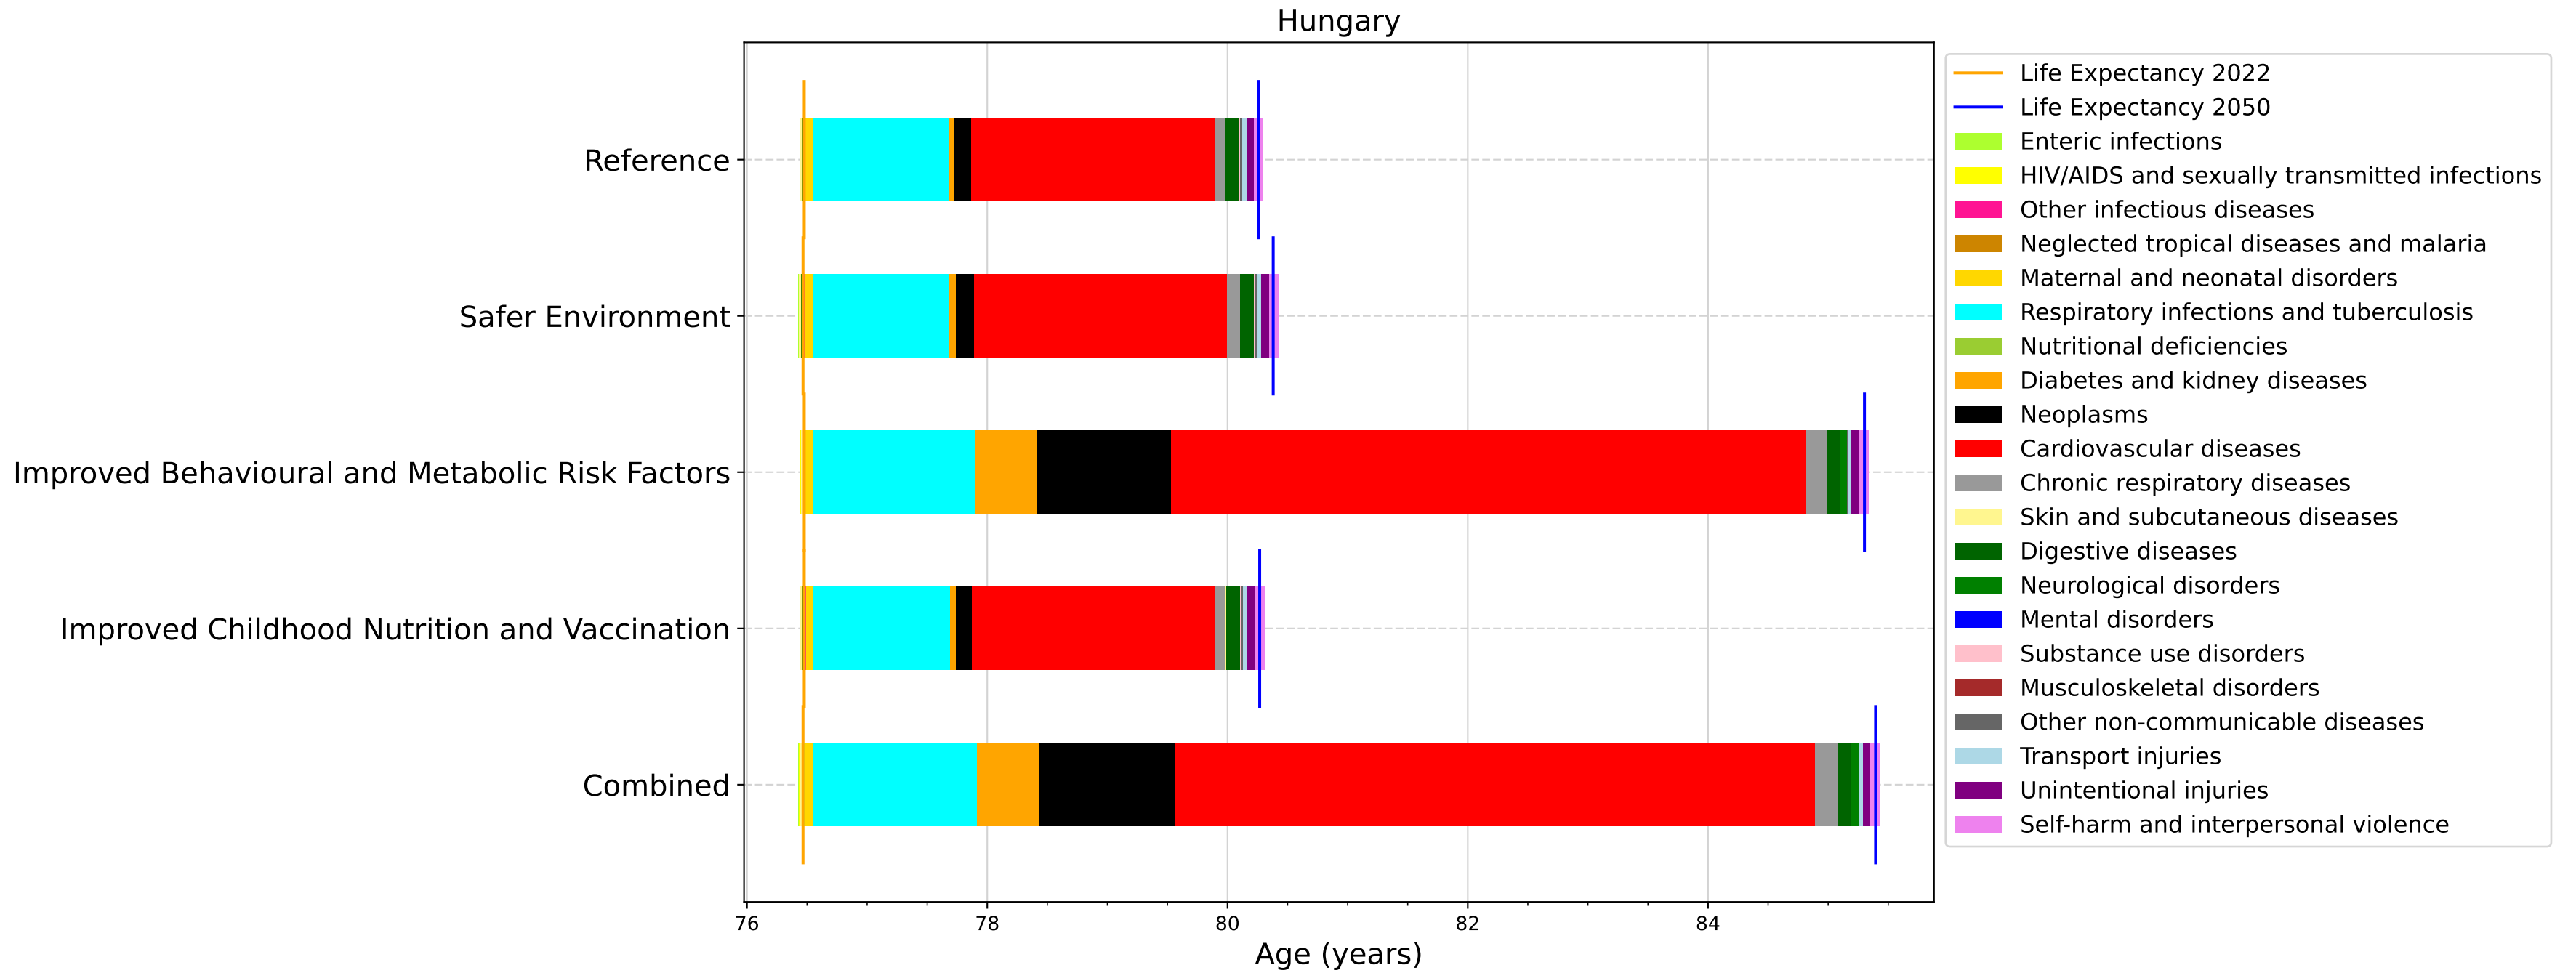



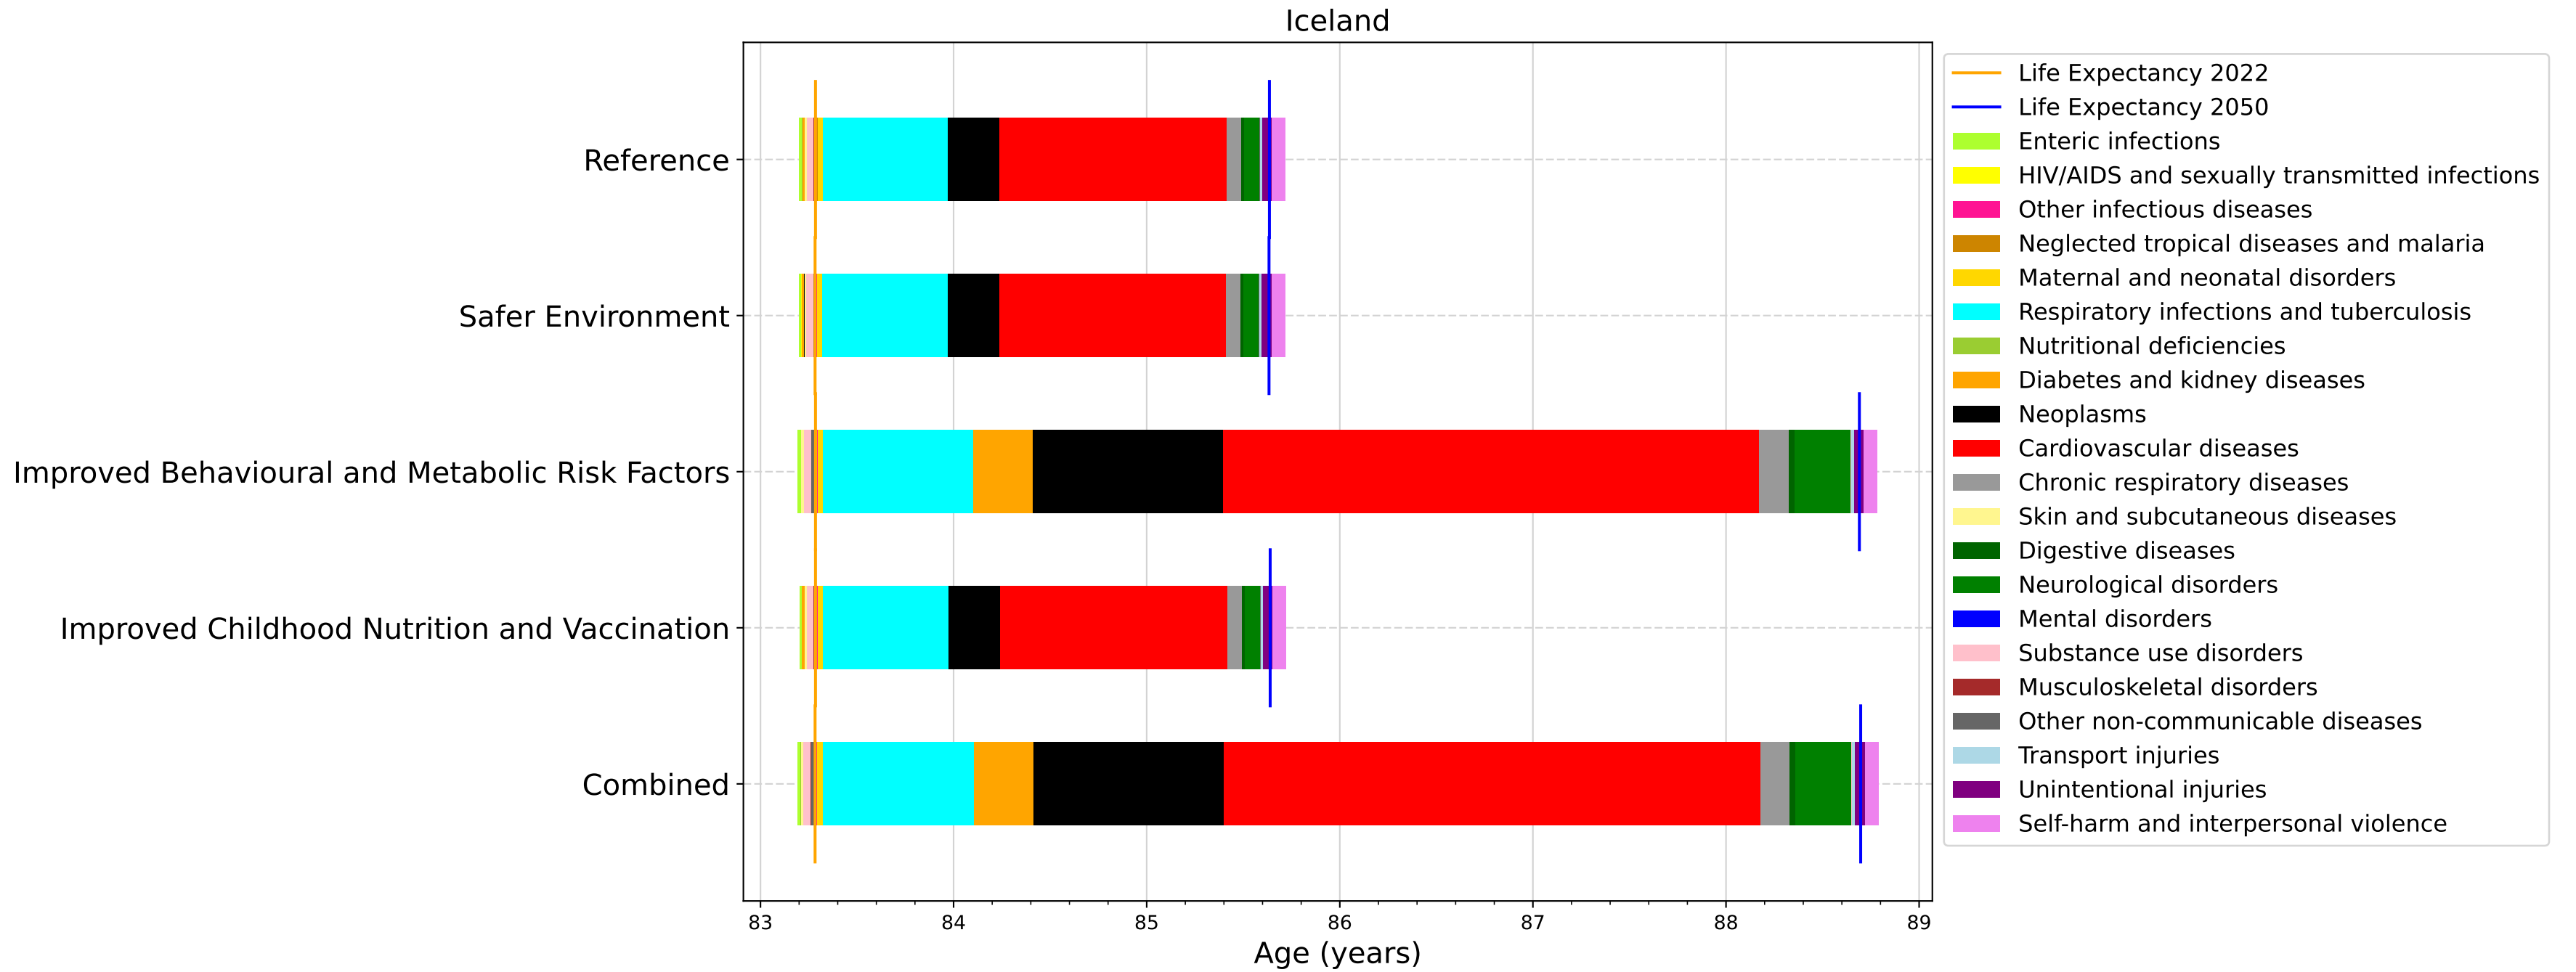

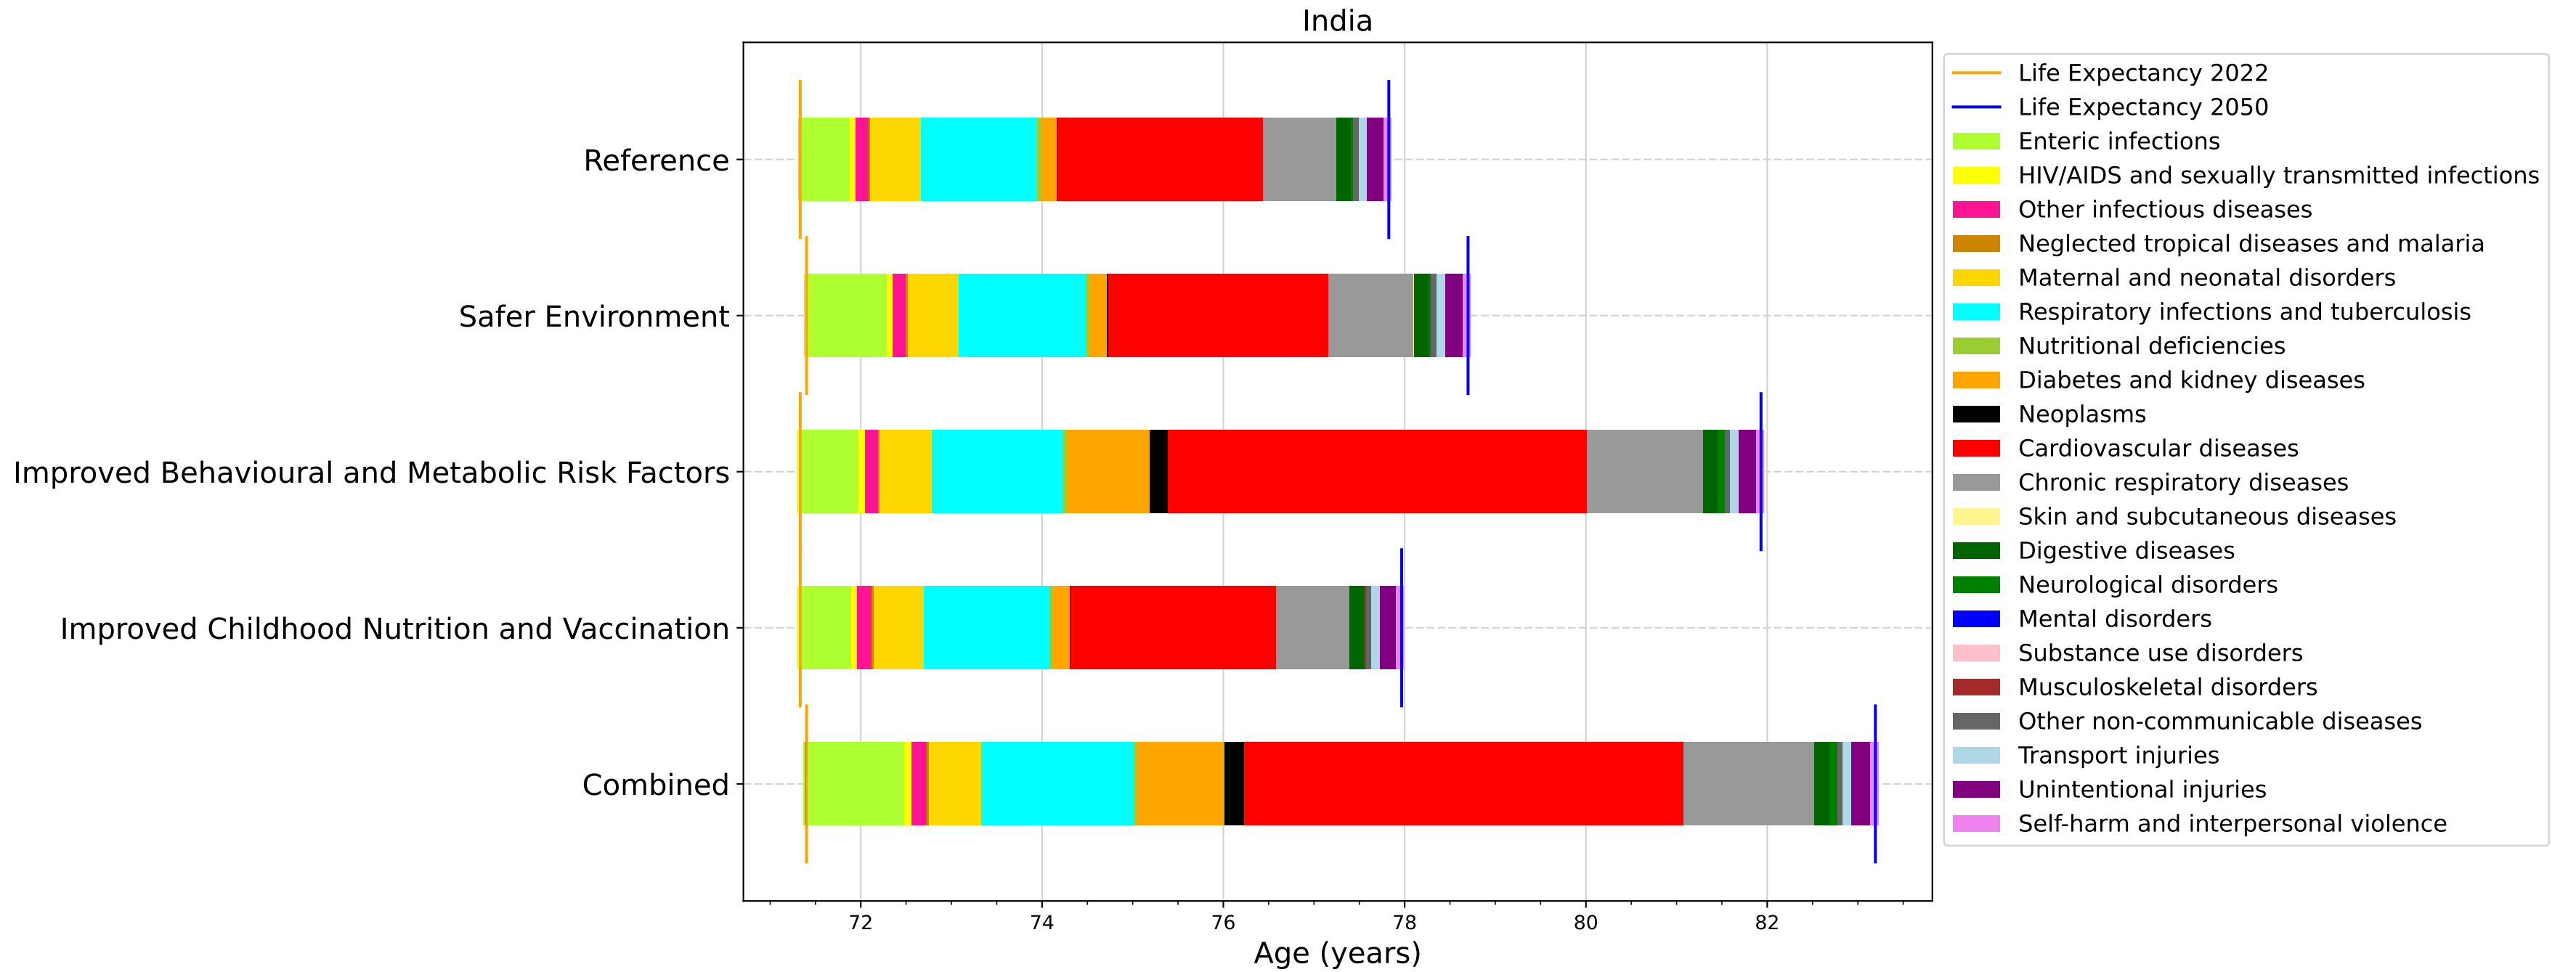

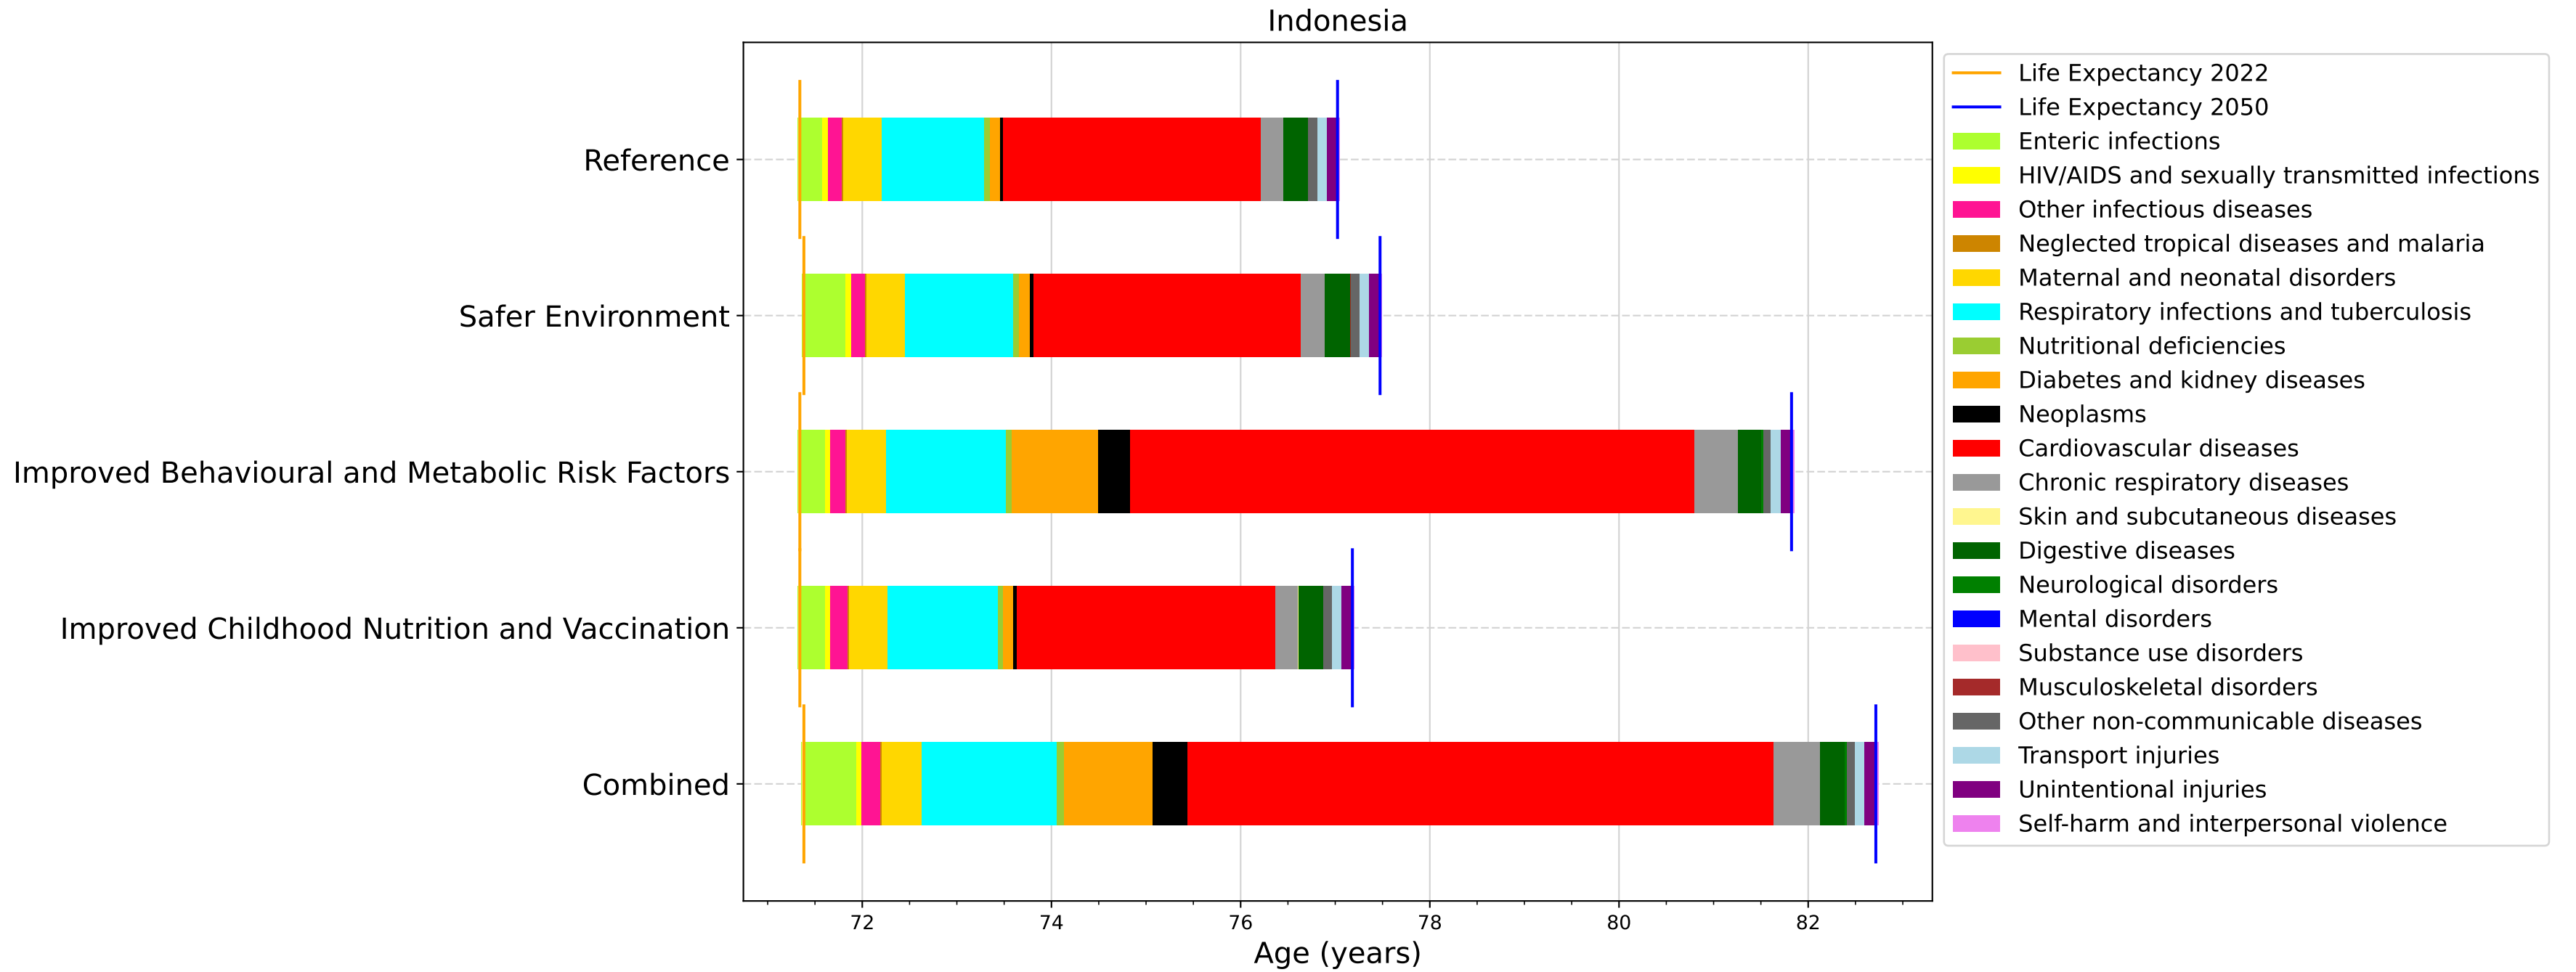

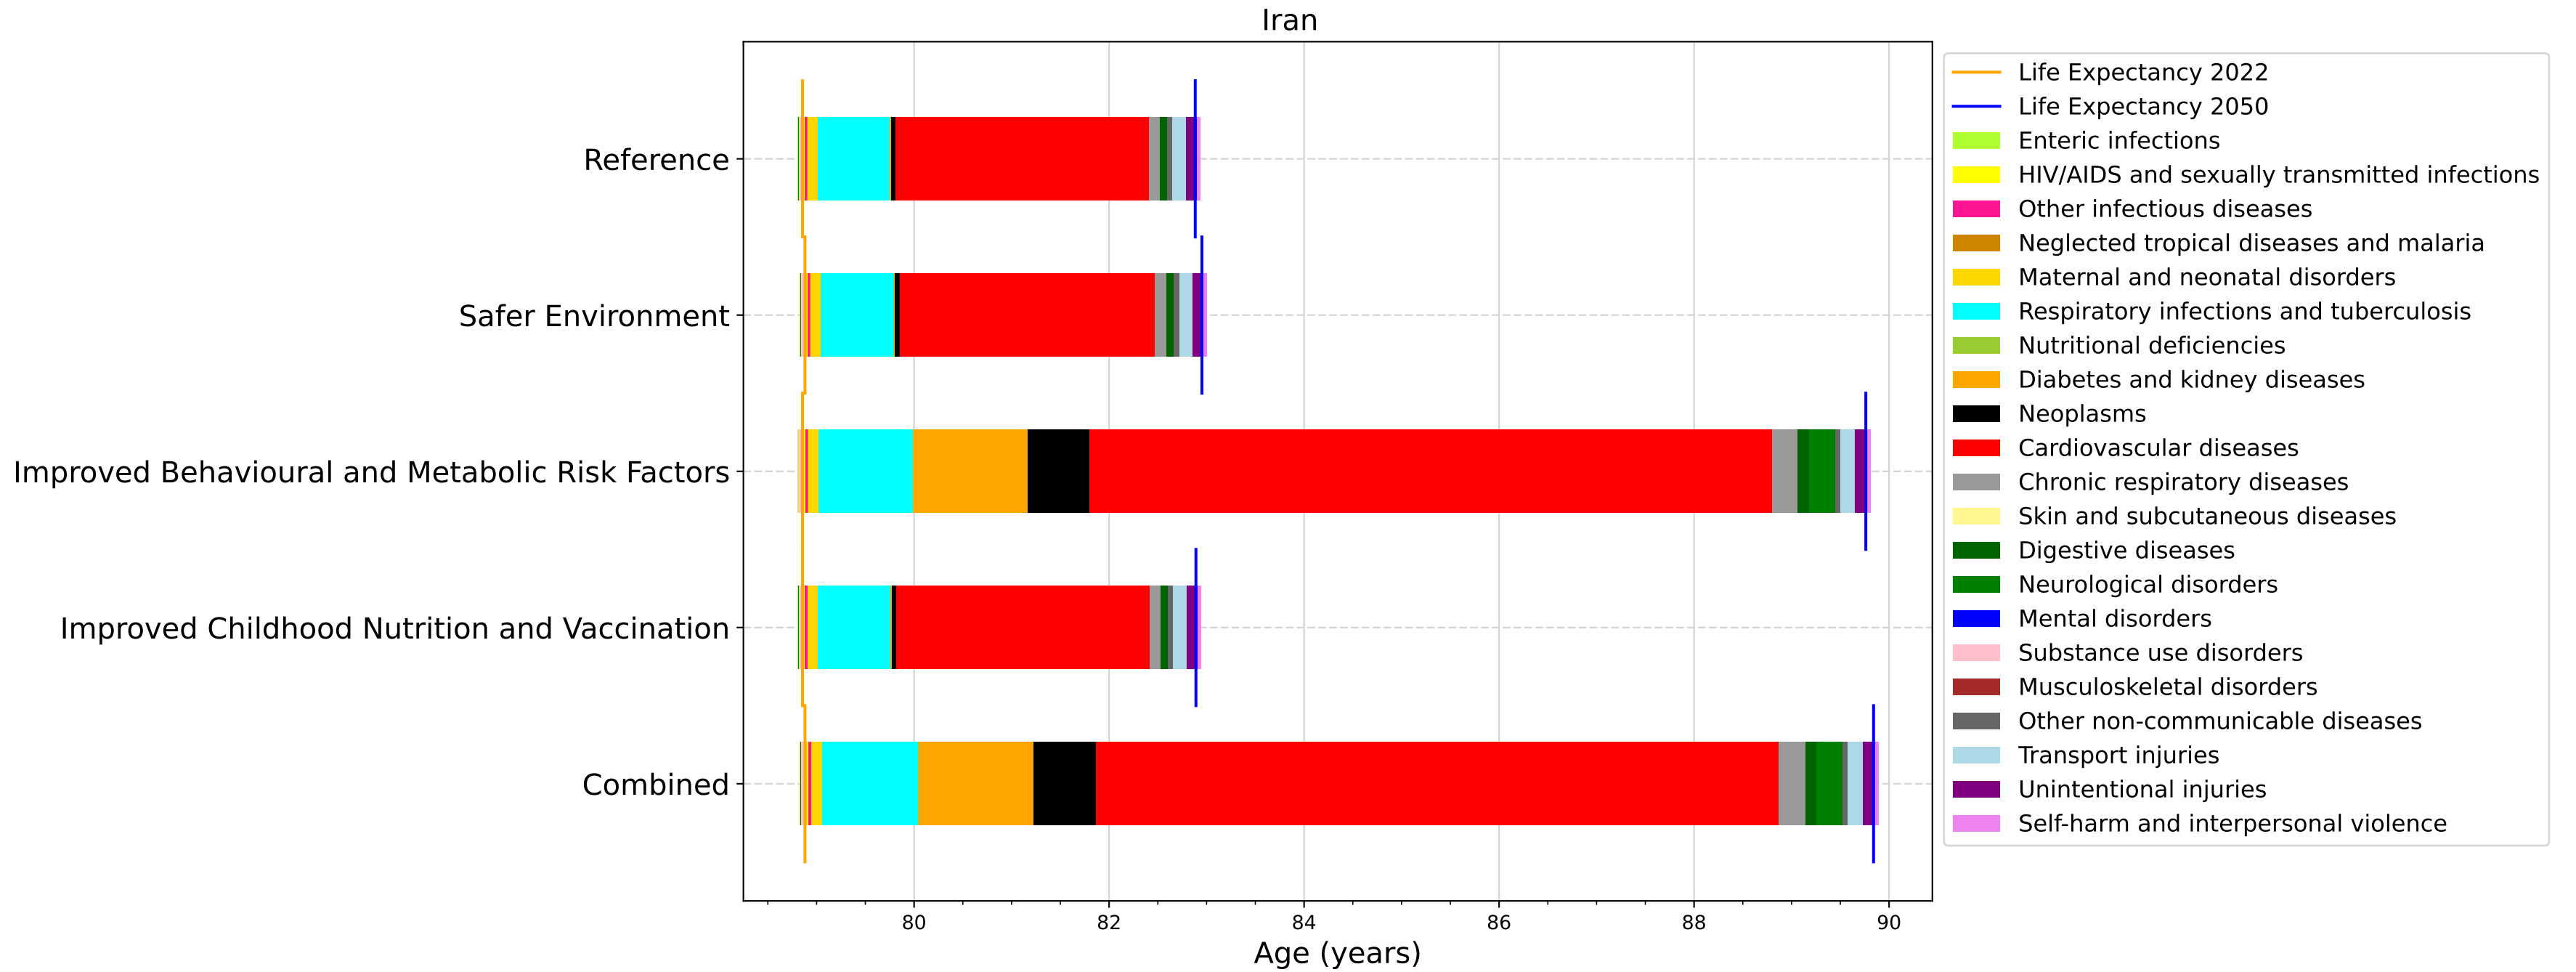

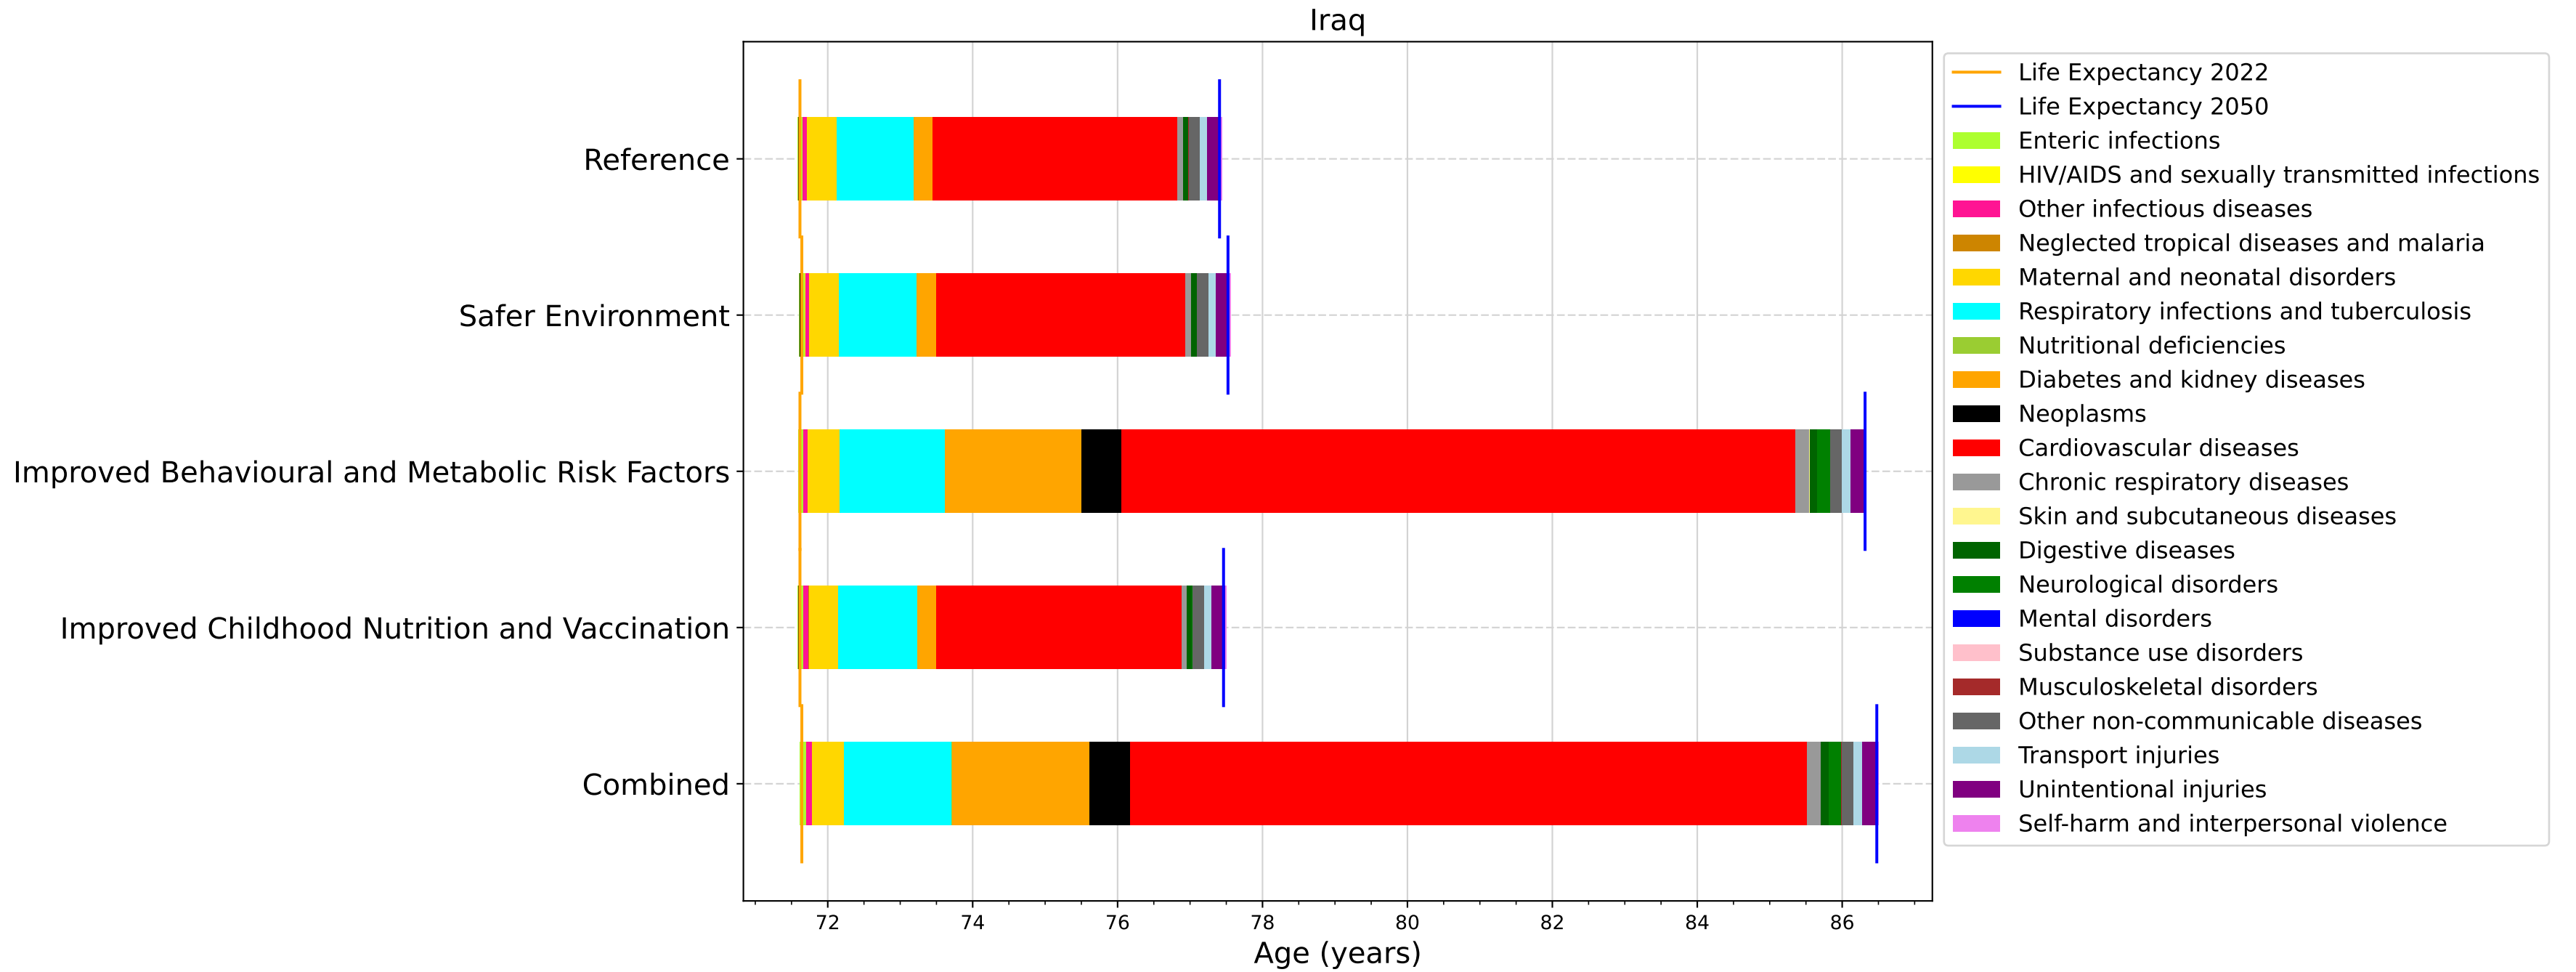

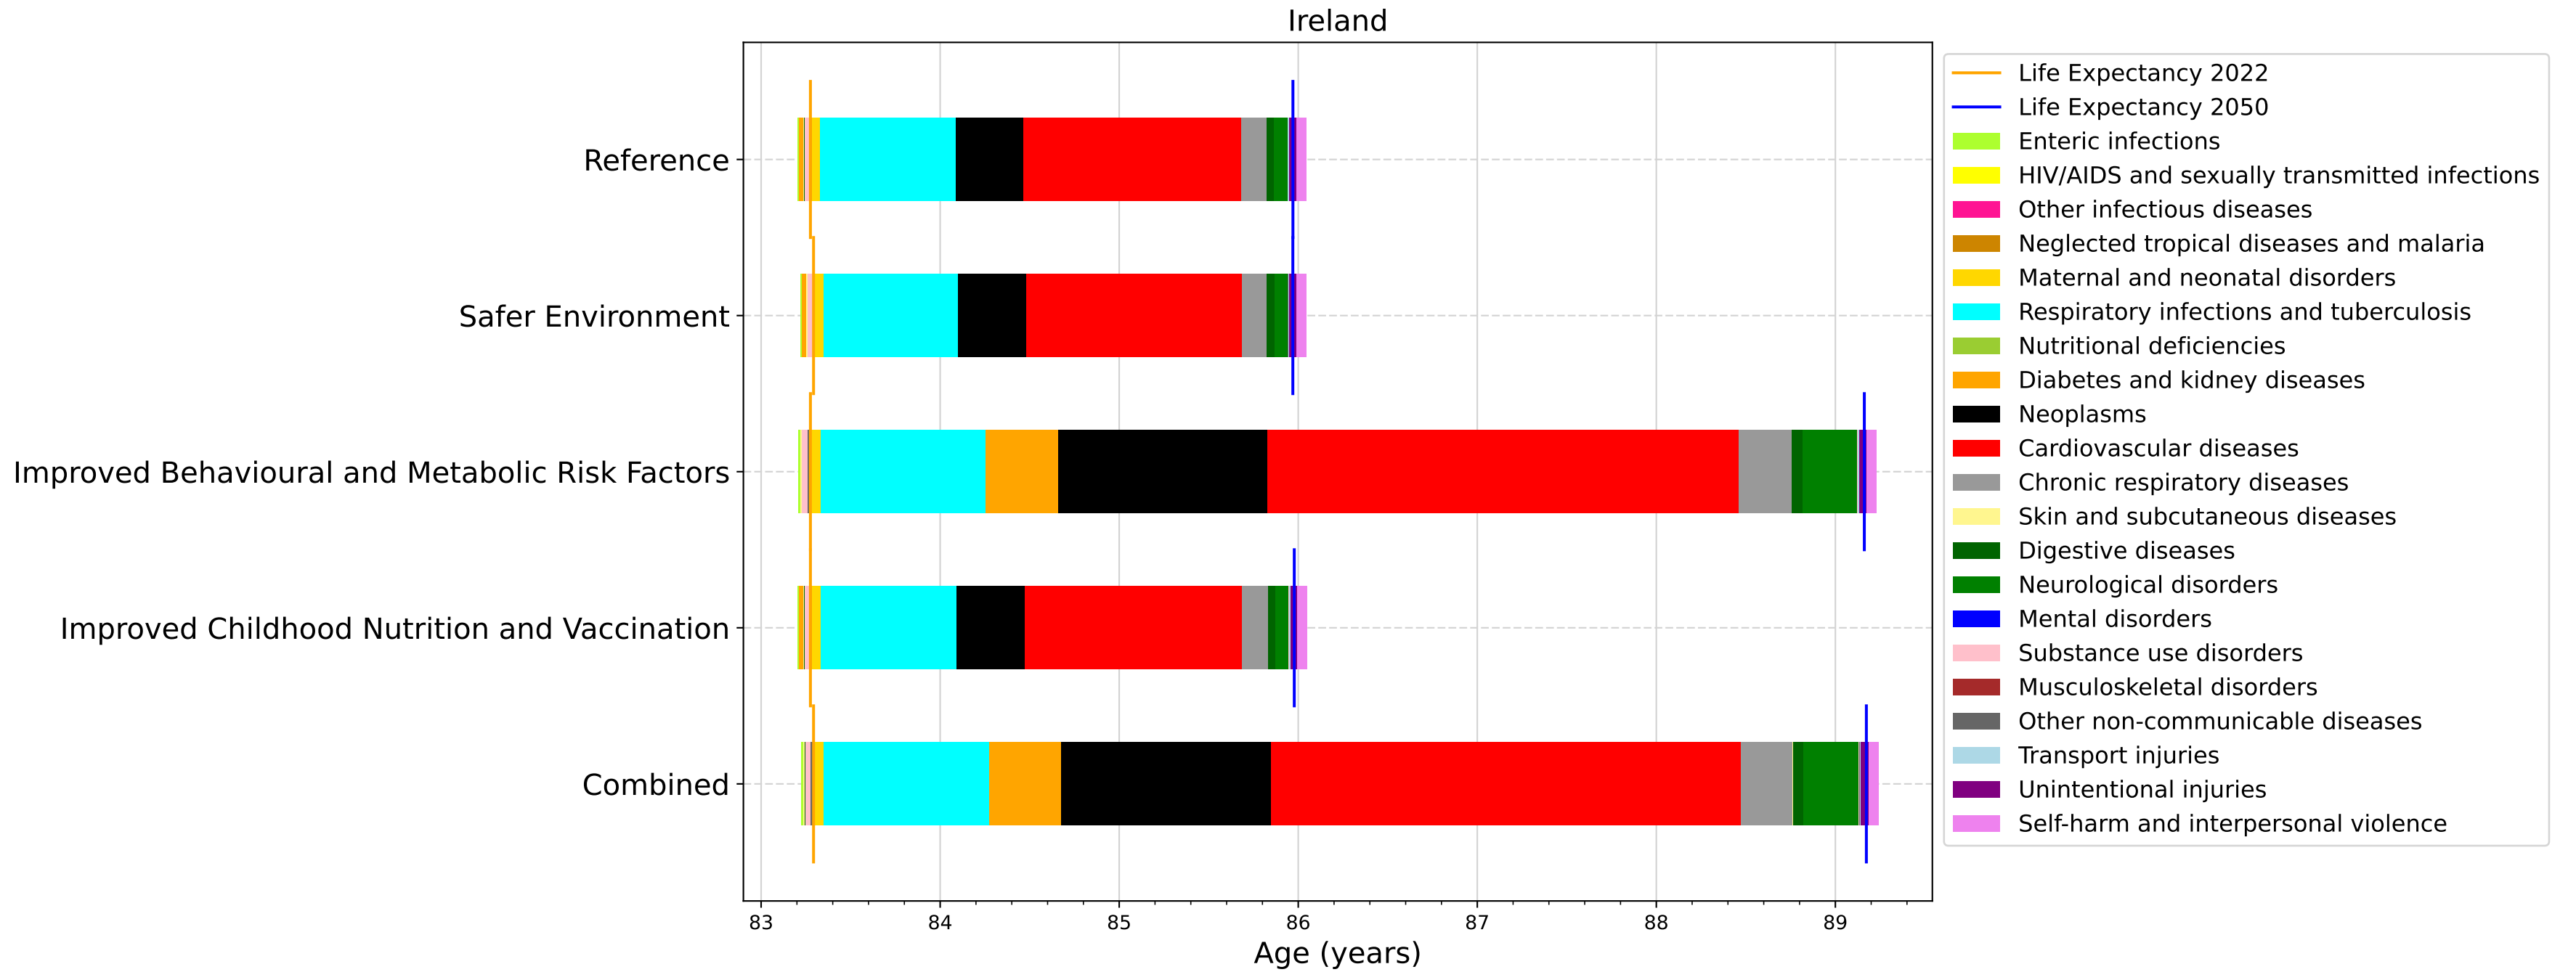

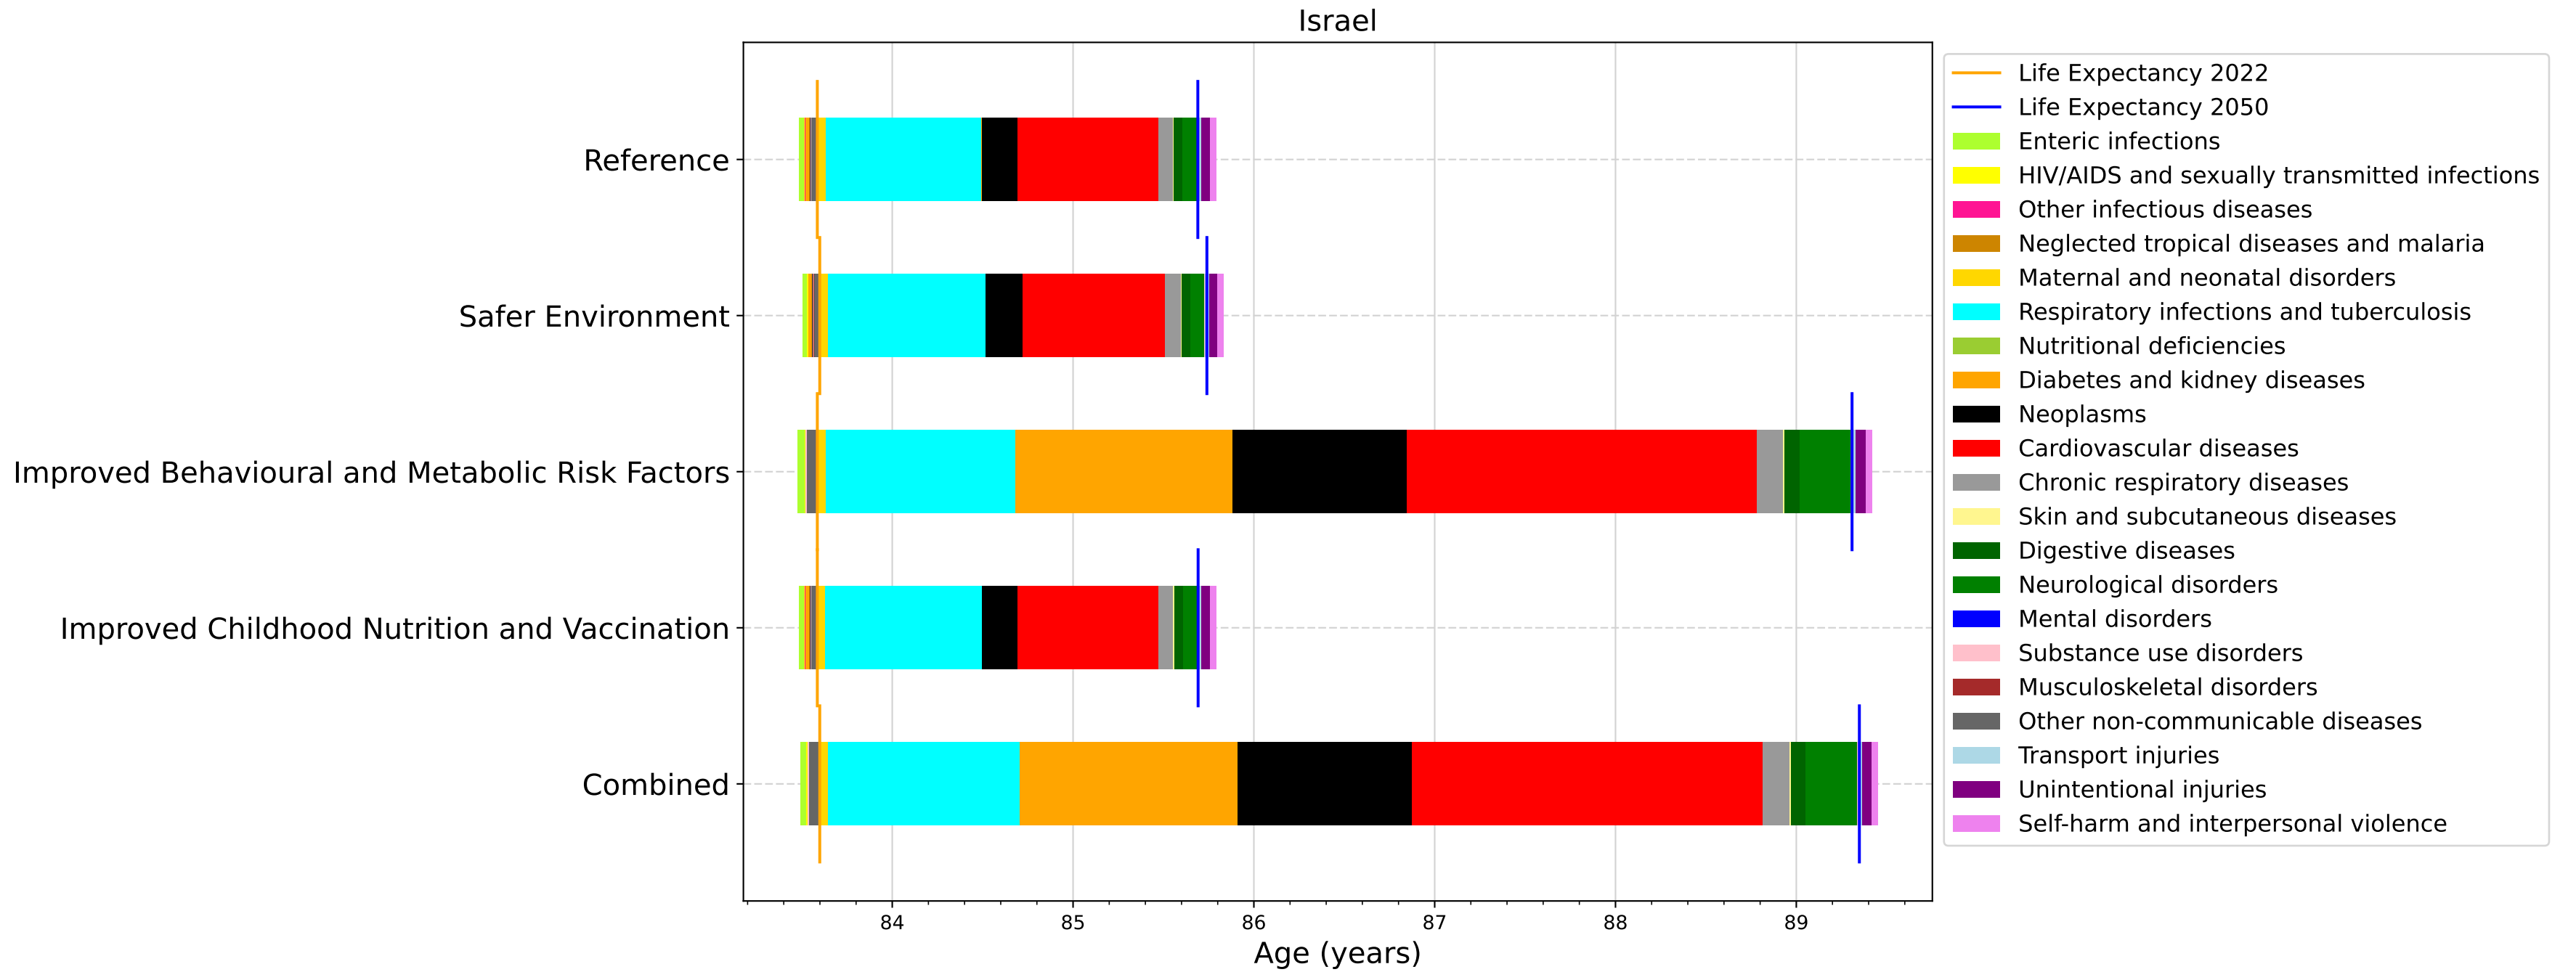

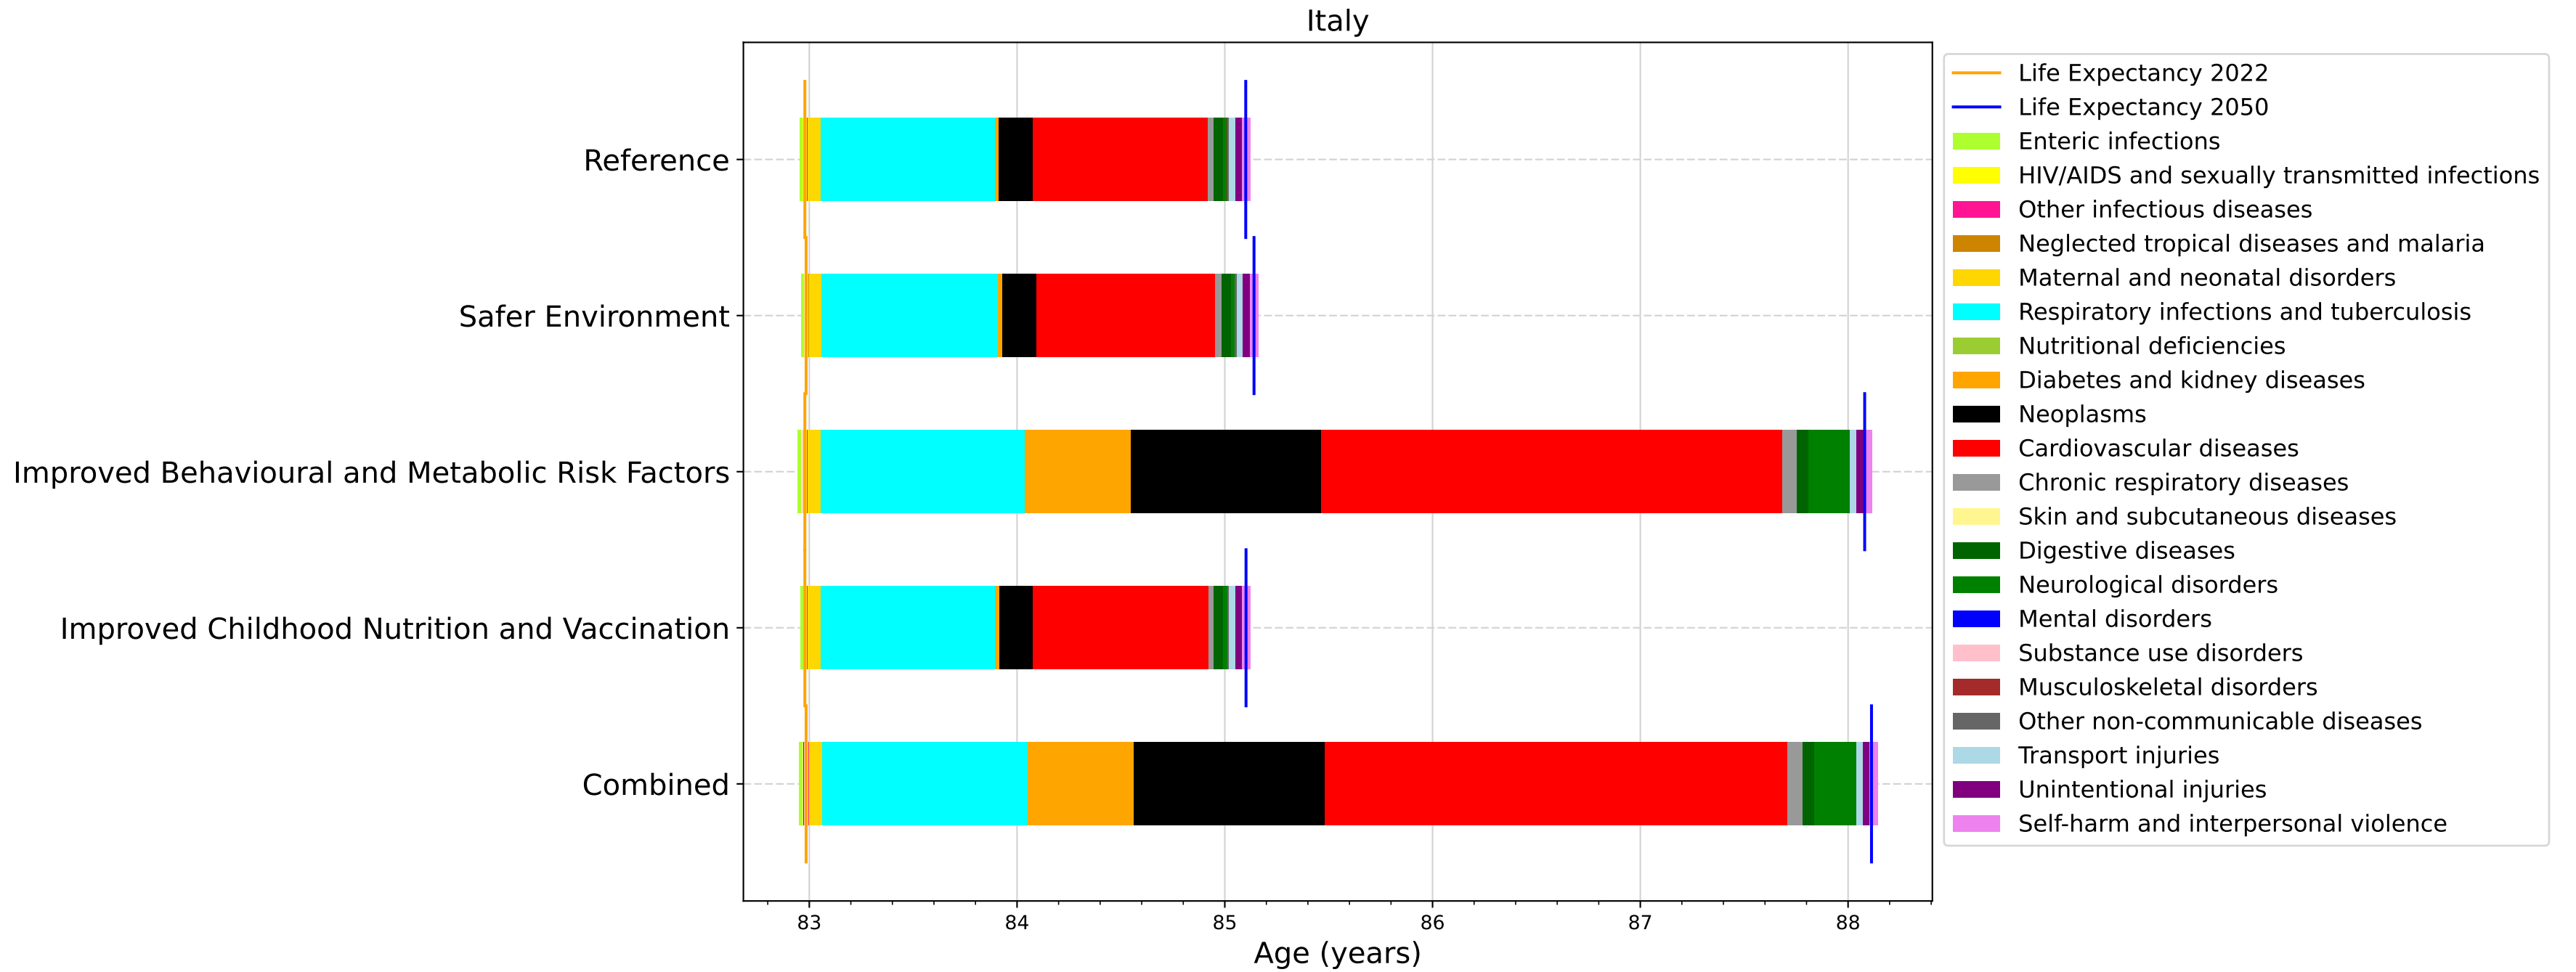



Jamaica

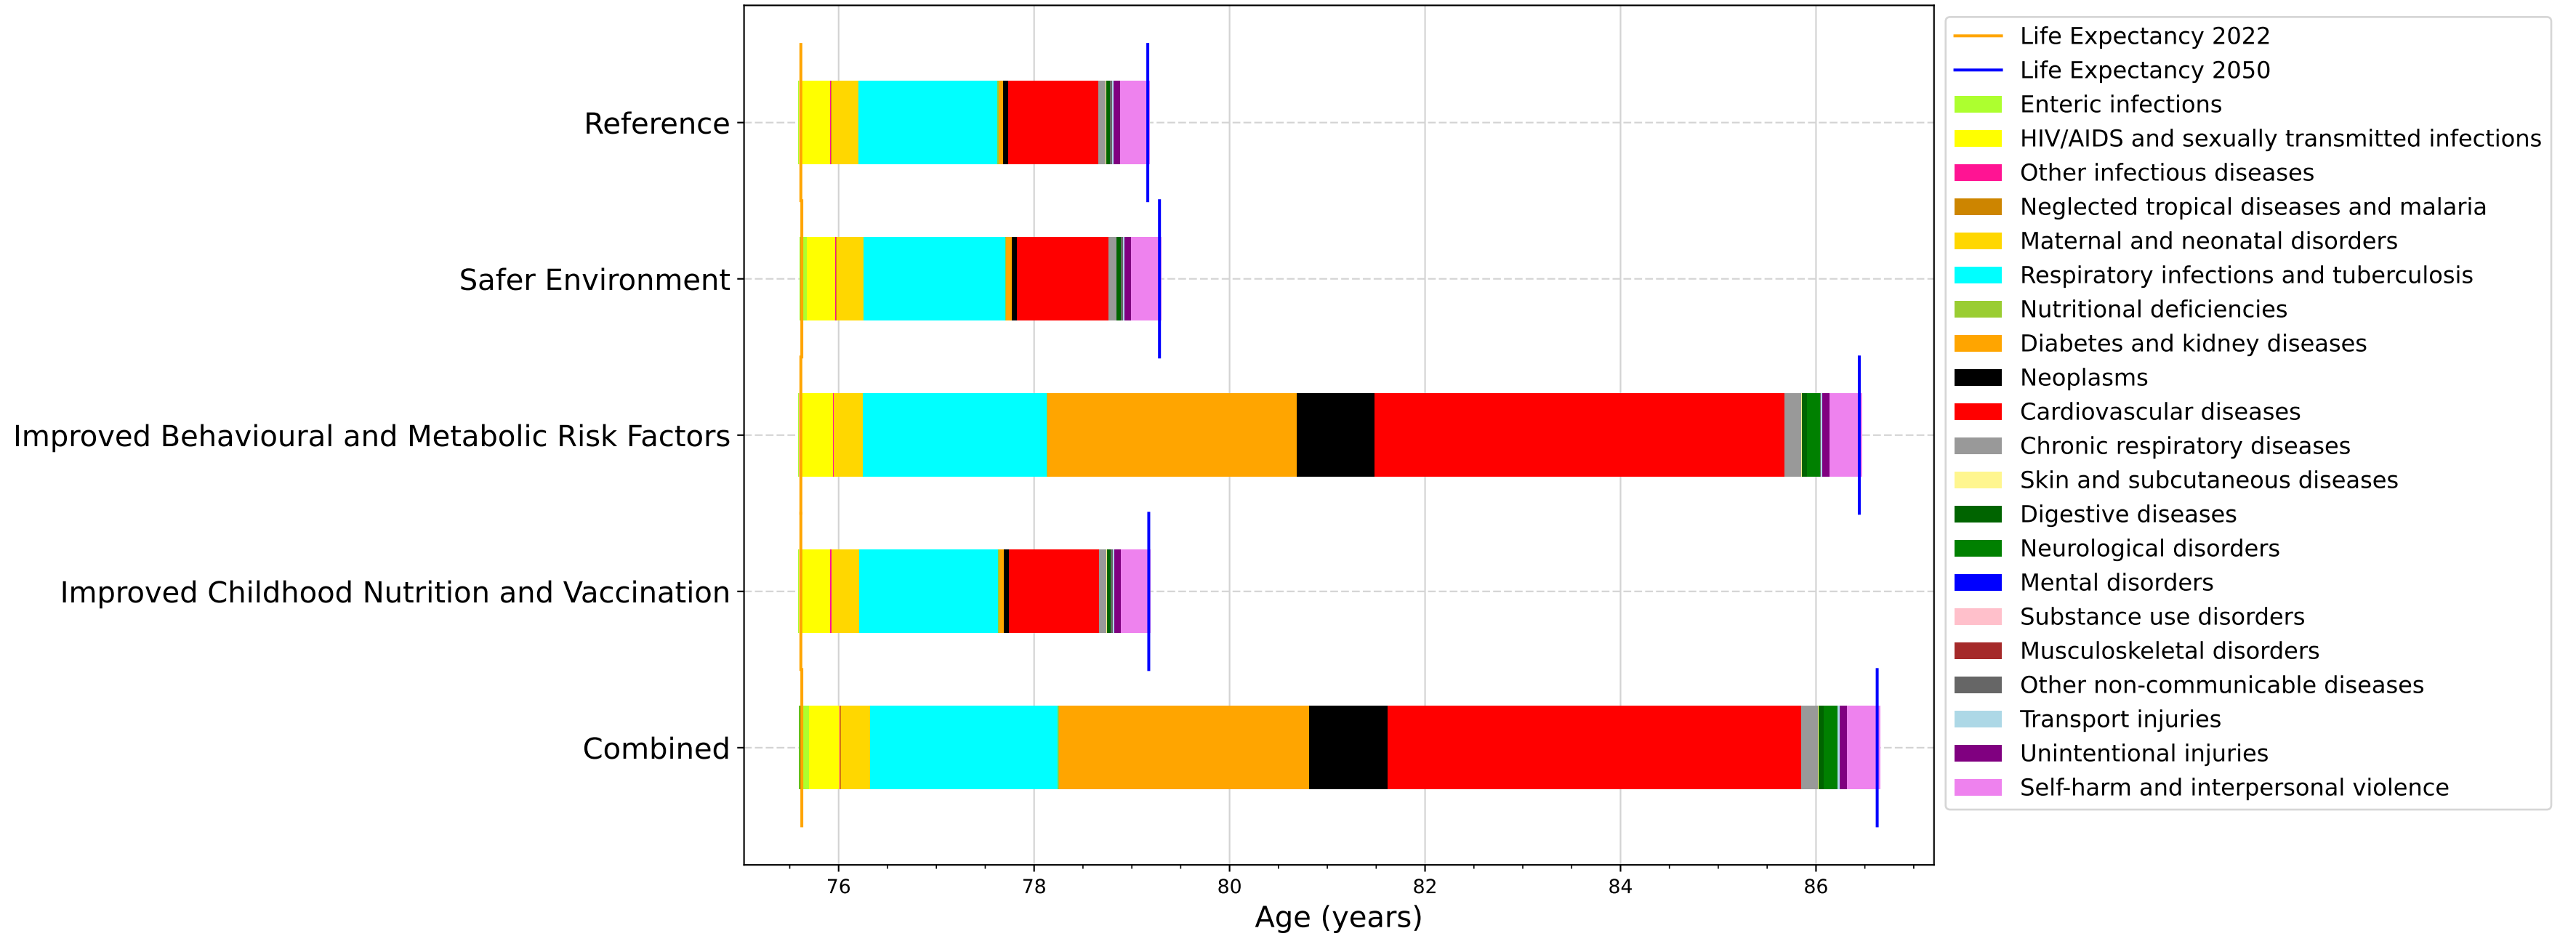

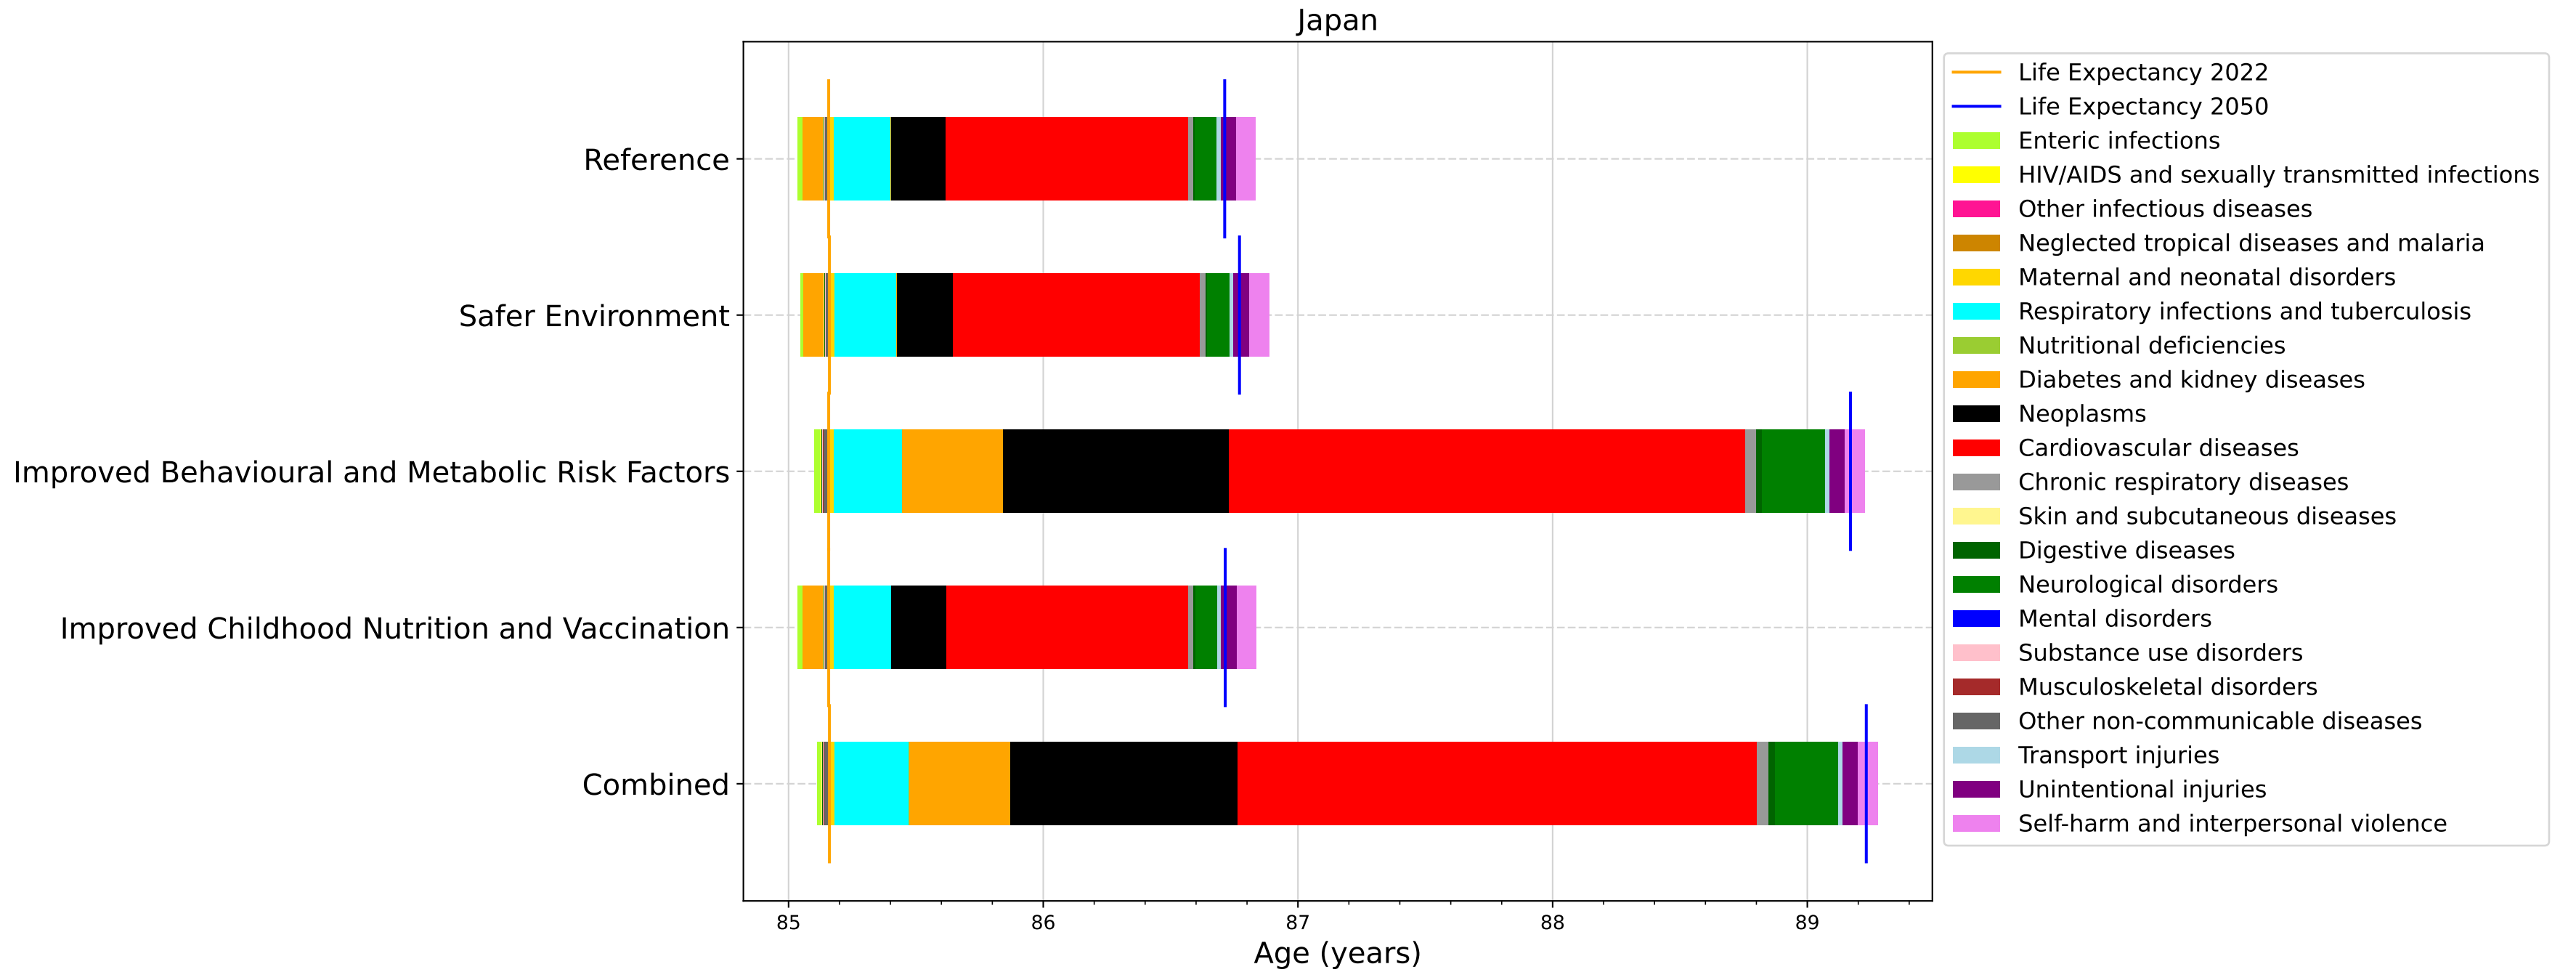

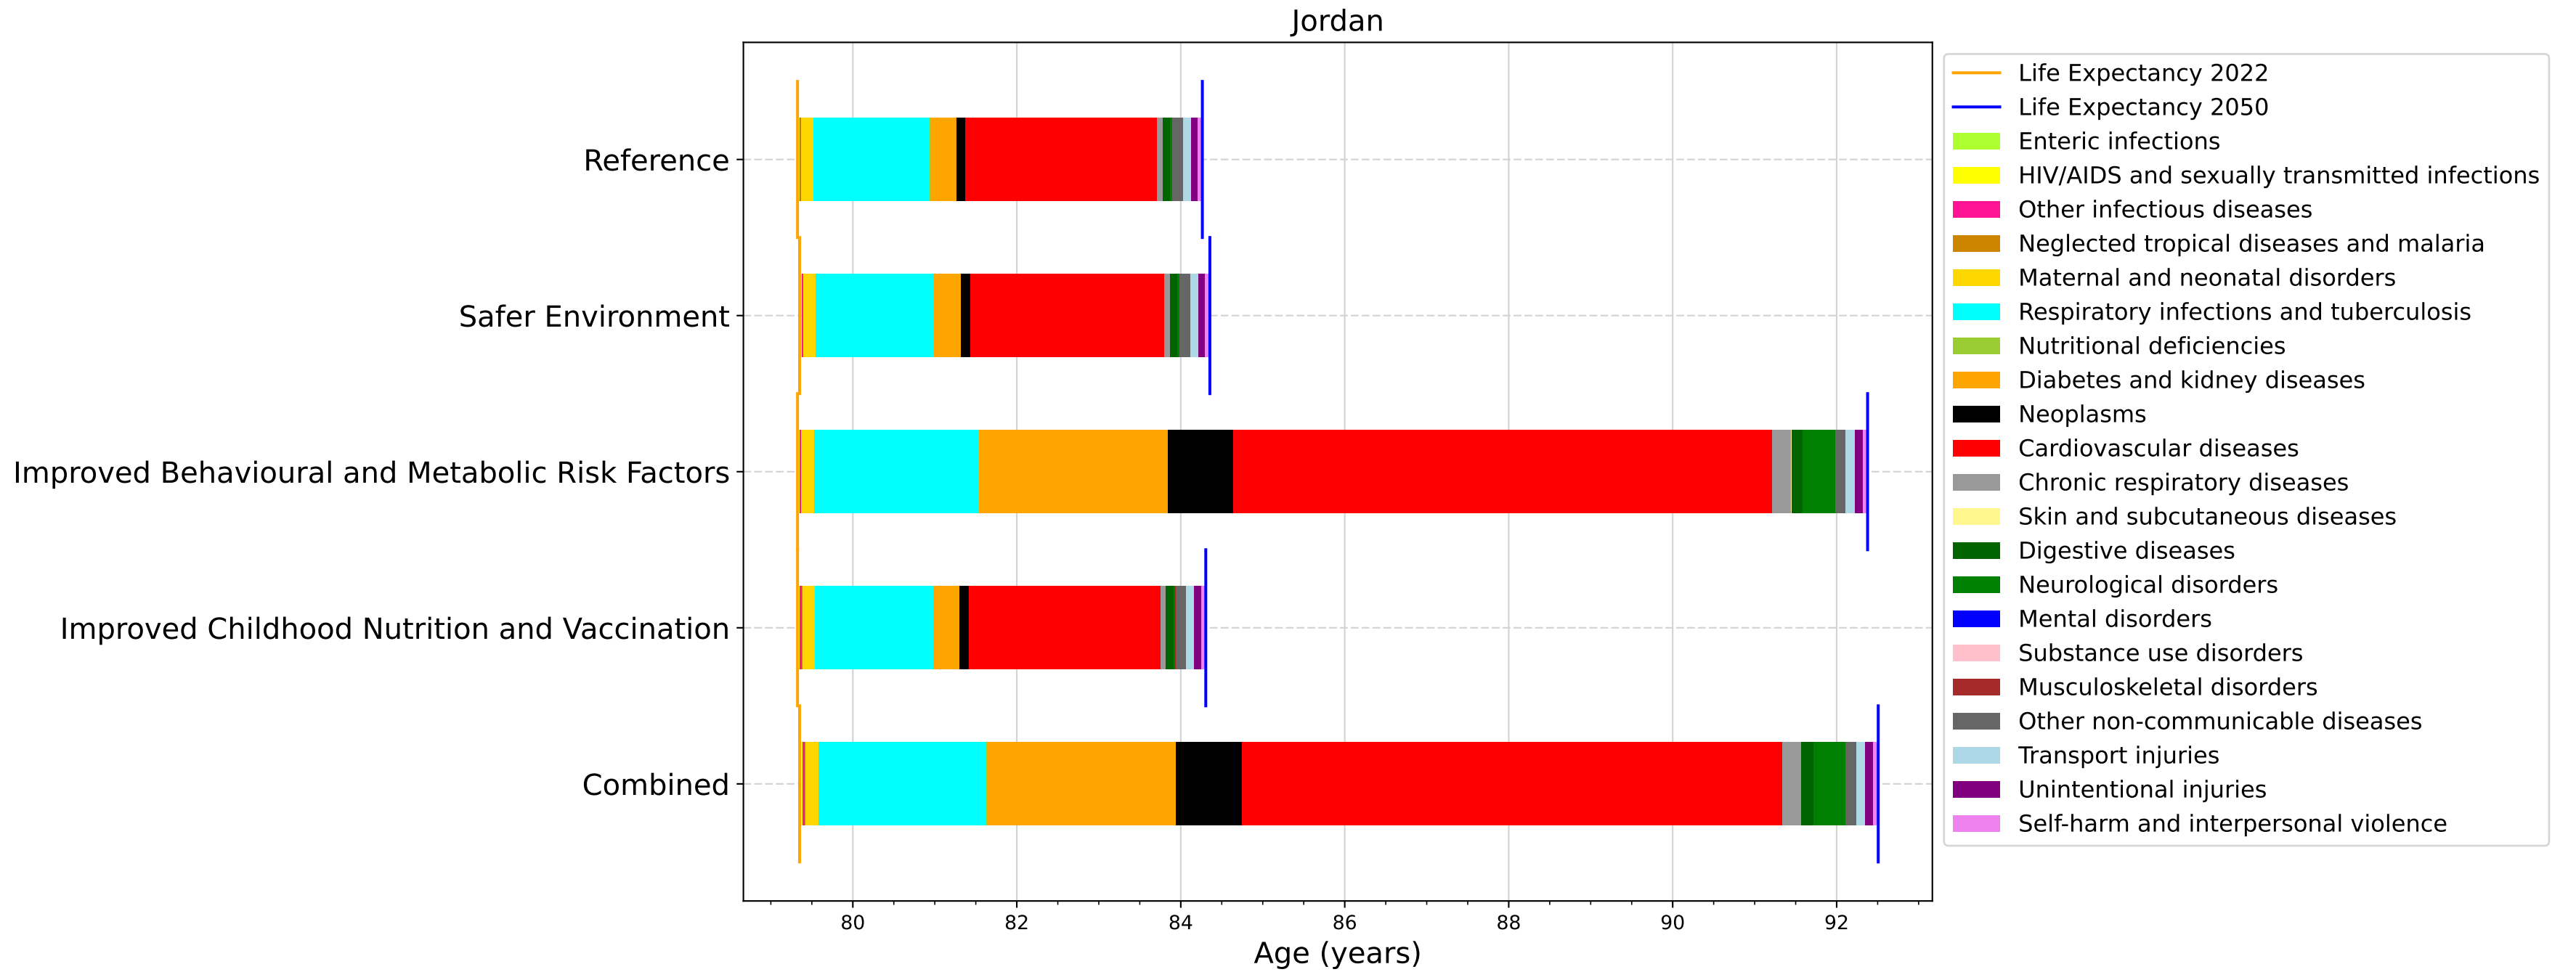

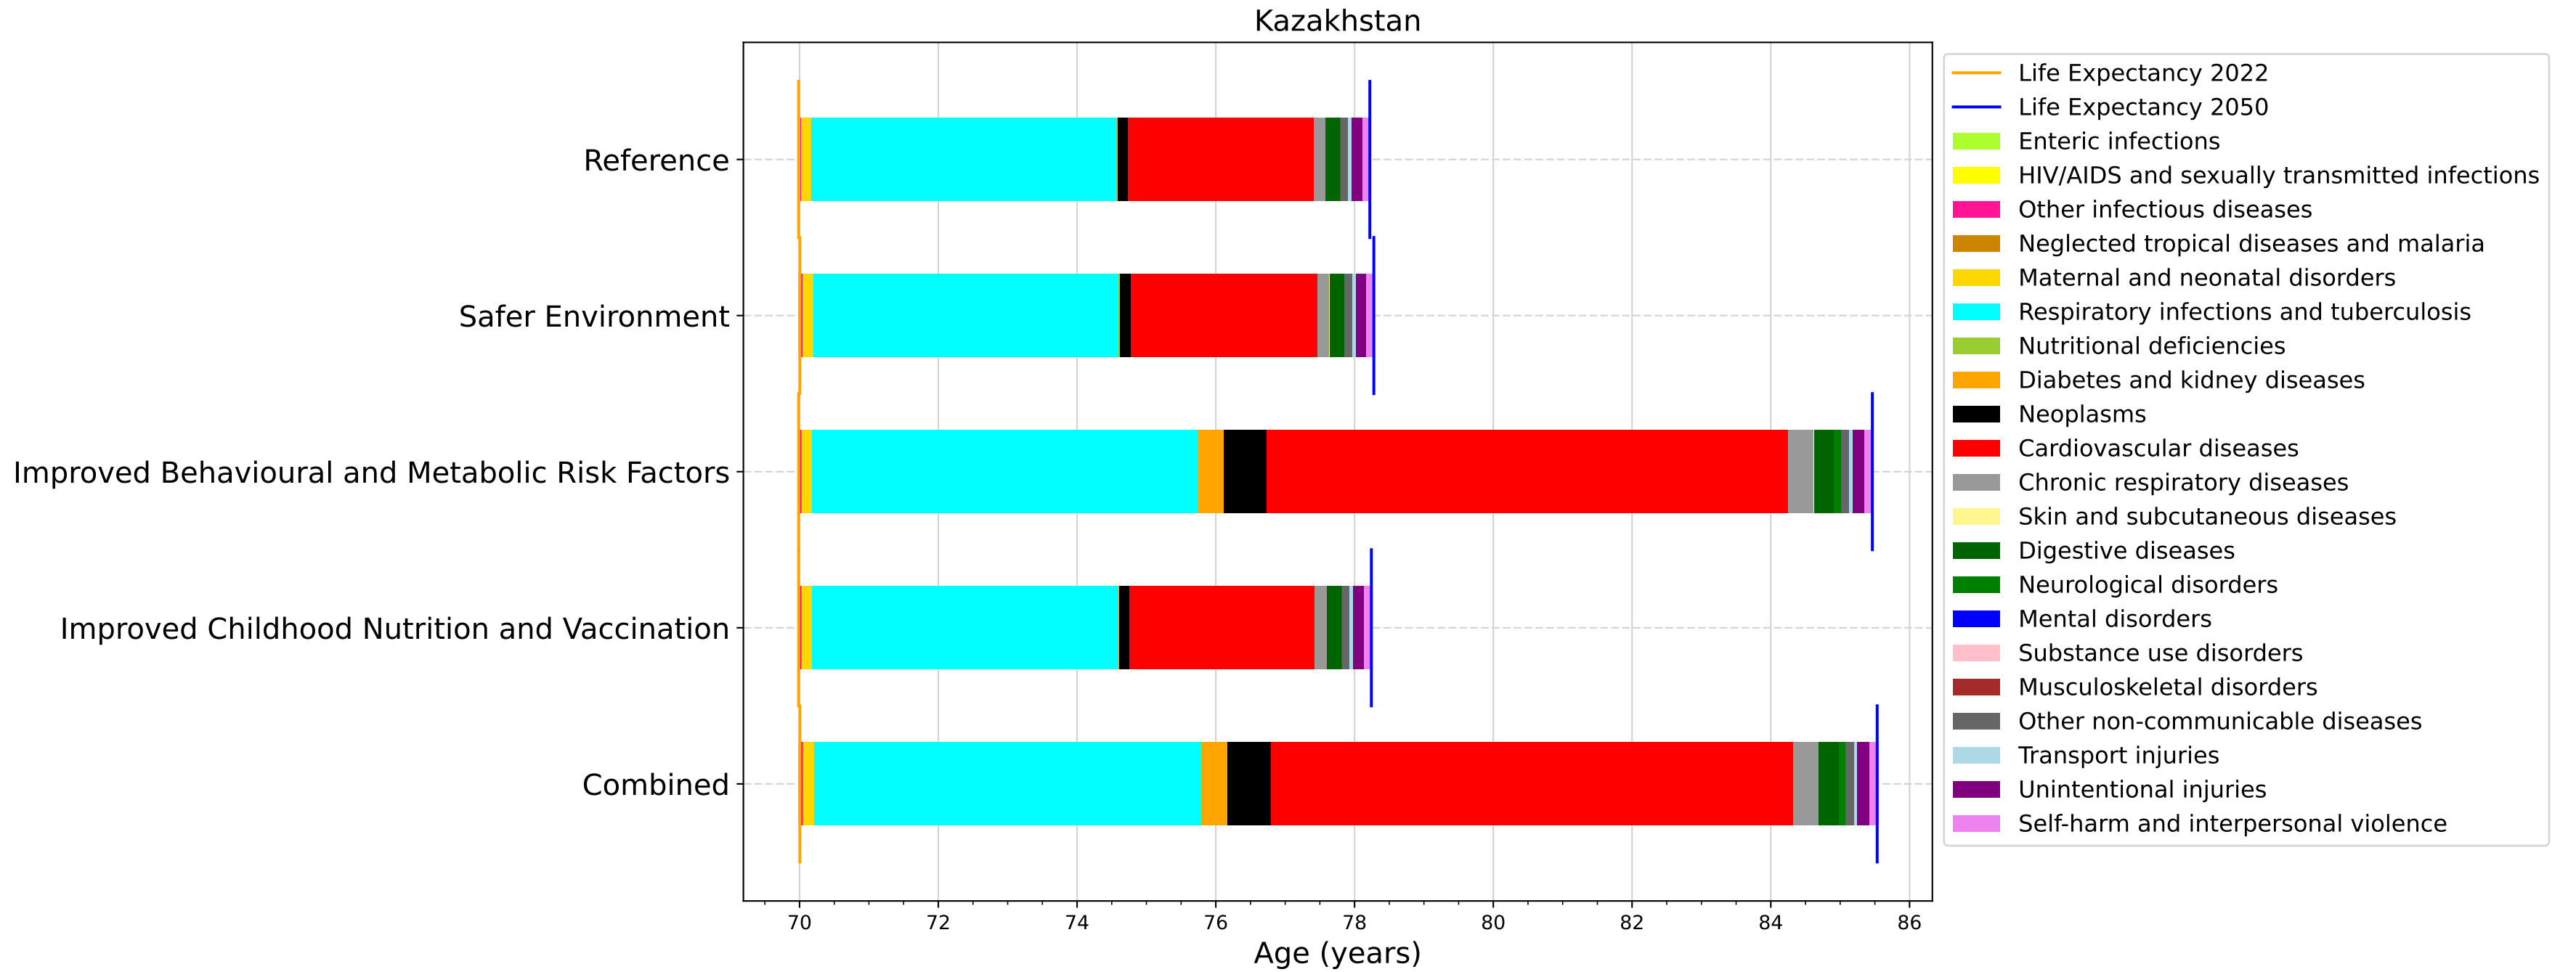

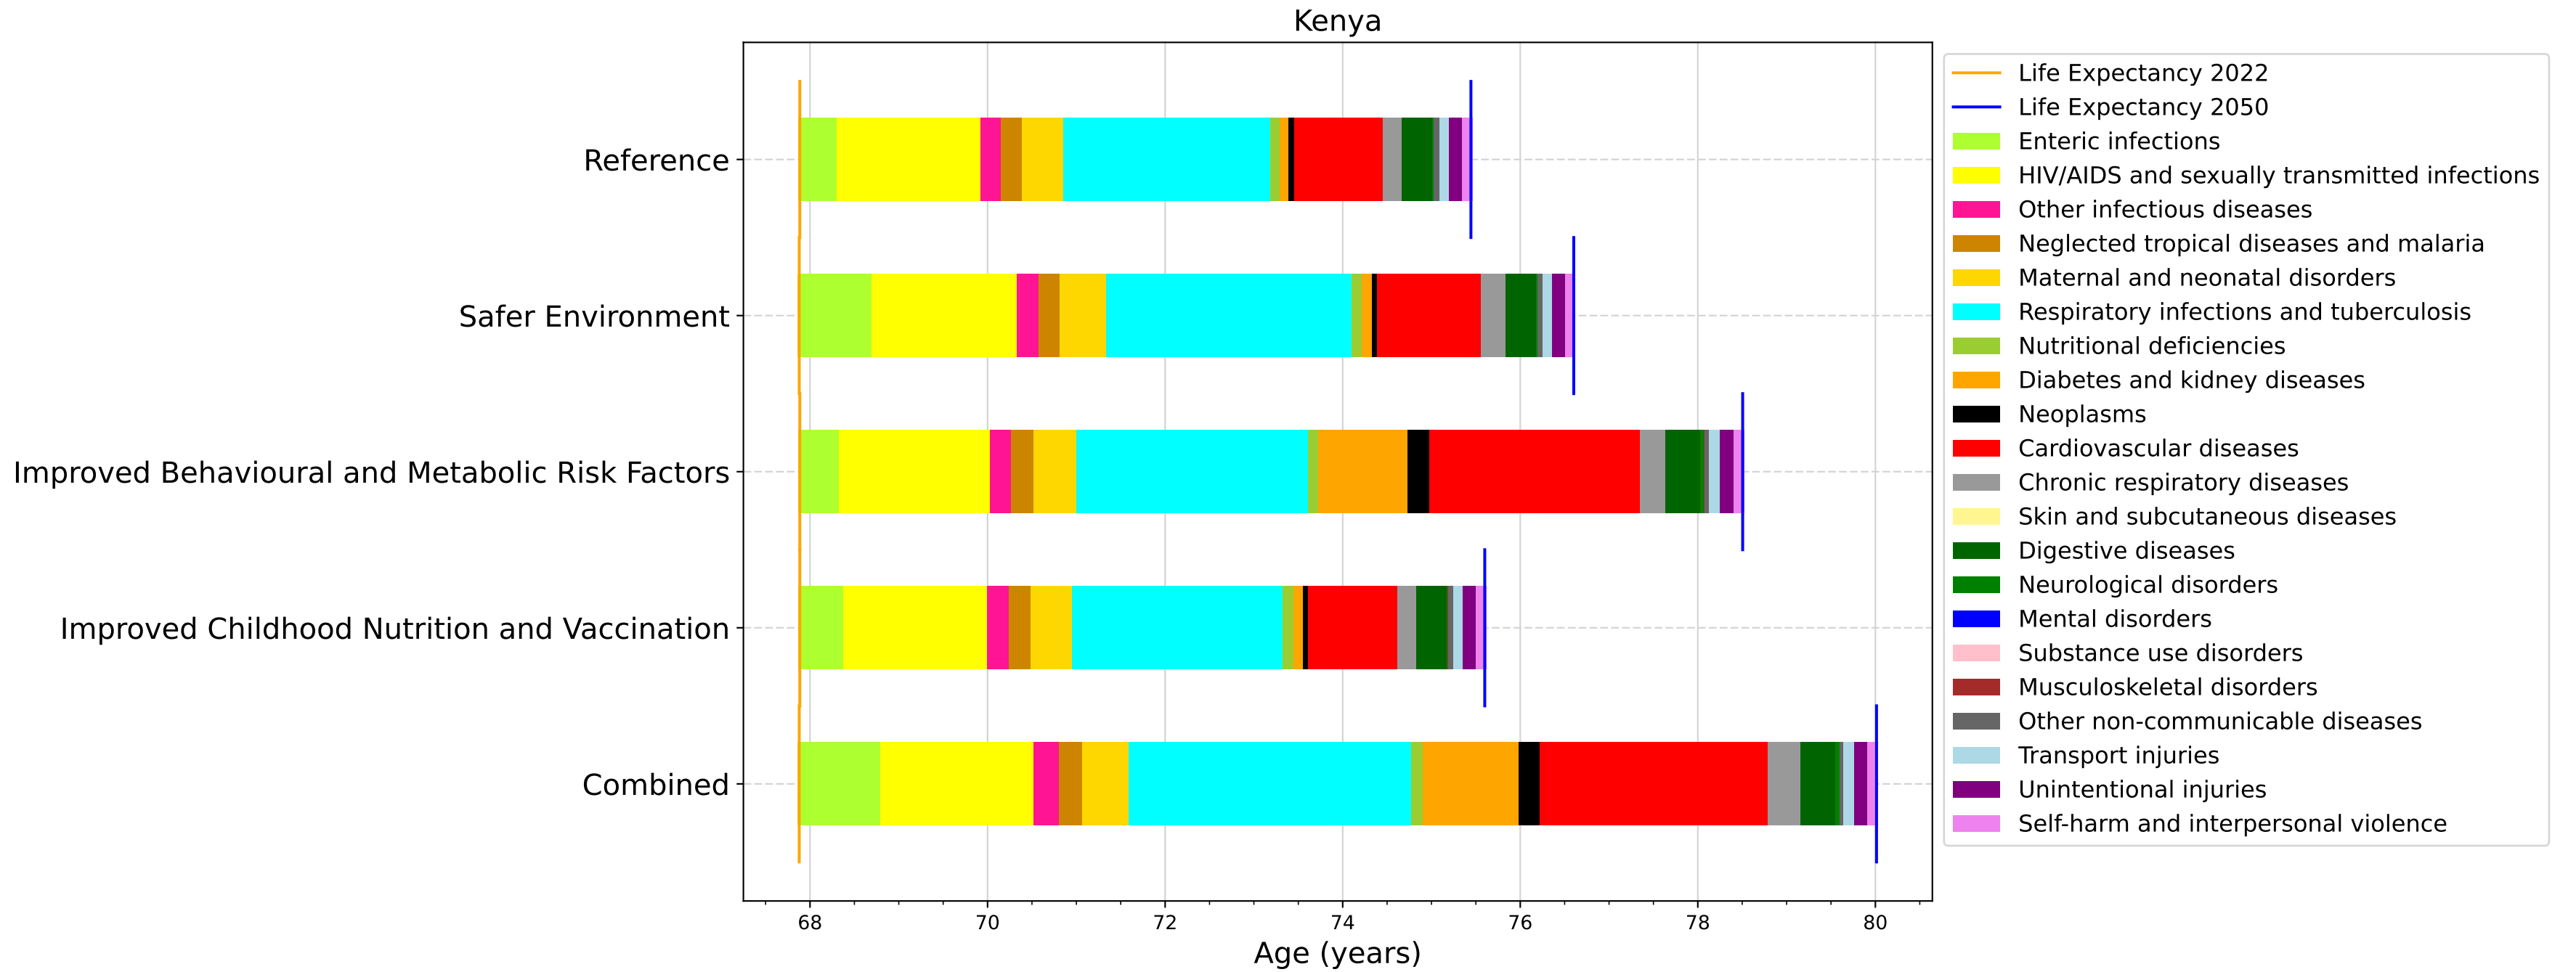

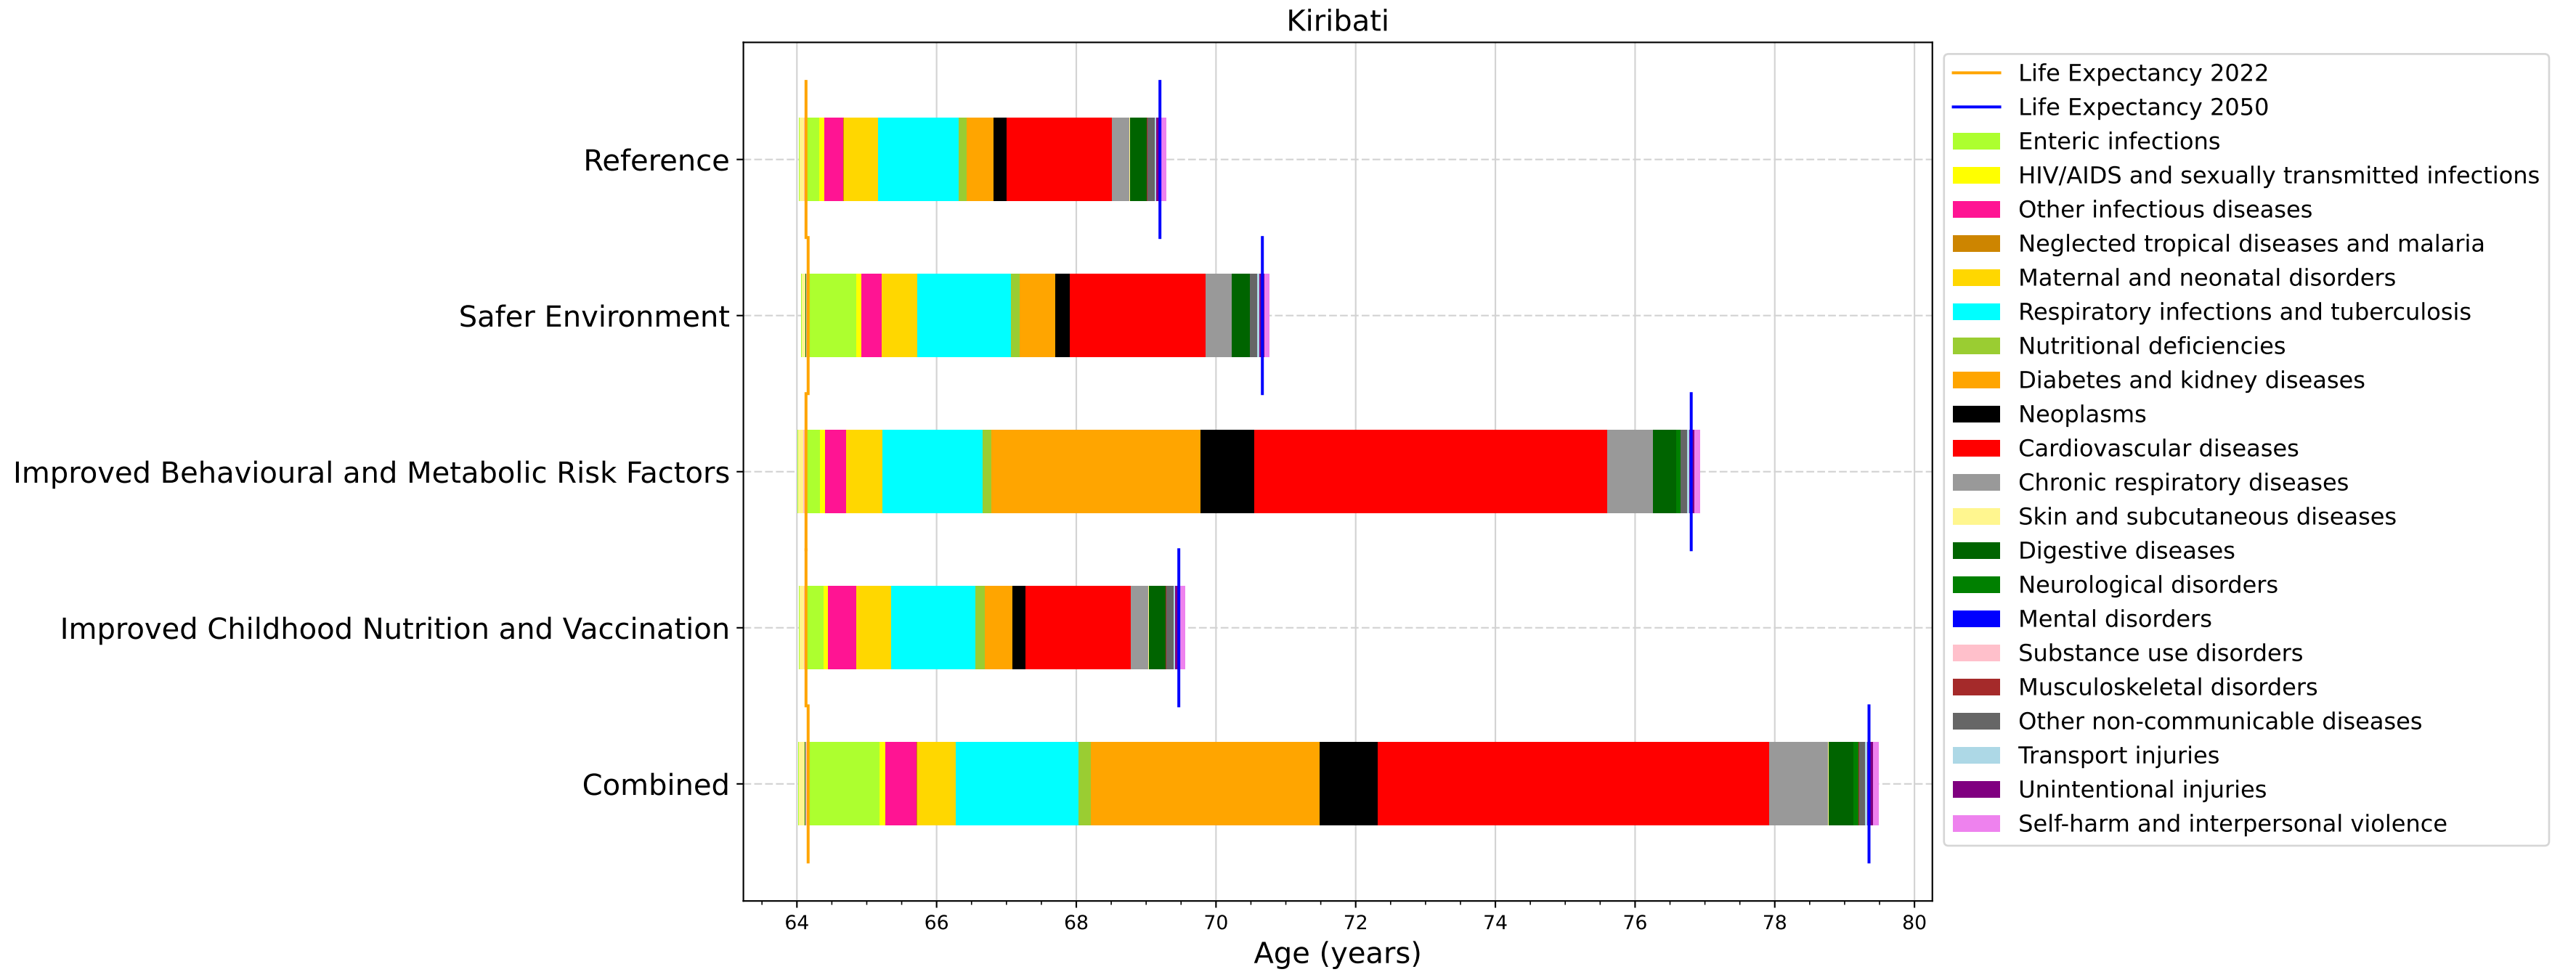

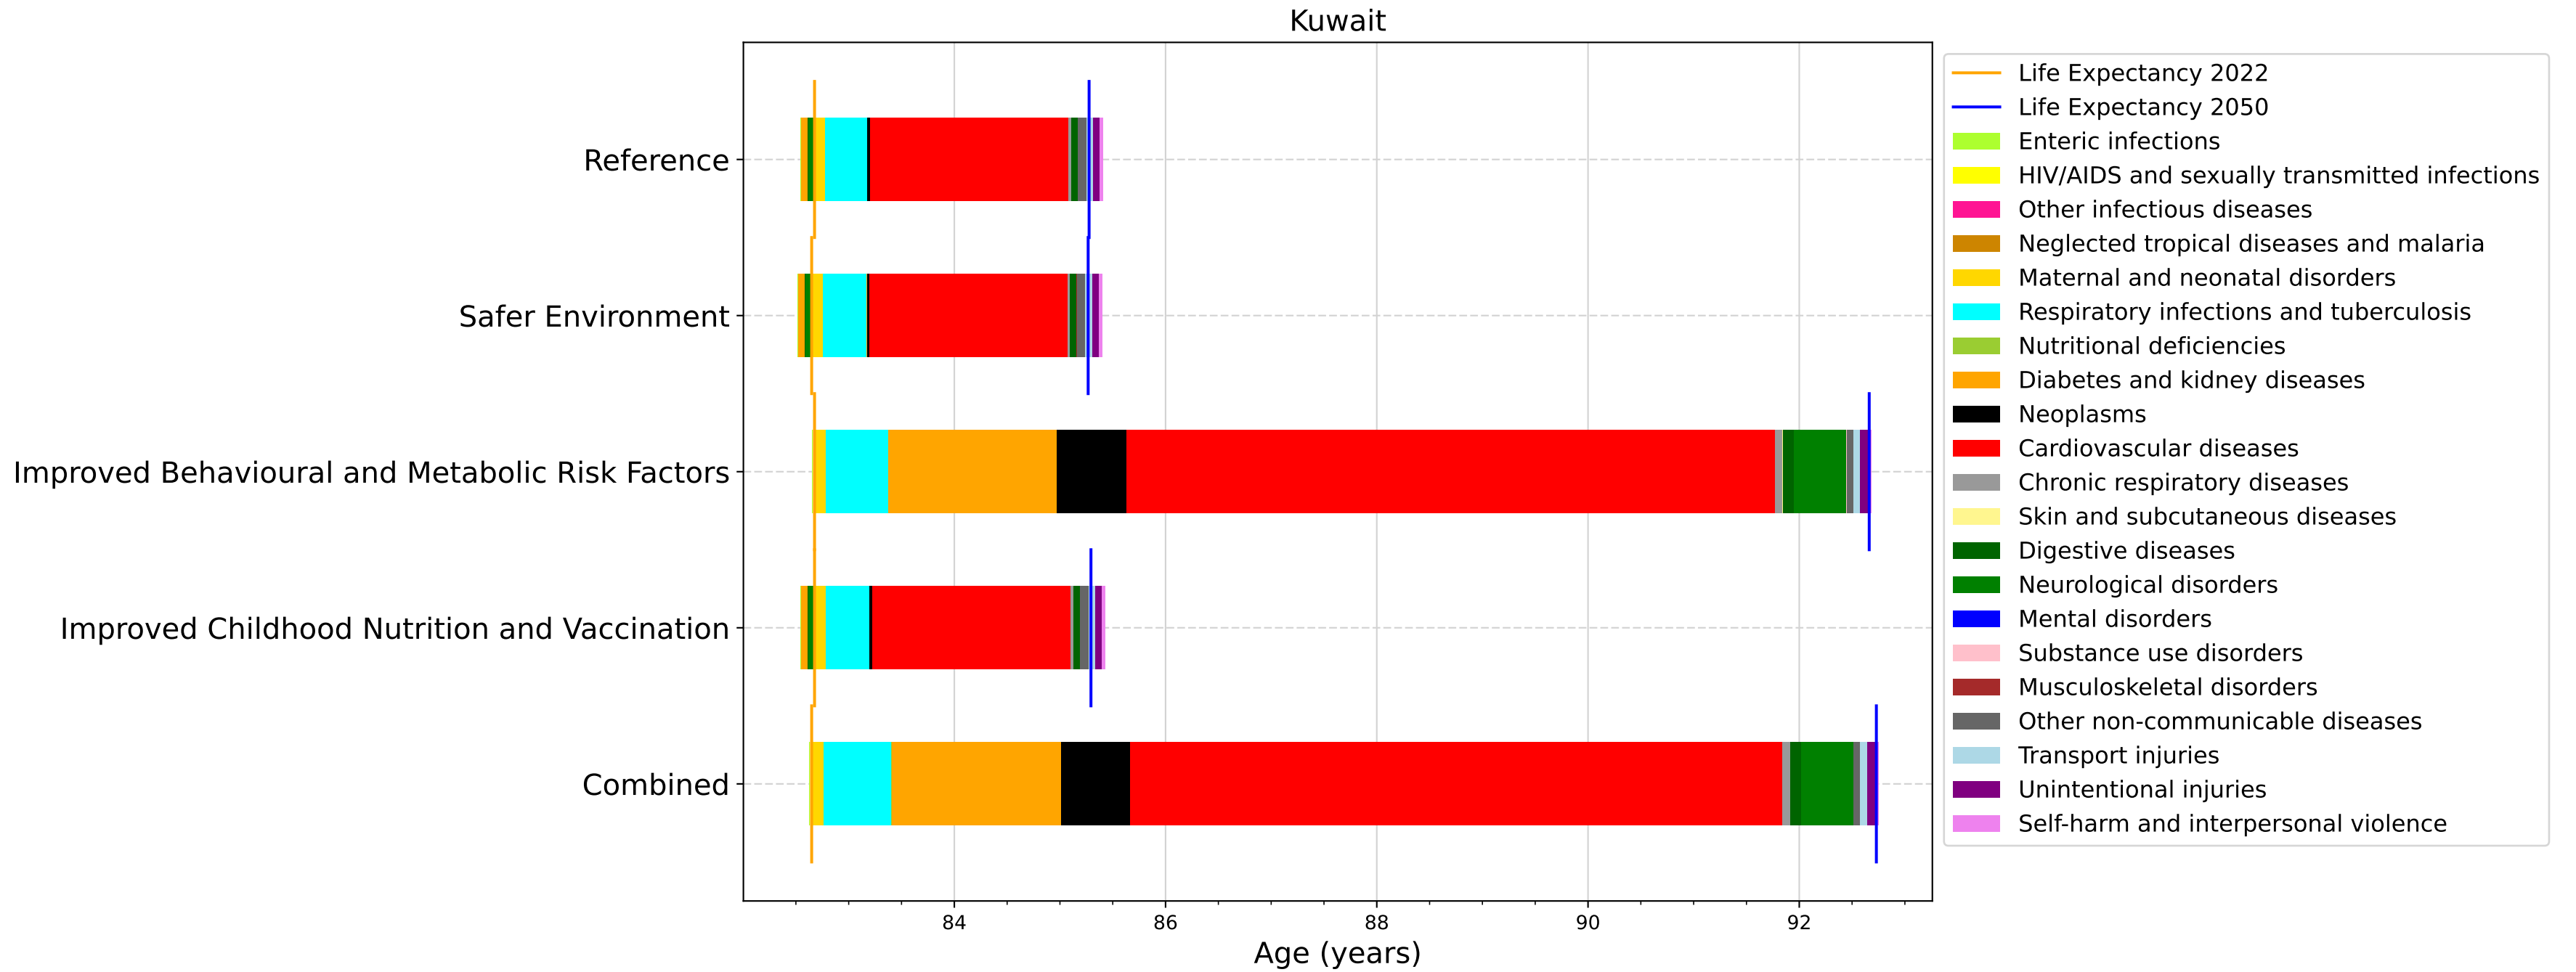

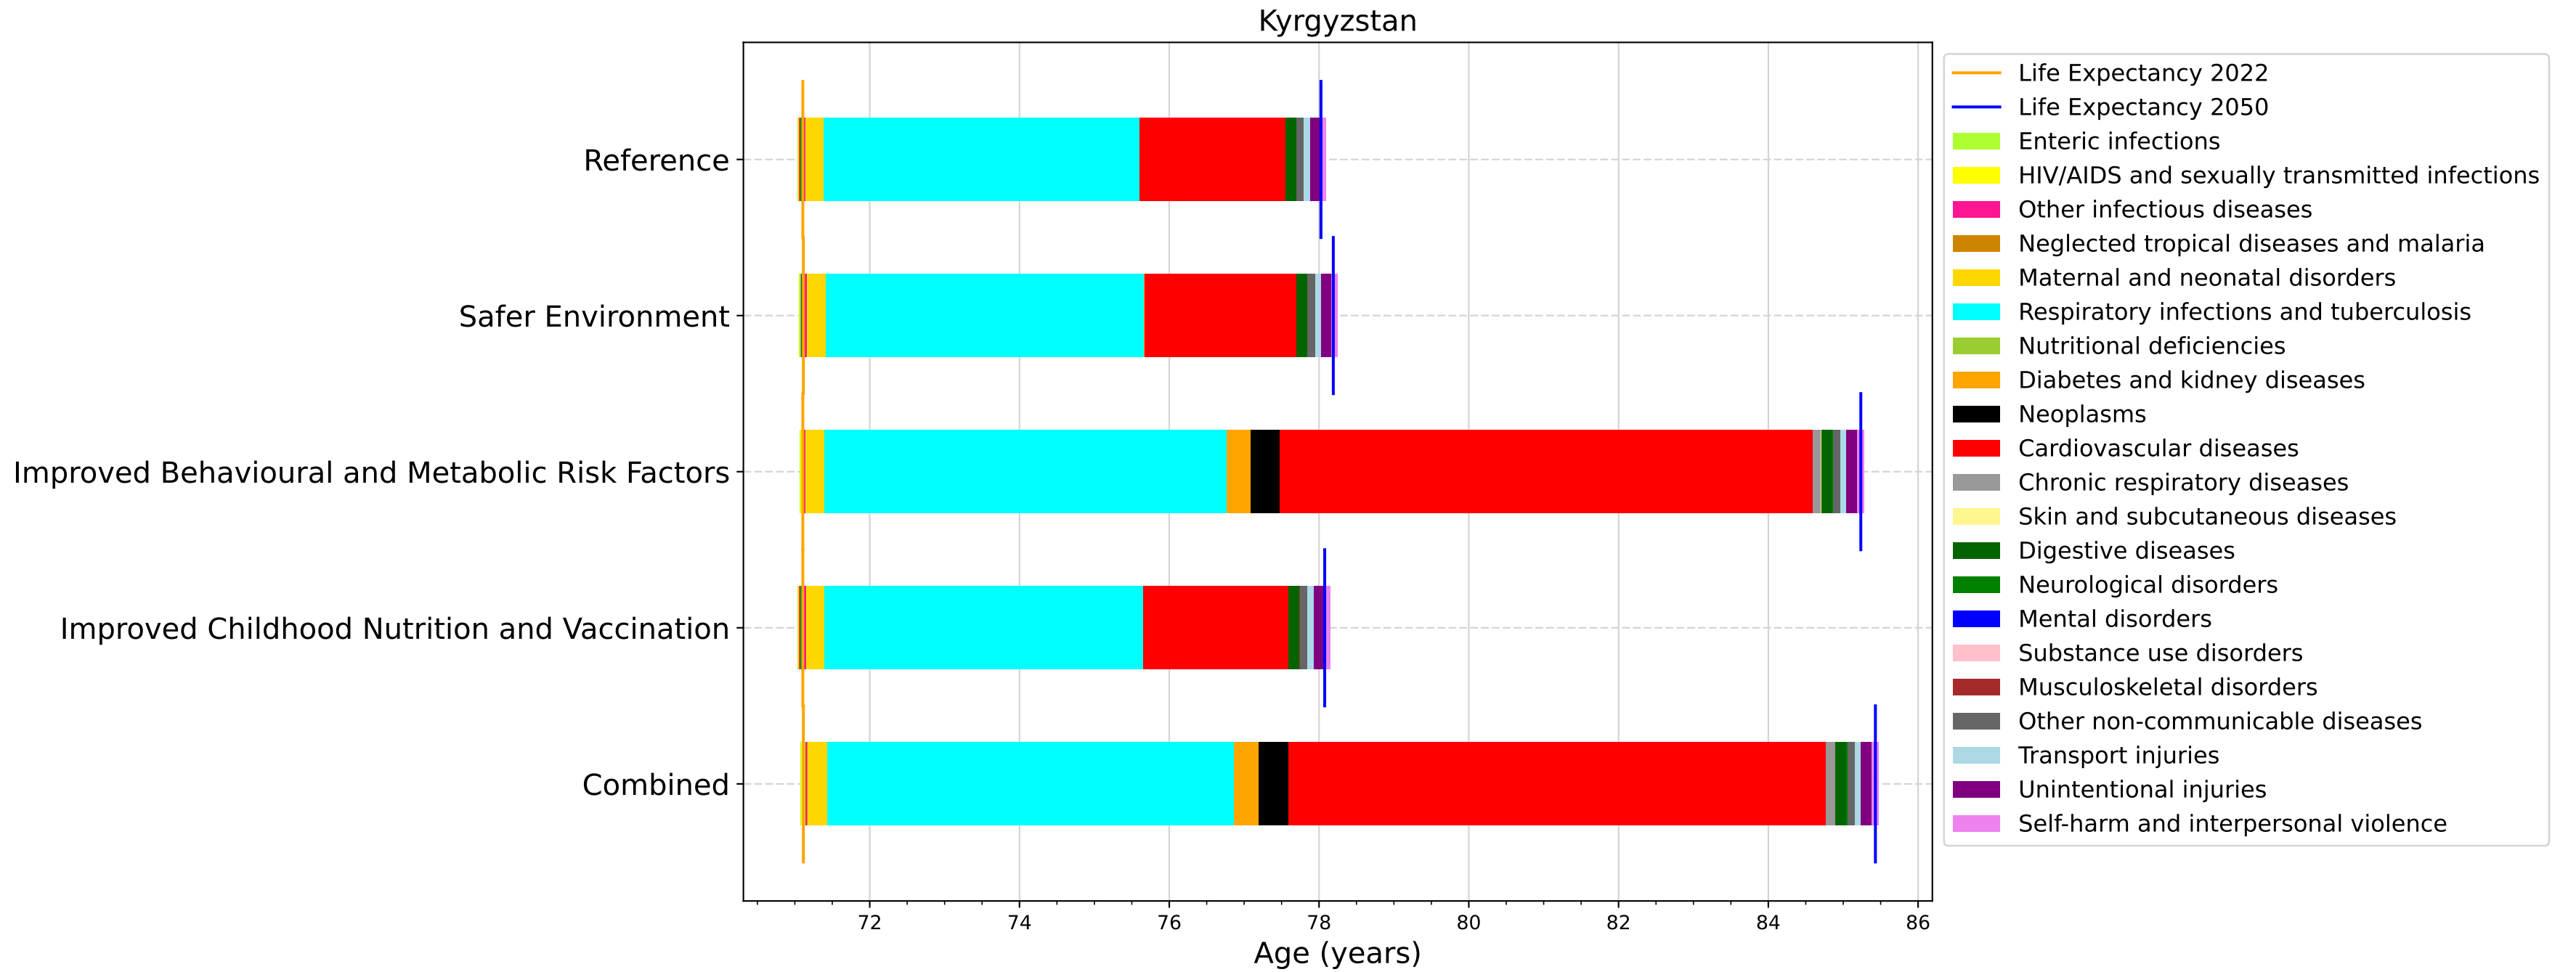



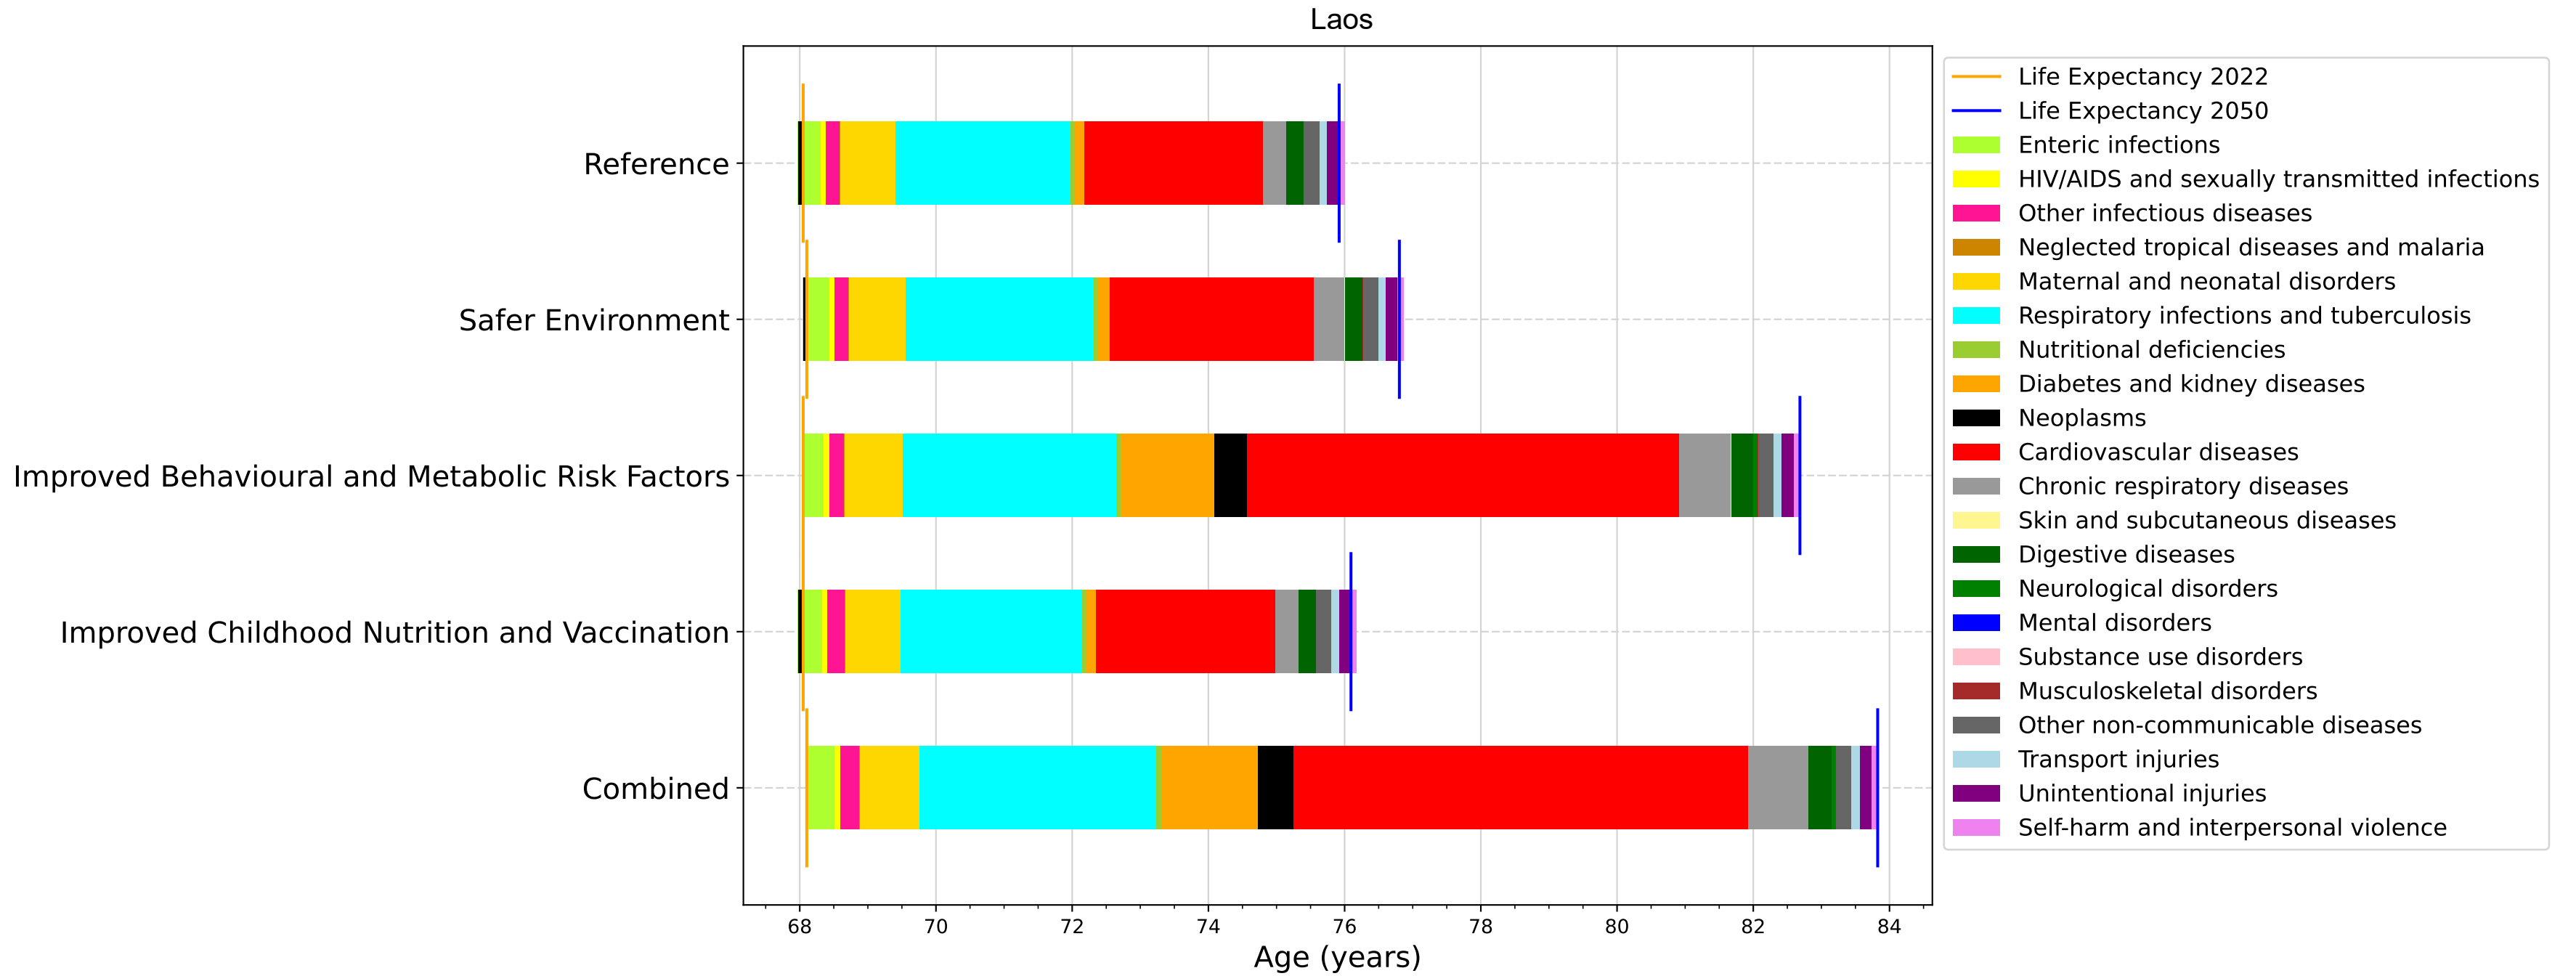

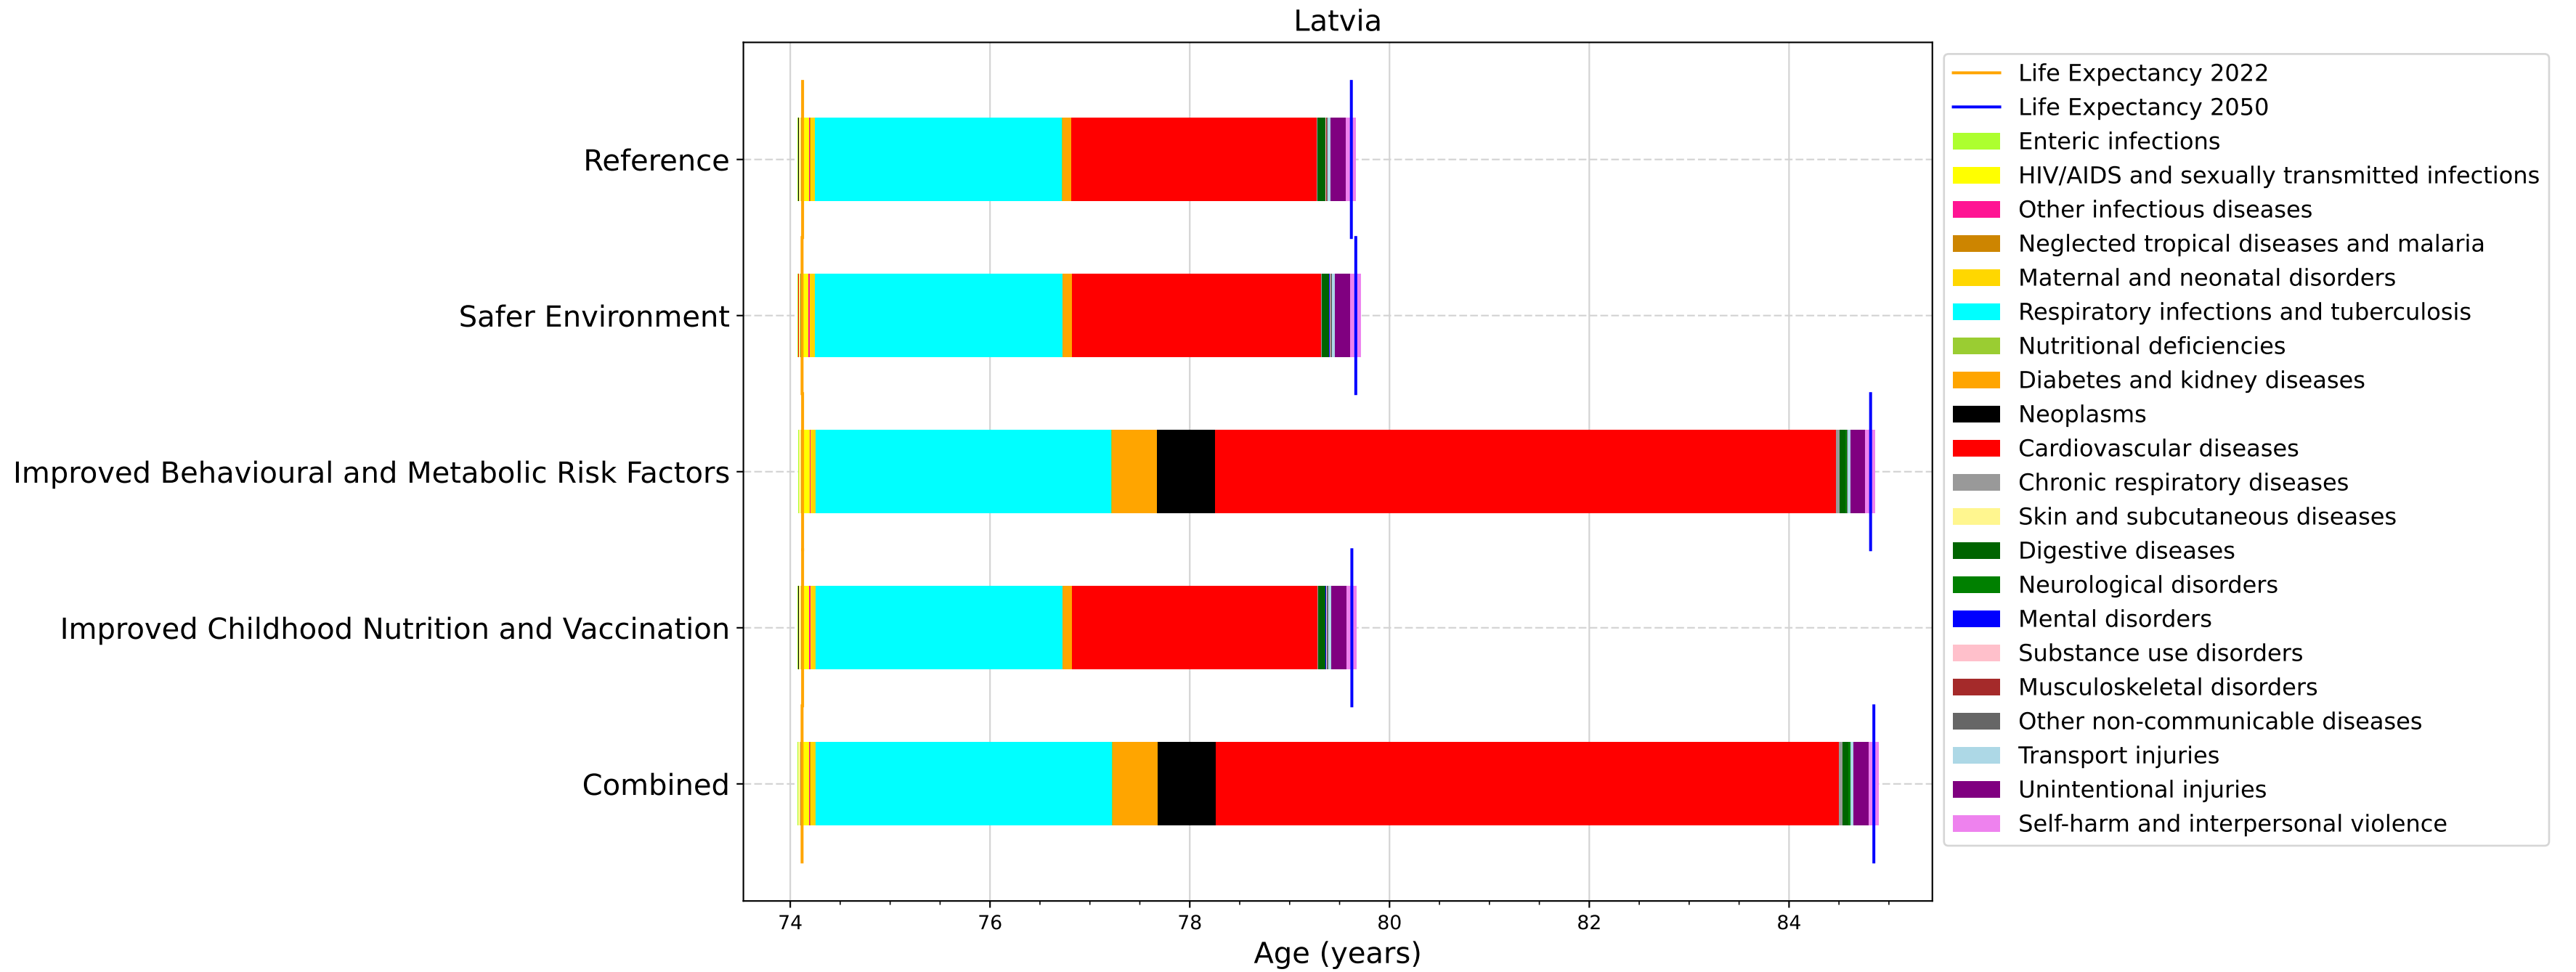

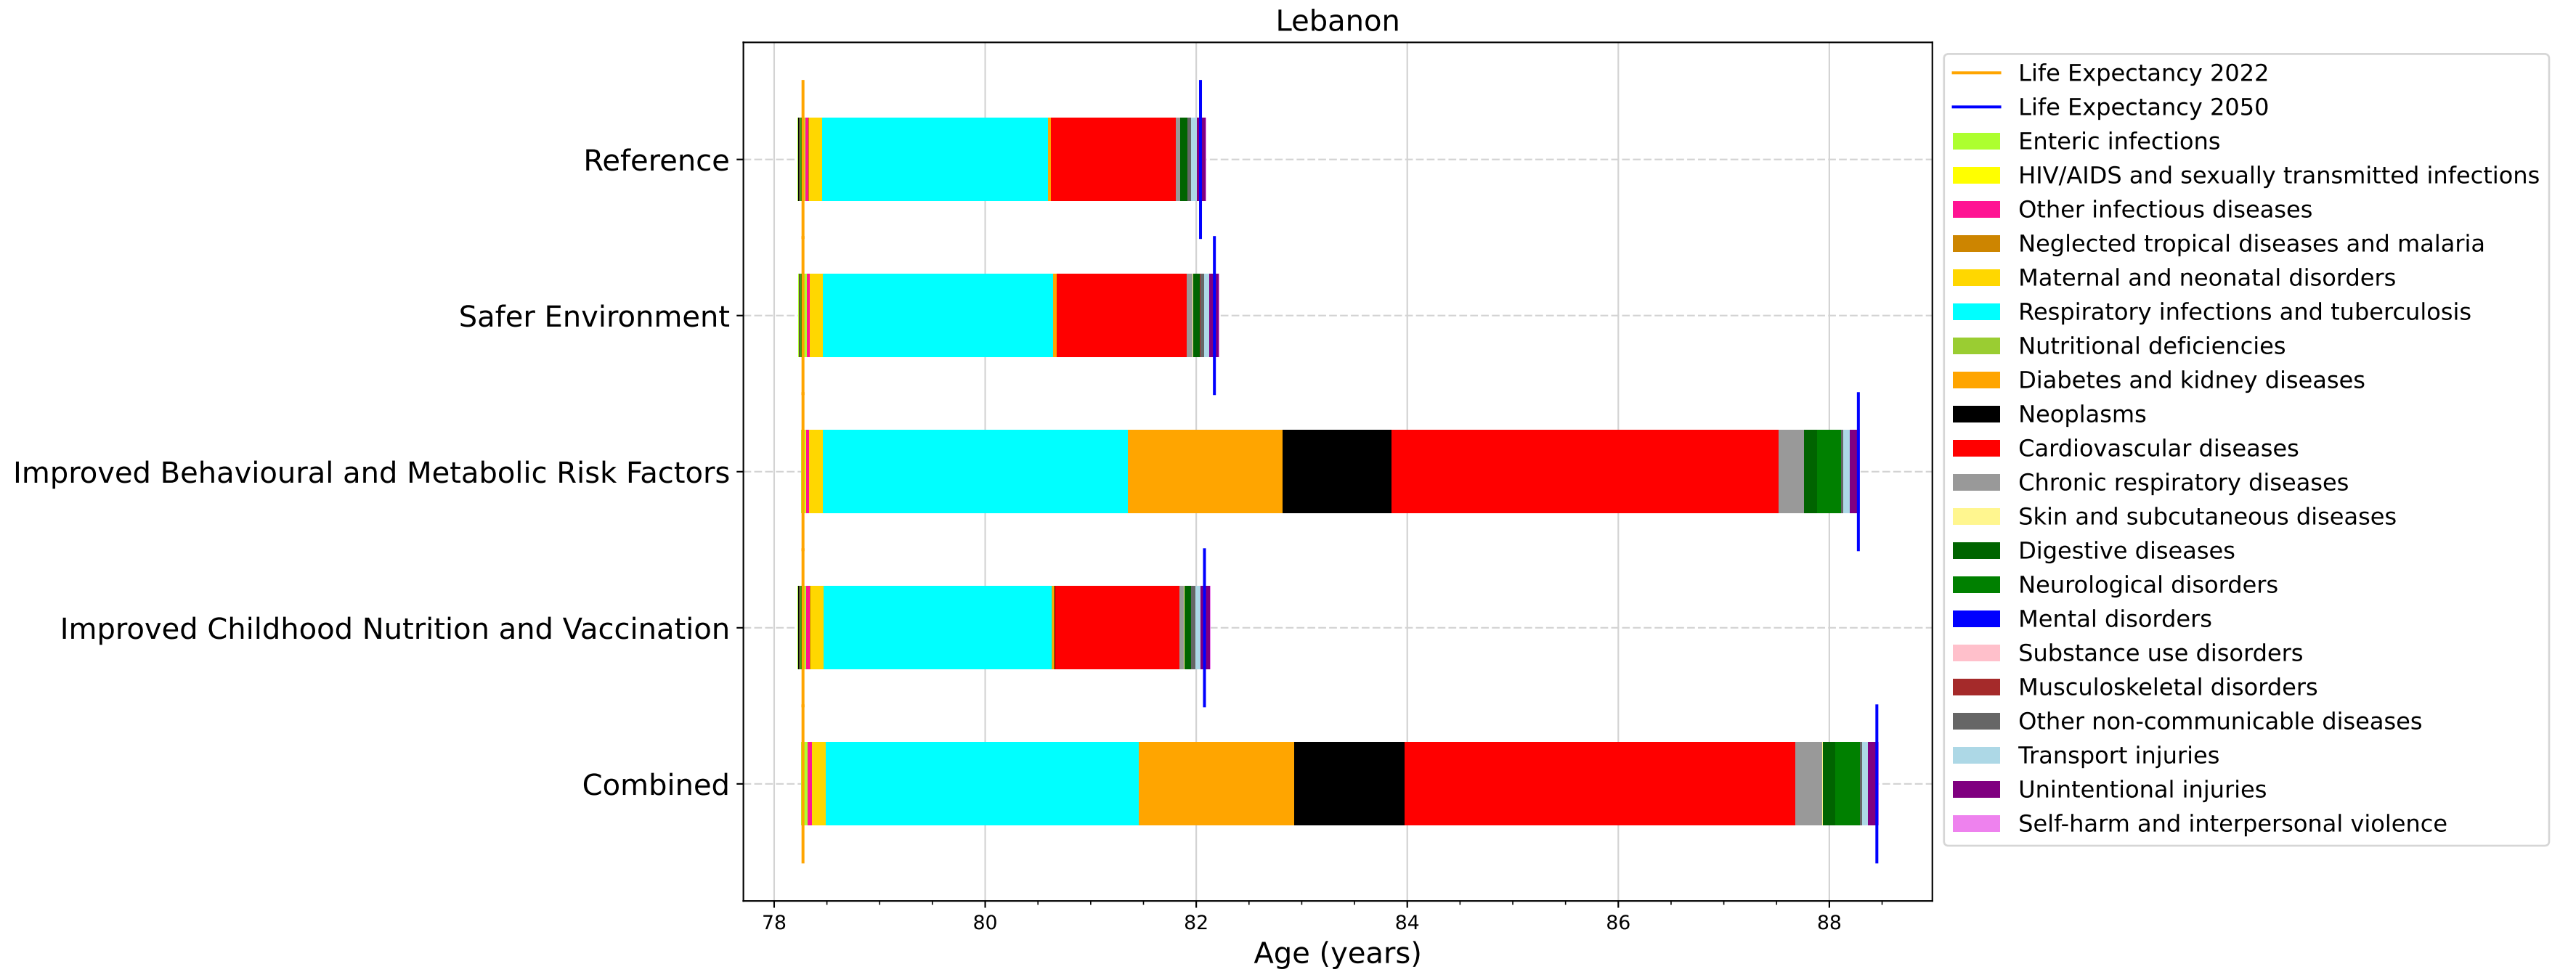

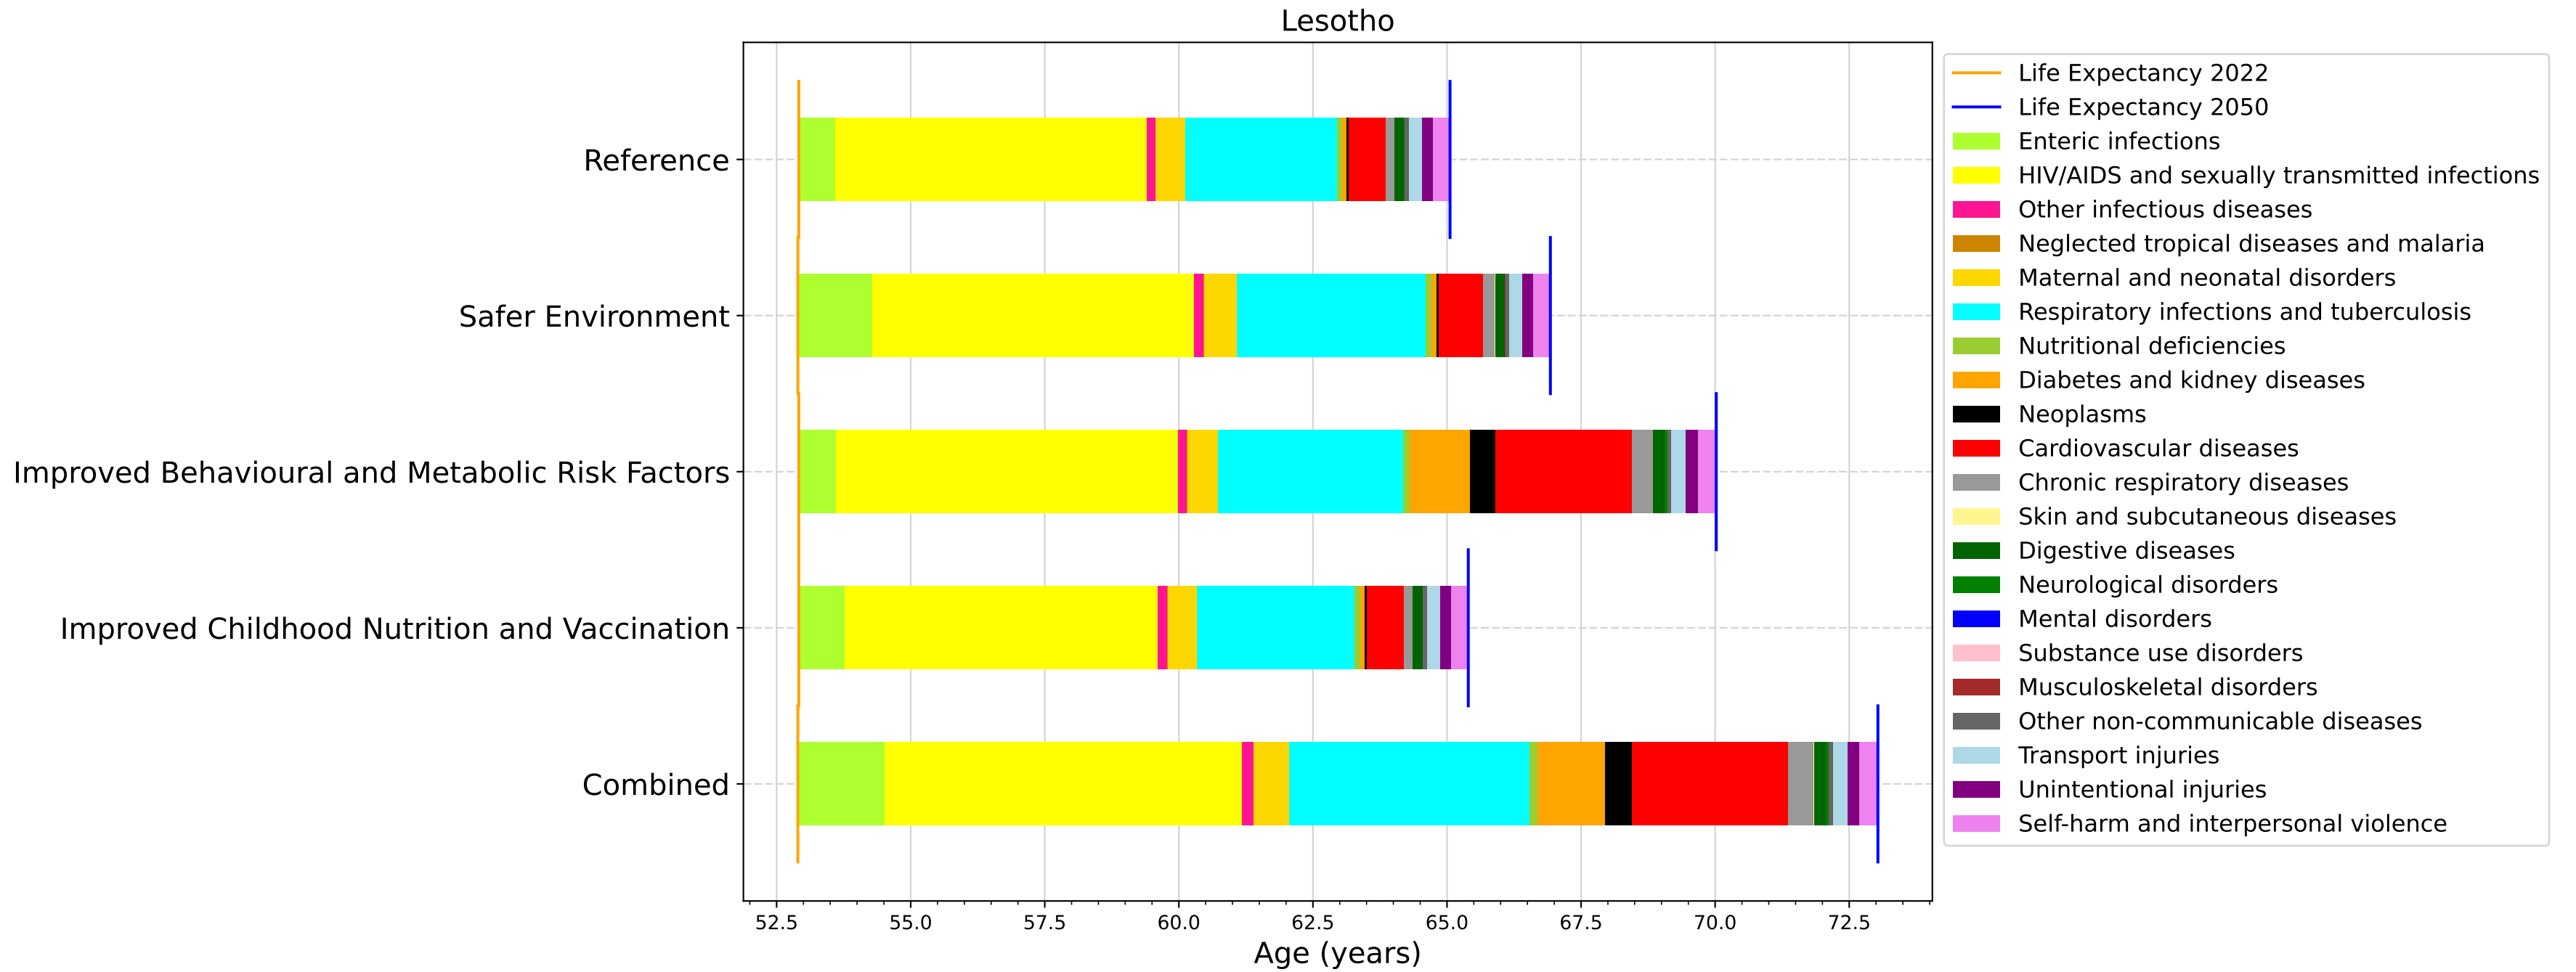

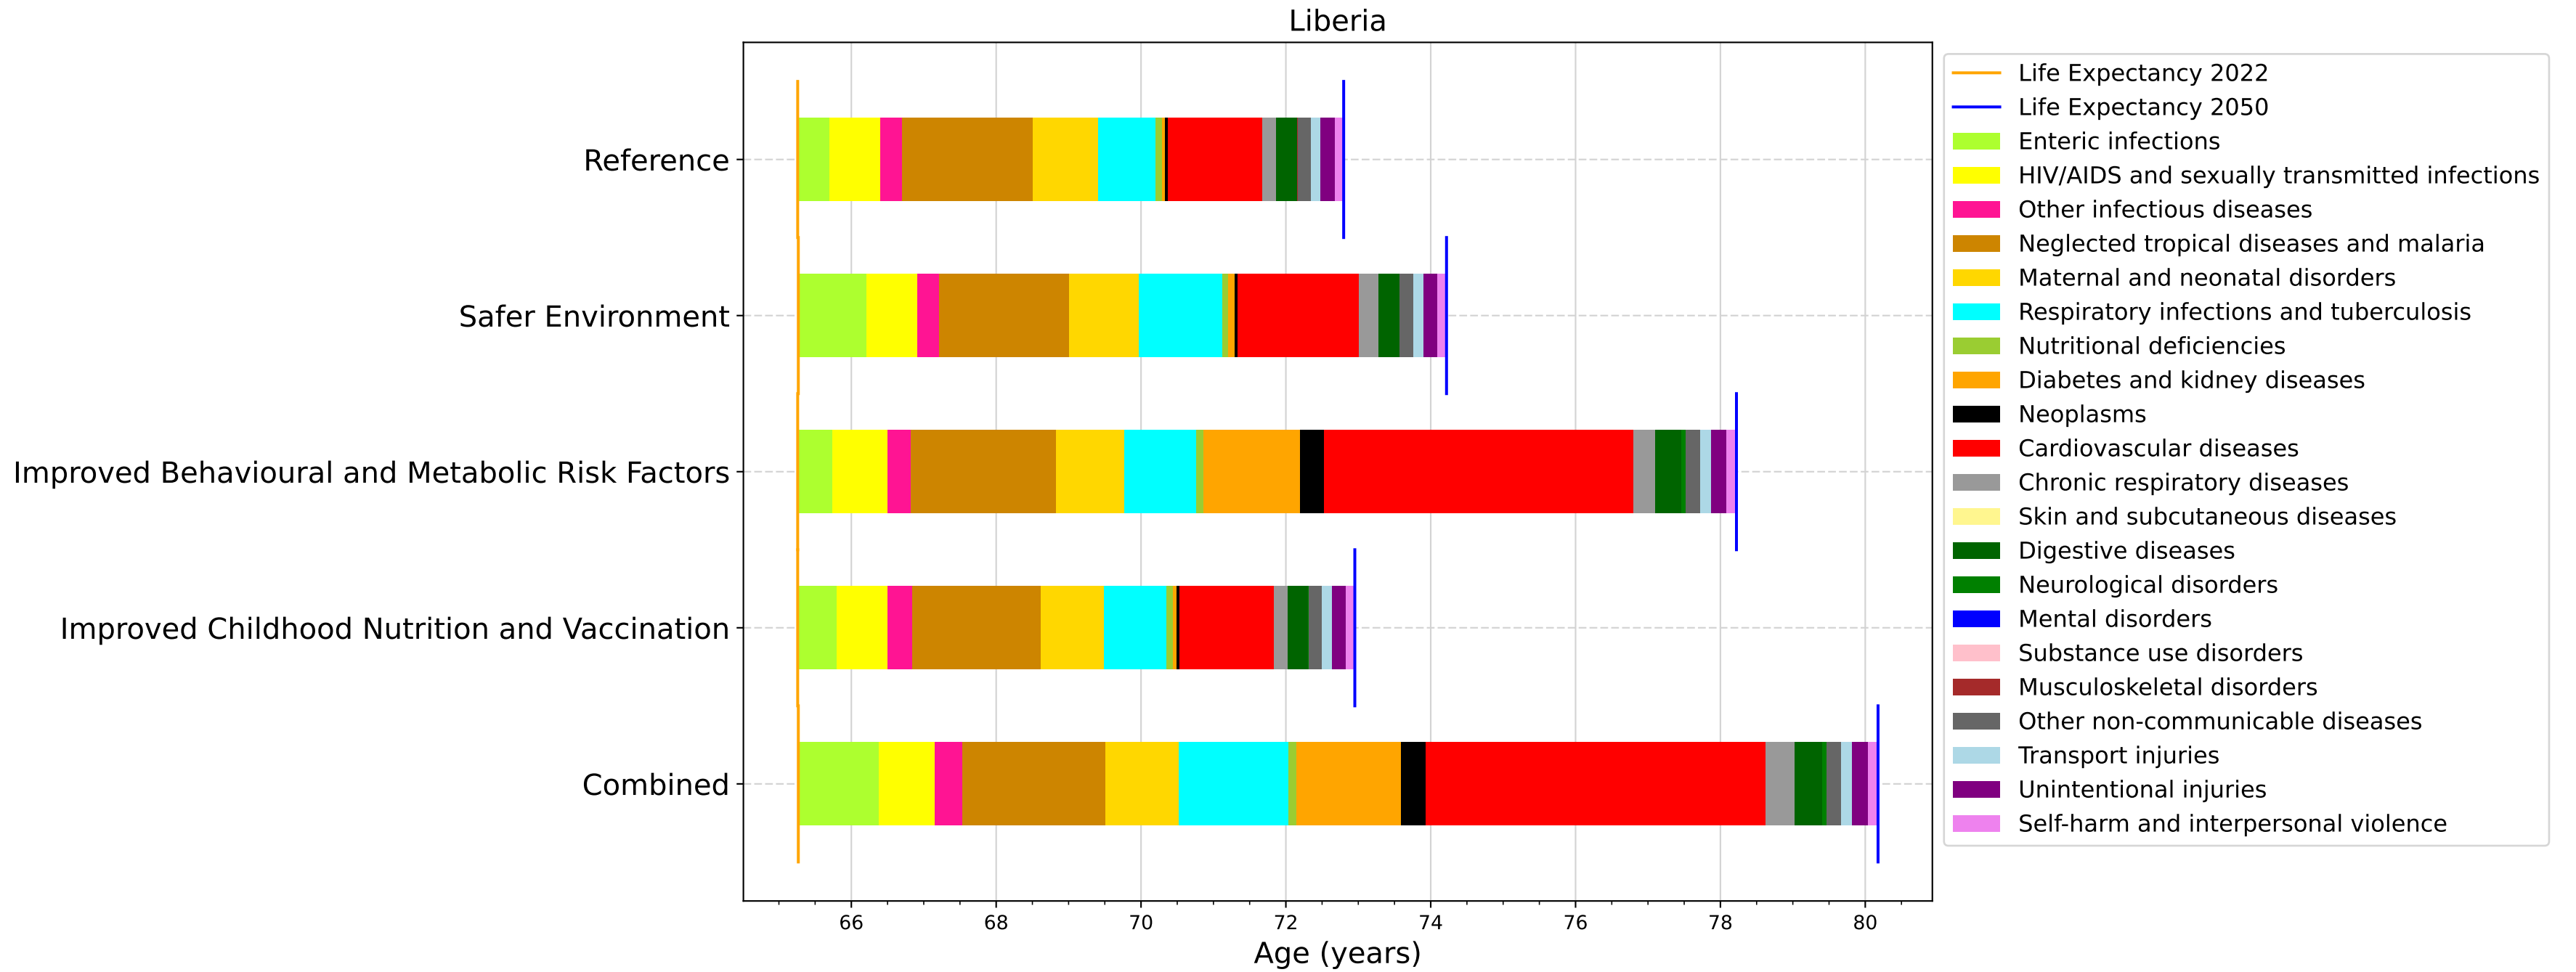

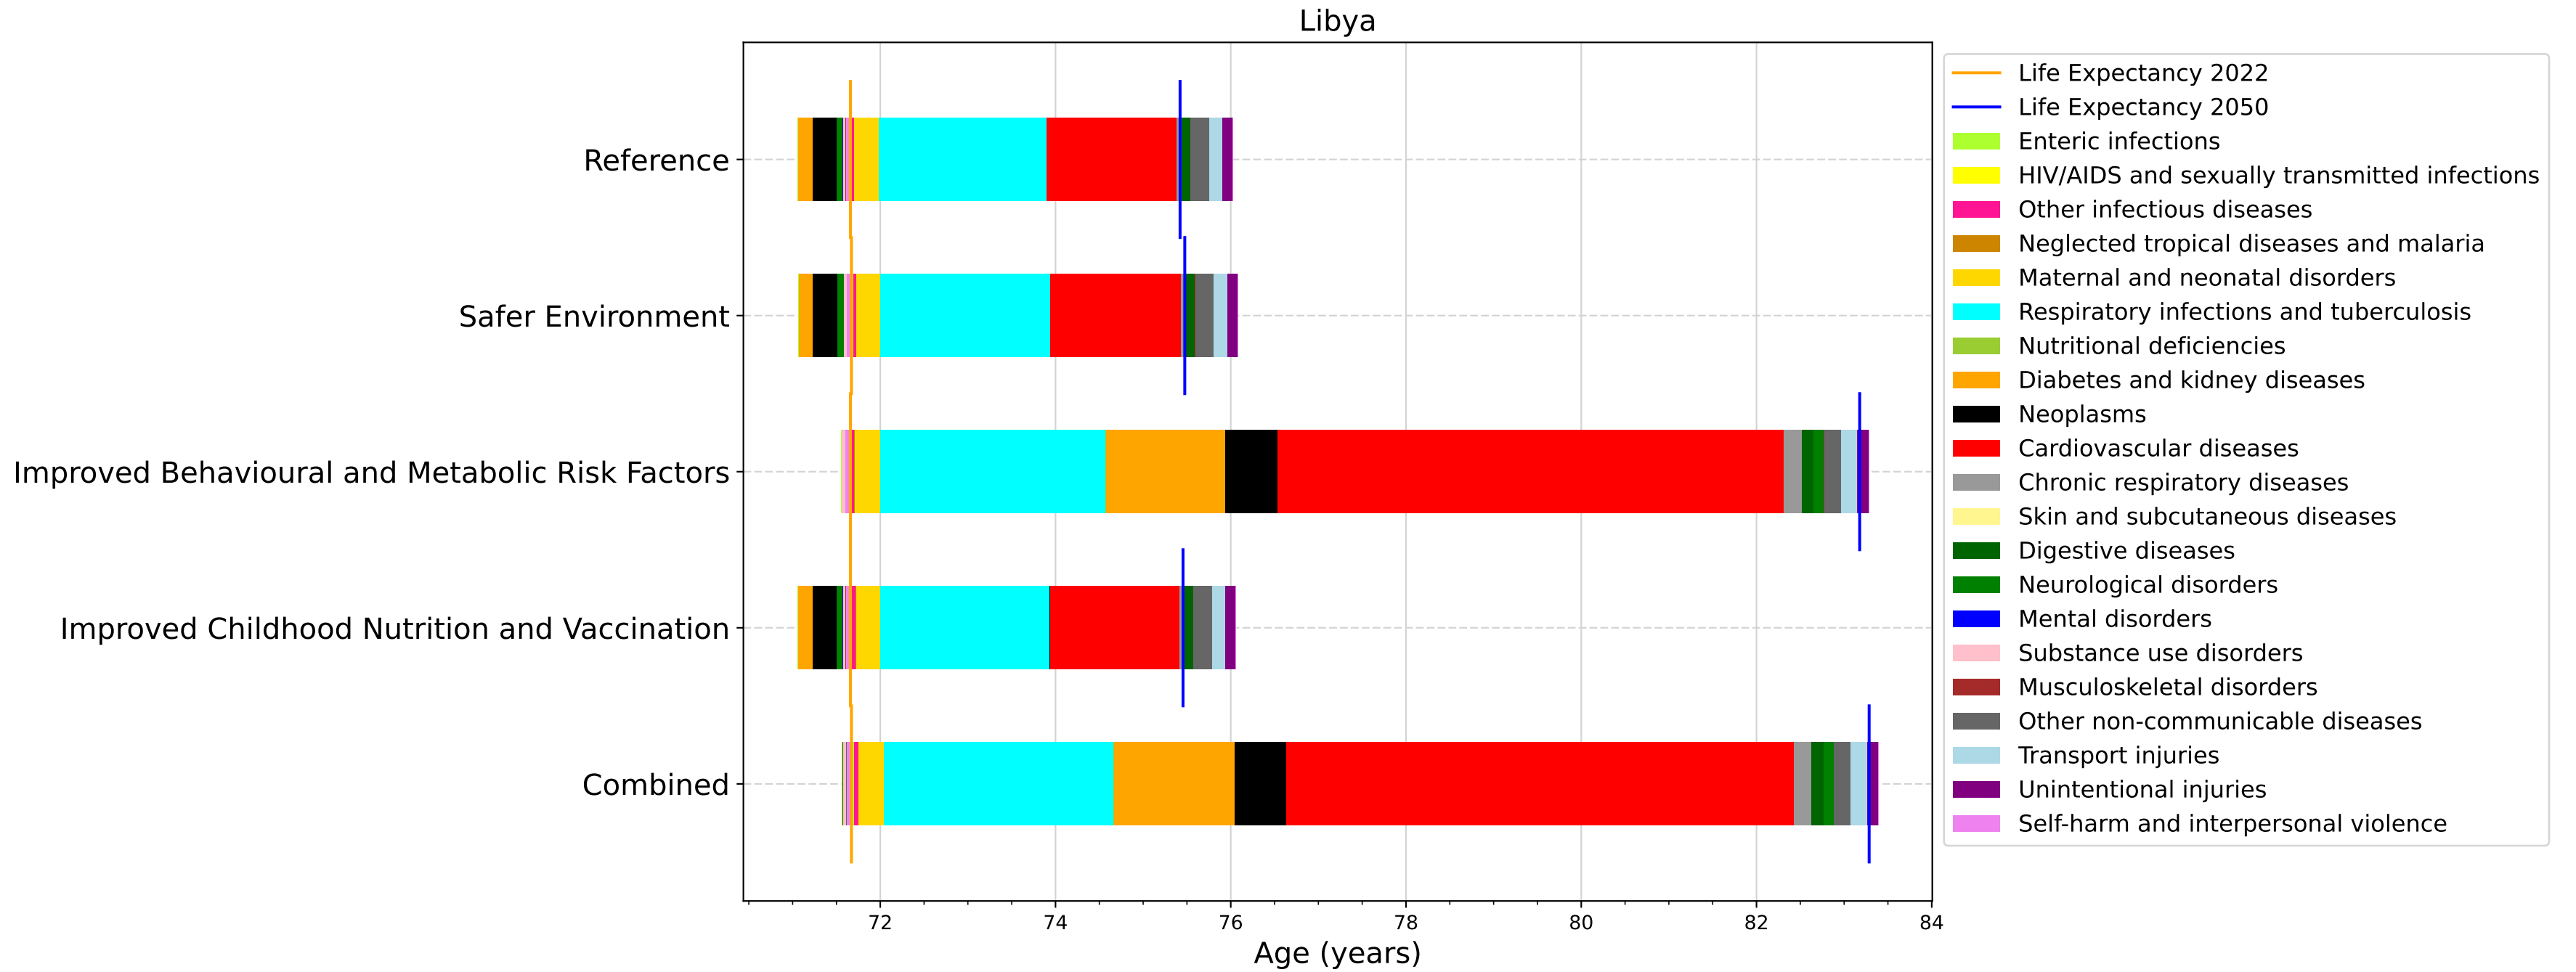

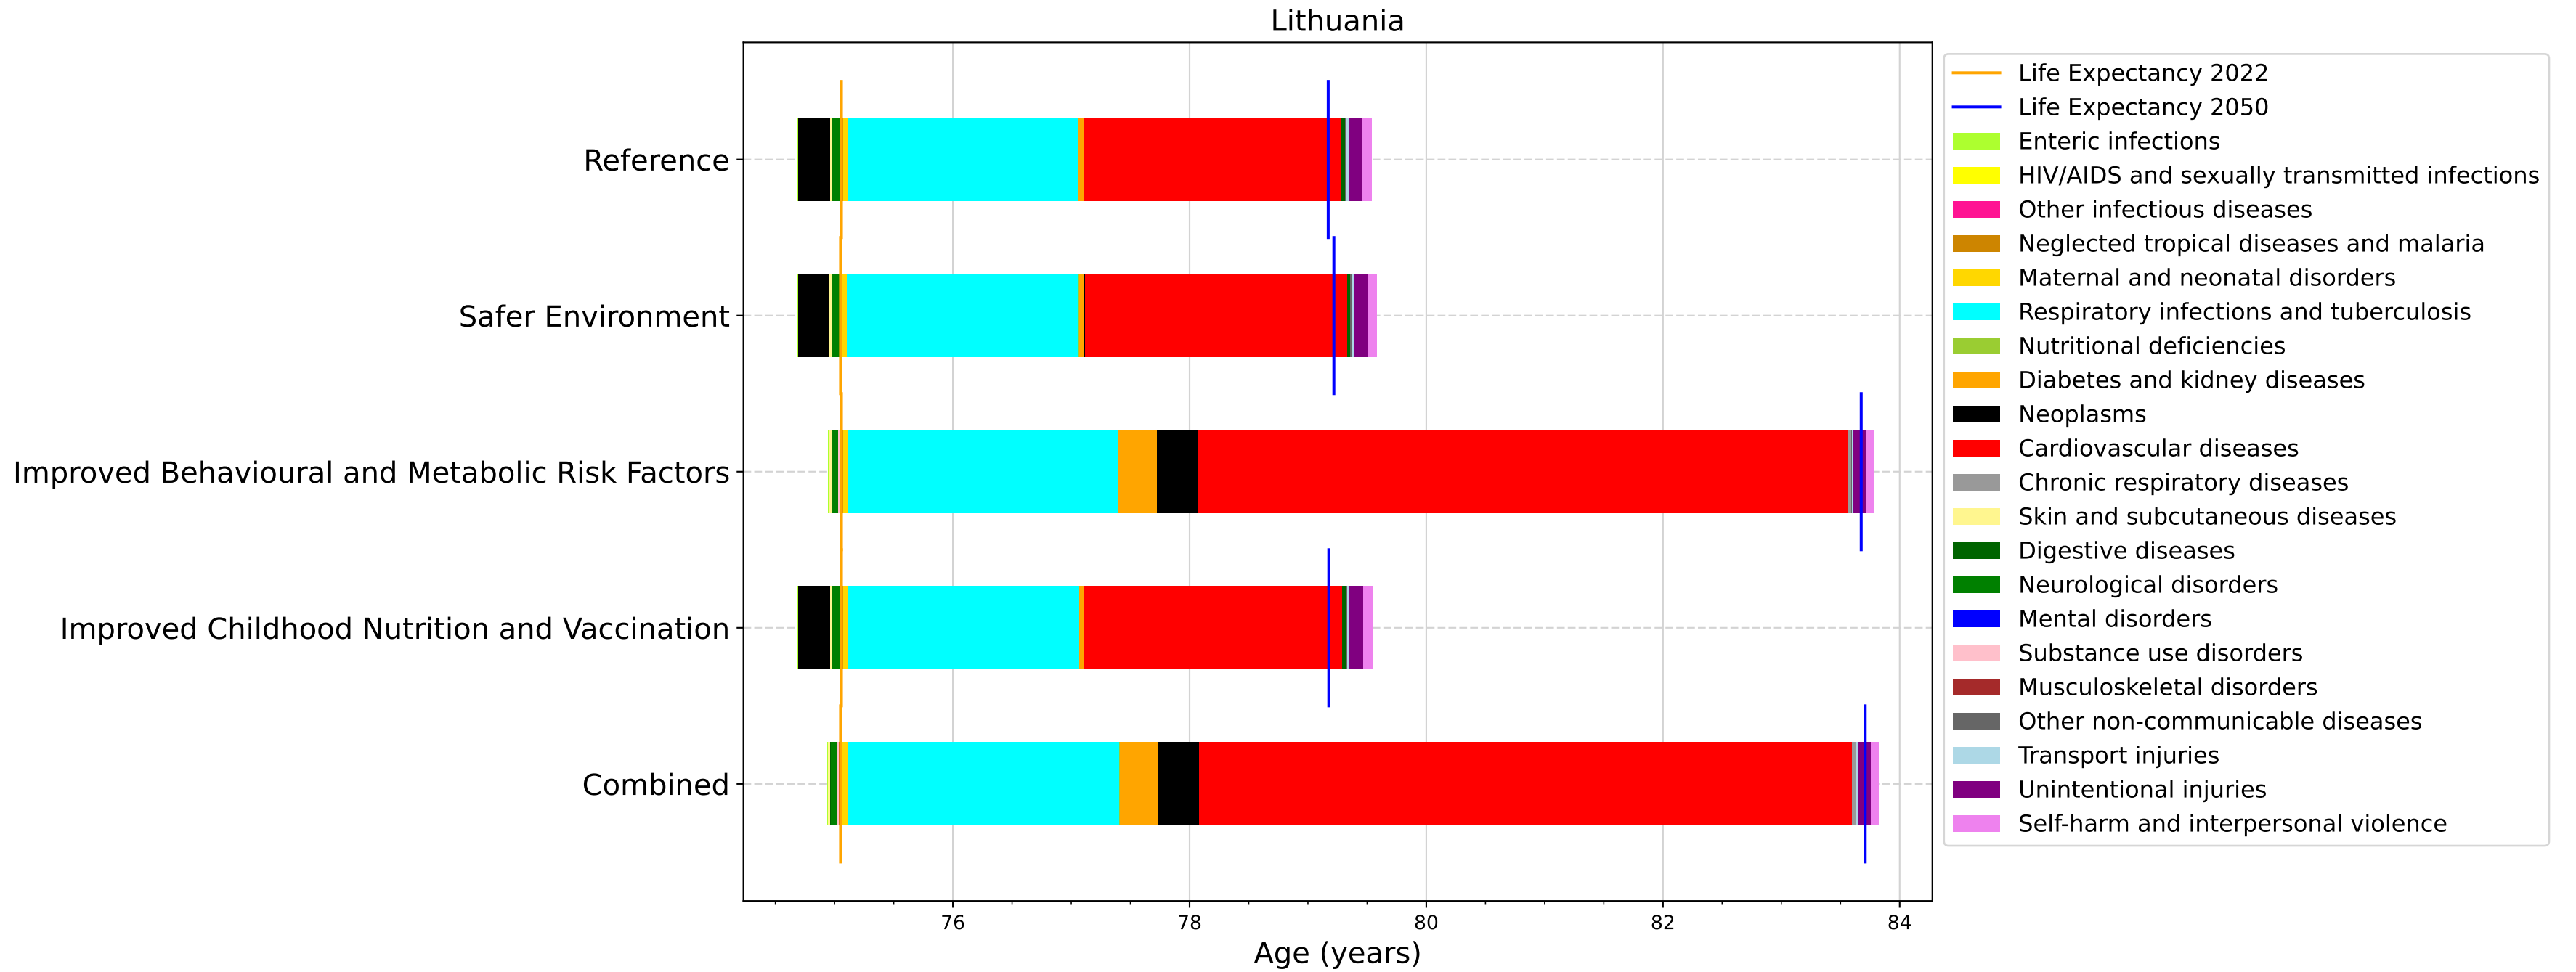

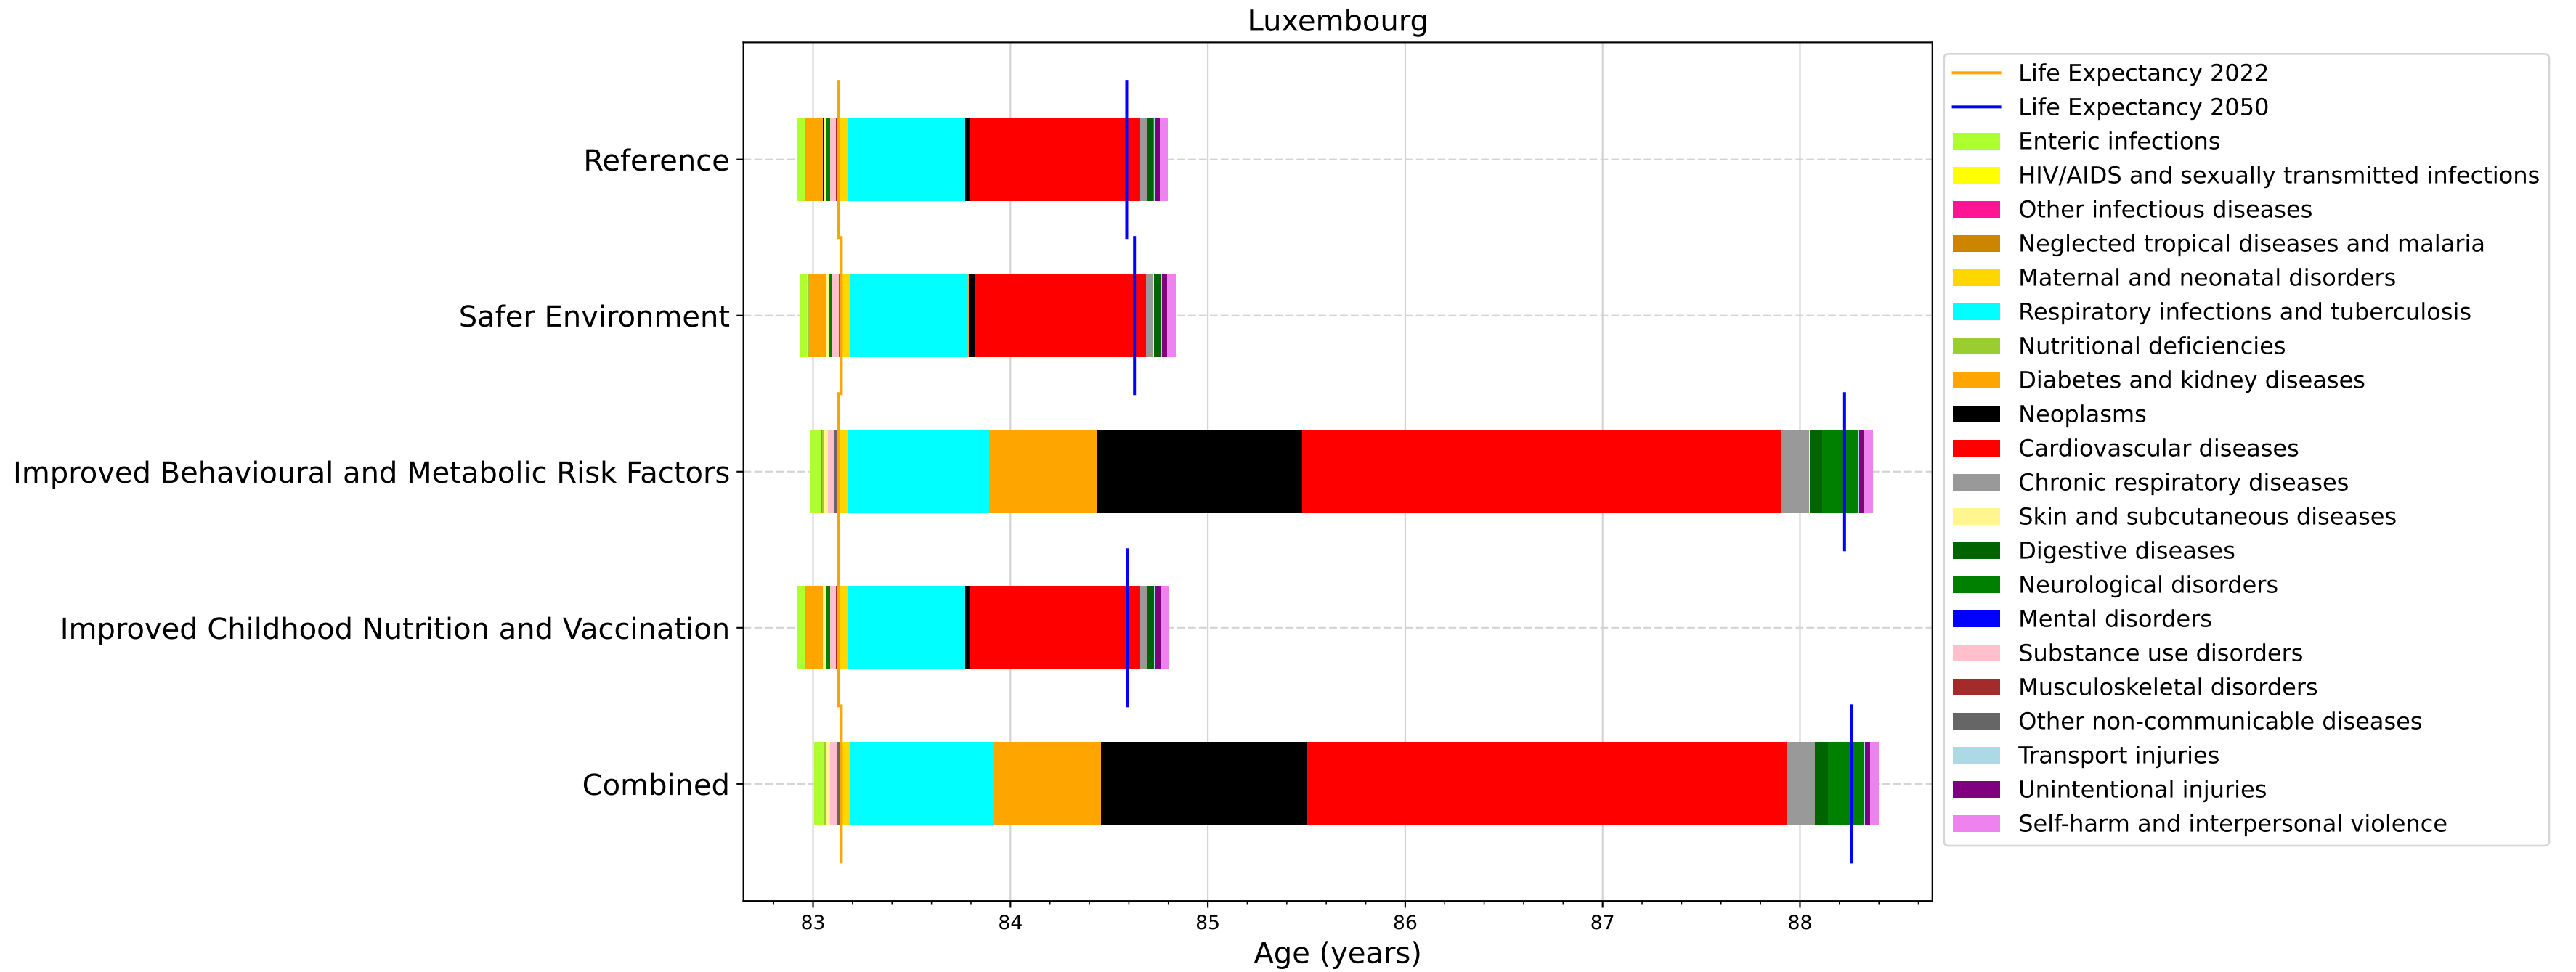



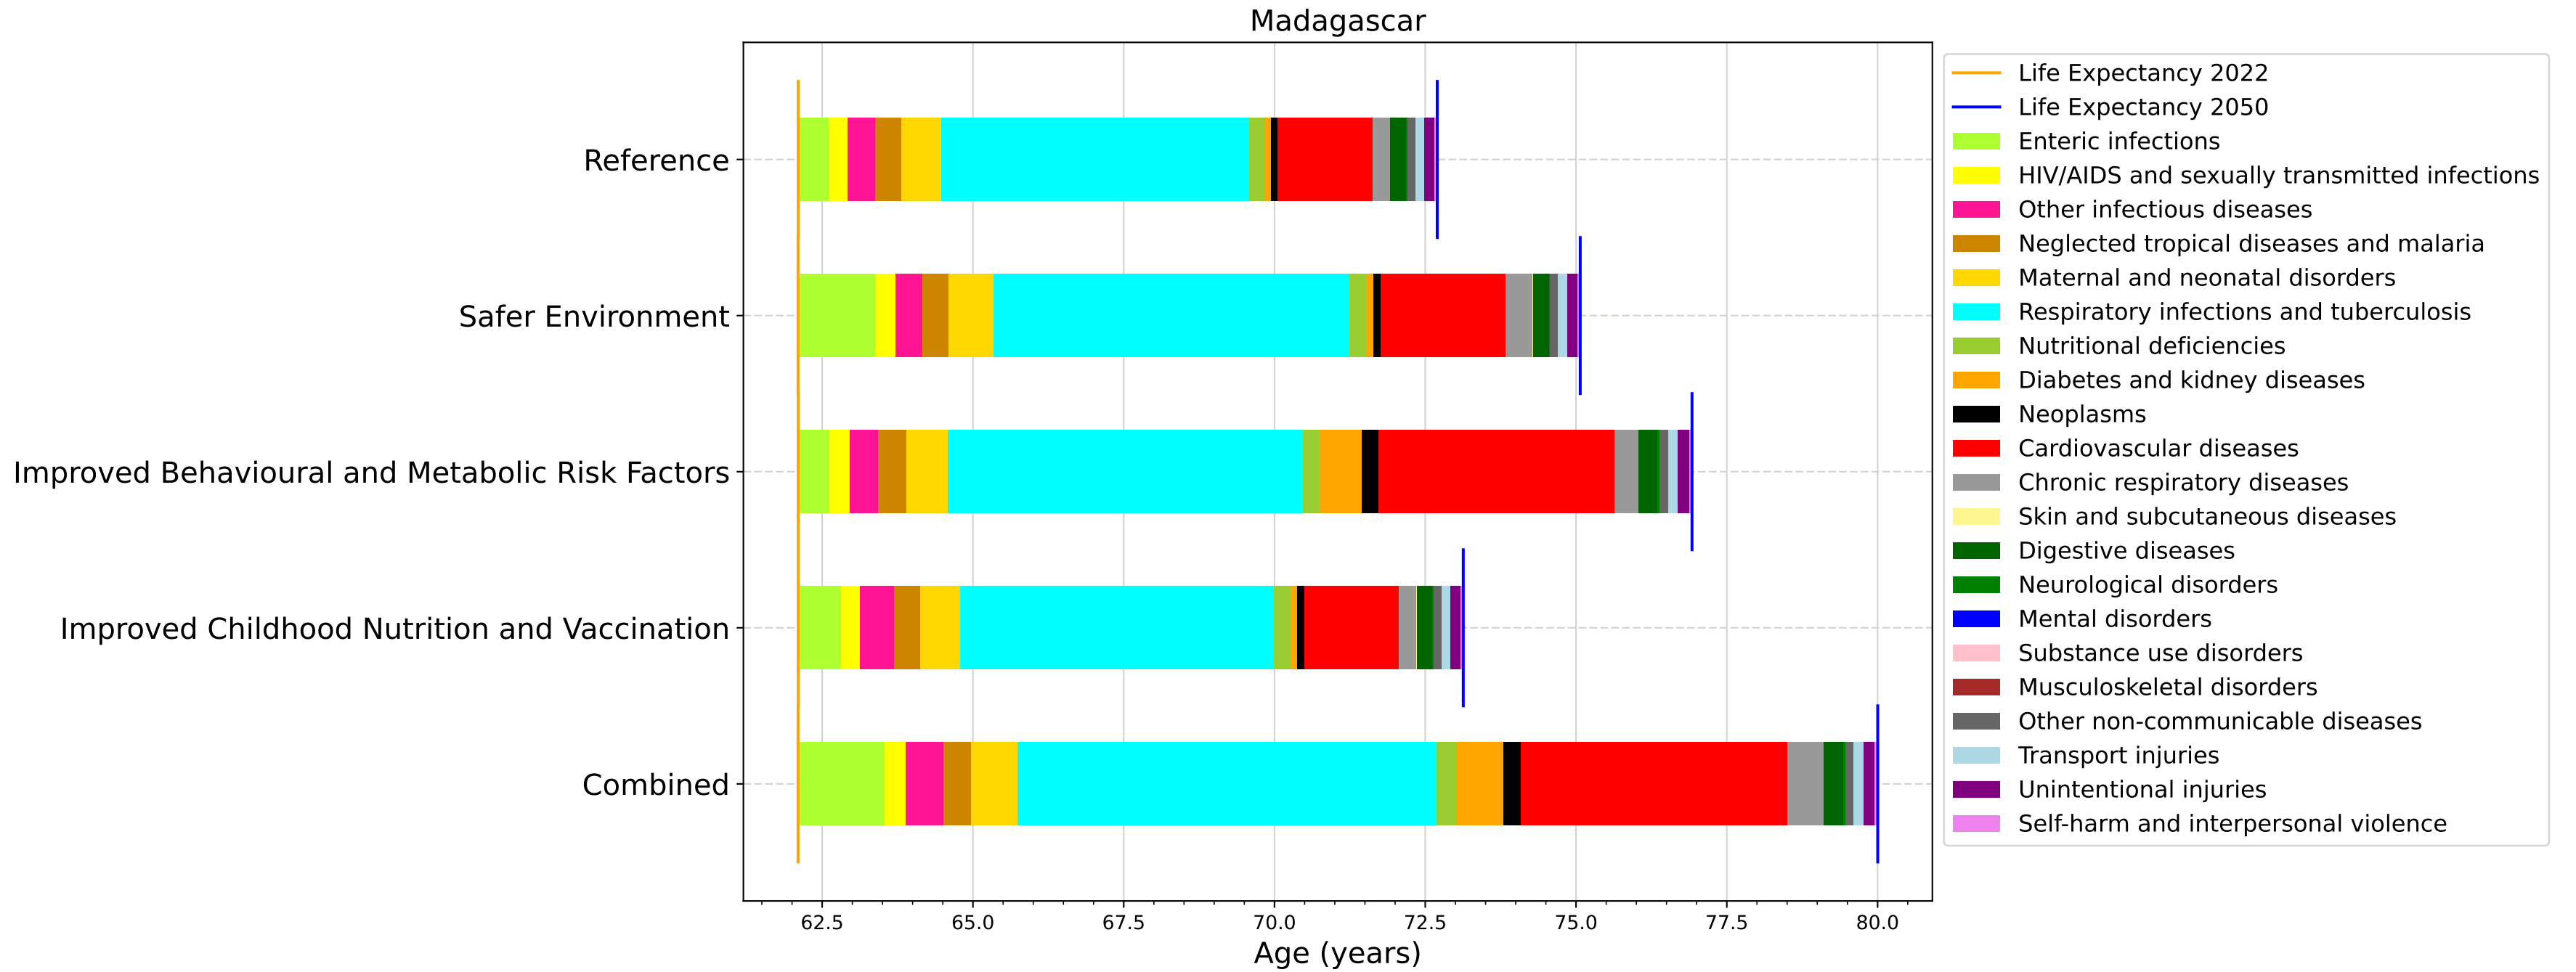

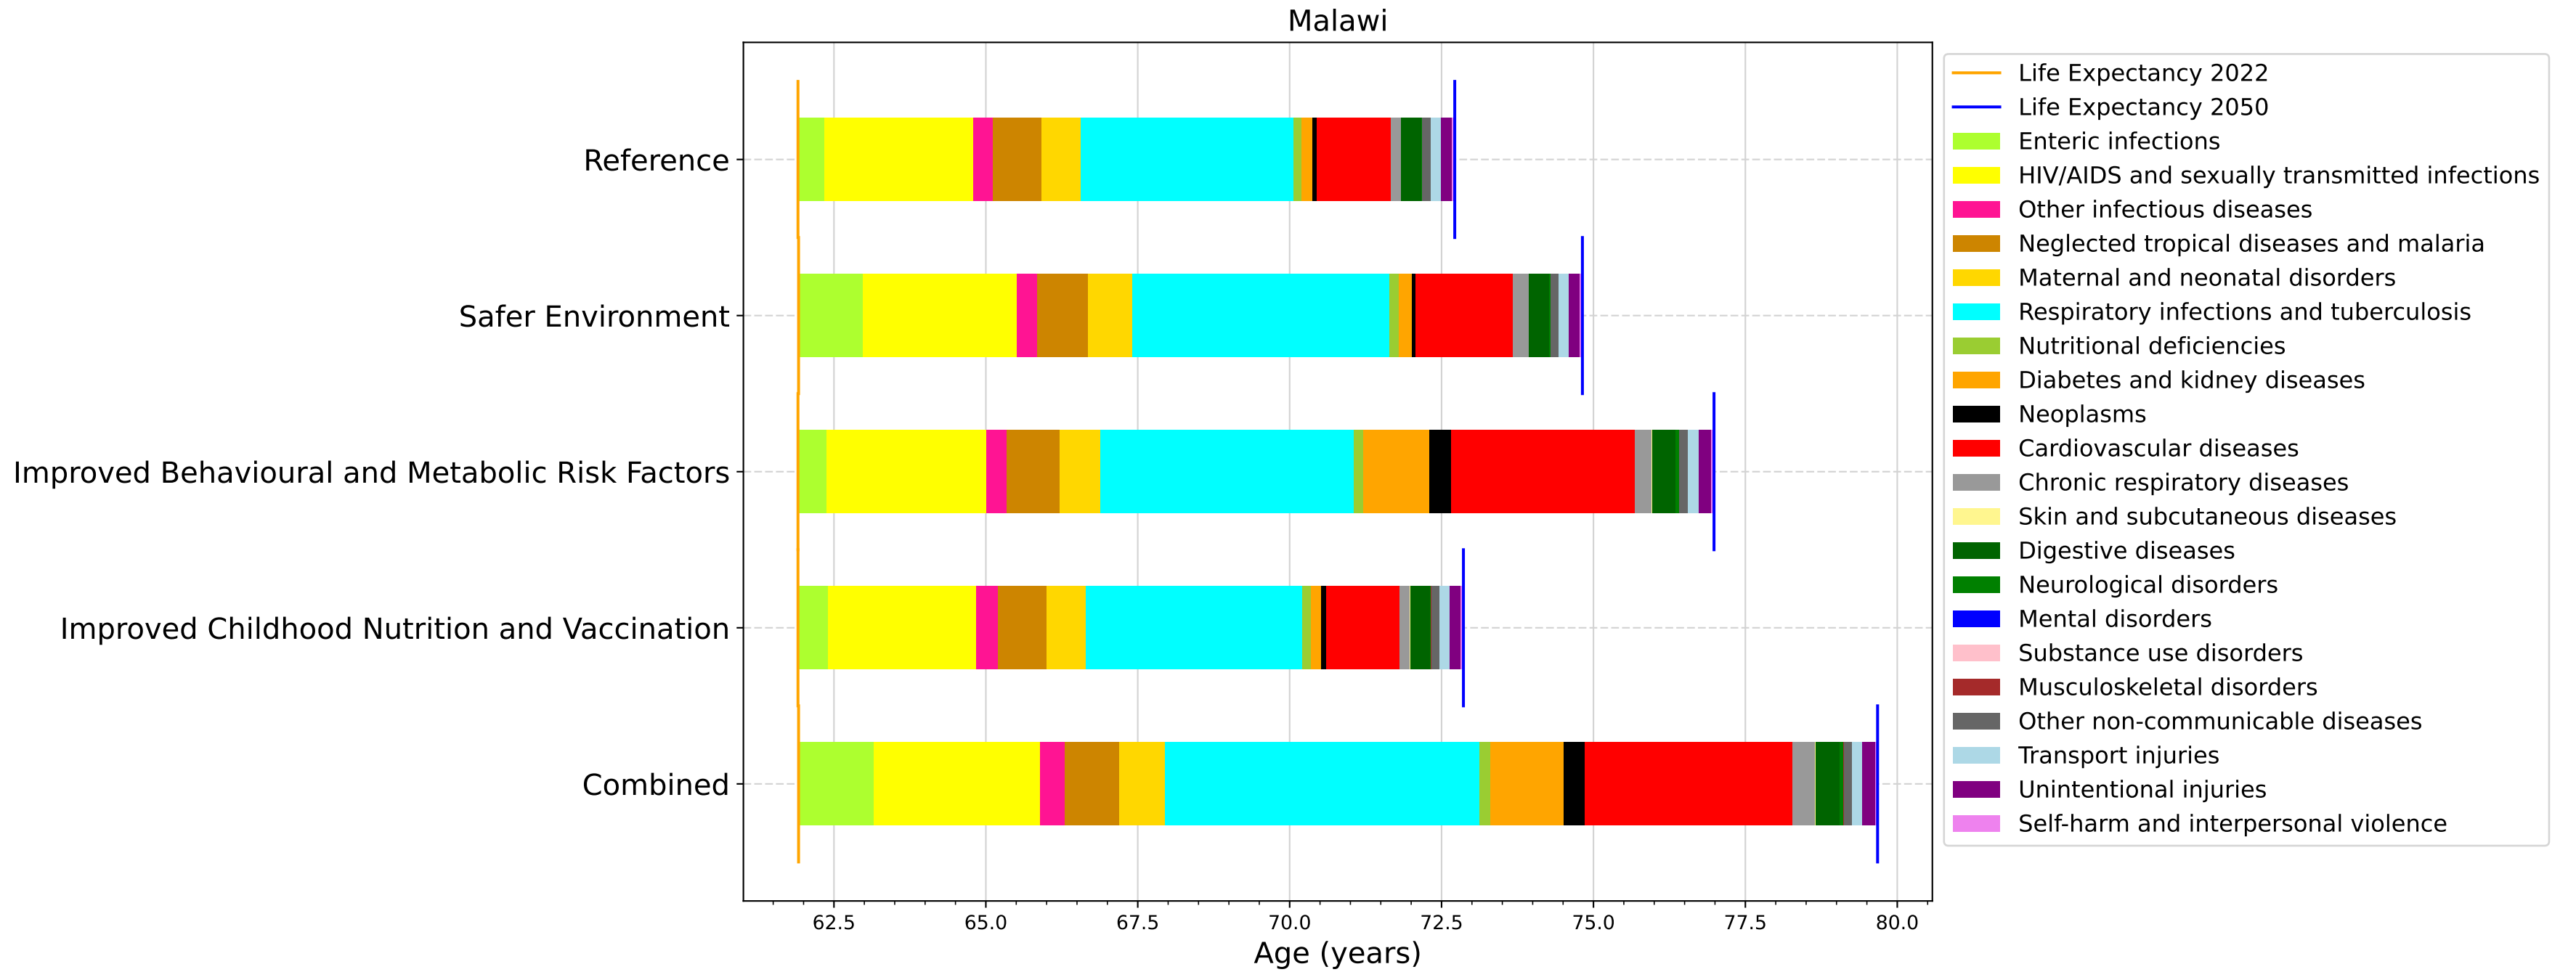

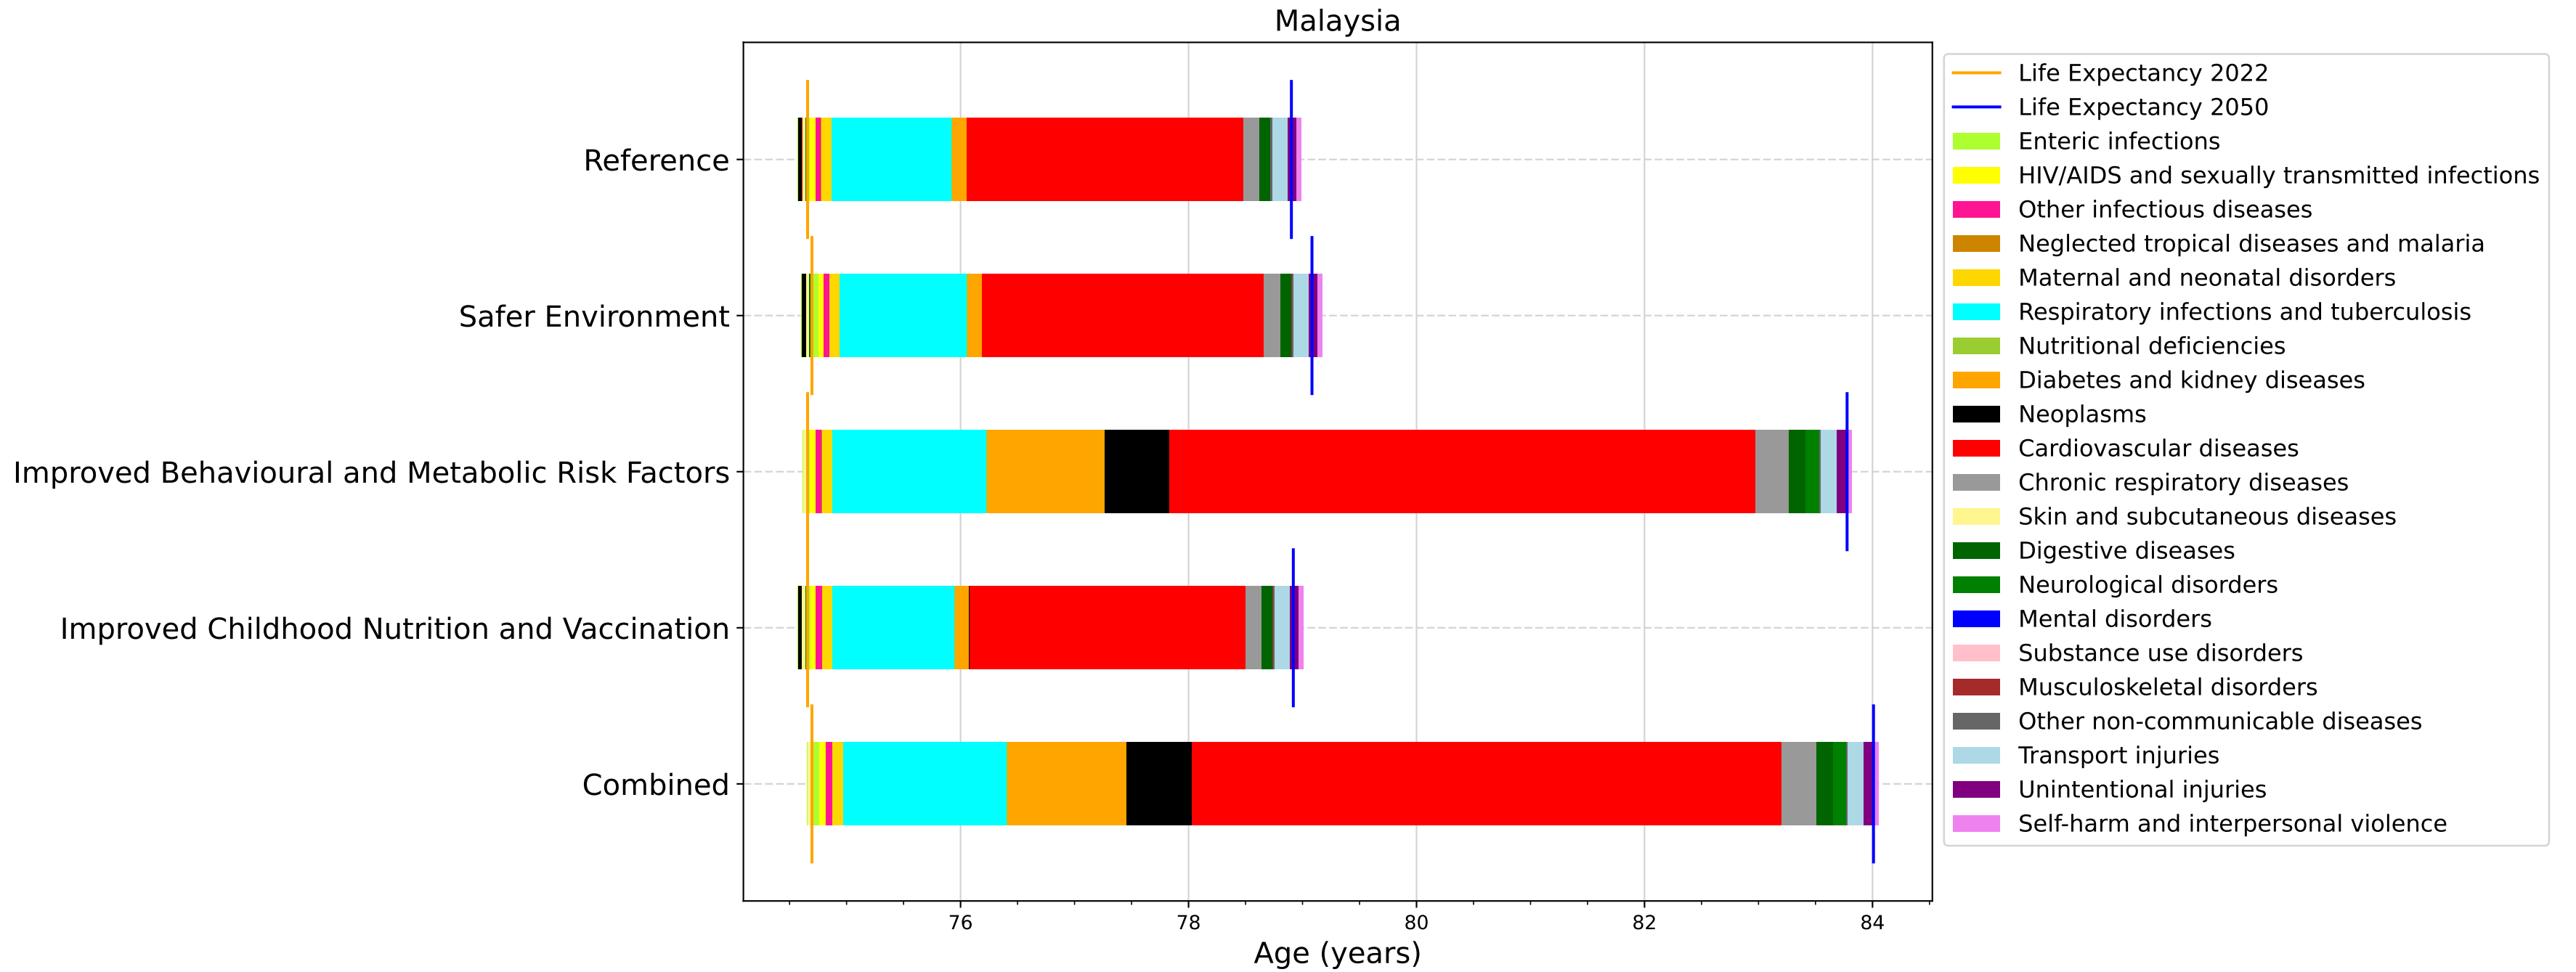

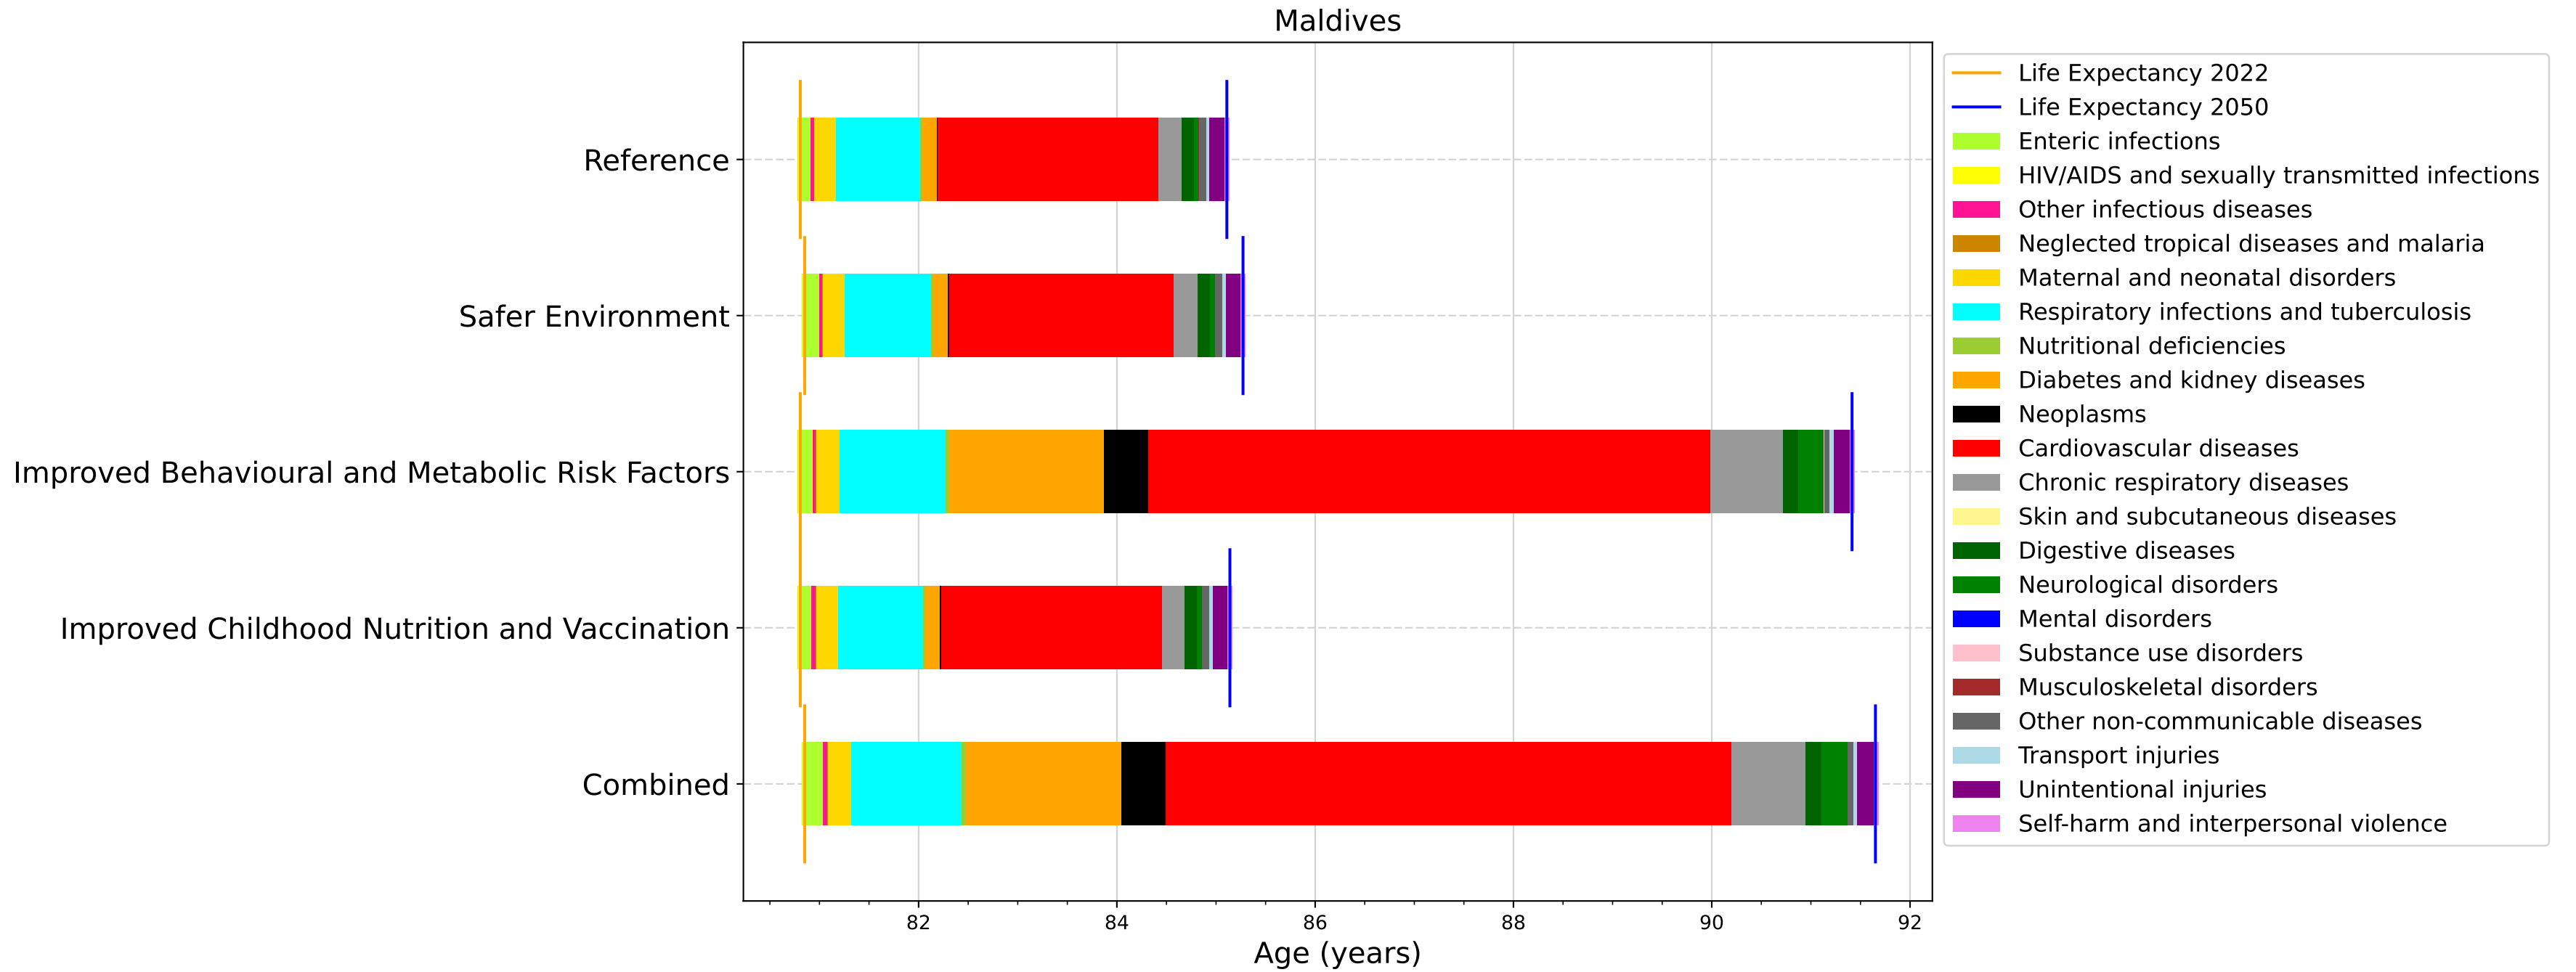

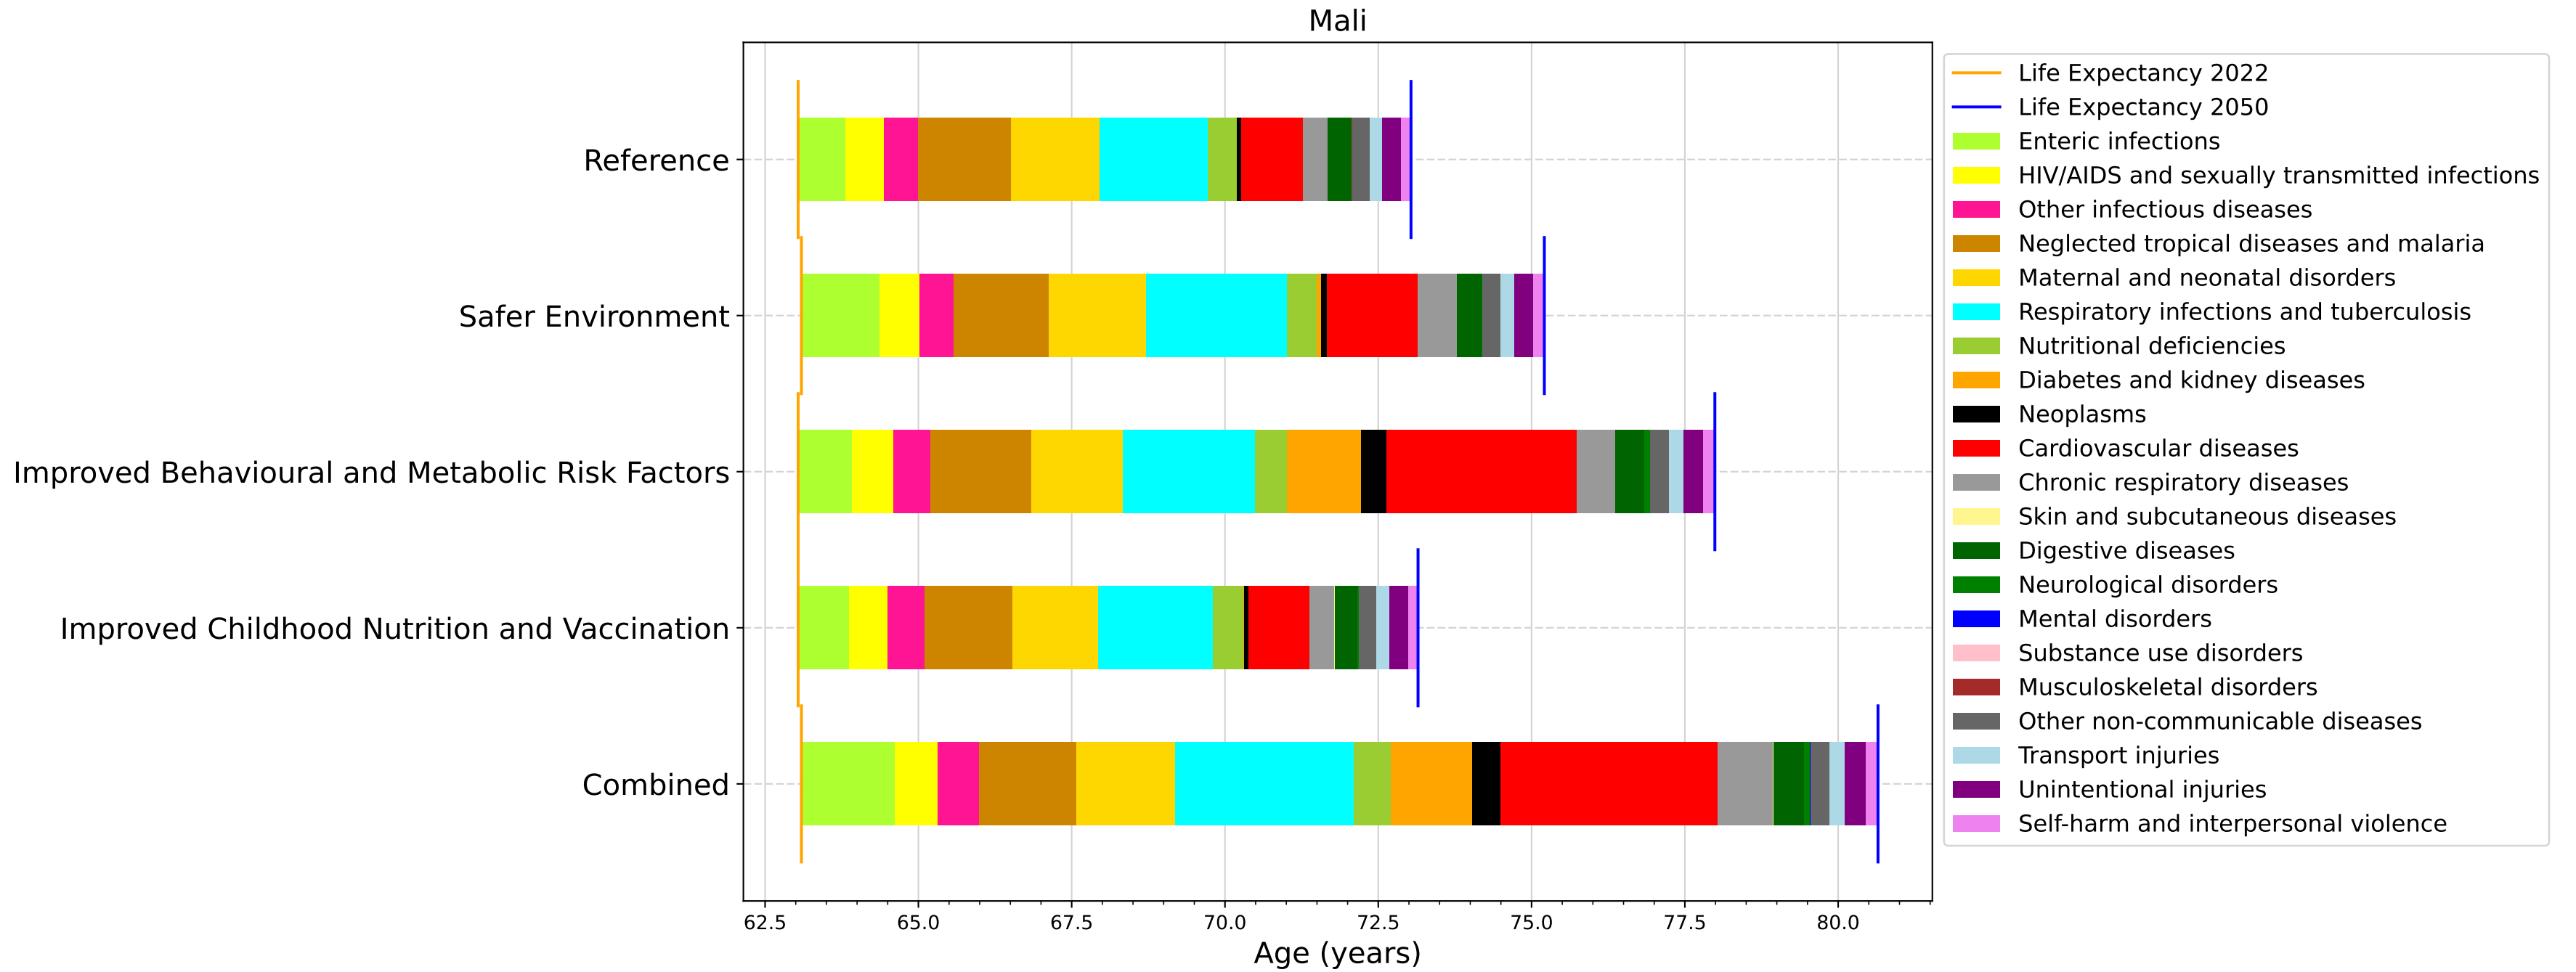

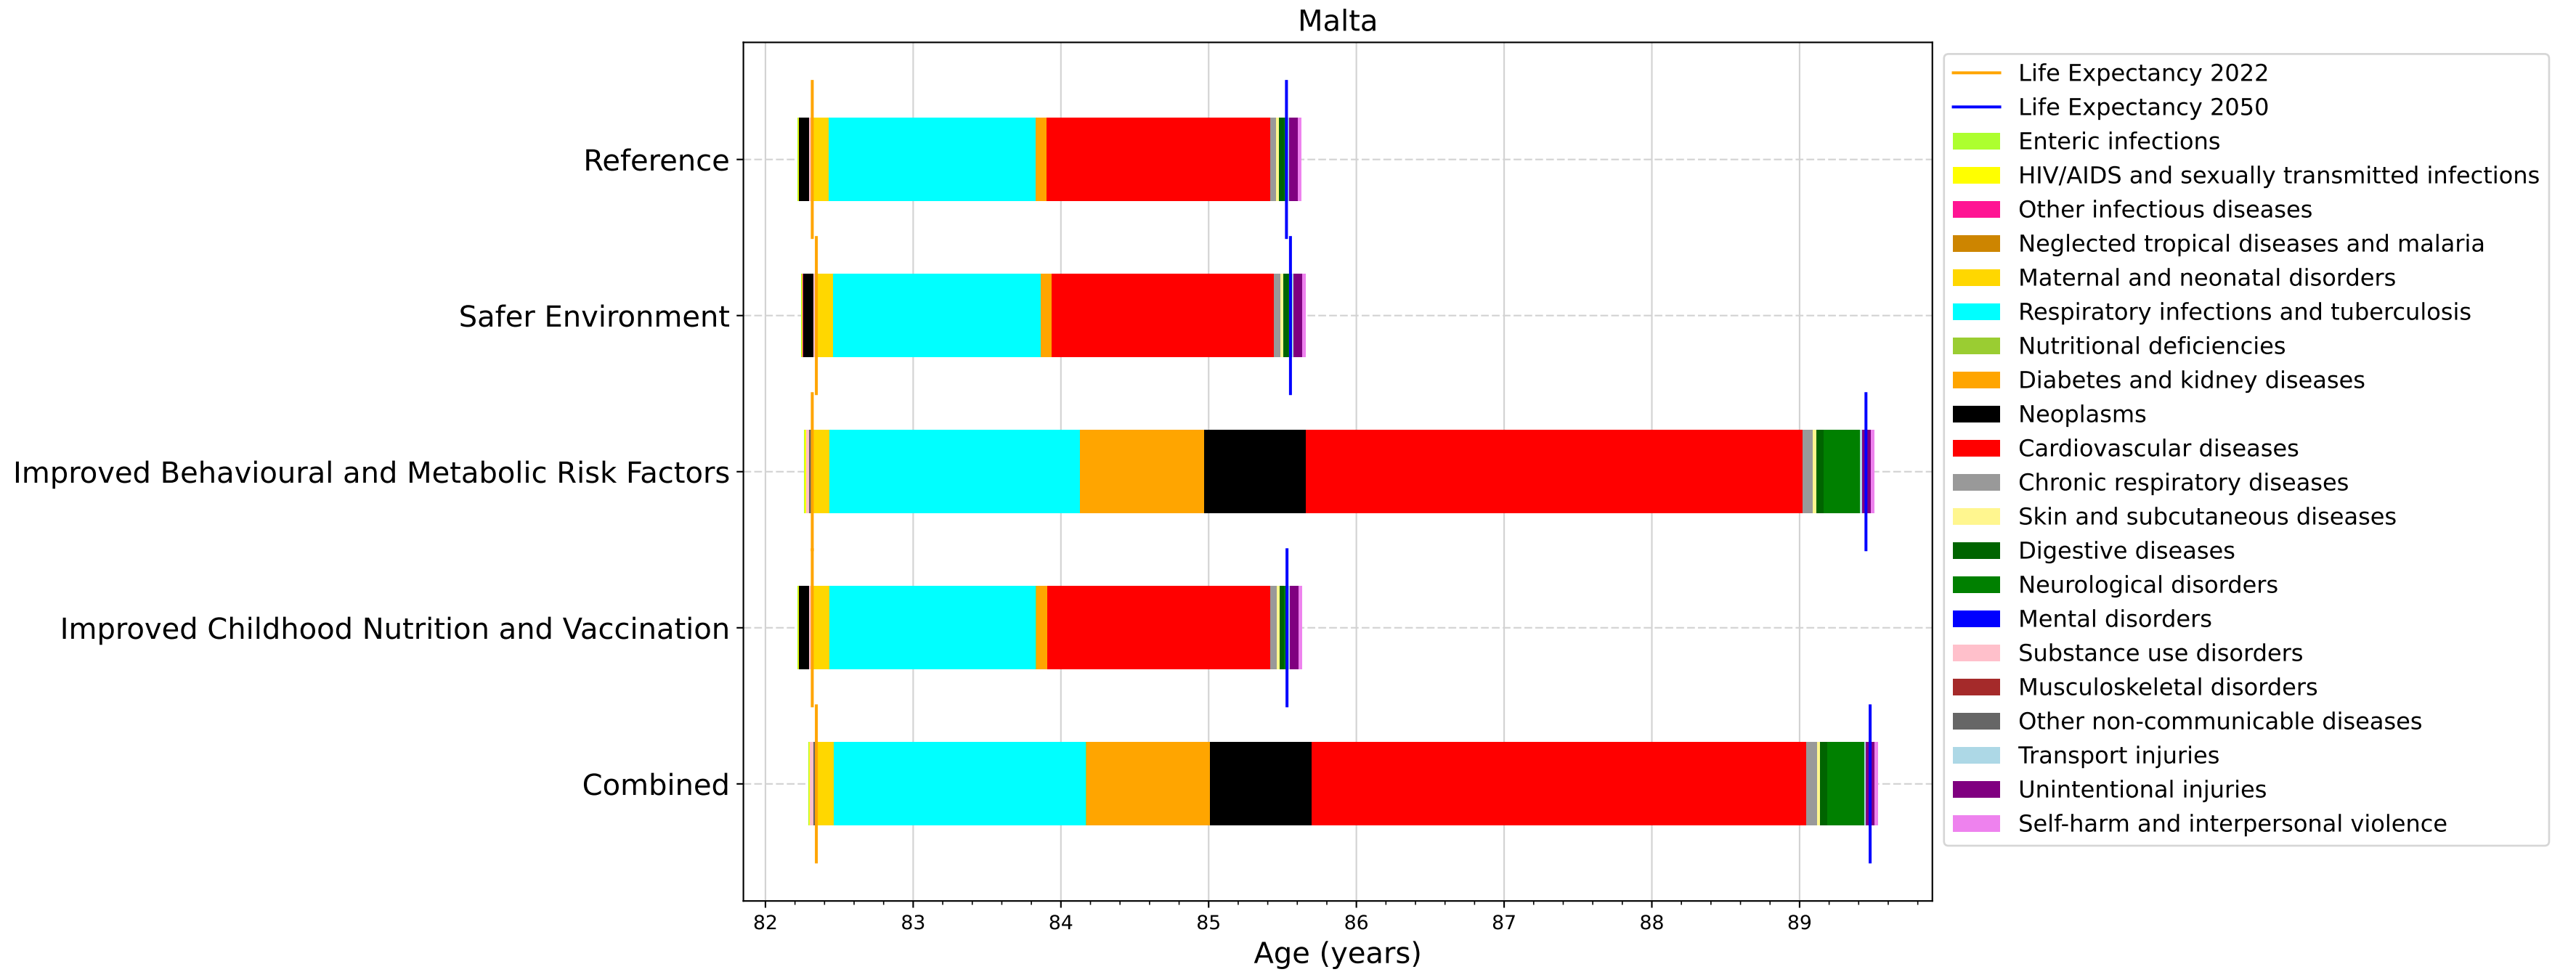

### Marshall Islands

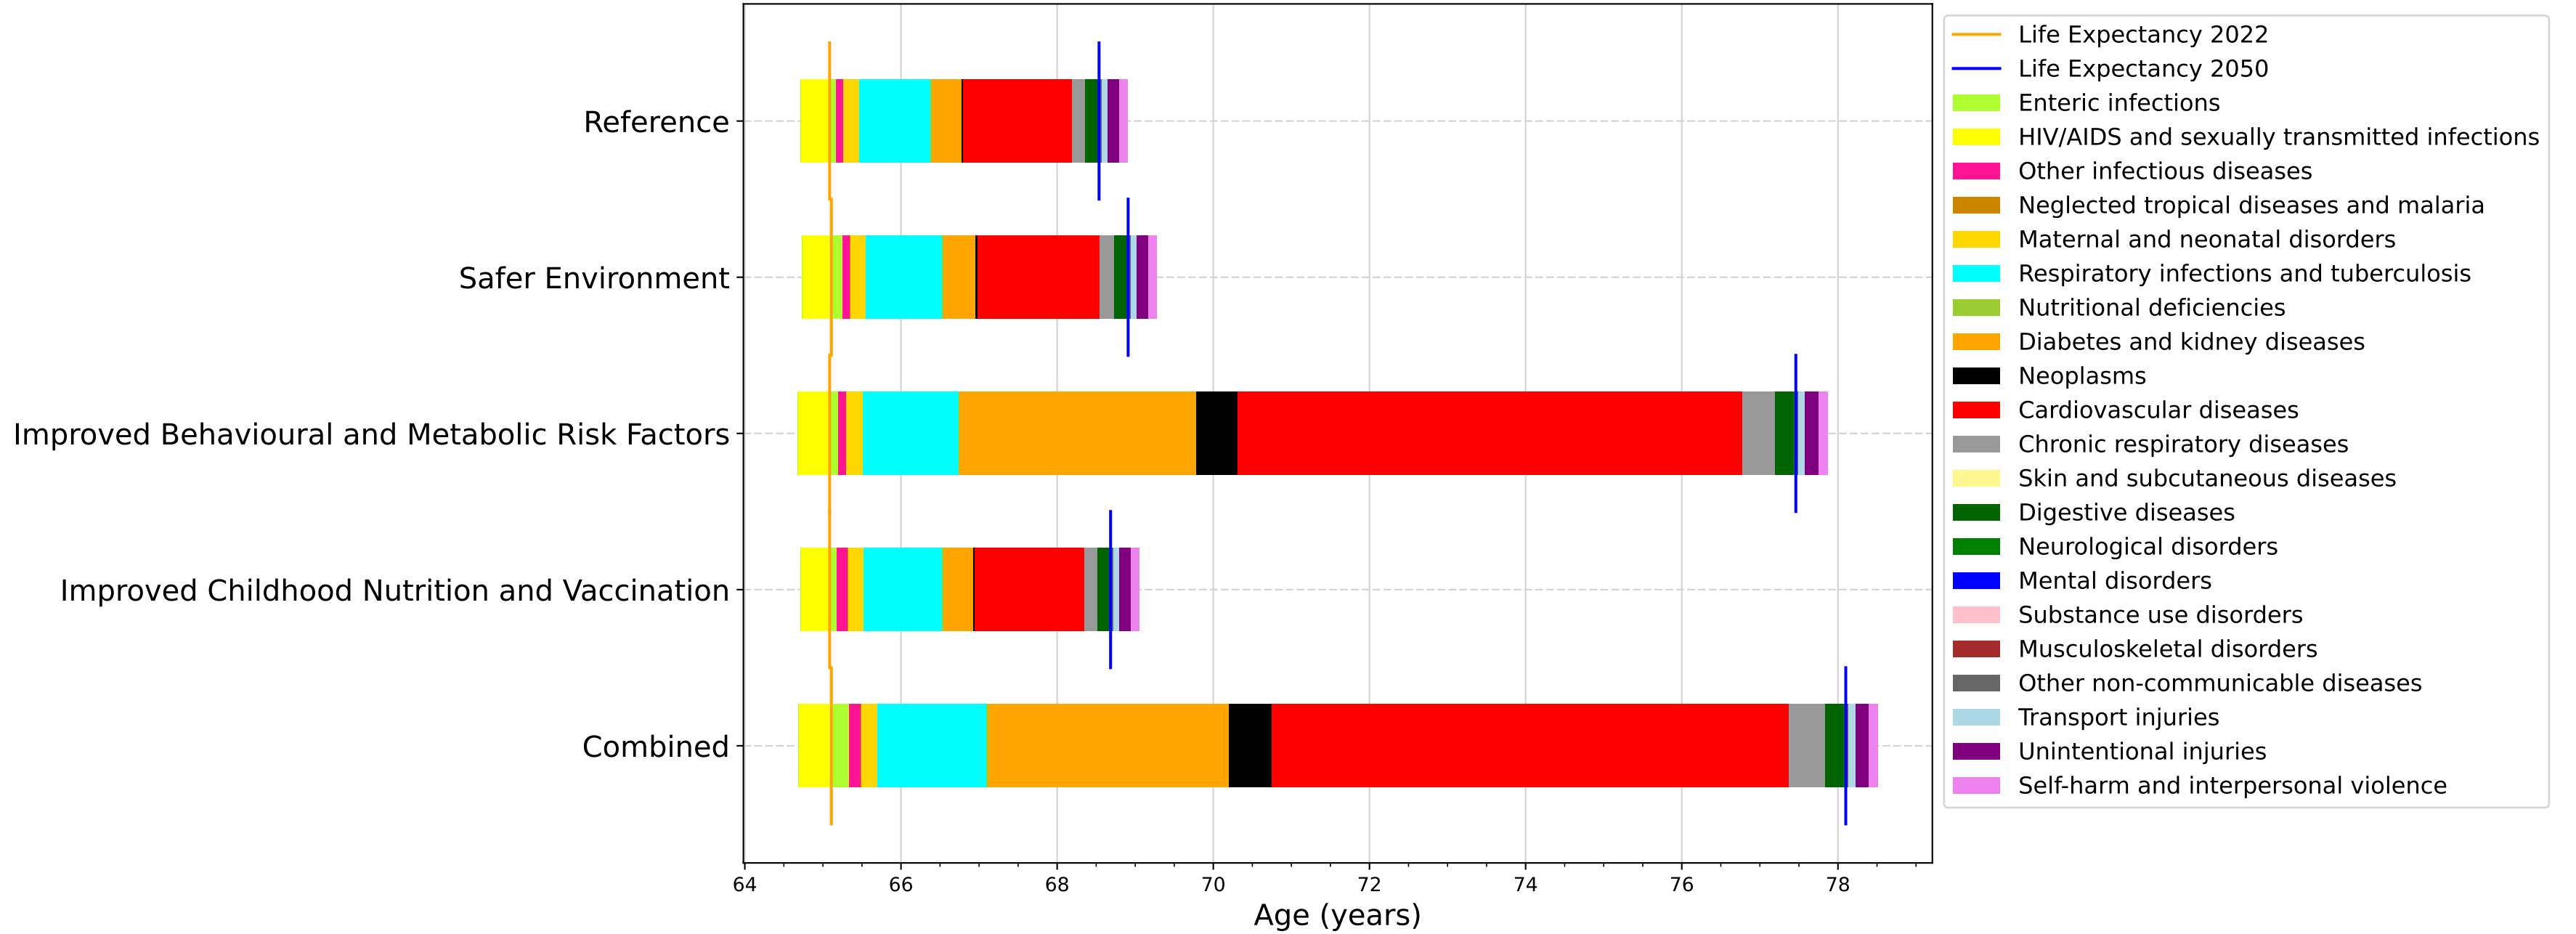

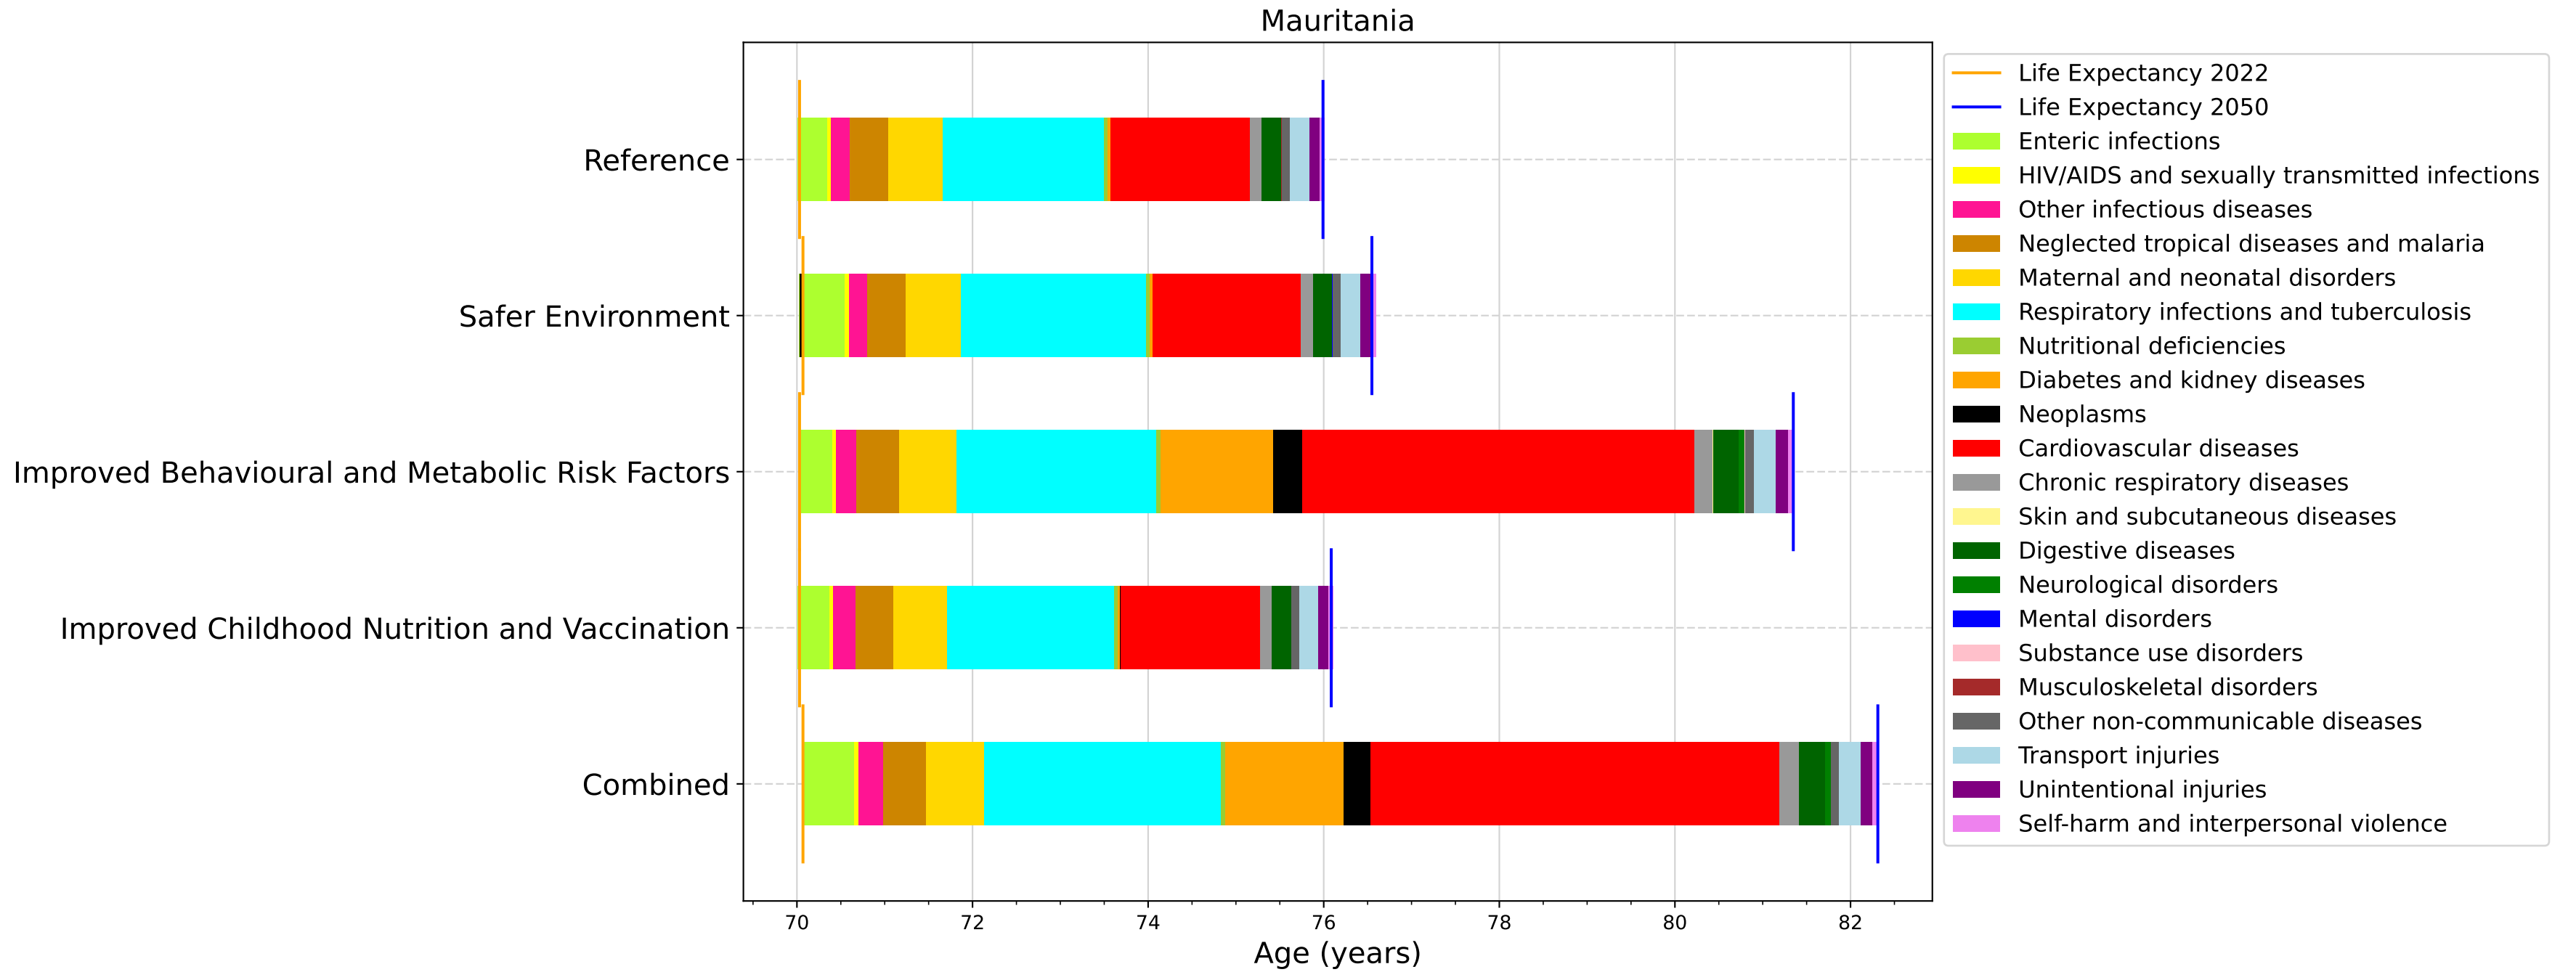



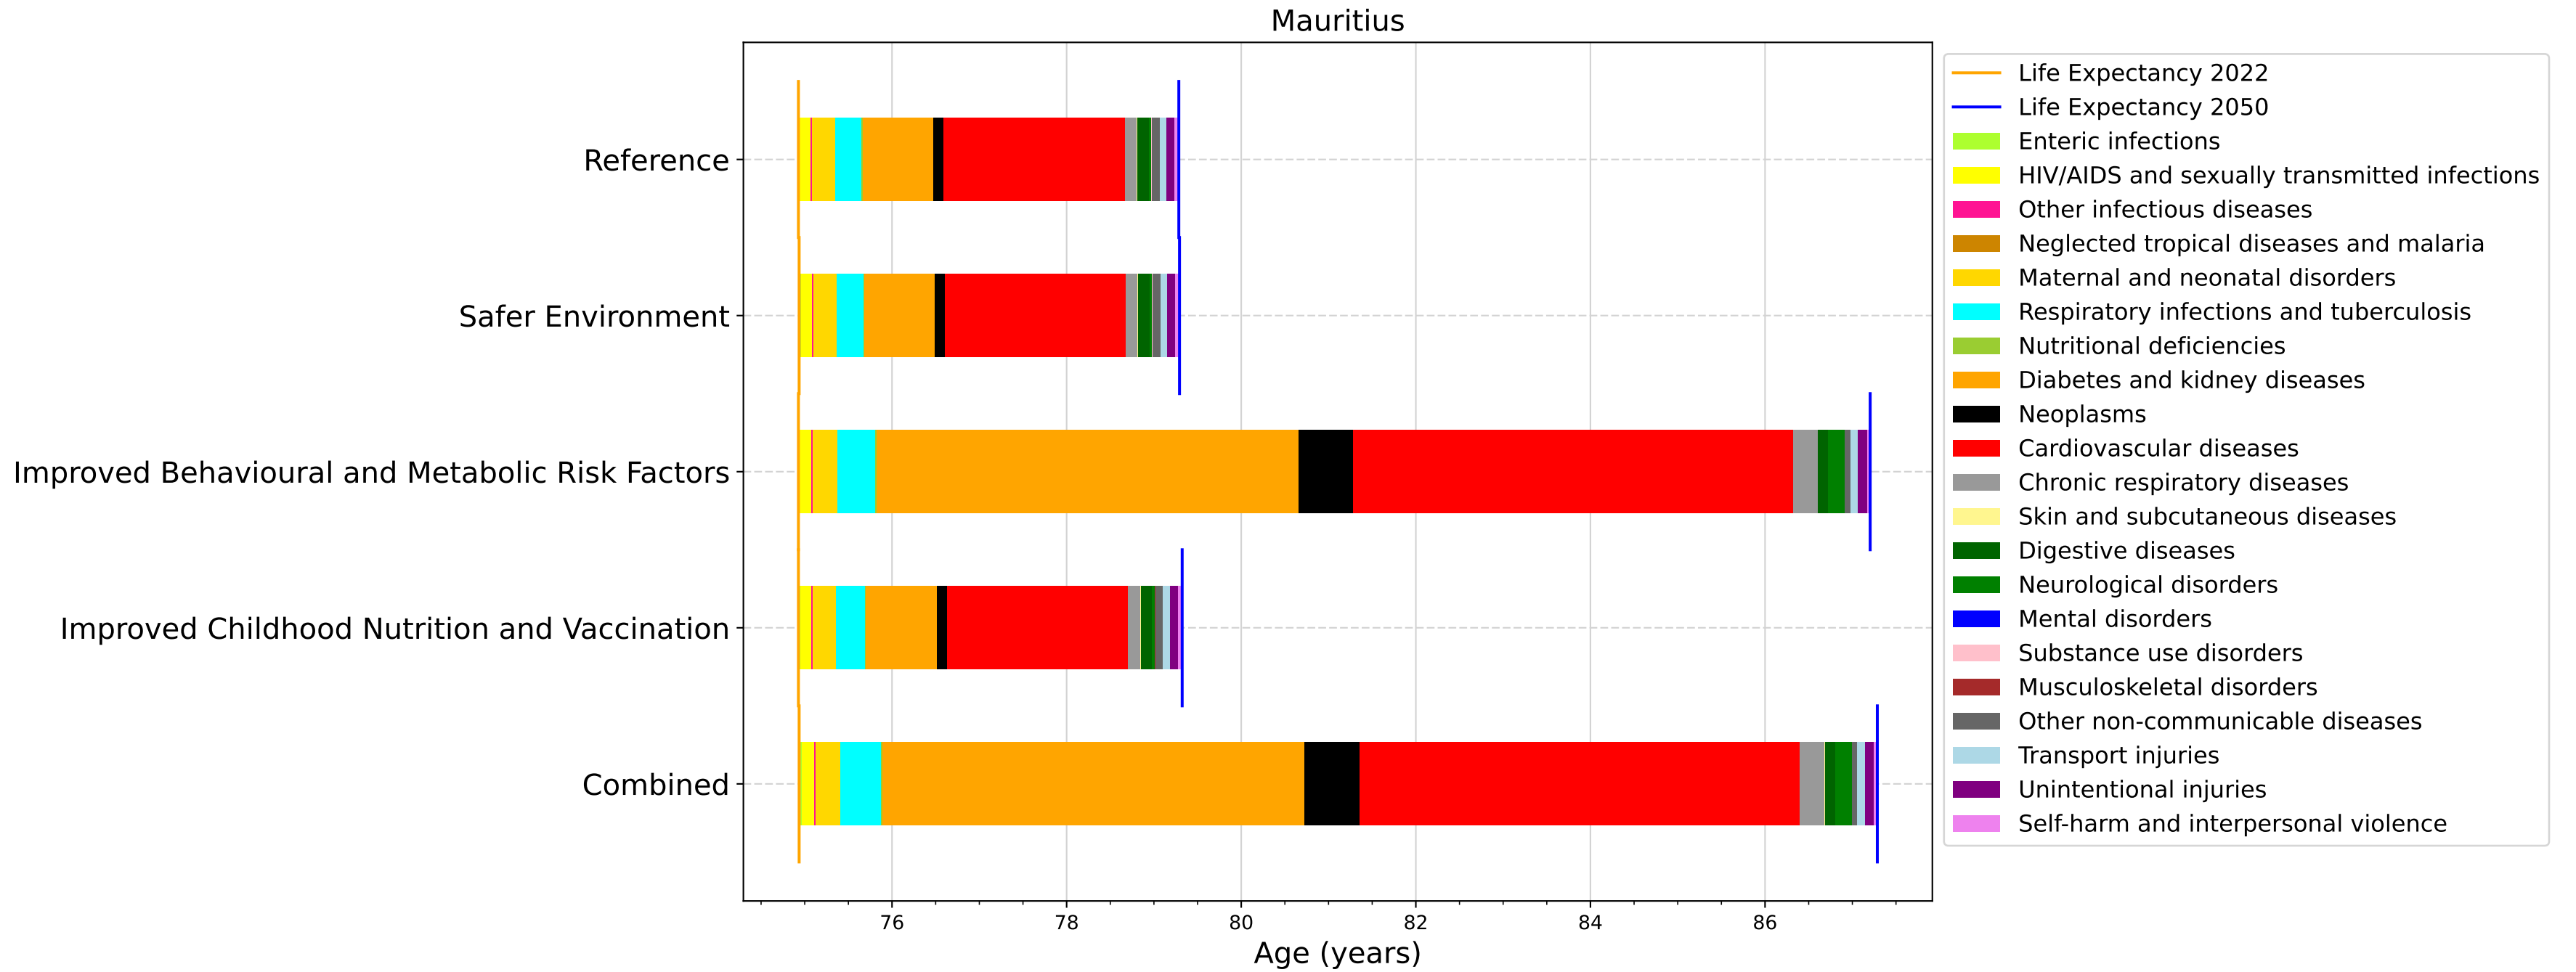

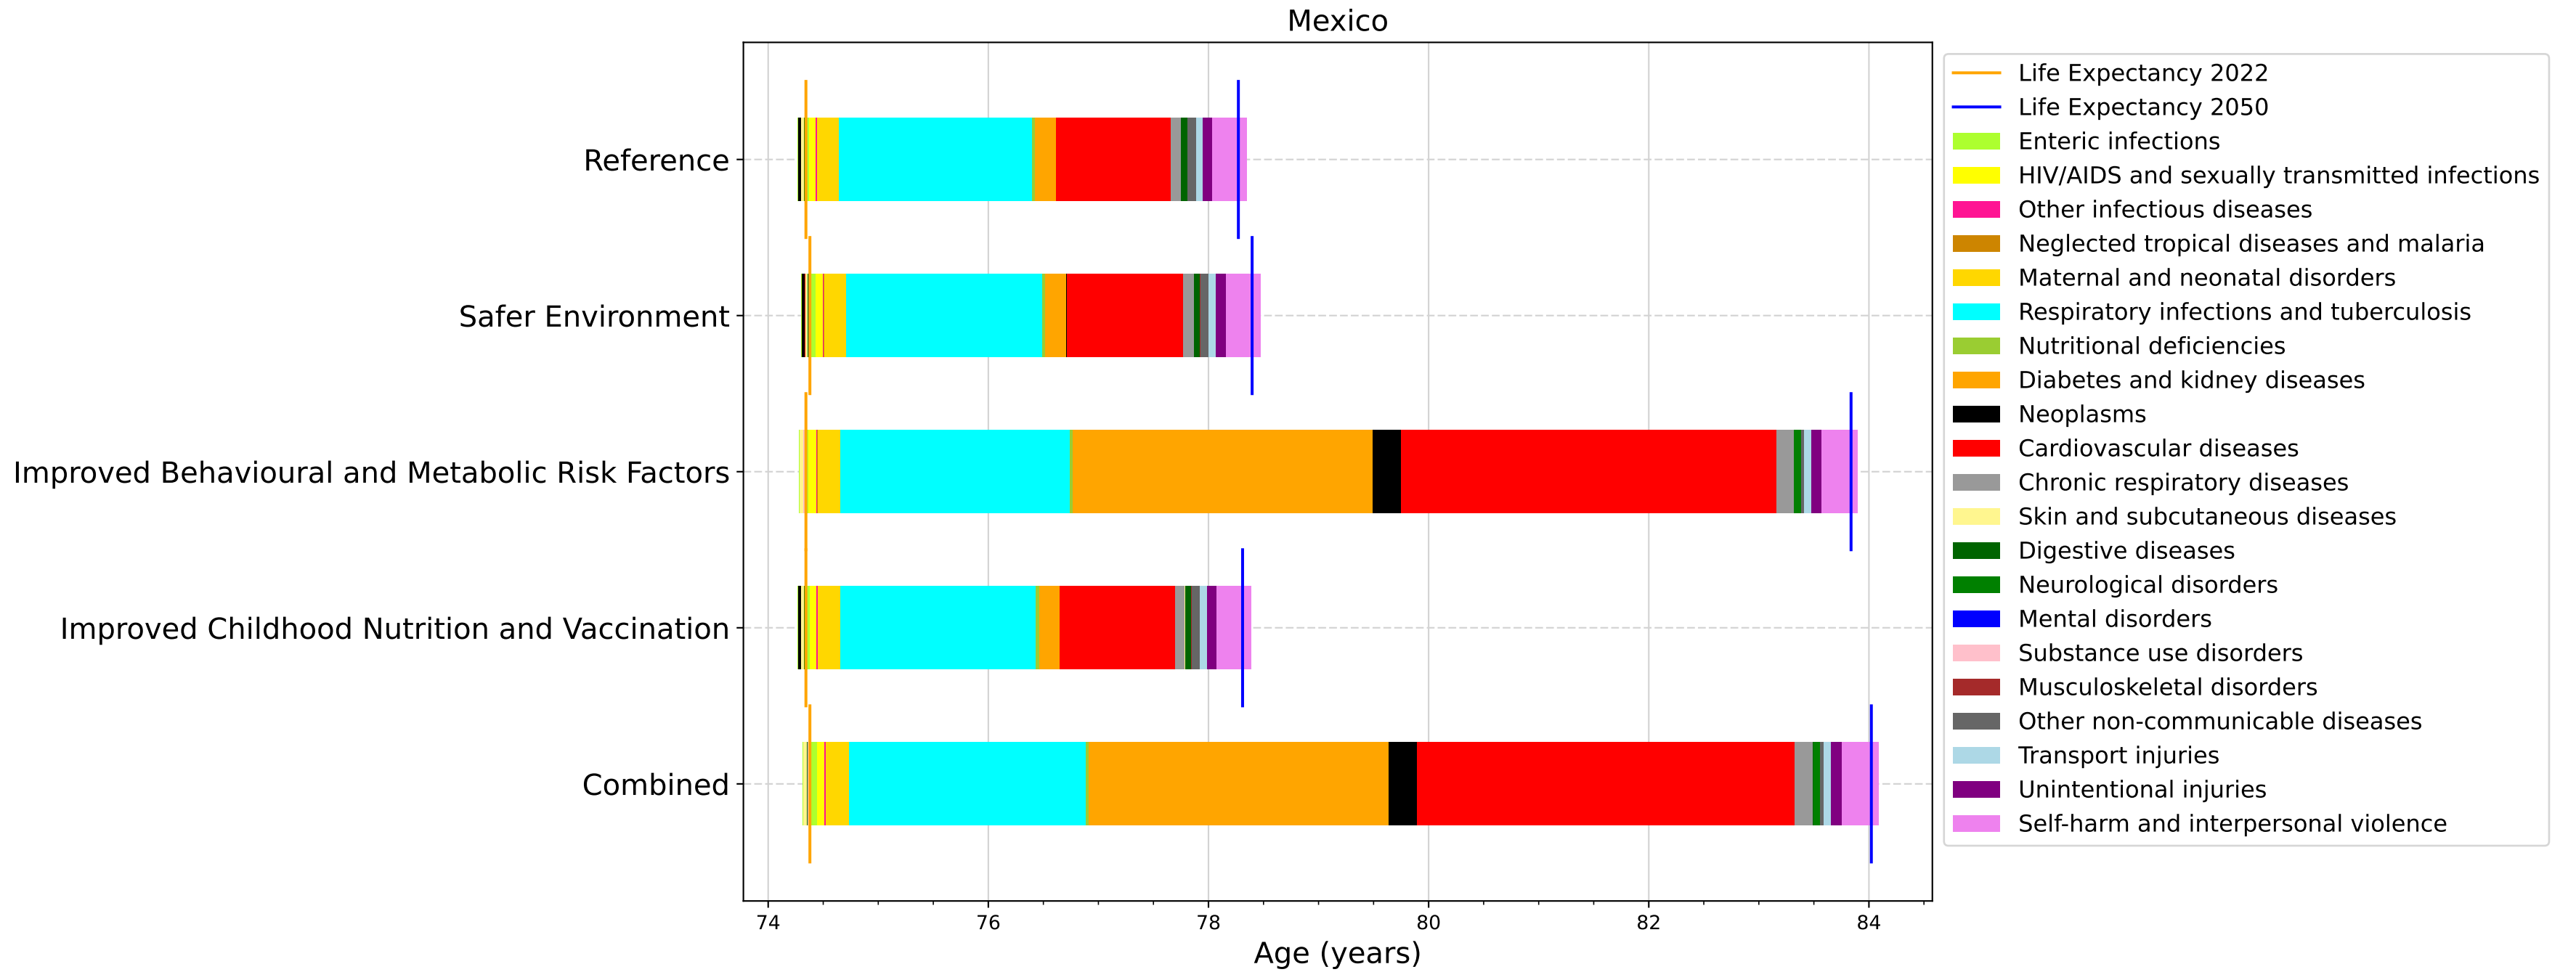

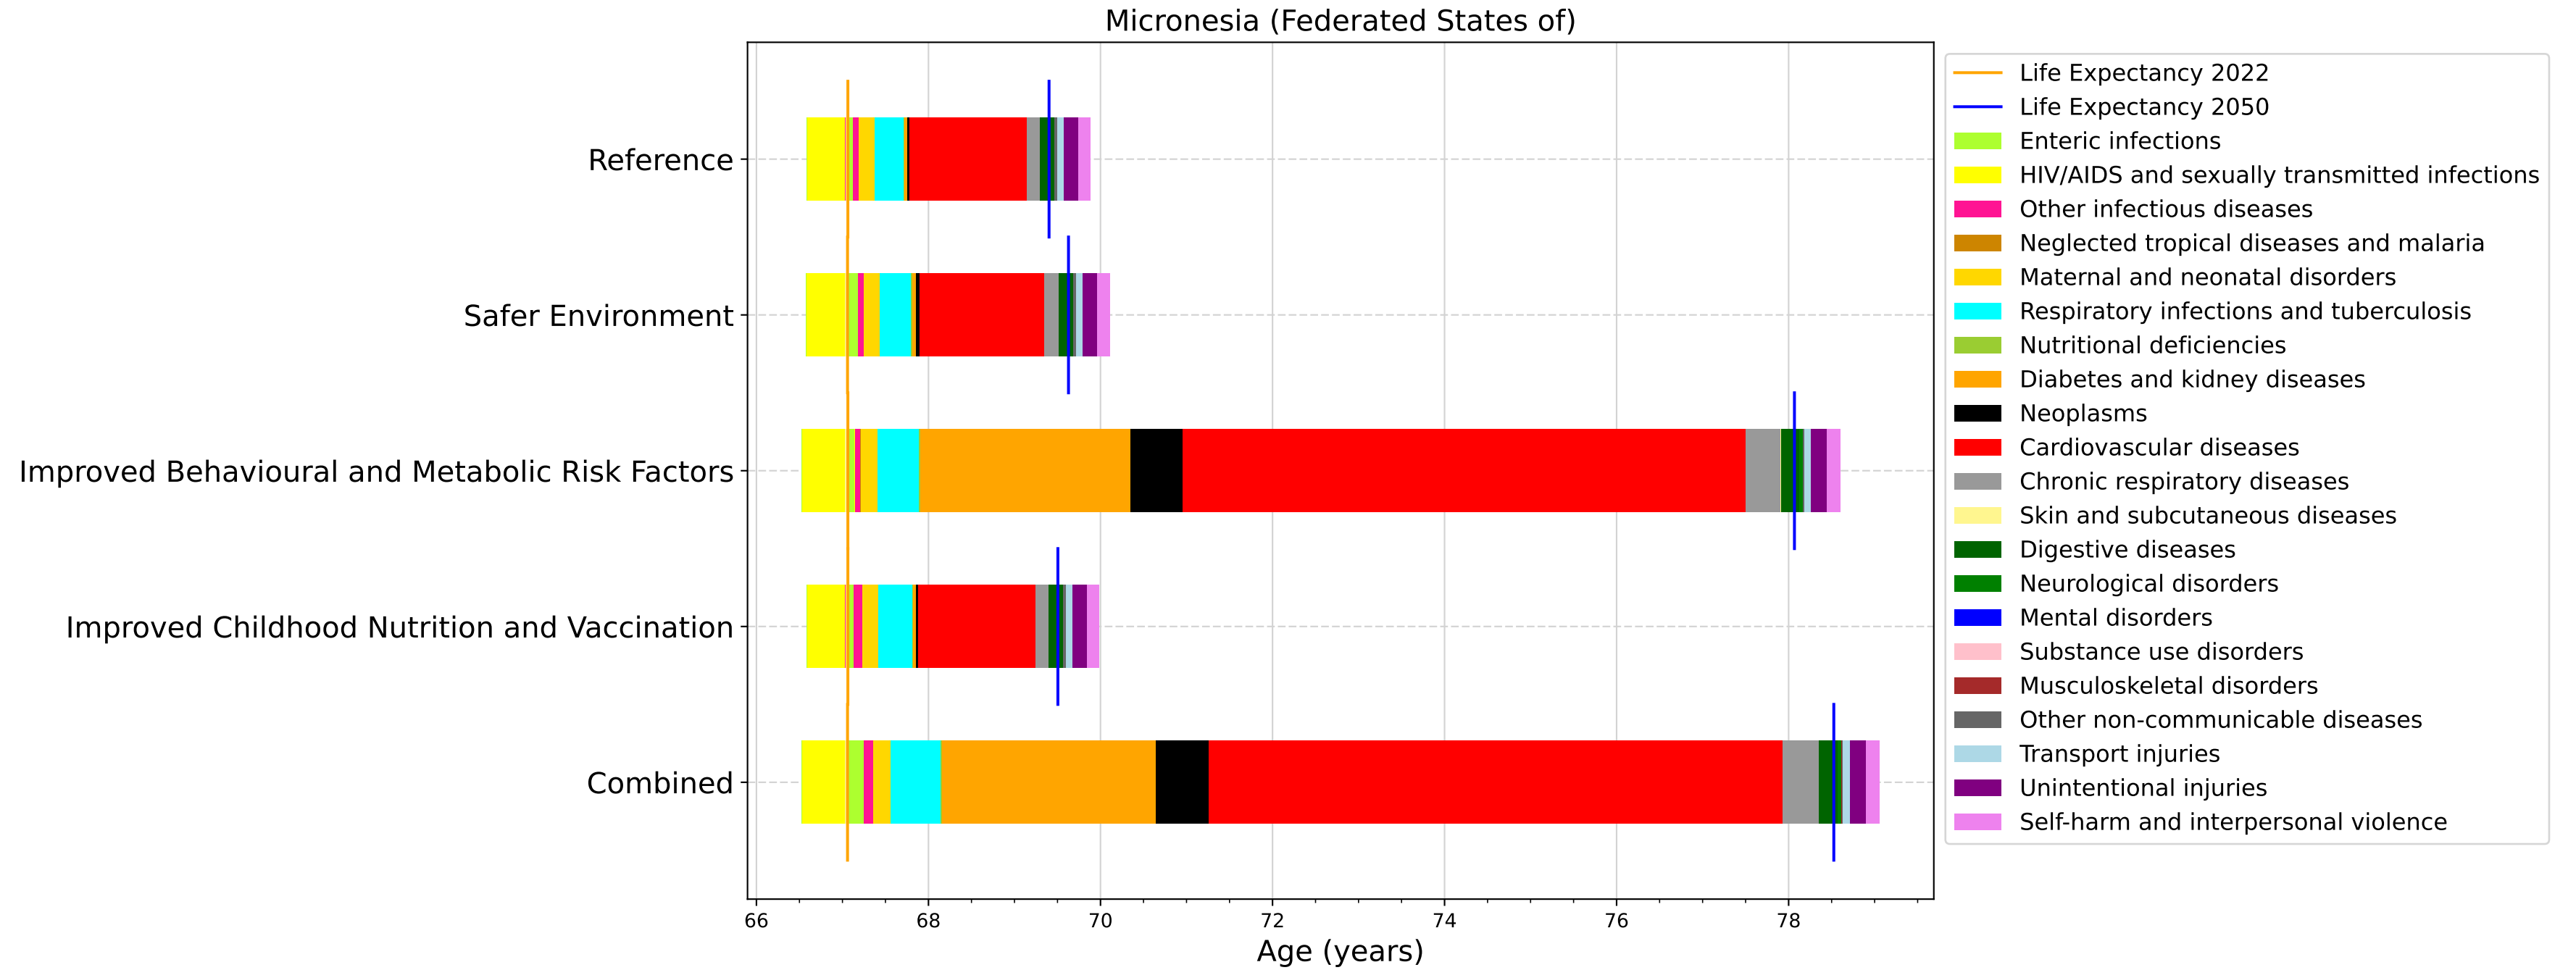

Monaco

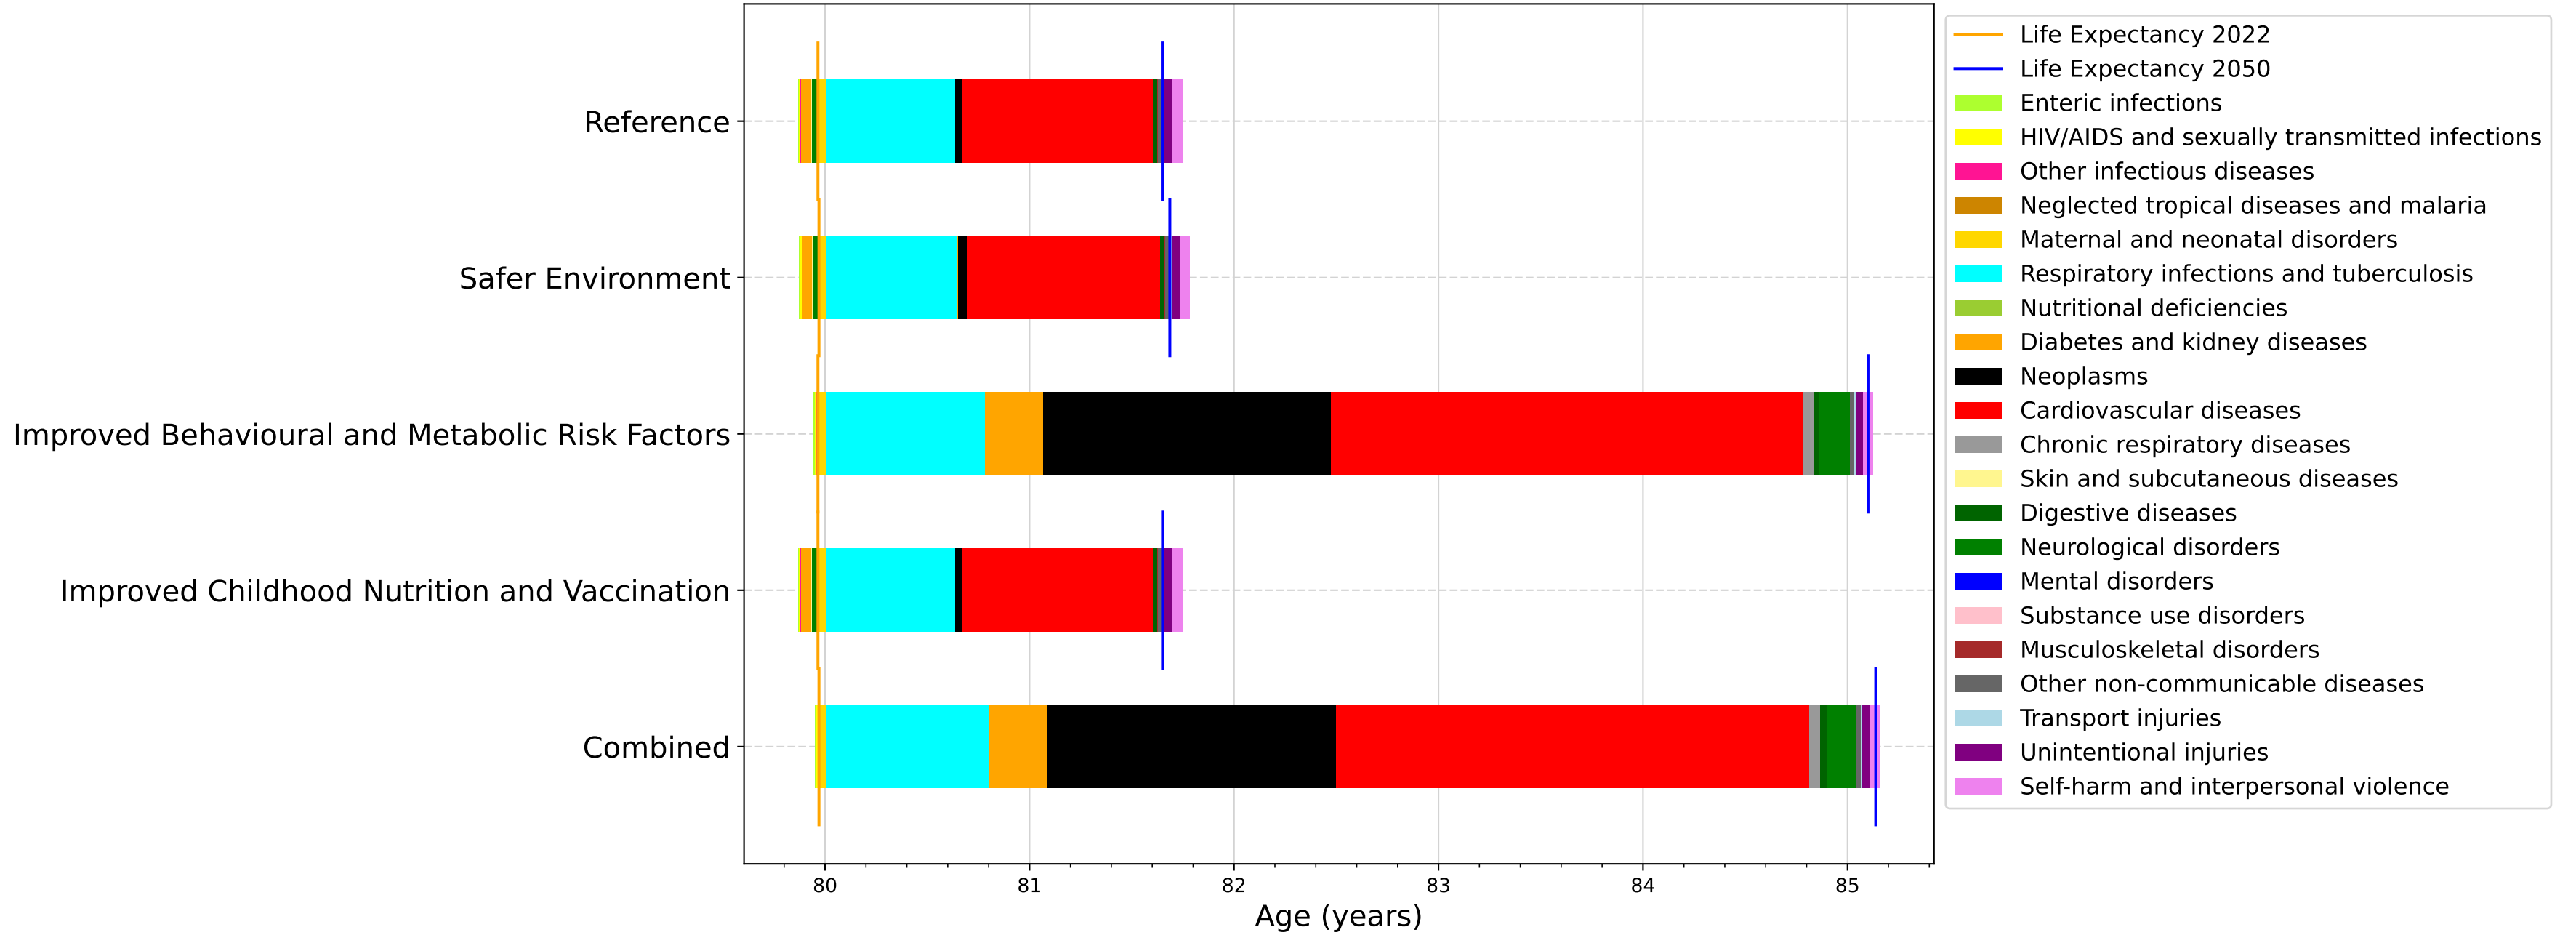

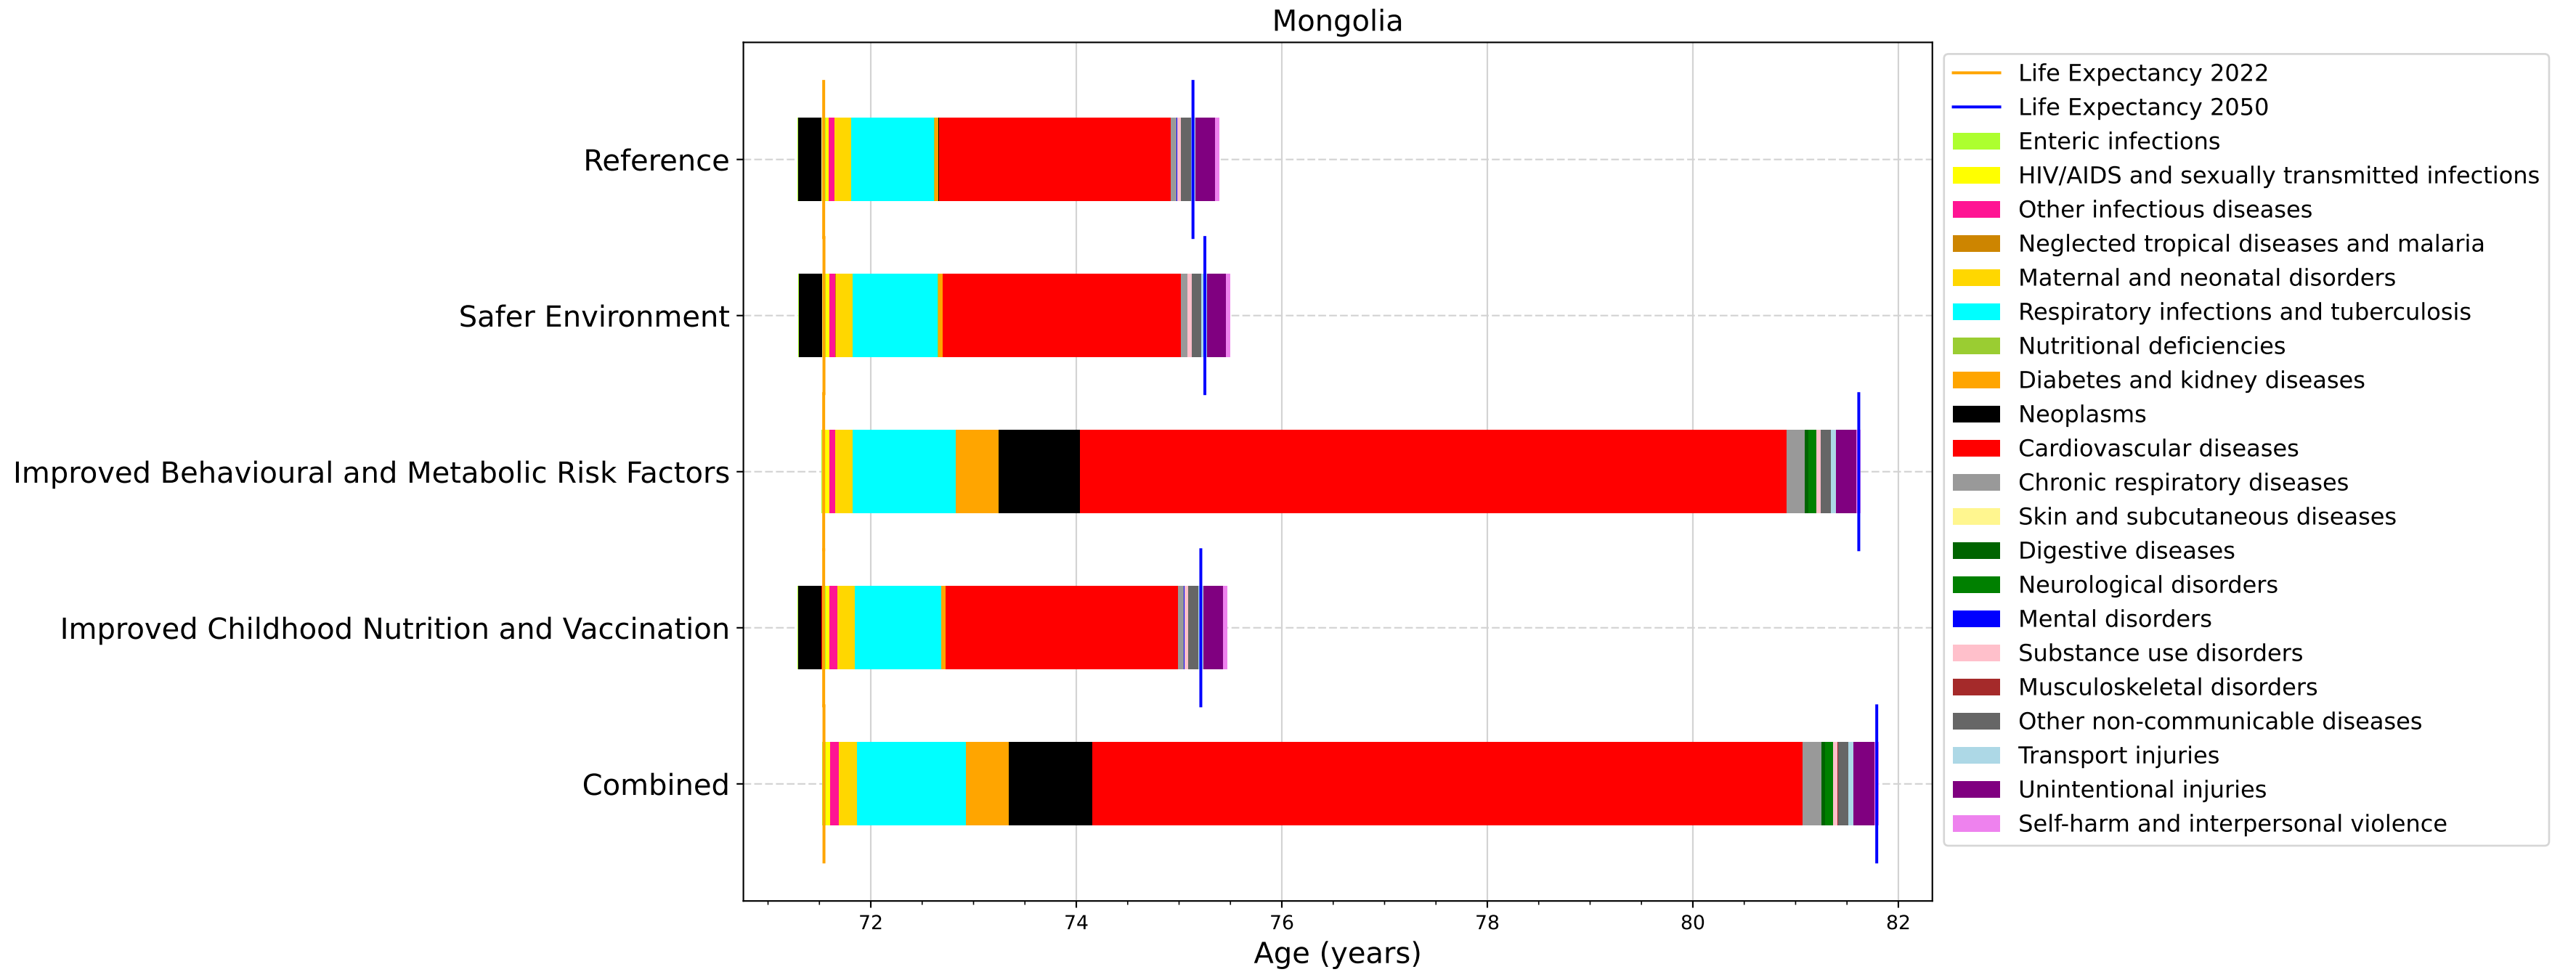

### Montenegro

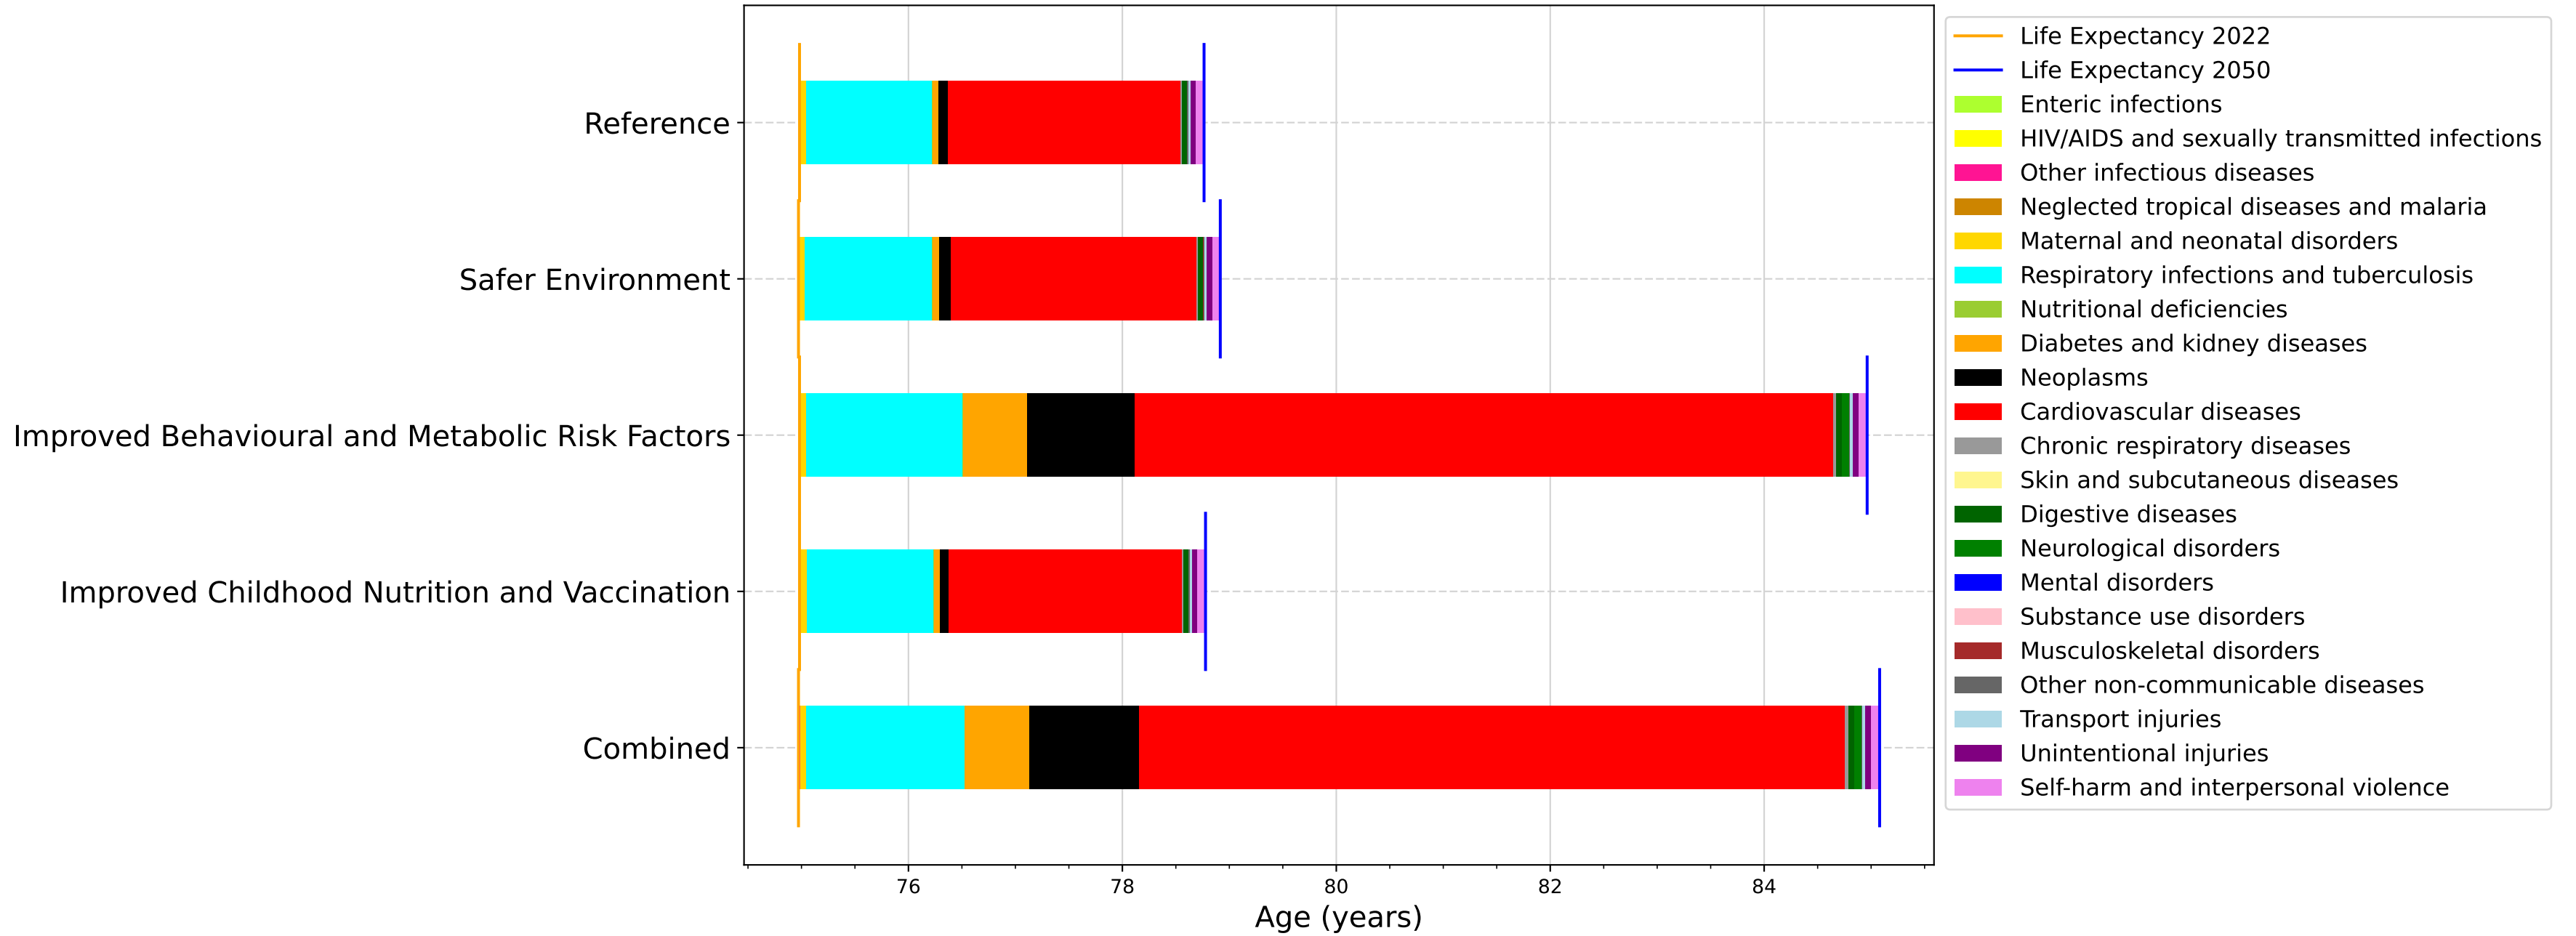

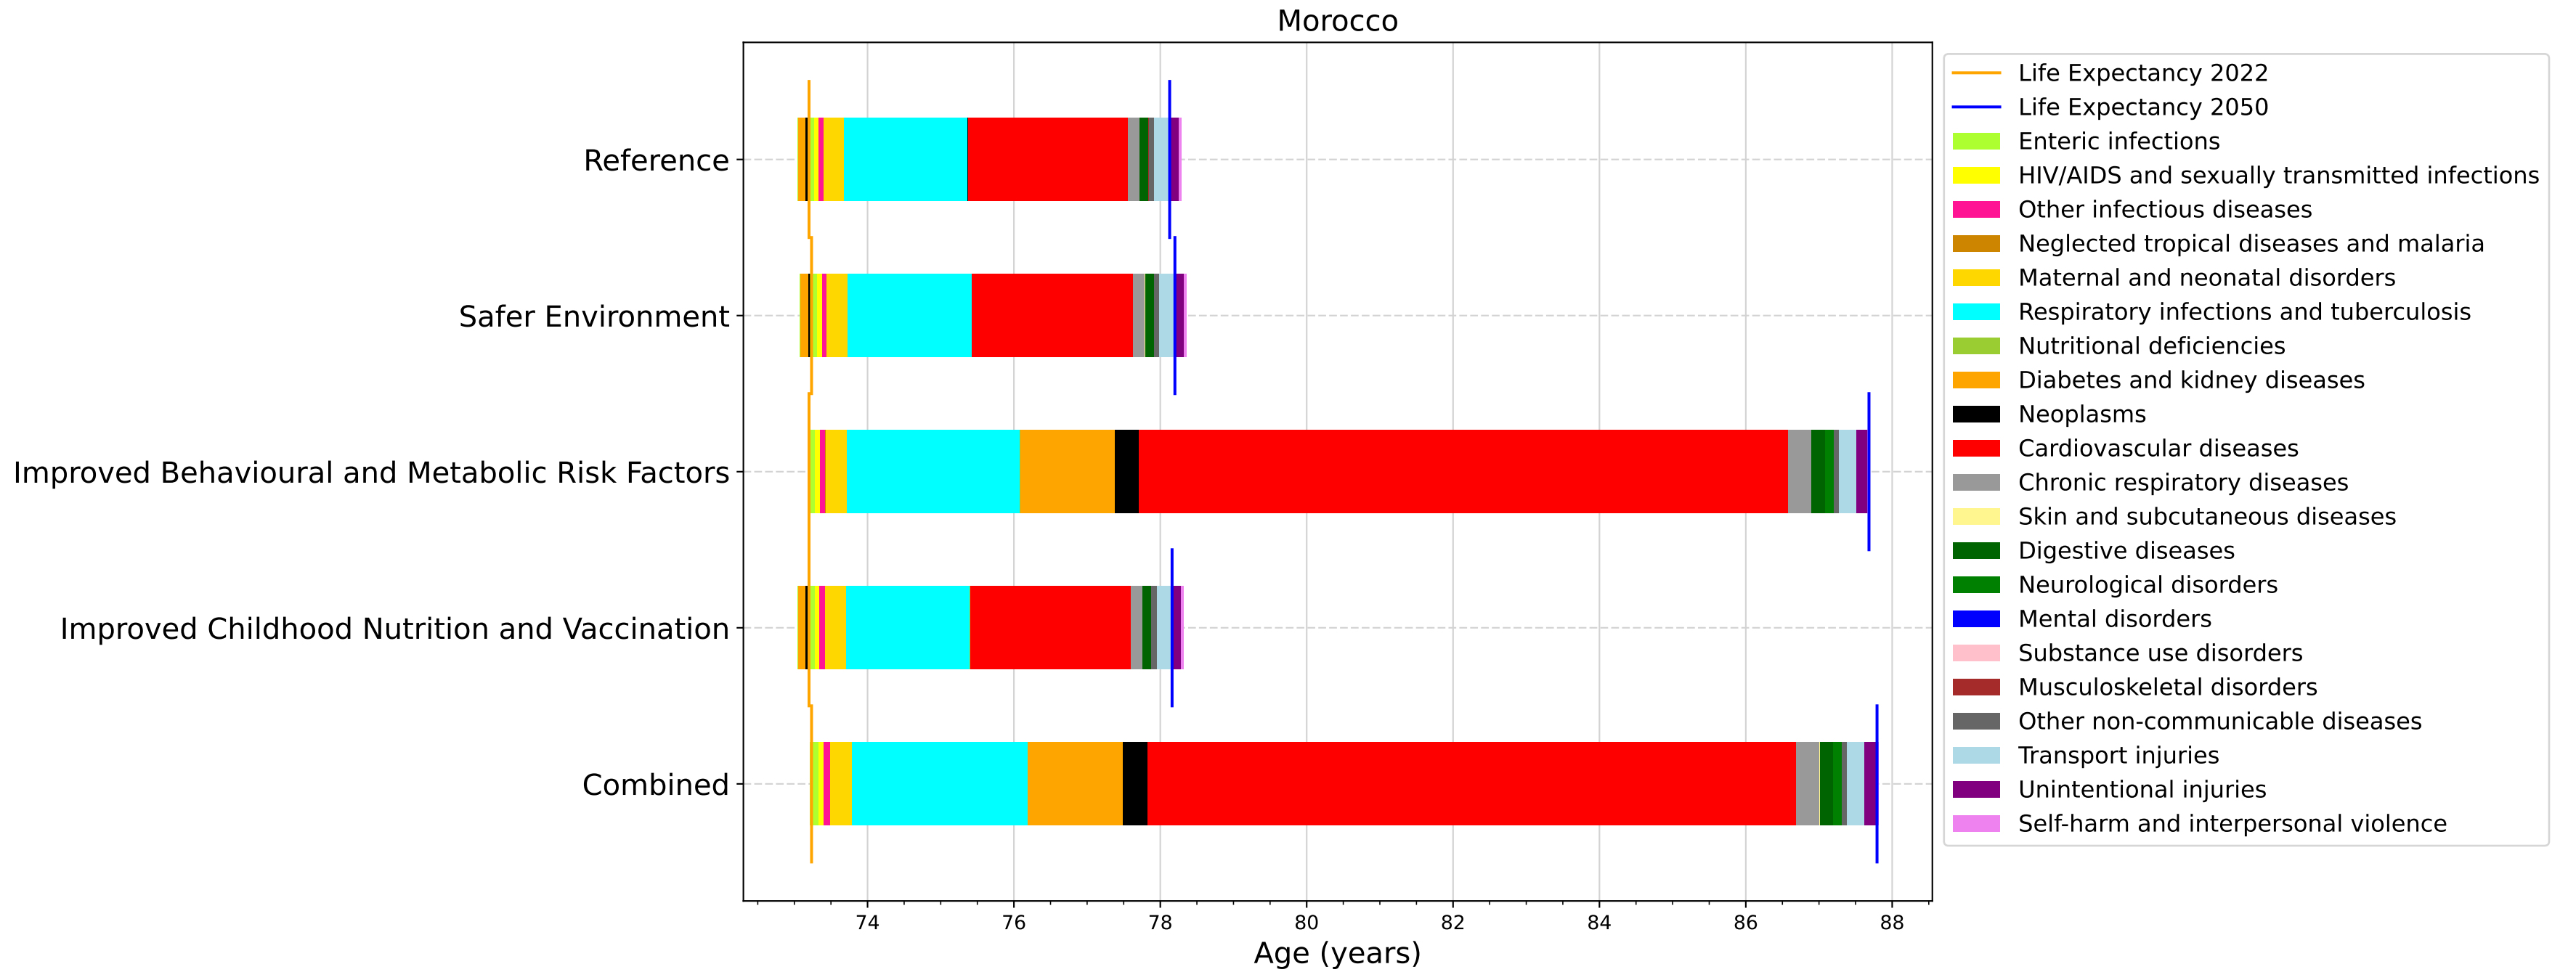

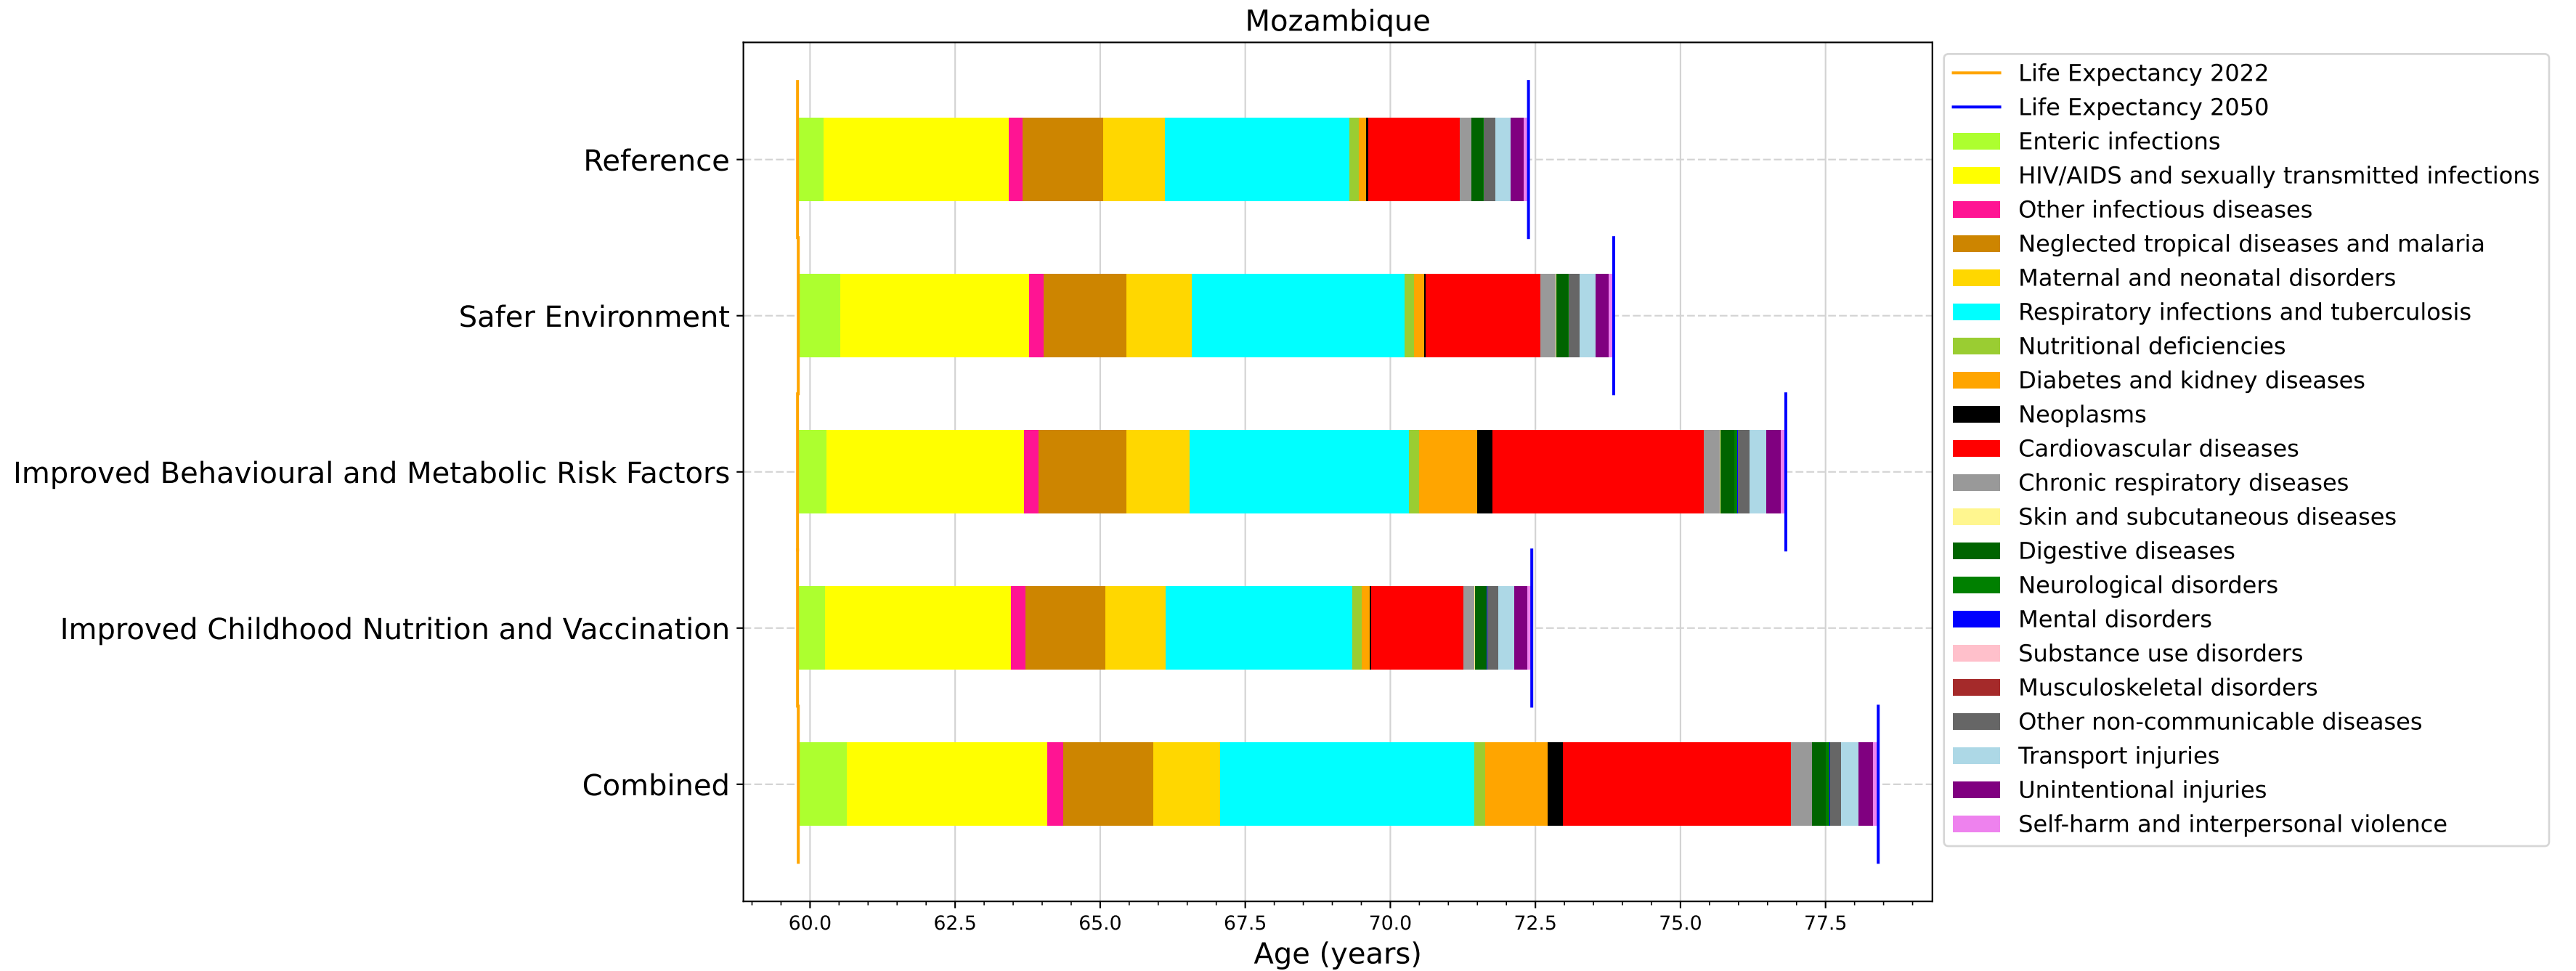



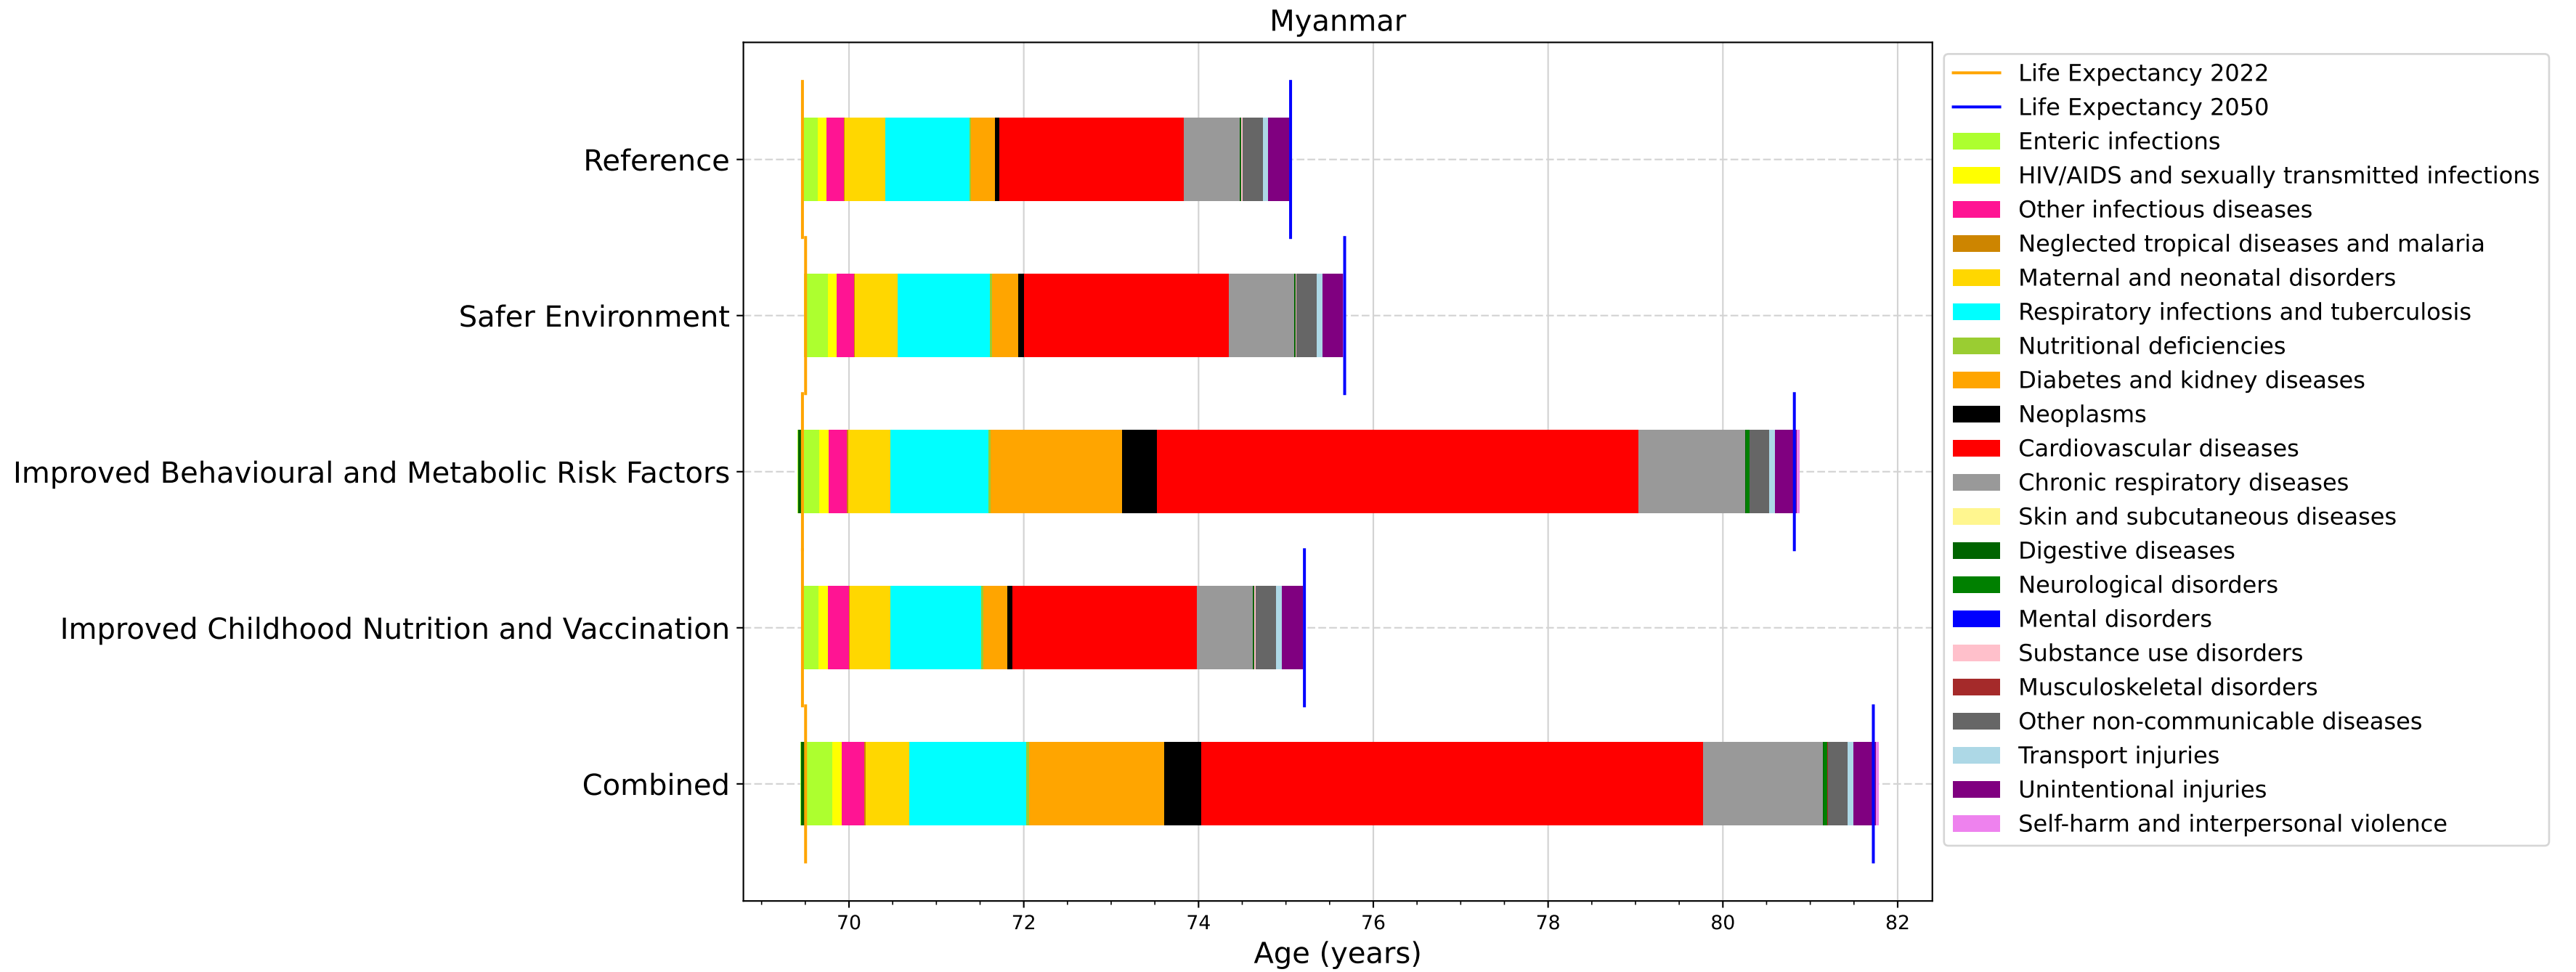

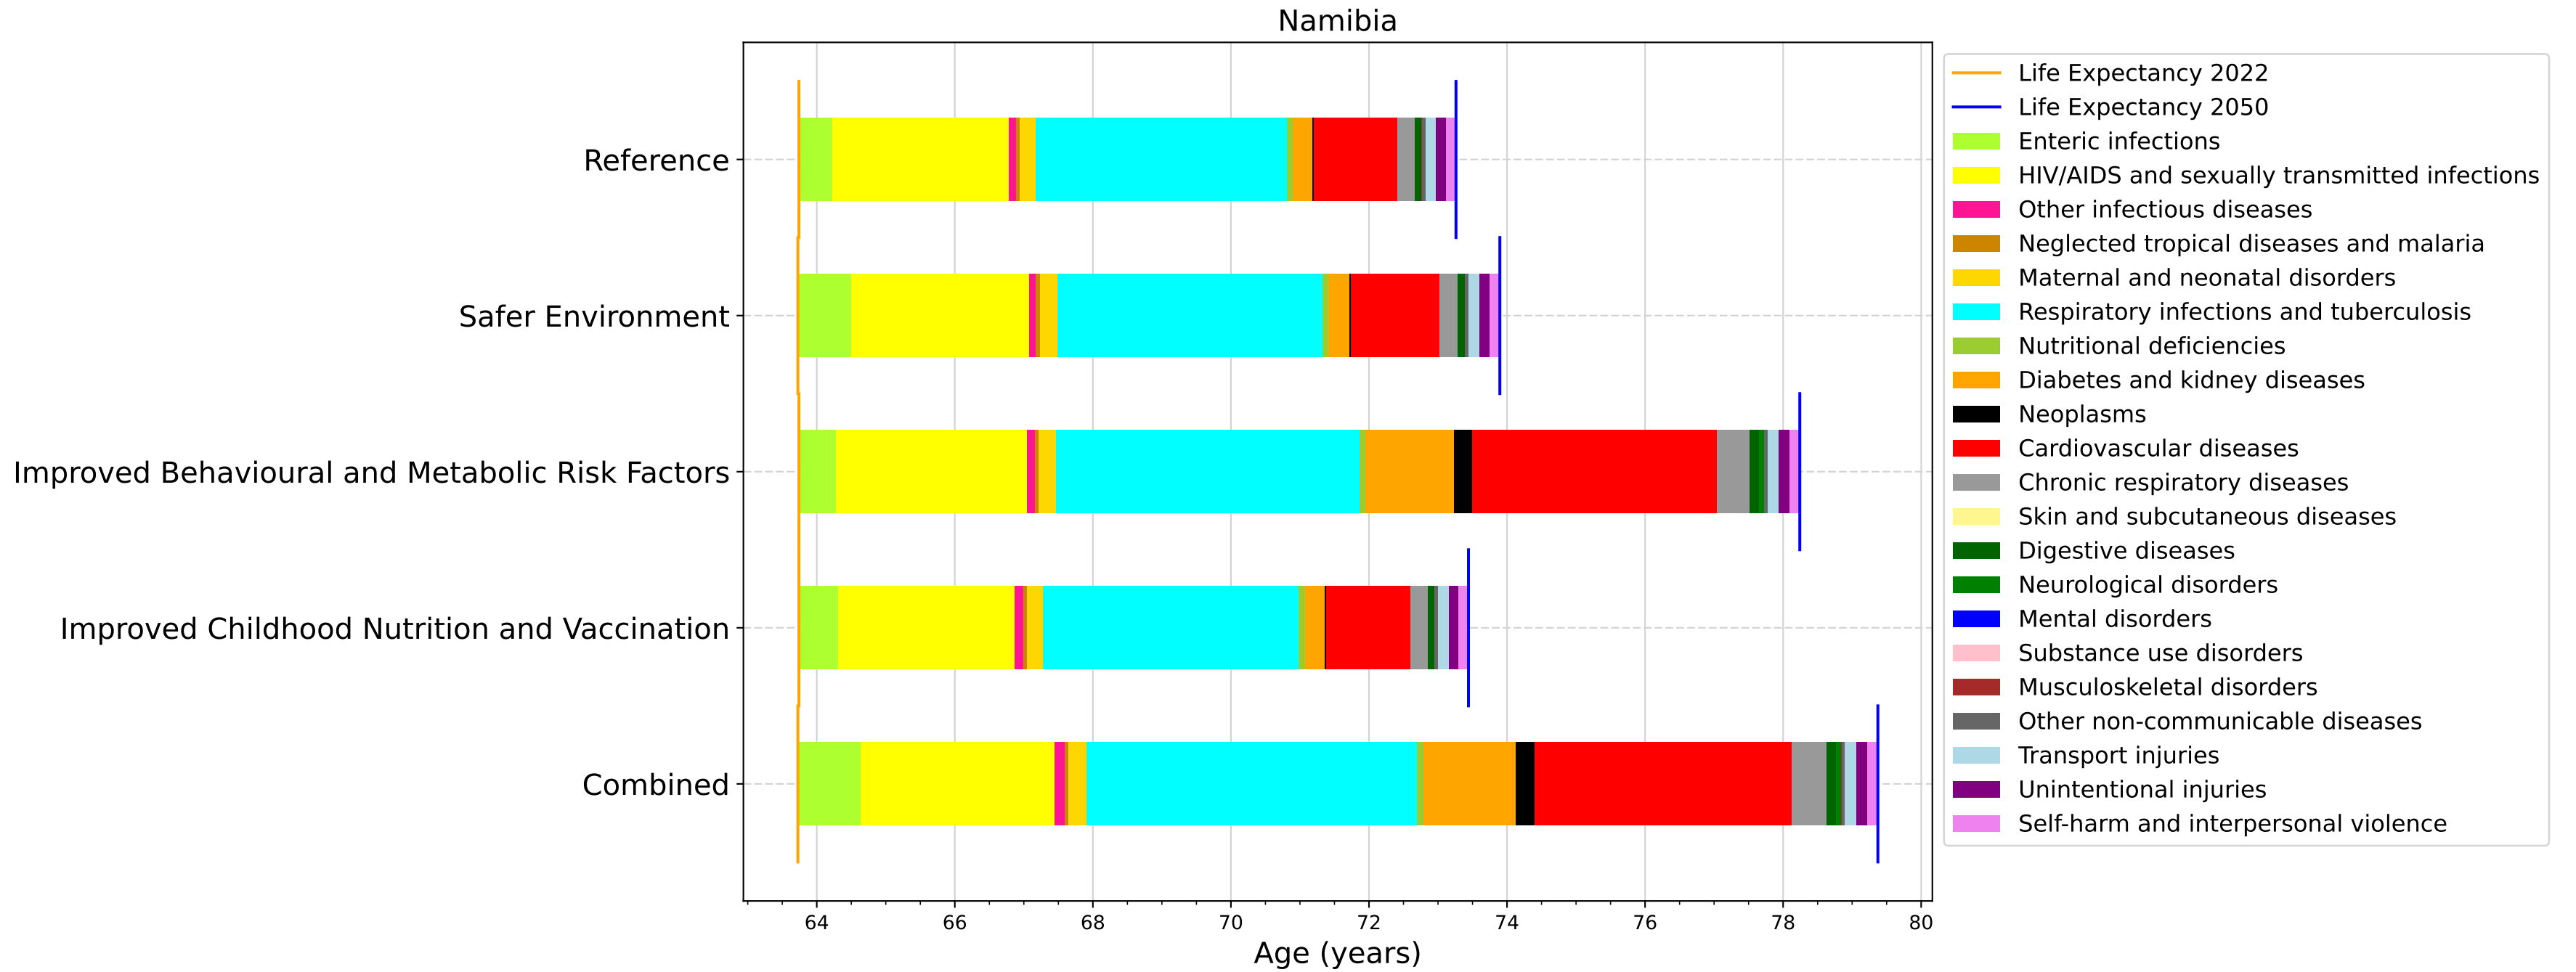

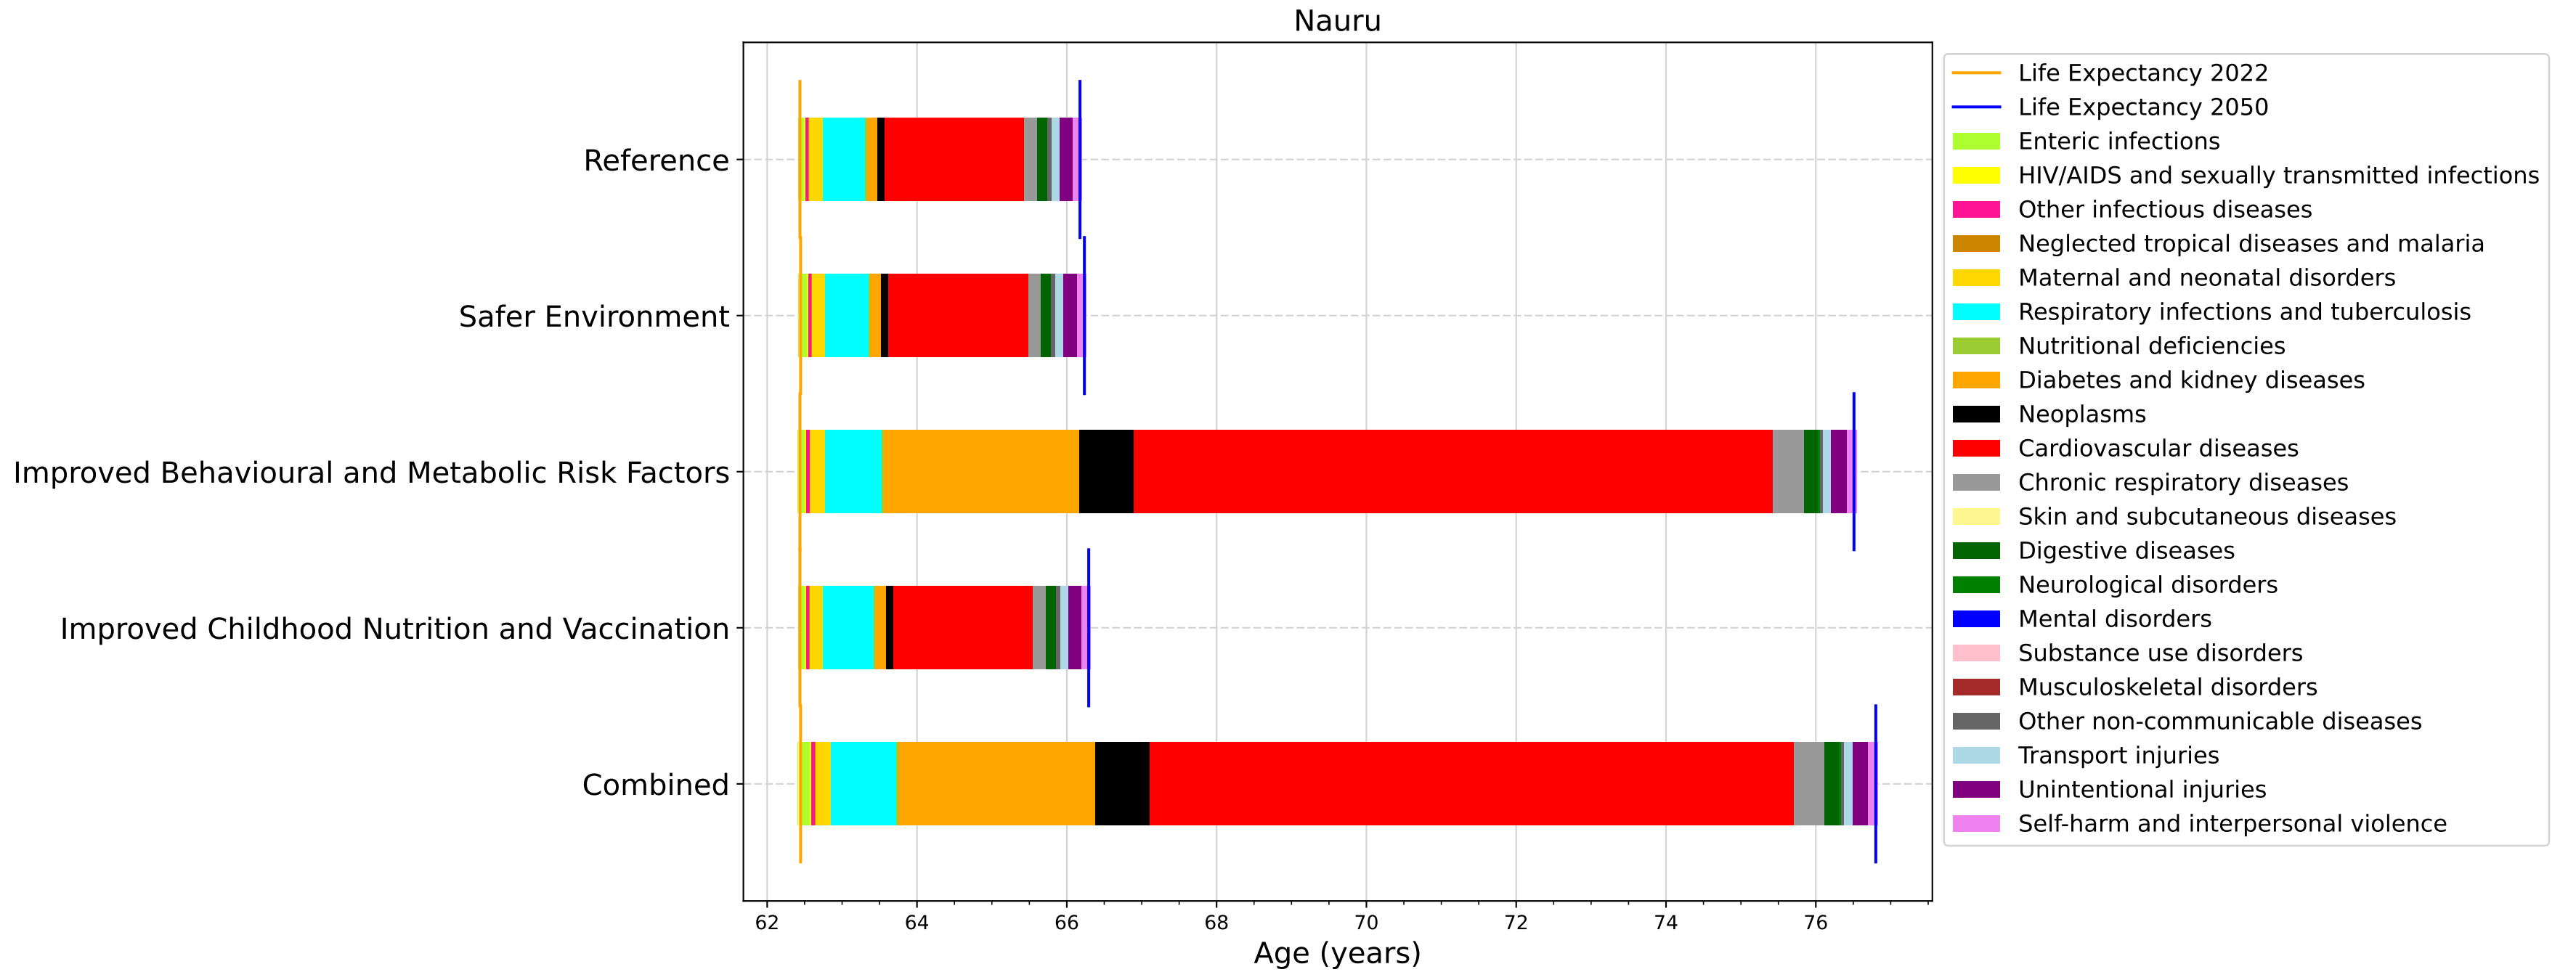

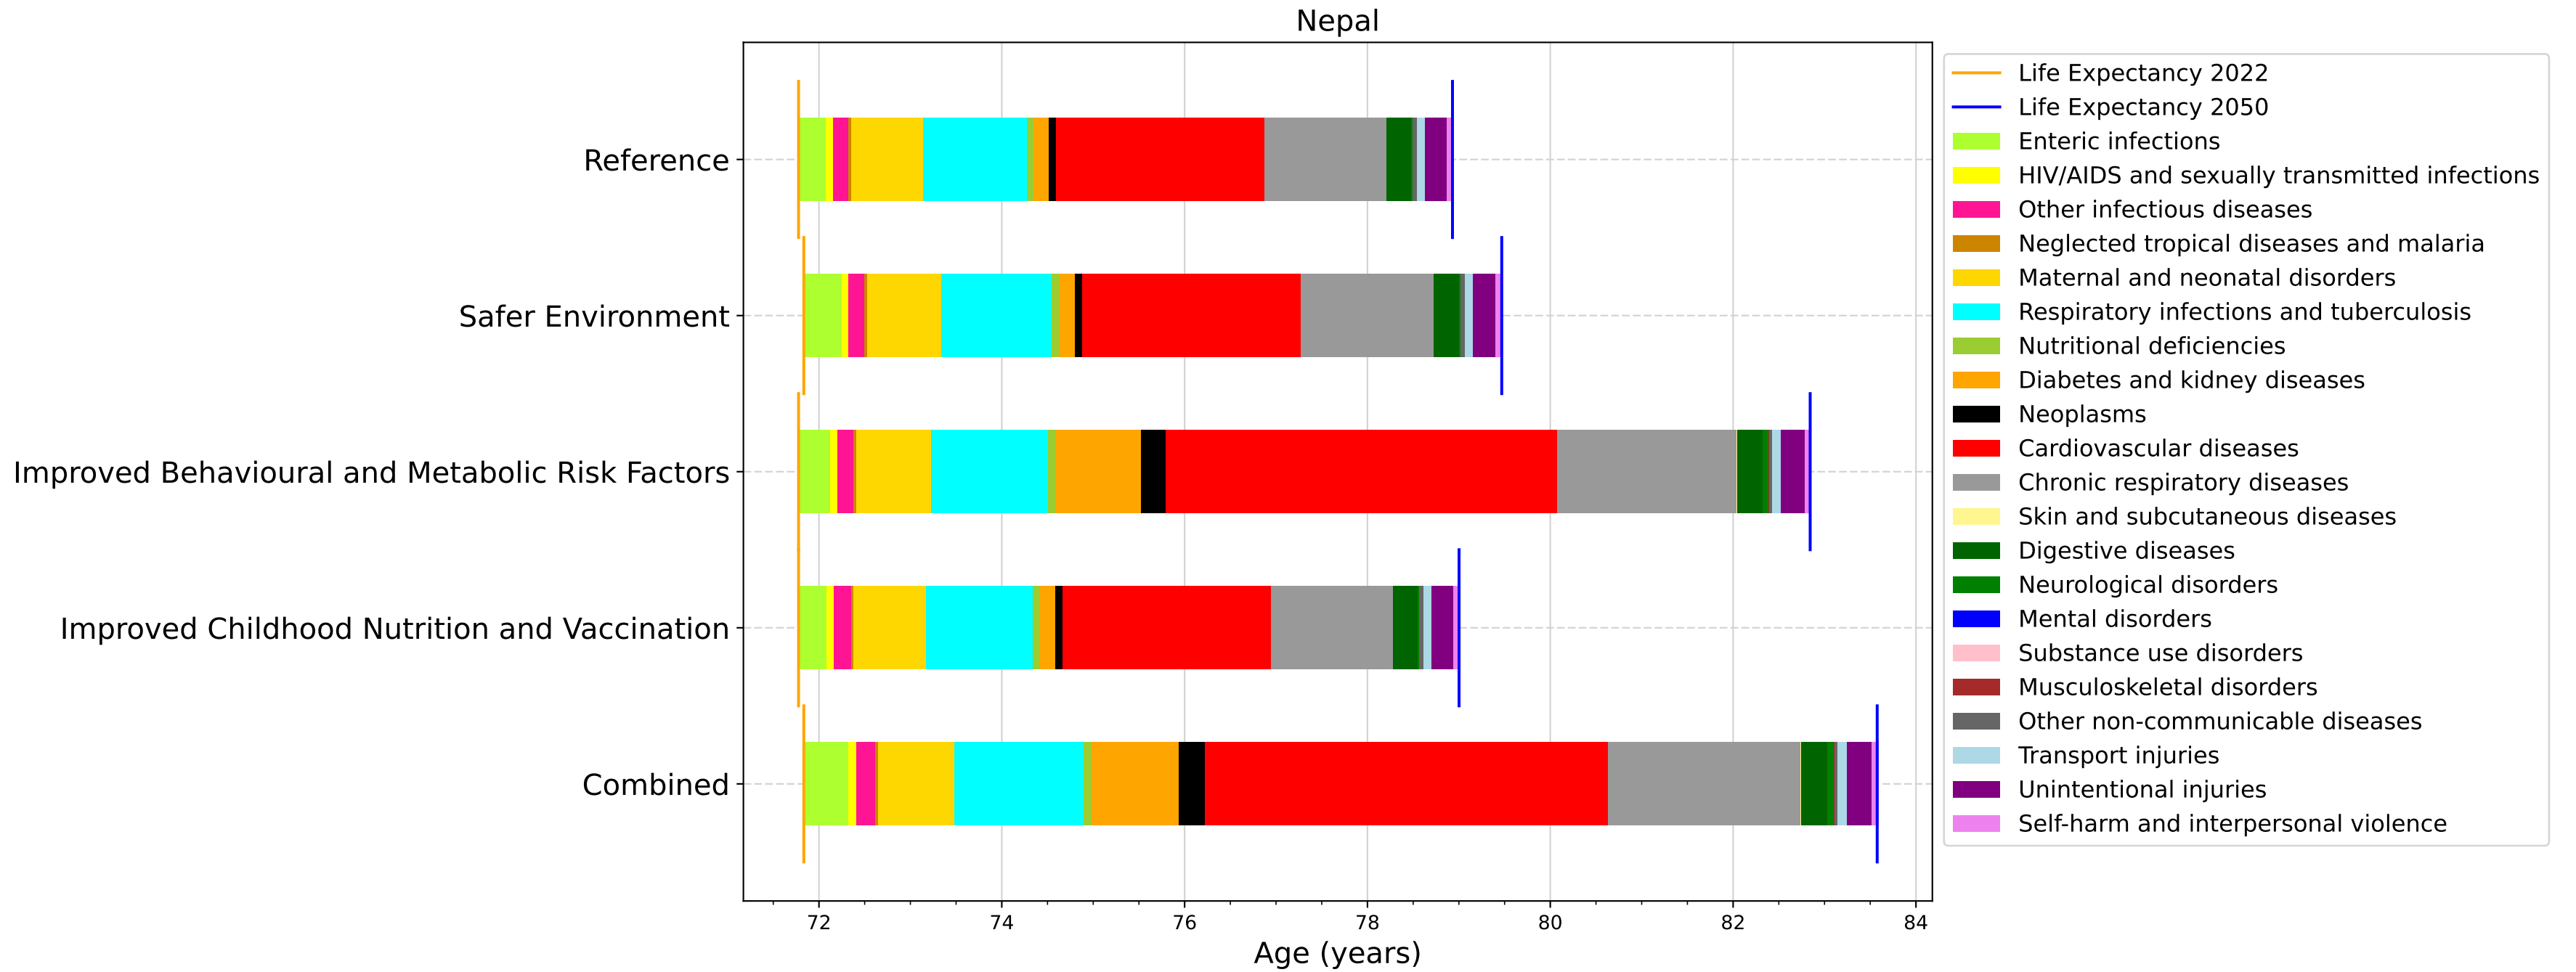

Netherlands

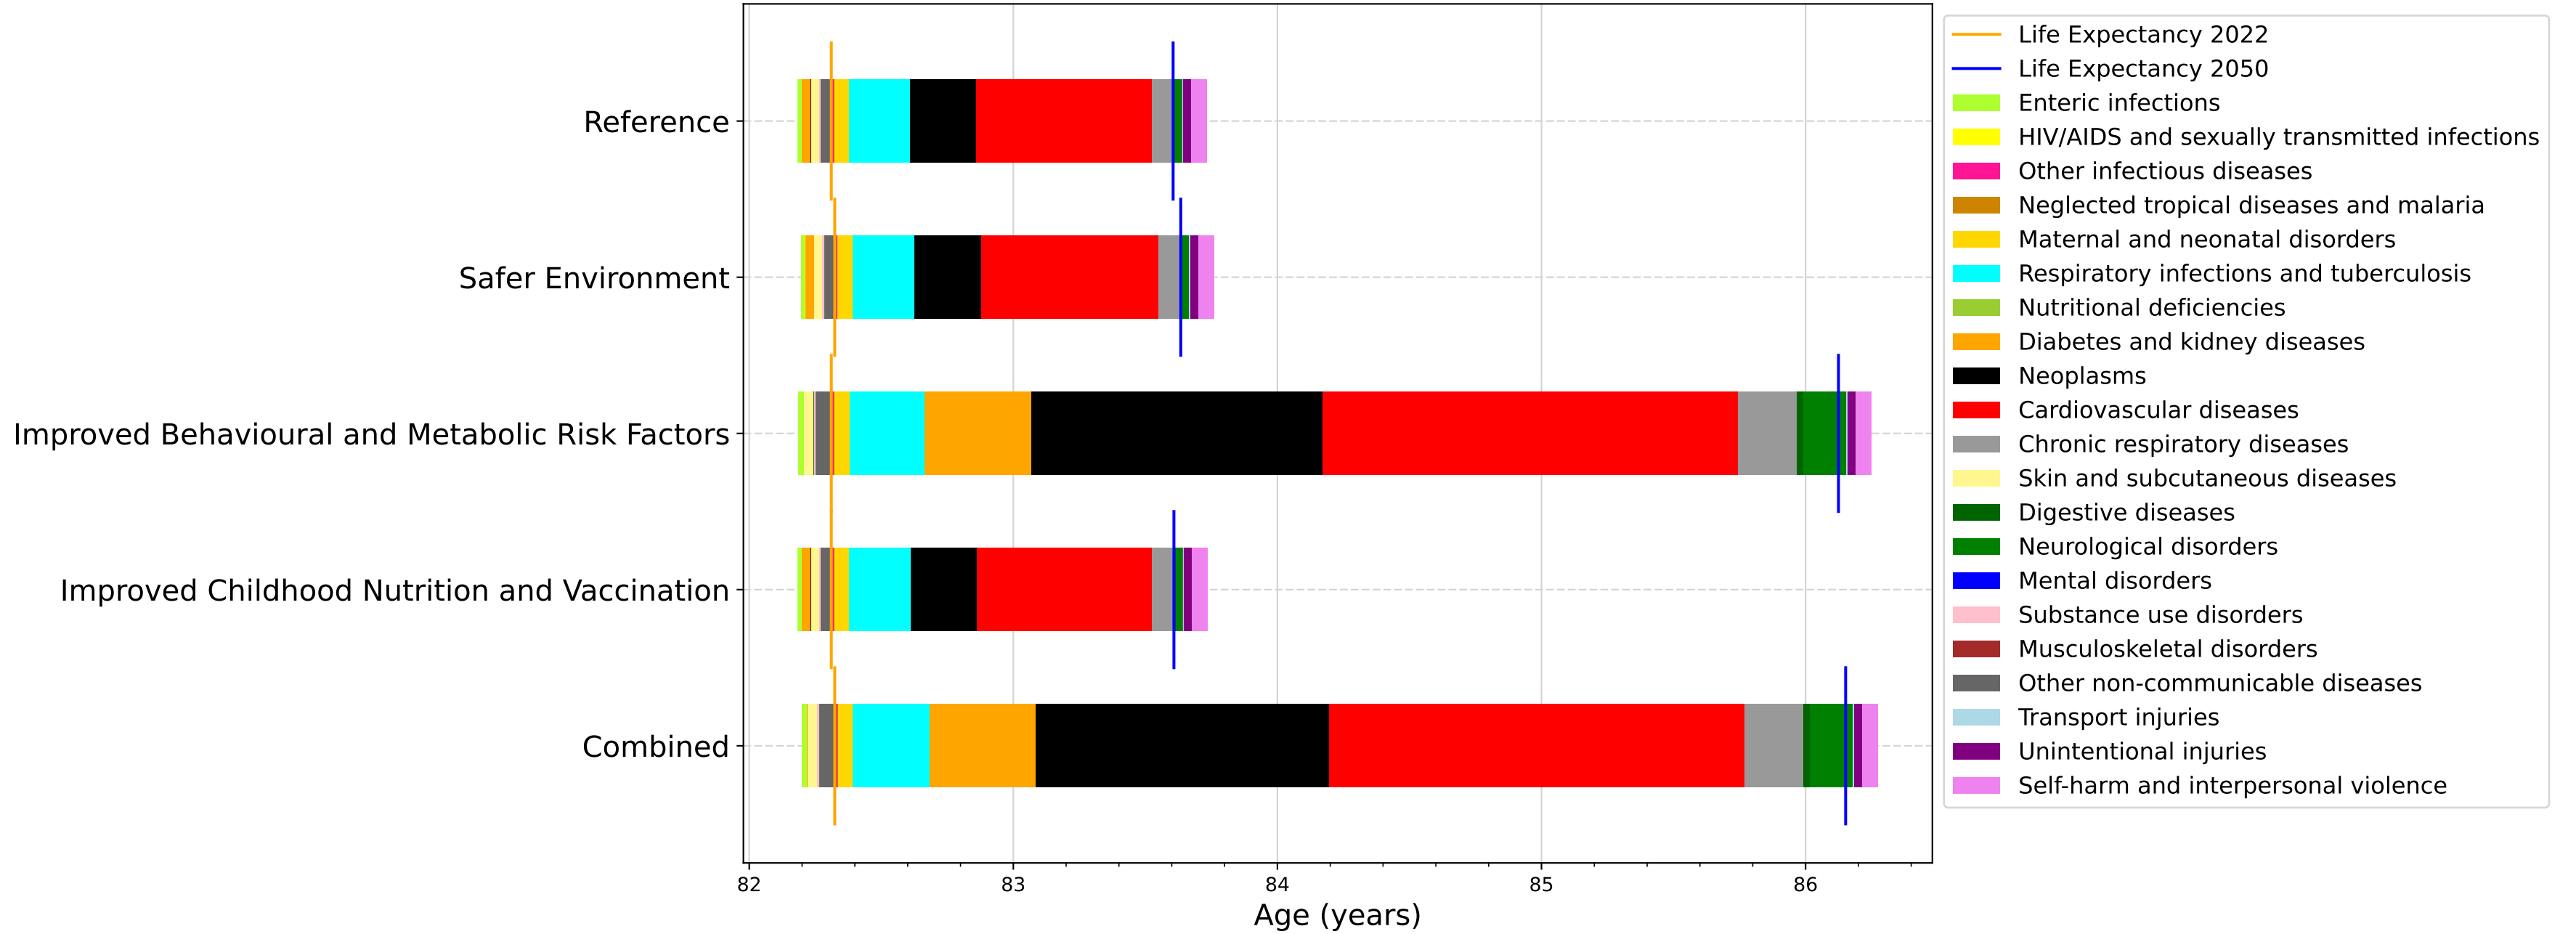

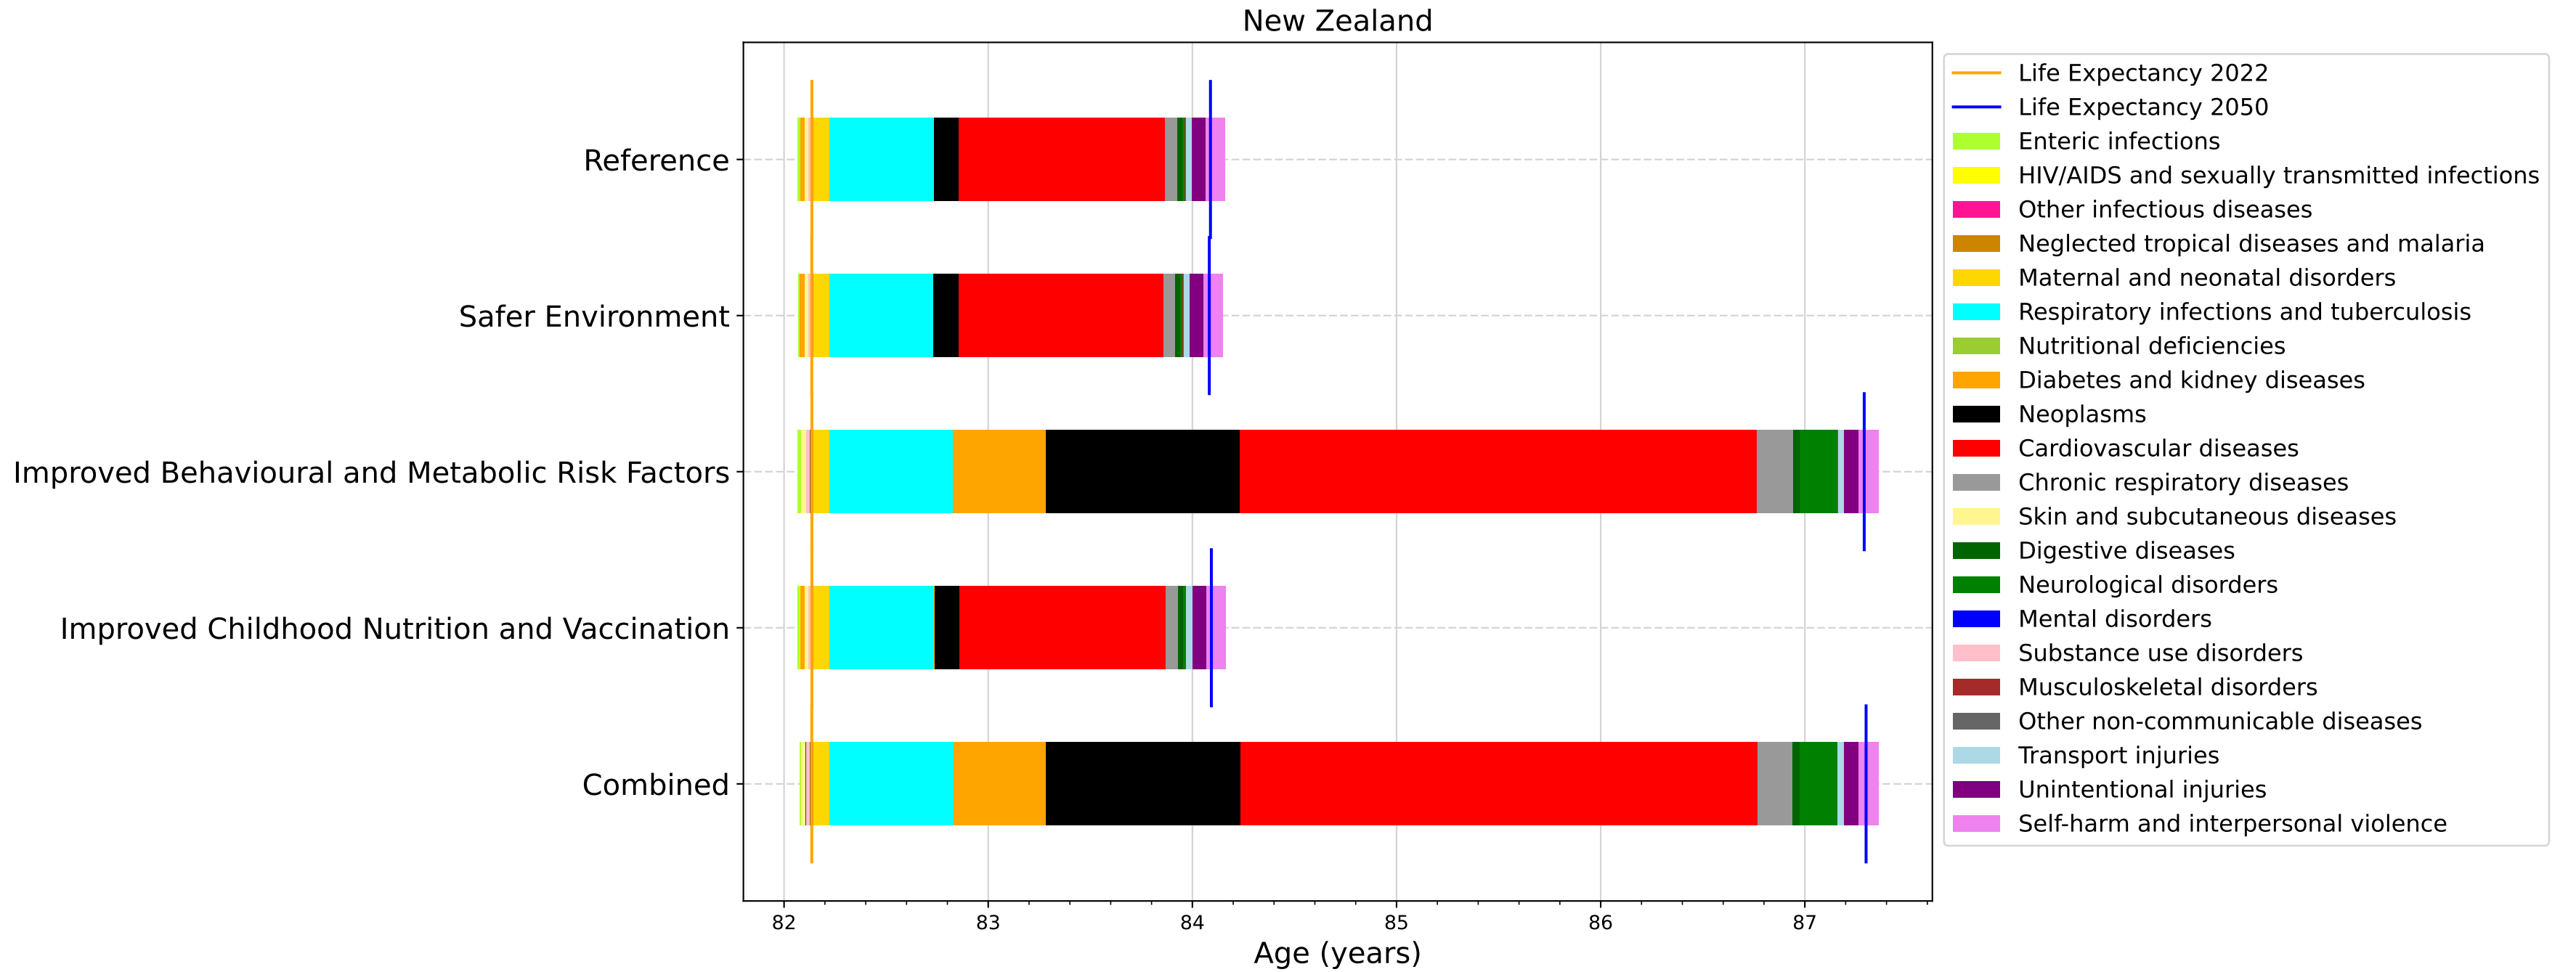

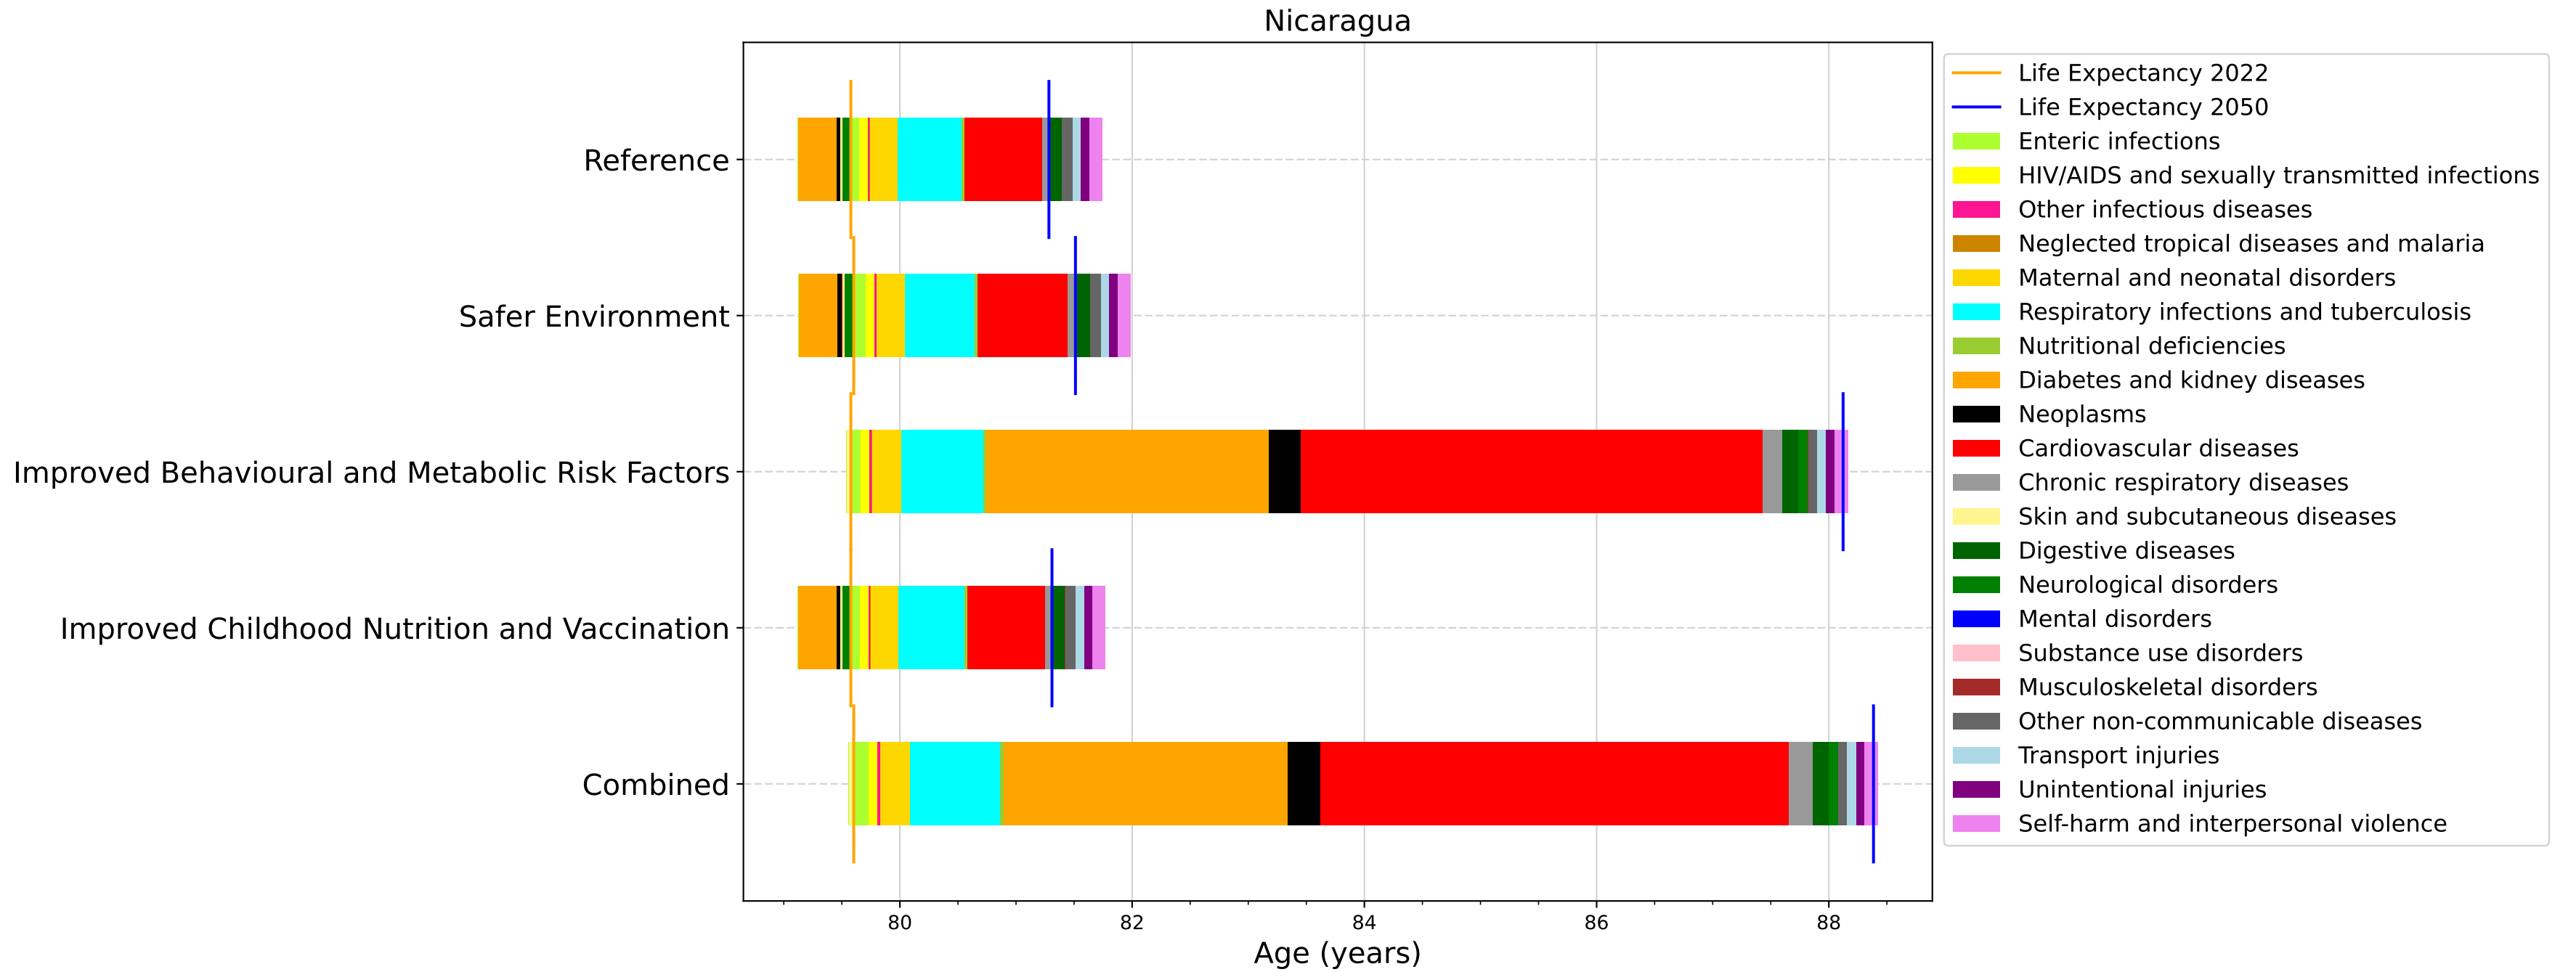

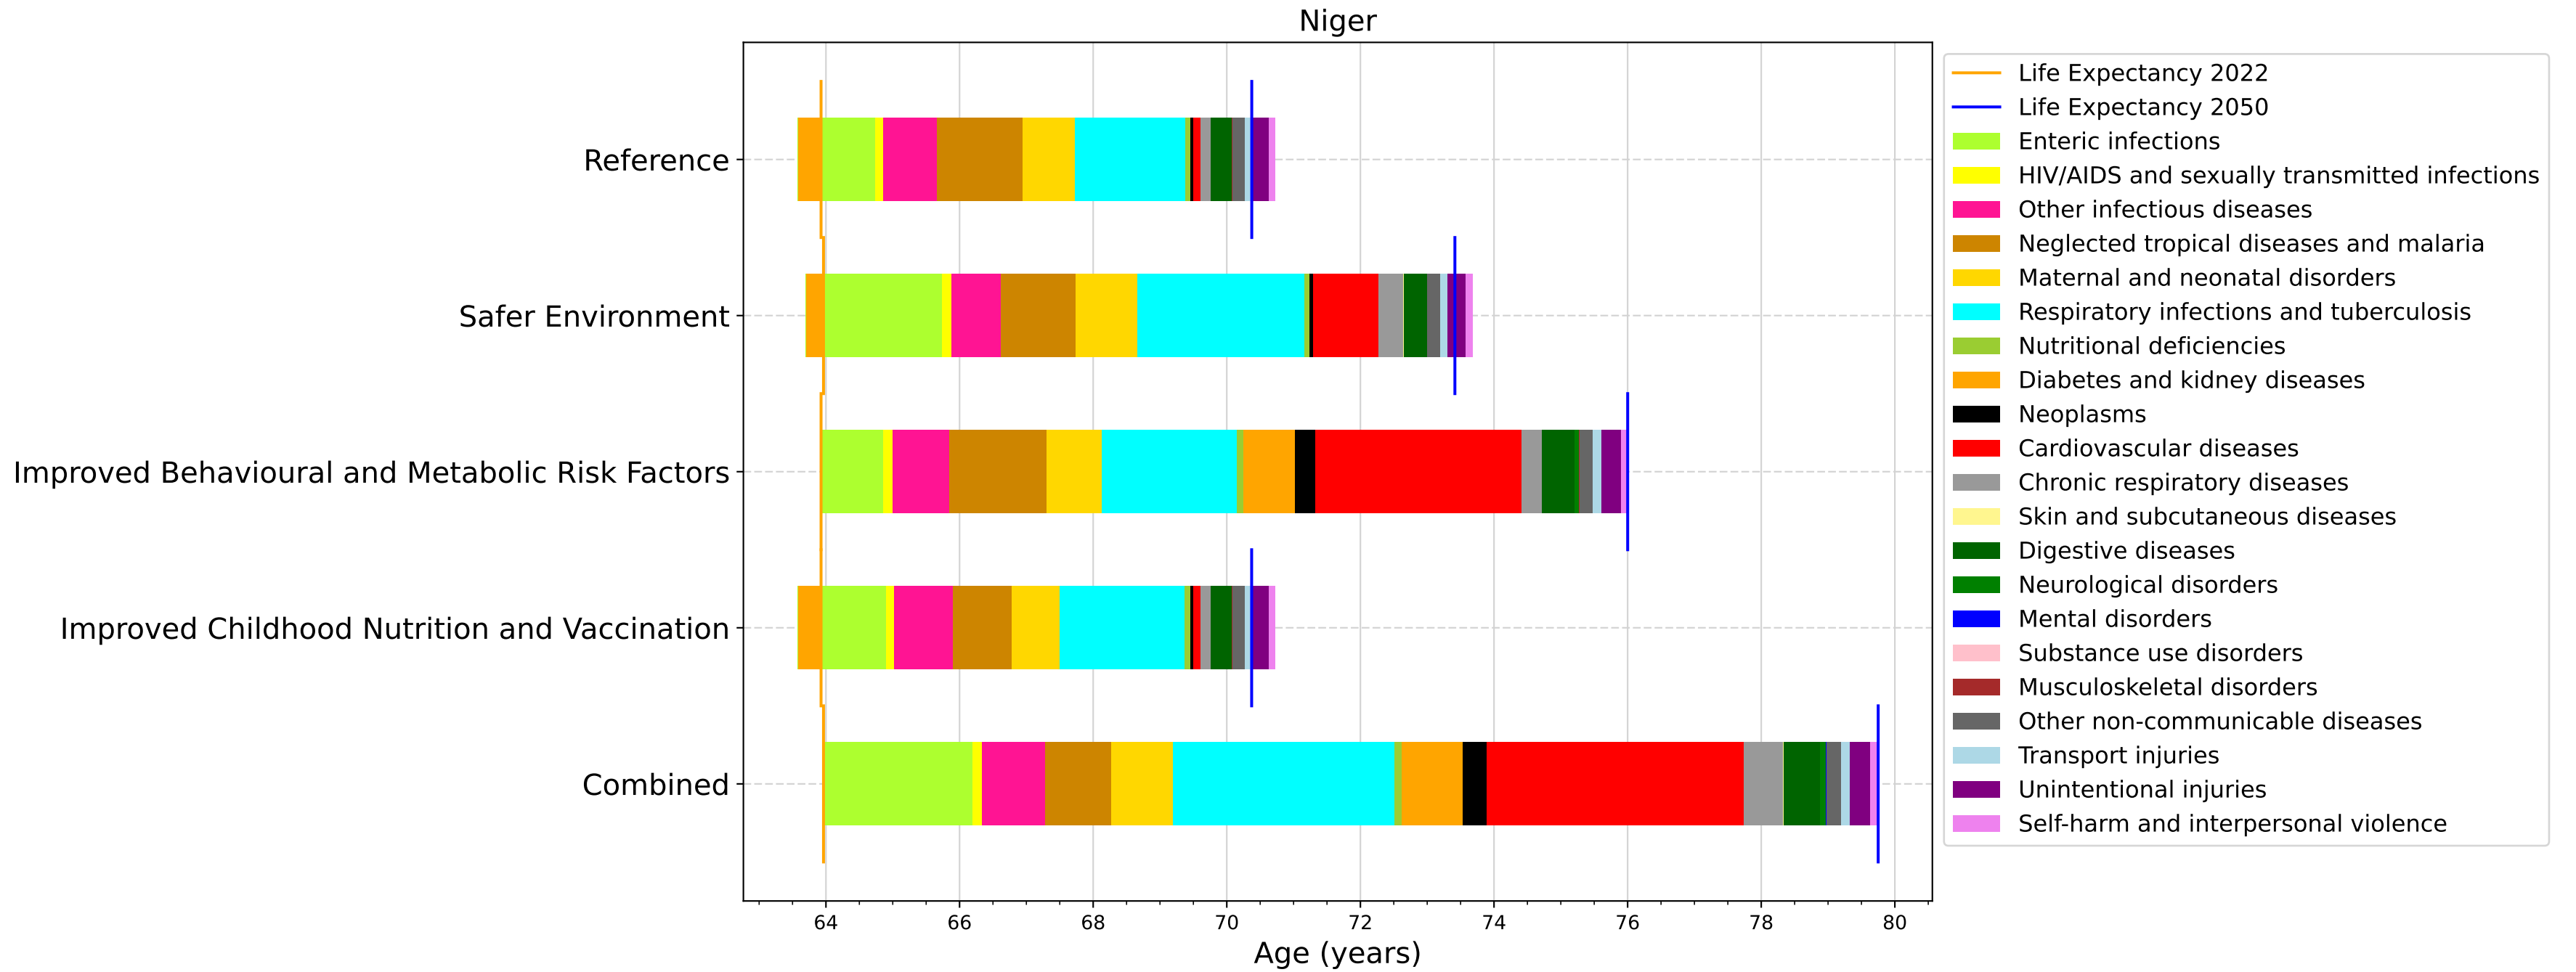



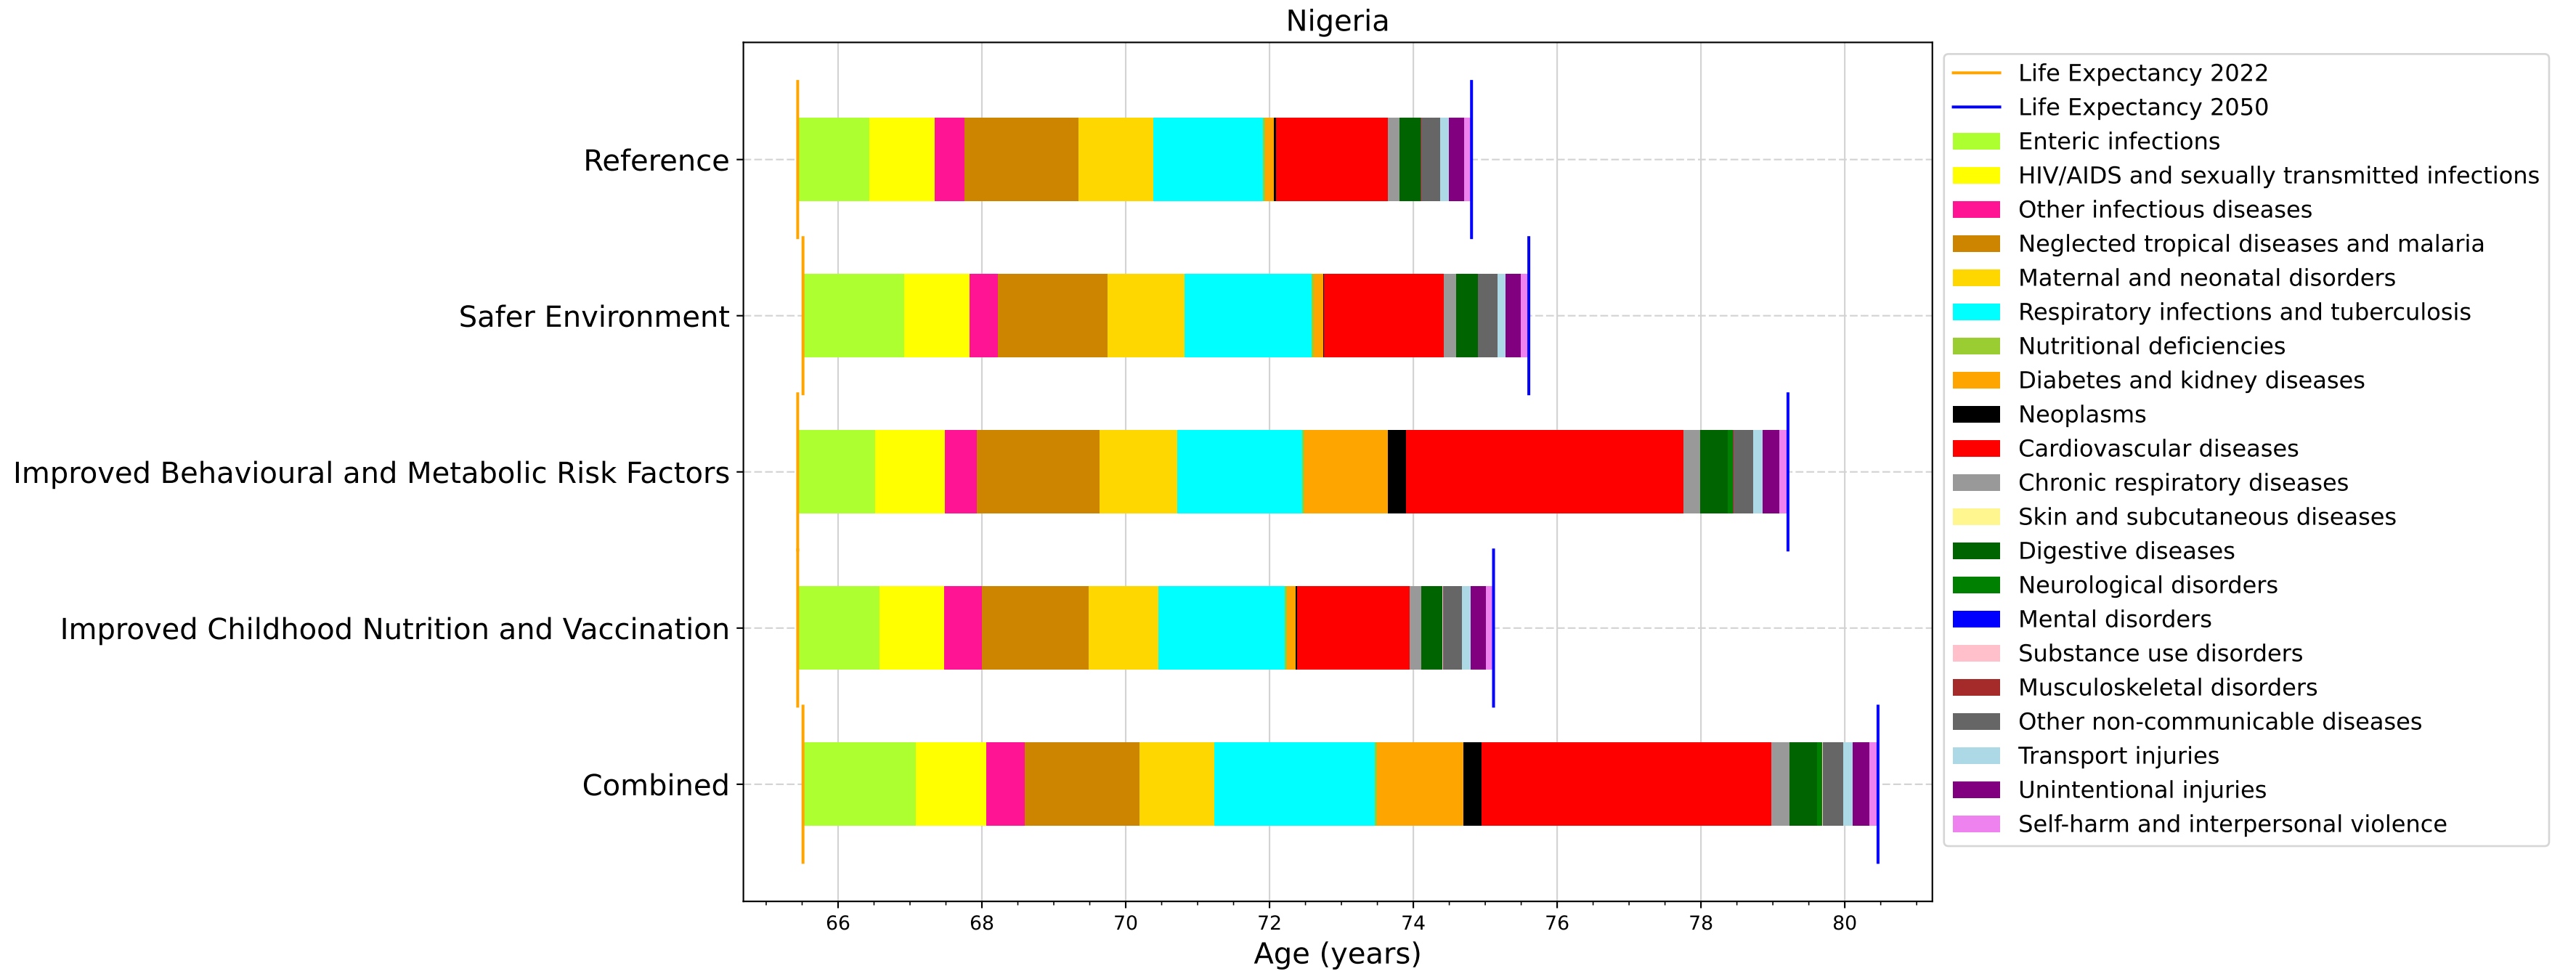

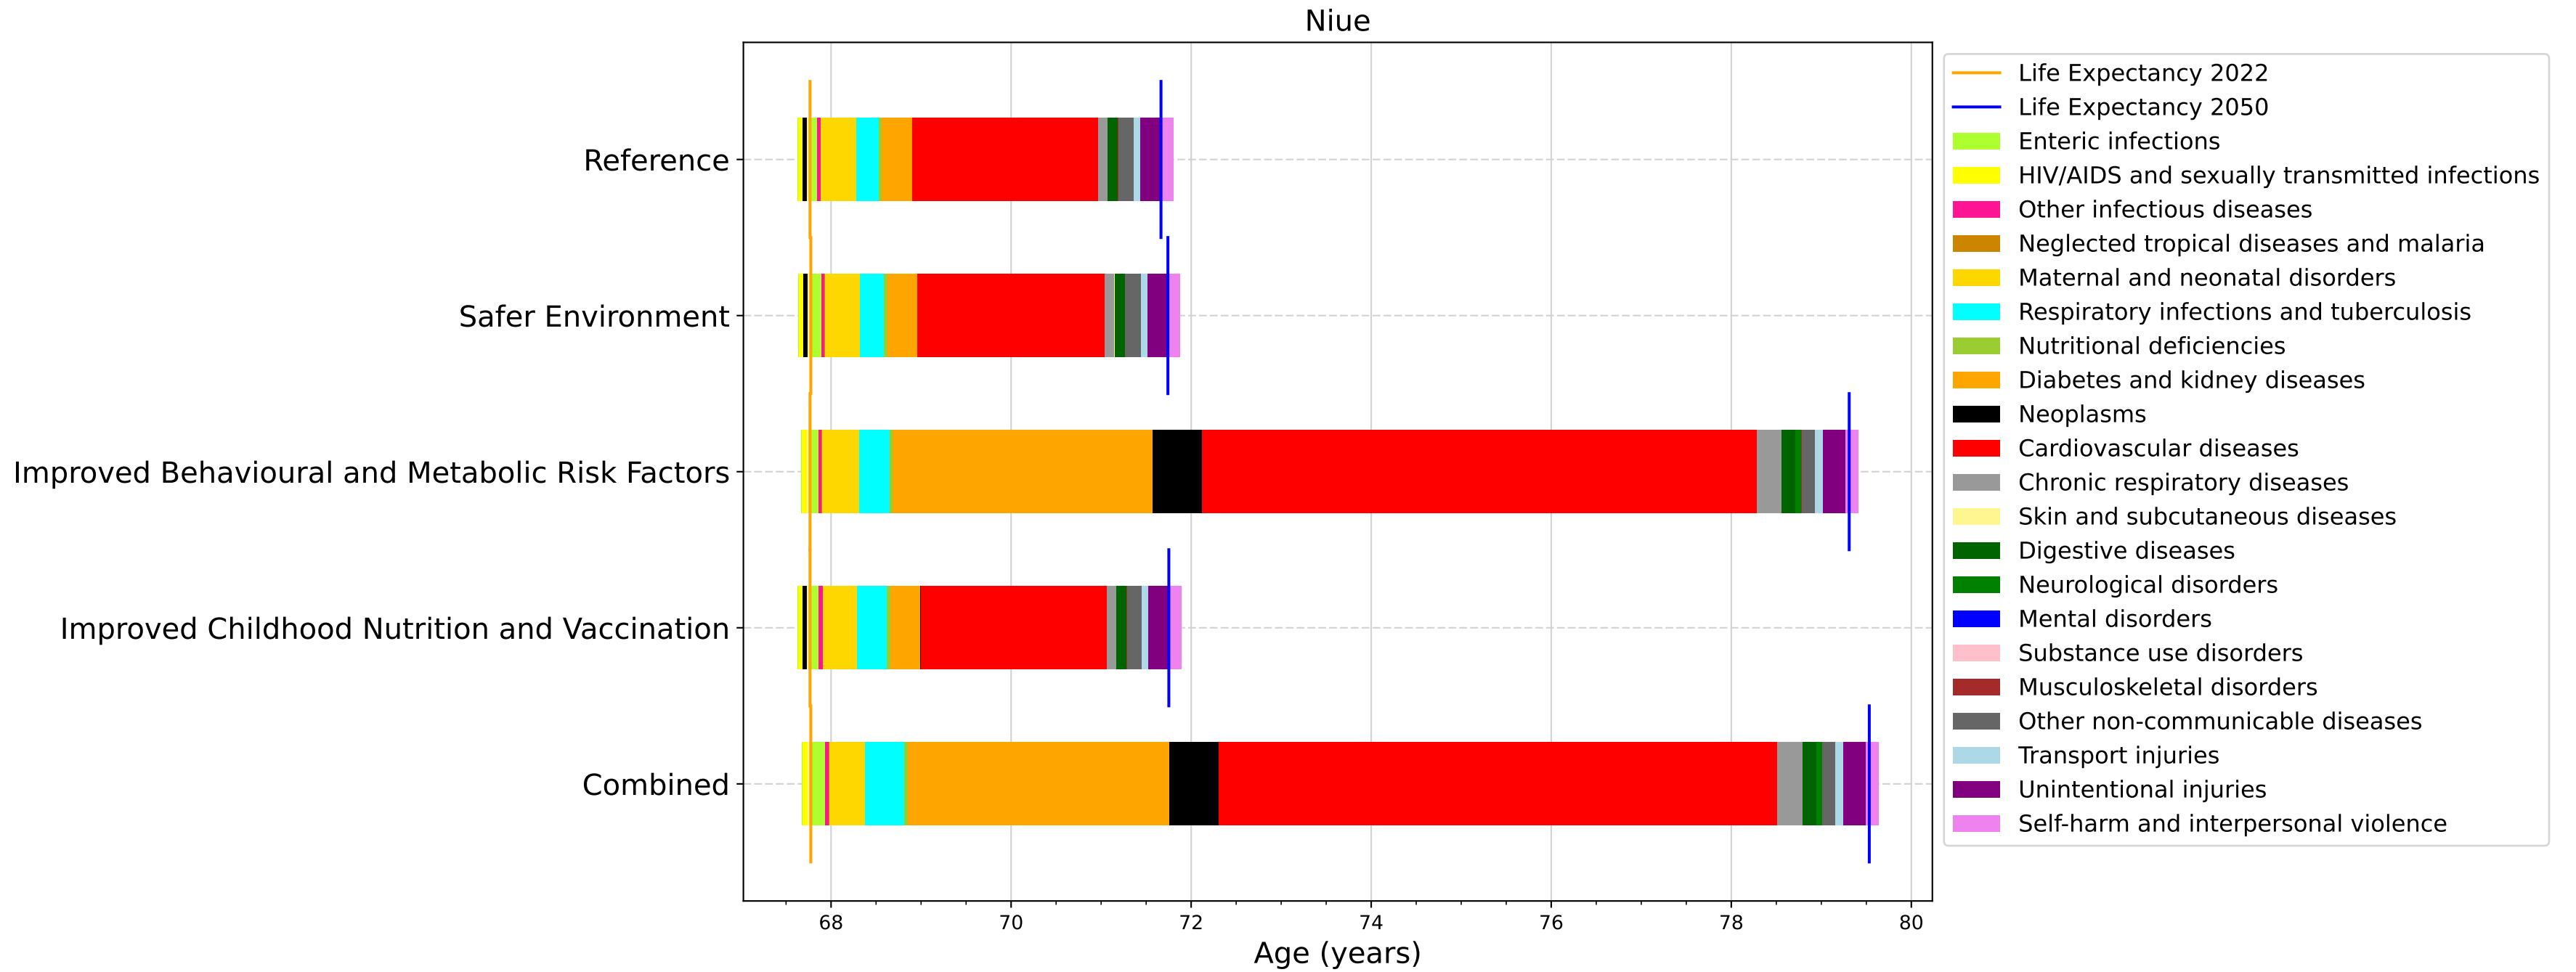

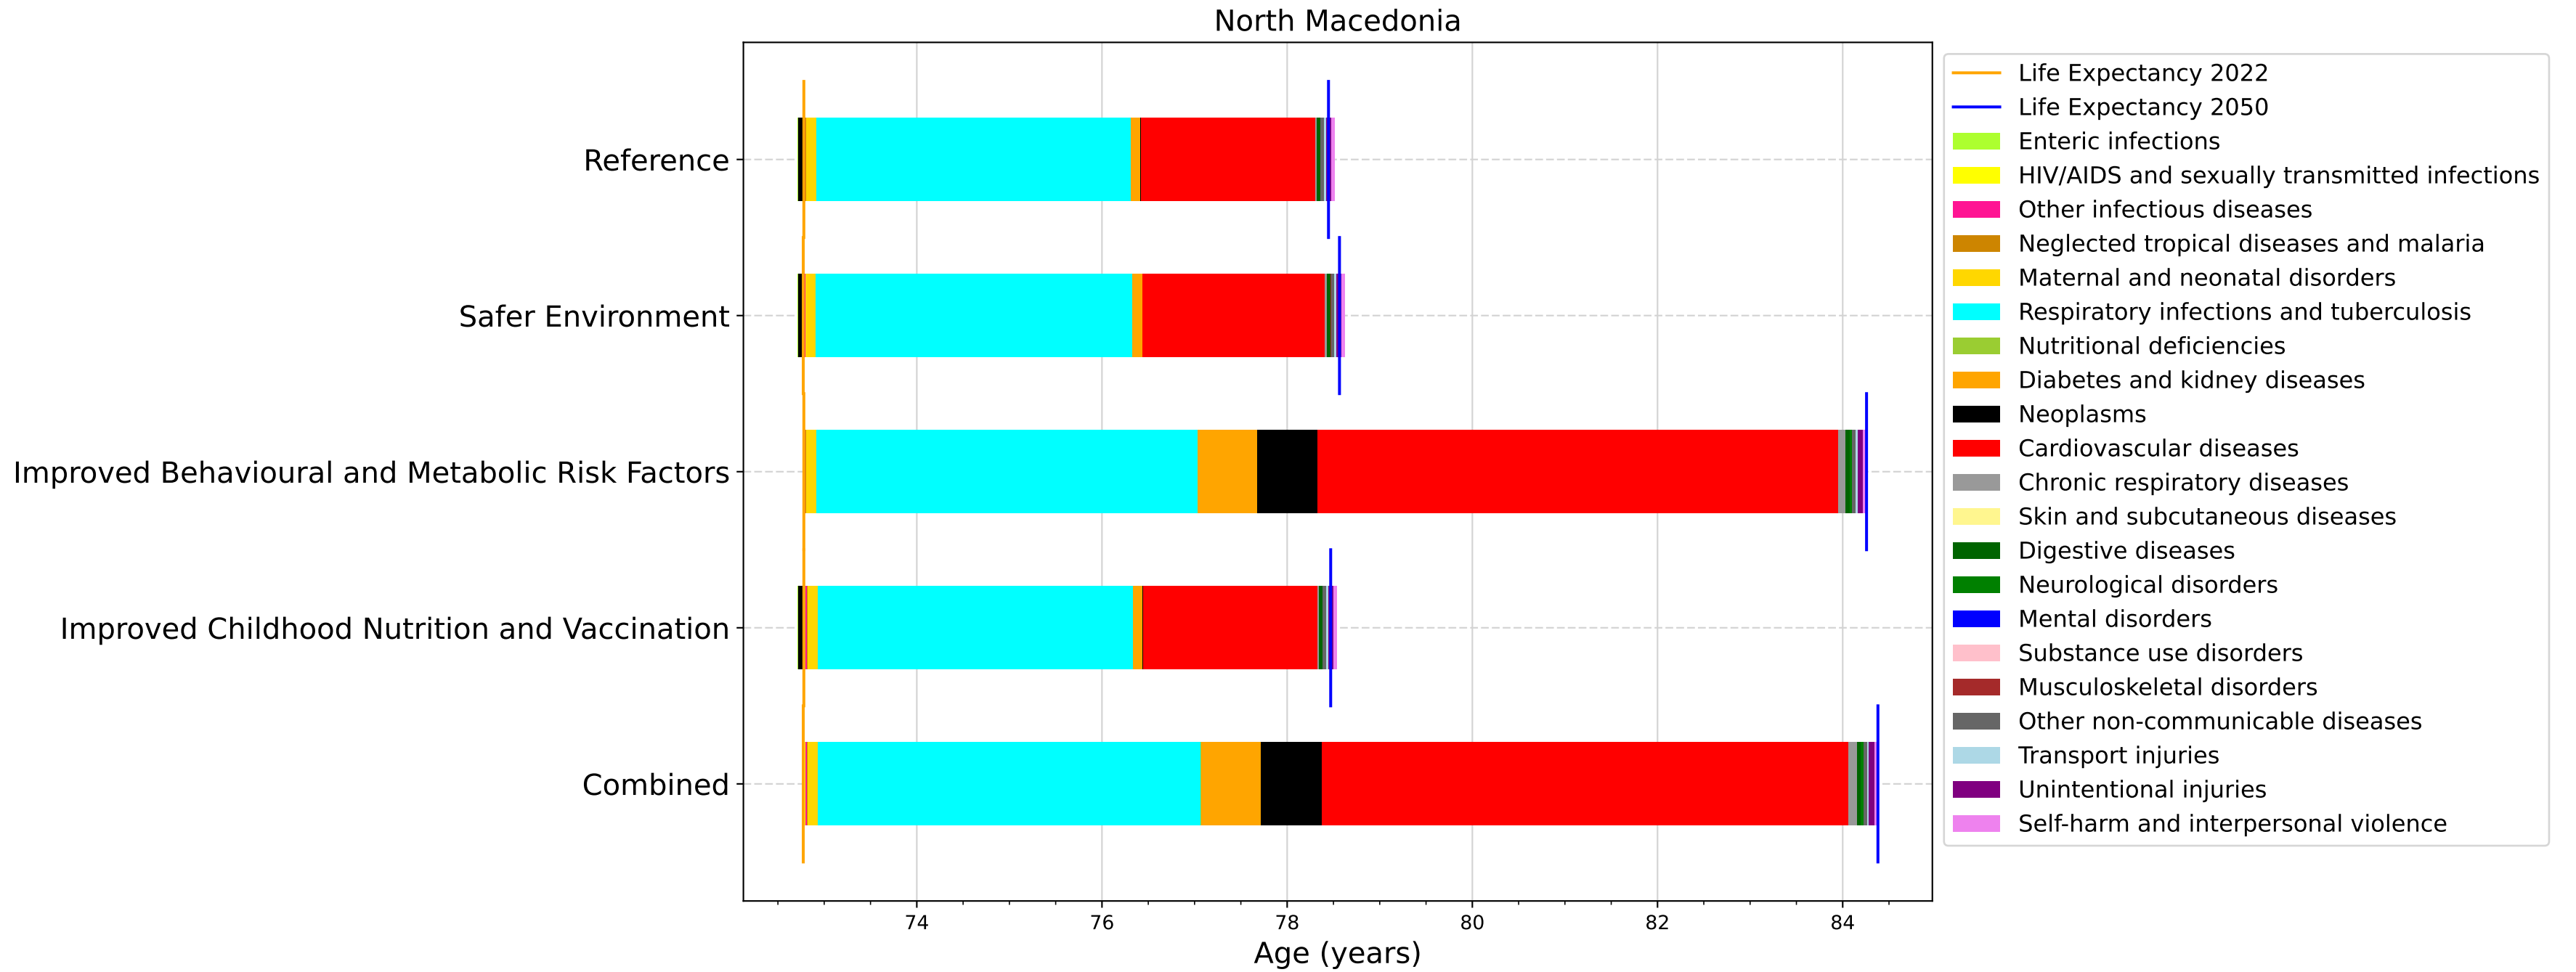

### Northern Mariana Islands

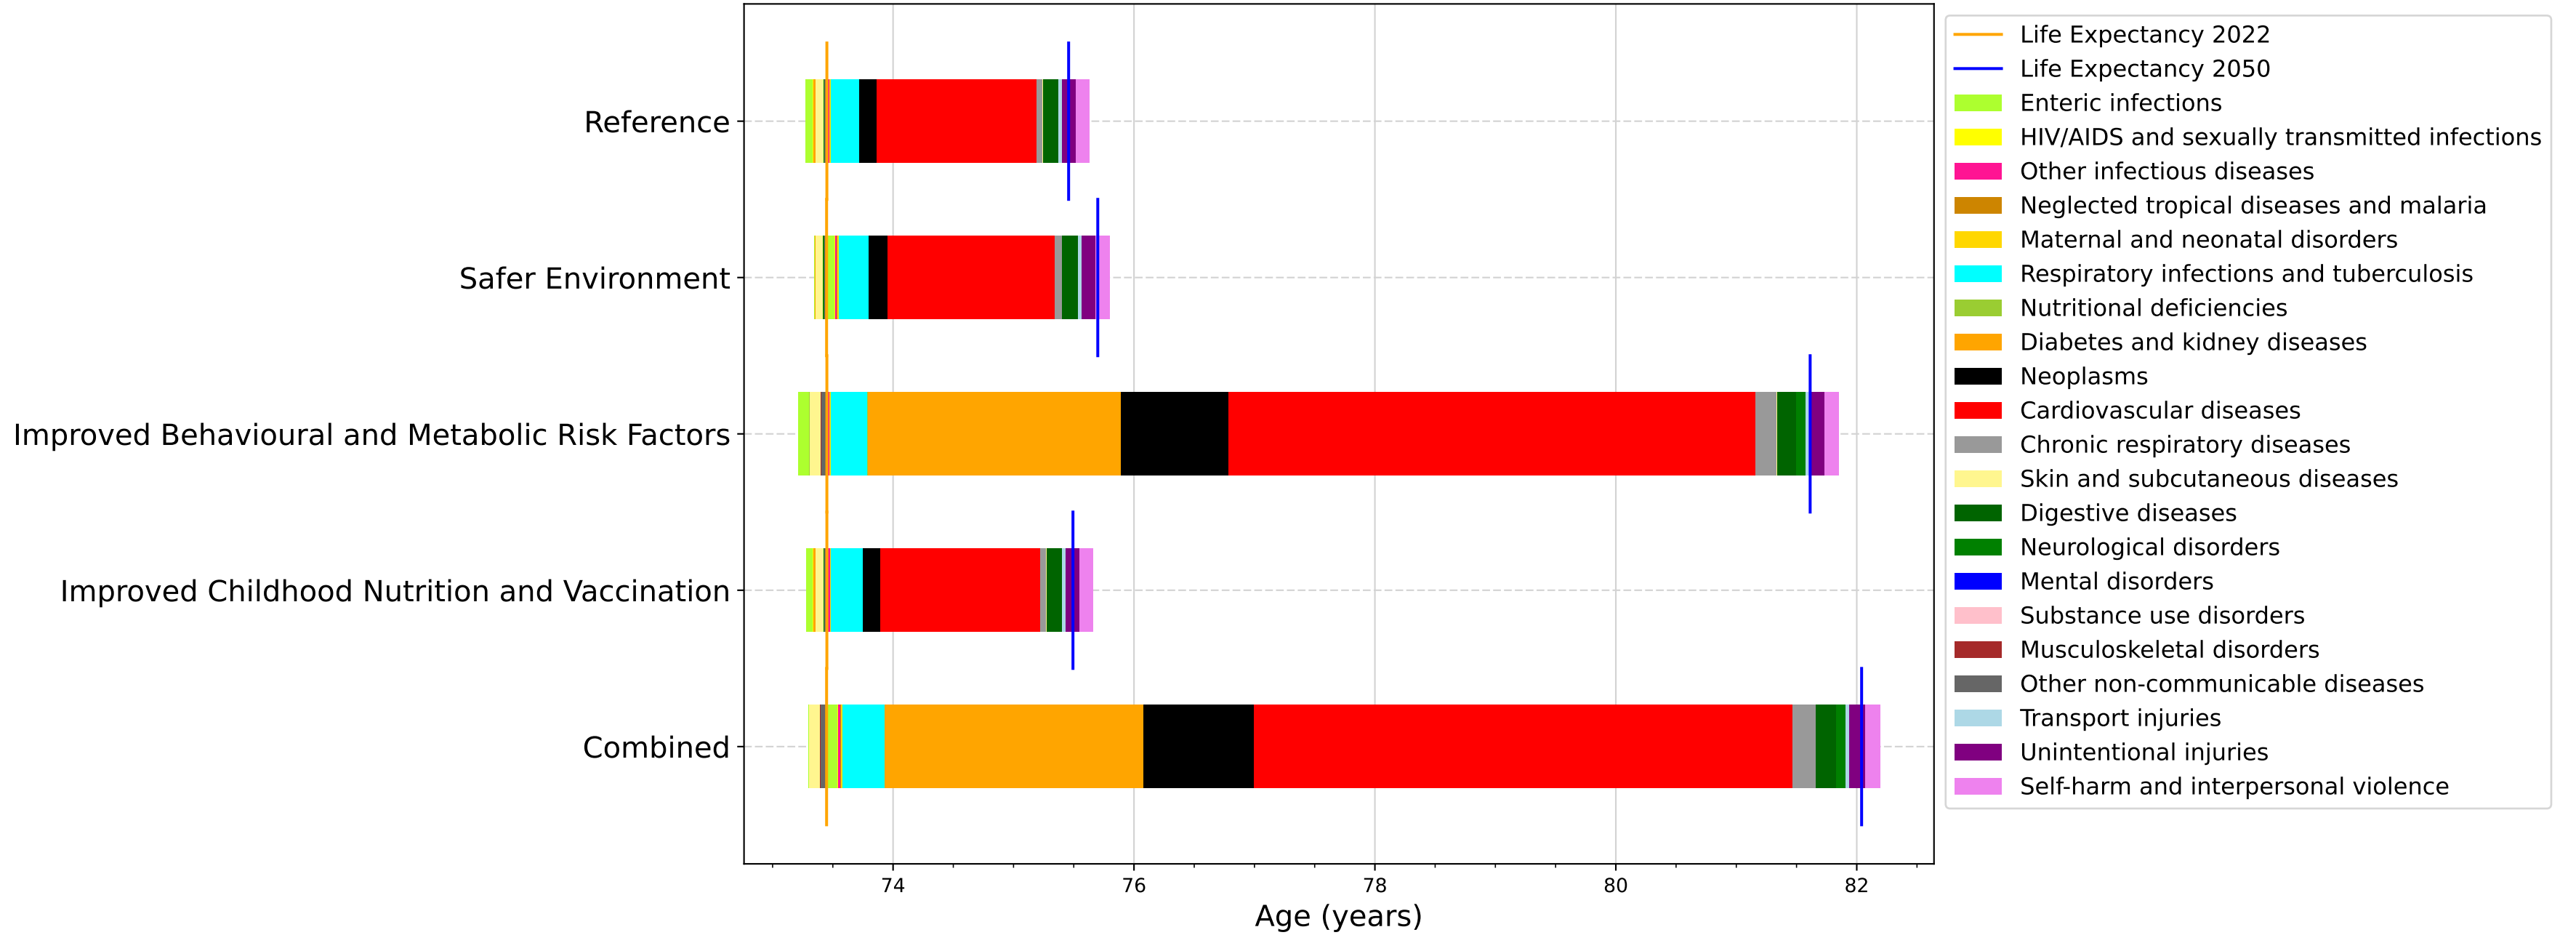

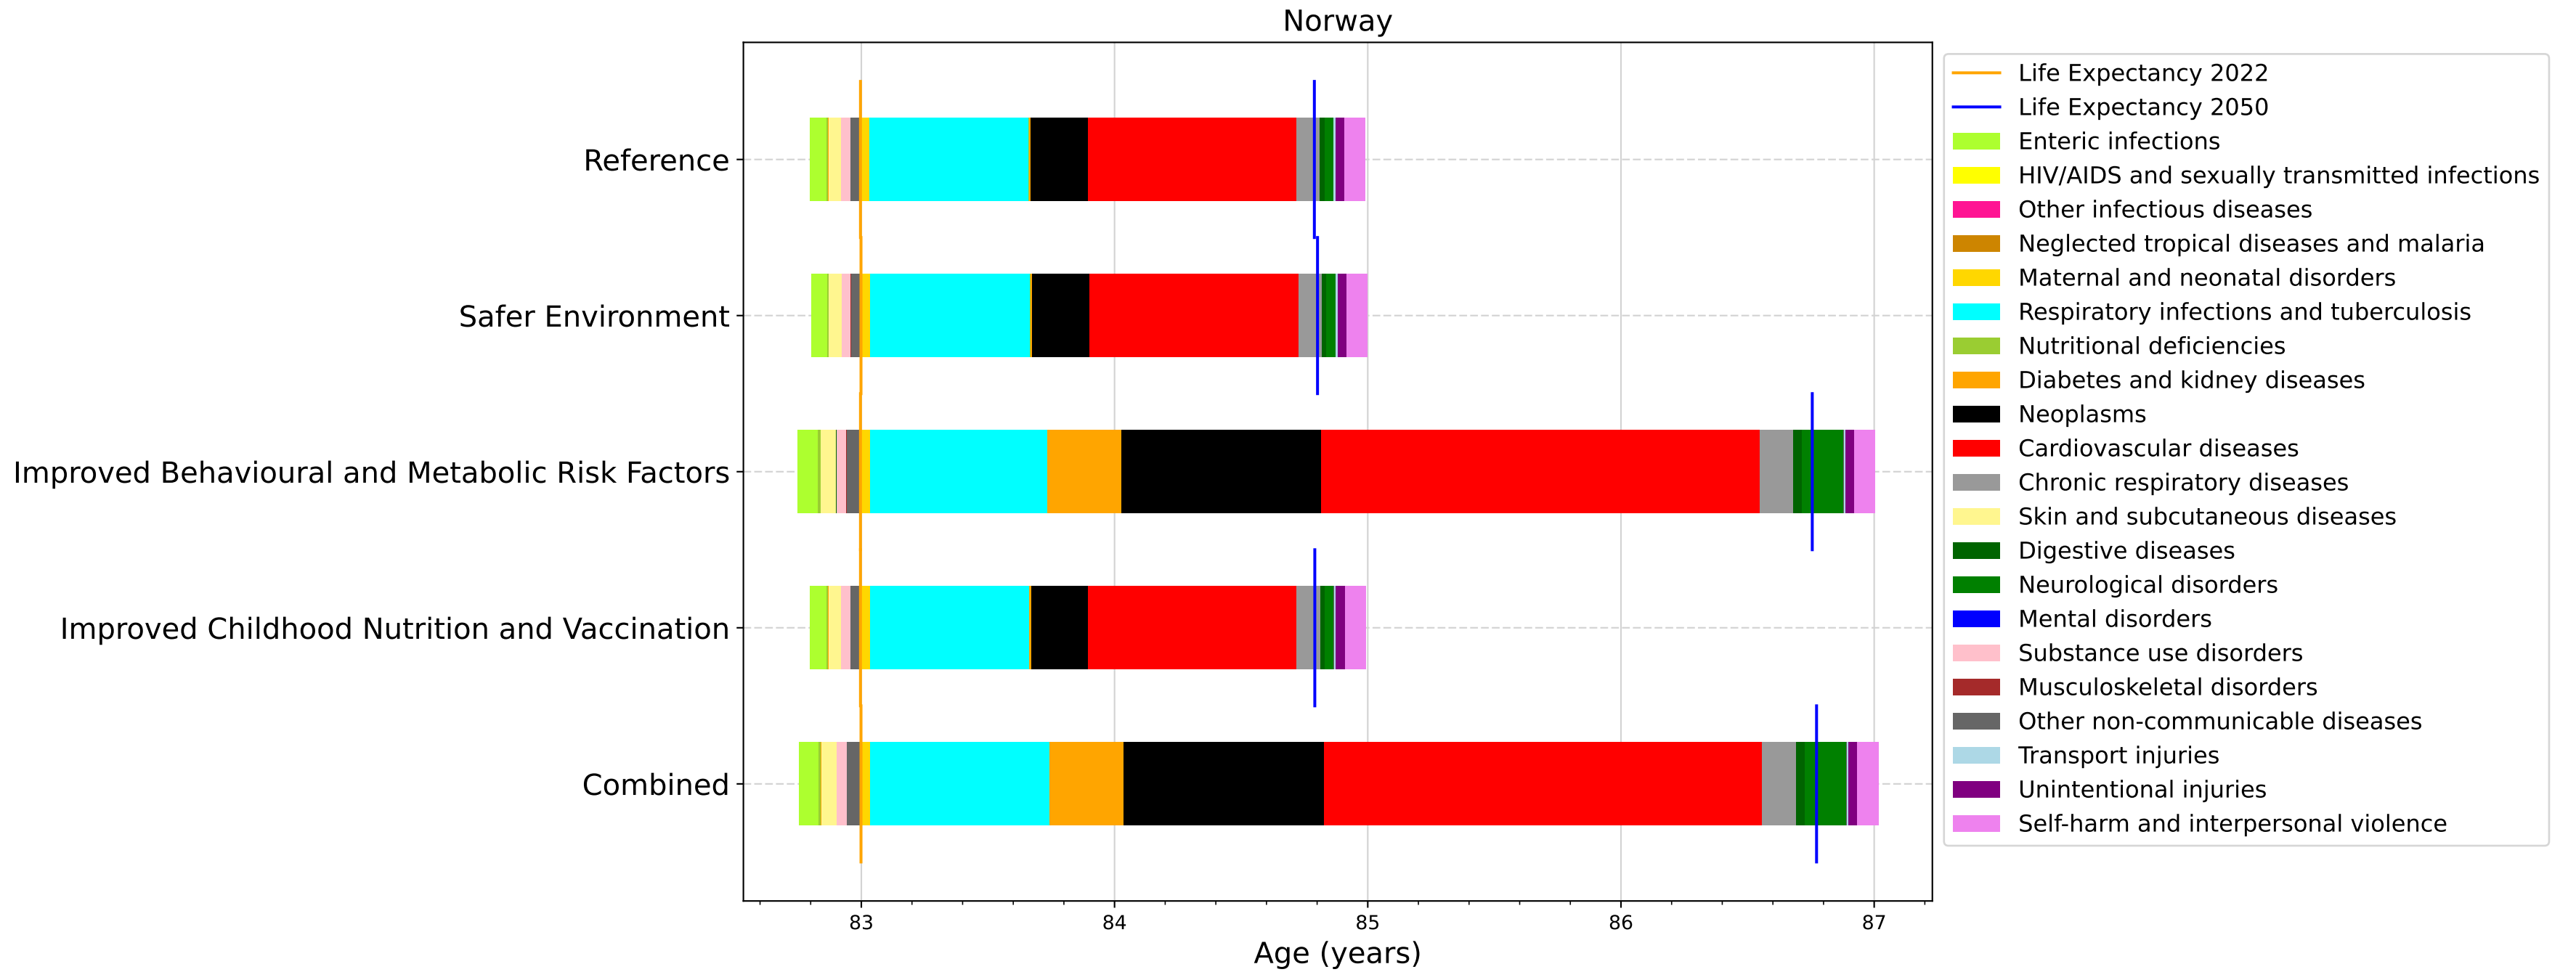

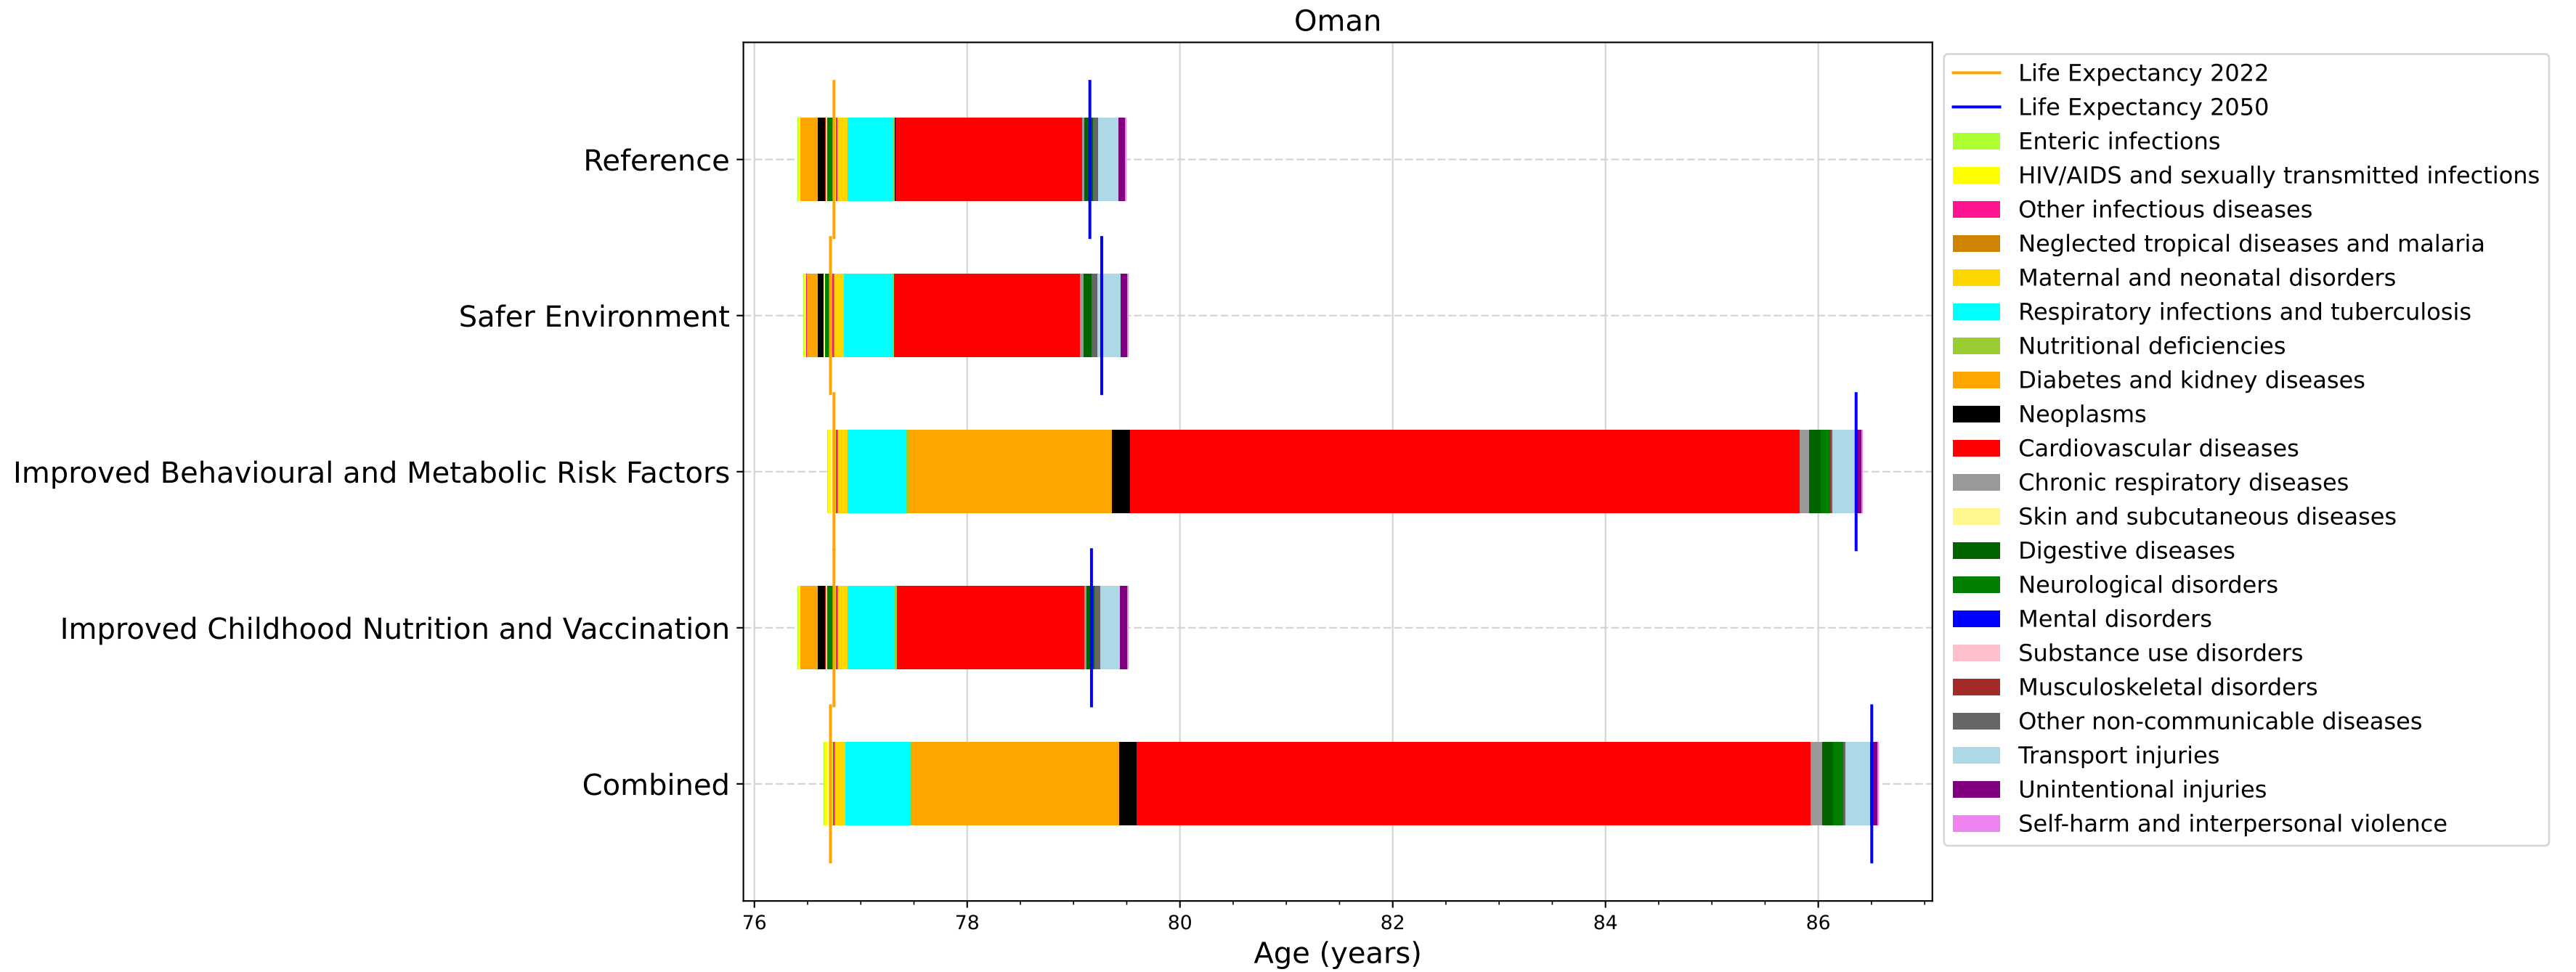

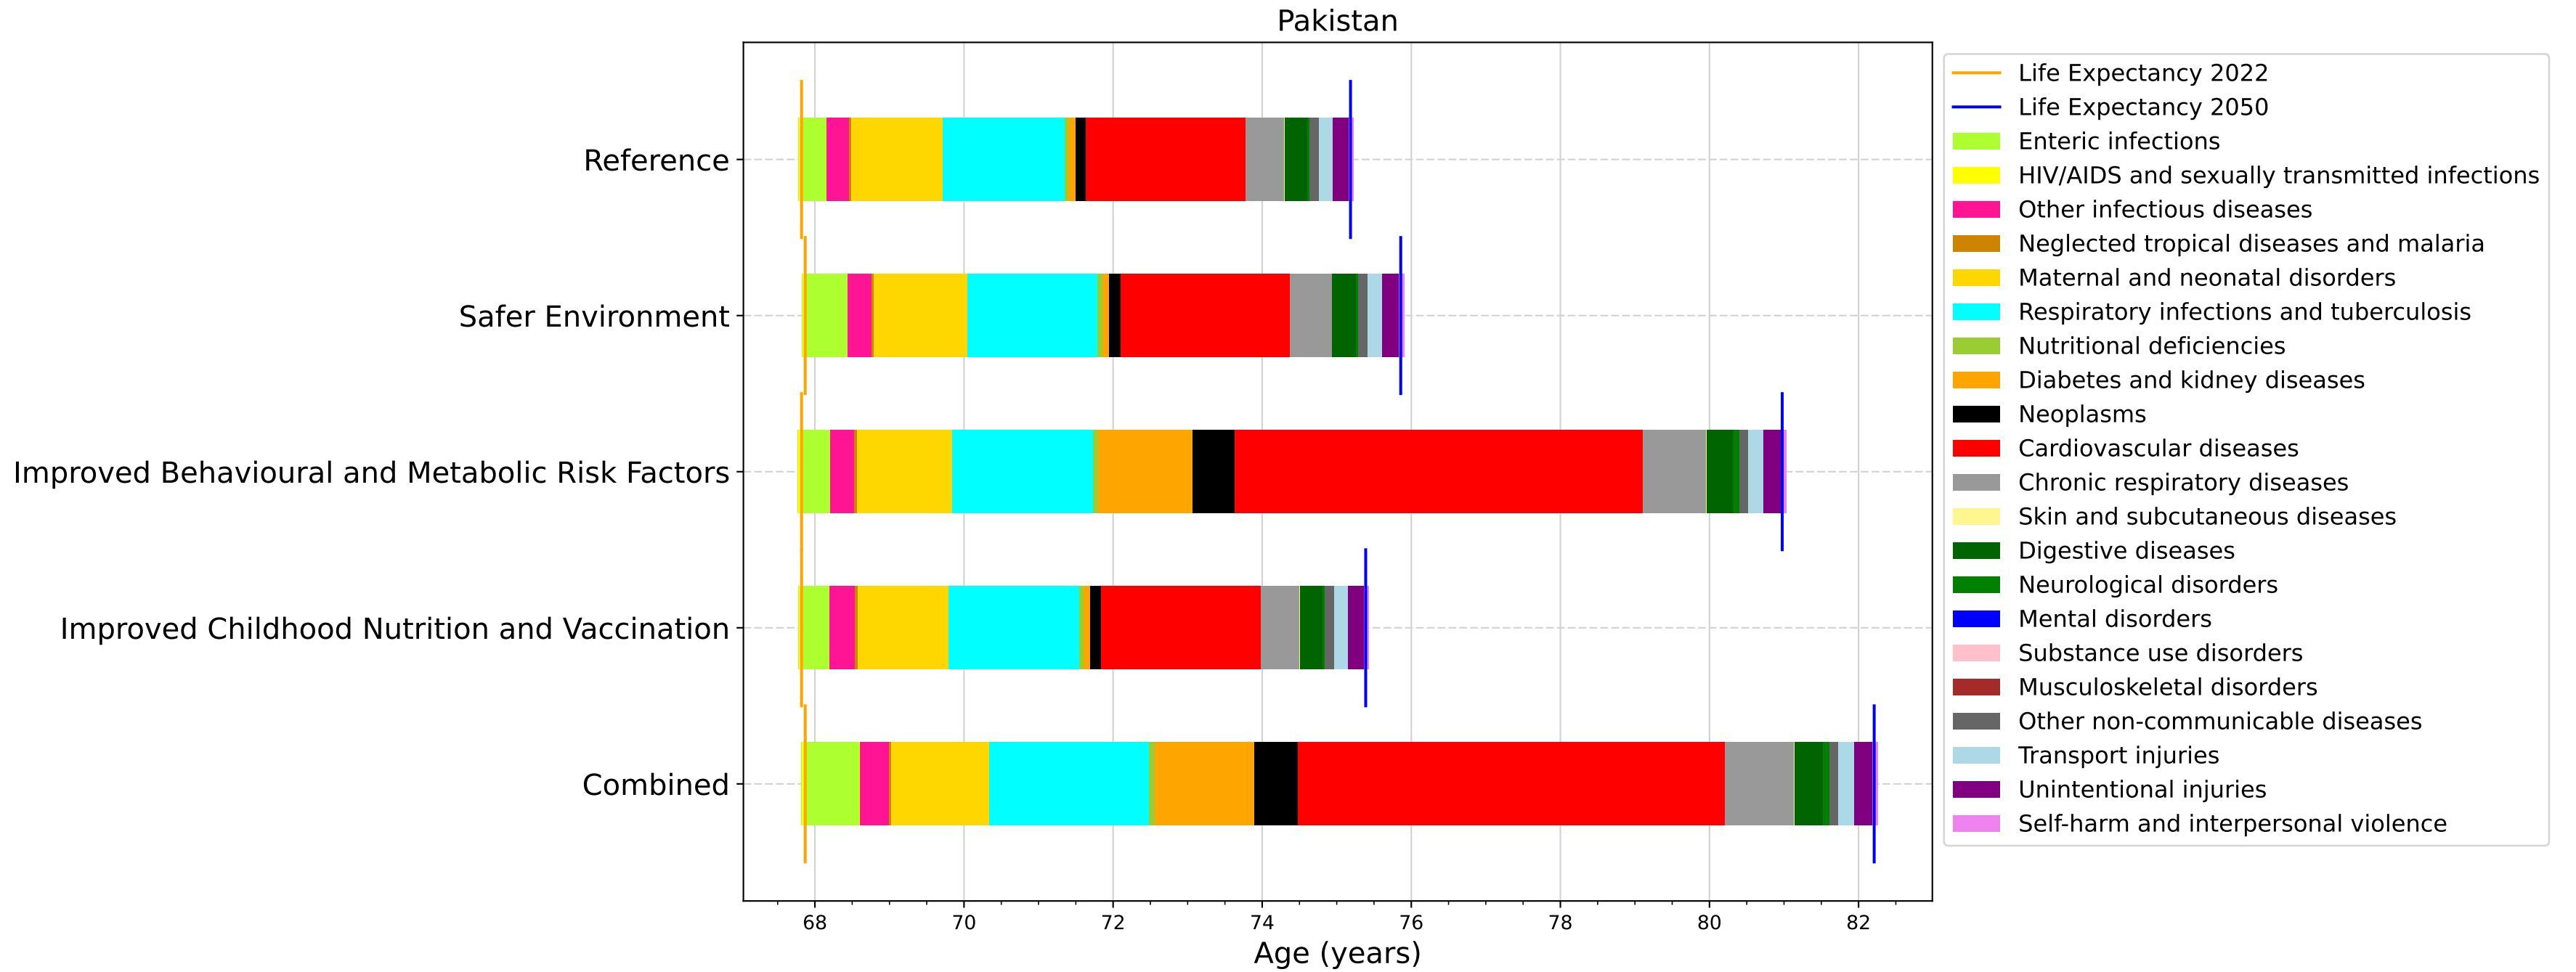

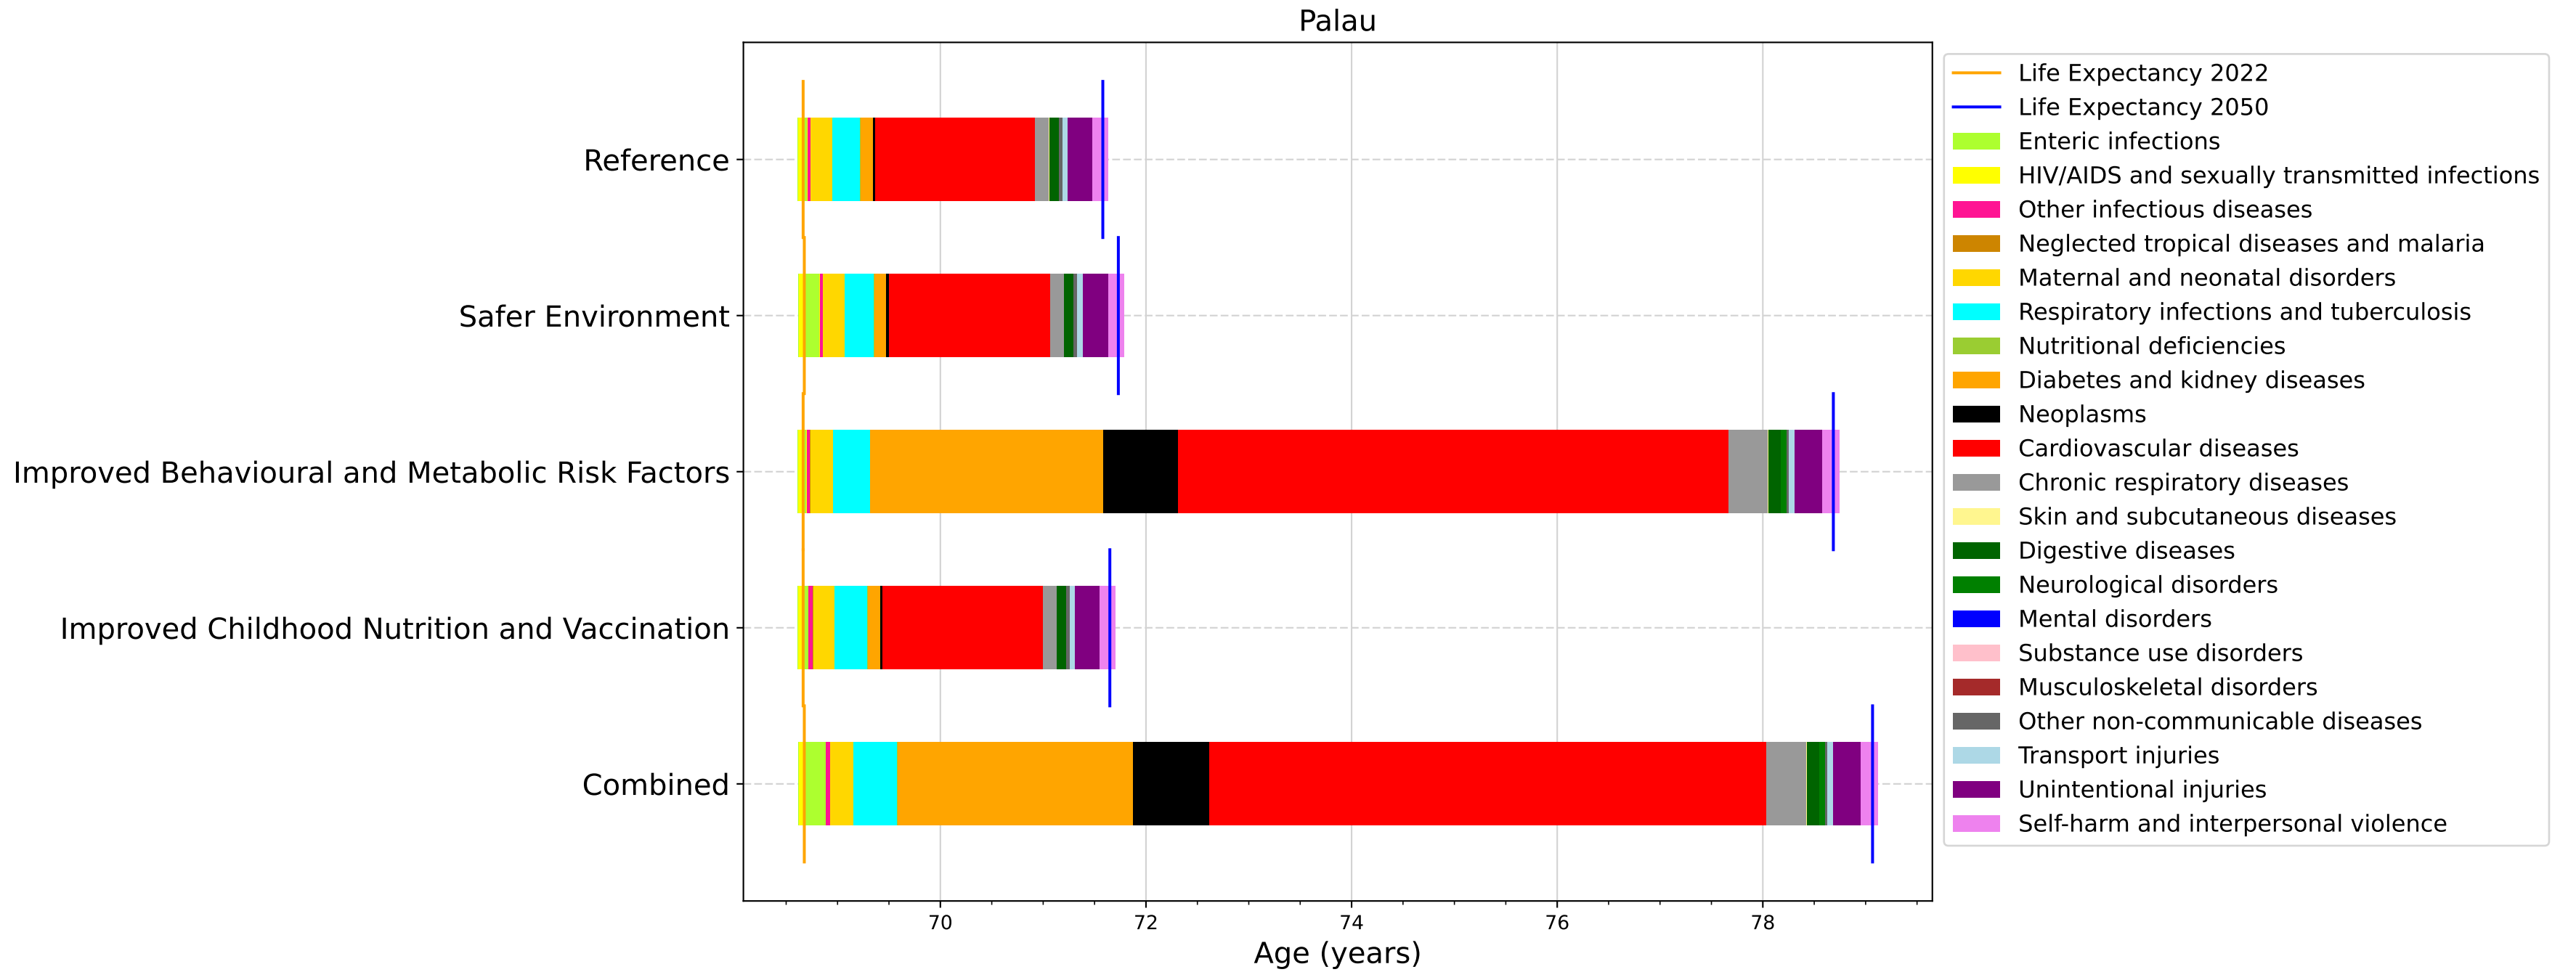



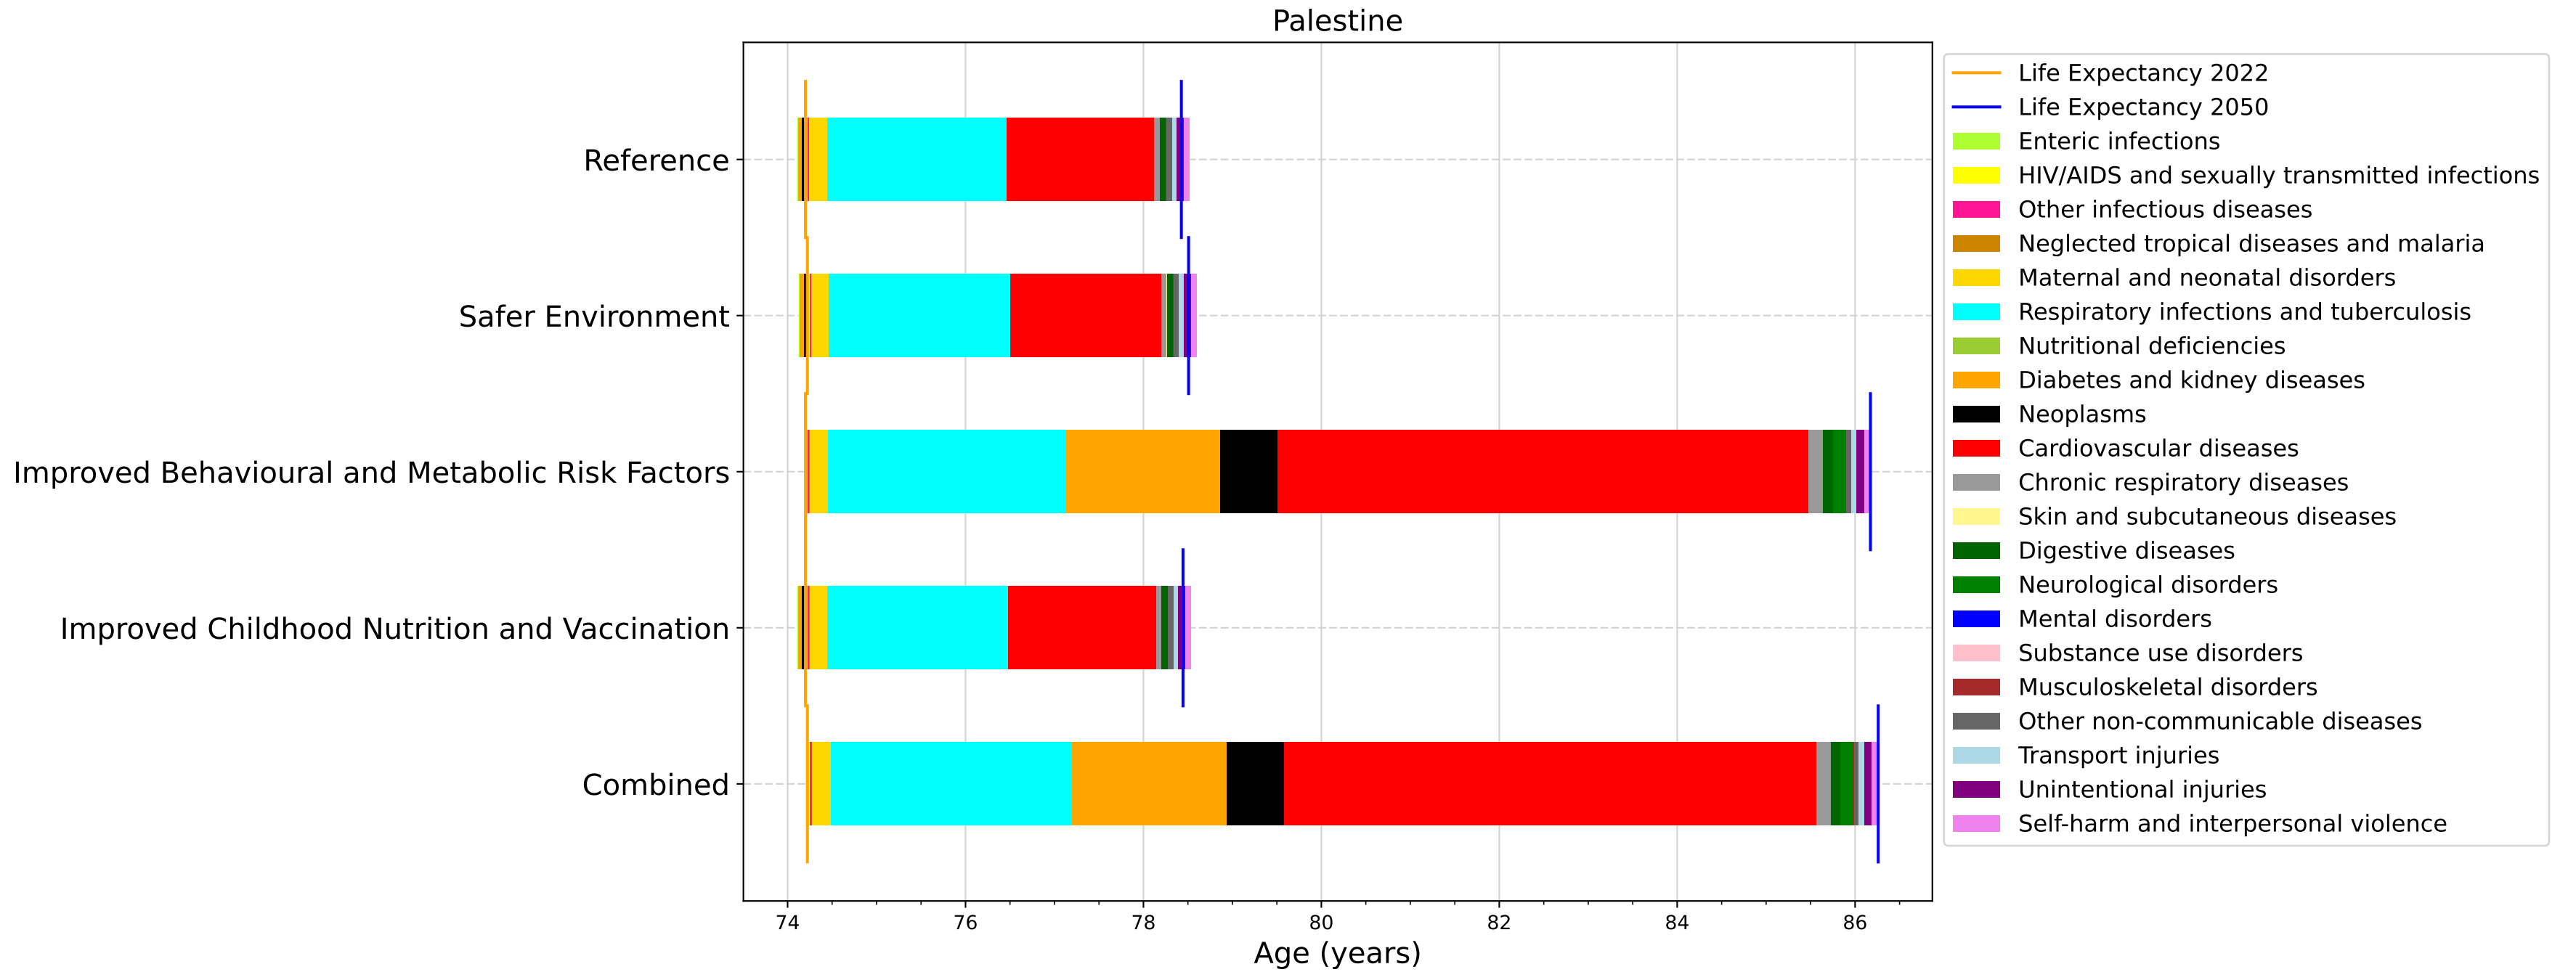

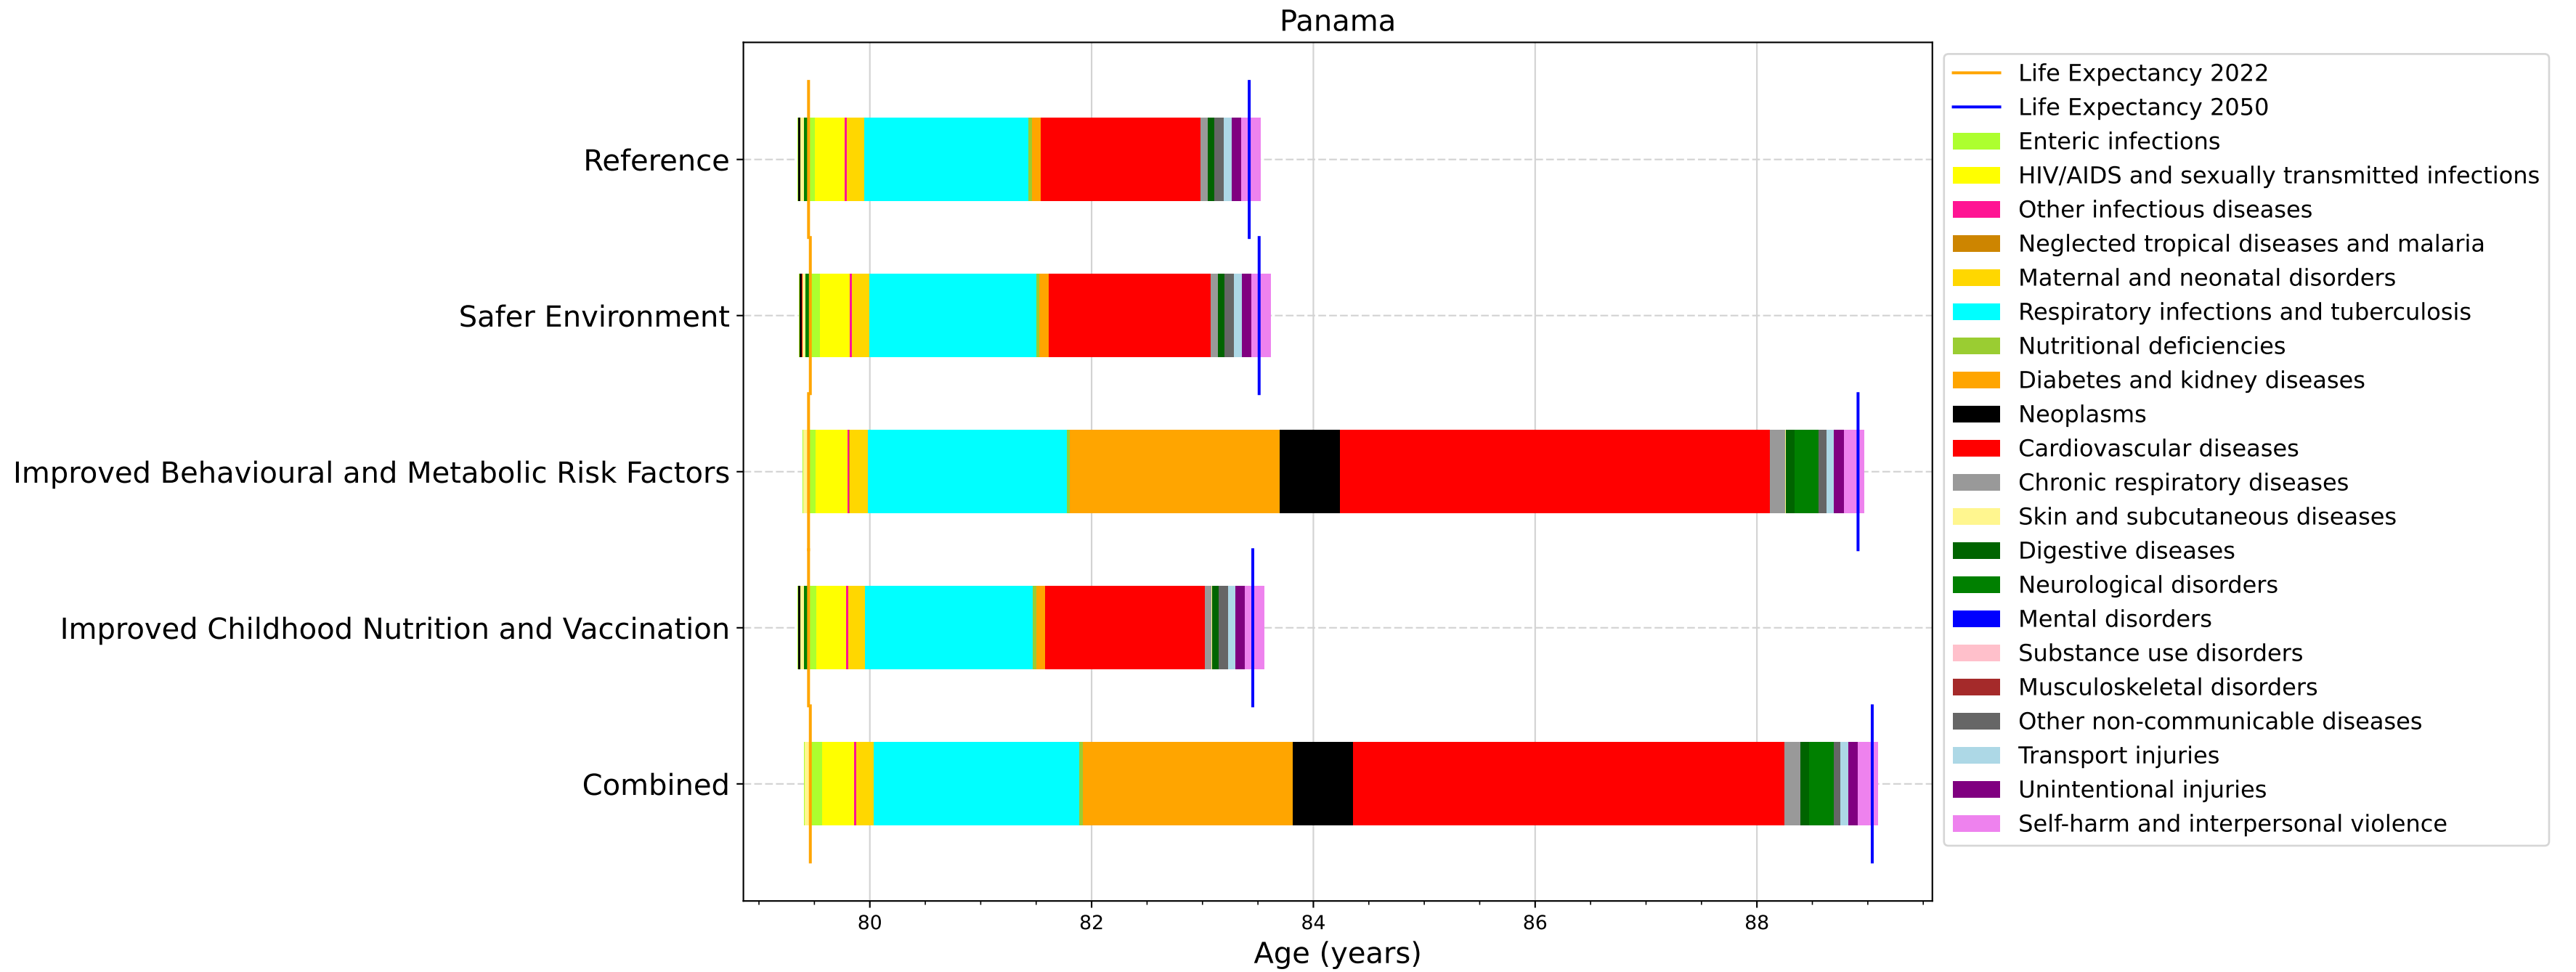

Papua New Guinea

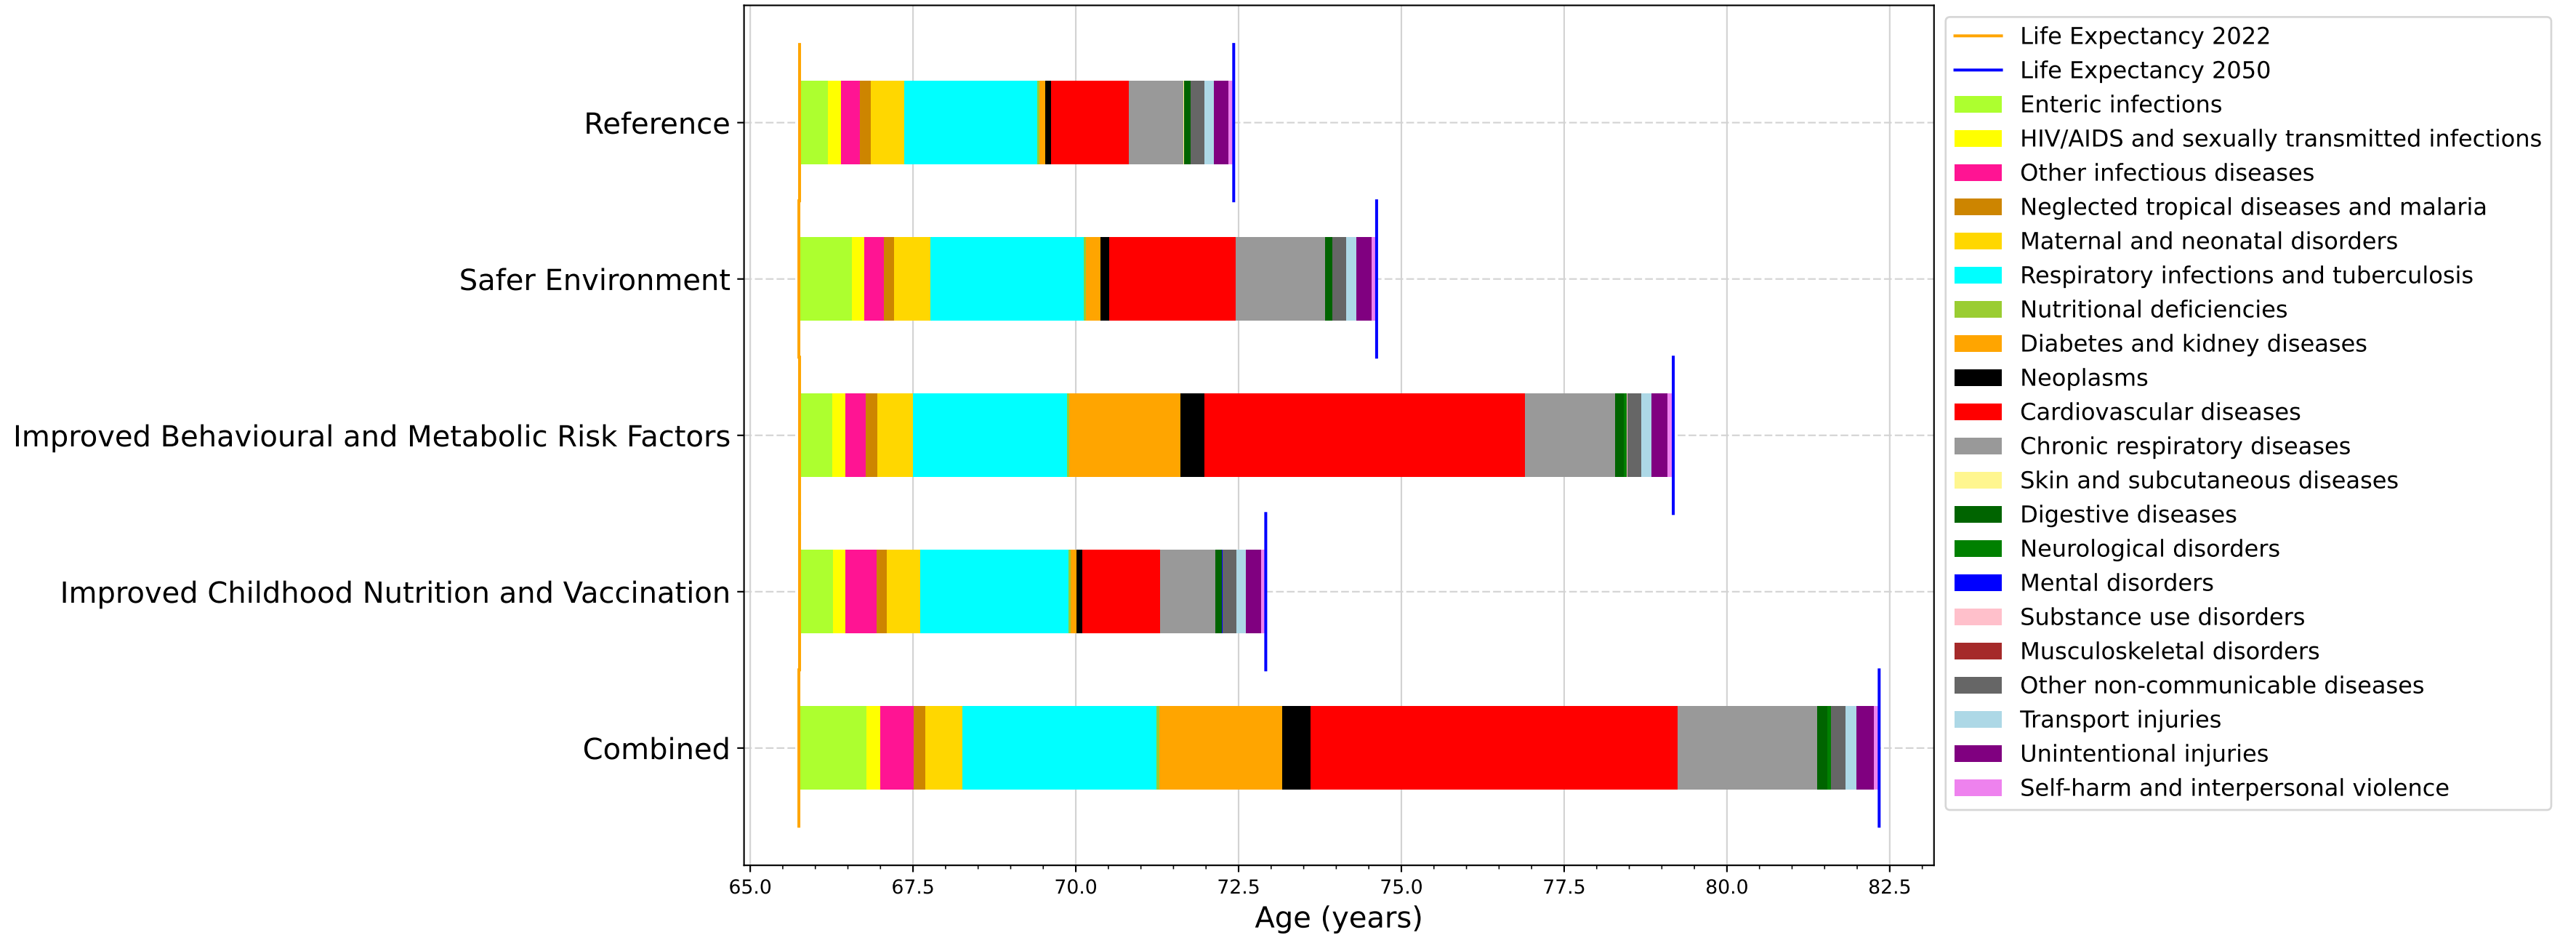

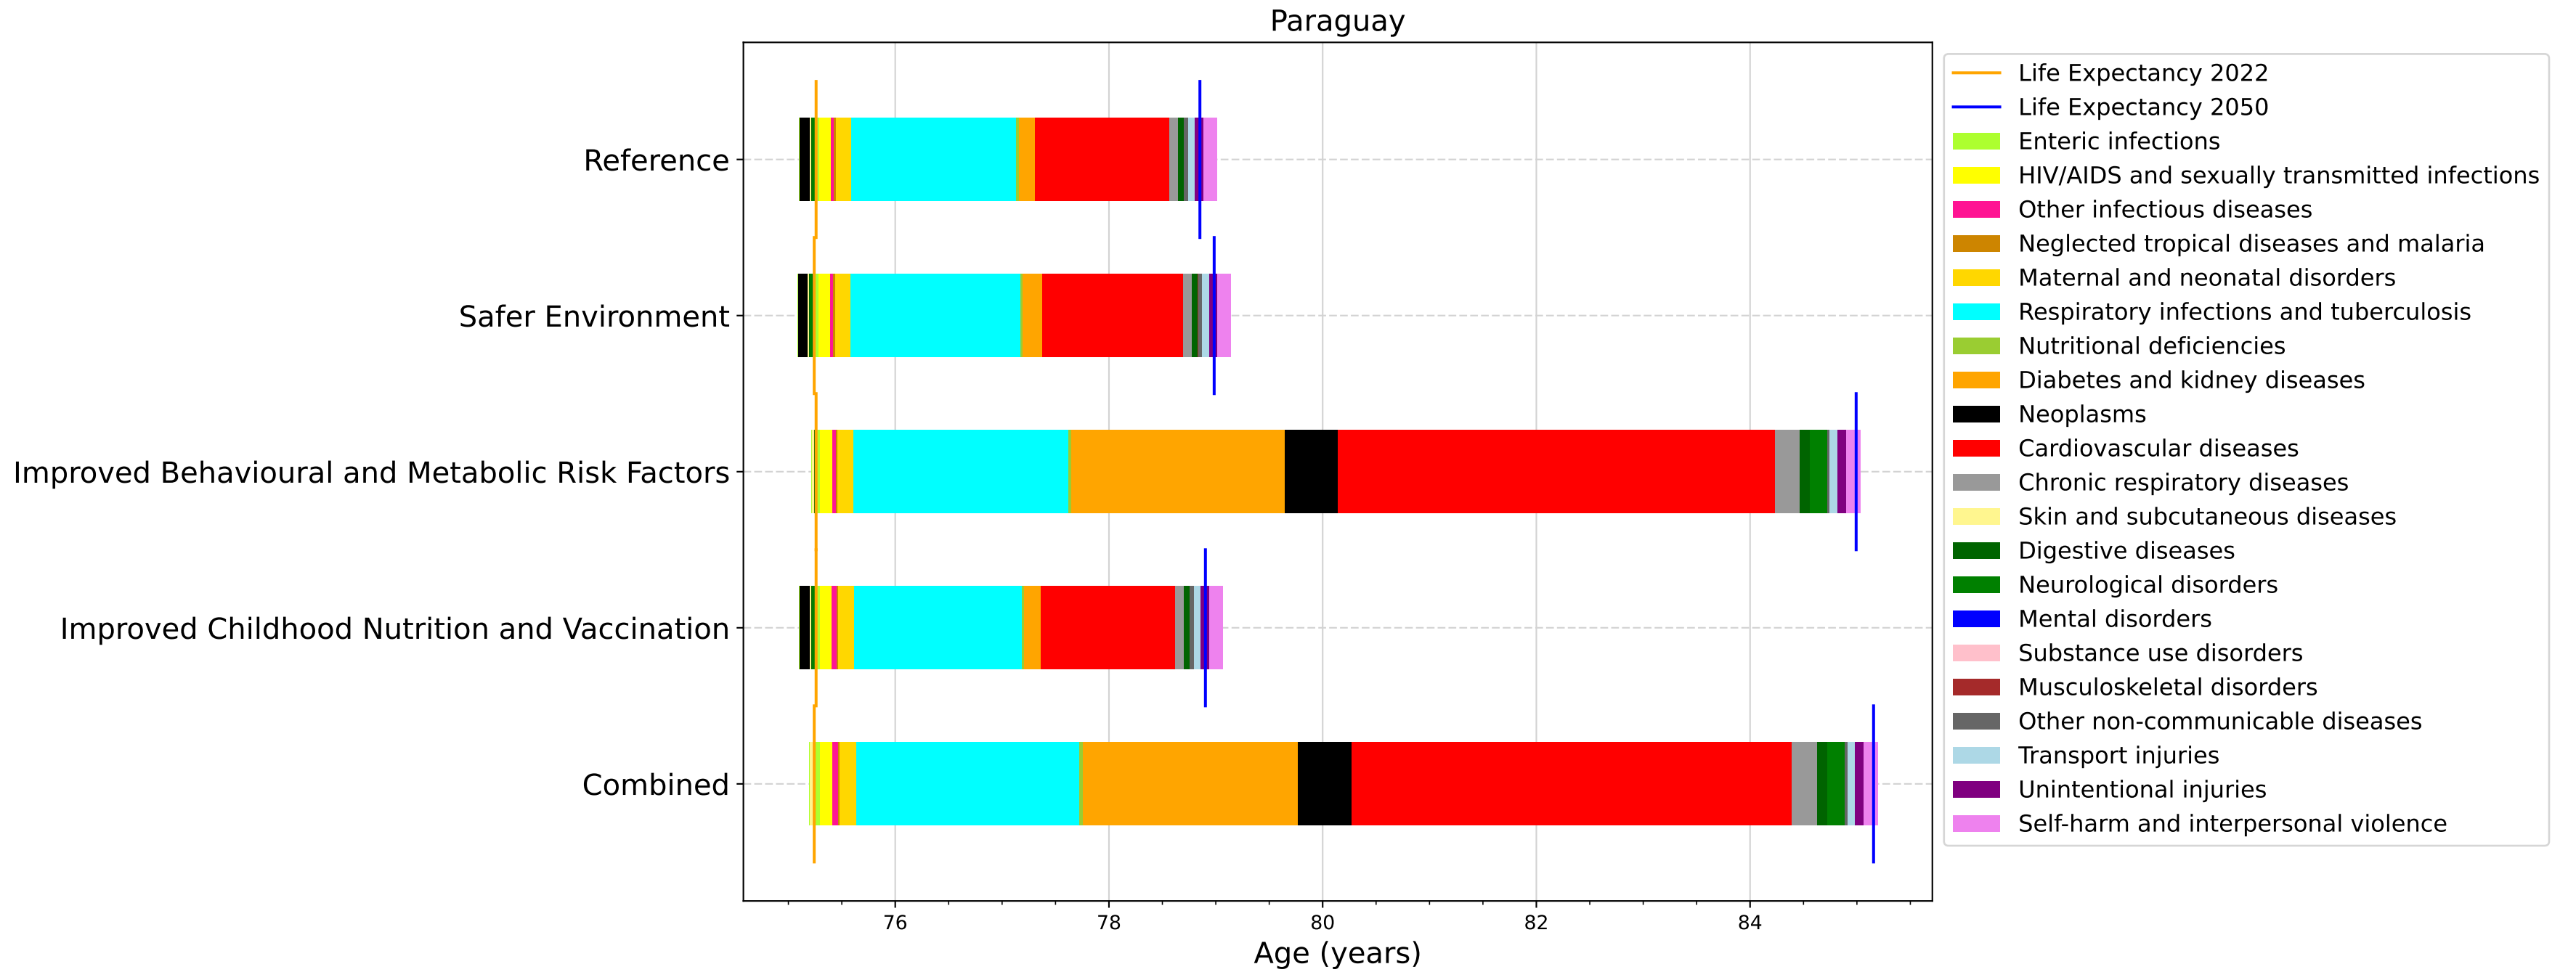

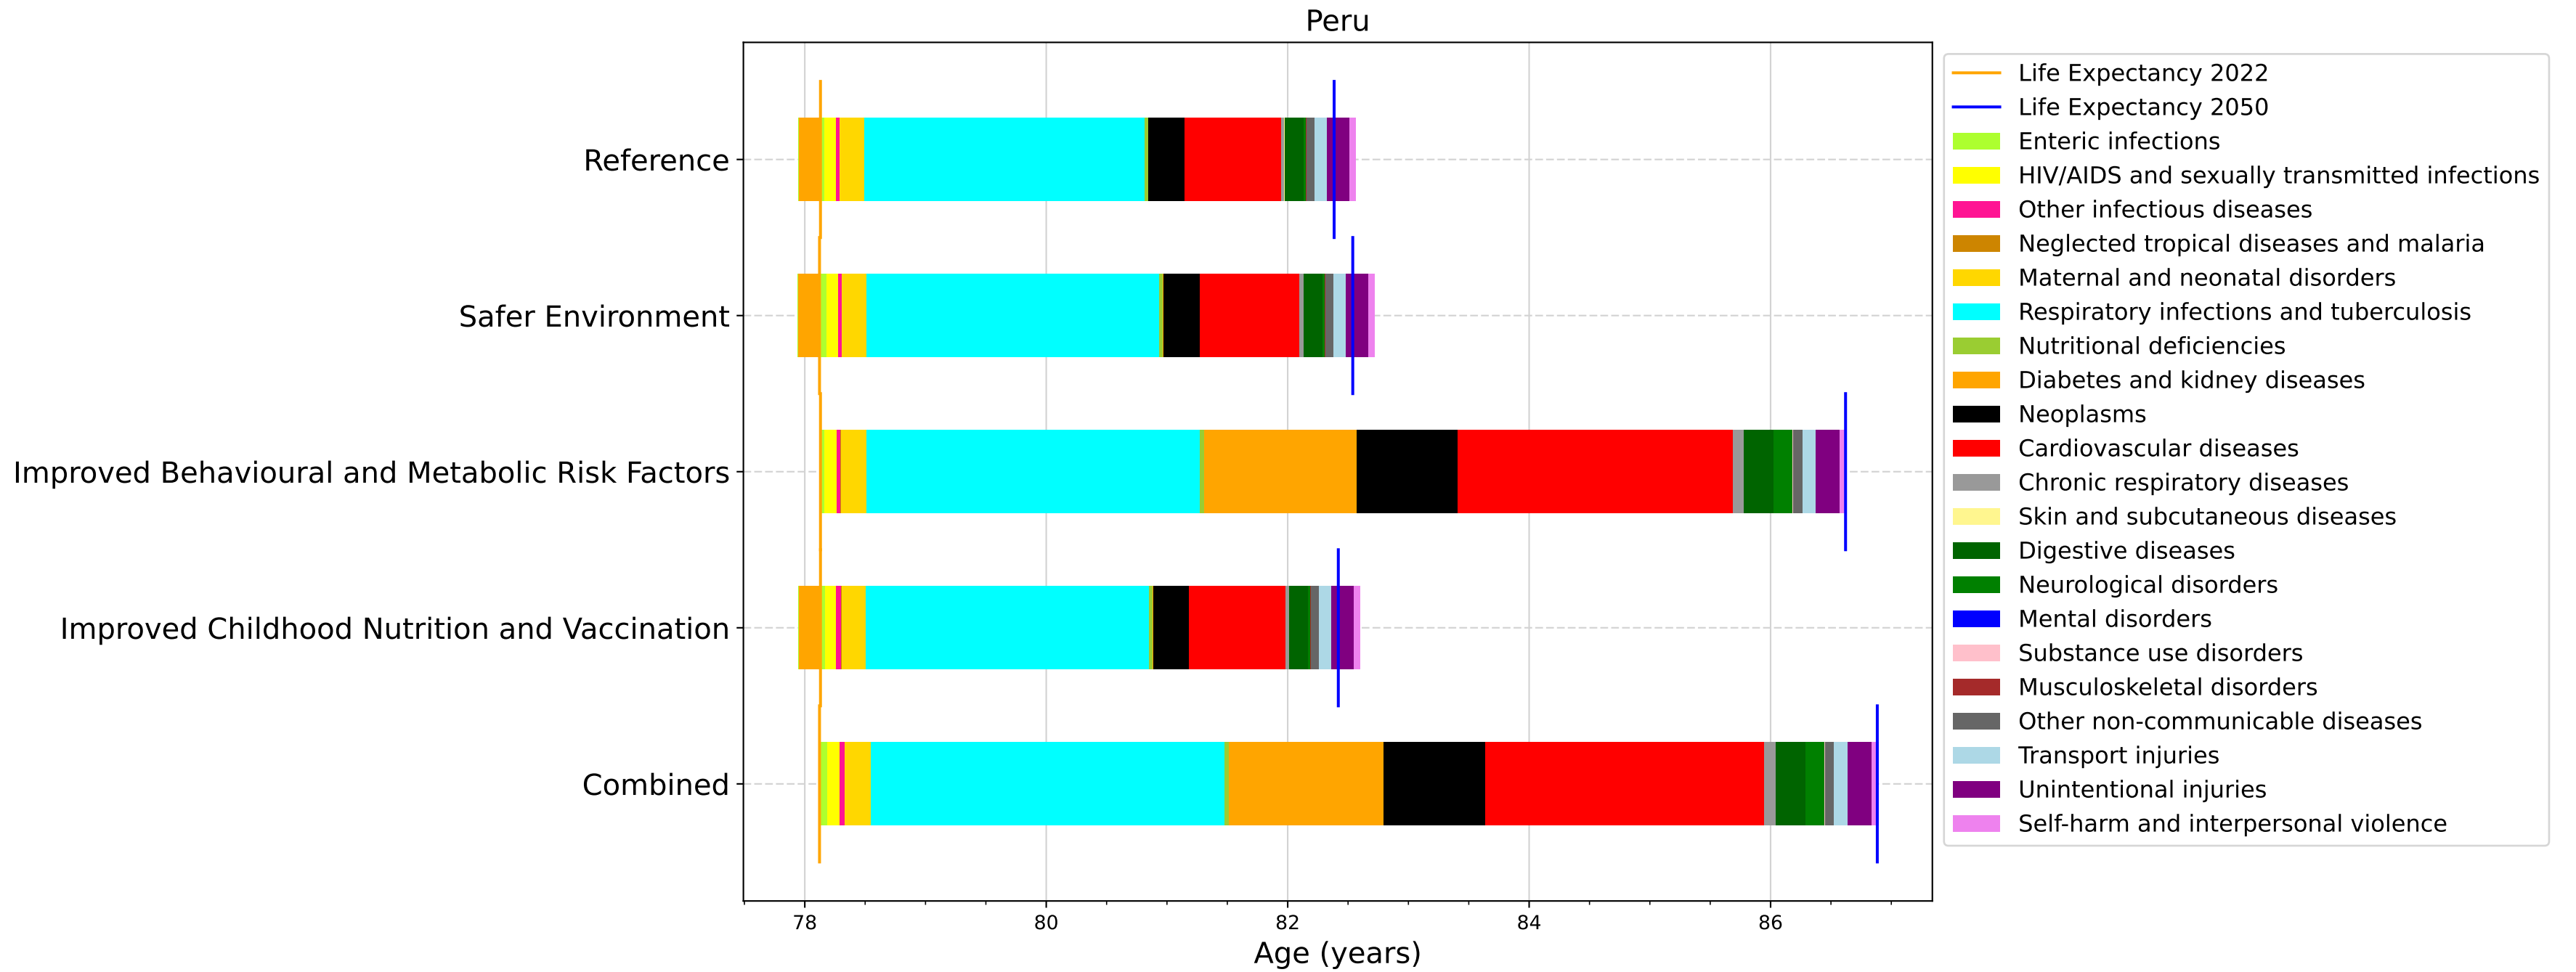

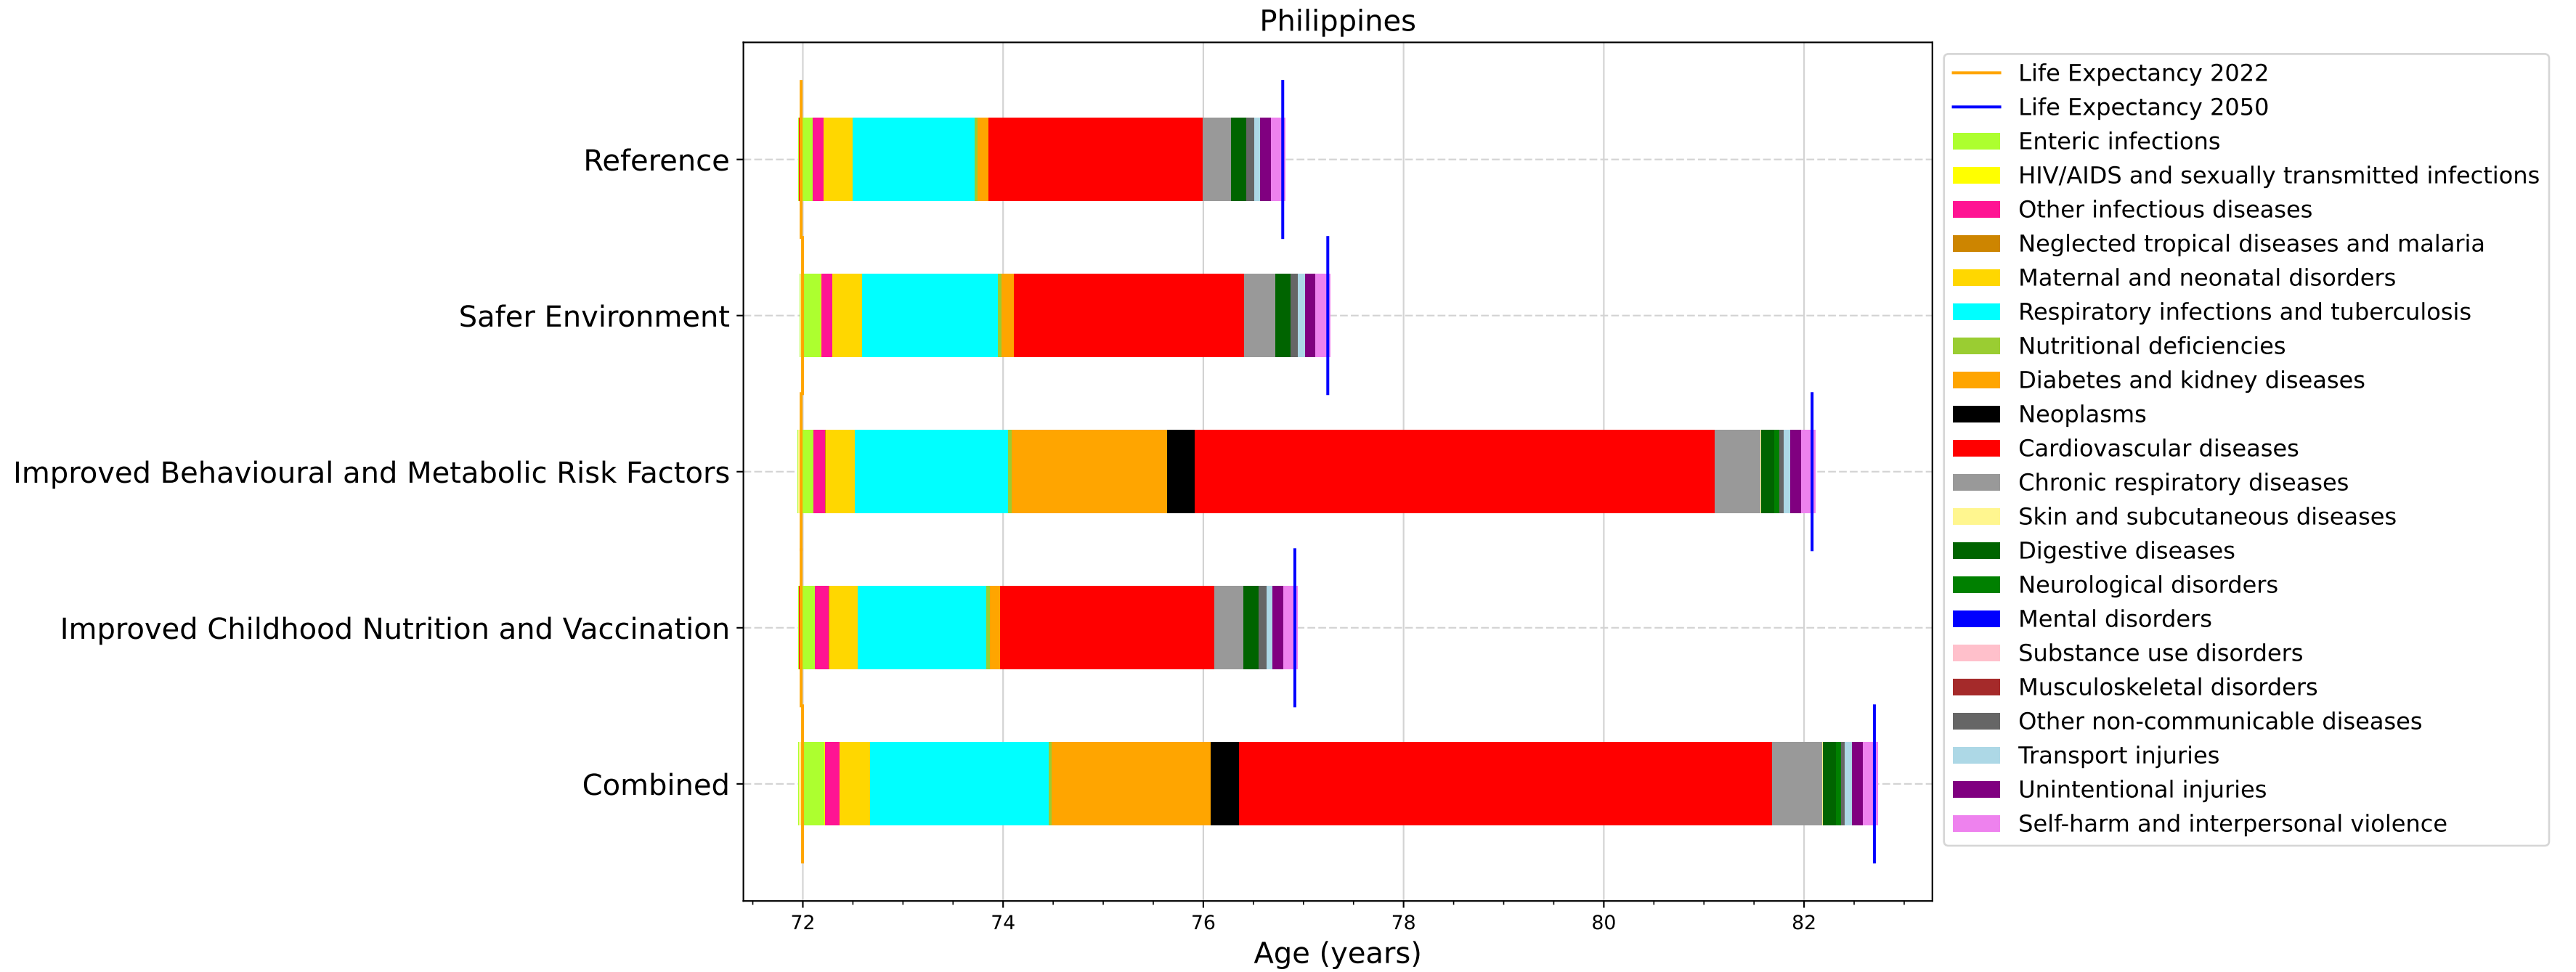

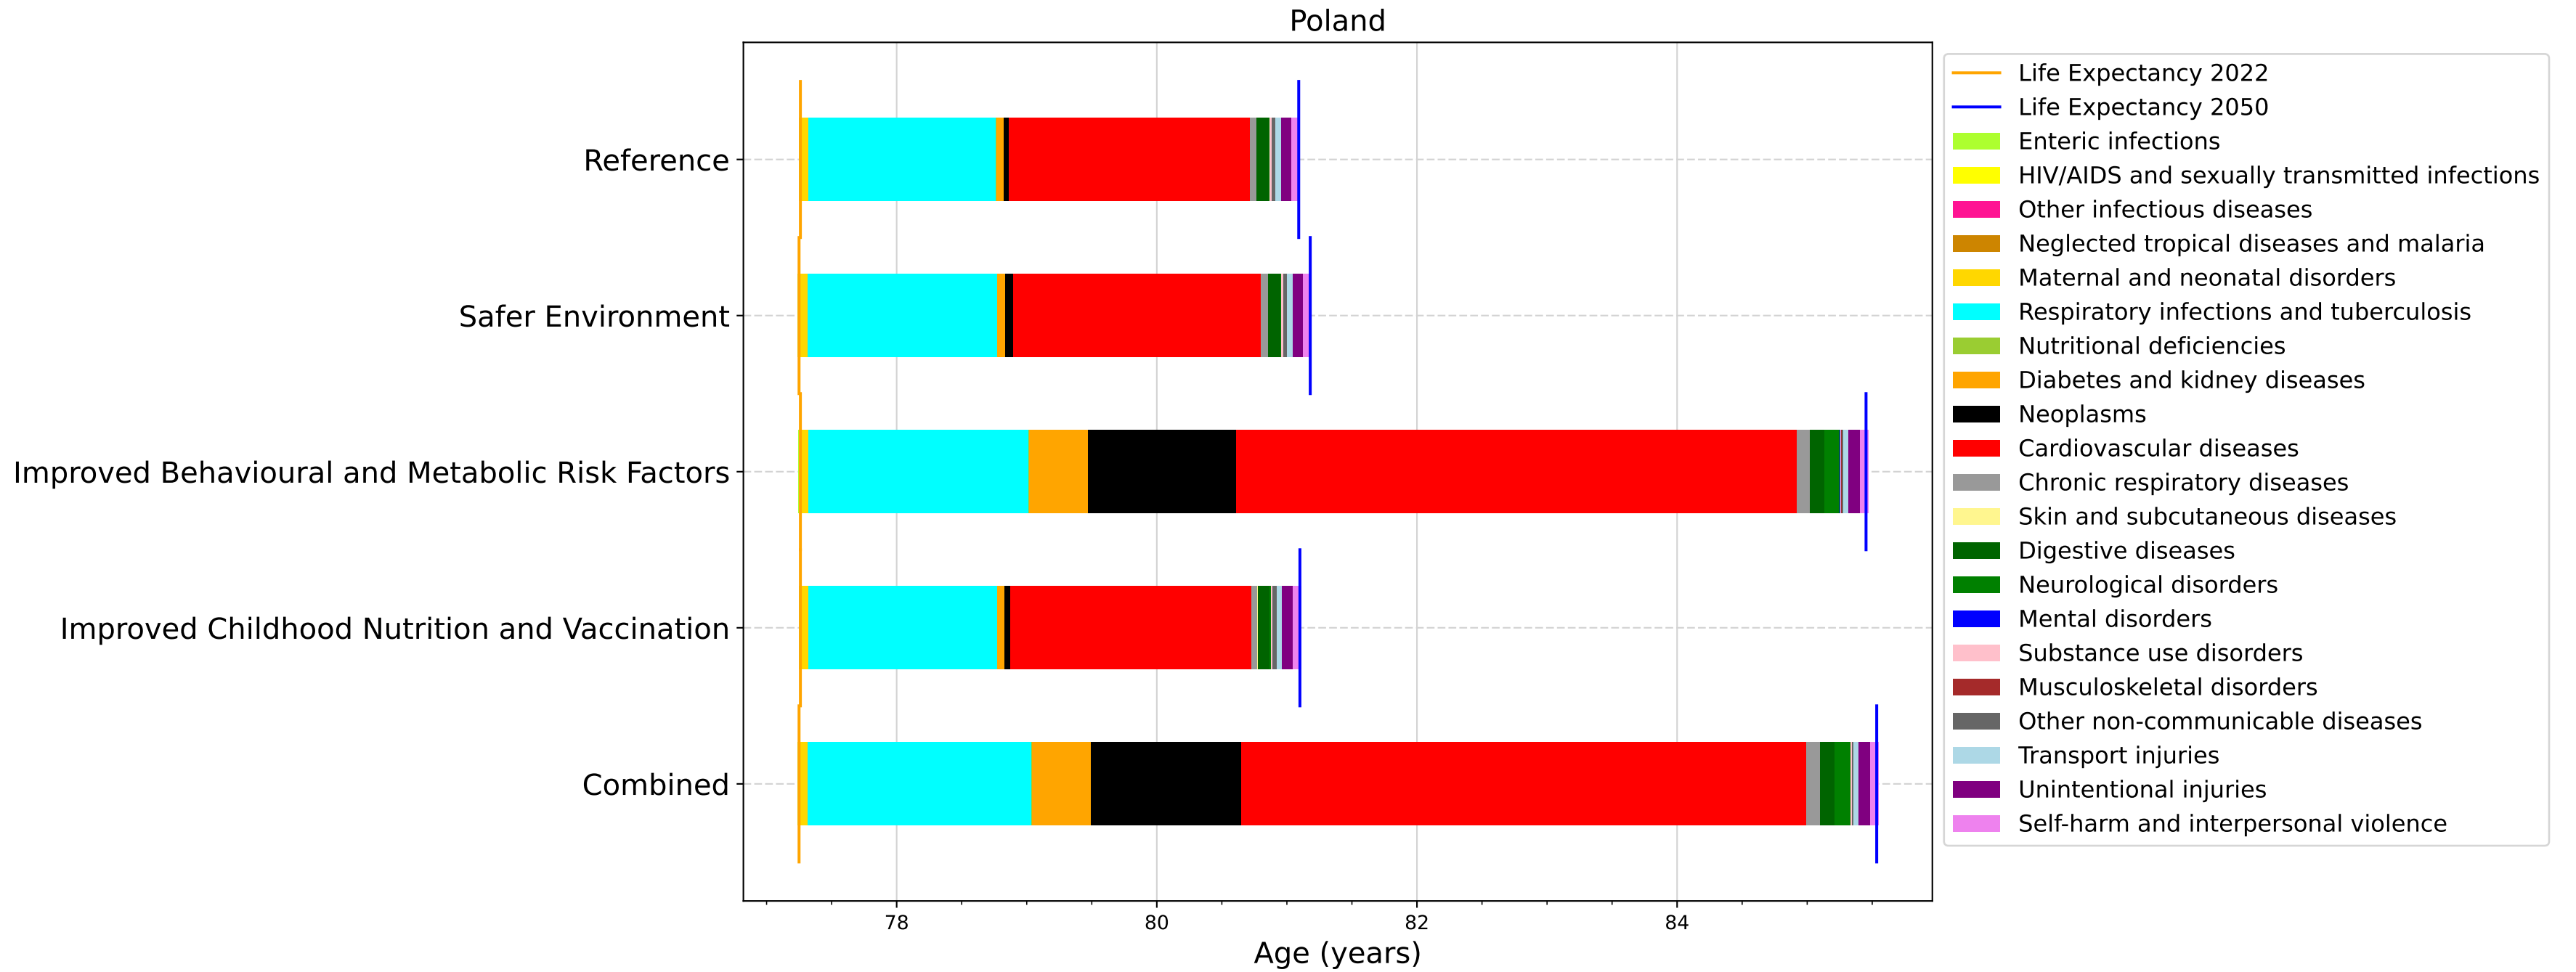

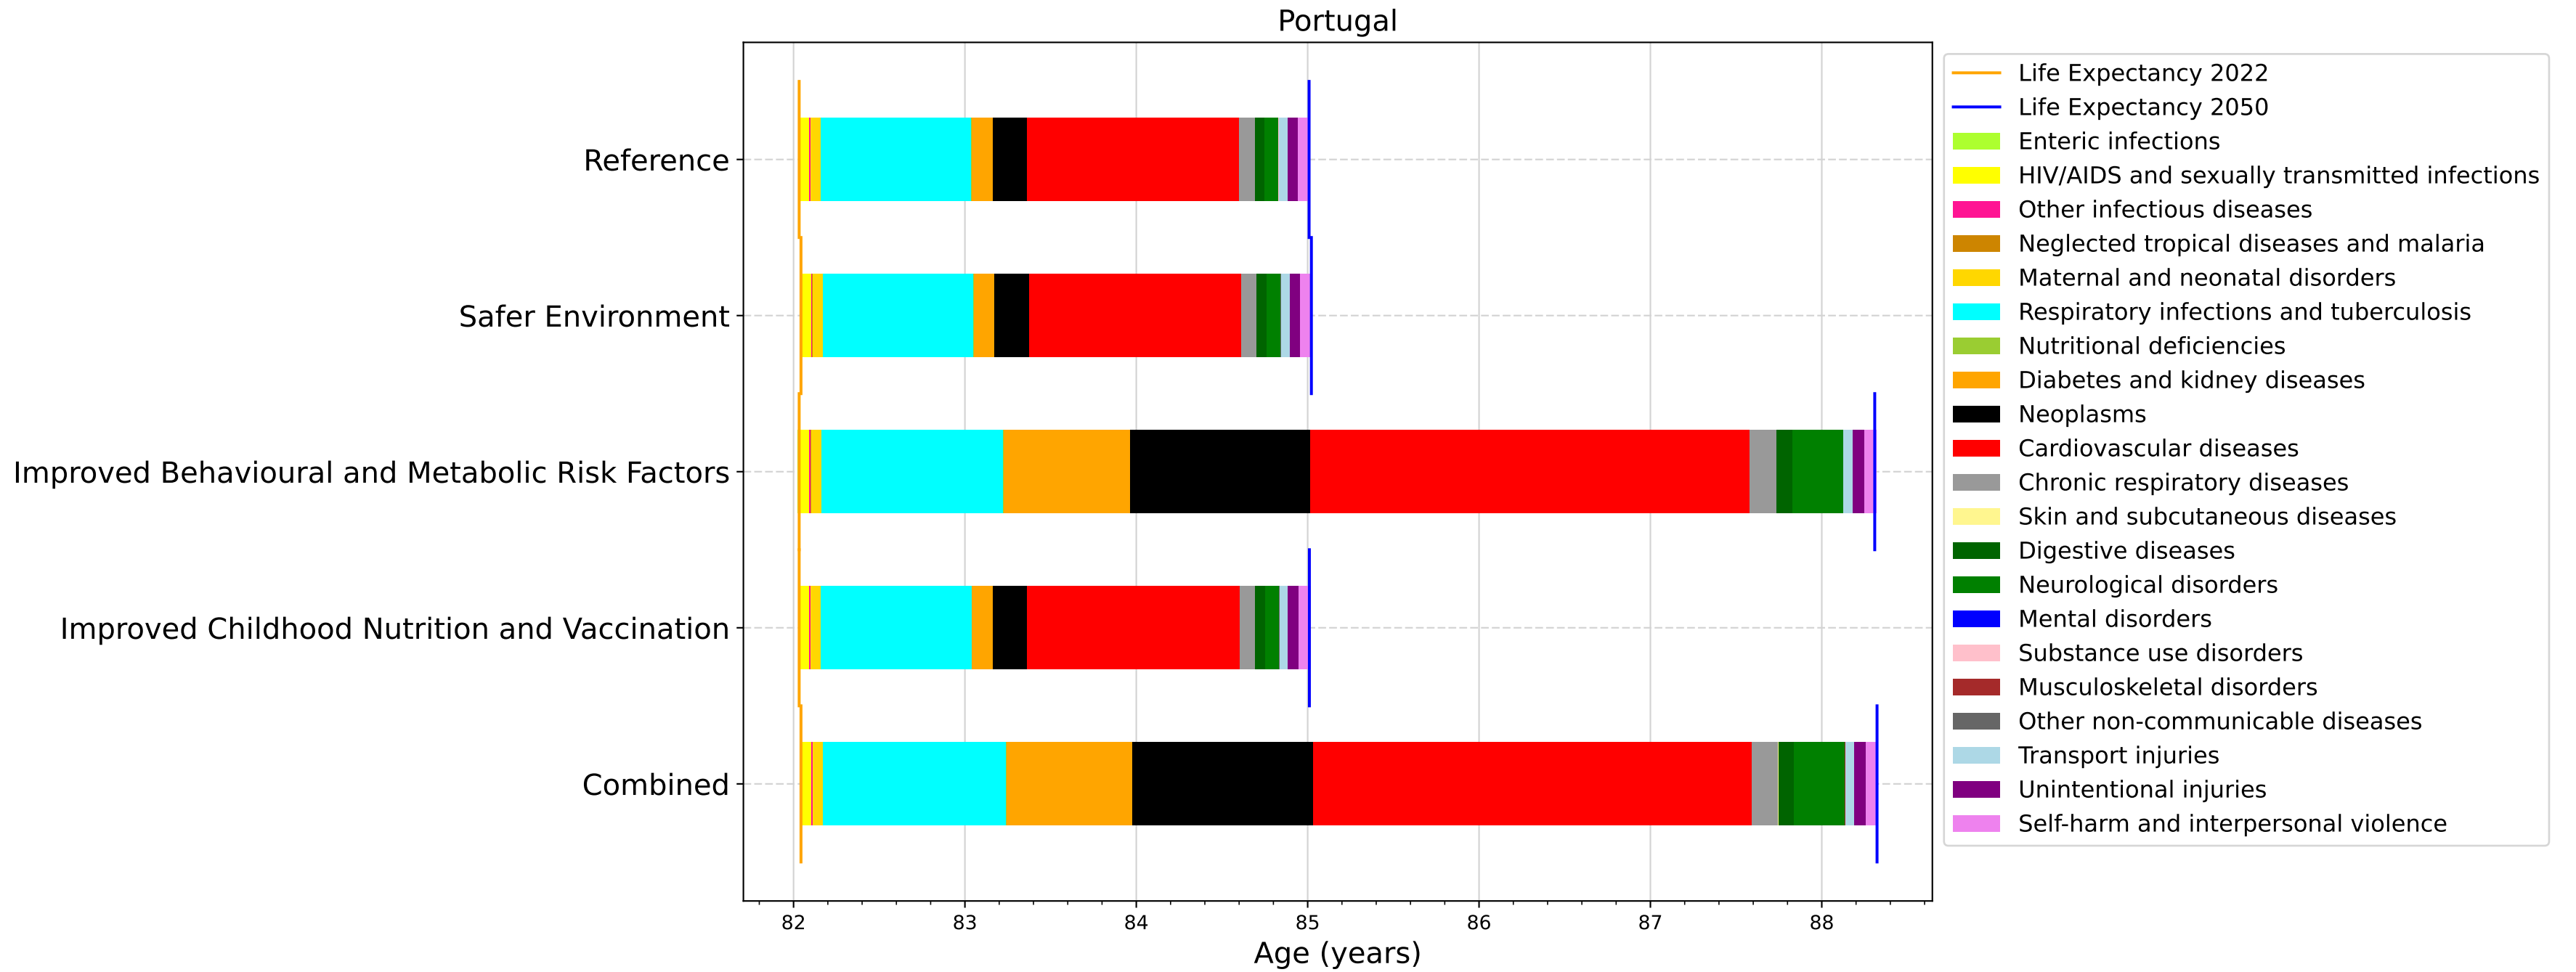



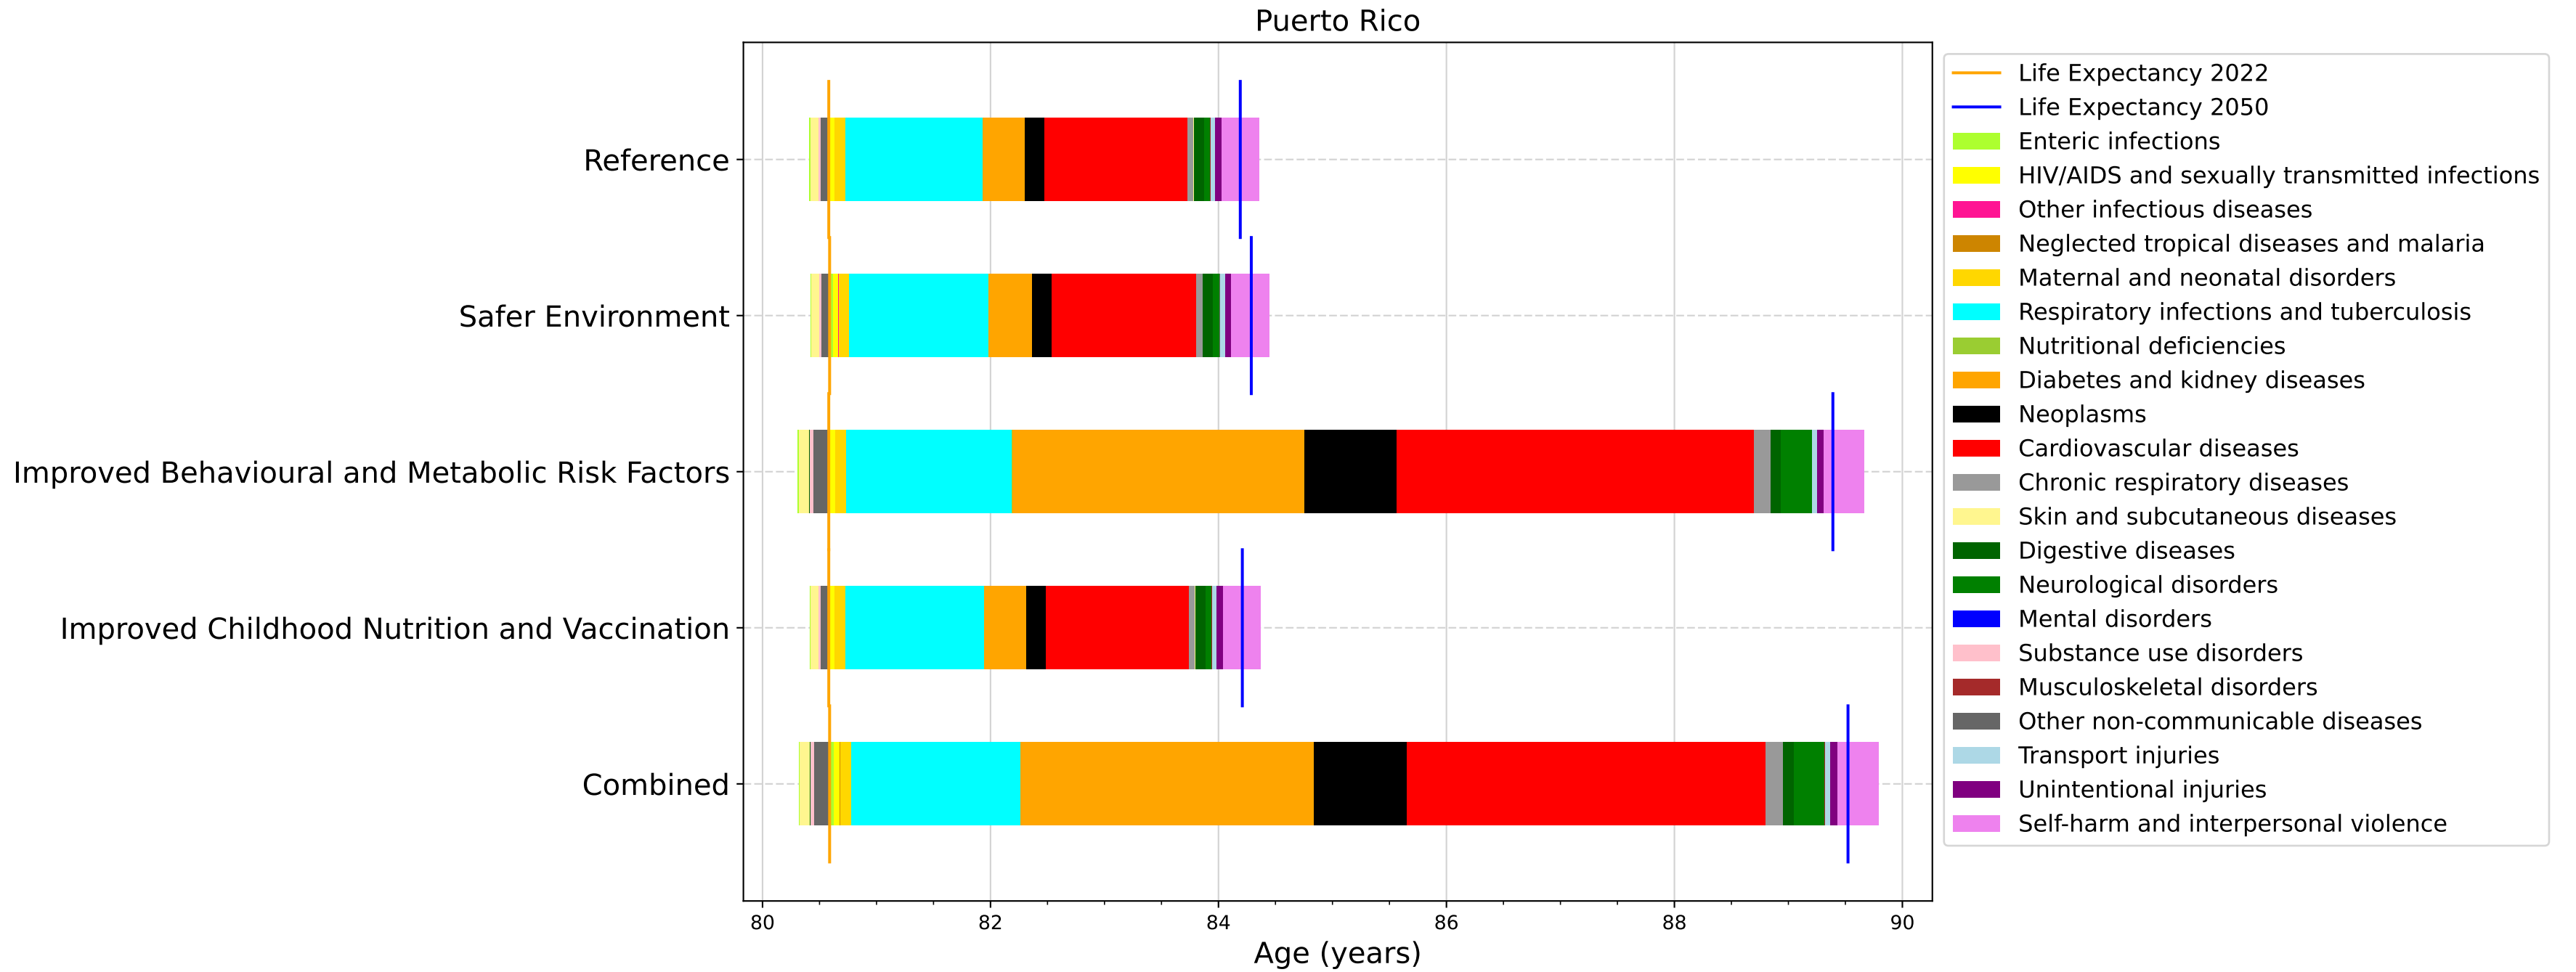

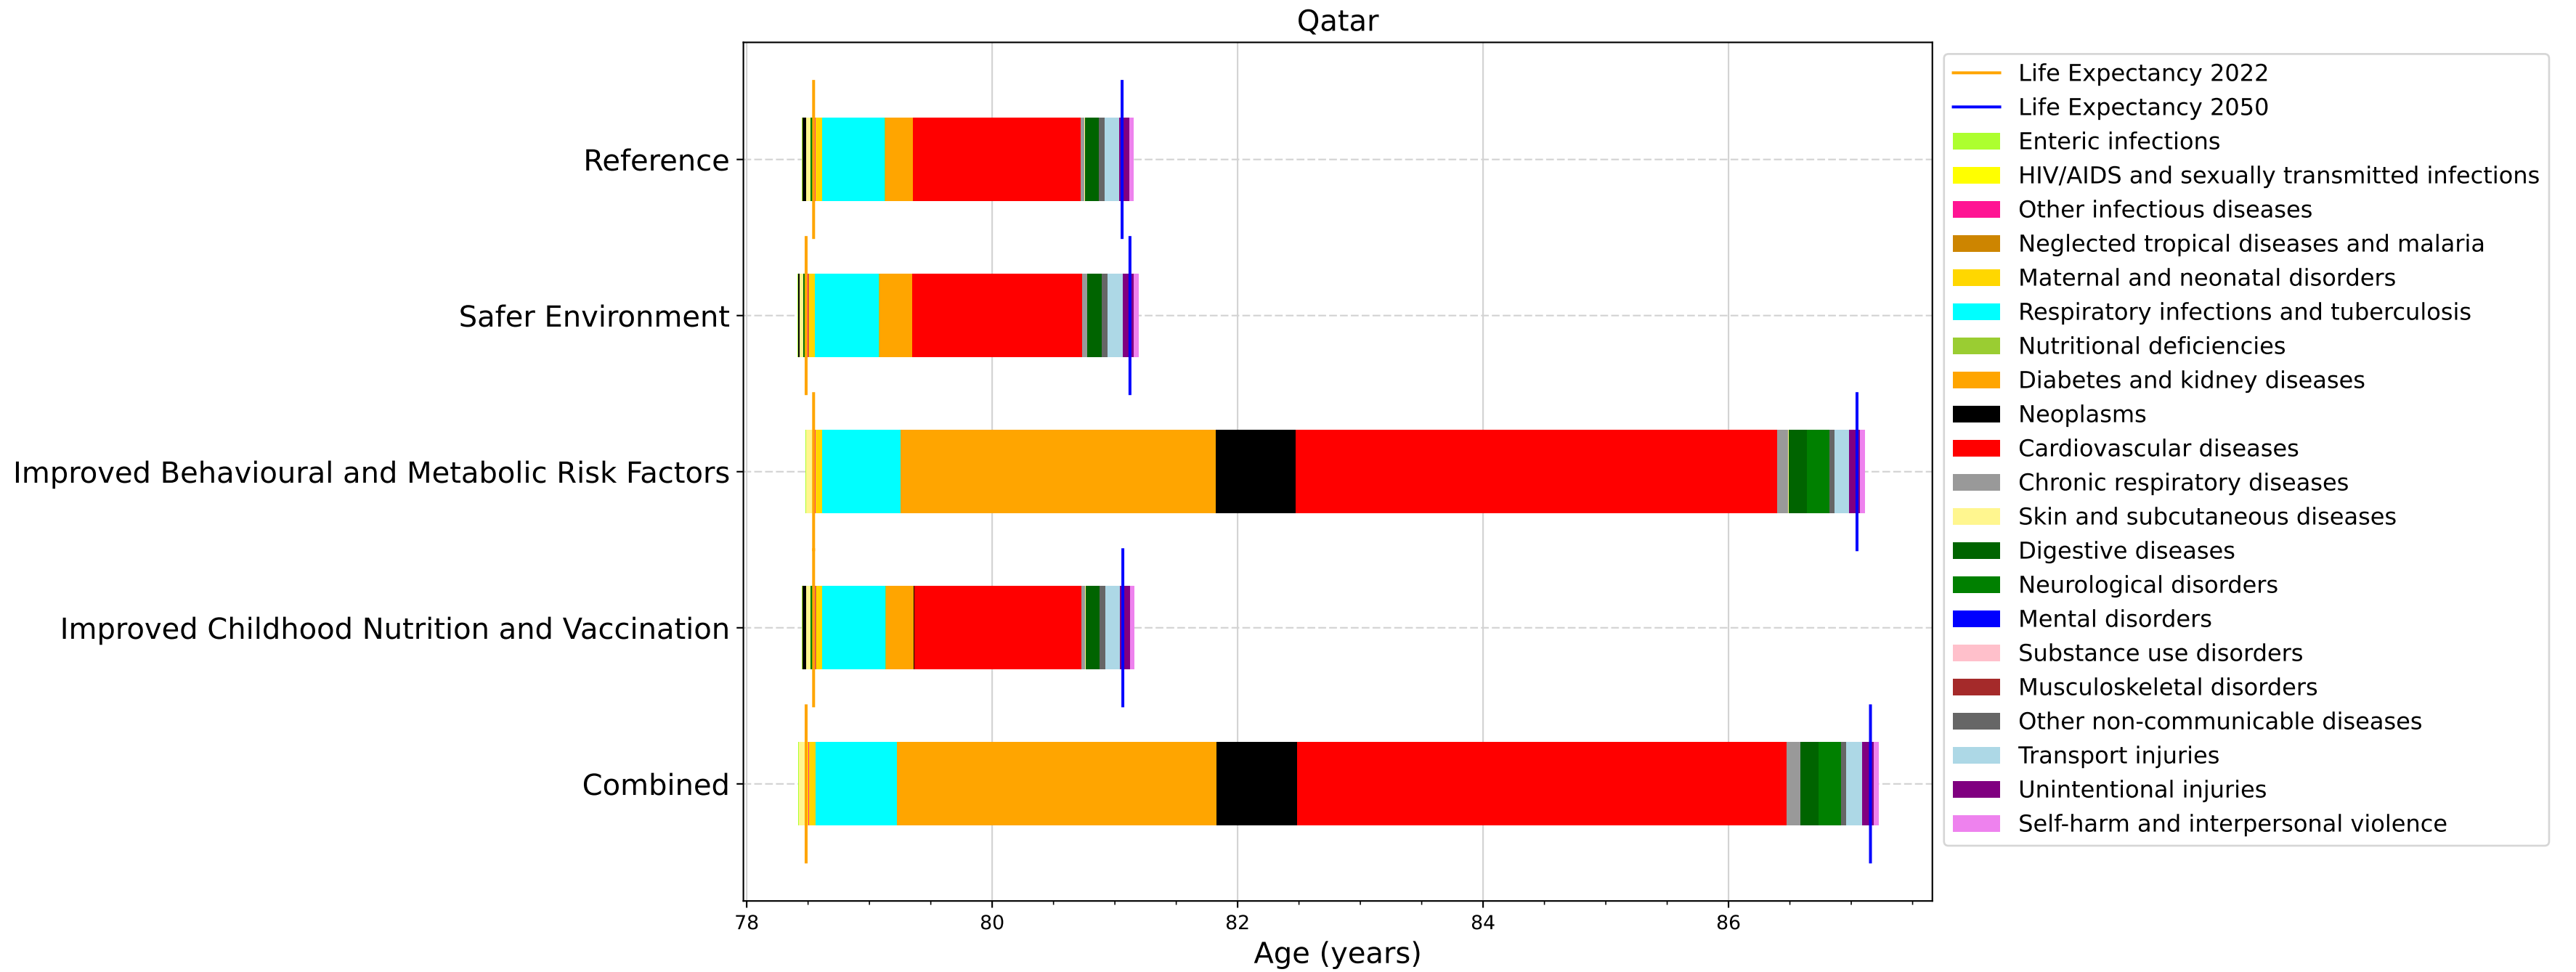

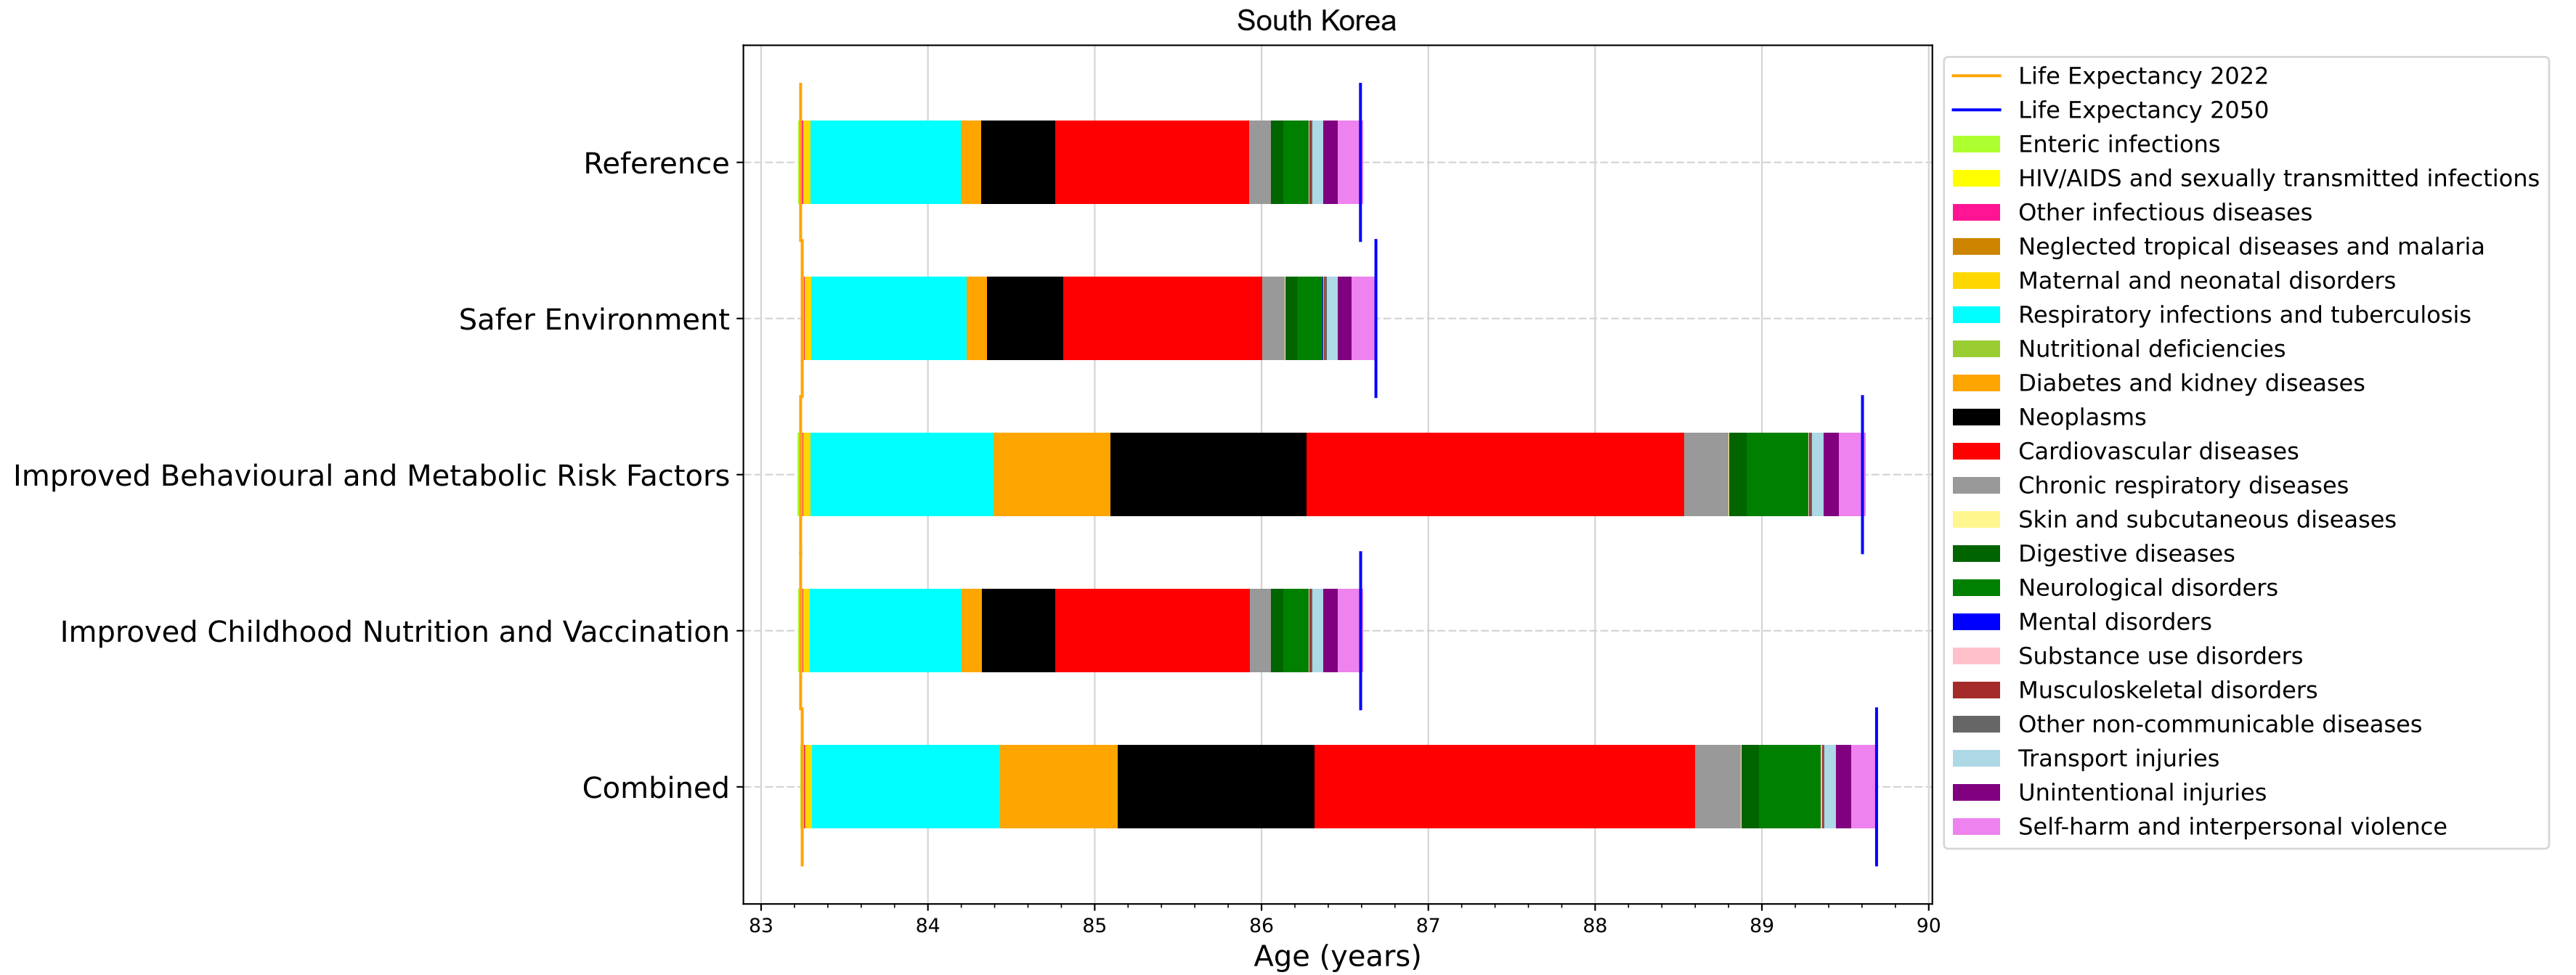

Republic of Moldova

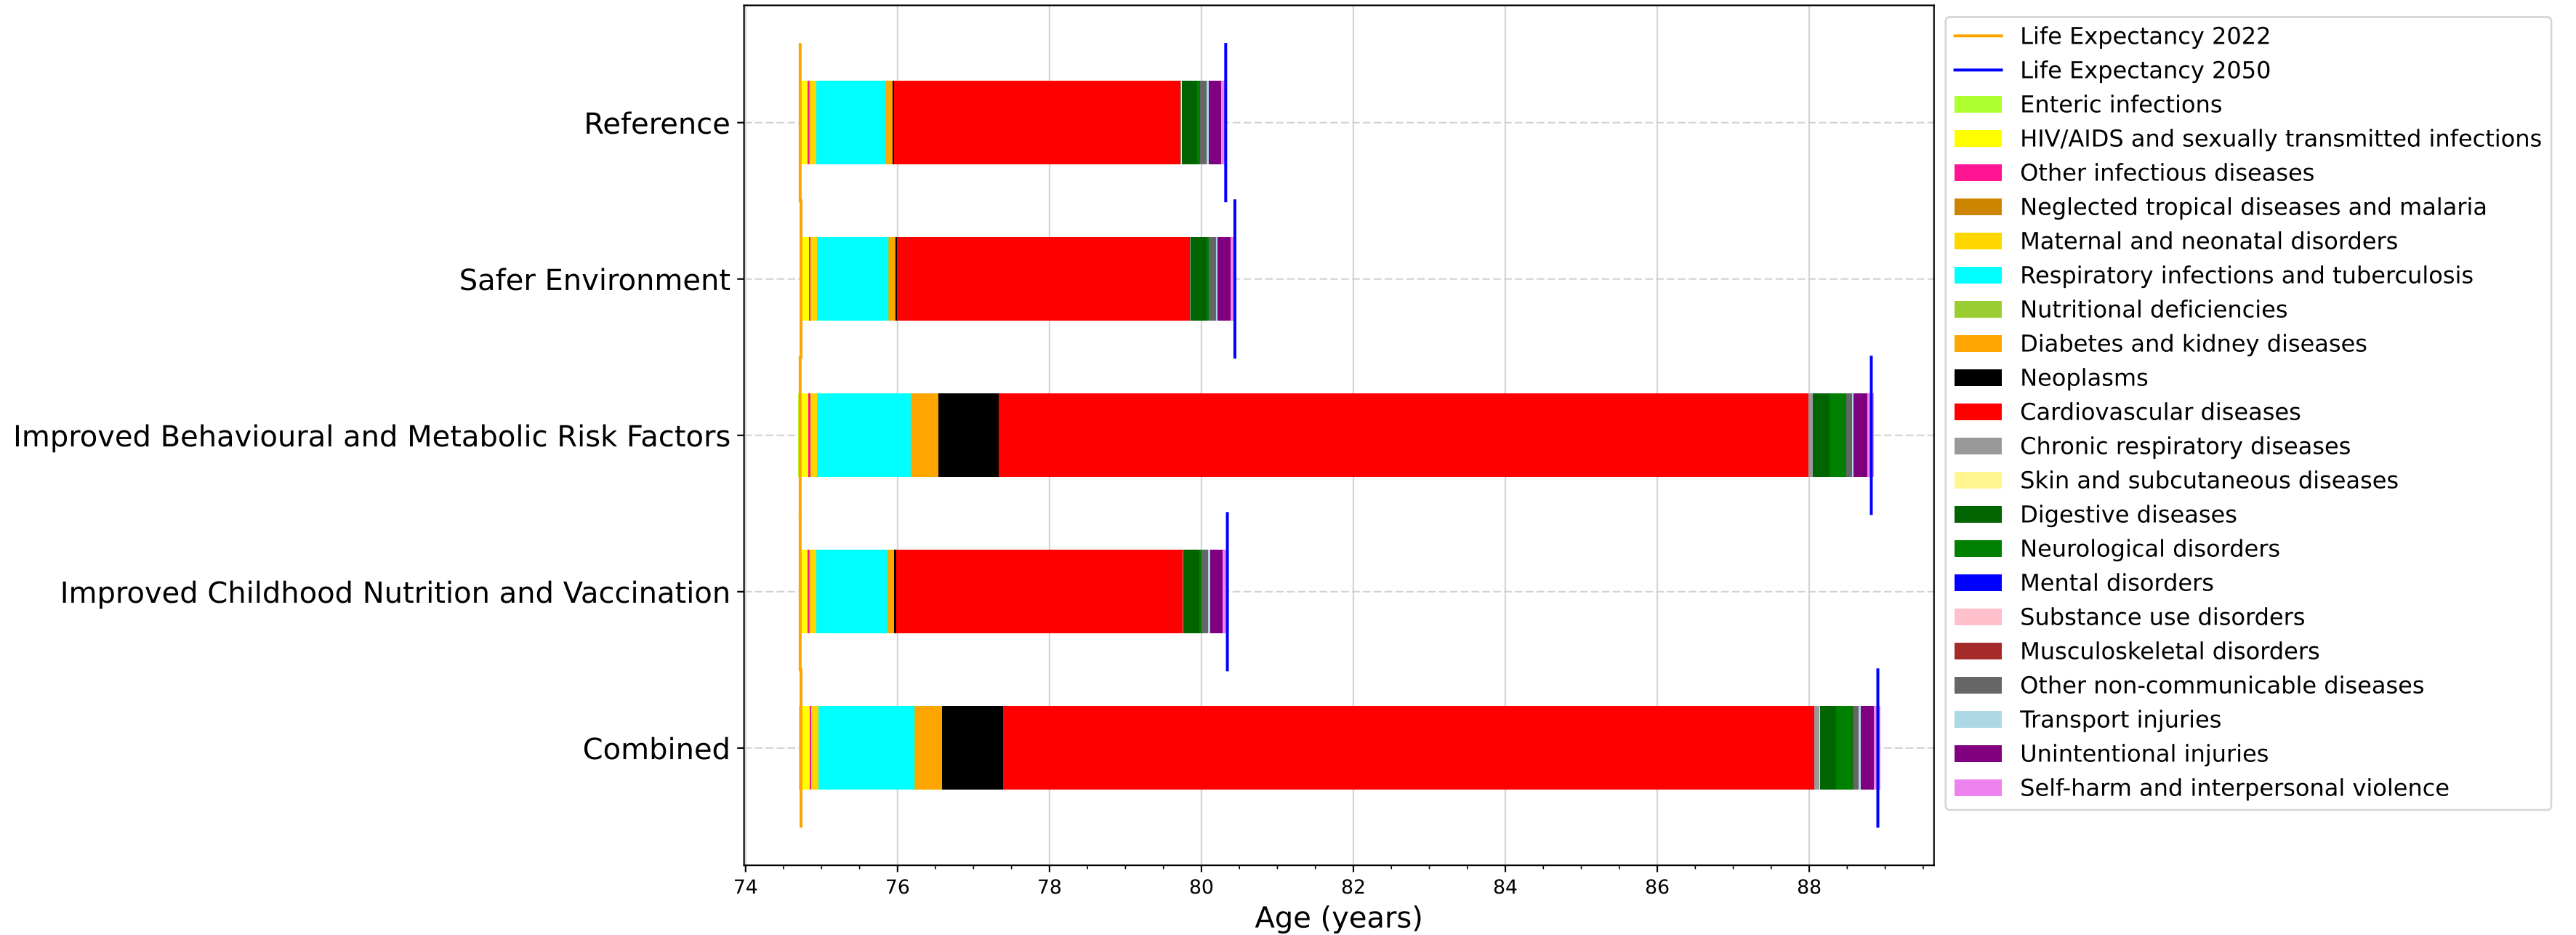

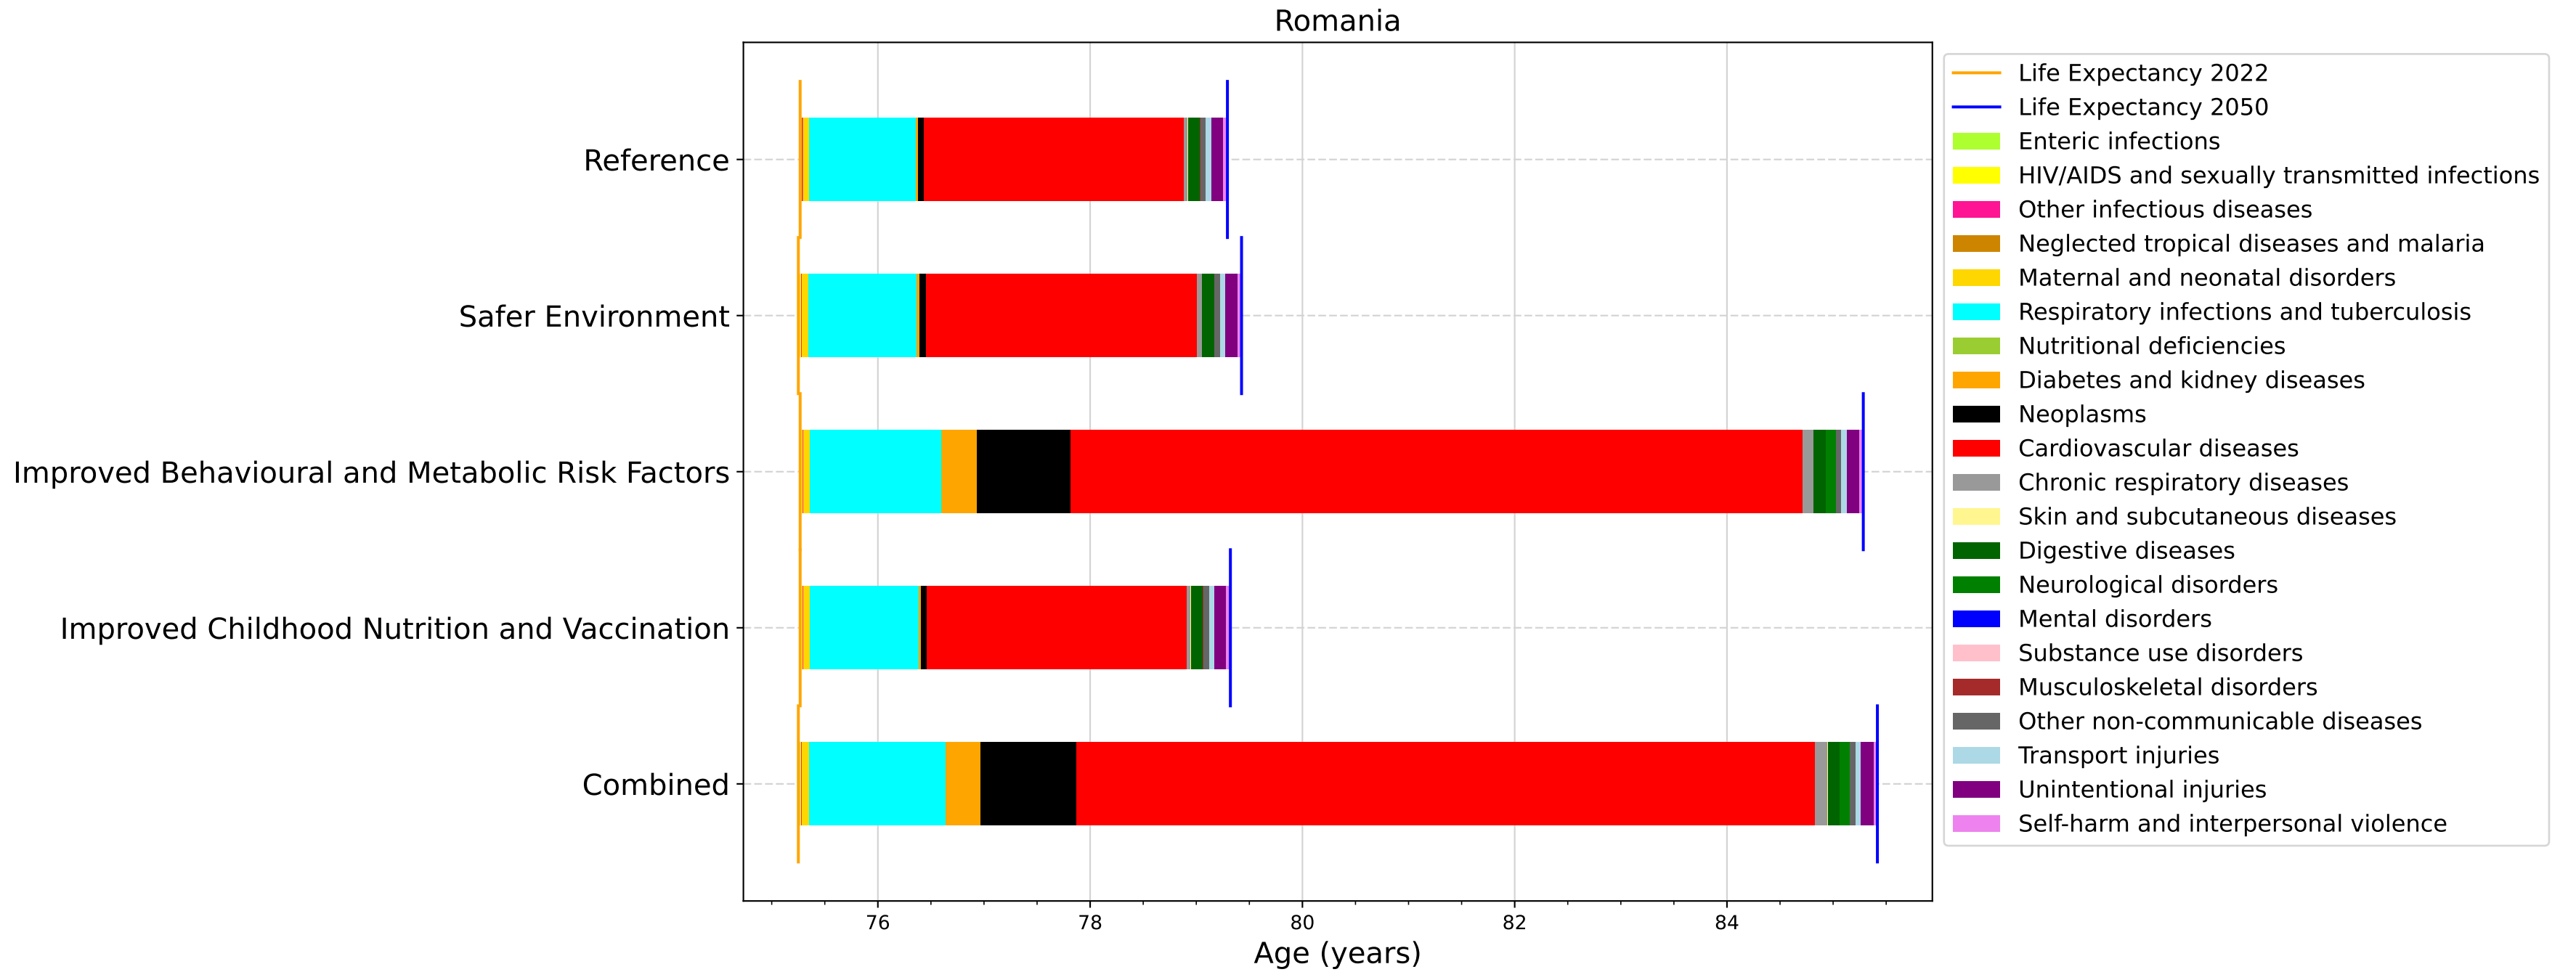

Russia

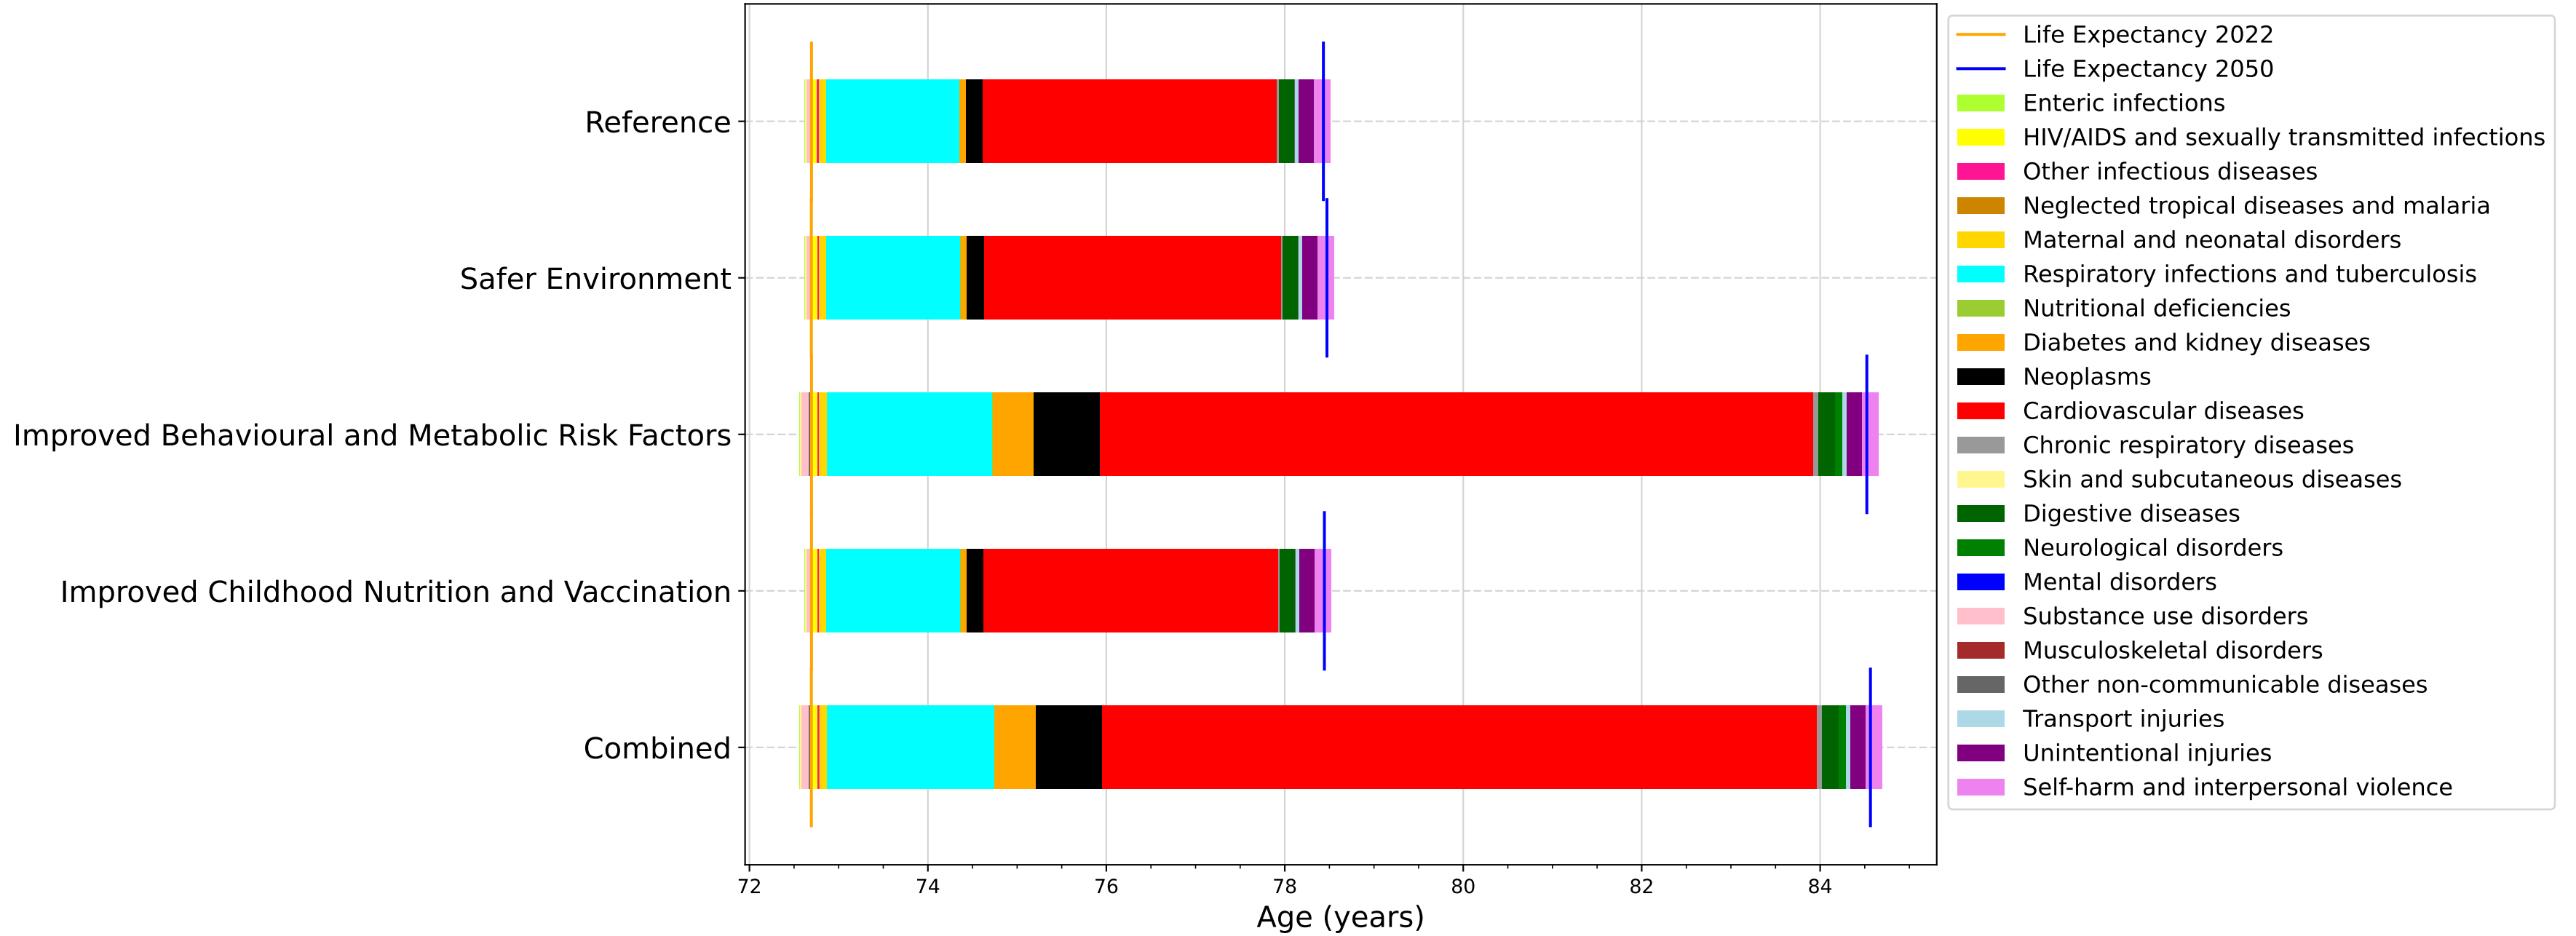

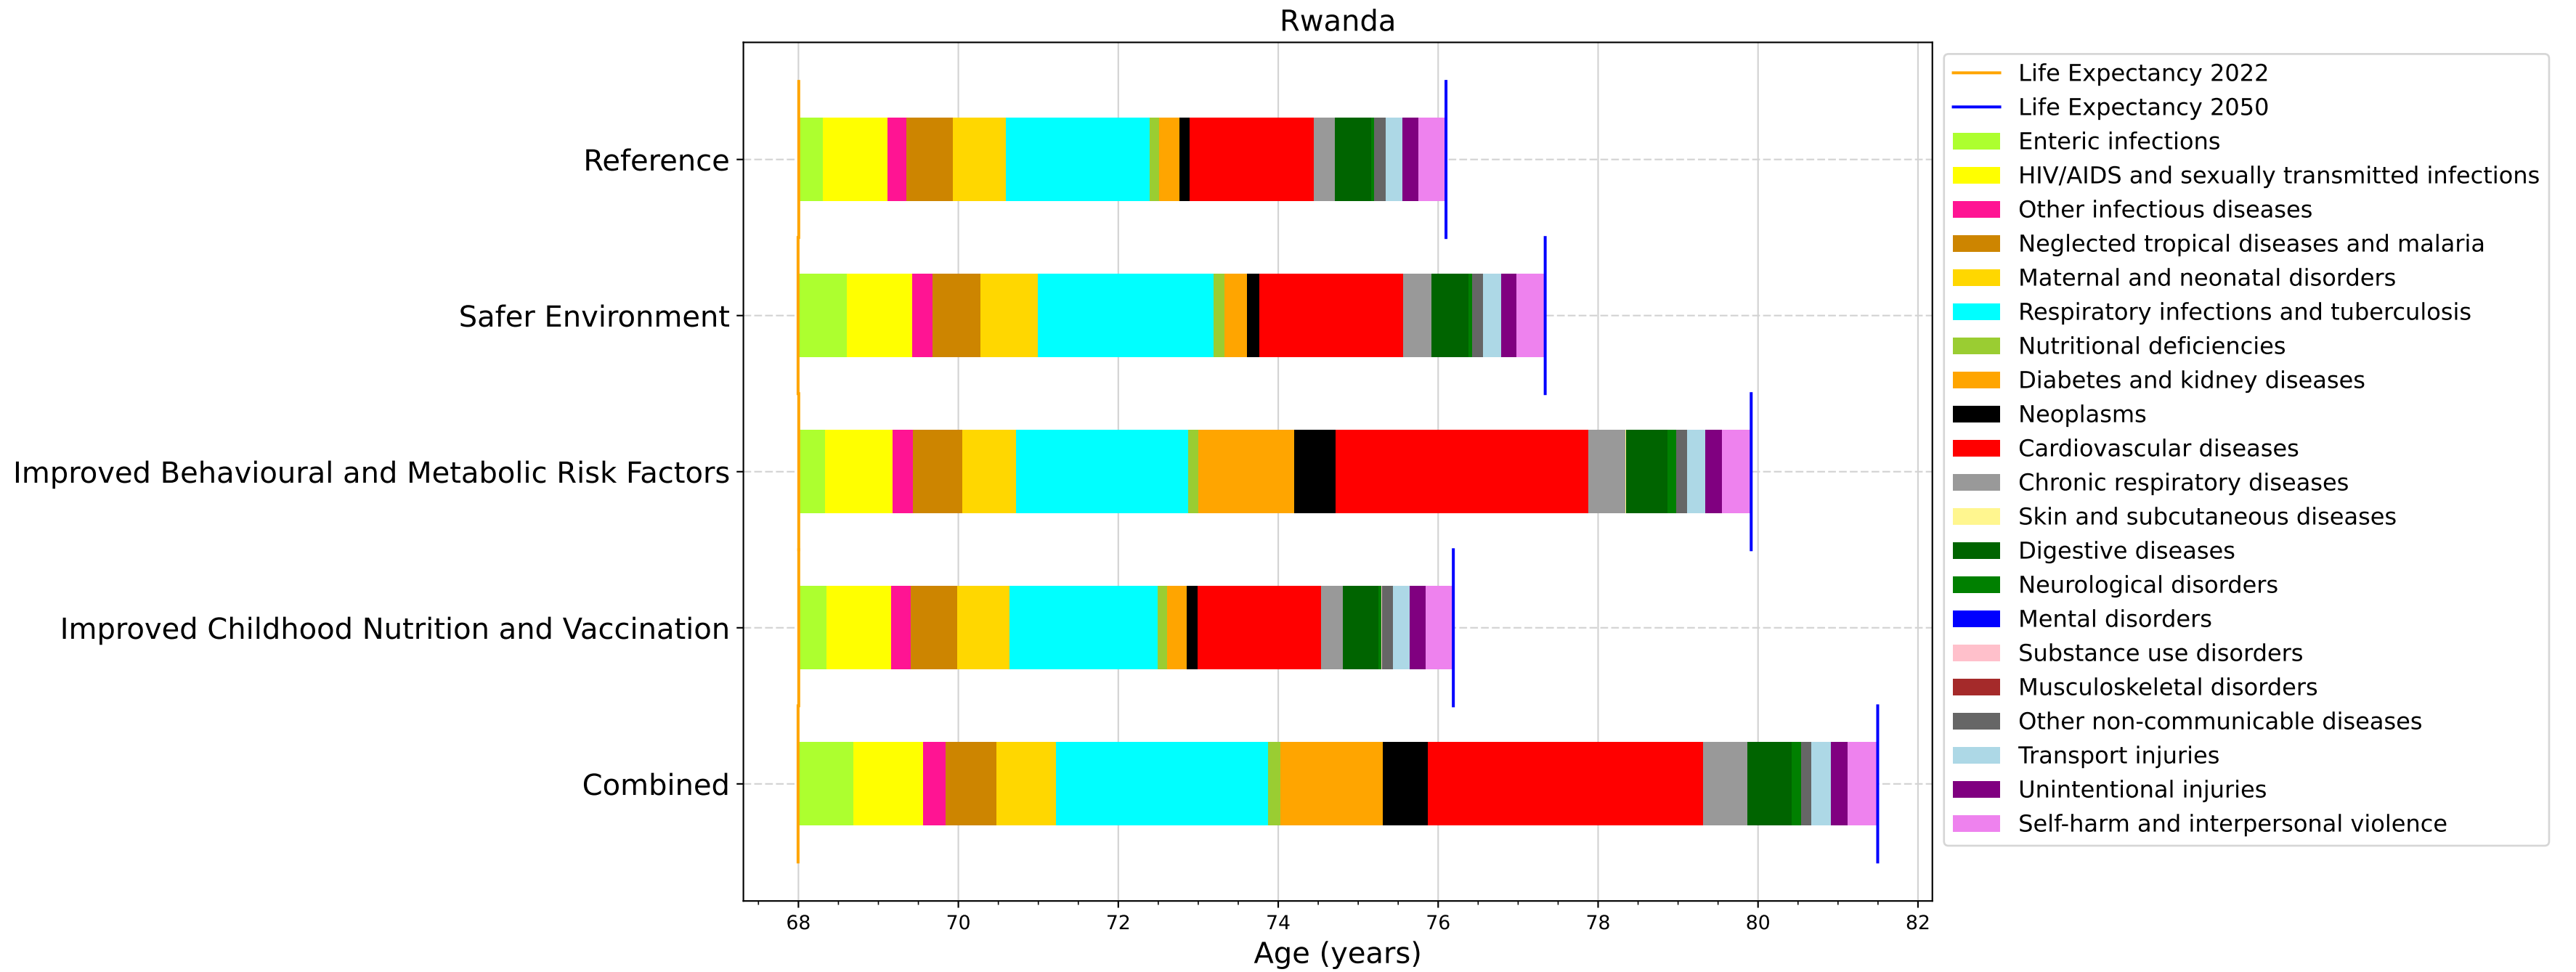

### Saint Kitts and Nevis

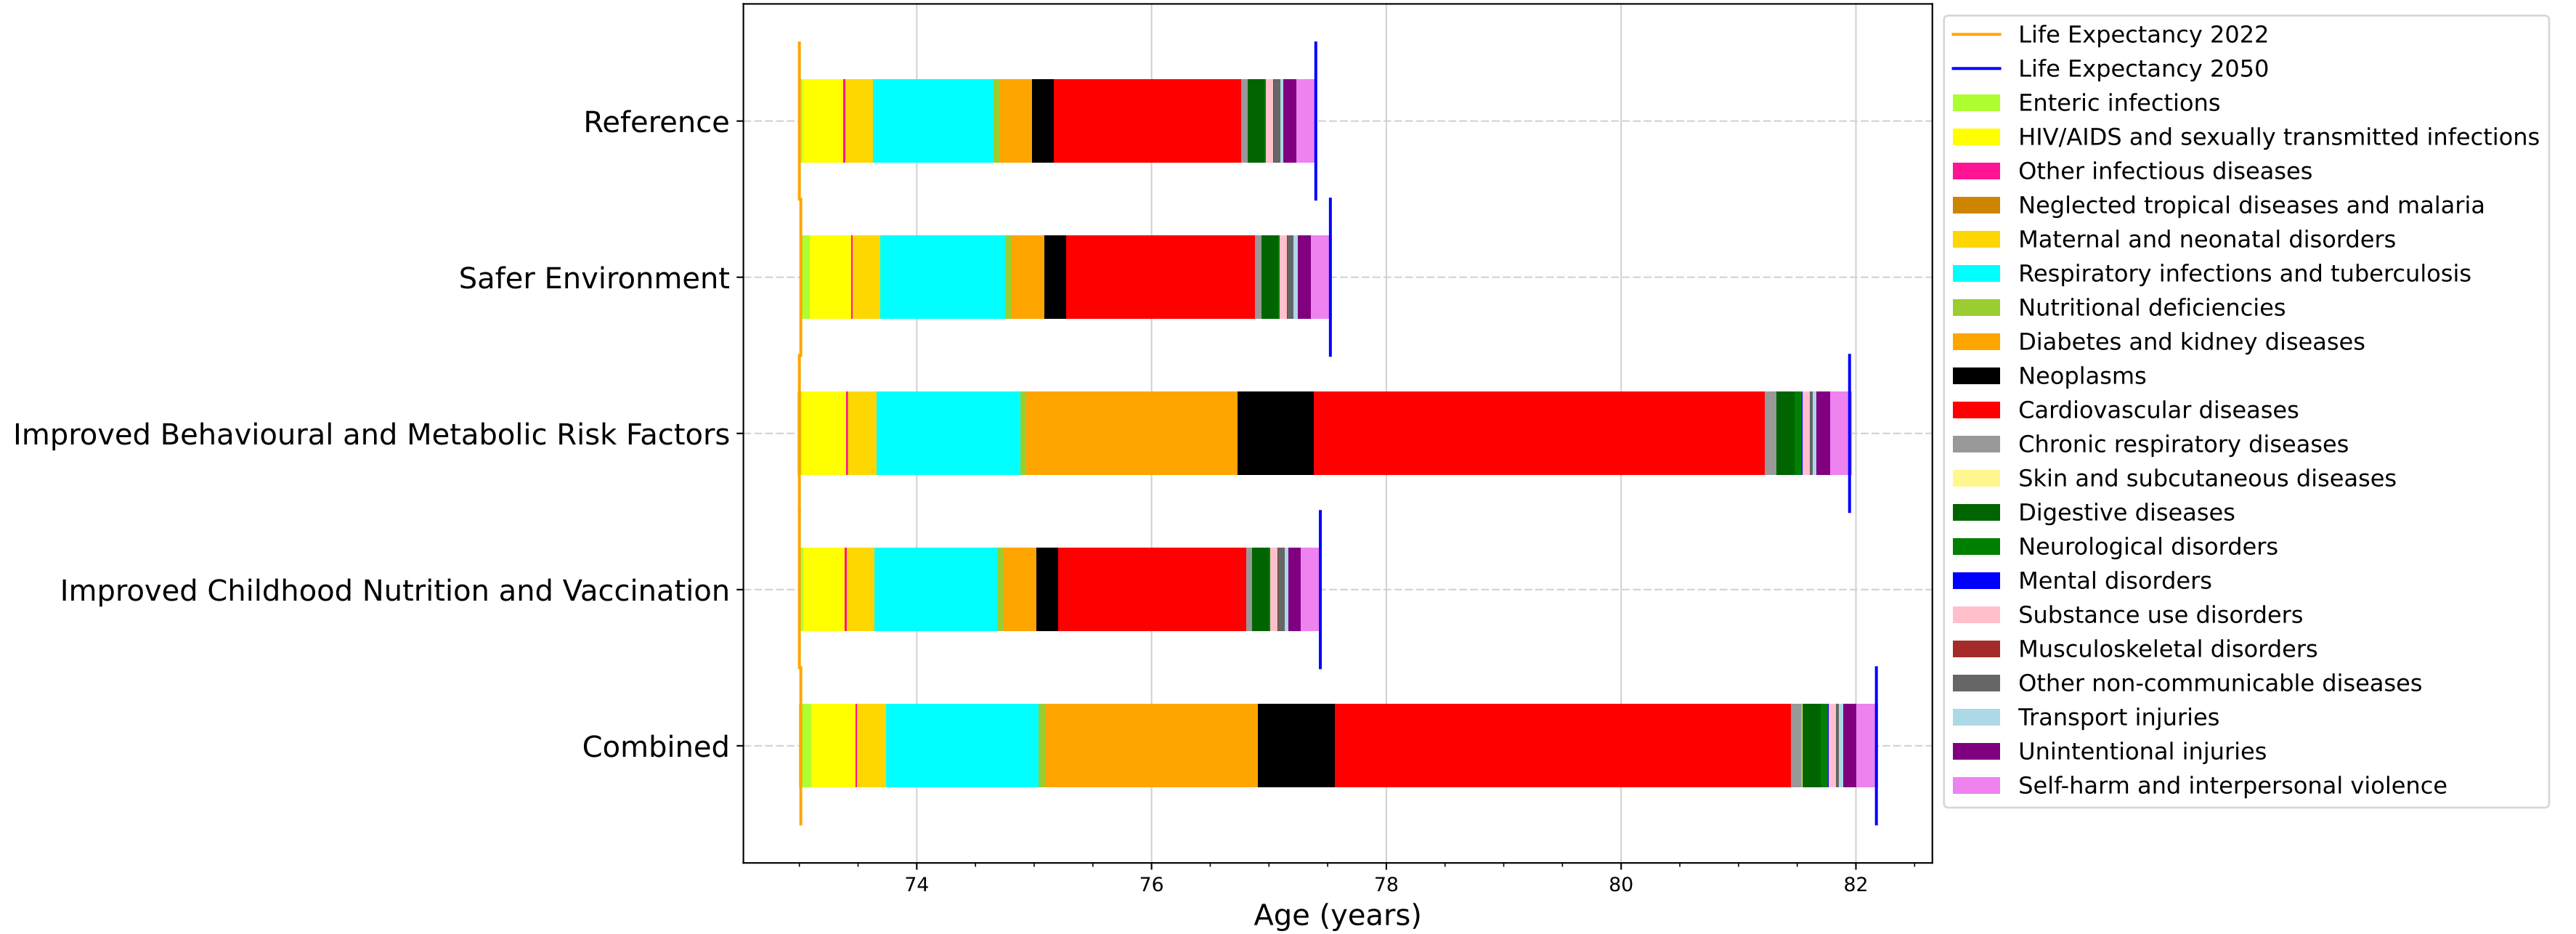



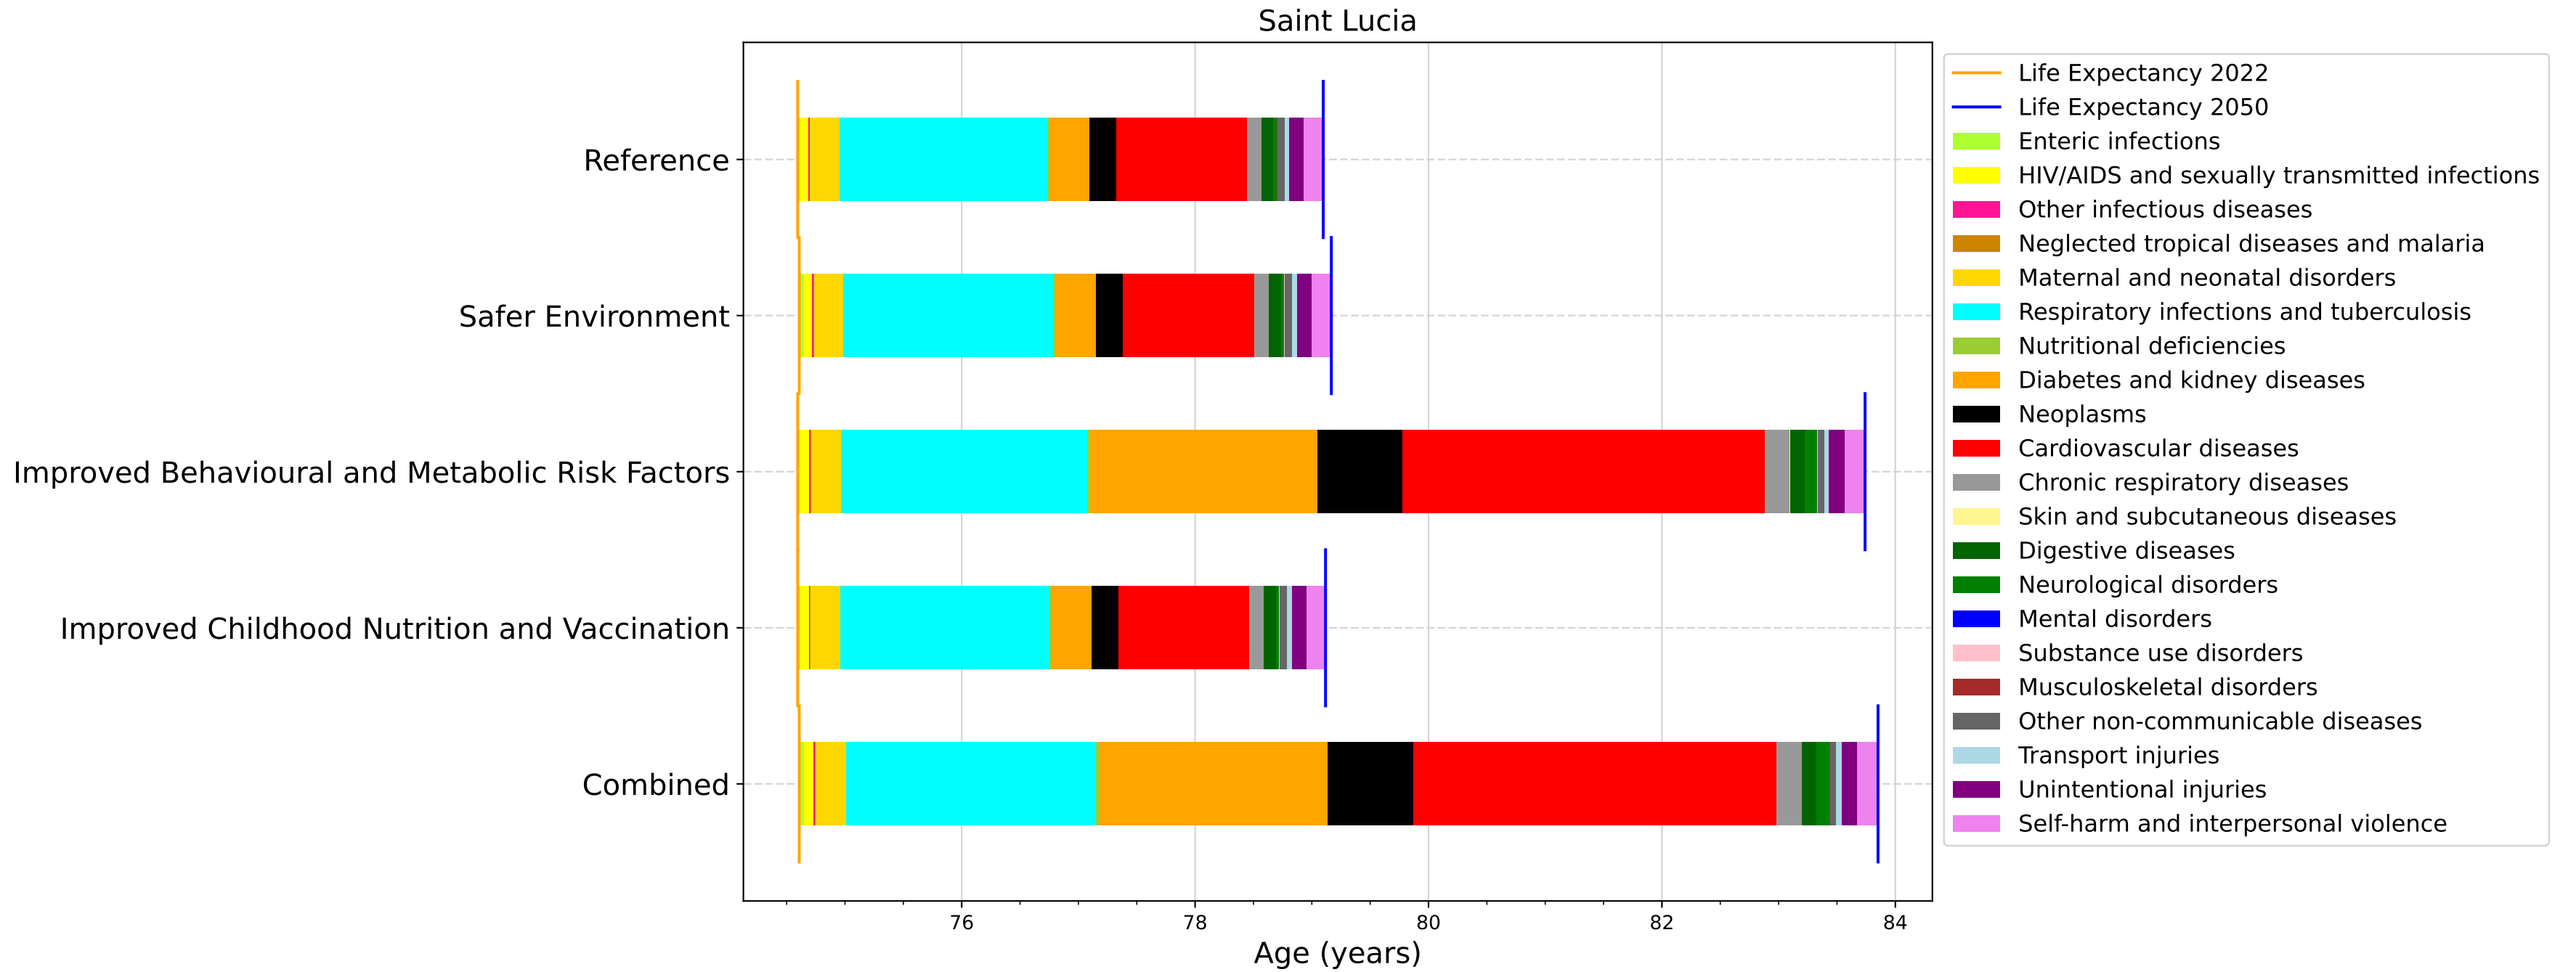

### Saint Vincent and the Grenadines

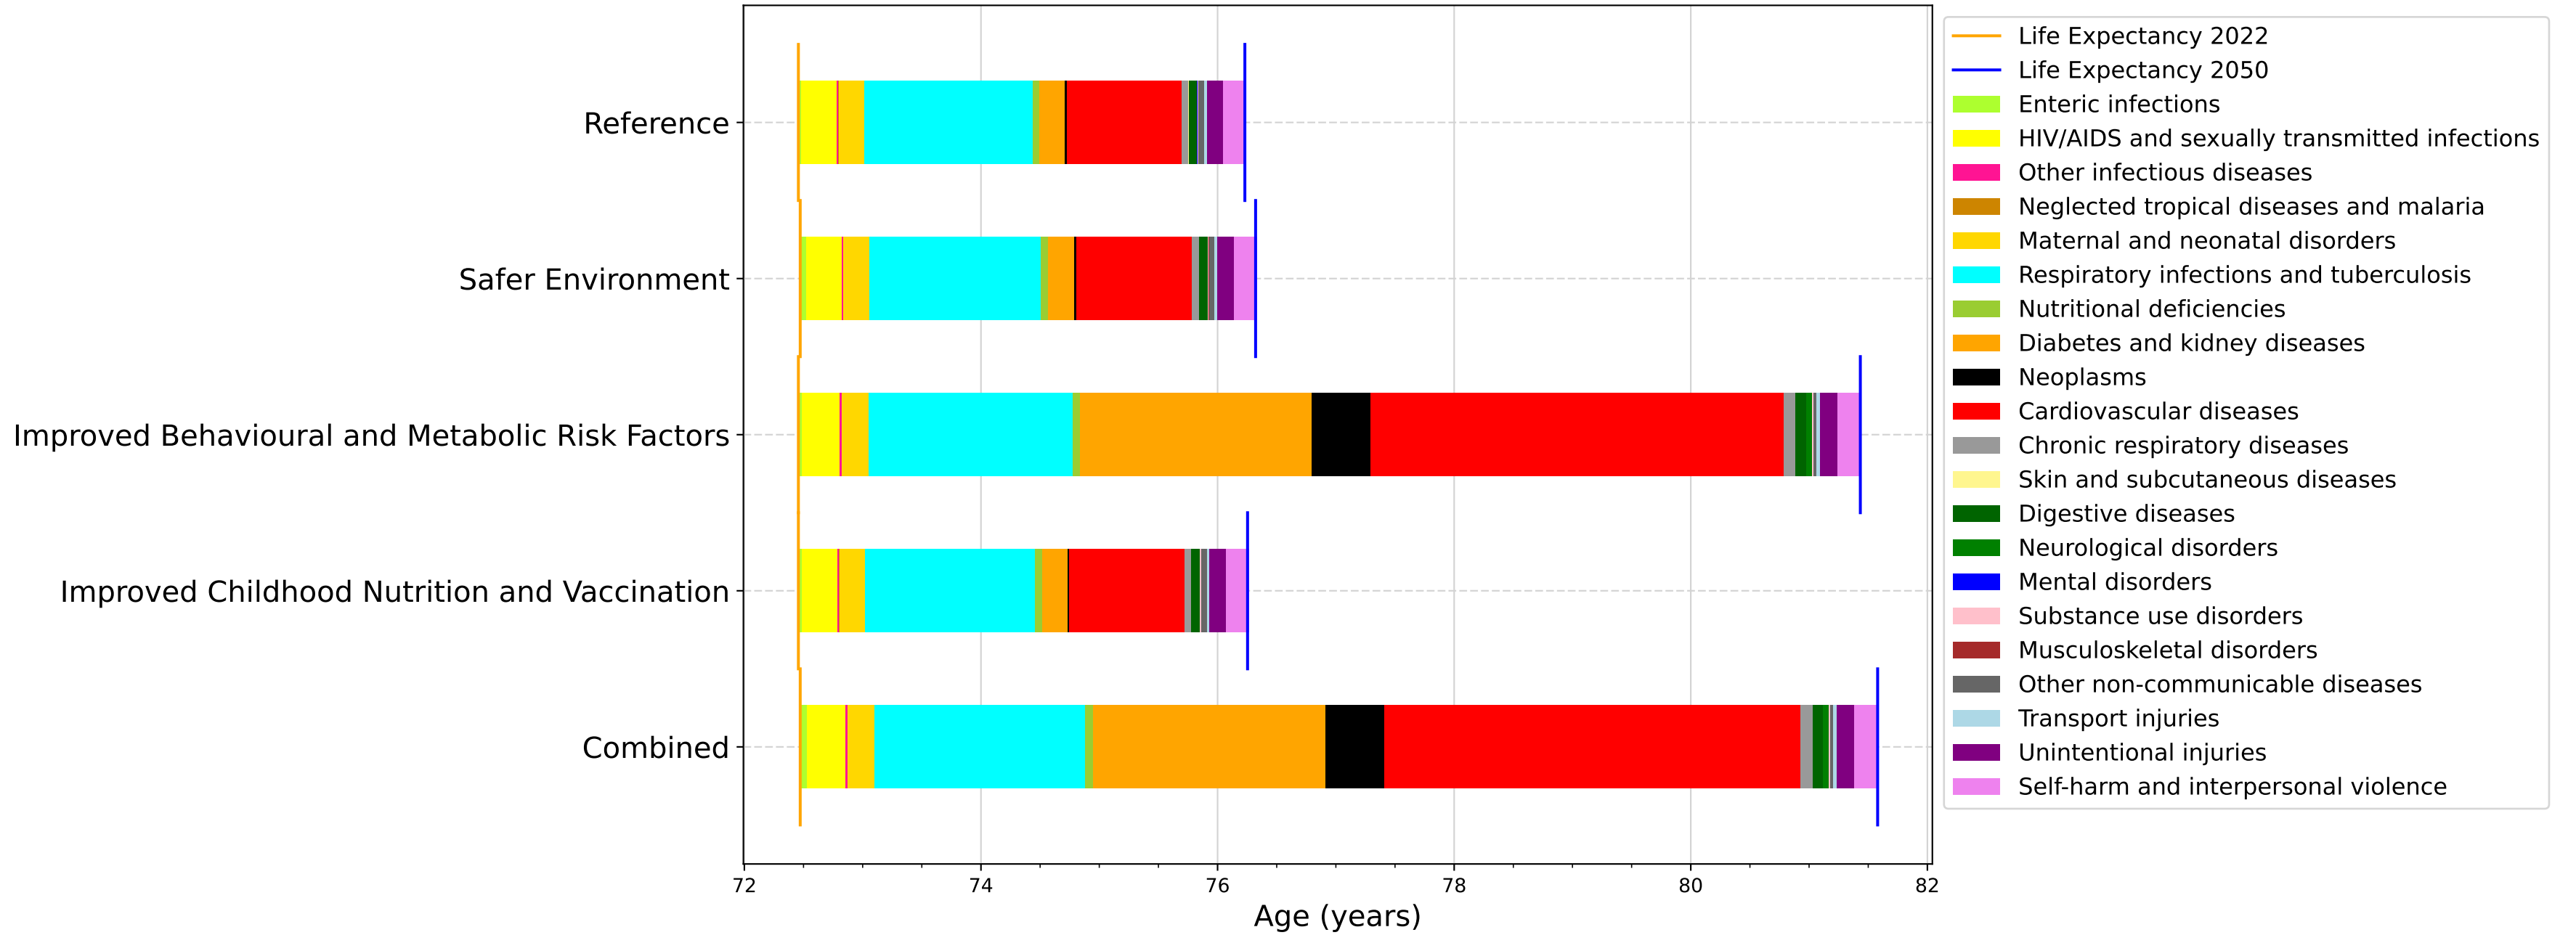

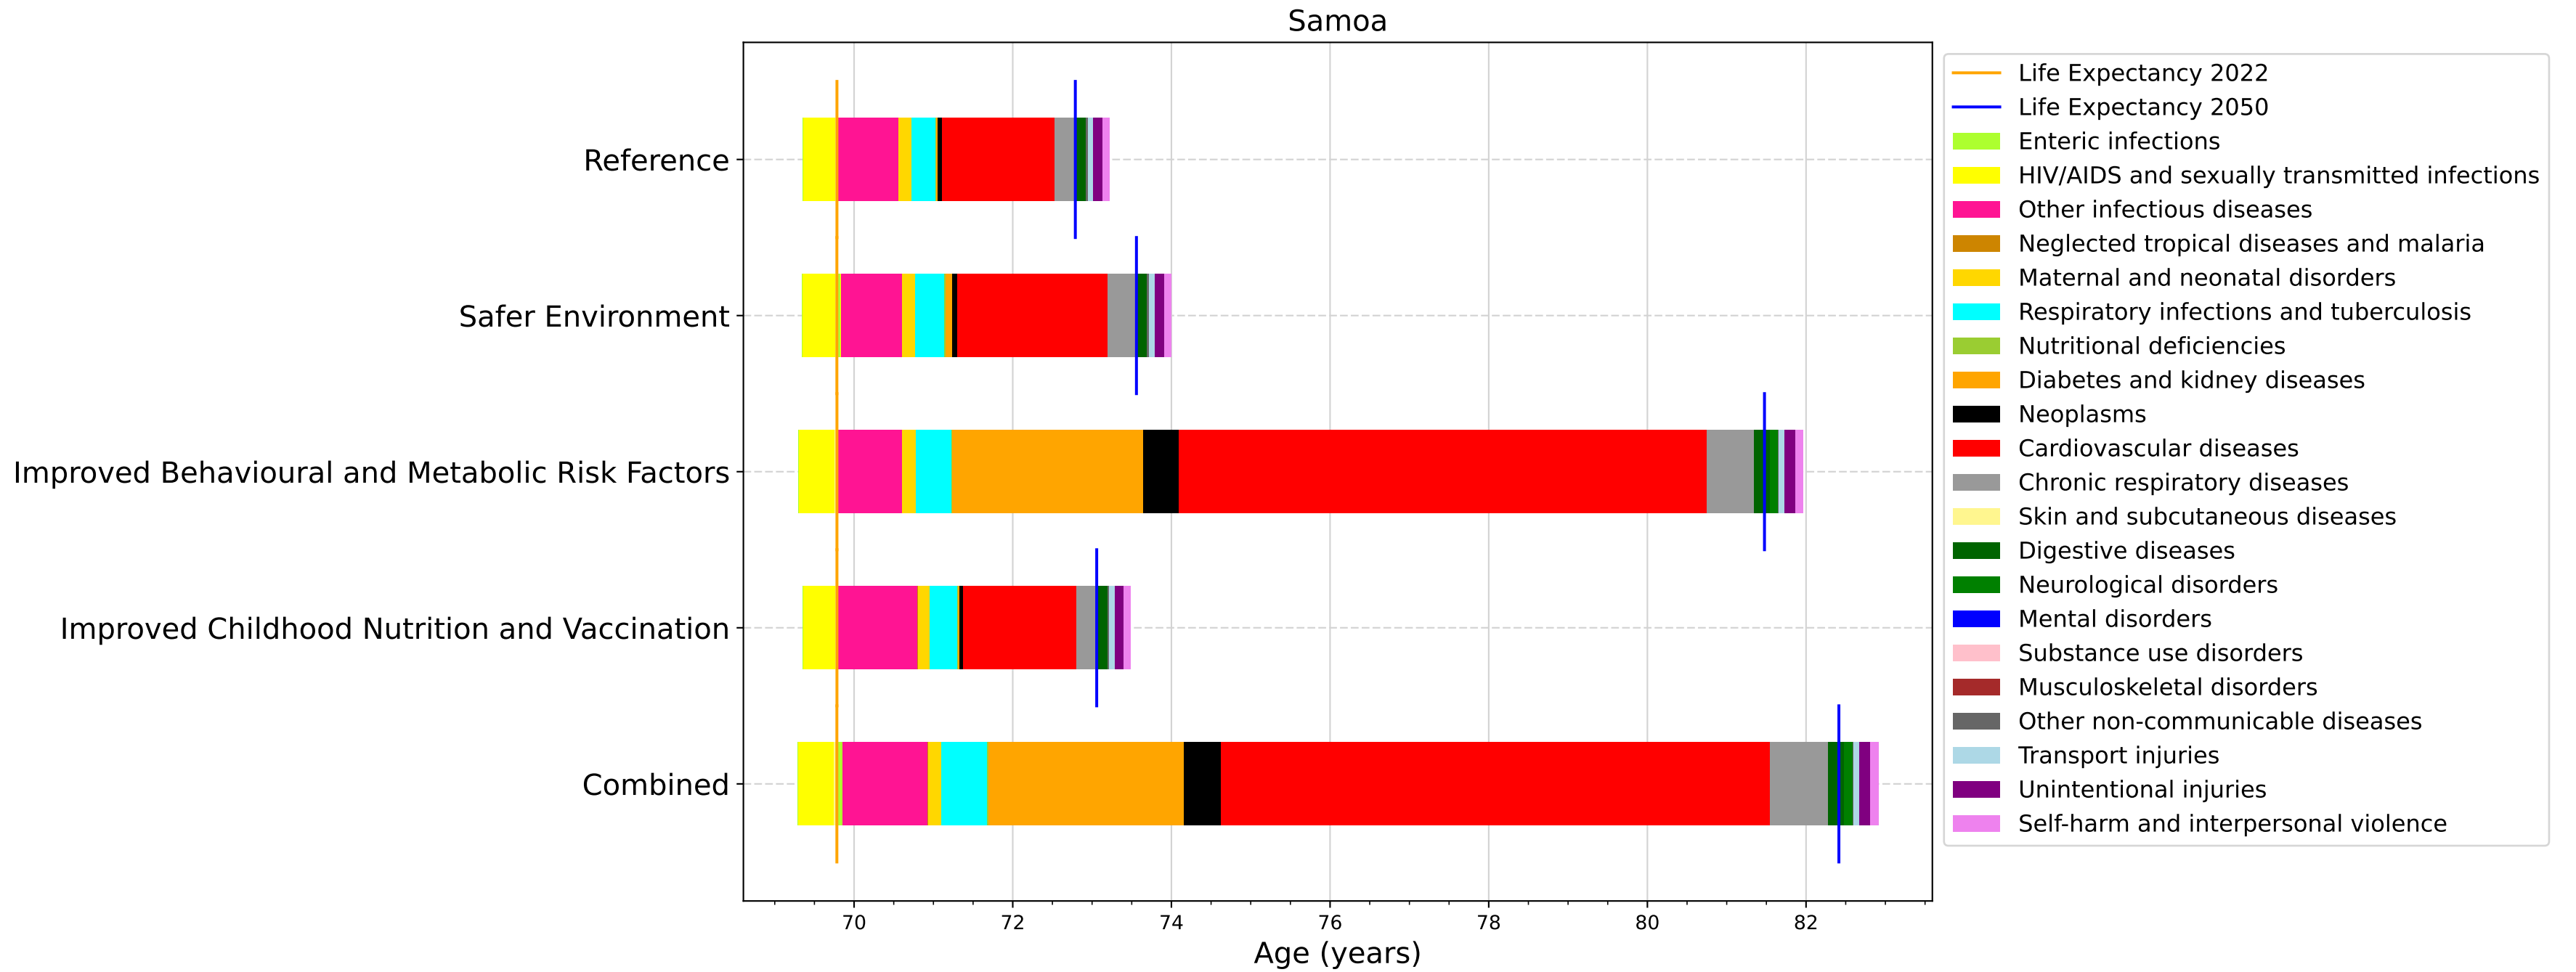

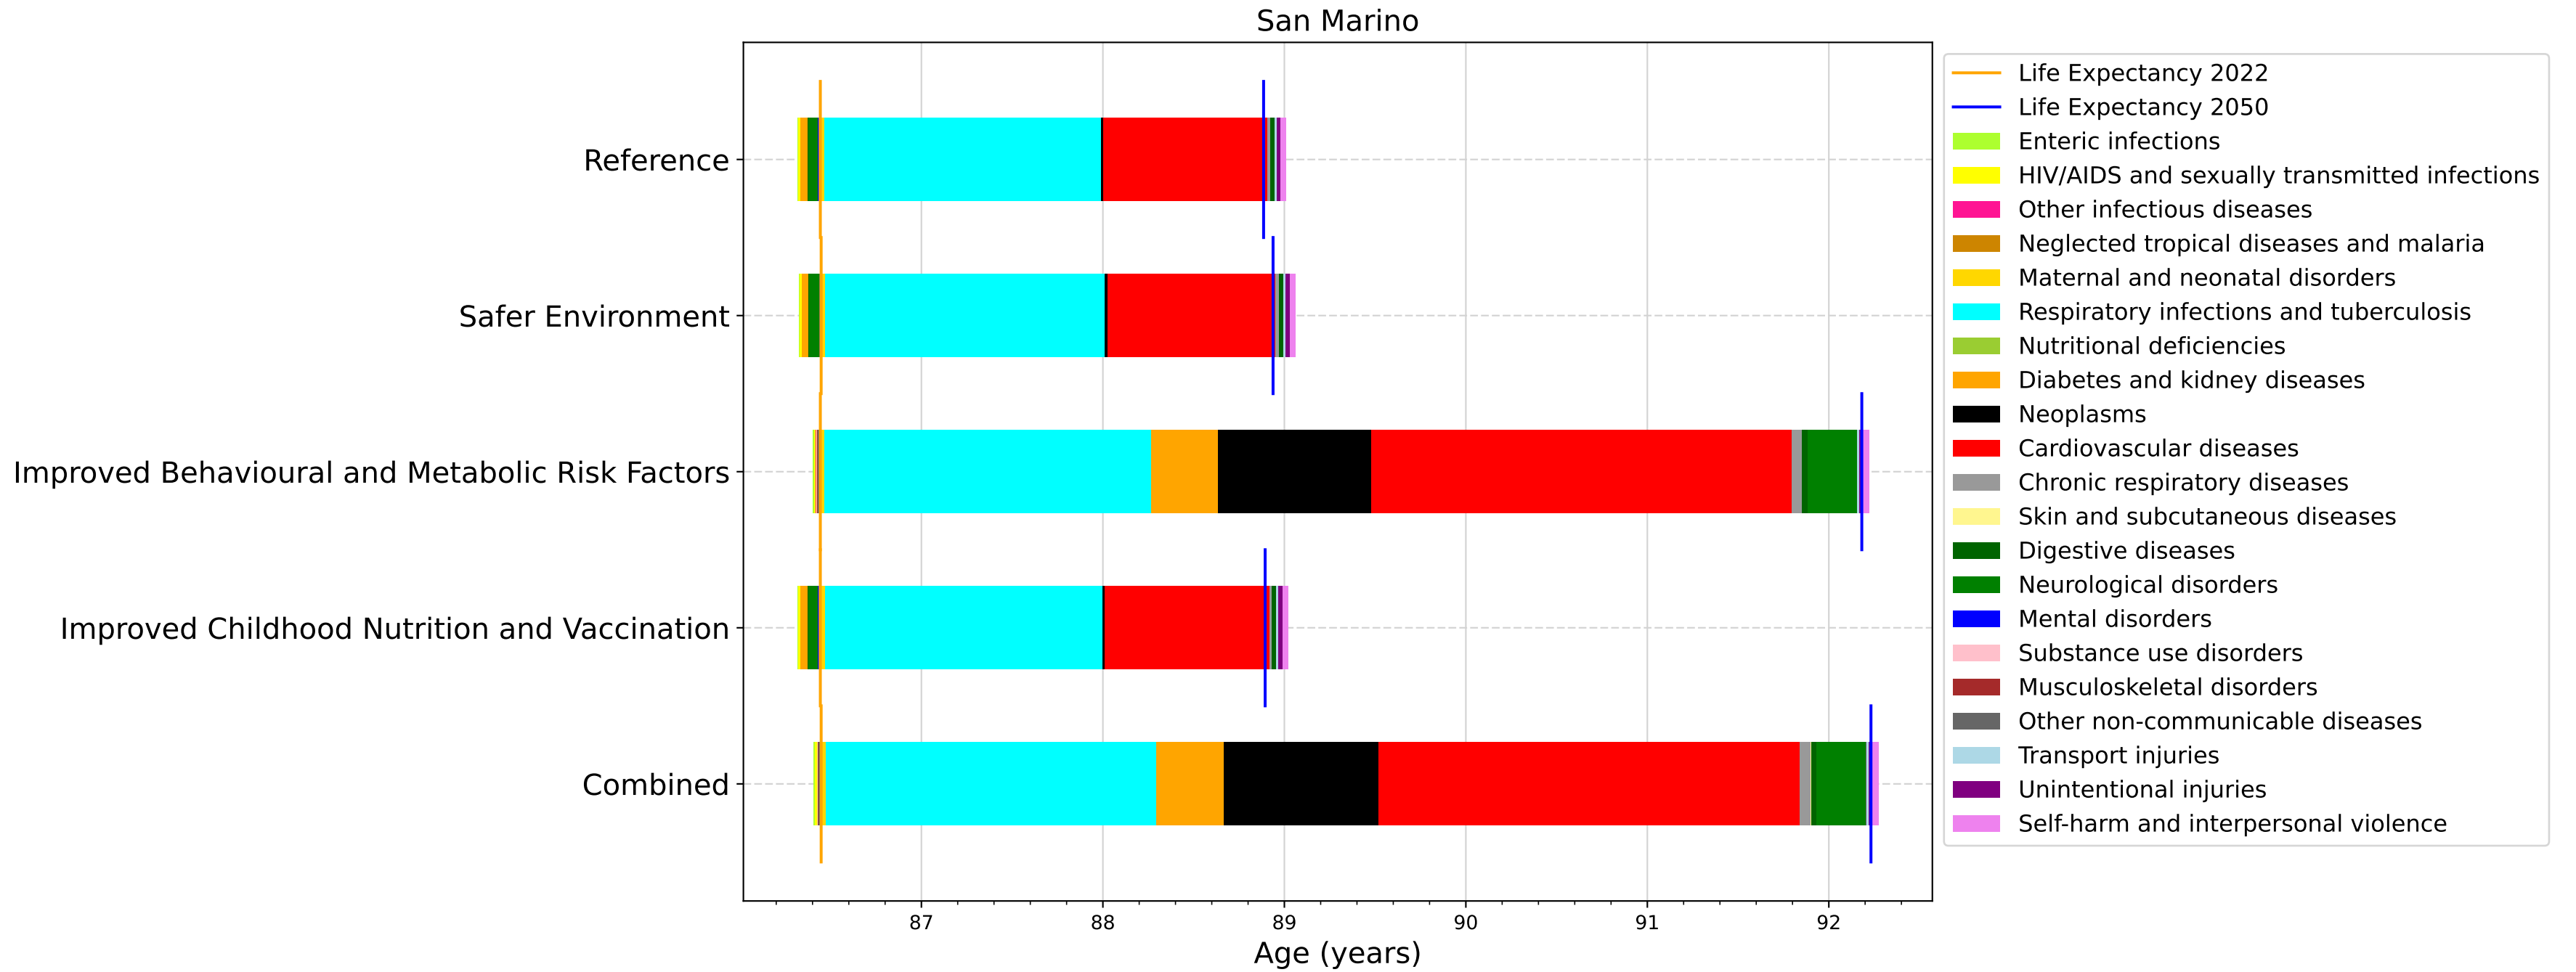

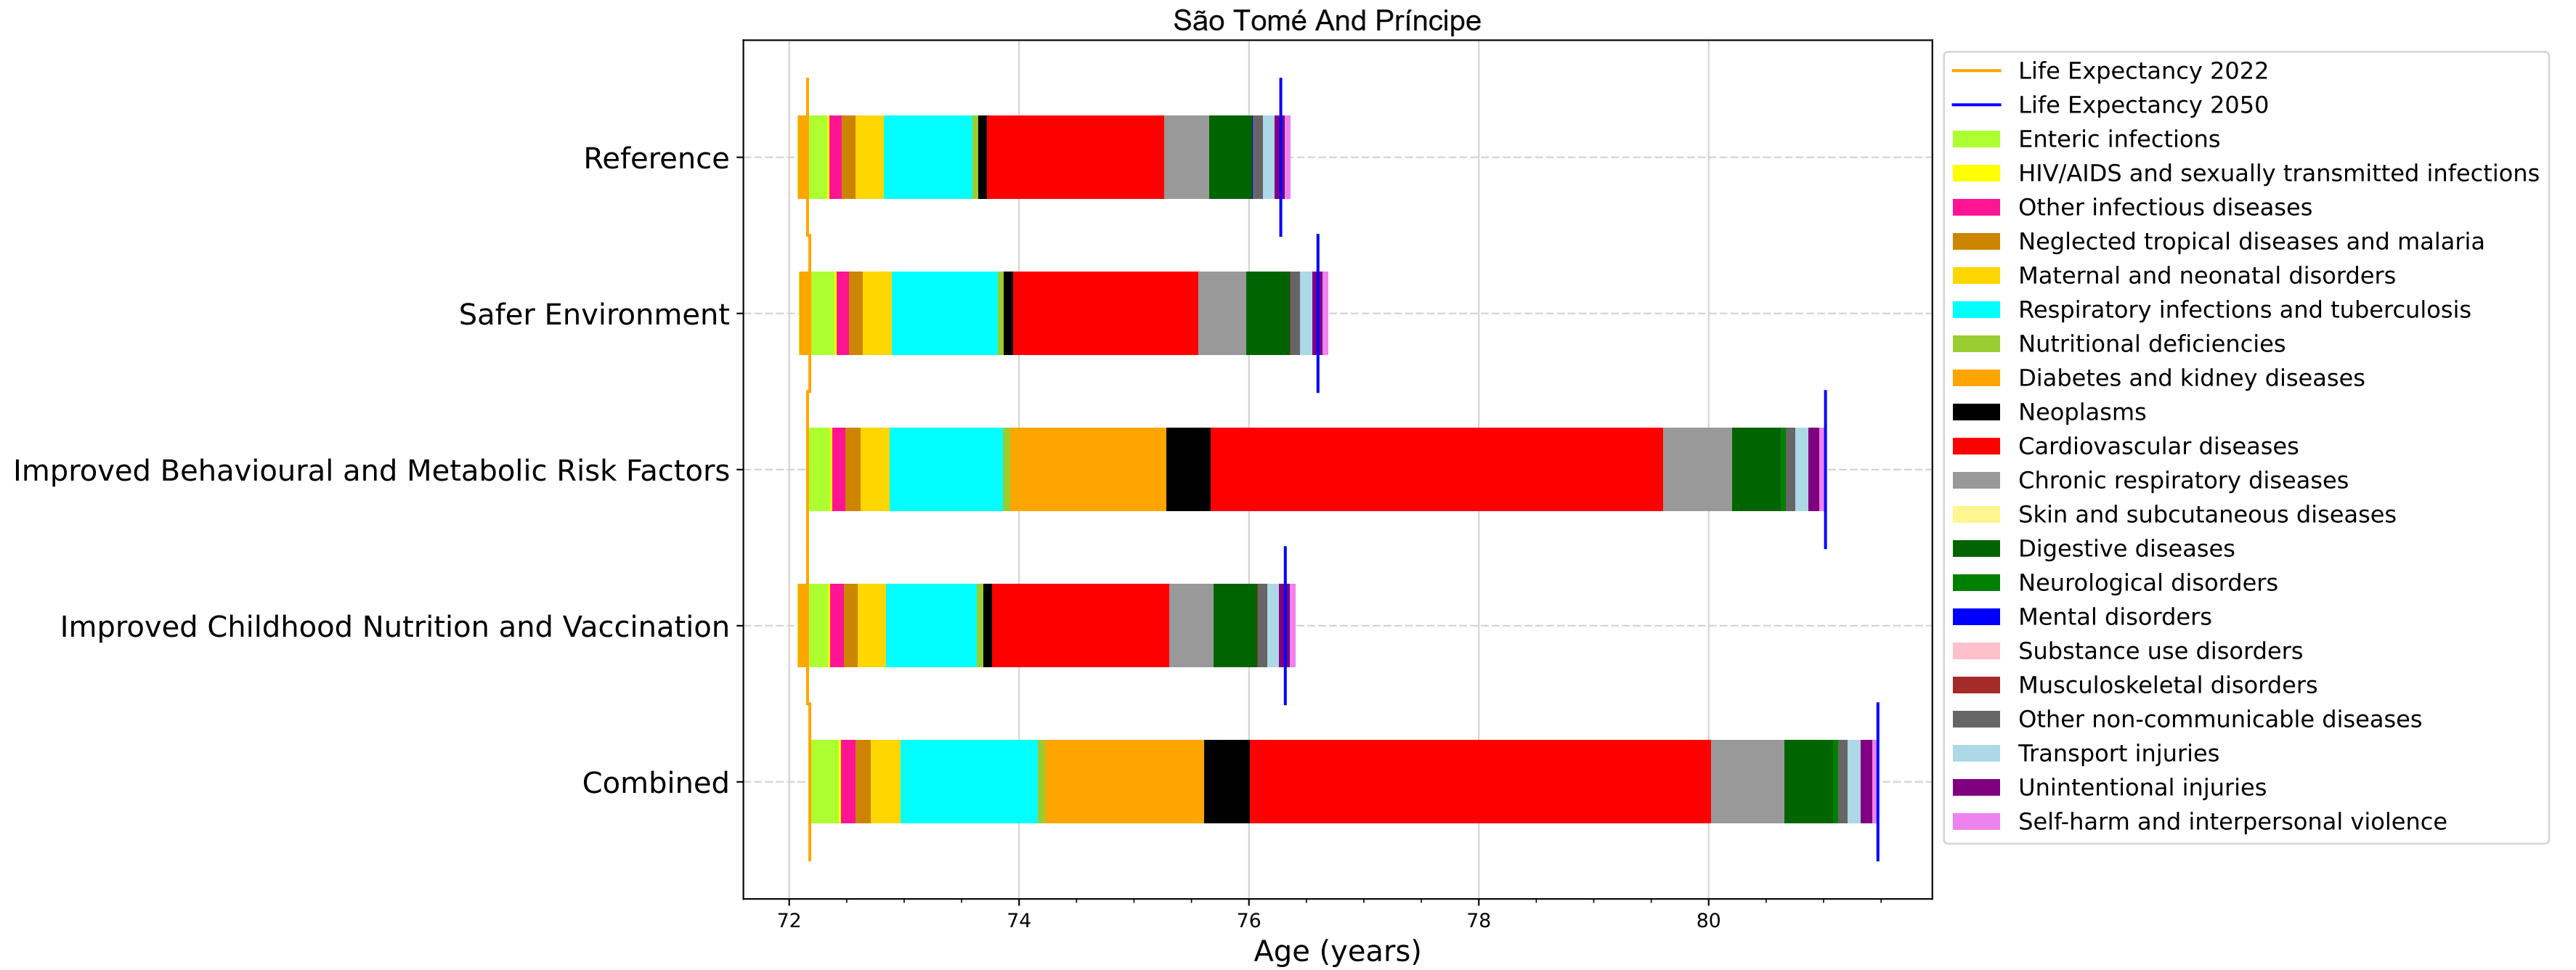

### Saudi Arabia

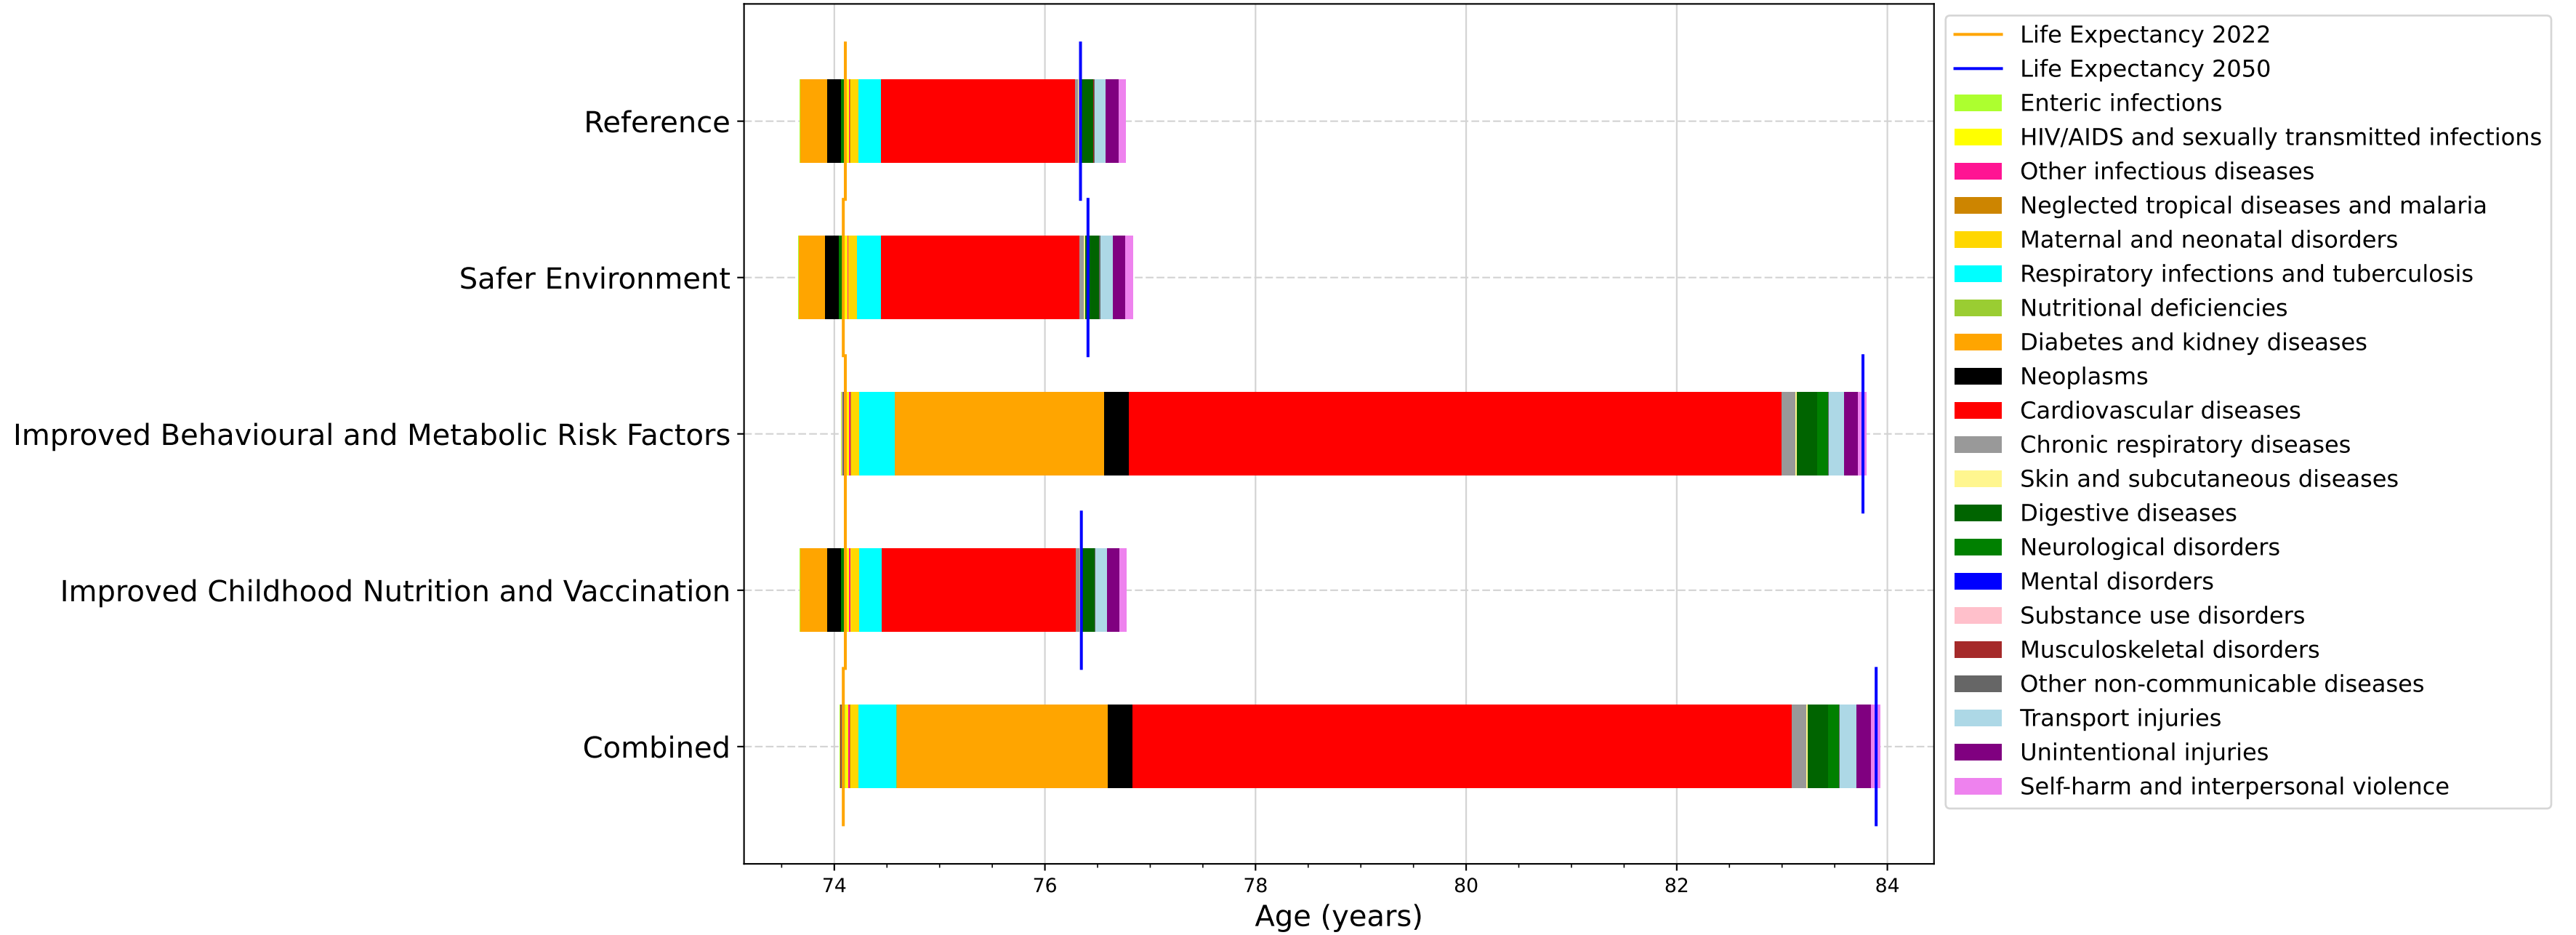

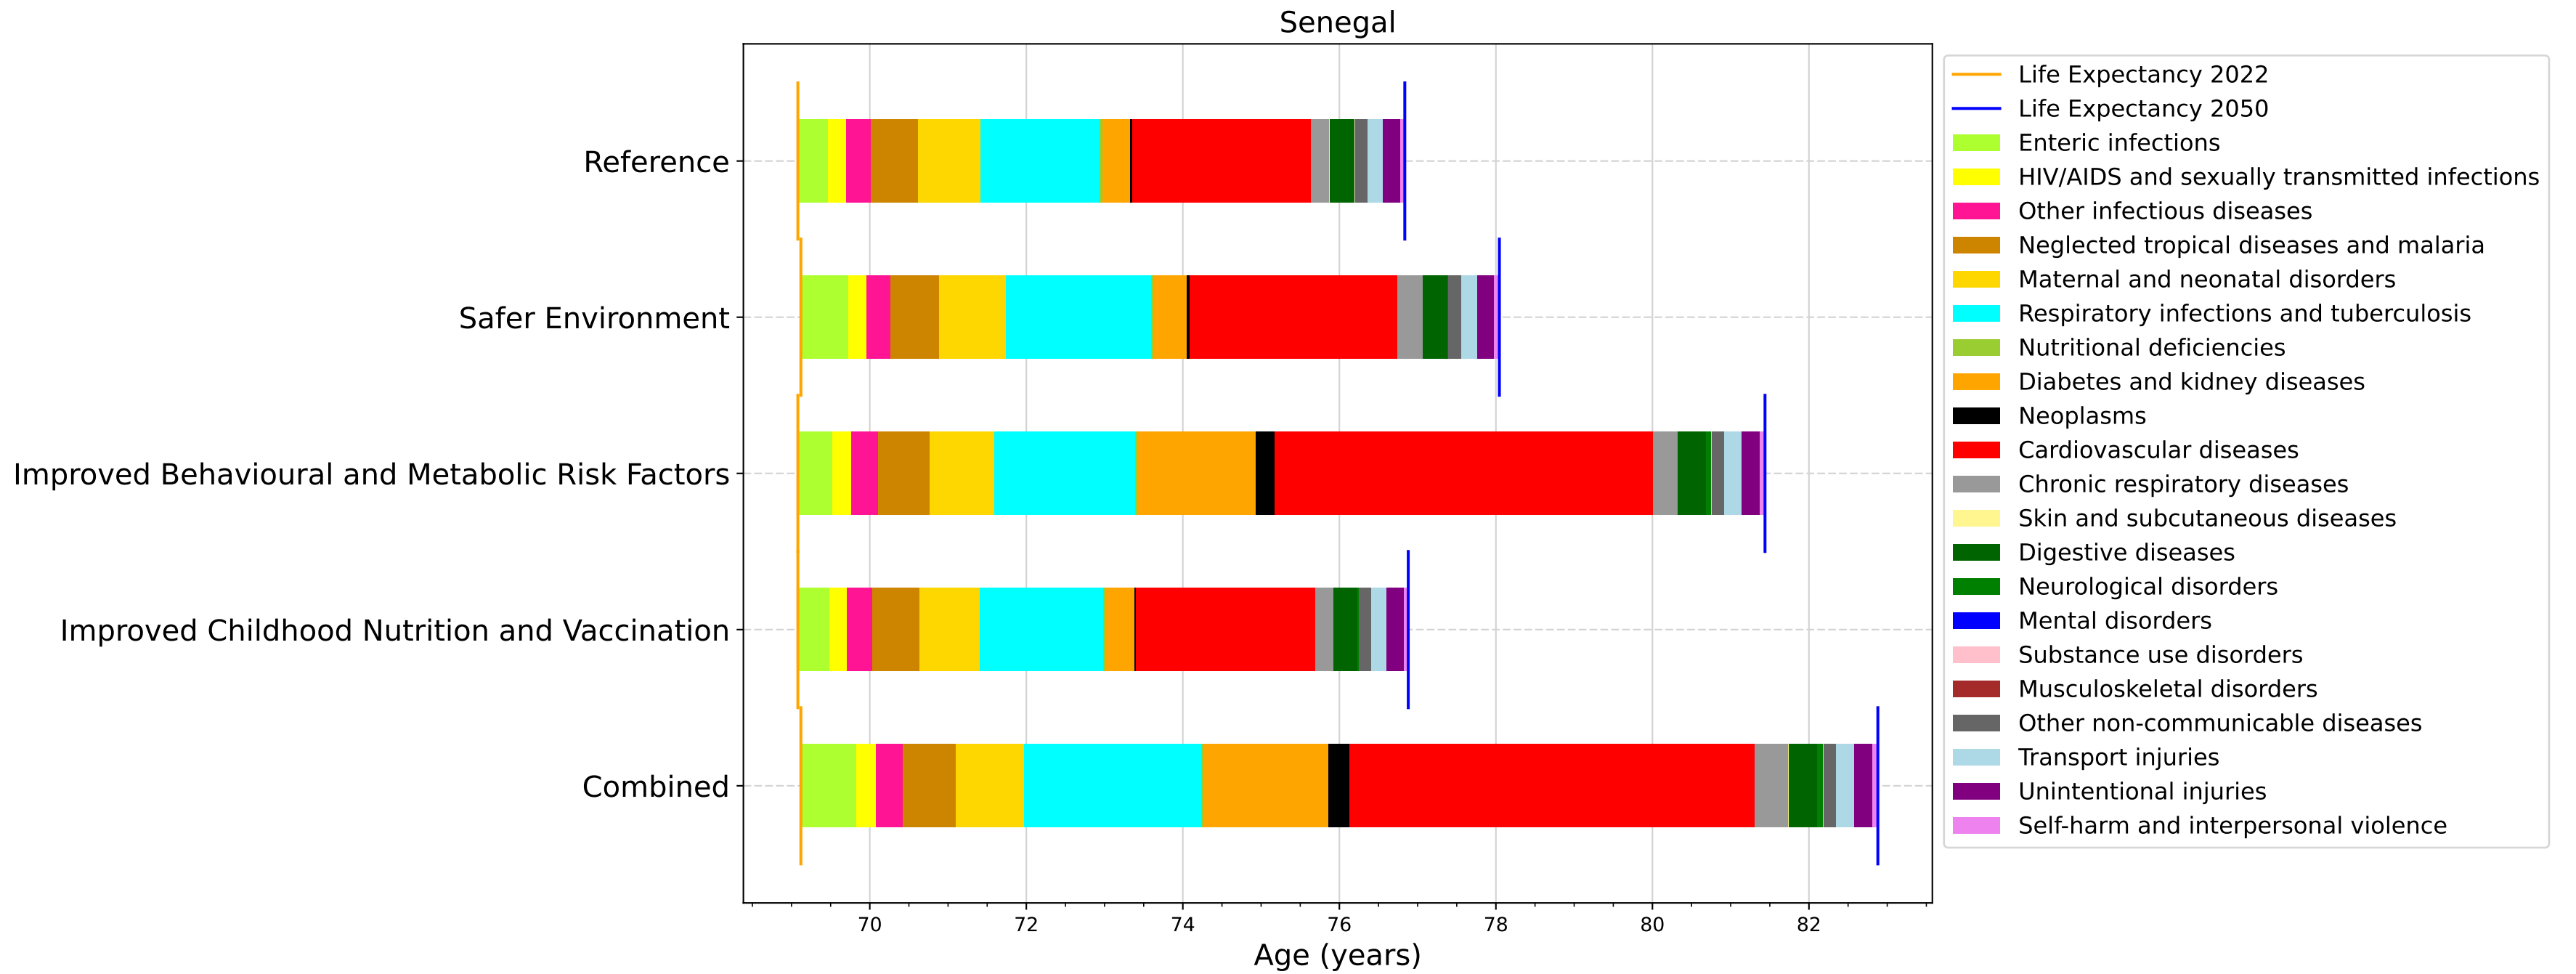

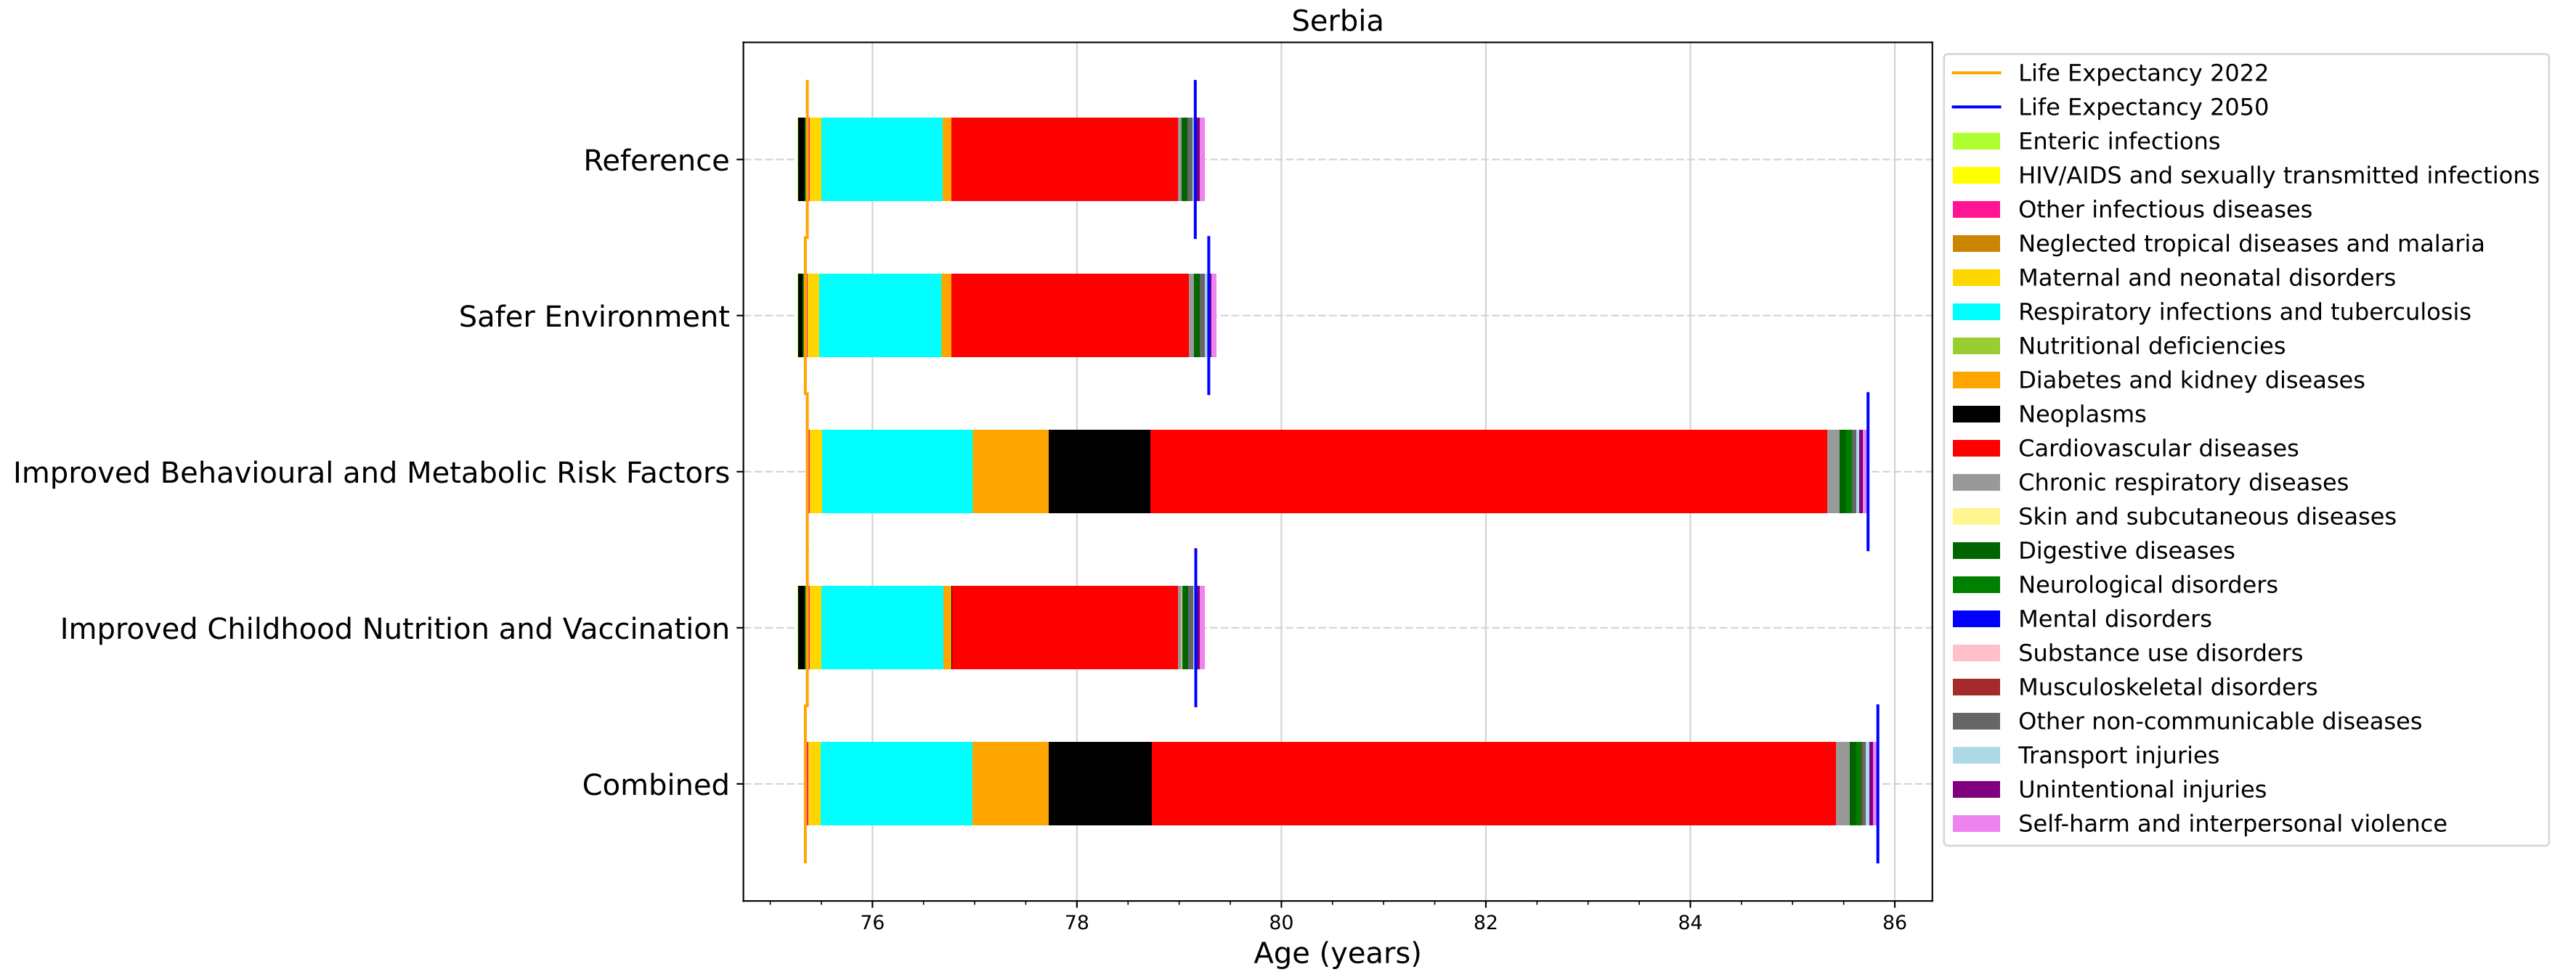



### Seychelles

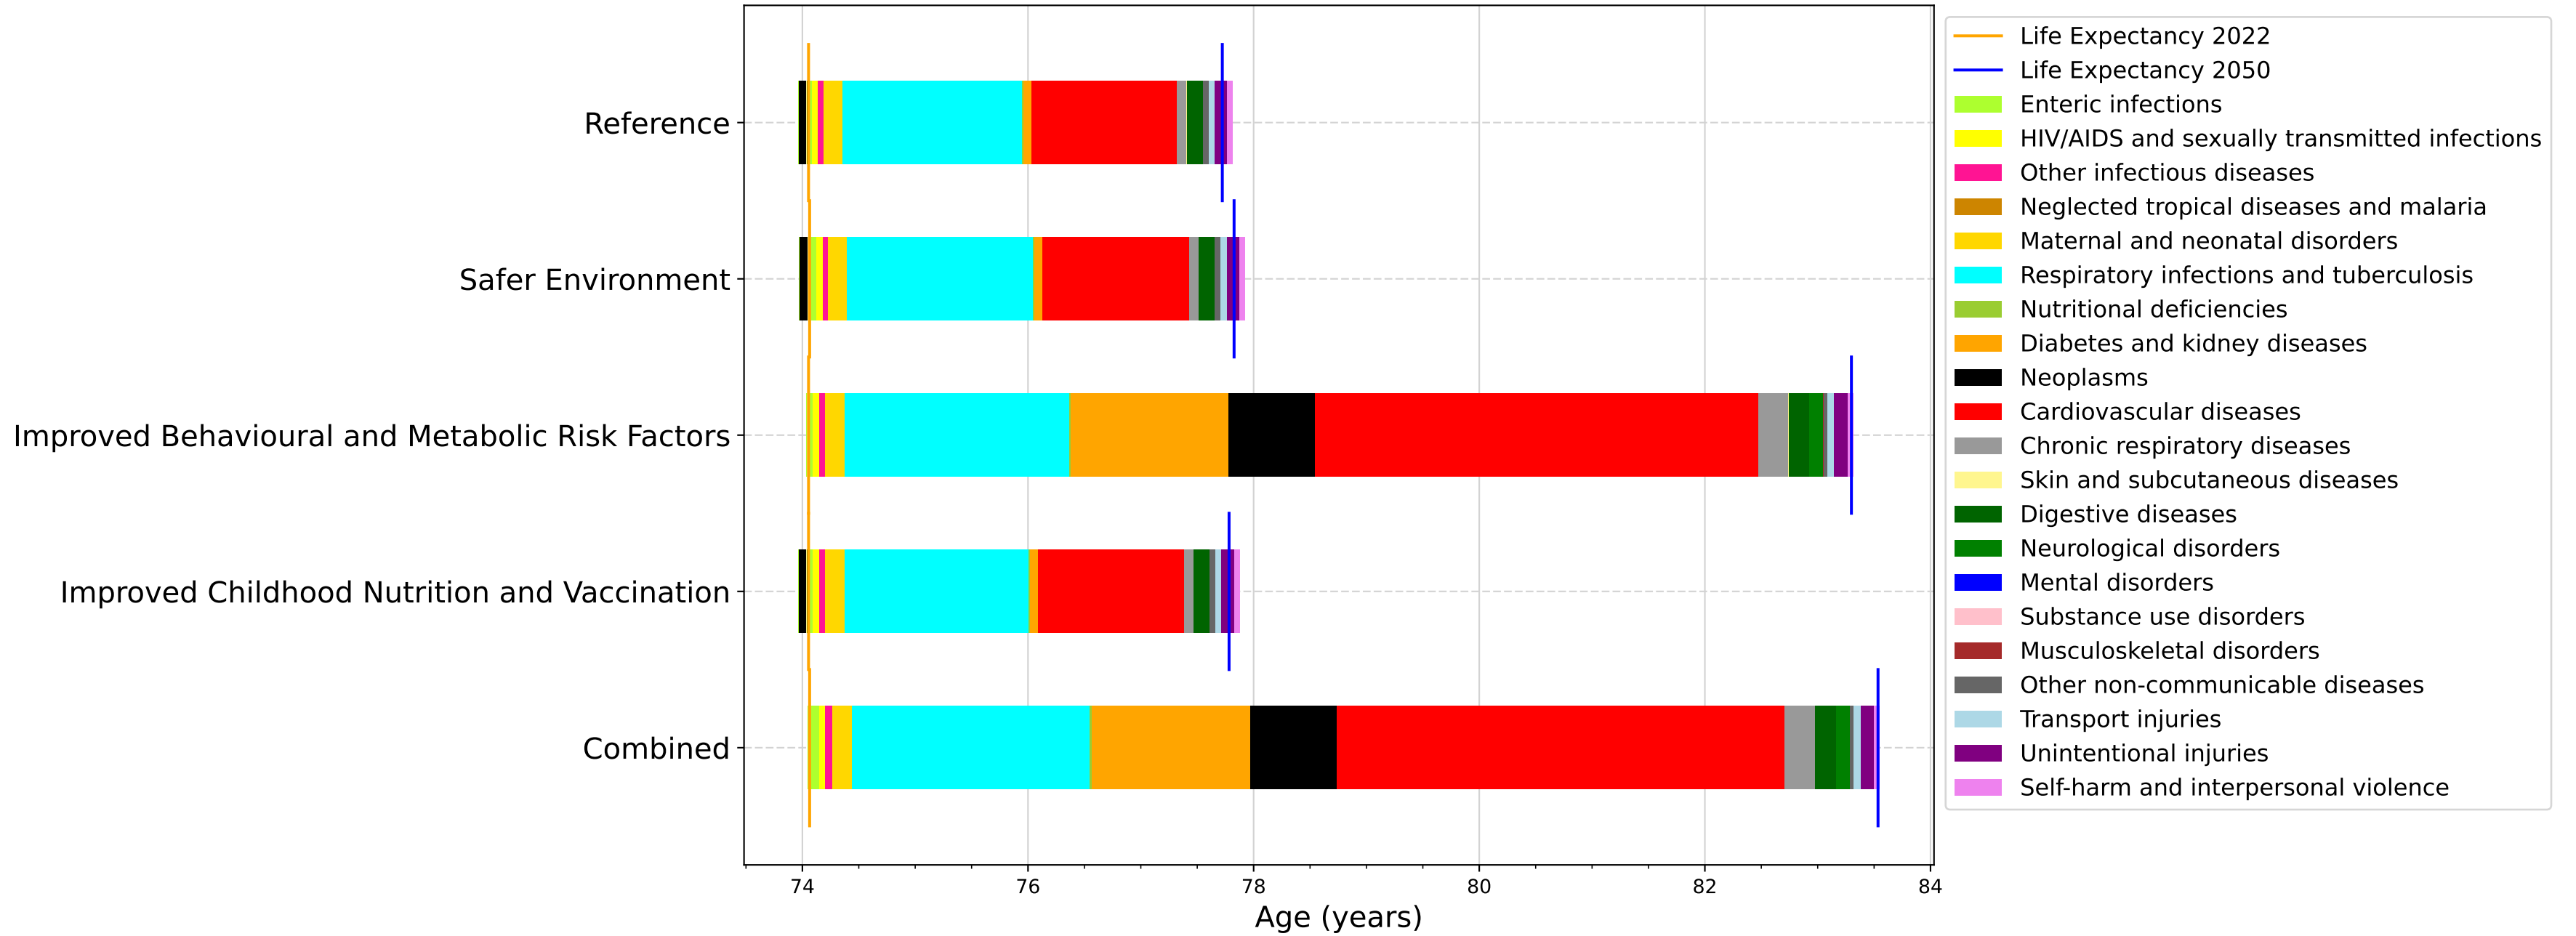

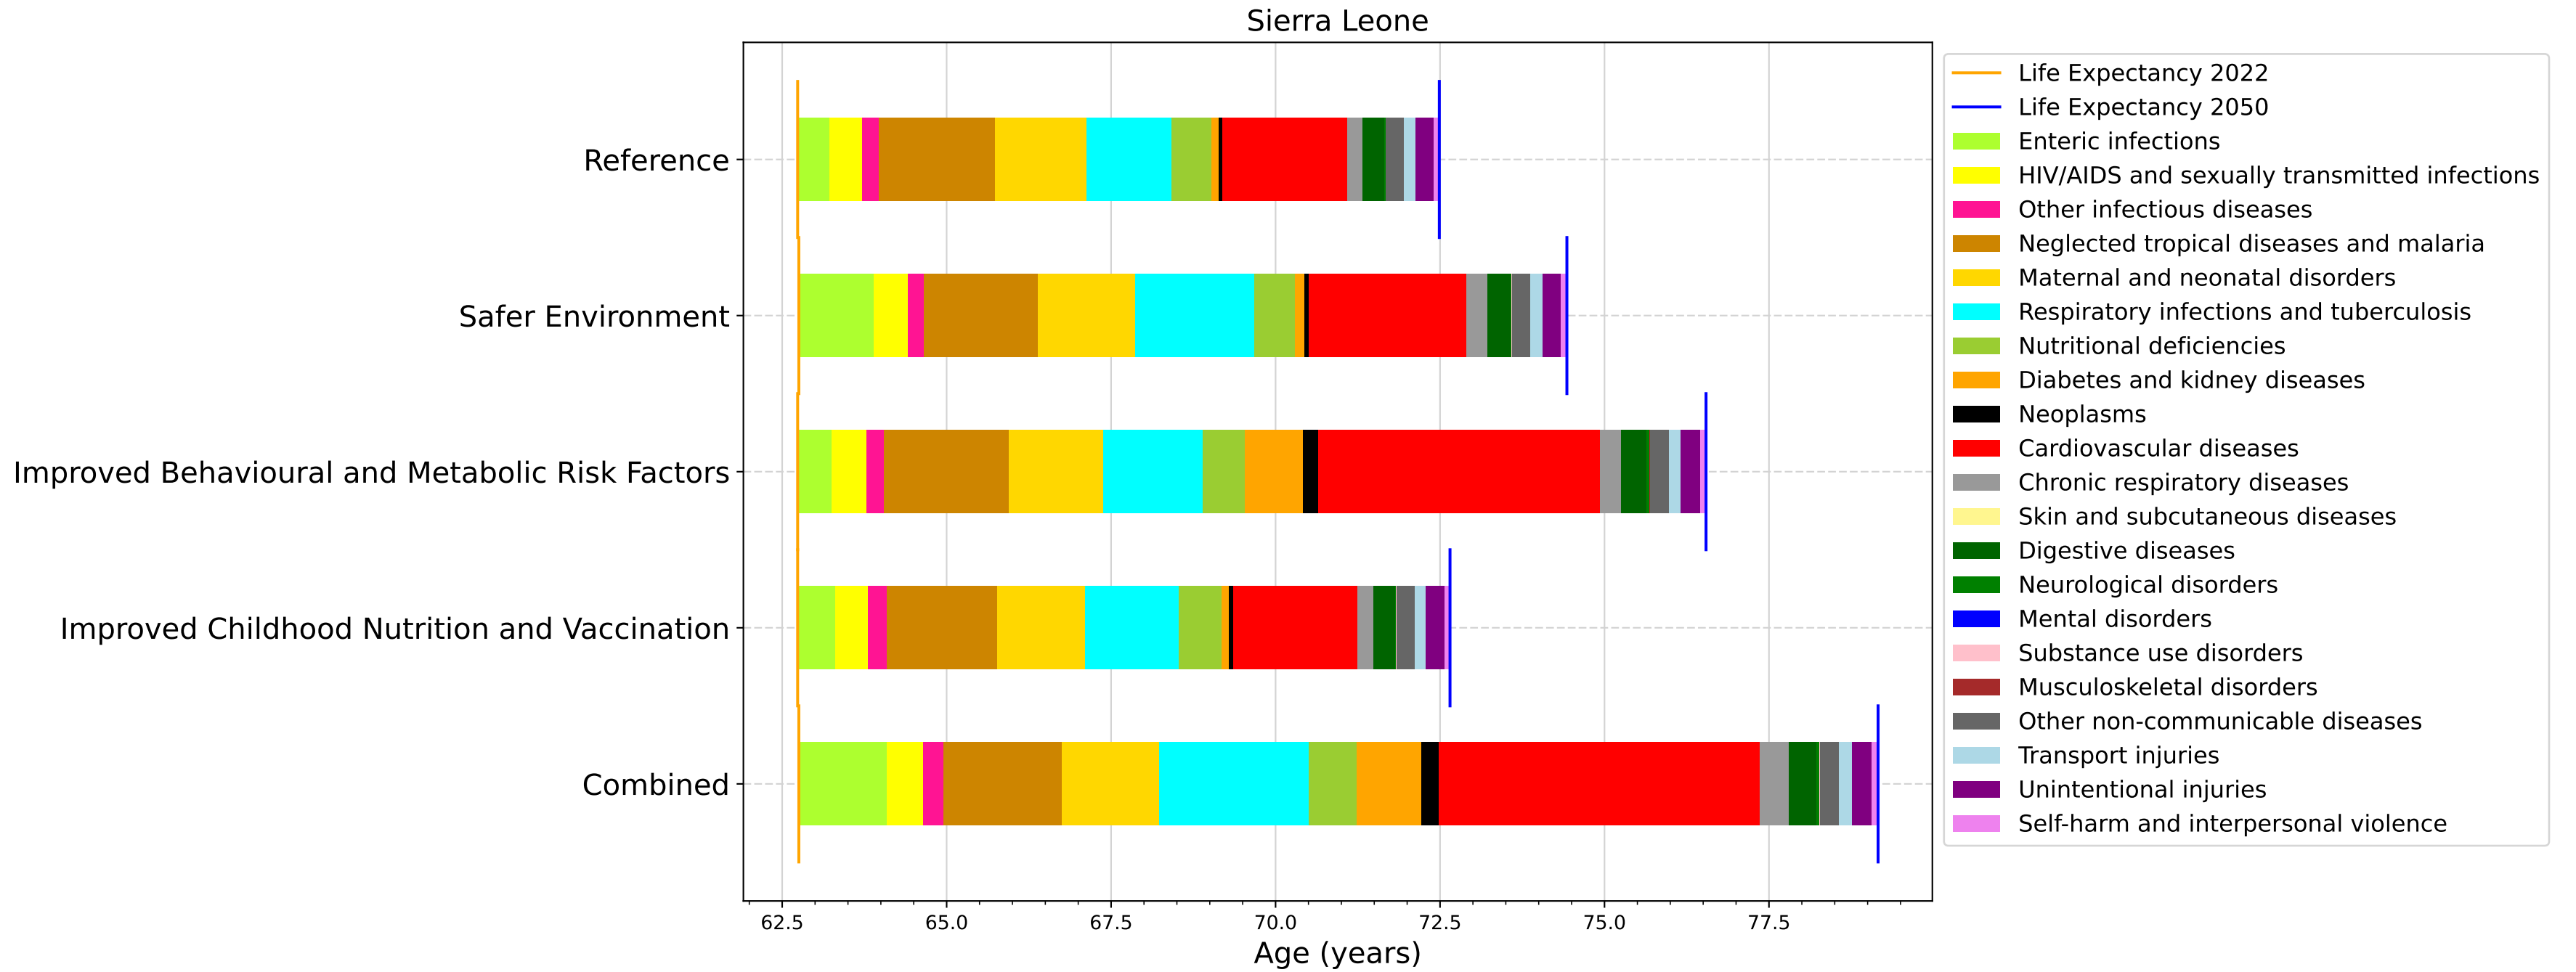

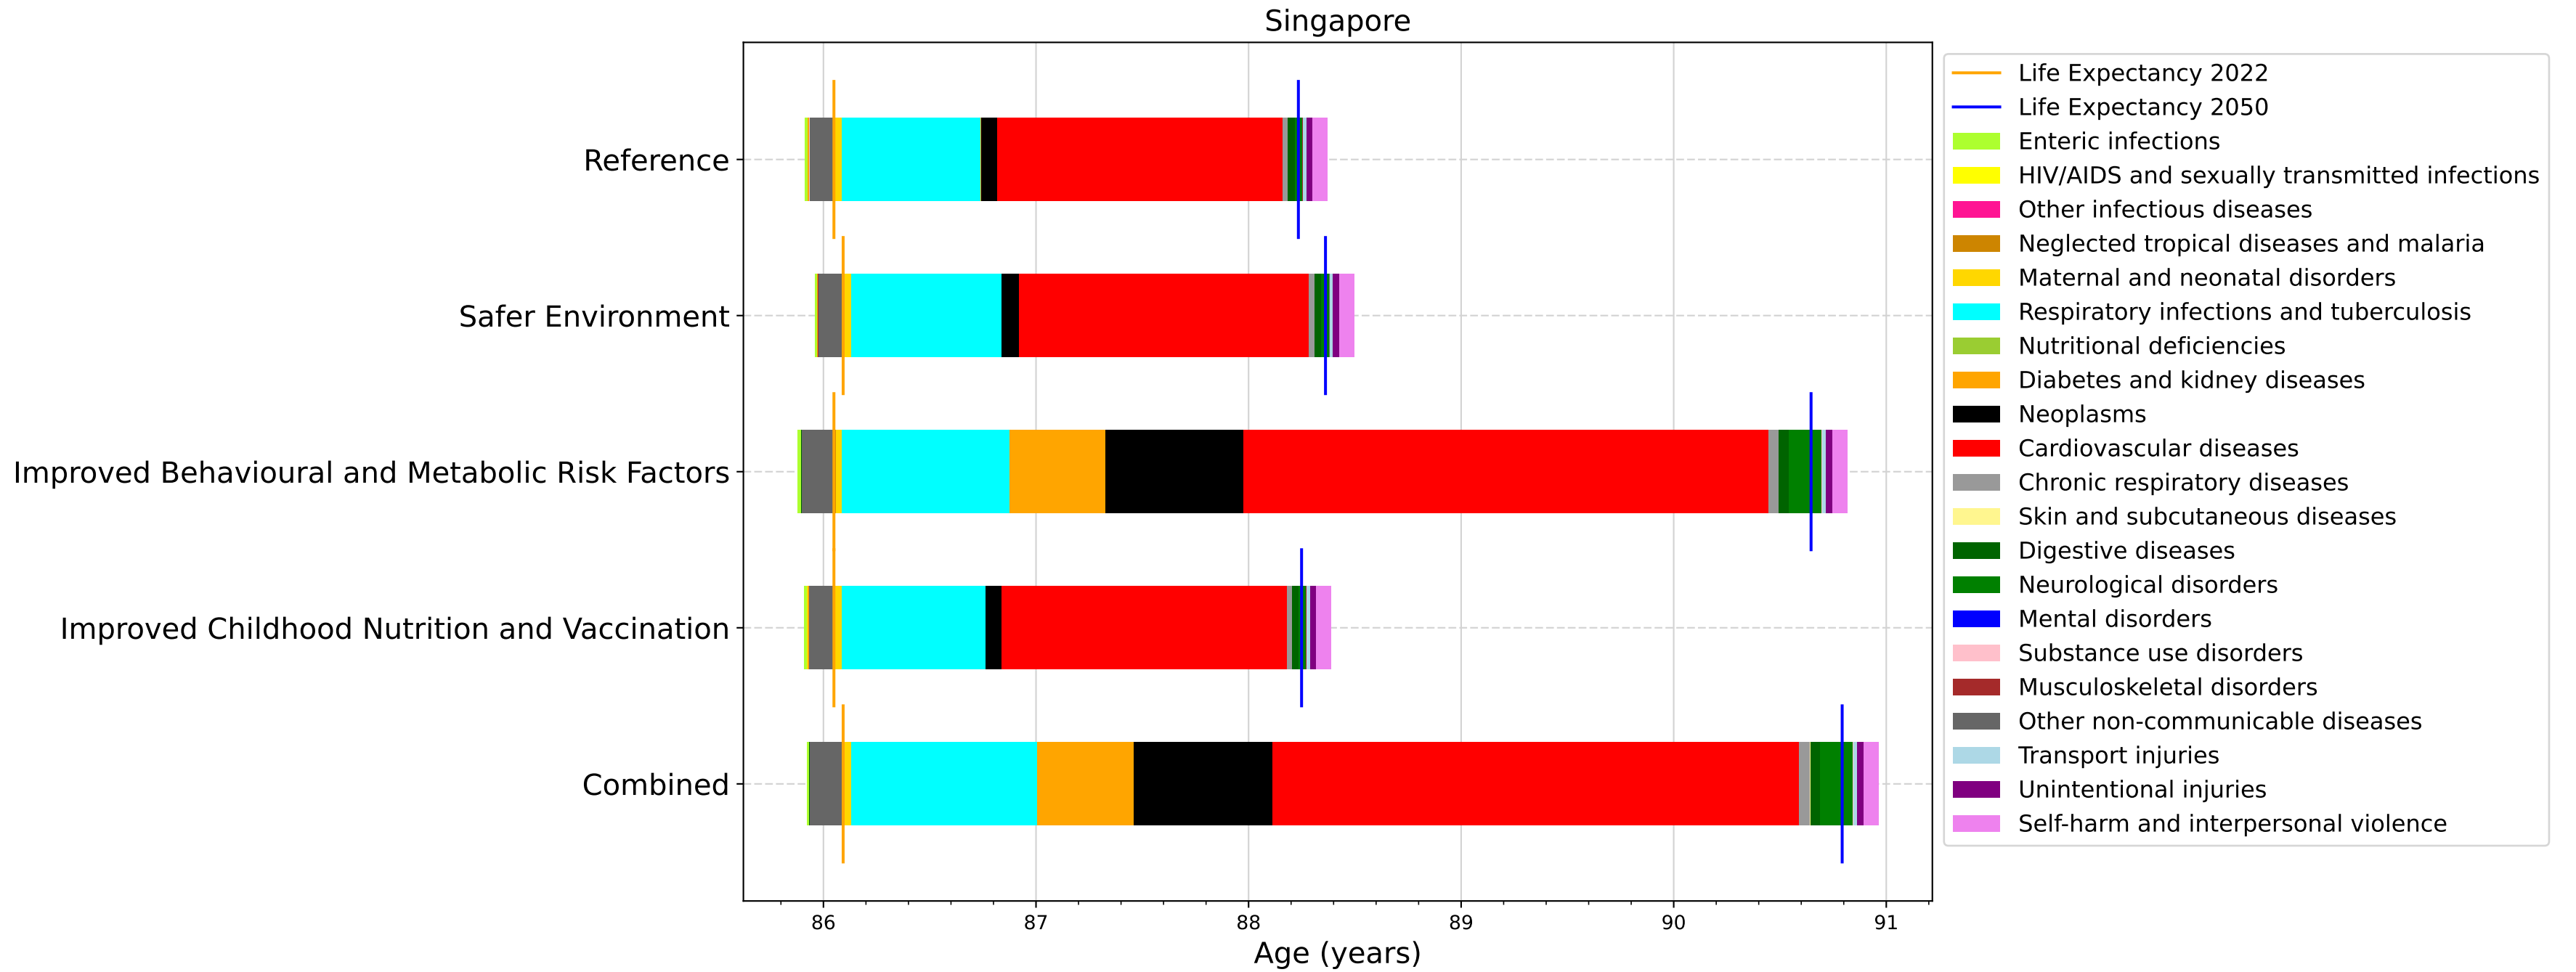

Slovakia

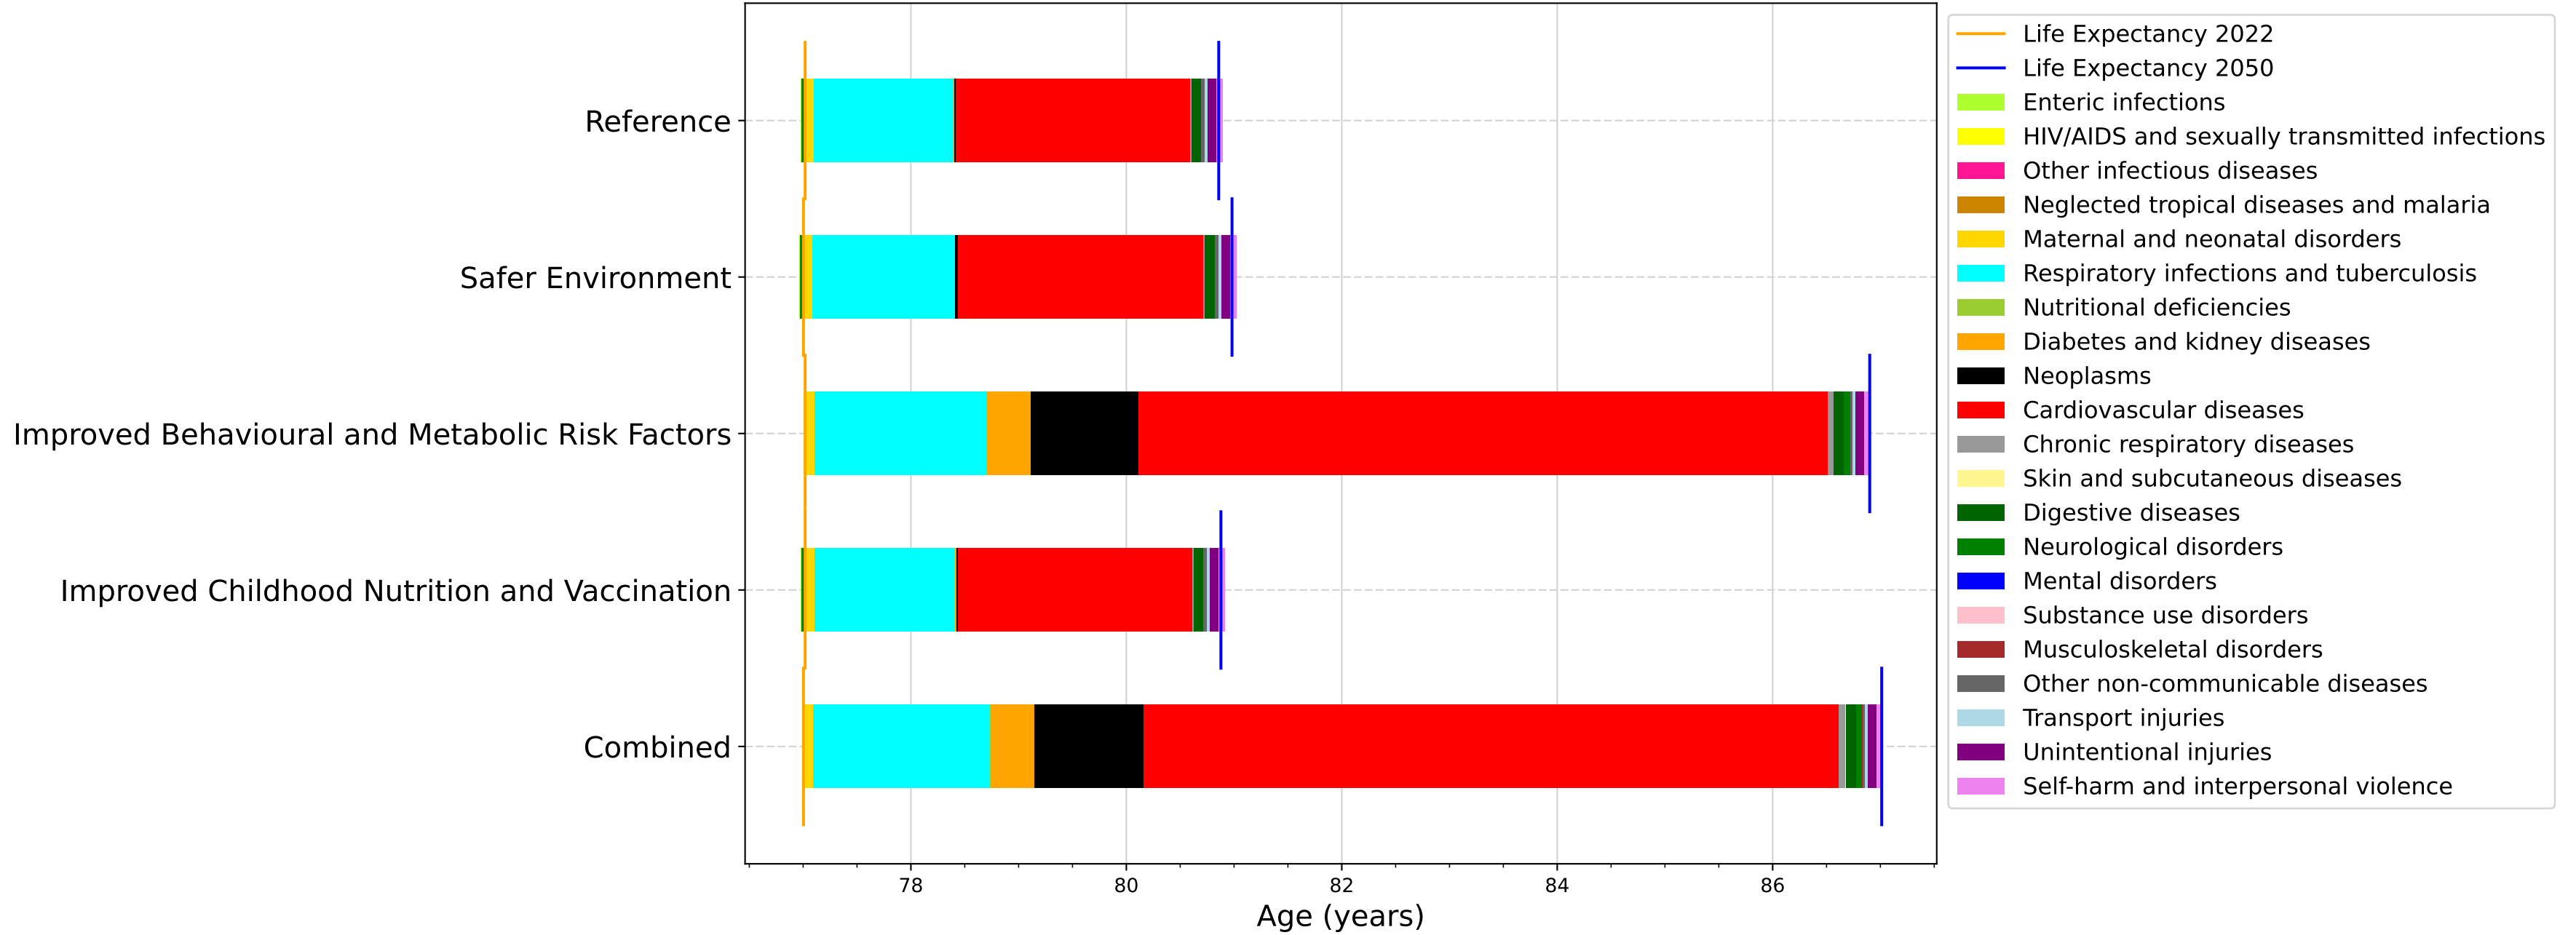

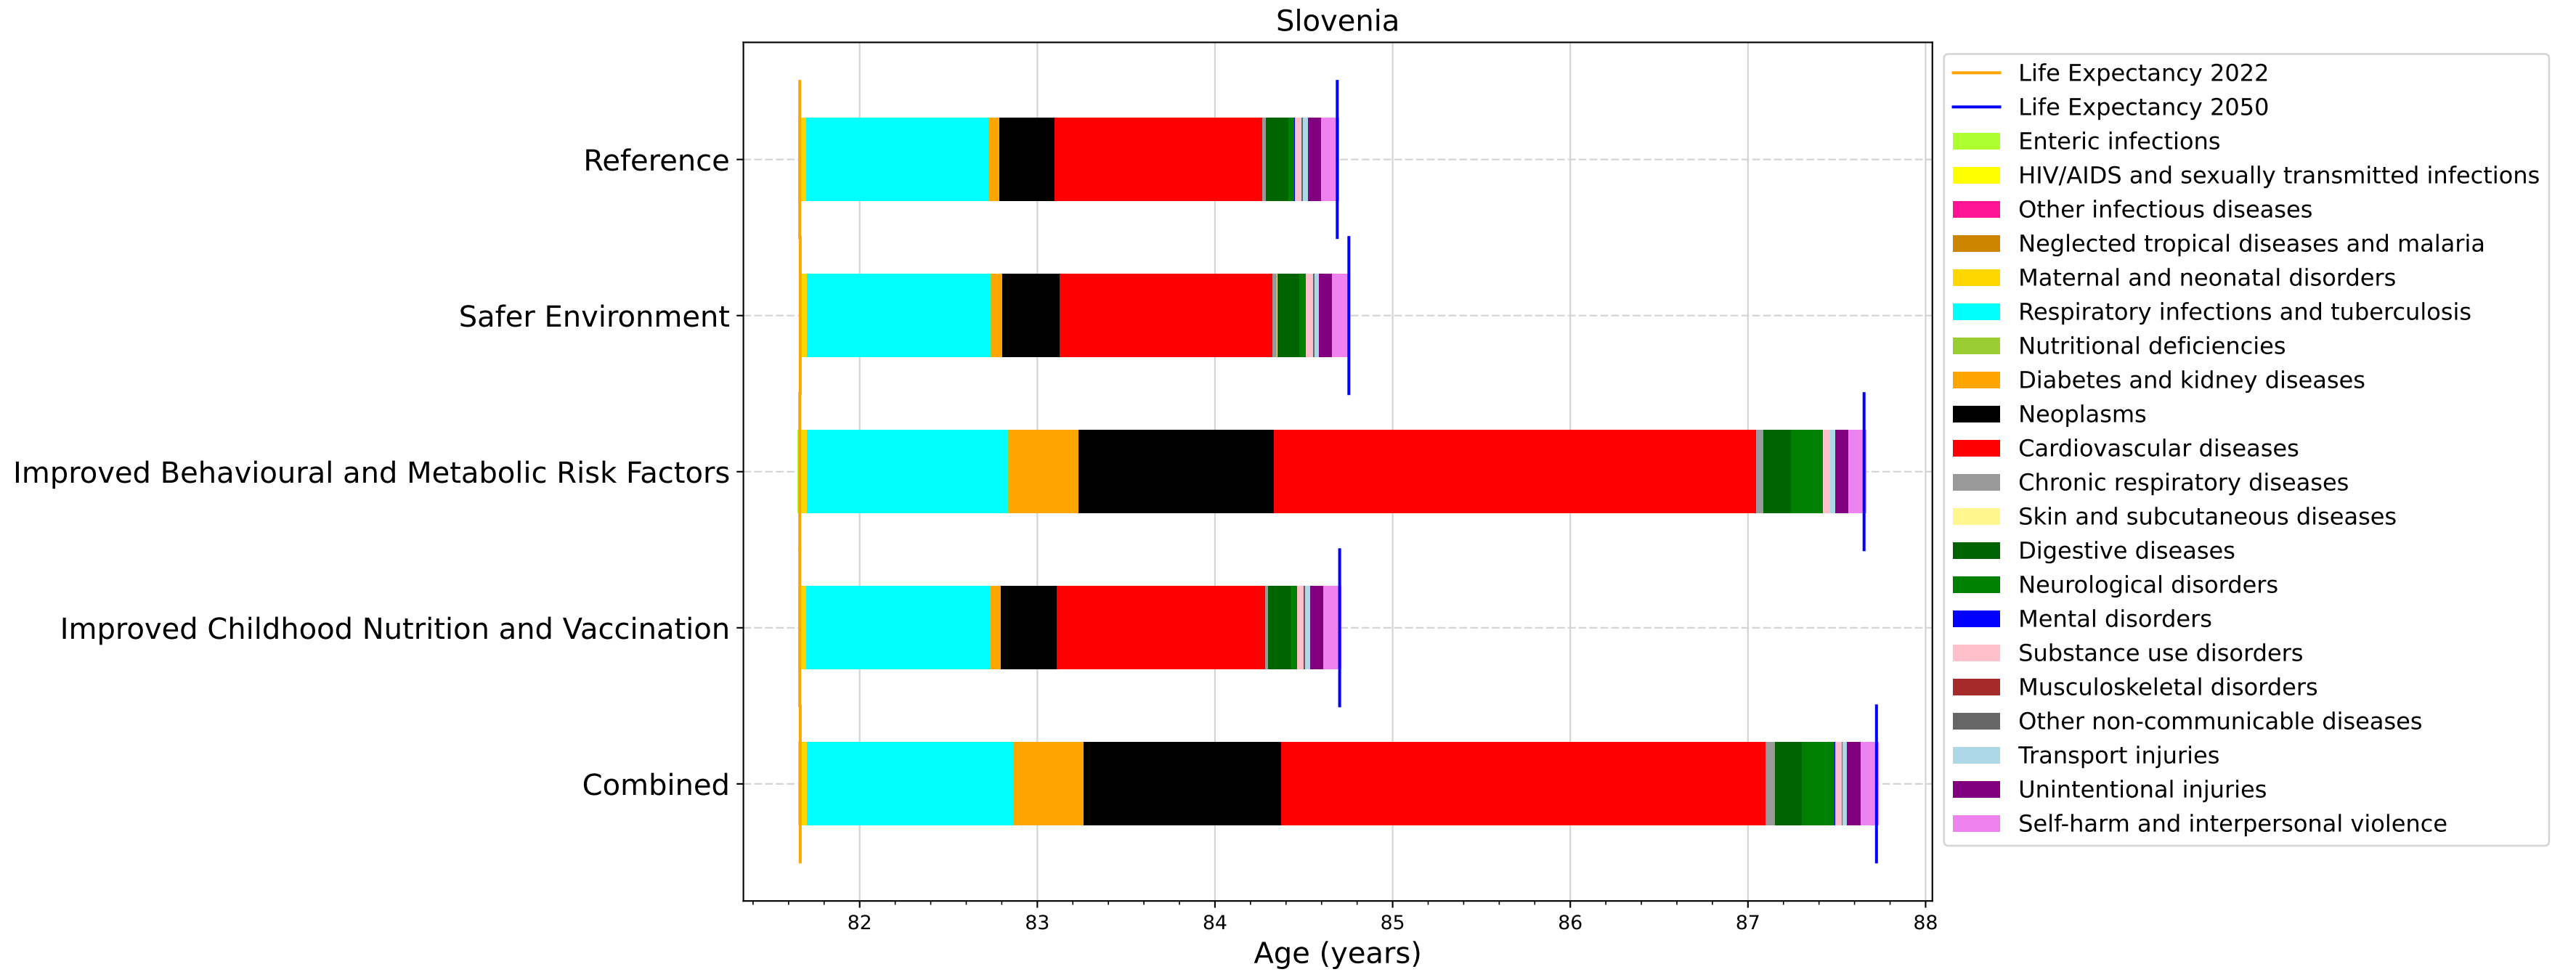

### Solomon Islands

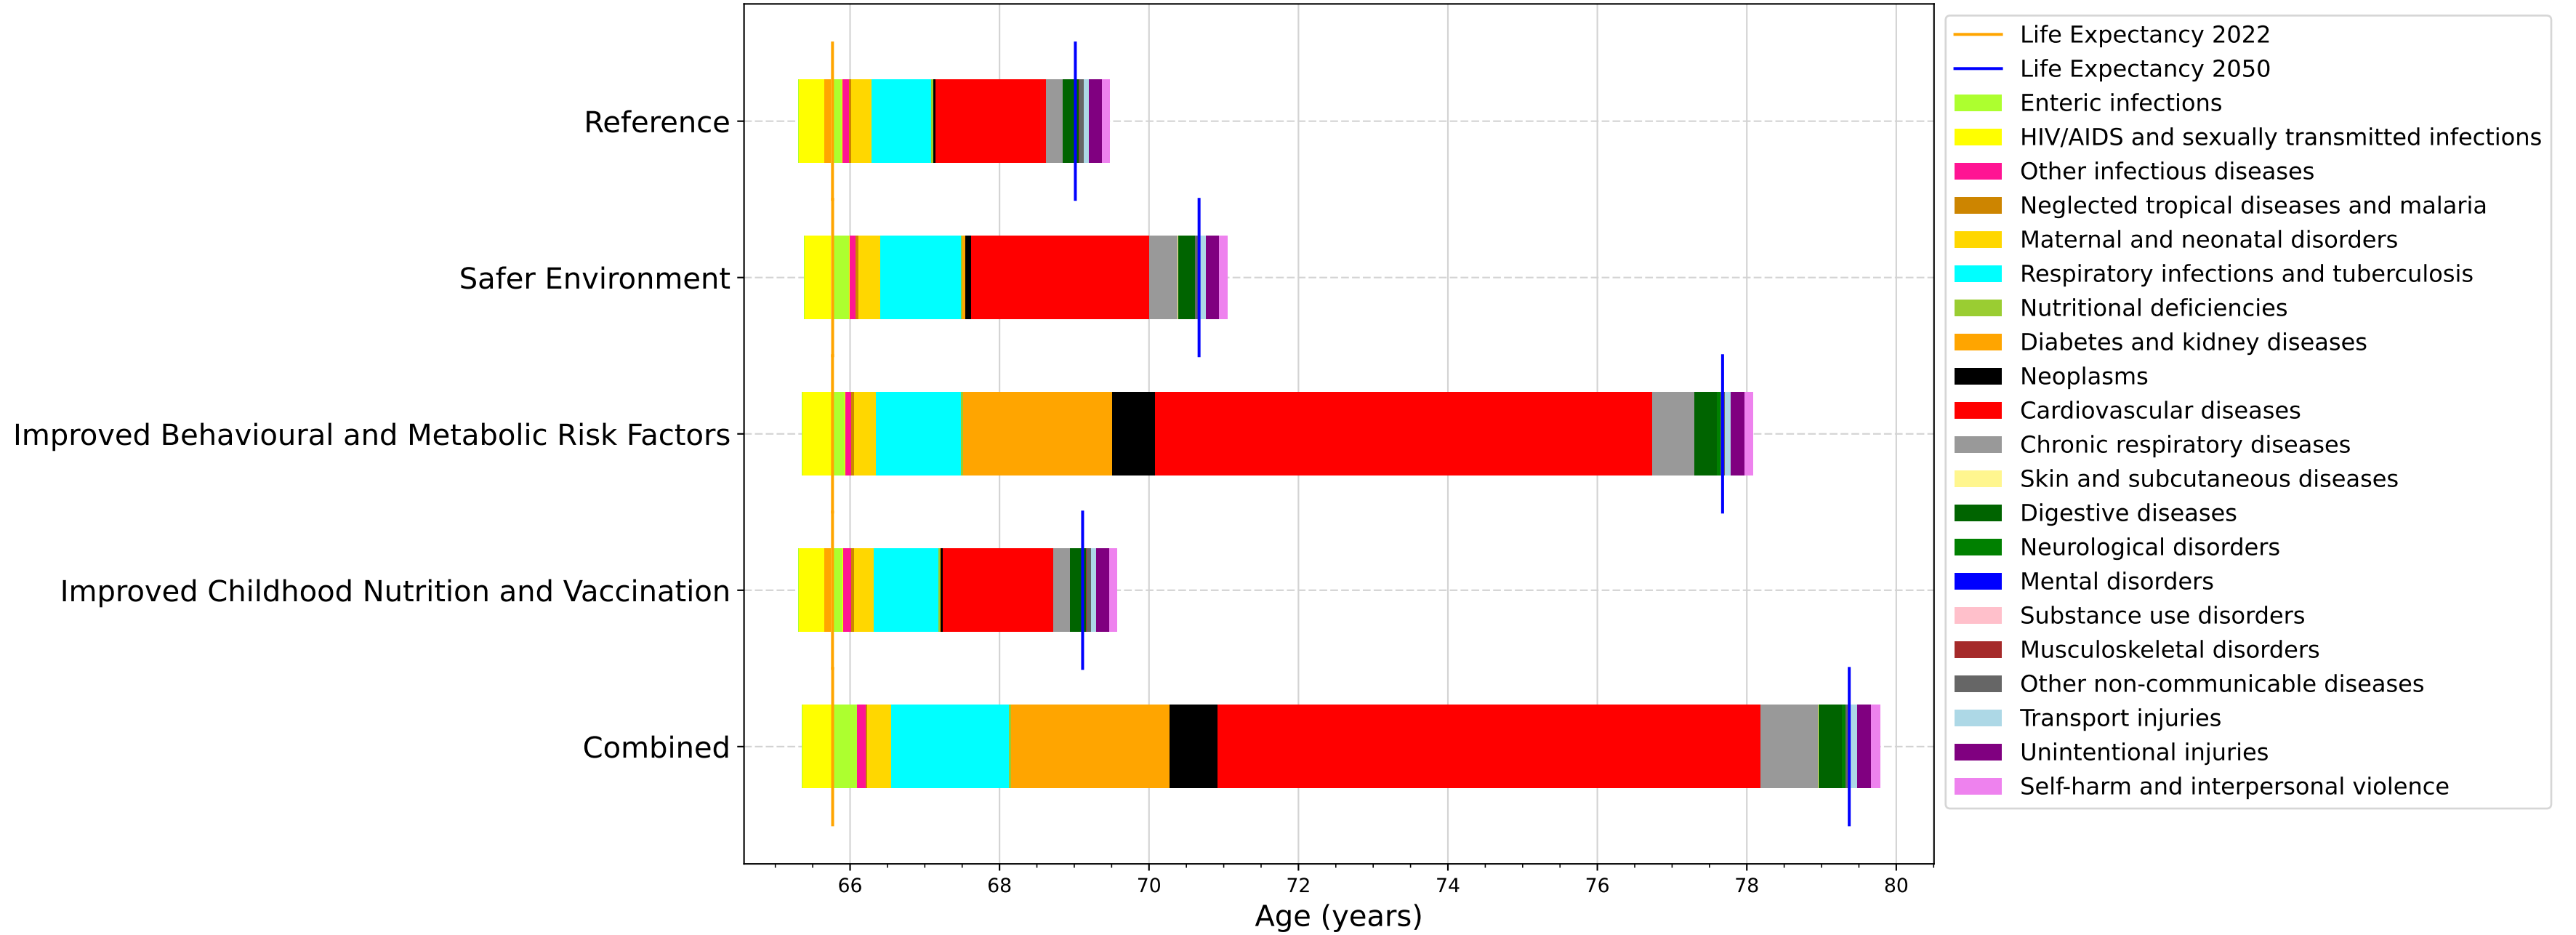

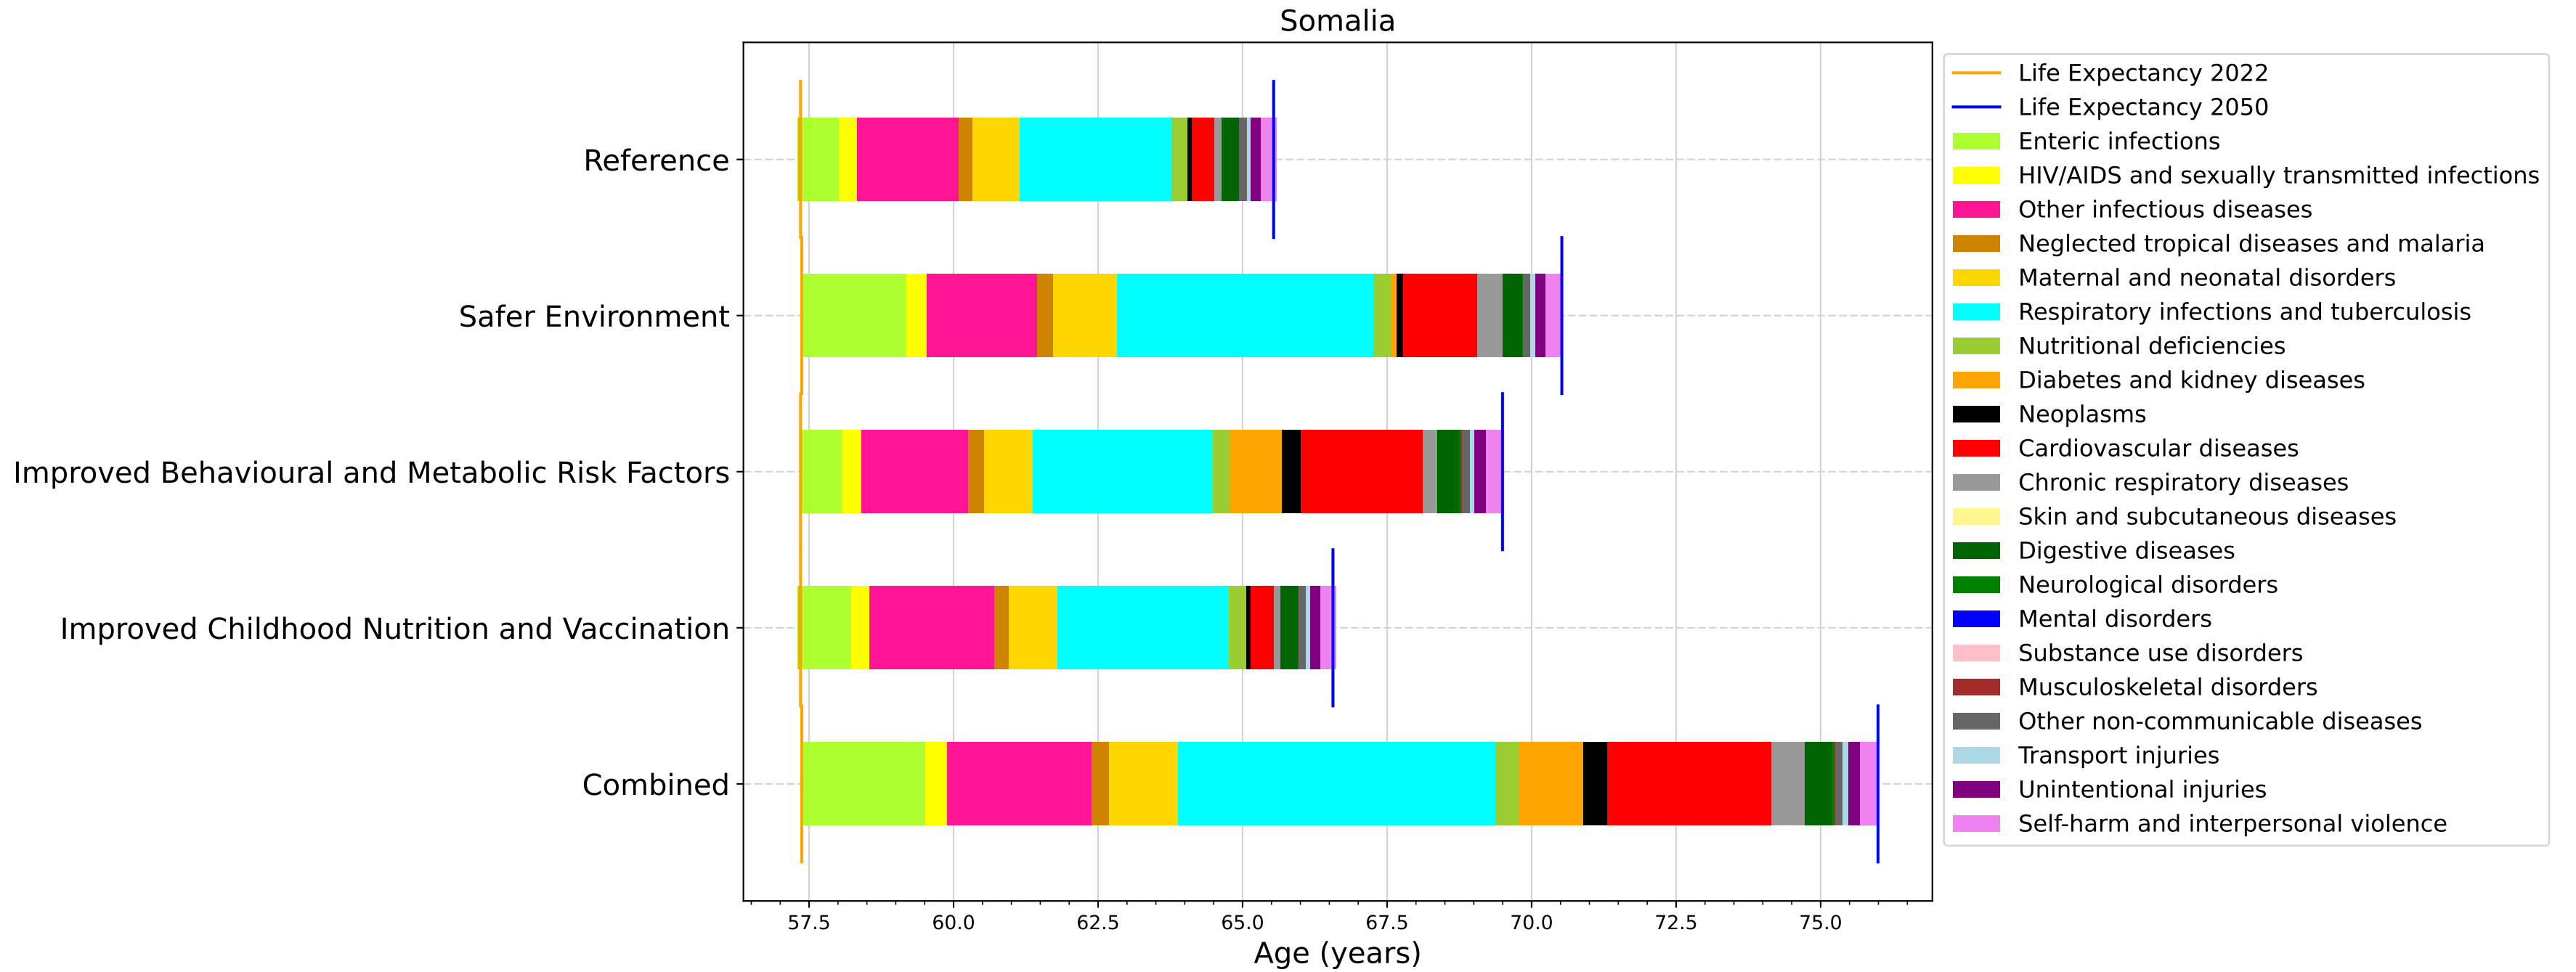

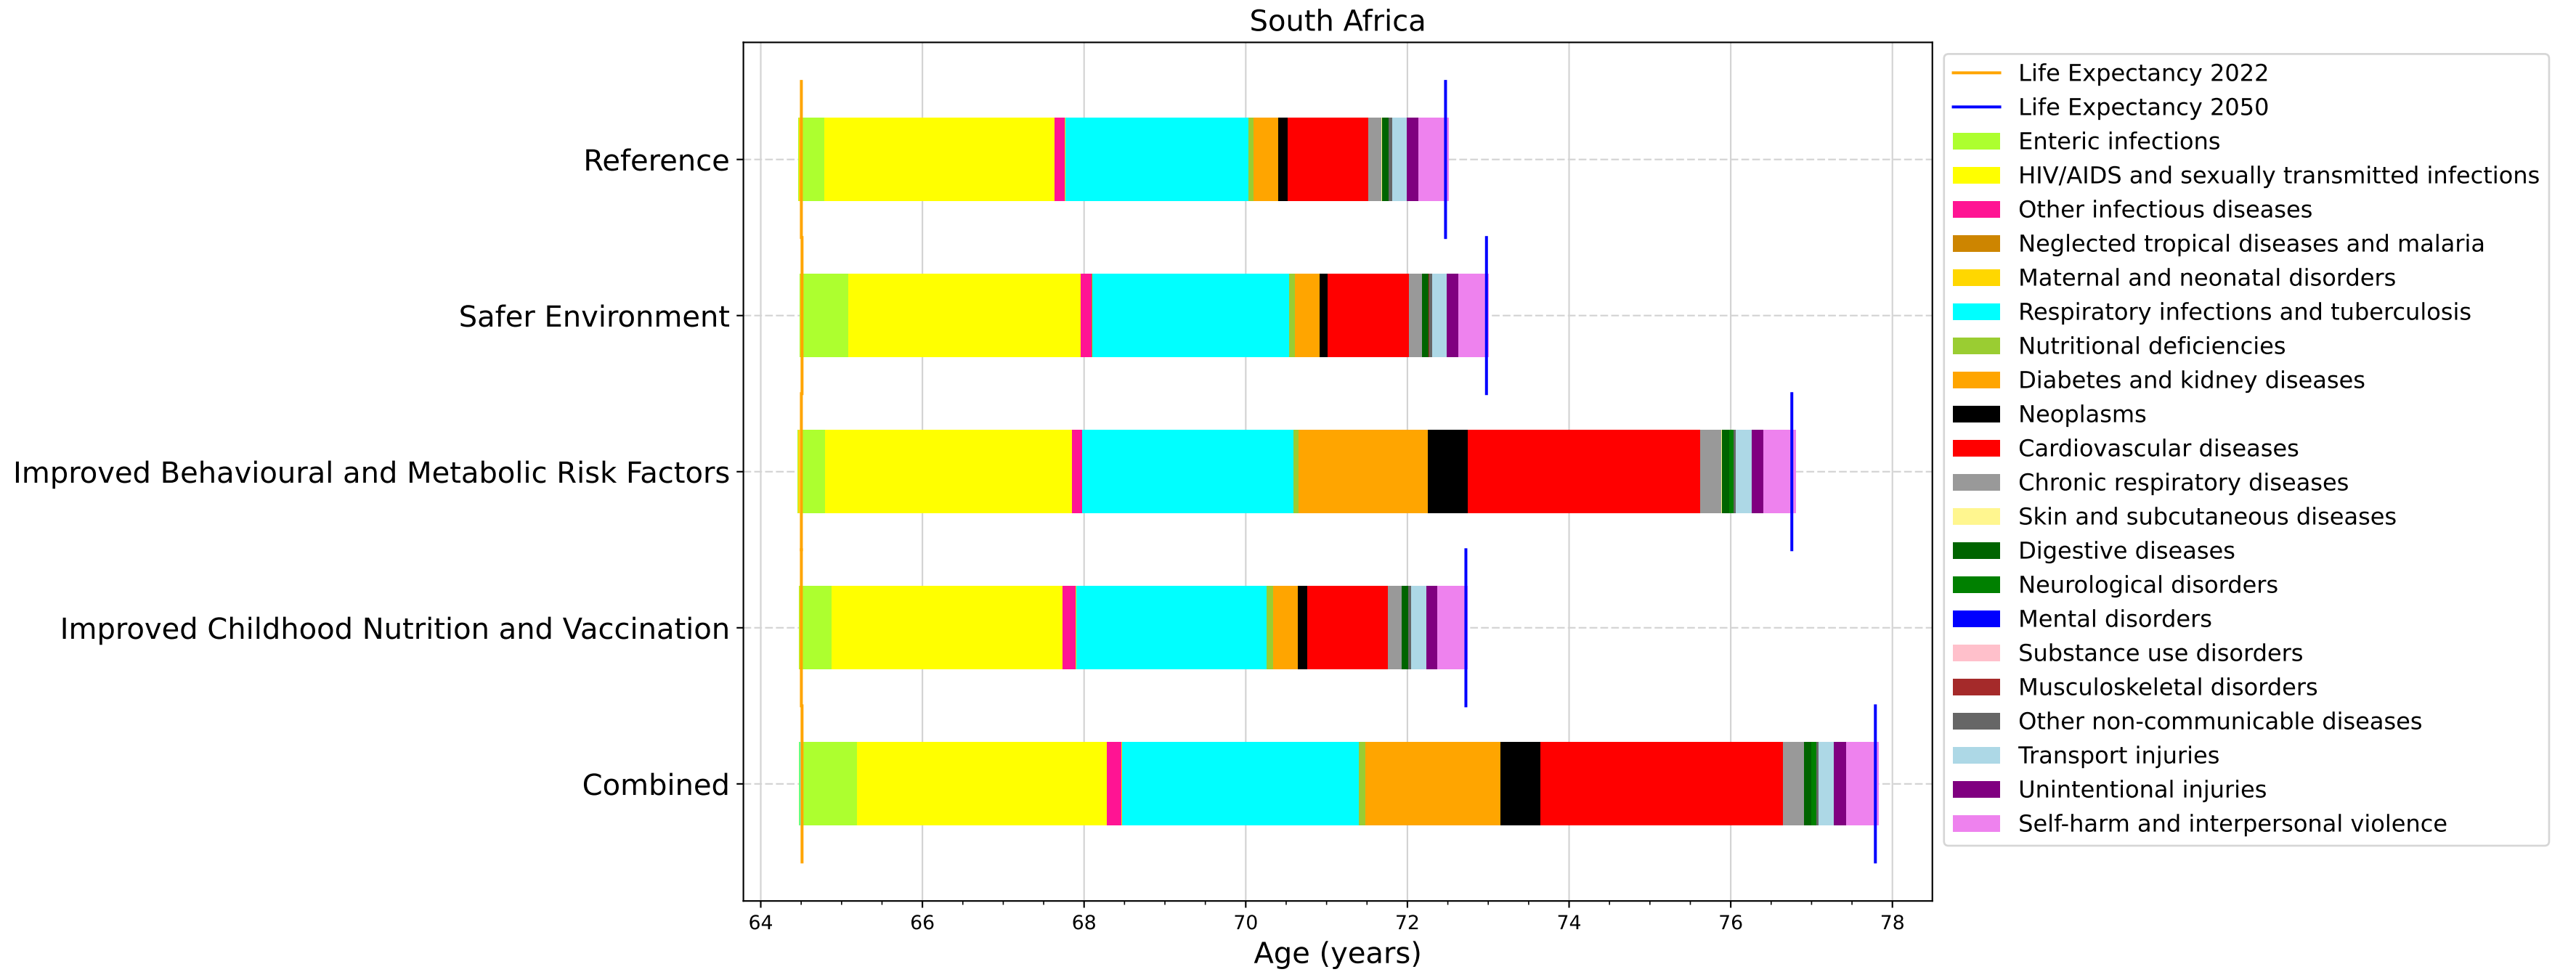



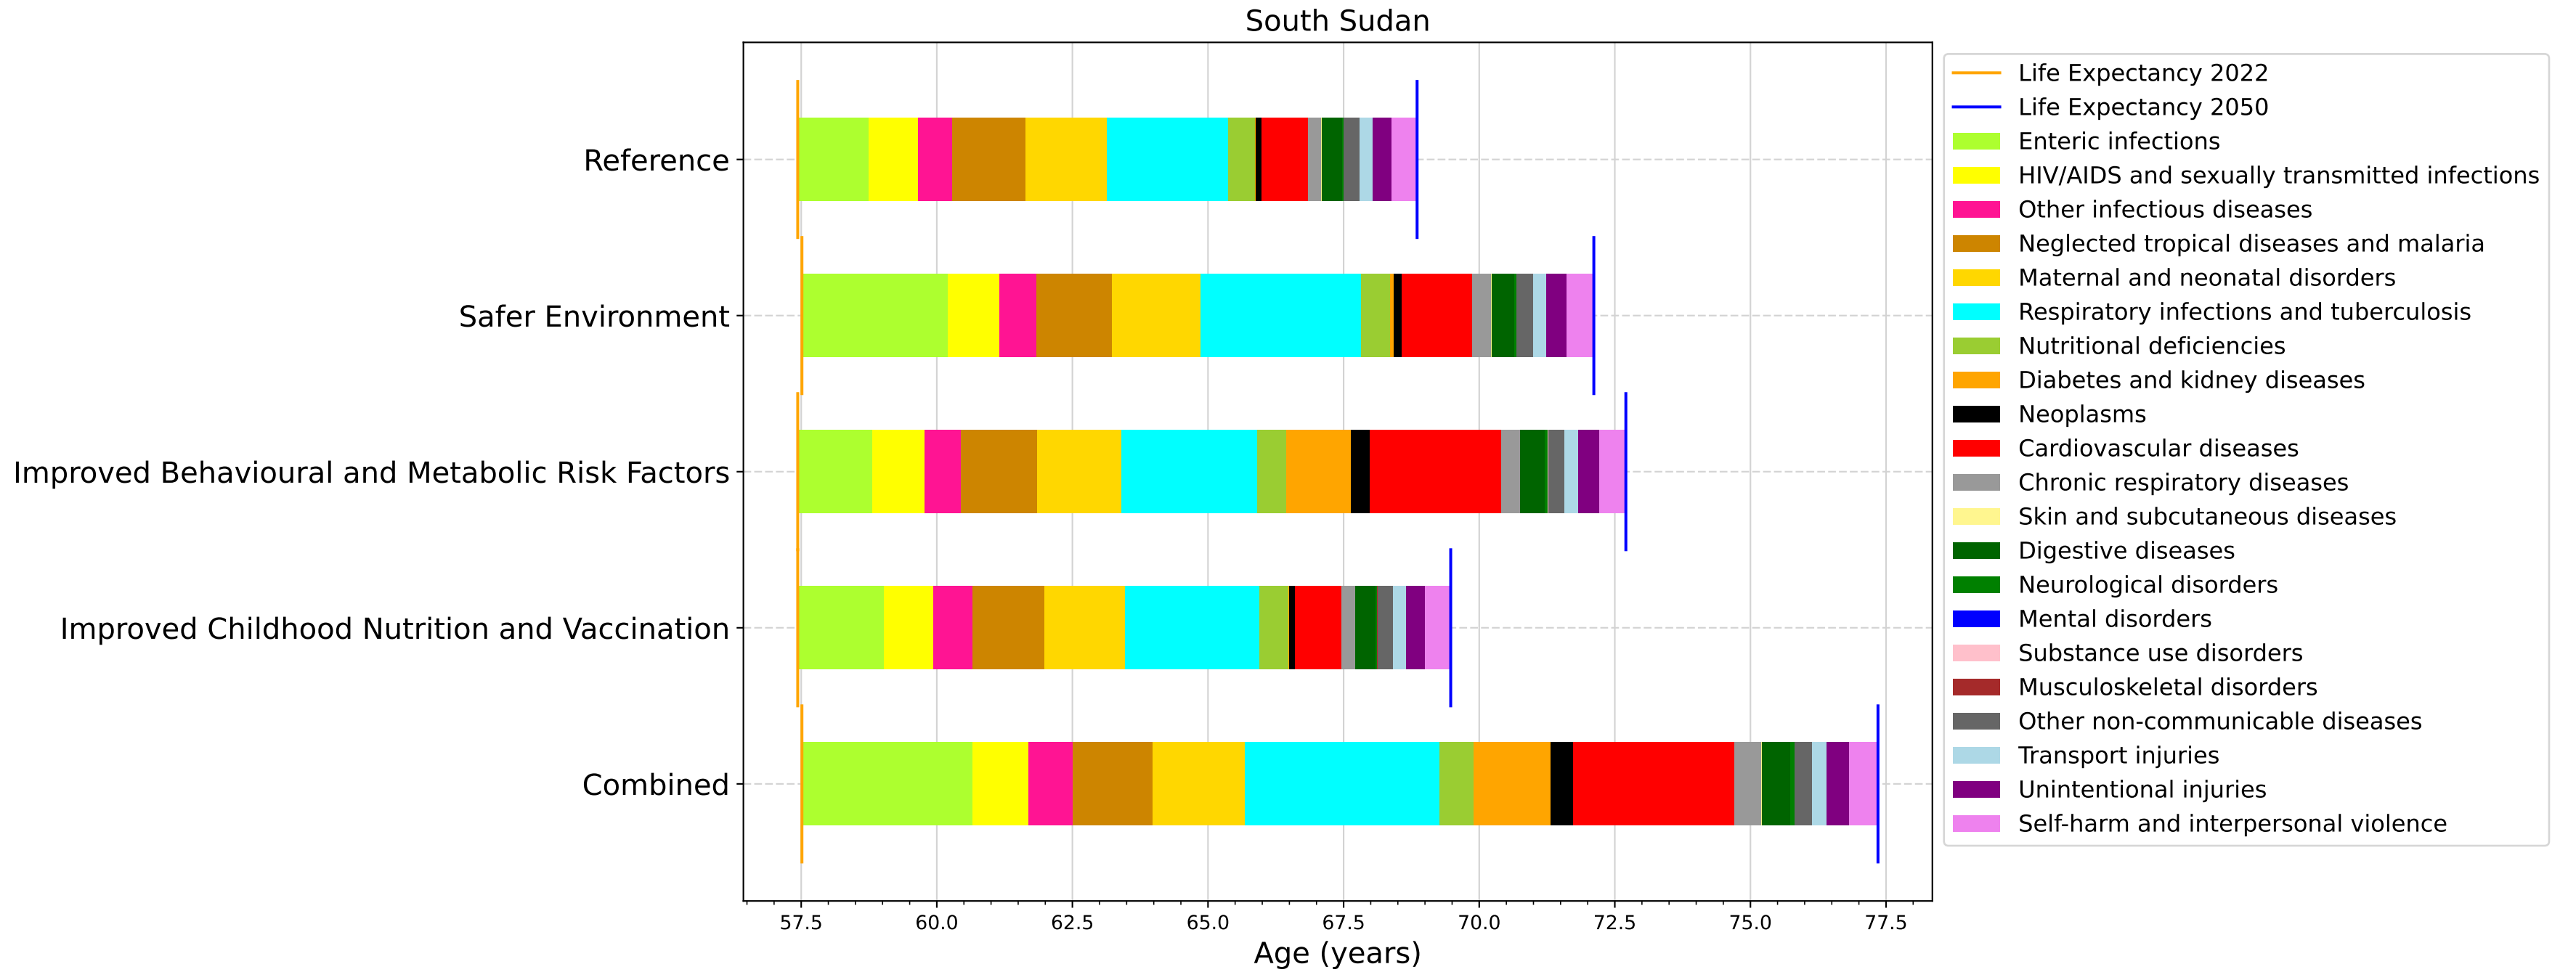

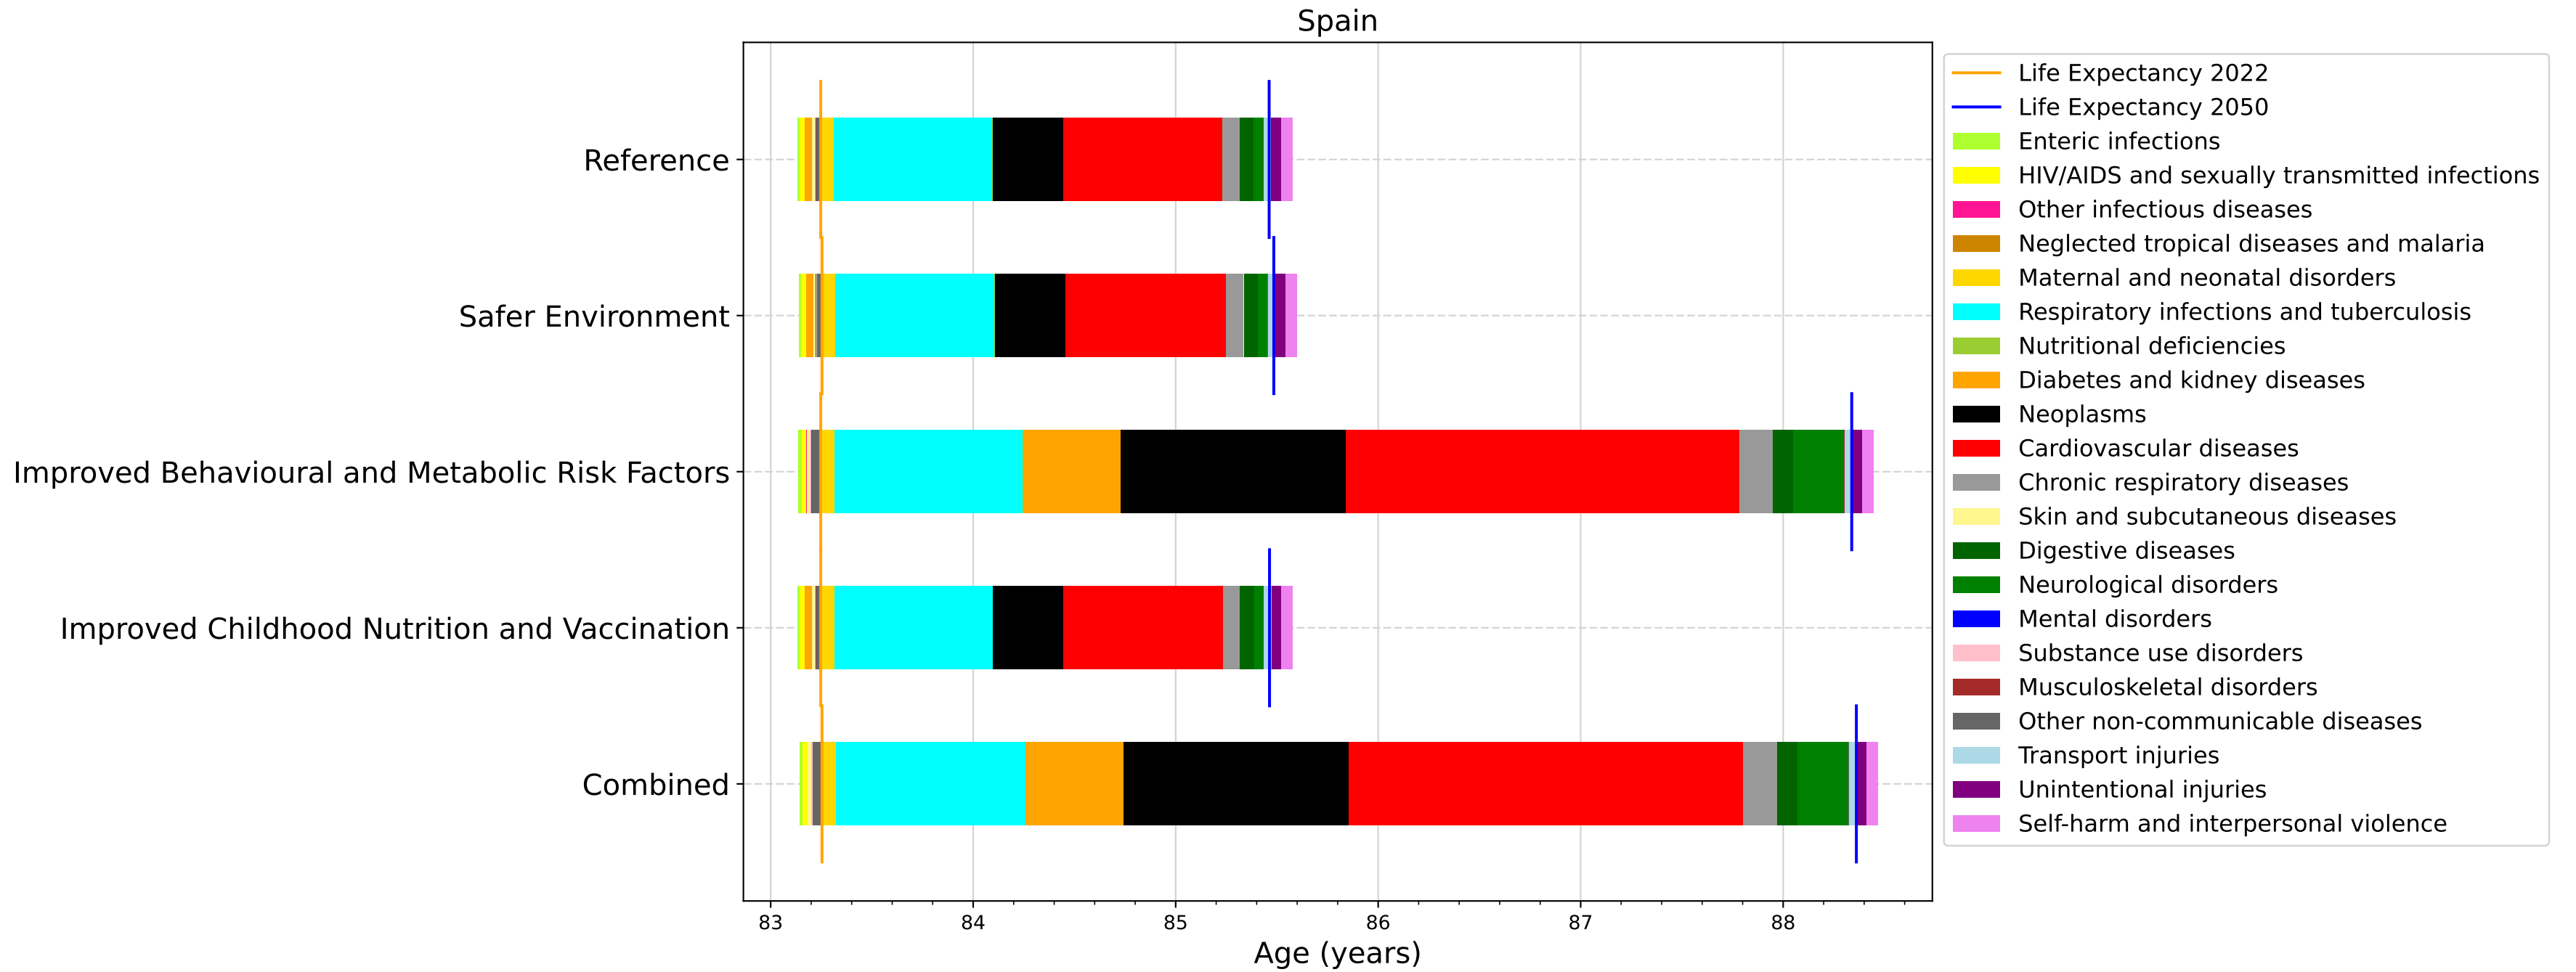

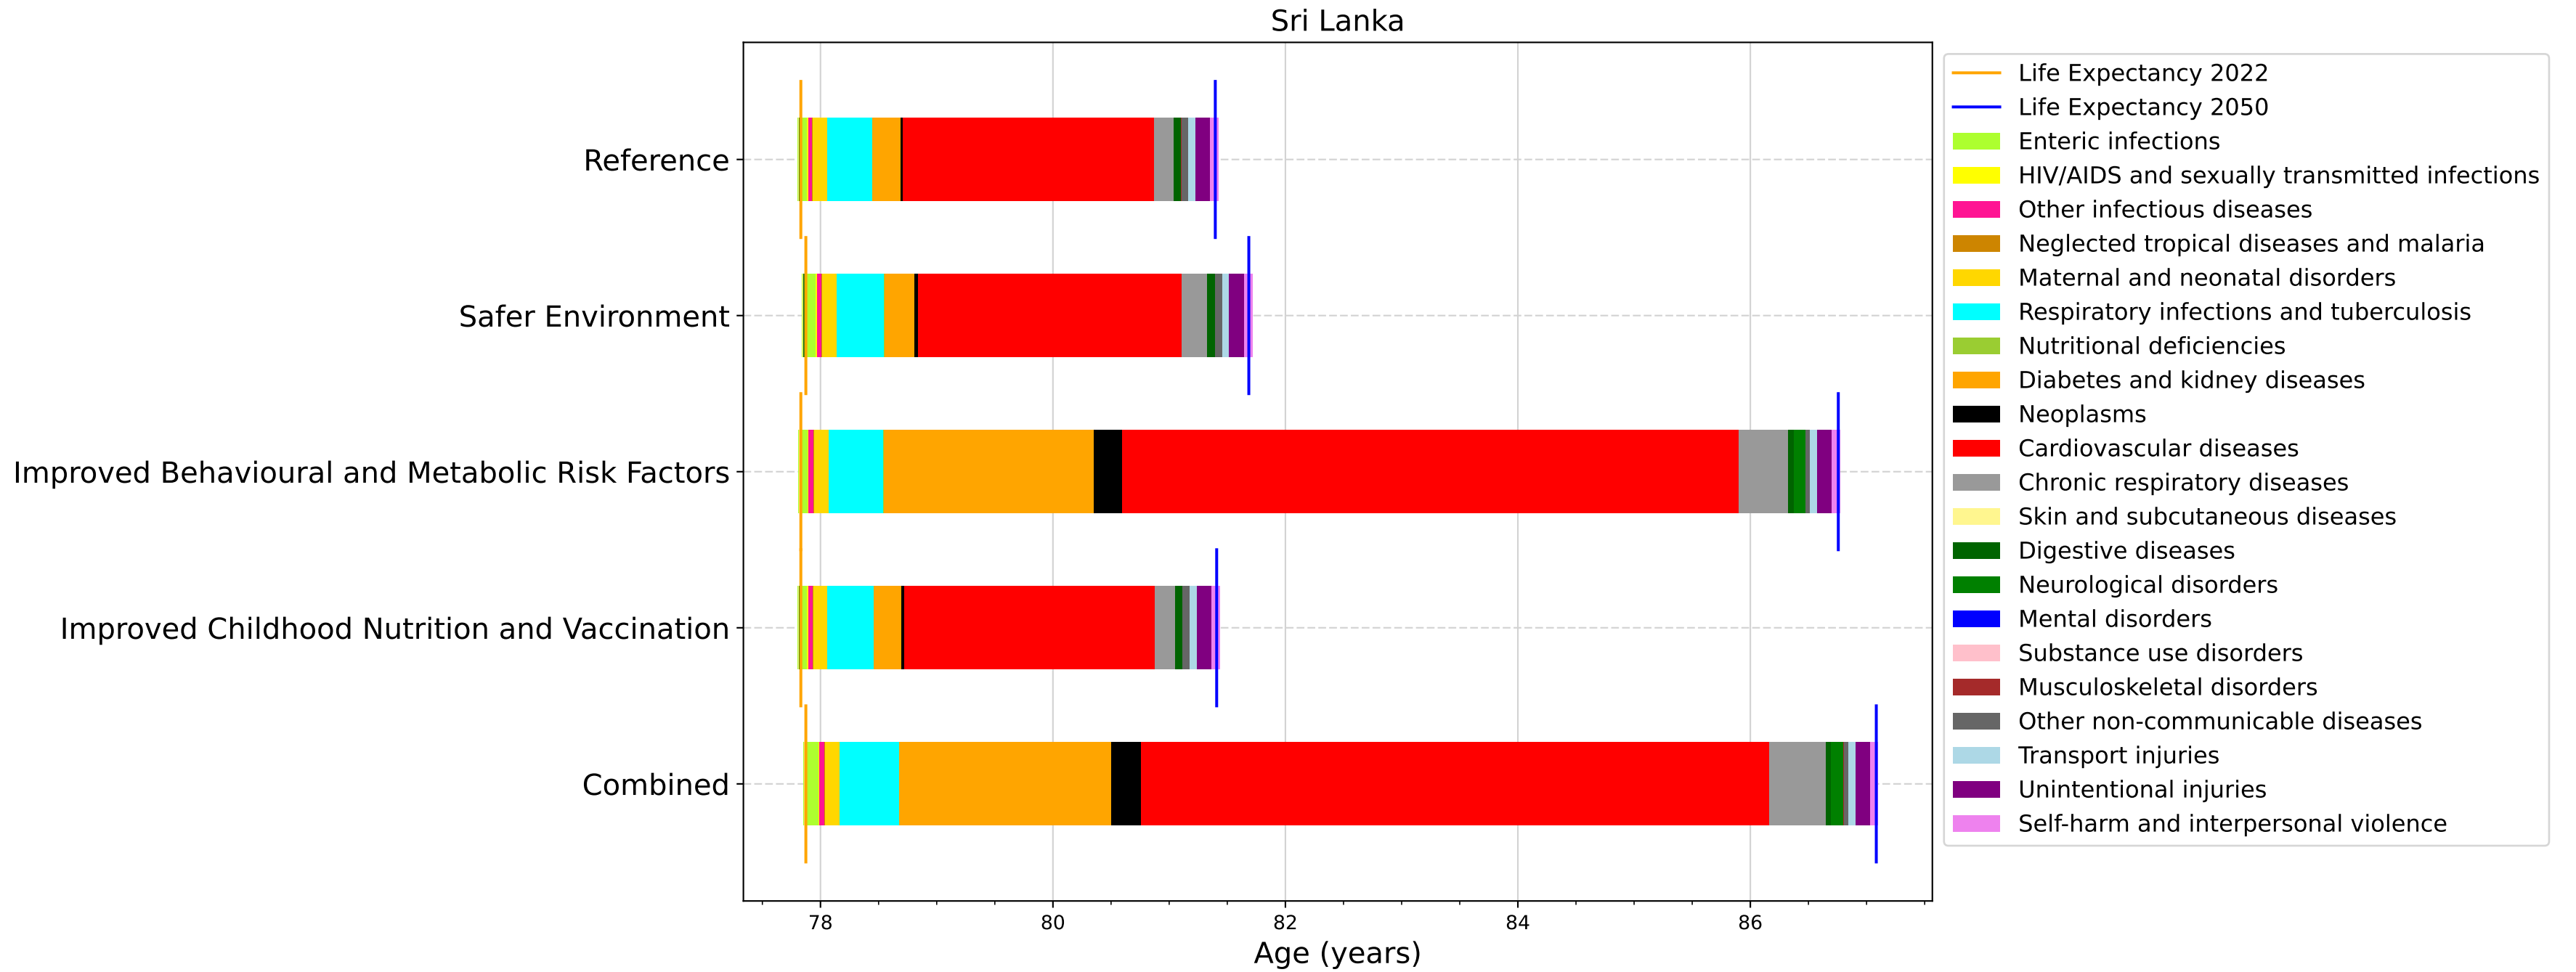

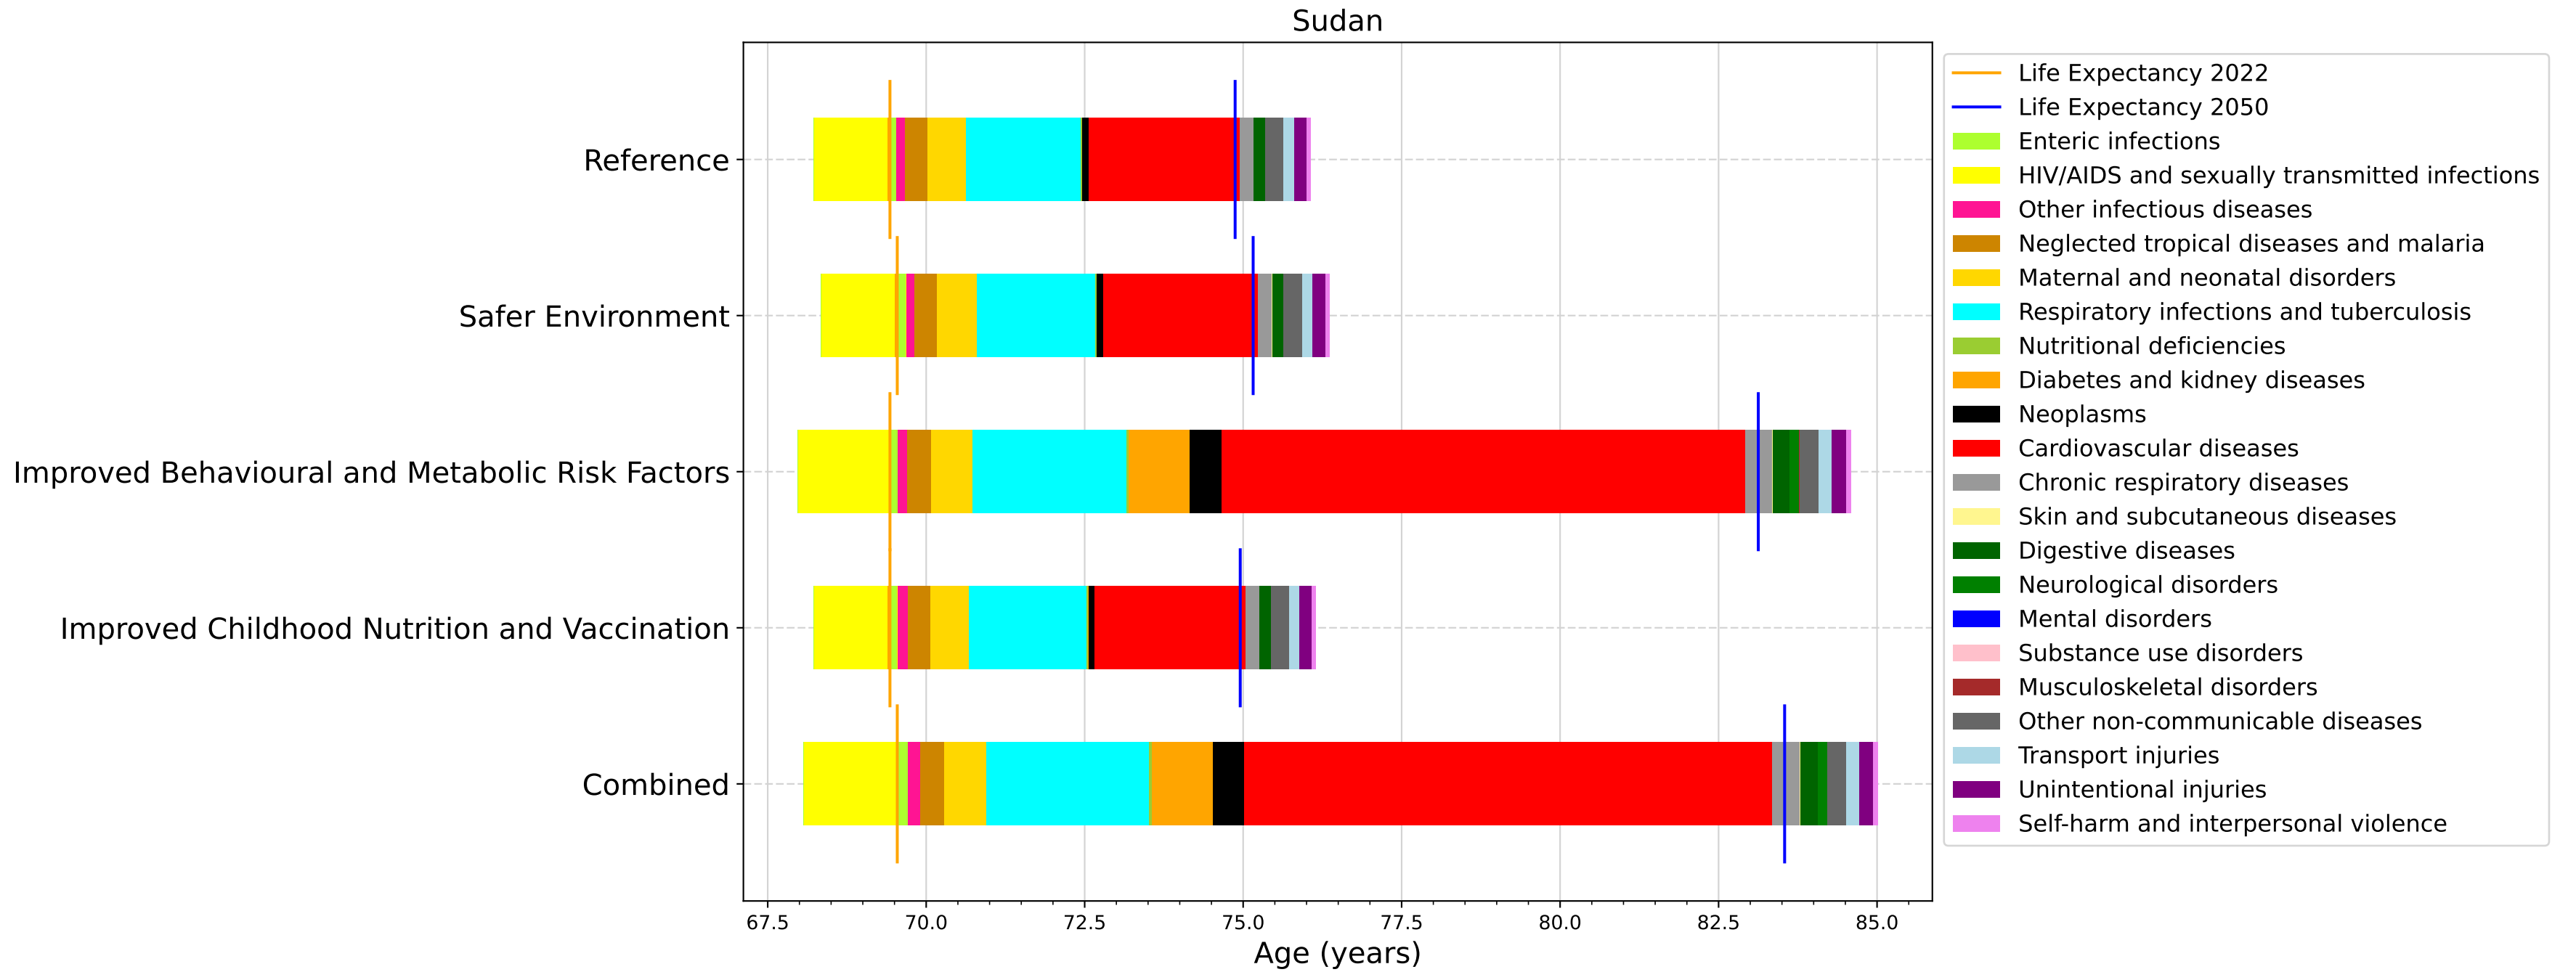

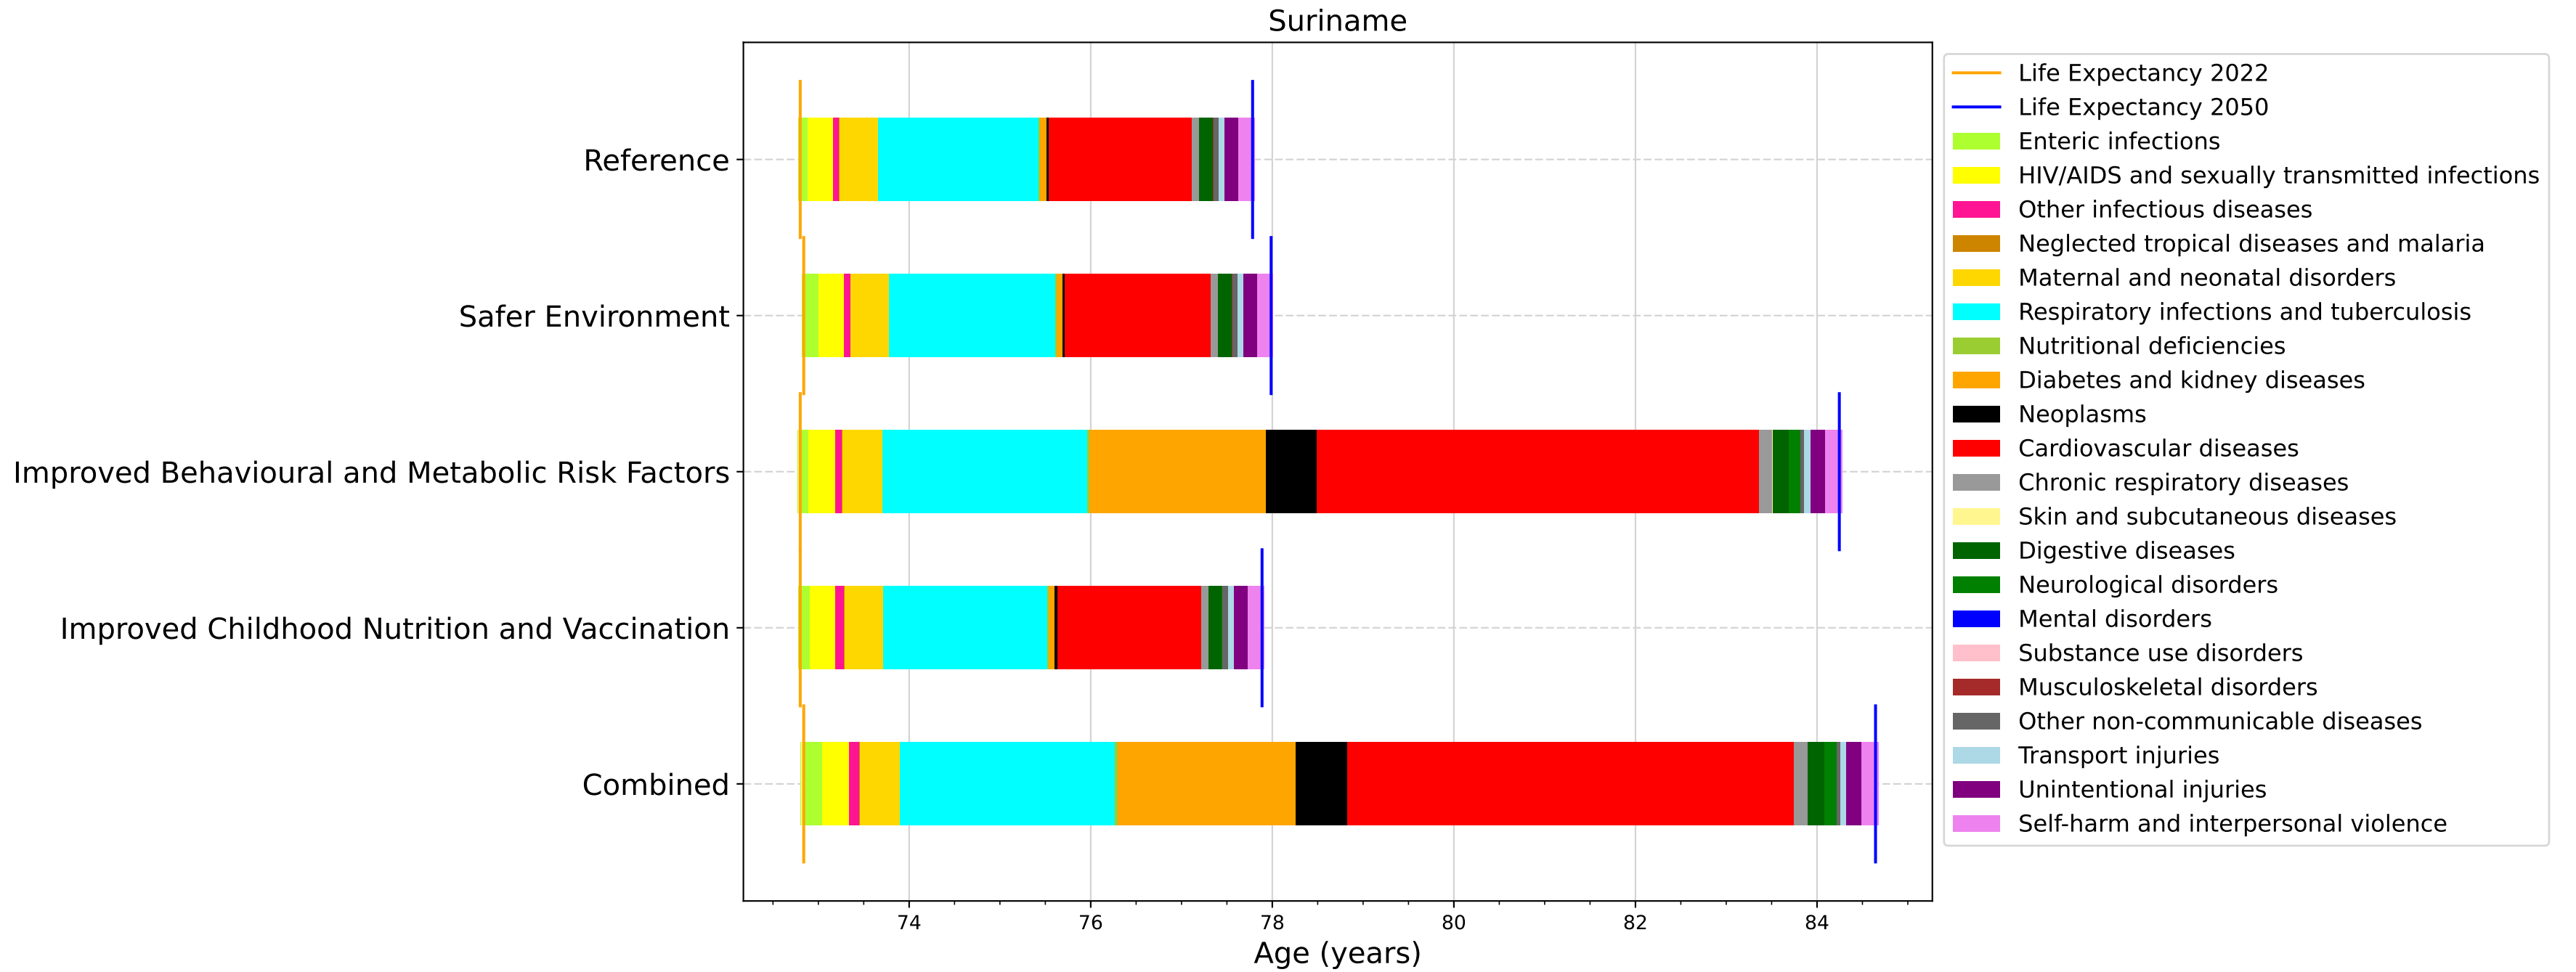

Sweden

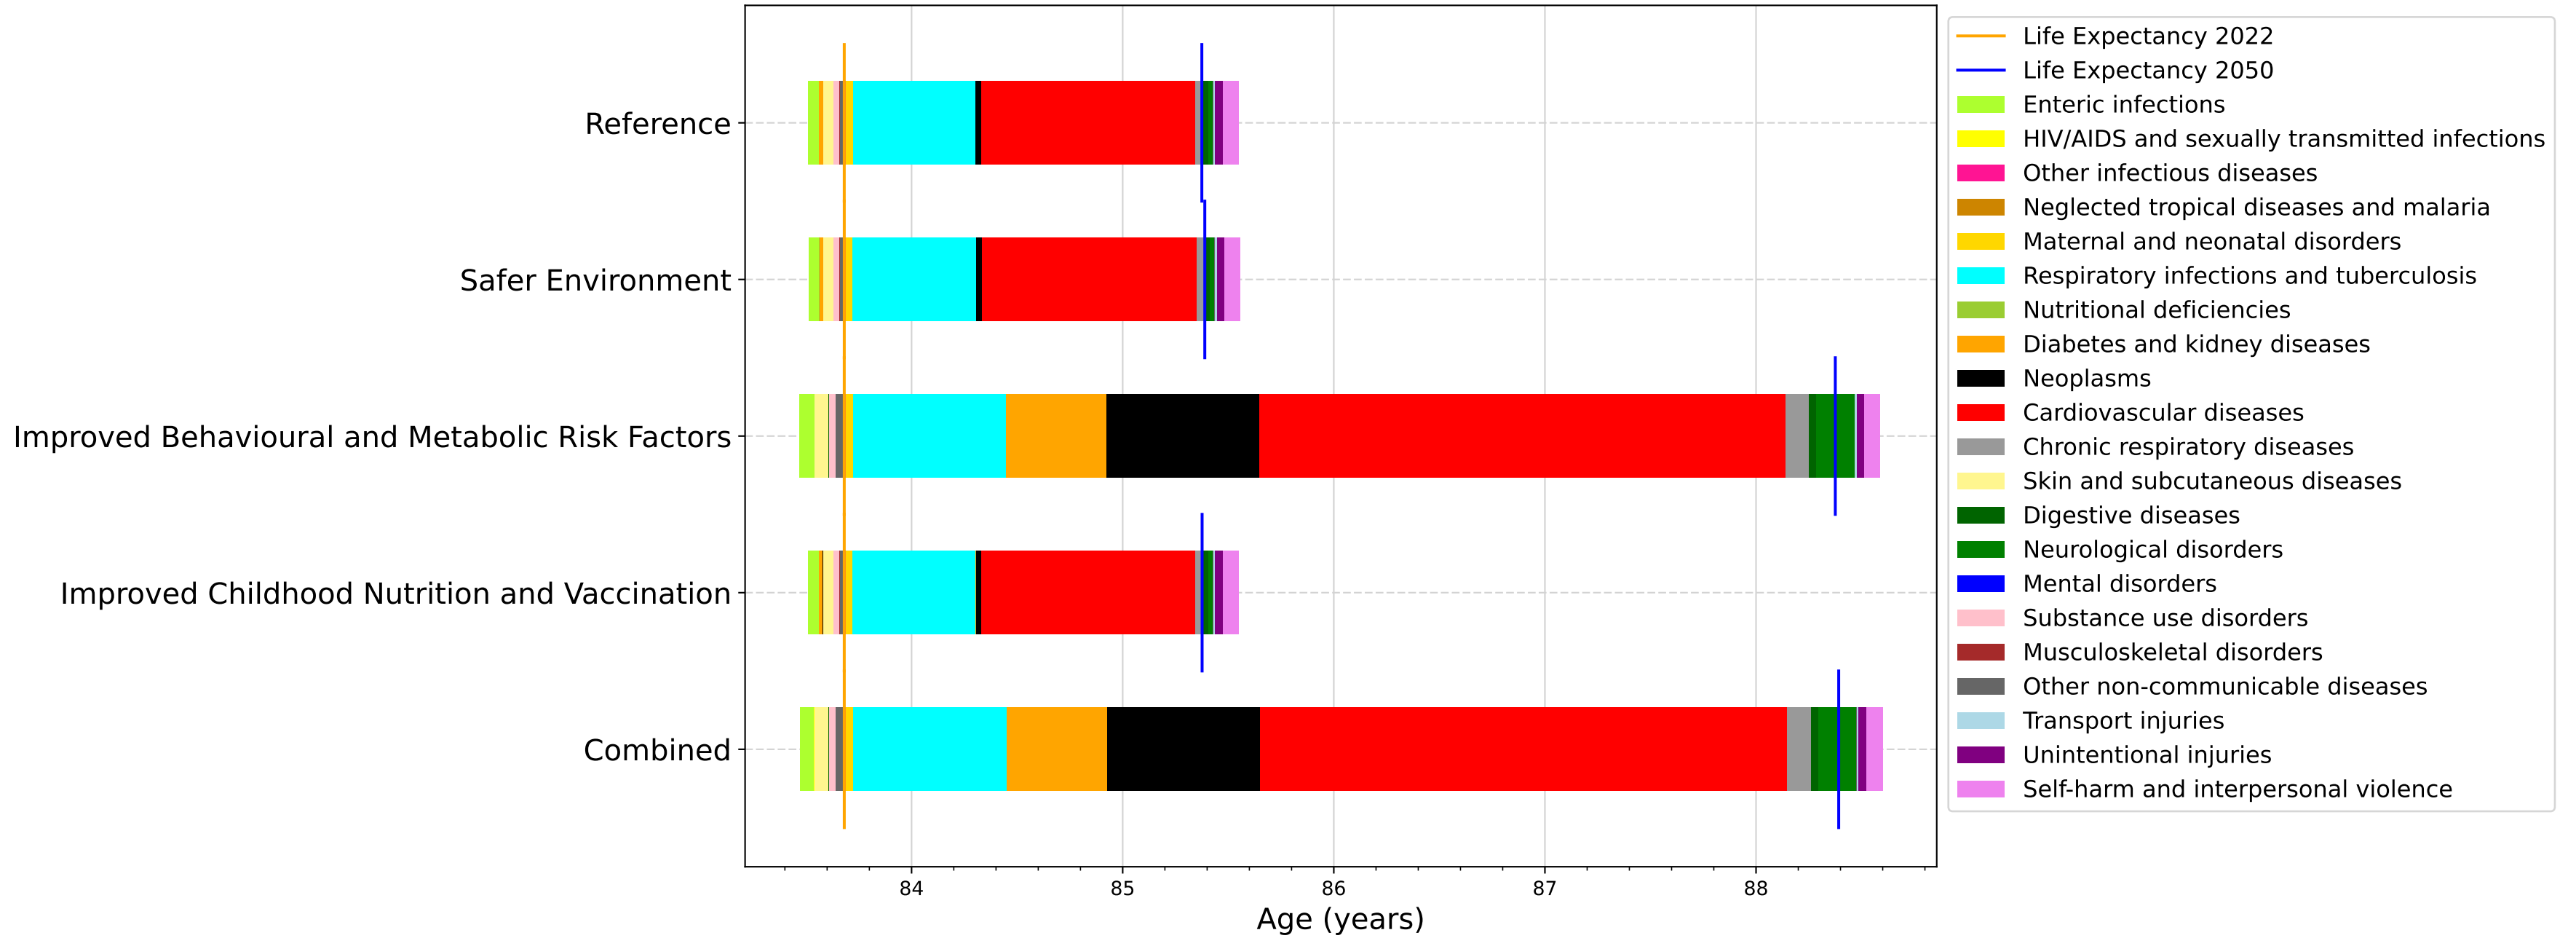

Switzerland

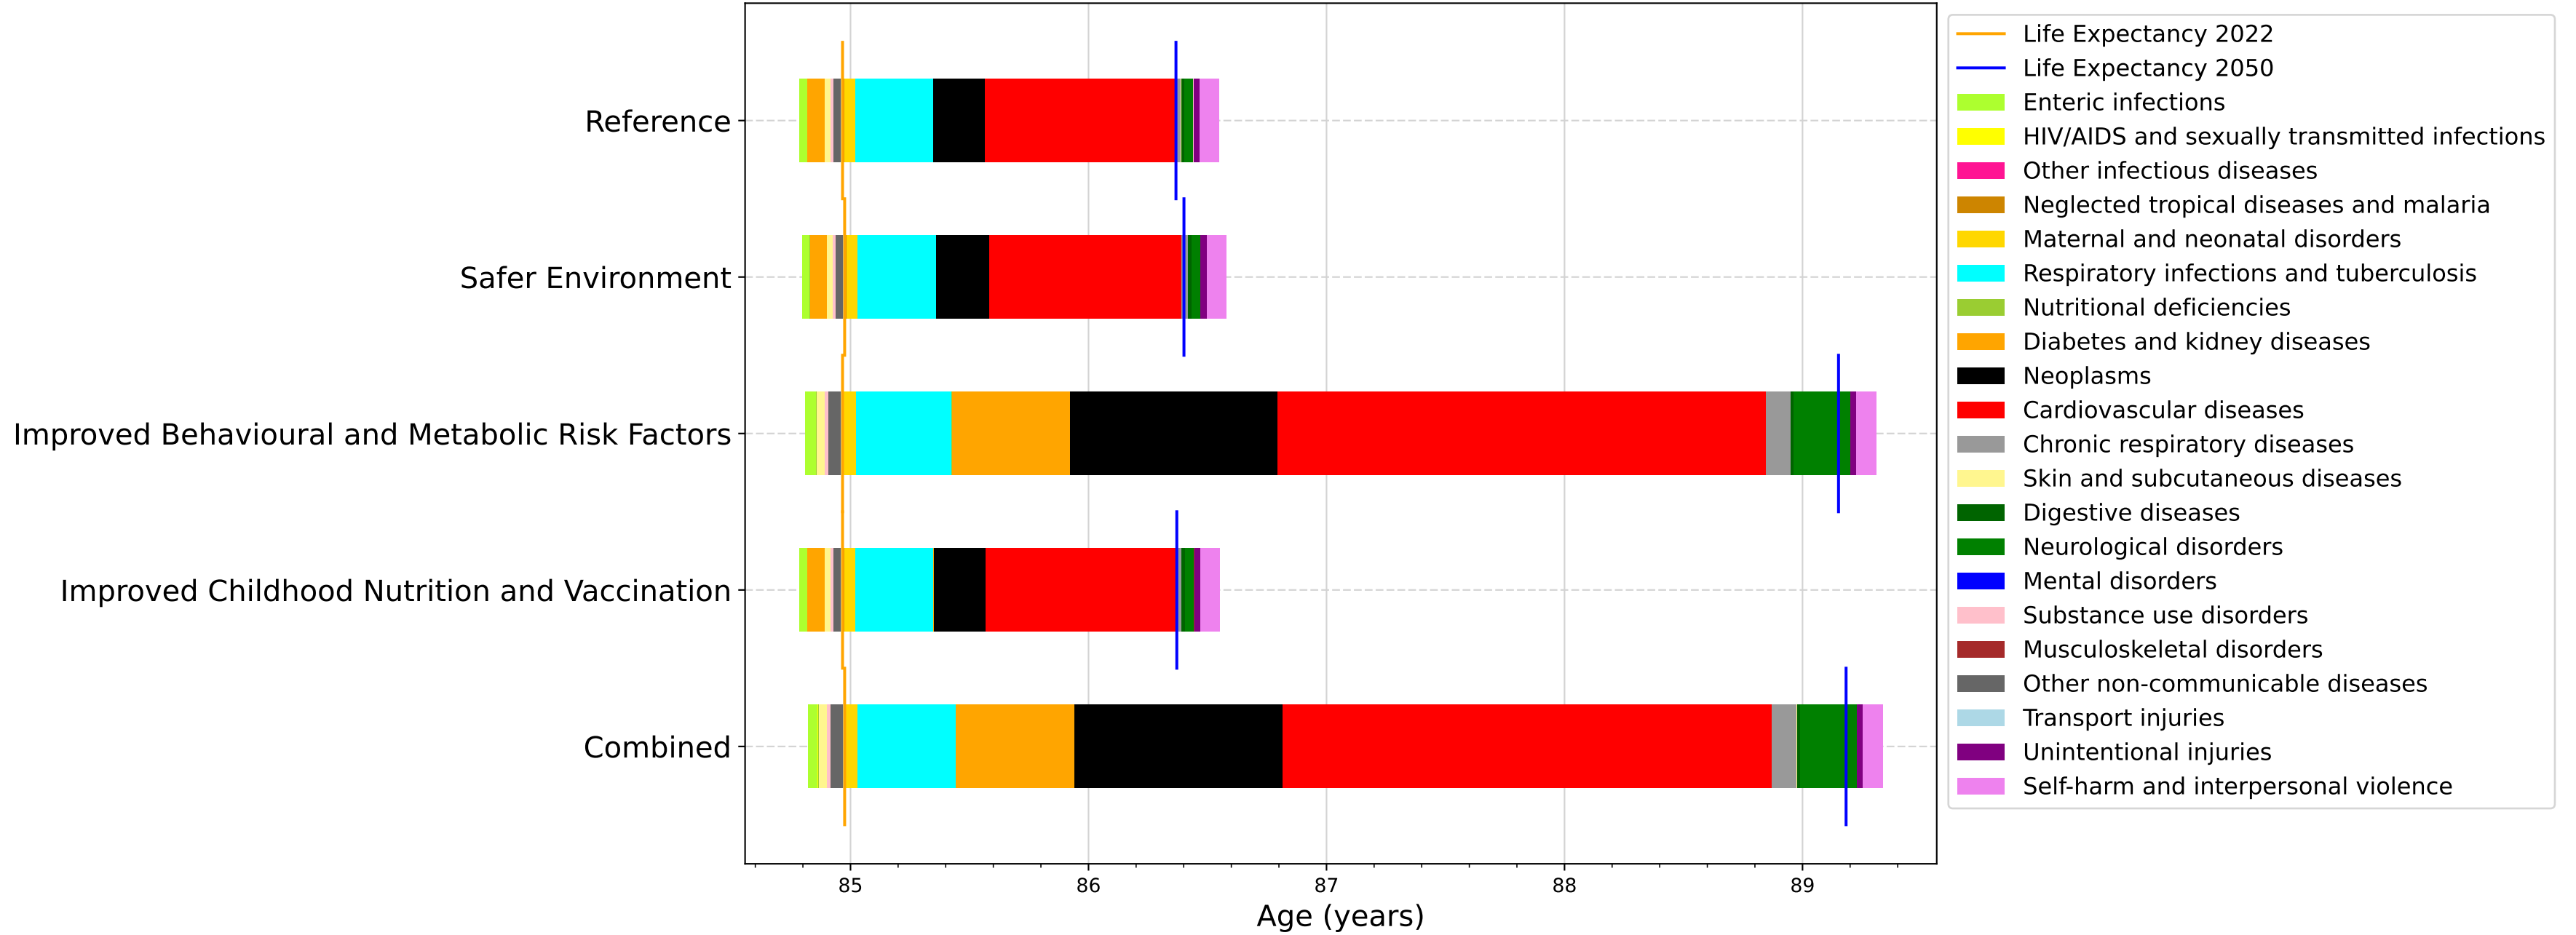

### Syrian Arab Republic

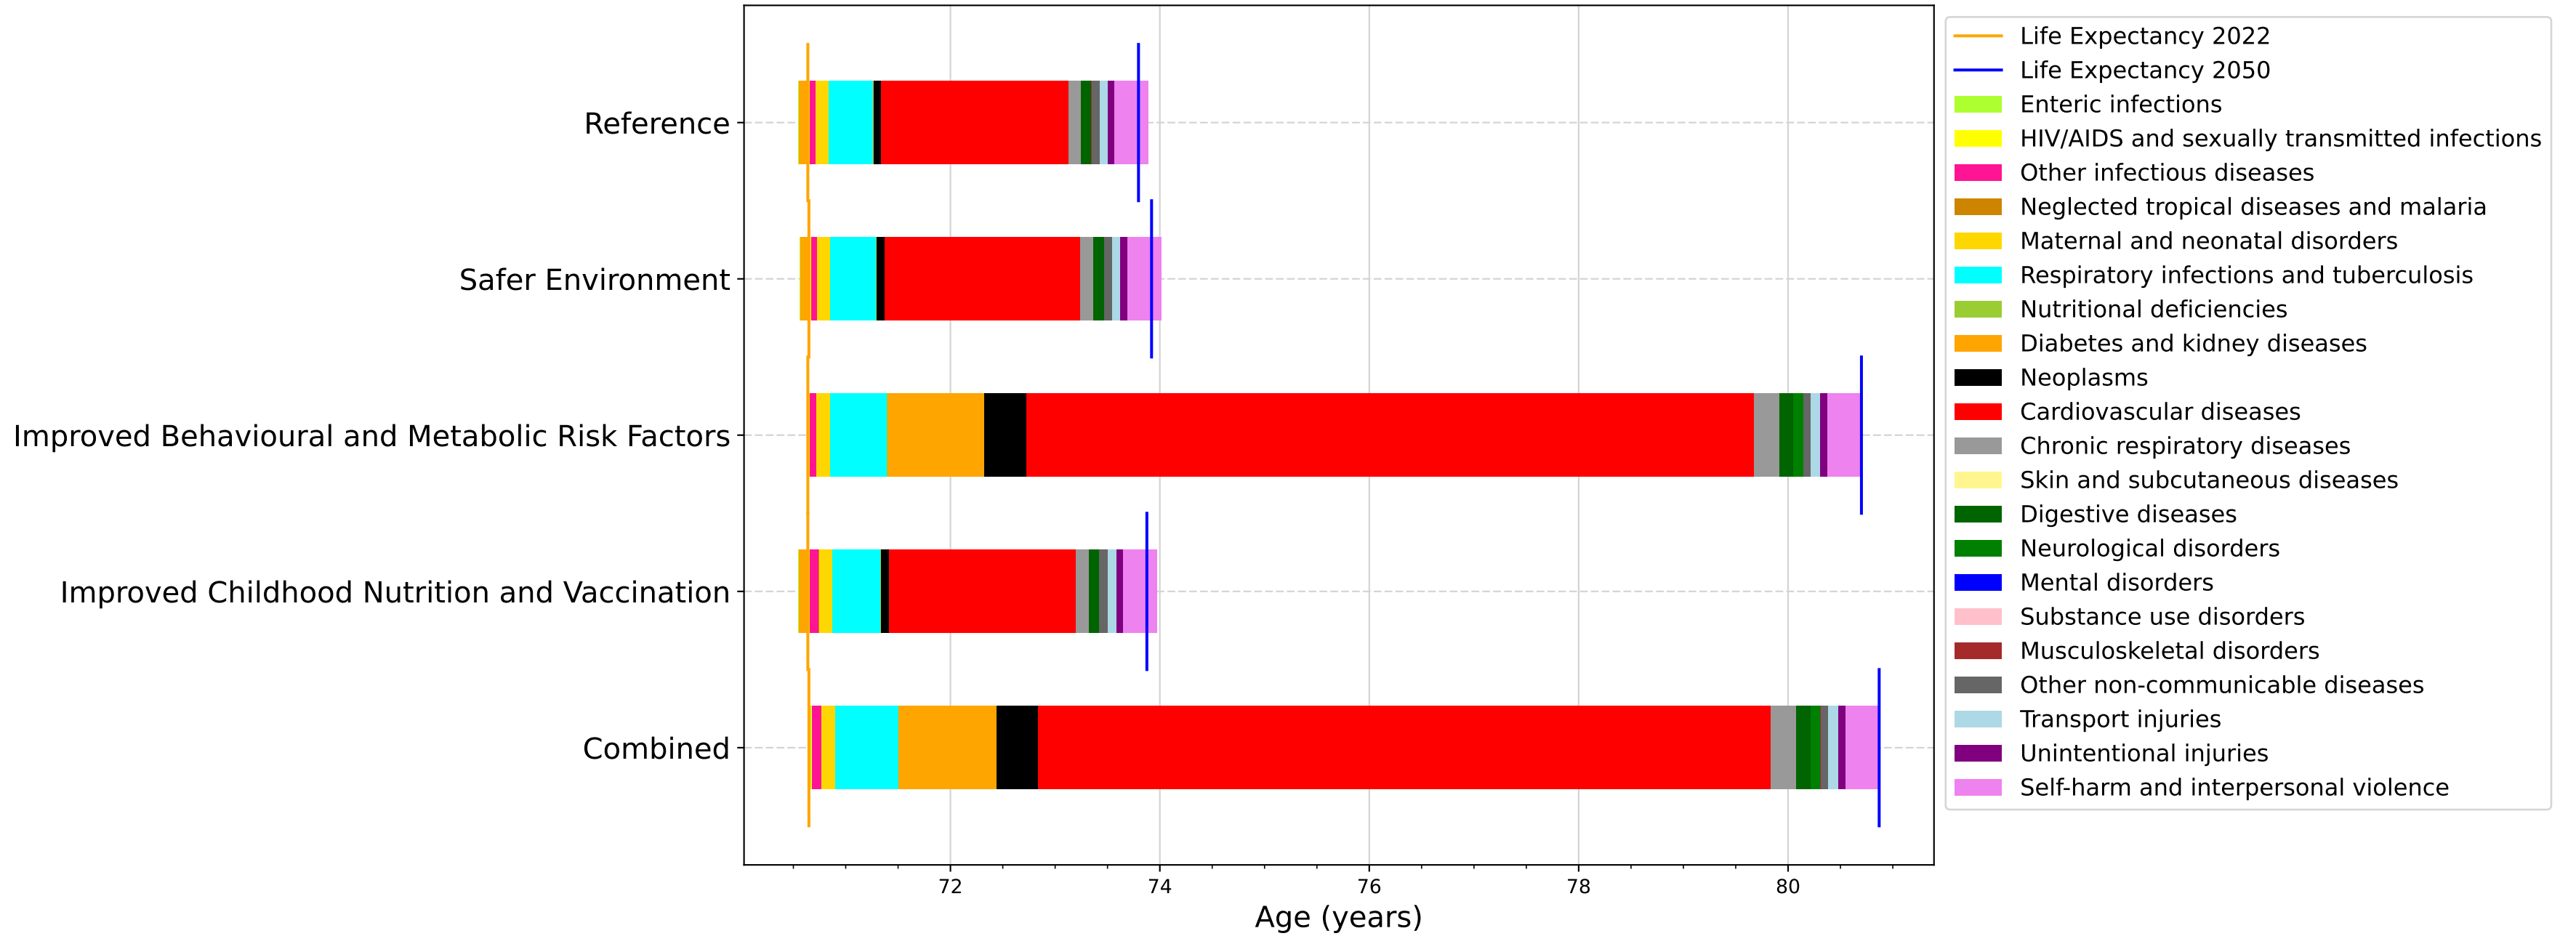



Taiwan (Province of China)

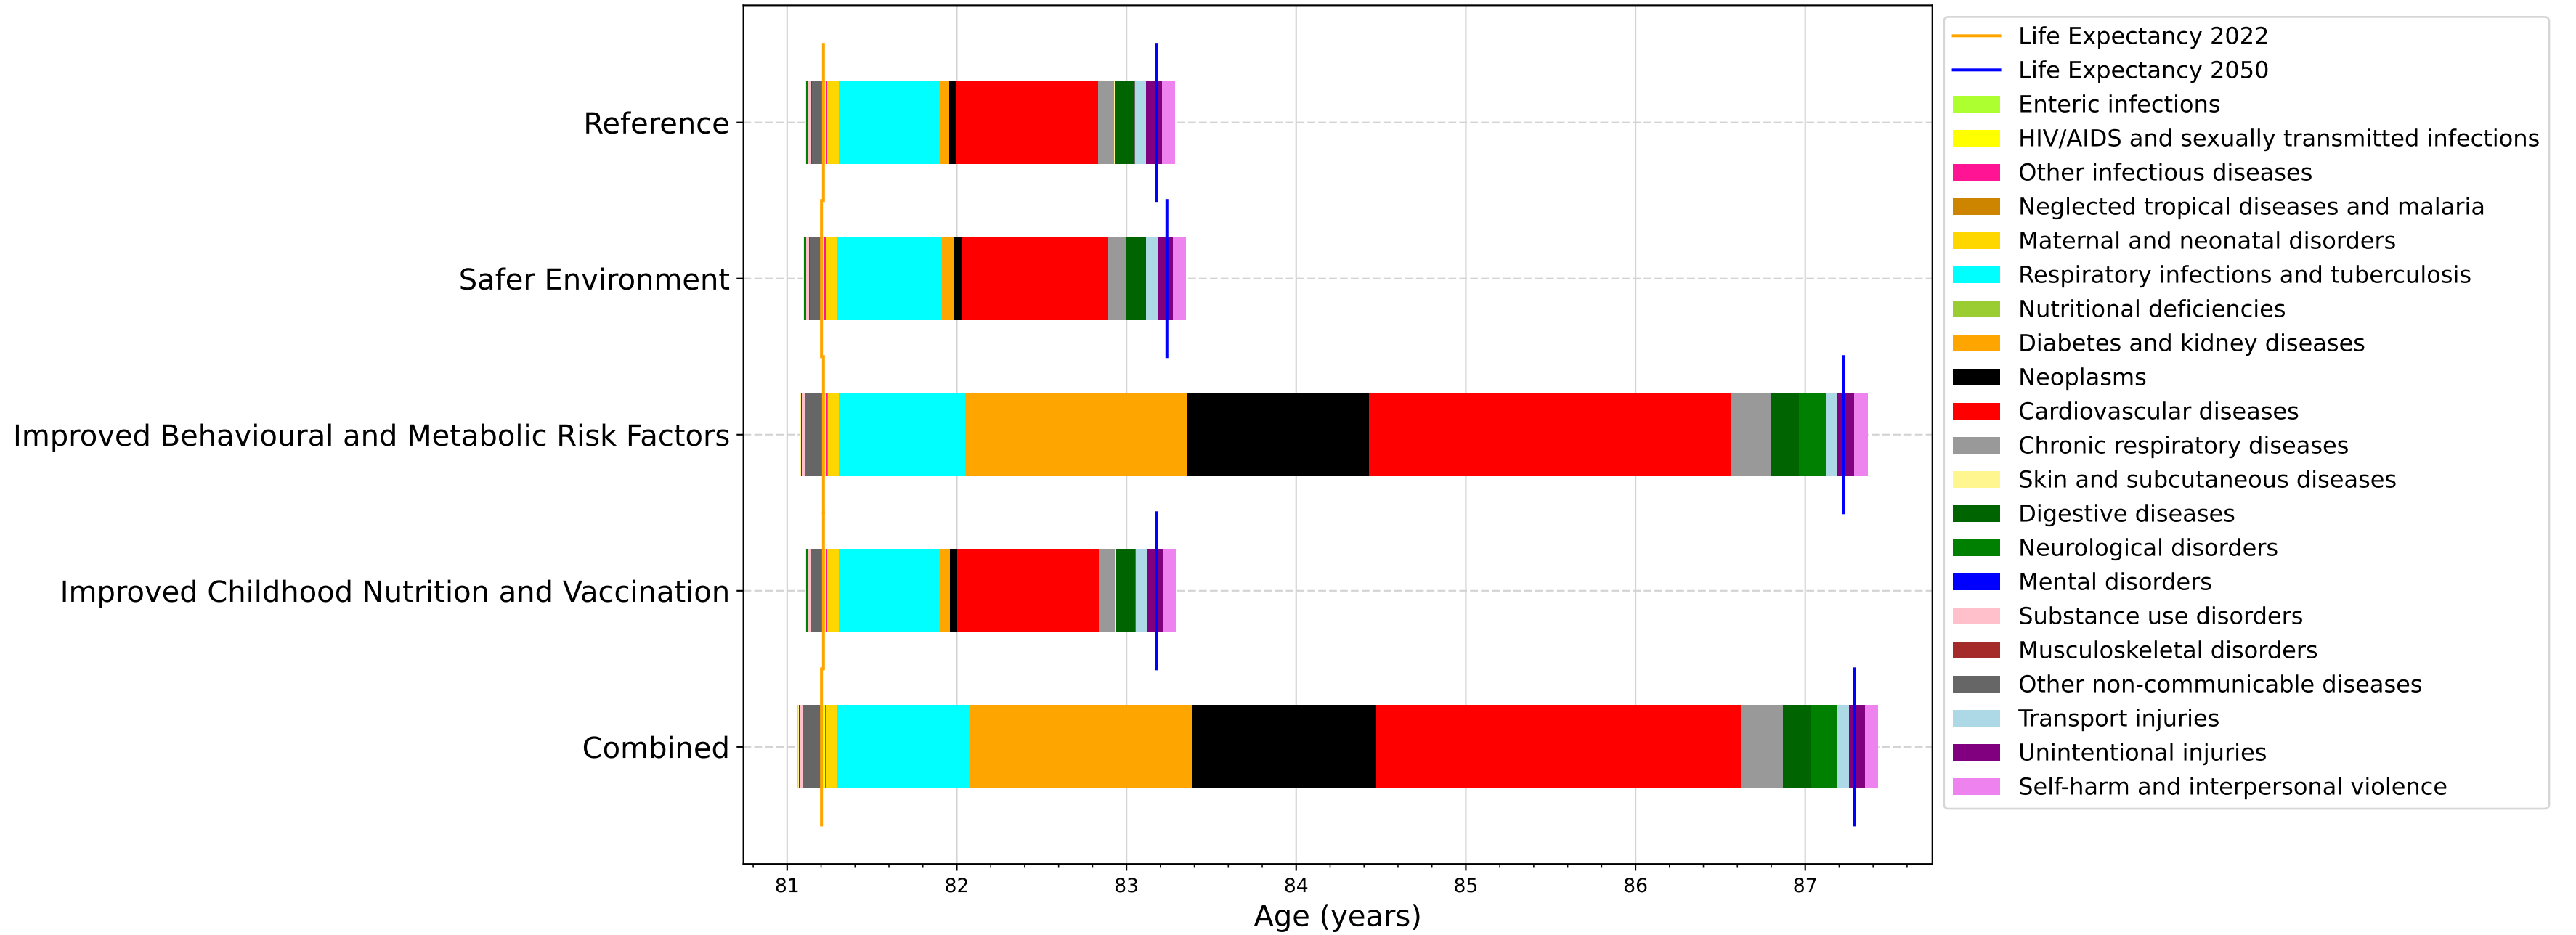

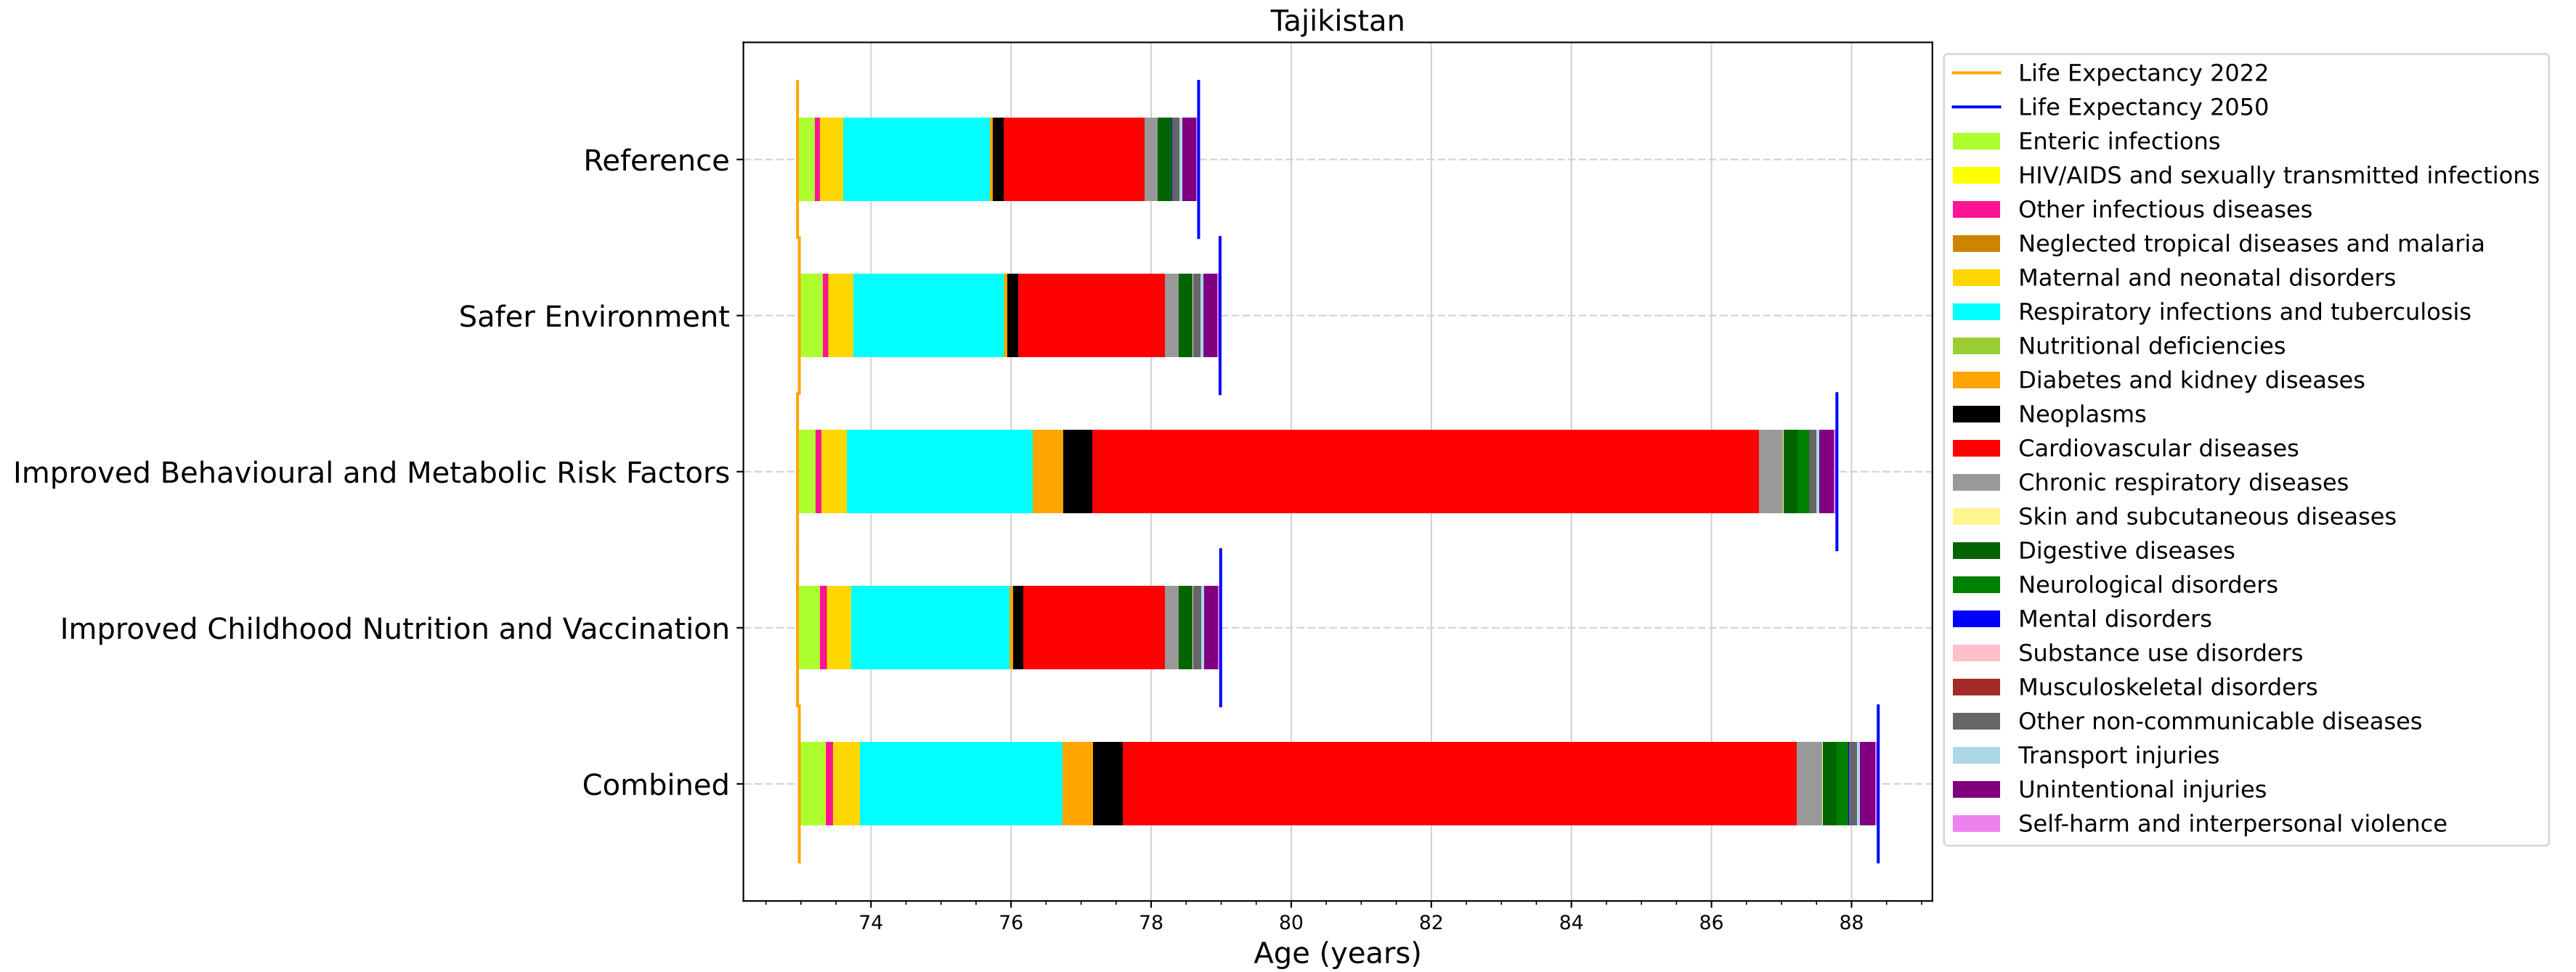

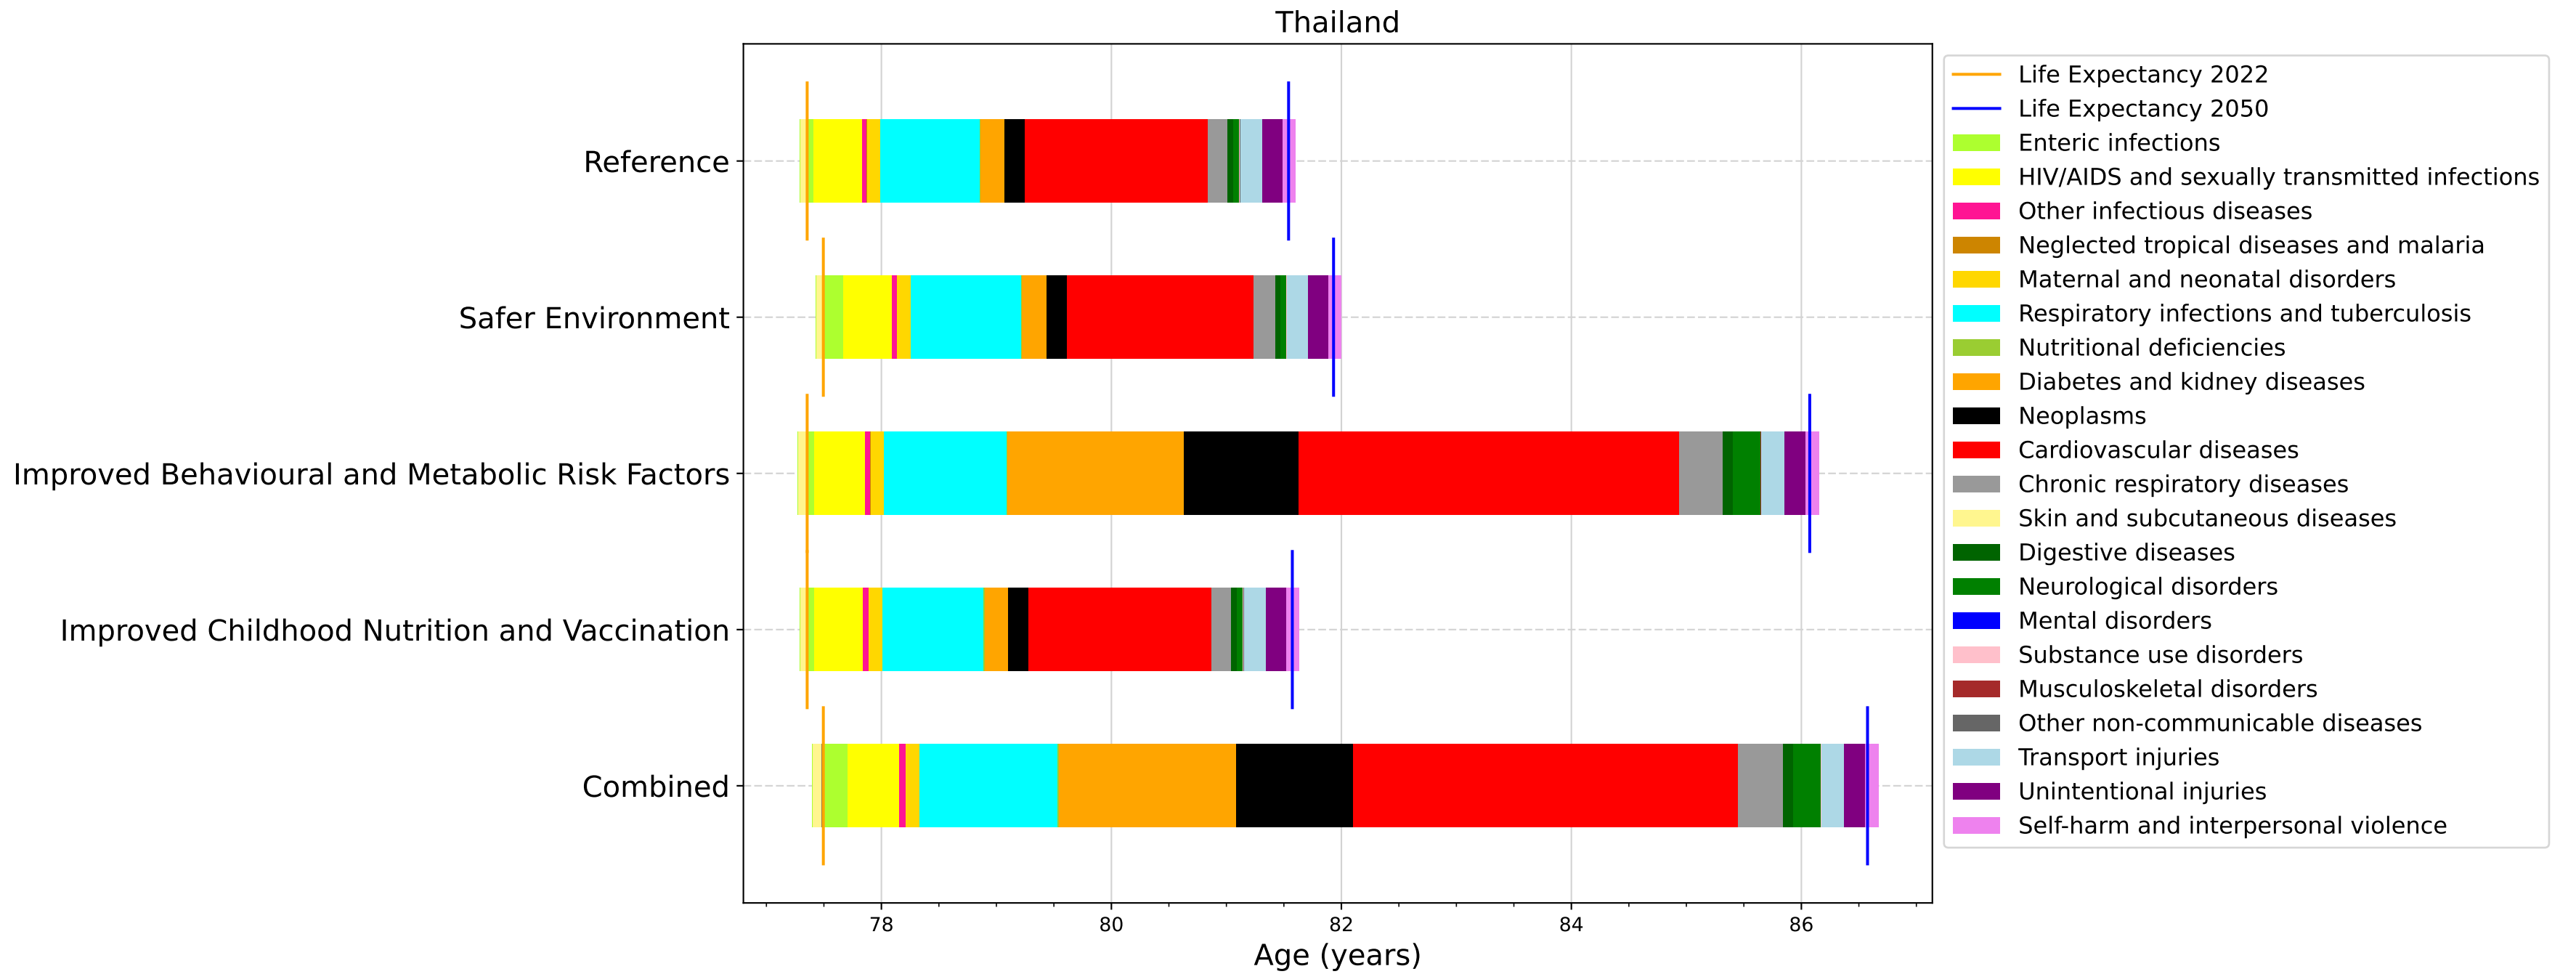

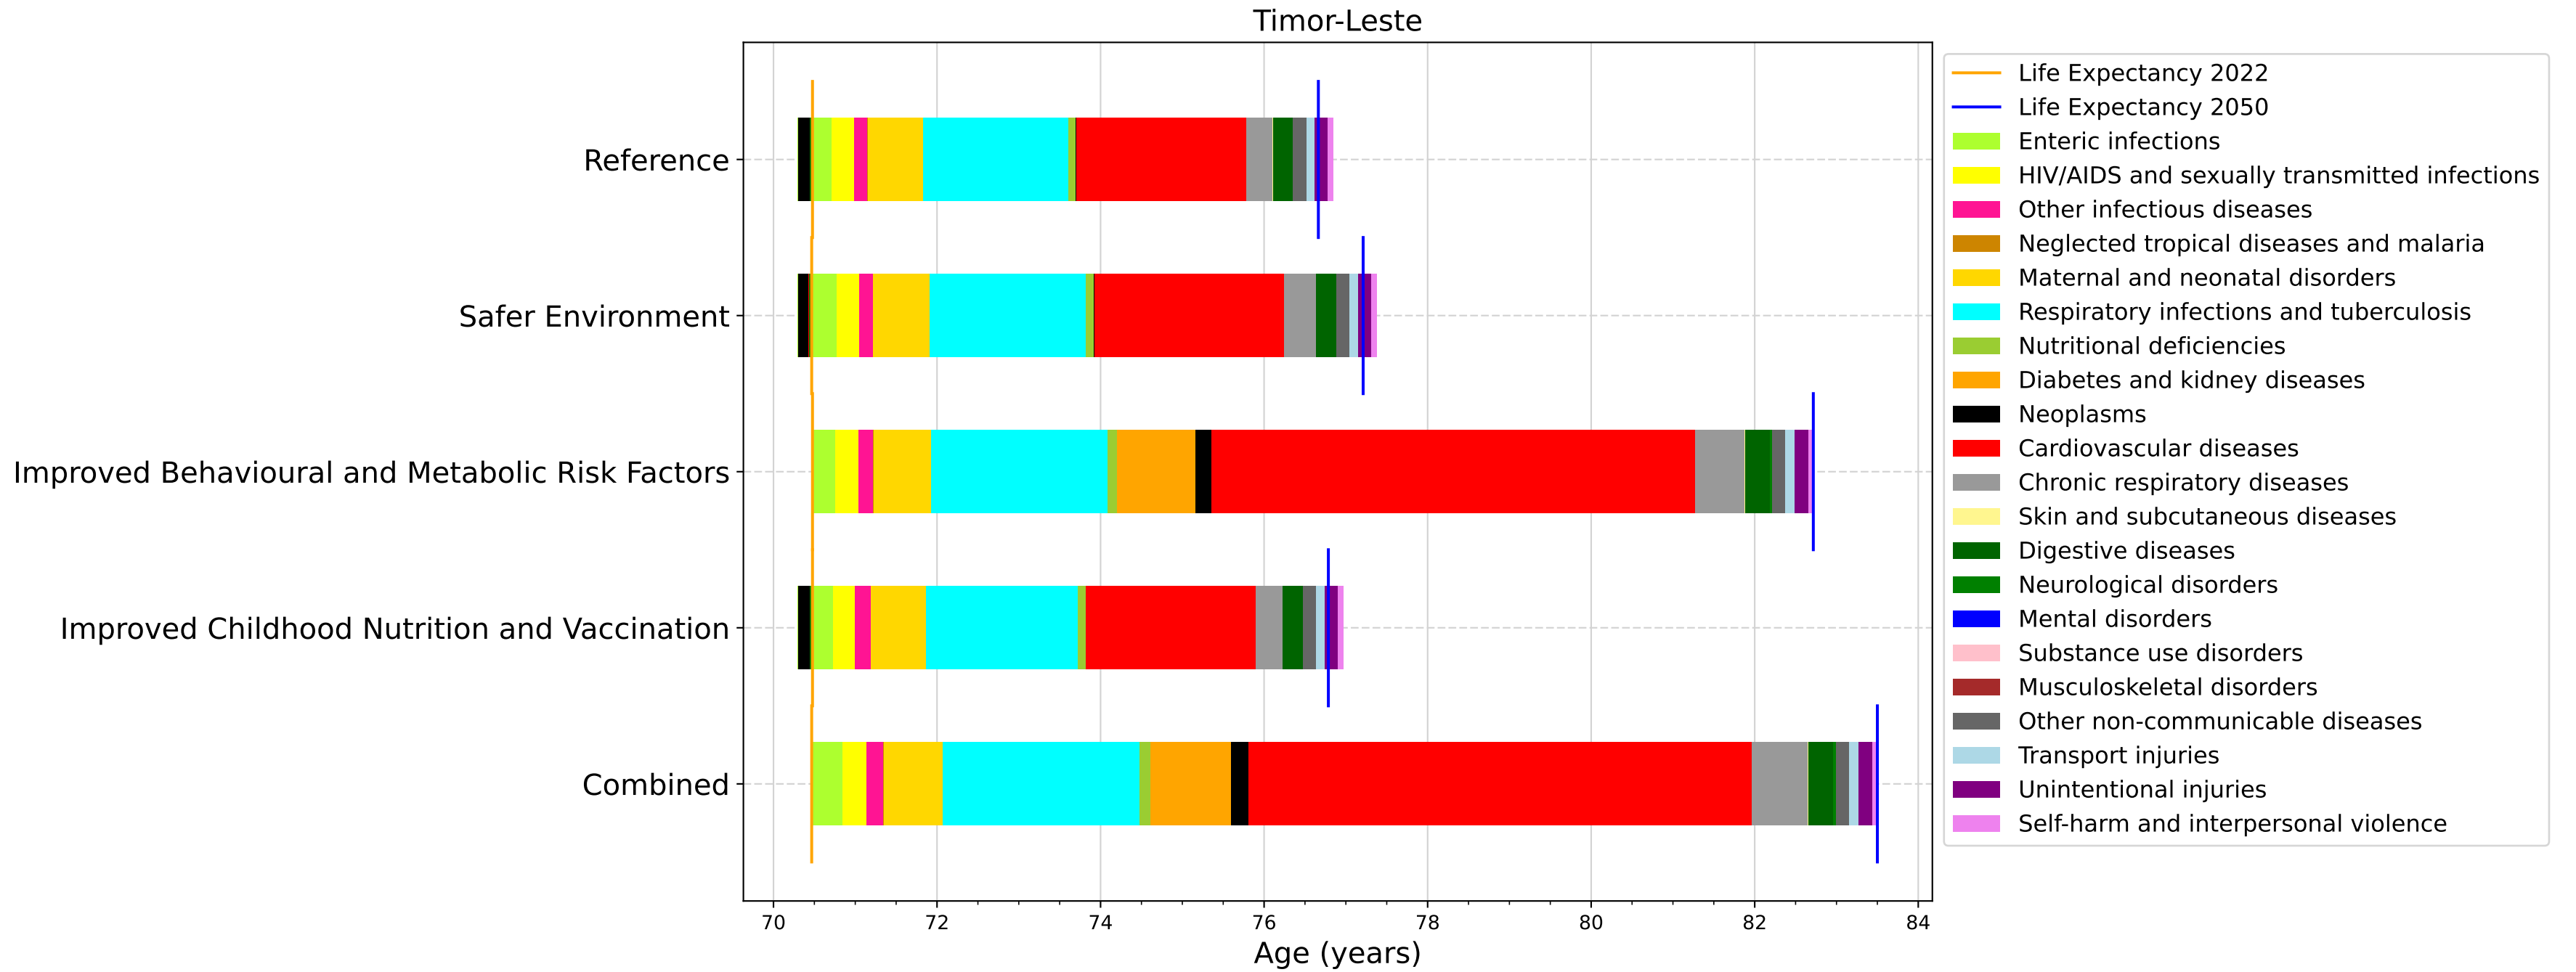

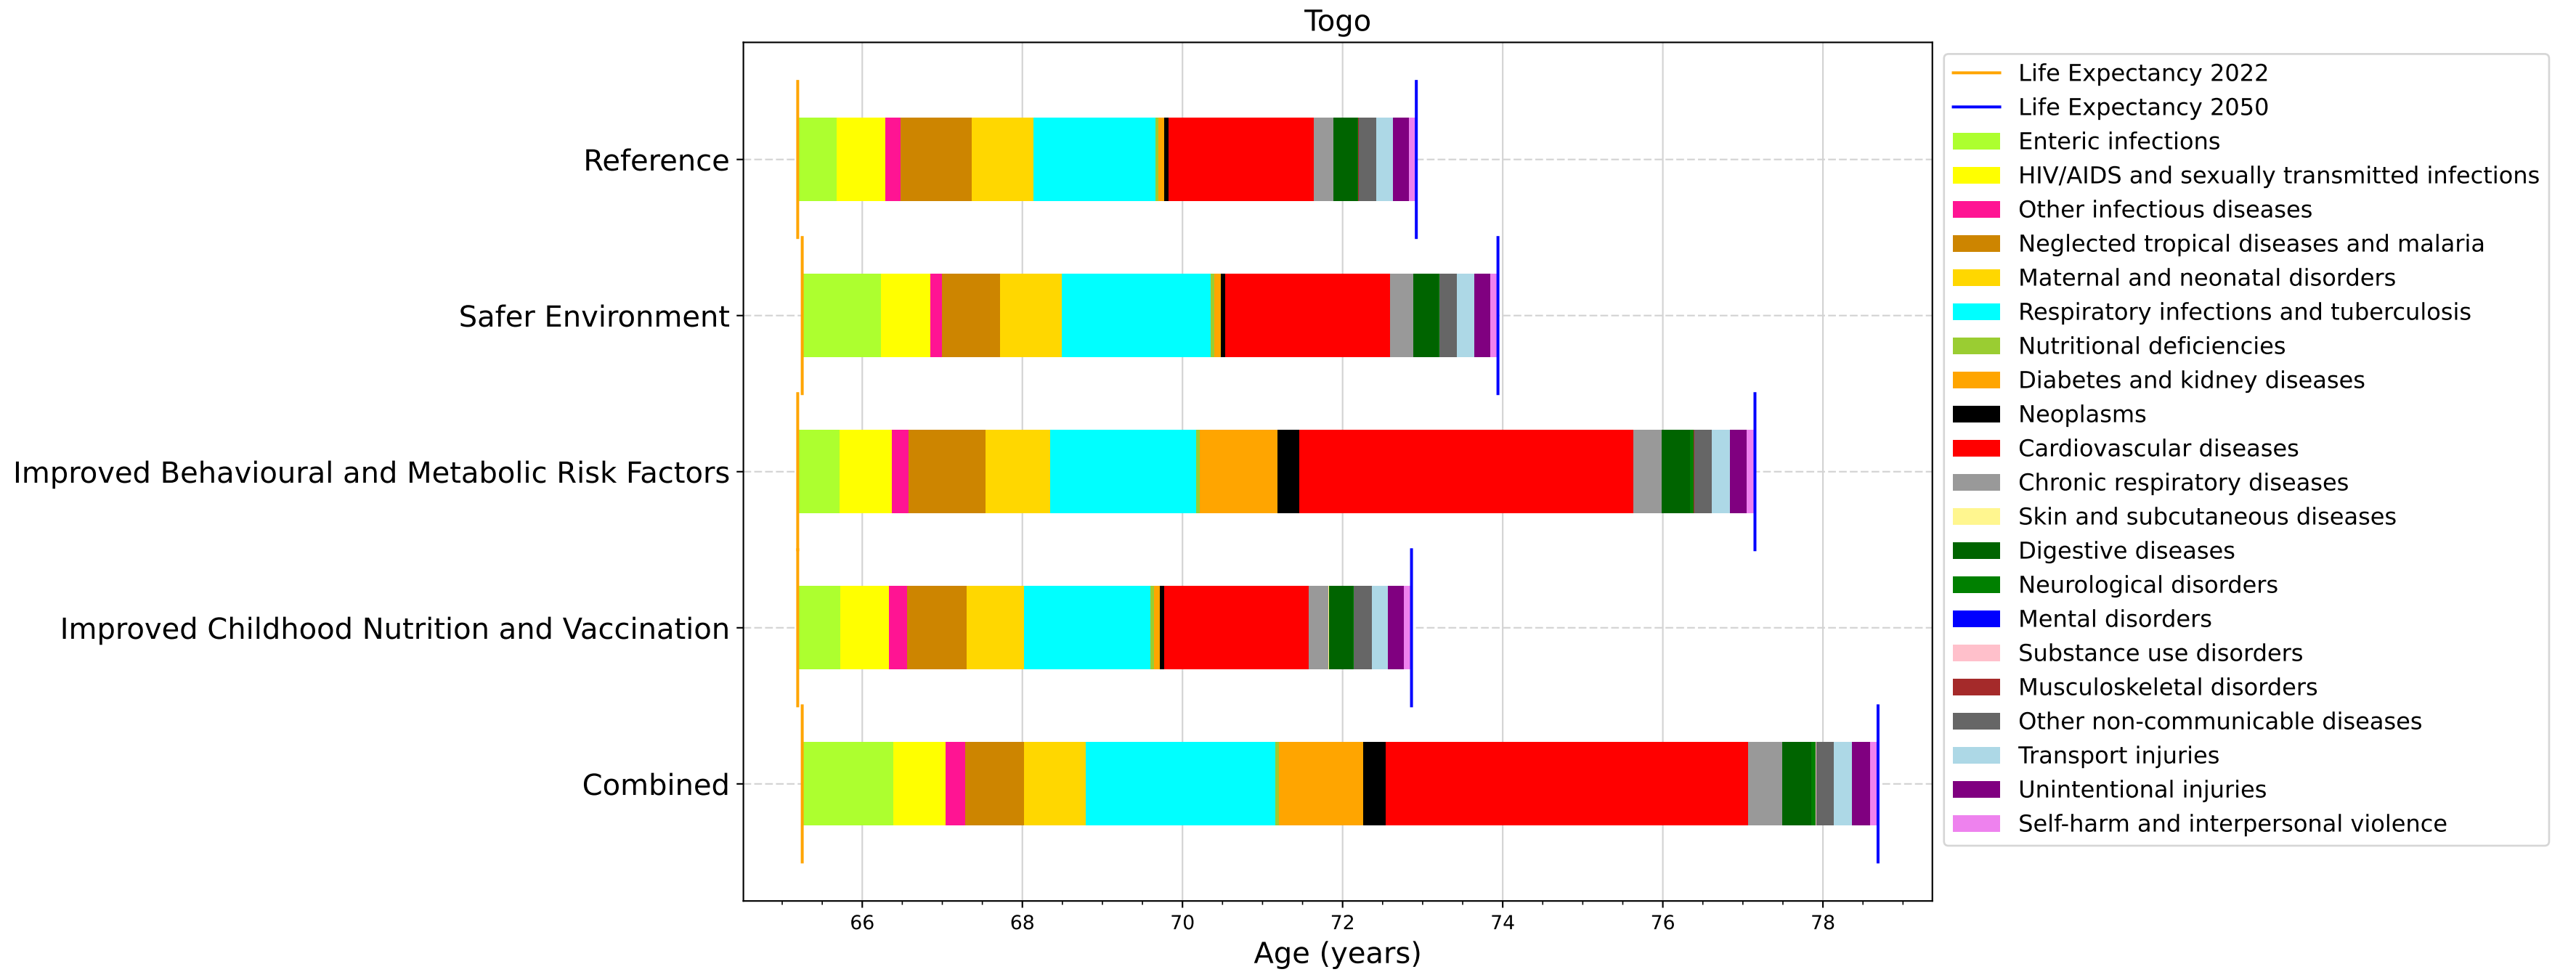

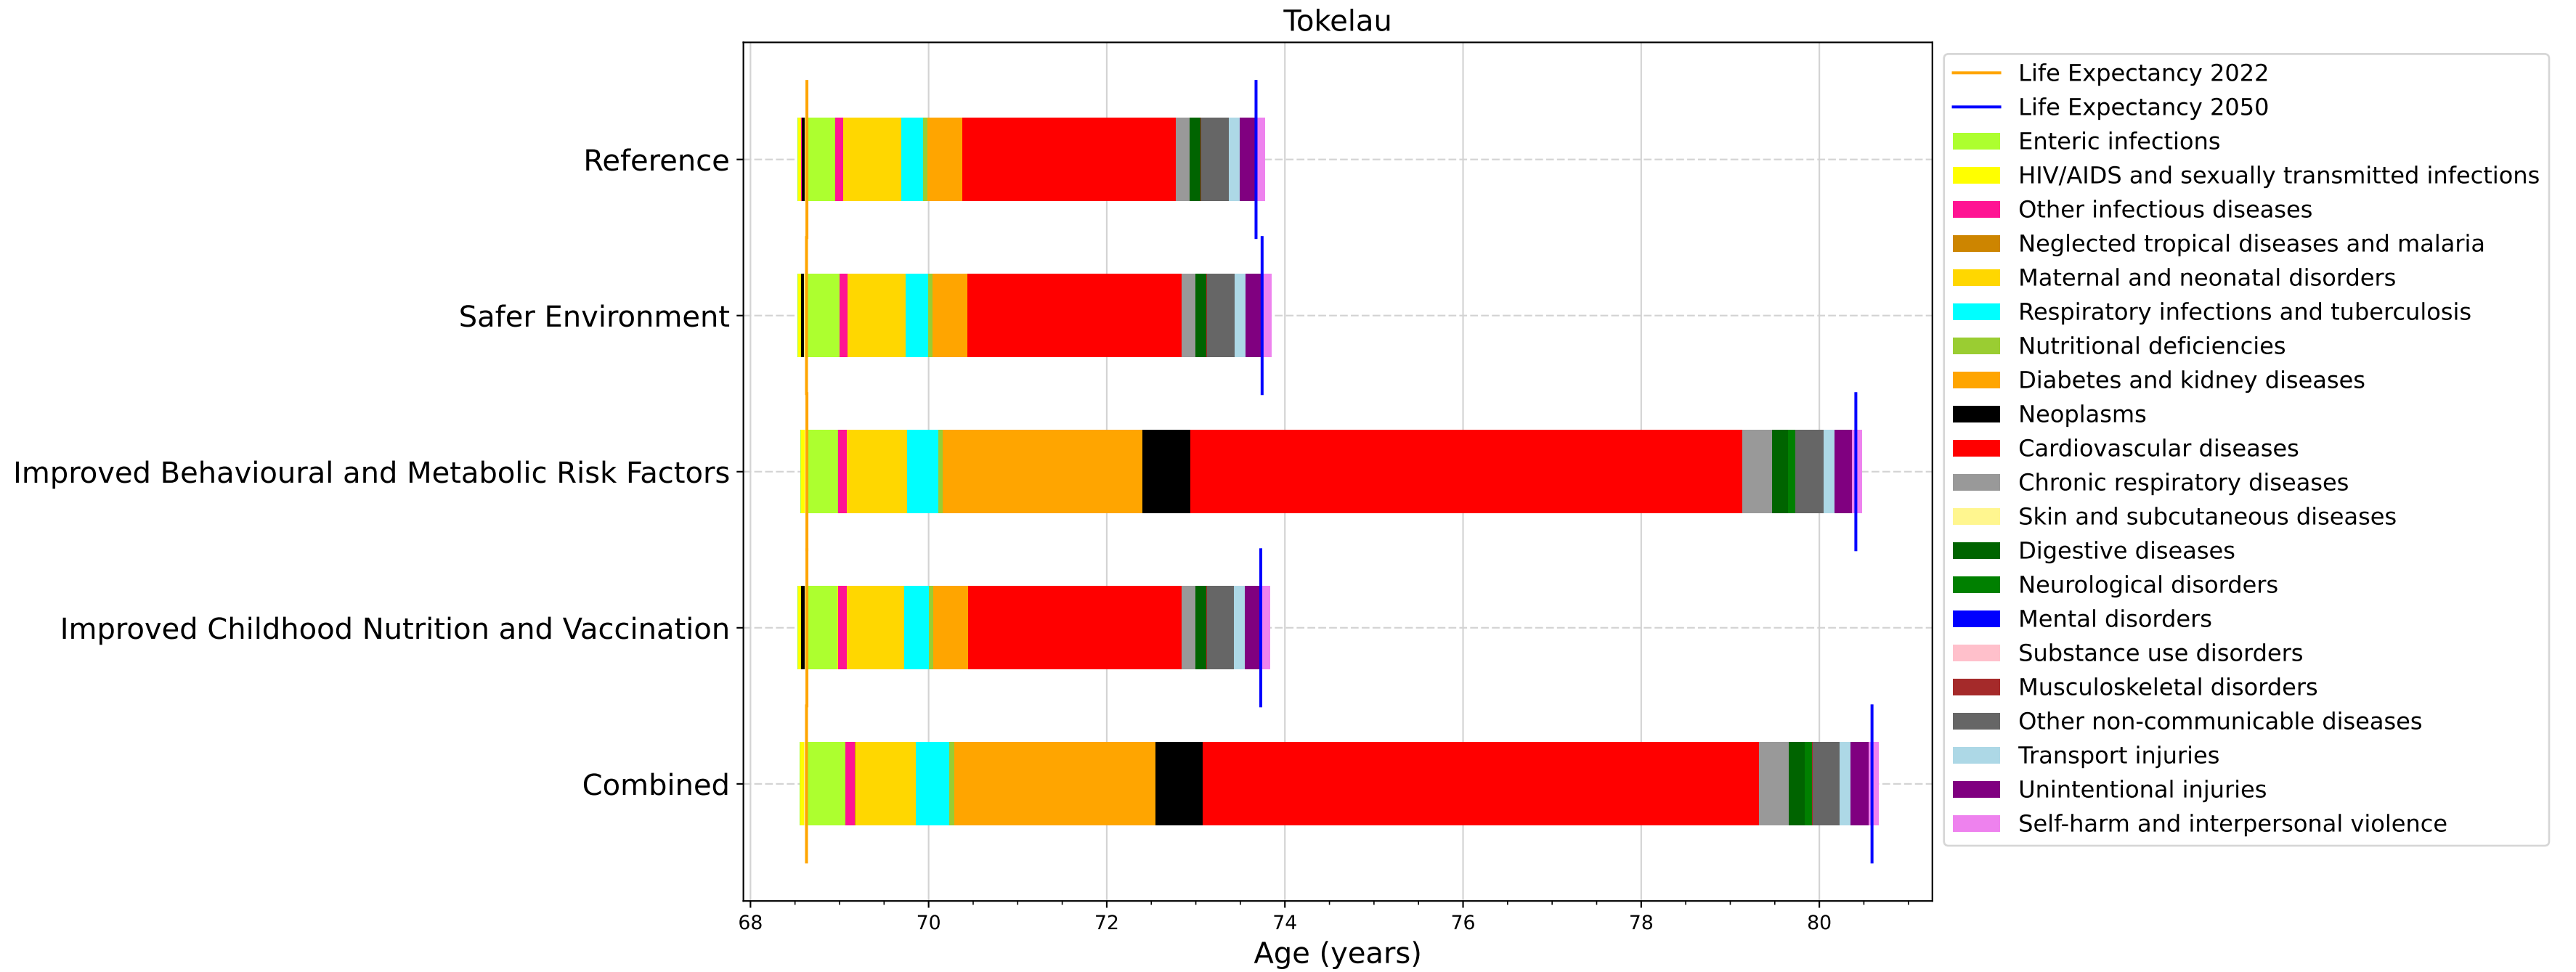

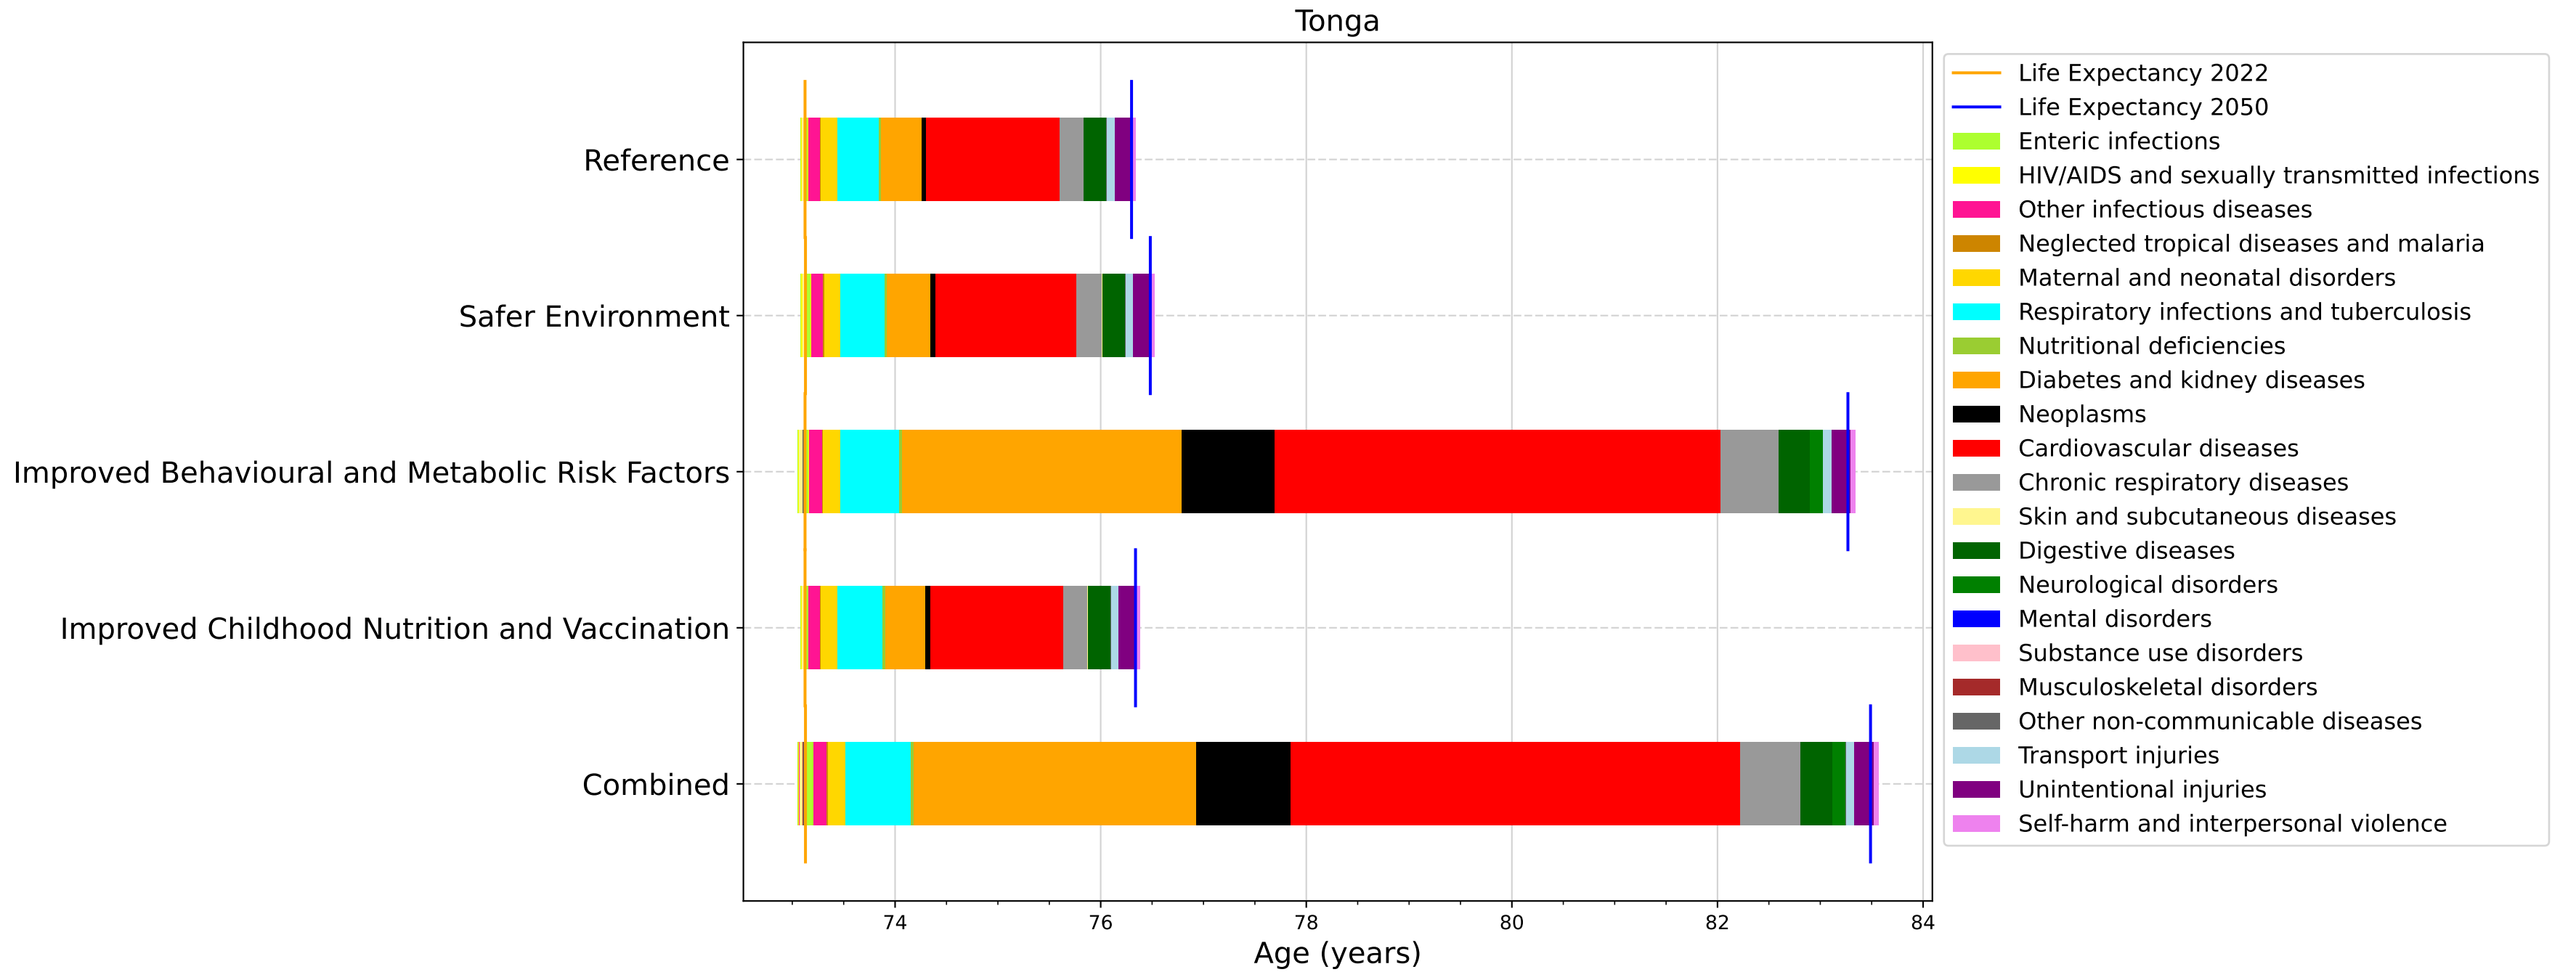

### Trinidad and Tobago

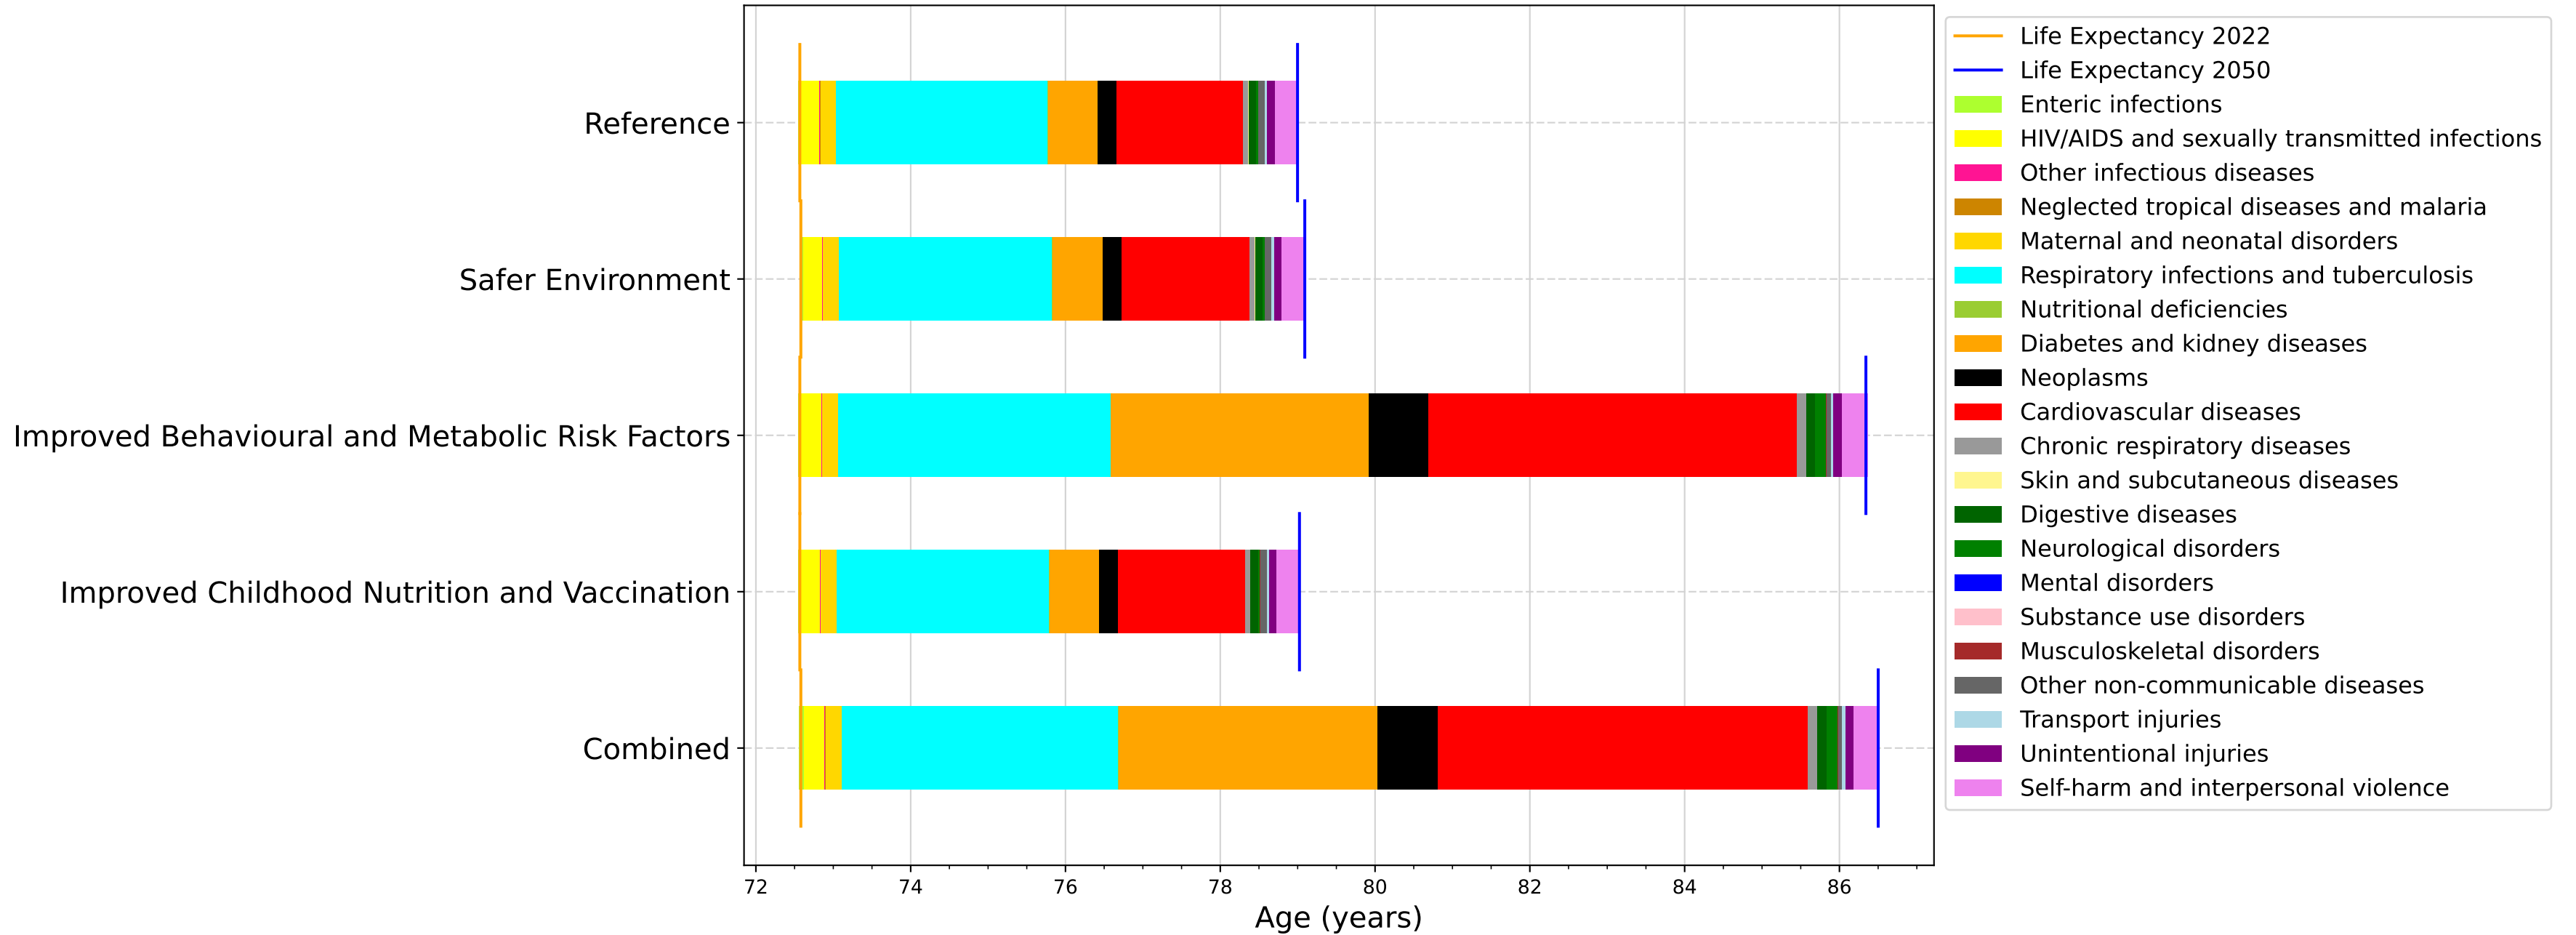



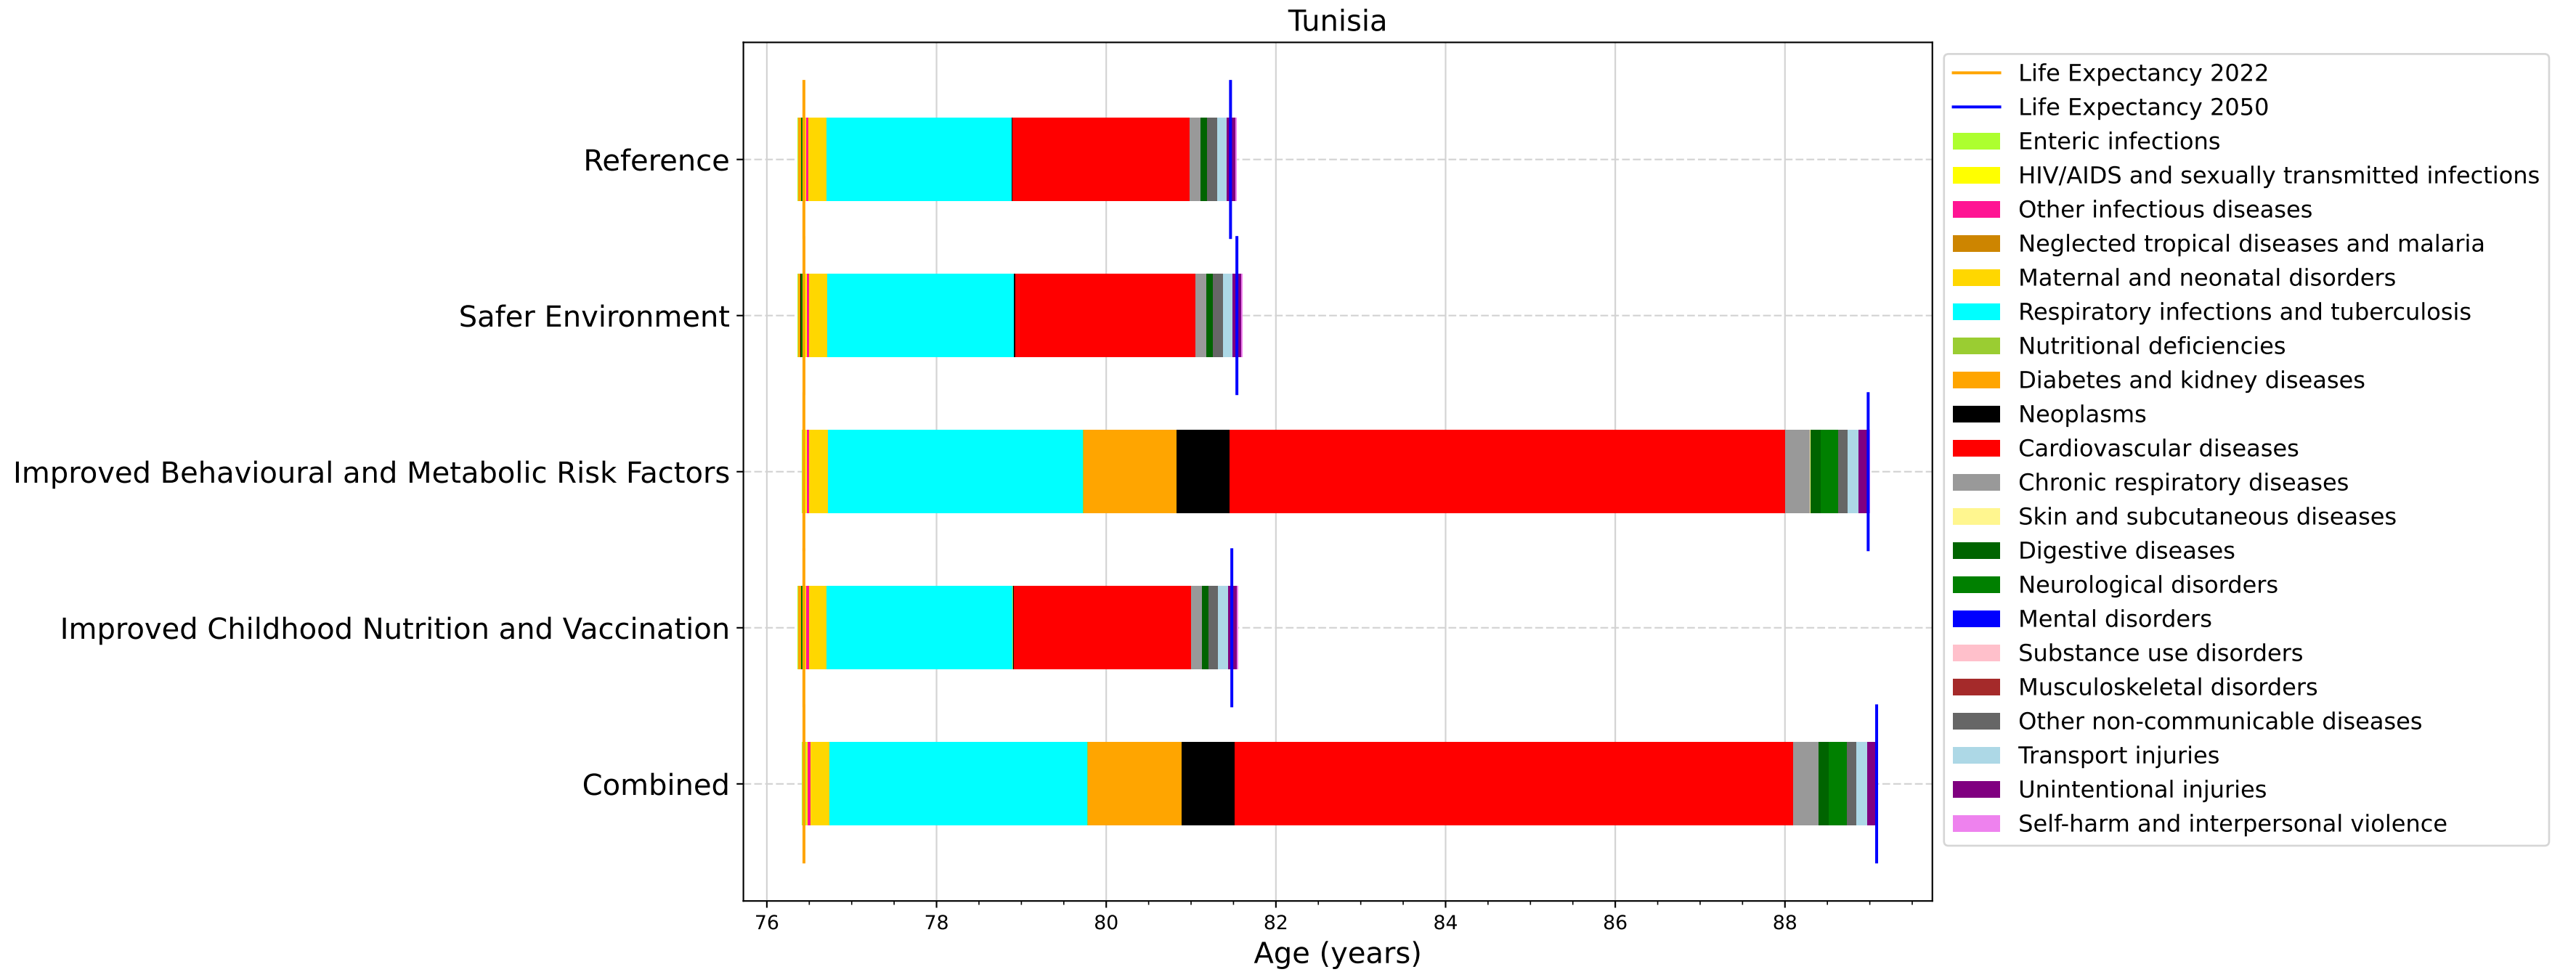

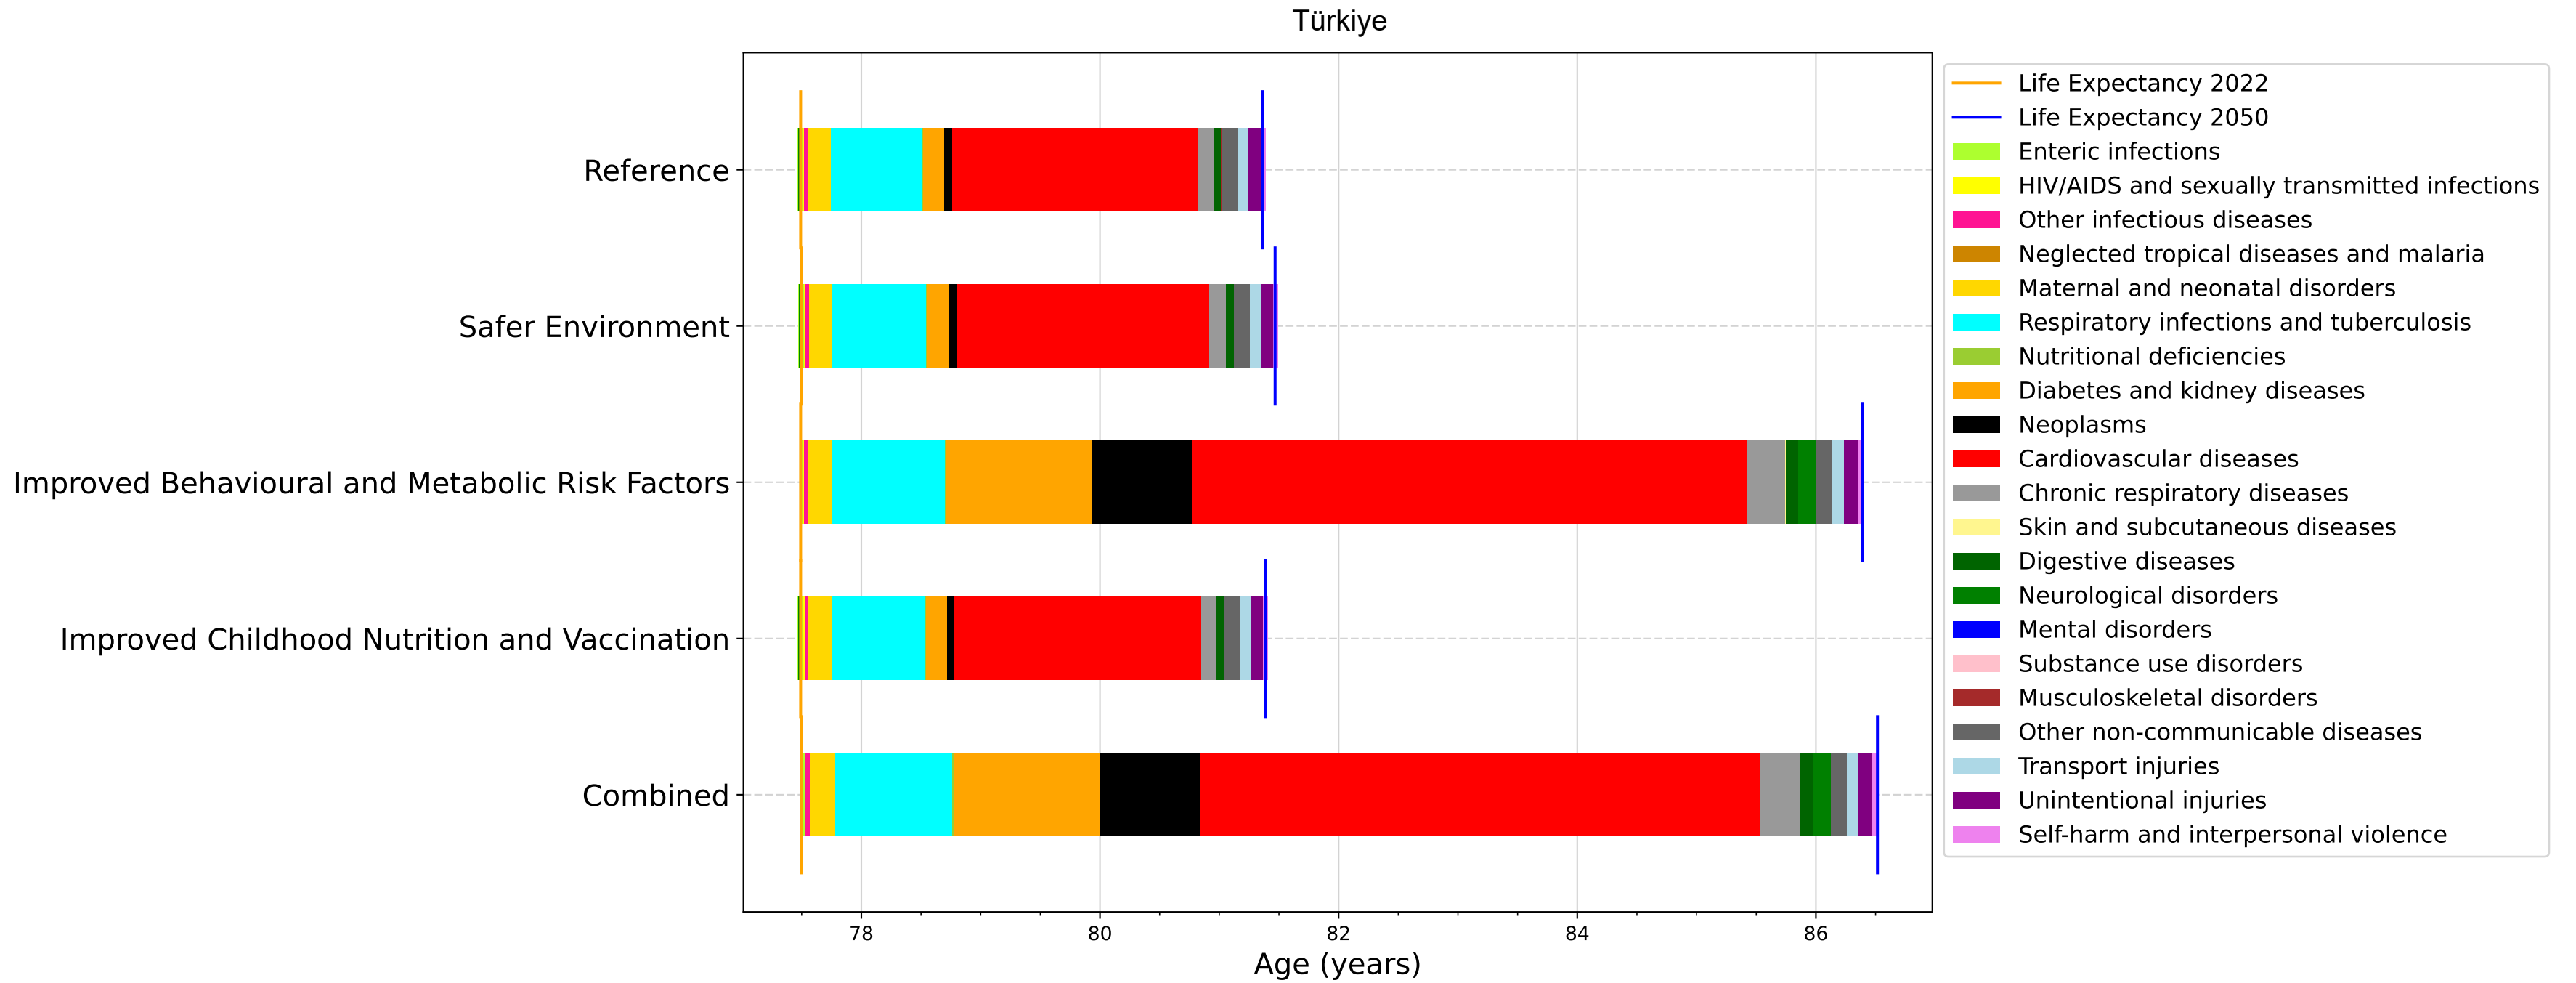

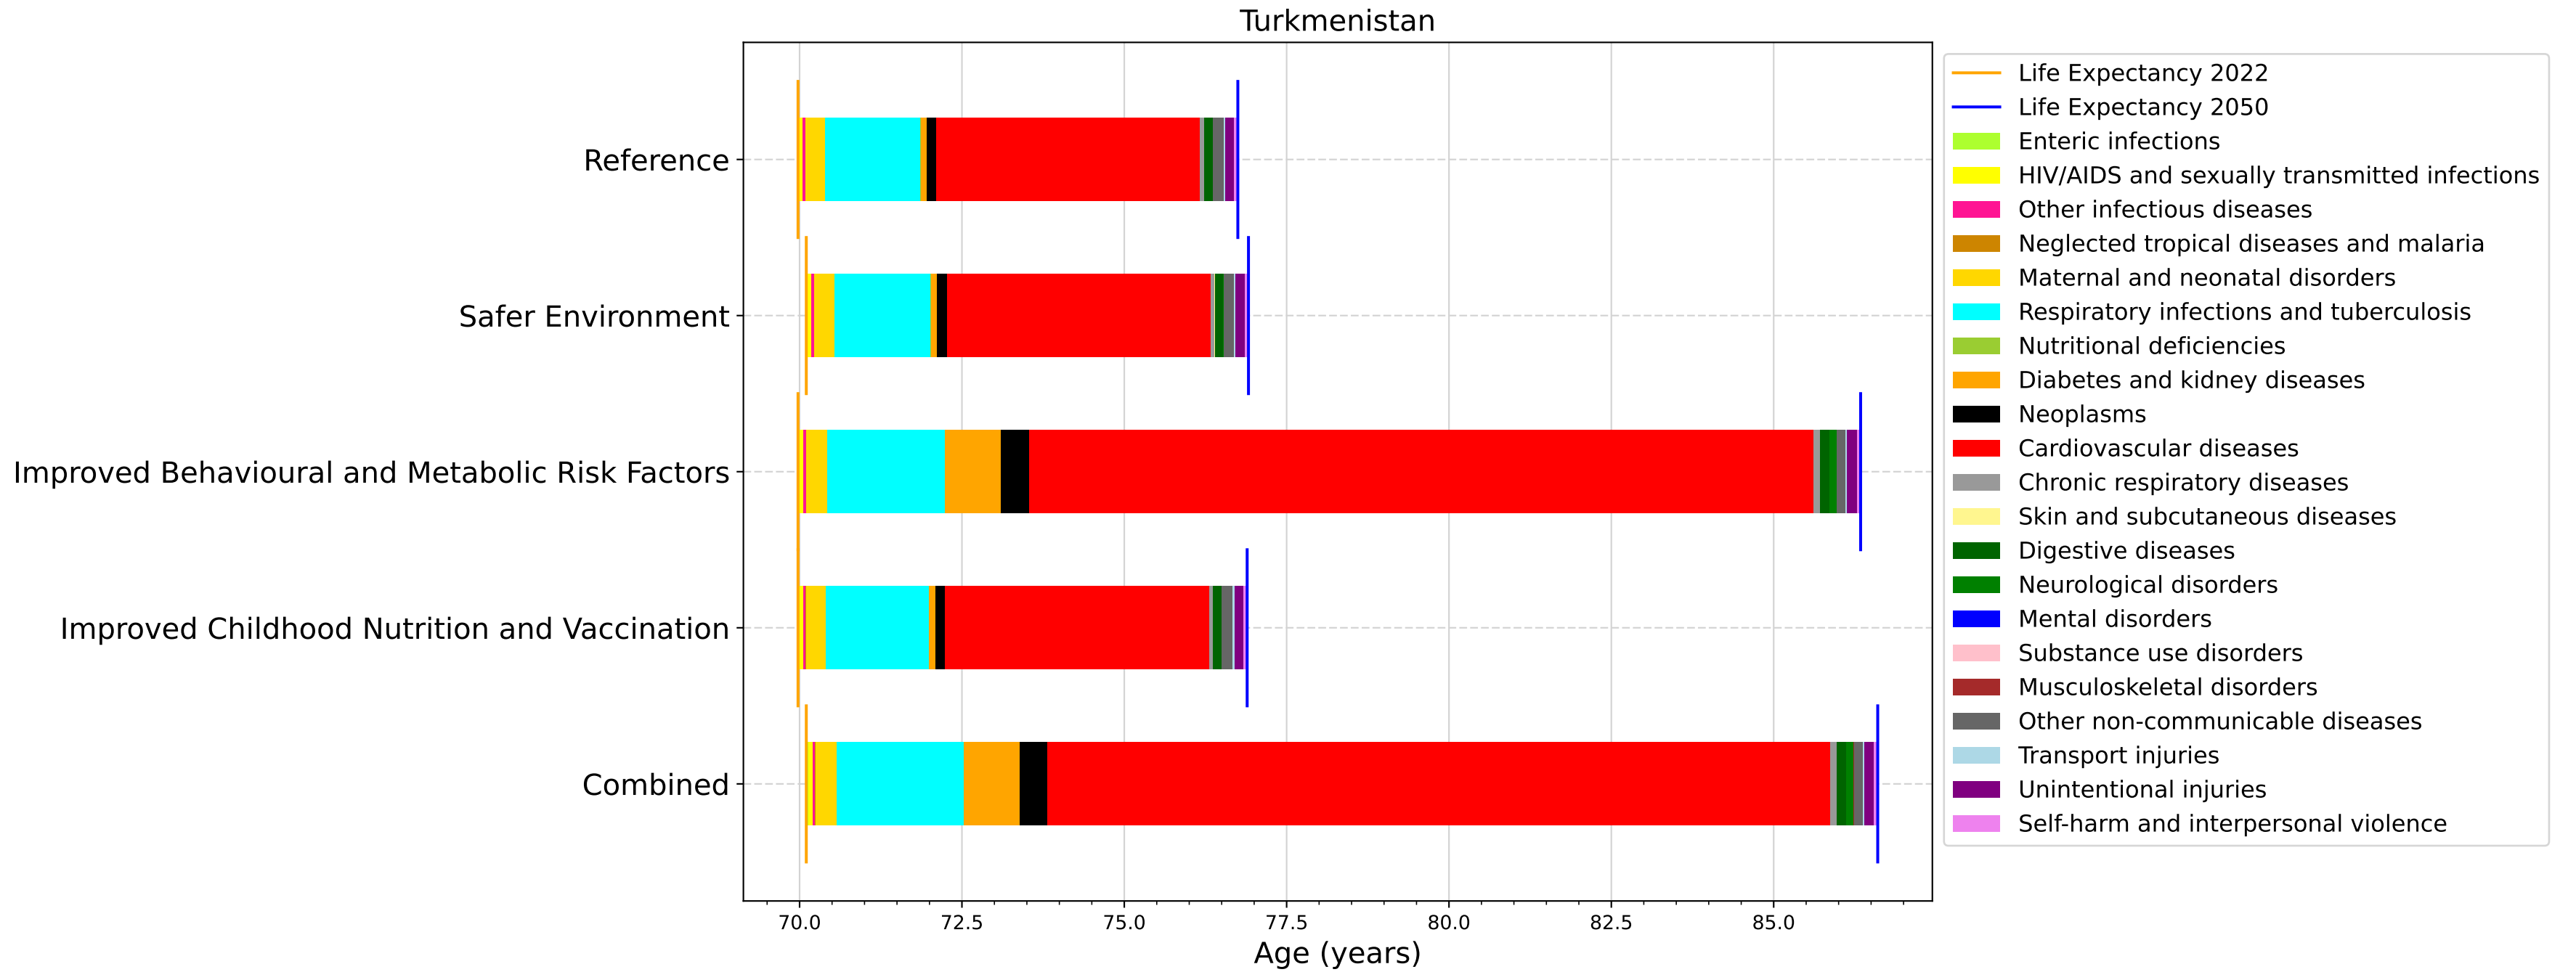

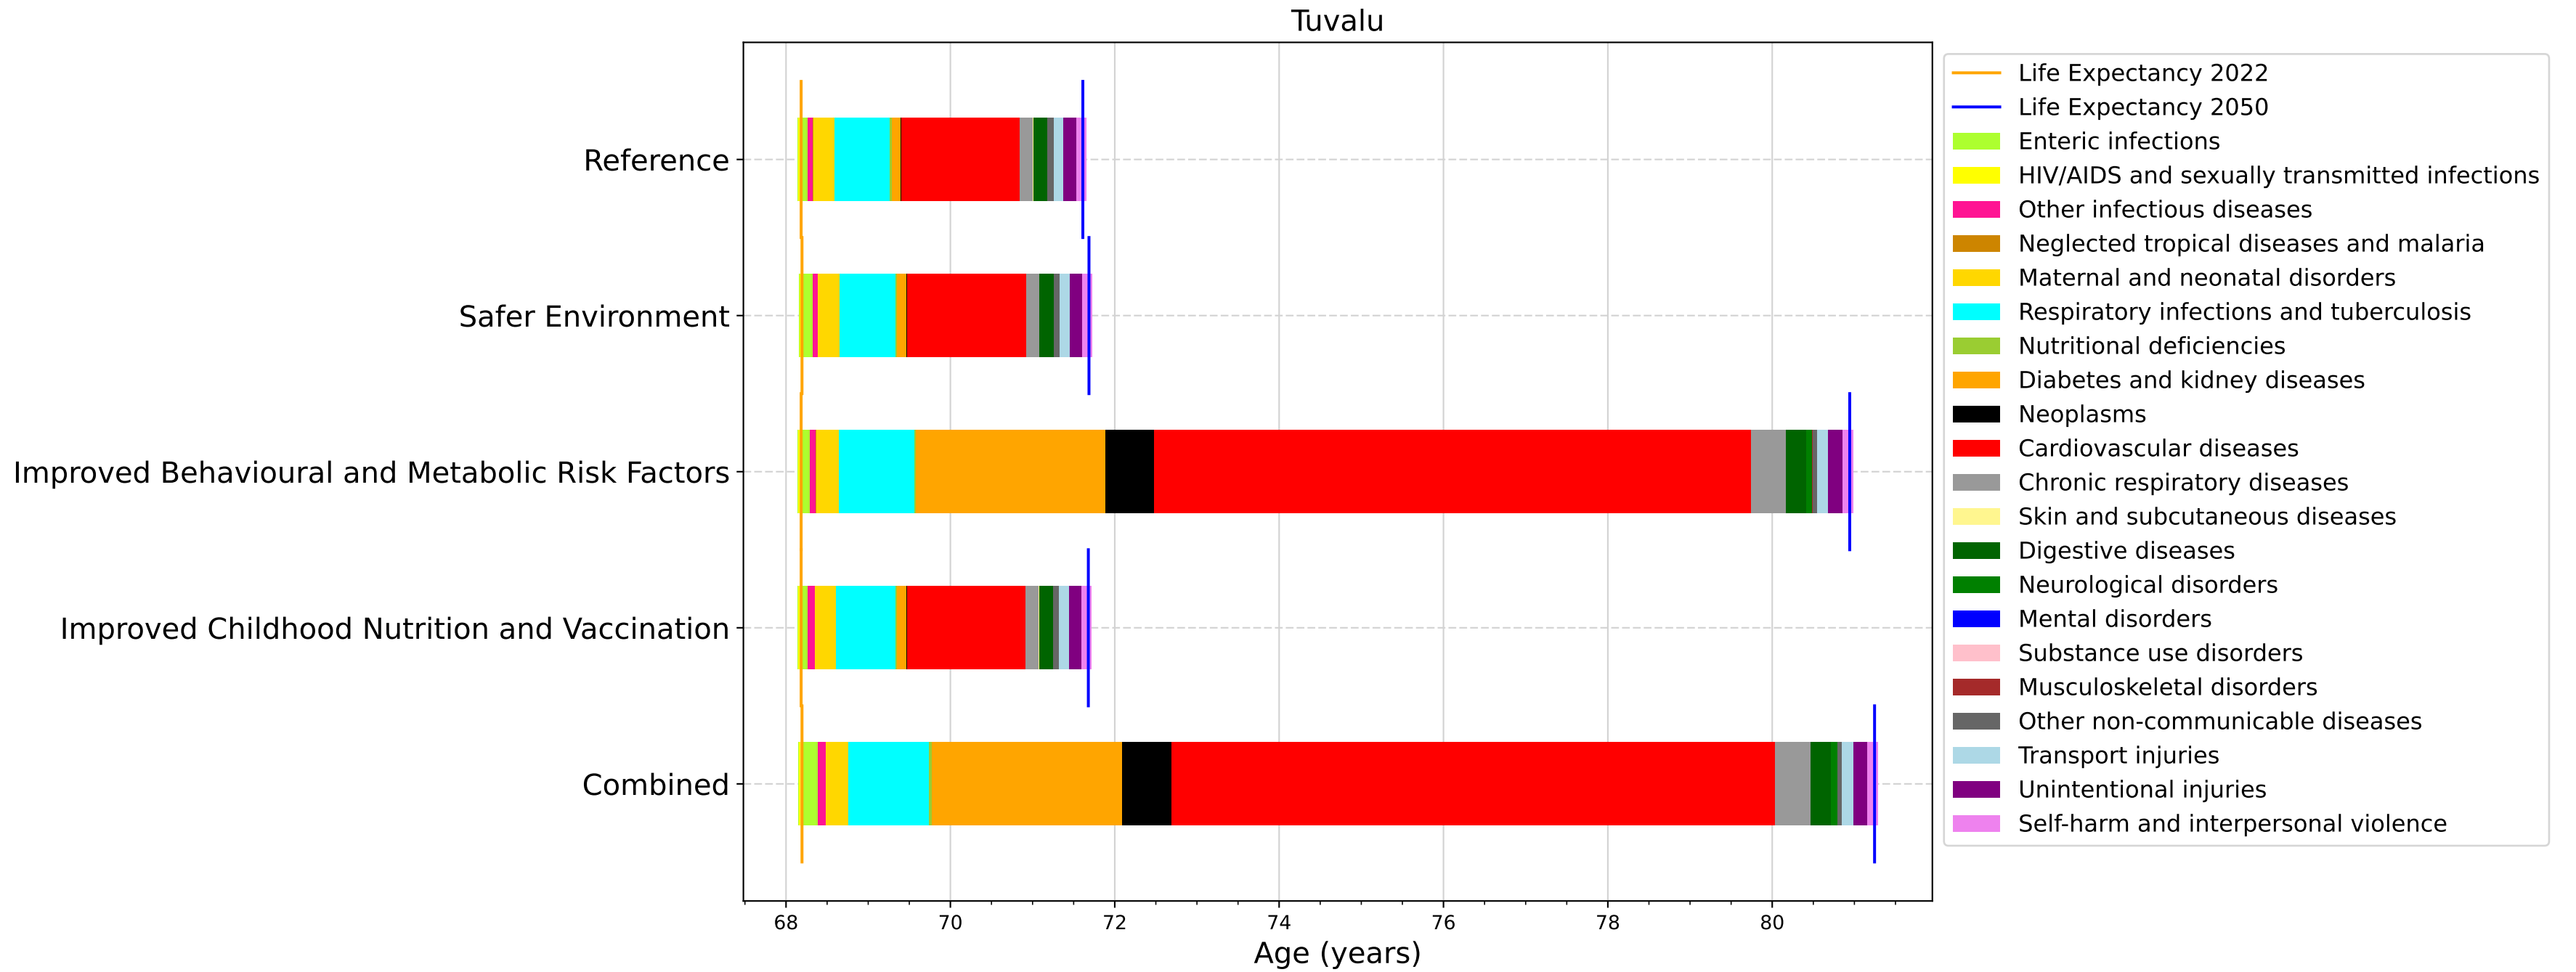

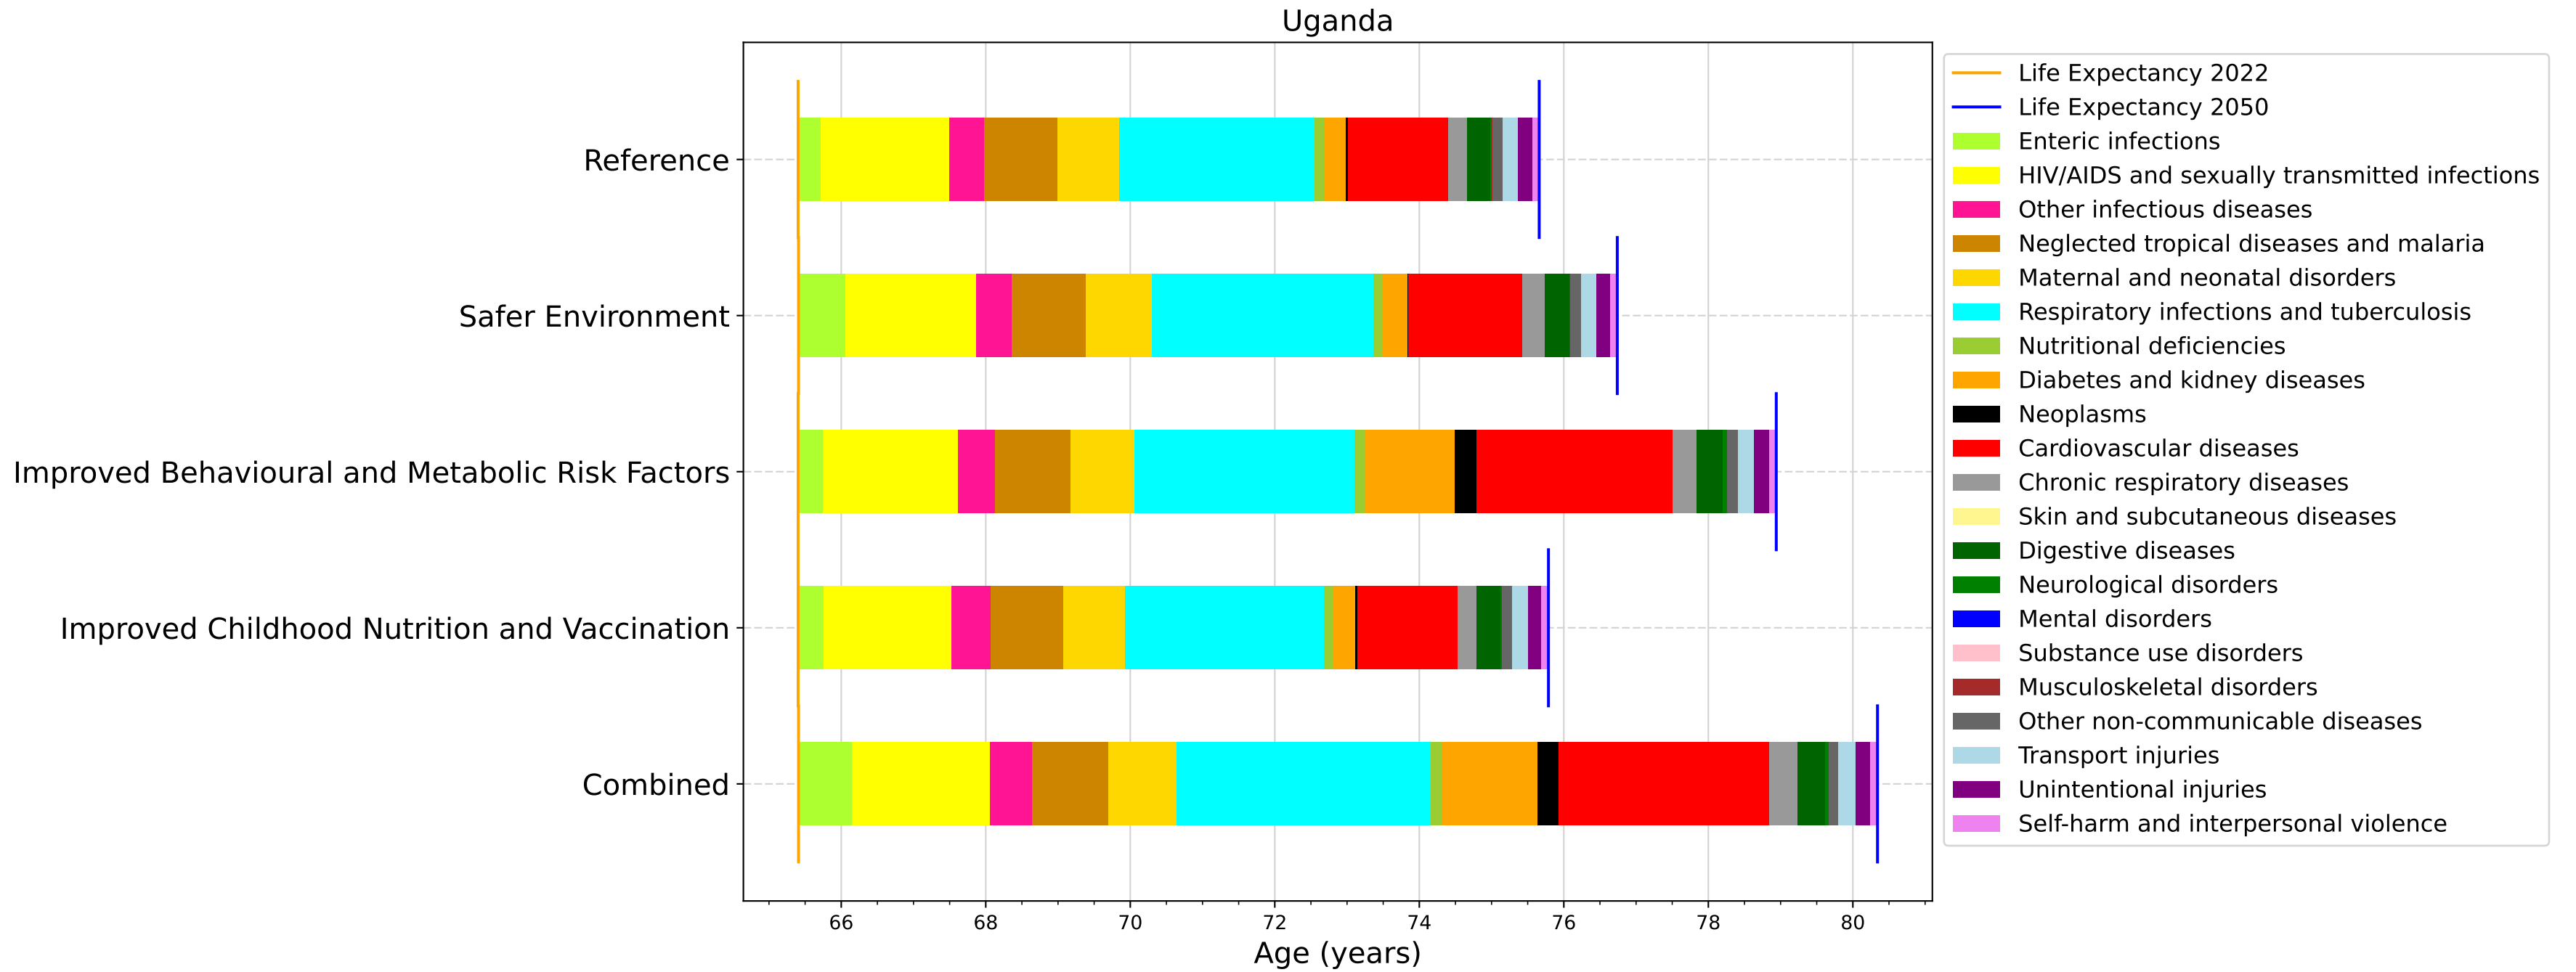

Ukraine

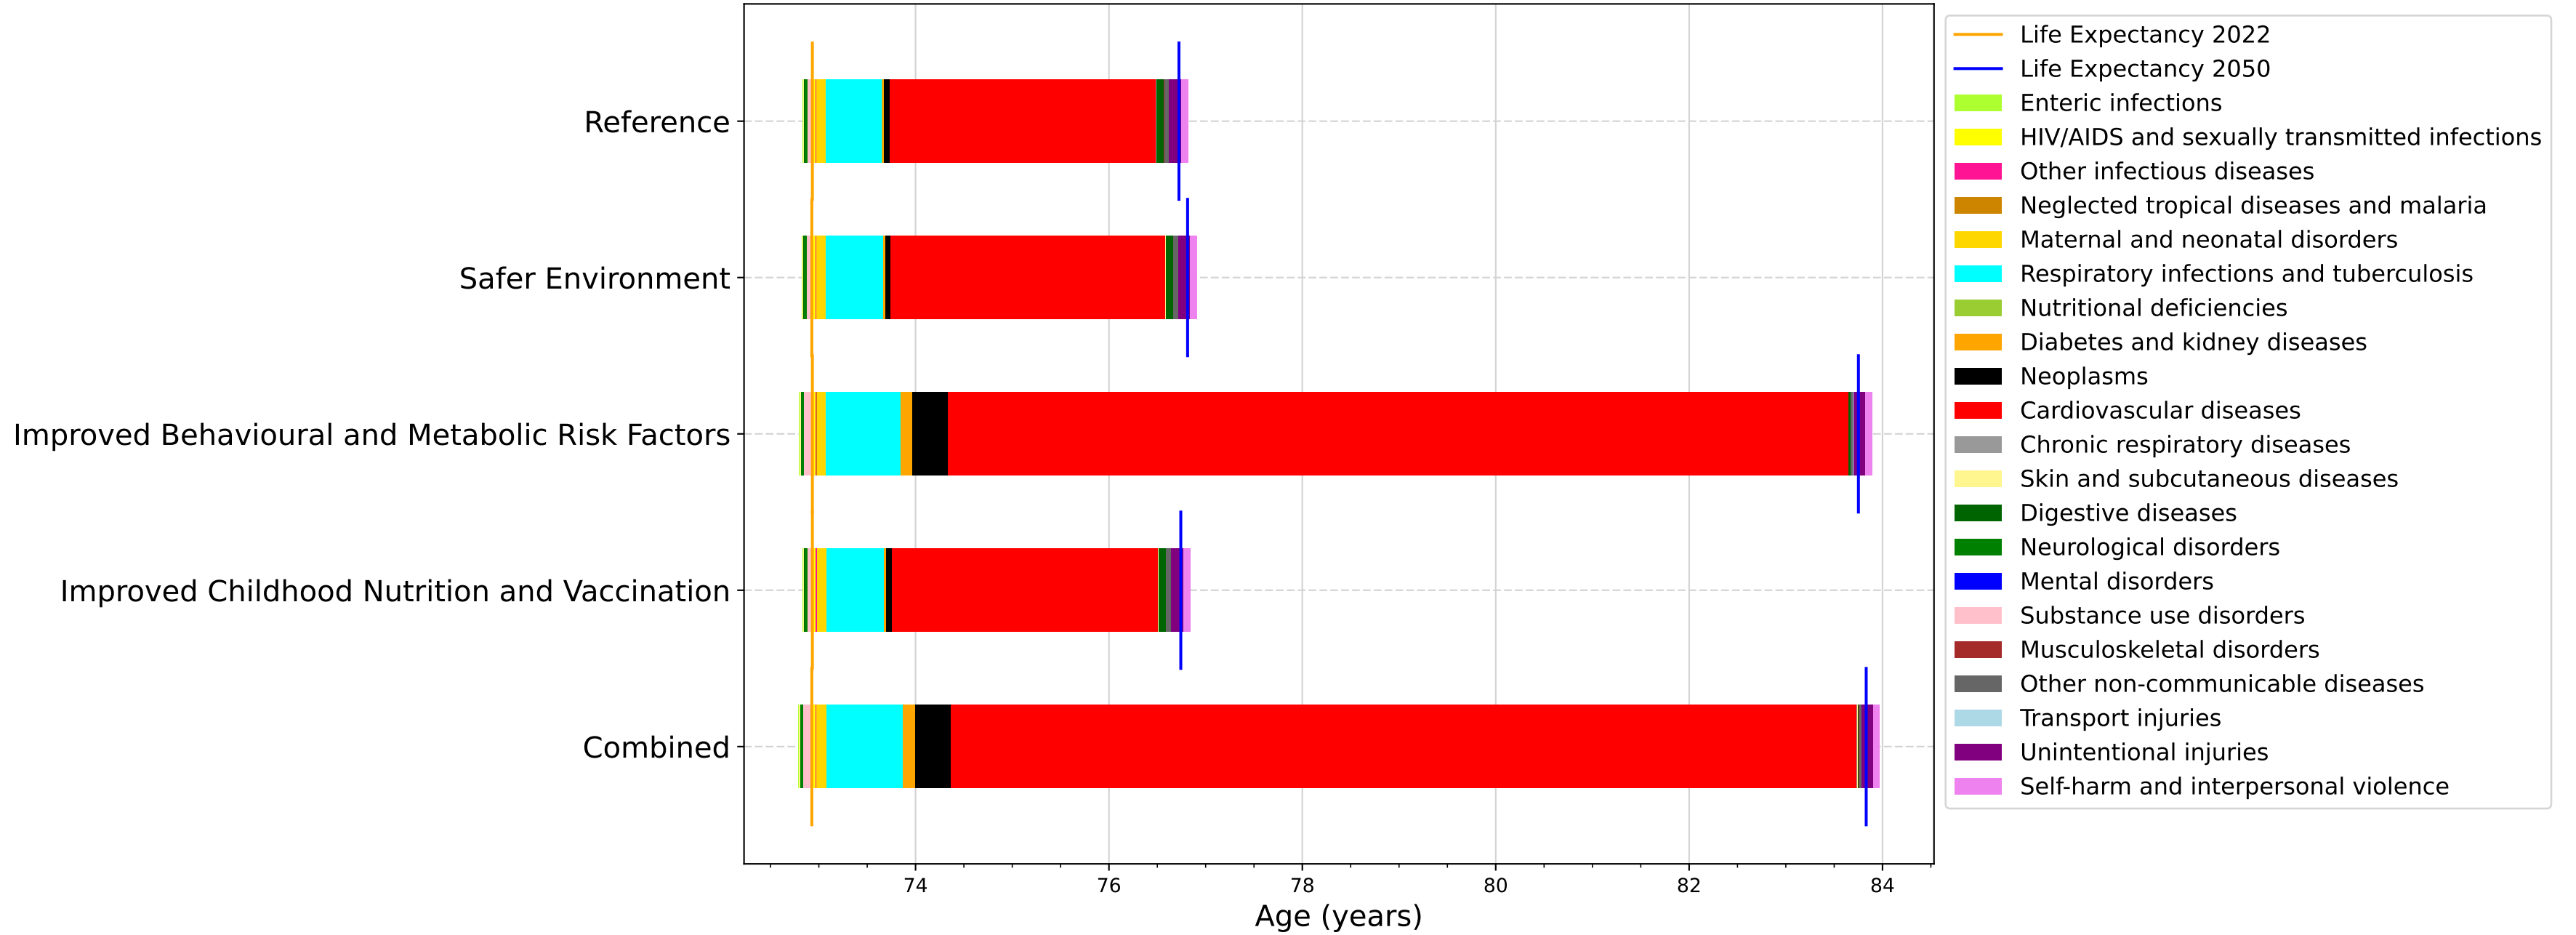

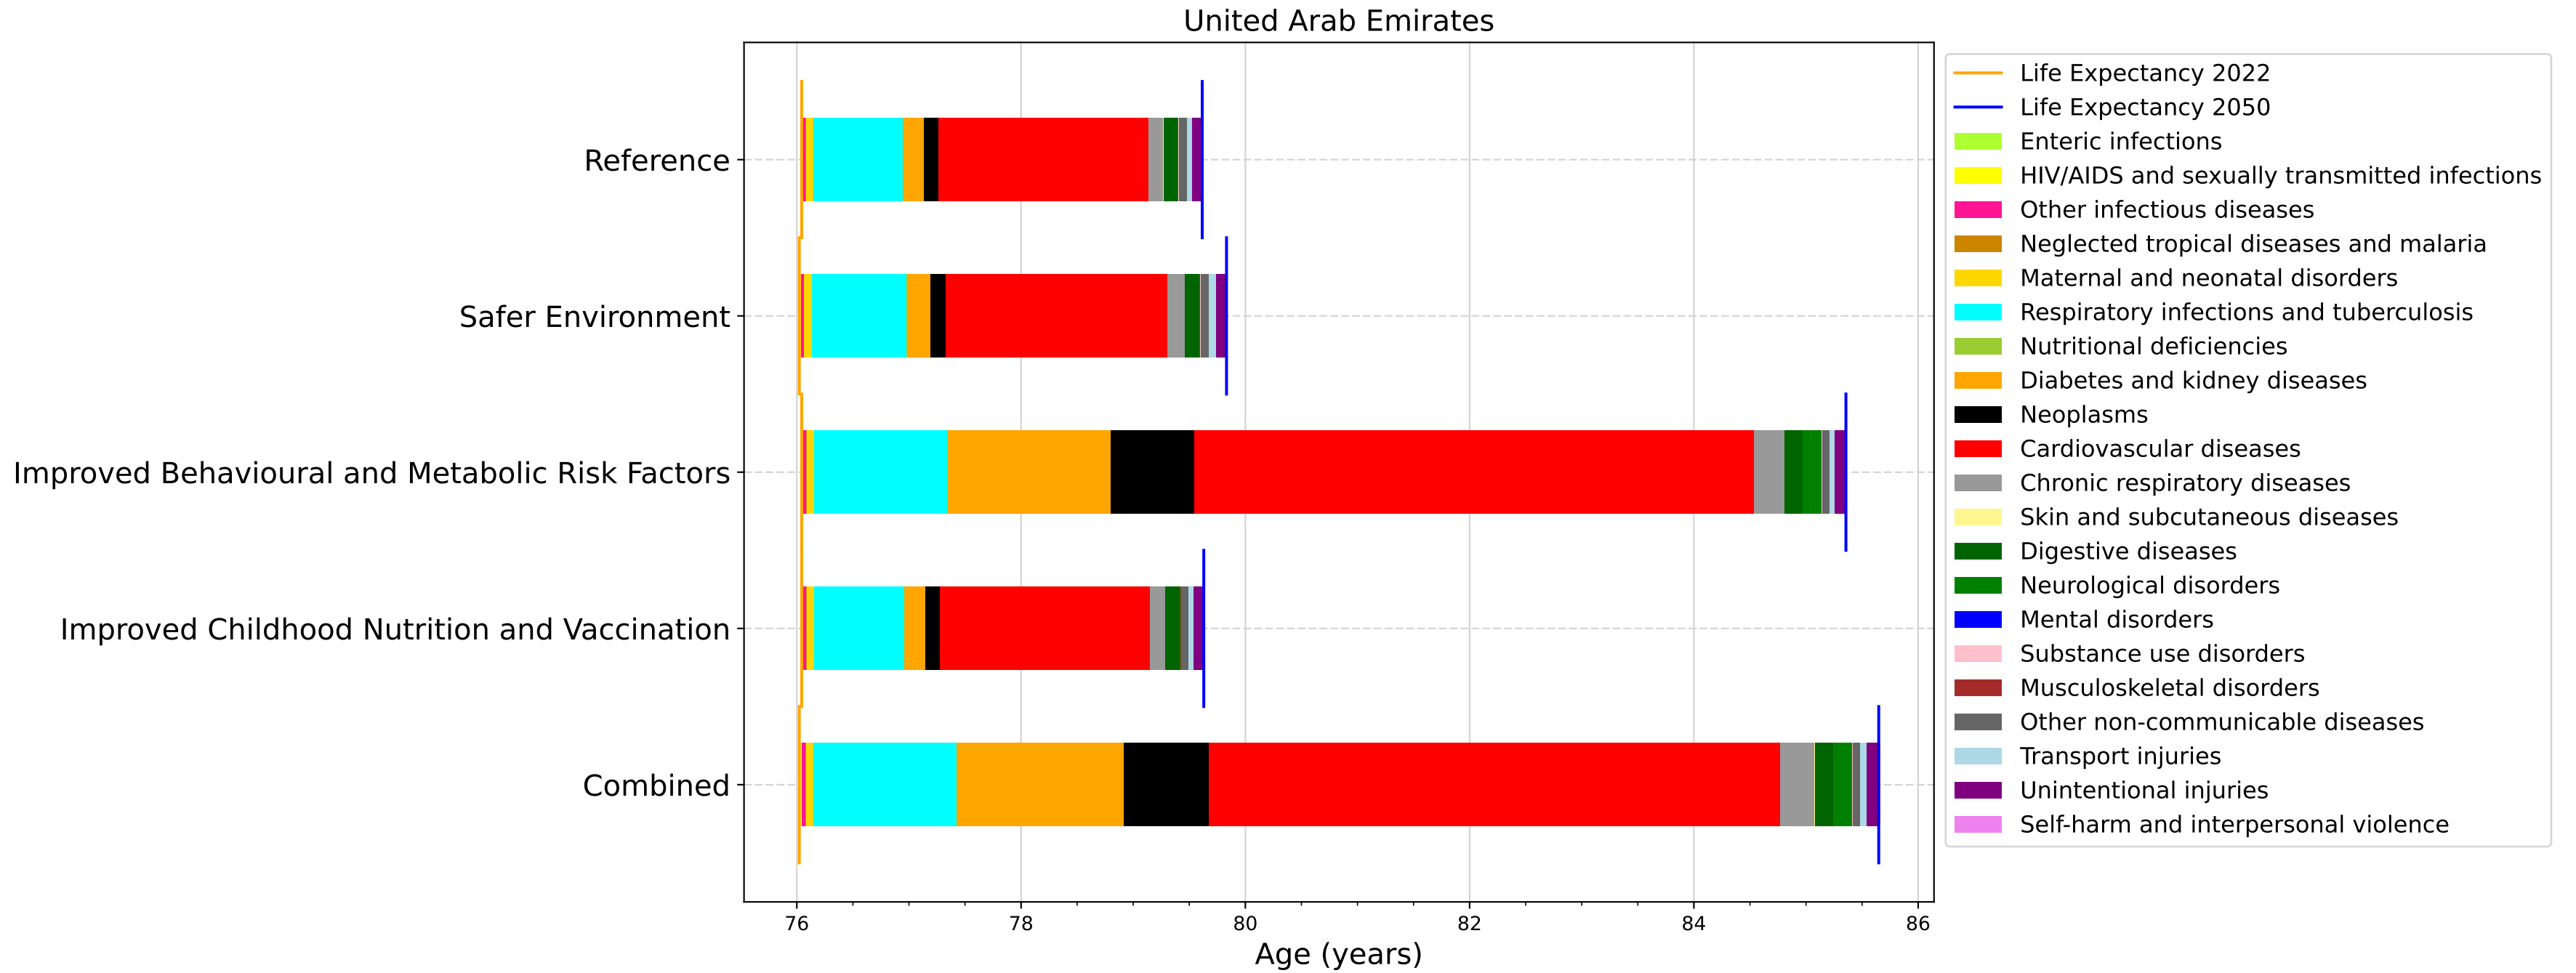

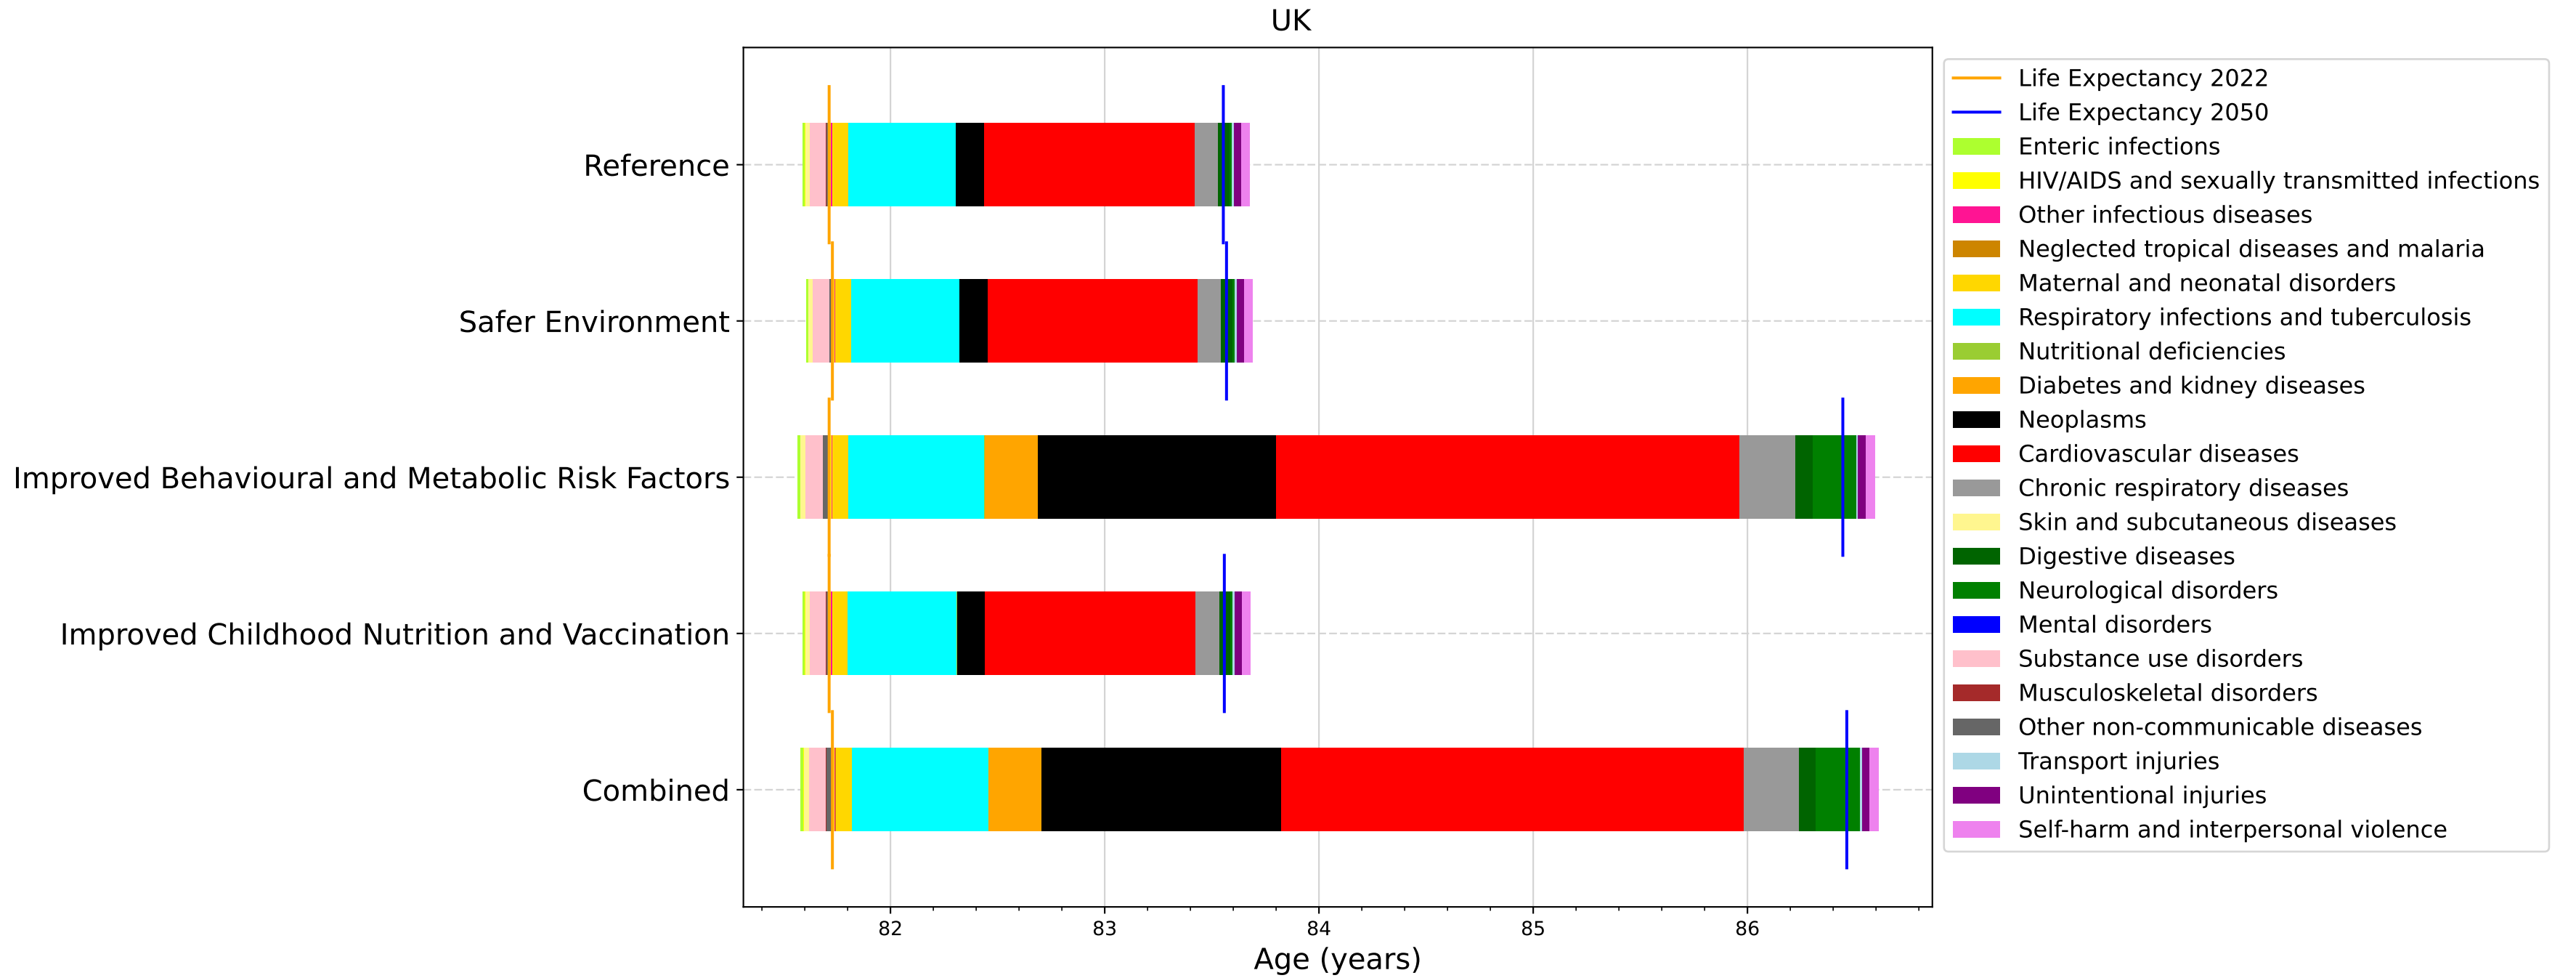



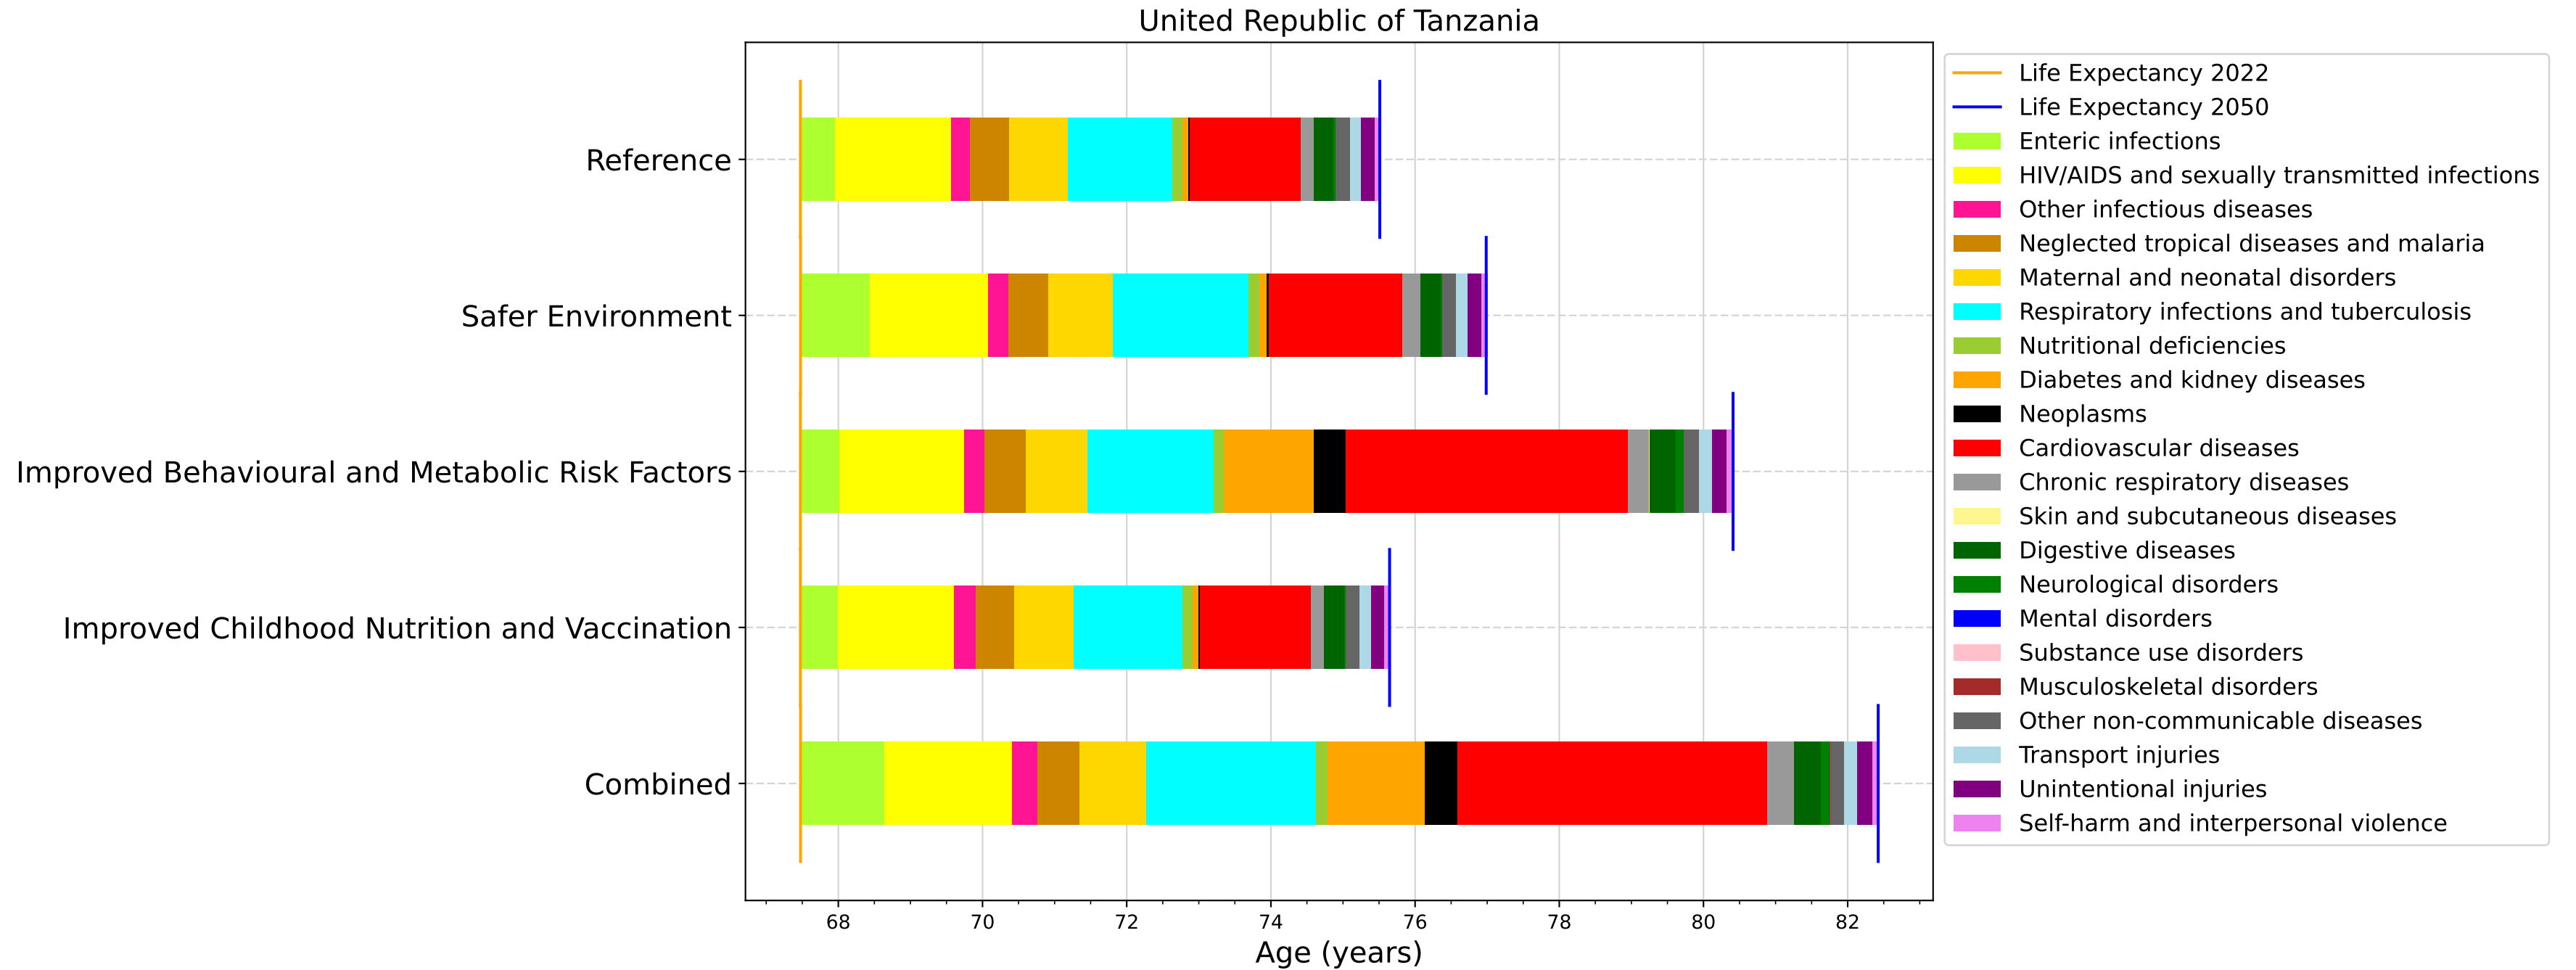

United States Virgin Islands

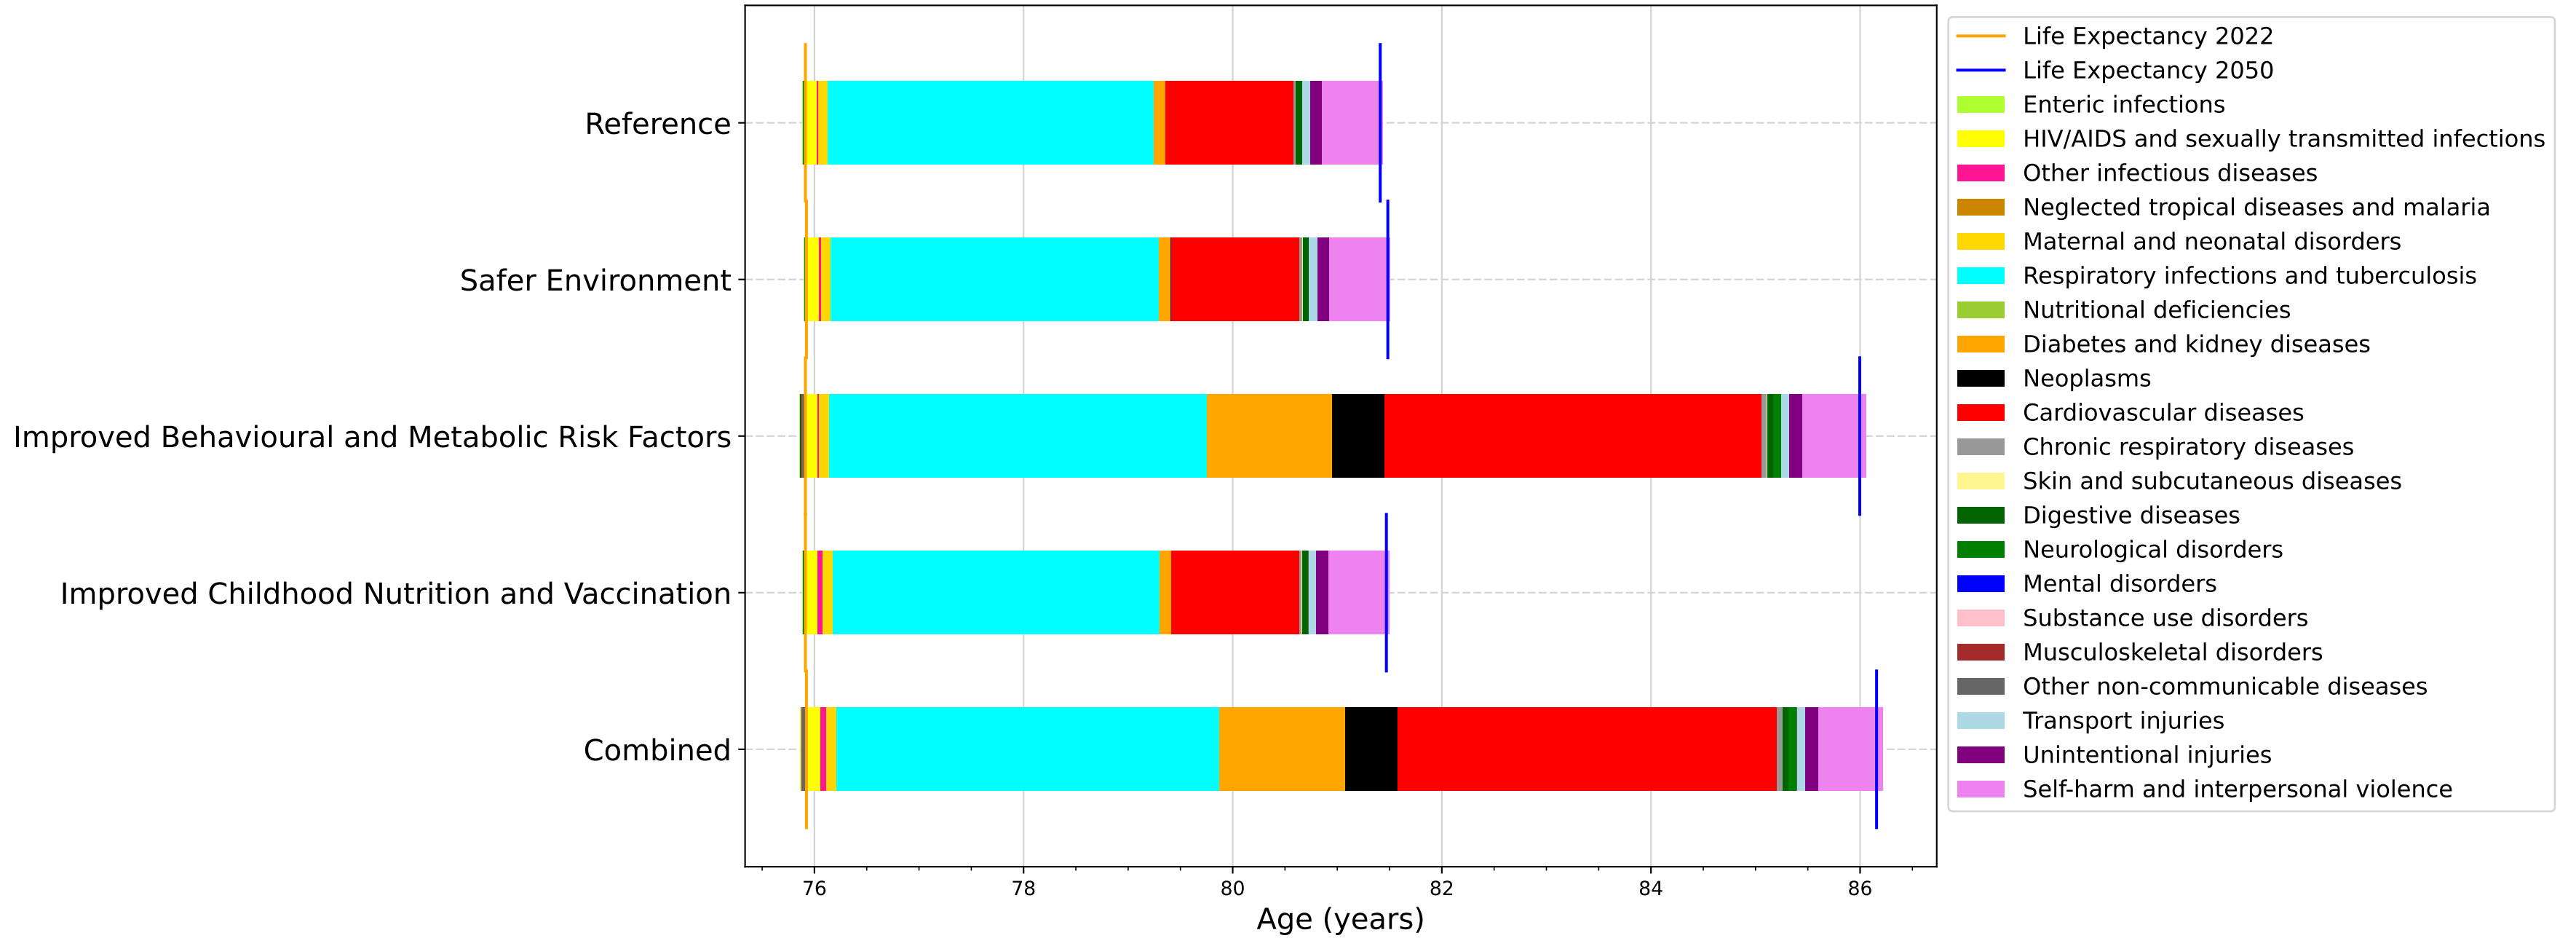

### USA

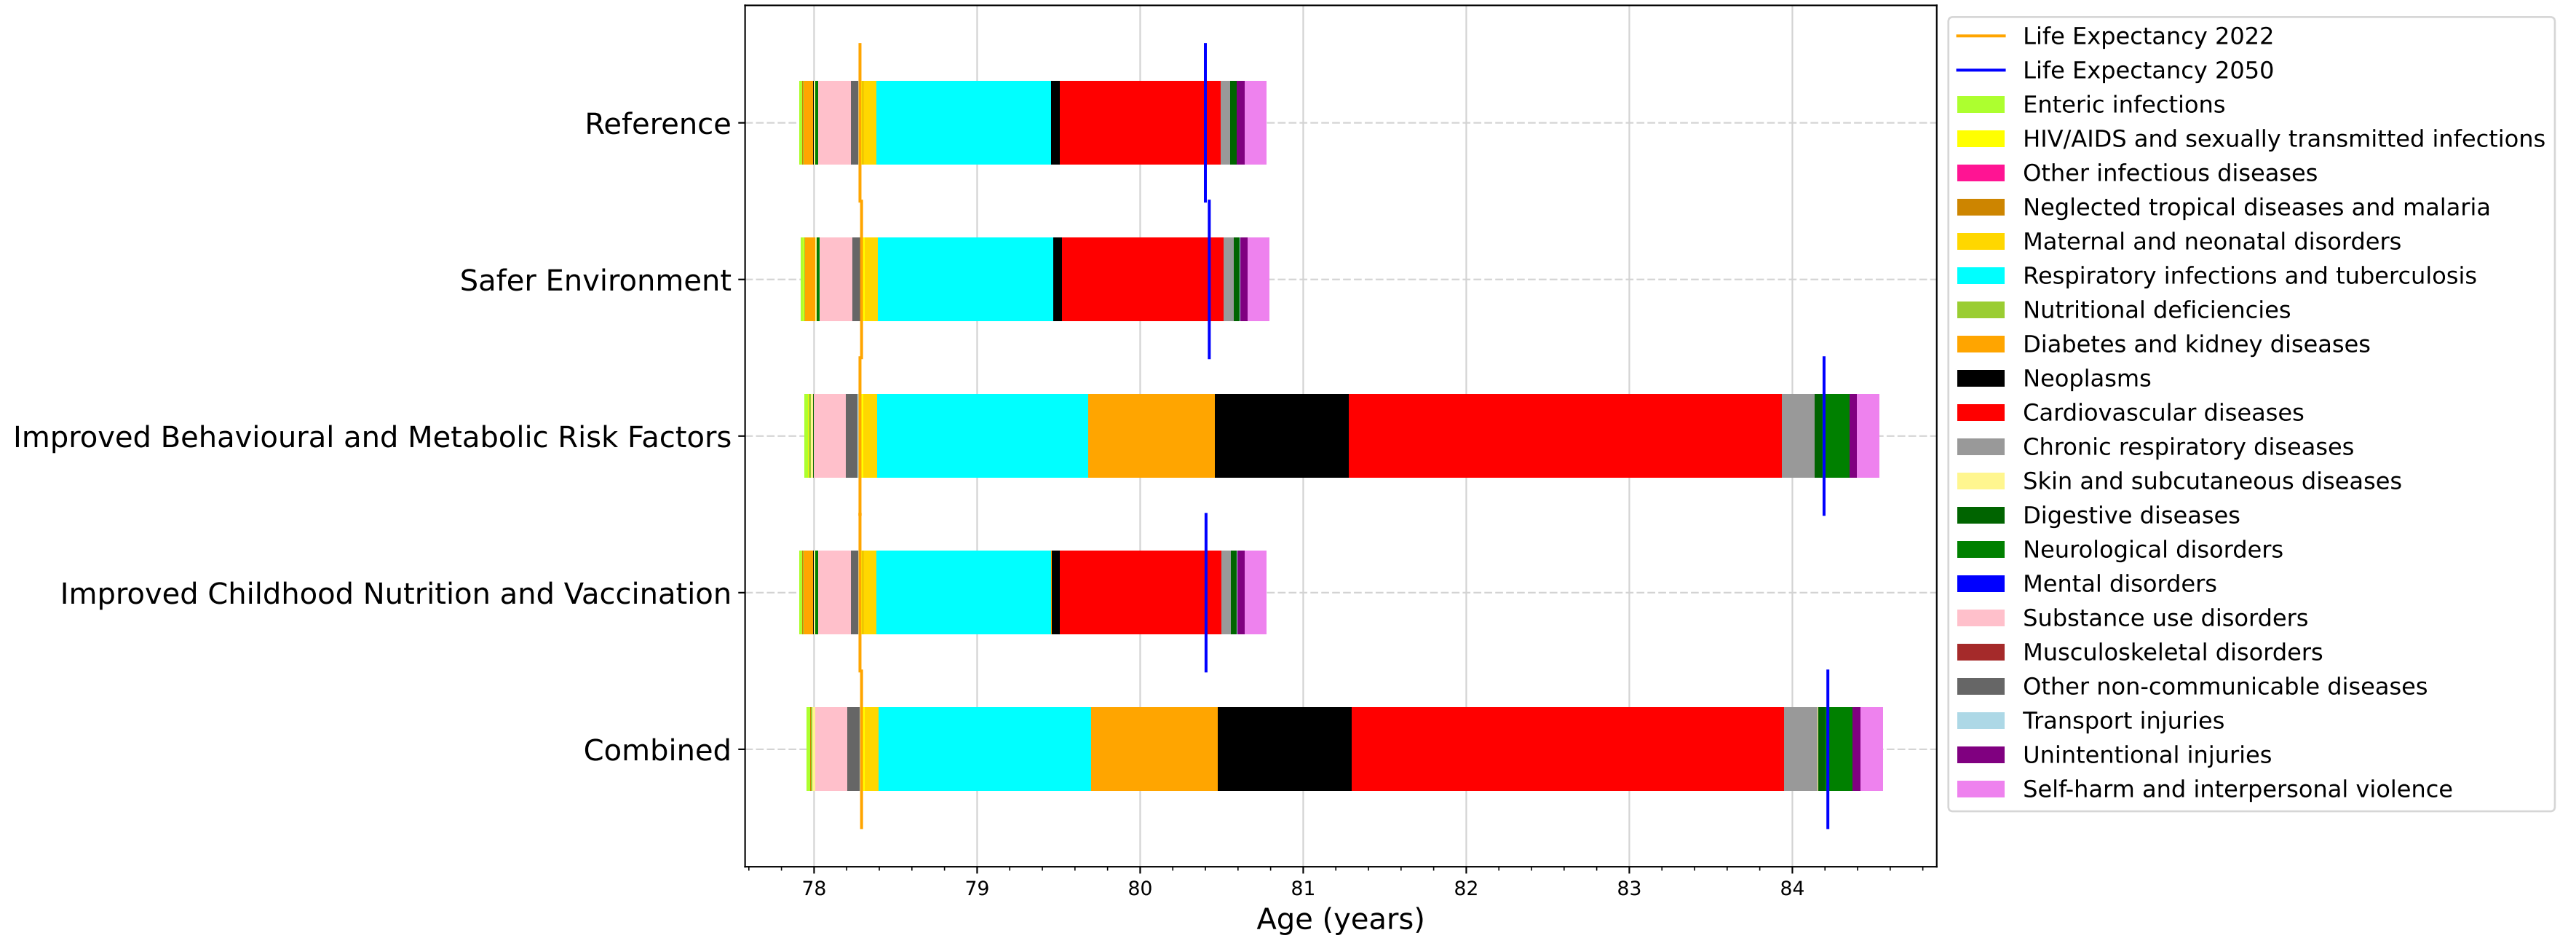

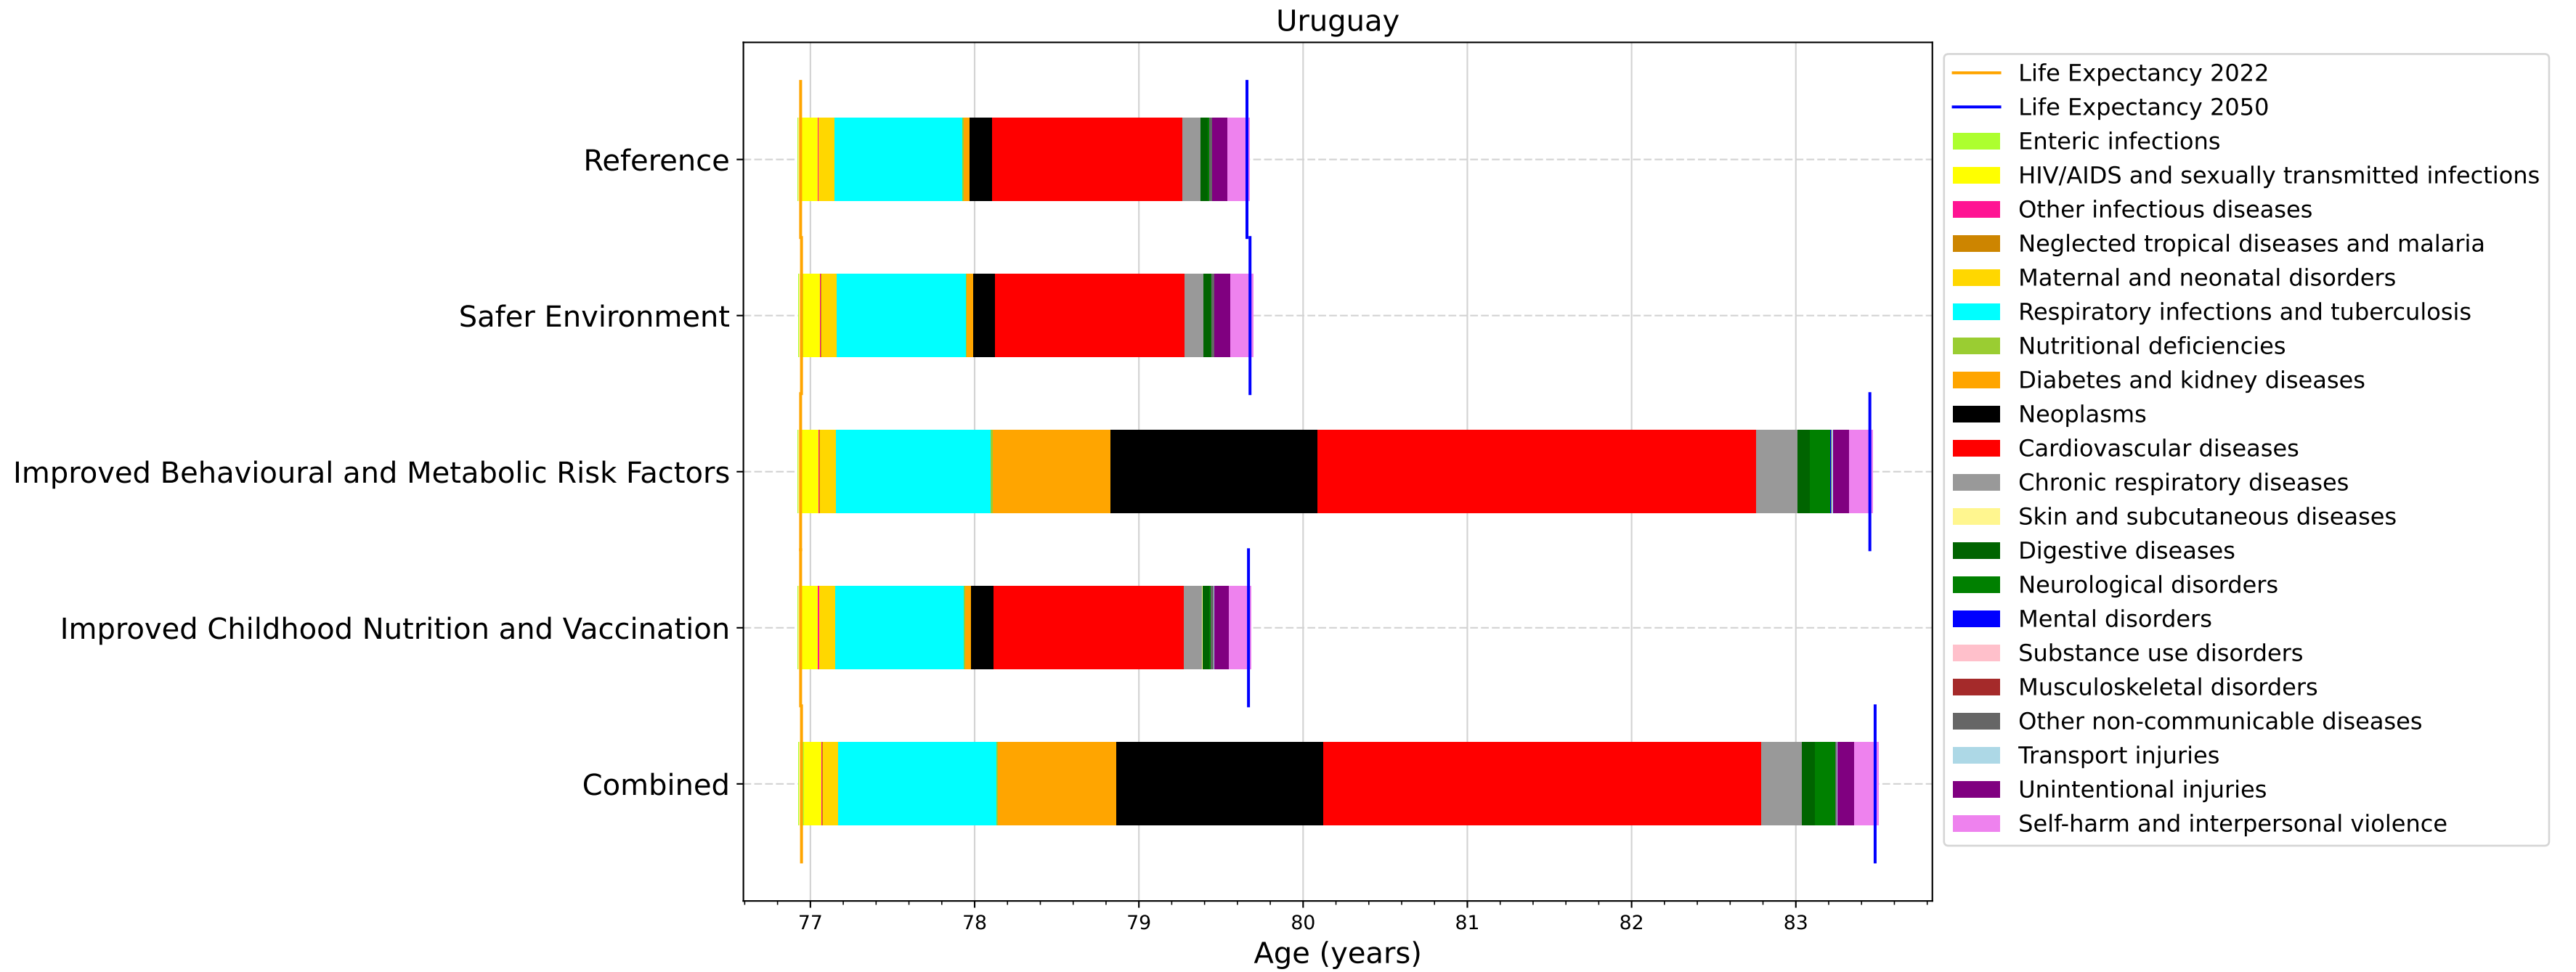

Uzbekistan

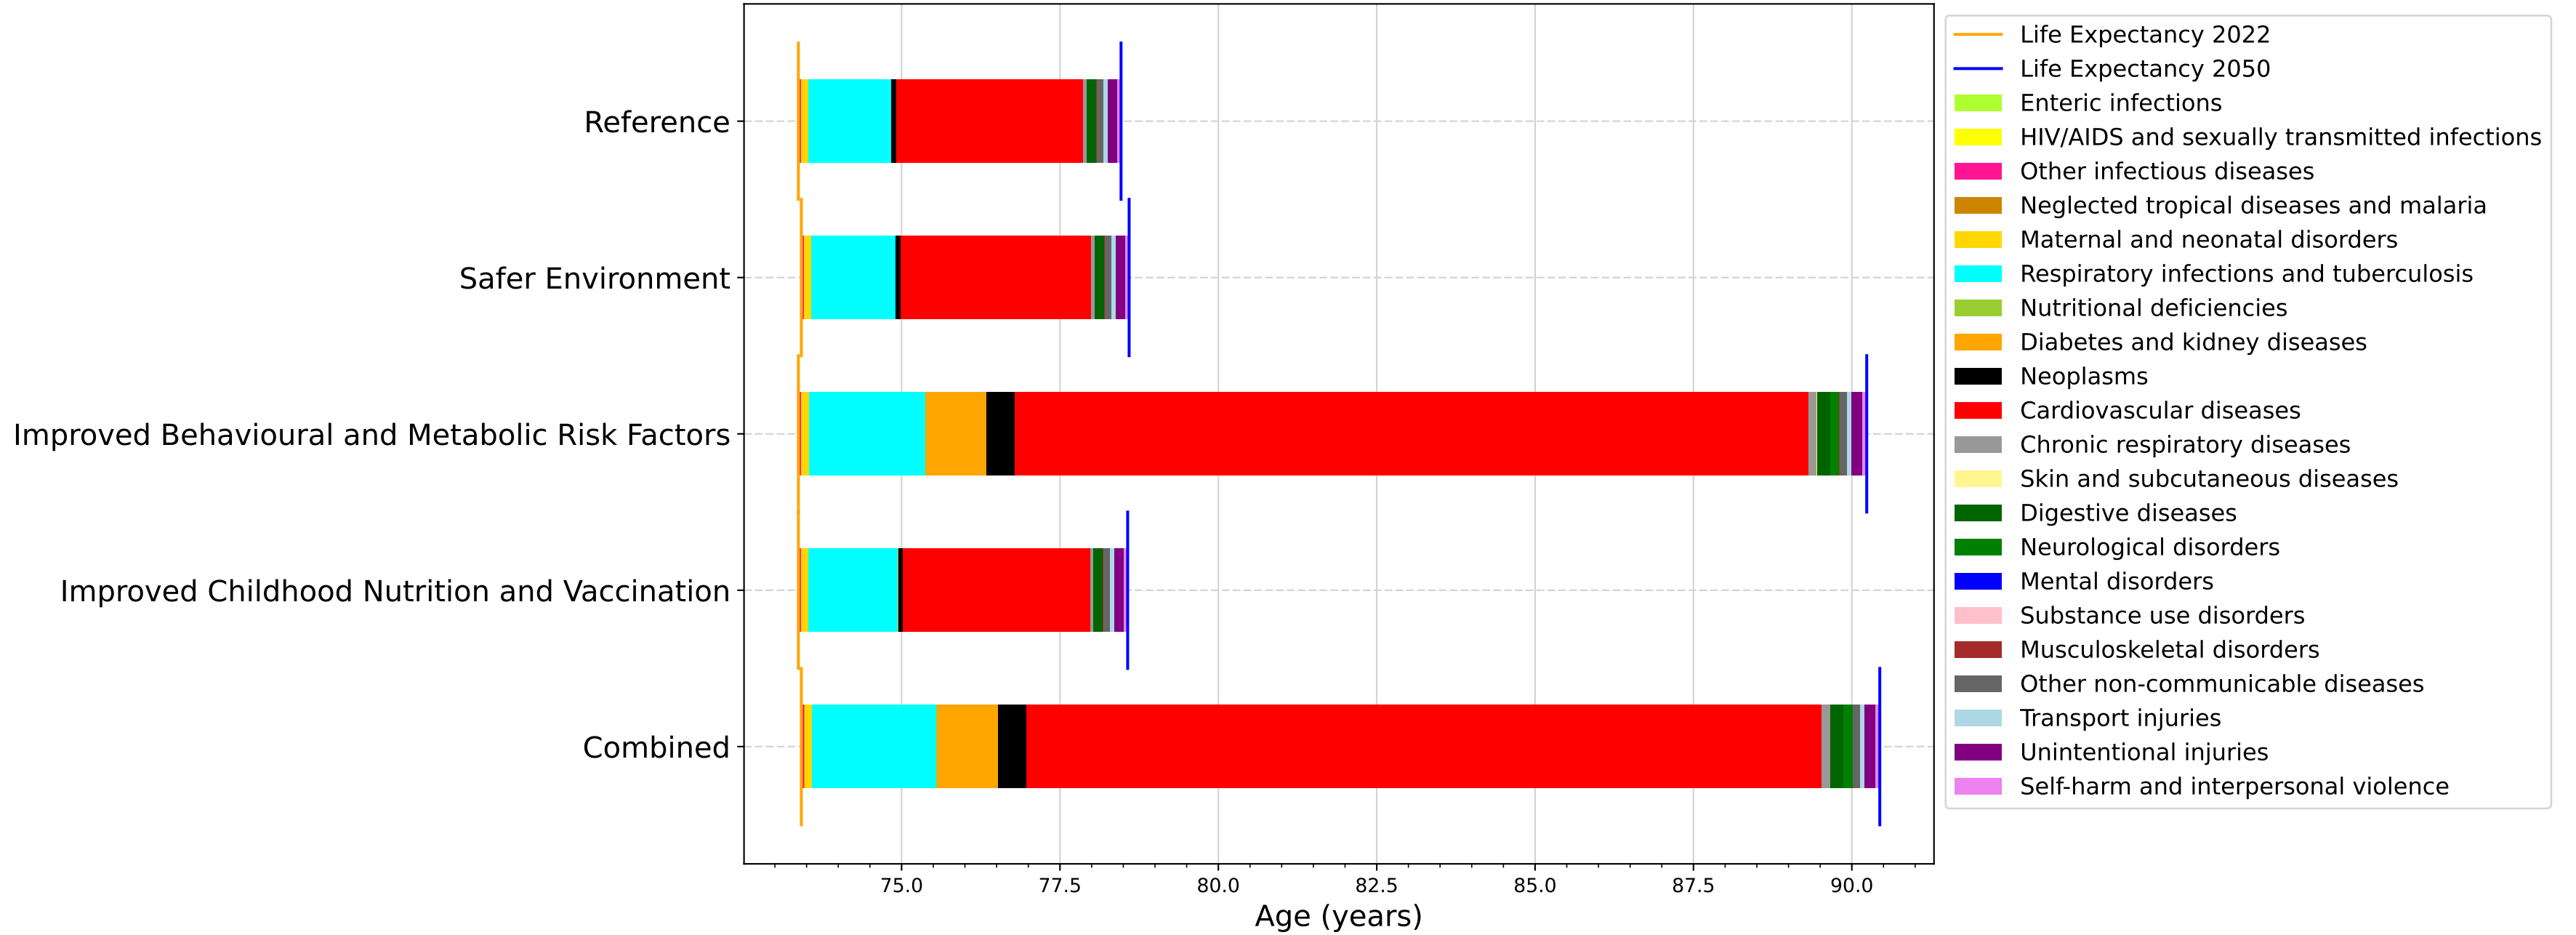

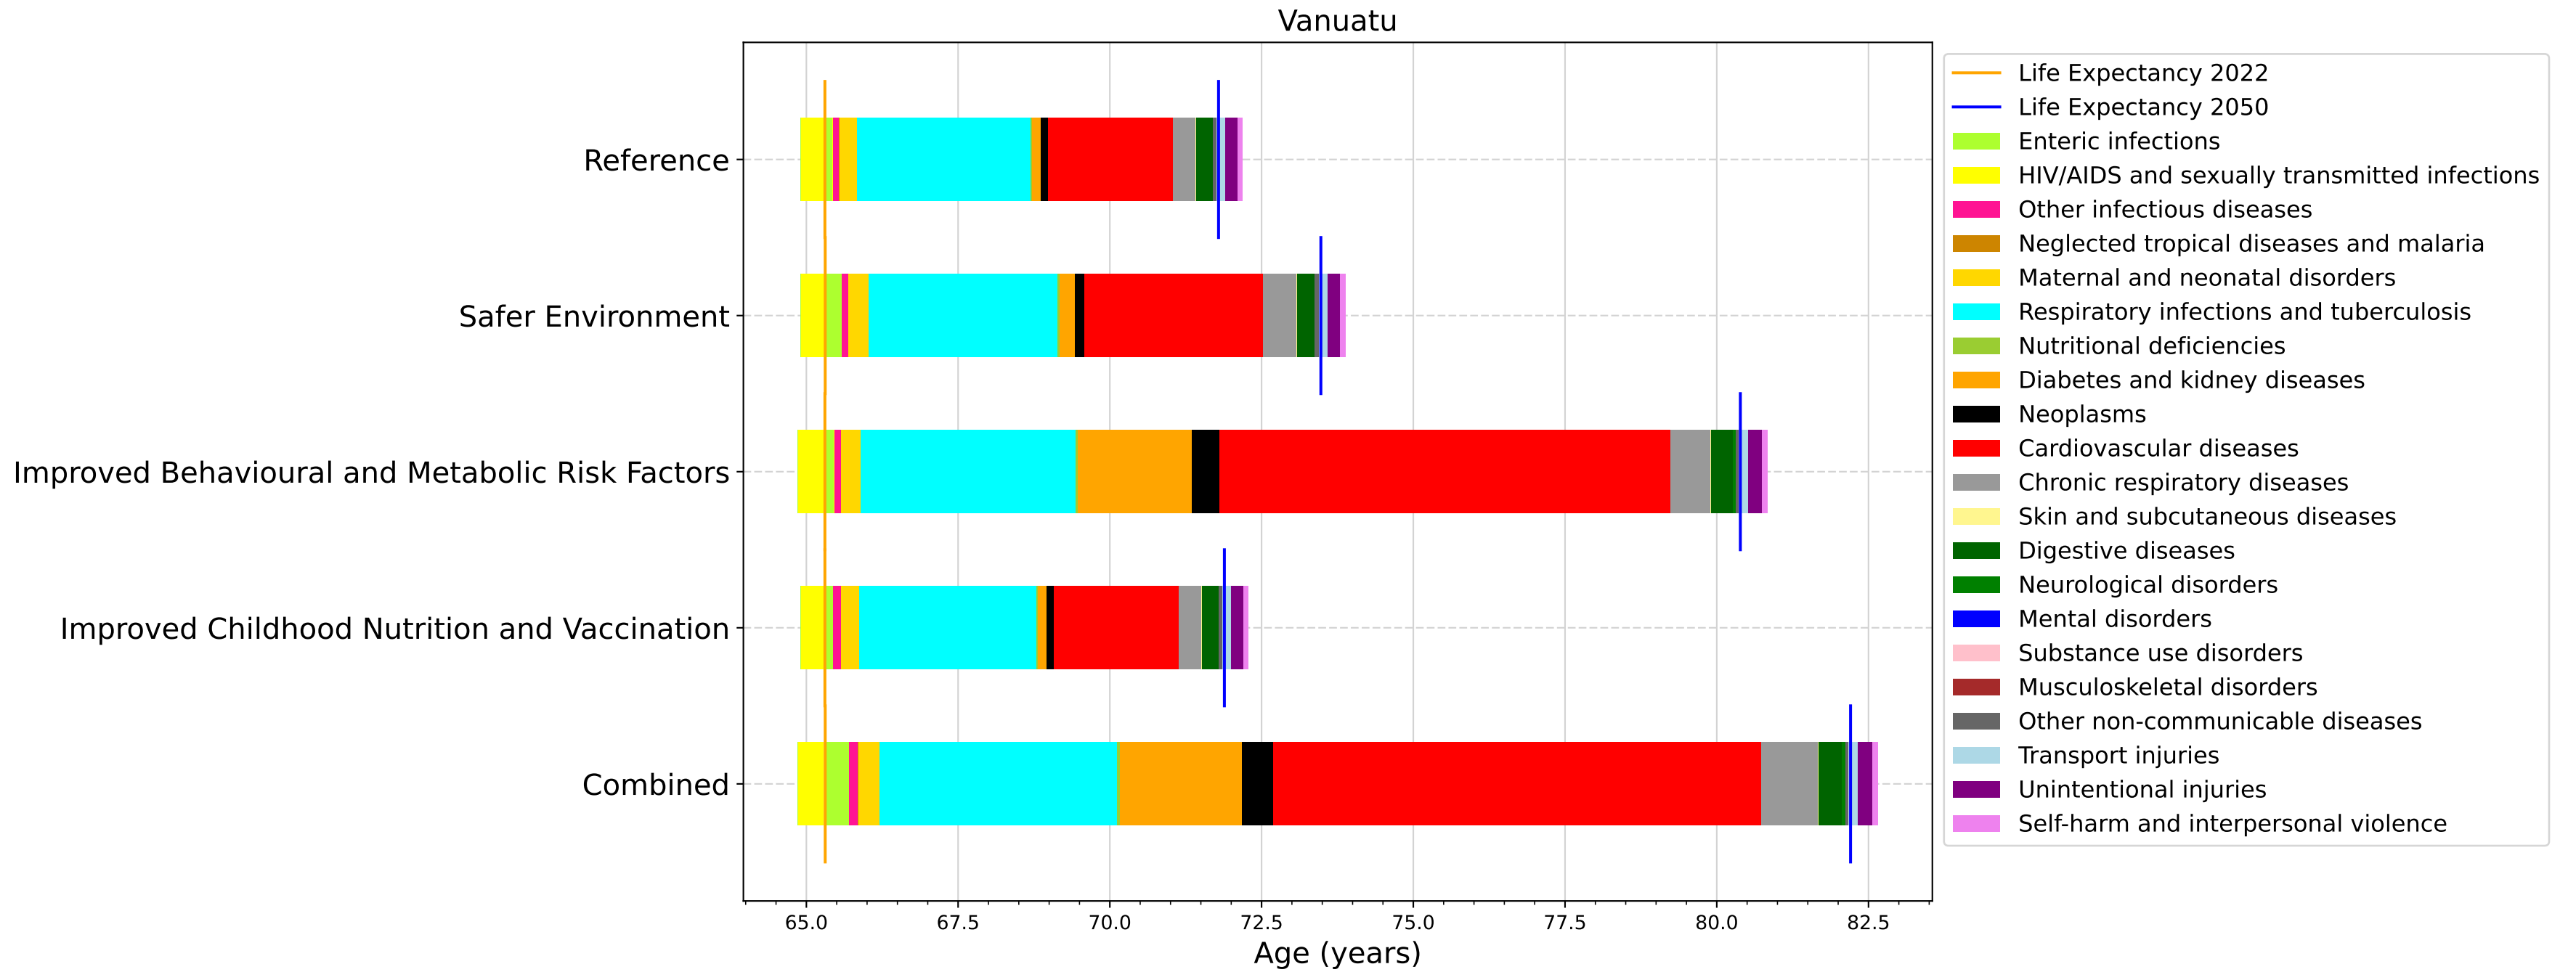

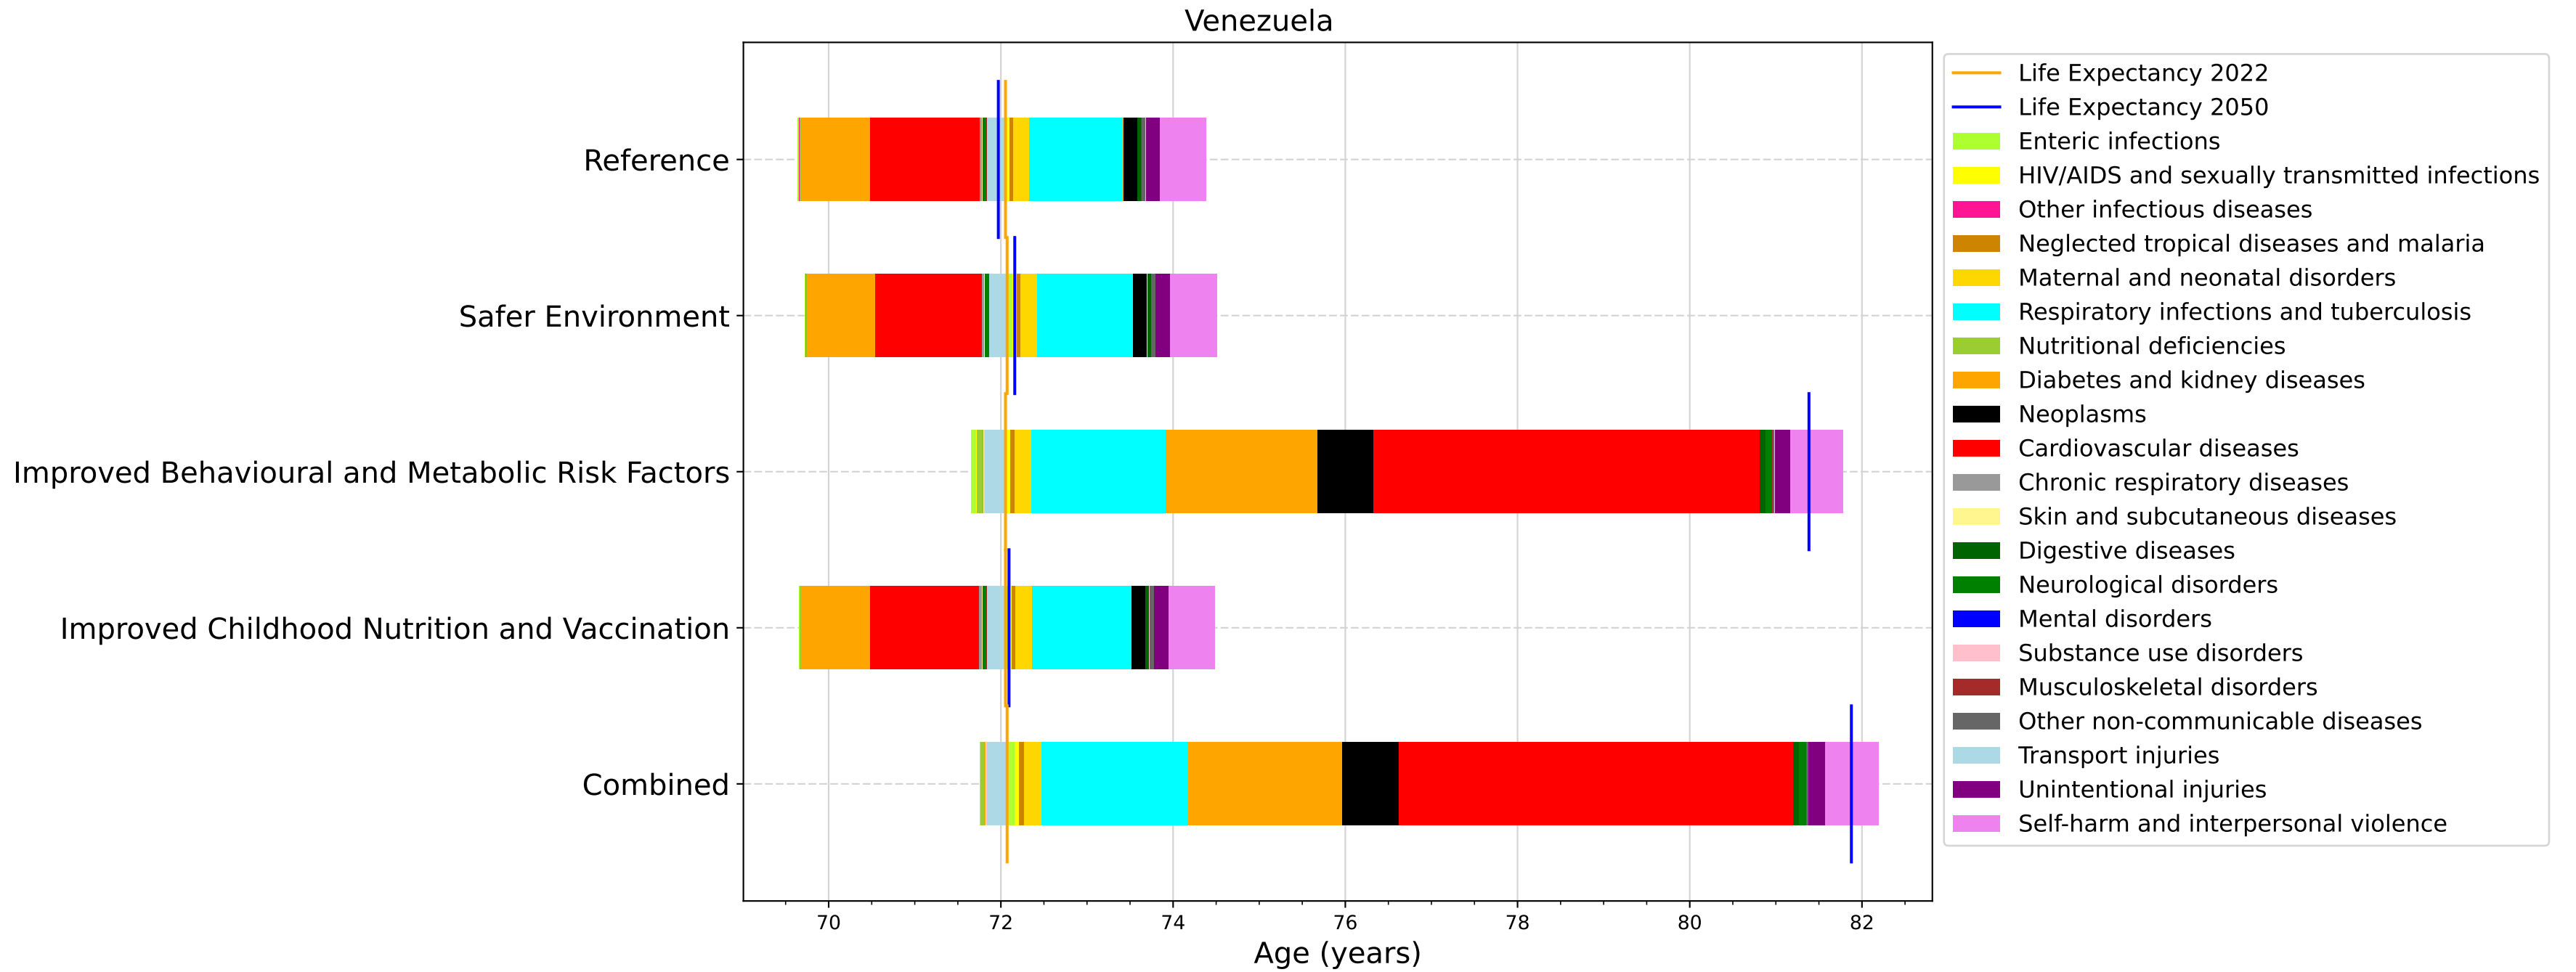

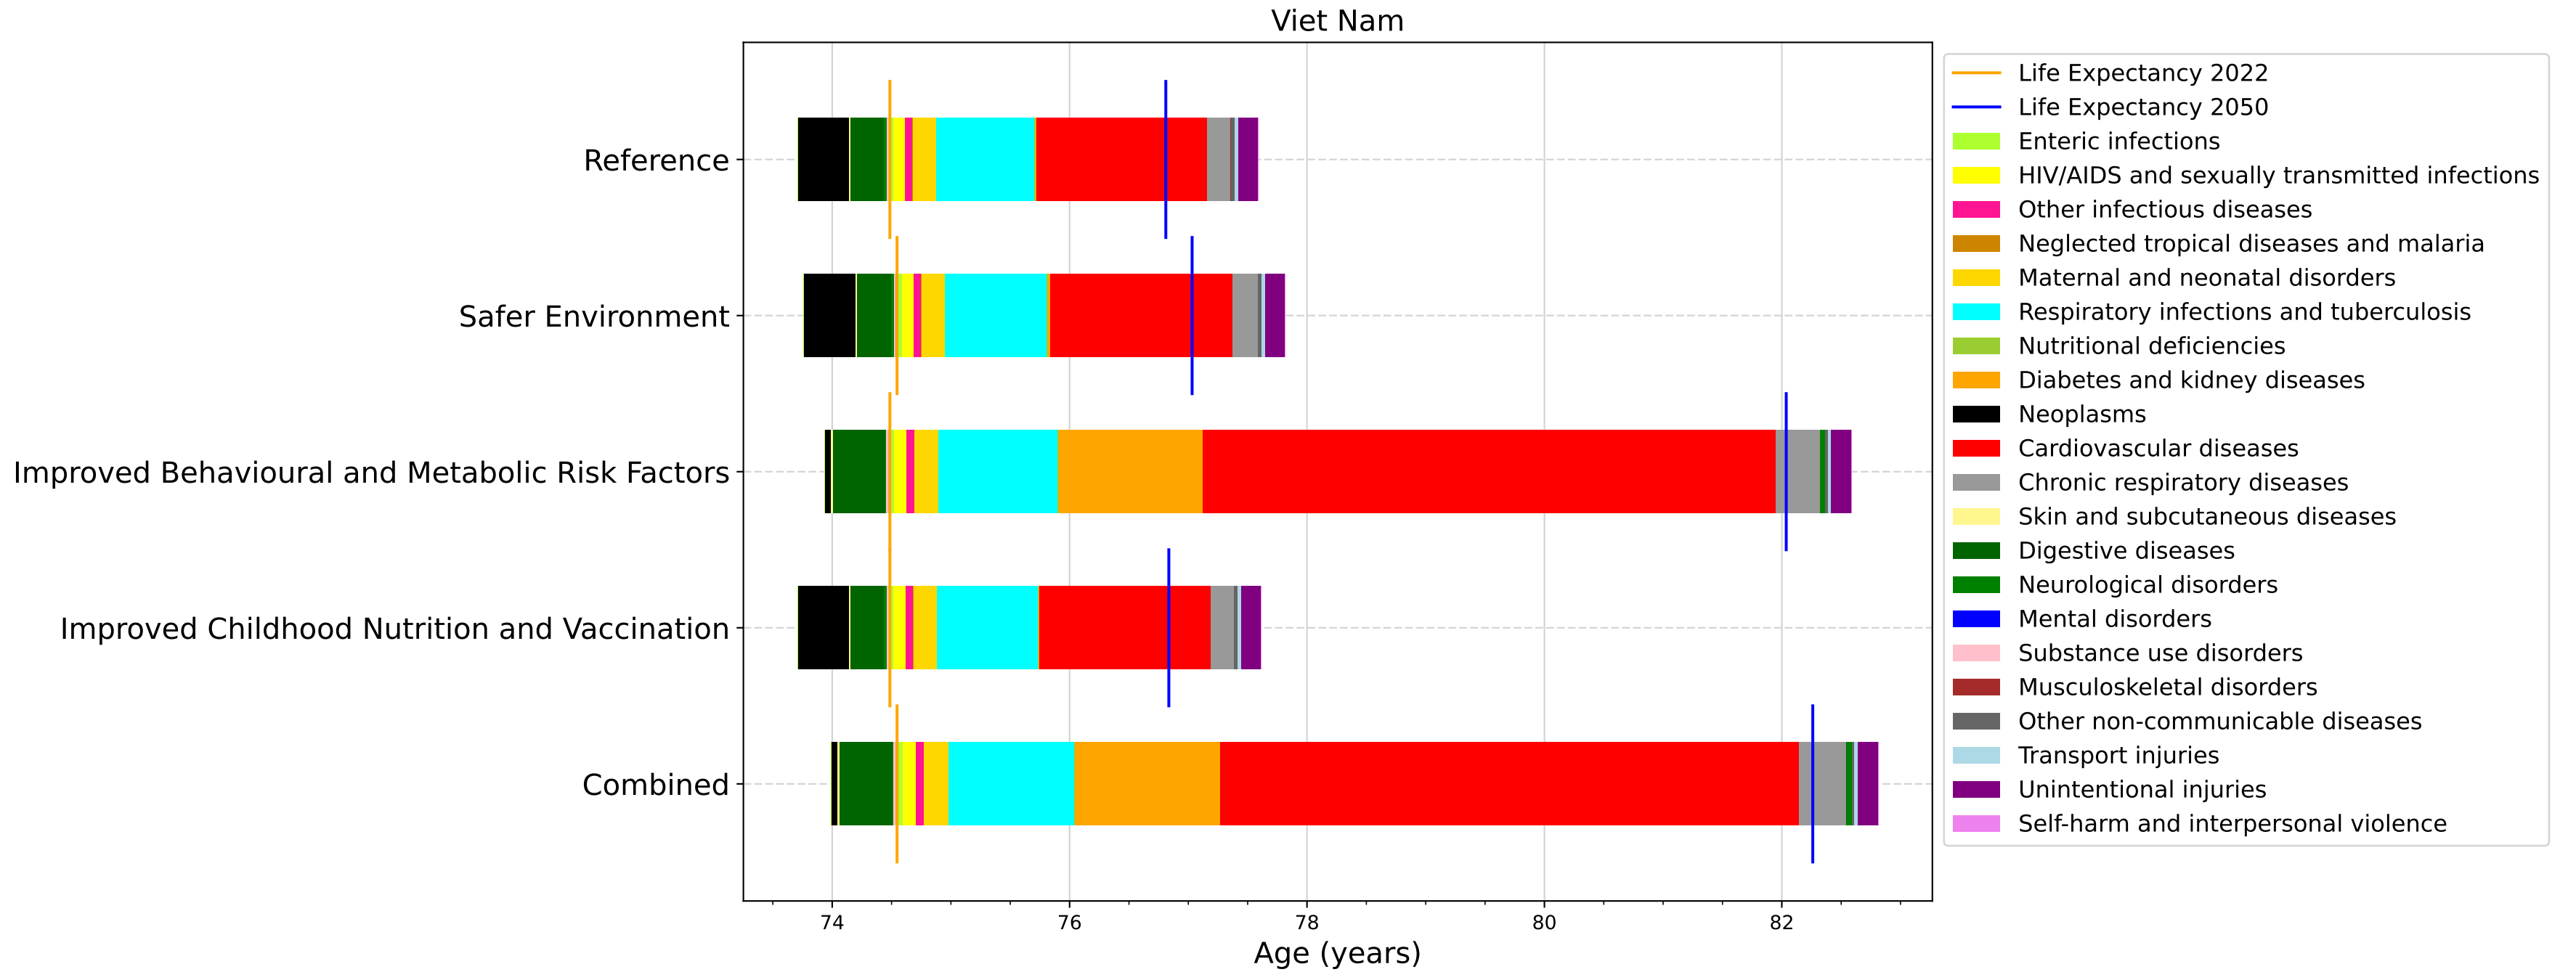



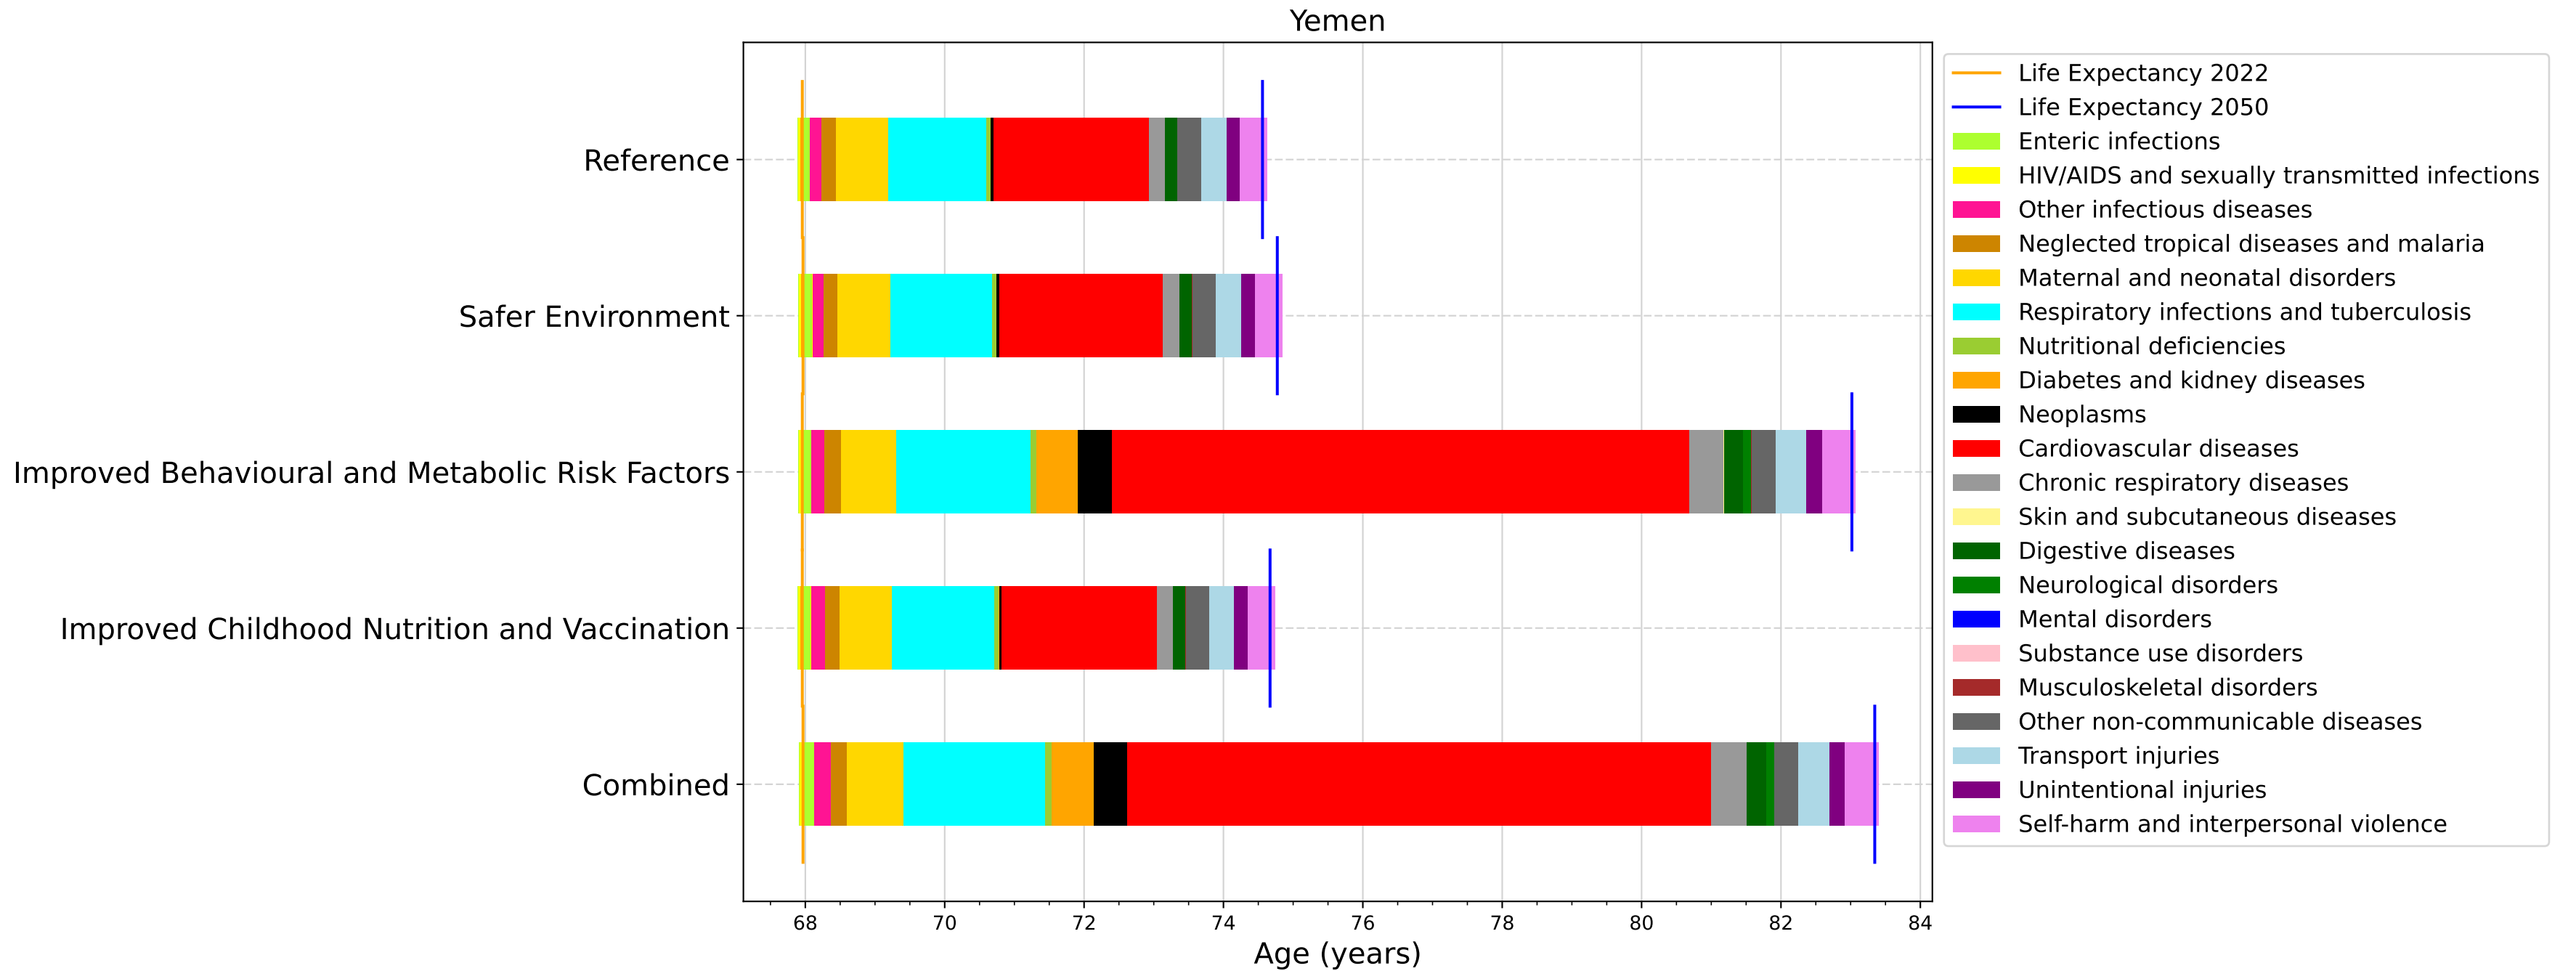

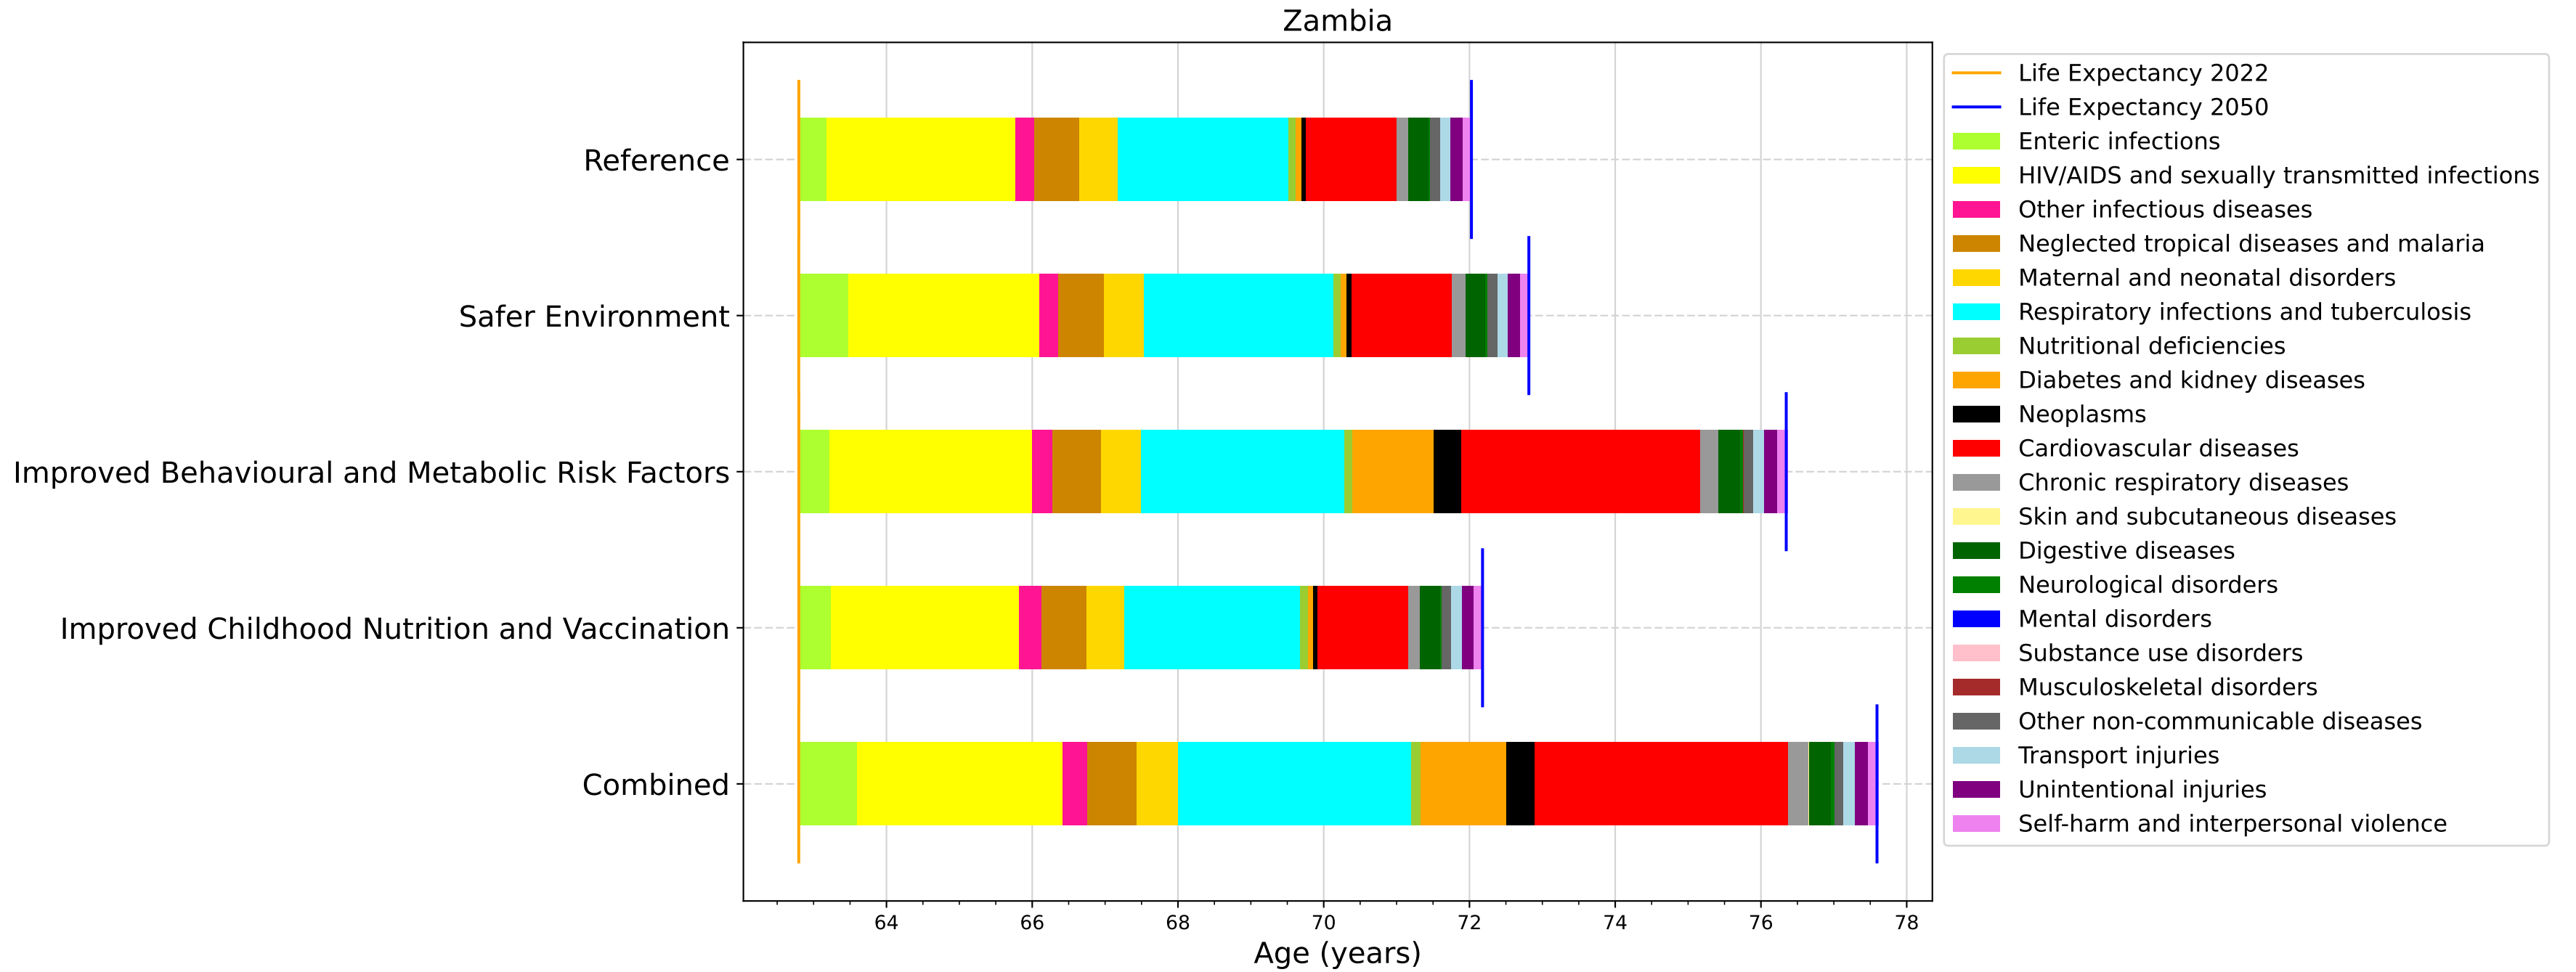

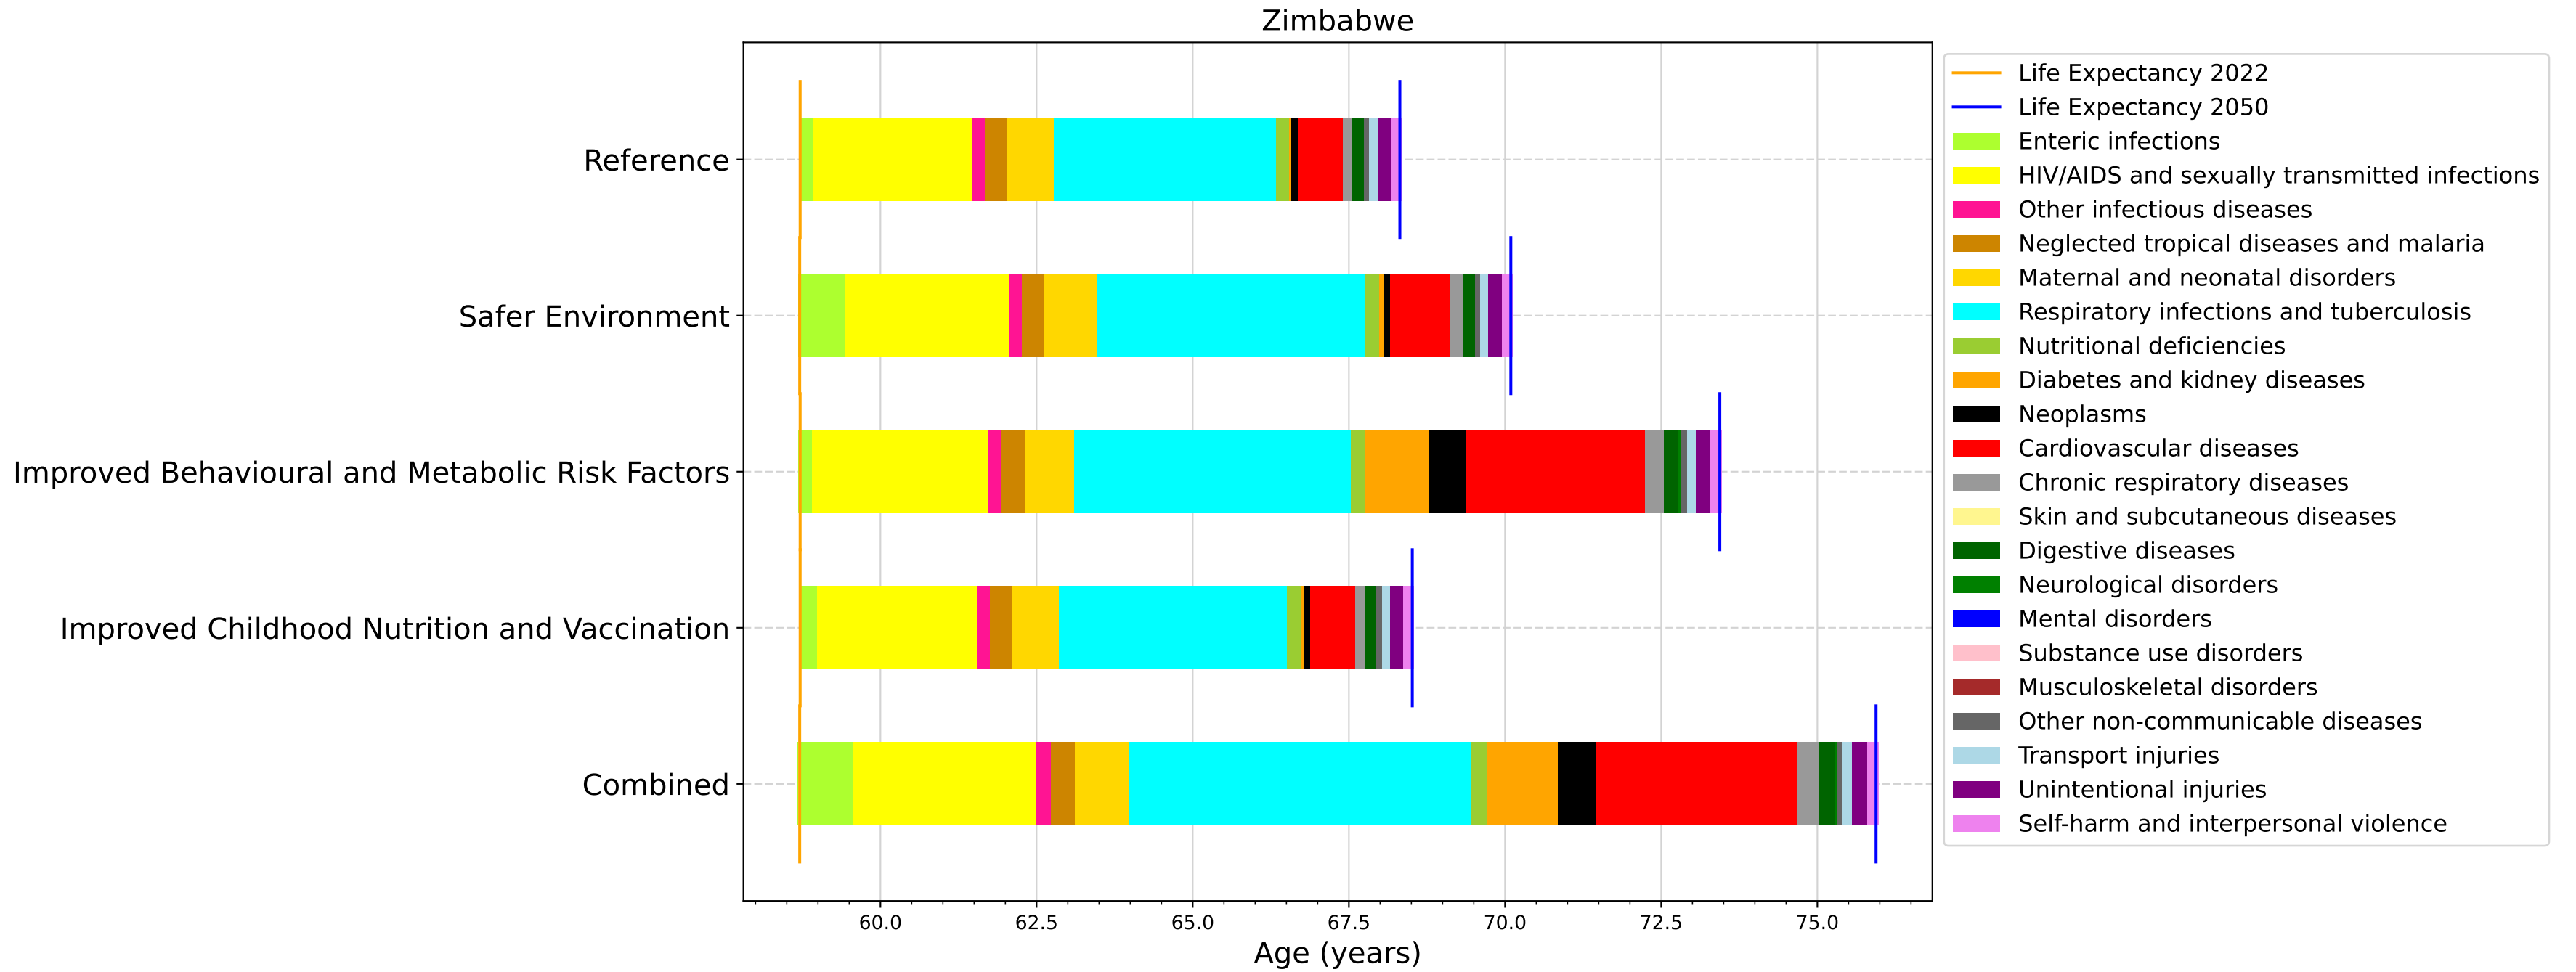

**Supplementary Results Table S1. Annual change in life expectancy in pre-COVID pandemic years (1990-2019) and post-COVID pandemic years (2022-2050) by global and super region for females, males and both sexes. Estimates are listed as means with 95% uncertainty intervals in parenthesis.**

|                                                        | Male                  |                         | Female                |                         | Both sexes            |                         |
|--------------------------------------------------------|-----------------------|-------------------------|-----------------------|-------------------------|-----------------------|-------------------------|
|                                                        | Past<br>(1990 - 2019) | Future<br>(2022 - 2050) | Past<br>(1990 - 2019) | Future<br>(2022 - 2050) | Past<br>(1990 - 2019) | Future<br>(2022 - 2050) |
| <b>Global</b>                                          | 0·27 (0·24 - 0·30)    | 0·15 (0·05 - 0·22)      | 0·27 (0·24 - 0·30)    | 0·18 (0·09 - 0·24)      | 0·27 (0·25 - 0·29)    | 0·16 (0·07 - 0·23)      |
| Central Europe,<br>Eastern Europe, and<br>Central Asia | 0·15 (0·14 - 0·16)    | 0·17 (0·09 - 0·23)      | 0·18 (0·16 - 0·19)    | 0·21 (0·14 - 0·27)      | 0·16 (0·15 - 0·17)    | 0·19 (0·11 - 0·25)      |
| High income                                            | 0·16 (0·16 - 0·16)    | 0·05 (0·04 - 0·06)      | 0·21 (0·21 - 0·22)    | 0·09 (0·08 - 0·10)      | 0·19 (0·18 - 0·19)    | 0·07 (0·06 - 0·08)      |
| Latin America and<br>Caribbean                         | 0·22 (0·20 - 0·23)    | 0·13 (0·03 - 0·20)      | 0·22 (0·20 - 0·24)    | 0·16 (0·08 - 0·22)      | 0·22 (0·20 - 0·24)    | 0·14 (0·05 - 0·21)      |
| North Africa and<br>Middle East                        | 0·28 (0·26 - 0·31)    | 0·14 (0·03 - 0·23)      | 0·28 (0·25 - 0·31)    | 0·17 (0·07 - 0·25)      | 0·28 (0·25 - 0·31)    | 0·16 (0·05 - 0·24)      |
| South Asia                                             | 0·35 (0·31 - 0·39)    | 0·24 (0·10 - 0·35)      | 0·31 (0·27 - 0·35)    | 0·24 (0·11 - 0·34)      | 0·33 (0·30 - 0·37)    | 0·24 (0·11 - 0·35)      |
| Southeast Asia, East<br>Asia, and Oceania              | 0·33 (0·26 - 0·38)    | 0·13 (0·06 - 0·18)      | 0·28 (0·21 - 0·35)    | 0·13 (0·07 - 0·17)      | 0·30 (0·25 - 0·35)    | 0·13 (0·07 - 0·18)      |
| Sub-Saharan Africa                                     | 0·36 (0·31 - 0·41)    | 0·32 (0·21 - 0·40)      | 0·36 (0·30 - 0·41)    | 0·33 (0·22 - 0·41)      | 0·36 (0·31 - 0·41)    | 0·33 (0·20 - 0·40)      |

**Supplemental Results Table S2. Life expectancy and healthy life expectancy (HALE) in 2022 and 2050 (reference scenario) by location for both sexes. Estimates are listed as means with 95% uncertainty intervals in parentheses. Highlighted rows indicate region and super region results from the GBD location hierarchy.**

|                                                         | Reference scenario life expectancy at birth |                    |                    | Reference scenario HALE at birth |                    |                    |
|---------------------------------------------------------|---------------------------------------------|--------------------|--------------------|----------------------------------|--------------------|--------------------|
|                                                         | Both Males and Females                      |                    |                    | Both Males and Females           |                    |                    |
|                                                         | 2022                                        | 2030               | 2050               | 2022                             | 2030               | 2050               |
| <b>Global</b>                                           | 73.6 (72.7 - 74.4)                          | 75.7 (74.4 - 76.7) | 78.2 (75.2 - 80.3) | 63.6 (60.7 - 66.3)               | 65.3 (62.3 - 68.1) | 66.7 (63.0 - 70.4) |
| <b>Central Europe, Eastern Europe, and Central Asia</b> | 73.5 (72.9 - 74.1)                          | 75.9 (74.9 - 76.8) | 78.8 (76.4 - 80.6) | 63.9 (61.1 - 66.5)               | 66.0 (63.1 - 68.6) | 68.1 (64.6 - 71.4) |
| <b>Central Asia</b>                                     | 72.1 (71.0 - 73.2)                          | 75.4 (73.8 - 76.8) | 78.6 (74.6 - 81.8) | 63.2 (60.6 - 65.6)               | 65.9 (63.1 - 68.6) | 68.4 (64.1 - 72.5) |
| Armenia                                                 | 76.2 (73.3 - 77.7)                          | 79.3 (78.1 - 80.5) | 82.2 (80.1 - 84.1) | 66.7 (63.2 - 69.3)               | 69.3 (66.3 - 71.8) | 71.6 (68.2 - 74.7) |
| Azerbaijan                                              | 72.5 (71.2 - 73.9)                          | 75.7 (74.0 - 77.4) | 79.1 (75.2 - 82.4) | 63.8 (61.3 - 66.1)               | 66.6 (63.8 - 69.1) | 69.2 (64.9 - 73.2) |
| Georgia                                                 | 74.0 (72.8 - 75.1)                          | 76.5 (75.4 - 77.8) | 78.8 (76.5 - 80.8) | 64.6 (61.8 - 67.1)               | 67.0 (64.1 - 69.5) | 68.8 (65.5 - 72.1) |
| Kazakhstan                                              | 70.0 (67.9 - 71.6)                          | 74.9 (73.7 - 76.1) | 78.3 (75.6 - 80.4) | 61.4 (58.6 - 63.9)               | 65.3 (62.6 - 67.9) | 67.8 (64.3 - 71.3) |
| Kyrgyzstan                                              | 71.1 (68.9 - 72.9)                          | 75.8 (73.8 - 77.7) | 78.2 (74.4 - 81.4) | 62.7 (59.7 - 65.4)               | 66.5 (63.3 - 69.3) | 68.2 (64.1 - 72.3) |
| Mongolia                                                | 71.6 (70.5 - 72.8)                          | 73.1 (71.6 - 74.9) | 75.3 (71.5 - 78.5) | 62.4 (59.5 - 65.0)               | 63.9 (61.1 - 66.8) | 65.4 (61.4 - 69.6) |
| Tajikistan                                              | 73.0 (70.7 - 74.6)                          | 75.8 (74.0 - 77.6) | 78.9 (74.4 - 82.8) | 64.0 (61.1 - 66.5)               | 66.5 (63.4 - 69.2) | 68.9 (64.4 - 73.5) |
| Turkmenistan                                            | 70.0 (67.0 - 72.7)                          | 72.8 (69.3 - 75.9) | 77.1 (70.6 - 82.8) | 61.7 (58.4 - 64.8)               | 64.2 (60.6 - 67.7) | 67.6 (61.7 - 73.3) |
| Uzbekistan                                              | 73.4 (72.0 - 74.8)                          | 75.4 (73.2 - 77.4) | 78.8 (73.5 - 83.0) | 64.2 (61.5 - 66.8)               | 66.0 (62.9 - 68.8) | 68.5 (63.4 - 73.3) |
| <b>Central Europe</b>                                   | 76.5 (75.9 - 77.2)                          | 78.7 (78.1 - 79.4) | 80.6 (79.4 - 81.5) | 66.6 (63.5 - 69.1)               | 68.5 (65.5 - 71.2) | 69.8 (66.7 - 72.6) |
| Albania                                                 | 77.5 (76.0 - 78.9)                          | 79.8 (78.4 - 81.3) | 81.4 (79.3 - 83.2) | 67.7 (64.6 - 70.5)               | 69.7 (66.6 - 72.5) | 70.8 (67.2 - 73.9) |
| Bosnia and Herzegovina                                  | 77.3 (75.2 - 79.3)                          | 79.8 (78.1 - 82.0) | 82.1 (79.5 - 84.9) | 66.9 (63.6 - 70.1)               | 69.1 (65.5 - 72.4) | 70.7 (66.5 - 74.5) |
| Bulgaria                                                | 72.4 (71.1 - 73.8)                          | 74.9 (73.5 - 76.2) | 76.8 (74.9 - 78.5) | 63.5 (60.6 - 65.9)               | 65.6 (62.7 - 68.1) | 67.1 (64.0 - 69.9) |
| Croatia                                                 | 77.8 (76.8 - 78.7)                          | 80.2 (79.3 - 81.1) | 81.6 (80.6 - 82.6) | 67.5 (64.4 - 70.2)               | 69.6 (66.5 - 72.3) | 70.6 (67.3 - 73.4) |

|                       |                           |                           |                           |                           |                           |                           |
|-----------------------|---------------------------|---------------------------|---------------------------|---------------------------|---------------------------|---------------------------|
| Czechia               | 79.6 (78.7 - 80.5)        | 81.1 (80.2 - 82.1)        | 82.7 (81.4 - 84.0)        | 68.6 (65.3 - 71.4)        | 70.1 (66.8 - 72.9)        | 71.2 (67.8 - 74.2)        |
| Hungary               | 76.5 (75.5 - 77.6)        | 78.5 (77.4 - 79.5)        | 80.3 (78.8 - 81.6)        | 66.4 (63.3 - 69.1)        | 68.2 (65.1 - 71.0)        | 69.4 (66.1 - 72.4)        |
| Montenegro            | 75.0 (74.0 - 76.0)        | 77.0 (76.0 - 78.0)        | 78.8 (77.5 - 79.9)        | 65.5 (62.6 - 68.0)        | 67.5 (64.5 - 70.0)        | 68.7 (65.7 - 71.4)        |
| North Macedonia       | 72.8 (70.4 - 74.5)        | 76.7 (75.5 - 78.0)        | 78.5 (76.8 - 79.9)        | 63.9 (60.9 - 66.7)        | 67.2 (64.3 - 69.7)        | 68.4 (65.4 - 71.3)        |
| Poland                | 77.3 (76.4 - 78.1)        | 79.6 (78.8 - 80.4)        | 81.1 (80.2 - 82.0)        | 67.0 (63.9 - 69.5)        | 69.0 (65.9 - 71.6)        | 70.1 (66.9 - 72.9)        |
| Romania               | 75.3 (74.2 - 76.4)        | 77.2 (76.1 - 78.4)        | 79.4 (77.4 - 81.1)        | 65.9 (63.0 - 68.5)        | 67.6 (64.6 - 70.3)        | 69.2 (65.9 - 72.3)        |
| Serbia                | 75.4 (74.2 - 76.6)        | 77.4 (76.2 - 78.6)        | 79.2 (77.7 - 80.6)        | 66.0 (63.2 - 68.5)        | 67.7 (64.7 - 70.3)        | 68.7 (65.3 - 71.6)        |
| Slovakia              | 77.0 (76.0 - 78.1)        | 79.0 (77.9 - 80.2)        | 80.9 (79.3 - 82.3)        | 66.9 (63.8 - 69.6)        | 68.7 (65.5 - 71.5)        | 70.0 (66.5 - 72.9)        |
| Slovenia              | 81.7 (80.7 - 82.7)        | 83.5 (82.6 - 84.5)        | 84.7 (83.7 - 85.8)        | 70.2 (66.8 - 73.0)        | 72.0 (68.6 - 74.9)        | 72.9 (69.4 - 75.7)        |
| <b>Eastern Europe</b> | <b>72.8 (71.9 - 73.7)</b> | <b>75.0 (73.8 - 76.2)</b> | <b>78.3 (75.9 - 80.2)</b> | <b>63.2 (60.4 - 65.8)</b> | <b>65.1 (62.1 - 67.7)</b> | <b>67.4 (64.0 - 70.7)</b> |
| Belarus               | 71.9 (70.1 - 73.8)        | 75.6 (73.6 - 77.7)        | 78.3 (75.1 - 81.0)        | 63.1 (60.4 - 65.8)        | 66.0 (63.3 - 68.7)        | 68.0 (64.4 - 71.3)        |
| Estonia               | 77.9 (76.8 - 79.0)        | 80.7 (79.7 - 81.8)        | 82.5 (80.9 - 83.8)        | 67.4 (64.3 - 70.0)        | 69.9 (66.7 - 72.5)        | 71.3 (67.9 - 74.3)        |
| Latvia                | 74.1 (72.6 - 75.5)        | 77.5 (76.5 - 78.7)        | 79.7 (78.2 - 81.1)        | 64.7 (61.9 - 67.2)        | 67.5 (64.6 - 70.0)        | 69.1 (65.9 - 72.0)        |
| Lithuania             | 75.1 (74.0 - 76.3)        | 77.6 (76.6 - 78.7)        | 79.2 (77.6 - 80.7)        | 65.2 (62.2 - 67.7)        | 67.3 (64.3 - 69.9)        | 68.4 (65.3 - 71.3)        |
| Moldova               | 74.7 (73.4 - 76.0)        | 77.2 (75.4 - 78.9)        | 80.5 (76.3 - 83.8)        | 65.2 (62.4 - 68.1)        | 67.4 (64.2 - 70.5)        | 69.9 (65.3 - 74.4)        |
| Russia                | 72.7 (71.9 - 73.6)        | 75.2 (74.1 - 76.2)        | 78.5 (76.5 - 80.3)        | 63.0 (60.3 - 65.6)        | 65.1 (62.3 - 67.8)        | 67.6 (64.3 - 70.7)        |
| Ukraine               | 73.0 (70.2 - 75.7)        | 74.1 (71.0 - 77.1)        | 77.0 (72.8 - 80.9)        | 63.3 (60.2 - 66.6)        | 64.3 (60.9 - 67.9)        | 66.4 (62.4 - 70.9)        |
| <b>High income</b>    | <b>81.4 (81.2 - 81.5)</b> | <b>82.6 (82.4 - 82.8)</b> | <b>83.3 (82.9 - 83.6)</b> | <b>69.3 (65.9 - 72.3)</b> | <b>70.4 (67.0 - 73.4)</b> | <b>70.8 (67.3 - 73.8)</b> |
| <b>Australasia</b>    | <b>83.1 (83.1 - 83.2)</b> | <b>84.3 (84.1 - 84.4)</b> | <b>85.0 (84.6 - 85.2)</b> | <b>70.5 (66.9 - 73.6)</b> | <b>71.6 (68.0 - 74.7)</b> | <b>71.9 (68.3 - 75.1)</b> |
| Australia             | 83.3 (83.2 - 83.4)        | 84.5 (84.3 - 84.6)        | 85.1 (84.8 - 85.4)        | 70.7 (67.1 - 73.8)        | 71.7 (68.1 - 74.8)        | 72.1 (68.3 - 75.2)        |

|                                  |                           |                           |                           |                           |                           |                           |
|----------------------------------|---------------------------|---------------------------|---------------------------|---------------------------|---------------------------|---------------------------|
| New Zealand                      | 82.1 (82.0 - 82.3)        | 83.3 (83.1 - 83.5)        | 84.1 (83.6 - 84.5)        | 69.8 (66.2 - 72.9)        | 70.9 (67.3 - 73.9)        | 71.4 (67.8 - 74.5)        |
| <b>High-income Asia Pacific</b>  | <b>84.8 (84.6 - 84.9)</b> | <b>85.9 (85.7 - 86.0)</b> | <b>86.7 (86.4 - 87.0)</b> | <b>73.6 (70.3 - 76.4)</b> | <b>74.4 (71.1 - 77.3)</b> | <b>74.9 (71.5 - 77.8)</b> |
| Brunei                           | 76.6 (75.5 - 77.6)        | 77.8 (76.7 - 78.8)        | 79.2 (77.5 - 80.6)        | 66.9 (63.7 - 69.4)        | 67.8 (64.7 - 70.5)        | 68.5 (65.3 - 71.6)        |
| Japan                            | 85.2 (85.0 - 85.3)        | 85.9 (85.8 - 86.1)        | 86.7 (86.4 - 87.0)        | 73.9 (70.6 - 76.7)        | 74.6 (71.2 - 77.4)        | 75.0 (71.5 - 77.9)        |
| Singapore                        | 86.0 (85.8 - 86.3)        | 87.2 (86.9 - 87.6)        | 88.2 (87.6 - 88.8)        | 75.2 (71.9 - 77.8)        | 76.1 (72.9 - 78.8)        | 76.4 (72.8 - 79.3)        |
| South Korea                      | 83.2 (82.5 - 83.5)        | 85.2 (84.9 - 85.4)        | 86.6 (86.1 - 87.0)        | 72.1 (68.9 - 74.8)        | 73.7 (70.5 - 76.5)        | 74.6 (71.2 - 77.6)        |
| <b>High-income North America</b> | <b>78.7 (78.5 - 78.9)</b> | <b>80.1 (79.8 - 80.3)</b> | <b>80.8 (80.3 - 81.3)</b> | <b>65.9 (62.3 - 69.0)</b> | <b>67.0 (63.4 - 70.1)</b> | <b>67.5 (63.9 - 70.6)</b> |
| Canada                           | 82.6 (82.4 - 82.8)        | 83.6 (83.4 - 83.8)        | 84.2 (83.8 - 84.6)        | 70.6 (67.0 - 73.5)        | 71.4 (67.9 - 74.3)        | 71.6 (67.9 - 74.7)        |
| Greenland                        | 74.0 (72.3 - 75.2)        | 76.6 (74.9 - 77.9)        | 78.6 (77.0 - 79.9)        | 63.9 (60.7 - 66.6)        | 65.9 (62.6 - 68.9)        | 67.5 (64.1 - 70.6)        |
| USA                              | 78.3 (78.1 - 78.5)        | 79.6 (79.4 - 79.9)        | 80.4 (79.8 - 81.0)        | 65.4 (61.7 - 68.5)        | 66.5 (62.9 - 69.6)        | 67.0 (63.3 - 70.1)        |
| <b>Southern Latin America</b>    | <b>78.4 (78.1 - 78.7)</b> | <b>79.9 (79.6 - 80.3)</b> | <b>81.1 (80.4 - 81.7)</b> | <b>67.6 (64.4 - 70.2)</b> | <b>68.8 (65.6 - 71.5)</b> | <b>69.4 (66.0 - 72.3)</b> |
| Argentina                        | 77.6 (77.3 - 78.0)        | 78.9 (78.5 - 79.2)        | 80.0 (79.2 - 80.7)        | 67.2 (64.1 - 69.7)        | 68.2 (65.1 - 70.8)        | 68.8 (65.4 - 71.5)        |
| Chile                            | 80.5 (80.2 - 80.8)        | 82.6 (82.3 - 82.9)        | 83.7 (83.1 - 84.3)        | 68.7 (65.3 - 71.7)        | 70.5 (67.0 - 73.5)        | 71.0 (67.4 - 74.1)        |
| Uruguay                          | 76.9 (76.5 - 77.3)        | 78.4 (78.0 - 78.8)        | 79.7 (79.0 - 80.1)        | 66.5 (63.5 - 69.1)        | 67.8 (64.7 - 70.4)        | 68.5 (65.3 - 71.2)        |
| <b>Western Europe</b>            | <b>82.4 (82.3 - 82.5)</b> | <b>83.6 (83.5 - 83.7)</b> | <b>84.4 (84.1 - 84.6)</b> | <b>70.6 (67.1 - 73.5)</b> | <b>71.7 (68.3 - 74.7)</b> | <b>72.3 (68.7 - 75.3)</b> |
| Andorra                          | 83.8 (81.3 - 86.5)        | 85.0 (82.4 - 87.8)        | 85.7 (83.2 - 88.3)        | 71.7 (68.2 - 75.2)        | 72.9 (69.4 - 76.4)        | 73.5 (69.7 - 77.0)        |
| Austria                          | 82.5 (82.3 - 82.8)        | 84.0 (83.7 - 84.3)        | 85.1 (84.6 - 85.5)        | 70.9 (67.5 - 73.8)        | 72.4 (69.0 - 75.2)        | 73.3 (69.9 - 76.1)        |
| Belgium                          | 82.2 (82.0 - 82.4)        | 83.3 (83.1 - 83.6)        | 84.1 (83.7 - 84.5)        | 70.3 (66.7 - 73.3)        | 71.4 (67.9 - 74.3)        | 71.9 (68.3 - 74.8)        |
| Cyprus                           | 81.5 (80.7 - 82.2)        | 82.9 (82.1 - 83.6)        | 84.1 (83.1 - 84.9)        | 70.6 (67.4 - 73.3)        | 71.8 (68.7 - 74.5)        | 72.5 (69.3 - 75.3)        |
| Denmark                          | 81.2 (80.9 - 81.5)        | 82.8 (82.5 - 83.0)        | 83.5 (83.2 - 83.8)        | 70.1 (66.8 - 72.8)        | 71.5 (68.2 - 74.2)        | 72.0 (68.6 - 74.8)        |

|                                    |                           |                           |                           |                           |                           |                           |
|------------------------------------|---------------------------|---------------------------|---------------------------|---------------------------|---------------------------|---------------------------|
| Finland                            | 80.8 (80.2 - 81.4)        | 83.5 (83.2 - 83.8)        | 84.5 (84.1 - 84.9)        | 69.4 (66.1 - 72.3)        | 71.6 (68.1 - 74.5)        | 72.1 (68.6 - 75.1)        |
| France                             | 83.1 (82.9 - 83.3)        | 84.4 (84.2 - 84.6)        | 84.9 (84.6 - 85.1)        | 71.0 (67.4 - 74.1)        | 72.2 (68.5 - 75.2)        | 72.5 (68.6 - 75.5)        |
| Germany                            | 81.5 (81.4 - 81.6)        | 82.5 (82.3 - 82.6)        | 83.3 (83.0 - 83.5)        | 69.8 (66.3 - 72.6)        | 70.7 (67.3 - 73.6)        | 71.3 (67.8 - 74.2)        |
| Greece                             | 80.3 (80.0 - 80.6)        | 82.0 (81.8 - 82.3)        | 83.0 (82.6 - 83.4)        | 69.1 (65.8 - 71.8)        | 70.5 (67.1 - 73.3)        | 71.1 (67.4 - 73.9)        |
| Iceland                            | 83.3 (82.6 - 83.9)        | 84.7 (84.0 - 85.4)        | 85.6 (84.9 - 86.4)        | 71.8 (68.4 - 74.6)        | 73.1 (69.8 - 75.9)        | 73.8 (70.4 - 76.7)        |
| Ireland                            | 83.3 (83.0 - 83.5)        | 84.8 (84.6 - 85.1)        | 86.0 (85.6 - 86.3)        | 71.2 (67.7 - 74.2)        | 72.8 (69.3 - 75.7)        | 73.6 (70.0 - 76.5)        |
| Israel                             | 83.6 (82.9 - 83.9)        | 85.1 (84.3 - 85.5)        | 85.7 (84.8 - 86.2)        | 72.1 (68.7 - 74.9)        | 73.4 (70.0 - 76.3)        | 73.8 (70.3 - 76.7)        |
| Italy                              | 83.0 (82.8 - 83.2)        | 84.3 (84.2 - 84.5)        | 85.1 (84.8 - 85.4)        | 71.3 (67.7 - 74.1)        | 72.4 (68.9 - 75.4)        | 72.9 (69.3 - 75.9)        |
| Luxembourg                         | 83.1 (82.4 - 83.9)        | 84.0 (83.3 - 84.7)        | 84.6 (83.9 - 85.3)        | 71.5 (68.1 - 74.3)        | 72.4 (69.0 - 75.2)        | 72.8 (69.4 - 75.7)        |
| Malta                              | 82.3 (81.5 - 83.1)        | 84.4 (83.7 - 85.2)        | 85.5 (84.6 - 86.4)        | 71.0 (67.6 - 73.8)        | 72.7 (69.2 - 75.6)        | 73.1 (69.5 - 76.3)        |
| Monaco                             | 80.0 (78.6 - 81.4)        | 80.9 (79.4 - 82.3)        | 81.7 (80.2 - 83.1)        | 69.3 (66.0 - 72.2)        | 70.1 (66.8 - 73.0)        | 70.7 (67.4 - 73.6)        |
| Netherlands                        | 82.3 (82.1 - 82.5)        | 83.0 (82.8 - 83.2)        | 83.6 (83.4 - 83.8)        | 70.9 (67.5 - 73.7)        | 71.7 (68.3 - 74.5)        | 72.1 (68.7 - 74.9)        |
| Norway                             | 83.0 (82.2 - 83.2)        | 84.2 (84.0 - 84.3)        | 84.8 (84.5 - 85.0)        | 71.1 (67.6 - 74.1)        | 72.3 (69.0 - 75.2)        | 72.9 (69.5 - 75.8)        |
| Portugal                           | 82.0 (81.8 - 82.3)        | 83.8 (83.6 - 84.1)        | 85.0 (84.6 - 85.4)        | 70.3 (66.8 - 73.2)        | 72.0 (68.6 - 74.9)        | 72.9 (69.3 - 75.8)        |
| San Marino                         | 86.5 (83.7 - 89.1)        | 88.3 (85.3 - 91.3)        | 89.0 (86.1 - 91.8)        | 73.7 (69.9 - 77.4)        | 75.2 (71.3 - 79.3)        | 75.6 (71.6 - 79.9)        |
| Spain                              | 83.2 (83.0 - 83.5)        | 84.6 (84.5 - 84.8)        | 85.5 (85.1 - 85.8)        | 71.5 (67.9 - 74.4)        | 72.8 (69.3 - 75.7)        | 73.2 (69.6 - 76.3)        |
| Sweden                             | 83.7 (83.0 - 84.3)        | 84.7 (84.1 - 85.4)        | 85.4 (84.7 - 86.1)        | 71.9 (68.3 - 74.9)        | 72.9 (69.4 - 75.8)        | 73.3 (69.7 - 76.2)        |
| Switzerland                        | 85.0 (84.8 - 85.2)        | 85.8 (85.6 - 86.1)        | 86.4 (86.0 - 86.7)        | 72.4 (68.7 - 75.5)        | 73.3 (69.7 - 76.4)        | 73.7 (70.1 - 76.7)        |
| UK                                 | 81.7 (81.6 - 81.9)        | 82.7 (82.5 - 82.9)        | 83.6 (83.2 - 83.9)        | 69.9 (66.4 - 72.8)        | 70.9 (67.5 - 73.9)        | 71.5 (68.0 - 74.4)        |
| <b>Latin America and Caribbean</b> | <b>75.6 (74.5 - 76.4)</b> | <b>77.6 (76.0 - 78.8)</b> | <b>79.6 (77.1 - 81.5)</b> | <b>64.9 (61.5 - 67.7)</b> | <b>66.5 (63.1 - 69.4)</b> | <b>67.5 (63.7 - 71.1)</b> |



|                             |                           |                           |                           |                           |                           |                           |
|-----------------------------|---------------------------|---------------------------|---------------------------|---------------------------|---------------------------|---------------------------|
| <b>Andean Latin America</b> | <b>76.0 (74.1 - 77.8)</b> | <b>79.2 (77.3 - 81.0)</b> | <b>80.8 (78.3 - 83.1)</b> | <b>66.2 (63.0 - 69.2)</b> | <b>68.9 (65.4 - 71.9)</b> | <b>69.7 (66.1 - 73.0)</b> |
| Bolivia                     | 68.7 (65.7 - 71.4)        | 74.4 (71.3 - 76.8)        | 76.4 (73.0 - 79.4)        | 60.2 (57.0 - 63.4)        | 64.8 (61.3 - 68.1)        | 66.0 (62.2 - 69.6)        |
| Ecuador                     | 77.1 (74.9 - 79.1)        | 79.0 (76.8 - 81.1)        | 80.4 (77.9 - 82.9)        | 66.9 (63.6 - 70.1)        | 68.4 (65.1 - 71.7)        | 68.8 (65.1 - 72.5)        |
| Peru                        | 78.2 (75.9 - 80.4)        | 80.9 (78.4 - 83.2)        | 82.5 (79.8 - 85.2)        | 68.1 (64.9 - 71.3)        | 70.5 (67.0 - 73.7)        | 71.5 (67.8 - 74.9)        |
| <b>Caribbean</b>            | <b>72.2 (60.3 - 74.6)</b> | <b>74.2 (71.3 - 76.4)</b> | <b>76.5 (63.6 - 79.8)</b> | <b>62.3 (52.1 - 65.9)</b> | <b>64.0 (59.1 - 67.4)</b> | <b>65.2 (54.2 - 69.5)</b> |
| Antigua and Barbuda         | 76.3 (75.9 - 76.6)        | 77.4 (76.7 - 78.0)        | 78.8 (76.9 - 80.1)        | 66.1 (63.0 - 68.8)        | 67.0 (63.7 - 69.6)        | 67.5 (63.9 - 70.6)        |
| The Bahamas                 | 73.8 (70.9 - 76.3)        | 75.3 (72.4 - 78.0)        | 76.8 (73.6 - 79.5)        | 64.2 (61.0 - 67.6)        | 65.3 (61.8 - 68.9)        | 66.1 (62.5 - 69.9)        |
| Barbados                    | 75.6 (73.1 - 77.8)        | 77.8 (75.3 - 80.2)        | 79.0 (76.2 - 81.5)        | 65.7 (62.0 - 69.0)        | 67.5 (63.7 - 70.8)        | 67.9 (64.1 - 71.5)        |
| Belize                      | 74.3 (71.5 - 76.0)        | 76.6 (75.0 - 78.3)        | 78.5 (75.4 - 81.1)        | 64.5 (61.0 - 67.3)        | 66.3 (63.1 - 69.4)        | 67.4 (63.2 - 71.2)        |
| Bermuda                     | 81.2 (79.2 - 82.6)        | 83.4 (81.4 - 84.8)        | 84.8 (82.8 - 86.2)        | 70.5 (67.3 - 73.5)        | 72.3 (68.8 - 75.3)        | 72.9 (69.2 - 76.0)        |
| Cuba                        | 78.6 (77.4 - 79.8)        | 79.5 (78.2 - 80.8)        | 80.9 (79.2 - 82.5)        | 68.4 (65.5 - 71.2)        | 69.1 (66.0 - 71.8)        | 69.7 (66.3 - 72.8)        |
| Dominica                    | 71.1 (68.7 - 73.2)        | 73.3 (70.7 - 75.3)        | 75.1 (72.1 - 77.5)        | 61.8 (58.5 - 64.7)        | 63.6 (60.3 - 66.7)        | 64.6 (60.7 - 68.1)        |
| Dominican Republic          | 75.4 (73.1 - 77.6)        | 76.9 (74.4 - 79.1)        | 79.4 (75.9 - 82.3)        | 65.2 (61.9 - 68.6)        | 66.4 (63.1 - 69.9)        | 67.6 (63.9 - 71.7)        |
| Grenada                     | 72.7 (71.4 - 74.0)        | 74.2 (72.6 - 75.8)        | 75.9 (73.4 - 77.9)        | 63.2 (60.2 - 65.8)        | 64.3 (61.5 - 67.1)        | 65.1 (61.5 - 68.4)        |
| Guyana                      | 67.4 (63.5 - 70.5)        | 71.2 (67.8 - 74.5)        | 74.3 (70.4 - 78.1)        | 57.9 (53.9 - 61.6)        | 60.6 (56.8 - 64.6)        | 62.6 (58.2 - 67.0)        |
| Haiti                       | 62.6 (38.4 - 67.0)        | 65.6 (59.0 - 69.8)        | 70.1 (44.7 - 75.8)        | 54.0 (33.6 - 58.6)        | 56.5 (50.8 - 61.1)        | 59.8 (39.0 - 65.7)        |
| Jamaica                     | 75.7 (72.6 - 78.7)        | 77.6 (74.3 - 80.7)        | 79.3 (75.8 - 82.5)        | 65.9 (62.4 - 69.5)        | 67.5 (63.8 - 71.3)        | 68.5 (64.4 - 72.4)        |
| Puerto Rico                 | 80.6 (78.8 - 82.5)        | 82.9 (81.0 - 84.8)        | 84.2 (82.0 - 86.3)        | 69.2 (65.5 - 72.5)        | 71.2 (67.6 - 74.7)        | 72.1 (68.1 - 75.8)        |
| Saint Kitts and Nevis       | 73.0 (71.1 - 74.8)        | 75.1 (73.3 - 77.0)        | 77.5 (75.0 - 79.5)        | 63.5 (60.4 - 66.2)        | 65.1 (61.8 - 68.0)        | 66.5 (62.8 - 69.9)        |
| Saint Lucia                 | 74.6 (72.1 - 77.1)        | 77.2 (74.7 - 79.4)        | 79.2 (76.1 - 81.8)        | 64.5 (60.8 - 67.6)        | 66.4 (62.7 - 69.8)        | 67.4 (63.2 - 71.2)        |

|                                     |                           |                           |                           |                           |                           |                           |
|-------------------------------------|---------------------------|---------------------------|---------------------------|---------------------------|---------------------------|---------------------------|
| Saint Vincent and the Grenadines    | 72.5 (70.8 - 74.0)        | 74.5 (72.8 - 76.1)        | 76.3 (73.8 - 78.2)        | 62.9 (60.0 - 65.8)        | 64.4 (61.2 - 67.3)        | 65.2 (61.6 - 68.7)        |
| Suriname                            | 72.9 (69.8 - 76.0)        | 75.4 (72.3 - 78.5)        | 78.0 (73.4 - 82.2)        | 62.7 (59.2 - 66.4)        | 64.7 (60.9 - 68.7)        | 66.3 (61.6 - 70.8)        |
| Trinidad and Tobago                 | 72.6 (69.5 - 75.5)        | 76.5 (73.5 - 79.5)        | 79.1 (75.8 - 82.4)        | 62.8 (59.2 - 66.3)        | 65.7 (61.9 - 69.4)        | 67.2 (63.0 - 71.2)        |
| Virgin Islands                      | 76.0 (72.7 - 78.7)        | 79.7 (77.4 - 81.8)        | 81.5 (79.2 - 83.5)        | 65.5 (61.6 - 68.9)        | 68.4 (64.7 - 71.8)        | 69.3 (65.4 - 73.0)        |
| <b>Central Latin America</b>        | <b>75.3 (74.0 - 76.6)</b> | <b>77.2 (74.9 - 78.9)</b> | <b>79.3 (76.3 - 81.8)</b> | <b>65.0 (61.8 - 67.9)</b> | <b>66.4 (62.8 - 69.5)</b> | <b>67.4 (63.3 - 71.3)</b> |
| Colombia                            | 79.9 (77.8 - 81.7)        | 82.2 (80.3 - 84.1)        | 84.4 (81.8 - 86.5)        | 68.9 (65.7 - 72.0)        | 70.7 (67.3 - 74.0)        | 71.8 (68.1 - 75.5)        |
| Costa Rica                          | 79.8 (78.6 - 81.0)        | 81.4 (80.2 - 82.7)        | 83.2 (81.3 - 84.9)        | 68.4 (65.1 - 71.6)        | 69.7 (66.3 - 73.0)        | 70.7 (66.9 - 74.3)        |
| El Salvador                         | 74.8 (72.4 - 77.1)        | 76.8 (74.3 - 79.3)        | 78.4 (75.2 - 81.3)        | 64.5 (60.9 - 67.8)        | 66.0 (62.3 - 69.5)        | 66.8 (62.8 - 70.7)        |
| Guatemala                           | 73.5 (71.7 - 75.2)        | 75.7 (73.9 - 77.6)        | 78.7 (75.9 - 81.1)        | 62.8 (59.5 - 66.0)        | 64.6 (61.3 - 68.1)        | 66.2 (62.4 - 70.3)        |
| Honduras                            | 71.4 (67.7 - 73.3)        | 73.5 (69.5 - 75.5)        | 76.0 (71.9 - 78.6)        | 62.0 (58.4 - 65.1)        | 63.8 (59.8 - 66.9)        | 65.3 (61.1 - 69.0)        |
| Mexico                              | 74.4 (73.1 - 75.6)        | 76.6 (75.2 - 78.0)        | 78.4 (76.2 - 80.4)        | 64.2 (61.0 - 67.1)        | 65.7 (62.5 - 68.7)        | 66.4 (62.7 - 69.9)        |
| Nicaragua                           | 79.6 (77.1 - 81.2)        | 80.3 (78.0 - 82.0)        | 81.4 (78.2 - 84.3)        | 68.1 (64.5 - 71.6)        | 68.5 (65.0 - 72.0)        | 68.8 (64.7 - 73.1)        |
| Panama                              | 79.5 (77.3 - 81.7)        | 81.6 (79.3 - 83.8)        | 83.5 (81.0 - 86.1)        | 68.3 (64.9 - 71.6)        | 69.8 (66.2 - 73.3)        | 70.6 (66.5 - 74.4)        |
| Venezuela                           | 72.1 (67.7 - 75.4)        | 71.7 (62.3 - 77.9)        | 73.9 (61.8 - 81.7)        | 62.9 (58.6 - 66.5)        | 62.8 (54.7 - 68.8)        | 64.3 (53.8 - 71.7)        |
| <b>Tropical Latin America</b>       | <b>76.6 (76.2 - 76.9)</b> | <b>78.3 (77.6 - 78.9)</b> | <b>80.3 (78.1 - 81.5)</b> | <b>65.0 (61.6 - 67.9)</b> | <b>66.4 (62.9 - 69.3)</b> | <b>67.4 (63.6 - 70.8)</b> |
| Brazil                              | 76.6 (76.3 - 76.9)        | 78.4 (77.7 - 78.9)        | 80.3 (78.2 - 81.5)        | 65.0 (61.5 - 67.9)        | 66.4 (62.9 - 69.3)        | 67.4 (63.6 - 70.8)        |
| Paraguay                            | 75.3 (72.6 - 77.7)        | 77.0 (74.0 - 79.4)        | 79.0 (75.5 - 82.0)        | 64.9 (61.3 - 68.3)        | 66.1 (62.3 - 69.5)        | 67.2 (63.0 - 71.0)        |
| <b>North Africa and Middle East</b> | <b>73.7 (72.4 - 75.0)</b> | <b>75.6 (73.9 - 77.1)</b> | <b>78.1 (75.0 - 80.6)</b> | <b>63.4 (60.3 - 66.2)</b> | <b>64.8 (61.7 - 68.0)</b> | <b>65.9 (61.8 - 69.8)</b> |
| <b>North Africa and Middle East</b> | <b>73.7 (72.4 - 75.0)</b> | <b>75.6 (73.9 - 77.1)</b> | <b>78.1 (75.0 - 80.6)</b> | <b>63.4 (60.3 - 66.2)</b> | <b>64.8 (61.7 - 68.0)</b> | <b>65.9 (61.8 - 69.8)</b> |
| Afghanistan                         | 62.9 (60.4 - 65.8)        | 66.4 (63.4 - 69.3)        | 72.1 (67.7 - 76.7)        | 53.6 (50.3 - 57.0)        | 56.4 (52.8 - 59.8)        | 60.4 (55.5 - 65.3)        |

|                      |                    |                    |                    |                    |                    |                    |
|----------------------|--------------------|--------------------|--------------------|--------------------|--------------------|--------------------|
| Algeria              | 77.3 (75.9 - 78.6) | 78.8 (77.1 - 80.3) | 81.3 (78.5 - 83.8) | 66.6 (63.4 - 69.5) | 67.6 (64.2 - 70.7) | 68.6 (64.5 - 72.5) |
| Bahrain              | 76.0 (74.9 - 77.1) | 77.6 (76.3 - 78.8) | 79.3 (77.0 - 81.0) | 65.6 (62.5 - 68.3) | 66.8 (63.9 - 69.7) | 67.4 (63.9 - 70.7) |
| Egypt                | 70.5 (68.8 - 72.2) | 72.0 (70.1 - 73.8) | 74.2 (71.1 - 77.0) | 61.7 (58.7 - 64.4) | 62.7 (59.5 - 65.6) | 63.4 (59.8 - 67.2) |
| Iran                 | 78.9 (77.7 - 79.3) | 80.6 (79.4 - 81.6) | 83.0 (80.0 - 85.1) | 67.2 (63.6 - 70.0) | 68.5 (65.1 - 71.6) | 69.4 (65.0 - 73.6) |
| Iraq                 | 71.7 (68.7 - 74.6) | 73.9 (70.7 - 76.8) | 77.6 (73.4 - 81.2) | 61.4 (57.8 - 64.7) | 63.2 (59.5 - 66.8) | 65.4 (60.8 - 69.7) |
| Jordan               | 79.4 (77.5 - 81.1) | 82.0 (79.9 - 83.8) | 84.4 (81.5 - 87.0) | 67.9 (64.6 - 71.1) | 69.8 (66.3 - 73.2) | 70.8 (66.7 - 74.7) |
| Kuwait               | 82.7 (81.1 - 84.2) | 83.7 (82.2 - 85.2) | 85.4 (82.7 - 87.2) | 70.2 (66.6 - 73.4) | 70.8 (67.0 - 74.1) | 71.2 (66.9 - 75.2) |
| Lebanon              | 78.3 (76.7 - 79.8) | 80.8 (79.3 - 82.3) | 82.1 (79.7 - 84.0) | 66.6 (63.2 - 69.8) | 68.5 (65.1 - 71.9) | 68.8 (64.9 - 72.7) |
| Libya                | 71.7 (68.7 - 74.3) | 74.2 (70.6 - 77.2) | 75.6 (71.2 - 79.6) | 61.7 (58.0 - 65.2) | 63.5 (59.7 - 67.2) | 63.8 (59.3 - 68.4) |
| Morocco              | 73.2 (71.1 - 75.4) | 75.6 (73.4 - 78.1) | 78.3 (74.3 - 82.1) | 63.0 (59.5 - 66.3) | 64.7 (61.3 - 68.2) | 65.8 (61.3 - 70.5) |
| Oman                 | 76.8 (75.0 - 78.4) | 77.6 (75.7 - 79.7) | 79.3 (75.8 - 82.6) | 66.4 (63.5 - 69.6) | 66.9 (63.6 - 70.3) | 67.2 (62.9 - 71.6) |
| Palestine            | 74.2 (71.0 - 76.0) | 76.6 (73.4 - 78.5) | 78.5 (74.8 - 81.0) | 63.8 (60.3 - 67.0) | 65.7 (61.7 - 68.9) | 66.6 (62.7 - 70.5) |
| Qatar                | 78.6 (76.7 - 80.3) | 79.7 (77.8 - 81.4) | 81.1 (78.9 - 83.3) | 67.5 (64.4 - 70.6) | 68.4 (65.2 - 71.5) | 69.0 (65.5 - 72.4) |
| Saudi Arabia         | 74.1 (72.1 - 76.0) | 74.8 (72.5 - 76.8) | 76.5 (72.5 - 79.5) | 63.8 (60.9 - 66.7) | 64.2 (61.0 - 67.3) | 64.7 (60.7 - 68.7) |
| Sudan                | 69.6 (66.5 - 72.4) | 72.7 (69.0 - 76.0) | 75.3 (66.9 - 81.0) | 60.3 (56.7 - 63.7) | 62.7 (58.6 - 66.8) | 64.0 (56.7 - 69.9) |
| Syria                | 70.9 (64.1 - 76.1) | 72.0 (65.1 - 77.3) | 74.2 (66.2 - 80.4) | 61.0 (54.5 - 66.6) | 61.6 (55.6 - 67.4) | 61.2 (53.5 - 68.0) |
| Tunisia              | 76.5 (73.9 - 79.0) | 79.4 (76.6 - 81.9) | 81.6 (78.1 - 84.7) | 65.7 (62.2 - 69.1) | 67.8 (64.0 - 71.4) | 68.7 (64.4 - 72.9) |
| Türkiye              | 77.5 (76.0 - 79.1) | 79.4 (77.8 - 81.0) | 81.4 (79.4 - 83.3) | 67.0 (64.0 - 70.0) | 68.4 (65.3 - 71.5) | 69.3 (65.9 - 72.7) |
| United Arab Emirates | 76.1 (74.9 - 77.4) | 77.8 (76.5 - 79.3) | 79.7 (77.4 - 81.7) | 65.8 (62.6 - 68.5) | 67.2 (64.2 - 70.0) | 67.9 (64.4 - 71.5) |
| Yemen                | 68.2 (63.9 - 71.6) | 70.8 (66.7 - 74.2) | 74.9 (69.4 - 80.0) | 58.5 (53.4 - 62.6) | 60.5 (56.0 - 64.6) | 63.3 (58.0 - 68.7) |

|                                               |                           |                           |                           |                           |                           |                           |
|-----------------------------------------------|---------------------------|---------------------------|---------------------------|---------------------------|---------------------------|---------------------------|
| <b>South Asia</b>                             | <b>71.1 (70.1 - 72.0)</b> | <b>73.7 (72.0 - 75.3)</b> | <b>77.8 (74.1 - 81.1)</b> | <b>60.9 (58.1 - 63.6)</b> | <b>63.0 (59.8 - 66.0)</b> | <b>65.6 (61.4 - 70.0)</b> |
| <b>South Asia</b>                             | <b>71.1 (70.1 - 72.0)</b> | <b>73.7 (72.0 - 75.3)</b> | <b>77.8 (74.1 - 81.1)</b> | <b>60.9 (58.1 - 63.6)</b> | <b>63.0 (59.8 - 66.0)</b> | <b>65.6 (61.4 - 70.0)</b> |
| Bangladesh                                    | 74.3 (71.6 - 76.6)        | 76.8 (73.9 - 79.2)        | 80.4 (76.1 - 83.8)        | 64.1 (61.1 - 67.1)        | 65.9 (62.6 - 69.1)        | 67.8 (63.6 - 72.0)        |
| Bhutan                                        | 72.7 (70.2 - 75.1)        | 76.0 (73.3 - 78.4)        | 79.6 (75.5 - 83.0)        | 63.2 (60.4 - 66.2)        | 65.5 (62.3 - 68.5)        | 67.6 (63.4 - 71.9)        |
| India                                         | 71.3 (70.3 - 72.3)        | 73.8 (72.1 - 75.4)        | 78.0 (74.0 - 81.4)        | 61.1 (58.2 - 63.8)        | 63.0 (59.9 - 66.2)        | 65.7 (61.6 - 70.2)        |
| Nepal                                         | 71.8 (69.4 - 73.9)        | 74.8 (72.3 - 77.0)        | 79.1 (75.0 - 82.6)        | 61.7 (58.9 - 64.5)        | 64.1 (60.9 - 67.2)        | 66.8 (62.7 - 71.0)        |
| Pakistan                                      | 67.9 (65.8 - 69.8)        | 71.0 (68.4 - 73.3)        | 75.4 (70.9 - 79.1)        | 58.4 (55.4 - 61.5)        | 60.9 (57.4 - 64.4)        | 63.6 (58.8 - 68.0)        |
| <b>Southeast Asia, East Asia, and Oceania</b> | <b>76.1 (74.8 - 77.3)</b> | <b>77.8 (76.4 - 79.0)</b> | <b>79.8 (77.8 - 81.6)</b> | <b>67.1 (64.5 - 69.4)</b> | <b>68.3 (65.5 - 70.9)</b> | <b>69.3 (66.0 - 72.4)</b> |
| <b>East Asia</b>                              | <b>77.9 (76.3 - 79.5)</b> | <b>79.5 (77.9 - 81.0)</b> | <b>81.5 (79.4 - 83.3)</b> | <b>68.8 (66.0 - 71.3)</b> | <b>69.9 (67.0 - 72.5)</b> | <b>70.9 (67.5 - 73.9)</b> |
| China                                         | 77.9 (76.3 - 79.5)        | 79.5 (77.9 - 81.1)        | 81.6 (79.4 - 83.4)        | 68.9 (66.0 - 71.3)        | 69.9 (67.0 - 72.5)        | 70.9 (67.5 - 74.0)        |
| North Korea                                   | 73.3 (70.8 - 75.6)        | 74.6 (71.8 - 76.9)        | 77.0 (73.0 - 80.0)        | 65.3 (62.7 - 68.0)        | 66.3 (63.5 - 69.2)        | 68.2 (64.4 - 71.6)        |
| Taiwan (Province of China)                    | 81.2 (80.5 - 81.9)        | 82.3 (81.8 - 83.0)        | 83.2 (82.4 - 84.0)        | 70.8 (67.7 - 73.4)        | 71.6 (68.5 - 74.2)        | 71.8 (68.5 - 74.5)        |
| <b>Oceania</b>                                | <b>66.2 (63.2 - 68.4)</b> | <b>68.5 (65.7 - 70.8)</b> | <b>72.6 (68.2 - 76.3)</b> | <b>58.0 (54.9 - 60.6)</b> | <b>60.0 (56.9 - 62.8)</b> | <b>62.9 (58.7 - 66.8)</b> |
| American Samoa                                | 71.0 (68.7 - 72.9)        | 71.6 (69.3 - 73.7)        | 73.6 (70.5 - 76.3)        | 61.4 (58.3 - 64.3)        | 62.1 (58.7 - 65.1)        | 63.2 (59.4 - 66.8)        |
| Cook Islands                                  | 76.3 (74.2 - 78.1)        | 77.4 (75.4 - 79.4)        | 79.1 (76.3 - 81.6)        | 66.1 (62.8 - 69.0)        | 66.8 (63.4 - 69.9)        | 67.2 (63.4 - 71.0)        |
| Federated States of Micronesia                | 67.1 (63.7 - 70.0)        | 67.9 (64.6 - 70.9)        | 69.5 (65.2 - 73.3)        | 59.2 (55.9 - 62.5)        | 59.6 (56.1 - 63.1)        | 60.3 (56.1 - 64.4)        |
| Fiji                                          | 68.1 (65.1 - 71.1)        | 69.8 (66.6 - 72.9)        | 72.8 (68.6 - 76.6)        | 59.7 (56.4 - 62.8)        | 61.0 (57.5 - 64.5)        | 62.9 (58.6 - 67.0)        |
| Guam                                          | 78.6 (76.1 - 80.3)        | 82.5 (80.8 - 84.1)        | 84.6 (81.8 - 87.0)        | 68.3 (64.8 - 71.6)        | 71.5 (67.8 - 74.7)        | 72.8 (68.5 - 76.7)        |
| Kiribati                                      | 64.2 (60.9 - 67.0)        | 65.9 (62.7 - 68.8)        | 69.3 (65.0 - 73.2)        | 56.4 (53.1 - 59.6)        | 57.7 (54.3 - 60.8)        | 59.8 (55.5 - 64.0)        |
| Marshall Islands                              | 65.2 (61.8 - 68.1)        | 66.2 (62.5 - 69.6)        | 68.7 (63.6 - 73.2)        | 57.2 (53.7 - 60.4)        | 57.8 (54.0 - 61.4)        | 59.2 (54.3 - 63.8)        |

|                          |                           |                           |                           |                           |                           |                           |
|--------------------------|---------------------------|---------------------------|---------------------------|---------------------------|---------------------------|---------------------------|
| Nauru                    | 62.5 (58.9 - 65.7)        | 63.6 (59.9 - 67.2)        | 66.4 (60.6 - 71.1)        | 55.3 (51.8 - 58.5)        | 56.0 (52.3 - 59.6)        | 57.7 (52.5 - 62.5)        |
| Niue                     | 67.8 (65.6 - 69.6)        | 69.0 (66.7 - 71.1)        | 71.7 (68.5 - 74.4)        | 59.4 (56.6 - 62.2)        | 60.2 (57.1 - 63.0)        | 61.7 (57.8 - 65.3)        |
| Northern Mariana Islands | 73.5 (73.0 - 75.0)        | 74.2 (73.3 - 75.7)        | 75.5 (73.0 - 77.5)        | 64.6 (62.0 - 66.9)        | 65.1 (62.5 - 67.6)        | 65.7 (62.5 - 68.7)        |
| Palau                    | 68.7 (66.2 - 71.0)        | 69.6 (66.9 - 72.0)        | 71.7 (67.9 - 74.4)        | 60.3 (57.5 - 62.9)        | 60.7 (57.8 - 63.7)        | 61.9 (58.2 - 65.2)        |
| Papua New Guinea         | 65.9 (62.6 - 68.5)        | 68.3 (65.1 - 71.0)        | 72.6 (68.0 - 76.5)        | 57.6 (54.2 - 60.4)        | 59.8 (56.5 - 62.9)        | 62.9 (58.7 - 67.1)        |
| Samoa                    | 69.8 (67.2 - 71.9)        | 70.9 (68.1 - 73.0)        | 72.9 (69.2 - 76.1)        | 61.2 (58.1 - 64.2)        | 62.0 (58.4 - 65.1)        | 62.9 (59.1 - 66.8)        |
| Solomon Islands          | 65.9 (61.9 - 68.8)        | 66.5 (62.4 - 69.5)        | 69.2 (64.2 - 73.4)        | 58.3 (54.7 - 61.4)        | 58.7 (54.6 - 62.0)        | 60.4 (55.9 - 64.9)        |
| Tokelau                  | 68.7 (66.4 - 70.7)        | 70.3 (68.0 - 72.6)        | 73.8 (70.0 - 76.9)        | 60.1 (57.2 - 62.8)        | 61.1 (57.9 - 64.3)        | 63.0 (58.8 - 67.0)        |
| Tonga                    | 73.2 (70.5 - 75.5)        | 74.3 (71.6 - 76.8)        | 76.4 (73.1 - 79.2)        | 64.2 (60.8 - 67.4)        | 64.8 (61.3 - 68.2)        | 65.7 (61.6 - 69.5)        |
| Tuvalu                   | 68.2 (66.0 - 70.1)        | 69.4 (67.2 - 71.4)        | 71.7 (67.3 - 75.1)        | 60.3 (57.7 - 62.8)        | 61.1 (58.3 - 63.8)        | 62.2 (58.3 - 65.9)        |
| Vanuatu                  | 65.4 (62.6 - 67.6)        | 68.8 (66.5 - 71.1)        | 71.9 (68.0 - 75.5)        | 57.9 (55.0 - 60.6)        | 60.6 (57.8 - 63.7)        | 62.6 (58.7 - 66.7)        |
| <b>Southeast Asia</b>    | <b>72.8 (71.6 - 74.1)</b> | <b>74.8 (73.4 - 76.0)</b> | <b>77.6 (75.2 - 79.6)</b> | <b>64.0 (61.4 - 66.5)</b> | <b>65.6 (62.8 - 68.0)</b> | <b>67.4 (64.0 - 70.5)</b> |
| Cambodia                 | 69.7 (66.8 - 72.5)        | 71.8 (69.0 - 74.5)        | 74.9 (71.8 - 78.0)        | 61.1 (57.7 - 64.2)        | 62.8 (59.3 - 66.0)        | 65.0 (61.1 - 68.9)        |
| Indonesia                | 71.4 (69.4 - 73.2)        | 73.6 (71.7 - 75.6)        | 77.1 (74.6 - 79.7)        | 63.1 (60.3 - 65.8)        | 64.9 (62.0 - 67.7)        | 67.3 (63.9 - 70.5)        |
| Laos                     | 68.1 (65.2 - 70.9)        | 71.9 (68.8 - 74.7)        | 76.0 (72.4 - 79.1)        | 60.3 (57.4 - 63.3)        | 63.4 (60.5 - 66.4)        | 66.2 (62.6 - 69.7)        |
| Malaysia                 | 74.7 (74.4 - 74.9)        | 76.4 (75.7 - 77.0)        | 78.9 (77.1 - 80.3)        | 65.3 (62.5 - 67.7)        | 66.6 (63.7 - 68.9)        | 68.0 (64.6 - 71.0)        |
| Maldives                 | 80.8 (79.2 - 82.5)        | 82.9 (81.0 - 84.6)        | 85.2 (82.4 - 87.7)        | 70.4 (67.6 - 73.3)        | 71.9 (68.9 - 74.9)        | 72.8 (69.0 - 76.4)        |
| Mauritius                | 74.9 (74.7 - 75.8)        | 76.5 (75.7 - 77.4)        | 79.3 (77.4 - 81.0)        | 64.8 (61.9 - 67.5)        | 65.9 (62.9 - 68.6)        | 67.6 (64.2 - 70.9)        |
| Myanmar                  | 69.5 (66.2 - 71.9)        | 71.5 (67.8 - 73.8)        | 75.2 (70.9 - 78.2)        | 61.1 (57.9 - 63.9)        | 62.7 (59.5 - 65.7)        | 65.3 (61.3 - 69.0)        |
| Philippines              | 72.0 (70.4 - 73.6)        | 73.8 (72.2 - 75.5)        | 76.8 (74.7 - 79.0)        | 63.0 (60.3 - 65.6)        | 64.5 (61.6 - 67.3)        | 66.6 (63.1 - 69.8)        |

|                                   |                           |                           |                           |                           |                           |                           |
|-----------------------------------|---------------------------|---------------------------|---------------------------|---------------------------|---------------------------|---------------------------|
| Seychelles                        | 74.1 (73.0 - 75.1)        | 76.0 (74.9 - 77.1)        | 77.7 (75.8 - 79.3)        | 64.5 (61.5 - 67.2)        | 66.2 (63.2 - 68.8)        | 66.5 (63.1 - 69.7)        |
| Sri Lanka                         | 77.9 (73.6 - 81.7)        | 79.1 (74.9 - 83.0)        | 81.5 (77.4 - 85.2)        | 67.2 (63.2 - 71.3)        | 68.2 (64.0 - 72.1)        | 69.5 (65.5 - 73.7)        |
| Thailand                          | 77.4 (74.7 - 80.0)        | 79.5 (76.7 - 82.2)        | 81.6 (78.6 - 84.7)        | 67.3 (64.1 - 70.6)        | 68.9 (65.4 - 72.4)        | 69.9 (66.2 - 73.7)        |
| Timor-Leste                       | 70.5 (68.1 - 72.8)        | 72.9 (70.2 - 75.3)        | 76.8 (72.9 - 80.0)        | 61.6 (58.8 - 64.5)        | 63.6 (60.6 - 66.6)        | 66.3 (62.5 - 70.0)        |
| Viet Nam                          | 74.5 (72.8 - 76.5)        | 75.7 (73.9 - 77.6)        | 76.9 (74.1 - 79.1)        | 66.0 (63.4 - 68.5)        | 66.8 (64.2 - 69.6)        | 67.4 (64.3 - 70.5)        |
| <b>Sub-Saharan Africa</b>         | <b>64.4 (62.6 - 66.0)</b> | <b>68.4 (66.3 - 70.2)</b> | <b>73.6 (69.4 - 76.2)</b> | <b>55.8 (53.1 - 58.4)</b> | <b>59.3 (56.2 - 62.2)</b> | <b>63.2 (59.4 - 67.0)</b> |
| <b>Central sub-Saharan Africa</b> | <b>63.6 (60.9 - 65.9)</b> | <b>67.3 (63.8 - 70.0)</b> | <b>72.2 (67.3 - 75.6)</b> | <b>54.9 (52.0 - 58.0)</b> | <b>58.1 (54.8 - 61.3)</b> | <b>61.8 (57.4 - 65.7)</b> |
| Angola                            | 64.4 (61.2 - 67.5)        | 67.7 (63.8 - 70.8)        | 73.1 (68.9 - 76.4)        | 55.6 (52.6 - 58.9)        | 58.4 (55.0 - 61.8)        | 62.2 (57.5 - 66.0)        |
| Central African Republic          | 52.3 (45.3 - 56.8)        | 58.4 (53.4 - 62.8)        | 64.8 (58.1 - 70.2)        | 45.5 (39.6 - 49.7)        | 50.5 (45.9 - 54.7)        | 55.4 (49.5 - 60.9)        |
| Congo (Brazzaville)               | 64.2 (60.8 - 67.0)        | 67.1 (63.7 - 70.2)        | 71.0 (66.7 - 74.6)        | 55.7 (52.5 - 58.8)        | 58.2 (54.4 - 61.5)        | 61.0 (56.5 - 65.0)        |
| DR Congo                          | 64.1 (61.3 - 66.9)        | 67.7 (63.6 - 70.8)        | 72.4 (67.3 - 76.1)        | 55.3 (52.4 - 58.6)        | 58.5 (54.6 - 61.9)        | 62.1 (57.5 - 66.2)        |
| Equatorial Guinea                 | 64.7 (59.5 - 68.9)        | 67.9 (63.0 - 72.2)        | 72.4 (66.5 - 76.7)        | 55.8 (51.4 - 60.0)        | 58.4 (53.5 - 62.8)        | 61.6 (56.1 - 66.5)        |
| Gabon                             | 66.6 (62.9 - 69.8)        | 69.2 (65.5 - 72.5)        | 72.9 (69.2 - 76.4)        | 57.5 (53.9 - 61.0)        | 59.7 (55.7 - 63.3)        | 62.1 (58.0 - 66.2)        |
| <b>Eastern sub-Saharan Africa</b> | <b>65.0 (63.2 - 66.5)</b> | <b>69.3 (67.4 - 71.0)</b> | <b>74.4 (71.0 - 76.7)</b> | <b>56.6 (53.8 - 59.1)</b> | <b>60.3 (57.3 - 63.1)</b> | <b>64.2 (60.4 - 67.7)</b> |
| Burundi                           | 61.8 (57.7 - 64.6)        | 68.2 (64.6 - 71.2)        | 73.4 (69.0 - 76.8)        | 54.3 (50.6 - 57.3)        | 59.5 (55.9 - 62.8)        | 63.6 (59.4 - 67.4)        |
| Comoros                           | 68.7 (66.0 - 71.0)        | 71.0 (68.2 - 73.5)        | 74.6 (70.9 - 77.7)        | 59.9 (57.1 - 62.8)        | 62.0 (59.0 - 65.1)        | 64.4 (60.5 - 68.1)        |
| Djibouti                          | 67.7 (63.5 - 71.0)        | 70.6 (66.7 - 74.0)        | 74.7 (70.2 - 78.2)        | 59.5 (55.6 - 63.1)        | 61.9 (58.0 - 65.7)        | 64.8 (60.5 - 69.2)        |
| Eritrea                           | 63.2 (59.0 - 66.8)        | 66.8 (63.2 - 70.2)        | 71.6 (67.1 - 75.1)        | 55.2 (51.2 - 58.7)        | 58.1 (54.3 - 61.9)        | 61.9 (57.4 - 66.0)        |
| Ethiopia                          | 68.4 (66.8 - 70.0)        | 72.3 (70.3 - 74.0)        | 77.1 (74.2 - 79.4)        | 59.3 (56.5 - 62.3)        | 62.6 (59.5 - 65.6)        | 66.0 (62.2 - 69.6)        |
| Kenya                             | 67.9 (66.4 - 69.5)        | 71.5 (69.7 - 73.0)        | 75.5 (72.8 - 77.9)        | 59.2 (56.5 - 61.7)        | 62.3 (59.5 - 65.0)        | 65.4 (62.1 - 68.7)        |

|                                    |                           |                           |                           |                           |                           |                           |
|------------------------------------|---------------------------|---------------------------|---------------------------|---------------------------|---------------------------|---------------------------|
| Madagascar                         | 62.2 (59.3 - 65.2)        | 68.0 (64.8 - 70.8)        | 72.8 (68.9 - 76.3)        | 54.7 (51.8 - 57.8)        | 59.6 (56.3 - 63.0)        | 63.3 (59.4 - 67.3)        |
| Malawi                             | 62.0 (59.4 - 64.3)        | 67.2 (64.6 - 69.9)        | 72.8 (68.8 - 76.0)        | 54.4 (51.7 - 57.1)        | 59.0 (55.9 - 62.0)        | 63.6 (59.6 - 67.5)        |
| Mozambique                         | 59.9 (57.4 - 62.6)        | 65.9 (62.6 - 69.0)        | 72.5 (68.1 - 76.1)        | 51.3 (48.3 - 54.2)        | 56.7 (53.4 - 60.0)        | 61.9 (57.5 - 65.7)        |
| Rwanda                             | 68.2 (65.5 - 71.0)        | 71.5 (68.4 - 74.3)        | 76.2 (72.6 - 79.0)        | 59.3 (56.6 - 62.4)        | 62.2 (59.1 - 65.4)        | 65.8 (62.3 - 69.3)        |
| Somalia                            | 57.5 (53.1 - 61.5)        | 60.4 (55.6 - 64.5)        | 65.9 (58.3 - 71.3)        | 50.5 (46.6 - 54.1)        | 53.0 (48.3 - 57.0)        | 57.5 (50.9 - 63.1)        |
| South Sudan                        | 57.5 (52.4 - 61.9)        | 62.0 (55.6 - 67.3)        | 69.2 (61.0 - 74.7)        | 49.6 (45.0 - 53.9)        | 53.5 (46.7 - 58.5)        | 59.4 (52.4 - 65.0)        |
| Tanzania                           | 67.5 (65.1 - 69.6)        | 70.8 (68.1 - 73.1)        | 75.6 (72.2 - 78.1)        | 58.8 (55.8 - 61.7)        | 61.5 (58.4 - 64.5)        | 65.1 (61.3 - 68.5)        |
| Uganda                             | 65.5 (62.2 - 67.7)        | 70.3 (67.1 - 72.7)        | 75.7 (72.1 - 78.2)        | 56.9 (53.8 - 59.7)        | 61.0 (57.4 - 64.1)        | 65.4 (61.7 - 68.6)        |
| Zambia                             | 62.9 (59.0 - 66.3)        | 67.4 (63.7 - 71.1)        | 72.1 (68.2 - 75.9)        | 54.7 (50.9 - 58.1)        | 58.7 (54.7 - 62.3)        | 62.4 (58.3 - 66.5)        |
| <b>Southern sub-Saharan Africa</b> | <b>63.0 (61.7 - 64.2)</b> | <b>67.4 (66.0 - 68.7)</b> | <b>71.9 (69.6 - 73.7)</b> | <b>54.1 (51.5 - 56.6)</b> | <b>57.7 (54.9 - 60.5)</b> | <b>61.4 (58.1 - 64.7)</b> |
| Botswana                           | 63.5 (61.0 - 65.9)        | 70.1 (67.7 - 72.2)        | 75.4 (72.5 - 77.8)        | 54.9 (52.1 - 57.9)        | 60.4 (57.2 - 63.5)        | 64.6 (60.8 - 68.0)        |
| Eswatini                           | 56.6 (52.3 - 59.9)        | 62.9 (58.6 - 67.0)        | 68.6 (64.0 - 73.1)        | 49.3 (45.4 - 52.8)        | 54.6 (50.6 - 58.6)        | 59.2 (54.9 - 63.5)        |
| Lesotho                            | 53.0 (50.4 - 55.5)        | 58.3 (55.4 - 61.3)        | 65.2 (61.2 - 68.6)        | 45.9 (43.3 - 48.8)        | 50.7 (47.8 - 53.7)        | 56.8 (53.2 - 60.3)        |
| Namibia                            | 63.8 (60.3 - 66.7)        | 68.8 (65.0 - 72.2)        | 73.4 (69.3 - 77.0)        | 55.8 (52.4 - 59.0)        | 60.0 (56.2 - 63.6)        | 63.5 (59.2 - 67.7)        |
| South Africa                       | 64.5 (63.6 - 65.4)        | 68.3 (67.4 - 69.3)        | 72.5 (70.8 - 73.9)        | 55.1 (52.3 - 57.5)        | 58.2 (55.3 - 60.7)        | 61.5 (58.2 - 64.6)        |
| Zimbabwe                           | 58.8 (55.7 - 61.5)        | 63.5 (60.0 - 66.8)        | 68.4 (64.2 - 71.9)        | 51.6 (48.5 - 54.6)        | 55.9 (52.2 - 59.2)        | 60.0 (55.9 - 63.8)        |
| <b>Western sub-Saharan Africa</b>  | <b>64.8 (62.8 - 66.6)</b> | <b>68.3 (65.6 - 70.6)</b> | <b>73.7 (69.2 - 76.9)</b> | <b>56.2 (53.3 - 58.9)</b> | <b>59.3 (56.1 - 62.7)</b> | <b>63.3 (59.0 - 67.3)</b> |
| Benin                              | 65.7 (63.2 - 68.0)        | 68.5 (63.5 - 71.7)        | 73.1 (62.6 - 77.4)        | 57.1 (54.1 - 60.0)        | 59.4 (55.0 - 63.0)        | 62.5 (53.2 - 67.4)        |
| Burkina Faso                       | 62.6 (59.9 - 65.0)        | 66.1 (60.7 - 69.6)        | 71.5 (62.5 - 76.0)        | 54.8 (51.7 - 57.6)        | 57.9 (52.7 - 61.7)        | 62.0 (53.9 - 66.9)        |
| Cabo Verde                         | 73.8 (71.7 - 76.0)        | 75.8 (73.6 - 78.1)        | 78.2 (75.8 - 80.6)        | 64.4 (61.1 - 67.4)        | 66.0 (62.7 - 69.1)        | 67.2 (63.6 - 70.6)        |

|                       |                    |                    |                    |                    |                    |                    |
|-----------------------|--------------------|--------------------|--------------------|--------------------|--------------------|--------------------|
| Cameroon              | 65.0 (61.5 - 67.9) | 68.3 (63.9 - 72.0) | 72.6 (67.8 - 76.5) | 56.6 (53.0 - 60.0) | 59.5 (55.3 - 63.8) | 62.7 (57.2 - 67.1) |
| Chad                  | 60.6 (56.4 - 64.5) | 64.2 (59.9 - 68.3) | 71.6 (66.5 - 75.9) | 52.7 (48.8 - 56.4) | 55.9 (51.7 - 59.9) | 61.6 (56.6 - 66.5) |
| Côte d'Ivoire         | 65.1 (61.7 - 67.8) | 69.1 (63.9 - 72.2) | 74.6 (68.6 - 78.6) | 56.7 (53.4 - 59.5) | 60.1 (55.4 - 63.9) | 63.8 (57.3 - 68.6) |
| The Gambia            | 65.7 (63.2 - 68.4) | 68.9 (66.2 - 71.7) | 74.1 (70.5 - 77.3) | 57.2 (54.3 - 60.2) | 59.8 (56.6 - 62.8) | 63.3 (59.4 - 67.0) |
| Ghana                 | 66.9 (64.2 - 69.4) | 69.4 (66.0 - 72.3) | 72.7 (67.1 - 76.4) | 58.5 (55.7 - 61.3) | 60.7 (57.3 - 64.1) | 62.9 (58.2 - 67.0) |
| Guinea                | 62.7 (58.8 - 66.3) | 66.5 (60.4 - 70.4) | 72.2 (63.2 - 76.8) | 54.7 (50.8 - 58.3) | 58.0 (52.4 - 62.1) | 62.2 (53.9 - 67.6) |
| Guinea-Bissau         | 58.7 (42.5 - 62.7) | 64.2 (61.4 - 66.9) | 70.2 (66.3 - 73.4) | 51.6 (38.4 - 55.6) | 56.1 (52.9 - 58.9) | 60.6 (56.5 - 64.1) |
| Liberia               | 65.3 (60.9 - 68.8) | 68.4 (63.3 - 72.4) | 73.0 (66.3 - 77.9) | 55.5 (51.3 - 59.5) | 58.3 (53.1 - 62.8) | 61.9 (55.7 - 67.1) |
| Mali                  | 63.1 (60.6 - 65.6) | 67.0 (63.4 - 70.1) | 73.2 (68.2 - 76.7) | 54.7 (51.7 - 57.6) | 58.1 (54.4 - 61.4) | 62.4 (57.7 - 66.6) |
| Mauritania            | 70.2 (65.5 - 72.9) | 73.2 (69.9 - 76.1) | 76.1 (72.3 - 79.5) | 61.5 (57.4 - 64.8) | 63.9 (60.2 - 67.4) | 65.6 (61.4 - 69.8) |
| Niger                 | 64.0 (59.7 - 67.5) | 66.7 (60.6 - 70.7) | 70.8 (64.3 - 75.7) | 55.9 (52.2 - 59.8) | 58.4 (52.8 - 62.7) | 61.5 (55.6 - 66.5) |
| Nigeria               | 65.5 (63.4 - 67.4) | 69.1 (65.5 - 72.0) | 75.0 (69.5 - 78.4) | 56.5 (53.4 - 59.5) | 59.8 (55.6 - 63.5) | 64.1 (58.9 - 68.4) |
| São Tomé and Príncipe | 72.2 (70.1 - 74.0) | 73.8 (71.7 - 75.6) | 76.3 (73.9 - 78.4) | 63.2 (60.3 - 66.0) | 64.6 (61.5 - 67.4) | 66.2 (62.8 - 69.5) |
| Senegal               | 69.1 (66.4 - 71.5) | 72.3 (69.3 - 74.8) | 76.9 (73.8 - 79.9) | 60.1 (56.7 - 63.4) | 62.7 (59.2 - 66.2) | 65.9 (62.1 - 70.0) |
| Sierra Leone          | 62.8 (58.9 - 66.1) | 66.5 (60.7 - 70.4) | 72.8 (65.2 - 77.6) | 54.6 (51.2 - 58.2) | 57.8 (52.0 - 61.9) | 62.7 (55.1 - 67.3) |
| Togo                  | 65.3 (61.2 - 68.4) | 68.7 (64.8 - 72.7) | 73.2 (67.3 - 77.9) | 56.9 (53.1 - 60.5) | 59.9 (55.5 - 64.1) | 63.1 (57.6 - 68.2) |



**Supplemental Results Table S3. Percent decrease in DALY counts by scenario compared to reference in 2050. Estimates are listed as mean counts with percent decrease compared to the reference scenario in parentheses. Highlighted rows indicate region and super region results from the GBD location hierarchy.**

| Location                                                | Reference (million) | Combined<br>(n, % decrease) | Safer Environment<br>(n, % decrease) | Improved Behavioural<br>and Metabolic Risks<br>(n, % decrease) | Improved Nutrition<br>and Vaccination<br>(n, % decrease) |
|---------------------------------------------------------|---------------------|-----------------------------|--------------------------------------|----------------------------------------------------------------|----------------------------------------------------------|
| <b>Global</b>                                           | 3148.76             | 2664.36 (-18.18)            | 3091.02 (-1.87)                      | 2730.64 (-15.31)                                               | 3129.41 (-0.62)                                          |
| <b>Central Europe, Eastern Europe, and Central Asia</b> | 151.01              | 127.28 (-18.64)             | 150.65 (-0.24)                       | 127.74 (-18.21)                                                | 150.72 (-0.19)                                           |
| <b>Central Asia</b>                                     | 35.03               | 27.51 (-27.35)              | 34.85 (-0.51)                        | 27.84 (-25.82)                                                 | 34.78 (-0.73)                                            |
| Armenia                                                 | 0.86                | 0.69 (-24.73)               | 0.86 (-0.04)                         | 0.69 (-24.51)                                                  | 0.86 (-0.08)                                             |
| Azerbaijan                                              | 3.78                | 2.91 (-29.72)               | 3.77 (-0.18)                         | 2.94 (-28.70)                                                  | 3.76 (-0.52)                                             |
| Georgia                                                 | 1.22                | 0.96 (-28.03)               | 1.22 (-0.41)                         | 0.96 (-27.58)                                                  | 1.22 (-0.10)                                             |
| Kazakhstan                                              | 6.79                | 5.64 (-20.33)               | 6.78 (-0.17)                         | 5.66 (-19.98)                                                  | 6.78 (-0.15)                                             |
| Kyrgyzstan                                              | 2.31                | 1.89 (-22.49)               | 2.30 (-0.67)                         | 1.90 (-21.43)                                                  | 2.31 (-0.34)                                             |
| Mongolia                                                | 1.64                | 1.39 (-17.65)               | 1.63 (-0.49)                         | 1.40 (-16.54)                                                  | 1.63 (-0.55)                                             |
| Tajikistan                                              | 3.73                | 2.94 (-26.60)               | 3.65 (-2.03)                         | 3.08 (-21.12)                                                  | 3.62 (-2.82)                                             |
| Turkmenistan                                            | 2.00                | 1.61 (-24.28)               | 1.99 (-0.46)                         | 1.63 (-22.67)                                                  | 1.98 (-0.87)                                             |
| Uzbekistan                                              | 12.70               | 9.47 (-34.07)               | 12.66 (-0.37)                        | 9.58 (-32.58)                                                  | 12.62 (-0.68)                                            |
| <b>Central Europe</b>                                   | 38.37               | 32.73 (-17.26)              | 38.27 (-0.27)                        | 32.79 (-17.04)                                                 | 38.36 (-0.03)                                            |
| Albania                                                 | 0.83                | 0.71 (-17.32)               | 0.83 (-0.34)                         | 0.71 (-17.01)                                                  | 0.83 (-0.06)                                             |
| Bosnia and Herzegovina                                  | 1.02                | 0.82 (-24.89)               | 1.02 (-0.39)                         | 0.82 (-24.52)                                                  | 1.02 (-0.04)                                             |
| Bulgaria                                                | 2.32                | 1.90 (-22.14)               | 2.31 (-0.44)                         | 1.90 (-21.81)                                                  | 2.32 (-0.05)                                             |
| Croatia                                                 | 1.29                | 1.12 (-15.54)               | 1.29 (-0.21)                         | 1.12 (-15.38)                                                  | 1.29 (-0.02)                                             |
| Czechia                                                 | 3.52                | 3.04 (-15.97)               | 3.52 (-0.19)                         | 3.04 (-15.82)                                                  | 3.52 (-0.03)                                             |
| Hungary                                                 | 3.48                | 3.02 (-15.32)               | 3.48 (-0.27)                         | 3.03 (-15.14)                                                  | 3.48 (-0.02)                                             |
| Montenegro                                              | 0.20                | 0.16 (-23.26)               | 0.20 (-0.42)                         | 0.16 (-23.00)                                                  | 0.20 (-0.04)                                             |
| North Macedonia                                         | 0.76                | 0.61 (-25.46)               | 0.76 (-0.43)                         | 0.61 (-25.11)                                                  | 0.76 (-0.04)                                             |

|                                  |               |                        |                       |                        |                       |
|----------------------------------|---------------|------------------------|-----------------------|------------------------|-----------------------|
| Poland                           | 13·11         | 11·36 (-15·35)         | 13·08 (-0·20)         | 11·38 (-15·17)         | 13·11 (-0·02)         |
| Romania                          | 6·24          | 5·31 (-17·43)          | 6·22 (-0·35)          | 5·33 (-17·11)          | 6·24 (-0·07)          |
| Serbia                           | 2·99          | 2·43 (-23·36)          | 2·98 (-0·38)          | 2·43 (-23·15)          | 2·99 (-0·01)          |
| Slovakia                         | 1·90          | 1·62 (-17·31)          | 1·89 (-0·26)          | 1·62 (-17·09)          | 1·90 (-0·05)          |
| Slovenia                         | 0·71          | 0·63 (-11·09)          | 0·70 (-0·16)          | 0·64 (-10·92)          | 0·70 (-0·04)          |
| <b>Eastern Europe</b>            | <b>77·60</b>  | <b>67·05 (-15·74)</b>  | <b>77·53 (-0·10)</b>  | <b>67·11 (-15·64)</b>  | <b>77·58 (-0·03)</b>  |
| Belarus                          | 3·41          | 2·91 (-17·11)          | 3·40 (-0·15)          | 2·91 (-16·98)          | 3·40 (-0·06)          |
| Estonia                          | 0·43          | 0·38 (-13·29)          | 0·43 (-0·05)          | 0·38 (-13·23)          | 0·43 (-0·02)          |
| Latvia                           | 0·59          | 0·52 (-13·35)          | 0·59 (-0·08)          | 0·52 (-13·28)          | 0·59 (-0·01)          |
| Lithuania                        | 0·89          | 0·80 (-11·59)          | 0·89 (-0·10)          | 0·80 (-11·53)          | 0·89 (-0·01)          |
| Moldova                          | 1·14          | 0·89 (-28·41)          | 1·14 (-0·30)          | 0·89 (-28·21)          | 1·14 (-0·03)          |
| Russia                           | 55·46         | 48·10 (-15·30)         | 55·42 (-0·07)         | 48·14 (-15·21)         | 55·44 (-0·03)         |
| Ukraine                          | 15·69         | 13·46 (-16·58)         | 15·66 (-0·19)         | 13·47 (-16·45)         | 15·68 (-0·03)         |
| <b>High income</b>               | <b>390·50</b> | <b>349·83 (-11·62)</b> | <b>390·29 (-0·05)</b> | <b>350·04 (-11·56)</b> | <b>390·45 (-0·01)</b> |
| <b>Australasia</b>               | <b>11·85</b>  | <b>10·78 (-9·92)</b>   | <b>11·84 (-0·06)</b>  | <b>10·79 (-9·84)</b>   | <b>11·85 (-0·01)</b>  |
| Australia                        | 9·87          | 8·99 (-9·68)           | 9·86 (-0·06)          | 9·00 (-9·61)           | 9·86 (-0·01)          |
| New Zealand                      | 1·98          | 1·79 (-11·12)          | 1·98 (-0·05)          | 1·79 (-11·02)          | 1·98 (-0·02)          |
| <b>High-income Asia Pacific</b>  | <b>57·03</b>  | <b>51·77 (-10·15)</b>  | <b>56·95 (-0·14)</b>  | <b>51·85 (-9·99)</b>   | <b>57·02 (-0·01)</b>  |
| Brunei                           | 0·16          | 0·13 (-25·00)          | 0·16 (-0·28)          | 0·13 (-24·72)          | 0·16 (-0·02)          |
| Japan                            | 37·53         | 34·64 (-8·34)          | 37·49 (-0·11)         | 34·69 (-8·19)          | 37·53 (-0·01)         |
| Singapore                        | 2·01          | 1·75 (-14·88)          | 2·00 (-0·19)          | 1·75 (-14·61)          | 2·01 (-0·03)          |
| South Korea                      | 17·32         | 15·25 (-13·60)         | 17·29 (-0·19)         | 15·27 (-13·42)         | 17·32 (0·00)          |
| <b>High-income North America</b> | <b>149·63</b> | <b>132·68 (-12·77)</b> | <b>149·58 (-0·03)</b> | <b>132·73 (-12·73)</b> | <b>149·61 (-0·01)</b> |
| Canada                           | 14·94         | 13·44 (-11·14)         | 14·94 (-0·03)         | 13·45 (-11·08)         | 14·94 (-0·02)         |

|                               |               |                        |                       |                        |                       |
|-------------------------------|---------------|------------------------|-----------------------|------------------------|-----------------------|
| Greenland                     | 0·02          | 0·02 (-13·26)          | 0·02 (-0·08)          | 0·02 (-13·11)          | 0·02 (-0·03)          |
| USA                           | 134·66        | 119·21 (-12·96)        | 134·62 (-0·03)        | 119·26 (-12·92)        | 134·65 (-0·01)        |
| <b>Southern Latin America</b> | <b>23·99</b>  | <b>20·62 (-16·35)</b>  | <b>23·99 (-0·02)</b>  | <b>20·63 (-16·28)</b>  | <b>23·99 (-0·02)</b>  |
| Argentina                     | 15·96         | 13·59 (-17·48)         | 15·96 (-0·03)         | 13·59 (-17·41)         | 15·96 (-0·02)         |
| Chile                         | 6·86          | 6·01 (-14·12)          | 6·86 (-0·00)          | 6·02 (-14·05)          | 6·86 (-0·03)          |
| Uruguay                       | 1·17          | 1·02 (-14·54)          | 1·17 (-0·04)          | 1·02 (-14·46)          | 1·17 (-0·02)          |
| <b>Western Europe</b>         | <b>148·00</b> | <b>133·98 (-10·46)</b> | <b>147·94 (-0·04)</b> | <b>134·04 (-10·42)</b> | <b>147·98 (-0·01)</b> |
| Andorra                       | 0·03          | 0·03 (-12·94)          | 0·03 (-0·07)          | 0·03 (-12·88)          | 0·03 (-0·01)          |
| Austria                       | 3·06          | 2·77 (-10·65)          | 3·06 (-0·14)          | 2·77 (-10·57)          | 3·06 (-0·01)          |
| Belgium                       | 4·06          | 3·68 (-10·10)          | 4·06 (-0·04)          | 3·69 (-10·03)          | 4·06 (-0·02)          |
| Cyprus                        | 0·47          | 0·41 (-14·75)          | 0·47 (-0·06)          | 0·41 (-14·67)          | 0·47 (-0·03)          |
| Denmark                       | 1·98          | 1·81 (-9·54)           | 1·98 (-0·06)          | 1·81 (-9·47)           | 1·98 (-0·01)          |
| Finland                       | 1·81          | 1·66 (-8·82)           | 1·81 (-0·03)          | 1·67 (-8·75)           | 1·81 (-0·02)          |
| France                        | 21·35         | 19·75 (-8·12)          | 21·34 (-0·05)         | 19·76 (-8·05)          | 21·35 (-0·02)         |
| Germany                       | 29·95         | 27·21 (-10·08)         | 29·94 (-0·05)         | 27·22 (-10·05)         | 29·95 (-0·01)         |
| Greece                        | 3·27          | 2·83 (-15·64)          | 3·27 (-0·13)          | 2·83 (-15·55)          | 3·27 (-0·01)          |
| Iceland                       | 0·12          | 0·11 (-9·64)           | 0·12 (-0·02)          | 0·11 (-9·58)           | 0·12 (-0·02)          |
| Ireland                       | 1·67          | 1·52 (-10·20)          | 1·67 (0·04)           | 1·52 (-10·19)          | 1·67 (-0·03)          |
| Israel                        | 2·87          | 2·57 (-11·82)          | 2·87 (-0·01)          | 2·57 (-11·78)          | 2·87 (-0·02)          |
| Italy                         | 19·17         | 17·38 (-10·33)         | 19·15 (-0·09)         | 17·39 (-10·27)         | 19·17 (-0·00)         |
| Luxembourg                    | 0·26          | 0·23 (-12·48)          | 0·26 (-0·08)          | 0·23 (-12·40)          | 0·26 (-0·02)          |
| Malta                         | 0·16          | 0·14 (-12·21)          | 0·16 (-0·06)          | 0·14 (-12·13)          | 0·16 (-0·02)          |
| Monaco                        | 0·01          | 0·01 (-10·44)          | 0·01 (-0·03)          | 0·01 (-10·41)          | 0·01 (-0·01)          |
| Netherlands                   | 5·82          | 5·34 (-9·02)           | 5·82 (-0·04)          | 5·34 (-8·97)           | 5·82 (-0·02)          |

|                                    |               |                        |                       |                        |                       |
|------------------------------------|---------------|------------------------|-----------------------|------------------------|-----------------------|
| Norway                             | 1.84          | 1.72 (-6.69)           | 1.84 (-0.04)          | 1.72 (-6.63)           | 1.84 (-0.01)          |
| Portugal                           | 3.57          | 3.16 (-12.84)          | 3.57 (-0.00)          | 3.16 (-12.83)          | 3.57 (-0.01)          |
| San Marino                         | 0.01          | 0.01 (-11.24)          | 0.01 (-0.10)          | 0.01 (-11.14)          | 0.01 (-0.02)          |
| Spain                              | 16.27         | 14.39 (-13.10)         | 16.26 (-0.04)         | 14.39 (-13.05)         | 16.27 (-0.01)         |
| Sweden                             | 3.57          | 3.26 (-9.58)           | 3.57 (-0.04)          | 3.26 (-9.52)           | 3.57 (-0.01)          |
| Switzerland                        | 3.08          | 2.79 (-10.15)          | 3.08 (-0.06)          | 2.80 (-10.08)          | 3.08 (-0.02)          |
| UK                                 | 23.46         | 21.09 (-11.23)         | 23.47 (0.03)          | 21.09 (-11.24)         | 23.46 (-0.02)         |
| <b>Latin America and Caribbean</b> | <b>229.71</b> | <b>190.97 (-20.29)</b> | <b>228.49 (-0.53)</b> | <b>192.40 (-19.39)</b> | <b>229.24 (-0.21)</b> |
| <b>Andean Latin America</b>        | <b>22.61</b>  | <b>19.16 (-17.98)</b>  | <b>22.51 (-0.43)</b>  | <b>19.31 (-17.10)</b>  | <b>22.55 (-0.23)</b>  |
| Bolivia                            | 4.71          | 3.95 (-19.24)          | 4.68 (-0.67)          | 4.00 (-17.86)          | 4.69 (-0.46)          |
| Ecuador                            | 6.55          | 5.39 (-21.51)          | 6.54 (-0.21)          | 5.42 (-20.88)          | 6.53 (-0.22)          |
| Peru                               | 11.35         | 9.82 (-15.53)          | 11.30 (-0.45)         | 9.89 (-14.72)          | 11.33 (-0.14)         |
| <b>Caribbean</b>                   | <b>19.25</b>  | <b>15.37 (-25.20)</b>  | <b>18.82 (-2.24)</b>  | <b>15.80 (-21.84)</b>  | <b>19.07 (-0.94)</b>  |
| Antigua and Barbuda                | 0.03          | 0.03 (-27.37)          | 0.03 (-0.32)          | 0.03 (-26.65)          | 0.03 (-0.07)          |
| The Bahamas                        | 0.17          | 0.13 (-26.77)          | 0.17 (-0.35)          | 0.13 (-26.17)          | 0.17 (-0.06)          |
| Barbados                           | 0.11          | 0.09 (-22.59)          | 0.11 (-0.27)          | 0.09 (-22.09)          | 0.11 (-0.03)          |
| Belize                             | 0.19          | 0.15 (-25.90)          | 0.19 (-0.89)          | 0.16 (-24.38)          | 0.19 (-0.17)          |
| Bermuda                            | 0.02          | 0.02 (-17.88)          | 0.02 (-0.23)          | 0.02 (-17.50)          | 0.02 (-0.01)          |
| Cuba                               | 3.92          | 3.29 (-19.34)          | 3.91 (-0.29)          | 3.30 (-18.80)          | 3.92 (-0.03)          |
| Dominica                           | 0.03          | 0.02 (-26.65)          | 0.03 (-0.30)          | 0.02 (-25.87)          | 0.03 (-0.16)          |
| Dominican Republic                 | 4.09          | 3.21 (-27.35)          | 4.07 (-0.54)          | 3.25 (-25.92)          | 4.08 (-0.39)          |
| Grenada                            | 0.04          | 0.03 (-25.93)          | 0.04 (-0.33)          | 0.03 (-25.25)          | 0.04 (-0.09)          |
| Guyana                             | 0.26          | 0.21 (-24.91)          | 0.26 (-0.45)          | 0.21 (-23.84)          | 0.26 (-0.17)          |
| Haiti                              | 6.92          | 5.47 (-26.37)          | 6.56 (-5.50)          | 5.81 (-18.99)          | 6.76 (-2.28)          |

|                                     |               |                        |                       |                        |                       |
|-------------------------------------|---------------|------------------------|-----------------------|------------------------|-----------------------|
| Jamaica                             | 0.94          | 0.72 (-30.95)          | 0.94 (-0.40)          | 0.73 (-30.16)          | 0.94 (-0.02)          |
| Puerto Rico                         | 1.00          | 0.80 (-25.08)          | 0.99 (-0.32)          | 0.80 (-24.21)          | 1.00 (-0.03)          |
| Saint Kitts and Nevis               | 0.02          | 0.02 (-23.31)          | 0.02 (-0.44)          | 0.02 (-22.36)          | 0.02 (-0.06)          |
| Saint Lucia                         | 0.07          | 0.06 (-24.39)          | 0.07 (-0.32)          | 0.06 (-23.80)          | 0.07 (-0.05)          |
| Saint Vincent and the Grenadines    | 0.04          | 0.03 (-24.22)          | 0.04 (-0.33)          | 0.03 (-23.58)          | 0.04 (-0.05)          |
| Suriname                            | 0.24          | 0.19 (-25.01)          | 0.24 (-0.60)          | 0.19 (-23.44)          | 0.24 (-0.38)          |
| Trinidad and Tobago                 | 0.46          | 0.35 (-31.57)          | 0.46 (-0.26)          | 0.35 (-30.98)          | 0.46 (-0.05)          |
| Virgin Islands                      | 0.03          | 0.02 (-21.68)          | 0.03 (-0.22)          | 0.02 (-21.11)          | 0.03 (-0.12)          |
| <b>Central Latin America</b>        | <b>97.02</b>  | <b>79.20 (-22.50)</b>  | <b>96.61 (-0.43)</b>  | <b>79.74 (-21.68)</b>  | <b>96.85 (-0.18)</b>  |
| Colombia                            | 16.55         | 13.89 (-19.15)         | 16.52 (-0.18)         | 13.94 (-18.75)         | 16.54 (-0.07)         |
| Costa Rica                          | 1.66          | 1.41 (-17.97)          | 1.66 (-0.16)          | 1.41 (-17.66)          | 1.66 (-0.03)          |
| El Salvador                         | 1.99          | 1.61 (-23.94)          | 1.98 (-0.43)          | 1.62 (-23.00)          | 1.99 (-0.09)          |
| Guatemala                           | 5.96          | 4.82 (-23.67)          | 5.89 (-1.15)          | 4.90 (-21.41)          | 5.91 (-0.69)          |
| Honduras                            | 4.05          | 3.32 (-21.93)          | 3.98 (-1.76)          | 3.38 (-19.82)          | 4.04 (-0.26)          |
| Mexico                              | 52.55         | 43.23 (-21.56)         | 52.40 (-0.28)         | 43.42 (-21.03)         | 52.49 (-0.11)         |
| Nicaragua                           | 2.26          | 1.76 (-28.56)          | 2.24 (-0.84)          | 1.77 (-27.58)          | 2.26 (-0.11)          |
| Panama                              | 1.60          | 1.34 (-19.44)          | 1.60 (-0.32)          | 1.35 (-18.83)          | 1.60 (-0.15)          |
| Venezuela                           | 10.40         | 7.83 (-32.83)          | 10.34 (-0.58)         | 7.95 (-30.91)          | 10.36 (-0.40)         |
| <b>Tropical Latin America</b>       | <b>90.84</b>  | <b>77.23 (-17.61)</b>  | <b>90.55 (-0.32)</b>  | <b>77.56 (-17.11)</b>  | <b>90.77 (-0.08)</b>  |
| Brazil                              | 88.27         | 75.13 (-17.49)         | 88.00 (-0.31)         | 75.45 (-16.99)         | 88.20 (-0.08)         |
| Paraguay                            | 2.57          | 2.10 (-22.10)          | 2.56 (-0.38)          | 2.11 (-21.56)          | 2.56 (-0.20)          |
| <b>North Africa and Middle East</b> | <b>266.91</b> | <b>203.16 (-31.38)</b> | <b>265.68 (-0.47)</b> | <b>204.91 (-30.26)</b> | <b>265.93 (-0.37)</b> |
| <b>North Africa and Middle East</b> | <b>266.91</b> | <b>203.16 (-31.38)</b> | <b>265.68 (-0.47)</b> | <b>204.91 (-30.26)</b> | <b>265.93 (-0.37)</b> |
| Afghanistan                         | 19.97         | 16.21 (-23.20)         | 19.54 (-2.21)         | 16.85 (-18.52)         | 19.52 (-2.30)         |

|                      |               |                        |                       |                        |                       |
|----------------------|---------------|------------------------|-----------------------|------------------------|-----------------------|
| Algeria              | 15.59         | 12.07 (-29.11)         | 15.55 (-0.22)         | 12.12 (-28.61)         | 15.56 (-0.15)         |
| Bahrain              | 0.73          | 0.54 (-35.94)          | 0.73 (-0.27)          | 0.54 (-35.30)          | 0.73 (-0.04)          |
| Egypt                | 46.37         | 31.69 (-46.31)         | 46.28 (-0.19)         | 31.91 (-45.34)         | 46.20 (-0.36)         |
| Iran                 | 31.86         | 24.92 (-27.85)         | 31.82 (-0.12)         | 24.96 (-27.64)         | 31.85 (-0.02)         |
| Iraq                 | 18.07         | 14.08 (-28.28)         | 18.02 (-0.27)         | 14.17 (-27.54)         | 18.01 (-0.30)         |
| Jordan               | 5.07          | 3.81 (-33.01)          | 5.06 (-0.18)          | 3.83 (-32.33)          | 5.06 (-0.27)          |
| Kuwait               | 2.01          | 1.42 (-41.17)          | 2.01 (0.03)           | 1.43 (-40.77)          | 2.01 (-0.05)          |
| Lebanon              | 1.90          | 1.43 (-32.83)          | 1.89 (-0.30)          | 1.44 (-32.31)          | 1.90 (-0.11)          |
| Libya                | 3.06          | 2.23 (-37.32)          | 3.06 (-0.20)          | 2.24 (-36.91)          | 3.06 (-0.06)          |
| Morocco              | 13.94         | 9.99 (-39.44)          | 13.93 (-0.02)         | 10.01 (-39.14)         | 13.92 (-0.10)         |
| Oman                 | 2.14          | 1.54 (-38.85)          | 2.13 (-0.45)          | 1.55 (-38.01)          | 2.14 (-0.06)          |
| Palestine            | 1.83          | 1.40 (-30.16)          | 1.82 (-0.15)          | 1.41 (-29.80)          | 1.82 (-0.13)          |
| Qatar                | 1.85          | 1.37 (-34.99)          | 1.84 (-0.32)          | 1.38 (-34.32)          | 1.85 (-0.03)          |
| Saudi Arabia         | 19.43         | 13.85 (-40.32)         | 19.40 (-0.18)         | 13.92 (-39.65)         | 19.43 (-0.02)         |
| Sudan                | 20.53         | 16.42 (-25.06)         | 20.29 (-1.18)         | 16.67 (-23.15)         | 20.44 (-0.48)         |
| Syria                | 6.80          | 5.47 (-24.18)          | 6.78 (-0.19)          | 5.50 (-23.63)          | 6.78 (-0.26)          |
| Tunisia              | 4.15          | 3.16 (-31.02)          | 4.13 (-0.31)          | 3.18 (-30.56)          | 4.14 (-0.05)          |
| Türkiye              | 28.15         | 22.95 (-22.64)         | 28.08 (-0.23)         | 23.01 (-22.32)         | 28.13 (-0.05)         |
| United Arab Emirates | 6.94          | 5.21 (-33.21)          | 6.88 (-0.90)          | 5.27 (-31.78)          | 6.94 (-0.05)          |
| Yemen                | 16.26         | 13.16 (-23.54)         | 16.14 (-0.76)         | 13.34 (-21.91)         | 16.15 (-0.68)         |
| <b>South Asia</b>    | <b>716.72</b> | <b>610.87 (-17.33)</b> | <b>701.41 (-2.18)</b> | <b>628.98 (-13.95)</b> | <b>713.46 (-0.46)</b> |
| <b>South Asia</b>    | <b>716.72</b> | <b>610.87 (-17.33)</b> | <b>701.41 (-2.18)</b> | <b>628.98 (-13.95)</b> | <b>713.46 (-0.46)</b> |
| Bangladesh           | 55.94         | 45.52 (-22.90)         | 54.58 (-2.49)         | 46.95 (-19.14)         | 55.85 (-0.15)         |
| Bhutan               | 0.27          | 0.23 (-17.70)          | 0.27 (-1.39)          | 0.23 (-15.99)          | 0.27 (-0.13)          |

|                                               |               |                        |                       |                        |                       |
|-----------------------------------------------|---------------|------------------------|-----------------------|------------------------|-----------------------|
| India                                         | 554.09        | 477.85 (-15.95)        | 542.34 (-2.17)        | 491.67 (-12.70)        | 551.91 (-0.39)        |
| Nepal                                         | 10.39         | 8.98 (-15.68)          | 10.24 (-1.48)         | 9.14 (-13.70)          | 10.36 (-0.21)         |
| Pakistan                                      | 96.03         | 78.30 (-22.66)         | 94.00 (-2.17)         | 80.99 (-18.57)         | 95.06 (-1.02)         |
| <b>Southeast Asia, East Asia, and Oceania</b> | <b>775.82</b> | <b>654.02 (-18.62)</b> | <b>768.54 (-0.95)</b> | <b>661.99 (-17.19)</b> | <b>773.83 (-0.26)</b> |
| <b>East Asia</b>                              | <b>501.04</b> | <b>427.27 (-17.27)</b> | <b>498.09 (-0.59)</b> | <b>430.11 (-16.49)</b> | <b>500.49 (-0.11)</b> |
| China                                         | 483.01        | 412.20 (-17.18)        | 480.31 (-0.56)        | 414.85 (-16.43)        | 482.46 (-0.11)        |
| North Korea                                   | 9.70          | 7.97 (-21.61)          | 9.44 (-2.68)          | 8.15 (-18.97)          | 9.69 (-0.03)          |
| Taiwan (Province of China)                    | 8.34          | 7.09 (-17.62)          | 8.33 (-0.10)          | 7.10 (-17.47)          | 8.34 (-0.01)          |
| <b>Oceania</b>                                | <b>7.99</b>   | <b>5.86 (-36.39)</b>   | <b>7.49 (-6.72)</b>   | <b>6.45 (-23.86)</b>   | <b>7.68 (-4.05)</b>   |
| American Samoa                                | 0.02          | 0.02 (-32.92)          | 0.02 (-0.58)          | 0.02 (-31.44)          | 0.02 (-0.25)          |
| Cook Islands                                  | 0.01          | 0.00 (-32.98)          | 0.01 (-0.35)          | 0.00 (-32.39)          | 0.01 (-0.00)          |
| Federated States of Micronesia                | 0.04          | 0.03 (-41.96)          | 0.04 (-0.95)          | 0.03 (-39.67)          | 0.04 (-0.42)          |
| Fiji                                          | 0.35          | 0.24 (-45.26)          | 0.35 (-0.65)          | 0.24 (-42.80)          | 0.35 (-0.54)          |
| Guam                                          | 0.05          | 0.04 (-29.21)          | 0.05 (-0.68)          | 0.04 (-27.70)          | 0.05 (-0.29)          |
| Kiribati                                      | 0.06          | 0.04 (-45.86)          | 0.05 (-5.05)          | 0.04 (-35.55)          | 0.06 (-1.45)          |
| Marshall Islands                              | 0.03          | 0.02 (-44.53)          | 0.03 (-1.46)          | 0.02 (-41.36)          | 0.03 (-0.65)          |
| Nauru                                         | 0.01          | 0.00 (-47.75)          | 0.01 (-0.29)          | 0.00 (-45.49)          | 0.01 (-0.74)          |
| Niue                                          | 0.00          | 0.00 (-29.74)          | 0.00 (-0.30)          | 0.00 (-28.80)          | 0.00 (-0.26)          |
| Northern Mariana Islands                      | 0.02          | 0.02 (-28.89)          | 0.02 (-0.98)          | 0.02 (-26.89)          | 0.02 (-0.13)          |
| Palau                                         | 0.01          | 0.01 (-31.81)          | 0.01 (-0.58)          | 0.01 (-30.07)          | 0.01 (-0.16)          |
| Papua New Guinea                              | 6.38          | 4.70 (-35.77)          | 5.94 (-7.44)          | 5.23 (-21.91)          | 6.10 (-4.70)          |
| Samoa                                         | 0.09          | 0.07 (-38.02)          | 0.09 (-2.59)          | 0.07 (-31.28)          | 0.09 (-2.62)          |
| Solomon Islands                               | 0.35          | 0.25 (-37.09)          | 0.33 (-5.94)          | 0.26 (-30.97)          | 0.34 (-0.70)          |
| Tokelau                                       | 0.00          | 0.00 (-28.97)          | 0.00 (-0.27)          | 0.00 (-28.23)          | 0.00 (-0.15)          |

|                                   |               |                        |                       |                        |                       |
|-----------------------------------|---------------|------------------------|-----------------------|------------------------|-----------------------|
| Tonga                             | 0.04          | 0.03 (-29.83)          | 0.04 (-0.82)          | 0.03 (-28.28)          | 0.04 (-0.40)          |
| Tuvalu                            | 0.01          | 0.00 (-42.82)          | 0.01 (-0.34)          | 0.00 (-41.08)          | 0.01 (-0.38)          |
| Vanuatu                           | 0.16          | 0.11 (-39.59)          | 0.15 (-6.31)          | 0.12 (-32.87)          | 0.15 (-0.71)          |
| <b>Southeast Asia</b>             | <b>266.78</b> | <b>220.89 (-20.78)</b> | <b>262.96 (-1.45)</b> | <b>225.43 (-18.34)</b> | <b>265.66 (-0.42)</b> |
| Cambodia                          | 6.88          | 5.70 (-20.72)          | 6.71 (-2.56)          | 5.83 (-18.13)          | 6.86 (-0.36)          |
| Indonesia                         | 105.57        | 86.46 (-22.10)         | 103.97 (-1.54)        | 88.83 (-18.84)         | 104.98 (-0.56)        |
| Laos                              | 2.86          | 2.23 (-27.97)          | 2.77 (-3.28)          | 2.31 (-23.67)          | 2.83 (-0.81)          |
| Malaysia                          | 12.16         | 10.15 (-19.78)         | 12.08 (-0.69)         | 10.23 (-18.82)         | 12.15 (-0.07)         |
| Maldives                          | 0.19          | 0.15 (-26.98)          | 0.19 (-0.58)          | 0.15 (-26.03)          | 0.19 (-0.11)          |
| Mauritius                         | 0.47          | 0.36 (-28.06)          | 0.47 (-0.02)          | 0.36 (-27.78)          | 0.47 (-0.08)          |
| Myanmar                           | 22.06         | 18.24 (-20.93)         | 21.63 (-2.00)         | 18.70 (-17.98)         | 21.92 (-0.64)         |
| Philippines                       | 45.38         | 37.69 (-20.42)         | 44.66 (-1.62)         | 38.48 (-17.93)         | 45.10 (-0.61)         |
| Seychelles                        | 0.05          | 0.04 (-27.16)          | 0.05 (-0.36)          | 0.04 (-26.06)          | 0.05 (-0.26)          |
| Sri Lanka                         | 7.11          | 6.00 (-18.51)          | 7.06 (-0.72)          | 6.04 (-17.60)          | 7.10 (-0.04)          |
| Thailand                          | 24.09         | 20.30 (-18.66)         | 23.81 (-1.19)         | 20.60 (-16.97)         | 24.08 (-0.05)         |
| Timor-Leste                       | 0.49          | 0.41 (-19.80)          | 0.48 (-2.10)          | 0.42 (-16.55)          | 0.49 (-0.96)          |
| Viet Nam                          | 39.13         | 32.87 (-19.07)         | 38.76 (-0.96)         | 33.14 (-18.08)         | 39.10 (-0.10)         |
| <b>Sub-Saharan Africa</b>         | <b>618.10</b> | <b>528.22 (-17.02)</b> | <b>585.95 (-5.49)</b> | <b>564.57 (-9.48)</b>  | <b>605.79 (-2.03)</b> |
| <b>Central sub-Saharan Africa</b> | <b>74.86</b>  | <b>63.73 (-17.48)</b>  | <b>71.86 (-4.18)</b>  | <b>67.37 (-11.13)</b>  | <b>73.83 (-1.41)</b>  |
| Angola                            | 18.92         | 16.41 (-15.28)         | 18.45 (-2.54)         | 17.22 (-9.83)          | 18.55 (-1.98)         |
| Central African Republic          | 3.13          | 2.56 (-22.11)          | 2.89 (-8.23)          | 2.82 (-10.96)          | 3.06 (-2.27)          |
| Congo (Brazzaville)               | 2.78          | 2.28 (-21.93)          | 2.71 (-2.68)          | 2.37 (-17.43)          | 2.77 (-0.68)          |
| DR Congo                          | 48.12         | 40.84 (-17.83)         | 45.91 (-4.82)         | 43.30 (-11.14)         | 47.55 (-1.20)         |
| Equatorial Guinea                 | 1.00          | 0.86 (-16.26)          | 0.99 (-0.73)          | 0.87 (-14.44)          | 0.99 (-0.68)          |



|                                    |               |                        |                       |                       |                       |
|------------------------------------|---------------|------------------------|-----------------------|-----------------------|-----------------------|
| Gabon                              | 0.92          | 0.78 (-18.24)          | 0.91 (-0.61)          | 0.79 (-16.76)         | 0.91 (-0.43)          |
| <b>Eastern sub-Saharan Africa</b>  | <b>211.57</b> | <b>177.80 (-18.99)</b> | <b>197.50 (-7.12)</b> | <b>193.45 (-9.36)</b> | <b>206.85 (-2.28)</b> |
| Burundi                            | 6.60          | 5.44 (-21.27)          | 5.97 (-10.50)         | 5.99 (-10.13)         | 6.54 (-0.88)          |
| Comoros                            | 0.29          | 0.24 (-21.33)          | 0.28 (-4.00)          | 0.25 (-15.86)         | 0.29 (-0.72)          |
| Djibouti                           | 0.62          | 0.52 (-18.53)          | 0.60 (-3.14)          | 0.54 (-13.39)         | 0.61 (-1.02)          |
| Eritrea                            | 2.99          | 2.50 (-19.74)          | 2.79 (-7.27)          | 2.72 (-10.18)         | 2.97 (-0.87)          |
| Ethiopia                           | 50.97         | 44.63 (-14.21)         | 48.65 (-4.79)         | 47.41 (-7.51)         | 50.27 (-1.40)         |
| Kenya                              | 20.04         | 17.20 (-16.55)         | 19.06 (-5.16)         | 18.23 (-9.94)         | 19.85 (-0.97)         |
| Madagascar                         | 14.28         | 11.26 (-26.79)         | 12.84 (-11.20)        | 12.81 (-11.52)        | 13.80 (-3.48)         |
| Malawi                             | 9.06          | 7.46 (-21.35)          | 8.35 (-8.44)          | 8.12 (-11.56)         | 8.96 (-1.08)          |
| Mozambique                         | 16.38         | 14.18 (-15.53)         | 15.54 (-5.42)         | 14.88 (-10.11)        | 16.30 (-0.49)         |
| Rwanda                             | 6.43          | 5.54 (-16.05)          | 6.12 (-5.19)          | 5.85 (-10.02)         | 6.39 (-0.68)          |
| Somalia                            | 16.99         | 12.18 (-39.53)         | 14.23 (-19.45)        | 15.83 (-7.35)         | 15.20 (-11.81)        |
| South Sudan                        | 7.99          | 6.45 (-23.84)          | 7.08 (-12.87)         | 7.55 (-5.91)          | 7.51 (-6.37)          |
| Tanzania                           | 26.74         | 22.18 (-20.59)         | 25.19 (-6.14)         | 23.72 (-12.76)        | 26.42 (-1.22)         |
| Uganda                             | 21.37         | 18.83 (-13.44)         | 20.37 (-4.89)         | 19.94 (-7.15)         | 21.07 (-1.38)         |
| Zambia                             | 10.63         | 9.03 (-17.72)          | 10.27 (-3.44)         | 9.46 (-12.33)         | 10.49 (-1.27)         |
| <b>Southern sub-Saharan Africa</b> | <b>38.69</b>  | <b>32.20 (-20.16)</b>  | <b>37.53 (-3.11)</b>  | <b>33.67 (-14.94)</b> | <b>38.29 (-1.05)</b>  |
| Botswana                           | 1.02          | 0.83 (-22.19)          | 1.00 (-1.69)          | 0.86 (-18.36)         | 1.01 (-1.13)          |
| Eswatini                           | 0.54          | 0.44 (-21.41)          | 0.52 (-2.51)          | 0.46 (-16.99)         | 0.53 (-0.87)          |
| Lesotho                            | 1.03          | 0.81 (-26.73)          | 0.96 (-7.35)          | 0.89 (-15.64)         | 1.01 (-1.52)          |
| Namibia                            | 1.10          | 0.92 (-19.84)          | 1.07 (-2.92)          | 0.96 (-14.85)         | 1.09 (-1.08)          |
| South Africa                       | 27.36         | 23.11 (-18.41)         | 26.88 (-1.77)         | 23.83 (-14.79)        | 27.12 (-0.89)         |
| Zimbabwe                           | 7.66          | 6.10 (-25.61)          | 7.10 (-7.91)          | 6.67 (-14.81)         | 7.54 (-1.57)          |

| Western sub-Saharan Africa | 292·98 | 254·49 (-15·12) | 279·06 (-4·99) | 270·09 (-8·47) | 286·82 (-2·15) |
|----------------------------|--------|-----------------|----------------|----------------|----------------|
| Benin                      | 9·12   | 8·10 (-12·59)   | 8·83 (-3·34)   | 8·41 (-8·41)   | 9·04 (-0·88)   |
| Burkina Faso               | 17·40  | 15·89 (-9·55)   | 16·45 (-5·82)  | 16·67 (-4·41)  | 17·30 (-0·59)  |
| Cabo Verde                 | 0·21   | 0·17 (-21·87)   | 0·20 (-0·92)   | 0·17 (-20·33)  | 0·21 (-0·07)   |
| Cameroon                   | 16·84  | 14·20 (-18·56)  | 16·39 (-2·74)  | 14·84 (-13·48) | 16·60 (-1·44)  |
| Chad                       | 16·50  | 13·30 (-24·03)  | 14·47 (-13·97) | 15·74 (-4·81)  | 15·06 (-9·56)  |
| Côte d'Ivoire              | 13·99  | 11·89 (-17·68)  | 13·51 (-3·54)  | 12·41 (-12·73) | 13·85 (-1·03)  |
| The Gambia                 | 1·05   | 0·90 (-16·70)   | 1·01 (-3·59)   | 0·93 (-12·59)  | 1·04 (-0·39)   |
| Ghana                      | 17·15  | 14·65 (-17·08)  | 16·67 (-2·87)  | 15·16 (-13·15) | 17·11 (-0·26)  |
| Guinea                     | 8·43   | 7·29 (-15·62)   | 8·00 (-5·38)   | 7·81 (-7·96)   | 8·24 (-2·28)   |
| Guinea-Bissau              | 1·19   | 0·98 (-21·31)   | 1·12 (-6·64)   | 1·06 (-12·93)  | 1·18 (-1·00)   |
| Liberia                    | 2·90   | 2·38 (-22·08)   | 2·74 (-5·79)   | 2·53 (-14·81)  | 2·88 (-0·98)   |
| Mali                       | 17·58  | 15·24 (-15·32)  | 16·36 (-7·43)  | 16·39 (-7·23)  | 17·32 (-1·49)  |
| Mauritania                 | 1·90   | 1·62 (-17·46)   | 1·85 (-2·70)   | 1·68 (-13·13)  | 1·89 (-0·84)   |
| Niger                      | 23·79  | 20·95 (-13·55)  | 21·74 (-9·42)  | 22·55 (-5·50)  | 23·63 (-0·68)  |
| Nigeria                    | 129·17 | 113·36 (-13·95) | 124·66 (-3·62) | 119·49 (-8·10) | 125·81 (-2·67) |
| São Tomé and Príncipe      | 0·07   | 0·06 (-21·36)   | 0·07 (-1·44)   | 0·06 (-19·28)  | 0·07 (-0·21)   |
| Senegal                    | 6·71   | 5·76 (-16·58)   | 6·42 (-4·55)   | 6·02 (-11·42)  | 6·69 (-0·36)   |
| Sierra Leone               | 4·86   | 4·17 (-16·54)   | 4·56 (-6·44)   | 4·46 (-8·88)   | 4·79 (-1·33)   |
| Togo                       | 4·12   | 3·59 (-14·78)   | 3·99 (-3·08)   | 3·71 (-10·96)  | 4·13 (0·29)    |

**Supplemental Results Table S4. Cause-specific death counts and age-standardised death rates in 2022 and 2050 by scenario. Estimates, listed as means, with 95% uncertainty intervals in parentheses. Highlighted rows indicate higher level aggregated causes from the GBD cause hierarchy.**

|                                                          | All-age Deaths (in Thousands) |                             |                             |                                               |                                              |                             | Age-standardized Death rate (per 100,000) |                       |                        |                                               |                                              |                       |
|----------------------------------------------------------|-------------------------------|-----------------------------|-----------------------------|-----------------------------------------------|----------------------------------------------|-----------------------------|-------------------------------------------|-----------------------|------------------------|-----------------------------------------------|----------------------------------------------|-----------------------|
|                                                          | Reference 2022                | Reference 2050              | Safer Environment 2050      | Improved Behavioural and Metabolic Risks 2050 | Improved Childhood Nutrition and Vaccination | Combined 2050               | Reference 2022                            | Reference 2050        | Safer Environment 2050 | Improved Behavioural and Metabolic Risks 2050 | Improved Childhood Nutrition and Vaccination | Combined 2050         |
|                                                          | <b>All causes</b>             | 60134.0 (57064.1 - 63169.5) | 90677.9 (83840.7 - 99580.9) | 89064.7 (82430.7 - 97819.0)                   | 74578.6 (69415.0 - 80820.2)                  | 90405.2 (83569.6 - 99492.4) | 72577.2 (67646.7 - 78507.8)               | 736.3 (702.6 - 772.7) | 547.8 (467.9 - 670.7)  | 526.5 (451.4 - 645.0)                         | 380.7 (333.4 - 451.6)                        | 543.4 (464.4 - 667.1) |
| <b>Communicable, maternal, neonatal, and nutritional</b> | 11926.1 (11046.4 - 12984.9)   | 9509.4 (7857.1 - 12224.9)   | 7900.6 (6560.8 - 10300.7)   | 11244.3 (9149.0 - 14526.9)                    | 9191.8 (7568.5 - 11900.8)                    | 8988.5 (7278.5 - 11916.6)   | 157.9 (146.1 - 172.4)                     | 80.7 (62.0 - 113.2)   | 68.6 (52.2 - 95.0)     | 80.1 (61.3 - 113.4)                           | 76.3 (58.0 - 107.5)                          | 65.0 (48.9 - 92.8)    |
| <b>HIV/AIDS and sexually transmitted infections</b>      | 769.0 (701.2 - 865.7)         | 363.1 (268.4 - 617.8)       | 365.3 (270.0 - 620.8)       | 382.4 (279.6 - 667.7)                         | 364.7 (269.4 - 619.3)                        | 386.0 (281.9 - 671.7)       | 9.5 (8.5 - 11.0)                          | 3.5 (2.6 - 6.1)       | 3.6 (2.6 - 6.1)        | 3.6 (2.6 - 6.1)                               | 3.6 (2.6 - 6.1)                              | 3.6 (2.6 - 6.1)       |
| HIV/AIDS                                                 | 692.4 (641.1 - 765.9)         | 326.8 (235.9 - 586.1)       | 328.5 (237.4 - 589.0)       | 344.2 (245.7 - 639.5)                         | 326.9 (235.9 - 586.2)                        | 346.0 (247.1 - 641.9)       | 8.3 (7.7 - 9.2)                           | 3.0 (2.2 - 5.5)       | 3.0 (2.2 - 5.5)        | 3.0 (2.2 - 5.5)                               | 3.0 (2.2 - 5.5)                              | 3.0 (2.2 - 5.5)       |
| Sexually transmitted infections excluding HIV            | 76.7 (33.9 - 152.1)           | 36.3 (18.2 - 66.7)          | 36.8 (18.4 - 68.1)          | 38.1 (19.7 - 68.9)                            | 37.9 (18.8 - 70.3)                           | 40.0 (20.4 - 73.2)          | 1.2 (0.5 - 2.4)                           | 0.6 (0.2 - 1.1)       | 0.6 (0.3 - 1.1)        | 0.6 (0.2 - 1.1)                               | 0.6 (0.3 - 1.1)                              | 0.6 (0.3 - 1.1)       |
| <b>Respiratory infections and tuberculosis</b>           | 6140.3 (5782.9 - 6517.1)      | 4934.2 (4251.2 - 5607.2)    | 4419.4 (3774.9 - 5046.2)    | 5989.6 (4989.6 - 6948.3)                      | 4703.0 (4047.1 - 5340.6)                     | 5163.5 (4242.1 - 6051.8)    | 75.8 (71.4 - 80.6)                        | 31.3 (25.1 - 38.8)    | 26.9 (21.5 - 33.6)     | 30.3 (24.1 - 38.0)                            | 28.5 (22.9 - 35.5)                           | 24.0 (19.0 - 30.4)    |
| Tuberculosis                                             | 1143.0 (1021.1 - 1279.0)      | 877.2 (594.7 - 1262.0)      | 869.1 (586.4 - 1251.6)      | 1025.1 (683.6 - 1499.8)                       | 880.4 (596.6 - 1267.2)                       | 1014.9 (673.3 - 1496.7)     | 13.5 (12.2 - 15.3)                        | 6.3 (4.0 - 9.8)       | 6.2 (3.9 - 9.7)        | 6.4 (4.1 - 10.1)                              | 6.3 (4.0 - 9.9)                              | 6.3 (4.0 - 10.0)      |
| Lower respiratory infections                             | 2573.3 (2330.2 - 2777.8)      | 4035.0 (3508.4 - 4436.3)    | 3527.9 (3043.8 - 3893.8)    | 4938.6 (4138.8 - 5584.8)                      | 3800.0 (3291.3 - 4185.3)                     | 4121.7 (3391.7 - 4681.4)    | 33.9 (30.7 - 36.7)                        | 24.8 (20.9 - 29.2)    | 20.5 (17.3 - 24.1)     | 23.7 (20.0 - 28.0)                            | 22.0 (18.5 - 25.9)                           | 17.4 (14.7 - 20.6)    |
| Upper respiratory infections                             | 19.4 (6.8 - 42.1)             | 21.2 (7.2 - 45.4)           | 21.7 (7.4 - 46.6)           | 25.0 (9.4 - 51.0)                             | 21.8 (7.2 - 46.3)                            | 26.0 (9.6 - 53.4)           | 0.3 (0.1 - 0.6)                           | 0.2 (0.1 - 0.5)       | 0.2 (0.1 - 0.6)        | 0.2 (0.1 - 0.5)                               | 0.2 (0.1 - 0.6)                              | 0.2 (0.1 - 0.6)       |
| Otitis media                                             | 0.5 (0.2 - 1.2)               | 0.8 (0.2 - 2.0)             | 0.8 (0.2 - 2.0)             | 0.9 (0.2 - 2.1)                               | 0.8 (0.2 - 2.0)                              | 0.9 (0.2 - 2.2)             | 0.0 (0.0 - 0.0)                           | 0.0 (0.0 - 0.0)       | 0.0 (0.0 - 0.0)        | 0.0 (0.0 - 0.0)                               | 0.0 (0.0 - 0.0)                              | 0.0 (0.0 - 0.0)       |
| COVID-19                                                 | 2404.0 (2268.6 - 2574.3)      | 0.0 (0.0 - 0.0)             | 0.0 (0.0 - 0.0)             | 0.0 (0.0 - 0.0)                               | 0.0 (0.0 - 0.0)                              | 0.0 (0.0 - 0.0)             | 28.1 (26.4 - 30.2)                        | 0.0 (0.0 - 0.0)       | 0.0 (0.0 - 0.0)        | 0.0 (0.0 - 0.0)                               | 0.0 (0.0 - 0.0)                              | 0.0 (0.0 - 0.0)       |
| <b>Enteric infections</b>                                | 1305.3 (954.5 - 1701.9)       | 1593.4 (1005.4 - 2282.9)    | 484.3 (318.7 - 694.8)       | 2002.2 (1213.0 - 2926.9)                      | 1517.4 (943.6 - 2205.9)                      | 599.7 (386.3 - 884.5)       | 17.3 (12.9 - 22.3)                        | 11.3 (7.0 - 17.8)     | 3.6 (2.2 - 5.7)        | 11.5 (7.0 - 18.1)                             | 9.9 (6.0 - 15.4)                             | 3.6 (2.2 - 5.6)       |
| Diarrheal diseases                                       | 1135.9 (774.6 - 1531.9)       | 1480.1 (901.3 - 2155.7)     | 372.1 (233.7 - 542.9)       | 1886.8 (1131.4 - 2772.4)                      | 1400.4 (826.0 - 2078.3)                      | 481.1 (294.2 - 718.9)       | 14.9 (10.6 - 19.8)                        | 9.7 (5.8 - 15.3)      | 2.1 (1.2 - 3.2)        | 9.9 (6.0 - 15.5)                              | 8.2 (4.7 - 12.8)                             | 1.9 (1.1 - 3.1)       |
| Typhoid and paratyphoid                                  | 105.6 (55.1 - 194.9)          | 53.2 (24.4 - 101.4)         | 52.1 (23.9 - 99.6)          | 53.9 (24.8 - 102.5)                           | 54.2 (24.8 - 103.7)                          | 53.9 (24.6 - 103.4)         | 1.5 (0.8 - 2.7)                           | 0.8 (0.3 - 1.4)       | 0.7 (0.3 - 1.4)        | 0.8 (0.3 - 1.4)                               | 0.8 (0.4 - 1.5)                              | 0.8 (0.4 - 1.5)       |
| Invasive Non-typhoidal Salmonella (iNTS)                 | 62.3 (35.1 - 98.7)            | 58.4 (27.0 - 112.7)         | 58.3 (27.0 - 113.2)         | 59.6 (27.6 - 114.7)                           | 61.1 (28.0 - 118.0)                          | 62.7 (28.8 - 121.6)         | 0.9 (0.5 - 1.4)                           | 0.8 (0.4 - 1.6)       | 0.8 (0.4 - 1.6)        | 0.8 (0.4 - 1.6)                               | 0.9 (0.4 - 1.7)                              | 0.9 (0.4 - 1.7)       |
| Other intestinal infectious diseases                     | 1.4 (1.0 - 1.9)               | 1.7 (1.1 - 2.5)             | 1.7 (1.2 - 2.5)             | 1.9 (1.2 - 2.9)                               | 1.7 (1.1 - 2.5)                              | 1.9 (1.3 - 2.9)             | 0.0 (0.0 - 0.0)                           | 0.0 (0.0 - 0.0)       | 0.0 (0.0 - 0.0)        | 0.0 (0.0 - 0.0)                               | 0.0 (0.0 - 0.0)                              | 0.0 (0.0 - 0.0)       |
| <b>Neglected tropical diseases and malaria</b>           | 792.3 (378.3 - 1448.8)        | 621.0 (251.3 - 1704.0)      | 655.9 (260.5 - 1882.9)      | 651.1 (272.6 - 1741.0)                        | 668.1 (260.5 - 1972.3)                       | 719.7 (289.8 - 2066.8)      | 11.0 (5.2 - 19.5)                         | 7.5 (2.6 - 22.5)      | 8.0 (2.7 - 24.6)       | 7.5 (2.6 - 22.6)                              | 8.3 (2.7 - 27.1)                             | 8.6 (2.8 - 28.1)      |
| Malaria                                                  | 692.0 (275.2 - 1357.8)        | 497.4 (119.8 - 1586.4)      | 529.8 (127.4 - 1762.5)      | 510.7 (125.0 - 1609.6)                        | 542.0 (124.8 - 1846.0)                       | 574.8 (135.9 - 1935.7)      | 9.7 (3.9 - 18.4)                          | 6.4 (1.3 - 21.6)      | 6.8 (1.4 - 23.2)       | 6.4 (1.3 - 21.6)                              | 7.1 (1.4 - 26.2)                             | 7.4 (1.5 - 27.0)      |
| Chagas disease                                           | 7.7 (6.5 - 9.2)               | 7.9 (6.4 - 9.7)             | 7.9 (6.4 - 9.6)             | 9.5 (7.6 - 11.8)                              | 8.0 (6.4 - 9.7)                              | 9.5 (7.6 - 11.7)            | 0.1 (0.1 - 0.1)                           | 0.0 (0.0 - 0.1)       | 0.0 (0.0 - 0.1)        | 0.0 (0.0 - 0.1)                               | 0.0 (0.0 - 0.1)                              | 0.0 (0.0 - 0.1)       |
| Leishmaniasis                                            | 5.0 (1.6 - 16.0)              | 1.6 (0.4 - 3.6)             | 1.6 (0.4 - 3.7)             | 1.6 (0.4 - 3.7)                               | 1.6 (0.4 - 3.7)                              | 1.6 (0.4 - 3.8)             | 0.1 (0.0 - 0.2)                           | 0.0 (0.0 - 0.0)       | 0.0 (0.0 - 0.0)        | 0.0 (0.0 - 0.0)                               | 0.0 (0.0 - 0.0)                              | 0.0 (0.0 - 0.1)       |
| African trypanosomiasis                                  | 1.7 (0.4 - 6.9)               | 2.4 (0.8 - 6.8)             | 2.4 (0.8 - 6.9)             | 2.4 (0.9 - 7.0)                               | 2.4 (0.8 - 6.8)                              | 2.5 (0.9 - 7.1)             | 0.0 (0.0 - 0.1)                           | 0.0 (0.0 - 0.1)       | 0.0 (0.0 - 0.1)        | 0.0 (0.0 - 0.1)                               | 0.0 (0.0 - 0.1)                              | 0.0 (0.0 - 0.1)       |
| Schistosomiasis                                          | 12.8 (10.5 - 16.3)            | 16.6 (7.0 - 71.0)           | 16.8 (7.1 - 71.5)           | 18.9 (7.7 - 91.4)                             | 16.7 (7.0 - 71.4)                            | 19.1 (7.9 - 92.0)           | 0.2 (0.1 - 0.2)                           | 0.1 (0.1 - 0.5)       | 0.1 (0.1 - 0.5)        | 0.1 (0.1 - 0.6)                               | 0.1 (0.1 - 0.5)                              | 0.1 (0.1 - 0.6)       |
| Cysticercosis                                            | 1.7 (1.2 - 2.4)               | 3.4 (2.0 - 5.6)             | 3.5 (2.0 - 5.6)             | 3.6 (2.1 - 5.9)                               | 3.4 (2.0 - 5.6)                              | 3.6 (2.1 - 5.8)             | 0.0 (0.0 - 0.0)                           | 0.0 (0.0 - 0.1)       | 0.0 (0.0 - 0.1)        | 0.0 (0.0 - 0.1)                               | 0.0 (0.0 - 0.1)                              | 0.0 (0.0 - 0.1)       |
| Cystic echinococcosis                                    | 1.4 (1.0 - 1.8)               | 1.8 (1.1 - 2.6)             | 1.8 (1.1 - 2.6)             | 2.1 (1.3 - 3.0)                               | 1.8 (1.1 - 2.6)                              | 2.1 (1.3 - 3.1)             | 0.0 (0.0 - 0.0)                           | 0.0 (0.0 - 0.0)       | 0.0 (0.0 - 0.0)        | 0.0 (0.0 - 0.0)                               | 0.0 (0.0 - 0.0)                              | 0.0 (0.0 - 0.0)       |
| Dengue                                                   | 29.6 (18.1 - 41.6)            | 45.3 (21.5 - 68.0)          | 45.9 (22.1 - 68.9)          | 53.9 (26.0 - 79.7)                            | 45.4 (21.6 - 68.2)                           | 54.6 (26.6 - 80.3)          | 0.4 (0.2 - 0.5)                           | 0.4 (0.2 - 0.6)       | 0.4 (0.2 - 0.6)        | 0.4 (0.2 - 0.6)                               | 0.4 (0.2 - 0.6)                              | 0.4 (0.2 - 0.6)       |
| Yellow fever                                             | 4.5 (1.6 - 10.1)              | 2.5 (1.0 - 7.1)             | 2.5 (1.0 - 7.3)             | 2.5 (1.0 - 7.2)                               | 2.5 (1.0 - 7.2)                              | 2.6 (1.0 - 7.5)             | 0.1 (0.0 - 0.1)                           | 0.0 (0.0 - 0.1)       | 0.0 (0.0 - 0.1)        | 0.0 (0.0 - 0.1)                               | 0.0 (0.0 - 0.1)                              | 0.0 (0.0 - 0.1)       |
| Rabies                                                   | 10.1 (5.8 - 14.5)             | 8.9 (3.5 - 16.3)            | 9.0 (3.5 - 16.6)            | 9.5 (3.7 - 17.3)                              | 9.0 (3.5 - 16.6)                             | 9.7 (3.8 - 17.8)            | 0.1 (0.1 - 0.2)                           | 0.1 (0.0 - 0.2)       | 0.1 (0.0 - 0.2)        | 0.1 (0.0 - 0.2)                               | 0.1 (0.0 - 0.2)                              | 0.1 (0.0 - 0.2)       |
| Intestinal nematode infections                           | 3.5 (2.2 - 5.7)               | 2.9 (1.7 - 5.0)             | 3.0 (1.8 - 5.1)             | 3.0 (1.8 - 5.1)                               | 3.0 (1.7 - 5.1)                              | 3.2 (1.9 - 5.3)             | 0.1 (0.0 - 0.1)                           | 0.0 (0.0 - 0.1)       | 0.0 (0.0 - 0.1)        | 0.0 (0.0 - 0.1)                               | 0.0 (0.0 - 0.1)                              | 0.0 (0.0 - 0.1)       |
| Other neglected tropical diseases                        | 22.2 (15.7 - 27.3)            | 30.2 (19.1 - 42.2)          | 31.7 (19.9 - 44.6)          | 33.4 (21.1 - 46.1)                            | 32.4 (20.2 - 46.1)                           | 36.5 (22.7 - 51.6)          | 0.3 (0.2 - 0.4)                           | 0.3 (0.2 - 0.5)       | 0.3 (0.2 - 0.5)        | 0.3 (0.2 - 0.5)                               | 0.4 (0.2 - 0.6)                              | 0.4 (0.2 - 0.6)       |
| <b>Other infectious diseases</b>                         | 707.3 (551.5 - 908.7)         | 617.1 (455.2 - 843.6)       | 630.5 (462.3 - 869.1)       | 694.5 (508.5 - 958.6)                         | 542.6 (399.0 - 743.2)                        | 621.7 (450.2 - 858.6)       | 9.8 (7.6 - 12.8)                          | 6.3 (4.5 - 9.0)       | 6.5 (4.6 - 9.4)        | 6.4 (4.5 - 9.1)                               | 5.0 (3.4 - 7.3)                              | 5.1 (3.4 - 7.5)       |
| Meningitis                                               | 210.0 (175.3 - 259.2)         | 167.6 (122.7 - 234.7)       | 170.4 (123.8 - 241.2)       | 185.1 (136.2 - 257.6)                         | 163.7 (118.4 - 232.1)                        | 181.4 (130.5 - 257.3)       | 2.9 (2.4 - 3.6)                           | 1.7 (1.2 - 2.6)       | 1.8 (1.2 - 2.7)        | 1.7 (1.2 - 2.6)                               | 1.7 (1.1 - 2.6)                              | 1.7 (1.1 - 2.6)       |
| Encephalitis                                             | 93.0 (78.0 - 110.1)           | 161.0 (117.9 - 214.5)       | 162.8 (118.4 - 218.2)       | 190.6 (136.3 - 262.7)                         | 162.8 (119.2 - 217.0)                        | 193.5 (136.9 - 268.7)       | 1.2 (1.0 - 1.4)                           | 1.3 (0.9 - 1.8)       | 1.3 (0.9 - 1.8)        | 1.3 (0.9 - 1.8)                               | 1.3 (0.9 - 1.8)                              | 1.3 (0.9 - 1.9)       |
| Diphtheria                                               | 3.6 (2.4 - 5.1)               | 2.0 (1.2 - 3.1)             | 2.1 (1.3 - 3.3)             | 2.0 (1.2 - 3.1)                               | 1.3 (0.9 - 1.8)                              | 1.3 (0.9 - 1.8)             | 0.1 (0.0 - 0.1)                           | 0.0 (0.0 - 0.0)       | 0.0 (0.0 - 0.1)        | 0.0 (0.0 - 0.0)                               | 0.0 (0.0 - 0.0)                              | 0.0 (0.0 - 0.0)       |
| Pertussis                                                | 136.5 (65.3 - 237.7)          | 87.9 (41.3 - 157.7)         | 94.5 (44.3 - 169.8)         | 87.9 (41.3 - 157.8)                           | 21.7 (10.9 - 37.3)                           | 22.1 (11.1 - 38.1)          | 2.1 (1.0 - 3.6)                           | 1.5 (0.7 - 2.7)       | 1.6 (0.7 - 3.0)        | 1.5 (0.7 - 2.7)                               | 0.3 (0.2 - 0.6)                              | 0.3 (0.2 - 0.6)       |
| Tetanus                                                  | 20.4 (9.2 - 31.9)             | 7.6 (2.1 - 15.5)            | 7.6 (2.0 - 15.5)            | 8.1 (2.2 - 16.4)                              | 6.5 (1.3 - 14.2)                             | 6.9 (1.4 - 15.0)            | 0.3 (0.1 - 0.4)                           | 0.1 (0.0 - 0.2)       | 0.1 (0.0 - 0.2)        | 0.1 (0.0 - 0.2)                               | 0.1 (0.0 - 0.1)                              | 0.1 (0.0 - 0.1)       |

|                                                        |                                    |                                    |                                    |                                    |                                    |                                    |                              |                              |                              |                              |                              |                              |
|--------------------------------------------------------|------------------------------------|------------------------------------|------------------------------------|------------------------------------|------------------------------------|------------------------------------|------------------------------|------------------------------|------------------------------|------------------------------|------------------------------|------------------------------|
| Measles                                                | 90.1 (35.0 - 195.4)                | 12.6 (4.2 - 41.9)                  | 13.6 (4.3 - 47.8)                  | 12.6 (4.2 - 41.9)                  | 5.5 (3.0 - 9.7)                    | 5.6 (3.0 - 10.0)                   | 1.4 (0.5 - 3.0)              | 0.2 (0.1 - 0.7)              | 0.2 (0.1 - 0.8)              | 0.2 (0.1 - 0.7)              | 0.1 (0.0 - 0.1)              | 0.1 (0.0 - 0.2)              |
| Varicella and herpes zoster                            | 13.8 (12.2 - 15.4)                 | 16.8 (11.3 - 24.9)                 | 17.3 (11.5 - 25.8)                 | 22.8 (14.7 - 34.7)                 | 17.1 (11.4 - 25.8)                 | 23.6 (15.0 - 36.7)                 | 0.2 (0.2 - 0.2)              | 0.1 (0.1 - 0.2)              | 0.1 (0.1 - 0.2)              | 0.1 (0.1 - 0.2)              | 0.1 (0.1 - 0.2)              | 0.1 (0.1 - 0.2)              |
| Acute hepatitis                                        | 70.2 (56.1 - 91.0)                 | 48.4 (32.6 - 72.2)                 | 48.2 (32.3 - 72.0)                 | 53.5 (35.5 - 80.9)                 | 48.9 (32.8 - 73.1)                 | 53.4 (35.4 - 81.1)                 | 0.9 (0.7 - 1.2)              | 0.4 (0.3 - 0.7)              | 0.4 (0.3 - 0.7)              | 0.4 (0.3 - 0.7)              | 0.4 (0.3 - 0.7)              | 0.4 (0.3 - 0.7)              |
| Other unspecified infectious diseases                  | 69.7 (46.5 - 96.3)                 | 113.2 (69.1 - 166.7)               | 114.1 (69.6 - 168.1)               | 131.9 (80.1 - 196.3)               | 115.2 (69.8 - 169.8)               | 133.9 (80.8 - 199.5)               | 0.9 (0.6 - 1.3)              | 1.0 (0.5 - 1.5)              | 1.0 (0.5 - 1.6)              | 1.0 (0.5 - 1.6)              | 1.0 (0.5 - 1.6)              | 1.0 (0.5 - 1.6)              |
| <b>Maternal and neonatal disorders</b>                 | <b>1993.0 (1697.6 - 2346.3)</b>    | <b>1063.5 (729.9 - 1526.7)</b>     | <b>1025.6 (701.0 - 1478.3)</b>     | <b>1064.0 (730.0 - 1527.9)</b>     | <b>1086.4 (741.6 - 1565.0)</b>     | <b>1045.1 (711.2 - 1510.9)</b>     | <b>31.5 (27.1 - 36.7)</b>    | <b>18.8 (13.9 - 25.1)</b>    | <b>18.1 (13.3 - 24.2)</b>    | <b>18.8 (13.9 - 25.1)</b>    | <b>19.2 (14.2 - 25.6)</b>    | <b>18.4 (13.5 - 24.6)</b>    |
| Maternal disorders                                     | 188.5 (160.8 - 224.1)              | 117.0 (69.6 - 190.1)               | 116.6 (69.6 - 189.0)               | 117.0 (69.6 - 190.2)               | 117.4 (69.9 - 190.9)               | 116.9 (69.8 - 189.7)               | 2.4 (2.0 - 2.8)              | 1.4 (0.8 - 2.2)              | 1.4 (0.8 - 2.2)              | 1.4 (0.8 - 2.2)              | 1.4 (0.8 - 2.2)              | 1.4 (0.8 - 2.2)              |
| Neonatal disorders                                     | 1804.5 (1513.8 - 2135.5)           | 946.5 (660.3 - 1342.3)             | 909.0 (631.7 - 1293.2)             | 947.0 (660.5 - 1343.2)             | 969.0 (671.8 - 1379.5)             | 928.2 (641.7 - 1324.0)             | 29.1 (25.0 - 34.0)           | 17.5 (13.0 - 23.1)           | 16.8 (12.4 - 22.3)           | 17.5 (13.0 - 23.1)           | 17.9 (13.3 - 23.7)           | 17.1 (12.7 - 22.7)           |
| <b>Nutritional deficiencies</b>                        | <b>219.0 (196.0 - 245.8)</b>       | <b>317.1 (210.2 - 467.5)</b>       | <b>319.6 (209.2 - 471.9)</b>       | <b>460.5 (291.1 - 713.8)</b>       | <b>309.5 (206.9 - 453.0)</b>       | <b>452.8 (284.3 - 701.5)</b>       | <b>3.0 (2.6 - 3.3)</b>       | <b>1.9 (1.1 - 3.1)</b>       | <b>1.9 (1.1 - 3.1)</b>       | <b>1.9 (1.1 - 3.3)</b>       | <b>1.7 (1.0 - 2.9)</b>       | <b>1.8 (1.0 - 2.9)</b>       |
| Protein-energy malnutrition                            | 186.6 (165.0 - 209.8)              | 278.6 (181.8 - 412.3)              | 280.6 (181.3 - 416.8)              | 406.0 (254.1 - 626.9)              | 270.9 (178.9 - 396.7)              | 397.7 (247.8 - 618.5)              | 2.6 (2.2 - 2.9)              | 1.7 (0.9 - 2.8)              | 1.6 (0.9 - 2.8)              | 1.7 (1.0 - 2.9)              | 1.5 (0.9 - 2.5)              | 1.5 (0.9 - 2.6)              |
| Other nutritional deficiencies                         | 32.4 (28.7 - 36.3)                 | 38.5 (26.0 - 54.8)                 | 39.0 (26.1 - 55.6)                 | 54.5 (35.0 - 81.2)                 | 38.6 (26.0 - 54.9)                 | 55.1 (35.1 - 82.4)                 | 0.4 (0.4 - 0.4)              | 0.2 (0.1 - 0.4)              | 0.2 (0.1 - 0.3)              | 0.2 (0.1 - 0.4)              | 0.2 (0.1 - 0.4)              | 0.2 (0.1 - 0.4)              |
| <b>Non-communicable diseases</b>                       | <b>43847.1 (41685.0 - 46151.8)</b> | <b>75509.0 (70228.7 - 81369.8)</b> | <b>75425.3 (70126.0 - 81403.7)</b> | <b>56752.3 (53275.9 - 60904.1)</b> | <b>75550.1 (70274.8 - 81410.9)</b> | <b>56908.6 (53392.9 - 61137.2)</b> | <b>525.1 (502.5 - 549.1)</b> | <b>423.5 (367.8 - 504.8)</b> | <b>414.4 (360.5 - 493.2)</b> | <b>256.6 (232.1 - 291.4)</b> | <b>423.4 (367.7 - 504.8)</b> | <b>252.5 (228.9 - 286.1)</b> |
| <b>Neoplasms</b>                                       | <b>10024.8 (9234.6 - 10726.8)</b>  | <b>18439.5 (15234.5 - 21972.7)</b> | <b>18559.2 (15339.5 - 22085.4)</b> | <b>17090.5 (14338.1 - 19921.4)</b> | <b>18443.3 (15236.5 - 21978.6)</b> | <b>17184.4 (14429.3 - 20015.6)</b> | <b>116.4 (107.4 - 124.2)</b> | <b>109.2 (96.8 - 123.1)</b>  | <b>108.4 (96.0 - 122.2)</b>  | <b>86.6 (77.5 - 97.0)</b>    | <b>109.2 (96.7 - 123.1)</b>  | <b>86.0 (76.9 - 96.3)</b>    |
| Lip and oral cavity cancer                             | 212.5 (192.4 - 231.0)              | 430.7 (385.5 - 471.7)              | 438.2 (392.1 - 479.5)              | 442.6 (393.9 - 485.2)              | 430.8 (385.6 - 471.8)              | 449.3 (399.8 - 492.7)              | 2.4 (2.2 - 2.6)              | 2.7 (2.4 - 3.0)              | 2.8 (2.4 - 3.0)              | 2.5 (2.2 - 2.7)              | 2.7 (2.4 - 3.0)              | 2.5 (2.2 - 2.7)              |
| Nasopharynx cancer                                     | 76.7 (67.7 - 86.0)                 | 135.4 (112.9 - 163.0)              | 137.0 (114.1 - 165.1)              | 134.6 (110.3 - 164.7)              | 135.5 (112.9 - 163.1)              | 135.9 (111.2 - 166.4)              | 0.9 (0.8 - 1.0)              | 0.9 (0.7 - 1.2)              | 0.9 (0.7 - 1.2)              | 0.8 (0.7 - 1.1)              | 0.9 (0.7 - 1.2)              | 0.8 (0.7 - 1.1)              |
| Other pharynx cancer                                   | 100.5 (91.3 - 110.5)               | 200.4 (179.7 - 227.2)              | 203.1 (181.9 - 230.5)              | 173.1 (153.9 - 195.9)              | 200.5 (179.7 - 227.2)              | 174.8 (155.5 - 198.0)              | 1.1 (1.0 - 1.2)              | 1.3 (1.2 - 1.5)              | 1.3 (1.2 - 1.5)              | 1.0 (0.9 - 1.2)              | 1.3 (1.2 - 1.5)              | 1.1 (0.9 - 1.2)              |
| Esophageal cancer                                      | 547.4 (481.0 - 620.9)              | 984.4 (870.6 - 1089.5)             | 1000.0 (884.7 - 1107.6)            | 917.3 (805.1 - 1019.8)             | 984.4 (870.6 - 1089.4)             | 927.8 (813.2 - 1032.3)             | 6.2 (5.5 - 7.1)              | 5.8 (5.1 - 6.6)              | 5.8 (5.1 - 6.6)              | 4.6 (4.0 - 5.3)              | 5.8 (5.1 - 6.6)              | 4.6 (4.0 - 5.3)              |
| Stomach cancer                                         | 955.1 (836.1 - 1083.5)             | 1195.0 (1023.6 - 1338.7)           | 1213.3 (1038.5 - 1358.9)           | 1320.0 (1116.2 - 1470.1)           | 1195.1 (1023.8 - 1338.8)           | 1335.6 (1127.8 - 1486.7)           | 11.0 (9.7 - 12.4)            | 6.8 (5.9 - 7.6)              | 6.8 (5.9 - 7.6)              | 6.3 (5.4 - 7.0)              | 6.8 (5.9 - 7.6)              | 6.3 (5.4 - 7.0)              |
| Colon and rectum cancer                                | 1064.4 (967.0 - 1142.7)            | 2189.8 (1532.5 - 2942.3)           | 2220.2 (1553.1 - 2981.0)           | 1238.0 (874.4 - 1644.2)            | 2190.6 (1532.9 - 2943.5)           | 1252.6 (885.0 - 1662.3)            | 12.5 (11.4 - 13.4)           | 12.2 (9.3 - 15.6)            | 12.2 (9.3 - 15.6)            | 5.7 (4.3 - 7.3)              | 12.2 (9.3 - 15.6)            | 5.7 (4.3 - 7.3)              |
| Liver cancer                                           | 493.5 (445.3 - 551.2)              | 1004.7 (834.7 - 1230.5)            | 1017.2 (843.8 - 1246.8)            | 987.5 (802.8 - 1232.5)             | 1004.8 (834.8 - 1230.6)            | 997.7 (810.1 - 1246.9)             | 5.7 (5.1 - 6.4)              | 6.2 (4.9 - 8.1)              | 6.2 (4.9 - 8.1)              | 5.3 (4.2 - 6.9)              | 6.2 (4.9 - 8.1)              | 5.3 (4.2 - 6.9)              |
| Gallbladder and biliary tract cancer                   | 173.6 (146.0 - 194.5)              | 245.6 (184.3 - 307.5)              | 249.0 (187.1 - 311.7)              | 255.1 (194.2 - 315.8)              | 245.6 (184.3 - 307.6)              | 258.1 (196.3 - 319.8)              | 2.0 (1.7 - 2.3)              | 1.4 (1.1 - 1.7)              | 1.4 (1.1 - 1.7)              | 1.2 (0.9 - 1.5)              | 1.4 (1.1 - 1.7)              | 1.2 (0.9 - 1.5)              |
| Pancreatic cancer                                      | 520.6 (473.9 - 565.5)              | 1268.8 (922.7 - 1676.0)            | 1280.9 (931.7 - 1691.2)            | 1224.8 (892.7 - 1605.4)            | 1268.9 (922.8 - 1676.2)            | 1234.0 (900.5 - 1616.3)            | 6.0 (5.5 - 6.5)              | 7.2 (5.6 - 9.1)              | 7.2 (5.6 - 9.1)              | 5.9 (4.6 - 7.5)              | 7.2 (5.6 - 9.1)              | 5.8 (4.5 - 7.5)              |
| Larynx cancer                                          | 118.1 (108.8 - 128.3)              | 176.5 (157.2 - 197.3)              | 179.3 (159.5 - 200.5)              | 142.4 (128.4 - 158.1)              | 176.6 (157.2 - 197.4)              | 144.1 (130.1 - 159.8)              | 1.3 (1.2 - 1.4)              | 1.1 (1.0 - 1.2)              | 1.1 (1.0 - 1.2)              | 0.8 (0.7 - 0.9)              | 1.1 (1.0 - 1.2)              | 0.8 (0.7 - 0.9)              |
| Tracheal, bronchus, and lung cancer                    | 2024.5 (1816.3 - 2218.4)           | 3443.8 (2562.6 - 4466.1)           | 3365.2 (2507.1 - 4360.8)           | 2580.6 (1936.6 - 3333.2)           | 3444.2 (2562.9 - 4466.9)           | 2512.3 (1888.3 - 3243.7)           | 23.2 (20.9 - 25.4)           | 19.4 (15.4 - 24.0)           | 18.7 (14.8 - 23.1)           | 12.3 (9.7 - 15.3)            | 19.4 (15.4 - 24.0)           | 11.9 (9.4 - 14.7)            |
| Malignant skin melanoma                                | 62.5 (55.3 - 67.9)                 | 112.3 (95.9 - 124.7)               | 113.3 (96.6 - 125.9)               | 136.9 (114.8 - 153.0)              | 112.4 (95.9 - 124.7)               | 137.9 (115.5 - 154.2)              | 0.7 (0.7 - 0.8)              | 0.7 (0.6 - 0.8)              | 0.7 (0.6 - 0.8)              | 0.7 (0.6 - 0.8)              | 0.7 (0.6 - 0.8)              | 0.7 (0.6 - 0.8)              |
| Non-melanoma skin cancer                               | 58.3 (50.1 - 64.3)                 | 165.0 (124.1 - 205.7)              | 168.5 (126.6 - 210.0)              | 228.8 (174.3 - 283.0)              | 165.1 (124.2 - 205.9)              | 233.0 (177.8 - 288.4)              | 0.7 (0.6 - 0.8)              | 0.8 (0.7 - 1.0)              | 0.8 (0.7 - 1.0)              | 0.9 (0.7 - 1.0)              | 0.8 (0.7 - 1.0)              | 0.9 (0.7 - 1.0)              |
| Soft tissue and other extraosseous sarcomas            | 51.1 (43.4 - 61.8)                 | 95.0 (77.7 - 117.2)                | 96.3 (78.6 - 118.9)                | 110.8 (89.8 - 136.9)               | 95.0 (77.7 - 117.3)                | 112.1 (90.7 - 138.7)               | 0.6 (0.5 - 0.7)              | 0.6 (0.5 - 0.8)              | 0.6 (0.5 - 0.8)              | 0.7 (0.5 - 0.8)              | 0.6 (0.5 - 0.8)              | 0.7 (0.5 - 0.8)              |
| Malignant neoplasm of bone and articular cartilage     | 67.9 (54.2 - 76.3)                 | 145.9 (92.6 - 213.3)               | 147.7 (93.9 - 215.9)               | 171.1 (109.7 - 250.6)              | 145.9 (92.6 - 213.4)               | 172.8 (110.9 - 252.9)              | 0.8 (0.6 - 0.9)              | 1.0 (0.7 - 1.5)              | 1.0 (0.7 - 1.5)              | 1.1 (0.7 - 1.6)              | 1.0 (0.7 - 1.5)              | 1.1 (0.7 - 1.6)              |
| Breast cancer                                          | 686.2 (630.2 - 734.2)              | 1261.7 (940.2 - 1629.4)            | 1275.4 (951.1 - 1644.4)            | 1104.0 (830.9 - 1410.2)            | 1261.9 (940.3 - 1629.6)            | 1115.2 (838.5 - 1422.6)            | 7.9 (7.3 - 8.5)              | 8.1 (6.4 - 10.1)             | 8.1 (6.4 - 10.1)             | 6.3 (5.0 - 7.9)              | 8.1 (6.4 - 10.1)             | 6.3 (5.0 - 7.9)              |
| Cervical cancer                                        | 299.7 (274.3 - 324.8)              | 429.6 (364.5 - 498.4)              | 434.3 (367.9 - 504.6)              | 453.6 (379.8 - 532.0)              | 429.6 (364.5 - 498.4)              | 457.8 (382.7 - 538.1)              | 3.4 (3.1 - 3.7)              | 3.0 (2.5 - 3.7)              | 3.0 (2.5 - 3.7)              | 2.9 (2.4 - 3.6)              | 3.0 (2.5 - 3.7)              | 2.9 (2.4 - 3.6)              |
| Uterine cancer                                         | 99.5 (88.7 - 108.6)                | 171.6 (150.5 - 192.3)              | 173.0 (151.7 - 194.0)              | 125.4 (107.9 - 143.1)              | 171.6 (150.5 - 192.3)              | 126.3 (108.5 - 144.2)              | 1.1 (1.0 - 1.2)              | 1.0 (0.9 - 1.2)              | 1.0 (0.9 - 1.2)              | 0.7 (0.6 - 0.8)              | 1.0 (0.9 - 1.2)              | 0.7 (0.6 - 0.8)              |
| Ovarian cancer                                         | 190.6 (170.3 - 206.9)              | 398.0 (300.9 - 509.9)              | 401.0 (303.7 - 513.3)              | 401.1 (305.4 - 511.8)              | 398.0 (300.9 - 509.9)              | 403.5 (307.2 - 514.2)              | 2.2 (1.9 - 2.4)              | 2.6 (2.1 - 3.2)              | 2.6 (2.0 - 3.2)              | 2.3 (1.9 - 2.9)              | 2.6 (2.1 - 3.2)              | 2.3 (1.8 - 2.9)              |
| Prostate cancer                                        | 440.4 (387.1 - 473.6)              | 1095.1 (833.6 - 1416.9)            | 1119.2 (850.5 - 1450.3)            | 1417.0 (1088.0 - 1825.4)           | 1095.7 (834.0 - 1417.8)            | 1445.1 (1106.5 - 1868.4)           | 5.3 (4.6 - 5.7)              | 5.6 (4.5 - 6.8)              | 5.6 (4.5 - 6.9)              | 5.8 (4.6 - 7.1)              | 5.6 (4.5 - 6.8)              | 5.8 (4.6 - 7.1)              |
| Testicular cancer                                      | 11.5 (10.8 - 12.3)                 | 17.3 (12.8 - 22.5)                 | 17.5 (12.9 - 22.7)                 | 19.9 (15.0 - 25.8)                 | 17.3 (12.8 - 22.5)                 | 20.1 (15.2 - 26.0)                 | 0.1 (0.1 - 0.1)              | 0.1 (0.1 - 0.2)              | 0.1 (0.1 - 0.2)              | 0.2 (0.1 - 0.2)              | 0.1 (0.1 - 0.2)              | 0.2 (0.1 - 0.2)              |
| Kidney cancer                                          | 164.5 (152.3 - 174.1)              | 324.0 (231.6 - 430.0)              | 327.0 (233.8 - 434.0)              | 282.2 (203.1 - 371.2)              | 324.0 (231.6 - 430.1)              | 284.5 (204.9 - 374.2)              | 1.9 (1.8 - 2.0)              | 1.9 (1.5 - 2.5)              | 1.9 (1.5 - 2.5)              | 1.4 (1.1 - 1.8)              | 1.9 (1.5 - 2.5)              | 1.4 (1.1 - 1.8)              |
| Bladder cancer                                         | 225.0 (204.3 - 245.3)              | 444.6 (365.7 - 537.4)              | 452.3 (371.7 - 547.0)              | 442.5 (368.2 - 526.9)              | 444.7 (365.8 - 537.7)              | 448.8 (373.2 - 535.3)              | 2.7 (2.4 - 2.9)              | 2.3 (2.1 - 2.7)              | 2.3 (2.1 - 2.7)              | 1.8 (1.6 - 2.1)              | 2.3 (2.1 - 2.7)              | 1.8 (1.6 - 2.1)              |
| Brain and central nervous system cancer                | 264.8 (230.1 - 301.0)              | 565.4 (485.8 - 646.9)              | 569.5 (488.9 - 652.3)              | 652.9 (552.5 - 745.2)              | 565.5 (485.9 - 647.0)              | 656.3 (554.7 - 749.2)              | 3.1 (2.6 - 3.5)              | 3.9 (3.3 - 4.4)              | 3.9 (3.3 - 4.4)              | 4.0 (3.4 - 4.5)              | 3.9 (3.3 - 4.4)              | 4.0 (3.3 - 4.5)              |
| Eye cancer                                             | 10.5 (8.3 - 12.5)                  | 17.9 (13.5 - 22.4)                 | 18.2 (13.7 - 22.9)                 | 20.5 (15.4 - 25.4)                 | 17.9 (13.5 - 22.4)                 | 20.9 (15.6 - 26.0)                 | 0.1 (0.1 - 0.2)              | 0.1 (0.1 - 0.2)              | 0.1 (0.1 - 0.2)              | 0.1 (0.1 - 0.2)              | 0.1 (0.1 - 0.2)              | 0.1 (0.1 - 0.2)              |
| Neuroblastoma and other peripheral nervous cell tumors | 5.2 (4.3 - 6.0)                    | 5.8 (4.0 - 8.1)                    | 5.9 (4.0 - 8.2)                    | 6.6 (4.6 - 9.1)                    | 5.8 (4.0 - 8.1)                    | 6.7 (4.6 - 9.2)                    | 0.1 (0.1 - 0.1)              | 0.1 (0.0 - 0.1)              | 0.1 (0.0 - 0.1)              | 0.1 (0.0 - 0.1)              | 0.1 (0.0 - 0.1)              | 0.1 (0.0 - 0.1)              |

|                                                     |                                    |                                    |                                    |                                    |                                    |                                    |                              |                              |                              |                           |                              |                           |
|-----------------------------------------------------|------------------------------------|------------------------------------|------------------------------------|------------------------------------|------------------------------------|------------------------------------|------------------------------|------------------------------|------------------------------|---------------------------|------------------------------|---------------------------|
| Thyroid cancer                                      | 45.8 (40.9 - 49.8)                 | 91.1 (74.8 - 107.6)                | 92.4 (76.1 - 109.0)                | 94.3 (78.5 - 110.3)                | 91.1 (74.9 - 107.6)                | 95.4 (79.4 - 111.7)                | 0.5 (0.5 - 0.6)              | 0.5 (0.5 - 0.6)              | 0.5 (0.5 - 0.6)              | 0.5 (0.4 - 0.6)           | 0.5 (0.5 - 0.6)              | 0.5 (0.4 - 0.6)           |
| Mesothelioma                                        | 30.2 (27.6 - 32.5)                 | 54.3 (46.2 - 63.5)                 | 54.8 (46.6 - 64.1)                 | 63.9 (54.3 - 74.3)                 | 54.3 (46.2 - 63.5)                 | 64.4 (54.7 - 75.0)                 | 0.4 (0.3 - 0.4)              | 0.3 (0.3 - 0.4)              | 0.3 (0.3 - 0.4)              | 0.3 (0.3 - 0.4)           | 0.3 (0.3 - 0.4)              | 0.3 (0.3 - 0.4)           |
| Hodgkin lymphoma                                    | 28.4 (21.1 - 37.6)                 | 36.6 (25.2 - 47.3)                 | 37.0 (25.4 - 47.8)                 | 40.9 (28.2 - 52.8)                 | 36.6 (25.2 - 47.3)                 | 41.3 (28.4 - 53.4)                 | 0.3 (0.3 - 0.4)              | 0.3 (0.2 - 0.4)              | 0.3 (0.2 - 0.4)              | 0.3 (0.2 - 0.4)           | 0.3 (0.2 - 0.4)              | 0.3 (0.2 - 0.4)           |
| Non-Hodgkin lymphoma                                | 272.0 (249.2 - 294.1)              | 503.8 (392.4 - 629.5)              | 510.0 (397.5 - 636.8)              | 562.2 (439.5 - 698.3)              | 504.0 (392.5 - 629.7)              | 568.0 (444.4 - 705.0)              | 3.2 (2.9 - 3.4)              | 3.2 (2.6 - 3.8)              | 3.2 (2.6 - 3.8)              | 3.0 (2.5 - 3.7)           | 3.2 (2.6 - 3.8)              | 3.0 (2.5 - 3.7)           |
| Multiple myeloma                                    | 119.0 (104.3 - 129.8)              | 237.0 (198.6 - 276.3)              | 239.2 (200.4 - 278.8)              | 258.2 (216.7 - 299.4)              | 237.0 (198.6 - 276.3)              | 260.2 (218.2 - 301.5)              | 1.4 (1.2 - 1.5)              | 1.4 (1.2 - 1.5)              | 1.3 (1.2 - 1.5)              | 1.3 (1.1 - 1.4)           | 1.4 (1.2 - 1.5)              | 1.3 (1.1 - 1.4)           |
| Leukemia                                            | 323.3 (278.8 - 356.3)              | 510.2 (410.0 - 620.2)              | 515.4 (414.2 - 626.0)              | 495.4 (401.4 - 598.9)              | 510.4 (410.1 - 620.4)              | 499.8 (405.1 - 604.6)              | 3.9 (3.3 - 4.3)              | 3.4 (2.8 - 4.0)              | 3.4 (2.8 - 4.0)              | 2.9 (2.4 - 3.5)           | 3.4 (2.8 - 4.0)              | 2.9 (2.4 - 3.5)           |
| Other malignant neoplasms                           | 225.0 (201.5 - 247.2)              | 365.9 (322.0 - 404.1)              | 371.0 (325.5 - 409.8)              | 439.1 (385.7 - 488.1)              | 366.0 (322.1 - 404.3)              | 444.2 (390.4 - 494.1)              | 2.7 (2.4 - 2.9)              | 2.3 (2.0 - 2.6)              | 2.3 (2.0 - 2.6)              | 2.4 (2.0 - 2.6)           | 2.3 (2.0 - 2.6)              | 2.4 (2.0 - 2.6)           |
| Other neoplasms                                     | 56.4 (48.3 - 68.5)                 | 116.3 (91.5 - 146.5)               | 117.2 (92.1 - 147.8)               | 147.3 (114.6 - 187.0)              | 116.4 (91.5 - 146.6)               | 148.2 (115.2 - 188.7)              | 0.7 (0.6 - 0.8)              | 0.6 (0.5 - 0.7)              | 0.6 (0.5 - 0.7)              | 0.6 (0.5 - 0.8)           | 0.6 (0.5 - 0.7)              | 0.6 (0.5 - 0.7)           |
| <b>Cardiovascular diseases</b>                      | <b>19228.9 (17501.1 - 20548.0)</b> | <b>27065.7 (21794.1 - 33578.8)</b> | <b>26784.4 (21499.5 - 33315.0)</b> | <b>12861.7 (10237.6 - 15598.1)</b> | <b>27081.9 (21806.3 - 33597.2)</b> | <b>12884.4 (10215.1 - 15682.3)</b> | <b>230.6 (210.6 - 246.6)</b> | <b>146.3 (107.7 - 198.2)</b> | <b>141.2 (104.0 - 191.5)</b> | <b>50.7 (39.8 - 66.0)</b> | <b>146.2 (107.7 - 198.2)</b> | <b>49.5 (38.9 - 64.4)</b> |
| Rheumatic heart disease                             | 369.2 (316.6 - 448.1)              | 399.2 (287.4 - 555.0)              | 411.6 (295.0 - 573.7)              | 534.3 (372.6 - 757.8)              | 399.4 (287.6 - 555.3)              | 548.6 (381.2 - 783.8)              | 4.4 (3.8 - 5.2)              | 2.4 (1.6 - 3.5)              | 2.4 (1.6 - 3.6)              | 2.6 (1.7 - 3.9)           | 2.4 (1.6 - 3.5)              | 2.6 (1.7 - 3.9)           |
| Ischemic heart disease                              | 8860.4 (8040.3 - 9479.5)           | 10582.0 (7525.2 - 14356.1)         | 10380.1 (7351.5 - 14101.3)         | 1895.2 (1316.1 - 2677.9)           | 10588.2 (7529.5 - 14363.6)         | 1860.7 (1286.2 - 2638.2)           | 106.1 (97.1 - 112.9)         | 57.7 (37.5 - 86.1)           | 55.2 (35.8 - 82.5)           | 7.1 (4.6 - 10.6)          | 57.6 (37.4 - 86.0)           | 6.8 (4.4 - 10.1)          |
| Stroke                                              | 7159.0 (6473.9 - 7733.3)           | 9170.3 (7655.4 - 10768.4)          | 8907.0 (7405.4 - 10485.1)          | 4143.2 (3261.4 - 5050.0)           | 9175.5 (7660.6 - 10773.7)          | 4041.1 (3166.1 - 4936.0)           | 85.3 (77.2 - 92.0)           | 49.7 (38.5 - 63.4)           | 47.0 (36.4 - 60.1)           | 16.3 (12.5 - 21.3)        | 49.7 (38.5 - 63.4)           | 15.5 (11.8 - 20.2)        |
| Hypertensive heart disease                          | 1355.4 (1132.7 - 1515.8)           | 3575.5 (2678.5 - 4728.1)           | 3667.8 (2738.6 - 4873.2)           | 2411.0 (1718.9 - 3328.1)           | 3577.9 (2680.6 - 4730.8)           | 2473.9 (1756.9 - 3429.0)           | 16.5 (13.8 - 18.4)           | 19.1 (13.2 - 27.5)           | 19.2 (13.3 - 27.6)           | 9.4 (6.4 - 13.8)          | 19.1 (13.2 - 27.4)           | 9.4 (6.4 - 13.9)          |
| Non-rheumatic valvular heart disease                | 185.1 (156.2 - 201.5)              | 458.5 (371.2 - 516.8)              | 464.7 (375.7 - 523.7)              | 647.9 (509.4 - 737.5)              | 458.6 (371.3 - 517.0)              | 655.2 (514.4 - 746.6)              | 2.4 (2.0 - 2.6)              | 2.2 (1.9 - 2.6)              | 2.2 (1.8 - 2.5)              | 2.2 (1.9 - 2.5)           | 2.2 (1.9 - 2.6)              | 2.2 (1.9 - 2.4)           |
| Cardiomyopathy and myocarditis                      | 403.4 (362.7 - 434.3)              | 638.4 (552.0 - 726.8)              | 652.7 (563.8 - 742.5)              | 860.7 (739.5 - 967.2)              | 638.8 (552.4 - 727.4)              | 878.9 (752.5 - 988.9)              | 4.9 (4.4 - 5.2)              | 3.9 (3.5 - 4.3)              | 3.9 (3.5 - 4.3)              | 4.2 (3.8 - 4.6)           | 3.9 (3.5 - 4.3)              | 4.2 (3.8 - 4.6)           |
| Pulmonary Arterial Hypertension                     | 22.6 (18.6 - 26.1)                 | 64.7 (41.1 - 100.9)                | 66.1 (41.9 - 103.1)                | 90.0 (57.2 - 139.4)                | 64.8 (41.1 - 101.0)                | 91.6 (58.1 - 141.8)                | 0.3 (0.2 - 0.3)              | 0.4 (0.3 - 0.5)              | 0.4 (0.3 - 0.5)              | 0.4 (0.3 - 0.6)           | 0.4 (0.3 - 0.5)              | 0.4 (0.3 - 0.6)           |
| Atrial fibrillation and flutter                     | 346.3 (291.9 - 378.3)              | 1147.4 (917.7 - 1379.8)            | 1186.1 (944.9 - 1422.6)            | 1154.9 (889.2 - 1366.7)            | 1148.6 (918.5 - 1381.6)            | 1191.0 (912.1 - 1407.0)            | 4.5 (3.7 - 4.9)              | 5.2 (4.4 - 5.8)              | 5.2 (4.4 - 5.8)              | 3.6 (3.0 - 3.9)           | 5.2 (4.4 - 5.8)              | 3.5 (2.9 - 3.9)           |
| Aortic aneurysm                                     | 155.8 (139.8 - 168.4)              | 265.1 (210.3 - 327.8)              | 269.4 (214.2 - 333.3)              | 206.7 (165.5 - 253.8)              | 265.2 (210.3 - 327.9)              | 209.9 (168.0 - 257.4)              | 1.9 (1.7 - 2.0)              | 1.4 (1.2 - 1.7)              | 1.4 (1.2 - 1.7)              | 0.8 (0.7 - 1.0)           | 1.4 (1.2 - 1.7)              | 0.8 (0.7 - 1.0)           |
| Lower extremity peripheral arterial disease         | 69.0 (60.0 - 75.7)                 | 176.6 (130.8 - 231.0)              | 180.0 (132.9 - 236.0)              | 130.0 (95.0 - 169.2)               | 176.7 (130.8 - 231.2)              | 132.4 (96.5 - 172.5)               | 0.9 (0.7 - 0.9)              | 0.9 (0.7 - 1.0)              | 0.8 (0.7 - 1.0)              | 0.4 (0.4 - 0.5)           | 0.9 (0.7 - 1.0)              | 0.4 (0.3 - 0.5)           |
| Endocarditis                                        | 80.1 (69.5 - 89.3)                 | 208.6 (160.3 - 262.0)              | 211.8 (162.4 - 266.3)              | 273.9 (204.4 - 351.4)              | 208.7 (160.4 - 262.1)              | 277.7 (206.7 - 356.7)              | 1.0 (0.9 - 1.1)              | 1.2 (0.9 - 1.7)              | 1.2 (0.9 - 1.6)              | 1.3 (0.9 - 1.7)           | 1.2 (0.9 - 1.7)              | 1.3 (0.9 - 1.7)           |
| Other cardiovascular and circulatory diseases       | 222.7 (201.2 - 242.5)              | 379.4 (327.3 - 426.3)              | 387.2 (333.1 - 436.2)              | 514.0 (431.6 - 584.0)              | 379.6 (327.5 - 426.5)              | 523.6 (438.7 - 596.8)              | 2.7 (2.4 - 2.9)              | 2.2 (1.8 - 2.6)              | 2.2 (1.8 - 2.6)              | 2.4 (2.0 - 2.8)           | 2.2 (1.8 - 2.6)              | 2.4 (2.0 - 2.8)           |
| <b>Chronic respiratory diseases</b>                 | <b>4392.9 (3930.6 - 4828.8)</b>    | <b>8381.9 (6839.0 - 10109.2)</b>   | <b>8085.5 (6568.4 - 9779.8)</b>    | <b>8696.7 (6834.1 - 10937.5)</b>   | <b>8388.8 (6843.6 - 10116.1)</b>   | <b>8362.4 (6535.6 - 10566.5)</b>   | <b>52.7 (47.6 - 57.7)</b>    | <b>43.5 (33.5 - 57.5)</b>    | <b>40.9 (31.4 - 54.0)</b>    | <b>35.2 (26.9 - 47.1)</b> | <b>43.4 (33.4 - 57.5)</b>    | <b>33.0 (25.3 - 44.2)</b> |
| Chronic obstructive pulmonary disease               | 3705.6 (3327.7 - 4072.5)           | 7443.7 (6037.1 - 9054.7)           | 7122.9 (5745.4 - 8696.5)           | 7650.6 (5954.3 - 9782.1)           | 7450.1 (6041.3 - 9061.6)           | 7291.2 (5641.4 - 9374.1)           | 44.5 (40.3 - 48.8)           | 38.0 (28.7 - 51.3)           | 35.4 (26.7 - 48.0)           | 30.3 (22.6 - 41.6)        | 38.0 (28.7 - 51.3)           | 28.1 (20.9 - 38.6)        |
| Pneumoconiosis                                      | 18.1 (16.0 - 20.8)                 | 20.0 (17.0 - 23.7)                 | 20.5 (17.2 - 24.3)                 | 25.4 (21.4 - 30.1)                 | 20.0 (17.0 - 23.7)                 | 25.8 (21.7 - 30.8)                 | 0.2 (0.2 - 0.2)              | 0.1 (0.1 - 0.1)              | 0.1 (0.1 - 0.1)              | 0.1 (0.1 - 0.1)           | 0.1 (0.1 - 0.1)              | 0.1 (0.1 - 0.1)           |
| Asthma                                              | 429.8 (351.8 - 557.2)              | 413.7 (321.3 - 538.8)              | 427.9 (329.9 - 560.8)              | 406.0 (308.6 - 540.1)              | 414.0 (321.5 - 539.1)              | 419.8 (316.8 - 563.3)              | 5.0 (4.1 - 6.4)              | 2.4 (1.8 - 3.3)              | 2.5 (1.8 - 3.4)              | 2.0 (1.5 - 2.7)           | 2.4 (1.8 - 3.3)              | 2.0 (1.5 - 2.7)           |
| Interstitial lung disease and pulmonary sarcoidosis | 193.4 (163.4 - 222.2)              | 429.0 (349.3 - 522.5)              | 437.1 (354.7 - 532.3)              | 524.1 (424.7 - 627.6)              | 429.1 (349.4 - 522.7)              | 533.0 (432.0 - 640.7)              | 2.3 (2.0 - 2.6)              | 2.3 (1.9 - 2.8)              | 2.3 (1.9 - 2.8)              | 2.3 (1.9 - 2.8)           | 2.3 (1.9 - 2.8)              | 2.3 (1.8 - 2.8)           |
| Other chronic respiratory diseases                  | 46.0 (35.9 - 58.5)                 | 75.5 (53.8 - 102.7)                | 77.1 (55.0 - 105.0)                | 90.7 (65.6 - 121.1)                | 75.6 (53.9 - 102.8)                | 92.6 (66.8 - 123.7)                | 0.5 (0.4 - 0.7)              | 0.5 (0.4 - 0.7)              | 0.5 (0.4 - 0.7)              | 0.5 (0.4 - 0.7)           | 0.5 (0.4 - 0.7)              | 0.5 (0.4 - 0.7)           |
| <b>Digestive diseases</b>                           | <b>2540.6 (2315.5 - 2798.4)</b>    | <b>4258.2 (3674.7 - 4882.9)</b>    | <b>4335.8 (3732.3 - 4985.8)</b>    | <b>5092.9 (4299.0 - 5940.0)</b>    | <b>4260.3 (3676.5 - 4885.0)</b>    | <b>5180.8 (4361.4 - 6062.2)</b>    | <b>29.9 (27.4 - 32.8)</b>    | <b>26.9 (22.2 - 32.9)</b>    | <b>26.9 (22.2 - 33.0)</b>    | <b>27.2 (22.4 - 33.3)</b> | <b>26.9 (22.2 - 32.9)</b>    | <b>27.2 (22.4 - 33.4)</b> |
| Cirrhosis and other chronic liver diseases          | 1439.3 (1307.6 - 1601.0)           | 2165.2 (1855.6 - 2520.7)           | 2197.0 (1880.7 - 2563.6)           | 2553.7 (2161.2 - 3011.5)           | 2165.9 (1856.3 - 2521.5)           | 2588.2 (2187.1 - 3059.6)           | 16.5 (15.1 - 18.2)           | 15.0 (12.4 - 18.2)           | 15.0 (12.5 - 18.3)           | 15.7 (13.0 - 19.1)        | 15.0 (12.4 - 18.2)           | 15.7 (13.0 - 19.2)        |
| Upper digestive system diseases                     | 271.3 (236.1 - 315.6)              | 350.5 (284.2 - 424.3)              | 360.8 (290.9 - 437.7)              | 432.0 (339.7 - 529.2)              | 350.8 (284.4 - 424.6)              | 443.7 (346.8 - 547.5)              | 3.2 (2.8 - 3.7)              | 2.0 (1.5 - 2.6)              | 2.0 (1.6 - 2.6)              | 2.0 (1.5 - 2.6)           | 2.0 (1.5 - 2.6)              | 2.0 (1.5 - 2.6)           |
| Appendicitis                                        | 29.2 (25.1 - 33.5)                 | 31.7 (22.7 - 43.7)                 | 32.5 (23.2 - 44.7)                 | 38.9 (27.1 - 54.9)                 | 31.7 (22.7 - 43.7)                 | 39.8 (27.6 - 56.4)                 | 0.4 (0.3 - 0.4)              | 0.2 (0.1 - 0.3)              | 0.2 (0.1 - 0.3)              | 0.2 (0.1 - 0.3)           | 0.2 (0.1 - 0.3)              | 0.2 (0.1 - 0.3)           |
| Paralytic ileus and intestinal obstruction          | 236.6 (207.4 - 266.6)              | 514.9 (422.4 - 614.2)              | 527.2 (430.6 - 630.5)              | 655.7 (520.0 - 802.3)              | 515.3 (422.6 - 614.7)              | 671.0 (529.8 - 822.8)              | 2.9 (2.6 - 3.3)              | 3.1 (2.4 - 3.9)              | 3.1 (2.4 - 3.9)              | 3.2 (2.4 - 4.0)           | 3.1 (2.4 - 3.9)              | 3.2 (2.4 - 4.0)           |
| Inguinal, femoral, and abdominal hernia             | 48.2 (42.2 - 56.4)                 | 84.2 (72.0 - 100.0)                | 86.9 (74.0 - 103.1)                | 112.6 (92.6 - 135.0)               | 84.3 (72.0 - 100.1)                | 116.2 (95.0 - 139.9)               | 0.6 (0.5 - 0.7)              | 0.5 (0.4 - 0.6)              | 0.5 (0.4 - 0.6)              | 0.5 (0.4 - 0.6)           | 0.5 (0.4 - 0.6)              | 0.5 (0.4 - 0.6)           |
| Inflammatory bowel disease                          | 42.9 (37.9 - 48.0)                 | 75.9 (63.8 - 88.5)                 | 77.2 (64.7 - 90.2)                 | 100.3 (81.6 - 117.5)               | 76.0 (63.8 - 88.5)                 | 101.8 (82.6 - 119.5)               | 0.5 (0.5 - 0.6)              | 0.4 (0.3 - 0.5)              | 0.4 (0.3 - 0.5)              | 0.4 (0.4 - 0.5)           | 0.4 (0.3 - 0.5)              | 0.4 (0.4 - 0.5)           |
| Vascular intestinal disorders                       | 92.7 (81.7 - 101.2)                | 179.5 (146.3 - 215.0)              | 181.8 (148.0 - 217.9)              | 235.2 (191.3 - 277.5)              | 179.5 (146.3 - 215.1)              | 237.9 (193.1 - 281.7)              | 1.1 (1.0 - 1.2)              | 0.9 (0.8 - 1.1)              | 0.9 (0.8 - 1.1)              | 0.9 (0.8 - 1.1)           | 0.9 (0.8 - 1.1)              | 0.9 (0.8 - 1.1)           |
| Gallbladder and biliary diseases                    | 132.9 (115.6 - 163.2)              | 287.5 (230.3 - 368.5)              | 293.5 (234.2 - 377.8)              | 228.7 (178.0 - 308.9)              | 287.7 (230.4 - 368.8)              | 233.7 (181.0 - 317.2)              | 1.6 (1.4 - 2.0)              | 1.5 (1.1 - 2.0)              | 1.5 (1.1 - 2.0)              | 0.9 (0.7 - 1.2)           | 1.5 (1.1 - 2.0)              | 0.9 (0.7 - 1.2)           |
| Pancreatitis                                        | 123.4 (110.1 - 144.2)              | 205.5 (168.7 - 248.6)              | 208.3 (170.6 - 252.1)              | 247.7 (200.2 - 303.0)              | 205.6 (168.7 - 248.7)              | 250.6 (202.1 - 307.0)              | 1.4 (1.3 - 1.7)              | 1.4 (1.1 - 1.7)              | 1.4 (1.1 - 1.7)              | 1.4 (1.1 - 1.8)           | 1.4 (1.1 - 1.7)              | 1.4 (1.1 - 1.8)           |
| Other digestive diseases                            | 124.1 (106.7 - 141.2)              | 363.1 (290.0 - 435.1)              | 370.7 (294.8 - 445.7)              | 488.0 (376.2 - 606.1)              | 363.4 (290.2 - 435.4)              | 498.0 (382.3 - 621.0)              | 1.5 (1.3 - 1.7)              | 1.9 (1.5 - 2.6)              | 1.9 (1.5 - 2.6)              | 2.0 (1.5 - 2.6)           | 1.9 (1.5 - 2.6)              | 2.0 (1.5 - 2.6)           |

|                                                   |                                 |                                  |                                  |                                  |                                  |                                  |                           |                           |                           |                           |                           |                           |
|---------------------------------------------------|---------------------------------|----------------------------------|----------------------------------|----------------------------------|----------------------------------|----------------------------------|---------------------------|---------------------------|---------------------------|---------------------------|---------------------------|---------------------------|
| <b>Neurological disorders</b>                     | <b>2656.9 (1207.8 - 5881.4)</b> | <b>6855.4 (2842.8 - 15317.5)</b> | <b>7040.7 (2918.5 - 15710.1)</b> | <b>8094.9 (3615.9 - 17274.2)</b> | <b>6861.0 (2845.0 - 15327.4)</b> | <b>8293.8 (3706.0 - 17673.9)</b> | <b>33.9 (15.0 - 75.9)</b> | <b>33.0 (14.5 - 74.4)</b> | <b>32.9 (14.5 - 74.1)</b> | <b>28.4 (13.7 - 61.6)</b> | <b>33.0 (14.5 - 74.4)</b> | <b>28.2 (13.7 - 61.3)</b> |
| Alzheimer's disease and other dementias           | 1992.1 (500.4 - 5231.7)         | 5457.2 (1359.3 - 14027.4)        | 5615.3 (1402.1 - 14397.4)        | 6272.7 (1644.8 - 15620.2)        | 5462.1 (1360.5 - 14036.8)        | 6440.8 (1692.4 - 15995.7)        | 25.8 (6.4 - 68.0)         | 25.0 (6.1 - 66.8)         | 24.9 (6.1 - 66.5)         | 20.0 (4.9 - 53.6)         | 25.0 (6.1 - 66.8)         | 19.9 (4.9 - 53.3)         |
| Parkinson's disease                               | 395.6 (349.2 - 428.6)           | 982.8 (848.2 - 1114.5)           | 1004.9 (866.1 - 1138.0)          | 1349.0 (1148.3 - 1509.5)         | 983.3 (848.5 - 1115.1)           | 1374.0 (1166.3 - 1538.8)         | 4.8 (4.3 - 5.2)           | 4.9 (4.3 - 5.4)           | 4.9 (4.3 - 5.4)           | 5.3 (4.7 - 5.8)           | 4.9 (4.3 - 5.4)           | 5.3 (4.6 - 5.8)           |
| Idiopathic epilepsy                               | 140.9 (116.2 - 156.0)           | 231.8 (163.8 - 312.3)            | 236.0 (166.6 - 318.5)            | 263.2 (184.4 - 358.2)            | 232.0 (163.9 - 312.6)            | 268.2 (187.6 - 365.8)            | 1.7 (1.4 - 1.9)           | 1.9 (1.2 - 2.8)           | 1.9 (1.2 - 2.8)           | 1.9 (1.2 - 2.8)           | 1.9 (1.2 - 2.8)           | 1.9 (1.2 - 2.8)           |
| Multiple sclerosis                                | 16.4 (15.4 - 17.3)              | 20.2 (18.0 - 22.5)               | 20.2 (18.1 - 22.5)               | 20.8 (18.3 - 23.1)               | 20.2 (18.0 - 22.5)               | 20.8 (18.4 - 23.2)               | 0.2 (0.2 - 0.2)           | 0.1 (0.1 - 0.2)           | 0.1 (0.1 - 0.2)           | 0.1 (0.1 - 0.1)           | 0.1 (0.1 - 0.2)           | 0.1 (0.1 - 0.1)           |
| Motor neuron disease                              | 39.6 (35.9 - 43.1)              | 50.9 (44.4 - 58.1)               | 51.0 (44.5 - 58.2)               | 55.4 (48.3 - 63.4)               | 50.9 (44.4 - 58.1)               | 55.5 (48.4 - 63.5)               | 0.5 (0.4 - 0.5)           | 0.3 (0.3 - 0.4)           | 0.3 (0.3 - 0.4)           | 0.3 (0.3 - 0.3)           | 0.3 (0.3 - 0.4)           | 0.3 (0.3 - 0.3)           |
| Other neurological disorders                      | 72.2 (65.4 - 77.4)              | 112.6 (87.8 - 141.7)             | 113.2 (88.3 - 142.6)             | 133.7 (104.8 - 167.2)            | 112.6 (87.9 - 141.8)             | 134.5 (105.3 - 168.3)            | 0.9 (0.8 - 0.9)           | 0.8 (0.6 - 0.9)           | 0.8 (0.6 - 0.9)           | 0.8 (0.6 - 0.9)           | 0.8 (0.6 - 0.9)           | 0.8 (0.6 - 0.9)           |
| <b>Mental disorders</b>                           | <b>0.2 (0.2 - 0.3)</b>          | <b>0.3 (0.2 - 0.4)</b>           | <b>0.3 (0.2 - 0.4)</b>           | <b>0.3 (0.2 - 0.4)</b>           | <b>0.3 (0.2 - 0.4)</b>           | <b>0.3 (0.2 - 0.4)</b>           | <b>0.0 (0.0 - 0.0)</b>    | <b>0.0 (0.0 - 0.0)</b>    | <b>0.0 (0.0 - 0.0)</b>    | <b>0.0 (0.0 - 0.0)</b>    | <b>0.0 (0.0 - 0.0)</b>    | <b>0.0 (0.0 - 0.0)</b>    |
| Eating disorders                                  | 0.2 (0.2 - 0.3)                 | 0.3 (0.2 - 0.4)                  | 0.3 (0.2 - 0.4)                  | 0.3 (0.2 - 0.4)                  | 0.3 (0.2 - 0.4)                  | 0.3 (0.2 - 0.4)                  | 0.0 (0.0 - 0.0)           | 0.0 (0.0 - 0.0)           | 0.0 (0.0 - 0.0)           | 0.0 (0.0 - 0.0)           | 0.0 (0.0 - 0.0)           | 0.0 (0.0 - 0.0)           |
| <b>Substance use disorders</b>                    | <b>299.9 (277.9 - 321.2)</b>    | <b>440.4 (383.2 - 499.5)</b>     | <b>442.9 (385.3 - 502.5)</b>     | <b>472.3 (410.4 - 540.2)</b>     | <b>440.5 (383.2 - 499.6)</b>     | <b>474.8 (412.4 - 543.2)</b>     | <b>3.5 (3.2 - 3.7)</b>    | <b>3.8 (3.3 - 4.4)</b>    | <b>3.8 (3.3 - 4.4)</b>    | <b>3.8 (3.3 - 4.4)</b>    | <b>3.8 (3.3 - 4.4)</b>    | <b>3.8 (3.3 - 4.4)</b>    |
| Alcohol use disorders                             | 160.0 (136.3 - 175.3)           | 201.5 (155.3 - 251.2)            | 202.8 (156.2 - 252.9)            | 219.0 (167.4 - 274.6)            | 201.5 (155.3 - 251.2)            | 220.2 (168.2 - 276.2)            | 1.8 (1.5 - 2.0)           | 1.6 (1.2 - 2.0)           | 1.6 (1.2 - 2.0)           | 1.7 (1.3 - 2.1)           | 1.6 (1.2 - 2.0)           | 1.7 (1.3 - 2.1)           |
| Drug use disorders                                | 139.9 (130.1 - 150.3)           | 238.9 (215.6 - 268.0)            | 240.1 (216.7 - 269.3)            | 253.3 (228.7 - 284.0)            | 239.0 (215.6 - 268.0)            | 254.6 (229.8 - 285.8)            | 1.7 (1.5 - 1.8)           | 2.1 (1.9 - 2.4)           | 2.1 (1.9 - 2.4)           | 2.1 (1.9 - 2.4)           | 2.1 (1.9 - 2.4)           | 2.1 (1.9 - 2.4)           |
| <b>Diabetes and kidney diseases</b>               | <b>3257.0 (2993.4 - 3473.2)</b> | <b>7367.5 (5912.9 - 8992.9)</b>  | <b>7423.5 (5941.2 - 9109.4)</b>  | <b>1059.9 (800.6 - 1371.8)</b>   | <b>7370.7 (5916.0 - 8996.1)</b>  | <b>1077.5 (811.1 - 1398.3)</b>   | <b>38.5 (35.4 - 41.0)</b> | <b>41.6 (31.0 - 55.7)</b> | <b>41.1 (30.6 - 55.0)</b> | <b>5.2 (3.7 - 7.3)</b>    | <b>41.6 (31.0 - 55.7)</b> | <b>5.2 (3.7 - 7.3)</b>    |
| Diabetes mellitus                                 | 1676.1 (1544.7 - 1796.9)        | 2940.3 (2374.5 - 3595.0)         | 2912.5 (2342.7 - 3581.0)         | 18.8 (14.8 - 24.3)               | 2941.4 (2375.6 - 3596.1)         | 19.0 (14.9 - 24.5)               | 19.6 (18.0 - 20.8)        | 16.7 (12.6 - 22.1)        | 16.2 (12.2 - 21.5)        | 0.2 (0.1 - 0.3)           | 16.7 (12.6 - 22.0)        | 0.2 (0.2 - 0.3)           |
| Chronic kidney disease                            | 1570.2 (1428.2 - 1689.4)        | 4409.9 (3496.1 - 5424.1)         | 4493.4 (3551.4 - 5536.2)         | 1016.7 (767.1 - 1311.5)          | 4411.9 (3497.6 - 5426.4)         | 1033.7 (777.9 - 1337.3)          | 18.8 (17.1 - 20.2)        | 24.8 (18.3 - 33.6)        | 24.8 (18.3 - 33.5)        | 4.9 (3.5 - 6.9)           | 24.8 (18.3 - 33.6)        | 4.9 (3.5 - 6.8)           |
| Acute glomerulonephritis                          | 10.7 (7.5 - 13.9)               | 17.3 (10.7 - 26.0)               | 17.6 (10.9 - 26.5)               | 24.4 (15.0 - 37.3)               | 17.3 (10.8 - 26.0)               | 24.8 (15.2 - 38.0)               | 0.1 (0.1 - 0.2)           | 0.1 (0.1 - 0.2)           | 0.1 (0.1 - 0.2)           | 0.1 (0.1 - 0.2)           | 0.1 (0.1 - 0.2)           | 0.1 (0.1 - 0.2)           |
| <b>Skin and subcutaneous diseases</b>             | <b>121.4 (110.5 - 129.3)</b>    | <b>382.3 (322.4 - 443.0)</b>     | <b>391.6 (328.7 - 453.9)</b>     | <b>499.5 (404.9 - 600.6)</b>     | <b>382.6 (322.6 - 443.3)</b>     | <b>511.7 (412.4 - 617.2)</b>     | <b>1.5 (1.4 - 1.6)</b>    | <b>2.1 (1.7 - 2.7)</b>    | <b>2.1 (1.7 - 2.7)</b>    | <b>2.1 (1.8 - 2.8)</b>    | <b>2.1 (1.7 - 2.7)</b>    | <b>2.1 (1.8 - 2.8)</b>    |
| Bacterial skin diseases                           | 76.8 (67.5 - 86.5)              | 276.1 (203.9 - 363.1)            | 282.0 (207.4 - 371.9)            | 355.0 (254.3 - 487.0)            | 276.3 (204.0 - 363.4)            | 362.7 (258.7 - 499.6)            | 0.9 (0.8 - 1.1)           | 1.5 (1.1 - 2.3)           | 1.5 (1.1 - 2.3)           | 1.6 (1.1 - 2.3)           | 1.5 (1.1 - 2.3)           | 1.6 (1.1 - 2.3)           |
| Decubitus ulcer                                   | 37.5 (28.6 - 42.8)              | 94.4 (61.1 - 133.6)              | 97.4 (63.1 - 138.0)              | 129.8 (85.1 - 181.4)             | 94.4 (61.1 - 133.7)              | 133.9 (87.6 - 186.9)             | 0.5 (0.4 - 0.5)           | 0.5 (0.3 - 0.6)           | 0.5 (0.3 - 0.6)           | 0.5 (0.4 - 0.6)           | 0.5 (0.3 - 0.6)           | 0.5 (0.4 - 0.6)           |
| Other skin and subcutaneous diseases              | 7.0 (5.7 - 12.5)                | 11.8 (7.9 - 24.5)                | 12.1 (8.1 - 25.2)                | 14.7 (9.8 - 30.4)                | 11.8 (7.9 - 24.5)                | 15.1 (10.0 - 31.4)               | 0.1 (0.1 - 0.2)           | 0.1 (0.1 - 0.2)           | 0.1 (0.1 - 0.2)           | 0.1 (0.1 - 0.2)           | 0.1 (0.1 - 0.2)           | 0.1 (0.1 - 0.2)           |
| <b>Musculoskeletal disorders</b>                  | <b>120.7 (103.5 - 131.7)</b>    | <b>280.7 (209.0 - 357.0)</b>     | <b>287.4 (213.6 - 365.3)</b>     | <b>348.8 (260.4 - 438.7)</b>     | <b>280.8 (209.1 - 357.2)</b>     | <b>356.3 (265.4 - 447.1)</b>     | <b>1.5 (1.2 - 1.6)</b>    | <b>1.6 (1.3 - 1.9)</b>    | <b>1.6 (1.3 - 1.9)</b>    | <b>1.6 (1.3 - 1.9)</b>    | <b>1.6 (1.3 - 1.9)</b>    | <b>1.6 (1.3 - 1.9)</b>    |
| Rheumatoid arthritis                              | 38.3 (31.4 - 44.3)              | 97.8 (75.6 - 118.1)              | 99.9 (77.2 - 121.1)              | 119.6 (92.7 - 145.3)             | 97.8 (75.6 - 118.2)              | 121.9 (94.6 - 148.5)             | 0.5 (0.4 - 0.5)           | 0.5 (0.4 - 0.6)           | 0.5 (0.4 - 0.6)           | 0.5 (0.4 - 0.6)           | 0.5 (0.4 - 0.6)           | 0.5 (0.4 - 0.6)           |
| Other musculoskeletal disorders                   | 82.4 (71.9 - 91.3)              | 182.9 (123.8 - 250.4)            | 187.5 (126.9 - 256.8)            | 229.2 (158.4 - 309.1)            | 183.0 (123.8 - 250.5)            | 234.4 (161.8 - 316.0)            | 1.0 (0.9 - 1.1)           | 1.1 (0.8 - 1.4)           | 1.1 (0.8 - 1.4)           | 1.1 (0.8 - 1.4)           | 1.1 (0.8 - 1.4)           | 1.1 (0.8 - 1.4)           |
| <b>Other non-communicable diseases</b>            | <b>1203.8 (1096.2 - 1338.0)</b> | <b>2037.0 (1798.1 - 2251.5)</b>  | <b>2074.0 (1826.3 - 2296.2)</b>  | <b>2534.9 (2144.7 - 2862.1)</b>  | <b>2040.2 (1800.6 - 2255.0)</b>  | <b>2582.3 (2177.6 - 2924.2)</b>  | <b>16.6 (15.1 - 18.5)</b> | <b>15.6 (13.5 - 18.2)</b> | <b>15.6 (13.5 - 18.2)</b> | <b>15.7 (13.6 - 18.4)</b> | <b>15.6 (13.5 - 18.2)</b> | <b>15.8 (13.6 - 18.4)</b> |
| Congenital birth defects                          | 523.2 (445.4 - 635.3)           | 338.2 (269.6 - 446.4)            | 339.6 (270.5 - 448.3)            | 339.7 (271.0 - 447.9)            | 340.2 (270.9 - 448.9)            | 342.5 (272.9 - 451.6)            | 8.1 (6.9 - 9.8)           | 5.6 (4.6 - 7.0)           | 5.6 (4.6 - 7.1)           | 5.6 (4.6 - 7.0)           | 5.6 (4.6 - 7.1)           | 5.6 (4.6 - 7.1)           |
| Urinary diseases and male infertility             | 373.2 (336.0 - 401.1)           | 1133.1 (970.5 - 1256.9)          | 1161.5 (989.4 - 1289.6)          | 1495.0 (1228.1 - 1700.8)         | 1133.7 (971.0 - 1257.7)          | 1530.6 (1251.8 - 1744.7)         | 4.6 (4.1 - 4.9)           | 6.1 (5.0 - 7.3)           | 6.1 (5.0 - 7.3)           | 6.1 (5.0 - 7.4)           | 6.1 (5.0 - 7.3)           | 6.1 (5.0 - 7.4)           |
| Gynecological diseases                            | 9.1 (6.4 - 10.6)                | 15.9 (10.6 - 20.1)               | 16.3 (10.9 - 20.6)               | 18.5 (12.3 - 23.5)               | 15.9 (10.7 - 20.1)               | 19.0 (12.5 - 24.0)               | 0.1 (0.1 - 0.1)           | 0.1 (0.1 - 0.1)           | 0.1 (0.1 - 0.2)           | 0.1 (0.1 - 0.2)           | 0.1 (0.1 - 0.1)           | 0.1 (0.1 - 0.2)           |
| Hemoglobinopathies and hemolytic anemias          | 88.9 (67.7 - 112.5)             | 127.7 (95.5 - 165.9)             | 129.4 (96.6 - 168.7)             | 145.4 (108.9 - 188.0)            | 127.8 (95.6 - 166.1)             | 147.5 (110.3 - 191.6)            | 1.1 (0.9 - 1.5)           | 1.1 (0.8 - 1.5)           | 1.1 (0.8 - 1.5)           | 1.2 (0.8 - 1.5)           | 1.1 (0.8 - 1.5)           | 1.2 (0.8 - 1.5)           |
| Endocrine, metabolic, blood, and immune disorders | 179.6 (156.3 - 194.4)           | 408.8 (344.3 - 454.3)            | 413.9 (347.9 - 460.4)            | 523.0 (426.2 - 593.0)            | 409.1 (344.5 - 454.6)            | 529.3 (430.3 - 601.1)            | 2.2 (1.9 - 2.4)           | 2.5 (2.0 - 2.9)           | 2.5 (2.0 - 2.9)           | 2.5 (2.1 - 2.9)           | 2.5 (2.0 - 2.9)           | 2.5 (2.1 - 2.9)           |
| Sudden infant death syndrome                      | 29.9 (17.5 - 40.9)              | 13.3 (7.5 - 20.0)                | 13.2 (7.5 - 20.0)                | 13.3 (7.5 - 20.0)                | 13.4 (7.6 - 20.2)                | 13.4 (7.6 - 20.2)                | 0.5 (0.3 - 0.7)           | 0.2 (0.1 - 0.3)           | 0.2 (0.1 - 0.3)           | 0.2 (0.1 - 0.3)           | 0.2 (0.1 - 0.3)           | 0.2 (0.1 - 0.3)           |
| <b>Injuries</b>                                   | <b>4360.8 (3997.5 - 4775.7)</b> | <b>5659.5 (4955.4 - 6461.1)</b>  | <b>5738.8 (5018.5 - 6558.5)</b>  | <b>6581.9 (5712.3 - 7587.9)</b>  | <b>5663.3 (4958.4 - 6465.8)</b>  | <b>6680.1 (5790.0 - 7697.2)</b>  | <b>53.4 (48.8 - 57.8)</b> | <b>43.6 (36.7 - 53.7)</b> | <b>43.6 (36.6 - 53.7)</b> | <b>44.0 (37.0 - 54.3)</b> | <b>43.6 (36.7 - 53.8)</b> | <b>43.9 (36.9 - 54.2)</b> |
| <b>Transport injuries</b>                         | <b>1277.3 (1186.6 - 1378.9)</b> | <b>1400.2 (987.6 - 2032.9)</b>   | <b>1400.8 (987.9 - 2034.3)</b>   | <b>1500.1 (1053.4 - 2190.0)</b>  | <b>1400.9 (988.1 - 2034.4)</b>   | <b>1500.8 (1053.4 - 2192.4)</b>  | <b>15.4 (14.4 - 16.5)</b> | <b>12.6 (8.5 - 19.4)</b>  | <b>12.5 (8.4 - 19.3)</b>  | <b>12.7 (8.5 - 19.6)</b>  | <b>12.6 (8.5 - 19.4)</b>  | <b>12.6 (8.5 - 19.5)</b>  |
| Road injuries                                     | 1198.3 (1113.0 - 1297.1)        | 1301.4 (883.6 - 1938.5)          | 1301.6 (883.1 - 1939.3)          | 1394.0 (942.5 - 2087.0)          | 1302.1 (884.1 - 1940.0)          | 1394.1 (941.8 - 2088.6)          | 14.5 (13.5 - 15.5)        | 11.7 (7.6 - 18.6)         | 11.6 (7.6 - 18.5)         | 11.8 (7.7 - 18.7)         | 11.7 (7.6 - 18.6)         | 11.7 (7.6 - 18.6)         |
| Other transport injuries                          | 79.0 (72.6 - 86.5)              | 98.7 (87.9 - 111.7)              | 99.3 (88.5 - 112.3)              | 106.1 (95.1 - 119.5)             | 98.8 (88.0 - 111.8)              | 106.7 (95.7 - 120.0)             | 1.0 (0.9 - 1.0)           | 0.9 (0.8 - 1.0)           | 0.9 (0.8 - 1.0)           | 0.9 (0.8 - 1.0)           | 0.9 (0.8 - 1.0)           | 0.9 (0.8 - 1.0)           |
| <b>Unintentional injuries</b>                     | <b>1832.1 (1570.6 - 2133.0)</b> | <b>2888.4 (2461.4 - 3263.8)</b>  | <b>2965.1 (2523.8 - 3348.6)</b>  | <b>3602.8 (3017.4 - 4058.3)</b>  | <b>2890.9 (2463.4 - 3267.1)</b>  | <b>3698.1 (3086.7 - 4166.0)</b>  | <b>22.8 (19.5 - 26.5)</b> | <b>18.7 (15.5 - 22.2)</b> | <b>18.8 (15.5 - 22.3)</b> | <b>18.8 (15.6 - 22.3)</b> | <b>18.7 (15.5 - 22.2)</b> | <b>18.9 (15.6 - 22.4)</b> |
| Falls                                             | 811.4 (686.3 - 896.9)           | 1744.0 (1402.2 - 2082.2)         | 1805.3 (1451.5 - 2156.0)         | 2290.2 (1856.3 - 2707.6)         | 1745.3 (1403.1 - 2083.9)         | 2366.8 (1902.6 - 2792.7)         | 10.0 (8.5 - 10.9)         | 9.5 (7.9 - 10.5)          | 9.5 (8.0 - 10.6)          | 9.5 (8.0 - 10.6)          | 9.5 (7.9 - 10.5)          | 9.6 (8.1 - 10.7)          |
| Drowning                                          | 270.4 (247.0 - 297.5)           | 219.2 (173.1 - 279.0)            | 220.1 (173.7 - 280.5)            | 241.9 (189.7 - 309.1)            | 219.5 (173.3 - 279.5)            | 242.9 (190.4 - 310.5)            | 3.5 (3.2 - 3.8)           | 2.0 (1.5 - 2.8)           | 2.0 (1.5 - 2.8)           | 2.0 (1.5 - 2.8)           | 2.0 (1.5 - 2.8)           | 2.0 (1.5 - 2.8)           |
| Fire, heat, and hot substances                    | 116.6 (89.0 - 134.4)            | 125.2 (94.6 - 145.7)             | 127.9 (96.7 - 149.0)             | 145.9 (112.3 - 169.5)            | 125.4 (94.7 - 145.9)             | 149.1 (114.9 - 173.3)            | 1.5 (1.1 - 1.7)           | 1.0 (0.7 - 1.2)           | 1.0 (0.7 - 1.2)           | 1.0 (0.7 - 1.2)           | 1.0 (0.7 - 1.2)           | 1.0 (0.7 - 1.2)           |

|                                             |                                 |                                 |                                 |                                 |                                 |                                 |                           |                           |                           |                           |                           |                           |
|---------------------------------------------|---------------------------------|---------------------------------|---------------------------------|---------------------------------|---------------------------------|---------------------------------|---------------------------|---------------------------|---------------------------|---------------------------|---------------------------|---------------------------|
| Poisonings                                  | 55.2 (37.1 - 64.4)              | 46.5 (29.0 - 55.2)              | 47.1 (29.3 - 55.8)              | 53.3 (32.7 - 63.0)              | 46.5 (29.0 - 55.2)              | 53.9 (33.0 - 63.8)              | 0.7 (0.5 - 0.8)           | 0.4 (0.2 - 0.4)           | 0.4 (0.2 - 0.5)           | 0.4 (0.2 - 0.5)           | 0.4 (0.2 - 0.4)           | 0.4 (0.2 - 0.5)           |
| Exposure to mechanical forces               | 103.8 (78.9 - 118.6)            | 108.3 (77.5 - 133.9)            | 108.7 (77.7 - 134.6)            | 118.0 (84.5 - 145.6)            | 108.4 (77.5 - 134.0)            | 118.6 (84.9 - 146.5)            | 1.3 (1.0 - 1.4)           | 1.0 (0.7 - 1.3)           | 1.0 (0.7 - 1.2)           | 1.0 (0.7 - 1.3)           | 1.0 (0.7 - 1.3)           | 1.0 (0.7 - 1.3)           |
| Adverse effects of medical treatment        | 123.1 (107.0 - 134.9)           | 178.4 (126.2 - 244.0)           | 182.3 (128.3 - 250.0)           | 211.6 (147.5 - 297.2)           | 178.6 (126.3 - 244.3)           | 216.3 (149.9 - 305.6)           | 1.5 (1.3 - 1.7)           | 1.3 (0.8 - 1.9)           | 1.3 (0.8 - 1.9)           | 1.3 (0.9 - 1.9)           | 1.3 (0.8 - 1.9)           | 1.3 (0.9 - 1.9)           |
| Animal contact                              | 89.4 (70.4 - 108.1)             | 156.9 (101.8 - 236.0)           | 159.4 (103.4 - 239.6)           | 173.9 (111.4 - 262.2)           | 157.0 (101.9 - 236.3)           | 177.0 (113.1 - 267.3)           | 1.1 (0.9 - 1.3)           | 1.3 (0.8 - 2.0)           | 1.3 (0.8 - 2.1)           | 1.3 (0.8 - 2.1)           | 1.3 (0.8 - 2.0)           | 1.3 (0.8 - 2.1)           |
| Foreign body                                | 106.9 (86.1 - 116.3)            | 160.5 (126.8 - 187.5)           | 163.2 (128.6 - 191.3)           | 201.7 (155.7 - 240.2)           | 160.7 (126.9 - 187.7)           | 205.2 (157.7 - 245.0)           | 1.4 (1.1 - 1.5)           | 1.1 (0.8 - 1.4)           | 1.1 (0.8 - 1.4)           | 1.1 (0.8 - 1.4)           | 1.1 (0.8 - 1.4)           | 1.1 (0.7 - 1.4)           |
| Environmental heat and cold exposure        | 35.8 (23.1 - 44.2)              | 40.5 (20.6 - 59.6)              | 41.3 (20.8 - 61.0)              | 48.3 (24.3 - 72.0)              | 40.5 (20.6 - 59.6)              | 49.2 (24.6 - 73.6)              | 0.4 (0.3 - 0.5)           | 0.3 (0.1 - 0.4)           | 0.3 (0.1 - 0.4)           | 0.3 (0.1 - 0.4)           | 0.3 (0.1 - 0.4)           | 0.3 (0.1 - 0.4)           |
| Exposure to forces of nature                | 54.9 (5.0 - 262.3)              | 61.0 (5.7 - 271.4)              | 61.6 (5.7 - 273.0)              | 65.6 (6.0 - 290.5)              | 61.1 (5.7 - 271.6)              | 66.2 (6.1 - 292.9)              | 0.7 (0.1 - 3.3)           | 0.6 (0.1 - 2.7)           | 0.6 (0.1 - 2.7)           | 0.6 (0.1 - 2.8)           | 0.6 (0.1 - 2.7)           | 0.6 (0.1 - 2.8)           |
| Other unintentional injuries (internal)     | 64.7 (41.3 - 78.1)              | 47.9 (28.5 - 63.3)              | 48.2 (28.6 - 63.8)              | 52.6 (31.6 - 68.8)              | 48.0 (28.5 - 63.4)              | 53.0 (31.8 - 69.3)              | 0.8 (0.5 - 1.0)           | 0.4 (0.3 - 0.6)           | 0.4 (0.3 - 0.6)           | 0.4 (0.3 - 0.6)           | 0.4 (0.3 - 0.6)           | 0.4 (0.3 - 0.6)           |
| <b>Self-harm and interpersonal violence</b> | <b>1251.3 (1151.8 - 1367.5)</b> | <b>1370.9 (1235.4 - 1527.9)</b> | <b>1372.9 (1236.2 - 1530.0)</b> | <b>1479.0 (1323.6 - 1677.2)</b> | <b>1371.5 (1236.0 - 1528.5)</b> | <b>1481.2 (1324.8 - 1680.8)</b> | <b>15.2 (14.0 - 16.5)</b> | <b>12.4 (11.1 - 13.8)</b> | <b>12.3 (11.0 - 13.7)</b> | <b>12.5 (11.2 - 13.9)</b> | <b>12.4 (11.1 - 13.8)</b> | <b>12.4 (11.1 - 13.9)</b> |
| Self-harm                                   | 749.6 (688.4 - 803.8)           | 877.5 (736.5 - 1015.4)          | 880.9 (739.0 - 1020.2)          | 958.7 (799.7 - 1117.8)          | 877.7 (736.7 - 1015.6)          | 962.1 (801.6 - 1122.5)          | 8.9 (8.3 - 9.5)           | 7.3 (6.0 - 8.8)           | 7.3 (6.0 - 8.8)           | 7.3 (6.1 - 8.9)           | 7.3 (6.0 - 8.8)           | 7.3 (6.0 - 8.8)           |
| Interpersonal violence                      | 398.0 (373.5 - 424.5)           | 364.5 (271.7 - 508.5)           | 362.5 (270.4 - 505.4)           | 374.4 (280.8 - 520.1)           | 364.8 (271.9 - 508.7)           | 372.6 (279.6 - 517.2)           | 4.9 (4.6 - 5.2)           | 3.7 (2.8 - 5.2)           | 3.7 (2.8 - 5.2)           | 3.7 (2.8 - 5.2)           | 3.7 (2.8 - 5.2)           | 3.7 (2.8 - 5.2)           |
| Conflict and terrorism                      | 90.8 (24.8 - 181.2)             | 106.3 (29.9 - 236.5)            | 106.8 (30.2 - 238.0)            | 122.6 (35.3 - 293.0)            | 106.4 (29.9 - 236.6)            | 123.2 (35.5 - 294.5)            | 1.2 (0.3 - 2.3)           | 1.1 (0.3 - 2.2)           | 1.1 (0.3 - 2.2)           | 1.1 (0.3 - 2.4)           | 1.1 (0.3 - 2.2)           | 1.1 (0.3 - 2.4)           |
| Police conflict and executions              | 13.0 (7.8 - 23.2)               | 22.5 (12.5 - 41.3)              | 22.6 (12.5 - 41.4)              | 23.3 (12.8 - 42.2)              | 22.6 (12.5 - 41.3)              | 23.3 (12.9 - 42.3)              | 0.2 (0.1 - 0.3)           | 0.2 (0.1 - 0.4)           | 0.2 (0.1 - 0.4)           | 0.2 (0.1 - 0.4)           | 0.2 (0.1 - 0.4)           | 0.2 (0.1 - 0.4)           |
